# Supplementary material for: Fetal weight estimation, evaluation of different methods
Source: Research Square preprint supplement (doi:10.21203/rs.3.rs-6395306/v1), 2025-08-07
Supplement: Supplementary file 6 [file f3533dde76e163149d01a2d1.pdf]

# Base\_datos\_estimacion\_peso\_fetal

|                                       |                                                                                                                                                                                                                                                                                      |
|---------------------------------------|--------------------------------------------------------------------------------------------------------------------------------------------------------------------------------------------------------------------------------------------------------------------------------------|
| Número de identificación participante | 1                                                                                                                                                                                                                                                                                    |
| CODIGO PARTICIPANTE                   |                                                                                                                                                                                                                                                                                      |
| Edad                                  | [*DATA REMOVED*]                                                                                                                                                                                                                                                                     |
| Gestaciones                           | <input checked="" type="radio"/> 1<br><input type="radio"/> 2<br><input type="radio"/> 3<br><input type="radio"/> mas de 3                                                                                                                                                           |
| partos                                | <input checked="" type="radio"/> 0<br><input type="radio"/> 1<br><input type="radio"/> 2<br><input type="radio"/> 3<br><input type="radio"/> mas de 3                                                                                                                                |
| cesáreas                              | <input checked="" type="radio"/> 0<br><input type="radio"/> 1<br><input type="radio"/> 2<br><input type="radio"/> 3<br><input type="radio"/> mas de 3                                                                                                                                |
| Abortos                               | <input checked="" type="radio"/> 0<br><input type="radio"/> 1<br><input type="radio"/> 2<br><input type="radio"/> 3<br><input type="radio"/> mas de 3                                                                                                                                |
| Tipo de gestacion                     | <input type="radio"/> espontanea<br><input type="radio"/> IAC inseminación artificial conyuge<br><input checked="" type="radio"/> IAD inseminación artificial donante<br><input type="radio"/> FIV Fecundación in Vitro<br><input type="radio"/> Ovodon FIV con donación de ovocitos |
| peso previo a embarazo                | [*DATA REMOVED*]                                                                                                                                                                                                                                                                     |
| Ganancia ponderal embarazo            | [*DATA REMOVED*]                                                                                                                                                                                                                                                                     |
| Talla madre                           | [*DATA REMOVED*]                                                                                                                                                                                                                                                                     |
| IMC previo embarazo                   | 31.992171327486922                                                                                                                                                                                                                                                                   |
| Patología obstétrica                  | <input checked="" type="radio"/> no<br><input type="radio"/> si                                                                                                                                                                                                                      |
| Diabetes pregestacional               | <input checked="" type="radio"/> no<br><input type="radio"/> si                                                                                                                                                                                                                      |
| Diabetes gestacional                  | <input checked="" type="radio"/> no<br><input type="radio"/> si                                                                                                                                                                                                                      |

|                                            |                                                                                                                                                                                      |
|--------------------------------------------|--------------------------------------------------------------------------------------------------------------------------------------------------------------------------------------|
| Diabetes gestacional con insulina          | <input checked="" type="radio"/> no<br><input type="radio"/> si                                                                                                                      |
| Diabetes gestacional con dieta y ejercicio | <input type="radio"/> no<br><input checked="" type="radio"/> si                                                                                                                      |
| Percentil fetos previos                    | <input checked="" type="radio"/> Nada<br><input type="radio"/> percentil menor de 10<br><input type="radio"/> percentil entre 10 y 90<br><input type="radio"/> percentil mayor de 90 |
| Exfumadora                                 | <input checked="" type="radio"/> Nada<br><input type="radio"/> menos de 5 años<br><input type="radio"/> 5 a 10 años<br><input type="radio"/> mayor o igual a 10 años                 |
| Hábito tabáquico                           | <input checked="" type="radio"/> no<br><input type="radio"/> si                                                                                                                      |
| fumadora                                   | [*DATA REMOVED*]                                                                                                                                                                     |
| Consumo otros tóxicos                      | <input checked="" type="radio"/> no<br><input type="radio"/> si                                                                                                                      |
| Hb 1T                                      | [*DATA REMOVED*]                                                                                                                                                                     |
| Htc 1T                                     | [*DATA REMOVED*]                                                                                                                                                                     |
| Hb 2T                                      | [*DATA REMOVED*]                                                                                                                                                                     |
| HTC 2T                                     | [*DATA REMOVED*]                                                                                                                                                                     |
| Hb 3T                                      | [*DATA REMOVED*]                                                                                                                                                                     |
| HTC 3T                                     | [*DATA REMOVED*]                                                                                                                                                                     |
| Suplemento FE oral                         | <input type="radio"/> si<br><input checked="" type="radio"/> no                                                                                                                      |
| Suplemento fe iv                           | <input type="radio"/> si<br><input checked="" type="radio"/> no                                                                                                                      |
| Transfusión                                | <input checked="" type="radio"/> no<br><input type="radio"/> si                                                                                                                      |
| Solicitada Vit D                           | <input checked="" type="radio"/> no<br><input type="radio"/> si                                                                                                                      |
| Deficit vit D                              | <input checked="" type="radio"/> no<br><input type="radio"/> si                                                                                                                      |
| Suplemento vit D                           | <input checked="" type="radio"/> si<br><input type="radio"/> no                                                                                                                      |

|                       |                                                                                                                                                                                                                                                                                                                                                                                                              |
|-----------------------|--------------------------------------------------------------------------------------------------------------------------------------------------------------------------------------------------------------------------------------------------------------------------------------------------------------------------------------------------------------------------------------------------------------|
| Dieta, cuestionario   | <input checked="" type="radio"/> sí<br><input type="radio"/> no                                                                                                                                                                                                                                                                                                                                              |
| Leche entera          | <input checked="" type="radio"/> Nunca o menos 1 vez al mes<br><input type="radio"/> 1 a 3 veces mes<br><input type="radio"/> 1 vez semana<br><input type="radio"/> 2 a 4 veces semana<br><input type="radio"/> 5 a 6 veces semana<br><input type="radio"/> 1 vez al día<br><input type="radio"/> 2 a 3 veces al día<br><input type="radio"/> 5 a 6 veces al día<br><input type="radio"/> más 6 veces al día |
| Leche semidesnatada   | <input type="radio"/> Nunca o menos 1 vez al mes<br><input type="radio"/> 1 a 3 veces mes<br><input type="radio"/> 1 vez semana<br><input type="radio"/> 2 a 4 veces semana<br><input type="radio"/> 5 a 6 veces semana<br><input checked="" type="radio"/> 1 vez al día<br><input type="radio"/> 2 a 3 veces al día<br><input type="radio"/> 5 a 6 veces al día<br><input type="radio"/> mas 6 veces al día |
| Leche desnatada       | <input type="radio"/> Nunca o menos 1 vez al mes<br><input type="radio"/> 1 a 3 veces mes<br><input checked="" type="radio"/> 1 vez semana<br><input type="radio"/> 2 a 4 veces semana<br><input type="radio"/> 5 a 6 veces semana<br><input type="radio"/> 1 vez al día<br><input type="radio"/> 2 a 3 veces al día<br><input type="radio"/> 5 a 6 veces al día<br><input type="radio"/> más 6 veces al día |
| Leche condensada      | <input checked="" type="radio"/> Nunca o menos 1 vez al mes<br><input type="radio"/> 1 a 3 veces mes<br><input type="radio"/> 1 vez semana<br><input type="radio"/> 2 a 4 veces semana<br><input type="radio"/> 5 a 6 veces semana<br><input type="radio"/> 1 vez al día<br><input type="radio"/> 2 a 3 veces al día<br><input type="radio"/> 5 a 6 veces al día<br><input type="radio"/> más 6 veces al día |
| nata o crema de leche | <input type="radio"/> Nunca o menos 1 vez al mes<br><input checked="" type="radio"/> 1 a 3 veces mes<br><input type="radio"/> 1 vez semana<br><input type="radio"/> 2 a 4 veces semana<br><input type="radio"/> 5 a 6 veces semana<br><input type="radio"/> 1 vez al día<br><input type="radio"/> 2 a 3 veces al día<br><input type="radio"/> 5 a 6 veces al día<br><input type="radio"/> más 6 veces al día |

---

Yogurt Entero

- ☐ Nunca o menos 1 vez al mes  
☐ 1 a 3 veces mes  
☐ 1 vez semana  
☒ 2 a 4 veces semana  
☐ 5 a 6 veces semana  
☐ 1 vez al día  
☐ 2 a 3 veces al día  
☐ 5 a 6 veces al día  
☐ más 6 veces al día

---

Yogurt desnatado

- ☒ Nunca o menos 1 vez al mes  
☐ 1 a 3 veces mes  
☐ 1 vez semana  
☐ 2 a 4 veces semana  
☐ 5 a 6 veces semana  
☐ 1 vez al día  
☐ 2 a 3 veces al día  
☐ 5 a 6 veces al día  
☐ más 6 veces al día

---

100g requesón o queso blando o queso fresco

- ☐ Nunca o menos 1 vez al mes  
☒ 1 a 3 veces mes  
☐ 1 vez semana  
☐ 2 a 4 veces semana  
☐ 5 a 6 veces semana  
☐ 1 vez al día  
☐ 2 a 3 veces al día  
☐ 5 a 6 veces al día  
☐ más 6 veces al día

---

queso curado o semicurado o cremoso

- ☐ Nunca o menos 1 vez al mes  
☐ 1 a 3 veces mes  
☐ 1 vez semana  
☒ 2 a 4 veces semana  
☐ 5 a 6 veces semana  
☐ 1 vez al día  
☐ 2 a 3 veces al día  
☐ 5 a 6 veces al día  
☐ más 6 veces al día

---

natillas flan pudding

- ☐ Nunca o menos 1 vez al mes  
☒ 1 a 3 veces mes  
☐ 1 vez semana  
☐ 2 a 4 veces semana  
☐ 5 a 6 veces semana  
☐ 1 vez al día  
☐ 2 a 3 veces al día  
☐ 5 a 6 veces al día  
☐ más 6 veces al día

---

Helado

- ☒ Nunca o menos 1 vez al mes  
☐ 1 a 3 veces mes  
☐ 1 vez semana  
☐ 2 a 4 veces semana  
☐ 5 a 6 veces semana  
☐ 1 vez al día  
☐ 2 a 3 veces al día  
☐ 5 a 6 veces al día  
☐ más 6 veces al día



|                                      |                                                                                                                                                                                                                                                                                                                                                                                                              |
|--------------------------------------|--------------------------------------------------------------------------------------------------------------------------------------------------------------------------------------------------------------------------------------------------------------------------------------------------------------------------------------------------------------------------------------------------------------|
| huevo                                | <input type="radio"/> Nunca o menos 1 vez al mes<br><input type="radio"/> 1 a 3 veces mes<br><input type="radio"/> 1 vez semana<br><input checked="" type="radio"/> 2 a 4 veces semana<br><input type="radio"/> 5 a 6 veces semana<br><input type="radio"/> 1 vez al día<br><input type="radio"/> 2 a 3 veces al día<br><input type="radio"/> 5 a 6 veces al día<br><input type="radio"/> más 6 veces al día |
| Pollo con piel                       | <input checked="" type="radio"/> Nunca o menos 1 vez al mes<br><input type="radio"/> 1 a 3 veces mes<br><input type="radio"/> 1 vez semana<br><input type="radio"/> 2 a 4 veces semana<br><input type="radio"/> 5 a 6 veces semana<br><input type="radio"/> 1 vez al día<br><input type="radio"/> 2 a 3 veces al día<br><input type="radio"/> 5 a 6 veces al día<br><input type="radio"/> más 6 veces al día |
| pollo sin piel                       | <input type="radio"/> Nunca o menos 1 vez al mes<br><input type="radio"/> 1 a 3 veces mes<br><input checked="" type="radio"/> 1 vez semana<br><input type="radio"/> 2 a 4 veces semana<br><input type="radio"/> 5 a 6 veces semana<br><input type="radio"/> 1 vez al día<br><input type="radio"/> 2 a 3 veces al día<br><input type="radio"/> 5 a 6 veces al día<br><input type="radio"/> más 6 veces al día |
| Ternera o cerdo o cordero            | <input type="radio"/> Nunca o menos 1 vez al mes<br><input type="radio"/> 1 a 3 veces mes<br><input checked="" type="radio"/> 1 vez semana<br><input type="radio"/> 2 a 4 veces semana<br><input type="radio"/> 5 a 6 veces semana<br><input type="radio"/> 1 vez al día<br><input type="radio"/> 2 a 3 veces al día<br><input type="radio"/> 5 a 6 veces al día<br><input type="radio"/> más 6 veces al día |
| carne caza: Conejo o codorniz o pato | <input checked="" type="radio"/> Nunca o menos 1 vez al mes<br><input type="radio"/> 1 a 3 veces mes<br><input type="radio"/> 1 vez semana<br><input type="radio"/> 2 a 4 veces semana<br><input type="radio"/> 5 a 6 veces semana<br><input type="radio"/> 1 vez al día<br><input type="radio"/> 2 a 3 veces al día<br><input type="radio"/> 5 a 6 veces al día<br><input type="radio"/> más 6 veces al día |
| Hígado de ternera o cerdo o pollo    | <input type="radio"/> Nunca o menos 1 vez al mes<br><input type="radio"/> 1 a 3 veces mes<br><input checked="" type="radio"/> 1 vez semana<br><input type="radio"/> 2 a 4 veces semana<br><input type="radio"/> 5 a 6 veces semana<br><input type="radio"/> 1 vez al día<br><input type="radio"/> 2 a 3 veces al día<br><input type="radio"/> 5 a 6 veces al día<br><input type="radio"/> más 6 veces al día |

---

Vísceras

- ☒ Nunca o menos 1 vez al mes  
☐ 1 a 3 veces mes  
☐ 1 vez semana  
☐ 2 a 4 veces semana  
☐ 5 a 6 veces semana  
☐ 1 vez al día  
☐ 2 a 3 veces al día  
☐ 5 a 6 veces al día  
☐ más 6 veces al día

---

Embutido

- ☐ Nunca o menos 1 vez al mes  
☐ 1 a 3 veces mes  
☐ 1 vez semana  
☒ 2 a 4 veces semana  
☐ 5 a 6 veces semana  
☐ 1 vez al día  
☐ 2 a 3 veces al día  
☐ 5 a 6 veces al día  
☐ más 6 veces al día

---

Salchicha o similar

- ☐ Nunca o menos 1 vez al mes  
☐ 1 a 3 veces mes  
☒ 1 vez semana  
☐ 2 a 4 veces semana  
☐ 5 a 6 veces semana  
☐ 1 vez al día  
☐ 2 a 3 veces al día  
☐ 5 a 6 veces al día  
☐ más 6 veces al día

---

Pate o foiegras

- ☒ Nunca o menos 1 vez al mes  
☐ 1 a 3 veces mes  
☐ 1 vez semana  
☐ 2 a 4 veces semana  
☐ 5 a 6 veces semana  
☐ 1 vez al día  
☐ 2 a 3 veces al día  
☐ 5 a 6 veces al día  
☐ más 6 veces al día

---

Hamburguesa

- ☐ Nunca o menos 1 vez al mes  
☐ 1 a 3 veces mes  
☒ 1 vez semana  
☐ 2 a 4 veces semana  
☐ 5 a 6 veces semana  
☐ 1 vez al día  
☐ 2 a 3 veces al día  
☐ 5 a 6 veces al día  
☐ más 6 veces al día

---

tocino o bacon

- ☒ Nunca o menos 1 vez al mes  
☐ 1 a 3 veces mes  
☐ 1 vez semana  
☐ 2 a 4 veces semana  
☐ 5 a 6 veces semana  
☐ 1 vez al día  
☐ 2 a 3 veces al día  
☐ 5 a 6 veces al día  
☐ más 6 veces al día

---

Pescado frito

- ☒ Nunca o menos 1 vez al mes  
☐ 1 a 3 veces mes  
☐ 1 vez semana  
☐ 2 a 4 veces semana  
☐ 5 a 6 veces semana  
☐ 1 vez al día  
☐ 2 a 3 veces al día  
☐ 5 a 6 veces al día  
☐ más 6 veces al día

---

pescado hervido blanco

- ☐ Nunca o menos 1 vez al mes  
☐ 1 a 3 veces mes  
☒ 1 vez semana  
☐ 2 a 4 veces semana  
☐ 5 a 6 veces semana  
☐ 1 vez al día  
☐ 2 a 3 veces al día  
☐ 5 a 6 veces al día  
☐ más 6 veces al día

---

pescado hervido azul

- ☒ Nunca o menos 1 vez al mes  
☐ 1 a 3 veces mes  
☐ 1 vez semana  
☐ 2 a 4 veces semana  
☐ 5 a 6 veces semana  
☐ 1 vez al día  
☐ 2 a 3 veces al día  
☐ 5 a 6 veces al día  
☐ más 6 veces al día

---

otros pescado azul

- ☒ Nunca o menos 1 vez al mes  
☐ 1 a 3 veces mes  
☐ 1 vez semana  
☐ 2 a 4 veces semana  
☐ 5 a 6 veces semana  
☐ 1 vez al día  
☐ 2 a 3 veces al día  
☐ 5 a 6 veces al día  
☐ más 6 veces al día

---

atun conserva

- ☐ Nunca o menos 1 vez al mes  
☒ 1 a 3 veces mes  
☐ 1 vez semana  
☐ 2 a 4 veces semana  
☐ 5 a 6 veces semana  
☐ 1 vez al día  
☐ 2 a 3 veces al día  
☐ 5 a 6 veces al día  
☐ más 6 veces al día

---

sardina conserva

- ☒ Nunca o menos 1 vez al mes  
☐ 1 a 3 veces mes  
☐ 1 vez semana  
☐ 2 a 4 veces semana  
☐ 5 a 6 veces semana  
☐ 1 vez al día  
☐ 2 a 3 veces al día  
☐ 5 a 6 veces al día  
☐ más 6 veces al día

|                                         |                                                                                                                                                                                                                                                                                                                                                                                                              |
|-----------------------------------------|--------------------------------------------------------------------------------------------------------------------------------------------------------------------------------------------------------------------------------------------------------------------------------------------------------------------------------------------------------------------------------------------------------------|
| pescado ahumado                         | <input checked="" type="radio"/> Nunca o menos 1 vez al mes<br><input type="radio"/> 1 a 3 veces mes<br><input type="radio"/> 1 vez semana<br><input type="radio"/> 2 a 4 veces semana<br><input type="radio"/> 5 a 6 veces semana<br><input type="radio"/> 1 vez al día<br><input type="radio"/> 2 a 3 veces al día<br><input type="radio"/> 5 a 6 veces al día<br><input type="radio"/> más 6 veces al día |
| almejas o mejillones o ostras unos 100g | <input type="radio"/> Nunca o menos 1 vez al mes<br><input checked="" type="radio"/> 1 a 3 veces mes<br><input type="radio"/> 1 vez semana<br><input type="radio"/> 2 a 4 veces semana<br><input type="radio"/> 5 a 6 veces semana<br><input type="radio"/> 1 vez al día<br><input type="radio"/> 2 a 3 veces al día<br><input type="radio"/> 5 a 6 veces al día<br><input type="radio"/> más 6 veces al día |
| calamar o chipiron o sepia unos 100g    | <input type="radio"/> Nunca o menos 1 vez al mes<br><input checked="" type="radio"/> 1 a 3 veces mes<br><input type="radio"/> 1 vez semana<br><input type="radio"/> 2 a 4 veces semana<br><input type="radio"/> 5 a 6 veces semana<br><input type="radio"/> 1 vez al día<br><input type="radio"/> 2 a 3 veces al día<br><input type="radio"/> 5 a 6 veces al día<br><input type="radio"/> más 6 veces al día |
| marisco unos 100g                       | <input type="radio"/> Nunca o menos 1 vez al mes<br><input checked="" type="radio"/> 1 a 3 veces mes<br><input type="radio"/> 1 vez semana<br><input type="radio"/> 2 a 4 veces semana<br><input type="radio"/> 5 a 6 veces semana<br><input type="radio"/> 1 vez al día<br><input type="radio"/> 2 a 3 veces al día<br><input type="radio"/> 5 a 6 veces al día<br><input type="radio"/> más 6 veces al día |
| Espinacas o acelgas cocinadas           | <input type="radio"/> Nunca o menos 1 vez al mes<br><input type="radio"/> 1 a 3 veces mes<br><input type="radio"/> 1 vez semana<br><input checked="" type="radio"/> 2 a 4 veces semana<br><input type="radio"/> 5 a 6 veces semana<br><input type="radio"/> 1 vez al día<br><input type="radio"/> 2 a 3 veces al día<br><input type="radio"/> 5 a 6 veces al día<br><input type="radio"/> más 6 veces al día |
| Col o coliflor o brocoli cocinado       | <input type="radio"/> Nunca o menos 1 vez al mes<br><input type="radio"/> 1 a 3 veces mes<br><input type="radio"/> 1 vez semana<br><input checked="" type="radio"/> 2 a 4 veces semana<br><input type="radio"/> 5 a 6 veces semana<br><input type="radio"/> 1 vez al día<br><input type="radio"/> 2 a 3 veces al día<br><input type="radio"/> 5 a 6 veces al día<br><input type="radio"/> más 6 veces al día |

---

Lechuga o endivia o escarola

- ☐ Nunca o menos 1 vez al mes  
☐ 1 a 3 veces mes  
☒ 1 vez semana  
☐ 2 a 4 veces semana  
☐ 5 a 6 veces semana  
☐ 1 vez al día  
☐ 2 a 3 veces al día  
☐ 5 a 6 veces al día  
☐ más 6 veces al día

---

tomate ensalada

- ☐ Nunca o menos 1 vez al mes  
☐ 1 a 3 veces mes  
☐ 1 vez semana  
☒ 2 a 4 veces semana  
☐ 5 a 6 veces semana  
☐ 1 vez al día  
☐ 2 a 3 veces al día  
☐ 5 a 6 veces al día  
☐ más 6 veces al día

---

cebolla

- ☐ Nunca o menos 1 vez al mes  
☐ 1 a 3 veces mes  
☐ 1 vez semana  
☒ 2 a 4 veces semana  
☐ 5 a 6 veces semana  
☐ 1 vez al día  
☐ 2 a 3 veces al día  
☐ 5 a 6 veces al día  
☐ más 6 veces al día

---

Zanahoria o calabaza

- ☐ Nunca o menos 1 vez al mes  
☐ 1 a 3 veces mes  
☐ 1 vez semana  
☒ 2 a 4 veces semana  
☐ 5 a 6 veces semana  
☐ 1 vez al día  
☐ 2 a 3 veces al día  
☐ 5 a 6 veces al día  
☐ más 6 veces al día

---

Judías verdes

- ☐ Nunca o menos 1 vez al mes  
☐ 1 a 3 veces mes  
☐ 1 vez semana  
☒ 2 a 4 veces semana  
☐ 5 a 6 veces semana  
☐ 1 vez al día  
☐ 2 a 3 veces al día  
☐ 5 a 6 veces al día  
☐ más 6 veces al día

---

Berenjena o calabacin o pepino

- ☐ Nunca o menos 1 vez al mes  
☐ 1 a 3 veces mes  
☐ 1 vez semana  
☒ 2 a 4 veces semana  
☐ 5 a 6 veces semana  
☐ 1 vez al día  
☐ 2 a 3 veces al día  
☐ 5 a 6 veces al día  
☐ más 6 veces al día

---

|          |                                                                                                                                                                                                                                                                                                                                                                                                              |
|----------|--------------------------------------------------------------------------------------------------------------------------------------------------------------------------------------------------------------------------------------------------------------------------------------------------------------------------------------------------------------------------------------------------------------|
| pimiento | <input type="radio"/> Nunca o menos 1 vez al mes<br><input type="radio"/> 1 a 3 veces mes<br><input type="radio"/> 1 vez semana<br><input checked="" type="radio"/> 2 a 4 veces semana<br><input type="radio"/> 5 a 6 veces semana<br><input type="radio"/> 1 vez al día<br><input type="radio"/> 2 a 3 veces al día<br><input type="radio"/> 5 a 6 veces al día<br><input type="radio"/> más 6 veces al día |
|----------|--------------------------------------------------------------------------------------------------------------------------------------------------------------------------------------------------------------------------------------------------------------------------------------------------------------------------------------------------------------------------------------------------------------|

---

|           |                                                                                                                                                                                                                                                                                                                                                                                                              |
|-----------|--------------------------------------------------------------------------------------------------------------------------------------------------------------------------------------------------------------------------------------------------------------------------------------------------------------------------------------------------------------------------------------------------------------|
| alcachofa | <input checked="" type="radio"/> Nunca o menos 1 vez al mes<br><input type="radio"/> 1 a 3 veces mes<br><input type="radio"/> 1 vez semana<br><input type="radio"/> 2 a 4 veces semana<br><input type="radio"/> 5 a 6 veces semana<br><input type="radio"/> 1 vez al día<br><input type="radio"/> 2 a 3 veces al día<br><input type="radio"/> 5 a 6 veces al día<br><input type="radio"/> más 6 veces al día |
|-----------|--------------------------------------------------------------------------------------------------------------------------------------------------------------------------------------------------------------------------------------------------------------------------------------------------------------------------------------------------------------------------------------------------------------|

---

|            |                                                                                                                                                                                                                                                                                                                                                                                                              |
|------------|--------------------------------------------------------------------------------------------------------------------------------------------------------------------------------------------------------------------------------------------------------------------------------------------------------------------------------------------------------------------------------------------------------------|
| espárragos | <input type="radio"/> Nunca o menos 1 vez al mes<br><input checked="" type="radio"/> 1 a 3 veces mes<br><input type="radio"/> 1 vez semana<br><input type="radio"/> 2 a 4 veces semana<br><input type="radio"/> 5 a 6 veces semana<br><input type="radio"/> 1 vez al día<br><input type="radio"/> 2 a 3 veces al día<br><input type="radio"/> 5 a 6 veces al día<br><input type="radio"/> más 6 veces al día |
|------------|--------------------------------------------------------------------------------------------------------------------------------------------------------------------------------------------------------------------------------------------------------------------------------------------------------------------------------------------------------------------------------------------------------------|

---

|              |                                                                                                                                                                                                                                                                                                                                                                                                              |
|--------------|--------------------------------------------------------------------------------------------------------------------------------------------------------------------------------------------------------------------------------------------------------------------------------------------------------------------------------------------------------------------------------------------------------------|
| maíz hervido | <input checked="" type="radio"/> Nunca o menos 1 vez al mes<br><input type="radio"/> 1 a 3 veces mes<br><input type="radio"/> 1 vez semana<br><input type="radio"/> 2 a 4 veces semana<br><input type="radio"/> 5 a 6 veces semana<br><input type="radio"/> 1 vez al día<br><input type="radio"/> 2 a 3 veces al día<br><input type="radio"/> 5 a 6 veces al día<br><input type="radio"/> más 6 veces al día |
|--------------|--------------------------------------------------------------------------------------------------------------------------------------------------------------------------------------------------------------------------------------------------------------------------------------------------------------------------------------------------------------------------------------------------------------|

---

|           |                                                                                                                                                                                                                                                                                                                                                                                                              |
|-----------|--------------------------------------------------------------------------------------------------------------------------------------------------------------------------------------------------------------------------------------------------------------------------------------------------------------------------------------------------------------------------------------------------------------|
| legumbres | <input type="radio"/> Nunca o menos 1 vez al mes<br><input type="radio"/> 1 a 3 veces mes<br><input type="radio"/> 1 vez semana<br><input checked="" type="radio"/> 2 a 4 veces semana<br><input type="radio"/> 5 a 6 veces semana<br><input type="radio"/> 1 vez al día<br><input type="radio"/> 2 a 3 veces al día<br><input type="radio"/> 5 a 6 veces al día<br><input type="radio"/> más 6 veces al día |
|-----------|--------------------------------------------------------------------------------------------------------------------------------------------------------------------------------------------------------------------------------------------------------------------------------------------------------------------------------------------------------------------------------------------------------------|

---

|                       |                                                                                                                                                                                                                                                                                                                                                                                                              |
|-----------------------|--------------------------------------------------------------------------------------------------------------------------------------------------------------------------------------------------------------------------------------------------------------------------------------------------------------------------------------------------------------------------------------------------------------|
| naranjas o mandarinas | <input type="radio"/> Nunca o menos 1 vez al mes<br><input type="radio"/> 1 a 3 veces mes<br><input type="radio"/> 1 vez semana<br><input checked="" type="radio"/> 2 a 4 veces semana<br><input type="radio"/> 5 a 6 veces semana<br><input type="radio"/> 1 vez al día<br><input type="radio"/> 2 a 3 veces al día<br><input type="radio"/> 5 a 6 veces al día<br><input type="radio"/> más 6 veces al día |
|-----------------------|--------------------------------------------------------------------------------------------------------------------------------------------------------------------------------------------------------------------------------------------------------------------------------------------------------------------------------------------------------------------------------------------------------------|

---

---

zum natural fruta

- ☐ Nunca o menos 1 vez al mes  
☐ 1 a 3 veces mes  
☐ 1 vez semana  
☒ 2 a 4 veces semana  
☐ 5 a 6 veces semana  
☐ 1 vez al día  
☐ 2 a 3 veces al día  
☐ 5 a 6 veces al día  
☐ más 6 veces al día

---

platano

- ☐ Nunca o menos 1 vez al mes  
☐ 1 a 3 veces mes  
☐ 1 vez semana  
☒ 2 a 4 veces semana  
☐ 5 a 6 veces semana  
☐ 1 vez al día  
☐ 2 a 3 veces al día  
☐ 5 a 6 veces al día  
☐ más 6 veces al día

---

manzana o pera

- ☐ Nunca o menos 1 vez al mes  
☒ 1 a 3 veces mes  
☐ 1 vez semana  
☐ 2 a 4 veces semana  
☐ 5 a 6 veces semana  
☐ 1 vez al día  
☐ 2 a 3 veces al día  
☐ 5 a 6 veces al día  
☐ más 6 veces al día

---

melocotón o nectarina

- ☒ Nunca o menos 1 vez al mes  
☐ 1 a 3 veces mes  
☐ 1 vez semana  
☐ 2 a 4 veces semana  
☐ 5 a 6 veces semana  
☐ 1 vez al día  
☐ 2 a 3 veces al día  
☐ 5 a 6 veces al día  
☐ más 6 veces al día

---

sandia o melon

- ☒ Nunca o menos 1 vez al mes  
☐ 1 a 3 veces mes  
☐ 1 vez semana  
☐ 2 a 4 veces semana  
☐ 5 a 6 veces semana  
☐ 1 vez al día  
☐ 2 a 3 veces al día  
☐ 5 a 6 veces al día  
☐ más 6 veces al día

---

uva

- ☐ Nunca o menos 1 vez al mes  
☒ 1 a 3 veces mes  
☐ 1 vez semana  
☐ 2 a 4 veces semana  
☐ 5 a 6 veces semana  
☐ 1 vez al día  
☐ 2 a 3 veces al día  
☐ 5 a 6 veces al día  
☐ más 6 veces al día

---

bruna o ciruela

- ☐ Nunca o menos 1 vez al mes  
☒ 1 a 3 veces mes  
☐ 1 vez semana  
☐ 2 a 4 veces semana  
☐ 5 a 6 veces semana  
☐ 1 vez al día  
☐ 2 a 3 veces al día  
☐ 5 a 6 veces al día  
☐ más 6 veces al día

---

kiwi

- ☒ Nunca o menos 1 vez al mes  
☐ 1 a 3 veces mes  
☐ 1 vez semana  
☐ 2 a 4 veces semana  
☐ 5 a 6 veces semana  
☐ 1 vez al día  
☐ 2 a 3 veces al día  
☐ 5 a 6 veces al día  
☐ más 6 veces al día

---

aceituna

- ☐ Nunca o menos 1 vez al mes  
☒ 1 a 3 veces mes  
☐ 1 vez semana  
☐ 2 a 4 veces semana  
☐ 5 a 6 veces semana  
☐ 1 vez al día  
☐ 2 a 3 veces al día  
☐ 5 a 6 veces al día  
☐ más 6 veces al día

---

frutos secos

- ☐ Nunca o menos 1 vez al mes  
☐ 1 a 3 veces mes  
☐ 1 vez semana  
☒ 2 a 4 veces semana  
☐ 5 a 6 veces semana  
☐ 1 vez al día  
☐ 2 a 3 veces al día  
☐ 5 a 6 veces al día  
☐ más 6 veces al día

---

pan blanco

- ☐ Nunca o menos 1 vez al mes  
☐ 1 a 3 veces mes  
☐ 1 vez semana  
☒ 2 a 4 veces semana  
☐ 5 a 6 veces semana  
☐ 1 vez al día  
☐ 2 a 3 veces al día  
☐ 5 a 6 veces al día  
☐ más 6 veces al día

---

pan integral

- ☐ Nunca o menos 1 vez al mes  
☐ 1 a 3 veces mes  
☐ 1 vez semana  
☒ 2 a 4 veces semana  
☐ 5 a 6 veces semana  
☐ 1 vez al día  
☐ 2 a 3 veces al día  
☐ 5 a 6 veces al día  
☐ más 6 veces al día



---

cereales desayuno

- ☐ Nunca o menos 1 vez al mes  
☐ 1 a 3 veces mes  
☐ 1 vez semana  
☐ 2 a 4 veces semana  
☐ 5 a 6 veces semana  
☒ 1 vez al día  
☐ 2 a 3 veces al día  
☐ 5 a 6 veces al día  
☐ más 6 veces al día

---

patatas fritas

- ☒ Nunca o menos 1 vez al mes  
☐ 1 a 3 veces mes  
☐ 1 vez semana  
☐ 2 a 4 veces semana  
☐ 5 a 6 veces semana  
☐ 1 vez al día  
☐ 2 a 3 veces al día  
☐ 5 a 6 veces al día  
☐ más 6 veces al día

---

patatas cocidas o asadas

- ☐ Nunca o menos 1 vez al mes  
☐ 1 a 3 veces mes  
☐ 1 vez semana  
☒ 2 a 4 veces semana  
☐ 5 a 6 veces semana  
☐ 1 vez al día  
☐ 2 a 3 veces al día  
☐ 5 a 6 veces al día  
☐ más 6 veces al día

---

bolsa papas

- ☒ Nunca o menos 1 vez al mes  
☐ 1 a 3 veces mes  
☐ 1 vez semana  
☐ 2 a 4 veces semana  
☐ 5 a 6 veces semana  
☐ 1 vez al día  
☐ 2 a 3 veces al día  
☐ 5 a 6 veces al día  
☐ más 6 veces al día

---

arroz cocinado

- ☐ Nunca o menos 1 vez al mes  
☐ 1 a 3 veces mes  
☒ 1 vez semana  
☐ 2 a 4 veces semana  
☐ 5 a 6 veces semana  
☐ 1 vez al día  
☐ 2 a 3 veces al día  
☐ 5 a 6 veces al día  
☐ más 6 veces al día

---

pasta

- ☐ Nunca o menos 1 vez al mes  
☐ 1 a 3 veces mes  
☒ 1 vez semana  
☐ 2 a 4 veces semana  
☐ 5 a 6 veces semana  
☐ 1 vez al día  
☐ 2 a 3 veces al día  
☐ 5 a 6 veces al día  
☐ más 6 veces al día

|                     |                                                                                                                                                                                                                                                                                                                                                                                                              |
|---------------------|--------------------------------------------------------------------------------------------------------------------------------------------------------------------------------------------------------------------------------------------------------------------------------------------------------------------------------------------------------------------------------------------------------------|
| pizza               | <input type="radio"/> Nunca o menos 1 vez al mes<br><input checked="" type="radio"/> 1 a 3 veces mes<br><input type="radio"/> 1 vez semana<br><input type="radio"/> 2 a 4 veces semana<br><input type="radio"/> 5 a 6 veces semana<br><input type="radio"/> 1 vez al día<br><input type="radio"/> 2 a 3 veces al día<br><input type="radio"/> 5 a 6 veces al día<br><input type="radio"/> más 6 veces al día |
| aceite oliva        | <input type="radio"/> Nunca o menos 1 vez al mes<br><input type="radio"/> 1 a 3 veces mes<br><input checked="" type="radio"/> 1 vez semana<br><input type="radio"/> 2 a 4 veces semana<br><input type="radio"/> 5 a 6 veces semana<br><input type="radio"/> 1 vez al día<br><input type="radio"/> 2 a 3 veces al día<br><input type="radio"/> 5 a 6 veces al día<br><input type="radio"/> más 6 veces al día |
| otros aceites       | <input checked="" type="radio"/> Nunca o menos 1 vez al mes<br><input type="radio"/> 1 a 3 veces mes<br><input type="radio"/> 1 vez semana<br><input type="radio"/> 2 a 4 veces semana<br><input type="radio"/> 5 a 6 veces semana<br><input type="radio"/> 1 vez al día<br><input type="radio"/> 2 a 3 veces al día<br><input type="radio"/> 5 a 6 veces al día<br><input type="radio"/> más 6 veces al día |
| margarina           | <input checked="" type="radio"/> Nunca o menos 1 vez al mes<br><input type="radio"/> 1 a 3 veces mes<br><input type="radio"/> 1 vez semana<br><input type="radio"/> 2 a 4 veces semana<br><input type="radio"/> 5 a 6 veces semana<br><input type="radio"/> 1 vez al día<br><input type="radio"/> 2 a 3 veces al día<br><input type="radio"/> 5 a 6 veces al día<br><input type="radio"/> más 6 veces al día |
| mantequilla         | <input checked="" type="radio"/> Nunca o menos 1 vez al mes<br><input type="radio"/> 1 a 3 veces mes<br><input type="radio"/> 1 vez semana<br><input type="radio"/> 2 a 4 veces semana<br><input type="radio"/> 5 a 6 veces semana<br><input type="radio"/> 1 vez al día<br><input type="radio"/> 2 a 3 veces al día<br><input type="radio"/> 5 a 6 veces al día<br><input type="radio"/> más 6 veces al día |
| galletas tipo maria | <input type="radio"/> Nunca o menos 1 vez al mes<br><input type="radio"/> 1 a 3 veces mes<br><input type="radio"/> 1 vez semana<br><input type="radio"/> 2 a 4 veces semana<br><input checked="" type="radio"/> 5 a 6 veces semana<br><input type="radio"/> 1 vez al día<br><input type="radio"/> 2 a 3 veces al día<br><input type="radio"/> 5 a 6 veces al día<br><input type="radio"/> más 6 veces al día |

|                           |                                                                                                                                                                                                                                                                                                                                                                                                              |
|---------------------------|--------------------------------------------------------------------------------------------------------------------------------------------------------------------------------------------------------------------------------------------------------------------------------------------------------------------------------------------------------------------------------------------------------------|
| galletas chocolate        | <input type="radio"/> Nunca o menos 1 vez al mes<br><input checked="" type="radio"/> 1 a 3 veces mes<br><input type="radio"/> 1 vez semana<br><input type="radio"/> 2 a 4 veces semana<br><input type="radio"/> 5 a 6 veces semana<br><input type="radio"/> 1 vez al día<br><input type="radio"/> 2 a 3 veces al día<br><input type="radio"/> 5 a 6 veces al día<br><input type="radio"/> más 6 veces al día |
| bollieria                 | <input type="radio"/> Nunca o menos 1 vez al mes<br><input type="radio"/> 1 a 3 veces mes<br><input type="radio"/> 1 vez semana<br><input checked="" type="radio"/> 2 a 4 veces semana<br><input type="radio"/> 5 a 6 veces semana<br><input type="radio"/> 1 vez al día<br><input type="radio"/> 2 a 3 veces al día<br><input type="radio"/> 5 a 6 veces al día<br><input type="radio"/> más 6 veces al día |
| chocolate o bombones      | <input type="radio"/> Nunca o menos 1 vez al mes<br><input type="radio"/> 1 a 3 veces mes<br><input checked="" type="radio"/> 1 vez semana<br><input type="radio"/> 2 a 4 veces semana<br><input type="radio"/> 5 a 6 veces semana<br><input type="radio"/> 1 vez al día<br><input type="radio"/> 2 a 3 veces al día<br><input type="radio"/> 5 a 6 veces al día<br><input type="radio"/> más 6 veces al día |
| chocolate polvo o colacao | <input type="radio"/> Nunca o menos 1 vez al mes<br><input checked="" type="radio"/> 1 a 3 veces mes<br><input type="radio"/> 1 vez semana<br><input type="radio"/> 2 a 4 veces semana<br><input type="radio"/> 5 a 6 veces semana<br><input type="radio"/> 1 vez al día<br><input type="radio"/> 2 a 3 veces al día<br><input type="radio"/> 5 a 6 veces al día<br><input type="radio"/> más 6 veces al día |
| vino tinto                | <input checked="" type="radio"/> Nunca o menos 1 vez al mes<br><input type="radio"/> 1 a 3 veces mes<br><input type="radio"/> 1 vez semana<br><input type="radio"/> 2 a 4 veces semana<br><input type="radio"/> 5 a 6 veces semana<br><input type="radio"/> 1 vez al día<br><input type="radio"/> 2 a 3 veces al día<br><input type="radio"/> 5 a 6 veces al día<br><input type="radio"/> más 6 veces al día |
| vino blanco               | <input checked="" type="radio"/> Nunca o menos 1 vez al mes<br><input type="radio"/> 1 a 3 veces mes<br><input type="radio"/> 1 vez semana<br><input type="radio"/> 2 a 4 veces semana<br><input type="radio"/> 5 a 6 veces semana<br><input type="radio"/> 1 vez al día<br><input type="radio"/> 2 a 3 veces al día<br><input type="radio"/> 5 a 6 veces al día<br><input type="radio"/> más 6 veces al día |

|                       |                                                                                                                                                                                                                                                                                                                                                                                                              |
|-----------------------|--------------------------------------------------------------------------------------------------------------------------------------------------------------------------------------------------------------------------------------------------------------------------------------------------------------------------------------------------------------------------------------------------------------|
| vino seco o vermut    | <input checked="" type="radio"/> Nunca o menos 1 vez al mes<br><input type="radio"/> 1 a 3 veces mes<br><input type="radio"/> 1 vez semana<br><input type="radio"/> 2 a 4 veces semana<br><input type="radio"/> 5 a 6 veces semana<br><input type="radio"/> 1 vez al día<br><input type="radio"/> 2 a 3 veces al día<br><input type="radio"/> 5 a 6 veces al día<br><input type="radio"/> más 6 veces al día |
| cerveza               | <input checked="" type="radio"/> Nunca o menos 1 vez al mes<br><input type="radio"/> 1 a 3 veces mes<br><input type="radio"/> 1 vez semana<br><input type="radio"/> 2 a 4 veces semana<br><input type="radio"/> 5 a 6 veces semana<br><input type="radio"/> 1 vez al día<br><input type="radio"/> 2 a 3 veces al día<br><input type="radio"/> 5 a 6 veces al día<br><input type="radio"/> más 6 veces al día |
| cerveza sin alcohol   | <input type="radio"/> Nunca o menos 1 vez al mes<br><input type="radio"/> 1 a 3 veces mes<br><input checked="" type="radio"/> 1 vez semana<br><input type="radio"/> 2 a 4 veces semana<br><input type="radio"/> 5 a 6 veces semana<br><input type="radio"/> 1 vez al día<br><input type="radio"/> 2 a 3 veces al día<br><input type="radio"/> 5 a 6 veces al día<br><input type="radio"/> más 6 veces al día |
| licores               | <input checked="" type="radio"/> Nunca o menos 1 vez al mes<br><input type="radio"/> 1 a 3 veces mes<br><input type="radio"/> 1 vez semana<br><input type="radio"/> 2 a 4 veces semana<br><input type="radio"/> 5 a 6 veces semana<br><input type="radio"/> 1 vez al día<br><input type="radio"/> 2 a 3 veces al día<br><input type="radio"/> 5 a 6 veces al día<br><input type="radio"/> más 6 veces al día |
| ginebra o ron o vodka | <input checked="" type="radio"/> Nunca o menos 1 vez al mes<br><input type="radio"/> 1 a 3 veces mes<br><input type="radio"/> 1 vez semana<br><input type="radio"/> 2 a 4 veces semana<br><input type="radio"/> 5 a 6 veces semana<br><input type="radio"/> 1 vez al día<br><input type="radio"/> 2 a 3 veces al día<br><input type="radio"/> 5 a 6 veces al día<br><input type="radio"/> más 6 veces al día |
| refresco normal       | <input checked="" type="radio"/> Nunca o menos 1 vez al mes<br><input type="radio"/> 1 a 3 veces mes<br><input type="radio"/> 1 vez semana<br><input type="radio"/> 2 a 4 veces semana<br><input type="radio"/> 5 a 6 veces semana<br><input type="radio"/> 1 vez al día<br><input type="radio"/> 2 a 3 veces al día<br><input type="radio"/> 5 a 6 veces al día<br><input type="radio"/> más 6 veces al día |

---

|                     |                                                                                                                                                                                                                                                                                                                                                                                                              |
|---------------------|--------------------------------------------------------------------------------------------------------------------------------------------------------------------------------------------------------------------------------------------------------------------------------------------------------------------------------------------------------------------------------------------------------------|
| refresco sin azúcar | <input checked="" type="radio"/> Nunca o menos 1 vez al mes<br><input type="radio"/> 1 a 3 veces mes<br><input type="radio"/> 1 vez semana<br><input type="radio"/> 2 a 4 veces semana<br><input type="radio"/> 5 a 6 veces semana<br><input type="radio"/> 1 vez al día<br><input type="radio"/> 2 a 3 veces al día<br><input type="radio"/> 5 a 6 veces al día<br><input type="radio"/> más 6 veces al día |
|---------------------|--------------------------------------------------------------------------------------------------------------------------------------------------------------------------------------------------------------------------------------------------------------------------------------------------------------------------------------------------------------------------------------------------------------|

---

|                |                                                                                                                                                                                                                                                                                                                                                                                                              |
|----------------|--------------------------------------------------------------------------------------------------------------------------------------------------------------------------------------------------------------------------------------------------------------------------------------------------------------------------------------------------------------------------------------------------------------|
| Agua del grifo | <input type="radio"/> Nunca o menos 1 vez al mes<br><input type="radio"/> 1 a 3 veces mes<br><input type="radio"/> 1 vez semana<br><input type="radio"/> 2 a 4 veces semana<br><input type="radio"/> 5 a 6 veces semana<br><input type="radio"/> 1 vez al día<br><input type="radio"/> 2 a 3 veces al día<br><input type="radio"/> 5 a 6 veces al día<br><input checked="" type="radio"/> más 6 veces al día |
|----------------|--------------------------------------------------------------------------------------------------------------------------------------------------------------------------------------------------------------------------------------------------------------------------------------------------------------------------------------------------------------------------------------------------------------|

---

|                          |                                                                                                                                                                                                                                                                                                                                                                                                              |
|--------------------------|--------------------------------------------------------------------------------------------------------------------------------------------------------------------------------------------------------------------------------------------------------------------------------------------------------------------------------------------------------------------------------------------------------------|
| agua embotellada sin gas | <input checked="" type="radio"/> Nunca o menos 1 vez al mes<br><input type="radio"/> 1 a 3 veces mes<br><input type="radio"/> 1 vez semana<br><input type="radio"/> 2 a 4 veces semana<br><input type="radio"/> 5 a 6 veces semana<br><input type="radio"/> 1 vez al día<br><input type="radio"/> 2 a 3 veces al día<br><input type="radio"/> 5 a 6 veces al día<br><input type="radio"/> más 6 veces al día |
|--------------------------|--------------------------------------------------------------------------------------------------------------------------------------------------------------------------------------------------------------------------------------------------------------------------------------------------------------------------------------------------------------------------------------------------------------|

---

|                          |                                                                                                                                                                                                                                                                                                                                                                                                              |
|--------------------------|--------------------------------------------------------------------------------------------------------------------------------------------------------------------------------------------------------------------------------------------------------------------------------------------------------------------------------------------------------------------------------------------------------------|
| agua embotellada con gas | <input checked="" type="radio"/> Nunca o menos 1 vez al mes<br><input type="radio"/> 1 a 3 veces mes<br><input type="radio"/> 1 vez semana<br><input type="radio"/> 2 a 4 veces semana<br><input type="radio"/> 5 a 6 veces semana<br><input type="radio"/> 1 vez al día<br><input type="radio"/> 2 a 3 veces al día<br><input type="radio"/> 5 a 6 veces al día<br><input type="radio"/> más 6 veces al día |
|--------------------------|--------------------------------------------------------------------------------------------------------------------------------------------------------------------------------------------------------------------------------------------------------------------------------------------------------------------------------------------------------------------------------------------------------------|

---

|                      |                                                                                                                                                                                                                                                                                                                                                                                                              |
|----------------------|--------------------------------------------------------------------------------------------------------------------------------------------------------------------------------------------------------------------------------------------------------------------------------------------------------------------------------------------------------------------------------------------------------------|
| zumو frutas embasado | <input type="radio"/> Nunca o menos 1 vez al mes<br><input checked="" type="radio"/> 1 a 3 veces mes<br><input type="radio"/> 1 vez semana<br><input type="radio"/> 2 a 4 veces semana<br><input type="radio"/> 5 a 6 veces semana<br><input type="radio"/> 1 vez al día<br><input type="radio"/> 2 a 3 veces al día<br><input type="radio"/> 5 a 6 veces al día<br><input type="radio"/> más 6 veces al día |
|----------------------|--------------------------------------------------------------------------------------------------------------------------------------------------------------------------------------------------------------------------------------------------------------------------------------------------------------------------------------------------------------------------------------------------------------|

---

|      |                                                                                                                                                                                                                                                                                                                                                                                                              |
|------|--------------------------------------------------------------------------------------------------------------------------------------------------------------------------------------------------------------------------------------------------------------------------------------------------------------------------------------------------------------------------------------------------------------|
| cafe | <input checked="" type="radio"/> Nunca o menos 1 vez al mes<br><input type="radio"/> 1 a 3 veces mes<br><input type="radio"/> 1 vez semana<br><input type="radio"/> 2 a 4 veces semana<br><input type="radio"/> 5 a 6 veces semana<br><input type="radio"/> 1 vez al día<br><input type="radio"/> 2 a 3 veces al día<br><input type="radio"/> 5 a 6 veces al día<br><input type="radio"/> más 6 veces al día |
|------|--------------------------------------------------------------------------------------------------------------------------------------------------------------------------------------------------------------------------------------------------------------------------------------------------------------------------------------------------------------------------------------------------------------|

---

|                       |                                                                                                                                                                                                                                                                                                                                                                                                              |
|-----------------------|--------------------------------------------------------------------------------------------------------------------------------------------------------------------------------------------------------------------------------------------------------------------------------------------------------------------------------------------------------------------------------------------------------------|
| cafe descafeinado     | <input type="radio"/> Nunca o menos 1 vez al mes<br><input type="radio"/> 1 a 3 veces mes<br><input type="radio"/> 1 vez semana<br><input type="radio"/> 2 a 4 veces semana<br><input type="radio"/> 5 a 6 veces semana<br><input checked="" type="radio"/> 1 vez al día<br><input type="radio"/> 2 a 3 veces al día<br><input type="radio"/> 5 a 6 veces al día<br><input type="radio"/> más 6 veces al día |
| te o infusión         | <input type="radio"/> Nunca o menos 1 vez al mes<br><input type="radio"/> 1 a 3 veces mes<br><input checked="" type="radio"/> 1 vez semana<br><input type="radio"/> 2 a 4 veces semana<br><input type="radio"/> 5 a 6 veces semana<br><input type="radio"/> 1 vez al día<br><input type="radio"/> 2 a 3 veces al día<br><input type="radio"/> 5 a 6 veces al día<br><input type="radio"/> más 6 veces al día |
| sopa o puré verduras  | <input type="radio"/> Nunca o menos 1 vez al mes<br><input type="radio"/> 1 a 3 veces mes<br><input type="radio"/> 1 vez semana<br><input checked="" type="radio"/> 2 a 4 veces semana<br><input type="radio"/> 5 a 6 veces semana<br><input type="radio"/> 1 vez al día<br><input type="radio"/> 2 a 3 veces al día<br><input type="radio"/> 5 a 6 veces al día<br><input type="radio"/> más 6 veces al día |
| croquetas pollo jamón | <input type="radio"/> Nunca o menos 1 vez al mes<br><input checked="" type="radio"/> 1 a 3 veces mes<br><input type="radio"/> 1 vez semana<br><input type="radio"/> 2 a 4 veces semana<br><input type="radio"/> 5 a 6 veces semana<br><input type="radio"/> 1 vez al día<br><input type="radio"/> 2 a 3 veces al día<br><input type="radio"/> 5 a 6 veces al día<br><input type="radio"/> más 6 veces al día |
| croquetas pescado     | <input type="radio"/> Nunca o menos 1 vez al mes<br><input checked="" type="radio"/> 1 a 3 veces mes<br><input type="radio"/> 1 vez semana<br><input type="radio"/> 2 a 4 veces semana<br><input type="radio"/> 5 a 6 veces semana<br><input type="radio"/> 1 vez al día<br><input type="radio"/> 2 a 3 veces al día<br><input type="radio"/> 5 a 6 veces al día<br><input type="radio"/> más 6 veces al día |
| mayonesa              | <input checked="" type="radio"/> Nunca o menos 1 vez al mes<br><input type="radio"/> 1 a 3 veces mes<br><input type="radio"/> 1 vez semana<br><input type="radio"/> 2 a 4 veces semana<br><input type="radio"/> 5 a 6 veces semana<br><input type="radio"/> 1 vez al día<br><input type="radio"/> 2 a 3 veces al día<br><input type="radio"/> 5 a 6 veces al día<br><input type="radio"/> más 6 veces al día |

salsa tomate

- ☐ Nunca o menos 1 vez al mes  
☒ 1 a 3 veces mes  
☐ 1 vez semana  
☐ 2 a 4 veces semana  
☐ 5 a 6 veces semana  
☐ 1 vez al día  
☐ 2 a 3 veces al día  
☐ 5 a 6 veces al día  
☐ más 6 veces al día

ketchup

- ☐ Nunca o menos 1 vez al mes  
☒ 1 a 3 veces mes  
☐ 1 vez semana  
☐ 2 a 4 veces semana  
☐ 5 a 6 veces semana  
☐ 1 vez al día  
☐ 2 a 3 veces al día  
☐ 5 a 6 veces al día  
☐ más 6 veces al día

sal

- ☒ Nunca o menos 1 vez al mes  
☐ 1 a 3 veces mes  
☐ 1 vez semana  
☐ 2 a 4 veces semana  
☐ 5 a 6 veces semana  
☐ 1 vez al día  
☐ 2 a 3 veces al día  
☐ 5 a 6 veces al día  
☐ más 6 veces al día

ajo

- ☐ Nunca o menos 1 vez al mes  
☐ 1 a 3 veces mes  
☐ 1 vez semana  
☒ 2 a 4 veces semana  
☐ 5 a 6 veces semana  
☐ 1 vez al día  
☐ 2 a 3 veces al día  
☐ 5 a 6 veces al día  
☐ más 6 veces al día

mermelada o miel

- ☒ Nunca o menos 1 vez al mes  
☐ 1 a 3 veces mes  
☐ 1 vez semana  
☐ 2 a 4 veces semana  
☐ 5 a 6 veces semana  
☐ 1 vez al día  
☐ 2 a 3 veces al día  
☐ 5 a 6 veces al día  
☐ más 6 veces al día

azúcar

- ☐ Nunca o menos 1 vez al mes  
☐ 1 a 3 veces mes  
☐ 1 vez semana  
☐ 2 a 4 veces semana  
☐ 5 a 6 veces semana  
☐ 1 vez al día  
☐ 2 a 3 veces al día  
☒ 5 a 6 veces al día  
☐ más 6 veces al día

|                                       |                                                                                                                                                                                                                                                                                                                                                                                                                                                                                                                               |
|---------------------------------------|-------------------------------------------------------------------------------------------------------------------------------------------------------------------------------------------------------------------------------------------------------------------------------------------------------------------------------------------------------------------------------------------------------------------------------------------------------------------------------------------------------------------------------|
| Otro alimento                         |                                                                                                                                                                                                                                                                                                                                                                                                                                                                                                                               |
| suplementos vitamínicos               | <input type="radio"/> si<br><input checked="" type="radio"/> no                                                                                                                                                                                                                                                                                                                                                                                                                                                               |
| suplementos vitamínicos               | [*DATA REMOVED*]                                                                                                                                                                                                                                                                                                                                                                                                                                                                                                              |
| dieta previa                          | <input type="radio"/> si<br><input checked="" type="radio"/> no                                                                                                                                                                                                                                                                                                                                                                                                                                                               |
| motivo dieta                          | <input type="radio"/> no dieta<br><input type="radio"/> control peso<br><input type="radio"/> control colesterol<br><input checked="" type="radio"/> control diabetes<br><input type="radio"/> problemas estómago<br><input type="radio"/> problemas vesícula o hepáticos<br><input type="radio"/> HTA o cardiopatía<br><input type="radio"/> problemas renales<br><input type="radio"/> alergia alimentaria<br><input type="radio"/> ácido úrico elevado<br><input type="radio"/> vegetariana<br><input type="radio"/> otros |
| cambio alimentos año previo gestación | <input checked="" type="radio"/> si<br><input type="radio"/> no                                                                                                                                                                                                                                                                                                                                                                                                                                                               |
| cambio lácteos                        | <input type="radio"/> eliminado<br><input checked="" type="radio"/> disminuido<br><input type="radio"/> igual<br><input type="radio"/> aumentado<br><input type="radio"/> no sabe                                                                                                                                                                                                                                                                                                                                             |
| cambio huevos                         | <input type="radio"/> eliminado<br><input type="radio"/> disminuido<br><input checked="" type="radio"/> igual<br><input type="radio"/> aumentado<br><input type="radio"/> no sabe                                                                                                                                                                                                                                                                                                                                             |
| cambio carne                          | <input type="radio"/> eliminado<br><input type="radio"/> disminuido<br><input checked="" type="radio"/> igual<br><input type="radio"/> aumentado<br><input type="radio"/> no sabe                                                                                                                                                                                                                                                                                                                                             |
| cambio pescado                        | <input type="radio"/> eliminado<br><input type="radio"/> disminuido<br><input type="radio"/> igual<br><input checked="" type="radio"/> aumentado<br><input type="radio"/> no sabe                                                                                                                                                                                                                                                                                                                                             |
| cambio verduras                       | <input type="radio"/> eliminado<br><input type="radio"/> disminuido<br><input checked="" type="radio"/> igual<br><input type="radio"/> aumentado<br><input type="radio"/> no sabe                                                                                                                                                                                                                                                                                                                                             |



|                            |                                                                                                                                                                                                                        |
|----------------------------|------------------------------------------------------------------------------------------------------------------------------------------------------------------------------------------------------------------------|
| cambio legumbres           | <input type="radio"/> eliminado<br><input type="radio"/> disminuido<br><input type="radio"/> igual<br><input checked="" type="radio"/> aumentado<br><input type="radio"/> no sabe                                      |
| cambio fruta               | <input type="radio"/> eliminado<br><input type="radio"/> disminuido<br><input type="radio"/> igual<br><input checked="" type="radio"/> aumentado<br><input type="radio"/> no sabe                                      |
| cambio pan                 | <input type="radio"/> eliminado<br><input type="radio"/> disminuido<br><input checked="" type="radio"/> igual<br><input type="radio"/> aumentado<br><input type="radio"/> no sabe                                      |
| cambio aceite oliva        | <input type="radio"/> eliminado<br><input type="radio"/> disminuido<br><input checked="" type="radio"/> igual<br><input type="radio"/> aumentado<br><input type="radio"/> no sabe                                      |
| cambio mante o margarina   | <input type="radio"/> eliminado<br><input type="radio"/> disminuido<br><input checked="" type="radio"/> igual<br><input type="radio"/> aumentado<br><input type="radio"/> no sabe                                      |
| cambio azúcar y dulces     | <input type="radio"/> eliminado<br><input type="radio"/> disminuido<br><input checked="" type="radio"/> igual<br><input type="radio"/> aumentado<br><input type="radio"/> no sabe                                      |
| cambio bebidas alcohólicas | <input checked="" type="radio"/> eliminado<br><input type="radio"/> disminuido<br><input type="radio"/> igual<br><input type="radio"/> aumentado<br><input type="radio"/> no sabe                                      |
| frecuencia comidas fritas  | <input type="radio"/> a diario<br><input type="radio"/> 5 a 6 veces semana<br><input type="radio"/> 2 a 4 veces semana<br><input type="radio"/> 1 vez semana<br><input checked="" type="radio"/> menos de 1 vez semana |
| carne                      | <input type="radio"/> no como<br><input type="radio"/> cruda<br><input type="radio"/> poco hecha<br><input checked="" type="radio"/> hecha<br><input type="radio"/> muy hecha                                          |
| grasa visible carne        | <input type="radio"/> quita toda<br><input checked="" type="radio"/> quita mayoría<br><input type="radio"/> quita un poco<br><input type="radio"/> no quita nada                                                       |

|                                |                                                                                                                                                                                                                                                          |
|--------------------------------|----------------------------------------------------------------------------------------------------------------------------------------------------------------------------------------------------------------------------------------------------------|
| cocina carne                   | <input checked="" type="radio"/> a la plancha<br><input type="radio"/> a la parrilla<br><input type="radio"/> asada<br><input type="radio"/> frita<br><input type="radio"/> guisada                                                                      |
| tostado quemado carne          | <input checked="" type="radio"/> nunca<br><input type="radio"/> 1 vez mes<br><input type="radio"/> 2 a 3 veces mes<br><input type="radio"/> 1 vez semana<br><input type="radio"/> 2 a 3 semanas                                                          |
| tostado quemado pescado        | <input checked="" type="radio"/> nunca<br><input type="radio"/> 1 vez mes<br><input type="radio"/> 2 a 3 veces mes<br><input type="radio"/> 1 vez semana<br><input type="radio"/> 2 a 3 semanas                                                          |
| socarrat paella                | <input checked="" type="radio"/> nunca<br><input type="radio"/> 1 vez mes<br><input type="radio"/> 2 a 3 veces mes<br><input type="radio"/> 1 vez semana<br><input type="radio"/> 2 a 3 semanas                                                          |
| grasa o aceite cocinar         | <input type="radio"/> mantequilla<br><input type="radio"/> margarina<br><input type="radio"/> aceite oliva<br><input checked="" type="radio"/> aceite oliva virgen extra<br><input type="radio"/> aceite vegetal<br><input type="radio"/> mezcla aceites |
| grasa aceite aliñar            | <input type="radio"/> mantequilla<br><input type="radio"/> margarina<br><input type="radio"/> aceite oliva<br><input checked="" type="radio"/> aceite oliva virgen extra<br><input type="radio"/> aceite vegetal<br><input type="radio"/> mezcla aceites |
| grasa aceite freir             | <input type="radio"/> mantequilla<br><input type="radio"/> margarina<br><input type="radio"/> aceite oliva<br><input checked="" type="radio"/> aceite oliva virgen extra<br><input type="radio"/> aceite vegetal<br><input type="radio"/> mezcla aceites |
| Ejercicio cuestionario         | <input checked="" type="radio"/> si<br><input type="radio"/> no                                                                                                                                                                                          |
| horas de sueño incluido siesta | [*DATA REMOVED*]                                                                                                                                                                                                                                         |
| minutos siesta                 | [*DATA REMOVED*]                                                                                                                                                                                                                                         |
| horas televisión semana        | [*DATA REMOVED*]                                                                                                                                                                                                                                         |

|                                        |                                                                                                                                                                                                                                                                                                                                                                           |
|----------------------------------------|---------------------------------------------------------------------------------------------------------------------------------------------------------------------------------------------------------------------------------------------------------------------------------------------------------------------------------------------------------------------------|
| actividad trabajo                      | <input type="radio"/> casi siempre sentado<br><input type="radio"/> sentado 50 por cien<br><input type="radio"/> casi siempre de pie, quieto<br><input checked="" type="radio"/> casi siempre levantado caminando y llevando pocas cosas<br><input type="radio"/> casi siempre levantado, caminando y llevado muchas cosas<br><input type="radio"/> trabajo manual pesado |
| tiempo caminar o bici al día           | <input type="radio"/> casi nunca<br><input type="radio"/> menos 20min día<br><input type="radio"/> 20 a 40 min día<br><input type="radio"/> 40 a 60 min día<br><input type="radio"/> 1h o 1h y media día<br><input checked="" type="radio"/> más de 1h y media al día                                                                                                     |
| tiempo tareas casa al día              | <input type="radio"/> menos de 1h día<br><input checked="" type="radio"/> 1 a 2h día<br><input type="radio"/> 3 a 4h día<br><input type="radio"/> 5 a 6h día<br><input type="radio"/> 7 a 8h día<br><input type="radio"/> más de 8h día                                                                                                                                   |
| tiempo libre televisión ordenador leer | <input checked="" type="radio"/> menos 1h día<br><input type="radio"/> 1h día<br><input type="radio"/> 2h día<br><input type="radio"/> 3h día<br><input type="radio"/> 4h día<br><input type="radio"/> 5 a 6h día<br><input type="radio"/> mas 6h día                                                                                                                     |
| tiempo libre ejercicio o deporte       | <input type="radio"/> menos 1h semana<br><input type="radio"/> 1h semana<br><input type="radio"/> 2h semana<br><input type="radio"/> 3h semana<br><input type="radio"/> 4 a 5h semana<br><input checked="" type="radio"/> mas 5h semana                                                                                                                                   |
| como se considera                      | <input type="radio"/> sedentaria<br><input type="radio"/> poco activa<br><input checked="" type="radio"/> moderadamente activa<br><input type="radio"/> bastante activa<br><input type="radio"/> muy activa<br><input type="radio"/> no sabe                                                                                                                              |
| FUR                                    | [*DATA REMOVED*]                                                                                                                                                                                                                                                                                                                                                          |
| Semanas gestación 2T                   | _____                                                                                                                                                                                                                                                                                                                                                                     |
| Días gestación 2T                      | _____                                                                                                                                                                                                                                                                                                                                                                     |
| DBP 2T                                 | _____                                                                                                                                                                                                                                                                                                                                                                     |
| CC 2T                                  | _____                                                                                                                                                                                                                                                                                                                                                                     |

|                                                   |                                                                                                                                                                                                 |
|---------------------------------------------------|-------------------------------------------------------------------------------------------------------------------------------------------------------------------------------------------------|
| AC 2T                                             |                                                                                                                                                                                                 |
| LF 2T                                             |                                                                                                                                                                                                 |
| PFE 2T (Hadlock)                                  |                                                                                                                                                                                                 |
| Semanas gestación 3T                              | [*DATA REMOVED*]                                                                                                                                                                                |
| días 3T                                           | [*DATA REMOVED*]                                                                                                                                                                                |
| DBP 3T                                            | [*DATA REMOVED*]                                                                                                                                                                                |
| CC 3T                                             | [*DATA REMOVED*]                                                                                                                                                                                |
| AC 3T                                             | [*DATA REMOVED*]                                                                                                                                                                                |
| LF 3T                                             | [*DATA REMOVED*]                                                                                                                                                                                |
| PFE 3T (Hadlock)                                  | [*DATA REMOVED*]                                                                                                                                                                                |
| Semanas de gestación final                        | [*DATA REMOVED*]                                                                                                                                                                                |
| días gestación final                              | [*DATA REMOVED*]                                                                                                                                                                                |
| Localización placenta                             | <input type="radio"/> anterior<br><input type="radio"/> lateral derecha<br><input type="radio"/> lateral izquierda<br><input checked="" type="radio"/> posterior<br><input type="radio"/> fondo |
| Presentación longitudinal cefálica                | <input type="radio"/> no<br><input checked="" type="radio"/> si                                                                                                                                 |
| Dorso                                             | <input type="radio"/> izquierda anterior<br><input checked="" type="radio"/> izquierda posterior<br><input type="radio"/> derecha anterior<br><input type="radio"/> derecha posterior           |
| diámetro biparietal                               | [*DATA REMOVED*]                                                                                                                                                                                |
| Circunferencia craneal                            | [*DATA REMOVED*]                                                                                                                                                                                |
| Circunferencia abdominal                          | [*DATA REMOVED*]                                                                                                                                                                                |
| Longitud de femur                                 | [*DATA REMOVED*]                                                                                                                                                                                |
| tejido celular subcutáneo a nivel del muslo en mm | [*DATA REMOVED*]                                                                                                                                                                                |
| tejido celular subcutáneo en abdomen en mm        | [*DATA REMOVED*]                                                                                                                                                                                |

|                                               |                                                                                                                                                          |
|-----------------------------------------------|----------------------------------------------------------------------------------------------------------------------------------------------------------|
| Volumen del muslo en cm3                      | [*DATA REMOVED*]                                                                                                                                         |
| Peso fetal estimado según fórmula de Hadlock  | [*DATA REMOVED*]                                                                                                                                         |
| Percentil                                     | [*DATA REMOVED*]                                                                                                                                         |
| Peso fetal estimado según fórmula de Scioscia | _____                                                                                                                                                    |
| Peso fetal estimado según fórmula de LEE      | _____                                                                                                                                                    |
| Tipo de parto                                 | <input checked="" type="radio"/> eutocico<br><input type="radio"/> instrumentado/ventosa<br><input type="radio"/> cesarea                                |
| fecha de nacimiento                           | [*DATA REMOVED*]                                                                                                                                         |
| Días entre exploración y nacimiento           | [*DATA REMOVED*]                                                                                                                                         |
| Peso RN en g                                  | [*DATA REMOVED*]                                                                                                                                         |
| sexo                                          | <input type="radio"/> mujer<br><input checked="" type="radio"/> hombre                                                                                   |
| Apgar 1 minuto                                | [*DATA REMOVED*]                                                                                                                                         |
| Apgar 5 minutos                               | [*DATA REMOVED*]                                                                                                                                         |
| Apgar 10 minutos                              | _____                                                                                                                                                    |
| antecedente Covid durante gestación           | <input type="radio"/> Yes<br><input checked="" type="radio"/> No                                                                                         |
| Nivel de estudios                             | <input type="radio"/> ninguno<br><input type="radio"/> primarios<br><input type="radio"/> secundarios<br><input checked="" type="radio"/> universitarios |

# Base\_datos\_estimacion\_peso\_fetal

|                                       |                                                                                                                                                                                                                                                                                      |
|---------------------------------------|--------------------------------------------------------------------------------------------------------------------------------------------------------------------------------------------------------------------------------------------------------------------------------------|
| Número de identificación participante | 2                                                                                                                                                                                                                                                                                    |
| CODIGO PARTICIPANTE                   |                                                                                                                                                                                                                                                                                      |
| Edad                                  | [*DATA REMOVED*]                                                                                                                                                                                                                                                                     |
| Gestaciones                           | <input type="radio"/> 1<br><input type="radio"/> 2<br><input checked="" type="radio"/> 3<br><input type="radio"/> mas de 3                                                                                                                                                           |
| partos                                | <input type="radio"/> 0<br><input type="radio"/> 1<br><input checked="" type="radio"/> 2<br><input type="radio"/> 3<br><input type="radio"/> mas de 3                                                                                                                                |
| cesáreas                              | <input checked="" type="radio"/> 0<br><input type="radio"/> 1<br><input type="radio"/> 2<br><input type="radio"/> 3<br><input type="radio"/> mas de 3                                                                                                                                |
| Abortos                               | <input checked="" type="radio"/> 0<br><input type="radio"/> 1<br><input type="radio"/> 2<br><input type="radio"/> 3<br><input type="radio"/> mas de 3                                                                                                                                |
| Tipo de gestacion                     | <input checked="" type="radio"/> espontanea<br><input type="radio"/> IAC inseminación artificial conyuge<br><input type="radio"/> IAD inseminación artificial donante<br><input type="radio"/> FIV Fecundación in Vitro<br><input type="radio"/> Ovodon FIV con donación de ovocitos |
| peso previo a embarazo                | [*DATA REMOVED*]                                                                                                                                                                                                                                                                     |
| Ganancia ponderal embarazo            | [*DATA REMOVED*]                                                                                                                                                                                                                                                                     |
| Talla madre                           | [*DATA REMOVED*]                                                                                                                                                                                                                                                                     |
| IMC previo embarazo                   | 22.22222222222222                                                                                                                                                                                                                                                                    |
| Patología obstétrica                  | <input checked="" type="radio"/> no<br><input type="radio"/> si                                                                                                                                                                                                                      |
| Diabetes pregestacional               | <input checked="" type="radio"/> no<br><input type="radio"/> si                                                                                                                                                                                                                      |
| Diabetes gestacional                  | <input type="radio"/> no<br><input checked="" type="radio"/> si                                                                                                                                                                                                                      |

|                                            |                                                                                                                                                                                      |
|--------------------------------------------|--------------------------------------------------------------------------------------------------------------------------------------------------------------------------------------|
| Diabetes gestacional con insulina          | <input type="radio"/> no<br><input checked="" type="radio"/> si                                                                                                                      |
| Diabetes gestacional con dieta y ejercicio | <input type="radio"/> no<br><input checked="" type="radio"/> si                                                                                                                      |
| Percentil fetos previos                    | <input type="radio"/> Nada<br><input checked="" type="radio"/> percentil menor de 10<br><input type="radio"/> percentil entre 10 y 90<br><input type="radio"/> percentil mayor de 90 |
| Exfumadora                                 | <input checked="" type="radio"/> Nada<br><input type="radio"/> menos de 5 años<br><input type="radio"/> 5 a 10 años<br><input type="radio"/> mayor o igual a 10 años                 |
| Hábito tabáquico                           | <input checked="" type="radio"/> no<br><input type="radio"/> si                                                                                                                      |
| fumadora                                   | [*DATA REMOVED*]                                                                                                                                                                     |
| Consumo otros tóxicos                      | <input checked="" type="radio"/> no<br><input type="radio"/> si                                                                                                                      |
| Hb 1T                                      | [*DATA REMOVED*]                                                                                                                                                                     |
| Htc 1T                                     | [*DATA REMOVED*]                                                                                                                                                                     |
| Hb 2T                                      | [*DATA REMOVED*]                                                                                                                                                                     |
| HTC 2T                                     | [*DATA REMOVED*]                                                                                                                                                                     |
| Hb 3T                                      | [*DATA REMOVED*]                                                                                                                                                                     |
| HTC 3T                                     | [*DATA REMOVED*]                                                                                                                                                                     |
| Suplemento FE oral                         | <input type="radio"/> si<br><input checked="" type="radio"/> no                                                                                                                      |
| Suplemento fe iv                           | <input type="radio"/> si<br><input checked="" type="radio"/> no                                                                                                                      |
| Transfusión                                | <input checked="" type="radio"/> no<br><input type="radio"/> si                                                                                                                      |
| Solicitada Vit D                           | <input checked="" type="radio"/> no<br><input type="radio"/> si                                                                                                                      |
| Deficit vit D                              | <input checked="" type="radio"/> no<br><input type="radio"/> si                                                                                                                      |
| Suplemento vit D                           | <input checked="" type="radio"/> si<br><input type="radio"/> no                                                                                                                      |

|                       |                                                                                                                                                                                                                                                                                                                                                                                                              |
|-----------------------|--------------------------------------------------------------------------------------------------------------------------------------------------------------------------------------------------------------------------------------------------------------------------------------------------------------------------------------------------------------------------------------------------------------|
| Dieta, cuestionario   | <input checked="" type="radio"/> sí<br><input type="radio"/> no                                                                                                                                                                                                                                                                                                                                              |
| Leche entera          | <input checked="" type="radio"/> Nunca o menos 1 vez al mes<br><input type="radio"/> 1 a 3 veces mes<br><input type="radio"/> 1 vez semana<br><input type="radio"/> 2 a 4 veces semana<br><input type="radio"/> 5 a 6 veces semana<br><input type="radio"/> 1 vez al día<br><input type="radio"/> 2 a 3 veces al día<br><input type="radio"/> 5 a 6 veces al día<br><input type="radio"/> más 6 veces al día |
| Leche semidesnatada   | <input type="radio"/> Nunca o menos 1 vez al mes<br><input type="radio"/> 1 a 3 veces mes<br><input type="radio"/> 1 vez semana<br><input type="radio"/> 2 a 4 veces semana<br><input type="radio"/> 5 a 6 veces semana<br><input type="radio"/> 1 vez al día<br><input checked="" type="radio"/> 2 a 3 veces al día<br><input type="radio"/> 5 a 6 veces al día<br><input type="radio"/> mas 6 veces al día |
| Leche desnatada       | <input checked="" type="radio"/> Nunca o menos 1 vez al mes<br><input type="radio"/> 1 a 3 veces mes<br><input type="radio"/> 1 vez semana<br><input type="radio"/> 2 a 4 veces semana<br><input type="radio"/> 5 a 6 veces semana<br><input type="radio"/> 1 vez al día<br><input type="radio"/> 2 a 3 veces al día<br><input type="radio"/> 5 a 6 veces al día<br><input type="radio"/> más 6 veces al día |
| Leche condensada      | <input checked="" type="radio"/> Nunca o menos 1 vez al mes<br><input type="radio"/> 1 a 3 veces mes<br><input type="radio"/> 1 vez semana<br><input type="radio"/> 2 a 4 veces semana<br><input type="radio"/> 5 a 6 veces semana<br><input type="radio"/> 1 vez al día<br><input type="radio"/> 2 a 3 veces al día<br><input type="radio"/> 5 a 6 veces al día<br><input type="radio"/> más 6 veces al día |
| nata o crema de leche | <input checked="" type="radio"/> Nunca o menos 1 vez al mes<br><input type="radio"/> 1 a 3 veces mes<br><input type="radio"/> 1 vez semana<br><input type="radio"/> 2 a 4 veces semana<br><input type="radio"/> 5 a 6 veces semana<br><input type="radio"/> 1 vez al día<br><input type="radio"/> 2 a 3 veces al día<br><input type="radio"/> 5 a 6 veces al día<br><input type="radio"/> más 6 veces al día |



|                                             |                                                                                                                                                                                                                                                                                                                                                                                                              |
|---------------------------------------------|--------------------------------------------------------------------------------------------------------------------------------------------------------------------------------------------------------------------------------------------------------------------------------------------------------------------------------------------------------------------------------------------------------------|
| Yogurt Entero                               | <input type="radio"/> Nunca o menos 1 vez al mes<br><input checked="" type="radio"/> 1 a 3 veces mes<br><input type="radio"/> 1 vez semana<br><input type="radio"/> 2 a 4 veces semana<br><input type="radio"/> 5 a 6 veces semana<br><input type="radio"/> 1 vez al día<br><input type="radio"/> 2 a 3 veces al día<br><input type="radio"/> 5 a 6 veces al día<br><input type="radio"/> más 6 veces al día |
| Yogurt desnatado                            | <input checked="" type="radio"/> Nunca o menos 1 vez al mes<br><input type="radio"/> 1 a 3 veces mes<br><input type="radio"/> 1 vez semana<br><input type="radio"/> 2 a 4 veces semana<br><input type="radio"/> 5 a 6 veces semana<br><input type="radio"/> 1 vez al día<br><input type="radio"/> 2 a 3 veces al día<br><input type="radio"/> 5 a 6 veces al día<br><input type="radio"/> más 6 veces al día |
| 100g requesón o queso blando o queso fresco | <input checked="" type="radio"/> Nunca o menos 1 vez al mes<br><input type="radio"/> 1 a 3 veces mes<br><input type="radio"/> 1 vez semana<br><input type="radio"/> 2 a 4 veces semana<br><input type="radio"/> 5 a 6 veces semana<br><input type="radio"/> 1 vez al día<br><input type="radio"/> 2 a 3 veces al día<br><input type="radio"/> 5 a 6 veces al día<br><input type="radio"/> más 6 veces al día |
| queso curado o semicurado o cremoso         | <input type="radio"/> Nunca o menos 1 vez al mes<br><input checked="" type="radio"/> 1 a 3 veces mes<br><input type="radio"/> 1 vez semana<br><input type="radio"/> 2 a 4 veces semana<br><input type="radio"/> 5 a 6 veces semana<br><input type="radio"/> 1 vez al día<br><input type="radio"/> 2 a 3 veces al día<br><input type="radio"/> 5 a 6 veces al día<br><input type="radio"/> más 6 veces al día |
| natillas flan pudding                       | <input checked="" type="radio"/> Nunca o menos 1 vez al mes<br><input type="radio"/> 1 a 3 veces mes<br><input type="radio"/> 1 vez semana<br><input type="radio"/> 2 a 4 veces semana<br><input type="radio"/> 5 a 6 veces semana<br><input type="radio"/> 1 vez al día<br><input type="radio"/> 2 a 3 veces al día<br><input type="radio"/> 5 a 6 veces al día<br><input type="radio"/> más 6 veces al día |
| Helado                                      | <input checked="" type="radio"/> Nunca o menos 1 vez al mes<br><input type="radio"/> 1 a 3 veces mes<br><input type="radio"/> 1 vez semana<br><input type="radio"/> 2 a 4 veces semana<br><input type="radio"/> 5 a 6 veces semana<br><input type="radio"/> 1 vez al día<br><input type="radio"/> 2 a 3 veces al día<br><input type="radio"/> 5 a 6 veces al día<br><input type="radio"/> más 6 veces al día |

|                                      |                                                                                                                                                                                                                                                                                                                                                                                                              |
|--------------------------------------|--------------------------------------------------------------------------------------------------------------------------------------------------------------------------------------------------------------------------------------------------------------------------------------------------------------------------------------------------------------------------------------------------------------|
| huevo                                | <input type="radio"/> Nunca o menos 1 vez al mes<br><input checked="" type="radio"/> 1 a 3 veces mes<br><input type="radio"/> 1 vez semana<br><input type="radio"/> 2 a 4 veces semana<br><input type="radio"/> 5 a 6 veces semana<br><input type="radio"/> 1 vez al día<br><input type="radio"/> 2 a 3 veces al día<br><input type="radio"/> 5 a 6 veces al día<br><input type="radio"/> más 6 veces al día |
| Pollo con piel                       | <input type="radio"/> Nunca o menos 1 vez al mes<br><input checked="" type="radio"/> 1 a 3 veces mes<br><input type="radio"/> 1 vez semana<br><input type="radio"/> 2 a 4 veces semana<br><input type="radio"/> 5 a 6 veces semana<br><input type="radio"/> 1 vez al día<br><input type="radio"/> 2 a 3 veces al día<br><input type="radio"/> 5 a 6 veces al día<br><input type="radio"/> más 6 veces al día |
| pollo sin piel                       | <input type="radio"/> Nunca o menos 1 vez al mes<br><input type="radio"/> 1 a 3 veces mes<br><input checked="" type="radio"/> 1 vez semana<br><input type="radio"/> 2 a 4 veces semana<br><input type="radio"/> 5 a 6 veces semana<br><input type="radio"/> 1 vez al día<br><input type="radio"/> 2 a 3 veces al día<br><input type="radio"/> 5 a 6 veces al día<br><input type="radio"/> más 6 veces al día |
| Ternera o cerdo o cordero            | <input type="radio"/> Nunca o menos 1 vez al mes<br><input type="radio"/> 1 a 3 veces mes<br><input checked="" type="radio"/> 1 vez semana<br><input type="radio"/> 2 a 4 veces semana<br><input type="radio"/> 5 a 6 veces semana<br><input type="radio"/> 1 vez al día<br><input type="radio"/> 2 a 3 veces al día<br><input type="radio"/> 5 a 6 veces al día<br><input type="radio"/> más 6 veces al día |
| carne caza: Conejo o codorniz o pato | <input checked="" type="radio"/> Nunca o menos 1 vez al mes<br><input type="radio"/> 1 a 3 veces mes<br><input type="radio"/> 1 vez semana<br><input type="radio"/> 2 a 4 veces semana<br><input type="radio"/> 5 a 6 veces semana<br><input type="radio"/> 1 vez al día<br><input type="radio"/> 2 a 3 veces al día<br><input type="radio"/> 5 a 6 veces al día<br><input type="radio"/> más 6 veces al día |
| Hígado de ternera o cerdo o pollo    | <input checked="" type="radio"/> Nunca o menos 1 vez al mes<br><input type="radio"/> 1 a 3 veces mes<br><input type="radio"/> 1 vez semana<br><input type="radio"/> 2 a 4 veces semana<br><input type="radio"/> 5 a 6 veces semana<br><input type="radio"/> 1 vez al día<br><input type="radio"/> 2 a 3 veces al día<br><input type="radio"/> 5 a 6 veces al día<br><input type="radio"/> más 6 veces al día |

|                     |                                                                                                                                                                                                                                                                                                                                                                                                              |
|---------------------|--------------------------------------------------------------------------------------------------------------------------------------------------------------------------------------------------------------------------------------------------------------------------------------------------------------------------------------------------------------------------------------------------------------|
| Vísceras            | <input checked="" type="radio"/> Nunca o menos 1 vez al mes<br><input type="radio"/> 1 a 3 veces mes<br><input type="radio"/> 1 vez semana<br><input type="radio"/> 2 a 4 veces semana<br><input type="radio"/> 5 a 6 veces semana<br><input type="radio"/> 1 vez al día<br><input type="radio"/> 2 a 3 veces al día<br><input type="radio"/> 5 a 6 veces al día<br><input type="radio"/> más 6 veces al día |
| Embutido            | <input type="radio"/> Nunca o menos 1 vez al mes<br><input type="radio"/> 1 a 3 veces mes<br><input type="radio"/> 1 vez semana<br><input checked="" type="radio"/> 2 a 4 veces semana<br><input type="radio"/> 5 a 6 veces semana<br><input type="radio"/> 1 vez al día<br><input type="radio"/> 2 a 3 veces al día<br><input type="radio"/> 5 a 6 veces al día<br><input type="radio"/> más 6 veces al día |
| Salchicha o similar | <input checked="" type="radio"/> Nunca o menos 1 vez al mes<br><input type="radio"/> 1 a 3 veces mes<br><input type="radio"/> 1 vez semana<br><input type="radio"/> 2 a 4 veces semana<br><input type="radio"/> 5 a 6 veces semana<br><input type="radio"/> 1 vez al día<br><input type="radio"/> 2 a 3 veces al día<br><input type="radio"/> 5 a 6 veces al día<br><input type="radio"/> más 6 veces al día |
| Pate o foiegras     | <input checked="" type="radio"/> Nunca o menos 1 vez al mes<br><input type="radio"/> 1 a 3 veces mes<br><input type="radio"/> 1 vez semana<br><input type="radio"/> 2 a 4 veces semana<br><input type="radio"/> 5 a 6 veces semana<br><input type="radio"/> 1 vez al día<br><input type="radio"/> 2 a 3 veces al día<br><input type="radio"/> 5 a 6 veces al día<br><input type="radio"/> más 6 veces al día |
| Hamburguesa         | <input type="radio"/> Nunca o menos 1 vez al mes<br><input checked="" type="radio"/> 1 a 3 veces mes<br><input type="radio"/> 1 vez semana<br><input type="radio"/> 2 a 4 veces semana<br><input type="radio"/> 5 a 6 veces semana<br><input type="radio"/> 1 vez al día<br><input type="radio"/> 2 a 3 veces al día<br><input type="radio"/> 5 a 6 veces al día<br><input type="radio"/> más 6 veces al día |
| tocino o bacon      | <input checked="" type="radio"/> Nunca o menos 1 vez al mes<br><input type="radio"/> 1 a 3 veces mes<br><input type="radio"/> 1 vez semana<br><input type="radio"/> 2 a 4 veces semana<br><input type="radio"/> 5 a 6 veces semana<br><input type="radio"/> 1 vez al día<br><input type="radio"/> 2 a 3 veces al día<br><input type="radio"/> 5 a 6 veces al día<br><input type="radio"/> más 6 veces al día |

|                        |                                                                                                                                                                                                                                                                                                                                                                                                              |
|------------------------|--------------------------------------------------------------------------------------------------------------------------------------------------------------------------------------------------------------------------------------------------------------------------------------------------------------------------------------------------------------------------------------------------------------|
| Pescado frito          | <input checked="" type="radio"/> Nunca o menos 1 vez al mes<br><input type="radio"/> 1 a 3 veces mes<br><input type="radio"/> 1 vez semana<br><input type="radio"/> 2 a 4 veces semana<br><input type="radio"/> 5 a 6 veces semana<br><input type="radio"/> 1 vez al día<br><input type="radio"/> 2 a 3 veces al día<br><input type="radio"/> 5 a 6 veces al día<br><input type="radio"/> más 6 veces al día |
| pescado hervido blanco | <input checked="" type="radio"/> Nunca o menos 1 vez al mes<br><input type="radio"/> 1 a 3 veces mes<br><input type="radio"/> 1 vez semana<br><input type="radio"/> 2 a 4 veces semana<br><input type="radio"/> 5 a 6 veces semana<br><input type="radio"/> 1 vez al día<br><input type="radio"/> 2 a 3 veces al día<br><input type="radio"/> 5 a 6 veces al día<br><input type="radio"/> más 6 veces al día |
| pescado hervido azul   | <input checked="" type="radio"/> Nunca o menos 1 vez al mes<br><input type="radio"/> 1 a 3 veces mes<br><input type="radio"/> 1 vez semana<br><input type="radio"/> 2 a 4 veces semana<br><input type="radio"/> 5 a 6 veces semana<br><input type="radio"/> 1 vez al día<br><input type="radio"/> 2 a 3 veces al día<br><input type="radio"/> 5 a 6 veces al día<br><input type="radio"/> más 6 veces al día |
| otros pescado azul     | <input checked="" type="radio"/> Nunca o menos 1 vez al mes<br><input type="radio"/> 1 a 3 veces mes<br><input type="radio"/> 1 vez semana<br><input type="radio"/> 2 a 4 veces semana<br><input type="radio"/> 5 a 6 veces semana<br><input type="radio"/> 1 vez al día<br><input type="radio"/> 2 a 3 veces al día<br><input type="radio"/> 5 a 6 veces al día<br><input type="radio"/> más 6 veces al día |
| atun conserva          | <input type="radio"/> Nunca o menos 1 vez al mes<br><input type="radio"/> 1 a 3 veces mes<br><input checked="" type="radio"/> 1 vez semana<br><input type="radio"/> 2 a 4 veces semana<br><input type="radio"/> 5 a 6 veces semana<br><input type="radio"/> 1 vez al día<br><input type="radio"/> 2 a 3 veces al día<br><input type="radio"/> 5 a 6 veces al día<br><input type="radio"/> más 6 veces al día |
| sardina conserva       | <input checked="" type="radio"/> Nunca o menos 1 vez al mes<br><input type="radio"/> 1 a 3 veces mes<br><input type="radio"/> 1 vez semana<br><input type="radio"/> 2 a 4 veces semana<br><input type="radio"/> 5 a 6 veces semana<br><input type="radio"/> 1 vez al día<br><input type="radio"/> 2 a 3 veces al día<br><input type="radio"/> 5 a 6 veces al día<br><input type="radio"/> más 6 veces al día |

|                                         |                                                                                                                                                                                                                                                                                                                                                                                                              |
|-----------------------------------------|--------------------------------------------------------------------------------------------------------------------------------------------------------------------------------------------------------------------------------------------------------------------------------------------------------------------------------------------------------------------------------------------------------------|
| pescado ahumado                         | <input checked="" type="radio"/> Nunca o menos 1 vez al mes<br><input type="radio"/> 1 a 3 veces mes<br><input type="radio"/> 1 vez semana<br><input type="radio"/> 2 a 4 veces semana<br><input type="radio"/> 5 a 6 veces semana<br><input type="radio"/> 1 vez al día<br><input type="radio"/> 2 a 3 veces al día<br><input type="radio"/> 5 a 6 veces al día<br><input type="radio"/> más 6 veces al día |
| almejas o mejillones o ostras unos 100g | <input checked="" type="radio"/> Nunca o menos 1 vez al mes<br><input type="radio"/> 1 a 3 veces mes<br><input type="radio"/> 1 vez semana<br><input type="radio"/> 2 a 4 veces semana<br><input type="radio"/> 5 a 6 veces semana<br><input type="radio"/> 1 vez al día<br><input type="radio"/> 2 a 3 veces al día<br><input type="radio"/> 5 a 6 veces al día<br><input type="radio"/> más 6 veces al día |
| calamar o chipiron o sepia unos 100g    | <input checked="" type="radio"/> Nunca o menos 1 vez al mes<br><input type="radio"/> 1 a 3 veces mes<br><input type="radio"/> 1 vez semana<br><input type="radio"/> 2 a 4 veces semana<br><input type="radio"/> 5 a 6 veces semana<br><input type="radio"/> 1 vez al día<br><input type="radio"/> 2 a 3 veces al día<br><input type="radio"/> 5 a 6 veces al día<br><input type="radio"/> más 6 veces al día |
| marisco unos 100g                       | <input checked="" type="radio"/> Nunca o menos 1 vez al mes<br><input type="radio"/> 1 a 3 veces mes<br><input type="radio"/> 1 vez semana<br><input type="radio"/> 2 a 4 veces semana<br><input type="radio"/> 5 a 6 veces semana<br><input type="radio"/> 1 vez al día<br><input type="radio"/> 2 a 3 veces al día<br><input type="radio"/> 5 a 6 veces al día<br><input type="radio"/> más 6 veces al día |
| Espinacas o acelgas cocinadas           | <input type="radio"/> Nunca o menos 1 vez al mes<br><input checked="" type="radio"/> 1 a 3 veces mes<br><input type="radio"/> 1 vez semana<br><input type="radio"/> 2 a 4 veces semana<br><input type="radio"/> 5 a 6 veces semana<br><input type="radio"/> 1 vez al día<br><input type="radio"/> 2 a 3 veces al día<br><input type="radio"/> 5 a 6 veces al día<br><input type="radio"/> más 6 veces al día |
| Col o coliflor o brocoli cocinado       | <input checked="" type="radio"/> Nunca o menos 1 vez al mes<br><input type="radio"/> 1 a 3 veces mes<br><input type="radio"/> 1 vez semana<br><input type="radio"/> 2 a 4 veces semana<br><input type="radio"/> 5 a 6 veces semana<br><input type="radio"/> 1 vez al día<br><input type="radio"/> 2 a 3 veces al día<br><input type="radio"/> 5 a 6 veces al día<br><input type="radio"/> más 6 veces al día |

---

Lechuga o endivia o escarola

- ☐ Nunca o menos 1 vez al mes  
☐ 1 a 3 veces mes  
☐ 1 vez semana  
☒ 2 a 4 veces semana  
☐ 5 a 6 veces semana  
☐ 1 vez al día  
☐ 2 a 3 veces al día  
☐ 5 a 6 veces al día  
☐ más 6 veces al día

---

tomate ensalada

- ☐ Nunca o menos 1 vez al mes  
☐ 1 a 3 veces mes  
☒ 1 vez semana  
☐ 2 a 4 veces semana  
☐ 5 a 6 veces semana  
☐ 1 vez al día  
☐ 2 a 3 veces al día  
☐ 5 a 6 veces al día  
☐ más 6 veces al día

---

cebolla

- ☐ Nunca o menos 1 vez al mes  
☐ 1 a 3 veces mes  
☒ 1 vez semana  
☐ 2 a 4 veces semana  
☐ 5 a 6 veces semana  
☐ 1 vez al día  
☐ 2 a 3 veces al día  
☐ 5 a 6 veces al día  
☐ más 6 veces al día

---

Zanahoria o calabaza

- ☐ Nunca o menos 1 vez al mes  
☐ 1 a 3 veces mes  
☒ 1 vez semana  
☐ 2 a 4 veces semana  
☐ 5 a 6 veces semana  
☐ 1 vez al día  
☐ 2 a 3 veces al día  
☐ 5 a 6 veces al día  
☐ más 6 veces al día

---

Judías verdes

- ☐ Nunca o menos 1 vez al mes  
☐ 1 a 3 veces mes  
☒ 1 vez semana  
☐ 2 a 4 veces semana  
☐ 5 a 6 veces semana  
☐ 1 vez al día  
☐ 2 a 3 veces al día  
☐ 5 a 6 veces al día  
☐ más 6 veces al día

---

Berenjena o calabacin o pepino

- ☐ Nunca o menos 1 vez al mes  
☐ 1 a 3 veces mes  
☒ 1 vez semana  
☐ 2 a 4 veces semana  
☐ 5 a 6 veces semana  
☐ 1 vez al día  
☐ 2 a 3 veces al día  
☐ 5 a 6 veces al día  
☐ más 6 veces al día

|                       |                                                                                                                                                                                                                                                                                                                                                                                                              |
|-----------------------|--------------------------------------------------------------------------------------------------------------------------------------------------------------------------------------------------------------------------------------------------------------------------------------------------------------------------------------------------------------------------------------------------------------|
| pimiento              | <input type="radio"/> Nunca o menos 1 vez al mes<br><input checked="" type="radio"/> 1 a 3 veces mes<br><input type="radio"/> 1 vez semana<br><input type="radio"/> 2 a 4 veces semana<br><input type="radio"/> 5 a 6 veces semana<br><input type="radio"/> 1 vez al día<br><input type="radio"/> 2 a 3 veces al día<br><input type="radio"/> 5 a 6 veces al día<br><input type="radio"/> más 6 veces al día |
| alcachofa             | <input checked="" type="radio"/> Nunca o menos 1 vez al mes<br><input type="radio"/> 1 a 3 veces mes<br><input type="radio"/> 1 vez semana<br><input type="radio"/> 2 a 4 veces semana<br><input type="radio"/> 5 a 6 veces semana<br><input type="radio"/> 1 vez al día<br><input type="radio"/> 2 a 3 veces al día<br><input type="radio"/> 5 a 6 veces al día<br><input type="radio"/> más 6 veces al día |
| espárragos            | <input checked="" type="radio"/> Nunca o menos 1 vez al mes<br><input type="radio"/> 1 a 3 veces mes<br><input type="radio"/> 1 vez semana<br><input type="radio"/> 2 a 4 veces semana<br><input type="radio"/> 5 a 6 veces semana<br><input type="radio"/> 1 vez al día<br><input type="radio"/> 2 a 3 veces al día<br><input type="radio"/> 5 a 6 veces al día<br><input type="radio"/> más 6 veces al día |
| maíz hervido          | <input checked="" type="radio"/> Nunca o menos 1 vez al mes<br><input type="radio"/> 1 a 3 veces mes<br><input type="radio"/> 1 vez semana<br><input type="radio"/> 2 a 4 veces semana<br><input type="radio"/> 5 a 6 veces semana<br><input type="radio"/> 1 vez al día<br><input type="radio"/> 2 a 3 veces al día<br><input type="radio"/> 5 a 6 veces al día<br><input type="radio"/> más 6 veces al día |
| legumbres             | <input type="radio"/> Nunca o menos 1 vez al mes<br><input checked="" type="radio"/> 1 a 3 veces mes<br><input type="radio"/> 1 vez semana<br><input type="radio"/> 2 a 4 veces semana<br><input type="radio"/> 5 a 6 veces semana<br><input type="radio"/> 1 vez al día<br><input type="radio"/> 2 a 3 veces al día<br><input type="radio"/> 5 a 6 veces al día<br><input type="radio"/> más 6 veces al día |
| naranjas o mandarinas | <input type="radio"/> Nunca o menos 1 vez al mes<br><input type="radio"/> 1 a 3 veces mes<br><input type="radio"/> 1 vez semana<br><input checked="" type="radio"/> 2 a 4 veces semana<br><input type="radio"/> 5 a 6 veces semana<br><input type="radio"/> 1 vez al día<br><input type="radio"/> 2 a 3 veces al día<br><input type="radio"/> 5 a 6 veces al día<br><input type="radio"/> más 6 veces al día |

---

zum natural fruta

- ☐ Nunca o menos 1 vez al mes  
☒ 1 a 3 veces mes  
☐ 1 vez semana  
☐ 2 a 4 veces semana  
☐ 5 a 6 veces semana  
☐ 1 vez al día  
☐ 2 a 3 veces al día  
☐ 5 a 6 veces al día  
☐ más 6 veces al día

---

platano

- ☐ Nunca o menos 1 vez al mes  
☒ 1 a 3 veces mes  
☐ 1 vez semana  
☐ 2 a 4 veces semana  
☐ 5 a 6 veces semana  
☐ 1 vez al día  
☐ 2 a 3 veces al día  
☐ 5 a 6 veces al día  
☐ más 6 veces al día

---

manzana o pera

- ☐ Nunca o menos 1 vez al mes  
☐ 1 a 3 veces mes  
☒ 1 vez semana  
☐ 2 a 4 veces semana  
☐ 5 a 6 veces semana  
☐ 1 vez al día  
☐ 2 a 3 veces al día  
☐ 5 a 6 veces al día  
☐ más 6 veces al día

---

melocotón o nectarina

- ☐ Nunca o menos 1 vez al mes  
☒ 1 a 3 veces mes  
☐ 1 vez semana  
☐ 2 a 4 veces semana  
☐ 5 a 6 veces semana  
☐ 1 vez al día  
☐ 2 a 3 veces al día  
☐ 5 a 6 veces al día  
☐ más 6 veces al día

---

sandia o melon

- ☒ Nunca o menos 1 vez al mes  
☐ 1 a 3 veces mes  
☐ 1 vez semana  
☐ 2 a 4 veces semana  
☐ 5 a 6 veces semana  
☐ 1 vez al día  
☐ 2 a 3 veces al día  
☐ 5 a 6 veces al día  
☐ más 6 veces al día

---

uva

- ☒ Nunca o menos 1 vez al mes  
☐ 1 a 3 veces mes  
☐ 1 vez semana  
☐ 2 a 4 veces semana  
☐ 5 a 6 veces semana  
☐ 1 vez al día  
☐ 2 a 3 veces al día  
☐ 5 a 6 veces al día  
☐ más 6 veces al día



bruna o ciruela

- ☒ Nunca o menos 1 vez al mes  
☐ 1 a 3 veces mes  
☐ 1 vez semana  
☐ 2 a 4 veces semana  
☐ 5 a 6 veces semana  
☐ 1 vez al día  
☐ 2 a 3 veces al día  
☐ 5 a 6 veces al día  
☐ más 6 veces al día

kiwi

- ☒ Nunca o menos 1 vez al mes  
☐ 1 a 3 veces mes  
☐ 1 vez semana  
☐ 2 a 4 veces semana  
☐ 5 a 6 veces semana  
☐ 1 vez al día  
☐ 2 a 3 veces al día  
☐ 5 a 6 veces al día  
☐ más 6 veces al día

aceituna

- ☐ Nunca o menos 1 vez al mes  
☒ 1 a 3 veces mes  
☐ 1 vez semana  
☐ 2 a 4 veces semana  
☐ 5 a 6 veces semana  
☐ 1 vez al día  
☐ 2 a 3 veces al día  
☐ 5 a 6 veces al día  
☐ más 6 veces al día

frutos secos

- ☐ Nunca o menos 1 vez al mes  
☒ 1 a 3 veces mes  
☐ 1 vez semana  
☐ 2 a 4 veces semana  
☐ 5 a 6 veces semana  
☐ 1 vez al día  
☐ 2 a 3 veces al día  
☐ 5 a 6 veces al día  
☐ más 6 veces al día

pan blanco

- ☐ Nunca o menos 1 vez al mes  
☐ 1 a 3 veces mes  
☐ 1 vez semana  
☐ 2 a 4 veces semana  
☐ 5 a 6 veces semana  
☒ 1 vez al día  
☐ 2 a 3 veces al día  
☐ 5 a 6 veces al día  
☐ más 6 veces al día

pan integral

- ☒ Nunca o menos 1 vez al mes  
☐ 1 a 3 veces mes  
☐ 1 vez semana  
☐ 2 a 4 veces semana  
☐ 5 a 6 veces semana  
☐ 1 vez al día  
☐ 2 a 3 veces al día  
☐ 5 a 6 veces al día  
☐ más 6 veces al día

---

cereales desayuno

- ☐ Nunca o menos 1 vez al mes  
☐ 1 a 3 veces mes  
☐ 1 vez semana  
☐ 2 a 4 veces semana  
☐ 5 a 6 veces semana  
☒ 1 vez al día  
☐ 2 a 3 veces al día  
☐ 5 a 6 veces al día  
☐ más 6 veces al día

---

patatas fritas

- ☒ Nunca o menos 1 vez al mes  
☐ 1 a 3 veces mes  
☐ 1 vez semana  
☐ 2 a 4 veces semana  
☐ 5 a 6 veces semana  
☐ 1 vez al día  
☐ 2 a 3 veces al día  
☐ 5 a 6 veces al día  
☐ más 6 veces al día

---

patatas cocidas o asadas

- ☐ Nunca o menos 1 vez al mes  
☒ 1 a 3 veces mes  
☐ 1 vez semana  
☐ 2 a 4 veces semana  
☐ 5 a 6 veces semana  
☐ 1 vez al día  
☐ 2 a 3 veces al día  
☐ 5 a 6 veces al día  
☐ más 6 veces al día

---

bolsa papas

- ☒ Nunca o menos 1 vez al mes  
☐ 1 a 3 veces mes  
☐ 1 vez semana  
☐ 2 a 4 veces semana  
☐ 5 a 6 veces semana  
☐ 1 vez al día  
☐ 2 a 3 veces al día  
☐ 5 a 6 veces al día  
☐ más 6 veces al día

---

arroz cocinado

- ☐ Nunca o menos 1 vez al mes  
☐ 1 a 3 veces mes  
☒ 1 vez semana  
☐ 2 a 4 veces semana  
☐ 5 a 6 veces semana  
☐ 1 vez al día  
☐ 2 a 3 veces al día  
☐ 5 a 6 veces al día  
☐ más 6 veces al día

---

pasta

- ☐ Nunca o menos 1 vez al mes  
☐ 1 a 3 veces mes  
☒ 1 vez semana  
☐ 2 a 4 veces semana  
☐ 5 a 6 veces semana  
☐ 1 vez al día  
☐ 2 a 3 veces al día  
☐ 5 a 6 veces al día  
☐ más 6 veces al día

|                     |                                                                                                                                                                                                                                                                                                                                                                                                              |
|---------------------|--------------------------------------------------------------------------------------------------------------------------------------------------------------------------------------------------------------------------------------------------------------------------------------------------------------------------------------------------------------------------------------------------------------|
| pizza               | <input type="radio"/> Nunca o menos 1 vez al mes<br><input type="radio"/> 1 a 3 veces mes<br><input checked="" type="radio"/> 1 vez semana<br><input type="radio"/> 2 a 4 veces semana<br><input type="radio"/> 5 a 6 veces semana<br><input type="radio"/> 1 vez al día<br><input type="radio"/> 2 a 3 veces al día<br><input type="radio"/> 5 a 6 veces al día<br><input type="radio"/> más 6 veces al día |
| aceite oliva        | <input type="radio"/> Nunca o menos 1 vez al mes<br><input type="radio"/> 1 a 3 veces mes<br><input type="radio"/> 1 vez semana<br><input checked="" type="radio"/> 2 a 4 veces semana<br><input type="radio"/> 5 a 6 veces semana<br><input type="radio"/> 1 vez al día<br><input type="radio"/> 2 a 3 veces al día<br><input type="radio"/> 5 a 6 veces al día<br><input type="radio"/> más 6 veces al día |
| otros aceites       | <input checked="" type="radio"/> Nunca o menos 1 vez al mes<br><input type="radio"/> 1 a 3 veces mes<br><input type="radio"/> 1 vez semana<br><input type="radio"/> 2 a 4 veces semana<br><input type="radio"/> 5 a 6 veces semana<br><input type="radio"/> 1 vez al día<br><input type="radio"/> 2 a 3 veces al día<br><input type="radio"/> 5 a 6 veces al día<br><input type="radio"/> más 6 veces al día |
| margarina           | <input type="radio"/> Nunca o menos 1 vez al mes<br><input checked="" type="radio"/> 1 a 3 veces mes<br><input type="radio"/> 1 vez semana<br><input type="radio"/> 2 a 4 veces semana<br><input type="radio"/> 5 a 6 veces semana<br><input type="radio"/> 1 vez al día<br><input type="radio"/> 2 a 3 veces al día<br><input type="radio"/> 5 a 6 veces al día<br><input type="radio"/> más 6 veces al día |
| mantequilla         | <input checked="" type="radio"/> Nunca o menos 1 vez al mes<br><input type="radio"/> 1 a 3 veces mes<br><input type="radio"/> 1 vez semana<br><input type="radio"/> 2 a 4 veces semana<br><input type="radio"/> 5 a 6 veces semana<br><input type="radio"/> 1 vez al día<br><input type="radio"/> 2 a 3 veces al día<br><input type="radio"/> 5 a 6 veces al día<br><input type="radio"/> más 6 veces al día |
| galletas tipo maria | <input type="radio"/> Nunca o menos 1 vez al mes<br><input type="radio"/> 1 a 3 veces mes<br><input type="radio"/> 1 vez semana<br><input type="radio"/> 2 a 4 veces semana<br><input type="radio"/> 5 a 6 veces semana<br><input checked="" type="radio"/> 1 vez al día<br><input type="radio"/> 2 a 3 veces al día<br><input type="radio"/> 5 a 6 veces al día<br><input type="radio"/> más 6 veces al día |

|                           |                                                                                                                                                                                                                                                                                                                                                                                                              |
|---------------------------|--------------------------------------------------------------------------------------------------------------------------------------------------------------------------------------------------------------------------------------------------------------------------------------------------------------------------------------------------------------------------------------------------------------|
| galletas chocolate        | <input type="radio"/> Nunca o menos 1 vez al mes<br><input type="radio"/> 1 a 3 veces mes<br><input type="radio"/> 1 vez semana<br><input type="radio"/> 2 a 4 veces semana<br><input checked="" type="radio"/> 5 a 6 veces semana<br><input type="radio"/> 1 vez al día<br><input type="radio"/> 2 a 3 veces al día<br><input type="radio"/> 5 a 6 veces al día<br><input type="radio"/> más 6 veces al día |
| bollieria                 | <input type="radio"/> Nunca o menos 1 vez al mes<br><input type="radio"/> 1 a 3 veces mes<br><input type="radio"/> 1 vez semana<br><input type="radio"/> 2 a 4 veces semana<br><input type="radio"/> 5 a 6 veces semana<br><input checked="" type="radio"/> 1 vez al día<br><input type="radio"/> 2 a 3 veces al día<br><input type="radio"/> 5 a 6 veces al día<br><input type="radio"/> más 6 veces al día |
| chocolate o bombones      | <input type="radio"/> Nunca o menos 1 vez al mes<br><input type="radio"/> 1 a 3 veces mes<br><input type="radio"/> 1 vez semana<br><input type="radio"/> 2 a 4 veces semana<br><input type="radio"/> 5 a 6 veces semana<br><input checked="" type="radio"/> 1 vez al día<br><input type="radio"/> 2 a 3 veces al día<br><input type="radio"/> 5 a 6 veces al día<br><input type="radio"/> más 6 veces al día |
| chocolate polvo o colacao | <input type="radio"/> Nunca o menos 1 vez al mes<br><input type="radio"/> 1 a 3 veces mes<br><input type="radio"/> 1 vez semana<br><input type="radio"/> 2 a 4 veces semana<br><input type="radio"/> 5 a 6 veces semana<br><input checked="" type="radio"/> 1 vez al día<br><input type="radio"/> 2 a 3 veces al día<br><input type="radio"/> 5 a 6 veces al día<br><input type="radio"/> más 6 veces al día |
| vino tinto                | <input checked="" type="radio"/> Nunca o menos 1 vez al mes<br><input type="radio"/> 1 a 3 veces mes<br><input type="radio"/> 1 vez semana<br><input type="radio"/> 2 a 4 veces semana<br><input type="radio"/> 5 a 6 veces semana<br><input type="radio"/> 1 vez al día<br><input type="radio"/> 2 a 3 veces al día<br><input type="radio"/> 5 a 6 veces al día<br><input type="radio"/> más 6 veces al día |
| vino blanco               | <input checked="" type="radio"/> Nunca o menos 1 vez al mes<br><input type="radio"/> 1 a 3 veces mes<br><input type="radio"/> 1 vez semana<br><input type="radio"/> 2 a 4 veces semana<br><input type="radio"/> 5 a 6 veces semana<br><input type="radio"/> 1 vez al día<br><input type="radio"/> 2 a 3 veces al día<br><input type="radio"/> 5 a 6 veces al día<br><input type="radio"/> más 6 veces al día |

---

|                    |                                                                                                                                                                                                                                                                                                                                                                                                              |
|--------------------|--------------------------------------------------------------------------------------------------------------------------------------------------------------------------------------------------------------------------------------------------------------------------------------------------------------------------------------------------------------------------------------------------------------|
| vino seco o vermut | <input checked="" type="radio"/> Nunca o menos 1 vez al mes<br><input type="radio"/> 1 a 3 veces mes<br><input type="radio"/> 1 vez semana<br><input type="radio"/> 2 a 4 veces semana<br><input type="radio"/> 5 a 6 veces semana<br><input type="radio"/> 1 vez al día<br><input type="radio"/> 2 a 3 veces al día<br><input type="radio"/> 5 a 6 veces al día<br><input type="radio"/> más 6 veces al día |
|--------------------|--------------------------------------------------------------------------------------------------------------------------------------------------------------------------------------------------------------------------------------------------------------------------------------------------------------------------------------------------------------------------------------------------------------|

---

|         |                                                                                                                                                                                                                                                                                                                                                                                                              |
|---------|--------------------------------------------------------------------------------------------------------------------------------------------------------------------------------------------------------------------------------------------------------------------------------------------------------------------------------------------------------------------------------------------------------------|
| cerveza | <input type="radio"/> Nunca o menos 1 vez al mes<br><input checked="" type="radio"/> 1 a 3 veces mes<br><input type="radio"/> 1 vez semana<br><input type="radio"/> 2 a 4 veces semana<br><input type="radio"/> 5 a 6 veces semana<br><input type="radio"/> 1 vez al día<br><input type="radio"/> 2 a 3 veces al día<br><input type="radio"/> 5 a 6 veces al día<br><input type="radio"/> más 6 veces al día |
|---------|--------------------------------------------------------------------------------------------------------------------------------------------------------------------------------------------------------------------------------------------------------------------------------------------------------------------------------------------------------------------------------------------------------------|

---

|                     |                                                                                                                                                                                                                                                                                                                                                                                                              |
|---------------------|--------------------------------------------------------------------------------------------------------------------------------------------------------------------------------------------------------------------------------------------------------------------------------------------------------------------------------------------------------------------------------------------------------------|
| cerveza sin alcohol | <input type="radio"/> Nunca o menos 1 vez al mes<br><input checked="" type="radio"/> 1 a 3 veces mes<br><input type="radio"/> 1 vez semana<br><input type="radio"/> 2 a 4 veces semana<br><input type="radio"/> 5 a 6 veces semana<br><input type="radio"/> 1 vez al día<br><input type="radio"/> 2 a 3 veces al día<br><input type="radio"/> 5 a 6 veces al día<br><input type="radio"/> más 6 veces al día |
|---------------------|--------------------------------------------------------------------------------------------------------------------------------------------------------------------------------------------------------------------------------------------------------------------------------------------------------------------------------------------------------------------------------------------------------------|

---

|         |                                                                                                                                                                                                                                                                                                                                                                                                              |
|---------|--------------------------------------------------------------------------------------------------------------------------------------------------------------------------------------------------------------------------------------------------------------------------------------------------------------------------------------------------------------------------------------------------------------|
| licores | <input checked="" type="radio"/> Nunca o menos 1 vez al mes<br><input type="radio"/> 1 a 3 veces mes<br><input type="radio"/> 1 vez semana<br><input type="radio"/> 2 a 4 veces semana<br><input type="radio"/> 5 a 6 veces semana<br><input type="radio"/> 1 vez al día<br><input type="radio"/> 2 a 3 veces al día<br><input type="radio"/> 5 a 6 veces al día<br><input type="radio"/> más 6 veces al día |
|---------|--------------------------------------------------------------------------------------------------------------------------------------------------------------------------------------------------------------------------------------------------------------------------------------------------------------------------------------------------------------------------------------------------------------|

---

|                       |                                                                                                                                                                                                                                                                                                                                                                                                              |
|-----------------------|--------------------------------------------------------------------------------------------------------------------------------------------------------------------------------------------------------------------------------------------------------------------------------------------------------------------------------------------------------------------------------------------------------------|
| ginebra o ron o vodka | <input checked="" type="radio"/> Nunca o menos 1 vez al mes<br><input type="radio"/> 1 a 3 veces mes<br><input type="radio"/> 1 vez semana<br><input type="radio"/> 2 a 4 veces semana<br><input type="radio"/> 5 a 6 veces semana<br><input type="radio"/> 1 vez al día<br><input type="radio"/> 2 a 3 veces al día<br><input type="radio"/> 5 a 6 veces al día<br><input type="radio"/> más 6 veces al día |
|-----------------------|--------------------------------------------------------------------------------------------------------------------------------------------------------------------------------------------------------------------------------------------------------------------------------------------------------------------------------------------------------------------------------------------------------------|

---

|                 |                                                                                                                                                                                                                                                                                                                                                                                                              |
|-----------------|--------------------------------------------------------------------------------------------------------------------------------------------------------------------------------------------------------------------------------------------------------------------------------------------------------------------------------------------------------------------------------------------------------------|
| refresco normal | <input checked="" type="radio"/> Nunca o menos 1 vez al mes<br><input type="radio"/> 1 a 3 veces mes<br><input type="radio"/> 1 vez semana<br><input type="radio"/> 2 a 4 veces semana<br><input type="radio"/> 5 a 6 veces semana<br><input type="radio"/> 1 vez al día<br><input type="radio"/> 2 a 3 veces al día<br><input type="radio"/> 5 a 6 veces al día<br><input type="radio"/> más 6 veces al día |
|-----------------|--------------------------------------------------------------------------------------------------------------------------------------------------------------------------------------------------------------------------------------------------------------------------------------------------------------------------------------------------------------------------------------------------------------|

---

|                           |                                                                                                                                                                                                                                                                                                                                                                                                              |
|---------------------------|--------------------------------------------------------------------------------------------------------------------------------------------------------------------------------------------------------------------------------------------------------------------------------------------------------------------------------------------------------------------------------------------------------------|
| refresco sin azúcar       | <input checked="" type="radio"/> Nunca o menos 1 vez al mes<br><input type="radio"/> 1 a 3 veces mes<br><input type="radio"/> 1 vez semana<br><input type="radio"/> 2 a 4 veces semana<br><input type="radio"/> 5 a 6 veces semana<br><input type="radio"/> 1 vez al día<br><input type="radio"/> 2 a 3 veces al día<br><input type="radio"/> 5 a 6 veces al día<br><input type="radio"/> más 6 veces al día |
| Agua del grifo            | <input checked="" type="radio"/> Nunca o menos 1 vez al mes<br><input type="radio"/> 1 a 3 veces mes<br><input type="radio"/> 1 vez semana<br><input type="radio"/> 2 a 4 veces semana<br><input type="radio"/> 5 a 6 veces semana<br><input type="radio"/> 1 vez al día<br><input type="radio"/> 2 a 3 veces al día<br><input type="radio"/> 5 a 6 veces al día<br><input type="radio"/> más 6 veces al día |
| agua embotellada sin gas  | <input type="radio"/> Nunca o menos 1 vez al mes<br><input type="radio"/> 1 a 3 veces mes<br><input type="radio"/> 1 vez semana<br><input type="radio"/> 2 a 4 veces semana<br><input type="radio"/> 5 a 6 veces semana<br><input type="radio"/> 1 vez al día<br><input type="radio"/> 2 a 3 veces al día<br><input checked="" type="radio"/> 5 a 6 veces al día<br><input type="radio"/> más 6 veces al día |
| agua embotellada con gas  | <input checked="" type="radio"/> Nunca o menos 1 vez al mes<br><input type="radio"/> 1 a 3 veces mes<br><input type="radio"/> 1 vez semana<br><input type="radio"/> 2 a 4 veces semana<br><input type="radio"/> 5 a 6 veces semana<br><input type="radio"/> 1 vez al día<br><input type="radio"/> 2 a 3 veces al día<br><input type="radio"/> 5 a 6 veces al día<br><input type="radio"/> más 6 veces al día |
| zumos frutas embotellados | <input checked="" type="radio"/> Nunca o menos 1 vez al mes<br><input type="radio"/> 1 a 3 veces mes<br><input type="radio"/> 1 vez semana<br><input type="radio"/> 2 a 4 veces semana<br><input type="radio"/> 5 a 6 veces semana<br><input type="radio"/> 1 vez al día<br><input type="radio"/> 2 a 3 veces al día<br><input type="radio"/> 5 a 6 veces al día<br><input type="radio"/> más 6 veces al día |
| café                      | <input checked="" type="radio"/> Nunca o menos 1 vez al mes<br><input type="radio"/> 1 a 3 veces mes<br><input type="radio"/> 1 vez semana<br><input type="radio"/> 2 a 4 veces semana<br><input type="radio"/> 5 a 6 veces semana<br><input type="radio"/> 1 vez al día<br><input type="radio"/> 2 a 3 veces al día<br><input type="radio"/> 5 a 6 veces al día<br><input type="radio"/> más 6 veces al día |

|                       |                                                                                                                                                                                                                                                                                                                                                                                                              |
|-----------------------|--------------------------------------------------------------------------------------------------------------------------------------------------------------------------------------------------------------------------------------------------------------------------------------------------------------------------------------------------------------------------------------------------------------|
| cafe descafeinado     | <input type="radio"/> Nunca o menos 1 vez al mes<br><input type="radio"/> 1 a 3 veces mes<br><input type="radio"/> 1 vez semana<br><input type="radio"/> 2 a 4 veces semana<br><input type="radio"/> 5 a 6 veces semana<br><input checked="" type="radio"/> 1 vez al día<br><input type="radio"/> 2 a 3 veces al día<br><input type="radio"/> 5 a 6 veces al día<br><input type="radio"/> más 6 veces al día |
| te o infusión         | <input type="radio"/> Nunca o menos 1 vez al mes<br><input checked="" type="radio"/> 1 a 3 veces mes<br><input type="radio"/> 1 vez semana<br><input type="radio"/> 2 a 4 veces semana<br><input type="radio"/> 5 a 6 veces semana<br><input type="radio"/> 1 vez al día<br><input type="radio"/> 2 a 3 veces al día<br><input type="radio"/> 5 a 6 veces al día<br><input type="radio"/> más 6 veces al día |
| sopa o puré verduras  | <input type="radio"/> Nunca o menos 1 vez al mes<br><input checked="" type="radio"/> 1 a 3 veces mes<br><input type="radio"/> 1 vez semana<br><input type="radio"/> 2 a 4 veces semana<br><input type="radio"/> 5 a 6 veces semana<br><input type="radio"/> 1 vez al día<br><input type="radio"/> 2 a 3 veces al día<br><input type="radio"/> 5 a 6 veces al día<br><input type="radio"/> más 6 veces al día |
| croquetas pollo jamón | <input type="radio"/> Nunca o menos 1 vez al mes<br><input checked="" type="radio"/> 1 a 3 veces mes<br><input type="radio"/> 1 vez semana<br><input type="radio"/> 2 a 4 veces semana<br><input type="radio"/> 5 a 6 veces semana<br><input type="radio"/> 1 vez al día<br><input type="radio"/> 2 a 3 veces al día<br><input type="radio"/> 5 a 6 veces al día<br><input type="radio"/> más 6 veces al día |
| croquetas pescado     | <input checked="" type="radio"/> Nunca o menos 1 vez al mes<br><input type="radio"/> 1 a 3 veces mes<br><input type="radio"/> 1 vez semana<br><input type="radio"/> 2 a 4 veces semana<br><input type="radio"/> 5 a 6 veces semana<br><input type="radio"/> 1 vez al día<br><input type="radio"/> 2 a 3 veces al día<br><input type="radio"/> 5 a 6 veces al día<br><input type="radio"/> más 6 veces al día |
| mayonesa              | <input checked="" type="radio"/> Nunca o menos 1 vez al mes<br><input type="radio"/> 1 a 3 veces mes<br><input type="radio"/> 1 vez semana<br><input type="radio"/> 2 a 4 veces semana<br><input type="radio"/> 5 a 6 veces semana<br><input type="radio"/> 1 vez al día<br><input type="radio"/> 2 a 3 veces al día<br><input type="radio"/> 5 a 6 veces al día<br><input type="radio"/> más 6 veces al día |

---

salsa tomate

- ☐ Nunca o menos 1 vez al mes  
☒ 1 a 3 veces mes  
☐ 1 vez semana  
☐ 2 a 4 veces semana  
☐ 5 a 6 veces semana  
☐ 1 vez al día  
☐ 2 a 3 veces al día  
☐ 5 a 6 veces al día  
☐ más 6 veces al día

---

ketchup

- ☒ Nunca o menos 1 vez al mes  
☐ 1 a 3 veces mes  
☐ 1 vez semana  
☐ 2 a 4 veces semana  
☐ 5 a 6 veces semana  
☐ 1 vez al día  
☐ 2 a 3 veces al día  
☐ 5 a 6 veces al día  
☐ más 6 veces al día

---

sal

- ☐ Nunca o menos 1 vez al mes  
☐ 1 a 3 veces mes  
☐ 1 vez semana  
☐ 2 a 4 veces semana  
☐ 5 a 6 veces semana  
☒ 1 vez al día  
☐ 2 a 3 veces al día  
☐ 5 a 6 veces al día  
☐ más 6 veces al día

---

ajo

- ☐ Nunca o menos 1 vez al mes  
☒ 1 a 3 veces mes  
☐ 1 vez semana  
☐ 2 a 4 veces semana  
☐ 5 a 6 veces semana  
☐ 1 vez al día  
☐ 2 a 3 veces al día  
☐ 5 a 6 veces al día  
☐ más 6 veces al día

---

mermelada o miel

- ☐ Nunca o menos 1 vez al mes  
☒ 1 a 3 veces mes  
☐ 1 vez semana  
☐ 2 a 4 veces semana  
☐ 5 a 6 veces semana  
☐ 1 vez al día  
☐ 2 a 3 veces al día  
☐ 5 a 6 veces al día  
☐ más 6 veces al día

---

azúcar

- ☐ Nunca o menos 1 vez al mes  
☐ 1 a 3 veces mes  
☐ 1 vez semana  
☐ 2 a 4 veces semana  
☐ 5 a 6 veces semana  
☒ 1 vez al día  
☐ 2 a 3 veces al día  
☐ 5 a 6 veces al día  
☐ más 6 veces al día



|                                       |                                                                                                                                                                                                                                                                                                                                                                                                                                                                                                                               |
|---------------------------------------|-------------------------------------------------------------------------------------------------------------------------------------------------------------------------------------------------------------------------------------------------------------------------------------------------------------------------------------------------------------------------------------------------------------------------------------------------------------------------------------------------------------------------------|
| Otro alimento                         |                                                                                                                                                                                                                                                                                                                                                                                                                                                                                                                               |
| suplementos vitamínicos               | <input type="radio"/> si<br><input checked="" type="radio"/> no                                                                                                                                                                                                                                                                                                                                                                                                                                                               |
| suplementos vitamínicos               | [*DATA REMOVED*]                                                                                                                                                                                                                                                                                                                                                                                                                                                                                                              |
| dieta previa                          | <input type="radio"/> si<br><input checked="" type="radio"/> no                                                                                                                                                                                                                                                                                                                                                                                                                                                               |
| motivo dieta                          | <input checked="" type="radio"/> no dieta<br><input type="radio"/> control peso<br><input type="radio"/> control colesterol<br><input type="radio"/> control diabetes<br><input type="radio"/> problemas estómago<br><input type="radio"/> problemas vesícula o hepáticos<br><input type="radio"/> HTA o cardiopatía<br><input type="radio"/> problemas renales<br><input type="radio"/> alergia alimentaria<br><input type="radio"/> ácido úrico elevado<br><input type="radio"/> vegetariana<br><input type="radio"/> otros |
| cambio alimentos año previo gestación | <input type="radio"/> si<br><input checked="" type="radio"/> no                                                                                                                                                                                                                                                                                                                                                                                                                                                               |
| cambio lácteos                        | <input type="radio"/> eliminado<br><input type="radio"/> disminuido<br><input checked="" type="radio"/> igual<br><input type="radio"/> aumentado<br><input type="radio"/> no sabe                                                                                                                                                                                                                                                                                                                                             |
| cambio huevos                         | <input type="radio"/> eliminado<br><input type="radio"/> disminuido<br><input checked="" type="radio"/> igual<br><input type="radio"/> aumentado<br><input type="radio"/> no sabe                                                                                                                                                                                                                                                                                                                                             |
| cambio carne                          | <input type="radio"/> eliminado<br><input type="radio"/> disminuido<br><input checked="" type="radio"/> igual<br><input type="radio"/> aumentado<br><input type="radio"/> no sabe                                                                                                                                                                                                                                                                                                                                             |
| cambio pescado                        | <input type="radio"/> eliminado<br><input type="radio"/> disminuido<br><input checked="" type="radio"/> igual<br><input type="radio"/> aumentado<br><input type="radio"/> no sabe                                                                                                                                                                                                                                                                                                                                             |
| cambio verduras                       | <input type="radio"/> eliminado<br><input type="radio"/> disminuido<br><input checked="" type="radio"/> igual<br><input type="radio"/> aumentado<br><input type="radio"/> no sabe                                                                                                                                                                                                                                                                                                                                             |

|                            |                                                                                                                                                                                                                        |
|----------------------------|------------------------------------------------------------------------------------------------------------------------------------------------------------------------------------------------------------------------|
| cambio legumbres           | <input type="radio"/> eliminado<br><input type="radio"/> disminuido<br><input checked="" type="radio"/> igual<br><input type="radio"/> aumentado<br><input type="radio"/> no sabe                                      |
| cambio fruta               | <input type="radio"/> eliminado<br><input type="radio"/> disminuido<br><input checked="" type="radio"/> igual<br><input type="radio"/> aumentado<br><input type="radio"/> no sabe                                      |
| cambio pan                 | <input type="radio"/> eliminado<br><input type="radio"/> disminuido<br><input checked="" type="radio"/> igual<br><input type="radio"/> aumentado<br><input type="radio"/> no sabe                                      |
| cambio aceite oliva        | <input type="radio"/> eliminado<br><input type="radio"/> disminuido<br><input checked="" type="radio"/> igual<br><input type="radio"/> aumentado<br><input type="radio"/> no sabe                                      |
| cambio mante o margarina   | <input type="radio"/> eliminado<br><input type="radio"/> disminuido<br><input checked="" type="radio"/> igual<br><input type="radio"/> aumentado<br><input type="radio"/> no sabe                                      |
| cambio azúcar y dulces     | <input type="radio"/> eliminado<br><input type="radio"/> disminuido<br><input checked="" type="radio"/> igual<br><input type="radio"/> aumentado<br><input type="radio"/> no sabe                                      |
| cambio bebidas alcohólicas | <input type="radio"/> eliminado<br><input type="radio"/> disminuido<br><input checked="" type="radio"/> igual<br><input type="radio"/> aumentado<br><input type="radio"/> no sabe                                      |
| frecuencia comidas fritas  | <input type="radio"/> a diario<br><input type="radio"/> 5 a 6 veces semana<br><input checked="" type="radio"/> 2 a 4 veces semana<br><input type="radio"/> 1 vez semana<br><input type="radio"/> menos de 1 vez semana |
| carne                      | <input type="radio"/> no como<br><input type="radio"/> cruda<br><input type="radio"/> poco hecha<br><input checked="" type="radio"/> hecha<br><input type="radio"/> muy hecha                                          |
| grasa visible carne        | <input checked="" type="radio"/> quita toda<br><input type="radio"/> quita mayoría<br><input type="radio"/> quita un poco<br><input type="radio"/> no quita nada                                                       |

|                                |                                                                                                                                                                                                                                                          |
|--------------------------------|----------------------------------------------------------------------------------------------------------------------------------------------------------------------------------------------------------------------------------------------------------|
| cocina carne                   | <input checked="" type="radio"/> a la plancha<br><input type="radio"/> a la parrilla<br><input type="radio"/> asada<br><input type="radio"/> frita<br><input type="radio"/> guisada                                                                      |
| tostado quemado carne          | <input type="radio"/> nunca<br><input checked="" type="radio"/> 1 vez mes<br><input type="radio"/> 2 a 3 veces mes<br><input type="radio"/> 1 vez semana<br><input type="radio"/> 2 a 3 semanas                                                          |
| tostado quemado pescado        | <input type="radio"/> nunca<br><input checked="" type="radio"/> 1 vez mes<br><input type="radio"/> 2 a 3 veces mes<br><input type="radio"/> 1 vez semana<br><input type="radio"/> 2 a 3 semanas                                                          |
| socarrat paella                | <input type="radio"/> nunca<br><input checked="" type="radio"/> 1 vez mes<br><input type="radio"/> 2 a 3 veces mes<br><input type="radio"/> 1 vez semana<br><input type="radio"/> 2 a 3 semanas                                                          |
| grasa o aceite cocinar         | <input type="radio"/> mantequilla<br><input type="radio"/> margarina<br><input checked="" type="radio"/> aceite oliva<br><input type="radio"/> aceite oliva virgen extra<br><input type="radio"/> aceite vegetal<br><input type="radio"/> mezcla aceites |
| grasa aceite aliñar            | <input type="radio"/> mantequilla<br><input type="radio"/> margarina<br><input checked="" type="radio"/> aceite oliva<br><input type="radio"/> aceite oliva virgen extra<br><input type="radio"/> aceite vegetal<br><input type="radio"/> mezcla aceites |
| grasa aceite freir             | <input type="radio"/> mantequilla<br><input type="radio"/> margarina<br><input type="radio"/> aceite oliva<br><input type="radio"/> aceite oliva virgen extra<br><input checked="" type="radio"/> aceite vegetal<br><input type="radio"/> mezcla aceites |
| Ejercicio cuestionario         | <input checked="" type="radio"/> si<br><input type="radio"/> no                                                                                                                                                                                          |
| horas de sueño incluido siesta | [*DATA REMOVED*]                                                                                                                                                                                                                                         |
| minutos siesta                 | [*DATA REMOVED*]                                                                                                                                                                                                                                         |
| horas televisión semana        | [*DATA REMOVED*]                                                                                                                                                                                                                                         |

|                                        |                                                                                                                                                                                                                                                                                                                                                                           |
|----------------------------------------|---------------------------------------------------------------------------------------------------------------------------------------------------------------------------------------------------------------------------------------------------------------------------------------------------------------------------------------------------------------------------|
| actividad trabajo                      | <input type="radio"/> casi siempre sentado<br><input type="radio"/> sentado 50 por cien<br><input type="radio"/> casi siempre de pie, quieto<br><input checked="" type="radio"/> casi siempre levantado caminando y llevando pocas cosas<br><input type="radio"/> casi siempre levantado, caminando y llevado muchas cosas<br><input type="radio"/> trabajo manual pesado |
| tiempo caminar o bici al día           | <input type="radio"/> casi nunca<br><input type="radio"/> menos 20min día<br><input checked="" type="radio"/> 20 a 40 min día<br><input type="radio"/> 40 a 60 min día<br><input type="radio"/> 1h o 1h y media día<br><input type="radio"/> más de 1h y media al día                                                                                                     |
| tiempo tareas casa al día              | <input type="radio"/> menos de 1h día<br><input checked="" type="radio"/> 1 a 2h día<br><input type="radio"/> 3 a 4h día<br><input type="radio"/> 5 a 6h día<br><input type="radio"/> 7 a 8h día<br><input type="radio"/> más de 8h día                                                                                                                                   |
| tiempo libre televisión ordenador leer | <input checked="" type="radio"/> menos 1h día<br><input type="radio"/> 1h día<br><input type="radio"/> 2h día<br><input type="radio"/> 3h día<br><input type="radio"/> 4h día<br><input type="radio"/> 5 a 6h día<br><input type="radio"/> mas 6h día                                                                                                                     |
| tiempo libre ejercicio o deporte       | <input checked="" type="radio"/> menos 1h semana<br><input type="radio"/> 1h semana<br><input type="radio"/> 2h semana<br><input type="radio"/> 3h semana<br><input type="radio"/> 4 a 5h semana<br><input type="radio"/> mas 5h semana                                                                                                                                   |
| como se considera                      | <input type="radio"/> sedentaria<br><input type="radio"/> poco activa<br><input type="radio"/> moderadamente activa<br><input checked="" type="radio"/> bastante activa<br><input type="radio"/> muy activa<br><input type="radio"/> no sabe                                                                                                                              |
| FUR                                    | [*DATA REMOVED*]                                                                                                                                                                                                                                                                                                                                                          |
| Semanas gestación 2T                   | [*DATA REMOVED*]                                                                                                                                                                                                                                                                                                                                                          |
| Días gestación 2T                      | [*DATA REMOVED*]                                                                                                                                                                                                                                                                                                                                                          |
| DBP 2T                                 | [*DATA REMOVED*]                                                                                                                                                                                                                                                                                                                                                          |
| CC 2T                                  | [*DATA REMOVED*]                                                                                                                                                                                                                                                                                                                                                          |
| AC 2T                                  | [*DATA REMOVED*]                                                                                                                                                                                                                                                                                                                                                          |

|                                                   |                                                                                                                                                                                                 |
|---------------------------------------------------|-------------------------------------------------------------------------------------------------------------------------------------------------------------------------------------------------|
| LF 2T                                             | [*DATA REMOVED*]                                                                                                                                                                                |
| PFE 2T (Hadlock)                                  | [*DATA REMOVED*]                                                                                                                                                                                |
| Semanas gestación 3T                              | [*DATA REMOVED*]                                                                                                                                                                                |
| días 3T                                           | [*DATA REMOVED*]                                                                                                                                                                                |
| DBP 3T                                            | [*DATA REMOVED*]                                                                                                                                                                                |
| CC 3T                                             | [*DATA REMOVED*]                                                                                                                                                                                |
| AC 3T                                             | [*DATA REMOVED*]                                                                                                                                                                                |
| LF 3T                                             | [*DATA REMOVED*]                                                                                                                                                                                |
| PFE 3T (Hadlock)                                  | [*DATA REMOVED*]                                                                                                                                                                                |
| Semanas de gestación final                        | [*DATA REMOVED*]                                                                                                                                                                                |
| días gestación final                              | [*DATA REMOVED*]                                                                                                                                                                                |
| Localización placenta                             | <input type="radio"/> anterior<br><input type="radio"/> lateral derecha<br><input type="radio"/> lateral izquierda<br><input type="radio"/> posterior<br><input checked="" type="radio"/> fondo |
| Presentación longitudinal cefálica                | <input type="radio"/> no<br><input checked="" type="radio"/> si                                                                                                                                 |
| Dorso                                             | <input checked="" type="radio"/> izquierda anterior<br><input type="radio"/> izquierda posterior<br><input type="radio"/> derecha anterior<br><input type="radio"/> derecha posterior           |
| diámetro biparietal                               | [*DATA REMOVED*]                                                                                                                                                                                |
| Circunferencia craneal                            | [*DATA REMOVED*]                                                                                                                                                                                |
| Circunferencia abdominal                          | [*DATA REMOVED*]                                                                                                                                                                                |
| Longitud de femur                                 | [*DATA REMOVED*]                                                                                                                                                                                |
| tejido celular subcutáneo a nivel del muslo en mm | [*DATA REMOVED*]                                                                                                                                                                                |
| tejido celular subcutáneo en abdomen en mm        | [*DATA REMOVED*]                                                                                                                                                                                |
| Volumen del muslo en cm3                          | [*DATA REMOVED*]                                                                                                                                                                                |
| Peso fetal estimado según fórmula de Hadlock      | [*DATA REMOVED*]                                                                                                                                                                                |

|                                               |                                                                                                                                                          |
|-----------------------------------------------|----------------------------------------------------------------------------------------------------------------------------------------------------------|
| Percentil                                     | [*DATA REMOVED*]                                                                                                                                         |
| Peso fetal estimado según fórmula de Scioscia | <hr/>                                                                                                                                                    |
| Peso fetal estimado según fórmula de LEE      | <hr/>                                                                                                                                                    |
| Tipo de parto                                 | <input checked="" type="radio"/> eutocico<br><input type="radio"/> instrumentado/ventosa<br><input type="radio"/> cesarea                                |
| fecha de nacimiento                           | [*DATA REMOVED*]                                                                                                                                         |
| Días entre exploración y nacimiento           | [*DATA REMOVED*]                                                                                                                                         |
| Peso RN en g                                  | [*DATA REMOVED*]                                                                                                                                         |
| sexo                                          | <input checked="" type="radio"/> mujer<br><input type="radio"/> hombre                                                                                   |
| Apgar 1 minuto                                | [*DATA REMOVED*]                                                                                                                                         |
| Apgar 5 minutos                               | [*DATA REMOVED*]                                                                                                                                         |
| Apgar 10 minutos                              | <hr/>                                                                                                                                                    |
| antecedente Covid durante gestación           | <input type="radio"/> Yes<br><input checked="" type="radio"/> No                                                                                         |
| Nivel de estudios                             | <input type="radio"/> ninguno<br><input type="radio"/> primarios<br><input checked="" type="radio"/> secundarios<br><input type="radio"/> universitarios |

# Base\_datos\_estimacion\_peso\_fetal

|                                       |                                                                                                                                                                                                                                                                                      |
|---------------------------------------|--------------------------------------------------------------------------------------------------------------------------------------------------------------------------------------------------------------------------------------------------------------------------------------|
| Número de identificación participante | 3                                                                                                                                                                                                                                                                                    |
| CODIGO PARTICIPANTE                   |                                                                                                                                                                                                                                                                                      |
| Edad                                  | [*DATA REMOVED*]                                                                                                                                                                                                                                                                     |
| Gestaciones                           | <input type="radio"/> 1<br><input type="radio"/> 2<br><input type="radio"/> 3<br><input checked="" type="radio"/> mas de 3                                                                                                                                                           |
| partos                                | <input type="radio"/> 0<br><input type="radio"/> 1<br><input checked="" type="radio"/> 2<br><input type="radio"/> 3<br><input type="radio"/> mas de 3                                                                                                                                |
| cesáreas                              | <input type="radio"/> 0<br><input type="radio"/> 1<br><input type="radio"/> 2<br><input type="radio"/> 3<br><input type="radio"/> mas de 3                                                                                                                                           |
| Abortos                               | <input type="radio"/> 0<br><input checked="" type="radio"/> 1<br><input type="radio"/> 2<br><input type="radio"/> 3<br><input type="radio"/> mas de 3                                                                                                                                |
| Tipo de gestacion                     | <input checked="" type="radio"/> espontanea<br><input type="radio"/> IAC inseminación artificial conyuge<br><input type="radio"/> IAD inseminación artificial donante<br><input type="radio"/> FIV Fecundación in Vitro<br><input type="radio"/> Ovodon FIV con donación de ovocitos |
| peso previo a embarazo                | [*DATA REMOVED*]                                                                                                                                                                                                                                                                     |
| Ganancia ponderal embarazo            | [*DATA REMOVED*]                                                                                                                                                                                                                                                                     |
| Talla madre                           | [*DATA REMOVED*]                                                                                                                                                                                                                                                                     |
| IMC previo embarazo                   | 26.666666666666668                                                                                                                                                                                                                                                                   |
| Patología obstétrica                  | <input checked="" type="radio"/> no<br><input type="radio"/> si                                                                                                                                                                                                                      |
| Diabetes pregestacional               | <input checked="" type="radio"/> no<br><input type="radio"/> si                                                                                                                                                                                                                      |
| Diabetes gestacional                  | <input type="radio"/> no<br><input checked="" type="radio"/> si                                                                                                                                                                                                                      |

|                                            |                                                                                                                                                                                      |
|--------------------------------------------|--------------------------------------------------------------------------------------------------------------------------------------------------------------------------------------|
| Diabetes gestacional con insulina          | <input type="radio"/> no<br><input checked="" type="radio"/> si                                                                                                                      |
| Diabetes gestacional con dieta y ejercicio | <input type="radio"/> no<br><input checked="" type="radio"/> si                                                                                                                      |
| Percentil fetos previos                    | <input type="radio"/> Nada<br><input checked="" type="radio"/> percentil menor de 10<br><input type="radio"/> percentil entre 10 y 90<br><input type="radio"/> percentil mayor de 90 |
| Exfumadora                                 | <input checked="" type="radio"/> Nada<br><input type="radio"/> menos de 5 años<br><input type="radio"/> 5 a 10 años<br><input type="radio"/> mayor o igual a 10 años                 |
| Hábito tabáquico                           | <input checked="" type="radio"/> no<br><input type="radio"/> si                                                                                                                      |
| fumadora                                   | [*DATA REMOVED*]                                                                                                                                                                     |
| Consumo otros tóxicos                      | <input checked="" type="radio"/> no<br><input type="radio"/> si                                                                                                                      |
| Hb 1T                                      | [*DATA REMOVED*]                                                                                                                                                                     |
| Htc 1T                                     | [*DATA REMOVED*]                                                                                                                                                                     |
| Hb 2T                                      | [*DATA REMOVED*]                                                                                                                                                                     |
| HTC 2T                                     | [*DATA REMOVED*]                                                                                                                                                                     |
| Hb 3T                                      | [*DATA REMOVED*]                                                                                                                                                                     |
| HTC 3T                                     | [*DATA REMOVED*]                                                                                                                                                                     |
| Suplemento FE oral                         | <input checked="" type="radio"/> si<br><input type="radio"/> no                                                                                                                      |
| Suplemento fe iv                           | <input type="radio"/> si<br><input checked="" type="radio"/> no                                                                                                                      |
| Transfusión                                | <input checked="" type="radio"/> no<br><input type="radio"/> si                                                                                                                      |
| Solicitada Vit D                           | <input checked="" type="radio"/> no<br><input type="radio"/> si                                                                                                                      |
| Deficit vit D                              | <input checked="" type="radio"/> no<br><input type="radio"/> si                                                                                                                      |
| Suplemento vit D                           | <input type="radio"/> si<br><input checked="" type="radio"/> no                                                                                                                      |



|                       |                                                                                                                                                                                                                                                                                                                                                                                                              |
|-----------------------|--------------------------------------------------------------------------------------------------------------------------------------------------------------------------------------------------------------------------------------------------------------------------------------------------------------------------------------------------------------------------------------------------------------|
| Dieta, cuestionario   | <input checked="" type="radio"/> sí<br><input type="radio"/> no                                                                                                                                                                                                                                                                                                                                              |
| Leche entera          | <input type="radio"/> Nunca o menos 1 vez al mes<br><input type="radio"/> 1 a 3 veces mes<br><input type="radio"/> 1 vez semana<br><input type="radio"/> 2 a 4 veces semana<br><input type="radio"/> 5 a 6 veces semana<br><input checked="" type="radio"/> 1 vez al día<br><input type="radio"/> 2 a 3 veces al día<br><input type="radio"/> 5 a 6 veces al día<br><input type="radio"/> más 6 veces al día |
| Leche semidesnatada   | <input type="radio"/> Nunca o menos 1 vez al mes<br><input type="radio"/> 1 a 3 veces mes<br><input type="radio"/> 1 vez semana<br><input type="radio"/> 2 a 4 veces semana<br><input type="radio"/> 5 a 6 veces semana<br><input checked="" type="radio"/> 1 vez al día<br><input type="radio"/> 2 a 3 veces al día<br><input type="radio"/> 5 a 6 veces al día<br><input type="radio"/> mas 6 veces al día |
| Leche desnatada       | <input checked="" type="radio"/> Nunca o menos 1 vez al mes<br><input type="radio"/> 1 a 3 veces mes<br><input type="radio"/> 1 vez semana<br><input type="radio"/> 2 a 4 veces semana<br><input type="radio"/> 5 a 6 veces semana<br><input type="radio"/> 1 vez al día<br><input type="radio"/> 2 a 3 veces al día<br><input type="radio"/> 5 a 6 veces al día<br><input type="radio"/> más 6 veces al día |
| Leche condensada      | <input checked="" type="radio"/> Nunca o menos 1 vez al mes<br><input type="radio"/> 1 a 3 veces mes<br><input type="radio"/> 1 vez semana<br><input type="radio"/> 2 a 4 veces semana<br><input type="radio"/> 5 a 6 veces semana<br><input type="radio"/> 1 vez al día<br><input type="radio"/> 2 a 3 veces al día<br><input type="radio"/> 5 a 6 veces al día<br><input type="radio"/> más 6 veces al día |
| nata o crema de leche | <input checked="" type="radio"/> Nunca o menos 1 vez al mes<br><input type="radio"/> 1 a 3 veces mes<br><input type="radio"/> 1 vez semana<br><input type="radio"/> 2 a 4 veces semana<br><input type="radio"/> 5 a 6 veces semana<br><input type="radio"/> 1 vez al día<br><input type="radio"/> 2 a 3 veces al día<br><input type="radio"/> 5 a 6 veces al día<br><input type="radio"/> más 6 veces al día |

---

Yogurt Entero

- ☐ Nunca o menos 1 vez al mes  
☐ 1 a 3 veces mes  
☒ 1 vez semana  
☐ 2 a 4 veces semana  
☐ 5 a 6 veces semana  
☐ 1 vez al día  
☐ 2 a 3 veces al día  
☐ 5 a 6 veces al día  
☐ más 6 veces al día

---

Yogurt desnatado

- ☐ Nunca o menos 1 vez al mes  
☐ 1 a 3 veces mes  
☒ 1 vez semana  
☐ 2 a 4 veces semana  
☐ 5 a 6 veces semana  
☐ 1 vez al día  
☐ 2 a 3 veces al día  
☐ 5 a 6 veces al día  
☐ más 6 veces al día

---

100g requesón o queso blando o queso fresco

- ☐ Nunca o menos 1 vez al mes  
☐ 1 a 3 veces mes  
☐ 1 vez semana  
☒ 2 a 4 veces semana  
☐ 5 a 6 veces semana  
☐ 1 vez al día  
☐ 2 a 3 veces al día  
☐ 5 a 6 veces al día  
☐ más 6 veces al día

---

queso curado o semicurado o cremoso

- ☐ Nunca o menos 1 vez al mes  
☐ 1 a 3 veces mes  
☐ 1 vez semana  
☒ 2 a 4 veces semana  
☐ 5 a 6 veces semana  
☐ 1 vez al día  
☐ 2 a 3 veces al día  
☐ 5 a 6 veces al día  
☐ más 6 veces al día

---

natillas flan pudding

- ☐ Nunca o menos 1 vez al mes  
☐ 1 a 3 veces mes  
☒ 1 vez semana  
☐ 2 a 4 veces semana  
☐ 5 a 6 veces semana  
☐ 1 vez al día  
☐ 2 a 3 veces al día  
☐ 5 a 6 veces al día  
☐ más 6 veces al día

---

Helado

- ☒ Nunca o menos 1 vez al mes  
☐ 1 a 3 veces mes  
☐ 1 vez semana  
☐ 2 a 4 veces semana  
☐ 5 a 6 veces semana  
☐ 1 vez al día  
☐ 2 a 3 veces al día  
☐ 5 a 6 veces al día  
☐ más 6 veces al día

|                                      |                                                                                                                                                                                                                                                                                                                                                                                                              |
|--------------------------------------|--------------------------------------------------------------------------------------------------------------------------------------------------------------------------------------------------------------------------------------------------------------------------------------------------------------------------------------------------------------------------------------------------------------|
| huevo                                | <input checked="" type="radio"/> Nunca o menos 1 vez al mes<br><input type="radio"/> 1 a 3 veces mes<br><input type="radio"/> 1 vez semana<br><input type="radio"/> 2 a 4 veces semana<br><input type="radio"/> 5 a 6 veces semana<br><input type="radio"/> 1 vez al día<br><input type="radio"/> 2 a 3 veces al día<br><input type="radio"/> 5 a 6 veces al día<br><input type="radio"/> más 6 veces al día |
| Pollo con piel                       | <input type="radio"/> Nunca o menos 1 vez al mes<br><input type="radio"/> 1 a 3 veces mes<br><input checked="" type="radio"/> 1 vez semana<br><input type="radio"/> 2 a 4 veces semana<br><input type="radio"/> 5 a 6 veces semana<br><input type="radio"/> 1 vez al día<br><input type="radio"/> 2 a 3 veces al día<br><input type="radio"/> 5 a 6 veces al día<br><input type="radio"/> más 6 veces al día |
| pollo sin piel                       | <input type="radio"/> Nunca o menos 1 vez al mes<br><input type="radio"/> 1 a 3 veces mes<br><input checked="" type="radio"/> 1 vez semana<br><input type="radio"/> 2 a 4 veces semana<br><input type="radio"/> 5 a 6 veces semana<br><input type="radio"/> 1 vez al día<br><input type="radio"/> 2 a 3 veces al día<br><input type="radio"/> 5 a 6 veces al día<br><input type="radio"/> más 6 veces al día |
| Ternera o cerdo o cordero            | <input type="radio"/> Nunca o menos 1 vez al mes<br><input type="radio"/> 1 a 3 veces mes<br><input type="radio"/> 1 vez semana<br><input checked="" type="radio"/> 2 a 4 veces semana<br><input type="radio"/> 5 a 6 veces semana<br><input type="radio"/> 1 vez al día<br><input type="radio"/> 2 a 3 veces al día<br><input type="radio"/> 5 a 6 veces al día<br><input type="radio"/> más 6 veces al día |
| carne caza: Conejo o codorniz o pato | <input checked="" type="radio"/> Nunca o menos 1 vez al mes<br><input type="radio"/> 1 a 3 veces mes<br><input type="radio"/> 1 vez semana<br><input type="radio"/> 2 a 4 veces semana<br><input type="radio"/> 5 a 6 veces semana<br><input type="radio"/> 1 vez al día<br><input type="radio"/> 2 a 3 veces al día<br><input type="radio"/> 5 a 6 veces al día<br><input type="radio"/> más 6 veces al día |
| Hígado de ternera o cerdo o pollo    | <input checked="" type="radio"/> Nunca o menos 1 vez al mes<br><input type="radio"/> 1 a 3 veces mes<br><input type="radio"/> 1 vez semana<br><input type="radio"/> 2 a 4 veces semana<br><input type="radio"/> 5 a 6 veces semana<br><input type="radio"/> 1 vez al día<br><input type="radio"/> 2 a 3 veces al día<br><input type="radio"/> 5 a 6 veces al día<br><input type="radio"/> más 6 veces al día |

---

Vísceras

- ☒ Nunca o menos 1 vez al mes  
☐ 1 a 3 veces mes  
☐ 1 vez semana  
☐ 2 a 4 veces semana  
☐ 5 a 6 veces semana  
☐ 1 vez al día  
☐ 2 a 3 veces al día  
☐ 5 a 6 veces al día  
☐ más 6 veces al día

---

Embutido

- ☒ Nunca o menos 1 vez al mes  
☐ 1 a 3 veces mes  
☐ 1 vez semana  
☐ 2 a 4 veces semana  
☐ 5 a 6 veces semana  
☐ 1 vez al día  
☐ 2 a 3 veces al día  
☐ 5 a 6 veces al día  
☐ más 6 veces al día

---

Salchicha o similar

- ☐ Nunca o menos 1 vez al mes  
☐ 1 a 3 veces mes  
☒ 1 vez semana  
☐ 2 a 4 veces semana  
☐ 5 a 6 veces semana  
☐ 1 vez al día  
☐ 2 a 3 veces al día  
☐ 5 a 6 veces al día  
☐ más 6 veces al día

---

Pate o foiegras

- ☒ Nunca o menos 1 vez al mes  
☐ 1 a 3 veces mes  
☐ 1 vez semana  
☐ 2 a 4 veces semana  
☐ 5 a 6 veces semana  
☐ 1 vez al día  
☐ 2 a 3 veces al día  
☐ 5 a 6 veces al día  
☐ más 6 veces al día

---

Hamburguesa

- ☐ Nunca o menos 1 vez al mes  
☐ 1 a 3 veces mes  
☒ 1 vez semana  
☐ 2 a 4 veces semana  
☐ 5 a 6 veces semana  
☐ 1 vez al día  
☐ 2 a 3 veces al día  
☐ 5 a 6 veces al día  
☐ más 6 veces al día

---

tocino o bacon

- ☒ Nunca o menos 1 vez al mes  
☐ 1 a 3 veces mes  
☐ 1 vez semana  
☐ 2 a 4 veces semana  
☐ 5 a 6 veces semana  
☐ 1 vez al día  
☐ 2 a 3 veces al día  
☐ 5 a 6 veces al día  
☐ más 6 veces al día

|                        |                                                                                                                                                                                                                                                                                                                                                                                                              |
|------------------------|--------------------------------------------------------------------------------------------------------------------------------------------------------------------------------------------------------------------------------------------------------------------------------------------------------------------------------------------------------------------------------------------------------------|
| Pescado frito          | <input type="radio"/> Nunca o menos 1 vez al mes<br><input checked="" type="radio"/> 1 a 3 veces mes<br><input type="radio"/> 1 vez semana<br><input type="radio"/> 2 a 4 veces semana<br><input type="radio"/> 5 a 6 veces semana<br><input type="radio"/> 1 vez al día<br><input type="radio"/> 2 a 3 veces al día<br><input type="radio"/> 5 a 6 veces al día<br><input type="radio"/> más 6 veces al día |
| pescado hervido blanco | <input type="radio"/> Nunca o menos 1 vez al mes<br><input type="radio"/> 1 a 3 veces mes<br><input checked="" type="radio"/> 1 vez semana<br><input type="radio"/> 2 a 4 veces semana<br><input type="radio"/> 5 a 6 veces semana<br><input type="radio"/> 1 vez al día<br><input type="radio"/> 2 a 3 veces al día<br><input type="radio"/> 5 a 6 veces al día<br><input type="radio"/> más 6 veces al día |
| pescado hervido azul   | <input type="radio"/> Nunca o menos 1 vez al mes<br><input checked="" type="radio"/> 1 a 3 veces mes<br><input type="radio"/> 1 vez semana<br><input type="radio"/> 2 a 4 veces semana<br><input type="radio"/> 5 a 6 veces semana<br><input type="radio"/> 1 vez al día<br><input type="radio"/> 2 a 3 veces al día<br><input type="radio"/> 5 a 6 veces al día<br><input type="radio"/> más 6 veces al día |
| otros pescado azul     | <input checked="" type="radio"/> Nunca o menos 1 vez al mes<br><input type="radio"/> 1 a 3 veces mes<br><input type="radio"/> 1 vez semana<br><input type="radio"/> 2 a 4 veces semana<br><input type="radio"/> 5 a 6 veces semana<br><input type="radio"/> 1 vez al día<br><input type="radio"/> 2 a 3 veces al día<br><input type="radio"/> 5 a 6 veces al día<br><input type="radio"/> más 6 veces al día |
| atun conserva          | <input type="radio"/> Nunca o menos 1 vez al mes<br><input checked="" type="radio"/> 1 a 3 veces mes<br><input type="radio"/> 1 vez semana<br><input type="radio"/> 2 a 4 veces semana<br><input type="radio"/> 5 a 6 veces semana<br><input type="radio"/> 1 vez al día<br><input type="radio"/> 2 a 3 veces al día<br><input type="radio"/> 5 a 6 veces al día<br><input type="radio"/> más 6 veces al día |
| sardina conserva       | <input checked="" type="radio"/> Nunca o menos 1 vez al mes<br><input type="radio"/> 1 a 3 veces mes<br><input type="radio"/> 1 vez semana<br><input type="radio"/> 2 a 4 veces semana<br><input type="radio"/> 5 a 6 veces semana<br><input type="radio"/> 1 vez al día<br><input type="radio"/> 2 a 3 veces al día<br><input type="radio"/> 5 a 6 veces al día<br><input type="radio"/> más 6 veces al día |

|                                         |                                                                                                                                                                                                                                                                                                                                                                                                              |
|-----------------------------------------|--------------------------------------------------------------------------------------------------------------------------------------------------------------------------------------------------------------------------------------------------------------------------------------------------------------------------------------------------------------------------------------------------------------|
| pescado ahumado                         | <input checked="" type="radio"/> Nunca o menos 1 vez al mes<br><input type="radio"/> 1 a 3 veces mes<br><input type="radio"/> 1 vez semana<br><input type="radio"/> 2 a 4 veces semana<br><input type="radio"/> 5 a 6 veces semana<br><input type="radio"/> 1 vez al día<br><input type="radio"/> 2 a 3 veces al día<br><input type="radio"/> 5 a 6 veces al día<br><input type="radio"/> más 6 veces al día |
| almejas o mejillones o ostras unos 100g | <input checked="" type="radio"/> Nunca o menos 1 vez al mes<br><input type="radio"/> 1 a 3 veces mes<br><input type="radio"/> 1 vez semana<br><input type="radio"/> 2 a 4 veces semana<br><input type="radio"/> 5 a 6 veces semana<br><input type="radio"/> 1 vez al día<br><input type="radio"/> 2 a 3 veces al día<br><input type="radio"/> 5 a 6 veces al día<br><input type="radio"/> más 6 veces al día |
| calamar o chipiron o sepia unos 100g    | <input type="radio"/> Nunca o menos 1 vez al mes<br><input checked="" type="radio"/> 1 a 3 veces mes<br><input type="radio"/> 1 vez semana<br><input type="radio"/> 2 a 4 veces semana<br><input type="radio"/> 5 a 6 veces semana<br><input type="radio"/> 1 vez al día<br><input type="radio"/> 2 a 3 veces al día<br><input type="radio"/> 5 a 6 veces al día<br><input type="radio"/> más 6 veces al día |
| marisco unos 100g                       | <input type="radio"/> Nunca o menos 1 vez al mes<br><input checked="" type="radio"/> 1 a 3 veces mes<br><input type="radio"/> 1 vez semana<br><input type="radio"/> 2 a 4 veces semana<br><input type="radio"/> 5 a 6 veces semana<br><input type="radio"/> 1 vez al día<br><input type="radio"/> 2 a 3 veces al día<br><input type="radio"/> 5 a 6 veces al día<br><input type="radio"/> más 6 veces al día |
| Espinacas o acelgas cocinadas           | <input type="radio"/> Nunca o menos 1 vez al mes<br><input checked="" type="radio"/> 1 a 3 veces mes<br><input type="radio"/> 1 vez semana<br><input type="radio"/> 2 a 4 veces semana<br><input type="radio"/> 5 a 6 veces semana<br><input type="radio"/> 1 vez al día<br><input type="radio"/> 2 a 3 veces al día<br><input type="radio"/> 5 a 6 veces al día<br><input type="radio"/> más 6 veces al día |
| Col o coliflor o brocoli cocinado       | <input type="radio"/> Nunca o menos 1 vez al mes<br><input checked="" type="radio"/> 1 a 3 veces mes<br><input type="radio"/> 1 vez semana<br><input type="radio"/> 2 a 4 veces semana<br><input type="radio"/> 5 a 6 veces semana<br><input type="radio"/> 1 vez al día<br><input type="radio"/> 2 a 3 veces al día<br><input type="radio"/> 5 a 6 veces al día<br><input type="radio"/> más 6 veces al día |

---

Lechuga o endivia o escarola

- ☐ Nunca o menos 1 vez al mes  
☒ 1 a 3 veces mes  
☐ 1 vez semana  
☐ 2 a 4 veces semana  
☐ 5 a 6 veces semana  
☐ 1 vez al día  
☐ 2 a 3 veces al día  
☐ 5 a 6 veces al día  
☐ más 6 veces al día

---

tomate ensalada

- ☐ Nunca o menos 1 vez al mes  
☐ 1 a 3 veces mes  
☐ 1 vez semana  
☒ 2 a 4 veces semana  
☐ 5 a 6 veces semana  
☐ 1 vez al día  
☐ 2 a 3 veces al día  
☐ 5 a 6 veces al día  
☐ más 6 veces al día

---

cebolla

- ☐ Nunca o menos 1 vez al mes  
☐ 1 a 3 veces mes  
☐ 1 vez semana  
☒ 2 a 4 veces semana  
☐ 5 a 6 veces semana  
☐ 1 vez al día  
☐ 2 a 3 veces al día  
☐ 5 a 6 veces al día  
☐ más 6 veces al día

---

Zanahoria o calabaza

- ☐ Nunca o menos 1 vez al mes  
☐ 1 a 3 veces mes  
☐ 1 vez semana  
☒ 2 a 4 veces semana  
☐ 5 a 6 veces semana  
☐ 1 vez al día  
☐ 2 a 3 veces al día  
☐ 5 a 6 veces al día  
☐ más 6 veces al día

---

Judías verdes

- ☐ Nunca o menos 1 vez al mes  
☐ 1 a 3 veces mes  
☐ 1 vez semana  
☒ 2 a 4 veces semana  
☐ 5 a 6 veces semana  
☐ 1 vez al día  
☐ 2 a 3 veces al día  
☐ 5 a 6 veces al día  
☐ más 6 veces al día

---

Berenjena o calabacin o pepino

- ☐ Nunca o menos 1 vez al mes  
☐ 1 a 3 veces mes  
☒ 1 vez semana  
☐ 2 a 4 veces semana  
☐ 5 a 6 veces semana  
☐ 1 vez al día  
☐ 2 a 3 veces al día  
☐ 5 a 6 veces al día  
☐ más 6 veces al día

---

pimiento

- ☐ Nunca o menos 1 vez al mes  
☐ 1 a 3 veces mes  
☒ 1 vez semana  
☐ 2 a 4 veces semana  
☐ 5 a 6 veces semana  
☐ 1 vez al día  
☐ 2 a 3 veces al día  
☐ 5 a 6 veces al día  
☐ más 6 veces al día

---

alcachofa

- ☐ Nunca o menos 1 vez al mes  
☐ 1 a 3 veces mes  
☒ 1 vez semana  
☐ 2 a 4 veces semana  
☐ 5 a 6 veces semana  
☐ 1 vez al día  
☐ 2 a 3 veces al día  
☐ 5 a 6 veces al día  
☐ más 6 veces al día

---

espárragos

- ☐ Nunca o menos 1 vez al mes  
☒ 1 a 3 veces mes  
☐ 1 vez semana  
☐ 2 a 4 veces semana  
☐ 5 a 6 veces semana  
☐ 1 vez al día  
☐ 2 a 3 veces al día  
☐ 5 a 6 veces al día  
☐ más 6 veces al día

---

maíz hervido

- ☐ Nunca o menos 1 vez al mes  
☐ 1 a 3 veces mes  
☒ 1 vez semana  
☐ 2 a 4 veces semana  
☐ 5 a 6 veces semana  
☐ 1 vez al día  
☐ 2 a 3 veces al día  
☐ 5 a 6 veces al día  
☐ más 6 veces al día

---

legumbres

- ☐ Nunca o menos 1 vez al mes  
☐ 1 a 3 veces mes  
☐ 1 vez semana  
☒ 2 a 4 veces semana  
☐ 5 a 6 veces semana  
☐ 1 vez al día  
☐ 2 a 3 veces al día  
☐ 5 a 6 veces al día  
☐ más 6 veces al día

---

naranjas o mandarinas

- ☐ Nunca o menos 1 vez al mes  
☐ 1 a 3 veces mes  
☒ 1 vez semana  
☐ 2 a 4 veces semana  
☐ 5 a 6 veces semana  
☐ 1 vez al día  
☐ 2 a 3 veces al día  
☐ 5 a 6 veces al día  
☐ más 6 veces al día



---

zum natural fruta

- ☐ Nunca o menos 1 vez al mes  
☐ 1 a 3 veces mes  
☐ 1 vez semana  
☒ 2 a 4 veces semana  
☐ 5 a 6 veces semana  
☐ 1 vez al día  
☐ 2 a 3 veces al día  
☐ 5 a 6 veces al día  
☐ más 6 veces al día

---

platano

- ☐ Nunca o menos 1 vez al mes  
☐ 1 a 3 veces mes  
☐ 1 vez semana  
☒ 2 a 4 veces semana  
☐ 5 a 6 veces semana  
☐ 1 vez al día  
☐ 2 a 3 veces al día  
☐ 5 a 6 veces al día  
☐ más 6 veces al día

---

manzana o pera

- ☐ Nunca o menos 1 vez al mes  
☐ 1 a 3 veces mes  
☐ 1 vez semana  
☒ 2 a 4 veces semana  
☐ 5 a 6 veces semana  
☐ 1 vez al día  
☐ 2 a 3 veces al día  
☐ 5 a 6 veces al día  
☐ más 6 veces al día

---

melocotón o nectarina

- ☐ Nunca o menos 1 vez al mes  
☐ 1 a 3 veces mes  
☒ 1 vez semana  
☐ 2 a 4 veces semana  
☐ 5 a 6 veces semana  
☐ 1 vez al día  
☐ 2 a 3 veces al día  
☐ 5 a 6 veces al día  
☐ más 6 veces al día

---

sandia o melon

- ☐ Nunca o menos 1 vez al mes  
☐ 1 a 3 veces mes  
☐ 1 vez semana  
☒ 2 a 4 veces semana  
☐ 5 a 6 veces semana  
☐ 1 vez al día  
☐ 2 a 3 veces al día  
☐ 5 a 6 veces al día  
☐ más 6 veces al día

---

uva

- ☐ Nunca o menos 1 vez al mes  
☐ 1 a 3 veces mes  
☒ 1 vez semana  
☐ 2 a 4 veces semana  
☐ 5 a 6 veces semana  
☐ 1 vez al día  
☐ 2 a 3 veces al día  
☐ 5 a 6 veces al día  
☐ más 6 veces al día

---

bruna o ciruela

- ☒ Nunca o menos 1 vez al mes  
☐ 1 a 3 veces mes  
☐ 1 vez semana  
☐ 2 a 4 veces semana  
☐ 5 a 6 veces semana  
☐ 1 vez al día  
☐ 2 a 3 veces al día  
☐ 5 a 6 veces al día  
☐ más 6 veces al día

---

kiwi

- ☐ Nunca o menos 1 vez al mes  
☐ 1 a 3 veces mes  
☐ 1 vez semana  
☒ 2 a 4 veces semana  
☐ 5 a 6 veces semana  
☐ 1 vez al día  
☐ 2 a 3 veces al día  
☐ 5 a 6 veces al día  
☐ más 6 veces al día

---

aceituna

- ☐ Nunca o menos 1 vez al mes  
☐ 1 a 3 veces mes  
☐ 1 vez semana  
☐ 2 a 4 veces semana  
☒ 5 a 6 veces semana  
☐ 1 vez al día  
☐ 2 a 3 veces al día  
☐ 5 a 6 veces al día  
☐ más 6 veces al día

---

frutos secos

- ☐ Nunca o menos 1 vez al mes  
☐ 1 a 3 veces mes  
☒ 1 vez semana  
☐ 2 a 4 veces semana  
☐ 5 a 6 veces semana  
☐ 1 vez al día  
☐ 2 a 3 veces al día  
☐ 5 a 6 veces al día  
☐ más 6 veces al día

---

pan blanco

- ☐ Nunca o menos 1 vez al mes  
☐ 1 a 3 veces mes  
☐ 1 vez semana  
☒ 2 a 4 veces semana  
☐ 5 a 6 veces semana  
☐ 1 vez al día  
☐ 2 a 3 veces al día  
☐ 5 a 6 veces al día  
☐ más 6 veces al día

---

pan integral

- ☒ Nunca o menos 1 vez al mes  
☐ 1 a 3 veces mes  
☐ 1 vez semana  
☐ 2 a 4 veces semana  
☐ 5 a 6 veces semana  
☐ 1 vez al día  
☐ 2 a 3 veces al día  
☐ 5 a 6 veces al día  
☐ más 6 veces al día

---

cereales desayuno

- ☐ Nunca o menos 1 vez al mes  
☒ 1 a 3 veces mes  
☐ 1 vez semana  
☐ 2 a 4 veces semana  
☐ 5 a 6 veces semana  
☐ 1 vez al día  
☐ 2 a 3 veces al día  
☐ 5 a 6 veces al día  
☐ más 6 veces al día

---

patatas fritas

- ☐ Nunca o menos 1 vez al mes  
☐ 1 a 3 veces mes  
☒ 1 vez semana  
☐ 2 a 4 veces semana  
☐ 5 a 6 veces semana  
☐ 1 vez al día  
☐ 2 a 3 veces al día  
☐ 5 a 6 veces al día  
☐ más 6 veces al día

---

patatas cocidas o asadas

- ☐ Nunca o menos 1 vez al mes  
☐ 1 a 3 veces mes  
☐ 1 vez semana  
☒ 2 a 4 veces semana  
☐ 5 a 6 veces semana  
☐ 1 vez al día  
☐ 2 a 3 veces al día  
☐ 5 a 6 veces al día  
☐ más 6 veces al día

---

bolsa papas

- ☐ Nunca o menos 1 vez al mes  
☒ 1 a 3 veces mes  
☐ 1 vez semana  
☐ 2 a 4 veces semana  
☐ 5 a 6 veces semana  
☐ 1 vez al día  
☐ 2 a 3 veces al día  
☐ 5 a 6 veces al día  
☐ más 6 veces al día

---

arroz cocinado

- ☐ Nunca o menos 1 vez al mes  
☐ 1 a 3 veces mes  
☐ 1 vez semana  
☒ 2 a 4 veces semana  
☐ 5 a 6 veces semana  
☐ 1 vez al día  
☐ 2 a 3 veces al día  
☐ 5 a 6 veces al día  
☐ más 6 veces al día

---

pasta

- ☐ Nunca o menos 1 vez al mes  
☐ 1 a 3 veces mes  
☐ 1 vez semana  
☒ 2 a 4 veces semana  
☐ 5 a 6 veces semana  
☐ 1 vez al día  
☐ 2 a 3 veces al día  
☐ 5 a 6 veces al día  
☐ más 6 veces al día

|                     |                                                                                                                                                                                                                                                                                                                                                                                                              |
|---------------------|--------------------------------------------------------------------------------------------------------------------------------------------------------------------------------------------------------------------------------------------------------------------------------------------------------------------------------------------------------------------------------------------------------------|
| pizza               | <input type="radio"/> Nunca o menos 1 vez al mes<br><input checked="" type="radio"/> 1 a 3 veces mes<br><input type="radio"/> 1 vez semana<br><input type="radio"/> 2 a 4 veces semana<br><input type="radio"/> 5 a 6 veces semana<br><input type="radio"/> 1 vez al día<br><input type="radio"/> 2 a 3 veces al día<br><input type="radio"/> 5 a 6 veces al día<br><input type="radio"/> más 6 veces al día |
| aceite oliva        | <input type="radio"/> Nunca o menos 1 vez al mes<br><input type="radio"/> 1 a 3 veces mes<br><input type="radio"/> 1 vez semana<br><input checked="" type="radio"/> 2 a 4 veces semana<br><input type="radio"/> 5 a 6 veces semana<br><input type="radio"/> 1 vez al día<br><input type="radio"/> 2 a 3 veces al día<br><input type="radio"/> 5 a 6 veces al día<br><input type="radio"/> más 6 veces al día |
| otros aceites       | <input type="radio"/> Nunca o menos 1 vez al mes<br><input type="radio"/> 1 a 3 veces mes<br><input checked="" type="radio"/> 1 vez semana<br><input type="radio"/> 2 a 4 veces semana<br><input type="radio"/> 5 a 6 veces semana<br><input type="radio"/> 1 vez al día<br><input type="radio"/> 2 a 3 veces al día<br><input type="radio"/> 5 a 6 veces al día<br><input type="radio"/> más 6 veces al día |
| margarina           | <input checked="" type="radio"/> Nunca o menos 1 vez al mes<br><input type="radio"/> 1 a 3 veces mes<br><input type="radio"/> 1 vez semana<br><input type="radio"/> 2 a 4 veces semana<br><input type="radio"/> 5 a 6 veces semana<br><input type="radio"/> 1 vez al día<br><input type="radio"/> 2 a 3 veces al día<br><input type="radio"/> 5 a 6 veces al día<br><input type="radio"/> más 6 veces al día |
| mantequilla         | <input checked="" type="radio"/> Nunca o menos 1 vez al mes<br><input type="radio"/> 1 a 3 veces mes<br><input type="radio"/> 1 vez semana<br><input type="radio"/> 2 a 4 veces semana<br><input type="radio"/> 5 a 6 veces semana<br><input type="radio"/> 1 vez al día<br><input type="radio"/> 2 a 3 veces al día<br><input type="radio"/> 5 a 6 veces al día<br><input type="radio"/> más 6 veces al día |
| galletas tipo maria | <input type="radio"/> Nunca o menos 1 vez al mes<br><input checked="" type="radio"/> 1 a 3 veces mes<br><input type="radio"/> 1 vez semana<br><input type="radio"/> 2 a 4 veces semana<br><input type="radio"/> 5 a 6 veces semana<br><input type="radio"/> 1 vez al día<br><input type="radio"/> 2 a 3 veces al día<br><input type="radio"/> 5 a 6 veces al día<br><input type="radio"/> más 6 veces al día |

|                           |                                                                                                                                                                                                                                                                                                                                                                                                              |
|---------------------------|--------------------------------------------------------------------------------------------------------------------------------------------------------------------------------------------------------------------------------------------------------------------------------------------------------------------------------------------------------------------------------------------------------------|
| galletas chocolate        | <input type="radio"/> Nunca o menos 1 vez al mes<br><input checked="" type="radio"/> 1 a 3 veces mes<br><input type="radio"/> 1 vez semana<br><input type="radio"/> 2 a 4 veces semana<br><input type="radio"/> 5 a 6 veces semana<br><input type="radio"/> 1 vez al día<br><input type="radio"/> 2 a 3 veces al día<br><input type="radio"/> 5 a 6 veces al día<br><input type="radio"/> más 6 veces al día |
| bollieria                 | <input type="radio"/> Nunca o menos 1 vez al mes<br><input type="radio"/> 1 a 3 veces mes<br><input checked="" type="radio"/> 1 vez semana<br><input type="radio"/> 2 a 4 veces semana<br><input type="radio"/> 5 a 6 veces semana<br><input type="radio"/> 1 vez al día<br><input type="radio"/> 2 a 3 veces al día<br><input type="radio"/> 5 a 6 veces al día<br><input type="radio"/> más 6 veces al día |
| chocolate o bombones      | <input type="radio"/> Nunca o menos 1 vez al mes<br><input type="radio"/> 1 a 3 veces mes<br><input checked="" type="radio"/> 1 vez semana<br><input type="radio"/> 2 a 4 veces semana<br><input type="radio"/> 5 a 6 veces semana<br><input type="radio"/> 1 vez al día<br><input type="radio"/> 2 a 3 veces al día<br><input type="radio"/> 5 a 6 veces al día<br><input type="radio"/> más 6 veces al día |
| chocolate polvo o colacao | <input type="radio"/> Nunca o menos 1 vez al mes<br><input type="radio"/> 1 a 3 veces mes<br><input type="radio"/> 1 vez semana<br><input type="radio"/> 2 a 4 veces semana<br><input type="radio"/> 5 a 6 veces semana<br><input checked="" type="radio"/> 1 vez al día<br><input type="radio"/> 2 a 3 veces al día<br><input type="radio"/> 5 a 6 veces al día<br><input type="radio"/> más 6 veces al día |
| vino tinto                | <input checked="" type="radio"/> Nunca o menos 1 vez al mes<br><input type="radio"/> 1 a 3 veces mes<br><input type="radio"/> 1 vez semana<br><input type="radio"/> 2 a 4 veces semana<br><input type="radio"/> 5 a 6 veces semana<br><input type="radio"/> 1 vez al día<br><input type="radio"/> 2 a 3 veces al día<br><input type="radio"/> 5 a 6 veces al día<br><input type="radio"/> más 6 veces al día |
| vino blanco               | <input checked="" type="radio"/> Nunca o menos 1 vez al mes<br><input type="radio"/> 1 a 3 veces mes<br><input type="radio"/> 1 vez semana<br><input type="radio"/> 2 a 4 veces semana<br><input type="radio"/> 5 a 6 veces semana<br><input type="radio"/> 1 vez al día<br><input type="radio"/> 2 a 3 veces al día<br><input type="radio"/> 5 a 6 veces al día<br><input type="radio"/> más 6 veces al día |

|                       |                                                                                                                                                                                                                                                                                                                                                                                                              |
|-----------------------|--------------------------------------------------------------------------------------------------------------------------------------------------------------------------------------------------------------------------------------------------------------------------------------------------------------------------------------------------------------------------------------------------------------|
| vino seco o vermut    | <input checked="" type="radio"/> Nunca o menos 1 vez al mes<br><input type="radio"/> 1 a 3 veces mes<br><input type="radio"/> 1 vez semana<br><input type="radio"/> 2 a 4 veces semana<br><input type="radio"/> 5 a 6 veces semana<br><input type="radio"/> 1 vez al día<br><input type="radio"/> 2 a 3 veces al día<br><input type="radio"/> 5 a 6 veces al día<br><input type="radio"/> más 6 veces al día |
| cerveza               | <input checked="" type="radio"/> Nunca o menos 1 vez al mes<br><input type="radio"/> 1 a 3 veces mes<br><input type="radio"/> 1 vez semana<br><input type="radio"/> 2 a 4 veces semana<br><input type="radio"/> 5 a 6 veces semana<br><input type="radio"/> 1 vez al día<br><input type="radio"/> 2 a 3 veces al día<br><input type="radio"/> 5 a 6 veces al día<br><input type="radio"/> más 6 veces al día |
| cerveza sin alcohol   | <input checked="" type="radio"/> Nunca o menos 1 vez al mes<br><input type="radio"/> 1 a 3 veces mes<br><input type="radio"/> 1 vez semana<br><input type="radio"/> 2 a 4 veces semana<br><input type="radio"/> 5 a 6 veces semana<br><input type="radio"/> 1 vez al día<br><input type="radio"/> 2 a 3 veces al día<br><input type="radio"/> 5 a 6 veces al día<br><input type="radio"/> más 6 veces al día |
| licores               | <input checked="" type="radio"/> Nunca o menos 1 vez al mes<br><input type="radio"/> 1 a 3 veces mes<br><input type="radio"/> 1 vez semana<br><input type="radio"/> 2 a 4 veces semana<br><input type="radio"/> 5 a 6 veces semana<br><input type="radio"/> 1 vez al día<br><input type="radio"/> 2 a 3 veces al día<br><input type="radio"/> 5 a 6 veces al día<br><input type="radio"/> más 6 veces al día |
| ginebra o ron o vodka | <input checked="" type="radio"/> Nunca o menos 1 vez al mes<br><input type="radio"/> 1 a 3 veces mes<br><input type="radio"/> 1 vez semana<br><input type="radio"/> 2 a 4 veces semana<br><input type="radio"/> 5 a 6 veces semana<br><input type="radio"/> 1 vez al día<br><input type="radio"/> 2 a 3 veces al día<br><input type="radio"/> 5 a 6 veces al día<br><input type="radio"/> más 6 veces al día |
| refresco normal       | <input type="radio"/> Nunca o menos 1 vez al mes<br><input checked="" type="radio"/> 1 a 3 veces mes<br><input type="radio"/> 1 vez semana<br><input type="radio"/> 2 a 4 veces semana<br><input type="radio"/> 5 a 6 veces semana<br><input type="radio"/> 1 vez al día<br><input type="radio"/> 2 a 3 veces al día<br><input type="radio"/> 5 a 6 veces al día<br><input type="radio"/> más 6 veces al día |

---

refresco sin azúcar

- ☐ Nunca o menos 1 vez al mes  
☒ 1 a 3 veces mes  
☐ 1 vez semana  
☐ 2 a 4 veces semana  
☐ 5 a 6 veces semana  
☐ 1 vez al día  
☐ 2 a 3 veces al día  
☐ 5 a 6 veces al día  
☐ más 6 veces al día

---

Agua del grifo

- ☒ Nunca o menos 1 vez al mes  
☐ 1 a 3 veces mes  
☐ 1 vez semana  
☐ 2 a 4 veces semana  
☐ 5 a 6 veces semana  
☐ 1 vez al día  
☐ 2 a 3 veces al día  
☐ 5 a 6 veces al día  
☐ más 6 veces al día

---

agua embotellada sin gas

- ☐ Nunca o menos 1 vez al mes  
☐ 1 a 3 veces mes  
☐ 1 vez semana  
☐ 2 a 4 veces semana  
☐ 5 a 6 veces semana  
☐ 1 vez al día  
☐ 2 a 3 veces al día  
☐ 5 a 6 veces al día  
☒ más 6 veces al día

---

agua embotellada con gas

- ☒ Nunca o menos 1 vez al mes  
☐ 1 a 3 veces mes  
☐ 1 vez semana  
☐ 2 a 4 veces semana  
☐ 5 a 6 veces semana  
☐ 1 vez al día  
☐ 2 a 3 veces al día  
☐ 5 a 6 veces al día  
☐ más 6 veces al día

---

zumو frutas embasado

- ☐ Nunca o menos 1 vez al mes  
☐ 1 a 3 veces mes  
☐ 1 vez semana  
☐ 2 a 4 veces semana  
☐ 5 a 6 veces semana  
☐ 1 vez al día  
☒ 2 a 3 veces al día  
☐ 5 a 6 veces al día  
☐ más 6 veces al día

---

cafe

- ☒ Nunca o menos 1 vez al mes  
☐ 1 a 3 veces mes  
☐ 1 vez semana  
☐ 2 a 4 veces semana  
☐ 5 a 6 veces semana  
☐ 1 vez al día  
☐ 2 a 3 veces al día  
☐ 5 a 6 veces al día  
☐ más 6 veces al día

|                       |                                                                                                                                                                                                                                                                                                                                                                                                              |
|-----------------------|--------------------------------------------------------------------------------------------------------------------------------------------------------------------------------------------------------------------------------------------------------------------------------------------------------------------------------------------------------------------------------------------------------------|
| cafe descafeinado     | <input checked="" type="radio"/> Nunca o menos 1 vez al mes<br><input type="radio"/> 1 a 3 veces mes<br><input type="radio"/> 1 vez semana<br><input type="radio"/> 2 a 4 veces semana<br><input type="radio"/> 5 a 6 veces semana<br><input type="radio"/> 1 vez al día<br><input type="radio"/> 2 a 3 veces al día<br><input type="radio"/> 5 a 6 veces al día<br><input type="radio"/> más 6 veces al día |
| te o infusión         | <input type="radio"/> Nunca o menos 1 vez al mes<br><input type="radio"/> 1 a 3 veces mes<br><input checked="" type="radio"/> 1 vez semana<br><input type="radio"/> 2 a 4 veces semana<br><input type="radio"/> 5 a 6 veces semana<br><input type="radio"/> 1 vez al día<br><input type="radio"/> 2 a 3 veces al día<br><input type="radio"/> 5 a 6 veces al día<br><input type="radio"/> más 6 veces al día |
| sopa o puré verduras  | <input type="radio"/> Nunca o menos 1 vez al mes<br><input type="radio"/> 1 a 3 veces mes<br><input type="radio"/> 1 vez semana<br><input checked="" type="radio"/> 2 a 4 veces semana<br><input type="radio"/> 5 a 6 veces semana<br><input type="radio"/> 1 vez al día<br><input type="radio"/> 2 a 3 veces al día<br><input type="radio"/> 5 a 6 veces al día<br><input type="radio"/> más 6 veces al día |
| croquetas pollo jamón | <input type="radio"/> Nunca o menos 1 vez al mes<br><input type="radio"/> 1 a 3 veces mes<br><input checked="" type="radio"/> 1 vez semana<br><input type="radio"/> 2 a 4 veces semana<br><input type="radio"/> 5 a 6 veces semana<br><input type="radio"/> 1 vez al día<br><input type="radio"/> 2 a 3 veces al día<br><input type="radio"/> 5 a 6 veces al día<br><input type="radio"/> más 6 veces al día |
| croquetas pescado     | <input type="radio"/> Nunca o menos 1 vez al mes<br><input checked="" type="radio"/> 1 a 3 veces mes<br><input type="radio"/> 1 vez semana<br><input type="radio"/> 2 a 4 veces semana<br><input type="radio"/> 5 a 6 veces semana<br><input type="radio"/> 1 vez al día<br><input type="radio"/> 2 a 3 veces al día<br><input type="radio"/> 5 a 6 veces al día<br><input type="radio"/> más 6 veces al día |
| mayonesa              | <input type="radio"/> Nunca o menos 1 vez al mes<br><input checked="" type="radio"/> 1 a 3 veces mes<br><input type="radio"/> 1 vez semana<br><input type="radio"/> 2 a 4 veces semana<br><input type="radio"/> 5 a 6 veces semana<br><input type="radio"/> 1 vez al día<br><input type="radio"/> 2 a 3 veces al día<br><input type="radio"/> 5 a 6 veces al día<br><input type="radio"/> más 6 veces al día |



|                  |                                                                                                                                                                                                                                                                                                                                                                                                              |
|------------------|--------------------------------------------------------------------------------------------------------------------------------------------------------------------------------------------------------------------------------------------------------------------------------------------------------------------------------------------------------------------------------------------------------------|
| salsa tomate     | <input type="radio"/> Nunca o menos 1 vez al mes<br><input type="radio"/> 1 a 3 veces mes<br><input checked="" type="radio"/> 1 vez semana<br><input type="radio"/> 2 a 4 veces semana<br><input type="radio"/> 5 a 6 veces semana<br><input type="radio"/> 1 vez al día<br><input type="radio"/> 2 a 3 veces al día<br><input type="radio"/> 5 a 6 veces al día<br><input type="radio"/> más 6 veces al día |
| ketchup          | <input type="radio"/> Nunca o menos 1 vez al mes<br><input type="radio"/> 1 a 3 veces mes<br><input checked="" type="radio"/> 1 vez semana<br><input type="radio"/> 2 a 4 veces semana<br><input type="radio"/> 5 a 6 veces semana<br><input type="radio"/> 1 vez al día<br><input type="radio"/> 2 a 3 veces al día<br><input type="radio"/> 5 a 6 veces al día<br><input type="radio"/> más 6 veces al día |
| sal              | <input checked="" type="radio"/> Nunca o menos 1 vez al mes<br><input type="radio"/> 1 a 3 veces mes<br><input type="radio"/> 1 vez semana<br><input type="radio"/> 2 a 4 veces semana<br><input type="radio"/> 5 a 6 veces semana<br><input type="radio"/> 1 vez al día<br><input type="radio"/> 2 a 3 veces al día<br><input type="radio"/> 5 a 6 veces al día<br><input type="radio"/> más 6 veces al día |
| ajo              | <input type="radio"/> Nunca o menos 1 vez al mes<br><input checked="" type="radio"/> 1 a 3 veces mes<br><input type="radio"/> 1 vez semana<br><input type="radio"/> 2 a 4 veces semana<br><input type="radio"/> 5 a 6 veces semana<br><input type="radio"/> 1 vez al día<br><input type="radio"/> 2 a 3 veces al día<br><input type="radio"/> 5 a 6 veces al día<br><input type="radio"/> más 6 veces al día |
| mermelada o miel | <input checked="" type="radio"/> Nunca o menos 1 vez al mes<br><input type="radio"/> 1 a 3 veces mes<br><input type="radio"/> 1 vez semana<br><input type="radio"/> 2 a 4 veces semana<br><input type="radio"/> 5 a 6 veces semana<br><input type="radio"/> 1 vez al día<br><input type="radio"/> 2 a 3 veces al día<br><input type="radio"/> 5 a 6 veces al día<br><input type="radio"/> más 6 veces al día |
| azúcar           | <input type="radio"/> Nunca o menos 1 vez al mes<br><input checked="" type="radio"/> 1 a 3 veces mes<br><input type="radio"/> 1 vez semana<br><input type="radio"/> 2 a 4 veces semana<br><input type="radio"/> 5 a 6 veces semana<br><input type="radio"/> 1 vez al día<br><input type="radio"/> 2 a 3 veces al día<br><input type="radio"/> 5 a 6 veces al día<br><input type="radio"/> más 6 veces al día |

---

Otro alimento

---

suplementos vitamínicos

- ☐ si  
☒ no

---

suplementos vitamínicos

---

dieta previa

- ☐ si  
☒ no

motivo dieta

- ☒ no dieta  
☐ control peso  
☐ control colesterol  
☐ control diabetes  
☐ problemas estómago  
☐ problemas vesícula o hepáticos  
☐ HTA o cardiopatía  
☐ problemas renales  
☐ alergia alimentaria  
☐ ácido úrico elevado  
☐ vegetariana  
☐ otros

---

cambio alimentos año previo gestación

- ☒ si  
☐ no

---

cambio lácteos

- ☐ eliminado  
☐ disminuido  
☒ igual  
☐ aumentado  
☐ no sabe

---

cambio huevos

- ☐ eliminado  
☐ disminuido  
☒ igual  
☐ aumentado  
☐ no sabe

---

cambio carne

- ☐ eliminado  
☐ disminuido  
☒ igual  
☐ aumentado  
☐ no sabe

---

cambio pescado

- ☐ eliminado  
☐ disminuido  
☒ igual  
☐ aumentado  
☐ no sabe

---

cambio verduras

- ☐ eliminado  
☒ disminuido  
☐ igual  
☐ aumentado  
☐ no sabe

|                            |                                                                                                                                                                                                                        |
|----------------------------|------------------------------------------------------------------------------------------------------------------------------------------------------------------------------------------------------------------------|
| cambio legumbres           | <input type="radio"/> eliminado<br><input checked="" type="radio"/> disminuido<br><input type="radio"/> igual<br><input type="radio"/> aumentado<br><input type="radio"/> no sabe                                      |
| cambio fruta               | <input type="radio"/> eliminado<br><input type="radio"/> disminuido<br><input checked="" type="radio"/> igual<br><input type="radio"/> aumentado<br><input type="radio"/> no sabe                                      |
| cambio pan                 | <input type="radio"/> eliminado<br><input type="radio"/> disminuido<br><input checked="" type="radio"/> igual<br><input type="radio"/> aumentado<br><input type="radio"/> no sabe                                      |
| cambio aceite oliva        | <input type="radio"/> eliminado<br><input type="radio"/> disminuido<br><input checked="" type="radio"/> igual<br><input type="radio"/> aumentado<br><input type="radio"/> no sabe                                      |
| cambio mante o margarina   | <input checked="" type="radio"/> eliminado<br><input type="radio"/> disminuido<br><input type="radio"/> igual<br><input type="radio"/> aumentado<br><input type="radio"/> no sabe                                      |
| cambio azúcar y dulces     | <input type="radio"/> eliminado<br><input type="radio"/> disminuido<br><input checked="" type="radio"/> igual<br><input type="radio"/> aumentado<br><input type="radio"/> no sabe                                      |
| cambio bebidas alcohólicas | <input checked="" type="radio"/> eliminado<br><input type="radio"/> disminuido<br><input type="radio"/> igual<br><input type="radio"/> aumentado<br><input type="radio"/> no sabe                                      |
| frecuencia comidas fritas  | <input type="radio"/> a diario<br><input type="radio"/> 5 a 6 veces semana<br><input type="radio"/> 2 a 4 veces semana<br><input checked="" type="radio"/> 1 vez semana<br><input type="radio"/> menos de 1 vez semana |
| carne                      | <input type="radio"/> no como<br><input type="radio"/> cruda<br><input type="radio"/> poco hecha<br><input type="radio"/> hecha<br><input checked="" type="radio"/> muy hecha                                          |
| grasa visible carne        | <input checked="" type="radio"/> quita toda<br><input type="radio"/> quita mayoría<br><input type="radio"/> quita un poco<br><input type="radio"/> no quita nada                                                       |

|                                |                                                                                                                                                                                                                                                          |
|--------------------------------|----------------------------------------------------------------------------------------------------------------------------------------------------------------------------------------------------------------------------------------------------------|
| cocina carne                   | <input type="radio"/> a la plancha<br><input type="radio"/> a la parrilla<br><input checked="" type="radio"/> asada<br><input type="radio"/> frita<br><input type="radio"/> guisada                                                                      |
| tostado quemado carne          | <input type="radio"/> nunca<br><input type="radio"/> 1 vez mes<br><input type="radio"/> 2 a 3 veces mes<br><input checked="" type="radio"/> 1 vez semana<br><input type="radio"/> 2 a 3 semanas                                                          |
| tostado quemado pescado        | <input type="radio"/> nunca<br><input type="radio"/> 1 vez mes<br><input type="radio"/> 2 a 3 veces mes<br><input checked="" type="radio"/> 1 vez semana<br><input type="radio"/> 2 a 3 semanas                                                          |
| socarrat paella                | <input checked="" type="radio"/> nunca<br><input type="radio"/> 1 vez mes<br><input type="radio"/> 2 a 3 veces mes<br><input type="radio"/> 1 vez semana<br><input type="radio"/> 2 a 3 semanas                                                          |
| grasa o aceite cocinar         | <input type="radio"/> mantequilla<br><input type="radio"/> margarina<br><input checked="" type="radio"/> aceite oliva<br><input type="radio"/> aceite oliva virgen extra<br><input type="radio"/> aceite vegetal<br><input type="radio"/> mezcla aceites |
| grasa aceite aliñar            | <input type="radio"/> mantequilla<br><input type="radio"/> margarina<br><input checked="" type="radio"/> aceite oliva<br><input type="radio"/> aceite oliva virgen extra<br><input type="radio"/> aceite vegetal<br><input type="radio"/> mezcla aceites |
| grasa aceite freir             | <input type="radio"/> mantequilla<br><input type="radio"/> margarina<br><input type="radio"/> aceite oliva<br><input type="radio"/> aceite oliva virgen extra<br><input type="radio"/> aceite vegetal<br><input type="radio"/> mezcla aceites            |
| Ejercicio cuestionario         | <input checked="" type="radio"/> si<br><input type="radio"/> no                                                                                                                                                                                          |
| horas de sueño incluido siesta | [*DATA REMOVED*]                                                                                                                                                                                                                                         |
| minutos siesta                 | [*DATA REMOVED*]                                                                                                                                                                                                                                         |
| horas televisión semana        | [*DATA REMOVED*]                                                                                                                                                                                                                                         |

|                                        |                                                                                                                                                                                                                                                                                                                                                                |
|----------------------------------------|----------------------------------------------------------------------------------------------------------------------------------------------------------------------------------------------------------------------------------------------------------------------------------------------------------------------------------------------------------------|
| actividad trabajo                      | <input type="radio"/> casi siempre sentado<br><input type="radio"/> sentado 50 por cien<br><input type="radio"/> casi siempre de pie, quieto<br><input type="radio"/> casi siempre levantado caminando y llevando pocas cosas<br><input type="radio"/> casi siempre levantado, caminando y llevado muchas cosas<br><input type="radio"/> trabajo manual pesado |
| tiempo caminar o bici al día           | <input type="radio"/> casi nunca<br><input type="radio"/> menos 20min día<br><input type="radio"/> 20 a 40 min día<br><input checked="" type="radio"/> 40 a 60 min día<br><input type="radio"/> 1h o 1h y media día<br><input type="radio"/> más de 1h y media al día                                                                                          |
| tiempo tareas casa al día              | <input type="radio"/> menos de 1h día<br><input type="radio"/> 1 a 2h día<br><input checked="" type="radio"/> 3 a 4h día<br><input type="radio"/> 5 a 6h día<br><input type="radio"/> 7 a 8h día<br><input type="radio"/> más de 8h día                                                                                                                        |
| tiempo libre televisión ordenador leer | <input type="radio"/> menos 1h día<br><input type="radio"/> 1h día<br><input type="radio"/> 2h día<br><input checked="" type="radio"/> 3h día<br><input type="radio"/> 4h día<br><input type="radio"/> 5 a 6h día<br><input type="radio"/> mas 6h día                                                                                                          |
| tiempo libre ejercicio o deporte       | <input type="radio"/> menos 1h semana<br><input checked="" type="radio"/> 1h semana<br><input type="radio"/> 2h semana<br><input type="radio"/> 3h semana<br><input type="radio"/> 4 a 5h semana<br><input type="radio"/> mas 5h semana                                                                                                                        |
| como se considera                      | <input checked="" type="radio"/> sedentaria<br><input type="radio"/> poco activa<br><input type="radio"/> moderadamente activa<br><input type="radio"/> bastante activa<br><input type="radio"/> muy activa<br><input type="radio"/> no sabe                                                                                                                   |
| FUR                                    | [*DATA REMOVED*]                                                                                                                                                                                                                                                                                                                                               |
| Semanas gestación 2T                   | [*DATA REMOVED*]                                                                                                                                                                                                                                                                                                                                               |
| Días gestación 2T                      | [*DATA REMOVED*]                                                                                                                                                                                                                                                                                                                                               |
| DBP 2T                                 | [*DATA REMOVED*]                                                                                                                                                                                                                                                                                                                                               |
| CC 2T                                  | [*DATA REMOVED*]                                                                                                                                                                                                                                                                                                                                               |
| AC 2T                                  | [*DATA REMOVED*]                                                                                                                                                                                                                                                                                                                                               |

|                                                   |                                                                                                                                                                                                 |
|---------------------------------------------------|-------------------------------------------------------------------------------------------------------------------------------------------------------------------------------------------------|
| LF 2T                                             | [*DATA REMOVED*]                                                                                                                                                                                |
| PFE 2T (Hadlock)                                  | [*DATA REMOVED*]                                                                                                                                                                                |
| Semanas gestación 3T                              | [*DATA REMOVED*]                                                                                                                                                                                |
| días 3T                                           | [*DATA REMOVED*]                                                                                                                                                                                |
| DBP 3T                                            | [*DATA REMOVED*]                                                                                                                                                                                |
| CC 3T                                             | [*DATA REMOVED*]                                                                                                                                                                                |
| AC 3T                                             | [*DATA REMOVED*]                                                                                                                                                                                |
| LF 3T                                             | [*DATA REMOVED*]                                                                                                                                                                                |
| PFE 3T (Hadlock)                                  | [*DATA REMOVED*]                                                                                                                                                                                |
| Semanas de gestación final                        | [*DATA REMOVED*]                                                                                                                                                                                |
| días gestación final                              | [*DATA REMOVED*]                                                                                                                                                                                |
| Localización placenta                             | <input checked="" type="radio"/> anterior<br><input type="radio"/> lateral derecha<br><input type="radio"/> lateral izquierda<br><input type="radio"/> posterior<br><input type="radio"/> fondo |
| Presentación longitudinal cefálica                | <input type="radio"/> no<br><input checked="" type="radio"/> si                                                                                                                                 |
| Dorso                                             | <input type="radio"/> izquierda anterior<br><input type="radio"/> izquierda posterior<br><input checked="" type="radio"/> derecha anterior<br><input type="radio"/> derecha posterior           |
| diámetro biparietal                               | [*DATA REMOVED*]                                                                                                                                                                                |
| Circunferencia craneal                            | [*DATA REMOVED*]                                                                                                                                                                                |
| Circunferencia abdominal                          | [*DATA REMOVED*]                                                                                                                                                                                |
| Longitud de femur                                 | [*DATA REMOVED*]                                                                                                                                                                                |
| tejido celular subcutáneo a nivel del muslo en mm | [*DATA REMOVED*]                                                                                                                                                                                |
| tejido celular subcutáneo en abdomen en mm        | [*DATA REMOVED*]                                                                                                                                                                                |
| Volumen del muslo en cm3                          | [*DATA REMOVED*]                                                                                                                                                                                |
| Peso fetal estimado según fórmula de Hadlock      | [*DATA REMOVED*]                                                                                                                                                                                |

|                                               |                                                                                                                                                          |
|-----------------------------------------------|----------------------------------------------------------------------------------------------------------------------------------------------------------|
| Percentil                                     | [*DATA REMOVED*]                                                                                                                                         |
| Peso fetal estimado según fórmula de Scioscia | <hr/>                                                                                                                                                    |
| Peso fetal estimado según fórmula de LEE      | <hr/>                                                                                                                                                    |
| Tipo de parto                                 | <input checked="" type="radio"/> eutocico<br><input type="radio"/> instrumentado/ventosa<br><input type="radio"/> cesarea                                |
| fecha de nacimiento                           | [*DATA REMOVED*]                                                                                                                                         |
| Días entre exploración y nacimiento           | [*DATA REMOVED*]                                                                                                                                         |
| Peso RN en g                                  | [*DATA REMOVED*]                                                                                                                                         |
| sexo                                          | <input type="radio"/> mujer<br><input checked="" type="radio"/> hombre                                                                                   |
| Apgar 1 minuto                                | [*DATA REMOVED*]                                                                                                                                         |
| Apgar 5 minutos                               | [*DATA REMOVED*]                                                                                                                                         |
| Apgar 10 minutos                              | <hr/>                                                                                                                                                    |
| antecedente Covid durante gestación           | <input type="radio"/> Yes<br><input checked="" type="radio"/> No                                                                                         |
| Nivel de estudios                             | <input type="radio"/> ninguno<br><input checked="" type="radio"/> primarios<br><input type="radio"/> secundarios<br><input type="radio"/> universitarios |

# Base\_datos\_estimacion\_peso\_fetal

|                                       |                                                                                                                                                                                                                                                                                      |
|---------------------------------------|--------------------------------------------------------------------------------------------------------------------------------------------------------------------------------------------------------------------------------------------------------------------------------------|
| Número de identificación participante | 4                                                                                                                                                                                                                                                                                    |
| CODIGO PARTICIPANTE                   |                                                                                                                                                                                                                                                                                      |
| Edad                                  | [*DATA REMOVED*]                                                                                                                                                                                                                                                                     |
| Gestaciones                           | <input type="radio"/> 1<br><input type="radio"/> 2<br><input checked="" type="radio"/> 3<br><input type="radio"/> mas de 3                                                                                                                                                           |
| partos                                | <input type="radio"/> 0<br><input type="radio"/> 1<br><input checked="" type="radio"/> 2<br><input type="radio"/> 3<br><input type="radio"/> mas de 3                                                                                                                                |
| cesáreas                              | <input checked="" type="radio"/> 0<br><input type="radio"/> 1<br><input type="radio"/> 2<br><input type="radio"/> 3<br><input type="radio"/> mas de 3                                                                                                                                |
| Abortos                               | <input checked="" type="radio"/> 0<br><input type="radio"/> 1<br><input type="radio"/> 2<br><input type="radio"/> 3<br><input type="radio"/> mas de 3                                                                                                                                |
| Tipo de gestacion                     | <input checked="" type="radio"/> espontanea<br><input type="radio"/> IAC inseminación artificial conyuge<br><input type="radio"/> IAD inseminación artificial donante<br><input type="radio"/> FIV Fecundación in Vitro<br><input type="radio"/> Ovodon FIV con donación de ovocitos |
| peso previo a embarazo                | [*DATA REMOVED*]                                                                                                                                                                                                                                                                     |
| Ganancia ponderal embarazo            | [*DATA REMOVED*]                                                                                                                                                                                                                                                                     |
| Talla madre                           | [*DATA REMOVED*]                                                                                                                                                                                                                                                                     |
| IMC previo embarazo                   | 27.180899908172638                                                                                                                                                                                                                                                                   |
| Patología obstétrica                  | <input checked="" type="radio"/> no<br><input type="radio"/> si                                                                                                                                                                                                                      |
| Diabetes pregestacional               | <input checked="" type="radio"/> no<br><input type="radio"/> si                                                                                                                                                                                                                      |
| Diabetes gestacional                  | <input type="radio"/> no<br><input checked="" type="radio"/> si                                                                                                                                                                                                                      |



|                                            |                                                                                                                                                                                      |
|--------------------------------------------|--------------------------------------------------------------------------------------------------------------------------------------------------------------------------------------|
| Diabetes gestacional con insulina          | <input type="radio"/> no<br><input checked="" type="radio"/> si                                                                                                                      |
| Diabetes gestacional con dieta y ejercicio | <input type="radio"/> no<br><input checked="" type="radio"/> si                                                                                                                      |
| Percentil fetos previos                    | <input checked="" type="radio"/> Nada<br><input type="radio"/> percentil menor de 10<br><input type="radio"/> percentil entre 10 y 90<br><input type="radio"/> percentil mayor de 90 |
| Exfumadora                                 | <input checked="" type="radio"/> Nada<br><input type="radio"/> menos de 5 años<br><input type="radio"/> 5 a 10 años<br><input type="radio"/> mayor o igual a 10 años                 |
| Hábito tabáquico                           | <input type="radio"/> no<br><input checked="" type="radio"/> si                                                                                                                      |
| fumadora                                   | [*DATA REMOVED*]                                                                                                                                                                     |
| Consumo otros tóxicos                      | <input checked="" type="radio"/> no<br><input type="radio"/> si                                                                                                                      |
| Hb 1T                                      | [*DATA REMOVED*]                                                                                                                                                                     |
| Htc 1T                                     | [*DATA REMOVED*]                                                                                                                                                                     |
| Hb 2T                                      | [*DATA REMOVED*]                                                                                                                                                                     |
| HTC 2T                                     | [*DATA REMOVED*]                                                                                                                                                                     |
| Hb 3T                                      | [*DATA REMOVED*]                                                                                                                                                                     |
| HTC 3T                                     | [*DATA REMOVED*]                                                                                                                                                                     |
| Suplemento FE oral                         | <input type="radio"/> si<br><input checked="" type="radio"/> no                                                                                                                      |
| Suplemento fe iv                           | <input type="radio"/> si<br><input type="radio"/> no                                                                                                                                 |
| Transfusión                                | <input type="radio"/> no<br><input type="radio"/> si                                                                                                                                 |
| Solicitada Vit D                           | <input type="radio"/> no<br><input type="radio"/> si                                                                                                                                 |
| Deficit vit D                              | <input type="radio"/> no<br><input type="radio"/> si                                                                                                                                 |
| Suplemento vit D                           | <input type="radio"/> si<br><input type="radio"/> no                                                                                                                                 |

---

Dieta, cuestionario

- ☐ sí  
☐ no
- 

Leche entera

- ☒ Nunca o menos 1 vez al mes  
☐ 1 a 3 veces mes  
☐ 1 vez semana  
☐ 2 a 4 veces semana  
☐ 5 a 6 veces semana  
☐ 1 vez al día  
☐ 2 a 3 veces al día  
☐ 5 a 6 veces al día  
☐ más 6 veces al día
- 

Leche semidesnatada

- ☐ Nunca o menos 1 vez al mes  
☐ 1 a 3 veces mes  
☐ 1 vez semana  
☐ 2 a 4 veces semana  
☐ 5 a 6 veces semana  
☐ 1 vez al día  
☒ 2 a 3 veces al día  
☐ 5 a 6 veces al día  
☐ mas 6 veces al día
- 

Leche desnatada

- ☒ Nunca o menos 1 vez al mes  
☐ 1 a 3 veces mes  
☐ 1 vez semana  
☐ 2 a 4 veces semana  
☐ 5 a 6 veces semana  
☐ 1 vez al día  
☐ 2 a 3 veces al día  
☐ 5 a 6 veces al día  
☐ más 6 veces al día
- 

Leche condensada

- ☒ Nunca o menos 1 vez al mes  
☐ 1 a 3 veces mes  
☐ 1 vez semana  
☐ 2 a 4 veces semana  
☐ 5 a 6 veces semana  
☐ 1 vez al día  
☐ 2 a 3 veces al día  
☐ 5 a 6 veces al día  
☐ más 6 veces al día
- 

nata o crema de leche

- ☒ Nunca o menos 1 vez al mes  
☐ 1 a 3 veces mes  
☐ 1 vez semana  
☐ 2 a 4 veces semana  
☐ 5 a 6 veces semana  
☐ 1 vez al día  
☐ 2 a 3 veces al día  
☐ 5 a 6 veces al día  
☐ más 6 veces al día

|                                             |                                                                                                                                                                                                                                                                                                                                                                                                              |
|---------------------------------------------|--------------------------------------------------------------------------------------------------------------------------------------------------------------------------------------------------------------------------------------------------------------------------------------------------------------------------------------------------------------------------------------------------------------|
| Yogurt Entero                               | <input type="radio"/> Nunca o menos 1 vez al mes<br><input type="radio"/> 1 a 3 veces mes<br><input type="radio"/> 1 vez semana<br><input type="radio"/> 2 a 4 veces semana<br><input type="radio"/> 5 a 6 veces semana<br><input type="radio"/> 1 vez al día<br><input checked="" type="radio"/> 2 a 3 veces al día<br><input type="radio"/> 5 a 6 veces al día<br><input type="radio"/> más 6 veces al día |
| Yogurt desnatado                            | <input checked="" type="radio"/> Nunca o menos 1 vez al mes<br><input type="radio"/> 1 a 3 veces mes<br><input type="radio"/> 1 vez semana<br><input type="radio"/> 2 a 4 veces semana<br><input type="radio"/> 5 a 6 veces semana<br><input type="radio"/> 1 vez al día<br><input type="radio"/> 2 a 3 veces al día<br><input type="radio"/> 5 a 6 veces al día<br><input type="radio"/> más 6 veces al día |
| 100g requesón o queso blando o queso fresco | <input checked="" type="radio"/> Nunca o menos 1 vez al mes<br><input type="radio"/> 1 a 3 veces mes<br><input type="radio"/> 1 vez semana<br><input type="radio"/> 2 a 4 veces semana<br><input type="radio"/> 5 a 6 veces semana<br><input type="radio"/> 1 vez al día<br><input type="radio"/> 2 a 3 veces al día<br><input type="radio"/> 5 a 6 veces al día<br><input type="radio"/> más 6 veces al día |
| queso curado o semicurado o cremoso         | <input type="radio"/> Nunca o menos 1 vez al mes<br><input type="radio"/> 1 a 3 veces mes<br><input type="radio"/> 1 vez semana<br><input checked="" type="radio"/> 2 a 4 veces semana<br><input type="radio"/> 5 a 6 veces semana<br><input type="radio"/> 1 vez al día<br><input type="radio"/> 2 a 3 veces al día<br><input type="radio"/> 5 a 6 veces al día<br><input type="radio"/> más 6 veces al día |
| natillas flan pudding                       | <input type="radio"/> Nunca o menos 1 vez al mes<br><input type="radio"/> 1 a 3 veces mes<br><input type="radio"/> 1 vez semana<br><input type="radio"/> 2 a 4 veces semana<br><input type="radio"/> 5 a 6 veces semana<br><input checked="" type="radio"/> 1 vez al día<br><input type="radio"/> 2 a 3 veces al día<br><input type="radio"/> 5 a 6 veces al día<br><input type="radio"/> más 6 veces al día |
| Helado                                      | <input checked="" type="radio"/> Nunca o menos 1 vez al mes<br><input type="radio"/> 1 a 3 veces mes<br><input type="radio"/> 1 vez semana<br><input type="radio"/> 2 a 4 veces semana<br><input type="radio"/> 5 a 6 veces semana<br><input type="radio"/> 1 vez al día<br><input type="radio"/> 2 a 3 veces al día<br><input type="radio"/> 5 a 6 veces al día<br><input type="radio"/> más 6 veces al día |

|                                      |                                                                                                                                                                                                                                                                                                                                                                                                              |
|--------------------------------------|--------------------------------------------------------------------------------------------------------------------------------------------------------------------------------------------------------------------------------------------------------------------------------------------------------------------------------------------------------------------------------------------------------------|
| huevo                                | <input type="radio"/> Nunca o menos 1 vez al mes<br><input type="radio"/> 1 a 3 veces mes<br><input type="radio"/> 1 vez semana<br><input checked="" type="radio"/> 2 a 4 veces semana<br><input type="radio"/> 5 a 6 veces semana<br><input type="radio"/> 1 vez al día<br><input type="radio"/> 2 a 3 veces al día<br><input type="radio"/> 5 a 6 veces al día<br><input type="radio"/> más 6 veces al día |
| Pollo con piel                       | <input type="radio"/> Nunca o menos 1 vez al mes<br><input type="radio"/> 1 a 3 veces mes<br><input type="radio"/> 1 vez semana<br><input checked="" type="radio"/> 2 a 4 veces semana<br><input type="radio"/> 5 a 6 veces semana<br><input type="radio"/> 1 vez al día<br><input type="radio"/> 2 a 3 veces al día<br><input type="radio"/> 5 a 6 veces al día<br><input type="radio"/> más 6 veces al día |
| pollo sin piel                       | <input type="radio"/> Nunca o menos 1 vez al mes<br><input type="radio"/> 1 a 3 veces mes<br><input type="radio"/> 1 vez semana<br><input checked="" type="radio"/> 2 a 4 veces semana<br><input type="radio"/> 5 a 6 veces semana<br><input type="radio"/> 1 vez al día<br><input type="radio"/> 2 a 3 veces al día<br><input type="radio"/> 5 a 6 veces al día<br><input type="radio"/> más 6 veces al día |
| Ternera o cerdo o cordero            | <input type="radio"/> Nunca o menos 1 vez al mes<br><input type="radio"/> 1 a 3 veces mes<br><input checked="" type="radio"/> 1 vez semana<br><input type="radio"/> 2 a 4 veces semana<br><input type="radio"/> 5 a 6 veces semana<br><input type="radio"/> 1 vez al día<br><input type="radio"/> 2 a 3 veces al día<br><input type="radio"/> 5 a 6 veces al día<br><input type="radio"/> más 6 veces al día |
| carne caza: Conejo o codorniz o pato | <input type="radio"/> Nunca o menos 1 vez al mes<br><input checked="" type="radio"/> 1 a 3 veces mes<br><input type="radio"/> 1 vez semana<br><input type="radio"/> 2 a 4 veces semana<br><input type="radio"/> 5 a 6 veces semana<br><input type="radio"/> 1 vez al día<br><input type="radio"/> 2 a 3 veces al día<br><input type="radio"/> 5 a 6 veces al día<br><input type="radio"/> más 6 veces al día |
| Hígado de ternera o cerdo o pollo    | <input type="radio"/> Nunca o menos 1 vez al mes<br><input checked="" type="radio"/> 1 a 3 veces mes<br><input type="radio"/> 1 vez semana<br><input type="radio"/> 2 a 4 veces semana<br><input type="radio"/> 5 a 6 veces semana<br><input type="radio"/> 1 vez al día<br><input type="radio"/> 2 a 3 veces al día<br><input type="radio"/> 5 a 6 veces al día<br><input type="radio"/> más 6 veces al día |

|                     |                                                                                                                                                                                                                                                                                                                                                                                                              |
|---------------------|--------------------------------------------------------------------------------------------------------------------------------------------------------------------------------------------------------------------------------------------------------------------------------------------------------------------------------------------------------------------------------------------------------------|
| Vísceras            | <input checked="" type="radio"/> Nunca o menos 1 vez al mes<br><input type="radio"/> 1 a 3 veces mes<br><input type="radio"/> 1 vez semana<br><input type="radio"/> 2 a 4 veces semana<br><input type="radio"/> 5 a 6 veces semana<br><input type="radio"/> 1 vez al día<br><input type="radio"/> 2 a 3 veces al día<br><input type="radio"/> 5 a 6 veces al día<br><input type="radio"/> más 6 veces al día |
| Embutido            | <input type="radio"/> Nunca o menos 1 vez al mes<br><input type="radio"/> 1 a 3 veces mes<br><input type="radio"/> 1 vez semana<br><input type="radio"/> 2 a 4 veces semana<br><input type="radio"/> 5 a 6 veces semana<br><input checked="" type="radio"/> 1 vez al día<br><input type="radio"/> 2 a 3 veces al día<br><input type="radio"/> 5 a 6 veces al día<br><input type="radio"/> más 6 veces al día |
| Salchicha o similar | <input type="radio"/> Nunca o menos 1 vez al mes<br><input type="radio"/> 1 a 3 veces mes<br><input type="radio"/> 1 vez semana<br><input type="radio"/> 2 a 4 veces semana<br><input checked="" type="radio"/> 5 a 6 veces semana<br><input type="radio"/> 1 vez al día<br><input type="radio"/> 2 a 3 veces al día<br><input type="radio"/> 5 a 6 veces al día<br><input type="radio"/> más 6 veces al día |
| Pate o foiegras     | <input type="radio"/> Nunca o menos 1 vez al mes<br><input type="radio"/> 1 a 3 veces mes<br><input type="radio"/> 1 vez semana<br><input type="radio"/> 2 a 4 veces semana<br><input checked="" type="radio"/> 5 a 6 veces semana<br><input type="radio"/> 1 vez al día<br><input type="radio"/> 2 a 3 veces al día<br><input type="radio"/> 5 a 6 veces al día<br><input type="radio"/> más 6 veces al día |
| Hamburguesa         | <input type="radio"/> Nunca o menos 1 vez al mes<br><input type="radio"/> 1 a 3 veces mes<br><input checked="" type="radio"/> 1 vez semana<br><input type="radio"/> 2 a 4 veces semana<br><input type="radio"/> 5 a 6 veces semana<br><input type="radio"/> 1 vez al día<br><input type="radio"/> 2 a 3 veces al día<br><input type="radio"/> 5 a 6 veces al día<br><input type="radio"/> más 6 veces al día |
| tocino o bacon      | <input type="radio"/> Nunca o menos 1 vez al mes<br><input checked="" type="radio"/> 1 a 3 veces mes<br><input type="radio"/> 1 vez semana<br><input type="radio"/> 2 a 4 veces semana<br><input type="radio"/> 5 a 6 veces semana<br><input type="radio"/> 1 vez al día<br><input type="radio"/> 2 a 3 veces al día<br><input type="radio"/> 5 a 6 veces al día<br><input type="radio"/> más 6 veces al día |

---

|               |                                                                                                                                                                                                                                                                                                                                                                                                   |
|---------------|---------------------------------------------------------------------------------------------------------------------------------------------------------------------------------------------------------------------------------------------------------------------------------------------------------------------------------------------------------------------------------------------------|
| Pescado frito | <input type="radio"/> Nunca o menos 1 vez al mes<br><input type="radio"/> 1 a 3 veces mes<br><input type="radio"/> 1 vez semana<br><input type="radio"/> 2 a 4 veces semana<br><input type="radio"/> 5 a 6 veces semana<br><input type="radio"/> 1 vez al día<br><input type="radio"/> 2 a 3 veces al día<br><input type="radio"/> 5 a 6 veces al día<br><input type="radio"/> más 6 veces al día |
|---------------|---------------------------------------------------------------------------------------------------------------------------------------------------------------------------------------------------------------------------------------------------------------------------------------------------------------------------------------------------------------------------------------------------|

---

|                        |                                                                                                                                                                                                                                                                                                                                                                                                              |
|------------------------|--------------------------------------------------------------------------------------------------------------------------------------------------------------------------------------------------------------------------------------------------------------------------------------------------------------------------------------------------------------------------------------------------------------|
| pescado hervido blanco | <input type="radio"/> Nunca o menos 1 vez al mes<br><input type="radio"/> 1 a 3 veces mes<br><input checked="" type="radio"/> 1 vez semana<br><input type="radio"/> 2 a 4 veces semana<br><input type="radio"/> 5 a 6 veces semana<br><input type="radio"/> 1 vez al día<br><input type="radio"/> 2 a 3 veces al día<br><input type="radio"/> 5 a 6 veces al día<br><input type="radio"/> más 6 veces al día |
|------------------------|--------------------------------------------------------------------------------------------------------------------------------------------------------------------------------------------------------------------------------------------------------------------------------------------------------------------------------------------------------------------------------------------------------------|

---

|                      |                                                                                                                                                                                                                                                                                                                                                                                                              |
|----------------------|--------------------------------------------------------------------------------------------------------------------------------------------------------------------------------------------------------------------------------------------------------------------------------------------------------------------------------------------------------------------------------------------------------------|
| pescado hervido azul | <input type="radio"/> Nunca o menos 1 vez al mes<br><input type="radio"/> 1 a 3 veces mes<br><input checked="" type="radio"/> 1 vez semana<br><input type="radio"/> 2 a 4 veces semana<br><input type="radio"/> 5 a 6 veces semana<br><input type="radio"/> 1 vez al día<br><input type="radio"/> 2 a 3 veces al día<br><input type="radio"/> 5 a 6 veces al día<br><input type="radio"/> más 6 veces al día |
|----------------------|--------------------------------------------------------------------------------------------------------------------------------------------------------------------------------------------------------------------------------------------------------------------------------------------------------------------------------------------------------------------------------------------------------------|

---

|                    |                                                                                                                                                                                                                                                                                                                                                                                                              |
|--------------------|--------------------------------------------------------------------------------------------------------------------------------------------------------------------------------------------------------------------------------------------------------------------------------------------------------------------------------------------------------------------------------------------------------------|
| otros pescado azul | <input type="radio"/> Nunca o menos 1 vez al mes<br><input type="radio"/> 1 a 3 veces mes<br><input type="radio"/> 1 vez semana<br><input checked="" type="radio"/> 2 a 4 veces semana<br><input type="radio"/> 5 a 6 veces semana<br><input type="radio"/> 1 vez al día<br><input type="radio"/> 2 a 3 veces al día<br><input type="radio"/> 5 a 6 veces al día<br><input type="radio"/> más 6 veces al día |
|--------------------|--------------------------------------------------------------------------------------------------------------------------------------------------------------------------------------------------------------------------------------------------------------------------------------------------------------------------------------------------------------------------------------------------------------|

---

|               |                                                                                                                                                                                                                                                                                                                                                                                                              |
|---------------|--------------------------------------------------------------------------------------------------------------------------------------------------------------------------------------------------------------------------------------------------------------------------------------------------------------------------------------------------------------------------------------------------------------|
| atun conserva | <input type="radio"/> Nunca o menos 1 vez al mes<br><input type="radio"/> 1 a 3 veces mes<br><input type="radio"/> 1 vez semana<br><input checked="" type="radio"/> 2 a 4 veces semana<br><input type="radio"/> 5 a 6 veces semana<br><input type="radio"/> 1 vez al día<br><input type="radio"/> 2 a 3 veces al día<br><input type="radio"/> 5 a 6 veces al día<br><input type="radio"/> más 6 veces al día |
|---------------|--------------------------------------------------------------------------------------------------------------------------------------------------------------------------------------------------------------------------------------------------------------------------------------------------------------------------------------------------------------------------------------------------------------|

---

|                  |                                                                                                                                                                                                                                                                                                                                                                                                              |
|------------------|--------------------------------------------------------------------------------------------------------------------------------------------------------------------------------------------------------------------------------------------------------------------------------------------------------------------------------------------------------------------------------------------------------------|
| sardina conserva | <input checked="" type="radio"/> Nunca o menos 1 vez al mes<br><input type="radio"/> 1 a 3 veces mes<br><input type="radio"/> 1 vez semana<br><input type="radio"/> 2 a 4 veces semana<br><input type="radio"/> 5 a 6 veces semana<br><input type="radio"/> 1 vez al día<br><input type="radio"/> 2 a 3 veces al día<br><input type="radio"/> 5 a 6 veces al día<br><input type="radio"/> más 6 veces al día |
|------------------|--------------------------------------------------------------------------------------------------------------------------------------------------------------------------------------------------------------------------------------------------------------------------------------------------------------------------------------------------------------------------------------------------------------|

---

|                                         |                                                                                                                                                                                                                                                                                                                                                                                                              |
|-----------------------------------------|--------------------------------------------------------------------------------------------------------------------------------------------------------------------------------------------------------------------------------------------------------------------------------------------------------------------------------------------------------------------------------------------------------------|
| pescado ahumado                         | <input type="radio"/> Nunca o menos 1 vez al mes<br><input type="radio"/> 1 a 3 veces mes<br><input checked="" type="radio"/> 1 vez semana<br><input type="radio"/> 2 a 4 veces semana<br><input type="radio"/> 5 a 6 veces semana<br><input type="radio"/> 1 vez al día<br><input type="radio"/> 2 a 3 veces al día<br><input type="radio"/> 5 a 6 veces al día<br><input type="radio"/> más 6 veces al día |
| almejas o mejillones o ostras unos 100g | <input checked="" type="radio"/> Nunca o menos 1 vez al mes<br><input type="radio"/> 1 a 3 veces mes<br><input type="radio"/> 1 vez semana<br><input type="radio"/> 2 a 4 veces semana<br><input type="radio"/> 5 a 6 veces semana<br><input type="radio"/> 1 vez al día<br><input type="radio"/> 2 a 3 veces al día<br><input type="radio"/> 5 a 6 veces al día<br><input type="radio"/> más 6 veces al día |
| calamar o chipiron o sepia unos 100g    | <input type="radio"/> Nunca o menos 1 vez al mes<br><input type="radio"/> 1 a 3 veces mes<br><input checked="" type="radio"/> 1 vez semana<br><input type="radio"/> 2 a 4 veces semana<br><input type="radio"/> 5 a 6 veces semana<br><input type="radio"/> 1 vez al día<br><input type="radio"/> 2 a 3 veces al día<br><input type="radio"/> 5 a 6 veces al día<br><input type="radio"/> más 6 veces al día |
| marisco unos 100g                       | <input type="radio"/> Nunca o menos 1 vez al mes<br><input type="radio"/> 1 a 3 veces mes<br><input checked="" type="radio"/> 1 vez semana<br><input type="radio"/> 2 a 4 veces semana<br><input type="radio"/> 5 a 6 veces semana<br><input type="radio"/> 1 vez al día<br><input type="radio"/> 2 a 3 veces al día<br><input type="radio"/> 5 a 6 veces al día<br><input type="radio"/> más 6 veces al día |
| Espinacas o acelgas cocinadas           | <input type="radio"/> Nunca o menos 1 vez al mes<br><input type="radio"/> 1 a 3 veces mes<br><input type="radio"/> 1 vez semana<br><input checked="" type="radio"/> 2 a 4 veces semana<br><input type="radio"/> 5 a 6 veces semana<br><input type="radio"/> 1 vez al día<br><input type="radio"/> 2 a 3 veces al día<br><input type="radio"/> 5 a 6 veces al día<br><input type="radio"/> más 6 veces al día |
| Col o coliflor o brocoli cocinado       | <input type="radio"/> Nunca o menos 1 vez al mes<br><input type="radio"/> 1 a 3 veces mes<br><input checked="" type="radio"/> 1 vez semana<br><input type="radio"/> 2 a 4 veces semana<br><input type="radio"/> 5 a 6 veces semana<br><input type="radio"/> 1 vez al día<br><input type="radio"/> 2 a 3 veces al día<br><input type="radio"/> 5 a 6 veces al día<br><input type="radio"/> más 6 veces al día |

---

Lechuga o endivia o escarola

- ☐ Nunca o menos 1 vez al mes  
☐ 1 a 3 veces mes  
☐ 1 vez semana  
☐ 2 a 4 veces semana  
☐ 5 a 6 veces semana  
☐ 1 vez al día  
☒ 2 a 3 veces al día  
☐ 5 a 6 veces al día  
☐ más 6 veces al día

---

tomate ensalada

- ☐ Nunca o menos 1 vez al mes  
☐ 1 a 3 veces mes  
☐ 1 vez semana  
☐ 2 a 4 veces semana  
☐ 5 a 6 veces semana  
☐ 1 vez al día  
☒ 2 a 3 veces al día  
☐ 5 a 6 veces al día  
☐ más 6 veces al día

---

cebolla

- ☐ Nunca o menos 1 vez al mes  
☐ 1 a 3 veces mes  
☐ 1 vez semana  
☒ 2 a 4 veces semana  
☐ 5 a 6 veces semana  
☐ 1 vez al día  
☐ 2 a 3 veces al día  
☐ 5 a 6 veces al día  
☐ más 6 veces al día

---

Zanahoria o calabaza

- ☐ Nunca o menos 1 vez al mes  
☒ 1 a 3 veces mes  
☐ 1 vez semana  
☐ 2 a 4 veces semana  
☐ 5 a 6 veces semana  
☐ 1 vez al día  
☐ 2 a 3 veces al día  
☐ 5 a 6 veces al día  
☐ más 6 veces al día

---

Judías verdes

- ☐ Nunca o menos 1 vez al mes  
☒ 1 a 3 veces mes  
☐ 1 vez semana  
☐ 2 a 4 veces semana  
☐ 5 a 6 veces semana  
☐ 1 vez al día  
☐ 2 a 3 veces al día  
☐ 5 a 6 veces al día  
☐ más 6 veces al día

---

Berenjena o calabacin o pepino

- ☐ Nunca o menos 1 vez al mes  
☐ 1 a 3 veces mes  
☒ 1 vez semana  
☐ 2 a 4 veces semana  
☐ 5 a 6 veces semana  
☐ 1 vez al día  
☐ 2 a 3 veces al día  
☐ 5 a 6 veces al día  
☐ más 6 veces al día



---

|          |                                                                                                                                                                                                                                                                                                                                                                                                              |
|----------|--------------------------------------------------------------------------------------------------------------------------------------------------------------------------------------------------------------------------------------------------------------------------------------------------------------------------------------------------------------------------------------------------------------|
| pimiento | <input type="radio"/> Nunca o menos 1 vez al mes<br><input type="radio"/> 1 a 3 veces mes<br><input checked="" type="radio"/> 1 vez semana<br><input type="radio"/> 2 a 4 veces semana<br><input type="radio"/> 5 a 6 veces semana<br><input type="radio"/> 1 vez al día<br><input type="radio"/> 2 a 3 veces al día<br><input type="radio"/> 5 a 6 veces al día<br><input type="radio"/> más 6 veces al día |
|----------|--------------------------------------------------------------------------------------------------------------------------------------------------------------------------------------------------------------------------------------------------------------------------------------------------------------------------------------------------------------------------------------------------------------|

---

|           |                                                                                                                                                                                                                                                                                                                                                                                                              |
|-----------|--------------------------------------------------------------------------------------------------------------------------------------------------------------------------------------------------------------------------------------------------------------------------------------------------------------------------------------------------------------------------------------------------------------|
| alcachofa | <input type="radio"/> Nunca o menos 1 vez al mes<br><input checked="" type="radio"/> 1 a 3 veces mes<br><input type="radio"/> 1 vez semana<br><input type="radio"/> 2 a 4 veces semana<br><input type="radio"/> 5 a 6 veces semana<br><input type="radio"/> 1 vez al día<br><input type="radio"/> 2 a 3 veces al día<br><input type="radio"/> 5 a 6 veces al día<br><input type="radio"/> más 6 veces al día |
|-----------|--------------------------------------------------------------------------------------------------------------------------------------------------------------------------------------------------------------------------------------------------------------------------------------------------------------------------------------------------------------------------------------------------------------|

---

|            |                                                                                                                                                                                                                                                                                                                                                                                                              |
|------------|--------------------------------------------------------------------------------------------------------------------------------------------------------------------------------------------------------------------------------------------------------------------------------------------------------------------------------------------------------------------------------------------------------------|
| espárragos | <input type="radio"/> Nunca o menos 1 vez al mes<br><input checked="" type="radio"/> 1 a 3 veces mes<br><input type="radio"/> 1 vez semana<br><input type="radio"/> 2 a 4 veces semana<br><input type="radio"/> 5 a 6 veces semana<br><input type="radio"/> 1 vez al día<br><input type="radio"/> 2 a 3 veces al día<br><input type="radio"/> 5 a 6 veces al día<br><input type="radio"/> más 6 veces al día |
|------------|--------------------------------------------------------------------------------------------------------------------------------------------------------------------------------------------------------------------------------------------------------------------------------------------------------------------------------------------------------------------------------------------------------------|

---

|              |                                                                                                                                                                                                                                                                                                                                                                                                              |
|--------------|--------------------------------------------------------------------------------------------------------------------------------------------------------------------------------------------------------------------------------------------------------------------------------------------------------------------------------------------------------------------------------------------------------------|
| maíz hervido | <input checked="" type="radio"/> Nunca o menos 1 vez al mes<br><input type="radio"/> 1 a 3 veces mes<br><input type="radio"/> 1 vez semana<br><input type="radio"/> 2 a 4 veces semana<br><input type="radio"/> 5 a 6 veces semana<br><input type="radio"/> 1 vez al día<br><input type="radio"/> 2 a 3 veces al día<br><input type="radio"/> 5 a 6 veces al día<br><input type="radio"/> más 6 veces al día |
|--------------|--------------------------------------------------------------------------------------------------------------------------------------------------------------------------------------------------------------------------------------------------------------------------------------------------------------------------------------------------------------------------------------------------------------|

---

|           |                                                                                                                                                                                                                                                                                                                                                                                                              |
|-----------|--------------------------------------------------------------------------------------------------------------------------------------------------------------------------------------------------------------------------------------------------------------------------------------------------------------------------------------------------------------------------------------------------------------|
| legumbres | <input type="radio"/> Nunca o menos 1 vez al mes<br><input type="radio"/> 1 a 3 veces mes<br><input type="radio"/> 1 vez semana<br><input checked="" type="radio"/> 2 a 4 veces semana<br><input type="radio"/> 5 a 6 veces semana<br><input type="radio"/> 1 vez al día<br><input type="radio"/> 2 a 3 veces al día<br><input type="radio"/> 5 a 6 veces al día<br><input type="radio"/> más 6 veces al día |
|-----------|--------------------------------------------------------------------------------------------------------------------------------------------------------------------------------------------------------------------------------------------------------------------------------------------------------------------------------------------------------------------------------------------------------------|

---

|                       |                                                                                                                                                                                                                                                                                                                                                                                                              |
|-----------------------|--------------------------------------------------------------------------------------------------------------------------------------------------------------------------------------------------------------------------------------------------------------------------------------------------------------------------------------------------------------------------------------------------------------|
| naranjas o mandarinas | <input type="radio"/> Nunca o menos 1 vez al mes<br><input type="radio"/> 1 a 3 veces mes<br><input type="radio"/> 1 vez semana<br><input type="radio"/> 2 a 4 veces semana<br><input type="radio"/> 5 a 6 veces semana<br><input type="radio"/> 1 vez al día<br><input type="radio"/> 2 a 3 veces al día<br><input checked="" type="radio"/> 5 a 6 veces al día<br><input type="radio"/> más 6 veces al día |
|-----------------------|--------------------------------------------------------------------------------------------------------------------------------------------------------------------------------------------------------------------------------------------------------------------------------------------------------------------------------------------------------------------------------------------------------------|

---

|                       |                                                                                                                                                                                                                                                                                                                                                                                                              |
|-----------------------|--------------------------------------------------------------------------------------------------------------------------------------------------------------------------------------------------------------------------------------------------------------------------------------------------------------------------------------------------------------------------------------------------------------|
| zum natural fruta     | <input type="radio"/> Nunca o menos 1 vez al mes<br><input type="radio"/> 1 a 3 veces mes<br><input type="radio"/> 1 vez semana<br><input type="radio"/> 2 a 4 veces semana<br><input type="radio"/> 5 a 6 veces semana<br><input type="radio"/> 1 vez al día<br><input checked="" type="radio"/> 2 a 3 veces al día<br><input type="radio"/> 5 a 6 veces al día<br><input type="radio"/> más 6 veces al día |
| platano               | <input type="radio"/> Nunca o menos 1 vez al mes<br><input checked="" type="radio"/> 1 a 3 veces mes<br><input type="radio"/> 1 vez semana<br><input type="radio"/> 2 a 4 veces semana<br><input type="radio"/> 5 a 6 veces semana<br><input type="radio"/> 1 vez al día<br><input type="radio"/> 2 a 3 veces al día<br><input type="radio"/> 5 a 6 veces al día<br><input type="radio"/> más 6 veces al día |
| manzana o pera        | <input type="radio"/> Nunca o menos 1 vez al mes<br><input checked="" type="radio"/> 1 a 3 veces mes<br><input type="radio"/> 1 vez semana<br><input type="radio"/> 2 a 4 veces semana<br><input type="radio"/> 5 a 6 veces semana<br><input type="radio"/> 1 vez al día<br><input type="radio"/> 2 a 3 veces al día<br><input type="radio"/> 5 a 6 veces al día<br><input type="radio"/> más 6 veces al día |
| melocotón o nectarina | <input checked="" type="radio"/> Nunca o menos 1 vez al mes<br><input type="radio"/> 1 a 3 veces mes<br><input type="radio"/> 1 vez semana<br><input type="radio"/> 2 a 4 veces semana<br><input type="radio"/> 5 a 6 veces semana<br><input type="radio"/> 1 vez al día<br><input type="radio"/> 2 a 3 veces al día<br><input type="radio"/> 5 a 6 veces al día<br><input type="radio"/> más 6 veces al día |
| sandia o melon        | <input type="radio"/> Nunca o menos 1 vez al mes<br><input checked="" type="radio"/> 1 a 3 veces mes<br><input type="radio"/> 1 vez semana<br><input type="radio"/> 2 a 4 veces semana<br><input type="radio"/> 5 a 6 veces semana<br><input type="radio"/> 1 vez al día<br><input type="radio"/> 2 a 3 veces al día<br><input type="radio"/> 5 a 6 veces al día<br><input type="radio"/> más 6 veces al día |
| uva                   | <input type="radio"/> Nunca o menos 1 vez al mes<br><input checked="" type="radio"/> 1 a 3 veces mes<br><input type="radio"/> 1 vez semana<br><input type="radio"/> 2 a 4 veces semana<br><input type="radio"/> 5 a 6 veces semana<br><input type="radio"/> 1 vez al día<br><input type="radio"/> 2 a 3 veces al día<br><input type="radio"/> 5 a 6 veces al día<br><input type="radio"/> más 6 veces al día |

---

bruna o ciruela

- ☒ Nunca o menos 1 vez al mes  
☐ 1 a 3 veces mes  
☐ 1 vez semana  
☐ 2 a 4 veces semana  
☐ 5 a 6 veces semana  
☐ 1 vez al día  
☐ 2 a 3 veces al día  
☐ 5 a 6 veces al día  
☐ más 6 veces al día

---

kiwi

- ☐ Nunca o menos 1 vez al mes  
☒ 1 a 3 veces mes  
☐ 1 vez semana  
☐ 2 a 4 veces semana  
☐ 5 a 6 veces semana  
☐ 1 vez al día  
☐ 2 a 3 veces al día  
☐ 5 a 6 veces al día  
☐ más 6 veces al día

---

aceituna

- ☐ Nunca o menos 1 vez al mes  
☐ 1 a 3 veces mes  
☒ 1 vez semana  
☐ 2 a 4 veces semana  
☐ 5 a 6 veces semana  
☐ 1 vez al día  
☐ 2 a 3 veces al día  
☐ 5 a 6 veces al día  
☐ más 6 veces al día

---

frutos secos

- ☐ Nunca o menos 1 vez al mes  
☐ 1 a 3 veces mes  
☐ 1 vez semana  
☒ 2 a 4 veces semana  
☐ 5 a 6 veces semana  
☐ 1 vez al día  
☐ 2 a 3 veces al día  
☐ 5 a 6 veces al día  
☐ más 6 veces al día

---

pan blanco

- ☐ Nunca o menos 1 vez al mes  
☐ 1 a 3 veces mes  
☐ 1 vez semana  
☐ 2 a 4 veces semana  
☐ 5 a 6 veces semana  
☒ 1 vez al día  
☐ 2 a 3 veces al día  
☐ 5 a 6 veces al día  
☐ más 6 veces al día

---

pan integral

- ☐ Nunca o menos 1 vez al mes  
☒ 1 a 3 veces mes  
☐ 1 vez semana  
☐ 2 a 4 veces semana  
☐ 5 a 6 veces semana  
☐ 1 vez al día  
☐ 2 a 3 veces al día  
☐ 5 a 6 veces al día  
☐ más 6 veces al día

|                          |                                                                                                                                                                                                                                                                                                                                                                                                              |
|--------------------------|--------------------------------------------------------------------------------------------------------------------------------------------------------------------------------------------------------------------------------------------------------------------------------------------------------------------------------------------------------------------------------------------------------------|
| cereales desayuno        | <input checked="" type="radio"/> Nunca o menos 1 vez al mes<br><input type="radio"/> 1 a 3 veces mes<br><input type="radio"/> 1 vez semana<br><input type="radio"/> 2 a 4 veces semana<br><input type="radio"/> 5 a 6 veces semana<br><input type="radio"/> 1 vez al día<br><input type="radio"/> 2 a 3 veces al día<br><input type="radio"/> 5 a 6 veces al día<br><input type="radio"/> más 6 veces al día |
| patatas fritas           | <input type="radio"/> Nunca o menos 1 vez al mes<br><input type="radio"/> 1 a 3 veces mes<br><input checked="" type="radio"/> 1 vez semana<br><input type="radio"/> 2 a 4 veces semana<br><input type="radio"/> 5 a 6 veces semana<br><input type="radio"/> 1 vez al día<br><input type="radio"/> 2 a 3 veces al día<br><input type="radio"/> 5 a 6 veces al día<br><input type="radio"/> más 6 veces al día |
| patatas cocidas o asadas | <input type="radio"/> Nunca o menos 1 vez al mes<br><input type="radio"/> 1 a 3 veces mes<br><input checked="" type="radio"/> 1 vez semana<br><input type="radio"/> 2 a 4 veces semana<br><input type="radio"/> 5 a 6 veces semana<br><input type="radio"/> 1 vez al día<br><input type="radio"/> 2 a 3 veces al día<br><input type="radio"/> 5 a 6 veces al día<br><input type="radio"/> más 6 veces al día |
| bolsa papas              | <input type="radio"/> Nunca o menos 1 vez al mes<br><input type="radio"/> 1 a 3 veces mes<br><input type="radio"/> 1 vez semana<br><input checked="" type="radio"/> 2 a 4 veces semana<br><input type="radio"/> 5 a 6 veces semana<br><input type="radio"/> 1 vez al día<br><input type="radio"/> 2 a 3 veces al día<br><input type="radio"/> 5 a 6 veces al día<br><input type="radio"/> más 6 veces al día |
| arroz cocinado           | <input type="radio"/> Nunca o menos 1 vez al mes<br><input type="radio"/> 1 a 3 veces mes<br><input type="radio"/> 1 vez semana<br><input checked="" type="radio"/> 2 a 4 veces semana<br><input type="radio"/> 5 a 6 veces semana<br><input type="radio"/> 1 vez al día<br><input type="radio"/> 2 a 3 veces al día<br><input type="radio"/> 5 a 6 veces al día<br><input type="radio"/> más 6 veces al día |
| pasta                    | <input type="radio"/> Nunca o menos 1 vez al mes<br><input type="radio"/> 1 a 3 veces mes<br><input type="radio"/> 1 vez semana<br><input checked="" type="radio"/> 2 a 4 veces semana<br><input type="radio"/> 5 a 6 veces semana<br><input type="radio"/> 1 vez al día<br><input type="radio"/> 2 a 3 veces al día<br><input type="radio"/> 5 a 6 veces al día<br><input type="radio"/> más 6 veces al día |

|                     |                                                                                                                                                                                                                                                                                                                                                                                                              |
|---------------------|--------------------------------------------------------------------------------------------------------------------------------------------------------------------------------------------------------------------------------------------------------------------------------------------------------------------------------------------------------------------------------------------------------------|
| pizza               | <input type="radio"/> Nunca o menos 1 vez al mes<br><input checked="" type="radio"/> 1 a 3 veces mes<br><input type="radio"/> 1 vez semana<br><input type="radio"/> 2 a 4 veces semana<br><input type="radio"/> 5 a 6 veces semana<br><input type="radio"/> 1 vez al día<br><input type="radio"/> 2 a 3 veces al día<br><input type="radio"/> 5 a 6 veces al día<br><input type="radio"/> más 6 veces al día |
| aceite oliva        | <input type="radio"/> Nunca o menos 1 vez al mes<br><input type="radio"/> 1 a 3 veces mes<br><input type="radio"/> 1 vez semana<br><input type="radio"/> 2 a 4 veces semana<br><input type="radio"/> 5 a 6 veces semana<br><input checked="" type="radio"/> 1 vez al día<br><input type="radio"/> 2 a 3 veces al día<br><input type="radio"/> 5 a 6 veces al día<br><input type="radio"/> más 6 veces al día |
| otros aceites       | <input type="radio"/> Nunca o menos 1 vez al mes<br><input type="radio"/> 1 a 3 veces mes<br><input type="radio"/> 1 vez semana<br><input type="radio"/> 2 a 4 veces semana<br><input type="radio"/> 5 a 6 veces semana<br><input checked="" type="radio"/> 1 vez al día<br><input type="radio"/> 2 a 3 veces al día<br><input type="radio"/> 5 a 6 veces al día<br><input type="radio"/> más 6 veces al día |
| margarina           | <input checked="" type="radio"/> Nunca o menos 1 vez al mes<br><input type="radio"/> 1 a 3 veces mes<br><input type="radio"/> 1 vez semana<br><input type="radio"/> 2 a 4 veces semana<br><input type="radio"/> 5 a 6 veces semana<br><input type="radio"/> 1 vez al día<br><input type="radio"/> 2 a 3 veces al día<br><input type="radio"/> 5 a 6 veces al día<br><input type="radio"/> más 6 veces al día |
| mantequilla         | <input checked="" type="radio"/> Nunca o menos 1 vez al mes<br><input type="radio"/> 1 a 3 veces mes<br><input type="radio"/> 1 vez semana<br><input type="radio"/> 2 a 4 veces semana<br><input type="radio"/> 5 a 6 veces semana<br><input type="radio"/> 1 vez al día<br><input type="radio"/> 2 a 3 veces al día<br><input type="radio"/> 5 a 6 veces al día<br><input type="radio"/> más 6 veces al día |
| galletas tipo maria | <input type="radio"/> Nunca o menos 1 vez al mes<br><input type="radio"/> 1 a 3 veces mes<br><input checked="" type="radio"/> 1 vez semana<br><input type="radio"/> 2 a 4 veces semana<br><input type="radio"/> 5 a 6 veces semana<br><input type="radio"/> 1 vez al día<br><input type="radio"/> 2 a 3 veces al día<br><input type="radio"/> 5 a 6 veces al día<br><input type="radio"/> más 6 veces al día |

|                           |                                                                                                                                                                                                                                                                                                                                                                                                              |
|---------------------------|--------------------------------------------------------------------------------------------------------------------------------------------------------------------------------------------------------------------------------------------------------------------------------------------------------------------------------------------------------------------------------------------------------------|
| galletas chocolate        | <input type="radio"/> Nunca o menos 1 vez al mes<br><input checked="" type="radio"/> 1 a 3 veces mes<br><input type="radio"/> 1 vez semana<br><input type="radio"/> 2 a 4 veces semana<br><input type="radio"/> 5 a 6 veces semana<br><input type="radio"/> 1 vez al día<br><input type="radio"/> 2 a 3 veces al día<br><input type="radio"/> 5 a 6 veces al día<br><input type="radio"/> más 6 veces al día |
| bollieria                 | <input type="radio"/> Nunca o menos 1 vez al mes<br><input type="radio"/> 1 a 3 veces mes<br><input type="radio"/> 1 vez semana<br><input type="radio"/> 2 a 4 veces semana<br><input type="radio"/> 5 a 6 veces semana<br><input checked="" type="radio"/> 1 vez al día<br><input type="radio"/> 2 a 3 veces al día<br><input type="radio"/> 5 a 6 veces al día<br><input type="radio"/> más 6 veces al día |
| chocolate o bombones      | <input type="radio"/> Nunca o menos 1 vez al mes<br><input type="radio"/> 1 a 3 veces mes<br><input type="radio"/> 1 vez semana<br><input checked="" type="radio"/> 2 a 4 veces semana<br><input type="radio"/> 5 a 6 veces semana<br><input type="radio"/> 1 vez al día<br><input type="radio"/> 2 a 3 veces al día<br><input type="radio"/> 5 a 6 veces al día<br><input type="radio"/> más 6 veces al día |
| chocolate polvo o colacao | <input checked="" type="radio"/> Nunca o menos 1 vez al mes<br><input type="radio"/> 1 a 3 veces mes<br><input type="radio"/> 1 vez semana<br><input type="radio"/> 2 a 4 veces semana<br><input type="radio"/> 5 a 6 veces semana<br><input type="radio"/> 1 vez al día<br><input type="radio"/> 2 a 3 veces al día<br><input type="radio"/> 5 a 6 veces al día<br><input type="radio"/> más 6 veces al día |
| vino tinto                | <input checked="" type="radio"/> Nunca o menos 1 vez al mes<br><input type="radio"/> 1 a 3 veces mes<br><input type="radio"/> 1 vez semana<br><input type="radio"/> 2 a 4 veces semana<br><input type="radio"/> 5 a 6 veces semana<br><input type="radio"/> 1 vez al día<br><input type="radio"/> 2 a 3 veces al día<br><input type="radio"/> 5 a 6 veces al día<br><input type="radio"/> más 6 veces al día |
| vino blanco               | <input checked="" type="radio"/> Nunca o menos 1 vez al mes<br><input type="radio"/> 1 a 3 veces mes<br><input type="radio"/> 1 vez semana<br><input type="radio"/> 2 a 4 veces semana<br><input type="radio"/> 5 a 6 veces semana<br><input type="radio"/> 1 vez al día<br><input type="radio"/> 2 a 3 veces al día<br><input type="radio"/> 5 a 6 veces al día<br><input type="radio"/> más 6 veces al día |

|                       |                                                                                                                                                                                                                                                                                                                                                                                                              |
|-----------------------|--------------------------------------------------------------------------------------------------------------------------------------------------------------------------------------------------------------------------------------------------------------------------------------------------------------------------------------------------------------------------------------------------------------|
| vino seco o vermut    | <input checked="" type="radio"/> Nunca o menos 1 vez al mes<br><input type="radio"/> 1 a 3 veces mes<br><input type="radio"/> 1 vez semana<br><input type="radio"/> 2 a 4 veces semana<br><input type="radio"/> 5 a 6 veces semana<br><input type="radio"/> 1 vez al día<br><input type="radio"/> 2 a 3 veces al día<br><input type="radio"/> 5 a 6 veces al día<br><input type="radio"/> más 6 veces al día |
| cerveza               | <input type="radio"/> Nunca o menos 1 vez al mes<br><input type="radio"/> 1 a 3 veces mes<br><input checked="" type="radio"/> 1 vez semana<br><input type="radio"/> 2 a 4 veces semana<br><input type="radio"/> 5 a 6 veces semana<br><input type="radio"/> 1 vez al día<br><input type="radio"/> 2 a 3 veces al día<br><input type="radio"/> 5 a 6 veces al día<br><input type="radio"/> más 6 veces al día |
| cerveza sin alcohol   | <input checked="" type="radio"/> Nunca o menos 1 vez al mes<br><input type="radio"/> 1 a 3 veces mes<br><input type="radio"/> 1 vez semana<br><input type="radio"/> 2 a 4 veces semana<br><input type="radio"/> 5 a 6 veces semana<br><input type="radio"/> 1 vez al día<br><input type="radio"/> 2 a 3 veces al día<br><input type="radio"/> 5 a 6 veces al día<br><input type="radio"/> más 6 veces al día |
| licores               | <input checked="" type="radio"/> Nunca o menos 1 vez al mes<br><input type="radio"/> 1 a 3 veces mes<br><input type="radio"/> 1 vez semana<br><input type="radio"/> 2 a 4 veces semana<br><input type="radio"/> 5 a 6 veces semana<br><input type="radio"/> 1 vez al día<br><input type="radio"/> 2 a 3 veces al día<br><input type="radio"/> 5 a 6 veces al día<br><input type="radio"/> más 6 veces al día |
| ginebra o ron o vodka | <input checked="" type="radio"/> Nunca o menos 1 vez al mes<br><input type="radio"/> 1 a 3 veces mes<br><input type="radio"/> 1 vez semana<br><input type="radio"/> 2 a 4 veces semana<br><input type="radio"/> 5 a 6 veces semana<br><input type="radio"/> 1 vez al día<br><input type="radio"/> 2 a 3 veces al día<br><input type="radio"/> 5 a 6 veces al día<br><input type="radio"/> más 6 veces al día |
| refresco normal       | <input type="radio"/> Nunca o menos 1 vez al mes<br><input type="radio"/> 1 a 3 veces mes<br><input type="radio"/> 1 vez semana<br><input checked="" type="radio"/> 2 a 4 veces semana<br><input type="radio"/> 5 a 6 veces semana<br><input type="radio"/> 1 vez al día<br><input type="radio"/> 2 a 3 veces al día<br><input type="radio"/> 5 a 6 veces al día<br><input type="radio"/> más 6 veces al día |

|                          |                                                                                                                                                                                                                                                                                                                                                                                                              |
|--------------------------|--------------------------------------------------------------------------------------------------------------------------------------------------------------------------------------------------------------------------------------------------------------------------------------------------------------------------------------------------------------------------------------------------------------|
| refresco sin azúcar      | <input type="radio"/> Nunca o menos 1 vez al mes<br><input type="radio"/> 1 a 3 veces mes<br><input type="radio"/> 1 vez semana<br><input checked="" type="radio"/> 2 a 4 veces semana<br><input type="radio"/> 5 a 6 veces semana<br><input type="radio"/> 1 vez al día<br><input type="radio"/> 2 a 3 veces al día<br><input type="radio"/> 5 a 6 veces al día<br><input type="radio"/> más 6 veces al día |
| Agua del grifo           | <input checked="" type="radio"/> Nunca o menos 1 vez al mes<br><input type="radio"/> 1 a 3 veces mes<br><input type="radio"/> 1 vez semana<br><input type="radio"/> 2 a 4 veces semana<br><input type="radio"/> 5 a 6 veces semana<br><input type="radio"/> 1 vez al día<br><input type="radio"/> 2 a 3 veces al día<br><input type="radio"/> 5 a 6 veces al día<br><input type="radio"/> más 6 veces al día |
| agua embotellada sin gas | <input type="radio"/> Nunca o menos 1 vez al mes<br><input type="radio"/> 1 a 3 veces mes<br><input type="radio"/> 1 vez semana<br><input type="radio"/> 2 a 4 veces semana<br><input type="radio"/> 5 a 6 veces semana<br><input type="radio"/> 1 vez al día<br><input checked="" type="radio"/> 2 a 3 veces al día<br><input type="radio"/> 5 a 6 veces al día<br><input type="radio"/> más 6 veces al día |
| agua embotellada con gas | <input checked="" type="radio"/> Nunca o menos 1 vez al mes<br><input type="radio"/> 1 a 3 veces mes<br><input type="radio"/> 1 vez semana<br><input type="radio"/> 2 a 4 veces semana<br><input type="radio"/> 5 a 6 veces semana<br><input type="radio"/> 1 vez al día<br><input type="radio"/> 2 a 3 veces al día<br><input type="radio"/> 5 a 6 veces al día<br><input type="radio"/> más 6 veces al día |
| zumو frutas embasado     | <input checked="" type="radio"/> Nunca o menos 1 vez al mes<br><input type="radio"/> 1 a 3 veces mes<br><input type="radio"/> 1 vez semana<br><input type="radio"/> 2 a 4 veces semana<br><input type="radio"/> 5 a 6 veces semana<br><input type="radio"/> 1 vez al día<br><input type="radio"/> 2 a 3 veces al día<br><input type="radio"/> 5 a 6 veces al día<br><input type="radio"/> más 6 veces al día |
| cafe                     | <input type="radio"/> Nunca o menos 1 vez al mes<br><input type="radio"/> 1 a 3 veces mes<br><input type="radio"/> 1 vez semana<br><input type="radio"/> 2 a 4 veces semana<br><input type="radio"/> 5 a 6 veces semana<br><input type="radio"/> 1 vez al día<br><input checked="" type="radio"/> 2 a 3 veces al día<br><input type="radio"/> 5 a 6 veces al día<br><input type="radio"/> más 6 veces al día |



|                       |                                                                                                                                                                                                                                                                                                                                                                                                              |
|-----------------------|--------------------------------------------------------------------------------------------------------------------------------------------------------------------------------------------------------------------------------------------------------------------------------------------------------------------------------------------------------------------------------------------------------------|
| cafe descafeinado     | <input checked="" type="radio"/> Nunca o menos 1 vez al mes<br><input type="radio"/> 1 a 3 veces mes<br><input type="radio"/> 1 vez semana<br><input type="radio"/> 2 a 4 veces semana<br><input type="radio"/> 5 a 6 veces semana<br><input type="radio"/> 1 vez al día<br><input type="radio"/> 2 a 3 veces al día<br><input type="radio"/> 5 a 6 veces al día<br><input type="radio"/> más 6 veces al día |
| te o infusión         | <input checked="" type="radio"/> Nunca o menos 1 vez al mes<br><input type="radio"/> 1 a 3 veces mes<br><input type="radio"/> 1 vez semana<br><input type="radio"/> 2 a 4 veces semana<br><input type="radio"/> 5 a 6 veces semana<br><input type="radio"/> 1 vez al día<br><input type="radio"/> 2 a 3 veces al día<br><input type="radio"/> 5 a 6 veces al día<br><input type="radio"/> más 6 veces al día |
| sopa o puré verduras  | <input type="radio"/> Nunca o menos 1 vez al mes<br><input type="radio"/> 1 a 3 veces mes<br><input type="radio"/> 1 vez semana<br><input checked="" type="radio"/> 2 a 4 veces semana<br><input type="radio"/> 5 a 6 veces semana<br><input type="radio"/> 1 vez al día<br><input type="radio"/> 2 a 3 veces al día<br><input type="radio"/> 5 a 6 veces al día<br><input type="radio"/> más 6 veces al día |
| croquetas pollo jamón | <input type="radio"/> Nunca o menos 1 vez al mes<br><input type="radio"/> 1 a 3 veces mes<br><input checked="" type="radio"/> 1 vez semana<br><input type="radio"/> 2 a 4 veces semana<br><input type="radio"/> 5 a 6 veces semana<br><input type="radio"/> 1 vez al día<br><input type="radio"/> 2 a 3 veces al día<br><input type="radio"/> 5 a 6 veces al día<br><input type="radio"/> más 6 veces al día |
| croquetas pescado     | <input type="radio"/> Nunca o menos 1 vez al mes<br><input type="radio"/> 1 a 3 veces mes<br><input checked="" type="radio"/> 1 vez semana<br><input type="radio"/> 2 a 4 veces semana<br><input type="radio"/> 5 a 6 veces semana<br><input type="radio"/> 1 vez al día<br><input type="radio"/> 2 a 3 veces al día<br><input type="radio"/> 5 a 6 veces al día<br><input type="radio"/> más 6 veces al día |
| mayonesa              | <input type="radio"/> Nunca o menos 1 vez al mes<br><input type="radio"/> 1 a 3 veces mes<br><input type="radio"/> 1 vez semana<br><input type="radio"/> 2 a 4 veces semana<br><input type="radio"/> 5 a 6 veces semana<br><input checked="" type="radio"/> 1 vez al día<br><input type="radio"/> 2 a 3 veces al día<br><input type="radio"/> 5 a 6 veces al día<br><input type="radio"/> más 6 veces al día |

---

salsa tomate

- ☒ Nunca o menos 1 vez al mes  
☐ 1 a 3 veces mes  
☐ 1 vez semana  
☐ 2 a 4 veces semana  
☐ 5 a 6 veces semana  
☐ 1 vez al día  
☐ 2 a 3 veces al día  
☐ 5 a 6 veces al día  
☐ más 6 veces al día

---

ketchup

- ☒ Nunca o menos 1 vez al mes  
☐ 1 a 3 veces mes  
☐ 1 vez semana  
☐ 2 a 4 veces semana  
☐ 5 a 6 veces semana  
☐ 1 vez al día  
☐ 2 a 3 veces al día  
☐ 5 a 6 veces al día  
☐ más 6 veces al día

---

sal

- ☒ Nunca o menos 1 vez al mes  
☐ 1 a 3 veces mes  
☐ 1 vez semana  
☐ 2 a 4 veces semana  
☐ 5 a 6 veces semana  
☐ 1 vez al día  
☐ 2 a 3 veces al día  
☐ 5 a 6 veces al día  
☐ más 6 veces al día

---

ajo

- ☐ Nunca o menos 1 vez al mes  
☐ 1 a 3 veces mes  
☒ 1 vez semana  
☐ 2 a 4 veces semana  
☐ 5 a 6 veces semana  
☐ 1 vez al día  
☐ 2 a 3 veces al día  
☐ 5 a 6 veces al día  
☐ más 6 veces al día

---

mermelada o miel

- ☒ Nunca o menos 1 vez al mes  
☐ 1 a 3 veces mes  
☐ 1 vez semana  
☐ 2 a 4 veces semana  
☐ 5 a 6 veces semana  
☐ 1 vez al día  
☐ 2 a 3 veces al día  
☐ 5 a 6 veces al día  
☐ más 6 veces al día

---

azúcar

- ☐ Nunca o menos 1 vez al mes  
☐ 1 a 3 veces mes  
☐ 1 vez semana  
☐ 2 a 4 veces semana  
☐ 5 a 6 veces semana  
☐ 1 vez al día  
☐ 2 a 3 veces al día  
☒ 5 a 6 veces al día  
☐ más 6 veces al día

---

Otro alimento

---

suplementos vitamínicos

- ☐ si  
☒ no

suplementos vitamínicos

[\*DATA REMOVED\*]

dieta previa

- ☐ si  
☒ no

motivo dieta

- ☒ no dieta  
☐ control peso  
☐ control colesterol  
☐ control diabetes  
☐ problemas estómago  
☐ problemas vesícula o hepáticos  
☐ HTA o cardiopatía  
☐ problemas renales  
☐ alergia alimentaria  
☐ ácido úrico elevado  
☐ vegetariana  
☐ otros

cambio alimentos año previo gestación

- ☒ si  
☐ no

cambio lácteos

- ☐ eliminado  
☐ disminuido  
☒ igual  
☐ aumentado  
☐ no sabe

cambio huevos

- ☐ eliminado  
☐ disminuido  
☒ igual  
☐ aumentado  
☐ no sabe

cambio carne

- ☐ eliminado  
☐ disminuido  
☒ igual  
☐ aumentado  
☐ no sabe

cambio pescado

- ☐ eliminado  
☐ disminuido  
☒ igual  
☐ aumentado  
☐ no sabe

cambio verduras

- ☐ eliminado  
☐ disminuido  
☒ igual  
☐ aumentado  
☐ no sabe

|                            |                                                                                                                                                                                                                        |
|----------------------------|------------------------------------------------------------------------------------------------------------------------------------------------------------------------------------------------------------------------|
| cambio legumbres           | <input type="radio"/> eliminado<br><input type="radio"/> disminuido<br><input checked="" type="radio"/> igual<br><input type="radio"/> aumentado<br><input type="radio"/> no sabe                                      |
| cambio fruta               | <input type="radio"/> eliminado<br><input type="radio"/> disminuido<br><input checked="" type="radio"/> igual<br><input type="radio"/> aumentado<br><input type="radio"/> no sabe                                      |
| cambio pan                 | <input type="radio"/> eliminado<br><input type="radio"/> disminuido<br><input checked="" type="radio"/> igual<br><input type="radio"/> aumentado<br><input type="radio"/> no sabe                                      |
| cambio aceite oliva        | <input type="radio"/> eliminado<br><input type="radio"/> disminuido<br><input checked="" type="radio"/> igual<br><input type="radio"/> aumentado<br><input type="radio"/> no sabe                                      |
| cambio mante o margarina   | <input type="radio"/> eliminado<br><input type="radio"/> disminuido<br><input type="radio"/> igual<br><input type="radio"/> aumentado<br><input checked="" type="radio"/> no sabe                                      |
| cambio azúcar y dulces     | <input type="radio"/> eliminado<br><input type="radio"/> disminuido<br><input checked="" type="radio"/> igual<br><input type="radio"/> aumentado<br><input type="radio"/> no sabe                                      |
| cambio bebidas alcohólicas | <input type="radio"/> eliminado<br><input type="radio"/> disminuido<br><input type="radio"/> igual<br><input type="radio"/> aumentado<br><input checked="" type="radio"/> no sabe                                      |
| frecuencia comidas fritas  | <input type="radio"/> a diario<br><input type="radio"/> 5 a 6 veces semana<br><input checked="" type="radio"/> 2 a 4 veces semana<br><input type="radio"/> 1 vez semana<br><input type="radio"/> menos de 1 vez semana |
| carne                      | <input type="radio"/> no como<br><input type="radio"/> cruda<br><input type="radio"/> poco hecha<br><input type="radio"/> hecha<br><input checked="" type="radio"/> muy hecha                                          |
| grasa visible carne        | <input checked="" type="radio"/> quita toda<br><input type="radio"/> quita mayoría<br><input type="radio"/> quita un poco<br><input type="radio"/> no quita nada                                                       |

|                                |                                                                                                                                                                                                                                                          |
|--------------------------------|----------------------------------------------------------------------------------------------------------------------------------------------------------------------------------------------------------------------------------------------------------|
| cocina carne                   | <input checked="" type="radio"/> a la plancha<br><input type="radio"/> a la parrilla<br><input type="radio"/> asada<br><input type="radio"/> frita<br><input type="radio"/> guisada                                                                      |
| tostado quemado carne          | <input checked="" type="radio"/> nunca<br><input type="radio"/> 1 vez mes<br><input type="radio"/> 2 a 3 veces mes<br><input type="radio"/> 1 vez semana<br><input type="radio"/> 2 a 3 semanas                                                          |
| tostado quemado pescado        | <input checked="" type="radio"/> nunca<br><input type="radio"/> 1 vez mes<br><input type="radio"/> 2 a 3 veces mes<br><input type="radio"/> 1 vez semana<br><input type="radio"/> 2 a 3 semanas                                                          |
| socarrat paella                | <input checked="" type="radio"/> nunca<br><input type="radio"/> 1 vez mes<br><input type="radio"/> 2 a 3 veces mes<br><input type="radio"/> 1 vez semana<br><input type="radio"/> 2 a 3 semanas                                                          |
| grasa o aceite cocinar         | <input type="radio"/> mantequilla<br><input type="radio"/> margarina<br><input type="radio"/> aceite oliva<br><input checked="" type="radio"/> aceite oliva virgen extra<br><input type="radio"/> aceite vegetal<br><input type="radio"/> mezcla aceites |
| grasa aceite aliñar            | <input type="radio"/> mantequilla<br><input type="radio"/> margarina<br><input type="radio"/> aceite oliva<br><input checked="" type="radio"/> aceite oliva virgen extra<br><input type="radio"/> aceite vegetal<br><input type="radio"/> mezcla aceites |
| grasa aceite freir             | <input type="radio"/> mantequilla<br><input checked="" type="radio"/> margarina<br><input type="radio"/> aceite oliva<br><input type="radio"/> aceite oliva virgen extra<br><input type="radio"/> aceite vegetal<br><input type="radio"/> mezcla aceites |
| Ejercicio cuestionario         | <input checked="" type="radio"/> si<br><input type="radio"/> no                                                                                                                                                                                          |
| horas de sueño incluido siesta | [*DATA REMOVED*]                                                                                                                                                                                                                                         |
| minutos siesta                 | [*DATA REMOVED*]                                                                                                                                                                                                                                         |
| horas televisión semana        | [*DATA REMOVED*]                                                                                                                                                                                                                                         |

|                                        |                                                                                                                                                                                                                                                                                                                                                                           |
|----------------------------------------|---------------------------------------------------------------------------------------------------------------------------------------------------------------------------------------------------------------------------------------------------------------------------------------------------------------------------------------------------------------------------|
| actividad trabajo                      | <input checked="" type="radio"/> casi siempre sentado<br><input type="radio"/> sentado 50 por cien<br><input type="radio"/> casi siempre de pie, quieto<br><input type="radio"/> casi siempre levantado caminando y llevando pocas cosas<br><input type="radio"/> casi siempre levantado, caminando y llevado muchas cosas<br><input type="radio"/> trabajo manual pesado |
| tiempo caminar o bici al día           | <input checked="" type="radio"/> casi nunca<br><input type="radio"/> menos 20min día<br><input type="radio"/> 20 a 40 min día<br><input type="radio"/> 40 a 60 min día<br><input type="radio"/> 1h o 1h y media día<br><input type="radio"/> más de 1h y media al día                                                                                                     |
| tiempo tareas casa al día              | <input type="radio"/> menos de 1h día<br><input checked="" type="radio"/> 1 a 2h día<br><input type="radio"/> 3 a 4h día<br><input type="radio"/> 5 a 6h día<br><input type="radio"/> 7 a 8h día<br><input type="radio"/> más de 8h día                                                                                                                                   |
| tiempo libre televisión ordenador leer | <input type="radio"/> menos 1h día<br><input checked="" type="radio"/> 1h día<br><input type="radio"/> 2h día<br><input type="radio"/> 3h día<br><input type="radio"/> 4h día<br><input type="radio"/> 5 a 6h día<br><input type="radio"/> mas 6h día                                                                                                                     |
| tiempo libre ejercicio o deporte       | <input type="radio"/> menos 1h semana<br><input type="radio"/> 1h semana<br><input type="radio"/> 2h semana<br><input type="radio"/> 3h semana<br><input checked="" type="radio"/> 4 a 5h semana<br><input type="radio"/> mas 5h semana                                                                                                                                   |
| como se considera                      | <input type="radio"/> sedentaria<br><input type="radio"/> poco activa<br><input checked="" type="radio"/> moderadamente activa<br><input type="radio"/> bastante activa<br><input type="radio"/> muy activa<br><input type="radio"/> no sabe                                                                                                                              |
| FUR                                    | [*DATA REMOVED*]                                                                                                                                                                                                                                                                                                                                                          |
| Semanas gestación 2T                   | [*DATA REMOVED*]                                                                                                                                                                                                                                                                                                                                                          |
| Días gestación 2T                      | [*DATA REMOVED*]                                                                                                                                                                                                                                                                                                                                                          |
| DBP 2T                                 | [*DATA REMOVED*]                                                                                                                                                                                                                                                                                                                                                          |
| CC 2T                                  | [*DATA REMOVED*]                                                                                                                                                                                                                                                                                                                                                          |
| AC 2T                                  | [*DATA REMOVED*]                                                                                                                                                                                                                                                                                                                                                          |

|                                                   |                                                                                                                                                                                                 |
|---------------------------------------------------|-------------------------------------------------------------------------------------------------------------------------------------------------------------------------------------------------|
| LF 2T                                             | [*DATA REMOVED*]                                                                                                                                                                                |
| PFE 2T (Hadlock)                                  | [*DATA REMOVED*]                                                                                                                                                                                |
| Semanas gestación 3T                              | [*DATA REMOVED*]                                                                                                                                                                                |
| días 3T                                           | [*DATA REMOVED*]                                                                                                                                                                                |
| DBP 3T                                            | [*DATA REMOVED*]                                                                                                                                                                                |
| CC 3T                                             | [*DATA REMOVED*]                                                                                                                                                                                |
| AC 3T                                             | [*DATA REMOVED*]                                                                                                                                                                                |
| LF 3T                                             | [*DATA REMOVED*]                                                                                                                                                                                |
| PFE 3T (Hadlock)                                  | [*DATA REMOVED*]                                                                                                                                                                                |
| Semanas de gestación final                        | [*DATA REMOVED*]                                                                                                                                                                                |
| días gestación final                              | [*DATA REMOVED*]                                                                                                                                                                                |
| Localización placenta                             | <input type="radio"/> anterior<br><input type="radio"/> lateral derecha<br><input type="radio"/> lateral izquierda<br><input checked="" type="radio"/> posterior<br><input type="radio"/> fondo |
| Presentación longitudinal cefálica                | <input type="radio"/> no<br><input checked="" type="radio"/> si                                                                                                                                 |
| Dorso                                             | <input type="radio"/> izquierda anterior<br><input type="radio"/> izquierda posterior<br><input checked="" type="radio"/> derecha anterior<br><input type="radio"/> derecha posterior           |
| diámetro biparietal                               | [*DATA REMOVED*]                                                                                                                                                                                |
| Circunferencia craneal                            | [*DATA REMOVED*]                                                                                                                                                                                |
| Circunferencia abdominal                          | [*DATA REMOVED*]                                                                                                                                                                                |
| Longitud de femur                                 | [*DATA REMOVED*]                                                                                                                                                                                |
| tejido celular subcutáneo a nivel del muslo en mm | [*DATA REMOVED*]                                                                                                                                                                                |
| tejido celular subcutáneo en abdomen en mm        | [*DATA REMOVED*]                                                                                                                                                                                |
| Volumen del muslo en cm3                          | [*DATA REMOVED*]                                                                                                                                                                                |
| Peso fetal estimado según fórmula de Hadlock      | [*DATA REMOVED*]                                                                                                                                                                                |

|                                               |                                                                                                                                               |
|-----------------------------------------------|-----------------------------------------------------------------------------------------------------------------------------------------------|
| Percentil                                     | [*DATA REMOVED*]                                                                                                                              |
| Peso fetal estimado según fórmula de Scioscia | <hr/>                                                                                                                                         |
| Peso fetal estimado según fórmula de LEE      | <hr/>                                                                                                                                         |
| Tipo de parto                                 | <input checked="" type="radio"/> eutocico<br><input type="radio"/> instrumentado/ventosa<br><input type="radio"/> cesarea                     |
| fecha de nacimiento                           | [*DATA REMOVED*]                                                                                                                              |
| Días entre exploración y nacimiento           | [*DATA REMOVED*]                                                                                                                              |
| Peso RN en g                                  | [*DATA REMOVED*]                                                                                                                              |
| sexo                                          | <input checked="" type="radio"/> mujer<br><input type="radio"/> hombre                                                                        |
| Apgar 1 minuto                                | [*DATA REMOVED*]                                                                                                                              |
| Apgar 5 minutos                               | [*DATA REMOVED*]                                                                                                                              |
| Apgar 10 minutos                              | <hr/>                                                                                                                                         |
| antecedente Covid durante gestación           | <input type="radio"/> Yes<br><input checked="" type="radio"/> No                                                                              |
| Nivel de estudios                             | <input type="radio"/> ninguno<br><input type="radio"/> primarios<br><input type="radio"/> secundarios<br><input type="radio"/> universitarios |



# Base\_datos\_estimacion\_peso\_fetal

|                                       |                                                                                                                                                                                                                                                                                      |
|---------------------------------------|--------------------------------------------------------------------------------------------------------------------------------------------------------------------------------------------------------------------------------------------------------------------------------------|
| Número de identificación participante | 5                                                                                                                                                                                                                                                                                    |
| CODIGO PARTICIPANTE                   |                                                                                                                                                                                                                                                                                      |
| Edad                                  | [*DATA REMOVED*]                                                                                                                                                                                                                                                                     |
| Gestaciones                           | <input type="radio"/> 1<br><input checked="" type="radio"/> 2<br><input type="radio"/> 3<br><input type="radio"/> mas de 3                                                                                                                                                           |
| partos                                | <input checked="" type="radio"/> 0<br><input type="radio"/> 1<br><input type="radio"/> 2<br><input type="radio"/> 3<br><input type="radio"/> mas de 3                                                                                                                                |
| cesáreas                              | <input checked="" type="radio"/> 0<br><input type="radio"/> 1<br><input type="radio"/> 2<br><input type="radio"/> 3<br><input type="radio"/> mas de 3                                                                                                                                |
| Abortos                               | <input type="radio"/> 0<br><input checked="" type="radio"/> 1<br><input type="radio"/> 2<br><input type="radio"/> 3<br><input type="radio"/> mas de 3                                                                                                                                |
| Tipo de gestacion                     | <input checked="" type="radio"/> espontanea<br><input type="radio"/> IAC inseminación artificial conyuge<br><input type="radio"/> IAD inseminación artificial donante<br><input type="radio"/> FIV Fecundación in Vitro<br><input type="radio"/> Ovodon FIV con donación de ovocitos |
| peso previo a embarazo                | [*DATA REMOVED*]                                                                                                                                                                                                                                                                     |
| Ganancia ponderal embarazo            | [*DATA REMOVED*]                                                                                                                                                                                                                                                                     |
| Talla madre                           | [*DATA REMOVED*]                                                                                                                                                                                                                                                                     |
| IMC previo embarazo                   | 22.77318640955005                                                                                                                                                                                                                                                                    |
| Patología obstétrica                  | <input checked="" type="radio"/> no<br><input type="radio"/> si                                                                                                                                                                                                                      |
| Diabetes pregestacional               | <input checked="" type="radio"/> no<br><input type="radio"/> si                                                                                                                                                                                                                      |
| Diabetes gestacional                  | <input type="radio"/> no<br><input checked="" type="radio"/> si                                                                                                                                                                                                                      |

|                                            |                                                                                                                                                                                      |
|--------------------------------------------|--------------------------------------------------------------------------------------------------------------------------------------------------------------------------------------|
| Diabetes gestacional con insulina          | <input type="radio"/> no<br><input checked="" type="radio"/> si                                                                                                                      |
| Diabetes gestacional con dieta y ejercicio | <input type="radio"/> no<br><input checked="" type="radio"/> si                                                                                                                      |
| Percentil fetos previos                    | <input checked="" type="radio"/> Nada<br><input type="radio"/> percentil menor de 10<br><input type="radio"/> percentil entre 10 y 90<br><input type="radio"/> percentil mayor de 90 |
| Exfumadora                                 | <input checked="" type="radio"/> Nada<br><input type="radio"/> menos de 5 años<br><input type="radio"/> 5 a 10 años<br><input type="radio"/> mayor o igual a 10 años                 |
| Hábito tabáquico                           | <input checked="" type="radio"/> no<br><input type="radio"/> si                                                                                                                      |
| fumadora                                   | [*DATA REMOVED*]                                                                                                                                                                     |
| Consumo otros tóxicos                      | <input checked="" type="radio"/> no<br><input type="radio"/> si                                                                                                                      |
| Hb 1T                                      | [*DATA REMOVED*]                                                                                                                                                                     |
| Htc 1T                                     | [*DATA REMOVED*]                                                                                                                                                                     |
| Hb 2T                                      | [*DATA REMOVED*]                                                                                                                                                                     |
| HTC 2T                                     | [*DATA REMOVED*]                                                                                                                                                                     |
| Hb 3T                                      | [*DATA REMOVED*]                                                                                                                                                                     |
| HTC 3T                                     | [*DATA REMOVED*]                                                                                                                                                                     |
| Suplemento FE oral                         | <input type="radio"/> si<br><input checked="" type="radio"/> no                                                                                                                      |
| Suplemento fe iv                           | <input type="radio"/> si<br><input checked="" type="radio"/> no                                                                                                                      |
| Transfusión                                | <input checked="" type="radio"/> no<br><input type="radio"/> si                                                                                                                      |
| Solicitada Vit D                           | <input checked="" type="radio"/> no<br><input type="radio"/> si                                                                                                                      |
| Deficit vit D                              | <input checked="" type="radio"/> no<br><input type="radio"/> si                                                                                                                      |
| Suplemento vit D                           | <input type="radio"/> si<br><input checked="" type="radio"/> no                                                                                                                      |

|                       |                                                                                                                                                                                                                                                                                                                                                                                                              |
|-----------------------|--------------------------------------------------------------------------------------------------------------------------------------------------------------------------------------------------------------------------------------------------------------------------------------------------------------------------------------------------------------------------------------------------------------|
| Dieta, cuestionario   | <input type="radio"/> si<br><input checked="" type="radio"/> no                                                                                                                                                                                                                                                                                                                                              |
| Leche entera          | <input checked="" type="radio"/> Nunca o menos 1 vez al mes<br><input type="radio"/> 1 a 3 veces mes<br><input type="radio"/> 1 vez semana<br><input type="radio"/> 2 a 4 veces semana<br><input type="radio"/> 5 a 6 veces semana<br><input type="radio"/> 1 vez al día<br><input type="radio"/> 2 a 3 veces al día<br><input type="radio"/> 5 a 6 veces al día<br><input type="radio"/> más 6 veces al día |
| Leche semidesnatada   | <input type="radio"/> Nunca o menos 1 vez al mes<br><input type="radio"/> 1 a 3 veces mes<br><input type="radio"/> 1 vez semana<br><input type="radio"/> 2 a 4 veces semana<br><input type="radio"/> 5 a 6 veces semana<br><input checked="" type="radio"/> 1 vez al día<br><input type="radio"/> 2 a 3 veces al día<br><input type="radio"/> 5 a 6 veces al día<br><input type="radio"/> mas 6 veces al día |
| Leche desnatada       | <input checked="" type="radio"/> Nunca o menos 1 vez al mes<br><input type="radio"/> 1 a 3 veces mes<br><input type="radio"/> 1 vez semana<br><input type="radio"/> 2 a 4 veces semana<br><input type="radio"/> 5 a 6 veces semana<br><input type="radio"/> 1 vez al día<br><input type="radio"/> 2 a 3 veces al día<br><input type="radio"/> 5 a 6 veces al día<br><input type="radio"/> más 6 veces al día |
| Leche condensada      | <input checked="" type="radio"/> Nunca o menos 1 vez al mes<br><input type="radio"/> 1 a 3 veces mes<br><input type="radio"/> 1 vez semana<br><input type="radio"/> 2 a 4 veces semana<br><input type="radio"/> 5 a 6 veces semana<br><input type="radio"/> 1 vez al día<br><input type="radio"/> 2 a 3 veces al día<br><input type="radio"/> 5 a 6 veces al día<br><input type="radio"/> más 6 veces al día |
| nata o crema de leche | <input checked="" type="radio"/> Nunca o menos 1 vez al mes<br><input type="radio"/> 1 a 3 veces mes<br><input type="radio"/> 1 vez semana<br><input type="radio"/> 2 a 4 veces semana<br><input type="radio"/> 5 a 6 veces semana<br><input type="radio"/> 1 vez al día<br><input type="radio"/> 2 a 3 veces al día<br><input type="radio"/> 5 a 6 veces al día<br><input type="radio"/> más 6 veces al día |

|                                             |                                                                                                                                                                                                                                                                                                                                                                                                              |
|---------------------------------------------|--------------------------------------------------------------------------------------------------------------------------------------------------------------------------------------------------------------------------------------------------------------------------------------------------------------------------------------------------------------------------------------------------------------|
| Yogurt Entero                               | <input checked="" type="radio"/> Nunca o menos 1 vez al mes<br><input type="radio"/> 1 a 3 veces mes<br><input type="radio"/> 1 vez semana<br><input type="radio"/> 2 a 4 veces semana<br><input type="radio"/> 5 a 6 veces semana<br><input type="radio"/> 1 vez al día<br><input type="radio"/> 2 a 3 veces al día<br><input type="radio"/> 5 a 6 veces al día<br><input type="radio"/> más 6 veces al día |
| Yogurt desnatado                            | <input checked="" type="radio"/> Nunca o menos 1 vez al mes<br><input type="radio"/> 1 a 3 veces mes<br><input type="radio"/> 1 vez semana<br><input type="radio"/> 2 a 4 veces semana<br><input type="radio"/> 5 a 6 veces semana<br><input type="radio"/> 1 vez al día<br><input type="radio"/> 2 a 3 veces al día<br><input type="radio"/> 5 a 6 veces al día<br><input type="radio"/> más 6 veces al día |
| 100g requesón o queso blando o queso fresco | <input checked="" type="radio"/> Nunca o menos 1 vez al mes<br><input type="radio"/> 1 a 3 veces mes<br><input type="radio"/> 1 vez semana<br><input type="radio"/> 2 a 4 veces semana<br><input type="radio"/> 5 a 6 veces semana<br><input type="radio"/> 1 vez al día<br><input type="radio"/> 2 a 3 veces al día<br><input type="radio"/> 5 a 6 veces al día<br><input type="radio"/> más 6 veces al día |
| queso curado o semicurado o cremoso         | <input checked="" type="radio"/> Nunca o menos 1 vez al mes<br><input type="radio"/> 1 a 3 veces mes<br><input type="radio"/> 1 vez semana<br><input type="radio"/> 2 a 4 veces semana<br><input type="radio"/> 5 a 6 veces semana<br><input type="radio"/> 1 vez al día<br><input type="radio"/> 2 a 3 veces al día<br><input type="radio"/> 5 a 6 veces al día<br><input type="radio"/> más 6 veces al día |
| natillas flan pudding                       | <input checked="" type="radio"/> Nunca o menos 1 vez al mes<br><input type="radio"/> 1 a 3 veces mes<br><input type="radio"/> 1 vez semana<br><input type="radio"/> 2 a 4 veces semana<br><input type="radio"/> 5 a 6 veces semana<br><input type="radio"/> 1 vez al día<br><input type="radio"/> 2 a 3 veces al día<br><input type="radio"/> 5 a 6 veces al día<br><input type="radio"/> más 6 veces al día |
| Helado                                      | <input type="radio"/> Nunca o menos 1 vez al mes<br><input type="radio"/> 1 a 3 veces mes<br><input checked="" type="radio"/> 1 vez semana<br><input type="radio"/> 2 a 4 veces semana<br><input type="radio"/> 5 a 6 veces semana<br><input type="radio"/> 1 vez al día<br><input type="radio"/> 2 a 3 veces al día<br><input type="radio"/> 5 a 6 veces al día<br><input type="radio"/> más 6 veces al día |

|                                      |                                                                                                                                                                                                                                                                                                                                                                                                              |
|--------------------------------------|--------------------------------------------------------------------------------------------------------------------------------------------------------------------------------------------------------------------------------------------------------------------------------------------------------------------------------------------------------------------------------------------------------------|
| huevo                                | <input type="radio"/> Nunca o menos 1 vez al mes<br><input type="radio"/> 1 a 3 veces mes<br><input type="radio"/> 1 vez semana<br><input checked="" type="radio"/> 2 a 4 veces semana<br><input type="radio"/> 5 a 6 veces semana<br><input type="radio"/> 1 vez al día<br><input type="radio"/> 2 a 3 veces al día<br><input type="radio"/> 5 a 6 veces al día<br><input type="radio"/> más 6 veces al día |
| Pollo con piel                       | <input checked="" type="radio"/> Nunca o menos 1 vez al mes<br><input type="radio"/> 1 a 3 veces mes<br><input type="radio"/> 1 vez semana<br><input type="radio"/> 2 a 4 veces semana<br><input type="radio"/> 5 a 6 veces semana<br><input type="radio"/> 1 vez al día<br><input type="radio"/> 2 a 3 veces al día<br><input type="radio"/> 5 a 6 veces al día<br><input type="radio"/> más 6 veces al día |
| pollo sin piel                       | <input type="radio"/> Nunca o menos 1 vez al mes<br><input type="radio"/> 1 a 3 veces mes<br><input type="radio"/> 1 vez semana<br><input checked="" type="radio"/> 2 a 4 veces semana<br><input type="radio"/> 5 a 6 veces semana<br><input type="radio"/> 1 vez al día<br><input type="radio"/> 2 a 3 veces al día<br><input type="radio"/> 5 a 6 veces al día<br><input type="radio"/> más 6 veces al día |
| Ternera o cerdo o cordero            | <input type="radio"/> Nunca o menos 1 vez al mes<br><input type="radio"/> 1 a 3 veces mes<br><input checked="" type="radio"/> 1 vez semana<br><input type="radio"/> 2 a 4 veces semana<br><input type="radio"/> 5 a 6 veces semana<br><input type="radio"/> 1 vez al día<br><input type="radio"/> 2 a 3 veces al día<br><input type="radio"/> 5 a 6 veces al día<br><input type="radio"/> más 6 veces al día |
| carne caza: Conejo o codorniz o pato | <input type="radio"/> Nunca o menos 1 vez al mes<br><input type="radio"/> 1 a 3 veces mes<br><input checked="" type="radio"/> 1 vez semana<br><input type="radio"/> 2 a 4 veces semana<br><input type="radio"/> 5 a 6 veces semana<br><input type="radio"/> 1 vez al día<br><input type="radio"/> 2 a 3 veces al día<br><input type="radio"/> 5 a 6 veces al día<br><input type="radio"/> más 6 veces al día |
| Hígado de ternera o cerdo o pollo    | <input checked="" type="radio"/> Nunca o menos 1 vez al mes<br><input type="radio"/> 1 a 3 veces mes<br><input type="radio"/> 1 vez semana<br><input type="radio"/> 2 a 4 veces semana<br><input type="radio"/> 5 a 6 veces semana<br><input type="radio"/> 1 vez al día<br><input type="radio"/> 2 a 3 veces al día<br><input type="radio"/> 5 a 6 veces al día<br><input type="radio"/> más 6 veces al día |

---

Vísceras

- ☒ Nunca o menos 1 vez al mes  
☐ 1 a 3 veces mes  
☐ 1 vez semana  
☐ 2 a 4 veces semana  
☐ 5 a 6 veces semana  
☐ 1 vez al día  
☐ 2 a 3 veces al día  
☐ 5 a 6 veces al día  
☐ más 6 veces al día

---

Embutido

- ☒ Nunca o menos 1 vez al mes  
☐ 1 a 3 veces mes  
☐ 1 vez semana  
☐ 2 a 4 veces semana  
☐ 5 a 6 veces semana  
☐ 1 vez al día  
☐ 2 a 3 veces al día  
☐ 5 a 6 veces al día  
☐ más 6 veces al día

---

Salchicha o similar

- ☒ Nunca o menos 1 vez al mes  
☐ 1 a 3 veces mes  
☐ 1 vez semana  
☐ 2 a 4 veces semana  
☐ 5 a 6 veces semana  
☐ 1 vez al día  
☐ 2 a 3 veces al día  
☐ 5 a 6 veces al día  
☐ más 6 veces al día

---

Pate o foiegras

- ☒ Nunca o menos 1 vez al mes  
☐ 1 a 3 veces mes  
☐ 1 vez semana  
☐ 2 a 4 veces semana  
☐ 5 a 6 veces semana  
☐ 1 vez al día  
☐ 2 a 3 veces al día  
☐ 5 a 6 veces al día  
☐ más 6 veces al día

---

Hamburguesa

- ☐ Nunca o menos 1 vez al mes  
☒ 1 a 3 veces mes  
☐ 1 vez semana  
☐ 2 a 4 veces semana  
☐ 5 a 6 veces semana  
☐ 1 vez al día  
☐ 2 a 3 veces al día  
☐ 5 a 6 veces al día  
☐ más 6 veces al día

---

tocino o bacon

- ☒ Nunca o menos 1 vez al mes  
☐ 1 a 3 veces mes  
☐ 1 vez semana  
☐ 2 a 4 veces semana  
☐ 5 a 6 veces semana  
☐ 1 vez al día  
☐ 2 a 3 veces al día  
☐ 5 a 6 veces al día  
☐ más 6 veces al día

---

|               |                                                                                                                                                                                                                                                                                                                                                                                                              |
|---------------|--------------------------------------------------------------------------------------------------------------------------------------------------------------------------------------------------------------------------------------------------------------------------------------------------------------------------------------------------------------------------------------------------------------|
| Pescado frito | <input type="radio"/> Nunca o menos 1 vez al mes<br><input type="radio"/> 1 a 3 veces mes<br><input checked="" type="radio"/> 1 vez semana<br><input type="radio"/> 2 a 4 veces semana<br><input type="radio"/> 5 a 6 veces semana<br><input type="radio"/> 1 vez al día<br><input type="radio"/> 2 a 3 veces al día<br><input type="radio"/> 5 a 6 veces al día<br><input type="radio"/> más 6 veces al día |
|---------------|--------------------------------------------------------------------------------------------------------------------------------------------------------------------------------------------------------------------------------------------------------------------------------------------------------------------------------------------------------------------------------------------------------------|

---

|                        |                                                                                                                                                                                                                                                                                                                                                                                                              |
|------------------------|--------------------------------------------------------------------------------------------------------------------------------------------------------------------------------------------------------------------------------------------------------------------------------------------------------------------------------------------------------------------------------------------------------------|
| pescado hervido blanco | <input type="radio"/> Nunca o menos 1 vez al mes<br><input type="radio"/> 1 a 3 veces mes<br><input checked="" type="radio"/> 1 vez semana<br><input type="radio"/> 2 a 4 veces semana<br><input type="radio"/> 5 a 6 veces semana<br><input type="radio"/> 1 vez al día<br><input type="radio"/> 2 a 3 veces al día<br><input type="radio"/> 5 a 6 veces al día<br><input type="radio"/> más 6 veces al día |
|------------------------|--------------------------------------------------------------------------------------------------------------------------------------------------------------------------------------------------------------------------------------------------------------------------------------------------------------------------------------------------------------------------------------------------------------|

---

|                      |                                                                                                                                                                                                                                                                                                                                                                                                              |
|----------------------|--------------------------------------------------------------------------------------------------------------------------------------------------------------------------------------------------------------------------------------------------------------------------------------------------------------------------------------------------------------------------------------------------------------|
| pescado hervido azul | <input type="radio"/> Nunca o menos 1 vez al mes<br><input checked="" type="radio"/> 1 a 3 veces mes<br><input type="radio"/> 1 vez semana<br><input type="radio"/> 2 a 4 veces semana<br><input type="radio"/> 5 a 6 veces semana<br><input type="radio"/> 1 vez al día<br><input type="radio"/> 2 a 3 veces al día<br><input type="radio"/> 5 a 6 veces al día<br><input type="radio"/> más 6 veces al día |
|----------------------|--------------------------------------------------------------------------------------------------------------------------------------------------------------------------------------------------------------------------------------------------------------------------------------------------------------------------------------------------------------------------------------------------------------|

---

|                    |                                                                                                                                                                                                                                                                                                                                                                                                              |
|--------------------|--------------------------------------------------------------------------------------------------------------------------------------------------------------------------------------------------------------------------------------------------------------------------------------------------------------------------------------------------------------------------------------------------------------|
| otros pescado azul | <input checked="" type="radio"/> Nunca o menos 1 vez al mes<br><input type="radio"/> 1 a 3 veces mes<br><input type="radio"/> 1 vez semana<br><input type="radio"/> 2 a 4 veces semana<br><input type="radio"/> 5 a 6 veces semana<br><input type="radio"/> 1 vez al día<br><input type="radio"/> 2 a 3 veces al día<br><input type="radio"/> 5 a 6 veces al día<br><input type="radio"/> más 6 veces al día |
|--------------------|--------------------------------------------------------------------------------------------------------------------------------------------------------------------------------------------------------------------------------------------------------------------------------------------------------------------------------------------------------------------------------------------------------------|

---

|               |                                                                                                                                                                                                                                                                                                                                                                                                              |
|---------------|--------------------------------------------------------------------------------------------------------------------------------------------------------------------------------------------------------------------------------------------------------------------------------------------------------------------------------------------------------------------------------------------------------------|
| atun conserva | <input type="radio"/> Nunca o menos 1 vez al mes<br><input checked="" type="radio"/> 1 a 3 veces mes<br><input type="radio"/> 1 vez semana<br><input type="radio"/> 2 a 4 veces semana<br><input type="radio"/> 5 a 6 veces semana<br><input type="radio"/> 1 vez al día<br><input type="radio"/> 2 a 3 veces al día<br><input type="radio"/> 5 a 6 veces al día<br><input type="radio"/> más 6 veces al día |
|---------------|--------------------------------------------------------------------------------------------------------------------------------------------------------------------------------------------------------------------------------------------------------------------------------------------------------------------------------------------------------------------------------------------------------------|

---

|                  |                                                                                                                                                                                                                                                                                                                                                                                                              |
|------------------|--------------------------------------------------------------------------------------------------------------------------------------------------------------------------------------------------------------------------------------------------------------------------------------------------------------------------------------------------------------------------------------------------------------|
| sardina conserva | <input type="radio"/> Nunca o menos 1 vez al mes<br><input checked="" type="radio"/> 1 a 3 veces mes<br><input type="radio"/> 1 vez semana<br><input type="radio"/> 2 a 4 veces semana<br><input type="radio"/> 5 a 6 veces semana<br><input type="radio"/> 1 vez al día<br><input type="radio"/> 2 a 3 veces al día<br><input type="radio"/> 5 a 6 veces al día<br><input type="radio"/> más 6 veces al día |
|------------------|--------------------------------------------------------------------------------------------------------------------------------------------------------------------------------------------------------------------------------------------------------------------------------------------------------------------------------------------------------------------------------------------------------------|

---

|                                         |                                                                                                                                                                                                                                                                                                                                                                                                              |
|-----------------------------------------|--------------------------------------------------------------------------------------------------------------------------------------------------------------------------------------------------------------------------------------------------------------------------------------------------------------------------------------------------------------------------------------------------------------|
| pescado ahumado                         | <input checked="" type="radio"/> Nunca o menos 1 vez al mes<br><input type="radio"/> 1 a 3 veces mes<br><input type="radio"/> 1 vez semana<br><input type="radio"/> 2 a 4 veces semana<br><input type="radio"/> 5 a 6 veces semana<br><input type="radio"/> 1 vez al día<br><input type="radio"/> 2 a 3 veces al día<br><input type="radio"/> 5 a 6 veces al día<br><input type="radio"/> más 6 veces al día |
| almejas o mejillones o ostras unos 100g | <input type="radio"/> Nunca o menos 1 vez al mes<br><input checked="" type="radio"/> 1 a 3 veces mes<br><input type="radio"/> 1 vez semana<br><input type="radio"/> 2 a 4 veces semana<br><input type="radio"/> 5 a 6 veces semana<br><input type="radio"/> 1 vez al día<br><input type="radio"/> 2 a 3 veces al día<br><input type="radio"/> 5 a 6 veces al día<br><input type="radio"/> más 6 veces al día |
| calamar o chipiron o sepia unos 100g    | <input type="radio"/> Nunca o menos 1 vez al mes<br><input checked="" type="radio"/> 1 a 3 veces mes<br><input type="radio"/> 1 vez semana<br><input type="radio"/> 2 a 4 veces semana<br><input type="radio"/> 5 a 6 veces semana<br><input type="radio"/> 1 vez al día<br><input type="radio"/> 2 a 3 veces al día<br><input type="radio"/> 5 a 6 veces al día<br><input type="radio"/> más 6 veces al día |
| marisco unos 100g                       | <input type="radio"/> Nunca o menos 1 vez al mes<br><input checked="" type="radio"/> 1 a 3 veces mes<br><input type="radio"/> 1 vez semana<br><input type="radio"/> 2 a 4 veces semana<br><input type="radio"/> 5 a 6 veces semana<br><input type="radio"/> 1 vez al día<br><input type="radio"/> 2 a 3 veces al día<br><input type="radio"/> 5 a 6 veces al día<br><input type="radio"/> más 6 veces al día |
| Espinacas o acelgas cocinadas           | <input type="radio"/> Nunca o menos 1 vez al mes<br><input type="radio"/> 1 a 3 veces mes<br><input type="radio"/> 1 vez semana<br><input checked="" type="radio"/> 2 a 4 veces semana<br><input type="radio"/> 5 a 6 veces semana<br><input type="radio"/> 1 vez al día<br><input type="radio"/> 2 a 3 veces al día<br><input type="radio"/> 5 a 6 veces al día<br><input type="radio"/> más 6 veces al día |
| Col o coliflor o brocoli cocinado       | <input type="radio"/> Nunca o menos 1 vez al mes<br><input type="radio"/> 1 a 3 veces mes<br><input type="radio"/> 1 vez semana<br><input checked="" type="radio"/> 2 a 4 veces semana<br><input type="radio"/> 5 a 6 veces semana<br><input type="radio"/> 1 vez al día<br><input type="radio"/> 2 a 3 veces al día<br><input type="radio"/> 5 a 6 veces al día<br><input type="radio"/> más 6 veces al día |



---

Lechuga o endivia o escarola

- ☐ Nunca o menos 1 vez al mes  
☐ 1 a 3 veces mes  
☐ 1 vez semana  
☒ 2 a 4 veces semana  
☐ 5 a 6 veces semana  
☐ 1 vez al día  
☐ 2 a 3 veces al día  
☐ 5 a 6 veces al día  
☐ más 6 veces al día

---

tomate ensalada

- ☐ Nunca o menos 1 vez al mes  
☐ 1 a 3 veces mes  
☐ 1 vez semana  
☒ 2 a 4 veces semana  
☐ 5 a 6 veces semana  
☐ 1 vez al día  
☐ 2 a 3 veces al día  
☐ 5 a 6 veces al día  
☐ más 6 veces al día

---

cebolla

- ☐ Nunca o menos 1 vez al mes  
☐ 1 a 3 veces mes  
☐ 1 vez semana  
☒ 2 a 4 veces semana  
☐ 5 a 6 veces semana  
☐ 1 vez al día  
☐ 2 a 3 veces al día  
☐ 5 a 6 veces al día  
☐ más 6 veces al día

---

Zanahoria o calabaza

- ☐ Nunca o menos 1 vez al mes  
☐ 1 a 3 veces mes  
☐ 1 vez semana  
☒ 2 a 4 veces semana  
☐ 5 a 6 veces semana  
☐ 1 vez al día  
☐ 2 a 3 veces al día  
☐ 5 a 6 veces al día  
☐ más 6 veces al día

---

Judías verdes

- ☐ Nunca o menos 1 vez al mes  
☐ 1 a 3 veces mes  
☐ 1 vez semana  
☒ 2 a 4 veces semana  
☐ 5 a 6 veces semana  
☐ 1 vez al día  
☐ 2 a 3 veces al día  
☐ 5 a 6 veces al día  
☐ más 6 veces al día

---

Berenjena o calabacin o pepino

- ☐ Nunca o menos 1 vez al mes  
☐ 1 a 3 veces mes  
☐ 1 vez semana  
☒ 2 a 4 veces semana  
☐ 5 a 6 veces semana  
☐ 1 vez al día  
☐ 2 a 3 veces al día  
☐ 5 a 6 veces al día  
☐ más 6 veces al día

---

|          |                                                                                                                                                                                                                                                                                                                                                                                                              |
|----------|--------------------------------------------------------------------------------------------------------------------------------------------------------------------------------------------------------------------------------------------------------------------------------------------------------------------------------------------------------------------------------------------------------------|
| pimiento | <input type="radio"/> Nunca o menos 1 vez al mes<br><input type="radio"/> 1 a 3 veces mes<br><input type="radio"/> 1 vez semana<br><input checked="" type="radio"/> 2 a 4 veces semana<br><input type="radio"/> 5 a 6 veces semana<br><input type="radio"/> 1 vez al día<br><input type="radio"/> 2 a 3 veces al día<br><input type="radio"/> 5 a 6 veces al día<br><input type="radio"/> más 6 veces al día |
|----------|--------------------------------------------------------------------------------------------------------------------------------------------------------------------------------------------------------------------------------------------------------------------------------------------------------------------------------------------------------------------------------------------------------------|

---

|           |                                                                                                                                                                                                                                                                                                                                                                                                              |
|-----------|--------------------------------------------------------------------------------------------------------------------------------------------------------------------------------------------------------------------------------------------------------------------------------------------------------------------------------------------------------------------------------------------------------------|
| alcachofa | <input type="radio"/> Nunca o menos 1 vez al mes<br><input type="radio"/> 1 a 3 veces mes<br><input type="radio"/> 1 vez semana<br><input checked="" type="radio"/> 2 a 4 veces semana<br><input type="radio"/> 5 a 6 veces semana<br><input type="radio"/> 1 vez al día<br><input type="radio"/> 2 a 3 veces al día<br><input type="radio"/> 5 a 6 veces al día<br><input type="radio"/> más 6 veces al día |
|-----------|--------------------------------------------------------------------------------------------------------------------------------------------------------------------------------------------------------------------------------------------------------------------------------------------------------------------------------------------------------------------------------------------------------------|

---

|            |                                                                                                                                                                                                                                                                                                                                                                                                              |
|------------|--------------------------------------------------------------------------------------------------------------------------------------------------------------------------------------------------------------------------------------------------------------------------------------------------------------------------------------------------------------------------------------------------------------|
| espárragos | <input type="radio"/> Nunca o menos 1 vez al mes<br><input type="radio"/> 1 a 3 veces mes<br><input type="radio"/> 1 vez semana<br><input checked="" type="radio"/> 2 a 4 veces semana<br><input type="radio"/> 5 a 6 veces semana<br><input type="radio"/> 1 vez al día<br><input type="radio"/> 2 a 3 veces al día<br><input type="radio"/> 5 a 6 veces al día<br><input type="radio"/> más 6 veces al día |
|------------|--------------------------------------------------------------------------------------------------------------------------------------------------------------------------------------------------------------------------------------------------------------------------------------------------------------------------------------------------------------------------------------------------------------|

---

|              |                                                                                                                                                                                                                                                                                                                                                                                                              |
|--------------|--------------------------------------------------------------------------------------------------------------------------------------------------------------------------------------------------------------------------------------------------------------------------------------------------------------------------------------------------------------------------------------------------------------|
| maíz hervido | <input checked="" type="radio"/> Nunca o menos 1 vez al mes<br><input type="radio"/> 1 a 3 veces mes<br><input type="radio"/> 1 vez semana<br><input type="radio"/> 2 a 4 veces semana<br><input type="radio"/> 5 a 6 veces semana<br><input type="radio"/> 1 vez al día<br><input type="radio"/> 2 a 3 veces al día<br><input type="radio"/> 5 a 6 veces al día<br><input type="radio"/> más 6 veces al día |
|--------------|--------------------------------------------------------------------------------------------------------------------------------------------------------------------------------------------------------------------------------------------------------------------------------------------------------------------------------------------------------------------------------------------------------------|

---

|           |                                                                                                                                                                                                                                                                                                                                                                                                              |
|-----------|--------------------------------------------------------------------------------------------------------------------------------------------------------------------------------------------------------------------------------------------------------------------------------------------------------------------------------------------------------------------------------------------------------------|
| legumbres | <input checked="" type="radio"/> Nunca o menos 1 vez al mes<br><input type="radio"/> 1 a 3 veces mes<br><input type="radio"/> 1 vez semana<br><input type="radio"/> 2 a 4 veces semana<br><input type="radio"/> 5 a 6 veces semana<br><input type="radio"/> 1 vez al día<br><input type="radio"/> 2 a 3 veces al día<br><input type="radio"/> 5 a 6 veces al día<br><input type="radio"/> más 6 veces al día |
|-----------|--------------------------------------------------------------------------------------------------------------------------------------------------------------------------------------------------------------------------------------------------------------------------------------------------------------------------------------------------------------------------------------------------------------|

---

|                       |                                                                                                                                                                                                                                                                                                                                                                                                              |
|-----------------------|--------------------------------------------------------------------------------------------------------------------------------------------------------------------------------------------------------------------------------------------------------------------------------------------------------------------------------------------------------------------------------------------------------------|
| naranjas o mandarinas | <input type="radio"/> Nunca o menos 1 vez al mes<br><input type="radio"/> 1 a 3 veces mes<br><input type="radio"/> 1 vez semana<br><input checked="" type="radio"/> 2 a 4 veces semana<br><input type="radio"/> 5 a 6 veces semana<br><input type="radio"/> 1 vez al día<br><input type="radio"/> 2 a 3 veces al día<br><input type="radio"/> 5 a 6 veces al día<br><input type="radio"/> más 6 veces al día |
|-----------------------|--------------------------------------------------------------------------------------------------------------------------------------------------------------------------------------------------------------------------------------------------------------------------------------------------------------------------------------------------------------------------------------------------------------|

---

---

zum natural fruta

- ☒ Nunca o menos 1 vez al mes  
☐ 1 a 3 veces mes  
☐ 1 vez semana  
☐ 2 a 4 veces semana  
☐ 5 a 6 veces semana  
☐ 1 vez al día  
☐ 2 a 3 veces al día  
☐ 5 a 6 veces al día  
☐ más 6 veces al día

---

platano

- ☐ Nunca o menos 1 vez al mes  
☐ 1 a 3 veces mes  
☐ 1 vez semana  
☒ 2 a 4 veces semana  
☐ 5 a 6 veces semana  
☐ 1 vez al día  
☐ 2 a 3 veces al día  
☐ 5 a 6 veces al día  
☐ más 6 veces al día

---

manzana o pera

- ☐ Nunca o menos 1 vez al mes  
☐ 1 a 3 veces mes  
☐ 1 vez semana  
☒ 2 a 4 veces semana  
☐ 5 a 6 veces semana  
☐ 1 vez al día  
☐ 2 a 3 veces al día  
☐ 5 a 6 veces al día  
☐ más 6 veces al día

---

melocotón o nectarina

- ☐ Nunca o menos 1 vez al mes  
☐ 1 a 3 veces mes  
☐ 1 vez semana  
☒ 2 a 4 veces semana  
☐ 5 a 6 veces semana  
☐ 1 vez al día  
☐ 2 a 3 veces al día  
☐ 5 a 6 veces al día  
☐ más 6 veces al día

---

sandia o melon

- ☐ Nunca o menos 1 vez al mes  
☐ 1 a 3 veces mes  
☐ 1 vez semana  
☒ 2 a 4 veces semana  
☐ 5 a 6 veces semana  
☐ 1 vez al día  
☐ 2 a 3 veces al día  
☐ 5 a 6 veces al día  
☐ más 6 veces al día

---

uva

- ☒ Nunca o menos 1 vez al mes  
☐ 1 a 3 veces mes  
☐ 1 vez semana  
☐ 2 a 4 veces semana  
☐ 5 a 6 veces semana  
☐ 1 vez al día  
☐ 2 a 3 veces al día  
☐ 5 a 6 veces al día  
☐ más 6 veces al día

|                 |                                                                                                                                                                                                                                                                                                                                                                                                              |
|-----------------|--------------------------------------------------------------------------------------------------------------------------------------------------------------------------------------------------------------------------------------------------------------------------------------------------------------------------------------------------------------------------------------------------------------|
| bruna o ciruela | <input checked="" type="radio"/> Nunca o menos 1 vez al mes<br><input type="radio"/> 1 a 3 veces mes<br><input type="radio"/> 1 vez semana<br><input type="radio"/> 2 a 4 veces semana<br><input type="radio"/> 5 a 6 veces semana<br><input type="radio"/> 1 vez al día<br><input type="radio"/> 2 a 3 veces al día<br><input type="radio"/> 5 a 6 veces al día<br><input type="radio"/> más 6 veces al día |
| kiwi            | <input checked="" type="radio"/> Nunca o menos 1 vez al mes<br><input type="radio"/> 1 a 3 veces mes<br><input type="radio"/> 1 vez semana<br><input type="radio"/> 2 a 4 veces semana<br><input type="radio"/> 5 a 6 veces semana<br><input type="radio"/> 1 vez al día<br><input type="radio"/> 2 a 3 veces al día<br><input type="radio"/> 5 a 6 veces al día<br><input type="radio"/> más 6 veces al día |
| aceituna        | <input checked="" type="radio"/> Nunca o menos 1 vez al mes<br><input type="radio"/> 1 a 3 veces mes<br><input type="radio"/> 1 vez semana<br><input type="radio"/> 2 a 4 veces semana<br><input type="radio"/> 5 a 6 veces semana<br><input type="radio"/> 1 vez al día<br><input type="radio"/> 2 a 3 veces al día<br><input type="radio"/> 5 a 6 veces al día<br><input type="radio"/> más 6 veces al día |
| frutos secos    | <input checked="" type="radio"/> Nunca o menos 1 vez al mes<br><input type="radio"/> 1 a 3 veces mes<br><input type="radio"/> 1 vez semana<br><input type="radio"/> 2 a 4 veces semana<br><input type="radio"/> 5 a 6 veces semana<br><input type="radio"/> 1 vez al día<br><input type="radio"/> 2 a 3 veces al día<br><input type="radio"/> 5 a 6 veces al día<br><input type="radio"/> más 6 veces al día |
| pan blanco      | <input type="radio"/> Nunca o menos 1 vez al mes<br><input type="radio"/> 1 a 3 veces mes<br><input type="radio"/> 1 vez semana<br><input checked="" type="radio"/> 2 a 4 veces semana<br><input type="radio"/> 5 a 6 veces semana<br><input type="radio"/> 1 vez al día<br><input type="radio"/> 2 a 3 veces al día<br><input type="radio"/> 5 a 6 veces al día<br><input type="radio"/> más 6 veces al día |
| pan integral    | <input type="radio"/> Nunca o menos 1 vez al mes<br><input type="radio"/> 1 a 3 veces mes<br><input type="radio"/> 1 vez semana<br><input checked="" type="radio"/> 2 a 4 veces semana<br><input type="radio"/> 5 a 6 veces semana<br><input type="radio"/> 1 vez al día<br><input type="radio"/> 2 a 3 veces al día<br><input type="radio"/> 5 a 6 veces al día<br><input type="radio"/> más 6 veces al día |

---

|                   |                                                                                                                                                                                                                                                                                                                                                                                                              |
|-------------------|--------------------------------------------------------------------------------------------------------------------------------------------------------------------------------------------------------------------------------------------------------------------------------------------------------------------------------------------------------------------------------------------------------------|
| cereales desayuno | <input checked="" type="radio"/> Nunca o menos 1 vez al mes<br><input type="radio"/> 1 a 3 veces mes<br><input type="radio"/> 1 vez semana<br><input type="radio"/> 2 a 4 veces semana<br><input type="radio"/> 5 a 6 veces semana<br><input type="radio"/> 1 vez al día<br><input type="radio"/> 2 a 3 veces al día<br><input type="radio"/> 5 a 6 veces al día<br><input type="radio"/> más 6 veces al día |
|-------------------|--------------------------------------------------------------------------------------------------------------------------------------------------------------------------------------------------------------------------------------------------------------------------------------------------------------------------------------------------------------------------------------------------------------|

---

|                |                                                                                                                                                                                                                                                                                                                                                                                                              |
|----------------|--------------------------------------------------------------------------------------------------------------------------------------------------------------------------------------------------------------------------------------------------------------------------------------------------------------------------------------------------------------------------------------------------------------|
| patatas fritas | <input checked="" type="radio"/> Nunca o menos 1 vez al mes<br><input type="radio"/> 1 a 3 veces mes<br><input type="radio"/> 1 vez semana<br><input type="radio"/> 2 a 4 veces semana<br><input type="radio"/> 5 a 6 veces semana<br><input type="radio"/> 1 vez al día<br><input type="radio"/> 2 a 3 veces al día<br><input type="radio"/> 5 a 6 veces al día<br><input type="radio"/> más 6 veces al día |
|----------------|--------------------------------------------------------------------------------------------------------------------------------------------------------------------------------------------------------------------------------------------------------------------------------------------------------------------------------------------------------------------------------------------------------------|

---

|                          |                                                                                                                                                                                                                                                                                                                                                                                                              |
|--------------------------|--------------------------------------------------------------------------------------------------------------------------------------------------------------------------------------------------------------------------------------------------------------------------------------------------------------------------------------------------------------------------------------------------------------|
| patatas cocidas o asadas | <input type="radio"/> Nunca o menos 1 vez al mes<br><input type="radio"/> 1 a 3 veces mes<br><input type="radio"/> 1 vez semana<br><input checked="" type="radio"/> 2 a 4 veces semana<br><input type="radio"/> 5 a 6 veces semana<br><input type="radio"/> 1 vez al día<br><input type="radio"/> 2 a 3 veces al día<br><input type="radio"/> 5 a 6 veces al día<br><input type="radio"/> más 6 veces al día |
|--------------------------|--------------------------------------------------------------------------------------------------------------------------------------------------------------------------------------------------------------------------------------------------------------------------------------------------------------------------------------------------------------------------------------------------------------|

---

|             |                                                                                                                                                                                                                                                                                                                                                                                                              |
|-------------|--------------------------------------------------------------------------------------------------------------------------------------------------------------------------------------------------------------------------------------------------------------------------------------------------------------------------------------------------------------------------------------------------------------|
| bolsa papas | <input checked="" type="radio"/> Nunca o menos 1 vez al mes<br><input type="radio"/> 1 a 3 veces mes<br><input type="radio"/> 1 vez semana<br><input type="radio"/> 2 a 4 veces semana<br><input type="radio"/> 5 a 6 veces semana<br><input type="radio"/> 1 vez al día<br><input type="radio"/> 2 a 3 veces al día<br><input type="radio"/> 5 a 6 veces al día<br><input type="radio"/> más 6 veces al día |
|-------------|--------------------------------------------------------------------------------------------------------------------------------------------------------------------------------------------------------------------------------------------------------------------------------------------------------------------------------------------------------------------------------------------------------------|

---

|                |                                                                                                                                                                                                                                                                                                                                                                                                              |
|----------------|--------------------------------------------------------------------------------------------------------------------------------------------------------------------------------------------------------------------------------------------------------------------------------------------------------------------------------------------------------------------------------------------------------------|
| arroz cocinado | <input type="radio"/> Nunca o menos 1 vez al mes<br><input type="radio"/> 1 a 3 veces mes<br><input type="radio"/> 1 vez semana<br><input checked="" type="radio"/> 2 a 4 veces semana<br><input type="radio"/> 5 a 6 veces semana<br><input type="radio"/> 1 vez al día<br><input type="radio"/> 2 a 3 veces al día<br><input type="radio"/> 5 a 6 veces al día<br><input type="radio"/> más 6 veces al día |
|----------------|--------------------------------------------------------------------------------------------------------------------------------------------------------------------------------------------------------------------------------------------------------------------------------------------------------------------------------------------------------------------------------------------------------------|

---

|       |                                                                                                                                                                                                                                                                                                                                                                                                              |
|-------|--------------------------------------------------------------------------------------------------------------------------------------------------------------------------------------------------------------------------------------------------------------------------------------------------------------------------------------------------------------------------------------------------------------|
| pasta | <input type="radio"/> Nunca o menos 1 vez al mes<br><input type="radio"/> 1 a 3 veces mes<br><input type="radio"/> 1 vez semana<br><input checked="" type="radio"/> 2 a 4 veces semana<br><input type="radio"/> 5 a 6 veces semana<br><input type="radio"/> 1 vez al día<br><input type="radio"/> 2 a 3 veces al día<br><input type="radio"/> 5 a 6 veces al día<br><input type="radio"/> más 6 veces al día |
|-------|--------------------------------------------------------------------------------------------------------------------------------------------------------------------------------------------------------------------------------------------------------------------------------------------------------------------------------------------------------------------------------------------------------------|

---

|                     |                                                                                                                                                                                                                                                                                                                                                                                                              |
|---------------------|--------------------------------------------------------------------------------------------------------------------------------------------------------------------------------------------------------------------------------------------------------------------------------------------------------------------------------------------------------------------------------------------------------------|
| pizza               | <input type="radio"/> Nunca o menos 1 vez al mes<br><input checked="" type="radio"/> 1 a 3 veces mes<br><input type="radio"/> 1 vez semana<br><input type="radio"/> 2 a 4 veces semana<br><input type="radio"/> 5 a 6 veces semana<br><input type="radio"/> 1 vez al día<br><input type="radio"/> 2 a 3 veces al día<br><input type="radio"/> 5 a 6 veces al día<br><input type="radio"/> más 6 veces al día |
| aceite oliva        | <input type="radio"/> Nunca o menos 1 vez al mes<br><input type="radio"/> 1 a 3 veces mes<br><input type="radio"/> 1 vez semana<br><input type="radio"/> 2 a 4 veces semana<br><input type="radio"/> 5 a 6 veces semana<br><input checked="" type="radio"/> 1 vez al día<br><input type="radio"/> 2 a 3 veces al día<br><input type="radio"/> 5 a 6 veces al día<br><input type="radio"/> más 6 veces al día |
| otros aceites       | <input checked="" type="radio"/> Nunca o menos 1 vez al mes<br><input type="radio"/> 1 a 3 veces mes<br><input type="radio"/> 1 vez semana<br><input type="radio"/> 2 a 4 veces semana<br><input type="radio"/> 5 a 6 veces semana<br><input type="radio"/> 1 vez al día<br><input type="radio"/> 2 a 3 veces al día<br><input type="radio"/> 5 a 6 veces al día<br><input type="radio"/> más 6 veces al día |
| margarina           | <input checked="" type="radio"/> Nunca o menos 1 vez al mes<br><input type="radio"/> 1 a 3 veces mes<br><input type="radio"/> 1 vez semana<br><input type="radio"/> 2 a 4 veces semana<br><input type="radio"/> 5 a 6 veces semana<br><input type="radio"/> 1 vez al día<br><input type="radio"/> 2 a 3 veces al día<br><input type="radio"/> 5 a 6 veces al día<br><input type="radio"/> más 6 veces al día |
| mantequilla         | <input checked="" type="radio"/> Nunca o menos 1 vez al mes<br><input type="radio"/> 1 a 3 veces mes<br><input type="radio"/> 1 vez semana<br><input type="radio"/> 2 a 4 veces semana<br><input type="radio"/> 5 a 6 veces semana<br><input type="radio"/> 1 vez al día<br><input type="radio"/> 2 a 3 veces al día<br><input type="radio"/> 5 a 6 veces al día<br><input type="radio"/> más 6 veces al día |
| galletas tipo maria | <input type="radio"/> Nunca o menos 1 vez al mes<br><input type="radio"/> 1 a 3 veces mes<br><input type="radio"/> 1 vez semana<br><input type="radio"/> 2 a 4 veces semana<br><input type="radio"/> 5 a 6 veces semana<br><input checked="" type="radio"/> 1 vez al día<br><input type="radio"/> 2 a 3 veces al día<br><input type="radio"/> 5 a 6 veces al día<br><input type="radio"/> más 6 veces al día |

|                           |                                                                                                                                                                                                                                                                                                                                                                                                              |
|---------------------------|--------------------------------------------------------------------------------------------------------------------------------------------------------------------------------------------------------------------------------------------------------------------------------------------------------------------------------------------------------------------------------------------------------------|
| galletas chocolate        | <input checked="" type="radio"/> Nunca o menos 1 vez al mes<br><input type="radio"/> 1 a 3 veces mes<br><input type="radio"/> 1 vez semana<br><input type="radio"/> 2 a 4 veces semana<br><input type="radio"/> 5 a 6 veces semana<br><input type="radio"/> 1 vez al día<br><input type="radio"/> 2 a 3 veces al día<br><input type="radio"/> 5 a 6 veces al día<br><input type="radio"/> más 6 veces al día |
| bollieria                 | <input type="radio"/> Nunca o menos 1 vez al mes<br><input checked="" type="radio"/> 1 a 3 veces mes<br><input type="radio"/> 1 vez semana<br><input type="radio"/> 2 a 4 veces semana<br><input type="radio"/> 5 a 6 veces semana<br><input type="radio"/> 1 vez al día<br><input type="radio"/> 2 a 3 veces al día<br><input type="radio"/> 5 a 6 veces al día<br><input type="radio"/> más 6 veces al día |
| chocolate o bombones      | <input type="radio"/> Nunca o menos 1 vez al mes<br><input checked="" type="radio"/> 1 a 3 veces mes<br><input type="radio"/> 1 vez semana<br><input type="radio"/> 2 a 4 veces semana<br><input type="radio"/> 5 a 6 veces semana<br><input type="radio"/> 1 vez al día<br><input type="radio"/> 2 a 3 veces al día<br><input type="radio"/> 5 a 6 veces al día<br><input type="radio"/> más 6 veces al día |
| chocolate polvo o colacao | <input checked="" type="radio"/> Nunca o menos 1 vez al mes<br><input type="radio"/> 1 a 3 veces mes<br><input type="radio"/> 1 vez semana<br><input type="radio"/> 2 a 4 veces semana<br><input type="radio"/> 5 a 6 veces semana<br><input type="radio"/> 1 vez al día<br><input type="radio"/> 2 a 3 veces al día<br><input type="radio"/> 5 a 6 veces al día<br><input type="radio"/> más 6 veces al día |
| vino tinto                | <input checked="" type="radio"/> Nunca o menos 1 vez al mes<br><input type="radio"/> 1 a 3 veces mes<br><input type="radio"/> 1 vez semana<br><input type="radio"/> 2 a 4 veces semana<br><input type="radio"/> 5 a 6 veces semana<br><input type="radio"/> 1 vez al día<br><input type="radio"/> 2 a 3 veces al día<br><input type="radio"/> 5 a 6 veces al día<br><input type="radio"/> más 6 veces al día |
| vino blanco               | <input checked="" type="radio"/> Nunca o menos 1 vez al mes<br><input type="radio"/> 1 a 3 veces mes<br><input type="radio"/> 1 vez semana<br><input type="radio"/> 2 a 4 veces semana<br><input type="radio"/> 5 a 6 veces semana<br><input type="radio"/> 1 vez al día<br><input type="radio"/> 2 a 3 veces al día<br><input type="radio"/> 5 a 6 veces al día<br><input type="radio"/> más 6 veces al día |

|                       |                                                                                                                                                                                                                                                                                                                                                                                                              |
|-----------------------|--------------------------------------------------------------------------------------------------------------------------------------------------------------------------------------------------------------------------------------------------------------------------------------------------------------------------------------------------------------------------------------------------------------|
| vino seco o vermut    | <input checked="" type="radio"/> Nunca o menos 1 vez al mes<br><input type="radio"/> 1 a 3 veces mes<br><input type="radio"/> 1 vez semana<br><input type="radio"/> 2 a 4 veces semana<br><input type="radio"/> 5 a 6 veces semana<br><input type="radio"/> 1 vez al día<br><input type="radio"/> 2 a 3 veces al día<br><input type="radio"/> 5 a 6 veces al día<br><input type="radio"/> más 6 veces al día |
| cerveza               | <input checked="" type="radio"/> Nunca o menos 1 vez al mes<br><input type="radio"/> 1 a 3 veces mes<br><input type="radio"/> 1 vez semana<br><input type="radio"/> 2 a 4 veces semana<br><input type="radio"/> 5 a 6 veces semana<br><input type="radio"/> 1 vez al día<br><input type="radio"/> 2 a 3 veces al día<br><input type="radio"/> 5 a 6 veces al día<br><input type="radio"/> más 6 veces al día |
| cerveza sin alcohol   | <input checked="" type="radio"/> Nunca o menos 1 vez al mes<br><input type="radio"/> 1 a 3 veces mes<br><input type="radio"/> 1 vez semana<br><input type="radio"/> 2 a 4 veces semana<br><input type="radio"/> 5 a 6 veces semana<br><input type="radio"/> 1 vez al día<br><input type="radio"/> 2 a 3 veces al día<br><input type="radio"/> 5 a 6 veces al día<br><input type="radio"/> más 6 veces al día |
| licores               | <input checked="" type="radio"/> Nunca o menos 1 vez al mes<br><input type="radio"/> 1 a 3 veces mes<br><input type="radio"/> 1 vez semana<br><input type="radio"/> 2 a 4 veces semana<br><input type="radio"/> 5 a 6 veces semana<br><input type="radio"/> 1 vez al día<br><input type="radio"/> 2 a 3 veces al día<br><input type="radio"/> 5 a 6 veces al día<br><input type="radio"/> más 6 veces al día |
| ginebra o ron o vodka | <input checked="" type="radio"/> Nunca o menos 1 vez al mes<br><input type="radio"/> 1 a 3 veces mes<br><input type="radio"/> 1 vez semana<br><input type="radio"/> 2 a 4 veces semana<br><input type="radio"/> 5 a 6 veces semana<br><input type="radio"/> 1 vez al día<br><input type="radio"/> 2 a 3 veces al día<br><input type="radio"/> 5 a 6 veces al día<br><input type="radio"/> más 6 veces al día |
| refresco normal       | <input type="radio"/> Nunca o menos 1 vez al mes<br><input type="radio"/> 1 a 3 veces mes<br><input checked="" type="radio"/> 1 vez semana<br><input type="radio"/> 2 a 4 veces semana<br><input type="radio"/> 5 a 6 veces semana<br><input type="radio"/> 1 vez al día<br><input type="radio"/> 2 a 3 veces al día<br><input type="radio"/> 5 a 6 veces al día<br><input type="radio"/> más 6 veces al día |



---

refresco sin azúcar

- ☐ Nunca o menos 1 vez al mes  
☐ 1 a 3 veces mes  
☒ 1 vez semana  
☐ 2 a 4 veces semana  
☐ 5 a 6 veces semana  
☐ 1 vez al día  
☐ 2 a 3 veces al día  
☐ 5 a 6 veces al día  
☐ más 6 veces al día

---

Agua del grifo

- ☒ Nunca o menos 1 vez al mes  
☐ 1 a 3 veces mes  
☐ 1 vez semana  
☐ 2 a 4 veces semana  
☐ 5 a 6 veces semana  
☐ 1 vez al día  
☐ 2 a 3 veces al día  
☐ 5 a 6 veces al día  
☐ más 6 veces al día

---

agua embotellada sin gas

- ☐ Nunca o menos 1 vez al mes  
☐ 1 a 3 veces mes  
☐ 1 vez semana  
☐ 2 a 4 veces semana  
☐ 5 a 6 veces semana  
☐ 1 vez al día  
☐ 2 a 3 veces al día  
☐ 5 a 6 veces al día  
☒ más 6 veces al día

---

agua embotellada con gas

- ☒ Nunca o menos 1 vez al mes  
☐ 1 a 3 veces mes  
☐ 1 vez semana  
☐ 2 a 4 veces semana  
☐ 5 a 6 veces semana  
☐ 1 vez al día  
☐ 2 a 3 veces al día  
☐ 5 a 6 veces al día  
☐ más 6 veces al día

---

zumو frutas embasado

- ☐ Nunca o menos 1 vez al mes  
☐ 1 a 3 veces mes  
☒ 1 vez semana  
☐ 2 a 4 veces semana  
☐ 5 a 6 veces semana  
☐ 1 vez al día  
☐ 2 a 3 veces al día  
☐ 5 a 6 veces al día  
☐ más 6 veces al día

---

cafe

- ☒ Nunca o menos 1 vez al mes  
☐ 1 a 3 veces mes  
☐ 1 vez semana  
☐ 2 a 4 veces semana  
☐ 5 a 6 veces semana  
☐ 1 vez al día  
☐ 2 a 3 veces al día  
☐ 5 a 6 veces al día  
☐ más 6 veces al día

---

|                   |                                                                                                                                                                                                                                                                                                                                                                                                              |
|-------------------|--------------------------------------------------------------------------------------------------------------------------------------------------------------------------------------------------------------------------------------------------------------------------------------------------------------------------------------------------------------------------------------------------------------|
| cafe descafeinado | <input type="radio"/> Nunca o menos 1 vez al mes<br><input type="radio"/> 1 a 3 veces mes<br><input type="radio"/> 1 vez semana<br><input checked="" type="radio"/> 2 a 4 veces semana<br><input type="radio"/> 5 a 6 veces semana<br><input type="radio"/> 1 vez al día<br><input type="radio"/> 2 a 3 veces al día<br><input type="radio"/> 5 a 6 veces al día<br><input type="radio"/> más 6 veces al día |
|-------------------|--------------------------------------------------------------------------------------------------------------------------------------------------------------------------------------------------------------------------------------------------------------------------------------------------------------------------------------------------------------------------------------------------------------|

---

|               |                                                                                                                                                                                                                                                                                                                                                                                                              |
|---------------|--------------------------------------------------------------------------------------------------------------------------------------------------------------------------------------------------------------------------------------------------------------------------------------------------------------------------------------------------------------------------------------------------------------|
| te o infusión | <input checked="" type="radio"/> Nunca o menos 1 vez al mes<br><input type="radio"/> 1 a 3 veces mes<br><input type="radio"/> 1 vez semana<br><input type="radio"/> 2 a 4 veces semana<br><input type="radio"/> 5 a 6 veces semana<br><input type="radio"/> 1 vez al día<br><input type="radio"/> 2 a 3 veces al día<br><input type="radio"/> 5 a 6 veces al día<br><input type="radio"/> más 6 veces al día |
|---------------|--------------------------------------------------------------------------------------------------------------------------------------------------------------------------------------------------------------------------------------------------------------------------------------------------------------------------------------------------------------------------------------------------------------|

---

|                      |                                                                                                                                                                                                                                                                                                                                                                                                              |
|----------------------|--------------------------------------------------------------------------------------------------------------------------------------------------------------------------------------------------------------------------------------------------------------------------------------------------------------------------------------------------------------------------------------------------------------|
| sopa o puré verduras | <input type="radio"/> Nunca o menos 1 vez al mes<br><input type="radio"/> 1 a 3 veces mes<br><input type="radio"/> 1 vez semana<br><input checked="" type="radio"/> 2 a 4 veces semana<br><input type="radio"/> 5 a 6 veces semana<br><input type="radio"/> 1 vez al día<br><input type="radio"/> 2 a 3 veces al día<br><input type="radio"/> 5 a 6 veces al día<br><input type="radio"/> más 6 veces al día |
|----------------------|--------------------------------------------------------------------------------------------------------------------------------------------------------------------------------------------------------------------------------------------------------------------------------------------------------------------------------------------------------------------------------------------------------------|

---

|                       |                                                                                                                                                                                                                                                                                                                                                                                                              |
|-----------------------|--------------------------------------------------------------------------------------------------------------------------------------------------------------------------------------------------------------------------------------------------------------------------------------------------------------------------------------------------------------------------------------------------------------|
| croquetas pollo jamón | <input checked="" type="radio"/> Nunca o menos 1 vez al mes<br><input type="radio"/> 1 a 3 veces mes<br><input type="radio"/> 1 vez semana<br><input type="radio"/> 2 a 4 veces semana<br><input type="radio"/> 5 a 6 veces semana<br><input type="radio"/> 1 vez al día<br><input type="radio"/> 2 a 3 veces al día<br><input type="radio"/> 5 a 6 veces al día<br><input type="radio"/> más 6 veces al día |
|-----------------------|--------------------------------------------------------------------------------------------------------------------------------------------------------------------------------------------------------------------------------------------------------------------------------------------------------------------------------------------------------------------------------------------------------------|

---

|                   |                                                                                                                                                                                                                                                                                                                                                                                                              |
|-------------------|--------------------------------------------------------------------------------------------------------------------------------------------------------------------------------------------------------------------------------------------------------------------------------------------------------------------------------------------------------------------------------------------------------------|
| croquetas pescado | <input checked="" type="radio"/> Nunca o menos 1 vez al mes<br><input type="radio"/> 1 a 3 veces mes<br><input type="radio"/> 1 vez semana<br><input type="radio"/> 2 a 4 veces semana<br><input type="radio"/> 5 a 6 veces semana<br><input type="radio"/> 1 vez al día<br><input type="radio"/> 2 a 3 veces al día<br><input type="radio"/> 5 a 6 veces al día<br><input type="radio"/> más 6 veces al día |
|-------------------|--------------------------------------------------------------------------------------------------------------------------------------------------------------------------------------------------------------------------------------------------------------------------------------------------------------------------------------------------------------------------------------------------------------|

---

|          |                                                                                                                                                                                                                                                                                                                                                                                                              |
|----------|--------------------------------------------------------------------------------------------------------------------------------------------------------------------------------------------------------------------------------------------------------------------------------------------------------------------------------------------------------------------------------------------------------------|
| mayonesa | <input checked="" type="radio"/> Nunca o menos 1 vez al mes<br><input type="radio"/> 1 a 3 veces mes<br><input type="radio"/> 1 vez semana<br><input type="radio"/> 2 a 4 veces semana<br><input type="radio"/> 5 a 6 veces semana<br><input type="radio"/> 1 vez al día<br><input type="radio"/> 2 a 3 veces al día<br><input type="radio"/> 5 a 6 veces al día<br><input type="radio"/> más 6 veces al día |
|----------|--------------------------------------------------------------------------------------------------------------------------------------------------------------------------------------------------------------------------------------------------------------------------------------------------------------------------------------------------------------------------------------------------------------|

---

|                  |                                                                                                                                                                                                                                                                                                                                                                                                              |
|------------------|--------------------------------------------------------------------------------------------------------------------------------------------------------------------------------------------------------------------------------------------------------------------------------------------------------------------------------------------------------------------------------------------------------------|
| salsa tomate     | <input checked="" type="radio"/> Nunca o menos 1 vez al mes<br><input type="radio"/> 1 a 3 veces mes<br><input type="radio"/> 1 vez semana<br><input type="radio"/> 2 a 4 veces semana<br><input type="radio"/> 5 a 6 veces semana<br><input type="radio"/> 1 vez al día<br><input type="radio"/> 2 a 3 veces al día<br><input type="radio"/> 5 a 6 veces al día<br><input type="radio"/> más 6 veces al día |
| ketchup          | <input checked="" type="radio"/> Nunca o menos 1 vez al mes<br><input type="radio"/> 1 a 3 veces mes<br><input type="radio"/> 1 vez semana<br><input type="radio"/> 2 a 4 veces semana<br><input type="radio"/> 5 a 6 veces semana<br><input type="radio"/> 1 vez al día<br><input type="radio"/> 2 a 3 veces al día<br><input type="radio"/> 5 a 6 veces al día<br><input type="radio"/> más 6 veces al día |
| sal              | <input checked="" type="radio"/> Nunca o menos 1 vez al mes<br><input type="radio"/> 1 a 3 veces mes<br><input type="radio"/> 1 vez semana<br><input type="radio"/> 2 a 4 veces semana<br><input type="radio"/> 5 a 6 veces semana<br><input type="radio"/> 1 vez al día<br><input type="radio"/> 2 a 3 veces al día<br><input type="radio"/> 5 a 6 veces al día<br><input type="radio"/> más 6 veces al día |
| ajo              | <input checked="" type="radio"/> Nunca o menos 1 vez al mes<br><input type="radio"/> 1 a 3 veces mes<br><input type="radio"/> 1 vez semana<br><input type="radio"/> 2 a 4 veces semana<br><input type="radio"/> 5 a 6 veces semana<br><input type="radio"/> 1 vez al día<br><input type="radio"/> 2 a 3 veces al día<br><input type="radio"/> 5 a 6 veces al día<br><input type="radio"/> más 6 veces al día |
| mermelada o miel | <input checked="" type="radio"/> Nunca o menos 1 vez al mes<br><input type="radio"/> 1 a 3 veces mes<br><input type="radio"/> 1 vez semana<br><input type="radio"/> 2 a 4 veces semana<br><input type="radio"/> 5 a 6 veces semana<br><input type="radio"/> 1 vez al día<br><input type="radio"/> 2 a 3 veces al día<br><input type="radio"/> 5 a 6 veces al día<br><input type="radio"/> más 6 veces al día |
| azúcar           | <input type="radio"/> Nunca o menos 1 vez al mes<br><input type="radio"/> 1 a 3 veces mes<br><input type="radio"/> 1 vez semana<br><input checked="" type="radio"/> 2 a 4 veces semana<br><input type="radio"/> 5 a 6 veces semana<br><input type="radio"/> 1 vez al día<br><input type="radio"/> 2 a 3 veces al día<br><input type="radio"/> 5 a 6 veces al día<br><input type="radio"/> más 6 veces al día |

---

Otro alimento

---

---

suplementos vitamínicos

- ☐ si  
☒ no
- 

---

suplementos vitamínicos

---

---

dieta previa

- ☐ si  
☒ no
- 

---

motivo dieta

- ☒ no dieta  
☐ control peso  
☐ control colesterol  
☐ control diabetes  
☐ problemas estómago  
☐ problemas vesícula o hepáticos  
☐ HTA o cardiopatía  
☐ problemas renales  
☐ alergia alimentaria  
☐ ácido úrico elevado  
☐ vegetariana  
☐ otros
- 

---

cambio alimentos año previo gestación

- ☒ si  
☐ no
- 

---

cambio lácteos

- ☐ eliminado  
☐ disminuido  
☒ igual  
☐ aumentado  
☐ no sabe
- 

---

cambio huevos

- ☐ eliminado  
☐ disminuido  
☒ igual  
☐ aumentado  
☐ no sabe
- 

---

cambio carne

- ☐ eliminado  
☐ disminuido  
☒ igual  
☐ aumentado  
☐ no sabe
- 

---

cambio pescado

- ☐ eliminado  
☐ disminuido  
☒ igual  
☐ aumentado  
☐ no sabe
- 

---

cambio verduras

- ☐ eliminado  
☐ disminuido  
☒ igual  
☐ aumentado  
☐ no sabe
-

|                            |                                                                                                                                                                                                                        |
|----------------------------|------------------------------------------------------------------------------------------------------------------------------------------------------------------------------------------------------------------------|
| cambio legumbres           | <input checked="" type="radio"/> eliminado<br><input type="radio"/> disminuido<br><input type="radio"/> igual<br><input type="radio"/> aumentado<br><input type="radio"/> no sabe                                      |
| cambio fruta               | <input type="radio"/> eliminado<br><input type="radio"/> disminuido<br><input checked="" type="radio"/> igual<br><input type="radio"/> aumentado<br><input type="radio"/> no sabe                                      |
| cambio pan                 | <input type="radio"/> eliminado<br><input type="radio"/> disminuido<br><input checked="" type="radio"/> igual<br><input type="radio"/> aumentado<br><input type="radio"/> no sabe                                      |
| cambio aceite oliva        | <input type="radio"/> eliminado<br><input type="radio"/> disminuido<br><input checked="" type="radio"/> igual<br><input type="radio"/> aumentado<br><input type="radio"/> no sabe                                      |
| cambio mante o margarina   | <input checked="" type="radio"/> eliminado<br><input type="radio"/> disminuido<br><input type="radio"/> igual<br><input type="radio"/> aumentado<br><input type="radio"/> no sabe                                      |
| cambio azúcar y dulces     | <input type="radio"/> eliminado<br><input type="radio"/> disminuido<br><input checked="" type="radio"/> igual<br><input type="radio"/> aumentado<br><input type="radio"/> no sabe                                      |
| cambio bebidas alcohólicas | <input checked="" type="radio"/> eliminado<br><input type="radio"/> disminuido<br><input type="radio"/> igual<br><input type="radio"/> aumentado<br><input type="radio"/> no sabe                                      |
| frecuencia comidas fritas  | <input type="radio"/> a diario<br><input type="radio"/> 5 a 6 veces semana<br><input type="radio"/> 2 a 4 veces semana<br><input type="radio"/> 1 vez semana<br><input checked="" type="radio"/> menos de 1 vez semana |
| carne                      | <input type="radio"/> no como<br><input type="radio"/> cruda<br><input type="radio"/> poco hecha<br><input type="radio"/> hecha<br><input checked="" type="radio"/> muy hecha                                          |
| grasa visible carne        | <input checked="" type="radio"/> quita toda<br><input type="radio"/> quita mayoría<br><input type="radio"/> quita un poco<br><input type="radio"/> no quita nada                                                       |

|                                |                                                                                                                                                                                                                                                          |
|--------------------------------|----------------------------------------------------------------------------------------------------------------------------------------------------------------------------------------------------------------------------------------------------------|
| cocina carne                   | <input checked="" type="radio"/> a la plancha<br><input type="radio"/> a la parrilla<br><input type="radio"/> asada<br><input type="radio"/> frita<br><input type="radio"/> guisada                                                                      |
| tostado quemado carne          | <input checked="" type="radio"/> nunca<br><input type="radio"/> 1 vez mes<br><input type="radio"/> 2 a 3 veces mes<br><input type="radio"/> 1 vez semana<br><input type="radio"/> 2 a 3 semanas                                                          |
| tostado quemado pescado        | <input checked="" type="radio"/> nunca<br><input type="radio"/> 1 vez mes<br><input type="radio"/> 2 a 3 veces mes<br><input type="radio"/> 1 vez semana<br><input type="radio"/> 2 a 3 semanas                                                          |
| socarrat paella                | <input checked="" type="radio"/> nunca<br><input type="radio"/> 1 vez mes<br><input type="radio"/> 2 a 3 veces mes<br><input type="radio"/> 1 vez semana<br><input type="radio"/> 2 a 3 semanas                                                          |
| grasa o aceite cocinar         | <input type="radio"/> mantequilla<br><input type="radio"/> margarina<br><input type="radio"/> aceite oliva<br><input checked="" type="radio"/> aceite oliva virgen extra<br><input type="radio"/> aceite vegetal<br><input type="radio"/> mezcla aceites |
| grasa aceite aliñar            | <input type="radio"/> mantequilla<br><input type="radio"/> margarina<br><input type="radio"/> aceite oliva<br><input type="radio"/> aceite oliva virgen extra<br><input type="radio"/> aceite vegetal<br><input type="radio"/> mezcla aceites            |
| grasa aceite freir             | <input type="radio"/> mantequilla<br><input type="radio"/> margarina<br><input type="radio"/> aceite oliva<br><input type="radio"/> aceite oliva virgen extra<br><input type="radio"/> aceite vegetal<br><input type="radio"/> mezcla aceites            |
| Ejercicio cuestionario         | <input checked="" type="radio"/> si<br><input type="radio"/> no                                                                                                                                                                                          |
| horas de sueño incluido siesta | [*DATA REMOVED*]                                                                                                                                                                                                                                         |
| minutos siesta                 | [*DATA REMOVED*]                                                                                                                                                                                                                                         |
| horas televisión semana        | [*DATA REMOVED*]                                                                                                                                                                                                                                         |

|                                        |                                                                                                                                                                                                                                                                                                                                                                           |
|----------------------------------------|---------------------------------------------------------------------------------------------------------------------------------------------------------------------------------------------------------------------------------------------------------------------------------------------------------------------------------------------------------------------------|
| actividad trabajo                      | <input type="radio"/> casi siempre sentado<br><input type="radio"/> sentado 50 por cien<br><input checked="" type="radio"/> casi siempre de pie, quieto<br><input type="radio"/> casi siempre levantado caminando y llevando pocas cosas<br><input type="radio"/> casi siempre levantado, caminando y llevado muchas cosas<br><input type="radio"/> trabajo manual pesado |
| tiempo caminar o bici al día           | <input type="radio"/> casi nunca<br><input checked="" type="radio"/> menos 20min día<br><input type="radio"/> 20 a 40 min día<br><input type="radio"/> 40 a 60 min día<br><input type="radio"/> 1h o 1h y media día<br><input type="radio"/> más de 1h y media al día                                                                                                     |
| tiempo tareas casa al día              | <input checked="" type="radio"/> menos de 1h día<br><input type="radio"/> 1 a 2h día<br><input type="radio"/> 3 a 4h día<br><input type="radio"/> 5 a 6h día<br><input type="radio"/> 7 a 8h día<br><input type="radio"/> más de 8h día                                                                                                                                   |
| tiempo libre televisión ordenador leer | <input checked="" type="radio"/> menos 1h día<br><input type="radio"/> 1h día<br><input type="radio"/> 2h día<br><input type="radio"/> 3h día<br><input type="radio"/> 4h día<br><input type="radio"/> 5 a 6h día<br><input type="radio"/> mas 6h día                                                                                                                     |
| tiempo libre ejercicio o deporte       | <input checked="" type="radio"/> menos 1h semana<br><input type="radio"/> 1h semana<br><input type="radio"/> 2h semana<br><input type="radio"/> 3h semana<br><input type="radio"/> 4 a 5h semana<br><input type="radio"/> mas 5h semana                                                                                                                                   |
| como se considera                      | <input type="radio"/> sedentaria<br><input checked="" type="radio"/> poco activa<br><input type="radio"/> moderadamente activa<br><input type="radio"/> bastante activa<br><input type="radio"/> muy activa<br><input type="radio"/> no sabe                                                                                                                              |
| FUR                                    | [*DATA REMOVED*]                                                                                                                                                                                                                                                                                                                                                          |
| Semanas gestación 2T                   | [*DATA REMOVED*]                                                                                                                                                                                                                                                                                                                                                          |
| Días gestación 2T                      | [*DATA REMOVED*]                                                                                                                                                                                                                                                                                                                                                          |
| DBP 2T                                 | [*DATA REMOVED*]                                                                                                                                                                                                                                                                                                                                                          |
| CC 2T                                  | [*DATA REMOVED*]                                                                                                                                                                                                                                                                                                                                                          |
| AC 2T                                  | [*DATA REMOVED*]                                                                                                                                                                                                                                                                                                                                                          |

|                                                   |                                                                                                                                                                                                 |
|---------------------------------------------------|-------------------------------------------------------------------------------------------------------------------------------------------------------------------------------------------------|
| LF 2T                                             | [*DATA REMOVED*]                                                                                                                                                                                |
| PFE 2T (Hadlock)                                  | [*DATA REMOVED*]                                                                                                                                                                                |
| Semanas gestación 3T                              | [*DATA REMOVED*]                                                                                                                                                                                |
| días 3T                                           | [*DATA REMOVED*]                                                                                                                                                                                |
| DBP 3T                                            | [*DATA REMOVED*]                                                                                                                                                                                |
| CC 3T                                             | [*DATA REMOVED*]                                                                                                                                                                                |
| AC 3T                                             | [*DATA REMOVED*]                                                                                                                                                                                |
| LF 3T                                             | [*DATA REMOVED*]                                                                                                                                                                                |
| PFE 3T (Hadlock)                                  | [*DATA REMOVED*]                                                                                                                                                                                |
| Semanas de gestación final                        | [*DATA REMOVED*]                                                                                                                                                                                |
| días gestación final                              | [*DATA REMOVED*]                                                                                                                                                                                |
| Localización placenta                             | <input type="radio"/> anterior<br><input type="radio"/> lateral derecha<br><input type="radio"/> lateral izquierda<br><input type="radio"/> posterior<br><input checked="" type="radio"/> fondo |
| Presentación longitudinal cefálica                | <input type="radio"/> no<br><input checked="" type="radio"/> si                                                                                                                                 |
| Dorso                                             | <input checked="" type="radio"/> izquierda anterior<br><input type="radio"/> izquierda posterior<br><input type="radio"/> derecha anterior<br><input type="radio"/> derecha posterior           |
| diámetro biparietal                               | [*DATA REMOVED*]                                                                                                                                                                                |
| Circunferencia craneal                            | [*DATA REMOVED*]                                                                                                                                                                                |
| Circunferencia abdominal                          | [*DATA REMOVED*]                                                                                                                                                                                |
| Longitud de femur                                 | [*DATA REMOVED*]                                                                                                                                                                                |
| tejido celular subcutáneo a nivel del muslo en mm | [*DATA REMOVED*]                                                                                                                                                                                |
| tejido celular subcutáneo en abdomen en mm        | [*DATA REMOVED*]                                                                                                                                                                                |
| Volumen del muslo en cm3                          | [*DATA REMOVED*]                                                                                                                                                                                |
| Peso fetal estimado según fórmula de Hadlock      | [*DATA REMOVED*]                                                                                                                                                                                |



|                                               |                                                                                                                                               |
|-----------------------------------------------|-----------------------------------------------------------------------------------------------------------------------------------------------|
| Percentil                                     | [*DATA REMOVED*]                                                                                                                              |
| Peso fetal estimado según fórmula de Scioscia | <hr/>                                                                                                                                         |
| Peso fetal estimado según fórmula de LEE      | <hr/>                                                                                                                                         |
| Tipo de parto                                 | <input type="radio"/> eutocico<br><input type="radio"/> instrumentado/ventosa<br><input checked="" type="radio"/> cesarea                     |
| fecha de nacimiento                           | [*DATA REMOVED*]                                                                                                                              |
| Días entre exploración y nacimiento           | [*DATA REMOVED*]                                                                                                                              |
| Peso RN en g                                  | [*DATA REMOVED*]                                                                                                                              |
| sexo                                          | <input type="radio"/> mujer<br><input checked="" type="radio"/> hombre                                                                        |
| Apgar 1 minuto                                | [*DATA REMOVED*]                                                                                                                              |
| Apgar 5 minutos                               | [*DATA REMOVED*]                                                                                                                              |
| Apgar 10 minutos                              | <hr/>                                                                                                                                         |
| antecedente Covid durante gestación           | <input type="radio"/> Yes<br><input checked="" type="radio"/> No                                                                              |
| Nivel de estudios                             | <input type="radio"/> ninguno<br><input type="radio"/> primarios<br><input type="radio"/> secundarios<br><input type="radio"/> universitarios |

# Base\_datos\_estimacion\_peso\_fetal

|                                       |                                                                                                                                                                                                                                                                                      |
|---------------------------------------|--------------------------------------------------------------------------------------------------------------------------------------------------------------------------------------------------------------------------------------------------------------------------------------|
| Número de identificación participante | 6                                                                                                                                                                                                                                                                                    |
| CODIGO PARTICIPANTE                   |                                                                                                                                                                                                                                                                                      |
| Edad                                  | [*DATA REMOVED*]                                                                                                                                                                                                                                                                     |
| Gestaciones                           | <input type="radio"/> 1<br><input type="radio"/> 2<br><input checked="" type="radio"/> 3<br><input type="radio"/> mas de 3                                                                                                                                                           |
| partos                                | <input type="radio"/> 0<br><input checked="" type="radio"/> 1<br><input type="radio"/> 2<br><input type="radio"/> 3<br><input type="radio"/> mas de 3                                                                                                                                |
| cesáreas                              | <input checked="" type="radio"/> 0<br><input type="radio"/> 1<br><input type="radio"/> 2<br><input type="radio"/> 3<br><input type="radio"/> mas de 3                                                                                                                                |
| Abortos                               | <input type="radio"/> 0<br><input checked="" type="radio"/> 1<br><input type="radio"/> 2<br><input type="radio"/> 3<br><input type="radio"/> mas de 3                                                                                                                                |
| Tipo de gestacion                     | <input checked="" type="radio"/> espontanea<br><input type="radio"/> IAC inseminación artificial conyuge<br><input type="radio"/> IAD inseminación artificial donante<br><input type="radio"/> FIV Fecundación in Vitro<br><input type="radio"/> Ovodon FIV con donación de ovocitos |
| peso previo a embarazo                | [*DATA REMOVED*]                                                                                                                                                                                                                                                                     |
| Ganancia ponderal embarazo            | [*DATA REMOVED*]                                                                                                                                                                                                                                                                     |
| Talla madre                           | [*DATA REMOVED*]                                                                                                                                                                                                                                                                     |
| IMC previo embarazo                   | 36.50871316195567                                                                                                                                                                                                                                                                    |
| Patología obstétrica                  | <input checked="" type="radio"/> no<br><input type="radio"/> si                                                                                                                                                                                                                      |
| Diabetes pregestacional               | <input checked="" type="radio"/> no<br><input type="radio"/> si                                                                                                                                                                                                                      |
| Diabetes gestacional                  | <input type="radio"/> no<br><input checked="" type="radio"/> si                                                                                                                                                                                                                      |

|                                            |                                                                                                                                                                                      |
|--------------------------------------------|--------------------------------------------------------------------------------------------------------------------------------------------------------------------------------------|
| Diabetes gestacional con insulina          | <input type="radio"/> no<br><input checked="" type="radio"/> si                                                                                                                      |
| Diabetes gestacional con dieta y ejercicio | <input type="radio"/> no<br><input checked="" type="radio"/> si                                                                                                                      |
| Percentil fetos previos                    | <input checked="" type="radio"/> Nada<br><input type="radio"/> percentil menor de 10<br><input type="radio"/> percentil entre 10 y 90<br><input type="radio"/> percentil mayor de 90 |
| Exfumadora                                 | <input checked="" type="radio"/> Nada<br><input type="radio"/> menos de 5 años<br><input type="radio"/> 5 a 10 años<br><input type="radio"/> mayor o igual a 10 años                 |
| Hábito tabáquico                           | <input checked="" type="radio"/> no<br><input type="radio"/> si                                                                                                                      |
| fumadora                                   | [*DATA REMOVED*]                                                                                                                                                                     |
| Consumo otros tóxicos                      | <input checked="" type="radio"/> no<br><input type="radio"/> si                                                                                                                      |
| Hb 1T                                      | _____                                                                                                                                                                                |
| Htc 1T                                     | _____                                                                                                                                                                                |
| Hb 2T                                      | _____                                                                                                                                                                                |
| HTC 2T                                     | _____                                                                                                                                                                                |
| Hb 3T                                      | _____                                                                                                                                                                                |
| HTC 3T                                     | _____                                                                                                                                                                                |
| Suplemento FE oral                         | <input type="radio"/> si<br><input checked="" type="radio"/> no                                                                                                                      |
| Suplemento fe iv                           | <input type="radio"/> si<br><input checked="" type="radio"/> no                                                                                                                      |
| Transfusión                                | <input checked="" type="radio"/> no<br><input type="radio"/> si                                                                                                                      |
| Solicitada Vit D                           | <input checked="" type="radio"/> no<br><input type="radio"/> si                                                                                                                      |

|                       |                                                                                                                                                                                                                                                                                                                                                                                                              |
|-----------------------|--------------------------------------------------------------------------------------------------------------------------------------------------------------------------------------------------------------------------------------------------------------------------------------------------------------------------------------------------------------------------------------------------------------|
| Deficit vit D         | <input checked="" type="radio"/> no<br><input type="radio"/> si                                                                                                                                                                                                                                                                                                                                              |
| Suplemento vit D      | <input type="radio"/> si<br><input checked="" type="radio"/> no                                                                                                                                                                                                                                                                                                                                              |
| Dieta, cuestionario   | <input checked="" type="radio"/> si<br><input type="radio"/> no                                                                                                                                                                                                                                                                                                                                              |
| Leche entera          | <input checked="" type="radio"/> Nunca o menos 1 vez al mes<br><input type="radio"/> 1 a 3 veces mes<br><input type="radio"/> 1 vez semana<br><input type="radio"/> 2 a 4 veces semana<br><input type="radio"/> 5 a 6 veces semana<br><input type="radio"/> 1 vez al día<br><input type="radio"/> 2 a 3 veces al día<br><input type="radio"/> 5 a 6 veces al día<br><input type="radio"/> más 6 veces al día |
| Leche semidesnatada   | <input checked="" type="radio"/> Nunca o menos 1 vez al mes<br><input type="radio"/> 1 a 3 veces mes<br><input type="radio"/> 1 vez semana<br><input type="radio"/> 2 a 4 veces semana<br><input type="radio"/> 5 a 6 veces semana<br><input type="radio"/> 1 vez al día<br><input type="radio"/> 2 a 3 veces al día<br><input type="radio"/> 5 a 6 veces al día<br><input type="radio"/> mas 6 veces al día |
| Leche desnatada       | <input type="radio"/> Nunca o menos 1 vez al mes<br><input type="radio"/> 1 a 3 veces mes<br><input checked="" type="radio"/> 1 vez semana<br><input type="radio"/> 2 a 4 veces semana<br><input type="radio"/> 5 a 6 veces semana<br><input type="radio"/> 1 vez al día<br><input type="radio"/> 2 a 3 veces al día<br><input type="radio"/> 5 a 6 veces al día<br><input type="radio"/> más 6 veces al día |
| Leche condensada      | <input checked="" type="radio"/> Nunca o menos 1 vez al mes<br><input type="radio"/> 1 a 3 veces mes<br><input type="radio"/> 1 vez semana<br><input type="radio"/> 2 a 4 veces semana<br><input type="radio"/> 5 a 6 veces semana<br><input type="radio"/> 1 vez al día<br><input type="radio"/> 2 a 3 veces al día<br><input type="radio"/> 5 a 6 veces al día<br><input type="radio"/> más 6 veces al día |
| nata o crema de leche | <input checked="" type="radio"/> Nunca o menos 1 vez al mes<br><input type="radio"/> 1 a 3 veces mes<br><input type="radio"/> 1 vez semana<br><input type="radio"/> 2 a 4 veces semana<br><input type="radio"/> 5 a 6 veces semana<br><input type="radio"/> 1 vez al día<br><input type="radio"/> 2 a 3 veces al día<br><input type="radio"/> 5 a 6 veces al día<br><input type="radio"/> más 6 veces al día |

|                                             |                                                                                                                                                                                                                                                                                                                                                                                                              |
|---------------------------------------------|--------------------------------------------------------------------------------------------------------------------------------------------------------------------------------------------------------------------------------------------------------------------------------------------------------------------------------------------------------------------------------------------------------------|
| Yogurt Entero                               | <input checked="" type="radio"/> Nunca o menos 1 vez al mes<br><input type="radio"/> 1 a 3 veces mes<br><input type="radio"/> 1 vez semana<br><input type="radio"/> 2 a 4 veces semana<br><input type="radio"/> 5 a 6 veces semana<br><input type="radio"/> 1 vez al día<br><input type="radio"/> 2 a 3 veces al día<br><input type="radio"/> 5 a 6 veces al día<br><input type="radio"/> más 6 veces al día |
| Yogurt desnatado                            | <input type="radio"/> Nunca o menos 1 vez al mes<br><input type="radio"/> 1 a 3 veces mes<br><input type="radio"/> 1 vez semana<br><input checked="" type="radio"/> 2 a 4 veces semana<br><input type="radio"/> 5 a 6 veces semana<br><input type="radio"/> 1 vez al día<br><input type="radio"/> 2 a 3 veces al día<br><input type="radio"/> 5 a 6 veces al día<br><input type="radio"/> más 6 veces al día |
| 100g requesón o queso blando o queso fresco | <input checked="" type="radio"/> Nunca o menos 1 vez al mes<br><input type="radio"/> 1 a 3 veces mes<br><input type="radio"/> 1 vez semana<br><input type="radio"/> 2 a 4 veces semana<br><input type="radio"/> 5 a 6 veces semana<br><input type="radio"/> 1 vez al día<br><input type="radio"/> 2 a 3 veces al día<br><input type="radio"/> 5 a 6 veces al día<br><input type="radio"/> más 6 veces al día |
| queso curado o semicurado o cremoso         | <input checked="" type="radio"/> Nunca o menos 1 vez al mes<br><input type="radio"/> 1 a 3 veces mes<br><input type="radio"/> 1 vez semana<br><input type="radio"/> 2 a 4 veces semana<br><input type="radio"/> 5 a 6 veces semana<br><input type="radio"/> 1 vez al día<br><input type="radio"/> 2 a 3 veces al día<br><input type="radio"/> 5 a 6 veces al día<br><input type="radio"/> más 6 veces al día |
| natillas flan pudding                       | <input checked="" type="radio"/> Nunca o menos 1 vez al mes<br><input type="radio"/> 1 a 3 veces mes<br><input type="radio"/> 1 vez semana<br><input type="radio"/> 2 a 4 veces semana<br><input type="radio"/> 5 a 6 veces semana<br><input type="radio"/> 1 vez al día<br><input type="radio"/> 2 a 3 veces al día<br><input type="radio"/> 5 a 6 veces al día<br><input type="radio"/> más 6 veces al día |
| Helado                                      | <input checked="" type="radio"/> Nunca o menos 1 vez al mes<br><input type="radio"/> 1 a 3 veces mes<br><input type="radio"/> 1 vez semana<br><input type="radio"/> 2 a 4 veces semana<br><input type="radio"/> 5 a 6 veces semana<br><input type="radio"/> 1 vez al día<br><input type="radio"/> 2 a 3 veces al día<br><input type="radio"/> 5 a 6 veces al día<br><input type="radio"/> más 6 veces al día |

|                                      |                                                                                                                                                                                                                                                                                                                                                                                                              |
|--------------------------------------|--------------------------------------------------------------------------------------------------------------------------------------------------------------------------------------------------------------------------------------------------------------------------------------------------------------------------------------------------------------------------------------------------------------|
| huevo                                | <input type="radio"/> Nunca o menos 1 vez al mes<br><input type="radio"/> 1 a 3 veces mes<br><input type="radio"/> 1 vez semana<br><input checked="" type="radio"/> 2 a 4 veces semana<br><input type="radio"/> 5 a 6 veces semana<br><input type="radio"/> 1 vez al día<br><input type="radio"/> 2 a 3 veces al día<br><input type="radio"/> 5 a 6 veces al día<br><input type="radio"/> más 6 veces al día |
| Pollo con piel                       | <input checked="" type="radio"/> Nunca o menos 1 vez al mes<br><input type="radio"/> 1 a 3 veces mes<br><input type="radio"/> 1 vez semana<br><input type="radio"/> 2 a 4 veces semana<br><input type="radio"/> 5 a 6 veces semana<br><input type="radio"/> 1 vez al día<br><input type="radio"/> 2 a 3 veces al día<br><input type="radio"/> 5 a 6 veces al día<br><input type="radio"/> más 6 veces al día |
| pollo sin piel                       | <input type="radio"/> Nunca o menos 1 vez al mes<br><input type="radio"/> 1 a 3 veces mes<br><input type="radio"/> 1 vez semana<br><input checked="" type="radio"/> 2 a 4 veces semana<br><input type="radio"/> 5 a 6 veces semana<br><input type="radio"/> 1 vez al día<br><input type="radio"/> 2 a 3 veces al día<br><input type="radio"/> 5 a 6 veces al día<br><input type="radio"/> más 6 veces al día |
| Ternera o cerdo o cordero            | <input type="radio"/> Nunca o menos 1 vez al mes<br><input type="radio"/> 1 a 3 veces mes<br><input checked="" type="radio"/> 1 vez semana<br><input type="radio"/> 2 a 4 veces semana<br><input type="radio"/> 5 a 6 veces semana<br><input type="radio"/> 1 vez al día<br><input type="radio"/> 2 a 3 veces al día<br><input type="radio"/> 5 a 6 veces al día<br><input type="radio"/> más 6 veces al día |
| carne caza: Conejo o codorniz o pato | <input checked="" type="radio"/> Nunca o menos 1 vez al mes<br><input type="radio"/> 1 a 3 veces mes<br><input type="radio"/> 1 vez semana<br><input type="radio"/> 2 a 4 veces semana<br><input type="radio"/> 5 a 6 veces semana<br><input type="radio"/> 1 vez al día<br><input type="radio"/> 2 a 3 veces al día<br><input type="radio"/> 5 a 6 veces al día<br><input type="radio"/> más 6 veces al día |
| Hígado de ternera o cerdo o pollo    | <input checked="" type="radio"/> Nunca o menos 1 vez al mes<br><input type="radio"/> 1 a 3 veces mes<br><input type="radio"/> 1 vez semana<br><input type="radio"/> 2 a 4 veces semana<br><input type="radio"/> 5 a 6 veces semana<br><input type="radio"/> 1 vez al día<br><input type="radio"/> 2 a 3 veces al día<br><input type="radio"/> 5 a 6 veces al día<br><input type="radio"/> más 6 veces al día |

---

Vísceras

- ☒ Nunca o menos 1 vez al mes  
☐ 1 a 3 veces mes  
☐ 1 vez semana  
☐ 2 a 4 veces semana  
☐ 5 a 6 veces semana  
☐ 1 vez al día  
☐ 2 a 3 veces al día  
☐ 5 a 6 veces al día  
☐ más 6 veces al día

---

Embutido

- ☒ Nunca o menos 1 vez al mes  
☐ 1 a 3 veces mes  
☐ 1 vez semana  
☐ 2 a 4 veces semana  
☐ 5 a 6 veces semana  
☐ 1 vez al día  
☐ 2 a 3 veces al día  
☐ 5 a 6 veces al día  
☐ más 6 veces al día

---

Salchicha o similar

- ☒ Nunca o menos 1 vez al mes  
☐ 1 a 3 veces mes  
☐ 1 vez semana  
☐ 2 a 4 veces semana  
☐ 5 a 6 veces semana  
☐ 1 vez al día  
☐ 2 a 3 veces al día  
☐ 5 a 6 veces al día  
☐ más 6 veces al día

---

Pate o foiegras

- ☒ Nunca o menos 1 vez al mes  
☐ 1 a 3 veces mes  
☐ 1 vez semana  
☐ 2 a 4 veces semana  
☐ 5 a 6 veces semana  
☐ 1 vez al día  
☐ 2 a 3 veces al día  
☐ 5 a 6 veces al día  
☐ más 6 veces al día

---

Hamburguesa

- ☒ Nunca o menos 1 vez al mes  
☐ 1 a 3 veces mes  
☐ 1 vez semana  
☐ 2 a 4 veces semana  
☐ 5 a 6 veces semana  
☐ 1 vez al día  
☐ 2 a 3 veces al día  
☐ 5 a 6 veces al día  
☐ más 6 veces al día

---

tocino o bacon

- ☒ Nunca o menos 1 vez al mes  
☐ 1 a 3 veces mes  
☐ 1 vez semana  
☐ 2 a 4 veces semana  
☐ 5 a 6 veces semana  
☐ 1 vez al día  
☐ 2 a 3 veces al día  
☐ 5 a 6 veces al día  
☐ más 6 veces al día

---

|               |                                                                                                                                                                                                                                                                                                                                                                                                              |
|---------------|--------------------------------------------------------------------------------------------------------------------------------------------------------------------------------------------------------------------------------------------------------------------------------------------------------------------------------------------------------------------------------------------------------------|
| Pescado frito | <input checked="" type="radio"/> Nunca o menos 1 vez al mes<br><input type="radio"/> 1 a 3 veces mes<br><input type="radio"/> 1 vez semana<br><input type="radio"/> 2 a 4 veces semana<br><input type="radio"/> 5 a 6 veces semana<br><input type="radio"/> 1 vez al día<br><input type="radio"/> 2 a 3 veces al día<br><input type="radio"/> 5 a 6 veces al día<br><input type="radio"/> más 6 veces al día |
|---------------|--------------------------------------------------------------------------------------------------------------------------------------------------------------------------------------------------------------------------------------------------------------------------------------------------------------------------------------------------------------------------------------------------------------|

---

|                        |                                                                                                                                                                                                                                                                                                                                                                                                              |
|------------------------|--------------------------------------------------------------------------------------------------------------------------------------------------------------------------------------------------------------------------------------------------------------------------------------------------------------------------------------------------------------------------------------------------------------|
| pescado hervido blanco | <input type="radio"/> Nunca o menos 1 vez al mes<br><input type="radio"/> 1 a 3 veces mes<br><input checked="" type="radio"/> 1 vez semana<br><input type="radio"/> 2 a 4 veces semana<br><input type="radio"/> 5 a 6 veces semana<br><input type="radio"/> 1 vez al día<br><input type="radio"/> 2 a 3 veces al día<br><input type="radio"/> 5 a 6 veces al día<br><input type="radio"/> más 6 veces al día |
|------------------------|--------------------------------------------------------------------------------------------------------------------------------------------------------------------------------------------------------------------------------------------------------------------------------------------------------------------------------------------------------------------------------------------------------------|

---

|                      |                                                                                                                                                                                                                                                                                                                                                                                                              |
|----------------------|--------------------------------------------------------------------------------------------------------------------------------------------------------------------------------------------------------------------------------------------------------------------------------------------------------------------------------------------------------------------------------------------------------------|
| pescado hervido azul | <input checked="" type="radio"/> Nunca o menos 1 vez al mes<br><input type="radio"/> 1 a 3 veces mes<br><input type="radio"/> 1 vez semana<br><input type="radio"/> 2 a 4 veces semana<br><input type="radio"/> 5 a 6 veces semana<br><input type="radio"/> 1 vez al día<br><input type="radio"/> 2 a 3 veces al día<br><input type="radio"/> 5 a 6 veces al día<br><input type="radio"/> más 6 veces al día |
|----------------------|--------------------------------------------------------------------------------------------------------------------------------------------------------------------------------------------------------------------------------------------------------------------------------------------------------------------------------------------------------------------------------------------------------------|

---

|                    |                                                                                                                                                                                                                                                                                                                                                                                                              |
|--------------------|--------------------------------------------------------------------------------------------------------------------------------------------------------------------------------------------------------------------------------------------------------------------------------------------------------------------------------------------------------------------------------------------------------------|
| otros pescado azul | <input type="radio"/> Nunca o menos 1 vez al mes<br><input type="radio"/> 1 a 3 veces mes<br><input checked="" type="radio"/> 1 vez semana<br><input type="radio"/> 2 a 4 veces semana<br><input type="radio"/> 5 a 6 veces semana<br><input type="radio"/> 1 vez al día<br><input type="radio"/> 2 a 3 veces al día<br><input type="radio"/> 5 a 6 veces al día<br><input type="radio"/> más 6 veces al día |
|--------------------|--------------------------------------------------------------------------------------------------------------------------------------------------------------------------------------------------------------------------------------------------------------------------------------------------------------------------------------------------------------------------------------------------------------|

---

|               |                                                                                                                                                                                                                                                                                                                                                                                                              |
|---------------|--------------------------------------------------------------------------------------------------------------------------------------------------------------------------------------------------------------------------------------------------------------------------------------------------------------------------------------------------------------------------------------------------------------|
| atun conserva | <input type="radio"/> Nunca o menos 1 vez al mes<br><input checked="" type="radio"/> 1 a 3 veces mes<br><input type="radio"/> 1 vez semana<br><input type="radio"/> 2 a 4 veces semana<br><input type="radio"/> 5 a 6 veces semana<br><input type="radio"/> 1 vez al día<br><input type="radio"/> 2 a 3 veces al día<br><input type="radio"/> 5 a 6 veces al día<br><input type="radio"/> más 6 veces al día |
|---------------|--------------------------------------------------------------------------------------------------------------------------------------------------------------------------------------------------------------------------------------------------------------------------------------------------------------------------------------------------------------------------------------------------------------|

---

|                  |                                                                                                                                                                                                                                                                                                                                                                                                              |
|------------------|--------------------------------------------------------------------------------------------------------------------------------------------------------------------------------------------------------------------------------------------------------------------------------------------------------------------------------------------------------------------------------------------------------------|
| sardina conserva | <input checked="" type="radio"/> Nunca o menos 1 vez al mes<br><input type="radio"/> 1 a 3 veces mes<br><input type="radio"/> 1 vez semana<br><input type="radio"/> 2 a 4 veces semana<br><input type="radio"/> 5 a 6 veces semana<br><input type="radio"/> 1 vez al día<br><input type="radio"/> 2 a 3 veces al día<br><input type="radio"/> 5 a 6 veces al día<br><input type="radio"/> más 6 veces al día |
|------------------|--------------------------------------------------------------------------------------------------------------------------------------------------------------------------------------------------------------------------------------------------------------------------------------------------------------------------------------------------------------------------------------------------------------|

---



---

pescado ahumado

- ☐ Nunca o menos 1 vez al mes  
☒ 1 a 3 veces mes  
☐ 1 vez semana  
☐ 2 a 4 veces semana  
☐ 5 a 6 veces semana  
☐ 1 vez al día  
☐ 2 a 3 veces al día  
☐ 5 a 6 veces al día  
☐ más 6 veces al día

---

almejas o mejillones o ostras unos 100g

- ☐ Nunca o menos 1 vez al mes  
☐ 1 a 3 veces mes  
☒ 1 vez semana  
☐ 2 a 4 veces semana  
☐ 5 a 6 veces semana  
☐ 1 vez al día  
☐ 2 a 3 veces al día  
☐ 5 a 6 veces al día  
☐ más 6 veces al día

---

calamar o chipiron o sepia unos 100g

- ☐ Nunca o menos 1 vez al mes  
☐ 1 a 3 veces mes  
☐ 1 vez semana  
☐ 2 a 4 veces semana  
☒ 5 a 6 veces semana  
☐ 1 vez al día  
☐ 2 a 3 veces al día  
☐ 5 a 6 veces al día  
☐ más 6 veces al día

---

marisco unos 100g

- ☐ Nunca o menos 1 vez al mes  
☒ 1 a 3 veces mes  
☐ 1 vez semana  
☐ 2 a 4 veces semana  
☐ 5 a 6 veces semana  
☐ 1 vez al día  
☐ 2 a 3 veces al día  
☐ 5 a 6 veces al día  
☐ más 6 veces al día

---

Espinacas o acelgas cocinadas

- ☒ Nunca o menos 1 vez al mes  
☐ 1 a 3 veces mes  
☐ 1 vez semana  
☐ 2 a 4 veces semana  
☐ 5 a 6 veces semana  
☐ 1 vez al día  
☐ 2 a 3 veces al día  
☐ 5 a 6 veces al día  
☐ más 6 veces al día

---

Col o coliflor o brocoli cocinado

- ☒ Nunca o menos 1 vez al mes  
☐ 1 a 3 veces mes  
☐ 1 vez semana  
☐ 2 a 4 veces semana  
☐ 5 a 6 veces semana  
☐ 1 vez al día  
☐ 2 a 3 veces al día  
☐ 5 a 6 veces al día  
☐ más 6 veces al día

---

Lechuga o endivia o escarola

- ☐ Nunca o menos 1 vez al mes  
☐ 1 a 3 veces mes  
☒ 1 vez semana  
☐ 2 a 4 veces semana  
☐ 5 a 6 veces semana  
☐ 1 vez al día  
☐ 2 a 3 veces al día  
☐ 5 a 6 veces al día  
☐ más 6 veces al día

---

tomate ensalada

- ☐ Nunca o menos 1 vez al mes  
☐ 1 a 3 veces mes  
☐ 1 vez semana  
☒ 2 a 4 veces semana  
☐ 5 a 6 veces semana  
☐ 1 vez al día  
☐ 2 a 3 veces al día  
☐ 5 a 6 veces al día  
☐ más 6 veces al día

---

cebolla

- ☐ Nunca o menos 1 vez al mes  
☐ 1 a 3 veces mes  
☐ 1 vez semana  
☐ 2 a 4 veces semana  
☒ 5 a 6 veces semana  
☐ 1 vez al día  
☐ 2 a 3 veces al día  
☐ 5 a 6 veces al día  
☐ más 6 veces al día

---

Zanahoria o calabaza

- ☐ Nunca o menos 1 vez al mes  
☐ 1 a 3 veces mes  
☐ 1 vez semana  
☐ 2 a 4 veces semana  
☐ 5 a 6 veces semana  
☒ 1 vez al día  
☐ 2 a 3 veces al día  
☐ 5 a 6 veces al día  
☐ más 6 veces al día

---

Judías verdes

- ☒ Nunca o menos 1 vez al mes  
☐ 1 a 3 veces mes  
☐ 1 vez semana  
☐ 2 a 4 veces semana  
☐ 5 a 6 veces semana  
☐ 1 vez al día  
☐ 2 a 3 veces al día  
☐ 5 a 6 veces al día  
☐ más 6 veces al día

---

Berenjena o calabacin o pepino

- ☐ Nunca o menos 1 vez al mes  
☒ 1 a 3 veces mes  
☐ 1 vez semana  
☐ 2 a 4 veces semana  
☐ 5 a 6 veces semana  
☐ 1 vez al día  
☐ 2 a 3 veces al día  
☐ 5 a 6 veces al día  
☐ más 6 veces al día

---

|          |                                                                                                                                                                                                                                                                                                                                                                                                              |
|----------|--------------------------------------------------------------------------------------------------------------------------------------------------------------------------------------------------------------------------------------------------------------------------------------------------------------------------------------------------------------------------------------------------------------|
| pimiento | <input type="radio"/> Nunca o menos 1 vez al mes<br><input type="radio"/> 1 a 3 veces mes<br><input type="radio"/> 1 vez semana<br><input checked="" type="radio"/> 2 a 4 veces semana<br><input type="radio"/> 5 a 6 veces semana<br><input type="radio"/> 1 vez al día<br><input type="radio"/> 2 a 3 veces al día<br><input type="radio"/> 5 a 6 veces al día<br><input type="radio"/> más 6 veces al día |
|----------|--------------------------------------------------------------------------------------------------------------------------------------------------------------------------------------------------------------------------------------------------------------------------------------------------------------------------------------------------------------------------------------------------------------|

---

|           |                                                                                                                                                                                                                                                                                                                                                                                                              |
|-----------|--------------------------------------------------------------------------------------------------------------------------------------------------------------------------------------------------------------------------------------------------------------------------------------------------------------------------------------------------------------------------------------------------------------|
| alcachofa | <input checked="" type="radio"/> Nunca o menos 1 vez al mes<br><input type="radio"/> 1 a 3 veces mes<br><input type="radio"/> 1 vez semana<br><input type="radio"/> 2 a 4 veces semana<br><input type="radio"/> 5 a 6 veces semana<br><input type="radio"/> 1 vez al día<br><input type="radio"/> 2 a 3 veces al día<br><input type="radio"/> 5 a 6 veces al día<br><input type="radio"/> más 6 veces al día |
|-----------|--------------------------------------------------------------------------------------------------------------------------------------------------------------------------------------------------------------------------------------------------------------------------------------------------------------------------------------------------------------------------------------------------------------|

---

|            |                                                                                                                                                                                                                                                                                                                                                                                                              |
|------------|--------------------------------------------------------------------------------------------------------------------------------------------------------------------------------------------------------------------------------------------------------------------------------------------------------------------------------------------------------------------------------------------------------------|
| espárragos | <input checked="" type="radio"/> Nunca o menos 1 vez al mes<br><input type="radio"/> 1 a 3 veces mes<br><input type="radio"/> 1 vez semana<br><input type="radio"/> 2 a 4 veces semana<br><input type="radio"/> 5 a 6 veces semana<br><input type="radio"/> 1 vez al día<br><input type="radio"/> 2 a 3 veces al día<br><input type="radio"/> 5 a 6 veces al día<br><input type="radio"/> más 6 veces al día |
|------------|--------------------------------------------------------------------------------------------------------------------------------------------------------------------------------------------------------------------------------------------------------------------------------------------------------------------------------------------------------------------------------------------------------------|

---

|              |                                                                                                                                                                                                                                                                                                                                                                                                              |
|--------------|--------------------------------------------------------------------------------------------------------------------------------------------------------------------------------------------------------------------------------------------------------------------------------------------------------------------------------------------------------------------------------------------------------------|
| maíz hervido | <input type="radio"/> Nunca o menos 1 vez al mes<br><input checked="" type="radio"/> 1 a 3 veces mes<br><input type="radio"/> 1 vez semana<br><input type="radio"/> 2 a 4 veces semana<br><input type="radio"/> 5 a 6 veces semana<br><input type="radio"/> 1 vez al día<br><input type="radio"/> 2 a 3 veces al día<br><input type="radio"/> 5 a 6 veces al día<br><input type="radio"/> más 6 veces al día |
|--------------|--------------------------------------------------------------------------------------------------------------------------------------------------------------------------------------------------------------------------------------------------------------------------------------------------------------------------------------------------------------------------------------------------------------|

---

|           |                                                                                                                                                                                                                                                                                                                                                                                                              |
|-----------|--------------------------------------------------------------------------------------------------------------------------------------------------------------------------------------------------------------------------------------------------------------------------------------------------------------------------------------------------------------------------------------------------------------|
| legumbres | <input type="radio"/> Nunca o menos 1 vez al mes<br><input type="radio"/> 1 a 3 veces mes<br><input type="radio"/> 1 vez semana<br><input type="radio"/> 2 a 4 veces semana<br><input checked="" type="radio"/> 5 a 6 veces semana<br><input type="radio"/> 1 vez al día<br><input type="radio"/> 2 a 3 veces al día<br><input type="radio"/> 5 a 6 veces al día<br><input type="radio"/> más 6 veces al día |
|-----------|--------------------------------------------------------------------------------------------------------------------------------------------------------------------------------------------------------------------------------------------------------------------------------------------------------------------------------------------------------------------------------------------------------------|

---

|                       |                                                                                                                                                                                                                                                                                                                                                                                                   |
|-----------------------|---------------------------------------------------------------------------------------------------------------------------------------------------------------------------------------------------------------------------------------------------------------------------------------------------------------------------------------------------------------------------------------------------|
| naranjas o mandarinas | <input type="radio"/> Nunca o menos 1 vez al mes<br><input type="radio"/> 1 a 3 veces mes<br><input type="radio"/> 1 vez semana<br><input type="radio"/> 2 a 4 veces semana<br><input type="radio"/> 5 a 6 veces semana<br><input type="radio"/> 1 vez al día<br><input type="radio"/> 2 a 3 veces al día<br><input type="radio"/> 5 a 6 veces al día<br><input type="radio"/> más 6 veces al día |
|-----------------------|---------------------------------------------------------------------------------------------------------------------------------------------------------------------------------------------------------------------------------------------------------------------------------------------------------------------------------------------------------------------------------------------------|

---

---

zum natural fruta

- ☐ Nunca o menos 1 vez al mes  
☐ 1 a 3 veces mes  
☐ 1 vez semana  
☐ 2 a 4 veces semana  
☒ 5 a 6 veces semana  
☐ 1 vez al día  
☐ 2 a 3 veces al día  
☐ 5 a 6 veces al día  
☐ más 6 veces al día

---

platano

- ☐ Nunca o menos 1 vez al mes  
☐ 1 a 3 veces mes  
☒ 1 vez semana  
☐ 2 a 4 veces semana  
☐ 5 a 6 veces semana  
☐ 1 vez al día  
☐ 2 a 3 veces al día  
☐ 5 a 6 veces al día  
☐ más 6 veces al día

---

manzana o pera

- ☐ Nunca o menos 1 vez al mes  
☐ 1 a 3 veces mes  
☒ 1 vez semana  
☐ 2 a 4 veces semana  
☐ 5 a 6 veces semana  
☐ 1 vez al día  
☐ 2 a 3 veces al día  
☐ 5 a 6 veces al día  
☐ más 6 veces al día

---

melocotón o nectarina

- ☐ Nunca o menos 1 vez al mes  
☐ 1 a 3 veces mes  
☒ 1 vez semana  
☐ 2 a 4 veces semana  
☐ 5 a 6 veces semana  
☐ 1 vez al día  
☐ 2 a 3 veces al día  
☐ 5 a 6 veces al día  
☐ más 6 veces al día

---

sandia o melon

- ☐ Nunca o menos 1 vez al mes  
☐ 1 a 3 veces mes  
☐ 1 vez semana  
☒ 2 a 4 veces semana  
☐ 5 a 6 veces semana  
☐ 1 vez al día  
☐ 2 a 3 veces al día  
☐ 5 a 6 veces al día  
☐ más 6 veces al día

---

uva

- ☐ Nunca o menos 1 vez al mes  
☐ 1 a 3 veces mes  
☐ 1 vez semana  
☒ 2 a 4 veces semana  
☐ 5 a 6 veces semana  
☐ 1 vez al día  
☐ 2 a 3 veces al día  
☐ 5 a 6 veces al día  
☐ más 6 veces al día

---

bruna o ciruela

- ☐ Nunca o menos 1 vez al mes  
☐ 1 a 3 veces mes  
☐ 1 vez semana  
☒ 2 a 4 veces semana  
☐ 5 a 6 veces semana  
☐ 1 vez al día  
☐ 2 a 3 veces al día  
☐ 5 a 6 veces al día  
☐ más 6 veces al día

---

kiwi

- ☐ Nunca o menos 1 vez al mes  
☐ 1 a 3 veces mes  
☐ 1 vez semana  
☒ 2 a 4 veces semana  
☐ 5 a 6 veces semana  
☐ 1 vez al día  
☐ 2 a 3 veces al día  
☐ 5 a 6 veces al día  
☐ más 6 veces al día

---

aceituna

- ☒ Nunca o menos 1 vez al mes  
☐ 1 a 3 veces mes  
☐ 1 vez semana  
☐ 2 a 4 veces semana  
☐ 5 a 6 veces semana  
☐ 1 vez al día  
☐ 2 a 3 veces al día  
☐ 5 a 6 veces al día  
☐ más 6 veces al día

---

frutos secos

- ☐ Nunca o menos 1 vez al mes  
☒ 1 a 3 veces mes  
☐ 1 vez semana  
☐ 2 a 4 veces semana  
☐ 5 a 6 veces semana  
☐ 1 vez al día  
☐ 2 a 3 veces al día  
☐ 5 a 6 veces al día  
☐ más 6 veces al día

---

pan blanco

- ☐ Nunca o menos 1 vez al mes  
☐ 1 a 3 veces mes  
☐ 1 vez semana  
☒ 2 a 4 veces semana  
☐ 5 a 6 veces semana  
☐ 1 vez al día  
☐ 2 a 3 veces al día  
☐ 5 a 6 veces al día  
☐ más 6 veces al día

---

pan integral

- ☐ Nunca o menos 1 vez al mes  
☐ 1 a 3 veces mes  
☒ 1 vez semana  
☐ 2 a 4 veces semana  
☐ 5 a 6 veces semana  
☐ 1 vez al día  
☐ 2 a 3 veces al día  
☐ 5 a 6 veces al día  
☐ más 6 veces al día

---

cereales desayuno

- ☐ Nunca o menos 1 vez al mes  
☐ 1 a 3 veces mes  
☐ 1 vez semana  
☒ 2 a 4 veces semana  
☐ 5 a 6 veces semana  
☐ 1 vez al día  
☐ 2 a 3 veces al día  
☐ 5 a 6 veces al día  
☐ más 6 veces al día

---

patatas fritas

- ☐ Nunca o menos 1 vez al mes  
☐ 1 a 3 veces mes  
☒ 1 vez semana  
☐ 2 a 4 veces semana  
☐ 5 a 6 veces semana  
☐ 1 vez al día  
☐ 2 a 3 veces al día  
☐ 5 a 6 veces al día  
☐ más 6 veces al día

---

patatas cocidas o asadas

- ☒ Nunca o menos 1 vez al mes  
☐ 1 a 3 veces mes  
☐ 1 vez semana  
☐ 2 a 4 veces semana  
☐ 5 a 6 veces semana  
☐ 1 vez al día  
☐ 2 a 3 veces al día  
☐ 5 a 6 veces al día  
☐ más 6 veces al día

---

bolsa papas

- ☐ Nunca o menos 1 vez al mes  
☐ 1 a 3 veces mes  
☐ 1 vez semana  
☒ 2 a 4 veces semana  
☐ 5 a 6 veces semana  
☐ 1 vez al día  
☐ 2 a 3 veces al día  
☐ 5 a 6 veces al día  
☐ más 6 veces al día

---

arroz cocinado

- ☐ Nunca o menos 1 vez al mes  
☐ 1 a 3 veces mes  
☐ 1 vez semana  
☐ 2 a 4 veces semana  
☒ 5 a 6 veces semana  
☐ 1 vez al día  
☐ 2 a 3 veces al día  
☐ 5 a 6 veces al día  
☐ más 6 veces al día

---

pasta

- ☐ Nunca o menos 1 vez al mes  
☐ 1 a 3 veces mes  
☐ 1 vez semana  
☒ 2 a 4 veces semana  
☐ 5 a 6 veces semana  
☐ 1 vez al día  
☐ 2 a 3 veces al día  
☐ 5 a 6 veces al día  
☐ más 6 veces al día

|                     |                                                                                                                                                                                                                                                                                                                                                                                                              |
|---------------------|--------------------------------------------------------------------------------------------------------------------------------------------------------------------------------------------------------------------------------------------------------------------------------------------------------------------------------------------------------------------------------------------------------------|
| pizza               | <input type="radio"/> Nunca o menos 1 vez al mes<br><input checked="" type="radio"/> 1 a 3 veces mes<br><input type="radio"/> 1 vez semana<br><input type="radio"/> 2 a 4 veces semana<br><input type="radio"/> 5 a 6 veces semana<br><input type="radio"/> 1 vez al día<br><input type="radio"/> 2 a 3 veces al día<br><input type="radio"/> 5 a 6 veces al día<br><input type="radio"/> más 6 veces al día |
| aceite oliva        | <input type="radio"/> Nunca o menos 1 vez al mes<br><input type="radio"/> 1 a 3 veces mes<br><input type="radio"/> 1 vez semana<br><input checked="" type="radio"/> 2 a 4 veces semana<br><input type="radio"/> 5 a 6 veces semana<br><input type="radio"/> 1 vez al día<br><input type="radio"/> 2 a 3 veces al día<br><input type="radio"/> 5 a 6 veces al día<br><input type="radio"/> más 6 veces al día |
| otros aceites       | <input checked="" type="radio"/> Nunca o menos 1 vez al mes<br><input type="radio"/> 1 a 3 veces mes<br><input type="radio"/> 1 vez semana<br><input type="radio"/> 2 a 4 veces semana<br><input type="radio"/> 5 a 6 veces semana<br><input type="radio"/> 1 vez al día<br><input type="radio"/> 2 a 3 veces al día<br><input type="radio"/> 5 a 6 veces al día<br><input type="radio"/> más 6 veces al día |
| margarina           | <input type="radio"/> Nunca o menos 1 vez al mes<br><input checked="" type="radio"/> 1 a 3 veces mes<br><input type="radio"/> 1 vez semana<br><input type="radio"/> 2 a 4 veces semana<br><input type="radio"/> 5 a 6 veces semana<br><input type="radio"/> 1 vez al día<br><input type="radio"/> 2 a 3 veces al día<br><input type="radio"/> 5 a 6 veces al día<br><input type="radio"/> más 6 veces al día |
| mantequilla         | <input type="radio"/> Nunca o menos 1 vez al mes<br><input checked="" type="radio"/> 1 a 3 veces mes<br><input type="radio"/> 1 vez semana<br><input type="radio"/> 2 a 4 veces semana<br><input type="radio"/> 5 a 6 veces semana<br><input type="radio"/> 1 vez al día<br><input type="radio"/> 2 a 3 veces al día<br><input type="radio"/> 5 a 6 veces al día<br><input type="radio"/> más 6 veces al día |
| galletas tipo maria | <input type="radio"/> Nunca o menos 1 vez al mes<br><input type="radio"/> 1 a 3 veces mes<br><input type="radio"/> 1 vez semana<br><input checked="" type="radio"/> 2 a 4 veces semana<br><input type="radio"/> 5 a 6 veces semana<br><input type="radio"/> 1 vez al día<br><input type="radio"/> 2 a 3 veces al día<br><input type="radio"/> 5 a 6 veces al día<br><input type="radio"/> más 6 veces al día |

|                           |                                                                                                                                                                                                                                                                                                                                                                                                              |
|---------------------------|--------------------------------------------------------------------------------------------------------------------------------------------------------------------------------------------------------------------------------------------------------------------------------------------------------------------------------------------------------------------------------------------------------------|
| galletas chocolate        | <input type="radio"/> Nunca o menos 1 vez al mes<br><input type="radio"/> 1 a 3 veces mes<br><input checked="" type="radio"/> 1 vez semana<br><input type="radio"/> 2 a 4 veces semana<br><input type="radio"/> 5 a 6 veces semana<br><input type="radio"/> 1 vez al día<br><input type="radio"/> 2 a 3 veces al día<br><input type="radio"/> 5 a 6 veces al día<br><input type="radio"/> más 6 veces al día |
| bollieria                 | <input type="radio"/> Nunca o menos 1 vez al mes<br><input checked="" type="radio"/> 1 a 3 veces mes<br><input type="radio"/> 1 vez semana<br><input type="radio"/> 2 a 4 veces semana<br><input type="radio"/> 5 a 6 veces semana<br><input type="radio"/> 1 vez al día<br><input type="radio"/> 2 a 3 veces al día<br><input type="radio"/> 5 a 6 veces al día<br><input type="radio"/> más 6 veces al día |
| chocolate o bombones      | <input type="radio"/> Nunca o menos 1 vez al mes<br><input checked="" type="radio"/> 1 a 3 veces mes<br><input type="radio"/> 1 vez semana<br><input type="radio"/> 2 a 4 veces semana<br><input type="radio"/> 5 a 6 veces semana<br><input type="radio"/> 1 vez al día<br><input type="radio"/> 2 a 3 veces al día<br><input type="radio"/> 5 a 6 veces al día<br><input type="radio"/> más 6 veces al día |
| chocolate polvo o colacao | <input type="radio"/> Nunca o menos 1 vez al mes<br><input checked="" type="radio"/> 1 a 3 veces mes<br><input type="radio"/> 1 vez semana<br><input type="radio"/> 2 a 4 veces semana<br><input type="radio"/> 5 a 6 veces semana<br><input type="radio"/> 1 vez al día<br><input type="radio"/> 2 a 3 veces al día<br><input type="radio"/> 5 a 6 veces al día<br><input type="radio"/> más 6 veces al día |
| vino tinto                | <input checked="" type="radio"/> Nunca o menos 1 vez al mes<br><input type="radio"/> 1 a 3 veces mes<br><input type="radio"/> 1 vez semana<br><input type="radio"/> 2 a 4 veces semana<br><input type="radio"/> 5 a 6 veces semana<br><input type="radio"/> 1 vez al día<br><input type="radio"/> 2 a 3 veces al día<br><input type="radio"/> 5 a 6 veces al día<br><input type="radio"/> más 6 veces al día |
| vino blanco               | <input checked="" type="radio"/> Nunca o menos 1 vez al mes<br><input type="radio"/> 1 a 3 veces mes<br><input type="radio"/> 1 vez semana<br><input type="radio"/> 2 a 4 veces semana<br><input type="radio"/> 5 a 6 veces semana<br><input type="radio"/> 1 vez al día<br><input type="radio"/> 2 a 3 veces al día<br><input type="radio"/> 5 a 6 veces al día<br><input type="radio"/> más 6 veces al día |



---

|                    |                                                                                                                                                                                                                                                                                                                                                                                                              |
|--------------------|--------------------------------------------------------------------------------------------------------------------------------------------------------------------------------------------------------------------------------------------------------------------------------------------------------------------------------------------------------------------------------------------------------------|
| vino seco o vermut | <input checked="" type="radio"/> Nunca o menos 1 vez al mes<br><input type="radio"/> 1 a 3 veces mes<br><input type="radio"/> 1 vez semana<br><input type="radio"/> 2 a 4 veces semana<br><input type="radio"/> 5 a 6 veces semana<br><input type="radio"/> 1 vez al día<br><input type="radio"/> 2 a 3 veces al día<br><input type="radio"/> 5 a 6 veces al día<br><input type="radio"/> más 6 veces al día |
|--------------------|--------------------------------------------------------------------------------------------------------------------------------------------------------------------------------------------------------------------------------------------------------------------------------------------------------------------------------------------------------------------------------------------------------------|

---

|         |                                                                                                                                                                                                                                                                                                                                                                                                              |
|---------|--------------------------------------------------------------------------------------------------------------------------------------------------------------------------------------------------------------------------------------------------------------------------------------------------------------------------------------------------------------------------------------------------------------|
| cerveza | <input checked="" type="radio"/> Nunca o menos 1 vez al mes<br><input type="radio"/> 1 a 3 veces mes<br><input type="radio"/> 1 vez semana<br><input type="radio"/> 2 a 4 veces semana<br><input type="radio"/> 5 a 6 veces semana<br><input type="radio"/> 1 vez al día<br><input type="radio"/> 2 a 3 veces al día<br><input type="radio"/> 5 a 6 veces al día<br><input type="radio"/> más 6 veces al día |
|---------|--------------------------------------------------------------------------------------------------------------------------------------------------------------------------------------------------------------------------------------------------------------------------------------------------------------------------------------------------------------------------------------------------------------|

---

|                     |                                                                                                                                                                                                                                                                                                                                                                                                              |
|---------------------|--------------------------------------------------------------------------------------------------------------------------------------------------------------------------------------------------------------------------------------------------------------------------------------------------------------------------------------------------------------------------------------------------------------|
| cerveza sin alcohol | <input checked="" type="radio"/> Nunca o menos 1 vez al mes<br><input type="radio"/> 1 a 3 veces mes<br><input type="radio"/> 1 vez semana<br><input type="radio"/> 2 a 4 veces semana<br><input type="radio"/> 5 a 6 veces semana<br><input type="radio"/> 1 vez al día<br><input type="radio"/> 2 a 3 veces al día<br><input type="radio"/> 5 a 6 veces al día<br><input type="radio"/> más 6 veces al día |
|---------------------|--------------------------------------------------------------------------------------------------------------------------------------------------------------------------------------------------------------------------------------------------------------------------------------------------------------------------------------------------------------------------------------------------------------|

---

|         |                                                                                                                                                                                                                                                                                                                                                                                                              |
|---------|--------------------------------------------------------------------------------------------------------------------------------------------------------------------------------------------------------------------------------------------------------------------------------------------------------------------------------------------------------------------------------------------------------------|
| licores | <input checked="" type="radio"/> Nunca o menos 1 vez al mes<br><input type="radio"/> 1 a 3 veces mes<br><input type="radio"/> 1 vez semana<br><input type="radio"/> 2 a 4 veces semana<br><input type="radio"/> 5 a 6 veces semana<br><input type="radio"/> 1 vez al día<br><input type="radio"/> 2 a 3 veces al día<br><input type="radio"/> 5 a 6 veces al día<br><input type="radio"/> más 6 veces al día |
|---------|--------------------------------------------------------------------------------------------------------------------------------------------------------------------------------------------------------------------------------------------------------------------------------------------------------------------------------------------------------------------------------------------------------------|

---

|                       |                                                                                                                                                                                                                                                                                                                                                                                                              |
|-----------------------|--------------------------------------------------------------------------------------------------------------------------------------------------------------------------------------------------------------------------------------------------------------------------------------------------------------------------------------------------------------------------------------------------------------|
| ginebra o ron o vodka | <input checked="" type="radio"/> Nunca o menos 1 vez al mes<br><input type="radio"/> 1 a 3 veces mes<br><input type="radio"/> 1 vez semana<br><input type="radio"/> 2 a 4 veces semana<br><input type="radio"/> 5 a 6 veces semana<br><input type="radio"/> 1 vez al día<br><input type="radio"/> 2 a 3 veces al día<br><input type="radio"/> 5 a 6 veces al día<br><input type="radio"/> más 6 veces al día |
|-----------------------|--------------------------------------------------------------------------------------------------------------------------------------------------------------------------------------------------------------------------------------------------------------------------------------------------------------------------------------------------------------------------------------------------------------|

---

|                 |                                                                                                                                                                                                                                                                                                                                                                                                              |
|-----------------|--------------------------------------------------------------------------------------------------------------------------------------------------------------------------------------------------------------------------------------------------------------------------------------------------------------------------------------------------------------------------------------------------------------|
| refresco normal | <input type="radio"/> Nunca o menos 1 vez al mes<br><input type="radio"/> 1 a 3 veces mes<br><input checked="" type="radio"/> 1 vez semana<br><input type="radio"/> 2 a 4 veces semana<br><input type="radio"/> 5 a 6 veces semana<br><input type="radio"/> 1 vez al día<br><input type="radio"/> 2 a 3 veces al día<br><input type="radio"/> 5 a 6 veces al día<br><input type="radio"/> más 6 veces al día |
|-----------------|--------------------------------------------------------------------------------------------------------------------------------------------------------------------------------------------------------------------------------------------------------------------------------------------------------------------------------------------------------------------------------------------------------------|

---

|                          |                                                                                                                                                                                                                                                                                                                                                                                                              |
|--------------------------|--------------------------------------------------------------------------------------------------------------------------------------------------------------------------------------------------------------------------------------------------------------------------------------------------------------------------------------------------------------------------------------------------------------|
| refresco sin azúcar      | <input checked="" type="radio"/> Nunca o menos 1 vez al mes<br><input type="radio"/> 1 a 3 veces mes<br><input type="radio"/> 1 vez semana<br><input type="radio"/> 2 a 4 veces semana<br><input type="radio"/> 5 a 6 veces semana<br><input type="radio"/> 1 vez al día<br><input type="radio"/> 2 a 3 veces al día<br><input type="radio"/> 5 a 6 veces al día<br><input type="radio"/> más 6 veces al día |
| Agua del grifo           | <input checked="" type="radio"/> Nunca o menos 1 vez al mes<br><input type="radio"/> 1 a 3 veces mes<br><input type="radio"/> 1 vez semana<br><input type="radio"/> 2 a 4 veces semana<br><input type="radio"/> 5 a 6 veces semana<br><input type="radio"/> 1 vez al día<br><input type="radio"/> 2 a 3 veces al día<br><input type="radio"/> 5 a 6 veces al día<br><input type="radio"/> más 6 veces al día |
| agua embotellada sin gas | <input type="radio"/> Nunca o menos 1 vez al mes<br><input type="radio"/> 1 a 3 veces mes<br><input type="radio"/> 1 vez semana<br><input type="radio"/> 2 a 4 veces semana<br><input type="radio"/> 5 a 6 veces semana<br><input type="radio"/> 1 vez al día<br><input type="radio"/> 2 a 3 veces al día<br><input type="radio"/> 5 a 6 veces al día<br><input checked="" type="radio"/> más 6 veces al día |
| agua embotellada con gas | <input checked="" type="radio"/> Nunca o menos 1 vez al mes<br><input type="radio"/> 1 a 3 veces mes<br><input type="radio"/> 1 vez semana<br><input type="radio"/> 2 a 4 veces semana<br><input type="radio"/> 5 a 6 veces semana<br><input type="radio"/> 1 vez al día<br><input type="radio"/> 2 a 3 veces al día<br><input type="radio"/> 5 a 6 veces al día<br><input type="radio"/> más 6 veces al día |
| zumو frutas embasado     | <input checked="" type="radio"/> Nunca o menos 1 vez al mes<br><input type="radio"/> 1 a 3 veces mes<br><input type="radio"/> 1 vez semana<br><input type="radio"/> 2 a 4 veces semana<br><input type="radio"/> 5 a 6 veces semana<br><input type="radio"/> 1 vez al día<br><input type="radio"/> 2 a 3 veces al día<br><input type="radio"/> 5 a 6 veces al día<br><input type="radio"/> más 6 veces al día |
| cafe                     | <input checked="" type="radio"/> Nunca o menos 1 vez al mes<br><input type="radio"/> 1 a 3 veces mes<br><input type="radio"/> 1 vez semana<br><input type="radio"/> 2 a 4 veces semana<br><input type="radio"/> 5 a 6 veces semana<br><input type="radio"/> 1 vez al día<br><input type="radio"/> 2 a 3 veces al día<br><input type="radio"/> 5 a 6 veces al día<br><input type="radio"/> más 6 veces al día |

---

cafe descafeinado

- ☐ Nunca o menos 1 vez al mes  
☒ 1 a 3 veces mes  
☐ 1 vez semana  
☐ 2 a 4 veces semana  
☐ 5 a 6 veces semana  
☐ 1 vez al día  
☐ 2 a 3 veces al día  
☐ 5 a 6 veces al día  
☐ más 6 veces al día

---

te o infusión

- ☐ Nunca o menos 1 vez al mes  
☐ 1 a 3 veces mes  
☒ 1 vez semana  
☐ 2 a 4 veces semana  
☐ 5 a 6 veces semana  
☐ 1 vez al día  
☐ 2 a 3 veces al día  
☐ 5 a 6 veces al día  
☐ más 6 veces al día

---

sopa o puré verduras

- ☒ Nunca o menos 1 vez al mes  
☐ 1 a 3 veces mes  
☐ 1 vez semana  
☐ 2 a 4 veces semana  
☐ 5 a 6 veces semana  
☐ 1 vez al día  
☐ 2 a 3 veces al día  
☐ 5 a 6 veces al día  
☐ más 6 veces al día

---

croquetas pollo jamón

- ☐ Nunca o menos 1 vez al mes  
☒ 1 a 3 veces mes  
☐ 1 vez semana  
☐ 2 a 4 veces semana  
☐ 5 a 6 veces semana  
☐ 1 vez al día  
☐ 2 a 3 veces al día  
☐ 5 a 6 veces al día  
☐ más 6 veces al día

---

croquetas pescado

- ☒ Nunca o menos 1 vez al mes  
☐ 1 a 3 veces mes  
☐ 1 vez semana  
☐ 2 a 4 veces semana  
☐ 5 a 6 veces semana  
☐ 1 vez al día  
☐ 2 a 3 veces al día  
☐ 5 a 6 veces al día  
☐ más 6 veces al día

---

mayonesa

- ☒ Nunca o menos 1 vez al mes  
☐ 1 a 3 veces mes  
☐ 1 vez semana  
☐ 2 a 4 veces semana  
☐ 5 a 6 veces semana  
☐ 1 vez al día  
☐ 2 a 3 veces al día  
☐ 5 a 6 veces al día  
☐ más 6 veces al día

|                  |                                                                                                                                                                                                                                                                                                                                                                                                              |
|------------------|--------------------------------------------------------------------------------------------------------------------------------------------------------------------------------------------------------------------------------------------------------------------------------------------------------------------------------------------------------------------------------------------------------------|
| salsa tomate     | <input type="radio"/> Nunca o menos 1 vez al mes<br><input checked="" type="radio"/> 1 a 3 veces mes<br><input type="radio"/> 1 vez semana<br><input type="radio"/> 2 a 4 veces semana<br><input type="radio"/> 5 a 6 veces semana<br><input type="radio"/> 1 vez al día<br><input type="radio"/> 2 a 3 veces al día<br><input type="radio"/> 5 a 6 veces al día<br><input type="radio"/> más 6 veces al día |
| ketchup          | <input type="radio"/> Nunca o menos 1 vez al mes<br><input type="radio"/> 1 a 3 veces mes<br><input checked="" type="radio"/> 1 vez semana<br><input type="radio"/> 2 a 4 veces semana<br><input type="radio"/> 5 a 6 veces semana<br><input type="radio"/> 1 vez al día<br><input type="radio"/> 2 a 3 veces al día<br><input type="radio"/> 5 a 6 veces al día<br><input type="radio"/> más 6 veces al día |
| sal              | <input checked="" type="radio"/> Nunca o menos 1 vez al mes<br><input type="radio"/> 1 a 3 veces mes<br><input type="radio"/> 1 vez semana<br><input type="radio"/> 2 a 4 veces semana<br><input type="radio"/> 5 a 6 veces semana<br><input type="radio"/> 1 vez al día<br><input type="radio"/> 2 a 3 veces al día<br><input type="radio"/> 5 a 6 veces al día<br><input type="radio"/> más 6 veces al día |
| ajo              | <input type="radio"/> Nunca o menos 1 vez al mes<br><input checked="" type="radio"/> 1 a 3 veces mes<br><input type="radio"/> 1 vez semana<br><input type="radio"/> 2 a 4 veces semana<br><input type="radio"/> 5 a 6 veces semana<br><input type="radio"/> 1 vez al día<br><input type="radio"/> 2 a 3 veces al día<br><input type="radio"/> 5 a 6 veces al día<br><input type="radio"/> más 6 veces al día |
| mermelada o miel | <input type="radio"/> Nunca o menos 1 vez al mes<br><input checked="" type="radio"/> 1 a 3 veces mes<br><input type="radio"/> 1 vez semana<br><input type="radio"/> 2 a 4 veces semana<br><input type="radio"/> 5 a 6 veces semana<br><input type="radio"/> 1 vez al día<br><input type="radio"/> 2 a 3 veces al día<br><input type="radio"/> 5 a 6 veces al día<br><input type="radio"/> más 6 veces al día |
| azúcar           | <input type="radio"/> Nunca o menos 1 vez al mes<br><input type="radio"/> 1 a 3 veces mes<br><input checked="" type="radio"/> 1 vez semana<br><input type="radio"/> 2 a 4 veces semana<br><input type="radio"/> 5 a 6 veces semana<br><input type="radio"/> 1 vez al día<br><input type="radio"/> 2 a 3 veces al día<br><input type="radio"/> 5 a 6 veces al día<br><input type="radio"/> más 6 veces al día |

|                                       |                                                                                                                                                                                                                                                                                                                                                                                                                                                                                                                               |
|---------------------------------------|-------------------------------------------------------------------------------------------------------------------------------------------------------------------------------------------------------------------------------------------------------------------------------------------------------------------------------------------------------------------------------------------------------------------------------------------------------------------------------------------------------------------------------|
| Otro alimento                         | [*DATA REMOVED*]                                                                                                                                                                                                                                                                                                                                                                                                                                                                                                              |
| suplementos vitamínicos               | <input checked="" type="radio"/> si<br><input type="radio"/> no                                                                                                                                                                                                                                                                                                                                                                                                                                                               |
| suplementos vitamínicos               |                                                                                                                                                                                                                                                                                                                                                                                                                                                                                                                               |
| dieta previa                          | <input checked="" type="radio"/> si<br><input type="radio"/> no                                                                                                                                                                                                                                                                                                                                                                                                                                                               |
| motivo dieta                          | <input type="radio"/> no dieta<br><input type="radio"/> control peso<br><input type="radio"/> control colesterol<br><input checked="" type="radio"/> control diabetes<br><input type="radio"/> problemas estómago<br><input type="radio"/> problemas vesícula o hepáticos<br><input type="radio"/> HTA o cardiopatía<br><input type="radio"/> problemas renales<br><input type="radio"/> alergia alimentaria<br><input type="radio"/> ácido úrico elevado<br><input type="radio"/> vegetariana<br><input type="radio"/> otros |
| cambio alimentos año previo gestación | <input checked="" type="radio"/> si<br><input type="radio"/> no                                                                                                                                                                                                                                                                                                                                                                                                                                                               |
| cambio lácteos                        | <input type="radio"/> eliminado<br><input type="radio"/> disminuido<br><input checked="" type="radio"/> igual<br><input type="radio"/> aumentado<br><input type="radio"/> no sabe                                                                                                                                                                                                                                                                                                                                             |
| cambio huevos                         | <input type="radio"/> eliminado<br><input type="radio"/> disminuido<br><input checked="" type="radio"/> igual<br><input type="radio"/> aumentado<br><input type="radio"/> no sabe                                                                                                                                                                                                                                                                                                                                             |
| cambio carne                          | <input type="radio"/> eliminado<br><input type="radio"/> disminuido<br><input type="radio"/> igual<br><input checked="" type="radio"/> aumentado<br><input type="radio"/> no sabe                                                                                                                                                                                                                                                                                                                                             |
| cambio pescado                        | <input type="radio"/> eliminado<br><input type="radio"/> disminuido<br><input type="radio"/> igual<br><input checked="" type="radio"/> aumentado<br><input type="radio"/> no sabe                                                                                                                                                                                                                                                                                                                                             |
| cambio verduras                       | <input type="radio"/> eliminado<br><input type="radio"/> disminuido<br><input type="radio"/> igual<br><input checked="" type="radio"/> aumentado<br><input type="radio"/> no sabe                                                                                                                                                                                                                                                                                                                                             |

|                            |                                                                                                                                                                                                                        |
|----------------------------|------------------------------------------------------------------------------------------------------------------------------------------------------------------------------------------------------------------------|
| cambio legumbres           | <input type="radio"/> eliminado<br><input type="radio"/> disminuido<br><input type="radio"/> igual<br><input checked="" type="radio"/> aumentado<br><input type="radio"/> no sabe                                      |
| cambio fruta               | <input type="radio"/> eliminado<br><input type="radio"/> disminuido<br><input checked="" type="radio"/> igual<br><input type="radio"/> aumentado<br><input type="radio"/> no sabe                                      |
| cambio pan                 | <input type="radio"/> eliminado<br><input checked="" type="radio"/> disminuido<br><input type="radio"/> igual<br><input type="radio"/> aumentado<br><input type="radio"/> no sabe                                      |
| cambio aceite oliva        | <input type="radio"/> eliminado<br><input type="radio"/> disminuido<br><input checked="" type="radio"/> igual<br><input type="radio"/> aumentado<br><input type="radio"/> no sabe                                      |
| cambio mante o margarina   | <input type="radio"/> eliminado<br><input checked="" type="radio"/> disminuido<br><input type="radio"/> igual<br><input type="radio"/> aumentado<br><input type="radio"/> no sabe                                      |
| cambio azúcar y dulces     | <input type="radio"/> eliminado<br><input checked="" type="radio"/> disminuido<br><input type="radio"/> igual<br><input type="radio"/> aumentado<br><input type="radio"/> no sabe                                      |
| cambio bebidas alcohólicas | <input checked="" type="radio"/> eliminado<br><input type="radio"/> disminuido<br><input type="radio"/> igual<br><input type="radio"/> aumentado<br><input type="radio"/> no sabe                                      |
| frecuencia comidas fritas  | <input type="radio"/> a diario<br><input type="radio"/> 5 a 6 veces semana<br><input type="radio"/> 2 a 4 veces semana<br><input type="radio"/> 1 vez semana<br><input checked="" type="radio"/> menos de 1 vez semana |
| carne                      | <input type="radio"/> no como<br><input type="radio"/> cruda<br><input type="radio"/> poco hecha<br><input type="radio"/> hecha<br><input checked="" type="radio"/> muy hecha                                          |
| grasa visible carne        | <input checked="" type="radio"/> quita toda<br><input type="radio"/> quita mayoría<br><input type="radio"/> quita un poco<br><input type="radio"/> no quita nada                                                       |

|                                |                                                                                                                                                                                                                                                          |
|--------------------------------|----------------------------------------------------------------------------------------------------------------------------------------------------------------------------------------------------------------------------------------------------------|
| cocina carne                   | <input checked="" type="radio"/> a la plancha<br><input type="radio"/> a la parrilla<br><input type="radio"/> asada<br><input type="radio"/> frita<br><input type="radio"/> guisada                                                                      |
| tostado quemado carne          | <input type="radio"/> nunca<br><input checked="" type="radio"/> 1 vez mes<br><input type="radio"/> 2 a 3 veces mes<br><input type="radio"/> 1 vez semana<br><input type="radio"/> 2 a 3 semanas                                                          |
| tostado quemado pescado        | <input type="radio"/> nunca<br><input checked="" type="radio"/> 1 vez mes<br><input type="radio"/> 2 a 3 veces mes<br><input type="radio"/> 1 vez semana<br><input type="radio"/> 2 a 3 semanas                                                          |
| socarrat paella                | <input checked="" type="radio"/> nunca<br><input type="radio"/> 1 vez mes<br><input type="radio"/> 2 a 3 veces mes<br><input type="radio"/> 1 vez semana<br><input type="radio"/> 2 a 3 semanas                                                          |
| grasa o aceite cocinar         | <input type="radio"/> mantequilla<br><input type="radio"/> margarina<br><input type="radio"/> aceite oliva<br><input checked="" type="radio"/> aceite oliva virgen extra<br><input type="radio"/> aceite vegetal<br><input type="radio"/> mezcla aceites |
| grasa aceite aliñar            | <input type="radio"/> mantequilla<br><input type="radio"/> margarina<br><input type="radio"/> aceite oliva<br><input checked="" type="radio"/> aceite oliva virgen extra<br><input type="radio"/> aceite vegetal<br><input type="radio"/> mezcla aceites |
| grasa aceite freir             | <input type="radio"/> mantequilla<br><input type="radio"/> margarina<br><input type="radio"/> aceite oliva<br><input type="radio"/> aceite oliva virgen extra<br><input checked="" type="radio"/> aceite vegetal<br><input type="radio"/> mezcla aceites |
| Ejercicio cuestionario         | <input checked="" type="radio"/> si<br><input type="radio"/> no                                                                                                                                                                                          |
| horas de sueño incluido siesta | [*DATA REMOVED*]                                                                                                                                                                                                                                         |
| minutos siesta                 | [*DATA REMOVED*]                                                                                                                                                                                                                                         |
| horas televisión semana        | [*DATA REMOVED*]                                                                                                                                                                                                                                         |

|                                        |                                                                                                                                                                                                                                                                                                                                                                           |
|----------------------------------------|---------------------------------------------------------------------------------------------------------------------------------------------------------------------------------------------------------------------------------------------------------------------------------------------------------------------------------------------------------------------------|
| actividad trabajo                      | <input type="radio"/> casi siempre sentado<br><input type="radio"/> sentado 50 por cien<br><input checked="" type="radio"/> casi siempre de pie, quieto<br><input type="radio"/> casi siempre levantado caminando y llevando pocas cosas<br><input type="radio"/> casi siempre levantado, caminando y llevado muchas cosas<br><input type="radio"/> trabajo manual pesado |
| tiempo caminar o bici al día           | <input checked="" type="radio"/> casi nunca<br><input type="radio"/> menos 20min día<br><input type="radio"/> 20 a 40 min día<br><input type="radio"/> 40 a 60 min día<br><input type="radio"/> 1h o 1h y media día<br><input type="radio"/> más de 1h y media al día                                                                                                     |
| tiempo tareas casa al día              | <input type="radio"/> menos de 1h día<br><input type="radio"/> 1 a 2h día<br><input checked="" type="radio"/> 3 a 4h día<br><input type="radio"/> 5 a 6h día<br><input type="radio"/> 7 a 8h día<br><input type="radio"/> más de 8h día                                                                                                                                   |
| tiempo libre televisión ordenador leer | <input type="radio"/> menos 1h día<br><input type="radio"/> 1h día<br><input type="radio"/> 2h día<br><input type="radio"/> 3h día<br><input checked="" type="radio"/> 4h día<br><input type="radio"/> 5 a 6h día<br><input type="radio"/> mas 6h día                                                                                                                     |
| tiempo libre ejercicio o deporte       | <input type="radio"/> menos 1h semana<br><input type="radio"/> 1h semana<br><input type="radio"/> 2h semana<br><input checked="" type="radio"/> 3h semana<br><input type="radio"/> 4 a 5h semana<br><input type="radio"/> mas 5h semana                                                                                                                                   |
| como se considera                      | <input type="radio"/> sedentaria<br><input checked="" type="radio"/> poco activa<br><input type="radio"/> moderadamente activa<br><input type="radio"/> bastante activa<br><input type="radio"/> muy activa<br><input type="radio"/> no sabe                                                                                                                              |
| FUR                                    | [*DATA REMOVED*]                                                                                                                                                                                                                                                                                                                                                          |
| Semanas gestación 2T                   | _____                                                                                                                                                                                                                                                                                                                                                                     |
| Días gestación 2T                      | _____                                                                                                                                                                                                                                                                                                                                                                     |
| DBP 2T                                 | _____                                                                                                                                                                                                                                                                                                                                                                     |
| CC 2T                                  | _____                                                                                                                                                                                                                                                                                                                                                                     |



|                                                   |                                                                                                                                                                                                 |
|---------------------------------------------------|-------------------------------------------------------------------------------------------------------------------------------------------------------------------------------------------------|
| AC 2T                                             |                                                                                                                                                                                                 |
| LF 2T                                             |                                                                                                                                                                                                 |
| PFE 2T (Hadlock)                                  |                                                                                                                                                                                                 |
| Semanas gestación 3T                              | [*DATA REMOVED*]                                                                                                                                                                                |
| días 3T                                           | [*DATA REMOVED*]                                                                                                                                                                                |
| DBP 3T                                            | [*DATA REMOVED*]                                                                                                                                                                                |
| CC 3T                                             | [*DATA REMOVED*]                                                                                                                                                                                |
| AC 3T                                             | [*DATA REMOVED*]                                                                                                                                                                                |
| LF 3T                                             | [*DATA REMOVED*]                                                                                                                                                                                |
| PFE 3T (Hadlock)                                  | [*DATA REMOVED*]                                                                                                                                                                                |
| Semanas de gestación final                        | [*DATA REMOVED*]                                                                                                                                                                                |
| días gestación final                              | [*DATA REMOVED*]                                                                                                                                                                                |
| Localización placenta                             | <input checked="" type="radio"/> anterior<br><input type="radio"/> lateral derecha<br><input type="radio"/> lateral izquierda<br><input type="radio"/> posterior<br><input type="radio"/> fondo |
| Presentación longitudinal cefálica                | <input type="radio"/> no<br><input checked="" type="radio"/> si                                                                                                                                 |
| Dorso                                             | <input type="radio"/> izquierda anterior<br><input checked="" type="radio"/> izquierda posterior<br><input type="radio"/> derecha anterior<br><input type="radio"/> derecha posterior           |
| diámetro biparietal                               | [*DATA REMOVED*]                                                                                                                                                                                |
| Circunferencia craneal                            | [*DATA REMOVED*]                                                                                                                                                                                |
| Circunferencia abdominal                          | [*DATA REMOVED*]                                                                                                                                                                                |
| Longitud de femur                                 | [*DATA REMOVED*]                                                                                                                                                                                |
| tejido celular subcutáneo a nivel del muslo en mm | [*DATA REMOVED*]                                                                                                                                                                                |
| tejido celular subcutáneo en abdomen en mm        | [*DATA REMOVED*]                                                                                                                                                                                |

|                                               |                                                                                                                                                          |
|-----------------------------------------------|----------------------------------------------------------------------------------------------------------------------------------------------------------|
| Volumen del muslo en cm3                      | [*DATA REMOVED*]                                                                                                                                         |
| Peso fetal estimado según fórmula de Hadlock  | [*DATA REMOVED*]                                                                                                                                         |
| Percentil                                     | [*DATA REMOVED*]                                                                                                                                         |
| Peso fetal estimado según fórmula de Scioscia | _____                                                                                                                                                    |
| Peso fetal estimado según fórmula de LEE      | _____                                                                                                                                                    |
| Tipo de parto                                 | <input checked="" type="radio"/> eutocico<br><input type="radio"/> instrumentado/ventosa<br><input type="radio"/> cesarea                                |
| fecha de nacimiento                           | [*DATA REMOVED*]                                                                                                                                         |
| Días entre exploración y nacimiento           | [*DATA REMOVED*]                                                                                                                                         |
| Peso RN en g                                  | [*DATA REMOVED*]                                                                                                                                         |
| sexo                                          | <input checked="" type="radio"/> mujer<br><input type="radio"/> hombre                                                                                   |
| Apgar 1 minuto                                | [*DATA REMOVED*]                                                                                                                                         |
| Apgar 5 minutos                               | [*DATA REMOVED*]                                                                                                                                         |
| Apgar 10 minutos                              | _____                                                                                                                                                    |
| antecedente Covid durante gestación           | <input type="radio"/> Yes<br><input checked="" type="radio"/> No                                                                                         |
| Nivel de estudios                             | <input type="radio"/> ninguno<br><input checked="" type="radio"/> primarios<br><input type="radio"/> secundarios<br><input type="radio"/> universitarios |

# Base\_datos\_estimacion\_peso\_fetal

|                                       |                                                                                                                                                                                                                                                                                      |
|---------------------------------------|--------------------------------------------------------------------------------------------------------------------------------------------------------------------------------------------------------------------------------------------------------------------------------------|
| Número de identificación participante | 7                                                                                                                                                                                                                                                                                    |
| CODIGO PARTICIPANTE                   |                                                                                                                                                                                                                                                                                      |
| Edad                                  | [*DATA REMOVED*]                                                                                                                                                                                                                                                                     |
| Gestaciones                           | <input type="radio"/> 1<br><input type="radio"/> 2<br><input checked="" type="radio"/> 3<br><input type="radio"/> mas de 3                                                                                                                                                           |
| partos                                | <input type="radio"/> 0<br><input checked="" type="radio"/> 1<br><input type="radio"/> 2<br><input type="radio"/> 3<br><input type="radio"/> mas de 3                                                                                                                                |
| cesáreas                              | <input checked="" type="radio"/> 0<br><input type="radio"/> 1<br><input type="radio"/> 2<br><input type="radio"/> 3<br><input type="radio"/> mas de 3                                                                                                                                |
| Abortos                               | <input type="radio"/> 0<br><input checked="" type="radio"/> 1<br><input type="radio"/> 2<br><input type="radio"/> 3<br><input type="radio"/> mas de 3                                                                                                                                |
| Tipo de gestacion                     | <input checked="" type="radio"/> espontanea<br><input type="radio"/> IAC inseminación artificial conyuge<br><input type="radio"/> IAD inseminación artificial donante<br><input type="radio"/> FIV Fecundación in Vitro<br><input type="radio"/> Ovodon FIV con donación de ovocitos |
| peso previo a embarazo                | [*DATA REMOVED*]                                                                                                                                                                                                                                                                     |
| Ganancia ponderal embarazo            | [*DATA REMOVED*]                                                                                                                                                                                                                                                                     |
| Talla madre                           | [*DATA REMOVED*]                                                                                                                                                                                                                                                                     |
| IMC previo embarazo                   | 25.117187499999993                                                                                                                                                                                                                                                                   |
| Patología obstétrica                  | <input checked="" type="radio"/> no<br><input type="radio"/> si                                                                                                                                                                                                                      |
| Diabetes pregestacional               | <input checked="" type="radio"/> no<br><input type="radio"/> si                                                                                                                                                                                                                      |
| Diabetes gestacional                  | <input checked="" type="radio"/> no<br><input type="radio"/> si                                                                                                                                                                                                                      |

|                                            |                                                                                                                                                                                      |
|--------------------------------------------|--------------------------------------------------------------------------------------------------------------------------------------------------------------------------------------|
| Diabetes gestacional con insulina          | <input checked="" type="radio"/> no<br><input type="radio"/> si                                                                                                                      |
| Diabetes gestacional con dieta y ejercicio | <input checked="" type="radio"/> no<br><input type="radio"/> si                                                                                                                      |
| Percentil fetos previos                    | <input checked="" type="radio"/> Nada<br><input type="radio"/> percentil menor de 10<br><input type="radio"/> percentil entre 10 y 90<br><input type="radio"/> percentil mayor de 90 |
| Exfumadora                                 | <input checked="" type="radio"/> Nada<br><input type="radio"/> menos de 5 años<br><input type="radio"/> 5 a 10 años<br><input type="radio"/> mayor o igual a 10 años                 |
| Hábito tabáquico                           | <input checked="" type="radio"/> no<br><input type="radio"/> si                                                                                                                      |
| fumadora                                   | _____                                                                                                                                                                                |
| Consumo otros tóxicos                      | <input checked="" type="radio"/> no<br><input type="radio"/> si                                                                                                                      |
| Hb 1T                                      | _____                                                                                                                                                                                |
| Htc 1T                                     | _____                                                                                                                                                                                |
| Hb 2T                                      | _____                                                                                                                                                                                |
| HTC 2T                                     | _____                                                                                                                                                                                |
| Hb 3T                                      | _____                                                                                                                                                                                |
| HTC 3T                                     | _____                                                                                                                                                                                |
| Suplemento FE oral                         | <input type="radio"/> si<br><input type="radio"/> no                                                                                                                                 |
| Suplemento fe iv                           | <input type="radio"/> si<br><input type="radio"/> no                                                                                                                                 |
| Transfusión                                | <input type="radio"/> no<br><input type="radio"/> si                                                                                                                                 |
| Solicitada Vit D                           | <input type="radio"/> no<br><input type="radio"/> si                                                                                                                                 |

|                       |                                                                                                                                                                                                                                                                                                                                                                                                              |
|-----------------------|--------------------------------------------------------------------------------------------------------------------------------------------------------------------------------------------------------------------------------------------------------------------------------------------------------------------------------------------------------------------------------------------------------------|
| Deficit vit D         | <input type="radio"/> no<br><input type="radio"/> si                                                                                                                                                                                                                                                                                                                                                         |
| Suplemento vit D      | <input type="radio"/> si<br><input type="radio"/> no                                                                                                                                                                                                                                                                                                                                                         |
| Dieta, cuestionario   | <input checked="" type="radio"/> si<br><input type="radio"/> no                                                                                                                                                                                                                                                                                                                                              |
| Leche entera          | <input type="radio"/> Nunca o menos 1 vez al mes<br><input type="radio"/> 1 a 3 veces mes<br><input type="radio"/> 1 vez semana<br><input type="radio"/> 2 a 4 veces semana<br><input type="radio"/> 5 a 6 veces semana<br><input type="radio"/> 1 vez al día<br><input checked="" type="radio"/> 2 a 3 veces al día<br><input type="radio"/> 5 a 6 veces al día<br><input type="radio"/> más 6 veces al día |
| Leche semidesnatada   | <input checked="" type="radio"/> Nunca o menos 1 vez al mes<br><input type="radio"/> 1 a 3 veces mes<br><input type="radio"/> 1 vez semana<br><input type="radio"/> 2 a 4 veces semana<br><input type="radio"/> 5 a 6 veces semana<br><input type="radio"/> 1 vez al día<br><input type="radio"/> 2 a 3 veces al día<br><input type="radio"/> 5 a 6 veces al día<br><input type="radio"/> mas 6 veces al día |
| Leche desnatada       | <input checked="" type="radio"/> Nunca o menos 1 vez al mes<br><input type="radio"/> 1 a 3 veces mes<br><input type="radio"/> 1 vez semana<br><input type="radio"/> 2 a 4 veces semana<br><input type="radio"/> 5 a 6 veces semana<br><input type="radio"/> 1 vez al día<br><input type="radio"/> 2 a 3 veces al día<br><input type="radio"/> 5 a 6 veces al día<br><input type="radio"/> más 6 veces al día |
| Leche condensada      | <input checked="" type="radio"/> Nunca o menos 1 vez al mes<br><input type="radio"/> 1 a 3 veces mes<br><input type="radio"/> 1 vez semana<br><input type="radio"/> 2 a 4 veces semana<br><input type="radio"/> 5 a 6 veces semana<br><input type="radio"/> 1 vez al día<br><input type="radio"/> 2 a 3 veces al día<br><input type="radio"/> 5 a 6 veces al día<br><input type="radio"/> más 6 veces al día |
| nata o crema de leche | <input checked="" type="radio"/> Nunca o menos 1 vez al mes<br><input type="radio"/> 1 a 3 veces mes<br><input type="radio"/> 1 vez semana<br><input type="radio"/> 2 a 4 veces semana<br><input type="radio"/> 5 a 6 veces semana<br><input type="radio"/> 1 vez al día<br><input type="radio"/> 2 a 3 veces al día<br><input type="radio"/> 5 a 6 veces al día<br><input type="radio"/> más 6 veces al día |

|                                             |                                                                                                                                                                                                                                                                                                                                                                                                              |
|---------------------------------------------|--------------------------------------------------------------------------------------------------------------------------------------------------------------------------------------------------------------------------------------------------------------------------------------------------------------------------------------------------------------------------------------------------------------|
| Yogurt Entero                               | <input type="radio"/> Nunca o menos 1 vez al mes<br><input type="radio"/> 1 a 3 veces mes<br><input type="radio"/> 1 vez semana<br><input checked="" type="radio"/> 2 a 4 veces semana<br><input type="radio"/> 5 a 6 veces semana<br><input type="radio"/> 1 vez al día<br><input type="radio"/> 2 a 3 veces al día<br><input type="radio"/> 5 a 6 veces al día<br><input type="radio"/> más 6 veces al día |
| Yogurt desnatado                            | <input type="radio"/> Nunca o menos 1 vez al mes<br><input checked="" type="radio"/> 1 a 3 veces mes<br><input type="radio"/> 1 vez semana<br><input type="radio"/> 2 a 4 veces semana<br><input type="radio"/> 5 a 6 veces semana<br><input type="radio"/> 1 vez al día<br><input type="radio"/> 2 a 3 veces al día<br><input type="radio"/> 5 a 6 veces al día<br><input type="radio"/> más 6 veces al día |
| 100g requesón o queso blando o queso fresco | <input checked="" type="radio"/> Nunca o menos 1 vez al mes<br><input type="radio"/> 1 a 3 veces mes<br><input type="radio"/> 1 vez semana<br><input type="radio"/> 2 a 4 veces semana<br><input type="radio"/> 5 a 6 veces semana<br><input type="radio"/> 1 vez al día<br><input type="radio"/> 2 a 3 veces al día<br><input type="radio"/> 5 a 6 veces al día<br><input type="radio"/> más 6 veces al día |
| queso curado o semicurado o cremoso         | <input type="radio"/> Nunca o menos 1 vez al mes<br><input type="radio"/> 1 a 3 veces mes<br><input checked="" type="radio"/> 1 vez semana<br><input type="radio"/> 2 a 4 veces semana<br><input type="radio"/> 5 a 6 veces semana<br><input type="radio"/> 1 vez al día<br><input type="radio"/> 2 a 3 veces al día<br><input type="radio"/> 5 a 6 veces al día<br><input type="radio"/> más 6 veces al día |
| natillas flan pudding                       | <input type="radio"/> Nunca o menos 1 vez al mes<br><input checked="" type="radio"/> 1 a 3 veces mes<br><input type="radio"/> 1 vez semana<br><input type="radio"/> 2 a 4 veces semana<br><input type="radio"/> 5 a 6 veces semana<br><input type="radio"/> 1 vez al día<br><input type="radio"/> 2 a 3 veces al día<br><input type="radio"/> 5 a 6 veces al día<br><input type="radio"/> más 6 veces al día |
| Helado                                      | <input type="radio"/> Nunca o menos 1 vez al mes<br><input checked="" type="radio"/> 1 a 3 veces mes<br><input type="radio"/> 1 vez semana<br><input type="radio"/> 2 a 4 veces semana<br><input type="radio"/> 5 a 6 veces semana<br><input type="radio"/> 1 vez al día<br><input type="radio"/> 2 a 3 veces al día<br><input type="radio"/> 5 a 6 veces al día<br><input type="radio"/> más 6 veces al día |

|                                      |                                                                                                                                                                                                                                                                                                                                                                                                              |
|--------------------------------------|--------------------------------------------------------------------------------------------------------------------------------------------------------------------------------------------------------------------------------------------------------------------------------------------------------------------------------------------------------------------------------------------------------------|
| huevo                                | <input type="radio"/> Nunca o menos 1 vez al mes<br><input type="radio"/> 1 a 3 veces mes<br><input checked="" type="radio"/> 1 vez semana<br><input type="radio"/> 2 a 4 veces semana<br><input type="radio"/> 5 a 6 veces semana<br><input type="radio"/> 1 vez al día<br><input type="radio"/> 2 a 3 veces al día<br><input type="radio"/> 5 a 6 veces al día<br><input type="radio"/> más 6 veces al día |
| Pollo con piel                       | <input checked="" type="radio"/> Nunca o menos 1 vez al mes<br><input type="radio"/> 1 a 3 veces mes<br><input type="radio"/> 1 vez semana<br><input type="radio"/> 2 a 4 veces semana<br><input type="radio"/> 5 a 6 veces semana<br><input type="radio"/> 1 vez al día<br><input type="radio"/> 2 a 3 veces al día<br><input type="radio"/> 5 a 6 veces al día<br><input type="radio"/> más 6 veces al día |
| pollo sin piel                       | <input type="radio"/> Nunca o menos 1 vez al mes<br><input type="radio"/> 1 a 3 veces mes<br><input type="radio"/> 1 vez semana<br><input checked="" type="radio"/> 2 a 4 veces semana<br><input type="radio"/> 5 a 6 veces semana<br><input type="radio"/> 1 vez al día<br><input type="radio"/> 2 a 3 veces al día<br><input type="radio"/> 5 a 6 veces al día<br><input type="radio"/> más 6 veces al día |
| Ternera o cerdo o cordero            | <input type="radio"/> Nunca o menos 1 vez al mes<br><input checked="" type="radio"/> 1 a 3 veces mes<br><input type="radio"/> 1 vez semana<br><input type="radio"/> 2 a 4 veces semana<br><input type="radio"/> 5 a 6 veces semana<br><input type="radio"/> 1 vez al día<br><input type="radio"/> 2 a 3 veces al día<br><input type="radio"/> 5 a 6 veces al día<br><input type="radio"/> más 6 veces al día |
| carne caza: Conejo o codorniz o pato | <input checked="" type="radio"/> Nunca o menos 1 vez al mes<br><input type="radio"/> 1 a 3 veces mes<br><input type="radio"/> 1 vez semana<br><input type="radio"/> 2 a 4 veces semana<br><input type="radio"/> 5 a 6 veces semana<br><input type="radio"/> 1 vez al día<br><input type="radio"/> 2 a 3 veces al día<br><input type="radio"/> 5 a 6 veces al día<br><input type="radio"/> más 6 veces al día |
| Hígado de ternera o cerdo o pollo    | <input checked="" type="radio"/> Nunca o menos 1 vez al mes<br><input type="radio"/> 1 a 3 veces mes<br><input type="radio"/> 1 vez semana<br><input type="radio"/> 2 a 4 veces semana<br><input type="radio"/> 5 a 6 veces semana<br><input type="radio"/> 1 vez al día<br><input type="radio"/> 2 a 3 veces al día<br><input type="radio"/> 5 a 6 veces al día<br><input type="radio"/> más 6 veces al día |

---

Vísceras

- ☒ Nunca o menos 1 vez al mes  
☐ 1 a 3 veces mes  
☐ 1 vez semana  
☐ 2 a 4 veces semana  
☐ 5 a 6 veces semana  
☐ 1 vez al día  
☐ 2 a 3 veces al día  
☐ 5 a 6 veces al día  
☐ más 6 veces al día

---

Embutido

- ☐ Nunca o menos 1 vez al mes  
☐ 1 a 3 veces mes  
☐ 1 vez semana  
☒ 2 a 4 veces semana  
☐ 5 a 6 veces semana  
☐ 1 vez al día  
☐ 2 a 3 veces al día  
☐ 5 a 6 veces al día  
☐ más 6 veces al día

---

Salchicha o similar

- ☐ Nunca o menos 1 vez al mes  
☒ 1 a 3 veces mes  
☐ 1 vez semana  
☐ 2 a 4 veces semana  
☐ 5 a 6 veces semana  
☐ 1 vez al día  
☐ 2 a 3 veces al día  
☐ 5 a 6 veces al día  
☐ más 6 veces al día

---

Pate o foiegras

- ☒ Nunca o menos 1 vez al mes  
☐ 1 a 3 veces mes  
☐ 1 vez semana  
☐ 2 a 4 veces semana  
☐ 5 a 6 veces semana  
☐ 1 vez al día  
☐ 2 a 3 veces al día  
☐ 5 a 6 veces al día  
☐ más 6 veces al día

---

Hamburguesa

- ☐ Nunca o menos 1 vez al mes  
☐ 1 a 3 veces mes  
☒ 1 vez semana  
☐ 2 a 4 veces semana  
☐ 5 a 6 veces semana  
☐ 1 vez al día  
☐ 2 a 3 veces al día  
☐ 5 a 6 veces al día  
☐ más 6 veces al día

---

tocino o bacon

- ☐ Nunca o menos 1 vez al mes  
☒ 1 a 3 veces mes  
☐ 1 vez semana  
☐ 2 a 4 veces semana  
☐ 5 a 6 veces semana  
☐ 1 vez al día  
☐ 2 a 3 veces al día  
☐ 5 a 6 veces al día  
☐ más 6 veces al día



|                        |                                                                                                                                                                                                                                                                                                                                                                                                              |
|------------------------|--------------------------------------------------------------------------------------------------------------------------------------------------------------------------------------------------------------------------------------------------------------------------------------------------------------------------------------------------------------------------------------------------------------|
| Pescado frito          | <input checked="" type="radio"/> Nunca o menos 1 vez al mes<br><input type="radio"/> 1 a 3 veces mes<br><input type="radio"/> 1 vez semana<br><input type="radio"/> 2 a 4 veces semana<br><input type="radio"/> 5 a 6 veces semana<br><input type="radio"/> 1 vez al día<br><input type="radio"/> 2 a 3 veces al día<br><input type="radio"/> 5 a 6 veces al día<br><input type="radio"/> más 6 veces al día |
| pescado hervido blanco | <input type="radio"/> Nunca o menos 1 vez al mes<br><input type="radio"/> 1 a 3 veces mes<br><input type="radio"/> 1 vez semana<br><input checked="" type="radio"/> 2 a 4 veces semana<br><input type="radio"/> 5 a 6 veces semana<br><input type="radio"/> 1 vez al día<br><input type="radio"/> 2 a 3 veces al día<br><input type="radio"/> 5 a 6 veces al día<br><input type="radio"/> más 6 veces al día |
| pescado hervido azul   | <input type="radio"/> Nunca o menos 1 vez al mes<br><input type="radio"/> 1 a 3 veces mes<br><input checked="" type="radio"/> 1 vez semana<br><input type="radio"/> 2 a 4 veces semana<br><input type="radio"/> 5 a 6 veces semana<br><input type="radio"/> 1 vez al día<br><input type="radio"/> 2 a 3 veces al día<br><input type="radio"/> 5 a 6 veces al día<br><input type="radio"/> más 6 veces al día |
| otros pescado azul     | <input type="radio"/> Nunca o menos 1 vez al mes<br><input type="radio"/> 1 a 3 veces mes<br><input type="radio"/> 1 vez semana<br><input checked="" type="radio"/> 2 a 4 veces semana<br><input type="radio"/> 5 a 6 veces semana<br><input type="radio"/> 1 vez al día<br><input type="radio"/> 2 a 3 veces al día<br><input type="radio"/> 5 a 6 veces al día<br><input type="radio"/> más 6 veces al día |
| atun conserva          | <input type="radio"/> Nunca o menos 1 vez al mes<br><input checked="" type="radio"/> 1 a 3 veces mes<br><input type="radio"/> 1 vez semana<br><input type="radio"/> 2 a 4 veces semana<br><input type="radio"/> 5 a 6 veces semana<br><input type="radio"/> 1 vez al día<br><input type="radio"/> 2 a 3 veces al día<br><input type="radio"/> 5 a 6 veces al día<br><input type="radio"/> más 6 veces al día |
| sardina conserva       | <input checked="" type="radio"/> Nunca o menos 1 vez al mes<br><input type="radio"/> 1 a 3 veces mes<br><input type="radio"/> 1 vez semana<br><input type="radio"/> 2 a 4 veces semana<br><input type="radio"/> 5 a 6 veces semana<br><input type="radio"/> 1 vez al día<br><input type="radio"/> 2 a 3 veces al día<br><input type="radio"/> 5 a 6 veces al día<br><input type="radio"/> más 6 veces al día |

|                                         |                                                                                                                                                                                                                                                                                                                                                                                                              |
|-----------------------------------------|--------------------------------------------------------------------------------------------------------------------------------------------------------------------------------------------------------------------------------------------------------------------------------------------------------------------------------------------------------------------------------------------------------------|
| pescado ahumado                         | <input checked="" type="radio"/> Nunca o menos 1 vez al mes<br><input type="radio"/> 1 a 3 veces mes<br><input type="radio"/> 1 vez semana<br><input type="radio"/> 2 a 4 veces semana<br><input type="radio"/> 5 a 6 veces semana<br><input type="radio"/> 1 vez al día<br><input type="radio"/> 2 a 3 veces al día<br><input type="radio"/> 5 a 6 veces al día<br><input type="radio"/> más 6 veces al día |
| almejas o mejillones o ostras unos 100g | <input checked="" type="radio"/> Nunca o menos 1 vez al mes<br><input type="radio"/> 1 a 3 veces mes<br><input type="radio"/> 1 vez semana<br><input type="radio"/> 2 a 4 veces semana<br><input type="radio"/> 5 a 6 veces semana<br><input type="radio"/> 1 vez al día<br><input type="radio"/> 2 a 3 veces al día<br><input type="radio"/> 5 a 6 veces al día<br><input type="radio"/> más 6 veces al día |
| calamar o chipiron o sepia unos 100g    | <input checked="" type="radio"/> Nunca o menos 1 vez al mes<br><input type="radio"/> 1 a 3 veces mes<br><input type="radio"/> 1 vez semana<br><input type="radio"/> 2 a 4 veces semana<br><input type="radio"/> 5 a 6 veces semana<br><input type="radio"/> 1 vez al día<br><input type="radio"/> 2 a 3 veces al día<br><input type="radio"/> 5 a 6 veces al día<br><input type="radio"/> más 6 veces al día |
| marisco unos 100g                       | <input type="radio"/> Nunca o menos 1 vez al mes<br><input checked="" type="radio"/> 1 a 3 veces mes<br><input type="radio"/> 1 vez semana<br><input type="radio"/> 2 a 4 veces semana<br><input type="radio"/> 5 a 6 veces semana<br><input type="radio"/> 1 vez al día<br><input type="radio"/> 2 a 3 veces al día<br><input type="radio"/> 5 a 6 veces al día<br><input type="radio"/> más 6 veces al día |
| Espinacas o acelgas cocinadas           | <input checked="" type="radio"/> Nunca o menos 1 vez al mes<br><input type="radio"/> 1 a 3 veces mes<br><input type="radio"/> 1 vez semana<br><input type="radio"/> 2 a 4 veces semana<br><input type="radio"/> 5 a 6 veces semana<br><input type="radio"/> 1 vez al día<br><input type="radio"/> 2 a 3 veces al día<br><input type="radio"/> 5 a 6 veces al día<br><input type="radio"/> más 6 veces al día |
| Col o coliflor o brocoli cocinado       | <input type="radio"/> Nunca o menos 1 vez al mes<br><input type="radio"/> 1 a 3 veces mes<br><input checked="" type="radio"/> 1 vez semana<br><input type="radio"/> 2 a 4 veces semana<br><input type="radio"/> 5 a 6 veces semana<br><input type="radio"/> 1 vez al día<br><input type="radio"/> 2 a 3 veces al día<br><input type="radio"/> 5 a 6 veces al día<br><input type="radio"/> más 6 veces al día |

---

Lechuga o endivia o escarola

- ☐ Nunca o menos 1 vez al mes  
☐ 1 a 3 veces mes  
☒ 1 vez semana  
☐ 2 a 4 veces semana  
☐ 5 a 6 veces semana  
☐ 1 vez al día  
☐ 2 a 3 veces al día  
☐ 5 a 6 veces al día  
☐ más 6 veces al día

---

tomate ensalada

- ☐ Nunca o menos 1 vez al mes  
☐ 1 a 3 veces mes  
☐ 1 vez semana  
☐ 2 a 4 veces semana  
☒ 5 a 6 veces semana  
☐ 1 vez al día  
☐ 2 a 3 veces al día  
☐ 5 a 6 veces al día  
☐ más 6 veces al día

---

cebolla

- ☒ Nunca o menos 1 vez al mes  
☐ 1 a 3 veces mes  
☐ 1 vez semana  
☐ 2 a 4 veces semana  
☐ 5 a 6 veces semana  
☐ 1 vez al día  
☐ 2 a 3 veces al día  
☐ 5 a 6 veces al día  
☐ más 6 veces al día

---

Zanahoria o calabaza

- ☐ Nunca o menos 1 vez al mes  
☐ 1 a 3 veces mes  
☐ 1 vez semana  
☒ 2 a 4 veces semana  
☐ 5 a 6 veces semana  
☐ 1 vez al día  
☐ 2 a 3 veces al día  
☐ 5 a 6 veces al día  
☐ más 6 veces al día

---

Judías verdes

- ☐ Nunca o menos 1 vez al mes  
☐ 1 a 3 veces mes  
☐ 1 vez semana  
☒ 2 a 4 veces semana  
☐ 5 a 6 veces semana  
☐ 1 vez al día  
☐ 2 a 3 veces al día  
☐ 5 a 6 veces al día  
☐ más 6 veces al día

---

Berenjena o calabacin o pepino

- ☐ Nunca o menos 1 vez al mes  
☐ 1 a 3 veces mes  
☒ 1 vez semana  
☐ 2 a 4 veces semana  
☐ 5 a 6 veces semana  
☐ 1 vez al día  
☐ 2 a 3 veces al día  
☐ 5 a 6 veces al día  
☐ más 6 veces al día

|                       |                                                                                                                                                                                                                                                                                                                                                                                                              |
|-----------------------|--------------------------------------------------------------------------------------------------------------------------------------------------------------------------------------------------------------------------------------------------------------------------------------------------------------------------------------------------------------------------------------------------------------|
| pimiento              | <input checked="" type="radio"/> Nunca o menos 1 vez al mes<br><input type="radio"/> 1 a 3 veces mes<br><input type="radio"/> 1 vez semana<br><input type="radio"/> 2 a 4 veces semana<br><input type="radio"/> 5 a 6 veces semana<br><input type="radio"/> 1 vez al día<br><input type="radio"/> 2 a 3 veces al día<br><input type="radio"/> 5 a 6 veces al día<br><input type="radio"/> más 6 veces al día |
| alcachofa             | <input type="radio"/> Nunca o menos 1 vez al mes<br><input type="radio"/> 1 a 3 veces mes<br><input checked="" type="radio"/> 1 vez semana<br><input type="radio"/> 2 a 4 veces semana<br><input type="radio"/> 5 a 6 veces semana<br><input type="radio"/> 1 vez al día<br><input type="radio"/> 2 a 3 veces al día<br><input type="radio"/> 5 a 6 veces al día<br><input type="radio"/> más 6 veces al día |
| espárragos            | <input checked="" type="radio"/> Nunca o menos 1 vez al mes<br><input type="radio"/> 1 a 3 veces mes<br><input type="radio"/> 1 vez semana<br><input type="radio"/> 2 a 4 veces semana<br><input type="radio"/> 5 a 6 veces semana<br><input type="radio"/> 1 vez al día<br><input type="radio"/> 2 a 3 veces al día<br><input type="radio"/> 5 a 6 veces al día<br><input type="radio"/> más 6 veces al día |
| maíz hervido          | <input checked="" type="radio"/> Nunca o menos 1 vez al mes<br><input type="radio"/> 1 a 3 veces mes<br><input type="radio"/> 1 vez semana<br><input type="radio"/> 2 a 4 veces semana<br><input type="radio"/> 5 a 6 veces semana<br><input type="radio"/> 1 vez al día<br><input type="radio"/> 2 a 3 veces al día<br><input type="radio"/> 5 a 6 veces al día<br><input type="radio"/> más 6 veces al día |
| legumbres             | <input type="radio"/> Nunca o menos 1 vez al mes<br><input type="radio"/> 1 a 3 veces mes<br><input type="radio"/> 1 vez semana<br><input checked="" type="radio"/> 2 a 4 veces semana<br><input type="radio"/> 5 a 6 veces semana<br><input type="radio"/> 1 vez al día<br><input type="radio"/> 2 a 3 veces al día<br><input type="radio"/> 5 a 6 veces al día<br><input type="radio"/> más 6 veces al día |
| naranjas o mandarinas | <input type="radio"/> Nunca o menos 1 vez al mes<br><input type="radio"/> 1 a 3 veces mes<br><input type="radio"/> 1 vez semana<br><input type="radio"/> 2 a 4 veces semana<br><input checked="" type="radio"/> 5 a 6 veces semana<br><input type="radio"/> 1 vez al día<br><input type="radio"/> 2 a 3 veces al día<br><input type="radio"/> 5 a 6 veces al día<br><input type="radio"/> más 6 veces al día |

---

zum natural fruta

- ☒ Nunca o menos 1 vez al mes  
☐ 1 a 3 veces mes  
☐ 1 vez semana  
☐ 2 a 4 veces semana  
☐ 5 a 6 veces semana  
☐ 1 vez al día  
☐ 2 a 3 veces al día  
☐ 5 a 6 veces al día  
☐ más 6 veces al día

---

platano

- ☐ Nunca o menos 1 vez al mes  
☐ 1 a 3 veces mes  
☐ 1 vez semana  
☒ 2 a 4 veces semana  
☐ 5 a 6 veces semana  
☐ 1 vez al día  
☐ 2 a 3 veces al día  
☐ 5 a 6 veces al día  
☐ más 6 veces al día

---

manzana o pera

- ☐ Nunca o menos 1 vez al mes  
☐ 1 a 3 veces mes  
☐ 1 vez semana  
☐ 2 a 4 veces semana  
☐ 5 a 6 veces semana  
☒ 1 vez al día  
☐ 2 a 3 veces al día  
☐ 5 a 6 veces al día  
☐ más 6 veces al día

---

melocotón o nectarina

- ☒ Nunca o menos 1 vez al mes  
☐ 1 a 3 veces mes  
☐ 1 vez semana  
☐ 2 a 4 veces semana  
☐ 5 a 6 veces semana  
☐ 1 vez al día  
☐ 2 a 3 veces al día  
☐ 5 a 6 veces al día  
☐ más 6 veces al día

---

sandia o melon

- ☒ Nunca o menos 1 vez al mes  
☐ 1 a 3 veces mes  
☐ 1 vez semana  
☐ 2 a 4 veces semana  
☐ 5 a 6 veces semana  
☐ 1 vez al día  
☐ 2 a 3 veces al día  
☐ 5 a 6 veces al día  
☐ más 6 veces al día

---

uva

- ☒ Nunca o menos 1 vez al mes  
☐ 1 a 3 veces mes  
☐ 1 vez semana  
☐ 2 a 4 veces semana  
☐ 5 a 6 veces semana  
☐ 1 vez al día  
☐ 2 a 3 veces al día  
☐ 5 a 6 veces al día  
☐ más 6 veces al día

---

bruna o ciruela

- ☒ Nunca o menos 1 vez al mes  
☐ 1 a 3 veces mes  
☐ 1 vez semana  
☐ 2 a 4 veces semana  
☐ 5 a 6 veces semana  
☐ 1 vez al día  
☐ 2 a 3 veces al día  
☐ 5 a 6 veces al día  
☐ más 6 veces al día

---

kiwi

- ☒ Nunca o menos 1 vez al mes  
☐ 1 a 3 veces mes  
☐ 1 vez semana  
☐ 2 a 4 veces semana  
☐ 5 a 6 veces semana  
☐ 1 vez al día  
☐ 2 a 3 veces al día  
☐ 5 a 6 veces al día  
☐ más 6 veces al día

---

aceituna

- ☐ Nunca o menos 1 vez al mes  
☒ 1 a 3 veces mes  
☐ 1 vez semana  
☐ 2 a 4 veces semana  
☐ 5 a 6 veces semana  
☐ 1 vez al día  
☐ 2 a 3 veces al día  
☐ 5 a 6 veces al día  
☐ más 6 veces al día

---

frutos secos

- ☐ Nunca o menos 1 vez al mes  
☒ 1 a 3 veces mes  
☐ 1 vez semana  
☐ 2 a 4 veces semana  
☐ 5 a 6 veces semana  
☐ 1 vez al día  
☐ 2 a 3 veces al día  
☐ 5 a 6 veces al día  
☐ más 6 veces al día

---

pan blanco

- ☐ Nunca o menos 1 vez al mes  
☐ 1 a 3 veces mes  
☐ 1 vez semana  
☐ 2 a 4 veces semana  
☐ 5 a 6 veces semana  
☐ 1 vez al día  
☒ 2 a 3 veces al día  
☐ 5 a 6 veces al día  
☐ más 6 veces al día

---

pan integral

- ☐ Nunca o menos 1 vez al mes  
☐ 1 a 3 veces mes  
☐ 1 vez semana  
☒ 2 a 4 veces semana  
☐ 5 a 6 veces semana  
☐ 1 vez al día  
☐ 2 a 3 veces al día  
☐ 5 a 6 veces al día  
☐ más 6 veces al día

---

cereales desayuno

- ☐ Nunca o menos 1 vez al mes  
☒ 1 a 3 veces mes  
☐ 1 vez semana  
☐ 2 a 4 veces semana  
☐ 5 a 6 veces semana  
☐ 1 vez al día  
☐ 2 a 3 veces al día  
☐ 5 a 6 veces al día  
☐ más 6 veces al día

---

patatas fritas

- ☐ Nunca o menos 1 vez al mes  
☐ 1 a 3 veces mes  
☒ 1 vez semana  
☐ 2 a 4 veces semana  
☐ 5 a 6 veces semana  
☐ 1 vez al día  
☐ 2 a 3 veces al día  
☐ 5 a 6 veces al día  
☐ más 6 veces al día

---

patatas cocidas o asadas

- ☐ Nunca o menos 1 vez al mes  
☐ 1 a 3 veces mes  
☐ 1 vez semana  
☒ 2 a 4 veces semana  
☐ 5 a 6 veces semana  
☐ 1 vez al día  
☐ 2 a 3 veces al día  
☐ 5 a 6 veces al día  
☐ más 6 veces al día

---

bolsa papas

- ☐ Nunca o menos 1 vez al mes  
☐ 1 a 3 veces mes  
☐ 1 vez semana  
☒ 2 a 4 veces semana  
☐ 5 a 6 veces semana  
☐ 1 vez al día  
☐ 2 a 3 veces al día  
☐ 5 a 6 veces al día  
☐ más 6 veces al día

---

arroz cocinado

- ☐ Nunca o menos 1 vez al mes  
☐ 1 a 3 veces mes  
☒ 1 vez semana  
☐ 2 a 4 veces semana  
☐ 5 a 6 veces semana  
☐ 1 vez al día  
☐ 2 a 3 veces al día  
☐ 5 a 6 veces al día  
☐ más 6 veces al día

---

pasta

- ☐ Nunca o menos 1 vez al mes  
☐ 1 a 3 veces mes  
☒ 1 vez semana  
☐ 2 a 4 veces semana  
☐ 5 a 6 veces semana  
☐ 1 vez al día  
☐ 2 a 3 veces al día  
☐ 5 a 6 veces al día  
☐ más 6 veces al día

|                     |                                                                                                                                                                                                                                                                                                                                                                                                              |
|---------------------|--------------------------------------------------------------------------------------------------------------------------------------------------------------------------------------------------------------------------------------------------------------------------------------------------------------------------------------------------------------------------------------------------------------|
| pizza               | <input type="radio"/> Nunca o menos 1 vez al mes<br><input type="radio"/> 1 a 3 veces mes<br><input checked="" type="radio"/> 1 vez semana<br><input type="radio"/> 2 a 4 veces semana<br><input type="radio"/> 5 a 6 veces semana<br><input type="radio"/> 1 vez al día<br><input type="radio"/> 2 a 3 veces al día<br><input type="radio"/> 5 a 6 veces al día<br><input type="radio"/> más 6 veces al día |
| aceite oliva        | <input type="radio"/> Nunca o menos 1 vez al mes<br><input type="radio"/> 1 a 3 veces mes<br><input type="radio"/> 1 vez semana<br><input type="radio"/> 2 a 4 veces semana<br><input checked="" type="radio"/> 5 a 6 veces semana<br><input type="radio"/> 1 vez al día<br><input type="radio"/> 2 a 3 veces al día<br><input type="radio"/> 5 a 6 veces al día<br><input type="radio"/> más 6 veces al día |
| otros aceites       | <input type="radio"/> Nunca o menos 1 vez al mes<br><input checked="" type="radio"/> 1 a 3 veces mes<br><input type="radio"/> 1 vez semana<br><input type="radio"/> 2 a 4 veces semana<br><input type="radio"/> 5 a 6 veces semana<br><input type="radio"/> 1 vez al día<br><input type="radio"/> 2 a 3 veces al día<br><input type="radio"/> 5 a 6 veces al día<br><input type="radio"/> más 6 veces al día |
| margarina           | <input checked="" type="radio"/> Nunca o menos 1 vez al mes<br><input type="radio"/> 1 a 3 veces mes<br><input type="radio"/> 1 vez semana<br><input type="radio"/> 2 a 4 veces semana<br><input type="radio"/> 5 a 6 veces semana<br><input type="radio"/> 1 vez al día<br><input type="radio"/> 2 a 3 veces al día<br><input type="radio"/> 5 a 6 veces al día<br><input type="radio"/> más 6 veces al día |
| mantequilla         | <input checked="" type="radio"/> Nunca o menos 1 vez al mes<br><input type="radio"/> 1 a 3 veces mes<br><input type="radio"/> 1 vez semana<br><input type="radio"/> 2 a 4 veces semana<br><input type="radio"/> 5 a 6 veces semana<br><input type="radio"/> 1 vez al día<br><input type="radio"/> 2 a 3 veces al día<br><input type="radio"/> 5 a 6 veces al día<br><input type="radio"/> más 6 veces al día |
| galletas tipo maria | <input type="radio"/> Nunca o menos 1 vez al mes<br><input type="radio"/> 1 a 3 veces mes<br><input type="radio"/> 1 vez semana<br><input type="radio"/> 2 a 4 veces semana<br><input type="radio"/> 5 a 6 veces semana<br><input type="radio"/> 1 vez al día<br><input type="radio"/> 2 a 3 veces al día<br><input checked="" type="radio"/> 5 a 6 veces al día<br><input type="radio"/> más 6 veces al día |



|                           |                                                                                                                                                                                                                                                                                                                                                                                                              |
|---------------------------|--------------------------------------------------------------------------------------------------------------------------------------------------------------------------------------------------------------------------------------------------------------------------------------------------------------------------------------------------------------------------------------------------------------|
| galletas chocolate        | <input type="radio"/> Nunca o menos 1 vez al mes<br><input checked="" type="radio"/> 1 a 3 veces mes<br><input type="radio"/> 1 vez semana<br><input type="radio"/> 2 a 4 veces semana<br><input type="radio"/> 5 a 6 veces semana<br><input type="radio"/> 1 vez al día<br><input type="radio"/> 2 a 3 veces al día<br><input type="radio"/> 5 a 6 veces al día<br><input type="radio"/> más 6 veces al día |
| bollieria                 | <input type="radio"/> Nunca o menos 1 vez al mes<br><input checked="" type="radio"/> 1 a 3 veces mes<br><input type="radio"/> 1 vez semana<br><input type="radio"/> 2 a 4 veces semana<br><input type="radio"/> 5 a 6 veces semana<br><input type="radio"/> 1 vez al día<br><input type="radio"/> 2 a 3 veces al día<br><input type="radio"/> 5 a 6 veces al día<br><input type="radio"/> más 6 veces al día |
| chocolate o bombones      | <input type="radio"/> Nunca o menos 1 vez al mes<br><input checked="" type="radio"/> 1 a 3 veces mes<br><input type="radio"/> 1 vez semana<br><input type="radio"/> 2 a 4 veces semana<br><input type="radio"/> 5 a 6 veces semana<br><input type="radio"/> 1 vez al día<br><input type="radio"/> 2 a 3 veces al día<br><input type="radio"/> 5 a 6 veces al día<br><input type="radio"/> más 6 veces al día |
| chocolate polvo o colacao | <input type="radio"/> Nunca o menos 1 vez al mes<br><input type="radio"/> 1 a 3 veces mes<br><input checked="" type="radio"/> 1 vez semana<br><input type="radio"/> 2 a 4 veces semana<br><input type="radio"/> 5 a 6 veces semana<br><input type="radio"/> 1 vez al día<br><input type="radio"/> 2 a 3 veces al día<br><input type="radio"/> 5 a 6 veces al día<br><input type="radio"/> más 6 veces al día |
| vino tinto                | <input checked="" type="radio"/> Nunca o menos 1 vez al mes<br><input type="radio"/> 1 a 3 veces mes<br><input type="radio"/> 1 vez semana<br><input type="radio"/> 2 a 4 veces semana<br><input type="radio"/> 5 a 6 veces semana<br><input type="radio"/> 1 vez al día<br><input type="radio"/> 2 a 3 veces al día<br><input type="radio"/> 5 a 6 veces al día<br><input type="radio"/> más 6 veces al día |
| vino blanco               | <input checked="" type="radio"/> Nunca o menos 1 vez al mes<br><input type="radio"/> 1 a 3 veces mes<br><input type="radio"/> 1 vez semana<br><input type="radio"/> 2 a 4 veces semana<br><input type="radio"/> 5 a 6 veces semana<br><input type="radio"/> 1 vez al día<br><input type="radio"/> 2 a 3 veces al día<br><input type="radio"/> 5 a 6 veces al día<br><input type="radio"/> más 6 veces al día |

|                       |                                                                                                                                                                                                                                                                                                                                                                                                              |
|-----------------------|--------------------------------------------------------------------------------------------------------------------------------------------------------------------------------------------------------------------------------------------------------------------------------------------------------------------------------------------------------------------------------------------------------------|
| vino seco o vermut    | <input checked="" type="radio"/> Nunca o menos 1 vez al mes<br><input type="radio"/> 1 a 3 veces mes<br><input type="radio"/> 1 vez semana<br><input type="radio"/> 2 a 4 veces semana<br><input type="radio"/> 5 a 6 veces semana<br><input type="radio"/> 1 vez al día<br><input type="radio"/> 2 a 3 veces al día<br><input type="radio"/> 5 a 6 veces al día<br><input type="radio"/> más 6 veces al día |
| cerveza               | <input checked="" type="radio"/> Nunca o menos 1 vez al mes<br><input type="radio"/> 1 a 3 veces mes<br><input type="radio"/> 1 vez semana<br><input type="radio"/> 2 a 4 veces semana<br><input type="radio"/> 5 a 6 veces semana<br><input type="radio"/> 1 vez al día<br><input type="radio"/> 2 a 3 veces al día<br><input type="radio"/> 5 a 6 veces al día<br><input type="radio"/> más 6 veces al día |
| cerveza sin alcohol   | <input checked="" type="radio"/> Nunca o menos 1 vez al mes<br><input type="radio"/> 1 a 3 veces mes<br><input type="radio"/> 1 vez semana<br><input type="radio"/> 2 a 4 veces semana<br><input type="radio"/> 5 a 6 veces semana<br><input type="radio"/> 1 vez al día<br><input type="radio"/> 2 a 3 veces al día<br><input type="radio"/> 5 a 6 veces al día<br><input type="radio"/> más 6 veces al día |
| licores               | <input checked="" type="radio"/> Nunca o menos 1 vez al mes<br><input type="radio"/> 1 a 3 veces mes<br><input type="radio"/> 1 vez semana<br><input type="radio"/> 2 a 4 veces semana<br><input type="radio"/> 5 a 6 veces semana<br><input type="radio"/> 1 vez al día<br><input type="radio"/> 2 a 3 veces al día<br><input type="radio"/> 5 a 6 veces al día<br><input type="radio"/> más 6 veces al día |
| ginebra o ron o vodka | <input checked="" type="radio"/> Nunca o menos 1 vez al mes<br><input type="radio"/> 1 a 3 veces mes<br><input type="radio"/> 1 vez semana<br><input type="radio"/> 2 a 4 veces semana<br><input type="radio"/> 5 a 6 veces semana<br><input type="radio"/> 1 vez al día<br><input type="radio"/> 2 a 3 veces al día<br><input type="radio"/> 5 a 6 veces al día<br><input type="radio"/> más 6 veces al día |
| refresco normal       | <input checked="" type="radio"/> Nunca o menos 1 vez al mes<br><input type="radio"/> 1 a 3 veces mes<br><input type="radio"/> 1 vez semana<br><input type="radio"/> 2 a 4 veces semana<br><input type="radio"/> 5 a 6 veces semana<br><input type="radio"/> 1 vez al día<br><input type="radio"/> 2 a 3 veces al día<br><input type="radio"/> 5 a 6 veces al día<br><input type="radio"/> más 6 veces al día |

---

refresco sin azúcar

- ☒ Nunca o menos 1 vez al mes  
☐ 1 a 3 veces mes  
☐ 1 vez semana  
☐ 2 a 4 veces semana  
☐ 5 a 6 veces semana  
☐ 1 vez al día  
☐ 2 a 3 veces al día  
☐ 5 a 6 veces al día  
☐ más 6 veces al día

---

Agua del grifo

- ☐ Nunca o menos 1 vez al mes  
☐ 1 a 3 veces mes  
☐ 1 vez semana  
☐ 2 a 4 veces semana  
☐ 5 a 6 veces semana  
☐ 1 vez al día  
☐ 2 a 3 veces al día  
☒ 5 a 6 veces al día  
☐ más 6 veces al día

---

agua embotellada sin gas

- ☐ Nunca o menos 1 vez al mes  
☒ 1 a 3 veces mes  
☐ 1 vez semana  
☐ 2 a 4 veces semana  
☐ 5 a 6 veces semana  
☐ 1 vez al día  
☐ 2 a 3 veces al día  
☐ 5 a 6 veces al día  
☐ más 6 veces al día

---

agua embotellada con gas

- ☒ Nunca o menos 1 vez al mes  
☐ 1 a 3 veces mes  
☐ 1 vez semana  
☐ 2 a 4 veces semana  
☐ 5 a 6 veces semana  
☐ 1 vez al día  
☐ 2 a 3 veces al día  
☐ 5 a 6 veces al día  
☐ más 6 veces al día

---

zumو frutas embasado

- ☒ Nunca o menos 1 vez al mes  
☐ 1 a 3 veces mes  
☐ 1 vez semana  
☐ 2 a 4 veces semana  
☐ 5 a 6 veces semana  
☐ 1 vez al día  
☐ 2 a 3 veces al día  
☐ 5 a 6 veces al día  
☐ más 6 veces al día

---

cafe

- ☐ Nunca o menos 1 vez al mes  
☐ 1 a 3 veces mes  
☐ 1 vez semana  
☐ 2 a 4 veces semana  
☐ 5 a 6 veces semana  
☒ 1 vez al día  
☐ 2 a 3 veces al día  
☐ 5 a 6 veces al día  
☐ más 6 veces al día

|                       |                                                                                                                                                                                                                                                                                                                                                                                                              |
|-----------------------|--------------------------------------------------------------------------------------------------------------------------------------------------------------------------------------------------------------------------------------------------------------------------------------------------------------------------------------------------------------------------------------------------------------|
| cafe descafeinado     | <input checked="" type="radio"/> Nunca o menos 1 vez al mes<br><input type="radio"/> 1 a 3 veces mes<br><input type="radio"/> 1 vez semana<br><input type="radio"/> 2 a 4 veces semana<br><input type="radio"/> 5 a 6 veces semana<br><input type="radio"/> 1 vez al día<br><input type="radio"/> 2 a 3 veces al día<br><input type="radio"/> 5 a 6 veces al día<br><input type="radio"/> más 6 veces al día |
| te o infusión         | <input checked="" type="radio"/> Nunca o menos 1 vez al mes<br><input type="radio"/> 1 a 3 veces mes<br><input type="radio"/> 1 vez semana<br><input type="radio"/> 2 a 4 veces semana<br><input type="radio"/> 5 a 6 veces semana<br><input type="radio"/> 1 vez al día<br><input type="radio"/> 2 a 3 veces al día<br><input type="radio"/> 5 a 6 veces al día<br><input type="radio"/> más 6 veces al día |
| sopa o puré verduras  | <input type="radio"/> Nunca o menos 1 vez al mes<br><input type="radio"/> 1 a 3 veces mes<br><input type="radio"/> 1 vez semana<br><input checked="" type="radio"/> 2 a 4 veces semana<br><input type="radio"/> 5 a 6 veces semana<br><input type="radio"/> 1 vez al día<br><input type="radio"/> 2 a 3 veces al día<br><input type="radio"/> 5 a 6 veces al día<br><input type="radio"/> más 6 veces al día |
| croquetas pollo jamón | <input type="radio"/> Nunca o menos 1 vez al mes<br><input checked="" type="radio"/> 1 a 3 veces mes<br><input type="radio"/> 1 vez semana<br><input type="radio"/> 2 a 4 veces semana<br><input type="radio"/> 5 a 6 veces semana<br><input type="radio"/> 1 vez al día<br><input type="radio"/> 2 a 3 veces al día<br><input type="radio"/> 5 a 6 veces al día<br><input type="radio"/> más 6 veces al día |
| croquetas pescado     | <input type="radio"/> Nunca o menos 1 vez al mes<br><input checked="" type="radio"/> 1 a 3 veces mes<br><input type="radio"/> 1 vez semana<br><input type="radio"/> 2 a 4 veces semana<br><input type="radio"/> 5 a 6 veces semana<br><input type="radio"/> 1 vez al día<br><input type="radio"/> 2 a 3 veces al día<br><input type="radio"/> 5 a 6 veces al día<br><input type="radio"/> más 6 veces al día |
| mayonesa              | <input checked="" type="radio"/> Nunca o menos 1 vez al mes<br><input type="radio"/> 1 a 3 veces mes<br><input type="radio"/> 1 vez semana<br><input type="radio"/> 2 a 4 veces semana<br><input type="radio"/> 5 a 6 veces semana<br><input type="radio"/> 1 vez al día<br><input type="radio"/> 2 a 3 veces al día<br><input type="radio"/> 5 a 6 veces al día<br><input type="radio"/> más 6 veces al día |

salsa tomate

- ☐ Nunca o menos 1 vez al mes  
☐ 1 a 3 veces mes  
☒ 1 vez semana  
☐ 2 a 4 veces semana  
☐ 5 a 6 veces semana  
☐ 1 vez al día  
☐ 2 a 3 veces al día  
☐ 5 a 6 veces al día  
☐ más 6 veces al día

ketchup

- ☐ Nunca o menos 1 vez al mes  
☒ 1 a 3 veces mes  
☐ 1 vez semana  
☐ 2 a 4 veces semana  
☐ 5 a 6 veces semana  
☐ 1 vez al día  
☐ 2 a 3 veces al día  
☐ 5 a 6 veces al día  
☐ más 6 veces al día

sal

- ☒ Nunca o menos 1 vez al mes  
☐ 1 a 3 veces mes  
☐ 1 vez semana  
☐ 2 a 4 veces semana  
☐ 5 a 6 veces semana  
☐ 1 vez al día  
☐ 2 a 3 veces al día  
☐ 5 a 6 veces al día  
☐ más 6 veces al día

ajo

- ☒ Nunca o menos 1 vez al mes  
☐ 1 a 3 veces mes  
☐ 1 vez semana  
☐ 2 a 4 veces semana  
☐ 5 a 6 veces semana  
☐ 1 vez al día  
☐ 2 a 3 veces al día  
☐ 5 a 6 veces al día  
☐ más 6 veces al día

mermelada o miel

- ☒ Nunca o menos 1 vez al mes  
☐ 1 a 3 veces mes  
☐ 1 vez semana  
☐ 2 a 4 veces semana  
☐ 5 a 6 veces semana  
☐ 1 vez al día  
☐ 2 a 3 veces al día  
☐ 5 a 6 veces al día  
☐ más 6 veces al día

azúcar

- ☐ Nunca o menos 1 vez al mes  
☐ 1 a 3 veces mes  
☐ 1 vez semana  
☐ 2 a 4 veces semana  
☐ 5 a 6 veces semana  
☒ 1 vez al día  
☐ 2 a 3 veces al día  
☐ 5 a 6 veces al día  
☐ más 6 veces al día

|                                       |                                                                                                                                                                                                                                                                                                                                                                                                                                                                                                                               |
|---------------------------------------|-------------------------------------------------------------------------------------------------------------------------------------------------------------------------------------------------------------------------------------------------------------------------------------------------------------------------------------------------------------------------------------------------------------------------------------------------------------------------------------------------------------------------------|
| Otro alimento                         |                                                                                                                                                                                                                                                                                                                                                                                                                                                                                                                               |
| suplementos vitamínicos               | <input checked="" type="radio"/> si<br><input type="radio"/> no                                                                                                                                                                                                                                                                                                                                                                                                                                                               |
| suplementos vitamínicos               | [*DATA REMOVED*]                                                                                                                                                                                                                                                                                                                                                                                                                                                                                                              |
| dieta previa                          | <input type="radio"/> si<br><input checked="" type="radio"/> no                                                                                                                                                                                                                                                                                                                                                                                                                                                               |
| motivo dieta                          | <input checked="" type="radio"/> no dieta<br><input type="radio"/> control peso<br><input type="radio"/> control colesterol<br><input type="radio"/> control diabetes<br><input type="radio"/> problemas estómago<br><input type="radio"/> problemas vesícula o hepáticos<br><input type="radio"/> HTA o cardiopatía<br><input type="radio"/> problemas renales<br><input type="radio"/> alergia alimentaria<br><input type="radio"/> ácido úrico elevado<br><input type="radio"/> vegetariana<br><input type="radio"/> otros |
| cambio alimentos año previo gestación | <input checked="" type="radio"/> si<br><input type="radio"/> no                                                                                                                                                                                                                                                                                                                                                                                                                                                               |
| cambio lácteos                        | <input type="radio"/> eliminado<br><input type="radio"/> disminuido<br><input checked="" type="radio"/> igual<br><input type="radio"/> aumentado<br><input type="radio"/> no sabe                                                                                                                                                                                                                                                                                                                                             |
| cambio huevos                         | <input type="radio"/> eliminado<br><input type="radio"/> disminuido<br><input checked="" type="radio"/> igual<br><input type="radio"/> aumentado<br><input type="radio"/> no sabe                                                                                                                                                                                                                                                                                                                                             |
| cambio carne                          | <input type="radio"/> eliminado<br><input type="radio"/> disminuido<br><input checked="" type="radio"/> igual<br><input type="radio"/> aumentado<br><input type="radio"/> no sabe                                                                                                                                                                                                                                                                                                                                             |
| cambio pescado                        | <input type="radio"/> eliminado<br><input type="radio"/> disminuido<br><input checked="" type="radio"/> igual<br><input type="radio"/> aumentado<br><input type="radio"/> no sabe                                                                                                                                                                                                                                                                                                                                             |
| cambio verduras                       | <input type="radio"/> eliminado<br><input type="radio"/> disminuido<br><input type="radio"/> igual<br><input checked="" type="radio"/> aumentado<br><input type="radio"/> no sabe                                                                                                                                                                                                                                                                                                                                             |

|                            |                                                                                                                                                                                                                        |
|----------------------------|------------------------------------------------------------------------------------------------------------------------------------------------------------------------------------------------------------------------|
| cambio legumbres           | <input type="radio"/> eliminado<br><input type="radio"/> disminuido<br><input type="radio"/> igual<br><input checked="" type="radio"/> aumentado<br><input type="radio"/> no sabe                                      |
| cambio fruta               | <input type="radio"/> eliminado<br><input type="radio"/> disminuido<br><input type="radio"/> igual<br><input checked="" type="radio"/> aumentado<br><input type="radio"/> no sabe                                      |
| cambio pan                 | <input type="radio"/> eliminado<br><input type="radio"/> disminuido<br><input checked="" type="radio"/> igual<br><input type="radio"/> aumentado<br><input type="radio"/> no sabe                                      |
| cambio aceite oliva        | <input type="radio"/> eliminado<br><input type="radio"/> disminuido<br><input checked="" type="radio"/> igual<br><input type="radio"/> aumentado<br><input type="radio"/> no sabe                                      |
| cambio mante o margarina   | <input type="radio"/> eliminado<br><input type="radio"/> disminuido<br><input checked="" type="radio"/> igual<br><input type="radio"/> aumentado<br><input type="radio"/> no sabe                                      |
| cambio azúcar y dulces     | <input type="radio"/> eliminado<br><input type="radio"/> disminuido<br><input checked="" type="radio"/> igual<br><input type="radio"/> aumentado<br><input type="radio"/> no sabe                                      |
| cambio bebidas alcohólicas | <input checked="" type="radio"/> eliminado<br><input type="radio"/> disminuido<br><input type="radio"/> igual<br><input type="radio"/> aumentado<br><input type="radio"/> no sabe                                      |
| frecuencia comidas fritas  | <input type="radio"/> a diario<br><input type="radio"/> 5 a 6 veces semana<br><input type="radio"/> 2 a 4 veces semana<br><input type="radio"/> 1 vez semana<br><input checked="" type="radio"/> menos de 1 vez semana |
| carne                      | <input type="radio"/> no como<br><input type="radio"/> cruda<br><input type="radio"/> poco hecha<br><input checked="" type="radio"/> hecha<br><input type="radio"/> muy hecha                                          |
| grasa visible carne        | <input type="radio"/> quita toda<br><input checked="" type="radio"/> quita mayoría<br><input type="radio"/> quita un poco<br><input type="radio"/> no quita nada                                                       |

|                                |                                                                                                                                                                                                                                                          |
|--------------------------------|----------------------------------------------------------------------------------------------------------------------------------------------------------------------------------------------------------------------------------------------------------|
| cocina carne                   | <input checked="" type="radio"/> a la plancha<br><input type="radio"/> a la parrilla<br><input type="radio"/> asada<br><input type="radio"/> frita<br><input type="radio"/> guisada                                                                      |
| tostado quemado carne          | <input type="radio"/> nunca<br><input checked="" type="radio"/> 1 vez mes<br><input type="radio"/> 2 a 3 veces mes<br><input type="radio"/> 1 vez semana<br><input type="radio"/> 2 a 3 semanas                                                          |
| tostado quemado pescado        | <input type="radio"/> nunca<br><input checked="" type="radio"/> 1 vez mes<br><input type="radio"/> 2 a 3 veces mes<br><input type="radio"/> 1 vez semana<br><input type="radio"/> 2 a 3 semanas                                                          |
| socarrat paella                | <input type="radio"/> nunca<br><input type="radio"/> 1 vez mes<br><input checked="" type="radio"/> 2 a 3 veces mes<br><input type="radio"/> 1 vez semana<br><input type="radio"/> 2 a 3 semanas                                                          |
| grasa o aceite cocinar         | <input type="radio"/> mantequilla<br><input type="radio"/> margarina<br><input type="radio"/> aceite oliva<br><input checked="" type="radio"/> aceite oliva virgen extra<br><input type="radio"/> aceite vegetal<br><input type="radio"/> mezcla aceites |
| grasa aceite aliñar            | <input type="radio"/> mantequilla<br><input type="radio"/> margarina<br><input type="radio"/> aceite oliva<br><input checked="" type="radio"/> aceite oliva virgen extra<br><input type="radio"/> aceite vegetal<br><input type="radio"/> mezcla aceites |
| grasa aceite freir             | <input type="radio"/> mantequilla<br><input type="radio"/> margarina<br><input type="radio"/> aceite oliva<br><input type="radio"/> aceite oliva virgen extra<br><input checked="" type="radio"/> aceite vegetal<br><input type="radio"/> mezcla aceites |
| Ejercicio cuestionario         | <input checked="" type="radio"/> si<br><input type="radio"/> no                                                                                                                                                                                          |
| horas de sueño incluido siesta | [*DATA REMOVED*]                                                                                                                                                                                                                                         |
| minutos siesta                 | [*DATA REMOVED*]                                                                                                                                                                                                                                         |
| horas televisión semana        | [*DATA REMOVED*]                                                                                                                                                                                                                                         |



|                                        |                                                                                                                                                                                                                                                                                                                                                                           |
|----------------------------------------|---------------------------------------------------------------------------------------------------------------------------------------------------------------------------------------------------------------------------------------------------------------------------------------------------------------------------------------------------------------------------|
| actividad trabajo                      | <input type="radio"/> casi siempre sentado<br><input type="radio"/> sentado 50 por cien<br><input type="radio"/> casi siempre de pie, quieto<br><input type="radio"/> casi siempre levantado caminando y llevando pocas cosas<br><input checked="" type="radio"/> casi siempre levantado, caminando y llevado muchas cosas<br><input type="radio"/> trabajo manual pesado |
| tiempo caminar o bici al día           | <input type="radio"/> casi nunca<br><input type="radio"/> menos 20min día<br><input checked="" type="radio"/> 20 a 40 min día<br><input type="radio"/> 40 a 60 min día<br><input type="radio"/> 1h o 1h y media día<br><input type="radio"/> más de 1h y media al día                                                                                                     |
| tiempo tareas casa al día              | <input type="radio"/> menos de 1h día<br><input checked="" type="radio"/> 1 a 2h día<br><input type="radio"/> 3 a 4h día<br><input type="radio"/> 5 a 6h día<br><input type="radio"/> 7 a 8h día<br><input type="radio"/> más de 8h día                                                                                                                                   |
| tiempo libre televisión ordenador leer | <input type="radio"/> menos 1h día<br><input type="radio"/> 1h día<br><input type="radio"/> 2h día<br><input checked="" type="radio"/> 3h día<br><input type="radio"/> 4h día<br><input type="radio"/> 5 a 6h día<br><input type="radio"/> mas 6h día                                                                                                                     |
| tiempo libre ejercicio o deporte       | <input checked="" type="radio"/> menos 1h semana<br><input type="radio"/> 1h semana<br><input type="radio"/> 2h semana<br><input type="radio"/> 3h semana<br><input type="radio"/> 4 a 5h semana<br><input type="radio"/> mas 5h semana                                                                                                                                   |
| como se considera                      | <input type="radio"/> sedentaria<br><input type="radio"/> poco activa<br><input checked="" type="radio"/> moderadamente activa<br><input type="radio"/> bastante activa<br><input type="radio"/> muy activa<br><input type="radio"/> no sabe                                                                                                                              |
| FUR                                    | [*DATA REMOVED*]                                                                                                                                                                                                                                                                                                                                                          |
| Semanas gestación 2T                   | _____                                                                                                                                                                                                                                                                                                                                                                     |
| Días gestación 2T                      | _____                                                                                                                                                                                                                                                                                                                                                                     |
| DBP 2T                                 | _____                                                                                                                                                                                                                                                                                                                                                                     |
| CC 2T                                  | _____                                                                                                                                                                                                                                                                                                                                                                     |

|                                                   |                                                                                                                                                                                                 |
|---------------------------------------------------|-------------------------------------------------------------------------------------------------------------------------------------------------------------------------------------------------|
| AC 2T                                             |                                                                                                                                                                                                 |
| LF 2T                                             |                                                                                                                                                                                                 |
| PFE 2T (Hadlock)                                  |                                                                                                                                                                                                 |
| Semanas gestación 3T                              | [*DATA REMOVED*]                                                                                                                                                                                |
| días 3T                                           | [*DATA REMOVED*]                                                                                                                                                                                |
| DBP 3T                                            | [*DATA REMOVED*]                                                                                                                                                                                |
| CC 3T                                             | [*DATA REMOVED*]                                                                                                                                                                                |
| AC 3T                                             | [*DATA REMOVED*]                                                                                                                                                                                |
| LF 3T                                             | [*DATA REMOVED*]                                                                                                                                                                                |
| PFE 3T (Hadlock)                                  | [*DATA REMOVED*]                                                                                                                                                                                |
| Semanas de gestación final                        | [*DATA REMOVED*]                                                                                                                                                                                |
| días gestación final                              | [*DATA REMOVED*]                                                                                                                                                                                |
| Localización placenta                             | <input type="radio"/> anterior<br><input type="radio"/> lateral derecha<br><input type="radio"/> lateral izquierda<br><input checked="" type="radio"/> posterior<br><input type="radio"/> fondo |
| Presentación longitudinal cefálica                | <input type="radio"/> no<br><input checked="" type="radio"/> si                                                                                                                                 |
| Dorso                                             | <input type="radio"/> izquierda anterior<br><input type="radio"/> izquierda posterior<br><input checked="" type="radio"/> derecha anterior<br><input type="radio"/> derecha posterior           |
| diámetro biparietal                               | [*DATA REMOVED*]                                                                                                                                                                                |
| Circunferencia craneal                            | [*DATA REMOVED*]                                                                                                                                                                                |
| Circunferencia abdominal                          | [*DATA REMOVED*]                                                                                                                                                                                |
| Longitud de femur                                 | [*DATA REMOVED*]                                                                                                                                                                                |
| tejido celular subcutáneo a nivel del muslo en mm | [*DATA REMOVED*]                                                                                                                                                                                |
| tejido celular subcutáneo en abdomen en mm        | [*DATA REMOVED*]                                                                                                                                                                                |

|                                               |                                                                                                                                               |
|-----------------------------------------------|-----------------------------------------------------------------------------------------------------------------------------------------------|
| Volumen del muslo en cm3                      | [*DATA REMOVED*]                                                                                                                              |
| Peso fetal estimado según fórmula de Hadlock  | [*DATA REMOVED*]                                                                                                                              |
| Percentil                                     | [*DATA REMOVED*]                                                                                                                              |
| Peso fetal estimado según fórmula de Scioscia | _____                                                                                                                                         |
| Peso fetal estimado según fórmula de LEE      | _____                                                                                                                                         |
| Tipo de parto                                 | <input checked="" type="radio"/> eutocico<br><input type="radio"/> instrumentado/ventosa<br><input type="radio"/> cesarea                     |
| fecha de nacimiento                           | [*DATA REMOVED*]                                                                                                                              |
| Días entre exploración y nacimiento           | [*DATA REMOVED*]                                                                                                                              |
| Peso RN en g                                  | [*DATA REMOVED*]                                                                                                                              |
| sexo                                          | <input checked="" type="radio"/> mujer<br><input type="radio"/> hombre                                                                        |
| Apgar 1 minuto                                | [*DATA REMOVED*]                                                                                                                              |
| Apgar 5 minutos                               | [*DATA REMOVED*]                                                                                                                              |
| Apgar 10 minutos                              | _____                                                                                                                                         |
| antecedente Covid durante gestación           | <input type="radio"/> Yes<br><input checked="" type="radio"/> No                                                                              |
| Nivel de estudios                             | <input type="radio"/> ninguno<br><input type="radio"/> primarios<br><input type="radio"/> secundarios<br><input type="radio"/> universitarios |

## Base\_datos\_estimacion\_peso\_fetal

|                                       |                                                                                                                                                                                                                                                                                      |
|---------------------------------------|--------------------------------------------------------------------------------------------------------------------------------------------------------------------------------------------------------------------------------------------------------------------------------------|
| Número de identificación participante | 8                                                                                                                                                                                                                                                                                    |
| CODIGO PARTICIPANTE                   |                                                                                                                                                                                                                                                                                      |
| Edad                                  | [*DATA REMOVED*]                                                                                                                                                                                                                                                                     |
| Gestaciones                           | <input checked="" type="radio"/> 1<br><input type="radio"/> 2<br><input type="radio"/> 3<br><input type="radio"/> mas de 3                                                                                                                                                           |
| partos                                | <input checked="" type="radio"/> 0<br><input type="radio"/> 1<br><input type="radio"/> 2<br><input type="radio"/> 3<br><input type="radio"/> mas de 3                                                                                                                                |
| cesáreas                              | <input checked="" type="radio"/> 0<br><input type="radio"/> 1<br><input type="radio"/> 2<br><input type="radio"/> 3<br><input type="radio"/> mas de 3                                                                                                                                |
| Abortos                               | <input checked="" type="radio"/> 0<br><input type="radio"/> 1<br><input type="radio"/> 2<br><input type="radio"/> 3<br><input type="radio"/> mas de 3                                                                                                                                |
| Tipo de gestacion                     | <input checked="" type="radio"/> espontanea<br><input type="radio"/> IAC inseminación artificial conyuge<br><input type="radio"/> IAD inseminación artificial donante<br><input type="radio"/> FIV Fecundación in Vitro<br><input type="radio"/> Ovodon FIV con donación de ovocitos |
| peso previo a embarazo                | [*DATA REMOVED*]                                                                                                                                                                                                                                                                     |
| Ganancia ponderal embarazo            | [*DATA REMOVED*]                                                                                                                                                                                                                                                                     |
| Talla madre                           | [*DATA REMOVED*]                                                                                                                                                                                                                                                                     |
| IMC previo embarazo                   | 21.11039897452331                                                                                                                                                                                                                                                                    |
| Patología obstétrica                  | <input checked="" type="radio"/> no<br><input type="radio"/> si                                                                                                                                                                                                                      |
| Diabetes pregestacional               | <input checked="" type="radio"/> no<br><input type="radio"/> si                                                                                                                                                                                                                      |
| Diabetes gestacional                  | <input checked="" type="radio"/> no<br><input type="radio"/> si                                                                                                                                                                                                                      |

|                                            |                                                                                                                                                                                      |
|--------------------------------------------|--------------------------------------------------------------------------------------------------------------------------------------------------------------------------------------|
| Diabetes gestacional con insulina          | <input checked="" type="radio"/> no<br><input type="radio"/> si                                                                                                                      |
| Diabetes gestacional con dieta y ejercicio | <input checked="" type="radio"/> no<br><input type="radio"/> si                                                                                                                      |
| Percentil fetos previos                    | <input checked="" type="radio"/> Nada<br><input type="radio"/> percentil menor de 10<br><input type="radio"/> percentil entre 10 y 90<br><input type="radio"/> percentil mayor de 90 |
| Exfumadora                                 | <input checked="" type="radio"/> Nada<br><input type="radio"/> menos de 5 años<br><input type="radio"/> 5 a 10 años<br><input type="radio"/> mayor o igual a 10 años                 |
| Hábito tabáquico                           | <input checked="" type="radio"/> no<br><input type="radio"/> si                                                                                                                      |
| fumadora                                   | [*DATA REMOVED*]                                                                                                                                                                     |
| Consumo otros tóxicos                      | <input checked="" type="radio"/> no<br><input type="radio"/> si                                                                                                                      |
| Hb 1T                                      | [*DATA REMOVED*]                                                                                                                                                                     |
| Htc 1T                                     | [*DATA REMOVED*]                                                                                                                                                                     |
| Hb 2T                                      | [*DATA REMOVED*]                                                                                                                                                                     |
| HTC 2T                                     | [*DATA REMOVED*]                                                                                                                                                                     |
| Hb 3T                                      | [*DATA REMOVED*]                                                                                                                                                                     |
| HTC 3T                                     | [*DATA REMOVED*]                                                                                                                                                                     |
| Suplemento FE oral                         | <input checked="" type="radio"/> si<br><input type="radio"/> no                                                                                                                      |
| Suplemento fe iv                           | <input type="radio"/> si<br><input checked="" type="radio"/> no                                                                                                                      |
| Transfusión                                | <input checked="" type="radio"/> no<br><input type="radio"/> si                                                                                                                      |
| Solicitada Vit D                           | <input checked="" type="radio"/> no<br><input type="radio"/> si                                                                                                                      |
| Deficit vit D                              | <input checked="" type="radio"/> no<br><input type="radio"/> si                                                                                                                      |
| Suplemento vit D                           | <input type="radio"/> si<br><input checked="" type="radio"/> no                                                                                                                      |

|                       |                                                                                                                                                                                                                                                                                                                                                                                                              |
|-----------------------|--------------------------------------------------------------------------------------------------------------------------------------------------------------------------------------------------------------------------------------------------------------------------------------------------------------------------------------------------------------------------------------------------------------|
| Dieta, cuestionario   | <input checked="" type="radio"/> sí<br><input type="radio"/> no                                                                                                                                                                                                                                                                                                                                              |
| Leche entera          | <input checked="" type="radio"/> Nunca o menos 1 vez al mes<br><input type="radio"/> 1 a 3 veces mes<br><input type="radio"/> 1 vez semana<br><input type="radio"/> 2 a 4 veces semana<br><input type="radio"/> 5 a 6 veces semana<br><input type="radio"/> 1 vez al día<br><input type="radio"/> 2 a 3 veces al día<br><input type="radio"/> 5 a 6 veces al día<br><input type="radio"/> más 6 veces al día |
| Leche semidesnatada   | <input type="radio"/> Nunca o menos 1 vez al mes<br><input type="radio"/> 1 a 3 veces mes<br><input type="radio"/> 1 vez semana<br><input type="radio"/> 2 a 4 veces semana<br><input type="radio"/> 5 a 6 veces semana<br><input checked="" type="radio"/> 1 vez al día<br><input type="radio"/> 2 a 3 veces al día<br><input type="radio"/> 5 a 6 veces al día<br><input type="radio"/> mas 6 veces al día |
| Leche desnatada       | <input checked="" type="radio"/> Nunca o menos 1 vez al mes<br><input type="radio"/> 1 a 3 veces mes<br><input type="radio"/> 1 vez semana<br><input type="radio"/> 2 a 4 veces semana<br><input type="radio"/> 5 a 6 veces semana<br><input type="radio"/> 1 vez al día<br><input type="radio"/> 2 a 3 veces al día<br><input type="radio"/> 5 a 6 veces al día<br><input type="radio"/> más 6 veces al día |
| Leche condensada      | <input checked="" type="radio"/> Nunca o menos 1 vez al mes<br><input type="radio"/> 1 a 3 veces mes<br><input type="radio"/> 1 vez semana<br><input type="radio"/> 2 a 4 veces semana<br><input type="radio"/> 5 a 6 veces semana<br><input type="radio"/> 1 vez al día<br><input type="radio"/> 2 a 3 veces al día<br><input type="radio"/> 5 a 6 veces al día<br><input type="radio"/> más 6 veces al día |
| nata o crema de leche | <input type="radio"/> Nunca o menos 1 vez al mes<br><input checked="" type="radio"/> 1 a 3 veces mes<br><input type="radio"/> 1 vez semana<br><input type="radio"/> 2 a 4 veces semana<br><input type="radio"/> 5 a 6 veces semana<br><input type="radio"/> 1 vez al día<br><input type="radio"/> 2 a 3 veces al día<br><input type="radio"/> 5 a 6 veces al día<br><input type="radio"/> más 6 veces al día |

|                                             |                                                                                                                                                                                                                                                                                                                                                                                                              |
|---------------------------------------------|--------------------------------------------------------------------------------------------------------------------------------------------------------------------------------------------------------------------------------------------------------------------------------------------------------------------------------------------------------------------------------------------------------------|
| Yogurt Entero                               | <input type="radio"/> Nunca o menos 1 vez al mes<br><input type="radio"/> 1 a 3 veces mes<br><input type="radio"/> 1 vez semana<br><input type="radio"/> 2 a 4 veces semana<br><input type="radio"/> 5 a 6 veces semana<br><input checked="" type="radio"/> 1 vez al día<br><input type="radio"/> 2 a 3 veces al día<br><input type="radio"/> 5 a 6 veces al día<br><input type="radio"/> más 6 veces al día |
| Yogurt desnatado                            | <input checked="" type="radio"/> Nunca o menos 1 vez al mes<br><input type="radio"/> 1 a 3 veces mes<br><input type="radio"/> 1 vez semana<br><input type="radio"/> 2 a 4 veces semana<br><input type="radio"/> 5 a 6 veces semana<br><input type="radio"/> 1 vez al día<br><input type="radio"/> 2 a 3 veces al día<br><input type="radio"/> 5 a 6 veces al día<br><input type="radio"/> más 6 veces al día |
| 100g requesón o queso blando o queso fresco | <input checked="" type="radio"/> Nunca o menos 1 vez al mes<br><input type="radio"/> 1 a 3 veces mes<br><input type="radio"/> 1 vez semana<br><input type="radio"/> 2 a 4 veces semana<br><input type="radio"/> 5 a 6 veces semana<br><input type="radio"/> 1 vez al día<br><input type="radio"/> 2 a 3 veces al día<br><input type="radio"/> 5 a 6 veces al día<br><input type="radio"/> más 6 veces al día |
| queso curado o semicurado o cremoso         | <input type="radio"/> Nunca o menos 1 vez al mes<br><input checked="" type="radio"/> 1 a 3 veces mes<br><input type="radio"/> 1 vez semana<br><input type="radio"/> 2 a 4 veces semana<br><input type="radio"/> 5 a 6 veces semana<br><input type="radio"/> 1 vez al día<br><input type="radio"/> 2 a 3 veces al día<br><input type="radio"/> 5 a 6 veces al día<br><input type="radio"/> más 6 veces al día |
| natillas flan pudding                       | <input type="radio"/> Nunca o menos 1 vez al mes<br><input checked="" type="radio"/> 1 a 3 veces mes<br><input type="radio"/> 1 vez semana<br><input type="radio"/> 2 a 4 veces semana<br><input type="radio"/> 5 a 6 veces semana<br><input type="radio"/> 1 vez al día<br><input type="radio"/> 2 a 3 veces al día<br><input type="radio"/> 5 a 6 veces al día<br><input type="radio"/> más 6 veces al día |
| Helado                                      | <input checked="" type="radio"/> Nunca o menos 1 vez al mes<br><input type="radio"/> 1 a 3 veces mes<br><input type="radio"/> 1 vez semana<br><input type="radio"/> 2 a 4 veces semana<br><input type="radio"/> 5 a 6 veces semana<br><input type="radio"/> 1 vez al día<br><input type="radio"/> 2 a 3 veces al día<br><input type="radio"/> 5 a 6 veces al día<br><input type="radio"/> más 6 veces al día |

|                                      |                                                                                                                                                                                                                                                                                                                                                                                                              |
|--------------------------------------|--------------------------------------------------------------------------------------------------------------------------------------------------------------------------------------------------------------------------------------------------------------------------------------------------------------------------------------------------------------------------------------------------------------|
| huevo                                | <input type="radio"/> Nunca o menos 1 vez al mes<br><input type="radio"/> 1 a 3 veces mes<br><input type="radio"/> 1 vez semana<br><input type="radio"/> 2 a 4 veces semana<br><input type="radio"/> 5 a 6 veces semana<br><input checked="" type="radio"/> 1 vez al día<br><input type="radio"/> 2 a 3 veces al día<br><input type="radio"/> 5 a 6 veces al día<br><input type="radio"/> más 6 veces al día |
| Pollo con piel                       | <input type="radio"/> Nunca o menos 1 vez al mes<br><input type="radio"/> 1 a 3 veces mes<br><input checked="" type="radio"/> 1 vez semana<br><input type="radio"/> 2 a 4 veces semana<br><input type="radio"/> 5 a 6 veces semana<br><input type="radio"/> 1 vez al día<br><input type="radio"/> 2 a 3 veces al día<br><input type="radio"/> 5 a 6 veces al día<br><input type="radio"/> más 6 veces al día |
| pollo sin piel                       | <input type="radio"/> Nunca o menos 1 vez al mes<br><input type="radio"/> 1 a 3 veces mes<br><input checked="" type="radio"/> 1 vez semana<br><input type="radio"/> 2 a 4 veces semana<br><input type="radio"/> 5 a 6 veces semana<br><input type="radio"/> 1 vez al día<br><input type="radio"/> 2 a 3 veces al día<br><input type="radio"/> 5 a 6 veces al día<br><input type="radio"/> más 6 veces al día |
| Ternera o cerdo o cordero            | <input type="radio"/> Nunca o menos 1 vez al mes<br><input type="radio"/> 1 a 3 veces mes<br><input checked="" type="radio"/> 1 vez semana<br><input type="radio"/> 2 a 4 veces semana<br><input type="radio"/> 5 a 6 veces semana<br><input type="radio"/> 1 vez al día<br><input type="radio"/> 2 a 3 veces al día<br><input type="radio"/> 5 a 6 veces al día<br><input type="radio"/> más 6 veces al día |
| carne caza: Conejo o codorniz o pato | <input checked="" type="radio"/> Nunca o menos 1 vez al mes<br><input type="radio"/> 1 a 3 veces mes<br><input type="radio"/> 1 vez semana<br><input type="radio"/> 2 a 4 veces semana<br><input type="radio"/> 5 a 6 veces semana<br><input type="radio"/> 1 vez al día<br><input type="radio"/> 2 a 3 veces al día<br><input type="radio"/> 5 a 6 veces al día<br><input type="radio"/> más 6 veces al día |
| Hígado de ternera o cerdo o pollo    | <input checked="" type="radio"/> Nunca o menos 1 vez al mes<br><input type="radio"/> 1 a 3 veces mes<br><input type="radio"/> 1 vez semana<br><input type="radio"/> 2 a 4 veces semana<br><input type="radio"/> 5 a 6 veces semana<br><input type="radio"/> 1 vez al día<br><input type="radio"/> 2 a 3 veces al día<br><input type="radio"/> 5 a 6 veces al día<br><input type="radio"/> más 6 veces al día |



---

Vísceras

- ☒ Nunca o menos 1 vez al mes  
☐ 1 a 3 veces mes  
☐ 1 vez semana  
☐ 2 a 4 veces semana  
☐ 5 a 6 veces semana  
☐ 1 vez al día  
☐ 2 a 3 veces al día  
☐ 5 a 6 veces al día  
☐ más 6 veces al día

---

Embutido

- ☒ Nunca o menos 1 vez al mes  
☐ 1 a 3 veces mes  
☐ 1 vez semana  
☐ 2 a 4 veces semana  
☐ 5 a 6 veces semana  
☐ 1 vez al día  
☐ 2 a 3 veces al día  
☐ 5 a 6 veces al día  
☐ más 6 veces al día

---

Salchicha o similar

- ☒ Nunca o menos 1 vez al mes  
☐ 1 a 3 veces mes  
☐ 1 vez semana  
☐ 2 a 4 veces semana  
☐ 5 a 6 veces semana  
☐ 1 vez al día  
☐ 2 a 3 veces al día  
☐ 5 a 6 veces al día  
☐ más 6 veces al día

---

Pate o foiegras

- ☒ Nunca o menos 1 vez al mes  
☐ 1 a 3 veces mes  
☐ 1 vez semana  
☐ 2 a 4 veces semana  
☐ 5 a 6 veces semana  
☐ 1 vez al día  
☐ 2 a 3 veces al día  
☐ 5 a 6 veces al día  
☐ más 6 veces al día

---

Hamburguesa

- ☐ Nunca o menos 1 vez al mes  
☐ 1 a 3 veces mes  
☒ 1 vez semana  
☐ 2 a 4 veces semana  
☐ 5 a 6 veces semana  
☐ 1 vez al día  
☐ 2 a 3 veces al día  
☐ 5 a 6 veces al día  
☐ más 6 veces al día

---

tocino o bacon

- ☐ Nunca o menos 1 vez al mes  
☒ 1 a 3 veces mes  
☐ 1 vez semana  
☐ 2 a 4 veces semana  
☐ 5 a 6 veces semana  
☐ 1 vez al día  
☐ 2 a 3 veces al día  
☐ 5 a 6 veces al día  
☐ más 6 veces al día

---

|               |                                                                                                                                                                                                                                                                                                                                                                                                              |
|---------------|--------------------------------------------------------------------------------------------------------------------------------------------------------------------------------------------------------------------------------------------------------------------------------------------------------------------------------------------------------------------------------------------------------------|
| Pescado frito | <input checked="" type="radio"/> Nunca o menos 1 vez al mes<br><input type="radio"/> 1 a 3 veces mes<br><input type="radio"/> 1 vez semana<br><input type="radio"/> 2 a 4 veces semana<br><input type="radio"/> 5 a 6 veces semana<br><input type="radio"/> 1 vez al día<br><input type="radio"/> 2 a 3 veces al día<br><input type="radio"/> 5 a 6 veces al día<br><input type="radio"/> más 6 veces al día |
|---------------|--------------------------------------------------------------------------------------------------------------------------------------------------------------------------------------------------------------------------------------------------------------------------------------------------------------------------------------------------------------------------------------------------------------|

---

|                        |                                                                                                                                                                                                                                                                                                                                                                                                              |
|------------------------|--------------------------------------------------------------------------------------------------------------------------------------------------------------------------------------------------------------------------------------------------------------------------------------------------------------------------------------------------------------------------------------------------------------|
| pescado hervido blanco | <input checked="" type="radio"/> Nunca o menos 1 vez al mes<br><input type="radio"/> 1 a 3 veces mes<br><input type="radio"/> 1 vez semana<br><input type="radio"/> 2 a 4 veces semana<br><input type="radio"/> 5 a 6 veces semana<br><input type="radio"/> 1 vez al día<br><input type="radio"/> 2 a 3 veces al día<br><input type="radio"/> 5 a 6 veces al día<br><input type="radio"/> más 6 veces al día |
|------------------------|--------------------------------------------------------------------------------------------------------------------------------------------------------------------------------------------------------------------------------------------------------------------------------------------------------------------------------------------------------------------------------------------------------------|

---

|                      |                                                                                                                                                                                                                                                                                                                                                                                                              |
|----------------------|--------------------------------------------------------------------------------------------------------------------------------------------------------------------------------------------------------------------------------------------------------------------------------------------------------------------------------------------------------------------------------------------------------------|
| pescado hervido azul | <input checked="" type="radio"/> Nunca o menos 1 vez al mes<br><input type="radio"/> 1 a 3 veces mes<br><input type="radio"/> 1 vez semana<br><input type="radio"/> 2 a 4 veces semana<br><input type="radio"/> 5 a 6 veces semana<br><input type="radio"/> 1 vez al día<br><input type="radio"/> 2 a 3 veces al día<br><input type="radio"/> 5 a 6 veces al día<br><input type="radio"/> más 6 veces al día |
|----------------------|--------------------------------------------------------------------------------------------------------------------------------------------------------------------------------------------------------------------------------------------------------------------------------------------------------------------------------------------------------------------------------------------------------------|

---

|                    |                                                                                                                                                                                                                                                                                                                                                                                                              |
|--------------------|--------------------------------------------------------------------------------------------------------------------------------------------------------------------------------------------------------------------------------------------------------------------------------------------------------------------------------------------------------------------------------------------------------------|
| otros pescado azul | <input type="radio"/> Nunca o menos 1 vez al mes<br><input checked="" type="radio"/> 1 a 3 veces mes<br><input type="radio"/> 1 vez semana<br><input type="radio"/> 2 a 4 veces semana<br><input type="radio"/> 5 a 6 veces semana<br><input type="radio"/> 1 vez al día<br><input type="radio"/> 2 a 3 veces al día<br><input type="radio"/> 5 a 6 veces al día<br><input type="radio"/> más 6 veces al día |
|--------------------|--------------------------------------------------------------------------------------------------------------------------------------------------------------------------------------------------------------------------------------------------------------------------------------------------------------------------------------------------------------------------------------------------------------|

---

|               |                                                                                                                                                                                                                                                                                                                                                                                                              |
|---------------|--------------------------------------------------------------------------------------------------------------------------------------------------------------------------------------------------------------------------------------------------------------------------------------------------------------------------------------------------------------------------------------------------------------|
| atun conserva | <input type="radio"/> Nunca o menos 1 vez al mes<br><input checked="" type="radio"/> 1 a 3 veces mes<br><input type="radio"/> 1 vez semana<br><input type="radio"/> 2 a 4 veces semana<br><input type="radio"/> 5 a 6 veces semana<br><input type="radio"/> 1 vez al día<br><input type="radio"/> 2 a 3 veces al día<br><input type="radio"/> 5 a 6 veces al día<br><input type="radio"/> más 6 veces al día |
|---------------|--------------------------------------------------------------------------------------------------------------------------------------------------------------------------------------------------------------------------------------------------------------------------------------------------------------------------------------------------------------------------------------------------------------|

---

|                  |                                                                                                                                                                                                                                                                                                                                                                                                              |
|------------------|--------------------------------------------------------------------------------------------------------------------------------------------------------------------------------------------------------------------------------------------------------------------------------------------------------------------------------------------------------------------------------------------------------------|
| sardina conserva | <input checked="" type="radio"/> Nunca o menos 1 vez al mes<br><input type="radio"/> 1 a 3 veces mes<br><input type="radio"/> 1 vez semana<br><input type="radio"/> 2 a 4 veces semana<br><input type="radio"/> 5 a 6 veces semana<br><input type="radio"/> 1 vez al día<br><input type="radio"/> 2 a 3 veces al día<br><input type="radio"/> 5 a 6 veces al día<br><input type="radio"/> más 6 veces al día |
|------------------|--------------------------------------------------------------------------------------------------------------------------------------------------------------------------------------------------------------------------------------------------------------------------------------------------------------------------------------------------------------------------------------------------------------|

---

|                                         |                                                                                                                                                                                                                                                                                                                                                                                                              |
|-----------------------------------------|--------------------------------------------------------------------------------------------------------------------------------------------------------------------------------------------------------------------------------------------------------------------------------------------------------------------------------------------------------------------------------------------------------------|
| pescado ahumado                         | <input type="radio"/> Nunca o menos 1 vez al mes<br><input checked="" type="radio"/> 1 a 3 veces mes<br><input type="radio"/> 1 vez semana<br><input type="radio"/> 2 a 4 veces semana<br><input type="radio"/> 5 a 6 veces semana<br><input type="radio"/> 1 vez al día<br><input type="radio"/> 2 a 3 veces al día<br><input type="radio"/> 5 a 6 veces al día<br><input type="radio"/> más 6 veces al día |
| almejas o mejillones o ostras unos 100g | <input checked="" type="radio"/> Nunca o menos 1 vez al mes<br><input type="radio"/> 1 a 3 veces mes<br><input type="radio"/> 1 vez semana<br><input type="radio"/> 2 a 4 veces semana<br><input type="radio"/> 5 a 6 veces semana<br><input type="radio"/> 1 vez al día<br><input type="radio"/> 2 a 3 veces al día<br><input type="radio"/> 5 a 6 veces al día<br><input type="radio"/> más 6 veces al día |
| calamar o chipiron o sepia unos 100g    | <input checked="" type="radio"/> Nunca o menos 1 vez al mes<br><input type="radio"/> 1 a 3 veces mes<br><input type="radio"/> 1 vez semana<br><input type="radio"/> 2 a 4 veces semana<br><input type="radio"/> 5 a 6 veces semana<br><input type="radio"/> 1 vez al día<br><input type="radio"/> 2 a 3 veces al día<br><input type="radio"/> 5 a 6 veces al día<br><input type="radio"/> más 6 veces al día |
| marisco unos 100g                       | <input checked="" type="radio"/> Nunca o menos 1 vez al mes<br><input type="radio"/> 1 a 3 veces mes<br><input type="radio"/> 1 vez semana<br><input type="radio"/> 2 a 4 veces semana<br><input type="radio"/> 5 a 6 veces semana<br><input type="radio"/> 1 vez al día<br><input type="radio"/> 2 a 3 veces al día<br><input type="radio"/> 5 a 6 veces al día<br><input type="radio"/> más 6 veces al día |
| Espinacas o acelgas cocinadas           | <input checked="" type="radio"/> Nunca o menos 1 vez al mes<br><input type="radio"/> 1 a 3 veces mes<br><input type="radio"/> 1 vez semana<br><input type="radio"/> 2 a 4 veces semana<br><input type="radio"/> 5 a 6 veces semana<br><input type="radio"/> 1 vez al día<br><input type="radio"/> 2 a 3 veces al día<br><input type="radio"/> 5 a 6 veces al día<br><input type="radio"/> más 6 veces al día |
| Col o coliflor o brocoli cocinado       | <input checked="" type="radio"/> Nunca o menos 1 vez al mes<br><input type="radio"/> 1 a 3 veces mes<br><input type="radio"/> 1 vez semana<br><input type="radio"/> 2 a 4 veces semana<br><input type="radio"/> 5 a 6 veces semana<br><input type="radio"/> 1 vez al día<br><input type="radio"/> 2 a 3 veces al día<br><input type="radio"/> 5 a 6 veces al día<br><input type="radio"/> más 6 veces al día |

---

Lechuga o endivia o escarola

- ☐ Nunca o menos 1 vez al mes  
☐ 1 a 3 veces mes  
☒ 1 vez semana  
☐ 2 a 4 veces semana  
☐ 5 a 6 veces semana  
☐ 1 vez al día  
☐ 2 a 3 veces al día  
☐ 5 a 6 veces al día  
☐ más 6 veces al día

---

tomate ensalada

- ☐ Nunca o menos 1 vez al mes  
☐ 1 a 3 veces mes  
☐ 1 vez semana  
☒ 2 a 4 veces semana  
☐ 5 a 6 veces semana  
☐ 1 vez al día  
☐ 2 a 3 veces al día  
☐ 5 a 6 veces al día  
☐ más 6 veces al día

---

cebolla

- ☐ Nunca o menos 1 vez al mes  
☐ 1 a 3 veces mes  
☐ 1 vez semana  
☐ 2 a 4 veces semana  
☒ 5 a 6 veces semana  
☐ 1 vez al día  
☐ 2 a 3 veces al día  
☐ 5 a 6 veces al día  
☐ más 6 veces al día

---

Zanahoria o calabaza

- ☒ Nunca o menos 1 vez al mes  
☐ 1 a 3 veces mes  
☐ 1 vez semana  
☐ 2 a 4 veces semana  
☐ 5 a 6 veces semana  
☐ 1 vez al día  
☐ 2 a 3 veces al día  
☐ 5 a 6 veces al día  
☐ más 6 veces al día

---

Judías verdes

- ☒ Nunca o menos 1 vez al mes  
☐ 1 a 3 veces mes  
☐ 1 vez semana  
☐ 2 a 4 veces semana  
☐ 5 a 6 veces semana  
☐ 1 vez al día  
☐ 2 a 3 veces al día  
☐ 5 a 6 veces al día  
☐ más 6 veces al día

---

Berenjena o calabacin o pepino

- ☒ Nunca o menos 1 vez al mes  
☐ 1 a 3 veces mes  
☐ 1 vez semana  
☐ 2 a 4 veces semana  
☐ 5 a 6 veces semana  
☐ 1 vez al día  
☐ 2 a 3 veces al día  
☐ 5 a 6 veces al día  
☐ más 6 veces al día

|                       |                                                                                                                                                                                                                                                                                                                                                                                                              |
|-----------------------|--------------------------------------------------------------------------------------------------------------------------------------------------------------------------------------------------------------------------------------------------------------------------------------------------------------------------------------------------------------------------------------------------------------|
| pimiento              | <input type="radio"/> Nunca o menos 1 vez al mes<br><input checked="" type="radio"/> 1 a 3 veces mes<br><input type="radio"/> 1 vez semana<br><input type="radio"/> 2 a 4 veces semana<br><input type="radio"/> 5 a 6 veces semana<br><input type="radio"/> 1 vez al día<br><input type="radio"/> 2 a 3 veces al día<br><input type="radio"/> 5 a 6 veces al día<br><input type="radio"/> más 6 veces al día |
| alcachofa             | <input checked="" type="radio"/> Nunca o menos 1 vez al mes<br><input type="radio"/> 1 a 3 veces mes<br><input type="radio"/> 1 vez semana<br><input type="radio"/> 2 a 4 veces semana<br><input type="radio"/> 5 a 6 veces semana<br><input type="radio"/> 1 vez al día<br><input type="radio"/> 2 a 3 veces al día<br><input type="radio"/> 5 a 6 veces al día<br><input type="radio"/> más 6 veces al día |
| espárragos            | <input checked="" type="radio"/> Nunca o menos 1 vez al mes<br><input type="radio"/> 1 a 3 veces mes<br><input type="radio"/> 1 vez semana<br><input type="radio"/> 2 a 4 veces semana<br><input type="radio"/> 5 a 6 veces semana<br><input type="radio"/> 1 vez al día<br><input type="radio"/> 2 a 3 veces al día<br><input type="radio"/> 5 a 6 veces al día<br><input type="radio"/> más 6 veces al día |
| maíz hervido          | <input checked="" type="radio"/> Nunca o menos 1 vez al mes<br><input type="radio"/> 1 a 3 veces mes<br><input type="radio"/> 1 vez semana<br><input type="radio"/> 2 a 4 veces semana<br><input type="radio"/> 5 a 6 veces semana<br><input type="radio"/> 1 vez al día<br><input type="radio"/> 2 a 3 veces al día<br><input type="radio"/> 5 a 6 veces al día<br><input type="radio"/> más 6 veces al día |
| legumbres             | <input type="radio"/> Nunca o menos 1 vez al mes<br><input checked="" type="radio"/> 1 a 3 veces mes<br><input type="radio"/> 1 vez semana<br><input type="radio"/> 2 a 4 veces semana<br><input type="radio"/> 5 a 6 veces semana<br><input type="radio"/> 1 vez al día<br><input type="radio"/> 2 a 3 veces al día<br><input type="radio"/> 5 a 6 veces al día<br><input type="radio"/> más 6 veces al día |
| naranjas o mandarinas | <input type="radio"/> Nunca o menos 1 vez al mes<br><input type="radio"/> 1 a 3 veces mes<br><input type="radio"/> 1 vez semana<br><input checked="" type="radio"/> 2 a 4 veces semana<br><input type="radio"/> 5 a 6 veces semana<br><input type="radio"/> 1 vez al día<br><input type="radio"/> 2 a 3 veces al día<br><input type="radio"/> 5 a 6 veces al día<br><input type="radio"/> más 6 veces al día |

|                       |                                                                                                                                                                                                                                                                                                                                                                                                              |
|-----------------------|--------------------------------------------------------------------------------------------------------------------------------------------------------------------------------------------------------------------------------------------------------------------------------------------------------------------------------------------------------------------------------------------------------------|
| zum natural fruta     | <input type="radio"/> Nunca o menos 1 vez al mes<br><input checked="" type="radio"/> 1 a 3 veces mes<br><input type="radio"/> 1 vez semana<br><input type="radio"/> 2 a 4 veces semana<br><input type="radio"/> 5 a 6 veces semana<br><input type="radio"/> 1 vez al día<br><input type="radio"/> 2 a 3 veces al día<br><input type="radio"/> 5 a 6 veces al día<br><input type="radio"/> más 6 veces al día |
| platano               | <input type="radio"/> Nunca o menos 1 vez al mes<br><input type="radio"/> 1 a 3 veces mes<br><input type="radio"/> 1 vez semana<br><input checked="" type="radio"/> 2 a 4 veces semana<br><input type="radio"/> 5 a 6 veces semana<br><input type="radio"/> 1 vez al día<br><input type="radio"/> 2 a 3 veces al día<br><input type="radio"/> 5 a 6 veces al día<br><input type="radio"/> más 6 veces al día |
| manzana o pera        | <input type="radio"/> Nunca o menos 1 vez al mes<br><input checked="" type="radio"/> 1 a 3 veces mes<br><input type="radio"/> 1 vez semana<br><input type="radio"/> 2 a 4 veces semana<br><input type="radio"/> 5 a 6 veces semana<br><input type="radio"/> 1 vez al día<br><input type="radio"/> 2 a 3 veces al día<br><input type="radio"/> 5 a 6 veces al día<br><input type="radio"/> más 6 veces al día |
| melocotón o nectarina | <input checked="" type="radio"/> Nunca o menos 1 vez al mes<br><input type="radio"/> 1 a 3 veces mes<br><input type="radio"/> 1 vez semana<br><input type="radio"/> 2 a 4 veces semana<br><input type="radio"/> 5 a 6 veces semana<br><input type="radio"/> 1 vez al día<br><input type="radio"/> 2 a 3 veces al día<br><input type="radio"/> 5 a 6 veces al día<br><input type="radio"/> más 6 veces al día |
| sandia o melon        | <input checked="" type="radio"/> Nunca o menos 1 vez al mes<br><input type="radio"/> 1 a 3 veces mes<br><input type="radio"/> 1 vez semana<br><input type="radio"/> 2 a 4 veces semana<br><input type="radio"/> 5 a 6 veces semana<br><input type="radio"/> 1 vez al día<br><input type="radio"/> 2 a 3 veces al día<br><input type="radio"/> 5 a 6 veces al día<br><input type="radio"/> más 6 veces al día |
| uva                   | <input checked="" type="radio"/> Nunca o menos 1 vez al mes<br><input type="radio"/> 1 a 3 veces mes<br><input type="radio"/> 1 vez semana<br><input type="radio"/> 2 a 4 veces semana<br><input type="radio"/> 5 a 6 veces semana<br><input type="radio"/> 1 vez al día<br><input type="radio"/> 2 a 3 veces al día<br><input type="radio"/> 5 a 6 veces al día<br><input type="radio"/> más 6 veces al día |

---

bruna o ciruela

- ☒ Nunca o menos 1 vez al mes  
☐ 1 a 3 veces mes  
☐ 1 vez semana  
☐ 2 a 4 veces semana  
☐ 5 a 6 veces semana  
☐ 1 vez al día  
☐ 2 a 3 veces al día  
☐ 5 a 6 veces al día  
☐ más 6 veces al día

---

kiwi

- ☒ Nunca o menos 1 vez al mes  
☐ 1 a 3 veces mes  
☐ 1 vez semana  
☐ 2 a 4 veces semana  
☐ 5 a 6 veces semana  
☐ 1 vez al día  
☐ 2 a 3 veces al día  
☐ 5 a 6 veces al día  
☐ más 6 veces al día

---

aceituna

- ☐ Nunca o menos 1 vez al mes  
☐ 1 a 3 veces mes  
☒ 1 vez semana  
☐ 2 a 4 veces semana  
☐ 5 a 6 veces semana  
☐ 1 vez al día  
☐ 2 a 3 veces al día  
☐ 5 a 6 veces al día  
☐ más 6 veces al día

---

frutos secos

- ☒ Nunca o menos 1 vez al mes  
☐ 1 a 3 veces mes  
☐ 1 vez semana  
☐ 2 a 4 veces semana  
☐ 5 a 6 veces semana  
☐ 1 vez al día  
☐ 2 a 3 veces al día  
☐ 5 a 6 veces al día  
☐ más 6 veces al día

---

pan blanco

- ☐ Nunca o menos 1 vez al mes  
☐ 1 a 3 veces mes  
☐ 1 vez semana  
☐ 2 a 4 veces semana  
☐ 5 a 6 veces semana  
☐ 1 vez al día  
☐ 2 a 3 veces al día  
☐ 5 a 6 veces al día  
☐ más 6 veces al día

---

pan integral

- ☐ Nunca o menos 1 vez al mes  
☐ 1 a 3 veces mes  
☒ 1 vez semana  
☐ 2 a 4 veces semana  
☐ 5 a 6 veces semana  
☐ 1 vez al día  
☐ 2 a 3 veces al día  
☐ 5 a 6 veces al día  
☐ más 6 veces al día

---

cereales desayuno

- ☒ Nunca o menos 1 vez al mes  
☐ 1 a 3 veces mes  
☐ 1 vez semana  
☐ 2 a 4 veces semana  
☐ 5 a 6 veces semana  
☐ 1 vez al día  
☐ 2 a 3 veces al día  
☐ 5 a 6 veces al día  
☐ más 6 veces al día

---

patatas fritas

- ☒ Nunca o menos 1 vez al mes  
☐ 1 a 3 veces mes  
☐ 1 vez semana  
☐ 2 a 4 veces semana  
☐ 5 a 6 veces semana  
☐ 1 vez al día  
☐ 2 a 3 veces al día  
☐ 5 a 6 veces al día  
☐ más 6 veces al día

---

patatas cocidas o asadas

- ☐ Nunca o menos 1 vez al mes  
☒ 1 a 3 veces mes  
☐ 1 vez semana  
☐ 2 a 4 veces semana  
☐ 5 a 6 veces semana  
☐ 1 vez al día  
☐ 2 a 3 veces al día  
☐ 5 a 6 veces al día  
☐ más 6 veces al día

---

bolsa papas

- ☐ Nunca o menos 1 vez al mes  
☒ 1 a 3 veces mes  
☐ 1 vez semana  
☐ 2 a 4 veces semana  
☐ 5 a 6 veces semana  
☐ 1 vez al día  
☐ 2 a 3 veces al día  
☐ 5 a 6 veces al día  
☐ más 6 veces al día

---

arroz cocinado

- ☐ Nunca o menos 1 vez al mes  
☒ 1 a 3 veces mes  
☐ 1 vez semana  
☐ 2 a 4 veces semana  
☐ 5 a 6 veces semana  
☐ 1 vez al día  
☐ 2 a 3 veces al día  
☐ 5 a 6 veces al día  
☐ más 6 veces al día

---

pasta

- ☐ Nunca o menos 1 vez al mes  
☐ 1 a 3 veces mes  
☒ 1 vez semana  
☐ 2 a 4 veces semana  
☐ 5 a 6 veces semana  
☐ 1 vez al día  
☐ 2 a 3 veces al día  
☐ 5 a 6 veces al día  
☐ más 6 veces al día



|                     |                                                                                                                                                                                                                                                                                                                                                                                                              |
|---------------------|--------------------------------------------------------------------------------------------------------------------------------------------------------------------------------------------------------------------------------------------------------------------------------------------------------------------------------------------------------------------------------------------------------------|
| pizza               | <input type="radio"/> Nunca o menos 1 vez al mes<br><input type="radio"/> 1 a 3 veces mes<br><input type="radio"/> 1 vez semana<br><input checked="" type="radio"/> 2 a 4 veces semana<br><input type="radio"/> 5 a 6 veces semana<br><input type="radio"/> 1 vez al día<br><input type="radio"/> 2 a 3 veces al día<br><input type="radio"/> 5 a 6 veces al día<br><input type="radio"/> más 6 veces al día |
| aceite oliva        | <input type="radio"/> Nunca o menos 1 vez al mes<br><input type="radio"/> 1 a 3 veces mes<br><input type="radio"/> 1 vez semana<br><input type="radio"/> 2 a 4 veces semana<br><input type="radio"/> 5 a 6 veces semana<br><input checked="" type="radio"/> 1 vez al día<br><input type="radio"/> 2 a 3 veces al día<br><input type="radio"/> 5 a 6 veces al día<br><input type="radio"/> más 6 veces al día |
| otros aceites       | <input type="radio"/> Nunca o menos 1 vez al mes<br><input type="radio"/> 1 a 3 veces mes<br><input checked="" type="radio"/> 1 vez semana<br><input type="radio"/> 2 a 4 veces semana<br><input type="radio"/> 5 a 6 veces semana<br><input type="radio"/> 1 vez al día<br><input type="radio"/> 2 a 3 veces al día<br><input type="radio"/> 5 a 6 veces al día<br><input type="radio"/> más 6 veces al día |
| margarina           | <input type="radio"/> Nunca o menos 1 vez al mes<br><input type="radio"/> 1 a 3 veces mes<br><input checked="" type="radio"/> 1 vez semana<br><input type="radio"/> 2 a 4 veces semana<br><input type="radio"/> 5 a 6 veces semana<br><input type="radio"/> 1 vez al día<br><input type="radio"/> 2 a 3 veces al día<br><input type="radio"/> 5 a 6 veces al día<br><input type="radio"/> más 6 veces al día |
| mantequilla         | <input type="radio"/> Nunca o menos 1 vez al mes<br><input type="radio"/> 1 a 3 veces mes<br><input checked="" type="radio"/> 1 vez semana<br><input type="radio"/> 2 a 4 veces semana<br><input type="radio"/> 5 a 6 veces semana<br><input type="radio"/> 1 vez al día<br><input type="radio"/> 2 a 3 veces al día<br><input type="radio"/> 5 a 6 veces al día<br><input type="radio"/> más 6 veces al día |
| galletas tipo maria | <input type="radio"/> Nunca o menos 1 vez al mes<br><input type="radio"/> 1 a 3 veces mes<br><input type="radio"/> 1 vez semana<br><input checked="" type="radio"/> 2 a 4 veces semana<br><input type="radio"/> 5 a 6 veces semana<br><input type="radio"/> 1 vez al día<br><input type="radio"/> 2 a 3 veces al día<br><input type="radio"/> 5 a 6 veces al día<br><input type="radio"/> más 6 veces al día |

|                           |                                                                                                                                                                                                                                                                                                                                                                                                              |
|---------------------------|--------------------------------------------------------------------------------------------------------------------------------------------------------------------------------------------------------------------------------------------------------------------------------------------------------------------------------------------------------------------------------------------------------------|
| galletas chocolate        | <input checked="" type="radio"/> Nunca o menos 1 vez al mes<br><input type="radio"/> 1 a 3 veces mes<br><input type="radio"/> 1 vez semana<br><input type="radio"/> 2 a 4 veces semana<br><input type="radio"/> 5 a 6 veces semana<br><input type="radio"/> 1 vez al día<br><input type="radio"/> 2 a 3 veces al día<br><input type="radio"/> 5 a 6 veces al día<br><input type="radio"/> más 6 veces al día |
| bollieria                 | <input type="radio"/> Nunca o menos 1 vez al mes<br><input type="radio"/> 1 a 3 veces mes<br><input type="radio"/> 1 vez semana<br><input type="radio"/> 2 a 4 veces semana<br><input type="radio"/> 5 a 6 veces semana<br><input type="radio"/> 1 vez al día<br><input checked="" type="radio"/> 2 a 3 veces al día<br><input type="radio"/> 5 a 6 veces al día<br><input type="radio"/> más 6 veces al día |
| chocolate o bombones      | <input checked="" type="radio"/> Nunca o menos 1 vez al mes<br><input type="radio"/> 1 a 3 veces mes<br><input type="radio"/> 1 vez semana<br><input type="radio"/> 2 a 4 veces semana<br><input type="radio"/> 5 a 6 veces semana<br><input type="radio"/> 1 vez al día<br><input type="radio"/> 2 a 3 veces al día<br><input type="radio"/> 5 a 6 veces al día<br><input type="radio"/> más 6 veces al día |
| chocolate polvo o colacao | <input type="radio"/> Nunca o menos 1 vez al mes<br><input type="radio"/> 1 a 3 veces mes<br><input type="radio"/> 1 vez semana<br><input type="radio"/> 2 a 4 veces semana<br><input type="radio"/> 5 a 6 veces semana<br><input type="radio"/> 1 vez al día<br><input checked="" type="radio"/> 2 a 3 veces al día<br><input type="radio"/> 5 a 6 veces al día<br><input type="radio"/> más 6 veces al día |
| vino tinto                | <input checked="" type="radio"/> Nunca o menos 1 vez al mes<br><input type="radio"/> 1 a 3 veces mes<br><input type="radio"/> 1 vez semana<br><input type="radio"/> 2 a 4 veces semana<br><input type="radio"/> 5 a 6 veces semana<br><input type="radio"/> 1 vez al día<br><input type="radio"/> 2 a 3 veces al día<br><input type="radio"/> 5 a 6 veces al día<br><input type="radio"/> más 6 veces al día |
| vino blanco               | <input checked="" type="radio"/> Nunca o menos 1 vez al mes<br><input type="radio"/> 1 a 3 veces mes<br><input type="radio"/> 1 vez semana<br><input type="radio"/> 2 a 4 veces semana<br><input type="radio"/> 5 a 6 veces semana<br><input type="radio"/> 1 vez al día<br><input type="radio"/> 2 a 3 veces al día<br><input type="radio"/> 5 a 6 veces al día<br><input type="radio"/> más 6 veces al día |

---

|                    |                                                                                                                                                                                                                                                                                                                                                                                                              |
|--------------------|--------------------------------------------------------------------------------------------------------------------------------------------------------------------------------------------------------------------------------------------------------------------------------------------------------------------------------------------------------------------------------------------------------------|
| vino seco o vermut | <input checked="" type="radio"/> Nunca o menos 1 vez al mes<br><input type="radio"/> 1 a 3 veces mes<br><input type="radio"/> 1 vez semana<br><input type="radio"/> 2 a 4 veces semana<br><input type="radio"/> 5 a 6 veces semana<br><input type="radio"/> 1 vez al día<br><input type="radio"/> 2 a 3 veces al día<br><input type="radio"/> 5 a 6 veces al día<br><input type="radio"/> más 6 veces al día |
|--------------------|--------------------------------------------------------------------------------------------------------------------------------------------------------------------------------------------------------------------------------------------------------------------------------------------------------------------------------------------------------------------------------------------------------------|

---

|         |                                                                                                                                                                                                                                                                                                                                                                                                              |
|---------|--------------------------------------------------------------------------------------------------------------------------------------------------------------------------------------------------------------------------------------------------------------------------------------------------------------------------------------------------------------------------------------------------------------|
| cerveza | <input checked="" type="radio"/> Nunca o menos 1 vez al mes<br><input type="radio"/> 1 a 3 veces mes<br><input type="radio"/> 1 vez semana<br><input type="radio"/> 2 a 4 veces semana<br><input type="radio"/> 5 a 6 veces semana<br><input type="radio"/> 1 vez al día<br><input type="radio"/> 2 a 3 veces al día<br><input type="radio"/> 5 a 6 veces al día<br><input type="radio"/> más 6 veces al día |
|---------|--------------------------------------------------------------------------------------------------------------------------------------------------------------------------------------------------------------------------------------------------------------------------------------------------------------------------------------------------------------------------------------------------------------|

---

|                     |                                                                                                                                                                                                                                                                                                                                                                                                              |
|---------------------|--------------------------------------------------------------------------------------------------------------------------------------------------------------------------------------------------------------------------------------------------------------------------------------------------------------------------------------------------------------------------------------------------------------|
| cerveza sin alcohol | <input checked="" type="radio"/> Nunca o menos 1 vez al mes<br><input type="radio"/> 1 a 3 veces mes<br><input type="radio"/> 1 vez semana<br><input type="radio"/> 2 a 4 veces semana<br><input type="radio"/> 5 a 6 veces semana<br><input type="radio"/> 1 vez al día<br><input type="radio"/> 2 a 3 veces al día<br><input type="radio"/> 5 a 6 veces al día<br><input type="radio"/> más 6 veces al día |
|---------------------|--------------------------------------------------------------------------------------------------------------------------------------------------------------------------------------------------------------------------------------------------------------------------------------------------------------------------------------------------------------------------------------------------------------|

---

|         |                                                                                                                                                                                                                                                                                                                                                                                                              |
|---------|--------------------------------------------------------------------------------------------------------------------------------------------------------------------------------------------------------------------------------------------------------------------------------------------------------------------------------------------------------------------------------------------------------------|
| licores | <input checked="" type="radio"/> Nunca o menos 1 vez al mes<br><input type="radio"/> 1 a 3 veces mes<br><input type="radio"/> 1 vez semana<br><input type="radio"/> 2 a 4 veces semana<br><input type="radio"/> 5 a 6 veces semana<br><input type="radio"/> 1 vez al día<br><input type="radio"/> 2 a 3 veces al día<br><input type="radio"/> 5 a 6 veces al día<br><input type="radio"/> más 6 veces al día |
|---------|--------------------------------------------------------------------------------------------------------------------------------------------------------------------------------------------------------------------------------------------------------------------------------------------------------------------------------------------------------------------------------------------------------------|

---

|                       |                                                                                                                                                                                                                                                                                                                                                                                                              |
|-----------------------|--------------------------------------------------------------------------------------------------------------------------------------------------------------------------------------------------------------------------------------------------------------------------------------------------------------------------------------------------------------------------------------------------------------|
| ginebra o ron o vodka | <input checked="" type="radio"/> Nunca o menos 1 vez al mes<br><input type="radio"/> 1 a 3 veces mes<br><input type="radio"/> 1 vez semana<br><input type="radio"/> 2 a 4 veces semana<br><input type="radio"/> 5 a 6 veces semana<br><input type="radio"/> 1 vez al día<br><input type="radio"/> 2 a 3 veces al día<br><input type="radio"/> 5 a 6 veces al día<br><input type="radio"/> más 6 veces al día |
|-----------------------|--------------------------------------------------------------------------------------------------------------------------------------------------------------------------------------------------------------------------------------------------------------------------------------------------------------------------------------------------------------------------------------------------------------|

---

|                 |                                                                                                                                                                                                                                                                                                                                                                                                              |
|-----------------|--------------------------------------------------------------------------------------------------------------------------------------------------------------------------------------------------------------------------------------------------------------------------------------------------------------------------------------------------------------------------------------------------------------|
| refresco normal | <input type="radio"/> Nunca o menos 1 vez al mes<br><input checked="" type="radio"/> 1 a 3 veces mes<br><input type="radio"/> 1 vez semana<br><input type="radio"/> 2 a 4 veces semana<br><input type="radio"/> 5 a 6 veces semana<br><input type="radio"/> 1 vez al día<br><input type="radio"/> 2 a 3 veces al día<br><input type="radio"/> 5 a 6 veces al día<br><input type="radio"/> más 6 veces al día |
|-----------------|--------------------------------------------------------------------------------------------------------------------------------------------------------------------------------------------------------------------------------------------------------------------------------------------------------------------------------------------------------------------------------------------------------------|

---

---

|                     |                                                                                                                                                                                                                                                                                                                                                                                                              |
|---------------------|--------------------------------------------------------------------------------------------------------------------------------------------------------------------------------------------------------------------------------------------------------------------------------------------------------------------------------------------------------------------------------------------------------------|
| refresco sin azúcar | <input checked="" type="radio"/> Nunca o menos 1 vez al mes<br><input type="radio"/> 1 a 3 veces mes<br><input type="radio"/> 1 vez semana<br><input type="radio"/> 2 a 4 veces semana<br><input type="radio"/> 5 a 6 veces semana<br><input type="radio"/> 1 vez al día<br><input type="radio"/> 2 a 3 veces al día<br><input type="radio"/> 5 a 6 veces al día<br><input type="radio"/> más 6 veces al día |
|---------------------|--------------------------------------------------------------------------------------------------------------------------------------------------------------------------------------------------------------------------------------------------------------------------------------------------------------------------------------------------------------------------------------------------------------|

---

|                |                                                                                                                                                                                                                                                                                                                                                                                                              |
|----------------|--------------------------------------------------------------------------------------------------------------------------------------------------------------------------------------------------------------------------------------------------------------------------------------------------------------------------------------------------------------------------------------------------------------|
| Agua del grifo | <input checked="" type="radio"/> Nunca o menos 1 vez al mes<br><input type="radio"/> 1 a 3 veces mes<br><input type="radio"/> 1 vez semana<br><input type="radio"/> 2 a 4 veces semana<br><input type="radio"/> 5 a 6 veces semana<br><input type="radio"/> 1 vez al día<br><input type="radio"/> 2 a 3 veces al día<br><input type="radio"/> 5 a 6 veces al día<br><input type="radio"/> más 6 veces al día |
|----------------|--------------------------------------------------------------------------------------------------------------------------------------------------------------------------------------------------------------------------------------------------------------------------------------------------------------------------------------------------------------------------------------------------------------|

---

|                          |                                                                                                                                                                                                                                                                                                                                                                                                              |
|--------------------------|--------------------------------------------------------------------------------------------------------------------------------------------------------------------------------------------------------------------------------------------------------------------------------------------------------------------------------------------------------------------------------------------------------------|
| agua embotellada sin gas | <input type="radio"/> Nunca o menos 1 vez al mes<br><input type="radio"/> 1 a 3 veces mes<br><input type="radio"/> 1 vez semana<br><input type="radio"/> 2 a 4 veces semana<br><input type="radio"/> 5 a 6 veces semana<br><input type="radio"/> 1 vez al día<br><input checked="" type="radio"/> 2 a 3 veces al día<br><input type="radio"/> 5 a 6 veces al día<br><input type="radio"/> más 6 veces al día |
|--------------------------|--------------------------------------------------------------------------------------------------------------------------------------------------------------------------------------------------------------------------------------------------------------------------------------------------------------------------------------------------------------------------------------------------------------|

---

|                          |                                                                                                                                                                                                                                                                                                                                                                                                              |
|--------------------------|--------------------------------------------------------------------------------------------------------------------------------------------------------------------------------------------------------------------------------------------------------------------------------------------------------------------------------------------------------------------------------------------------------------|
| agua embotellada con gas | <input checked="" type="radio"/> Nunca o menos 1 vez al mes<br><input type="radio"/> 1 a 3 veces mes<br><input type="radio"/> 1 vez semana<br><input type="radio"/> 2 a 4 veces semana<br><input type="radio"/> 5 a 6 veces semana<br><input type="radio"/> 1 vez al día<br><input type="radio"/> 2 a 3 veces al día<br><input type="radio"/> 5 a 6 veces al día<br><input type="radio"/> más 6 veces al día |
|--------------------------|--------------------------------------------------------------------------------------------------------------------------------------------------------------------------------------------------------------------------------------------------------------------------------------------------------------------------------------------------------------------------------------------------------------|

---

|                           |                                                                                                                                                                                                                                                                                                                                                                                                              |
|---------------------------|--------------------------------------------------------------------------------------------------------------------------------------------------------------------------------------------------------------------------------------------------------------------------------------------------------------------------------------------------------------------------------------------------------------|
| zumos frutas embotellados | <input checked="" type="radio"/> Nunca o menos 1 vez al mes<br><input type="radio"/> 1 a 3 veces mes<br><input type="radio"/> 1 vez semana<br><input type="radio"/> 2 a 4 veces semana<br><input type="radio"/> 5 a 6 veces semana<br><input type="radio"/> 1 vez al día<br><input type="radio"/> 2 a 3 veces al día<br><input type="radio"/> 5 a 6 veces al día<br><input type="radio"/> más 6 veces al día |
|---------------------------|--------------------------------------------------------------------------------------------------------------------------------------------------------------------------------------------------------------------------------------------------------------------------------------------------------------------------------------------------------------------------------------------------------------|

---

|      |                                                                                                                                                                                                                                                                                                                                                                                                              |
|------|--------------------------------------------------------------------------------------------------------------------------------------------------------------------------------------------------------------------------------------------------------------------------------------------------------------------------------------------------------------------------------------------------------------|
| café | <input type="radio"/> Nunca o menos 1 vez al mes<br><input type="radio"/> 1 a 3 veces mes<br><input type="radio"/> 1 vez semana<br><input type="radio"/> 2 a 4 veces semana<br><input type="radio"/> 5 a 6 veces semana<br><input type="radio"/> 1 vez al día<br><input checked="" type="radio"/> 2 a 3 veces al día<br><input type="radio"/> 5 a 6 veces al día<br><input type="radio"/> más 6 veces al día |
|------|--------------------------------------------------------------------------------------------------------------------------------------------------------------------------------------------------------------------------------------------------------------------------------------------------------------------------------------------------------------------------------------------------------------|

---

|                       |                                                                                                                                                                                                                                                                                                                                                                                                              |
|-----------------------|--------------------------------------------------------------------------------------------------------------------------------------------------------------------------------------------------------------------------------------------------------------------------------------------------------------------------------------------------------------------------------------------------------------|
| cafe descafeinado     | <input type="radio"/> Nunca o menos 1 vez al mes<br><input type="radio"/> 1 a 3 veces mes<br><input checked="" type="radio"/> 1 vez semana<br><input type="radio"/> 2 a 4 veces semana<br><input type="radio"/> 5 a 6 veces semana<br><input type="radio"/> 1 vez al día<br><input type="radio"/> 2 a 3 veces al día<br><input type="radio"/> 5 a 6 veces al día<br><input type="radio"/> más 6 veces al día |
| te o infusión         | <input checked="" type="radio"/> Nunca o menos 1 vez al mes<br><input type="radio"/> 1 a 3 veces mes<br><input type="radio"/> 1 vez semana<br><input type="radio"/> 2 a 4 veces semana<br><input type="radio"/> 5 a 6 veces semana<br><input type="radio"/> 1 vez al día<br><input type="radio"/> 2 a 3 veces al día<br><input type="radio"/> 5 a 6 veces al día<br><input type="radio"/> más 6 veces al día |
| sopa o puré verduras  | <input type="radio"/> Nunca o menos 1 vez al mes<br><input checked="" type="radio"/> 1 a 3 veces mes<br><input type="radio"/> 1 vez semana<br><input type="radio"/> 2 a 4 veces semana<br><input type="radio"/> 5 a 6 veces semana<br><input type="radio"/> 1 vez al día<br><input type="radio"/> 2 a 3 veces al día<br><input type="radio"/> 5 a 6 veces al día<br><input type="radio"/> más 6 veces al día |
| croquetas pollo jamón | <input checked="" type="radio"/> Nunca o menos 1 vez al mes<br><input type="radio"/> 1 a 3 veces mes<br><input type="radio"/> 1 vez semana<br><input type="radio"/> 2 a 4 veces semana<br><input type="radio"/> 5 a 6 veces semana<br><input type="radio"/> 1 vez al día<br><input type="radio"/> 2 a 3 veces al día<br><input type="radio"/> 5 a 6 veces al día<br><input type="radio"/> más 6 veces al día |
| croquetas pescado     | <input checked="" type="radio"/> Nunca o menos 1 vez al mes<br><input type="radio"/> 1 a 3 veces mes<br><input type="radio"/> 1 vez semana<br><input type="radio"/> 2 a 4 veces semana<br><input type="radio"/> 5 a 6 veces semana<br><input type="radio"/> 1 vez al día<br><input type="radio"/> 2 a 3 veces al día<br><input type="radio"/> 5 a 6 veces al día<br><input type="radio"/> más 6 veces al día |
| mayonesa              | <input type="radio"/> Nunca o menos 1 vez al mes<br><input checked="" type="radio"/> 1 a 3 veces mes<br><input type="radio"/> 1 vez semana<br><input type="radio"/> 2 a 4 veces semana<br><input type="radio"/> 5 a 6 veces semana<br><input type="radio"/> 1 vez al día<br><input type="radio"/> 2 a 3 veces al día<br><input type="radio"/> 5 a 6 veces al día<br><input type="radio"/> más 6 veces al día |

|                  |                                                                                                                                                                                                                                                                                                                                                                                                              |
|------------------|--------------------------------------------------------------------------------------------------------------------------------------------------------------------------------------------------------------------------------------------------------------------------------------------------------------------------------------------------------------------------------------------------------------|
| salsa tomate     | <input type="radio"/> Nunca o menos 1 vez al mes<br><input type="radio"/> 1 a 3 veces mes<br><input type="radio"/> 1 vez semana<br><input checked="" type="radio"/> 2 a 4 veces semana<br><input type="radio"/> 5 a 6 veces semana<br><input type="radio"/> 1 vez al día<br><input type="radio"/> 2 a 3 veces al día<br><input type="radio"/> 5 a 6 veces al día<br><input type="radio"/> más 6 veces al día |
| ketchup          | <input checked="" type="radio"/> Nunca o menos 1 vez al mes<br><input type="radio"/> 1 a 3 veces mes<br><input type="radio"/> 1 vez semana<br><input type="radio"/> 2 a 4 veces semana<br><input type="radio"/> 5 a 6 veces semana<br><input type="radio"/> 1 vez al día<br><input type="radio"/> 2 a 3 veces al día<br><input type="radio"/> 5 a 6 veces al día<br><input type="radio"/> más 6 veces al día |
| sal              | <input type="radio"/> Nunca o menos 1 vez al mes<br><input type="radio"/> 1 a 3 veces mes<br><input type="radio"/> 1 vez semana<br><input checked="" type="radio"/> 2 a 4 veces semana<br><input type="radio"/> 5 a 6 veces semana<br><input type="radio"/> 1 vez al día<br><input type="radio"/> 2 a 3 veces al día<br><input type="radio"/> 5 a 6 veces al día<br><input type="radio"/> más 6 veces al día |
| ajo              | <input type="radio"/> Nunca o menos 1 vez al mes<br><input type="radio"/> 1 a 3 veces mes<br><input checked="" type="radio"/> 1 vez semana<br><input type="radio"/> 2 a 4 veces semana<br><input type="radio"/> 5 a 6 veces semana<br><input type="radio"/> 1 vez al día<br><input type="radio"/> 2 a 3 veces al día<br><input type="radio"/> 5 a 6 veces al día<br><input type="radio"/> más 6 veces al día |
| mermelada o miel | <input type="radio"/> Nunca o menos 1 vez al mes<br><input type="radio"/> 1 a 3 veces mes<br><input checked="" type="radio"/> 1 vez semana<br><input type="radio"/> 2 a 4 veces semana<br><input type="radio"/> 5 a 6 veces semana<br><input type="radio"/> 1 vez al día<br><input type="radio"/> 2 a 3 veces al día<br><input type="radio"/> 5 a 6 veces al día<br><input type="radio"/> más 6 veces al día |
| azúcar           | <input type="radio"/> Nunca o menos 1 vez al mes<br><input type="radio"/> 1 a 3 veces mes<br><input type="radio"/> 1 vez semana<br><input type="radio"/> 2 a 4 veces semana<br><input type="radio"/> 5 a 6 veces semana<br><input checked="" type="radio"/> 1 vez al día<br><input type="radio"/> 2 a 3 veces al día<br><input type="radio"/> 5 a 6 veces al día<br><input type="radio"/> más 6 veces al día |

|                                       |                                                                                                                                                                                                                                                                                                                                                                                                                                                                                                                               |
|---------------------------------------|-------------------------------------------------------------------------------------------------------------------------------------------------------------------------------------------------------------------------------------------------------------------------------------------------------------------------------------------------------------------------------------------------------------------------------------------------------------------------------------------------------------------------------|
| Otro alimento                         |                                                                                                                                                                                                                                                                                                                                                                                                                                                                                                                               |
| suplementos vitamínicos               | <input checked="" type="radio"/> si<br><input type="radio"/> no                                                                                                                                                                                                                                                                                                                                                                                                                                                               |
| suplementos vitamínicos               | [*DATA REMOVED*]                                                                                                                                                                                                                                                                                                                                                                                                                                                                                                              |
| dieta previa                          | <input type="radio"/> si<br><input checked="" type="radio"/> no                                                                                                                                                                                                                                                                                                                                                                                                                                                               |
| motivo dieta                          | <input checked="" type="radio"/> no dieta<br><input type="radio"/> control peso<br><input type="radio"/> control colesterol<br><input type="radio"/> control diabetes<br><input type="radio"/> problemas estómago<br><input type="radio"/> problemas vesícula o hepáticos<br><input type="radio"/> HTA o cardiopatía<br><input type="radio"/> problemas renales<br><input type="radio"/> alergia alimentaria<br><input type="radio"/> ácido úrico elevado<br><input type="radio"/> vegetariana<br><input type="radio"/> otros |
| cambio alimentos año previo gestación | <input checked="" type="radio"/> si<br><input type="radio"/> no                                                                                                                                                                                                                                                                                                                                                                                                                                                               |
| cambio lácteos                        | <input type="radio"/> eliminado<br><input type="radio"/> disminuido<br><input checked="" type="radio"/> igual<br><input type="radio"/> aumentado<br><input type="radio"/> no sabe                                                                                                                                                                                                                                                                                                                                             |
| cambio huevos                         | <input type="radio"/> eliminado<br><input type="radio"/> disminuido<br><input checked="" type="radio"/> igual<br><input type="radio"/> aumentado<br><input type="radio"/> no sabe                                                                                                                                                                                                                                                                                                                                             |
| cambio carne                          | <input type="radio"/> eliminado<br><input type="radio"/> disminuido<br><input checked="" type="radio"/> igual<br><input type="radio"/> aumentado<br><input type="radio"/> no sabe                                                                                                                                                                                                                                                                                                                                             |
| cambio pescado                        | <input checked="" type="radio"/> eliminado<br><input type="radio"/> disminuido<br><input type="radio"/> igual<br><input type="radio"/> aumentado<br><input type="radio"/> no sabe                                                                                                                                                                                                                                                                                                                                             |
| cambio verduras                       | <input type="radio"/> eliminado<br><input type="radio"/> disminuido<br><input checked="" type="radio"/> igual<br><input type="radio"/> aumentado<br><input type="radio"/> no sabe                                                                                                                                                                                                                                                                                                                                             |

|                            |                                                                                                                                                                                                                        |
|----------------------------|------------------------------------------------------------------------------------------------------------------------------------------------------------------------------------------------------------------------|
| cambio legumbres           | <input type="radio"/> eliminado<br><input type="radio"/> disminuido<br><input checked="" type="radio"/> igual<br><input type="radio"/> aumentado<br><input type="radio"/> no sabe                                      |
| cambio fruta               | <input type="radio"/> eliminado<br><input type="radio"/> disminuido<br><input checked="" type="radio"/> igual<br><input type="radio"/> aumentado<br><input type="radio"/> no sabe                                      |
| cambio pan                 | <input type="radio"/> eliminado<br><input type="radio"/> disminuido<br><input checked="" type="radio"/> igual<br><input type="radio"/> aumentado<br><input type="radio"/> no sabe                                      |
| cambio aceite oliva        | <input type="radio"/> eliminado<br><input type="radio"/> disminuido<br><input checked="" type="radio"/> igual<br><input type="radio"/> aumentado<br><input type="radio"/> no sabe                                      |
| cambio mante o margarina   | <input type="radio"/> eliminado<br><input type="radio"/> disminuido<br><input checked="" type="radio"/> igual<br><input type="radio"/> aumentado<br><input type="radio"/> no sabe                                      |
| cambio azúcar y dulces     | <input type="radio"/> eliminado<br><input type="radio"/> disminuido<br><input checked="" type="radio"/> igual<br><input type="radio"/> aumentado<br><input type="radio"/> no sabe                                      |
| cambio bebidas alcohólicas | <input checked="" type="radio"/> eliminado<br><input type="radio"/> disminuido<br><input type="radio"/> igual<br><input type="radio"/> aumentado<br><input type="radio"/> no sabe                                      |
| frecuencia comidas fritas  | <input type="radio"/> a diario<br><input type="radio"/> 5 a 6 veces semana<br><input type="radio"/> 2 a 4 veces semana<br><input checked="" type="radio"/> 1 vez semana<br><input type="radio"/> menos de 1 vez semana |
| carne                      | <input type="radio"/> no como<br><input type="radio"/> cruda<br><input type="radio"/> poco hecha<br><input type="radio"/> hecha<br><input checked="" type="radio"/> muy hecha                                          |
| grasa visible carne        | <input type="radio"/> quita toda<br><input checked="" type="radio"/> quita mayoría<br><input type="radio"/> quita un poco<br><input type="radio"/> no quita nada                                                       |



|                                |                                                                                                                                                                                                                                                          |
|--------------------------------|----------------------------------------------------------------------------------------------------------------------------------------------------------------------------------------------------------------------------------------------------------|
| cocina carne                   | <input checked="" type="radio"/> a la plancha<br><input type="radio"/> a la parrilla<br><input type="radio"/> asada<br><input type="radio"/> frita<br><input type="radio"/> guisada                                                                      |
| tostado quemado carne          | <input checked="" type="radio"/> nunca<br><input type="radio"/> 1 vez mes<br><input type="radio"/> 2 a 3 veces mes<br><input type="radio"/> 1 vez semana<br><input type="radio"/> 2 a 3 semanas                                                          |
| tostado quemado pescado        | <input checked="" type="radio"/> nunca<br><input type="radio"/> 1 vez mes<br><input type="radio"/> 2 a 3 veces mes<br><input type="radio"/> 1 vez semana<br><input type="radio"/> 2 a 3 semanas                                                          |
| socarrat paella                | <input checked="" type="radio"/> nunca<br><input type="radio"/> 1 vez mes<br><input type="radio"/> 2 a 3 veces mes<br><input type="radio"/> 1 vez semana<br><input type="radio"/> 2 a 3 semanas                                                          |
| grasa o aceite cocinar         | <input type="radio"/> mantequilla<br><input type="radio"/> margarina<br><input checked="" type="radio"/> aceite oliva<br><input type="radio"/> aceite oliva virgen extra<br><input type="radio"/> aceite vegetal<br><input type="radio"/> mezcla aceites |
| grasa aceite aliñar            | <input type="radio"/> mantequilla<br><input type="radio"/> margarina<br><input type="radio"/> aceite oliva<br><input checked="" type="radio"/> aceite oliva virgen extra<br><input type="radio"/> aceite vegetal<br><input type="radio"/> mezcla aceites |
| grasa aceite freir             | <input type="radio"/> mantequilla<br><input type="radio"/> margarina<br><input type="radio"/> aceite oliva<br><input type="radio"/> aceite oliva virgen extra<br><input type="radio"/> aceite vegetal<br><input checked="" type="radio"/> mezcla aceites |
| Ejercicio cuestionario         | <input checked="" type="radio"/> si<br><input type="radio"/> no                                                                                                                                                                                          |
| horas de sueño incluido siesta | [*DATA REMOVED*]                                                                                                                                                                                                                                         |
| minutos siesta                 | [*DATA REMOVED*]                                                                                                                                                                                                                                         |
| horas televisión semana        | [*DATA REMOVED*]                                                                                                                                                                                                                                         |

|                                        |                                                                                                                                                                                                                                                                                                                                                                           |
|----------------------------------------|---------------------------------------------------------------------------------------------------------------------------------------------------------------------------------------------------------------------------------------------------------------------------------------------------------------------------------------------------------------------------|
| actividad trabajo                      | <input type="radio"/> casi siempre sentado<br><input type="radio"/> sentado 50 por cien<br><input type="radio"/> casi siempre de pie, quieto<br><input checked="" type="radio"/> casi siempre levantado caminando y llevando pocas cosas<br><input type="radio"/> casi siempre levantado, caminando y llevado muchas cosas<br><input type="radio"/> trabajo manual pesado |
| tiempo caminar o bici al día           | <input type="radio"/> casi nunca<br><input type="radio"/> menos 20min día<br><input type="radio"/> 20 a 40 min día<br><input type="radio"/> 40 a 60 min día<br><input checked="" type="radio"/> 1h o 1h y media día<br><input type="radio"/> más de 1h y media al día                                                                                                     |
| tiempo tareas casa al día              | <input type="radio"/> menos de 1h día<br><input checked="" type="radio"/> 1 a 2h día<br><input type="radio"/> 3 a 4h día<br><input type="radio"/> 5 a 6h día<br><input type="radio"/> 7 a 8h día<br><input type="radio"/> más de 8h día                                                                                                                                   |
| tiempo libre televisión ordenador leer | <input type="radio"/> menos 1h día<br><input type="radio"/> 1h día<br><input type="radio"/> 2h día<br><input type="radio"/> 3h día<br><input type="radio"/> 4h día<br><input checked="" type="radio"/> 5 a 6h día<br><input type="radio"/> mas 6h día                                                                                                                     |
| tiempo libre ejercicio o deporte       | <input type="radio"/> menos 1h semana<br><input type="radio"/> 1h semana<br><input type="radio"/> 2h semana<br><input checked="" type="radio"/> 3h semana<br><input type="radio"/> 4 a 5h semana<br><input type="radio"/> mas 5h semana                                                                                                                                   |
| como se considera                      | <input type="radio"/> sedentaria<br><input type="radio"/> poco activa<br><input type="radio"/> moderadamente activa<br><input checked="" type="radio"/> bastante activa<br><input type="radio"/> muy activa<br><input type="radio"/> no sabe                                                                                                                              |
| FUR                                    | [*DATA REMOVED*]                                                                                                                                                                                                                                                                                                                                                          |
| Semanas gestación 2T                   | [*DATA REMOVED*]                                                                                                                                                                                                                                                                                                                                                          |
| Días gestación 2T                      | [*DATA REMOVED*]                                                                                                                                                                                                                                                                                                                                                          |
| DBP 2T                                 | [*DATA REMOVED*]                                                                                                                                                                                                                                                                                                                                                          |
| CC 2T                                  | [*DATA REMOVED*]                                                                                                                                                                                                                                                                                                                                                          |
| AC 2T                                  | [*DATA REMOVED*]                                                                                                                                                                                                                                                                                                                                                          |

|                                                   |                                                                                                                                                                                                 |
|---------------------------------------------------|-------------------------------------------------------------------------------------------------------------------------------------------------------------------------------------------------|
| LF 2T                                             | [*DATA REMOVED*]                                                                                                                                                                                |
| PFE 2T (Hadlock)                                  | [*DATA REMOVED*]                                                                                                                                                                                |
| Semanas gestación 3T                              | [*DATA REMOVED*]                                                                                                                                                                                |
| días 3T                                           | [*DATA REMOVED*]                                                                                                                                                                                |
| DBP 3T                                            | [*DATA REMOVED*]                                                                                                                                                                                |
| CC 3T                                             | [*DATA REMOVED*]                                                                                                                                                                                |
| AC 3T                                             | [*DATA REMOVED*]                                                                                                                                                                                |
| LF 3T                                             | [*DATA REMOVED*]                                                                                                                                                                                |
| PFE 3T (Hadlock)                                  | [*DATA REMOVED*]                                                                                                                                                                                |
| Semanas de gestación final                        | [*DATA REMOVED*]                                                                                                                                                                                |
| días gestación final                              | [*DATA REMOVED*]                                                                                                                                                                                |
| Localización placenta                             | <input checked="" type="radio"/> anterior<br><input type="radio"/> lateral derecha<br><input type="radio"/> lateral izquierda<br><input type="radio"/> posterior<br><input type="radio"/> fondo |
| Presentación longitudinal cefálica                | <input type="radio"/> no<br><input checked="" type="radio"/> si                                                                                                                                 |
| Dorso                                             | <input checked="" type="radio"/> izquierda anterior<br><input type="radio"/> izquierda posterior<br><input type="radio"/> derecha anterior<br><input type="radio"/> derecha posterior           |
| diámetro biparietal                               | [*DATA REMOVED*]                                                                                                                                                                                |
| Circunferencia craneal                            | [*DATA REMOVED*]                                                                                                                                                                                |
| Circunferencia abdominal                          | [*DATA REMOVED*]                                                                                                                                                                                |
| Longitud de femur                                 | [*DATA REMOVED*]                                                                                                                                                                                |
| tejido celular subcutáneo a nivel del muslo en mm | [*DATA REMOVED*]                                                                                                                                                                                |
| tejido celular subcutáneo en abdomen en mm        | [*DATA REMOVED*]                                                                                                                                                                                |
| Volumen del muslo en cm3                          | [*DATA REMOVED*]                                                                                                                                                                                |
| Peso fetal estimado según fórmula de Hadlock      | [*DATA REMOVED*]                                                                                                                                                                                |

|                                               |                                                                                                                                               |
|-----------------------------------------------|-----------------------------------------------------------------------------------------------------------------------------------------------|
| Percentil                                     | [*DATA REMOVED*]                                                                                                                              |
| Peso fetal estimado según fórmula de Scioscia | <hr/>                                                                                                                                         |
| Peso fetal estimado según fórmula de LEE      | <hr/>                                                                                                                                         |
| Tipo de parto                                 | <input type="radio"/> eutocico<br><input type="radio"/> instrumentado/ventosa<br><input checked="" type="radio"/> cesarea                     |
| fecha de nacimiento                           | [*DATA REMOVED*]                                                                                                                              |
| Días entre exploración y nacimiento           | [*DATA REMOVED*]                                                                                                                              |
| Peso RN en g                                  | [*DATA REMOVED*]                                                                                                                              |
| sexo                                          | <input checked="" type="radio"/> mujer<br><input type="radio"/> hombre                                                                        |
| Apgar 1 minuto                                | [*DATA REMOVED*]                                                                                                                              |
| Apgar 5 minutos                               | [*DATA REMOVED*]                                                                                                                              |
| Apgar 10 minutos                              | <hr/>                                                                                                                                         |
| antecedente Covid durante gestación           | <input type="radio"/> Yes<br><input checked="" type="radio"/> No                                                                              |
| Nivel de estudios                             | <input type="radio"/> ninguno<br><input type="radio"/> primarios<br><input type="radio"/> secundarios<br><input type="radio"/> universitarios |

# Base\_datos\_estimacion\_peso\_fetal

|                                       |                                                                                                                                                                                                                                                                                      |
|---------------------------------------|--------------------------------------------------------------------------------------------------------------------------------------------------------------------------------------------------------------------------------------------------------------------------------------|
| Número de identificación participante | 9                                                                                                                                                                                                                                                                                    |
| CODIGO PARTICIPANTE                   |                                                                                                                                                                                                                                                                                      |
| Edad                                  | [*DATA REMOVED*]                                                                                                                                                                                                                                                                     |
| Gestaciones                           | <input checked="" type="radio"/> 1<br><input type="radio"/> 2<br><input type="radio"/> 3<br><input type="radio"/> mas de 3                                                                                                                                                           |
| partos                                | <input checked="" type="radio"/> 0<br><input type="radio"/> 1<br><input type="radio"/> 2<br><input type="radio"/> 3<br><input type="radio"/> mas de 3                                                                                                                                |
| cesáreas                              | <input checked="" type="radio"/> 0<br><input type="radio"/> 1<br><input type="radio"/> 2<br><input type="radio"/> 3<br><input type="radio"/> mas de 3                                                                                                                                |
| Abortos                               | <input checked="" type="radio"/> 0<br><input type="radio"/> 1<br><input type="radio"/> 2<br><input type="radio"/> 3<br><input type="radio"/> mas de 3                                                                                                                                |
| Tipo de gestacion                     | <input type="radio"/> espontanea<br><input type="radio"/> IAC inseminación artificial conyuge<br><input type="radio"/> IAD inseminación artificial donante<br><input checked="" type="radio"/> FIV Fecundación in Vitro<br><input type="radio"/> Ovodon FIV con donación de ovocitos |
| peso previo a embarazo                | [*DATA REMOVED*]                                                                                                                                                                                                                                                                     |
| Ganancia ponderal embarazo            | [*DATA REMOVED*]                                                                                                                                                                                                                                                                     |
| Talla madre                           | [*DATA REMOVED*]                                                                                                                                                                                                                                                                     |
| IMC previo embarazo                   | 21.289062499999996                                                                                                                                                                                                                                                                   |
| Patología obstétrica                  | <input checked="" type="radio"/> no<br><input type="radio"/> si                                                                                                                                                                                                                      |
| Diabetes pregestacional               | <input checked="" type="radio"/> no<br><input type="radio"/> si                                                                                                                                                                                                                      |
| Diabetes gestacional                  | <input checked="" type="radio"/> no<br><input type="radio"/> si                                                                                                                                                                                                                      |

|                                            |                                                                                                                                                                                      |
|--------------------------------------------|--------------------------------------------------------------------------------------------------------------------------------------------------------------------------------------|
| Diabetes gestacional con insulina          | <input checked="" type="radio"/> no<br><input type="radio"/> si                                                                                                                      |
| Diabetes gestacional con dieta y ejercicio | <input checked="" type="radio"/> no<br><input type="radio"/> si                                                                                                                      |
| Percentil fetos previos                    | <input checked="" type="radio"/> Nada<br><input type="radio"/> percentil menor de 10<br><input type="radio"/> percentil entre 10 y 90<br><input type="radio"/> percentil mayor de 90 |
| Exfumadora                                 | <input checked="" type="radio"/> Nada<br><input type="radio"/> menos de 5 años<br><input type="radio"/> 5 a 10 años<br><input type="radio"/> mayor o igual a 10 años                 |
| Hábito tabáquico                           | <input checked="" type="radio"/> no<br><input type="radio"/> si                                                                                                                      |
| fumadora                                   | [*DATA REMOVED*]                                                                                                                                                                     |
| Consumo otros tóxicos                      | <input checked="" type="radio"/> no<br><input type="radio"/> si                                                                                                                      |
| Hb 1T                                      | [*DATA REMOVED*]                                                                                                                                                                     |
| Htc 1T                                     | [*DATA REMOVED*]                                                                                                                                                                     |
| Hb 2T                                      | [*DATA REMOVED*]                                                                                                                                                                     |
| HTC 2T                                     | [*DATA REMOVED*]                                                                                                                                                                     |
| Hb 3T                                      | [*DATA REMOVED*]                                                                                                                                                                     |
| HTC 3T                                     | [*DATA REMOVED*]                                                                                                                                                                     |
| Suplemento FE oral                         | <input checked="" type="radio"/> si<br><input type="radio"/> no                                                                                                                      |
| Suplemento fe iv                           | <input type="radio"/> si<br><input checked="" type="radio"/> no                                                                                                                      |
| Transfusión                                | <input checked="" type="radio"/> no<br><input type="radio"/> si                                                                                                                      |
| Solicitada Vit D                           | <input checked="" type="radio"/> no<br><input type="radio"/> si                                                                                                                      |
| Deficit vit D                              | <input checked="" type="radio"/> no<br><input type="radio"/> si                                                                                                                      |
| Suplemento vit D                           | <input type="radio"/> si<br><input checked="" type="radio"/> no                                                                                                                      |

|                       |                                                                                                                                                                                                                                                                                                                                                                                                              |
|-----------------------|--------------------------------------------------------------------------------------------------------------------------------------------------------------------------------------------------------------------------------------------------------------------------------------------------------------------------------------------------------------------------------------------------------------|
| Dieta, cuestionario   | <input checked="" type="radio"/> si<br><input type="radio"/> no                                                                                                                                                                                                                                                                                                                                              |
| Leche entera          | <input checked="" type="radio"/> Nunca o menos 1 vez al mes<br><input type="radio"/> 1 a 3 veces mes<br><input type="radio"/> 1 vez semana<br><input type="radio"/> 2 a 4 veces semana<br><input type="radio"/> 5 a 6 veces semana<br><input type="radio"/> 1 vez al día<br><input type="radio"/> 2 a 3 veces al día<br><input type="radio"/> 5 a 6 veces al día<br><input type="radio"/> más 6 veces al día |
| Leche semidesnatada   | <input checked="" type="radio"/> Nunca o menos 1 vez al mes<br><input type="radio"/> 1 a 3 veces mes<br><input type="radio"/> 1 vez semana<br><input type="radio"/> 2 a 4 veces semana<br><input type="radio"/> 5 a 6 veces semana<br><input type="radio"/> 1 vez al día<br><input type="radio"/> 2 a 3 veces al día<br><input type="radio"/> 5 a 6 veces al día<br><input type="radio"/> mas 6 veces al día |
| Leche desnatada       | <input type="radio"/> Nunca o menos 1 vez al mes<br><input type="radio"/> 1 a 3 veces mes<br><input type="radio"/> 1 vez semana<br><input type="radio"/> 2 a 4 veces semana<br><input type="radio"/> 5 a 6 veces semana<br><input checked="" type="radio"/> 1 vez al día<br><input type="radio"/> 2 a 3 veces al día<br><input type="radio"/> 5 a 6 veces al día<br><input type="radio"/> más 6 veces al día |
| Leche condensada      | <input checked="" type="radio"/> Nunca o menos 1 vez al mes<br><input type="radio"/> 1 a 3 veces mes<br><input type="radio"/> 1 vez semana<br><input type="radio"/> 2 a 4 veces semana<br><input type="radio"/> 5 a 6 veces semana<br><input type="radio"/> 1 vez al día<br><input type="radio"/> 2 a 3 veces al día<br><input type="radio"/> 5 a 6 veces al día<br><input type="radio"/> más 6 veces al día |
| nata o crema de leche | <input type="radio"/> Nunca o menos 1 vez al mes<br><input checked="" type="radio"/> 1 a 3 veces mes<br><input type="radio"/> 1 vez semana<br><input type="radio"/> 2 a 4 veces semana<br><input type="radio"/> 5 a 6 veces semana<br><input type="radio"/> 1 vez al día<br><input type="radio"/> 2 a 3 veces al día<br><input type="radio"/> 5 a 6 veces al día<br><input type="radio"/> más 6 veces al día |

|                                             |                                                                                                                                                                                                                                                                                                                                                                                                              |
|---------------------------------------------|--------------------------------------------------------------------------------------------------------------------------------------------------------------------------------------------------------------------------------------------------------------------------------------------------------------------------------------------------------------------------------------------------------------|
| Yogurt Entero                               | <input type="radio"/> Nunca o menos 1 vez al mes<br><input checked="" type="radio"/> 1 a 3 veces mes<br><input type="radio"/> 1 vez semana<br><input type="radio"/> 2 a 4 veces semana<br><input type="radio"/> 5 a 6 veces semana<br><input type="radio"/> 1 vez al día<br><input type="radio"/> 2 a 3 veces al día<br><input type="radio"/> 5 a 6 veces al día<br><input type="radio"/> más 6 veces al día |
| Yogurt desnatado                            | <input type="radio"/> Nunca o menos 1 vez al mes<br><input type="radio"/> 1 a 3 veces mes<br><input type="radio"/> 1 vez semana<br><input checked="" type="radio"/> 2 a 4 veces semana<br><input type="radio"/> 5 a 6 veces semana<br><input type="radio"/> 1 vez al día<br><input type="radio"/> 2 a 3 veces al día<br><input type="radio"/> 5 a 6 veces al día<br><input type="radio"/> más 6 veces al día |
| 100g requesón o queso blando o queso fresco | <input type="radio"/> Nunca o menos 1 vez al mes<br><input type="radio"/> 1 a 3 veces mes<br><input type="radio"/> 1 vez semana<br><input checked="" type="radio"/> 2 a 4 veces semana<br><input type="radio"/> 5 a 6 veces semana<br><input type="radio"/> 1 vez al día<br><input type="radio"/> 2 a 3 veces al día<br><input type="radio"/> 5 a 6 veces al día<br><input type="radio"/> más 6 veces al día |
| queso curado o semicurado o cremoso         | <input type="radio"/> Nunca o menos 1 vez al mes<br><input type="radio"/> 1 a 3 veces mes<br><input checked="" type="radio"/> 1 vez semana<br><input type="radio"/> 2 a 4 veces semana<br><input type="radio"/> 5 a 6 veces semana<br><input type="radio"/> 1 vez al día<br><input type="radio"/> 2 a 3 veces al día<br><input type="radio"/> 5 a 6 veces al día<br><input type="radio"/> más 6 veces al día |
| natillas flan pudding                       | <input checked="" type="radio"/> Nunca o menos 1 vez al mes<br><input type="radio"/> 1 a 3 veces mes<br><input type="radio"/> 1 vez semana<br><input type="radio"/> 2 a 4 veces semana<br><input type="radio"/> 5 a 6 veces semana<br><input type="radio"/> 1 vez al día<br><input type="radio"/> 2 a 3 veces al día<br><input type="radio"/> 5 a 6 veces al día<br><input type="radio"/> más 6 veces al día |
| Helado                                      | <input checked="" type="radio"/> Nunca o menos 1 vez al mes<br><input type="radio"/> 1 a 3 veces mes<br><input type="radio"/> 1 vez semana<br><input type="radio"/> 2 a 4 veces semana<br><input type="radio"/> 5 a 6 veces semana<br><input type="radio"/> 1 vez al día<br><input type="radio"/> 2 a 3 veces al día<br><input type="radio"/> 5 a 6 veces al día<br><input type="radio"/> más 6 veces al día |



|                                      |                                                                                                                                                                                                                                                                                                                                                                                                              |
|--------------------------------------|--------------------------------------------------------------------------------------------------------------------------------------------------------------------------------------------------------------------------------------------------------------------------------------------------------------------------------------------------------------------------------------------------------------|
| huevo                                | <input type="radio"/> Nunca o menos 1 vez al mes<br><input type="radio"/> 1 a 3 veces mes<br><input type="radio"/> 1 vez semana<br><input checked="" type="radio"/> 2 a 4 veces semana<br><input type="radio"/> 5 a 6 veces semana<br><input type="radio"/> 1 vez al día<br><input type="radio"/> 2 a 3 veces al día<br><input type="radio"/> 5 a 6 veces al día<br><input type="radio"/> más 6 veces al día |
| Pollo con piel                       | <input checked="" type="radio"/> Nunca o menos 1 vez al mes<br><input type="radio"/> 1 a 3 veces mes<br><input type="radio"/> 1 vez semana<br><input type="radio"/> 2 a 4 veces semana<br><input type="radio"/> 5 a 6 veces semana<br><input type="radio"/> 1 vez al día<br><input type="radio"/> 2 a 3 veces al día<br><input type="radio"/> 5 a 6 veces al día<br><input type="radio"/> más 6 veces al día |
| pollo sin piel                       | <input type="radio"/> Nunca o menos 1 vez al mes<br><input type="radio"/> 1 a 3 veces mes<br><input checked="" type="radio"/> 1 vez semana<br><input type="radio"/> 2 a 4 veces semana<br><input type="radio"/> 5 a 6 veces semana<br><input type="radio"/> 1 vez al día<br><input type="radio"/> 2 a 3 veces al día<br><input type="radio"/> 5 a 6 veces al día<br><input type="radio"/> más 6 veces al día |
| Ternera o cerdo o cordero            | <input type="radio"/> Nunca o menos 1 vez al mes<br><input checked="" type="radio"/> 1 a 3 veces mes<br><input type="radio"/> 1 vez semana<br><input type="radio"/> 2 a 4 veces semana<br><input type="radio"/> 5 a 6 veces semana<br><input type="radio"/> 1 vez al día<br><input type="radio"/> 2 a 3 veces al día<br><input type="radio"/> 5 a 6 veces al día<br><input type="radio"/> más 6 veces al día |
| carne caza: Conejo o codorniz o pato | <input checked="" type="radio"/> Nunca o menos 1 vez al mes<br><input type="radio"/> 1 a 3 veces mes<br><input type="radio"/> 1 vez semana<br><input type="radio"/> 2 a 4 veces semana<br><input type="radio"/> 5 a 6 veces semana<br><input type="radio"/> 1 vez al día<br><input type="radio"/> 2 a 3 veces al día<br><input type="radio"/> 5 a 6 veces al día<br><input type="radio"/> más 6 veces al día |
| Hígado de ternera o cerdo o pollo    | <input checked="" type="radio"/> Nunca o menos 1 vez al mes<br><input type="radio"/> 1 a 3 veces mes<br><input type="radio"/> 1 vez semana<br><input type="radio"/> 2 a 4 veces semana<br><input type="radio"/> 5 a 6 veces semana<br><input type="radio"/> 1 vez al día<br><input type="radio"/> 2 a 3 veces al día<br><input type="radio"/> 5 a 6 veces al día<br><input type="radio"/> más 6 veces al día |

|                     |                                                                                                                                                                                                                                                                                                                                                                                                              |
|---------------------|--------------------------------------------------------------------------------------------------------------------------------------------------------------------------------------------------------------------------------------------------------------------------------------------------------------------------------------------------------------------------------------------------------------|
| Vísceras            | <input checked="" type="radio"/> Nunca o menos 1 vez al mes<br><input type="radio"/> 1 a 3 veces mes<br><input type="radio"/> 1 vez semana<br><input type="radio"/> 2 a 4 veces semana<br><input type="radio"/> 5 a 6 veces semana<br><input type="radio"/> 1 vez al día<br><input type="radio"/> 2 a 3 veces al día<br><input type="radio"/> 5 a 6 veces al día<br><input type="radio"/> más 6 veces al día |
| Embutido            | <input checked="" type="radio"/> Nunca o menos 1 vez al mes<br><input type="radio"/> 1 a 3 veces mes<br><input type="radio"/> 1 vez semana<br><input type="radio"/> 2 a 4 veces semana<br><input type="radio"/> 5 a 6 veces semana<br><input type="radio"/> 1 vez al día<br><input type="radio"/> 2 a 3 veces al día<br><input type="radio"/> 5 a 6 veces al día<br><input type="radio"/> más 6 veces al día |
| Salchicha o similar | <input type="radio"/> Nunca o menos 1 vez al mes<br><input checked="" type="radio"/> 1 a 3 veces mes<br><input type="radio"/> 1 vez semana<br><input type="radio"/> 2 a 4 veces semana<br><input type="radio"/> 5 a 6 veces semana<br><input type="radio"/> 1 vez al día<br><input type="radio"/> 2 a 3 veces al día<br><input type="radio"/> 5 a 6 veces al día<br><input type="radio"/> más 6 veces al día |
| Pate o foiegras     | <input type="radio"/> Nunca o menos 1 vez al mes<br><input checked="" type="radio"/> 1 a 3 veces mes<br><input type="radio"/> 1 vez semana<br><input type="radio"/> 2 a 4 veces semana<br><input type="radio"/> 5 a 6 veces semana<br><input type="radio"/> 1 vez al día<br><input type="radio"/> 2 a 3 veces al día<br><input type="radio"/> 5 a 6 veces al día<br><input type="radio"/> más 6 veces al día |
| Hamburguesa         | <input type="radio"/> Nunca o menos 1 vez al mes<br><input type="radio"/> 1 a 3 veces mes<br><input checked="" type="radio"/> 1 vez semana<br><input type="radio"/> 2 a 4 veces semana<br><input type="radio"/> 5 a 6 veces semana<br><input type="radio"/> 1 vez al día<br><input type="radio"/> 2 a 3 veces al día<br><input type="radio"/> 5 a 6 veces al día<br><input type="radio"/> más 6 veces al día |
| tocino o bacon      | <input type="radio"/> Nunca o menos 1 vez al mes<br><input checked="" type="radio"/> 1 a 3 veces mes<br><input type="radio"/> 1 vez semana<br><input type="radio"/> 2 a 4 veces semana<br><input type="radio"/> 5 a 6 veces semana<br><input type="radio"/> 1 vez al día<br><input type="radio"/> 2 a 3 veces al día<br><input type="radio"/> 5 a 6 veces al día<br><input type="radio"/> más 6 veces al día |

---

|               |                                                                                                                                                                                                                                                                                                                                                                                                              |
|---------------|--------------------------------------------------------------------------------------------------------------------------------------------------------------------------------------------------------------------------------------------------------------------------------------------------------------------------------------------------------------------------------------------------------------|
| Pescado frito | <input checked="" type="radio"/> Nunca o menos 1 vez al mes<br><input type="radio"/> 1 a 3 veces mes<br><input type="radio"/> 1 vez semana<br><input type="radio"/> 2 a 4 veces semana<br><input type="radio"/> 5 a 6 veces semana<br><input type="radio"/> 1 vez al día<br><input type="radio"/> 2 a 3 veces al día<br><input type="radio"/> 5 a 6 veces al día<br><input type="radio"/> más 6 veces al día |
|---------------|--------------------------------------------------------------------------------------------------------------------------------------------------------------------------------------------------------------------------------------------------------------------------------------------------------------------------------------------------------------------------------------------------------------|

---

|                        |                                                                                                                                                                                                                                                                                                                                                                                                              |
|------------------------|--------------------------------------------------------------------------------------------------------------------------------------------------------------------------------------------------------------------------------------------------------------------------------------------------------------------------------------------------------------------------------------------------------------|
| pescado hervido blanco | <input type="radio"/> Nunca o menos 1 vez al mes<br><input type="radio"/> 1 a 3 veces mes<br><input checked="" type="radio"/> 1 vez semana<br><input type="radio"/> 2 a 4 veces semana<br><input type="radio"/> 5 a 6 veces semana<br><input type="radio"/> 1 vez al día<br><input type="radio"/> 2 a 3 veces al día<br><input type="radio"/> 5 a 6 veces al día<br><input type="radio"/> más 6 veces al día |
|------------------------|--------------------------------------------------------------------------------------------------------------------------------------------------------------------------------------------------------------------------------------------------------------------------------------------------------------------------------------------------------------------------------------------------------------|

---

|                      |                                                                                                                                                                                                                                                                                                                                                                                                              |
|----------------------|--------------------------------------------------------------------------------------------------------------------------------------------------------------------------------------------------------------------------------------------------------------------------------------------------------------------------------------------------------------------------------------------------------------|
| pescado hervido azul | <input checked="" type="radio"/> Nunca o menos 1 vez al mes<br><input type="radio"/> 1 a 3 veces mes<br><input type="radio"/> 1 vez semana<br><input type="radio"/> 2 a 4 veces semana<br><input type="radio"/> 5 a 6 veces semana<br><input type="radio"/> 1 vez al día<br><input type="radio"/> 2 a 3 veces al día<br><input type="radio"/> 5 a 6 veces al día<br><input type="radio"/> más 6 veces al día |
|----------------------|--------------------------------------------------------------------------------------------------------------------------------------------------------------------------------------------------------------------------------------------------------------------------------------------------------------------------------------------------------------------------------------------------------------|

---

|                    |                                                                                                                                                                                                                                                                                                                                                                                                              |
|--------------------|--------------------------------------------------------------------------------------------------------------------------------------------------------------------------------------------------------------------------------------------------------------------------------------------------------------------------------------------------------------------------------------------------------------|
| otros pescado azul | <input type="radio"/> Nunca o menos 1 vez al mes<br><input type="radio"/> 1 a 3 veces mes<br><input checked="" type="radio"/> 1 vez semana<br><input type="radio"/> 2 a 4 veces semana<br><input type="radio"/> 5 a 6 veces semana<br><input type="radio"/> 1 vez al día<br><input type="radio"/> 2 a 3 veces al día<br><input type="radio"/> 5 a 6 veces al día<br><input type="radio"/> más 6 veces al día |
|--------------------|--------------------------------------------------------------------------------------------------------------------------------------------------------------------------------------------------------------------------------------------------------------------------------------------------------------------------------------------------------------------------------------------------------------|

---

|               |                                                                                                                                                                                                                                                                                                                                                                                                              |
|---------------|--------------------------------------------------------------------------------------------------------------------------------------------------------------------------------------------------------------------------------------------------------------------------------------------------------------------------------------------------------------------------------------------------------------|
| atun conserva | <input type="radio"/> Nunca o menos 1 vez al mes<br><input checked="" type="radio"/> 1 a 3 veces mes<br><input type="radio"/> 1 vez semana<br><input type="radio"/> 2 a 4 veces semana<br><input type="radio"/> 5 a 6 veces semana<br><input type="radio"/> 1 vez al día<br><input type="radio"/> 2 a 3 veces al día<br><input type="radio"/> 5 a 6 veces al día<br><input type="radio"/> más 6 veces al día |
|---------------|--------------------------------------------------------------------------------------------------------------------------------------------------------------------------------------------------------------------------------------------------------------------------------------------------------------------------------------------------------------------------------------------------------------|

---

|                  |                                                                                                                                                                                                                                                                                                                                                                                                              |
|------------------|--------------------------------------------------------------------------------------------------------------------------------------------------------------------------------------------------------------------------------------------------------------------------------------------------------------------------------------------------------------------------------------------------------------|
| sardina conserva | <input checked="" type="radio"/> Nunca o menos 1 vez al mes<br><input type="radio"/> 1 a 3 veces mes<br><input type="radio"/> 1 vez semana<br><input type="radio"/> 2 a 4 veces semana<br><input type="radio"/> 5 a 6 veces semana<br><input type="radio"/> 1 vez al día<br><input type="radio"/> 2 a 3 veces al día<br><input type="radio"/> 5 a 6 veces al día<br><input type="radio"/> más 6 veces al día |
|------------------|--------------------------------------------------------------------------------------------------------------------------------------------------------------------------------------------------------------------------------------------------------------------------------------------------------------------------------------------------------------------------------------------------------------|

---

|                                         |                                                                                                                                                                                                                                                                                                                                                                                                              |
|-----------------------------------------|--------------------------------------------------------------------------------------------------------------------------------------------------------------------------------------------------------------------------------------------------------------------------------------------------------------------------------------------------------------------------------------------------------------|
| pescado ahumado                         | <input checked="" type="radio"/> Nunca o menos 1 vez al mes<br><input type="radio"/> 1 a 3 veces mes<br><input type="radio"/> 1 vez semana<br><input type="radio"/> 2 a 4 veces semana<br><input type="radio"/> 5 a 6 veces semana<br><input type="radio"/> 1 vez al día<br><input type="radio"/> 2 a 3 veces al día<br><input type="radio"/> 5 a 6 veces al día<br><input type="radio"/> más 6 veces al día |
| almejas o mejillones o ostras unos 100g | <input type="radio"/> Nunca o menos 1 vez al mes<br><input checked="" type="radio"/> 1 a 3 veces mes<br><input type="radio"/> 1 vez semana<br><input type="radio"/> 2 a 4 veces semana<br><input type="radio"/> 5 a 6 veces semana<br><input type="radio"/> 1 vez al día<br><input type="radio"/> 2 a 3 veces al día<br><input type="radio"/> 5 a 6 veces al día<br><input type="radio"/> más 6 veces al día |
| calamar o chipiron o sepia unos 100g    | <input type="radio"/> Nunca o menos 1 vez al mes<br><input checked="" type="radio"/> 1 a 3 veces mes<br><input type="radio"/> 1 vez semana<br><input type="radio"/> 2 a 4 veces semana<br><input type="radio"/> 5 a 6 veces semana<br><input type="radio"/> 1 vez al día<br><input type="radio"/> 2 a 3 veces al día<br><input type="radio"/> 5 a 6 veces al día<br><input type="radio"/> más 6 veces al día |
| marisco unos 100g                       | <input type="radio"/> Nunca o menos 1 vez al mes<br><input checked="" type="radio"/> 1 a 3 veces mes<br><input type="radio"/> 1 vez semana<br><input type="radio"/> 2 a 4 veces semana<br><input type="radio"/> 5 a 6 veces semana<br><input type="radio"/> 1 vez al día<br><input type="radio"/> 2 a 3 veces al día<br><input type="radio"/> 5 a 6 veces al día<br><input type="radio"/> más 6 veces al día |
| Espinacas o acelgas cocinadas           | <input type="radio"/> Nunca o menos 1 vez al mes<br><input checked="" type="radio"/> 1 a 3 veces mes<br><input type="radio"/> 1 vez semana<br><input type="radio"/> 2 a 4 veces semana<br><input type="radio"/> 5 a 6 veces semana<br><input type="radio"/> 1 vez al día<br><input type="radio"/> 2 a 3 veces al día<br><input type="radio"/> 5 a 6 veces al día<br><input type="radio"/> más 6 veces al día |
| Col o coliflor o brocoli cocinado       | <input type="radio"/> Nunca o menos 1 vez al mes<br><input type="radio"/> 1 a 3 veces mes<br><input type="radio"/> 1 vez semana<br><input checked="" type="radio"/> 2 a 4 veces semana<br><input type="radio"/> 5 a 6 veces semana<br><input type="radio"/> 1 vez al día<br><input type="radio"/> 2 a 3 veces al día<br><input type="radio"/> 5 a 6 veces al día<br><input type="radio"/> más 6 veces al día |

---

Lechuga o endivia o escarola

- ☐ Nunca o menos 1 vez al mes  
☐ 1 a 3 veces mes  
☒ 1 vez semana  
☐ 2 a 4 veces semana  
☐ 5 a 6 veces semana  
☐ 1 vez al día  
☐ 2 a 3 veces al día  
☐ 5 a 6 veces al día  
☐ más 6 veces al día

---

tomate ensalada

- ☐ Nunca o menos 1 vez al mes  
☐ 1 a 3 veces mes  
☒ 1 vez semana  
☐ 2 a 4 veces semana  
☐ 5 a 6 veces semana  
☐ 1 vez al día  
☐ 2 a 3 veces al día  
☐ 5 a 6 veces al día  
☐ más 6 veces al día

---

cebolla

- ☐ Nunca o menos 1 vez al mes  
☐ 1 a 3 veces mes  
☐ 1 vez semana  
☒ 2 a 4 veces semana  
☐ 5 a 6 veces semana  
☐ 1 vez al día  
☐ 2 a 3 veces al día  
☐ 5 a 6 veces al día  
☐ más 6 veces al día

---

Zanahoria o calabaza

- ☐ Nunca o menos 1 vez al mes  
☐ 1 a 3 veces mes  
☐ 1 vez semana  
☒ 2 a 4 veces semana  
☐ 5 a 6 veces semana  
☐ 1 vez al día  
☐ 2 a 3 veces al día  
☐ 5 a 6 veces al día  
☐ más 6 veces al día

---

Judías verdes

- ☐ Nunca o menos 1 vez al mes  
☐ 1 a 3 veces mes  
☒ 1 vez semana  
☐ 2 a 4 veces semana  
☐ 5 a 6 veces semana  
☐ 1 vez al día  
☐ 2 a 3 veces al día  
☐ 5 a 6 veces al día  
☐ más 6 veces al día

---

Berenjena o calabacin o pepino

- ☐ Nunca o menos 1 vez al mes  
☐ 1 a 3 veces mes  
☒ 1 vez semana  
☐ 2 a 4 veces semana  
☐ 5 a 6 veces semana  
☐ 1 vez al día  
☐ 2 a 3 veces al día  
☐ 5 a 6 veces al día  
☐ más 6 veces al día

|                       |                                                                                                                                                                                                                                                                                                                                                                                                              |
|-----------------------|--------------------------------------------------------------------------------------------------------------------------------------------------------------------------------------------------------------------------------------------------------------------------------------------------------------------------------------------------------------------------------------------------------------|
| pimiento              | <input type="radio"/> Nunca o menos 1 vez al mes<br><input type="radio"/> 1 a 3 veces mes<br><input type="radio"/> 1 vez semana<br><input checked="" type="radio"/> 2 a 4 veces semana<br><input type="radio"/> 5 a 6 veces semana<br><input type="radio"/> 1 vez al día<br><input type="radio"/> 2 a 3 veces al día<br><input type="radio"/> 5 a 6 veces al día<br><input type="radio"/> más 6 veces al día |
| alcachofa             | <input type="radio"/> Nunca o menos 1 vez al mes<br><input checked="" type="radio"/> 1 a 3 veces mes<br><input type="radio"/> 1 vez semana<br><input type="radio"/> 2 a 4 veces semana<br><input type="radio"/> 5 a 6 veces semana<br><input type="radio"/> 1 vez al día<br><input type="radio"/> 2 a 3 veces al día<br><input type="radio"/> 5 a 6 veces al día<br><input type="radio"/> más 6 veces al día |
| espárragos            | <input type="radio"/> Nunca o menos 1 vez al mes<br><input checked="" type="radio"/> 1 a 3 veces mes<br><input type="radio"/> 1 vez semana<br><input type="radio"/> 2 a 4 veces semana<br><input type="radio"/> 5 a 6 veces semana<br><input type="radio"/> 1 vez al día<br><input type="radio"/> 2 a 3 veces al día<br><input type="radio"/> 5 a 6 veces al día<br><input type="radio"/> más 6 veces al día |
| maíz hervido          | <input type="radio"/> Nunca o menos 1 vez al mes<br><input checked="" type="radio"/> 1 a 3 veces mes<br><input type="radio"/> 1 vez semana<br><input type="radio"/> 2 a 4 veces semana<br><input type="radio"/> 5 a 6 veces semana<br><input type="radio"/> 1 vez al día<br><input type="radio"/> 2 a 3 veces al día<br><input type="radio"/> 5 a 6 veces al día<br><input type="radio"/> más 6 veces al día |
| legumbres             | <input type="radio"/> Nunca o menos 1 vez al mes<br><input type="radio"/> 1 a 3 veces mes<br><input type="radio"/> 1 vez semana<br><input checked="" type="radio"/> 2 a 4 veces semana<br><input type="radio"/> 5 a 6 veces semana<br><input type="radio"/> 1 vez al día<br><input type="radio"/> 2 a 3 veces al día<br><input type="radio"/> 5 a 6 veces al día<br><input type="radio"/> más 6 veces al día |
| naranjas o mandarinas | <input type="radio"/> Nunca o menos 1 vez al mes<br><input type="radio"/> 1 a 3 veces mes<br><input type="radio"/> 1 vez semana<br><input type="radio"/> 2 a 4 veces semana<br><input type="radio"/> 5 a 6 veces semana<br><input type="radio"/> 1 vez al día<br><input checked="" type="radio"/> 2 a 3 veces al día<br><input type="radio"/> 5 a 6 veces al día<br><input type="radio"/> más 6 veces al día |

|                       |                                                                                                                                                                                                                                                                                                                                                                                                              |
|-----------------------|--------------------------------------------------------------------------------------------------------------------------------------------------------------------------------------------------------------------------------------------------------------------------------------------------------------------------------------------------------------------------------------------------------------|
| zum natural fruta     | <input type="radio"/> Nunca o menos 1 vez al mes<br><input checked="" type="radio"/> 1 a 3 veces mes<br><input type="radio"/> 1 vez semana<br><input type="radio"/> 2 a 4 veces semana<br><input type="radio"/> 5 a 6 veces semana<br><input type="radio"/> 1 vez al día<br><input type="radio"/> 2 a 3 veces al día<br><input type="radio"/> 5 a 6 veces al día<br><input type="radio"/> más 6 veces al día |
| platano               | <input checked="" type="radio"/> Nunca o menos 1 vez al mes<br><input type="radio"/> 1 a 3 veces mes<br><input type="radio"/> 1 vez semana<br><input type="radio"/> 2 a 4 veces semana<br><input type="radio"/> 5 a 6 veces semana<br><input type="radio"/> 1 vez al día<br><input type="radio"/> 2 a 3 veces al día<br><input type="radio"/> 5 a 6 veces al día<br><input type="radio"/> más 6 veces al día |
| manzana o pera        | <input type="radio"/> Nunca o menos 1 vez al mes<br><input checked="" type="radio"/> 1 a 3 veces mes<br><input type="radio"/> 1 vez semana<br><input type="radio"/> 2 a 4 veces semana<br><input type="radio"/> 5 a 6 veces semana<br><input type="radio"/> 1 vez al día<br><input type="radio"/> 2 a 3 veces al día<br><input type="radio"/> 5 a 6 veces al día<br><input type="radio"/> más 6 veces al día |
| melocotón o nectarina | <input type="radio"/> Nunca o menos 1 vez al mes<br><input checked="" type="radio"/> 1 a 3 veces mes<br><input type="radio"/> 1 vez semana<br><input type="radio"/> 2 a 4 veces semana<br><input type="radio"/> 5 a 6 veces semana<br><input type="radio"/> 1 vez al día<br><input type="radio"/> 2 a 3 veces al día<br><input type="radio"/> 5 a 6 veces al día<br><input type="radio"/> más 6 veces al día |
| sandia o melon        | <input type="radio"/> Nunca o menos 1 vez al mes<br><input checked="" type="radio"/> 1 a 3 veces mes<br><input type="radio"/> 1 vez semana<br><input type="radio"/> 2 a 4 veces semana<br><input type="radio"/> 5 a 6 veces semana<br><input type="radio"/> 1 vez al día<br><input type="radio"/> 2 a 3 veces al día<br><input type="radio"/> 5 a 6 veces al día<br><input type="radio"/> más 6 veces al día |
| uva                   | <input type="radio"/> Nunca o menos 1 vez al mes<br><input type="radio"/> 1 a 3 veces mes<br><input type="radio"/> 1 vez semana<br><input checked="" type="radio"/> 2 a 4 veces semana<br><input type="radio"/> 5 a 6 veces semana<br><input type="radio"/> 1 vez al día<br><input type="radio"/> 2 a 3 veces al día<br><input type="radio"/> 5 a 6 veces al día<br><input type="radio"/> más 6 veces al día |

---

bruna o ciruela

- ☒ Nunca o menos 1 vez al mes  
☐ 1 a 3 veces mes  
☐ 1 vez semana  
☐ 2 a 4 veces semana  
☐ 5 a 6 veces semana  
☐ 1 vez al día  
☐ 2 a 3 veces al día  
☐ 5 a 6 veces al día  
☐ más 6 veces al día

---

kiwi

- ☐ Nunca o menos 1 vez al mes  
☐ 1 a 3 veces mes  
☐ 1 vez semana  
☒ 2 a 4 veces semana  
☐ 5 a 6 veces semana  
☐ 1 vez al día  
☐ 2 a 3 veces al día  
☐ 5 a 6 veces al día  
☐ más 6 veces al día

---

aceituna

- ☐ Nunca o menos 1 vez al mes  
☒ 1 a 3 veces mes  
☐ 1 vez semana  
☐ 2 a 4 veces semana  
☐ 5 a 6 veces semana  
☐ 1 vez al día  
☐ 2 a 3 veces al día  
☐ 5 a 6 veces al día  
☐ más 6 veces al día

---

frutos secos

- ☐ Nunca o menos 1 vez al mes  
☐ 1 a 3 veces mes  
☐ 1 vez semana  
☐ 2 a 4 veces semana  
☐ 5 a 6 veces semana  
☒ 1 vez al día  
☐ 2 a 3 veces al día  
☐ 5 a 6 veces al día  
☐ más 6 veces al día

---

pan blanco

- ☐ Nunca o menos 1 vez al mes  
☒ 1 a 3 veces mes  
☐ 1 vez semana  
☐ 2 a 4 veces semana  
☐ 5 a 6 veces semana  
☐ 1 vez al día  
☐ 2 a 3 veces al día  
☐ 5 a 6 veces al día  
☐ más 6 veces al día

---

pan integral

- ☐ Nunca o menos 1 vez al mes  
☐ 1 a 3 veces mes  
☐ 1 vez semana  
☒ 2 a 4 veces semana  
☐ 5 a 6 veces semana  
☐ 1 vez al día  
☐ 2 a 3 veces al día  
☐ 5 a 6 veces al día  
☐ más 6 veces al día



---

|                   |                                                                                                                                                                                                                                                                                                                                                                                                              |
|-------------------|--------------------------------------------------------------------------------------------------------------------------------------------------------------------------------------------------------------------------------------------------------------------------------------------------------------------------------------------------------------------------------------------------------------|
| cereales desayuno | <input checked="" type="radio"/> Nunca o menos 1 vez al mes<br><input type="radio"/> 1 a 3 veces mes<br><input type="radio"/> 1 vez semana<br><input type="radio"/> 2 a 4 veces semana<br><input type="radio"/> 5 a 6 veces semana<br><input type="radio"/> 1 vez al día<br><input type="radio"/> 2 a 3 veces al día<br><input type="radio"/> 5 a 6 veces al día<br><input type="radio"/> más 6 veces al día |
|-------------------|--------------------------------------------------------------------------------------------------------------------------------------------------------------------------------------------------------------------------------------------------------------------------------------------------------------------------------------------------------------------------------------------------------------|

---

|                |                                                                                                                                                                                                                                                                                                                                                                                                              |
|----------------|--------------------------------------------------------------------------------------------------------------------------------------------------------------------------------------------------------------------------------------------------------------------------------------------------------------------------------------------------------------------------------------------------------------|
| patatas fritas | <input type="radio"/> Nunca o menos 1 vez al mes<br><input checked="" type="radio"/> 1 a 3 veces mes<br><input type="radio"/> 1 vez semana<br><input type="radio"/> 2 a 4 veces semana<br><input type="radio"/> 5 a 6 veces semana<br><input type="radio"/> 1 vez al día<br><input type="radio"/> 2 a 3 veces al día<br><input type="radio"/> 5 a 6 veces al día<br><input type="radio"/> más 6 veces al día |
|----------------|--------------------------------------------------------------------------------------------------------------------------------------------------------------------------------------------------------------------------------------------------------------------------------------------------------------------------------------------------------------------------------------------------------------|

---

|                          |                                                                                                                                                                                                                                                                                                                                                                                                              |
|--------------------------|--------------------------------------------------------------------------------------------------------------------------------------------------------------------------------------------------------------------------------------------------------------------------------------------------------------------------------------------------------------------------------------------------------------|
| patatas cocidas o asadas | <input type="radio"/> Nunca o menos 1 vez al mes<br><input checked="" type="radio"/> 1 a 3 veces mes<br><input type="radio"/> 1 vez semana<br><input type="radio"/> 2 a 4 veces semana<br><input type="radio"/> 5 a 6 veces semana<br><input type="radio"/> 1 vez al día<br><input type="radio"/> 2 a 3 veces al día<br><input type="radio"/> 5 a 6 veces al día<br><input type="radio"/> más 6 veces al día |
|--------------------------|--------------------------------------------------------------------------------------------------------------------------------------------------------------------------------------------------------------------------------------------------------------------------------------------------------------------------------------------------------------------------------------------------------------|

---

|             |                                                                                                                                                                                                                                                                                                                                                                                                              |
|-------------|--------------------------------------------------------------------------------------------------------------------------------------------------------------------------------------------------------------------------------------------------------------------------------------------------------------------------------------------------------------------------------------------------------------|
| bolsa papas | <input type="radio"/> Nunca o menos 1 vez al mes<br><input type="radio"/> 1 a 3 veces mes<br><input checked="" type="radio"/> 1 vez semana<br><input type="radio"/> 2 a 4 veces semana<br><input type="radio"/> 5 a 6 veces semana<br><input type="radio"/> 1 vez al día<br><input type="radio"/> 2 a 3 veces al día<br><input type="radio"/> 5 a 6 veces al día<br><input type="radio"/> más 6 veces al día |
|-------------|--------------------------------------------------------------------------------------------------------------------------------------------------------------------------------------------------------------------------------------------------------------------------------------------------------------------------------------------------------------------------------------------------------------|

---

|                |                                                                                                                                                                                                                                                                                                                                                                                                              |
|----------------|--------------------------------------------------------------------------------------------------------------------------------------------------------------------------------------------------------------------------------------------------------------------------------------------------------------------------------------------------------------------------------------------------------------|
| arroz cocinado | <input type="radio"/> Nunca o menos 1 vez al mes<br><input type="radio"/> 1 a 3 veces mes<br><input checked="" type="radio"/> 1 vez semana<br><input type="radio"/> 2 a 4 veces semana<br><input type="radio"/> 5 a 6 veces semana<br><input type="radio"/> 1 vez al día<br><input type="radio"/> 2 a 3 veces al día<br><input type="radio"/> 5 a 6 veces al día<br><input type="radio"/> más 6 veces al día |
|----------------|--------------------------------------------------------------------------------------------------------------------------------------------------------------------------------------------------------------------------------------------------------------------------------------------------------------------------------------------------------------------------------------------------------------|

---

|       |                                                                                                                                                                                                                                                                                                                                                                                                              |
|-------|--------------------------------------------------------------------------------------------------------------------------------------------------------------------------------------------------------------------------------------------------------------------------------------------------------------------------------------------------------------------------------------------------------------|
| pasta | <input type="radio"/> Nunca o menos 1 vez al mes<br><input type="radio"/> 1 a 3 veces mes<br><input checked="" type="radio"/> 1 vez semana<br><input type="radio"/> 2 a 4 veces semana<br><input type="radio"/> 5 a 6 veces semana<br><input type="radio"/> 1 vez al día<br><input type="radio"/> 2 a 3 veces al día<br><input type="radio"/> 5 a 6 veces al día<br><input type="radio"/> más 6 veces al día |
|-------|--------------------------------------------------------------------------------------------------------------------------------------------------------------------------------------------------------------------------------------------------------------------------------------------------------------------------------------------------------------------------------------------------------------|

---

|                     |                                                                                                                                                                                                                                                                                                                                                                                                              |
|---------------------|--------------------------------------------------------------------------------------------------------------------------------------------------------------------------------------------------------------------------------------------------------------------------------------------------------------------------------------------------------------------------------------------------------------|
| pizza               | <input type="radio"/> Nunca o menos 1 vez al mes<br><input type="radio"/> 1 a 3 veces mes<br><input checked="" type="radio"/> 1 vez semana<br><input type="radio"/> 2 a 4 veces semana<br><input type="radio"/> 5 a 6 veces semana<br><input type="radio"/> 1 vez al día<br><input type="radio"/> 2 a 3 veces al día<br><input type="radio"/> 5 a 6 veces al día<br><input type="radio"/> más 6 veces al día |
| aceite oliva        | <input type="radio"/> Nunca o menos 1 vez al mes<br><input type="radio"/> 1 a 3 veces mes<br><input type="radio"/> 1 vez semana<br><input type="radio"/> 2 a 4 veces semana<br><input checked="" type="radio"/> 5 a 6 veces semana<br><input type="radio"/> 1 vez al día<br><input type="radio"/> 2 a 3 veces al día<br><input type="radio"/> 5 a 6 veces al día<br><input type="radio"/> más 6 veces al día |
| otros aceites       | <input checked="" type="radio"/> Nunca o menos 1 vez al mes<br><input type="radio"/> 1 a 3 veces mes<br><input type="radio"/> 1 vez semana<br><input type="radio"/> 2 a 4 veces semana<br><input type="radio"/> 5 a 6 veces semana<br><input type="radio"/> 1 vez al día<br><input type="radio"/> 2 a 3 veces al día<br><input type="radio"/> 5 a 6 veces al día<br><input type="radio"/> más 6 veces al día |
| margarina           | <input checked="" type="radio"/> Nunca o menos 1 vez al mes<br><input type="radio"/> 1 a 3 veces mes<br><input type="radio"/> 1 vez semana<br><input type="radio"/> 2 a 4 veces semana<br><input type="radio"/> 5 a 6 veces semana<br><input type="radio"/> 1 vez al día<br><input type="radio"/> 2 a 3 veces al día<br><input type="radio"/> 5 a 6 veces al día<br><input type="radio"/> más 6 veces al día |
| mantequilla         | <input type="radio"/> Nunca o menos 1 vez al mes<br><input type="radio"/> 1 a 3 veces mes<br><input checked="" type="radio"/> 1 vez semana<br><input type="radio"/> 2 a 4 veces semana<br><input type="radio"/> 5 a 6 veces semana<br><input type="radio"/> 1 vez al día<br><input type="radio"/> 2 a 3 veces al día<br><input type="radio"/> 5 a 6 veces al día<br><input type="radio"/> más 6 veces al día |
| galletas tipo maria | <input checked="" type="radio"/> Nunca o menos 1 vez al mes<br><input type="radio"/> 1 a 3 veces mes<br><input type="radio"/> 1 vez semana<br><input type="radio"/> 2 a 4 veces semana<br><input type="radio"/> 5 a 6 veces semana<br><input type="radio"/> 1 vez al día<br><input type="radio"/> 2 a 3 veces al día<br><input type="radio"/> 5 a 6 veces al día<br><input type="radio"/> más 6 veces al día |

|                           |                                                                                                                                                                                                                                                                                                                                                                                                              |
|---------------------------|--------------------------------------------------------------------------------------------------------------------------------------------------------------------------------------------------------------------------------------------------------------------------------------------------------------------------------------------------------------------------------------------------------------|
| galletas chocolate        | <input type="radio"/> Nunca o menos 1 vez al mes<br><input type="radio"/> 1 a 3 veces mes<br><input type="radio"/> 1 vez semana<br><input type="radio"/> 2 a 4 veces semana<br><input type="radio"/> 5 a 6 veces semana<br><input type="radio"/> 1 vez al día<br><input checked="" type="radio"/> 2 a 3 veces al día<br><input type="radio"/> 5 a 6 veces al día<br><input type="radio"/> más 6 veces al día |
| bollieria                 | <input type="radio"/> Nunca o menos 1 vez al mes<br><input checked="" type="radio"/> 1 a 3 veces mes<br><input type="radio"/> 1 vez semana<br><input type="radio"/> 2 a 4 veces semana<br><input type="radio"/> 5 a 6 veces semana<br><input type="radio"/> 1 vez al día<br><input type="radio"/> 2 a 3 veces al día<br><input type="radio"/> 5 a 6 veces al día<br><input type="radio"/> más 6 veces al día |
| chocolate o bombones      | <input type="radio"/> Nunca o menos 1 vez al mes<br><input type="radio"/> 1 a 3 veces mes<br><input type="radio"/> 1 vez semana<br><input type="radio"/> 2 a 4 veces semana<br><input type="radio"/> 5 a 6 veces semana<br><input checked="" type="radio"/> 1 vez al día<br><input type="radio"/> 2 a 3 veces al día<br><input type="radio"/> 5 a 6 veces al día<br><input type="radio"/> más 6 veces al día |
| chocolate polvo o colacao | <input type="radio"/> Nunca o menos 1 vez al mes<br><input type="radio"/> 1 a 3 veces mes<br><input type="radio"/> 1 vez semana<br><input checked="" type="radio"/> 2 a 4 veces semana<br><input type="radio"/> 5 a 6 veces semana<br><input type="radio"/> 1 vez al día<br><input type="radio"/> 2 a 3 veces al día<br><input type="radio"/> 5 a 6 veces al día<br><input type="radio"/> más 6 veces al día |
| vino tinto                | <input checked="" type="radio"/> Nunca o menos 1 vez al mes<br><input type="radio"/> 1 a 3 veces mes<br><input type="radio"/> 1 vez semana<br><input type="radio"/> 2 a 4 veces semana<br><input type="radio"/> 5 a 6 veces semana<br><input type="radio"/> 1 vez al día<br><input type="radio"/> 2 a 3 veces al día<br><input type="radio"/> 5 a 6 veces al día<br><input type="radio"/> más 6 veces al día |
| vino blanco               | <input checked="" type="radio"/> Nunca o menos 1 vez al mes<br><input type="radio"/> 1 a 3 veces mes<br><input type="radio"/> 1 vez semana<br><input type="radio"/> 2 a 4 veces semana<br><input type="radio"/> 5 a 6 veces semana<br><input type="radio"/> 1 vez al día<br><input type="radio"/> 2 a 3 veces al día<br><input type="radio"/> 5 a 6 veces al día<br><input type="radio"/> más 6 veces al día |

|                       |                                                                                                                                                                                                                                                                                                                                                                                                              |
|-----------------------|--------------------------------------------------------------------------------------------------------------------------------------------------------------------------------------------------------------------------------------------------------------------------------------------------------------------------------------------------------------------------------------------------------------|
| vino seco o vermut    | <input checked="" type="radio"/> Nunca o menos 1 vez al mes<br><input type="radio"/> 1 a 3 veces mes<br><input type="radio"/> 1 vez semana<br><input type="radio"/> 2 a 4 veces semana<br><input type="radio"/> 5 a 6 veces semana<br><input type="radio"/> 1 vez al día<br><input type="radio"/> 2 a 3 veces al día<br><input type="radio"/> 5 a 6 veces al día<br><input type="radio"/> más 6 veces al día |
| cerveza               | <input checked="" type="radio"/> Nunca o menos 1 vez al mes<br><input type="radio"/> 1 a 3 veces mes<br><input type="radio"/> 1 vez semana<br><input type="radio"/> 2 a 4 veces semana<br><input type="radio"/> 5 a 6 veces semana<br><input type="radio"/> 1 vez al día<br><input type="radio"/> 2 a 3 veces al día<br><input type="radio"/> 5 a 6 veces al día<br><input type="radio"/> más 6 veces al día |
| cerveza sin alcohol   | <input type="radio"/> Nunca o menos 1 vez al mes<br><input type="radio"/> 1 a 3 veces mes<br><input checked="" type="radio"/> 1 vez semana<br><input type="radio"/> 2 a 4 veces semana<br><input type="radio"/> 5 a 6 veces semana<br><input type="radio"/> 1 vez al día<br><input type="radio"/> 2 a 3 veces al día<br><input type="radio"/> 5 a 6 veces al día<br><input type="radio"/> más 6 veces al día |
| licores               | <input checked="" type="radio"/> Nunca o menos 1 vez al mes<br><input type="radio"/> 1 a 3 veces mes<br><input type="radio"/> 1 vez semana<br><input type="radio"/> 2 a 4 veces semana<br><input type="radio"/> 5 a 6 veces semana<br><input type="radio"/> 1 vez al día<br><input type="radio"/> 2 a 3 veces al día<br><input type="radio"/> 5 a 6 veces al día<br><input type="radio"/> más 6 veces al día |
| ginebra o ron o vodka | <input checked="" type="radio"/> Nunca o menos 1 vez al mes<br><input type="radio"/> 1 a 3 veces mes<br><input type="radio"/> 1 vez semana<br><input type="radio"/> 2 a 4 veces semana<br><input type="radio"/> 5 a 6 veces semana<br><input type="radio"/> 1 vez al día<br><input type="radio"/> 2 a 3 veces al día<br><input type="radio"/> 5 a 6 veces al día<br><input type="radio"/> más 6 veces al día |
| refresco normal       | <input checked="" type="radio"/> Nunca o menos 1 vez al mes<br><input type="radio"/> 1 a 3 veces mes<br><input type="radio"/> 1 vez semana<br><input type="radio"/> 2 a 4 veces semana<br><input type="radio"/> 5 a 6 veces semana<br><input type="radio"/> 1 vez al día<br><input type="radio"/> 2 a 3 veces al día<br><input type="radio"/> 5 a 6 veces al día<br><input type="radio"/> más 6 veces al día |

|                          |                                                                                                                                                                                                                                                                                                                                                                                                              |
|--------------------------|--------------------------------------------------------------------------------------------------------------------------------------------------------------------------------------------------------------------------------------------------------------------------------------------------------------------------------------------------------------------------------------------------------------|
| refresco sin azúcar      | <input type="radio"/> Nunca o menos 1 vez al mes<br><input checked="" type="radio"/> 1 a 3 veces mes<br><input type="radio"/> 1 vez semana<br><input type="radio"/> 2 a 4 veces semana<br><input type="radio"/> 5 a 6 veces semana<br><input type="radio"/> 1 vez al día<br><input type="radio"/> 2 a 3 veces al día<br><input type="radio"/> 5 a 6 veces al día<br><input type="radio"/> más 6 veces al día |
| Agua del grifo           | <input checked="" type="radio"/> Nunca o menos 1 vez al mes<br><input type="radio"/> 1 a 3 veces mes<br><input type="radio"/> 1 vez semana<br><input type="radio"/> 2 a 4 veces semana<br><input type="radio"/> 5 a 6 veces semana<br><input type="radio"/> 1 vez al día<br><input type="radio"/> 2 a 3 veces al día<br><input type="radio"/> 5 a 6 veces al día<br><input type="radio"/> más 6 veces al día |
| agua embotellada sin gas | <input type="radio"/> Nunca o menos 1 vez al mes<br><input type="radio"/> 1 a 3 veces mes<br><input type="radio"/> 1 vez semana<br><input type="radio"/> 2 a 4 veces semana<br><input type="radio"/> 5 a 6 veces semana<br><input type="radio"/> 1 vez al día<br><input type="radio"/> 2 a 3 veces al día<br><input type="radio"/> 5 a 6 veces al día<br><input checked="" type="radio"/> más 6 veces al día |
| agua embotellada con gas | <input checked="" type="radio"/> Nunca o menos 1 vez al mes<br><input type="radio"/> 1 a 3 veces mes<br><input type="radio"/> 1 vez semana<br><input type="radio"/> 2 a 4 veces semana<br><input type="radio"/> 5 a 6 veces semana<br><input type="radio"/> 1 vez al día<br><input type="radio"/> 2 a 3 veces al día<br><input type="radio"/> 5 a 6 veces al día<br><input type="radio"/> más 6 veces al día |
| zumو frutas embasado     | <input checked="" type="radio"/> Nunca o menos 1 vez al mes<br><input type="radio"/> 1 a 3 veces mes<br><input type="radio"/> 1 vez semana<br><input type="radio"/> 2 a 4 veces semana<br><input type="radio"/> 5 a 6 veces semana<br><input type="radio"/> 1 vez al día<br><input type="radio"/> 2 a 3 veces al día<br><input type="radio"/> 5 a 6 veces al día<br><input type="radio"/> más 6 veces al día |
| cafe                     | <input type="radio"/> Nunca o menos 1 vez al mes<br><input type="radio"/> 1 a 3 veces mes<br><input checked="" type="radio"/> 1 vez semana<br><input type="radio"/> 2 a 4 veces semana<br><input type="radio"/> 5 a 6 veces semana<br><input type="radio"/> 1 vez al día<br><input type="radio"/> 2 a 3 veces al día<br><input type="radio"/> 5 a 6 veces al día<br><input type="radio"/> más 6 veces al día |

|                       |                                                                                                                                                                                                                                                                                                                                                                                                              |
|-----------------------|--------------------------------------------------------------------------------------------------------------------------------------------------------------------------------------------------------------------------------------------------------------------------------------------------------------------------------------------------------------------------------------------------------------|
| cafe descafeinado     | <input checked="" type="radio"/> Nunca o menos 1 vez al mes<br><input type="radio"/> 1 a 3 veces mes<br><input type="radio"/> 1 vez semana<br><input type="radio"/> 2 a 4 veces semana<br><input type="radio"/> 5 a 6 veces semana<br><input type="radio"/> 1 vez al día<br><input type="radio"/> 2 a 3 veces al día<br><input type="radio"/> 5 a 6 veces al día<br><input type="radio"/> más 6 veces al día |
| te o infusión         | <input type="radio"/> Nunca o menos 1 vez al mes<br><input type="radio"/> 1 a 3 veces mes<br><input checked="" type="radio"/> 1 vez semana<br><input type="radio"/> 2 a 4 veces semana<br><input type="radio"/> 5 a 6 veces semana<br><input type="radio"/> 1 vez al día<br><input type="radio"/> 2 a 3 veces al día<br><input type="radio"/> 5 a 6 veces al día<br><input type="radio"/> más 6 veces al día |
| sopa o puré verduras  | <input type="radio"/> Nunca o menos 1 vez al mes<br><input type="radio"/> 1 a 3 veces mes<br><input type="radio"/> 1 vez semana<br><input checked="" type="radio"/> 2 a 4 veces semana<br><input type="radio"/> 5 a 6 veces semana<br><input type="radio"/> 1 vez al día<br><input type="radio"/> 2 a 3 veces al día<br><input type="radio"/> 5 a 6 veces al día<br><input type="radio"/> más 6 veces al día |
| croquetas pollo jamón | <input type="radio"/> Nunca o menos 1 vez al mes<br><input checked="" type="radio"/> 1 a 3 veces mes<br><input type="radio"/> 1 vez semana<br><input type="radio"/> 2 a 4 veces semana<br><input type="radio"/> 5 a 6 veces semana<br><input type="radio"/> 1 vez al día<br><input type="radio"/> 2 a 3 veces al día<br><input type="radio"/> 5 a 6 veces al día<br><input type="radio"/> más 6 veces al día |
| croquetas pescado     | <input checked="" type="radio"/> Nunca o menos 1 vez al mes<br><input type="radio"/> 1 a 3 veces mes<br><input type="radio"/> 1 vez semana<br><input type="radio"/> 2 a 4 veces semana<br><input type="radio"/> 5 a 6 veces semana<br><input type="radio"/> 1 vez al día<br><input type="radio"/> 2 a 3 veces al día<br><input type="radio"/> 5 a 6 veces al día<br><input type="radio"/> más 6 veces al día |
| mayonesa              | <input type="radio"/> Nunca o menos 1 vez al mes<br><input type="radio"/> 1 a 3 veces mes<br><input checked="" type="radio"/> 1 vez semana<br><input type="radio"/> 2 a 4 veces semana<br><input type="radio"/> 5 a 6 veces semana<br><input type="radio"/> 1 vez al día<br><input type="radio"/> 2 a 3 veces al día<br><input type="radio"/> 5 a 6 veces al día<br><input type="radio"/> más 6 veces al día |

---

salsa tomate

- ☐ Nunca o menos 1 vez al mes  
☐ 1 a 3 veces mes  
☒ 1 vez semana  
☐ 2 a 4 veces semana  
☐ 5 a 6 veces semana  
☐ 1 vez al día  
☐ 2 a 3 veces al día  
☐ 5 a 6 veces al día  
☐ más 6 veces al día

---

ketchup

- ☐ Nunca o menos 1 vez al mes  
☒ 1 a 3 veces mes  
☐ 1 vez semana  
☐ 2 a 4 veces semana  
☐ 5 a 6 veces semana  
☐ 1 vez al día  
☐ 2 a 3 veces al día  
☐ 5 a 6 veces al día  
☐ más 6 veces al día

---

sal

- ☐ Nunca o menos 1 vez al mes  
☐ 1 a 3 veces mes  
☒ 1 vez semana  
☐ 2 a 4 veces semana  
☐ 5 a 6 veces semana  
☐ 1 vez al día  
☐ 2 a 3 veces al día  
☐ 5 a 6 veces al día  
☐ más 6 veces al día

---

ajo

- ☒ Nunca o menos 1 vez al mes  
☐ 1 a 3 veces mes  
☐ 1 vez semana  
☐ 2 a 4 veces semana  
☐ 5 a 6 veces semana  
☐ 1 vez al día  
☐ 2 a 3 veces al día  
☐ 5 a 6 veces al día  
☐ más 6 veces al día

---

mermelada o miel

- ☐ Nunca o menos 1 vez al mes  
☒ 1 a 3 veces mes  
☐ 1 vez semana  
☐ 2 a 4 veces semana  
☐ 5 a 6 veces semana  
☐ 1 vez al día  
☐ 2 a 3 veces al día  
☐ 5 a 6 veces al día  
☐ más 6 veces al día

---

azúcar

- ☒ Nunca o menos 1 vez al mes  
☐ 1 a 3 veces mes  
☐ 1 vez semana  
☐ 2 a 4 veces semana  
☐ 5 a 6 veces semana  
☐ 1 vez al día  
☐ 2 a 3 veces al día  
☐ 5 a 6 veces al día  
☐ más 6 veces al día

|                                       |                                                                                                                                                                                                                                                                                                                                                                                                                                                                                                                               |
|---------------------------------------|-------------------------------------------------------------------------------------------------------------------------------------------------------------------------------------------------------------------------------------------------------------------------------------------------------------------------------------------------------------------------------------------------------------------------------------------------------------------------------------------------------------------------------|
| Otro alimento                         |                                                                                                                                                                                                                                                                                                                                                                                                                                                                                                                               |
| suplementos vitamínicos               | <input checked="" type="radio"/> si<br><input type="radio"/> no                                                                                                                                                                                                                                                                                                                                                                                                                                                               |
| suplementos vitamínicos               | [*DATA REMOVED*]                                                                                                                                                                                                                                                                                                                                                                                                                                                                                                              |
| dieta previa                          | <input type="radio"/> si<br><input checked="" type="radio"/> no                                                                                                                                                                                                                                                                                                                                                                                                                                                               |
| motivo dieta                          | <input checked="" type="radio"/> no dieta<br><input type="radio"/> control peso<br><input type="radio"/> control colesterol<br><input type="radio"/> control diabetes<br><input type="radio"/> problemas estómago<br><input type="radio"/> problemas vesícula o hepáticos<br><input type="radio"/> HTA o cardiopatía<br><input type="radio"/> problemas renales<br><input type="radio"/> alergia alimentaria<br><input type="radio"/> ácido úrico elevado<br><input type="radio"/> vegetariana<br><input type="radio"/> otros |
| cambio alimentos año previo gestación | <input checked="" type="radio"/> si<br><input type="radio"/> no                                                                                                                                                                                                                                                                                                                                                                                                                                                               |
| cambio lácteos                        | <input type="radio"/> eliminado<br><input type="radio"/> disminuido<br><input type="radio"/> igual<br><input checked="" type="radio"/> aumentado<br><input type="radio"/> no sabe                                                                                                                                                                                                                                                                                                                                             |
| cambio huevos                         | <input type="radio"/> eliminado<br><input type="radio"/> disminuido<br><input checked="" type="radio"/> igual<br><input type="radio"/> aumentado<br><input type="radio"/> no sabe                                                                                                                                                                                                                                                                                                                                             |
| cambio carne                          | <input type="radio"/> eliminado<br><input type="radio"/> disminuido<br><input checked="" type="radio"/> igual<br><input type="radio"/> aumentado<br><input type="radio"/> no sabe                                                                                                                                                                                                                                                                                                                                             |
| cambio pescado                        | <input type="radio"/> eliminado<br><input checked="" type="radio"/> disminuido<br><input type="radio"/> igual<br><input type="radio"/> aumentado<br><input type="radio"/> no sabe                                                                                                                                                                                                                                                                                                                                             |
| cambio verduras                       | <input type="radio"/> eliminado<br><input type="radio"/> disminuido<br><input checked="" type="radio"/> igual<br><input type="radio"/> aumentado<br><input type="radio"/> no sabe                                                                                                                                                                                                                                                                                                                                             |



|                            |                                                                                                                                                                                                                        |
|----------------------------|------------------------------------------------------------------------------------------------------------------------------------------------------------------------------------------------------------------------|
| cambio legumbres           | <input type="radio"/> eliminado<br><input type="radio"/> disminuido<br><input checked="" type="radio"/> igual<br><input type="radio"/> aumentado<br><input type="radio"/> no sabe                                      |
| cambio fruta               | <input type="radio"/> eliminado<br><input type="radio"/> disminuido<br><input type="radio"/> igual<br><input checked="" type="radio"/> aumentado<br><input type="radio"/> no sabe                                      |
| cambio pan                 | <input type="radio"/> eliminado<br><input type="radio"/> disminuido<br><input checked="" type="radio"/> igual<br><input type="radio"/> aumentado<br><input type="radio"/> no sabe                                      |
| cambio aceite oliva        | <input type="radio"/> eliminado<br><input type="radio"/> disminuido<br><input checked="" type="radio"/> igual<br><input type="radio"/> aumentado<br><input type="radio"/> no sabe                                      |
| cambio mante o margarina   | <input type="radio"/> eliminado<br><input type="radio"/> disminuido<br><input type="radio"/> igual<br><input checked="" type="radio"/> aumentado<br><input type="radio"/> no sabe                                      |
| cambio azúcar y dulces     | <input type="radio"/> eliminado<br><input type="radio"/> disminuido<br><input type="radio"/> igual<br><input checked="" type="radio"/> aumentado<br><input type="radio"/> no sabe                                      |
| cambio bebidas alcohólicas | <input checked="" type="radio"/> eliminado<br><input type="radio"/> disminuido<br><input type="radio"/> igual<br><input type="radio"/> aumentado<br><input type="radio"/> no sabe                                      |
| frecuencia comidas fritas  | <input type="radio"/> a diario<br><input type="radio"/> 5 a 6 veces semana<br><input type="radio"/> 2 a 4 veces semana<br><input type="radio"/> 1 vez semana<br><input checked="" type="radio"/> menos de 1 vez semana |
| carne                      | <input type="radio"/> no como<br><input type="radio"/> cruda<br><input type="radio"/> poco hecha<br><input type="radio"/> hecha<br><input checked="" type="radio"/> muy hecha                                          |
| grasa visible carne        | <input checked="" type="radio"/> quita toda<br><input type="radio"/> quita mayoría<br><input type="radio"/> quita un poco<br><input type="radio"/> no quita nada                                                       |

|                                |                                                                                                                                                                                                                                                          |
|--------------------------------|----------------------------------------------------------------------------------------------------------------------------------------------------------------------------------------------------------------------------------------------------------|
| cocina carne                   | <input checked="" type="radio"/> a la plancha<br><input type="radio"/> a la parrilla<br><input type="radio"/> asada<br><input type="radio"/> frita<br><input type="radio"/> guisada                                                                      |
| tostado quemado carne          | <input type="radio"/> nunca<br><input checked="" type="radio"/> 1 vez mes<br><input type="radio"/> 2 a 3 veces mes<br><input type="radio"/> 1 vez semana<br><input type="radio"/> 2 a 3 semanas                                                          |
| tostado quemado pescado        | <input type="radio"/> nunca<br><input checked="" type="radio"/> 1 vez mes<br><input type="radio"/> 2 a 3 veces mes<br><input type="radio"/> 1 vez semana<br><input type="radio"/> 2 a 3 semanas                                                          |
| socarrat paella                | <input checked="" type="radio"/> nunca<br><input type="radio"/> 1 vez mes<br><input type="radio"/> 2 a 3 veces mes<br><input type="radio"/> 1 vez semana<br><input type="radio"/> 2 a 3 semanas                                                          |
| grasa o aceite cocinar         | <input type="radio"/> mantequilla<br><input type="radio"/> margarina<br><input type="radio"/> aceite oliva<br><input checked="" type="radio"/> aceite oliva virgen extra<br><input type="radio"/> aceite vegetal<br><input type="radio"/> mezcla aceites |
| grasa aceite aliñar            | <input type="radio"/> mantequilla<br><input type="radio"/> margarina<br><input type="radio"/> aceite oliva<br><input checked="" type="radio"/> aceite oliva virgen extra<br><input type="radio"/> aceite vegetal<br><input type="radio"/> mezcla aceites |
| grasa aceite freir             | <input type="radio"/> mantequilla<br><input type="radio"/> margarina<br><input type="radio"/> aceite oliva<br><input checked="" type="radio"/> aceite oliva virgen extra<br><input type="radio"/> aceite vegetal<br><input type="radio"/> mezcla aceites |
| Ejercicio cuestionario         | <input checked="" type="radio"/> si<br><input type="radio"/> no                                                                                                                                                                                          |
| horas de sueño incluido siesta | [*DATA REMOVED*]                                                                                                                                                                                                                                         |
| minutos siesta                 | [*DATA REMOVED*]                                                                                                                                                                                                                                         |
| horas televisión semana        | [*DATA REMOVED*]                                                                                                                                                                                                                                         |

|                                        |                                                                                                                                                                                                                                                                                                                                                                           |
|----------------------------------------|---------------------------------------------------------------------------------------------------------------------------------------------------------------------------------------------------------------------------------------------------------------------------------------------------------------------------------------------------------------------------|
| actividad trabajo                      | <input checked="" type="radio"/> casi siempre sentado<br><input type="radio"/> sentado 50 por cien<br><input type="radio"/> casi siempre de pie, quieto<br><input type="radio"/> casi siempre levantado caminando y llevando pocas cosas<br><input type="radio"/> casi siempre levantado, caminando y llevado muchas cosas<br><input type="radio"/> trabajo manual pesado |
| tiempo caminar o bici al día           | <input type="radio"/> casi nunca<br><input type="radio"/> menos 20min día<br><input type="radio"/> 20 a 40 min día<br><input checked="" type="radio"/> 40 a 60 min día<br><input type="radio"/> 1h o 1h y media día<br><input type="radio"/> más de 1h y media al día                                                                                                     |
| tiempo tareas casa al día              | <input type="radio"/> menos de 1h día<br><input type="radio"/> 1 a 2h día<br><input checked="" type="radio"/> 3 a 4h día<br><input type="radio"/> 5 a 6h día<br><input type="radio"/> 7 a 8h día<br><input type="radio"/> más de 8h día                                                                                                                                   |
| tiempo libre televisión ordenador leer | <input type="radio"/> menos 1h día<br><input type="radio"/> 1h día<br><input checked="" type="radio"/> 2h día<br><input type="radio"/> 3h día<br><input type="radio"/> 4h día<br><input type="radio"/> 5 a 6h día<br><input type="radio"/> mas 6h día                                                                                                                     |
| tiempo libre ejercicio o deporte       | <input type="radio"/> menos 1h semana<br><input type="radio"/> 1h semana<br><input type="radio"/> 2h semana<br><input type="radio"/> 3h semana<br><input checked="" type="radio"/> 4 a 5h semana<br><input type="radio"/> mas 5h semana                                                                                                                                   |
| como se considera                      | <input type="radio"/> sedentaria<br><input type="radio"/> poco activa<br><input checked="" type="radio"/> moderadamente activa<br><input type="radio"/> bastante activa<br><input type="radio"/> muy activa<br><input type="radio"/> no sabe                                                                                                                              |
| FUR                                    | [*DATA REMOVED*]                                                                                                                                                                                                                                                                                                                                                          |
| Semanas gestación 2T                   | [*DATA REMOVED*]                                                                                                                                                                                                                                                                                                                                                          |
| Días gestación 2T                      | [*DATA REMOVED*]                                                                                                                                                                                                                                                                                                                                                          |
| DBP 2T                                 | [*DATA REMOVED*]                                                                                                                                                                                                                                                                                                                                                          |
| CC 2T                                  | [*DATA REMOVED*]                                                                                                                                                                                                                                                                                                                                                          |
| AC 2T                                  | [*DATA REMOVED*]                                                                                                                                                                                                                                                                                                                                                          |

|                                                   |                                                                                                                                                                                                 |
|---------------------------------------------------|-------------------------------------------------------------------------------------------------------------------------------------------------------------------------------------------------|
| LF 2T                                             | [*DATA REMOVED*]                                                                                                                                                                                |
| PFE 2T (Hadlock)                                  | [*DATA REMOVED*]                                                                                                                                                                                |
| Semanas gestación 3T                              | [*DATA REMOVED*]                                                                                                                                                                                |
| días 3T                                           | [*DATA REMOVED*]                                                                                                                                                                                |
| DBP 3T                                            | [*DATA REMOVED*]                                                                                                                                                                                |
| CC 3T                                             | [*DATA REMOVED*]                                                                                                                                                                                |
| AC 3T                                             | [*DATA REMOVED*]                                                                                                                                                                                |
| LF 3T                                             | [*DATA REMOVED*]                                                                                                                                                                                |
| PFE 3T (Hadlock)                                  | [*DATA REMOVED*]                                                                                                                                                                                |
| Semanas de gestación final                        | [*DATA REMOVED*]                                                                                                                                                                                |
| días gestación final                              | [*DATA REMOVED*]                                                                                                                                                                                |
| Localización placenta                             | <input type="radio"/> anterior<br><input type="radio"/> lateral derecha<br><input type="radio"/> lateral izquierda<br><input checked="" type="radio"/> posterior<br><input type="radio"/> fondo |
| Presentación longitudinal cefálica                | <input type="radio"/> no<br><input checked="" type="radio"/> si                                                                                                                                 |
| Dorso                                             | <input type="radio"/> izquierda anterior<br><input checked="" type="radio"/> izquierda posterior<br><input type="radio"/> derecha anterior<br><input type="radio"/> derecha posterior           |
| diámetro biparietal                               | [*DATA REMOVED*]                                                                                                                                                                                |
| Circunferencia craneal                            | [*DATA REMOVED*]                                                                                                                                                                                |
| Circunferencia abdominal                          | [*DATA REMOVED*]                                                                                                                                                                                |
| Longitud de femur                                 | [*DATA REMOVED*]                                                                                                                                                                                |
| tejido celular subcutáneo a nivel del muslo en mm | [*DATA REMOVED*]                                                                                                                                                                                |
| tejido celular subcutáneo en abdomen en mm        | [*DATA REMOVED*]                                                                                                                                                                                |
| Volumen del muslo en cm3                          | [*DATA REMOVED*]                                                                                                                                                                                |
| Peso fetal estimado según fórmula de Hadlock      | [*DATA REMOVED*]                                                                                                                                                                                |

|                                               |                                                                                                                                                          |
|-----------------------------------------------|----------------------------------------------------------------------------------------------------------------------------------------------------------|
| Percentil                                     | [*DATA REMOVED*]                                                                                                                                         |
| Peso fetal estimado según fórmula de Scioscia | <hr/>                                                                                                                                                    |
| Peso fetal estimado según fórmula de LEE      | <hr/>                                                                                                                                                    |
| Tipo de parto                                 | <input type="radio"/> eutocico<br><input checked="" type="radio"/> instrumentado/ventosa<br><input type="radio"/> cesarea                                |
| fecha de nacimiento                           | [*DATA REMOVED*]                                                                                                                                         |
| Días entre exploración y nacimiento           | [*DATA REMOVED*]                                                                                                                                         |
| Peso RN en g                                  | [*DATA REMOVED*]                                                                                                                                         |
| sexo                                          | <input type="radio"/> mujer<br><input checked="" type="radio"/> hombre                                                                                   |
| Apgar 1 minuto                                | [*DATA REMOVED*]                                                                                                                                         |
| Apgar 5 minutos                               | [*DATA REMOVED*]                                                                                                                                         |
| Apgar 10 minutos                              | <hr/>                                                                                                                                                    |
| antecedente Covid durante gestación           | <input type="radio"/> Yes<br><input checked="" type="radio"/> No                                                                                         |
| Nivel de estudios                             | <input type="radio"/> ninguno<br><input type="radio"/> primarios<br><input type="radio"/> secundarios<br><input checked="" type="radio"/> universitarios |

# Base\_datos\_estimacion\_peso\_fetal

|                                       |                                                                                                                                                                                                                                                                                      |
|---------------------------------------|--------------------------------------------------------------------------------------------------------------------------------------------------------------------------------------------------------------------------------------------------------------------------------------|
| Número de identificación participante | 10                                                                                                                                                                                                                                                                                   |
| CODIGO PARTICIPANTE                   |                                                                                                                                                                                                                                                                                      |
| Edad                                  | [*DATA REMOVED*]                                                                                                                                                                                                                                                                     |
| Gestaciones                           | <input checked="" type="radio"/> 1<br><input type="radio"/> 2<br><input type="radio"/> 3<br><input type="radio"/> mas de 3                                                                                                                                                           |
| partos                                | <input checked="" type="radio"/> 0<br><input type="radio"/> 1<br><input type="radio"/> 2<br><input type="radio"/> 3<br><input type="radio"/> mas de 3                                                                                                                                |
| cesáreas                              | <input checked="" type="radio"/> 0<br><input type="radio"/> 1<br><input type="radio"/> 2<br><input type="radio"/> 3<br><input type="radio"/> mas de 3                                                                                                                                |
| Abortos                               | <input checked="" type="radio"/> 0<br><input type="radio"/> 1<br><input type="radio"/> 2<br><input type="radio"/> 3<br><input type="radio"/> mas de 3                                                                                                                                |
| Tipo de gestacion                     | <input checked="" type="radio"/> espontanea<br><input type="radio"/> IAC inseminación artificial conyuge<br><input type="radio"/> IAD inseminación artificial donante<br><input type="radio"/> FIV Fecundación in Vitro<br><input type="radio"/> Ovodon FIV con donación de ovocitos |
| peso previo a embarazo                | [*DATA REMOVED*]                                                                                                                                                                                                                                                                     |
| Ganancia ponderal embarazo            | [*DATA REMOVED*]                                                                                                                                                                                                                                                                     |
| Talla madre                           | [*DATA REMOVED*]                                                                                                                                                                                                                                                                     |
| IMC previo embarazo                   | 23.711844630960897                                                                                                                                                                                                                                                                   |
| Patología obstétrica                  | <input checked="" type="radio"/> no<br><input type="radio"/> si                                                                                                                                                                                                                      |
| Diabetes pregestacional               | <input checked="" type="radio"/> no<br><input type="radio"/> si                                                                                                                                                                                                                      |
| Diabetes gestacional                  | <input checked="" type="radio"/> no<br><input type="radio"/> si                                                                                                                                                                                                                      |

|                                            |                                                                                                                                                                                      |
|--------------------------------------------|--------------------------------------------------------------------------------------------------------------------------------------------------------------------------------------|
| Diabetes gestacional con insulina          | <input checked="" type="radio"/> no<br><input type="radio"/> si                                                                                                                      |
| Diabetes gestacional con dieta y ejercicio | <input checked="" type="radio"/> no<br><input type="radio"/> si                                                                                                                      |
| Percentil fetos previos                    | <input checked="" type="radio"/> Nada<br><input type="radio"/> percentil menor de 10<br><input type="radio"/> percentil entre 10 y 90<br><input type="radio"/> percentil mayor de 90 |
| Exfumadora                                 | <input checked="" type="radio"/> Nada<br><input type="radio"/> menos de 5 años<br><input type="radio"/> 5 a 10 años<br><input type="radio"/> mayor o igual a 10 años                 |
| Hábito tabáquico                           | <input checked="" type="radio"/> no<br><input type="radio"/> si                                                                                                                      |
| fumadora                                   | [*DATA REMOVED*]                                                                                                                                                                     |
| Consumo otros tóxicos                      | <input checked="" type="radio"/> no<br><input type="radio"/> si                                                                                                                      |
| Hb 1T                                      | _____                                                                                                                                                                                |
| Htc 1T                                     | _____                                                                                                                                                                                |
| Hb 2T                                      | _____                                                                                                                                                                                |
| HTC 2T                                     | _____                                                                                                                                                                                |
| Hb 3T                                      | _____                                                                                                                                                                                |
| HTC 3T                                     | _____                                                                                                                                                                                |
| Suplemento FE oral                         | <input type="radio"/> si<br><input checked="" type="radio"/> no                                                                                                                      |
| Suplemento fe iv                           | <input type="radio"/> si<br><input checked="" type="radio"/> no                                                                                                                      |
| Transfusión                                | <input checked="" type="radio"/> no<br><input type="radio"/> si                                                                                                                      |
| Solicitada Vit D                           | <input checked="" type="radio"/> no<br><input type="radio"/> si                                                                                                                      |

|                       |                                                                                                                                                                                                                                                                                                                                                                                                              |
|-----------------------|--------------------------------------------------------------------------------------------------------------------------------------------------------------------------------------------------------------------------------------------------------------------------------------------------------------------------------------------------------------------------------------------------------------|
| Deficit vit D         | <input checked="" type="radio"/> no<br><input type="radio"/> si                                                                                                                                                                                                                                                                                                                                              |
| Suplemento vit D      | <input type="radio"/> si<br><input checked="" type="radio"/> no                                                                                                                                                                                                                                                                                                                                              |
| Dieta, cuestionario   | <input checked="" type="radio"/> si<br><input type="radio"/> no                                                                                                                                                                                                                                                                                                                                              |
| Leche entera          | <input checked="" type="radio"/> Nunca o menos 1 vez al mes<br><input type="radio"/> 1 a 3 veces mes<br><input type="radio"/> 1 vez semana<br><input type="radio"/> 2 a 4 veces semana<br><input type="radio"/> 5 a 6 veces semana<br><input type="radio"/> 1 vez al día<br><input type="radio"/> 2 a 3 veces al día<br><input type="radio"/> 5 a 6 veces al día<br><input type="radio"/> más 6 veces al día |
| Leche semidesnatada   | <input type="radio"/> Nunca o menos 1 vez al mes<br><input type="radio"/> 1 a 3 veces mes<br><input type="radio"/> 1 vez semana<br><input type="radio"/> 2 a 4 veces semana<br><input type="radio"/> 5 a 6 veces semana<br><input type="radio"/> 1 vez al día<br><input checked="" type="radio"/> 2 a 3 veces al día<br><input type="radio"/> 5 a 6 veces al día<br><input type="radio"/> mas 6 veces al día |
| Leche desnatada       | <input checked="" type="radio"/> Nunca o menos 1 vez al mes<br><input type="radio"/> 1 a 3 veces mes<br><input type="radio"/> 1 vez semana<br><input type="radio"/> 2 a 4 veces semana<br><input type="radio"/> 5 a 6 veces semana<br><input type="radio"/> 1 vez al día<br><input type="radio"/> 2 a 3 veces al día<br><input type="radio"/> 5 a 6 veces al día<br><input type="radio"/> más 6 veces al día |
| Leche condensada      | <input checked="" type="radio"/> Nunca o menos 1 vez al mes<br><input type="radio"/> 1 a 3 veces mes<br><input type="radio"/> 1 vez semana<br><input type="radio"/> 2 a 4 veces semana<br><input type="radio"/> 5 a 6 veces semana<br><input type="radio"/> 1 vez al día<br><input type="radio"/> 2 a 3 veces al día<br><input type="radio"/> 5 a 6 veces al día<br><input type="radio"/> más 6 veces al día |
| nata o crema de leche | <input type="radio"/> Nunca o menos 1 vez al mes<br><input checked="" type="radio"/> 1 a 3 veces mes<br><input type="radio"/> 1 vez semana<br><input type="radio"/> 2 a 4 veces semana<br><input type="radio"/> 5 a 6 veces semana<br><input type="radio"/> 1 vez al día<br><input type="radio"/> 2 a 3 veces al día<br><input type="radio"/> 5 a 6 veces al día<br><input type="radio"/> más 6 veces al día |



|                                             |                                                                                                                                                                                                                                                                                                                                                                                                              |
|---------------------------------------------|--------------------------------------------------------------------------------------------------------------------------------------------------------------------------------------------------------------------------------------------------------------------------------------------------------------------------------------------------------------------------------------------------------------|
| Yogurt Entero                               | <input type="radio"/> Nunca o menos 1 vez al mes<br><input type="radio"/> 1 a 3 veces mes<br><input type="radio"/> 1 vez semana<br><input checked="" type="radio"/> 2 a 4 veces semana<br><input type="radio"/> 5 a 6 veces semana<br><input type="radio"/> 1 vez al día<br><input type="radio"/> 2 a 3 veces al día<br><input type="radio"/> 5 a 6 veces al día<br><input type="radio"/> más 6 veces al día |
| Yogurt desnatado                            | <input type="radio"/> Nunca o menos 1 vez al mes<br><input type="radio"/> 1 a 3 veces mes<br><input type="radio"/> 1 vez semana<br><input checked="" type="radio"/> 2 a 4 veces semana<br><input type="radio"/> 5 a 6 veces semana<br><input type="radio"/> 1 vez al día<br><input type="radio"/> 2 a 3 veces al día<br><input type="radio"/> 5 a 6 veces al día<br><input type="radio"/> más 6 veces al día |
| 100g requesón o queso blando o queso fresco | <input type="radio"/> Nunca o menos 1 vez al mes<br><input type="radio"/> 1 a 3 veces mes<br><input checked="" type="radio"/> 1 vez semana<br><input type="radio"/> 2 a 4 veces semana<br><input type="radio"/> 5 a 6 veces semana<br><input type="radio"/> 1 vez al día<br><input type="radio"/> 2 a 3 veces al día<br><input type="radio"/> 5 a 6 veces al día<br><input type="radio"/> más 6 veces al día |
| queso curado o semicurado o cremoso         | <input type="radio"/> Nunca o menos 1 vez al mes<br><input type="radio"/> 1 a 3 veces mes<br><input type="radio"/> 1 vez semana<br><input type="radio"/> 2 a 4 veces semana<br><input checked="" type="radio"/> 5 a 6 veces semana<br><input type="radio"/> 1 vez al día<br><input type="radio"/> 2 a 3 veces al día<br><input type="radio"/> 5 a 6 veces al día<br><input type="radio"/> más 6 veces al día |
| natillas flan pudding                       | <input type="radio"/> Nunca o menos 1 vez al mes<br><input checked="" type="radio"/> 1 a 3 veces mes<br><input type="radio"/> 1 vez semana<br><input type="radio"/> 2 a 4 veces semana<br><input type="radio"/> 5 a 6 veces semana<br><input type="radio"/> 1 vez al día<br><input type="radio"/> 2 a 3 veces al día<br><input type="radio"/> 5 a 6 veces al día<br><input type="radio"/> más 6 veces al día |
| Helado                                      | <input type="radio"/> Nunca o menos 1 vez al mes<br><input type="radio"/> 1 a 3 veces mes<br><input checked="" type="radio"/> 1 vez semana<br><input type="radio"/> 2 a 4 veces semana<br><input type="radio"/> 5 a 6 veces semana<br><input type="radio"/> 1 vez al día<br><input type="radio"/> 2 a 3 veces al día<br><input type="radio"/> 5 a 6 veces al día<br><input type="radio"/> más 6 veces al día |

|                                      |                                                                                                                                                                                                                                                                                                                                                                                                              |
|--------------------------------------|--------------------------------------------------------------------------------------------------------------------------------------------------------------------------------------------------------------------------------------------------------------------------------------------------------------------------------------------------------------------------------------------------------------|
| huevo                                | <input type="radio"/> Nunca o menos 1 vez al mes<br><input type="radio"/> 1 a 3 veces mes<br><input type="radio"/> 1 vez semana<br><input checked="" type="radio"/> 2 a 4 veces semana<br><input type="radio"/> 5 a 6 veces semana<br><input type="radio"/> 1 vez al día<br><input type="radio"/> 2 a 3 veces al día<br><input type="radio"/> 5 a 6 veces al día<br><input type="radio"/> más 6 veces al día |
| Pollo con piel                       | <input checked="" type="radio"/> Nunca o menos 1 vez al mes<br><input type="radio"/> 1 a 3 veces mes<br><input type="radio"/> 1 vez semana<br><input type="radio"/> 2 a 4 veces semana<br><input type="radio"/> 5 a 6 veces semana<br><input type="radio"/> 1 vez al día<br><input type="radio"/> 2 a 3 veces al día<br><input type="radio"/> 5 a 6 veces al día<br><input type="radio"/> más 6 veces al día |
| pollo sin piel                       | <input type="radio"/> Nunca o menos 1 vez al mes<br><input type="radio"/> 1 a 3 veces mes<br><input type="radio"/> 1 vez semana<br><input checked="" type="radio"/> 2 a 4 veces semana<br><input type="radio"/> 5 a 6 veces semana<br><input type="radio"/> 1 vez al día<br><input type="radio"/> 2 a 3 veces al día<br><input type="radio"/> 5 a 6 veces al día<br><input type="radio"/> más 6 veces al día |
| Ternera o cerdo o cordero            | <input type="radio"/> Nunca o menos 1 vez al mes<br><input checked="" type="radio"/> 1 a 3 veces mes<br><input type="radio"/> 1 vez semana<br><input type="radio"/> 2 a 4 veces semana<br><input type="radio"/> 5 a 6 veces semana<br><input type="radio"/> 1 vez al día<br><input type="radio"/> 2 a 3 veces al día<br><input type="radio"/> 5 a 6 veces al día<br><input type="radio"/> más 6 veces al día |
| carne caza: Conejo o codorniz o pato | <input checked="" type="radio"/> Nunca o menos 1 vez al mes<br><input type="radio"/> 1 a 3 veces mes<br><input type="radio"/> 1 vez semana<br><input type="radio"/> 2 a 4 veces semana<br><input type="radio"/> 5 a 6 veces semana<br><input type="radio"/> 1 vez al día<br><input type="radio"/> 2 a 3 veces al día<br><input type="radio"/> 5 a 6 veces al día<br><input type="radio"/> más 6 veces al día |
| Hígado de ternera o cerdo o pollo    | <input type="radio"/> Nunca o menos 1 vez al mes<br><input checked="" type="radio"/> 1 a 3 veces mes<br><input type="radio"/> 1 vez semana<br><input type="radio"/> 2 a 4 veces semana<br><input type="radio"/> 5 a 6 veces semana<br><input type="radio"/> 1 vez al día<br><input type="radio"/> 2 a 3 veces al día<br><input type="radio"/> 5 a 6 veces al día<br><input type="radio"/> más 6 veces al día |

|                     |                                                                                                                                                                                                                                                                                                                                                                                                              |
|---------------------|--------------------------------------------------------------------------------------------------------------------------------------------------------------------------------------------------------------------------------------------------------------------------------------------------------------------------------------------------------------------------------------------------------------|
| Vísceras            | <input checked="" type="radio"/> Nunca o menos 1 vez al mes<br><input type="radio"/> 1 a 3 veces mes<br><input type="radio"/> 1 vez semana<br><input type="radio"/> 2 a 4 veces semana<br><input type="radio"/> 5 a 6 veces semana<br><input type="radio"/> 1 vez al día<br><input type="radio"/> 2 a 3 veces al día<br><input type="radio"/> 5 a 6 veces al día<br><input type="radio"/> más 6 veces al día |
| Embutido            | <input type="radio"/> Nunca o menos 1 vez al mes<br><input type="radio"/> 1 a 3 veces mes<br><input type="radio"/> 1 vez semana<br><input checked="" type="radio"/> 2 a 4 veces semana<br><input type="radio"/> 5 a 6 veces semana<br><input type="radio"/> 1 vez al día<br><input type="radio"/> 2 a 3 veces al día<br><input type="radio"/> 5 a 6 veces al día<br><input type="radio"/> más 6 veces al día |
| Salchicha o similar | <input type="radio"/> Nunca o menos 1 vez al mes<br><input type="radio"/> 1 a 3 veces mes<br><input checked="" type="radio"/> 1 vez semana<br><input type="radio"/> 2 a 4 veces semana<br><input type="radio"/> 5 a 6 veces semana<br><input type="radio"/> 1 vez al día<br><input type="radio"/> 2 a 3 veces al día<br><input type="radio"/> 5 a 6 veces al día<br><input type="radio"/> más 6 veces al día |
| Pate o foiegras     | <input checked="" type="radio"/> Nunca o menos 1 vez al mes<br><input type="radio"/> 1 a 3 veces mes<br><input type="radio"/> 1 vez semana<br><input type="radio"/> 2 a 4 veces semana<br><input type="radio"/> 5 a 6 veces semana<br><input type="radio"/> 1 vez al día<br><input type="radio"/> 2 a 3 veces al día<br><input type="radio"/> 5 a 6 veces al día<br><input type="radio"/> más 6 veces al día |
| Hamburguesa         | <input type="radio"/> Nunca o menos 1 vez al mes<br><input type="radio"/> 1 a 3 veces mes<br><input type="radio"/> 1 vez semana<br><input checked="" type="radio"/> 2 a 4 veces semana<br><input type="radio"/> 5 a 6 veces semana<br><input type="radio"/> 1 vez al día<br><input type="radio"/> 2 a 3 veces al día<br><input type="radio"/> 5 a 6 veces al día<br><input type="radio"/> más 6 veces al día |
| tocino o bacon      | <input checked="" type="radio"/> Nunca o menos 1 vez al mes<br><input type="radio"/> 1 a 3 veces mes<br><input type="radio"/> 1 vez semana<br><input type="radio"/> 2 a 4 veces semana<br><input type="radio"/> 5 a 6 veces semana<br><input type="radio"/> 1 vez al día<br><input type="radio"/> 2 a 3 veces al día<br><input type="radio"/> 5 a 6 veces al día<br><input type="radio"/> más 6 veces al día |

---

|               |                                                                                                                                                                                                                                                                                                                                                                                                              |
|---------------|--------------------------------------------------------------------------------------------------------------------------------------------------------------------------------------------------------------------------------------------------------------------------------------------------------------------------------------------------------------------------------------------------------------|
| Pescado frito | <input type="radio"/> Nunca o menos 1 vez al mes<br><input checked="" type="radio"/> 1 a 3 veces mes<br><input type="radio"/> 1 vez semana<br><input type="radio"/> 2 a 4 veces semana<br><input type="radio"/> 5 a 6 veces semana<br><input type="radio"/> 1 vez al día<br><input type="radio"/> 2 a 3 veces al día<br><input type="radio"/> 5 a 6 veces al día<br><input type="radio"/> más 6 veces al día |
|---------------|--------------------------------------------------------------------------------------------------------------------------------------------------------------------------------------------------------------------------------------------------------------------------------------------------------------------------------------------------------------------------------------------------------------|

---

|                        |                                                                                                                                                                                                                                                                                                                                                                                                              |
|------------------------|--------------------------------------------------------------------------------------------------------------------------------------------------------------------------------------------------------------------------------------------------------------------------------------------------------------------------------------------------------------------------------------------------------------|
| pescado hervido blanco | <input type="radio"/> Nunca o menos 1 vez al mes<br><input type="radio"/> 1 a 3 veces mes<br><input checked="" type="radio"/> 1 vez semana<br><input type="radio"/> 2 a 4 veces semana<br><input type="radio"/> 5 a 6 veces semana<br><input type="radio"/> 1 vez al día<br><input type="radio"/> 2 a 3 veces al día<br><input type="radio"/> 5 a 6 veces al día<br><input type="radio"/> más 6 veces al día |
|------------------------|--------------------------------------------------------------------------------------------------------------------------------------------------------------------------------------------------------------------------------------------------------------------------------------------------------------------------------------------------------------------------------------------------------------|

---

|                      |                                                                                                                                                                                                                                                                                                                                                                                                              |
|----------------------|--------------------------------------------------------------------------------------------------------------------------------------------------------------------------------------------------------------------------------------------------------------------------------------------------------------------------------------------------------------------------------------------------------------|
| pescado hervido azul | <input type="radio"/> Nunca o menos 1 vez al mes<br><input type="radio"/> 1 a 3 veces mes<br><input checked="" type="radio"/> 1 vez semana<br><input type="radio"/> 2 a 4 veces semana<br><input type="radio"/> 5 a 6 veces semana<br><input type="radio"/> 1 vez al día<br><input type="radio"/> 2 a 3 veces al día<br><input type="radio"/> 5 a 6 veces al día<br><input type="radio"/> más 6 veces al día |
|----------------------|--------------------------------------------------------------------------------------------------------------------------------------------------------------------------------------------------------------------------------------------------------------------------------------------------------------------------------------------------------------------------------------------------------------|

---

|                    |                                                                                                                                                                                                                                                                                                                                                                                                              |
|--------------------|--------------------------------------------------------------------------------------------------------------------------------------------------------------------------------------------------------------------------------------------------------------------------------------------------------------------------------------------------------------------------------------------------------------|
| otros pescado azul | <input checked="" type="radio"/> Nunca o menos 1 vez al mes<br><input type="radio"/> 1 a 3 veces mes<br><input type="radio"/> 1 vez semana<br><input type="radio"/> 2 a 4 veces semana<br><input type="radio"/> 5 a 6 veces semana<br><input type="radio"/> 1 vez al día<br><input type="radio"/> 2 a 3 veces al día<br><input type="radio"/> 5 a 6 veces al día<br><input type="radio"/> más 6 veces al día |
|--------------------|--------------------------------------------------------------------------------------------------------------------------------------------------------------------------------------------------------------------------------------------------------------------------------------------------------------------------------------------------------------------------------------------------------------|

---

|               |                                                                                                                                                                                                                                                                                                                                                                                                              |
|---------------|--------------------------------------------------------------------------------------------------------------------------------------------------------------------------------------------------------------------------------------------------------------------------------------------------------------------------------------------------------------------------------------------------------------|
| atun conserva | <input type="radio"/> Nunca o menos 1 vez al mes<br><input checked="" type="radio"/> 1 a 3 veces mes<br><input type="radio"/> 1 vez semana<br><input type="radio"/> 2 a 4 veces semana<br><input type="radio"/> 5 a 6 veces semana<br><input type="radio"/> 1 vez al día<br><input type="radio"/> 2 a 3 veces al día<br><input type="radio"/> 5 a 6 veces al día<br><input type="radio"/> más 6 veces al día |
|---------------|--------------------------------------------------------------------------------------------------------------------------------------------------------------------------------------------------------------------------------------------------------------------------------------------------------------------------------------------------------------------------------------------------------------|

---

|                  |                                                                                                                                                                                                                                                                                                                                                                                                              |
|------------------|--------------------------------------------------------------------------------------------------------------------------------------------------------------------------------------------------------------------------------------------------------------------------------------------------------------------------------------------------------------------------------------------------------------|
| sardina conserva | <input checked="" type="radio"/> Nunca o menos 1 vez al mes<br><input type="radio"/> 1 a 3 veces mes<br><input type="radio"/> 1 vez semana<br><input type="radio"/> 2 a 4 veces semana<br><input type="radio"/> 5 a 6 veces semana<br><input type="radio"/> 1 vez al día<br><input type="radio"/> 2 a 3 veces al día<br><input type="radio"/> 5 a 6 veces al día<br><input type="radio"/> más 6 veces al día |
|------------------|--------------------------------------------------------------------------------------------------------------------------------------------------------------------------------------------------------------------------------------------------------------------------------------------------------------------------------------------------------------------------------------------------------------|

---

|                                         |                                                                                                                                                                                                                                                                                                                                                                                                              |
|-----------------------------------------|--------------------------------------------------------------------------------------------------------------------------------------------------------------------------------------------------------------------------------------------------------------------------------------------------------------------------------------------------------------------------------------------------------------|
| pescado ahumado                         | <input checked="" type="radio"/> Nunca o menos 1 vez al mes<br><input type="radio"/> 1 a 3 veces mes<br><input type="radio"/> 1 vez semana<br><input type="radio"/> 2 a 4 veces semana<br><input type="radio"/> 5 a 6 veces semana<br><input type="radio"/> 1 vez al día<br><input type="radio"/> 2 a 3 veces al día<br><input type="radio"/> 5 a 6 veces al día<br><input type="radio"/> más 6 veces al día |
| almejas o mejillones o ostras unos 100g | <input type="radio"/> Nunca o menos 1 vez al mes<br><input type="radio"/> 1 a 3 veces mes<br><input type="radio"/> 1 vez semana<br><input checked="" type="radio"/> 2 a 4 veces semana<br><input type="radio"/> 5 a 6 veces semana<br><input type="radio"/> 1 vez al día<br><input type="radio"/> 2 a 3 veces al día<br><input type="radio"/> 5 a 6 veces al día<br><input type="radio"/> más 6 veces al día |
| calamar o chipiron o sepia unos 100g    | <input type="radio"/> Nunca o menos 1 vez al mes<br><input type="radio"/> 1 a 3 veces mes<br><input checked="" type="radio"/> 1 vez semana<br><input type="radio"/> 2 a 4 veces semana<br><input type="radio"/> 5 a 6 veces semana<br><input type="radio"/> 1 vez al día<br><input type="radio"/> 2 a 3 veces al día<br><input type="radio"/> 5 a 6 veces al día<br><input type="radio"/> más 6 veces al día |
| marisco unos 100g                       | <input type="radio"/> Nunca o menos 1 vez al mes<br><input checked="" type="radio"/> 1 a 3 veces mes<br><input type="radio"/> 1 vez semana<br><input type="radio"/> 2 a 4 veces semana<br><input type="radio"/> 5 a 6 veces semana<br><input type="radio"/> 1 vez al día<br><input type="radio"/> 2 a 3 veces al día<br><input type="radio"/> 5 a 6 veces al día<br><input type="radio"/> más 6 veces al día |
| Espinacas o acelgas cocinadas           | <input checked="" type="radio"/> Nunca o menos 1 vez al mes<br><input type="radio"/> 1 a 3 veces mes<br><input type="radio"/> 1 vez semana<br><input type="radio"/> 2 a 4 veces semana<br><input type="radio"/> 5 a 6 veces semana<br><input type="radio"/> 1 vez al día<br><input type="radio"/> 2 a 3 veces al día<br><input type="radio"/> 5 a 6 veces al día<br><input type="radio"/> más 6 veces al día |
| Col o coliflor o brocoli cocinado       | <input checked="" type="radio"/> Nunca o menos 1 vez al mes<br><input type="radio"/> 1 a 3 veces mes<br><input type="radio"/> 1 vez semana<br><input type="radio"/> 2 a 4 veces semana<br><input type="radio"/> 5 a 6 veces semana<br><input type="radio"/> 1 vez al día<br><input type="radio"/> 2 a 3 veces al día<br><input type="radio"/> 5 a 6 veces al día<br><input type="radio"/> más 6 veces al día |

---

Lechuga o endivia o escarola

- ☐ Nunca o menos 1 vez al mes  
☐ 1 a 3 veces mes  
☐ 1 vez semana  
☒ 2 a 4 veces semana  
☐ 5 a 6 veces semana  
☐ 1 vez al día  
☐ 2 a 3 veces al día  
☐ 5 a 6 veces al día  
☐ más 6 veces al día

---

tomate ensalada

- ☐ Nunca o menos 1 vez al mes  
☐ 1 a 3 veces mes  
☐ 1 vez semana  
☒ 2 a 4 veces semana  
☐ 5 a 6 veces semana  
☐ 1 vez al día  
☐ 2 a 3 veces al día  
☐ 5 a 6 veces al día  
☐ más 6 veces al día

---

cebolla

- ☐ Nunca o menos 1 vez al mes  
☐ 1 a 3 veces mes  
☐ 1 vez semana  
☒ 2 a 4 veces semana  
☐ 5 a 6 veces semana  
☐ 1 vez al día  
☐ 2 a 3 veces al día  
☐ 5 a 6 veces al día  
☐ más 6 veces al día

---

Zanahoria o calabaza

- ☐ Nunca o menos 1 vez al mes  
☐ 1 a 3 veces mes  
☐ 1 vez semana  
☒ 2 a 4 veces semana  
☐ 5 a 6 veces semana  
☐ 1 vez al día  
☐ 2 a 3 veces al día  
☐ 5 a 6 veces al día  
☐ más 6 veces al día

---

Judías verdes

- ☒ Nunca o menos 1 vez al mes  
☐ 1 a 3 veces mes  
☐ 1 vez semana  
☐ 2 a 4 veces semana  
☐ 5 a 6 veces semana  
☐ 1 vez al día  
☐ 2 a 3 veces al día  
☐ 5 a 6 veces al día  
☐ más 6 veces al día

---

Berenjena o calabacin o pepino

- ☐ Nunca o menos 1 vez al mes  
☐ 1 a 3 veces mes  
☒ 1 vez semana  
☐ 2 a 4 veces semana  
☐ 5 a 6 veces semana  
☐ 1 vez al día  
☐ 2 a 3 veces al día  
☐ 5 a 6 veces al día  
☐ más 6 veces al día

|                       |                                                                                                                                                                                                                                                                                                                                                                                                              |
|-----------------------|--------------------------------------------------------------------------------------------------------------------------------------------------------------------------------------------------------------------------------------------------------------------------------------------------------------------------------------------------------------------------------------------------------------|
| pimiento              | <input type="radio"/> Nunca o menos 1 vez al mes<br><input type="radio"/> 1 a 3 veces mes<br><input checked="" type="radio"/> 1 vez semana<br><input type="radio"/> 2 a 4 veces semana<br><input type="radio"/> 5 a 6 veces semana<br><input type="radio"/> 1 vez al día<br><input type="radio"/> 2 a 3 veces al día<br><input type="radio"/> 5 a 6 veces al día<br><input type="radio"/> más 6 veces al día |
| alcachofa             | <input checked="" type="radio"/> Nunca o menos 1 vez al mes<br><input type="radio"/> 1 a 3 veces mes<br><input type="radio"/> 1 vez semana<br><input type="radio"/> 2 a 4 veces semana<br><input type="radio"/> 5 a 6 veces semana<br><input type="radio"/> 1 vez al día<br><input type="radio"/> 2 a 3 veces al día<br><input type="radio"/> 5 a 6 veces al día<br><input type="radio"/> más 6 veces al día |
| espárragos            | <input checked="" type="radio"/> Nunca o menos 1 vez al mes<br><input type="radio"/> 1 a 3 veces mes<br><input type="radio"/> 1 vez semana<br><input type="radio"/> 2 a 4 veces semana<br><input type="radio"/> 5 a 6 veces semana<br><input type="radio"/> 1 vez al día<br><input type="radio"/> 2 a 3 veces al día<br><input type="radio"/> 5 a 6 veces al día<br><input type="radio"/> más 6 veces al día |
| maíz hervido          | <input checked="" type="radio"/> Nunca o menos 1 vez al mes<br><input type="radio"/> 1 a 3 veces mes<br><input type="radio"/> 1 vez semana<br><input type="radio"/> 2 a 4 veces semana<br><input type="radio"/> 5 a 6 veces semana<br><input type="radio"/> 1 vez al día<br><input type="radio"/> 2 a 3 veces al día<br><input type="radio"/> 5 a 6 veces al día<br><input type="radio"/> más 6 veces al día |
| legumbres             | <input type="radio"/> Nunca o menos 1 vez al mes<br><input type="radio"/> 1 a 3 veces mes<br><input type="radio"/> 1 vez semana<br><input checked="" type="radio"/> 2 a 4 veces semana<br><input type="radio"/> 5 a 6 veces semana<br><input type="radio"/> 1 vez al día<br><input type="radio"/> 2 a 3 veces al día<br><input type="radio"/> 5 a 6 veces al día<br><input type="radio"/> más 6 veces al día |
| naranjas o mandarinas | <input type="radio"/> Nunca o menos 1 vez al mes<br><input type="radio"/> 1 a 3 veces mes<br><input checked="" type="radio"/> 1 vez semana<br><input type="radio"/> 2 a 4 veces semana<br><input type="radio"/> 5 a 6 veces semana<br><input type="radio"/> 1 vez al día<br><input type="radio"/> 2 a 3 veces al día<br><input type="radio"/> 5 a 6 veces al día<br><input type="radio"/> más 6 veces al día |

|                       |                                                                                                                                                                                                                                                                                                                                                                                                              |
|-----------------------|--------------------------------------------------------------------------------------------------------------------------------------------------------------------------------------------------------------------------------------------------------------------------------------------------------------------------------------------------------------------------------------------------------------|
| zum natural fruta     | <input checked="" type="radio"/> Nunca o menos 1 vez al mes<br><input type="radio"/> 1 a 3 veces mes<br><input type="radio"/> 1 vez semana<br><input type="radio"/> 2 a 4 veces semana<br><input type="radio"/> 5 a 6 veces semana<br><input type="radio"/> 1 vez al día<br><input type="radio"/> 2 a 3 veces al día<br><input type="radio"/> 5 a 6 veces al día<br><input type="radio"/> más 6 veces al día |
| platano               | <input type="radio"/> Nunca o menos 1 vez al mes<br><input type="radio"/> 1 a 3 veces mes<br><input type="radio"/> 1 vez semana<br><input checked="" type="radio"/> 2 a 4 veces semana<br><input type="radio"/> 5 a 6 veces semana<br><input type="radio"/> 1 vez al día<br><input type="radio"/> 2 a 3 veces al día<br><input type="radio"/> 5 a 6 veces al día<br><input type="radio"/> más 6 veces al día |
| manzana o pera        | <input type="radio"/> Nunca o menos 1 vez al mes<br><input type="radio"/> 1 a 3 veces mes<br><input type="radio"/> 1 vez semana<br><input checked="" type="radio"/> 2 a 4 veces semana<br><input type="radio"/> 5 a 6 veces semana<br><input type="radio"/> 1 vez al día<br><input type="radio"/> 2 a 3 veces al día<br><input type="radio"/> 5 a 6 veces al día<br><input type="radio"/> más 6 veces al día |
| melocotón o nectarina | <input type="radio"/> Nunca o menos 1 vez al mes<br><input checked="" type="radio"/> 1 a 3 veces mes<br><input type="radio"/> 1 vez semana<br><input type="radio"/> 2 a 4 veces semana<br><input type="radio"/> 5 a 6 veces semana<br><input type="radio"/> 1 vez al día<br><input type="radio"/> 2 a 3 veces al día<br><input type="radio"/> 5 a 6 veces al día<br><input type="radio"/> más 6 veces al día |
| sandia o melon        | <input type="radio"/> Nunca o menos 1 vez al mes<br><input type="radio"/> 1 a 3 veces mes<br><input checked="" type="radio"/> 1 vez semana<br><input type="radio"/> 2 a 4 veces semana<br><input type="radio"/> 5 a 6 veces semana<br><input type="radio"/> 1 vez al día<br><input type="radio"/> 2 a 3 veces al día<br><input type="radio"/> 5 a 6 veces al día<br><input type="radio"/> más 6 veces al día |
| uva                   | <input type="radio"/> Nunca o menos 1 vez al mes<br><input checked="" type="radio"/> 1 a 3 veces mes<br><input type="radio"/> 1 vez semana<br><input type="radio"/> 2 a 4 veces semana<br><input type="radio"/> 5 a 6 veces semana<br><input type="radio"/> 1 vez al día<br><input type="radio"/> 2 a 3 veces al día<br><input type="radio"/> 5 a 6 veces al día<br><input type="radio"/> más 6 veces al día |



---

bruna o ciruela

- ☒ Nunca o menos 1 vez al mes  
☐ 1 a 3 veces mes  
☐ 1 vez semana  
☐ 2 a 4 veces semana  
☐ 5 a 6 veces semana  
☐ 1 vez al día  
☐ 2 a 3 veces al día  
☐ 5 a 6 veces al día  
☐ más 6 veces al día

---

kiwi

- ☐ Nunca o menos 1 vez al mes  
☐ 1 a 3 veces mes  
☒ 1 vez semana  
☐ 2 a 4 veces semana  
☐ 5 a 6 veces semana  
☐ 1 vez al día  
☐ 2 a 3 veces al día  
☐ 5 a 6 veces al día  
☐ más 6 veces al día

---

aceituna

- ☐ Nunca o menos 1 vez al mes  
☐ 1 a 3 veces mes  
☒ 1 vez semana  
☐ 2 a 4 veces semana  
☐ 5 a 6 veces semana  
☐ 1 vez al día  
☐ 2 a 3 veces al día  
☐ 5 a 6 veces al día  
☐ más 6 veces al día

---

frutos secos

- ☐ Nunca o menos 1 vez al mes  
☐ 1 a 3 veces mes  
☐ 1 vez semana  
☒ 2 a 4 veces semana  
☐ 5 a 6 veces semana  
☐ 1 vez al día  
☐ 2 a 3 veces al día  
☐ 5 a 6 veces al día  
☐ más 6 veces al día

---

pan blanco

- ☐ Nunca o menos 1 vez al mes  
☐ 1 a 3 veces mes  
☐ 1 vez semana  
☐ 2 a 4 veces semana  
☐ 5 a 6 veces semana  
☒ 1 vez al día  
☐ 2 a 3 veces al día  
☐ 5 a 6 veces al día  
☐ más 6 veces al día

---

pan integral

- ☐ Nunca o menos 1 vez al mes  
☐ 1 a 3 veces mes  
☐ 1 vez semana  
☐ 2 a 4 veces semana  
☐ 5 a 6 veces semana  
☐ 1 vez al día  
☒ 2 a 3 veces al día  
☐ 5 a 6 veces al día  
☐ más 6 veces al día

---

cereales desayuno

- ☐ Nunca o menos 1 vez al mes  
☒ 1 a 3 veces mes  
☐ 1 vez semana  
☐ 2 a 4 veces semana  
☐ 5 a 6 veces semana  
☐ 1 vez al día  
☐ 2 a 3 veces al día  
☐ 5 a 6 veces al día  
☐ más 6 veces al día

---

patatas fritas

- ☐ Nunca o menos 1 vez al mes  
☒ 1 a 3 veces mes  
☐ 1 vez semana  
☐ 2 a 4 veces semana  
☐ 5 a 6 veces semana  
☐ 1 vez al día  
☐ 2 a 3 veces al día  
☐ 5 a 6 veces al día  
☐ más 6 veces al día

---

patatas cocidas o asadas

- ☐ Nunca o menos 1 vez al mes  
☐ 1 a 3 veces mes  
☒ 1 vez semana  
☐ 2 a 4 veces semana  
☐ 5 a 6 veces semana  
☐ 1 vez al día  
☐ 2 a 3 veces al día  
☐ 5 a 6 veces al día  
☐ más 6 veces al día

---

bolsa papas

- ☒ Nunca o menos 1 vez al mes  
☐ 1 a 3 veces mes  
☐ 1 vez semana  
☐ 2 a 4 veces semana  
☐ 5 a 6 veces semana  
☐ 1 vez al día  
☐ 2 a 3 veces al día  
☐ 5 a 6 veces al día  
☐ más 6 veces al día

---

arroz cocinado

- ☐ Nunca o menos 1 vez al mes  
☐ 1 a 3 veces mes  
☐ 1 vez semana  
☒ 2 a 4 veces semana  
☐ 5 a 6 veces semana  
☐ 1 vez al día  
☐ 2 a 3 veces al día  
☐ 5 a 6 veces al día  
☐ más 6 veces al día

---

pasta

- ☐ Nunca o menos 1 vez al mes  
☐ 1 a 3 veces mes  
☐ 1 vez semana  
☒ 2 a 4 veces semana  
☐ 5 a 6 veces semana  
☐ 1 vez al día  
☐ 2 a 3 veces al día  
☐ 5 a 6 veces al día  
☐ más 6 veces al día

|                     |                                                                                                                                                                                                                                                                                                                                                                                                              |
|---------------------|--------------------------------------------------------------------------------------------------------------------------------------------------------------------------------------------------------------------------------------------------------------------------------------------------------------------------------------------------------------------------------------------------------------|
| pizza               | <input type="radio"/> Nunca o menos 1 vez al mes<br><input type="radio"/> 1 a 3 veces mes<br><input checked="" type="radio"/> 1 vez semana<br><input type="radio"/> 2 a 4 veces semana<br><input type="radio"/> 5 a 6 veces semana<br><input type="radio"/> 1 vez al día<br><input type="radio"/> 2 a 3 veces al día<br><input type="radio"/> 5 a 6 veces al día<br><input type="radio"/> más 6 veces al día |
| aceite oliva        | <input type="radio"/> Nunca o menos 1 vez al mes<br><input type="radio"/> 1 a 3 veces mes<br><input type="radio"/> 1 vez semana<br><input type="radio"/> 2 a 4 veces semana<br><input type="radio"/> 5 a 6 veces semana<br><input type="radio"/> 1 vez al día<br><input checked="" type="radio"/> 2 a 3 veces al día<br><input type="radio"/> 5 a 6 veces al día<br><input type="radio"/> más 6 veces al día |
| otros aceites       | <input type="radio"/> Nunca o menos 1 vez al mes<br><input checked="" type="radio"/> 1 a 3 veces mes<br><input type="radio"/> 1 vez semana<br><input type="radio"/> 2 a 4 veces semana<br><input type="radio"/> 5 a 6 veces semana<br><input type="radio"/> 1 vez al día<br><input type="radio"/> 2 a 3 veces al día<br><input type="radio"/> 5 a 6 veces al día<br><input type="radio"/> más 6 veces al día |
| margarina           | <input type="radio"/> Nunca o menos 1 vez al mes<br><input checked="" type="radio"/> 1 a 3 veces mes<br><input type="radio"/> 1 vez semana<br><input type="radio"/> 2 a 4 veces semana<br><input type="radio"/> 5 a 6 veces semana<br><input type="radio"/> 1 vez al día<br><input type="radio"/> 2 a 3 veces al día<br><input type="radio"/> 5 a 6 veces al día<br><input type="radio"/> más 6 veces al día |
| mantequilla         | <input type="radio"/> Nunca o menos 1 vez al mes<br><input type="radio"/> 1 a 3 veces mes<br><input checked="" type="radio"/> 1 vez semana<br><input type="radio"/> 2 a 4 veces semana<br><input type="radio"/> 5 a 6 veces semana<br><input type="radio"/> 1 vez al día<br><input type="radio"/> 2 a 3 veces al día<br><input type="radio"/> 5 a 6 veces al día<br><input type="radio"/> más 6 veces al día |
| galletas tipo maria | <input type="radio"/> Nunca o menos 1 vez al mes<br><input type="radio"/> 1 a 3 veces mes<br><input type="radio"/> 1 vez semana<br><input checked="" type="radio"/> 2 a 4 veces semana<br><input type="radio"/> 5 a 6 veces semana<br><input type="radio"/> 1 vez al día<br><input type="radio"/> 2 a 3 veces al día<br><input type="radio"/> 5 a 6 veces al día<br><input type="radio"/> más 6 veces al día |

|                           |                                                                                                                                                                                                                                                                                                                                                                                                              |
|---------------------------|--------------------------------------------------------------------------------------------------------------------------------------------------------------------------------------------------------------------------------------------------------------------------------------------------------------------------------------------------------------------------------------------------------------|
| galletas chocolate        | <input type="radio"/> Nunca o menos 1 vez al mes<br><input type="radio"/> 1 a 3 veces mes<br><input type="radio"/> 1 vez semana<br><input checked="" type="radio"/> 2 a 4 veces semana<br><input type="radio"/> 5 a 6 veces semana<br><input type="radio"/> 1 vez al día<br><input type="radio"/> 2 a 3 veces al día<br><input type="radio"/> 5 a 6 veces al día<br><input type="radio"/> más 6 veces al día |
| bollieria                 | <input type="radio"/> Nunca o menos 1 vez al mes<br><input type="radio"/> 1 a 3 veces mes<br><input type="radio"/> 1 vez semana<br><input checked="" type="radio"/> 2 a 4 veces semana<br><input type="radio"/> 5 a 6 veces semana<br><input type="radio"/> 1 vez al día<br><input type="radio"/> 2 a 3 veces al día<br><input type="radio"/> 5 a 6 veces al día<br><input type="radio"/> más 6 veces al día |
| chocolate o bombones      | <input type="radio"/> Nunca o menos 1 vez al mes<br><input checked="" type="radio"/> 1 a 3 veces mes<br><input type="radio"/> 1 vez semana<br><input type="radio"/> 2 a 4 veces semana<br><input type="radio"/> 5 a 6 veces semana<br><input type="radio"/> 1 vez al día<br><input type="radio"/> 2 a 3 veces al día<br><input type="radio"/> 5 a 6 veces al día<br><input type="radio"/> más 6 veces al día |
| chocolate polvo o colacao | <input checked="" type="radio"/> Nunca o menos 1 vez al mes<br><input type="radio"/> 1 a 3 veces mes<br><input type="radio"/> 1 vez semana<br><input type="radio"/> 2 a 4 veces semana<br><input type="radio"/> 5 a 6 veces semana<br><input type="radio"/> 1 vez al día<br><input type="radio"/> 2 a 3 veces al día<br><input type="radio"/> 5 a 6 veces al día<br><input type="radio"/> más 6 veces al día |
| vino tinto                | <input checked="" type="radio"/> Nunca o menos 1 vez al mes<br><input type="radio"/> 1 a 3 veces mes<br><input type="radio"/> 1 vez semana<br><input type="radio"/> 2 a 4 veces semana<br><input type="radio"/> 5 a 6 veces semana<br><input type="radio"/> 1 vez al día<br><input type="radio"/> 2 a 3 veces al día<br><input type="radio"/> 5 a 6 veces al día<br><input type="radio"/> más 6 veces al día |
| vino blanco               | <input checked="" type="radio"/> Nunca o menos 1 vez al mes<br><input type="radio"/> 1 a 3 veces mes<br><input type="radio"/> 1 vez semana<br><input type="radio"/> 2 a 4 veces semana<br><input type="radio"/> 5 a 6 veces semana<br><input type="radio"/> 1 vez al día<br><input type="radio"/> 2 a 3 veces al día<br><input type="radio"/> 5 a 6 veces al día<br><input type="radio"/> más 6 veces al día |

|                       |                                                                                                                                                                                                                                                                                                                                                                                                              |
|-----------------------|--------------------------------------------------------------------------------------------------------------------------------------------------------------------------------------------------------------------------------------------------------------------------------------------------------------------------------------------------------------------------------------------------------------|
| vino seco o vermut    | <input checked="" type="radio"/> Nunca o menos 1 vez al mes<br><input type="radio"/> 1 a 3 veces mes<br><input type="radio"/> 1 vez semana<br><input type="radio"/> 2 a 4 veces semana<br><input type="radio"/> 5 a 6 veces semana<br><input type="radio"/> 1 vez al día<br><input type="radio"/> 2 a 3 veces al día<br><input type="radio"/> 5 a 6 veces al día<br><input type="radio"/> más 6 veces al día |
| cerveza               | <input checked="" type="radio"/> Nunca o menos 1 vez al mes<br><input type="radio"/> 1 a 3 veces mes<br><input type="radio"/> 1 vez semana<br><input type="radio"/> 2 a 4 veces semana<br><input type="radio"/> 5 a 6 veces semana<br><input type="radio"/> 1 vez al día<br><input type="radio"/> 2 a 3 veces al día<br><input type="radio"/> 5 a 6 veces al día<br><input type="radio"/> más 6 veces al día |
| cerveza sin alcohol   | <input checked="" type="radio"/> Nunca o menos 1 vez al mes<br><input type="radio"/> 1 a 3 veces mes<br><input type="radio"/> 1 vez semana<br><input type="radio"/> 2 a 4 veces semana<br><input type="radio"/> 5 a 6 veces semana<br><input type="radio"/> 1 vez al día<br><input type="radio"/> 2 a 3 veces al día<br><input type="radio"/> 5 a 6 veces al día<br><input type="radio"/> más 6 veces al día |
| licores               | <input checked="" type="radio"/> Nunca o menos 1 vez al mes<br><input type="radio"/> 1 a 3 veces mes<br><input type="radio"/> 1 vez semana<br><input type="radio"/> 2 a 4 veces semana<br><input type="radio"/> 5 a 6 veces semana<br><input type="radio"/> 1 vez al día<br><input type="radio"/> 2 a 3 veces al día<br><input type="radio"/> 5 a 6 veces al día<br><input type="radio"/> más 6 veces al día |
| ginebra o ron o vodka | <input checked="" type="radio"/> Nunca o menos 1 vez al mes<br><input type="radio"/> 1 a 3 veces mes<br><input type="radio"/> 1 vez semana<br><input type="radio"/> 2 a 4 veces semana<br><input type="radio"/> 5 a 6 veces semana<br><input type="radio"/> 1 vez al día<br><input type="radio"/> 2 a 3 veces al día<br><input type="radio"/> 5 a 6 veces al día<br><input type="radio"/> más 6 veces al día |
| refresco normal       | <input type="radio"/> Nunca o menos 1 vez al mes<br><input checked="" type="radio"/> 1 a 3 veces mes<br><input type="radio"/> 1 vez semana<br><input type="radio"/> 2 a 4 veces semana<br><input type="radio"/> 5 a 6 veces semana<br><input type="radio"/> 1 vez al día<br><input type="radio"/> 2 a 3 veces al día<br><input type="radio"/> 5 a 6 veces al día<br><input type="radio"/> más 6 veces al día |

|                           |                                                                                                                                                                                                                                                                                                                                                                                                              |
|---------------------------|--------------------------------------------------------------------------------------------------------------------------------------------------------------------------------------------------------------------------------------------------------------------------------------------------------------------------------------------------------------------------------------------------------------|
| refresco sin azúcar       | <input type="radio"/> Nunca o menos 1 vez al mes<br><input checked="" type="radio"/> 1 a 3 veces mes<br><input type="radio"/> 1 vez semana<br><input type="radio"/> 2 a 4 veces semana<br><input type="radio"/> 5 a 6 veces semana<br><input type="radio"/> 1 vez al día<br><input type="radio"/> 2 a 3 veces al día<br><input type="radio"/> 5 a 6 veces al día<br><input type="radio"/> más 6 veces al día |
| Agua del grifo            | <input checked="" type="radio"/> Nunca o menos 1 vez al mes<br><input type="radio"/> 1 a 3 veces mes<br><input type="radio"/> 1 vez semana<br><input type="radio"/> 2 a 4 veces semana<br><input type="radio"/> 5 a 6 veces semana<br><input type="radio"/> 1 vez al día<br><input type="radio"/> 2 a 3 veces al día<br><input type="radio"/> 5 a 6 veces al día<br><input type="radio"/> más 6 veces al día |
| agua embotellada sin gas  | <input type="radio"/> Nunca o menos 1 vez al mes<br><input type="radio"/> 1 a 3 veces mes<br><input type="radio"/> 1 vez semana<br><input type="radio"/> 2 a 4 veces semana<br><input type="radio"/> 5 a 6 veces semana<br><input type="radio"/> 1 vez al día<br><input type="radio"/> 2 a 3 veces al día<br><input type="radio"/> 5 a 6 veces al día<br><input checked="" type="radio"/> más 6 veces al día |
| agua embotellada con gas  | <input checked="" type="radio"/> Nunca o menos 1 vez al mes<br><input type="radio"/> 1 a 3 veces mes<br><input type="radio"/> 1 vez semana<br><input type="radio"/> 2 a 4 veces semana<br><input type="radio"/> 5 a 6 veces semana<br><input type="radio"/> 1 vez al día<br><input type="radio"/> 2 a 3 veces al día<br><input type="radio"/> 5 a 6 veces al día<br><input type="radio"/> más 6 veces al día |
| zumos frutas embotellados | <input type="radio"/> Nunca o menos 1 vez al mes<br><input checked="" type="radio"/> 1 a 3 veces mes<br><input type="radio"/> 1 vez semana<br><input type="radio"/> 2 a 4 veces semana<br><input type="radio"/> 5 a 6 veces semana<br><input type="radio"/> 1 vez al día<br><input type="radio"/> 2 a 3 veces al día<br><input type="radio"/> 5 a 6 veces al día<br><input type="radio"/> más 6 veces al día |
| café                      | <input type="radio"/> Nunca o menos 1 vez al mes<br><input type="radio"/> 1 a 3 veces mes<br><input type="radio"/> 1 vez semana<br><input type="radio"/> 2 a 4 veces semana<br><input checked="" type="radio"/> 5 a 6 veces semana<br><input type="radio"/> 1 vez al día<br><input type="radio"/> 2 a 3 veces al día<br><input type="radio"/> 5 a 6 veces al día<br><input type="radio"/> más 6 veces al día |

|                       |                                                                                                                                                                                                                                                                                                                                                                                                              |
|-----------------------|--------------------------------------------------------------------------------------------------------------------------------------------------------------------------------------------------------------------------------------------------------------------------------------------------------------------------------------------------------------------------------------------------------------|
| cafe descafeinado     | <input type="radio"/> Nunca o menos 1 vez al mes<br><input checked="" type="radio"/> 1 a 3 veces mes<br><input type="radio"/> 1 vez semana<br><input type="radio"/> 2 a 4 veces semana<br><input type="radio"/> 5 a 6 veces semana<br><input type="radio"/> 1 vez al día<br><input type="radio"/> 2 a 3 veces al día<br><input type="radio"/> 5 a 6 veces al día<br><input type="radio"/> más 6 veces al día |
| te o infusión         | <input checked="" type="radio"/> Nunca o menos 1 vez al mes<br><input type="radio"/> 1 a 3 veces mes<br><input type="radio"/> 1 vez semana<br><input type="radio"/> 2 a 4 veces semana<br><input type="radio"/> 5 a 6 veces semana<br><input type="radio"/> 1 vez al día<br><input type="radio"/> 2 a 3 veces al día<br><input type="radio"/> 5 a 6 veces al día<br><input type="radio"/> más 6 veces al día |
| sopa o puré verduras  | <input type="radio"/> Nunca o menos 1 vez al mes<br><input type="radio"/> 1 a 3 veces mes<br><input checked="" type="radio"/> 1 vez semana<br><input type="radio"/> 2 a 4 veces semana<br><input type="radio"/> 5 a 6 veces semana<br><input type="radio"/> 1 vez al día<br><input type="radio"/> 2 a 3 veces al día<br><input type="radio"/> 5 a 6 veces al día<br><input type="radio"/> más 6 veces al día |
| croquetas pollo jamón | <input type="radio"/> Nunca o menos 1 vez al mes<br><input checked="" type="radio"/> 1 a 3 veces mes<br><input type="radio"/> 1 vez semana<br><input type="radio"/> 2 a 4 veces semana<br><input type="radio"/> 5 a 6 veces semana<br><input type="radio"/> 1 vez al día<br><input type="radio"/> 2 a 3 veces al día<br><input type="radio"/> 5 a 6 veces al día<br><input type="radio"/> más 6 veces al día |
| croquetas pescado     | <input checked="" type="radio"/> Nunca o menos 1 vez al mes<br><input type="radio"/> 1 a 3 veces mes<br><input type="radio"/> 1 vez semana<br><input type="radio"/> 2 a 4 veces semana<br><input type="radio"/> 5 a 6 veces semana<br><input type="radio"/> 1 vez al día<br><input type="radio"/> 2 a 3 veces al día<br><input type="radio"/> 5 a 6 veces al día<br><input type="radio"/> más 6 veces al día |
| mayonesa              | <input type="radio"/> Nunca o menos 1 vez al mes<br><input checked="" type="radio"/> 1 a 3 veces mes<br><input type="radio"/> 1 vez semana<br><input type="radio"/> 2 a 4 veces semana<br><input type="radio"/> 5 a 6 veces semana<br><input type="radio"/> 1 vez al día<br><input type="radio"/> 2 a 3 veces al día<br><input type="radio"/> 5 a 6 veces al día<br><input type="radio"/> más 6 veces al día |

|                  |                                                                                                                                                                                                                                                                                                                                                                                                              |
|------------------|--------------------------------------------------------------------------------------------------------------------------------------------------------------------------------------------------------------------------------------------------------------------------------------------------------------------------------------------------------------------------------------------------------------|
| salsa tomate     | <input type="radio"/> Nunca o menos 1 vez al mes<br><input type="radio"/> 1 a 3 veces mes<br><input type="radio"/> 1 vez semana<br><input checked="" type="radio"/> 2 a 4 veces semana<br><input type="radio"/> 5 a 6 veces semana<br><input type="radio"/> 1 vez al día<br><input type="radio"/> 2 a 3 veces al día<br><input type="radio"/> 5 a 6 veces al día<br><input type="radio"/> más 6 veces al día |
| ketchup          | <input type="radio"/> Nunca o menos 1 vez al mes<br><input checked="" type="radio"/> 1 a 3 veces mes<br><input type="radio"/> 1 vez semana<br><input type="radio"/> 2 a 4 veces semana<br><input type="radio"/> 5 a 6 veces semana<br><input type="radio"/> 1 vez al día<br><input type="radio"/> 2 a 3 veces al día<br><input type="radio"/> 5 a 6 veces al día<br><input type="radio"/> más 6 veces al día |
| sal              | <input type="radio"/> Nunca o menos 1 vez al mes<br><input type="radio"/> 1 a 3 veces mes<br><input type="radio"/> 1 vez semana<br><input type="radio"/> 2 a 4 veces semana<br><input type="radio"/> 5 a 6 veces semana<br><input type="radio"/> 1 vez al día<br><input checked="" type="radio"/> 2 a 3 veces al día<br><input type="radio"/> 5 a 6 veces al día<br><input type="radio"/> más 6 veces al día |
| ajo              | <input type="radio"/> Nunca o menos 1 vez al mes<br><input type="radio"/> 1 a 3 veces mes<br><input checked="" type="radio"/> 1 vez semana<br><input type="radio"/> 2 a 4 veces semana<br><input type="radio"/> 5 a 6 veces semana<br><input type="radio"/> 1 vez al día<br><input type="radio"/> 2 a 3 veces al día<br><input type="radio"/> 5 a 6 veces al día<br><input type="radio"/> más 6 veces al día |
| mermelada o miel | <input type="radio"/> Nunca o menos 1 vez al mes<br><input type="radio"/> 1 a 3 veces mes<br><input type="radio"/> 1 vez semana<br><input checked="" type="radio"/> 2 a 4 veces semana<br><input type="radio"/> 5 a 6 veces semana<br><input type="radio"/> 1 vez al día<br><input type="radio"/> 2 a 3 veces al día<br><input type="radio"/> 5 a 6 veces al día<br><input type="radio"/> más 6 veces al día |
| azúcar           | <input type="radio"/> Nunca o menos 1 vez al mes<br><input type="radio"/> 1 a 3 veces mes<br><input checked="" type="radio"/> 1 vez semana<br><input type="radio"/> 2 a 4 veces semana<br><input type="radio"/> 5 a 6 veces semana<br><input type="radio"/> 1 vez al día<br><input type="radio"/> 2 a 3 veces al día<br><input type="radio"/> 5 a 6 veces al día<br><input type="radio"/> más 6 veces al día |



|                                       |                                                                                                                                                                                                                                                                                                                                                                                                                                                                                                                               |
|---------------------------------------|-------------------------------------------------------------------------------------------------------------------------------------------------------------------------------------------------------------------------------------------------------------------------------------------------------------------------------------------------------------------------------------------------------------------------------------------------------------------------------------------------------------------------------|
| Otro alimento                         |                                                                                                                                                                                                                                                                                                                                                                                                                                                                                                                               |
| suplementos vitamínicos               | <input checked="" type="radio"/> si<br><input type="radio"/> no                                                                                                                                                                                                                                                                                                                                                                                                                                                               |
| suplementos vitamínicos               | [*DATA REMOVED*]                                                                                                                                                                                                                                                                                                                                                                                                                                                                                                              |
| dieta previa                          | <input type="radio"/> si<br><input checked="" type="radio"/> no                                                                                                                                                                                                                                                                                                                                                                                                                                                               |
| motivo dieta                          | <input checked="" type="radio"/> no dieta<br><input type="radio"/> control peso<br><input type="radio"/> control colesterol<br><input type="radio"/> control diabetes<br><input type="radio"/> problemas estómago<br><input type="radio"/> problemas vesícula o hepáticos<br><input type="radio"/> HTA o cardiopatía<br><input type="radio"/> problemas renales<br><input type="radio"/> alergia alimentaria<br><input type="radio"/> ácido úrico elevado<br><input type="radio"/> vegetariana<br><input type="radio"/> otros |
| cambio alimentos año previo gestación | <input checked="" type="radio"/> si<br><input type="radio"/> no                                                                                                                                                                                                                                                                                                                                                                                                                                                               |
| cambio lácteos                        | <input type="radio"/> eliminado<br><input type="radio"/> disminuido<br><input type="radio"/> igual<br><input checked="" type="radio"/> aumentado<br><input type="radio"/> no sabe                                                                                                                                                                                                                                                                                                                                             |
| cambio huevos                         | <input type="radio"/> eliminado<br><input type="radio"/> disminuido<br><input checked="" type="radio"/> igual<br><input type="radio"/> aumentado<br><input type="radio"/> no sabe                                                                                                                                                                                                                                                                                                                                             |
| cambio carne                          | <input type="radio"/> eliminado<br><input type="radio"/> disminuido<br><input checked="" type="radio"/> igual<br><input type="radio"/> aumentado<br><input type="radio"/> no sabe                                                                                                                                                                                                                                                                                                                                             |
| cambio pescado                        | <input type="radio"/> eliminado<br><input type="radio"/> disminuido<br><input checked="" type="radio"/> igual<br><input type="radio"/> aumentado<br><input type="radio"/> no sabe                                                                                                                                                                                                                                                                                                                                             |
| cambio verduras                       | <input type="radio"/> eliminado<br><input type="radio"/> disminuido<br><input checked="" type="radio"/> igual<br><input type="radio"/> aumentado<br><input type="radio"/> no sabe                                                                                                                                                                                                                                                                                                                                             |

|                            |                                                                                                                                                                                                                        |
|----------------------------|------------------------------------------------------------------------------------------------------------------------------------------------------------------------------------------------------------------------|
| cambio legumbres           | <input type="radio"/> eliminado<br><input type="radio"/> disminuido<br><input checked="" type="radio"/> igual<br><input type="radio"/> aumentado<br><input type="radio"/> no sabe                                      |
| cambio fruta               | <input type="radio"/> eliminado<br><input type="radio"/> disminuido<br><input type="radio"/> igual<br><input checked="" type="radio"/> aumentado<br><input type="radio"/> no sabe                                      |
| cambio pan                 | <input type="radio"/> eliminado<br><input type="radio"/> disminuido<br><input type="radio"/> igual<br><input checked="" type="radio"/> aumentado<br><input type="radio"/> no sabe                                      |
| cambio aceite oliva        | <input type="radio"/> eliminado<br><input type="radio"/> disminuido<br><input checked="" type="radio"/> igual<br><input type="radio"/> aumentado<br><input type="radio"/> no sabe                                      |
| cambio mante o margarina   | <input type="radio"/> eliminado<br><input type="radio"/> disminuido<br><input checked="" type="radio"/> igual<br><input type="radio"/> aumentado<br><input type="radio"/> no sabe                                      |
| cambio azúcar y dulces     | <input type="radio"/> eliminado<br><input type="radio"/> disminuido<br><input type="radio"/> igual<br><input checked="" type="radio"/> aumentado<br><input type="radio"/> no sabe                                      |
| cambio bebidas alcohólicas | <input checked="" type="radio"/> eliminado<br><input type="radio"/> disminuido<br><input type="radio"/> igual<br><input type="radio"/> aumentado<br><input type="radio"/> no sabe                                      |
| frecuencia comidas fritas  | <input type="radio"/> a diario<br><input type="radio"/> 5 a 6 veces semana<br><input type="radio"/> 2 a 4 veces semana<br><input checked="" type="radio"/> 1 vez semana<br><input type="radio"/> menos de 1 vez semana |
| carne                      | <input type="radio"/> no como<br><input type="radio"/> cruda<br><input type="radio"/> poco hecha<br><input type="radio"/> hecha<br><input checked="" type="radio"/> muy hecha                                          |
| grasa visible carne        | <input checked="" type="radio"/> quita toda<br><input type="radio"/> quita mayoría<br><input type="radio"/> quita un poco<br><input type="radio"/> no quita nada                                                       |

|                                |                                                                                                                                                                                                                                                          |
|--------------------------------|----------------------------------------------------------------------------------------------------------------------------------------------------------------------------------------------------------------------------------------------------------|
| cocina carne                   | <input type="radio"/> a la plancha<br><input checked="" type="radio"/> a la parrilla<br><input type="radio"/> asada<br><input type="radio"/> frita<br><input type="radio"/> guisada                                                                      |
| tostado quemado carne          | <input checked="" type="radio"/> nunca<br><input type="radio"/> 1 vez mes<br><input type="radio"/> 2 a 3 veces mes<br><input type="radio"/> 1 vez semana<br><input type="radio"/> 2 a 3 semanas                                                          |
| tostado quemado pescado        | <input checked="" type="radio"/> nunca<br><input type="radio"/> 1 vez mes<br><input type="radio"/> 2 a 3 veces mes<br><input type="radio"/> 1 vez semana<br><input type="radio"/> 2 a 3 semanas                                                          |
| socarrat paella                | <input type="radio"/> nunca<br><input checked="" type="radio"/> 1 vez mes<br><input type="radio"/> 2 a 3 veces mes<br><input type="radio"/> 1 vez semana<br><input type="radio"/> 2 a 3 semanas                                                          |
| grasa o aceite cocinar         | <input type="radio"/> mantequilla<br><input type="radio"/> margarina<br><input type="radio"/> aceite oliva<br><input checked="" type="radio"/> aceite oliva virgen extra<br><input type="radio"/> aceite vegetal<br><input type="radio"/> mezcla aceites |
| grasa aceite aliñar            | <input type="radio"/> mantequilla<br><input type="radio"/> margarina<br><input type="radio"/> aceite oliva<br><input checked="" type="radio"/> aceite oliva virgen extra<br><input type="radio"/> aceite vegetal<br><input type="radio"/> mezcla aceites |
| grasa aceite freir             | <input type="radio"/> mantequilla<br><input type="radio"/> margarina<br><input type="radio"/> aceite oliva<br><input type="radio"/> aceite oliva virgen extra<br><input type="radio"/> aceite vegetal<br><input checked="" type="radio"/> mezcla aceites |
| Ejercicio cuestionario         | <input checked="" type="radio"/> si<br><input type="radio"/> no                                                                                                                                                                                          |
| horas de sueño incluido siesta | [*DATA REMOVED*]                                                                                                                                                                                                                                         |
| minutos siesta                 | [*DATA REMOVED*]                                                                                                                                                                                                                                         |
| horas televisión semana        | [*DATA REMOVED*]                                                                                                                                                                                                                                         |

|                                        |                                                                                                                                                                                                                                                                                                                                                                           |
|----------------------------------------|---------------------------------------------------------------------------------------------------------------------------------------------------------------------------------------------------------------------------------------------------------------------------------------------------------------------------------------------------------------------------|
| actividad trabajo                      | <input type="radio"/> casi siempre sentado<br><input type="radio"/> sentado 50 por cien<br><input type="radio"/> casi siempre de pie, quieto<br><input checked="" type="radio"/> casi siempre levantado caminando y llevando pocas cosas<br><input type="radio"/> casi siempre levantado, caminando y llevado muchas cosas<br><input type="radio"/> trabajo manual pesado |
| tiempo caminar o bici al día           | <input type="radio"/> casi nunca<br><input type="radio"/> menos 20min día<br><input type="radio"/> 20 a 40 min día<br><input type="radio"/> 40 a 60 min día<br><input checked="" type="radio"/> 1h o 1h y media día<br><input type="radio"/> más de 1h y media al día                                                                                                     |
| tiempo tareas casa al día              | <input type="radio"/> menos de 1h día<br><input checked="" type="radio"/> 1 a 2h día<br><input type="radio"/> 3 a 4h día<br><input type="radio"/> 5 a 6h día<br><input type="radio"/> 7 a 8h día<br><input type="radio"/> más de 8h día                                                                                                                                   |
| tiempo libre televisión ordenador leer | <input type="radio"/> menos 1h día<br><input type="radio"/> 1h día<br><input type="radio"/> 2h día<br><input type="radio"/> 3h día<br><input type="radio"/> 4h día<br><input checked="" type="radio"/> 5 a 6h día<br><input type="radio"/> mas 6h día                                                                                                                     |
| tiempo libre ejercicio o deporte       | <input type="radio"/> menos 1h semana<br><input type="radio"/> 1h semana<br><input type="radio"/> 2h semana<br><input checked="" type="radio"/> 3h semana<br><input type="radio"/> 4 a 5h semana<br><input type="radio"/> mas 5h semana                                                                                                                                   |
| como se considera                      | <input type="radio"/> sedentaria<br><input type="radio"/> poco activa<br><input checked="" type="radio"/> moderadamente activa<br><input type="radio"/> bastante activa<br><input type="radio"/> muy activa<br><input type="radio"/> no sabe                                                                                                                              |
| FUR                                    | [*DATA REMOVED*]                                                                                                                                                                                                                                                                                                                                                          |
| Semanas gestación 2T                   | _____                                                                                                                                                                                                                                                                                                                                                                     |
| Días gestación 2T                      | _____                                                                                                                                                                                                                                                                                                                                                                     |
| DBP 2T                                 | _____                                                                                                                                                                                                                                                                                                                                                                     |
| CC 2T                                  | _____                                                                                                                                                                                                                                                                                                                                                                     |

|                                                   |                                                                                                                                                                                                 |
|---------------------------------------------------|-------------------------------------------------------------------------------------------------------------------------------------------------------------------------------------------------|
| AC 2T                                             |                                                                                                                                                                                                 |
| LF 2T                                             |                                                                                                                                                                                                 |
| PFE 2T (Hadlock)                                  |                                                                                                                                                                                                 |
| Semanas gestación 3T                              | [*DATA REMOVED*]                                                                                                                                                                                |
| días 3T                                           | [*DATA REMOVED*]                                                                                                                                                                                |
| DBP 3T                                            | [*DATA REMOVED*]                                                                                                                                                                                |
| CC 3T                                             | [*DATA REMOVED*]                                                                                                                                                                                |
| AC 3T                                             | [*DATA REMOVED*]                                                                                                                                                                                |
| LF 3T                                             | [*DATA REMOVED*]                                                                                                                                                                                |
| PFE 3T (Hadlock)                                  | [*DATA REMOVED*]                                                                                                                                                                                |
| Semanas de gestación final                        | [*DATA REMOVED*]                                                                                                                                                                                |
| días gestación final                              | [*DATA REMOVED*]                                                                                                                                                                                |
| Localización placenta                             | <input checked="" type="radio"/> anterior<br><input type="radio"/> lateral derecha<br><input type="radio"/> lateral izquierda<br><input type="radio"/> posterior<br><input type="radio"/> fondo |
| Presentación longitudinal cefálica                | <input type="radio"/> no<br><input checked="" type="radio"/> si                                                                                                                                 |
| Dorso                                             | <input type="radio"/> izquierda anterior<br><input type="radio"/> izquierda posterior<br><input checked="" type="radio"/> derecha anterior<br><input type="radio"/> derecha posterior           |
| diámetro biparietal                               | [*DATA REMOVED*]                                                                                                                                                                                |
| Circunferencia craneal                            | [*DATA REMOVED*]                                                                                                                                                                                |
| Circunferencia abdominal                          | [*DATA REMOVED*]                                                                                                                                                                                |
| Longitud de femur                                 | [*DATA REMOVED*]                                                                                                                                                                                |
| tejido celular subcutáneo a nivel del muslo en mm | [*DATA REMOVED*]                                                                                                                                                                                |
| tejido celular subcutáneo en abdomen en mm        | [*DATA REMOVED*]                                                                                                                                                                                |

|                                               |                                                                                                                                                          |
|-----------------------------------------------|----------------------------------------------------------------------------------------------------------------------------------------------------------|
| Volumen del muslo en cm3                      | [*DATA REMOVED*]                                                                                                                                         |
| Peso fetal estimado según fórmula de Hadlock  | [*DATA REMOVED*]                                                                                                                                         |
| Percentil                                     | [*DATA REMOVED*]                                                                                                                                         |
| Peso fetal estimado según fórmula de Scioscia | _____                                                                                                                                                    |
| Peso fetal estimado según fórmula de LEE      | _____                                                                                                                                                    |
| Tipo de parto                                 | <input type="radio"/> eutocico<br><input checked="" type="radio"/> instrumentado/ventosa<br><input type="radio"/> cesarea                                |
| fecha de nacimiento                           | [*DATA REMOVED*]                                                                                                                                         |
| Días entre exploración y nacimiento           | [*DATA REMOVED*]                                                                                                                                         |
| Peso RN en g                                  | [*DATA REMOVED*]                                                                                                                                         |
| sexo                                          | <input checked="" type="radio"/> mujer<br><input type="radio"/> hombre                                                                                   |
| Apgar 1 minuto                                | [*DATA REMOVED*]                                                                                                                                         |
| Apgar 5 minutos                               | [*DATA REMOVED*]                                                                                                                                         |
| Apgar 10 minutos                              | _____                                                                                                                                                    |
| antecedente Covid durante gestación           | <input type="radio"/> Yes<br><input checked="" type="radio"/> No                                                                                         |
| Nivel de estudios                             | <input type="radio"/> ninguno<br><input type="radio"/> primarios<br><input type="radio"/> secundarios<br><input checked="" type="radio"/> universitarios |

# Base\_datos\_estimacion\_peso\_fetal

|                                       |                                                                                                                                                                                                                                                                                      |
|---------------------------------------|--------------------------------------------------------------------------------------------------------------------------------------------------------------------------------------------------------------------------------------------------------------------------------------|
| Número de identificación participante | 11                                                                                                                                                                                                                                                                                   |
| CODIGO PARTICIPANTE                   |                                                                                                                                                                                                                                                                                      |
| Edad                                  | [*DATA REMOVED*]                                                                                                                                                                                                                                                                     |
| Gestaciones                           | <input type="radio"/> 1<br><input type="radio"/> 2<br><input type="radio"/> 3<br><input checked="" type="radio"/> mas de 3                                                                                                                                                           |
| partos                                | <input type="radio"/> 0<br><input checked="" type="radio"/> 1<br><input type="radio"/> 2<br><input type="radio"/> 3<br><input type="radio"/> mas de 3                                                                                                                                |
| cesáreas                              | <input checked="" type="radio"/> 0<br><input type="radio"/> 1<br><input type="radio"/> 2<br><input type="radio"/> 3<br><input type="radio"/> mas de 3                                                                                                                                |
| Abortos                               | <input type="radio"/> 0<br><input type="radio"/> 1<br><input checked="" type="radio"/> 2<br><input type="radio"/> 3<br><input type="radio"/> mas de 3                                                                                                                                |
| Tipo de gestacion                     | <input checked="" type="radio"/> espontanea<br><input type="radio"/> IAC inseminación artificial conyuge<br><input type="radio"/> IAD inseminación artificial donante<br><input type="radio"/> FIV Fecundación in Vitro<br><input type="radio"/> Ovodon FIV con donación de ovocitos |
| peso previo a embarazo                | [*DATA REMOVED*]                                                                                                                                                                                                                                                                     |
| Ganancia ponderal embarazo            | [*DATA REMOVED*]                                                                                                                                                                                                                                                                     |
| Talla madre                           | [*DATA REMOVED*]                                                                                                                                                                                                                                                                     |
| IMC previo embarazo                   | 22.77318640955005                                                                                                                                                                                                                                                                    |
| Patología obstétrica                  | <input checked="" type="radio"/> no<br><input type="radio"/> si                                                                                                                                                                                                                      |
| Diabetes pregestacional               | <input checked="" type="radio"/> no<br><input type="radio"/> si                                                                                                                                                                                                                      |
| Diabetes gestacional                  | <input checked="" type="radio"/> no<br><input type="radio"/> si                                                                                                                                                                                                                      |

|                                            |                                                                                                                                                                                      |
|--------------------------------------------|--------------------------------------------------------------------------------------------------------------------------------------------------------------------------------------|
| Diabetes gestacional con insulina          | <input checked="" type="radio"/> no<br><input type="radio"/> si                                                                                                                      |
| Diabetes gestacional con dieta y ejercicio | <input checked="" type="radio"/> no<br><input type="radio"/> si                                                                                                                      |
| Percentil fetos previos                    | <input checked="" type="radio"/> Nada<br><input type="radio"/> percentil menor de 10<br><input type="radio"/> percentil entre 10 y 90<br><input type="radio"/> percentil mayor de 90 |
| Exfumadora                                 | <input checked="" type="radio"/> Nada<br><input type="radio"/> menos de 5 años<br><input type="radio"/> 5 a 10 años<br><input type="radio"/> mayor o igual a 10 años                 |
| Hábito tabáquico                           | <input checked="" type="radio"/> no<br><input type="radio"/> si                                                                                                                      |
| fumadora                                   | [*DATA REMOVED*]                                                                                                                                                                     |
| Consumo otros tóxicos                      | <input checked="" type="radio"/> no<br><input type="radio"/> si                                                                                                                      |
| Hb 1T                                      | [*DATA REMOVED*]                                                                                                                                                                     |
| Htc 1T                                     | [*DATA REMOVED*]                                                                                                                                                                     |
| Hb 2T                                      | [*DATA REMOVED*]                                                                                                                                                                     |
| HTC 2T                                     | [*DATA REMOVED*]                                                                                                                                                                     |
| Hb 3T                                      | [*DATA REMOVED*]                                                                                                                                                                     |
| HTC 3T                                     | [*DATA REMOVED*]                                                                                                                                                                     |
| Suplemento FE oral                         | <input checked="" type="radio"/> si<br><input type="radio"/> no                                                                                                                      |
| Suplemento fe iv                           | <input type="radio"/> si<br><input checked="" type="radio"/> no                                                                                                                      |
| Transfusión                                | <input checked="" type="radio"/> no<br><input type="radio"/> si                                                                                                                      |
| Solicitada Vit D                           | <input checked="" type="radio"/> no<br><input type="radio"/> si                                                                                                                      |
| Deficit vit D                              | <input checked="" type="radio"/> no<br><input type="radio"/> si                                                                                                                      |
| Suplemento vit D                           | <input type="radio"/> si<br><input checked="" type="radio"/> no                                                                                                                      |



|                       |                                                                                                                                                                                                                                                                                                                                                                                                              |
|-----------------------|--------------------------------------------------------------------------------------------------------------------------------------------------------------------------------------------------------------------------------------------------------------------------------------------------------------------------------------------------------------------------------------------------------------|
| Dieta, cuestionario   | <input checked="" type="radio"/> sí<br><input type="radio"/> no                                                                                                                                                                                                                                                                                                                                              |
| Leche entera          | <input checked="" type="radio"/> Nunca o menos 1 vez al mes<br><input type="radio"/> 1 a 3 veces mes<br><input type="radio"/> 1 vez semana<br><input type="radio"/> 2 a 4 veces semana<br><input type="radio"/> 5 a 6 veces semana<br><input type="radio"/> 1 vez al día<br><input type="radio"/> 2 a 3 veces al día<br><input type="radio"/> 5 a 6 veces al día<br><input type="radio"/> más 6 veces al día |
| Leche semidesnatada   | <input type="radio"/> Nunca o menos 1 vez al mes<br><input type="radio"/> 1 a 3 veces mes<br><input type="radio"/> 1 vez semana<br><input type="radio"/> 2 a 4 veces semana<br><input type="radio"/> 5 a 6 veces semana<br><input checked="" type="radio"/> 1 vez al día<br><input type="radio"/> 2 a 3 veces al día<br><input type="radio"/> 5 a 6 veces al día<br><input type="radio"/> mas 6 veces al día |
| Leche desnatada       | <input checked="" type="radio"/> Nunca o menos 1 vez al mes<br><input type="radio"/> 1 a 3 veces mes<br><input type="radio"/> 1 vez semana<br><input type="radio"/> 2 a 4 veces semana<br><input type="radio"/> 5 a 6 veces semana<br><input type="radio"/> 1 vez al día<br><input type="radio"/> 2 a 3 veces al día<br><input type="radio"/> 5 a 6 veces al día<br><input type="radio"/> más 6 veces al día |
| Leche condensada      | <input checked="" type="radio"/> Nunca o menos 1 vez al mes<br><input type="radio"/> 1 a 3 veces mes<br><input type="radio"/> 1 vez semana<br><input type="radio"/> 2 a 4 veces semana<br><input type="radio"/> 5 a 6 veces semana<br><input type="radio"/> 1 vez al día<br><input type="radio"/> 2 a 3 veces al día<br><input type="radio"/> 5 a 6 veces al día<br><input type="radio"/> más 6 veces al día |
| nata o crema de leche | <input checked="" type="radio"/> Nunca o menos 1 vez al mes<br><input type="radio"/> 1 a 3 veces mes<br><input type="radio"/> 1 vez semana<br><input type="radio"/> 2 a 4 veces semana<br><input type="radio"/> 5 a 6 veces semana<br><input type="radio"/> 1 vez al día<br><input type="radio"/> 2 a 3 veces al día<br><input type="radio"/> 5 a 6 veces al día<br><input type="radio"/> más 6 veces al día |

|                                             |                                                                                                                                                                                                                                                                                                                                                                                                              |
|---------------------------------------------|--------------------------------------------------------------------------------------------------------------------------------------------------------------------------------------------------------------------------------------------------------------------------------------------------------------------------------------------------------------------------------------------------------------|
| Yogurt Entero                               | <input checked="" type="radio"/> Nunca o menos 1 vez al mes<br><input type="radio"/> 1 a 3 veces mes<br><input type="radio"/> 1 vez semana<br><input type="radio"/> 2 a 4 veces semana<br><input type="radio"/> 5 a 6 veces semana<br><input type="radio"/> 1 vez al día<br><input type="radio"/> 2 a 3 veces al día<br><input type="radio"/> 5 a 6 veces al día<br><input type="radio"/> más 6 veces al día |
| Yogurt desnatado                            | <input checked="" type="radio"/> Nunca o menos 1 vez al mes<br><input type="radio"/> 1 a 3 veces mes<br><input type="radio"/> 1 vez semana<br><input type="radio"/> 2 a 4 veces semana<br><input type="radio"/> 5 a 6 veces semana<br><input type="radio"/> 1 vez al día<br><input type="radio"/> 2 a 3 veces al día<br><input type="radio"/> 5 a 6 veces al día<br><input type="radio"/> más 6 veces al día |
| 100g requesón o queso blando o queso fresco | <input type="radio"/> Nunca o menos 1 vez al mes<br><input type="radio"/> 1 a 3 veces mes<br><input checked="" type="radio"/> 1 vez semana<br><input type="radio"/> 2 a 4 veces semana<br><input type="radio"/> 5 a 6 veces semana<br><input type="radio"/> 1 vez al día<br><input type="radio"/> 2 a 3 veces al día<br><input type="radio"/> 5 a 6 veces al día<br><input type="radio"/> más 6 veces al día |
| queso curado o semicurado o cremoso         | <input type="radio"/> Nunca o menos 1 vez al mes<br><input type="radio"/> 1 a 3 veces mes<br><input type="radio"/> 1 vez semana<br><input checked="" type="radio"/> 2 a 4 veces semana<br><input type="radio"/> 5 a 6 veces semana<br><input type="radio"/> 1 vez al día<br><input type="radio"/> 2 a 3 veces al día<br><input type="radio"/> 5 a 6 veces al día<br><input type="radio"/> más 6 veces al día |
| natillas flan pudding                       | <input type="radio"/> Nunca o menos 1 vez al mes<br><input checked="" type="radio"/> 1 a 3 veces mes<br><input type="radio"/> 1 vez semana<br><input type="radio"/> 2 a 4 veces semana<br><input type="radio"/> 5 a 6 veces semana<br><input type="radio"/> 1 vez al día<br><input type="radio"/> 2 a 3 veces al día<br><input type="radio"/> 5 a 6 veces al día<br><input type="radio"/> más 6 veces al día |
| Helado                                      | <input type="radio"/> Nunca o menos 1 vez al mes<br><input checked="" type="radio"/> 1 a 3 veces mes<br><input type="radio"/> 1 vez semana<br><input type="radio"/> 2 a 4 veces semana<br><input type="radio"/> 5 a 6 veces semana<br><input type="radio"/> 1 vez al día<br><input type="radio"/> 2 a 3 veces al día<br><input type="radio"/> 5 a 6 veces al día<br><input type="radio"/> más 6 veces al día |

|                                      |                                                                                                                                                                                                                                                                                                                                                                                                              |
|--------------------------------------|--------------------------------------------------------------------------------------------------------------------------------------------------------------------------------------------------------------------------------------------------------------------------------------------------------------------------------------------------------------------------------------------------------------|
| huevo                                | <input type="radio"/> Nunca o menos 1 vez al mes<br><input type="radio"/> 1 a 3 veces mes<br><input type="radio"/> 1 vez semana<br><input checked="" type="radio"/> 2 a 4 veces semana<br><input type="radio"/> 5 a 6 veces semana<br><input type="radio"/> 1 vez al día<br><input type="radio"/> 2 a 3 veces al día<br><input type="radio"/> 5 a 6 veces al día<br><input type="radio"/> más 6 veces al día |
| Pollo con piel                       | <input checked="" type="radio"/> Nunca o menos 1 vez al mes<br><input type="radio"/> 1 a 3 veces mes<br><input type="radio"/> 1 vez semana<br><input type="radio"/> 2 a 4 veces semana<br><input type="radio"/> 5 a 6 veces semana<br><input type="radio"/> 1 vez al día<br><input type="radio"/> 2 a 3 veces al día<br><input type="radio"/> 5 a 6 veces al día<br><input type="radio"/> más 6 veces al día |
| pollo sin piel                       | <input type="radio"/> Nunca o menos 1 vez al mes<br><input type="radio"/> 1 a 3 veces mes<br><input type="radio"/> 1 vez semana<br><input checked="" type="radio"/> 2 a 4 veces semana<br><input type="radio"/> 5 a 6 veces semana<br><input type="radio"/> 1 vez al día<br><input type="radio"/> 2 a 3 veces al día<br><input type="radio"/> 5 a 6 veces al día<br><input type="radio"/> más 6 veces al día |
| Ternera o cerdo o cordero            | <input type="radio"/> Nunca o menos 1 vez al mes<br><input type="radio"/> 1 a 3 veces mes<br><input type="radio"/> 1 vez semana<br><input checked="" type="radio"/> 2 a 4 veces semana<br><input type="radio"/> 5 a 6 veces semana<br><input type="radio"/> 1 vez al día<br><input type="radio"/> 2 a 3 veces al día<br><input type="radio"/> 5 a 6 veces al día<br><input type="radio"/> más 6 veces al día |
| carne caza: Conejo o codorniz o pato | <input type="radio"/> Nunca o menos 1 vez al mes<br><input checked="" type="radio"/> 1 a 3 veces mes<br><input type="radio"/> 1 vez semana<br><input type="radio"/> 2 a 4 veces semana<br><input type="radio"/> 5 a 6 veces semana<br><input type="radio"/> 1 vez al día<br><input type="radio"/> 2 a 3 veces al día<br><input type="radio"/> 5 a 6 veces al día<br><input type="radio"/> más 6 veces al día |
| Hígado de ternera o cerdo o pollo    | <input checked="" type="radio"/> Nunca o menos 1 vez al mes<br><input type="radio"/> 1 a 3 veces mes<br><input type="radio"/> 1 vez semana<br><input type="radio"/> 2 a 4 veces semana<br><input type="radio"/> 5 a 6 veces semana<br><input type="radio"/> 1 vez al día<br><input type="radio"/> 2 a 3 veces al día<br><input type="radio"/> 5 a 6 veces al día<br><input type="radio"/> más 6 veces al día |

|                     |                                                                                                                                                                                                                                                                                                                                                                                                              |
|---------------------|--------------------------------------------------------------------------------------------------------------------------------------------------------------------------------------------------------------------------------------------------------------------------------------------------------------------------------------------------------------------------------------------------------------|
| Vísceras            | <input checked="" type="radio"/> Nunca o menos 1 vez al mes<br><input type="radio"/> 1 a 3 veces mes<br><input type="radio"/> 1 vez semana<br><input type="radio"/> 2 a 4 veces semana<br><input type="radio"/> 5 a 6 veces semana<br><input type="radio"/> 1 vez al día<br><input type="radio"/> 2 a 3 veces al día<br><input type="radio"/> 5 a 6 veces al día<br><input type="radio"/> más 6 veces al día |
| Embutido            | <input type="radio"/> Nunca o menos 1 vez al mes<br><input type="radio"/> 1 a 3 veces mes<br><input type="radio"/> 1 vez semana<br><input type="radio"/> 2 a 4 veces semana<br><input type="radio"/> 5 a 6 veces semana<br><input checked="" type="radio"/> 1 vez al día<br><input type="radio"/> 2 a 3 veces al día<br><input type="radio"/> 5 a 6 veces al día<br><input type="radio"/> más 6 veces al día |
| Salchicha o similar | <input type="radio"/> Nunca o menos 1 vez al mes<br><input checked="" type="radio"/> 1 a 3 veces mes<br><input type="radio"/> 1 vez semana<br><input type="radio"/> 2 a 4 veces semana<br><input type="radio"/> 5 a 6 veces semana<br><input type="radio"/> 1 vez al día<br><input type="radio"/> 2 a 3 veces al día<br><input type="radio"/> 5 a 6 veces al día<br><input type="radio"/> más 6 veces al día |
| Pate o foiegras     | <input type="radio"/> Nunca o menos 1 vez al mes<br><input checked="" type="radio"/> 1 a 3 veces mes<br><input type="radio"/> 1 vez semana<br><input type="radio"/> 2 a 4 veces semana<br><input type="radio"/> 5 a 6 veces semana<br><input type="radio"/> 1 vez al día<br><input type="radio"/> 2 a 3 veces al día<br><input type="radio"/> 5 a 6 veces al día<br><input type="radio"/> más 6 veces al día |
| Hamburguesa         | <input type="radio"/> Nunca o menos 1 vez al mes<br><input checked="" type="radio"/> 1 a 3 veces mes<br><input type="radio"/> 1 vez semana<br><input type="radio"/> 2 a 4 veces semana<br><input type="radio"/> 5 a 6 veces semana<br><input type="radio"/> 1 vez al día<br><input type="radio"/> 2 a 3 veces al día<br><input type="radio"/> 5 a 6 veces al día<br><input type="radio"/> más 6 veces al día |
| tocino o bacon      | <input checked="" type="radio"/> Nunca o menos 1 vez al mes<br><input type="radio"/> 1 a 3 veces mes<br><input type="radio"/> 1 vez semana<br><input type="radio"/> 2 a 4 veces semana<br><input type="radio"/> 5 a 6 veces semana<br><input type="radio"/> 1 vez al día<br><input type="radio"/> 2 a 3 veces al día<br><input type="radio"/> 5 a 6 veces al día<br><input type="radio"/> más 6 veces al día |

|                        |                                                                                                                                                                                                                                                                                                                                                                                                              |
|------------------------|--------------------------------------------------------------------------------------------------------------------------------------------------------------------------------------------------------------------------------------------------------------------------------------------------------------------------------------------------------------------------------------------------------------|
| Pescado frito          | <input checked="" type="radio"/> Nunca o menos 1 vez al mes<br><input type="radio"/> 1 a 3 veces mes<br><input type="radio"/> 1 vez semana<br><input type="radio"/> 2 a 4 veces semana<br><input type="radio"/> 5 a 6 veces semana<br><input type="radio"/> 1 vez al día<br><input type="radio"/> 2 a 3 veces al día<br><input type="radio"/> 5 a 6 veces al día<br><input type="radio"/> más 6 veces al día |
| pescado hervido blanco | <input checked="" type="radio"/> Nunca o menos 1 vez al mes<br><input type="radio"/> 1 a 3 veces mes<br><input type="radio"/> 1 vez semana<br><input type="radio"/> 2 a 4 veces semana<br><input type="radio"/> 5 a 6 veces semana<br><input type="radio"/> 1 vez al día<br><input type="radio"/> 2 a 3 veces al día<br><input type="radio"/> 5 a 6 veces al día<br><input type="radio"/> más 6 veces al día |
| pescado hervido azul   | <input type="radio"/> Nunca o menos 1 vez al mes<br><input type="radio"/> 1 a 3 veces mes<br><input checked="" type="radio"/> 1 vez semana<br><input type="radio"/> 2 a 4 veces semana<br><input type="radio"/> 5 a 6 veces semana<br><input type="radio"/> 1 vez al día<br><input type="radio"/> 2 a 3 veces al día<br><input type="radio"/> 5 a 6 veces al día<br><input type="radio"/> más 6 veces al día |
| otros pescado azul     | <input type="radio"/> Nunca o menos 1 vez al mes<br><input checked="" type="radio"/> 1 a 3 veces mes<br><input type="radio"/> 1 vez semana<br><input type="radio"/> 2 a 4 veces semana<br><input type="radio"/> 5 a 6 veces semana<br><input type="radio"/> 1 vez al día<br><input type="radio"/> 2 a 3 veces al día<br><input type="radio"/> 5 a 6 veces al día<br><input type="radio"/> más 6 veces al día |
| atun conserva          | <input type="radio"/> Nunca o menos 1 vez al mes<br><input type="radio"/> 1 a 3 veces mes<br><input checked="" type="radio"/> 1 vez semana<br><input type="radio"/> 2 a 4 veces semana<br><input type="radio"/> 5 a 6 veces semana<br><input type="radio"/> 1 vez al día<br><input type="radio"/> 2 a 3 veces al día<br><input type="radio"/> 5 a 6 veces al día<br><input type="radio"/> más 6 veces al día |
| sardina conserva       | <input checked="" type="radio"/> Nunca o menos 1 vez al mes<br><input type="radio"/> 1 a 3 veces mes<br><input type="radio"/> 1 vez semana<br><input type="radio"/> 2 a 4 veces semana<br><input type="radio"/> 5 a 6 veces semana<br><input type="radio"/> 1 vez al día<br><input type="radio"/> 2 a 3 veces al día<br><input type="radio"/> 5 a 6 veces al día<br><input type="radio"/> más 6 veces al día |

|                                         |                                                                                                                                                                                                                                                                                                                                                                                                              |
|-----------------------------------------|--------------------------------------------------------------------------------------------------------------------------------------------------------------------------------------------------------------------------------------------------------------------------------------------------------------------------------------------------------------------------------------------------------------|
| pescado ahumado                         | <input checked="" type="radio"/> Nunca o menos 1 vez al mes<br><input type="radio"/> 1 a 3 veces mes<br><input type="radio"/> 1 vez semana<br><input type="radio"/> 2 a 4 veces semana<br><input type="radio"/> 5 a 6 veces semana<br><input type="radio"/> 1 vez al día<br><input type="radio"/> 2 a 3 veces al día<br><input type="radio"/> 5 a 6 veces al día<br><input type="radio"/> más 6 veces al día |
| almejas o mejillones o ostras unos 100g | <input checked="" type="radio"/> Nunca o menos 1 vez al mes<br><input type="radio"/> 1 a 3 veces mes<br><input type="radio"/> 1 vez semana<br><input type="radio"/> 2 a 4 veces semana<br><input type="radio"/> 5 a 6 veces semana<br><input type="radio"/> 1 vez al día<br><input type="radio"/> 2 a 3 veces al día<br><input type="radio"/> 5 a 6 veces al día<br><input type="radio"/> más 6 veces al día |
| calamar o chipiron o sepia unos 100g    | <input checked="" type="radio"/> Nunca o menos 1 vez al mes<br><input type="radio"/> 1 a 3 veces mes<br><input type="radio"/> 1 vez semana<br><input type="radio"/> 2 a 4 veces semana<br><input type="radio"/> 5 a 6 veces semana<br><input type="radio"/> 1 vez al día<br><input type="radio"/> 2 a 3 veces al día<br><input type="radio"/> 5 a 6 veces al día<br><input type="radio"/> más 6 veces al día |
| marisco unos 100g                       | <input type="radio"/> Nunca o menos 1 vez al mes<br><input checked="" type="radio"/> 1 a 3 veces mes<br><input type="radio"/> 1 vez semana<br><input type="radio"/> 2 a 4 veces semana<br><input type="radio"/> 5 a 6 veces semana<br><input type="radio"/> 1 vez al día<br><input type="radio"/> 2 a 3 veces al día<br><input type="radio"/> 5 a 6 veces al día<br><input type="radio"/> más 6 veces al día |
| Espinacas o acelgas cocinadas           | <input type="radio"/> Nunca o menos 1 vez al mes<br><input type="radio"/> 1 a 3 veces mes<br><input checked="" type="radio"/> 1 vez semana<br><input type="radio"/> 2 a 4 veces semana<br><input type="radio"/> 5 a 6 veces semana<br><input type="radio"/> 1 vez al día<br><input type="radio"/> 2 a 3 veces al día<br><input type="radio"/> 5 a 6 veces al día<br><input type="radio"/> más 6 veces al día |
| Col o coliflor o brocoli cocinado       | <input type="radio"/> Nunca o menos 1 vez al mes<br><input checked="" type="radio"/> 1 a 3 veces mes<br><input type="radio"/> 1 vez semana<br><input type="radio"/> 2 a 4 veces semana<br><input type="radio"/> 5 a 6 veces semana<br><input type="radio"/> 1 vez al día<br><input type="radio"/> 2 a 3 veces al día<br><input type="radio"/> 5 a 6 veces al día<br><input type="radio"/> más 6 veces al día |

---

Lechuga o endivia o escarola

- ☐ Nunca o menos 1 vez al mes  
☐ 1 a 3 veces mes  
☐ 1 vez semana  
☐ 2 a 4 veces semana  
☐ 5 a 6 veces semana  
☒ 1 vez al día  
☐ 2 a 3 veces al día  
☐ 5 a 6 veces al día  
☐ más 6 veces al día

---

tomate ensalada

- ☐ Nunca o menos 1 vez al mes  
☐ 1 a 3 veces mes  
☐ 1 vez semana  
☐ 2 a 4 veces semana  
☐ 5 a 6 veces semana  
☒ 1 vez al día  
☐ 2 a 3 veces al día  
☐ 5 a 6 veces al día  
☐ más 6 veces al día

---

cebolla

- ☐ Nunca o menos 1 vez al mes  
☐ 1 a 3 veces mes  
☐ 1 vez semana  
☒ 2 a 4 veces semana  
☐ 5 a 6 veces semana  
☐ 1 vez al día  
☐ 2 a 3 veces al día  
☐ 5 a 6 veces al día  
☐ más 6 veces al día

---

Zanahoria o calabaza

- ☐ Nunca o menos 1 vez al mes  
☐ 1 a 3 veces mes  
☐ 1 vez semana  
☒ 2 a 4 veces semana  
☐ 5 a 6 veces semana  
☐ 1 vez al día  
☐ 2 a 3 veces al día  
☐ 5 a 6 veces al día  
☐ más 6 veces al día

---

Judías verdes

- ☐ Nunca o menos 1 vez al mes  
☐ 1 a 3 veces mes  
☐ 1 vez semana  
☒ 2 a 4 veces semana  
☐ 5 a 6 veces semana  
☐ 1 vez al día  
☐ 2 a 3 veces al día  
☐ 5 a 6 veces al día  
☐ más 6 veces al día

---

Berenjena o calabacin o pepino

- ☐ Nunca o menos 1 vez al mes  
☐ 1 a 3 veces mes  
☐ 1 vez semana  
☒ 2 a 4 veces semana  
☐ 5 a 6 veces semana  
☐ 1 vez al día  
☐ 2 a 3 veces al día  
☐ 5 a 6 veces al día  
☐ más 6 veces al día

|                       |                                                                                                                                                                                                                                                                                                                                                                                                              |
|-----------------------|--------------------------------------------------------------------------------------------------------------------------------------------------------------------------------------------------------------------------------------------------------------------------------------------------------------------------------------------------------------------------------------------------------------|
| pimiento              | <input type="radio"/> Nunca o menos 1 vez al mes<br><input type="radio"/> 1 a 3 veces mes<br><input type="radio"/> 1 vez semana<br><input checked="" type="radio"/> 2 a 4 veces semana<br><input type="radio"/> 5 a 6 veces semana<br><input type="radio"/> 1 vez al día<br><input type="radio"/> 2 a 3 veces al día<br><input type="radio"/> 5 a 6 veces al día<br><input type="radio"/> más 6 veces al día |
| alcachofa             | <input checked="" type="radio"/> Nunca o menos 1 vez al mes<br><input type="radio"/> 1 a 3 veces mes<br><input type="radio"/> 1 vez semana<br><input type="radio"/> 2 a 4 veces semana<br><input type="radio"/> 5 a 6 veces semana<br><input type="radio"/> 1 vez al día<br><input type="radio"/> 2 a 3 veces al día<br><input type="radio"/> 5 a 6 veces al día<br><input type="radio"/> más 6 veces al día |
| espárragos            | <input type="radio"/> Nunca o menos 1 vez al mes<br><input checked="" type="radio"/> 1 a 3 veces mes<br><input type="radio"/> 1 vez semana<br><input type="radio"/> 2 a 4 veces semana<br><input type="radio"/> 5 a 6 veces semana<br><input type="radio"/> 1 vez al día<br><input type="radio"/> 2 a 3 veces al día<br><input type="radio"/> 5 a 6 veces al día<br><input type="radio"/> más 6 veces al día |
| maíz hervido          | <input checked="" type="radio"/> Nunca o menos 1 vez al mes<br><input type="radio"/> 1 a 3 veces mes<br><input type="radio"/> 1 vez semana<br><input type="radio"/> 2 a 4 veces semana<br><input type="radio"/> 5 a 6 veces semana<br><input type="radio"/> 1 vez al día<br><input type="radio"/> 2 a 3 veces al día<br><input type="radio"/> 5 a 6 veces al día<br><input type="radio"/> más 6 veces al día |
| legumbres             | <input type="radio"/> Nunca o menos 1 vez al mes<br><input type="radio"/> 1 a 3 veces mes<br><input checked="" type="radio"/> 1 vez semana<br><input type="radio"/> 2 a 4 veces semana<br><input type="radio"/> 5 a 6 veces semana<br><input type="radio"/> 1 vez al día<br><input type="radio"/> 2 a 3 veces al día<br><input type="radio"/> 5 a 6 veces al día<br><input type="radio"/> más 6 veces al día |
| naranjas o mandarinas | <input type="radio"/> Nunca o menos 1 vez al mes<br><input type="radio"/> 1 a 3 veces mes<br><input type="radio"/> 1 vez semana<br><input checked="" type="radio"/> 2 a 4 veces semana<br><input type="radio"/> 5 a 6 veces semana<br><input type="radio"/> 1 vez al día<br><input type="radio"/> 2 a 3 veces al día<br><input type="radio"/> 5 a 6 veces al día<br><input type="radio"/> más 6 veces al día |



|                       |                                                                                                                                                                                                                                                                                                                                                                                                              |
|-----------------------|--------------------------------------------------------------------------------------------------------------------------------------------------------------------------------------------------------------------------------------------------------------------------------------------------------------------------------------------------------------------------------------------------------------|
| zum natural fruta     | <input type="radio"/> Nunca o menos 1 vez al mes<br><input type="radio"/> 1 a 3 veces mes<br><input checked="" type="radio"/> 1 vez semana<br><input type="radio"/> 2 a 4 veces semana<br><input type="radio"/> 5 a 6 veces semana<br><input type="radio"/> 1 vez al día<br><input type="radio"/> 2 a 3 veces al día<br><input type="radio"/> 5 a 6 veces al día<br><input type="radio"/> más 6 veces al día |
| platano               | <input type="radio"/> Nunca o menos 1 vez al mes<br><input type="radio"/> 1 a 3 veces mes<br><input type="radio"/> 1 vez semana<br><input checked="" type="radio"/> 2 a 4 veces semana<br><input type="radio"/> 5 a 6 veces semana<br><input type="radio"/> 1 vez al día<br><input type="radio"/> 2 a 3 veces al día<br><input type="radio"/> 5 a 6 veces al día<br><input type="radio"/> más 6 veces al día |
| manzana o pera        | <input type="radio"/> Nunca o menos 1 vez al mes<br><input type="radio"/> 1 a 3 veces mes<br><input type="radio"/> 1 vez semana<br><input type="radio"/> 2 a 4 veces semana<br><input checked="" type="radio"/> 5 a 6 veces semana<br><input type="radio"/> 1 vez al día<br><input type="radio"/> 2 a 3 veces al día<br><input type="radio"/> 5 a 6 veces al día<br><input type="radio"/> más 6 veces al día |
| melocotón o nectarina | <input type="radio"/> Nunca o menos 1 vez al mes<br><input checked="" type="radio"/> 1 a 3 veces mes<br><input type="radio"/> 1 vez semana<br><input type="radio"/> 2 a 4 veces semana<br><input type="radio"/> 5 a 6 veces semana<br><input type="radio"/> 1 vez al día<br><input type="radio"/> 2 a 3 veces al día<br><input type="radio"/> 5 a 6 veces al día<br><input type="radio"/> más 6 veces al día |
| sandia o melon        | <input type="radio"/> Nunca o menos 1 vez al mes<br><input checked="" type="radio"/> 1 a 3 veces mes<br><input type="radio"/> 1 vez semana<br><input type="radio"/> 2 a 4 veces semana<br><input type="radio"/> 5 a 6 veces semana<br><input type="radio"/> 1 vez al día<br><input type="radio"/> 2 a 3 veces al día<br><input type="radio"/> 5 a 6 veces al día<br><input type="radio"/> más 6 veces al día |
| uva                   | <input type="radio"/> Nunca o menos 1 vez al mes<br><input checked="" type="radio"/> 1 a 3 veces mes<br><input type="radio"/> 1 vez semana<br><input type="radio"/> 2 a 4 veces semana<br><input type="radio"/> 5 a 6 veces semana<br><input type="radio"/> 1 vez al día<br><input type="radio"/> 2 a 3 veces al día<br><input type="radio"/> 5 a 6 veces al día<br><input type="radio"/> más 6 veces al día |

|                 |                                                                                                                                                                                                                                                                                                                                                                                                              |
|-----------------|--------------------------------------------------------------------------------------------------------------------------------------------------------------------------------------------------------------------------------------------------------------------------------------------------------------------------------------------------------------------------------------------------------------|
| bruna o ciruela | <input checked="" type="radio"/> Nunca o menos 1 vez al mes<br><input type="radio"/> 1 a 3 veces mes<br><input type="radio"/> 1 vez semana<br><input type="radio"/> 2 a 4 veces semana<br><input type="radio"/> 5 a 6 veces semana<br><input type="radio"/> 1 vez al día<br><input type="radio"/> 2 a 3 veces al día<br><input type="radio"/> 5 a 6 veces al día<br><input type="radio"/> más 6 veces al día |
| kiwi            | <input checked="" type="radio"/> Nunca o menos 1 vez al mes<br><input type="radio"/> 1 a 3 veces mes<br><input type="radio"/> 1 vez semana<br><input type="radio"/> 2 a 4 veces semana<br><input type="radio"/> 5 a 6 veces semana<br><input type="radio"/> 1 vez al día<br><input type="radio"/> 2 a 3 veces al día<br><input type="radio"/> 5 a 6 veces al día<br><input type="radio"/> más 6 veces al día |
| aceituna        | <input type="radio"/> Nunca o menos 1 vez al mes<br><input type="radio"/> 1 a 3 veces mes<br><input type="radio"/> 1 vez semana<br><input type="radio"/> 2 a 4 veces semana<br><input type="radio"/> 5 a 6 veces semana<br><input checked="" type="radio"/> 1 vez al día<br><input type="radio"/> 2 a 3 veces al día<br><input type="radio"/> 5 a 6 veces al día<br><input type="radio"/> más 6 veces al día |
| frutos secos    | <input type="radio"/> Nunca o menos 1 vez al mes<br><input type="radio"/> 1 a 3 veces mes<br><input type="radio"/> 1 vez semana<br><input type="radio"/> 2 a 4 veces semana<br><input type="radio"/> 5 a 6 veces semana<br><input checked="" type="radio"/> 1 vez al día<br><input type="radio"/> 2 a 3 veces al día<br><input type="radio"/> 5 a 6 veces al día<br><input type="radio"/> más 6 veces al día |
| pan blanco      | <input checked="" type="radio"/> Nunca o menos 1 vez al mes<br><input type="radio"/> 1 a 3 veces mes<br><input type="radio"/> 1 vez semana<br><input type="radio"/> 2 a 4 veces semana<br><input type="radio"/> 5 a 6 veces semana<br><input type="radio"/> 1 vez al día<br><input type="radio"/> 2 a 3 veces al día<br><input type="radio"/> 5 a 6 veces al día<br><input type="radio"/> más 6 veces al día |
| pan integral    | <input type="radio"/> Nunca o menos 1 vez al mes<br><input type="radio"/> 1 a 3 veces mes<br><input type="radio"/> 1 vez semana<br><input type="radio"/> 2 a 4 veces semana<br><input type="radio"/> 5 a 6 veces semana<br><input checked="" type="radio"/> 1 vez al día<br><input type="radio"/> 2 a 3 veces al día<br><input type="radio"/> 5 a 6 veces al día<br><input type="radio"/> más 6 veces al día |

|                          |                                                                                                                                                                                                                                                                                                                                                                                                              |
|--------------------------|--------------------------------------------------------------------------------------------------------------------------------------------------------------------------------------------------------------------------------------------------------------------------------------------------------------------------------------------------------------------------------------------------------------|
| cereales desayuno        | <input checked="" type="radio"/> Nunca o menos 1 vez al mes<br><input type="radio"/> 1 a 3 veces mes<br><input type="radio"/> 1 vez semana<br><input type="radio"/> 2 a 4 veces semana<br><input type="radio"/> 5 a 6 veces semana<br><input type="radio"/> 1 vez al día<br><input type="radio"/> 2 a 3 veces al día<br><input type="radio"/> 5 a 6 veces al día<br><input type="radio"/> más 6 veces al día |
| patatas fritas           | <input type="radio"/> Nunca o menos 1 vez al mes<br><input checked="" type="radio"/> 1 a 3 veces mes<br><input type="radio"/> 1 vez semana<br><input type="radio"/> 2 a 4 veces semana<br><input type="radio"/> 5 a 6 veces semana<br><input type="radio"/> 1 vez al día<br><input type="radio"/> 2 a 3 veces al día<br><input type="radio"/> 5 a 6 veces al día<br><input type="radio"/> más 6 veces al día |
| patatas cocidas o asadas | <input type="radio"/> Nunca o menos 1 vez al mes<br><input type="radio"/> 1 a 3 veces mes<br><input type="radio"/> 1 vez semana<br><input checked="" type="radio"/> 2 a 4 veces semana<br><input type="radio"/> 5 a 6 veces semana<br><input type="radio"/> 1 vez al día<br><input type="radio"/> 2 a 3 veces al día<br><input type="radio"/> 5 a 6 veces al día<br><input type="radio"/> más 6 veces al día |
| bolsa papas              | <input type="radio"/> Nunca o menos 1 vez al mes<br><input checked="" type="radio"/> 1 a 3 veces mes<br><input type="radio"/> 1 vez semana<br><input type="radio"/> 2 a 4 veces semana<br><input type="radio"/> 5 a 6 veces semana<br><input type="radio"/> 1 vez al día<br><input type="radio"/> 2 a 3 veces al día<br><input type="radio"/> 5 a 6 veces al día<br><input type="radio"/> más 6 veces al día |
| arroz cocinado           | <input type="radio"/> Nunca o menos 1 vez al mes<br><input type="radio"/> 1 a 3 veces mes<br><input type="radio"/> 1 vez semana<br><input checked="" type="radio"/> 2 a 4 veces semana<br><input type="radio"/> 5 a 6 veces semana<br><input type="radio"/> 1 vez al día<br><input type="radio"/> 2 a 3 veces al día<br><input type="radio"/> 5 a 6 veces al día<br><input type="radio"/> más 6 veces al día |
| pasta                    | <input type="radio"/> Nunca o menos 1 vez al mes<br><input type="radio"/> 1 a 3 veces mes<br><input type="radio"/> 1 vez semana<br><input type="radio"/> 2 a 4 veces semana<br><input type="radio"/> 5 a 6 veces semana<br><input checked="" type="radio"/> 1 vez al día<br><input type="radio"/> 2 a 3 veces al día<br><input type="radio"/> 5 a 6 veces al día<br><input type="radio"/> más 6 veces al día |

|                     |                                                                                                                                                                                                                                                                                                                                                                                                              |
|---------------------|--------------------------------------------------------------------------------------------------------------------------------------------------------------------------------------------------------------------------------------------------------------------------------------------------------------------------------------------------------------------------------------------------------------|
| pizza               | <input type="radio"/> Nunca o menos 1 vez al mes<br><input type="radio"/> 1 a 3 veces mes<br><input checked="" type="radio"/> 1 vez semana<br><input type="radio"/> 2 a 4 veces semana<br><input type="radio"/> 5 a 6 veces semana<br><input type="radio"/> 1 vez al día<br><input type="radio"/> 2 a 3 veces al día<br><input type="radio"/> 5 a 6 veces al día<br><input type="radio"/> más 6 veces al día |
| aceite oliva        | <input type="radio"/> Nunca o menos 1 vez al mes<br><input type="radio"/> 1 a 3 veces mes<br><input type="radio"/> 1 vez semana<br><input type="radio"/> 2 a 4 veces semana<br><input type="radio"/> 5 a 6 veces semana<br><input checked="" type="radio"/> 1 vez al día<br><input type="radio"/> 2 a 3 veces al día<br><input type="radio"/> 5 a 6 veces al día<br><input type="radio"/> más 6 veces al día |
| otros aceites       | <input checked="" type="radio"/> Nunca o menos 1 vez al mes<br><input type="radio"/> 1 a 3 veces mes<br><input type="radio"/> 1 vez semana<br><input type="radio"/> 2 a 4 veces semana<br><input type="radio"/> 5 a 6 veces semana<br><input type="radio"/> 1 vez al día<br><input type="radio"/> 2 a 3 veces al día<br><input type="radio"/> 5 a 6 veces al día<br><input type="radio"/> más 6 veces al día |
| margarina           | <input checked="" type="radio"/> Nunca o menos 1 vez al mes<br><input type="radio"/> 1 a 3 veces mes<br><input type="radio"/> 1 vez semana<br><input type="radio"/> 2 a 4 veces semana<br><input type="radio"/> 5 a 6 veces semana<br><input type="radio"/> 1 vez al día<br><input type="radio"/> 2 a 3 veces al día<br><input type="radio"/> 5 a 6 veces al día<br><input type="radio"/> más 6 veces al día |
| mantequilla         | <input type="radio"/> Nunca o menos 1 vez al mes<br><input checked="" type="radio"/> 1 a 3 veces mes<br><input type="radio"/> 1 vez semana<br><input type="radio"/> 2 a 4 veces semana<br><input type="radio"/> 5 a 6 veces semana<br><input type="radio"/> 1 vez al día<br><input type="radio"/> 2 a 3 veces al día<br><input type="radio"/> 5 a 6 veces al día<br><input type="radio"/> más 6 veces al día |
| galletas tipo maria | <input checked="" type="radio"/> Nunca o menos 1 vez al mes<br><input type="radio"/> 1 a 3 veces mes<br><input type="radio"/> 1 vez semana<br><input type="radio"/> 2 a 4 veces semana<br><input type="radio"/> 5 a 6 veces semana<br><input type="radio"/> 1 vez al día<br><input type="radio"/> 2 a 3 veces al día<br><input type="radio"/> 5 a 6 veces al día<br><input type="radio"/> más 6 veces al día |

|                           |                                                                                                                                                                                                                                                                                                                                                                                                              |
|---------------------------|--------------------------------------------------------------------------------------------------------------------------------------------------------------------------------------------------------------------------------------------------------------------------------------------------------------------------------------------------------------------------------------------------------------|
| galletas chocolate        | <input checked="" type="radio"/> Nunca o menos 1 vez al mes<br><input type="radio"/> 1 a 3 veces mes<br><input type="radio"/> 1 vez semana<br><input type="radio"/> 2 a 4 veces semana<br><input type="radio"/> 5 a 6 veces semana<br><input type="radio"/> 1 vez al día<br><input type="radio"/> 2 a 3 veces al día<br><input type="radio"/> 5 a 6 veces al día<br><input type="radio"/> más 6 veces al día |
| bollieria                 | <input checked="" type="radio"/> Nunca o menos 1 vez al mes<br><input type="radio"/> 1 a 3 veces mes<br><input type="radio"/> 1 vez semana<br><input type="radio"/> 2 a 4 veces semana<br><input type="radio"/> 5 a 6 veces semana<br><input type="radio"/> 1 vez al día<br><input type="radio"/> 2 a 3 veces al día<br><input type="radio"/> 5 a 6 veces al día<br><input type="radio"/> más 6 veces al día |
| chocolate o bombones      | <input type="radio"/> Nunca o menos 1 vez al mes<br><input checked="" type="radio"/> 1 a 3 veces mes<br><input type="radio"/> 1 vez semana<br><input type="radio"/> 2 a 4 veces semana<br><input type="radio"/> 5 a 6 veces semana<br><input type="radio"/> 1 vez al día<br><input type="radio"/> 2 a 3 veces al día<br><input type="radio"/> 5 a 6 veces al día<br><input type="radio"/> más 6 veces al día |
| chocolate polvo o colacao | <input type="radio"/> Nunca o menos 1 vez al mes<br><input type="radio"/> 1 a 3 veces mes<br><input type="radio"/> 1 vez semana<br><input type="radio"/> 2 a 4 veces semana<br><input type="radio"/> 5 a 6 veces semana<br><input checked="" type="radio"/> 1 vez al día<br><input type="radio"/> 2 a 3 veces al día<br><input type="radio"/> 5 a 6 veces al día<br><input type="radio"/> más 6 veces al día |
| vino tinto                | <input checked="" type="radio"/> Nunca o menos 1 vez al mes<br><input type="radio"/> 1 a 3 veces mes<br><input type="radio"/> 1 vez semana<br><input type="radio"/> 2 a 4 veces semana<br><input type="radio"/> 5 a 6 veces semana<br><input type="radio"/> 1 vez al día<br><input type="radio"/> 2 a 3 veces al día<br><input type="radio"/> 5 a 6 veces al día<br><input type="radio"/> más 6 veces al día |
| vino blanco               | <input checked="" type="radio"/> Nunca o menos 1 vez al mes<br><input type="radio"/> 1 a 3 veces mes<br><input type="radio"/> 1 vez semana<br><input type="radio"/> 2 a 4 veces semana<br><input type="radio"/> 5 a 6 veces semana<br><input type="radio"/> 1 vez al día<br><input type="radio"/> 2 a 3 veces al día<br><input type="radio"/> 5 a 6 veces al día<br><input type="radio"/> más 6 veces al día |

|                       |                                                                                                                                                                                                                                                                                                                                                                                                              |
|-----------------------|--------------------------------------------------------------------------------------------------------------------------------------------------------------------------------------------------------------------------------------------------------------------------------------------------------------------------------------------------------------------------------------------------------------|
| vino seco o vermut    | <input checked="" type="radio"/> Nunca o menos 1 vez al mes<br><input type="radio"/> 1 a 3 veces mes<br><input type="radio"/> 1 vez semana<br><input type="radio"/> 2 a 4 veces semana<br><input type="radio"/> 5 a 6 veces semana<br><input type="radio"/> 1 vez al día<br><input type="radio"/> 2 a 3 veces al día<br><input type="radio"/> 5 a 6 veces al día<br><input type="radio"/> más 6 veces al día |
| cerveza               | <input checked="" type="radio"/> Nunca o menos 1 vez al mes<br><input type="radio"/> 1 a 3 veces mes<br><input type="radio"/> 1 vez semana<br><input type="radio"/> 2 a 4 veces semana<br><input type="radio"/> 5 a 6 veces semana<br><input type="radio"/> 1 vez al día<br><input type="radio"/> 2 a 3 veces al día<br><input type="radio"/> 5 a 6 veces al día<br><input type="radio"/> más 6 veces al día |
| cerveza sin alcohol   | <input checked="" type="radio"/> Nunca o menos 1 vez al mes<br><input type="radio"/> 1 a 3 veces mes<br><input type="radio"/> 1 vez semana<br><input type="radio"/> 2 a 4 veces semana<br><input type="radio"/> 5 a 6 veces semana<br><input type="radio"/> 1 vez al día<br><input type="radio"/> 2 a 3 veces al día<br><input type="radio"/> 5 a 6 veces al día<br><input type="radio"/> más 6 veces al día |
| licores               | <input checked="" type="radio"/> Nunca o menos 1 vez al mes<br><input type="radio"/> 1 a 3 veces mes<br><input type="radio"/> 1 vez semana<br><input type="radio"/> 2 a 4 veces semana<br><input type="radio"/> 5 a 6 veces semana<br><input type="radio"/> 1 vez al día<br><input type="radio"/> 2 a 3 veces al día<br><input type="radio"/> 5 a 6 veces al día<br><input type="radio"/> más 6 veces al día |
| ginebra o ron o vodka | <input checked="" type="radio"/> Nunca o menos 1 vez al mes<br><input type="radio"/> 1 a 3 veces mes<br><input type="radio"/> 1 vez semana<br><input type="radio"/> 2 a 4 veces semana<br><input type="radio"/> 5 a 6 veces semana<br><input type="radio"/> 1 vez al día<br><input type="radio"/> 2 a 3 veces al día<br><input type="radio"/> 5 a 6 veces al día<br><input type="radio"/> más 6 veces al día |
| refresco normal       | <input checked="" type="radio"/> Nunca o menos 1 vez al mes<br><input type="radio"/> 1 a 3 veces mes<br><input type="radio"/> 1 vez semana<br><input type="radio"/> 2 a 4 veces semana<br><input type="radio"/> 5 a 6 veces semana<br><input type="radio"/> 1 vez al día<br><input type="radio"/> 2 a 3 veces al día<br><input type="radio"/> 5 a 6 veces al día<br><input type="radio"/> más 6 veces al día |

|                          |                                                                                                                                                                                                                                                                                                                                                                                                              |
|--------------------------|--------------------------------------------------------------------------------------------------------------------------------------------------------------------------------------------------------------------------------------------------------------------------------------------------------------------------------------------------------------------------------------------------------------|
| refresco sin azúcar      | <input type="radio"/> Nunca o menos 1 vez al mes<br><input type="radio"/> 1 a 3 veces mes<br><input checked="" type="radio"/> 1 vez semana<br><input type="radio"/> 2 a 4 veces semana<br><input type="radio"/> 5 a 6 veces semana<br><input type="radio"/> 1 vez al día<br><input type="radio"/> 2 a 3 veces al día<br><input type="radio"/> 5 a 6 veces al día<br><input type="radio"/> más 6 veces al día |
| Agua del grifo           | <input checked="" type="radio"/> Nunca o menos 1 vez al mes<br><input type="radio"/> 1 a 3 veces mes<br><input type="radio"/> 1 vez semana<br><input type="radio"/> 2 a 4 veces semana<br><input type="radio"/> 5 a 6 veces semana<br><input type="radio"/> 1 vez al día<br><input type="radio"/> 2 a 3 veces al día<br><input type="radio"/> 5 a 6 veces al día<br><input type="radio"/> más 6 veces al día |
| agua embotellada sin gas | <input type="radio"/> Nunca o menos 1 vez al mes<br><input type="radio"/> 1 a 3 veces mes<br><input type="radio"/> 1 vez semana<br><input type="radio"/> 2 a 4 veces semana<br><input type="radio"/> 5 a 6 veces semana<br><input type="radio"/> 1 vez al día<br><input type="radio"/> 2 a 3 veces al día<br><input type="radio"/> 5 a 6 veces al día<br><input checked="" type="radio"/> más 6 veces al día |
| agua embotellada con gas | <input checked="" type="radio"/> Nunca o menos 1 vez al mes<br><input type="radio"/> 1 a 3 veces mes<br><input type="radio"/> 1 vez semana<br><input type="radio"/> 2 a 4 veces semana<br><input type="radio"/> 5 a 6 veces semana<br><input type="radio"/> 1 vez al día<br><input type="radio"/> 2 a 3 veces al día<br><input type="radio"/> 5 a 6 veces al día<br><input type="radio"/> más 6 veces al día |
| zumو frutas embasado     | <input checked="" type="radio"/> Nunca o menos 1 vez al mes<br><input type="radio"/> 1 a 3 veces mes<br><input type="radio"/> 1 vez semana<br><input type="radio"/> 2 a 4 veces semana<br><input type="radio"/> 5 a 6 veces semana<br><input type="radio"/> 1 vez al día<br><input type="radio"/> 2 a 3 veces al día<br><input type="radio"/> 5 a 6 veces al día<br><input type="radio"/> más 6 veces al día |
| cafe                     | <input checked="" type="radio"/> Nunca o menos 1 vez al mes<br><input type="radio"/> 1 a 3 veces mes<br><input type="radio"/> 1 vez semana<br><input type="radio"/> 2 a 4 veces semana<br><input type="radio"/> 5 a 6 veces semana<br><input type="radio"/> 1 vez al día<br><input type="radio"/> 2 a 3 veces al día<br><input type="radio"/> 5 a 6 veces al día<br><input type="radio"/> más 6 veces al día |

|                       |                                                                                                                                                                                                                                                                                                                                                                                                              |
|-----------------------|--------------------------------------------------------------------------------------------------------------------------------------------------------------------------------------------------------------------------------------------------------------------------------------------------------------------------------------------------------------------------------------------------------------|
| cafe descafeinado     | <input checked="" type="radio"/> Nunca o menos 1 vez al mes<br><input type="radio"/> 1 a 3 veces mes<br><input type="radio"/> 1 vez semana<br><input type="radio"/> 2 a 4 veces semana<br><input type="radio"/> 5 a 6 veces semana<br><input type="radio"/> 1 vez al día<br><input type="radio"/> 2 a 3 veces al día<br><input type="radio"/> 5 a 6 veces al día<br><input type="radio"/> más 6 veces al día |
| te o infusión         | <input type="radio"/> Nunca o menos 1 vez al mes<br><input checked="" type="radio"/> 1 a 3 veces mes<br><input type="radio"/> 1 vez semana<br><input type="radio"/> 2 a 4 veces semana<br><input type="radio"/> 5 a 6 veces semana<br><input type="radio"/> 1 vez al día<br><input type="radio"/> 2 a 3 veces al día<br><input type="radio"/> 5 a 6 veces al día<br><input type="radio"/> más 6 veces al día |
| sopa o puré verduras  | <input type="radio"/> Nunca o menos 1 vez al mes<br><input type="radio"/> 1 a 3 veces mes<br><input type="radio"/> 1 vez semana<br><input checked="" type="radio"/> 2 a 4 veces semana<br><input type="radio"/> 5 a 6 veces semana<br><input type="radio"/> 1 vez al día<br><input type="radio"/> 2 a 3 veces al día<br><input type="radio"/> 5 a 6 veces al día<br><input type="radio"/> más 6 veces al día |
| croquetas pollo jamón | <input type="radio"/> Nunca o menos 1 vez al mes<br><input checked="" type="radio"/> 1 a 3 veces mes<br><input type="radio"/> 1 vez semana<br><input type="radio"/> 2 a 4 veces semana<br><input type="radio"/> 5 a 6 veces semana<br><input type="radio"/> 1 vez al día<br><input type="radio"/> 2 a 3 veces al día<br><input type="radio"/> 5 a 6 veces al día<br><input type="radio"/> más 6 veces al día |
| croquetas pescado     | <input checked="" type="radio"/> Nunca o menos 1 vez al mes<br><input type="radio"/> 1 a 3 veces mes<br><input type="radio"/> 1 vez semana<br><input type="radio"/> 2 a 4 veces semana<br><input type="radio"/> 5 a 6 veces semana<br><input type="radio"/> 1 vez al día<br><input type="radio"/> 2 a 3 veces al día<br><input type="radio"/> 5 a 6 veces al día<br><input type="radio"/> más 6 veces al día |
| mayonesa              | <input checked="" type="radio"/> Nunca o menos 1 vez al mes<br><input type="radio"/> 1 a 3 veces mes<br><input type="radio"/> 1 vez semana<br><input type="radio"/> 2 a 4 veces semana<br><input type="radio"/> 5 a 6 veces semana<br><input type="radio"/> 1 vez al día<br><input type="radio"/> 2 a 3 veces al día<br><input type="radio"/> 5 a 6 veces al día<br><input type="radio"/> más 6 veces al día |



|                  |                                                                                                                                                                                                                                                                                                                                                                                                              |
|------------------|--------------------------------------------------------------------------------------------------------------------------------------------------------------------------------------------------------------------------------------------------------------------------------------------------------------------------------------------------------------------------------------------------------------|
| salsa tomate     | <input type="radio"/> Nunca o menos 1 vez al mes<br><input type="radio"/> 1 a 3 veces mes<br><input type="radio"/> 1 vez semana<br><input type="radio"/> 2 a 4 veces semana<br><input checked="" type="radio"/> 5 a 6 veces semana<br><input type="radio"/> 1 vez al día<br><input type="radio"/> 2 a 3 veces al día<br><input type="radio"/> 5 a 6 veces al día<br><input type="radio"/> más 6 veces al día |
| ketchup          | <input type="radio"/> Nunca o menos 1 vez al mes<br><input type="radio"/> 1 a 3 veces mes<br><input type="radio"/> 1 vez semana<br><input checked="" type="radio"/> 2 a 4 veces semana<br><input type="radio"/> 5 a 6 veces semana<br><input type="radio"/> 1 vez al día<br><input type="radio"/> 2 a 3 veces al día<br><input type="radio"/> 5 a 6 veces al día<br><input type="radio"/> más 6 veces al día |
| sal              | <input type="radio"/> Nunca o menos 1 vez al mes<br><input type="radio"/> 1 a 3 veces mes<br><input type="radio"/> 1 vez semana<br><input type="radio"/> 2 a 4 veces semana<br><input checked="" type="radio"/> 5 a 6 veces semana<br><input type="radio"/> 1 vez al día<br><input type="radio"/> 2 a 3 veces al día<br><input type="radio"/> 5 a 6 veces al día<br><input type="radio"/> más 6 veces al día |
| ajo              | <input checked="" type="radio"/> Nunca o menos 1 vez al mes<br><input type="radio"/> 1 a 3 veces mes<br><input type="radio"/> 1 vez semana<br><input type="radio"/> 2 a 4 veces semana<br><input type="radio"/> 5 a 6 veces semana<br><input type="radio"/> 1 vez al día<br><input type="radio"/> 2 a 3 veces al día<br><input type="radio"/> 5 a 6 veces al día<br><input type="radio"/> más 6 veces al día |
| mermelada o miel | <input type="radio"/> Nunca o menos 1 vez al mes<br><input checked="" type="radio"/> 1 a 3 veces mes<br><input type="radio"/> 1 vez semana<br><input type="radio"/> 2 a 4 veces semana<br><input type="radio"/> 5 a 6 veces semana<br><input type="radio"/> 1 vez al día<br><input type="radio"/> 2 a 3 veces al día<br><input type="radio"/> 5 a 6 veces al día<br><input type="radio"/> más 6 veces al día |
| azúcar           | <input checked="" type="radio"/> Nunca o menos 1 vez al mes<br><input type="radio"/> 1 a 3 veces mes<br><input type="radio"/> 1 vez semana<br><input type="radio"/> 2 a 4 veces semana<br><input type="radio"/> 5 a 6 veces semana<br><input type="radio"/> 1 vez al día<br><input type="radio"/> 2 a 3 veces al día<br><input type="radio"/> 5 a 6 veces al día<br><input type="radio"/> más 6 veces al día |

|                                       |                                                                                                                                                                                                                                                                                                                                                                                                                                                                                                                               |
|---------------------------------------|-------------------------------------------------------------------------------------------------------------------------------------------------------------------------------------------------------------------------------------------------------------------------------------------------------------------------------------------------------------------------------------------------------------------------------------------------------------------------------------------------------------------------------|
| Otro alimento                         |                                                                                                                                                                                                                                                                                                                                                                                                                                                                                                                               |
| suplementos vitamínicos               | <input checked="" type="radio"/> si<br><input type="radio"/> no                                                                                                                                                                                                                                                                                                                                                                                                                                                               |
| suplementos vitamínicos               | [*DATA REMOVED*]                                                                                                                                                                                                                                                                                                                                                                                                                                                                                                              |
| dieta previa                          | <input type="radio"/> si<br><input checked="" type="radio"/> no                                                                                                                                                                                                                                                                                                                                                                                                                                                               |
| motivo dieta                          | <input checked="" type="radio"/> no dieta<br><input type="radio"/> control peso<br><input type="radio"/> control colesterol<br><input type="radio"/> control diabetes<br><input type="radio"/> problemas estómago<br><input type="radio"/> problemas vesícula o hepáticos<br><input type="radio"/> HTA o cardiopatía<br><input type="radio"/> problemas renales<br><input type="radio"/> alergia alimentaria<br><input type="radio"/> ácido úrico elevado<br><input type="radio"/> vegetariana<br><input type="radio"/> otros |
| cambio alimentos año previo gestación | <input checked="" type="radio"/> si<br><input type="radio"/> no                                                                                                                                                                                                                                                                                                                                                                                                                                                               |
| cambio lácteos                        | <input type="radio"/> eliminado<br><input type="radio"/> disminuido<br><input checked="" type="radio"/> igual<br><input type="radio"/> aumentado<br><input type="radio"/> no sabe                                                                                                                                                                                                                                                                                                                                             |
| cambio huevos                         | <input type="radio"/> eliminado<br><input type="radio"/> disminuido<br><input checked="" type="radio"/> igual<br><input type="radio"/> aumentado<br><input type="radio"/> no sabe                                                                                                                                                                                                                                                                                                                                             |
| cambio carne                          | <input type="radio"/> eliminado<br><input type="radio"/> disminuido<br><input checked="" type="radio"/> igual<br><input type="radio"/> aumentado<br><input type="radio"/> no sabe                                                                                                                                                                                                                                                                                                                                             |
| cambio pescado                        | <input type="radio"/> eliminado<br><input type="radio"/> disminuido<br><input checked="" type="radio"/> igual<br><input type="radio"/> aumentado<br><input type="radio"/> no sabe                                                                                                                                                                                                                                                                                                                                             |
| cambio verduras                       | <input type="radio"/> eliminado<br><input type="radio"/> disminuido<br><input checked="" type="radio"/> igual<br><input type="radio"/> aumentado<br><input type="radio"/> no sabe                                                                                                                                                                                                                                                                                                                                             |

|                            |                                                                                                                                                                                                                        |
|----------------------------|------------------------------------------------------------------------------------------------------------------------------------------------------------------------------------------------------------------------|
| cambio legumbres           | <input type="radio"/> eliminado<br><input type="radio"/> disminuido<br><input checked="" type="radio"/> igual<br><input type="radio"/> aumentado<br><input type="radio"/> no sabe                                      |
| cambio fruta               | <input type="radio"/> eliminado<br><input type="radio"/> disminuido<br><input checked="" type="radio"/> igual<br><input type="radio"/> aumentado<br><input type="radio"/> no sabe                                      |
| cambio pan                 | <input type="radio"/> eliminado<br><input type="radio"/> disminuido<br><input checked="" type="radio"/> igual<br><input type="radio"/> aumentado<br><input type="radio"/> no sabe                                      |
| cambio aceite oliva        | <input type="radio"/> eliminado<br><input type="radio"/> disminuido<br><input checked="" type="radio"/> igual<br><input type="radio"/> aumentado<br><input type="radio"/> no sabe                                      |
| cambio mante o margarina   | <input type="radio"/> eliminado<br><input type="radio"/> disminuido<br><input checked="" type="radio"/> igual<br><input type="radio"/> aumentado<br><input type="radio"/> no sabe                                      |
| cambio azúcar y dulces     | <input type="radio"/> eliminado<br><input type="radio"/> disminuido<br><input checked="" type="radio"/> igual<br><input type="radio"/> aumentado<br><input type="radio"/> no sabe                                      |
| cambio bebidas alcohólicas | <input checked="" type="radio"/> eliminado<br><input type="radio"/> disminuido<br><input type="radio"/> igual<br><input type="radio"/> aumentado<br><input type="radio"/> no sabe                                      |
| frecuencia comidas fritas  | <input type="radio"/> a diario<br><input type="radio"/> 5 a 6 veces semana<br><input type="radio"/> 2 a 4 veces semana<br><input type="radio"/> 1 vez semana<br><input checked="" type="radio"/> menos de 1 vez semana |
| carne                      | <input type="radio"/> no como<br><input type="radio"/> cruda<br><input type="radio"/> poco hecha<br><input checked="" type="radio"/> hecha<br><input type="radio"/> muy hecha                                          |
| grasa visible carne        | <input type="radio"/> quita toda<br><input checked="" type="radio"/> quita mayoría<br><input type="radio"/> quita un poco<br><input type="radio"/> no quita nada                                                       |

|                                |                                                                                                                                                                                                                                                          |
|--------------------------------|----------------------------------------------------------------------------------------------------------------------------------------------------------------------------------------------------------------------------------------------------------|
| cocina carne                   | <input checked="" type="radio"/> a la plancha<br><input type="radio"/> a la parrilla<br><input type="radio"/> asada<br><input type="radio"/> frita<br><input type="radio"/> guisada                                                                      |
| tostado quemado carne          | <input checked="" type="radio"/> nunca<br><input type="radio"/> 1 vez mes<br><input type="radio"/> 2 a 3 veces mes<br><input type="radio"/> 1 vez semana<br><input type="radio"/> 2 a 3 semanas                                                          |
| tostado quemado pescado        | <input checked="" type="radio"/> nunca<br><input type="radio"/> 1 vez mes<br><input type="radio"/> 2 a 3 veces mes<br><input type="radio"/> 1 vez semana<br><input type="radio"/> 2 a 3 semanas                                                          |
| socarrat paella                | <input checked="" type="radio"/> nunca<br><input type="radio"/> 1 vez mes<br><input type="radio"/> 2 a 3 veces mes<br><input type="radio"/> 1 vez semana<br><input type="radio"/> 2 a 3 semanas                                                          |
| grasa o aceite cocinar         | <input type="radio"/> mantequilla<br><input type="radio"/> margarina<br><input type="radio"/> aceite oliva<br><input checked="" type="radio"/> aceite oliva virgen extra<br><input type="radio"/> aceite vegetal<br><input type="radio"/> mezcla aceites |
| grasa aceite aliñar            | <input type="radio"/> mantequilla<br><input type="radio"/> margarina<br><input type="radio"/> aceite oliva<br><input checked="" type="radio"/> aceite oliva virgen extra<br><input type="radio"/> aceite vegetal<br><input type="radio"/> mezcla aceites |
| grasa aceite freir             | <input type="radio"/> mantequilla<br><input type="radio"/> margarina<br><input checked="" type="radio"/> aceite oliva<br><input type="radio"/> aceite oliva virgen extra<br><input type="radio"/> aceite vegetal<br><input type="radio"/> mezcla aceites |
| Ejercicio cuestionario         | <input checked="" type="radio"/> si<br><input type="radio"/> no                                                                                                                                                                                          |
| horas de sueño incluido siesta | [*DATA REMOVED*]                                                                                                                                                                                                                                         |
| minutos siesta                 | [*DATA REMOVED*]                                                                                                                                                                                                                                         |
| horas televisión semana        | [*DATA REMOVED*]                                                                                                                                                                                                                                         |

|                                        |                                                                                                                                                                                                                                                                                                                                                                           |
|----------------------------------------|---------------------------------------------------------------------------------------------------------------------------------------------------------------------------------------------------------------------------------------------------------------------------------------------------------------------------------------------------------------------------|
| actividad trabajo                      | <input checked="" type="radio"/> casi siempre sentado<br><input type="radio"/> sentado 50 por cien<br><input type="radio"/> casi siempre de pie, quieto<br><input type="radio"/> casi siempre levantado caminando y llevando pocas cosas<br><input type="radio"/> casi siempre levantado, caminando y llevado muchas cosas<br><input type="radio"/> trabajo manual pesado |
| tiempo caminar o bici al día           | <input type="radio"/> casi nunca<br><input type="radio"/> menos 20min día<br><input checked="" type="radio"/> 20 a 40 min día<br><input type="radio"/> 40 a 60 min día<br><input type="radio"/> 1h o 1h y media día<br><input type="radio"/> más de 1h y media al día                                                                                                     |
| tiempo tareas casa al día              | <input type="radio"/> menos de 1h día<br><input checked="" type="radio"/> 1 a 2h día<br><input type="radio"/> 3 a 4h día<br><input type="radio"/> 5 a 6h día<br><input type="radio"/> 7 a 8h día<br><input type="radio"/> más de 8h día                                                                                                                                   |
| tiempo libre televisión ordenador leer | <input type="radio"/> menos 1h día<br><input type="radio"/> 1h día<br><input checked="" type="radio"/> 2h día<br><input type="radio"/> 3h día<br><input type="radio"/> 4h día<br><input type="radio"/> 5 a 6h día<br><input type="radio"/> mas 6h día                                                                                                                     |
| tiempo libre ejercicio o deporte       | <input type="radio"/> menos 1h semana<br><input type="radio"/> 1h semana<br><input checked="" type="radio"/> 2h semana<br><input type="radio"/> 3h semana<br><input type="radio"/> 4 a 5h semana<br><input type="radio"/> mas 5h semana                                                                                                                                   |
| como se considera                      | <input type="radio"/> sedentaria<br><input checked="" type="radio"/> poco activa<br><input type="radio"/> moderadamente activa<br><input type="radio"/> bastante activa<br><input type="radio"/> muy activa<br><input type="radio"/> no sabe                                                                                                                              |
| FUR                                    | [*DATA REMOVED*]                                                                                                                                                                                                                                                                                                                                                          |
| Semanas gestación 2T                   | [*DATA REMOVED*]                                                                                                                                                                                                                                                                                                                                                          |
| Días gestación 2T                      | [*DATA REMOVED*]                                                                                                                                                                                                                                                                                                                                                          |
| DBP 2T                                 | [*DATA REMOVED*]                                                                                                                                                                                                                                                                                                                                                          |
| CC 2T                                  | [*DATA REMOVED*]                                                                                                                                                                                                                                                                                                                                                          |
| AC 2T                                  | [*DATA REMOVED*]                                                                                                                                                                                                                                                                                                                                                          |

|                                                   |                                                                                                                                                                                                 |
|---------------------------------------------------|-------------------------------------------------------------------------------------------------------------------------------------------------------------------------------------------------|
| LF 2T                                             | [*DATA REMOVED*]                                                                                                                                                                                |
| PFE 2T (Hadlock)                                  | [*DATA REMOVED*]                                                                                                                                                                                |
| Semanas gestación 3T                              | [*DATA REMOVED*]                                                                                                                                                                                |
| días 3T                                           | [*DATA REMOVED*]                                                                                                                                                                                |
| DBP 3T                                            | [*DATA REMOVED*]                                                                                                                                                                                |
| CC 3T                                             | [*DATA REMOVED*]                                                                                                                                                                                |
| AC 3T                                             | [*DATA REMOVED*]                                                                                                                                                                                |
| LF 3T                                             | [*DATA REMOVED*]                                                                                                                                                                                |
| PFE 3T (Hadlock)                                  | [*DATA REMOVED*]                                                                                                                                                                                |
| Semanas de gestación final                        | [*DATA REMOVED*]                                                                                                                                                                                |
| días gestación final                              | [*DATA REMOVED*]                                                                                                                                                                                |
| Localización placenta                             | <input type="radio"/> anterior<br><input type="radio"/> lateral derecha<br><input type="radio"/> lateral izquierda<br><input checked="" type="radio"/> posterior<br><input type="radio"/> fondo |
| Presentación longitudinal cefálica                | <input type="radio"/> no<br><input checked="" type="radio"/> si                                                                                                                                 |
| Dorso                                             | <input type="radio"/> izquierda anterior<br><input type="radio"/> izquierda posterior<br><input checked="" type="radio"/> derecha anterior<br><input type="radio"/> derecha posterior           |
| diámetro biparietal                               | [*DATA REMOVED*]                                                                                                                                                                                |
| Circunferencia craneal                            | [*DATA REMOVED*]                                                                                                                                                                                |
| Circunferencia abdominal                          | [*DATA REMOVED*]                                                                                                                                                                                |
| Longitud de femur                                 | [*DATA REMOVED*]                                                                                                                                                                                |
| tejido celular subcutáneo a nivel del muslo en mm | [*DATA REMOVED*]                                                                                                                                                                                |
| tejido celular subcutáneo en abdomen en mm        | [*DATA REMOVED*]                                                                                                                                                                                |
| Volumen del muslo en cm3                          | [*DATA REMOVED*]                                                                                                                                                                                |
| Peso fetal estimado según fórmula de Hadlock      | [*DATA REMOVED*]                                                                                                                                                                                |

|                                               |                                                                                                                                                          |
|-----------------------------------------------|----------------------------------------------------------------------------------------------------------------------------------------------------------|
| Percentil                                     | [*DATA REMOVED*]                                                                                                                                         |
| Peso fetal estimado según fórmula de Scioscia | <hr/>                                                                                                                                                    |
| Peso fetal estimado según fórmula de LEE      | <hr/>                                                                                                                                                    |
| Tipo de parto                                 | <input checked="" type="radio"/> eutocico<br><input type="radio"/> instrumentado/ventosa<br><input type="radio"/> cesarea                                |
| fecha de nacimiento                           | [*DATA REMOVED*]                                                                                                                                         |
| Días entre exploración y nacimiento           | [*DATA REMOVED*]                                                                                                                                         |
| Peso RN en g                                  | [*DATA REMOVED*]                                                                                                                                         |
| sexo                                          | <input type="radio"/> mujer<br><input checked="" type="radio"/> hombre                                                                                   |
| Apgar 1 minuto                                | [*DATA REMOVED*]                                                                                                                                         |
| Apgar 5 minutos                               | [*DATA REMOVED*]                                                                                                                                         |
| Apgar 10 minutos                              | <hr/>                                                                                                                                                    |
| antecedente Covid durante gestación           | <input type="radio"/> Yes<br><input checked="" type="radio"/> No                                                                                         |
| Nivel de estudios                             | <input type="radio"/> ninguno<br><input type="radio"/> primarios<br><input checked="" type="radio"/> secundarios<br><input type="radio"/> universitarios |

# Base\_datos\_estimacion\_peso\_fetal

|                                       |                                                                                                                                                                                                                                                                                      |
|---------------------------------------|--------------------------------------------------------------------------------------------------------------------------------------------------------------------------------------------------------------------------------------------------------------------------------------|
| Número de identificación participante | 12                                                                                                                                                                                                                                                                                   |
| CODIGO PARTICIPANTE                   |                                                                                                                                                                                                                                                                                      |
| Edad                                  | [*DATA REMOVED*]                                                                                                                                                                                                                                                                     |
| Gestaciones                           | <input type="radio"/> 1<br><input type="radio"/> 2<br><input checked="" type="radio"/> 3<br><input type="radio"/> mas de 3                                                                                                                                                           |
| partos                                | <input type="radio"/> 0<br><input checked="" type="radio"/> 1<br><input type="radio"/> 2<br><input type="radio"/> 3<br><input type="radio"/> mas de 3                                                                                                                                |
| cesáreas                              | <input checked="" type="radio"/> 0<br><input type="radio"/> 1<br><input type="radio"/> 2<br><input type="radio"/> 3<br><input type="radio"/> mas de 3                                                                                                                                |
| Abortos                               | <input type="radio"/> 0<br><input checked="" type="radio"/> 1<br><input type="radio"/> 2<br><input type="radio"/> 3<br><input type="radio"/> mas de 3                                                                                                                                |
| Tipo de gestacion                     | <input checked="" type="radio"/> espontanea<br><input type="radio"/> IAC inseminación artificial conyuge<br><input type="radio"/> IAD inseminación artificial donante<br><input type="radio"/> FIV Fecundación in Vitro<br><input type="radio"/> Ovodon FIV con donación de ovocitos |
| peso previo a embarazo                | [*DATA REMOVED*]                                                                                                                                                                                                                                                                     |
| Ganancia ponderal embarazo            | [*DATA REMOVED*]                                                                                                                                                                                                                                                                     |
| Talla madre                           | [*DATA REMOVED*]                                                                                                                                                                                                                                                                     |
| IMC previo embarazo                   | 24.96494647925858                                                                                                                                                                                                                                                                    |
| Patología obstétrica                  | <input checked="" type="radio"/> no<br><input type="radio"/> si                                                                                                                                                                                                                      |
| Diabetes pregestacional               | <input checked="" type="radio"/> no<br><input type="radio"/> si                                                                                                                                                                                                                      |
| Diabetes gestacional                  | <input checked="" type="radio"/> no<br><input type="radio"/> si                                                                                                                                                                                                                      |



|                                            |                                                                                                                                                                                      |
|--------------------------------------------|--------------------------------------------------------------------------------------------------------------------------------------------------------------------------------------|
| Diabetes gestacional con insulina          | <input checked="" type="radio"/> no<br><input type="radio"/> si                                                                                                                      |
| Diabetes gestacional con dieta y ejercicio | <input checked="" type="radio"/> no<br><input type="radio"/> si                                                                                                                      |
| Percentil fetos previos                    | <input checked="" type="radio"/> Nada<br><input type="radio"/> percentil menor de 10<br><input type="radio"/> percentil entre 10 y 90<br><input type="radio"/> percentil mayor de 90 |
| Exfumadora                                 | <input checked="" type="radio"/> Nada<br><input type="radio"/> menos de 5 años<br><input type="radio"/> 5 a 10 años<br><input type="radio"/> mayor o igual a 10 años                 |
| Hábito tabáquico                           | <input type="radio"/> no<br><input checked="" type="radio"/> si                                                                                                                      |
| fumadora                                   | [*DATA REMOVED*]                                                                                                                                                                     |
| Consumo otros tóxicos                      | <input checked="" type="radio"/> no<br><input type="radio"/> si                                                                                                                      |
| Hb 1T                                      | _____                                                                                                                                                                                |
| Htc 1T                                     | _____                                                                                                                                                                                |
| Hb 2T                                      | _____                                                                                                                                                                                |
| HTC 2T                                     | _____                                                                                                                                                                                |
| Hb 3T                                      | [*DATA REMOVED*]                                                                                                                                                                     |
| HTC 3T                                     | _____                                                                                                                                                                                |
| Suplemento FE oral                         | <input checked="" type="radio"/> si<br><input type="radio"/> no                                                                                                                      |
| Suplemento fe iv                           | <input type="radio"/> si<br><input checked="" type="radio"/> no                                                                                                                      |
| Transfusión                                | <input checked="" type="radio"/> no<br><input type="radio"/> si                                                                                                                      |
| Solicitada Vit D                           | <input checked="" type="radio"/> no<br><input type="radio"/> si                                                                                                                      |
| Deficit vit D                              | <input checked="" type="radio"/> no<br><input type="radio"/> si                                                                                                                      |

|                       |                                                                                                                                                                                                                                                                                                                                                                                                              |
|-----------------------|--------------------------------------------------------------------------------------------------------------------------------------------------------------------------------------------------------------------------------------------------------------------------------------------------------------------------------------------------------------------------------------------------------------|
| Suplemento vit D      | <input type="radio"/> si<br><input checked="" type="radio"/> no                                                                                                                                                                                                                                                                                                                                              |
| Dieta, cuestionario   | <input checked="" type="radio"/> si<br><input type="radio"/> no                                                                                                                                                                                                                                                                                                                                              |
| Leche entera          | <input checked="" type="radio"/> Nunca o menos 1 vez al mes<br><input type="radio"/> 1 a 3 veces mes<br><input type="radio"/> 1 vez semana<br><input type="radio"/> 2 a 4 veces semana<br><input type="radio"/> 5 a 6 veces semana<br><input type="radio"/> 1 vez al día<br><input type="radio"/> 2 a 3 veces al día<br><input type="radio"/> 5 a 6 veces al día<br><input type="radio"/> más 6 veces al día |
| Leche semidesnatada   | <input checked="" type="radio"/> Nunca o menos 1 vez al mes<br><input type="radio"/> 1 a 3 veces mes<br><input type="radio"/> 1 vez semana<br><input type="radio"/> 2 a 4 veces semana<br><input type="radio"/> 5 a 6 veces semana<br><input type="radio"/> 1 vez al día<br><input type="radio"/> 2 a 3 veces al día<br><input type="radio"/> 5 a 6 veces al día<br><input type="radio"/> mas 6 veces al día |
| Leche desnatada       | <input type="radio"/> Nunca o menos 1 vez al mes<br><input type="radio"/> 1 a 3 veces mes<br><input type="radio"/> 1 vez semana<br><input type="radio"/> 2 a 4 veces semana<br><input type="radio"/> 5 a 6 veces semana<br><input checked="" type="radio"/> 1 vez al día<br><input type="radio"/> 2 a 3 veces al día<br><input type="radio"/> 5 a 6 veces al día<br><input type="radio"/> más 6 veces al día |
| Leche condensada      | <input checked="" type="radio"/> Nunca o menos 1 vez al mes<br><input type="radio"/> 1 a 3 veces mes<br><input type="radio"/> 1 vez semana<br><input type="radio"/> 2 a 4 veces semana<br><input type="radio"/> 5 a 6 veces semana<br><input type="radio"/> 1 vez al día<br><input type="radio"/> 2 a 3 veces al día<br><input type="radio"/> 5 a 6 veces al día<br><input type="radio"/> más 6 veces al día |
| nata o crema de leche | <input checked="" type="radio"/> Nunca o menos 1 vez al mes<br><input type="radio"/> 1 a 3 veces mes<br><input type="radio"/> 1 vez semana<br><input type="radio"/> 2 a 4 veces semana<br><input type="radio"/> 5 a 6 veces semana<br><input type="radio"/> 1 vez al día<br><input type="radio"/> 2 a 3 veces al día<br><input type="radio"/> 5 a 6 veces al día<br><input type="radio"/> más 6 veces al día |

|                                             |                                                                                                                                                                                                                                                                                                                                                                                                              |
|---------------------------------------------|--------------------------------------------------------------------------------------------------------------------------------------------------------------------------------------------------------------------------------------------------------------------------------------------------------------------------------------------------------------------------------------------------------------|
| Yogurt Entero                               | <input type="radio"/> Nunca o menos 1 vez al mes<br><input type="radio"/> 1 a 3 veces mes<br><input checked="" type="radio"/> 1 vez semana<br><input type="radio"/> 2 a 4 veces semana<br><input type="radio"/> 5 a 6 veces semana<br><input type="radio"/> 1 vez al día<br><input type="radio"/> 2 a 3 veces al día<br><input type="radio"/> 5 a 6 veces al día<br><input type="radio"/> más 6 veces al día |
| Yogurt desnatado                            | <input type="radio"/> Nunca o menos 1 vez al mes<br><input type="radio"/> 1 a 3 veces mes<br><input type="radio"/> 1 vez semana<br><input checked="" type="radio"/> 2 a 4 veces semana<br><input type="radio"/> 5 a 6 veces semana<br><input type="radio"/> 1 vez al día<br><input type="radio"/> 2 a 3 veces al día<br><input type="radio"/> 5 a 6 veces al día<br><input type="radio"/> más 6 veces al día |
| 100g requesón o queso blando o queso fresco | <input type="radio"/> Nunca o menos 1 vez al mes<br><input type="radio"/> 1 a 3 veces mes<br><input type="radio"/> 1 vez semana<br><input checked="" type="radio"/> 2 a 4 veces semana<br><input type="radio"/> 5 a 6 veces semana<br><input type="radio"/> 1 vez al día<br><input type="radio"/> 2 a 3 veces al día<br><input type="radio"/> 5 a 6 veces al día<br><input type="radio"/> más 6 veces al día |
| queso curado o semicurado o cremoso         | <input type="radio"/> Nunca o menos 1 vez al mes<br><input type="radio"/> 1 a 3 veces mes<br><input type="radio"/> 1 vez semana<br><input checked="" type="radio"/> 2 a 4 veces semana<br><input type="radio"/> 5 a 6 veces semana<br><input type="radio"/> 1 vez al día<br><input type="radio"/> 2 a 3 veces al día<br><input type="radio"/> 5 a 6 veces al día<br><input type="radio"/> más 6 veces al día |
| natillas flan pudding                       | <input type="radio"/> Nunca o menos 1 vez al mes<br><input checked="" type="radio"/> 1 a 3 veces mes<br><input type="radio"/> 1 vez semana<br><input type="radio"/> 2 a 4 veces semana<br><input type="radio"/> 5 a 6 veces semana<br><input type="radio"/> 1 vez al día<br><input type="radio"/> 2 a 3 veces al día<br><input type="radio"/> 5 a 6 veces al día<br><input type="radio"/> más 6 veces al día |
| Helado                                      | <input type="radio"/> Nunca o menos 1 vez al mes<br><input checked="" type="radio"/> 1 a 3 veces mes<br><input type="radio"/> 1 vez semana<br><input type="radio"/> 2 a 4 veces semana<br><input type="radio"/> 5 a 6 veces semana<br><input type="radio"/> 1 vez al día<br><input type="radio"/> 2 a 3 veces al día<br><input type="radio"/> 5 a 6 veces al día<br><input type="radio"/> más 6 veces al día |

|                                      |                                                                                                                                                                                                                                                                                                                                                                                                              |
|--------------------------------------|--------------------------------------------------------------------------------------------------------------------------------------------------------------------------------------------------------------------------------------------------------------------------------------------------------------------------------------------------------------------------------------------------------------|
| huevo                                | <input type="radio"/> Nunca o menos 1 vez al mes<br><input type="radio"/> 1 a 3 veces mes<br><input type="radio"/> 1 vez semana<br><input checked="" type="radio"/> 2 a 4 veces semana<br><input type="radio"/> 5 a 6 veces semana<br><input type="radio"/> 1 vez al día<br><input type="radio"/> 2 a 3 veces al día<br><input type="radio"/> 5 a 6 veces al día<br><input type="radio"/> más 6 veces al día |
| Pollo con piel                       | <input type="radio"/> Nunca o menos 1 vez al mes<br><input type="radio"/> 1 a 3 veces mes<br><input type="radio"/> 1 vez semana<br><input checked="" type="radio"/> 2 a 4 veces semana<br><input type="radio"/> 5 a 6 veces semana<br><input type="radio"/> 1 vez al día<br><input type="radio"/> 2 a 3 veces al día<br><input type="radio"/> 5 a 6 veces al día<br><input type="radio"/> más 6 veces al día |
| pollo sin piel                       | <input type="radio"/> Nunca o menos 1 vez al mes<br><input type="radio"/> 1 a 3 veces mes<br><input checked="" type="radio"/> 1 vez semana<br><input type="radio"/> 2 a 4 veces semana<br><input type="radio"/> 5 a 6 veces semana<br><input type="radio"/> 1 vez al día<br><input type="radio"/> 2 a 3 veces al día<br><input type="radio"/> 5 a 6 veces al día<br><input type="radio"/> más 6 veces al día |
| Ternera o cerdo o cordero            | <input type="radio"/> Nunca o menos 1 vez al mes<br><input type="radio"/> 1 a 3 veces mes<br><input type="radio"/> 1 vez semana<br><input type="radio"/> 2 a 4 veces semana<br><input checked="" type="radio"/> 5 a 6 veces semana<br><input type="radio"/> 1 vez al día<br><input type="radio"/> 2 a 3 veces al día<br><input type="radio"/> 5 a 6 veces al día<br><input type="radio"/> más 6 veces al día |
| carne caza: Conejo o codorniz o pato | <input checked="" type="radio"/> Nunca o menos 1 vez al mes<br><input type="radio"/> 1 a 3 veces mes<br><input type="radio"/> 1 vez semana<br><input type="radio"/> 2 a 4 veces semana<br><input type="radio"/> 5 a 6 veces semana<br><input type="radio"/> 1 vez al día<br><input type="radio"/> 2 a 3 veces al día<br><input type="radio"/> 5 a 6 veces al día<br><input type="radio"/> más 6 veces al día |
| Hígado de ternera o cerdo o pollo    | <input checked="" type="radio"/> Nunca o menos 1 vez al mes<br><input type="radio"/> 1 a 3 veces mes<br><input type="radio"/> 1 vez semana<br><input type="radio"/> 2 a 4 veces semana<br><input type="radio"/> 5 a 6 veces semana<br><input type="radio"/> 1 vez al día<br><input type="radio"/> 2 a 3 veces al día<br><input type="radio"/> 5 a 6 veces al día<br><input type="radio"/> más 6 veces al día |

|                     |                                                                                                                                                                                                                                                                                                                                                                                                              |
|---------------------|--------------------------------------------------------------------------------------------------------------------------------------------------------------------------------------------------------------------------------------------------------------------------------------------------------------------------------------------------------------------------------------------------------------|
| Vísceras            | <input checked="" type="radio"/> Nunca o menos 1 vez al mes<br><input type="radio"/> 1 a 3 veces mes<br><input type="radio"/> 1 vez semana<br><input type="radio"/> 2 a 4 veces semana<br><input type="radio"/> 5 a 6 veces semana<br><input type="radio"/> 1 vez al día<br><input type="radio"/> 2 a 3 veces al día<br><input type="radio"/> 5 a 6 veces al día<br><input type="radio"/> más 6 veces al día |
| Embutido            | <input type="radio"/> Nunca o menos 1 vez al mes<br><input checked="" type="radio"/> 1 a 3 veces mes<br><input type="radio"/> 1 vez semana<br><input type="radio"/> 2 a 4 veces semana<br><input type="radio"/> 5 a 6 veces semana<br><input type="radio"/> 1 vez al día<br><input type="radio"/> 2 a 3 veces al día<br><input type="radio"/> 5 a 6 veces al día<br><input type="radio"/> más 6 veces al día |
| Salchicha o similar | <input type="radio"/> Nunca o menos 1 vez al mes<br><input type="radio"/> 1 a 3 veces mes<br><input checked="" type="radio"/> 1 vez semana<br><input type="radio"/> 2 a 4 veces semana<br><input type="radio"/> 5 a 6 veces semana<br><input type="radio"/> 1 vez al día<br><input type="radio"/> 2 a 3 veces al día<br><input type="radio"/> 5 a 6 veces al día<br><input type="radio"/> más 6 veces al día |
| Pate o foiegras     | <input type="radio"/> Nunca o menos 1 vez al mes<br><input checked="" type="radio"/> 1 a 3 veces mes<br><input type="radio"/> 1 vez semana<br><input type="radio"/> 2 a 4 veces semana<br><input type="radio"/> 5 a 6 veces semana<br><input type="radio"/> 1 vez al día<br><input type="radio"/> 2 a 3 veces al día<br><input type="radio"/> 5 a 6 veces al día<br><input type="radio"/> más 6 veces al día |
| Hamburguesa         | <input type="radio"/> Nunca o menos 1 vez al mes<br><input type="radio"/> 1 a 3 veces mes<br><input checked="" type="radio"/> 1 vez semana<br><input type="radio"/> 2 a 4 veces semana<br><input type="radio"/> 5 a 6 veces semana<br><input type="radio"/> 1 vez al día<br><input type="radio"/> 2 a 3 veces al día<br><input type="radio"/> 5 a 6 veces al día<br><input type="radio"/> más 6 veces al día |
| tocino o bacon      | <input type="radio"/> Nunca o menos 1 vez al mes<br><input checked="" type="radio"/> 1 a 3 veces mes<br><input type="radio"/> 1 vez semana<br><input type="radio"/> 2 a 4 veces semana<br><input type="radio"/> 5 a 6 veces semana<br><input type="radio"/> 1 vez al día<br><input type="radio"/> 2 a 3 veces al día<br><input type="radio"/> 5 a 6 veces al día<br><input type="radio"/> más 6 veces al día |

---

|               |                                                                                                                                                                                                                                                                                                                                                                                                              |
|---------------|--------------------------------------------------------------------------------------------------------------------------------------------------------------------------------------------------------------------------------------------------------------------------------------------------------------------------------------------------------------------------------------------------------------|
| Pescado frito | <input type="radio"/> Nunca o menos 1 vez al mes<br><input type="radio"/> 1 a 3 veces mes<br><input checked="" type="radio"/> 1 vez semana<br><input type="radio"/> 2 a 4 veces semana<br><input type="radio"/> 5 a 6 veces semana<br><input type="radio"/> 1 vez al día<br><input type="radio"/> 2 a 3 veces al día<br><input type="radio"/> 5 a 6 veces al día<br><input type="radio"/> más 6 veces al día |
|---------------|--------------------------------------------------------------------------------------------------------------------------------------------------------------------------------------------------------------------------------------------------------------------------------------------------------------------------------------------------------------------------------------------------------------|

---

|                        |                                                                                                                                                                                                                                                                                                                                                                                                              |
|------------------------|--------------------------------------------------------------------------------------------------------------------------------------------------------------------------------------------------------------------------------------------------------------------------------------------------------------------------------------------------------------------------------------------------------------|
| pescado hervido blanco | <input type="radio"/> Nunca o menos 1 vez al mes<br><input type="radio"/> 1 a 3 veces mes<br><input type="radio"/> 1 vez semana<br><input checked="" type="radio"/> 2 a 4 veces semana<br><input type="radio"/> 5 a 6 veces semana<br><input type="radio"/> 1 vez al día<br><input type="radio"/> 2 a 3 veces al día<br><input type="radio"/> 5 a 6 veces al día<br><input type="radio"/> más 6 veces al día |
|------------------------|--------------------------------------------------------------------------------------------------------------------------------------------------------------------------------------------------------------------------------------------------------------------------------------------------------------------------------------------------------------------------------------------------------------|

---

|                      |                                                                                                                                                                                                                                                                                                                                                                                                              |
|----------------------|--------------------------------------------------------------------------------------------------------------------------------------------------------------------------------------------------------------------------------------------------------------------------------------------------------------------------------------------------------------------------------------------------------------|
| pescado hervido azul | <input type="radio"/> Nunca o menos 1 vez al mes<br><input type="radio"/> 1 a 3 veces mes<br><input checked="" type="radio"/> 1 vez semana<br><input type="radio"/> 2 a 4 veces semana<br><input type="radio"/> 5 a 6 veces semana<br><input type="radio"/> 1 vez al día<br><input type="radio"/> 2 a 3 veces al día<br><input type="radio"/> 5 a 6 veces al día<br><input type="radio"/> más 6 veces al día |
|----------------------|--------------------------------------------------------------------------------------------------------------------------------------------------------------------------------------------------------------------------------------------------------------------------------------------------------------------------------------------------------------------------------------------------------------|

---

|                    |                                                                                                                                                                                                                                                                                                                                                                                                              |
|--------------------|--------------------------------------------------------------------------------------------------------------------------------------------------------------------------------------------------------------------------------------------------------------------------------------------------------------------------------------------------------------------------------------------------------------|
| otros pescado azul | <input type="radio"/> Nunca o menos 1 vez al mes<br><input type="radio"/> 1 a 3 veces mes<br><input checked="" type="radio"/> 1 vez semana<br><input type="radio"/> 2 a 4 veces semana<br><input type="radio"/> 5 a 6 veces semana<br><input type="radio"/> 1 vez al día<br><input type="radio"/> 2 a 3 veces al día<br><input type="radio"/> 5 a 6 veces al día<br><input type="radio"/> más 6 veces al día |
|--------------------|--------------------------------------------------------------------------------------------------------------------------------------------------------------------------------------------------------------------------------------------------------------------------------------------------------------------------------------------------------------------------------------------------------------|

---

|               |                                                                                                                                                                                                                                                                                                                                                                                                              |
|---------------|--------------------------------------------------------------------------------------------------------------------------------------------------------------------------------------------------------------------------------------------------------------------------------------------------------------------------------------------------------------------------------------------------------------|
| atun conserva | <input type="radio"/> Nunca o menos 1 vez al mes<br><input type="radio"/> 1 a 3 veces mes<br><input checked="" type="radio"/> 1 vez semana<br><input type="radio"/> 2 a 4 veces semana<br><input type="radio"/> 5 a 6 veces semana<br><input type="radio"/> 1 vez al día<br><input type="radio"/> 2 a 3 veces al día<br><input type="radio"/> 5 a 6 veces al día<br><input type="radio"/> más 6 veces al día |
|---------------|--------------------------------------------------------------------------------------------------------------------------------------------------------------------------------------------------------------------------------------------------------------------------------------------------------------------------------------------------------------------------------------------------------------|

---

|                  |                                                                                                                                                                                                                                                                                                                                                                                                              |
|------------------|--------------------------------------------------------------------------------------------------------------------------------------------------------------------------------------------------------------------------------------------------------------------------------------------------------------------------------------------------------------------------------------------------------------|
| sardina conserva | <input type="radio"/> Nunca o menos 1 vez al mes<br><input type="radio"/> 1 a 3 veces mes<br><input checked="" type="radio"/> 1 vez semana<br><input type="radio"/> 2 a 4 veces semana<br><input type="radio"/> 5 a 6 veces semana<br><input type="radio"/> 1 vez al día<br><input type="radio"/> 2 a 3 veces al día<br><input type="radio"/> 5 a 6 veces al día<br><input type="radio"/> más 6 veces al día |
|------------------|--------------------------------------------------------------------------------------------------------------------------------------------------------------------------------------------------------------------------------------------------------------------------------------------------------------------------------------------------------------------------------------------------------------|

---

---

pescado ahumado

- ☐ Nunca o menos 1 vez al mes  
☐ 1 a 3 veces mes  
☒ 1 vez semana  
☐ 2 a 4 veces semana  
☐ 5 a 6 veces semana  
☐ 1 vez al día  
☐ 2 a 3 veces al día  
☐ 5 a 6 veces al día  
☐ más 6 veces al día

---

almejas o mejillones o ostras unos 100g

- ☐ Nunca o menos 1 vez al mes  
☐ 1 a 3 veces mes  
☐ 1 vez semana  
☒ 2 a 4 veces semana  
☐ 5 a 6 veces semana  
☐ 1 vez al día  
☐ 2 a 3 veces al día  
☐ 5 a 6 veces al día  
☐ más 6 veces al día

---

calamar o chipiron o sepia unos 100g

- ☐ Nunca o menos 1 vez al mes  
☐ 1 a 3 veces mes  
☐ 1 vez semana  
☒ 2 a 4 veces semana  
☐ 5 a 6 veces semana  
☐ 1 vez al día  
☐ 2 a 3 veces al día  
☐ 5 a 6 veces al día  
☐ más 6 veces al día

---

marisco unos 100g

- ☐ Nunca o menos 1 vez al mes  
☐ 1 a 3 veces mes  
☐ 1 vez semana  
☒ 2 a 4 veces semana  
☐ 5 a 6 veces semana  
☐ 1 vez al día  
☐ 2 a 3 veces al día  
☐ 5 a 6 veces al día  
☐ más 6 veces al día

---

Espinacas o acelgas cocinadas

- ☐ Nunca o menos 1 vez al mes  
☐ 1 a 3 veces mes  
☒ 1 vez semana  
☐ 2 a 4 veces semana  
☐ 5 a 6 veces semana  
☐ 1 vez al día  
☐ 2 a 3 veces al día  
☐ 5 a 6 veces al día  
☐ más 6 veces al día

---

Col o coliflor o brocoli cocinado

- ☐ Nunca o menos 1 vez al mes  
☐ 1 a 3 veces mes  
☒ 1 vez semana  
☐ 2 a 4 veces semana  
☐ 5 a 6 veces semana  
☐ 1 vez al día  
☐ 2 a 3 veces al día  
☐ 5 a 6 veces al día  
☐ más 6 veces al día

---

Lechuga o endivia o escarola

- ☐ Nunca o menos 1 vez al mes  
☐ 1 a 3 veces mes  
☐ 1 vez semana  
☒ 2 a 4 veces semana  
☐ 5 a 6 veces semana  
☐ 1 vez al día  
☐ 2 a 3 veces al día  
☐ 5 a 6 veces al día  
☐ más 6 veces al día

---

tomate ensalada

- ☐ Nunca o menos 1 vez al mes  
☐ 1 a 3 veces mes  
☐ 1 vez semana  
☐ 2 a 4 veces semana  
☒ 5 a 6 veces semana  
☐ 1 vez al día  
☐ 2 a 3 veces al día  
☐ 5 a 6 veces al día  
☐ más 6 veces al día

---

cebolla

- ☐ Nunca o menos 1 vez al mes  
☐ 1 a 3 veces mes  
☐ 1 vez semana  
☐ 2 a 4 veces semana  
☒ 5 a 6 veces semana  
☐ 1 vez al día  
☐ 2 a 3 veces al día  
☐ 5 a 6 veces al día  
☐ más 6 veces al día

---

Zanahoria o calabaza

- ☐ Nunca o menos 1 vez al mes  
☐ 1 a 3 veces mes  
☐ 1 vez semana  
☐ 2 a 4 veces semana  
☒ 5 a 6 veces semana  
☐ 1 vez al día  
☐ 2 a 3 veces al día  
☐ 5 a 6 veces al día  
☐ más 6 veces al día

---

Judías verdes

- ☐ Nunca o menos 1 vez al mes  
☐ 1 a 3 veces mes  
☐ 1 vez semana  
☐ 2 a 4 veces semana  
☒ 5 a 6 veces semana  
☐ 1 vez al día  
☐ 2 a 3 veces al día  
☐ 5 a 6 veces al día  
☐ más 6 veces al día

---

Berenjena o calabacin o pepino

- ☐ Nunca o menos 1 vez al mes  
☐ 1 a 3 veces mes  
☐ 1 vez semana  
☐ 2 a 4 veces semana  
☒ 5 a 6 veces semana  
☐ 1 vez al día  
☐ 2 a 3 veces al día  
☐ 5 a 6 veces al día  
☐ más 6 veces al día



|                       |                                                                                                                                                                                                                                                                                                                                                                                                              |
|-----------------------|--------------------------------------------------------------------------------------------------------------------------------------------------------------------------------------------------------------------------------------------------------------------------------------------------------------------------------------------------------------------------------------------------------------|
| pimiento              | <input type="radio"/> Nunca o menos 1 vez al mes<br><input type="radio"/> 1 a 3 veces mes<br><input type="radio"/> 1 vez semana<br><input type="radio"/> 2 a 4 veces semana<br><input checked="" type="radio"/> 5 a 6 veces semana<br><input type="radio"/> 1 vez al día<br><input type="radio"/> 2 a 3 veces al día<br><input type="radio"/> 5 a 6 veces al día<br><input type="radio"/> más 6 veces al día |
| alcachofa             | <input type="radio"/> Nunca o menos 1 vez al mes<br><input type="radio"/> 1 a 3 veces mes<br><input type="radio"/> 1 vez semana<br><input checked="" type="radio"/> 2 a 4 veces semana<br><input type="radio"/> 5 a 6 veces semana<br><input type="radio"/> 1 vez al día<br><input type="radio"/> 2 a 3 veces al día<br><input type="radio"/> 5 a 6 veces al día<br><input type="radio"/> más 6 veces al día |
| espárragos            | <input type="radio"/> Nunca o menos 1 vez al mes<br><input type="radio"/> 1 a 3 veces mes<br><input type="radio"/> 1 vez semana<br><input checked="" type="radio"/> 2 a 4 veces semana<br><input type="radio"/> 5 a 6 veces semana<br><input type="radio"/> 1 vez al día<br><input type="radio"/> 2 a 3 veces al día<br><input type="radio"/> 5 a 6 veces al día<br><input type="radio"/> más 6 veces al día |
| maíz hervido          | <input type="radio"/> Nunca o menos 1 vez al mes<br><input type="radio"/> 1 a 3 veces mes<br><input type="radio"/> 1 vez semana<br><input type="radio"/> 2 a 4 veces semana<br><input checked="" type="radio"/> 5 a 6 veces semana<br><input type="radio"/> 1 vez al día<br><input type="radio"/> 2 a 3 veces al día<br><input type="radio"/> 5 a 6 veces al día<br><input type="radio"/> más 6 veces al día |
| legumbres             | <input type="radio"/> Nunca o menos 1 vez al mes<br><input type="radio"/> 1 a 3 veces mes<br><input type="radio"/> 1 vez semana<br><input type="radio"/> 2 a 4 veces semana<br><input checked="" type="radio"/> 5 a 6 veces semana<br><input type="radio"/> 1 vez al día<br><input type="radio"/> 2 a 3 veces al día<br><input type="radio"/> 5 a 6 veces al día<br><input type="radio"/> más 6 veces al día |
| naranjas o mandarinas | <input type="radio"/> Nunca o menos 1 vez al mes<br><input type="radio"/> 1 a 3 veces mes<br><input type="radio"/> 1 vez semana<br><input type="radio"/> 2 a 4 veces semana<br><input type="radio"/> 5 a 6 veces semana<br><input type="radio"/> 1 vez al día<br><input checked="" type="radio"/> 2 a 3 veces al día<br><input type="radio"/> 5 a 6 veces al día<br><input type="radio"/> más 6 veces al día |

|                       |                                                                                                                                                                                                                                                                                                                                                                                                              |
|-----------------------|--------------------------------------------------------------------------------------------------------------------------------------------------------------------------------------------------------------------------------------------------------------------------------------------------------------------------------------------------------------------------------------------------------------|
| zum natural fruta     | <input type="radio"/> Nunca o menos 1 vez al mes<br><input type="radio"/> 1 a 3 veces mes<br><input type="radio"/> 1 vez semana<br><input type="radio"/> 2 a 4 veces semana<br><input checked="" type="radio"/> 5 a 6 veces semana<br><input type="radio"/> 1 vez al día<br><input type="radio"/> 2 a 3 veces al día<br><input type="radio"/> 5 a 6 veces al día<br><input type="radio"/> más 6 veces al día |
| platano               | <input type="radio"/> Nunca o menos 1 vez al mes<br><input type="radio"/> 1 a 3 veces mes<br><input type="radio"/> 1 vez semana<br><input type="radio"/> 2 a 4 veces semana<br><input type="radio"/> 5 a 6 veces semana<br><input checked="" type="radio"/> 1 vez al día<br><input type="radio"/> 2 a 3 veces al día<br><input type="radio"/> 5 a 6 veces al día<br><input type="radio"/> más 6 veces al día |
| manzana o pera        | <input type="radio"/> Nunca o menos 1 vez al mes<br><input type="radio"/> 1 a 3 veces mes<br><input type="radio"/> 1 vez semana<br><input type="radio"/> 2 a 4 veces semana<br><input checked="" type="radio"/> 5 a 6 veces semana<br><input type="radio"/> 1 vez al día<br><input type="radio"/> 2 a 3 veces al día<br><input type="radio"/> 5 a 6 veces al día<br><input type="radio"/> más 6 veces al día |
| melocotón o nectarina | <input type="radio"/> Nunca o menos 1 vez al mes<br><input type="radio"/> 1 a 3 veces mes<br><input type="radio"/> 1 vez semana<br><input checked="" type="radio"/> 2 a 4 veces semana<br><input type="radio"/> 5 a 6 veces semana<br><input type="radio"/> 1 vez al día<br><input type="radio"/> 2 a 3 veces al día<br><input type="radio"/> 5 a 6 veces al día<br><input type="radio"/> más 6 veces al día |
| sandia o melon        | <input type="radio"/> Nunca o menos 1 vez al mes<br><input type="radio"/> 1 a 3 veces mes<br><input type="radio"/> 1 vez semana<br><input checked="" type="radio"/> 2 a 4 veces semana<br><input type="radio"/> 5 a 6 veces semana<br><input type="radio"/> 1 vez al día<br><input type="radio"/> 2 a 3 veces al día<br><input type="radio"/> 5 a 6 veces al día<br><input type="radio"/> más 6 veces al día |
| uva                   | <input type="radio"/> Nunca o menos 1 vez al mes<br><input type="radio"/> 1 a 3 veces mes<br><input type="radio"/> 1 vez semana<br><input checked="" type="radio"/> 2 a 4 veces semana<br><input type="radio"/> 5 a 6 veces semana<br><input type="radio"/> 1 vez al día<br><input type="radio"/> 2 a 3 veces al día<br><input type="radio"/> 5 a 6 veces al día<br><input type="radio"/> más 6 veces al día |

---

bruna o ciruela

- ☐ Nunca o menos 1 vez al mes  
☐ 1 a 3 veces mes  
☐ 1 vez semana  
☒ 2 a 4 veces semana  
☐ 5 a 6 veces semana  
☐ 1 vez al día  
☐ 2 a 3 veces al día  
☐ 5 a 6 veces al día  
☐ más 6 veces al día

---

kiwi

- ☐ Nunca o menos 1 vez al mes  
☐ 1 a 3 veces mes  
☐ 1 vez semana  
☒ 2 a 4 veces semana  
☐ 5 a 6 veces semana  
☐ 1 vez al día  
☐ 2 a 3 veces al día  
☐ 5 a 6 veces al día  
☐ más 6 veces al día

---

aceituna

- ☐ Nunca o menos 1 vez al mes  
☐ 1 a 3 veces mes  
☐ 1 vez semana  
☐ 2 a 4 veces semana  
☒ 5 a 6 veces semana  
☐ 1 vez al día  
☐ 2 a 3 veces al día  
☐ 5 a 6 veces al día  
☐ más 6 veces al día

---

frutos secos

- ☐ Nunca o menos 1 vez al mes  
☐ 1 a 3 veces mes  
☐ 1 vez semana  
☐ 2 a 4 veces semana  
☐ 5 a 6 veces semana  
☒ 1 vez al día  
☐ 2 a 3 veces al día  
☐ 5 a 6 veces al día  
☐ más 6 veces al día

---

pan blanco

- ☐ Nunca o menos 1 vez al mes  
☐ 1 a 3 veces mes  
☐ 1 vez semana  
☐ 2 a 4 veces semana  
☐ 5 a 6 veces semana  
☐ 1 vez al día  
☒ 2 a 3 veces al día  
☐ 5 a 6 veces al día  
☐ más 6 veces al día

---

pan integral

- ☐ Nunca o menos 1 vez al mes  
☐ 1 a 3 veces mes  
☐ 1 vez semana  
☐ 2 a 4 veces semana  
☐ 5 a 6 veces semana  
☐ 1 vez al día  
☒ 2 a 3 veces al día  
☐ 5 a 6 veces al día  
☐ más 6 veces al día

---

|                   |                                                                                                                                                                                                                                                                                                                                                                                                              |
|-------------------|--------------------------------------------------------------------------------------------------------------------------------------------------------------------------------------------------------------------------------------------------------------------------------------------------------------------------------------------------------------------------------------------------------------|
| cereales desayuno | <input type="radio"/> Nunca o menos 1 vez al mes<br><input type="radio"/> 1 a 3 veces mes<br><input type="radio"/> 1 vez semana<br><input type="radio"/> 2 a 4 veces semana<br><input type="radio"/> 5 a 6 veces semana<br><input checked="" type="radio"/> 1 vez al día<br><input type="radio"/> 2 a 3 veces al día<br><input type="radio"/> 5 a 6 veces al día<br><input type="radio"/> más 6 veces al día |
|-------------------|--------------------------------------------------------------------------------------------------------------------------------------------------------------------------------------------------------------------------------------------------------------------------------------------------------------------------------------------------------------------------------------------------------------|

---

|                |                                                                                                                                                                                                                                                                                                                                                                                                              |
|----------------|--------------------------------------------------------------------------------------------------------------------------------------------------------------------------------------------------------------------------------------------------------------------------------------------------------------------------------------------------------------------------------------------------------------|
| patatas fritas | <input type="radio"/> Nunca o menos 1 vez al mes<br><input type="radio"/> 1 a 3 veces mes<br><input type="radio"/> 1 vez semana<br><input checked="" type="radio"/> 2 a 4 veces semana<br><input type="radio"/> 5 a 6 veces semana<br><input type="radio"/> 1 vez al día<br><input type="radio"/> 2 a 3 veces al día<br><input type="radio"/> 5 a 6 veces al día<br><input type="radio"/> más 6 veces al día |
|----------------|--------------------------------------------------------------------------------------------------------------------------------------------------------------------------------------------------------------------------------------------------------------------------------------------------------------------------------------------------------------------------------------------------------------|

---

|                          |                                                                                                                                                                                                                                                                                                                                                                                                              |
|--------------------------|--------------------------------------------------------------------------------------------------------------------------------------------------------------------------------------------------------------------------------------------------------------------------------------------------------------------------------------------------------------------------------------------------------------|
| patatas cocidas o asadas | <input type="radio"/> Nunca o menos 1 vez al mes<br><input type="radio"/> 1 a 3 veces mes<br><input type="radio"/> 1 vez semana<br><input checked="" type="radio"/> 2 a 4 veces semana<br><input type="radio"/> 5 a 6 veces semana<br><input type="radio"/> 1 vez al día<br><input type="radio"/> 2 a 3 veces al día<br><input type="radio"/> 5 a 6 veces al día<br><input type="radio"/> más 6 veces al día |
|--------------------------|--------------------------------------------------------------------------------------------------------------------------------------------------------------------------------------------------------------------------------------------------------------------------------------------------------------------------------------------------------------------------------------------------------------|

---

|             |                                                                                                                                                                                                                                                                                                                                                                                                              |
|-------------|--------------------------------------------------------------------------------------------------------------------------------------------------------------------------------------------------------------------------------------------------------------------------------------------------------------------------------------------------------------------------------------------------------------|
| bolsa papas | <input type="radio"/> Nunca o menos 1 vez al mes<br><input type="radio"/> 1 a 3 veces mes<br><input checked="" type="radio"/> 1 vez semana<br><input type="radio"/> 2 a 4 veces semana<br><input type="radio"/> 5 a 6 veces semana<br><input type="radio"/> 1 vez al día<br><input type="radio"/> 2 a 3 veces al día<br><input type="radio"/> 5 a 6 veces al día<br><input type="radio"/> más 6 veces al día |
|-------------|--------------------------------------------------------------------------------------------------------------------------------------------------------------------------------------------------------------------------------------------------------------------------------------------------------------------------------------------------------------------------------------------------------------|

---

|                |                                                                                                                                                                                                                                                                                                                                                                                                              |
|----------------|--------------------------------------------------------------------------------------------------------------------------------------------------------------------------------------------------------------------------------------------------------------------------------------------------------------------------------------------------------------------------------------------------------------|
| arroz cocinado | <input type="radio"/> Nunca o menos 1 vez al mes<br><input type="radio"/> 1 a 3 veces mes<br><input type="radio"/> 1 vez semana<br><input checked="" type="radio"/> 2 a 4 veces semana<br><input type="radio"/> 5 a 6 veces semana<br><input type="radio"/> 1 vez al día<br><input type="radio"/> 2 a 3 veces al día<br><input type="radio"/> 5 a 6 veces al día<br><input type="radio"/> más 6 veces al día |
|----------------|--------------------------------------------------------------------------------------------------------------------------------------------------------------------------------------------------------------------------------------------------------------------------------------------------------------------------------------------------------------------------------------------------------------|

---

|       |                                                                                                                                                                                                                                                                                                                                                                                                              |
|-------|--------------------------------------------------------------------------------------------------------------------------------------------------------------------------------------------------------------------------------------------------------------------------------------------------------------------------------------------------------------------------------------------------------------|
| pasta | <input type="radio"/> Nunca o menos 1 vez al mes<br><input type="radio"/> 1 a 3 veces mes<br><input type="radio"/> 1 vez semana<br><input checked="" type="radio"/> 2 a 4 veces semana<br><input type="radio"/> 5 a 6 veces semana<br><input type="radio"/> 1 vez al día<br><input type="radio"/> 2 a 3 veces al día<br><input type="radio"/> 5 a 6 veces al día<br><input type="radio"/> más 6 veces al día |
|-------|--------------------------------------------------------------------------------------------------------------------------------------------------------------------------------------------------------------------------------------------------------------------------------------------------------------------------------------------------------------------------------------------------------------|

|                     |                                                                                                                                                                                                                                                                                                                                                                                                              |
|---------------------|--------------------------------------------------------------------------------------------------------------------------------------------------------------------------------------------------------------------------------------------------------------------------------------------------------------------------------------------------------------------------------------------------------------|
| pizza               | <input type="radio"/> Nunca o menos 1 vez al mes<br><input checked="" type="radio"/> 1 a 3 veces mes<br><input type="radio"/> 1 vez semana<br><input type="radio"/> 2 a 4 veces semana<br><input type="radio"/> 5 a 6 veces semana<br><input type="radio"/> 1 vez al día<br><input type="radio"/> 2 a 3 veces al día<br><input type="radio"/> 5 a 6 veces al día<br><input type="radio"/> más 6 veces al día |
| aceite oliva        | <input type="radio"/> Nunca o menos 1 vez al mes<br><input type="radio"/> 1 a 3 veces mes<br><input type="radio"/> 1 vez semana<br><input type="radio"/> 2 a 4 veces semana<br><input type="radio"/> 5 a 6 veces semana<br><input type="radio"/> 1 vez al día<br><input checked="" type="radio"/> 2 a 3 veces al día<br><input type="radio"/> 5 a 6 veces al día<br><input type="radio"/> más 6 veces al día |
| otros aceites       | <input type="radio"/> Nunca o menos 1 vez al mes<br><input type="radio"/> 1 a 3 veces mes<br><input type="radio"/> 1 vez semana<br><input type="radio"/> 2 a 4 veces semana<br><input type="radio"/> 5 a 6 veces semana<br><input checked="" type="radio"/> 1 vez al día<br><input type="radio"/> 2 a 3 veces al día<br><input type="radio"/> 5 a 6 veces al día<br><input type="radio"/> más 6 veces al día |
| margarina           | <input type="radio"/> Nunca o menos 1 vez al mes<br><input type="radio"/> 1 a 3 veces mes<br><input type="radio"/> 1 vez semana<br><input checked="" type="radio"/> 2 a 4 veces semana<br><input type="radio"/> 5 a 6 veces semana<br><input type="radio"/> 1 vez al día<br><input type="radio"/> 2 a 3 veces al día<br><input type="radio"/> 5 a 6 veces al día<br><input type="radio"/> más 6 veces al día |
| mantequilla         | <input checked="" type="radio"/> Nunca o menos 1 vez al mes<br><input type="radio"/> 1 a 3 veces mes<br><input type="radio"/> 1 vez semana<br><input type="radio"/> 2 a 4 veces semana<br><input type="radio"/> 5 a 6 veces semana<br><input type="radio"/> 1 vez al día<br><input type="radio"/> 2 a 3 veces al día<br><input type="radio"/> 5 a 6 veces al día<br><input type="radio"/> más 6 veces al día |
| galletas tipo maria | <input type="radio"/> Nunca o menos 1 vez al mes<br><input type="radio"/> 1 a 3 veces mes<br><input type="radio"/> 1 vez semana<br><input checked="" type="radio"/> 2 a 4 veces semana<br><input type="radio"/> 5 a 6 veces semana<br><input type="radio"/> 1 vez al día<br><input type="radio"/> 2 a 3 veces al día<br><input type="radio"/> 5 a 6 veces al día<br><input type="radio"/> más 6 veces al día |

---

galletas chocolate

- ☐ Nunca o menos 1 vez al mes  
☒ 1 a 3 veces mes  
☐ 1 vez semana  
☐ 2 a 4 veces semana  
☐ 5 a 6 veces semana  
☐ 1 vez al día  
☐ 2 a 3 veces al día  
☐ 5 a 6 veces al día  
☐ más 6 veces al día

---

bolleria

- ☐ Nunca o menos 1 vez al mes  
☒ 1 a 3 veces mes  
☐ 1 vez semana  
☐ 2 a 4 veces semana  
☐ 5 a 6 veces semana  
☐ 1 vez al día  
☐ 2 a 3 veces al día  
☐ 5 a 6 veces al día  
☐ más 6 veces al día

---

chocolate o bombones

- ☐ Nunca o menos 1 vez al mes  
☐ 1 a 3 veces mes  
☐ 1 vez semana  
☒ 2 a 4 veces semana  
☐ 5 a 6 veces semana  
☐ 1 vez al día  
☐ 2 a 3 veces al día  
☐ 5 a 6 veces al día  
☐ más 6 veces al día

---

chocolate polvo o colacao

- ☐ Nunca o menos 1 vez al mes  
☐ 1 a 3 veces mes  
☐ 1 vez semana  
☐ 2 a 4 veces semana  
☐ 5 a 6 veces semana  
☒ 1 vez al día  
☐ 2 a 3 veces al día  
☐ 5 a 6 veces al día  
☐ más 6 veces al día

---

vino tinto

- ☒ Nunca o menos 1 vez al mes  
☐ 1 a 3 veces mes  
☐ 1 vez semana  
☐ 2 a 4 veces semana  
☐ 5 a 6 veces semana  
☐ 1 vez al día  
☐ 2 a 3 veces al día  
☐ 5 a 6 veces al día  
☐ más 6 veces al día

---

vino blanco

- ☒ Nunca o menos 1 vez al mes  
☐ 1 a 3 veces mes  
☐ 1 vez semana  
☐ 2 a 4 veces semana  
☐ 5 a 6 veces semana  
☐ 1 vez al día  
☐ 2 a 3 veces al día  
☐ 5 a 6 veces al día  
☐ más 6 veces al día

|                       |                                                                                                                                                                                                                                                                                                                                                                                                              |
|-----------------------|--------------------------------------------------------------------------------------------------------------------------------------------------------------------------------------------------------------------------------------------------------------------------------------------------------------------------------------------------------------------------------------------------------------|
| vino seco o vermut    | <input checked="" type="radio"/> Nunca o menos 1 vez al mes<br><input type="radio"/> 1 a 3 veces mes<br><input type="radio"/> 1 vez semana<br><input type="radio"/> 2 a 4 veces semana<br><input type="radio"/> 5 a 6 veces semana<br><input type="radio"/> 1 vez al día<br><input type="radio"/> 2 a 3 veces al día<br><input type="radio"/> 5 a 6 veces al día<br><input type="radio"/> más 6 veces al día |
| cerveza               | <input checked="" type="radio"/> Nunca o menos 1 vez al mes<br><input type="radio"/> 1 a 3 veces mes<br><input type="radio"/> 1 vez semana<br><input type="radio"/> 2 a 4 veces semana<br><input type="radio"/> 5 a 6 veces semana<br><input type="radio"/> 1 vez al día<br><input type="radio"/> 2 a 3 veces al día<br><input type="radio"/> 5 a 6 veces al día<br><input type="radio"/> más 6 veces al día |
| cerveza sin alcohol   | <input type="radio"/> Nunca o menos 1 vez al mes<br><input type="radio"/> 1 a 3 veces mes<br><input type="radio"/> 1 vez semana<br><input checked="" type="radio"/> 2 a 4 veces semana<br><input type="radio"/> 5 a 6 veces semana<br><input type="radio"/> 1 vez al día<br><input type="radio"/> 2 a 3 veces al día<br><input type="radio"/> 5 a 6 veces al día<br><input type="radio"/> más 6 veces al día |
| licores               | <input checked="" type="radio"/> Nunca o menos 1 vez al mes<br><input type="radio"/> 1 a 3 veces mes<br><input type="radio"/> 1 vez semana<br><input type="radio"/> 2 a 4 veces semana<br><input type="radio"/> 5 a 6 veces semana<br><input type="radio"/> 1 vez al día<br><input type="radio"/> 2 a 3 veces al día<br><input type="radio"/> 5 a 6 veces al día<br><input type="radio"/> más 6 veces al día |
| ginebra o ron o vodka | <input checked="" type="radio"/> Nunca o menos 1 vez al mes<br><input type="radio"/> 1 a 3 veces mes<br><input type="radio"/> 1 vez semana<br><input type="radio"/> 2 a 4 veces semana<br><input type="radio"/> 5 a 6 veces semana<br><input type="radio"/> 1 vez al día<br><input type="radio"/> 2 a 3 veces al día<br><input type="radio"/> 5 a 6 veces al día<br><input type="radio"/> más 6 veces al día |
| refresco normal       | <input type="radio"/> Nunca o menos 1 vez al mes<br><input type="radio"/> 1 a 3 veces mes<br><input type="radio"/> 1 vez semana<br><input checked="" type="radio"/> 2 a 4 veces semana<br><input type="radio"/> 5 a 6 veces semana<br><input type="radio"/> 1 vez al día<br><input type="radio"/> 2 a 3 veces al día<br><input type="radio"/> 5 a 6 veces al día<br><input type="radio"/> más 6 veces al día |

|                          |                                                                                                                                                                                                                                                                                                                                                                                                              |
|--------------------------|--------------------------------------------------------------------------------------------------------------------------------------------------------------------------------------------------------------------------------------------------------------------------------------------------------------------------------------------------------------------------------------------------------------|
| refresco sin azúcar      | <input type="radio"/> Nunca o menos 1 vez al mes<br><input type="radio"/> 1 a 3 veces mes<br><input type="radio"/> 1 vez semana<br><input checked="" type="radio"/> 2 a 4 veces semana<br><input type="radio"/> 5 a 6 veces semana<br><input type="radio"/> 1 vez al día<br><input type="radio"/> 2 a 3 veces al día<br><input type="radio"/> 5 a 6 veces al día<br><input type="radio"/> más 6 veces al día |
| Agua del grifo           | <input checked="" type="radio"/> Nunca o menos 1 vez al mes<br><input type="radio"/> 1 a 3 veces mes<br><input type="radio"/> 1 vez semana<br><input type="radio"/> 2 a 4 veces semana<br><input type="radio"/> 5 a 6 veces semana<br><input type="radio"/> 1 vez al día<br><input type="radio"/> 2 a 3 veces al día<br><input type="radio"/> 5 a 6 veces al día<br><input type="radio"/> más 6 veces al día |
| agua embotellada sin gas | <input type="radio"/> Nunca o menos 1 vez al mes<br><input type="radio"/> 1 a 3 veces mes<br><input type="radio"/> 1 vez semana<br><input type="radio"/> 2 a 4 veces semana<br><input type="radio"/> 5 a 6 veces semana<br><input type="radio"/> 1 vez al día<br><input type="radio"/> 2 a 3 veces al día<br><input type="radio"/> 5 a 6 veces al día<br><input checked="" type="radio"/> más 6 veces al día |
| agua embotellada con gas | <input checked="" type="radio"/> Nunca o menos 1 vez al mes<br><input type="radio"/> 1 a 3 veces mes<br><input type="radio"/> 1 vez semana<br><input type="radio"/> 2 a 4 veces semana<br><input type="radio"/> 5 a 6 veces semana<br><input type="radio"/> 1 vez al día<br><input type="radio"/> 2 a 3 veces al día<br><input type="radio"/> 5 a 6 veces al día<br><input type="radio"/> más 6 veces al día |
| zumو frutas embasado     | <input checked="" type="radio"/> Nunca o menos 1 vez al mes<br><input type="radio"/> 1 a 3 veces mes<br><input type="radio"/> 1 vez semana<br><input type="radio"/> 2 a 4 veces semana<br><input type="radio"/> 5 a 6 veces semana<br><input type="radio"/> 1 vez al día<br><input type="radio"/> 2 a 3 veces al día<br><input type="radio"/> 5 a 6 veces al día<br><input type="radio"/> más 6 veces al día |
| cafe                     | <input type="radio"/> Nunca o menos 1 vez al mes<br><input checked="" type="radio"/> 1 a 3 veces mes<br><input type="radio"/> 1 vez semana<br><input type="radio"/> 2 a 4 veces semana<br><input type="radio"/> 5 a 6 veces semana<br><input type="radio"/> 1 vez al día<br><input type="radio"/> 2 a 3 veces al día<br><input type="radio"/> 5 a 6 veces al día<br><input type="radio"/> más 6 veces al día |



|                       |                                                                                                                                                                                                                                                                                                                                                                                                              |
|-----------------------|--------------------------------------------------------------------------------------------------------------------------------------------------------------------------------------------------------------------------------------------------------------------------------------------------------------------------------------------------------------------------------------------------------------|
| cafe descafeinado     | <input type="radio"/> Nunca o menos 1 vez al mes<br><input checked="" type="radio"/> 1 a 3 veces mes<br><input type="radio"/> 1 vez semana<br><input type="radio"/> 2 a 4 veces semana<br><input type="radio"/> 5 a 6 veces semana<br><input type="radio"/> 1 vez al día<br><input type="radio"/> 2 a 3 veces al día<br><input type="radio"/> 5 a 6 veces al día<br><input type="radio"/> más 6 veces al día |
| te o infusión         | <input type="radio"/> Nunca o menos 1 vez al mes<br><input type="radio"/> 1 a 3 veces mes<br><input type="radio"/> 1 vez semana<br><input type="radio"/> 2 a 4 veces semana<br><input type="radio"/> 5 a 6 veces semana<br><input checked="" type="radio"/> 1 vez al día<br><input type="radio"/> 2 a 3 veces al día<br><input type="radio"/> 5 a 6 veces al día<br><input type="radio"/> más 6 veces al día |
| sopa o puré verduras  | <input type="radio"/> Nunca o menos 1 vez al mes<br><input type="radio"/> 1 a 3 veces mes<br><input checked="" type="radio"/> 1 vez semana<br><input type="radio"/> 2 a 4 veces semana<br><input type="radio"/> 5 a 6 veces semana<br><input type="radio"/> 1 vez al día<br><input type="radio"/> 2 a 3 veces al día<br><input type="radio"/> 5 a 6 veces al día<br><input type="radio"/> más 6 veces al día |
| croquetas pollo jamón | <input type="radio"/> Nunca o menos 1 vez al mes<br><input type="radio"/> 1 a 3 veces mes<br><input checked="" type="radio"/> 1 vez semana<br><input type="radio"/> 2 a 4 veces semana<br><input type="radio"/> 5 a 6 veces semana<br><input type="radio"/> 1 vez al día<br><input type="radio"/> 2 a 3 veces al día<br><input type="radio"/> 5 a 6 veces al día<br><input type="radio"/> más 6 veces al día |
| croquetas pescado     | <input type="radio"/> Nunca o menos 1 vez al mes<br><input type="radio"/> 1 a 3 veces mes<br><input checked="" type="radio"/> 1 vez semana<br><input type="radio"/> 2 a 4 veces semana<br><input type="radio"/> 5 a 6 veces semana<br><input type="radio"/> 1 vez al día<br><input type="radio"/> 2 a 3 veces al día<br><input type="radio"/> 5 a 6 veces al día<br><input type="radio"/> más 6 veces al día |
| mayonesa              | <input checked="" type="radio"/> Nunca o menos 1 vez al mes<br><input type="radio"/> 1 a 3 veces mes<br><input type="radio"/> 1 vez semana<br><input type="radio"/> 2 a 4 veces semana<br><input type="radio"/> 5 a 6 veces semana<br><input type="radio"/> 1 vez al día<br><input type="radio"/> 2 a 3 veces al día<br><input type="radio"/> 5 a 6 veces al día<br><input type="radio"/> más 6 veces al día |

|                  |                                                                                                                                                                                                                                                                                                                                                                                                              |
|------------------|--------------------------------------------------------------------------------------------------------------------------------------------------------------------------------------------------------------------------------------------------------------------------------------------------------------------------------------------------------------------------------------------------------------|
| salsa tomate     | <input checked="" type="radio"/> Nunca o menos 1 vez al mes<br><input type="radio"/> 1 a 3 veces mes<br><input type="radio"/> 1 vez semana<br><input type="radio"/> 2 a 4 veces semana<br><input type="radio"/> 5 a 6 veces semana<br><input type="radio"/> 1 vez al día<br><input type="radio"/> 2 a 3 veces al día<br><input type="radio"/> 5 a 6 veces al día<br><input type="radio"/> más 6 veces al día |
| ketchup          | <input type="radio"/> Nunca o menos 1 vez al mes<br><input type="radio"/> 1 a 3 veces mes<br><input type="radio"/> 1 vez semana<br><input checked="" type="radio"/> 2 a 4 veces semana<br><input type="radio"/> 5 a 6 veces semana<br><input type="radio"/> 1 vez al día<br><input type="radio"/> 2 a 3 veces al día<br><input type="radio"/> 5 a 6 veces al día<br><input type="radio"/> más 6 veces al día |
| sal              | <input type="radio"/> Nunca o menos 1 vez al mes<br><input type="radio"/> 1 a 3 veces mes<br><input type="radio"/> 1 vez semana<br><input checked="" type="radio"/> 2 a 4 veces semana<br><input type="radio"/> 5 a 6 veces semana<br><input type="radio"/> 1 vez al día<br><input type="radio"/> 2 a 3 veces al día<br><input type="radio"/> 5 a 6 veces al día<br><input type="radio"/> más 6 veces al día |
| ajo              | <input type="radio"/> Nunca o menos 1 vez al mes<br><input type="radio"/> 1 a 3 veces mes<br><input type="radio"/> 1 vez semana<br><input checked="" type="radio"/> 2 a 4 veces semana<br><input type="radio"/> 5 a 6 veces semana<br><input type="radio"/> 1 vez al día<br><input type="radio"/> 2 a 3 veces al día<br><input type="radio"/> 5 a 6 veces al día<br><input type="radio"/> más 6 veces al día |
| mermelada o miel | <input checked="" type="radio"/> Nunca o menos 1 vez al mes<br><input type="radio"/> 1 a 3 veces mes<br><input type="radio"/> 1 vez semana<br><input type="radio"/> 2 a 4 veces semana<br><input type="radio"/> 5 a 6 veces semana<br><input type="radio"/> 1 vez al día<br><input type="radio"/> 2 a 3 veces al día<br><input type="radio"/> 5 a 6 veces al día<br><input type="radio"/> más 6 veces al día |
| azúcar           | <input type="radio"/> Nunca o menos 1 vez al mes<br><input type="radio"/> 1 a 3 veces mes<br><input type="radio"/> 1 vez semana<br><input checked="" type="radio"/> 2 a 4 veces semana<br><input type="radio"/> 5 a 6 veces semana<br><input type="radio"/> 1 vez al día<br><input type="radio"/> 2 a 3 veces al día<br><input type="radio"/> 5 a 6 veces al día<br><input type="radio"/> más 6 veces al día |

|                                       |                                                                                                                                                                                                                                                                                                                                                                                                                                                                                                                               |
|---------------------------------------|-------------------------------------------------------------------------------------------------------------------------------------------------------------------------------------------------------------------------------------------------------------------------------------------------------------------------------------------------------------------------------------------------------------------------------------------------------------------------------------------------------------------------------|
| Otro alimento                         |                                                                                                                                                                                                                                                                                                                                                                                                                                                                                                                               |
| suplementos vitamínicos               | <input checked="" type="radio"/> si<br><input type="radio"/> no                                                                                                                                                                                                                                                                                                                                                                                                                                                               |
| suplementos vitamínicos               | [*DATA REMOVED*]                                                                                                                                                                                                                                                                                                                                                                                                                                                                                                              |
| dieta previa                          | <input type="radio"/> si<br><input checked="" type="radio"/> no                                                                                                                                                                                                                                                                                                                                                                                                                                                               |
| motivo dieta                          | <input checked="" type="radio"/> no dieta<br><input type="radio"/> control peso<br><input type="radio"/> control colesterol<br><input type="radio"/> control diabetes<br><input type="radio"/> problemas estómago<br><input type="radio"/> problemas vesícula o hepáticos<br><input type="radio"/> HTA o cardiopatía<br><input type="radio"/> problemas renales<br><input type="radio"/> alergia alimentaria<br><input type="radio"/> ácido úrico elevado<br><input type="radio"/> vegetariana<br><input type="radio"/> otros |
| cambio alimentos año previo gestación | <input type="radio"/> si<br><input checked="" type="radio"/> no                                                                                                                                                                                                                                                                                                                                                                                                                                                               |
| cambio lácteos                        | <input type="radio"/> eliminado<br><input type="radio"/> disminuido<br><input checked="" type="radio"/> igual<br><input type="radio"/> aumentado<br><input type="radio"/> no sabe                                                                                                                                                                                                                                                                                                                                             |
| cambio huevos                         | <input type="radio"/> eliminado<br><input type="radio"/> disminuido<br><input checked="" type="radio"/> igual<br><input type="radio"/> aumentado<br><input type="radio"/> no sabe                                                                                                                                                                                                                                                                                                                                             |
| cambio carne                          | <input type="radio"/> eliminado<br><input type="radio"/> disminuido<br><input checked="" type="radio"/> igual<br><input type="radio"/> aumentado<br><input type="radio"/> no sabe                                                                                                                                                                                                                                                                                                                                             |
| cambio pescado                        | <input type="radio"/> eliminado<br><input type="radio"/> disminuido<br><input checked="" type="radio"/> igual<br><input type="radio"/> aumentado<br><input type="radio"/> no sabe                                                                                                                                                                                                                                                                                                                                             |
| cambio verduras                       | <input type="radio"/> eliminado<br><input type="radio"/> disminuido<br><input checked="" type="radio"/> igual<br><input type="radio"/> aumentado<br><input type="radio"/> no sabe                                                                                                                                                                                                                                                                                                                                             |

|                            |                                                                                                                                                                                                                        |
|----------------------------|------------------------------------------------------------------------------------------------------------------------------------------------------------------------------------------------------------------------|
| cambio legumbres           | <input type="radio"/> eliminado<br><input type="radio"/> disminuido<br><input checked="" type="radio"/> igual<br><input type="radio"/> aumentado<br><input type="radio"/> no sabe                                      |
| cambio fruta               | <input type="radio"/> eliminado<br><input type="radio"/> disminuido<br><input checked="" type="radio"/> igual<br><input type="radio"/> aumentado<br><input type="radio"/> no sabe                                      |
| cambio pan                 | <input type="radio"/> eliminado<br><input type="radio"/> disminuido<br><input checked="" type="radio"/> igual<br><input type="radio"/> aumentado<br><input type="radio"/> no sabe                                      |
| cambio aceite oliva        | <input type="radio"/> eliminado<br><input type="radio"/> disminuido<br><input checked="" type="radio"/> igual<br><input type="radio"/> aumentado<br><input type="radio"/> no sabe                                      |
| cambio mante o margarina   | <input type="radio"/> eliminado<br><input type="radio"/> disminuido<br><input checked="" type="radio"/> igual<br><input type="radio"/> aumentado<br><input type="radio"/> no sabe                                      |
| cambio azúcar y dulces     | <input type="radio"/> eliminado<br><input type="radio"/> disminuido<br><input checked="" type="radio"/> igual<br><input type="radio"/> aumentado<br><input type="radio"/> no sabe                                      |
| cambio bebidas alcohólicas | <input type="radio"/> eliminado<br><input type="radio"/> disminuido<br><input checked="" type="radio"/> igual<br><input type="radio"/> aumentado<br><input type="radio"/> no sabe                                      |
| frecuencia comidas fritas  | <input type="radio"/> a diario<br><input type="radio"/> 5 a 6 veces semana<br><input checked="" type="radio"/> 2 a 4 veces semana<br><input type="radio"/> 1 vez semana<br><input type="radio"/> menos de 1 vez semana |
| carne                      | <input type="radio"/> no como<br><input type="radio"/> cruda<br><input type="radio"/> poco hecha<br><input checked="" type="radio"/> hecha<br><input type="radio"/> muy hecha                                          |
| grasa visible carne        | <input type="radio"/> quita toda<br><input type="radio"/> quita mayoría<br><input checked="" type="radio"/> quita un poco<br><input type="radio"/> no quita nada                                                       |

|                                |                                                                                                                                                                                                                                                          |
|--------------------------------|----------------------------------------------------------------------------------------------------------------------------------------------------------------------------------------------------------------------------------------------------------|
| cocina carne                   | <input type="radio"/> a la plancha<br><input type="radio"/> a la parrilla<br><input checked="" type="radio"/> asada<br><input type="radio"/> frita<br><input type="radio"/> guisada                                                                      |
| tostado quemado carne          | <input type="radio"/> nunca<br><input type="radio"/> 1 vez mes<br><input type="radio"/> 2 a 3 veces mes<br><input checked="" type="radio"/> 1 vez semana<br><input type="radio"/> 2 a 3 semanas                                                          |
| tostado quemado pescado        | <input type="radio"/> nunca<br><input type="radio"/> 1 vez mes<br><input type="radio"/> 2 a 3 veces mes<br><input checked="" type="radio"/> 1 vez semana<br><input type="radio"/> 2 a 3 semanas                                                          |
| socarrat paella                | <input type="radio"/> nunca<br><input type="radio"/> 1 vez mes<br><input type="radio"/> 2 a 3 veces mes<br><input checked="" type="radio"/> 1 vez semana<br><input type="radio"/> 2 a 3 semanas                                                          |
| grasa o aceite cocinar         | <input type="radio"/> mantequilla<br><input type="radio"/> margarina<br><input checked="" type="radio"/> aceite oliva<br><input type="radio"/> aceite oliva virgen extra<br><input type="radio"/> aceite vegetal<br><input type="radio"/> mezcla aceites |
| grasa aceite aliñar            | <input type="radio"/> mantequilla<br><input type="radio"/> margarina<br><input checked="" type="radio"/> aceite oliva<br><input type="radio"/> aceite oliva virgen extra<br><input type="radio"/> aceite vegetal<br><input type="radio"/> mezcla aceites |
| grasa aceite freir             | <input type="radio"/> mantequilla<br><input type="radio"/> margarina<br><input checked="" type="radio"/> aceite oliva<br><input type="radio"/> aceite oliva virgen extra<br><input type="radio"/> aceite vegetal<br><input type="radio"/> mezcla aceites |
| Ejercicio cuestionario         | <input checked="" type="radio"/> si<br><input type="radio"/> no                                                                                                                                                                                          |
| horas de sueño incluido siesta | [*DATA REMOVED*]                                                                                                                                                                                                                                         |
| minutos siesta                 | [*DATA REMOVED*]                                                                                                                                                                                                                                         |
| horas televisión semana        | [*DATA REMOVED*]                                                                                                                                                                                                                                         |

|                                        |                                                                                                                                                                                                                                                                                                                                                                           |
|----------------------------------------|---------------------------------------------------------------------------------------------------------------------------------------------------------------------------------------------------------------------------------------------------------------------------------------------------------------------------------------------------------------------------|
| actividad trabajo                      | <input type="radio"/> casi siempre sentado<br><input type="radio"/> sentado 50 por cien<br><input type="radio"/> casi siempre de pie, quieto<br><input type="radio"/> casi siempre levantado caminando y llevando pocas cosas<br><input type="radio"/> casi siempre levantado, caminando y llevado muchas cosas<br><input checked="" type="radio"/> trabajo manual pesado |
| tiempo caminar o bici al día           | <input type="radio"/> casi nunca<br><input checked="" type="radio"/> menos 20min día<br><input type="radio"/> 20 a 40 min día<br><input type="radio"/> 40 a 60 min día<br><input type="radio"/> 1h o 1h y media día<br><input type="radio"/> más de 1h y media al día                                                                                                     |
| tiempo tareas casa al día              | <input type="radio"/> menos de 1h día<br><input type="radio"/> 1 a 2h día<br><input checked="" type="radio"/> 3 a 4h día<br><input type="radio"/> 5 a 6h día<br><input type="radio"/> 7 a 8h día<br><input type="radio"/> más de 8h día                                                                                                                                   |
| tiempo libre televisión ordenador leer | <input type="radio"/> menos 1h día<br><input type="radio"/> 1h día<br><input type="radio"/> 2h día<br><input checked="" type="radio"/> 3h día<br><input type="radio"/> 4h día<br><input type="radio"/> 5 a 6h día<br><input type="radio"/> mas 6h día                                                                                                                     |
| tiempo libre ejercicio o deporte       | <input type="radio"/> menos 1h semana<br><input type="radio"/> 1h semana<br><input type="radio"/> 2h semana<br><input type="radio"/> 3h semana<br><input checked="" type="radio"/> 4 a 5h semana<br><input type="radio"/> mas 5h semana                                                                                                                                   |
| como se considera                      | <input type="radio"/> sedentaria<br><input checked="" type="radio"/> poco activa<br><input type="radio"/> moderadamente activa<br><input type="radio"/> bastante activa<br><input type="radio"/> muy activa<br><input type="radio"/> no sabe                                                                                                                              |
| FUR                                    | [*DATA REMOVED*]                                                                                                                                                                                                                                                                                                                                                          |
| Semanas gestación 2T                   | _____                                                                                                                                                                                                                                                                                                                                                                     |
| Días gestación 2T                      | _____                                                                                                                                                                                                                                                                                                                                                                     |
| DBP 2T                                 | _____                                                                                                                                                                                                                                                                                                                                                                     |
| CC 2T                                  | _____                                                                                                                                                                                                                                                                                                                                                                     |

|                                                   |                                                                                                                                                                                                 |
|---------------------------------------------------|-------------------------------------------------------------------------------------------------------------------------------------------------------------------------------------------------|
| AC 2T                                             |                                                                                                                                                                                                 |
| LF 2T                                             |                                                                                                                                                                                                 |
| PFE 2T (Hadlock)                                  |                                                                                                                                                                                                 |
| Semanas gestación 3T                              | [*DATA REMOVED*]                                                                                                                                                                                |
| días 3T                                           | [*DATA REMOVED*]                                                                                                                                                                                |
| DBP 3T                                            | [*DATA REMOVED*]                                                                                                                                                                                |
| CC 3T                                             | [*DATA REMOVED*]                                                                                                                                                                                |
| AC 3T                                             | [*DATA REMOVED*]                                                                                                                                                                                |
| LF 3T                                             | [*DATA REMOVED*]                                                                                                                                                                                |
| PFE 3T (Hadlock)                                  | [*DATA REMOVED*]                                                                                                                                                                                |
| Semanas de gestación final                        | [*DATA REMOVED*]                                                                                                                                                                                |
| días gestación final                              | [*DATA REMOVED*]                                                                                                                                                                                |
| Localización placenta                             | <input checked="" type="radio"/> anterior<br><input type="radio"/> lateral derecha<br><input type="radio"/> lateral izquierda<br><input type="radio"/> posterior<br><input type="radio"/> fondo |
| Presentación longitudinal cefálica                | <input type="radio"/> no<br><input checked="" type="radio"/> si                                                                                                                                 |
| Dorso                                             | <input checked="" type="radio"/> izquierda anterior<br><input type="radio"/> izquierda posterior<br><input type="radio"/> derecha anterior<br><input type="radio"/> derecha posterior           |
| diámetro biparietal                               | [*DATA REMOVED*]                                                                                                                                                                                |
| Circunferencia craneal                            | [*DATA REMOVED*]                                                                                                                                                                                |
| Circunferencia abdominal                          | [*DATA REMOVED*]                                                                                                                                                                                |
| Longitud de femur                                 | [*DATA REMOVED*]                                                                                                                                                                                |
| tejido celular subcutáneo a nivel del muslo en mm | [*DATA REMOVED*]                                                                                                                                                                                |
| tejido celular subcutáneo en abdomen en mm        | [*DATA REMOVED*]                                                                                                                                                                                |

|                                               |                                                                                                                                                          |
|-----------------------------------------------|----------------------------------------------------------------------------------------------------------------------------------------------------------|
| Volumen del muslo en cm3                      | [*DATA REMOVED*]                                                                                                                                         |
| Peso fetal estimado según fórmula de Hadlock  | [*DATA REMOVED*]                                                                                                                                         |
| Percentil                                     | [*DATA REMOVED*]                                                                                                                                         |
| Peso fetal estimado según fórmula de Scioscia | _____                                                                                                                                                    |
| Peso fetal estimado según fórmula de LEE      | _____                                                                                                                                                    |
| Tipo de parto                                 | <input checked="" type="radio"/> eutocico<br><input type="radio"/> instrumentado/ventosa<br><input type="radio"/> cesarea                                |
| fecha de nacimiento                           | [*DATA REMOVED*]                                                                                                                                         |
| Días entre exploración y nacimiento           | [*DATA REMOVED*]                                                                                                                                         |
| Peso RN en g                                  | [*DATA REMOVED*]                                                                                                                                         |
| sexo                                          | <input type="radio"/> mujer<br><input checked="" type="radio"/> hombre                                                                                   |
| Apgar 1 minuto                                | [*DATA REMOVED*]                                                                                                                                         |
| Apgar 5 minutos                               | [*DATA REMOVED*]                                                                                                                                         |
| Apgar 10 minutos                              | _____                                                                                                                                                    |
| antecedente Covid durante gestación           | <input type="radio"/> Yes<br><input checked="" type="radio"/> No                                                                                         |
| Nivel de estudios                             | <input type="radio"/> ninguno<br><input checked="" type="radio"/> primarios<br><input type="radio"/> secundarios<br><input type="radio"/> universitarios |



## Base\_datos\_estimacion\_peso\_fetal

|                                       |                                                                                                                                                                                                                                                                                      |
|---------------------------------------|--------------------------------------------------------------------------------------------------------------------------------------------------------------------------------------------------------------------------------------------------------------------------------------|
| Número de identificación participante | 13                                                                                                                                                                                                                                                                                   |
| CODIGO PARTICIPANTE                   |                                                                                                                                                                                                                                                                                      |
| Edad                                  | [*DATA REMOVED*]                                                                                                                                                                                                                                                                     |
| Gestaciones                           | <input checked="" type="radio"/> 1<br><input type="radio"/> 2<br><input type="radio"/> 3<br><input type="radio"/> mas de 3                                                                                                                                                           |
| partos                                | <input checked="" type="radio"/> 0<br><input type="radio"/> 1<br><input type="radio"/> 2<br><input type="radio"/> 3<br><input type="radio"/> mas de 3                                                                                                                                |
| cesáreas                              | <input checked="" type="radio"/> 0<br><input type="radio"/> 1<br><input type="radio"/> 2<br><input type="radio"/> 3<br><input type="radio"/> mas de 3                                                                                                                                |
| Abortos                               | <input checked="" type="radio"/> 0<br><input type="radio"/> 1<br><input type="radio"/> 2<br><input type="radio"/> 3<br><input type="radio"/> mas de 3                                                                                                                                |
| Tipo de gestacion                     | <input checked="" type="radio"/> espontanea<br><input type="radio"/> IAC inseminación artificial conyuge<br><input type="radio"/> IAD inseminación artificial donante<br><input type="radio"/> FIV Fecundación in Vitro<br><input type="radio"/> Ovodon FIV con donación de ovocitos |
| peso previo a embarazo                | [*DATA REMOVED*]                                                                                                                                                                                                                                                                     |
| Ganancia ponderal embarazo            | [*DATA REMOVED*]                                                                                                                                                                                                                                                                     |
| Talla madre                           | [*DATA REMOVED*]                                                                                                                                                                                                                                                                     |
| IMC previo embarazo                   | 23.124670372023203                                                                                                                                                                                                                                                                   |
| Patología obstétrica                  | <input checked="" type="radio"/> no<br><input type="radio"/> si                                                                                                                                                                                                                      |
| Diabetes pregestacional               | <input checked="" type="radio"/> no<br><input type="radio"/> si                                                                                                                                                                                                                      |
| Diabetes gestacional                  | <input checked="" type="radio"/> no<br><input type="radio"/> si                                                                                                                                                                                                                      |

|                                            |                                                                                                                                                                                      |
|--------------------------------------------|--------------------------------------------------------------------------------------------------------------------------------------------------------------------------------------|
| Diabetes gestacional con insulina          | <input checked="" type="radio"/> no<br><input type="radio"/> si                                                                                                                      |
| Diabetes gestacional con dieta y ejercicio | <input checked="" type="radio"/> no<br><input type="radio"/> si                                                                                                                      |
| Percentil fetos previos                    | <input checked="" type="radio"/> Nada<br><input type="radio"/> percentil menor de 10<br><input type="radio"/> percentil entre 10 y 90<br><input type="radio"/> percentil mayor de 90 |
| Exfumadora                                 | <input checked="" type="radio"/> Nada<br><input type="radio"/> menos de 5 años<br><input type="radio"/> 5 a 10 años<br><input type="radio"/> mayor o igual a 10 años                 |
| Hábito tabáquico                           | <input checked="" type="radio"/> no<br><input type="radio"/> si                                                                                                                      |
| fumadora                                   | [*DATA REMOVED*]                                                                                                                                                                     |
| Consumo otros tóxicos                      | <input checked="" type="radio"/> no<br><input type="radio"/> si                                                                                                                      |
| Hb 1T                                      | [*DATA REMOVED*]                                                                                                                                                                     |
| Htc 1T                                     | [*DATA REMOVED*]                                                                                                                                                                     |
| Hb 2T                                      | [*DATA REMOVED*]                                                                                                                                                                     |
| HTC 2T                                     | [*DATA REMOVED*]                                                                                                                                                                     |
| Hb 3T                                      | [*DATA REMOVED*]                                                                                                                                                                     |
| HTC 3T                                     | [*DATA REMOVED*]                                                                                                                                                                     |
| Suplemento FE oral                         | <input type="radio"/> si<br><input checked="" type="radio"/> no                                                                                                                      |
| Suplemento fe iv                           | <input type="radio"/> si<br><input checked="" type="radio"/> no                                                                                                                      |
| Transfusión                                | <input checked="" type="radio"/> no<br><input type="radio"/> si                                                                                                                      |
| Solicitada Vit D                           | <input checked="" type="radio"/> no<br><input type="radio"/> si                                                                                                                      |
| Deficit vit D                              | <input checked="" type="radio"/> no<br><input type="radio"/> si                                                                                                                      |
| Suplemento vit D                           | <input type="radio"/> si<br><input checked="" type="radio"/> no                                                                                                                      |

|                       |                                                                                                                                                                                                                                                                                                                                                                                                              |
|-----------------------|--------------------------------------------------------------------------------------------------------------------------------------------------------------------------------------------------------------------------------------------------------------------------------------------------------------------------------------------------------------------------------------------------------------|
| Dieta, cuestionario   | <input checked="" type="radio"/> si<br><input type="radio"/> no                                                                                                                                                                                                                                                                                                                                              |
| Leche entera          | <input checked="" type="radio"/> Nunca o menos 1 vez al mes<br><input type="radio"/> 1 a 3 veces mes<br><input type="radio"/> 1 vez semana<br><input type="radio"/> 2 a 4 veces semana<br><input type="radio"/> 5 a 6 veces semana<br><input type="radio"/> 1 vez al día<br><input type="radio"/> 2 a 3 veces al día<br><input type="radio"/> 5 a 6 veces al día<br><input type="radio"/> más 6 veces al día |
| Leche semidesnatada   | <input checked="" type="radio"/> Nunca o menos 1 vez al mes<br><input type="radio"/> 1 a 3 veces mes<br><input type="radio"/> 1 vez semana<br><input type="radio"/> 2 a 4 veces semana<br><input type="radio"/> 5 a 6 veces semana<br><input type="radio"/> 1 vez al día<br><input type="radio"/> 2 a 3 veces al día<br><input type="radio"/> 5 a 6 veces al día<br><input type="radio"/> mas 6 veces al día |
| Leche desnatada       | <input type="radio"/> Nunca o menos 1 vez al mes<br><input type="radio"/> 1 a 3 veces mes<br><input type="radio"/> 1 vez semana<br><input type="radio"/> 2 a 4 veces semana<br><input type="radio"/> 5 a 6 veces semana<br><input type="radio"/> 1 vez al día<br><input checked="" type="radio"/> 2 a 3 veces al día<br><input type="radio"/> 5 a 6 veces al día<br><input type="radio"/> más 6 veces al día |
| Leche condensada      | <input checked="" type="radio"/> Nunca o menos 1 vez al mes<br><input type="radio"/> 1 a 3 veces mes<br><input type="radio"/> 1 vez semana<br><input type="radio"/> 2 a 4 veces semana<br><input type="radio"/> 5 a 6 veces semana<br><input type="radio"/> 1 vez al día<br><input type="radio"/> 2 a 3 veces al día<br><input type="radio"/> 5 a 6 veces al día<br><input type="radio"/> más 6 veces al día |
| nata o crema de leche | <input checked="" type="radio"/> Nunca o menos 1 vez al mes<br><input type="radio"/> 1 a 3 veces mes<br><input type="radio"/> 1 vez semana<br><input type="radio"/> 2 a 4 veces semana<br><input type="radio"/> 5 a 6 veces semana<br><input type="radio"/> 1 vez al día<br><input type="radio"/> 2 a 3 veces al día<br><input type="radio"/> 5 a 6 veces al día<br><input type="radio"/> más 6 veces al día |

---

Yogurt Entero

- ☐ Nunca o menos 1 vez al mes  
☐ 1 a 3 veces mes  
☐ 1 vez semana  
☐ 2 a 4 veces semana  
☐ 5 a 6 veces semana  
☒ 1 vez al día  
☐ 2 a 3 veces al día  
☐ 5 a 6 veces al día  
☐ más 6 veces al día

---

Yogurt desnatado

- ☒ Nunca o menos 1 vez al mes  
☐ 1 a 3 veces mes  
☐ 1 vez semana  
☐ 2 a 4 veces semana  
☐ 5 a 6 veces semana  
☐ 1 vez al día  
☐ 2 a 3 veces al día  
☐ 5 a 6 veces al día  
☐ más 6 veces al día

---

100g requesón o queso blando o queso fresco

- ☐ Nunca o menos 1 vez al mes  
☐ 1 a 3 veces mes  
☐ 1 vez semana  
☒ 2 a 4 veces semana  
☐ 5 a 6 veces semana  
☐ 1 vez al día  
☐ 2 a 3 veces al día  
☐ 5 a 6 veces al día  
☐ más 6 veces al día

---

queso curado o semicurado o cremoso

- ☐ Nunca o menos 1 vez al mes  
☐ 1 a 3 veces mes  
☐ 1 vez semana  
☒ 2 a 4 veces semana  
☐ 5 a 6 veces semana  
☐ 1 vez al día  
☐ 2 a 3 veces al día  
☐ 5 a 6 veces al día  
☐ más 6 veces al día

---

natillas flan pudding

- ☒ Nunca o menos 1 vez al mes  
☐ 1 a 3 veces mes  
☐ 1 vez semana  
☐ 2 a 4 veces semana  
☐ 5 a 6 veces semana  
☐ 1 vez al día  
☐ 2 a 3 veces al día  
☐ 5 a 6 veces al día  
☐ más 6 veces al día

---

Helado

- ☐ Nunca o menos 1 vez al mes  
☐ 1 a 3 veces mes  
☒ 1 vez semana  
☐ 2 a 4 veces semana  
☐ 5 a 6 veces semana  
☐ 1 vez al día  
☐ 2 a 3 veces al día  
☐ 5 a 6 veces al día  
☐ más 6 veces al día

|                                      |                                                                                                                                                                                                                                                                                                                                                                                                              |
|--------------------------------------|--------------------------------------------------------------------------------------------------------------------------------------------------------------------------------------------------------------------------------------------------------------------------------------------------------------------------------------------------------------------------------------------------------------|
| huevo                                | <input type="radio"/> Nunca o menos 1 vez al mes<br><input type="radio"/> 1 a 3 veces mes<br><input type="radio"/> 1 vez semana<br><input checked="" type="radio"/> 2 a 4 veces semana<br><input type="radio"/> 5 a 6 veces semana<br><input type="radio"/> 1 vez al día<br><input type="radio"/> 2 a 3 veces al día<br><input type="radio"/> 5 a 6 veces al día<br><input type="radio"/> más 6 veces al día |
| Pollo con piel                       | <input checked="" type="radio"/> Nunca o menos 1 vez al mes<br><input type="radio"/> 1 a 3 veces mes<br><input type="radio"/> 1 vez semana<br><input type="radio"/> 2 a 4 veces semana<br><input type="radio"/> 5 a 6 veces semana<br><input type="radio"/> 1 vez al día<br><input type="radio"/> 2 a 3 veces al día<br><input type="radio"/> 5 a 6 veces al día<br><input type="radio"/> más 6 veces al día |
| pollo sin piel                       | <input type="radio"/> Nunca o menos 1 vez al mes<br><input type="radio"/> 1 a 3 veces mes<br><input type="radio"/> 1 vez semana<br><input checked="" type="radio"/> 2 a 4 veces semana<br><input type="radio"/> 5 a 6 veces semana<br><input type="radio"/> 1 vez al día<br><input type="radio"/> 2 a 3 veces al día<br><input type="radio"/> 5 a 6 veces al día<br><input type="radio"/> más 6 veces al día |
| Ternera o cerdo o cordero            | <input type="radio"/> Nunca o menos 1 vez al mes<br><input type="radio"/> 1 a 3 veces mes<br><input checked="" type="radio"/> 1 vez semana<br><input type="radio"/> 2 a 4 veces semana<br><input type="radio"/> 5 a 6 veces semana<br><input type="radio"/> 1 vez al día<br><input type="radio"/> 2 a 3 veces al día<br><input type="radio"/> 5 a 6 veces al día<br><input type="radio"/> más 6 veces al día |
| carne caza: Conejo o codorniz o pato | <input checked="" type="radio"/> Nunca o menos 1 vez al mes<br><input type="radio"/> 1 a 3 veces mes<br><input type="radio"/> 1 vez semana<br><input type="radio"/> 2 a 4 veces semana<br><input type="radio"/> 5 a 6 veces semana<br><input type="radio"/> 1 vez al día<br><input type="radio"/> 2 a 3 veces al día<br><input type="radio"/> 5 a 6 veces al día<br><input type="radio"/> más 6 veces al día |
| Hígado de ternera o cerdo o pollo    | <input checked="" type="radio"/> Nunca o menos 1 vez al mes<br><input type="radio"/> 1 a 3 veces mes<br><input type="radio"/> 1 vez semana<br><input type="radio"/> 2 a 4 veces semana<br><input type="radio"/> 5 a 6 veces semana<br><input type="radio"/> 1 vez al día<br><input type="radio"/> 2 a 3 veces al día<br><input type="radio"/> 5 a 6 veces al día<br><input type="radio"/> más 6 veces al día |

|                     |                                                                                                                                                                                                                                                                                                                                                                                                              |
|---------------------|--------------------------------------------------------------------------------------------------------------------------------------------------------------------------------------------------------------------------------------------------------------------------------------------------------------------------------------------------------------------------------------------------------------|
| Vísceras            | <input checked="" type="radio"/> Nunca o menos 1 vez al mes<br><input type="radio"/> 1 a 3 veces mes<br><input type="radio"/> 1 vez semana<br><input type="radio"/> 2 a 4 veces semana<br><input type="radio"/> 5 a 6 veces semana<br><input type="radio"/> 1 vez al día<br><input type="radio"/> 2 a 3 veces al día<br><input type="radio"/> 5 a 6 veces al día<br><input type="radio"/> más 6 veces al día |
| Embutido            | <input checked="" type="radio"/> Nunca o menos 1 vez al mes<br><input type="radio"/> 1 a 3 veces mes<br><input type="radio"/> 1 vez semana<br><input type="radio"/> 2 a 4 veces semana<br><input type="radio"/> 5 a 6 veces semana<br><input type="radio"/> 1 vez al día<br><input type="radio"/> 2 a 3 veces al día<br><input type="radio"/> 5 a 6 veces al día<br><input type="radio"/> más 6 veces al día |
| Salchicha o similar | <input checked="" type="radio"/> Nunca o menos 1 vez al mes<br><input type="radio"/> 1 a 3 veces mes<br><input type="radio"/> 1 vez semana<br><input type="radio"/> 2 a 4 veces semana<br><input type="radio"/> 5 a 6 veces semana<br><input type="radio"/> 1 vez al día<br><input type="radio"/> 2 a 3 veces al día<br><input type="radio"/> 5 a 6 veces al día<br><input type="radio"/> más 6 veces al día |
| Pate o foiegras     | <input checked="" type="radio"/> Nunca o menos 1 vez al mes<br><input type="radio"/> 1 a 3 veces mes<br><input type="radio"/> 1 vez semana<br><input type="radio"/> 2 a 4 veces semana<br><input type="radio"/> 5 a 6 veces semana<br><input type="radio"/> 1 vez al día<br><input type="radio"/> 2 a 3 veces al día<br><input type="radio"/> 5 a 6 veces al día<br><input type="radio"/> más 6 veces al día |
| Hamburguesa         | <input type="radio"/> Nunca o menos 1 vez al mes<br><input checked="" type="radio"/> 1 a 3 veces mes<br><input type="radio"/> 1 vez semana<br><input type="radio"/> 2 a 4 veces semana<br><input type="radio"/> 5 a 6 veces semana<br><input type="radio"/> 1 vez al día<br><input type="radio"/> 2 a 3 veces al día<br><input type="radio"/> 5 a 6 veces al día<br><input type="radio"/> más 6 veces al día |
| tocino o bacon      | <input type="radio"/> Nunca o menos 1 vez al mes<br><input checked="" type="radio"/> 1 a 3 veces mes<br><input type="radio"/> 1 vez semana<br><input type="radio"/> 2 a 4 veces semana<br><input type="radio"/> 5 a 6 veces semana<br><input type="radio"/> 1 vez al día<br><input type="radio"/> 2 a 3 veces al día<br><input type="radio"/> 5 a 6 veces al día<br><input type="radio"/> más 6 veces al día |

|                        |                                                                                                                                                                                                                                                                                                                                                                                                              |
|------------------------|--------------------------------------------------------------------------------------------------------------------------------------------------------------------------------------------------------------------------------------------------------------------------------------------------------------------------------------------------------------------------------------------------------------|
| Pescado frito          | <input checked="" type="radio"/> Nunca o menos 1 vez al mes<br><input type="radio"/> 1 a 3 veces mes<br><input type="radio"/> 1 vez semana<br><input type="radio"/> 2 a 4 veces semana<br><input type="radio"/> 5 a 6 veces semana<br><input type="radio"/> 1 vez al día<br><input type="radio"/> 2 a 3 veces al día<br><input type="radio"/> 5 a 6 veces al día<br><input type="radio"/> más 6 veces al día |
| pescado hervido blanco | <input checked="" type="radio"/> Nunca o menos 1 vez al mes<br><input type="radio"/> 1 a 3 veces mes<br><input type="radio"/> 1 vez semana<br><input type="radio"/> 2 a 4 veces semana<br><input type="radio"/> 5 a 6 veces semana<br><input type="radio"/> 1 vez al día<br><input type="radio"/> 2 a 3 veces al día<br><input type="radio"/> 5 a 6 veces al día<br><input type="radio"/> más 6 veces al día |
| pescado hervido azul   | <input type="radio"/> Nunca o menos 1 vez al mes<br><input type="radio"/> 1 a 3 veces mes<br><input type="radio"/> 1 vez semana<br><input checked="" type="radio"/> 2 a 4 veces semana<br><input type="radio"/> 5 a 6 veces semana<br><input type="radio"/> 1 vez al día<br><input type="radio"/> 2 a 3 veces al día<br><input type="radio"/> 5 a 6 veces al día<br><input type="radio"/> más 6 veces al día |
| otros pescado azul     | <input checked="" type="radio"/> Nunca o menos 1 vez al mes<br><input type="radio"/> 1 a 3 veces mes<br><input type="radio"/> 1 vez semana<br><input type="radio"/> 2 a 4 veces semana<br><input type="radio"/> 5 a 6 veces semana<br><input type="radio"/> 1 vez al día<br><input type="radio"/> 2 a 3 veces al día<br><input type="radio"/> 5 a 6 veces al día<br><input type="radio"/> más 6 veces al día |
| atun conserva          | <input type="radio"/> Nunca o menos 1 vez al mes<br><input type="radio"/> 1 a 3 veces mes<br><input type="radio"/> 1 vez semana<br><input checked="" type="radio"/> 2 a 4 veces semana<br><input type="radio"/> 5 a 6 veces semana<br><input type="radio"/> 1 vez al día<br><input type="radio"/> 2 a 3 veces al día<br><input type="radio"/> 5 a 6 veces al día<br><input type="radio"/> más 6 veces al día |
| sardina conserva       | <input checked="" type="radio"/> Nunca o menos 1 vez al mes<br><input type="radio"/> 1 a 3 veces mes<br><input type="radio"/> 1 vez semana<br><input type="radio"/> 2 a 4 veces semana<br><input type="radio"/> 5 a 6 veces semana<br><input type="radio"/> 1 vez al día<br><input type="radio"/> 2 a 3 veces al día<br><input type="radio"/> 5 a 6 veces al día<br><input type="radio"/> más 6 veces al día |

|                                         |                                                                                                                                                                                                                                                                                                                                                                                                              |
|-----------------------------------------|--------------------------------------------------------------------------------------------------------------------------------------------------------------------------------------------------------------------------------------------------------------------------------------------------------------------------------------------------------------------------------------------------------------|
| pescado ahumado                         | <input checked="" type="radio"/> Nunca o menos 1 vez al mes<br><input type="radio"/> 1 a 3 veces mes<br><input type="radio"/> 1 vez semana<br><input type="radio"/> 2 a 4 veces semana<br><input type="radio"/> 5 a 6 veces semana<br><input type="radio"/> 1 vez al día<br><input type="radio"/> 2 a 3 veces al día<br><input type="radio"/> 5 a 6 veces al día<br><input type="radio"/> más 6 veces al día |
| almejas o mejillones o ostras unos 100g | <input type="radio"/> Nunca o menos 1 vez al mes<br><input type="radio"/> 1 a 3 veces mes<br><input checked="" type="radio"/> 1 vez semana<br><input type="radio"/> 2 a 4 veces semana<br><input type="radio"/> 5 a 6 veces semana<br><input type="radio"/> 1 vez al día<br><input type="radio"/> 2 a 3 veces al día<br><input type="radio"/> 5 a 6 veces al día<br><input type="radio"/> más 6 veces al día |
| calamar o chipiron o sepia unos 100g    | <input checked="" type="radio"/> Nunca o menos 1 vez al mes<br><input type="radio"/> 1 a 3 veces mes<br><input type="radio"/> 1 vez semana<br><input type="radio"/> 2 a 4 veces semana<br><input type="radio"/> 5 a 6 veces semana<br><input type="radio"/> 1 vez al día<br><input type="radio"/> 2 a 3 veces al día<br><input type="radio"/> 5 a 6 veces al día<br><input type="radio"/> más 6 veces al día |
| marisco unos 100g                       | <input type="radio"/> Nunca o menos 1 vez al mes<br><input checked="" type="radio"/> 1 a 3 veces mes<br><input type="radio"/> 1 vez semana<br><input type="radio"/> 2 a 4 veces semana<br><input type="radio"/> 5 a 6 veces semana<br><input type="radio"/> 1 vez al día<br><input type="radio"/> 2 a 3 veces al día<br><input type="radio"/> 5 a 6 veces al día<br><input type="radio"/> más 6 veces al día |
| Espinacas o acelgas cocinadas           | <input checked="" type="radio"/> Nunca o menos 1 vez al mes<br><input type="radio"/> 1 a 3 veces mes<br><input type="radio"/> 1 vez semana<br><input type="radio"/> 2 a 4 veces semana<br><input type="radio"/> 5 a 6 veces semana<br><input type="radio"/> 1 vez al día<br><input type="radio"/> 2 a 3 veces al día<br><input type="radio"/> 5 a 6 veces al día<br><input type="radio"/> más 6 veces al día |
| Col o coliflor o brocoli cocinado       | <input checked="" type="radio"/> Nunca o menos 1 vez al mes<br><input type="radio"/> 1 a 3 veces mes<br><input type="radio"/> 1 vez semana<br><input type="radio"/> 2 a 4 veces semana<br><input type="radio"/> 5 a 6 veces semana<br><input type="radio"/> 1 vez al día<br><input type="radio"/> 2 a 3 veces al día<br><input type="radio"/> 5 a 6 veces al día<br><input type="radio"/> más 6 veces al día |



|                                |                                                                                                                                                                                                                                                                                                                                                                                                              |
|--------------------------------|--------------------------------------------------------------------------------------------------------------------------------------------------------------------------------------------------------------------------------------------------------------------------------------------------------------------------------------------------------------------------------------------------------------|
| Lechuga o endivia o escarola   | <input checked="" type="radio"/> Nunca o menos 1 vez al mes<br><input type="radio"/> 1 a 3 veces mes<br><input type="radio"/> 1 vez semana<br><input type="radio"/> 2 a 4 veces semana<br><input type="radio"/> 5 a 6 veces semana<br><input type="radio"/> 1 vez al día<br><input type="radio"/> 2 a 3 veces al día<br><input type="radio"/> 5 a 6 veces al día<br><input type="radio"/> más 6 veces al día |
| tomate ensalada                | <input type="radio"/> Nunca o menos 1 vez al mes<br><input type="radio"/> 1 a 3 veces mes<br><input type="radio"/> 1 vez semana<br><input type="radio"/> 2 a 4 veces semana<br><input checked="" type="radio"/> 5 a 6 veces semana<br><input type="radio"/> 1 vez al día<br><input type="radio"/> 2 a 3 veces al día<br><input type="radio"/> 5 a 6 veces al día<br><input type="radio"/> más 6 veces al día |
| cebolla                        | <input type="radio"/> Nunca o menos 1 vez al mes<br><input type="radio"/> 1 a 3 veces mes<br><input type="radio"/> 1 vez semana<br><input checked="" type="radio"/> 2 a 4 veces semana<br><input type="radio"/> 5 a 6 veces semana<br><input type="radio"/> 1 vez al día<br><input type="radio"/> 2 a 3 veces al día<br><input type="radio"/> 5 a 6 veces al día<br><input type="radio"/> más 6 veces al día |
| Zanahoria o calabaza           | <input checked="" type="radio"/> Nunca o menos 1 vez al mes<br><input type="radio"/> 1 a 3 veces mes<br><input type="radio"/> 1 vez semana<br><input type="radio"/> 2 a 4 veces semana<br><input type="radio"/> 5 a 6 veces semana<br><input type="radio"/> 1 vez al día<br><input type="radio"/> 2 a 3 veces al día<br><input type="radio"/> 5 a 6 veces al día<br><input type="radio"/> más 6 veces al día |
| Judías verdes                  | <input checked="" type="radio"/> Nunca o menos 1 vez al mes<br><input type="radio"/> 1 a 3 veces mes<br><input type="radio"/> 1 vez semana<br><input type="radio"/> 2 a 4 veces semana<br><input type="radio"/> 5 a 6 veces semana<br><input type="radio"/> 1 vez al día<br><input type="radio"/> 2 a 3 veces al día<br><input type="radio"/> 5 a 6 veces al día<br><input type="radio"/> más 6 veces al día |
| Berenjena o calabacin o pepino | <input type="radio"/> Nunca o menos 1 vez al mes<br><input type="radio"/> 1 a 3 veces mes<br><input checked="" type="radio"/> 1 vez semana<br><input type="radio"/> 2 a 4 veces semana<br><input type="radio"/> 5 a 6 veces semana<br><input type="radio"/> 1 vez al día<br><input type="radio"/> 2 a 3 veces al día<br><input type="radio"/> 5 a 6 veces al día<br><input type="radio"/> más 6 veces al día |

|                       |                                                                                                                                                                                                                                                                                                                                                                                                              |
|-----------------------|--------------------------------------------------------------------------------------------------------------------------------------------------------------------------------------------------------------------------------------------------------------------------------------------------------------------------------------------------------------------------------------------------------------|
| pimiento              | <input checked="" type="radio"/> Nunca o menos 1 vez al mes<br><input type="radio"/> 1 a 3 veces mes<br><input type="radio"/> 1 vez semana<br><input type="radio"/> 2 a 4 veces semana<br><input type="radio"/> 5 a 6 veces semana<br><input type="radio"/> 1 vez al día<br><input type="radio"/> 2 a 3 veces al día<br><input type="radio"/> 5 a 6 veces al día<br><input type="radio"/> más 6 veces al día |
| alcachofa             | <input checked="" type="radio"/> Nunca o menos 1 vez al mes<br><input type="radio"/> 1 a 3 veces mes<br><input type="radio"/> 1 vez semana<br><input type="radio"/> 2 a 4 veces semana<br><input type="radio"/> 5 a 6 veces semana<br><input type="radio"/> 1 vez al día<br><input type="radio"/> 2 a 3 veces al día<br><input type="radio"/> 5 a 6 veces al día<br><input type="radio"/> más 6 veces al día |
| espárragos            | <input checked="" type="radio"/> Nunca o menos 1 vez al mes<br><input type="radio"/> 1 a 3 veces mes<br><input type="radio"/> 1 vez semana<br><input type="radio"/> 2 a 4 veces semana<br><input type="radio"/> 5 a 6 veces semana<br><input type="radio"/> 1 vez al día<br><input type="radio"/> 2 a 3 veces al día<br><input type="radio"/> 5 a 6 veces al día<br><input type="radio"/> más 6 veces al día |
| maíz hervido          | <input checked="" type="radio"/> Nunca o menos 1 vez al mes<br><input type="radio"/> 1 a 3 veces mes<br><input type="radio"/> 1 vez semana<br><input type="radio"/> 2 a 4 veces semana<br><input type="radio"/> 5 a 6 veces semana<br><input type="radio"/> 1 vez al día<br><input type="radio"/> 2 a 3 veces al día<br><input type="radio"/> 5 a 6 veces al día<br><input type="radio"/> más 6 veces al día |
| legumbres             | <input type="radio"/> Nunca o menos 1 vez al mes<br><input type="radio"/> 1 a 3 veces mes<br><input type="radio"/> 1 vez semana<br><input checked="" type="radio"/> 2 a 4 veces semana<br><input type="radio"/> 5 a 6 veces semana<br><input type="radio"/> 1 vez al día<br><input type="radio"/> 2 a 3 veces al día<br><input type="radio"/> 5 a 6 veces al día<br><input type="radio"/> más 6 veces al día |
| naranjas o mandarinas | <input type="radio"/> Nunca o menos 1 vez al mes<br><input type="radio"/> 1 a 3 veces mes<br><input type="radio"/> 1 vez semana<br><input type="radio"/> 2 a 4 veces semana<br><input type="radio"/> 5 a 6 veces semana<br><input checked="" type="radio"/> 1 vez al día<br><input type="radio"/> 2 a 3 veces al día<br><input type="radio"/> 5 a 6 veces al día<br><input type="radio"/> más 6 veces al día |

|                       |                                                                                                                                                                                                                                                                                                                                                                                                              |
|-----------------------|--------------------------------------------------------------------------------------------------------------------------------------------------------------------------------------------------------------------------------------------------------------------------------------------------------------------------------------------------------------------------------------------------------------|
| zum natural fruta     | <input checked="" type="radio"/> Nunca o menos 1 vez al mes<br><input type="radio"/> 1 a 3 veces mes<br><input type="radio"/> 1 vez semana<br><input type="radio"/> 2 a 4 veces semana<br><input type="radio"/> 5 a 6 veces semana<br><input type="radio"/> 1 vez al día<br><input type="radio"/> 2 a 3 veces al día<br><input type="radio"/> 5 a 6 veces al día<br><input type="radio"/> más 6 veces al día |
| platano               | <input type="radio"/> Nunca o menos 1 vez al mes<br><input type="radio"/> 1 a 3 veces mes<br><input type="radio"/> 1 vez semana<br><input type="radio"/> 2 a 4 veces semana<br><input type="radio"/> 5 a 6 veces semana<br><input checked="" type="radio"/> 1 vez al día<br><input type="radio"/> 2 a 3 veces al día<br><input type="radio"/> 5 a 6 veces al día<br><input type="radio"/> más 6 veces al día |
| manzana o pera        | <input type="radio"/> Nunca o menos 1 vez al mes<br><input type="radio"/> 1 a 3 veces mes<br><input type="radio"/> 1 vez semana<br><input type="radio"/> 2 a 4 veces semana<br><input type="radio"/> 5 a 6 veces semana<br><input checked="" type="radio"/> 1 vez al día<br><input type="radio"/> 2 a 3 veces al día<br><input type="radio"/> 5 a 6 veces al día<br><input type="radio"/> más 6 veces al día |
| melocotón o nectarina | <input checked="" type="radio"/> Nunca o menos 1 vez al mes<br><input type="radio"/> 1 a 3 veces mes<br><input type="radio"/> 1 vez semana<br><input type="radio"/> 2 a 4 veces semana<br><input type="radio"/> 5 a 6 veces semana<br><input type="radio"/> 1 vez al día<br><input type="radio"/> 2 a 3 veces al día<br><input type="radio"/> 5 a 6 veces al día<br><input type="radio"/> más 6 veces al día |
| sandia o melon        | <input type="radio"/> Nunca o menos 1 vez al mes<br><input type="radio"/> 1 a 3 veces mes<br><input type="radio"/> 1 vez semana<br><input type="radio"/> 2 a 4 veces semana<br><input type="radio"/> 5 a 6 veces semana<br><input checked="" type="radio"/> 1 vez al día<br><input type="radio"/> 2 a 3 veces al día<br><input type="radio"/> 5 a 6 veces al día<br><input type="radio"/> más 6 veces al día |
| uva                   | <input type="radio"/> Nunca o menos 1 vez al mes<br><input type="radio"/> 1 a 3 veces mes<br><input type="radio"/> 1 vez semana<br><input type="radio"/> 2 a 4 veces semana<br><input type="radio"/> 5 a 6 veces semana<br><input checked="" type="radio"/> 1 vez al día<br><input type="radio"/> 2 a 3 veces al día<br><input type="radio"/> 5 a 6 veces al día<br><input type="radio"/> más 6 veces al día |

---

bruna o ciruela

- ☐ Nunca o menos 1 vez al mes  
☐ 1 a 3 veces mes  
☐ 1 vez semana  
☐ 2 a 4 veces semana  
☐ 5 a 6 veces semana  
☒ 1 vez al día  
☐ 2 a 3 veces al día  
☐ 5 a 6 veces al día  
☐ más 6 veces al día

---

kiwi

- ☐ Nunca o menos 1 vez al mes  
☐ 1 a 3 veces mes  
☐ 1 vez semana  
☐ 2 a 4 veces semana  
☐ 5 a 6 veces semana  
☒ 1 vez al día  
☐ 2 a 3 veces al día  
☐ 5 a 6 veces al día  
☐ más 6 veces al día

---

aceituna

- ☐ Nunca o menos 1 vez al mes  
☐ 1 a 3 veces mes  
☐ 1 vez semana  
☐ 2 a 4 veces semana  
☒ 5 a 6 veces semana  
☐ 1 vez al día  
☐ 2 a 3 veces al día  
☐ 5 a 6 veces al día  
☐ más 6 veces al día

---

frutos secos

- ☐ Nunca o menos 1 vez al mes  
☐ 1 a 3 veces mes  
☐ 1 vez semana  
☒ 2 a 4 veces semana  
☐ 5 a 6 veces semana  
☐ 1 vez al día  
☐ 2 a 3 veces al día  
☐ 5 a 6 veces al día  
☐ más 6 veces al día

---

pan blanco

- ☐ Nunca o menos 1 vez al mes  
☐ 1 a 3 veces mes  
☐ 1 vez semana  
☒ 2 a 4 veces semana  
☐ 5 a 6 veces semana  
☐ 1 vez al día  
☐ 2 a 3 veces al día  
☐ 5 a 6 veces al día  
☐ más 6 veces al día

---

pan integral

- ☐ Nunca o menos 1 vez al mes  
☐ 1 a 3 veces mes  
☐ 1 vez semana  
☒ 2 a 4 veces semana  
☐ 5 a 6 veces semana  
☐ 1 vez al día  
☐ 2 a 3 veces al día  
☐ 5 a 6 veces al día  
☐ más 6 veces al día

---

|                   |                                                                                                                                                                                                                                                                                                                                                                                                              |
|-------------------|--------------------------------------------------------------------------------------------------------------------------------------------------------------------------------------------------------------------------------------------------------------------------------------------------------------------------------------------------------------------------------------------------------------|
| cereales desayuno | <input checked="" type="radio"/> Nunca o menos 1 vez al mes<br><input type="radio"/> 1 a 3 veces mes<br><input type="radio"/> 1 vez semana<br><input type="radio"/> 2 a 4 veces semana<br><input type="radio"/> 5 a 6 veces semana<br><input type="radio"/> 1 vez al día<br><input type="radio"/> 2 a 3 veces al día<br><input type="radio"/> 5 a 6 veces al día<br><input type="radio"/> más 6 veces al día |
|-------------------|--------------------------------------------------------------------------------------------------------------------------------------------------------------------------------------------------------------------------------------------------------------------------------------------------------------------------------------------------------------------------------------------------------------|

---

|                |                                                                                                                                                                                                                                                                                                                                                                                                              |
|----------------|--------------------------------------------------------------------------------------------------------------------------------------------------------------------------------------------------------------------------------------------------------------------------------------------------------------------------------------------------------------------------------------------------------------|
| patatas fritas | <input checked="" type="radio"/> Nunca o menos 1 vez al mes<br><input type="radio"/> 1 a 3 veces mes<br><input type="radio"/> 1 vez semana<br><input type="radio"/> 2 a 4 veces semana<br><input type="radio"/> 5 a 6 veces semana<br><input type="radio"/> 1 vez al día<br><input type="radio"/> 2 a 3 veces al día<br><input type="radio"/> 5 a 6 veces al día<br><input type="radio"/> más 6 veces al día |
|----------------|--------------------------------------------------------------------------------------------------------------------------------------------------------------------------------------------------------------------------------------------------------------------------------------------------------------------------------------------------------------------------------------------------------------|

---

|                          |                                                                                                                                                                                                                                                                                                                                                                                                              |
|--------------------------|--------------------------------------------------------------------------------------------------------------------------------------------------------------------------------------------------------------------------------------------------------------------------------------------------------------------------------------------------------------------------------------------------------------|
| patatas cocidas o asadas | <input type="radio"/> Nunca o menos 1 vez al mes<br><input type="radio"/> 1 a 3 veces mes<br><input type="radio"/> 1 vez semana<br><input checked="" type="radio"/> 2 a 4 veces semana<br><input type="radio"/> 5 a 6 veces semana<br><input type="radio"/> 1 vez al día<br><input type="radio"/> 2 a 3 veces al día<br><input type="radio"/> 5 a 6 veces al día<br><input type="radio"/> más 6 veces al día |
|--------------------------|--------------------------------------------------------------------------------------------------------------------------------------------------------------------------------------------------------------------------------------------------------------------------------------------------------------------------------------------------------------------------------------------------------------|

---

|             |                                                                                                                                                                                                                                                                                                                                                                                                              |
|-------------|--------------------------------------------------------------------------------------------------------------------------------------------------------------------------------------------------------------------------------------------------------------------------------------------------------------------------------------------------------------------------------------------------------------|
| bolsa papas | <input checked="" type="radio"/> Nunca o menos 1 vez al mes<br><input type="radio"/> 1 a 3 veces mes<br><input type="radio"/> 1 vez semana<br><input type="radio"/> 2 a 4 veces semana<br><input type="radio"/> 5 a 6 veces semana<br><input type="radio"/> 1 vez al día<br><input type="radio"/> 2 a 3 veces al día<br><input type="radio"/> 5 a 6 veces al día<br><input type="radio"/> más 6 veces al día |
|-------------|--------------------------------------------------------------------------------------------------------------------------------------------------------------------------------------------------------------------------------------------------------------------------------------------------------------------------------------------------------------------------------------------------------------|

---

|                |                                                                                                                                                                                                                                                                                                                                                                                                              |
|----------------|--------------------------------------------------------------------------------------------------------------------------------------------------------------------------------------------------------------------------------------------------------------------------------------------------------------------------------------------------------------------------------------------------------------|
| arroz cocinado | <input type="radio"/> Nunca o menos 1 vez al mes<br><input type="radio"/> 1 a 3 veces mes<br><input checked="" type="radio"/> 1 vez semana<br><input type="radio"/> 2 a 4 veces semana<br><input type="radio"/> 5 a 6 veces semana<br><input type="radio"/> 1 vez al día<br><input type="radio"/> 2 a 3 veces al día<br><input type="radio"/> 5 a 6 veces al día<br><input type="radio"/> más 6 veces al día |
|----------------|--------------------------------------------------------------------------------------------------------------------------------------------------------------------------------------------------------------------------------------------------------------------------------------------------------------------------------------------------------------------------------------------------------------|

---

|       |                                                                                                                                                                                                                                                                                                                                                                                                              |
|-------|--------------------------------------------------------------------------------------------------------------------------------------------------------------------------------------------------------------------------------------------------------------------------------------------------------------------------------------------------------------------------------------------------------------|
| pasta | <input type="radio"/> Nunca o menos 1 vez al mes<br><input type="radio"/> 1 a 3 veces mes<br><input checked="" type="radio"/> 1 vez semana<br><input type="radio"/> 2 a 4 veces semana<br><input type="radio"/> 5 a 6 veces semana<br><input type="radio"/> 1 vez al día<br><input type="radio"/> 2 a 3 veces al día<br><input type="radio"/> 5 a 6 veces al día<br><input type="radio"/> más 6 veces al día |
|-------|--------------------------------------------------------------------------------------------------------------------------------------------------------------------------------------------------------------------------------------------------------------------------------------------------------------------------------------------------------------------------------------------------------------|

---

|                     |                                                                                                                                                                                                                                                                                                                                                                                                              |
|---------------------|--------------------------------------------------------------------------------------------------------------------------------------------------------------------------------------------------------------------------------------------------------------------------------------------------------------------------------------------------------------------------------------------------------------|
| pizza               | <input type="radio"/> Nunca o menos 1 vez al mes<br><input type="radio"/> 1 a 3 veces mes<br><input checked="" type="radio"/> 1 vez semana<br><input type="radio"/> 2 a 4 veces semana<br><input type="radio"/> 5 a 6 veces semana<br><input type="radio"/> 1 vez al día<br><input type="radio"/> 2 a 3 veces al día<br><input type="radio"/> 5 a 6 veces al día<br><input type="radio"/> más 6 veces al día |
| aceite oliva        | <input type="radio"/> Nunca o menos 1 vez al mes<br><input type="radio"/> 1 a 3 veces mes<br><input type="radio"/> 1 vez semana<br><input type="radio"/> 2 a 4 veces semana<br><input type="radio"/> 5 a 6 veces semana<br><input type="radio"/> 1 vez al día<br><input checked="" type="radio"/> 2 a 3 veces al día<br><input type="radio"/> 5 a 6 veces al día<br><input type="radio"/> más 6 veces al día |
| otros aceites       | <input checked="" type="radio"/> Nunca o menos 1 vez al mes<br><input type="radio"/> 1 a 3 veces mes<br><input type="radio"/> 1 vez semana<br><input type="radio"/> 2 a 4 veces semana<br><input type="radio"/> 5 a 6 veces semana<br><input type="radio"/> 1 vez al día<br><input type="radio"/> 2 a 3 veces al día<br><input type="radio"/> 5 a 6 veces al día<br><input type="radio"/> más 6 veces al día |
| margarina           | <input checked="" type="radio"/> Nunca o menos 1 vez al mes<br><input type="radio"/> 1 a 3 veces mes<br><input type="radio"/> 1 vez semana<br><input type="radio"/> 2 a 4 veces semana<br><input type="radio"/> 5 a 6 veces semana<br><input type="radio"/> 1 vez al día<br><input type="radio"/> 2 a 3 veces al día<br><input type="radio"/> 5 a 6 veces al día<br><input type="radio"/> más 6 veces al día |
| mantequilla         | <input checked="" type="radio"/> Nunca o menos 1 vez al mes<br><input type="radio"/> 1 a 3 veces mes<br><input type="radio"/> 1 vez semana<br><input type="radio"/> 2 a 4 veces semana<br><input type="radio"/> 5 a 6 veces semana<br><input type="radio"/> 1 vez al día<br><input type="radio"/> 2 a 3 veces al día<br><input type="radio"/> 5 a 6 veces al día<br><input type="radio"/> más 6 veces al día |
| galletas tipo maria | <input type="radio"/> Nunca o menos 1 vez al mes<br><input type="radio"/> 1 a 3 veces mes<br><input type="radio"/> 1 vez semana<br><input type="radio"/> 2 a 4 veces semana<br><input type="radio"/> 5 a 6 veces semana<br><input checked="" type="radio"/> 1 vez al día<br><input type="radio"/> 2 a 3 veces al día<br><input type="radio"/> 5 a 6 veces al día<br><input type="radio"/> más 6 veces al día |

|                           |                                                                                                                                                                                                                                                                                                                                                                                                              |
|---------------------------|--------------------------------------------------------------------------------------------------------------------------------------------------------------------------------------------------------------------------------------------------------------------------------------------------------------------------------------------------------------------------------------------------------------|
| galletas chocolate        | <input checked="" type="radio"/> Nunca o menos 1 vez al mes<br><input type="radio"/> 1 a 3 veces mes<br><input type="radio"/> 1 vez semana<br><input type="radio"/> 2 a 4 veces semana<br><input type="radio"/> 5 a 6 veces semana<br><input type="radio"/> 1 vez al día<br><input type="radio"/> 2 a 3 veces al día<br><input type="radio"/> 5 a 6 veces al día<br><input type="radio"/> más 6 veces al día |
| bollieria                 | <input type="radio"/> Nunca o menos 1 vez al mes<br><input checked="" type="radio"/> 1 a 3 veces mes<br><input type="radio"/> 1 vez semana<br><input type="radio"/> 2 a 4 veces semana<br><input type="radio"/> 5 a 6 veces semana<br><input type="radio"/> 1 vez al día<br><input type="radio"/> 2 a 3 veces al día<br><input type="radio"/> 5 a 6 veces al día<br><input type="radio"/> más 6 veces al día |
| chocolate o bombones      | <input checked="" type="radio"/> Nunca o menos 1 vez al mes<br><input type="radio"/> 1 a 3 veces mes<br><input type="radio"/> 1 vez semana<br><input type="radio"/> 2 a 4 veces semana<br><input type="radio"/> 5 a 6 veces semana<br><input type="radio"/> 1 vez al día<br><input type="radio"/> 2 a 3 veces al día<br><input type="radio"/> 5 a 6 veces al día<br><input type="radio"/> más 6 veces al día |
| chocolate polvo o colacao | <input type="radio"/> Nunca o menos 1 vez al mes<br><input type="radio"/> 1 a 3 veces mes<br><input type="radio"/> 1 vez semana<br><input type="radio"/> 2 a 4 veces semana<br><input type="radio"/> 5 a 6 veces semana<br><input checked="" type="radio"/> 1 vez al día<br><input type="radio"/> 2 a 3 veces al día<br><input type="radio"/> 5 a 6 veces al día<br><input type="radio"/> más 6 veces al día |
| vino tinto                | <input checked="" type="radio"/> Nunca o menos 1 vez al mes<br><input type="radio"/> 1 a 3 veces mes<br><input type="radio"/> 1 vez semana<br><input type="radio"/> 2 a 4 veces semana<br><input type="radio"/> 5 a 6 veces semana<br><input type="radio"/> 1 vez al día<br><input type="radio"/> 2 a 3 veces al día<br><input type="radio"/> 5 a 6 veces al día<br><input type="radio"/> más 6 veces al día |
| vino blanco               | <input checked="" type="radio"/> Nunca o menos 1 vez al mes<br><input type="radio"/> 1 a 3 veces mes<br><input type="radio"/> 1 vez semana<br><input type="radio"/> 2 a 4 veces semana<br><input type="radio"/> 5 a 6 veces semana<br><input type="radio"/> 1 vez al día<br><input type="radio"/> 2 a 3 veces al día<br><input type="radio"/> 5 a 6 veces al día<br><input type="radio"/> más 6 veces al día |

|                       |                                                                                                                                                                                                                                                                                                                                                                                                              |
|-----------------------|--------------------------------------------------------------------------------------------------------------------------------------------------------------------------------------------------------------------------------------------------------------------------------------------------------------------------------------------------------------------------------------------------------------|
| vino seco o vermut    | <input checked="" type="radio"/> Nunca o menos 1 vez al mes<br><input type="radio"/> 1 a 3 veces mes<br><input type="radio"/> 1 vez semana<br><input type="radio"/> 2 a 4 veces semana<br><input type="radio"/> 5 a 6 veces semana<br><input type="radio"/> 1 vez al día<br><input type="radio"/> 2 a 3 veces al día<br><input type="radio"/> 5 a 6 veces al día<br><input type="radio"/> más 6 veces al día |
| cerveza               | <input checked="" type="radio"/> Nunca o menos 1 vez al mes<br><input type="radio"/> 1 a 3 veces mes<br><input type="radio"/> 1 vez semana<br><input type="radio"/> 2 a 4 veces semana<br><input type="radio"/> 5 a 6 veces semana<br><input type="radio"/> 1 vez al día<br><input type="radio"/> 2 a 3 veces al día<br><input type="radio"/> 5 a 6 veces al día<br><input type="radio"/> más 6 veces al día |
| cerveza sin alcohol   | <input checked="" type="radio"/> Nunca o menos 1 vez al mes<br><input type="radio"/> 1 a 3 veces mes<br><input type="radio"/> 1 vez semana<br><input type="radio"/> 2 a 4 veces semana<br><input type="radio"/> 5 a 6 veces semana<br><input type="radio"/> 1 vez al día<br><input type="radio"/> 2 a 3 veces al día<br><input type="radio"/> 5 a 6 veces al día<br><input type="radio"/> más 6 veces al día |
| licores               | <input checked="" type="radio"/> Nunca o menos 1 vez al mes<br><input type="radio"/> 1 a 3 veces mes<br><input type="radio"/> 1 vez semana<br><input type="radio"/> 2 a 4 veces semana<br><input type="radio"/> 5 a 6 veces semana<br><input type="radio"/> 1 vez al día<br><input type="radio"/> 2 a 3 veces al día<br><input type="radio"/> 5 a 6 veces al día<br><input type="radio"/> más 6 veces al día |
| ginebra o ron o vodka | <input checked="" type="radio"/> Nunca o menos 1 vez al mes<br><input type="radio"/> 1 a 3 veces mes<br><input type="radio"/> 1 vez semana<br><input type="radio"/> 2 a 4 veces semana<br><input type="radio"/> 5 a 6 veces semana<br><input type="radio"/> 1 vez al día<br><input type="radio"/> 2 a 3 veces al día<br><input type="radio"/> 5 a 6 veces al día<br><input type="radio"/> más 6 veces al día |
| refresco normal       | <input checked="" type="radio"/> Nunca o menos 1 vez al mes<br><input type="radio"/> 1 a 3 veces mes<br><input type="radio"/> 1 vez semana<br><input type="radio"/> 2 a 4 veces semana<br><input type="radio"/> 5 a 6 veces semana<br><input type="radio"/> 1 vez al día<br><input type="radio"/> 2 a 3 veces al día<br><input type="radio"/> 5 a 6 veces al día<br><input type="radio"/> más 6 veces al día |



|                          |                                                                                                                                                                                                                                                                                                                                                                                                              |
|--------------------------|--------------------------------------------------------------------------------------------------------------------------------------------------------------------------------------------------------------------------------------------------------------------------------------------------------------------------------------------------------------------------------------------------------------|
| refresco sin azúcar      | <input checked="" type="radio"/> Nunca o menos 1 vez al mes<br><input type="radio"/> 1 a 3 veces mes<br><input type="radio"/> 1 vez semana<br><input type="radio"/> 2 a 4 veces semana<br><input type="radio"/> 5 a 6 veces semana<br><input type="radio"/> 1 vez al día<br><input type="radio"/> 2 a 3 veces al día<br><input type="radio"/> 5 a 6 veces al día<br><input type="radio"/> más 6 veces al día |
| Agua del grifo           | <input checked="" type="radio"/> Nunca o menos 1 vez al mes<br><input type="radio"/> 1 a 3 veces mes<br><input type="radio"/> 1 vez semana<br><input type="radio"/> 2 a 4 veces semana<br><input type="radio"/> 5 a 6 veces semana<br><input type="radio"/> 1 vez al día<br><input type="radio"/> 2 a 3 veces al día<br><input type="radio"/> 5 a 6 veces al día<br><input type="radio"/> más 6 veces al día |
| agua embotellada sin gas | <input type="radio"/> Nunca o menos 1 vez al mes<br><input type="radio"/> 1 a 3 veces mes<br><input type="radio"/> 1 vez semana<br><input type="radio"/> 2 a 4 veces semana<br><input type="radio"/> 5 a 6 veces semana<br><input type="radio"/> 1 vez al día<br><input type="radio"/> 2 a 3 veces al día<br><input type="radio"/> 5 a 6 veces al día<br><input checked="" type="radio"/> más 6 veces al día |
| agua embotellada con gas | <input checked="" type="radio"/> Nunca o menos 1 vez al mes<br><input type="radio"/> 1 a 3 veces mes<br><input type="radio"/> 1 vez semana<br><input type="radio"/> 2 a 4 veces semana<br><input type="radio"/> 5 a 6 veces semana<br><input type="radio"/> 1 vez al día<br><input type="radio"/> 2 a 3 veces al día<br><input type="radio"/> 5 a 6 veces al día<br><input type="radio"/> más 6 veces al día |
| zumو frutas embasado     | <input checked="" type="radio"/> Nunca o menos 1 vez al mes<br><input type="radio"/> 1 a 3 veces mes<br><input type="radio"/> 1 vez semana<br><input type="radio"/> 2 a 4 veces semana<br><input type="radio"/> 5 a 6 veces semana<br><input type="radio"/> 1 vez al día<br><input type="radio"/> 2 a 3 veces al día<br><input type="radio"/> 5 a 6 veces al día<br><input type="radio"/> más 6 veces al día |
| cafe                     | <input checked="" type="radio"/> Nunca o menos 1 vez al mes<br><input type="radio"/> 1 a 3 veces mes<br><input type="radio"/> 1 vez semana<br><input type="radio"/> 2 a 4 veces semana<br><input type="radio"/> 5 a 6 veces semana<br><input type="radio"/> 1 vez al día<br><input type="radio"/> 2 a 3 veces al día<br><input type="radio"/> 5 a 6 veces al día<br><input type="radio"/> más 6 veces al día |

|                       |                                                                                                                                                                                                                                                                                                                                                                                                              |
|-----------------------|--------------------------------------------------------------------------------------------------------------------------------------------------------------------------------------------------------------------------------------------------------------------------------------------------------------------------------------------------------------------------------------------------------------|
| cafe descafeinado     | <input checked="" type="radio"/> Nunca o menos 1 vez al mes<br><input type="radio"/> 1 a 3 veces mes<br><input type="radio"/> 1 vez semana<br><input type="radio"/> 2 a 4 veces semana<br><input type="radio"/> 5 a 6 veces semana<br><input type="radio"/> 1 vez al día<br><input type="radio"/> 2 a 3 veces al día<br><input type="radio"/> 5 a 6 veces al día<br><input type="radio"/> más 6 veces al día |
| te o infusión         | <input checked="" type="radio"/> Nunca o menos 1 vez al mes<br><input type="radio"/> 1 a 3 veces mes<br><input type="radio"/> 1 vez semana<br><input type="radio"/> 2 a 4 veces semana<br><input type="radio"/> 5 a 6 veces semana<br><input type="radio"/> 1 vez al día<br><input type="radio"/> 2 a 3 veces al día<br><input type="radio"/> 5 a 6 veces al día<br><input type="radio"/> más 6 veces al día |
| sopa o puré verduras  | <input checked="" type="radio"/> Nunca o menos 1 vez al mes<br><input type="radio"/> 1 a 3 veces mes<br><input type="radio"/> 1 vez semana<br><input type="radio"/> 2 a 4 veces semana<br><input type="radio"/> 5 a 6 veces semana<br><input type="radio"/> 1 vez al día<br><input type="radio"/> 2 a 3 veces al día<br><input type="radio"/> 5 a 6 veces al día<br><input type="radio"/> más 6 veces al día |
| croquetas pollo jamón | <input checked="" type="radio"/> Nunca o menos 1 vez al mes<br><input type="radio"/> 1 a 3 veces mes<br><input type="radio"/> 1 vez semana<br><input type="radio"/> 2 a 4 veces semana<br><input type="radio"/> 5 a 6 veces semana<br><input type="radio"/> 1 vez al día<br><input type="radio"/> 2 a 3 veces al día<br><input type="radio"/> 5 a 6 veces al día<br><input type="radio"/> más 6 veces al día |
| croquetas pescado     | <input checked="" type="radio"/> Nunca o menos 1 vez al mes<br><input type="radio"/> 1 a 3 veces mes<br><input type="radio"/> 1 vez semana<br><input type="radio"/> 2 a 4 veces semana<br><input type="radio"/> 5 a 6 veces semana<br><input type="radio"/> 1 vez al día<br><input type="radio"/> 2 a 3 veces al día<br><input type="radio"/> 5 a 6 veces al día<br><input type="radio"/> más 6 veces al día |
| mayonesa              | <input checked="" type="radio"/> Nunca o menos 1 vez al mes<br><input type="radio"/> 1 a 3 veces mes<br><input type="radio"/> 1 vez semana<br><input type="radio"/> 2 a 4 veces semana<br><input type="radio"/> 5 a 6 veces semana<br><input type="radio"/> 1 vez al día<br><input type="radio"/> 2 a 3 veces al día<br><input type="radio"/> 5 a 6 veces al día<br><input type="radio"/> más 6 veces al día |

|                  |                                                                                                                                                                                                                                                                                                                                                                                                              |
|------------------|--------------------------------------------------------------------------------------------------------------------------------------------------------------------------------------------------------------------------------------------------------------------------------------------------------------------------------------------------------------------------------------------------------------|
| salsa tomate     | <input checked="" type="radio"/> Nunca o menos 1 vez al mes<br><input type="radio"/> 1 a 3 veces mes<br><input type="radio"/> 1 vez semana<br><input type="radio"/> 2 a 4 veces semana<br><input type="radio"/> 5 a 6 veces semana<br><input type="radio"/> 1 vez al día<br><input type="radio"/> 2 a 3 veces al día<br><input type="radio"/> 5 a 6 veces al día<br><input type="radio"/> más 6 veces al día |
| ketchup          | <input checked="" type="radio"/> Nunca o menos 1 vez al mes<br><input type="radio"/> 1 a 3 veces mes<br><input type="radio"/> 1 vez semana<br><input type="radio"/> 2 a 4 veces semana<br><input type="radio"/> 5 a 6 veces semana<br><input type="radio"/> 1 vez al día<br><input type="radio"/> 2 a 3 veces al día<br><input type="radio"/> 5 a 6 veces al día<br><input type="radio"/> más 6 veces al día |
| sal              | <input type="radio"/> Nunca o menos 1 vez al mes<br><input type="radio"/> 1 a 3 veces mes<br><input type="radio"/> 1 vez semana<br><input type="radio"/> 2 a 4 veces semana<br><input type="radio"/> 5 a 6 veces semana<br><input type="radio"/> 1 vez al día<br><input checked="" type="radio"/> 2 a 3 veces al día<br><input type="radio"/> 5 a 6 veces al día<br><input type="radio"/> más 6 veces al día |
| ajo              | <input checked="" type="radio"/> Nunca o menos 1 vez al mes<br><input type="radio"/> 1 a 3 veces mes<br><input type="radio"/> 1 vez semana<br><input type="radio"/> 2 a 4 veces semana<br><input type="radio"/> 5 a 6 veces semana<br><input type="radio"/> 1 vez al día<br><input type="radio"/> 2 a 3 veces al día<br><input type="radio"/> 5 a 6 veces al día<br><input type="radio"/> más 6 veces al día |
| mermelada o miel | <input checked="" type="radio"/> Nunca o menos 1 vez al mes<br><input type="radio"/> 1 a 3 veces mes<br><input type="radio"/> 1 vez semana<br><input type="radio"/> 2 a 4 veces semana<br><input type="radio"/> 5 a 6 veces semana<br><input type="radio"/> 1 vez al día<br><input type="radio"/> 2 a 3 veces al día<br><input type="radio"/> 5 a 6 veces al día<br><input type="radio"/> más 6 veces al día |
| azúcar           | <input type="radio"/> Nunca o menos 1 vez al mes<br><input type="radio"/> 1 a 3 veces mes<br><input type="radio"/> 1 vez semana<br><input type="radio"/> 2 a 4 veces semana<br><input type="radio"/> 5 a 6 veces semana<br><input type="radio"/> 1 vez al día<br><input checked="" type="radio"/> 2 a 3 veces al día<br><input type="radio"/> 5 a 6 veces al día<br><input type="radio"/> más 6 veces al día |

|                                       |                                                                                                                                                                                                                                                                                                                                                                                                                                                                                                                               |
|---------------------------------------|-------------------------------------------------------------------------------------------------------------------------------------------------------------------------------------------------------------------------------------------------------------------------------------------------------------------------------------------------------------------------------------------------------------------------------------------------------------------------------------------------------------------------------|
| Otro alimento                         | [*DATA REMOVED*]                                                                                                                                                                                                                                                                                                                                                                                                                                                                                                              |
| suplementos vitamínicos               | <input checked="" type="radio"/> si<br><input type="radio"/> no                                                                                                                                                                                                                                                                                                                                                                                                                                                               |
| suplementos vitamínicos               | [*DATA REMOVED*]                                                                                                                                                                                                                                                                                                                                                                                                                                                                                                              |
| dieta previa                          | <input type="radio"/> si<br><input checked="" type="radio"/> no                                                                                                                                                                                                                                                                                                                                                                                                                                                               |
| motivo dieta                          | <input checked="" type="radio"/> no dieta<br><input type="radio"/> control peso<br><input type="radio"/> control colesterol<br><input type="radio"/> control diabetes<br><input type="radio"/> problemas estómago<br><input type="radio"/> problemas vesícula o hepáticos<br><input type="radio"/> HTA o cardiopatía<br><input type="radio"/> problemas renales<br><input type="radio"/> alergia alimentaria<br><input type="radio"/> ácido úrico elevado<br><input type="radio"/> vegetariana<br><input type="radio"/> otros |
| cambio alimentos año previo gestación | <input type="radio"/> si<br><input checked="" type="radio"/> no                                                                                                                                                                                                                                                                                                                                                                                                                                                               |
| cambio lácteos                        | <input type="radio"/> eliminado<br><input type="radio"/> disminuido<br><input checked="" type="radio"/> igual<br><input type="radio"/> aumentado<br><input type="radio"/> no sabe                                                                                                                                                                                                                                                                                                                                             |
| cambio huevos                         | <input type="radio"/> eliminado<br><input type="radio"/> disminuido<br><input checked="" type="radio"/> igual<br><input type="radio"/> aumentado<br><input type="radio"/> no sabe                                                                                                                                                                                                                                                                                                                                             |
| cambio carne                          | <input type="radio"/> eliminado<br><input type="radio"/> disminuido<br><input checked="" type="radio"/> igual<br><input type="radio"/> aumentado<br><input type="radio"/> no sabe                                                                                                                                                                                                                                                                                                                                             |
| cambio pescado                        | <input type="radio"/> eliminado<br><input type="radio"/> disminuido<br><input checked="" type="radio"/> igual<br><input type="radio"/> aumentado<br><input type="radio"/> no sabe                                                                                                                                                                                                                                                                                                                                             |
| cambio verduras                       | <input type="radio"/> eliminado<br><input type="radio"/> disminuido<br><input checked="" type="radio"/> igual<br><input type="radio"/> aumentado<br><input type="radio"/> no sabe                                                                                                                                                                                                                                                                                                                                             |

|                            |                                                                                                                                                                                                                        |
|----------------------------|------------------------------------------------------------------------------------------------------------------------------------------------------------------------------------------------------------------------|
| cambio legumbres           | <input type="radio"/> eliminado<br><input type="radio"/> disminuido<br><input checked="" type="radio"/> igual<br><input type="radio"/> aumentado<br><input type="radio"/> no sabe                                      |
| cambio fruta               | <input type="radio"/> eliminado<br><input type="radio"/> disminuido<br><input checked="" type="radio"/> igual<br><input type="radio"/> aumentado<br><input type="radio"/> no sabe                                      |
| cambio pan                 | <input type="radio"/> eliminado<br><input type="radio"/> disminuido<br><input checked="" type="radio"/> igual<br><input type="radio"/> aumentado<br><input type="radio"/> no sabe                                      |
| cambio aceite oliva        | <input type="radio"/> eliminado<br><input type="radio"/> disminuido<br><input checked="" type="radio"/> igual<br><input type="radio"/> aumentado<br><input type="radio"/> no sabe                                      |
| cambio mante o margarina   | <input type="radio"/> eliminado<br><input type="radio"/> disminuido<br><input checked="" type="radio"/> igual<br><input type="radio"/> aumentado<br><input type="radio"/> no sabe                                      |
| cambio azúcar y dulces     | <input type="radio"/> eliminado<br><input type="radio"/> disminuido<br><input checked="" type="radio"/> igual<br><input type="radio"/> aumentado<br><input type="radio"/> no sabe                                      |
| cambio bebidas alcohólicas | <input type="radio"/> eliminado<br><input type="radio"/> disminuido<br><input checked="" type="radio"/> igual<br><input type="radio"/> aumentado<br><input type="radio"/> no sabe                                      |
| frecuencia comidas fritas  | <input type="radio"/> a diario<br><input type="radio"/> 5 a 6 veces semana<br><input type="radio"/> 2 a 4 veces semana<br><input type="radio"/> 1 vez semana<br><input checked="" type="radio"/> menos de 1 vez semana |
| carne                      | <input type="radio"/> no como<br><input type="radio"/> cruda<br><input type="radio"/> poco hecha<br><input checked="" type="radio"/> hecha<br><input type="radio"/> muy hecha                                          |
| grasa visible carne        | <input checked="" type="radio"/> quita toda<br><input type="radio"/> quita mayoría<br><input type="radio"/> quita un poco<br><input type="radio"/> no quita nada                                                       |

|                                |                                                                                                                                                                                                                                                          |
|--------------------------------|----------------------------------------------------------------------------------------------------------------------------------------------------------------------------------------------------------------------------------------------------------|
| cocina carne                   | <input checked="" type="radio"/> a la plancha<br><input type="radio"/> a la parrilla<br><input type="radio"/> asada<br><input type="radio"/> frita<br><input type="radio"/> guisada                                                                      |
| tostado quemado carne          | <input checked="" type="radio"/> nunca<br><input type="radio"/> 1 vez mes<br><input type="radio"/> 2 a 3 veces mes<br><input type="radio"/> 1 vez semana<br><input type="radio"/> 2 a 3 semanas                                                          |
| tostado quemado pescado        | <input checked="" type="radio"/> nunca<br><input type="radio"/> 1 vez mes<br><input type="radio"/> 2 a 3 veces mes<br><input type="radio"/> 1 vez semana<br><input type="radio"/> 2 a 3 semanas                                                          |
| socarrat paella                | <input checked="" type="radio"/> nunca<br><input type="radio"/> 1 vez mes<br><input type="radio"/> 2 a 3 veces mes<br><input type="radio"/> 1 vez semana<br><input type="radio"/> 2 a 3 semanas                                                          |
| grasa o aceite cocinar         | <input type="radio"/> mantequilla<br><input type="radio"/> margarina<br><input type="radio"/> aceite oliva<br><input checked="" type="radio"/> aceite oliva virgen extra<br><input type="radio"/> aceite vegetal<br><input type="radio"/> mezcla aceites |
| grasa aceite aliñar            | <input type="radio"/> mantequilla<br><input type="radio"/> margarina<br><input type="radio"/> aceite oliva<br><input checked="" type="radio"/> aceite oliva virgen extra<br><input type="radio"/> aceite vegetal<br><input type="radio"/> mezcla aceites |
| grasa aceite freir             | <input type="radio"/> mantequilla<br><input type="radio"/> margarina<br><input type="radio"/> aceite oliva<br><input checked="" type="radio"/> aceite oliva virgen extra<br><input type="radio"/> aceite vegetal<br><input type="radio"/> mezcla aceites |
| Ejercicio cuestionario         | <input checked="" type="radio"/> si<br><input type="radio"/> no                                                                                                                                                                                          |
| horas de sueño incluido siesta | [*DATA REMOVED*]                                                                                                                                                                                                                                         |
| minutos siesta                 | [*DATA REMOVED*]                                                                                                                                                                                                                                         |
| horas televisión semana        | [*DATA REMOVED*]                                                                                                                                                                                                                                         |

|                                        |                                                                                                                                                                                                                                                                                                                                                                           |
|----------------------------------------|---------------------------------------------------------------------------------------------------------------------------------------------------------------------------------------------------------------------------------------------------------------------------------------------------------------------------------------------------------------------------|
| actividad trabajo                      | <input type="radio"/> casi siempre sentado<br><input type="radio"/> sentado 50 por cien<br><input type="radio"/> casi siempre de pie, quieto<br><input checked="" type="radio"/> casi siempre levantado caminando y llevando pocas cosas<br><input type="radio"/> casi siempre levantado, caminando y llevado muchas cosas<br><input type="radio"/> trabajo manual pesado |
| tiempo caminar o bici al día           | <input type="radio"/> casi nunca<br><input type="radio"/> menos 20min día<br><input type="radio"/> 20 a 40 min día<br><input checked="" type="radio"/> 40 a 60 min día<br><input type="radio"/> 1h o 1h y media día<br><input type="radio"/> más de 1h y media al día                                                                                                     |
| tiempo tareas casa al día              | <input type="radio"/> menos de 1h día<br><input type="radio"/> 1 a 2h día<br><input checked="" type="radio"/> 3 a 4h día<br><input type="radio"/> 5 a 6h día<br><input type="radio"/> 7 a 8h día<br><input type="radio"/> más de 8h día                                                                                                                                   |
| tiempo libre televisión ordenador leer | <input type="radio"/> menos 1h día<br><input type="radio"/> 1h día<br><input type="radio"/> 2h día<br><input checked="" type="radio"/> 3h día<br><input type="radio"/> 4h día<br><input type="radio"/> 5 a 6h día<br><input type="radio"/> mas 6h día                                                                                                                     |
| tiempo libre ejercicio o deporte       | <input type="radio"/> menos 1h semana<br><input type="radio"/> 1h semana<br><input type="radio"/> 2h semana<br><input type="radio"/> 3h semana<br><input type="radio"/> 4 a 5h semana<br><input checked="" type="radio"/> mas 5h semana                                                                                                                                   |
| como se considera                      | <input type="radio"/> sedentaria<br><input type="radio"/> poco activa<br><input checked="" type="radio"/> moderadamente activa<br><input type="radio"/> bastante activa<br><input type="radio"/> muy activa<br><input type="radio"/> no sabe                                                                                                                              |
| FUR                                    | [*DATA REMOVED*]                                                                                                                                                                                                                                                                                                                                                          |
| Semanas gestación 2T                   | [*DATA REMOVED*]                                                                                                                                                                                                                                                                                                                                                          |
| Días gestación 2T                      | [*DATA REMOVED*]                                                                                                                                                                                                                                                                                                                                                          |
| DBP 2T                                 | [*DATA REMOVED*]                                                                                                                                                                                                                                                                                                                                                          |
| CC 2T                                  | [*DATA REMOVED*]                                                                                                                                                                                                                                                                                                                                                          |
| AC 2T                                  | [*DATA REMOVED*]                                                                                                                                                                                                                                                                                                                                                          |

|                                                   |                                                                                                                                                                                                 |
|---------------------------------------------------|-------------------------------------------------------------------------------------------------------------------------------------------------------------------------------------------------|
| LF 2T                                             | [*DATA REMOVED*]                                                                                                                                                                                |
| PFE 2T (Hadlock)                                  | [*DATA REMOVED*]                                                                                                                                                                                |
| Semanas gestación 3T                              | [*DATA REMOVED*]                                                                                                                                                                                |
| días 3T                                           | [*DATA REMOVED*]                                                                                                                                                                                |
| DBP 3T                                            | [*DATA REMOVED*]                                                                                                                                                                                |
| CC 3T                                             | [*DATA REMOVED*]                                                                                                                                                                                |
| AC 3T                                             | [*DATA REMOVED*]                                                                                                                                                                                |
| LF 3T                                             | [*DATA REMOVED*]                                                                                                                                                                                |
| PFE 3T (Hadlock)                                  | [*DATA REMOVED*]                                                                                                                                                                                |
| Semanas de gestación final                        | [*DATA REMOVED*]                                                                                                                                                                                |
| días gestación final                              | [*DATA REMOVED*]                                                                                                                                                                                |
| Localización placenta                             | <input checked="" type="radio"/> anterior<br><input type="radio"/> lateral derecha<br><input type="radio"/> lateral izquierda<br><input type="radio"/> posterior<br><input type="radio"/> fondo |
| Presentación longitudinal cefálica                | <input type="radio"/> no<br><input checked="" type="radio"/> si                                                                                                                                 |
| Dorso                                             | <input type="radio"/> izquierda anterior<br><input type="radio"/> izquierda posterior<br><input checked="" type="radio"/> derecha anterior<br><input type="radio"/> derecha posterior           |
| diámetro biparietal                               | [*DATA REMOVED*]                                                                                                                                                                                |
| Circunferencia craneal                            | [*DATA REMOVED*]                                                                                                                                                                                |
| Circunferencia abdominal                          | [*DATA REMOVED*]                                                                                                                                                                                |
| Longitud de femur                                 | [*DATA REMOVED*]                                                                                                                                                                                |
| tejido celular subcutáneo a nivel del muslo en mm | [*DATA REMOVED*]                                                                                                                                                                                |
| tejido celular subcutáneo en abdomen en mm        | [*DATA REMOVED*]                                                                                                                                                                                |
| Volumen del muslo en cm3                          | [*DATA REMOVED*]                                                                                                                                                                                |
| Peso fetal estimado según fórmula de Hadlock      | [*DATA REMOVED*]                                                                                                                                                                                |



|                                               |                                                                                                                                                          |
|-----------------------------------------------|----------------------------------------------------------------------------------------------------------------------------------------------------------|
| Percentil                                     | [*DATA REMOVED*]                                                                                                                                         |
| Peso fetal estimado según fórmula de Scioscia | <hr/>                                                                                                                                                    |
| Peso fetal estimado según fórmula de LEE      | <hr/>                                                                                                                                                    |
| Tipo de parto                                 | <input type="radio"/> eutocico<br><input type="radio"/> instrumentado/ventosa<br><input checked="" type="radio"/> cesarea                                |
| fecha de nacimiento                           | [*DATA REMOVED*]                                                                                                                                         |
| Días entre exploración y nacimiento           | [*DATA REMOVED*]                                                                                                                                         |
| Peso RN en g                                  | [*DATA REMOVED*]                                                                                                                                         |
| sexo                                          | <input type="radio"/> mujer<br><input checked="" type="radio"/> hombre                                                                                   |
| Apgar 1 minuto                                | [*DATA REMOVED*]                                                                                                                                         |
| Apgar 5 minutos                               | [*DATA REMOVED*]                                                                                                                                         |
| Apgar 10 minutos                              | <hr/>                                                                                                                                                    |
| antecedente Covid durante gestación           | <input type="radio"/> Yes<br><input checked="" type="radio"/> No                                                                                         |
| Nivel de estudios                             | <input type="radio"/> ninguno<br><input type="radio"/> primarios<br><input type="radio"/> secundarios<br><input checked="" type="radio"/> universitarios |

# Base\_datos\_estimacion\_peso\_fetal

|                                       |                                                                                                                                                                                                                                                                                      |
|---------------------------------------|--------------------------------------------------------------------------------------------------------------------------------------------------------------------------------------------------------------------------------------------------------------------------------------|
| Número de identificación participante | 14                                                                                                                                                                                                                                                                                   |
| CODIGO PARTICIPANTE                   |                                                                                                                                                                                                                                                                                      |
| Edad                                  | [*DATA REMOVED*]                                                                                                                                                                                                                                                                     |
| Gestaciones                           | <input type="radio"/> 1<br><input checked="" type="radio"/> 2<br><input type="radio"/> 3<br><input type="radio"/> mas de 3                                                                                                                                                           |
| partos                                | <input type="radio"/> 0<br><input checked="" type="radio"/> 1<br><input type="radio"/> 2<br><input type="radio"/> 3<br><input type="radio"/> mas de 3                                                                                                                                |
| cesáreas                              | <input checked="" type="radio"/> 0<br><input type="radio"/> 1<br><input type="radio"/> 2<br><input type="radio"/> 3<br><input type="radio"/> mas de 3                                                                                                                                |
| Abortos                               | <input checked="" type="radio"/> 0<br><input type="radio"/> 1<br><input type="radio"/> 2<br><input type="radio"/> 3<br><input type="radio"/> mas de 3                                                                                                                                |
| Tipo de gestacion                     | <input checked="" type="radio"/> espontanea<br><input type="radio"/> IAC inseminación artificial conyuge<br><input type="radio"/> IAD inseminación artificial donante<br><input type="radio"/> FIV Fecundación in Vitro<br><input type="radio"/> Ovodon FIV con donación de ovocitos |
| peso previo a embarazo                | [*DATA REMOVED*]                                                                                                                                                                                                                                                                     |
| Ganancia ponderal embarazo            | [*DATA REMOVED*]                                                                                                                                                                                                                                                                     |
| Talla madre                           | [*DATA REMOVED*]                                                                                                                                                                                                                                                                     |
| IMC previo embarazo                   | 22.837370242214536                                                                                                                                                                                                                                                                   |
| Patología obstétrica                  | <input checked="" type="radio"/> no<br><input type="radio"/> si                                                                                                                                                                                                                      |
| Diabetes pregestacional               | <input checked="" type="radio"/> no<br><input type="radio"/> si                                                                                                                                                                                                                      |
| Diabetes gestacional                  | <input checked="" type="radio"/> no<br><input type="radio"/> si                                                                                                                                                                                                                      |

|                                            |                                                                                                                                                                                      |
|--------------------------------------------|--------------------------------------------------------------------------------------------------------------------------------------------------------------------------------------|
| Diabetes gestacional con insulina          | <input checked="" type="radio"/> no<br><input type="radio"/> si                                                                                                                      |
| Diabetes gestacional con dieta y ejercicio | <input checked="" type="radio"/> no<br><input type="radio"/> si                                                                                                                      |
| Percentil fetos previos                    | <input checked="" type="radio"/> Nada<br><input type="radio"/> percentil menor de 10<br><input type="radio"/> percentil entre 10 y 90<br><input type="radio"/> percentil mayor de 90 |
| Exfumadora                                 | <input checked="" type="radio"/> Nada<br><input type="radio"/> menos de 5 años<br><input type="radio"/> 5 a 10 años<br><input type="radio"/> mayor o igual a 10 años                 |
| Hábito tabáquico                           | <input checked="" type="radio"/> no<br><input type="radio"/> si                                                                                                                      |
| fumadora                                   | [*DATA REMOVED*]                                                                                                                                                                     |
| Consumo otros tóxicos                      | <input checked="" type="radio"/> no<br><input type="radio"/> si                                                                                                                      |
| Hb 1T                                      | [*DATA REMOVED*]                                                                                                                                                                     |
| Htc 1T                                     | [*DATA REMOVED*]                                                                                                                                                                     |
| Hb 2T                                      | [*DATA REMOVED*]                                                                                                                                                                     |
| HTC 2T                                     | [*DATA REMOVED*]                                                                                                                                                                     |
| Hb 3T                                      | [*DATA REMOVED*]                                                                                                                                                                     |
| HTC 3T                                     | [*DATA REMOVED*]                                                                                                                                                                     |
| Suplemento FE oral                         | <input checked="" type="radio"/> si<br><input type="radio"/> no                                                                                                                      |
| Suplemento fe iv                           | <input type="radio"/> si<br><input checked="" type="radio"/> no                                                                                                                      |
| Transfusión                                | <input checked="" type="radio"/> no<br><input type="radio"/> si                                                                                                                      |
| Solicitada Vit D                           | <input checked="" type="radio"/> no<br><input type="radio"/> si                                                                                                                      |
| Deficit vit D                              | <input checked="" type="radio"/> no<br><input type="radio"/> si                                                                                                                      |
| Suplemento vit D                           | <input type="radio"/> si<br><input checked="" type="radio"/> no                                                                                                                      |

|                       |                                                                                                                                                                                                                                                                                                                                                                                                              |
|-----------------------|--------------------------------------------------------------------------------------------------------------------------------------------------------------------------------------------------------------------------------------------------------------------------------------------------------------------------------------------------------------------------------------------------------------|
| Dieta, cuestionario   | <input checked="" type="radio"/> sí<br><input type="radio"/> no                                                                                                                                                                                                                                                                                                                                              |
| Leche entera          | <input checked="" type="radio"/> Nunca o menos 1 vez al mes<br><input type="radio"/> 1 a 3 veces mes<br><input type="radio"/> 1 vez semana<br><input type="radio"/> 2 a 4 veces semana<br><input type="radio"/> 5 a 6 veces semana<br><input type="radio"/> 1 vez al día<br><input type="radio"/> 2 a 3 veces al día<br><input type="radio"/> 5 a 6 veces al día<br><input type="radio"/> más 6 veces al día |
| Leche semidesnatada   | <input checked="" type="radio"/> Nunca o menos 1 vez al mes<br><input type="radio"/> 1 a 3 veces mes<br><input type="radio"/> 1 vez semana<br><input type="radio"/> 2 a 4 veces semana<br><input type="radio"/> 5 a 6 veces semana<br><input type="radio"/> 1 vez al día<br><input type="radio"/> 2 a 3 veces al día<br><input type="radio"/> 5 a 6 veces al día<br><input type="radio"/> mas 6 veces al día |
| Leche desnatada       | <input type="radio"/> Nunca o menos 1 vez al mes<br><input type="radio"/> 1 a 3 veces mes<br><input type="radio"/> 1 vez semana<br><input checked="" type="radio"/> 2 a 4 veces semana<br><input type="radio"/> 5 a 6 veces semana<br><input type="radio"/> 1 vez al día<br><input type="radio"/> 2 a 3 veces al día<br><input type="radio"/> 5 a 6 veces al día<br><input type="radio"/> más 6 veces al día |
| Leche condensada      | <input checked="" type="radio"/> Nunca o menos 1 vez al mes<br><input type="radio"/> 1 a 3 veces mes<br><input type="radio"/> 1 vez semana<br><input type="radio"/> 2 a 4 veces semana<br><input type="radio"/> 5 a 6 veces semana<br><input type="radio"/> 1 vez al día<br><input type="radio"/> 2 a 3 veces al día<br><input type="radio"/> 5 a 6 veces al día<br><input type="radio"/> más 6 veces al día |
| nata o crema de leche | <input type="radio"/> Nunca o menos 1 vez al mes<br><input checked="" type="radio"/> 1 a 3 veces mes<br><input type="radio"/> 1 vez semana<br><input type="radio"/> 2 a 4 veces semana<br><input type="radio"/> 5 a 6 veces semana<br><input type="radio"/> 1 vez al día<br><input type="radio"/> 2 a 3 veces al día<br><input type="radio"/> 5 a 6 veces al día<br><input type="radio"/> más 6 veces al día |

|                                             |                                                                                                                                                                                                                                                                                                                                                                                                              |
|---------------------------------------------|--------------------------------------------------------------------------------------------------------------------------------------------------------------------------------------------------------------------------------------------------------------------------------------------------------------------------------------------------------------------------------------------------------------|
| Yogurt Entero                               | <input checked="" type="radio"/> Nunca o menos 1 vez al mes<br><input type="radio"/> 1 a 3 veces mes<br><input type="radio"/> 1 vez semana<br><input type="radio"/> 2 a 4 veces semana<br><input type="radio"/> 5 a 6 veces semana<br><input type="radio"/> 1 vez al día<br><input type="radio"/> 2 a 3 veces al día<br><input type="radio"/> 5 a 6 veces al día<br><input type="radio"/> más 6 veces al día |
| Yogurt desnatado                            | <input checked="" type="radio"/> Nunca o menos 1 vez al mes<br><input type="radio"/> 1 a 3 veces mes<br><input type="radio"/> 1 vez semana<br><input type="radio"/> 2 a 4 veces semana<br><input type="radio"/> 5 a 6 veces semana<br><input type="radio"/> 1 vez al día<br><input type="radio"/> 2 a 3 veces al día<br><input type="radio"/> 5 a 6 veces al día<br><input type="radio"/> más 6 veces al día |
| 100g requesón o queso blando o queso fresco | <input checked="" type="radio"/> Nunca o menos 1 vez al mes<br><input type="radio"/> 1 a 3 veces mes<br><input type="radio"/> 1 vez semana<br><input type="radio"/> 2 a 4 veces semana<br><input type="radio"/> 5 a 6 veces semana<br><input type="radio"/> 1 vez al día<br><input type="radio"/> 2 a 3 veces al día<br><input type="radio"/> 5 a 6 veces al día<br><input type="radio"/> más 6 veces al día |
| queso curado o semicurado o cremoso         | <input type="radio"/> Nunca o menos 1 vez al mes<br><input type="radio"/> 1 a 3 veces mes<br><input type="radio"/> 1 vez semana<br><input checked="" type="radio"/> 2 a 4 veces semana<br><input type="radio"/> 5 a 6 veces semana<br><input type="radio"/> 1 vez al día<br><input type="radio"/> 2 a 3 veces al día<br><input type="radio"/> 5 a 6 veces al día<br><input type="radio"/> más 6 veces al día |
| natillas flan pudding                       | <input checked="" type="radio"/> Nunca o menos 1 vez al mes<br><input type="radio"/> 1 a 3 veces mes<br><input type="radio"/> 1 vez semana<br><input type="radio"/> 2 a 4 veces semana<br><input type="radio"/> 5 a 6 veces semana<br><input type="radio"/> 1 vez al día<br><input type="radio"/> 2 a 3 veces al día<br><input type="radio"/> 5 a 6 veces al día<br><input type="radio"/> más 6 veces al día |
| Helado                                      | <input type="radio"/> Nunca o menos 1 vez al mes<br><input type="radio"/> 1 a 3 veces mes<br><input type="radio"/> 1 vez semana<br><input type="radio"/> 2 a 4 veces semana<br><input type="radio"/> 5 a 6 veces semana<br><input checked="" type="radio"/> 1 vez al día<br><input type="radio"/> 2 a 3 veces al día<br><input type="radio"/> 5 a 6 veces al día<br><input type="radio"/> más 6 veces al día |

|                                      |                                                                                                                                                                                                                                                                                                                                                                                                              |
|--------------------------------------|--------------------------------------------------------------------------------------------------------------------------------------------------------------------------------------------------------------------------------------------------------------------------------------------------------------------------------------------------------------------------------------------------------------|
| huevo                                | <input type="radio"/> Nunca o menos 1 vez al mes<br><input type="radio"/> 1 a 3 veces mes<br><input checked="" type="radio"/> 1 vez semana<br><input type="radio"/> 2 a 4 veces semana<br><input type="radio"/> 5 a 6 veces semana<br><input type="radio"/> 1 vez al día<br><input type="radio"/> 2 a 3 veces al día<br><input type="radio"/> 5 a 6 veces al día<br><input type="radio"/> más 6 veces al día |
| Pollo con piel                       | <input checked="" type="radio"/> Nunca o menos 1 vez al mes<br><input type="radio"/> 1 a 3 veces mes<br><input type="radio"/> 1 vez semana<br><input type="radio"/> 2 a 4 veces semana<br><input type="radio"/> 5 a 6 veces semana<br><input type="radio"/> 1 vez al día<br><input type="radio"/> 2 a 3 veces al día<br><input type="radio"/> 5 a 6 veces al día<br><input type="radio"/> más 6 veces al día |
| pollo sin piel                       | <input type="radio"/> Nunca o menos 1 vez al mes<br><input type="radio"/> 1 a 3 veces mes<br><input type="radio"/> 1 vez semana<br><input checked="" type="radio"/> 2 a 4 veces semana<br><input type="radio"/> 5 a 6 veces semana<br><input type="radio"/> 1 vez al día<br><input type="radio"/> 2 a 3 veces al día<br><input type="radio"/> 5 a 6 veces al día<br><input type="radio"/> más 6 veces al día |
| Ternera o cerdo o cordero            | <input type="radio"/> Nunca o menos 1 vez al mes<br><input type="radio"/> 1 a 3 veces mes<br><input type="radio"/> 1 vez semana<br><input checked="" type="radio"/> 2 a 4 veces semana<br><input type="radio"/> 5 a 6 veces semana<br><input type="radio"/> 1 vez al día<br><input type="radio"/> 2 a 3 veces al día<br><input type="radio"/> 5 a 6 veces al día<br><input type="radio"/> más 6 veces al día |
| carne caza: Conejo o codorniz o pato | <input checked="" type="radio"/> Nunca o menos 1 vez al mes<br><input type="radio"/> 1 a 3 veces mes<br><input type="radio"/> 1 vez semana<br><input type="radio"/> 2 a 4 veces semana<br><input type="radio"/> 5 a 6 veces semana<br><input type="radio"/> 1 vez al día<br><input type="radio"/> 2 a 3 veces al día<br><input type="radio"/> 5 a 6 veces al día<br><input type="radio"/> más 6 veces al día |
| Hígado de ternera o cerdo o pollo    | <input checked="" type="radio"/> Nunca o menos 1 vez al mes<br><input type="radio"/> 1 a 3 veces mes<br><input type="radio"/> 1 vez semana<br><input type="radio"/> 2 a 4 veces semana<br><input type="radio"/> 5 a 6 veces semana<br><input type="radio"/> 1 vez al día<br><input type="radio"/> 2 a 3 veces al día<br><input type="radio"/> 5 a 6 veces al día<br><input type="radio"/> más 6 veces al día |

|                     |                                                                                                                                                                                                                                                                                                                                                                                                              |
|---------------------|--------------------------------------------------------------------------------------------------------------------------------------------------------------------------------------------------------------------------------------------------------------------------------------------------------------------------------------------------------------------------------------------------------------|
| Vísceras            | <input checked="" type="radio"/> Nunca o menos 1 vez al mes<br><input type="radio"/> 1 a 3 veces mes<br><input type="radio"/> 1 vez semana<br><input type="radio"/> 2 a 4 veces semana<br><input type="radio"/> 5 a 6 veces semana<br><input type="radio"/> 1 vez al día<br><input type="radio"/> 2 a 3 veces al día<br><input type="radio"/> 5 a 6 veces al día<br><input type="radio"/> más 6 veces al día |
| Embutido            | <input type="radio"/> Nunca o menos 1 vez al mes<br><input checked="" type="radio"/> 1 a 3 veces mes<br><input type="radio"/> 1 vez semana<br><input type="radio"/> 2 a 4 veces semana<br><input type="radio"/> 5 a 6 veces semana<br><input type="radio"/> 1 vez al día<br><input type="radio"/> 2 a 3 veces al día<br><input type="radio"/> 5 a 6 veces al día<br><input type="radio"/> más 6 veces al día |
| Salchicha o similar | <input type="radio"/> Nunca o menos 1 vez al mes<br><input type="radio"/> 1 a 3 veces mes<br><input checked="" type="radio"/> 1 vez semana<br><input type="radio"/> 2 a 4 veces semana<br><input type="radio"/> 5 a 6 veces semana<br><input type="radio"/> 1 vez al día<br><input type="radio"/> 2 a 3 veces al día<br><input type="radio"/> 5 a 6 veces al día<br><input type="radio"/> más 6 veces al día |
| Pate o foiegras     | <input checked="" type="radio"/> Nunca o menos 1 vez al mes<br><input type="radio"/> 1 a 3 veces mes<br><input type="radio"/> 1 vez semana<br><input type="radio"/> 2 a 4 veces semana<br><input type="radio"/> 5 a 6 veces semana<br><input type="radio"/> 1 vez al día<br><input type="radio"/> 2 a 3 veces al día<br><input type="radio"/> 5 a 6 veces al día<br><input type="radio"/> más 6 veces al día |
| Hamburguesa         | <input type="radio"/> Nunca o menos 1 vez al mes<br><input type="radio"/> 1 a 3 veces mes<br><input checked="" type="radio"/> 1 vez semana<br><input type="radio"/> 2 a 4 veces semana<br><input type="radio"/> 5 a 6 veces semana<br><input type="radio"/> 1 vez al día<br><input type="radio"/> 2 a 3 veces al día<br><input type="radio"/> 5 a 6 veces al día<br><input type="radio"/> más 6 veces al día |
| tocino o bacon      | <input checked="" type="radio"/> Nunca o menos 1 vez al mes<br><input type="radio"/> 1 a 3 veces mes<br><input type="radio"/> 1 vez semana<br><input type="radio"/> 2 a 4 veces semana<br><input type="radio"/> 5 a 6 veces semana<br><input type="radio"/> 1 vez al día<br><input type="radio"/> 2 a 3 veces al día<br><input type="radio"/> 5 a 6 veces al día<br><input type="radio"/> más 6 veces al día |

---

|               |                                                                                                                                                                                                                                                                                                                                                                                                              |
|---------------|--------------------------------------------------------------------------------------------------------------------------------------------------------------------------------------------------------------------------------------------------------------------------------------------------------------------------------------------------------------------------------------------------------------|
| Pescado frito | <input type="radio"/> Nunca o menos 1 vez al mes<br><input checked="" type="radio"/> 1 a 3 veces mes<br><input type="radio"/> 1 vez semana<br><input type="radio"/> 2 a 4 veces semana<br><input type="radio"/> 5 a 6 veces semana<br><input type="radio"/> 1 vez al día<br><input type="radio"/> 2 a 3 veces al día<br><input type="radio"/> 5 a 6 veces al día<br><input type="radio"/> más 6 veces al día |
|---------------|--------------------------------------------------------------------------------------------------------------------------------------------------------------------------------------------------------------------------------------------------------------------------------------------------------------------------------------------------------------------------------------------------------------|

---

|                        |                                                                                                                                                                                                                                                                                                                                                                                                              |
|------------------------|--------------------------------------------------------------------------------------------------------------------------------------------------------------------------------------------------------------------------------------------------------------------------------------------------------------------------------------------------------------------------------------------------------------|
| pescado hervido blanco | <input checked="" type="radio"/> Nunca o menos 1 vez al mes<br><input type="radio"/> 1 a 3 veces mes<br><input type="radio"/> 1 vez semana<br><input type="radio"/> 2 a 4 veces semana<br><input type="radio"/> 5 a 6 veces semana<br><input type="radio"/> 1 vez al día<br><input type="radio"/> 2 a 3 veces al día<br><input type="radio"/> 5 a 6 veces al día<br><input type="radio"/> más 6 veces al día |
|------------------------|--------------------------------------------------------------------------------------------------------------------------------------------------------------------------------------------------------------------------------------------------------------------------------------------------------------------------------------------------------------------------------------------------------------|

---

|                      |                                                                                                                                                                                                                                                                                                                                                                                                              |
|----------------------|--------------------------------------------------------------------------------------------------------------------------------------------------------------------------------------------------------------------------------------------------------------------------------------------------------------------------------------------------------------------------------------------------------------|
| pescado hervido azul | <input checked="" type="radio"/> Nunca o menos 1 vez al mes<br><input type="radio"/> 1 a 3 veces mes<br><input type="radio"/> 1 vez semana<br><input type="radio"/> 2 a 4 veces semana<br><input type="radio"/> 5 a 6 veces semana<br><input type="radio"/> 1 vez al día<br><input type="radio"/> 2 a 3 veces al día<br><input type="radio"/> 5 a 6 veces al día<br><input type="radio"/> más 6 veces al día |
|----------------------|--------------------------------------------------------------------------------------------------------------------------------------------------------------------------------------------------------------------------------------------------------------------------------------------------------------------------------------------------------------------------------------------------------------|

---

|                    |                                                                                                                                                                                                                                                                                                                                                                                                              |
|--------------------|--------------------------------------------------------------------------------------------------------------------------------------------------------------------------------------------------------------------------------------------------------------------------------------------------------------------------------------------------------------------------------------------------------------|
| otros pescado azul | <input type="radio"/> Nunca o menos 1 vez al mes<br><input checked="" type="radio"/> 1 a 3 veces mes<br><input type="radio"/> 1 vez semana<br><input type="radio"/> 2 a 4 veces semana<br><input type="radio"/> 5 a 6 veces semana<br><input type="radio"/> 1 vez al día<br><input type="radio"/> 2 a 3 veces al día<br><input type="radio"/> 5 a 6 veces al día<br><input type="radio"/> más 6 veces al día |
|--------------------|--------------------------------------------------------------------------------------------------------------------------------------------------------------------------------------------------------------------------------------------------------------------------------------------------------------------------------------------------------------------------------------------------------------|

---

|               |                                                                                                                                                                                                                                                                                                                                                                                                              |
|---------------|--------------------------------------------------------------------------------------------------------------------------------------------------------------------------------------------------------------------------------------------------------------------------------------------------------------------------------------------------------------------------------------------------------------|
| atun conserva | <input type="radio"/> Nunca o menos 1 vez al mes<br><input type="radio"/> 1 a 3 veces mes<br><input checked="" type="radio"/> 1 vez semana<br><input type="radio"/> 2 a 4 veces semana<br><input type="radio"/> 5 a 6 veces semana<br><input type="radio"/> 1 vez al día<br><input type="radio"/> 2 a 3 veces al día<br><input type="radio"/> 5 a 6 veces al día<br><input type="radio"/> más 6 veces al día |
|---------------|--------------------------------------------------------------------------------------------------------------------------------------------------------------------------------------------------------------------------------------------------------------------------------------------------------------------------------------------------------------------------------------------------------------|

---

|                  |                                                                                                                                                                                                                                                                                                                                                                                                              |
|------------------|--------------------------------------------------------------------------------------------------------------------------------------------------------------------------------------------------------------------------------------------------------------------------------------------------------------------------------------------------------------------------------------------------------------|
| sardina conserva | <input checked="" type="radio"/> Nunca o menos 1 vez al mes<br><input type="radio"/> 1 a 3 veces mes<br><input type="radio"/> 1 vez semana<br><input type="radio"/> 2 a 4 veces semana<br><input type="radio"/> 5 a 6 veces semana<br><input type="radio"/> 1 vez al día<br><input type="radio"/> 2 a 3 veces al día<br><input type="radio"/> 5 a 6 veces al día<br><input type="radio"/> más 6 veces al día |
|------------------|--------------------------------------------------------------------------------------------------------------------------------------------------------------------------------------------------------------------------------------------------------------------------------------------------------------------------------------------------------------------------------------------------------------|

---



|                                         |                                                                                                                                                                                                                                                                                                                                                                                                              |
|-----------------------------------------|--------------------------------------------------------------------------------------------------------------------------------------------------------------------------------------------------------------------------------------------------------------------------------------------------------------------------------------------------------------------------------------------------------------|
| pescado ahumado                         | <input checked="" type="radio"/> Nunca o menos 1 vez al mes<br><input type="radio"/> 1 a 3 veces mes<br><input type="radio"/> 1 vez semana<br><input type="radio"/> 2 a 4 veces semana<br><input type="radio"/> 5 a 6 veces semana<br><input type="radio"/> 1 vez al día<br><input type="radio"/> 2 a 3 veces al día<br><input type="radio"/> 5 a 6 veces al día<br><input type="radio"/> más 6 veces al día |
| almejas o mejillones o ostras unos 100g | <input type="radio"/> Nunca o menos 1 vez al mes<br><input checked="" type="radio"/> 1 a 3 veces mes<br><input type="radio"/> 1 vez semana<br><input type="radio"/> 2 a 4 veces semana<br><input type="radio"/> 5 a 6 veces semana<br><input type="radio"/> 1 vez al día<br><input type="radio"/> 2 a 3 veces al día<br><input type="radio"/> 5 a 6 veces al día<br><input type="radio"/> más 6 veces al día |
| calamar o chipiron o sepia unos 100g    | <input type="radio"/> Nunca o menos 1 vez al mes<br><input type="radio"/> 1 a 3 veces mes<br><input checked="" type="radio"/> 1 vez semana<br><input type="radio"/> 2 a 4 veces semana<br><input type="radio"/> 5 a 6 veces semana<br><input type="radio"/> 1 vez al día<br><input type="radio"/> 2 a 3 veces al día<br><input type="radio"/> 5 a 6 veces al día<br><input type="radio"/> más 6 veces al día |
| marisco unos 100g                       | <input type="radio"/> Nunca o menos 1 vez al mes<br><input type="radio"/> 1 a 3 veces mes<br><input checked="" type="radio"/> 1 vez semana<br><input type="radio"/> 2 a 4 veces semana<br><input type="radio"/> 5 a 6 veces semana<br><input type="radio"/> 1 vez al día<br><input type="radio"/> 2 a 3 veces al día<br><input type="radio"/> 5 a 6 veces al día<br><input type="radio"/> más 6 veces al día |
| Espinacas o acelgas cocinadas           | <input checked="" type="radio"/> Nunca o menos 1 vez al mes<br><input type="radio"/> 1 a 3 veces mes<br><input type="radio"/> 1 vez semana<br><input type="radio"/> 2 a 4 veces semana<br><input type="radio"/> 5 a 6 veces semana<br><input type="radio"/> 1 vez al día<br><input type="radio"/> 2 a 3 veces al día<br><input type="radio"/> 5 a 6 veces al día<br><input type="radio"/> más 6 veces al día |
| Col o coliflor o brocoli cocinado       | <input checked="" type="radio"/> Nunca o menos 1 vez al mes<br><input type="radio"/> 1 a 3 veces mes<br><input type="radio"/> 1 vez semana<br><input type="radio"/> 2 a 4 veces semana<br><input type="radio"/> 5 a 6 veces semana<br><input type="radio"/> 1 vez al día<br><input type="radio"/> 2 a 3 veces al día<br><input type="radio"/> 5 a 6 veces al día<br><input type="radio"/> más 6 veces al día |

---

|                              |                                                                                                                                                                                                                                                                                                                                                                                                              |
|------------------------------|--------------------------------------------------------------------------------------------------------------------------------------------------------------------------------------------------------------------------------------------------------------------------------------------------------------------------------------------------------------------------------------------------------------|
| Lechuga o endivia o escarola | <input type="radio"/> Nunca o menos 1 vez al mes<br><input checked="" type="radio"/> 1 a 3 veces mes<br><input type="radio"/> 1 vez semana<br><input type="radio"/> 2 a 4 veces semana<br><input type="radio"/> 5 a 6 veces semana<br><input type="radio"/> 1 vez al día<br><input type="radio"/> 2 a 3 veces al día<br><input type="radio"/> 5 a 6 veces al día<br><input type="radio"/> más 6 veces al día |
|------------------------------|--------------------------------------------------------------------------------------------------------------------------------------------------------------------------------------------------------------------------------------------------------------------------------------------------------------------------------------------------------------------------------------------------------------|

---

|                 |                                                                                                                                                                                                                                                                                                                                                                                                              |
|-----------------|--------------------------------------------------------------------------------------------------------------------------------------------------------------------------------------------------------------------------------------------------------------------------------------------------------------------------------------------------------------------------------------------------------------|
| tomate ensalada | <input type="radio"/> Nunca o menos 1 vez al mes<br><input checked="" type="radio"/> 1 a 3 veces mes<br><input type="radio"/> 1 vez semana<br><input type="radio"/> 2 a 4 veces semana<br><input type="radio"/> 5 a 6 veces semana<br><input type="radio"/> 1 vez al día<br><input type="radio"/> 2 a 3 veces al día<br><input type="radio"/> 5 a 6 veces al día<br><input type="radio"/> más 6 veces al día |
|-----------------|--------------------------------------------------------------------------------------------------------------------------------------------------------------------------------------------------------------------------------------------------------------------------------------------------------------------------------------------------------------------------------------------------------------|

---

|         |                                                                                                                                                                                                                                                                                                                                                                                                              |
|---------|--------------------------------------------------------------------------------------------------------------------------------------------------------------------------------------------------------------------------------------------------------------------------------------------------------------------------------------------------------------------------------------------------------------|
| cebolla | <input type="radio"/> Nunca o menos 1 vez al mes<br><input type="radio"/> 1 a 3 veces mes<br><input checked="" type="radio"/> 1 vez semana<br><input type="radio"/> 2 a 4 veces semana<br><input type="radio"/> 5 a 6 veces semana<br><input type="radio"/> 1 vez al día<br><input type="radio"/> 2 a 3 veces al día<br><input type="radio"/> 5 a 6 veces al día<br><input type="radio"/> más 6 veces al día |
|---------|--------------------------------------------------------------------------------------------------------------------------------------------------------------------------------------------------------------------------------------------------------------------------------------------------------------------------------------------------------------------------------------------------------------|

---

|                      |                                                                                                                                                                                                                                                                                                                                                                                                              |
|----------------------|--------------------------------------------------------------------------------------------------------------------------------------------------------------------------------------------------------------------------------------------------------------------------------------------------------------------------------------------------------------------------------------------------------------|
| Zanahoria o calabaza | <input checked="" type="radio"/> Nunca o menos 1 vez al mes<br><input type="radio"/> 1 a 3 veces mes<br><input type="radio"/> 1 vez semana<br><input type="radio"/> 2 a 4 veces semana<br><input type="radio"/> 5 a 6 veces semana<br><input type="radio"/> 1 vez al día<br><input type="radio"/> 2 a 3 veces al día<br><input type="radio"/> 5 a 6 veces al día<br><input type="radio"/> más 6 veces al día |
|----------------------|--------------------------------------------------------------------------------------------------------------------------------------------------------------------------------------------------------------------------------------------------------------------------------------------------------------------------------------------------------------------------------------------------------------|

---

|               |                                                                                                                                                                                                                                                                                                                                                                                                              |
|---------------|--------------------------------------------------------------------------------------------------------------------------------------------------------------------------------------------------------------------------------------------------------------------------------------------------------------------------------------------------------------------------------------------------------------|
| Judías verdes | <input checked="" type="radio"/> Nunca o menos 1 vez al mes<br><input type="radio"/> 1 a 3 veces mes<br><input type="radio"/> 1 vez semana<br><input type="radio"/> 2 a 4 veces semana<br><input type="radio"/> 5 a 6 veces semana<br><input type="radio"/> 1 vez al día<br><input type="radio"/> 2 a 3 veces al día<br><input type="radio"/> 5 a 6 veces al día<br><input type="radio"/> más 6 veces al día |
|---------------|--------------------------------------------------------------------------------------------------------------------------------------------------------------------------------------------------------------------------------------------------------------------------------------------------------------------------------------------------------------------------------------------------------------|

---

|                                |                                                                                                                                                                                                                                                                                                                                                                                                              |
|--------------------------------|--------------------------------------------------------------------------------------------------------------------------------------------------------------------------------------------------------------------------------------------------------------------------------------------------------------------------------------------------------------------------------------------------------------|
| Berenjena o calabacin o pepino | <input checked="" type="radio"/> Nunca o menos 1 vez al mes<br><input type="radio"/> 1 a 3 veces mes<br><input type="radio"/> 1 vez semana<br><input type="radio"/> 2 a 4 veces semana<br><input type="radio"/> 5 a 6 veces semana<br><input type="radio"/> 1 vez al día<br><input type="radio"/> 2 a 3 veces al día<br><input type="radio"/> 5 a 6 veces al día<br><input type="radio"/> más 6 veces al día |
|--------------------------------|--------------------------------------------------------------------------------------------------------------------------------------------------------------------------------------------------------------------------------------------------------------------------------------------------------------------------------------------------------------------------------------------------------------|

---

---

|          |                                                                                                                                                                                                                                                                                                                                                                                                              |
|----------|--------------------------------------------------------------------------------------------------------------------------------------------------------------------------------------------------------------------------------------------------------------------------------------------------------------------------------------------------------------------------------------------------------------|
| pimiento | <input checked="" type="radio"/> Nunca o menos 1 vez al mes<br><input type="radio"/> 1 a 3 veces mes<br><input type="radio"/> 1 vez semana<br><input type="radio"/> 2 a 4 veces semana<br><input type="radio"/> 5 a 6 veces semana<br><input type="radio"/> 1 vez al día<br><input type="radio"/> 2 a 3 veces al día<br><input type="radio"/> 5 a 6 veces al día<br><input type="radio"/> más 6 veces al día |
|----------|--------------------------------------------------------------------------------------------------------------------------------------------------------------------------------------------------------------------------------------------------------------------------------------------------------------------------------------------------------------------------------------------------------------|

---

|           |                                                                                                                                                                                                                                                                                                                                                                                                              |
|-----------|--------------------------------------------------------------------------------------------------------------------------------------------------------------------------------------------------------------------------------------------------------------------------------------------------------------------------------------------------------------------------------------------------------------|
| alcachofa | <input checked="" type="radio"/> Nunca o menos 1 vez al mes<br><input type="radio"/> 1 a 3 veces mes<br><input type="radio"/> 1 vez semana<br><input type="radio"/> 2 a 4 veces semana<br><input type="radio"/> 5 a 6 veces semana<br><input type="radio"/> 1 vez al día<br><input type="radio"/> 2 a 3 veces al día<br><input type="radio"/> 5 a 6 veces al día<br><input type="radio"/> más 6 veces al día |
|-----------|--------------------------------------------------------------------------------------------------------------------------------------------------------------------------------------------------------------------------------------------------------------------------------------------------------------------------------------------------------------------------------------------------------------|

---

|            |                                                                                                                                                                                                                                                                                                                                                                                                              |
|------------|--------------------------------------------------------------------------------------------------------------------------------------------------------------------------------------------------------------------------------------------------------------------------------------------------------------------------------------------------------------------------------------------------------------|
| espárragos | <input type="radio"/> Nunca o menos 1 vez al mes<br><input checked="" type="radio"/> 1 a 3 veces mes<br><input type="radio"/> 1 vez semana<br><input type="radio"/> 2 a 4 veces semana<br><input type="radio"/> 5 a 6 veces semana<br><input type="radio"/> 1 vez al día<br><input type="radio"/> 2 a 3 veces al día<br><input type="radio"/> 5 a 6 veces al día<br><input type="radio"/> más 6 veces al día |
|------------|--------------------------------------------------------------------------------------------------------------------------------------------------------------------------------------------------------------------------------------------------------------------------------------------------------------------------------------------------------------------------------------------------------------|

---

|              |                                                                                                                                                                                                                                                                                                                                                                                                              |
|--------------|--------------------------------------------------------------------------------------------------------------------------------------------------------------------------------------------------------------------------------------------------------------------------------------------------------------------------------------------------------------------------------------------------------------|
| maíz hervido | <input checked="" type="radio"/> Nunca o menos 1 vez al mes<br><input type="radio"/> 1 a 3 veces mes<br><input type="radio"/> 1 vez semana<br><input type="radio"/> 2 a 4 veces semana<br><input type="radio"/> 5 a 6 veces semana<br><input type="radio"/> 1 vez al día<br><input type="radio"/> 2 a 3 veces al día<br><input type="radio"/> 5 a 6 veces al día<br><input type="radio"/> más 6 veces al día |
|--------------|--------------------------------------------------------------------------------------------------------------------------------------------------------------------------------------------------------------------------------------------------------------------------------------------------------------------------------------------------------------------------------------------------------------|

---

|           |                                                                                                                                                                                                                                                                                                                                                                                                              |
|-----------|--------------------------------------------------------------------------------------------------------------------------------------------------------------------------------------------------------------------------------------------------------------------------------------------------------------------------------------------------------------------------------------------------------------|
| legumbres | <input type="radio"/> Nunca o menos 1 vez al mes<br><input checked="" type="radio"/> 1 a 3 veces mes<br><input type="radio"/> 1 vez semana<br><input type="radio"/> 2 a 4 veces semana<br><input type="radio"/> 5 a 6 veces semana<br><input type="radio"/> 1 vez al día<br><input type="radio"/> 2 a 3 veces al día<br><input type="radio"/> 5 a 6 veces al día<br><input type="radio"/> más 6 veces al día |
|-----------|--------------------------------------------------------------------------------------------------------------------------------------------------------------------------------------------------------------------------------------------------------------------------------------------------------------------------------------------------------------------------------------------------------------|

---

|                       |                                                                                                                                                                                                                                                                                                                                                                                                              |
|-----------------------|--------------------------------------------------------------------------------------------------------------------------------------------------------------------------------------------------------------------------------------------------------------------------------------------------------------------------------------------------------------------------------------------------------------|
| naranjas o mandarinas | <input type="radio"/> Nunca o menos 1 vez al mes<br><input type="radio"/> 1 a 3 veces mes<br><input type="radio"/> 1 vez semana<br><input checked="" type="radio"/> 2 a 4 veces semana<br><input type="radio"/> 5 a 6 veces semana<br><input type="radio"/> 1 vez al día<br><input type="radio"/> 2 a 3 veces al día<br><input type="radio"/> 5 a 6 veces al día<br><input type="radio"/> más 6 veces al día |
|-----------------------|--------------------------------------------------------------------------------------------------------------------------------------------------------------------------------------------------------------------------------------------------------------------------------------------------------------------------------------------------------------------------------------------------------------|

---

|                       |                                                                                                                                                                                                                                                                                                                                                                                                              |
|-----------------------|--------------------------------------------------------------------------------------------------------------------------------------------------------------------------------------------------------------------------------------------------------------------------------------------------------------------------------------------------------------------------------------------------------------|
| zum natural fruta     | <input type="radio"/> Nunca o menos 1 vez al mes<br><input type="radio"/> 1 a 3 veces mes<br><input type="radio"/> 1 vez semana<br><input checked="" type="radio"/> 2 a 4 veces semana<br><input type="radio"/> 5 a 6 veces semana<br><input type="radio"/> 1 vez al día<br><input type="radio"/> 2 a 3 veces al día<br><input type="radio"/> 5 a 6 veces al día<br><input type="radio"/> más 6 veces al día |
| platano               | <input checked="" type="radio"/> Nunca o menos 1 vez al mes<br><input type="radio"/> 1 a 3 veces mes<br><input type="radio"/> 1 vez semana<br><input type="radio"/> 2 a 4 veces semana<br><input type="radio"/> 5 a 6 veces semana<br><input type="radio"/> 1 vez al día<br><input type="radio"/> 2 a 3 veces al día<br><input type="radio"/> 5 a 6 veces al día<br><input type="radio"/> más 6 veces al día |
| manzana o pera        | <input type="radio"/> Nunca o menos 1 vez al mes<br><input checked="" type="radio"/> 1 a 3 veces mes<br><input type="radio"/> 1 vez semana<br><input type="radio"/> 2 a 4 veces semana<br><input type="radio"/> 5 a 6 veces semana<br><input type="radio"/> 1 vez al día<br><input type="radio"/> 2 a 3 veces al día<br><input type="radio"/> 5 a 6 veces al día<br><input type="radio"/> más 6 veces al día |
| melocotón o nectarina | <input checked="" type="radio"/> Nunca o menos 1 vez al mes<br><input type="radio"/> 1 a 3 veces mes<br><input type="radio"/> 1 vez semana<br><input type="radio"/> 2 a 4 veces semana<br><input type="radio"/> 5 a 6 veces semana<br><input type="radio"/> 1 vez al día<br><input type="radio"/> 2 a 3 veces al día<br><input type="radio"/> 5 a 6 veces al día<br><input type="radio"/> más 6 veces al día |
| sandia o melon        | <input type="radio"/> Nunca o menos 1 vez al mes<br><input type="radio"/> 1 a 3 veces mes<br><input type="radio"/> 1 vez semana<br><input checked="" type="radio"/> 2 a 4 veces semana<br><input type="radio"/> 5 a 6 veces semana<br><input type="radio"/> 1 vez al día<br><input type="radio"/> 2 a 3 veces al día<br><input type="radio"/> 5 a 6 veces al día<br><input type="radio"/> más 6 veces al día |
| uva                   | <input checked="" type="radio"/> Nunca o menos 1 vez al mes<br><input type="radio"/> 1 a 3 veces mes<br><input type="radio"/> 1 vez semana<br><input type="radio"/> 2 a 4 veces semana<br><input type="radio"/> 5 a 6 veces semana<br><input type="radio"/> 1 vez al día<br><input type="radio"/> 2 a 3 veces al día<br><input type="radio"/> 5 a 6 veces al día<br><input type="radio"/> más 6 veces al día |

|                 |                                                                                                                                                                                                                                                                                                                                                                                                              |
|-----------------|--------------------------------------------------------------------------------------------------------------------------------------------------------------------------------------------------------------------------------------------------------------------------------------------------------------------------------------------------------------------------------------------------------------|
| bruna o ciruela | <input checked="" type="radio"/> Nunca o menos 1 vez al mes<br><input type="radio"/> 1 a 3 veces mes<br><input type="radio"/> 1 vez semana<br><input type="radio"/> 2 a 4 veces semana<br><input type="radio"/> 5 a 6 veces semana<br><input type="radio"/> 1 vez al día<br><input type="radio"/> 2 a 3 veces al día<br><input type="radio"/> 5 a 6 veces al día<br><input type="radio"/> más 6 veces al día |
| kiwi            | <input checked="" type="radio"/> Nunca o menos 1 vez al mes<br><input type="radio"/> 1 a 3 veces mes<br><input type="radio"/> 1 vez semana<br><input type="radio"/> 2 a 4 veces semana<br><input type="radio"/> 5 a 6 veces semana<br><input type="radio"/> 1 vez al día<br><input type="radio"/> 2 a 3 veces al día<br><input type="radio"/> 5 a 6 veces al día<br><input type="radio"/> más 6 veces al día |
| aceituna        | <input type="radio"/> Nunca o menos 1 vez al mes<br><input checked="" type="radio"/> 1 a 3 veces mes<br><input type="radio"/> 1 vez semana<br><input type="radio"/> 2 a 4 veces semana<br><input type="radio"/> 5 a 6 veces semana<br><input type="radio"/> 1 vez al día<br><input type="radio"/> 2 a 3 veces al día<br><input type="radio"/> 5 a 6 veces al día<br><input type="radio"/> más 6 veces al día |
| frutos secos    | <input type="radio"/> Nunca o menos 1 vez al mes<br><input type="radio"/> 1 a 3 veces mes<br><input checked="" type="radio"/> 1 vez semana<br><input type="radio"/> 2 a 4 veces semana<br><input type="radio"/> 5 a 6 veces semana<br><input type="radio"/> 1 vez al día<br><input type="radio"/> 2 a 3 veces al día<br><input type="radio"/> 5 a 6 veces al día<br><input type="radio"/> más 6 veces al día |
| pan blanco      | <input type="radio"/> Nunca o menos 1 vez al mes<br><input type="radio"/> 1 a 3 veces mes<br><input checked="" type="radio"/> 1 vez semana<br><input type="radio"/> 2 a 4 veces semana<br><input type="radio"/> 5 a 6 veces semana<br><input type="radio"/> 1 vez al día<br><input type="radio"/> 2 a 3 veces al día<br><input type="radio"/> 5 a 6 veces al día<br><input type="radio"/> más 6 veces al día |
| pan integral    | <input checked="" type="radio"/> Nunca o menos 1 vez al mes<br><input type="radio"/> 1 a 3 veces mes<br><input type="radio"/> 1 vez semana<br><input type="radio"/> 2 a 4 veces semana<br><input type="radio"/> 5 a 6 veces semana<br><input type="radio"/> 1 vez al día<br><input type="radio"/> 2 a 3 veces al día<br><input type="radio"/> 5 a 6 veces al día<br><input type="radio"/> más 6 veces al día |

---

cereales desayuno

- ☒ Nunca o menos 1 vez al mes  
☐ 1 a 3 veces mes  
☐ 1 vez semana  
☐ 2 a 4 veces semana  
☐ 5 a 6 veces semana  
☐ 1 vez al día  
☐ 2 a 3 veces al día  
☐ 5 a 6 veces al día  
☐ más 6 veces al día

---

patatas fritas

- ☐ Nunca o menos 1 vez al mes  
☐ 1 a 3 veces mes  
☒ 1 vez semana  
☐ 2 a 4 veces semana  
☐ 5 a 6 veces semana  
☐ 1 vez al día  
☐ 2 a 3 veces al día  
☐ 5 a 6 veces al día  
☐ más 6 veces al día

---

patatas cocidas o asadas

- ☐ Nunca o menos 1 vez al mes  
☒ 1 a 3 veces mes  
☐ 1 vez semana  
☐ 2 a 4 veces semana  
☐ 5 a 6 veces semana  
☐ 1 vez al día  
☐ 2 a 3 veces al día  
☐ 5 a 6 veces al día  
☐ más 6 veces al día

---

bolsa papas

- ☐ Nunca o menos 1 vez al mes  
☐ 1 a 3 veces mes  
☐ 1 vez semana  
☒ 2 a 4 veces semana  
☐ 5 a 6 veces semana  
☐ 1 vez al día  
☐ 2 a 3 veces al día  
☐ 5 a 6 veces al día  
☐ más 6 veces al día

---

arroz cocinado

- ☐ Nunca o menos 1 vez al mes  
☐ 1 a 3 veces mes  
☐ 1 vez semana  
☒ 2 a 4 veces semana  
☐ 5 a 6 veces semana  
☐ 1 vez al día  
☐ 2 a 3 veces al día  
☐ 5 a 6 veces al día  
☐ más 6 veces al día

---

pasta

- ☐ Nunca o menos 1 vez al mes  
☐ 1 a 3 veces mes  
☒ 1 vez semana  
☐ 2 a 4 veces semana  
☐ 5 a 6 veces semana  
☐ 1 vez al día  
☐ 2 a 3 veces al día  
☐ 5 a 6 veces al día  
☐ más 6 veces al día

|                     |                                                                                                                                                                                                                                                                                                                                                                                                              |
|---------------------|--------------------------------------------------------------------------------------------------------------------------------------------------------------------------------------------------------------------------------------------------------------------------------------------------------------------------------------------------------------------------------------------------------------|
| pizza               | <input type="radio"/> Nunca o menos 1 vez al mes<br><input type="radio"/> 1 a 3 veces mes<br><input checked="" type="radio"/> 1 vez semana<br><input type="radio"/> 2 a 4 veces semana<br><input type="radio"/> 5 a 6 veces semana<br><input type="radio"/> 1 vez al día<br><input type="radio"/> 2 a 3 veces al día<br><input type="radio"/> 5 a 6 veces al día<br><input type="radio"/> más 6 veces al día |
| aceite oliva        | <input type="radio"/> Nunca o menos 1 vez al mes<br><input checked="" type="radio"/> 1 a 3 veces mes<br><input type="radio"/> 1 vez semana<br><input type="radio"/> 2 a 4 veces semana<br><input type="radio"/> 5 a 6 veces semana<br><input type="radio"/> 1 vez al día<br><input type="radio"/> 2 a 3 veces al día<br><input type="radio"/> 5 a 6 veces al día<br><input type="radio"/> más 6 veces al día |
| otros aceites       | <input checked="" type="radio"/> Nunca o menos 1 vez al mes<br><input type="radio"/> 1 a 3 veces mes<br><input type="radio"/> 1 vez semana<br><input type="radio"/> 2 a 4 veces semana<br><input type="radio"/> 5 a 6 veces semana<br><input type="radio"/> 1 vez al día<br><input type="radio"/> 2 a 3 veces al día<br><input type="radio"/> 5 a 6 veces al día<br><input type="radio"/> más 6 veces al día |
| margarina           | <input checked="" type="radio"/> Nunca o menos 1 vez al mes<br><input type="radio"/> 1 a 3 veces mes<br><input type="radio"/> 1 vez semana<br><input type="radio"/> 2 a 4 veces semana<br><input type="radio"/> 5 a 6 veces semana<br><input type="radio"/> 1 vez al día<br><input type="radio"/> 2 a 3 veces al día<br><input type="radio"/> 5 a 6 veces al día<br><input type="radio"/> más 6 veces al día |
| mantequilla         | <input checked="" type="radio"/> Nunca o menos 1 vez al mes<br><input type="radio"/> 1 a 3 veces mes<br><input type="radio"/> 1 vez semana<br><input type="radio"/> 2 a 4 veces semana<br><input type="radio"/> 5 a 6 veces semana<br><input type="radio"/> 1 vez al día<br><input type="radio"/> 2 a 3 veces al día<br><input type="radio"/> 5 a 6 veces al día<br><input type="radio"/> más 6 veces al día |
| galletas tipo maria | <input type="radio"/> Nunca o menos 1 vez al mes<br><input type="radio"/> 1 a 3 veces mes<br><input checked="" type="radio"/> 1 vez semana<br><input type="radio"/> 2 a 4 veces semana<br><input type="radio"/> 5 a 6 veces semana<br><input type="radio"/> 1 vez al día<br><input type="radio"/> 2 a 3 veces al día<br><input type="radio"/> 5 a 6 veces al día<br><input type="radio"/> más 6 veces al día |

|                           |                                                                                                                                                                                                                                                                                                                                                                                                              |
|---------------------------|--------------------------------------------------------------------------------------------------------------------------------------------------------------------------------------------------------------------------------------------------------------------------------------------------------------------------------------------------------------------------------------------------------------|
| galletas chocolate        | <input type="radio"/> Nunca o menos 1 vez al mes<br><input type="radio"/> 1 a 3 veces mes<br><input checked="" type="radio"/> 1 vez semana<br><input type="radio"/> 2 a 4 veces semana<br><input type="radio"/> 5 a 6 veces semana<br><input type="radio"/> 1 vez al día<br><input type="radio"/> 2 a 3 veces al día<br><input type="radio"/> 5 a 6 veces al día<br><input type="radio"/> más 6 veces al día |
| bollieria                 | <input type="radio"/> Nunca o menos 1 vez al mes<br><input type="radio"/> 1 a 3 veces mes<br><input checked="" type="radio"/> 1 vez semana<br><input type="radio"/> 2 a 4 veces semana<br><input type="radio"/> 5 a 6 veces semana<br><input type="radio"/> 1 vez al día<br><input type="radio"/> 2 a 3 veces al día<br><input type="radio"/> 5 a 6 veces al día<br><input type="radio"/> más 6 veces al día |
| chocolate o bombones      | <input type="radio"/> Nunca o menos 1 vez al mes<br><input type="radio"/> 1 a 3 veces mes<br><input type="radio"/> 1 vez semana<br><input type="radio"/> 2 a 4 veces semana<br><input checked="" type="radio"/> 5 a 6 veces semana<br><input type="radio"/> 1 vez al día<br><input type="radio"/> 2 a 3 veces al día<br><input type="radio"/> 5 a 6 veces al día<br><input type="radio"/> más 6 veces al día |
| chocolate polvo o colacao | <input type="radio"/> Nunca o menos 1 vez al mes<br><input type="radio"/> 1 a 3 veces mes<br><input type="radio"/> 1 vez semana<br><input checked="" type="radio"/> 2 a 4 veces semana<br><input type="radio"/> 5 a 6 veces semana<br><input type="radio"/> 1 vez al día<br><input type="radio"/> 2 a 3 veces al día<br><input type="radio"/> 5 a 6 veces al día<br><input type="radio"/> más 6 veces al día |
| vino tinto                | <input checked="" type="radio"/> Nunca o menos 1 vez al mes<br><input type="radio"/> 1 a 3 veces mes<br><input type="radio"/> 1 vez semana<br><input type="radio"/> 2 a 4 veces semana<br><input type="radio"/> 5 a 6 veces semana<br><input type="radio"/> 1 vez al día<br><input type="radio"/> 2 a 3 veces al día<br><input type="radio"/> 5 a 6 veces al día<br><input type="radio"/> más 6 veces al día |
| vino blanco               | <input checked="" type="radio"/> Nunca o menos 1 vez al mes<br><input type="radio"/> 1 a 3 veces mes<br><input type="radio"/> 1 vez semana<br><input type="radio"/> 2 a 4 veces semana<br><input type="radio"/> 5 a 6 veces semana<br><input type="radio"/> 1 vez al día<br><input type="radio"/> 2 a 3 veces al día<br><input type="radio"/> 5 a 6 veces al día<br><input type="radio"/> más 6 veces al día |



---

|                    |                                                                                                                                                                                                                                                                                                                                                                                                              |
|--------------------|--------------------------------------------------------------------------------------------------------------------------------------------------------------------------------------------------------------------------------------------------------------------------------------------------------------------------------------------------------------------------------------------------------------|
| vino seco o vermut | <input checked="" type="radio"/> Nunca o menos 1 vez al mes<br><input type="radio"/> 1 a 3 veces mes<br><input type="radio"/> 1 vez semana<br><input type="radio"/> 2 a 4 veces semana<br><input type="radio"/> 5 a 6 veces semana<br><input type="radio"/> 1 vez al día<br><input type="radio"/> 2 a 3 veces al día<br><input type="radio"/> 5 a 6 veces al día<br><input type="radio"/> más 6 veces al día |
|--------------------|--------------------------------------------------------------------------------------------------------------------------------------------------------------------------------------------------------------------------------------------------------------------------------------------------------------------------------------------------------------------------------------------------------------|

---

|         |                                                                                                                                                                                                                                                                                                                                                                                                              |
|---------|--------------------------------------------------------------------------------------------------------------------------------------------------------------------------------------------------------------------------------------------------------------------------------------------------------------------------------------------------------------------------------------------------------------|
| cerveza | <input checked="" type="radio"/> Nunca o menos 1 vez al mes<br><input type="radio"/> 1 a 3 veces mes<br><input type="radio"/> 1 vez semana<br><input type="radio"/> 2 a 4 veces semana<br><input type="radio"/> 5 a 6 veces semana<br><input type="radio"/> 1 vez al día<br><input type="radio"/> 2 a 3 veces al día<br><input type="radio"/> 5 a 6 veces al día<br><input type="radio"/> más 6 veces al día |
|---------|--------------------------------------------------------------------------------------------------------------------------------------------------------------------------------------------------------------------------------------------------------------------------------------------------------------------------------------------------------------------------------------------------------------|

---

|                     |                                                                                                                                                                                                                                                                                                                                                                                                              |
|---------------------|--------------------------------------------------------------------------------------------------------------------------------------------------------------------------------------------------------------------------------------------------------------------------------------------------------------------------------------------------------------------------------------------------------------|
| cerveza sin alcohol | <input checked="" type="radio"/> Nunca o menos 1 vez al mes<br><input type="radio"/> 1 a 3 veces mes<br><input type="radio"/> 1 vez semana<br><input type="radio"/> 2 a 4 veces semana<br><input type="radio"/> 5 a 6 veces semana<br><input type="radio"/> 1 vez al día<br><input type="radio"/> 2 a 3 veces al día<br><input type="radio"/> 5 a 6 veces al día<br><input type="radio"/> más 6 veces al día |
|---------------------|--------------------------------------------------------------------------------------------------------------------------------------------------------------------------------------------------------------------------------------------------------------------------------------------------------------------------------------------------------------------------------------------------------------|

---

|         |                                                                                                                                                                                                                                                                                                                                                                                                              |
|---------|--------------------------------------------------------------------------------------------------------------------------------------------------------------------------------------------------------------------------------------------------------------------------------------------------------------------------------------------------------------------------------------------------------------|
| licores | <input checked="" type="radio"/> Nunca o menos 1 vez al mes<br><input type="radio"/> 1 a 3 veces mes<br><input type="radio"/> 1 vez semana<br><input type="radio"/> 2 a 4 veces semana<br><input type="radio"/> 5 a 6 veces semana<br><input type="radio"/> 1 vez al día<br><input type="radio"/> 2 a 3 veces al día<br><input type="radio"/> 5 a 6 veces al día<br><input type="radio"/> más 6 veces al día |
|---------|--------------------------------------------------------------------------------------------------------------------------------------------------------------------------------------------------------------------------------------------------------------------------------------------------------------------------------------------------------------------------------------------------------------|

---

|                       |                                                                                                                                                                                                                                                                                                                                                                                                              |
|-----------------------|--------------------------------------------------------------------------------------------------------------------------------------------------------------------------------------------------------------------------------------------------------------------------------------------------------------------------------------------------------------------------------------------------------------|
| ginebra o ron o vodka | <input checked="" type="radio"/> Nunca o menos 1 vez al mes<br><input type="radio"/> 1 a 3 veces mes<br><input type="radio"/> 1 vez semana<br><input type="radio"/> 2 a 4 veces semana<br><input type="radio"/> 5 a 6 veces semana<br><input type="radio"/> 1 vez al día<br><input type="radio"/> 2 a 3 veces al día<br><input type="radio"/> 5 a 6 veces al día<br><input type="radio"/> más 6 veces al día |
|-----------------------|--------------------------------------------------------------------------------------------------------------------------------------------------------------------------------------------------------------------------------------------------------------------------------------------------------------------------------------------------------------------------------------------------------------|

---

|                 |                                                                                                                                                                                                                                                                                                                                                                                                              |
|-----------------|--------------------------------------------------------------------------------------------------------------------------------------------------------------------------------------------------------------------------------------------------------------------------------------------------------------------------------------------------------------------------------------------------------------|
| refresco normal | <input checked="" type="radio"/> Nunca o menos 1 vez al mes<br><input type="radio"/> 1 a 3 veces mes<br><input type="radio"/> 1 vez semana<br><input type="radio"/> 2 a 4 veces semana<br><input type="radio"/> 5 a 6 veces semana<br><input type="radio"/> 1 vez al día<br><input type="radio"/> 2 a 3 veces al día<br><input type="radio"/> 5 a 6 veces al día<br><input type="radio"/> más 6 veces al día |
|-----------------|--------------------------------------------------------------------------------------------------------------------------------------------------------------------------------------------------------------------------------------------------------------------------------------------------------------------------------------------------------------------------------------------------------------|

---

|                          |                                                                                                                                                                                                                                                                                                                                                                                                              |
|--------------------------|--------------------------------------------------------------------------------------------------------------------------------------------------------------------------------------------------------------------------------------------------------------------------------------------------------------------------------------------------------------------------------------------------------------|
| refresco sin azúcar      | <input type="radio"/> Nunca o menos 1 vez al mes<br><input type="radio"/> 1 a 3 veces mes<br><input checked="" type="radio"/> 1 vez semana<br><input type="radio"/> 2 a 4 veces semana<br><input type="radio"/> 5 a 6 veces semana<br><input type="radio"/> 1 vez al día<br><input type="radio"/> 2 a 3 veces al día<br><input type="radio"/> 5 a 6 veces al día<br><input type="radio"/> más 6 veces al día |
| Agua del grifo           | <input checked="" type="radio"/> Nunca o menos 1 vez al mes<br><input type="radio"/> 1 a 3 veces mes<br><input type="radio"/> 1 vez semana<br><input type="radio"/> 2 a 4 veces semana<br><input type="radio"/> 5 a 6 veces semana<br><input type="radio"/> 1 vez al día<br><input type="radio"/> 2 a 3 veces al día<br><input type="radio"/> 5 a 6 veces al día<br><input type="radio"/> más 6 veces al día |
| agua embotellada sin gas | <input type="radio"/> Nunca o menos 1 vez al mes<br><input type="radio"/> 1 a 3 veces mes<br><input type="radio"/> 1 vez semana<br><input type="radio"/> 2 a 4 veces semana<br><input type="radio"/> 5 a 6 veces semana<br><input type="radio"/> 1 vez al día<br><input type="radio"/> 2 a 3 veces al día<br><input type="radio"/> 5 a 6 veces al día<br><input checked="" type="radio"/> más 6 veces al día |
| agua embotellada con gas | <input checked="" type="radio"/> Nunca o menos 1 vez al mes<br><input type="radio"/> 1 a 3 veces mes<br><input type="radio"/> 1 vez semana<br><input type="radio"/> 2 a 4 veces semana<br><input type="radio"/> 5 a 6 veces semana<br><input type="radio"/> 1 vez al día<br><input type="radio"/> 2 a 3 veces al día<br><input type="radio"/> 5 a 6 veces al día<br><input type="radio"/> más 6 veces al día |
| zumو frutas embasado     | <input checked="" type="radio"/> Nunca o menos 1 vez al mes<br><input type="radio"/> 1 a 3 veces mes<br><input type="radio"/> 1 vez semana<br><input type="radio"/> 2 a 4 veces semana<br><input type="radio"/> 5 a 6 veces semana<br><input type="radio"/> 1 vez al día<br><input type="radio"/> 2 a 3 veces al día<br><input type="radio"/> 5 a 6 veces al día<br><input type="radio"/> más 6 veces al día |
| cafe                     | <input checked="" type="radio"/> Nunca o menos 1 vez al mes<br><input type="radio"/> 1 a 3 veces mes<br><input type="radio"/> 1 vez semana<br><input type="radio"/> 2 a 4 veces semana<br><input type="radio"/> 5 a 6 veces semana<br><input type="radio"/> 1 vez al día<br><input type="radio"/> 2 a 3 veces al día<br><input type="radio"/> 5 a 6 veces al día<br><input type="radio"/> más 6 veces al día |

---

café descafeinado

- ☐ Nunca o menos 1 vez al mes  
☐ 1 a 3 veces mes  
☐ 1 vez semana  
☒ 2 a 4 veces semana  
☐ 5 a 6 veces semana  
☐ 1 vez al día  
☐ 2 a 3 veces al día  
☐ 5 a 6 veces al día  
☐ más 6 veces al día

---

té o infusión

- ☒ Nunca o menos 1 vez al mes  
☐ 1 a 3 veces mes  
☐ 1 vez semana  
☐ 2 a 4 veces semana  
☐ 5 a 6 veces semana  
☐ 1 vez al día  
☐ 2 a 3 veces al día  
☐ 5 a 6 veces al día  
☐ más 6 veces al día

---

sopa o puré verduras

- ☐ Nunca o menos 1 vez al mes  
☐ 1 a 3 veces mes  
☒ 1 vez semana  
☐ 2 a 4 veces semana  
☐ 5 a 6 veces semana  
☐ 1 vez al día  
☐ 2 a 3 veces al día  
☐ 5 a 6 veces al día  
☐ más 6 veces al día

---

croquetas pollo jamón

- ☐ Nunca o menos 1 vez al mes  
☐ 1 a 3 veces mes  
☒ 1 vez semana  
☐ 2 a 4 veces semana  
☐ 5 a 6 veces semana  
☐ 1 vez al día  
☐ 2 a 3 veces al día  
☐ 5 a 6 veces al día  
☐ más 6 veces al día

---

croquetas pescado

- ☐ Nunca o menos 1 vez al mes  
☐ 1 a 3 veces mes  
☒ 1 vez semana  
☐ 2 a 4 veces semana  
☐ 5 a 6 veces semana  
☐ 1 vez al día  
☐ 2 a 3 veces al día  
☐ 5 a 6 veces al día  
☐ más 6 veces al día

---

mayonesa

- ☐ Nunca o menos 1 vez al mes  
☐ 1 a 3 veces mes  
☒ 1 vez semana  
☐ 2 a 4 veces semana  
☐ 5 a 6 veces semana  
☐ 1 vez al día  
☐ 2 a 3 veces al día  
☐ 5 a 6 veces al día  
☐ más 6 veces al día

|                  |                                                                                                                                                                                                                                                                                                                                                                                                              |
|------------------|--------------------------------------------------------------------------------------------------------------------------------------------------------------------------------------------------------------------------------------------------------------------------------------------------------------------------------------------------------------------------------------------------------------|
| salsa tomate     | <input type="radio"/> Nunca o menos 1 vez al mes<br><input type="radio"/> 1 a 3 veces mes<br><input type="radio"/> 1 vez semana<br><input checked="" type="radio"/> 2 a 4 veces semana<br><input type="radio"/> 5 a 6 veces semana<br><input type="radio"/> 1 vez al día<br><input type="radio"/> 2 a 3 veces al día<br><input type="radio"/> 5 a 6 veces al día<br><input type="radio"/> más 6 veces al día |
| ketchup          | <input checked="" type="radio"/> Nunca o menos 1 vez al mes<br><input type="radio"/> 1 a 3 veces mes<br><input type="radio"/> 1 vez semana<br><input type="radio"/> 2 a 4 veces semana<br><input type="radio"/> 5 a 6 veces semana<br><input type="radio"/> 1 vez al día<br><input type="radio"/> 2 a 3 veces al día<br><input type="radio"/> 5 a 6 veces al día<br><input type="radio"/> más 6 veces al día |
| sal              | <input checked="" type="radio"/> Nunca o menos 1 vez al mes<br><input type="radio"/> 1 a 3 veces mes<br><input type="radio"/> 1 vez semana<br><input type="radio"/> 2 a 4 veces semana<br><input type="radio"/> 5 a 6 veces semana<br><input type="radio"/> 1 vez al día<br><input type="radio"/> 2 a 3 veces al día<br><input type="radio"/> 5 a 6 veces al día<br><input type="radio"/> más 6 veces al día |
| ajo              | <input checked="" type="radio"/> Nunca o menos 1 vez al mes<br><input type="radio"/> 1 a 3 veces mes<br><input type="radio"/> 1 vez semana<br><input type="radio"/> 2 a 4 veces semana<br><input type="radio"/> 5 a 6 veces semana<br><input type="radio"/> 1 vez al día<br><input type="radio"/> 2 a 3 veces al día<br><input type="radio"/> 5 a 6 veces al día<br><input type="radio"/> más 6 veces al día |
| mermelada o miel | <input checked="" type="radio"/> Nunca o menos 1 vez al mes<br><input type="radio"/> 1 a 3 veces mes<br><input type="radio"/> 1 vez semana<br><input type="radio"/> 2 a 4 veces semana<br><input type="radio"/> 5 a 6 veces semana<br><input type="radio"/> 1 vez al día<br><input type="radio"/> 2 a 3 veces al día<br><input type="radio"/> 5 a 6 veces al día<br><input type="radio"/> más 6 veces al día |
| azúcar           | <input type="radio"/> Nunca o menos 1 vez al mes<br><input type="radio"/> 1 a 3 veces mes<br><input type="radio"/> 1 vez semana<br><input checked="" type="radio"/> 2 a 4 veces semana<br><input type="radio"/> 5 a 6 veces semana<br><input type="radio"/> 1 vez al día<br><input type="radio"/> 2 a 3 veces al día<br><input type="radio"/> 5 a 6 veces al día<br><input type="radio"/> más 6 veces al día |

|                                       |                                                                                                                                                                                                                                                                                                                                                                                                                                                                                                                               |
|---------------------------------------|-------------------------------------------------------------------------------------------------------------------------------------------------------------------------------------------------------------------------------------------------------------------------------------------------------------------------------------------------------------------------------------------------------------------------------------------------------------------------------------------------------------------------------|
| Otro alimento                         | [*DATA REMOVED*]                                                                                                                                                                                                                                                                                                                                                                                                                                                                                                              |
| suplementos vitamínicos               | <input type="radio"/> si<br><input type="radio"/> no                                                                                                                                                                                                                                                                                                                                                                                                                                                                          |
| suplementos vitamínicos               |                                                                                                                                                                                                                                                                                                                                                                                                                                                                                                                               |
| dieta previa                          | <input type="radio"/> si<br><input checked="" type="radio"/> no                                                                                                                                                                                                                                                                                                                                                                                                                                                               |
| motivo dieta                          | <input checked="" type="radio"/> no dieta<br><input type="radio"/> control peso<br><input type="radio"/> control colesterol<br><input type="radio"/> control diabetes<br><input type="radio"/> problemas estómago<br><input type="radio"/> problemas vesícula o hepáticos<br><input type="radio"/> HTA o cardiopatía<br><input type="radio"/> problemas renales<br><input type="radio"/> alergia alimentaria<br><input type="radio"/> ácido úrico elevado<br><input type="radio"/> vegetariana<br><input type="radio"/> otros |
| cambio alimentos año previo gestación | <input checked="" type="radio"/> si<br><input type="radio"/> no                                                                                                                                                                                                                                                                                                                                                                                                                                                               |
| cambio lácteos                        | <input type="radio"/> eliminado<br><input type="radio"/> disminuido<br><input checked="" type="radio"/> igual<br><input type="radio"/> aumentado<br><input type="radio"/> no sabe                                                                                                                                                                                                                                                                                                                                             |
| cambio huevos                         | <input type="radio"/> eliminado<br><input type="radio"/> disminuido<br><input checked="" type="radio"/> igual<br><input type="radio"/> aumentado<br><input type="radio"/> no sabe                                                                                                                                                                                                                                                                                                                                             |
| cambio carne                          | <input type="radio"/> eliminado<br><input checked="" type="radio"/> disminuido<br><input type="radio"/> igual<br><input type="radio"/> aumentado<br><input type="radio"/> no sabe                                                                                                                                                                                                                                                                                                                                             |
| cambio pescado                        | <input type="radio"/> eliminado<br><input checked="" type="radio"/> disminuido<br><input type="radio"/> igual<br><input type="radio"/> aumentado<br><input type="radio"/> no sabe                                                                                                                                                                                                                                                                                                                                             |
| cambio verduras                       | <input type="radio"/> eliminado<br><input type="radio"/> disminuido<br><input checked="" type="radio"/> igual<br><input type="radio"/> aumentado<br><input type="radio"/> no sabe                                                                                                                                                                                                                                                                                                                                             |

|                            |                                                                                                                                                                                                                        |
|----------------------------|------------------------------------------------------------------------------------------------------------------------------------------------------------------------------------------------------------------------|
| cambio legumbres           | <input type="radio"/> eliminado<br><input type="radio"/> disminuido<br><input checked="" type="radio"/> igual<br><input type="radio"/> aumentado<br><input type="radio"/> no sabe                                      |
| cambio fruta               | <input type="radio"/> eliminado<br><input type="radio"/> disminuido<br><input type="radio"/> igual<br><input checked="" type="radio"/> aumentado<br><input type="radio"/> no sabe                                      |
| cambio pan                 | <input type="radio"/> eliminado<br><input type="radio"/> disminuido<br><input checked="" type="radio"/> igual<br><input type="radio"/> aumentado<br><input type="radio"/> no sabe                                      |
| cambio aceite oliva        | <input type="radio"/> eliminado<br><input type="radio"/> disminuido<br><input checked="" type="radio"/> igual<br><input type="radio"/> aumentado<br><input type="radio"/> no sabe                                      |
| cambio mante o margarina   | <input type="radio"/> eliminado<br><input type="radio"/> disminuido<br><input checked="" type="radio"/> igual<br><input type="radio"/> aumentado<br><input type="radio"/> no sabe                                      |
| cambio azúcar y dulces     | <input type="radio"/> eliminado<br><input type="radio"/> disminuido<br><input checked="" type="radio"/> igual<br><input type="radio"/> aumentado<br><input type="radio"/> no sabe                                      |
| cambio bebidas alcohólicas | <input checked="" type="radio"/> eliminado<br><input type="radio"/> disminuido<br><input type="radio"/> igual<br><input type="radio"/> aumentado<br><input type="radio"/> no sabe                                      |
| frecuencia comidas fritas  | <input type="radio"/> a diario<br><input type="radio"/> 5 a 6 veces semana<br><input checked="" type="radio"/> 2 a 4 veces semana<br><input type="radio"/> 1 vez semana<br><input type="radio"/> menos de 1 vez semana |
| carne                      | <input type="radio"/> no como<br><input type="radio"/> cruda<br><input type="radio"/> poco hecha<br><input type="radio"/> hecha<br><input checked="" type="radio"/> muy hecha                                          |
| grasa visible carne        | <input type="radio"/> quita toda<br><input type="radio"/> quita mayoría<br><input checked="" type="radio"/> quita un poco<br><input type="radio"/> no quita nada                                                       |

|                                |                                                                                                                                                                                                                                                          |
|--------------------------------|----------------------------------------------------------------------------------------------------------------------------------------------------------------------------------------------------------------------------------------------------------|
| cocina carne                   | <input checked="" type="radio"/> a la plancha<br><input type="radio"/> a la parrilla<br><input type="radio"/> asada<br><input type="radio"/> frita<br><input type="radio"/> guisada                                                                      |
| tostado quemado carne          | <input checked="" type="radio"/> nunca<br><input type="radio"/> 1 vez mes<br><input type="radio"/> 2 a 3 veces mes<br><input type="radio"/> 1 vez semana<br><input type="radio"/> 2 a 3 semanas                                                          |
| tostado quemado pescado        | <input checked="" type="radio"/> nunca<br><input type="radio"/> 1 vez mes<br><input type="radio"/> 2 a 3 veces mes<br><input type="radio"/> 1 vez semana<br><input type="radio"/> 2 a 3 semanas                                                          |
| socarrat paella                | <input type="radio"/> nunca<br><input type="radio"/> 1 vez mes<br><input type="radio"/> 2 a 3 veces mes<br><input checked="" type="radio"/> 1 vez semana<br><input type="radio"/> 2 a 3 semanas                                                          |
| grasa o aceite cocinar         | <input type="radio"/> mantequilla<br><input type="radio"/> margarina<br><input type="radio"/> aceite oliva<br><input checked="" type="radio"/> aceite oliva virgen extra<br><input type="radio"/> aceite vegetal<br><input type="radio"/> mezcla aceites |
| grasa aceite aliñar            | <input type="radio"/> mantequilla<br><input type="radio"/> margarina<br><input type="radio"/> aceite oliva<br><input checked="" type="radio"/> aceite oliva virgen extra<br><input type="radio"/> aceite vegetal<br><input type="radio"/> mezcla aceites |
| grasa aceite freir             | <input type="radio"/> mantequilla<br><input type="radio"/> margarina<br><input type="radio"/> aceite oliva<br><input checked="" type="radio"/> aceite oliva virgen extra<br><input type="radio"/> aceite vegetal<br><input type="radio"/> mezcla aceites |
| Ejercicio cuestionario         | <input checked="" type="radio"/> si<br><input type="radio"/> no                                                                                                                                                                                          |
| horas de sueño incluido siesta | [*DATA REMOVED*]                                                                                                                                                                                                                                         |
| minutos siesta                 | [*DATA REMOVED*]                                                                                                                                                                                                                                         |
| horas televisión semana        | [*DATA REMOVED*]                                                                                                                                                                                                                                         |

|                                        |                                                                                                                                                                                                                                                                                                                                                                           |
|----------------------------------------|---------------------------------------------------------------------------------------------------------------------------------------------------------------------------------------------------------------------------------------------------------------------------------------------------------------------------------------------------------------------------|
| actividad trabajo                      | <input checked="" type="radio"/> casi siempre sentado<br><input type="radio"/> sentado 50 por cien<br><input type="radio"/> casi siempre de pie, quieto<br><input type="radio"/> casi siempre levantado caminando y llevando pocas cosas<br><input type="radio"/> casi siempre levantado, caminando y llevado muchas cosas<br><input type="radio"/> trabajo manual pesado |
| tiempo caminar o bici al día           | <input type="radio"/> casi nunca<br><input type="radio"/> menos 20min día<br><input type="radio"/> 20 a 40 min día<br><input checked="" type="radio"/> 40 a 60 min día<br><input type="radio"/> 1h o 1h y media día<br><input type="radio"/> más de 1h y media al día                                                                                                     |
| tiempo tareas casa al día              | <input type="radio"/> menos de 1h día<br><input type="radio"/> 1 a 2h día<br><input checked="" type="radio"/> 3 a 4h día<br><input type="radio"/> 5 a 6h día<br><input type="radio"/> 7 a 8h día<br><input type="radio"/> más de 8h día                                                                                                                                   |
| tiempo libre televisión ordenador leer | <input type="radio"/> menos 1h día<br><input type="radio"/> 1h día<br><input type="radio"/> 2h día<br><input checked="" type="radio"/> 3h día<br><input type="radio"/> 4h día<br><input type="radio"/> 5 a 6h día<br><input type="radio"/> mas 6h día                                                                                                                     |
| tiempo libre ejercicio o deporte       | <input type="radio"/> menos 1h semana<br><input type="radio"/> 1h semana<br><input type="radio"/> 2h semana<br><input type="radio"/> 3h semana<br><input type="radio"/> 4 a 5h semana<br><input checked="" type="radio"/> mas 5h semana                                                                                                                                   |
| como se considera                      | <input type="radio"/> sedentaria<br><input type="radio"/> poco activa<br><input checked="" type="radio"/> moderadamente activa<br><input type="radio"/> bastante activa<br><input type="radio"/> muy activa<br><input type="radio"/> no sabe                                                                                                                              |
| FUR                                    | [*DATA REMOVED*]                                                                                                                                                                                                                                                                                                                                                          |
| Semanas gestación 2T                   | [*DATA REMOVED*]                                                                                                                                                                                                                                                                                                                                                          |
| Días gestación 2T                      | [*DATA REMOVED*]                                                                                                                                                                                                                                                                                                                                                          |
| DBP 2T                                 | [*DATA REMOVED*]                                                                                                                                                                                                                                                                                                                                                          |
| CC 2T                                  | [*DATA REMOVED*]                                                                                                                                                                                                                                                                                                                                                          |
| AC 2T                                  | [*DATA REMOVED*]                                                                                                                                                                                                                                                                                                                                                          |



|                                                   |                                                                                                                                                                                                 |
|---------------------------------------------------|-------------------------------------------------------------------------------------------------------------------------------------------------------------------------------------------------|
| LF 2T                                             | [*DATA REMOVED*]                                                                                                                                                                                |
| PFE 2T (Hadlock)                                  | [*DATA REMOVED*]                                                                                                                                                                                |
| Semanas gestación 3T                              | [*DATA REMOVED*]                                                                                                                                                                                |
| días 3T                                           | [*DATA REMOVED*]                                                                                                                                                                                |
| DBP 3T                                            | [*DATA REMOVED*]                                                                                                                                                                                |
| CC 3T                                             | [*DATA REMOVED*]                                                                                                                                                                                |
| AC 3T                                             | [*DATA REMOVED*]                                                                                                                                                                                |
| LF 3T                                             | [*DATA REMOVED*]                                                                                                                                                                                |
| PFE 3T (Hadlock)                                  | [*DATA REMOVED*]                                                                                                                                                                                |
| Semanas de gestación final                        | [*DATA REMOVED*]                                                                                                                                                                                |
| días gestación final                              | [*DATA REMOVED*]                                                                                                                                                                                |
| Localización placenta                             | <input checked="" type="radio"/> anterior<br><input type="radio"/> lateral derecha<br><input type="radio"/> lateral izquierda<br><input type="radio"/> posterior<br><input type="radio"/> fondo |
| Presentación longitudinal cefálica                | <input type="radio"/> no<br><input checked="" type="radio"/> si                                                                                                                                 |
| Dorso                                             | <input type="radio"/> izquierda anterior<br><input checked="" type="radio"/> izquierda posterior<br><input type="radio"/> derecha anterior<br><input type="radio"/> derecha posterior           |
| diámetro biparietal                               | [*DATA REMOVED*]                                                                                                                                                                                |
| Circunferencia craneal                            | [*DATA REMOVED*]                                                                                                                                                                                |
| Circunferencia abdominal                          | [*DATA REMOVED*]                                                                                                                                                                                |
| Longitud de femur                                 | [*DATA REMOVED*]                                                                                                                                                                                |
| tejido celular subcutáneo a nivel del muslo en mm | [*DATA REMOVED*]                                                                                                                                                                                |
| tejido celular subcutáneo en abdomen en mm        | [*DATA REMOVED*]                                                                                                                                                                                |
| Volumen del muslo en cm3                          | [*DATA REMOVED*]                                                                                                                                                                                |
| Peso fetal estimado según fórmula de Hadlock      | [*DATA REMOVED*]                                                                                                                                                                                |

|                                               |                                                                                                                                                          |
|-----------------------------------------------|----------------------------------------------------------------------------------------------------------------------------------------------------------|
| Percentil                                     | [*DATA REMOVED*]                                                                                                                                         |
| Peso fetal estimado según fórmula de Scioscia | <hr/>                                                                                                                                                    |
| Peso fetal estimado según fórmula de LEE      | <hr/>                                                                                                                                                    |
| Tipo de parto                                 | <input checked="" type="radio"/> eutocico<br><input type="radio"/> instrumentado/ventosa<br><input type="radio"/> cesarea                                |
| fecha de nacimiento                           | [*DATA REMOVED*]                                                                                                                                         |
| Días entre exploración y nacimiento           | [*DATA REMOVED*]                                                                                                                                         |
| Peso RN en g                                  | [*DATA REMOVED*]                                                                                                                                         |
| sexo                                          | <input type="radio"/> mujer<br><input checked="" type="radio"/> hombre                                                                                   |
| Apgar 1 minuto                                | [*DATA REMOVED*]                                                                                                                                         |
| Apgar 5 minutos                               | [*DATA REMOVED*]                                                                                                                                         |
| Apgar 10 minutos                              | <hr/>                                                                                                                                                    |
| antecedente Covid durante gestación           | <input type="radio"/> Yes<br><input checked="" type="radio"/> No                                                                                         |
| Nivel de estudios                             | <input type="radio"/> ninguno<br><input type="radio"/> primarios<br><input checked="" type="radio"/> secundarios<br><input type="radio"/> universitarios |

## Base\_datos\_estimacion\_peso\_fetal

|                                       |                                                                                                                                                                                                                                                                                      |
|---------------------------------------|--------------------------------------------------------------------------------------------------------------------------------------------------------------------------------------------------------------------------------------------------------------------------------------|
| Número de identificación participante | 15                                                                                                                                                                                                                                                                                   |
| CODIGO PARTICIPANTE                   |                                                                                                                                                                                                                                                                                      |
| Edad                                  | [*DATA REMOVED*]                                                                                                                                                                                                                                                                     |
| Gestaciones                           | <input checked="" type="radio"/> 1<br><input type="radio"/> 2<br><input type="radio"/> 3<br><input type="radio"/> mas de 3                                                                                                                                                           |
| partos                                | <input checked="" type="radio"/> 0<br><input type="radio"/> 1<br><input type="radio"/> 2<br><input type="radio"/> 3<br><input type="radio"/> mas de 3                                                                                                                                |
| cesáreas                              | <input checked="" type="radio"/> 0<br><input type="radio"/> 1<br><input type="radio"/> 2<br><input type="radio"/> 3<br><input type="radio"/> mas de 3                                                                                                                                |
| Abortos                               | <input checked="" type="radio"/> 0<br><input type="radio"/> 1<br><input type="radio"/> 2<br><input type="radio"/> 3<br><input type="radio"/> mas de 3                                                                                                                                |
| Tipo de gestacion                     | <input checked="" type="radio"/> espontanea<br><input type="radio"/> IAC inseminación artificial conyuge<br><input type="radio"/> IAD inseminación artificial donante<br><input type="radio"/> FIV Fecundación in Vitro<br><input type="radio"/> Ovodon FIV con donación de ovocitos |
| peso previo a embarazo                | [*DATA REMOVED*]                                                                                                                                                                                                                                                                     |
| Ganancia ponderal embarazo            | [*DATA REMOVED*]                                                                                                                                                                                                                                                                     |
| Talla madre                           | [*DATA REMOVED*]                                                                                                                                                                                                                                                                     |
| IMC previo embarazo                   | 23.019199567333693                                                                                                                                                                                                                                                                   |
| Patología obstétrica                  | <input checked="" type="radio"/> no<br><input type="radio"/> si                                                                                                                                                                                                                      |
| Diabetes pregestacional               | <input checked="" type="radio"/> no<br><input type="radio"/> si                                                                                                                                                                                                                      |
| Diabetes gestacional                  | <input checked="" type="radio"/> no<br><input type="radio"/> si                                                                                                                                                                                                                      |

|                                            |                                                                                                                                                                                      |
|--------------------------------------------|--------------------------------------------------------------------------------------------------------------------------------------------------------------------------------------|
| Diabetes gestacional con insulina          | <input checked="" type="radio"/> no<br><input type="radio"/> si                                                                                                                      |
| Diabetes gestacional con dieta y ejercicio | <input checked="" type="radio"/> no<br><input type="radio"/> si                                                                                                                      |
| Percentil fetos previos                    | <input checked="" type="radio"/> Nada<br><input type="radio"/> percentil menor de 10<br><input type="radio"/> percentil entre 10 y 90<br><input type="radio"/> percentil mayor de 90 |
| Exfumadora                                 | <input checked="" type="radio"/> Nada<br><input type="radio"/> menos de 5 años<br><input type="radio"/> 5 a 10 años<br><input type="radio"/> mayor o igual a 10 años                 |
| Hábito tabáquico                           | <input checked="" type="radio"/> no<br><input type="radio"/> si                                                                                                                      |
| fumadora                                   | [*DATA REMOVED*]                                                                                                                                                                     |
| Consumo otros tóxicos                      | <input checked="" type="radio"/> no<br><input type="radio"/> si                                                                                                                      |
| Hb 1T                                      | [*DATA REMOVED*]                                                                                                                                                                     |
| Htc 1T                                     | [*DATA REMOVED*]                                                                                                                                                                     |
| Hb 2T                                      | [*DATA REMOVED*]                                                                                                                                                                     |
| HTC 2T                                     | [*DATA REMOVED*]                                                                                                                                                                     |
| Hb 3T                                      | [*DATA REMOVED*]                                                                                                                                                                     |
| HTC 3T                                     | [*DATA REMOVED*]                                                                                                                                                                     |
| Suplemento FE oral                         | <input checked="" type="radio"/> si<br><input type="radio"/> no                                                                                                                      |
| Suplemento fe iv                           | <input type="radio"/> si<br><input checked="" type="radio"/> no                                                                                                                      |
| Transfusión                                | <input checked="" type="radio"/> no<br><input type="radio"/> si                                                                                                                      |
| Solicitada Vit D                           | <input type="radio"/> no<br><input checked="" type="radio"/> si                                                                                                                      |
| Deficit vit D                              | <input type="radio"/> no<br><input checked="" type="radio"/> si                                                                                                                      |
| Suplemento vit D                           | <input checked="" type="radio"/> si<br><input type="radio"/> no                                                                                                                      |

|                       |                                                                                                                                                                                                                                                                                                                                                                                                              |
|-----------------------|--------------------------------------------------------------------------------------------------------------------------------------------------------------------------------------------------------------------------------------------------------------------------------------------------------------------------------------------------------------------------------------------------------------|
| Dieta, cuestionario   | <input checked="" type="radio"/> sí<br><input type="radio"/> no                                                                                                                                                                                                                                                                                                                                              |
| Leche entera          | <input type="radio"/> Nunca o menos 1 vez al mes<br><input type="radio"/> 1 a 3 veces mes<br><input type="radio"/> 1 vez semana<br><input type="radio"/> 2 a 4 veces semana<br><input type="radio"/> 5 a 6 veces semana<br><input checked="" type="radio"/> 1 vez al día<br><input type="radio"/> 2 a 3 veces al día<br><input type="radio"/> 5 a 6 veces al día<br><input type="radio"/> más 6 veces al día |
| Leche semidesnatada   | <input checked="" type="radio"/> Nunca o menos 1 vez al mes<br><input type="radio"/> 1 a 3 veces mes<br><input type="radio"/> 1 vez semana<br><input type="radio"/> 2 a 4 veces semana<br><input type="radio"/> 5 a 6 veces semana<br><input type="radio"/> 1 vez al día<br><input type="radio"/> 2 a 3 veces al día<br><input type="radio"/> 5 a 6 veces al día<br><input type="radio"/> mas 6 veces al día |
| Leche desnatada       | <input checked="" type="radio"/> Nunca o menos 1 vez al mes<br><input type="radio"/> 1 a 3 veces mes<br><input type="radio"/> 1 vez semana<br><input type="radio"/> 2 a 4 veces semana<br><input type="radio"/> 5 a 6 veces semana<br><input type="radio"/> 1 vez al día<br><input type="radio"/> 2 a 3 veces al día<br><input type="radio"/> 5 a 6 veces al día<br><input type="radio"/> más 6 veces al día |
| Leche condensada      | <input checked="" type="radio"/> Nunca o menos 1 vez al mes<br><input type="radio"/> 1 a 3 veces mes<br><input type="radio"/> 1 vez semana<br><input type="radio"/> 2 a 4 veces semana<br><input type="radio"/> 5 a 6 veces semana<br><input type="radio"/> 1 vez al día<br><input type="radio"/> 2 a 3 veces al día<br><input type="radio"/> 5 a 6 veces al día<br><input type="radio"/> más 6 veces al día |
| nata o crema de leche | <input checked="" type="radio"/> Nunca o menos 1 vez al mes<br><input type="radio"/> 1 a 3 veces mes<br><input type="radio"/> 1 vez semana<br><input type="radio"/> 2 a 4 veces semana<br><input type="radio"/> 5 a 6 veces semana<br><input type="radio"/> 1 vez al día<br><input type="radio"/> 2 a 3 veces al día<br><input type="radio"/> 5 a 6 veces al día<br><input type="radio"/> más 6 veces al día |

|                                             |                                                                                                                                                                                                                                                                                                                                                                                                              |
|---------------------------------------------|--------------------------------------------------------------------------------------------------------------------------------------------------------------------------------------------------------------------------------------------------------------------------------------------------------------------------------------------------------------------------------------------------------------|
| Yogurt Entero                               | <input type="radio"/> Nunca o menos 1 vez al mes<br><input type="radio"/> 1 a 3 veces mes<br><input type="radio"/> 1 vez semana<br><input checked="" type="radio"/> 2 a 4 veces semana<br><input type="radio"/> 5 a 6 veces semana<br><input type="radio"/> 1 vez al día<br><input type="radio"/> 2 a 3 veces al día<br><input type="radio"/> 5 a 6 veces al día<br><input type="radio"/> más 6 veces al día |
| Yogurt desnatado                            | <input checked="" type="radio"/> Nunca o menos 1 vez al mes<br><input type="radio"/> 1 a 3 veces mes<br><input type="radio"/> 1 vez semana<br><input type="radio"/> 2 a 4 veces semana<br><input type="radio"/> 5 a 6 veces semana<br><input type="radio"/> 1 vez al día<br><input type="radio"/> 2 a 3 veces al día<br><input type="radio"/> 5 a 6 veces al día<br><input type="radio"/> más 6 veces al día |
| 100g requesón o queso blando o queso fresco | <input type="radio"/> Nunca o menos 1 vez al mes<br><input type="radio"/> 1 a 3 veces mes<br><input checked="" type="radio"/> 1 vez semana<br><input type="radio"/> 2 a 4 veces semana<br><input type="radio"/> 5 a 6 veces semana<br><input type="radio"/> 1 vez al día<br><input type="radio"/> 2 a 3 veces al día<br><input type="radio"/> 5 a 6 veces al día<br><input type="radio"/> más 6 veces al día |
| queso curado o semicurado o cremoso         | <input type="radio"/> Nunca o menos 1 vez al mes<br><input checked="" type="radio"/> 1 a 3 veces mes<br><input type="radio"/> 1 vez semana<br><input type="radio"/> 2 a 4 veces semana<br><input type="radio"/> 5 a 6 veces semana<br><input type="radio"/> 1 vez al día<br><input type="radio"/> 2 a 3 veces al día<br><input type="radio"/> 5 a 6 veces al día<br><input type="radio"/> más 6 veces al día |
| natillas flan pudding                       | <input checked="" type="radio"/> Nunca o menos 1 vez al mes<br><input type="radio"/> 1 a 3 veces mes<br><input type="radio"/> 1 vez semana<br><input type="radio"/> 2 a 4 veces semana<br><input type="radio"/> 5 a 6 veces semana<br><input type="radio"/> 1 vez al día<br><input type="radio"/> 2 a 3 veces al día<br><input type="radio"/> 5 a 6 veces al día<br><input type="radio"/> más 6 veces al día |
| Helado                                      | <input type="radio"/> Nunca o menos 1 vez al mes<br><input type="radio"/> 1 a 3 veces mes<br><input type="radio"/> 1 vez semana<br><input checked="" type="radio"/> 2 a 4 veces semana<br><input type="radio"/> 5 a 6 veces semana<br><input type="radio"/> 1 vez al día<br><input type="radio"/> 2 a 3 veces al día<br><input type="radio"/> 5 a 6 veces al día<br><input type="radio"/> más 6 veces al día |

|                                      |                                                                                                                                                                                                                                                                                                                                                                                                              |
|--------------------------------------|--------------------------------------------------------------------------------------------------------------------------------------------------------------------------------------------------------------------------------------------------------------------------------------------------------------------------------------------------------------------------------------------------------------|
| huevo                                | <input type="radio"/> Nunca o menos 1 vez al mes<br><input type="radio"/> 1 a 3 veces mes<br><input type="radio"/> 1 vez semana<br><input checked="" type="radio"/> 2 a 4 veces semana<br><input type="radio"/> 5 a 6 veces semana<br><input type="radio"/> 1 vez al día<br><input type="radio"/> 2 a 3 veces al día<br><input type="radio"/> 5 a 6 veces al día<br><input type="radio"/> más 6 veces al día |
| Pollo con piel                       | <input checked="" type="radio"/> Nunca o menos 1 vez al mes<br><input type="radio"/> 1 a 3 veces mes<br><input type="radio"/> 1 vez semana<br><input type="radio"/> 2 a 4 veces semana<br><input type="radio"/> 5 a 6 veces semana<br><input type="radio"/> 1 vez al día<br><input type="radio"/> 2 a 3 veces al día<br><input type="radio"/> 5 a 6 veces al día<br><input type="radio"/> más 6 veces al día |
| pollo sin piel                       | <input type="radio"/> Nunca o menos 1 vez al mes<br><input type="radio"/> 1 a 3 veces mes<br><input type="radio"/> 1 vez semana<br><input checked="" type="radio"/> 2 a 4 veces semana<br><input type="radio"/> 5 a 6 veces semana<br><input type="radio"/> 1 vez al día<br><input type="radio"/> 2 a 3 veces al día<br><input type="radio"/> 5 a 6 veces al día<br><input type="radio"/> más 6 veces al día |
| Ternera o cerdo o cordero            | <input checked="" type="radio"/> Nunca o menos 1 vez al mes<br><input type="radio"/> 1 a 3 veces mes<br><input type="radio"/> 1 vez semana<br><input type="radio"/> 2 a 4 veces semana<br><input type="radio"/> 5 a 6 veces semana<br><input type="radio"/> 1 vez al día<br><input type="radio"/> 2 a 3 veces al día<br><input type="radio"/> 5 a 6 veces al día<br><input type="radio"/> más 6 veces al día |
| carne caza: Conejo o codorniz o pato | <input checked="" type="radio"/> Nunca o menos 1 vez al mes<br><input type="radio"/> 1 a 3 veces mes<br><input type="radio"/> 1 vez semana<br><input type="radio"/> 2 a 4 veces semana<br><input type="radio"/> 5 a 6 veces semana<br><input type="radio"/> 1 vez al día<br><input type="radio"/> 2 a 3 veces al día<br><input type="radio"/> 5 a 6 veces al día<br><input type="radio"/> más 6 veces al día |
| Hígado de ternera o cerdo o pollo    | <input checked="" type="radio"/> Nunca o menos 1 vez al mes<br><input type="radio"/> 1 a 3 veces mes<br><input type="radio"/> 1 vez semana<br><input type="radio"/> 2 a 4 veces semana<br><input type="radio"/> 5 a 6 veces semana<br><input type="radio"/> 1 vez al día<br><input type="radio"/> 2 a 3 veces al día<br><input type="radio"/> 5 a 6 veces al día<br><input type="radio"/> más 6 veces al día |

|                     |                                                                                                                                                                                                                                                                                                                                                                                                              |
|---------------------|--------------------------------------------------------------------------------------------------------------------------------------------------------------------------------------------------------------------------------------------------------------------------------------------------------------------------------------------------------------------------------------------------------------|
| Vísceras            | <input checked="" type="radio"/> Nunca o menos 1 vez al mes<br><input type="radio"/> 1 a 3 veces mes<br><input type="radio"/> 1 vez semana<br><input type="radio"/> 2 a 4 veces semana<br><input type="radio"/> 5 a 6 veces semana<br><input type="radio"/> 1 vez al día<br><input type="radio"/> 2 a 3 veces al día<br><input type="radio"/> 5 a 6 veces al día<br><input type="radio"/> más 6 veces al día |
| Embutido            | <input checked="" type="radio"/> Nunca o menos 1 vez al mes<br><input type="radio"/> 1 a 3 veces mes<br><input type="radio"/> 1 vez semana<br><input type="radio"/> 2 a 4 veces semana<br><input type="radio"/> 5 a 6 veces semana<br><input type="radio"/> 1 vez al día<br><input type="radio"/> 2 a 3 veces al día<br><input type="radio"/> 5 a 6 veces al día<br><input type="radio"/> más 6 veces al día |
| Salchicha o similar | <input type="radio"/> Nunca o menos 1 vez al mes<br><input type="radio"/> 1 a 3 veces mes<br><input checked="" type="radio"/> 1 vez semana<br><input type="radio"/> 2 a 4 veces semana<br><input type="radio"/> 5 a 6 veces semana<br><input type="radio"/> 1 vez al día<br><input type="radio"/> 2 a 3 veces al día<br><input type="radio"/> 5 a 6 veces al día<br><input type="radio"/> más 6 veces al día |
| Pate o foiegras     | <input checked="" type="radio"/> Nunca o menos 1 vez al mes<br><input type="radio"/> 1 a 3 veces mes<br><input type="radio"/> 1 vez semana<br><input type="radio"/> 2 a 4 veces semana<br><input type="radio"/> 5 a 6 veces semana<br><input type="radio"/> 1 vez al día<br><input type="radio"/> 2 a 3 veces al día<br><input type="radio"/> 5 a 6 veces al día<br><input type="radio"/> más 6 veces al día |
| Hamburguesa         | <input type="radio"/> Nunca o menos 1 vez al mes<br><input type="radio"/> 1 a 3 veces mes<br><input checked="" type="radio"/> 1 vez semana<br><input type="radio"/> 2 a 4 veces semana<br><input type="radio"/> 5 a 6 veces semana<br><input type="radio"/> 1 vez al día<br><input type="radio"/> 2 a 3 veces al día<br><input type="radio"/> 5 a 6 veces al día<br><input type="radio"/> más 6 veces al día |
| tocino o bacon      | <input checked="" type="radio"/> Nunca o menos 1 vez al mes<br><input type="radio"/> 1 a 3 veces mes<br><input type="radio"/> 1 vez semana<br><input type="radio"/> 2 a 4 veces semana<br><input type="radio"/> 5 a 6 veces semana<br><input type="radio"/> 1 vez al día<br><input type="radio"/> 2 a 3 veces al día<br><input type="radio"/> 5 a 6 veces al día<br><input type="radio"/> más 6 veces al día |



|                        |                                                                                                                                                                                                                                                                                                                                                                                                              |
|------------------------|--------------------------------------------------------------------------------------------------------------------------------------------------------------------------------------------------------------------------------------------------------------------------------------------------------------------------------------------------------------------------------------------------------------|
| Pescado frito          | <input checked="" type="radio"/> Nunca o menos 1 vez al mes<br><input type="radio"/> 1 a 3 veces mes<br><input type="radio"/> 1 vez semana<br><input type="radio"/> 2 a 4 veces semana<br><input type="radio"/> 5 a 6 veces semana<br><input type="radio"/> 1 vez al día<br><input type="radio"/> 2 a 3 veces al día<br><input type="radio"/> 5 a 6 veces al día<br><input type="radio"/> más 6 veces al día |
| pescado hervido blanco | <input type="radio"/> Nunca o menos 1 vez al mes<br><input type="radio"/> 1 a 3 veces mes<br><input checked="" type="radio"/> 1 vez semana<br><input type="radio"/> 2 a 4 veces semana<br><input type="radio"/> 5 a 6 veces semana<br><input type="radio"/> 1 vez al día<br><input type="radio"/> 2 a 3 veces al día<br><input type="radio"/> 5 a 6 veces al día<br><input type="radio"/> más 6 veces al día |
| pescado hervido azul   | <input checked="" type="radio"/> Nunca o menos 1 vez al mes<br><input type="radio"/> 1 a 3 veces mes<br><input type="radio"/> 1 vez semana<br><input type="radio"/> 2 a 4 veces semana<br><input type="radio"/> 5 a 6 veces semana<br><input type="radio"/> 1 vez al día<br><input type="radio"/> 2 a 3 veces al día<br><input type="radio"/> 5 a 6 veces al día<br><input type="radio"/> más 6 veces al día |
| otros pescado azul     | <input type="radio"/> Nunca o menos 1 vez al mes<br><input type="radio"/> 1 a 3 veces mes<br><input checked="" type="radio"/> 1 vez semana<br><input type="radio"/> 2 a 4 veces semana<br><input type="radio"/> 5 a 6 veces semana<br><input type="radio"/> 1 vez al día<br><input type="radio"/> 2 a 3 veces al día<br><input type="radio"/> 5 a 6 veces al día<br><input type="radio"/> más 6 veces al día |
| atun conserva          | <input type="radio"/> Nunca o menos 1 vez al mes<br><input type="radio"/> 1 a 3 veces mes<br><input type="radio"/> 1 vez semana<br><input checked="" type="radio"/> 2 a 4 veces semana<br><input type="radio"/> 5 a 6 veces semana<br><input type="radio"/> 1 vez al día<br><input type="radio"/> 2 a 3 veces al día<br><input type="radio"/> 5 a 6 veces al día<br><input type="radio"/> más 6 veces al día |
| sardina conserva       | <input type="radio"/> Nunca o menos 1 vez al mes<br><input checked="" type="radio"/> 1 a 3 veces mes<br><input type="radio"/> 1 vez semana<br><input type="radio"/> 2 a 4 veces semana<br><input type="radio"/> 5 a 6 veces semana<br><input type="radio"/> 1 vez al día<br><input type="radio"/> 2 a 3 veces al día<br><input type="radio"/> 5 a 6 veces al día<br><input type="radio"/> más 6 veces al día |

|                                         |                                                                                                                                                                                                                                                                                                                                                                                                              |
|-----------------------------------------|--------------------------------------------------------------------------------------------------------------------------------------------------------------------------------------------------------------------------------------------------------------------------------------------------------------------------------------------------------------------------------------------------------------|
| pescado ahumado                         | <input checked="" type="radio"/> Nunca o menos 1 vez al mes<br><input type="radio"/> 1 a 3 veces mes<br><input type="radio"/> 1 vez semana<br><input type="radio"/> 2 a 4 veces semana<br><input type="radio"/> 5 a 6 veces semana<br><input type="radio"/> 1 vez al día<br><input type="radio"/> 2 a 3 veces al día<br><input type="radio"/> 5 a 6 veces al día<br><input type="radio"/> más 6 veces al día |
| almejas o mejillones o ostras unos 100g | <input checked="" type="radio"/> Nunca o menos 1 vez al mes<br><input type="radio"/> 1 a 3 veces mes<br><input type="radio"/> 1 vez semana<br><input type="radio"/> 2 a 4 veces semana<br><input type="radio"/> 5 a 6 veces semana<br><input type="radio"/> 1 vez al día<br><input type="radio"/> 2 a 3 veces al día<br><input type="radio"/> 5 a 6 veces al día<br><input type="radio"/> más 6 veces al día |
| calamar o chipiron o sepia unos 100g    | <input checked="" type="radio"/> Nunca o menos 1 vez al mes<br><input type="radio"/> 1 a 3 veces mes<br><input type="radio"/> 1 vez semana<br><input type="radio"/> 2 a 4 veces semana<br><input type="radio"/> 5 a 6 veces semana<br><input type="radio"/> 1 vez al día<br><input type="radio"/> 2 a 3 veces al día<br><input type="radio"/> 5 a 6 veces al día<br><input type="radio"/> más 6 veces al día |
| marisco unos 100g                       | <input checked="" type="radio"/> Nunca o menos 1 vez al mes<br><input type="radio"/> 1 a 3 veces mes<br><input type="radio"/> 1 vez semana<br><input type="radio"/> 2 a 4 veces semana<br><input type="radio"/> 5 a 6 veces semana<br><input type="radio"/> 1 vez al día<br><input type="radio"/> 2 a 3 veces al día<br><input type="radio"/> 5 a 6 veces al día<br><input type="radio"/> más 6 veces al día |
| Espinacas o acelgas cocinadas           | <input type="radio"/> Nunca o menos 1 vez al mes<br><input checked="" type="radio"/> 1 a 3 veces mes<br><input type="radio"/> 1 vez semana<br><input type="radio"/> 2 a 4 veces semana<br><input type="radio"/> 5 a 6 veces semana<br><input type="radio"/> 1 vez al día<br><input type="radio"/> 2 a 3 veces al día<br><input type="radio"/> 5 a 6 veces al día<br><input type="radio"/> más 6 veces al día |
| Col o coliflor o brocoli cocinado       | <input type="radio"/> Nunca o menos 1 vez al mes<br><input checked="" type="radio"/> 1 a 3 veces mes<br><input type="radio"/> 1 vez semana<br><input type="radio"/> 2 a 4 veces semana<br><input type="radio"/> 5 a 6 veces semana<br><input type="radio"/> 1 vez al día<br><input type="radio"/> 2 a 3 veces al día<br><input type="radio"/> 5 a 6 veces al día<br><input type="radio"/> más 6 veces al día |

---

Lechuga o endivia o escarola

- ☐ Nunca o menos 1 vez al mes  
☐ 1 a 3 veces mes  
☐ 1 vez semana  
☒ 2 a 4 veces semana  
☐ 5 a 6 veces semana  
☐ 1 vez al día  
☐ 2 a 3 veces al día  
☐ 5 a 6 veces al día  
☐ más 6 veces al día

---

tomate ensalada

- ☒ Nunca o menos 1 vez al mes  
☐ 1 a 3 veces mes  
☐ 1 vez semana  
☐ 2 a 4 veces semana  
☐ 5 a 6 veces semana  
☐ 1 vez al día  
☐ 2 a 3 veces al día  
☐ 5 a 6 veces al día  
☐ más 6 veces al día

---

cebolla

- ☐ Nunca o menos 1 vez al mes  
☐ 1 a 3 veces mes  
☒ 1 vez semana  
☐ 2 a 4 veces semana  
☐ 5 a 6 veces semana  
☐ 1 vez al día  
☐ 2 a 3 veces al día  
☐ 5 a 6 veces al día  
☐ más 6 veces al día

---

Zanahoria o calabaza

- ☐ Nunca o menos 1 vez al mes  
☐ 1 a 3 veces mes  
☐ 1 vez semana  
☒ 2 a 4 veces semana  
☐ 5 a 6 veces semana  
☐ 1 vez al día  
☐ 2 a 3 veces al día  
☐ 5 a 6 veces al día  
☐ más 6 veces al día

---

Judías verdes

- ☒ Nunca o menos 1 vez al mes  
☐ 1 a 3 veces mes  
☐ 1 vez semana  
☐ 2 a 4 veces semana  
☐ 5 a 6 veces semana  
☐ 1 vez al día  
☐ 2 a 3 veces al día  
☐ 5 a 6 veces al día  
☐ más 6 veces al día

---

Berenjena o calabacin o pepino

- ☐ Nunca o menos 1 vez al mes  
☐ 1 a 3 veces mes  
☐ 1 vez semana  
☒ 2 a 4 veces semana  
☐ 5 a 6 veces semana  
☐ 1 vez al día  
☐ 2 a 3 veces al día  
☐ 5 a 6 veces al día  
☐ más 6 veces al día

|                       |                                                                                                                                                                                                                                                                                                                                                                                                              |
|-----------------------|--------------------------------------------------------------------------------------------------------------------------------------------------------------------------------------------------------------------------------------------------------------------------------------------------------------------------------------------------------------------------------------------------------------|
| pimiento              | <input type="radio"/> Nunca o menos 1 vez al mes<br><input type="radio"/> 1 a 3 veces mes<br><input checked="" type="radio"/> 1 vez semana<br><input type="radio"/> 2 a 4 veces semana<br><input type="radio"/> 5 a 6 veces semana<br><input type="radio"/> 1 vez al día<br><input type="radio"/> 2 a 3 veces al día<br><input type="radio"/> 5 a 6 veces al día<br><input type="radio"/> más 6 veces al día |
| alcachofa             | <input checked="" type="radio"/> Nunca o menos 1 vez al mes<br><input type="radio"/> 1 a 3 veces mes<br><input type="radio"/> 1 vez semana<br><input type="radio"/> 2 a 4 veces semana<br><input type="radio"/> 5 a 6 veces semana<br><input type="radio"/> 1 vez al día<br><input type="radio"/> 2 a 3 veces al día<br><input type="radio"/> 5 a 6 veces al día<br><input type="radio"/> más 6 veces al día |
| espárragos            | <input type="radio"/> Nunca o menos 1 vez al mes<br><input checked="" type="radio"/> 1 a 3 veces mes<br><input type="radio"/> 1 vez semana<br><input type="radio"/> 2 a 4 veces semana<br><input type="radio"/> 5 a 6 veces semana<br><input type="radio"/> 1 vez al día<br><input type="radio"/> 2 a 3 veces al día<br><input type="radio"/> 5 a 6 veces al día<br><input type="radio"/> más 6 veces al día |
| maíz hervido          | <input checked="" type="radio"/> Nunca o menos 1 vez al mes<br><input type="radio"/> 1 a 3 veces mes<br><input type="radio"/> 1 vez semana<br><input type="radio"/> 2 a 4 veces semana<br><input type="radio"/> 5 a 6 veces semana<br><input type="radio"/> 1 vez al día<br><input type="radio"/> 2 a 3 veces al día<br><input type="radio"/> 5 a 6 veces al día<br><input type="radio"/> más 6 veces al día |
| legumbres             | <input type="radio"/> Nunca o menos 1 vez al mes<br><input type="radio"/> 1 a 3 veces mes<br><input type="radio"/> 1 vez semana<br><input checked="" type="radio"/> 2 a 4 veces semana<br><input type="radio"/> 5 a 6 veces semana<br><input type="radio"/> 1 vez al día<br><input type="radio"/> 2 a 3 veces al día<br><input type="radio"/> 5 a 6 veces al día<br><input type="radio"/> más 6 veces al día |
| naranjas o mandarinas | <input type="radio"/> Nunca o menos 1 vez al mes<br><input checked="" type="radio"/> 1 a 3 veces mes<br><input type="radio"/> 1 vez semana<br><input type="radio"/> 2 a 4 veces semana<br><input type="radio"/> 5 a 6 veces semana<br><input type="radio"/> 1 vez al día<br><input type="radio"/> 2 a 3 veces al día<br><input type="radio"/> 5 a 6 veces al día<br><input type="radio"/> más 6 veces al día |

|                       |                                                                                                                                                                                                                                                                                                                                                                                                              |
|-----------------------|--------------------------------------------------------------------------------------------------------------------------------------------------------------------------------------------------------------------------------------------------------------------------------------------------------------------------------------------------------------------------------------------------------------|
| zum natural fruta     | <input checked="" type="radio"/> Nunca o menos 1 vez al mes<br><input type="radio"/> 1 a 3 veces mes<br><input type="radio"/> 1 vez semana<br><input type="radio"/> 2 a 4 veces semana<br><input type="radio"/> 5 a 6 veces semana<br><input type="radio"/> 1 vez al día<br><input type="radio"/> 2 a 3 veces al día<br><input type="radio"/> 5 a 6 veces al día<br><input type="radio"/> más 6 veces al día |
| platano               | <input type="radio"/> Nunca o menos 1 vez al mes<br><input type="radio"/> 1 a 3 veces mes<br><input checked="" type="radio"/> 1 vez semana<br><input type="radio"/> 2 a 4 veces semana<br><input type="radio"/> 5 a 6 veces semana<br><input type="radio"/> 1 vez al día<br><input type="radio"/> 2 a 3 veces al día<br><input type="radio"/> 5 a 6 veces al día<br><input type="radio"/> más 6 veces al día |
| manzana o pera        | <input type="radio"/> Nunca o menos 1 vez al mes<br><input type="radio"/> 1 a 3 veces mes<br><input checked="" type="radio"/> 1 vez semana<br><input type="radio"/> 2 a 4 veces semana<br><input type="radio"/> 5 a 6 veces semana<br><input type="radio"/> 1 vez al día<br><input type="radio"/> 2 a 3 veces al día<br><input type="radio"/> 5 a 6 veces al día<br><input type="radio"/> más 6 veces al día |
| melocotón o nectarina | <input type="radio"/> Nunca o menos 1 vez al mes<br><input type="radio"/> 1 a 3 veces mes<br><input type="radio"/> 1 vez semana<br><input type="radio"/> 2 a 4 veces semana<br><input checked="" type="radio"/> 5 a 6 veces semana<br><input type="radio"/> 1 vez al día<br><input type="radio"/> 2 a 3 veces al día<br><input type="radio"/> 5 a 6 veces al día<br><input type="radio"/> más 6 veces al día |
| sandia o melon        | <input type="radio"/> Nunca o menos 1 vez al mes<br><input type="radio"/> 1 a 3 veces mes<br><input type="radio"/> 1 vez semana<br><input type="radio"/> 2 a 4 veces semana<br><input type="radio"/> 5 a 6 veces semana<br><input checked="" type="radio"/> 1 vez al día<br><input type="radio"/> 2 a 3 veces al día<br><input type="radio"/> 5 a 6 veces al día<br><input type="radio"/> más 6 veces al día |
| uva                   | <input checked="" type="radio"/> Nunca o menos 1 vez al mes<br><input type="radio"/> 1 a 3 veces mes<br><input type="radio"/> 1 vez semana<br><input type="radio"/> 2 a 4 veces semana<br><input type="radio"/> 5 a 6 veces semana<br><input type="radio"/> 1 vez al día<br><input type="radio"/> 2 a 3 veces al día<br><input type="radio"/> 5 a 6 veces al día<br><input type="radio"/> más 6 veces al día |

---

bruna o ciruela

- ☒ Nunca o menos 1 vez al mes  
☐ 1 a 3 veces mes  
☐ 1 vez semana  
☐ 2 a 4 veces semana  
☐ 5 a 6 veces semana  
☐ 1 vez al día  
☐ 2 a 3 veces al día  
☐ 5 a 6 veces al día  
☐ más 6 veces al día

---

kiwi

- ☐ Nunca o menos 1 vez al mes  
☐ 1 a 3 veces mes  
☐ 1 vez semana  
☐ 2 a 4 veces semana  
☐ 5 a 6 veces semana  
☒ 1 vez al día  
☐ 2 a 3 veces al día  
☐ 5 a 6 veces al día  
☐ más 6 veces al día

---

aceituna

- ☐ Nunca o menos 1 vez al mes  
☐ 1 a 3 veces mes  
☒ 1 vez semana  
☐ 2 a 4 veces semana  
☐ 5 a 6 veces semana  
☐ 1 vez al día  
☐ 2 a 3 veces al día  
☐ 5 a 6 veces al día  
☐ más 6 veces al día

---

frutos secos

- ☐ Nunca o menos 1 vez al mes  
☐ 1 a 3 veces mes  
☐ 1 vez semana  
☒ 2 a 4 veces semana  
☐ 5 a 6 veces semana  
☐ 1 vez al día  
☐ 2 a 3 veces al día  
☐ 5 a 6 veces al día  
☐ más 6 veces al día

---

pan blanco

- ☐ Nunca o menos 1 vez al mes  
☐ 1 a 3 veces mes  
☒ 1 vez semana  
☐ 2 a 4 veces semana  
☐ 5 a 6 veces semana  
☐ 1 vez al día  
☐ 2 a 3 veces al día  
☐ 5 a 6 veces al día  
☐ más 6 veces al día

---

pan integral

- ☐ Nunca o menos 1 vez al mes  
☒ 1 a 3 veces mes  
☐ 1 vez semana  
☐ 2 a 4 veces semana  
☐ 5 a 6 veces semana  
☐ 1 vez al día  
☐ 2 a 3 veces al día  
☐ 5 a 6 veces al día  
☐ más 6 veces al día

---

cereales desayuno

- ☒ Nunca o menos 1 vez al mes  
☐ 1 a 3 veces mes  
☐ 1 vez semana  
☐ 2 a 4 veces semana  
☐ 5 a 6 veces semana  
☐ 1 vez al día  
☐ 2 a 3 veces al día  
☐ 5 a 6 veces al día  
☐ más 6 veces al día

---

patatas fritas

- ☐ Nunca o menos 1 vez al mes  
☒ 1 a 3 veces mes  
☐ 1 vez semana  
☐ 2 a 4 veces semana  
☐ 5 a 6 veces semana  
☐ 1 vez al día  
☐ 2 a 3 veces al día  
☐ 5 a 6 veces al día  
☐ más 6 veces al día

---

patatas cocidas o asadas

- ☐ Nunca o menos 1 vez al mes  
☐ 1 a 3 veces mes  
☒ 1 vez semana  
☐ 2 a 4 veces semana  
☐ 5 a 6 veces semana  
☐ 1 vez al día  
☐ 2 a 3 veces al día  
☐ 5 a 6 veces al día  
☐ más 6 veces al día

---

bolsa papas

- ☐ Nunca o menos 1 vez al mes  
☒ 1 a 3 veces mes  
☐ 1 vez semana  
☐ 2 a 4 veces semana  
☐ 5 a 6 veces semana  
☐ 1 vez al día  
☐ 2 a 3 veces al día  
☐ 5 a 6 veces al día  
☐ más 6 veces al día

---

arroz cocinado

- ☐ Nunca o menos 1 vez al mes  
☐ 1 a 3 veces mes  
☐ 1 vez semana  
☒ 2 a 4 veces semana  
☐ 5 a 6 veces semana  
☐ 1 vez al día  
☐ 2 a 3 veces al día  
☐ 5 a 6 veces al día  
☐ más 6 veces al día

---

pasta

- ☐ Nunca o menos 1 vez al mes  
☐ 1 a 3 veces mes  
☐ 1 vez semana  
☒ 2 a 4 veces semana  
☐ 5 a 6 veces semana  
☐ 1 vez al día  
☐ 2 a 3 veces al día  
☐ 5 a 6 veces al día  
☐ más 6 veces al día

|                     |                                                                                                                                                                                                                                                                                                                                                                                                              |
|---------------------|--------------------------------------------------------------------------------------------------------------------------------------------------------------------------------------------------------------------------------------------------------------------------------------------------------------------------------------------------------------------------------------------------------------|
| pizza               | <input type="radio"/> Nunca o menos 1 vez al mes<br><input type="radio"/> 1 a 3 veces mes<br><input checked="" type="radio"/> 1 vez semana<br><input type="radio"/> 2 a 4 veces semana<br><input type="radio"/> 5 a 6 veces semana<br><input type="radio"/> 1 vez al día<br><input type="radio"/> 2 a 3 veces al día<br><input type="radio"/> 5 a 6 veces al día<br><input type="radio"/> más 6 veces al día |
| aceite oliva        | <input type="radio"/> Nunca o menos 1 vez al mes<br><input type="radio"/> 1 a 3 veces mes<br><input type="radio"/> 1 vez semana<br><input checked="" type="radio"/> 2 a 4 veces semana<br><input type="radio"/> 5 a 6 veces semana<br><input type="radio"/> 1 vez al día<br><input type="radio"/> 2 a 3 veces al día<br><input type="radio"/> 5 a 6 veces al día<br><input type="radio"/> más 6 veces al día |
| otros aceites       | <input checked="" type="radio"/> Nunca o menos 1 vez al mes<br><input type="radio"/> 1 a 3 veces mes<br><input type="radio"/> 1 vez semana<br><input type="radio"/> 2 a 4 veces semana<br><input type="radio"/> 5 a 6 veces semana<br><input type="radio"/> 1 vez al día<br><input type="radio"/> 2 a 3 veces al día<br><input type="radio"/> 5 a 6 veces al día<br><input type="radio"/> más 6 veces al día |
| margarina           | <input checked="" type="radio"/> Nunca o menos 1 vez al mes<br><input type="radio"/> 1 a 3 veces mes<br><input type="radio"/> 1 vez semana<br><input type="radio"/> 2 a 4 veces semana<br><input type="radio"/> 5 a 6 veces semana<br><input type="radio"/> 1 vez al día<br><input type="radio"/> 2 a 3 veces al día<br><input type="radio"/> 5 a 6 veces al día<br><input type="radio"/> más 6 veces al día |
| mantequilla         | <input checked="" type="radio"/> Nunca o menos 1 vez al mes<br><input type="radio"/> 1 a 3 veces mes<br><input type="radio"/> 1 vez semana<br><input type="radio"/> 2 a 4 veces semana<br><input type="radio"/> 5 a 6 veces semana<br><input type="radio"/> 1 vez al día<br><input type="radio"/> 2 a 3 veces al día<br><input type="radio"/> 5 a 6 veces al día<br><input type="radio"/> más 6 veces al día |
| galletas tipo maria | <input checked="" type="radio"/> Nunca o menos 1 vez al mes<br><input type="radio"/> 1 a 3 veces mes<br><input type="radio"/> 1 vez semana<br><input type="radio"/> 2 a 4 veces semana<br><input type="radio"/> 5 a 6 veces semana<br><input type="radio"/> 1 vez al día<br><input type="radio"/> 2 a 3 veces al día<br><input type="radio"/> 5 a 6 veces al día<br><input type="radio"/> más 6 veces al día |



|                           |                                                                                                                                                                                                                                                                                                                                                                                                              |
|---------------------------|--------------------------------------------------------------------------------------------------------------------------------------------------------------------------------------------------------------------------------------------------------------------------------------------------------------------------------------------------------------------------------------------------------------|
| galletas chocolate        | <input checked="" type="radio"/> Nunca o menos 1 vez al mes<br><input type="radio"/> 1 a 3 veces mes<br><input type="radio"/> 1 vez semana<br><input type="radio"/> 2 a 4 veces semana<br><input type="radio"/> 5 a 6 veces semana<br><input type="radio"/> 1 vez al día<br><input type="radio"/> 2 a 3 veces al día<br><input type="radio"/> 5 a 6 veces al día<br><input type="radio"/> más 6 veces al día |
| bollieria                 | <input type="radio"/> Nunca o menos 1 vez al mes<br><input type="radio"/> 1 a 3 veces mes<br><input checked="" type="radio"/> 1 vez semana<br><input type="radio"/> 2 a 4 veces semana<br><input type="radio"/> 5 a 6 veces semana<br><input type="radio"/> 1 vez al día<br><input type="radio"/> 2 a 3 veces al día<br><input type="radio"/> 5 a 6 veces al día<br><input type="radio"/> más 6 veces al día |
| chocolate o bombones      | <input type="radio"/> Nunca o menos 1 vez al mes<br><input type="radio"/> 1 a 3 veces mes<br><input checked="" type="radio"/> 1 vez semana<br><input type="radio"/> 2 a 4 veces semana<br><input type="radio"/> 5 a 6 veces semana<br><input type="radio"/> 1 vez al día<br><input type="radio"/> 2 a 3 veces al día<br><input type="radio"/> 5 a 6 veces al día<br><input type="radio"/> más 6 veces al día |
| chocolate polvo o colacao | <input type="radio"/> Nunca o menos 1 vez al mes<br><input type="radio"/> 1 a 3 veces mes<br><input type="radio"/> 1 vez semana<br><input checked="" type="radio"/> 2 a 4 veces semana<br><input type="radio"/> 5 a 6 veces semana<br><input type="radio"/> 1 vez al día<br><input type="radio"/> 2 a 3 veces al día<br><input type="radio"/> 5 a 6 veces al día<br><input type="radio"/> más 6 veces al día |
| vino tinto                | <input checked="" type="radio"/> Nunca o menos 1 vez al mes<br><input type="radio"/> 1 a 3 veces mes<br><input type="radio"/> 1 vez semana<br><input type="radio"/> 2 a 4 veces semana<br><input type="radio"/> 5 a 6 veces semana<br><input type="radio"/> 1 vez al día<br><input type="radio"/> 2 a 3 veces al día<br><input type="radio"/> 5 a 6 veces al día<br><input type="radio"/> más 6 veces al día |
| vino blanco               | <input checked="" type="radio"/> Nunca o menos 1 vez al mes<br><input type="radio"/> 1 a 3 veces mes<br><input type="radio"/> 1 vez semana<br><input type="radio"/> 2 a 4 veces semana<br><input type="radio"/> 5 a 6 veces semana<br><input type="radio"/> 1 vez al día<br><input type="radio"/> 2 a 3 veces al día<br><input type="radio"/> 5 a 6 veces al día<br><input type="radio"/> más 6 veces al día |

|                       |                                                                                                                                                                                                                                                                                                                                                                                                              |
|-----------------------|--------------------------------------------------------------------------------------------------------------------------------------------------------------------------------------------------------------------------------------------------------------------------------------------------------------------------------------------------------------------------------------------------------------|
| vino seco o vermut    | <input checked="" type="radio"/> Nunca o menos 1 vez al mes<br><input type="radio"/> 1 a 3 veces mes<br><input type="radio"/> 1 vez semana<br><input type="radio"/> 2 a 4 veces semana<br><input type="radio"/> 5 a 6 veces semana<br><input type="radio"/> 1 vez al día<br><input type="radio"/> 2 a 3 veces al día<br><input type="radio"/> 5 a 6 veces al día<br><input type="radio"/> más 6 veces al día |
| cerveza               | <input checked="" type="radio"/> Nunca o menos 1 vez al mes<br><input type="radio"/> 1 a 3 veces mes<br><input type="radio"/> 1 vez semana<br><input type="radio"/> 2 a 4 veces semana<br><input type="radio"/> 5 a 6 veces semana<br><input type="radio"/> 1 vez al día<br><input type="radio"/> 2 a 3 veces al día<br><input type="radio"/> 5 a 6 veces al día<br><input type="radio"/> más 6 veces al día |
| cerveza sin alcohol   | <input checked="" type="radio"/> Nunca o menos 1 vez al mes<br><input type="radio"/> 1 a 3 veces mes<br><input type="radio"/> 1 vez semana<br><input type="radio"/> 2 a 4 veces semana<br><input type="radio"/> 5 a 6 veces semana<br><input type="radio"/> 1 vez al día<br><input type="radio"/> 2 a 3 veces al día<br><input type="radio"/> 5 a 6 veces al día<br><input type="radio"/> más 6 veces al día |
| licores               | <input checked="" type="radio"/> Nunca o menos 1 vez al mes<br><input type="radio"/> 1 a 3 veces mes<br><input type="radio"/> 1 vez semana<br><input type="radio"/> 2 a 4 veces semana<br><input type="radio"/> 5 a 6 veces semana<br><input type="radio"/> 1 vez al día<br><input type="radio"/> 2 a 3 veces al día<br><input type="radio"/> 5 a 6 veces al día<br><input type="radio"/> más 6 veces al día |
| ginebra o ron o vodka | <input checked="" type="radio"/> Nunca o menos 1 vez al mes<br><input type="radio"/> 1 a 3 veces mes<br><input type="radio"/> 1 vez semana<br><input type="radio"/> 2 a 4 veces semana<br><input type="radio"/> 5 a 6 veces semana<br><input type="radio"/> 1 vez al día<br><input type="radio"/> 2 a 3 veces al día<br><input type="radio"/> 5 a 6 veces al día<br><input type="radio"/> más 6 veces al día |
| refresco normal       | <input checked="" type="radio"/> Nunca o menos 1 vez al mes<br><input type="radio"/> 1 a 3 veces mes<br><input type="radio"/> 1 vez semana<br><input type="radio"/> 2 a 4 veces semana<br><input type="radio"/> 5 a 6 veces semana<br><input type="radio"/> 1 vez al día<br><input type="radio"/> 2 a 3 veces al día<br><input type="radio"/> 5 a 6 veces al día<br><input type="radio"/> más 6 veces al día |

|                          |                                                                                                                                                                                                                                                                                                                                                                                                              |
|--------------------------|--------------------------------------------------------------------------------------------------------------------------------------------------------------------------------------------------------------------------------------------------------------------------------------------------------------------------------------------------------------------------------------------------------------|
| refresco sin azúcar      | <input type="radio"/> Nunca o menos 1 vez al mes<br><input type="radio"/> 1 a 3 veces mes<br><input type="radio"/> 1 vez semana<br><input checked="" type="radio"/> 2 a 4 veces semana<br><input type="radio"/> 5 a 6 veces semana<br><input type="radio"/> 1 vez al día<br><input type="radio"/> 2 a 3 veces al día<br><input type="radio"/> 5 a 6 veces al día<br><input type="radio"/> más 6 veces al día |
| Agua del grifo           | <input checked="" type="radio"/> Nunca o menos 1 vez al mes<br><input type="radio"/> 1 a 3 veces mes<br><input type="radio"/> 1 vez semana<br><input type="radio"/> 2 a 4 veces semana<br><input type="radio"/> 5 a 6 veces semana<br><input type="radio"/> 1 vez al día<br><input type="radio"/> 2 a 3 veces al día<br><input type="radio"/> 5 a 6 veces al día<br><input type="radio"/> más 6 veces al día |
| agua embotellada sin gas | <input type="radio"/> Nunca o menos 1 vez al mes<br><input type="radio"/> 1 a 3 veces mes<br><input type="radio"/> 1 vez semana<br><input type="radio"/> 2 a 4 veces semana<br><input type="radio"/> 5 a 6 veces semana<br><input type="radio"/> 1 vez al día<br><input type="radio"/> 2 a 3 veces al día<br><input checked="" type="radio"/> 5 a 6 veces al día<br><input type="radio"/> más 6 veces al día |
| agua embotellada con gas | <input checked="" type="radio"/> Nunca o menos 1 vez al mes<br><input type="radio"/> 1 a 3 veces mes<br><input type="radio"/> 1 vez semana<br><input type="radio"/> 2 a 4 veces semana<br><input type="radio"/> 5 a 6 veces semana<br><input type="radio"/> 1 vez al día<br><input type="radio"/> 2 a 3 veces al día<br><input type="radio"/> 5 a 6 veces al día<br><input type="radio"/> más 6 veces al día |
| zumو frutas embasado     | <input checked="" type="radio"/> Nunca o menos 1 vez al mes<br><input type="radio"/> 1 a 3 veces mes<br><input type="radio"/> 1 vez semana<br><input type="radio"/> 2 a 4 veces semana<br><input type="radio"/> 5 a 6 veces semana<br><input type="radio"/> 1 vez al día<br><input type="radio"/> 2 a 3 veces al día<br><input type="radio"/> 5 a 6 veces al día<br><input type="radio"/> más 6 veces al día |
| cafe                     | <input checked="" type="radio"/> Nunca o menos 1 vez al mes<br><input type="radio"/> 1 a 3 veces mes<br><input type="radio"/> 1 vez semana<br><input type="radio"/> 2 a 4 veces semana<br><input type="radio"/> 5 a 6 veces semana<br><input type="radio"/> 1 vez al día<br><input type="radio"/> 2 a 3 veces al día<br><input type="radio"/> 5 a 6 veces al día<br><input type="radio"/> más 6 veces al día |

|                       |                                                                                                                                                                                                                                                                                                                                                                                                              |
|-----------------------|--------------------------------------------------------------------------------------------------------------------------------------------------------------------------------------------------------------------------------------------------------------------------------------------------------------------------------------------------------------------------------------------------------------|
| cafe descafeinado     | <input checked="" type="radio"/> Nunca o menos 1 vez al mes<br><input type="radio"/> 1 a 3 veces mes<br><input type="radio"/> 1 vez semana<br><input type="radio"/> 2 a 4 veces semana<br><input type="radio"/> 5 a 6 veces semana<br><input type="radio"/> 1 vez al día<br><input type="radio"/> 2 a 3 veces al día<br><input type="radio"/> 5 a 6 veces al día<br><input type="radio"/> más 6 veces al día |
| te o infusión         | <input checked="" type="radio"/> Nunca o menos 1 vez al mes<br><input type="radio"/> 1 a 3 veces mes<br><input type="radio"/> 1 vez semana<br><input type="radio"/> 2 a 4 veces semana<br><input type="radio"/> 5 a 6 veces semana<br><input type="radio"/> 1 vez al día<br><input type="radio"/> 2 a 3 veces al día<br><input type="radio"/> 5 a 6 veces al día<br><input type="radio"/> más 6 veces al día |
| sopa o puré verduras  | <input type="radio"/> Nunca o menos 1 vez al mes<br><input type="radio"/> 1 a 3 veces mes<br><input checked="" type="radio"/> 1 vez semana<br><input type="radio"/> 2 a 4 veces semana<br><input type="radio"/> 5 a 6 veces semana<br><input type="radio"/> 1 vez al día<br><input type="radio"/> 2 a 3 veces al día<br><input type="radio"/> 5 a 6 veces al día<br><input type="radio"/> más 6 veces al día |
| croquetas pollo jamón | <input type="radio"/> Nunca o menos 1 vez al mes<br><input type="radio"/> 1 a 3 veces mes<br><input checked="" type="radio"/> 1 vez semana<br><input type="radio"/> 2 a 4 veces semana<br><input type="radio"/> 5 a 6 veces semana<br><input type="radio"/> 1 vez al día<br><input type="radio"/> 2 a 3 veces al día<br><input type="radio"/> 5 a 6 veces al día<br><input type="radio"/> más 6 veces al día |
| croquetas pescado     | <input checked="" type="radio"/> Nunca o menos 1 vez al mes<br><input type="radio"/> 1 a 3 veces mes<br><input type="radio"/> 1 vez semana<br><input type="radio"/> 2 a 4 veces semana<br><input type="radio"/> 5 a 6 veces semana<br><input type="radio"/> 1 vez al día<br><input type="radio"/> 2 a 3 veces al día<br><input type="radio"/> 5 a 6 veces al día<br><input type="radio"/> más 6 veces al día |
| mayonesa              | <input type="radio"/> Nunca o menos 1 vez al mes<br><input type="radio"/> 1 a 3 veces mes<br><input checked="" type="radio"/> 1 vez semana<br><input type="radio"/> 2 a 4 veces semana<br><input type="radio"/> 5 a 6 veces semana<br><input type="radio"/> 1 vez al día<br><input type="radio"/> 2 a 3 veces al día<br><input type="radio"/> 5 a 6 veces al día<br><input type="radio"/> más 6 veces al día |

|                  |                                                                                                                                                                                                                                                                                                                                                                                                              |
|------------------|--------------------------------------------------------------------------------------------------------------------------------------------------------------------------------------------------------------------------------------------------------------------------------------------------------------------------------------------------------------------------------------------------------------|
| salsa tomate     | <input type="radio"/> Nunca o menos 1 vez al mes<br><input type="radio"/> 1 a 3 veces mes<br><input type="radio"/> 1 vez semana<br><input checked="" type="radio"/> 2 a 4 veces semana<br><input type="radio"/> 5 a 6 veces semana<br><input type="radio"/> 1 vez al día<br><input type="radio"/> 2 a 3 veces al día<br><input type="radio"/> 5 a 6 veces al día<br><input type="radio"/> más 6 veces al día |
| ketchup          | <input type="radio"/> Nunca o menos 1 vez al mes<br><input type="radio"/> 1 a 3 veces mes<br><input checked="" type="radio"/> 1 vez semana<br><input type="radio"/> 2 a 4 veces semana<br><input type="radio"/> 5 a 6 veces semana<br><input type="radio"/> 1 vez al día<br><input type="radio"/> 2 a 3 veces al día<br><input type="radio"/> 5 a 6 veces al día<br><input type="radio"/> más 6 veces al día |
| sal              | <input checked="" type="radio"/> Nunca o menos 1 vez al mes<br><input type="radio"/> 1 a 3 veces mes<br><input type="radio"/> 1 vez semana<br><input type="radio"/> 2 a 4 veces semana<br><input type="radio"/> 5 a 6 veces semana<br><input type="radio"/> 1 vez al día<br><input type="radio"/> 2 a 3 veces al día<br><input type="radio"/> 5 a 6 veces al día<br><input type="radio"/> más 6 veces al día |
| ajo              | <input checked="" type="radio"/> Nunca o menos 1 vez al mes<br><input type="radio"/> 1 a 3 veces mes<br><input type="radio"/> 1 vez semana<br><input type="radio"/> 2 a 4 veces semana<br><input type="radio"/> 5 a 6 veces semana<br><input type="radio"/> 1 vez al día<br><input type="radio"/> 2 a 3 veces al día<br><input type="radio"/> 5 a 6 veces al día<br><input type="radio"/> más 6 veces al día |
| mermelada o miel | <input checked="" type="radio"/> Nunca o menos 1 vez al mes<br><input type="radio"/> 1 a 3 veces mes<br><input type="radio"/> 1 vez semana<br><input type="radio"/> 2 a 4 veces semana<br><input type="radio"/> 5 a 6 veces semana<br><input type="radio"/> 1 vez al día<br><input type="radio"/> 2 a 3 veces al día<br><input type="radio"/> 5 a 6 veces al día<br><input type="radio"/> más 6 veces al día |
| azúcar           | <input checked="" type="radio"/> Nunca o menos 1 vez al mes<br><input type="radio"/> 1 a 3 veces mes<br><input type="radio"/> 1 vez semana<br><input type="radio"/> 2 a 4 veces semana<br><input type="radio"/> 5 a 6 veces semana<br><input type="radio"/> 1 vez al día<br><input type="radio"/> 2 a 3 veces al día<br><input type="radio"/> 5 a 6 veces al día<br><input type="radio"/> más 6 veces al día |

|                                       |                                                                                                                                                                                                                                                                                                                                                                                                                                                                                                                               |
|---------------------------------------|-------------------------------------------------------------------------------------------------------------------------------------------------------------------------------------------------------------------------------------------------------------------------------------------------------------------------------------------------------------------------------------------------------------------------------------------------------------------------------------------------------------------------------|
| Otro alimento                         |                                                                                                                                                                                                                                                                                                                                                                                                                                                                                                                               |
| suplementos vitamínicos               | <input checked="" type="radio"/> si<br><input type="radio"/> no                                                                                                                                                                                                                                                                                                                                                                                                                                                               |
| suplementos vitamínicos               | [*DATA REMOVED*]                                                                                                                                                                                                                                                                                                                                                                                                                                                                                                              |
| dieta previa                          | <input type="radio"/> si<br><input checked="" type="radio"/> no                                                                                                                                                                                                                                                                                                                                                                                                                                                               |
| motivo dieta                          | <input checked="" type="radio"/> no dieta<br><input type="radio"/> control peso<br><input type="radio"/> control colesterol<br><input type="radio"/> control diabetes<br><input type="radio"/> problemas estómago<br><input type="radio"/> problemas vesícula o hepáticos<br><input type="radio"/> HTA o cardiopatía<br><input type="radio"/> problemas renales<br><input type="radio"/> alergia alimentaria<br><input type="radio"/> ácido úrico elevado<br><input type="radio"/> vegetariana<br><input type="radio"/> otros |
| cambio alimentos año previo gestación | <input type="radio"/> si<br><input checked="" type="radio"/> no                                                                                                                                                                                                                                                                                                                                                                                                                                                               |
| cambio lácteos                        | <input type="radio"/> eliminado<br><input type="radio"/> disminuido<br><input checked="" type="radio"/> igual<br><input type="radio"/> aumentado<br><input type="radio"/> no sabe                                                                                                                                                                                                                                                                                                                                             |
| cambio huevos                         | <input type="radio"/> eliminado<br><input type="radio"/> disminuido<br><input checked="" type="radio"/> igual<br><input type="radio"/> aumentado<br><input type="radio"/> no sabe                                                                                                                                                                                                                                                                                                                                             |
| cambio carne                          | <input type="radio"/> eliminado<br><input type="radio"/> disminuido<br><input checked="" type="radio"/> igual<br><input type="radio"/> aumentado<br><input type="radio"/> no sabe                                                                                                                                                                                                                                                                                                                                             |
| cambio pescado                        | <input type="radio"/> eliminado<br><input type="radio"/> disminuido<br><input checked="" type="radio"/> igual<br><input type="radio"/> aumentado<br><input type="radio"/> no sabe                                                                                                                                                                                                                                                                                                                                             |
| cambio verduras                       | <input type="radio"/> eliminado<br><input type="radio"/> disminuido<br><input checked="" type="radio"/> igual<br><input type="radio"/> aumentado<br><input type="radio"/> no sabe                                                                                                                                                                                                                                                                                                                                             |

|                            |                                                                                                                                                                                                                        |
|----------------------------|------------------------------------------------------------------------------------------------------------------------------------------------------------------------------------------------------------------------|
| cambio legumbres           | <input type="radio"/> eliminado<br><input type="radio"/> disminuido<br><input checked="" type="radio"/> igual<br><input type="radio"/> aumentado<br><input type="radio"/> no sabe                                      |
| cambio fruta               | <input type="radio"/> eliminado<br><input type="radio"/> disminuido<br><input checked="" type="radio"/> igual<br><input type="radio"/> aumentado<br><input type="radio"/> no sabe                                      |
| cambio pan                 | <input type="radio"/> eliminado<br><input type="radio"/> disminuido<br><input checked="" type="radio"/> igual<br><input type="radio"/> aumentado<br><input type="radio"/> no sabe                                      |
| cambio aceite oliva        | <input type="radio"/> eliminado<br><input type="radio"/> disminuido<br><input checked="" type="radio"/> igual<br><input type="radio"/> aumentado<br><input type="radio"/> no sabe                                      |
| cambio mante o margarina   | <input type="radio"/> eliminado<br><input type="radio"/> disminuido<br><input checked="" type="radio"/> igual<br><input type="radio"/> aumentado<br><input type="radio"/> no sabe                                      |
| cambio azúcar y dulces     | <input type="radio"/> eliminado<br><input type="radio"/> disminuido<br><input checked="" type="radio"/> igual<br><input type="radio"/> aumentado<br><input type="radio"/> no sabe                                      |
| cambio bebidas alcohólicas | <input type="radio"/> eliminado<br><input type="radio"/> disminuido<br><input checked="" type="radio"/> igual<br><input type="radio"/> aumentado<br><input type="radio"/> no sabe                                      |
| frecuencia comidas fritas  | <input type="radio"/> a diario<br><input type="radio"/> 5 a 6 veces semana<br><input type="radio"/> 2 a 4 veces semana<br><input checked="" type="radio"/> 1 vez semana<br><input type="radio"/> menos de 1 vez semana |
| carne                      | <input type="radio"/> no como<br><input type="radio"/> cruda<br><input type="radio"/> poco hecha<br><input type="radio"/> hecha<br><input checked="" type="radio"/> muy hecha                                          |
| grasa visible carne        | <input checked="" type="radio"/> quita toda<br><input type="radio"/> quita mayoría<br><input type="radio"/> quita un poco<br><input type="radio"/> no quita nada                                                       |

|                                |                                                                                                                                                                                                                                                          |
|--------------------------------|----------------------------------------------------------------------------------------------------------------------------------------------------------------------------------------------------------------------------------------------------------|
| cocina carne                   | <input checked="" type="radio"/> a la plancha<br><input type="radio"/> a la parrilla<br><input type="radio"/> asada<br><input type="radio"/> frita<br><input type="radio"/> guisada                                                                      |
| tostado quemado carne          | <input checked="" type="radio"/> nunca<br><input type="radio"/> 1 vez mes<br><input type="radio"/> 2 a 3 veces mes<br><input type="radio"/> 1 vez semana<br><input type="radio"/> 2 a 3 semanas                                                          |
| tostado quemado pescado        | <input checked="" type="radio"/> nunca<br><input type="radio"/> 1 vez mes<br><input type="radio"/> 2 a 3 veces mes<br><input type="radio"/> 1 vez semana<br><input type="radio"/> 2 a 3 semanas                                                          |
| socarrat paella                | <input checked="" type="radio"/> nunca<br><input type="radio"/> 1 vez mes<br><input type="radio"/> 2 a 3 veces mes<br><input type="radio"/> 1 vez semana<br><input type="radio"/> 2 a 3 semanas                                                          |
| grasa o aceite cocinar         | <input type="radio"/> mantequilla<br><input type="radio"/> margarina<br><input type="radio"/> aceite oliva<br><input checked="" type="radio"/> aceite oliva virgen extra<br><input type="radio"/> aceite vegetal<br><input type="radio"/> mezcla aceites |
| grasa aceite aliñar            | <input type="radio"/> mantequilla<br><input type="radio"/> margarina<br><input type="radio"/> aceite oliva<br><input checked="" type="radio"/> aceite oliva virgen extra<br><input type="radio"/> aceite vegetal<br><input type="radio"/> mezcla aceites |
| grasa aceite freir             | <input type="radio"/> mantequilla<br><input type="radio"/> margarina<br><input checked="" type="radio"/> aceite oliva<br><input type="radio"/> aceite oliva virgen extra<br><input type="radio"/> aceite vegetal<br><input type="radio"/> mezcla aceites |
| Ejercicio cuestionario         | <input checked="" type="radio"/> si<br><input type="radio"/> no                                                                                                                                                                                          |
| horas de sueño incluido siesta | [*DATA REMOVED*]                                                                                                                                                                                                                                         |
| minutos siesta                 | [*DATA REMOVED*]                                                                                                                                                                                                                                         |
| horas televisión semana        | [*DATA REMOVED*]                                                                                                                                                                                                                                         |



|                                        |                                                                                                                                                                                                                                                                                                                                                                           |
|----------------------------------------|---------------------------------------------------------------------------------------------------------------------------------------------------------------------------------------------------------------------------------------------------------------------------------------------------------------------------------------------------------------------------|
| actividad trabajo                      | <input type="radio"/> casi siempre sentado<br><input checked="" type="radio"/> sentado 50 por cien<br><input type="radio"/> casi siempre de pie, quieto<br><input type="radio"/> casi siempre levantado caminando y llevando pocas cosas<br><input type="radio"/> casi siempre levantado, caminando y llevado muchas cosas<br><input type="radio"/> trabajo manual pesado |
| tiempo caminar o bici al día           | <input type="radio"/> casi nunca<br><input type="radio"/> menos 20min día<br><input checked="" type="radio"/> 20 a 40 min día<br><input type="radio"/> 40 a 60 min día<br><input type="radio"/> 1h o 1h y media día<br><input type="radio"/> más de 1h y media al día                                                                                                     |
| tiempo tareas casa al día              | <input type="radio"/> menos de 1h día<br><input checked="" type="radio"/> 1 a 2h día<br><input type="radio"/> 3 a 4h día<br><input type="radio"/> 5 a 6h día<br><input type="radio"/> 7 a 8h día<br><input type="radio"/> más de 8h día                                                                                                                                   |
| tiempo libre televisión ordenador leer | <input type="radio"/> menos 1h día<br><input type="radio"/> 1h día<br><input type="radio"/> 2h día<br><input checked="" type="radio"/> 3h día<br><input type="radio"/> 4h día<br><input type="radio"/> 5 a 6h día<br><input type="radio"/> mas 6h día                                                                                                                     |
| tiempo libre ejercicio o deporte       | <input checked="" type="radio"/> menos 1h semana<br><input type="radio"/> 1h semana<br><input type="radio"/> 2h semana<br><input type="radio"/> 3h semana<br><input type="radio"/> 4 a 5h semana<br><input type="radio"/> mas 5h semana                                                                                                                                   |
| como se considera                      | <input type="radio"/> sedentaria<br><input checked="" type="radio"/> poco activa<br><input type="radio"/> moderadamente activa<br><input type="radio"/> bastante activa<br><input type="radio"/> muy activa<br><input type="radio"/> no sabe                                                                                                                              |
| FUR                                    | [*DATA REMOVED*]                                                                                                                                                                                                                                                                                                                                                          |
| Semanas gestación 2T                   | [*DATA REMOVED*]                                                                                                                                                                                                                                                                                                                                                          |
| Días gestación 2T                      | [*DATA REMOVED*]                                                                                                                                                                                                                                                                                                                                                          |
| DBP 2T                                 | [*DATA REMOVED*]                                                                                                                                                                                                                                                                                                                                                          |
| CC 2T                                  | [*DATA REMOVED*]                                                                                                                                                                                                                                                                                                                                                          |
| AC 2T                                  | [*DATA REMOVED*]                                                                                                                                                                                                                                                                                                                                                          |

|                                                   |                                                                                                                                                                                                 |
|---------------------------------------------------|-------------------------------------------------------------------------------------------------------------------------------------------------------------------------------------------------|
| LF 2T                                             | [*DATA REMOVED*]                                                                                                                                                                                |
| PFE 2T (Hadlock)                                  | [*DATA REMOVED*]                                                                                                                                                                                |
| Semanas gestación 3T                              | [*DATA REMOVED*]                                                                                                                                                                                |
| días 3T                                           | [*DATA REMOVED*]                                                                                                                                                                                |
| DBP 3T                                            | [*DATA REMOVED*]                                                                                                                                                                                |
| CC 3T                                             | [*DATA REMOVED*]                                                                                                                                                                                |
| AC 3T                                             | [*DATA REMOVED*]                                                                                                                                                                                |
| LF 3T                                             | [*DATA REMOVED*]                                                                                                                                                                                |
| PFE 3T (Hadlock)                                  | [*DATA REMOVED*]                                                                                                                                                                                |
| Semanas de gestación final                        | [*DATA REMOVED*]                                                                                                                                                                                |
| días gestación final                              | [*DATA REMOVED*]                                                                                                                                                                                |
| Localización placenta                             | <input type="radio"/> anterior<br><input type="radio"/> lateral derecha<br><input type="radio"/> lateral izquierda<br><input checked="" type="radio"/> posterior<br><input type="radio"/> fondo |
| Presentación longitudinal cefálica                | <input type="radio"/> no<br><input checked="" type="radio"/> si                                                                                                                                 |
| Dorso                                             | <input checked="" type="radio"/> izquierda anterior<br><input type="radio"/> izquierda posterior<br><input type="radio"/> derecha anterior<br><input type="radio"/> derecha posterior           |
| diámetro biparietal                               | [*DATA REMOVED*]                                                                                                                                                                                |
| Circunferencia craneal                            | [*DATA REMOVED*]                                                                                                                                                                                |
| Circunferencia abdominal                          | [*DATA REMOVED*]                                                                                                                                                                                |
| Longitud de femur                                 | [*DATA REMOVED*]                                                                                                                                                                                |
| tejido celular subcutáneo a nivel del muslo en mm | [*DATA REMOVED*]                                                                                                                                                                                |
| tejido celular subcutáneo en abdomen en mm        | [*DATA REMOVED*]                                                                                                                                                                                |
| Volumen del muslo en cm3                          | [*DATA REMOVED*]                                                                                                                                                                                |
| Peso fetal estimado según fórmula de Hadlock      | [*DATA REMOVED*]                                                                                                                                                                                |

|                                               |                                                                                                                                                          |
|-----------------------------------------------|----------------------------------------------------------------------------------------------------------------------------------------------------------|
| Percentil                                     | [*DATA REMOVED*]                                                                                                                                         |
| Peso fetal estimado según fórmula de Scioscia | <hr/>                                                                                                                                                    |
| Peso fetal estimado según fórmula de LEE      | <hr/>                                                                                                                                                    |
| Tipo de parto                                 | <input checked="" type="radio"/> eutocico<br><input type="radio"/> instrumentado/ventosa<br><input type="radio"/> cesarea                                |
| fecha de nacimiento                           | [*DATA REMOVED*]                                                                                                                                         |
| Días entre exploración y nacimiento           | [*DATA REMOVED*]                                                                                                                                         |
| Peso RN en g                                  | [*DATA REMOVED*]                                                                                                                                         |
| sexo                                          | <input checked="" type="radio"/> mujer<br><input type="radio"/> hombre                                                                                   |
| Apgar 1 minuto                                | [*DATA REMOVED*]                                                                                                                                         |
| Apgar 5 minutos                               | [*DATA REMOVED*]                                                                                                                                         |
| Apgar 10 minutos                              | <hr/>                                                                                                                                                    |
| antecedente Covid durante gestación           | <input type="radio"/> Yes<br><input checked="" type="radio"/> No                                                                                         |
| Nivel de estudios                             | <input type="radio"/> ninguno<br><input type="radio"/> primarios<br><input type="radio"/> secundarios<br><input checked="" type="radio"/> universitarios |

# Base\_datos\_estimacion\_peso\_fetal

|                                       |                                                                                                                                                                                                                                                                                      |
|---------------------------------------|--------------------------------------------------------------------------------------------------------------------------------------------------------------------------------------------------------------------------------------------------------------------------------------|
| Número de identificación participante | 16                                                                                                                                                                                                                                                                                   |
| CODIGO PARTICIPANTE                   |                                                                                                                                                                                                                                                                                      |
| Edad                                  | [*DATA REMOVED*]                                                                                                                                                                                                                                                                     |
| Gestaciones                           | <input checked="" type="radio"/> 1<br><input type="radio"/> 2<br><input type="radio"/> 3<br><input type="radio"/> mas de 3                                                                                                                                                           |
| partos                                | <input checked="" type="radio"/> 0<br><input type="radio"/> 1<br><input type="radio"/> 2<br><input type="radio"/> 3<br><input type="radio"/> mas de 3                                                                                                                                |
| cesáreas                              | <input checked="" type="radio"/> 0<br><input type="radio"/> 1<br><input type="radio"/> 2<br><input type="radio"/> 3<br><input type="radio"/> mas de 3                                                                                                                                |
| Abortos                               | <input checked="" type="radio"/> 0<br><input type="radio"/> 1<br><input type="radio"/> 2<br><input type="radio"/> 3<br><input type="radio"/> mas de 3                                                                                                                                |
| Tipo de gestacion                     | <input checked="" type="radio"/> espontanea<br><input type="radio"/> IAC inseminación artificial conyuge<br><input type="radio"/> IAD inseminación artificial donante<br><input type="radio"/> FIV Fecundación in Vitro<br><input type="radio"/> Ovodon FIV con donación de ovocitos |
| peso previo a embarazo                | [*DATA REMOVED*]                                                                                                                                                                                                                                                                     |
| Ganancia ponderal embarazo            | [*DATA REMOVED*]                                                                                                                                                                                                                                                                     |
| Talla madre                           | [*DATA REMOVED*]                                                                                                                                                                                                                                                                     |
| IMC previo embarazo                   | 31.63371488033298                                                                                                                                                                                                                                                                    |
| Patología obstétrica                  | <input checked="" type="radio"/> no<br><input type="radio"/> si                                                                                                                                                                                                                      |
| Diabetes pregestacional               | <input checked="" type="radio"/> no<br><input type="radio"/> si                                                                                                                                                                                                                      |
| Diabetes gestacional                  | <input checked="" type="radio"/> no<br><input type="radio"/> si                                                                                                                                                                                                                      |

|                                            |                                                                                                                                                                                      |
|--------------------------------------------|--------------------------------------------------------------------------------------------------------------------------------------------------------------------------------------|
| Diabetes gestacional con insulina          | <input checked="" type="radio"/> no<br><input type="radio"/> si                                                                                                                      |
| Diabetes gestacional con dieta y ejercicio | <input checked="" type="radio"/> no<br><input type="radio"/> si                                                                                                                      |
| Percentil fetos previos                    | <input checked="" type="radio"/> Nada<br><input type="radio"/> percentil menor de 10<br><input type="radio"/> percentil entre 10 y 90<br><input type="radio"/> percentil mayor de 90 |
| Exfumadora                                 | <input checked="" type="radio"/> Nada<br><input type="radio"/> menos de 5 años<br><input type="radio"/> 5 a 10 años<br><input type="radio"/> mayor o igual a 10 años                 |
| Hábito tabáquico                           | <input checked="" type="radio"/> no<br><input type="radio"/> si                                                                                                                      |
| fumadora                                   | [*DATA REMOVED*]                                                                                                                                                                     |
| Consumo otros tóxicos                      | <input checked="" type="radio"/> no<br><input type="radio"/> si                                                                                                                      |
| Hb 1T                                      | [*DATA REMOVED*]                                                                                                                                                                     |
| Htc 1T                                     | [*DATA REMOVED*]                                                                                                                                                                     |
| Hb 2T                                      | [*DATA REMOVED*]                                                                                                                                                                     |
| HTC 2T                                     | [*DATA REMOVED*]                                                                                                                                                                     |
| Hb 3T                                      | [*DATA REMOVED*]                                                                                                                                                                     |
| HTC 3T                                     | [*DATA REMOVED*]                                                                                                                                                                     |
| Suplemento FE oral                         | <input checked="" type="radio"/> si<br><input type="radio"/> no                                                                                                                      |
| Suplemento fe iv                           | <input type="radio"/> si<br><input checked="" type="radio"/> no                                                                                                                      |
| Transfusión                                | <input checked="" type="radio"/> no<br><input type="radio"/> si                                                                                                                      |
| Solicitada Vit D                           | <input checked="" type="radio"/> no<br><input type="radio"/> si                                                                                                                      |
| Deficit vit D                              | <input checked="" type="radio"/> no<br><input type="radio"/> si                                                                                                                      |
| Suplemento vit D                           | <input type="radio"/> si<br><input checked="" type="radio"/> no                                                                                                                      |

|                       |                                                                                                                                                                                                                                                                                                                                                                                                              |
|-----------------------|--------------------------------------------------------------------------------------------------------------------------------------------------------------------------------------------------------------------------------------------------------------------------------------------------------------------------------------------------------------------------------------------------------------|
| Dieta, cuestionario   | <input checked="" type="radio"/> si<br><input type="radio"/> no                                                                                                                                                                                                                                                                                                                                              |
| Leche entera          | <input checked="" type="radio"/> Nunca o menos 1 vez al mes<br><input type="radio"/> 1 a 3 veces mes<br><input type="radio"/> 1 vez semana<br><input type="radio"/> 2 a 4 veces semana<br><input type="radio"/> 5 a 6 veces semana<br><input type="radio"/> 1 vez al día<br><input type="radio"/> 2 a 3 veces al día<br><input type="radio"/> 5 a 6 veces al día<br><input type="radio"/> más 6 veces al día |
| Leche semidesnatada   | <input type="radio"/> Nunca o menos 1 vez al mes<br><input type="radio"/> 1 a 3 veces mes<br><input type="radio"/> 1 vez semana<br><input type="radio"/> 2 a 4 veces semana<br><input type="radio"/> 5 a 6 veces semana<br><input checked="" type="radio"/> 1 vez al día<br><input type="radio"/> 2 a 3 veces al día<br><input type="radio"/> 5 a 6 veces al día<br><input type="radio"/> mas 6 veces al día |
| Leche desnatada       | <input checked="" type="radio"/> Nunca o menos 1 vez al mes<br><input type="radio"/> 1 a 3 veces mes<br><input type="radio"/> 1 vez semana<br><input type="radio"/> 2 a 4 veces semana<br><input type="radio"/> 5 a 6 veces semana<br><input type="radio"/> 1 vez al día<br><input type="radio"/> 2 a 3 veces al día<br><input type="radio"/> 5 a 6 veces al día<br><input type="radio"/> más 6 veces al día |
| Leche condensada      | <input checked="" type="radio"/> Nunca o menos 1 vez al mes<br><input type="radio"/> 1 a 3 veces mes<br><input type="radio"/> 1 vez semana<br><input type="radio"/> 2 a 4 veces semana<br><input type="radio"/> 5 a 6 veces semana<br><input type="radio"/> 1 vez al día<br><input type="radio"/> 2 a 3 veces al día<br><input type="radio"/> 5 a 6 veces al día<br><input type="radio"/> más 6 veces al día |
| nata o crema de leche | <input checked="" type="radio"/> Nunca o menos 1 vez al mes<br><input type="radio"/> 1 a 3 veces mes<br><input type="radio"/> 1 vez semana<br><input type="radio"/> 2 a 4 veces semana<br><input type="radio"/> 5 a 6 veces semana<br><input type="radio"/> 1 vez al día<br><input type="radio"/> 2 a 3 veces al día<br><input type="radio"/> 5 a 6 veces al día<br><input type="radio"/> más 6 veces al día |

|                                             |                                                                                                                                                                                                                                                                                                                                                                                                              |
|---------------------------------------------|--------------------------------------------------------------------------------------------------------------------------------------------------------------------------------------------------------------------------------------------------------------------------------------------------------------------------------------------------------------------------------------------------------------|
| Yogurt Entero                               | <input checked="" type="radio"/> Nunca o menos 1 vez al mes<br><input type="radio"/> 1 a 3 veces mes<br><input type="radio"/> 1 vez semana<br><input type="radio"/> 2 a 4 veces semana<br><input type="radio"/> 5 a 6 veces semana<br><input type="radio"/> 1 vez al día<br><input type="radio"/> 2 a 3 veces al día<br><input type="radio"/> 5 a 6 veces al día<br><input type="radio"/> más 6 veces al día |
| Yogurt desnatado                            | <input type="radio"/> Nunca o menos 1 vez al mes<br><input type="radio"/> 1 a 3 veces mes<br><input type="radio"/> 1 vez semana<br><input checked="" type="radio"/> 2 a 4 veces semana<br><input type="radio"/> 5 a 6 veces semana<br><input type="radio"/> 1 vez al día<br><input type="radio"/> 2 a 3 veces al día<br><input type="radio"/> 5 a 6 veces al día<br><input type="radio"/> más 6 veces al día |
| 100g requesón o queso blando o queso fresco | <input checked="" type="radio"/> Nunca o menos 1 vez al mes<br><input type="radio"/> 1 a 3 veces mes<br><input type="radio"/> 1 vez semana<br><input type="radio"/> 2 a 4 veces semana<br><input type="radio"/> 5 a 6 veces semana<br><input type="radio"/> 1 vez al día<br><input type="radio"/> 2 a 3 veces al día<br><input type="radio"/> 5 a 6 veces al día<br><input type="radio"/> más 6 veces al día |
| queso curado o semicurado o cremoso         | <input type="radio"/> Nunca o menos 1 vez al mes<br><input type="radio"/> 1 a 3 veces mes<br><input type="radio"/> 1 vez semana<br><input checked="" type="radio"/> 2 a 4 veces semana<br><input type="radio"/> 5 a 6 veces semana<br><input type="radio"/> 1 vez al día<br><input type="radio"/> 2 a 3 veces al día<br><input type="radio"/> 5 a 6 veces al día<br><input type="radio"/> más 6 veces al día |
| natillas flan pudding                       | <input type="radio"/> Nunca o menos 1 vez al mes<br><input checked="" type="radio"/> 1 a 3 veces mes<br><input type="radio"/> 1 vez semana<br><input type="radio"/> 2 a 4 veces semana<br><input type="radio"/> 5 a 6 veces semana<br><input type="radio"/> 1 vez al día<br><input type="radio"/> 2 a 3 veces al día<br><input type="radio"/> 5 a 6 veces al día<br><input type="radio"/> más 6 veces al día |
| Helado                                      | <input checked="" type="radio"/> Nunca o menos 1 vez al mes<br><input type="radio"/> 1 a 3 veces mes<br><input type="radio"/> 1 vez semana<br><input type="radio"/> 2 a 4 veces semana<br><input type="radio"/> 5 a 6 veces semana<br><input type="radio"/> 1 vez al día<br><input type="radio"/> 2 a 3 veces al día<br><input type="radio"/> 5 a 6 veces al día<br><input type="radio"/> más 6 veces al día |

|                                      |                                                                                                                                                                                                                                                                                                                                                                                                              |
|--------------------------------------|--------------------------------------------------------------------------------------------------------------------------------------------------------------------------------------------------------------------------------------------------------------------------------------------------------------------------------------------------------------------------------------------------------------|
| huevo                                | <input type="radio"/> Nunca o menos 1 vez al mes<br><input type="radio"/> 1 a 3 veces mes<br><input checked="" type="radio"/> 1 vez semana<br><input type="radio"/> 2 a 4 veces semana<br><input type="radio"/> 5 a 6 veces semana<br><input type="radio"/> 1 vez al día<br><input type="radio"/> 2 a 3 veces al día<br><input type="radio"/> 5 a 6 veces al día<br><input type="radio"/> más 6 veces al día |
| Pollo con piel                       | <input checked="" type="radio"/> Nunca o menos 1 vez al mes<br><input type="radio"/> 1 a 3 veces mes<br><input type="radio"/> 1 vez semana<br><input type="radio"/> 2 a 4 veces semana<br><input type="radio"/> 5 a 6 veces semana<br><input type="radio"/> 1 vez al día<br><input type="radio"/> 2 a 3 veces al día<br><input type="radio"/> 5 a 6 veces al día<br><input type="radio"/> más 6 veces al día |
| pollo sin piel                       | <input type="radio"/> Nunca o menos 1 vez al mes<br><input type="radio"/> 1 a 3 veces mes<br><input type="radio"/> 1 vez semana<br><input checked="" type="radio"/> 2 a 4 veces semana<br><input type="radio"/> 5 a 6 veces semana<br><input type="radio"/> 1 vez al día<br><input type="radio"/> 2 a 3 veces al día<br><input type="radio"/> 5 a 6 veces al día<br><input type="radio"/> más 6 veces al día |
| Ternera o cerdo o cordero            | <input type="radio"/> Nunca o menos 1 vez al mes<br><input type="radio"/> 1 a 3 veces mes<br><input type="radio"/> 1 vez semana<br><input checked="" type="radio"/> 2 a 4 veces semana<br><input type="radio"/> 5 a 6 veces semana<br><input type="radio"/> 1 vez al día<br><input type="radio"/> 2 a 3 veces al día<br><input type="radio"/> 5 a 6 veces al día<br><input type="radio"/> más 6 veces al día |
| carne caza: Conejo o codorniz o pato | <input type="radio"/> Nunca o menos 1 vez al mes<br><input type="radio"/> 1 a 3 veces mes<br><input checked="" type="radio"/> 1 vez semana<br><input type="radio"/> 2 a 4 veces semana<br><input type="radio"/> 5 a 6 veces semana<br><input type="radio"/> 1 vez al día<br><input type="radio"/> 2 a 3 veces al día<br><input type="radio"/> 5 a 6 veces al día<br><input type="radio"/> más 6 veces al día |
| Hígado de ternera o cerdo o pollo    | <input checked="" type="radio"/> Nunca o menos 1 vez al mes<br><input type="radio"/> 1 a 3 veces mes<br><input type="radio"/> 1 vez semana<br><input type="radio"/> 2 a 4 veces semana<br><input type="radio"/> 5 a 6 veces semana<br><input type="radio"/> 1 vez al día<br><input type="radio"/> 2 a 3 veces al día<br><input type="radio"/> 5 a 6 veces al día<br><input type="radio"/> más 6 veces al día |



|                     |                                                                                                                                                                                                                                                                                                                                                                                                              |
|---------------------|--------------------------------------------------------------------------------------------------------------------------------------------------------------------------------------------------------------------------------------------------------------------------------------------------------------------------------------------------------------------------------------------------------------|
| Vísceras            | <input checked="" type="radio"/> Nunca o menos 1 vez al mes<br><input type="radio"/> 1 a 3 veces mes<br><input type="radio"/> 1 vez semana<br><input type="radio"/> 2 a 4 veces semana<br><input type="radio"/> 5 a 6 veces semana<br><input type="radio"/> 1 vez al día<br><input type="radio"/> 2 a 3 veces al día<br><input type="radio"/> 5 a 6 veces al día<br><input type="radio"/> más 6 veces al día |
| Embutido            | <input type="radio"/> Nunca o menos 1 vez al mes<br><input checked="" type="radio"/> 1 a 3 veces mes<br><input type="radio"/> 1 vez semana<br><input type="radio"/> 2 a 4 veces semana<br><input type="radio"/> 5 a 6 veces semana<br><input type="radio"/> 1 vez al día<br><input type="radio"/> 2 a 3 veces al día<br><input type="radio"/> 5 a 6 veces al día<br><input type="radio"/> más 6 veces al día |
| Salchicha o similar | <input checked="" type="radio"/> Nunca o menos 1 vez al mes<br><input type="radio"/> 1 a 3 veces mes<br><input type="radio"/> 1 vez semana<br><input type="radio"/> 2 a 4 veces semana<br><input type="radio"/> 5 a 6 veces semana<br><input type="radio"/> 1 vez al día<br><input type="radio"/> 2 a 3 veces al día<br><input type="radio"/> 5 a 6 veces al día<br><input type="radio"/> más 6 veces al día |
| Pate o foiegras     | <input checked="" type="radio"/> Nunca o menos 1 vez al mes<br><input type="radio"/> 1 a 3 veces mes<br><input type="radio"/> 1 vez semana<br><input type="radio"/> 2 a 4 veces semana<br><input type="radio"/> 5 a 6 veces semana<br><input type="radio"/> 1 vez al día<br><input type="radio"/> 2 a 3 veces al día<br><input type="radio"/> 5 a 6 veces al día<br><input type="radio"/> más 6 veces al día |
| Hamburguesa         | <input type="radio"/> Nunca o menos 1 vez al mes<br><input type="radio"/> 1 a 3 veces mes<br><input checked="" type="radio"/> 1 vez semana<br><input type="radio"/> 2 a 4 veces semana<br><input type="radio"/> 5 a 6 veces semana<br><input type="radio"/> 1 vez al día<br><input type="radio"/> 2 a 3 veces al día<br><input type="radio"/> 5 a 6 veces al día<br><input type="radio"/> más 6 veces al día |
| tocino o bacon      | <input checked="" type="radio"/> Nunca o menos 1 vez al mes<br><input type="radio"/> 1 a 3 veces mes<br><input type="radio"/> 1 vez semana<br><input type="radio"/> 2 a 4 veces semana<br><input type="radio"/> 5 a 6 veces semana<br><input type="radio"/> 1 vez al día<br><input type="radio"/> 2 a 3 veces al día<br><input type="radio"/> 5 a 6 veces al día<br><input type="radio"/> más 6 veces al día |

|                        |                                                                                                                                                                                                                                                                                                                                                                                                              |
|------------------------|--------------------------------------------------------------------------------------------------------------------------------------------------------------------------------------------------------------------------------------------------------------------------------------------------------------------------------------------------------------------------------------------------------------|
| Pescado frito          | <input checked="" type="radio"/> Nunca o menos 1 vez al mes<br><input type="radio"/> 1 a 3 veces mes<br><input type="radio"/> 1 vez semana<br><input type="radio"/> 2 a 4 veces semana<br><input type="radio"/> 5 a 6 veces semana<br><input type="radio"/> 1 vez al día<br><input type="radio"/> 2 a 3 veces al día<br><input type="radio"/> 5 a 6 veces al día<br><input type="radio"/> más 6 veces al día |
| pescado hervido blanco | <input type="radio"/> Nunca o menos 1 vez al mes<br><input type="radio"/> 1 a 3 veces mes<br><input type="radio"/> 1 vez semana<br><input checked="" type="radio"/> 2 a 4 veces semana<br><input type="radio"/> 5 a 6 veces semana<br><input type="radio"/> 1 vez al día<br><input type="radio"/> 2 a 3 veces al día<br><input type="radio"/> 5 a 6 veces al día<br><input type="radio"/> más 6 veces al día |
| pescado hervido azul   | <input checked="" type="radio"/> Nunca o menos 1 vez al mes<br><input type="radio"/> 1 a 3 veces mes<br><input type="radio"/> 1 vez semana<br><input type="radio"/> 2 a 4 veces semana<br><input type="radio"/> 5 a 6 veces semana<br><input type="radio"/> 1 vez al día<br><input type="radio"/> 2 a 3 veces al día<br><input type="radio"/> 5 a 6 veces al día<br><input type="radio"/> más 6 veces al día |
| otros pescado azul     | <input type="radio"/> Nunca o menos 1 vez al mes<br><input type="radio"/> 1 a 3 veces mes<br><input checked="" type="radio"/> 1 vez semana<br><input type="radio"/> 2 a 4 veces semana<br><input type="radio"/> 5 a 6 veces semana<br><input type="radio"/> 1 vez al día<br><input type="radio"/> 2 a 3 veces al día<br><input type="radio"/> 5 a 6 veces al día<br><input type="radio"/> más 6 veces al día |
| atun conserva          | <input type="radio"/> Nunca o menos 1 vez al mes<br><input type="radio"/> 1 a 3 veces mes<br><input checked="" type="radio"/> 1 vez semana<br><input type="radio"/> 2 a 4 veces semana<br><input type="radio"/> 5 a 6 veces semana<br><input type="radio"/> 1 vez al día<br><input type="radio"/> 2 a 3 veces al día<br><input type="radio"/> 5 a 6 veces al día<br><input type="radio"/> más 6 veces al día |
| sardina conserva       | <input checked="" type="radio"/> Nunca o menos 1 vez al mes<br><input type="radio"/> 1 a 3 veces mes<br><input type="radio"/> 1 vez semana<br><input type="radio"/> 2 a 4 veces semana<br><input type="radio"/> 5 a 6 veces semana<br><input type="radio"/> 1 vez al día<br><input type="radio"/> 2 a 3 veces al día<br><input type="radio"/> 5 a 6 veces al día<br><input type="radio"/> más 6 veces al día |

|                                         |                                                                                                                                                                                                                                                                                                                                                                                                              |
|-----------------------------------------|--------------------------------------------------------------------------------------------------------------------------------------------------------------------------------------------------------------------------------------------------------------------------------------------------------------------------------------------------------------------------------------------------------------|
| pescado ahumado                         | <input checked="" type="radio"/> Nunca o menos 1 vez al mes<br><input type="radio"/> 1 a 3 veces mes<br><input type="radio"/> 1 vez semana<br><input type="radio"/> 2 a 4 veces semana<br><input type="radio"/> 5 a 6 veces semana<br><input type="radio"/> 1 vez al día<br><input type="radio"/> 2 a 3 veces al día<br><input type="radio"/> 5 a 6 veces al día<br><input type="radio"/> más 6 veces al día |
| almejas o mejillones o ostras unos 100g | <input type="radio"/> Nunca o menos 1 vez al mes<br><input checked="" type="radio"/> 1 a 3 veces mes<br><input type="radio"/> 1 vez semana<br><input type="radio"/> 2 a 4 veces semana<br><input type="radio"/> 5 a 6 veces semana<br><input type="radio"/> 1 vez al día<br><input type="radio"/> 2 a 3 veces al día<br><input type="radio"/> 5 a 6 veces al día<br><input type="radio"/> más 6 veces al día |
| calamar o chipiron o sepia unos 100g    | <input type="radio"/> Nunca o menos 1 vez al mes<br><input checked="" type="radio"/> 1 a 3 veces mes<br><input type="radio"/> 1 vez semana<br><input type="radio"/> 2 a 4 veces semana<br><input type="radio"/> 5 a 6 veces semana<br><input type="radio"/> 1 vez al día<br><input type="radio"/> 2 a 3 veces al día<br><input type="radio"/> 5 a 6 veces al día<br><input type="radio"/> más 6 veces al día |
| marisco unos 100g                       | <input type="radio"/> Nunca o menos 1 vez al mes<br><input checked="" type="radio"/> 1 a 3 veces mes<br><input type="radio"/> 1 vez semana<br><input type="radio"/> 2 a 4 veces semana<br><input type="radio"/> 5 a 6 veces semana<br><input type="radio"/> 1 vez al día<br><input type="radio"/> 2 a 3 veces al día<br><input type="radio"/> 5 a 6 veces al día<br><input type="radio"/> más 6 veces al día |
| Espinacas o acelgas cocinadas           | <input type="radio"/> Nunca o menos 1 vez al mes<br><input type="radio"/> 1 a 3 veces mes<br><input checked="" type="radio"/> 1 vez semana<br><input type="radio"/> 2 a 4 veces semana<br><input type="radio"/> 5 a 6 veces semana<br><input type="radio"/> 1 vez al día<br><input type="radio"/> 2 a 3 veces al día<br><input type="radio"/> 5 a 6 veces al día<br><input type="radio"/> más 6 veces al día |
| Col o coliflor o brocoli cocinado       | <input type="radio"/> Nunca o menos 1 vez al mes<br><input type="radio"/> 1 a 3 veces mes<br><input type="radio"/> 1 vez semana<br><input checked="" type="radio"/> 2 a 4 veces semana<br><input type="radio"/> 5 a 6 veces semana<br><input type="radio"/> 1 vez al día<br><input type="radio"/> 2 a 3 veces al día<br><input type="radio"/> 5 a 6 veces al día<br><input type="radio"/> más 6 veces al día |

---

Lechuga o endivia o escarola

- ☐ Nunca o menos 1 vez al mes  
☐ 1 a 3 veces mes  
☒ 1 vez semana  
☐ 2 a 4 veces semana  
☐ 5 a 6 veces semana  
☐ 1 vez al día  
☐ 2 a 3 veces al día  
☐ 5 a 6 veces al día  
☐ más 6 veces al día

---

tomate ensalada

- ☐ Nunca o menos 1 vez al mes  
☐ 1 a 3 veces mes  
☐ 1 vez semana  
☒ 2 a 4 veces semana  
☐ 5 a 6 veces semana  
☐ 1 vez al día  
☐ 2 a 3 veces al día  
☐ 5 a 6 veces al día  
☐ más 6 veces al día

---

cebolla

- ☐ Nunca o menos 1 vez al mes  
☐ 1 a 3 veces mes  
☐ 1 vez semana  
☒ 2 a 4 veces semana  
☐ 5 a 6 veces semana  
☐ 1 vez al día  
☐ 2 a 3 veces al día  
☐ 5 a 6 veces al día  
☐ más 6 veces al día

---

Zanahoria o calabaza

- ☐ Nunca o menos 1 vez al mes  
☐ 1 a 3 veces mes  
☐ 1 vez semana  
☒ 2 a 4 veces semana  
☐ 5 a 6 veces semana  
☐ 1 vez al día  
☐ 2 a 3 veces al día  
☐ 5 a 6 veces al día  
☐ más 6 veces al día

---

Judías verdes

- ☐ Nunca o menos 1 vez al mes  
☐ 1 a 3 veces mes  
☐ 1 vez semana  
☒ 2 a 4 veces semana  
☐ 5 a 6 veces semana  
☐ 1 vez al día  
☐ 2 a 3 veces al día  
☐ 5 a 6 veces al día  
☐ más 6 veces al día

---

Berenjena o calabacin o pepino

- ☐ Nunca o menos 1 vez al mes  
☐ 1 a 3 veces mes  
☒ 1 vez semana  
☐ 2 a 4 veces semana  
☐ 5 a 6 veces semana  
☐ 1 vez al día  
☐ 2 a 3 veces al día  
☐ 5 a 6 veces al día  
☐ más 6 veces al día

|                       |                                                                                                                                                                                                                                                                                                                                                                                                              |
|-----------------------|--------------------------------------------------------------------------------------------------------------------------------------------------------------------------------------------------------------------------------------------------------------------------------------------------------------------------------------------------------------------------------------------------------------|
| pimiento              | <input type="radio"/> Nunca o menos 1 vez al mes<br><input type="radio"/> 1 a 3 veces mes<br><input type="radio"/> 1 vez semana<br><input checked="" type="radio"/> 2 a 4 veces semana<br><input type="radio"/> 5 a 6 veces semana<br><input type="radio"/> 1 vez al día<br><input type="radio"/> 2 a 3 veces al día<br><input type="radio"/> 5 a 6 veces al día<br><input type="radio"/> más 6 veces al día |
| alcachofa             | <input type="radio"/> Nunca o menos 1 vez al mes<br><input checked="" type="radio"/> 1 a 3 veces mes<br><input type="radio"/> 1 vez semana<br><input type="radio"/> 2 a 4 veces semana<br><input type="radio"/> 5 a 6 veces semana<br><input type="radio"/> 1 vez al día<br><input type="radio"/> 2 a 3 veces al día<br><input type="radio"/> 5 a 6 veces al día<br><input type="radio"/> más 6 veces al día |
| espárragos            | <input checked="" type="radio"/> Nunca o menos 1 vez al mes<br><input type="radio"/> 1 a 3 veces mes<br><input type="radio"/> 1 vez semana<br><input type="radio"/> 2 a 4 veces semana<br><input type="radio"/> 5 a 6 veces semana<br><input type="radio"/> 1 vez al día<br><input type="radio"/> 2 a 3 veces al día<br><input type="radio"/> 5 a 6 veces al día<br><input type="radio"/> más 6 veces al día |
| maíz hervido          | <input checked="" type="radio"/> Nunca o menos 1 vez al mes<br><input type="radio"/> 1 a 3 veces mes<br><input type="radio"/> 1 vez semana<br><input type="radio"/> 2 a 4 veces semana<br><input type="radio"/> 5 a 6 veces semana<br><input type="radio"/> 1 vez al día<br><input type="radio"/> 2 a 3 veces al día<br><input type="radio"/> 5 a 6 veces al día<br><input type="radio"/> más 6 veces al día |
| legumbres             | <input type="radio"/> Nunca o menos 1 vez al mes<br><input type="radio"/> 1 a 3 veces mes<br><input type="radio"/> 1 vez semana<br><input type="radio"/> 2 a 4 veces semana<br><input checked="" type="radio"/> 5 a 6 veces semana<br><input type="radio"/> 1 vez al día<br><input type="radio"/> 2 a 3 veces al día<br><input type="radio"/> 5 a 6 veces al día<br><input type="radio"/> más 6 veces al día |
| naranjas o mandarinas | <input type="radio"/> Nunca o menos 1 vez al mes<br><input type="radio"/> 1 a 3 veces mes<br><input type="radio"/> 1 vez semana<br><input type="radio"/> 2 a 4 veces semana<br><input type="radio"/> 5 a 6 veces semana<br><input checked="" type="radio"/> 1 vez al día<br><input type="radio"/> 2 a 3 veces al día<br><input type="radio"/> 5 a 6 veces al día<br><input type="radio"/> más 6 veces al día |

|                       |                                                                                                                                                                                                                                                                                                                                                                                                              |
|-----------------------|--------------------------------------------------------------------------------------------------------------------------------------------------------------------------------------------------------------------------------------------------------------------------------------------------------------------------------------------------------------------------------------------------------------|
| zum natural fruta     | <input type="radio"/> Nunca o menos 1 vez al mes<br><input type="radio"/> 1 a 3 veces mes<br><input checked="" type="radio"/> 1 vez semana<br><input type="radio"/> 2 a 4 veces semana<br><input type="radio"/> 5 a 6 veces semana<br><input type="radio"/> 1 vez al día<br><input type="radio"/> 2 a 3 veces al día<br><input type="radio"/> 5 a 6 veces al día<br><input type="radio"/> más 6 veces al día |
| platano               | <input type="radio"/> Nunca o menos 1 vez al mes<br><input type="radio"/> 1 a 3 veces mes<br><input type="radio"/> 1 vez semana<br><input type="radio"/> 2 a 4 veces semana<br><input checked="" type="radio"/> 5 a 6 veces semana<br><input type="radio"/> 1 vez al día<br><input type="radio"/> 2 a 3 veces al día<br><input type="radio"/> 5 a 6 veces al día<br><input type="radio"/> más 6 veces al día |
| manzana o pera        | <input type="radio"/> Nunca o menos 1 vez al mes<br><input type="radio"/> 1 a 3 veces mes<br><input type="radio"/> 1 vez semana<br><input type="radio"/> 2 a 4 veces semana<br><input checked="" type="radio"/> 5 a 6 veces semana<br><input type="radio"/> 1 vez al día<br><input type="radio"/> 2 a 3 veces al día<br><input type="radio"/> 5 a 6 veces al día<br><input type="radio"/> más 6 veces al día |
| melocotón o nectarina | <input type="radio"/> Nunca o menos 1 vez al mes<br><input checked="" type="radio"/> 1 a 3 veces mes<br><input type="radio"/> 1 vez semana<br><input type="radio"/> 2 a 4 veces semana<br><input type="radio"/> 5 a 6 veces semana<br><input type="radio"/> 1 vez al día<br><input type="radio"/> 2 a 3 veces al día<br><input type="radio"/> 5 a 6 veces al día<br><input type="radio"/> más 6 veces al día |
| sandia o melon        | <input type="radio"/> Nunca o menos 1 vez al mes<br><input checked="" type="radio"/> 1 a 3 veces mes<br><input type="radio"/> 1 vez semana<br><input type="radio"/> 2 a 4 veces semana<br><input type="radio"/> 5 a 6 veces semana<br><input type="radio"/> 1 vez al día<br><input type="radio"/> 2 a 3 veces al día<br><input type="radio"/> 5 a 6 veces al día<br><input type="radio"/> más 6 veces al día |
| uva                   | <input type="radio"/> Nunca o menos 1 vez al mes<br><input checked="" type="radio"/> 1 a 3 veces mes<br><input type="radio"/> 1 vez semana<br><input type="radio"/> 2 a 4 veces semana<br><input type="radio"/> 5 a 6 veces semana<br><input type="radio"/> 1 vez al día<br><input type="radio"/> 2 a 3 veces al día<br><input type="radio"/> 5 a 6 veces al día<br><input type="radio"/> más 6 veces al día |

---

bruna o ciruela

- ☒ Nunca o menos 1 vez al mes  
☐ 1 a 3 veces mes  
☐ 1 vez semana  
☐ 2 a 4 veces semana  
☐ 5 a 6 veces semana  
☐ 1 vez al día  
☐ 2 a 3 veces al día  
☐ 5 a 6 veces al día  
☐ más 6 veces al día

---

kiwi

- ☐ Nunca o menos 1 vez al mes  
☐ 1 a 3 veces mes  
☐ 1 vez semana  
☐ 2 a 4 veces semana  
☐ 5 a 6 veces semana  
☒ 1 vez al día  
☐ 2 a 3 veces al día  
☐ 5 a 6 veces al día  
☐ más 6 veces al día

---

aceituna

- ☐ Nunca o menos 1 vez al mes  
☐ 1 a 3 veces mes  
☒ 1 vez semana  
☐ 2 a 4 veces semana  
☐ 5 a 6 veces semana  
☐ 1 vez al día  
☐ 2 a 3 veces al día  
☐ 5 a 6 veces al día  
☐ más 6 veces al día

---

frutos secos

- ☐ Nunca o menos 1 vez al mes  
☐ 1 a 3 veces mes  
☐ 1 vez semana  
☒ 2 a 4 veces semana  
☐ 5 a 6 veces semana  
☐ 1 vez al día  
☐ 2 a 3 veces al día  
☐ 5 a 6 veces al día  
☐ más 6 veces al día

---

pan blanco

- ☐ Nunca o menos 1 vez al mes  
☐ 1 a 3 veces mes  
☐ 1 vez semana  
☒ 2 a 4 veces semana  
☐ 5 a 6 veces semana  
☐ 1 vez al día  
☐ 2 a 3 veces al día  
☐ 5 a 6 veces al día  
☐ más 6 veces al día

---

pan integral

- ☐ Nunca o menos 1 vez al mes  
☒ 1 a 3 veces mes  
☐ 1 vez semana  
☐ 2 a 4 veces semana  
☐ 5 a 6 veces semana  
☐ 1 vez al día  
☐ 2 a 3 veces al día  
☐ 5 a 6 veces al día  
☐ más 6 veces al día

---

cereales desayuno

- ☐ Nunca o menos 1 vez al mes  
☐ 1 a 3 veces mes  
☐ 1 vez semana  
☒ 2 a 4 veces semana  
☐ 5 a 6 veces semana  
☐ 1 vez al día  
☐ 2 a 3 veces al día  
☐ 5 a 6 veces al día  
☐ más 6 veces al día

---

patatas fritas

- ☐ Nunca o menos 1 vez al mes  
☒ 1 a 3 veces mes  
☐ 1 vez semana  
☐ 2 a 4 veces semana  
☐ 5 a 6 veces semana  
☐ 1 vez al día  
☐ 2 a 3 veces al día  
☐ 5 a 6 veces al día  
☐ más 6 veces al día

---

patatas cocidas o asadas

- ☐ Nunca o menos 1 vez al mes  
☐ 1 a 3 veces mes  
☐ 1 vez semana  
☒ 2 a 4 veces semana  
☐ 5 a 6 veces semana  
☐ 1 vez al día  
☐ 2 a 3 veces al día  
☐ 5 a 6 veces al día  
☐ más 6 veces al día

---

bolsa papas

- ☐ Nunca o menos 1 vez al mes  
☒ 1 a 3 veces mes  
☐ 1 vez semana  
☐ 2 a 4 veces semana  
☐ 5 a 6 veces semana  
☐ 1 vez al día  
☐ 2 a 3 veces al día  
☐ 5 a 6 veces al día  
☐ más 6 veces al día

---

arroz cocinado

- ☐ Nunca o menos 1 vez al mes  
☐ 1 a 3 veces mes  
☐ 1 vez semana  
☒ 2 a 4 veces semana  
☐ 5 a 6 veces semana  
☐ 1 vez al día  
☐ 2 a 3 veces al día  
☐ 5 a 6 veces al día  
☐ más 6 veces al día

---

pasta

- ☐ Nunca o menos 1 vez al mes  
☐ 1 a 3 veces mes  
☒ 1 vez semana  
☐ 2 a 4 veces semana  
☐ 5 a 6 veces semana  
☐ 1 vez al día  
☐ 2 a 3 veces al día  
☐ 5 a 6 veces al día  
☐ más 6 veces al día



|                     |                                                                                                                                                                                                                                                                                                                                                                                                              |
|---------------------|--------------------------------------------------------------------------------------------------------------------------------------------------------------------------------------------------------------------------------------------------------------------------------------------------------------------------------------------------------------------------------------------------------------|
| pizza               | <input type="radio"/> Nunca o menos 1 vez al mes<br><input checked="" type="radio"/> 1 a 3 veces mes<br><input type="radio"/> 1 vez semana<br><input type="radio"/> 2 a 4 veces semana<br><input type="radio"/> 5 a 6 veces semana<br><input type="radio"/> 1 vez al día<br><input type="radio"/> 2 a 3 veces al día<br><input type="radio"/> 5 a 6 veces al día<br><input type="radio"/> más 6 veces al día |
| aceite oliva        | <input type="radio"/> Nunca o menos 1 vez al mes<br><input type="radio"/> 1 a 3 veces mes<br><input checked="" type="radio"/> 1 vez semana<br><input type="radio"/> 2 a 4 veces semana<br><input type="radio"/> 5 a 6 veces semana<br><input type="radio"/> 1 vez al día<br><input type="radio"/> 2 a 3 veces al día<br><input type="radio"/> 5 a 6 veces al día<br><input type="radio"/> más 6 veces al día |
| otros aceites       | <input type="radio"/> Nunca o menos 1 vez al mes<br><input type="radio"/> 1 a 3 veces mes<br><input checked="" type="radio"/> 1 vez semana<br><input type="radio"/> 2 a 4 veces semana<br><input type="radio"/> 5 a 6 veces semana<br><input type="radio"/> 1 vez al día<br><input type="radio"/> 2 a 3 veces al día<br><input type="radio"/> 5 a 6 veces al día<br><input type="radio"/> más 6 veces al día |
| margarina           | <input checked="" type="radio"/> Nunca o menos 1 vez al mes<br><input type="radio"/> 1 a 3 veces mes<br><input type="radio"/> 1 vez semana<br><input type="radio"/> 2 a 4 veces semana<br><input type="radio"/> 5 a 6 veces semana<br><input type="radio"/> 1 vez al día<br><input type="radio"/> 2 a 3 veces al día<br><input type="radio"/> 5 a 6 veces al día<br><input type="radio"/> más 6 veces al día |
| mantequilla         | <input checked="" type="radio"/> Nunca o menos 1 vez al mes<br><input type="radio"/> 1 a 3 veces mes<br><input type="radio"/> 1 vez semana<br><input type="radio"/> 2 a 4 veces semana<br><input type="radio"/> 5 a 6 veces semana<br><input type="radio"/> 1 vez al día<br><input type="radio"/> 2 a 3 veces al día<br><input type="radio"/> 5 a 6 veces al día<br><input type="radio"/> más 6 veces al día |
| galletas tipo maria | <input checked="" type="radio"/> Nunca o menos 1 vez al mes<br><input type="radio"/> 1 a 3 veces mes<br><input type="radio"/> 1 vez semana<br><input type="radio"/> 2 a 4 veces semana<br><input type="radio"/> 5 a 6 veces semana<br><input type="radio"/> 1 vez al día<br><input type="radio"/> 2 a 3 veces al día<br><input type="radio"/> 5 a 6 veces al día<br><input type="radio"/> más 6 veces al día |

|                           |                                                                                                                                                                                                                                                                                                                                                                                                              |
|---------------------------|--------------------------------------------------------------------------------------------------------------------------------------------------------------------------------------------------------------------------------------------------------------------------------------------------------------------------------------------------------------------------------------------------------------|
| galletas chocolate        | <input checked="" type="radio"/> Nunca o menos 1 vez al mes<br><input type="radio"/> 1 a 3 veces mes<br><input type="radio"/> 1 vez semana<br><input type="radio"/> 2 a 4 veces semana<br><input type="radio"/> 5 a 6 veces semana<br><input type="radio"/> 1 vez al día<br><input type="radio"/> 2 a 3 veces al día<br><input type="radio"/> 5 a 6 veces al día<br><input type="radio"/> más 6 veces al día |
| bollieria                 | <input type="radio"/> Nunca o menos 1 vez al mes<br><input checked="" type="radio"/> 1 a 3 veces mes<br><input type="radio"/> 1 vez semana<br><input type="radio"/> 2 a 4 veces semana<br><input type="radio"/> 5 a 6 veces semana<br><input type="radio"/> 1 vez al día<br><input type="radio"/> 2 a 3 veces al día<br><input type="radio"/> 5 a 6 veces al día<br><input type="radio"/> más 6 veces al día |
| chocolate o bombones      | <input checked="" type="radio"/> Nunca o menos 1 vez al mes<br><input type="radio"/> 1 a 3 veces mes<br><input type="radio"/> 1 vez semana<br><input type="radio"/> 2 a 4 veces semana<br><input type="radio"/> 5 a 6 veces semana<br><input type="radio"/> 1 vez al día<br><input type="radio"/> 2 a 3 veces al día<br><input type="radio"/> 5 a 6 veces al día<br><input type="radio"/> más 6 veces al día |
| chocolate polvo o colacao | <input type="radio"/> Nunca o menos 1 vez al mes<br><input type="radio"/> 1 a 3 veces mes<br><input checked="" type="radio"/> 1 vez semana<br><input type="radio"/> 2 a 4 veces semana<br><input type="radio"/> 5 a 6 veces semana<br><input type="radio"/> 1 vez al día<br><input type="radio"/> 2 a 3 veces al día<br><input type="radio"/> 5 a 6 veces al día<br><input type="radio"/> más 6 veces al día |
| vino tinto                | <input checked="" type="radio"/> Nunca o menos 1 vez al mes<br><input type="radio"/> 1 a 3 veces mes<br><input type="radio"/> 1 vez semana<br><input type="radio"/> 2 a 4 veces semana<br><input type="radio"/> 5 a 6 veces semana<br><input type="radio"/> 1 vez al día<br><input type="radio"/> 2 a 3 veces al día<br><input type="radio"/> 5 a 6 veces al día<br><input type="radio"/> más 6 veces al día |
| vino blanco               | <input checked="" type="radio"/> Nunca o menos 1 vez al mes<br><input type="radio"/> 1 a 3 veces mes<br><input type="radio"/> 1 vez semana<br><input type="radio"/> 2 a 4 veces semana<br><input type="radio"/> 5 a 6 veces semana<br><input type="radio"/> 1 vez al día<br><input type="radio"/> 2 a 3 veces al día<br><input type="radio"/> 5 a 6 veces al día<br><input type="radio"/> más 6 veces al día |

|                       |                                                                                                                                                                                                                                                                                                                                                                                                              |
|-----------------------|--------------------------------------------------------------------------------------------------------------------------------------------------------------------------------------------------------------------------------------------------------------------------------------------------------------------------------------------------------------------------------------------------------------|
| vino seco o vermut    | <input checked="" type="radio"/> Nunca o menos 1 vez al mes<br><input type="radio"/> 1 a 3 veces mes<br><input type="radio"/> 1 vez semana<br><input type="radio"/> 2 a 4 veces semana<br><input type="radio"/> 5 a 6 veces semana<br><input type="radio"/> 1 vez al día<br><input type="radio"/> 2 a 3 veces al día<br><input type="radio"/> 5 a 6 veces al día<br><input type="radio"/> más 6 veces al día |
| cerveza               | <input checked="" type="radio"/> Nunca o menos 1 vez al mes<br><input type="radio"/> 1 a 3 veces mes<br><input type="radio"/> 1 vez semana<br><input type="radio"/> 2 a 4 veces semana<br><input type="radio"/> 5 a 6 veces semana<br><input type="radio"/> 1 vez al día<br><input type="radio"/> 2 a 3 veces al día<br><input type="radio"/> 5 a 6 veces al día<br><input type="radio"/> más 6 veces al día |
| cerveza sin alcohol   | <input checked="" type="radio"/> Nunca o menos 1 vez al mes<br><input type="radio"/> 1 a 3 veces mes<br><input type="radio"/> 1 vez semana<br><input type="radio"/> 2 a 4 veces semana<br><input type="radio"/> 5 a 6 veces semana<br><input type="radio"/> 1 vez al día<br><input type="radio"/> 2 a 3 veces al día<br><input type="radio"/> 5 a 6 veces al día<br><input type="radio"/> más 6 veces al día |
| licores               | <input checked="" type="radio"/> Nunca o menos 1 vez al mes<br><input type="radio"/> 1 a 3 veces mes<br><input type="radio"/> 1 vez semana<br><input type="radio"/> 2 a 4 veces semana<br><input type="radio"/> 5 a 6 veces semana<br><input type="radio"/> 1 vez al día<br><input type="radio"/> 2 a 3 veces al día<br><input type="radio"/> 5 a 6 veces al día<br><input type="radio"/> más 6 veces al día |
| ginebra o ron o vodka | <input checked="" type="radio"/> Nunca o menos 1 vez al mes<br><input type="radio"/> 1 a 3 veces mes<br><input type="radio"/> 1 vez semana<br><input type="radio"/> 2 a 4 veces semana<br><input type="radio"/> 5 a 6 veces semana<br><input type="radio"/> 1 vez al día<br><input type="radio"/> 2 a 3 veces al día<br><input type="radio"/> 5 a 6 veces al día<br><input type="radio"/> más 6 veces al día |
| refresco normal       | <input checked="" type="radio"/> Nunca o menos 1 vez al mes<br><input type="radio"/> 1 a 3 veces mes<br><input type="radio"/> 1 vez semana<br><input type="radio"/> 2 a 4 veces semana<br><input type="radio"/> 5 a 6 veces semana<br><input type="radio"/> 1 vez al día<br><input type="radio"/> 2 a 3 veces al día<br><input type="radio"/> 5 a 6 veces al día<br><input type="radio"/> más 6 veces al día |

|                          |                                                                                                                                                                                                                                                                                                                                                                                                              |
|--------------------------|--------------------------------------------------------------------------------------------------------------------------------------------------------------------------------------------------------------------------------------------------------------------------------------------------------------------------------------------------------------------------------------------------------------|
| refresco sin azúcar      | <input type="radio"/> Nunca o menos 1 vez al mes<br><input type="radio"/> 1 a 3 veces mes<br><input checked="" type="radio"/> 1 vez semana<br><input type="radio"/> 2 a 4 veces semana<br><input type="radio"/> 5 a 6 veces semana<br><input type="radio"/> 1 vez al día<br><input type="radio"/> 2 a 3 veces al día<br><input type="radio"/> 5 a 6 veces al día<br><input type="radio"/> más 6 veces al día |
| Agua del grifo           | <input checked="" type="radio"/> Nunca o menos 1 vez al mes<br><input type="radio"/> 1 a 3 veces mes<br><input type="radio"/> 1 vez semana<br><input type="radio"/> 2 a 4 veces semana<br><input type="radio"/> 5 a 6 veces semana<br><input type="radio"/> 1 vez al día<br><input type="radio"/> 2 a 3 veces al día<br><input type="radio"/> 5 a 6 veces al día<br><input type="radio"/> más 6 veces al día |
| agua embotellada sin gas | <input type="radio"/> Nunca o menos 1 vez al mes<br><input type="radio"/> 1 a 3 veces mes<br><input type="radio"/> 1 vez semana<br><input type="radio"/> 2 a 4 veces semana<br><input type="radio"/> 5 a 6 veces semana<br><input checked="" type="radio"/> 1 vez al día<br><input type="radio"/> 2 a 3 veces al día<br><input type="radio"/> 5 a 6 veces al día<br><input type="radio"/> más 6 veces al día |
| agua embotellada con gas | <input checked="" type="radio"/> Nunca o menos 1 vez al mes<br><input type="radio"/> 1 a 3 veces mes<br><input type="radio"/> 1 vez semana<br><input type="radio"/> 2 a 4 veces semana<br><input type="radio"/> 5 a 6 veces semana<br><input type="radio"/> 1 vez al día<br><input type="radio"/> 2 a 3 veces al día<br><input type="radio"/> 5 a 6 veces al día<br><input type="radio"/> más 6 veces al día |
| zumو frutas embasado     | <input type="radio"/> Nunca o menos 1 vez al mes<br><input checked="" type="radio"/> 1 a 3 veces mes<br><input type="radio"/> 1 vez semana<br><input type="radio"/> 2 a 4 veces semana<br><input type="radio"/> 5 a 6 veces semana<br><input type="radio"/> 1 vez al día<br><input type="radio"/> 2 a 3 veces al día<br><input type="radio"/> 5 a 6 veces al día<br><input type="radio"/> más 6 veces al día |
| cafe                     | <input type="radio"/> Nunca o menos 1 vez al mes<br><input type="radio"/> 1 a 3 veces mes<br><input type="radio"/> 1 vez semana<br><input type="radio"/> 2 a 4 veces semana<br><input type="radio"/> 5 a 6 veces semana<br><input checked="" type="radio"/> 1 vez al día<br><input type="radio"/> 2 a 3 veces al día<br><input type="radio"/> 5 a 6 veces al día<br><input type="radio"/> más 6 veces al día |

|                       |                                                                                                                                                                                                                                                                                                                                                                                                              |
|-----------------------|--------------------------------------------------------------------------------------------------------------------------------------------------------------------------------------------------------------------------------------------------------------------------------------------------------------------------------------------------------------------------------------------------------------|
| cafe descafeinado     | <input type="radio"/> Nunca o menos 1 vez al mes<br><input type="radio"/> 1 a 3 veces mes<br><input type="radio"/> 1 vez semana<br><input type="radio"/> 2 a 4 veces semana<br><input type="radio"/> 5 a 6 veces semana<br><input checked="" type="radio"/> 1 vez al día<br><input type="radio"/> 2 a 3 veces al día<br><input type="radio"/> 5 a 6 veces al día<br><input type="radio"/> más 6 veces al día |
| te o infusión         | <input checked="" type="radio"/> Nunca o menos 1 vez al mes<br><input type="radio"/> 1 a 3 veces mes<br><input type="radio"/> 1 vez semana<br><input type="radio"/> 2 a 4 veces semana<br><input type="radio"/> 5 a 6 veces semana<br><input type="radio"/> 1 vez al día<br><input type="radio"/> 2 a 3 veces al día<br><input type="radio"/> 5 a 6 veces al día<br><input type="radio"/> más 6 veces al día |
| sopa o puré verduras  | <input type="radio"/> Nunca o menos 1 vez al mes<br><input type="radio"/> 1 a 3 veces mes<br><input type="radio"/> 1 vez semana<br><input checked="" type="radio"/> 2 a 4 veces semana<br><input type="radio"/> 5 a 6 veces semana<br><input type="radio"/> 1 vez al día<br><input type="radio"/> 2 a 3 veces al día<br><input type="radio"/> 5 a 6 veces al día<br><input type="radio"/> más 6 veces al día |
| croquetas pollo jamón | <input type="radio"/> Nunca o menos 1 vez al mes<br><input checked="" type="radio"/> 1 a 3 veces mes<br><input type="radio"/> 1 vez semana<br><input type="radio"/> 2 a 4 veces semana<br><input type="radio"/> 5 a 6 veces semana<br><input type="radio"/> 1 vez al día<br><input type="radio"/> 2 a 3 veces al día<br><input type="radio"/> 5 a 6 veces al día<br><input type="radio"/> más 6 veces al día |
| croquetas pescado     | <input type="radio"/> Nunca o menos 1 vez al mes<br><input checked="" type="radio"/> 1 a 3 veces mes<br><input type="radio"/> 1 vez semana<br><input type="radio"/> 2 a 4 veces semana<br><input type="radio"/> 5 a 6 veces semana<br><input type="radio"/> 1 vez al día<br><input type="radio"/> 2 a 3 veces al día<br><input type="radio"/> 5 a 6 veces al día<br><input type="radio"/> más 6 veces al día |
| mayonesa              | <input checked="" type="radio"/> Nunca o menos 1 vez al mes<br><input type="radio"/> 1 a 3 veces mes<br><input type="radio"/> 1 vez semana<br><input type="radio"/> 2 a 4 veces semana<br><input type="radio"/> 5 a 6 veces semana<br><input type="radio"/> 1 vez al día<br><input type="radio"/> 2 a 3 veces al día<br><input type="radio"/> 5 a 6 veces al día<br><input type="radio"/> más 6 veces al día |

---

salsa tomate

- ☐ Nunca o menos 1 vez al mes  
☐ 1 a 3 veces mes  
☒ 1 vez semana  
☐ 2 a 4 veces semana  
☐ 5 a 6 veces semana  
☐ 1 vez al día  
☐ 2 a 3 veces al día  
☐ 5 a 6 veces al día  
☐ más 6 veces al día

---

ketchup

- ☐ Nunca o menos 1 vez al mes  
☒ 1 a 3 veces mes  
☐ 1 vez semana  
☐ 2 a 4 veces semana  
☐ 5 a 6 veces semana  
☐ 1 vez al día  
☐ 2 a 3 veces al día  
☐ 5 a 6 veces al día  
☐ más 6 veces al día

---

sal

- ☐ Nunca o menos 1 vez al mes  
☐ 1 a 3 veces mes  
☐ 1 vez semana  
☒ 2 a 4 veces semana  
☐ 5 a 6 veces semana  
☐ 1 vez al día  
☐ 2 a 3 veces al día  
☐ 5 a 6 veces al día  
☐ más 6 veces al día

---

ajo

- ☐ Nunca o menos 1 vez al mes  
☒ 1 a 3 veces mes  
☐ 1 vez semana  
☐ 2 a 4 veces semana  
☐ 5 a 6 veces semana  
☐ 1 vez al día  
☐ 2 a 3 veces al día  
☐ 5 a 6 veces al día  
☐ más 6 veces al día

---

mermelada o miel

- ☐ Nunca o menos 1 vez al mes  
☒ 1 a 3 veces mes  
☐ 1 vez semana  
☐ 2 a 4 veces semana  
☐ 5 a 6 veces semana  
☐ 1 vez al día  
☐ 2 a 3 veces al día  
☐ 5 a 6 veces al día  
☐ más 6 veces al día

---

azúcar

- ☐ Nunca o menos 1 vez al mes  
☐ 1 a 3 veces mes  
☐ 1 vez semana  
☒ 2 a 4 veces semana  
☐ 5 a 6 veces semana  
☐ 1 vez al día  
☐ 2 a 3 veces al día  
☐ 5 a 6 veces al día  
☐ más 6 veces al día

|                                       |                                                                                                                                                                                                                                                                                                                                                                                                                                                                                                                               |
|---------------------------------------|-------------------------------------------------------------------------------------------------------------------------------------------------------------------------------------------------------------------------------------------------------------------------------------------------------------------------------------------------------------------------------------------------------------------------------------------------------------------------------------------------------------------------------|
| Otro alimento                         |                                                                                                                                                                                                                                                                                                                                                                                                                                                                                                                               |
| suplementos vitamínicos               | <input checked="" type="radio"/> si<br><input type="radio"/> no                                                                                                                                                                                                                                                                                                                                                                                                                                                               |
| suplementos vitamínicos               | [*DATA REMOVED*]                                                                                                                                                                                                                                                                                                                                                                                                                                                                                                              |
| dieta previa                          | <input type="radio"/> si<br><input checked="" type="radio"/> no                                                                                                                                                                                                                                                                                                                                                                                                                                                               |
| motivo dieta                          | <input checked="" type="radio"/> no dieta<br><input type="radio"/> control peso<br><input type="radio"/> control colesterol<br><input type="radio"/> control diabetes<br><input type="radio"/> problemas estómago<br><input type="radio"/> problemas vesícula o hepáticos<br><input type="radio"/> HTA o cardiopatía<br><input type="radio"/> problemas renales<br><input type="radio"/> alergia alimentaria<br><input type="radio"/> ácido úrico elevado<br><input type="radio"/> vegetariana<br><input type="radio"/> otros |
| cambio alimentos año previo gestación | <input checked="" type="radio"/> si<br><input type="radio"/> no                                                                                                                                                                                                                                                                                                                                                                                                                                                               |
| cambio lácteos                        | <input type="radio"/> eliminado<br><input type="radio"/> disminuido<br><input checked="" type="radio"/> igual<br><input type="radio"/> aumentado<br><input type="radio"/> no sabe                                                                                                                                                                                                                                                                                                                                             |
| cambio huevos                         | <input type="radio"/> eliminado<br><input type="radio"/> disminuido<br><input checked="" type="radio"/> igual<br><input type="radio"/> aumentado<br><input type="radio"/> no sabe                                                                                                                                                                                                                                                                                                                                             |
| cambio carne                          | <input type="radio"/> eliminado<br><input type="radio"/> disminuido<br><input checked="" type="radio"/> igual<br><input type="radio"/> aumentado<br><input type="radio"/> no sabe                                                                                                                                                                                                                                                                                                                                             |
| cambio pescado                        | <input type="radio"/> eliminado<br><input type="radio"/> disminuido<br><input checked="" type="radio"/> igual<br><input type="radio"/> aumentado<br><input type="radio"/> no sabe                                                                                                                                                                                                                                                                                                                                             |
| cambio verduras                       | <input type="radio"/> eliminado<br><input type="radio"/> disminuido<br><input checked="" type="radio"/> igual<br><input type="radio"/> aumentado<br><input type="radio"/> no sabe                                                                                                                                                                                                                                                                                                                                             |

|                            |                                                                                                                                                                                                                        |
|----------------------------|------------------------------------------------------------------------------------------------------------------------------------------------------------------------------------------------------------------------|
| cambio legumbres           | <input type="radio"/> eliminado<br><input type="radio"/> disminuido<br><input checked="" type="radio"/> igual<br><input type="radio"/> aumentado<br><input type="radio"/> no sabe                                      |
| cambio fruta               | <input type="radio"/> eliminado<br><input type="radio"/> disminuido<br><input checked="" type="radio"/> igual<br><input type="radio"/> aumentado<br><input type="radio"/> no sabe                                      |
| cambio pan                 | <input type="radio"/> eliminado<br><input type="radio"/> disminuido<br><input checked="" type="radio"/> igual<br><input type="radio"/> aumentado<br><input type="radio"/> no sabe                                      |
| cambio aceite oliva        | <input type="radio"/> eliminado<br><input type="radio"/> disminuido<br><input checked="" type="radio"/> igual<br><input type="radio"/> aumentado<br><input type="radio"/> no sabe                                      |
| cambio mante o margarina   | <input checked="" type="radio"/> eliminado<br><input type="radio"/> disminuido<br><input type="radio"/> igual<br><input type="radio"/> aumentado<br><input type="radio"/> no sabe                                      |
| cambio azúcar y dulces     | <input type="radio"/> eliminado<br><input checked="" type="radio"/> disminuido<br><input type="radio"/> igual<br><input type="radio"/> aumentado<br><input type="radio"/> no sabe                                      |
| cambio bebidas alcohólicas | <input checked="" type="radio"/> eliminado<br><input type="radio"/> disminuido<br><input type="radio"/> igual<br><input type="radio"/> aumentado<br><input type="radio"/> no sabe                                      |
| frecuencia comidas fritas  | <input type="radio"/> a diario<br><input type="radio"/> 5 a 6 veces semana<br><input type="radio"/> 2 a 4 veces semana<br><input checked="" type="radio"/> 1 vez semana<br><input type="radio"/> menos de 1 vez semana |
| carne                      | <input type="radio"/> no como<br><input type="radio"/> cruda<br><input type="radio"/> poco hecha<br><input checked="" type="radio"/> hecha<br><input type="radio"/> muy hecha                                          |
| grasa visible carne        | <input checked="" type="radio"/> quita toda<br><input type="radio"/> quita mayoría<br><input type="radio"/> quita un poco<br><input type="radio"/> no quita nada                                                       |



|                                |                                                                                                                                                                                                                                                          |
|--------------------------------|----------------------------------------------------------------------------------------------------------------------------------------------------------------------------------------------------------------------------------------------------------|
| cocina carne                   | <input checked="" type="radio"/> a la plancha<br><input type="radio"/> a la parrilla<br><input type="radio"/> asada<br><input type="radio"/> frita<br><input type="radio"/> guisada                                                                      |
| tostado quemado carne          | <input checked="" type="radio"/> nunca<br><input type="radio"/> 1 vez mes<br><input type="radio"/> 2 a 3 veces mes<br><input type="radio"/> 1 vez semana<br><input type="radio"/> 2 a 3 semanas                                                          |
| tostado quemado pescado        | <input checked="" type="radio"/> nunca<br><input type="radio"/> 1 vez mes<br><input type="radio"/> 2 a 3 veces mes<br><input type="radio"/> 1 vez semana<br><input type="radio"/> 2 a 3 semanas                                                          |
| socarrat paella                | <input type="radio"/> nunca<br><input checked="" type="radio"/> 1 vez mes<br><input type="radio"/> 2 a 3 veces mes<br><input type="radio"/> 1 vez semana<br><input type="radio"/> 2 a 3 semanas                                                          |
| grasa o aceite cocinar         | <input type="radio"/> mantequilla<br><input type="radio"/> margarina<br><input type="radio"/> aceite oliva<br><input checked="" type="radio"/> aceite oliva virgen extra<br><input type="radio"/> aceite vegetal<br><input type="radio"/> mezcla aceites |
| grasa aceite aliñar            | <input type="radio"/> mantequilla<br><input type="radio"/> margarina<br><input checked="" type="radio"/> aceite oliva<br><input type="radio"/> aceite oliva virgen extra<br><input type="radio"/> aceite vegetal<br><input type="radio"/> mezcla aceites |
| grasa aceite freir             | <input type="radio"/> mantequilla<br><input type="radio"/> margarina<br><input checked="" type="radio"/> aceite oliva<br><input type="radio"/> aceite oliva virgen extra<br><input type="radio"/> aceite vegetal<br><input type="radio"/> mezcla aceites |
| Ejercicio cuestionario         | <input checked="" type="radio"/> si<br><input type="radio"/> no                                                                                                                                                                                          |
| horas de sueño incluido siesta | [*DATA REMOVED*]                                                                                                                                                                                                                                         |
| minutos siesta                 | [*DATA REMOVED*]                                                                                                                                                                                                                                         |
| horas televisión semana        | [*DATA REMOVED*]                                                                                                                                                                                                                                         |

|                                        |                                                                                                                                                                                                                                                                                                                                                                           |
|----------------------------------------|---------------------------------------------------------------------------------------------------------------------------------------------------------------------------------------------------------------------------------------------------------------------------------------------------------------------------------------------------------------------------|
| actividad trabajo                      | <input type="radio"/> casi siempre sentado<br><input type="radio"/> sentado 50 por cien<br><input type="radio"/> casi siempre de pie, quieto<br><input type="radio"/> casi siempre levantado caminando y llevando pocas cosas<br><input type="radio"/> casi siempre levantado, caminando y llevado muchas cosas<br><input checked="" type="radio"/> trabajo manual pesado |
| tiempo caminar o bici al día           | <input type="radio"/> casi nunca<br><input type="radio"/> menos 20min día<br><input checked="" type="radio"/> 20 a 40 min día<br><input type="radio"/> 40 a 60 min día<br><input type="radio"/> 1h o 1h y media día<br><input type="radio"/> más de 1h y media al día                                                                                                     |
| tiempo tareas casa al día              | <input type="radio"/> menos de 1h día<br><input type="radio"/> 1 a 2h día<br><input checked="" type="radio"/> 3 a 4h día<br><input type="radio"/> 5 a 6h día<br><input type="radio"/> 7 a 8h día<br><input type="radio"/> más de 8h día                                                                                                                                   |
| tiempo libre televisión ordenador leer | <input checked="" type="radio"/> menos 1h día<br><input type="radio"/> 1h día<br><input type="radio"/> 2h día<br><input type="radio"/> 3h día<br><input type="radio"/> 4h día<br><input type="radio"/> 5 a 6h día<br><input type="radio"/> mas 6h día                                                                                                                     |
| tiempo libre ejercicio o deporte       | <input type="radio"/> menos 1h semana<br><input type="radio"/> 1h semana<br><input type="radio"/> 2h semana<br><input type="radio"/> 3h semana<br><input checked="" type="radio"/> 4 a 5h semana<br><input type="radio"/> mas 5h semana                                                                                                                                   |
| como se considera                      | <input type="radio"/> sedentaria<br><input type="radio"/> poco activa<br><input checked="" type="radio"/> moderadamente activa<br><input type="radio"/> bastante activa<br><input type="radio"/> muy activa<br><input type="radio"/> no sabe                                                                                                                              |
| FUR                                    | [*DATA REMOVED*]                                                                                                                                                                                                                                                                                                                                                          |
| Semanas gestación 2T                   | [*DATA REMOVED*]                                                                                                                                                                                                                                                                                                                                                          |
| Días gestación 2T                      | [*DATA REMOVED*]                                                                                                                                                                                                                                                                                                                                                          |
| DBP 2T                                 | [*DATA REMOVED*]                                                                                                                                                                                                                                                                                                                                                          |
| CC 2T                                  | [*DATA REMOVED*]                                                                                                                                                                                                                                                                                                                                                          |
| AC 2T                                  | [*DATA REMOVED*]                                                                                                                                                                                                                                                                                                                                                          |

|                                                   |                                                                                                                                                                                                 |
|---------------------------------------------------|-------------------------------------------------------------------------------------------------------------------------------------------------------------------------------------------------|
| LF 2T                                             | [*DATA REMOVED*]                                                                                                                                                                                |
| PFE 2T (Hadlock)                                  | [*DATA REMOVED*]                                                                                                                                                                                |
| Semanas gestación 3T                              | [*DATA REMOVED*]                                                                                                                                                                                |
| días 3T                                           | [*DATA REMOVED*]                                                                                                                                                                                |
| DBP 3T                                            | [*DATA REMOVED*]                                                                                                                                                                                |
| CC 3T                                             | [*DATA REMOVED*]                                                                                                                                                                                |
| AC 3T                                             | [*DATA REMOVED*]                                                                                                                                                                                |
| LF 3T                                             | [*DATA REMOVED*]                                                                                                                                                                                |
| PFE 3T (Hadlock)                                  | [*DATA REMOVED*]                                                                                                                                                                                |
| Semanas de gestación final                        | [*DATA REMOVED*]                                                                                                                                                                                |
| días gestación final                              | [*DATA REMOVED*]                                                                                                                                                                                |
| Localización placenta                             | <input type="radio"/> anterior<br><input checked="" type="radio"/> lateral derecha<br><input type="radio"/> lateral izquierda<br><input type="radio"/> posterior<br><input type="radio"/> fondo |
| Presentación longitudinal cefálica                | <input type="radio"/> no<br><input checked="" type="radio"/> si                                                                                                                                 |
| Dorso                                             | <input type="radio"/> izquierda anterior<br><input type="radio"/> izquierda posterior<br><input type="radio"/> derecha anterior<br><input checked="" type="radio"/> derecha posterior           |
| diámetro biparietal                               | [*DATA REMOVED*]                                                                                                                                                                                |
| Circunferencia craneal                            | [*DATA REMOVED*]                                                                                                                                                                                |
| Circunferencia abdominal                          | [*DATA REMOVED*]                                                                                                                                                                                |
| Longitud de femur                                 | [*DATA REMOVED*]                                                                                                                                                                                |
| tejido celular subcutáneo a nivel del muslo en mm | [*DATA REMOVED*]                                                                                                                                                                                |
| tejido celular subcutáneo en abdomen en mm        | [*DATA REMOVED*]                                                                                                                                                                                |
| Volumen del muslo en cm3                          | [*DATA REMOVED*]                                                                                                                                                                                |
| Peso fetal estimado según fórmula de Hadlock      | [*DATA REMOVED*]                                                                                                                                                                                |

|                                               |                                                                                                                                               |
|-----------------------------------------------|-----------------------------------------------------------------------------------------------------------------------------------------------|
| Percentil                                     | [*DATA REMOVED*]                                                                                                                              |
| Peso fetal estimado según fórmula de Scioscia | <hr/>                                                                                                                                         |
| Peso fetal estimado según fórmula de LEE      | <hr/>                                                                                                                                         |
| Tipo de parto                                 | <input type="radio"/> eutocico<br><input type="radio"/> instrumentado/ventosa<br><input checked="" type="radio"/> cesarea                     |
| fecha de nacimiento                           | [*DATA REMOVED*]                                                                                                                              |
| Días entre exploración y nacimiento           | [*DATA REMOVED*]                                                                                                                              |
| Peso RN en g                                  | [*DATA REMOVED*]                                                                                                                              |
| sexo                                          | <input checked="" type="radio"/> mujer<br><input type="radio"/> hombre                                                                        |
| Apgar 1 minuto                                | [*DATA REMOVED*]                                                                                                                              |
| Apgar 5 minutos                               | [*DATA REMOVED*]                                                                                                                              |
| Apgar 10 minutos                              | <hr/>                                                                                                                                         |
| antecedente Covid durante gestación           | <input type="radio"/> Yes<br><input checked="" type="radio"/> No                                                                              |
| Nivel de estudios                             | <input type="radio"/> ninguno<br><input type="radio"/> primarios<br><input type="radio"/> secundarios<br><input type="radio"/> universitarios |

# Base\_datos\_estimacion\_peso\_fetal

|                                       |                                                                                                                                                                                                                                                                                      |
|---------------------------------------|--------------------------------------------------------------------------------------------------------------------------------------------------------------------------------------------------------------------------------------------------------------------------------------|
| Número de identificación participante | 17                                                                                                                                                                                                                                                                                   |
| CODIGO PARTICIPANTE                   |                                                                                                                                                                                                                                                                                      |
| Edad                                  | [*DATA REMOVED*]                                                                                                                                                                                                                                                                     |
| Gestaciones                           | <input type="radio"/> 1<br><input type="radio"/> 2<br><input type="radio"/> 3<br><input checked="" type="radio"/> mas de 3                                                                                                                                                           |
| partos                                | <input type="radio"/> 0<br><input type="radio"/> 1<br><input checked="" type="radio"/> 2<br><input type="radio"/> 3<br><input type="radio"/> mas de 3                                                                                                                                |
| cesáreas                              | <input checked="" type="radio"/> 0<br><input type="radio"/> 1<br><input type="radio"/> 2<br><input type="radio"/> 3<br><input type="radio"/> mas de 3                                                                                                                                |
| Abortos                               | <input type="radio"/> 0<br><input checked="" type="radio"/> 1<br><input type="radio"/> 2<br><input type="radio"/> 3<br><input type="radio"/> mas de 3                                                                                                                                |
| Tipo de gestacion                     | <input checked="" type="radio"/> espontanea<br><input type="radio"/> IAC inseminación artificial conyuge<br><input type="radio"/> IAD inseminación artificial donante<br><input type="radio"/> FIV Fecundación in Vitro<br><input type="radio"/> Ovodon FIV con donación de ovocitos |
| peso previo a embarazo                | [*DATA REMOVED*]                                                                                                                                                                                                                                                                     |
| Ganancia ponderal embarazo            | [*DATA REMOVED*]                                                                                                                                                                                                                                                                     |
| Talla madre                           | [*DATA REMOVED*]                                                                                                                                                                                                                                                                     |
| IMC previo embarazo                   | 19.94805976890361                                                                                                                                                                                                                                                                    |
| Patología obstétrica                  | <input checked="" type="radio"/> no<br><input type="radio"/> si                                                                                                                                                                                                                      |
| Diabetes pregestacional               | <input checked="" type="radio"/> no<br><input type="radio"/> si                                                                                                                                                                                                                      |
| Diabetes gestacional                  | <input checked="" type="radio"/> no<br><input type="radio"/> si                                                                                                                                                                                                                      |

|                                            |                                                                                                                                                                                      |
|--------------------------------------------|--------------------------------------------------------------------------------------------------------------------------------------------------------------------------------------|
| Diabetes gestacional con insulina          | <input checked="" type="radio"/> no<br><input type="radio"/> si                                                                                                                      |
| Diabetes gestacional con dieta y ejercicio | <input checked="" type="radio"/> no<br><input type="radio"/> si                                                                                                                      |
| Percentil fetos previos                    | <input checked="" type="radio"/> Nada<br><input type="radio"/> percentil menor de 10<br><input type="radio"/> percentil entre 10 y 90<br><input type="radio"/> percentil mayor de 90 |
| Exfumadora                                 | <input checked="" type="radio"/> Nada<br><input type="radio"/> menos de 5 años<br><input type="radio"/> 5 a 10 años<br><input type="radio"/> mayor o igual a 10 años                 |
| Hábito tabáquico                           | <input type="radio"/> no<br><input checked="" type="radio"/> si                                                                                                                      |
| fumadora                                   | [*DATA REMOVED*]                                                                                                                                                                     |
| Consumo otros tóxicos                      | <input checked="" type="radio"/> no<br><input type="radio"/> si                                                                                                                      |
| Hb 1T                                      | [*DATA REMOVED*]                                                                                                                                                                     |
| Htc 1T                                     | [*DATA REMOVED*]                                                                                                                                                                     |
| Hb 2T                                      | [*DATA REMOVED*]                                                                                                                                                                     |
| HTC 2T                                     | [*DATA REMOVED*]                                                                                                                                                                     |
| Hb 3T                                      | [*DATA REMOVED*]                                                                                                                                                                     |
| HTC 3T                                     | [*DATA REMOVED*]                                                                                                                                                                     |
| Suplemento FE oral                         | <input checked="" type="radio"/> si<br><input type="radio"/> no                                                                                                                      |
| Suplemento fe iv                           | <input type="radio"/> si<br><input checked="" type="radio"/> no                                                                                                                      |
| Transfusión                                | <input checked="" type="radio"/> no<br><input type="radio"/> si                                                                                                                      |
| Solicitada Vit D                           | <input checked="" type="radio"/> no<br><input type="radio"/> si                                                                                                                      |
| Deficit vit D                              | <input type="radio"/> no<br><input type="radio"/> si                                                                                                                                 |
| Suplemento vit D                           | <input type="radio"/> si<br><input type="radio"/> no                                                                                                                                 |

|                       |                                                                                                                                                                                                                                                                                                                                                                                                              |
|-----------------------|--------------------------------------------------------------------------------------------------------------------------------------------------------------------------------------------------------------------------------------------------------------------------------------------------------------------------------------------------------------------------------------------------------------|
| Dieta, cuestionario   | <input checked="" type="radio"/> sí<br><input type="radio"/> no                                                                                                                                                                                                                                                                                                                                              |
| Leche entera          | <input checked="" type="radio"/> Nunca o menos 1 vez al mes<br><input type="radio"/> 1 a 3 veces mes<br><input type="radio"/> 1 vez semana<br><input type="radio"/> 2 a 4 veces semana<br><input type="radio"/> 5 a 6 veces semana<br><input type="radio"/> 1 vez al día<br><input type="radio"/> 2 a 3 veces al día<br><input type="radio"/> 5 a 6 veces al día<br><input type="radio"/> más 6 veces al día |
| Leche semidesnatada   | <input checked="" type="radio"/> Nunca o menos 1 vez al mes<br><input type="radio"/> 1 a 3 veces mes<br><input type="radio"/> 1 vez semana<br><input type="radio"/> 2 a 4 veces semana<br><input type="radio"/> 5 a 6 veces semana<br><input type="radio"/> 1 vez al día<br><input type="radio"/> 2 a 3 veces al día<br><input type="radio"/> 5 a 6 veces al día<br><input type="radio"/> mas 6 veces al día |
| Leche desnatada       | <input type="radio"/> Nunca o menos 1 vez al mes<br><input type="radio"/> 1 a 3 veces mes<br><input type="radio"/> 1 vez semana<br><input checked="" type="radio"/> 2 a 4 veces semana<br><input type="radio"/> 5 a 6 veces semana<br><input type="radio"/> 1 vez al día<br><input type="radio"/> 2 a 3 veces al día<br><input type="radio"/> 5 a 6 veces al día<br><input type="radio"/> más 6 veces al día |
| Leche condensada      | <input checked="" type="radio"/> Nunca o menos 1 vez al mes<br><input type="radio"/> 1 a 3 veces mes<br><input type="radio"/> 1 vez semana<br><input type="radio"/> 2 a 4 veces semana<br><input type="radio"/> 5 a 6 veces semana<br><input type="radio"/> 1 vez al día<br><input type="radio"/> 2 a 3 veces al día<br><input type="radio"/> 5 a 6 veces al día<br><input type="radio"/> más 6 veces al día |
| nata o crema de leche | <input type="radio"/> Nunca o menos 1 vez al mes<br><input checked="" type="radio"/> 1 a 3 veces mes<br><input type="radio"/> 1 vez semana<br><input type="radio"/> 2 a 4 veces semana<br><input type="radio"/> 5 a 6 veces semana<br><input type="radio"/> 1 vez al día<br><input type="radio"/> 2 a 3 veces al día<br><input type="radio"/> 5 a 6 veces al día<br><input type="radio"/> más 6 veces al día |

|                                             |                                                                                                                                                                                                                                                                                                                                                                                                              |
|---------------------------------------------|--------------------------------------------------------------------------------------------------------------------------------------------------------------------------------------------------------------------------------------------------------------------------------------------------------------------------------------------------------------------------------------------------------------|
| Yogurt Entero                               | <input type="radio"/> Nunca o menos 1 vez al mes<br><input type="radio"/> 1 a 3 veces mes<br><input type="radio"/> 1 vez semana<br><input checked="" type="radio"/> 2 a 4 veces semana<br><input type="radio"/> 5 a 6 veces semana<br><input type="radio"/> 1 vez al día<br><input type="radio"/> 2 a 3 veces al día<br><input type="radio"/> 5 a 6 veces al día<br><input type="radio"/> más 6 veces al día |
| Yogurt desnatado                            | <input checked="" type="radio"/> Nunca o menos 1 vez al mes<br><input type="radio"/> 1 a 3 veces mes<br><input type="radio"/> 1 vez semana<br><input type="radio"/> 2 a 4 veces semana<br><input type="radio"/> 5 a 6 veces semana<br><input type="radio"/> 1 vez al día<br><input type="radio"/> 2 a 3 veces al día<br><input type="radio"/> 5 a 6 veces al día<br><input type="radio"/> más 6 veces al día |
| 100g requesón o queso blando o queso fresco | <input type="radio"/> Nunca o menos 1 vez al mes<br><input type="radio"/> 1 a 3 veces mes<br><input checked="" type="radio"/> 1 vez semana<br><input type="radio"/> 2 a 4 veces semana<br><input type="radio"/> 5 a 6 veces semana<br><input type="radio"/> 1 vez al día<br><input type="radio"/> 2 a 3 veces al día<br><input type="radio"/> 5 a 6 veces al día<br><input type="radio"/> más 6 veces al día |
| queso curado o semicurado o cremoso         | <input checked="" type="radio"/> Nunca o menos 1 vez al mes<br><input type="radio"/> 1 a 3 veces mes<br><input type="radio"/> 1 vez semana<br><input type="radio"/> 2 a 4 veces semana<br><input type="radio"/> 5 a 6 veces semana<br><input type="radio"/> 1 vez al día<br><input type="radio"/> 2 a 3 veces al día<br><input type="radio"/> 5 a 6 veces al día<br><input type="radio"/> más 6 veces al día |
| natillas flan pudding                       | <input type="radio"/> Nunca o menos 1 vez al mes<br><input type="radio"/> 1 a 3 veces mes<br><input checked="" type="radio"/> 1 vez semana<br><input type="radio"/> 2 a 4 veces semana<br><input type="radio"/> 5 a 6 veces semana<br><input type="radio"/> 1 vez al día<br><input type="radio"/> 2 a 3 veces al día<br><input type="radio"/> 5 a 6 veces al día<br><input type="radio"/> más 6 veces al día |
| Helado                                      | <input checked="" type="radio"/> Nunca o menos 1 vez al mes<br><input type="radio"/> 1 a 3 veces mes<br><input type="radio"/> 1 vez semana<br><input type="radio"/> 2 a 4 veces semana<br><input type="radio"/> 5 a 6 veces semana<br><input type="radio"/> 1 vez al día<br><input type="radio"/> 2 a 3 veces al día<br><input type="radio"/> 5 a 6 veces al día<br><input type="radio"/> más 6 veces al día |



|                                      |                                                                                                                                                                                                                                                                                                                                                                                                              |
|--------------------------------------|--------------------------------------------------------------------------------------------------------------------------------------------------------------------------------------------------------------------------------------------------------------------------------------------------------------------------------------------------------------------------------------------------------------|
| huevo                                | <input type="radio"/> Nunca o menos 1 vez al mes<br><input type="radio"/> 1 a 3 veces mes<br><input type="radio"/> 1 vez semana<br><input checked="" type="radio"/> 2 a 4 veces semana<br><input type="radio"/> 5 a 6 veces semana<br><input type="radio"/> 1 vez al día<br><input type="radio"/> 2 a 3 veces al día<br><input type="radio"/> 5 a 6 veces al día<br><input type="radio"/> más 6 veces al día |
| Pollo con piel                       | <input type="radio"/> Nunca o menos 1 vez al mes<br><input checked="" type="radio"/> 1 a 3 veces mes<br><input type="radio"/> 1 vez semana<br><input type="radio"/> 2 a 4 veces semana<br><input type="radio"/> 5 a 6 veces semana<br><input type="radio"/> 1 vez al día<br><input type="radio"/> 2 a 3 veces al día<br><input type="radio"/> 5 a 6 veces al día<br><input type="radio"/> más 6 veces al día |
| pollo sin piel                       | <input type="radio"/> Nunca o menos 1 vez al mes<br><input type="radio"/> 1 a 3 veces mes<br><input checked="" type="radio"/> 1 vez semana<br><input type="radio"/> 2 a 4 veces semana<br><input type="radio"/> 5 a 6 veces semana<br><input type="radio"/> 1 vez al día<br><input type="radio"/> 2 a 3 veces al día<br><input type="radio"/> 5 a 6 veces al día<br><input type="radio"/> más 6 veces al día |
| Ternera o cerdo o cordero            | <input type="radio"/> Nunca o menos 1 vez al mes<br><input type="radio"/> 1 a 3 veces mes<br><input checked="" type="radio"/> 1 vez semana<br><input type="radio"/> 2 a 4 veces semana<br><input type="radio"/> 5 a 6 veces semana<br><input type="radio"/> 1 vez al día<br><input type="radio"/> 2 a 3 veces al día<br><input type="radio"/> 5 a 6 veces al día<br><input type="radio"/> más 6 veces al día |
| carne caza: Conejo o codorniz o pato | <input checked="" type="radio"/> Nunca o menos 1 vez al mes<br><input type="radio"/> 1 a 3 veces mes<br><input type="radio"/> 1 vez semana<br><input type="radio"/> 2 a 4 veces semana<br><input type="radio"/> 5 a 6 veces semana<br><input type="radio"/> 1 vez al día<br><input type="radio"/> 2 a 3 veces al día<br><input type="radio"/> 5 a 6 veces al día<br><input type="radio"/> más 6 veces al día |
| Hígado de ternera o cerdo o pollo    | <input checked="" type="radio"/> Nunca o menos 1 vez al mes<br><input type="radio"/> 1 a 3 veces mes<br><input type="radio"/> 1 vez semana<br><input type="radio"/> 2 a 4 veces semana<br><input type="radio"/> 5 a 6 veces semana<br><input type="radio"/> 1 vez al día<br><input type="radio"/> 2 a 3 veces al día<br><input type="radio"/> 5 a 6 veces al día<br><input type="radio"/> más 6 veces al día |

|                     |                                                                                                                                                                                                                                                                                                                                                                                                              |
|---------------------|--------------------------------------------------------------------------------------------------------------------------------------------------------------------------------------------------------------------------------------------------------------------------------------------------------------------------------------------------------------------------------------------------------------|
| Vísceras            | <input checked="" type="radio"/> Nunca o menos 1 vez al mes<br><input type="radio"/> 1 a 3 veces mes<br><input type="radio"/> 1 vez semana<br><input type="radio"/> 2 a 4 veces semana<br><input type="radio"/> 5 a 6 veces semana<br><input type="radio"/> 1 vez al día<br><input type="radio"/> 2 a 3 veces al día<br><input type="radio"/> 5 a 6 veces al día<br><input type="radio"/> más 6 veces al día |
| Embutido            | <input checked="" type="radio"/> Nunca o menos 1 vez al mes<br><input type="radio"/> 1 a 3 veces mes<br><input type="radio"/> 1 vez semana<br><input type="radio"/> 2 a 4 veces semana<br><input type="radio"/> 5 a 6 veces semana<br><input type="radio"/> 1 vez al día<br><input type="radio"/> 2 a 3 veces al día<br><input type="radio"/> 5 a 6 veces al día<br><input type="radio"/> más 6 veces al día |
| Salchicha o similar | <input type="radio"/> Nunca o menos 1 vez al mes<br><input checked="" type="radio"/> 1 a 3 veces mes<br><input type="radio"/> 1 vez semana<br><input type="radio"/> 2 a 4 veces semana<br><input type="radio"/> 5 a 6 veces semana<br><input type="radio"/> 1 vez al día<br><input type="radio"/> 2 a 3 veces al día<br><input type="radio"/> 5 a 6 veces al día<br><input type="radio"/> más 6 veces al día |
| Pate o foiegras     | <input type="radio"/> Nunca o menos 1 vez al mes<br><input type="radio"/> 1 a 3 veces mes<br><input checked="" type="radio"/> 1 vez semana<br><input type="radio"/> 2 a 4 veces semana<br><input type="radio"/> 5 a 6 veces semana<br><input type="radio"/> 1 vez al día<br><input type="radio"/> 2 a 3 veces al día<br><input type="radio"/> 5 a 6 veces al día<br><input type="radio"/> más 6 veces al día |
| Hamburguesa         | <input type="radio"/> Nunca o menos 1 vez al mes<br><input type="radio"/> 1 a 3 veces mes<br><input checked="" type="radio"/> 1 vez semana<br><input type="radio"/> 2 a 4 veces semana<br><input type="radio"/> 5 a 6 veces semana<br><input type="radio"/> 1 vez al día<br><input type="radio"/> 2 a 3 veces al día<br><input type="radio"/> 5 a 6 veces al día<br><input type="radio"/> más 6 veces al día |
| tocino o bacon      | <input type="radio"/> Nunca o menos 1 vez al mes<br><input checked="" type="radio"/> 1 a 3 veces mes<br><input type="radio"/> 1 vez semana<br><input type="radio"/> 2 a 4 veces semana<br><input type="radio"/> 5 a 6 veces semana<br><input type="radio"/> 1 vez al día<br><input type="radio"/> 2 a 3 veces al día<br><input type="radio"/> 5 a 6 veces al día<br><input type="radio"/> más 6 veces al día |

---

Pescado frito

- ☐ Nunca o menos 1 vez al mes  
☒ 1 a 3 veces mes  
☐ 1 vez semana  
☐ 2 a 4 veces semana  
☐ 5 a 6 veces semana  
☐ 1 vez al día  
☐ 2 a 3 veces al día  
☐ 5 a 6 veces al día  
☐ más 6 veces al día

---

pescado hervido blanco

- ☐ Nunca o menos 1 vez al mes  
☒ 1 a 3 veces mes  
☐ 1 vez semana  
☐ 2 a 4 veces semana  
☐ 5 a 6 veces semana  
☐ 1 vez al día  
☐ 2 a 3 veces al día  
☐ 5 a 6 veces al día  
☐ más 6 veces al día

---

pescado hervido azul

- ☒ Nunca o menos 1 vez al mes  
☐ 1 a 3 veces mes  
☐ 1 vez semana  
☐ 2 a 4 veces semana  
☐ 5 a 6 veces semana  
☐ 1 vez al día  
☐ 2 a 3 veces al día  
☐ 5 a 6 veces al día  
☐ más 6 veces al día

---

otros pescado azul

- ☒ Nunca o menos 1 vez al mes  
☐ 1 a 3 veces mes  
☐ 1 vez semana  
☐ 2 a 4 veces semana  
☐ 5 a 6 veces semana  
☐ 1 vez al día  
☐ 2 a 3 veces al día  
☐ 5 a 6 veces al día  
☐ más 6 veces al día

---

atun conserva

- ☐ Nunca o menos 1 vez al mes  
☒ 1 a 3 veces mes  
☐ 1 vez semana  
☐ 2 a 4 veces semana  
☐ 5 a 6 veces semana  
☐ 1 vez al día  
☐ 2 a 3 veces al día  
☐ 5 a 6 veces al día  
☐ más 6 veces al día

---

sardina conserva

- ☒ Nunca o menos 1 vez al mes  
☐ 1 a 3 veces mes  
☐ 1 vez semana  
☐ 2 a 4 veces semana  
☐ 5 a 6 veces semana  
☐ 1 vez al día  
☐ 2 a 3 veces al día  
☐ 5 a 6 veces al día  
☐ más 6 veces al día

|                                         |                                                                                                                                                                                                                                                                                                                                                                                                              |
|-----------------------------------------|--------------------------------------------------------------------------------------------------------------------------------------------------------------------------------------------------------------------------------------------------------------------------------------------------------------------------------------------------------------------------------------------------------------|
| pescado ahumado                         | <input checked="" type="radio"/> Nunca o menos 1 vez al mes<br><input type="radio"/> 1 a 3 veces mes<br><input type="radio"/> 1 vez semana<br><input type="radio"/> 2 a 4 veces semana<br><input type="radio"/> 5 a 6 veces semana<br><input type="radio"/> 1 vez al día<br><input type="radio"/> 2 a 3 veces al día<br><input type="radio"/> 5 a 6 veces al día<br><input type="radio"/> más 6 veces al día |
| almejas o mejillones o ostras unos 100g | <input type="radio"/> Nunca o menos 1 vez al mes<br><input checked="" type="radio"/> 1 a 3 veces mes<br><input type="radio"/> 1 vez semana<br><input type="radio"/> 2 a 4 veces semana<br><input type="radio"/> 5 a 6 veces semana<br><input type="radio"/> 1 vez al día<br><input type="radio"/> 2 a 3 veces al día<br><input type="radio"/> 5 a 6 veces al día<br><input type="radio"/> más 6 veces al día |
| calamar o chipiron o sepia unos 100g    | <input type="radio"/> Nunca o menos 1 vez al mes<br><input checked="" type="radio"/> 1 a 3 veces mes<br><input type="radio"/> 1 vez semana<br><input type="radio"/> 2 a 4 veces semana<br><input type="radio"/> 5 a 6 veces semana<br><input type="radio"/> 1 vez al día<br><input type="radio"/> 2 a 3 veces al día<br><input type="radio"/> 5 a 6 veces al día<br><input type="radio"/> más 6 veces al día |
| marisco unos 100g                       | <input checked="" type="radio"/> Nunca o menos 1 vez al mes<br><input type="radio"/> 1 a 3 veces mes<br><input type="radio"/> 1 vez semana<br><input type="radio"/> 2 a 4 veces semana<br><input type="radio"/> 5 a 6 veces semana<br><input type="radio"/> 1 vez al día<br><input type="radio"/> 2 a 3 veces al día<br><input type="radio"/> 5 a 6 veces al día<br><input type="radio"/> más 6 veces al día |
| Espinacas o acelgas cocinadas           | <input checked="" type="radio"/> Nunca o menos 1 vez al mes<br><input type="radio"/> 1 a 3 veces mes<br><input type="radio"/> 1 vez semana<br><input type="radio"/> 2 a 4 veces semana<br><input type="radio"/> 5 a 6 veces semana<br><input type="radio"/> 1 vez al día<br><input type="radio"/> 2 a 3 veces al día<br><input type="radio"/> 5 a 6 veces al día<br><input type="radio"/> más 6 veces al día |
| Col o coliflor o brocoli cocinado       | <input checked="" type="radio"/> Nunca o menos 1 vez al mes<br><input type="radio"/> 1 a 3 veces mes<br><input type="radio"/> 1 vez semana<br><input type="radio"/> 2 a 4 veces semana<br><input type="radio"/> 5 a 6 veces semana<br><input type="radio"/> 1 vez al día<br><input type="radio"/> 2 a 3 veces al día<br><input type="radio"/> 5 a 6 veces al día<br><input type="radio"/> más 6 veces al día |

---

Lechuga o endivia o escarola

- ☐ Nunca o menos 1 vez al mes  
☒ 1 a 3 veces mes  
☐ 1 vez semana  
☐ 2 a 4 veces semana  
☐ 5 a 6 veces semana  
☐ 1 vez al día  
☐ 2 a 3 veces al día  
☐ 5 a 6 veces al día  
☐ más 6 veces al día

---

tomate ensalada

- ☐ Nunca o menos 1 vez al mes  
☒ 1 a 3 veces mes  
☐ 1 vez semana  
☐ 2 a 4 veces semana  
☐ 5 a 6 veces semana  
☐ 1 vez al día  
☐ 2 a 3 veces al día  
☐ 5 a 6 veces al día  
☐ más 6 veces al día

---

cebolla

- ☐ Nunca o menos 1 vez al mes  
☒ 1 a 3 veces mes  
☐ 1 vez semana  
☐ 2 a 4 veces semana  
☐ 5 a 6 veces semana  
☐ 1 vez al día  
☐ 2 a 3 veces al día  
☐ 5 a 6 veces al día  
☐ más 6 veces al día

---

Zanahoria o calabaza

- ☐ Nunca o menos 1 vez al mes  
☐ 1 a 3 veces mes  
☒ 1 vez semana  
☐ 2 a 4 veces semana  
☐ 5 a 6 veces semana  
☐ 1 vez al día  
☐ 2 a 3 veces al día  
☐ 5 a 6 veces al día  
☐ más 6 veces al día

---

Judías verdes

- ☐ Nunca o menos 1 vez al mes  
☐ 1 a 3 veces mes  
☒ 1 vez semana  
☐ 2 a 4 veces semana  
☐ 5 a 6 veces semana  
☐ 1 vez al día  
☐ 2 a 3 veces al día  
☐ 5 a 6 veces al día  
☐ más 6 veces al día

---

Berenjena o calabacin o pepino

- ☐ Nunca o menos 1 vez al mes  
☒ 1 a 3 veces mes  
☐ 1 vez semana  
☐ 2 a 4 veces semana  
☐ 5 a 6 veces semana  
☐ 1 vez al día  
☐ 2 a 3 veces al día  
☐ 5 a 6 veces al día  
☐ más 6 veces al día

|                       |                                                                                                                                                                                                                                                                                                                                                                                                              |
|-----------------------|--------------------------------------------------------------------------------------------------------------------------------------------------------------------------------------------------------------------------------------------------------------------------------------------------------------------------------------------------------------------------------------------------------------|
| pimiento              | <input checked="" type="radio"/> Nunca o menos 1 vez al mes<br><input type="radio"/> 1 a 3 veces mes<br><input type="radio"/> 1 vez semana<br><input type="radio"/> 2 a 4 veces semana<br><input type="radio"/> 5 a 6 veces semana<br><input type="radio"/> 1 vez al día<br><input type="radio"/> 2 a 3 veces al día<br><input type="radio"/> 5 a 6 veces al día<br><input type="radio"/> más 6 veces al día |
| alcachofa             | <input checked="" type="radio"/> Nunca o menos 1 vez al mes<br><input type="radio"/> 1 a 3 veces mes<br><input type="radio"/> 1 vez semana<br><input type="radio"/> 2 a 4 veces semana<br><input type="radio"/> 5 a 6 veces semana<br><input type="radio"/> 1 vez al día<br><input type="radio"/> 2 a 3 veces al día<br><input type="radio"/> 5 a 6 veces al día<br><input type="radio"/> más 6 veces al día |
| espárragos            | <input type="radio"/> Nunca o menos 1 vez al mes<br><input checked="" type="radio"/> 1 a 3 veces mes<br><input type="radio"/> 1 vez semana<br><input type="radio"/> 2 a 4 veces semana<br><input type="radio"/> 5 a 6 veces semana<br><input type="radio"/> 1 vez al día<br><input type="radio"/> 2 a 3 veces al día<br><input type="radio"/> 5 a 6 veces al día<br><input type="radio"/> más 6 veces al día |
| maíz hervido          | <input type="radio"/> Nunca o menos 1 vez al mes<br><input type="radio"/> 1 a 3 veces mes<br><input checked="" type="radio"/> 1 vez semana<br><input type="radio"/> 2 a 4 veces semana<br><input type="radio"/> 5 a 6 veces semana<br><input type="radio"/> 1 vez al día<br><input type="radio"/> 2 a 3 veces al día<br><input type="radio"/> 5 a 6 veces al día<br><input type="radio"/> más 6 veces al día |
| legumbres             | <input type="radio"/> Nunca o menos 1 vez al mes<br><input type="radio"/> 1 a 3 veces mes<br><input checked="" type="radio"/> 1 vez semana<br><input type="radio"/> 2 a 4 veces semana<br><input type="radio"/> 5 a 6 veces semana<br><input type="radio"/> 1 vez al día<br><input type="radio"/> 2 a 3 veces al día<br><input type="radio"/> 5 a 6 veces al día<br><input type="radio"/> más 6 veces al día |
| naranjas o mandarinas | <input type="radio"/> Nunca o menos 1 vez al mes<br><input type="radio"/> 1 a 3 veces mes<br><input type="radio"/> 1 vez semana<br><input checked="" type="radio"/> 2 a 4 veces semana<br><input type="radio"/> 5 a 6 veces semana<br><input type="radio"/> 1 vez al día<br><input type="radio"/> 2 a 3 veces al día<br><input type="radio"/> 5 a 6 veces al día<br><input type="radio"/> más 6 veces al día |

---

|                    |                                                                                                                                                                                                                                                                                                                                                                                                              |
|--------------------|--------------------------------------------------------------------------------------------------------------------------------------------------------------------------------------------------------------------------------------------------------------------------------------------------------------------------------------------------------------------------------------------------------------|
| zumو natural fruta | <input checked="" type="radio"/> Nunca o menos 1 vez al mes<br><input type="radio"/> 1 a 3 veces mes<br><input type="radio"/> 1 vez semana<br><input type="radio"/> 2 a 4 veces semana<br><input type="radio"/> 5 a 6 veces semana<br><input type="radio"/> 1 vez al día<br><input type="radio"/> 2 a 3 veces al día<br><input type="radio"/> 5 a 6 veces al día<br><input type="radio"/> más 6 veces al día |
|--------------------|--------------------------------------------------------------------------------------------------------------------------------------------------------------------------------------------------------------------------------------------------------------------------------------------------------------------------------------------------------------------------------------------------------------|

---

|         |                                                                                                                                                                                                                                                                                                                                                                                                              |
|---------|--------------------------------------------------------------------------------------------------------------------------------------------------------------------------------------------------------------------------------------------------------------------------------------------------------------------------------------------------------------------------------------------------------------|
| platano | <input type="radio"/> Nunca o menos 1 vez al mes<br><input type="radio"/> 1 a 3 veces mes<br><input checked="" type="radio"/> 1 vez semana<br><input type="radio"/> 2 a 4 veces semana<br><input type="radio"/> 5 a 6 veces semana<br><input type="radio"/> 1 vez al día<br><input type="radio"/> 2 a 3 veces al día<br><input type="radio"/> 5 a 6 veces al día<br><input type="radio"/> más 6 veces al día |
|---------|--------------------------------------------------------------------------------------------------------------------------------------------------------------------------------------------------------------------------------------------------------------------------------------------------------------------------------------------------------------------------------------------------------------|

---

|                |                                                                                                                                                                                                                                                                                                                                                                                                              |
|----------------|--------------------------------------------------------------------------------------------------------------------------------------------------------------------------------------------------------------------------------------------------------------------------------------------------------------------------------------------------------------------------------------------------------------|
| manzana o pera | <input type="radio"/> Nunca o menos 1 vez al mes<br><input type="radio"/> 1 a 3 veces mes<br><input checked="" type="radio"/> 1 vez semana<br><input type="radio"/> 2 a 4 veces semana<br><input type="radio"/> 5 a 6 veces semana<br><input type="radio"/> 1 vez al día<br><input type="radio"/> 2 a 3 veces al día<br><input type="radio"/> 5 a 6 veces al día<br><input type="radio"/> más 6 veces al día |
|----------------|--------------------------------------------------------------------------------------------------------------------------------------------------------------------------------------------------------------------------------------------------------------------------------------------------------------------------------------------------------------------------------------------------------------|

---

|                       |                                                                                                                                                                                                                                                                                                                                                                                                              |
|-----------------------|--------------------------------------------------------------------------------------------------------------------------------------------------------------------------------------------------------------------------------------------------------------------------------------------------------------------------------------------------------------------------------------------------------------|
| melocotón o nectarina | <input type="radio"/> Nunca o menos 1 vez al mes<br><input type="radio"/> 1 a 3 veces mes<br><input checked="" type="radio"/> 1 vez semana<br><input type="radio"/> 2 a 4 veces semana<br><input type="radio"/> 5 a 6 veces semana<br><input type="radio"/> 1 vez al día<br><input type="radio"/> 2 a 3 veces al día<br><input type="radio"/> 5 a 6 veces al día<br><input type="radio"/> más 6 veces al día |
|-----------------------|--------------------------------------------------------------------------------------------------------------------------------------------------------------------------------------------------------------------------------------------------------------------------------------------------------------------------------------------------------------------------------------------------------------|

---

|                |                                                                                                                                                                                                                                                                                                                                                                                                              |
|----------------|--------------------------------------------------------------------------------------------------------------------------------------------------------------------------------------------------------------------------------------------------------------------------------------------------------------------------------------------------------------------------------------------------------------|
| sandia o melon | <input checked="" type="radio"/> Nunca o menos 1 vez al mes<br><input type="radio"/> 1 a 3 veces mes<br><input type="radio"/> 1 vez semana<br><input type="radio"/> 2 a 4 veces semana<br><input type="radio"/> 5 a 6 veces semana<br><input type="radio"/> 1 vez al día<br><input type="radio"/> 2 a 3 veces al día<br><input type="radio"/> 5 a 6 veces al día<br><input type="radio"/> más 6 veces al día |
|----------------|--------------------------------------------------------------------------------------------------------------------------------------------------------------------------------------------------------------------------------------------------------------------------------------------------------------------------------------------------------------------------------------------------------------|

---

|     |                                                                                                                                                                                                                                                                                                                                                                                                              |
|-----|--------------------------------------------------------------------------------------------------------------------------------------------------------------------------------------------------------------------------------------------------------------------------------------------------------------------------------------------------------------------------------------------------------------|
| uva | <input checked="" type="radio"/> Nunca o menos 1 vez al mes<br><input type="radio"/> 1 a 3 veces mes<br><input type="radio"/> 1 vez semana<br><input type="radio"/> 2 a 4 veces semana<br><input type="radio"/> 5 a 6 veces semana<br><input type="radio"/> 1 vez al día<br><input type="radio"/> 2 a 3 veces al día<br><input type="radio"/> 5 a 6 veces al día<br><input type="radio"/> más 6 veces al día |
|-----|--------------------------------------------------------------------------------------------------------------------------------------------------------------------------------------------------------------------------------------------------------------------------------------------------------------------------------------------------------------------------------------------------------------|

---

|                 |                                                                                                                                                                                                                                                                                                                                                                                                              |
|-----------------|--------------------------------------------------------------------------------------------------------------------------------------------------------------------------------------------------------------------------------------------------------------------------------------------------------------------------------------------------------------------------------------------------------------|
| bruna o ciruela | <input checked="" type="radio"/> Nunca o menos 1 vez al mes<br><input type="radio"/> 1 a 3 veces mes<br><input type="radio"/> 1 vez semana<br><input type="radio"/> 2 a 4 veces semana<br><input type="radio"/> 5 a 6 veces semana<br><input type="radio"/> 1 vez al día<br><input type="radio"/> 2 a 3 veces al día<br><input type="radio"/> 5 a 6 veces al día<br><input type="radio"/> más 6 veces al día |
| kiwi            | <input checked="" type="radio"/> Nunca o menos 1 vez al mes<br><input type="radio"/> 1 a 3 veces mes<br><input type="radio"/> 1 vez semana<br><input type="radio"/> 2 a 4 veces semana<br><input type="radio"/> 5 a 6 veces semana<br><input type="radio"/> 1 vez al día<br><input type="radio"/> 2 a 3 veces al día<br><input type="radio"/> 5 a 6 veces al día<br><input type="radio"/> más 6 veces al día |
| aceituna        | <input checked="" type="radio"/> Nunca o menos 1 vez al mes<br><input type="radio"/> 1 a 3 veces mes<br><input type="radio"/> 1 vez semana<br><input type="radio"/> 2 a 4 veces semana<br><input type="radio"/> 5 a 6 veces semana<br><input type="radio"/> 1 vez al día<br><input type="radio"/> 2 a 3 veces al día<br><input type="radio"/> 5 a 6 veces al día<br><input type="radio"/> más 6 veces al día |
| frutos secos    | <input type="radio"/> Nunca o menos 1 vez al mes<br><input type="radio"/> 1 a 3 veces mes<br><input checked="" type="radio"/> 1 vez semana<br><input type="radio"/> 2 a 4 veces semana<br><input type="radio"/> 5 a 6 veces semana<br><input type="radio"/> 1 vez al día<br><input type="radio"/> 2 a 3 veces al día<br><input type="radio"/> 5 a 6 veces al día<br><input type="radio"/> más 6 veces al día |
| pan blanco      | <input type="radio"/> Nunca o menos 1 vez al mes<br><input type="radio"/> 1 a 3 veces mes<br><input type="radio"/> 1 vez semana<br><input type="radio"/> 2 a 4 veces semana<br><input type="radio"/> 5 a 6 veces semana<br><input checked="" type="radio"/> 1 vez al día<br><input type="radio"/> 2 a 3 veces al día<br><input type="radio"/> 5 a 6 veces al día<br><input type="radio"/> más 6 veces al día |
| pan integral    | <input checked="" type="radio"/> Nunca o menos 1 vez al mes<br><input type="radio"/> 1 a 3 veces mes<br><input type="radio"/> 1 vez semana<br><input type="radio"/> 2 a 4 veces semana<br><input type="radio"/> 5 a 6 veces semana<br><input type="radio"/> 1 vez al día<br><input type="radio"/> 2 a 3 veces al día<br><input type="radio"/> 5 a 6 veces al día<br><input type="radio"/> más 6 veces al día |



---

cereales desayuno

- ☐ Nunca o menos 1 vez al mes  
☐ 1 a 3 veces mes  
☒ 1 vez semana  
☐ 2 a 4 veces semana  
☐ 5 a 6 veces semana  
☐ 1 vez al día  
☐ 2 a 3 veces al día  
☐ 5 a 6 veces al día  
☐ más 6 veces al día

---

patatas fritas

- ☐ Nunca o menos 1 vez al mes  
☒ 1 a 3 veces mes  
☐ 1 vez semana  
☐ 2 a 4 veces semana  
☐ 5 a 6 veces semana  
☐ 1 vez al día  
☐ 2 a 3 veces al día  
☐ 5 a 6 veces al día  
☐ más 6 veces al día

---

patatas cocidas o asadas

- ☐ Nunca o menos 1 vez al mes  
☐ 1 a 3 veces mes  
☒ 1 vez semana  
☐ 2 a 4 veces semana  
☐ 5 a 6 veces semana  
☐ 1 vez al día  
☐ 2 a 3 veces al día  
☐ 5 a 6 veces al día  
☐ más 6 veces al día

---

bolsa papas

- ☒ Nunca o menos 1 vez al mes  
☐ 1 a 3 veces mes  
☐ 1 vez semana  
☐ 2 a 4 veces semana  
☐ 5 a 6 veces semana  
☐ 1 vez al día  
☐ 2 a 3 veces al día  
☐ 5 a 6 veces al día  
☐ más 6 veces al día

---

arroz cocinado

- ☐ Nunca o menos 1 vez al mes  
☐ 1 a 3 veces mes  
☒ 1 vez semana  
☐ 2 a 4 veces semana  
☐ 5 a 6 veces semana  
☐ 1 vez al día  
☐ 2 a 3 veces al día  
☐ 5 a 6 veces al día  
☐ más 6 veces al día

---

pasta

- ☐ Nunca o menos 1 vez al mes  
☐ 1 a 3 veces mes  
☒ 1 vez semana  
☐ 2 a 4 veces semana  
☐ 5 a 6 veces semana  
☐ 1 vez al día  
☐ 2 a 3 veces al día  
☐ 5 a 6 veces al día  
☐ más 6 veces al día

|                     |                                                                                                                                                                                                                                                                                                                                                                                                              |
|---------------------|--------------------------------------------------------------------------------------------------------------------------------------------------------------------------------------------------------------------------------------------------------------------------------------------------------------------------------------------------------------------------------------------------------------|
| pizza               | <input type="radio"/> Nunca o menos 1 vez al mes<br><input type="radio"/> 1 a 3 veces mes<br><input checked="" type="radio"/> 1 vez semana<br><input type="radio"/> 2 a 4 veces semana<br><input type="radio"/> 5 a 6 veces semana<br><input type="radio"/> 1 vez al día<br><input type="radio"/> 2 a 3 veces al día<br><input type="radio"/> 5 a 6 veces al día<br><input type="radio"/> más 6 veces al día |
| aceite oliva        | <input type="radio"/> Nunca o menos 1 vez al mes<br><input type="radio"/> 1 a 3 veces mes<br><input type="radio"/> 1 vez semana<br><input type="radio"/> 2 a 4 veces semana<br><input type="radio"/> 5 a 6 veces semana<br><input checked="" type="radio"/> 1 vez al día<br><input type="radio"/> 2 a 3 veces al día<br><input type="radio"/> 5 a 6 veces al día<br><input type="radio"/> más 6 veces al día |
| otros aceites       | <input type="radio"/> Nunca o menos 1 vez al mes<br><input checked="" type="radio"/> 1 a 3 veces mes<br><input type="radio"/> 1 vez semana<br><input type="radio"/> 2 a 4 veces semana<br><input type="radio"/> 5 a 6 veces semana<br><input type="radio"/> 1 vez al día<br><input type="radio"/> 2 a 3 veces al día<br><input type="radio"/> 5 a 6 veces al día<br><input type="radio"/> más 6 veces al día |
| margarina           | <input checked="" type="radio"/> Nunca o menos 1 vez al mes<br><input type="radio"/> 1 a 3 veces mes<br><input type="radio"/> 1 vez semana<br><input type="radio"/> 2 a 4 veces semana<br><input type="radio"/> 5 a 6 veces semana<br><input type="radio"/> 1 vez al día<br><input type="radio"/> 2 a 3 veces al día<br><input type="radio"/> 5 a 6 veces al día<br><input type="radio"/> más 6 veces al día |
| mantequilla         | <input type="radio"/> Nunca o menos 1 vez al mes<br><input type="radio"/> 1 a 3 veces mes<br><input checked="" type="radio"/> 1 vez semana<br><input type="radio"/> 2 a 4 veces semana<br><input type="radio"/> 5 a 6 veces semana<br><input type="radio"/> 1 vez al día<br><input type="radio"/> 2 a 3 veces al día<br><input type="radio"/> 5 a 6 veces al día<br><input type="radio"/> más 6 veces al día |
| galletas tipo maria | <input checked="" type="radio"/> Nunca o menos 1 vez al mes<br><input type="radio"/> 1 a 3 veces mes<br><input type="radio"/> 1 vez semana<br><input type="radio"/> 2 a 4 veces semana<br><input type="radio"/> 5 a 6 veces semana<br><input type="radio"/> 1 vez al día<br><input type="radio"/> 2 a 3 veces al día<br><input type="radio"/> 5 a 6 veces al día<br><input type="radio"/> más 6 veces al día |

|                           |                                                                                                                                                                                                                                                                                                                                                                                                              |
|---------------------------|--------------------------------------------------------------------------------------------------------------------------------------------------------------------------------------------------------------------------------------------------------------------------------------------------------------------------------------------------------------------------------------------------------------|
| galletas chocolate        | <input type="radio"/> Nunca o menos 1 vez al mes<br><input checked="" type="radio"/> 1 a 3 veces mes<br><input type="radio"/> 1 vez semana<br><input type="radio"/> 2 a 4 veces semana<br><input type="radio"/> 5 a 6 veces semana<br><input type="radio"/> 1 vez al día<br><input type="radio"/> 2 a 3 veces al día<br><input type="radio"/> 5 a 6 veces al día<br><input type="radio"/> más 6 veces al día |
| bollieria                 | <input type="radio"/> Nunca o menos 1 vez al mes<br><input checked="" type="radio"/> 1 a 3 veces mes<br><input type="radio"/> 1 vez semana<br><input type="radio"/> 2 a 4 veces semana<br><input type="radio"/> 5 a 6 veces semana<br><input type="radio"/> 1 vez al día<br><input type="radio"/> 2 a 3 veces al día<br><input type="radio"/> 5 a 6 veces al día<br><input type="radio"/> más 6 veces al día |
| chocolate o bombones      | <input checked="" type="radio"/> Nunca o menos 1 vez al mes<br><input type="radio"/> 1 a 3 veces mes<br><input type="radio"/> 1 vez semana<br><input type="radio"/> 2 a 4 veces semana<br><input type="radio"/> 5 a 6 veces semana<br><input type="radio"/> 1 vez al día<br><input type="radio"/> 2 a 3 veces al día<br><input type="radio"/> 5 a 6 veces al día<br><input type="radio"/> más 6 veces al día |
| chocolate polvo o colacao | <input checked="" type="radio"/> Nunca o menos 1 vez al mes<br><input type="radio"/> 1 a 3 veces mes<br><input type="radio"/> 1 vez semana<br><input type="radio"/> 2 a 4 veces semana<br><input type="radio"/> 5 a 6 veces semana<br><input type="radio"/> 1 vez al día<br><input type="radio"/> 2 a 3 veces al día<br><input type="radio"/> 5 a 6 veces al día<br><input type="radio"/> más 6 veces al día |
| vino tinto                | <input checked="" type="radio"/> Nunca o menos 1 vez al mes<br><input type="radio"/> 1 a 3 veces mes<br><input type="radio"/> 1 vez semana<br><input type="radio"/> 2 a 4 veces semana<br><input type="radio"/> 5 a 6 veces semana<br><input type="radio"/> 1 vez al día<br><input type="radio"/> 2 a 3 veces al día<br><input type="radio"/> 5 a 6 veces al día<br><input type="radio"/> más 6 veces al día |
| vino blanco               | <input checked="" type="radio"/> Nunca o menos 1 vez al mes<br><input type="radio"/> 1 a 3 veces mes<br><input type="radio"/> 1 vez semana<br><input type="radio"/> 2 a 4 veces semana<br><input type="radio"/> 5 a 6 veces semana<br><input type="radio"/> 1 vez al día<br><input type="radio"/> 2 a 3 veces al día<br><input type="radio"/> 5 a 6 veces al día<br><input type="radio"/> más 6 veces al día |

|                       |                                                                                                                                                                                                                                                                                                                                                                                                              |
|-----------------------|--------------------------------------------------------------------------------------------------------------------------------------------------------------------------------------------------------------------------------------------------------------------------------------------------------------------------------------------------------------------------------------------------------------|
| vino seco o vermut    | <input checked="" type="radio"/> Nunca o menos 1 vez al mes<br><input type="radio"/> 1 a 3 veces mes<br><input type="radio"/> 1 vez semana<br><input type="radio"/> 2 a 4 veces semana<br><input type="radio"/> 5 a 6 veces semana<br><input type="radio"/> 1 vez al día<br><input type="radio"/> 2 a 3 veces al día<br><input type="radio"/> 5 a 6 veces al día<br><input type="radio"/> más 6 veces al día |
| cerveza               | <input checked="" type="radio"/> Nunca o menos 1 vez al mes<br><input type="radio"/> 1 a 3 veces mes<br><input type="radio"/> 1 vez semana<br><input type="radio"/> 2 a 4 veces semana<br><input type="radio"/> 5 a 6 veces semana<br><input type="radio"/> 1 vez al día<br><input type="radio"/> 2 a 3 veces al día<br><input type="radio"/> 5 a 6 veces al día<br><input type="radio"/> más 6 veces al día |
| cerveza sin alcohol   | <input checked="" type="radio"/> Nunca o menos 1 vez al mes<br><input type="radio"/> 1 a 3 veces mes<br><input type="radio"/> 1 vez semana<br><input type="radio"/> 2 a 4 veces semana<br><input type="radio"/> 5 a 6 veces semana<br><input type="radio"/> 1 vez al día<br><input type="radio"/> 2 a 3 veces al día<br><input type="radio"/> 5 a 6 veces al día<br><input type="radio"/> más 6 veces al día |
| licores               | <input checked="" type="radio"/> Nunca o menos 1 vez al mes<br><input type="radio"/> 1 a 3 veces mes<br><input type="radio"/> 1 vez semana<br><input type="radio"/> 2 a 4 veces semana<br><input type="radio"/> 5 a 6 veces semana<br><input type="radio"/> 1 vez al día<br><input type="radio"/> 2 a 3 veces al día<br><input type="radio"/> 5 a 6 veces al día<br><input type="radio"/> más 6 veces al día |
| ginebra o ron o vodka | <input checked="" type="radio"/> Nunca o menos 1 vez al mes<br><input type="radio"/> 1 a 3 veces mes<br><input type="radio"/> 1 vez semana<br><input type="radio"/> 2 a 4 veces semana<br><input type="radio"/> 5 a 6 veces semana<br><input type="radio"/> 1 vez al día<br><input type="radio"/> 2 a 3 veces al día<br><input type="radio"/> 5 a 6 veces al día<br><input type="radio"/> más 6 veces al día |
| refresco normal       | <input type="radio"/> Nunca o menos 1 vez al mes<br><input type="radio"/> 1 a 3 veces mes<br><input type="radio"/> 1 vez semana<br><input checked="" type="radio"/> 2 a 4 veces semana<br><input type="radio"/> 5 a 6 veces semana<br><input type="radio"/> 1 vez al día<br><input type="radio"/> 2 a 3 veces al día<br><input type="radio"/> 5 a 6 veces al día<br><input type="radio"/> más 6 veces al día |

|                          |                                                                                                                                                                                                                                                                                                                                                                                                              |
|--------------------------|--------------------------------------------------------------------------------------------------------------------------------------------------------------------------------------------------------------------------------------------------------------------------------------------------------------------------------------------------------------------------------------------------------------|
| refresco sin azúcar      | <input checked="" type="radio"/> Nunca o menos 1 vez al mes<br><input type="radio"/> 1 a 3 veces mes<br><input type="radio"/> 1 vez semana<br><input type="radio"/> 2 a 4 veces semana<br><input type="radio"/> 5 a 6 veces semana<br><input type="radio"/> 1 vez al día<br><input type="radio"/> 2 a 3 veces al día<br><input type="radio"/> 5 a 6 veces al día<br><input type="radio"/> más 6 veces al día |
| Agua del grifo           | <input checked="" type="radio"/> Nunca o menos 1 vez al mes<br><input type="radio"/> 1 a 3 veces mes<br><input type="radio"/> 1 vez semana<br><input type="radio"/> 2 a 4 veces semana<br><input type="radio"/> 5 a 6 veces semana<br><input type="radio"/> 1 vez al día<br><input type="radio"/> 2 a 3 veces al día<br><input type="radio"/> 5 a 6 veces al día<br><input type="radio"/> más 6 veces al día |
| agua embotellada sin gas | <input type="radio"/> Nunca o menos 1 vez al mes<br><input type="radio"/> 1 a 3 veces mes<br><input type="radio"/> 1 vez semana<br><input type="radio"/> 2 a 4 veces semana<br><input type="radio"/> 5 a 6 veces semana<br><input type="radio"/> 1 vez al día<br><input type="radio"/> 2 a 3 veces al día<br><input type="radio"/> 5 a 6 veces al día<br><input checked="" type="radio"/> más 6 veces al día |
| agua embotellada con gas | <input checked="" type="radio"/> Nunca o menos 1 vez al mes<br><input type="radio"/> 1 a 3 veces mes<br><input type="radio"/> 1 vez semana<br><input type="radio"/> 2 a 4 veces semana<br><input type="radio"/> 5 a 6 veces semana<br><input type="radio"/> 1 vez al día<br><input type="radio"/> 2 a 3 veces al día<br><input type="radio"/> 5 a 6 veces al día<br><input type="radio"/> más 6 veces al día |
| zumو frutas embasado     | <input checked="" type="radio"/> Nunca o menos 1 vez al mes<br><input type="radio"/> 1 a 3 veces mes<br><input type="radio"/> 1 vez semana<br><input type="radio"/> 2 a 4 veces semana<br><input type="radio"/> 5 a 6 veces semana<br><input type="radio"/> 1 vez al día<br><input type="radio"/> 2 a 3 veces al día<br><input type="radio"/> 5 a 6 veces al día<br><input type="radio"/> más 6 veces al día |
| cafe                     | <input type="radio"/> Nunca o menos 1 vez al mes<br><input type="radio"/> 1 a 3 veces mes<br><input checked="" type="radio"/> 1 vez semana<br><input type="radio"/> 2 a 4 veces semana<br><input type="radio"/> 5 a 6 veces semana<br><input type="radio"/> 1 vez al día<br><input type="radio"/> 2 a 3 veces al día<br><input type="radio"/> 5 a 6 veces al día<br><input type="radio"/> más 6 veces al día |

|                       |                                                                                                                                                                                                                                                                                                                                                                                                              |
|-----------------------|--------------------------------------------------------------------------------------------------------------------------------------------------------------------------------------------------------------------------------------------------------------------------------------------------------------------------------------------------------------------------------------------------------------|
| cafe descafeinado     | <input checked="" type="radio"/> Nunca o menos 1 vez al mes<br><input type="radio"/> 1 a 3 veces mes<br><input type="radio"/> 1 vez semana<br><input type="radio"/> 2 a 4 veces semana<br><input type="radio"/> 5 a 6 veces semana<br><input type="radio"/> 1 vez al día<br><input type="radio"/> 2 a 3 veces al día<br><input type="radio"/> 5 a 6 veces al día<br><input type="radio"/> más 6 veces al día |
| te o infusión         | <input checked="" type="radio"/> Nunca o menos 1 vez al mes<br><input type="radio"/> 1 a 3 veces mes<br><input type="radio"/> 1 vez semana<br><input type="radio"/> 2 a 4 veces semana<br><input type="radio"/> 5 a 6 veces semana<br><input type="radio"/> 1 vez al día<br><input type="radio"/> 2 a 3 veces al día<br><input type="radio"/> 5 a 6 veces al día<br><input type="radio"/> más 6 veces al día |
| sopa o puré verduras  | <input type="radio"/> Nunca o menos 1 vez al mes<br><input checked="" type="radio"/> 1 a 3 veces mes<br><input type="radio"/> 1 vez semana<br><input type="radio"/> 2 a 4 veces semana<br><input type="radio"/> 5 a 6 veces semana<br><input type="radio"/> 1 vez al día<br><input type="radio"/> 2 a 3 veces al día<br><input type="radio"/> 5 a 6 veces al día<br><input type="radio"/> más 6 veces al día |
| croquetas pollo jamón | <input type="radio"/> Nunca o menos 1 vez al mes<br><input checked="" type="radio"/> 1 a 3 veces mes<br><input type="radio"/> 1 vez semana<br><input type="radio"/> 2 a 4 veces semana<br><input type="radio"/> 5 a 6 veces semana<br><input type="radio"/> 1 vez al día<br><input type="radio"/> 2 a 3 veces al día<br><input type="radio"/> 5 a 6 veces al día<br><input type="radio"/> más 6 veces al día |
| croquetas pescado     | <input type="radio"/> Nunca o menos 1 vez al mes<br><input checked="" type="radio"/> 1 a 3 veces mes<br><input type="radio"/> 1 vez semana<br><input type="radio"/> 2 a 4 veces semana<br><input type="radio"/> 5 a 6 veces semana<br><input type="radio"/> 1 vez al día<br><input type="radio"/> 2 a 3 veces al día<br><input type="radio"/> 5 a 6 veces al día<br><input type="radio"/> más 6 veces al día |
| mayonesa              | <input type="radio"/> Nunca o menos 1 vez al mes<br><input type="radio"/> 1 a 3 veces mes<br><input checked="" type="radio"/> 1 vez semana<br><input type="radio"/> 2 a 4 veces semana<br><input type="radio"/> 5 a 6 veces semana<br><input type="radio"/> 1 vez al día<br><input type="radio"/> 2 a 3 veces al día<br><input type="radio"/> 5 a 6 veces al día<br><input type="radio"/> más 6 veces al día |

|                  |                                                                                                                                                                                                                                                                                                                                                                                                              |
|------------------|--------------------------------------------------------------------------------------------------------------------------------------------------------------------------------------------------------------------------------------------------------------------------------------------------------------------------------------------------------------------------------------------------------------|
| salsa tomate     | <input type="radio"/> Nunca o menos 1 vez al mes<br><input type="radio"/> 1 a 3 veces mes<br><input checked="" type="radio"/> 1 vez semana<br><input type="radio"/> 2 a 4 veces semana<br><input type="radio"/> 5 a 6 veces semana<br><input type="radio"/> 1 vez al día<br><input type="radio"/> 2 a 3 veces al día<br><input type="radio"/> 5 a 6 veces al día<br><input type="radio"/> más 6 veces al día |
| ketchup          | <input checked="" type="radio"/> Nunca o menos 1 vez al mes<br><input type="radio"/> 1 a 3 veces mes<br><input type="radio"/> 1 vez semana<br><input type="radio"/> 2 a 4 veces semana<br><input type="radio"/> 5 a 6 veces semana<br><input type="radio"/> 1 vez al día<br><input type="radio"/> 2 a 3 veces al día<br><input type="radio"/> 5 a 6 veces al día<br><input type="radio"/> más 6 veces al día |
| sal              | <input type="radio"/> Nunca o menos 1 vez al mes<br><input type="radio"/> 1 a 3 veces mes<br><input type="radio"/> 1 vez semana<br><input type="radio"/> 2 a 4 veces semana<br><input type="radio"/> 5 a 6 veces semana<br><input type="radio"/> 1 vez al día<br><input checked="" type="radio"/> 2 a 3 veces al día<br><input type="radio"/> 5 a 6 veces al día<br><input type="radio"/> más 6 veces al día |
| ajo              | <input type="radio"/> Nunca o menos 1 vez al mes<br><input type="radio"/> 1 a 3 veces mes<br><input checked="" type="radio"/> 1 vez semana<br><input type="radio"/> 2 a 4 veces semana<br><input type="radio"/> 5 a 6 veces semana<br><input type="radio"/> 1 vez al día<br><input type="radio"/> 2 a 3 veces al día<br><input type="radio"/> 5 a 6 veces al día<br><input type="radio"/> más 6 veces al día |
| mermelada o miel | <input checked="" type="radio"/> Nunca o menos 1 vez al mes<br><input type="radio"/> 1 a 3 veces mes<br><input type="radio"/> 1 vez semana<br><input type="radio"/> 2 a 4 veces semana<br><input type="radio"/> 5 a 6 veces semana<br><input type="radio"/> 1 vez al día<br><input type="radio"/> 2 a 3 veces al día<br><input type="radio"/> 5 a 6 veces al día<br><input type="radio"/> más 6 veces al día |
| azúcar           | <input type="radio"/> Nunca o menos 1 vez al mes<br><input type="radio"/> 1 a 3 veces mes<br><input checked="" type="radio"/> 1 vez semana<br><input type="radio"/> 2 a 4 veces semana<br><input type="radio"/> 5 a 6 veces semana<br><input type="radio"/> 1 vez al día<br><input type="radio"/> 2 a 3 veces al día<br><input type="radio"/> 5 a 6 veces al día<br><input type="radio"/> más 6 veces al día |

|                                       |                                                                                                                                                                                                                                                                                                                                                                                                                                                                                                                               |
|---------------------------------------|-------------------------------------------------------------------------------------------------------------------------------------------------------------------------------------------------------------------------------------------------------------------------------------------------------------------------------------------------------------------------------------------------------------------------------------------------------------------------------------------------------------------------------|
| Otro alimento                         |                                                                                                                                                                                                                                                                                                                                                                                                                                                                                                                               |
| suplementos vitamínicos               | <input type="radio"/> si<br><input checked="" type="radio"/> no                                                                                                                                                                                                                                                                                                                                                                                                                                                               |
| suplementos vitamínicos               |                                                                                                                                                                                                                                                                                                                                                                                                                                                                                                                               |
| dieta previa                          | <input type="radio"/> si<br><input checked="" type="radio"/> no                                                                                                                                                                                                                                                                                                                                                                                                                                                               |
| motivo dieta                          | <input checked="" type="radio"/> no dieta<br><input type="radio"/> control peso<br><input type="radio"/> control colesterol<br><input type="radio"/> control diabetes<br><input type="radio"/> problemas estómago<br><input type="radio"/> problemas vesícula o hepáticos<br><input type="radio"/> HTA o cardiopatía<br><input type="radio"/> problemas renales<br><input type="radio"/> alergia alimentaria<br><input type="radio"/> ácido úrico elevado<br><input type="radio"/> vegetariana<br><input type="radio"/> otros |
| cambio alimentos año previo gestación | <input checked="" type="radio"/> si<br><input type="radio"/> no                                                                                                                                                                                                                                                                                                                                                                                                                                                               |
| cambio lácteos                        | <input type="radio"/> eliminado<br><input type="radio"/> disminuido<br><input checked="" type="radio"/> igual<br><input type="radio"/> aumentado<br><input type="radio"/> no sabe                                                                                                                                                                                                                                                                                                                                             |
| cambio huevos                         | <input type="radio"/> eliminado<br><input type="radio"/> disminuido<br><input checked="" type="radio"/> igual<br><input type="radio"/> aumentado<br><input type="radio"/> no sabe                                                                                                                                                                                                                                                                                                                                             |
| cambio carne                          | <input type="radio"/> eliminado<br><input type="radio"/> disminuido<br><input checked="" type="radio"/> igual<br><input type="radio"/> aumentado<br><input type="radio"/> no sabe                                                                                                                                                                                                                                                                                                                                             |
| cambio pescado                        | <input type="radio"/> eliminado<br><input type="radio"/> disminuido<br><input checked="" type="radio"/> igual<br><input type="radio"/> aumentado<br><input type="radio"/> no sabe                                                                                                                                                                                                                                                                                                                                             |
| cambio verduras                       | <input type="radio"/> eliminado<br><input type="radio"/> disminuido<br><input checked="" type="radio"/> igual<br><input type="radio"/> aumentado<br><input type="radio"/> no sabe                                                                                                                                                                                                                                                                                                                                             |



|                            |                                                                                                                                                                                                                        |
|----------------------------|------------------------------------------------------------------------------------------------------------------------------------------------------------------------------------------------------------------------|
| cambio legumbres           | <input type="radio"/> eliminado<br><input type="radio"/> disminuido<br><input checked="" type="radio"/> igual<br><input type="radio"/> aumentado<br><input type="radio"/> no sabe                                      |
| cambio fruta               | <input type="radio"/> eliminado<br><input type="radio"/> disminuido<br><input checked="" type="radio"/> igual<br><input type="radio"/> aumentado<br><input type="radio"/> no sabe                                      |
| cambio pan                 | <input type="radio"/> eliminado<br><input type="radio"/> disminuido<br><input checked="" type="radio"/> igual<br><input type="radio"/> aumentado<br><input type="radio"/> no sabe                                      |
| cambio aceite oliva        | <input type="radio"/> eliminado<br><input type="radio"/> disminuido<br><input checked="" type="radio"/> igual<br><input type="radio"/> aumentado<br><input type="radio"/> no sabe                                      |
| cambio mante o margarina   | <input type="radio"/> eliminado<br><input type="radio"/> disminuido<br><input checked="" type="radio"/> igual<br><input type="radio"/> aumentado<br><input type="radio"/> no sabe                                      |
| cambio azúcar y dulces     | <input type="radio"/> eliminado<br><input type="radio"/> disminuido<br><input checked="" type="radio"/> igual<br><input type="radio"/> aumentado<br><input type="radio"/> no sabe                                      |
| cambio bebidas alcohólicas | <input checked="" type="radio"/> eliminado<br><input type="radio"/> disminuido<br><input type="radio"/> igual<br><input type="radio"/> aumentado<br><input type="radio"/> no sabe                                      |
| frecuencia comidas fritas  | <input type="radio"/> a diario<br><input type="radio"/> 5 a 6 veces semana<br><input type="radio"/> 2 a 4 veces semana<br><input type="radio"/> 1 vez semana<br><input checked="" type="radio"/> menos de 1 vez semana |
| carne                      | <input type="radio"/> no como<br><input type="radio"/> cruda<br><input type="radio"/> poco hecha<br><input type="radio"/> hecha<br><input checked="" type="radio"/> muy hecha                                          |
| grasa visible carne        | <input type="radio"/> quita toda<br><input checked="" type="radio"/> quita mayoría<br><input type="radio"/> quita un poco<br><input type="radio"/> no quita nada                                                       |

|                                |                                                                                                                                                                                                                                                          |
|--------------------------------|----------------------------------------------------------------------------------------------------------------------------------------------------------------------------------------------------------------------------------------------------------|
| cocina carne                   | <input type="radio"/> a la plancha<br><input type="radio"/> a la parrilla<br><input type="radio"/> asada<br><input type="radio"/> frita<br><input checked="" type="radio"/> guisada                                                                      |
| tostado quemado carne          | <input type="radio"/> nunca<br><input checked="" type="radio"/> 1 vez mes<br><input type="radio"/> 2 a 3 veces mes<br><input type="radio"/> 1 vez semana<br><input type="radio"/> 2 a 3 semanas                                                          |
| tostado quemado pescado        | <input checked="" type="radio"/> nunca<br><input type="radio"/> 1 vez mes<br><input type="radio"/> 2 a 3 veces mes<br><input type="radio"/> 1 vez semana<br><input type="radio"/> 2 a 3 semanas                                                          |
| socarrat paella                | <input type="radio"/> nunca<br><input type="radio"/> 1 vez mes<br><input type="radio"/> 2 a 3 veces mes<br><input checked="" type="radio"/> 1 vez semana<br><input type="radio"/> 2 a 3 semanas                                                          |
| grasa o aceite cocinar         | <input type="radio"/> mantequilla<br><input type="radio"/> margarina<br><input checked="" type="radio"/> aceite oliva<br><input type="radio"/> aceite oliva virgen extra<br><input type="radio"/> aceite vegetal<br><input type="radio"/> mezcla aceites |
| grasa aceite aliñar            | <input type="radio"/> mantequilla<br><input type="radio"/> margarina<br><input checked="" type="radio"/> aceite oliva<br><input type="radio"/> aceite oliva virgen extra<br><input type="radio"/> aceite vegetal<br><input type="radio"/> mezcla aceites |
| grasa aceite freir             | <input type="radio"/> mantequilla<br><input type="radio"/> margarina<br><input checked="" type="radio"/> aceite oliva<br><input type="radio"/> aceite oliva virgen extra<br><input type="radio"/> aceite vegetal<br><input type="radio"/> mezcla aceites |
| Ejercicio cuestionario         | <input checked="" type="radio"/> si<br><input type="radio"/> no                                                                                                                                                                                          |
| horas de sueño incluido siesta | [*DATA REMOVED*]                                                                                                                                                                                                                                         |
| minutos siesta                 | [*DATA REMOVED*]                                                                                                                                                                                                                                         |
| horas televisión semana        | [*DATA REMOVED*]                                                                                                                                                                                                                                         |

|                                        |                                                                                                                                                                                                                                                                                                                                                                           |
|----------------------------------------|---------------------------------------------------------------------------------------------------------------------------------------------------------------------------------------------------------------------------------------------------------------------------------------------------------------------------------------------------------------------------|
| actividad trabajo                      | <input type="radio"/> casi siempre sentado<br><input type="radio"/> sentado 50 por cien<br><input type="radio"/> casi siempre de pie, quieto<br><input checked="" type="radio"/> casi siempre levantado caminando y llevando pocas cosas<br><input type="radio"/> casi siempre levantado, caminando y llevado muchas cosas<br><input type="radio"/> trabajo manual pesado |
| tiempo caminar o bici al día           | <input type="radio"/> casi nunca<br><input type="radio"/> menos 20min día<br><input type="radio"/> 20 a 40 min día<br><input checked="" type="radio"/> 40 a 60 min día<br><input type="radio"/> 1h o 1h y media día<br><input type="radio"/> más de 1h y media al día                                                                                                     |
| tiempo tareas casa al día              | <input type="radio"/> menos de 1h día<br><input checked="" type="radio"/> 1 a 2h día<br><input type="radio"/> 3 a 4h día<br><input type="radio"/> 5 a 6h día<br><input type="radio"/> 7 a 8h día<br><input type="radio"/> más de 8h día                                                                                                                                   |
| tiempo libre televisión ordenador leer | <input checked="" type="radio"/> menos 1h día<br><input type="radio"/> 1h día<br><input type="radio"/> 2h día<br><input type="radio"/> 3h día<br><input type="radio"/> 4h día<br><input type="radio"/> 5 a 6h día<br><input type="radio"/> mas 6h día                                                                                                                     |
| tiempo libre ejercicio o deporte       | <input type="radio"/> menos 1h semana<br><input checked="" type="radio"/> 1h semana<br><input type="radio"/> 2h semana<br><input type="radio"/> 3h semana<br><input type="radio"/> 4 a 5h semana<br><input type="radio"/> mas 5h semana                                                                                                                                   |
| como se considera                      | <input type="radio"/> sedentaria<br><input type="radio"/> poco activa<br><input checked="" type="radio"/> moderadamente activa<br><input type="radio"/> bastante activa<br><input type="radio"/> muy activa<br><input type="radio"/> no sabe                                                                                                                              |
| FUR                                    | [*DATA REMOVED*]                                                                                                                                                                                                                                                                                                                                                          |
| Semanas gestación 2T                   | [*DATA REMOVED*]                                                                                                                                                                                                                                                                                                                                                          |
| Días gestación 2T                      | [*DATA REMOVED*]                                                                                                                                                                                                                                                                                                                                                          |
| DBP 2T                                 | [*DATA REMOVED*]                                                                                                                                                                                                                                                                                                                                                          |
| CC 2T                                  | [*DATA REMOVED*]                                                                                                                                                                                                                                                                                                                                                          |
| AC 2T                                  | [*DATA REMOVED*]                                                                                                                                                                                                                                                                                                                                                          |

|                                                   |                                                                                                                                                                                                 |
|---------------------------------------------------|-------------------------------------------------------------------------------------------------------------------------------------------------------------------------------------------------|
| LF 2T                                             | [*DATA REMOVED*]                                                                                                                                                                                |
| PFE 2T (Hadlock)                                  | [*DATA REMOVED*]                                                                                                                                                                                |
| Semanas gestación 3T                              | [*DATA REMOVED*]                                                                                                                                                                                |
| días 3T                                           | [*DATA REMOVED*]                                                                                                                                                                                |
| DBP 3T                                            | [*DATA REMOVED*]                                                                                                                                                                                |
| CC 3T                                             | [*DATA REMOVED*]                                                                                                                                                                                |
| AC 3T                                             | [*DATA REMOVED*]                                                                                                                                                                                |
| LF 3T                                             | [*DATA REMOVED*]                                                                                                                                                                                |
| PFE 3T (Hadlock)                                  | [*DATA REMOVED*]                                                                                                                                                                                |
| Semanas de gestación final                        | [*DATA REMOVED*]                                                                                                                                                                                |
| días gestación final                              | [*DATA REMOVED*]                                                                                                                                                                                |
| Localización placenta                             | <input checked="" type="radio"/> anterior<br><input type="radio"/> lateral derecha<br><input type="radio"/> lateral izquierda<br><input type="radio"/> posterior<br><input type="radio"/> fondo |
| Presentación longitudinal cefálica                | <input type="radio"/> no<br><input checked="" type="radio"/> si                                                                                                                                 |
| Dorso                                             | <input checked="" type="radio"/> izquierda anterior<br><input type="radio"/> izquierda posterior<br><input type="radio"/> derecha anterior<br><input type="radio"/> derecha posterior           |
| diámetro biparietal                               | [*DATA REMOVED*]                                                                                                                                                                                |
| Circunferencia craneal                            | [*DATA REMOVED*]                                                                                                                                                                                |
| Circunferencia abdominal                          | [*DATA REMOVED*]                                                                                                                                                                                |
| Longitud de femur                                 | [*DATA REMOVED*]                                                                                                                                                                                |
| tejido celular subcutáneo a nivel del muslo en mm | [*DATA REMOVED*]                                                                                                                                                                                |
| tejido celular subcutáneo en abdomen en mm        | [*DATA REMOVED*]                                                                                                                                                                                |
| Volumen del muslo en cm3                          | [*DATA REMOVED*]                                                                                                                                                                                |
| Peso fetal estimado según fórmula de Hadlock      | [*DATA REMOVED*]                                                                                                                                                                                |

|                                               |                                                                                                                                                          |
|-----------------------------------------------|----------------------------------------------------------------------------------------------------------------------------------------------------------|
| Percentil                                     | [*DATA REMOVED*]                                                                                                                                         |
| Peso fetal estimado según fórmula de Scioscia | <hr/>                                                                                                                                                    |
| Peso fetal estimado según fórmula de LEE      | <hr/>                                                                                                                                                    |
| Tipo de parto                                 | <input checked="" type="radio"/> eutocico<br><input type="radio"/> instrumentado/ventosa<br><input type="radio"/> cesarea                                |
| fecha de nacimiento                           | [*DATA REMOVED*]                                                                                                                                         |
| Días entre exploración y nacimiento           | [*DATA REMOVED*]                                                                                                                                         |
| Peso RN en g                                  | [*DATA REMOVED*]                                                                                                                                         |
| sexo                                          | <input type="radio"/> mujer<br><input checked="" type="radio"/> hombre                                                                                   |
| Apgar 1 minuto                                | [*DATA REMOVED*]                                                                                                                                         |
| Apgar 5 minutos                               | [*DATA REMOVED*]                                                                                                                                         |
| Apgar 10 minutos                              | <hr/>                                                                                                                                                    |
| antecedente Covid durante gestación           | <input type="radio"/> Yes<br><input checked="" type="radio"/> No                                                                                         |
| Nivel de estudios                             | <input type="radio"/> ninguno<br><input type="radio"/> primarios<br><input checked="" type="radio"/> secundarios<br><input type="radio"/> universitarios |

# Base\_datos\_estimacion\_peso\_fetal

|                                       |                                                                                                                                                                                                                                                                                      |
|---------------------------------------|--------------------------------------------------------------------------------------------------------------------------------------------------------------------------------------------------------------------------------------------------------------------------------------|
| Número de identificación participante | 18                                                                                                                                                                                                                                                                                   |
| CODIGO PARTICIPANTE                   |                                                                                                                                                                                                                                                                                      |
| Edad                                  | [*DATA REMOVED*]                                                                                                                                                                                                                                                                     |
| Gestaciones                           | <input type="radio"/> 1<br><input type="radio"/> 2<br><input checked="" type="radio"/> 3<br><input type="radio"/> mas de 3                                                                                                                                                           |
| partos                                | <input type="radio"/> 0<br><input checked="" type="radio"/> 1<br><input type="radio"/> 2<br><input type="radio"/> 3<br><input type="radio"/> mas de 3                                                                                                                                |
| cesáreas                              | <input type="radio"/> 0<br><input checked="" type="radio"/> 1<br><input type="radio"/> 2<br><input type="radio"/> 3<br><input type="radio"/> mas de 3                                                                                                                                |
| Abortos                               | <input checked="" type="radio"/> 0<br><input type="radio"/> 1<br><input type="radio"/> 2<br><input type="radio"/> 3<br><input type="radio"/> mas de 3                                                                                                                                |
| Tipo de gestacion                     | <input checked="" type="radio"/> espontanea<br><input type="radio"/> IAC inseminación artificial conyuge<br><input type="radio"/> IAD inseminación artificial donante<br><input type="radio"/> FIV Fecundación in Vitro<br><input type="radio"/> Ovodon FIV con donación de ovocitos |
| peso previo a embarazo                | [*DATA REMOVED*]                                                                                                                                                                                                                                                                     |
| Ganancia ponderal embarazo            | [*DATA REMOVED*]                                                                                                                                                                                                                                                                     |
| Talla madre                           | [*DATA REMOVED*]                                                                                                                                                                                                                                                                     |
| IMC previo embarazo                   | 19.467401285583104                                                                                                                                                                                                                                                                   |
| Patología obstétrica                  | <input checked="" type="radio"/> no<br><input type="radio"/> si                                                                                                                                                                                                                      |
| Diabetes pregestacional               | <input checked="" type="radio"/> no<br><input type="radio"/> si                                                                                                                                                                                                                      |
| Diabetes gestacional                  | <input checked="" type="radio"/> no<br><input type="radio"/> si                                                                                                                                                                                                                      |

|                                            |                                                                                                                                                                           |
|--------------------------------------------|---------------------------------------------------------------------------------------------------------------------------------------------------------------------------|
| Diabetes gestacional con insulina          | <input checked="" type="radio"/> no<br><input type="radio"/> si                                                                                                           |
| Diabetes gestacional con dieta y ejercicio | <input checked="" type="radio"/> no<br><input type="radio"/> si                                                                                                           |
| Percentil fetos previos                    | <input type="radio"/> Nada<br><input type="radio"/> percentil menor de 10<br><input type="radio"/> percentil entre 10 y 90<br><input type="radio"/> percentil mayor de 90 |
| Exfumadora                                 | <input checked="" type="radio"/> Nada<br><input type="radio"/> menos de 5 años<br><input type="radio"/> 5 a 10 años<br><input type="radio"/> mayor o igual a 10 años      |
| Hábito tabáquico                           | <input checked="" type="radio"/> no<br><input type="radio"/> si                                                                                                           |
| fumadora                                   | [*DATA REMOVED*]                                                                                                                                                          |
| Consumo otros tóxicos                      | <input checked="" type="radio"/> no<br><input type="radio"/> si                                                                                                           |
| Hb 1T                                      | [*DATA REMOVED*]                                                                                                                                                          |
| Htc 1T                                     | [*DATA REMOVED*]                                                                                                                                                          |
| Hb 2T                                      | [*DATA REMOVED*]                                                                                                                                                          |
| HTC 2T                                     | [*DATA REMOVED*]                                                                                                                                                          |
| Hb 3T                                      | [*DATA REMOVED*]                                                                                                                                                          |
| HTC 3T                                     | [*DATA REMOVED*]                                                                                                                                                          |
| Suplemento FE oral                         | <input checked="" type="radio"/> si<br><input type="radio"/> no                                                                                                           |
| Suplemento fe iv                           | <input type="radio"/> si<br><input checked="" type="radio"/> no                                                                                                           |
| Transfusión                                | <input checked="" type="radio"/> no<br><input type="radio"/> si                                                                                                           |
| Solicitada Vit D                           | <input checked="" type="radio"/> no<br><input type="radio"/> si                                                                                                           |
| Deficit vit D                              | <input type="radio"/> no<br><input type="radio"/> si                                                                                                                      |
| Suplemento vit D                           | <input type="radio"/> si<br><input type="radio"/> no                                                                                                                      |

|                       |                                                                                                                                                                                                                                                                                                                                                                                                              |
|-----------------------|--------------------------------------------------------------------------------------------------------------------------------------------------------------------------------------------------------------------------------------------------------------------------------------------------------------------------------------------------------------------------------------------------------------|
| Dieta, cuestionario   | <input checked="" type="radio"/> si<br><input type="radio"/> no                                                                                                                                                                                                                                                                                                                                              |
| Leche entera          | <input checked="" type="radio"/> Nunca o menos 1 vez al mes<br><input type="radio"/> 1 a 3 veces mes<br><input type="radio"/> 1 vez semana<br><input type="radio"/> 2 a 4 veces semana<br><input type="radio"/> 5 a 6 veces semana<br><input type="radio"/> 1 vez al día<br><input type="radio"/> 2 a 3 veces al día<br><input type="radio"/> 5 a 6 veces al día<br><input type="radio"/> más 6 veces al día |
| Leche semidesnatada   | <input type="radio"/> Nunca o menos 1 vez al mes<br><input type="radio"/> 1 a 3 veces mes<br><input type="radio"/> 1 vez semana<br><input type="radio"/> 2 a 4 veces semana<br><input type="radio"/> 5 a 6 veces semana<br><input checked="" type="radio"/> 1 vez al día<br><input type="radio"/> 2 a 3 veces al día<br><input type="radio"/> 5 a 6 veces al día<br><input type="radio"/> mas 6 veces al día |
| Leche desnatada       | <input checked="" type="radio"/> Nunca o menos 1 vez al mes<br><input type="radio"/> 1 a 3 veces mes<br><input type="radio"/> 1 vez semana<br><input type="radio"/> 2 a 4 veces semana<br><input type="radio"/> 5 a 6 veces semana<br><input type="radio"/> 1 vez al día<br><input type="radio"/> 2 a 3 veces al día<br><input type="radio"/> 5 a 6 veces al día<br><input type="radio"/> más 6 veces al día |
| Leche condensada      | <input checked="" type="radio"/> Nunca o menos 1 vez al mes<br><input type="radio"/> 1 a 3 veces mes<br><input type="radio"/> 1 vez semana<br><input type="radio"/> 2 a 4 veces semana<br><input type="radio"/> 5 a 6 veces semana<br><input type="radio"/> 1 vez al día<br><input type="radio"/> 2 a 3 veces al día<br><input type="radio"/> 5 a 6 veces al día<br><input type="radio"/> más 6 veces al día |
| nata o crema de leche | <input checked="" type="radio"/> Nunca o menos 1 vez al mes<br><input type="radio"/> 1 a 3 veces mes<br><input type="radio"/> 1 vez semana<br><input type="radio"/> 2 a 4 veces semana<br><input type="radio"/> 5 a 6 veces semana<br><input type="radio"/> 1 vez al día<br><input type="radio"/> 2 a 3 veces al día<br><input type="radio"/> 5 a 6 veces al día<br><input type="radio"/> más 6 veces al día |



|                                             |                                                                                                                                                                                                                                                                                                                                                                                                              |
|---------------------------------------------|--------------------------------------------------------------------------------------------------------------------------------------------------------------------------------------------------------------------------------------------------------------------------------------------------------------------------------------------------------------------------------------------------------------|
| Yogurt Entero                               | <input checked="" type="radio"/> Nunca o menos 1 vez al mes<br><input type="radio"/> 1 a 3 veces mes<br><input type="radio"/> 1 vez semana<br><input type="radio"/> 2 a 4 veces semana<br><input type="radio"/> 5 a 6 veces semana<br><input type="radio"/> 1 vez al día<br><input type="radio"/> 2 a 3 veces al día<br><input type="radio"/> 5 a 6 veces al día<br><input type="radio"/> más 6 veces al día |
| Yogurt desnatado                            | <input type="radio"/> Nunca o menos 1 vez al mes<br><input type="radio"/> 1 a 3 veces mes<br><input type="radio"/> 1 vez semana<br><input type="radio"/> 2 a 4 veces semana<br><input type="radio"/> 5 a 6 veces semana<br><input checked="" type="radio"/> 1 vez al día<br><input type="radio"/> 2 a 3 veces al día<br><input type="radio"/> 5 a 6 veces al día<br><input type="radio"/> más 6 veces al día |
| 100g requesón o queso blando o queso fresco | <input checked="" type="radio"/> Nunca o menos 1 vez al mes<br><input type="radio"/> 1 a 3 veces mes<br><input type="radio"/> 1 vez semana<br><input type="radio"/> 2 a 4 veces semana<br><input type="radio"/> 5 a 6 veces semana<br><input type="radio"/> 1 vez al día<br><input type="radio"/> 2 a 3 veces al día<br><input type="radio"/> 5 a 6 veces al día<br><input type="radio"/> más 6 veces al día |
| queso curado o semicurado o cremoso         | <input type="radio"/> Nunca o menos 1 vez al mes<br><input type="radio"/> 1 a 3 veces mes<br><input type="radio"/> 1 vez semana<br><input type="radio"/> 2 a 4 veces semana<br><input type="radio"/> 5 a 6 veces semana<br><input checked="" type="radio"/> 1 vez al día<br><input type="radio"/> 2 a 3 veces al día<br><input type="radio"/> 5 a 6 veces al día<br><input type="radio"/> más 6 veces al día |
| natillas flan pudding                       | <input checked="" type="radio"/> Nunca o menos 1 vez al mes<br><input type="radio"/> 1 a 3 veces mes<br><input type="radio"/> 1 vez semana<br><input type="radio"/> 2 a 4 veces semana<br><input type="radio"/> 5 a 6 veces semana<br><input type="radio"/> 1 vez al día<br><input type="radio"/> 2 a 3 veces al día<br><input type="radio"/> 5 a 6 veces al día<br><input type="radio"/> más 6 veces al día |
| Helado                                      | <input checked="" type="radio"/> Nunca o menos 1 vez al mes<br><input type="radio"/> 1 a 3 veces mes<br><input type="radio"/> 1 vez semana<br><input type="radio"/> 2 a 4 veces semana<br><input type="radio"/> 5 a 6 veces semana<br><input type="radio"/> 1 vez al día<br><input type="radio"/> 2 a 3 veces al día<br><input type="radio"/> 5 a 6 veces al día<br><input type="radio"/> más 6 veces al día |

|                                      |                                                                                                                                                                                                                                                                                                                                                                                                              |
|--------------------------------------|--------------------------------------------------------------------------------------------------------------------------------------------------------------------------------------------------------------------------------------------------------------------------------------------------------------------------------------------------------------------------------------------------------------|
| huevo                                | <input type="radio"/> Nunca o menos 1 vez al mes<br><input type="radio"/> 1 a 3 veces mes<br><input type="radio"/> 1 vez semana<br><input checked="" type="radio"/> 2 a 4 veces semana<br><input type="radio"/> 5 a 6 veces semana<br><input type="radio"/> 1 vez al día<br><input type="radio"/> 2 a 3 veces al día<br><input type="radio"/> 5 a 6 veces al día<br><input type="radio"/> más 6 veces al día |
| Pollo con piel                       | <input checked="" type="radio"/> Nunca o menos 1 vez al mes<br><input type="radio"/> 1 a 3 veces mes<br><input type="radio"/> 1 vez semana<br><input type="radio"/> 2 a 4 veces semana<br><input type="radio"/> 5 a 6 veces semana<br><input type="radio"/> 1 vez al día<br><input type="radio"/> 2 a 3 veces al día<br><input type="radio"/> 5 a 6 veces al día<br><input type="radio"/> más 6 veces al día |
| pollo sin piel                       | <input type="radio"/> Nunca o menos 1 vez al mes<br><input type="radio"/> 1 a 3 veces mes<br><input type="radio"/> 1 vez semana<br><input type="radio"/> 2 a 4 veces semana<br><input checked="" type="radio"/> 5 a 6 veces semana<br><input type="radio"/> 1 vez al día<br><input type="radio"/> 2 a 3 veces al día<br><input type="radio"/> 5 a 6 veces al día<br><input type="radio"/> más 6 veces al día |
| Ternera o cerdo o cordero            | <input type="radio"/> Nunca o menos 1 vez al mes<br><input type="radio"/> 1 a 3 veces mes<br><input type="radio"/> 1 vez semana<br><input checked="" type="radio"/> 2 a 4 veces semana<br><input type="radio"/> 5 a 6 veces semana<br><input type="radio"/> 1 vez al día<br><input type="radio"/> 2 a 3 veces al día<br><input type="radio"/> 5 a 6 veces al día<br><input type="radio"/> más 6 veces al día |
| carne caza: Conejo o codorniz o pato | <input checked="" type="radio"/> Nunca o menos 1 vez al mes<br><input type="radio"/> 1 a 3 veces mes<br><input type="radio"/> 1 vez semana<br><input type="radio"/> 2 a 4 veces semana<br><input type="radio"/> 5 a 6 veces semana<br><input type="radio"/> 1 vez al día<br><input type="radio"/> 2 a 3 veces al día<br><input type="radio"/> 5 a 6 veces al día<br><input type="radio"/> más 6 veces al día |
| Hígado de ternera o cerdo o pollo    | <input checked="" type="radio"/> Nunca o menos 1 vez al mes<br><input type="radio"/> 1 a 3 veces mes<br><input type="radio"/> 1 vez semana<br><input type="radio"/> 2 a 4 veces semana<br><input type="radio"/> 5 a 6 veces semana<br><input type="radio"/> 1 vez al día<br><input type="radio"/> 2 a 3 veces al día<br><input type="radio"/> 5 a 6 veces al día<br><input type="radio"/> más 6 veces al día |

|                     |                                                                                                                                                                                                                                                                                                                                                                                                              |
|---------------------|--------------------------------------------------------------------------------------------------------------------------------------------------------------------------------------------------------------------------------------------------------------------------------------------------------------------------------------------------------------------------------------------------------------|
| Vísceras            | <input checked="" type="radio"/> Nunca o menos 1 vez al mes<br><input type="radio"/> 1 a 3 veces mes<br><input type="radio"/> 1 vez semana<br><input type="radio"/> 2 a 4 veces semana<br><input type="radio"/> 5 a 6 veces semana<br><input type="radio"/> 1 vez al día<br><input type="radio"/> 2 a 3 veces al día<br><input type="radio"/> 5 a 6 veces al día<br><input type="radio"/> más 6 veces al día |
| Embutido            | <input type="radio"/> Nunca o menos 1 vez al mes<br><input type="radio"/> 1 a 3 veces mes<br><input type="radio"/> 1 vez semana<br><input type="radio"/> 2 a 4 veces semana<br><input type="radio"/> 5 a 6 veces semana<br><input checked="" type="radio"/> 1 vez al día<br><input type="radio"/> 2 a 3 veces al día<br><input type="radio"/> 5 a 6 veces al día<br><input type="radio"/> más 6 veces al día |
| Salchicha o similar | <input checked="" type="radio"/> Nunca o menos 1 vez al mes<br><input type="radio"/> 1 a 3 veces mes<br><input type="radio"/> 1 vez semana<br><input type="radio"/> 2 a 4 veces semana<br><input type="radio"/> 5 a 6 veces semana<br><input type="radio"/> 1 vez al día<br><input type="radio"/> 2 a 3 veces al día<br><input type="radio"/> 5 a 6 veces al día<br><input type="radio"/> más 6 veces al día |
| Pate o foiegras     | <input checked="" type="radio"/> Nunca o menos 1 vez al mes<br><input type="radio"/> 1 a 3 veces mes<br><input type="radio"/> 1 vez semana<br><input type="radio"/> 2 a 4 veces semana<br><input type="radio"/> 5 a 6 veces semana<br><input type="radio"/> 1 vez al día<br><input type="radio"/> 2 a 3 veces al día<br><input type="radio"/> 5 a 6 veces al día<br><input type="radio"/> más 6 veces al día |
| Hamburguesa         | <input type="radio"/> Nunca o menos 1 vez al mes<br><input type="radio"/> 1 a 3 veces mes<br><input type="radio"/> 1 vez semana<br><input checked="" type="radio"/> 2 a 4 veces semana<br><input type="radio"/> 5 a 6 veces semana<br><input type="radio"/> 1 vez al día<br><input type="radio"/> 2 a 3 veces al día<br><input type="radio"/> 5 a 6 veces al día<br><input type="radio"/> más 6 veces al día |
| tocino o bacon      | <input checked="" type="radio"/> Nunca o menos 1 vez al mes<br><input type="radio"/> 1 a 3 veces mes<br><input type="radio"/> 1 vez semana<br><input type="radio"/> 2 a 4 veces semana<br><input type="radio"/> 5 a 6 veces semana<br><input type="radio"/> 1 vez al día<br><input type="radio"/> 2 a 3 veces al día<br><input type="radio"/> 5 a 6 veces al día<br><input type="radio"/> más 6 veces al día |

|                        |                                                                                                                                                                                                                                                                                                                                                                                                              |
|------------------------|--------------------------------------------------------------------------------------------------------------------------------------------------------------------------------------------------------------------------------------------------------------------------------------------------------------------------------------------------------------------------------------------------------------|
| Pescado frito          | <input checked="" type="radio"/> Nunca o menos 1 vez al mes<br><input type="radio"/> 1 a 3 veces mes<br><input type="radio"/> 1 vez semana<br><input type="radio"/> 2 a 4 veces semana<br><input type="radio"/> 5 a 6 veces semana<br><input type="radio"/> 1 vez al día<br><input type="radio"/> 2 a 3 veces al día<br><input type="radio"/> 5 a 6 veces al día<br><input type="radio"/> más 6 veces al día |
| pescado hervido blanco | <input type="radio"/> Nunca o menos 1 vez al mes<br><input type="radio"/> 1 a 3 veces mes<br><input type="radio"/> 1 vez semana<br><input checked="" type="radio"/> 2 a 4 veces semana<br><input type="radio"/> 5 a 6 veces semana<br><input type="radio"/> 1 vez al día<br><input type="radio"/> 2 a 3 veces al día<br><input type="radio"/> 5 a 6 veces al día<br><input type="radio"/> más 6 veces al día |
| pescado hervido azul   | <input checked="" type="radio"/> Nunca o menos 1 vez al mes<br><input type="radio"/> 1 a 3 veces mes<br><input type="radio"/> 1 vez semana<br><input type="radio"/> 2 a 4 veces semana<br><input type="radio"/> 5 a 6 veces semana<br><input type="radio"/> 1 vez al día<br><input type="radio"/> 2 a 3 veces al día<br><input type="radio"/> 5 a 6 veces al día<br><input type="radio"/> más 6 veces al día |
| otros pescado azul     | <input checked="" type="radio"/> Nunca o menos 1 vez al mes<br><input type="radio"/> 1 a 3 veces mes<br><input type="radio"/> 1 vez semana<br><input type="radio"/> 2 a 4 veces semana<br><input type="radio"/> 5 a 6 veces semana<br><input type="radio"/> 1 vez al día<br><input type="radio"/> 2 a 3 veces al día<br><input type="radio"/> 5 a 6 veces al día<br><input type="radio"/> más 6 veces al día |
| atun conserva          | <input type="radio"/> Nunca o menos 1 vez al mes<br><input type="radio"/> 1 a 3 veces mes<br><input type="radio"/> 1 vez semana<br><input checked="" type="radio"/> 2 a 4 veces semana<br><input type="radio"/> 5 a 6 veces semana<br><input type="radio"/> 1 vez al día<br><input type="radio"/> 2 a 3 veces al día<br><input type="radio"/> 5 a 6 veces al día<br><input type="radio"/> más 6 veces al día |
| sardina conserva       | <input checked="" type="radio"/> Nunca o menos 1 vez al mes<br><input type="radio"/> 1 a 3 veces mes<br><input type="radio"/> 1 vez semana<br><input type="radio"/> 2 a 4 veces semana<br><input type="radio"/> 5 a 6 veces semana<br><input type="radio"/> 1 vez al día<br><input type="radio"/> 2 a 3 veces al día<br><input type="radio"/> 5 a 6 veces al día<br><input type="radio"/> más 6 veces al día |

|                                         |                                                                                                                                                                                                                                                                                                                                                                                                              |
|-----------------------------------------|--------------------------------------------------------------------------------------------------------------------------------------------------------------------------------------------------------------------------------------------------------------------------------------------------------------------------------------------------------------------------------------------------------------|
| pescado ahumado                         | <input checked="" type="radio"/> Nunca o menos 1 vez al mes<br><input type="radio"/> 1 a 3 veces mes<br><input type="radio"/> 1 vez semana<br><input type="radio"/> 2 a 4 veces semana<br><input type="radio"/> 5 a 6 veces semana<br><input type="radio"/> 1 vez al día<br><input type="radio"/> 2 a 3 veces al día<br><input type="radio"/> 5 a 6 veces al día<br><input type="radio"/> más 6 veces al día |
| almejas o mejillones o ostras unos 100g | <input type="radio"/> Nunca o menos 1 vez al mes<br><input type="radio"/> 1 a 3 veces mes<br><input type="radio"/> 1 vez semana<br><input checked="" type="radio"/> 2 a 4 veces semana<br><input type="radio"/> 5 a 6 veces semana<br><input type="radio"/> 1 vez al día<br><input type="radio"/> 2 a 3 veces al día<br><input type="radio"/> 5 a 6 veces al día<br><input type="radio"/> más 6 veces al día |
| calamar o chipiron o sepia unos 100g    | <input type="radio"/> Nunca o menos 1 vez al mes<br><input type="radio"/> 1 a 3 veces mes<br><input type="radio"/> 1 vez semana<br><input type="radio"/> 2 a 4 veces semana<br><input type="radio"/> 5 a 6 veces semana<br><input type="radio"/> 1 vez al día<br><input type="radio"/> 2 a 3 veces al día<br><input type="radio"/> 5 a 6 veces al día<br><input type="radio"/> más 6 veces al día            |
| marisco unos 100g                       | <input type="radio"/> Nunca o menos 1 vez al mes<br><input type="radio"/> 1 a 3 veces mes<br><input checked="" type="radio"/> 1 vez semana<br><input type="radio"/> 2 a 4 veces semana<br><input type="radio"/> 5 a 6 veces semana<br><input type="radio"/> 1 vez al día<br><input type="radio"/> 2 a 3 veces al día<br><input type="radio"/> 5 a 6 veces al día<br><input type="radio"/> más 6 veces al día |
| Espinacas o acelgas cocinadas           | <input checked="" type="radio"/> Nunca o menos 1 vez al mes<br><input type="radio"/> 1 a 3 veces mes<br><input type="radio"/> 1 vez semana<br><input type="radio"/> 2 a 4 veces semana<br><input type="radio"/> 5 a 6 veces semana<br><input type="radio"/> 1 vez al día<br><input type="radio"/> 2 a 3 veces al día<br><input type="radio"/> 5 a 6 veces al día<br><input type="radio"/> más 6 veces al día |
| Col o coliflor o brocoli cocinado       | <input type="radio"/> Nunca o menos 1 vez al mes<br><input type="radio"/> 1 a 3 veces mes<br><input checked="" type="radio"/> 1 vez semana<br><input type="radio"/> 2 a 4 veces semana<br><input type="radio"/> 5 a 6 veces semana<br><input type="radio"/> 1 vez al día<br><input type="radio"/> 2 a 3 veces al día<br><input type="radio"/> 5 a 6 veces al día<br><input type="radio"/> más 6 veces al día |

---

Lechuga o endivia o escarola

- ☐ Nunca o menos 1 vez al mes  
☐ 1 a 3 veces mes  
☒ 1 vez semana  
☐ 2 a 4 veces semana  
☐ 5 a 6 veces semana  
☐ 1 vez al día  
☐ 2 a 3 veces al día  
☐ 5 a 6 veces al día  
☐ más 6 veces al día

---

tomate ensalada

- ☐ Nunca o menos 1 vez al mes  
☐ 1 a 3 veces mes  
☐ 1 vez semana  
☒ 2 a 4 veces semana  
☐ 5 a 6 veces semana  
☐ 1 vez al día  
☐ 2 a 3 veces al día  
☐ 5 a 6 veces al día  
☐ más 6 veces al día

---

cebolla

- ☐ Nunca o menos 1 vez al mes  
☐ 1 a 3 veces mes  
☐ 1 vez semana  
☐ 2 a 4 veces semana  
☒ 5 a 6 veces semana  
☐ 1 vez al día  
☐ 2 a 3 veces al día  
☐ 5 a 6 veces al día  
☐ más 6 veces al día

---

Zanahoria o calabaza

- ☐ Nunca o menos 1 vez al mes  
☐ 1 a 3 veces mes  
☐ 1 vez semana  
☒ 2 a 4 veces semana  
☐ 5 a 6 veces semana  
☐ 1 vez al día  
☐ 2 a 3 veces al día  
☐ 5 a 6 veces al día  
☐ más 6 veces al día

---

Judías verdes

- ☐ Nunca o menos 1 vez al mes  
☐ 1 a 3 veces mes  
☐ 1 vez semana  
☐ 2 a 4 veces semana  
☒ 5 a 6 veces semana  
☐ 1 vez al día  
☐ 2 a 3 veces al día  
☐ 5 a 6 veces al día  
☐ más 6 veces al día

---

Berenjena o calabacin o pepino

- ☐ Nunca o menos 1 vez al mes  
☐ 1 a 3 veces mes  
☐ 1 vez semana  
☐ 2 a 4 veces semana  
☒ 5 a 6 veces semana  
☐ 1 vez al día  
☐ 2 a 3 veces al día  
☐ 5 a 6 veces al día  
☐ más 6 veces al día

---

|          |                                                                                                                                                                                                                                                                                                                                                                                                              |
|----------|--------------------------------------------------------------------------------------------------------------------------------------------------------------------------------------------------------------------------------------------------------------------------------------------------------------------------------------------------------------------------------------------------------------|
| pimiento | <input type="radio"/> Nunca o menos 1 vez al mes<br><input type="radio"/> 1 a 3 veces mes<br><input type="radio"/> 1 vez semana<br><input type="radio"/> 2 a 4 veces semana<br><input checked="" type="radio"/> 5 a 6 veces semana<br><input type="radio"/> 1 vez al día<br><input type="radio"/> 2 a 3 veces al día<br><input type="radio"/> 5 a 6 veces al día<br><input type="radio"/> más 6 veces al día |
|----------|--------------------------------------------------------------------------------------------------------------------------------------------------------------------------------------------------------------------------------------------------------------------------------------------------------------------------------------------------------------------------------------------------------------|

---

|           |                                                                                                                                                                                                                                                                                                                                                                                                              |
|-----------|--------------------------------------------------------------------------------------------------------------------------------------------------------------------------------------------------------------------------------------------------------------------------------------------------------------------------------------------------------------------------------------------------------------|
| alcachofa | <input type="radio"/> Nunca o menos 1 vez al mes<br><input type="radio"/> 1 a 3 veces mes<br><input type="radio"/> 1 vez semana<br><input checked="" type="radio"/> 2 a 4 veces semana<br><input type="radio"/> 5 a 6 veces semana<br><input type="radio"/> 1 vez al día<br><input type="radio"/> 2 a 3 veces al día<br><input type="radio"/> 5 a 6 veces al día<br><input type="radio"/> más 6 veces al día |
|-----------|--------------------------------------------------------------------------------------------------------------------------------------------------------------------------------------------------------------------------------------------------------------------------------------------------------------------------------------------------------------------------------------------------------------|

---

|            |                                                                                                                                                                                                                                                                                                                                                                                                              |
|------------|--------------------------------------------------------------------------------------------------------------------------------------------------------------------------------------------------------------------------------------------------------------------------------------------------------------------------------------------------------------------------------------------------------------|
| espárragos | <input checked="" type="radio"/> Nunca o menos 1 vez al mes<br><input type="radio"/> 1 a 3 veces mes<br><input type="radio"/> 1 vez semana<br><input type="radio"/> 2 a 4 veces semana<br><input type="radio"/> 5 a 6 veces semana<br><input type="radio"/> 1 vez al día<br><input type="radio"/> 2 a 3 veces al día<br><input type="radio"/> 5 a 6 veces al día<br><input type="radio"/> más 6 veces al día |
|------------|--------------------------------------------------------------------------------------------------------------------------------------------------------------------------------------------------------------------------------------------------------------------------------------------------------------------------------------------------------------------------------------------------------------|

---

|              |                                                                                                                                                                                                                                                                                                                                                                                                              |
|--------------|--------------------------------------------------------------------------------------------------------------------------------------------------------------------------------------------------------------------------------------------------------------------------------------------------------------------------------------------------------------------------------------------------------------|
| maíz hervido | <input type="radio"/> Nunca o menos 1 vez al mes<br><input type="radio"/> 1 a 3 veces mes<br><input type="radio"/> 1 vez semana<br><input checked="" type="radio"/> 2 a 4 veces semana<br><input type="radio"/> 5 a 6 veces semana<br><input type="radio"/> 1 vez al día<br><input type="radio"/> 2 a 3 veces al día<br><input type="radio"/> 5 a 6 veces al día<br><input type="radio"/> más 6 veces al día |
|--------------|--------------------------------------------------------------------------------------------------------------------------------------------------------------------------------------------------------------------------------------------------------------------------------------------------------------------------------------------------------------------------------------------------------------|

---

|           |                                                                                                                                                                                                                                                                                                                                                                                                              |
|-----------|--------------------------------------------------------------------------------------------------------------------------------------------------------------------------------------------------------------------------------------------------------------------------------------------------------------------------------------------------------------------------------------------------------------|
| legumbres | <input type="radio"/> Nunca o menos 1 vez al mes<br><input type="radio"/> 1 a 3 veces mes<br><input type="radio"/> 1 vez semana<br><input checked="" type="radio"/> 2 a 4 veces semana<br><input type="radio"/> 5 a 6 veces semana<br><input type="radio"/> 1 vez al día<br><input type="radio"/> 2 a 3 veces al día<br><input type="radio"/> 5 a 6 veces al día<br><input type="radio"/> más 6 veces al día |
|-----------|--------------------------------------------------------------------------------------------------------------------------------------------------------------------------------------------------------------------------------------------------------------------------------------------------------------------------------------------------------------------------------------------------------------|

---

|                       |                                                                                                                                                                                                                                                                                                                                                                                                              |
|-----------------------|--------------------------------------------------------------------------------------------------------------------------------------------------------------------------------------------------------------------------------------------------------------------------------------------------------------------------------------------------------------------------------------------------------------|
| naranjas o mandarinas | <input type="radio"/> Nunca o menos 1 vez al mes<br><input type="radio"/> 1 a 3 veces mes<br><input type="radio"/> 1 vez semana<br><input type="radio"/> 2 a 4 veces semana<br><input type="radio"/> 5 a 6 veces semana<br><input checked="" type="radio"/> 1 vez al día<br><input type="radio"/> 2 a 3 veces al día<br><input type="radio"/> 5 a 6 veces al día<br><input type="radio"/> más 6 veces al día |
|-----------------------|--------------------------------------------------------------------------------------------------------------------------------------------------------------------------------------------------------------------------------------------------------------------------------------------------------------------------------------------------------------------------------------------------------------|

---

|                       |                                                                                                                                                                                                                                                                                                                                                                                                              |
|-----------------------|--------------------------------------------------------------------------------------------------------------------------------------------------------------------------------------------------------------------------------------------------------------------------------------------------------------------------------------------------------------------------------------------------------------|
| zum natural fruta     | <input type="radio"/> Nunca o menos 1 vez al mes<br><input type="radio"/> 1 a 3 veces mes<br><input checked="" type="radio"/> 1 vez semana<br><input type="radio"/> 2 a 4 veces semana<br><input type="radio"/> 5 a 6 veces semana<br><input type="radio"/> 1 vez al día<br><input type="radio"/> 2 a 3 veces al día<br><input type="radio"/> 5 a 6 veces al día<br><input type="radio"/> más 6 veces al día |
| platano               | <input type="radio"/> Nunca o menos 1 vez al mes<br><input type="radio"/> 1 a 3 veces mes<br><input type="radio"/> 1 vez semana<br><input checked="" type="radio"/> 2 a 4 veces semana<br><input type="radio"/> 5 a 6 veces semana<br><input type="radio"/> 1 vez al día<br><input type="radio"/> 2 a 3 veces al día<br><input type="radio"/> 5 a 6 veces al día<br><input type="radio"/> más 6 veces al día |
| manzana o pera        | <input type="radio"/> Nunca o menos 1 vez al mes<br><input type="radio"/> 1 a 3 veces mes<br><input type="radio"/> 1 vez semana<br><input type="radio"/> 2 a 4 veces semana<br><input checked="" type="radio"/> 5 a 6 veces semana<br><input type="radio"/> 1 vez al día<br><input type="radio"/> 2 a 3 veces al día<br><input type="radio"/> 5 a 6 veces al día<br><input type="radio"/> más 6 veces al día |
| melocotón o nectarina | <input checked="" type="radio"/> Nunca o menos 1 vez al mes<br><input type="radio"/> 1 a 3 veces mes<br><input type="radio"/> 1 vez semana<br><input type="radio"/> 2 a 4 veces semana<br><input type="radio"/> 5 a 6 veces semana<br><input type="radio"/> 1 vez al día<br><input type="radio"/> 2 a 3 veces al día<br><input type="radio"/> 5 a 6 veces al día<br><input type="radio"/> más 6 veces al día |
| sandia o melon        | <input checked="" type="radio"/> Nunca o menos 1 vez al mes<br><input type="radio"/> 1 a 3 veces mes<br><input type="radio"/> 1 vez semana<br><input type="radio"/> 2 a 4 veces semana<br><input type="radio"/> 5 a 6 veces semana<br><input type="radio"/> 1 vez al día<br><input type="radio"/> 2 a 3 veces al día<br><input type="radio"/> 5 a 6 veces al día<br><input type="radio"/> más 6 veces al día |
| uva                   | <input checked="" type="radio"/> Nunca o menos 1 vez al mes<br><input type="radio"/> 1 a 3 veces mes<br><input type="radio"/> 1 vez semana<br><input type="radio"/> 2 a 4 veces semana<br><input type="radio"/> 5 a 6 veces semana<br><input type="radio"/> 1 vez al día<br><input type="radio"/> 2 a 3 veces al día<br><input type="radio"/> 5 a 6 veces al día<br><input type="radio"/> más 6 veces al día |



---

bruna o ciruela

- ☒ Nunca o menos 1 vez al mes  
☐ 1 a 3 veces mes  
☐ 1 vez semana  
☐ 2 a 4 veces semana  
☐ 5 a 6 veces semana  
☐ 1 vez al día  
☐ 2 a 3 veces al día  
☐ 5 a 6 veces al día  
☐ más 6 veces al día

---

kiwi

- ☐ Nunca o menos 1 vez al mes  
☐ 1 a 3 veces mes  
☒ 1 vez semana  
☐ 2 a 4 veces semana  
☐ 5 a 6 veces semana  
☐ 1 vez al día  
☐ 2 a 3 veces al día  
☐ 5 a 6 veces al día  
☐ más 6 veces al día

---

aceituna

- ☒ Nunca o menos 1 vez al mes  
☐ 1 a 3 veces mes  
☐ 1 vez semana  
☐ 2 a 4 veces semana  
☐ 5 a 6 veces semana  
☐ 1 vez al día  
☐ 2 a 3 veces al día  
☐ 5 a 6 veces al día  
☐ más 6 veces al día

---

frutos secos

- ☐ Nunca o menos 1 vez al mes  
☐ 1 a 3 veces mes  
☐ 1 vez semana  
☒ 2 a 4 veces semana  
☐ 5 a 6 veces semana  
☐ 1 vez al día  
☐ 2 a 3 veces al día  
☐ 5 a 6 veces al día  
☐ más 6 veces al día

---

pan blanco

- ☒ Nunca o menos 1 vez al mes  
☐ 1 a 3 veces mes  
☐ 1 vez semana  
☐ 2 a 4 veces semana  
☐ 5 a 6 veces semana  
☐ 1 vez al día  
☐ 2 a 3 veces al día  
☐ 5 a 6 veces al día  
☐ más 6 veces al día

---

pan integral

- ☐ Nunca o menos 1 vez al mes  
☐ 1 a 3 veces mes  
☐ 1 vez semana  
☐ 2 a 4 veces semana  
☐ 5 a 6 veces semana  
☒ 1 vez al día  
☐ 2 a 3 veces al día  
☐ 5 a 6 veces al día  
☐ más 6 veces al día

|                          |                                                                                                                                                                                                                                                                                                                                                                                                              |
|--------------------------|--------------------------------------------------------------------------------------------------------------------------------------------------------------------------------------------------------------------------------------------------------------------------------------------------------------------------------------------------------------------------------------------------------------|
| cereales desayuno        | <input checked="" type="radio"/> Nunca o menos 1 vez al mes<br><input type="radio"/> 1 a 3 veces mes<br><input type="radio"/> 1 vez semana<br><input type="radio"/> 2 a 4 veces semana<br><input type="radio"/> 5 a 6 veces semana<br><input type="radio"/> 1 vez al día<br><input type="radio"/> 2 a 3 veces al día<br><input type="radio"/> 5 a 6 veces al día<br><input type="radio"/> más 6 veces al día |
| patatas fritas           | <input checked="" type="radio"/> Nunca o menos 1 vez al mes<br><input type="radio"/> 1 a 3 veces mes<br><input type="radio"/> 1 vez semana<br><input type="radio"/> 2 a 4 veces semana<br><input type="radio"/> 5 a 6 veces semana<br><input type="radio"/> 1 vez al día<br><input type="radio"/> 2 a 3 veces al día<br><input type="radio"/> 5 a 6 veces al día<br><input type="radio"/> más 6 veces al día |
| patatas cocidas o asadas | <input checked="" type="radio"/> Nunca o menos 1 vez al mes<br><input type="radio"/> 1 a 3 veces mes<br><input type="radio"/> 1 vez semana<br><input type="radio"/> 2 a 4 veces semana<br><input type="radio"/> 5 a 6 veces semana<br><input type="radio"/> 1 vez al día<br><input type="radio"/> 2 a 3 veces al día<br><input type="radio"/> 5 a 6 veces al día<br><input type="radio"/> más 6 veces al día |
| bolsa papas              | <input checked="" type="radio"/> Nunca o menos 1 vez al mes<br><input type="radio"/> 1 a 3 veces mes<br><input type="radio"/> 1 vez semana<br><input type="radio"/> 2 a 4 veces semana<br><input type="radio"/> 5 a 6 veces semana<br><input type="radio"/> 1 vez al día<br><input type="radio"/> 2 a 3 veces al día<br><input type="radio"/> 5 a 6 veces al día<br><input type="radio"/> más 6 veces al día |
| arroz cocinado           | <input checked="" type="radio"/> Nunca o menos 1 vez al mes<br><input type="radio"/> 1 a 3 veces mes<br><input type="radio"/> 1 vez semana<br><input type="radio"/> 2 a 4 veces semana<br><input type="radio"/> 5 a 6 veces semana<br><input type="radio"/> 1 vez al día<br><input type="radio"/> 2 a 3 veces al día<br><input type="radio"/> 5 a 6 veces al día<br><input type="radio"/> más 6 veces al día |
| pasta                    | <input checked="" type="radio"/> Nunca o menos 1 vez al mes<br><input type="radio"/> 1 a 3 veces mes<br><input type="radio"/> 1 vez semana<br><input type="radio"/> 2 a 4 veces semana<br><input type="radio"/> 5 a 6 veces semana<br><input type="radio"/> 1 vez al día<br><input type="radio"/> 2 a 3 veces al día<br><input type="radio"/> 5 a 6 veces al día<br><input type="radio"/> más 6 veces al día |

|                     |                                                                                                                                                                                                                                                                                                                                                                                                              |
|---------------------|--------------------------------------------------------------------------------------------------------------------------------------------------------------------------------------------------------------------------------------------------------------------------------------------------------------------------------------------------------------------------------------------------------------|
| pizza               | <input checked="" type="radio"/> Nunca o menos 1 vez al mes<br><input type="radio"/> 1 a 3 veces mes<br><input type="radio"/> 1 vez semana<br><input type="radio"/> 2 a 4 veces semana<br><input type="radio"/> 5 a 6 veces semana<br><input type="radio"/> 1 vez al día<br><input type="radio"/> 2 a 3 veces al día<br><input type="radio"/> 5 a 6 veces al día<br><input type="radio"/> más 6 veces al día |
| aceite oliva        | <input type="radio"/> Nunca o menos 1 vez al mes<br><input type="radio"/> 1 a 3 veces mes<br><input type="radio"/> 1 vez semana<br><input type="radio"/> 2 a 4 veces semana<br><input type="radio"/> 5 a 6 veces semana<br><input checked="" type="radio"/> 1 vez al día<br><input type="radio"/> 2 a 3 veces al día<br><input type="radio"/> 5 a 6 veces al día<br><input type="radio"/> más 6 veces al día |
| otros aceites       | <input checked="" type="radio"/> Nunca o menos 1 vez al mes<br><input type="radio"/> 1 a 3 veces mes<br><input type="radio"/> 1 vez semana<br><input type="radio"/> 2 a 4 veces semana<br><input type="radio"/> 5 a 6 veces semana<br><input type="radio"/> 1 vez al día<br><input type="radio"/> 2 a 3 veces al día<br><input type="radio"/> 5 a 6 veces al día<br><input type="radio"/> más 6 veces al día |
| margarina           | <input checked="" type="radio"/> Nunca o menos 1 vez al mes<br><input type="radio"/> 1 a 3 veces mes<br><input type="radio"/> 1 vez semana<br><input type="radio"/> 2 a 4 veces semana<br><input type="radio"/> 5 a 6 veces semana<br><input type="radio"/> 1 vez al día<br><input type="radio"/> 2 a 3 veces al día<br><input type="radio"/> 5 a 6 veces al día<br><input type="radio"/> más 6 veces al día |
| mantequilla         | <input checked="" type="radio"/> Nunca o menos 1 vez al mes<br><input type="radio"/> 1 a 3 veces mes<br><input type="radio"/> 1 vez semana<br><input type="radio"/> 2 a 4 veces semana<br><input type="radio"/> 5 a 6 veces semana<br><input type="radio"/> 1 vez al día<br><input type="radio"/> 2 a 3 veces al día<br><input type="radio"/> 5 a 6 veces al día<br><input type="radio"/> más 6 veces al día |
| galletas tipo maria | <input type="radio"/> Nunca o menos 1 vez al mes<br><input type="radio"/> 1 a 3 veces mes<br><input checked="" type="radio"/> 1 vez semana<br><input type="radio"/> 2 a 4 veces semana<br><input type="radio"/> 5 a 6 veces semana<br><input type="radio"/> 1 vez al día<br><input type="radio"/> 2 a 3 veces al día<br><input type="radio"/> 5 a 6 veces al día<br><input type="radio"/> más 6 veces al día |

---

galletas chocolate

- ☐ Nunca o menos 1 vez al mes  
☐ 1 a 3 veces mes  
☒ 1 vez semana  
☐ 2 a 4 veces semana  
☐ 5 a 6 veces semana  
☐ 1 vez al día  
☐ 2 a 3 veces al día  
☐ 5 a 6 veces al día  
☐ más 6 veces al día

---

bolleria

- ☐ Nunca o menos 1 vez al mes  
☐ 1 a 3 veces mes  
☒ 1 vez semana  
☐ 2 a 4 veces semana  
☐ 5 a 6 veces semana  
☐ 1 vez al día  
☐ 2 a 3 veces al día  
☐ 5 a 6 veces al día  
☐ más 6 veces al día

---

chocolate o bombones

- ☐ Nunca o menos 1 vez al mes  
☐ 1 a 3 veces mes  
☒ 1 vez semana  
☐ 2 a 4 veces semana  
☐ 5 a 6 veces semana  
☐ 1 vez al día  
☐ 2 a 3 veces al día  
☐ 5 a 6 veces al día  
☐ más 6 veces al día

---

chocolate polvo o colacao

- ☒ Nunca o menos 1 vez al mes  
☐ 1 a 3 veces mes  
☐ 1 vez semana  
☐ 2 a 4 veces semana  
☐ 5 a 6 veces semana  
☐ 1 vez al día  
☐ 2 a 3 veces al día  
☐ 5 a 6 veces al día  
☐ más 6 veces al día

---

vino tinto

- ☒ Nunca o menos 1 vez al mes  
☐ 1 a 3 veces mes  
☐ 1 vez semana  
☐ 2 a 4 veces semana  
☐ 5 a 6 veces semana  
☐ 1 vez al día  
☐ 2 a 3 veces al día  
☐ 5 a 6 veces al día  
☐ más 6 veces al día

---

vino blanco

- ☒ Nunca o menos 1 vez al mes  
☐ 1 a 3 veces mes  
☐ 1 vez semana  
☐ 2 a 4 veces semana  
☐ 5 a 6 veces semana  
☐ 1 vez al día  
☐ 2 a 3 veces al día  
☐ 5 a 6 veces al día  
☐ más 6 veces al día

|                       |                                                                                                                                                                                                                                                                                                                                                                                                              |
|-----------------------|--------------------------------------------------------------------------------------------------------------------------------------------------------------------------------------------------------------------------------------------------------------------------------------------------------------------------------------------------------------------------------------------------------------|
| vino seco o vermut    | <input checked="" type="radio"/> Nunca o menos 1 vez al mes<br><input type="radio"/> 1 a 3 veces mes<br><input type="radio"/> 1 vez semana<br><input type="radio"/> 2 a 4 veces semana<br><input type="radio"/> 5 a 6 veces semana<br><input type="radio"/> 1 vez al día<br><input type="radio"/> 2 a 3 veces al día<br><input type="radio"/> 5 a 6 veces al día<br><input type="radio"/> más 6 veces al día |
| cerveza               | <input checked="" type="radio"/> Nunca o menos 1 vez al mes<br><input type="radio"/> 1 a 3 veces mes<br><input type="radio"/> 1 vez semana<br><input type="radio"/> 2 a 4 veces semana<br><input type="radio"/> 5 a 6 veces semana<br><input type="radio"/> 1 vez al día<br><input type="radio"/> 2 a 3 veces al día<br><input type="radio"/> 5 a 6 veces al día<br><input type="radio"/> más 6 veces al día |
| cerveza sin alcohol   | <input checked="" type="radio"/> Nunca o menos 1 vez al mes<br><input type="radio"/> 1 a 3 veces mes<br><input type="radio"/> 1 vez semana<br><input type="radio"/> 2 a 4 veces semana<br><input type="radio"/> 5 a 6 veces semana<br><input type="radio"/> 1 vez al día<br><input type="radio"/> 2 a 3 veces al día<br><input type="radio"/> 5 a 6 veces al día<br><input type="radio"/> más 6 veces al día |
| licores               | <input checked="" type="radio"/> Nunca o menos 1 vez al mes<br><input type="radio"/> 1 a 3 veces mes<br><input type="radio"/> 1 vez semana<br><input type="radio"/> 2 a 4 veces semana<br><input type="radio"/> 5 a 6 veces semana<br><input type="radio"/> 1 vez al día<br><input type="radio"/> 2 a 3 veces al día<br><input type="radio"/> 5 a 6 veces al día<br><input type="radio"/> más 6 veces al día |
| ginebra o ron o vodka | <input checked="" type="radio"/> Nunca o menos 1 vez al mes<br><input type="radio"/> 1 a 3 veces mes<br><input type="radio"/> 1 vez semana<br><input type="radio"/> 2 a 4 veces semana<br><input type="radio"/> 5 a 6 veces semana<br><input type="radio"/> 1 vez al día<br><input type="radio"/> 2 a 3 veces al día<br><input type="radio"/> 5 a 6 veces al día<br><input type="radio"/> más 6 veces al día |
| refresco normal       | <input type="radio"/> Nunca o menos 1 vez al mes<br><input type="radio"/> 1 a 3 veces mes<br><input checked="" type="radio"/> 1 vez semana<br><input type="radio"/> 2 a 4 veces semana<br><input type="radio"/> 5 a 6 veces semana<br><input type="radio"/> 1 vez al día<br><input type="radio"/> 2 a 3 veces al día<br><input type="radio"/> 5 a 6 veces al día<br><input type="radio"/> más 6 veces al día |

|                          |                                                                                                                                                                                                                                                                                                                                                                                                              |
|--------------------------|--------------------------------------------------------------------------------------------------------------------------------------------------------------------------------------------------------------------------------------------------------------------------------------------------------------------------------------------------------------------------------------------------------------|
| refresco sin azúcar      | <input checked="" type="radio"/> Nunca o menos 1 vez al mes<br><input type="radio"/> 1 a 3 veces mes<br><input type="radio"/> 1 vez semana<br><input type="radio"/> 2 a 4 veces semana<br><input type="radio"/> 5 a 6 veces semana<br><input type="radio"/> 1 vez al día<br><input type="radio"/> 2 a 3 veces al día<br><input type="radio"/> 5 a 6 veces al día<br><input type="radio"/> más 6 veces al día |
| Agua del grifo           | <input checked="" type="radio"/> Nunca o menos 1 vez al mes<br><input type="radio"/> 1 a 3 veces mes<br><input type="radio"/> 1 vez semana<br><input type="radio"/> 2 a 4 veces semana<br><input type="radio"/> 5 a 6 veces semana<br><input type="radio"/> 1 vez al día<br><input type="radio"/> 2 a 3 veces al día<br><input type="radio"/> 5 a 6 veces al día<br><input type="radio"/> más 6 veces al día |
| agua embotellada sin gas | <input type="radio"/> Nunca o menos 1 vez al mes<br><input type="radio"/> 1 a 3 veces mes<br><input type="radio"/> 1 vez semana<br><input type="radio"/> 2 a 4 veces semana<br><input type="radio"/> 5 a 6 veces semana<br><input type="radio"/> 1 vez al día<br><input type="radio"/> 2 a 3 veces al día<br><input type="radio"/> 5 a 6 veces al día<br><input checked="" type="radio"/> más 6 veces al día |
| agua embotellada con gas | <input checked="" type="radio"/> Nunca o menos 1 vez al mes<br><input type="radio"/> 1 a 3 veces mes<br><input type="radio"/> 1 vez semana<br><input type="radio"/> 2 a 4 veces semana<br><input type="radio"/> 5 a 6 veces semana<br><input type="radio"/> 1 vez al día<br><input type="radio"/> 2 a 3 veces al día<br><input type="radio"/> 5 a 6 veces al día<br><input type="radio"/> más 6 veces al día |
| zumو frutas embasado     | <input type="radio"/> Nunca o menos 1 vez al mes<br><input type="radio"/> 1 a 3 veces mes<br><input checked="" type="radio"/> 1 vez semana<br><input type="radio"/> 2 a 4 veces semana<br><input type="radio"/> 5 a 6 veces semana<br><input type="radio"/> 1 vez al día<br><input type="radio"/> 2 a 3 veces al día<br><input type="radio"/> 5 a 6 veces al día<br><input type="radio"/> más 6 veces al día |
| cafe                     | <input checked="" type="radio"/> Nunca o menos 1 vez al mes<br><input type="radio"/> 1 a 3 veces mes<br><input type="radio"/> 1 vez semana<br><input type="radio"/> 2 a 4 veces semana<br><input type="radio"/> 5 a 6 veces semana<br><input type="radio"/> 1 vez al día<br><input type="radio"/> 2 a 3 veces al día<br><input type="radio"/> 5 a 6 veces al día<br><input type="radio"/> más 6 veces al día |

|                       |                                                                                                                                                                                                                                                                                                                                                                                                              |
|-----------------------|--------------------------------------------------------------------------------------------------------------------------------------------------------------------------------------------------------------------------------------------------------------------------------------------------------------------------------------------------------------------------------------------------------------|
| cafe descafeinado     | <input checked="" type="radio"/> Nunca o menos 1 vez al mes<br><input type="radio"/> 1 a 3 veces mes<br><input type="radio"/> 1 vez semana<br><input type="radio"/> 2 a 4 veces semana<br><input type="radio"/> 5 a 6 veces semana<br><input type="radio"/> 1 vez al día<br><input type="radio"/> 2 a 3 veces al día<br><input type="radio"/> 5 a 6 veces al día<br><input type="radio"/> más 6 veces al día |
| te o infusión         | <input type="radio"/> Nunca o menos 1 vez al mes<br><input type="radio"/> 1 a 3 veces mes<br><input type="radio"/> 1 vez semana<br><input type="radio"/> 2 a 4 veces semana<br><input type="radio"/> 5 a 6 veces semana<br><input checked="" type="radio"/> 1 vez al día<br><input type="radio"/> 2 a 3 veces al día<br><input type="radio"/> 5 a 6 veces al día<br><input type="radio"/> más 6 veces al día |
| sopa o puré verduras  | <input type="radio"/> Nunca o menos 1 vez al mes<br><input type="radio"/> 1 a 3 veces mes<br><input type="radio"/> 1 vez semana<br><input checked="" type="radio"/> 2 a 4 veces semana<br><input type="radio"/> 5 a 6 veces semana<br><input type="radio"/> 1 vez al día<br><input type="radio"/> 2 a 3 veces al día<br><input type="radio"/> 5 a 6 veces al día<br><input type="radio"/> más 6 veces al día |
| croquetas pollo jamón | <input checked="" type="radio"/> Nunca o menos 1 vez al mes<br><input type="radio"/> 1 a 3 veces mes<br><input type="radio"/> 1 vez semana<br><input type="radio"/> 2 a 4 veces semana<br><input type="radio"/> 5 a 6 veces semana<br><input type="radio"/> 1 vez al día<br><input type="radio"/> 2 a 3 veces al día<br><input type="radio"/> 5 a 6 veces al día<br><input type="radio"/> más 6 veces al día |
| croquetas pescado     | <input checked="" type="radio"/> Nunca o menos 1 vez al mes<br><input type="radio"/> 1 a 3 veces mes<br><input type="radio"/> 1 vez semana<br><input type="radio"/> 2 a 4 veces semana<br><input type="radio"/> 5 a 6 veces semana<br><input type="radio"/> 1 vez al día<br><input type="radio"/> 2 a 3 veces al día<br><input type="radio"/> 5 a 6 veces al día<br><input type="radio"/> más 6 veces al día |
| mayonesa              | <input checked="" type="radio"/> Nunca o menos 1 vez al mes<br><input type="radio"/> 1 a 3 veces mes<br><input type="radio"/> 1 vez semana<br><input type="radio"/> 2 a 4 veces semana<br><input type="radio"/> 5 a 6 veces semana<br><input type="radio"/> 1 vez al día<br><input type="radio"/> 2 a 3 veces al día<br><input type="radio"/> 5 a 6 veces al día<br><input type="radio"/> más 6 veces al día |

|                  |                                                                                                                                                                                                                                                                                                                                                                                                              |
|------------------|--------------------------------------------------------------------------------------------------------------------------------------------------------------------------------------------------------------------------------------------------------------------------------------------------------------------------------------------------------------------------------------------------------------|
| salsa tomate     | <input checked="" type="radio"/> Nunca o menos 1 vez al mes<br><input type="radio"/> 1 a 3 veces mes<br><input type="radio"/> 1 vez semana<br><input type="radio"/> 2 a 4 veces semana<br><input type="radio"/> 5 a 6 veces semana<br><input type="radio"/> 1 vez al día<br><input type="radio"/> 2 a 3 veces al día<br><input type="radio"/> 5 a 6 veces al día<br><input type="radio"/> más 6 veces al día |
| ketchup          | <input type="radio"/> Nunca o menos 1 vez al mes<br><input type="radio"/> 1 a 3 veces mes<br><input checked="" type="radio"/> 1 vez semana<br><input type="radio"/> 2 a 4 veces semana<br><input type="radio"/> 5 a 6 veces semana<br><input type="radio"/> 1 vez al día<br><input type="radio"/> 2 a 3 veces al día<br><input type="radio"/> 5 a 6 veces al día<br><input type="radio"/> más 6 veces al día |
| sal              | <input checked="" type="radio"/> Nunca o menos 1 vez al mes<br><input type="radio"/> 1 a 3 veces mes<br><input type="radio"/> 1 vez semana<br><input type="radio"/> 2 a 4 veces semana<br><input type="radio"/> 5 a 6 veces semana<br><input type="radio"/> 1 vez al día<br><input type="radio"/> 2 a 3 veces al día<br><input type="radio"/> 5 a 6 veces al día<br><input type="radio"/> más 6 veces al día |
| ajo              | <input type="radio"/> Nunca o menos 1 vez al mes<br><input type="radio"/> 1 a 3 veces mes<br><input type="radio"/> 1 vez semana<br><input checked="" type="radio"/> 2 a 4 veces semana<br><input type="radio"/> 5 a 6 veces semana<br><input type="radio"/> 1 vez al día<br><input type="radio"/> 2 a 3 veces al día<br><input type="radio"/> 5 a 6 veces al día<br><input type="radio"/> más 6 veces al día |
| mermelada o miel | <input checked="" type="radio"/> Nunca o menos 1 vez al mes<br><input type="radio"/> 1 a 3 veces mes<br><input type="radio"/> 1 vez semana<br><input type="radio"/> 2 a 4 veces semana<br><input type="radio"/> 5 a 6 veces semana<br><input type="radio"/> 1 vez al día<br><input type="radio"/> 2 a 3 veces al día<br><input type="radio"/> 5 a 6 veces al día<br><input type="radio"/> más 6 veces al día |
| azúcar           | <input type="radio"/> Nunca o menos 1 vez al mes<br><input type="radio"/> 1 a 3 veces mes<br><input type="radio"/> 1 vez semana<br><input type="radio"/> 2 a 4 veces semana<br><input type="radio"/> 5 a 6 veces semana<br><input checked="" type="radio"/> 1 vez al día<br><input type="radio"/> 2 a 3 veces al día<br><input type="radio"/> 5 a 6 veces al día<br><input type="radio"/> más 6 veces al día |



|                                       |                                                                                                                                                                                                                                                                                                                                                                                                                                                                                                                               |
|---------------------------------------|-------------------------------------------------------------------------------------------------------------------------------------------------------------------------------------------------------------------------------------------------------------------------------------------------------------------------------------------------------------------------------------------------------------------------------------------------------------------------------------------------------------------------------|
| Otro alimento                         |                                                                                                                                                                                                                                                                                                                                                                                                                                                                                                                               |
| suplementos vitamínicos               | <input type="radio"/> si<br><input checked="" type="radio"/> no                                                                                                                                                                                                                                                                                                                                                                                                                                                               |
| suplementos vitamínicos               |                                                                                                                                                                                                                                                                                                                                                                                                                                                                                                                               |
| dieta previa                          | <input type="radio"/> si<br><input checked="" type="radio"/> no                                                                                                                                                                                                                                                                                                                                                                                                                                                               |
| motivo dieta                          | <input checked="" type="radio"/> no dieta<br><input type="radio"/> control peso<br><input type="radio"/> control colesterol<br><input type="radio"/> control diabetes<br><input type="radio"/> problemas estómago<br><input type="radio"/> problemas vesícula o hepáticos<br><input type="radio"/> HTA o cardiopatía<br><input type="radio"/> problemas renales<br><input type="radio"/> alergia alimentaria<br><input type="radio"/> ácido úrico elevado<br><input type="radio"/> vegetariana<br><input type="radio"/> otros |
| cambio alimentos año previo gestación | <input checked="" type="radio"/> si<br><input type="radio"/> no                                                                                                                                                                                                                                                                                                                                                                                                                                                               |
| cambio lácteos                        | <input type="radio"/> eliminado<br><input type="radio"/> disminuido<br><input checked="" type="radio"/> igual<br><input type="radio"/> aumentado<br><input type="radio"/> no sabe                                                                                                                                                                                                                                                                                                                                             |
| cambio huevos                         | <input type="radio"/> eliminado<br><input type="radio"/> disminuido<br><input checked="" type="radio"/> igual<br><input type="radio"/> aumentado<br><input type="radio"/> no sabe                                                                                                                                                                                                                                                                                                                                             |
| cambio carne                          | <input type="radio"/> eliminado<br><input type="radio"/> disminuido<br><input checked="" type="radio"/> igual<br><input type="radio"/> aumentado<br><input type="radio"/> no sabe                                                                                                                                                                                                                                                                                                                                             |
| cambio pescado                        | <input type="radio"/> eliminado<br><input type="radio"/> disminuido<br><input checked="" type="radio"/> igual<br><input type="radio"/> aumentado<br><input type="radio"/> no sabe                                                                                                                                                                                                                                                                                                                                             |
| cambio verduras                       | <input type="radio"/> eliminado<br><input type="radio"/> disminuido<br><input checked="" type="radio"/> igual<br><input type="radio"/> aumentado<br><input type="radio"/> no sabe                                                                                                                                                                                                                                                                                                                                             |

|                            |                                                                                                                                                                                                                        |
|----------------------------|------------------------------------------------------------------------------------------------------------------------------------------------------------------------------------------------------------------------|
| cambio legumbres           | <input type="radio"/> eliminado<br><input type="radio"/> disminuido<br><input checked="" type="radio"/> igual<br><input type="radio"/> aumentado<br><input type="radio"/> no sabe                                      |
| cambio fruta               | <input type="radio"/> eliminado<br><input type="radio"/> disminuido<br><input checked="" type="radio"/> igual<br><input type="radio"/> aumentado<br><input type="radio"/> no sabe                                      |
| cambio pan                 | <input type="radio"/> eliminado<br><input type="radio"/> disminuido<br><input checked="" type="radio"/> igual<br><input type="radio"/> aumentado<br><input type="radio"/> no sabe                                      |
| cambio aceite oliva        | <input type="radio"/> eliminado<br><input type="radio"/> disminuido<br><input checked="" type="radio"/> igual<br><input type="radio"/> aumentado<br><input type="radio"/> no sabe                                      |
| cambio mante o margarina   | <input type="radio"/> eliminado<br><input type="radio"/> disminuido<br><input checked="" type="radio"/> igual<br><input type="radio"/> aumentado<br><input type="radio"/> no sabe                                      |
| cambio azúcar y dulces     | <input type="radio"/> eliminado<br><input type="radio"/> disminuido<br><input checked="" type="radio"/> igual<br><input type="radio"/> aumentado<br><input type="radio"/> no sabe                                      |
| cambio bebidas alcohólicas | <input checked="" type="radio"/> eliminado<br><input type="radio"/> disminuido<br><input type="radio"/> igual<br><input type="radio"/> aumentado<br><input type="radio"/> no sabe                                      |
| frecuencia comidas fritas  | <input type="radio"/> a diario<br><input type="radio"/> 5 a 6 veces semana<br><input type="radio"/> 2 a 4 veces semana<br><input checked="" type="radio"/> 1 vez semana<br><input type="radio"/> menos de 1 vez semana |
| carne                      | <input type="radio"/> no como<br><input type="radio"/> cruda<br><input type="radio"/> poco hecha<br><input type="radio"/> hecha<br><input checked="" type="radio"/> muy hecha                                          |
| grasa visible carne        | <input checked="" type="radio"/> quita toda<br><input type="radio"/> quita mayoría<br><input type="radio"/> quita un poco<br><input type="radio"/> no quita nada                                                       |

|                                |                                                                                                                                                                                                                                                          |
|--------------------------------|----------------------------------------------------------------------------------------------------------------------------------------------------------------------------------------------------------------------------------------------------------|
| cocina carne                   | <input checked="" type="radio"/> a la plancha<br><input type="radio"/> a la parrilla<br><input type="radio"/> asada<br><input type="radio"/> frita<br><input type="radio"/> guisada                                                                      |
| tostado quemado carne          | <input checked="" type="radio"/> nunca<br><input type="radio"/> 1 vez mes<br><input type="radio"/> 2 a 3 veces mes<br><input type="radio"/> 1 vez semana<br><input type="radio"/> 2 a 3 semanas                                                          |
| tostado quemado pescado        | <input checked="" type="radio"/> nunca<br><input type="radio"/> 1 vez mes<br><input type="radio"/> 2 a 3 veces mes<br><input type="radio"/> 1 vez semana<br><input type="radio"/> 2 a 3 semanas                                                          |
| socarrat paella                | <input type="radio"/> nunca<br><input checked="" type="radio"/> 1 vez mes<br><input type="radio"/> 2 a 3 veces mes<br><input type="radio"/> 1 vez semana<br><input type="radio"/> 2 a 3 semanas                                                          |
| grasa o aceite cocinar         | <input type="radio"/> mantequilla<br><input type="radio"/> margarina<br><input type="radio"/> aceite oliva<br><input checked="" type="radio"/> aceite oliva virgen extra<br><input type="radio"/> aceite vegetal<br><input type="radio"/> mezcla aceites |
| grasa aceite aliñar            | <input type="radio"/> mantequilla<br><input type="radio"/> margarina<br><input type="radio"/> aceite oliva<br><input checked="" type="radio"/> aceite oliva virgen extra<br><input type="radio"/> aceite vegetal<br><input type="radio"/> mezcla aceites |
| grasa aceite freir             | <input type="radio"/> mantequilla<br><input type="radio"/> margarina<br><input type="radio"/> aceite oliva<br><input checked="" type="radio"/> aceite oliva virgen extra<br><input type="radio"/> aceite vegetal<br><input type="radio"/> mezcla aceites |
| Ejercicio cuestionario         | <input checked="" type="radio"/> si<br><input type="radio"/> no                                                                                                                                                                                          |
| horas de sueño incluido siesta | [*DATA REMOVED*]                                                                                                                                                                                                                                         |
| minutos siesta                 | [*DATA REMOVED*]                                                                                                                                                                                                                                         |
| horas televisión semana        | [*DATA REMOVED*]                                                                                                                                                                                                                                         |

|                                        |                                                                                                                                                                                                                                                                                                                                                                           |
|----------------------------------------|---------------------------------------------------------------------------------------------------------------------------------------------------------------------------------------------------------------------------------------------------------------------------------------------------------------------------------------------------------------------------|
| actividad trabajo                      | <input type="radio"/> casi siempre sentado<br><input type="radio"/> sentado 50 por cien<br><input type="radio"/> casi siempre de pie, quieto<br><input checked="" type="radio"/> casi siempre levantado caminando y llevando pocas cosas<br><input type="radio"/> casi siempre levantado, caminando y llevado muchas cosas<br><input type="radio"/> trabajo manual pesado |
| tiempo caminar o bici al día           | <input type="radio"/> casi nunca<br><input type="radio"/> menos 20min día<br><input type="radio"/> 20 a 40 min día<br><input checked="" type="radio"/> 40 a 60 min día<br><input type="radio"/> 1h o 1h y media día<br><input type="radio"/> más de 1h y media al día                                                                                                     |
| tiempo tareas casa al día              | <input type="radio"/> menos de 1h día<br><input checked="" type="radio"/> 1 a 2h día<br><input type="radio"/> 3 a 4h día<br><input type="radio"/> 5 a 6h día<br><input type="radio"/> 7 a 8h día<br><input type="radio"/> más de 8h día                                                                                                                                   |
| tiempo libre televisión ordenador leer | <input type="radio"/> menos 1h día<br><input checked="" type="radio"/> 1h día<br><input type="radio"/> 2h día<br><input type="radio"/> 3h día<br><input type="radio"/> 4h día<br><input type="radio"/> 5 a 6h día<br><input type="radio"/> mas 6h día                                                                                                                     |
| tiempo libre ejercicio o deporte       | <input type="radio"/> menos 1h semana<br><input type="radio"/> 1h semana<br><input type="radio"/> 2h semana<br><input type="radio"/> 3h semana<br><input checked="" type="radio"/> 4 a 5h semana<br><input type="radio"/> mas 5h semana                                                                                                                                   |
| como se considera                      | <input type="radio"/> sedentaria<br><input type="radio"/> poco activa<br><input type="radio"/> moderadamente activa<br><input checked="" type="radio"/> bastante activa<br><input type="radio"/> muy activa<br><input type="radio"/> no sabe                                                                                                                              |
| FUR                                    | [*DATA REMOVED*]                                                                                                                                                                                                                                                                                                                                                          |
| Semanas gestación 2T                   | [*DATA REMOVED*]                                                                                                                                                                                                                                                                                                                                                          |
| Días gestación 2T                      | [*DATA REMOVED*]                                                                                                                                                                                                                                                                                                                                                          |
| DBP 2T                                 | [*DATA REMOVED*]                                                                                                                                                                                                                                                                                                                                                          |
| CC 2T                                  | [*DATA REMOVED*]                                                                                                                                                                                                                                                                                                                                                          |
| AC 2T                                  | [*DATA REMOVED*]                                                                                                                                                                                                                                                                                                                                                          |

|                                                   |                                                                                                                                                                                                 |
|---------------------------------------------------|-------------------------------------------------------------------------------------------------------------------------------------------------------------------------------------------------|
| LF 2T                                             | [*DATA REMOVED*]                                                                                                                                                                                |
| PFE 2T (Hadlock)                                  | [*DATA REMOVED*]                                                                                                                                                                                |
| Semanas gestación 3T                              | [*DATA REMOVED*]                                                                                                                                                                                |
| días 3T                                           | [*DATA REMOVED*]                                                                                                                                                                                |
| DBP 3T                                            | [*DATA REMOVED*]                                                                                                                                                                                |
| CC 3T                                             | [*DATA REMOVED*]                                                                                                                                                                                |
| AC 3T                                             | [*DATA REMOVED*]                                                                                                                                                                                |
| LF 3T                                             | [*DATA REMOVED*]                                                                                                                                                                                |
| PFE 3T (Hadlock)                                  | [*DATA REMOVED*]                                                                                                                                                                                |
| Semanas de gestación final                        | [*DATA REMOVED*]                                                                                                                                                                                |
| días gestación final                              | [*DATA REMOVED*]                                                                                                                                                                                |
| Localización placenta                             | <input checked="" type="radio"/> anterior<br><input type="radio"/> lateral derecha<br><input type="radio"/> lateral izquierda<br><input type="radio"/> posterior<br><input type="radio"/> fondo |
| Presentación longitudinal cefálica                | <input type="radio"/> no<br><input checked="" type="radio"/> si                                                                                                                                 |
| Dorso                                             | <input type="radio"/> izquierda anterior<br><input type="radio"/> izquierda posterior<br><input checked="" type="radio"/> derecha anterior<br><input type="radio"/> derecha posterior           |
| diámetro biparietal                               | [*DATA REMOVED*]                                                                                                                                                                                |
| Circunferencia craneal                            | [*DATA REMOVED*]                                                                                                                                                                                |
| Circunferencia abdominal                          | [*DATA REMOVED*]                                                                                                                                                                                |
| Longitud de femur                                 | [*DATA REMOVED*]                                                                                                                                                                                |
| tejido celular subcutáneo a nivel del muslo en mm | [*DATA REMOVED*]                                                                                                                                                                                |
| tejido celular subcutáneo en abdomen en mm        | [*DATA REMOVED*]                                                                                                                                                                                |
| Volumen del muslo en cm3                          | [*DATA REMOVED*]                                                                                                                                                                                |
| Peso fetal estimado según fórmula de Hadlock      | [*DATA REMOVED*]                                                                                                                                                                                |

|                                               |                                                                                                                                                          |
|-----------------------------------------------|----------------------------------------------------------------------------------------------------------------------------------------------------------|
| Percentil                                     | [*DATA REMOVED*]                                                                                                                                         |
| Peso fetal estimado según fórmula de Scioscia | <hr/>                                                                                                                                                    |
| Peso fetal estimado según fórmula de LEE      | <hr/>                                                                                                                                                    |
| Tipo de parto                                 | <input type="radio"/> eutocico<br><input type="radio"/> instrumentado/ventosa<br><input checked="" type="radio"/> cesarea                                |
| fecha de nacimiento                           | [*DATA REMOVED*]                                                                                                                                         |
| Días entre exploración y nacimiento           | [*DATA REMOVED*]                                                                                                                                         |
| Peso RN en g                                  | [*DATA REMOVED*]                                                                                                                                         |
| sexo                                          | <input type="radio"/> mujer<br><input checked="" type="radio"/> hombre                                                                                   |
| Apgar 1 minuto                                | [*DATA REMOVED*]                                                                                                                                         |
| Apgar 5 minutos                               | [*DATA REMOVED*]                                                                                                                                         |
| Apgar 10 minutos                              | <hr/>                                                                                                                                                    |
| antecedente Covid durante gestación           | <input type="radio"/> Yes<br><input checked="" type="radio"/> No                                                                                         |
| Nivel de estudios                             | <input type="radio"/> ninguno<br><input type="radio"/> primarios<br><input checked="" type="radio"/> secundarios<br><input type="radio"/> universitarios |

# Base\_datos\_estimacion\_peso\_fetal

|                                       |                                                                                                                                                                                                                                                                                      |
|---------------------------------------|--------------------------------------------------------------------------------------------------------------------------------------------------------------------------------------------------------------------------------------------------------------------------------------|
| Número de identificación participante | 19                                                                                                                                                                                                                                                                                   |
| CODIGO PARTICIPANTE                   |                                                                                                                                                                                                                                                                                      |
| Edad                                  | [*DATA REMOVED*]                                                                                                                                                                                                                                                                     |
| Gestaciones                           | <input type="radio"/> 1<br><input checked="" type="radio"/> 2<br><input type="radio"/> 3<br><input type="radio"/> mas de 3                                                                                                                                                           |
| partos                                | <input checked="" type="radio"/> 0<br><input type="radio"/> 1<br><input type="radio"/> 2<br><input type="radio"/> 3<br><input type="radio"/> mas de 3                                                                                                                                |
| cesáreas                              | <input type="radio"/> 0<br><input checked="" type="radio"/> 1<br><input type="radio"/> 2<br><input type="radio"/> 3<br><input type="radio"/> mas de 3                                                                                                                                |
| Abortos                               | <input checked="" type="radio"/> 0<br><input type="radio"/> 1<br><input type="radio"/> 2<br><input type="radio"/> 3<br><input type="radio"/> mas de 3                                                                                                                                |
| Tipo de gestacion                     | <input checked="" type="radio"/> espontanea<br><input type="radio"/> IAC inseminación artificial conyuge<br><input type="radio"/> IAD inseminación artificial donante<br><input type="radio"/> FIV Fecundación in Vitro<br><input type="radio"/> Ovodon FIV con donación de ovocitos |
| peso previo a embarazo                | [*DATA REMOVED*]                                                                                                                                                                                                                                                                     |
| Ganancia ponderal embarazo            | [*DATA REMOVED*]                                                                                                                                                                                                                                                                     |
| Talla madre                           | [*DATA REMOVED*]                                                                                                                                                                                                                                                                     |
| IMC previo embarazo                   | 23.632812499999996                                                                                                                                                                                                                                                                   |
| Patología obstétrica                  | <input checked="" type="radio"/> no<br><input type="radio"/> si                                                                                                                                                                                                                      |
| Diabetes pregestacional               | <input checked="" type="radio"/> no<br><input type="radio"/> si                                                                                                                                                                                                                      |
| Diabetes gestacional                  | <input checked="" type="radio"/> no<br><input type="radio"/> si                                                                                                                                                                                                                      |

|                                            |                                                                                                                                                                                      |
|--------------------------------------------|--------------------------------------------------------------------------------------------------------------------------------------------------------------------------------------|
| Diabetes gestacional con insulina          | <input checked="" type="radio"/> no<br><input type="radio"/> si                                                                                                                      |
| Diabetes gestacional con dieta y ejercicio | <input checked="" type="radio"/> no<br><input type="radio"/> si                                                                                                                      |
| Percentil fetos previos                    | <input checked="" type="radio"/> Nada<br><input type="radio"/> percentil menor de 10<br><input type="radio"/> percentil entre 10 y 90<br><input type="radio"/> percentil mayor de 90 |
| Exfumadora                                 | <input checked="" type="radio"/> Nada<br><input type="radio"/> menos de 5 años<br><input type="radio"/> 5 a 10 años<br><input type="radio"/> mayor o igual a 10 años                 |
| Hábito tabáquico                           | <input type="radio"/> no<br><input checked="" type="radio"/> si                                                                                                                      |
| fumadora                                   | [*DATA REMOVED*]                                                                                                                                                                     |
| Consumo otros tóxicos                      | <input checked="" type="radio"/> no<br><input type="radio"/> si                                                                                                                      |
| Hb 1T                                      | [*DATA REMOVED*]                                                                                                                                                                     |
| Htc 1T                                     | [*DATA REMOVED*]                                                                                                                                                                     |
| Hb 2T                                      | [*DATA REMOVED*]                                                                                                                                                                     |
| HTC 2T                                     | [*DATA REMOVED*]                                                                                                                                                                     |
| Hb 3T                                      | [*DATA REMOVED*]                                                                                                                                                                     |
| HTC 3T                                     | [*DATA REMOVED*]                                                                                                                                                                     |
| Suplemento FE oral                         | <input checked="" type="radio"/> si<br><input type="radio"/> no                                                                                                                      |
| Suplemento fe iv                           | <input type="radio"/> si<br><input checked="" type="radio"/> no                                                                                                                      |
| Transfusión                                | <input checked="" type="radio"/> no<br><input type="radio"/> si                                                                                                                      |
| Solicitada Vit D                           | <input checked="" type="radio"/> no<br><input type="radio"/> si                                                                                                                      |
| Deficit vit D                              | <input type="radio"/> no<br><input type="radio"/> si                                                                                                                                 |
| Suplemento vit D                           | <input type="radio"/> si<br><input checked="" type="radio"/> no                                                                                                                      |



|                       |                                                                                                                                                                                                                                                                                                                                                                                                              |
|-----------------------|--------------------------------------------------------------------------------------------------------------------------------------------------------------------------------------------------------------------------------------------------------------------------------------------------------------------------------------------------------------------------------------------------------------|
| Dieta, cuestionario   | <input checked="" type="radio"/> si<br><input type="radio"/> no                                                                                                                                                                                                                                                                                                                                              |
| Leche entera          | <input type="radio"/> Nunca o menos 1 vez al mes<br><input type="radio"/> 1 a 3 veces mes<br><input type="radio"/> 1 vez semana<br><input type="radio"/> 2 a 4 veces semana<br><input type="radio"/> 5 a 6 veces semana<br><input checked="" type="radio"/> 1 vez al día<br><input type="radio"/> 2 a 3 veces al día<br><input type="radio"/> 5 a 6 veces al día<br><input type="radio"/> más 6 veces al día |
| Leche semidesnatada   | <input checked="" type="radio"/> Nunca o menos 1 vez al mes<br><input type="radio"/> 1 a 3 veces mes<br><input type="radio"/> 1 vez semana<br><input type="radio"/> 2 a 4 veces semana<br><input type="radio"/> 5 a 6 veces semana<br><input type="radio"/> 1 vez al día<br><input type="radio"/> 2 a 3 veces al día<br><input type="radio"/> 5 a 6 veces al día<br><input type="radio"/> mas 6 veces al día |
| Leche desnatada       | <input checked="" type="radio"/> Nunca o menos 1 vez al mes<br><input type="radio"/> 1 a 3 veces mes<br><input type="radio"/> 1 vez semana<br><input type="radio"/> 2 a 4 veces semana<br><input type="radio"/> 5 a 6 veces semana<br><input type="radio"/> 1 vez al día<br><input type="radio"/> 2 a 3 veces al día<br><input type="radio"/> 5 a 6 veces al día<br><input type="radio"/> más 6 veces al día |
| Leche condensada      | <input checked="" type="radio"/> Nunca o menos 1 vez al mes<br><input type="radio"/> 1 a 3 veces mes<br><input type="radio"/> 1 vez semana<br><input type="radio"/> 2 a 4 veces semana<br><input type="radio"/> 5 a 6 veces semana<br><input type="radio"/> 1 vez al día<br><input type="radio"/> 2 a 3 veces al día<br><input type="radio"/> 5 a 6 veces al día<br><input type="radio"/> más 6 veces al día |
| nata o crema de leche | <input checked="" type="radio"/> Nunca o menos 1 vez al mes<br><input type="radio"/> 1 a 3 veces mes<br><input type="radio"/> 1 vez semana<br><input type="radio"/> 2 a 4 veces semana<br><input type="radio"/> 5 a 6 veces semana<br><input type="radio"/> 1 vez al día<br><input type="radio"/> 2 a 3 veces al día<br><input type="radio"/> 5 a 6 veces al día<br><input type="radio"/> más 6 veces al día |

|                                             |                                                                                                                                                                                                                                                                                                                                                                                                              |
|---------------------------------------------|--------------------------------------------------------------------------------------------------------------------------------------------------------------------------------------------------------------------------------------------------------------------------------------------------------------------------------------------------------------------------------------------------------------|
| Yogurt Entero                               | <input type="radio"/> Nunca o menos 1 vez al mes<br><input type="radio"/> 1 a 3 veces mes<br><input type="radio"/> 1 vez semana<br><input type="radio"/> 2 a 4 veces semana<br><input type="radio"/> 5 a 6 veces semana<br><input checked="" type="radio"/> 1 vez al día<br><input type="radio"/> 2 a 3 veces al día<br><input type="radio"/> 5 a 6 veces al día<br><input type="radio"/> más 6 veces al día |
| Yogurt desnatado                            | <input checked="" type="radio"/> Nunca o menos 1 vez al mes<br><input type="radio"/> 1 a 3 veces mes<br><input type="radio"/> 1 vez semana<br><input type="radio"/> 2 a 4 veces semana<br><input type="radio"/> 5 a 6 veces semana<br><input type="radio"/> 1 vez al día<br><input type="radio"/> 2 a 3 veces al día<br><input type="radio"/> 5 a 6 veces al día<br><input type="radio"/> más 6 veces al día |
| 100g requesón o queso blando o queso fresco | <input type="radio"/> Nunca o menos 1 vez al mes<br><input type="radio"/> 1 a 3 veces mes<br><input type="radio"/> 1 vez semana<br><input checked="" type="radio"/> 2 a 4 veces semana<br><input type="radio"/> 5 a 6 veces semana<br><input type="radio"/> 1 vez al día<br><input type="radio"/> 2 a 3 veces al día<br><input type="radio"/> 5 a 6 veces al día<br><input type="radio"/> más 6 veces al día |
| queso curado o semicurado o cremoso         | <input checked="" type="radio"/> Nunca o menos 1 vez al mes<br><input type="radio"/> 1 a 3 veces mes<br><input type="radio"/> 1 vez semana<br><input type="radio"/> 2 a 4 veces semana<br><input type="radio"/> 5 a 6 veces semana<br><input type="radio"/> 1 vez al día<br><input type="radio"/> 2 a 3 veces al día<br><input type="radio"/> 5 a 6 veces al día<br><input type="radio"/> más 6 veces al día |
| natillas flan pudding                       | <input checked="" type="radio"/> Nunca o menos 1 vez al mes<br><input type="radio"/> 1 a 3 veces mes<br><input type="radio"/> 1 vez semana<br><input type="radio"/> 2 a 4 veces semana<br><input type="radio"/> 5 a 6 veces semana<br><input type="radio"/> 1 vez al día<br><input type="radio"/> 2 a 3 veces al día<br><input type="radio"/> 5 a 6 veces al día<br><input type="radio"/> más 6 veces al día |
| Helado                                      | <input type="radio"/> Nunca o menos 1 vez al mes<br><input type="radio"/> 1 a 3 veces mes<br><input type="radio"/> 1 vez semana<br><input checked="" type="radio"/> 2 a 4 veces semana<br><input type="radio"/> 5 a 6 veces semana<br><input type="radio"/> 1 vez al día<br><input type="radio"/> 2 a 3 veces al día<br><input type="radio"/> 5 a 6 veces al día<br><input type="radio"/> más 6 veces al día |

|                                      |                                                                                                                                                                                                                                                                                                                                                                                                              |
|--------------------------------------|--------------------------------------------------------------------------------------------------------------------------------------------------------------------------------------------------------------------------------------------------------------------------------------------------------------------------------------------------------------------------------------------------------------|
| huevo                                | <input checked="" type="radio"/> Nunca o menos 1 vez al mes<br><input type="radio"/> 1 a 3 veces mes<br><input type="radio"/> 1 vez semana<br><input type="radio"/> 2 a 4 veces semana<br><input type="radio"/> 5 a 6 veces semana<br><input type="radio"/> 1 vez al día<br><input type="radio"/> 2 a 3 veces al día<br><input type="radio"/> 5 a 6 veces al día<br><input type="radio"/> más 6 veces al día |
| Pollo con piel                       | <input type="radio"/> Nunca o menos 1 vez al mes<br><input type="radio"/> 1 a 3 veces mes<br><input type="radio"/> 1 vez semana<br><input checked="" type="radio"/> 2 a 4 veces semana<br><input type="radio"/> 5 a 6 veces semana<br><input type="radio"/> 1 vez al día<br><input type="radio"/> 2 a 3 veces al día<br><input type="radio"/> 5 a 6 veces al día<br><input type="radio"/> más 6 veces al día |
| pollo sin piel                       | <input type="radio"/> Nunca o menos 1 vez al mes<br><input type="radio"/> 1 a 3 veces mes<br><input type="radio"/> 1 vez semana<br><input checked="" type="radio"/> 2 a 4 veces semana<br><input type="radio"/> 5 a 6 veces semana<br><input type="radio"/> 1 vez al día<br><input type="radio"/> 2 a 3 veces al día<br><input type="radio"/> 5 a 6 veces al día<br><input type="radio"/> más 6 veces al día |
| Ternera o cerdo o cordero            | <input checked="" type="radio"/> Nunca o menos 1 vez al mes<br><input type="radio"/> 1 a 3 veces mes<br><input type="radio"/> 1 vez semana<br><input type="radio"/> 2 a 4 veces semana<br><input type="radio"/> 5 a 6 veces semana<br><input type="radio"/> 1 vez al día<br><input type="radio"/> 2 a 3 veces al día<br><input type="radio"/> 5 a 6 veces al día<br><input type="radio"/> más 6 veces al día |
| carne caza: Conejo o codorniz o pato | <input checked="" type="radio"/> Nunca o menos 1 vez al mes<br><input type="radio"/> 1 a 3 veces mes<br><input type="radio"/> 1 vez semana<br><input type="radio"/> 2 a 4 veces semana<br><input type="radio"/> 5 a 6 veces semana<br><input type="radio"/> 1 vez al día<br><input type="radio"/> 2 a 3 veces al día<br><input type="radio"/> 5 a 6 veces al día<br><input type="radio"/> más 6 veces al día |
| Hígado de ternera o cerdo o pollo    | <input checked="" type="radio"/> Nunca o menos 1 vez al mes<br><input type="radio"/> 1 a 3 veces mes<br><input type="radio"/> 1 vez semana<br><input type="radio"/> 2 a 4 veces semana<br><input type="radio"/> 5 a 6 veces semana<br><input type="radio"/> 1 vez al día<br><input type="radio"/> 2 a 3 veces al día<br><input type="radio"/> 5 a 6 veces al día<br><input type="radio"/> más 6 veces al día |

|                     |                                                                                                                                                                                                                                                                                                                                                                                                              |
|---------------------|--------------------------------------------------------------------------------------------------------------------------------------------------------------------------------------------------------------------------------------------------------------------------------------------------------------------------------------------------------------------------------------------------------------|
| Vísceras            | <input checked="" type="radio"/> Nunca o menos 1 vez al mes<br><input type="radio"/> 1 a 3 veces mes<br><input type="radio"/> 1 vez semana<br><input type="radio"/> 2 a 4 veces semana<br><input type="radio"/> 5 a 6 veces semana<br><input type="radio"/> 1 vez al día<br><input type="radio"/> 2 a 3 veces al día<br><input type="radio"/> 5 a 6 veces al día<br><input type="radio"/> más 6 veces al día |
| Embutido            | <input type="radio"/> Nunca o menos 1 vez al mes<br><input type="radio"/> 1 a 3 veces mes<br><input type="radio"/> 1 vez semana<br><input checked="" type="radio"/> 2 a 4 veces semana<br><input type="radio"/> 5 a 6 veces semana<br><input type="radio"/> 1 vez al día<br><input type="radio"/> 2 a 3 veces al día<br><input type="radio"/> 5 a 6 veces al día<br><input type="radio"/> más 6 veces al día |
| Salchicha o similar | <input checked="" type="radio"/> Nunca o menos 1 vez al mes<br><input type="radio"/> 1 a 3 veces mes<br><input type="radio"/> 1 vez semana<br><input type="radio"/> 2 a 4 veces semana<br><input type="radio"/> 5 a 6 veces semana<br><input type="radio"/> 1 vez al día<br><input type="radio"/> 2 a 3 veces al día<br><input type="radio"/> 5 a 6 veces al día<br><input type="radio"/> más 6 veces al día |
| Pate o foiegras     | <input type="radio"/> Nunca o menos 1 vez al mes<br><input type="radio"/> 1 a 3 veces mes<br><input checked="" type="radio"/> 1 vez semana<br><input type="radio"/> 2 a 4 veces semana<br><input type="radio"/> 5 a 6 veces semana<br><input type="radio"/> 1 vez al día<br><input type="radio"/> 2 a 3 veces al día<br><input type="radio"/> 5 a 6 veces al día<br><input type="radio"/> más 6 veces al día |
| Hamburguesa         | <input type="radio"/> Nunca o menos 1 vez al mes<br><input checked="" type="radio"/> 1 a 3 veces mes<br><input type="radio"/> 1 vez semana<br><input type="radio"/> 2 a 4 veces semana<br><input type="radio"/> 5 a 6 veces semana<br><input type="radio"/> 1 vez al día<br><input type="radio"/> 2 a 3 veces al día<br><input type="radio"/> 5 a 6 veces al día<br><input type="radio"/> más 6 veces al día |
| tocino o bacon      | <input checked="" type="radio"/> Nunca o menos 1 vez al mes<br><input type="radio"/> 1 a 3 veces mes<br><input type="radio"/> 1 vez semana<br><input type="radio"/> 2 a 4 veces semana<br><input type="radio"/> 5 a 6 veces semana<br><input type="radio"/> 1 vez al día<br><input type="radio"/> 2 a 3 veces al día<br><input type="radio"/> 5 a 6 veces al día<br><input type="radio"/> más 6 veces al día |

|                        |                                                                                                                                                                                                                                                                                                                                                                                                              |
|------------------------|--------------------------------------------------------------------------------------------------------------------------------------------------------------------------------------------------------------------------------------------------------------------------------------------------------------------------------------------------------------------------------------------------------------|
| Pescado frito          | <input checked="" type="radio"/> Nunca o menos 1 vez al mes<br><input type="radio"/> 1 a 3 veces mes<br><input type="radio"/> 1 vez semana<br><input type="radio"/> 2 a 4 veces semana<br><input type="radio"/> 5 a 6 veces semana<br><input type="radio"/> 1 vez al día<br><input type="radio"/> 2 a 3 veces al día<br><input type="radio"/> 5 a 6 veces al día<br><input type="radio"/> más 6 veces al día |
| pescado hervido blanco | <input checked="" type="radio"/> Nunca o menos 1 vez al mes<br><input type="radio"/> 1 a 3 veces mes<br><input type="radio"/> 1 vez semana<br><input type="radio"/> 2 a 4 veces semana<br><input type="radio"/> 5 a 6 veces semana<br><input type="radio"/> 1 vez al día<br><input type="radio"/> 2 a 3 veces al día<br><input type="radio"/> 5 a 6 veces al día<br><input type="radio"/> más 6 veces al día |
| pescado hervido azul   | <input checked="" type="radio"/> Nunca o menos 1 vez al mes<br><input type="radio"/> 1 a 3 veces mes<br><input type="radio"/> 1 vez semana<br><input type="radio"/> 2 a 4 veces semana<br><input type="radio"/> 5 a 6 veces semana<br><input type="radio"/> 1 vez al día<br><input type="radio"/> 2 a 3 veces al día<br><input type="radio"/> 5 a 6 veces al día<br><input type="radio"/> más 6 veces al día |
| otros pescado azul     | <input checked="" type="radio"/> Nunca o menos 1 vez al mes<br><input type="radio"/> 1 a 3 veces mes<br><input type="radio"/> 1 vez semana<br><input type="radio"/> 2 a 4 veces semana<br><input type="radio"/> 5 a 6 veces semana<br><input type="radio"/> 1 vez al día<br><input type="radio"/> 2 a 3 veces al día<br><input type="radio"/> 5 a 6 veces al día<br><input type="radio"/> más 6 veces al día |
| atun conserva          | <input checked="" type="radio"/> Nunca o menos 1 vez al mes<br><input type="radio"/> 1 a 3 veces mes<br><input type="radio"/> 1 vez semana<br><input type="radio"/> 2 a 4 veces semana<br><input type="radio"/> 5 a 6 veces semana<br><input type="radio"/> 1 vez al día<br><input type="radio"/> 2 a 3 veces al día<br><input type="radio"/> 5 a 6 veces al día<br><input type="radio"/> más 6 veces al día |
| sardina conserva       | <input checked="" type="radio"/> Nunca o menos 1 vez al mes<br><input type="radio"/> 1 a 3 veces mes<br><input type="radio"/> 1 vez semana<br><input type="radio"/> 2 a 4 veces semana<br><input type="radio"/> 5 a 6 veces semana<br><input type="radio"/> 1 vez al día<br><input type="radio"/> 2 a 3 veces al día<br><input type="radio"/> 5 a 6 veces al día<br><input type="radio"/> más 6 veces al día |

|                                         |                                                                                                                                                                                                                                                                                                                                                                                                              |
|-----------------------------------------|--------------------------------------------------------------------------------------------------------------------------------------------------------------------------------------------------------------------------------------------------------------------------------------------------------------------------------------------------------------------------------------------------------------|
| pescado ahumado                         | <input checked="" type="radio"/> Nunca o menos 1 vez al mes<br><input type="radio"/> 1 a 3 veces mes<br><input type="radio"/> 1 vez semana<br><input type="radio"/> 2 a 4 veces semana<br><input type="radio"/> 5 a 6 veces semana<br><input type="radio"/> 1 vez al día<br><input type="radio"/> 2 a 3 veces al día<br><input type="radio"/> 5 a 6 veces al día<br><input type="radio"/> más 6 veces al día |
| almejas o mejillones o ostras unos 100g | <input checked="" type="radio"/> Nunca o menos 1 vez al mes<br><input type="radio"/> 1 a 3 veces mes<br><input type="radio"/> 1 vez semana<br><input type="radio"/> 2 a 4 veces semana<br><input type="radio"/> 5 a 6 veces semana<br><input type="radio"/> 1 vez al día<br><input type="radio"/> 2 a 3 veces al día<br><input type="radio"/> 5 a 6 veces al día<br><input type="radio"/> más 6 veces al día |
| calamar o chipiron o sepia unos 100g    | <input checked="" type="radio"/> Nunca o menos 1 vez al mes<br><input type="radio"/> 1 a 3 veces mes<br><input type="radio"/> 1 vez semana<br><input type="radio"/> 2 a 4 veces semana<br><input type="radio"/> 5 a 6 veces semana<br><input type="radio"/> 1 vez al día<br><input type="radio"/> 2 a 3 veces al día<br><input type="radio"/> 5 a 6 veces al día<br><input type="radio"/> más 6 veces al día |
| marisco unos 100g                       | <input checked="" type="radio"/> Nunca o menos 1 vez al mes<br><input type="radio"/> 1 a 3 veces mes<br><input type="radio"/> 1 vez semana<br><input type="radio"/> 2 a 4 veces semana<br><input type="radio"/> 5 a 6 veces semana<br><input type="radio"/> 1 vez al día<br><input type="radio"/> 2 a 3 veces al día<br><input type="radio"/> 5 a 6 veces al día<br><input type="radio"/> más 6 veces al día |
| Espinacas o acelgas cocinadas           | <input checked="" type="radio"/> Nunca o menos 1 vez al mes<br><input type="radio"/> 1 a 3 veces mes<br><input type="radio"/> 1 vez semana<br><input type="radio"/> 2 a 4 veces semana<br><input type="radio"/> 5 a 6 veces semana<br><input type="radio"/> 1 vez al día<br><input type="radio"/> 2 a 3 veces al día<br><input type="radio"/> 5 a 6 veces al día<br><input type="radio"/> más 6 veces al día |
| Col o coliflor o brocoli cocinado       | <input checked="" type="radio"/> Nunca o menos 1 vez al mes<br><input type="radio"/> 1 a 3 veces mes<br><input type="radio"/> 1 vez semana<br><input type="radio"/> 2 a 4 veces semana<br><input type="radio"/> 5 a 6 veces semana<br><input type="radio"/> 1 vez al día<br><input type="radio"/> 2 a 3 veces al día<br><input type="radio"/> 5 a 6 veces al día<br><input type="radio"/> más 6 veces al día |

---

Lechuga o endivia o escarola

- ☐ Nunca o menos 1 vez al mes  
☐ 1 a 3 veces mes  
☐ 1 vez semana  
☒ 2 a 4 veces semana  
☐ 5 a 6 veces semana  
☐ 1 vez al día  
☐ 2 a 3 veces al día  
☐ 5 a 6 veces al día  
☐ más 6 veces al día

---

tomate ensalada

- ☐ Nunca o menos 1 vez al mes  
☐ 1 a 3 veces mes  
☐ 1 vez semana  
☒ 2 a 4 veces semana  
☐ 5 a 6 veces semana  
☐ 1 vez al día  
☐ 2 a 3 veces al día  
☐ 5 a 6 veces al día  
☐ más 6 veces al día

---

cebolla

- ☐ Nunca o menos 1 vez al mes  
☐ 1 a 3 veces mes  
☐ 1 vez semana  
☒ 2 a 4 veces semana  
☐ 5 a 6 veces semana  
☐ 1 vez al día  
☐ 2 a 3 veces al día  
☐ 5 a 6 veces al día  
☐ más 6 veces al día

---

Zanahoria o calabaza

- ☒ Nunca o menos 1 vez al mes  
☐ 1 a 3 veces mes  
☐ 1 vez semana  
☐ 2 a 4 veces semana  
☐ 5 a 6 veces semana  
☐ 1 vez al día  
☐ 2 a 3 veces al día  
☐ 5 a 6 veces al día  
☐ más 6 veces al día

---

Judías verdes

- ☒ Nunca o menos 1 vez al mes  
☐ 1 a 3 veces mes  
☐ 1 vez semana  
☐ 2 a 4 veces semana  
☐ 5 a 6 veces semana  
☐ 1 vez al día  
☐ 2 a 3 veces al día  
☐ 5 a 6 veces al día  
☐ más 6 veces al día

---

Berenjena o calabacin o pepino

- ☒ Nunca o menos 1 vez al mes  
☐ 1 a 3 veces mes  
☐ 1 vez semana  
☐ 2 a 4 veces semana  
☐ 5 a 6 veces semana  
☐ 1 vez al día  
☐ 2 a 3 veces al día  
☐ 5 a 6 veces al día  
☐ más 6 veces al día

|                       |                                                                                                                                                                                                                                                                                                                                                                                                              |
|-----------------------|--------------------------------------------------------------------------------------------------------------------------------------------------------------------------------------------------------------------------------------------------------------------------------------------------------------------------------------------------------------------------------------------------------------|
| pimiento              | <input type="radio"/> Nunca o menos 1 vez al mes<br><input type="radio"/> 1 a 3 veces mes<br><input checked="" type="radio"/> 1 vez semana<br><input type="radio"/> 2 a 4 veces semana<br><input type="radio"/> 5 a 6 veces semana<br><input type="radio"/> 1 vez al día<br><input type="radio"/> 2 a 3 veces al día<br><input type="radio"/> 5 a 6 veces al día<br><input type="radio"/> más 6 veces al día |
| alcachofa             | <input type="radio"/> Nunca o menos 1 vez al mes<br><input type="radio"/> 1 a 3 veces mes<br><input checked="" type="radio"/> 1 vez semana<br><input type="radio"/> 2 a 4 veces semana<br><input type="radio"/> 5 a 6 veces semana<br><input type="radio"/> 1 vez al día<br><input type="radio"/> 2 a 3 veces al día<br><input type="radio"/> 5 a 6 veces al día<br><input type="radio"/> más 6 veces al día |
| espárragos            | <input type="radio"/> Nunca o menos 1 vez al mes<br><input type="radio"/> 1 a 3 veces mes<br><input checked="" type="radio"/> 1 vez semana<br><input type="radio"/> 2 a 4 veces semana<br><input type="radio"/> 5 a 6 veces semana<br><input type="radio"/> 1 vez al día<br><input type="radio"/> 2 a 3 veces al día<br><input type="radio"/> 5 a 6 veces al día<br><input type="radio"/> más 6 veces al día |
| maíz hervido          | <input checked="" type="radio"/> Nunca o menos 1 vez al mes<br><input type="radio"/> 1 a 3 veces mes<br><input type="radio"/> 1 vez semana<br><input type="radio"/> 2 a 4 veces semana<br><input type="radio"/> 5 a 6 veces semana<br><input type="radio"/> 1 vez al día<br><input type="radio"/> 2 a 3 veces al día<br><input type="radio"/> 5 a 6 veces al día<br><input type="radio"/> más 6 veces al día |
| legumbres             | <input type="radio"/> Nunca o menos 1 vez al mes<br><input type="radio"/> 1 a 3 veces mes<br><input type="radio"/> 1 vez semana<br><input type="radio"/> 2 a 4 veces semana<br><input checked="" type="radio"/> 5 a 6 veces semana<br><input type="radio"/> 1 vez al día<br><input type="radio"/> 2 a 3 veces al día<br><input type="radio"/> 5 a 6 veces al día<br><input type="radio"/> más 6 veces al día |
| naranjas o mandarinas | <input checked="" type="radio"/> Nunca o menos 1 vez al mes<br><input type="radio"/> 1 a 3 veces mes<br><input type="radio"/> 1 vez semana<br><input type="radio"/> 2 a 4 veces semana<br><input type="radio"/> 5 a 6 veces semana<br><input type="radio"/> 1 vez al día<br><input type="radio"/> 2 a 3 veces al día<br><input type="radio"/> 5 a 6 veces al día<br><input type="radio"/> más 6 veces al día |



|                       |                                                                                                                                                                                                                                                                                                                                                                                                              |
|-----------------------|--------------------------------------------------------------------------------------------------------------------------------------------------------------------------------------------------------------------------------------------------------------------------------------------------------------------------------------------------------------------------------------------------------------|
| zum natural fruta     | <input type="radio"/> Nunca o menos 1 vez al mes<br><input type="radio"/> 1 a 3 veces mes<br><input type="radio"/> 1 vez semana<br><input type="radio"/> 2 a 4 veces semana<br><input type="radio"/> 5 a 6 veces semana<br><input type="radio"/> 1 vez al día<br><input checked="" type="radio"/> 2 a 3 veces al día<br><input type="radio"/> 5 a 6 veces al día<br><input type="radio"/> más 6 veces al día |
| platano               | <input type="radio"/> Nunca o menos 1 vez al mes<br><input type="radio"/> 1 a 3 veces mes<br><input type="radio"/> 1 vez semana<br><input type="radio"/> 2 a 4 veces semana<br><input type="radio"/> 5 a 6 veces semana<br><input type="radio"/> 1 vez al día<br><input checked="" type="radio"/> 2 a 3 veces al día<br><input type="radio"/> 5 a 6 veces al día<br><input type="radio"/> más 6 veces al día |
| manzana o pera        | <input type="radio"/> Nunca o menos 1 vez al mes<br><input type="radio"/> 1 a 3 veces mes<br><input type="radio"/> 1 vez semana<br><input type="radio"/> 2 a 4 veces semana<br><input type="radio"/> 5 a 6 veces semana<br><input type="radio"/> 1 vez al día<br><input checked="" type="radio"/> 2 a 3 veces al día<br><input type="radio"/> 5 a 6 veces al día<br><input type="radio"/> más 6 veces al día |
| melocotón o nectarina | <input checked="" type="radio"/> Nunca o menos 1 vez al mes<br><input type="radio"/> 1 a 3 veces mes<br><input type="radio"/> 1 vez semana<br><input type="radio"/> 2 a 4 veces semana<br><input type="radio"/> 5 a 6 veces semana<br><input type="radio"/> 1 vez al día<br><input type="radio"/> 2 a 3 veces al día<br><input type="radio"/> 5 a 6 veces al día<br><input type="radio"/> más 6 veces al día |
| sandia o melon        | <input checked="" type="radio"/> Nunca o menos 1 vez al mes<br><input type="radio"/> 1 a 3 veces mes<br><input type="radio"/> 1 vez semana<br><input type="radio"/> 2 a 4 veces semana<br><input type="radio"/> 5 a 6 veces semana<br><input type="radio"/> 1 vez al día<br><input type="radio"/> 2 a 3 veces al día<br><input type="radio"/> 5 a 6 veces al día<br><input type="radio"/> más 6 veces al día |
| uva                   | <input checked="" type="radio"/> Nunca o menos 1 vez al mes<br><input type="radio"/> 1 a 3 veces mes<br><input type="radio"/> 1 vez semana<br><input type="radio"/> 2 a 4 veces semana<br><input type="radio"/> 5 a 6 veces semana<br><input type="radio"/> 1 vez al día<br><input type="radio"/> 2 a 3 veces al día<br><input type="radio"/> 5 a 6 veces al día<br><input type="radio"/> más 6 veces al día |

|                 |                                                                                                                                                                                                                                                                                                                                                                                                              |
|-----------------|--------------------------------------------------------------------------------------------------------------------------------------------------------------------------------------------------------------------------------------------------------------------------------------------------------------------------------------------------------------------------------------------------------------|
| bruna o ciruela | <input checked="" type="radio"/> Nunca o menos 1 vez al mes<br><input type="radio"/> 1 a 3 veces mes<br><input type="radio"/> 1 vez semana<br><input type="radio"/> 2 a 4 veces semana<br><input type="radio"/> 5 a 6 veces semana<br><input type="radio"/> 1 vez al día<br><input type="radio"/> 2 a 3 veces al día<br><input type="radio"/> 5 a 6 veces al día<br><input type="radio"/> más 6 veces al día |
| kiwi            | <input checked="" type="radio"/> Nunca o menos 1 vez al mes<br><input type="radio"/> 1 a 3 veces mes<br><input type="radio"/> 1 vez semana<br><input type="radio"/> 2 a 4 veces semana<br><input type="radio"/> 5 a 6 veces semana<br><input type="radio"/> 1 vez al día<br><input type="radio"/> 2 a 3 veces al día<br><input type="radio"/> 5 a 6 veces al día<br><input type="radio"/> más 6 veces al día |
| aceituna        | <input checked="" type="radio"/> Nunca o menos 1 vez al mes<br><input type="radio"/> 1 a 3 veces mes<br><input type="radio"/> 1 vez semana<br><input type="radio"/> 2 a 4 veces semana<br><input type="radio"/> 5 a 6 veces semana<br><input type="radio"/> 1 vez al día<br><input type="radio"/> 2 a 3 veces al día<br><input type="radio"/> 5 a 6 veces al día<br><input type="radio"/> más 6 veces al día |
| frutos secos    | <input type="radio"/> Nunca o menos 1 vez al mes<br><input checked="" type="radio"/> 1 a 3 veces mes<br><input type="radio"/> 1 vez semana<br><input type="radio"/> 2 a 4 veces semana<br><input type="radio"/> 5 a 6 veces semana<br><input type="radio"/> 1 vez al día<br><input type="radio"/> 2 a 3 veces al día<br><input type="radio"/> 5 a 6 veces al día<br><input type="radio"/> más 6 veces al día |
| pan blanco      | <input type="radio"/> Nunca o menos 1 vez al mes<br><input type="radio"/> 1 a 3 veces mes<br><input type="radio"/> 1 vez semana<br><input type="radio"/> 2 a 4 veces semana<br><input checked="" type="radio"/> 5 a 6 veces semana<br><input type="radio"/> 1 vez al día<br><input type="radio"/> 2 a 3 veces al día<br><input type="radio"/> 5 a 6 veces al día<br><input type="radio"/> más 6 veces al día |
| pan integral    | <input checked="" type="radio"/> Nunca o menos 1 vez al mes<br><input type="radio"/> 1 a 3 veces mes<br><input type="radio"/> 1 vez semana<br><input type="radio"/> 2 a 4 veces semana<br><input type="radio"/> 5 a 6 veces semana<br><input type="radio"/> 1 vez al día<br><input type="radio"/> 2 a 3 veces al día<br><input type="radio"/> 5 a 6 veces al día<br><input type="radio"/> más 6 veces al día |

|                          |                                                                                                                                                                                                                                                                                                                                                                                                              |
|--------------------------|--------------------------------------------------------------------------------------------------------------------------------------------------------------------------------------------------------------------------------------------------------------------------------------------------------------------------------------------------------------------------------------------------------------|
| cereales desayuno        | <input checked="" type="radio"/> Nunca o menos 1 vez al mes<br><input type="radio"/> 1 a 3 veces mes<br><input type="radio"/> 1 vez semana<br><input type="radio"/> 2 a 4 veces semana<br><input type="radio"/> 5 a 6 veces semana<br><input type="radio"/> 1 vez al día<br><input type="radio"/> 2 a 3 veces al día<br><input type="radio"/> 5 a 6 veces al día<br><input type="radio"/> más 6 veces al día |
| patatas fritas           | <input type="radio"/> Nunca o menos 1 vez al mes<br><input type="radio"/> 1 a 3 veces mes<br><input type="radio"/> 1 vez semana<br><input checked="" type="radio"/> 2 a 4 veces semana<br><input type="radio"/> 5 a 6 veces semana<br><input type="radio"/> 1 vez al día<br><input type="radio"/> 2 a 3 veces al día<br><input type="radio"/> 5 a 6 veces al día<br><input type="radio"/> más 6 veces al día |
| patatas cocidas o asadas | <input type="radio"/> Nunca o menos 1 vez al mes<br><input type="radio"/> 1 a 3 veces mes<br><input type="radio"/> 1 vez semana<br><input checked="" type="radio"/> 2 a 4 veces semana<br><input type="radio"/> 5 a 6 veces semana<br><input type="radio"/> 1 vez al día<br><input type="radio"/> 2 a 3 veces al día<br><input type="radio"/> 5 a 6 veces al día<br><input type="radio"/> más 6 veces al día |
| bolsa papas              | <input type="radio"/> Nunca o menos 1 vez al mes<br><input checked="" type="radio"/> 1 a 3 veces mes<br><input type="radio"/> 1 vez semana<br><input type="radio"/> 2 a 4 veces semana<br><input type="radio"/> 5 a 6 veces semana<br><input type="radio"/> 1 vez al día<br><input type="radio"/> 2 a 3 veces al día<br><input type="radio"/> 5 a 6 veces al día<br><input type="radio"/> más 6 veces al día |
| arroz cocinado           | <input checked="" type="radio"/> Nunca o menos 1 vez al mes<br><input type="radio"/> 1 a 3 veces mes<br><input type="radio"/> 1 vez semana<br><input type="radio"/> 2 a 4 veces semana<br><input type="radio"/> 5 a 6 veces semana<br><input type="radio"/> 1 vez al día<br><input type="radio"/> 2 a 3 veces al día<br><input type="radio"/> 5 a 6 veces al día<br><input type="radio"/> más 6 veces al día |
| pasta                    | <input type="radio"/> Nunca o menos 1 vez al mes<br><input type="radio"/> 1 a 3 veces mes<br><input type="radio"/> 1 vez semana<br><input checked="" type="radio"/> 2 a 4 veces semana<br><input type="radio"/> 5 a 6 veces semana<br><input type="radio"/> 1 vez al día<br><input type="radio"/> 2 a 3 veces al día<br><input type="radio"/> 5 a 6 veces al día<br><input type="radio"/> más 6 veces al día |

|                     |                                                                                                                                                                                                                                                                                                                                                                                                              |
|---------------------|--------------------------------------------------------------------------------------------------------------------------------------------------------------------------------------------------------------------------------------------------------------------------------------------------------------------------------------------------------------------------------------------------------------|
| pizza               | <input type="radio"/> Nunca o menos 1 vez al mes<br><input type="radio"/> 1 a 3 veces mes<br><input checked="" type="radio"/> 1 vez semana<br><input type="radio"/> 2 a 4 veces semana<br><input type="radio"/> 5 a 6 veces semana<br><input type="radio"/> 1 vez al día<br><input type="radio"/> 2 a 3 veces al día<br><input type="radio"/> 5 a 6 veces al día<br><input type="radio"/> más 6 veces al día |
| aceite oliva        | <input type="radio"/> Nunca o menos 1 vez al mes<br><input type="radio"/> 1 a 3 veces mes<br><input type="radio"/> 1 vez semana<br><input type="radio"/> 2 a 4 veces semana<br><input type="radio"/> 5 a 6 veces semana<br><input type="radio"/> 1 vez al día<br><input checked="" type="radio"/> 2 a 3 veces al día<br><input type="radio"/> 5 a 6 veces al día<br><input type="radio"/> más 6 veces al día |
| otros aceites       | <input checked="" type="radio"/> Nunca o menos 1 vez al mes<br><input type="radio"/> 1 a 3 veces mes<br><input type="radio"/> 1 vez semana<br><input type="radio"/> 2 a 4 veces semana<br><input type="radio"/> 5 a 6 veces semana<br><input type="radio"/> 1 vez al día<br><input type="radio"/> 2 a 3 veces al día<br><input type="radio"/> 5 a 6 veces al día<br><input type="radio"/> más 6 veces al día |
| margarina           | <input checked="" type="radio"/> Nunca o menos 1 vez al mes<br><input type="radio"/> 1 a 3 veces mes<br><input type="radio"/> 1 vez semana<br><input type="radio"/> 2 a 4 veces semana<br><input type="radio"/> 5 a 6 veces semana<br><input type="radio"/> 1 vez al día<br><input type="radio"/> 2 a 3 veces al día<br><input type="radio"/> 5 a 6 veces al día<br><input type="radio"/> más 6 veces al día |
| mantequilla         | <input checked="" type="radio"/> Nunca o menos 1 vez al mes<br><input type="radio"/> 1 a 3 veces mes<br><input type="radio"/> 1 vez semana<br><input type="radio"/> 2 a 4 veces semana<br><input type="radio"/> 5 a 6 veces semana<br><input type="radio"/> 1 vez al día<br><input type="radio"/> 2 a 3 veces al día<br><input type="radio"/> 5 a 6 veces al día<br><input type="radio"/> más 6 veces al día |
| galletas tipo maria | <input checked="" type="radio"/> Nunca o menos 1 vez al mes<br><input type="radio"/> 1 a 3 veces mes<br><input type="radio"/> 1 vez semana<br><input type="radio"/> 2 a 4 veces semana<br><input type="radio"/> 5 a 6 veces semana<br><input type="radio"/> 1 vez al día<br><input type="radio"/> 2 a 3 veces al día<br><input type="radio"/> 5 a 6 veces al día<br><input type="radio"/> más 6 veces al día |

|                           |                                                                                                                                                                                                                                                                                                                                                                                                              |
|---------------------------|--------------------------------------------------------------------------------------------------------------------------------------------------------------------------------------------------------------------------------------------------------------------------------------------------------------------------------------------------------------------------------------------------------------|
| galletas chocolate        | <input type="radio"/> Nunca o menos 1 vez al mes<br><input type="radio"/> 1 a 3 veces mes<br><input type="radio"/> 1 vez semana<br><input checked="" type="radio"/> 2 a 4 veces semana<br><input type="radio"/> 5 a 6 veces semana<br><input type="radio"/> 1 vez al día<br><input type="radio"/> 2 a 3 veces al día<br><input type="radio"/> 5 a 6 veces al día<br><input type="radio"/> más 6 veces al día |
| bollieria                 | <input type="radio"/> Nunca o menos 1 vez al mes<br><input type="radio"/> 1 a 3 veces mes<br><input type="radio"/> 1 vez semana<br><input checked="" type="radio"/> 2 a 4 veces semana<br><input type="radio"/> 5 a 6 veces semana<br><input type="radio"/> 1 vez al día<br><input type="radio"/> 2 a 3 veces al día<br><input type="radio"/> 5 a 6 veces al día<br><input type="radio"/> más 6 veces al día |
| chocolate o bombones      | <input type="radio"/> Nunca o menos 1 vez al mes<br><input type="radio"/> 1 a 3 veces mes<br><input type="radio"/> 1 vez semana<br><input checked="" type="radio"/> 2 a 4 veces semana<br><input type="radio"/> 5 a 6 veces semana<br><input type="radio"/> 1 vez al día<br><input type="radio"/> 2 a 3 veces al día<br><input type="radio"/> 5 a 6 veces al día<br><input type="radio"/> más 6 veces al día |
| chocolate polvo o colacao | <input type="radio"/> Nunca o menos 1 vez al mes<br><input type="radio"/> 1 a 3 veces mes<br><input type="radio"/> 1 vez semana<br><input type="radio"/> 2 a 4 veces semana<br><input type="radio"/> 5 a 6 veces semana<br><input checked="" type="radio"/> 1 vez al día<br><input type="radio"/> 2 a 3 veces al día<br><input type="radio"/> 5 a 6 veces al día<br><input type="radio"/> más 6 veces al día |
| vino tinto                | <input checked="" type="radio"/> Nunca o menos 1 vez al mes<br><input type="radio"/> 1 a 3 veces mes<br><input type="radio"/> 1 vez semana<br><input type="radio"/> 2 a 4 veces semana<br><input type="radio"/> 5 a 6 veces semana<br><input type="radio"/> 1 vez al día<br><input type="radio"/> 2 a 3 veces al día<br><input type="radio"/> 5 a 6 veces al día<br><input type="radio"/> más 6 veces al día |
| vino blanco               | <input checked="" type="radio"/> Nunca o menos 1 vez al mes<br><input type="radio"/> 1 a 3 veces mes<br><input type="radio"/> 1 vez semana<br><input type="radio"/> 2 a 4 veces semana<br><input type="radio"/> 5 a 6 veces semana<br><input type="radio"/> 1 vez al día<br><input type="radio"/> 2 a 3 veces al día<br><input type="radio"/> 5 a 6 veces al día<br><input type="radio"/> más 6 veces al día |

|                       |                                                                                                                                                                                                                                                                                                                                                                                                              |
|-----------------------|--------------------------------------------------------------------------------------------------------------------------------------------------------------------------------------------------------------------------------------------------------------------------------------------------------------------------------------------------------------------------------------------------------------|
| vino seco o vermut    | <input checked="" type="radio"/> Nunca o menos 1 vez al mes<br><input type="radio"/> 1 a 3 veces mes<br><input type="radio"/> 1 vez semana<br><input type="radio"/> 2 a 4 veces semana<br><input type="radio"/> 5 a 6 veces semana<br><input type="radio"/> 1 vez al día<br><input type="radio"/> 2 a 3 veces al día<br><input type="radio"/> 5 a 6 veces al día<br><input type="radio"/> más 6 veces al día |
| cerveza               | <input checked="" type="radio"/> Nunca o menos 1 vez al mes<br><input type="radio"/> 1 a 3 veces mes<br><input type="radio"/> 1 vez semana<br><input type="radio"/> 2 a 4 veces semana<br><input type="radio"/> 5 a 6 veces semana<br><input type="radio"/> 1 vez al día<br><input type="radio"/> 2 a 3 veces al día<br><input type="radio"/> 5 a 6 veces al día<br><input type="radio"/> más 6 veces al día |
| cerveza sin alcohol   | <input checked="" type="radio"/> Nunca o menos 1 vez al mes<br><input type="radio"/> 1 a 3 veces mes<br><input type="radio"/> 1 vez semana<br><input type="radio"/> 2 a 4 veces semana<br><input type="radio"/> 5 a 6 veces semana<br><input type="radio"/> 1 vez al día<br><input type="radio"/> 2 a 3 veces al día<br><input type="radio"/> 5 a 6 veces al día<br><input type="radio"/> más 6 veces al día |
| licores               | <input checked="" type="radio"/> Nunca o menos 1 vez al mes<br><input type="radio"/> 1 a 3 veces mes<br><input type="radio"/> 1 vez semana<br><input type="radio"/> 2 a 4 veces semana<br><input type="radio"/> 5 a 6 veces semana<br><input type="radio"/> 1 vez al día<br><input type="radio"/> 2 a 3 veces al día<br><input type="radio"/> 5 a 6 veces al día<br><input type="radio"/> más 6 veces al día |
| ginebra o ron o vodka | <input checked="" type="radio"/> Nunca o menos 1 vez al mes<br><input type="radio"/> 1 a 3 veces mes<br><input type="radio"/> 1 vez semana<br><input type="radio"/> 2 a 4 veces semana<br><input type="radio"/> 5 a 6 veces semana<br><input type="radio"/> 1 vez al día<br><input type="radio"/> 2 a 3 veces al día<br><input type="radio"/> 5 a 6 veces al día<br><input type="radio"/> más 6 veces al día |
| refresco normal       | <input type="radio"/> Nunca o menos 1 vez al mes<br><input checked="" type="radio"/> 1 a 3 veces mes<br><input type="radio"/> 1 vez semana<br><input type="radio"/> 2 a 4 veces semana<br><input type="radio"/> 5 a 6 veces semana<br><input type="radio"/> 1 vez al día<br><input type="radio"/> 2 a 3 veces al día<br><input type="radio"/> 5 a 6 veces al día<br><input type="radio"/> más 6 veces al día |

|                          |                                                                                                                                                                                                                                                                                                                                                                                                              |
|--------------------------|--------------------------------------------------------------------------------------------------------------------------------------------------------------------------------------------------------------------------------------------------------------------------------------------------------------------------------------------------------------------------------------------------------------|
| refresco sin azúcar      | <input checked="" type="radio"/> Nunca o menos 1 vez al mes<br><input type="radio"/> 1 a 3 veces mes<br><input type="radio"/> 1 vez semana<br><input type="radio"/> 2 a 4 veces semana<br><input type="radio"/> 5 a 6 veces semana<br><input type="radio"/> 1 vez al día<br><input type="radio"/> 2 a 3 veces al día<br><input type="radio"/> 5 a 6 veces al día<br><input type="radio"/> más 6 veces al día |
| Agua del grifo           | <input checked="" type="radio"/> Nunca o menos 1 vez al mes<br><input type="radio"/> 1 a 3 veces mes<br><input type="radio"/> 1 vez semana<br><input type="radio"/> 2 a 4 veces semana<br><input type="radio"/> 5 a 6 veces semana<br><input type="radio"/> 1 vez al día<br><input type="radio"/> 2 a 3 veces al día<br><input type="radio"/> 5 a 6 veces al día<br><input type="radio"/> más 6 veces al día |
| agua embotellada sin gas | <input type="radio"/> Nunca o menos 1 vez al mes<br><input type="radio"/> 1 a 3 veces mes<br><input type="radio"/> 1 vez semana<br><input type="radio"/> 2 a 4 veces semana<br><input type="radio"/> 5 a 6 veces semana<br><input type="radio"/> 1 vez al día<br><input checked="" type="radio"/> 2 a 3 veces al día<br><input type="radio"/> 5 a 6 veces al día<br><input type="radio"/> más 6 veces al día |
| agua embotellada con gas | <input checked="" type="radio"/> Nunca o menos 1 vez al mes<br><input type="radio"/> 1 a 3 veces mes<br><input type="radio"/> 1 vez semana<br><input type="radio"/> 2 a 4 veces semana<br><input type="radio"/> 5 a 6 veces semana<br><input type="radio"/> 1 vez al día<br><input type="radio"/> 2 a 3 veces al día<br><input type="radio"/> 5 a 6 veces al día<br><input type="radio"/> más 6 veces al día |
| zumو frutas embasado     | <input checked="" type="radio"/> Nunca o menos 1 vez al mes<br><input type="radio"/> 1 a 3 veces mes<br><input type="radio"/> 1 vez semana<br><input type="radio"/> 2 a 4 veces semana<br><input type="radio"/> 5 a 6 veces semana<br><input type="radio"/> 1 vez al día<br><input type="radio"/> 2 a 3 veces al día<br><input type="radio"/> 5 a 6 veces al día<br><input type="radio"/> más 6 veces al día |
| cafe                     | <input checked="" type="radio"/> Nunca o menos 1 vez al mes<br><input type="radio"/> 1 a 3 veces mes<br><input type="radio"/> 1 vez semana<br><input type="radio"/> 2 a 4 veces semana<br><input type="radio"/> 5 a 6 veces semana<br><input type="radio"/> 1 vez al día<br><input type="radio"/> 2 a 3 veces al día<br><input type="radio"/> 5 a 6 veces al día<br><input type="radio"/> más 6 veces al día |

|                       |                                                                                                                                                                                                                                                                                                                                                                                                              |
|-----------------------|--------------------------------------------------------------------------------------------------------------------------------------------------------------------------------------------------------------------------------------------------------------------------------------------------------------------------------------------------------------------------------------------------------------|
| cafe descafeinado     | <input type="radio"/> Nunca o menos 1 vez al mes<br><input type="radio"/> 1 a 3 veces mes<br><input type="radio"/> 1 vez semana<br><input type="radio"/> 2 a 4 veces semana<br><input type="radio"/> 5 a 6 veces semana<br><input type="radio"/> 1 vez al día<br><input checked="" type="radio"/> 2 a 3 veces al día<br><input type="radio"/> 5 a 6 veces al día<br><input type="radio"/> más 6 veces al día |
| te o infusión         | <input checked="" type="radio"/> Nunca o menos 1 vez al mes<br><input type="radio"/> 1 a 3 veces mes<br><input type="radio"/> 1 vez semana<br><input type="radio"/> 2 a 4 veces semana<br><input type="radio"/> 5 a 6 veces semana<br><input type="radio"/> 1 vez al día<br><input type="radio"/> 2 a 3 veces al día<br><input type="radio"/> 5 a 6 veces al día<br><input type="radio"/> más 6 veces al día |
| sopa o puré verduras  | <input type="radio"/> Nunca o menos 1 vez al mes<br><input type="radio"/> 1 a 3 veces mes<br><input checked="" type="radio"/> 1 vez semana<br><input type="radio"/> 2 a 4 veces semana<br><input type="radio"/> 5 a 6 veces semana<br><input type="radio"/> 1 vez al día<br><input type="radio"/> 2 a 3 veces al día<br><input type="radio"/> 5 a 6 veces al día<br><input type="radio"/> más 6 veces al día |
| croquetas pollo jamón | <input type="radio"/> Nunca o menos 1 vez al mes<br><input checked="" type="radio"/> 1 a 3 veces mes<br><input type="radio"/> 1 vez semana<br><input type="radio"/> 2 a 4 veces semana<br><input type="radio"/> 5 a 6 veces semana<br><input type="radio"/> 1 vez al día<br><input type="radio"/> 2 a 3 veces al día<br><input type="radio"/> 5 a 6 veces al día<br><input type="radio"/> más 6 veces al día |
| croquetas pescado     | <input checked="" type="radio"/> Nunca o menos 1 vez al mes<br><input type="radio"/> 1 a 3 veces mes<br><input type="radio"/> 1 vez semana<br><input type="radio"/> 2 a 4 veces semana<br><input type="radio"/> 5 a 6 veces semana<br><input type="radio"/> 1 vez al día<br><input type="radio"/> 2 a 3 veces al día<br><input type="radio"/> 5 a 6 veces al día<br><input type="radio"/> más 6 veces al día |
| mayonesa              | <input checked="" type="radio"/> Nunca o menos 1 vez al mes<br><input type="radio"/> 1 a 3 veces mes<br><input type="radio"/> 1 vez semana<br><input type="radio"/> 2 a 4 veces semana<br><input type="radio"/> 5 a 6 veces semana<br><input type="radio"/> 1 vez al día<br><input type="radio"/> 2 a 3 veces al día<br><input type="radio"/> 5 a 6 veces al día<br><input type="radio"/> más 6 veces al día |



salsa tomate

- ☐ Nunca o menos 1 vez al mes  
☐ 1 a 3 veces mes  
☒ 1 vez semana  
☐ 2 a 4 veces semana  
☐ 5 a 6 veces semana  
☐ 1 vez al día  
☐ 2 a 3 veces al día  
☐ 5 a 6 veces al día  
☐ más 6 veces al día

ketchup

- ☒ Nunca o menos 1 vez al mes  
☐ 1 a 3 veces mes  
☐ 1 vez semana  
☐ 2 a 4 veces semana  
☐ 5 a 6 veces semana  
☐ 1 vez al día  
☐ 2 a 3 veces al día  
☐ 5 a 6 veces al día  
☐ más 6 veces al día

sal

- ☐ Nunca o menos 1 vez al mes  
☐ 1 a 3 veces mes  
☐ 1 vez semana  
☐ 2 a 4 veces semana  
☐ 5 a 6 veces semana  
☐ 1 vez al día  
☐ 2 a 3 veces al día  
☒ 5 a 6 veces al día  
☐ más 6 veces al día

ajo

- ☐ Nunca o menos 1 vez al mes  
☐ 1 a 3 veces mes  
☐ 1 vez semana  
☐ 2 a 4 veces semana  
☐ 5 a 6 veces semana  
☐ 1 vez al día  
☒ 2 a 3 veces al día  
☐ 5 a 6 veces al día  
☐ más 6 veces al día

mermelada o miel

- ☒ Nunca o menos 1 vez al mes  
☐ 1 a 3 veces mes  
☐ 1 vez semana  
☐ 2 a 4 veces semana  
☐ 5 a 6 veces semana  
☐ 1 vez al día  
☐ 2 a 3 veces al día  
☐ 5 a 6 veces al día  
☐ más 6 veces al día

azúcar

- ☒ Nunca o menos 1 vez al mes  
☐ 1 a 3 veces mes  
☐ 1 vez semana  
☐ 2 a 4 veces semana  
☐ 5 a 6 veces semana  
☐ 1 vez al día  
☐ 2 a 3 veces al día  
☐ 5 a 6 veces al día  
☐ más 6 veces al día

|                                       |                                                                                                                                                                                                                                                                                                                                                                                                                                                                                                                               |
|---------------------------------------|-------------------------------------------------------------------------------------------------------------------------------------------------------------------------------------------------------------------------------------------------------------------------------------------------------------------------------------------------------------------------------------------------------------------------------------------------------------------------------------------------------------------------------|
| Otro alimento                         |                                                                                                                                                                                                                                                                                                                                                                                                                                                                                                                               |
| suplementos vitamínicos               | <input checked="" type="radio"/> si<br><input type="radio"/> no                                                                                                                                                                                                                                                                                                                                                                                                                                                               |
| suplementos vitamínicos               | [*DATA REMOVED*]                                                                                                                                                                                                                                                                                                                                                                                                                                                                                                              |
| dieta previa                          | <input type="radio"/> si<br><input checked="" type="radio"/> no                                                                                                                                                                                                                                                                                                                                                                                                                                                               |
| motivo dieta                          | <input checked="" type="radio"/> no dieta<br><input type="radio"/> control peso<br><input type="radio"/> control colesterol<br><input type="radio"/> control diabetes<br><input type="radio"/> problemas estómago<br><input type="radio"/> problemas vesícula o hepáticos<br><input type="radio"/> HTA o cardiopatía<br><input type="radio"/> problemas renales<br><input type="radio"/> alergia alimentaria<br><input type="radio"/> ácido úrico elevado<br><input type="radio"/> vegetariana<br><input type="radio"/> otros |
| cambio alimentos año previo gestación | <input checked="" type="radio"/> si<br><input type="radio"/> no                                                                                                                                                                                                                                                                                                                                                                                                                                                               |
| cambio lácteos                        | <input type="radio"/> eliminado<br><input type="radio"/> disminuido<br><input checked="" type="radio"/> igual<br><input type="radio"/> aumentado<br><input type="radio"/> no sabe                                                                                                                                                                                                                                                                                                                                             |
| cambio huevos                         | <input type="radio"/> eliminado<br><input type="radio"/> disminuido<br><input type="radio"/> igual<br><input checked="" type="radio"/> aumentado<br><input type="radio"/> no sabe                                                                                                                                                                                                                                                                                                                                             |
| cambio carne                          | <input type="radio"/> eliminado<br><input type="radio"/> disminuido<br><input checked="" type="radio"/> igual<br><input type="radio"/> aumentado<br><input type="radio"/> no sabe                                                                                                                                                                                                                                                                                                                                             |
| cambio pescado                        | <input type="radio"/> eliminado<br><input checked="" type="radio"/> disminuido<br><input type="radio"/> igual<br><input type="radio"/> aumentado<br><input type="radio"/> no sabe                                                                                                                                                                                                                                                                                                                                             |
| cambio verduras                       | <input type="radio"/> eliminado<br><input type="radio"/> disminuido<br><input type="radio"/> igual<br><input checked="" type="radio"/> aumentado<br><input type="radio"/> no sabe                                                                                                                                                                                                                                                                                                                                             |

|                            |                                                                                                                                                                                                                        |
|----------------------------|------------------------------------------------------------------------------------------------------------------------------------------------------------------------------------------------------------------------|
| cambio legumbres           | <input type="radio"/> eliminado<br><input type="radio"/> disminuido<br><input type="radio"/> igual<br><input checked="" type="radio"/> aumentado<br><input type="radio"/> no sabe                                      |
| cambio fruta               | <input type="radio"/> eliminado<br><input type="radio"/> disminuido<br><input type="radio"/> igual<br><input checked="" type="radio"/> aumentado<br><input type="radio"/> no sabe                                      |
| cambio pan                 | <input type="radio"/> eliminado<br><input type="radio"/> disminuido<br><input checked="" type="radio"/> igual<br><input type="radio"/> aumentado<br><input type="radio"/> no sabe                                      |
| cambio aceite oliva        | <input type="radio"/> eliminado<br><input type="radio"/> disminuido<br><input checked="" type="radio"/> igual<br><input type="radio"/> aumentado<br><input type="radio"/> no sabe                                      |
| cambio mante o margarina   | <input type="radio"/> eliminado<br><input checked="" type="radio"/> disminuido<br><input type="radio"/> igual<br><input type="radio"/> aumentado<br><input type="radio"/> no sabe                                      |
| cambio azúcar y dulces     | <input type="radio"/> eliminado<br><input type="radio"/> disminuido<br><input checked="" type="radio"/> igual<br><input type="radio"/> aumentado<br><input type="radio"/> no sabe                                      |
| cambio bebidas alcohólicas | <input checked="" type="radio"/> eliminado<br><input type="radio"/> disminuido<br><input type="radio"/> igual<br><input type="radio"/> aumentado<br><input type="radio"/> no sabe                                      |
| frecuencia comidas fritas  | <input type="radio"/> a diario<br><input type="radio"/> 5 a 6 veces semana<br><input checked="" type="radio"/> 2 a 4 veces semana<br><input type="radio"/> 1 vez semana<br><input type="radio"/> menos de 1 vez semana |
| carne                      | <input type="radio"/> no como<br><input type="radio"/> cruda<br><input type="radio"/> poco hecha<br><input type="radio"/> hecha<br><input checked="" type="radio"/> muy hecha                                          |
| grasa visible carne        | <input checked="" type="radio"/> quita toda<br><input type="radio"/> quita mayoría<br><input type="radio"/> quita un poco<br><input type="radio"/> no quita nada                                                       |

|                                |                                                                                                                                                                                                                                                          |
|--------------------------------|----------------------------------------------------------------------------------------------------------------------------------------------------------------------------------------------------------------------------------------------------------|
| cocina carne                   | <input type="radio"/> a la plancha<br><input type="radio"/> a la parrilla<br><input type="radio"/> asada<br><input checked="" type="radio"/> frita<br><input type="radio"/> guisada                                                                      |
| tostado quemado carne          | <input checked="" type="radio"/> nunca<br><input type="radio"/> 1 vez mes<br><input type="radio"/> 2 a 3 veces mes<br><input type="radio"/> 1 vez semana<br><input type="radio"/> 2 a 3 semanas                                                          |
| tostado quemado pescado        | <input checked="" type="radio"/> nunca<br><input type="radio"/> 1 vez mes<br><input type="radio"/> 2 a 3 veces mes<br><input type="radio"/> 1 vez semana<br><input type="radio"/> 2 a 3 semanas                                                          |
| socarrat paella                | <input type="radio"/> nunca<br><input type="radio"/> 1 vez mes<br><input type="radio"/> 2 a 3 veces mes<br><input checked="" type="radio"/> 1 vez semana<br><input type="radio"/> 2 a 3 semanas                                                          |
| grasa o aceite cocinar         | <input type="radio"/> mantequilla<br><input type="radio"/> margarina<br><input type="radio"/> aceite oliva<br><input checked="" type="radio"/> aceite oliva virgen extra<br><input type="radio"/> aceite vegetal<br><input type="radio"/> mezcla aceites |
| grasa aceite aliñar            | <input type="radio"/> mantequilla<br><input type="radio"/> margarina<br><input checked="" type="radio"/> aceite oliva<br><input type="radio"/> aceite oliva virgen extra<br><input type="radio"/> aceite vegetal<br><input type="radio"/> mezcla aceites |
| grasa aceite freir             | <input type="radio"/> mantequilla<br><input type="radio"/> margarina<br><input type="radio"/> aceite oliva<br><input type="radio"/> aceite oliva virgen extra<br><input checked="" type="radio"/> aceite vegetal<br><input type="radio"/> mezcla aceites |
| Ejercicio cuestionario         | <input checked="" type="radio"/> si<br><input type="radio"/> no                                                                                                                                                                                          |
| horas de sueño incluido siesta | [*DATA REMOVED*]                                                                                                                                                                                                                                         |
| minutos siesta                 | [*DATA REMOVED*]                                                                                                                                                                                                                                         |
| horas televisión semana        | [*DATA REMOVED*]                                                                                                                                                                                                                                         |

|                                        |                                                                                                                                                                                                                                                                                                                                                                           |
|----------------------------------------|---------------------------------------------------------------------------------------------------------------------------------------------------------------------------------------------------------------------------------------------------------------------------------------------------------------------------------------------------------------------------|
| actividad trabajo                      | <input checked="" type="radio"/> casi siempre sentado<br><input type="radio"/> sentado 50 por cien<br><input type="radio"/> casi siempre de pie, quieto<br><input type="radio"/> casi siempre levantado caminando y llevando pocas cosas<br><input type="radio"/> casi siempre levantado, caminando y llevado muchas cosas<br><input type="radio"/> trabajo manual pesado |
| tiempo caminar o bici al día           | <input type="radio"/> casi nunca<br><input checked="" type="radio"/> menos 20min día<br><input type="radio"/> 20 a 40 min día<br><input type="radio"/> 40 a 60 min día<br><input type="radio"/> 1h o 1h y media día<br><input type="radio"/> más de 1h y media al día                                                                                                     |
| tiempo tareas casa al día              | <input type="radio"/> menos de 1h día<br><input checked="" type="radio"/> 1 a 2h día<br><input type="radio"/> 3 a 4h día<br><input type="radio"/> 5 a 6h día<br><input type="radio"/> 7 a 8h día<br><input type="radio"/> más de 8h día                                                                                                                                   |
| tiempo libre televisión ordenador leer | <input type="radio"/> menos 1h día<br><input type="radio"/> 1h día<br><input type="radio"/> 2h día<br><input type="radio"/> 3h día<br><input checked="" type="radio"/> 4h día<br><input type="radio"/> 5 a 6h día<br><input type="radio"/> mas 6h día                                                                                                                     |
| tiempo libre ejercicio o deporte       | <input checked="" type="radio"/> menos 1h semana<br><input type="radio"/> 1h semana<br><input type="radio"/> 2h semana<br><input type="radio"/> 3h semana<br><input type="radio"/> 4 a 5h semana<br><input type="radio"/> mas 5h semana                                                                                                                                   |
| como se considera                      | <input type="radio"/> sedentaria<br><input checked="" type="radio"/> poco activa<br><input type="radio"/> moderadamente activa<br><input type="radio"/> bastante activa<br><input type="radio"/> muy activa<br><input type="radio"/> no sabe                                                                                                                              |
| FUR                                    | [*DATA REMOVED*]                                                                                                                                                                                                                                                                                                                                                          |
| Semanas gestación 2T                   | [*DATA REMOVED*]                                                                                                                                                                                                                                                                                                                                                          |
| Días gestación 2T                      | [*DATA REMOVED*]                                                                                                                                                                                                                                                                                                                                                          |
| DBP 2T                                 | [*DATA REMOVED*]                                                                                                                                                                                                                                                                                                                                                          |
| CC 2T                                  | [*DATA REMOVED*]                                                                                                                                                                                                                                                                                                                                                          |
| AC 2T                                  | [*DATA REMOVED*]                                                                                                                                                                                                                                                                                                                                                          |

|                                                   |                                                                                                                                                                                                 |
|---------------------------------------------------|-------------------------------------------------------------------------------------------------------------------------------------------------------------------------------------------------|
| LF 2T                                             | [*DATA REMOVED*]                                                                                                                                                                                |
| PFE 2T (Hadlock)                                  | [*DATA REMOVED*]                                                                                                                                                                                |
| Semanas gestación 3T                              | [*DATA REMOVED*]                                                                                                                                                                                |
| días 3T                                           | [*DATA REMOVED*]                                                                                                                                                                                |
| DBP 3T                                            | [*DATA REMOVED*]                                                                                                                                                                                |
| CC 3T                                             | [*DATA REMOVED*]                                                                                                                                                                                |
| AC 3T                                             | [*DATA REMOVED*]                                                                                                                                                                                |
| LF 3T                                             | [*DATA REMOVED*]                                                                                                                                                                                |
| PFE 3T (Hadlock)                                  | [*DATA REMOVED*]                                                                                                                                                                                |
| Semanas de gestación final                        | [*DATA REMOVED*]                                                                                                                                                                                |
| días gestación final                              | [*DATA REMOVED*]                                                                                                                                                                                |
| Localización placenta                             | <input type="radio"/> anterior<br><input type="radio"/> lateral derecha<br><input type="radio"/> lateral izquierda<br><input checked="" type="radio"/> posterior<br><input type="radio"/> fondo |
| Presentación longitudinal cefálica                | <input type="radio"/> no<br><input checked="" type="radio"/> si                                                                                                                                 |
| Dorso                                             | <input checked="" type="radio"/> izquierda anterior<br><input type="radio"/> izquierda posterior<br><input type="radio"/> derecha anterior<br><input type="radio"/> derecha posterior           |
| diámetro biparietal                               | [*DATA REMOVED*]                                                                                                                                                                                |
| Circunferencia craneal                            | [*DATA REMOVED*]                                                                                                                                                                                |
| Circunferencia abdominal                          | [*DATA REMOVED*]                                                                                                                                                                                |
| Longitud de femur                                 | [*DATA REMOVED*]                                                                                                                                                                                |
| tejido celular subcutáneo a nivel del muslo en mm | [*DATA REMOVED*]                                                                                                                                                                                |
| tejido celular subcutáneo en abdomen en mm        | [*DATA REMOVED*]                                                                                                                                                                                |
| Volumen del muslo en cm3                          | [*DATA REMOVED*]                                                                                                                                                                                |
| Peso fetal estimado según fórmula de Hadlock      | [*DATA REMOVED*]                                                                                                                                                                                |

|                                               |                                                                                                                                                          |
|-----------------------------------------------|----------------------------------------------------------------------------------------------------------------------------------------------------------|
| Percentil                                     | [*DATA REMOVED*]                                                                                                                                         |
| Peso fetal estimado según fórmula de Scioscia | <hr/>                                                                                                                                                    |
| Peso fetal estimado según fórmula de LEE      | <hr/>                                                                                                                                                    |
| Tipo de parto                                 | <input type="radio"/> eutocico<br><input type="radio"/> instrumentado/ventosa<br><input checked="" type="radio"/> cesarea                                |
| fecha de nacimiento                           | [*DATA REMOVED*]                                                                                                                                         |
| Días entre exploración y nacimiento           | [*DATA REMOVED*]                                                                                                                                         |
| Peso RN en g                                  | [*DATA REMOVED*]                                                                                                                                         |
| sexo                                          | <input checked="" type="radio"/> mujer<br><input type="radio"/> hombre                                                                                   |
| Apgar 1 minuto                                | [*DATA REMOVED*]                                                                                                                                         |
| Apgar 5 minutos                               | [*DATA REMOVED*]                                                                                                                                         |
| Apgar 10 minutos                              | <hr/>                                                                                                                                                    |
| antecedente Covid durante gestación           | <input type="radio"/> Yes<br><input checked="" type="radio"/> No                                                                                         |
| Nivel de estudios                             | <input type="radio"/> ninguno<br><input type="radio"/> primarios<br><input checked="" type="radio"/> secundarios<br><input type="radio"/> universitarios |

# Base\_datos\_estimacion\_peso\_fetal

|                                       |                                                                                                                                                                                                                                                                                      |
|---------------------------------------|--------------------------------------------------------------------------------------------------------------------------------------------------------------------------------------------------------------------------------------------------------------------------------------|
| Número de identificación participante | 20                                                                                                                                                                                                                                                                                   |
| CODIGO PARTICIPANTE                   |                                                                                                                                                                                                                                                                                      |
| Edad                                  | [*DATA REMOVED*]                                                                                                                                                                                                                                                                     |
| Gestaciones                           | <input type="radio"/> 1<br><input checked="" type="radio"/> 2<br><input type="radio"/> 3<br><input type="radio"/> mas de 3                                                                                                                                                           |
| partos                                | <input checked="" type="radio"/> 0<br><input type="radio"/> 1<br><input type="radio"/> 2<br><input type="radio"/> 3<br><input type="radio"/> mas de 3                                                                                                                                |
| cesáreas                              | <input checked="" type="radio"/> 0<br><input type="radio"/> 1<br><input type="radio"/> 2<br><input type="radio"/> 3<br><input type="radio"/> mas de 3                                                                                                                                |
| Abortos                               | <input type="radio"/> 0<br><input checked="" type="radio"/> 1<br><input type="radio"/> 2<br><input type="radio"/> 3<br><input type="radio"/> mas de 3                                                                                                                                |
| Tipo de gestacion                     | <input type="radio"/> espontanea<br><input type="radio"/> IAC inseminación artificial conyuge<br><input type="radio"/> IAD inseminación artificial donante<br><input checked="" type="radio"/> FIV Fecundación in Vitro<br><input type="radio"/> Ovodon FIV con donación de ovocitos |
| peso previo a embarazo                | [*DATA REMOVED*]                                                                                                                                                                                                                                                                     |
| Ganancia ponderal embarazo            | [*DATA REMOVED*]                                                                                                                                                                                                                                                                     |
| Talla madre                           | [*DATA REMOVED*]                                                                                                                                                                                                                                                                     |
| IMC previo embarazo                   | 26.25958474843318                                                                                                                                                                                                                                                                    |
| Patología obstétrica                  | <input checked="" type="radio"/> no<br><input type="radio"/> si                                                                                                                                                                                                                      |
| Diabetes pregestacional               | <input checked="" type="radio"/> no<br><input type="radio"/> si                                                                                                                                                                                                                      |
| Diabetes gestacional                  | <input checked="" type="radio"/> no<br><input type="radio"/> si                                                                                                                                                                                                                      |



|                                            |                                                                                                                                                                                      |
|--------------------------------------------|--------------------------------------------------------------------------------------------------------------------------------------------------------------------------------------|
| Diabetes gestacional con insulina          | <input checked="" type="radio"/> no<br><input type="radio"/> si                                                                                                                      |
| Diabetes gestacional con dieta y ejercicio | <input checked="" type="radio"/> no<br><input type="radio"/> si                                                                                                                      |
| Percentil fetos previos                    | <input checked="" type="radio"/> Nada<br><input type="radio"/> percentil menor de 10<br><input type="radio"/> percentil entre 10 y 90<br><input type="radio"/> percentil mayor de 90 |
| Exfumadora                                 | <input checked="" type="radio"/> Nada<br><input type="radio"/> menos de 5 años<br><input type="radio"/> 5 a 10 años<br><input type="radio"/> mayor o igual a 10 años                 |
| Hábito tabáquico                           | <input checked="" type="radio"/> no<br><input type="radio"/> si                                                                                                                      |
| fumadora                                   | [*DATA REMOVED*]                                                                                                                                                                     |
| Consumo otros tóxicos                      | <input checked="" type="radio"/> no<br><input type="radio"/> si                                                                                                                      |
| Hb 1T                                      | [*DATA REMOVED*]                                                                                                                                                                     |
| Htc 1T                                     | [*DATA REMOVED*]                                                                                                                                                                     |
| Hb 2T                                      | [*DATA REMOVED*]                                                                                                                                                                     |
| HTC 2T                                     | [*DATA REMOVED*]                                                                                                                                                                     |
| Hb 3T                                      | [*DATA REMOVED*]                                                                                                                                                                     |
| HTC 3T                                     | [*DATA REMOVED*]                                                                                                                                                                     |
| Suplemento FE oral                         | <input checked="" type="radio"/> si<br><input type="radio"/> no                                                                                                                      |
| Suplemento fe iv                           | <input type="radio"/> si<br><input checked="" type="radio"/> no                                                                                                                      |
| Transfusión                                | <input checked="" type="radio"/> no<br><input type="radio"/> si                                                                                                                      |
| Solicitada Vit D                           | <input checked="" type="radio"/> no<br><input type="radio"/> si                                                                                                                      |
| Deficit vit D                              | <input type="radio"/> no<br><input type="radio"/> si                                                                                                                                 |
| Suplemento vit D                           | <input type="radio"/> si<br><input type="radio"/> no                                                                                                                                 |

|                       |                                                                                                                                                                                                                                                                                                                                                                                                              |
|-----------------------|--------------------------------------------------------------------------------------------------------------------------------------------------------------------------------------------------------------------------------------------------------------------------------------------------------------------------------------------------------------------------------------------------------------|
| Dieta, cuestionario   | <input checked="" type="radio"/> sí<br><input type="radio"/> no                                                                                                                                                                                                                                                                                                                                              |
| Leche entera          | <input type="radio"/> Nunca o menos 1 vez al mes<br><input type="radio"/> 1 a 3 veces mes<br><input type="radio"/> 1 vez semana<br><input type="radio"/> 2 a 4 veces semana<br><input type="radio"/> 5 a 6 veces semana<br><input checked="" type="radio"/> 1 vez al día<br><input type="radio"/> 2 a 3 veces al día<br><input type="radio"/> 5 a 6 veces al día<br><input type="radio"/> más 6 veces al día |
| Leche semidesnatada   | <input checked="" type="radio"/> Nunca o menos 1 vez al mes<br><input type="radio"/> 1 a 3 veces mes<br><input type="radio"/> 1 vez semana<br><input type="radio"/> 2 a 4 veces semana<br><input type="radio"/> 5 a 6 veces semana<br><input type="radio"/> 1 vez al día<br><input type="radio"/> 2 a 3 veces al día<br><input type="radio"/> 5 a 6 veces al día<br><input type="radio"/> mas 6 veces al día |
| Leche desnatada       | <input checked="" type="radio"/> Nunca o menos 1 vez al mes<br><input type="radio"/> 1 a 3 veces mes<br><input type="radio"/> 1 vez semana<br><input type="radio"/> 2 a 4 veces semana<br><input type="radio"/> 5 a 6 veces semana<br><input type="radio"/> 1 vez al día<br><input type="radio"/> 2 a 3 veces al día<br><input type="radio"/> 5 a 6 veces al día<br><input type="radio"/> más 6 veces al día |
| Leche condensada      | <input checked="" type="radio"/> Nunca o menos 1 vez al mes<br><input type="radio"/> 1 a 3 veces mes<br><input type="radio"/> 1 vez semana<br><input type="radio"/> 2 a 4 veces semana<br><input type="radio"/> 5 a 6 veces semana<br><input type="radio"/> 1 vez al día<br><input type="radio"/> 2 a 3 veces al día<br><input type="radio"/> 5 a 6 veces al día<br><input type="radio"/> más 6 veces al día |
| nata o crema de leche | <input checked="" type="radio"/> Nunca o menos 1 vez al mes<br><input type="radio"/> 1 a 3 veces mes<br><input type="radio"/> 1 vez semana<br><input type="radio"/> 2 a 4 veces semana<br><input type="radio"/> 5 a 6 veces semana<br><input type="radio"/> 1 vez al día<br><input type="radio"/> 2 a 3 veces al día<br><input type="radio"/> 5 a 6 veces al día<br><input type="radio"/> más 6 veces al día |

---

Yogurt Entero

- ☐ Nunca o menos 1 vez al mes  
☐ 1 a 3 veces mes  
☐ 1 vez semana  
☐ 2 a 4 veces semana  
☐ 5 a 6 veces semana  
☒ 1 vez al día  
☐ 2 a 3 veces al día  
☐ 5 a 6 veces al día  
☐ más 6 veces al día

---

Yogurt desnatado

- ☒ Nunca o menos 1 vez al mes  
☐ 1 a 3 veces mes  
☐ 1 vez semana  
☐ 2 a 4 veces semana  
☐ 5 a 6 veces semana  
☐ 1 vez al día  
☐ 2 a 3 veces al día  
☐ 5 a 6 veces al día  
☐ más 6 veces al día

---

100g requesón o queso blando o queso fresco

- ☒ Nunca o menos 1 vez al mes  
☐ 1 a 3 veces mes  
☐ 1 vez semana  
☐ 2 a 4 veces semana  
☐ 5 a 6 veces semana  
☐ 1 vez al día  
☐ 2 a 3 veces al día  
☐ 5 a 6 veces al día  
☐ más 6 veces al día

---

queso curado o semicurado o cremoso

- ☐ Nunca o menos 1 vez al mes  
☐ 1 a 3 veces mes  
☐ 1 vez semana  
☐ 2 a 4 veces semana  
☐ 5 a 6 veces semana  
☒ 1 vez al día  
☐ 2 a 3 veces al día  
☐ 5 a 6 veces al día  
☐ más 6 veces al día

---

natillas flan pudding

- ☒ Nunca o menos 1 vez al mes  
☐ 1 a 3 veces mes  
☐ 1 vez semana  
☐ 2 a 4 veces semana  
☐ 5 a 6 veces semana  
☐ 1 vez al día  
☐ 2 a 3 veces al día  
☐ 5 a 6 veces al día  
☐ más 6 veces al día

---

Helado

- ☒ Nunca o menos 1 vez al mes  
☐ 1 a 3 veces mes  
☐ 1 vez semana  
☐ 2 a 4 veces semana  
☐ 5 a 6 veces semana  
☐ 1 vez al día  
☐ 2 a 3 veces al día  
☐ 5 a 6 veces al día  
☐ más 6 veces al día

|                                      |                                                                                                                                                                                                                                                                                                                                                                                                              |
|--------------------------------------|--------------------------------------------------------------------------------------------------------------------------------------------------------------------------------------------------------------------------------------------------------------------------------------------------------------------------------------------------------------------------------------------------------------|
| huevo                                | <input type="radio"/> Nunca o menos 1 vez al mes<br><input type="radio"/> 1 a 3 veces mes<br><input type="radio"/> 1 vez semana<br><input checked="" type="radio"/> 2 a 4 veces semana<br><input type="radio"/> 5 a 6 veces semana<br><input type="radio"/> 1 vez al día<br><input type="radio"/> 2 a 3 veces al día<br><input type="radio"/> 5 a 6 veces al día<br><input type="radio"/> más 6 veces al día |
| Pollo con piel                       | <input checked="" type="radio"/> Nunca o menos 1 vez al mes<br><input type="radio"/> 1 a 3 veces mes<br><input type="radio"/> 1 vez semana<br><input type="radio"/> 2 a 4 veces semana<br><input type="radio"/> 5 a 6 veces semana<br><input type="radio"/> 1 vez al día<br><input type="radio"/> 2 a 3 veces al día<br><input type="radio"/> 5 a 6 veces al día<br><input type="radio"/> más 6 veces al día |
| pollo sin piel                       | <input type="radio"/> Nunca o menos 1 vez al mes<br><input type="radio"/> 1 a 3 veces mes<br><input type="radio"/> 1 vez semana<br><input checked="" type="radio"/> 2 a 4 veces semana<br><input type="radio"/> 5 a 6 veces semana<br><input type="radio"/> 1 vez al día<br><input type="radio"/> 2 a 3 veces al día<br><input type="radio"/> 5 a 6 veces al día<br><input type="radio"/> más 6 veces al día |
| Ternera o cerdo o cordero            | <input type="radio"/> Nunca o menos 1 vez al mes<br><input type="radio"/> 1 a 3 veces mes<br><input type="radio"/> 1 vez semana<br><input checked="" type="radio"/> 2 a 4 veces semana<br><input type="radio"/> 5 a 6 veces semana<br><input type="radio"/> 1 vez al día<br><input type="radio"/> 2 a 3 veces al día<br><input type="radio"/> 5 a 6 veces al día<br><input type="radio"/> más 6 veces al día |
| carne caza: Conejo o codorniz o pato | <input checked="" type="radio"/> Nunca o menos 1 vez al mes<br><input type="radio"/> 1 a 3 veces mes<br><input type="radio"/> 1 vez semana<br><input type="radio"/> 2 a 4 veces semana<br><input type="radio"/> 5 a 6 veces semana<br><input type="radio"/> 1 vez al día<br><input type="radio"/> 2 a 3 veces al día<br><input type="radio"/> 5 a 6 veces al día<br><input type="radio"/> más 6 veces al día |
| Hígado de ternera o cerdo o pollo    | <input checked="" type="radio"/> Nunca o menos 1 vez al mes<br><input type="radio"/> 1 a 3 veces mes<br><input type="radio"/> 1 vez semana<br><input type="radio"/> 2 a 4 veces semana<br><input type="radio"/> 5 a 6 veces semana<br><input type="radio"/> 1 vez al día<br><input type="radio"/> 2 a 3 veces al día<br><input type="radio"/> 5 a 6 veces al día<br><input type="radio"/> más 6 veces al día |

|                     |                                                                                                                                                                                                                                                                                                                                                                                                              |
|---------------------|--------------------------------------------------------------------------------------------------------------------------------------------------------------------------------------------------------------------------------------------------------------------------------------------------------------------------------------------------------------------------------------------------------------|
| Vísceras            | <input checked="" type="radio"/> Nunca o menos 1 vez al mes<br><input type="radio"/> 1 a 3 veces mes<br><input type="radio"/> 1 vez semana<br><input type="radio"/> 2 a 4 veces semana<br><input type="radio"/> 5 a 6 veces semana<br><input type="radio"/> 1 vez al día<br><input type="radio"/> 2 a 3 veces al día<br><input type="radio"/> 5 a 6 veces al día<br><input type="radio"/> más 6 veces al día |
| Embutido            | <input checked="" type="radio"/> Nunca o menos 1 vez al mes<br><input type="radio"/> 1 a 3 veces mes<br><input type="radio"/> 1 vez semana<br><input type="radio"/> 2 a 4 veces semana<br><input type="radio"/> 5 a 6 veces semana<br><input type="radio"/> 1 vez al día<br><input type="radio"/> 2 a 3 veces al día<br><input type="radio"/> 5 a 6 veces al día<br><input type="radio"/> más 6 veces al día |
| Salchicha o similar | <input checked="" type="radio"/> Nunca o menos 1 vez al mes<br><input type="radio"/> 1 a 3 veces mes<br><input type="radio"/> 1 vez semana<br><input type="radio"/> 2 a 4 veces semana<br><input type="radio"/> 5 a 6 veces semana<br><input type="radio"/> 1 vez al día<br><input type="radio"/> 2 a 3 veces al día<br><input type="radio"/> 5 a 6 veces al día<br><input type="radio"/> más 6 veces al día |
| Pate o foiegras     | <input checked="" type="radio"/> Nunca o menos 1 vez al mes<br><input type="radio"/> 1 a 3 veces mes<br><input type="radio"/> 1 vez semana<br><input type="radio"/> 2 a 4 veces semana<br><input type="radio"/> 5 a 6 veces semana<br><input type="radio"/> 1 vez al día<br><input type="radio"/> 2 a 3 veces al día<br><input type="radio"/> 5 a 6 veces al día<br><input type="radio"/> más 6 veces al día |
| Hamburguesa         | <input type="radio"/> Nunca o menos 1 vez al mes<br><input type="radio"/> 1 a 3 veces mes<br><input type="radio"/> 1 vez semana<br><input checked="" type="radio"/> 2 a 4 veces semana<br><input type="radio"/> 5 a 6 veces semana<br><input type="radio"/> 1 vez al día<br><input type="radio"/> 2 a 3 veces al día<br><input type="radio"/> 5 a 6 veces al día<br><input type="radio"/> más 6 veces al día |
| tocino o bacon      | <input checked="" type="radio"/> Nunca o menos 1 vez al mes<br><input type="radio"/> 1 a 3 veces mes<br><input type="radio"/> 1 vez semana<br><input type="radio"/> 2 a 4 veces semana<br><input type="radio"/> 5 a 6 veces semana<br><input type="radio"/> 1 vez al día<br><input type="radio"/> 2 a 3 veces al día<br><input type="radio"/> 5 a 6 veces al día<br><input type="radio"/> más 6 veces al día |

---

Pescado frito

- ☒ Nunca o menos 1 vez al mes  
☐ 1 a 3 veces mes  
☐ 1 vez semana  
☐ 2 a 4 veces semana  
☐ 5 a 6 veces semana  
☐ 1 vez al día  
☐ 2 a 3 veces al día  
☐ 5 a 6 veces al día  
☐ más 6 veces al día

---

pescado hervido blanco

- ☐ Nunca o menos 1 vez al mes  
☐ 1 a 3 veces mes  
☒ 1 vez semana  
☐ 2 a 4 veces semana  
☐ 5 a 6 veces semana  
☐ 1 vez al día  
☐ 2 a 3 veces al día  
☐ 5 a 6 veces al día  
☐ más 6 veces al día

---

pescado hervido azul

- ☐ Nunca o menos 1 vez al mes  
☐ 1 a 3 veces mes  
☒ 1 vez semana  
☐ 2 a 4 veces semana  
☐ 5 a 6 veces semana  
☐ 1 vez al día  
☐ 2 a 3 veces al día  
☐ 5 a 6 veces al día  
☐ más 6 veces al día

---

otros pescado azul

- ☐ Nunca o menos 1 vez al mes  
☐ 1 a 3 veces mes  
☒ 1 vez semana  
☐ 2 a 4 veces semana  
☐ 5 a 6 veces semana  
☐ 1 vez al día  
☐ 2 a 3 veces al día  
☐ 5 a 6 veces al día  
☐ más 6 veces al día

---

atun conserva

- ☐ Nunca o menos 1 vez al mes  
☐ 1 a 3 veces mes  
☒ 1 vez semana  
☐ 2 a 4 veces semana  
☐ 5 a 6 veces semana  
☐ 1 vez al día  
☐ 2 a 3 veces al día  
☐ 5 a 6 veces al día  
☐ más 6 veces al día

---

sardina conserva

- ☒ Nunca o menos 1 vez al mes  
☐ 1 a 3 veces mes  
☐ 1 vez semana  
☐ 2 a 4 veces semana  
☐ 5 a 6 veces semana  
☐ 1 vez al día  
☐ 2 a 3 veces al día  
☐ 5 a 6 veces al día  
☐ más 6 veces al día

---

pescado ahumado

- ☐ Nunca o menos 1 vez al mes  
☐ 1 a 3 veces mes  
☒ 1 vez semana  
☐ 2 a 4 veces semana  
☐ 5 a 6 veces semana  
☐ 1 vez al día  
☐ 2 a 3 veces al día  
☐ 5 a 6 veces al día  
☐ más 6 veces al día

---

almejas o mejillones o ostras unos 100g

- ☒ Nunca o menos 1 vez al mes  
☐ 1 a 3 veces mes  
☐ 1 vez semana  
☐ 2 a 4 veces semana  
☐ 5 a 6 veces semana  
☐ 1 vez al día  
☐ 2 a 3 veces al día  
☐ 5 a 6 veces al día  
☐ más 6 veces al día

---

calamar o chipiron o sepia unos 100g

- ☐ Nunca o menos 1 vez al mes  
☒ 1 a 3 veces mes  
☐ 1 vez semana  
☐ 2 a 4 veces semana  
☐ 5 a 6 veces semana  
☐ 1 vez al día  
☐ 2 a 3 veces al día  
☐ 5 a 6 veces al día  
☐ más 6 veces al día

---

marisco unos 100g

- ☐ Nunca o menos 1 vez al mes  
☒ 1 a 3 veces mes  
☐ 1 vez semana  
☐ 2 a 4 veces semana  
☐ 5 a 6 veces semana  
☐ 1 vez al día  
☐ 2 a 3 veces al día  
☐ 5 a 6 veces al día  
☐ más 6 veces al día

---

Espinacas o acelgas cocinadas

- ☐ Nunca o menos 1 vez al mes  
☐ 1 a 3 veces mes  
☐ 1 vez semana  
☒ 2 a 4 veces semana  
☐ 5 a 6 veces semana  
☐ 1 vez al día  
☐ 2 a 3 veces al día  
☐ 5 a 6 veces al día  
☐ más 6 veces al día

---

Col o coliflor o brocoli cocinado

- ☐ Nunca o menos 1 vez al mes  
☒ 1 a 3 veces mes  
☐ 1 vez semana  
☐ 2 a 4 veces semana  
☐ 5 a 6 veces semana  
☐ 1 vez al día  
☐ 2 a 3 veces al día  
☐ 5 a 6 veces al día  
☐ más 6 veces al día

---

|                              |                                                                                                                                                                                                                                                                                                                                                                                                              |
|------------------------------|--------------------------------------------------------------------------------------------------------------------------------------------------------------------------------------------------------------------------------------------------------------------------------------------------------------------------------------------------------------------------------------------------------------|
| Lechuga o endivia o escarola | <input type="radio"/> Nunca o menos 1 vez al mes<br><input checked="" type="radio"/> 1 a 3 veces mes<br><input type="radio"/> 1 vez semana<br><input type="radio"/> 2 a 4 veces semana<br><input type="radio"/> 5 a 6 veces semana<br><input type="radio"/> 1 vez al día<br><input type="radio"/> 2 a 3 veces al día<br><input type="radio"/> 5 a 6 veces al día<br><input type="radio"/> más 6 veces al día |
|------------------------------|--------------------------------------------------------------------------------------------------------------------------------------------------------------------------------------------------------------------------------------------------------------------------------------------------------------------------------------------------------------------------------------------------------------|

---

|                 |                                                                                                                                                                                                                                                                                                                                                                                                              |
|-----------------|--------------------------------------------------------------------------------------------------------------------------------------------------------------------------------------------------------------------------------------------------------------------------------------------------------------------------------------------------------------------------------------------------------------|
| tomate ensalada | <input type="radio"/> Nunca o menos 1 vez al mes<br><input type="radio"/> 1 a 3 veces mes<br><input checked="" type="radio"/> 1 vez semana<br><input type="radio"/> 2 a 4 veces semana<br><input type="radio"/> 5 a 6 veces semana<br><input type="radio"/> 1 vez al día<br><input type="radio"/> 2 a 3 veces al día<br><input type="radio"/> 5 a 6 veces al día<br><input type="radio"/> más 6 veces al día |
|-----------------|--------------------------------------------------------------------------------------------------------------------------------------------------------------------------------------------------------------------------------------------------------------------------------------------------------------------------------------------------------------------------------------------------------------|

---

|         |                                                                                                                                                                                                                                                                                                                                                                                                              |
|---------|--------------------------------------------------------------------------------------------------------------------------------------------------------------------------------------------------------------------------------------------------------------------------------------------------------------------------------------------------------------------------------------------------------------|
| cebolla | <input checked="" type="radio"/> Nunca o menos 1 vez al mes<br><input type="radio"/> 1 a 3 veces mes<br><input type="radio"/> 1 vez semana<br><input type="radio"/> 2 a 4 veces semana<br><input type="radio"/> 5 a 6 veces semana<br><input type="radio"/> 1 vez al día<br><input type="radio"/> 2 a 3 veces al día<br><input type="radio"/> 5 a 6 veces al día<br><input type="radio"/> más 6 veces al día |
|---------|--------------------------------------------------------------------------------------------------------------------------------------------------------------------------------------------------------------------------------------------------------------------------------------------------------------------------------------------------------------------------------------------------------------|

---

|                      |                                                                                                                                                                                                                                                                                                                                                                                                              |
|----------------------|--------------------------------------------------------------------------------------------------------------------------------------------------------------------------------------------------------------------------------------------------------------------------------------------------------------------------------------------------------------------------------------------------------------|
| Zanahoria o calabaza | <input type="radio"/> Nunca o menos 1 vez al mes<br><input type="radio"/> 1 a 3 veces mes<br><input type="radio"/> 1 vez semana<br><input checked="" type="radio"/> 2 a 4 veces semana<br><input type="radio"/> 5 a 6 veces semana<br><input type="radio"/> 1 vez al día<br><input type="radio"/> 2 a 3 veces al día<br><input type="radio"/> 5 a 6 veces al día<br><input type="radio"/> más 6 veces al día |
|----------------------|--------------------------------------------------------------------------------------------------------------------------------------------------------------------------------------------------------------------------------------------------------------------------------------------------------------------------------------------------------------------------------------------------------------|

---

|               |                                                                                                                                                                                                                                                                                                                                                                                                              |
|---------------|--------------------------------------------------------------------------------------------------------------------------------------------------------------------------------------------------------------------------------------------------------------------------------------------------------------------------------------------------------------------------------------------------------------|
| Judías verdes | <input checked="" type="radio"/> Nunca o menos 1 vez al mes<br><input type="radio"/> 1 a 3 veces mes<br><input type="radio"/> 1 vez semana<br><input type="radio"/> 2 a 4 veces semana<br><input type="radio"/> 5 a 6 veces semana<br><input type="radio"/> 1 vez al día<br><input type="radio"/> 2 a 3 veces al día<br><input type="radio"/> 5 a 6 veces al día<br><input type="radio"/> más 6 veces al día |
|---------------|--------------------------------------------------------------------------------------------------------------------------------------------------------------------------------------------------------------------------------------------------------------------------------------------------------------------------------------------------------------------------------------------------------------|

---

|                                |                                                                                                                                                                                                                                                                                                                                                                                                              |
|--------------------------------|--------------------------------------------------------------------------------------------------------------------------------------------------------------------------------------------------------------------------------------------------------------------------------------------------------------------------------------------------------------------------------------------------------------|
| Berenjena o calabacin o pepino | <input type="radio"/> Nunca o menos 1 vez al mes<br><input type="radio"/> 1 a 3 veces mes<br><input type="radio"/> 1 vez semana<br><input type="radio"/> 2 a 4 veces semana<br><input checked="" type="radio"/> 5 a 6 veces semana<br><input type="radio"/> 1 vez al día<br><input type="radio"/> 2 a 3 veces al día<br><input type="radio"/> 5 a 6 veces al día<br><input type="radio"/> más 6 veces al día |
|--------------------------------|--------------------------------------------------------------------------------------------------------------------------------------------------------------------------------------------------------------------------------------------------------------------------------------------------------------------------------------------------------------------------------------------------------------|

---



---

pimiento

- ☐ Nunca o menos 1 vez al mes
- ☐ 1 a 3 veces mes
- ☐ 1 vez semana
- ☐ 2 a 4 veces semana
- ☒ 5 a 6 veces semana
- ☐ 1 vez al día
- ☐ 2 a 3 veces al día
- ☐ 5 a 6 veces al día
- ☐ más 6 veces al día

---

alcachofa

- ☐ Nunca o menos 1 vez al mes
- ☐ 1 a 3 veces mes
- ☐ 1 vez semana
- ☒ 2 a 4 veces semana
- ☐ 5 a 6 veces semana
- ☐ 1 vez al día
- ☐ 2 a 3 veces al día
- ☐ 5 a 6 veces al día
- ☐ más 6 veces al día

---

espárragos

- ☐ Nunca o menos 1 vez al mes
- ☐ 1 a 3 veces mes
- ☒ 1 vez semana
- ☐ 2 a 4 veces semana
- ☐ 5 a 6 veces semana
- ☐ 1 vez al día
- ☐ 2 a 3 veces al día
- ☐ 5 a 6 veces al día
- ☐ más 6 veces al día

---

maíz hervido

- ☐ Nunca o menos 1 vez al mes
- ☐ 1 a 3 veces mes
- ☒ 1 vez semana
- ☐ 2 a 4 veces semana
- ☐ 5 a 6 veces semana
- ☐ 1 vez al día
- ☐ 2 a 3 veces al día
- ☐ 5 a 6 veces al día
- ☐ más 6 veces al día

---

legumbres

- ☐ Nunca o menos 1 vez al mes
- ☐ 1 a 3 veces mes
- ☐ 1 vez semana
- ☒ 2 a 4 veces semana
- ☐ 5 a 6 veces semana
- ☐ 1 vez al día
- ☐ 2 a 3 veces al día
- ☐ 5 a 6 veces al día
- ☐ más 6 veces al día

---

naranjas o mandarinas

- ☐ Nunca o menos 1 vez al mes
- ☐ 1 a 3 veces mes
- ☐ 1 vez semana
- ☒ 2 a 4 veces semana
- ☐ 5 a 6 veces semana
- ☐ 1 vez al día
- ☐ 2 a 3 veces al día
- ☐ 5 a 6 veces al día
- ☐ más 6 veces al día

|                       |                                                                                                                                                                                                                                                                                                                                                                                                              |
|-----------------------|--------------------------------------------------------------------------------------------------------------------------------------------------------------------------------------------------------------------------------------------------------------------------------------------------------------------------------------------------------------------------------------------------------------|
| zum natural fruta     | <input type="radio"/> Nunca o menos 1 vez al mes<br><input checked="" type="radio"/> 1 a 3 veces mes<br><input type="radio"/> 1 vez semana<br><input type="radio"/> 2 a 4 veces semana<br><input type="radio"/> 5 a 6 veces semana<br><input type="radio"/> 1 vez al día<br><input type="radio"/> 2 a 3 veces al día<br><input type="radio"/> 5 a 6 veces al día<br><input type="radio"/> más 6 veces al día |
| platano               | <input checked="" type="radio"/> Nunca o menos 1 vez al mes<br><input type="radio"/> 1 a 3 veces mes<br><input type="radio"/> 1 vez semana<br><input type="radio"/> 2 a 4 veces semana<br><input type="radio"/> 5 a 6 veces semana<br><input type="radio"/> 1 vez al día<br><input type="radio"/> 2 a 3 veces al día<br><input type="radio"/> 5 a 6 veces al día<br><input type="radio"/> más 6 veces al día |
| manzana o pera        | <input checked="" type="radio"/> Nunca o menos 1 vez al mes<br><input type="radio"/> 1 a 3 veces mes<br><input type="radio"/> 1 vez semana<br><input type="radio"/> 2 a 4 veces semana<br><input type="radio"/> 5 a 6 veces semana<br><input type="radio"/> 1 vez al día<br><input type="radio"/> 2 a 3 veces al día<br><input type="radio"/> 5 a 6 veces al día<br><input type="radio"/> más 6 veces al día |
| melocotón o nectarina | <input checked="" type="radio"/> Nunca o menos 1 vez al mes<br><input type="radio"/> 1 a 3 veces mes<br><input type="radio"/> 1 vez semana<br><input type="radio"/> 2 a 4 veces semana<br><input type="radio"/> 5 a 6 veces semana<br><input type="radio"/> 1 vez al día<br><input type="radio"/> 2 a 3 veces al día<br><input type="radio"/> 5 a 6 veces al día<br><input type="radio"/> más 6 veces al día |
| sandia o melon        | <input type="radio"/> Nunca o menos 1 vez al mes<br><input type="radio"/> 1 a 3 veces mes<br><input checked="" type="radio"/> 1 vez semana<br><input type="radio"/> 2 a 4 veces semana<br><input type="radio"/> 5 a 6 veces semana<br><input type="radio"/> 1 vez al día<br><input type="radio"/> 2 a 3 veces al día<br><input type="radio"/> 5 a 6 veces al día<br><input type="radio"/> más 6 veces al día |
| uva                   | <input type="radio"/> Nunca o menos 1 vez al mes<br><input type="radio"/> 1 a 3 veces mes<br><input checked="" type="radio"/> 1 vez semana<br><input type="radio"/> 2 a 4 veces semana<br><input type="radio"/> 5 a 6 veces semana<br><input type="radio"/> 1 vez al día<br><input type="radio"/> 2 a 3 veces al día<br><input type="radio"/> 5 a 6 veces al día<br><input type="radio"/> más 6 veces al día |

|                 |                                                                                                                                                                                                                                                                                                                                                                                                              |
|-----------------|--------------------------------------------------------------------------------------------------------------------------------------------------------------------------------------------------------------------------------------------------------------------------------------------------------------------------------------------------------------------------------------------------------------|
| bruna o ciruela | <input checked="" type="radio"/> Nunca o menos 1 vez al mes<br><input type="radio"/> 1 a 3 veces mes<br><input type="radio"/> 1 vez semana<br><input type="radio"/> 2 a 4 veces semana<br><input type="radio"/> 5 a 6 veces semana<br><input type="radio"/> 1 vez al día<br><input type="radio"/> 2 a 3 veces al día<br><input type="radio"/> 5 a 6 veces al día<br><input type="radio"/> más 6 veces al día |
| kiwi            | <input type="radio"/> Nunca o menos 1 vez al mes<br><input type="radio"/> 1 a 3 veces mes<br><input checked="" type="radio"/> 1 vez semana<br><input type="radio"/> 2 a 4 veces semana<br><input type="radio"/> 5 a 6 veces semana<br><input type="radio"/> 1 vez al día<br><input type="radio"/> 2 a 3 veces al día<br><input type="radio"/> 5 a 6 veces al día<br><input type="radio"/> más 6 veces al día |
| aceituna        | <input type="radio"/> Nunca o menos 1 vez al mes<br><input checked="" type="radio"/> 1 a 3 veces mes<br><input type="radio"/> 1 vez semana<br><input type="radio"/> 2 a 4 veces semana<br><input type="radio"/> 5 a 6 veces semana<br><input type="radio"/> 1 vez al día<br><input type="radio"/> 2 a 3 veces al día<br><input type="radio"/> 5 a 6 veces al día<br><input type="radio"/> más 6 veces al día |
| frutos secos    | <input type="radio"/> Nunca o menos 1 vez al mes<br><input type="radio"/> 1 a 3 veces mes<br><input type="radio"/> 1 vez semana<br><input type="radio"/> 2 a 4 veces semana<br><input type="radio"/> 5 a 6 veces semana<br><input checked="" type="radio"/> 1 vez al día<br><input type="radio"/> 2 a 3 veces al día<br><input type="radio"/> 5 a 6 veces al día<br><input type="radio"/> más 6 veces al día |
| pan blanco      | <input type="radio"/> Nunca o menos 1 vez al mes<br><input type="radio"/> 1 a 3 veces mes<br><input type="radio"/> 1 vez semana<br><input checked="" type="radio"/> 2 a 4 veces semana<br><input type="radio"/> 5 a 6 veces semana<br><input type="radio"/> 1 vez al día<br><input type="radio"/> 2 a 3 veces al día<br><input type="radio"/> 5 a 6 veces al día<br><input type="radio"/> más 6 veces al día |
| pan integral    | <input type="radio"/> Nunca o menos 1 vez al mes<br><input type="radio"/> 1 a 3 veces mes<br><input type="radio"/> 1 vez semana<br><input checked="" type="radio"/> 2 a 4 veces semana<br><input type="radio"/> 5 a 6 veces semana<br><input type="radio"/> 1 vez al día<br><input type="radio"/> 2 a 3 veces al día<br><input type="radio"/> 5 a 6 veces al día<br><input type="radio"/> más 6 veces al día |

|                          |                                                                                                                                                                                                                                                                                                                                                                                                              |
|--------------------------|--------------------------------------------------------------------------------------------------------------------------------------------------------------------------------------------------------------------------------------------------------------------------------------------------------------------------------------------------------------------------------------------------------------|
| cereales desayuno        | <input type="radio"/> Nunca o menos 1 vez al mes<br><input type="radio"/> 1 a 3 veces mes<br><input type="radio"/> 1 vez semana<br><input checked="" type="radio"/> 2 a 4 veces semana<br><input type="radio"/> 5 a 6 veces semana<br><input type="radio"/> 1 vez al día<br><input type="radio"/> 2 a 3 veces al día<br><input type="radio"/> 5 a 6 veces al día<br><input type="radio"/> más 6 veces al día |
| patatas fritas           | <input checked="" type="radio"/> Nunca o menos 1 vez al mes<br><input type="radio"/> 1 a 3 veces mes<br><input type="radio"/> 1 vez semana<br><input type="radio"/> 2 a 4 veces semana<br><input type="radio"/> 5 a 6 veces semana<br><input type="radio"/> 1 vez al día<br><input type="radio"/> 2 a 3 veces al día<br><input type="radio"/> 5 a 6 veces al día<br><input type="radio"/> más 6 veces al día |
| patatas cocidas o asadas | <input type="radio"/> Nunca o menos 1 vez al mes<br><input type="radio"/> 1 a 3 veces mes<br><input type="radio"/> 1 vez semana<br><input checked="" type="radio"/> 2 a 4 veces semana<br><input type="radio"/> 5 a 6 veces semana<br><input type="radio"/> 1 vez al día<br><input type="radio"/> 2 a 3 veces al día<br><input type="radio"/> 5 a 6 veces al día<br><input type="radio"/> más 6 veces al día |
| bolsa papas              | <input checked="" type="radio"/> Nunca o menos 1 vez al mes<br><input type="radio"/> 1 a 3 veces mes<br><input type="radio"/> 1 vez semana<br><input type="radio"/> 2 a 4 veces semana<br><input type="radio"/> 5 a 6 veces semana<br><input type="radio"/> 1 vez al día<br><input type="radio"/> 2 a 3 veces al día<br><input type="radio"/> 5 a 6 veces al día<br><input type="radio"/> más 6 veces al día |
| arroz cocinado           | <input type="radio"/> Nunca o menos 1 vez al mes<br><input type="radio"/> 1 a 3 veces mes<br><input type="radio"/> 1 vez semana<br><input checked="" type="radio"/> 2 a 4 veces semana<br><input type="radio"/> 5 a 6 veces semana<br><input type="radio"/> 1 vez al día<br><input type="radio"/> 2 a 3 veces al día<br><input type="radio"/> 5 a 6 veces al día<br><input type="radio"/> más 6 veces al día |
| pasta                    | <input type="radio"/> Nunca o menos 1 vez al mes<br><input type="radio"/> 1 a 3 veces mes<br><input checked="" type="radio"/> 1 vez semana<br><input type="radio"/> 2 a 4 veces semana<br><input type="radio"/> 5 a 6 veces semana<br><input type="radio"/> 1 vez al día<br><input type="radio"/> 2 a 3 veces al día<br><input type="radio"/> 5 a 6 veces al día<br><input type="radio"/> más 6 veces al día |

|                     |                                                                                                                                                                                                                                                                                                                                                                                                              |
|---------------------|--------------------------------------------------------------------------------------------------------------------------------------------------------------------------------------------------------------------------------------------------------------------------------------------------------------------------------------------------------------------------------------------------------------|
| pizza               | <input type="radio"/> Nunca o menos 1 vez al mes<br><input type="radio"/> 1 a 3 veces mes<br><input checked="" type="radio"/> 1 vez semana<br><input type="radio"/> 2 a 4 veces semana<br><input type="radio"/> 5 a 6 veces semana<br><input type="radio"/> 1 vez al día<br><input type="radio"/> 2 a 3 veces al día<br><input type="radio"/> 5 a 6 veces al día<br><input type="radio"/> más 6 veces al día |
| aceite oliva        | <input type="radio"/> Nunca o menos 1 vez al mes<br><input type="radio"/> 1 a 3 veces mes<br><input type="radio"/> 1 vez semana<br><input checked="" type="radio"/> 2 a 4 veces semana<br><input type="radio"/> 5 a 6 veces semana<br><input type="radio"/> 1 vez al día<br><input type="radio"/> 2 a 3 veces al día<br><input type="radio"/> 5 a 6 veces al día<br><input type="radio"/> más 6 veces al día |
| otros aceites       | <input checked="" type="radio"/> Nunca o menos 1 vez al mes<br><input type="radio"/> 1 a 3 veces mes<br><input type="radio"/> 1 vez semana<br><input type="radio"/> 2 a 4 veces semana<br><input type="radio"/> 5 a 6 veces semana<br><input type="radio"/> 1 vez al día<br><input type="radio"/> 2 a 3 veces al día<br><input type="radio"/> 5 a 6 veces al día<br><input type="radio"/> más 6 veces al día |
| margarina           | <input checked="" type="radio"/> Nunca o menos 1 vez al mes<br><input type="radio"/> 1 a 3 veces mes<br><input type="radio"/> 1 vez semana<br><input type="radio"/> 2 a 4 veces semana<br><input type="radio"/> 5 a 6 veces semana<br><input type="radio"/> 1 vez al día<br><input type="radio"/> 2 a 3 veces al día<br><input type="radio"/> 5 a 6 veces al día<br><input type="radio"/> más 6 veces al día |
| mantequilla         | <input type="radio"/> Nunca o menos 1 vez al mes<br><input type="radio"/> 1 a 3 veces mes<br><input type="radio"/> 1 vez semana<br><input checked="" type="radio"/> 2 a 4 veces semana<br><input type="radio"/> 5 a 6 veces semana<br><input type="radio"/> 1 vez al día<br><input type="radio"/> 2 a 3 veces al día<br><input type="radio"/> 5 a 6 veces al día<br><input type="radio"/> más 6 veces al día |
| galletas tipo maria | <input checked="" type="radio"/> Nunca o menos 1 vez al mes<br><input type="radio"/> 1 a 3 veces mes<br><input type="radio"/> 1 vez semana<br><input type="radio"/> 2 a 4 veces semana<br><input type="radio"/> 5 a 6 veces semana<br><input type="radio"/> 1 vez al día<br><input type="radio"/> 2 a 3 veces al día<br><input type="radio"/> 5 a 6 veces al día<br><input type="radio"/> más 6 veces al día |

|                           |                                                                                                                                                                                                                                                                                                                                                                                                              |
|---------------------------|--------------------------------------------------------------------------------------------------------------------------------------------------------------------------------------------------------------------------------------------------------------------------------------------------------------------------------------------------------------------------------------------------------------|
| galletas chocolate        | <input checked="" type="radio"/> Nunca o menos 1 vez al mes<br><input type="radio"/> 1 a 3 veces mes<br><input type="radio"/> 1 vez semana<br><input type="radio"/> 2 a 4 veces semana<br><input type="radio"/> 5 a 6 veces semana<br><input type="radio"/> 1 vez al día<br><input type="radio"/> 2 a 3 veces al día<br><input type="radio"/> 5 a 6 veces al día<br><input type="radio"/> más 6 veces al día |
| bollieria                 | <input checked="" type="radio"/> Nunca o menos 1 vez al mes<br><input type="radio"/> 1 a 3 veces mes<br><input type="radio"/> 1 vez semana<br><input type="radio"/> 2 a 4 veces semana<br><input type="radio"/> 5 a 6 veces semana<br><input type="radio"/> 1 vez al día<br><input type="radio"/> 2 a 3 veces al día<br><input type="radio"/> 5 a 6 veces al día<br><input type="radio"/> más 6 veces al día |
| chocolate o bombones      | <input checked="" type="radio"/> Nunca o menos 1 vez al mes<br><input type="radio"/> 1 a 3 veces mes<br><input type="radio"/> 1 vez semana<br><input type="radio"/> 2 a 4 veces semana<br><input type="radio"/> 5 a 6 veces semana<br><input type="radio"/> 1 vez al día<br><input type="radio"/> 2 a 3 veces al día<br><input type="radio"/> 5 a 6 veces al día<br><input type="radio"/> más 6 veces al día |
| chocolate polvo o colacao | <input checked="" type="radio"/> Nunca o menos 1 vez al mes<br><input type="radio"/> 1 a 3 veces mes<br><input type="radio"/> 1 vez semana<br><input type="radio"/> 2 a 4 veces semana<br><input type="radio"/> 5 a 6 veces semana<br><input type="radio"/> 1 vez al día<br><input type="radio"/> 2 a 3 veces al día<br><input type="radio"/> 5 a 6 veces al día<br><input type="radio"/> más 6 veces al día |
| vino tinto                | <input checked="" type="radio"/> Nunca o menos 1 vez al mes<br><input type="radio"/> 1 a 3 veces mes<br><input type="radio"/> 1 vez semana<br><input type="radio"/> 2 a 4 veces semana<br><input type="radio"/> 5 a 6 veces semana<br><input type="radio"/> 1 vez al día<br><input type="radio"/> 2 a 3 veces al día<br><input type="radio"/> 5 a 6 veces al día<br><input type="radio"/> más 6 veces al día |
| vino blanco               | <input checked="" type="radio"/> Nunca o menos 1 vez al mes<br><input type="radio"/> 1 a 3 veces mes<br><input type="radio"/> 1 vez semana<br><input type="radio"/> 2 a 4 veces semana<br><input type="radio"/> 5 a 6 veces semana<br><input type="radio"/> 1 vez al día<br><input type="radio"/> 2 a 3 veces al día<br><input type="radio"/> 5 a 6 veces al día<br><input type="radio"/> más 6 veces al día |

|                       |                                                                                                                                                                                                                                                                                                                                                                                                              |
|-----------------------|--------------------------------------------------------------------------------------------------------------------------------------------------------------------------------------------------------------------------------------------------------------------------------------------------------------------------------------------------------------------------------------------------------------|
| vino seco o vermut    | <input checked="" type="radio"/> Nunca o menos 1 vez al mes<br><input type="radio"/> 1 a 3 veces mes<br><input type="radio"/> 1 vez semana<br><input type="radio"/> 2 a 4 veces semana<br><input type="radio"/> 5 a 6 veces semana<br><input type="radio"/> 1 vez al día<br><input type="radio"/> 2 a 3 veces al día<br><input type="radio"/> 5 a 6 veces al día<br><input type="radio"/> más 6 veces al día |
| cerveza               | <input checked="" type="radio"/> Nunca o menos 1 vez al mes<br><input type="radio"/> 1 a 3 veces mes<br><input type="radio"/> 1 vez semana<br><input type="radio"/> 2 a 4 veces semana<br><input type="radio"/> 5 a 6 veces semana<br><input type="radio"/> 1 vez al día<br><input type="radio"/> 2 a 3 veces al día<br><input type="radio"/> 5 a 6 veces al día<br><input type="radio"/> más 6 veces al día |
| cerveza sin alcohol   | <input checked="" type="radio"/> Nunca o menos 1 vez al mes<br><input type="radio"/> 1 a 3 veces mes<br><input type="radio"/> 1 vez semana<br><input type="radio"/> 2 a 4 veces semana<br><input type="radio"/> 5 a 6 veces semana<br><input type="radio"/> 1 vez al día<br><input type="radio"/> 2 a 3 veces al día<br><input type="radio"/> 5 a 6 veces al día<br><input type="radio"/> más 6 veces al día |
| licores               | <input checked="" type="radio"/> Nunca o menos 1 vez al mes<br><input type="radio"/> 1 a 3 veces mes<br><input type="radio"/> 1 vez semana<br><input type="radio"/> 2 a 4 veces semana<br><input type="radio"/> 5 a 6 veces semana<br><input type="radio"/> 1 vez al día<br><input type="radio"/> 2 a 3 veces al día<br><input type="radio"/> 5 a 6 veces al día<br><input type="radio"/> más 6 veces al día |
| ginebra o ron o vodka | <input checked="" type="radio"/> Nunca o menos 1 vez al mes<br><input type="radio"/> 1 a 3 veces mes<br><input type="radio"/> 1 vez semana<br><input type="radio"/> 2 a 4 veces semana<br><input type="radio"/> 5 a 6 veces semana<br><input type="radio"/> 1 vez al día<br><input type="radio"/> 2 a 3 veces al día<br><input type="radio"/> 5 a 6 veces al día<br><input type="radio"/> más 6 veces al día |
| refresco normal       | <input checked="" type="radio"/> Nunca o menos 1 vez al mes<br><input type="radio"/> 1 a 3 veces mes<br><input type="radio"/> 1 vez semana<br><input type="radio"/> 2 a 4 veces semana<br><input type="radio"/> 5 a 6 veces semana<br><input type="radio"/> 1 vez al día<br><input type="radio"/> 2 a 3 veces al día<br><input type="radio"/> 5 a 6 veces al día<br><input type="radio"/> más 6 veces al día |

|                          |                                                                                                                                                                                                                                                                                                                                                                                                              |
|--------------------------|--------------------------------------------------------------------------------------------------------------------------------------------------------------------------------------------------------------------------------------------------------------------------------------------------------------------------------------------------------------------------------------------------------------|
| refresco sin azúcar      | <input checked="" type="radio"/> Nunca o menos 1 vez al mes<br><input type="radio"/> 1 a 3 veces mes<br><input type="radio"/> 1 vez semana<br><input type="radio"/> 2 a 4 veces semana<br><input type="radio"/> 5 a 6 veces semana<br><input type="radio"/> 1 vez al día<br><input type="radio"/> 2 a 3 veces al día<br><input type="radio"/> 5 a 6 veces al día<br><input type="radio"/> más 6 veces al día |
| Agua del grifo           | <input checked="" type="radio"/> Nunca o menos 1 vez al mes<br><input type="radio"/> 1 a 3 veces mes<br><input type="radio"/> 1 vez semana<br><input type="radio"/> 2 a 4 veces semana<br><input type="radio"/> 5 a 6 veces semana<br><input type="radio"/> 1 vez al día<br><input type="radio"/> 2 a 3 veces al día<br><input type="radio"/> 5 a 6 veces al día<br><input type="radio"/> más 6 veces al día |
| agua embotellada sin gas | <input type="radio"/> Nunca o menos 1 vez al mes<br><input type="radio"/> 1 a 3 veces mes<br><input type="radio"/> 1 vez semana<br><input type="radio"/> 2 a 4 veces semana<br><input type="radio"/> 5 a 6 veces semana<br><input type="radio"/> 1 vez al día<br><input type="radio"/> 2 a 3 veces al día<br><input type="radio"/> 5 a 6 veces al día<br><input checked="" type="radio"/> más 6 veces al día |
| agua embotellada con gas | <input type="radio"/> Nunca o menos 1 vez al mes<br><input checked="" type="radio"/> 1 a 3 veces mes<br><input type="radio"/> 1 vez semana<br><input type="radio"/> 2 a 4 veces semana<br><input type="radio"/> 5 a 6 veces semana<br><input type="radio"/> 1 vez al día<br><input type="radio"/> 2 a 3 veces al día<br><input type="radio"/> 5 a 6 veces al día<br><input type="radio"/> más 6 veces al día |
| zumو frutas embasado     | <input checked="" type="radio"/> Nunca o menos 1 vez al mes<br><input type="radio"/> 1 a 3 veces mes<br><input type="radio"/> 1 vez semana<br><input type="radio"/> 2 a 4 veces semana<br><input type="radio"/> 5 a 6 veces semana<br><input type="radio"/> 1 vez al día<br><input type="radio"/> 2 a 3 veces al día<br><input type="radio"/> 5 a 6 veces al día<br><input type="radio"/> más 6 veces al día |
| cafe                     | <input checked="" type="radio"/> Nunca o menos 1 vez al mes<br><input type="radio"/> 1 a 3 veces mes<br><input type="radio"/> 1 vez semana<br><input type="radio"/> 2 a 4 veces semana<br><input type="radio"/> 5 a 6 veces semana<br><input type="radio"/> 1 vez al día<br><input type="radio"/> 2 a 3 veces al día<br><input type="radio"/> 5 a 6 veces al día<br><input type="radio"/> más 6 veces al día |



|                       |                                                                                                                                                                                                                                                                                                                                                                                                              |
|-----------------------|--------------------------------------------------------------------------------------------------------------------------------------------------------------------------------------------------------------------------------------------------------------------------------------------------------------------------------------------------------------------------------------------------------------|
| cafe descafeinado     | <input checked="" type="radio"/> Nunca o menos 1 vez al mes<br><input type="radio"/> 1 a 3 veces mes<br><input type="radio"/> 1 vez semana<br><input type="radio"/> 2 a 4 veces semana<br><input type="radio"/> 5 a 6 veces semana<br><input type="radio"/> 1 vez al día<br><input type="radio"/> 2 a 3 veces al día<br><input type="radio"/> 5 a 6 veces al día<br><input type="radio"/> más 6 veces al día |
| te o infusión         | <input checked="" type="radio"/> Nunca o menos 1 vez al mes<br><input type="radio"/> 1 a 3 veces mes<br><input type="radio"/> 1 vez semana<br><input type="radio"/> 2 a 4 veces semana<br><input type="radio"/> 5 a 6 veces semana<br><input type="radio"/> 1 vez al día<br><input type="radio"/> 2 a 3 veces al día<br><input type="radio"/> 5 a 6 veces al día<br><input type="radio"/> más 6 veces al día |
| sopa o puré verduras  | <input type="radio"/> Nunca o menos 1 vez al mes<br><input type="radio"/> 1 a 3 veces mes<br><input type="radio"/> 1 vez semana<br><input checked="" type="radio"/> 2 a 4 veces semana<br><input type="radio"/> 5 a 6 veces semana<br><input type="radio"/> 1 vez al día<br><input type="radio"/> 2 a 3 veces al día<br><input type="radio"/> 5 a 6 veces al día<br><input type="radio"/> más 6 veces al día |
| croquetas pollo jamón | <input checked="" type="radio"/> Nunca o menos 1 vez al mes<br><input type="radio"/> 1 a 3 veces mes<br><input type="radio"/> 1 vez semana<br><input type="radio"/> 2 a 4 veces semana<br><input type="radio"/> 5 a 6 veces semana<br><input type="radio"/> 1 vez al día<br><input type="radio"/> 2 a 3 veces al día<br><input type="radio"/> 5 a 6 veces al día<br><input type="radio"/> más 6 veces al día |
| croquetas pescado     | <input checked="" type="radio"/> Nunca o menos 1 vez al mes<br><input type="radio"/> 1 a 3 veces mes<br><input type="radio"/> 1 vez semana<br><input type="radio"/> 2 a 4 veces semana<br><input type="radio"/> 5 a 6 veces semana<br><input type="radio"/> 1 vez al día<br><input type="radio"/> 2 a 3 veces al día<br><input type="radio"/> 5 a 6 veces al día<br><input type="radio"/> más 6 veces al día |
| mayonesa              | <input type="radio"/> Nunca o menos 1 vez al mes<br><input type="radio"/> 1 a 3 veces mes<br><input checked="" type="radio"/> 1 vez semana<br><input type="radio"/> 2 a 4 veces semana<br><input type="radio"/> 5 a 6 veces semana<br><input type="radio"/> 1 vez al día<br><input type="radio"/> 2 a 3 veces al día<br><input type="radio"/> 5 a 6 veces al día<br><input type="radio"/> más 6 veces al día |

|                  |                                                                                                                                                                                                                                                                                                                                                                                                              |
|------------------|--------------------------------------------------------------------------------------------------------------------------------------------------------------------------------------------------------------------------------------------------------------------------------------------------------------------------------------------------------------------------------------------------------------|
| salsa tomate     | <input checked="" type="radio"/> Nunca o menos 1 vez al mes<br><input type="radio"/> 1 a 3 veces mes<br><input type="radio"/> 1 vez semana<br><input type="radio"/> 2 a 4 veces semana<br><input type="radio"/> 5 a 6 veces semana<br><input type="radio"/> 1 vez al día<br><input type="radio"/> 2 a 3 veces al día<br><input type="radio"/> 5 a 6 veces al día<br><input type="radio"/> más 6 veces al día |
| ketchup          | <input checked="" type="radio"/> Nunca o menos 1 vez al mes<br><input type="radio"/> 1 a 3 veces mes<br><input type="radio"/> 1 vez semana<br><input type="radio"/> 2 a 4 veces semana<br><input type="radio"/> 5 a 6 veces semana<br><input type="radio"/> 1 vez al día<br><input type="radio"/> 2 a 3 veces al día<br><input type="radio"/> 5 a 6 veces al día<br><input type="radio"/> más 6 veces al día |
| sal              | <input type="radio"/> Nunca o menos 1 vez al mes<br><input type="radio"/> 1 a 3 veces mes<br><input type="radio"/> 1 vez semana<br><input type="radio"/> 2 a 4 veces semana<br><input checked="" type="radio"/> 5 a 6 veces semana<br><input type="radio"/> 1 vez al día<br><input type="radio"/> 2 a 3 veces al día<br><input type="radio"/> 5 a 6 veces al día<br><input type="radio"/> más 6 veces al día |
| ajo              | <input checked="" type="radio"/> Nunca o menos 1 vez al mes<br><input type="radio"/> 1 a 3 veces mes<br><input type="radio"/> 1 vez semana<br><input type="radio"/> 2 a 4 veces semana<br><input type="radio"/> 5 a 6 veces semana<br><input type="radio"/> 1 vez al día<br><input type="radio"/> 2 a 3 veces al día<br><input type="radio"/> 5 a 6 veces al día<br><input type="radio"/> más 6 veces al día |
| mermelada o miel | <input type="radio"/> Nunca o menos 1 vez al mes<br><input type="radio"/> 1 a 3 veces mes<br><input type="radio"/> 1 vez semana<br><input checked="" type="radio"/> 2 a 4 veces semana<br><input type="radio"/> 5 a 6 veces semana<br><input type="radio"/> 1 vez al día<br><input type="radio"/> 2 a 3 veces al día<br><input type="radio"/> 5 a 6 veces al día<br><input type="radio"/> más 6 veces al día |
| azúcar           | <input checked="" type="radio"/> Nunca o menos 1 vez al mes<br><input type="radio"/> 1 a 3 veces mes<br><input type="radio"/> 1 vez semana<br><input type="radio"/> 2 a 4 veces semana<br><input type="radio"/> 5 a 6 veces semana<br><input type="radio"/> 1 vez al día<br><input type="radio"/> 2 a 3 veces al día<br><input type="radio"/> 5 a 6 veces al día<br><input type="radio"/> más 6 veces al día |

|                                       |                                                                                                                                                                                                                                                                                                                                                                                                                                                                                                                               |
|---------------------------------------|-------------------------------------------------------------------------------------------------------------------------------------------------------------------------------------------------------------------------------------------------------------------------------------------------------------------------------------------------------------------------------------------------------------------------------------------------------------------------------------------------------------------------------|
| Otro alimento                         |                                                                                                                                                                                                                                                                                                                                                                                                                                                                                                                               |
| suplementos vitamínicos               | <input checked="" type="radio"/> si<br><input type="radio"/> no                                                                                                                                                                                                                                                                                                                                                                                                                                                               |
| suplementos vitamínicos               | [*DATA REMOVED*]                                                                                                                                                                                                                                                                                                                                                                                                                                                                                                              |
| dieta previa                          | <input type="radio"/> si<br><input checked="" type="radio"/> no                                                                                                                                                                                                                                                                                                                                                                                                                                                               |
| motivo dieta                          | <input type="radio"/> no dieta<br><input type="radio"/> control peso<br><input type="radio"/> control colesterol<br><input type="radio"/> control diabetes<br><input type="radio"/> problemas estómago<br><input type="radio"/> problemas vesícula o hepáticos<br><input type="radio"/> HTA o cardiopatía<br><input type="radio"/> problemas renales<br><input type="radio"/> alergia alimentaria<br><input type="radio"/> ácido úrico elevado<br><input checked="" type="radio"/> vegetariana<br><input type="radio"/> otros |
| cambio alimentos año previo gestación | <input type="radio"/> si<br><input checked="" type="radio"/> no                                                                                                                                                                                                                                                                                                                                                                                                                                                               |
| cambio lácteos                        | <input type="radio"/> eliminado<br><input type="radio"/> disminuido<br><input checked="" type="radio"/> igual<br><input type="radio"/> aumentado<br><input type="radio"/> no sabe                                                                                                                                                                                                                                                                                                                                             |
| cambio huevos                         | <input type="radio"/> eliminado<br><input type="radio"/> disminuido<br><input checked="" type="radio"/> igual<br><input type="radio"/> aumentado<br><input type="radio"/> no sabe                                                                                                                                                                                                                                                                                                                                             |
| cambio carne                          | <input type="radio"/> eliminado<br><input type="radio"/> disminuido<br><input checked="" type="radio"/> igual<br><input type="radio"/> aumentado<br><input type="radio"/> no sabe                                                                                                                                                                                                                                                                                                                                             |
| cambio pescado                        | <input type="radio"/> eliminado<br><input type="radio"/> disminuido<br><input checked="" type="radio"/> igual<br><input type="radio"/> aumentado<br><input type="radio"/> no sabe                                                                                                                                                                                                                                                                                                                                             |
| cambio verduras                       | <input type="radio"/> eliminado<br><input type="radio"/> disminuido<br><input checked="" type="radio"/> igual<br><input type="radio"/> aumentado<br><input type="radio"/> no sabe                                                                                                                                                                                                                                                                                                                                             |

|                            |                                                                                                                                                                                                                        |
|----------------------------|------------------------------------------------------------------------------------------------------------------------------------------------------------------------------------------------------------------------|
| cambio legumbres           | <input type="radio"/> eliminado<br><input type="radio"/> disminuido<br><input checked="" type="radio"/> igual<br><input type="radio"/> aumentado<br><input type="radio"/> no sabe                                      |
| cambio fruta               | <input type="radio"/> eliminado<br><input type="radio"/> disminuido<br><input checked="" type="radio"/> igual<br><input type="radio"/> aumentado<br><input type="radio"/> no sabe                                      |
| cambio pan                 | <input type="radio"/> eliminado<br><input type="radio"/> disminuido<br><input checked="" type="radio"/> igual<br><input type="radio"/> aumentado<br><input type="radio"/> no sabe                                      |
| cambio aceite oliva        | <input type="radio"/> eliminado<br><input type="radio"/> disminuido<br><input checked="" type="radio"/> igual<br><input type="radio"/> aumentado<br><input type="radio"/> no sabe                                      |
| cambio mante o margarina   | <input type="radio"/> eliminado<br><input type="radio"/> disminuido<br><input checked="" type="radio"/> igual<br><input type="radio"/> aumentado<br><input type="radio"/> no sabe                                      |
| cambio azúcar y dulces     | <input type="radio"/> eliminado<br><input type="radio"/> disminuido<br><input checked="" type="radio"/> igual<br><input type="radio"/> aumentado<br><input type="radio"/> no sabe                                      |
| cambio bebidas alcohólicas | <input type="radio"/> eliminado<br><input type="radio"/> disminuido<br><input checked="" type="radio"/> igual<br><input type="radio"/> aumentado<br><input type="radio"/> no sabe                                      |
| frecuencia comidas fritas  | <input type="radio"/> a diario<br><input type="radio"/> 5 a 6 veces semana<br><input type="radio"/> 2 a 4 veces semana<br><input type="radio"/> 1 vez semana<br><input checked="" type="radio"/> menos de 1 vez semana |
| carne                      | <input type="radio"/> no como<br><input type="radio"/> cruda<br><input type="radio"/> poco hecha<br><input type="radio"/> hecha<br><input checked="" type="radio"/> muy hecha                                          |
| grasa visible carne        | <input type="radio"/> quita toda<br><input checked="" type="radio"/> quita mayoría<br><input type="radio"/> quita un poco<br><input type="radio"/> no quita nada                                                       |

|                                |                                                                                                                                                                                                                                                          |
|--------------------------------|----------------------------------------------------------------------------------------------------------------------------------------------------------------------------------------------------------------------------------------------------------|
| cocina carne                   | <input type="radio"/> a la plancha<br><input type="radio"/> a la parrilla<br><input checked="" type="radio"/> asada<br><input type="radio"/> frita<br><input type="radio"/> guisada                                                                      |
| tostado quemado carne          | <input type="radio"/> nunca<br><input checked="" type="radio"/> 1 vez mes<br><input type="radio"/> 2 a 3 veces mes<br><input type="radio"/> 1 vez semana<br><input type="radio"/> 2 a 3 semanas                                                          |
| tostado quemado pescado        | <input type="radio"/> nunca<br><input checked="" type="radio"/> 1 vez mes<br><input type="radio"/> 2 a 3 veces mes<br><input type="radio"/> 1 vez semana<br><input type="radio"/> 2 a 3 semanas                                                          |
| socarrat paella                | <input type="radio"/> nunca<br><input checked="" type="radio"/> 1 vez mes<br><input type="radio"/> 2 a 3 veces mes<br><input type="radio"/> 1 vez semana<br><input type="radio"/> 2 a 3 semanas                                                          |
| grasa o aceite cocinar         | <input type="radio"/> mantequilla<br><input type="radio"/> margarina<br><input checked="" type="radio"/> aceite oliva<br><input type="radio"/> aceite oliva virgen extra<br><input type="radio"/> aceite vegetal<br><input type="radio"/> mezcla aceites |
| grasa aceite aliñar            | <input type="radio"/> mantequilla<br><input type="radio"/> margarina<br><input checked="" type="radio"/> aceite oliva<br><input type="radio"/> aceite oliva virgen extra<br><input type="radio"/> aceite vegetal<br><input type="radio"/> mezcla aceites |
| grasa aceite freir             | <input type="radio"/> mantequilla<br><input type="radio"/> margarina<br><input checked="" type="radio"/> aceite oliva<br><input type="radio"/> aceite oliva virgen extra<br><input type="radio"/> aceite vegetal<br><input type="radio"/> mezcla aceites |
| Ejercicio cuestionario         | <input checked="" type="radio"/> si<br><input type="radio"/> no                                                                                                                                                                                          |
| horas de sueño incluido siesta | [*DATA REMOVED*]                                                                                                                                                                                                                                         |
| minutos siesta                 | [*DATA REMOVED*]                                                                                                                                                                                                                                         |
| horas televisión semana        | [*DATA REMOVED*]                                                                                                                                                                                                                                         |

|                                        |                                                                                                                                                                                                                                                                                                                                                                           |
|----------------------------------------|---------------------------------------------------------------------------------------------------------------------------------------------------------------------------------------------------------------------------------------------------------------------------------------------------------------------------------------------------------------------------|
| actividad trabajo                      | <input type="radio"/> casi siempre sentado<br><input type="radio"/> sentado 50 por cien<br><input type="radio"/> casi siempre de pie, quieto<br><input checked="" type="radio"/> casi siempre levantado caminando y llevando pocas cosas<br><input type="radio"/> casi siempre levantado, caminando y llevado muchas cosas<br><input type="radio"/> trabajo manual pesado |
| tiempo caminar o bici al día           | <input type="radio"/> casi nunca<br><input type="radio"/> menos 20min día<br><input type="radio"/> 20 a 40 min día<br><input checked="" type="radio"/> 40 a 60 min día<br><input type="radio"/> 1h o 1h y media día<br><input type="radio"/> más de 1h y media al día                                                                                                     |
| tiempo tareas casa al día              | <input type="radio"/> menos de 1h día<br><input checked="" type="radio"/> 1 a 2h día<br><input type="radio"/> 3 a 4h día<br><input type="radio"/> 5 a 6h día<br><input type="radio"/> 7 a 8h día<br><input type="radio"/> más de 8h día                                                                                                                                   |
| tiempo libre televisión ordenador leer | <input type="radio"/> menos 1h día<br><input type="radio"/> 1h día<br><input type="radio"/> 2h día<br><input type="radio"/> 3h día<br><input checked="" type="radio"/> 4h día<br><input type="radio"/> 5 a 6h día<br><input type="radio"/> mas 6h día                                                                                                                     |
| tiempo libre ejercicio o deporte       | <input type="radio"/> menos 1h semana<br><input type="radio"/> 1h semana<br><input type="radio"/> 2h semana<br><input type="radio"/> 3h semana<br><input type="radio"/> 4 a 5h semana<br><input checked="" type="radio"/> mas 5h semana                                                                                                                                   |
| como se considera                      | <input type="radio"/> sedentaria<br><input checked="" type="radio"/> poco activa<br><input type="radio"/> moderadamente activa<br><input type="radio"/> bastante activa<br><input type="radio"/> muy activa<br><input type="radio"/> no sabe                                                                                                                              |
| FUR                                    | [*DATA REMOVED*]                                                                                                                                                                                                                                                                                                                                                          |
| Semanas gestación 2T                   | [*DATA REMOVED*]                                                                                                                                                                                                                                                                                                                                                          |
| Días gestación 2T                      | [*DATA REMOVED*]                                                                                                                                                                                                                                                                                                                                                          |
| DBP 2T                                 | [*DATA REMOVED*]                                                                                                                                                                                                                                                                                                                                                          |
| CC 2T                                  | [*DATA REMOVED*]                                                                                                                                                                                                                                                                                                                                                          |
| AC 2T                                  | [*DATA REMOVED*]                                                                                                                                                                                                                                                                                                                                                          |

|                                                   |                                                                                                                                                                                                 |
|---------------------------------------------------|-------------------------------------------------------------------------------------------------------------------------------------------------------------------------------------------------|
| LF 2T                                             | [*DATA REMOVED*]                                                                                                                                                                                |
| PFE 2T (Hadlock)                                  | [*DATA REMOVED*]                                                                                                                                                                                |
| Semanas gestación 3T                              | [*DATA REMOVED*]                                                                                                                                                                                |
| días 3T                                           | [*DATA REMOVED*]                                                                                                                                                                                |
| DBP 3T                                            | [*DATA REMOVED*]                                                                                                                                                                                |
| CC 3T                                             | [*DATA REMOVED*]                                                                                                                                                                                |
| AC 3T                                             | [*DATA REMOVED*]                                                                                                                                                                                |
| LF 3T                                             | [*DATA REMOVED*]                                                                                                                                                                                |
| PFE 3T (Hadlock)                                  | [*DATA REMOVED*]                                                                                                                                                                                |
| Semanas de gestación final                        | [*DATA REMOVED*]                                                                                                                                                                                |
| días gestación final                              | [*DATA REMOVED*]                                                                                                                                                                                |
| Localización placenta                             | <input type="radio"/> anterior<br><input type="radio"/> lateral derecha<br><input type="radio"/> lateral izquierda<br><input checked="" type="radio"/> posterior<br><input type="radio"/> fondo |
| Presentación longitudinal cefálica                | <input type="radio"/> no<br><input checked="" type="radio"/> si                                                                                                                                 |
| Dorso                                             | <input type="radio"/> izquierda anterior<br><input type="radio"/> izquierda posterior<br><input checked="" type="radio"/> derecha anterior<br><input type="radio"/> derecha posterior           |
| diámetro biparietal                               | [*DATA REMOVED*]                                                                                                                                                                                |
| Circunferencia craneal                            | [*DATA REMOVED*]                                                                                                                                                                                |
| Circunferencia abdominal                          | [*DATA REMOVED*]                                                                                                                                                                                |
| Longitud de femur                                 | [*DATA REMOVED*]                                                                                                                                                                                |
| tejido celular subcutáneo a nivel del muslo en mm | [*DATA REMOVED*]                                                                                                                                                                                |
| tejido celular subcutáneo en abdomen en mm        | [*DATA REMOVED*]                                                                                                                                                                                |
| Volumen del muslo en cm3                          | [*DATA REMOVED*]                                                                                                                                                                                |
| Peso fetal estimado según fórmula de Hadlock      | [*DATA REMOVED*]                                                                                                                                                                                |

|                                               |                                                                                                                                               |
|-----------------------------------------------|-----------------------------------------------------------------------------------------------------------------------------------------------|
| Percentil                                     | [*DATA REMOVED*]                                                                                                                              |
| Peso fetal estimado según fórmula de Scioscia | <hr/>                                                                                                                                         |
| Peso fetal estimado según fórmula de LEE      | <hr/>                                                                                                                                         |
| Tipo de parto                                 | <input checked="" type="radio"/> eutocico<br><input type="radio"/> instrumentado/ventosa<br><input type="radio"/> cesarea                     |
| fecha de nacimiento                           | [*DATA REMOVED*]                                                                                                                              |
| Días entre exploración y nacimiento           | [*DATA REMOVED*]                                                                                                                              |
| Peso RN en g                                  | [*DATA REMOVED*]                                                                                                                              |
| sexo                                          | <input checked="" type="radio"/> mujer<br><input type="radio"/> hombre                                                                        |
| Apgar 1 minuto                                | [*DATA REMOVED*]                                                                                                                              |
| Apgar 5 minutos                               | [*DATA REMOVED*]                                                                                                                              |
| Apgar 10 minutos                              | <hr/>                                                                                                                                         |
| antecedente Covid durante gestación           | <input type="radio"/> Yes<br><input checked="" type="radio"/> No                                                                              |
| Nivel de estudios                             | <input type="radio"/> ninguno<br><input type="radio"/> primarios<br><input type="radio"/> secundarios<br><input type="radio"/> universitarios |



# Base\_datos\_estimacion\_peso\_fetal

|                                       |                                                                                                                                                                                                                                                                                      |
|---------------------------------------|--------------------------------------------------------------------------------------------------------------------------------------------------------------------------------------------------------------------------------------------------------------------------------------|
| Número de identificación participante | 21                                                                                                                                                                                                                                                                                   |
| CODIGO PARTICIPANTE                   |                                                                                                                                                                                                                                                                                      |
| Edad                                  | [*DATA REMOVED*]                                                                                                                                                                                                                                                                     |
| Gestaciones                           | <input type="radio"/> 1<br><input checked="" type="radio"/> 2<br><input type="radio"/> 3<br><input type="radio"/> mas de 3                                                                                                                                                           |
| partos                                | <input checked="" type="radio"/> 0<br><input type="radio"/> 1<br><input type="radio"/> 2<br><input type="radio"/> 3<br><input type="radio"/> mas de 3                                                                                                                                |
| cesáreas                              | <input checked="" type="radio"/> 0<br><input type="radio"/> 1<br><input type="radio"/> 2<br><input type="radio"/> 3<br><input type="radio"/> mas de 3                                                                                                                                |
| Abortos                               | <input checked="" type="radio"/> 0<br><input type="radio"/> 1<br><input type="radio"/> 2<br><input type="radio"/> 3<br><input type="radio"/> mas de 3                                                                                                                                |
| Tipo de gestacion                     | <input type="radio"/> espontanea<br><input type="radio"/> IAC inseminación artificial conyuge<br><input type="radio"/> IAD inseminación artificial donante<br><input checked="" type="radio"/> FIV Fecundación in Vitro<br><input type="radio"/> Ovodon FIV con donación de ovocitos |
| peso previo a embarazo                | [*DATA REMOVED*]                                                                                                                                                                                                                                                                     |
| Ganancia ponderal embarazo            | [*DATA REMOVED*]                                                                                                                                                                                                                                                                     |
| Talla madre                           | [*DATA REMOVED*]                                                                                                                                                                                                                                                                     |
| IMC previo embarazo                   | 26.609712545078956                                                                                                                                                                                                                                                                   |
| Patología obstétrica                  | <input checked="" type="radio"/> no<br><input type="radio"/> si                                                                                                                                                                                                                      |
| Diabetes pregestacional               | <input checked="" type="radio"/> no<br><input type="radio"/> si                                                                                                                                                                                                                      |
| Diabetes gestacional                  | <input checked="" type="radio"/> no<br><input type="radio"/> si                                                                                                                                                                                                                      |

|                                            |                                                                                                                                                                                      |
|--------------------------------------------|--------------------------------------------------------------------------------------------------------------------------------------------------------------------------------------|
| Diabetes gestacional con insulina          | <input checked="" type="radio"/> no<br><input type="radio"/> si                                                                                                                      |
| Diabetes gestacional con dieta y ejercicio | <input checked="" type="radio"/> no<br><input type="radio"/> si                                                                                                                      |
| Percentil fetos previos                    | <input checked="" type="radio"/> Nada<br><input type="radio"/> percentil menor de 10<br><input type="radio"/> percentil entre 10 y 90<br><input type="radio"/> percentil mayor de 90 |
| Exfumadora                                 | <input checked="" type="radio"/> Nada<br><input type="radio"/> menos de 5 años<br><input type="radio"/> 5 a 10 años<br><input type="radio"/> mayor o igual a 10 años                 |
| Hábito tabáquico                           | <input checked="" type="radio"/> no<br><input type="radio"/> si                                                                                                                      |
| fumadora                                   | [*DATA REMOVED*]                                                                                                                                                                     |
| Consumo otros tóxicos                      | <input checked="" type="radio"/> no<br><input type="radio"/> si                                                                                                                      |
| Hb 1T                                      | [*DATA REMOVED*]                                                                                                                                                                     |
| Htc 1T                                     | [*DATA REMOVED*]                                                                                                                                                                     |
| Hb 2T                                      | [*DATA REMOVED*]                                                                                                                                                                     |
| HTC 2T                                     | [*DATA REMOVED*]                                                                                                                                                                     |
| Hb 3T                                      | [*DATA REMOVED*]                                                                                                                                                                     |
| HTC 3T                                     | [*DATA REMOVED*]                                                                                                                                                                     |
| Suplemento FE oral                         | <input checked="" type="radio"/> si<br><input type="radio"/> no                                                                                                                      |
| Suplemento fe iv                           | <input type="radio"/> si<br><input checked="" type="radio"/> no                                                                                                                      |
| Transfusión                                | <input checked="" type="radio"/> no<br><input type="radio"/> si                                                                                                                      |
| Solicitada Vit D                           | <input checked="" type="radio"/> no<br><input type="radio"/> si                                                                                                                      |
| Deficit vit D                              | <input type="radio"/> no<br><input type="radio"/> si                                                                                                                                 |
| Suplemento vit D                           | <input type="radio"/> si<br><input type="radio"/> no                                                                                                                                 |

|                       |                                                                                                                                                                                                                                                                                                                                                                                                              |
|-----------------------|--------------------------------------------------------------------------------------------------------------------------------------------------------------------------------------------------------------------------------------------------------------------------------------------------------------------------------------------------------------------------------------------------------------|
| Dieta, cuestionario   | <input checked="" type="radio"/> si<br><input type="radio"/> no                                                                                                                                                                                                                                                                                                                                              |
| Leche entera          | <input type="radio"/> Nunca o menos 1 vez al mes<br><input type="radio"/> 1 a 3 veces mes<br><input type="radio"/> 1 vez semana<br><input type="radio"/> 2 a 4 veces semana<br><input checked="" type="radio"/> 5 a 6 veces semana<br><input type="radio"/> 1 vez al día<br><input type="radio"/> 2 a 3 veces al día<br><input type="radio"/> 5 a 6 veces al día<br><input type="radio"/> más 6 veces al día |
| Leche semidesnatada   | <input checked="" type="radio"/> Nunca o menos 1 vez al mes<br><input type="radio"/> 1 a 3 veces mes<br><input type="radio"/> 1 vez semana<br><input type="radio"/> 2 a 4 veces semana<br><input type="radio"/> 5 a 6 veces semana<br><input type="radio"/> 1 vez al día<br><input type="radio"/> 2 a 3 veces al día<br><input type="radio"/> 5 a 6 veces al día<br><input type="radio"/> mas 6 veces al día |
| Leche desnatada       | <input checked="" type="radio"/> Nunca o menos 1 vez al mes<br><input type="radio"/> 1 a 3 veces mes<br><input type="radio"/> 1 vez semana<br><input type="radio"/> 2 a 4 veces semana<br><input type="radio"/> 5 a 6 veces semana<br><input type="radio"/> 1 vez al día<br><input type="radio"/> 2 a 3 veces al día<br><input type="radio"/> 5 a 6 veces al día<br><input type="radio"/> más 6 veces al día |
| Leche condensada      | <input checked="" type="radio"/> Nunca o menos 1 vez al mes<br><input type="radio"/> 1 a 3 veces mes<br><input type="radio"/> 1 vez semana<br><input type="radio"/> 2 a 4 veces semana<br><input type="radio"/> 5 a 6 veces semana<br><input type="radio"/> 1 vez al día<br><input type="radio"/> 2 a 3 veces al día<br><input type="radio"/> 5 a 6 veces al día<br><input type="radio"/> más 6 veces al día |
| nata o crema de leche | <input checked="" type="radio"/> Nunca o menos 1 vez al mes<br><input type="radio"/> 1 a 3 veces mes<br><input type="radio"/> 1 vez semana<br><input type="radio"/> 2 a 4 veces semana<br><input type="radio"/> 5 a 6 veces semana<br><input type="radio"/> 1 vez al día<br><input type="radio"/> 2 a 3 veces al día<br><input type="radio"/> 5 a 6 veces al día<br><input type="radio"/> más 6 veces al día |

---

Yogurt Entero

- ☐ Nunca o menos 1 vez al mes  
☐ 1 a 3 veces mes  
☐ 1 vez semana  
☒ 2 a 4 veces semana  
☐ 5 a 6 veces semana  
☐ 1 vez al día  
☐ 2 a 3 veces al día  
☐ 5 a 6 veces al día  
☐ más 6 veces al día

---

Yogurt desnatado

- ☒ Nunca o menos 1 vez al mes  
☐ 1 a 3 veces mes  
☐ 1 vez semana  
☐ 2 a 4 veces semana  
☐ 5 a 6 veces semana  
☐ 1 vez al día  
☐ 2 a 3 veces al día  
☐ 5 a 6 veces al día  
☐ más 6 veces al día

---

100g requesón o queso blando o queso fresco

- ☒ Nunca o menos 1 vez al mes  
☐ 1 a 3 veces mes  
☐ 1 vez semana  
☐ 2 a 4 veces semana  
☐ 5 a 6 veces semana  
☐ 1 vez al día  
☐ 2 a 3 veces al día  
☐ 5 a 6 veces al día  
☐ más 6 veces al día

---

queso curado o semicurado o cremoso

- ☒ Nunca o menos 1 vez al mes  
☐ 1 a 3 veces mes  
☐ 1 vez semana  
☐ 2 a 4 veces semana  
☐ 5 a 6 veces semana  
☐ 1 vez al día  
☐ 2 a 3 veces al día  
☐ 5 a 6 veces al día  
☐ más 6 veces al día

---

natillas flan pudding

- ☒ Nunca o menos 1 vez al mes  
☐ 1 a 3 veces mes  
☐ 1 vez semana  
☐ 2 a 4 veces semana  
☐ 5 a 6 veces semana  
☐ 1 vez al día  
☐ 2 a 3 veces al día  
☐ 5 a 6 veces al día  
☐ más 6 veces al día

---

Helado

- ☒ Nunca o menos 1 vez al mes  
☐ 1 a 3 veces mes  
☐ 1 vez semana  
☐ 2 a 4 veces semana  
☐ 5 a 6 veces semana  
☐ 1 vez al día  
☐ 2 a 3 veces al día  
☐ 5 a 6 veces al día  
☐ más 6 veces al día

|                                      |                                                                                                                                                                                                                                                                                                                                                                                                              |
|--------------------------------------|--------------------------------------------------------------------------------------------------------------------------------------------------------------------------------------------------------------------------------------------------------------------------------------------------------------------------------------------------------------------------------------------------------------|
| huevo                                | <input type="radio"/> Nunca o menos 1 vez al mes<br><input type="radio"/> 1 a 3 veces mes<br><input checked="" type="radio"/> 1 vez semana<br><input type="radio"/> 2 a 4 veces semana<br><input type="radio"/> 5 a 6 veces semana<br><input type="radio"/> 1 vez al día<br><input type="radio"/> 2 a 3 veces al día<br><input type="radio"/> 5 a 6 veces al día<br><input type="radio"/> más 6 veces al día |
| Pollo con piel                       | <input type="radio"/> Nunca o menos 1 vez al mes<br><input type="radio"/> 1 a 3 veces mes<br><input checked="" type="radio"/> 1 vez semana<br><input type="radio"/> 2 a 4 veces semana<br><input type="radio"/> 5 a 6 veces semana<br><input type="radio"/> 1 vez al día<br><input type="radio"/> 2 a 3 veces al día<br><input type="radio"/> 5 a 6 veces al día<br><input type="radio"/> más 6 veces al día |
| pollo sin piel                       | <input checked="" type="radio"/> Nunca o menos 1 vez al mes<br><input type="radio"/> 1 a 3 veces mes<br><input type="radio"/> 1 vez semana<br><input type="radio"/> 2 a 4 veces semana<br><input type="radio"/> 5 a 6 veces semana<br><input type="radio"/> 1 vez al día<br><input type="radio"/> 2 a 3 veces al día<br><input type="radio"/> 5 a 6 veces al día<br><input type="radio"/> más 6 veces al día |
| Ternera o cerdo o cordero            | <input type="radio"/> Nunca o menos 1 vez al mes<br><input type="radio"/> 1 a 3 veces mes<br><input checked="" type="radio"/> 1 vez semana<br><input type="radio"/> 2 a 4 veces semana<br><input type="radio"/> 5 a 6 veces semana<br><input type="radio"/> 1 vez al día<br><input type="radio"/> 2 a 3 veces al día<br><input type="radio"/> 5 a 6 veces al día<br><input type="radio"/> más 6 veces al día |
| carne caza: Conejo o codorniz o pato | <input checked="" type="radio"/> Nunca o menos 1 vez al mes<br><input type="radio"/> 1 a 3 veces mes<br><input type="radio"/> 1 vez semana<br><input type="radio"/> 2 a 4 veces semana<br><input type="radio"/> 5 a 6 veces semana<br><input type="radio"/> 1 vez al día<br><input type="radio"/> 2 a 3 veces al día<br><input type="radio"/> 5 a 6 veces al día<br><input type="radio"/> más 6 veces al día |
| Hígado de ternera o cerdo o pollo    | <input type="radio"/> Nunca o menos 1 vez al mes<br><input checked="" type="radio"/> 1 a 3 veces mes<br><input type="radio"/> 1 vez semana<br><input type="radio"/> 2 a 4 veces semana<br><input type="radio"/> 5 a 6 veces semana<br><input type="radio"/> 1 vez al día<br><input type="radio"/> 2 a 3 veces al día<br><input type="radio"/> 5 a 6 veces al día<br><input type="radio"/> más 6 veces al día |

|                     |                                                                                                                                                                                                                                                                                                                                                                                                              |
|---------------------|--------------------------------------------------------------------------------------------------------------------------------------------------------------------------------------------------------------------------------------------------------------------------------------------------------------------------------------------------------------------------------------------------------------|
| Vísceras            | <input checked="" type="radio"/> Nunca o menos 1 vez al mes<br><input type="radio"/> 1 a 3 veces mes<br><input type="radio"/> 1 vez semana<br><input type="radio"/> 2 a 4 veces semana<br><input type="radio"/> 5 a 6 veces semana<br><input type="radio"/> 1 vez al día<br><input type="radio"/> 2 a 3 veces al día<br><input type="radio"/> 5 a 6 veces al día<br><input type="radio"/> más 6 veces al día |
| Embutido            | <input checked="" type="radio"/> Nunca o menos 1 vez al mes<br><input type="radio"/> 1 a 3 veces mes<br><input type="radio"/> 1 vez semana<br><input type="radio"/> 2 a 4 veces semana<br><input type="radio"/> 5 a 6 veces semana<br><input type="radio"/> 1 vez al día<br><input type="radio"/> 2 a 3 veces al día<br><input type="radio"/> 5 a 6 veces al día<br><input type="radio"/> más 6 veces al día |
| Salchicha o similar | <input checked="" type="radio"/> Nunca o menos 1 vez al mes<br><input type="radio"/> 1 a 3 veces mes<br><input type="radio"/> 1 vez semana<br><input type="radio"/> 2 a 4 veces semana<br><input type="radio"/> 5 a 6 veces semana<br><input type="radio"/> 1 vez al día<br><input type="radio"/> 2 a 3 veces al día<br><input type="radio"/> 5 a 6 veces al día<br><input type="radio"/> más 6 veces al día |
| Pate o foiegras     | <input checked="" type="radio"/> Nunca o menos 1 vez al mes<br><input type="radio"/> 1 a 3 veces mes<br><input type="radio"/> 1 vez semana<br><input type="radio"/> 2 a 4 veces semana<br><input type="radio"/> 5 a 6 veces semana<br><input type="radio"/> 1 vez al día<br><input type="radio"/> 2 a 3 veces al día<br><input type="radio"/> 5 a 6 veces al día<br><input type="radio"/> más 6 veces al día |
| Hamburguesa         | <input type="radio"/> Nunca o menos 1 vez al mes<br><input type="radio"/> 1 a 3 veces mes<br><input checked="" type="radio"/> 1 vez semana<br><input type="radio"/> 2 a 4 veces semana<br><input type="radio"/> 5 a 6 veces semana<br><input type="radio"/> 1 vez al día<br><input type="radio"/> 2 a 3 veces al día<br><input type="radio"/> 5 a 6 veces al día<br><input type="radio"/> más 6 veces al día |
| tocino o bacon      | <input checked="" type="radio"/> Nunca o menos 1 vez al mes<br><input type="radio"/> 1 a 3 veces mes<br><input type="radio"/> 1 vez semana<br><input type="radio"/> 2 a 4 veces semana<br><input type="radio"/> 5 a 6 veces semana<br><input type="radio"/> 1 vez al día<br><input type="radio"/> 2 a 3 veces al día<br><input type="radio"/> 5 a 6 veces al día<br><input type="radio"/> más 6 veces al día |

---

|               |                                                                                                                                                                                                                                                                                                                                                                                                              |
|---------------|--------------------------------------------------------------------------------------------------------------------------------------------------------------------------------------------------------------------------------------------------------------------------------------------------------------------------------------------------------------------------------------------------------------|
| Pescado frito | <input type="radio"/> Nunca o menos 1 vez al mes<br><input type="radio"/> 1 a 3 veces mes<br><input checked="" type="radio"/> 1 vez semana<br><input type="radio"/> 2 a 4 veces semana<br><input type="radio"/> 5 a 6 veces semana<br><input type="radio"/> 1 vez al día<br><input type="radio"/> 2 a 3 veces al día<br><input type="radio"/> 5 a 6 veces al día<br><input type="radio"/> más 6 veces al día |
|---------------|--------------------------------------------------------------------------------------------------------------------------------------------------------------------------------------------------------------------------------------------------------------------------------------------------------------------------------------------------------------------------------------------------------------|

---

|                        |                                                                                                                                                                                                                                                                                                                                                                                                              |
|------------------------|--------------------------------------------------------------------------------------------------------------------------------------------------------------------------------------------------------------------------------------------------------------------------------------------------------------------------------------------------------------------------------------------------------------|
| pescado hervido blanco | <input checked="" type="radio"/> Nunca o menos 1 vez al mes<br><input type="radio"/> 1 a 3 veces mes<br><input type="radio"/> 1 vez semana<br><input type="radio"/> 2 a 4 veces semana<br><input type="radio"/> 5 a 6 veces semana<br><input type="radio"/> 1 vez al día<br><input type="radio"/> 2 a 3 veces al día<br><input type="radio"/> 5 a 6 veces al día<br><input type="radio"/> más 6 veces al día |
|------------------------|--------------------------------------------------------------------------------------------------------------------------------------------------------------------------------------------------------------------------------------------------------------------------------------------------------------------------------------------------------------------------------------------------------------|

---

|                      |                                                                                                                                                                                                                                                                                                                                                                                                              |
|----------------------|--------------------------------------------------------------------------------------------------------------------------------------------------------------------------------------------------------------------------------------------------------------------------------------------------------------------------------------------------------------------------------------------------------------|
| pescado hervido azul | <input checked="" type="radio"/> Nunca o menos 1 vez al mes<br><input type="radio"/> 1 a 3 veces mes<br><input type="radio"/> 1 vez semana<br><input type="radio"/> 2 a 4 veces semana<br><input type="radio"/> 5 a 6 veces semana<br><input type="radio"/> 1 vez al día<br><input type="radio"/> 2 a 3 veces al día<br><input type="radio"/> 5 a 6 veces al día<br><input type="radio"/> más 6 veces al día |
|----------------------|--------------------------------------------------------------------------------------------------------------------------------------------------------------------------------------------------------------------------------------------------------------------------------------------------------------------------------------------------------------------------------------------------------------|

---

|                    |                                                                                                                                                                                                                                                                                                                                                                                                              |
|--------------------|--------------------------------------------------------------------------------------------------------------------------------------------------------------------------------------------------------------------------------------------------------------------------------------------------------------------------------------------------------------------------------------------------------------|
| otros pescado azul | <input checked="" type="radio"/> Nunca o menos 1 vez al mes<br><input type="radio"/> 1 a 3 veces mes<br><input type="radio"/> 1 vez semana<br><input type="radio"/> 2 a 4 veces semana<br><input type="radio"/> 5 a 6 veces semana<br><input type="radio"/> 1 vez al día<br><input type="radio"/> 2 a 3 veces al día<br><input type="radio"/> 5 a 6 veces al día<br><input type="radio"/> más 6 veces al día |
|--------------------|--------------------------------------------------------------------------------------------------------------------------------------------------------------------------------------------------------------------------------------------------------------------------------------------------------------------------------------------------------------------------------------------------------------|

---

|               |                                                                                                                                                                                                                                                                                                                                                                                                              |
|---------------|--------------------------------------------------------------------------------------------------------------------------------------------------------------------------------------------------------------------------------------------------------------------------------------------------------------------------------------------------------------------------------------------------------------|
| atun conserva | <input checked="" type="radio"/> Nunca o menos 1 vez al mes<br><input type="radio"/> 1 a 3 veces mes<br><input type="radio"/> 1 vez semana<br><input type="radio"/> 2 a 4 veces semana<br><input type="radio"/> 5 a 6 veces semana<br><input type="radio"/> 1 vez al día<br><input type="radio"/> 2 a 3 veces al día<br><input type="radio"/> 5 a 6 veces al día<br><input type="radio"/> más 6 veces al día |
|---------------|--------------------------------------------------------------------------------------------------------------------------------------------------------------------------------------------------------------------------------------------------------------------------------------------------------------------------------------------------------------------------------------------------------------|

---

|                  |                                                                                                                                                                                                                                                                                                                                                                                                              |
|------------------|--------------------------------------------------------------------------------------------------------------------------------------------------------------------------------------------------------------------------------------------------------------------------------------------------------------------------------------------------------------------------------------------------------------|
| sardina conserva | <input checked="" type="radio"/> Nunca o menos 1 vez al mes<br><input type="radio"/> 1 a 3 veces mes<br><input type="radio"/> 1 vez semana<br><input type="radio"/> 2 a 4 veces semana<br><input type="radio"/> 5 a 6 veces semana<br><input type="radio"/> 1 vez al día<br><input type="radio"/> 2 a 3 veces al día<br><input type="radio"/> 5 a 6 veces al día<br><input type="radio"/> más 6 veces al día |
|------------------|--------------------------------------------------------------------------------------------------------------------------------------------------------------------------------------------------------------------------------------------------------------------------------------------------------------------------------------------------------------------------------------------------------------|

---

|                                         |                                                                                                                                                                                                                                                                                                                                                                                                              |
|-----------------------------------------|--------------------------------------------------------------------------------------------------------------------------------------------------------------------------------------------------------------------------------------------------------------------------------------------------------------------------------------------------------------------------------------------------------------|
| pescado ahumado                         | <input checked="" type="radio"/> Nunca o menos 1 vez al mes<br><input type="radio"/> 1 a 3 veces mes<br><input type="radio"/> 1 vez semana<br><input type="radio"/> 2 a 4 veces semana<br><input type="radio"/> 5 a 6 veces semana<br><input type="radio"/> 1 vez al día<br><input type="radio"/> 2 a 3 veces al día<br><input type="radio"/> 5 a 6 veces al día<br><input type="radio"/> más 6 veces al día |
| almejas o mejillones o ostras unos 100g | <input checked="" type="radio"/> Nunca o menos 1 vez al mes<br><input type="radio"/> 1 a 3 veces mes<br><input type="radio"/> 1 vez semana<br><input type="radio"/> 2 a 4 veces semana<br><input type="radio"/> 5 a 6 veces semana<br><input type="radio"/> 1 vez al día<br><input type="radio"/> 2 a 3 veces al día<br><input type="radio"/> 5 a 6 veces al día<br><input type="radio"/> más 6 veces al día |
| calamar o chipiron o sepia unos 100g    | <input checked="" type="radio"/> Nunca o menos 1 vez al mes<br><input type="radio"/> 1 a 3 veces mes<br><input type="radio"/> 1 vez semana<br><input type="radio"/> 2 a 4 veces semana<br><input type="radio"/> 5 a 6 veces semana<br><input type="radio"/> 1 vez al día<br><input type="radio"/> 2 a 3 veces al día<br><input type="radio"/> 5 a 6 veces al día<br><input type="radio"/> más 6 veces al día |
| marisco unos 100g                       | <input checked="" type="radio"/> Nunca o menos 1 vez al mes<br><input type="radio"/> 1 a 3 veces mes<br><input type="radio"/> 1 vez semana<br><input type="radio"/> 2 a 4 veces semana<br><input type="radio"/> 5 a 6 veces semana<br><input type="radio"/> 1 vez al día<br><input type="radio"/> 2 a 3 veces al día<br><input type="radio"/> 5 a 6 veces al día<br><input type="radio"/> más 6 veces al día |
| Espinacas o acelgas cocinadas           | <input checked="" type="radio"/> Nunca o menos 1 vez al mes<br><input type="radio"/> 1 a 3 veces mes<br><input type="radio"/> 1 vez semana<br><input type="radio"/> 2 a 4 veces semana<br><input type="radio"/> 5 a 6 veces semana<br><input type="radio"/> 1 vez al día<br><input type="radio"/> 2 a 3 veces al día<br><input type="radio"/> 5 a 6 veces al día<br><input type="radio"/> más 6 veces al día |
| Col o coliflor o brocoli cocinado       | <input checked="" type="radio"/> Nunca o menos 1 vez al mes<br><input type="radio"/> 1 a 3 veces mes<br><input type="radio"/> 1 vez semana<br><input type="radio"/> 2 a 4 veces semana<br><input type="radio"/> 5 a 6 veces semana<br><input type="radio"/> 1 vez al día<br><input type="radio"/> 2 a 3 veces al día<br><input type="radio"/> 5 a 6 veces al día<br><input type="radio"/> más 6 veces al día |



---

|                              |                                                                                                                                                                                                                                                                                                                                                                                                              |
|------------------------------|--------------------------------------------------------------------------------------------------------------------------------------------------------------------------------------------------------------------------------------------------------------------------------------------------------------------------------------------------------------------------------------------------------------|
| Lechuga o endivia o escarola | <input type="radio"/> Nunca o menos 1 vez al mes<br><input type="radio"/> 1 a 3 veces mes<br><input type="radio"/> 1 vez semana<br><input checked="" type="radio"/> 2 a 4 veces semana<br><input type="radio"/> 5 a 6 veces semana<br><input type="radio"/> 1 vez al día<br><input type="radio"/> 2 a 3 veces al día<br><input type="radio"/> 5 a 6 veces al día<br><input type="radio"/> más 6 veces al día |
|------------------------------|--------------------------------------------------------------------------------------------------------------------------------------------------------------------------------------------------------------------------------------------------------------------------------------------------------------------------------------------------------------------------------------------------------------|

---

|                 |                                                                                                                                                                                                                                                                                                                                                                                                              |
|-----------------|--------------------------------------------------------------------------------------------------------------------------------------------------------------------------------------------------------------------------------------------------------------------------------------------------------------------------------------------------------------------------------------------------------------|
| tomate ensalada | <input type="radio"/> Nunca o menos 1 vez al mes<br><input type="radio"/> 1 a 3 veces mes<br><input type="radio"/> 1 vez semana<br><input checked="" type="radio"/> 2 a 4 veces semana<br><input type="radio"/> 5 a 6 veces semana<br><input type="radio"/> 1 vez al día<br><input type="radio"/> 2 a 3 veces al día<br><input type="radio"/> 5 a 6 veces al día<br><input type="radio"/> más 6 veces al día |
|-----------------|--------------------------------------------------------------------------------------------------------------------------------------------------------------------------------------------------------------------------------------------------------------------------------------------------------------------------------------------------------------------------------------------------------------|

---

|         |                                                                                                                                                                                                                                                                                                                                                                                                              |
|---------|--------------------------------------------------------------------------------------------------------------------------------------------------------------------------------------------------------------------------------------------------------------------------------------------------------------------------------------------------------------------------------------------------------------|
| cebolla | <input type="radio"/> Nunca o menos 1 vez al mes<br><input type="radio"/> 1 a 3 veces mes<br><input type="radio"/> 1 vez semana<br><input checked="" type="radio"/> 2 a 4 veces semana<br><input type="radio"/> 5 a 6 veces semana<br><input type="radio"/> 1 vez al día<br><input type="radio"/> 2 a 3 veces al día<br><input type="radio"/> 5 a 6 veces al día<br><input type="radio"/> más 6 veces al día |
|---------|--------------------------------------------------------------------------------------------------------------------------------------------------------------------------------------------------------------------------------------------------------------------------------------------------------------------------------------------------------------------------------------------------------------|

---

|                      |                                                                                                                                                                                                                                                                                                                                                                                                              |
|----------------------|--------------------------------------------------------------------------------------------------------------------------------------------------------------------------------------------------------------------------------------------------------------------------------------------------------------------------------------------------------------------------------------------------------------|
| Zanahoria o calabaza | <input type="radio"/> Nunca o menos 1 vez al mes<br><input type="radio"/> 1 a 3 veces mes<br><input type="radio"/> 1 vez semana<br><input checked="" type="radio"/> 2 a 4 veces semana<br><input type="radio"/> 5 a 6 veces semana<br><input type="radio"/> 1 vez al día<br><input type="radio"/> 2 a 3 veces al día<br><input type="radio"/> 5 a 6 veces al día<br><input type="radio"/> más 6 veces al día |
|----------------------|--------------------------------------------------------------------------------------------------------------------------------------------------------------------------------------------------------------------------------------------------------------------------------------------------------------------------------------------------------------------------------------------------------------|

---

|               |                                                                                                                                                                                                                                                                                                                                                                                                              |
|---------------|--------------------------------------------------------------------------------------------------------------------------------------------------------------------------------------------------------------------------------------------------------------------------------------------------------------------------------------------------------------------------------------------------------------|
| Judías verdes | <input checked="" type="radio"/> Nunca o menos 1 vez al mes<br><input type="radio"/> 1 a 3 veces mes<br><input type="radio"/> 1 vez semana<br><input type="radio"/> 2 a 4 veces semana<br><input type="radio"/> 5 a 6 veces semana<br><input type="radio"/> 1 vez al día<br><input type="radio"/> 2 a 3 veces al día<br><input type="radio"/> 5 a 6 veces al día<br><input type="radio"/> más 6 veces al día |
|---------------|--------------------------------------------------------------------------------------------------------------------------------------------------------------------------------------------------------------------------------------------------------------------------------------------------------------------------------------------------------------------------------------------------------------|

---

|                                |                                                                                                                                                                                                                                                                                                                                                                                                              |
|--------------------------------|--------------------------------------------------------------------------------------------------------------------------------------------------------------------------------------------------------------------------------------------------------------------------------------------------------------------------------------------------------------------------------------------------------------|
| Berenjena o calabacin o pepino | <input checked="" type="radio"/> Nunca o menos 1 vez al mes<br><input type="radio"/> 1 a 3 veces mes<br><input type="radio"/> 1 vez semana<br><input type="radio"/> 2 a 4 veces semana<br><input type="radio"/> 5 a 6 veces semana<br><input type="radio"/> 1 vez al día<br><input type="radio"/> 2 a 3 veces al día<br><input type="radio"/> 5 a 6 veces al día<br><input type="radio"/> más 6 veces al día |
|--------------------------------|--------------------------------------------------------------------------------------------------------------------------------------------------------------------------------------------------------------------------------------------------------------------------------------------------------------------------------------------------------------------------------------------------------------|

---

|                       |                                                                                                                                                                                                                                                                                                                                                                                                              |
|-----------------------|--------------------------------------------------------------------------------------------------------------------------------------------------------------------------------------------------------------------------------------------------------------------------------------------------------------------------------------------------------------------------------------------------------------|
| pimiento              | <input checked="" type="radio"/> Nunca o menos 1 vez al mes<br><input type="radio"/> 1 a 3 veces mes<br><input type="radio"/> 1 vez semana<br><input type="radio"/> 2 a 4 veces semana<br><input type="radio"/> 5 a 6 veces semana<br><input type="radio"/> 1 vez al día<br><input type="radio"/> 2 a 3 veces al día<br><input type="radio"/> 5 a 6 veces al día<br><input type="radio"/> más 6 veces al día |
| alcachofa             | <input checked="" type="radio"/> Nunca o menos 1 vez al mes<br><input type="radio"/> 1 a 3 veces mes<br><input type="radio"/> 1 vez semana<br><input type="radio"/> 2 a 4 veces semana<br><input type="radio"/> 5 a 6 veces semana<br><input type="radio"/> 1 vez al día<br><input type="radio"/> 2 a 3 veces al día<br><input type="radio"/> 5 a 6 veces al día<br><input type="radio"/> más 6 veces al día |
| espárragos            | <input checked="" type="radio"/> Nunca o menos 1 vez al mes<br><input type="radio"/> 1 a 3 veces mes<br><input type="radio"/> 1 vez semana<br><input type="radio"/> 2 a 4 veces semana<br><input type="radio"/> 5 a 6 veces semana<br><input type="radio"/> 1 vez al día<br><input type="radio"/> 2 a 3 veces al día<br><input type="radio"/> 5 a 6 veces al día<br><input type="radio"/> más 6 veces al día |
| maíz hervido          | <input type="radio"/> Nunca o menos 1 vez al mes<br><input type="radio"/> 1 a 3 veces mes<br><input checked="" type="radio"/> 1 vez semana<br><input type="radio"/> 2 a 4 veces semana<br><input type="radio"/> 5 a 6 veces semana<br><input type="radio"/> 1 vez al día<br><input type="radio"/> 2 a 3 veces al día<br><input type="radio"/> 5 a 6 veces al día<br><input type="radio"/> más 6 veces al día |
| legumbres             | <input type="radio"/> Nunca o menos 1 vez al mes<br><input type="radio"/> 1 a 3 veces mes<br><input checked="" type="radio"/> 1 vez semana<br><input type="radio"/> 2 a 4 veces semana<br><input type="radio"/> 5 a 6 veces semana<br><input type="radio"/> 1 vez al día<br><input type="radio"/> 2 a 3 veces al día<br><input type="radio"/> 5 a 6 veces al día<br><input type="radio"/> más 6 veces al día |
| naranjas o mandarinas | <input type="radio"/> Nunca o menos 1 vez al mes<br><input type="radio"/> 1 a 3 veces mes<br><input type="radio"/> 1 vez semana<br><input type="radio"/> 2 a 4 veces semana<br><input checked="" type="radio"/> 5 a 6 veces semana<br><input type="radio"/> 1 vez al día<br><input type="radio"/> 2 a 3 veces al día<br><input type="radio"/> 5 a 6 veces al día<br><input type="radio"/> más 6 veces al día |

|                       |                                                                                                                                                                                                                                                                                                                                                                                                              |
|-----------------------|--------------------------------------------------------------------------------------------------------------------------------------------------------------------------------------------------------------------------------------------------------------------------------------------------------------------------------------------------------------------------------------------------------------|
| zum natural fruta     | <input checked="" type="radio"/> Nunca o menos 1 vez al mes<br><input type="radio"/> 1 a 3 veces mes<br><input type="radio"/> 1 vez semana<br><input type="radio"/> 2 a 4 veces semana<br><input type="radio"/> 5 a 6 veces semana<br><input type="radio"/> 1 vez al día<br><input type="radio"/> 2 a 3 veces al día<br><input type="radio"/> 5 a 6 veces al día<br><input type="radio"/> más 6 veces al día |
| platano               | <input checked="" type="radio"/> Nunca o menos 1 vez al mes<br><input type="radio"/> 1 a 3 veces mes<br><input type="radio"/> 1 vez semana<br><input type="radio"/> 2 a 4 veces semana<br><input type="radio"/> 5 a 6 veces semana<br><input type="radio"/> 1 vez al día<br><input type="radio"/> 2 a 3 veces al día<br><input type="radio"/> 5 a 6 veces al día<br><input type="radio"/> más 6 veces al día |
| manzana o pera        | <input checked="" type="radio"/> Nunca o menos 1 vez al mes<br><input type="radio"/> 1 a 3 veces mes<br><input type="radio"/> 1 vez semana<br><input type="radio"/> 2 a 4 veces semana<br><input type="radio"/> 5 a 6 veces semana<br><input type="radio"/> 1 vez al día<br><input type="radio"/> 2 a 3 veces al día<br><input type="radio"/> 5 a 6 veces al día<br><input type="radio"/> más 6 veces al día |
| melocotón o nectarina | <input checked="" type="radio"/> Nunca o menos 1 vez al mes<br><input type="radio"/> 1 a 3 veces mes<br><input type="radio"/> 1 vez semana<br><input type="radio"/> 2 a 4 veces semana<br><input type="radio"/> 5 a 6 veces semana<br><input type="radio"/> 1 vez al día<br><input type="radio"/> 2 a 3 veces al día<br><input type="radio"/> 5 a 6 veces al día<br><input type="radio"/> más 6 veces al día |
| sandia o melon        | <input checked="" type="radio"/> Nunca o menos 1 vez al mes<br><input type="radio"/> 1 a 3 veces mes<br><input type="radio"/> 1 vez semana<br><input type="radio"/> 2 a 4 veces semana<br><input type="radio"/> 5 a 6 veces semana<br><input type="radio"/> 1 vez al día<br><input type="radio"/> 2 a 3 veces al día<br><input type="radio"/> 5 a 6 veces al día<br><input type="radio"/> más 6 veces al día |
| uva                   | <input checked="" type="radio"/> Nunca o menos 1 vez al mes<br><input type="radio"/> 1 a 3 veces mes<br><input type="radio"/> 1 vez semana<br><input type="radio"/> 2 a 4 veces semana<br><input type="radio"/> 5 a 6 veces semana<br><input type="radio"/> 1 vez al día<br><input type="radio"/> 2 a 3 veces al día<br><input type="radio"/> 5 a 6 veces al día<br><input type="radio"/> más 6 veces al día |

|                 |                                                                                                                                                                                                                                                                                                                                                                                                              |
|-----------------|--------------------------------------------------------------------------------------------------------------------------------------------------------------------------------------------------------------------------------------------------------------------------------------------------------------------------------------------------------------------------------------------------------------|
| bruna o ciruela | <input checked="" type="radio"/> Nunca o menos 1 vez al mes<br><input type="radio"/> 1 a 3 veces mes<br><input type="radio"/> 1 vez semana<br><input type="radio"/> 2 a 4 veces semana<br><input type="radio"/> 5 a 6 veces semana<br><input type="radio"/> 1 vez al día<br><input type="radio"/> 2 a 3 veces al día<br><input type="radio"/> 5 a 6 veces al día<br><input type="radio"/> más 6 veces al día |
| kiwi            | <input type="radio"/> Nunca o menos 1 vez al mes<br><input type="radio"/> 1 a 3 veces mes<br><input type="radio"/> 1 vez semana<br><input type="radio"/> 2 a 4 veces semana<br><input checked="" type="radio"/> 5 a 6 veces semana<br><input type="radio"/> 1 vez al día<br><input type="radio"/> 2 a 3 veces al día<br><input type="radio"/> 5 a 6 veces al día<br><input type="radio"/> más 6 veces al día |
| aceituna        | <input checked="" type="radio"/> Nunca o menos 1 vez al mes<br><input type="radio"/> 1 a 3 veces mes<br><input type="radio"/> 1 vez semana<br><input type="radio"/> 2 a 4 veces semana<br><input type="radio"/> 5 a 6 veces semana<br><input type="radio"/> 1 vez al día<br><input type="radio"/> 2 a 3 veces al día<br><input type="radio"/> 5 a 6 veces al día<br><input type="radio"/> más 6 veces al día |
| frutos secos    | <input checked="" type="radio"/> Nunca o menos 1 vez al mes<br><input type="radio"/> 1 a 3 veces mes<br><input type="radio"/> 1 vez semana<br><input type="radio"/> 2 a 4 veces semana<br><input type="radio"/> 5 a 6 veces semana<br><input type="radio"/> 1 vez al día<br><input type="radio"/> 2 a 3 veces al día<br><input type="radio"/> 5 a 6 veces al día<br><input type="radio"/> más 6 veces al día |
| pan blanco      | <input type="radio"/> Nunca o menos 1 vez al mes<br><input type="radio"/> 1 a 3 veces mes<br><input type="radio"/> 1 vez semana<br><input checked="" type="radio"/> 2 a 4 veces semana<br><input type="radio"/> 5 a 6 veces semana<br><input type="radio"/> 1 vez al día<br><input type="radio"/> 2 a 3 veces al día<br><input type="radio"/> 5 a 6 veces al día<br><input type="radio"/> más 6 veces al día |
| pan integral    | <input checked="" type="radio"/> Nunca o menos 1 vez al mes<br><input type="radio"/> 1 a 3 veces mes<br><input type="radio"/> 1 vez semana<br><input type="radio"/> 2 a 4 veces semana<br><input type="radio"/> 5 a 6 veces semana<br><input type="radio"/> 1 vez al día<br><input type="radio"/> 2 a 3 veces al día<br><input type="radio"/> 5 a 6 veces al día<br><input type="radio"/> más 6 veces al día |

|                          |                                                                                                                                                                                                                                                                                                                                                                                                              |
|--------------------------|--------------------------------------------------------------------------------------------------------------------------------------------------------------------------------------------------------------------------------------------------------------------------------------------------------------------------------------------------------------------------------------------------------------|
| cereales desayuno        | <input checked="" type="radio"/> Nunca o menos 1 vez al mes<br><input type="radio"/> 1 a 3 veces mes<br><input type="radio"/> 1 vez semana<br><input type="radio"/> 2 a 4 veces semana<br><input type="radio"/> 5 a 6 veces semana<br><input type="radio"/> 1 vez al día<br><input type="radio"/> 2 a 3 veces al día<br><input type="radio"/> 5 a 6 veces al día<br><input type="radio"/> más 6 veces al día |
| patatas fritas           | <input checked="" type="radio"/> Nunca o menos 1 vez al mes<br><input type="radio"/> 1 a 3 veces mes<br><input type="radio"/> 1 vez semana<br><input type="radio"/> 2 a 4 veces semana<br><input type="radio"/> 5 a 6 veces semana<br><input type="radio"/> 1 vez al día<br><input type="radio"/> 2 a 3 veces al día<br><input type="radio"/> 5 a 6 veces al día<br><input type="radio"/> más 6 veces al día |
| patatas cocidas o asadas | <input checked="" type="radio"/> Nunca o menos 1 vez al mes<br><input type="radio"/> 1 a 3 veces mes<br><input type="radio"/> 1 vez semana<br><input type="radio"/> 2 a 4 veces semana<br><input type="radio"/> 5 a 6 veces semana<br><input type="radio"/> 1 vez al día<br><input type="radio"/> 2 a 3 veces al día<br><input type="radio"/> 5 a 6 veces al día<br><input type="radio"/> más 6 veces al día |
| bolsa papas              | <input checked="" type="radio"/> Nunca o menos 1 vez al mes<br><input type="radio"/> 1 a 3 veces mes<br><input type="radio"/> 1 vez semana<br><input type="radio"/> 2 a 4 veces semana<br><input type="radio"/> 5 a 6 veces semana<br><input type="radio"/> 1 vez al día<br><input type="radio"/> 2 a 3 veces al día<br><input type="radio"/> 5 a 6 veces al día<br><input type="radio"/> más 6 veces al día |
| arroz cocinado           | <input type="radio"/> Nunca o menos 1 vez al mes<br><input type="radio"/> 1 a 3 veces mes<br><input checked="" type="radio"/> 1 vez semana<br><input type="radio"/> 2 a 4 veces semana<br><input type="radio"/> 5 a 6 veces semana<br><input type="radio"/> 1 vez al día<br><input type="radio"/> 2 a 3 veces al día<br><input type="radio"/> 5 a 6 veces al día<br><input type="radio"/> más 6 veces al día |
| pasta                    | <input type="radio"/> Nunca o menos 1 vez al mes<br><input type="radio"/> 1 a 3 veces mes<br><input checked="" type="radio"/> 1 vez semana<br><input type="radio"/> 2 a 4 veces semana<br><input type="radio"/> 5 a 6 veces semana<br><input type="radio"/> 1 vez al día<br><input type="radio"/> 2 a 3 veces al día<br><input type="radio"/> 5 a 6 veces al día<br><input type="radio"/> más 6 veces al día |

|                     |                                                                                                                                                                                                                                                                                                                                                                                                              |
|---------------------|--------------------------------------------------------------------------------------------------------------------------------------------------------------------------------------------------------------------------------------------------------------------------------------------------------------------------------------------------------------------------------------------------------------|
| pizza               | <input checked="" type="radio"/> Nunca o menos 1 vez al mes<br><input type="radio"/> 1 a 3 veces mes<br><input type="radio"/> 1 vez semana<br><input type="radio"/> 2 a 4 veces semana<br><input type="radio"/> 5 a 6 veces semana<br><input type="radio"/> 1 vez al día<br><input type="radio"/> 2 a 3 veces al día<br><input type="radio"/> 5 a 6 veces al día<br><input type="radio"/> más 6 veces al día |
| aceite oliva        | <input type="radio"/> Nunca o menos 1 vez al mes<br><input type="radio"/> 1 a 3 veces mes<br><input type="radio"/> 1 vez semana<br><input checked="" type="radio"/> 2 a 4 veces semana<br><input type="radio"/> 5 a 6 veces semana<br><input type="radio"/> 1 vez al día<br><input type="radio"/> 2 a 3 veces al día<br><input type="radio"/> 5 a 6 veces al día<br><input type="radio"/> más 6 veces al día |
| otros aceites       | <input checked="" type="radio"/> Nunca o menos 1 vez al mes<br><input type="radio"/> 1 a 3 veces mes<br><input type="radio"/> 1 vez semana<br><input type="radio"/> 2 a 4 veces semana<br><input type="radio"/> 5 a 6 veces semana<br><input type="radio"/> 1 vez al día<br><input type="radio"/> 2 a 3 veces al día<br><input type="radio"/> 5 a 6 veces al día<br><input type="radio"/> más 6 veces al día |
| margarina           | <input checked="" type="radio"/> Nunca o menos 1 vez al mes<br><input type="radio"/> 1 a 3 veces mes<br><input type="radio"/> 1 vez semana<br><input type="radio"/> 2 a 4 veces semana<br><input type="radio"/> 5 a 6 veces semana<br><input type="radio"/> 1 vez al día<br><input type="radio"/> 2 a 3 veces al día<br><input type="radio"/> 5 a 6 veces al día<br><input type="radio"/> más 6 veces al día |
| mantequilla         | <input checked="" type="radio"/> Nunca o menos 1 vez al mes<br><input type="radio"/> 1 a 3 veces mes<br><input type="radio"/> 1 vez semana<br><input type="radio"/> 2 a 4 veces semana<br><input type="radio"/> 5 a 6 veces semana<br><input type="radio"/> 1 vez al día<br><input type="radio"/> 2 a 3 veces al día<br><input type="radio"/> 5 a 6 veces al día<br><input type="radio"/> más 6 veces al día |
| galletas tipo maria | <input type="radio"/> Nunca o menos 1 vez al mes<br><input type="radio"/> 1 a 3 veces mes<br><input type="radio"/> 1 vez semana<br><input checked="" type="radio"/> 2 a 4 veces semana<br><input type="radio"/> 5 a 6 veces semana<br><input type="radio"/> 1 vez al día<br><input type="radio"/> 2 a 3 veces al día<br><input type="radio"/> 5 a 6 veces al día<br><input type="radio"/> más 6 veces al día |

---

galletas chocolate

- ☒ Nunca o menos 1 vez al mes  
☐ 1 a 3 veces mes  
☐ 1 vez semana  
☐ 2 a 4 veces semana  
☐ 5 a 6 veces semana  
☐ 1 vez al día  
☐ 2 a 3 veces al día  
☐ 5 a 6 veces al día  
☐ más 6 veces al día

---

bolleria

- ☒ Nunca o menos 1 vez al mes  
☐ 1 a 3 veces mes  
☐ 1 vez semana  
☐ 2 a 4 veces semana  
☐ 5 a 6 veces semana  
☐ 1 vez al día  
☐ 2 a 3 veces al día  
☐ 5 a 6 veces al día  
☐ más 6 veces al día

---

chocolate o bombones

- ☒ Nunca o menos 1 vez al mes  
☐ 1 a 3 veces mes  
☐ 1 vez semana  
☐ 2 a 4 veces semana  
☐ 5 a 6 veces semana  
☐ 1 vez al día  
☐ 2 a 3 veces al día  
☐ 5 a 6 veces al día  
☐ más 6 veces al día

---

chocolate polvo o colacao

- ☒ Nunca o menos 1 vez al mes  
☐ 1 a 3 veces mes  
☐ 1 vez semana  
☐ 2 a 4 veces semana  
☐ 5 a 6 veces semana  
☐ 1 vez al día  
☐ 2 a 3 veces al día  
☐ 5 a 6 veces al día  
☐ más 6 veces al día

---

vino tinto

- ☒ Nunca o menos 1 vez al mes  
☐ 1 a 3 veces mes  
☐ 1 vez semana  
☐ 2 a 4 veces semana  
☐ 5 a 6 veces semana  
☐ 1 vez al día  
☐ 2 a 3 veces al día  
☐ 5 a 6 veces al día  
☐ más 6 veces al día

---

vino blanco

- ☒ Nunca o menos 1 vez al mes  
☐ 1 a 3 veces mes  
☐ 1 vez semana  
☐ 2 a 4 veces semana  
☐ 5 a 6 veces semana  
☐ 1 vez al día  
☐ 2 a 3 veces al día  
☐ 5 a 6 veces al día  
☐ más 6 veces al día

|                       |                                                                                                                                                                                                                                                                                                                                                                                                              |
|-----------------------|--------------------------------------------------------------------------------------------------------------------------------------------------------------------------------------------------------------------------------------------------------------------------------------------------------------------------------------------------------------------------------------------------------------|
| vino seco o vermut    | <input checked="" type="radio"/> Nunca o menos 1 vez al mes<br><input type="radio"/> 1 a 3 veces mes<br><input type="radio"/> 1 vez semana<br><input type="radio"/> 2 a 4 veces semana<br><input type="radio"/> 5 a 6 veces semana<br><input type="radio"/> 1 vez al día<br><input type="radio"/> 2 a 3 veces al día<br><input type="radio"/> 5 a 6 veces al día<br><input type="radio"/> más 6 veces al día |
| cerveza               | <input checked="" type="radio"/> Nunca o menos 1 vez al mes<br><input type="radio"/> 1 a 3 veces mes<br><input type="radio"/> 1 vez semana<br><input type="radio"/> 2 a 4 veces semana<br><input type="radio"/> 5 a 6 veces semana<br><input type="radio"/> 1 vez al día<br><input type="radio"/> 2 a 3 veces al día<br><input type="radio"/> 5 a 6 veces al día<br><input type="radio"/> más 6 veces al día |
| cerveza sin alcohol   | <input checked="" type="radio"/> Nunca o menos 1 vez al mes<br><input type="radio"/> 1 a 3 veces mes<br><input type="radio"/> 1 vez semana<br><input type="radio"/> 2 a 4 veces semana<br><input type="radio"/> 5 a 6 veces semana<br><input type="radio"/> 1 vez al día<br><input type="radio"/> 2 a 3 veces al día<br><input type="radio"/> 5 a 6 veces al día<br><input type="radio"/> más 6 veces al día |
| licores               | <input checked="" type="radio"/> Nunca o menos 1 vez al mes<br><input type="radio"/> 1 a 3 veces mes<br><input type="radio"/> 1 vez semana<br><input type="radio"/> 2 a 4 veces semana<br><input type="radio"/> 5 a 6 veces semana<br><input type="radio"/> 1 vez al día<br><input type="radio"/> 2 a 3 veces al día<br><input type="radio"/> 5 a 6 veces al día<br><input type="radio"/> más 6 veces al día |
| ginebra o ron o vodka | <input checked="" type="radio"/> Nunca o menos 1 vez al mes<br><input type="radio"/> 1 a 3 veces mes<br><input type="radio"/> 1 vez semana<br><input type="radio"/> 2 a 4 veces semana<br><input type="radio"/> 5 a 6 veces semana<br><input type="radio"/> 1 vez al día<br><input type="radio"/> 2 a 3 veces al día<br><input type="radio"/> 5 a 6 veces al día<br><input type="radio"/> más 6 veces al día |
| refresco normal       | <input checked="" type="radio"/> Nunca o menos 1 vez al mes<br><input type="radio"/> 1 a 3 veces mes<br><input type="radio"/> 1 vez semana<br><input type="radio"/> 2 a 4 veces semana<br><input type="radio"/> 5 a 6 veces semana<br><input type="radio"/> 1 vez al día<br><input type="radio"/> 2 a 3 veces al día<br><input type="radio"/> 5 a 6 veces al día<br><input type="radio"/> más 6 veces al día |



|                          |                                                                                                                                                                                                                                                                                                                                                                                                              |
|--------------------------|--------------------------------------------------------------------------------------------------------------------------------------------------------------------------------------------------------------------------------------------------------------------------------------------------------------------------------------------------------------------------------------------------------------|
| refresco sin azúcar      | <input checked="" type="radio"/> Nunca o menos 1 vez al mes<br><input type="radio"/> 1 a 3 veces mes<br><input type="radio"/> 1 vez semana<br><input type="radio"/> 2 a 4 veces semana<br><input type="radio"/> 5 a 6 veces semana<br><input type="radio"/> 1 vez al día<br><input type="radio"/> 2 a 3 veces al día<br><input type="radio"/> 5 a 6 veces al día<br><input type="radio"/> más 6 veces al día |
| Agua del grifo           | <input checked="" type="radio"/> Nunca o menos 1 vez al mes<br><input type="radio"/> 1 a 3 veces mes<br><input type="radio"/> 1 vez semana<br><input type="radio"/> 2 a 4 veces semana<br><input type="radio"/> 5 a 6 veces semana<br><input type="radio"/> 1 vez al día<br><input type="radio"/> 2 a 3 veces al día<br><input type="radio"/> 5 a 6 veces al día<br><input type="radio"/> más 6 veces al día |
| agua embotellada sin gas | <input type="radio"/> Nunca o menos 1 vez al mes<br><input type="radio"/> 1 a 3 veces mes<br><input type="radio"/> 1 vez semana<br><input type="radio"/> 2 a 4 veces semana<br><input checked="" type="radio"/> 5 a 6 veces semana<br><input type="radio"/> 1 vez al día<br><input type="radio"/> 2 a 3 veces al día<br><input type="radio"/> 5 a 6 veces al día<br><input type="radio"/> más 6 veces al día |
| agua embotellada con gas | <input checked="" type="radio"/> Nunca o menos 1 vez al mes<br><input type="radio"/> 1 a 3 veces mes<br><input type="radio"/> 1 vez semana<br><input type="radio"/> 2 a 4 veces semana<br><input type="radio"/> 5 a 6 veces semana<br><input type="radio"/> 1 vez al día<br><input type="radio"/> 2 a 3 veces al día<br><input type="radio"/> 5 a 6 veces al día<br><input type="radio"/> más 6 veces al día |
| zumو frutas embasado     | <input checked="" type="radio"/> Nunca o menos 1 vez al mes<br><input type="radio"/> 1 a 3 veces mes<br><input type="radio"/> 1 vez semana<br><input type="radio"/> 2 a 4 veces semana<br><input type="radio"/> 5 a 6 veces semana<br><input type="radio"/> 1 vez al día<br><input type="radio"/> 2 a 3 veces al día<br><input type="radio"/> 5 a 6 veces al día<br><input type="radio"/> más 6 veces al día |
| cafe                     | <input checked="" type="radio"/> Nunca o menos 1 vez al mes<br><input type="radio"/> 1 a 3 veces mes<br><input type="radio"/> 1 vez semana<br><input type="radio"/> 2 a 4 veces semana<br><input type="radio"/> 5 a 6 veces semana<br><input type="radio"/> 1 vez al día<br><input type="radio"/> 2 a 3 veces al día<br><input type="radio"/> 5 a 6 veces al día<br><input type="radio"/> más 6 veces al día |

|                       |                                                                                                                                                                                                                                                                                                                                                                                                              |
|-----------------------|--------------------------------------------------------------------------------------------------------------------------------------------------------------------------------------------------------------------------------------------------------------------------------------------------------------------------------------------------------------------------------------------------------------|
| cafe descafeinado     | <input checked="" type="radio"/> Nunca o menos 1 vez al mes<br><input type="radio"/> 1 a 3 veces mes<br><input type="radio"/> 1 vez semana<br><input type="radio"/> 2 a 4 veces semana<br><input type="radio"/> 5 a 6 veces semana<br><input type="radio"/> 1 vez al día<br><input type="radio"/> 2 a 3 veces al día<br><input type="radio"/> 5 a 6 veces al día<br><input type="radio"/> más 6 veces al día |
| te o infusión         | <input checked="" type="radio"/> Nunca o menos 1 vez al mes<br><input type="radio"/> 1 a 3 veces mes<br><input type="radio"/> 1 vez semana<br><input type="radio"/> 2 a 4 veces semana<br><input type="radio"/> 5 a 6 veces semana<br><input type="radio"/> 1 vez al día<br><input type="radio"/> 2 a 3 veces al día<br><input type="radio"/> 5 a 6 veces al día<br><input type="radio"/> más 6 veces al día |
| sopa o puré verduras  | <input type="radio"/> Nunca o menos 1 vez al mes<br><input type="radio"/> 1 a 3 veces mes<br><input checked="" type="radio"/> 1 vez semana<br><input type="radio"/> 2 a 4 veces semana<br><input type="radio"/> 5 a 6 veces semana<br><input type="radio"/> 1 vez al día<br><input type="radio"/> 2 a 3 veces al día<br><input type="radio"/> 5 a 6 veces al día<br><input type="radio"/> más 6 veces al día |
| croquetas pollo jamón | <input checked="" type="radio"/> Nunca o menos 1 vez al mes<br><input type="radio"/> 1 a 3 veces mes<br><input type="radio"/> 1 vez semana<br><input type="radio"/> 2 a 4 veces semana<br><input type="radio"/> 5 a 6 veces semana<br><input type="radio"/> 1 vez al día<br><input type="radio"/> 2 a 3 veces al día<br><input type="radio"/> 5 a 6 veces al día<br><input type="radio"/> más 6 veces al día |
| croquetas pescado     | <input checked="" type="radio"/> Nunca o menos 1 vez al mes<br><input type="radio"/> 1 a 3 veces mes<br><input type="radio"/> 1 vez semana<br><input type="radio"/> 2 a 4 veces semana<br><input type="radio"/> 5 a 6 veces semana<br><input type="radio"/> 1 vez al día<br><input type="radio"/> 2 a 3 veces al día<br><input type="radio"/> 5 a 6 veces al día<br><input type="radio"/> más 6 veces al día |
| mayonesa              | <input checked="" type="radio"/> Nunca o menos 1 vez al mes<br><input type="radio"/> 1 a 3 veces mes<br><input type="radio"/> 1 vez semana<br><input type="radio"/> 2 a 4 veces semana<br><input type="radio"/> 5 a 6 veces semana<br><input type="radio"/> 1 vez al día<br><input type="radio"/> 2 a 3 veces al día<br><input type="radio"/> 5 a 6 veces al día<br><input type="radio"/> más 6 veces al día |

|                  |                                                                                                                                                                                                                                                                                                                                                                                                              |
|------------------|--------------------------------------------------------------------------------------------------------------------------------------------------------------------------------------------------------------------------------------------------------------------------------------------------------------------------------------------------------------------------------------------------------------|
| salsa tomate     | <input checked="" type="radio"/> Nunca o menos 1 vez al mes<br><input type="radio"/> 1 a 3 veces mes<br><input type="radio"/> 1 vez semana<br><input type="radio"/> 2 a 4 veces semana<br><input type="radio"/> 5 a 6 veces semana<br><input type="radio"/> 1 vez al día<br><input type="radio"/> 2 a 3 veces al día<br><input type="radio"/> 5 a 6 veces al día<br><input type="radio"/> más 6 veces al día |
| ketchup          | <input checked="" type="radio"/> Nunca o menos 1 vez al mes<br><input type="radio"/> 1 a 3 veces mes<br><input type="radio"/> 1 vez semana<br><input type="radio"/> 2 a 4 veces semana<br><input type="radio"/> 5 a 6 veces semana<br><input type="radio"/> 1 vez al día<br><input type="radio"/> 2 a 3 veces al día<br><input type="radio"/> 5 a 6 veces al día<br><input type="radio"/> más 6 veces al día |
| sal              | <input checked="" type="radio"/> Nunca o menos 1 vez al mes<br><input type="radio"/> 1 a 3 veces mes<br><input type="radio"/> 1 vez semana<br><input type="radio"/> 2 a 4 veces semana<br><input type="radio"/> 5 a 6 veces semana<br><input type="radio"/> 1 vez al día<br><input type="radio"/> 2 a 3 veces al día<br><input type="radio"/> 5 a 6 veces al día<br><input type="radio"/> más 6 veces al día |
| ajo              | <input checked="" type="radio"/> Nunca o menos 1 vez al mes<br><input type="radio"/> 1 a 3 veces mes<br><input type="radio"/> 1 vez semana<br><input type="radio"/> 2 a 4 veces semana<br><input type="radio"/> 5 a 6 veces semana<br><input type="radio"/> 1 vez al día<br><input type="radio"/> 2 a 3 veces al día<br><input type="radio"/> 5 a 6 veces al día<br><input type="radio"/> más 6 veces al día |
| mermelada o miel | <input type="radio"/> Nunca o menos 1 vez al mes<br><input type="radio"/> 1 a 3 veces mes<br><input type="radio"/> 1 vez semana<br><input checked="" type="radio"/> 2 a 4 veces semana<br><input type="radio"/> 5 a 6 veces semana<br><input type="radio"/> 1 vez al día<br><input type="radio"/> 2 a 3 veces al día<br><input type="radio"/> 5 a 6 veces al día<br><input type="radio"/> más 6 veces al día |
| azúcar           | <input checked="" type="radio"/> Nunca o menos 1 vez al mes<br><input type="radio"/> 1 a 3 veces mes<br><input type="radio"/> 1 vez semana<br><input type="radio"/> 2 a 4 veces semana<br><input type="radio"/> 5 a 6 veces semana<br><input type="radio"/> 1 vez al día<br><input type="radio"/> 2 a 3 veces al día<br><input type="radio"/> 5 a 6 veces al día<br><input type="radio"/> más 6 veces al día |

|                                       |                                                                                                                                                                                                                                                                                                                                                                                                                                                                                                                               |
|---------------------------------------|-------------------------------------------------------------------------------------------------------------------------------------------------------------------------------------------------------------------------------------------------------------------------------------------------------------------------------------------------------------------------------------------------------------------------------------------------------------------------------------------------------------------------------|
| Otro alimento                         | <hr/>                                                                                                                                                                                                                                                                                                                                                                                                                                                                                                                         |
| suplementos vitamínicos               | <input type="radio"/> si<br><input checked="" type="radio"/> no                                                                                                                                                                                                                                                                                                                                                                                                                                                               |
| suplementos vitamínicos               | <hr/>                                                                                                                                                                                                                                                                                                                                                                                                                                                                                                                         |
| dieta previa                          | <input type="radio"/> si<br><input checked="" type="radio"/> no                                                                                                                                                                                                                                                                                                                                                                                                                                                               |
| motivo dieta                          | <input checked="" type="radio"/> no dieta<br><input type="radio"/> control peso<br><input type="radio"/> control colesterol<br><input type="radio"/> control diabetes<br><input type="radio"/> problemas estómago<br><input type="radio"/> problemas vesícula o hepáticos<br><input type="radio"/> HTA o cardiopatía<br><input type="radio"/> problemas renales<br><input type="radio"/> alergia alimentaria<br><input type="radio"/> ácido úrico elevado<br><input type="radio"/> vegetariana<br><input type="radio"/> otros |
| cambio alimentos año previo gestación | <input type="radio"/> si<br><input checked="" type="radio"/> no                                                                                                                                                                                                                                                                                                                                                                                                                                                               |
| cambio lácteos                        | <input type="radio"/> eliminado<br><input type="radio"/> disminuido<br><input checked="" type="radio"/> igual<br><input type="radio"/> aumentado<br><input type="radio"/> no sabe                                                                                                                                                                                                                                                                                                                                             |
| cambio huevos                         | <input type="radio"/> eliminado<br><input type="radio"/> disminuido<br><input checked="" type="radio"/> igual<br><input type="radio"/> aumentado<br><input type="radio"/> no sabe                                                                                                                                                                                                                                                                                                                                             |
| cambio carne                          | <input type="radio"/> eliminado<br><input type="radio"/> disminuido<br><input checked="" type="radio"/> igual<br><input type="radio"/> aumentado<br><input type="radio"/> no sabe                                                                                                                                                                                                                                                                                                                                             |
| cambio pescado                        | <input type="radio"/> eliminado<br><input type="radio"/> disminuido<br><input checked="" type="radio"/> igual<br><input type="radio"/> aumentado<br><input type="radio"/> no sabe                                                                                                                                                                                                                                                                                                                                             |
| cambio verduras                       | <input type="radio"/> eliminado<br><input type="radio"/> disminuido<br><input checked="" type="radio"/> igual<br><input type="radio"/> aumentado<br><input type="radio"/> no sabe                                                                                                                                                                                                                                                                                                                                             |

|                            |                                                                                                                                                                                                                        |
|----------------------------|------------------------------------------------------------------------------------------------------------------------------------------------------------------------------------------------------------------------|
| cambio legumbres           | <input type="radio"/> eliminado<br><input type="radio"/> disminuido<br><input checked="" type="radio"/> igual<br><input type="radio"/> aumentado<br><input type="radio"/> no sabe                                      |
| cambio fruta               | <input type="radio"/> eliminado<br><input type="radio"/> disminuido<br><input checked="" type="radio"/> igual<br><input type="radio"/> aumentado<br><input type="radio"/> no sabe                                      |
| cambio pan                 | <input type="radio"/> eliminado<br><input type="radio"/> disminuido<br><input checked="" type="radio"/> igual<br><input type="radio"/> aumentado<br><input type="radio"/> no sabe                                      |
| cambio aceite oliva        | <input type="radio"/> eliminado<br><input type="radio"/> disminuido<br><input checked="" type="radio"/> igual<br><input type="radio"/> aumentado<br><input type="radio"/> no sabe                                      |
| cambio mante o margarina   | <input type="radio"/> eliminado<br><input type="radio"/> disminuido<br><input checked="" type="radio"/> igual<br><input type="radio"/> aumentado<br><input type="radio"/> no sabe                                      |
| cambio azúcar y dulces     | <input type="radio"/> eliminado<br><input type="radio"/> disminuido<br><input checked="" type="radio"/> igual<br><input type="radio"/> aumentado<br><input type="radio"/> no sabe                                      |
| cambio bebidas alcohólicas | <input type="radio"/> eliminado<br><input type="radio"/> disminuido<br><input checked="" type="radio"/> igual<br><input type="radio"/> aumentado<br><input type="radio"/> no sabe                                      |
| frecuencia comidas fritas  | <input type="radio"/> a diario<br><input type="radio"/> 5 a 6 veces semana<br><input type="radio"/> 2 a 4 veces semana<br><input checked="" type="radio"/> 1 vez semana<br><input type="radio"/> menos de 1 vez semana |
| carne                      | <input type="radio"/> no como<br><input type="radio"/> cruda<br><input type="radio"/> poco hecha<br><input checked="" type="radio"/> hecha<br><input type="radio"/> muy hecha                                          |
| grasa visible carne        | <input checked="" type="radio"/> quita toda<br><input type="radio"/> quita mayoría<br><input type="radio"/> quita un poco<br><input type="radio"/> no quita nada                                                       |

|                                |                                                                                                                                                                                                                                                          |
|--------------------------------|----------------------------------------------------------------------------------------------------------------------------------------------------------------------------------------------------------------------------------------------------------|
| cocina carne                   | <input checked="" type="radio"/> a la plancha<br><input type="radio"/> a la parrilla<br><input type="radio"/> asada<br><input type="radio"/> frita<br><input type="radio"/> guisada                                                                      |
| tostado quemado carne          | <input checked="" type="radio"/> nunca<br><input type="radio"/> 1 vez mes<br><input type="radio"/> 2 a 3 veces mes<br><input type="radio"/> 1 vez semana<br><input type="radio"/> 2 a 3 semanas                                                          |
| tostado quemado pescado        | <input checked="" type="radio"/> nunca<br><input type="radio"/> 1 vez mes<br><input type="radio"/> 2 a 3 veces mes<br><input type="radio"/> 1 vez semana<br><input type="radio"/> 2 a 3 semanas                                                          |
| socarrat paella                | <input checked="" type="radio"/> nunca<br><input type="radio"/> 1 vez mes<br><input type="radio"/> 2 a 3 veces mes<br><input type="radio"/> 1 vez semana<br><input type="radio"/> 2 a 3 semanas                                                          |
| grasa o aceite cocinar         | <input type="radio"/> mantequilla<br><input type="radio"/> margarina<br><input checked="" type="radio"/> aceite oliva<br><input type="radio"/> aceite oliva virgen extra<br><input type="radio"/> aceite vegetal<br><input type="radio"/> mezcla aceites |
| grasa aceite aliñar            | <input type="radio"/> mantequilla<br><input type="radio"/> margarina<br><input type="radio"/> aceite oliva<br><input type="radio"/> aceite oliva virgen extra<br><input type="radio"/> aceite vegetal<br><input type="radio"/> mezcla aceites            |
| grasa aceite freir             | <input type="radio"/> mantequilla<br><input type="radio"/> margarina<br><input checked="" type="radio"/> aceite oliva<br><input type="radio"/> aceite oliva virgen extra<br><input type="radio"/> aceite vegetal<br><input type="radio"/> mezcla aceites |
| Ejercicio cuestionario         | <input type="radio"/> si<br><input checked="" type="radio"/> no                                                                                                                                                                                          |
| horas de sueño incluido siesta | _____                                                                                                                                                                                                                                                    |
| minutos siesta                 | _____                                                                                                                                                                                                                                                    |
| horas televisión semana        | _____                                                                                                                                                                                                                                                    |

|                                        |                                                                                                                                                                                                                                                                                                                                                                |
|----------------------------------------|----------------------------------------------------------------------------------------------------------------------------------------------------------------------------------------------------------------------------------------------------------------------------------------------------------------------------------------------------------------|
| actividad trabajo                      | <input type="radio"/> casi siempre sentado<br><input type="radio"/> sentado 50 por cien<br><input type="radio"/> casi siempre de pie, quieto<br><input type="radio"/> casi siempre levantado caminando y llevando pocas cosas<br><input type="radio"/> casi siempre levantado, caminando y llevado muchas cosas<br><input type="radio"/> trabajo manual pesado |
| tiempo caminar o bici al día           | <input type="radio"/> casi nunca<br><input type="radio"/> menos 20min día<br><input type="radio"/> 20 a 40 min día<br><input type="radio"/> 40 a 60 min día<br><input type="radio"/> 1h o 1h y media día<br><input type="radio"/> más de 1h y media al día                                                                                                     |
| tiempo tareas casa al día              | <input type="radio"/> menos de 1h día<br><input type="radio"/> 1 a 2h día<br><input type="radio"/> 3 a 4h día<br><input type="radio"/> 5 a 6h día<br><input type="radio"/> 7 a 8h día<br><input type="radio"/> más de 8h día                                                                                                                                   |
| tiempo libre televisión ordenador leer | <input type="radio"/> menos 1h día<br><input type="radio"/> 1h día<br><input type="radio"/> 2h día<br><input type="radio"/> 3h día<br><input type="radio"/> 4h día<br><input type="radio"/> 5 a 6h día<br><input type="radio"/> mas 6h día                                                                                                                     |
| tiempo libre ejercicio o deporte       | <input type="radio"/> menos 1h semana<br><input type="radio"/> 1h semana<br><input type="radio"/> 2h semana<br><input type="radio"/> 3h semana<br><input type="radio"/> 4 a 5h semana<br><input type="radio"/> mas 5h semana                                                                                                                                   |
| como se considera                      | <input type="radio"/> sedentaria<br><input type="radio"/> poco activa<br><input type="radio"/> moderadamente activa<br><input type="radio"/> bastante activa<br><input type="radio"/> muy activa<br><input type="radio"/> no sabe                                                                                                                              |
| FUR                                    | [*DATA REMOVED*]                                                                                                                                                                                                                                                                                                                                               |
| Semanas gestación 2T                   | _____                                                                                                                                                                                                                                                                                                                                                          |
| Días gestación 2T                      | _____                                                                                                                                                                                                                                                                                                                                                          |
| DBP 2T                                 | _____                                                                                                                                                                                                                                                                                                                                                          |
| CC 2T                                  | _____                                                                                                                                                                                                                                                                                                                                                          |

|                                                   |                                                                                                                                                                                                 |
|---------------------------------------------------|-------------------------------------------------------------------------------------------------------------------------------------------------------------------------------------------------|
| AC 2T                                             |                                                                                                                                                                                                 |
| LF 2T                                             |                                                                                                                                                                                                 |
| PFE 2T (Hadlock)                                  |                                                                                                                                                                                                 |
| Semanas gestación 3T                              | [*DATA REMOVED*]                                                                                                                                                                                |
| días 3T                                           | [*DATA REMOVED*]                                                                                                                                                                                |
| DBP 3T                                            | [*DATA REMOVED*]                                                                                                                                                                                |
| CC 3T                                             | [*DATA REMOVED*]                                                                                                                                                                                |
| AC 3T                                             | [*DATA REMOVED*]                                                                                                                                                                                |
| LF 3T                                             | [*DATA REMOVED*]                                                                                                                                                                                |
| PFE 3T (Hadlock)                                  | [*DATA REMOVED*]                                                                                                                                                                                |
| Semanas de gestación final                        | [*DATA REMOVED*]                                                                                                                                                                                |
| días gestación final                              | [*DATA REMOVED*]                                                                                                                                                                                |
| Localización placenta                             | <input type="radio"/> anterior<br><input type="radio"/> lateral derecha<br><input type="radio"/> lateral izquierda<br><input checked="" type="radio"/> posterior<br><input type="radio"/> fondo |
| Presentación longitudinal cefálica                | <input type="radio"/> no<br><input checked="" type="radio"/> si                                                                                                                                 |
| Dorso                                             | <input type="radio"/> izquierda anterior<br><input checked="" type="radio"/> izquierda posterior<br><input type="radio"/> derecha anterior<br><input type="radio"/> derecha posterior           |
| diámetro biparietal                               | [*DATA REMOVED*]                                                                                                                                                                                |
| Circunferencia craneal                            | [*DATA REMOVED*]                                                                                                                                                                                |
| Circunferencia abdominal                          | [*DATA REMOVED*]                                                                                                                                                                                |
| Longitud de femur                                 | [*DATA REMOVED*]                                                                                                                                                                                |
| tejido celular subcutáneo a nivel del muslo en mm | [*DATA REMOVED*]                                                                                                                                                                                |
| tejido celular subcutáneo en abdomen en mm        | [*DATA REMOVED*]                                                                                                                                                                                |



|                                               |                                                                                                                                                          |
|-----------------------------------------------|----------------------------------------------------------------------------------------------------------------------------------------------------------|
| Volumen del muslo en cm3                      | [*DATA REMOVED*]                                                                                                                                         |
| Peso fetal estimado según fórmula de Hadlock  | [*DATA REMOVED*]                                                                                                                                         |
| Percentil                                     | [*DATA REMOVED*]                                                                                                                                         |
| Peso fetal estimado según fórmula de Scioscia | _____                                                                                                                                                    |
| Peso fetal estimado según fórmula de LEE      | _____                                                                                                                                                    |
| Tipo de parto                                 | <input checked="" type="radio"/> eutocico<br><input type="radio"/> instrumentado/ventosa<br><input type="radio"/> cesarea                                |
| fecha de nacimiento                           | [*DATA REMOVED*]                                                                                                                                         |
| Días entre exploración y nacimiento           | [*DATA REMOVED*]                                                                                                                                         |
| Peso RN en g                                  | [*DATA REMOVED*]                                                                                                                                         |
| sexo                                          | <input checked="" type="radio"/> mujer<br><input type="radio"/> hombre                                                                                   |
| Apgar 1 minuto                                | [*DATA REMOVED*]                                                                                                                                         |
| Apgar 5 minutos                               | [*DATA REMOVED*]                                                                                                                                         |
| Apgar 10 minutos                              | _____                                                                                                                                                    |
| antecedente Covid durante gestación           | <input type="radio"/> Yes<br><input checked="" type="radio"/> No                                                                                         |
| Nivel de estudios                             | <input type="radio"/> ninguno<br><input checked="" type="radio"/> primarios<br><input type="radio"/> secundarios<br><input type="radio"/> universitarios |

# Base\_datos\_estimacion\_peso\_fetal

|                                       |                                                                                                                                                                                                                                                                                      |
|---------------------------------------|--------------------------------------------------------------------------------------------------------------------------------------------------------------------------------------------------------------------------------------------------------------------------------------|
| Número de identificación participante | 22                                                                                                                                                                                                                                                                                   |
| CODIGO PARTICIPANTE                   |                                                                                                                                                                                                                                                                                      |
| Edad                                  | [*DATA REMOVED*]                                                                                                                                                                                                                                                                     |
| Gestaciones                           | <input type="radio"/> 1<br><input checked="" type="radio"/> 2<br><input type="radio"/> 3<br><input type="radio"/> mas de 3                                                                                                                                                           |
| partos                                | <input checked="" type="radio"/> 0<br><input type="radio"/> 1<br><input type="radio"/> 2<br><input type="radio"/> 3<br><input type="radio"/> mas de 3                                                                                                                                |
| cesáreas                              | <input type="radio"/> 0<br><input checked="" type="radio"/> 1<br><input type="radio"/> 2<br><input type="radio"/> 3<br><input type="radio"/> mas de 3                                                                                                                                |
| Abortos                               | <input checked="" type="radio"/> 0<br><input type="radio"/> 1<br><input type="radio"/> 2<br><input type="radio"/> 3<br><input type="radio"/> mas de 3                                                                                                                                |
| Tipo de gestacion                     | <input checked="" type="radio"/> espontanea<br><input type="radio"/> IAC inseminación artificial conyuge<br><input type="radio"/> IAD inseminación artificial donante<br><input type="radio"/> FIV Fecundación in Vitro<br><input type="radio"/> Ovodon FIV con donación de ovocitos |
| peso previo a embarazo                | [*DATA REMOVED*]                                                                                                                                                                                                                                                                     |
| Ganancia ponderal embarazo            | [*DATA REMOVED*]                                                                                                                                                                                                                                                                     |
| Talla madre                           | [*DATA REMOVED*]                                                                                                                                                                                                                                                                     |
| IMC previo embarazo                   | 19.60519199567334                                                                                                                                                                                                                                                                    |
| Patología obstétrica                  | <input checked="" type="radio"/> no<br><input type="radio"/> si                                                                                                                                                                                                                      |
| Diabetes pregestacional               | <input checked="" type="radio"/> no<br><input type="radio"/> si                                                                                                                                                                                                                      |
| Diabetes gestacional                  | <input checked="" type="radio"/> no<br><input type="radio"/> si                                                                                                                                                                                                                      |

|                                            |                                                                                                                                                                                      |
|--------------------------------------------|--------------------------------------------------------------------------------------------------------------------------------------------------------------------------------------|
| Diabetes gestacional con insulina          | <input checked="" type="radio"/> no<br><input type="radio"/> si                                                                                                                      |
| Diabetes gestacional con dieta y ejercicio | <input checked="" type="radio"/> no<br><input type="radio"/> si                                                                                                                      |
| Percentil fetos previos                    | <input checked="" type="radio"/> Nada<br><input type="radio"/> percentil menor de 10<br><input type="radio"/> percentil entre 10 y 90<br><input type="radio"/> percentil mayor de 90 |
| Exfumadora                                 | <input checked="" type="radio"/> Nada<br><input type="radio"/> menos de 5 años<br><input type="radio"/> 5 a 10 años<br><input type="radio"/> mayor o igual a 10 años                 |
| Hábito tabáquico                           | <input checked="" type="radio"/> no<br><input type="radio"/> si                                                                                                                      |
| fumadora                                   | [*DATA REMOVED*]                                                                                                                                                                     |
| Consumo otros tóxicos                      | <input checked="" type="radio"/> no<br><input type="radio"/> si                                                                                                                      |
| Hb 1T                                      | [*DATA REMOVED*]                                                                                                                                                                     |
| Htc 1T                                     | [*DATA REMOVED*]                                                                                                                                                                     |
| Hb 2T                                      | [*DATA REMOVED*]                                                                                                                                                                     |
| HTC 2T                                     | [*DATA REMOVED*]                                                                                                                                                                     |
| Hb 3T                                      | [*DATA REMOVED*]                                                                                                                                                                     |
| HTC 3T                                     | [*DATA REMOVED*]                                                                                                                                                                     |
| Suplemento FE oral                         | <input type="radio"/> si<br><input checked="" type="radio"/> no                                                                                                                      |
| Suplemento fe iv                           | <input type="radio"/> si<br><input checked="" type="radio"/> no                                                                                                                      |
| Transfusión                                | <input checked="" type="radio"/> no<br><input type="radio"/> si                                                                                                                      |
| Solicitada Vit D                           | <input checked="" type="radio"/> no<br><input type="radio"/> si                                                                                                                      |
| Deficit vit D                              | <input type="radio"/> no<br><input type="radio"/> si                                                                                                                                 |
| Suplemento vit D                           | <input type="radio"/> si<br><input type="radio"/> no                                                                                                                                 |

|                       |                                                                                                                                                                                                                                                                                                                                                                                                              |
|-----------------------|--------------------------------------------------------------------------------------------------------------------------------------------------------------------------------------------------------------------------------------------------------------------------------------------------------------------------------------------------------------------------------------------------------------|
| Dieta, cuestionario   | <input checked="" type="radio"/> sí<br><input type="radio"/> no                                                                                                                                                                                                                                                                                                                                              |
| Leche entera          | <input checked="" type="radio"/> Nunca o menos 1 vez al mes<br><input type="radio"/> 1 a 3 veces mes<br><input type="radio"/> 1 vez semana<br><input type="radio"/> 2 a 4 veces semana<br><input type="radio"/> 5 a 6 veces semana<br><input type="radio"/> 1 vez al día<br><input type="radio"/> 2 a 3 veces al día<br><input type="radio"/> 5 a 6 veces al día<br><input type="radio"/> más 6 veces al día |
| Leche semidesnatada   | <input type="radio"/> Nunca o menos 1 vez al mes<br><input checked="" type="radio"/> 1 a 3 veces mes<br><input type="radio"/> 1 vez semana<br><input type="radio"/> 2 a 4 veces semana<br><input type="radio"/> 5 a 6 veces semana<br><input type="radio"/> 1 vez al día<br><input type="radio"/> 2 a 3 veces al día<br><input type="radio"/> 5 a 6 veces al día<br><input type="radio"/> mas 6 veces al día |
| Leche desnatada       | <input type="radio"/> Nunca o menos 1 vez al mes<br><input type="radio"/> 1 a 3 veces mes<br><input type="radio"/> 1 vez semana<br><input type="radio"/> 2 a 4 veces semana<br><input type="radio"/> 5 a 6 veces semana<br><input checked="" type="radio"/> 1 vez al día<br><input type="radio"/> 2 a 3 veces al día<br><input type="radio"/> 5 a 6 veces al día<br><input type="radio"/> más 6 veces al día |
| Leche condensada      | <input type="radio"/> Nunca o menos 1 vez al mes<br><input checked="" type="radio"/> 1 a 3 veces mes<br><input type="radio"/> 1 vez semana<br><input type="radio"/> 2 a 4 veces semana<br><input type="radio"/> 5 a 6 veces semana<br><input type="radio"/> 1 vez al día<br><input type="radio"/> 2 a 3 veces al día<br><input type="radio"/> 5 a 6 veces al día<br><input type="radio"/> más 6 veces al día |
| nata o crema de leche | <input checked="" type="radio"/> Nunca o menos 1 vez al mes<br><input type="radio"/> 1 a 3 veces mes<br><input type="radio"/> 1 vez semana<br><input type="radio"/> 2 a 4 veces semana<br><input type="radio"/> 5 a 6 veces semana<br><input type="radio"/> 1 vez al día<br><input type="radio"/> 2 a 3 veces al día<br><input type="radio"/> 5 a 6 veces al día<br><input type="radio"/> más 6 veces al día |

|                                             |                                                                                                                                                                                                                                                                                                                                                                                                              |
|---------------------------------------------|--------------------------------------------------------------------------------------------------------------------------------------------------------------------------------------------------------------------------------------------------------------------------------------------------------------------------------------------------------------------------------------------------------------|
| Yogurt Entero                               | <input type="radio"/> Nunca o menos 1 vez al mes<br><input checked="" type="radio"/> 1 a 3 veces mes<br><input type="radio"/> 1 vez semana<br><input type="radio"/> 2 a 4 veces semana<br><input type="radio"/> 5 a 6 veces semana<br><input type="radio"/> 1 vez al día<br><input type="radio"/> 2 a 3 veces al día<br><input type="radio"/> 5 a 6 veces al día<br><input type="radio"/> más 6 veces al día |
| Yogurt desnatado                            | <input type="radio"/> Nunca o menos 1 vez al mes<br><input type="radio"/> 1 a 3 veces mes<br><input type="radio"/> 1 vez semana<br><input checked="" type="radio"/> 2 a 4 veces semana<br><input type="radio"/> 5 a 6 veces semana<br><input type="radio"/> 1 vez al día<br><input type="radio"/> 2 a 3 veces al día<br><input type="radio"/> 5 a 6 veces al día<br><input type="radio"/> más 6 veces al día |
| 100g requesón o queso blando o queso fresco | <input type="radio"/> Nunca o menos 1 vez al mes<br><input type="radio"/> 1 a 3 veces mes<br><input type="radio"/> 1 vez semana<br><input checked="" type="radio"/> 2 a 4 veces semana<br><input type="radio"/> 5 a 6 veces semana<br><input type="radio"/> 1 vez al día<br><input type="radio"/> 2 a 3 veces al día<br><input type="radio"/> 5 a 6 veces al día<br><input type="radio"/> más 6 veces al día |
| queso curado o semicurado o cremoso         | <input type="radio"/> Nunca o menos 1 vez al mes<br><input type="radio"/> 1 a 3 veces mes<br><input type="radio"/> 1 vez semana<br><input checked="" type="radio"/> 2 a 4 veces semana<br><input type="radio"/> 5 a 6 veces semana<br><input type="radio"/> 1 vez al día<br><input type="radio"/> 2 a 3 veces al día<br><input type="radio"/> 5 a 6 veces al día<br><input type="radio"/> más 6 veces al día |
| natillas flan pudding                       | <input type="radio"/> Nunca o menos 1 vez al mes<br><input checked="" type="radio"/> 1 a 3 veces mes<br><input type="radio"/> 1 vez semana<br><input type="radio"/> 2 a 4 veces semana<br><input type="radio"/> 5 a 6 veces semana<br><input type="radio"/> 1 vez al día<br><input type="radio"/> 2 a 3 veces al día<br><input type="radio"/> 5 a 6 veces al día<br><input type="radio"/> más 6 veces al día |
| Helado                                      | <input type="radio"/> Nunca o menos 1 vez al mes<br><input type="radio"/> 1 a 3 veces mes<br><input type="radio"/> 1 vez semana<br><input type="radio"/> 2 a 4 veces semana<br><input checked="" type="radio"/> 5 a 6 veces semana<br><input type="radio"/> 1 vez al día<br><input type="radio"/> 2 a 3 veces al día<br><input type="radio"/> 5 a 6 veces al día<br><input type="radio"/> más 6 veces al día |

|                                      |                                                                                                                                                                                                                                                                                                                                                                                                              |
|--------------------------------------|--------------------------------------------------------------------------------------------------------------------------------------------------------------------------------------------------------------------------------------------------------------------------------------------------------------------------------------------------------------------------------------------------------------|
| huevo                                | <input type="radio"/> Nunca o menos 1 vez al mes<br><input type="radio"/> 1 a 3 veces mes<br><input checked="" type="radio"/> 1 vez semana<br><input type="radio"/> 2 a 4 veces semana<br><input type="radio"/> 5 a 6 veces semana<br><input type="radio"/> 1 vez al día<br><input type="radio"/> 2 a 3 veces al día<br><input type="radio"/> 5 a 6 veces al día<br><input type="radio"/> más 6 veces al día |
| Pollo con piel                       | <input checked="" type="radio"/> Nunca o menos 1 vez al mes<br><input type="radio"/> 1 a 3 veces mes<br><input type="radio"/> 1 vez semana<br><input type="radio"/> 2 a 4 veces semana<br><input type="radio"/> 5 a 6 veces semana<br><input type="radio"/> 1 vez al día<br><input type="radio"/> 2 a 3 veces al día<br><input type="radio"/> 5 a 6 veces al día<br><input type="radio"/> más 6 veces al día |
| pollo sin piel                       | <input type="radio"/> Nunca o menos 1 vez al mes<br><input type="radio"/> 1 a 3 veces mes<br><input checked="" type="radio"/> 1 vez semana<br><input type="radio"/> 2 a 4 veces semana<br><input type="radio"/> 5 a 6 veces semana<br><input type="radio"/> 1 vez al día<br><input type="radio"/> 2 a 3 veces al día<br><input type="radio"/> 5 a 6 veces al día<br><input type="radio"/> más 6 veces al día |
| Ternera o cerdo o cordero            | <input type="radio"/> Nunca o menos 1 vez al mes<br><input type="radio"/> 1 a 3 veces mes<br><input checked="" type="radio"/> 1 vez semana<br><input type="radio"/> 2 a 4 veces semana<br><input type="radio"/> 5 a 6 veces semana<br><input type="radio"/> 1 vez al día<br><input type="radio"/> 2 a 3 veces al día<br><input type="radio"/> 5 a 6 veces al día<br><input type="radio"/> más 6 veces al día |
| carne caza: Conejo o codorniz o pato | <input checked="" type="radio"/> Nunca o menos 1 vez al mes<br><input type="radio"/> 1 a 3 veces mes<br><input type="radio"/> 1 vez semana<br><input type="radio"/> 2 a 4 veces semana<br><input type="radio"/> 5 a 6 veces semana<br><input type="radio"/> 1 vez al día<br><input type="radio"/> 2 a 3 veces al día<br><input type="radio"/> 5 a 6 veces al día<br><input type="radio"/> más 6 veces al día |
| Hígado de ternera o cerdo o pollo    | <input checked="" type="radio"/> Nunca o menos 1 vez al mes<br><input type="radio"/> 1 a 3 veces mes<br><input type="radio"/> 1 vez semana<br><input type="radio"/> 2 a 4 veces semana<br><input type="radio"/> 5 a 6 veces semana<br><input type="radio"/> 1 vez al día<br><input type="radio"/> 2 a 3 veces al día<br><input type="radio"/> 5 a 6 veces al día<br><input type="radio"/> más 6 veces al día |

|                     |                                                                                                                                                                                                                                                                                                                                                                                                              |
|---------------------|--------------------------------------------------------------------------------------------------------------------------------------------------------------------------------------------------------------------------------------------------------------------------------------------------------------------------------------------------------------------------------------------------------------|
| Vísceras            | <input checked="" type="radio"/> Nunca o menos 1 vez al mes<br><input type="radio"/> 1 a 3 veces mes<br><input type="radio"/> 1 vez semana<br><input type="radio"/> 2 a 4 veces semana<br><input type="radio"/> 5 a 6 veces semana<br><input type="radio"/> 1 vez al día<br><input type="radio"/> 2 a 3 veces al día<br><input type="radio"/> 5 a 6 veces al día<br><input type="radio"/> más 6 veces al día |
| Embutido            | <input checked="" type="radio"/> Nunca o menos 1 vez al mes<br><input type="radio"/> 1 a 3 veces mes<br><input type="radio"/> 1 vez semana<br><input type="radio"/> 2 a 4 veces semana<br><input type="radio"/> 5 a 6 veces semana<br><input type="radio"/> 1 vez al día<br><input type="radio"/> 2 a 3 veces al día<br><input type="radio"/> 5 a 6 veces al día<br><input type="radio"/> más 6 veces al día |
| Salchicha o similar | <input checked="" type="radio"/> Nunca o menos 1 vez al mes<br><input type="radio"/> 1 a 3 veces mes<br><input type="radio"/> 1 vez semana<br><input type="radio"/> 2 a 4 veces semana<br><input type="radio"/> 5 a 6 veces semana<br><input type="radio"/> 1 vez al día<br><input type="radio"/> 2 a 3 veces al día<br><input type="radio"/> 5 a 6 veces al día<br><input type="radio"/> más 6 veces al día |
| Pate o foiegras     | <input checked="" type="radio"/> Nunca o menos 1 vez al mes<br><input type="radio"/> 1 a 3 veces mes<br><input type="radio"/> 1 vez semana<br><input type="radio"/> 2 a 4 veces semana<br><input type="radio"/> 5 a 6 veces semana<br><input type="radio"/> 1 vez al día<br><input type="radio"/> 2 a 3 veces al día<br><input type="radio"/> 5 a 6 veces al día<br><input type="radio"/> más 6 veces al día |
| Hamburguesa         | <input type="radio"/> Nunca o menos 1 vez al mes<br><input type="radio"/> 1 a 3 veces mes<br><input checked="" type="radio"/> 1 vez semana<br><input type="radio"/> 2 a 4 veces semana<br><input type="radio"/> 5 a 6 veces semana<br><input type="radio"/> 1 vez al día<br><input type="radio"/> 2 a 3 veces al día<br><input type="radio"/> 5 a 6 veces al día<br><input type="radio"/> más 6 veces al día |
| tocino o bacon      | <input checked="" type="radio"/> Nunca o menos 1 vez al mes<br><input type="radio"/> 1 a 3 veces mes<br><input type="radio"/> 1 vez semana<br><input type="radio"/> 2 a 4 veces semana<br><input type="radio"/> 5 a 6 veces semana<br><input type="radio"/> 1 vez al día<br><input type="radio"/> 2 a 3 veces al día<br><input type="radio"/> 5 a 6 veces al día<br><input type="radio"/> más 6 veces al día |

|                        |                                                                                                                                                                                                                                                                                                                                                                                                              |
|------------------------|--------------------------------------------------------------------------------------------------------------------------------------------------------------------------------------------------------------------------------------------------------------------------------------------------------------------------------------------------------------------------------------------------------------|
| Pescado frito          | <input checked="" type="radio"/> Nunca o menos 1 vez al mes<br><input type="radio"/> 1 a 3 veces mes<br><input type="radio"/> 1 vez semana<br><input type="radio"/> 2 a 4 veces semana<br><input type="radio"/> 5 a 6 veces semana<br><input type="radio"/> 1 vez al día<br><input type="radio"/> 2 a 3 veces al día<br><input type="radio"/> 5 a 6 veces al día<br><input type="radio"/> más 6 veces al día |
| pescado hervido blanco | <input type="radio"/> Nunca o menos 1 vez al mes<br><input type="radio"/> 1 a 3 veces mes<br><input checked="" type="radio"/> 1 vez semana<br><input type="radio"/> 2 a 4 veces semana<br><input type="radio"/> 5 a 6 veces semana<br><input type="radio"/> 1 vez al día<br><input type="radio"/> 2 a 3 veces al día<br><input type="radio"/> 5 a 6 veces al día<br><input type="radio"/> más 6 veces al día |
| pescado hervido azul   | <input type="radio"/> Nunca o menos 1 vez al mes<br><input type="radio"/> 1 a 3 veces mes<br><input checked="" type="radio"/> 1 vez semana<br><input type="radio"/> 2 a 4 veces semana<br><input type="radio"/> 5 a 6 veces semana<br><input type="radio"/> 1 vez al día<br><input type="radio"/> 2 a 3 veces al día<br><input type="radio"/> 5 a 6 veces al día<br><input type="radio"/> más 6 veces al día |
| otros pescado azul     | <input type="radio"/> Nunca o menos 1 vez al mes<br><input checked="" type="radio"/> 1 a 3 veces mes<br><input type="radio"/> 1 vez semana<br><input type="radio"/> 2 a 4 veces semana<br><input type="radio"/> 5 a 6 veces semana<br><input type="radio"/> 1 vez al día<br><input type="radio"/> 2 a 3 veces al día<br><input type="radio"/> 5 a 6 veces al día<br><input type="radio"/> más 6 veces al día |
| atun conserva          | <input type="radio"/> Nunca o menos 1 vez al mes<br><input checked="" type="radio"/> 1 a 3 veces mes<br><input type="radio"/> 1 vez semana<br><input type="radio"/> 2 a 4 veces semana<br><input type="radio"/> 5 a 6 veces semana<br><input type="radio"/> 1 vez al día<br><input type="radio"/> 2 a 3 veces al día<br><input type="radio"/> 5 a 6 veces al día<br><input type="radio"/> más 6 veces al día |
| sardina conserva       | <input type="radio"/> Nunca o menos 1 vez al mes<br><input checked="" type="radio"/> 1 a 3 veces mes<br><input type="radio"/> 1 vez semana<br><input type="radio"/> 2 a 4 veces semana<br><input type="radio"/> 5 a 6 veces semana<br><input type="radio"/> 1 vez al día<br><input type="radio"/> 2 a 3 veces al día<br><input type="radio"/> 5 a 6 veces al día<br><input type="radio"/> más 6 veces al día |



|                                         |                                                                                                                                                                                                                                                                                                                                                                                                              |
|-----------------------------------------|--------------------------------------------------------------------------------------------------------------------------------------------------------------------------------------------------------------------------------------------------------------------------------------------------------------------------------------------------------------------------------------------------------------|
| pescado ahumado                         | <input checked="" type="radio"/> Nunca o menos 1 vez al mes<br><input type="radio"/> 1 a 3 veces mes<br><input type="radio"/> 1 vez semana<br><input type="radio"/> 2 a 4 veces semana<br><input type="radio"/> 5 a 6 veces semana<br><input type="radio"/> 1 vez al día<br><input type="radio"/> 2 a 3 veces al día<br><input type="radio"/> 5 a 6 veces al día<br><input type="radio"/> más 6 veces al día |
| almejas o mejillones o ostras unos 100g | <input checked="" type="radio"/> Nunca o menos 1 vez al mes<br><input type="radio"/> 1 a 3 veces mes<br><input type="radio"/> 1 vez semana<br><input type="radio"/> 2 a 4 veces semana<br><input type="radio"/> 5 a 6 veces semana<br><input type="radio"/> 1 vez al día<br><input type="radio"/> 2 a 3 veces al día<br><input type="radio"/> 5 a 6 veces al día<br><input type="radio"/> más 6 veces al día |
| calamar o chipiron o sepia unos 100g    | <input checked="" type="radio"/> Nunca o menos 1 vez al mes<br><input type="radio"/> 1 a 3 veces mes<br><input type="radio"/> 1 vez semana<br><input type="radio"/> 2 a 4 veces semana<br><input type="radio"/> 5 a 6 veces semana<br><input type="radio"/> 1 vez al día<br><input type="radio"/> 2 a 3 veces al día<br><input type="radio"/> 5 a 6 veces al día<br><input type="radio"/> más 6 veces al día |
| marisco unos 100g                       | <input checked="" type="radio"/> Nunca o menos 1 vez al mes<br><input type="radio"/> 1 a 3 veces mes<br><input type="radio"/> 1 vez semana<br><input type="radio"/> 2 a 4 veces semana<br><input type="radio"/> 5 a 6 veces semana<br><input type="radio"/> 1 vez al día<br><input type="radio"/> 2 a 3 veces al día<br><input type="radio"/> 5 a 6 veces al día<br><input type="radio"/> más 6 veces al día |
| Espinacas o acelgas cocinadas           | <input type="radio"/> Nunca o menos 1 vez al mes<br><input type="radio"/> 1 a 3 veces mes<br><input checked="" type="radio"/> 1 vez semana<br><input type="radio"/> 2 a 4 veces semana<br><input type="radio"/> 5 a 6 veces semana<br><input type="radio"/> 1 vez al día<br><input type="radio"/> 2 a 3 veces al día<br><input type="radio"/> 5 a 6 veces al día<br><input type="radio"/> más 6 veces al día |
| Col o coliflor o brocoli cocinado       | <input type="radio"/> Nunca o menos 1 vez al mes<br><input type="radio"/> 1 a 3 veces mes<br><input checked="" type="radio"/> 1 vez semana<br><input type="radio"/> 2 a 4 veces semana<br><input type="radio"/> 5 a 6 veces semana<br><input type="radio"/> 1 vez al día<br><input type="radio"/> 2 a 3 veces al día<br><input type="radio"/> 5 a 6 veces al día<br><input type="radio"/> más 6 veces al día |

---

Lechuga o endivia o escarola

- ☐ Nunca o menos 1 vez al mes  
☐ 1 a 3 veces mes  
☐ 1 vez semana  
☒ 2 a 4 veces semana  
☐ 5 a 6 veces semana  
☐ 1 vez al día  
☐ 2 a 3 veces al día  
☐ 5 a 6 veces al día  
☐ más 6 veces al día

---

tomate ensalada

- ☐ Nunca o menos 1 vez al mes  
☐ 1 a 3 veces mes  
☐ 1 vez semana  
☒ 2 a 4 veces semana  
☐ 5 a 6 veces semana  
☐ 1 vez al día  
☐ 2 a 3 veces al día  
☐ 5 a 6 veces al día  
☐ más 6 veces al día

---

cebolla

- ☐ Nunca o menos 1 vez al mes  
☐ 1 a 3 veces mes  
☐ 1 vez semana  
☒ 2 a 4 veces semana  
☐ 5 a 6 veces semana  
☐ 1 vez al día  
☐ 2 a 3 veces al día  
☐ 5 a 6 veces al día  
☐ más 6 veces al día

---

Zanahoria o calabaza

- ☐ Nunca o menos 1 vez al mes  
☒ 1 a 3 veces mes  
☐ 1 vez semana  
☐ 2 a 4 veces semana  
☐ 5 a 6 veces semana  
☐ 1 vez al día  
☐ 2 a 3 veces al día  
☐ 5 a 6 veces al día  
☐ más 6 veces al día

---

Judías verdes

- ☐ Nunca o menos 1 vez al mes  
☒ 1 a 3 veces mes  
☐ 1 vez semana  
☐ 2 a 4 veces semana  
☐ 5 a 6 veces semana  
☐ 1 vez al día  
☐ 2 a 3 veces al día  
☐ 5 a 6 veces al día  
☐ más 6 veces al día

---

Berenjena o calabacin o pepino

- ☐ Nunca o menos 1 vez al mes  
☒ 1 a 3 veces mes  
☐ 1 vez semana  
☐ 2 a 4 veces semana  
☐ 5 a 6 veces semana  
☐ 1 vez al día  
☐ 2 a 3 veces al día  
☐ 5 a 6 veces al día  
☐ más 6 veces al día

|                       |                                                                                                                                                                                                                                                                                                                                                                                                              |
|-----------------------|--------------------------------------------------------------------------------------------------------------------------------------------------------------------------------------------------------------------------------------------------------------------------------------------------------------------------------------------------------------------------------------------------------------|
| pimiento              | <input checked="" type="radio"/> Nunca o menos 1 vez al mes<br><input type="radio"/> 1 a 3 veces mes<br><input type="radio"/> 1 vez semana<br><input type="radio"/> 2 a 4 veces semana<br><input type="radio"/> 5 a 6 veces semana<br><input type="radio"/> 1 vez al día<br><input type="radio"/> 2 a 3 veces al día<br><input type="radio"/> 5 a 6 veces al día<br><input type="radio"/> más 6 veces al día |
| alcachofa             | <input checked="" type="radio"/> Nunca o menos 1 vez al mes<br><input type="radio"/> 1 a 3 veces mes<br><input type="radio"/> 1 vez semana<br><input type="radio"/> 2 a 4 veces semana<br><input type="radio"/> 5 a 6 veces semana<br><input type="radio"/> 1 vez al día<br><input type="radio"/> 2 a 3 veces al día<br><input type="radio"/> 5 a 6 veces al día<br><input type="radio"/> más 6 veces al día |
| espárragos            | <input checked="" type="radio"/> Nunca o menos 1 vez al mes<br><input type="radio"/> 1 a 3 veces mes<br><input type="radio"/> 1 vez semana<br><input type="radio"/> 2 a 4 veces semana<br><input type="radio"/> 5 a 6 veces semana<br><input type="radio"/> 1 vez al día<br><input type="radio"/> 2 a 3 veces al día<br><input type="radio"/> 5 a 6 veces al día<br><input type="radio"/> más 6 veces al día |
| maíz hervido          | <input checked="" type="radio"/> Nunca o menos 1 vez al mes<br><input type="radio"/> 1 a 3 veces mes<br><input type="radio"/> 1 vez semana<br><input type="radio"/> 2 a 4 veces semana<br><input type="radio"/> 5 a 6 veces semana<br><input type="radio"/> 1 vez al día<br><input type="radio"/> 2 a 3 veces al día<br><input type="radio"/> 5 a 6 veces al día<br><input type="radio"/> más 6 veces al día |
| legumbres             | <input type="radio"/> Nunca o menos 1 vez al mes<br><input type="radio"/> 1 a 3 veces mes<br><input checked="" type="radio"/> 1 vez semana<br><input type="radio"/> 2 a 4 veces semana<br><input type="radio"/> 5 a 6 veces semana<br><input type="radio"/> 1 vez al día<br><input type="radio"/> 2 a 3 veces al día<br><input type="radio"/> 5 a 6 veces al día<br><input type="radio"/> más 6 veces al día |
| naranjas o mandarinas | <input type="radio"/> Nunca o menos 1 vez al mes<br><input type="radio"/> 1 a 3 veces mes<br><input type="radio"/> 1 vez semana<br><input checked="" type="radio"/> 2 a 4 veces semana<br><input type="radio"/> 5 a 6 veces semana<br><input type="radio"/> 1 vez al día<br><input type="radio"/> 2 a 3 veces al día<br><input type="radio"/> 5 a 6 veces al día<br><input type="radio"/> más 6 veces al día |

|                       |                                                                                                                                                                                                                                                                                                                                                                                                              |
|-----------------------|--------------------------------------------------------------------------------------------------------------------------------------------------------------------------------------------------------------------------------------------------------------------------------------------------------------------------------------------------------------------------------------------------------------|
| zum natural fruta     | <input type="radio"/> Nunca o menos 1 vez al mes<br><input type="radio"/> 1 a 3 veces mes<br><input type="radio"/> 1 vez semana<br><input checked="" type="radio"/> 2 a 4 veces semana<br><input type="radio"/> 5 a 6 veces semana<br><input type="radio"/> 1 vez al día<br><input type="radio"/> 2 a 3 veces al día<br><input type="radio"/> 5 a 6 veces al día<br><input type="radio"/> más 6 veces al día |
| platano               | <input type="radio"/> Nunca o menos 1 vez al mes<br><input type="radio"/> 1 a 3 veces mes<br><input type="radio"/> 1 vez semana<br><input checked="" type="radio"/> 2 a 4 veces semana<br><input type="radio"/> 5 a 6 veces semana<br><input type="radio"/> 1 vez al día<br><input type="radio"/> 2 a 3 veces al día<br><input type="radio"/> 5 a 6 veces al día<br><input type="radio"/> más 6 veces al día |
| manzana o pera        | <input type="radio"/> Nunca o menos 1 vez al mes<br><input type="radio"/> 1 a 3 veces mes<br><input type="radio"/> 1 vez semana<br><input checked="" type="radio"/> 2 a 4 veces semana<br><input type="radio"/> 5 a 6 veces semana<br><input type="radio"/> 1 vez al día<br><input type="radio"/> 2 a 3 veces al día<br><input type="radio"/> 5 a 6 veces al día<br><input type="radio"/> más 6 veces al día |
| melocotón o nectarina | <input type="radio"/> Nunca o menos 1 vez al mes<br><input type="radio"/> 1 a 3 veces mes<br><input type="radio"/> 1 vez semana<br><input checked="" type="radio"/> 2 a 4 veces semana<br><input type="radio"/> 5 a 6 veces semana<br><input type="radio"/> 1 vez al día<br><input type="radio"/> 2 a 3 veces al día<br><input type="radio"/> 5 a 6 veces al día<br><input type="radio"/> más 6 veces al día |
| sandia o melon        | <input type="radio"/> Nunca o menos 1 vez al mes<br><input type="radio"/> 1 a 3 veces mes<br><input type="radio"/> 1 vez semana<br><input checked="" type="radio"/> 2 a 4 veces semana<br><input type="radio"/> 5 a 6 veces semana<br><input type="radio"/> 1 vez al día<br><input type="radio"/> 2 a 3 veces al día<br><input type="radio"/> 5 a 6 veces al día<br><input type="radio"/> más 6 veces al día |
| uva                   | <input type="radio"/> Nunca o menos 1 vez al mes<br><input checked="" type="radio"/> 1 a 3 veces mes<br><input type="radio"/> 1 vez semana<br><input type="radio"/> 2 a 4 veces semana<br><input type="radio"/> 5 a 6 veces semana<br><input type="radio"/> 1 vez al día<br><input type="radio"/> 2 a 3 veces al día<br><input type="radio"/> 5 a 6 veces al día<br><input type="radio"/> más 6 veces al día |

---

bruna o ciruela

- ☐ Nunca o menos 1 vez al mes  
☒ 1 a 3 veces mes  
☐ 1 vez semana  
☐ 2 a 4 veces semana  
☐ 5 a 6 veces semana  
☐ 1 vez al día  
☐ 2 a 3 veces al día  
☐ 5 a 6 veces al día  
☐ más 6 veces al día

---

kiwi

- ☐ Nunca o menos 1 vez al mes  
☒ 1 a 3 veces mes  
☐ 1 vez semana  
☐ 2 a 4 veces semana  
☐ 5 a 6 veces semana  
☐ 1 vez al día  
☐ 2 a 3 veces al día  
☐ 5 a 6 veces al día  
☐ más 6 veces al día

---

aceituna

- ☐ Nunca o menos 1 vez al mes  
☐ 1 a 3 veces mes  
☐ 1 vez semana  
☒ 2 a 4 veces semana  
☐ 5 a 6 veces semana  
☐ 1 vez al día  
☐ 2 a 3 veces al día  
☐ 5 a 6 veces al día  
☐ más 6 veces al día

---

frutos secos

- ☐ Nunca o menos 1 vez al mes  
☐ 1 a 3 veces mes  
☐ 1 vez semana  
☒ 2 a 4 veces semana  
☐ 5 a 6 veces semana  
☐ 1 vez al día  
☐ 2 a 3 veces al día  
☐ 5 a 6 veces al día  
☐ más 6 veces al día

---

pan blanco

- ☐ Nunca o menos 1 vez al mes  
☒ 1 a 3 veces mes  
☐ 1 vez semana  
☐ 2 a 4 veces semana  
☐ 5 a 6 veces semana  
☐ 1 vez al día  
☐ 2 a 3 veces al día  
☐ 5 a 6 veces al día  
☐ más 6 veces al día

---

pan integral

- ☐ Nunca o menos 1 vez al mes  
☐ 1 a 3 veces mes  
☐ 1 vez semana  
☐ 2 a 4 veces semana  
☐ 5 a 6 veces semana  
☒ 1 vez al día  
☐ 2 a 3 veces al día  
☐ 5 a 6 veces al día  
☐ más 6 veces al día

|                          |                                                                                                                                                                                                                                                                                                                                                                                                              |
|--------------------------|--------------------------------------------------------------------------------------------------------------------------------------------------------------------------------------------------------------------------------------------------------------------------------------------------------------------------------------------------------------------------------------------------------------|
| cereales desayuno        | <input type="radio"/> Nunca o menos 1 vez al mes<br><input checked="" type="radio"/> 1 a 3 veces mes<br><input type="radio"/> 1 vez semana<br><input type="radio"/> 2 a 4 veces semana<br><input type="radio"/> 5 a 6 veces semana<br><input type="radio"/> 1 vez al día<br><input type="radio"/> 2 a 3 veces al día<br><input type="radio"/> 5 a 6 veces al día<br><input type="radio"/> más 6 veces al día |
| patatas fritas           | <input checked="" type="radio"/> Nunca o menos 1 vez al mes<br><input type="radio"/> 1 a 3 veces mes<br><input type="radio"/> 1 vez semana<br><input type="radio"/> 2 a 4 veces semana<br><input type="radio"/> 5 a 6 veces semana<br><input type="radio"/> 1 vez al día<br><input type="radio"/> 2 a 3 veces al día<br><input type="radio"/> 5 a 6 veces al día<br><input type="radio"/> más 6 veces al día |
| patatas cocidas o asadas | <input type="radio"/> Nunca o menos 1 vez al mes<br><input type="radio"/> 1 a 3 veces mes<br><input checked="" type="radio"/> 1 vez semana<br><input type="radio"/> 2 a 4 veces semana<br><input type="radio"/> 5 a 6 veces semana<br><input type="radio"/> 1 vez al día<br><input type="radio"/> 2 a 3 veces al día<br><input type="radio"/> 5 a 6 veces al día<br><input type="radio"/> más 6 veces al día |
| bolsa papas              | <input checked="" type="radio"/> Nunca o menos 1 vez al mes<br><input type="radio"/> 1 a 3 veces mes<br><input type="radio"/> 1 vez semana<br><input type="radio"/> 2 a 4 veces semana<br><input type="radio"/> 5 a 6 veces semana<br><input type="radio"/> 1 vez al día<br><input type="radio"/> 2 a 3 veces al día<br><input type="radio"/> 5 a 6 veces al día<br><input type="radio"/> más 6 veces al día |
| arroz cocinado           | <input type="radio"/> Nunca o menos 1 vez al mes<br><input type="radio"/> 1 a 3 veces mes<br><input checked="" type="radio"/> 1 vez semana<br><input type="radio"/> 2 a 4 veces semana<br><input type="radio"/> 5 a 6 veces semana<br><input type="radio"/> 1 vez al día<br><input type="radio"/> 2 a 3 veces al día<br><input type="radio"/> 5 a 6 veces al día<br><input type="radio"/> más 6 veces al día |
| pasta                    | <input type="radio"/> Nunca o menos 1 vez al mes<br><input type="radio"/> 1 a 3 veces mes<br><input checked="" type="radio"/> 1 vez semana<br><input type="radio"/> 2 a 4 veces semana<br><input type="radio"/> 5 a 6 veces semana<br><input type="radio"/> 1 vez al día<br><input type="radio"/> 2 a 3 veces al día<br><input type="radio"/> 5 a 6 veces al día<br><input type="radio"/> más 6 veces al día |

|                     |                                                                                                                                                                                                                                                                                                                                                                                                              |
|---------------------|--------------------------------------------------------------------------------------------------------------------------------------------------------------------------------------------------------------------------------------------------------------------------------------------------------------------------------------------------------------------------------------------------------------|
| pizza               | <input type="radio"/> Nunca o menos 1 vez al mes<br><input type="radio"/> 1 a 3 veces mes<br><input checked="" type="radio"/> 1 vez semana<br><input type="radio"/> 2 a 4 veces semana<br><input type="radio"/> 5 a 6 veces semana<br><input type="radio"/> 1 vez al día<br><input type="radio"/> 2 a 3 veces al día<br><input type="radio"/> 5 a 6 veces al día<br><input type="radio"/> más 6 veces al día |
| aceite oliva        | <input type="radio"/> Nunca o menos 1 vez al mes<br><input type="radio"/> 1 a 3 veces mes<br><input type="radio"/> 1 vez semana<br><input type="radio"/> 2 a 4 veces semana<br><input type="radio"/> 5 a 6 veces semana<br><input checked="" type="radio"/> 1 vez al día<br><input type="radio"/> 2 a 3 veces al día<br><input type="radio"/> 5 a 6 veces al día<br><input type="radio"/> más 6 veces al día |
| otros aceites       | <input checked="" type="radio"/> Nunca o menos 1 vez al mes<br><input type="radio"/> 1 a 3 veces mes<br><input type="radio"/> 1 vez semana<br><input type="radio"/> 2 a 4 veces semana<br><input type="radio"/> 5 a 6 veces semana<br><input type="radio"/> 1 vez al día<br><input type="radio"/> 2 a 3 veces al día<br><input type="radio"/> 5 a 6 veces al día<br><input type="radio"/> más 6 veces al día |
| margarina           | <input checked="" type="radio"/> Nunca o menos 1 vez al mes<br><input type="radio"/> 1 a 3 veces mes<br><input type="radio"/> 1 vez semana<br><input type="radio"/> 2 a 4 veces semana<br><input type="radio"/> 5 a 6 veces semana<br><input type="radio"/> 1 vez al día<br><input type="radio"/> 2 a 3 veces al día<br><input type="radio"/> 5 a 6 veces al día<br><input type="radio"/> más 6 veces al día |
| mantequilla         | <input type="radio"/> Nunca o menos 1 vez al mes<br><input type="radio"/> 1 a 3 veces mes<br><input type="radio"/> 1 vez semana<br><input type="radio"/> 2 a 4 veces semana<br><input type="radio"/> 5 a 6 veces semana<br><input checked="" type="radio"/> 1 vez al día<br><input type="radio"/> 2 a 3 veces al día<br><input type="radio"/> 5 a 6 veces al día<br><input type="radio"/> más 6 veces al día |
| galletas tipo maria | <input type="radio"/> Nunca o menos 1 vez al mes<br><input checked="" type="radio"/> 1 a 3 veces mes<br><input type="radio"/> 1 vez semana<br><input type="radio"/> 2 a 4 veces semana<br><input type="radio"/> 5 a 6 veces semana<br><input type="radio"/> 1 vez al día<br><input type="radio"/> 2 a 3 veces al día<br><input type="radio"/> 5 a 6 veces al día<br><input type="radio"/> más 6 veces al día |

|                           |                                                                                                                                                                                                                                                                                                                                                                                                              |
|---------------------------|--------------------------------------------------------------------------------------------------------------------------------------------------------------------------------------------------------------------------------------------------------------------------------------------------------------------------------------------------------------------------------------------------------------|
| galletas chocolate        | <input type="radio"/> Nunca o menos 1 vez al mes<br><input checked="" type="radio"/> 1 a 3 veces mes<br><input type="radio"/> 1 vez semana<br><input type="radio"/> 2 a 4 veces semana<br><input type="radio"/> 5 a 6 veces semana<br><input type="radio"/> 1 vez al día<br><input type="radio"/> 2 a 3 veces al día<br><input type="radio"/> 5 a 6 veces al día<br><input type="radio"/> más 6 veces al día |
| bollieria                 | <input type="radio"/> Nunca o menos 1 vez al mes<br><input checked="" type="radio"/> 1 a 3 veces mes<br><input type="radio"/> 1 vez semana<br><input type="radio"/> 2 a 4 veces semana<br><input type="radio"/> 5 a 6 veces semana<br><input type="radio"/> 1 vez al día<br><input type="radio"/> 2 a 3 veces al día<br><input type="radio"/> 5 a 6 veces al día<br><input type="radio"/> más 6 veces al día |
| chocolate o bombones      | <input type="radio"/> Nunca o menos 1 vez al mes<br><input type="radio"/> 1 a 3 veces mes<br><input checked="" type="radio"/> 1 vez semana<br><input type="radio"/> 2 a 4 veces semana<br><input type="radio"/> 5 a 6 veces semana<br><input type="radio"/> 1 vez al día<br><input type="radio"/> 2 a 3 veces al día<br><input type="radio"/> 5 a 6 veces al día<br><input type="radio"/> más 6 veces al día |
| chocolate polvo o colacao | <input checked="" type="radio"/> Nunca o menos 1 vez al mes<br><input type="radio"/> 1 a 3 veces mes<br><input type="radio"/> 1 vez semana<br><input type="radio"/> 2 a 4 veces semana<br><input type="radio"/> 5 a 6 veces semana<br><input type="radio"/> 1 vez al día<br><input type="radio"/> 2 a 3 veces al día<br><input type="radio"/> 5 a 6 veces al día<br><input type="radio"/> más 6 veces al día |
| vino tinto                | <input checked="" type="radio"/> Nunca o menos 1 vez al mes<br><input type="radio"/> 1 a 3 veces mes<br><input type="radio"/> 1 vez semana<br><input type="radio"/> 2 a 4 veces semana<br><input type="radio"/> 5 a 6 veces semana<br><input type="radio"/> 1 vez al día<br><input type="radio"/> 2 a 3 veces al día<br><input type="radio"/> 5 a 6 veces al día<br><input type="radio"/> más 6 veces al día |
| vino blanco               | <input checked="" type="radio"/> Nunca o menos 1 vez al mes<br><input type="radio"/> 1 a 3 veces mes<br><input type="radio"/> 1 vez semana<br><input type="radio"/> 2 a 4 veces semana<br><input type="radio"/> 5 a 6 veces semana<br><input type="radio"/> 1 vez al día<br><input type="radio"/> 2 a 3 veces al día<br><input type="radio"/> 5 a 6 veces al día<br><input type="radio"/> más 6 veces al día |



|                       |                                                                                                                                                                                                                                                                                                                                                                                                              |
|-----------------------|--------------------------------------------------------------------------------------------------------------------------------------------------------------------------------------------------------------------------------------------------------------------------------------------------------------------------------------------------------------------------------------------------------------|
| vino seco o vermut    | <input checked="" type="radio"/> Nunca o menos 1 vez al mes<br><input type="radio"/> 1 a 3 veces mes<br><input type="radio"/> 1 vez semana<br><input type="radio"/> 2 a 4 veces semana<br><input type="radio"/> 5 a 6 veces semana<br><input type="radio"/> 1 vez al día<br><input type="radio"/> 2 a 3 veces al día<br><input type="radio"/> 5 a 6 veces al día<br><input type="radio"/> más 6 veces al día |
| cerveza               | <input checked="" type="radio"/> Nunca o menos 1 vez al mes<br><input type="radio"/> 1 a 3 veces mes<br><input type="radio"/> 1 vez semana<br><input type="radio"/> 2 a 4 veces semana<br><input type="radio"/> 5 a 6 veces semana<br><input type="radio"/> 1 vez al día<br><input type="radio"/> 2 a 3 veces al día<br><input type="radio"/> 5 a 6 veces al día<br><input type="radio"/> más 6 veces al día |
| cerveza sin alcohol   | <input type="radio"/> Nunca o menos 1 vez al mes<br><input type="radio"/> 1 a 3 veces mes<br><input checked="" type="radio"/> 1 vez semana<br><input type="radio"/> 2 a 4 veces semana<br><input type="radio"/> 5 a 6 veces semana<br><input type="radio"/> 1 vez al día<br><input type="radio"/> 2 a 3 veces al día<br><input type="radio"/> 5 a 6 veces al día<br><input type="radio"/> más 6 veces al día |
| licores               | <input checked="" type="radio"/> Nunca o menos 1 vez al mes<br><input type="radio"/> 1 a 3 veces mes<br><input type="radio"/> 1 vez semana<br><input type="radio"/> 2 a 4 veces semana<br><input type="radio"/> 5 a 6 veces semana<br><input type="radio"/> 1 vez al día<br><input type="radio"/> 2 a 3 veces al día<br><input type="radio"/> 5 a 6 veces al día<br><input type="radio"/> más 6 veces al día |
| ginebra o ron o vodka | <input checked="" type="radio"/> Nunca o menos 1 vez al mes<br><input type="radio"/> 1 a 3 veces mes<br><input type="radio"/> 1 vez semana<br><input type="radio"/> 2 a 4 veces semana<br><input type="radio"/> 5 a 6 veces semana<br><input type="radio"/> 1 vez al día<br><input type="radio"/> 2 a 3 veces al día<br><input type="radio"/> 5 a 6 veces al día<br><input type="radio"/> más 6 veces al día |
| refresco normal       | <input checked="" type="radio"/> Nunca o menos 1 vez al mes<br><input type="radio"/> 1 a 3 veces mes<br><input type="radio"/> 1 vez semana<br><input type="radio"/> 2 a 4 veces semana<br><input type="radio"/> 5 a 6 veces semana<br><input type="radio"/> 1 vez al día<br><input type="radio"/> 2 a 3 veces al día<br><input type="radio"/> 5 a 6 veces al día<br><input type="radio"/> más 6 veces al día |

|                           |                                                                                                                                                                                                                                                                                                                                                                                                              |
|---------------------------|--------------------------------------------------------------------------------------------------------------------------------------------------------------------------------------------------------------------------------------------------------------------------------------------------------------------------------------------------------------------------------------------------------------|
| refresco sin azúcar       | <input type="radio"/> Nunca o menos 1 vez al mes<br><input type="radio"/> 1 a 3 veces mes<br><input checked="" type="radio"/> 1 vez semana<br><input type="radio"/> 2 a 4 veces semana<br><input type="radio"/> 5 a 6 veces semana<br><input type="radio"/> 1 vez al día<br><input type="radio"/> 2 a 3 veces al día<br><input type="radio"/> 5 a 6 veces al día<br><input type="radio"/> más 6 veces al día |
| Agua del grifo            | <input checked="" type="radio"/> Nunca o menos 1 vez al mes<br><input type="radio"/> 1 a 3 veces mes<br><input type="radio"/> 1 vez semana<br><input type="radio"/> 2 a 4 veces semana<br><input type="radio"/> 5 a 6 veces semana<br><input type="radio"/> 1 vez al día<br><input type="radio"/> 2 a 3 veces al día<br><input type="radio"/> 5 a 6 veces al día<br><input type="radio"/> más 6 veces al día |
| agua embotellada sin gas  | <input type="radio"/> Nunca o menos 1 vez al mes<br><input type="radio"/> 1 a 3 veces mes<br><input type="radio"/> 1 vez semana<br><input type="radio"/> 2 a 4 veces semana<br><input type="radio"/> 5 a 6 veces semana<br><input type="radio"/> 1 vez al día<br><input type="radio"/> 2 a 3 veces al día<br><input type="radio"/> 5 a 6 veces al día<br><input checked="" type="radio"/> más 6 veces al día |
| agua embotellada con gas  | <input checked="" type="radio"/> Nunca o menos 1 vez al mes<br><input type="radio"/> 1 a 3 veces mes<br><input type="radio"/> 1 vez semana<br><input type="radio"/> 2 a 4 veces semana<br><input type="radio"/> 5 a 6 veces semana<br><input type="radio"/> 1 vez al día<br><input type="radio"/> 2 a 3 veces al día<br><input type="radio"/> 5 a 6 veces al día<br><input type="radio"/> más 6 veces al día |
| zumos frutas embotellados | <input type="radio"/> Nunca o menos 1 vez al mes<br><input type="radio"/> 1 a 3 veces mes<br><input checked="" type="radio"/> 1 vez semana<br><input type="radio"/> 2 a 4 veces semana<br><input type="radio"/> 5 a 6 veces semana<br><input type="radio"/> 1 vez al día<br><input type="radio"/> 2 a 3 veces al día<br><input type="radio"/> 5 a 6 veces al día<br><input type="radio"/> más 6 veces al día |
| café                      | <input type="radio"/> Nunca o menos 1 vez al mes<br><input type="radio"/> 1 a 3 veces mes<br><input type="radio"/> 1 vez semana<br><input type="radio"/> 2 a 4 veces semana<br><input type="radio"/> 5 a 6 veces semana<br><input checked="" type="radio"/> 1 vez al día<br><input type="radio"/> 2 a 3 veces al día<br><input type="radio"/> 5 a 6 veces al día<br><input type="radio"/> más 6 veces al día |

|                       |                                                                                                                                                                                                                                                                                                                                                                                                              |
|-----------------------|--------------------------------------------------------------------------------------------------------------------------------------------------------------------------------------------------------------------------------------------------------------------------------------------------------------------------------------------------------------------------------------------------------------|
| cafe descafeinado     | <input type="radio"/> Nunca o menos 1 vez al mes<br><input type="radio"/> 1 a 3 veces mes<br><input type="radio"/> 1 vez semana<br><input type="radio"/> 2 a 4 veces semana<br><input type="radio"/> 5 a 6 veces semana<br><input checked="" type="radio"/> 1 vez al día<br><input type="radio"/> 2 a 3 veces al día<br><input type="radio"/> 5 a 6 veces al día<br><input type="radio"/> más 6 veces al día |
| te o infusión         | <input type="radio"/> Nunca o menos 1 vez al mes<br><input type="radio"/> 1 a 3 veces mes<br><input type="radio"/> 1 vez semana<br><input type="radio"/> 2 a 4 veces semana<br><input checked="" type="radio"/> 5 a 6 veces semana<br><input type="radio"/> 1 vez al día<br><input type="radio"/> 2 a 3 veces al día<br><input type="radio"/> 5 a 6 veces al día<br><input type="radio"/> más 6 veces al día |
| sopa o puré verduras  | <input type="radio"/> Nunca o menos 1 vez al mes<br><input type="radio"/> 1 a 3 veces mes<br><input checked="" type="radio"/> 1 vez semana<br><input type="radio"/> 2 a 4 veces semana<br><input type="radio"/> 5 a 6 veces semana<br><input type="radio"/> 1 vez al día<br><input type="radio"/> 2 a 3 veces al día<br><input type="radio"/> 5 a 6 veces al día<br><input type="radio"/> más 6 veces al día |
| croquetas pollo jamón | <input checked="" type="radio"/> Nunca o menos 1 vez al mes<br><input type="radio"/> 1 a 3 veces mes<br><input type="radio"/> 1 vez semana<br><input type="radio"/> 2 a 4 veces semana<br><input type="radio"/> 5 a 6 veces semana<br><input type="radio"/> 1 vez al día<br><input type="radio"/> 2 a 3 veces al día<br><input type="radio"/> 5 a 6 veces al día<br><input type="radio"/> más 6 veces al día |
| croquetas pescado     | <input checked="" type="radio"/> Nunca o menos 1 vez al mes<br><input type="radio"/> 1 a 3 veces mes<br><input type="radio"/> 1 vez semana<br><input type="radio"/> 2 a 4 veces semana<br><input type="radio"/> 5 a 6 veces semana<br><input type="radio"/> 1 vez al día<br><input type="radio"/> 2 a 3 veces al día<br><input type="radio"/> 5 a 6 veces al día<br><input type="radio"/> más 6 veces al día |
| mayonesa              | <input checked="" type="radio"/> Nunca o menos 1 vez al mes<br><input type="radio"/> 1 a 3 veces mes<br><input type="radio"/> 1 vez semana<br><input type="radio"/> 2 a 4 veces semana<br><input type="radio"/> 5 a 6 veces semana<br><input type="radio"/> 1 vez al día<br><input type="radio"/> 2 a 3 veces al día<br><input type="radio"/> 5 a 6 veces al día<br><input type="radio"/> más 6 veces al día |

|                  |                                                                                                                                                                                                                                                                                                                                                                                                              |
|------------------|--------------------------------------------------------------------------------------------------------------------------------------------------------------------------------------------------------------------------------------------------------------------------------------------------------------------------------------------------------------------------------------------------------------|
| salsa tomate     | <input type="radio"/> Nunca o menos 1 vez al mes<br><input checked="" type="radio"/> 1 a 3 veces mes<br><input type="radio"/> 1 vez semana<br><input type="radio"/> 2 a 4 veces semana<br><input type="radio"/> 5 a 6 veces semana<br><input type="radio"/> 1 vez al día<br><input type="radio"/> 2 a 3 veces al día<br><input type="radio"/> 5 a 6 veces al día<br><input type="radio"/> más 6 veces al día |
| ketchup          | <input checked="" type="radio"/> Nunca o menos 1 vez al mes<br><input type="radio"/> 1 a 3 veces mes<br><input type="radio"/> 1 vez semana<br><input type="radio"/> 2 a 4 veces semana<br><input type="radio"/> 5 a 6 veces semana<br><input type="radio"/> 1 vez al día<br><input type="radio"/> 2 a 3 veces al día<br><input type="radio"/> 5 a 6 veces al día<br><input type="radio"/> más 6 veces al día |
| sal              | <input checked="" type="radio"/> Nunca o menos 1 vez al mes<br><input type="radio"/> 1 a 3 veces mes<br><input type="radio"/> 1 vez semana<br><input type="radio"/> 2 a 4 veces semana<br><input type="radio"/> 5 a 6 veces semana<br><input type="radio"/> 1 vez al día<br><input type="radio"/> 2 a 3 veces al día<br><input type="radio"/> 5 a 6 veces al día<br><input type="radio"/> más 6 veces al día |
| ajo              | <input type="radio"/> Nunca o menos 1 vez al mes<br><input checked="" type="radio"/> 1 a 3 veces mes<br><input type="radio"/> 1 vez semana<br><input type="radio"/> 2 a 4 veces semana<br><input type="radio"/> 5 a 6 veces semana<br><input type="radio"/> 1 vez al día<br><input type="radio"/> 2 a 3 veces al día<br><input type="radio"/> 5 a 6 veces al día<br><input type="radio"/> más 6 veces al día |
| mermelada o miel | <input type="radio"/> Nunca o menos 1 vez al mes<br><input type="radio"/> 1 a 3 veces mes<br><input type="radio"/> 1 vez semana<br><input type="radio"/> 2 a 4 veces semana<br><input checked="" type="radio"/> 5 a 6 veces semana<br><input type="radio"/> 1 vez al día<br><input type="radio"/> 2 a 3 veces al día<br><input type="radio"/> 5 a 6 veces al día<br><input type="radio"/> más 6 veces al día |
| azúcar           | <input type="radio"/> Nunca o menos 1 vez al mes<br><input type="radio"/> 1 a 3 veces mes<br><input type="radio"/> 1 vez semana<br><input type="radio"/> 2 a 4 veces semana<br><input checked="" type="radio"/> 5 a 6 veces semana<br><input type="radio"/> 1 vez al día<br><input type="radio"/> 2 a 3 veces al día<br><input type="radio"/> 5 a 6 veces al día<br><input type="radio"/> más 6 veces al día |

|                                       |                                                                                                                                                                                                                                                                                                                                                                                                                                                                                                                               |
|---------------------------------------|-------------------------------------------------------------------------------------------------------------------------------------------------------------------------------------------------------------------------------------------------------------------------------------------------------------------------------------------------------------------------------------------------------------------------------------------------------------------------------------------------------------------------------|
| Otro alimento                         |                                                                                                                                                                                                                                                                                                                                                                                                                                                                                                                               |
| suplementos vitamínicos               | <input checked="" type="radio"/> si<br><input type="radio"/> no                                                                                                                                                                                                                                                                                                                                                                                                                                                               |
| suplementos vitamínicos               | [*DATA REMOVED*]                                                                                                                                                                                                                                                                                                                                                                                                                                                                                                              |
| dieta previa                          | <input type="radio"/> si<br><input checked="" type="radio"/> no                                                                                                                                                                                                                                                                                                                                                                                                                                                               |
| motivo dieta                          | <input checked="" type="radio"/> no dieta<br><input type="radio"/> control peso<br><input type="radio"/> control colesterol<br><input type="radio"/> control diabetes<br><input type="radio"/> problemas estómago<br><input type="radio"/> problemas vesícula o hepáticos<br><input type="radio"/> HTA o cardiopatía<br><input type="radio"/> problemas renales<br><input type="radio"/> alergia alimentaria<br><input type="radio"/> ácido úrico elevado<br><input type="radio"/> vegetariana<br><input type="radio"/> otros |
| cambio alimentos año previo gestación | <input checked="" type="radio"/> si<br><input type="radio"/> no                                                                                                                                                                                                                                                                                                                                                                                                                                                               |
| cambio lácteos                        | <input type="radio"/> eliminado<br><input type="radio"/> disminuido<br><input checked="" type="radio"/> igual<br><input type="radio"/> aumentado<br><input type="radio"/> no sabe                                                                                                                                                                                                                                                                                                                                             |
| cambio huevos                         | <input type="radio"/> eliminado<br><input type="radio"/> disminuido<br><input checked="" type="radio"/> igual<br><input type="radio"/> aumentado<br><input type="radio"/> no sabe                                                                                                                                                                                                                                                                                                                                             |
| cambio carne                          | <input type="radio"/> eliminado<br><input type="radio"/> disminuido<br><input checked="" type="radio"/> igual<br><input type="radio"/> aumentado<br><input type="radio"/> no sabe                                                                                                                                                                                                                                                                                                                                             |
| cambio pescado                        | <input type="radio"/> eliminado<br><input type="radio"/> disminuido<br><input checked="" type="radio"/> igual<br><input type="radio"/> aumentado<br><input type="radio"/> no sabe                                                                                                                                                                                                                                                                                                                                             |
| cambio verduras                       | <input type="radio"/> eliminado<br><input type="radio"/> disminuido<br><input checked="" type="radio"/> igual<br><input type="radio"/> aumentado<br><input type="radio"/> no sabe                                                                                                                                                                                                                                                                                                                                             |

|                            |                                                                                                                                                                                                                        |
|----------------------------|------------------------------------------------------------------------------------------------------------------------------------------------------------------------------------------------------------------------|
| cambio legumbres           | <input type="radio"/> eliminado<br><input type="radio"/> disminuido<br><input checked="" type="radio"/> igual<br><input type="radio"/> aumentado<br><input type="radio"/> no sabe                                      |
| cambio fruta               | <input type="radio"/> eliminado<br><input type="radio"/> disminuido<br><input checked="" type="radio"/> igual<br><input type="radio"/> aumentado<br><input type="radio"/> no sabe                                      |
| cambio pan                 | <input type="radio"/> eliminado<br><input type="radio"/> disminuido<br><input checked="" type="radio"/> igual<br><input type="radio"/> aumentado<br><input type="radio"/> no sabe                                      |
| cambio aceite oliva        | <input type="radio"/> eliminado<br><input type="radio"/> disminuido<br><input checked="" type="radio"/> igual<br><input type="radio"/> aumentado<br><input type="radio"/> no sabe                                      |
| cambio mante o margarina   | <input type="radio"/> eliminado<br><input type="radio"/> disminuido<br><input checked="" type="radio"/> igual<br><input type="radio"/> aumentado<br><input type="radio"/> no sabe                                      |
| cambio azúcar y dulces     | <input type="radio"/> eliminado<br><input type="radio"/> disminuido<br><input checked="" type="radio"/> igual<br><input type="radio"/> aumentado<br><input type="radio"/> no sabe                                      |
| cambio bebidas alcohólicas | <input checked="" type="radio"/> eliminado<br><input type="radio"/> disminuido<br><input type="radio"/> igual<br><input type="radio"/> aumentado<br><input type="radio"/> no sabe                                      |
| frecuencia comidas fritas  | <input type="radio"/> a diario<br><input type="radio"/> 5 a 6 veces semana<br><input type="radio"/> 2 a 4 veces semana<br><input type="radio"/> 1 vez semana<br><input checked="" type="radio"/> menos de 1 vez semana |
| carne                      | <input type="radio"/> no como<br><input type="radio"/> cruda<br><input type="radio"/> poco hecha<br><input type="radio"/> hecha<br><input checked="" type="radio"/> muy hecha                                          |
| grasa visible carne        | <input checked="" type="radio"/> quita toda<br><input type="radio"/> quita mayoría<br><input type="radio"/> quita un poco<br><input type="radio"/> no quita nada                                                       |

|                                |                                                                                                                                                                                                                                                          |
|--------------------------------|----------------------------------------------------------------------------------------------------------------------------------------------------------------------------------------------------------------------------------------------------------|
| cocina carne                   | <input checked="" type="radio"/> a la plancha<br><input type="radio"/> a la parrilla<br><input type="radio"/> asada<br><input type="radio"/> frita<br><input type="radio"/> guisada                                                                      |
| tostado quemado carne          | <input checked="" type="radio"/> nunca<br><input type="radio"/> 1 vez mes<br><input type="radio"/> 2 a 3 veces mes<br><input type="radio"/> 1 vez semana<br><input type="radio"/> 2 a 3 semanas                                                          |
| tostado quemado pescado        | <input checked="" type="radio"/> nunca<br><input type="radio"/> 1 vez mes<br><input type="radio"/> 2 a 3 veces mes<br><input type="radio"/> 1 vez semana<br><input type="radio"/> 2 a 3 semanas                                                          |
| socarrat paella                | <input checked="" type="radio"/> nunca<br><input type="radio"/> 1 vez mes<br><input type="radio"/> 2 a 3 veces mes<br><input type="radio"/> 1 vez semana<br><input type="radio"/> 2 a 3 semanas                                                          |
| grasa o aceite cocinar         | <input type="radio"/> mantequilla<br><input type="radio"/> margarina<br><input checked="" type="radio"/> aceite oliva<br><input type="radio"/> aceite oliva virgen extra<br><input type="radio"/> aceite vegetal<br><input type="radio"/> mezcla aceites |
| grasa aceite aliñar            | <input type="radio"/> mantequilla<br><input type="radio"/> margarina<br><input checked="" type="radio"/> aceite oliva<br><input type="radio"/> aceite oliva virgen extra<br><input type="radio"/> aceite vegetal<br><input type="radio"/> mezcla aceites |
| grasa aceite freir             | <input type="radio"/> mantequilla<br><input type="radio"/> margarina<br><input checked="" type="radio"/> aceite oliva<br><input type="radio"/> aceite oliva virgen extra<br><input type="radio"/> aceite vegetal<br><input type="radio"/> mezcla aceites |
| Ejercicio cuestionario         | <input checked="" type="radio"/> si<br><input type="radio"/> no                                                                                                                                                                                          |
| horas de sueño incluido siesta | [*DATA REMOVED*]                                                                                                                                                                                                                                         |
| minutos siesta                 | [*DATA REMOVED*]                                                                                                                                                                                                                                         |
| horas televisión semana        | [*DATA REMOVED*]                                                                                                                                                                                                                                         |

|                                        |                                                                                                                                                                                                                                                                                                                                                                           |
|----------------------------------------|---------------------------------------------------------------------------------------------------------------------------------------------------------------------------------------------------------------------------------------------------------------------------------------------------------------------------------------------------------------------------|
| actividad trabajo                      | <input type="radio"/> casi siempre sentado<br><input type="radio"/> sentado 50 por cien<br><input type="radio"/> casi siempre de pie, quieto<br><input checked="" type="radio"/> casi siempre levantado caminando y llevando pocas cosas<br><input type="radio"/> casi siempre levantado, caminando y llevado muchas cosas<br><input type="radio"/> trabajo manual pesado |
| tiempo caminar o bici al día           | <input type="radio"/> casi nunca<br><input type="radio"/> menos 20min día<br><input checked="" type="radio"/> 20 a 40 min día<br><input type="radio"/> 40 a 60 min día<br><input type="radio"/> 1h o 1h y media día<br><input type="radio"/> más de 1h y media al día                                                                                                     |
| tiempo tareas casa al día              | <input type="radio"/> menos de 1h día<br><input checked="" type="radio"/> 1 a 2h día<br><input type="radio"/> 3 a 4h día<br><input type="radio"/> 5 a 6h día<br><input type="radio"/> 7 a 8h día<br><input type="radio"/> más de 8h día                                                                                                                                   |
| tiempo libre televisión ordenador leer | <input type="radio"/> menos 1h día<br><input type="radio"/> 1h día<br><input checked="" type="radio"/> 2h día<br><input type="radio"/> 3h día<br><input type="radio"/> 4h día<br><input type="radio"/> 5 a 6h día<br><input type="radio"/> mas 6h día                                                                                                                     |
| tiempo libre ejercicio o deporte       | <input type="radio"/> menos 1h semana<br><input type="radio"/> 1h semana<br><input type="radio"/> 2h semana<br><input type="radio"/> 3h semana<br><input checked="" type="radio"/> 4 a 5h semana<br><input type="radio"/> mas 5h semana                                                                                                                                   |
| como se considera                      | <input type="radio"/> sedentaria<br><input type="radio"/> poco activa<br><input checked="" type="radio"/> moderadamente activa<br><input type="radio"/> bastante activa<br><input type="radio"/> muy activa<br><input type="radio"/> no sabe                                                                                                                              |
| FUR                                    | [*DATA REMOVED*]                                                                                                                                                                                                                                                                                                                                                          |
| Semanas gestación 2T                   | [*DATA REMOVED*]                                                                                                                                                                                                                                                                                                                                                          |
| Días gestación 2T                      | [*DATA REMOVED*]                                                                                                                                                                                                                                                                                                                                                          |
| DBP 2T                                 | [*DATA REMOVED*]                                                                                                                                                                                                                                                                                                                                                          |
| CC 2T                                  | [*DATA REMOVED*]                                                                                                                                                                                                                                                                                                                                                          |
| AC 2T                                  | [*DATA REMOVED*]                                                                                                                                                                                                                                                                                                                                                          |



|                                                   |                                                                                                                                                                                                 |
|---------------------------------------------------|-------------------------------------------------------------------------------------------------------------------------------------------------------------------------------------------------|
| LF 2T                                             | [*DATA REMOVED*]                                                                                                                                                                                |
| PFE 2T (Hadlock)                                  | [*DATA REMOVED*]                                                                                                                                                                                |
| Semanas gestación 3T                              | [*DATA REMOVED*]                                                                                                                                                                                |
| días 3T                                           | [*DATA REMOVED*]                                                                                                                                                                                |
| DBP 3T                                            | [*DATA REMOVED*]                                                                                                                                                                                |
| CC 3T                                             | [*DATA REMOVED*]                                                                                                                                                                                |
| AC 3T                                             | [*DATA REMOVED*]                                                                                                                                                                                |
| LF 3T                                             | [*DATA REMOVED*]                                                                                                                                                                                |
| PFE 3T (Hadlock)                                  | [*DATA REMOVED*]                                                                                                                                                                                |
| Semanas de gestación final                        | [*DATA REMOVED*]                                                                                                                                                                                |
| días gestación final                              | [*DATA REMOVED*]                                                                                                                                                                                |
| Localización placenta                             | <input type="radio"/> anterior<br><input type="radio"/> lateral derecha<br><input checked="" type="radio"/> lateral izquierda<br><input type="radio"/> posterior<br><input type="radio"/> fondo |
| Presentación longitudinal cefálica                | <input type="radio"/> no<br><input checked="" type="radio"/> si                                                                                                                                 |
| Dorso                                             | <input type="radio"/> izquierda anterior<br><input type="radio"/> izquierda posterior<br><input type="radio"/> derecha anterior<br><input checked="" type="radio"/> derecha posterior           |
| diámetro biparietal                               | [*DATA REMOVED*]                                                                                                                                                                                |
| Circunferencia craneal                            | [*DATA REMOVED*]                                                                                                                                                                                |
| Circunferencia abdominal                          | [*DATA REMOVED*]                                                                                                                                                                                |
| Longitud de femur                                 | [*DATA REMOVED*]                                                                                                                                                                                |
| tejido celular subcutáneo a nivel del muslo en mm | [*DATA REMOVED*]                                                                                                                                                                                |
| tejido celular subcutáneo en abdomen en mm        | [*DATA REMOVED*]                                                                                                                                                                                |
| Volumen del muslo en cm3                          | [*DATA REMOVED*]                                                                                                                                                                                |
| Peso fetal estimado según fórmula de Hadlock      | [*DATA REMOVED*]                                                                                                                                                                                |

|                                               |                                                                                                                                                          |
|-----------------------------------------------|----------------------------------------------------------------------------------------------------------------------------------------------------------|
| Percentil                                     | [*DATA REMOVED*]                                                                                                                                         |
| Peso fetal estimado según fórmula de Scioscia | <hr/>                                                                                                                                                    |
| Peso fetal estimado según fórmula de LEE      | <hr/>                                                                                                                                                    |
| Tipo de parto                                 | <input type="radio"/> eutocico<br><input type="radio"/> instrumentado/ventosa<br><input checked="" type="radio"/> cesarea                                |
| fecha de nacimiento                           | [*DATA REMOVED*]                                                                                                                                         |
| Días entre exploración y nacimiento           | [*DATA REMOVED*]                                                                                                                                         |
| Peso RN en g                                  | [*DATA REMOVED*]                                                                                                                                         |
| sexo                                          | <input checked="" type="radio"/> mujer<br><input type="radio"/> hombre                                                                                   |
| Apgar 1 minuto                                | <hr/>                                                                                                                                                    |
| Apgar 5 minutos                               | <hr/>                                                                                                                                                    |
| Apgar 10 minutos                              | <hr/>                                                                                                                                                    |
| antecedente Covid durante gestación           | <input type="radio"/> Yes<br><input checked="" type="radio"/> No                                                                                         |
| Nivel de estudios                             | <input type="radio"/> ninguno<br><input type="radio"/> primarios<br><input type="radio"/> secundarios<br><input checked="" type="radio"/> universitarios |

# Base\_datos\_estimacion\_peso\_fetal

|                                       |                                                                                                                                                                                                                                                                                      |
|---------------------------------------|--------------------------------------------------------------------------------------------------------------------------------------------------------------------------------------------------------------------------------------------------------------------------------------|
| Número de identificación participante | 23                                                                                                                                                                                                                                                                                   |
| CODIGO PARTICIPANTE                   |                                                                                                                                                                                                                                                                                      |
| Edad                                  | [*DATA REMOVED*]                                                                                                                                                                                                                                                                     |
| Gestaciones                           | <input checked="" type="radio"/> 1<br><input type="radio"/> 2<br><input type="radio"/> 3<br><input type="radio"/> mas de 3                                                                                                                                                           |
| partos                                | <input checked="" type="radio"/> 0<br><input type="radio"/> 1<br><input type="radio"/> 2<br><input type="radio"/> 3<br><input type="radio"/> mas de 3                                                                                                                                |
| cesáreas                              | <input checked="" type="radio"/> 0<br><input type="radio"/> 1<br><input type="radio"/> 2<br><input type="radio"/> 3<br><input type="radio"/> mas de 3                                                                                                                                |
| Abortos                               | <input checked="" type="radio"/> 0<br><input type="radio"/> 1<br><input type="radio"/> 2<br><input type="radio"/> 3<br><input type="radio"/> mas de 3                                                                                                                                |
| Tipo de gestacion                     | <input checked="" type="radio"/> espontanea<br><input type="radio"/> IAC inseminación artificial conyuge<br><input type="radio"/> IAD inseminación artificial donante<br><input type="radio"/> FIV Fecundación in Vitro<br><input type="radio"/> Ovodon FIV con donación de ovocitos |
| peso previo a embarazo                | [*DATA REMOVED*]                                                                                                                                                                                                                                                                     |
| Ganancia ponderal embarazo            | [*DATA REMOVED*]                                                                                                                                                                                                                                                                     |
| Talla madre                           | [*DATA REMOVED*]                                                                                                                                                                                                                                                                     |
| IMC previo embarazo                   | 20.28479857195018                                                                                                                                                                                                                                                                    |
| Patología obstétrica                  | <input checked="" type="radio"/> no<br><input type="radio"/> si                                                                                                                                                                                                                      |
| Diabetes pregestacional               | <input checked="" type="radio"/> no<br><input type="radio"/> si                                                                                                                                                                                                                      |
| Diabetes gestacional                  | <input checked="" type="radio"/> no<br><input type="radio"/> si                                                                                                                                                                                                                      |

|                                            |                                                                                                                                                                                      |
|--------------------------------------------|--------------------------------------------------------------------------------------------------------------------------------------------------------------------------------------|
| Diabetes gestacional con insulina          | <input checked="" type="radio"/> no<br><input type="radio"/> si                                                                                                                      |
| Diabetes gestacional con dieta y ejercicio | <input checked="" type="radio"/> no<br><input type="radio"/> si                                                                                                                      |
| Percentil fetos previos                    | <input checked="" type="radio"/> Nada<br><input type="radio"/> percentil menor de 10<br><input type="radio"/> percentil entre 10 y 90<br><input type="radio"/> percentil mayor de 90 |
| Exfumadora                                 | <input checked="" type="radio"/> Nada<br><input type="radio"/> menos de 5 años<br><input type="radio"/> 5 a 10 años<br><input type="radio"/> mayor o igual a 10 años                 |
| Hábito tabáquico                           | <input checked="" type="radio"/> no<br><input type="radio"/> si                                                                                                                      |
| fumadora                                   | [*DATA REMOVED*]                                                                                                                                                                     |
| Consumo otros tóxicos                      | <input checked="" type="radio"/> no<br><input type="radio"/> si                                                                                                                      |
| Hb 1T                                      | [*DATA REMOVED*]                                                                                                                                                                     |
| Htc 1T                                     | [*DATA REMOVED*]                                                                                                                                                                     |
| Hb 2T                                      | [*DATA REMOVED*]                                                                                                                                                                     |
| HTC 2T                                     | [*DATA REMOVED*]                                                                                                                                                                     |
| Hb 3T                                      | [*DATA REMOVED*]                                                                                                                                                                     |
| HTC 3T                                     | [*DATA REMOVED*]                                                                                                                                                                     |
| Suplemento FE oral                         | <input type="radio"/> si<br><input checked="" type="radio"/> no                                                                                                                      |
| Suplemento fe iv                           | <input type="radio"/> si<br><input checked="" type="radio"/> no                                                                                                                      |
| Transfusión                                | <input checked="" type="radio"/> no<br><input type="radio"/> si                                                                                                                      |
| Solicitada Vit D                           | <input checked="" type="radio"/> no<br><input type="radio"/> si                                                                                                                      |
| Deficit vit D                              | <input type="radio"/> no<br><input type="radio"/> si                                                                                                                                 |
| Suplemento vit D                           | <input type="radio"/> si<br><input type="radio"/> no                                                                                                                                 |

|                       |                                                                                                                                                                                                                                                                                                                                                                                                              |
|-----------------------|--------------------------------------------------------------------------------------------------------------------------------------------------------------------------------------------------------------------------------------------------------------------------------------------------------------------------------------------------------------------------------------------------------------|
| Dieta, cuestionario   | <input checked="" type="radio"/> si<br><input type="radio"/> no                                                                                                                                                                                                                                                                                                                                              |
| Leche entera          | <input checked="" type="radio"/> Nunca o menos 1 vez al mes<br><input type="radio"/> 1 a 3 veces mes<br><input type="radio"/> 1 vez semana<br><input type="radio"/> 2 a 4 veces semana<br><input type="radio"/> 5 a 6 veces semana<br><input type="radio"/> 1 vez al día<br><input type="radio"/> 2 a 3 veces al día<br><input type="radio"/> 5 a 6 veces al día<br><input type="radio"/> más 6 veces al día |
| Leche semidesnatada   | <input checked="" type="radio"/> Nunca o menos 1 vez al mes<br><input type="radio"/> 1 a 3 veces mes<br><input type="radio"/> 1 vez semana<br><input type="radio"/> 2 a 4 veces semana<br><input type="radio"/> 5 a 6 veces semana<br><input type="radio"/> 1 vez al día<br><input type="radio"/> 2 a 3 veces al día<br><input type="radio"/> 5 a 6 veces al día<br><input type="radio"/> mas 6 veces al día |
| Leche desnatada       | <input type="radio"/> Nunca o menos 1 vez al mes<br><input type="radio"/> 1 a 3 veces mes<br><input type="radio"/> 1 vez semana<br><input checked="" type="radio"/> 2 a 4 veces semana<br><input type="radio"/> 5 a 6 veces semana<br><input type="radio"/> 1 vez al día<br><input type="radio"/> 2 a 3 veces al día<br><input type="radio"/> 5 a 6 veces al día<br><input type="radio"/> más 6 veces al día |
| Leche condensada      | <input checked="" type="radio"/> Nunca o menos 1 vez al mes<br><input type="radio"/> 1 a 3 veces mes<br><input type="radio"/> 1 vez semana<br><input type="radio"/> 2 a 4 veces semana<br><input type="radio"/> 5 a 6 veces semana<br><input type="radio"/> 1 vez al día<br><input type="radio"/> 2 a 3 veces al día<br><input type="radio"/> 5 a 6 veces al día<br><input type="radio"/> más 6 veces al día |
| nata o crema de leche | <input checked="" type="radio"/> Nunca o menos 1 vez al mes<br><input type="radio"/> 1 a 3 veces mes<br><input type="radio"/> 1 vez semana<br><input type="radio"/> 2 a 4 veces semana<br><input type="radio"/> 5 a 6 veces semana<br><input type="radio"/> 1 vez al día<br><input type="radio"/> 2 a 3 veces al día<br><input type="radio"/> 5 a 6 veces al día<br><input type="radio"/> más 6 veces al día |

|                                             |                                                                                                                                                                                                                                                                                                                                                                                                              |
|---------------------------------------------|--------------------------------------------------------------------------------------------------------------------------------------------------------------------------------------------------------------------------------------------------------------------------------------------------------------------------------------------------------------------------------------------------------------|
| Yogurt Entero                               | <input checked="" type="radio"/> Nunca o menos 1 vez al mes<br><input type="radio"/> 1 a 3 veces mes<br><input type="radio"/> 1 vez semana<br><input type="radio"/> 2 a 4 veces semana<br><input type="radio"/> 5 a 6 veces semana<br><input type="radio"/> 1 vez al día<br><input type="radio"/> 2 a 3 veces al día<br><input type="radio"/> 5 a 6 veces al día<br><input type="radio"/> más 6 veces al día |
| Yogurt desnatado                            | <input type="radio"/> Nunca o menos 1 vez al mes<br><input type="radio"/> 1 a 3 veces mes<br><input type="radio"/> 1 vez semana<br><input type="radio"/> 2 a 4 veces semana<br><input type="radio"/> 5 a 6 veces semana<br><input checked="" type="radio"/> 1 vez al día<br><input type="radio"/> 2 a 3 veces al día<br><input type="radio"/> 5 a 6 veces al día<br><input type="radio"/> más 6 veces al día |
| 100g requesón o queso blando o queso fresco | <input type="radio"/> Nunca o menos 1 vez al mes<br><input checked="" type="radio"/> 1 a 3 veces mes<br><input type="radio"/> 1 vez semana<br><input type="radio"/> 2 a 4 veces semana<br><input type="radio"/> 5 a 6 veces semana<br><input type="radio"/> 1 vez al día<br><input type="radio"/> 2 a 3 veces al día<br><input type="radio"/> 5 a 6 veces al día<br><input type="radio"/> más 6 veces al día |
| queso curado o semicurado o cremoso         | <input type="radio"/> Nunca o menos 1 vez al mes<br><input checked="" type="radio"/> 1 a 3 veces mes<br><input type="radio"/> 1 vez semana<br><input type="radio"/> 2 a 4 veces semana<br><input type="radio"/> 5 a 6 veces semana<br><input type="radio"/> 1 vez al día<br><input type="radio"/> 2 a 3 veces al día<br><input type="radio"/> 5 a 6 veces al día<br><input type="radio"/> más 6 veces al día |
| natillas flan pudding                       | <input type="radio"/> Nunca o menos 1 vez al mes<br><input checked="" type="radio"/> 1 a 3 veces mes<br><input type="radio"/> 1 vez semana<br><input type="radio"/> 2 a 4 veces semana<br><input type="radio"/> 5 a 6 veces semana<br><input type="radio"/> 1 vez al día<br><input type="radio"/> 2 a 3 veces al día<br><input type="radio"/> 5 a 6 veces al día<br><input type="radio"/> más 6 veces al día |
| Helado                                      | <input checked="" type="radio"/> Nunca o menos 1 vez al mes<br><input type="radio"/> 1 a 3 veces mes<br><input type="radio"/> 1 vez semana<br><input type="radio"/> 2 a 4 veces semana<br><input type="radio"/> 5 a 6 veces semana<br><input type="radio"/> 1 vez al día<br><input type="radio"/> 2 a 3 veces al día<br><input type="radio"/> 5 a 6 veces al día<br><input type="radio"/> más 6 veces al día |

|                                      |                                                                                                                                                                                                                                                                                                                                                                                                              |
|--------------------------------------|--------------------------------------------------------------------------------------------------------------------------------------------------------------------------------------------------------------------------------------------------------------------------------------------------------------------------------------------------------------------------------------------------------------|
| huevo                                | <input type="radio"/> Nunca o menos 1 vez al mes<br><input type="radio"/> 1 a 3 veces mes<br><input type="radio"/> 1 vez semana<br><input checked="" type="radio"/> 2 a 4 veces semana<br><input type="radio"/> 5 a 6 veces semana<br><input type="radio"/> 1 vez al día<br><input type="radio"/> 2 a 3 veces al día<br><input type="radio"/> 5 a 6 veces al día<br><input type="radio"/> más 6 veces al día |
| Pollo con piel                       | <input checked="" type="radio"/> Nunca o menos 1 vez al mes<br><input type="radio"/> 1 a 3 veces mes<br><input type="radio"/> 1 vez semana<br><input type="radio"/> 2 a 4 veces semana<br><input type="radio"/> 5 a 6 veces semana<br><input type="radio"/> 1 vez al día<br><input type="radio"/> 2 a 3 veces al día<br><input type="radio"/> 5 a 6 veces al día<br><input type="radio"/> más 6 veces al día |
| pollo sin piel                       | <input type="radio"/> Nunca o menos 1 vez al mes<br><input type="radio"/> 1 a 3 veces mes<br><input type="radio"/> 1 vez semana<br><input checked="" type="radio"/> 2 a 4 veces semana<br><input type="radio"/> 5 a 6 veces semana<br><input type="radio"/> 1 vez al día<br><input type="radio"/> 2 a 3 veces al día<br><input type="radio"/> 5 a 6 veces al día<br><input type="radio"/> más 6 veces al día |
| Ternera o cerdo o cordero            | <input type="radio"/> Nunca o menos 1 vez al mes<br><input type="radio"/> 1 a 3 veces mes<br><input checked="" type="radio"/> 1 vez semana<br><input type="radio"/> 2 a 4 veces semana<br><input type="radio"/> 5 a 6 veces semana<br><input type="radio"/> 1 vez al día<br><input type="radio"/> 2 a 3 veces al día<br><input type="radio"/> 5 a 6 veces al día<br><input type="radio"/> más 6 veces al día |
| carne caza: Conejo o codorniz o pato | <input checked="" type="radio"/> Nunca o menos 1 vez al mes<br><input type="radio"/> 1 a 3 veces mes<br><input type="radio"/> 1 vez semana<br><input type="radio"/> 2 a 4 veces semana<br><input type="radio"/> 5 a 6 veces semana<br><input type="radio"/> 1 vez al día<br><input type="radio"/> 2 a 3 veces al día<br><input type="radio"/> 5 a 6 veces al día<br><input type="radio"/> más 6 veces al día |
| Hígado de ternera o cerdo o pollo    | <input checked="" type="radio"/> Nunca o menos 1 vez al mes<br><input type="radio"/> 1 a 3 veces mes<br><input type="radio"/> 1 vez semana<br><input type="radio"/> 2 a 4 veces semana<br><input type="radio"/> 5 a 6 veces semana<br><input type="radio"/> 1 vez al día<br><input type="radio"/> 2 a 3 veces al día<br><input type="radio"/> 5 a 6 veces al día<br><input type="radio"/> más 6 veces al día |

|                     |                                                                                                                                                                                                                                                                                                                                                                                                              |
|---------------------|--------------------------------------------------------------------------------------------------------------------------------------------------------------------------------------------------------------------------------------------------------------------------------------------------------------------------------------------------------------------------------------------------------------|
| Vísceras            | <input checked="" type="radio"/> Nunca o menos 1 vez al mes<br><input type="radio"/> 1 a 3 veces mes<br><input type="radio"/> 1 vez semana<br><input type="radio"/> 2 a 4 veces semana<br><input type="radio"/> 5 a 6 veces semana<br><input type="radio"/> 1 vez al día<br><input type="radio"/> 2 a 3 veces al día<br><input type="radio"/> 5 a 6 veces al día<br><input type="radio"/> más 6 veces al día |
| Embutido            | <input checked="" type="radio"/> Nunca o menos 1 vez al mes<br><input type="radio"/> 1 a 3 veces mes<br><input type="radio"/> 1 vez semana<br><input type="radio"/> 2 a 4 veces semana<br><input type="radio"/> 5 a 6 veces semana<br><input type="radio"/> 1 vez al día<br><input type="radio"/> 2 a 3 veces al día<br><input type="radio"/> 5 a 6 veces al día<br><input type="radio"/> más 6 veces al día |
| Salchicha o similar | <input checked="" type="radio"/> Nunca o menos 1 vez al mes<br><input type="radio"/> 1 a 3 veces mes<br><input type="radio"/> 1 vez semana<br><input type="radio"/> 2 a 4 veces semana<br><input type="radio"/> 5 a 6 veces semana<br><input type="radio"/> 1 vez al día<br><input type="radio"/> 2 a 3 veces al día<br><input type="radio"/> 5 a 6 veces al día<br><input type="radio"/> más 6 veces al día |
| Pate o foiegras     | <input checked="" type="radio"/> Nunca o menos 1 vez al mes<br><input type="radio"/> 1 a 3 veces mes<br><input type="radio"/> 1 vez semana<br><input type="radio"/> 2 a 4 veces semana<br><input type="radio"/> 5 a 6 veces semana<br><input type="radio"/> 1 vez al día<br><input type="radio"/> 2 a 3 veces al día<br><input type="radio"/> 5 a 6 veces al día<br><input type="radio"/> más 6 veces al día |
| Hamburguesa         | <input type="radio"/> Nunca o menos 1 vez al mes<br><input type="radio"/> 1 a 3 veces mes<br><input checked="" type="radio"/> 1 vez semana<br><input type="radio"/> 2 a 4 veces semana<br><input type="radio"/> 5 a 6 veces semana<br><input type="radio"/> 1 vez al día<br><input type="radio"/> 2 a 3 veces al día<br><input type="radio"/> 5 a 6 veces al día<br><input type="radio"/> más 6 veces al día |
| tocino o bacon      | <input checked="" type="radio"/> Nunca o menos 1 vez al mes<br><input type="radio"/> 1 a 3 veces mes<br><input type="radio"/> 1 vez semana<br><input type="radio"/> 2 a 4 veces semana<br><input type="radio"/> 5 a 6 veces semana<br><input type="radio"/> 1 vez al día<br><input type="radio"/> 2 a 3 veces al día<br><input type="radio"/> 5 a 6 veces al día<br><input type="radio"/> más 6 veces al día |



|                        |                                                                                                                                                                                                                                                                                                                                                                                                              |
|------------------------|--------------------------------------------------------------------------------------------------------------------------------------------------------------------------------------------------------------------------------------------------------------------------------------------------------------------------------------------------------------------------------------------------------------|
| Pescado frito          | <input checked="" type="radio"/> Nunca o menos 1 vez al mes<br><input type="radio"/> 1 a 3 veces mes<br><input type="radio"/> 1 vez semana<br><input type="radio"/> 2 a 4 veces semana<br><input type="radio"/> 5 a 6 veces semana<br><input type="radio"/> 1 vez al día<br><input type="radio"/> 2 a 3 veces al día<br><input type="radio"/> 5 a 6 veces al día<br><input type="radio"/> más 6 veces al día |
| pescado hervido blanco | <input type="radio"/> Nunca o menos 1 vez al mes<br><input type="radio"/> 1 a 3 veces mes<br><input checked="" type="radio"/> 1 vez semana<br><input type="radio"/> 2 a 4 veces semana<br><input type="radio"/> 5 a 6 veces semana<br><input type="radio"/> 1 vez al día<br><input type="radio"/> 2 a 3 veces al día<br><input type="radio"/> 5 a 6 veces al día<br><input type="radio"/> más 6 veces al día |
| pescado hervido azul   | <input checked="" type="radio"/> Nunca o menos 1 vez al mes<br><input type="radio"/> 1 a 3 veces mes<br><input type="radio"/> 1 vez semana<br><input type="radio"/> 2 a 4 veces semana<br><input type="radio"/> 5 a 6 veces semana<br><input type="radio"/> 1 vez al día<br><input type="radio"/> 2 a 3 veces al día<br><input type="radio"/> 5 a 6 veces al día<br><input type="radio"/> más 6 veces al día |
| otros pescado azul     | <input checked="" type="radio"/> Nunca o menos 1 vez al mes<br><input type="radio"/> 1 a 3 veces mes<br><input type="radio"/> 1 vez semana<br><input type="radio"/> 2 a 4 veces semana<br><input type="radio"/> 5 a 6 veces semana<br><input type="radio"/> 1 vez al día<br><input type="radio"/> 2 a 3 veces al día<br><input type="radio"/> 5 a 6 veces al día<br><input type="radio"/> más 6 veces al día |
| atun conserva          | <input type="radio"/> Nunca o menos 1 vez al mes<br><input checked="" type="radio"/> 1 a 3 veces mes<br><input type="radio"/> 1 vez semana<br><input type="radio"/> 2 a 4 veces semana<br><input type="radio"/> 5 a 6 veces semana<br><input type="radio"/> 1 vez al día<br><input type="radio"/> 2 a 3 veces al día<br><input type="radio"/> 5 a 6 veces al día<br><input type="radio"/> más 6 veces al día |
| sardina conserva       | <input checked="" type="radio"/> Nunca o menos 1 vez al mes<br><input type="radio"/> 1 a 3 veces mes<br><input type="radio"/> 1 vez semana<br><input type="radio"/> 2 a 4 veces semana<br><input type="radio"/> 5 a 6 veces semana<br><input type="radio"/> 1 vez al día<br><input type="radio"/> 2 a 3 veces al día<br><input type="radio"/> 5 a 6 veces al día<br><input type="radio"/> más 6 veces al día |

|                                         |                                                                                                                                                                                                                                                                                                                                                                                                              |
|-----------------------------------------|--------------------------------------------------------------------------------------------------------------------------------------------------------------------------------------------------------------------------------------------------------------------------------------------------------------------------------------------------------------------------------------------------------------|
| pescado ahumado                         | <input checked="" type="radio"/> Nunca o menos 1 vez al mes<br><input type="radio"/> 1 a 3 veces mes<br><input type="radio"/> 1 vez semana<br><input type="radio"/> 2 a 4 veces semana<br><input type="radio"/> 5 a 6 veces semana<br><input type="radio"/> 1 vez al día<br><input type="radio"/> 2 a 3 veces al día<br><input type="radio"/> 5 a 6 veces al día<br><input type="radio"/> más 6 veces al día |
| almejas o mejillones o ostras unos 100g | <input type="radio"/> Nunca o menos 1 vez al mes<br><input checked="" type="radio"/> 1 a 3 veces mes<br><input type="radio"/> 1 vez semana<br><input type="radio"/> 2 a 4 veces semana<br><input type="radio"/> 5 a 6 veces semana<br><input type="radio"/> 1 vez al día<br><input type="radio"/> 2 a 3 veces al día<br><input type="radio"/> 5 a 6 veces al día<br><input type="radio"/> más 6 veces al día |
| calamar o chipiron o sepia unos 100g    | <input checked="" type="radio"/> Nunca o menos 1 vez al mes<br><input type="radio"/> 1 a 3 veces mes<br><input type="radio"/> 1 vez semana<br><input type="radio"/> 2 a 4 veces semana<br><input type="radio"/> 5 a 6 veces semana<br><input type="radio"/> 1 vez al día<br><input type="radio"/> 2 a 3 veces al día<br><input type="radio"/> 5 a 6 veces al día<br><input type="radio"/> más 6 veces al día |
| marisco unos 100g                       | <input checked="" type="radio"/> Nunca o menos 1 vez al mes<br><input type="radio"/> 1 a 3 veces mes<br><input type="radio"/> 1 vez semana<br><input type="radio"/> 2 a 4 veces semana<br><input type="radio"/> 5 a 6 veces semana<br><input type="radio"/> 1 vez al día<br><input type="radio"/> 2 a 3 veces al día<br><input type="radio"/> 5 a 6 veces al día<br><input type="radio"/> más 6 veces al día |
| Espinacas o acelgas cocinadas           | <input type="radio"/> Nunca o menos 1 vez al mes<br><input checked="" type="radio"/> 1 a 3 veces mes<br><input type="radio"/> 1 vez semana<br><input type="radio"/> 2 a 4 veces semana<br><input type="radio"/> 5 a 6 veces semana<br><input type="radio"/> 1 vez al día<br><input type="radio"/> 2 a 3 veces al día<br><input type="radio"/> 5 a 6 veces al día<br><input type="radio"/> más 6 veces al día |
| Col o coliflor o brocoli cocinado       | <input type="radio"/> Nunca o menos 1 vez al mes<br><input checked="" type="radio"/> 1 a 3 veces mes<br><input type="radio"/> 1 vez semana<br><input type="radio"/> 2 a 4 veces semana<br><input type="radio"/> 5 a 6 veces semana<br><input type="radio"/> 1 vez al día<br><input type="radio"/> 2 a 3 veces al día<br><input type="radio"/> 5 a 6 veces al día<br><input type="radio"/> más 6 veces al día |

---

Lechuga o endivia o escarola

- ☐ Nunca o menos 1 vez al mes  
☐ 1 a 3 veces mes  
☐ 1 vez semana  
☒ 2 a 4 veces semana  
☐ 5 a 6 veces semana  
☐ 1 vez al día  
☐ 2 a 3 veces al día  
☐ 5 a 6 veces al día  
☐ más 6 veces al día

---

tomate ensalada

- ☐ Nunca o menos 1 vez al mes  
☐ 1 a 3 veces mes  
☐ 1 vez semana  
☒ 2 a 4 veces semana  
☐ 5 a 6 veces semana  
☐ 1 vez al día  
☐ 2 a 3 veces al día  
☐ 5 a 6 veces al día  
☐ más 6 veces al día

---

cebolla

- ☐ Nunca o menos 1 vez al mes  
☐ 1 a 3 veces mes  
☒ 1 vez semana  
☐ 2 a 4 veces semana  
☐ 5 a 6 veces semana  
☐ 1 vez al día  
☐ 2 a 3 veces al día  
☐ 5 a 6 veces al día  
☐ más 6 veces al día

---

Zanahoria o calabaza

- ☐ Nunca o menos 1 vez al mes  
☐ 1 a 3 veces mes  
☒ 1 vez semana  
☐ 2 a 4 veces semana  
☐ 5 a 6 veces semana  
☐ 1 vez al día  
☐ 2 a 3 veces al día  
☐ 5 a 6 veces al día  
☐ más 6 veces al día

---

Judías verdes

- ☐ Nunca o menos 1 vez al mes  
☐ 1 a 3 veces mes  
☒ 1 vez semana  
☐ 2 a 4 veces semana  
☐ 5 a 6 veces semana  
☐ 1 vez al día  
☐ 2 a 3 veces al día  
☐ 5 a 6 veces al día  
☐ más 6 veces al día

---

Berenjena o calabacin o pepino

- ☐ Nunca o menos 1 vez al mes  
☐ 1 a 3 veces mes  
☒ 1 vez semana  
☐ 2 a 4 veces semana  
☐ 5 a 6 veces semana  
☐ 1 vez al día  
☐ 2 a 3 veces al día  
☐ 5 a 6 veces al día  
☐ más 6 veces al día

|                       |                                                                                                                                                                                                                                                                                                                                                                                                              |
|-----------------------|--------------------------------------------------------------------------------------------------------------------------------------------------------------------------------------------------------------------------------------------------------------------------------------------------------------------------------------------------------------------------------------------------------------|
| pimiento              | <input type="radio"/> Nunca o menos 1 vez al mes<br><input checked="" type="radio"/> 1 a 3 veces mes<br><input type="radio"/> 1 vez semana<br><input type="radio"/> 2 a 4 veces semana<br><input type="radio"/> 5 a 6 veces semana<br><input type="radio"/> 1 vez al día<br><input type="radio"/> 2 a 3 veces al día<br><input type="radio"/> 5 a 6 veces al día<br><input type="radio"/> más 6 veces al día |
| alcachofa             | <input type="radio"/> Nunca o menos 1 vez al mes<br><input checked="" type="radio"/> 1 a 3 veces mes<br><input type="radio"/> 1 vez semana<br><input type="radio"/> 2 a 4 veces semana<br><input type="radio"/> 5 a 6 veces semana<br><input type="radio"/> 1 vez al día<br><input type="radio"/> 2 a 3 veces al día<br><input type="radio"/> 5 a 6 veces al día<br><input type="radio"/> más 6 veces al día |
| espárragos            | <input type="radio"/> Nunca o menos 1 vez al mes<br><input type="radio"/> 1 a 3 veces mes<br><input checked="" type="radio"/> 1 vez semana<br><input type="radio"/> 2 a 4 veces semana<br><input type="radio"/> 5 a 6 veces semana<br><input type="radio"/> 1 vez al día<br><input type="radio"/> 2 a 3 veces al día<br><input type="radio"/> 5 a 6 veces al día<br><input type="radio"/> más 6 veces al día |
| maíz hervido          | <input checked="" type="radio"/> Nunca o menos 1 vez al mes<br><input type="radio"/> 1 a 3 veces mes<br><input type="radio"/> 1 vez semana<br><input type="radio"/> 2 a 4 veces semana<br><input type="radio"/> 5 a 6 veces semana<br><input type="radio"/> 1 vez al día<br><input type="radio"/> 2 a 3 veces al día<br><input type="radio"/> 5 a 6 veces al día<br><input type="radio"/> más 6 veces al día |
| legumbres             | <input type="radio"/> Nunca o menos 1 vez al mes<br><input type="radio"/> 1 a 3 veces mes<br><input type="radio"/> 1 vez semana<br><input checked="" type="radio"/> 2 a 4 veces semana<br><input type="radio"/> 5 a 6 veces semana<br><input type="radio"/> 1 vez al día<br><input type="radio"/> 2 a 3 veces al día<br><input type="radio"/> 5 a 6 veces al día<br><input type="radio"/> más 6 veces al día |
| naranjas o mandarinas | <input type="radio"/> Nunca o menos 1 vez al mes<br><input type="radio"/> 1 a 3 veces mes<br><input type="radio"/> 1 vez semana<br><input type="radio"/> 2 a 4 veces semana<br><input type="radio"/> 5 a 6 veces semana<br><input checked="" type="radio"/> 1 vez al día<br><input type="radio"/> 2 a 3 veces al día<br><input type="radio"/> 5 a 6 veces al día<br><input type="radio"/> más 6 veces al día |

|                       |                                                                                                                                                                                                                                                                                                                                                                                                              |
|-----------------------|--------------------------------------------------------------------------------------------------------------------------------------------------------------------------------------------------------------------------------------------------------------------------------------------------------------------------------------------------------------------------------------------------------------|
| zum natural fruta     | <input type="radio"/> Nunca o menos 1 vez al mes<br><input type="radio"/> 1 a 3 veces mes<br><input type="radio"/> 1 vez semana<br><input type="radio"/> 2 a 4 veces semana<br><input type="radio"/> 5 a 6 veces semana<br><input checked="" type="radio"/> 1 vez al día<br><input type="radio"/> 2 a 3 veces al día<br><input type="radio"/> 5 a 6 veces al día<br><input type="radio"/> más 6 veces al día |
| platano               | <input type="radio"/> Nunca o menos 1 vez al mes<br><input type="radio"/> 1 a 3 veces mes<br><input type="radio"/> 1 vez semana<br><input checked="" type="radio"/> 2 a 4 veces semana<br><input type="radio"/> 5 a 6 veces semana<br><input type="radio"/> 1 vez al día<br><input type="radio"/> 2 a 3 veces al día<br><input type="radio"/> 5 a 6 veces al día<br><input type="radio"/> más 6 veces al día |
| manzana o pera        | <input type="radio"/> Nunca o menos 1 vez al mes<br><input checked="" type="radio"/> 1 a 3 veces mes<br><input type="radio"/> 1 vez semana<br><input type="radio"/> 2 a 4 veces semana<br><input type="radio"/> 5 a 6 veces semana<br><input type="radio"/> 1 vez al día<br><input type="radio"/> 2 a 3 veces al día<br><input type="radio"/> 5 a 6 veces al día<br><input type="radio"/> más 6 veces al día |
| melocotón o nectarina | <input checked="" type="radio"/> Nunca o menos 1 vez al mes<br><input type="radio"/> 1 a 3 veces mes<br><input type="radio"/> 1 vez semana<br><input type="radio"/> 2 a 4 veces semana<br><input type="radio"/> 5 a 6 veces semana<br><input type="radio"/> 1 vez al día<br><input type="radio"/> 2 a 3 veces al día<br><input type="radio"/> 5 a 6 veces al día<br><input type="radio"/> más 6 veces al día |
| sandia o melon        | <input checked="" type="radio"/> Nunca o menos 1 vez al mes<br><input type="radio"/> 1 a 3 veces mes<br><input type="radio"/> 1 vez semana<br><input type="radio"/> 2 a 4 veces semana<br><input type="radio"/> 5 a 6 veces semana<br><input type="radio"/> 1 vez al día<br><input type="radio"/> 2 a 3 veces al día<br><input type="radio"/> 5 a 6 veces al día<br><input type="radio"/> más 6 veces al día |
| uva                   | <input type="radio"/> Nunca o menos 1 vez al mes<br><input checked="" type="radio"/> 1 a 3 veces mes<br><input type="radio"/> 1 vez semana<br><input type="radio"/> 2 a 4 veces semana<br><input type="radio"/> 5 a 6 veces semana<br><input type="radio"/> 1 vez al día<br><input type="radio"/> 2 a 3 veces al día<br><input type="radio"/> 5 a 6 veces al día<br><input type="radio"/> más 6 veces al día |

---

bruna o ciruela

- ☐ Nunca o menos 1 vez al mes  
☐ 1 a 3 veces mes  
☐ 1 vez semana  
☒ 2 a 4 veces semana  
☐ 5 a 6 veces semana  
☐ 1 vez al día  
☐ 2 a 3 veces al día  
☐ 5 a 6 veces al día  
☐ más 6 veces al día

---

kiwi

- ☐ Nunca o menos 1 vez al mes  
☒ 1 a 3 veces mes  
☐ 1 vez semana  
☐ 2 a 4 veces semana  
☐ 5 a 6 veces semana  
☐ 1 vez al día  
☐ 2 a 3 veces al día  
☐ 5 a 6 veces al día  
☐ más 6 veces al día

---

aceituna

- ☐ Nunca o menos 1 vez al mes  
☒ 1 a 3 veces mes  
☐ 1 vez semana  
☐ 2 a 4 veces semana  
☐ 5 a 6 veces semana  
☐ 1 vez al día  
☐ 2 a 3 veces al día  
☐ 5 a 6 veces al día  
☐ más 6 veces al día

---

frutos secos

- ☐ Nunca o menos 1 vez al mes  
☐ 1 a 3 veces mes  
☐ 1 vez semana  
☒ 2 a 4 veces semana  
☐ 5 a 6 veces semana  
☐ 1 vez al día  
☐ 2 a 3 veces al día  
☐ 5 a 6 veces al día  
☐ más 6 veces al día

---

pan blanco

- ☐ Nunca o menos 1 vez al mes  
☐ 1 a 3 veces mes  
☐ 1 vez semana  
☐ 2 a 4 veces semana  
☐ 5 a 6 veces semana  
☒ 1 vez al día  
☐ 2 a 3 veces al día  
☐ 5 a 6 veces al día  
☐ más 6 veces al día

---

pan integral

- ☒ Nunca o menos 1 vez al mes  
☐ 1 a 3 veces mes  
☐ 1 vez semana  
☐ 2 a 4 veces semana  
☐ 5 a 6 veces semana  
☐ 1 vez al día  
☐ 2 a 3 veces al día  
☐ 5 a 6 veces al día  
☐ más 6 veces al día

|                          |                                                                                                                                                                                                                                                                                                                                                                                                              |
|--------------------------|--------------------------------------------------------------------------------------------------------------------------------------------------------------------------------------------------------------------------------------------------------------------------------------------------------------------------------------------------------------------------------------------------------------|
| cereales desayuno        | <input checked="" type="radio"/> Nunca o menos 1 vez al mes<br><input type="radio"/> 1 a 3 veces mes<br><input type="radio"/> 1 vez semana<br><input type="radio"/> 2 a 4 veces semana<br><input type="radio"/> 5 a 6 veces semana<br><input type="radio"/> 1 vez al día<br><input type="radio"/> 2 a 3 veces al día<br><input type="radio"/> 5 a 6 veces al día<br><input type="radio"/> más 6 veces al día |
| patatas fritas           | <input type="radio"/> Nunca o menos 1 vez al mes<br><input type="radio"/> 1 a 3 veces mes<br><input checked="" type="radio"/> 1 vez semana<br><input type="radio"/> 2 a 4 veces semana<br><input type="radio"/> 5 a 6 veces semana<br><input type="radio"/> 1 vez al día<br><input type="radio"/> 2 a 3 veces al día<br><input type="radio"/> 5 a 6 veces al día<br><input type="radio"/> más 6 veces al día |
| patatas cocidas o asadas | <input type="radio"/> Nunca o menos 1 vez al mes<br><input type="radio"/> 1 a 3 veces mes<br><input checked="" type="radio"/> 1 vez semana<br><input type="radio"/> 2 a 4 veces semana<br><input type="radio"/> 5 a 6 veces semana<br><input type="radio"/> 1 vez al día<br><input type="radio"/> 2 a 3 veces al día<br><input type="radio"/> 5 a 6 veces al día<br><input type="radio"/> más 6 veces al día |
| bolsa papas              | <input type="radio"/> Nunca o menos 1 vez al mes<br><input type="radio"/> 1 a 3 veces mes<br><input checked="" type="radio"/> 1 vez semana<br><input type="radio"/> 2 a 4 veces semana<br><input type="radio"/> 5 a 6 veces semana<br><input type="radio"/> 1 vez al día<br><input type="radio"/> 2 a 3 veces al día<br><input type="radio"/> 5 a 6 veces al día<br><input type="radio"/> más 6 veces al día |
| arroz cocinado           | <input type="radio"/> Nunca o menos 1 vez al mes<br><input checked="" type="radio"/> 1 a 3 veces mes<br><input type="radio"/> 1 vez semana<br><input type="radio"/> 2 a 4 veces semana<br><input type="radio"/> 5 a 6 veces semana<br><input type="radio"/> 1 vez al día<br><input type="radio"/> 2 a 3 veces al día<br><input type="radio"/> 5 a 6 veces al día<br><input type="radio"/> más 6 veces al día |
| pasta                    | <input type="radio"/> Nunca o menos 1 vez al mes<br><input type="radio"/> 1 a 3 veces mes<br><input checked="" type="radio"/> 1 vez semana<br><input type="radio"/> 2 a 4 veces semana<br><input type="radio"/> 5 a 6 veces semana<br><input type="radio"/> 1 vez al día<br><input type="radio"/> 2 a 3 veces al día<br><input type="radio"/> 5 a 6 veces al día<br><input type="radio"/> más 6 veces al día |

|                     |                                                                                                                                                                                                                                                                                                                                                                                                              |
|---------------------|--------------------------------------------------------------------------------------------------------------------------------------------------------------------------------------------------------------------------------------------------------------------------------------------------------------------------------------------------------------------------------------------------------------|
| pizza               | <input type="radio"/> Nunca o menos 1 vez al mes<br><input type="radio"/> 1 a 3 veces mes<br><input checked="" type="radio"/> 1 vez semana<br><input type="radio"/> 2 a 4 veces semana<br><input type="radio"/> 5 a 6 veces semana<br><input type="radio"/> 1 vez al día<br><input type="radio"/> 2 a 3 veces al día<br><input type="radio"/> 5 a 6 veces al día<br><input type="radio"/> más 6 veces al día |
| aceite oliva        | <input type="radio"/> Nunca o menos 1 vez al mes<br><input type="radio"/> 1 a 3 veces mes<br><input type="radio"/> 1 vez semana<br><input checked="" type="radio"/> 2 a 4 veces semana<br><input type="radio"/> 5 a 6 veces semana<br><input type="radio"/> 1 vez al día<br><input type="radio"/> 2 a 3 veces al día<br><input type="radio"/> 5 a 6 veces al día<br><input type="radio"/> más 6 veces al día |
| otros aceites       | <input type="radio"/> Nunca o menos 1 vez al mes<br><input type="radio"/> 1 a 3 veces mes<br><input checked="" type="radio"/> 1 vez semana<br><input type="radio"/> 2 a 4 veces semana<br><input type="radio"/> 5 a 6 veces semana<br><input type="radio"/> 1 vez al día<br><input type="radio"/> 2 a 3 veces al día<br><input type="radio"/> 5 a 6 veces al día<br><input type="radio"/> más 6 veces al día |
| margarina           | <input checked="" type="radio"/> Nunca o menos 1 vez al mes<br><input type="radio"/> 1 a 3 veces mes<br><input type="radio"/> 1 vez semana<br><input type="radio"/> 2 a 4 veces semana<br><input type="radio"/> 5 a 6 veces semana<br><input type="radio"/> 1 vez al día<br><input type="radio"/> 2 a 3 veces al día<br><input type="radio"/> 5 a 6 veces al día<br><input type="radio"/> más 6 veces al día |
| mantequilla         | <input checked="" type="radio"/> Nunca o menos 1 vez al mes<br><input type="radio"/> 1 a 3 veces mes<br><input type="radio"/> 1 vez semana<br><input type="radio"/> 2 a 4 veces semana<br><input type="radio"/> 5 a 6 veces semana<br><input type="radio"/> 1 vez al día<br><input type="radio"/> 2 a 3 veces al día<br><input type="radio"/> 5 a 6 veces al día<br><input type="radio"/> más 6 veces al día |
| galletas tipo maria | <input type="radio"/> Nunca o menos 1 vez al mes<br><input type="radio"/> 1 a 3 veces mes<br><input type="radio"/> 1 vez semana<br><input checked="" type="radio"/> 2 a 4 veces semana<br><input type="radio"/> 5 a 6 veces semana<br><input type="radio"/> 1 vez al día<br><input type="radio"/> 2 a 3 veces al día<br><input type="radio"/> 5 a 6 veces al día<br><input type="radio"/> más 6 veces al día |



|                           |                                                                                                                                                                                                                                                                                                                                                                                                              |
|---------------------------|--------------------------------------------------------------------------------------------------------------------------------------------------------------------------------------------------------------------------------------------------------------------------------------------------------------------------------------------------------------------------------------------------------------|
| galletas chocolate        | <input checked="" type="radio"/> Nunca o menos 1 vez al mes<br><input type="radio"/> 1 a 3 veces mes<br><input type="radio"/> 1 vez semana<br><input type="radio"/> 2 a 4 veces semana<br><input type="radio"/> 5 a 6 veces semana<br><input type="radio"/> 1 vez al día<br><input type="radio"/> 2 a 3 veces al día<br><input type="radio"/> 5 a 6 veces al día<br><input type="radio"/> más 6 veces al día |
| bollieria                 | <input type="radio"/> Nunca o menos 1 vez al mes<br><input type="radio"/> 1 a 3 veces mes<br><input type="radio"/> 1 vez semana<br><input checked="" type="radio"/> 2 a 4 veces semana<br><input type="radio"/> 5 a 6 veces semana<br><input type="radio"/> 1 vez al día<br><input type="radio"/> 2 a 3 veces al día<br><input type="radio"/> 5 a 6 veces al día<br><input type="radio"/> más 6 veces al día |
| chocolate o bombones      | <input type="radio"/> Nunca o menos 1 vez al mes<br><input type="radio"/> 1 a 3 veces mes<br><input type="radio"/> 1 vez semana<br><input checked="" type="radio"/> 2 a 4 veces semana<br><input type="radio"/> 5 a 6 veces semana<br><input type="radio"/> 1 vez al día<br><input type="radio"/> 2 a 3 veces al día<br><input type="radio"/> 5 a 6 veces al día<br><input type="radio"/> más 6 veces al día |
| chocolate polvo o colacao | <input checked="" type="radio"/> Nunca o menos 1 vez al mes<br><input type="radio"/> 1 a 3 veces mes<br><input type="radio"/> 1 vez semana<br><input type="radio"/> 2 a 4 veces semana<br><input type="radio"/> 5 a 6 veces semana<br><input type="radio"/> 1 vez al día<br><input type="radio"/> 2 a 3 veces al día<br><input type="radio"/> 5 a 6 veces al día<br><input type="radio"/> más 6 veces al día |
| vino tinto                | <input checked="" type="radio"/> Nunca o menos 1 vez al mes<br><input type="radio"/> 1 a 3 veces mes<br><input type="radio"/> 1 vez semana<br><input type="radio"/> 2 a 4 veces semana<br><input type="radio"/> 5 a 6 veces semana<br><input type="radio"/> 1 vez al día<br><input type="radio"/> 2 a 3 veces al día<br><input type="radio"/> 5 a 6 veces al día<br><input type="radio"/> más 6 veces al día |
| vino blanco               | <input checked="" type="radio"/> Nunca o menos 1 vez al mes<br><input type="radio"/> 1 a 3 veces mes<br><input type="radio"/> 1 vez semana<br><input type="radio"/> 2 a 4 veces semana<br><input type="radio"/> 5 a 6 veces semana<br><input type="radio"/> 1 vez al día<br><input type="radio"/> 2 a 3 veces al día<br><input type="radio"/> 5 a 6 veces al día<br><input type="radio"/> más 6 veces al día |

|                       |                                                                                                                                                                                                                                                                                                                                                                                                              |
|-----------------------|--------------------------------------------------------------------------------------------------------------------------------------------------------------------------------------------------------------------------------------------------------------------------------------------------------------------------------------------------------------------------------------------------------------|
| vino seco o vermut    | <input checked="" type="radio"/> Nunca o menos 1 vez al mes<br><input type="radio"/> 1 a 3 veces mes<br><input type="radio"/> 1 vez semana<br><input type="radio"/> 2 a 4 veces semana<br><input type="radio"/> 5 a 6 veces semana<br><input type="radio"/> 1 vez al día<br><input type="radio"/> 2 a 3 veces al día<br><input type="radio"/> 5 a 6 veces al día<br><input type="radio"/> más 6 veces al día |
| cerveza               | <input checked="" type="radio"/> Nunca o menos 1 vez al mes<br><input type="radio"/> 1 a 3 veces mes<br><input type="radio"/> 1 vez semana<br><input type="radio"/> 2 a 4 veces semana<br><input type="radio"/> 5 a 6 veces semana<br><input type="radio"/> 1 vez al día<br><input type="radio"/> 2 a 3 veces al día<br><input type="radio"/> 5 a 6 veces al día<br><input type="radio"/> más 6 veces al día |
| cerveza sin alcohol   | <input checked="" type="radio"/> Nunca o menos 1 vez al mes<br><input type="radio"/> 1 a 3 veces mes<br><input type="radio"/> 1 vez semana<br><input type="radio"/> 2 a 4 veces semana<br><input type="radio"/> 5 a 6 veces semana<br><input type="radio"/> 1 vez al día<br><input type="radio"/> 2 a 3 veces al día<br><input type="radio"/> 5 a 6 veces al día<br><input type="radio"/> más 6 veces al día |
| licores               | <input checked="" type="radio"/> Nunca o menos 1 vez al mes<br><input type="radio"/> 1 a 3 veces mes<br><input type="radio"/> 1 vez semana<br><input type="radio"/> 2 a 4 veces semana<br><input type="radio"/> 5 a 6 veces semana<br><input type="radio"/> 1 vez al día<br><input type="radio"/> 2 a 3 veces al día<br><input type="radio"/> 5 a 6 veces al día<br><input type="radio"/> más 6 veces al día |
| ginebra o ron o vodka | <input checked="" type="radio"/> Nunca o menos 1 vez al mes<br><input type="radio"/> 1 a 3 veces mes<br><input type="radio"/> 1 vez semana<br><input type="radio"/> 2 a 4 veces semana<br><input type="radio"/> 5 a 6 veces semana<br><input type="radio"/> 1 vez al día<br><input type="radio"/> 2 a 3 veces al día<br><input type="radio"/> 5 a 6 veces al día<br><input type="radio"/> más 6 veces al día |
| refresco normal       | <input checked="" type="radio"/> Nunca o menos 1 vez al mes<br><input type="radio"/> 1 a 3 veces mes<br><input type="radio"/> 1 vez semana<br><input type="radio"/> 2 a 4 veces semana<br><input type="radio"/> 5 a 6 veces semana<br><input type="radio"/> 1 vez al día<br><input type="radio"/> 2 a 3 veces al día<br><input type="radio"/> 5 a 6 veces al día<br><input type="radio"/> más 6 veces al día |

---

refresco sin azúcar

- ☐ Nunca o menos 1 vez al mes
- ☐ 1 a 3 veces mes
- ☒ 1 vez semana
- ☐ 2 a 4 veces semana
- ☐ 5 a 6 veces semana
- ☐ 1 vez al día
- ☐ 2 a 3 veces al día
- ☐ 5 a 6 veces al día
- ☐ más 6 veces al día

---

Agua del grifo

- ☒ Nunca o menos 1 vez al mes
- ☐ 1 a 3 veces mes
- ☐ 1 vez semana
- ☐ 2 a 4 veces semana
- ☐ 5 a 6 veces semana
- ☐ 1 vez al día
- ☐ 2 a 3 veces al día
- ☐ 5 a 6 veces al día
- ☐ más 6 veces al día

---

agua embotellada sin gas

- ☐ Nunca o menos 1 vez al mes
- ☐ 1 a 3 veces mes
- ☐ 1 vez semana
- ☐ 2 a 4 veces semana
- ☐ 5 a 6 veces semana
- ☐ 1 vez al día
- ☐ 2 a 3 veces al día
- ☐ 5 a 6 veces al día
- ☒ más 6 veces al día

---

agua embotellada con gas

- ☒ Nunca o menos 1 vez al mes
- ☐ 1 a 3 veces mes
- ☐ 1 vez semana
- ☐ 2 a 4 veces semana
- ☐ 5 a 6 veces semana
- ☐ 1 vez al día
- ☐ 2 a 3 veces al día
- ☐ 5 a 6 veces al día
- ☐ más 6 veces al día

---

zumو frutas embasado

- ☐ Nunca o menos 1 vez al mes
- ☒ 1 a 3 veces mes
- ☐ 1 vez semana
- ☐ 2 a 4 veces semana
- ☐ 5 a 6 veces semana
- ☐ 1 vez al día
- ☐ 2 a 3 veces al día
- ☐ 5 a 6 veces al día
- ☐ más 6 veces al día

---

cafe

- ☒ Nunca o menos 1 vez al mes
- ☐ 1 a 3 veces mes
- ☐ 1 vez semana
- ☐ 2 a 4 veces semana
- ☐ 5 a 6 veces semana
- ☐ 1 vez al día
- ☐ 2 a 3 veces al día
- ☐ 5 a 6 veces al día
- ☐ más 6 veces al día

|                       |                                                                                                                                                                                                                                                                                                                                                                                                              |
|-----------------------|--------------------------------------------------------------------------------------------------------------------------------------------------------------------------------------------------------------------------------------------------------------------------------------------------------------------------------------------------------------------------------------------------------------|
| cafe descafeinado     | <input checked="" type="radio"/> Nunca o menos 1 vez al mes<br><input type="radio"/> 1 a 3 veces mes<br><input type="radio"/> 1 vez semana<br><input type="radio"/> 2 a 4 veces semana<br><input type="radio"/> 5 a 6 veces semana<br><input type="radio"/> 1 vez al día<br><input type="radio"/> 2 a 3 veces al día<br><input type="radio"/> 5 a 6 veces al día<br><input type="radio"/> más 6 veces al día |
| te o infusión         | <input checked="" type="radio"/> Nunca o menos 1 vez al mes<br><input type="radio"/> 1 a 3 veces mes<br><input type="radio"/> 1 vez semana<br><input type="radio"/> 2 a 4 veces semana<br><input type="radio"/> 5 a 6 veces semana<br><input type="radio"/> 1 vez al día<br><input type="radio"/> 2 a 3 veces al día<br><input type="radio"/> 5 a 6 veces al día<br><input type="radio"/> más 6 veces al día |
| sopa o puré verduras  | <input type="radio"/> Nunca o menos 1 vez al mes<br><input type="radio"/> 1 a 3 veces mes<br><input type="radio"/> 1 vez semana<br><input checked="" type="radio"/> 2 a 4 veces semana<br><input type="radio"/> 5 a 6 veces semana<br><input type="radio"/> 1 vez al día<br><input type="radio"/> 2 a 3 veces al día<br><input type="radio"/> 5 a 6 veces al día<br><input type="radio"/> más 6 veces al día |
| croquetas pollo jamón | <input checked="" type="radio"/> Nunca o menos 1 vez al mes<br><input type="radio"/> 1 a 3 veces mes<br><input type="radio"/> 1 vez semana<br><input type="radio"/> 2 a 4 veces semana<br><input type="radio"/> 5 a 6 veces semana<br><input type="radio"/> 1 vez al día<br><input type="radio"/> 2 a 3 veces al día<br><input type="radio"/> 5 a 6 veces al día<br><input type="radio"/> más 6 veces al día |
| croquetas pescado     | <input checked="" type="radio"/> Nunca o menos 1 vez al mes<br><input type="radio"/> 1 a 3 veces mes<br><input type="radio"/> 1 vez semana<br><input type="radio"/> 2 a 4 veces semana<br><input type="radio"/> 5 a 6 veces semana<br><input type="radio"/> 1 vez al día<br><input type="radio"/> 2 a 3 veces al día<br><input type="radio"/> 5 a 6 veces al día<br><input type="radio"/> más 6 veces al día |
| mayonesa              | <input checked="" type="radio"/> Nunca o menos 1 vez al mes<br><input type="radio"/> 1 a 3 veces mes<br><input type="radio"/> 1 vez semana<br><input type="radio"/> 2 a 4 veces semana<br><input type="radio"/> 5 a 6 veces semana<br><input type="radio"/> 1 vez al día<br><input type="radio"/> 2 a 3 veces al día<br><input type="radio"/> 5 a 6 veces al día<br><input type="radio"/> más 6 veces al día |

|                  |                                                                                                                                                                                                                                                                                                                                                                                                              |
|------------------|--------------------------------------------------------------------------------------------------------------------------------------------------------------------------------------------------------------------------------------------------------------------------------------------------------------------------------------------------------------------------------------------------------------|
| salsa tomate     | <input type="radio"/> Nunca o menos 1 vez al mes<br><input type="radio"/> 1 a 3 veces mes<br><input checked="" type="radio"/> 1 vez semana<br><input type="radio"/> 2 a 4 veces semana<br><input type="radio"/> 5 a 6 veces semana<br><input type="radio"/> 1 vez al día<br><input type="radio"/> 2 a 3 veces al día<br><input type="radio"/> 5 a 6 veces al día<br><input type="radio"/> más 6 veces al día |
| ketchup          | <input checked="" type="radio"/> Nunca o menos 1 vez al mes<br><input type="radio"/> 1 a 3 veces mes<br><input type="radio"/> 1 vez semana<br><input type="radio"/> 2 a 4 veces semana<br><input type="radio"/> 5 a 6 veces semana<br><input type="radio"/> 1 vez al día<br><input type="radio"/> 2 a 3 veces al día<br><input type="radio"/> 5 a 6 veces al día<br><input type="radio"/> más 6 veces al día |
| sal              | <input type="radio"/> Nunca o menos 1 vez al mes<br><input type="radio"/> 1 a 3 veces mes<br><input type="radio"/> 1 vez semana<br><input checked="" type="radio"/> 2 a 4 veces semana<br><input type="radio"/> 5 a 6 veces semana<br><input type="radio"/> 1 vez al día<br><input type="radio"/> 2 a 3 veces al día<br><input type="radio"/> 5 a 6 veces al día<br><input type="radio"/> más 6 veces al día |
| ajo              | <input checked="" type="radio"/> Nunca o menos 1 vez al mes<br><input type="radio"/> 1 a 3 veces mes<br><input type="radio"/> 1 vez semana<br><input type="radio"/> 2 a 4 veces semana<br><input type="radio"/> 5 a 6 veces semana<br><input type="radio"/> 1 vez al día<br><input type="radio"/> 2 a 3 veces al día<br><input type="radio"/> 5 a 6 veces al día<br><input type="radio"/> más 6 veces al día |
| mermelada o miel | <input type="radio"/> Nunca o menos 1 vez al mes<br><input type="radio"/> 1 a 3 veces mes<br><input type="radio"/> 1 vez semana<br><input checked="" type="radio"/> 2 a 4 veces semana<br><input type="radio"/> 5 a 6 veces semana<br><input type="radio"/> 1 vez al día<br><input type="radio"/> 2 a 3 veces al día<br><input type="radio"/> 5 a 6 veces al día<br><input type="radio"/> más 6 veces al día |
| azúcar           | <input checked="" type="radio"/> Nunca o menos 1 vez al mes<br><input type="radio"/> 1 a 3 veces mes<br><input type="radio"/> 1 vez semana<br><input type="radio"/> 2 a 4 veces semana<br><input type="radio"/> 5 a 6 veces semana<br><input type="radio"/> 1 vez al día<br><input type="radio"/> 2 a 3 veces al día<br><input type="radio"/> 5 a 6 veces al día<br><input type="radio"/> más 6 veces al día |

|                                       |                                                                                                                                                                                                                                                                                                                                                                                                                                                                                                                               |
|---------------------------------------|-------------------------------------------------------------------------------------------------------------------------------------------------------------------------------------------------------------------------------------------------------------------------------------------------------------------------------------------------------------------------------------------------------------------------------------------------------------------------------------------------------------------------------|
| Otro alimento                         |                                                                                                                                                                                                                                                                                                                                                                                                                                                                                                                               |
| suplementos vitamínicos               | <input checked="" type="radio"/> si<br><input type="radio"/> no                                                                                                                                                                                                                                                                                                                                                                                                                                                               |
| suplementos vitamínicos               | [*DATA REMOVED*]                                                                                                                                                                                                                                                                                                                                                                                                                                                                                                              |
| dieta previa                          | <input type="radio"/> si<br><input checked="" type="radio"/> no                                                                                                                                                                                                                                                                                                                                                                                                                                                               |
| motivo dieta                          | <input type="radio"/> no dieta<br><input type="radio"/> control peso<br><input type="radio"/> control colesterol<br><input type="radio"/> control diabetes<br><input type="radio"/> problemas estómago<br><input type="radio"/> problemas vesícula o hepáticos<br><input type="radio"/> HTA o cardiopatía<br><input type="radio"/> problemas renales<br><input type="radio"/> alergia alimentaria<br><input type="radio"/> ácido úrico elevado<br><input checked="" type="radio"/> vegetariana<br><input type="radio"/> otros |
| cambio alimentos año previo gestación | <input type="radio"/> si<br><input checked="" type="radio"/> no                                                                                                                                                                                                                                                                                                                                                                                                                                                               |
| cambio lácteos                        | <input type="radio"/> eliminado<br><input type="radio"/> disminuido<br><input checked="" type="radio"/> igual<br><input type="radio"/> aumentado<br><input type="radio"/> no sabe                                                                                                                                                                                                                                                                                                                                             |
| cambio huevos                         | <input type="radio"/> eliminado<br><input type="radio"/> disminuido<br><input checked="" type="radio"/> igual<br><input type="radio"/> aumentado<br><input type="radio"/> no sabe                                                                                                                                                                                                                                                                                                                                             |
| cambio carne                          | <input type="radio"/> eliminado<br><input type="radio"/> disminuido<br><input checked="" type="radio"/> igual<br><input type="radio"/> aumentado<br><input type="radio"/> no sabe                                                                                                                                                                                                                                                                                                                                             |
| cambio pescado                        | <input type="radio"/> eliminado<br><input type="radio"/> disminuido<br><input checked="" type="radio"/> igual<br><input type="radio"/> aumentado<br><input type="radio"/> no sabe                                                                                                                                                                                                                                                                                                                                             |
| cambio verduras                       | <input type="radio"/> eliminado<br><input type="radio"/> disminuido<br><input checked="" type="radio"/> igual<br><input type="radio"/> aumentado<br><input type="radio"/> no sabe                                                                                                                                                                                                                                                                                                                                             |

|                            |                                                                                                                                                                                                                        |
|----------------------------|------------------------------------------------------------------------------------------------------------------------------------------------------------------------------------------------------------------------|
| cambio legumbres           | <input type="radio"/> eliminado<br><input type="radio"/> disminuido<br><input checked="" type="radio"/> igual<br><input type="radio"/> aumentado<br><input type="radio"/> no sabe                                      |
| cambio fruta               | <input type="radio"/> eliminado<br><input type="radio"/> disminuido<br><input checked="" type="radio"/> igual<br><input type="radio"/> aumentado<br><input type="radio"/> no sabe                                      |
| cambio pan                 | <input type="radio"/> eliminado<br><input type="radio"/> disminuido<br><input checked="" type="radio"/> igual<br><input type="radio"/> aumentado<br><input type="radio"/> no sabe                                      |
| cambio aceite oliva        | <input type="radio"/> eliminado<br><input type="radio"/> disminuido<br><input checked="" type="radio"/> igual<br><input type="radio"/> aumentado<br><input type="radio"/> no sabe                                      |
| cambio mante o margarina   | <input type="radio"/> eliminado<br><input type="radio"/> disminuido<br><input checked="" type="radio"/> igual<br><input type="radio"/> aumentado<br><input type="radio"/> no sabe                                      |
| cambio azúcar y dulces     | <input type="radio"/> eliminado<br><input type="radio"/> disminuido<br><input checked="" type="radio"/> igual<br><input type="radio"/> aumentado<br><input type="radio"/> no sabe                                      |
| cambio bebidas alcohólicas | <input type="radio"/> eliminado<br><input type="radio"/> disminuido<br><input checked="" type="radio"/> igual<br><input type="radio"/> aumentado<br><input type="radio"/> no sabe                                      |
| frecuencia comidas fritas  | <input type="radio"/> a diario<br><input type="radio"/> 5 a 6 veces semana<br><input type="radio"/> 2 a 4 veces semana<br><input checked="" type="radio"/> 1 vez semana<br><input type="radio"/> menos de 1 vez semana |
| carne                      | <input type="radio"/> no como<br><input type="radio"/> cruda<br><input type="radio"/> poco hecha<br><input type="radio"/> hecha<br><input checked="" type="radio"/> muy hecha                                          |
| grasa visible carne        | <input checked="" type="radio"/> quita toda<br><input type="radio"/> quita mayoría<br><input type="radio"/> quita un poco<br><input type="radio"/> no quita nada                                                       |

|                                |                                                                                                                                                                                                                                                          |
|--------------------------------|----------------------------------------------------------------------------------------------------------------------------------------------------------------------------------------------------------------------------------------------------------|
| cocina carne                   | <input checked="" type="radio"/> a la plancha<br><input type="radio"/> a la parrilla<br><input type="radio"/> asada<br><input type="radio"/> frita<br><input type="radio"/> guisada                                                                      |
| tostado quemado carne          | <input checked="" type="radio"/> nunca<br><input type="radio"/> 1 vez mes<br><input type="radio"/> 2 a 3 veces mes<br><input type="radio"/> 1 vez semana<br><input type="radio"/> 2 a 3 semanas                                                          |
| tostado quemado pescado        | <input checked="" type="radio"/> nunca<br><input type="radio"/> 1 vez mes<br><input type="radio"/> 2 a 3 veces mes<br><input type="radio"/> 1 vez semana<br><input type="radio"/> 2 a 3 semanas                                                          |
| socarrat paella                | <input checked="" type="radio"/> nunca<br><input type="radio"/> 1 vez mes<br><input type="radio"/> 2 a 3 veces mes<br><input type="radio"/> 1 vez semana<br><input type="radio"/> 2 a 3 semanas                                                          |
| grasa o aceite cocinar         | <input type="radio"/> mantequilla<br><input type="radio"/> margarina<br><input checked="" type="radio"/> aceite oliva<br><input type="radio"/> aceite oliva virgen extra<br><input type="radio"/> aceite vegetal<br><input type="radio"/> mezcla aceites |
| grasa aceite aliñar            | <input type="radio"/> mantequilla<br><input type="radio"/> margarina<br><input checked="" type="radio"/> aceite oliva<br><input type="radio"/> aceite oliva virgen extra<br><input type="radio"/> aceite vegetal<br><input type="radio"/> mezcla aceites |
| grasa aceite freir             | <input type="radio"/> mantequilla<br><input type="radio"/> margarina<br><input type="radio"/> aceite oliva<br><input checked="" type="radio"/> aceite oliva virgen extra<br><input type="radio"/> aceite vegetal<br><input type="radio"/> mezcla aceites |
| Ejercicio cuestionario         | <input checked="" type="radio"/> si<br><input type="radio"/> no                                                                                                                                                                                          |
| horas de sueño incluido siesta | [*DATA REMOVED*]                                                                                                                                                                                                                                         |
| minutos siesta                 | [*DATA REMOVED*]                                                                                                                                                                                                                                         |
| horas televisión semana        | [*DATA REMOVED*]                                                                                                                                                                                                                                         |



|                                        |                                                                                                                                                                                                                                                                                                                                                                           |
|----------------------------------------|---------------------------------------------------------------------------------------------------------------------------------------------------------------------------------------------------------------------------------------------------------------------------------------------------------------------------------------------------------------------------|
| actividad trabajo                      | <input type="radio"/> casi siempre sentado<br><input type="radio"/> sentado 50 por cien<br><input checked="" type="radio"/> casi siempre de pie, quieto<br><input type="radio"/> casi siempre levantado caminando y llevando pocas cosas<br><input type="radio"/> casi siempre levantado, caminando y llevado muchas cosas<br><input type="radio"/> trabajo manual pesado |
| tiempo caminar o bici al día           | <input type="radio"/> casi nunca<br><input type="radio"/> menos 20min día<br><input type="radio"/> 20 a 40 min día<br><input type="radio"/> 40 a 60 min día<br><input checked="" type="radio"/> 1h o 1h y media día<br><input type="radio"/> más de 1h y media al día                                                                                                     |
| tiempo tareas casa al día              | <input type="radio"/> menos de 1h día<br><input checked="" type="radio"/> 1 a 2h día<br><input type="radio"/> 3 a 4h día<br><input type="radio"/> 5 a 6h día<br><input type="radio"/> 7 a 8h día<br><input type="radio"/> más de 8h día                                                                                                                                   |
| tiempo libre televisión ordenador leer | <input type="radio"/> menos 1h día<br><input type="radio"/> 1h día<br><input type="radio"/> 2h día<br><input type="radio"/> 3h día<br><input checked="" type="radio"/> 4h día<br><input type="radio"/> 5 a 6h día<br><input type="radio"/> mas 6h día                                                                                                                     |
| tiempo libre ejercicio o deporte       | <input type="radio"/> menos 1h semana<br><input type="radio"/> 1h semana<br><input type="radio"/> 2h semana<br><input type="radio"/> 3h semana<br><input checked="" type="radio"/> 4 a 5h semana<br><input type="radio"/> mas 5h semana                                                                                                                                   |
| como se considera                      | <input type="radio"/> sedentaria<br><input type="radio"/> poco activa<br><input checked="" type="radio"/> moderadamente activa<br><input type="radio"/> bastante activa<br><input type="radio"/> muy activa<br><input type="radio"/> no sabe                                                                                                                              |
| FUR                                    | [*DATA REMOVED*]                                                                                                                                                                                                                                                                                                                                                          |
| Semanas gestación 2T                   | [*DATA REMOVED*]                                                                                                                                                                                                                                                                                                                                                          |
| Días gestación 2T                      | [*DATA REMOVED*]                                                                                                                                                                                                                                                                                                                                                          |
| DBP 2T                                 | [*DATA REMOVED*]                                                                                                                                                                                                                                                                                                                                                          |
| CC 2T                                  | [*DATA REMOVED*]                                                                                                                                                                                                                                                                                                                                                          |
| AC 2T                                  | [*DATA REMOVED*]                                                                                                                                                                                                                                                                                                                                                          |

|                                                   |                                                                                                                                                                                                 |
|---------------------------------------------------|-------------------------------------------------------------------------------------------------------------------------------------------------------------------------------------------------|
| LF 2T                                             | [*DATA REMOVED*]                                                                                                                                                                                |
| PFE 2T (Hadlock)                                  | [*DATA REMOVED*]                                                                                                                                                                                |
| Semanas gestación 3T                              | [*DATA REMOVED*]                                                                                                                                                                                |
| días 3T                                           | [*DATA REMOVED*]                                                                                                                                                                                |
| DBP 3T                                            | [*DATA REMOVED*]                                                                                                                                                                                |
| CC 3T                                             | [*DATA REMOVED*]                                                                                                                                                                                |
| AC 3T                                             | [*DATA REMOVED*]                                                                                                                                                                                |
| LF 3T                                             | [*DATA REMOVED*]                                                                                                                                                                                |
| PFE 3T (Hadlock)                                  | [*DATA REMOVED*]                                                                                                                                                                                |
| Semanas de gestación final                        | [*DATA REMOVED*]                                                                                                                                                                                |
| días gestación final                              | [*DATA REMOVED*]                                                                                                                                                                                |
| Localización placenta                             | <input type="radio"/> anterior<br><input type="radio"/> lateral derecha<br><input type="radio"/> lateral izquierda<br><input checked="" type="radio"/> posterior<br><input type="radio"/> fondo |
| Presentación longitudinal cefálica                | <input type="radio"/> no<br><input checked="" type="radio"/> si                                                                                                                                 |
| Dorso                                             | <input type="radio"/> izquierda anterior<br><input type="radio"/> izquierda posterior<br><input type="radio"/> derecha anterior<br><input checked="" type="radio"/> derecha posterior           |
| diámetro biparietal                               | [*DATA REMOVED*]                                                                                                                                                                                |
| Circunferencia craneal                            | [*DATA REMOVED*]                                                                                                                                                                                |
| Circunferencia abdominal                          | [*DATA REMOVED*]                                                                                                                                                                                |
| Longitud de femur                                 | [*DATA REMOVED*]                                                                                                                                                                                |
| tejido celular subcutáneo a nivel del muslo en mm | [*DATA REMOVED*]                                                                                                                                                                                |
| tejido celular subcutáneo en abdomen en mm        | [*DATA REMOVED*]                                                                                                                                                                                |
| Volumen del muslo en cm3                          | [*DATA REMOVED*]                                                                                                                                                                                |
| Peso fetal estimado según fórmula de Hadlock      | [*DATA REMOVED*]                                                                                                                                                                                |

|                                               |                                                                                                                                                          |
|-----------------------------------------------|----------------------------------------------------------------------------------------------------------------------------------------------------------|
| Percentil                                     | [*DATA REMOVED*]                                                                                                                                         |
| Peso fetal estimado según fórmula de Scioscia | <hr/>                                                                                                                                                    |
| Peso fetal estimado según fórmula de LEE      | <hr/>                                                                                                                                                    |
| Tipo de parto                                 | <input checked="" type="radio"/> eutocico<br><input type="radio"/> instrumentado/ventosa<br><input type="radio"/> cesarea                                |
| fecha de nacimiento                           | [*DATA REMOVED*]                                                                                                                                         |
| Días entre exploración y nacimiento           | [*DATA REMOVED*]                                                                                                                                         |
| Peso RN en g                                  | [*DATA REMOVED*]                                                                                                                                         |
| sexo                                          | <input type="radio"/> mujer<br><input checked="" type="radio"/> hombre                                                                                   |
| Apgar 1 minuto                                | [*DATA REMOVED*]                                                                                                                                         |
| Apgar 5 minutos                               | [*DATA REMOVED*]                                                                                                                                         |
| Apgar 10 minutos                              | <hr/>                                                                                                                                                    |
| antecedente Covid durante gestación           | <input type="radio"/> Yes<br><input checked="" type="radio"/> No                                                                                         |
| Nivel de estudios                             | <input type="radio"/> ninguno<br><input checked="" type="radio"/> primarios<br><input type="radio"/> secundarios<br><input type="radio"/> universitarios |

# Base\_datos\_estimacion\_peso\_fetal

|                                       |                                                                                                                                                                                                                                                                                      |
|---------------------------------------|--------------------------------------------------------------------------------------------------------------------------------------------------------------------------------------------------------------------------------------------------------------------------------------|
| Número de identificación participante | 24                                                                                                                                                                                                                                                                                   |
| CODIGO PARTICIPANTE                   |                                                                                                                                                                                                                                                                                      |
| Edad                                  | [*DATA REMOVED*]                                                                                                                                                                                                                                                                     |
| Gestaciones                           | <input checked="" type="radio"/> 1<br><input type="radio"/> 2<br><input type="radio"/> 3<br><input type="radio"/> mas de 3                                                                                                                                                           |
| partos                                | <input checked="" type="radio"/> 0<br><input type="radio"/> 1<br><input type="radio"/> 2<br><input type="radio"/> 3<br><input type="radio"/> mas de 3                                                                                                                                |
| cesáreas                              | <input checked="" type="radio"/> 0<br><input type="radio"/> 1<br><input type="radio"/> 2<br><input type="radio"/> 3<br><input type="radio"/> mas de 3                                                                                                                                |
| Abortos                               | <input checked="" type="radio"/> 0<br><input type="radio"/> 1<br><input type="radio"/> 2<br><input type="radio"/> 3<br><input type="radio"/> mas de 3                                                                                                                                |
| Tipo de gestacion                     | <input checked="" type="radio"/> espontanea<br><input type="radio"/> IAC inseminación artificial conyuge<br><input type="radio"/> IAD inseminación artificial donante<br><input type="radio"/> FIV Fecundación in Vitro<br><input type="radio"/> Ovodon FIV con donación de ovocitos |
| peso previo a embarazo                | [*DATA REMOVED*]                                                                                                                                                                                                                                                                     |
| Ganancia ponderal embarazo            | [*DATA REMOVED*]                                                                                                                                                                                                                                                                     |
| Talla madre                           | [*DATA REMOVED*]                                                                                                                                                                                                                                                                     |
| IMC previo embarazo                   | 16.806134238997235                                                                                                                                                                                                                                                                   |
| Patología obstétrica                  | <input checked="" type="radio"/> no<br><input type="radio"/> si                                                                                                                                                                                                                      |
| Diabetes pregestacional               | <input checked="" type="radio"/> no<br><input type="radio"/> si                                                                                                                                                                                                                      |
| Diabetes gestacional                  | <input checked="" type="radio"/> no<br><input type="radio"/> si                                                                                                                                                                                                                      |

|                                            |                                                                                                                                                                                      |
|--------------------------------------------|--------------------------------------------------------------------------------------------------------------------------------------------------------------------------------------|
| Diabetes gestacional con insulina          | <input checked="" type="radio"/> no<br><input type="radio"/> si                                                                                                                      |
| Diabetes gestacional con dieta y ejercicio | <input checked="" type="radio"/> no<br><input type="radio"/> si                                                                                                                      |
| Percentil fetos previos                    | <input checked="" type="radio"/> Nada<br><input type="radio"/> percentil menor de 10<br><input type="radio"/> percentil entre 10 y 90<br><input type="radio"/> percentil mayor de 90 |
| Exfumadora                                 | <input checked="" type="radio"/> Nada<br><input type="radio"/> menos de 5 años<br><input type="radio"/> 5 a 10 años<br><input type="radio"/> mayor o igual a 10 años                 |
| Hábito tabáquico                           | <input checked="" type="radio"/> no<br><input type="radio"/> si                                                                                                                      |
| fumadora                                   | [*DATA REMOVED*]                                                                                                                                                                     |
| Consumo otros tóxicos                      | <input checked="" type="radio"/> no<br><input type="radio"/> si                                                                                                                      |
| Hb 1T                                      | [*DATA REMOVED*]                                                                                                                                                                     |
| Htc 1T                                     | [*DATA REMOVED*]                                                                                                                                                                     |
| Hb 2T                                      | [*DATA REMOVED*]                                                                                                                                                                     |
| HTC 2T                                     | [*DATA REMOVED*]                                                                                                                                                                     |
| Hb 3T                                      | [*DATA REMOVED*]                                                                                                                                                                     |
| HTC 3T                                     | [*DATA REMOVED*]                                                                                                                                                                     |
| Suplemento FE oral                         | <input checked="" type="radio"/> si<br><input type="radio"/> no                                                                                                                      |
| Suplemento fe iv                           | <input type="radio"/> si<br><input checked="" type="radio"/> no                                                                                                                      |
| Transfusión                                | <input checked="" type="radio"/> no<br><input type="radio"/> si                                                                                                                      |
| Solicitada Vit D                           | <input checked="" type="radio"/> no<br><input type="radio"/> si                                                                                                                      |
| Deficit vit D                              | <input type="radio"/> no<br><input type="radio"/> si                                                                                                                                 |
| Suplemento vit D                           | <input type="radio"/> si<br><input type="radio"/> no                                                                                                                                 |

|                       |                                                                                                                                                                                                                                                                                                                                                                                                              |
|-----------------------|--------------------------------------------------------------------------------------------------------------------------------------------------------------------------------------------------------------------------------------------------------------------------------------------------------------------------------------------------------------------------------------------------------------|
| Dieta, cuestionario   | <input checked="" type="radio"/> sí<br><input type="radio"/> no                                                                                                                                                                                                                                                                                                                                              |
| Leche entera          | <input type="radio"/> Nunca o menos 1 vez al mes<br><input type="radio"/> 1 a 3 veces mes<br><input type="radio"/> 1 vez semana<br><input checked="" type="radio"/> 2 a 4 veces semana<br><input type="radio"/> 5 a 6 veces semana<br><input type="radio"/> 1 vez al día<br><input type="radio"/> 2 a 3 veces al día<br><input type="radio"/> 5 a 6 veces al día<br><input type="radio"/> más 6 veces al día |
| Leche semidesnatada   | <input type="radio"/> Nunca o menos 1 vez al mes<br><input type="radio"/> 1 a 3 veces mes<br><input checked="" type="radio"/> 1 vez semana<br><input type="radio"/> 2 a 4 veces semana<br><input type="radio"/> 5 a 6 veces semana<br><input type="radio"/> 1 vez al día<br><input type="radio"/> 2 a 3 veces al día<br><input type="radio"/> 5 a 6 veces al día<br><input type="radio"/> mas 6 veces al día |
| Leche desnatada       | <input checked="" type="radio"/> Nunca o menos 1 vez al mes<br><input type="radio"/> 1 a 3 veces mes<br><input type="radio"/> 1 vez semana<br><input type="radio"/> 2 a 4 veces semana<br><input type="radio"/> 5 a 6 veces semana<br><input type="radio"/> 1 vez al día<br><input type="radio"/> 2 a 3 veces al día<br><input type="radio"/> 5 a 6 veces al día<br><input type="radio"/> más 6 veces al día |
| Leche condensada      | <input checked="" type="radio"/> Nunca o menos 1 vez al mes<br><input type="radio"/> 1 a 3 veces mes<br><input type="radio"/> 1 vez semana<br><input type="radio"/> 2 a 4 veces semana<br><input type="radio"/> 5 a 6 veces semana<br><input type="radio"/> 1 vez al día<br><input type="radio"/> 2 a 3 veces al día<br><input type="radio"/> 5 a 6 veces al día<br><input type="radio"/> más 6 veces al día |
| nata o crema de leche | <input checked="" type="radio"/> Nunca o menos 1 vez al mes<br><input type="radio"/> 1 a 3 veces mes<br><input type="radio"/> 1 vez semana<br><input type="radio"/> 2 a 4 veces semana<br><input type="radio"/> 5 a 6 veces semana<br><input type="radio"/> 1 vez al día<br><input type="radio"/> 2 a 3 veces al día<br><input type="radio"/> 5 a 6 veces al día<br><input type="radio"/> más 6 veces al día |

|                                             |                                                                                                                                                                                                                                                                                                                                                                                                              |
|---------------------------------------------|--------------------------------------------------------------------------------------------------------------------------------------------------------------------------------------------------------------------------------------------------------------------------------------------------------------------------------------------------------------------------------------------------------------|
| Yogurt Entero                               | <input type="radio"/> Nunca o menos 1 vez al mes<br><input type="radio"/> 1 a 3 veces mes<br><input type="radio"/> 1 vez semana<br><input checked="" type="radio"/> 2 a 4 veces semana<br><input type="radio"/> 5 a 6 veces semana<br><input type="radio"/> 1 vez al día<br><input type="radio"/> 2 a 3 veces al día<br><input type="radio"/> 5 a 6 veces al día<br><input type="radio"/> más 6 veces al día |
| Yogurt desnatado                            | <input checked="" type="radio"/> Nunca o menos 1 vez al mes<br><input type="radio"/> 1 a 3 veces mes<br><input type="radio"/> 1 vez semana<br><input type="radio"/> 2 a 4 veces semana<br><input type="radio"/> 5 a 6 veces semana<br><input type="radio"/> 1 vez al día<br><input type="radio"/> 2 a 3 veces al día<br><input type="radio"/> 5 a 6 veces al día<br><input type="radio"/> más 6 veces al día |
| 100g requesón o queso blando o queso fresco | <input type="radio"/> Nunca o menos 1 vez al mes<br><input type="radio"/> 1 a 3 veces mes<br><input type="radio"/> 1 vez semana<br><input checked="" type="radio"/> 2 a 4 veces semana<br><input type="radio"/> 5 a 6 veces semana<br><input type="radio"/> 1 vez al día<br><input type="radio"/> 2 a 3 veces al día<br><input type="radio"/> 5 a 6 veces al día<br><input type="radio"/> más 6 veces al día |
| queso curado o semicurado o cremoso         | <input type="radio"/> Nunca o menos 1 vez al mes<br><input type="radio"/> 1 a 3 veces mes<br><input checked="" type="radio"/> 1 vez semana<br><input type="radio"/> 2 a 4 veces semana<br><input type="radio"/> 5 a 6 veces semana<br><input type="radio"/> 1 vez al día<br><input type="radio"/> 2 a 3 veces al día<br><input type="radio"/> 5 a 6 veces al día<br><input type="radio"/> más 6 veces al día |
| natillas flan pudding                       | <input type="radio"/> Nunca o menos 1 vez al mes<br><input checked="" type="radio"/> 1 a 3 veces mes<br><input type="radio"/> 1 vez semana<br><input type="radio"/> 2 a 4 veces semana<br><input type="radio"/> 5 a 6 veces semana<br><input type="radio"/> 1 vez al día<br><input type="radio"/> 2 a 3 veces al día<br><input type="radio"/> 5 a 6 veces al día<br><input type="radio"/> más 6 veces al día |
| Helado                                      | <input checked="" type="radio"/> Nunca o menos 1 vez al mes<br><input type="radio"/> 1 a 3 veces mes<br><input type="radio"/> 1 vez semana<br><input type="radio"/> 2 a 4 veces semana<br><input type="radio"/> 5 a 6 veces semana<br><input type="radio"/> 1 vez al día<br><input type="radio"/> 2 a 3 veces al día<br><input type="radio"/> 5 a 6 veces al día<br><input type="radio"/> más 6 veces al día |

|                                      |                                                                                                                                                                                                                                                                                                                                                                                                              |
|--------------------------------------|--------------------------------------------------------------------------------------------------------------------------------------------------------------------------------------------------------------------------------------------------------------------------------------------------------------------------------------------------------------------------------------------------------------|
| huevo                                | <input type="radio"/> Nunca o menos 1 vez al mes<br><input type="radio"/> 1 a 3 veces mes<br><input type="radio"/> 1 vez semana<br><input type="radio"/> 2 a 4 veces semana<br><input checked="" type="radio"/> 5 a 6 veces semana<br><input type="radio"/> 1 vez al día<br><input type="radio"/> 2 a 3 veces al día<br><input type="radio"/> 5 a 6 veces al día<br><input type="radio"/> más 6 veces al día |
| Pollo con piel                       | <input type="radio"/> Nunca o menos 1 vez al mes<br><input type="radio"/> 1 a 3 veces mes<br><input checked="" type="radio"/> 1 vez semana<br><input type="radio"/> 2 a 4 veces semana<br><input type="radio"/> 5 a 6 veces semana<br><input type="radio"/> 1 vez al día<br><input type="radio"/> 2 a 3 veces al día<br><input type="radio"/> 5 a 6 veces al día<br><input type="radio"/> más 6 veces al día |
| pollo sin piel                       | <input type="radio"/> Nunca o menos 1 vez al mes<br><input type="radio"/> 1 a 3 veces mes<br><input type="radio"/> 1 vez semana<br><input checked="" type="radio"/> 2 a 4 veces semana<br><input type="radio"/> 5 a 6 veces semana<br><input type="radio"/> 1 vez al día<br><input type="radio"/> 2 a 3 veces al día<br><input type="radio"/> 5 a 6 veces al día<br><input type="radio"/> más 6 veces al día |
| Ternera o cerdo o cordero            | <input checked="" type="radio"/> Nunca o menos 1 vez al mes<br><input type="radio"/> 1 a 3 veces mes<br><input type="radio"/> 1 vez semana<br><input type="radio"/> 2 a 4 veces semana<br><input type="radio"/> 5 a 6 veces semana<br><input type="radio"/> 1 vez al día<br><input type="radio"/> 2 a 3 veces al día<br><input type="radio"/> 5 a 6 veces al día<br><input type="radio"/> más 6 veces al día |
| carne caza: Conejo o codorniz o pato | <input checked="" type="radio"/> Nunca o menos 1 vez al mes<br><input type="radio"/> 1 a 3 veces mes<br><input type="radio"/> 1 vez semana<br><input type="radio"/> 2 a 4 veces semana<br><input type="radio"/> 5 a 6 veces semana<br><input type="radio"/> 1 vez al día<br><input type="radio"/> 2 a 3 veces al día<br><input type="radio"/> 5 a 6 veces al día<br><input type="radio"/> más 6 veces al día |
| Hígado de ternera o cerdo o pollo    | <input checked="" type="radio"/> Nunca o menos 1 vez al mes<br><input type="radio"/> 1 a 3 veces mes<br><input type="radio"/> 1 vez semana<br><input type="radio"/> 2 a 4 veces semana<br><input type="radio"/> 5 a 6 veces semana<br><input type="radio"/> 1 vez al día<br><input type="radio"/> 2 a 3 veces al día<br><input type="radio"/> 5 a 6 veces al día<br><input type="radio"/> más 6 veces al día |



|                     |                                                                                                                                                                                                                                                                                                                                                                                                              |
|---------------------|--------------------------------------------------------------------------------------------------------------------------------------------------------------------------------------------------------------------------------------------------------------------------------------------------------------------------------------------------------------------------------------------------------------|
| Vísceras            | <input checked="" type="radio"/> Nunca o menos 1 vez al mes<br><input type="radio"/> 1 a 3 veces mes<br><input type="radio"/> 1 vez semana<br><input type="radio"/> 2 a 4 veces semana<br><input type="radio"/> 5 a 6 veces semana<br><input type="radio"/> 1 vez al día<br><input type="radio"/> 2 a 3 veces al día<br><input type="radio"/> 5 a 6 veces al día<br><input type="radio"/> más 6 veces al día |
| Embutido            | <input checked="" type="radio"/> Nunca o menos 1 vez al mes<br><input type="radio"/> 1 a 3 veces mes<br><input type="radio"/> 1 vez semana<br><input type="radio"/> 2 a 4 veces semana<br><input type="radio"/> 5 a 6 veces semana<br><input type="radio"/> 1 vez al día<br><input type="radio"/> 2 a 3 veces al día<br><input type="radio"/> 5 a 6 veces al día<br><input type="radio"/> más 6 veces al día |
| Salchicha o similar | <input checked="" type="radio"/> Nunca o menos 1 vez al mes<br><input type="radio"/> 1 a 3 veces mes<br><input type="radio"/> 1 vez semana<br><input type="radio"/> 2 a 4 veces semana<br><input type="radio"/> 5 a 6 veces semana<br><input type="radio"/> 1 vez al día<br><input type="radio"/> 2 a 3 veces al día<br><input type="radio"/> 5 a 6 veces al día<br><input type="radio"/> más 6 veces al día |
| Pate o foiegras     | <input checked="" type="radio"/> Nunca o menos 1 vez al mes<br><input type="radio"/> 1 a 3 veces mes<br><input type="radio"/> 1 vez semana<br><input type="radio"/> 2 a 4 veces semana<br><input type="radio"/> 5 a 6 veces semana<br><input type="radio"/> 1 vez al día<br><input type="radio"/> 2 a 3 veces al día<br><input type="radio"/> 5 a 6 veces al día<br><input type="radio"/> más 6 veces al día |
| Hamburguesa         | <input checked="" type="radio"/> Nunca o menos 1 vez al mes<br><input type="radio"/> 1 a 3 veces mes<br><input type="radio"/> 1 vez semana<br><input type="radio"/> 2 a 4 veces semana<br><input type="radio"/> 5 a 6 veces semana<br><input type="radio"/> 1 vez al día<br><input type="radio"/> 2 a 3 veces al día<br><input type="radio"/> 5 a 6 veces al día<br><input type="radio"/> más 6 veces al día |
| tocino o bacon      | <input checked="" type="radio"/> Nunca o menos 1 vez al mes<br><input type="radio"/> 1 a 3 veces mes<br><input type="radio"/> 1 vez semana<br><input type="radio"/> 2 a 4 veces semana<br><input type="radio"/> 5 a 6 veces semana<br><input type="radio"/> 1 vez al día<br><input type="radio"/> 2 a 3 veces al día<br><input type="radio"/> 5 a 6 veces al día<br><input type="radio"/> más 6 veces al día |

---

Pescado frito

- ☐ Nunca o menos 1 vez al mes  
☒ 1 a 3 veces mes  
☐ 1 vez semana  
☐ 2 a 4 veces semana  
☐ 5 a 6 veces semana  
☐ 1 vez al día  
☐ 2 a 3 veces al día  
☐ 5 a 6 veces al día  
☐ más 6 veces al día

---

pescado hervido blanco

- ☐ Nunca o menos 1 vez al mes  
☐ 1 a 3 veces mes  
☒ 1 vez semana  
☐ 2 a 4 veces semana  
☐ 5 a 6 veces semana  
☐ 1 vez al día  
☐ 2 a 3 veces al día  
☐ 5 a 6 veces al día  
☐ más 6 veces al día

---

pescado hervido azul

- ☐ Nunca o menos 1 vez al mes  
☐ 1 a 3 veces mes  
☒ 1 vez semana  
☐ 2 a 4 veces semana  
☐ 5 a 6 veces semana  
☐ 1 vez al día  
☐ 2 a 3 veces al día  
☐ 5 a 6 veces al día  
☐ más 6 veces al día

---

otros pescado azul

- ☐ Nunca o menos 1 vez al mes  
☒ 1 a 3 veces mes  
☐ 1 vez semana  
☐ 2 a 4 veces semana  
☐ 5 a 6 veces semana  
☐ 1 vez al día  
☐ 2 a 3 veces al día  
☐ 5 a 6 veces al día  
☐ más 6 veces al día

---

atun conserva

- ☐ Nunca o menos 1 vez al mes  
☐ 1 a 3 veces mes  
☒ 1 vez semana  
☐ 2 a 4 veces semana  
☐ 5 a 6 veces semana  
☐ 1 vez al día  
☐ 2 a 3 veces al día  
☐ 5 a 6 veces al día  
☐ más 6 veces al día

---

sardina conserva

- ☐ Nunca o menos 1 vez al mes  
☒ 1 a 3 veces mes  
☐ 1 vez semana  
☐ 2 a 4 veces semana  
☐ 5 a 6 veces semana  
☐ 1 vez al día  
☐ 2 a 3 veces al día  
☐ 5 a 6 veces al día  
☐ más 6 veces al día

|                                         |                                                                                                                                                                                                                                                                                                                                                                                                              |
|-----------------------------------------|--------------------------------------------------------------------------------------------------------------------------------------------------------------------------------------------------------------------------------------------------------------------------------------------------------------------------------------------------------------------------------------------------------------|
| pescado ahumado                         | <input type="radio"/> Nunca o menos 1 vez al mes<br><input checked="" type="radio"/> 1 a 3 veces mes<br><input type="radio"/> 1 vez semana<br><input type="radio"/> 2 a 4 veces semana<br><input type="radio"/> 5 a 6 veces semana<br><input type="radio"/> 1 vez al día<br><input type="radio"/> 2 a 3 veces al día<br><input type="radio"/> 5 a 6 veces al día<br><input type="radio"/> más 6 veces al día |
| almejas o mejillones o ostras unos 100g | <input checked="" type="radio"/> Nunca o menos 1 vez al mes<br><input type="radio"/> 1 a 3 veces mes<br><input type="radio"/> 1 vez semana<br><input type="radio"/> 2 a 4 veces semana<br><input type="radio"/> 5 a 6 veces semana<br><input type="radio"/> 1 vez al día<br><input type="radio"/> 2 a 3 veces al día<br><input type="radio"/> 5 a 6 veces al día<br><input type="radio"/> más 6 veces al día |
| calamar o chipiron o sepia unos 100g    | <input checked="" type="radio"/> Nunca o menos 1 vez al mes<br><input type="radio"/> 1 a 3 veces mes<br><input type="radio"/> 1 vez semana<br><input type="radio"/> 2 a 4 veces semana<br><input type="radio"/> 5 a 6 veces semana<br><input type="radio"/> 1 vez al día<br><input type="radio"/> 2 a 3 veces al día<br><input type="radio"/> 5 a 6 veces al día<br><input type="radio"/> más 6 veces al día |
| marisco unos 100g                       | <input checked="" type="radio"/> Nunca o menos 1 vez al mes<br><input type="radio"/> 1 a 3 veces mes<br><input type="radio"/> 1 vez semana<br><input type="radio"/> 2 a 4 veces semana<br><input type="radio"/> 5 a 6 veces semana<br><input type="radio"/> 1 vez al día<br><input type="radio"/> 2 a 3 veces al día<br><input type="radio"/> 5 a 6 veces al día<br><input type="radio"/> más 6 veces al día |
| Espinacas o acelgas cocinadas           | <input type="radio"/> Nunca o menos 1 vez al mes<br><input type="radio"/> 1 a 3 veces mes<br><input type="radio"/> 1 vez semana<br><input checked="" type="radio"/> 2 a 4 veces semana<br><input type="radio"/> 5 a 6 veces semana<br><input type="radio"/> 1 vez al día<br><input type="radio"/> 2 a 3 veces al día<br><input type="radio"/> 5 a 6 veces al día<br><input type="radio"/> más 6 veces al día |
| Col o coliflor o brocoli cocinado       | <input type="radio"/> Nunca o menos 1 vez al mes<br><input type="radio"/> 1 a 3 veces mes<br><input type="radio"/> 1 vez semana<br><input checked="" type="radio"/> 2 a 4 veces semana<br><input type="radio"/> 5 a 6 veces semana<br><input type="radio"/> 1 vez al día<br><input type="radio"/> 2 a 3 veces al día<br><input type="radio"/> 5 a 6 veces al día<br><input type="radio"/> más 6 veces al día |

---

Lechuga o endivia o escarola

- ☐ Nunca o menos 1 vez al mes  
☐ 1 a 3 veces mes  
☐ 1 vez semana  
☒ 2 a 4 veces semana  
☐ 5 a 6 veces semana  
☐ 1 vez al día  
☐ 2 a 3 veces al día  
☐ 5 a 6 veces al día  
☐ más 6 veces al día

---

tomate ensalada

- ☐ Nunca o menos 1 vez al mes  
☐ 1 a 3 veces mes  
☐ 1 vez semana  
☒ 2 a 4 veces semana  
☐ 5 a 6 veces semana  
☐ 1 vez al día  
☐ 2 a 3 veces al día  
☐ 5 a 6 veces al día  
☐ más 6 veces al día

---

cebolla

- ☐ Nunca o menos 1 vez al mes  
☐ 1 a 3 veces mes  
☐ 1 vez semana  
☒ 2 a 4 veces semana  
☐ 5 a 6 veces semana  
☐ 1 vez al día  
☐ 2 a 3 veces al día  
☐ 5 a 6 veces al día  
☐ más 6 veces al día

---

Zanahoria o calabaza

- ☐ Nunca o menos 1 vez al mes  
☐ 1 a 3 veces mes  
☒ 1 vez semana  
☐ 2 a 4 veces semana  
☐ 5 a 6 veces semana  
☐ 1 vez al día  
☐ 2 a 3 veces al día  
☐ 5 a 6 veces al día  
☐ más 6 veces al día

---

Judías verdes

- ☒ Nunca o menos 1 vez al mes  
☐ 1 a 3 veces mes  
☐ 1 vez semana  
☐ 2 a 4 veces semana  
☐ 5 a 6 veces semana  
☐ 1 vez al día  
☐ 2 a 3 veces al día  
☐ 5 a 6 veces al día  
☐ más 6 veces al día

---

Berenjena o calabacin o pepino

- ☐ Nunca o menos 1 vez al mes  
☐ 1 a 3 veces mes  
☒ 1 vez semana  
☐ 2 a 4 veces semana  
☐ 5 a 6 veces semana  
☐ 1 vez al día  
☐ 2 a 3 veces al día  
☐ 5 a 6 veces al día  
☐ más 6 veces al día

|                       |                                                                                                                                                                                                                                                                                                                                                                                                              |
|-----------------------|--------------------------------------------------------------------------------------------------------------------------------------------------------------------------------------------------------------------------------------------------------------------------------------------------------------------------------------------------------------------------------------------------------------|
| pimiento              | <input checked="" type="radio"/> Nunca o menos 1 vez al mes<br><input type="radio"/> 1 a 3 veces mes<br><input type="radio"/> 1 vez semana<br><input type="radio"/> 2 a 4 veces semana<br><input type="radio"/> 5 a 6 veces semana<br><input type="radio"/> 1 vez al día<br><input type="radio"/> 2 a 3 veces al día<br><input type="radio"/> 5 a 6 veces al día<br><input type="radio"/> más 6 veces al día |
| alcachofa             | <input checked="" type="radio"/> Nunca o menos 1 vez al mes<br><input type="radio"/> 1 a 3 veces mes<br><input type="radio"/> 1 vez semana<br><input type="radio"/> 2 a 4 veces semana<br><input type="radio"/> 5 a 6 veces semana<br><input type="radio"/> 1 vez al día<br><input type="radio"/> 2 a 3 veces al día<br><input type="radio"/> 5 a 6 veces al día<br><input type="radio"/> más 6 veces al día |
| espárragos            | <input checked="" type="radio"/> Nunca o menos 1 vez al mes<br><input type="radio"/> 1 a 3 veces mes<br><input type="radio"/> 1 vez semana<br><input type="radio"/> 2 a 4 veces semana<br><input type="radio"/> 5 a 6 veces semana<br><input type="radio"/> 1 vez al día<br><input type="radio"/> 2 a 3 veces al día<br><input type="radio"/> 5 a 6 veces al día<br><input type="radio"/> más 6 veces al día |
| maíz hervido          | <input checked="" type="radio"/> Nunca o menos 1 vez al mes<br><input type="radio"/> 1 a 3 veces mes<br><input type="radio"/> 1 vez semana<br><input type="radio"/> 2 a 4 veces semana<br><input type="radio"/> 5 a 6 veces semana<br><input type="radio"/> 1 vez al día<br><input type="radio"/> 2 a 3 veces al día<br><input type="radio"/> 5 a 6 veces al día<br><input type="radio"/> más 6 veces al día |
| legumbres             | <input type="radio"/> Nunca o menos 1 vez al mes<br><input type="radio"/> 1 a 3 veces mes<br><input type="radio"/> 1 vez semana<br><input type="radio"/> 2 a 4 veces semana<br><input checked="" type="radio"/> 5 a 6 veces semana<br><input type="radio"/> 1 vez al día<br><input type="radio"/> 2 a 3 veces al día<br><input type="radio"/> 5 a 6 veces al día<br><input type="radio"/> más 6 veces al día |
| naranjas o mandarinas | <input type="radio"/> Nunca o menos 1 vez al mes<br><input type="radio"/> 1 a 3 veces mes<br><input type="radio"/> 1 vez semana<br><input type="radio"/> 2 a 4 veces semana<br><input checked="" type="radio"/> 5 a 6 veces semana<br><input type="radio"/> 1 vez al día<br><input type="radio"/> 2 a 3 veces al día<br><input type="radio"/> 5 a 6 veces al día<br><input type="radio"/> más 6 veces al día |

---

zum natural fruta

- ☐ Nunca o menos 1 vez al mes  
☐ 1 a 3 veces mes  
☐ 1 vez semana  
☒ 2 a 4 veces semana  
☐ 5 a 6 veces semana  
☐ 1 vez al día  
☐ 2 a 3 veces al día  
☐ 5 a 6 veces al día  
☐ más 6 veces al día

---

platano

- ☐ Nunca o menos 1 vez al mes  
☐ 1 a 3 veces mes  
☐ 1 vez semana  
☒ 2 a 4 veces semana  
☐ 5 a 6 veces semana  
☐ 1 vez al día  
☐ 2 a 3 veces al día  
☐ 5 a 6 veces al día  
☐ más 6 veces al día

---

manzana o pera

- ☐ Nunca o menos 1 vez al mes  
☐ 1 a 3 veces mes  
☐ 1 vez semana  
☒ 2 a 4 veces semana  
☐ 5 a 6 veces semana  
☐ 1 vez al día  
☐ 2 a 3 veces al día  
☐ 5 a 6 veces al día  
☐ más 6 veces al día

---

melocotón o nectarina

- ☐ Nunca o menos 1 vez al mes  
☐ 1 a 3 veces mes  
☐ 1 vez semana  
☐ 2 a 4 veces semana  
☒ 5 a 6 veces semana  
☐ 1 vez al día  
☐ 2 a 3 veces al día  
☐ 5 a 6 veces al día  
☐ más 6 veces al día

---

sandia o melon

- ☒ Nunca o menos 1 vez al mes  
☐ 1 a 3 veces mes  
☐ 1 vez semana  
☐ 2 a 4 veces semana  
☐ 5 a 6 veces semana  
☐ 1 vez al día  
☐ 2 a 3 veces al día  
☐ 5 a 6 veces al día  
☐ más 6 veces al día

---

uva

- ☒ Nunca o menos 1 vez al mes  
☐ 1 a 3 veces mes  
☐ 1 vez semana  
☐ 2 a 4 veces semana  
☐ 5 a 6 veces semana  
☐ 1 vez al día  
☐ 2 a 3 veces al día  
☐ 5 a 6 veces al día  
☐ más 6 veces al día

---

bruna o ciruela

- ☐ Nunca o menos 1 vez al mes  
☐ 1 a 3 veces mes  
☒ 1 vez semana  
☐ 2 a 4 veces semana  
☐ 5 a 6 veces semana  
☐ 1 vez al día  
☐ 2 a 3 veces al día  
☐ 5 a 6 veces al día  
☐ más 6 veces al día

---

kiwi

- ☐ Nunca o menos 1 vez al mes  
☐ 1 a 3 veces mes  
☒ 1 vez semana  
☐ 2 a 4 veces semana  
☐ 5 a 6 veces semana  
☐ 1 vez al día  
☐ 2 a 3 veces al día  
☐ 5 a 6 veces al día  
☐ más 6 veces al día

---

aceituna

- ☒ Nunca o menos 1 vez al mes  
☐ 1 a 3 veces mes  
☐ 1 vez semana  
☐ 2 a 4 veces semana  
☐ 5 a 6 veces semana  
☐ 1 vez al día  
☐ 2 a 3 veces al día  
☐ 5 a 6 veces al día  
☐ más 6 veces al día

---

frutos secos

- ☐ Nunca o menos 1 vez al mes  
☐ 1 a 3 veces mes  
☒ 1 vez semana  
☐ 2 a 4 veces semana  
☐ 5 a 6 veces semana  
☐ 1 vez al día  
☐ 2 a 3 veces al día  
☐ 5 a 6 veces al día  
☐ más 6 veces al día

---

pan blanco

- ☐ Nunca o menos 1 vez al mes  
☐ 1 a 3 veces mes  
☐ 1 vez semana  
☒ 2 a 4 veces semana  
☐ 5 a 6 veces semana  
☐ 1 vez al día  
☐ 2 a 3 veces al día  
☐ 5 a 6 veces al día  
☐ más 6 veces al día

---

pan integral

- ☐ Nunca o menos 1 vez al mes  
☒ 1 a 3 veces mes  
☐ 1 vez semana  
☐ 2 a 4 veces semana  
☐ 5 a 6 veces semana  
☐ 1 vez al día  
☐ 2 a 3 veces al día  
☐ 5 a 6 veces al día  
☐ más 6 veces al día

---

cereales desayuno

- ☐ Nunca o menos 1 vez al mes  
☐ 1 a 3 veces mes  
☒ 1 vez semana  
☐ 2 a 4 veces semana  
☐ 5 a 6 veces semana  
☐ 1 vez al día  
☐ 2 a 3 veces al día  
☐ 5 a 6 veces al día  
☐ más 6 veces al día

---

patatas fritas

- ☐ Nunca o menos 1 vez al mes  
☐ 1 a 3 veces mes  
☐ 1 vez semana  
☒ 2 a 4 veces semana  
☐ 5 a 6 veces semana  
☐ 1 vez al día  
☐ 2 a 3 veces al día  
☐ 5 a 6 veces al día  
☐ más 6 veces al día

---

patatas cocidas o asadas

- ☐ Nunca o menos 1 vez al mes  
☐ 1 a 3 veces mes  
☐ 1 vez semana  
☐ 2 a 4 veces semana  
☒ 5 a 6 veces semana  
☐ 1 vez al día  
☐ 2 a 3 veces al día  
☐ 5 a 6 veces al día  
☐ más 6 veces al día

---

bolsa papas

- ☐ Nunca o menos 1 vez al mes  
☐ 1 a 3 veces mes  
☐ 1 vez semana  
☐ 2 a 4 veces semana  
☒ 5 a 6 veces semana  
☐ 1 vez al día  
☐ 2 a 3 veces al día  
☐ 5 a 6 veces al día  
☐ más 6 veces al día

---

arroz cocinado

- ☐ Nunca o menos 1 vez al mes  
☐ 1 a 3 veces mes  
☐ 1 vez semana  
☐ 2 a 4 veces semana  
☒ 5 a 6 veces semana  
☐ 1 vez al día  
☐ 2 a 3 veces al día  
☐ 5 a 6 veces al día  
☐ más 6 veces al día

---

pasta

- ☐ Nunca o menos 1 vez al mes  
☐ 1 a 3 veces mes  
☐ 1 vez semana  
☐ 2 a 4 veces semana  
☒ 5 a 6 veces semana  
☐ 1 vez al día  
☐ 2 a 3 veces al día  
☐ 5 a 6 veces al día  
☐ más 6 veces al día



|                     |                                                                                                                                                                                                                                                                                                                                                                                                              |
|---------------------|--------------------------------------------------------------------------------------------------------------------------------------------------------------------------------------------------------------------------------------------------------------------------------------------------------------------------------------------------------------------------------------------------------------|
| pizza               | <input type="radio"/> Nunca o menos 1 vez al mes<br><input type="radio"/> 1 a 3 veces mes<br><input type="radio"/> 1 vez semana<br><input type="radio"/> 2 a 4 veces semana<br><input checked="" type="radio"/> 5 a 6 veces semana<br><input type="radio"/> 1 vez al día<br><input type="radio"/> 2 a 3 veces al día<br><input type="radio"/> 5 a 6 veces al día<br><input type="radio"/> más 6 veces al día |
| aceite oliva        | <input type="radio"/> Nunca o menos 1 vez al mes<br><input type="radio"/> 1 a 3 veces mes<br><input type="radio"/> 1 vez semana<br><input checked="" type="radio"/> 2 a 4 veces semana<br><input type="radio"/> 5 a 6 veces semana<br><input type="radio"/> 1 vez al día<br><input type="radio"/> 2 a 3 veces al día<br><input type="radio"/> 5 a 6 veces al día<br><input type="radio"/> más 6 veces al día |
| otros aceites       | <input type="radio"/> Nunca o menos 1 vez al mes<br><input type="radio"/> 1 a 3 veces mes<br><input type="radio"/> 1 vez semana<br><input checked="" type="radio"/> 2 a 4 veces semana<br><input type="radio"/> 5 a 6 veces semana<br><input type="radio"/> 1 vez al día<br><input type="radio"/> 2 a 3 veces al día<br><input type="radio"/> 5 a 6 veces al día<br><input type="radio"/> más 6 veces al día |
| margarina           | <input type="radio"/> Nunca o menos 1 vez al mes<br><input type="radio"/> 1 a 3 veces mes<br><input checked="" type="radio"/> 1 vez semana<br><input type="radio"/> 2 a 4 veces semana<br><input type="radio"/> 5 a 6 veces semana<br><input type="radio"/> 1 vez al día<br><input type="radio"/> 2 a 3 veces al día<br><input type="radio"/> 5 a 6 veces al día<br><input type="radio"/> más 6 veces al día |
| mantequilla         | <input type="radio"/> Nunca o menos 1 vez al mes<br><input type="radio"/> 1 a 3 veces mes<br><input checked="" type="radio"/> 1 vez semana<br><input type="radio"/> 2 a 4 veces semana<br><input type="radio"/> 5 a 6 veces semana<br><input type="radio"/> 1 vez al día<br><input type="radio"/> 2 a 3 veces al día<br><input type="radio"/> 5 a 6 veces al día<br><input type="radio"/> más 6 veces al día |
| galletas tipo maria | <input type="radio"/> Nunca o menos 1 vez al mes<br><input type="radio"/> 1 a 3 veces mes<br><input type="radio"/> 1 vez semana<br><input type="radio"/> 2 a 4 veces semana<br><input checked="" type="radio"/> 5 a 6 veces semana<br><input type="radio"/> 1 vez al día<br><input type="radio"/> 2 a 3 veces al día<br><input type="radio"/> 5 a 6 veces al día<br><input type="radio"/> más 6 veces al día |

|                           |                                                                                                                                                                                                                                                                                                                                                                                                              |
|---------------------------|--------------------------------------------------------------------------------------------------------------------------------------------------------------------------------------------------------------------------------------------------------------------------------------------------------------------------------------------------------------------------------------------------------------|
| galletas chocolate        | <input type="radio"/> Nunca o menos 1 vez al mes<br><input type="radio"/> 1 a 3 veces mes<br><input type="radio"/> 1 vez semana<br><input type="radio"/> 2 a 4 veces semana<br><input checked="" type="radio"/> 5 a 6 veces semana<br><input type="radio"/> 1 vez al día<br><input type="radio"/> 2 a 3 veces al día<br><input type="radio"/> 5 a 6 veces al día<br><input type="radio"/> más 6 veces al día |
| bollieria                 | <input type="radio"/> Nunca o menos 1 vez al mes<br><input type="radio"/> 1 a 3 veces mes<br><input type="radio"/> 1 vez semana<br><input type="radio"/> 2 a 4 veces semana<br><input checked="" type="radio"/> 5 a 6 veces semana<br><input type="radio"/> 1 vez al día<br><input type="radio"/> 2 a 3 veces al día<br><input type="radio"/> 5 a 6 veces al día<br><input type="radio"/> más 6 veces al día |
| chocolate o bombones      | <input type="radio"/> Nunca o menos 1 vez al mes<br><input type="radio"/> 1 a 3 veces mes<br><input type="radio"/> 1 vez semana<br><input type="radio"/> 2 a 4 veces semana<br><input checked="" type="radio"/> 5 a 6 veces semana<br><input type="radio"/> 1 vez al día<br><input type="radio"/> 2 a 3 veces al día<br><input type="radio"/> 5 a 6 veces al día<br><input type="radio"/> más 6 veces al día |
| chocolate polvo o colacao | <input type="radio"/> Nunca o menos 1 vez al mes<br><input type="radio"/> 1 a 3 veces mes<br><input type="radio"/> 1 vez semana<br><input type="radio"/> 2 a 4 veces semana<br><input checked="" type="radio"/> 5 a 6 veces semana<br><input type="radio"/> 1 vez al día<br><input type="radio"/> 2 a 3 veces al día<br><input type="radio"/> 5 a 6 veces al día<br><input type="radio"/> más 6 veces al día |
| vino tinto                | <input checked="" type="radio"/> Nunca o menos 1 vez al mes<br><input type="radio"/> 1 a 3 veces mes<br><input type="radio"/> 1 vez semana<br><input type="radio"/> 2 a 4 veces semana<br><input type="radio"/> 5 a 6 veces semana<br><input type="radio"/> 1 vez al día<br><input type="radio"/> 2 a 3 veces al día<br><input type="radio"/> 5 a 6 veces al día<br><input type="radio"/> más 6 veces al día |
| vino blanco               | <input checked="" type="radio"/> Nunca o menos 1 vez al mes<br><input type="radio"/> 1 a 3 veces mes<br><input type="radio"/> 1 vez semana<br><input type="radio"/> 2 a 4 veces semana<br><input type="radio"/> 5 a 6 veces semana<br><input type="radio"/> 1 vez al día<br><input type="radio"/> 2 a 3 veces al día<br><input type="radio"/> 5 a 6 veces al día<br><input type="radio"/> más 6 veces al día |

|                       |                                                                                                                                                                                                                                                                                                                                                                                                              |
|-----------------------|--------------------------------------------------------------------------------------------------------------------------------------------------------------------------------------------------------------------------------------------------------------------------------------------------------------------------------------------------------------------------------------------------------------|
| vino seco o vermut    | <input checked="" type="radio"/> Nunca o menos 1 vez al mes<br><input type="radio"/> 1 a 3 veces mes<br><input type="radio"/> 1 vez semana<br><input type="radio"/> 2 a 4 veces semana<br><input type="radio"/> 5 a 6 veces semana<br><input type="radio"/> 1 vez al día<br><input type="radio"/> 2 a 3 veces al día<br><input type="radio"/> 5 a 6 veces al día<br><input type="radio"/> más 6 veces al día |
| cerveza               | <input checked="" type="radio"/> Nunca o menos 1 vez al mes<br><input type="radio"/> 1 a 3 veces mes<br><input type="radio"/> 1 vez semana<br><input type="radio"/> 2 a 4 veces semana<br><input type="radio"/> 5 a 6 veces semana<br><input type="radio"/> 1 vez al día<br><input type="radio"/> 2 a 3 veces al día<br><input type="radio"/> 5 a 6 veces al día<br><input type="radio"/> más 6 veces al día |
| cerveza sin alcohol   | <input checked="" type="radio"/> Nunca o menos 1 vez al mes<br><input type="radio"/> 1 a 3 veces mes<br><input type="radio"/> 1 vez semana<br><input type="radio"/> 2 a 4 veces semana<br><input type="radio"/> 5 a 6 veces semana<br><input type="radio"/> 1 vez al día<br><input type="radio"/> 2 a 3 veces al día<br><input type="radio"/> 5 a 6 veces al día<br><input type="radio"/> más 6 veces al día |
| licores               | <input checked="" type="radio"/> Nunca o menos 1 vez al mes<br><input type="radio"/> 1 a 3 veces mes<br><input type="radio"/> 1 vez semana<br><input type="radio"/> 2 a 4 veces semana<br><input type="radio"/> 5 a 6 veces semana<br><input type="radio"/> 1 vez al día<br><input type="radio"/> 2 a 3 veces al día<br><input type="radio"/> 5 a 6 veces al día<br><input type="radio"/> más 6 veces al día |
| ginebra o ron o vodka | <input checked="" type="radio"/> Nunca o menos 1 vez al mes<br><input type="radio"/> 1 a 3 veces mes<br><input type="radio"/> 1 vez semana<br><input type="radio"/> 2 a 4 veces semana<br><input type="radio"/> 5 a 6 veces semana<br><input type="radio"/> 1 vez al día<br><input type="radio"/> 2 a 3 veces al día<br><input type="radio"/> 5 a 6 veces al día<br><input type="radio"/> más 6 veces al día |
| refresco normal       | <input type="radio"/> Nunca o menos 1 vez al mes<br><input type="radio"/> 1 a 3 veces mes<br><input type="radio"/> 1 vez semana<br><input checked="" type="radio"/> 2 a 4 veces semana<br><input type="radio"/> 5 a 6 veces semana<br><input type="radio"/> 1 vez al día<br><input type="radio"/> 2 a 3 veces al día<br><input type="radio"/> 5 a 6 veces al día<br><input type="radio"/> más 6 veces al día |

|                          |                                                                                                                                                                                                                                                                                                                                                                                                              |
|--------------------------|--------------------------------------------------------------------------------------------------------------------------------------------------------------------------------------------------------------------------------------------------------------------------------------------------------------------------------------------------------------------------------------------------------------|
| refresco sin azúcar      | <input type="radio"/> Nunca o menos 1 vez al mes<br><input type="radio"/> 1 a 3 veces mes<br><input type="radio"/> 1 vez semana<br><input type="radio"/> 2 a 4 veces semana<br><input checked="" type="radio"/> 5 a 6 veces semana<br><input type="radio"/> 1 vez al día<br><input type="radio"/> 2 a 3 veces al día<br><input type="radio"/> 5 a 6 veces al día<br><input type="radio"/> más 6 veces al día |
| Agua del grifo           | <input type="radio"/> Nunca o menos 1 vez al mes<br><input type="radio"/> 1 a 3 veces mes<br><input type="radio"/> 1 vez semana<br><input type="radio"/> 2 a 4 veces semana<br><input type="radio"/> 5 a 6 veces semana<br><input type="radio"/> 1 vez al día<br><input checked="" type="radio"/> 2 a 3 veces al día<br><input type="radio"/> 5 a 6 veces al día<br><input type="radio"/> más 6 veces al día |
| agua embotellada sin gas | <input type="radio"/> Nunca o menos 1 vez al mes<br><input type="radio"/> 1 a 3 veces mes<br><input type="radio"/> 1 vez semana<br><input type="radio"/> 2 a 4 veces semana<br><input type="radio"/> 5 a 6 veces semana<br><input type="radio"/> 1 vez al día<br><input checked="" type="radio"/> 2 a 3 veces al día<br><input type="radio"/> 5 a 6 veces al día<br><input type="radio"/> más 6 veces al día |
| agua embotellada con gas | <input checked="" type="radio"/> Nunca o menos 1 vez al mes<br><input type="radio"/> 1 a 3 veces mes<br><input type="radio"/> 1 vez semana<br><input type="radio"/> 2 a 4 veces semana<br><input type="radio"/> 5 a 6 veces semana<br><input type="radio"/> 1 vez al día<br><input type="radio"/> 2 a 3 veces al día<br><input type="radio"/> 5 a 6 veces al día<br><input type="radio"/> más 6 veces al día |
| zumو frutas embasado     | <input type="radio"/> Nunca o menos 1 vez al mes<br><input type="radio"/> 1 a 3 veces mes<br><input type="radio"/> 1 vez semana<br><input type="radio"/> 2 a 4 veces semana<br><input type="radio"/> 5 a 6 veces semana<br><input checked="" type="radio"/> 1 vez al día<br><input type="radio"/> 2 a 3 veces al día<br><input type="radio"/> 5 a 6 veces al día<br><input type="radio"/> más 6 veces al día |
| cafe                     | <input checked="" type="radio"/> Nunca o menos 1 vez al mes<br><input type="radio"/> 1 a 3 veces mes<br><input type="radio"/> 1 vez semana<br><input type="radio"/> 2 a 4 veces semana<br><input type="radio"/> 5 a 6 veces semana<br><input type="radio"/> 1 vez al día<br><input type="radio"/> 2 a 3 veces al día<br><input type="radio"/> 5 a 6 veces al día<br><input type="radio"/> más 6 veces al día |

|                       |                                                                                                                                                                                                                                                                                                                                                                                                              |
|-----------------------|--------------------------------------------------------------------------------------------------------------------------------------------------------------------------------------------------------------------------------------------------------------------------------------------------------------------------------------------------------------------------------------------------------------|
| cafe descafeinado     | <input type="radio"/> Nunca o menos 1 vez al mes<br><input type="radio"/> 1 a 3 veces mes<br><input type="radio"/> 1 vez semana<br><input type="radio"/> 2 a 4 veces semana<br><input type="radio"/> 5 a 6 veces semana<br><input checked="" type="radio"/> 1 vez al día<br><input type="radio"/> 2 a 3 veces al día<br><input type="radio"/> 5 a 6 veces al día<br><input type="radio"/> más 6 veces al día |
| te o infusión         | <input type="radio"/> Nunca o menos 1 vez al mes<br><input type="radio"/> 1 a 3 veces mes<br><input type="radio"/> 1 vez semana<br><input type="radio"/> 2 a 4 veces semana<br><input checked="" type="radio"/> 5 a 6 veces semana<br><input type="radio"/> 1 vez al día<br><input type="radio"/> 2 a 3 veces al día<br><input type="radio"/> 5 a 6 veces al día<br><input type="radio"/> más 6 veces al día |
| sopa o puré verduras  | <input type="radio"/> Nunca o menos 1 vez al mes<br><input type="radio"/> 1 a 3 veces mes<br><input type="radio"/> 1 vez semana<br><input checked="" type="radio"/> 2 a 4 veces semana<br><input type="radio"/> 5 a 6 veces semana<br><input type="radio"/> 1 vez al día<br><input type="radio"/> 2 a 3 veces al día<br><input type="radio"/> 5 a 6 veces al día<br><input type="radio"/> más 6 veces al día |
| croquetas pollo jamón | <input type="radio"/> Nunca o menos 1 vez al mes<br><input checked="" type="radio"/> 1 a 3 veces mes<br><input type="radio"/> 1 vez semana<br><input type="radio"/> 2 a 4 veces semana<br><input type="radio"/> 5 a 6 veces semana<br><input type="radio"/> 1 vez al día<br><input type="radio"/> 2 a 3 veces al día<br><input type="radio"/> 5 a 6 veces al día<br><input type="radio"/> más 6 veces al día |
| croquetas pescado     | <input type="radio"/> Nunca o menos 1 vez al mes<br><input type="radio"/> 1 a 3 veces mes<br><input checked="" type="radio"/> 1 vez semana<br><input type="radio"/> 2 a 4 veces semana<br><input type="radio"/> 5 a 6 veces semana<br><input type="radio"/> 1 vez al día<br><input type="radio"/> 2 a 3 veces al día<br><input type="radio"/> 5 a 6 veces al día<br><input type="radio"/> más 6 veces al día |
| mayonesa              | <input type="radio"/> Nunca o menos 1 vez al mes<br><input type="radio"/> 1 a 3 veces mes<br><input type="radio"/> 1 vez semana<br><input checked="" type="radio"/> 2 a 4 veces semana<br><input type="radio"/> 5 a 6 veces semana<br><input type="radio"/> 1 vez al día<br><input type="radio"/> 2 a 3 veces al día<br><input type="radio"/> 5 a 6 veces al día<br><input type="radio"/> más 6 veces al día |

|                  |                                                                                                                                                                                                                                                                                                                                                                                                              |
|------------------|--------------------------------------------------------------------------------------------------------------------------------------------------------------------------------------------------------------------------------------------------------------------------------------------------------------------------------------------------------------------------------------------------------------|
| salsa tomate     | <input type="radio"/> Nunca o menos 1 vez al mes<br><input type="radio"/> 1 a 3 veces mes<br><input type="radio"/> 1 vez semana<br><input checked="" type="radio"/> 2 a 4 veces semana<br><input type="radio"/> 5 a 6 veces semana<br><input type="radio"/> 1 vez al día<br><input type="radio"/> 2 a 3 veces al día<br><input type="radio"/> 5 a 6 veces al día<br><input type="radio"/> más 6 veces al día |
| ketchup          | <input type="radio"/> Nunca o menos 1 vez al mes<br><input type="radio"/> 1 a 3 veces mes<br><input type="radio"/> 1 vez semana<br><input checked="" type="radio"/> 2 a 4 veces semana<br><input type="radio"/> 5 a 6 veces semana<br><input type="radio"/> 1 vez al día<br><input type="radio"/> 2 a 3 veces al día<br><input type="radio"/> 5 a 6 veces al día<br><input type="radio"/> más 6 veces al día |
| sal              | <input type="radio"/> Nunca o menos 1 vez al mes<br><input type="radio"/> 1 a 3 veces mes<br><input type="radio"/> 1 vez semana<br><input type="radio"/> 2 a 4 veces semana<br><input checked="" type="radio"/> 5 a 6 veces semana<br><input type="radio"/> 1 vez al día<br><input type="radio"/> 2 a 3 veces al día<br><input type="radio"/> 5 a 6 veces al día<br><input type="radio"/> más 6 veces al día |
| ajo              | <input type="radio"/> Nunca o menos 1 vez al mes<br><input type="radio"/> 1 a 3 veces mes<br><input checked="" type="radio"/> 1 vez semana<br><input type="radio"/> 2 a 4 veces semana<br><input type="radio"/> 5 a 6 veces semana<br><input type="radio"/> 1 vez al día<br><input type="radio"/> 2 a 3 veces al día<br><input type="radio"/> 5 a 6 veces al día<br><input type="radio"/> más 6 veces al día |
| mermelada o miel | <input type="radio"/> Nunca o menos 1 vez al mes<br><input type="radio"/> 1 a 3 veces mes<br><input checked="" type="radio"/> 1 vez semana<br><input type="radio"/> 2 a 4 veces semana<br><input type="radio"/> 5 a 6 veces semana<br><input type="radio"/> 1 vez al día<br><input type="radio"/> 2 a 3 veces al día<br><input type="radio"/> 5 a 6 veces al día<br><input type="radio"/> más 6 veces al día |
| azúcar           | <input type="radio"/> Nunca o menos 1 vez al mes<br><input type="radio"/> 1 a 3 veces mes<br><input type="radio"/> 1 vez semana<br><input type="radio"/> 2 a 4 veces semana<br><input checked="" type="radio"/> 5 a 6 veces semana<br><input type="radio"/> 1 vez al día<br><input type="radio"/> 2 a 3 veces al día<br><input type="radio"/> 5 a 6 veces al día<br><input type="radio"/> más 6 veces al día |

|                                       |                                                                                                                                                                                                                                                                                                                                                                                                                                                                                                                    |
|---------------------------------------|--------------------------------------------------------------------------------------------------------------------------------------------------------------------------------------------------------------------------------------------------------------------------------------------------------------------------------------------------------------------------------------------------------------------------------------------------------------------------------------------------------------------|
| Otro alimento                         | <hr/>                                                                                                                                                                                                                                                                                                                                                                                                                                                                                                              |
| suplementos vitamínicos               | <input type="radio"/> si<br><input checked="" type="radio"/> no                                                                                                                                                                                                                                                                                                                                                                                                                                                    |
| suplementos vitamínicos               | <hr/>                                                                                                                                                                                                                                                                                                                                                                                                                                                                                                              |
| dieta previa                          | <input type="radio"/> si<br><input checked="" type="radio"/> no                                                                                                                                                                                                                                                                                                                                                                                                                                                    |
| motivo dieta                          | <input type="radio"/> no dieta<br><input type="radio"/> control peso<br><input type="radio"/> control colesterol<br><input type="radio"/> control diabetes<br><input type="radio"/> problemas estómago<br><input type="radio"/> problemas vesícula o hepáticos<br><input type="radio"/> HTA o cardiopatía<br><input type="radio"/> problemas renales<br><input type="radio"/> alergia alimentaria<br><input type="radio"/> ácido úrico elevado<br><input type="radio"/> vegetariana<br><input type="radio"/> otros |
| cambio alimentos año previo gestación | <input type="radio"/> si<br><input type="radio"/> no                                                                                                                                                                                                                                                                                                                                                                                                                                                               |
| cambio lácteos                        | <input type="radio"/> eliminado<br><input type="radio"/> disminuido<br><input type="radio"/> igual<br><input type="radio"/> aumentado<br><input type="radio"/> no sabe                                                                                                                                                                                                                                                                                                                                             |
| cambio huevos                         | <input type="radio"/> eliminado<br><input type="radio"/> disminuido<br><input type="radio"/> igual<br><input type="radio"/> aumentado<br><input type="radio"/> no sabe                                                                                                                                                                                                                                                                                                                                             |
| cambio carne                          | <input type="radio"/> eliminado<br><input type="radio"/> disminuido<br><input type="radio"/> igual<br><input type="radio"/> aumentado<br><input type="radio"/> no sabe                                                                                                                                                                                                                                                                                                                                             |
| cambio pescado                        | <input type="radio"/> eliminado<br><input type="radio"/> disminuido<br><input type="radio"/> igual<br><input type="radio"/> aumentado<br><input type="radio"/> no sabe                                                                                                                                                                                                                                                                                                                                             |
| cambio verduras                       | <input type="radio"/> eliminado<br><input type="radio"/> disminuido<br><input type="radio"/> igual<br><input type="radio"/> aumentado<br><input type="radio"/> no sabe                                                                                                                                                                                                                                                                                                                                             |

|                            |                                                                                                                                                                                                             |
|----------------------------|-------------------------------------------------------------------------------------------------------------------------------------------------------------------------------------------------------------|
| cambio legumbres           | <input type="radio"/> eliminado<br><input type="radio"/> disminuido<br><input type="radio"/> igual<br><input type="radio"/> aumentado<br><input type="radio"/> no sabe                                      |
| cambio fruta               | <input type="radio"/> eliminado<br><input type="radio"/> disminuido<br><input type="radio"/> igual<br><input type="radio"/> aumentado<br><input type="radio"/> no sabe                                      |
| cambio pan                 | <input type="radio"/> eliminado<br><input type="radio"/> disminuido<br><input type="radio"/> igual<br><input type="radio"/> aumentado<br><input type="radio"/> no sabe                                      |
| cambio aceite oliva        | <input type="radio"/> eliminado<br><input type="radio"/> disminuido<br><input type="radio"/> igual<br><input type="radio"/> aumentado<br><input type="radio"/> no sabe                                      |
| cambio mante o margarina   | <input type="radio"/> eliminado<br><input type="radio"/> disminuido<br><input type="radio"/> igual<br><input type="radio"/> aumentado<br><input type="radio"/> no sabe                                      |
| cambio azúcar y dulces     | <input type="radio"/> eliminado<br><input type="radio"/> disminuido<br><input type="radio"/> igual<br><input type="radio"/> aumentado<br><input type="radio"/> no sabe                                      |
| cambio bebidas alcohólicas | <input type="radio"/> eliminado<br><input type="radio"/> disminuido<br><input type="radio"/> igual<br><input type="radio"/> aumentado<br><input type="radio"/> no sabe                                      |
| frecuencia comidas fritas  | <input type="radio"/> a diario<br><input type="radio"/> 5 a 6 veces semana<br><input type="radio"/> 2 a 4 veces semana<br><input type="radio"/> 1 vez semana<br><input type="radio"/> menos de 1 vez semana |
| carne                      | <input type="radio"/> no como<br><input type="radio"/> cruda<br><input type="radio"/> poco hecha<br><input type="radio"/> hecha<br><input type="radio"/> muy hecha                                          |
| grasa visible carne        | <input type="radio"/> quita toda<br><input type="radio"/> quita mayoría<br><input type="radio"/> quita un poco<br><input type="radio"/> no quita nada                                                       |



|                                |                                                                                                                                                                                                                                               |
|--------------------------------|-----------------------------------------------------------------------------------------------------------------------------------------------------------------------------------------------------------------------------------------------|
| cocina carne                   | <input type="radio"/> a la plancha<br><input type="radio"/> a la parrilla<br><input type="radio"/> asada<br><input type="radio"/> frita<br><input type="radio"/> guisada                                                                      |
| tostado quemado carne          | <input type="radio"/> nunca<br><input type="radio"/> 1 vez mes<br><input type="radio"/> 2 a 3 veces mes<br><input type="radio"/> 1 vez semana<br><input type="radio"/> 2 a 3 semanas                                                          |
| tostado quemado pescado        | <input type="radio"/> nunca<br><input type="radio"/> 1 vez mes<br><input type="radio"/> 2 a 3 veces mes<br><input type="radio"/> 1 vez semana<br><input type="radio"/> 2 a 3 semanas                                                          |
| socarrat paella                | <input type="radio"/> nunca<br><input type="radio"/> 1 vez mes<br><input type="radio"/> 2 a 3 veces mes<br><input type="radio"/> 1 vez semana<br><input type="radio"/> 2 a 3 semanas                                                          |
| grasa o aceite cocinar         | <input type="radio"/> mantequilla<br><input type="radio"/> margarina<br><input type="radio"/> aceite oliva<br><input type="radio"/> aceite oliva virgen extra<br><input type="radio"/> aceite vegetal<br><input type="radio"/> mezcla aceites |
| grasa aceite aliñar            | <input type="radio"/> mantequilla<br><input type="radio"/> margarina<br><input type="radio"/> aceite oliva<br><input type="radio"/> aceite oliva virgen extra<br><input type="radio"/> aceite vegetal<br><input type="radio"/> mezcla aceites |
| grasa aceite freir             | <input type="radio"/> mantequilla<br><input type="radio"/> margarina<br><input type="radio"/> aceite oliva<br><input type="radio"/> aceite oliva virgen extra<br><input type="radio"/> aceite vegetal<br><input type="radio"/> mezcla aceites |
| Ejercicio cuestionario         | <input type="radio"/> si<br><input checked="" type="radio"/> no                                                                                                                                                                               |
| horas de sueño incluido siesta | _____                                                                                                                                                                                                                                         |
| minutos siesta                 | _____                                                                                                                                                                                                                                         |
| horas televisión semana        | _____                                                                                                                                                                                                                                         |

|                                        |                                                                                                                                                                                                                                                                                                                                                                |
|----------------------------------------|----------------------------------------------------------------------------------------------------------------------------------------------------------------------------------------------------------------------------------------------------------------------------------------------------------------------------------------------------------------|
| actividad trabajo                      | <input type="radio"/> casi siempre sentado<br><input type="radio"/> sentado 50 por cien<br><input type="radio"/> casi siempre de pie, quieto<br><input type="radio"/> casi siempre levantado caminando y llevando pocas cosas<br><input type="radio"/> casi siempre levantado, caminando y llevado muchas cosas<br><input type="radio"/> trabajo manual pesado |
| tiempo caminar o bici al día           | <input type="radio"/> casi nunca<br><input type="radio"/> menos 20min día<br><input type="radio"/> 20 a 40 min día<br><input type="radio"/> 40 a 60 min día<br><input type="radio"/> 1h o 1h y media día<br><input type="radio"/> más de 1h y media al día                                                                                                     |
| tiempo tareas casa al día              | <input type="radio"/> menos de 1h día<br><input type="radio"/> 1 a 2h día<br><input type="radio"/> 3 a 4h día<br><input type="radio"/> 5 a 6h día<br><input type="radio"/> 7 a 8h día<br><input type="radio"/> más de 8h día                                                                                                                                   |
| tiempo libre televisión ordenador leer | <input type="radio"/> menos 1h día<br><input type="radio"/> 1h día<br><input type="radio"/> 2h día<br><input type="radio"/> 3h día<br><input type="radio"/> 4h día<br><input type="radio"/> 5 a 6h día<br><input type="radio"/> mas 6h día                                                                                                                     |
| tiempo libre ejercicio o deporte       | <input type="radio"/> menos 1h semana<br><input type="radio"/> 1h semana<br><input type="radio"/> 2h semana<br><input type="radio"/> 3h semana<br><input type="radio"/> 4 a 5h semana<br><input type="radio"/> mas 5h semana                                                                                                                                   |
| como se considera                      | <input type="radio"/> sedentaria<br><input type="radio"/> poco activa<br><input type="radio"/> moderadamente activa<br><input type="radio"/> bastante activa<br><input type="radio"/> muy activa<br><input type="radio"/> no sabe                                                                                                                              |
| FUR                                    | [*DATA REMOVED*]                                                                                                                                                                                                                                                                                                                                               |
| Semanas gestación 2T                   | [*DATA REMOVED*]                                                                                                                                                                                                                                                                                                                                               |
| Días gestación 2T                      | [*DATA REMOVED*]                                                                                                                                                                                                                                                                                                                                               |
| DBP 2T                                 | [*DATA REMOVED*]                                                                                                                                                                                                                                                                                                                                               |
| CC 2T                                  | [*DATA REMOVED*]                                                                                                                                                                                                                                                                                                                                               |
| AC 2T                                  | [*DATA REMOVED*]                                                                                                                                                                                                                                                                                                                                               |

|                                                   |                                                                                                                                                                                                 |
|---------------------------------------------------|-------------------------------------------------------------------------------------------------------------------------------------------------------------------------------------------------|
| LF 2T                                             | [*DATA REMOVED*]                                                                                                                                                                                |
| PFE 2T (Hadlock)                                  | [*DATA REMOVED*]                                                                                                                                                                                |
| Semanas gestación 3T                              | [*DATA REMOVED*]                                                                                                                                                                                |
| días 3T                                           | [*DATA REMOVED*]                                                                                                                                                                                |
| DBP 3T                                            | [*DATA REMOVED*]                                                                                                                                                                                |
| CC 3T                                             | [*DATA REMOVED*]                                                                                                                                                                                |
| AC 3T                                             | [*DATA REMOVED*]                                                                                                                                                                                |
| LF 3T                                             | [*DATA REMOVED*]                                                                                                                                                                                |
| PFE 3T (Hadlock)                                  | [*DATA REMOVED*]                                                                                                                                                                                |
| Semanas de gestación final                        | [*DATA REMOVED*]                                                                                                                                                                                |
| días gestación final                              | [*DATA REMOVED*]                                                                                                                                                                                |
| Localización placenta                             | <input type="radio"/> anterior<br><input type="radio"/> lateral derecha<br><input type="radio"/> lateral izquierda<br><input checked="" type="radio"/> posterior<br><input type="radio"/> fondo |
| Presentación longitudinal cefálica                | <input type="radio"/> no<br><input checked="" type="radio"/> si                                                                                                                                 |
| Dorso                                             | <input checked="" type="radio"/> izquierda anterior<br><input type="radio"/> izquierda posterior<br><input type="radio"/> derecha anterior<br><input type="radio"/> derecha posterior           |
| diámetro biparietal                               | [*DATA REMOVED*]                                                                                                                                                                                |
| Circunferencia craneal                            | [*DATA REMOVED*]                                                                                                                                                                                |
| Circunferencia abdominal                          | [*DATA REMOVED*]                                                                                                                                                                                |
| Longitud de femur                                 | [*DATA REMOVED*]                                                                                                                                                                                |
| tejido celular subcutáneo a nivel del muslo en mm | [*DATA REMOVED*]                                                                                                                                                                                |
| tejido celular subcutáneo en abdomen en mm        | [*DATA REMOVED*]                                                                                                                                                                                |
| Volumen del muslo en cm3                          | [*DATA REMOVED*]                                                                                                                                                                                |
| Peso fetal estimado según fórmula de Hadlock      | [*DATA REMOVED*]                                                                                                                                                                                |

|                                               |                                                                                                                                                          |
|-----------------------------------------------|----------------------------------------------------------------------------------------------------------------------------------------------------------|
| Percentil                                     | [*DATA REMOVED*]                                                                                                                                         |
| Peso fetal estimado según fórmula de Scioscia | <hr/>                                                                                                                                                    |
| Peso fetal estimado según fórmula de LEE      | <hr/>                                                                                                                                                    |
| Tipo de parto                                 | <input checked="" type="radio"/> eutocico<br><input type="radio"/> instrumentado/ventosa<br><input type="radio"/> cesarea                                |
| fecha de nacimiento                           | [*DATA REMOVED*]                                                                                                                                         |
| Días entre exploración y nacimiento           | [*DATA REMOVED*]                                                                                                                                         |
| Peso RN en g                                  | [*DATA REMOVED*]                                                                                                                                         |
| sexo                                          | <input type="radio"/> mujer<br><input checked="" type="radio"/> hombre                                                                                   |
| Apgar 1 minuto                                | [*DATA REMOVED*]                                                                                                                                         |
| Apgar 5 minutos                               | [*DATA REMOVED*]                                                                                                                                         |
| Apgar 10 minutos                              | <hr/>                                                                                                                                                    |
| antecedente Covid durante gestación           | <input type="radio"/> Yes<br><input checked="" type="radio"/> No                                                                                         |
| Nivel de estudios                             | <input type="radio"/> ninguno<br><input type="radio"/> primarios<br><input checked="" type="radio"/> secundarios<br><input type="radio"/> universitarios |

# Base\_datos\_estimacion\_peso\_fetal

|                                       |                                                                                                                                                                                                                                                                                      |
|---------------------------------------|--------------------------------------------------------------------------------------------------------------------------------------------------------------------------------------------------------------------------------------------------------------------------------------|
| Número de identificación participante | 25                                                                                                                                                                                                                                                                                   |
| CODIGO PARTICIPANTE                   |                                                                                                                                                                                                                                                                                      |
| Edad                                  | [*DATA REMOVED*]                                                                                                                                                                                                                                                                     |
| Gestaciones                           | <input type="radio"/> 1<br><input type="radio"/> 2<br><input checked="" type="radio"/> 3<br><input type="radio"/> mas de 3                                                                                                                                                           |
| partos                                | <input type="radio"/> 0<br><input checked="" type="radio"/> 1<br><input type="radio"/> 2<br><input type="radio"/> 3<br><input type="radio"/> mas de 3                                                                                                                                |
| cesáreas                              | <input checked="" type="radio"/> 0<br><input type="radio"/> 1<br><input type="radio"/> 2<br><input type="radio"/> 3<br><input type="radio"/> mas de 3                                                                                                                                |
| Abortos                               | <input type="radio"/> 0<br><input checked="" type="radio"/> 1<br><input type="radio"/> 2<br><input type="radio"/> 3<br><input type="radio"/> mas de 3                                                                                                                                |
| Tipo de gestacion                     | <input checked="" type="radio"/> espontanea<br><input type="radio"/> IAC inseminación artificial conyuge<br><input type="radio"/> IAD inseminación artificial donante<br><input type="radio"/> FIV Fecundación in Vitro<br><input type="radio"/> Ovodon FIV con donación de ovocitos |
| peso previo a embarazo                | [*DATA REMOVED*]                                                                                                                                                                                                                                                                     |
| Ganancia ponderal embarazo            | [*DATA REMOVED*]                                                                                                                                                                                                                                                                     |
| Talla madre                           | [*DATA REMOVED*]                                                                                                                                                                                                                                                                     |
| IMC previo embarazo                   | 20.195092211553114                                                                                                                                                                                                                                                                   |
| Patología obstétrica                  | <input checked="" type="radio"/> no<br><input type="radio"/> si                                                                                                                                                                                                                      |
| Diabetes pregestacional               | <input checked="" type="radio"/> no<br><input type="radio"/> si                                                                                                                                                                                                                      |
| Diabetes gestacional                  | <input checked="" type="radio"/> no<br><input type="radio"/> si                                                                                                                                                                                                                      |

|                                            |                                                                                                                                                                                      |
|--------------------------------------------|--------------------------------------------------------------------------------------------------------------------------------------------------------------------------------------|
| Diabetes gestacional con insulina          | <input checked="" type="radio"/> no<br><input type="radio"/> si                                                                                                                      |
| Diabetes gestacional con dieta y ejercicio | <input checked="" type="radio"/> no<br><input type="radio"/> si                                                                                                                      |
| Percentil fetos previos                    | <input checked="" type="radio"/> Nada<br><input type="radio"/> percentil menor de 10<br><input type="radio"/> percentil entre 10 y 90<br><input type="radio"/> percentil mayor de 90 |
| Exfumadora                                 | <input checked="" type="radio"/> Nada<br><input type="radio"/> menos de 5 años<br><input type="radio"/> 5 a 10 años<br><input type="radio"/> mayor o igual a 10 años                 |
| Hábito tabáquico                           | <input checked="" type="radio"/> no<br><input type="radio"/> si                                                                                                                      |
| fumadora                                   | [*DATA REMOVED*]                                                                                                                                                                     |
| Consumo otros tóxicos                      | <input checked="" type="radio"/> no<br><input type="radio"/> si                                                                                                                      |
| Hb 1T                                      | [*DATA REMOVED*]                                                                                                                                                                     |
| Htc 1T                                     | [*DATA REMOVED*]                                                                                                                                                                     |
| Hb 2T                                      | [*DATA REMOVED*]                                                                                                                                                                     |
| HTC 2T                                     | [*DATA REMOVED*]                                                                                                                                                                     |
| Hb 3T                                      | [*DATA REMOVED*]                                                                                                                                                                     |
| HTC 3T                                     | [*DATA REMOVED*]                                                                                                                                                                     |
| Suplemento FE oral                         | <input checked="" type="radio"/> si<br><input type="radio"/> no                                                                                                                      |
| Suplemento fe iv                           | <input type="radio"/> si<br><input checked="" type="radio"/> no                                                                                                                      |
| Transfusión                                | <input checked="" type="radio"/> no<br><input type="radio"/> si                                                                                                                      |
| Solicitada Vit D                           | <input checked="" type="radio"/> no<br><input type="radio"/> si                                                                                                                      |
| Deficit vit D                              | <input type="radio"/> no<br><input type="radio"/> si                                                                                                                                 |
| Suplemento vit D                           | <input type="radio"/> si<br><input type="radio"/> no                                                                                                                                 |

|                       |                                                                                                                                                                                                                                                                                                                                                                                                              |
|-----------------------|--------------------------------------------------------------------------------------------------------------------------------------------------------------------------------------------------------------------------------------------------------------------------------------------------------------------------------------------------------------------------------------------------------------|
| Dieta, cuestionario   | <input checked="" type="radio"/> sí<br><input type="radio"/> no                                                                                                                                                                                                                                                                                                                                              |
| Leche entera          | <input type="radio"/> Nunca o menos 1 vez al mes<br><input type="radio"/> 1 a 3 veces mes<br><input type="radio"/> 1 vez semana<br><input type="radio"/> 2 a 4 veces semana<br><input type="radio"/> 5 a 6 veces semana<br><input type="radio"/> 1 vez al día<br><input type="radio"/> 2 a 3 veces al día<br><input type="radio"/> 5 a 6 veces al día<br><input type="radio"/> más 6 veces al día            |
| Leche semidesnatada   | <input type="radio"/> Nunca o menos 1 vez al mes<br><input type="radio"/> 1 a 3 veces mes<br><input type="radio"/> 1 vez semana<br><input type="radio"/> 2 a 4 veces semana<br><input type="radio"/> 5 a 6 veces semana<br><input type="radio"/> 1 vez al día<br><input type="radio"/> 2 a 3 veces al día<br><input type="radio"/> 5 a 6 veces al día<br><input type="radio"/> mas 6 veces al día            |
| Leche desnatada       | <input type="radio"/> Nunca o menos 1 vez al mes<br><input type="radio"/> 1 a 3 veces mes<br><input type="radio"/> 1 vez semana<br><input type="radio"/> 2 a 4 veces semana<br><input type="radio"/> 5 a 6 veces semana<br><input type="radio"/> 1 vez al día<br><input checked="" type="radio"/> 2 a 3 veces al día<br><input type="radio"/> 5 a 6 veces al día<br><input type="radio"/> más 6 veces al día |
| Leche condensada      | <input type="radio"/> Nunca o menos 1 vez al mes<br><input type="radio"/> 1 a 3 veces mes<br><input type="radio"/> 1 vez semana<br><input type="radio"/> 2 a 4 veces semana<br><input type="radio"/> 5 a 6 veces semana<br><input type="radio"/> 1 vez al día<br><input type="radio"/> 2 a 3 veces al día<br><input type="radio"/> 5 a 6 veces al día<br><input type="radio"/> más 6 veces al día            |
| nata o crema de leche | <input type="radio"/> Nunca o menos 1 vez al mes<br><input type="radio"/> 1 a 3 veces mes<br><input type="radio"/> 1 vez semana<br><input type="radio"/> 2 a 4 veces semana<br><input type="radio"/> 5 a 6 veces semana<br><input type="radio"/> 1 vez al día<br><input type="radio"/> 2 a 3 veces al día<br><input type="radio"/> 5 a 6 veces al día<br><input type="radio"/> más 6 veces al día            |

|                                             |                                                                                                                                                                                                                                                                                                                                                                                                              |
|---------------------------------------------|--------------------------------------------------------------------------------------------------------------------------------------------------------------------------------------------------------------------------------------------------------------------------------------------------------------------------------------------------------------------------------------------------------------|
| Yogurt Entero                               | <input type="radio"/> Nunca o menos 1 vez al mes<br><input type="radio"/> 1 a 3 veces mes<br><input type="radio"/> 1 vez semana<br><input checked="" type="radio"/> 2 a 4 veces semana<br><input type="radio"/> 5 a 6 veces semana<br><input type="radio"/> 1 vez al día<br><input type="radio"/> 2 a 3 veces al día<br><input type="radio"/> 5 a 6 veces al día<br><input type="radio"/> más 6 veces al día |
| Yogurt desnatado                            | <input type="radio"/> Nunca o menos 1 vez al mes<br><input type="radio"/> 1 a 3 veces mes<br><input type="radio"/> 1 vez semana<br><input type="radio"/> 2 a 4 veces semana<br><input checked="" type="radio"/> 5 a 6 veces semana<br><input type="radio"/> 1 vez al día<br><input type="radio"/> 2 a 3 veces al día<br><input type="radio"/> 5 a 6 veces al día<br><input type="radio"/> más 6 veces al día |
| 100g requesón o queso blando o queso fresco | <input type="radio"/> Nunca o menos 1 vez al mes<br><input type="radio"/> 1 a 3 veces mes<br><input checked="" type="radio"/> 1 vez semana<br><input type="radio"/> 2 a 4 veces semana<br><input type="radio"/> 5 a 6 veces semana<br><input type="radio"/> 1 vez al día<br><input type="radio"/> 2 a 3 veces al día<br><input type="radio"/> 5 a 6 veces al día<br><input type="radio"/> más 6 veces al día |
| queso curado o semicurado o cremoso         | <input type="radio"/> Nunca o menos 1 vez al mes<br><input type="radio"/> 1 a 3 veces mes<br><input type="radio"/> 1 vez semana<br><input checked="" type="radio"/> 2 a 4 veces semana<br><input type="radio"/> 5 a 6 veces semana<br><input type="radio"/> 1 vez al día<br><input type="radio"/> 2 a 3 veces al día<br><input type="radio"/> 5 a 6 veces al día<br><input type="radio"/> más 6 veces al día |
| natillas flan pudding                       | <input type="radio"/> Nunca o menos 1 vez al mes<br><input type="radio"/> 1 a 3 veces mes<br><input checked="" type="radio"/> 1 vez semana<br><input type="radio"/> 2 a 4 veces semana<br><input type="radio"/> 5 a 6 veces semana<br><input type="radio"/> 1 vez al día<br><input type="radio"/> 2 a 3 veces al día<br><input type="radio"/> 5 a 6 veces al día<br><input type="radio"/> más 6 veces al día |
| Helado                                      | <input type="radio"/> Nunca o menos 1 vez al mes<br><input type="radio"/> 1 a 3 veces mes<br><input checked="" type="radio"/> 1 vez semana<br><input type="radio"/> 2 a 4 veces semana<br><input type="radio"/> 5 a 6 veces semana<br><input type="radio"/> 1 vez al día<br><input type="radio"/> 2 a 3 veces al día<br><input type="radio"/> 5 a 6 veces al día<br><input type="radio"/> más 6 veces al día |



|                                      |                                                                                                                                                                                                                                                                                                                                                                                                              |
|--------------------------------------|--------------------------------------------------------------------------------------------------------------------------------------------------------------------------------------------------------------------------------------------------------------------------------------------------------------------------------------------------------------------------------------------------------------|
| huevo                                | <input type="radio"/> Nunca o menos 1 vez al mes<br><input type="radio"/> 1 a 3 veces mes<br><input type="radio"/> 1 vez semana<br><input type="radio"/> 2 a 4 veces semana<br><input checked="" type="radio"/> 5 a 6 veces semana<br><input type="radio"/> 1 vez al día<br><input type="radio"/> 2 a 3 veces al día<br><input type="radio"/> 5 a 6 veces al día<br><input type="radio"/> más 6 veces al día |
| Pollo con piel                       | <input type="radio"/> Nunca o menos 1 vez al mes<br><input type="radio"/> 1 a 3 veces mes<br><input checked="" type="radio"/> 1 vez semana<br><input type="radio"/> 2 a 4 veces semana<br><input type="radio"/> 5 a 6 veces semana<br><input type="radio"/> 1 vez al día<br><input type="radio"/> 2 a 3 veces al día<br><input type="radio"/> 5 a 6 veces al día<br><input type="radio"/> más 6 veces al día |
| pollo sin piel                       | <input type="radio"/> Nunca o menos 1 vez al mes<br><input type="radio"/> 1 a 3 veces mes<br><input checked="" type="radio"/> 1 vez semana<br><input type="radio"/> 2 a 4 veces semana<br><input type="radio"/> 5 a 6 veces semana<br><input type="radio"/> 1 vez al día<br><input type="radio"/> 2 a 3 veces al día<br><input type="radio"/> 5 a 6 veces al día<br><input type="radio"/> más 6 veces al día |
| Ternera o cerdo o cordero            | <input type="radio"/> Nunca o menos 1 vez al mes<br><input type="radio"/> 1 a 3 veces mes<br><input checked="" type="radio"/> 1 vez semana<br><input type="radio"/> 2 a 4 veces semana<br><input type="radio"/> 5 a 6 veces semana<br><input type="radio"/> 1 vez al día<br><input type="radio"/> 2 a 3 veces al día<br><input type="radio"/> 5 a 6 veces al día<br><input type="radio"/> más 6 veces al día |
| carne caza: Conejo o codorniz o pato | <input type="radio"/> Nunca o menos 1 vez al mes<br><input type="radio"/> 1 a 3 veces mes<br><input type="radio"/> 1 vez semana<br><input type="radio"/> 2 a 4 veces semana<br><input type="radio"/> 5 a 6 veces semana<br><input type="radio"/> 1 vez al día<br><input type="radio"/> 2 a 3 veces al día<br><input type="radio"/> 5 a 6 veces al día<br><input type="radio"/> más 6 veces al día            |
| Hígado de ternera o cerdo o pollo    | <input type="radio"/> Nunca o menos 1 vez al mes<br><input type="radio"/> 1 a 3 veces mes<br><input type="radio"/> 1 vez semana<br><input type="radio"/> 2 a 4 veces semana<br><input type="radio"/> 5 a 6 veces semana<br><input type="radio"/> 1 vez al día<br><input type="radio"/> 2 a 3 veces al día<br><input type="radio"/> 5 a 6 veces al día<br><input type="radio"/> más 6 veces al día            |

|                     |                                                                                                                                                                                                                                                                                                                                                                                                              |
|---------------------|--------------------------------------------------------------------------------------------------------------------------------------------------------------------------------------------------------------------------------------------------------------------------------------------------------------------------------------------------------------------------------------------------------------|
| Vísceras            | <input type="radio"/> Nunca o menos 1 vez al mes<br><input type="radio"/> 1 a 3 veces mes<br><input type="radio"/> 1 vez semana<br><input type="radio"/> 2 a 4 veces semana<br><input type="radio"/> 5 a 6 veces semana<br><input type="radio"/> 1 vez al día<br><input type="radio"/> 2 a 3 veces al día<br><input type="radio"/> 5 a 6 veces al día<br><input type="radio"/> más 6 veces al día            |
| Embutido            | <input type="radio"/> Nunca o menos 1 vez al mes<br><input type="radio"/> 1 a 3 veces mes<br><input type="radio"/> 1 vez semana<br><input type="radio"/> 2 a 4 veces semana<br><input type="radio"/> 5 a 6 veces semana<br><input type="radio"/> 1 vez al día<br><input type="radio"/> 2 a 3 veces al día<br><input type="radio"/> 5 a 6 veces al día<br><input type="radio"/> más 6 veces al día            |
| Salchicha o similar | <input type="radio"/> Nunca o menos 1 vez al mes<br><input type="radio"/> 1 a 3 veces mes<br><input type="radio"/> 1 vez semana<br><input type="radio"/> 2 a 4 veces semana<br><input type="radio"/> 5 a 6 veces semana<br><input type="radio"/> 1 vez al día<br><input type="radio"/> 2 a 3 veces al día<br><input type="radio"/> 5 a 6 veces al día<br><input type="radio"/> más 6 veces al día            |
| Pate o foiegras     | <input type="radio"/> Nunca o menos 1 vez al mes<br><input type="radio"/> 1 a 3 veces mes<br><input type="radio"/> 1 vez semana<br><input type="radio"/> 2 a 4 veces semana<br><input type="radio"/> 5 a 6 veces semana<br><input type="radio"/> 1 vez al día<br><input type="radio"/> 2 a 3 veces al día<br><input type="radio"/> 5 a 6 veces al día<br><input type="radio"/> más 6 veces al día            |
| Hamburguesa         | <input type="radio"/> Nunca o menos 1 vez al mes<br><input checked="" type="radio"/> 1 a 3 veces mes<br><input type="radio"/> 1 vez semana<br><input type="radio"/> 2 a 4 veces semana<br><input type="radio"/> 5 a 6 veces semana<br><input type="radio"/> 1 vez al día<br><input type="radio"/> 2 a 3 veces al día<br><input type="radio"/> 5 a 6 veces al día<br><input type="radio"/> más 6 veces al día |
| tocino o bacon      | <input checked="" type="radio"/> Nunca o menos 1 vez al mes<br><input type="radio"/> 1 a 3 veces mes<br><input type="radio"/> 1 vez semana<br><input type="radio"/> 2 a 4 veces semana<br><input type="radio"/> 5 a 6 veces semana<br><input type="radio"/> 1 vez al día<br><input type="radio"/> 2 a 3 veces al día<br><input type="radio"/> 5 a 6 veces al día<br><input type="radio"/> más 6 veces al día |

|                        |                                                                                                                                                                                                                                                                                                                                                                                                              |
|------------------------|--------------------------------------------------------------------------------------------------------------------------------------------------------------------------------------------------------------------------------------------------------------------------------------------------------------------------------------------------------------------------------------------------------------|
| Pescado frito          | <input checked="" type="radio"/> Nunca o menos 1 vez al mes<br><input type="radio"/> 1 a 3 veces mes<br><input type="radio"/> 1 vez semana<br><input type="radio"/> 2 a 4 veces semana<br><input type="radio"/> 5 a 6 veces semana<br><input type="radio"/> 1 vez al día<br><input type="radio"/> 2 a 3 veces al día<br><input type="radio"/> 5 a 6 veces al día<br><input type="radio"/> más 6 veces al día |
| pescado hervido blanco | <input type="radio"/> Nunca o menos 1 vez al mes<br><input type="radio"/> 1 a 3 veces mes<br><input checked="" type="radio"/> 1 vez semana<br><input type="radio"/> 2 a 4 veces semana<br><input type="radio"/> 5 a 6 veces semana<br><input type="radio"/> 1 vez al día<br><input type="radio"/> 2 a 3 veces al día<br><input type="radio"/> 5 a 6 veces al día<br><input type="radio"/> más 6 veces al día |
| pescado hervido azul   | <input type="radio"/> Nunca o menos 1 vez al mes<br><input type="radio"/> 1 a 3 veces mes<br><input type="radio"/> 1 vez semana<br><input type="radio"/> 2 a 4 veces semana<br><input type="radio"/> 5 a 6 veces semana<br><input type="radio"/> 1 vez al día<br><input type="radio"/> 2 a 3 veces al día<br><input type="radio"/> 5 a 6 veces al día<br><input type="radio"/> más 6 veces al día            |
| otros pescado azul     | <input type="radio"/> Nunca o menos 1 vez al mes<br><input type="radio"/> 1 a 3 veces mes<br><input checked="" type="radio"/> 1 vez semana<br><input type="radio"/> 2 a 4 veces semana<br><input type="radio"/> 5 a 6 veces semana<br><input type="radio"/> 1 vez al día<br><input type="radio"/> 2 a 3 veces al día<br><input type="radio"/> 5 a 6 veces al día<br><input type="radio"/> más 6 veces al día |
| atun conserva          | <input type="radio"/> Nunca o menos 1 vez al mes<br><input checked="" type="radio"/> 1 a 3 veces mes<br><input type="radio"/> 1 vez semana<br><input type="radio"/> 2 a 4 veces semana<br><input type="radio"/> 5 a 6 veces semana<br><input type="radio"/> 1 vez al día<br><input type="radio"/> 2 a 3 veces al día<br><input type="radio"/> 5 a 6 veces al día<br><input type="radio"/> más 6 veces al día |
| sardina conserva       | <input type="radio"/> Nunca o menos 1 vez al mes<br><input type="radio"/> 1 a 3 veces mes<br><input type="radio"/> 1 vez semana<br><input type="radio"/> 2 a 4 veces semana<br><input type="radio"/> 5 a 6 veces semana<br><input type="radio"/> 1 vez al día<br><input type="radio"/> 2 a 3 veces al día<br><input type="radio"/> 5 a 6 veces al día<br><input type="radio"/> más 6 veces al día            |

|                                         |                                                                                                                                                                                                                                                                                                                                                                                                              |
|-----------------------------------------|--------------------------------------------------------------------------------------------------------------------------------------------------------------------------------------------------------------------------------------------------------------------------------------------------------------------------------------------------------------------------------------------------------------|
| pescado ahumado                         | <input type="radio"/> Nunca o menos 1 vez al mes<br><input type="radio"/> 1 a 3 veces mes<br><input type="radio"/> 1 vez semana<br><input type="radio"/> 2 a 4 veces semana<br><input type="radio"/> 5 a 6 veces semana<br><input type="radio"/> 1 vez al día<br><input type="radio"/> 2 a 3 veces al día<br><input type="radio"/> 5 a 6 veces al día<br><input type="radio"/> más 6 veces al día            |
| almejas o mejillones o ostras unos 100g | <input checked="" type="radio"/> Nunca o menos 1 vez al mes<br><input type="radio"/> 1 a 3 veces mes<br><input type="radio"/> 1 vez semana<br><input type="radio"/> 2 a 4 veces semana<br><input type="radio"/> 5 a 6 veces semana<br><input type="radio"/> 1 vez al día<br><input type="radio"/> 2 a 3 veces al día<br><input type="radio"/> 5 a 6 veces al día<br><input type="radio"/> más 6 veces al día |
| calamar o chipiron o sepia unos 100g    | <input checked="" type="radio"/> Nunca o menos 1 vez al mes<br><input type="radio"/> 1 a 3 veces mes<br><input type="radio"/> 1 vez semana<br><input type="radio"/> 2 a 4 veces semana<br><input type="radio"/> 5 a 6 veces semana<br><input type="radio"/> 1 vez al día<br><input type="radio"/> 2 a 3 veces al día<br><input type="radio"/> 5 a 6 veces al día<br><input type="radio"/> más 6 veces al día |
| marisco unos 100g                       | <input checked="" type="radio"/> Nunca o menos 1 vez al mes<br><input type="radio"/> 1 a 3 veces mes<br><input type="radio"/> 1 vez semana<br><input type="radio"/> 2 a 4 veces semana<br><input type="radio"/> 5 a 6 veces semana<br><input type="radio"/> 1 vez al día<br><input type="radio"/> 2 a 3 veces al día<br><input type="radio"/> 5 a 6 veces al día<br><input type="radio"/> más 6 veces al día |
| Espinacas o acelgas cocinadas           | <input type="radio"/> Nunca o menos 1 vez al mes<br><input type="radio"/> 1 a 3 veces mes<br><input checked="" type="radio"/> 1 vez semana<br><input type="radio"/> 2 a 4 veces semana<br><input type="radio"/> 5 a 6 veces semana<br><input type="radio"/> 1 vez al día<br><input type="radio"/> 2 a 3 veces al día<br><input type="radio"/> 5 a 6 veces al día<br><input type="radio"/> más 6 veces al día |
| Col o coliflor o brocoli cocinado       | <input type="radio"/> Nunca o menos 1 vez al mes<br><input type="radio"/> 1 a 3 veces mes<br><input checked="" type="radio"/> 1 vez semana<br><input type="radio"/> 2 a 4 veces semana<br><input type="radio"/> 5 a 6 veces semana<br><input type="radio"/> 1 vez al día<br><input type="radio"/> 2 a 3 veces al día<br><input type="radio"/> 5 a 6 veces al día<br><input type="radio"/> más 6 veces al día |

---

Lechuga o endivia o escarola

- ☐ Nunca o menos 1 vez al mes  
☐ 1 a 3 veces mes  
☐ 1 vez semana  
☒ 2 a 4 veces semana  
☐ 5 a 6 veces semana  
☐ 1 vez al día  
☐ 2 a 3 veces al día  
☐ 5 a 6 veces al día  
☐ más 6 veces al día

---

tomate ensalada

- ☐ Nunca o menos 1 vez al mes  
☐ 1 a 3 veces mes  
☐ 1 vez semana  
☒ 2 a 4 veces semana  
☐ 5 a 6 veces semana  
☐ 1 vez al día  
☐ 2 a 3 veces al día  
☐ 5 a 6 veces al día  
☐ más 6 veces al día

---

cebolla

- ☐ Nunca o menos 1 vez al mes  
☒ 1 a 3 veces mes  
☐ 1 vez semana  
☐ 2 a 4 veces semana  
☐ 5 a 6 veces semana  
☐ 1 vez al día  
☐ 2 a 3 veces al día  
☐ 5 a 6 veces al día  
☐ más 6 veces al día

---

Zanahoria o calabaza

- ☐ Nunca o menos 1 vez al mes  
☐ 1 a 3 veces mes  
☒ 1 vez semana  
☐ 2 a 4 veces semana  
☐ 5 a 6 veces semana  
☐ 1 vez al día  
☐ 2 a 3 veces al día  
☐ 5 a 6 veces al día  
☐ más 6 veces al día

---

Judías verdes

- ☐ Nunca o menos 1 vez al mes  
☒ 1 a 3 veces mes  
☐ 1 vez semana  
☐ 2 a 4 veces semana  
☐ 5 a 6 veces semana  
☐ 1 vez al día  
☐ 2 a 3 veces al día  
☐ 5 a 6 veces al día  
☐ más 6 veces al día

---

Berenjena o calabacin o pepino

- ☐ Nunca o menos 1 vez al mes  
☐ 1 a 3 veces mes  
☒ 1 vez semana  
☐ 2 a 4 veces semana  
☐ 5 a 6 veces semana  
☐ 1 vez al día  
☐ 2 a 3 veces al día  
☐ 5 a 6 veces al día  
☐ más 6 veces al día

|                       |                                                                                                                                                                                                                                                                                                                                                                                                              |
|-----------------------|--------------------------------------------------------------------------------------------------------------------------------------------------------------------------------------------------------------------------------------------------------------------------------------------------------------------------------------------------------------------------------------------------------------|
| pimiento              | <input type="radio"/> Nunca o menos 1 vez al mes<br><input checked="" type="radio"/> 1 a 3 veces mes<br><input type="radio"/> 1 vez semana<br><input type="radio"/> 2 a 4 veces semana<br><input type="radio"/> 5 a 6 veces semana<br><input type="radio"/> 1 vez al día<br><input type="radio"/> 2 a 3 veces al día<br><input type="radio"/> 5 a 6 veces al día<br><input type="radio"/> más 6 veces al día |
| alcachofa             | <input checked="" type="radio"/> Nunca o menos 1 vez al mes<br><input type="radio"/> 1 a 3 veces mes<br><input type="radio"/> 1 vez semana<br><input type="radio"/> 2 a 4 veces semana<br><input type="radio"/> 5 a 6 veces semana<br><input type="radio"/> 1 vez al día<br><input type="radio"/> 2 a 3 veces al día<br><input type="radio"/> 5 a 6 veces al día<br><input type="radio"/> más 6 veces al día |
| espárragos            | <input type="radio"/> Nunca o menos 1 vez al mes<br><input checked="" type="radio"/> 1 a 3 veces mes<br><input type="radio"/> 1 vez semana<br><input type="radio"/> 2 a 4 veces semana<br><input type="radio"/> 5 a 6 veces semana<br><input type="radio"/> 1 vez al día<br><input type="radio"/> 2 a 3 veces al día<br><input type="radio"/> 5 a 6 veces al día<br><input type="radio"/> más 6 veces al día |
| maíz hervido          | <input checked="" type="radio"/> Nunca o menos 1 vez al mes<br><input type="radio"/> 1 a 3 veces mes<br><input type="radio"/> 1 vez semana<br><input type="radio"/> 2 a 4 veces semana<br><input type="radio"/> 5 a 6 veces semana<br><input type="radio"/> 1 vez al día<br><input type="radio"/> 2 a 3 veces al día<br><input type="radio"/> 5 a 6 veces al día<br><input type="radio"/> más 6 veces al día |
| legumbres             | <input type="radio"/> Nunca o menos 1 vez al mes<br><input type="radio"/> 1 a 3 veces mes<br><input checked="" type="radio"/> 1 vez semana<br><input type="radio"/> 2 a 4 veces semana<br><input type="radio"/> 5 a 6 veces semana<br><input type="radio"/> 1 vez al día<br><input type="radio"/> 2 a 3 veces al día<br><input type="radio"/> 5 a 6 veces al día<br><input type="radio"/> más 6 veces al día |
| naranjas o mandarinas | <input type="radio"/> Nunca o menos 1 vez al mes<br><input type="radio"/> 1 a 3 veces mes<br><input type="radio"/> 1 vez semana<br><input checked="" type="radio"/> 2 a 4 veces semana<br><input type="radio"/> 5 a 6 veces semana<br><input type="radio"/> 1 vez al día<br><input type="radio"/> 2 a 3 veces al día<br><input type="radio"/> 5 a 6 veces al día<br><input type="radio"/> más 6 veces al día |

---

|                    |                                                                                                                                                                                                                                                                                                                                                                                                              |
|--------------------|--------------------------------------------------------------------------------------------------------------------------------------------------------------------------------------------------------------------------------------------------------------------------------------------------------------------------------------------------------------------------------------------------------------|
| zumو natural fruta | <input type="radio"/> Nunca o menos 1 vez al mes<br><input type="radio"/> 1 a 3 veces mes<br><input checked="" type="radio"/> 1 vez semana<br><input type="radio"/> 2 a 4 veces semana<br><input type="radio"/> 5 a 6 veces semana<br><input type="radio"/> 1 vez al día<br><input type="radio"/> 2 a 3 veces al día<br><input type="radio"/> 5 a 6 veces al día<br><input type="radio"/> más 6 veces al día |
|--------------------|--------------------------------------------------------------------------------------------------------------------------------------------------------------------------------------------------------------------------------------------------------------------------------------------------------------------------------------------------------------------------------------------------------------|

---

|         |                                                                                                                                                                                                                                                                                                                                                                                                   |
|---------|---------------------------------------------------------------------------------------------------------------------------------------------------------------------------------------------------------------------------------------------------------------------------------------------------------------------------------------------------------------------------------------------------|
| platano | <input type="radio"/> Nunca o menos 1 vez al mes<br><input type="radio"/> 1 a 3 veces mes<br><input type="radio"/> 1 vez semana<br><input type="radio"/> 2 a 4 veces semana<br><input type="radio"/> 5 a 6 veces semana<br><input type="radio"/> 1 vez al día<br><input type="radio"/> 2 a 3 veces al día<br><input type="radio"/> 5 a 6 veces al día<br><input type="radio"/> más 6 veces al día |
|---------|---------------------------------------------------------------------------------------------------------------------------------------------------------------------------------------------------------------------------------------------------------------------------------------------------------------------------------------------------------------------------------------------------|

---

|                |                                                                                                                                                                                                                                                                                                                                                                                                              |
|----------------|--------------------------------------------------------------------------------------------------------------------------------------------------------------------------------------------------------------------------------------------------------------------------------------------------------------------------------------------------------------------------------------------------------------|
| manzana o pera | <input type="radio"/> Nunca o menos 1 vez al mes<br><input type="radio"/> 1 a 3 veces mes<br><input type="radio"/> 1 vez semana<br><input checked="" type="radio"/> 2 a 4 veces semana<br><input type="radio"/> 5 a 6 veces semana<br><input type="radio"/> 1 vez al día<br><input type="radio"/> 2 a 3 veces al día<br><input type="radio"/> 5 a 6 veces al día<br><input type="radio"/> más 6 veces al día |
|----------------|--------------------------------------------------------------------------------------------------------------------------------------------------------------------------------------------------------------------------------------------------------------------------------------------------------------------------------------------------------------------------------------------------------------|

---

|                       |                                                                                                                                                                                                                                                                                                                                                                                                              |
|-----------------------|--------------------------------------------------------------------------------------------------------------------------------------------------------------------------------------------------------------------------------------------------------------------------------------------------------------------------------------------------------------------------------------------------------------|
| melocotón o nectarina | <input type="radio"/> Nunca o menos 1 vez al mes<br><input type="radio"/> 1 a 3 veces mes<br><input type="radio"/> 1 vez semana<br><input checked="" type="radio"/> 2 a 4 veces semana<br><input type="radio"/> 5 a 6 veces semana<br><input type="radio"/> 1 vez al día<br><input type="radio"/> 2 a 3 veces al día<br><input type="radio"/> 5 a 6 veces al día<br><input type="radio"/> más 6 veces al día |
|-----------------------|--------------------------------------------------------------------------------------------------------------------------------------------------------------------------------------------------------------------------------------------------------------------------------------------------------------------------------------------------------------------------------------------------------------|

---

|                |                                                                                                                                                                                                                                                                                                                                                                                                              |
|----------------|--------------------------------------------------------------------------------------------------------------------------------------------------------------------------------------------------------------------------------------------------------------------------------------------------------------------------------------------------------------------------------------------------------------|
| sandia o melon | <input type="radio"/> Nunca o menos 1 vez al mes<br><input type="radio"/> 1 a 3 veces mes<br><input type="radio"/> 1 vez semana<br><input checked="" type="radio"/> 2 a 4 veces semana<br><input type="radio"/> 5 a 6 veces semana<br><input type="radio"/> 1 vez al día<br><input type="radio"/> 2 a 3 veces al día<br><input type="radio"/> 5 a 6 veces al día<br><input type="radio"/> más 6 veces al día |
|----------------|--------------------------------------------------------------------------------------------------------------------------------------------------------------------------------------------------------------------------------------------------------------------------------------------------------------------------------------------------------------------------------------------------------------|

---

|     |                                                                                                                                                                                                                                                                                                                                                                                                              |
|-----|--------------------------------------------------------------------------------------------------------------------------------------------------------------------------------------------------------------------------------------------------------------------------------------------------------------------------------------------------------------------------------------------------------------|
| uva | <input type="radio"/> Nunca o menos 1 vez al mes<br><input checked="" type="radio"/> 1 a 3 veces mes<br><input type="radio"/> 1 vez semana<br><input type="radio"/> 2 a 4 veces semana<br><input type="radio"/> 5 a 6 veces semana<br><input type="radio"/> 1 vez al día<br><input type="radio"/> 2 a 3 veces al día<br><input type="radio"/> 5 a 6 veces al día<br><input type="radio"/> más 6 veces al día |
|-----|--------------------------------------------------------------------------------------------------------------------------------------------------------------------------------------------------------------------------------------------------------------------------------------------------------------------------------------------------------------------------------------------------------------|

---

|                 |                                                                                                                                                                                                                                                                                                                                                                                                              |
|-----------------|--------------------------------------------------------------------------------------------------------------------------------------------------------------------------------------------------------------------------------------------------------------------------------------------------------------------------------------------------------------------------------------------------------------|
| bruna o ciruela | <input type="radio"/> Nunca o menos 1 vez al mes<br><input type="radio"/> 1 a 3 veces mes<br><input checked="" type="radio"/> 1 vez semana<br><input type="radio"/> 2 a 4 veces semana<br><input type="radio"/> 5 a 6 veces semana<br><input type="radio"/> 1 vez al día<br><input type="radio"/> 2 a 3 veces al día<br><input type="radio"/> 5 a 6 veces al día<br><input type="radio"/> más 6 veces al día |
| kiwi            | <input type="radio"/> Nunca o menos 1 vez al mes<br><input checked="" type="radio"/> 1 a 3 veces mes<br><input type="radio"/> 1 vez semana<br><input type="radio"/> 2 a 4 veces semana<br><input type="radio"/> 5 a 6 veces semana<br><input type="radio"/> 1 vez al día<br><input type="radio"/> 2 a 3 veces al día<br><input type="radio"/> 5 a 6 veces al día<br><input type="radio"/> más 6 veces al día |
| aceituna        | <input checked="" type="radio"/> Nunca o menos 1 vez al mes<br><input type="radio"/> 1 a 3 veces mes<br><input type="radio"/> 1 vez semana<br><input type="radio"/> 2 a 4 veces semana<br><input type="radio"/> 5 a 6 veces semana<br><input type="radio"/> 1 vez al día<br><input type="radio"/> 2 a 3 veces al día<br><input type="radio"/> 5 a 6 veces al día<br><input type="radio"/> más 6 veces al día |
| frutos secos    | <input type="radio"/> Nunca o menos 1 vez al mes<br><input checked="" type="radio"/> 1 a 3 veces mes<br><input type="radio"/> 1 vez semana<br><input type="radio"/> 2 a 4 veces semana<br><input type="radio"/> 5 a 6 veces semana<br><input type="radio"/> 1 vez al día<br><input type="radio"/> 2 a 3 veces al día<br><input type="radio"/> 5 a 6 veces al día<br><input type="radio"/> más 6 veces al día |
| pan blanco      | <input checked="" type="radio"/> Nunca o menos 1 vez al mes<br><input type="radio"/> 1 a 3 veces mes<br><input type="radio"/> 1 vez semana<br><input type="radio"/> 2 a 4 veces semana<br><input type="radio"/> 5 a 6 veces semana<br><input type="radio"/> 1 vez al día<br><input type="radio"/> 2 a 3 veces al día<br><input type="radio"/> 5 a 6 veces al día<br><input type="radio"/> más 6 veces al día |
| pan integral    | <input type="radio"/> Nunca o menos 1 vez al mes<br><input type="radio"/> 1 a 3 veces mes<br><input type="radio"/> 1 vez semana<br><input type="radio"/> 2 a 4 veces semana<br><input type="radio"/> 5 a 6 veces semana<br><input type="radio"/> 1 vez al día<br><input checked="" type="radio"/> 2 a 3 veces al día<br><input type="radio"/> 5 a 6 veces al día<br><input type="radio"/> más 6 veces al día |



---

cereales desayuno

- ☐ Nunca o menos 1 vez al mes  
☐ 1 a 3 veces mes  
☐ 1 vez semana  
☐ 2 a 4 veces semana  
☐ 5 a 6 veces semana  
☒ 1 vez al día  
☐ 2 a 3 veces al día  
☐ 5 a 6 veces al día  
☐ más 6 veces al día

---

patatas fritas

- ☐ Nunca o menos 1 vez al mes  
☒ 1 a 3 veces mes  
☐ 1 vez semana  
☐ 2 a 4 veces semana  
☐ 5 a 6 veces semana  
☐ 1 vez al día  
☐ 2 a 3 veces al día  
☐ 5 a 6 veces al día  
☐ más 6 veces al día

---

patatas cocidas o asadas

- ☐ Nunca o menos 1 vez al mes  
☐ 1 a 3 veces mes  
☐ 1 vez semana  
☒ 2 a 4 veces semana  
☐ 5 a 6 veces semana  
☐ 1 vez al día  
☐ 2 a 3 veces al día  
☐ 5 a 6 veces al día  
☐ más 6 veces al día

---

bolsa papas

- ☒ Nunca o menos 1 vez al mes  
☐ 1 a 3 veces mes  
☐ 1 vez semana  
☐ 2 a 4 veces semana  
☐ 5 a 6 veces semana  
☐ 1 vez al día  
☐ 2 a 3 veces al día  
☐ 5 a 6 veces al día  
☐ más 6 veces al día

---

arroz cocinado

- ☐ Nunca o menos 1 vez al mes  
☐ 1 a 3 veces mes  
☒ 1 vez semana  
☐ 2 a 4 veces semana  
☐ 5 a 6 veces semana  
☐ 1 vez al día  
☐ 2 a 3 veces al día  
☐ 5 a 6 veces al día  
☐ más 6 veces al día

---

pasta

- ☐ Nunca o menos 1 vez al mes  
☐ 1 a 3 veces mes  
☒ 1 vez semana  
☐ 2 a 4 veces semana  
☐ 5 a 6 veces semana  
☐ 1 vez al día  
☐ 2 a 3 veces al día  
☐ 5 a 6 veces al día  
☐ más 6 veces al día

|                     |                                                                                                                                                                                                                                                                                                                                                                                                              |
|---------------------|--------------------------------------------------------------------------------------------------------------------------------------------------------------------------------------------------------------------------------------------------------------------------------------------------------------------------------------------------------------------------------------------------------------|
| pizza               | <input type="radio"/> Nunca o menos 1 vez al mes<br><input checked="" type="radio"/> 1 a 3 veces mes<br><input type="radio"/> 1 vez semana<br><input type="radio"/> 2 a 4 veces semana<br><input type="radio"/> 5 a 6 veces semana<br><input type="radio"/> 1 vez al día<br><input type="radio"/> 2 a 3 veces al día<br><input type="radio"/> 5 a 6 veces al día<br><input type="radio"/> más 6 veces al día |
| aceite oliva        | <input type="radio"/> Nunca o menos 1 vez al mes<br><input type="radio"/> 1 a 3 veces mes<br><input type="radio"/> 1 vez semana<br><input checked="" type="radio"/> 2 a 4 veces semana<br><input type="radio"/> 5 a 6 veces semana<br><input type="radio"/> 1 vez al día<br><input type="radio"/> 2 a 3 veces al día<br><input type="radio"/> 5 a 6 veces al día<br><input type="radio"/> más 6 veces al día |
| otros aceites       | <input checked="" type="radio"/> Nunca o menos 1 vez al mes<br><input type="radio"/> 1 a 3 veces mes<br><input type="radio"/> 1 vez semana<br><input type="radio"/> 2 a 4 veces semana<br><input type="radio"/> 5 a 6 veces semana<br><input type="radio"/> 1 vez al día<br><input type="radio"/> 2 a 3 veces al día<br><input type="radio"/> 5 a 6 veces al día<br><input type="radio"/> más 6 veces al día |
| margarina           | <input type="radio"/> Nunca o menos 1 vez al mes<br><input type="radio"/> 1 a 3 veces mes<br><input type="radio"/> 1 vez semana<br><input checked="" type="radio"/> 2 a 4 veces semana<br><input type="radio"/> 5 a 6 veces semana<br><input type="radio"/> 1 vez al día<br><input type="radio"/> 2 a 3 veces al día<br><input type="radio"/> 5 a 6 veces al día<br><input type="radio"/> más 6 veces al día |
| mantequilla         | <input type="radio"/> Nunca o menos 1 vez al mes<br><input type="radio"/> 1 a 3 veces mes<br><input type="radio"/> 1 vez semana<br><input checked="" type="radio"/> 2 a 4 veces semana<br><input type="radio"/> 5 a 6 veces semana<br><input type="radio"/> 1 vez al día<br><input type="radio"/> 2 a 3 veces al día<br><input type="radio"/> 5 a 6 veces al día<br><input type="radio"/> más 6 veces al día |
| galletas tipo maria | <input type="radio"/> Nunca o menos 1 vez al mes<br><input type="radio"/> 1 a 3 veces mes<br><input checked="" type="radio"/> 1 vez semana<br><input type="radio"/> 2 a 4 veces semana<br><input type="radio"/> 5 a 6 veces semana<br><input type="radio"/> 1 vez al día<br><input type="radio"/> 2 a 3 veces al día<br><input type="radio"/> 5 a 6 veces al día<br><input type="radio"/> más 6 veces al día |

|                           |                                                                                                                                                                                                                                                                                                                                                                                                              |
|---------------------------|--------------------------------------------------------------------------------------------------------------------------------------------------------------------------------------------------------------------------------------------------------------------------------------------------------------------------------------------------------------------------------------------------------------|
| galletas chocolate        | <input checked="" type="radio"/> Nunca o menos 1 vez al mes<br><input type="radio"/> 1 a 3 veces mes<br><input type="radio"/> 1 vez semana<br><input type="radio"/> 2 a 4 veces semana<br><input type="radio"/> 5 a 6 veces semana<br><input type="radio"/> 1 vez al día<br><input type="radio"/> 2 a 3 veces al día<br><input type="radio"/> 5 a 6 veces al día<br><input type="radio"/> más 6 veces al día |
| bollieria                 | <input type="radio"/> Nunca o menos 1 vez al mes<br><input type="radio"/> 1 a 3 veces mes<br><input type="radio"/> 1 vez semana<br><input checked="" type="radio"/> 2 a 4 veces semana<br><input type="radio"/> 5 a 6 veces semana<br><input type="radio"/> 1 vez al día<br><input type="radio"/> 2 a 3 veces al día<br><input type="radio"/> 5 a 6 veces al día<br><input type="radio"/> más 6 veces al día |
| chocolate o bombones      | <input type="radio"/> Nunca o menos 1 vez al mes<br><input type="radio"/> 1 a 3 veces mes<br><input type="radio"/> 1 vez semana<br><input checked="" type="radio"/> 2 a 4 veces semana<br><input type="radio"/> 5 a 6 veces semana<br><input type="radio"/> 1 vez al día<br><input type="radio"/> 2 a 3 veces al día<br><input type="radio"/> 5 a 6 veces al día<br><input type="radio"/> más 6 veces al día |
| chocolate polvo o colacao | <input checked="" type="radio"/> Nunca o menos 1 vez al mes<br><input type="radio"/> 1 a 3 veces mes<br><input type="radio"/> 1 vez semana<br><input type="radio"/> 2 a 4 veces semana<br><input type="radio"/> 5 a 6 veces semana<br><input type="radio"/> 1 vez al día<br><input type="radio"/> 2 a 3 veces al día<br><input type="radio"/> 5 a 6 veces al día<br><input type="radio"/> más 6 veces al día |
| vino tinto                | <input checked="" type="radio"/> Nunca o menos 1 vez al mes<br><input type="radio"/> 1 a 3 veces mes<br><input type="radio"/> 1 vez semana<br><input type="radio"/> 2 a 4 veces semana<br><input type="radio"/> 5 a 6 veces semana<br><input type="radio"/> 1 vez al día<br><input type="radio"/> 2 a 3 veces al día<br><input type="radio"/> 5 a 6 veces al día<br><input type="radio"/> más 6 veces al día |
| vino blanco               | <input checked="" type="radio"/> Nunca o menos 1 vez al mes<br><input type="radio"/> 1 a 3 veces mes<br><input type="radio"/> 1 vez semana<br><input type="radio"/> 2 a 4 veces semana<br><input type="radio"/> 5 a 6 veces semana<br><input type="radio"/> 1 vez al día<br><input type="radio"/> 2 a 3 veces al día<br><input type="radio"/> 5 a 6 veces al día<br><input type="radio"/> más 6 veces al día |

|                       |                                                                                                                                                                                                                                                                                                                                                                                                              |
|-----------------------|--------------------------------------------------------------------------------------------------------------------------------------------------------------------------------------------------------------------------------------------------------------------------------------------------------------------------------------------------------------------------------------------------------------|
| vino seco o vermut    | <input checked="" type="radio"/> Nunca o menos 1 vez al mes<br><input type="radio"/> 1 a 3 veces mes<br><input type="radio"/> 1 vez semana<br><input type="radio"/> 2 a 4 veces semana<br><input type="radio"/> 5 a 6 veces semana<br><input type="radio"/> 1 vez al día<br><input type="radio"/> 2 a 3 veces al día<br><input type="radio"/> 5 a 6 veces al día<br><input type="radio"/> más 6 veces al día |
| cerveza               | <input checked="" type="radio"/> Nunca o menos 1 vez al mes<br><input type="radio"/> 1 a 3 veces mes<br><input type="radio"/> 1 vez semana<br><input type="radio"/> 2 a 4 veces semana<br><input type="radio"/> 5 a 6 veces semana<br><input type="radio"/> 1 vez al día<br><input type="radio"/> 2 a 3 veces al día<br><input type="radio"/> 5 a 6 veces al día<br><input type="radio"/> más 6 veces al día |
| cerveza sin alcohol   | <input checked="" type="radio"/> Nunca o menos 1 vez al mes<br><input type="radio"/> 1 a 3 veces mes<br><input type="radio"/> 1 vez semana<br><input type="radio"/> 2 a 4 veces semana<br><input type="radio"/> 5 a 6 veces semana<br><input type="radio"/> 1 vez al día<br><input type="radio"/> 2 a 3 veces al día<br><input type="radio"/> 5 a 6 veces al día<br><input type="radio"/> más 6 veces al día |
| licores               | <input checked="" type="radio"/> Nunca o menos 1 vez al mes<br><input type="radio"/> 1 a 3 veces mes<br><input type="radio"/> 1 vez semana<br><input type="radio"/> 2 a 4 veces semana<br><input type="radio"/> 5 a 6 veces semana<br><input type="radio"/> 1 vez al día<br><input type="radio"/> 2 a 3 veces al día<br><input type="radio"/> 5 a 6 veces al día<br><input type="radio"/> más 6 veces al día |
| ginebra o ron o vodka | <input checked="" type="radio"/> Nunca o menos 1 vez al mes<br><input type="radio"/> 1 a 3 veces mes<br><input type="radio"/> 1 vez semana<br><input type="radio"/> 2 a 4 veces semana<br><input type="radio"/> 5 a 6 veces semana<br><input type="radio"/> 1 vez al día<br><input type="radio"/> 2 a 3 veces al día<br><input type="radio"/> 5 a 6 veces al día<br><input type="radio"/> más 6 veces al día |
| refresco normal       | <input checked="" type="radio"/> Nunca o menos 1 vez al mes<br><input type="radio"/> 1 a 3 veces mes<br><input type="radio"/> 1 vez semana<br><input type="radio"/> 2 a 4 veces semana<br><input type="radio"/> 5 a 6 veces semana<br><input type="radio"/> 1 vez al día<br><input type="radio"/> 2 a 3 veces al día<br><input type="radio"/> 5 a 6 veces al día<br><input type="radio"/> más 6 veces al día |

---

refresco sin azúcar

- ☐ Nunca o menos 1 vez al mes  
☐ 1 a 3 veces mes  
☐ 1 vez semana  
☐ 2 a 4 veces semana  
☐ 5 a 6 veces semana  
☐ 1 vez al día  
☐ 2 a 3 veces al día  
☐ 5 a 6 veces al día  
☐ más 6 veces al día

---

Agua del grifo

- ☐ Nunca o menos 1 vez al mes  
☐ 1 a 3 veces mes  
☐ 1 vez semana  
☐ 2 a 4 veces semana  
☐ 5 a 6 veces semana  
☐ 1 vez al día  
☐ 2 a 3 veces al día  
☐ 5 a 6 veces al día  
☐ más 6 veces al día

---

agua embotellada sin gas

- ☐ Nunca o menos 1 vez al mes  
☐ 1 a 3 veces mes  
☐ 1 vez semana  
☐ 2 a 4 veces semana  
☐ 5 a 6 veces semana  
☐ 1 vez al día  
☒ 2 a 3 veces al día  
☐ 5 a 6 veces al día  
☐ más 6 veces al día

---

agua embotellada con gas

- ☐ Nunca o menos 1 vez al mes  
☐ 1 a 3 veces mes  
☐ 1 vez semana  
☐ 2 a 4 veces semana  
☐ 5 a 6 veces semana  
☐ 1 vez al día  
☐ 2 a 3 veces al día  
☐ 5 a 6 veces al día  
☐ más 6 veces al día

---

zumو frutas embasado

- ☐ Nunca o menos 1 vez al mes  
☒ 1 a 3 veces mes  
☐ 1 vez semana  
☐ 2 a 4 veces semana  
☐ 5 a 6 veces semana  
☐ 1 vez al día  
☐ 2 a 3 veces al día  
☐ 5 a 6 veces al día  
☐ más 6 veces al día

---

cafe

- ☐ Nunca o menos 1 vez al mes  
☐ 1 a 3 veces mes  
☐ 1 vez semana  
☐ 2 a 4 veces semana  
☐ 5 a 6 veces semana  
☐ 1 vez al día  
☐ 2 a 3 veces al día  
☐ 5 a 6 veces al día  
☐ más 6 veces al día

|                       |                                                                                                                                                                                                                                                                                                                                                                                                              |
|-----------------------|--------------------------------------------------------------------------------------------------------------------------------------------------------------------------------------------------------------------------------------------------------------------------------------------------------------------------------------------------------------------------------------------------------------|
| cafe descafeinado     | <input type="radio"/> Nunca o menos 1 vez al mes<br><input type="radio"/> 1 a 3 veces mes<br><input type="radio"/> 1 vez semana<br><input type="radio"/> 2 a 4 veces semana<br><input type="radio"/> 5 a 6 veces semana<br><input checked="" type="radio"/> 1 vez al día<br><input type="radio"/> 2 a 3 veces al día<br><input type="radio"/> 5 a 6 veces al día<br><input type="radio"/> más 6 veces al día |
| te o infusión         | <input checked="" type="radio"/> Nunca o menos 1 vez al mes<br><input type="radio"/> 1 a 3 veces mes<br><input type="radio"/> 1 vez semana<br><input type="radio"/> 2 a 4 veces semana<br><input type="radio"/> 5 a 6 veces semana<br><input type="radio"/> 1 vez al día<br><input type="radio"/> 2 a 3 veces al día<br><input type="radio"/> 5 a 6 veces al día<br><input type="radio"/> más 6 veces al día |
| sopa o puré verduras  | <input type="radio"/> Nunca o menos 1 vez al mes<br><input type="radio"/> 1 a 3 veces mes<br><input checked="" type="radio"/> 1 vez semana<br><input type="radio"/> 2 a 4 veces semana<br><input type="radio"/> 5 a 6 veces semana<br><input type="radio"/> 1 vez al día<br><input type="radio"/> 2 a 3 veces al día<br><input type="radio"/> 5 a 6 veces al día<br><input type="radio"/> más 6 veces al día |
| croquetas pollo jamón | <input type="radio"/> Nunca o menos 1 vez al mes<br><input checked="" type="radio"/> 1 a 3 veces mes<br><input type="radio"/> 1 vez semana<br><input type="radio"/> 2 a 4 veces semana<br><input type="radio"/> 5 a 6 veces semana<br><input type="radio"/> 1 vez al día<br><input type="radio"/> 2 a 3 veces al día<br><input type="radio"/> 5 a 6 veces al día<br><input type="radio"/> más 6 veces al día |
| croquetas pescado     | <input type="radio"/> Nunca o menos 1 vez al mes<br><input checked="" type="radio"/> 1 a 3 veces mes<br><input type="radio"/> 1 vez semana<br><input type="radio"/> 2 a 4 veces semana<br><input type="radio"/> 5 a 6 veces semana<br><input type="radio"/> 1 vez al día<br><input type="radio"/> 2 a 3 veces al día<br><input type="radio"/> 5 a 6 veces al día<br><input type="radio"/> más 6 veces al día |
| mayonesa              | <input type="radio"/> Nunca o menos 1 vez al mes<br><input checked="" type="radio"/> 1 a 3 veces mes<br><input type="radio"/> 1 vez semana<br><input type="radio"/> 2 a 4 veces semana<br><input type="radio"/> 5 a 6 veces semana<br><input type="radio"/> 1 vez al día<br><input type="radio"/> 2 a 3 veces al día<br><input type="radio"/> 5 a 6 veces al día<br><input type="radio"/> más 6 veces al día |

|                  |                                                                                                                                                                                                                                                                                                                                                                                                              |
|------------------|--------------------------------------------------------------------------------------------------------------------------------------------------------------------------------------------------------------------------------------------------------------------------------------------------------------------------------------------------------------------------------------------------------------|
| salsa tomate     | <input type="radio"/> Nunca o menos 1 vez al mes<br><input type="radio"/> 1 a 3 veces mes<br><input checked="" type="radio"/> 1 vez semana<br><input type="radio"/> 2 a 4 veces semana<br><input type="radio"/> 5 a 6 veces semana<br><input type="radio"/> 1 vez al día<br><input type="radio"/> 2 a 3 veces al día<br><input type="radio"/> 5 a 6 veces al día<br><input type="radio"/> más 6 veces al día |
| ketchup          | <input type="radio"/> Nunca o menos 1 vez al mes<br><input checked="" type="radio"/> 1 a 3 veces mes<br><input type="radio"/> 1 vez semana<br><input type="radio"/> 2 a 4 veces semana<br><input type="radio"/> 5 a 6 veces semana<br><input type="radio"/> 1 vez al día<br><input type="radio"/> 2 a 3 veces al día<br><input type="radio"/> 5 a 6 veces al día<br><input type="radio"/> más 6 veces al día |
| sal              | <input type="radio"/> Nunca o menos 1 vez al mes<br><input type="radio"/> 1 a 3 veces mes<br><input type="radio"/> 1 vez semana<br><input type="radio"/> 2 a 4 veces semana<br><input type="radio"/> 5 a 6 veces semana<br><input checked="" type="radio"/> 1 vez al día<br><input type="radio"/> 2 a 3 veces al día<br><input type="radio"/> 5 a 6 veces al día<br><input type="radio"/> más 6 veces al día |
| ajo              | <input type="radio"/> Nunca o menos 1 vez al mes<br><input type="radio"/> 1 a 3 veces mes<br><input checked="" type="radio"/> 1 vez semana<br><input type="radio"/> 2 a 4 veces semana<br><input type="radio"/> 5 a 6 veces semana<br><input type="radio"/> 1 vez al día<br><input type="radio"/> 2 a 3 veces al día<br><input type="radio"/> 5 a 6 veces al día<br><input type="radio"/> más 6 veces al día |
| mermelada o miel | <input type="radio"/> Nunca o menos 1 vez al mes<br><input type="radio"/> 1 a 3 veces mes<br><input checked="" type="radio"/> 1 vez semana<br><input type="radio"/> 2 a 4 veces semana<br><input type="radio"/> 5 a 6 veces semana<br><input type="radio"/> 1 vez al día<br><input type="radio"/> 2 a 3 veces al día<br><input type="radio"/> 5 a 6 veces al día<br><input type="radio"/> más 6 veces al día |
| azúcar           | <input type="radio"/> Nunca o menos 1 vez al mes<br><input type="radio"/> 1 a 3 veces mes<br><input type="radio"/> 1 vez semana<br><input checked="" type="radio"/> 2 a 4 veces semana<br><input type="radio"/> 5 a 6 veces semana<br><input type="radio"/> 1 vez al día<br><input type="radio"/> 2 a 3 veces al día<br><input type="radio"/> 5 a 6 veces al día<br><input type="radio"/> más 6 veces al día |

|                                       |                                                                                                                                                                                                                                                                                                                                                                                                                                                                                                                               |
|---------------------------------------|-------------------------------------------------------------------------------------------------------------------------------------------------------------------------------------------------------------------------------------------------------------------------------------------------------------------------------------------------------------------------------------------------------------------------------------------------------------------------------------------------------------------------------|
| Otro alimento                         |                                                                                                                                                                                                                                                                                                                                                                                                                                                                                                                               |
| suplementos vitamínicos               | <input checked="" type="radio"/> si<br><input type="radio"/> no                                                                                                                                                                                                                                                                                                                                                                                                                                                               |
| suplementos vitamínicos               | [*DATA REMOVED*]                                                                                                                                                                                                                                                                                                                                                                                                                                                                                                              |
| dieta previa                          | <input type="radio"/> si<br><input checked="" type="radio"/> no                                                                                                                                                                                                                                                                                                                                                                                                                                                               |
| motivo dieta                          | <input checked="" type="radio"/> no dieta<br><input type="radio"/> control peso<br><input type="radio"/> control colesterol<br><input type="radio"/> control diabetes<br><input type="radio"/> problemas estómago<br><input type="radio"/> problemas vesícula o hepáticos<br><input type="radio"/> HTA o cardiopatía<br><input type="radio"/> problemas renales<br><input type="radio"/> alergia alimentaria<br><input type="radio"/> ácido úrico elevado<br><input type="radio"/> vegetariana<br><input type="radio"/> otros |
| cambio alimentos año previo gestación | <input type="radio"/> si<br><input checked="" type="radio"/> no                                                                                                                                                                                                                                                                                                                                                                                                                                                               |
| cambio lácteos                        | <input type="radio"/> eliminado<br><input type="radio"/> disminuido<br><input checked="" type="radio"/> igual<br><input type="radio"/> aumentado<br><input type="radio"/> no sabe                                                                                                                                                                                                                                                                                                                                             |
| cambio huevos                         | <input type="radio"/> eliminado<br><input type="radio"/> disminuido<br><input checked="" type="radio"/> igual<br><input type="radio"/> aumentado<br><input type="radio"/> no sabe                                                                                                                                                                                                                                                                                                                                             |
| cambio carne                          | <input type="radio"/> eliminado<br><input type="radio"/> disminuido<br><input checked="" type="radio"/> igual<br><input type="radio"/> aumentado<br><input type="radio"/> no sabe                                                                                                                                                                                                                                                                                                                                             |
| cambio pescado                        | <input type="radio"/> eliminado<br><input type="radio"/> disminuido<br><input checked="" type="radio"/> igual<br><input type="radio"/> aumentado<br><input type="radio"/> no sabe                                                                                                                                                                                                                                                                                                                                             |
| cambio verduras                       | <input type="radio"/> eliminado<br><input type="radio"/> disminuido<br><input checked="" type="radio"/> igual<br><input type="radio"/> aumentado<br><input type="radio"/> no sabe                                                                                                                                                                                                                                                                                                                                             |



|                            |                                                                                                                                                                                                                        |
|----------------------------|------------------------------------------------------------------------------------------------------------------------------------------------------------------------------------------------------------------------|
| cambio legumbres           | <input type="radio"/> eliminado<br><input type="radio"/> disminuido<br><input checked="" type="radio"/> igual<br><input type="radio"/> aumentado<br><input type="radio"/> no sabe                                      |
| cambio fruta               | <input type="radio"/> eliminado<br><input type="radio"/> disminuido<br><input checked="" type="radio"/> igual<br><input type="radio"/> aumentado<br><input type="radio"/> no sabe                                      |
| cambio pan                 | <input type="radio"/> eliminado<br><input type="radio"/> disminuido<br><input checked="" type="radio"/> igual<br><input type="radio"/> aumentado<br><input type="radio"/> no sabe                                      |
| cambio aceite oliva        | <input type="radio"/> eliminado<br><input type="radio"/> disminuido<br><input checked="" type="radio"/> igual<br><input type="radio"/> aumentado<br><input type="radio"/> no sabe                                      |
| cambio mante o margarina   | <input type="radio"/> eliminado<br><input type="radio"/> disminuido<br><input checked="" type="radio"/> igual<br><input type="radio"/> aumentado<br><input type="radio"/> no sabe                                      |
| cambio azúcar y dulces     | <input type="radio"/> eliminado<br><input type="radio"/> disminuido<br><input checked="" type="radio"/> igual<br><input type="radio"/> aumentado<br><input type="radio"/> no sabe                                      |
| cambio bebidas alcohólicas | <input type="radio"/> eliminado<br><input type="radio"/> disminuido<br><input checked="" type="radio"/> igual<br><input type="radio"/> aumentado<br><input type="radio"/> no sabe                                      |
| frecuencia comidas fritas  | <input type="radio"/> a diario<br><input type="radio"/> 5 a 6 veces semana<br><input type="radio"/> 2 a 4 veces semana<br><input checked="" type="radio"/> 1 vez semana<br><input type="radio"/> menos de 1 vez semana |
| carne                      | <input type="radio"/> no como<br><input type="radio"/> cruda<br><input type="radio"/> poco hecha<br><input checked="" type="radio"/> hecha<br><input type="radio"/> muy hecha                                          |
| grasa visible carne        | <input type="radio"/> quita toda<br><input checked="" type="radio"/> quita mayoría<br><input type="radio"/> quita un poco<br><input type="radio"/> no quita nada                                                       |

|                                |                                                                                                                                                                                                                                                          |
|--------------------------------|----------------------------------------------------------------------------------------------------------------------------------------------------------------------------------------------------------------------------------------------------------|
| cocina carne                   | <input checked="" type="radio"/> a la plancha<br><input type="radio"/> a la parrilla<br><input type="radio"/> asada<br><input type="radio"/> frita<br><input type="radio"/> guisada                                                                      |
| tostado quemado carne          | <input checked="" type="radio"/> nunca<br><input type="radio"/> 1 vez mes<br><input type="radio"/> 2 a 3 veces mes<br><input type="radio"/> 1 vez semana<br><input type="radio"/> 2 a 3 semanas                                                          |
| tostado quemado pescado        | <input checked="" type="radio"/> nunca<br><input type="radio"/> 1 vez mes<br><input type="radio"/> 2 a 3 veces mes<br><input type="radio"/> 1 vez semana<br><input type="radio"/> 2 a 3 semanas                                                          |
| socarrat paella                | <input checked="" type="radio"/> nunca<br><input type="radio"/> 1 vez mes<br><input type="radio"/> 2 a 3 veces mes<br><input type="radio"/> 1 vez semana<br><input type="radio"/> 2 a 3 semanas                                                          |
| grasa o aceite cocinar         | <input type="radio"/> mantequilla<br><input type="radio"/> margarina<br><input checked="" type="radio"/> aceite oliva<br><input type="radio"/> aceite oliva virgen extra<br><input type="radio"/> aceite vegetal<br><input type="radio"/> mezcla aceites |
| grasa aceite aliñar            | <input type="radio"/> mantequilla<br><input type="radio"/> margarina<br><input checked="" type="radio"/> aceite oliva<br><input type="radio"/> aceite oliva virgen extra<br><input type="radio"/> aceite vegetal<br><input type="radio"/> mezcla aceites |
| grasa aceite freir             | <input type="radio"/> mantequilla<br><input type="radio"/> margarina<br><input checked="" type="radio"/> aceite oliva<br><input type="radio"/> aceite oliva virgen extra<br><input type="radio"/> aceite vegetal<br><input type="radio"/> mezcla aceites |
| Ejercicio cuestionario         | <input checked="" type="radio"/> si<br><input type="radio"/> no                                                                                                                                                                                          |
| horas de sueño incluido siesta | [*DATA REMOVED*]                                                                                                                                                                                                                                         |
| minutos siesta                 | [*DATA REMOVED*]                                                                                                                                                                                                                                         |
| horas televisión semana        | [*DATA REMOVED*]                                                                                                                                                                                                                                         |

|                                        |                                                                                                                                                                                                                                                                                                                                                                           |
|----------------------------------------|---------------------------------------------------------------------------------------------------------------------------------------------------------------------------------------------------------------------------------------------------------------------------------------------------------------------------------------------------------------------------|
| actividad trabajo                      | <input type="radio"/> casi siempre sentado<br><input type="radio"/> sentado 50 por cien<br><input checked="" type="radio"/> casi siempre de pie, quieto<br><input type="radio"/> casi siempre levantado caminando y llevando pocas cosas<br><input type="radio"/> casi siempre levantado, caminando y llevado muchas cosas<br><input type="radio"/> trabajo manual pesado |
| tiempo caminar o bici al día           | <input type="radio"/> casi nunca<br><input type="radio"/> menos 20min día<br><input type="radio"/> 20 a 40 min día<br><input checked="" type="radio"/> 40 a 60 min día<br><input type="radio"/> 1h o 1h y media día<br><input type="radio"/> más de 1h y media al día                                                                                                     |
| tiempo tareas casa al día              | <input type="radio"/> menos de 1h día<br><input type="radio"/> 1 a 2h día<br><input checked="" type="radio"/> 3 a 4h día<br><input type="radio"/> 5 a 6h día<br><input type="radio"/> 7 a 8h día<br><input type="radio"/> más de 8h día                                                                                                                                   |
| tiempo libre televisión ordenador leer | <input type="radio"/> menos 1h día<br><input type="radio"/> 1h día<br><input checked="" type="radio"/> 2h día<br><input type="radio"/> 3h día<br><input type="radio"/> 4h día<br><input type="radio"/> 5 a 6h día<br><input type="radio"/> mas 6h día                                                                                                                     |
| tiempo libre ejercicio o deporte       | <input type="radio"/> menos 1h semana<br><input type="radio"/> 1h semana<br><input type="radio"/> 2h semana<br><input checked="" type="radio"/> 3h semana<br><input type="radio"/> 4 a 5h semana<br><input type="radio"/> mas 5h semana                                                                                                                                   |
| como se considera                      | <input type="radio"/> sedentaria<br><input type="radio"/> poco activa<br><input checked="" type="radio"/> moderadamente activa<br><input type="radio"/> bastante activa<br><input type="radio"/> muy activa<br><input type="radio"/> no sabe                                                                                                                              |
| FUR                                    | [*DATA REMOVED*]                                                                                                                                                                                                                                                                                                                                                          |
| Semanas gestación 2T                   | [*DATA REMOVED*]                                                                                                                                                                                                                                                                                                                                                          |
| Días gestación 2T                      | [*DATA REMOVED*]                                                                                                                                                                                                                                                                                                                                                          |
| DBP 2T                                 | [*DATA REMOVED*]                                                                                                                                                                                                                                                                                                                                                          |
| CC 2T                                  | [*DATA REMOVED*]                                                                                                                                                                                                                                                                                                                                                          |
| AC 2T                                  | [*DATA REMOVED*]                                                                                                                                                                                                                                                                                                                                                          |

|                                                   |                                                                                                                                                                                                 |
|---------------------------------------------------|-------------------------------------------------------------------------------------------------------------------------------------------------------------------------------------------------|
| LF 2T                                             | [*DATA REMOVED*]                                                                                                                                                                                |
| PFE 2T (Hadlock)                                  | [*DATA REMOVED*]                                                                                                                                                                                |
| Semanas gestación 3T                              | [*DATA REMOVED*]                                                                                                                                                                                |
| días 3T                                           | [*DATA REMOVED*]                                                                                                                                                                                |
| DBP 3T                                            | [*DATA REMOVED*]                                                                                                                                                                                |
| CC 3T                                             | [*DATA REMOVED*]                                                                                                                                                                                |
| AC 3T                                             | [*DATA REMOVED*]                                                                                                                                                                                |
| LF 3T                                             | [*DATA REMOVED*]                                                                                                                                                                                |
| PFE 3T (Hadlock)                                  | [*DATA REMOVED*]                                                                                                                                                                                |
| Semanas de gestación final                        | [*DATA REMOVED*]                                                                                                                                                                                |
| días gestación final                              | [*DATA REMOVED*]                                                                                                                                                                                |
| Localización placenta                             | <input checked="" type="radio"/> anterior<br><input type="radio"/> lateral derecha<br><input type="radio"/> lateral izquierda<br><input type="radio"/> posterior<br><input type="radio"/> fondo |
| Presentación longitudinal cefálica                | <input type="radio"/> no<br><input checked="" type="radio"/> si                                                                                                                                 |
| Dorso                                             | <input type="radio"/> izquierda anterior<br><input type="radio"/> izquierda posterior<br><input type="radio"/> derecha anterior<br><input checked="" type="radio"/> derecha posterior           |
| diámetro biparietal                               | [*DATA REMOVED*]                                                                                                                                                                                |
| Circunferencia craneal                            | [*DATA REMOVED*]                                                                                                                                                                                |
| Circunferencia abdominal                          | [*DATA REMOVED*]                                                                                                                                                                                |
| Longitud de femur                                 | [*DATA REMOVED*]                                                                                                                                                                                |
| tejido celular subcutáneo a nivel del muslo en mm | [*DATA REMOVED*]                                                                                                                                                                                |
| tejido celular subcutáneo en abdomen en mm        | [*DATA REMOVED*]                                                                                                                                                                                |
| Volumen del muslo en cm3                          | [*DATA REMOVED*]                                                                                                                                                                                |
| Peso fetal estimado según fórmula de Hadlock      | [*DATA REMOVED*]                                                                                                                                                                                |

|                                               |                                                                                                                                                          |
|-----------------------------------------------|----------------------------------------------------------------------------------------------------------------------------------------------------------|
| Percentil                                     | [*DATA REMOVED*]                                                                                                                                         |
| Peso fetal estimado según fórmula de Scioscia | <hr/>                                                                                                                                                    |
| Peso fetal estimado según fórmula de LEE      | <hr/>                                                                                                                                                    |
| Tipo de parto                                 | <input checked="" type="radio"/> eutocico<br><input type="radio"/> instrumentado/ventosa<br><input type="radio"/> cesarea                                |
| fecha de nacimiento                           | [*DATA REMOVED*]                                                                                                                                         |
| Días entre exploración y nacimiento           | [*DATA REMOVED*]                                                                                                                                         |
| Peso RN en g                                  | [*DATA REMOVED*]                                                                                                                                         |
| sexo                                          | <input checked="" type="radio"/> mujer<br><input type="radio"/> hombre                                                                                   |
| Apgar 1 minuto                                | [*DATA REMOVED*]                                                                                                                                         |
| Apgar 5 minutos                               | [*DATA REMOVED*]                                                                                                                                         |
| Apgar 10 minutos                              | <hr/>                                                                                                                                                    |
| antecedente Covid durante gestación           | <input type="radio"/> Yes<br><input checked="" type="radio"/> No                                                                                         |
| Nivel de estudios                             | <input type="radio"/> ninguno<br><input checked="" type="radio"/> primarios<br><input type="radio"/> secundarios<br><input type="radio"/> universitarios |

# Base\_datos\_estimacion\_peso\_fetal

|                                       |                                                                                                                                                                                                                                                                                      |
|---------------------------------------|--------------------------------------------------------------------------------------------------------------------------------------------------------------------------------------------------------------------------------------------------------------------------------------|
| Número de identificación participante | 26                                                                                                                                                                                                                                                                                   |
| CODIGO PARTICIPANTE                   |                                                                                                                                                                                                                                                                                      |
| Edad                                  | [*DATA REMOVED*]                                                                                                                                                                                                                                                                     |
| Gestaciones                           | <input type="radio"/> 1<br><input checked="" type="radio"/> 2<br><input type="radio"/> 3<br><input type="radio"/> mas de 3                                                                                                                                                           |
| partos                                | <input checked="" type="radio"/> 0<br><input type="radio"/> 1<br><input type="radio"/> 2<br><input type="radio"/> 3<br><input type="radio"/> mas de 3                                                                                                                                |
| cesáreas                              | <input checked="" type="radio"/> 0<br><input type="radio"/> 1<br><input type="radio"/> 2<br><input type="radio"/> 3<br><input type="radio"/> mas de 3                                                                                                                                |
| Abortos                               | <input type="radio"/> 0<br><input checked="" type="radio"/> 1<br><input type="radio"/> 2<br><input type="radio"/> 3<br><input type="radio"/> mas de 3                                                                                                                                |
| Tipo de gestacion                     | <input checked="" type="radio"/> espontanea<br><input type="radio"/> IAC inseminación artificial conyuge<br><input type="radio"/> IAD inseminación artificial donante<br><input type="radio"/> FIV Fecundación in Vitro<br><input type="radio"/> Ovodon FIV con donación de ovocitos |
| peso previo a embarazo                | [*DATA REMOVED*]                                                                                                                                                                                                                                                                     |
| Ganancia ponderal embarazo            |                                                                                                                                                                                                                                                                                      |
| Talla madre                           | [*DATA REMOVED*]                                                                                                                                                                                                                                                                     |
| IMC previo embarazo                   | 23.1084345786212                                                                                                                                                                                                                                                                     |
| Patología obstétrica                  | <input checked="" type="radio"/> no<br><input type="radio"/> si                                                                                                                                                                                                                      |
| Diabetes pregestacional               | <input checked="" type="radio"/> no<br><input type="radio"/> si                                                                                                                                                                                                                      |
| Diabetes gestacional                  | <input checked="" type="radio"/> no<br><input type="radio"/> si                                                                                                                                                                                                                      |

|                                            |                                                                                                                                                                                      |
|--------------------------------------------|--------------------------------------------------------------------------------------------------------------------------------------------------------------------------------------|
| Diabetes gestacional con insulina          | <input checked="" type="radio"/> no<br><input type="radio"/> si                                                                                                                      |
| Diabetes gestacional con dieta y ejercicio | <input checked="" type="radio"/> no<br><input type="radio"/> si                                                                                                                      |
| Percentil fetos previos                    | <input checked="" type="radio"/> Nada<br><input type="radio"/> percentil menor de 10<br><input type="radio"/> percentil entre 10 y 90<br><input type="radio"/> percentil mayor de 90 |
| Exfumadora                                 | <input checked="" type="radio"/> Nada<br><input type="radio"/> menos de 5 años<br><input type="radio"/> 5 a 10 años<br><input type="radio"/> mayor o igual a 10 años                 |
| Hábito tabáquico                           | <input checked="" type="radio"/> no<br><input type="radio"/> si                                                                                                                      |
| fumadora                                   | [*DATA REMOVED*]                                                                                                                                                                     |
| Consumo otros tóxicos                      | <input checked="" type="radio"/> no<br><input type="radio"/> si                                                                                                                      |
| Hb 1T                                      | [*DATA REMOVED*]                                                                                                                                                                     |
| Htc 1T                                     | [*DATA REMOVED*]                                                                                                                                                                     |
| Hb 2T                                      | [*DATA REMOVED*]                                                                                                                                                                     |
| HTC 2T                                     | [*DATA REMOVED*]                                                                                                                                                                     |
| Hb 3T                                      | [*DATA REMOVED*]                                                                                                                                                                     |
| HTC 3T                                     | [*DATA REMOVED*]                                                                                                                                                                     |
| Suplemento FE oral                         | <input checked="" type="radio"/> si<br><input type="radio"/> no                                                                                                                      |
| Suplemento fe iv                           | <input type="radio"/> si<br><input checked="" type="radio"/> no                                                                                                                      |
| Transfusión                                | <input checked="" type="radio"/> no<br><input type="radio"/> si                                                                                                                      |
| Solicitada Vit D                           | <input checked="" type="radio"/> no<br><input type="radio"/> si                                                                                                                      |
| Deficit vit D                              | <input type="radio"/> no<br><input type="radio"/> si                                                                                                                                 |
| Suplemento vit D                           | <input type="radio"/> si<br><input type="radio"/> no                                                                                                                                 |

|                       |                                                                                                                                                                                                                                                                                                                                                                                                              |
|-----------------------|--------------------------------------------------------------------------------------------------------------------------------------------------------------------------------------------------------------------------------------------------------------------------------------------------------------------------------------------------------------------------------------------------------------|
| Dieta, cuestionario   | <input checked="" type="radio"/> sí<br><input type="radio"/> no                                                                                                                                                                                                                                                                                                                                              |
| Leche entera          | <input checked="" type="radio"/> Nunca o menos 1 vez al mes<br><input type="radio"/> 1 a 3 veces mes<br><input type="radio"/> 1 vez semana<br><input type="radio"/> 2 a 4 veces semana<br><input type="radio"/> 5 a 6 veces semana<br><input type="radio"/> 1 vez al día<br><input type="radio"/> 2 a 3 veces al día<br><input type="radio"/> 5 a 6 veces al día<br><input type="radio"/> más 6 veces al día |
| Leche semidesnatada   | <input checked="" type="radio"/> Nunca o menos 1 vez al mes<br><input type="radio"/> 1 a 3 veces mes<br><input type="radio"/> 1 vez semana<br><input type="radio"/> 2 a 4 veces semana<br><input type="radio"/> 5 a 6 veces semana<br><input type="radio"/> 1 vez al día<br><input type="radio"/> 2 a 3 veces al día<br><input type="radio"/> 5 a 6 veces al día<br><input type="radio"/> mas 6 veces al día |
| Leche desnatada       | <input checked="" type="radio"/> Nunca o menos 1 vez al mes<br><input type="radio"/> 1 a 3 veces mes<br><input type="radio"/> 1 vez semana<br><input type="radio"/> 2 a 4 veces semana<br><input type="radio"/> 5 a 6 veces semana<br><input type="radio"/> 1 vez al día<br><input type="radio"/> 2 a 3 veces al día<br><input type="radio"/> 5 a 6 veces al día<br><input type="radio"/> más 6 veces al día |
| Leche condensada      | <input checked="" type="radio"/> Nunca o menos 1 vez al mes<br><input type="radio"/> 1 a 3 veces mes<br><input type="radio"/> 1 vez semana<br><input type="radio"/> 2 a 4 veces semana<br><input type="radio"/> 5 a 6 veces semana<br><input type="radio"/> 1 vez al día<br><input type="radio"/> 2 a 3 veces al día<br><input type="radio"/> 5 a 6 veces al día<br><input type="radio"/> más 6 veces al día |
| nata o crema de leche | <input checked="" type="radio"/> Nunca o menos 1 vez al mes<br><input type="radio"/> 1 a 3 veces mes<br><input type="radio"/> 1 vez semana<br><input type="radio"/> 2 a 4 veces semana<br><input type="radio"/> 5 a 6 veces semana<br><input type="radio"/> 1 vez al día<br><input type="radio"/> 2 a 3 veces al día<br><input type="radio"/> 5 a 6 veces al día<br><input type="radio"/> más 6 veces al día |



|                                             |                                                                                                                                                                                                                                                                                                                                                                                                              |
|---------------------------------------------|--------------------------------------------------------------------------------------------------------------------------------------------------------------------------------------------------------------------------------------------------------------------------------------------------------------------------------------------------------------------------------------------------------------|
| Yogurt Entero                               | <input checked="" type="radio"/> Nunca o menos 1 vez al mes<br><input type="radio"/> 1 a 3 veces mes<br><input type="radio"/> 1 vez semana<br><input type="radio"/> 2 a 4 veces semana<br><input type="radio"/> 5 a 6 veces semana<br><input type="radio"/> 1 vez al día<br><input type="radio"/> 2 a 3 veces al día<br><input type="radio"/> 5 a 6 veces al día<br><input type="radio"/> más 6 veces al día |
| Yogurt desnatado                            | <input type="radio"/> Nunca o menos 1 vez al mes<br><input type="radio"/> 1 a 3 veces mes<br><input type="radio"/> 1 vez semana<br><input type="radio"/> 2 a 4 veces semana<br><input type="radio"/> 5 a 6 veces semana<br><input checked="" type="radio"/> 1 vez al día<br><input type="radio"/> 2 a 3 veces al día<br><input type="radio"/> 5 a 6 veces al día<br><input type="radio"/> más 6 veces al día |
| 100g requesón o queso blando o queso fresco | <input type="radio"/> Nunca o menos 1 vez al mes<br><input type="radio"/> 1 a 3 veces mes<br><input type="radio"/> 1 vez semana<br><input type="radio"/> 2 a 4 veces semana<br><input type="radio"/> 5 a 6 veces semana<br><input checked="" type="radio"/> 1 vez al día<br><input type="radio"/> 2 a 3 veces al día<br><input type="radio"/> 5 a 6 veces al día<br><input type="radio"/> más 6 veces al día |
| queso curado o semicurado o cremoso         | <input type="radio"/> Nunca o menos 1 vez al mes<br><input checked="" type="radio"/> 1 a 3 veces mes<br><input type="radio"/> 1 vez semana<br><input type="radio"/> 2 a 4 veces semana<br><input type="radio"/> 5 a 6 veces semana<br><input type="radio"/> 1 vez al día<br><input type="radio"/> 2 a 3 veces al día<br><input type="radio"/> 5 a 6 veces al día<br><input type="radio"/> más 6 veces al día |
| natillas flan pudding                       | <input checked="" type="radio"/> Nunca o menos 1 vez al mes<br><input type="radio"/> 1 a 3 veces mes<br><input type="radio"/> 1 vez semana<br><input type="radio"/> 2 a 4 veces semana<br><input type="radio"/> 5 a 6 veces semana<br><input type="radio"/> 1 vez al día<br><input type="radio"/> 2 a 3 veces al día<br><input type="radio"/> 5 a 6 veces al día<br><input type="radio"/> más 6 veces al día |
| Helado                                      | <input checked="" type="radio"/> Nunca o menos 1 vez al mes<br><input type="radio"/> 1 a 3 veces mes<br><input type="radio"/> 1 vez semana<br><input type="radio"/> 2 a 4 veces semana<br><input type="radio"/> 5 a 6 veces semana<br><input type="radio"/> 1 vez al día<br><input type="radio"/> 2 a 3 veces al día<br><input type="radio"/> 5 a 6 veces al día<br><input type="radio"/> más 6 veces al día |

|                                      |                                                                                                                                                                                                                                                                                                                                                                                                              |
|--------------------------------------|--------------------------------------------------------------------------------------------------------------------------------------------------------------------------------------------------------------------------------------------------------------------------------------------------------------------------------------------------------------------------------------------------------------|
| huevo                                | <input type="radio"/> Nunca o menos 1 vez al mes<br><input type="radio"/> 1 a 3 veces mes<br><input type="radio"/> 1 vez semana<br><input checked="" type="radio"/> 2 a 4 veces semana<br><input type="radio"/> 5 a 6 veces semana<br><input type="radio"/> 1 vez al día<br><input type="radio"/> 2 a 3 veces al día<br><input type="radio"/> 5 a 6 veces al día<br><input type="radio"/> más 6 veces al día |
| Pollo con piel                       | <input checked="" type="radio"/> Nunca o menos 1 vez al mes<br><input type="radio"/> 1 a 3 veces mes<br><input type="radio"/> 1 vez semana<br><input type="radio"/> 2 a 4 veces semana<br><input type="radio"/> 5 a 6 veces semana<br><input type="radio"/> 1 vez al día<br><input type="radio"/> 2 a 3 veces al día<br><input type="radio"/> 5 a 6 veces al día<br><input type="radio"/> más 6 veces al día |
| pollo sin piel                       | <input checked="" type="radio"/> Nunca o menos 1 vez al mes<br><input type="radio"/> 1 a 3 veces mes<br><input type="radio"/> 1 vez semana<br><input type="radio"/> 2 a 4 veces semana<br><input type="radio"/> 5 a 6 veces semana<br><input type="radio"/> 1 vez al día<br><input type="radio"/> 2 a 3 veces al día<br><input type="radio"/> 5 a 6 veces al día<br><input type="radio"/> más 6 veces al día |
| Ternera o cerdo o cordero            | <input checked="" type="radio"/> Nunca o menos 1 vez al mes<br><input type="radio"/> 1 a 3 veces mes<br><input type="radio"/> 1 vez semana<br><input type="radio"/> 2 a 4 veces semana<br><input type="radio"/> 5 a 6 veces semana<br><input type="radio"/> 1 vez al día<br><input type="radio"/> 2 a 3 veces al día<br><input type="radio"/> 5 a 6 veces al día<br><input type="radio"/> más 6 veces al día |
| carne caza: Conejo o codorniz o pato | <input checked="" type="radio"/> Nunca o menos 1 vez al mes<br><input type="radio"/> 1 a 3 veces mes<br><input type="radio"/> 1 vez semana<br><input type="radio"/> 2 a 4 veces semana<br><input type="radio"/> 5 a 6 veces semana<br><input type="radio"/> 1 vez al día<br><input type="radio"/> 2 a 3 veces al día<br><input type="radio"/> 5 a 6 veces al día<br><input type="radio"/> más 6 veces al día |
| Hígado de ternera o cerdo o pollo    | <input checked="" type="radio"/> Nunca o menos 1 vez al mes<br><input type="radio"/> 1 a 3 veces mes<br><input type="radio"/> 1 vez semana<br><input type="radio"/> 2 a 4 veces semana<br><input type="radio"/> 5 a 6 veces semana<br><input type="radio"/> 1 vez al día<br><input type="radio"/> 2 a 3 veces al día<br><input type="radio"/> 5 a 6 veces al día<br><input type="radio"/> más 6 veces al día |

|                     |                                                                                                                                                                                                                                                                                                                                                                                                              |
|---------------------|--------------------------------------------------------------------------------------------------------------------------------------------------------------------------------------------------------------------------------------------------------------------------------------------------------------------------------------------------------------------------------------------------------------|
| Vísceras            | <input checked="" type="radio"/> Nunca o menos 1 vez al mes<br><input type="radio"/> 1 a 3 veces mes<br><input type="radio"/> 1 vez semana<br><input type="radio"/> 2 a 4 veces semana<br><input type="radio"/> 5 a 6 veces semana<br><input type="radio"/> 1 vez al día<br><input type="radio"/> 2 a 3 veces al día<br><input type="radio"/> 5 a 6 veces al día<br><input type="radio"/> más 6 veces al día |
| Embutido            | <input checked="" type="radio"/> Nunca o menos 1 vez al mes<br><input type="radio"/> 1 a 3 veces mes<br><input type="radio"/> 1 vez semana<br><input type="radio"/> 2 a 4 veces semana<br><input type="radio"/> 5 a 6 veces semana<br><input type="radio"/> 1 vez al día<br><input type="radio"/> 2 a 3 veces al día<br><input type="radio"/> 5 a 6 veces al día<br><input type="radio"/> más 6 veces al día |
| Salchicha o similar | <input checked="" type="radio"/> Nunca o menos 1 vez al mes<br><input type="radio"/> 1 a 3 veces mes<br><input type="radio"/> 1 vez semana<br><input type="radio"/> 2 a 4 veces semana<br><input type="radio"/> 5 a 6 veces semana<br><input type="radio"/> 1 vez al día<br><input type="radio"/> 2 a 3 veces al día<br><input type="radio"/> 5 a 6 veces al día<br><input type="radio"/> más 6 veces al día |
| Pate o foiegras     | <input checked="" type="radio"/> Nunca o menos 1 vez al mes<br><input type="radio"/> 1 a 3 veces mes<br><input type="radio"/> 1 vez semana<br><input type="radio"/> 2 a 4 veces semana<br><input type="radio"/> 5 a 6 veces semana<br><input type="radio"/> 1 vez al día<br><input type="radio"/> 2 a 3 veces al día<br><input type="radio"/> 5 a 6 veces al día<br><input type="radio"/> más 6 veces al día |
| Hamburguesa         | <input checked="" type="radio"/> Nunca o menos 1 vez al mes<br><input type="radio"/> 1 a 3 veces mes<br><input type="radio"/> 1 vez semana<br><input type="radio"/> 2 a 4 veces semana<br><input type="radio"/> 5 a 6 veces semana<br><input type="radio"/> 1 vez al día<br><input type="radio"/> 2 a 3 veces al día<br><input type="radio"/> 5 a 6 veces al día<br><input type="radio"/> más 6 veces al día |
| tocino o bacon      | <input checked="" type="radio"/> Nunca o menos 1 vez al mes<br><input type="radio"/> 1 a 3 veces mes<br><input type="radio"/> 1 vez semana<br><input type="radio"/> 2 a 4 veces semana<br><input type="radio"/> 5 a 6 veces semana<br><input type="radio"/> 1 vez al día<br><input type="radio"/> 2 a 3 veces al día<br><input type="radio"/> 5 a 6 veces al día<br><input type="radio"/> más 6 veces al día |

---

|               |                                                                                                                                                                                                                                                                                                                                                                                                              |
|---------------|--------------------------------------------------------------------------------------------------------------------------------------------------------------------------------------------------------------------------------------------------------------------------------------------------------------------------------------------------------------------------------------------------------------|
| Pescado frito | <input checked="" type="radio"/> Nunca o menos 1 vez al mes<br><input type="radio"/> 1 a 3 veces mes<br><input type="radio"/> 1 vez semana<br><input type="radio"/> 2 a 4 veces semana<br><input type="radio"/> 5 a 6 veces semana<br><input type="radio"/> 1 vez al día<br><input type="radio"/> 2 a 3 veces al día<br><input type="radio"/> 5 a 6 veces al día<br><input type="radio"/> más 6 veces al día |
|---------------|--------------------------------------------------------------------------------------------------------------------------------------------------------------------------------------------------------------------------------------------------------------------------------------------------------------------------------------------------------------------------------------------------------------|

---

|                        |                                                                                                                                                                                                                                                                                                                                                                                                              |
|------------------------|--------------------------------------------------------------------------------------------------------------------------------------------------------------------------------------------------------------------------------------------------------------------------------------------------------------------------------------------------------------------------------------------------------------|
| pescado hervido blanco | <input type="radio"/> Nunca o menos 1 vez al mes<br><input type="radio"/> 1 a 3 veces mes<br><input checked="" type="radio"/> 1 vez semana<br><input type="radio"/> 2 a 4 veces semana<br><input type="radio"/> 5 a 6 veces semana<br><input type="radio"/> 1 vez al día<br><input type="radio"/> 2 a 3 veces al día<br><input type="radio"/> 5 a 6 veces al día<br><input type="radio"/> más 6 veces al día |
|------------------------|--------------------------------------------------------------------------------------------------------------------------------------------------------------------------------------------------------------------------------------------------------------------------------------------------------------------------------------------------------------------------------------------------------------|

---

|                      |                                                                                                                                                                                                                                                                                                                                                                                                              |
|----------------------|--------------------------------------------------------------------------------------------------------------------------------------------------------------------------------------------------------------------------------------------------------------------------------------------------------------------------------------------------------------------------------------------------------------|
| pescado hervido azul | <input checked="" type="radio"/> Nunca o menos 1 vez al mes<br><input type="radio"/> 1 a 3 veces mes<br><input type="radio"/> 1 vez semana<br><input type="radio"/> 2 a 4 veces semana<br><input type="radio"/> 5 a 6 veces semana<br><input type="radio"/> 1 vez al día<br><input type="radio"/> 2 a 3 veces al día<br><input type="radio"/> 5 a 6 veces al día<br><input type="radio"/> más 6 veces al día |
|----------------------|--------------------------------------------------------------------------------------------------------------------------------------------------------------------------------------------------------------------------------------------------------------------------------------------------------------------------------------------------------------------------------------------------------------|

---

|                    |                                                                                                                                                                                                                                                                                                                                                                                                              |
|--------------------|--------------------------------------------------------------------------------------------------------------------------------------------------------------------------------------------------------------------------------------------------------------------------------------------------------------------------------------------------------------------------------------------------------------|
| otros pescado azul | <input type="radio"/> Nunca o menos 1 vez al mes<br><input type="radio"/> 1 a 3 veces mes<br><input checked="" type="radio"/> 1 vez semana<br><input type="radio"/> 2 a 4 veces semana<br><input type="radio"/> 5 a 6 veces semana<br><input type="radio"/> 1 vez al día<br><input type="radio"/> 2 a 3 veces al día<br><input type="radio"/> 5 a 6 veces al día<br><input type="radio"/> más 6 veces al día |
|--------------------|--------------------------------------------------------------------------------------------------------------------------------------------------------------------------------------------------------------------------------------------------------------------------------------------------------------------------------------------------------------------------------------------------------------|

---

|               |                                                                                                                                                                                                                                                                                                                                                                                                              |
|---------------|--------------------------------------------------------------------------------------------------------------------------------------------------------------------------------------------------------------------------------------------------------------------------------------------------------------------------------------------------------------------------------------------------------------|
| atun conserva | <input checked="" type="radio"/> Nunca o menos 1 vez al mes<br><input type="radio"/> 1 a 3 veces mes<br><input type="radio"/> 1 vez semana<br><input type="radio"/> 2 a 4 veces semana<br><input type="radio"/> 5 a 6 veces semana<br><input type="radio"/> 1 vez al día<br><input type="radio"/> 2 a 3 veces al día<br><input type="radio"/> 5 a 6 veces al día<br><input type="radio"/> más 6 veces al día |
|---------------|--------------------------------------------------------------------------------------------------------------------------------------------------------------------------------------------------------------------------------------------------------------------------------------------------------------------------------------------------------------------------------------------------------------|

---

|                  |                                                                                                                                                                                                                                                                                                                                                                                                              |
|------------------|--------------------------------------------------------------------------------------------------------------------------------------------------------------------------------------------------------------------------------------------------------------------------------------------------------------------------------------------------------------------------------------------------------------|
| sardina conserva | <input type="radio"/> Nunca o menos 1 vez al mes<br><input type="radio"/> 1 a 3 veces mes<br><input checked="" type="radio"/> 1 vez semana<br><input type="radio"/> 2 a 4 veces semana<br><input type="radio"/> 5 a 6 veces semana<br><input type="radio"/> 1 vez al día<br><input type="radio"/> 2 a 3 veces al día<br><input type="radio"/> 5 a 6 veces al día<br><input type="radio"/> más 6 veces al día |
|------------------|--------------------------------------------------------------------------------------------------------------------------------------------------------------------------------------------------------------------------------------------------------------------------------------------------------------------------------------------------------------------------------------------------------------|

---

---

pescado ahumado

- ☐ Nunca o menos 1 vez al mes  
☐ 1 a 3 veces mes  
☒ 1 vez semana  
☐ 2 a 4 veces semana  
☐ 5 a 6 veces semana  
☐ 1 vez al día  
☐ 2 a 3 veces al día  
☐ 5 a 6 veces al día  
☐ más 6 veces al día

---

almejas o mejillones o ostras unos 100g

- ☐ Nunca o menos 1 vez al mes  
☒ 1 a 3 veces mes  
☐ 1 vez semana  
☐ 2 a 4 veces semana  
☐ 5 a 6 veces semana  
☐ 1 vez al día  
☐ 2 a 3 veces al día  
☐ 5 a 6 veces al día  
☐ más 6 veces al día

---

calamar o chipiron o sepia unos 100g

- ☐ Nunca o menos 1 vez al mes  
☒ 1 a 3 veces mes  
☐ 1 vez semana  
☐ 2 a 4 veces semana  
☐ 5 a 6 veces semana  
☐ 1 vez al día  
☐ 2 a 3 veces al día  
☐ 5 a 6 veces al día  
☐ más 6 veces al día

---

marisco unos 100g

- ☒ Nunca o menos 1 vez al mes  
☐ 1 a 3 veces mes  
☐ 1 vez semana  
☐ 2 a 4 veces semana  
☐ 5 a 6 veces semana  
☐ 1 vez al día  
☐ 2 a 3 veces al día  
☐ 5 a 6 veces al día  
☐ más 6 veces al día

---

Espinacas o acelgas cocinadas

- ☐ Nunca o menos 1 vez al mes  
☐ 1 a 3 veces mes  
☒ 1 vez semana  
☐ 2 a 4 veces semana  
☐ 5 a 6 veces semana  
☐ 1 vez al día  
☐ 2 a 3 veces al día  
☐ 5 a 6 veces al día  
☐ más 6 veces al día

---

Col o coliflor o brocoli cocinado

- ☐ Nunca o menos 1 vez al mes  
☐ 1 a 3 veces mes  
☒ 1 vez semana  
☐ 2 a 4 veces semana  
☐ 5 a 6 veces semana  
☐ 1 vez al día  
☐ 2 a 3 veces al día  
☐ 5 a 6 veces al día  
☐ más 6 veces al día

---

Lechuga o endivia o escarola

- ☐ Nunca o menos 1 vez al mes  
☐ 1 a 3 veces mes  
☒ 1 vez semana  
☐ 2 a 4 veces semana  
☐ 5 a 6 veces semana  
☐ 1 vez al día  
☐ 2 a 3 veces al día  
☐ 5 a 6 veces al día  
☐ más 6 veces al día

---

tomate ensalada

- ☐ Nunca o menos 1 vez al mes  
☒ 1 a 3 veces mes  
☐ 1 vez semana  
☐ 2 a 4 veces semana  
☐ 5 a 6 veces semana  
☐ 1 vez al día  
☐ 2 a 3 veces al día  
☐ 5 a 6 veces al día  
☐ más 6 veces al día

---

cebolla

- ☐ Nunca o menos 1 vez al mes  
☐ 1 a 3 veces mes  
☐ 1 vez semana  
☒ 2 a 4 veces semana  
☐ 5 a 6 veces semana  
☐ 1 vez al día  
☐ 2 a 3 veces al día  
☐ 5 a 6 veces al día  
☐ más 6 veces al día

---

Zanahoria o calabaza

- ☐ Nunca o menos 1 vez al mes  
☐ 1 a 3 veces mes  
☒ 1 vez semana  
☐ 2 a 4 veces semana  
☐ 5 a 6 veces semana  
☐ 1 vez al día  
☐ 2 a 3 veces al día  
☐ 5 a 6 veces al día  
☐ más 6 veces al día

---

Judías verdes

- ☐ Nunca o menos 1 vez al mes  
☒ 1 a 3 veces mes  
☐ 1 vez semana  
☐ 2 a 4 veces semana  
☐ 5 a 6 veces semana  
☐ 1 vez al día  
☐ 2 a 3 veces al día  
☐ 5 a 6 veces al día  
☐ más 6 veces al día

---

Berenjena o calabacin o pepino

- ☐ Nunca o menos 1 vez al mes  
☐ 1 a 3 veces mes  
☐ 1 vez semana  
☒ 2 a 4 veces semana  
☐ 5 a 6 veces semana  
☐ 1 vez al día  
☐ 2 a 3 veces al día  
☐ 5 a 6 veces al día  
☐ más 6 veces al día

---

|          |                                                                                                                                                                                                                                                                                                                                                                                                              |
|----------|--------------------------------------------------------------------------------------------------------------------------------------------------------------------------------------------------------------------------------------------------------------------------------------------------------------------------------------------------------------------------------------------------------------|
| pimiento | <input checked="" type="radio"/> Nunca o menos 1 vez al mes<br><input type="radio"/> 1 a 3 veces mes<br><input type="radio"/> 1 vez semana<br><input type="radio"/> 2 a 4 veces semana<br><input type="radio"/> 5 a 6 veces semana<br><input type="radio"/> 1 vez al día<br><input type="radio"/> 2 a 3 veces al día<br><input type="radio"/> 5 a 6 veces al día<br><input type="radio"/> más 6 veces al día |
|----------|--------------------------------------------------------------------------------------------------------------------------------------------------------------------------------------------------------------------------------------------------------------------------------------------------------------------------------------------------------------------------------------------------------------|

---

|           |                                                                                                                                                                                                                                                                                                                                                                                                              |
|-----------|--------------------------------------------------------------------------------------------------------------------------------------------------------------------------------------------------------------------------------------------------------------------------------------------------------------------------------------------------------------------------------------------------------------|
| alcachofa | <input type="radio"/> Nunca o menos 1 vez al mes<br><input type="radio"/> 1 a 3 veces mes<br><input checked="" type="radio"/> 1 vez semana<br><input type="radio"/> 2 a 4 veces semana<br><input type="radio"/> 5 a 6 veces semana<br><input type="radio"/> 1 vez al día<br><input type="radio"/> 2 a 3 veces al día<br><input type="radio"/> 5 a 6 veces al día<br><input type="radio"/> más 6 veces al día |
|-----------|--------------------------------------------------------------------------------------------------------------------------------------------------------------------------------------------------------------------------------------------------------------------------------------------------------------------------------------------------------------------------------------------------------------|

---

|            |                                                                                                                                                                                                                                                                                                                                                                                                              |
|------------|--------------------------------------------------------------------------------------------------------------------------------------------------------------------------------------------------------------------------------------------------------------------------------------------------------------------------------------------------------------------------------------------------------------|
| espárragos | <input type="radio"/> Nunca o menos 1 vez al mes<br><input type="radio"/> 1 a 3 veces mes<br><input checked="" type="radio"/> 1 vez semana<br><input type="radio"/> 2 a 4 veces semana<br><input type="radio"/> 5 a 6 veces semana<br><input type="radio"/> 1 vez al día<br><input type="radio"/> 2 a 3 veces al día<br><input type="radio"/> 5 a 6 veces al día<br><input type="radio"/> más 6 veces al día |
|------------|--------------------------------------------------------------------------------------------------------------------------------------------------------------------------------------------------------------------------------------------------------------------------------------------------------------------------------------------------------------------------------------------------------------|

---

|              |                                                                                                                                                                                                                                                                                                                                                                                                              |
|--------------|--------------------------------------------------------------------------------------------------------------------------------------------------------------------------------------------------------------------------------------------------------------------------------------------------------------------------------------------------------------------------------------------------------------|
| maíz hervido | <input checked="" type="radio"/> Nunca o menos 1 vez al mes<br><input type="radio"/> 1 a 3 veces mes<br><input type="radio"/> 1 vez semana<br><input type="radio"/> 2 a 4 veces semana<br><input type="radio"/> 5 a 6 veces semana<br><input type="radio"/> 1 vez al día<br><input type="radio"/> 2 a 3 veces al día<br><input type="radio"/> 5 a 6 veces al día<br><input type="radio"/> más 6 veces al día |
|--------------|--------------------------------------------------------------------------------------------------------------------------------------------------------------------------------------------------------------------------------------------------------------------------------------------------------------------------------------------------------------------------------------------------------------|

---

|           |                                                                                                                                                                                                                                                                                                                                                                                                              |
|-----------|--------------------------------------------------------------------------------------------------------------------------------------------------------------------------------------------------------------------------------------------------------------------------------------------------------------------------------------------------------------------------------------------------------------|
| legumbres | <input type="radio"/> Nunca o menos 1 vez al mes<br><input type="radio"/> 1 a 3 veces mes<br><input type="radio"/> 1 vez semana<br><input checked="" type="radio"/> 2 a 4 veces semana<br><input type="radio"/> 5 a 6 veces semana<br><input type="radio"/> 1 vez al día<br><input type="radio"/> 2 a 3 veces al día<br><input type="radio"/> 5 a 6 veces al día<br><input type="radio"/> más 6 veces al día |
|-----------|--------------------------------------------------------------------------------------------------------------------------------------------------------------------------------------------------------------------------------------------------------------------------------------------------------------------------------------------------------------------------------------------------------------|

---

|                       |                                                                                                                                                                                                                                                                                                                                                                                                              |
|-----------------------|--------------------------------------------------------------------------------------------------------------------------------------------------------------------------------------------------------------------------------------------------------------------------------------------------------------------------------------------------------------------------------------------------------------|
| naranjas o mandarinas | <input checked="" type="radio"/> Nunca o menos 1 vez al mes<br><input type="radio"/> 1 a 3 veces mes<br><input type="radio"/> 1 vez semana<br><input type="radio"/> 2 a 4 veces semana<br><input type="radio"/> 5 a 6 veces semana<br><input type="radio"/> 1 vez al día<br><input type="radio"/> 2 a 3 veces al día<br><input type="radio"/> 5 a 6 veces al día<br><input type="radio"/> más 6 veces al día |
|-----------------------|--------------------------------------------------------------------------------------------------------------------------------------------------------------------------------------------------------------------------------------------------------------------------------------------------------------------------------------------------------------------------------------------------------------|

---

|                       |                                                                                                                                                                                                                                                                                                                                                                                                              |
|-----------------------|--------------------------------------------------------------------------------------------------------------------------------------------------------------------------------------------------------------------------------------------------------------------------------------------------------------------------------------------------------------------------------------------------------------|
| zum natural fruta     | <input checked="" type="radio"/> Nunca o menos 1 vez al mes<br><input type="radio"/> 1 a 3 veces mes<br><input type="radio"/> 1 vez semana<br><input type="radio"/> 2 a 4 veces semana<br><input type="radio"/> 5 a 6 veces semana<br><input type="radio"/> 1 vez al día<br><input type="radio"/> 2 a 3 veces al día<br><input type="radio"/> 5 a 6 veces al día<br><input type="radio"/> más 6 veces al día |
| platano               | <input type="radio"/> Nunca o menos 1 vez al mes<br><input type="radio"/> 1 a 3 veces mes<br><input type="radio"/> 1 vez semana<br><input type="radio"/> 2 a 4 veces semana<br><input type="radio"/> 5 a 6 veces semana<br><input checked="" type="radio"/> 1 vez al día<br><input type="radio"/> 2 a 3 veces al día<br><input type="radio"/> 5 a 6 veces al día<br><input type="radio"/> más 6 veces al día |
| manzana o pera        | <input type="radio"/> Nunca o menos 1 vez al mes<br><input type="radio"/> 1 a 3 veces mes<br><input type="radio"/> 1 vez semana<br><input type="radio"/> 2 a 4 veces semana<br><input type="radio"/> 5 a 6 veces semana<br><input type="radio"/> 1 vez al día<br><input checked="" type="radio"/> 2 a 3 veces al día<br><input type="radio"/> 5 a 6 veces al día<br><input type="radio"/> más 6 veces al día |
| melocotón o nectarina | <input checked="" type="radio"/> Nunca o menos 1 vez al mes<br><input type="radio"/> 1 a 3 veces mes<br><input type="radio"/> 1 vez semana<br><input type="radio"/> 2 a 4 veces semana<br><input type="radio"/> 5 a 6 veces semana<br><input type="radio"/> 1 vez al día<br><input type="radio"/> 2 a 3 veces al día<br><input type="radio"/> 5 a 6 veces al día<br><input type="radio"/> más 6 veces al día |
| sandia o melon        | <input checked="" type="radio"/> Nunca o menos 1 vez al mes<br><input type="radio"/> 1 a 3 veces mes<br><input type="radio"/> 1 vez semana<br><input type="radio"/> 2 a 4 veces semana<br><input type="radio"/> 5 a 6 veces semana<br><input type="radio"/> 1 vez al día<br><input type="radio"/> 2 a 3 veces al día<br><input type="radio"/> 5 a 6 veces al día<br><input type="radio"/> más 6 veces al día |
| uva                   | <input checked="" type="radio"/> Nunca o menos 1 vez al mes<br><input type="radio"/> 1 a 3 veces mes<br><input type="radio"/> 1 vez semana<br><input type="radio"/> 2 a 4 veces semana<br><input type="radio"/> 5 a 6 veces semana<br><input type="radio"/> 1 vez al día<br><input type="radio"/> 2 a 3 veces al día<br><input type="radio"/> 5 a 6 veces al día<br><input type="radio"/> más 6 veces al día |



---

bruna o ciruela

- ☒ Nunca o menos 1 vez al mes  
☐ 1 a 3 veces mes  
☐ 1 vez semana  
☐ 2 a 4 veces semana  
☐ 5 a 6 veces semana  
☐ 1 vez al día  
☐ 2 a 3 veces al día  
☐ 5 a 6 veces al día  
☐ más 6 veces al día

---

kiwi

- ☐ Nunca o menos 1 vez al mes  
☐ 1 a 3 veces mes  
☐ 1 vez semana  
☐ 2 a 4 veces semana  
☐ 5 a 6 veces semana  
☒ 1 vez al día  
☐ 2 a 3 veces al día  
☐ 5 a 6 veces al día  
☐ más 6 veces al día

---

aceituna

- ☐ Nunca o menos 1 vez al mes  
☒ 1 a 3 veces mes  
☐ 1 vez semana  
☐ 2 a 4 veces semana  
☐ 5 a 6 veces semana  
☐ 1 vez al día  
☐ 2 a 3 veces al día  
☐ 5 a 6 veces al día  
☐ más 6 veces al día

---

frutos secos

- ☐ Nunca o menos 1 vez al mes  
☐ 1 a 3 veces mes  
☐ 1 vez semana  
☐ 2 a 4 veces semana  
☐ 5 a 6 veces semana  
☒ 1 vez al día  
☐ 2 a 3 veces al día  
☐ 5 a 6 veces al día  
☐ más 6 veces al día

---

pan blanco

- ☒ Nunca o menos 1 vez al mes  
☐ 1 a 3 veces mes  
☐ 1 vez semana  
☐ 2 a 4 veces semana  
☐ 5 a 6 veces semana  
☐ 1 vez al día  
☐ 2 a 3 veces al día  
☐ 5 a 6 veces al día  
☐ más 6 veces al día

---

pan integral

- ☐ Nunca o menos 1 vez al mes  
☐ 1 a 3 veces mes  
☐ 1 vez semana  
☐ 2 a 4 veces semana  
☐ 5 a 6 veces semana  
☒ 1 vez al día  
☐ 2 a 3 veces al día  
☐ 5 a 6 veces al día  
☐ más 6 veces al día

---

cereales desayuno

- ☐ Nunca o menos 1 vez al mes  
☐ 1 a 3 veces mes  
☐ 1 vez semana  
☒ 2 a 4 veces semana  
☐ 5 a 6 veces semana  
☐ 1 vez al día  
☐ 2 a 3 veces al día  
☐ 5 a 6 veces al día  
☐ más 6 veces al día

---

patatas fritas

- ☒ Nunca o menos 1 vez al mes  
☐ 1 a 3 veces mes  
☐ 1 vez semana  
☐ 2 a 4 veces semana  
☐ 5 a 6 veces semana  
☐ 1 vez al día  
☐ 2 a 3 veces al día  
☐ 5 a 6 veces al día  
☐ más 6 veces al día

---

patatas cocidas o asadas

- ☒ Nunca o menos 1 vez al mes  
☐ 1 a 3 veces mes  
☐ 1 vez semana  
☐ 2 a 4 veces semana  
☐ 5 a 6 veces semana  
☐ 1 vez al día  
☐ 2 a 3 veces al día  
☐ 5 a 6 veces al día  
☐ más 6 veces al día

---

bolsa papas

- ☐ Nunca o menos 1 vez al mes  
☐ 1 a 3 veces mes  
☒ 1 vez semana  
☐ 2 a 4 veces semana  
☐ 5 a 6 veces semana  
☐ 1 vez al día  
☐ 2 a 3 veces al día  
☐ 5 a 6 veces al día  
☐ más 6 veces al día

---

arroz cocinado

- ☐ Nunca o menos 1 vez al mes  
☒ 1 a 3 veces mes  
☐ 1 vez semana  
☐ 2 a 4 veces semana  
☐ 5 a 6 veces semana  
☐ 1 vez al día  
☐ 2 a 3 veces al día  
☐ 5 a 6 veces al día  
☐ más 6 veces al día

---

pasta

- ☐ Nunca o menos 1 vez al mes  
☐ 1 a 3 veces mes  
☒ 1 vez semana  
☐ 2 a 4 veces semana  
☐ 5 a 6 veces semana  
☐ 1 vez al día  
☐ 2 a 3 veces al día  
☐ 5 a 6 veces al día  
☐ más 6 veces al día

|                     |                                                                                                                                                                                                                                                                                                                                                                                                              |
|---------------------|--------------------------------------------------------------------------------------------------------------------------------------------------------------------------------------------------------------------------------------------------------------------------------------------------------------------------------------------------------------------------------------------------------------|
| pizza               | <input type="radio"/> Nunca o menos 1 vez al mes<br><input checked="" type="radio"/> 1 a 3 veces mes<br><input type="radio"/> 1 vez semana<br><input type="radio"/> 2 a 4 veces semana<br><input type="radio"/> 5 a 6 veces semana<br><input type="radio"/> 1 vez al día<br><input type="radio"/> 2 a 3 veces al día<br><input type="radio"/> 5 a 6 veces al día<br><input type="radio"/> más 6 veces al día |
| aceite oliva        | <input type="radio"/> Nunca o menos 1 vez al mes<br><input type="radio"/> 1 a 3 veces mes<br><input type="radio"/> 1 vez semana<br><input checked="" type="radio"/> 2 a 4 veces semana<br><input type="radio"/> 5 a 6 veces semana<br><input type="radio"/> 1 vez al día<br><input type="radio"/> 2 a 3 veces al día<br><input type="radio"/> 5 a 6 veces al día<br><input type="radio"/> más 6 veces al día |
| otros aceites       | <input checked="" type="radio"/> Nunca o menos 1 vez al mes<br><input type="radio"/> 1 a 3 veces mes<br><input type="radio"/> 1 vez semana<br><input type="radio"/> 2 a 4 veces semana<br><input type="radio"/> 5 a 6 veces semana<br><input type="radio"/> 1 vez al día<br><input type="radio"/> 2 a 3 veces al día<br><input type="radio"/> 5 a 6 veces al día<br><input type="radio"/> más 6 veces al día |
| margarina           | <input checked="" type="radio"/> Nunca o menos 1 vez al mes<br><input type="radio"/> 1 a 3 veces mes<br><input type="radio"/> 1 vez semana<br><input type="radio"/> 2 a 4 veces semana<br><input type="radio"/> 5 a 6 veces semana<br><input type="radio"/> 1 vez al día<br><input type="radio"/> 2 a 3 veces al día<br><input type="radio"/> 5 a 6 veces al día<br><input type="radio"/> más 6 veces al día |
| mantequilla         | <input checked="" type="radio"/> Nunca o menos 1 vez al mes<br><input type="radio"/> 1 a 3 veces mes<br><input type="radio"/> 1 vez semana<br><input type="radio"/> 2 a 4 veces semana<br><input type="radio"/> 5 a 6 veces semana<br><input type="radio"/> 1 vez al día<br><input type="radio"/> 2 a 3 veces al día<br><input type="radio"/> 5 a 6 veces al día<br><input type="radio"/> más 6 veces al día |
| galletas tipo maria | <input checked="" type="radio"/> Nunca o menos 1 vez al mes<br><input type="radio"/> 1 a 3 veces mes<br><input type="radio"/> 1 vez semana<br><input type="radio"/> 2 a 4 veces semana<br><input type="radio"/> 5 a 6 veces semana<br><input type="radio"/> 1 vez al día<br><input type="radio"/> 2 a 3 veces al día<br><input type="radio"/> 5 a 6 veces al día<br><input type="radio"/> más 6 veces al día |

---

galletas chocolate

- ☒ Nunca o menos 1 vez al mes  
☐ 1 a 3 veces mes  
☐ 1 vez semana  
☐ 2 a 4 veces semana  
☐ 5 a 6 veces semana  
☐ 1 vez al día  
☐ 2 a 3 veces al día  
☐ 5 a 6 veces al día  
☐ más 6 veces al día

---

bolleria

- ☒ Nunca o menos 1 vez al mes  
☐ 1 a 3 veces mes  
☐ 1 vez semana  
☐ 2 a 4 veces semana  
☐ 5 a 6 veces semana  
☐ 1 vez al día  
☐ 2 a 3 veces al día  
☐ 5 a 6 veces al día  
☐ más 6 veces al día

---

chocolate o bombones

- ☐ Nunca o menos 1 vez al mes  
☐ 1 a 3 veces mes  
☐ 1 vez semana  
☐ 2 a 4 veces semana  
☐ 5 a 6 veces semana  
☒ 1 vez al día  
☐ 2 a 3 veces al día  
☐ 5 a 6 veces al día  
☐ más 6 veces al día

---

chocolate polvo o colacao

- ☒ Nunca o menos 1 vez al mes  
☐ 1 a 3 veces mes  
☐ 1 vez semana  
☐ 2 a 4 veces semana  
☐ 5 a 6 veces semana  
☐ 1 vez al día  
☐ 2 a 3 veces al día  
☐ 5 a 6 veces al día  
☐ más 6 veces al día

---

vino tinto

- ☒ Nunca o menos 1 vez al mes  
☐ 1 a 3 veces mes  
☐ 1 vez semana  
☐ 2 a 4 veces semana  
☐ 5 a 6 veces semana  
☐ 1 vez al día  
☐ 2 a 3 veces al día  
☐ 5 a 6 veces al día  
☐ más 6 veces al día

---

vino blanco

- ☒ Nunca o menos 1 vez al mes  
☐ 1 a 3 veces mes  
☐ 1 vez semana  
☐ 2 a 4 veces semana  
☐ 5 a 6 veces semana  
☐ 1 vez al día  
☐ 2 a 3 veces al día  
☐ 5 a 6 veces al día  
☐ más 6 veces al día

|                       |                                                                                                                                                                                                                                                                                                                                                                                                              |
|-----------------------|--------------------------------------------------------------------------------------------------------------------------------------------------------------------------------------------------------------------------------------------------------------------------------------------------------------------------------------------------------------------------------------------------------------|
| vino seco o vermut    | <input checked="" type="radio"/> Nunca o menos 1 vez al mes<br><input type="radio"/> 1 a 3 veces mes<br><input type="radio"/> 1 vez semana<br><input type="radio"/> 2 a 4 veces semana<br><input type="radio"/> 5 a 6 veces semana<br><input type="radio"/> 1 vez al día<br><input type="radio"/> 2 a 3 veces al día<br><input type="radio"/> 5 a 6 veces al día<br><input type="radio"/> más 6 veces al día |
| cerveza               | <input checked="" type="radio"/> Nunca o menos 1 vez al mes<br><input type="radio"/> 1 a 3 veces mes<br><input type="radio"/> 1 vez semana<br><input type="radio"/> 2 a 4 veces semana<br><input type="radio"/> 5 a 6 veces semana<br><input type="radio"/> 1 vez al día<br><input type="radio"/> 2 a 3 veces al día<br><input type="radio"/> 5 a 6 veces al día<br><input type="radio"/> más 6 veces al día |
| cerveza sin alcohol   | <input checked="" type="radio"/> Nunca o menos 1 vez al mes<br><input type="radio"/> 1 a 3 veces mes<br><input type="radio"/> 1 vez semana<br><input type="radio"/> 2 a 4 veces semana<br><input type="radio"/> 5 a 6 veces semana<br><input type="radio"/> 1 vez al día<br><input type="radio"/> 2 a 3 veces al día<br><input type="radio"/> 5 a 6 veces al día<br><input type="radio"/> más 6 veces al día |
| licores               | <input checked="" type="radio"/> Nunca o menos 1 vez al mes<br><input type="radio"/> 1 a 3 veces mes<br><input type="radio"/> 1 vez semana<br><input type="radio"/> 2 a 4 veces semana<br><input type="radio"/> 5 a 6 veces semana<br><input type="radio"/> 1 vez al día<br><input type="radio"/> 2 a 3 veces al día<br><input type="radio"/> 5 a 6 veces al día<br><input type="radio"/> más 6 veces al día |
| ginebra o ron o vodka | <input checked="" type="radio"/> Nunca o menos 1 vez al mes<br><input type="radio"/> 1 a 3 veces mes<br><input type="radio"/> 1 vez semana<br><input type="radio"/> 2 a 4 veces semana<br><input type="radio"/> 5 a 6 veces semana<br><input type="radio"/> 1 vez al día<br><input type="radio"/> 2 a 3 veces al día<br><input type="radio"/> 5 a 6 veces al día<br><input type="radio"/> más 6 veces al día |
| refresco normal       | <input checked="" type="radio"/> Nunca o menos 1 vez al mes<br><input type="radio"/> 1 a 3 veces mes<br><input type="radio"/> 1 vez semana<br><input type="radio"/> 2 a 4 veces semana<br><input type="radio"/> 5 a 6 veces semana<br><input type="radio"/> 1 vez al día<br><input type="radio"/> 2 a 3 veces al día<br><input type="radio"/> 5 a 6 veces al día<br><input type="radio"/> más 6 veces al día |

|                          |                                                                                                                                                                                                                                                                                                                                                                                                              |
|--------------------------|--------------------------------------------------------------------------------------------------------------------------------------------------------------------------------------------------------------------------------------------------------------------------------------------------------------------------------------------------------------------------------------------------------------|
| refresco sin azúcar      | <input checked="" type="radio"/> Nunca o menos 1 vez al mes<br><input type="radio"/> 1 a 3 veces mes<br><input type="radio"/> 1 vez semana<br><input type="radio"/> 2 a 4 veces semana<br><input type="radio"/> 5 a 6 veces semana<br><input type="radio"/> 1 vez al día<br><input type="radio"/> 2 a 3 veces al día<br><input type="radio"/> 5 a 6 veces al día<br><input type="radio"/> más 6 veces al día |
| Agua del grifo           | <input checked="" type="radio"/> Nunca o menos 1 vez al mes<br><input type="radio"/> 1 a 3 veces mes<br><input type="radio"/> 1 vez semana<br><input type="radio"/> 2 a 4 veces semana<br><input type="radio"/> 5 a 6 veces semana<br><input type="radio"/> 1 vez al día<br><input type="radio"/> 2 a 3 veces al día<br><input type="radio"/> 5 a 6 veces al día<br><input type="radio"/> más 6 veces al día |
| agua embotellada sin gas | <input type="radio"/> Nunca o menos 1 vez al mes<br><input type="radio"/> 1 a 3 veces mes<br><input type="radio"/> 1 vez semana<br><input type="radio"/> 2 a 4 veces semana<br><input type="radio"/> 5 a 6 veces semana<br><input type="radio"/> 1 vez al día<br><input type="radio"/> 2 a 3 veces al día<br><input type="radio"/> 5 a 6 veces al día<br><input checked="" type="radio"/> más 6 veces al día |
| agua embotellada con gas | <input type="radio"/> Nunca o menos 1 vez al mes<br><input checked="" type="radio"/> 1 a 3 veces mes<br><input type="radio"/> 1 vez semana<br><input type="radio"/> 2 a 4 veces semana<br><input type="radio"/> 5 a 6 veces semana<br><input type="radio"/> 1 vez al día<br><input type="radio"/> 2 a 3 veces al día<br><input type="radio"/> 5 a 6 veces al día<br><input type="radio"/> más 6 veces al día |
| zumو frutas embasado     | <input checked="" type="radio"/> Nunca o menos 1 vez al mes<br><input type="radio"/> 1 a 3 veces mes<br><input type="radio"/> 1 vez semana<br><input type="radio"/> 2 a 4 veces semana<br><input type="radio"/> 5 a 6 veces semana<br><input type="radio"/> 1 vez al día<br><input type="radio"/> 2 a 3 veces al día<br><input type="radio"/> 5 a 6 veces al día<br><input type="radio"/> más 6 veces al día |
| cafe                     | <input checked="" type="radio"/> Nunca o menos 1 vez al mes<br><input type="radio"/> 1 a 3 veces mes<br><input type="radio"/> 1 vez semana<br><input type="radio"/> 2 a 4 veces semana<br><input type="radio"/> 5 a 6 veces semana<br><input type="radio"/> 1 vez al día<br><input type="radio"/> 2 a 3 veces al día<br><input type="radio"/> 5 a 6 veces al día<br><input type="radio"/> más 6 veces al día |

|                       |                                                                                                                                                                                                                                                                                                                                                                                                              |
|-----------------------|--------------------------------------------------------------------------------------------------------------------------------------------------------------------------------------------------------------------------------------------------------------------------------------------------------------------------------------------------------------------------------------------------------------|
| cafe descafeinado     | <input checked="" type="radio"/> Nunca o menos 1 vez al mes<br><input type="radio"/> 1 a 3 veces mes<br><input type="radio"/> 1 vez semana<br><input type="radio"/> 2 a 4 veces semana<br><input type="radio"/> 5 a 6 veces semana<br><input type="radio"/> 1 vez al día<br><input type="radio"/> 2 a 3 veces al día<br><input type="radio"/> 5 a 6 veces al día<br><input type="radio"/> más 6 veces al día |
| te o infusión         | <input type="radio"/> Nunca o menos 1 vez al mes<br><input type="radio"/> 1 a 3 veces mes<br><input type="radio"/> 1 vez semana<br><input type="radio"/> 2 a 4 veces semana<br><input checked="" type="radio"/> 5 a 6 veces semana<br><input type="radio"/> 1 vez al día<br><input type="radio"/> 2 a 3 veces al día<br><input type="radio"/> 5 a 6 veces al día<br><input type="radio"/> más 6 veces al día |
| sopa o puré verduras  | <input type="radio"/> Nunca o menos 1 vez al mes<br><input type="radio"/> 1 a 3 veces mes<br><input type="radio"/> 1 vez semana<br><input checked="" type="radio"/> 2 a 4 veces semana<br><input type="radio"/> 5 a 6 veces semana<br><input type="radio"/> 1 vez al día<br><input type="radio"/> 2 a 3 veces al día<br><input type="radio"/> 5 a 6 veces al día<br><input type="radio"/> más 6 veces al día |
| croquetas pollo jamón | <input type="radio"/> Nunca o menos 1 vez al mes<br><input checked="" type="radio"/> 1 a 3 veces mes<br><input type="radio"/> 1 vez semana<br><input type="radio"/> 2 a 4 veces semana<br><input type="radio"/> 5 a 6 veces semana<br><input type="radio"/> 1 vez al día<br><input type="radio"/> 2 a 3 veces al día<br><input type="radio"/> 5 a 6 veces al día<br><input type="radio"/> más 6 veces al día |
| croquetas pescado     | <input checked="" type="radio"/> Nunca o menos 1 vez al mes<br><input type="radio"/> 1 a 3 veces mes<br><input type="radio"/> 1 vez semana<br><input type="radio"/> 2 a 4 veces semana<br><input type="radio"/> 5 a 6 veces semana<br><input type="radio"/> 1 vez al día<br><input type="radio"/> 2 a 3 veces al día<br><input type="radio"/> 5 a 6 veces al día<br><input type="radio"/> más 6 veces al día |
| mayonesa              | <input type="radio"/> Nunca o menos 1 vez al mes<br><input checked="" type="radio"/> 1 a 3 veces mes<br><input type="radio"/> 1 vez semana<br><input type="radio"/> 2 a 4 veces semana<br><input type="radio"/> 5 a 6 veces semana<br><input type="radio"/> 1 vez al día<br><input type="radio"/> 2 a 3 veces al día<br><input type="radio"/> 5 a 6 veces al día<br><input type="radio"/> más 6 veces al día |

|                  |                                                                                                                                                                                                                                                                                                                                                                                                              |
|------------------|--------------------------------------------------------------------------------------------------------------------------------------------------------------------------------------------------------------------------------------------------------------------------------------------------------------------------------------------------------------------------------------------------------------|
| salsa tomate     | <input type="radio"/> Nunca o menos 1 vez al mes<br><input checked="" type="radio"/> 1 a 3 veces mes<br><input type="radio"/> 1 vez semana<br><input type="radio"/> 2 a 4 veces semana<br><input type="radio"/> 5 a 6 veces semana<br><input type="radio"/> 1 vez al día<br><input type="radio"/> 2 a 3 veces al día<br><input type="radio"/> 5 a 6 veces al día<br><input type="radio"/> más 6 veces al día |
| ketchup          | <input type="radio"/> Nunca o menos 1 vez al mes<br><input checked="" type="radio"/> 1 a 3 veces mes<br><input type="radio"/> 1 vez semana<br><input type="radio"/> 2 a 4 veces semana<br><input type="radio"/> 5 a 6 veces semana<br><input type="radio"/> 1 vez al día<br><input type="radio"/> 2 a 3 veces al día<br><input type="radio"/> 5 a 6 veces al día<br><input type="radio"/> más 6 veces al día |
| sal              | <input checked="" type="radio"/> Nunca o menos 1 vez al mes<br><input type="radio"/> 1 a 3 veces mes<br><input type="radio"/> 1 vez semana<br><input type="radio"/> 2 a 4 veces semana<br><input type="radio"/> 5 a 6 veces semana<br><input type="radio"/> 1 vez al día<br><input type="radio"/> 2 a 3 veces al día<br><input type="radio"/> 5 a 6 veces al día<br><input type="radio"/> más 6 veces al día |
| ajo              | <input type="radio"/> Nunca o menos 1 vez al mes<br><input type="radio"/> 1 a 3 veces mes<br><input checked="" type="radio"/> 1 vez semana<br><input type="radio"/> 2 a 4 veces semana<br><input type="radio"/> 5 a 6 veces semana<br><input type="radio"/> 1 vez al día<br><input type="radio"/> 2 a 3 veces al día<br><input type="radio"/> 5 a 6 veces al día<br><input type="radio"/> más 6 veces al día |
| mermelada o miel | <input checked="" type="radio"/> Nunca o menos 1 vez al mes<br><input type="radio"/> 1 a 3 veces mes<br><input type="radio"/> 1 vez semana<br><input type="radio"/> 2 a 4 veces semana<br><input type="radio"/> 5 a 6 veces semana<br><input type="radio"/> 1 vez al día<br><input type="radio"/> 2 a 3 veces al día<br><input type="radio"/> 5 a 6 veces al día<br><input type="radio"/> más 6 veces al día |
| azúcar           | <input checked="" type="radio"/> Nunca o menos 1 vez al mes<br><input type="radio"/> 1 a 3 veces mes<br><input type="radio"/> 1 vez semana<br><input type="radio"/> 2 a 4 veces semana<br><input type="radio"/> 5 a 6 veces semana<br><input type="radio"/> 1 vez al día<br><input type="radio"/> 2 a 3 veces al día<br><input type="radio"/> 5 a 6 veces al día<br><input type="radio"/> más 6 veces al día |



|                                       |                                                                                                                                                                                                                                                                                                                                                                                                                                                                                                                               |
|---------------------------------------|-------------------------------------------------------------------------------------------------------------------------------------------------------------------------------------------------------------------------------------------------------------------------------------------------------------------------------------------------------------------------------------------------------------------------------------------------------------------------------------------------------------------------------|
| Otro alimento                         | [*DATA REMOVED*]                                                                                                                                                                                                                                                                                                                                                                                                                                                                                                              |
| suplementos vitamínicos               | <input type="radio"/> si<br><input checked="" type="radio"/> no                                                                                                                                                                                                                                                                                                                                                                                                                                                               |
| suplementos vitamínicos               |                                                                                                                                                                                                                                                                                                                                                                                                                                                                                                                               |
| dieta previa                          | <input type="radio"/> si<br><input checked="" type="radio"/> no                                                                                                                                                                                                                                                                                                                                                                                                                                                               |
| motivo dieta                          | <input checked="" type="radio"/> no dieta<br><input type="radio"/> control peso<br><input type="radio"/> control colesterol<br><input type="radio"/> control diabetes<br><input type="radio"/> problemas estómago<br><input type="radio"/> problemas vesícula o hepáticos<br><input type="radio"/> HTA o cardiopatía<br><input type="radio"/> problemas renales<br><input type="radio"/> alergia alimentaria<br><input type="radio"/> ácido úrico elevado<br><input type="radio"/> vegetariana<br><input type="radio"/> otros |
| cambio alimentos año previo gestación | <input checked="" type="radio"/> si<br><input type="radio"/> no                                                                                                                                                                                                                                                                                                                                                                                                                                                               |
| cambio lácteos                        | <input type="radio"/> eliminado<br><input type="radio"/> disminuido<br><input checked="" type="radio"/> igual<br><input type="radio"/> aumentado<br><input type="radio"/> no sabe                                                                                                                                                                                                                                                                                                                                             |
| cambio huevos                         | <input type="radio"/> eliminado<br><input type="radio"/> disminuido<br><input checked="" type="radio"/> igual<br><input type="radio"/> aumentado<br><input type="radio"/> no sabe                                                                                                                                                                                                                                                                                                                                             |
| cambio carne                          | <input type="radio"/> eliminado<br><input type="radio"/> disminuido<br><input checked="" type="radio"/> igual<br><input type="radio"/> aumentado<br><input type="radio"/> no sabe                                                                                                                                                                                                                                                                                                                                             |
| cambio pescado                        | <input type="radio"/> eliminado<br><input type="radio"/> disminuido<br><input checked="" type="radio"/> igual<br><input type="radio"/> aumentado<br><input type="radio"/> no sabe                                                                                                                                                                                                                                                                                                                                             |
| cambio verduras                       | <input type="radio"/> eliminado<br><input type="radio"/> disminuido<br><input checked="" type="radio"/> igual<br><input type="radio"/> aumentado<br><input type="radio"/> no sabe                                                                                                                                                                                                                                                                                                                                             |

|                            |                                                                                                                                                                                                                        |
|----------------------------|------------------------------------------------------------------------------------------------------------------------------------------------------------------------------------------------------------------------|
| cambio legumbres           | <input type="radio"/> eliminado<br><input type="radio"/> disminuido<br><input checked="" type="radio"/> igual<br><input type="radio"/> aumentado<br><input type="radio"/> no sabe                                      |
| cambio fruta               | <input type="radio"/> eliminado<br><input type="radio"/> disminuido<br><input type="radio"/> igual<br><input checked="" type="radio"/> aumentado<br><input type="radio"/> no sabe                                      |
| cambio pan                 | <input type="radio"/> eliminado<br><input type="radio"/> disminuido<br><input checked="" type="radio"/> igual<br><input type="radio"/> aumentado<br><input type="radio"/> no sabe                                      |
| cambio aceite oliva        | <input type="radio"/> eliminado<br><input type="radio"/> disminuido<br><input checked="" type="radio"/> igual<br><input type="radio"/> aumentado<br><input type="radio"/> no sabe                                      |
| cambio mante o margarina   | <input type="radio"/> eliminado<br><input type="radio"/> disminuido<br><input checked="" type="radio"/> igual<br><input type="radio"/> aumentado<br><input type="radio"/> no sabe                                      |
| cambio azúcar y dulces     | <input type="radio"/> eliminado<br><input type="radio"/> disminuido<br><input checked="" type="radio"/> igual<br><input type="radio"/> aumentado<br><input type="radio"/> no sabe                                      |
| cambio bebidas alcohólicas | <input checked="" type="radio"/> eliminado<br><input type="radio"/> disminuido<br><input type="radio"/> igual<br><input type="radio"/> aumentado<br><input type="radio"/> no sabe                                      |
| frecuencia comidas fritas  | <input type="radio"/> a diario<br><input type="radio"/> 5 a 6 veces semana<br><input type="radio"/> 2 a 4 veces semana<br><input type="radio"/> 1 vez semana<br><input checked="" type="radio"/> menos de 1 vez semana |
| carne                      | <input checked="" type="radio"/> no como<br><input type="radio"/> cruda<br><input type="radio"/> poco hecha<br><input type="radio"/> hecha<br><input type="radio"/> muy hecha                                          |
| grasa visible carne        | <input type="radio"/> quita toda<br><input type="radio"/> quita mayoría<br><input type="radio"/> quita un poco<br><input type="radio"/> no quita nada                                                                  |

|                                |                                                                                                                                                                                                                                                          |
|--------------------------------|----------------------------------------------------------------------------------------------------------------------------------------------------------------------------------------------------------------------------------------------------------|
| cocina carne                   | <input type="radio"/> a la plancha<br><input type="radio"/> a la parrilla<br><input type="radio"/> asada<br><input type="radio"/> frita<br><input type="radio"/> guisada                                                                                 |
| tostado quemado carne          | <input type="radio"/> nunca<br><input type="radio"/> 1 vez mes<br><input type="radio"/> 2 a 3 veces mes<br><input type="radio"/> 1 vez semana<br><input type="radio"/> 2 a 3 semanas                                                                     |
| tostado quemado pescado        | <input checked="" type="radio"/> nunca<br><input type="radio"/> 1 vez mes<br><input type="radio"/> 2 a 3 veces mes<br><input type="radio"/> 1 vez semana<br><input type="radio"/> 2 a 3 semanas                                                          |
| socarrat paella                | <input checked="" type="radio"/> nunca<br><input type="radio"/> 1 vez mes<br><input type="radio"/> 2 a 3 veces mes<br><input type="radio"/> 1 vez semana<br><input type="radio"/> 2 a 3 semanas                                                          |
| grasa o aceite cocinar         | <input type="radio"/> mantequilla<br><input type="radio"/> margarina<br><input type="radio"/> aceite oliva<br><input checked="" type="radio"/> aceite oliva virgen extra<br><input type="radio"/> aceite vegetal<br><input type="radio"/> mezcla aceites |
| grasa aceite aliñar            | <input type="radio"/> mantequilla<br><input type="radio"/> margarina<br><input type="radio"/> aceite oliva<br><input checked="" type="radio"/> aceite oliva virgen extra<br><input type="radio"/> aceite vegetal<br><input type="radio"/> mezcla aceites |
| grasa aceite freir             | <input type="radio"/> mantequilla<br><input type="radio"/> margarina<br><input type="radio"/> aceite oliva<br><input checked="" type="radio"/> aceite oliva virgen extra<br><input type="radio"/> aceite vegetal<br><input type="radio"/> mezcla aceites |
| Ejercicio cuestionario         | <input checked="" type="radio"/> si<br><input type="radio"/> no                                                                                                                                                                                          |
| horas de sueño incluido siesta | [*DATA REMOVED*]                                                                                                                                                                                                                                         |
| minutos siesta                 | [*DATA REMOVED*]                                                                                                                                                                                                                                         |
| horas televisión semana        | [*DATA REMOVED*]                                                                                                                                                                                                                                         |

|                                        |                                                                                                                                                                                                                                                                                                                                                                           |
|----------------------------------------|---------------------------------------------------------------------------------------------------------------------------------------------------------------------------------------------------------------------------------------------------------------------------------------------------------------------------------------------------------------------------|
| actividad trabajo                      | <input checked="" type="radio"/> casi siempre sentado<br><input type="radio"/> sentado 50 por cien<br><input type="radio"/> casi siempre de pie, quieto<br><input type="radio"/> casi siempre levantado caminando y llevando pocas cosas<br><input type="radio"/> casi siempre levantado, caminando y llevado muchas cosas<br><input type="radio"/> trabajo manual pesado |
| tiempo caminar o bici al día           | <input type="radio"/> casi nunca<br><input type="radio"/> menos 20min día<br><input checked="" type="radio"/> 20 a 40 min día<br><input type="radio"/> 40 a 60 min día<br><input type="radio"/> 1h o 1h y media día<br><input type="radio"/> más de 1h y media al día                                                                                                     |
| tiempo tareas casa al día              | <input type="radio"/> menos de 1h día<br><input checked="" type="radio"/> 1 a 2h día<br><input type="radio"/> 3 a 4h día<br><input type="radio"/> 5 a 6h día<br><input type="radio"/> 7 a 8h día<br><input type="radio"/> más de 8h día                                                                                                                                   |
| tiempo libre televisión ordenador leer | <input type="radio"/> menos 1h día<br><input type="radio"/> 1h día<br><input checked="" type="radio"/> 2h día<br><input type="radio"/> 3h día<br><input type="radio"/> 4h día<br><input type="radio"/> 5 a 6h día<br><input type="radio"/> mas 6h día                                                                                                                     |
| tiempo libre ejercicio o deporte       | <input type="radio"/> menos 1h semana<br><input type="radio"/> 1h semana<br><input type="radio"/> 2h semana<br><input type="radio"/> 3h semana<br><input type="radio"/> 4 a 5h semana<br><input checked="" type="radio"/> mas 5h semana                                                                                                                                   |
| como se considera                      | <input type="radio"/> sedentaria<br><input type="radio"/> poco activa<br><input checked="" type="radio"/> moderadamente activa<br><input type="radio"/> bastante activa<br><input type="radio"/> muy activa<br><input type="radio"/> no sabe                                                                                                                              |
| FUR                                    | [*DATA REMOVED*]                                                                                                                                                                                                                                                                                                                                                          |
| Semanas gestación 2T                   | [*DATA REMOVED*]                                                                                                                                                                                                                                                                                                                                                          |
| Días gestación 2T                      | [*DATA REMOVED*]                                                                                                                                                                                                                                                                                                                                                          |
| DBP 2T                                 | [*DATA REMOVED*]                                                                                                                                                                                                                                                                                                                                                          |
| CC 2T                                  | [*DATA REMOVED*]                                                                                                                                                                                                                                                                                                                                                          |
| AC 2T                                  | [*DATA REMOVED*]                                                                                                                                                                                                                                                                                                                                                          |

|                                                   |                                                                                                                                                                                                 |
|---------------------------------------------------|-------------------------------------------------------------------------------------------------------------------------------------------------------------------------------------------------|
| LF 2T                                             | [*DATA REMOVED*]                                                                                                                                                                                |
| PFE 2T (Hadlock)                                  | [*DATA REMOVED*]                                                                                                                                                                                |
| Semanas gestación 3T                              | [*DATA REMOVED*]                                                                                                                                                                                |
| días 3T                                           | [*DATA REMOVED*]                                                                                                                                                                                |
| DBP 3T                                            | [*DATA REMOVED*]                                                                                                                                                                                |
| CC 3T                                             | [*DATA REMOVED*]                                                                                                                                                                                |
| AC 3T                                             | [*DATA REMOVED*]                                                                                                                                                                                |
| LF 3T                                             | [*DATA REMOVED*]                                                                                                                                                                                |
| PFE 3T (Hadlock)                                  | [*DATA REMOVED*]                                                                                                                                                                                |
| Semanas de gestación final                        | [*DATA REMOVED*]                                                                                                                                                                                |
| días gestación final                              | [*DATA REMOVED*]                                                                                                                                                                                |
| Localización placenta                             | <input checked="" type="radio"/> anterior<br><input type="radio"/> lateral derecha<br><input type="radio"/> lateral izquierda<br><input type="radio"/> posterior<br><input type="radio"/> fondo |
| Presentación longitudinal cefálica                | <input type="radio"/> no<br><input checked="" type="radio"/> si                                                                                                                                 |
| Dorso                                             | <input type="radio"/> izquierda anterior<br><input checked="" type="radio"/> izquierda posterior<br><input type="radio"/> derecha anterior<br><input type="radio"/> derecha posterior           |
| diámetro biparietal                               | [*DATA REMOVED*]                                                                                                                                                                                |
| Circunferencia craneal                            | [*DATA REMOVED*]                                                                                                                                                                                |
| Circunferencia abdominal                          | [*DATA REMOVED*]                                                                                                                                                                                |
| Longitud de femur                                 | [*DATA REMOVED*]                                                                                                                                                                                |
| tejido celular subcutáneo a nivel del muslo en mm | [*DATA REMOVED*]                                                                                                                                                                                |
| tejido celular subcutáneo en abdomen en mm        | [*DATA REMOVED*]                                                                                                                                                                                |
| Volumen del muslo en cm3                          | [*DATA REMOVED*]                                                                                                                                                                                |
| Peso fetal estimado según fórmula de Hadlock      | [*DATA REMOVED*]                                                                                                                                                                                |

|                                               |                                                                                                                                               |
|-----------------------------------------------|-----------------------------------------------------------------------------------------------------------------------------------------------|
| Percentil                                     | [*DATA REMOVED*]                                                                                                                              |
| Peso fetal estimado según fórmula de Scioscia | <hr/>                                                                                                                                         |
| Peso fetal estimado según fórmula de LEE      | <hr/>                                                                                                                                         |
| Tipo de parto                                 | <input checked="" type="radio"/> eutocico<br><input type="radio"/> instrumentado/ventosa<br><input type="radio"/> cesarea                     |
| fecha de nacimiento                           | [*DATA REMOVED*]                                                                                                                              |
| Días entre exploración y nacimiento           | [*DATA REMOVED*]                                                                                                                              |
| Peso RN en g                                  | [*DATA REMOVED*]                                                                                                                              |
| sexo                                          | <input checked="" type="radio"/> mujer<br><input type="radio"/> hombre                                                                        |
| Apgar 1 minuto                                | [*DATA REMOVED*]                                                                                                                              |
| Apgar 5 minutos                               | [*DATA REMOVED*]                                                                                                                              |
| Apgar 10 minutos                              | <hr/>                                                                                                                                         |
| antecedente Covid durante gestación           | <input type="radio"/> Yes<br><input checked="" type="radio"/> No                                                                              |
| Nivel de estudios                             | <input type="radio"/> ninguno<br><input type="radio"/> primarios<br><input type="radio"/> secundarios<br><input type="radio"/> universitarios |

## Base\_datos\_estimacion\_peso\_fetal

|                                       |                                                                                                                                                                                                                                                                                      |
|---------------------------------------|--------------------------------------------------------------------------------------------------------------------------------------------------------------------------------------------------------------------------------------------------------------------------------------|
| Número de identificación participante | 27                                                                                                                                                                                                                                                                                   |
| CODIGO PARTICIPANTE                   |                                                                                                                                                                                                                                                                                      |
| Edad                                  | [*DATA REMOVED*]                                                                                                                                                                                                                                                                     |
| Gestaciones                           | <input checked="" type="radio"/> 1<br><input type="radio"/> 2<br><input type="radio"/> 3<br><input type="radio"/> mas de 3                                                                                                                                                           |
| partos                                | <input checked="" type="radio"/> 0<br><input type="radio"/> 1<br><input type="radio"/> 2<br><input type="radio"/> 3<br><input type="radio"/> mas de 3                                                                                                                                |
| cesáreas                              | <input checked="" type="radio"/> 0<br><input type="radio"/> 1<br><input type="radio"/> 2<br><input type="radio"/> 3<br><input type="radio"/> mas de 3                                                                                                                                |
| Abortos                               | <input checked="" type="radio"/> 0<br><input type="radio"/> 1<br><input type="radio"/> 2<br><input type="radio"/> 3<br><input type="radio"/> mas de 3                                                                                                                                |
| Tipo de gestacion                     | <input checked="" type="radio"/> espontanea<br><input type="radio"/> IAC inseminación artificial conyuge<br><input type="radio"/> IAD inseminación artificial donante<br><input type="radio"/> FIV Fecundación in Vitro<br><input type="radio"/> Ovodon FIV con donación de ovocitos |
| peso previo a embarazo                | [*DATA REMOVED*]                                                                                                                                                                                                                                                                     |
| Ganancia ponderal embarazo            | [*DATA REMOVED*]                                                                                                                                                                                                                                                                     |
| Talla madre                           | [*DATA REMOVED*]                                                                                                                                                                                                                                                                     |
| IMC previo embarazo                   | 20.549886621315196                                                                                                                                                                                                                                                                   |
| Patología obstétrica                  | <input checked="" type="radio"/> no<br><input type="radio"/> si                                                                                                                                                                                                                      |
| Diabetes pregestacional               | <input checked="" type="radio"/> no<br><input type="radio"/> si                                                                                                                                                                                                                      |
| Diabetes gestacional                  | <input checked="" type="radio"/> no<br><input type="radio"/> si                                                                                                                                                                                                                      |

|                                            |                                                                                                                                                                                      |
|--------------------------------------------|--------------------------------------------------------------------------------------------------------------------------------------------------------------------------------------|
| Diabetes gestacional con insulina          | <input checked="" type="radio"/> no<br><input type="radio"/> si                                                                                                                      |
| Diabetes gestacional con dieta y ejercicio | <input checked="" type="radio"/> no<br><input type="radio"/> si                                                                                                                      |
| Percentil fetos previos                    | <input checked="" type="radio"/> Nada<br><input type="radio"/> percentil menor de 10<br><input type="radio"/> percentil entre 10 y 90<br><input type="radio"/> percentil mayor de 90 |
| Exfumadora                                 | <input checked="" type="radio"/> Nada<br><input type="radio"/> menos de 5 años<br><input type="radio"/> 5 a 10 años<br><input type="radio"/> mayor o igual a 10 años                 |
| Hábito tabáquico                           | <input checked="" type="radio"/> no<br><input type="radio"/> si                                                                                                                      |
| fumadora                                   | [*DATA REMOVED*]                                                                                                                                                                     |
| Consumo otros tóxicos                      | <input checked="" type="radio"/> no<br><input type="radio"/> si                                                                                                                      |
| Hb 1T                                      | _____                                                                                                                                                                                |
| Htc 1T                                     | _____                                                                                                                                                                                |
| Hb 2T                                      | _____                                                                                                                                                                                |
| HTC 2T                                     | _____                                                                                                                                                                                |
| Hb 3T                                      | _____                                                                                                                                                                                |
| HTC 3T                                     | _____                                                                                                                                                                                |
| Suplemento FE oral                         | <input checked="" type="radio"/> si<br><input type="radio"/> no                                                                                                                      |
| Suplemento fe iv                           | <input type="radio"/> si<br><input type="radio"/> no                                                                                                                                 |
| Transfusión                                | <input type="radio"/> no<br><input type="radio"/> si                                                                                                                                 |
| Solicitada Vit D                           | <input type="radio"/> no<br><input type="radio"/> si                                                                                                                                 |



|                       |                                                                                                                                                                                                                                                                                                                                                                                                              |
|-----------------------|--------------------------------------------------------------------------------------------------------------------------------------------------------------------------------------------------------------------------------------------------------------------------------------------------------------------------------------------------------------------------------------------------------------|
| Deficit vit D         | <input type="radio"/> no<br><input type="radio"/> si                                                                                                                                                                                                                                                                                                                                                         |
| Suplemento vit D      | <input type="radio"/> si<br><input type="radio"/> no                                                                                                                                                                                                                                                                                                                                                         |
| Dieta, cuestionario   | <input checked="" type="radio"/> si<br><input type="radio"/> no                                                                                                                                                                                                                                                                                                                                              |
| Leche entera          | <input checked="" type="radio"/> Nunca o menos 1 vez al mes<br><input type="radio"/> 1 a 3 veces mes<br><input type="radio"/> 1 vez semana<br><input type="radio"/> 2 a 4 veces semana<br><input type="radio"/> 5 a 6 veces semana<br><input type="radio"/> 1 vez al día<br><input type="radio"/> 2 a 3 veces al día<br><input type="radio"/> 5 a 6 veces al día<br><input type="radio"/> más 6 veces al día |
| Leche semidesnatada   | <input type="radio"/> Nunca o menos 1 vez al mes<br><input type="radio"/> 1 a 3 veces mes<br><input type="radio"/> 1 vez semana<br><input type="radio"/> 2 a 4 veces semana<br><input type="radio"/> 5 a 6 veces semana<br><input checked="" type="radio"/> 1 vez al día<br><input type="radio"/> 2 a 3 veces al día<br><input type="radio"/> 5 a 6 veces al día<br><input type="radio"/> mas 6 veces al día |
| Leche desnatada       | <input checked="" type="radio"/> Nunca o menos 1 vez al mes<br><input type="radio"/> 1 a 3 veces mes<br><input type="radio"/> 1 vez semana<br><input type="radio"/> 2 a 4 veces semana<br><input type="radio"/> 5 a 6 veces semana<br><input type="radio"/> 1 vez al día<br><input type="radio"/> 2 a 3 veces al día<br><input type="radio"/> 5 a 6 veces al día<br><input type="radio"/> más 6 veces al día |
| Leche condensada      | <input checked="" type="radio"/> Nunca o menos 1 vez al mes<br><input type="radio"/> 1 a 3 veces mes<br><input type="radio"/> 1 vez semana<br><input type="radio"/> 2 a 4 veces semana<br><input type="radio"/> 5 a 6 veces semana<br><input type="radio"/> 1 vez al día<br><input type="radio"/> 2 a 3 veces al día<br><input type="radio"/> 5 a 6 veces al día<br><input type="radio"/> más 6 veces al día |
| nata o crema de leche | <input checked="" type="radio"/> Nunca o menos 1 vez al mes<br><input type="radio"/> 1 a 3 veces mes<br><input type="radio"/> 1 vez semana<br><input type="radio"/> 2 a 4 veces semana<br><input type="radio"/> 5 a 6 veces semana<br><input type="radio"/> 1 vez al día<br><input type="radio"/> 2 a 3 veces al día<br><input type="radio"/> 5 a 6 veces al día<br><input type="radio"/> más 6 veces al día |

---

Yogurt Entero

- ☐ Nunca o menos 1 vez al mes
- ☐ 1 a 3 veces mes
- ☐ 1 vez semana
- ☐ 2 a 4 veces semana
- ☐ 5 a 6 veces semana
- ☒ 1 vez al día
- ☐ 2 a 3 veces al día
- ☐ 5 a 6 veces al día
- ☐ más 6 veces al día

---

Yogurt desnatado

- ☒ Nunca o menos 1 vez al mes
- ☐ 1 a 3 veces mes
- ☐ 1 vez semana
- ☐ 2 a 4 veces semana
- ☐ 5 a 6 veces semana
- ☐ 1 vez al día
- ☐ 2 a 3 veces al día
- ☐ 5 a 6 veces al día
- ☐ más 6 veces al día

---

100g requesón o queso blando o queso fresco

- ☐ Nunca o menos 1 vez al mes
- ☐ 1 a 3 veces mes
- ☐ 1 vez semana
- ☐ 2 a 4 veces semana
- ☐ 5 a 6 veces semana
- ☒ 1 vez al día
- ☐ 2 a 3 veces al día
- ☐ 5 a 6 veces al día
- ☐ más 6 veces al día

---

queso curado o semicurado o cremoso

- ☐ Nunca o menos 1 vez al mes
- ☐ 1 a 3 veces mes
- ☐ 1 vez semana
- ☐ 2 a 4 veces semana
- ☐ 5 a 6 veces semana
- ☒ 1 vez al día
- ☐ 2 a 3 veces al día
- ☐ 5 a 6 veces al día
- ☐ más 6 veces al día

---

natillas flan pudding

- ☒ Nunca o menos 1 vez al mes
- ☐ 1 a 3 veces mes
- ☐ 1 vez semana
- ☐ 2 a 4 veces semana
- ☐ 5 a 6 veces semana
- ☐ 1 vez al día
- ☐ 2 a 3 veces al día
- ☐ 5 a 6 veces al día
- ☐ más 6 veces al día

---

Helado

- ☒ Nunca o menos 1 vez al mes
- ☐ 1 a 3 veces mes
- ☐ 1 vez semana
- ☐ 2 a 4 veces semana
- ☐ 5 a 6 veces semana
- ☐ 1 vez al día
- ☐ 2 a 3 veces al día
- ☐ 5 a 6 veces al día
- ☐ más 6 veces al día

|                                      |                                                                                                                                                                                                                                                                                                                                                                                                              |
|--------------------------------------|--------------------------------------------------------------------------------------------------------------------------------------------------------------------------------------------------------------------------------------------------------------------------------------------------------------------------------------------------------------------------------------------------------------|
| huevo                                | <input type="radio"/> Nunca o menos 1 vez al mes<br><input type="radio"/> 1 a 3 veces mes<br><input type="radio"/> 1 vez semana<br><input checked="" type="radio"/> 2 a 4 veces semana<br><input type="radio"/> 5 a 6 veces semana<br><input type="radio"/> 1 vez al día<br><input type="radio"/> 2 a 3 veces al día<br><input type="radio"/> 5 a 6 veces al día<br><input type="radio"/> más 6 veces al día |
| Pollo con piel                       | <input checked="" type="radio"/> Nunca o menos 1 vez al mes<br><input type="radio"/> 1 a 3 veces mes<br><input type="radio"/> 1 vez semana<br><input type="radio"/> 2 a 4 veces semana<br><input type="radio"/> 5 a 6 veces semana<br><input type="radio"/> 1 vez al día<br><input type="radio"/> 2 a 3 veces al día<br><input type="radio"/> 5 a 6 veces al día<br><input type="radio"/> más 6 veces al día |
| pollo sin piel                       | <input type="radio"/> Nunca o menos 1 vez al mes<br><input type="radio"/> 1 a 3 veces mes<br><input checked="" type="radio"/> 1 vez semana<br><input type="radio"/> 2 a 4 veces semana<br><input type="radio"/> 5 a 6 veces semana<br><input type="radio"/> 1 vez al día<br><input type="radio"/> 2 a 3 veces al día<br><input type="radio"/> 5 a 6 veces al día<br><input type="radio"/> más 6 veces al día |
| Ternera o cerdo o cordero            | <input checked="" type="radio"/> Nunca o menos 1 vez al mes<br><input type="radio"/> 1 a 3 veces mes<br><input type="radio"/> 1 vez semana<br><input type="radio"/> 2 a 4 veces semana<br><input type="radio"/> 5 a 6 veces semana<br><input type="radio"/> 1 vez al día<br><input type="radio"/> 2 a 3 veces al día<br><input type="radio"/> 5 a 6 veces al día<br><input type="radio"/> más 6 veces al día |
| carne caza: Conejo o codorniz o pato | <input checked="" type="radio"/> Nunca o menos 1 vez al mes<br><input type="radio"/> 1 a 3 veces mes<br><input type="radio"/> 1 vez semana<br><input type="radio"/> 2 a 4 veces semana<br><input type="radio"/> 5 a 6 veces semana<br><input type="radio"/> 1 vez al día<br><input type="radio"/> 2 a 3 veces al día<br><input type="radio"/> 5 a 6 veces al día<br><input type="radio"/> más 6 veces al día |
| Hígado de ternera o cerdo o pollo    | <input checked="" type="radio"/> Nunca o menos 1 vez al mes<br><input type="radio"/> 1 a 3 veces mes<br><input type="radio"/> 1 vez semana<br><input type="radio"/> 2 a 4 veces semana<br><input type="radio"/> 5 a 6 veces semana<br><input type="radio"/> 1 vez al día<br><input type="radio"/> 2 a 3 veces al día<br><input type="radio"/> 5 a 6 veces al día<br><input type="radio"/> más 6 veces al día |

|                     |                                                                                                                                                                                                                                                                                                                                                                                                              |
|---------------------|--------------------------------------------------------------------------------------------------------------------------------------------------------------------------------------------------------------------------------------------------------------------------------------------------------------------------------------------------------------------------------------------------------------|
| Vísceras            | <input checked="" type="radio"/> Nunca o menos 1 vez al mes<br><input type="radio"/> 1 a 3 veces mes<br><input type="radio"/> 1 vez semana<br><input type="radio"/> 2 a 4 veces semana<br><input type="radio"/> 5 a 6 veces semana<br><input type="radio"/> 1 vez al día<br><input type="radio"/> 2 a 3 veces al día<br><input type="radio"/> 5 a 6 veces al día<br><input type="radio"/> más 6 veces al día |
| Embutido            | <input checked="" type="radio"/> Nunca o menos 1 vez al mes<br><input type="radio"/> 1 a 3 veces mes<br><input type="radio"/> 1 vez semana<br><input type="radio"/> 2 a 4 veces semana<br><input type="radio"/> 5 a 6 veces semana<br><input type="radio"/> 1 vez al día<br><input type="radio"/> 2 a 3 veces al día<br><input type="radio"/> 5 a 6 veces al día<br><input type="radio"/> más 6 veces al día |
| Salchicha o similar | <input checked="" type="radio"/> Nunca o menos 1 vez al mes<br><input type="radio"/> 1 a 3 veces mes<br><input type="radio"/> 1 vez semana<br><input type="radio"/> 2 a 4 veces semana<br><input type="radio"/> 5 a 6 veces semana<br><input type="radio"/> 1 vez al día<br><input type="radio"/> 2 a 3 veces al día<br><input type="radio"/> 5 a 6 veces al día<br><input type="radio"/> más 6 veces al día |
| Pate o foiegras     | <input checked="" type="radio"/> Nunca o menos 1 vez al mes<br><input type="radio"/> 1 a 3 veces mes<br><input type="radio"/> 1 vez semana<br><input type="radio"/> 2 a 4 veces semana<br><input type="radio"/> 5 a 6 veces semana<br><input type="radio"/> 1 vez al día<br><input type="radio"/> 2 a 3 veces al día<br><input type="radio"/> 5 a 6 veces al día<br><input type="radio"/> más 6 veces al día |
| Hamburguesa         | <input type="radio"/> Nunca o menos 1 vez al mes<br><input checked="" type="radio"/> 1 a 3 veces mes<br><input type="radio"/> 1 vez semana<br><input type="radio"/> 2 a 4 veces semana<br><input type="radio"/> 5 a 6 veces semana<br><input type="radio"/> 1 vez al día<br><input type="radio"/> 2 a 3 veces al día<br><input type="radio"/> 5 a 6 veces al día<br><input type="radio"/> más 6 veces al día |
| tocino o bacon      | <input type="radio"/> Nunca o menos 1 vez al mes<br><input checked="" type="radio"/> 1 a 3 veces mes<br><input type="radio"/> 1 vez semana<br><input type="radio"/> 2 a 4 veces semana<br><input type="radio"/> 5 a 6 veces semana<br><input type="radio"/> 1 vez al día<br><input type="radio"/> 2 a 3 veces al día<br><input type="radio"/> 5 a 6 veces al día<br><input type="radio"/> más 6 veces al día |

---

|               |                                                                                                                                                                                                                                                                                                                                                                                                              |
|---------------|--------------------------------------------------------------------------------------------------------------------------------------------------------------------------------------------------------------------------------------------------------------------------------------------------------------------------------------------------------------------------------------------------------------|
| Pescado frito | <input type="radio"/> Nunca o menos 1 vez al mes<br><input checked="" type="radio"/> 1 a 3 veces mes<br><input type="radio"/> 1 vez semana<br><input type="radio"/> 2 a 4 veces semana<br><input type="radio"/> 5 a 6 veces semana<br><input type="radio"/> 1 vez al día<br><input type="radio"/> 2 a 3 veces al día<br><input type="radio"/> 5 a 6 veces al día<br><input type="radio"/> más 6 veces al día |
|---------------|--------------------------------------------------------------------------------------------------------------------------------------------------------------------------------------------------------------------------------------------------------------------------------------------------------------------------------------------------------------------------------------------------------------|

---

|                        |                                                                                                                                                                                                                                                                                                                                                                                                              |
|------------------------|--------------------------------------------------------------------------------------------------------------------------------------------------------------------------------------------------------------------------------------------------------------------------------------------------------------------------------------------------------------------------------------------------------------|
| pescado hervido blanco | <input type="radio"/> Nunca o menos 1 vez al mes<br><input type="radio"/> 1 a 3 veces mes<br><input type="radio"/> 1 vez semana<br><input checked="" type="radio"/> 2 a 4 veces semana<br><input type="radio"/> 5 a 6 veces semana<br><input type="radio"/> 1 vez al día<br><input type="radio"/> 2 a 3 veces al día<br><input type="radio"/> 5 a 6 veces al día<br><input type="radio"/> más 6 veces al día |
|------------------------|--------------------------------------------------------------------------------------------------------------------------------------------------------------------------------------------------------------------------------------------------------------------------------------------------------------------------------------------------------------------------------------------------------------|

---

|                      |                                                                                                                                                                                                                                                                                                                                                                                                              |
|----------------------|--------------------------------------------------------------------------------------------------------------------------------------------------------------------------------------------------------------------------------------------------------------------------------------------------------------------------------------------------------------------------------------------------------------|
| pescado hervido azul | <input type="radio"/> Nunca o menos 1 vez al mes<br><input checked="" type="radio"/> 1 a 3 veces mes<br><input type="radio"/> 1 vez semana<br><input type="radio"/> 2 a 4 veces semana<br><input type="radio"/> 5 a 6 veces semana<br><input type="radio"/> 1 vez al día<br><input type="radio"/> 2 a 3 veces al día<br><input type="radio"/> 5 a 6 veces al día<br><input type="radio"/> más 6 veces al día |
|----------------------|--------------------------------------------------------------------------------------------------------------------------------------------------------------------------------------------------------------------------------------------------------------------------------------------------------------------------------------------------------------------------------------------------------------|

---

|                    |                                                                                                                                                                                                                                                                                                                                                                                                              |
|--------------------|--------------------------------------------------------------------------------------------------------------------------------------------------------------------------------------------------------------------------------------------------------------------------------------------------------------------------------------------------------------------------------------------------------------|
| otros pescado azul | <input type="radio"/> Nunca o menos 1 vez al mes<br><input checked="" type="radio"/> 1 a 3 veces mes<br><input type="radio"/> 1 vez semana<br><input type="radio"/> 2 a 4 veces semana<br><input type="radio"/> 5 a 6 veces semana<br><input type="radio"/> 1 vez al día<br><input type="radio"/> 2 a 3 veces al día<br><input type="radio"/> 5 a 6 veces al día<br><input type="radio"/> más 6 veces al día |
|--------------------|--------------------------------------------------------------------------------------------------------------------------------------------------------------------------------------------------------------------------------------------------------------------------------------------------------------------------------------------------------------------------------------------------------------|

---

|               |                                                                                                                                                                                                                                                                                                                                                                                                              |
|---------------|--------------------------------------------------------------------------------------------------------------------------------------------------------------------------------------------------------------------------------------------------------------------------------------------------------------------------------------------------------------------------------------------------------------|
| atun conserva | <input type="radio"/> Nunca o menos 1 vez al mes<br><input type="radio"/> 1 a 3 veces mes<br><input checked="" type="radio"/> 1 vez semana<br><input type="radio"/> 2 a 4 veces semana<br><input type="radio"/> 5 a 6 veces semana<br><input type="radio"/> 1 vez al día<br><input type="radio"/> 2 a 3 veces al día<br><input type="radio"/> 5 a 6 veces al día<br><input type="radio"/> más 6 veces al día |
|---------------|--------------------------------------------------------------------------------------------------------------------------------------------------------------------------------------------------------------------------------------------------------------------------------------------------------------------------------------------------------------------------------------------------------------|

---

|                  |                                                                                                                                                                                                                                                                                                                                                                                                              |
|------------------|--------------------------------------------------------------------------------------------------------------------------------------------------------------------------------------------------------------------------------------------------------------------------------------------------------------------------------------------------------------------------------------------------------------|
| sardina conserva | <input checked="" type="radio"/> Nunca o menos 1 vez al mes<br><input type="radio"/> 1 a 3 veces mes<br><input type="radio"/> 1 vez semana<br><input type="radio"/> 2 a 4 veces semana<br><input type="radio"/> 5 a 6 veces semana<br><input type="radio"/> 1 vez al día<br><input type="radio"/> 2 a 3 veces al día<br><input type="radio"/> 5 a 6 veces al día<br><input type="radio"/> más 6 veces al día |
|------------------|--------------------------------------------------------------------------------------------------------------------------------------------------------------------------------------------------------------------------------------------------------------------------------------------------------------------------------------------------------------------------------------------------------------|

---

---

pescado ahumado

- ☒ Nunca o menos 1 vez al mes  
☐ 1 a 3 veces mes  
☐ 1 vez semana  
☐ 2 a 4 veces semana  
☐ 5 a 6 veces semana  
☐ 1 vez al día  
☐ 2 a 3 veces al día  
☐ 5 a 6 veces al día  
☐ más 6 veces al día

---

almejas o mejillones o ostras unos 100g

- ☐ Nunca o menos 1 vez al mes  
☒ 1 a 3 veces mes  
☐ 1 vez semana  
☐ 2 a 4 veces semana  
☐ 5 a 6 veces semana  
☐ 1 vez al día  
☐ 2 a 3 veces al día  
☐ 5 a 6 veces al día  
☐ más 6 veces al día

---

calamar o chipiron o sepia unos 100g

- ☐ Nunca o menos 1 vez al mes  
☒ 1 a 3 veces mes  
☐ 1 vez semana  
☐ 2 a 4 veces semana  
☐ 5 a 6 veces semana  
☐ 1 vez al día  
☐ 2 a 3 veces al día  
☐ 5 a 6 veces al día  
☐ más 6 veces al día

---

marisco unos 100g

- ☐ Nunca o menos 1 vez al mes  
☒ 1 a 3 veces mes  
☐ 1 vez semana  
☐ 2 a 4 veces semana  
☐ 5 a 6 veces semana  
☐ 1 vez al día  
☐ 2 a 3 veces al día  
☐ 5 a 6 veces al día  
☐ más 6 veces al día

---

Espinacas o acelgas cocinadas

- ☐ Nunca o menos 1 vez al mes  
☒ 1 a 3 veces mes  
☐ 1 vez semana  
☐ 2 a 4 veces semana  
☐ 5 a 6 veces semana  
☐ 1 vez al día  
☐ 2 a 3 veces al día  
☐ 5 a 6 veces al día  
☐ más 6 veces al día

---

Col o coliflor o brocoli cocinado

- ☒ Nunca o menos 1 vez al mes  
☐ 1 a 3 veces mes  
☐ 1 vez semana  
☐ 2 a 4 veces semana  
☐ 5 a 6 veces semana  
☐ 1 vez al día  
☐ 2 a 3 veces al día  
☐ 5 a 6 veces al día  
☐ más 6 veces al día

---

Lechuga o endivia o escarola

- ☐ Nunca o menos 1 vez al mes  
☐ 1 a 3 veces mes  
☒ 1 vez semana  
☐ 2 a 4 veces semana  
☐ 5 a 6 veces semana  
☐ 1 vez al día  
☐ 2 a 3 veces al día  
☐ 5 a 6 veces al día  
☐ más 6 veces al día

---

tomate ensalada

- ☐ Nunca o menos 1 vez al mes  
☐ 1 a 3 veces mes  
☐ 1 vez semana  
☐ 2 a 4 veces semana  
☒ 5 a 6 veces semana  
☐ 1 vez al día  
☐ 2 a 3 veces al día  
☐ 5 a 6 veces al día  
☐ más 6 veces al día

---

cebolla

- ☐ Nunca o menos 1 vez al mes  
☐ 1 a 3 veces mes  
☐ 1 vez semana  
☒ 2 a 4 veces semana  
☐ 5 a 6 veces semana  
☐ 1 vez al día  
☐ 2 a 3 veces al día  
☐ 5 a 6 veces al día  
☐ más 6 veces al día

---

Zanahoria o calabaza

- ☐ Nunca o menos 1 vez al mes  
☐ 1 a 3 veces mes  
☒ 1 vez semana  
☐ 2 a 4 veces semana  
☐ 5 a 6 veces semana  
☐ 1 vez al día  
☐ 2 a 3 veces al día  
☐ 5 a 6 veces al día  
☐ más 6 veces al día

---

Judías verdes

- ☐ Nunca o menos 1 vez al mes  
☒ 1 a 3 veces mes  
☐ 1 vez semana  
☐ 2 a 4 veces semana  
☐ 5 a 6 veces semana  
☐ 1 vez al día  
☐ 2 a 3 veces al día  
☐ 5 a 6 veces al día  
☐ más 6 veces al día

---

Berenjena o calabacin o pepino

- ☐ Nunca o menos 1 vez al mes  
☐ 1 a 3 veces mes  
☒ 1 vez semana  
☐ 2 a 4 veces semana  
☐ 5 a 6 veces semana  
☐ 1 vez al día  
☐ 2 a 3 veces al día  
☐ 5 a 6 veces al día  
☐ más 6 veces al día

---

|          |                                                                                                                                                                                                                                                                                                                                                                                                              |
|----------|--------------------------------------------------------------------------------------------------------------------------------------------------------------------------------------------------------------------------------------------------------------------------------------------------------------------------------------------------------------------------------------------------------------|
| pimiento | <input type="radio"/> Nunca o menos 1 vez al mes<br><input checked="" type="radio"/> 1 a 3 veces mes<br><input type="radio"/> 1 vez semana<br><input type="radio"/> 2 a 4 veces semana<br><input type="radio"/> 5 a 6 veces semana<br><input type="radio"/> 1 vez al día<br><input type="radio"/> 2 a 3 veces al día<br><input type="radio"/> 5 a 6 veces al día<br><input type="radio"/> más 6 veces al día |
|----------|--------------------------------------------------------------------------------------------------------------------------------------------------------------------------------------------------------------------------------------------------------------------------------------------------------------------------------------------------------------------------------------------------------------|

---

|           |                                                                                                                                                                                                                                                                                                                                                                                                              |
|-----------|--------------------------------------------------------------------------------------------------------------------------------------------------------------------------------------------------------------------------------------------------------------------------------------------------------------------------------------------------------------------------------------------------------------|
| alcachofa | <input type="radio"/> Nunca o menos 1 vez al mes<br><input checked="" type="radio"/> 1 a 3 veces mes<br><input type="radio"/> 1 vez semana<br><input type="radio"/> 2 a 4 veces semana<br><input type="radio"/> 5 a 6 veces semana<br><input type="radio"/> 1 vez al día<br><input type="radio"/> 2 a 3 veces al día<br><input type="radio"/> 5 a 6 veces al día<br><input type="radio"/> más 6 veces al día |
|-----------|--------------------------------------------------------------------------------------------------------------------------------------------------------------------------------------------------------------------------------------------------------------------------------------------------------------------------------------------------------------------------------------------------------------|

---

|            |                                                                                                                                                                                                                                                                                                                                                                                                              |
|------------|--------------------------------------------------------------------------------------------------------------------------------------------------------------------------------------------------------------------------------------------------------------------------------------------------------------------------------------------------------------------------------------------------------------|
| espárragos | <input checked="" type="radio"/> Nunca o menos 1 vez al mes<br><input type="radio"/> 1 a 3 veces mes<br><input type="radio"/> 1 vez semana<br><input type="radio"/> 2 a 4 veces semana<br><input type="radio"/> 5 a 6 veces semana<br><input type="radio"/> 1 vez al día<br><input type="radio"/> 2 a 3 veces al día<br><input type="radio"/> 5 a 6 veces al día<br><input type="radio"/> más 6 veces al día |
|------------|--------------------------------------------------------------------------------------------------------------------------------------------------------------------------------------------------------------------------------------------------------------------------------------------------------------------------------------------------------------------------------------------------------------|

---

|              |                                                                                                                                                                                                                                                                                                                                                                                                              |
|--------------|--------------------------------------------------------------------------------------------------------------------------------------------------------------------------------------------------------------------------------------------------------------------------------------------------------------------------------------------------------------------------------------------------------------|
| maíz hervido | <input type="radio"/> Nunca o menos 1 vez al mes<br><input checked="" type="radio"/> 1 a 3 veces mes<br><input type="radio"/> 1 vez semana<br><input type="radio"/> 2 a 4 veces semana<br><input type="radio"/> 5 a 6 veces semana<br><input type="radio"/> 1 vez al día<br><input type="radio"/> 2 a 3 veces al día<br><input type="radio"/> 5 a 6 veces al día<br><input type="radio"/> más 6 veces al día |
|--------------|--------------------------------------------------------------------------------------------------------------------------------------------------------------------------------------------------------------------------------------------------------------------------------------------------------------------------------------------------------------------------------------------------------------|

---

|           |                                                                                                                                                                                                                                                                                                                                                                                                              |
|-----------|--------------------------------------------------------------------------------------------------------------------------------------------------------------------------------------------------------------------------------------------------------------------------------------------------------------------------------------------------------------------------------------------------------------|
| legumbres | <input type="radio"/> Nunca o menos 1 vez al mes<br><input type="radio"/> 1 a 3 veces mes<br><input checked="" type="radio"/> 1 vez semana<br><input type="radio"/> 2 a 4 veces semana<br><input type="radio"/> 5 a 6 veces semana<br><input type="radio"/> 1 vez al día<br><input type="radio"/> 2 a 3 veces al día<br><input type="radio"/> 5 a 6 veces al día<br><input type="radio"/> más 6 veces al día |
|-----------|--------------------------------------------------------------------------------------------------------------------------------------------------------------------------------------------------------------------------------------------------------------------------------------------------------------------------------------------------------------------------------------------------------------|

---

|                       |                                                                                                                                                                                                                                                                                                                                                                                                              |
|-----------------------|--------------------------------------------------------------------------------------------------------------------------------------------------------------------------------------------------------------------------------------------------------------------------------------------------------------------------------------------------------------------------------------------------------------|
| naranjas o mandarinas | <input type="radio"/> Nunca o menos 1 vez al mes<br><input type="radio"/> 1 a 3 veces mes<br><input type="radio"/> 1 vez semana<br><input type="radio"/> 2 a 4 veces semana<br><input type="radio"/> 5 a 6 veces semana<br><input checked="" type="radio"/> 1 vez al día<br><input type="radio"/> 2 a 3 veces al día<br><input type="radio"/> 5 a 6 veces al día<br><input type="radio"/> más 6 veces al día |
|-----------------------|--------------------------------------------------------------------------------------------------------------------------------------------------------------------------------------------------------------------------------------------------------------------------------------------------------------------------------------------------------------------------------------------------------------|

---



---

|                    |                                                                                                                                                                                                                                                                                                                                                                                                              |
|--------------------|--------------------------------------------------------------------------------------------------------------------------------------------------------------------------------------------------------------------------------------------------------------------------------------------------------------------------------------------------------------------------------------------------------------|
| zumو natural fruta | <input type="radio"/> Nunca o menos 1 vez al mes<br><input type="radio"/> 1 a 3 veces mes<br><input type="radio"/> 1 vez semana<br><input type="radio"/> 2 a 4 veces semana<br><input type="radio"/> 5 a 6 veces semana<br><input checked="" type="radio"/> 1 vez al día<br><input type="radio"/> 2 a 3 veces al día<br><input type="radio"/> 5 a 6 veces al día<br><input type="radio"/> más 6 veces al día |
|--------------------|--------------------------------------------------------------------------------------------------------------------------------------------------------------------------------------------------------------------------------------------------------------------------------------------------------------------------------------------------------------------------------------------------------------|

---

|         |                                                                                                                                                                                                                                                                                                                                                                                                              |
|---------|--------------------------------------------------------------------------------------------------------------------------------------------------------------------------------------------------------------------------------------------------------------------------------------------------------------------------------------------------------------------------------------------------------------|
| platano | <input type="radio"/> Nunca o menos 1 vez al mes<br><input type="radio"/> 1 a 3 veces mes<br><input type="radio"/> 1 vez semana<br><input checked="" type="radio"/> 2 a 4 veces semana<br><input type="radio"/> 5 a 6 veces semana<br><input type="radio"/> 1 vez al día<br><input type="radio"/> 2 a 3 veces al día<br><input type="radio"/> 5 a 6 veces al día<br><input type="radio"/> más 6 veces al día |
|---------|--------------------------------------------------------------------------------------------------------------------------------------------------------------------------------------------------------------------------------------------------------------------------------------------------------------------------------------------------------------------------------------------------------------|

---

|                |                                                                                                                                                                                                                                                                                                                                                                                                              |
|----------------|--------------------------------------------------------------------------------------------------------------------------------------------------------------------------------------------------------------------------------------------------------------------------------------------------------------------------------------------------------------------------------------------------------------|
| manzana o pera | <input type="radio"/> Nunca o menos 1 vez al mes<br><input type="radio"/> 1 a 3 veces mes<br><input type="radio"/> 1 vez semana<br><input checked="" type="radio"/> 2 a 4 veces semana<br><input type="radio"/> 5 a 6 veces semana<br><input type="radio"/> 1 vez al día<br><input type="radio"/> 2 a 3 veces al día<br><input type="radio"/> 5 a 6 veces al día<br><input type="radio"/> más 6 veces al día |
|----------------|--------------------------------------------------------------------------------------------------------------------------------------------------------------------------------------------------------------------------------------------------------------------------------------------------------------------------------------------------------------------------------------------------------------|

---

|                       |                                                                                                                                                                                                                                                                                                                                                                                                              |
|-----------------------|--------------------------------------------------------------------------------------------------------------------------------------------------------------------------------------------------------------------------------------------------------------------------------------------------------------------------------------------------------------------------------------------------------------|
| melocotón o nectarina | <input type="radio"/> Nunca o menos 1 vez al mes<br><input type="radio"/> 1 a 3 veces mes<br><input type="radio"/> 1 vez semana<br><input checked="" type="radio"/> 2 a 4 veces semana<br><input type="radio"/> 5 a 6 veces semana<br><input type="radio"/> 1 vez al día<br><input type="radio"/> 2 a 3 veces al día<br><input type="radio"/> 5 a 6 veces al día<br><input type="radio"/> más 6 veces al día |
|-----------------------|--------------------------------------------------------------------------------------------------------------------------------------------------------------------------------------------------------------------------------------------------------------------------------------------------------------------------------------------------------------------------------------------------------------|

---

|                |                                                                                                                                                                                                                                                                                                                                                                                                              |
|----------------|--------------------------------------------------------------------------------------------------------------------------------------------------------------------------------------------------------------------------------------------------------------------------------------------------------------------------------------------------------------------------------------------------------------|
| sandia o melon | <input type="radio"/> Nunca o menos 1 vez al mes<br><input type="radio"/> 1 a 3 veces mes<br><input type="radio"/> 1 vez semana<br><input checked="" type="radio"/> 2 a 4 veces semana<br><input type="radio"/> 5 a 6 veces semana<br><input type="radio"/> 1 vez al día<br><input type="radio"/> 2 a 3 veces al día<br><input type="radio"/> 5 a 6 veces al día<br><input type="radio"/> más 6 veces al día |
|----------------|--------------------------------------------------------------------------------------------------------------------------------------------------------------------------------------------------------------------------------------------------------------------------------------------------------------------------------------------------------------------------------------------------------------|

---

|     |                                                                                                                                                                                                                                                                                                                                                                                                              |
|-----|--------------------------------------------------------------------------------------------------------------------------------------------------------------------------------------------------------------------------------------------------------------------------------------------------------------------------------------------------------------------------------------------------------------|
| uva | <input type="radio"/> Nunca o menos 1 vez al mes<br><input type="radio"/> 1 a 3 veces mes<br><input type="radio"/> 1 vez semana<br><input type="radio"/> 2 a 4 veces semana<br><input checked="" type="radio"/> 5 a 6 veces semana<br><input type="radio"/> 1 vez al día<br><input type="radio"/> 2 a 3 veces al día<br><input type="radio"/> 5 a 6 veces al día<br><input type="radio"/> más 6 veces al día |
|-----|--------------------------------------------------------------------------------------------------------------------------------------------------------------------------------------------------------------------------------------------------------------------------------------------------------------------------------------------------------------------------------------------------------------|

---

---

bruna o ciruela

- ☐ Nunca o menos 1 vez al mes  
☐ 1 a 3 veces mes  
☐ 1 vez semana  
☒ 2 a 4 veces semana  
☐ 5 a 6 veces semana  
☐ 1 vez al día  
☐ 2 a 3 veces al día  
☐ 5 a 6 veces al día  
☐ más 6 veces al día

---

kiwi

- ☐ Nunca o menos 1 vez al mes  
☐ 1 a 3 veces mes  
☐ 1 vez semana  
☒ 2 a 4 veces semana  
☐ 5 a 6 veces semana  
☐ 1 vez al día  
☐ 2 a 3 veces al día  
☐ 5 a 6 veces al día  
☐ más 6 veces al día

---

aceituna

- ☐ Nunca o menos 1 vez al mes  
☒ 1 a 3 veces mes  
☐ 1 vez semana  
☐ 2 a 4 veces semana  
☐ 5 a 6 veces semana  
☐ 1 vez al día  
☐ 2 a 3 veces al día  
☐ 5 a 6 veces al día  
☐ más 6 veces al día

---

frutos secos

- ☐ Nunca o menos 1 vez al mes  
☐ 1 a 3 veces mes  
☐ 1 vez semana  
☒ 2 a 4 veces semana  
☐ 5 a 6 veces semana  
☐ 1 vez al día  
☐ 2 a 3 veces al día  
☐ 5 a 6 veces al día  
☐ más 6 veces al día

---

pan blanco

- ☒ Nunca o menos 1 vez al mes  
☐ 1 a 3 veces mes  
☐ 1 vez semana  
☐ 2 a 4 veces semana  
☐ 5 a 6 veces semana  
☐ 1 vez al día  
☐ 2 a 3 veces al día  
☐ 5 a 6 veces al día  
☐ más 6 veces al día

---

pan integral

- ☐ Nunca o menos 1 vez al mes  
☐ 1 a 3 veces mes  
☐ 1 vez semana  
☐ 2 a 4 veces semana  
☐ 5 a 6 veces semana  
☒ 1 vez al día  
☐ 2 a 3 veces al día  
☐ 5 a 6 veces al día  
☐ más 6 veces al día

|                          |                                                                                                                                                                                                                                                                                                                                                                                                              |
|--------------------------|--------------------------------------------------------------------------------------------------------------------------------------------------------------------------------------------------------------------------------------------------------------------------------------------------------------------------------------------------------------------------------------------------------------|
| cereales desayuno        | <input type="radio"/> Nunca o menos 1 vez al mes<br><input type="radio"/> 1 a 3 veces mes<br><input type="radio"/> 1 vez semana<br><input type="radio"/> 2 a 4 veces semana<br><input type="radio"/> 5 a 6 veces semana<br><input checked="" type="radio"/> 1 vez al día<br><input type="radio"/> 2 a 3 veces al día<br><input type="radio"/> 5 a 6 veces al día<br><input type="radio"/> más 6 veces al día |
| patatas fritas           | <input type="radio"/> Nunca o menos 1 vez al mes<br><input checked="" type="radio"/> 1 a 3 veces mes<br><input type="radio"/> 1 vez semana<br><input type="radio"/> 2 a 4 veces semana<br><input type="radio"/> 5 a 6 veces semana<br><input type="radio"/> 1 vez al día<br><input type="radio"/> 2 a 3 veces al día<br><input type="radio"/> 5 a 6 veces al día<br><input type="radio"/> más 6 veces al día |
| patatas cocidas o asadas | <input type="radio"/> Nunca o menos 1 vez al mes<br><input type="radio"/> 1 a 3 veces mes<br><input type="radio"/> 1 vez semana<br><input checked="" type="radio"/> 2 a 4 veces semana<br><input type="radio"/> 5 a 6 veces semana<br><input type="radio"/> 1 vez al día<br><input type="radio"/> 2 a 3 veces al día<br><input type="radio"/> 5 a 6 veces al día<br><input type="radio"/> más 6 veces al día |
| bolsa papas              | <input type="radio"/> Nunca o menos 1 vez al mes<br><input checked="" type="radio"/> 1 a 3 veces mes<br><input type="radio"/> 1 vez semana<br><input type="radio"/> 2 a 4 veces semana<br><input type="radio"/> 5 a 6 veces semana<br><input type="radio"/> 1 vez al día<br><input type="radio"/> 2 a 3 veces al día<br><input type="radio"/> 5 a 6 veces al día<br><input type="radio"/> más 6 veces al día |
| arroz cocinado           | <input type="radio"/> Nunca o menos 1 vez al mes<br><input type="radio"/> 1 a 3 veces mes<br><input type="radio"/> 1 vez semana<br><input checked="" type="radio"/> 2 a 4 veces semana<br><input type="radio"/> 5 a 6 veces semana<br><input type="radio"/> 1 vez al día<br><input type="radio"/> 2 a 3 veces al día<br><input type="radio"/> 5 a 6 veces al día<br><input type="radio"/> más 6 veces al día |
| pasta                    | <input type="radio"/> Nunca o menos 1 vez al mes<br><input type="radio"/> 1 a 3 veces mes<br><input checked="" type="radio"/> 1 vez semana<br><input type="radio"/> 2 a 4 veces semana<br><input type="radio"/> 5 a 6 veces semana<br><input type="radio"/> 1 vez al día<br><input type="radio"/> 2 a 3 veces al día<br><input type="radio"/> 5 a 6 veces al día<br><input type="radio"/> más 6 veces al día |

|                     |                                                                                                                                                                                                                                                                                                                                                                                                              |
|---------------------|--------------------------------------------------------------------------------------------------------------------------------------------------------------------------------------------------------------------------------------------------------------------------------------------------------------------------------------------------------------------------------------------------------------|
| pizza               | <input type="radio"/> Nunca o menos 1 vez al mes<br><input type="radio"/> 1 a 3 veces mes<br><input checked="" type="radio"/> 1 vez semana<br><input type="radio"/> 2 a 4 veces semana<br><input type="radio"/> 5 a 6 veces semana<br><input type="radio"/> 1 vez al día<br><input type="radio"/> 2 a 3 veces al día<br><input type="radio"/> 5 a 6 veces al día<br><input type="radio"/> más 6 veces al día |
| aceite oliva        | <input type="radio"/> Nunca o menos 1 vez al mes<br><input type="radio"/> 1 a 3 veces mes<br><input type="radio"/> 1 vez semana<br><input checked="" type="radio"/> 2 a 4 veces semana<br><input type="radio"/> 5 a 6 veces semana<br><input type="radio"/> 1 vez al día<br><input type="radio"/> 2 a 3 veces al día<br><input type="radio"/> 5 a 6 veces al día<br><input type="radio"/> más 6 veces al día |
| otros aceites       | <input checked="" type="radio"/> Nunca o menos 1 vez al mes<br><input type="radio"/> 1 a 3 veces mes<br><input type="radio"/> 1 vez semana<br><input type="radio"/> 2 a 4 veces semana<br><input type="radio"/> 5 a 6 veces semana<br><input type="radio"/> 1 vez al día<br><input type="radio"/> 2 a 3 veces al día<br><input type="radio"/> 5 a 6 veces al día<br><input type="radio"/> más 6 veces al día |
| margarina           | <input checked="" type="radio"/> Nunca o menos 1 vez al mes<br><input type="radio"/> 1 a 3 veces mes<br><input type="radio"/> 1 vez semana<br><input type="radio"/> 2 a 4 veces semana<br><input type="radio"/> 5 a 6 veces semana<br><input type="radio"/> 1 vez al día<br><input type="radio"/> 2 a 3 veces al día<br><input type="radio"/> 5 a 6 veces al día<br><input type="radio"/> más 6 veces al día |
| mantequilla         | <input type="radio"/> Nunca o menos 1 vez al mes<br><input checked="" type="radio"/> 1 a 3 veces mes<br><input type="radio"/> 1 vez semana<br><input type="radio"/> 2 a 4 veces semana<br><input type="radio"/> 5 a 6 veces semana<br><input type="radio"/> 1 vez al día<br><input type="radio"/> 2 a 3 veces al día<br><input type="radio"/> 5 a 6 veces al día<br><input type="radio"/> más 6 veces al día |
| galletas tipo maria | <input type="radio"/> Nunca o menos 1 vez al mes<br><input checked="" type="radio"/> 1 a 3 veces mes<br><input type="radio"/> 1 vez semana<br><input type="radio"/> 2 a 4 veces semana<br><input type="radio"/> 5 a 6 veces semana<br><input type="radio"/> 1 vez al día<br><input type="radio"/> 2 a 3 veces al día<br><input type="radio"/> 5 a 6 veces al día<br><input type="radio"/> más 6 veces al día |

|                           |                                                                                                                                                                                                                                                                                                                                                                                                              |
|---------------------------|--------------------------------------------------------------------------------------------------------------------------------------------------------------------------------------------------------------------------------------------------------------------------------------------------------------------------------------------------------------------------------------------------------------|
| galletas chocolate        | <input checked="" type="radio"/> Nunca o menos 1 vez al mes<br><input type="radio"/> 1 a 3 veces mes<br><input type="radio"/> 1 vez semana<br><input type="radio"/> 2 a 4 veces semana<br><input type="radio"/> 5 a 6 veces semana<br><input type="radio"/> 1 vez al día<br><input type="radio"/> 2 a 3 veces al día<br><input type="radio"/> 5 a 6 veces al día<br><input type="radio"/> más 6 veces al día |
| bollieria                 | <input type="radio"/> Nunca o menos 1 vez al mes<br><input checked="" type="radio"/> 1 a 3 veces mes<br><input type="radio"/> 1 vez semana<br><input type="radio"/> 2 a 4 veces semana<br><input type="radio"/> 5 a 6 veces semana<br><input type="radio"/> 1 vez al día<br><input type="radio"/> 2 a 3 veces al día<br><input type="radio"/> 5 a 6 veces al día<br><input type="radio"/> más 6 veces al día |
| chocolate o bombones      | <input type="radio"/> Nunca o menos 1 vez al mes<br><input type="radio"/> 1 a 3 veces mes<br><input checked="" type="radio"/> 1 vez semana<br><input type="radio"/> 2 a 4 veces semana<br><input type="radio"/> 5 a 6 veces semana<br><input type="radio"/> 1 vez al día<br><input type="radio"/> 2 a 3 veces al día<br><input type="radio"/> 5 a 6 veces al día<br><input type="radio"/> más 6 veces al día |
| chocolate polvo o colacao | <input type="radio"/> Nunca o menos 1 vez al mes<br><input checked="" type="radio"/> 1 a 3 veces mes<br><input type="radio"/> 1 vez semana<br><input type="radio"/> 2 a 4 veces semana<br><input type="radio"/> 5 a 6 veces semana<br><input type="radio"/> 1 vez al día<br><input type="radio"/> 2 a 3 veces al día<br><input type="radio"/> 5 a 6 veces al día<br><input type="radio"/> más 6 veces al día |
| vino tinto                | <input checked="" type="radio"/> Nunca o menos 1 vez al mes<br><input type="radio"/> 1 a 3 veces mes<br><input type="radio"/> 1 vez semana<br><input type="radio"/> 2 a 4 veces semana<br><input type="radio"/> 5 a 6 veces semana<br><input type="radio"/> 1 vez al día<br><input type="radio"/> 2 a 3 veces al día<br><input type="radio"/> 5 a 6 veces al día<br><input type="radio"/> más 6 veces al día |
| vino blanco               | <input checked="" type="radio"/> Nunca o menos 1 vez al mes<br><input type="radio"/> 1 a 3 veces mes<br><input type="radio"/> 1 vez semana<br><input type="radio"/> 2 a 4 veces semana<br><input type="radio"/> 5 a 6 veces semana<br><input type="radio"/> 1 vez al día<br><input type="radio"/> 2 a 3 veces al día<br><input type="radio"/> 5 a 6 veces al día<br><input type="radio"/> más 6 veces al día |

|                       |                                                                                                                                                                                                                                                                                                                                                                                                              |
|-----------------------|--------------------------------------------------------------------------------------------------------------------------------------------------------------------------------------------------------------------------------------------------------------------------------------------------------------------------------------------------------------------------------------------------------------|
| vino seco o vermut    | <input checked="" type="radio"/> Nunca o menos 1 vez al mes<br><input type="radio"/> 1 a 3 veces mes<br><input type="radio"/> 1 vez semana<br><input type="radio"/> 2 a 4 veces semana<br><input type="radio"/> 5 a 6 veces semana<br><input type="radio"/> 1 vez al día<br><input type="radio"/> 2 a 3 veces al día<br><input type="radio"/> 5 a 6 veces al día<br><input type="radio"/> más 6 veces al día |
| cerveza               | <input checked="" type="radio"/> Nunca o menos 1 vez al mes<br><input type="radio"/> 1 a 3 veces mes<br><input type="radio"/> 1 vez semana<br><input type="radio"/> 2 a 4 veces semana<br><input type="radio"/> 5 a 6 veces semana<br><input type="radio"/> 1 vez al día<br><input type="radio"/> 2 a 3 veces al día<br><input type="radio"/> 5 a 6 veces al día<br><input type="radio"/> más 6 veces al día |
| cerveza sin alcohol   | <input type="radio"/> Nunca o menos 1 vez al mes<br><input checked="" type="radio"/> 1 a 3 veces mes<br><input type="radio"/> 1 vez semana<br><input type="radio"/> 2 a 4 veces semana<br><input type="radio"/> 5 a 6 veces semana<br><input type="radio"/> 1 vez al día<br><input type="radio"/> 2 a 3 veces al día<br><input type="radio"/> 5 a 6 veces al día<br><input type="radio"/> más 6 veces al día |
| licores               | <input checked="" type="radio"/> Nunca o menos 1 vez al mes<br><input type="radio"/> 1 a 3 veces mes<br><input type="radio"/> 1 vez semana<br><input type="radio"/> 2 a 4 veces semana<br><input type="radio"/> 5 a 6 veces semana<br><input type="radio"/> 1 vez al día<br><input type="radio"/> 2 a 3 veces al día<br><input type="radio"/> 5 a 6 veces al día<br><input type="radio"/> más 6 veces al día |
| ginebra o ron o vodka | <input checked="" type="radio"/> Nunca o menos 1 vez al mes<br><input type="radio"/> 1 a 3 veces mes<br><input type="radio"/> 1 vez semana<br><input type="radio"/> 2 a 4 veces semana<br><input type="radio"/> 5 a 6 veces semana<br><input type="radio"/> 1 vez al día<br><input type="radio"/> 2 a 3 veces al día<br><input type="radio"/> 5 a 6 veces al día<br><input type="radio"/> más 6 veces al día |
| refresco normal       | <input checked="" type="radio"/> Nunca o menos 1 vez al mes<br><input type="radio"/> 1 a 3 veces mes<br><input type="radio"/> 1 vez semana<br><input type="radio"/> 2 a 4 veces semana<br><input type="radio"/> 5 a 6 veces semana<br><input type="radio"/> 1 vez al día<br><input type="radio"/> 2 a 3 veces al día<br><input type="radio"/> 5 a 6 veces al día<br><input type="radio"/> más 6 veces al día |

---

refresco sin azúcar

- ☐ Nunca o menos 1 vez al mes  
☒ 1 a 3 veces mes  
☐ 1 vez semana  
☐ 2 a 4 veces semana  
☐ 5 a 6 veces semana  
☐ 1 vez al día  
☐ 2 a 3 veces al día  
☐ 5 a 6 veces al día  
☐ más 6 veces al día

---

Agua del grifo

- ☒ Nunca o menos 1 vez al mes  
☐ 1 a 3 veces mes  
☐ 1 vez semana  
☐ 2 a 4 veces semana  
☐ 5 a 6 veces semana  
☐ 1 vez al día  
☐ 2 a 3 veces al día  
☐ 5 a 6 veces al día  
☐ más 6 veces al día

---

agua embotellada sin gas

- ☐ Nunca o menos 1 vez al mes  
☐ 1 a 3 veces mes  
☐ 1 vez semana  
☐ 2 a 4 veces semana  
☐ 5 a 6 veces semana  
☐ 1 vez al día  
☐ 2 a 3 veces al día  
☒ 5 a 6 veces al día  
☐ más 6 veces al día

---

agua embotellada con gas

- ☒ Nunca o menos 1 vez al mes  
☐ 1 a 3 veces mes  
☐ 1 vez semana  
☐ 2 a 4 veces semana  
☐ 5 a 6 veces semana  
☐ 1 vez al día  
☐ 2 a 3 veces al día  
☐ 5 a 6 veces al día  
☐ más 6 veces al día

---

zumو frutas embasado

- ☒ Nunca o menos 1 vez al mes  
☐ 1 a 3 veces mes  
☐ 1 vez semana  
☐ 2 a 4 veces semana  
☐ 5 a 6 veces semana  
☐ 1 vez al día  
☐ 2 a 3 veces al día  
☐ 5 a 6 veces al día  
☐ más 6 veces al día

---

cafe

- ☒ Nunca o menos 1 vez al mes  
☐ 1 a 3 veces mes  
☐ 1 vez semana  
☐ 2 a 4 veces semana  
☐ 5 a 6 veces semana  
☐ 1 vez al día  
☐ 2 a 3 veces al día  
☐ 5 a 6 veces al día  
☐ más 6 veces al día

|                       |                                                                                                                                                                                                                                                                                                                                                                                                              |
|-----------------------|--------------------------------------------------------------------------------------------------------------------------------------------------------------------------------------------------------------------------------------------------------------------------------------------------------------------------------------------------------------------------------------------------------------|
| cafe descafeinado     | <input type="radio"/> Nunca o menos 1 vez al mes<br><input type="radio"/> 1 a 3 veces mes<br><input type="radio"/> 1 vez semana<br><input type="radio"/> 2 a 4 veces semana<br><input type="radio"/> 5 a 6 veces semana<br><input checked="" type="radio"/> 1 vez al día<br><input type="radio"/> 2 a 3 veces al día<br><input type="radio"/> 5 a 6 veces al día<br><input type="radio"/> más 6 veces al día |
| te o infusión         | <input type="radio"/> Nunca o menos 1 vez al mes<br><input checked="" type="radio"/> 1 a 3 veces mes<br><input type="radio"/> 1 vez semana<br><input type="radio"/> 2 a 4 veces semana<br><input type="radio"/> 5 a 6 veces semana<br><input type="radio"/> 1 vez al día<br><input type="radio"/> 2 a 3 veces al día<br><input type="radio"/> 5 a 6 veces al día<br><input type="radio"/> más 6 veces al día |
| sopa o puré verduras  | <input type="radio"/> Nunca o menos 1 vez al mes<br><input type="radio"/> 1 a 3 veces mes<br><input checked="" type="radio"/> 1 vez semana<br><input type="radio"/> 2 a 4 veces semana<br><input type="radio"/> 5 a 6 veces semana<br><input type="radio"/> 1 vez al día<br><input type="radio"/> 2 a 3 veces al día<br><input type="radio"/> 5 a 6 veces al día<br><input type="radio"/> más 6 veces al día |
| croquetas pollo jamón | <input type="radio"/> Nunca o menos 1 vez al mes<br><input checked="" type="radio"/> 1 a 3 veces mes<br><input type="radio"/> 1 vez semana<br><input type="radio"/> 2 a 4 veces semana<br><input type="radio"/> 5 a 6 veces semana<br><input type="radio"/> 1 vez al día<br><input type="radio"/> 2 a 3 veces al día<br><input type="radio"/> 5 a 6 veces al día<br><input type="radio"/> más 6 veces al día |
| croquetas pescado     | <input checked="" type="radio"/> Nunca o menos 1 vez al mes<br><input type="radio"/> 1 a 3 veces mes<br><input type="radio"/> 1 vez semana<br><input type="radio"/> 2 a 4 veces semana<br><input type="radio"/> 5 a 6 veces semana<br><input type="radio"/> 1 vez al día<br><input type="radio"/> 2 a 3 veces al día<br><input type="radio"/> 5 a 6 veces al día<br><input type="radio"/> más 6 veces al día |
| mayonesa              | <input checked="" type="radio"/> Nunca o menos 1 vez al mes<br><input type="radio"/> 1 a 3 veces mes<br><input type="radio"/> 1 vez semana<br><input type="radio"/> 2 a 4 veces semana<br><input type="radio"/> 5 a 6 veces semana<br><input type="radio"/> 1 vez al día<br><input type="radio"/> 2 a 3 veces al día<br><input type="radio"/> 5 a 6 veces al día<br><input type="radio"/> más 6 veces al día |



---

salsa tomate

- ☐ Nunca o menos 1 vez al mes  
☒ 1 a 3 veces mes  
☐ 1 vez semana  
☐ 2 a 4 veces semana  
☐ 5 a 6 veces semana  
☐ 1 vez al día  
☐ 2 a 3 veces al día  
☐ 5 a 6 veces al día  
☐ más 6 veces al día

---

ketchup

- ☐ Nunca o menos 1 vez al mes  
☒ 1 a 3 veces mes  
☐ 1 vez semana  
☐ 2 a 4 veces semana  
☐ 5 a 6 veces semana  
☐ 1 vez al día  
☐ 2 a 3 veces al día  
☐ 5 a 6 veces al día  
☐ más 6 veces al día

---

sal

- ☒ Nunca o menos 1 vez al mes  
☐ 1 a 3 veces mes  
☐ 1 vez semana  
☐ 2 a 4 veces semana  
☐ 5 a 6 veces semana  
☐ 1 vez al día  
☐ 2 a 3 veces al día  
☐ 5 a 6 veces al día  
☐ más 6 veces al día

---

ajo

- ☐ Nunca o menos 1 vez al mes  
☒ 1 a 3 veces mes  
☐ 1 vez semana  
☐ 2 a 4 veces semana  
☐ 5 a 6 veces semana  
☐ 1 vez al día  
☐ 2 a 3 veces al día  
☐ 5 a 6 veces al día  
☐ más 6 veces al día

---

mermelada o miel

- ☐ Nunca o menos 1 vez al mes  
☐ 1 a 3 veces mes  
☐ 1 vez semana  
☐ 2 a 4 veces semana  
☐ 5 a 6 veces semana  
☒ 1 vez al día  
☐ 2 a 3 veces al día  
☐ 5 a 6 veces al día  
☐ más 6 veces al día

---

azúcar

- ☒ Nunca o menos 1 vez al mes  
☐ 1 a 3 veces mes  
☐ 1 vez semana  
☐ 2 a 4 veces semana  
☐ 5 a 6 veces semana  
☐ 1 vez al día  
☐ 2 a 3 veces al día  
☐ 5 a 6 veces al día  
☐ más 6 veces al día

|                                       |                                                                                                                                                                                                                                                                                                                                                                                                                                                                                                                               |
|---------------------------------------|-------------------------------------------------------------------------------------------------------------------------------------------------------------------------------------------------------------------------------------------------------------------------------------------------------------------------------------------------------------------------------------------------------------------------------------------------------------------------------------------------------------------------------|
| Otro alimento                         |                                                                                                                                                                                                                                                                                                                                                                                                                                                                                                                               |
| suplementos vitamínicos               | <input checked="" type="radio"/> si<br><input type="radio"/> no                                                                                                                                                                                                                                                                                                                                                                                                                                                               |
| suplementos vitamínicos               | [*DATA REMOVED*]                                                                                                                                                                                                                                                                                                                                                                                                                                                                                                              |
| dieta previa                          | <input type="radio"/> si<br><input checked="" type="radio"/> no                                                                                                                                                                                                                                                                                                                                                                                                                                                               |
| motivo dieta                          | <input checked="" type="radio"/> no dieta<br><input type="radio"/> control peso<br><input type="radio"/> control colesterol<br><input type="radio"/> control diabetes<br><input type="radio"/> problemas estómago<br><input type="radio"/> problemas vesícula o hepáticos<br><input type="radio"/> HTA o cardiopatía<br><input type="radio"/> problemas renales<br><input type="radio"/> alergia alimentaria<br><input type="radio"/> ácido úrico elevado<br><input type="radio"/> vegetariana<br><input type="radio"/> otros |
| cambio alimentos año previo gestación | <input checked="" type="radio"/> si<br><input type="radio"/> no                                                                                                                                                                                                                                                                                                                                                                                                                                                               |
| cambio lácteos                        | <input type="radio"/> eliminado<br><input type="radio"/> disminuido<br><input type="radio"/> igual<br><input checked="" type="radio"/> aumentado<br><input type="radio"/> no sabe                                                                                                                                                                                                                                                                                                                                             |
| cambio huevos                         | <input type="radio"/> eliminado<br><input type="radio"/> disminuido<br><input checked="" type="radio"/> igual<br><input type="radio"/> aumentado<br><input type="radio"/> no sabe                                                                                                                                                                                                                                                                                                                                             |
| cambio carne                          | <input type="radio"/> eliminado<br><input type="radio"/> disminuido<br><input checked="" type="radio"/> igual<br><input type="radio"/> aumentado<br><input type="radio"/> no sabe                                                                                                                                                                                                                                                                                                                                             |
| cambio pescado                        | <input type="radio"/> eliminado<br><input type="radio"/> disminuido<br><input type="radio"/> igual<br><input checked="" type="radio"/> aumentado<br><input type="radio"/> no sabe                                                                                                                                                                                                                                                                                                                                             |
| cambio verduras                       | <input type="radio"/> eliminado<br><input type="radio"/> disminuido<br><input type="radio"/> igual<br><input checked="" type="radio"/> aumentado<br><input type="radio"/> no sabe                                                                                                                                                                                                                                                                                                                                             |

|                            |                                                                                                                                                                                                                        |
|----------------------------|------------------------------------------------------------------------------------------------------------------------------------------------------------------------------------------------------------------------|
| cambio legumbres           | <input type="radio"/> eliminado<br><input type="radio"/> disminuido<br><input type="radio"/> igual<br><input checked="" type="radio"/> aumentado<br><input type="radio"/> no sabe                                      |
| cambio fruta               | <input type="radio"/> eliminado<br><input type="radio"/> disminuido<br><input type="radio"/> igual<br><input checked="" type="radio"/> aumentado<br><input type="radio"/> no sabe                                      |
| cambio pan                 | <input type="radio"/> eliminado<br><input type="radio"/> disminuido<br><input checked="" type="radio"/> igual<br><input type="radio"/> aumentado<br><input type="radio"/> no sabe                                      |
| cambio aceite oliva        | <input type="radio"/> eliminado<br><input type="radio"/> disminuido<br><input checked="" type="radio"/> igual<br><input type="radio"/> aumentado<br><input type="radio"/> no sabe                                      |
| cambio mante o margarina   | <input type="radio"/> eliminado<br><input type="radio"/> disminuido<br><input checked="" type="radio"/> igual<br><input type="radio"/> aumentado<br><input type="radio"/> no sabe                                      |
| cambio azúcar y dulces     | <input type="radio"/> eliminado<br><input checked="" type="radio"/> disminuido<br><input type="radio"/> igual<br><input type="radio"/> aumentado<br><input type="radio"/> no sabe                                      |
| cambio bebidas alcohólicas | <input checked="" type="radio"/> eliminado<br><input type="radio"/> disminuido<br><input type="radio"/> igual<br><input type="radio"/> aumentado<br><input type="radio"/> no sabe                                      |
| frecuencia comidas fritas  | <input type="radio"/> a diario<br><input type="radio"/> 5 a 6 veces semana<br><input type="radio"/> 2 a 4 veces semana<br><input type="radio"/> 1 vez semana<br><input checked="" type="radio"/> menos de 1 vez semana |
| carne                      | <input type="radio"/> no como<br><input type="radio"/> cruda<br><input type="radio"/> poco hecha<br><input type="radio"/> hecha<br><input checked="" type="radio"/> muy hecha                                          |
| grasa visible carne        | <input type="radio"/> quita toda<br><input checked="" type="radio"/> quita mayoría<br><input type="radio"/> quita un poco<br><input type="radio"/> no quita nada                                                       |

|                                |                                                                                                                                                                                                                                                          |
|--------------------------------|----------------------------------------------------------------------------------------------------------------------------------------------------------------------------------------------------------------------------------------------------------|
| cocina carne                   | <input checked="" type="radio"/> a la plancha<br><input type="radio"/> a la parrilla<br><input type="radio"/> asada<br><input type="radio"/> frita<br><input type="radio"/> guisada                                                                      |
| tostado quemado carne          | <input checked="" type="radio"/> nunca<br><input type="radio"/> 1 vez mes<br><input type="radio"/> 2 a 3 veces mes<br><input type="radio"/> 1 vez semana<br><input type="radio"/> 2 a 3 semanas                                                          |
| tostado quemado pescado        | <input checked="" type="radio"/> nunca<br><input type="radio"/> 1 vez mes<br><input type="radio"/> 2 a 3 veces mes<br><input type="radio"/> 1 vez semana<br><input type="radio"/> 2 a 3 semanas                                                          |
| socarrat paella                | <input checked="" type="radio"/> nunca<br><input type="radio"/> 1 vez mes<br><input type="radio"/> 2 a 3 veces mes<br><input type="radio"/> 1 vez semana<br><input type="radio"/> 2 a 3 semanas                                                          |
| grasa o aceite cocinar         | <input type="radio"/> mantequilla<br><input type="radio"/> margarina<br><input type="radio"/> aceite oliva<br><input checked="" type="radio"/> aceite oliva virgen extra<br><input type="radio"/> aceite vegetal<br><input type="radio"/> mezcla aceites |
| grasa aceite aliñar            | <input type="radio"/> mantequilla<br><input type="radio"/> margarina<br><input type="radio"/> aceite oliva<br><input checked="" type="radio"/> aceite oliva virgen extra<br><input type="radio"/> aceite vegetal<br><input type="radio"/> mezcla aceites |
| grasa aceite freir             | <input type="radio"/> mantequilla<br><input type="radio"/> margarina<br><input type="radio"/> aceite oliva<br><input checked="" type="radio"/> aceite oliva virgen extra<br><input type="radio"/> aceite vegetal<br><input type="radio"/> mezcla aceites |
| Ejercicio cuestionario         | <input checked="" type="radio"/> si<br><input type="radio"/> no                                                                                                                                                                                          |
| horas de sueño incluido siesta | [*DATA REMOVED*]                                                                                                                                                                                                                                         |
| minutos siesta                 | [*DATA REMOVED*]                                                                                                                                                                                                                                         |
| horas televisión semana        | [*DATA REMOVED*]                                                                                                                                                                                                                                         |

|                                        |                                                                                                                                                                                                                                                                                                                                                                           |
|----------------------------------------|---------------------------------------------------------------------------------------------------------------------------------------------------------------------------------------------------------------------------------------------------------------------------------------------------------------------------------------------------------------------------|
| actividad trabajo                      | <input type="radio"/> casi siempre sentado<br><input type="radio"/> sentado 50 por cien<br><input checked="" type="radio"/> casi siempre de pie, quieto<br><input type="radio"/> casi siempre levantado caminando y llevando pocas cosas<br><input type="radio"/> casi siempre levantado, caminando y llevado muchas cosas<br><input type="radio"/> trabajo manual pesado |
| tiempo caminar o bici al día           | <input type="radio"/> casi nunca<br><input type="radio"/> menos 20min día<br><input type="radio"/> 20 a 40 min día<br><input type="radio"/> 40 a 60 min día<br><input checked="" type="radio"/> 1h o 1h y media día<br><input type="radio"/> más de 1h y media al día                                                                                                     |
| tiempo tareas casa al día              | <input type="radio"/> menos de 1h día<br><input checked="" type="radio"/> 1 a 2h día<br><input type="radio"/> 3 a 4h día<br><input type="radio"/> 5 a 6h día<br><input type="radio"/> 7 a 8h día<br><input type="radio"/> más de 8h día                                                                                                                                   |
| tiempo libre televisión ordenador leer | <input type="radio"/> menos 1h día<br><input type="radio"/> 1h día<br><input type="radio"/> 2h día<br><input checked="" type="radio"/> 3h día<br><input type="radio"/> 4h día<br><input type="radio"/> 5 a 6h día<br><input type="radio"/> mas 6h día                                                                                                                     |
| tiempo libre ejercicio o deporte       | <input type="radio"/> menos 1h semana<br><input type="radio"/> 1h semana<br><input checked="" type="radio"/> 2h semana<br><input type="radio"/> 3h semana<br><input type="radio"/> 4 a 5h semana<br><input type="radio"/> mas 5h semana                                                                                                                                   |
| como se considera                      | <input type="radio"/> sedentaria<br><input type="radio"/> poco activa<br><input checked="" type="radio"/> moderadamente activa<br><input type="radio"/> bastante activa<br><input type="radio"/> muy activa<br><input type="radio"/> no sabe                                                                                                                              |
| FUR                                    | [*DATA REMOVED*]                                                                                                                                                                                                                                                                                                                                                          |
| Semanas gestación 2T                   | _____                                                                                                                                                                                                                                                                                                                                                                     |
| Días gestación 2T                      | _____                                                                                                                                                                                                                                                                                                                                                                     |
| DBP 2T                                 | _____                                                                                                                                                                                                                                                                                                                                                                     |
| CC 2T                                  | _____                                                                                                                                                                                                                                                                                                                                                                     |

|                                    |                                                                                                                                                                                                 |
|------------------------------------|-------------------------------------------------------------------------------------------------------------------------------------------------------------------------------------------------|
| AC 2T                              | <hr/>                                                                                                                                                                                           |
| LF 2T                              | <hr/>                                                                                                                                                                                           |
| PFE 2T (Hadlock)                   | <hr/>                                                                                                                                                                                           |
| Semanas gestación 3T               | <hr/>                                                                                                                                                                                           |
| días 3T                            | <hr/>                                                                                                                                                                                           |
| DBP 3T                             | <hr/>                                                                                                                                                                                           |
| CC 3T                              | <hr/>                                                                                                                                                                                           |
| AC 3T                              | <hr/>                                                                                                                                                                                           |
| LF 3T                              | <hr/>                                                                                                                                                                                           |
| PFE 3T (Hadlock)                   | <hr/>                                                                                                                                                                                           |
| Semanas de gestación final         | [*DATA REMOVED*]                                                                                                                                                                                |
| días gestación final               | [*DATA REMOVED*]                                                                                                                                                                                |
| Localización placenta              | <input type="radio"/> anterior<br><input type="radio"/> lateral derecha<br><input type="radio"/> lateral izquierda<br><input checked="" type="radio"/> posterior<br><input type="radio"/> fondo |
| Presentación longitudinal cefálica | <input type="radio"/> no<br><input checked="" type="radio"/> si                                                                                                                                 |
| Dorso                              | <input type="radio"/> izquierda anterior<br><input checked="" type="radio"/> izquierda posterior<br><input type="radio"/> derecha anterior<br><input type="radio"/> derecha posterior           |
| diámetro biparietal                | [*DATA REMOVED*]                                                                                                                                                                                |
| Circunferencia craneal             | [*DATA REMOVED*]                                                                                                                                                                                |
| Circunferencia abdominal           | [*DATA REMOVED*]                                                                                                                                                                                |

|                                                   |                                                                                                                                               |
|---------------------------------------------------|-----------------------------------------------------------------------------------------------------------------------------------------------|
| Longitud de femur                                 | [*DATA REMOVED*]                                                                                                                              |
| tejido celular subcutáneo a nivel del muslo en mm | [*DATA REMOVED*]                                                                                                                              |
| tejido celular subcutáneo en abdomen en mm        | [*DATA REMOVED*]                                                                                                                              |
| Volumen del muslo en cm3                          | [*DATA REMOVED*]                                                                                                                              |
| Peso fetal estimado según fórmula de Hadlock      | [*DATA REMOVED*]                                                                                                                              |
| Percentil                                         | [*DATA REMOVED*]                                                                                                                              |
| Peso fetal estimado según fórmula de Scioscia     | _____                                                                                                                                         |
| Peso fetal estimado según fórmula de LEE          | _____                                                                                                                                         |
| Tipo de parto                                     | <input checked="" type="radio"/> eutocico<br><input type="radio"/> instrumentado/ventosa<br><input type="radio"/> cesarea                     |
| fecha de nacimiento                               | [*DATA REMOVED*]                                                                                                                              |
| Días entre exploración y nacimiento               | [*DATA REMOVED*]                                                                                                                              |
| Peso RN en g                                      | [*DATA REMOVED*]                                                                                                                              |
| sexo                                              | <input checked="" type="radio"/> mujer<br><input type="radio"/> hombre                                                                        |
| Apgar 1 minuto                                    | [*DATA REMOVED*]                                                                                                                              |
| Apgar 5 minutos                                   | [*DATA REMOVED*]                                                                                                                              |
| Apgar 10 minutos                                  | _____                                                                                                                                         |
| antecedente Covid durante gestación               | <input type="radio"/> Yes<br><input checked="" type="radio"/> No                                                                              |
| Nivel de estudios                                 | <input type="radio"/> ninguno<br><input type="radio"/> primarios<br><input type="radio"/> secundarios<br><input type="radio"/> universitarios |

# Base\_datos\_estimacion\_peso\_fetal

|                                       |                                                                                                                                                                                                                                                                                      |
|---------------------------------------|--------------------------------------------------------------------------------------------------------------------------------------------------------------------------------------------------------------------------------------------------------------------------------------|
| Número de identificación participante | 28                                                                                                                                                                                                                                                                                   |
| CODIGO PARTICIPANTE                   |                                                                                                                                                                                                                                                                                      |
| Edad                                  | [*DATA REMOVED*]                                                                                                                                                                                                                                                                     |
| Gestaciones                           | <input type="radio"/> 1<br><input type="radio"/> 2<br><input checked="" type="radio"/> 3<br><input type="radio"/> mas de 3                                                                                                                                                           |
| partos                                | <input checked="" type="radio"/> 0<br><input type="radio"/> 1<br><input type="radio"/> 2<br><input type="radio"/> 3<br><input type="radio"/> mas de 3                                                                                                                                |
| cesáreas                              | <input type="radio"/> 0<br><input checked="" type="radio"/> 1<br><input type="radio"/> 2<br><input type="radio"/> 3<br><input type="radio"/> mas de 3                                                                                                                                |
| Abortos                               | <input type="radio"/> 0<br><input checked="" type="radio"/> 1<br><input type="radio"/> 2<br><input type="radio"/> 3<br><input type="radio"/> mas de 3                                                                                                                                |
| Tipo de gestacion                     | <input type="radio"/> espontanea<br><input type="radio"/> IAC inseminación artificial conyuge<br><input type="radio"/> IAD inseminación artificial donante<br><input checked="" type="radio"/> FIV Fecundación in Vitro<br><input type="radio"/> Ovodon FIV con donación de ovocitos |
| peso previo a embarazo                | [*DATA REMOVED*]                                                                                                                                                                                                                                                                     |
| Ganancia ponderal embarazo            | [*DATA REMOVED*]                                                                                                                                                                                                                                                                     |
| Talla madre                           | [*DATA REMOVED*]                                                                                                                                                                                                                                                                     |
| IMC previo embarazo                   | 20.964360587002094                                                                                                                                                                                                                                                                   |
| Patología obstétrica                  | <input checked="" type="radio"/> no<br><input type="radio"/> si                                                                                                                                                                                                                      |
| Diabetes pregestacional               | <input checked="" type="radio"/> no<br><input type="radio"/> si                                                                                                                                                                                                                      |
| Diabetes gestacional                  | <input checked="" type="radio"/> no<br><input type="radio"/> si                                                                                                                                                                                                                      |



|                                            |                                                                                                                                                                                      |
|--------------------------------------------|--------------------------------------------------------------------------------------------------------------------------------------------------------------------------------------|
| Diabetes gestacional con insulina          | <input checked="" type="radio"/> no<br><input type="radio"/> si                                                                                                                      |
| Diabetes gestacional con dieta y ejercicio | <input checked="" type="radio"/> no<br><input type="radio"/> si                                                                                                                      |
| Percentil fetos previos                    | <input checked="" type="radio"/> Nada<br><input type="radio"/> percentil menor de 10<br><input type="radio"/> percentil entre 10 y 90<br><input type="radio"/> percentil mayor de 90 |
| Exfumadora                                 | <input type="radio"/> Nada<br><input checked="" type="radio"/> menos de 5 años<br><input type="radio"/> 5 a 10 años<br><input type="radio"/> mayor o igual a 10 años                 |
| Hábito tabáquico                           | <input checked="" type="radio"/> no<br><input type="radio"/> si                                                                                                                      |
| fumadora                                   | [*DATA REMOVED*]                                                                                                                                                                     |
| Consumo otros tóxicos                      | <input checked="" type="radio"/> no<br><input type="radio"/> si                                                                                                                      |
| Hb 1T                                      | [*DATA REMOVED*]                                                                                                                                                                     |
| Htc 1T                                     | [*DATA REMOVED*]                                                                                                                                                                     |
| Hb 2T                                      | [*DATA REMOVED*]                                                                                                                                                                     |
| HTC 2T                                     | [*DATA REMOVED*]                                                                                                                                                                     |
| Hb 3T                                      | [*DATA REMOVED*]                                                                                                                                                                     |
| HTC 3T                                     | [*DATA REMOVED*]                                                                                                                                                                     |
| Suplemento FE oral                         | <input checked="" type="radio"/> si<br><input type="radio"/> no                                                                                                                      |
| Suplemento fe iv                           | <input type="radio"/> si<br><input checked="" type="radio"/> no                                                                                                                      |
| Transfusión                                | <input checked="" type="radio"/> no<br><input type="radio"/> si                                                                                                                      |
| Solicitada Vit D                           | <input checked="" type="radio"/> no<br><input type="radio"/> si                                                                                                                      |
| Deficit vit D                              | <input type="radio"/> no<br><input type="radio"/> si                                                                                                                                 |
| Suplemento vit D                           | <input type="radio"/> si<br><input type="radio"/> no                                                                                                                                 |

|                       |                                                                                                                                                                                                                                                                                                                                                                                                              |
|-----------------------|--------------------------------------------------------------------------------------------------------------------------------------------------------------------------------------------------------------------------------------------------------------------------------------------------------------------------------------------------------------------------------------------------------------|
| Dieta, cuestionario   | <input checked="" type="radio"/> sí<br><input type="radio"/> no                                                                                                                                                                                                                                                                                                                                              |
| Leche entera          | <input type="radio"/> Nunca o menos 1 vez al mes<br><input type="radio"/> 1 a 3 veces mes<br><input type="radio"/> 1 vez semana<br><input type="radio"/> 2 a 4 veces semana<br><input type="radio"/> 5 a 6 veces semana<br><input checked="" type="radio"/> 1 vez al día<br><input type="radio"/> 2 a 3 veces al día<br><input type="radio"/> 5 a 6 veces al día<br><input type="radio"/> más 6 veces al día |
| Leche semidesnatada   | <input type="radio"/> Nunca o menos 1 vez al mes<br><input type="radio"/> 1 a 3 veces mes<br><input checked="" type="radio"/> 1 vez semana<br><input type="radio"/> 2 a 4 veces semana<br><input type="radio"/> 5 a 6 veces semana<br><input type="radio"/> 1 vez al día<br><input type="radio"/> 2 a 3 veces al día<br><input type="radio"/> 5 a 6 veces al día<br><input type="radio"/> mas 6 veces al día |
| Leche desnatada       | <input checked="" type="radio"/> Nunca o menos 1 vez al mes<br><input type="radio"/> 1 a 3 veces mes<br><input type="radio"/> 1 vez semana<br><input type="radio"/> 2 a 4 veces semana<br><input type="radio"/> 5 a 6 veces semana<br><input type="radio"/> 1 vez al día<br><input type="radio"/> 2 a 3 veces al día<br><input type="radio"/> 5 a 6 veces al día<br><input type="radio"/> más 6 veces al día |
| Leche condensada      | <input checked="" type="radio"/> Nunca o menos 1 vez al mes<br><input type="radio"/> 1 a 3 veces mes<br><input type="radio"/> 1 vez semana<br><input type="radio"/> 2 a 4 veces semana<br><input type="radio"/> 5 a 6 veces semana<br><input type="radio"/> 1 vez al día<br><input type="radio"/> 2 a 3 veces al día<br><input type="radio"/> 5 a 6 veces al día<br><input type="radio"/> más 6 veces al día |
| nata o crema de leche | <input checked="" type="radio"/> Nunca o menos 1 vez al mes<br><input type="radio"/> 1 a 3 veces mes<br><input type="radio"/> 1 vez semana<br><input type="radio"/> 2 a 4 veces semana<br><input type="radio"/> 5 a 6 veces semana<br><input type="radio"/> 1 vez al día<br><input type="radio"/> 2 a 3 veces al día<br><input type="radio"/> 5 a 6 veces al día<br><input type="radio"/> más 6 veces al día |

|                                             |                                                                                                                                                                                                                                                                                                                                                                                                              |
|---------------------------------------------|--------------------------------------------------------------------------------------------------------------------------------------------------------------------------------------------------------------------------------------------------------------------------------------------------------------------------------------------------------------------------------------------------------------|
| Yogurt Entero                               | <input type="radio"/> Nunca o menos 1 vez al mes<br><input type="radio"/> 1 a 3 veces mes<br><input type="radio"/> 1 vez semana<br><input type="radio"/> 2 a 4 veces semana<br><input type="radio"/> 5 a 6 veces semana<br><input type="radio"/> 1 vez al día<br><input type="radio"/> 2 a 3 veces al día<br><input type="radio"/> 5 a 6 veces al día<br><input type="radio"/> más 6 veces al día            |
| Yogurt desnatado                            | <input type="radio"/> Nunca o menos 1 vez al mes<br><input type="radio"/> 1 a 3 veces mes<br><input type="radio"/> 1 vez semana<br><input checked="" type="radio"/> 2 a 4 veces semana<br><input type="radio"/> 5 a 6 veces semana<br><input type="radio"/> 1 vez al día<br><input type="radio"/> 2 a 3 veces al día<br><input type="radio"/> 5 a 6 veces al día<br><input type="radio"/> más 6 veces al día |
| 100g requesón o queso blando o queso fresco | <input type="radio"/> Nunca o menos 1 vez al mes<br><input type="radio"/> 1 a 3 veces mes<br><input checked="" type="radio"/> 1 vez semana<br><input type="radio"/> 2 a 4 veces semana<br><input type="radio"/> 5 a 6 veces semana<br><input type="radio"/> 1 vez al día<br><input type="radio"/> 2 a 3 veces al día<br><input type="radio"/> 5 a 6 veces al día<br><input type="radio"/> más 6 veces al día |
| queso curado o semicurado o cremoso         | <input type="radio"/> Nunca o menos 1 vez al mes<br><input type="radio"/> 1 a 3 veces mes<br><input type="radio"/> 1 vez semana<br><input checked="" type="radio"/> 2 a 4 veces semana<br><input type="radio"/> 5 a 6 veces semana<br><input type="radio"/> 1 vez al día<br><input type="radio"/> 2 a 3 veces al día<br><input type="radio"/> 5 a 6 veces al día<br><input type="radio"/> más 6 veces al día |
| natillas flan pudding                       | <input checked="" type="radio"/> Nunca o menos 1 vez al mes<br><input type="radio"/> 1 a 3 veces mes<br><input type="radio"/> 1 vez semana<br><input type="radio"/> 2 a 4 veces semana<br><input type="radio"/> 5 a 6 veces semana<br><input type="radio"/> 1 vez al día<br><input type="radio"/> 2 a 3 veces al día<br><input type="radio"/> 5 a 6 veces al día<br><input type="radio"/> más 6 veces al día |
| Helado                                      | <input type="radio"/> Nunca o menos 1 vez al mes<br><input type="radio"/> 1 a 3 veces mes<br><input checked="" type="radio"/> 1 vez semana<br><input type="radio"/> 2 a 4 veces semana<br><input type="radio"/> 5 a 6 veces semana<br><input type="radio"/> 1 vez al día<br><input type="radio"/> 2 a 3 veces al día<br><input type="radio"/> 5 a 6 veces al día<br><input type="radio"/> más 6 veces al día |

|                                      |                                                                                                                                                                                                                                                                                                                                                                                                              |
|--------------------------------------|--------------------------------------------------------------------------------------------------------------------------------------------------------------------------------------------------------------------------------------------------------------------------------------------------------------------------------------------------------------------------------------------------------------|
| huevo                                | <input type="radio"/> Nunca o menos 1 vez al mes<br><input checked="" type="radio"/> 1 a 3 veces mes<br><input type="radio"/> 1 vez semana<br><input type="radio"/> 2 a 4 veces semana<br><input type="radio"/> 5 a 6 veces semana<br><input type="radio"/> 1 vez al día<br><input type="radio"/> 2 a 3 veces al día<br><input type="radio"/> 5 a 6 veces al día<br><input type="radio"/> más 6 veces al día |
| Pollo con piel                       | <input checked="" type="radio"/> Nunca o menos 1 vez al mes<br><input type="radio"/> 1 a 3 veces mes<br><input type="radio"/> 1 vez semana<br><input type="radio"/> 2 a 4 veces semana<br><input type="radio"/> 5 a 6 veces semana<br><input type="radio"/> 1 vez al día<br><input type="radio"/> 2 a 3 veces al día<br><input type="radio"/> 5 a 6 veces al día<br><input type="radio"/> más 6 veces al día |
| pollo sin piel                       | <input type="radio"/> Nunca o menos 1 vez al mes<br><input type="radio"/> 1 a 3 veces mes<br><input checked="" type="radio"/> 1 vez semana<br><input type="radio"/> 2 a 4 veces semana<br><input type="radio"/> 5 a 6 veces semana<br><input type="radio"/> 1 vez al día<br><input type="radio"/> 2 a 3 veces al día<br><input type="radio"/> 5 a 6 veces al día<br><input type="radio"/> más 6 veces al día |
| Ternera o cerdo o cordero            | <input type="radio"/> Nunca o menos 1 vez al mes<br><input checked="" type="radio"/> 1 a 3 veces mes<br><input type="radio"/> 1 vez semana<br><input type="radio"/> 2 a 4 veces semana<br><input type="radio"/> 5 a 6 veces semana<br><input type="radio"/> 1 vez al día<br><input type="radio"/> 2 a 3 veces al día<br><input type="radio"/> 5 a 6 veces al día<br><input type="radio"/> más 6 veces al día |
| carne caza: Conejo o codorniz o pato | <input checked="" type="radio"/> Nunca o menos 1 vez al mes<br><input type="radio"/> 1 a 3 veces mes<br><input type="radio"/> 1 vez semana<br><input type="radio"/> 2 a 4 veces semana<br><input type="radio"/> 5 a 6 veces semana<br><input type="radio"/> 1 vez al día<br><input type="radio"/> 2 a 3 veces al día<br><input type="radio"/> 5 a 6 veces al día<br><input type="radio"/> más 6 veces al día |
| Hígado de ternera o cerdo o pollo    | <input checked="" type="radio"/> Nunca o menos 1 vez al mes<br><input type="radio"/> 1 a 3 veces mes<br><input type="radio"/> 1 vez semana<br><input type="radio"/> 2 a 4 veces semana<br><input type="radio"/> 5 a 6 veces semana<br><input type="radio"/> 1 vez al día<br><input type="radio"/> 2 a 3 veces al día<br><input type="radio"/> 5 a 6 veces al día<br><input type="radio"/> más 6 veces al día |

|                     |                                                                                                                                                                                                                                                                                                                                                                                                              |
|---------------------|--------------------------------------------------------------------------------------------------------------------------------------------------------------------------------------------------------------------------------------------------------------------------------------------------------------------------------------------------------------------------------------------------------------|
| Vísceras            | <input checked="" type="radio"/> Nunca o menos 1 vez al mes<br><input type="radio"/> 1 a 3 veces mes<br><input type="radio"/> 1 vez semana<br><input type="radio"/> 2 a 4 veces semana<br><input type="radio"/> 5 a 6 veces semana<br><input type="radio"/> 1 vez al día<br><input type="radio"/> 2 a 3 veces al día<br><input type="radio"/> 5 a 6 veces al día<br><input type="radio"/> más 6 veces al día |
| Embutido            | <input checked="" type="radio"/> Nunca o menos 1 vez al mes<br><input type="radio"/> 1 a 3 veces mes<br><input type="radio"/> 1 vez semana<br><input type="radio"/> 2 a 4 veces semana<br><input type="radio"/> 5 a 6 veces semana<br><input type="radio"/> 1 vez al día<br><input type="radio"/> 2 a 3 veces al día<br><input type="radio"/> 5 a 6 veces al día<br><input type="radio"/> más 6 veces al día |
| Salchicha o similar | <input checked="" type="radio"/> Nunca o menos 1 vez al mes<br><input type="radio"/> 1 a 3 veces mes<br><input type="radio"/> 1 vez semana<br><input type="radio"/> 2 a 4 veces semana<br><input type="radio"/> 5 a 6 veces semana<br><input type="radio"/> 1 vez al día<br><input type="radio"/> 2 a 3 veces al día<br><input type="radio"/> 5 a 6 veces al día<br><input type="radio"/> más 6 veces al día |
| Pate o foiegras     | <input checked="" type="radio"/> Nunca o menos 1 vez al mes<br><input type="radio"/> 1 a 3 veces mes<br><input type="radio"/> 1 vez semana<br><input type="radio"/> 2 a 4 veces semana<br><input type="radio"/> 5 a 6 veces semana<br><input type="radio"/> 1 vez al día<br><input type="radio"/> 2 a 3 veces al día<br><input type="radio"/> 5 a 6 veces al día<br><input type="radio"/> más 6 veces al día |
| Hamburguesa         | <input type="radio"/> Nunca o menos 1 vez al mes<br><input checked="" type="radio"/> 1 a 3 veces mes<br><input type="radio"/> 1 vez semana<br><input type="radio"/> 2 a 4 veces semana<br><input type="radio"/> 5 a 6 veces semana<br><input type="radio"/> 1 vez al día<br><input type="radio"/> 2 a 3 veces al día<br><input type="radio"/> 5 a 6 veces al día<br><input type="radio"/> más 6 veces al día |
| tocino o bacon      | <input checked="" type="radio"/> Nunca o menos 1 vez al mes<br><input type="radio"/> 1 a 3 veces mes<br><input type="radio"/> 1 vez semana<br><input type="radio"/> 2 a 4 veces semana<br><input type="radio"/> 5 a 6 veces semana<br><input type="radio"/> 1 vez al día<br><input type="radio"/> 2 a 3 veces al día<br><input type="radio"/> 5 a 6 veces al día<br><input type="radio"/> más 6 veces al día |

---

Pescado frito

- ☒ Nunca o menos 1 vez al mes  
☐ 1 a 3 veces mes  
☐ 1 vez semana  
☐ 2 a 4 veces semana  
☐ 5 a 6 veces semana  
☐ 1 vez al día  
☐ 2 a 3 veces al día  
☐ 5 a 6 veces al día  
☐ más 6 veces al día

---

pescado hervido blanco

- ☐ Nunca o menos 1 vez al mes  
☐ 1 a 3 veces mes  
☐ 1 vez semana  
☒ 2 a 4 veces semana  
☐ 5 a 6 veces semana  
☐ 1 vez al día  
☐ 2 a 3 veces al día  
☐ 5 a 6 veces al día  
☐ más 6 veces al día

---

pescado hervido azul

- ☒ Nunca o menos 1 vez al mes  
☐ 1 a 3 veces mes  
☐ 1 vez semana  
☐ 2 a 4 veces semana  
☐ 5 a 6 veces semana  
☐ 1 vez al día  
☐ 2 a 3 veces al día  
☐ 5 a 6 veces al día  
☐ más 6 veces al día

---

otros pescado azul

- ☐ Nunca o menos 1 vez al mes  
☒ 1 a 3 veces mes  
☐ 1 vez semana  
☐ 2 a 4 veces semana  
☐ 5 a 6 veces semana  
☐ 1 vez al día  
☐ 2 a 3 veces al día  
☐ 5 a 6 veces al día  
☐ más 6 veces al día

---

atun conserva

- ☐ Nunca o menos 1 vez al mes  
☒ 1 a 3 veces mes  
☐ 1 vez semana  
☐ 2 a 4 veces semana  
☐ 5 a 6 veces semana  
☐ 1 vez al día  
☐ 2 a 3 veces al día  
☐ 5 a 6 veces al día  
☐ más 6 veces al día

---

sardina conserva

- ☒ Nunca o menos 1 vez al mes  
☐ 1 a 3 veces mes  
☐ 1 vez semana  
☐ 2 a 4 veces semana  
☐ 5 a 6 veces semana  
☐ 1 vez al día  
☐ 2 a 3 veces al día  
☐ 5 a 6 veces al día  
☐ más 6 veces al día

|                                         |                                                                                                                                                                                                                                                                                                                                                                                                              |
|-----------------------------------------|--------------------------------------------------------------------------------------------------------------------------------------------------------------------------------------------------------------------------------------------------------------------------------------------------------------------------------------------------------------------------------------------------------------|
| pescado ahumado                         | <input checked="" type="radio"/> Nunca o menos 1 vez al mes<br><input type="radio"/> 1 a 3 veces mes<br><input type="radio"/> 1 vez semana<br><input type="radio"/> 2 a 4 veces semana<br><input type="radio"/> 5 a 6 veces semana<br><input type="radio"/> 1 vez al día<br><input type="radio"/> 2 a 3 veces al día<br><input type="radio"/> 5 a 6 veces al día<br><input type="radio"/> más 6 veces al día |
| almejas o mejillones o ostras unos 100g | <input type="radio"/> Nunca o menos 1 vez al mes<br><input type="radio"/> 1 a 3 veces mes<br><input checked="" type="radio"/> 1 vez semana<br><input type="radio"/> 2 a 4 veces semana<br><input type="radio"/> 5 a 6 veces semana<br><input type="radio"/> 1 vez al día<br><input type="radio"/> 2 a 3 veces al día<br><input type="radio"/> 5 a 6 veces al día<br><input type="radio"/> más 6 veces al día |
| calamar o chipiron o sepia unos 100g    | <input checked="" type="radio"/> Nunca o menos 1 vez al mes<br><input type="radio"/> 1 a 3 veces mes<br><input type="radio"/> 1 vez semana<br><input type="radio"/> 2 a 4 veces semana<br><input type="radio"/> 5 a 6 veces semana<br><input type="radio"/> 1 vez al día<br><input type="radio"/> 2 a 3 veces al día<br><input type="radio"/> 5 a 6 veces al día<br><input type="radio"/> más 6 veces al día |
| marisco unos 100g                       | <input checked="" type="radio"/> Nunca o menos 1 vez al mes<br><input type="radio"/> 1 a 3 veces mes<br><input type="radio"/> 1 vez semana<br><input type="radio"/> 2 a 4 veces semana<br><input type="radio"/> 5 a 6 veces semana<br><input type="radio"/> 1 vez al día<br><input type="radio"/> 2 a 3 veces al día<br><input type="radio"/> 5 a 6 veces al día<br><input type="radio"/> más 6 veces al día |
| Espinacas o acelgas cocinadas           | <input type="radio"/> Nunca o menos 1 vez al mes<br><input type="radio"/> 1 a 3 veces mes<br><input checked="" type="radio"/> 1 vez semana<br><input type="radio"/> 2 a 4 veces semana<br><input type="radio"/> 5 a 6 veces semana<br><input type="radio"/> 1 vez al día<br><input type="radio"/> 2 a 3 veces al día<br><input type="radio"/> 5 a 6 veces al día<br><input type="radio"/> más 6 veces al día |
| Col o coliflor o brocoli cocinado       | <input type="radio"/> Nunca o menos 1 vez al mes<br><input type="radio"/> 1 a 3 veces mes<br><input checked="" type="radio"/> 1 vez semana<br><input type="radio"/> 2 a 4 veces semana<br><input type="radio"/> 5 a 6 veces semana<br><input type="radio"/> 1 vez al día<br><input type="radio"/> 2 a 3 veces al día<br><input type="radio"/> 5 a 6 veces al día<br><input type="radio"/> más 6 veces al día |

---

Lechuga o endivia o escarola

- ☐ Nunca o menos 1 vez al mes  
☐ 1 a 3 veces mes  
☐ 1 vez semana  
☒ 2 a 4 veces semana  
☐ 5 a 6 veces semana  
☐ 1 vez al día  
☐ 2 a 3 veces al día  
☐ 5 a 6 veces al día  
☐ más 6 veces al día

---

tomate ensalada

- ☐ Nunca o menos 1 vez al mes  
☒ 1 a 3 veces mes  
☐ 1 vez semana  
☐ 2 a 4 veces semana  
☐ 5 a 6 veces semana  
☐ 1 vez al día  
☐ 2 a 3 veces al día  
☐ 5 a 6 veces al día  
☐ más 6 veces al día

---

cebolla

- ☐ Nunca o menos 1 vez al mes  
☐ 1 a 3 veces mes  
☐ 1 vez semana  
☐ 2 a 4 veces semana  
☒ 5 a 6 veces semana  
☐ 1 vez al día  
☐ 2 a 3 veces al día  
☐ 5 a 6 veces al día  
☐ más 6 veces al día

---

Zanahoria o calabaza

- ☐ Nunca o menos 1 vez al mes  
☐ 1 a 3 veces mes  
☐ 1 vez semana  
☐ 2 a 4 veces semana  
☒ 5 a 6 veces semana  
☐ 1 vez al día  
☐ 2 a 3 veces al día  
☐ 5 a 6 veces al día  
☐ más 6 veces al día

---

Judías verdes

- ☐ Nunca o menos 1 vez al mes  
☐ 1 a 3 veces mes  
☐ 1 vez semana  
☐ 2 a 4 veces semana  
☒ 5 a 6 veces semana  
☐ 1 vez al día  
☐ 2 a 3 veces al día  
☐ 5 a 6 veces al día  
☐ más 6 veces al día

---

Berenjena o calabacin o pepino

- ☐ Nunca o menos 1 vez al mes  
☐ 1 a 3 veces mes  
☐ 1 vez semana  
☐ 2 a 4 veces semana  
☒ 5 a 6 veces semana  
☐ 1 vez al día  
☐ 2 a 3 veces al día  
☐ 5 a 6 veces al día  
☐ más 6 veces al día



|                       |                                                                                                                                                                                                                                                                                                                                                                                                              |
|-----------------------|--------------------------------------------------------------------------------------------------------------------------------------------------------------------------------------------------------------------------------------------------------------------------------------------------------------------------------------------------------------------------------------------------------------|
| pimiento              | <input type="radio"/> Nunca o menos 1 vez al mes<br><input type="radio"/> 1 a 3 veces mes<br><input type="radio"/> 1 vez semana<br><input type="radio"/> 2 a 4 veces semana<br><input checked="" type="radio"/> 5 a 6 veces semana<br><input type="radio"/> 1 vez al día<br><input type="radio"/> 2 a 3 veces al día<br><input type="radio"/> 5 a 6 veces al día<br><input type="radio"/> más 6 veces al día |
| alcachofa             | <input type="radio"/> Nunca o menos 1 vez al mes<br><input checked="" type="radio"/> 1 a 3 veces mes<br><input type="radio"/> 1 vez semana<br><input type="radio"/> 2 a 4 veces semana<br><input type="radio"/> 5 a 6 veces semana<br><input type="radio"/> 1 vez al día<br><input type="radio"/> 2 a 3 veces al día<br><input type="radio"/> 5 a 6 veces al día<br><input type="radio"/> más 6 veces al día |
| espárragos            | <input checked="" type="radio"/> Nunca o menos 1 vez al mes<br><input type="radio"/> 1 a 3 veces mes<br><input type="radio"/> 1 vez semana<br><input type="radio"/> 2 a 4 veces semana<br><input type="radio"/> 5 a 6 veces semana<br><input type="radio"/> 1 vez al día<br><input type="radio"/> 2 a 3 veces al día<br><input type="radio"/> 5 a 6 veces al día<br><input type="radio"/> más 6 veces al día |
| maíz hervido          | <input type="radio"/> Nunca o menos 1 vez al mes<br><input checked="" type="radio"/> 1 a 3 veces mes<br><input type="radio"/> 1 vez semana<br><input type="radio"/> 2 a 4 veces semana<br><input type="radio"/> 5 a 6 veces semana<br><input type="radio"/> 1 vez al día<br><input type="radio"/> 2 a 3 veces al día<br><input type="radio"/> 5 a 6 veces al día<br><input type="radio"/> más 6 veces al día |
| legumbres             | <input type="radio"/> Nunca o menos 1 vez al mes<br><input checked="" type="radio"/> 1 a 3 veces mes<br><input type="radio"/> 1 vez semana<br><input type="radio"/> 2 a 4 veces semana<br><input type="radio"/> 5 a 6 veces semana<br><input type="radio"/> 1 vez al día<br><input type="radio"/> 2 a 3 veces al día<br><input type="radio"/> 5 a 6 veces al día<br><input type="radio"/> más 6 veces al día |
| naranjas o mandarinas | <input checked="" type="radio"/> Nunca o menos 1 vez al mes<br><input type="radio"/> 1 a 3 veces mes<br><input type="radio"/> 1 vez semana<br><input type="radio"/> 2 a 4 veces semana<br><input type="radio"/> 5 a 6 veces semana<br><input type="radio"/> 1 vez al día<br><input type="radio"/> 2 a 3 veces al día<br><input type="radio"/> 5 a 6 veces al día<br><input type="radio"/> más 6 veces al día |

---

zum natural fruta

- ☐ Nunca o menos 1 vez al mes  
☒ 1 a 3 veces mes  
☐ 1 vez semana  
☐ 2 a 4 veces semana  
☐ 5 a 6 veces semana  
☐ 1 vez al día  
☐ 2 a 3 veces al día  
☐ 5 a 6 veces al día  
☐ más 6 veces al día

---

platano

- ☐ Nunca o menos 1 vez al mes  
☒ 1 a 3 veces mes  
☐ 1 vez semana  
☐ 2 a 4 veces semana  
☐ 5 a 6 veces semana  
☐ 1 vez al día  
☐ 2 a 3 veces al día  
☐ 5 a 6 veces al día  
☐ más 6 veces al día

---

manzana o pera

- ☐ Nunca o menos 1 vez al mes  
☐ 1 a 3 veces mes  
☐ 1 vez semana  
☒ 2 a 4 veces semana  
☐ 5 a 6 veces semana  
☐ 1 vez al día  
☐ 2 a 3 veces al día  
☐ 5 a 6 veces al día  
☐ más 6 veces al día

---

melocotón o nectarina

- ☒ Nunca o menos 1 vez al mes  
☐ 1 a 3 veces mes  
☐ 1 vez semana  
☐ 2 a 4 veces semana  
☐ 5 a 6 veces semana  
☐ 1 vez al día  
☐ 2 a 3 veces al día  
☐ 5 a 6 veces al día  
☐ más 6 veces al día

---

sandia o melon

- ☐ Nunca o menos 1 vez al mes  
☐ 1 a 3 veces mes  
☐ 1 vez semana  
☐ 2 a 4 veces semana  
☒ 5 a 6 veces semana  
☐ 1 vez al día  
☐ 2 a 3 veces al día  
☐ 5 a 6 veces al día  
☐ más 6 veces al día

---

uva

- ☒ Nunca o menos 1 vez al mes  
☐ 1 a 3 veces mes  
☐ 1 vez semana  
☐ 2 a 4 veces semana  
☐ 5 a 6 veces semana  
☐ 1 vez al día  
☐ 2 a 3 veces al día  
☐ 5 a 6 veces al día  
☐ más 6 veces al día

---

bruna o ciruela

- ☒ Nunca o menos 1 vez al mes  
☐ 1 a 3 veces mes  
☐ 1 vez semana  
☐ 2 a 4 veces semana  
☐ 5 a 6 veces semana  
☐ 1 vez al día  
☐ 2 a 3 veces al día  
☐ 5 a 6 veces al día  
☐ más 6 veces al día

---

kiwi

- ☒ Nunca o menos 1 vez al mes  
☐ 1 a 3 veces mes  
☐ 1 vez semana  
☐ 2 a 4 veces semana  
☐ 5 a 6 veces semana  
☐ 1 vez al día  
☐ 2 a 3 veces al día  
☐ 5 a 6 veces al día  
☐ más 6 veces al día

---

aceituna

- ☒ Nunca o menos 1 vez al mes  
☐ 1 a 3 veces mes  
☐ 1 vez semana  
☐ 2 a 4 veces semana  
☐ 5 a 6 veces semana  
☐ 1 vez al día  
☐ 2 a 3 veces al día  
☐ 5 a 6 veces al día  
☐ más 6 veces al día

---

frutos secos

- ☐ Nunca o menos 1 vez al mes  
☐ 1 a 3 veces mes  
☐ 1 vez semana  
☒ 2 a 4 veces semana  
☐ 5 a 6 veces semana  
☐ 1 vez al día  
☐ 2 a 3 veces al día  
☐ 5 a 6 veces al día  
☐ más 6 veces al día

---

pan blanco

- ☐ Nunca o menos 1 vez al mes  
☐ 1 a 3 veces mes  
☒ 1 vez semana  
☐ 2 a 4 veces semana  
☐ 5 a 6 veces semana  
☐ 1 vez al día  
☐ 2 a 3 veces al día  
☐ 5 a 6 veces al día  
☐ más 6 veces al día

---

pan integral

- ☐ Nunca o menos 1 vez al mes  
☐ 1 a 3 veces mes  
☐ 1 vez semana  
☒ 2 a 4 veces semana  
☐ 5 a 6 veces semana  
☐ 1 vez al día  
☐ 2 a 3 veces al día  
☐ 5 a 6 veces al día  
☐ más 6 veces al día

---

cereales desayuno

- ☐ Nunca o menos 1 vez al mes  
☒ 1 a 3 veces mes  
☐ 1 vez semana  
☐ 2 a 4 veces semana  
☐ 5 a 6 veces semana  
☐ 1 vez al día  
☐ 2 a 3 veces al día  
☐ 5 a 6 veces al día  
☐ más 6 veces al día

---

patatas fritas

- ☐ Nunca o menos 1 vez al mes  
☒ 1 a 3 veces mes  
☐ 1 vez semana  
☐ 2 a 4 veces semana  
☐ 5 a 6 veces semana  
☐ 1 vez al día  
☐ 2 a 3 veces al día  
☐ 5 a 6 veces al día  
☐ más 6 veces al día

---

patatas cocidas o asadas

- ☐ Nunca o menos 1 vez al mes  
☐ 1 a 3 veces mes  
☐ 1 vez semana  
☒ 2 a 4 veces semana  
☐ 5 a 6 veces semana  
☐ 1 vez al día  
☐ 2 a 3 veces al día  
☐ 5 a 6 veces al día  
☐ más 6 veces al día

---

bolsa papas

- ☐ Nunca o menos 1 vez al mes  
☐ 1 a 3 veces mes  
☒ 1 vez semana  
☐ 2 a 4 veces semana  
☐ 5 a 6 veces semana  
☐ 1 vez al día  
☐ 2 a 3 veces al día  
☐ 5 a 6 veces al día  
☐ más 6 veces al día

---

arroz cocinado

- ☐ Nunca o menos 1 vez al mes  
☐ 1 a 3 veces mes  
☒ 1 vez semana  
☐ 2 a 4 veces semana  
☐ 5 a 6 veces semana  
☐ 1 vez al día  
☐ 2 a 3 veces al día  
☐ 5 a 6 veces al día  
☐ más 6 veces al día

---

pasta

- ☐ Nunca o menos 1 vez al mes  
☐ 1 a 3 veces mes  
☒ 1 vez semana  
☐ 2 a 4 veces semana  
☐ 5 a 6 veces semana  
☐ 1 vez al día  
☐ 2 a 3 veces al día  
☐ 5 a 6 veces al día  
☐ más 6 veces al día

|                     |                                                                                                                                                                                                                                                                                                                                                                                                              |
|---------------------|--------------------------------------------------------------------------------------------------------------------------------------------------------------------------------------------------------------------------------------------------------------------------------------------------------------------------------------------------------------------------------------------------------------|
| pizza               | <input type="radio"/> Nunca o menos 1 vez al mes<br><input checked="" type="radio"/> 1 a 3 veces mes<br><input type="radio"/> 1 vez semana<br><input type="radio"/> 2 a 4 veces semana<br><input type="radio"/> 5 a 6 veces semana<br><input type="radio"/> 1 vez al día<br><input type="radio"/> 2 a 3 veces al día<br><input type="radio"/> 5 a 6 veces al día<br><input type="radio"/> más 6 veces al día |
| aceite oliva        | <input type="radio"/> Nunca o menos 1 vez al mes<br><input type="radio"/> 1 a 3 veces mes<br><input type="radio"/> 1 vez semana<br><input checked="" type="radio"/> 2 a 4 veces semana<br><input type="radio"/> 5 a 6 veces semana<br><input type="radio"/> 1 vez al día<br><input type="radio"/> 2 a 3 veces al día<br><input type="radio"/> 5 a 6 veces al día<br><input type="radio"/> más 6 veces al día |
| otros aceites       | <input type="radio"/> Nunca o menos 1 vez al mes<br><input type="radio"/> 1 a 3 veces mes<br><input type="radio"/> 1 vez semana<br><input checked="" type="radio"/> 2 a 4 veces semana<br><input type="radio"/> 5 a 6 veces semana<br><input type="radio"/> 1 vez al día<br><input type="radio"/> 2 a 3 veces al día<br><input type="radio"/> 5 a 6 veces al día<br><input type="radio"/> más 6 veces al día |
| margarina           | <input type="radio"/> Nunca o menos 1 vez al mes<br><input checked="" type="radio"/> 1 a 3 veces mes<br><input type="radio"/> 1 vez semana<br><input type="radio"/> 2 a 4 veces semana<br><input type="radio"/> 5 a 6 veces semana<br><input type="radio"/> 1 vez al día<br><input type="radio"/> 2 a 3 veces al día<br><input type="radio"/> 5 a 6 veces al día<br><input type="radio"/> más 6 veces al día |
| mantequilla         | <input checked="" type="radio"/> Nunca o menos 1 vez al mes<br><input type="radio"/> 1 a 3 veces mes<br><input type="radio"/> 1 vez semana<br><input type="radio"/> 2 a 4 veces semana<br><input type="radio"/> 5 a 6 veces semana<br><input type="radio"/> 1 vez al día<br><input type="radio"/> 2 a 3 veces al día<br><input type="radio"/> 5 a 6 veces al día<br><input type="radio"/> más 6 veces al día |
| galletas tipo maria | <input type="radio"/> Nunca o menos 1 vez al mes<br><input type="radio"/> 1 a 3 veces mes<br><input type="radio"/> 1 vez semana<br><input type="radio"/> 2 a 4 veces semana<br><input checked="" type="radio"/> 5 a 6 veces semana<br><input type="radio"/> 1 vez al día<br><input type="radio"/> 2 a 3 veces al día<br><input type="radio"/> 5 a 6 veces al día<br><input type="radio"/> más 6 veces al día |

|                           |                                                                                                                                                                                                                                                                                                                                                                                                              |
|---------------------------|--------------------------------------------------------------------------------------------------------------------------------------------------------------------------------------------------------------------------------------------------------------------------------------------------------------------------------------------------------------------------------------------------------------|
| galletas chocolate        | <input type="radio"/> Nunca o menos 1 vez al mes<br><input checked="" type="radio"/> 1 a 3 veces mes<br><input type="radio"/> 1 vez semana<br><input type="radio"/> 2 a 4 veces semana<br><input type="radio"/> 5 a 6 veces semana<br><input type="radio"/> 1 vez al día<br><input type="radio"/> 2 a 3 veces al día<br><input type="radio"/> 5 a 6 veces al día<br><input type="radio"/> más 6 veces al día |
| bollieria                 | <input type="radio"/> Nunca o menos 1 vez al mes<br><input type="radio"/> 1 a 3 veces mes<br><input type="radio"/> 1 vez semana<br><input checked="" type="radio"/> 2 a 4 veces semana<br><input type="radio"/> 5 a 6 veces semana<br><input type="radio"/> 1 vez al día<br><input type="radio"/> 2 a 3 veces al día<br><input type="radio"/> 5 a 6 veces al día<br><input type="radio"/> más 6 veces al día |
| chocolate o bombones      | <input type="radio"/> Nunca o menos 1 vez al mes<br><input checked="" type="radio"/> 1 a 3 veces mes<br><input type="radio"/> 1 vez semana<br><input type="radio"/> 2 a 4 veces semana<br><input type="radio"/> 5 a 6 veces semana<br><input type="radio"/> 1 vez al día<br><input type="radio"/> 2 a 3 veces al día<br><input type="radio"/> 5 a 6 veces al día<br><input type="radio"/> más 6 veces al día |
| chocolate polvo o colacao | <input checked="" type="radio"/> Nunca o menos 1 vez al mes<br><input type="radio"/> 1 a 3 veces mes<br><input type="radio"/> 1 vez semana<br><input type="radio"/> 2 a 4 veces semana<br><input type="radio"/> 5 a 6 veces semana<br><input type="radio"/> 1 vez al día<br><input type="radio"/> 2 a 3 veces al día<br><input type="radio"/> 5 a 6 veces al día<br><input type="radio"/> más 6 veces al día |
| vino tinto                | <input checked="" type="radio"/> Nunca o menos 1 vez al mes<br><input type="radio"/> 1 a 3 veces mes<br><input type="radio"/> 1 vez semana<br><input type="radio"/> 2 a 4 veces semana<br><input type="radio"/> 5 a 6 veces semana<br><input type="radio"/> 1 vez al día<br><input type="radio"/> 2 a 3 veces al día<br><input type="radio"/> 5 a 6 veces al día<br><input type="radio"/> más 6 veces al día |
| vino blanco               | <input checked="" type="radio"/> Nunca o menos 1 vez al mes<br><input type="radio"/> 1 a 3 veces mes<br><input type="radio"/> 1 vez semana<br><input type="radio"/> 2 a 4 veces semana<br><input type="radio"/> 5 a 6 veces semana<br><input type="radio"/> 1 vez al día<br><input type="radio"/> 2 a 3 veces al día<br><input type="radio"/> 5 a 6 veces al día<br><input type="radio"/> más 6 veces al día |

|                       |                                                                                                                                                                                                                                                                                                                                                                                                              |
|-----------------------|--------------------------------------------------------------------------------------------------------------------------------------------------------------------------------------------------------------------------------------------------------------------------------------------------------------------------------------------------------------------------------------------------------------|
| vino seco o vermut    | <input checked="" type="radio"/> Nunca o menos 1 vez al mes<br><input type="radio"/> 1 a 3 veces mes<br><input type="radio"/> 1 vez semana<br><input type="radio"/> 2 a 4 veces semana<br><input type="radio"/> 5 a 6 veces semana<br><input type="radio"/> 1 vez al día<br><input type="radio"/> 2 a 3 veces al día<br><input type="radio"/> 5 a 6 veces al día<br><input type="radio"/> más 6 veces al día |
| cerveza               | <input checked="" type="radio"/> Nunca o menos 1 vez al mes<br><input type="radio"/> 1 a 3 veces mes<br><input type="radio"/> 1 vez semana<br><input type="radio"/> 2 a 4 veces semana<br><input type="radio"/> 5 a 6 veces semana<br><input type="radio"/> 1 vez al día<br><input type="radio"/> 2 a 3 veces al día<br><input type="radio"/> 5 a 6 veces al día<br><input type="radio"/> más 6 veces al día |
| cerveza sin alcohol   | <input checked="" type="radio"/> Nunca o menos 1 vez al mes<br><input type="radio"/> 1 a 3 veces mes<br><input type="radio"/> 1 vez semana<br><input type="radio"/> 2 a 4 veces semana<br><input type="radio"/> 5 a 6 veces semana<br><input type="radio"/> 1 vez al día<br><input type="radio"/> 2 a 3 veces al día<br><input type="radio"/> 5 a 6 veces al día<br><input type="radio"/> más 6 veces al día |
| licores               | <input checked="" type="radio"/> Nunca o menos 1 vez al mes<br><input type="radio"/> 1 a 3 veces mes<br><input type="radio"/> 1 vez semana<br><input type="radio"/> 2 a 4 veces semana<br><input type="radio"/> 5 a 6 veces semana<br><input type="radio"/> 1 vez al día<br><input type="radio"/> 2 a 3 veces al día<br><input type="radio"/> 5 a 6 veces al día<br><input type="radio"/> más 6 veces al día |
| ginebra o ron o vodka | <input checked="" type="radio"/> Nunca o menos 1 vez al mes<br><input type="radio"/> 1 a 3 veces mes<br><input type="radio"/> 1 vez semana<br><input type="radio"/> 2 a 4 veces semana<br><input type="radio"/> 5 a 6 veces semana<br><input type="radio"/> 1 vez al día<br><input type="radio"/> 2 a 3 veces al día<br><input type="radio"/> 5 a 6 veces al día<br><input type="radio"/> más 6 veces al día |
| refresco normal       | <input checked="" type="radio"/> Nunca o menos 1 vez al mes<br><input type="radio"/> 1 a 3 veces mes<br><input type="radio"/> 1 vez semana<br><input type="radio"/> 2 a 4 veces semana<br><input type="radio"/> 5 a 6 veces semana<br><input type="radio"/> 1 vez al día<br><input type="radio"/> 2 a 3 veces al día<br><input type="radio"/> 5 a 6 veces al día<br><input type="radio"/> más 6 veces al día |

|                          |                                                                                                                                                                                                                                                                                                                                                                                                              |
|--------------------------|--------------------------------------------------------------------------------------------------------------------------------------------------------------------------------------------------------------------------------------------------------------------------------------------------------------------------------------------------------------------------------------------------------------|
| refresco sin azúcar      | <input type="radio"/> Nunca o menos 1 vez al mes<br><input type="radio"/> 1 a 3 veces mes<br><input checked="" type="radio"/> 1 vez semana<br><input type="radio"/> 2 a 4 veces semana<br><input type="radio"/> 5 a 6 veces semana<br><input type="radio"/> 1 vez al día<br><input type="radio"/> 2 a 3 veces al día<br><input type="radio"/> 5 a 6 veces al día<br><input type="radio"/> más 6 veces al día |
| Agua del grifo           | <input checked="" type="radio"/> Nunca o menos 1 vez al mes<br><input type="radio"/> 1 a 3 veces mes<br><input type="radio"/> 1 vez semana<br><input type="radio"/> 2 a 4 veces semana<br><input type="radio"/> 5 a 6 veces semana<br><input type="radio"/> 1 vez al día<br><input type="radio"/> 2 a 3 veces al día<br><input type="radio"/> 5 a 6 veces al día<br><input type="radio"/> más 6 veces al día |
| agua embotellada sin gas | <input type="radio"/> Nunca o menos 1 vez al mes<br><input type="radio"/> 1 a 3 veces mes<br><input type="radio"/> 1 vez semana<br><input type="radio"/> 2 a 4 veces semana<br><input type="radio"/> 5 a 6 veces semana<br><input type="radio"/> 1 vez al día<br><input type="radio"/> 2 a 3 veces al día<br><input checked="" type="radio"/> 5 a 6 veces al día<br><input type="radio"/> más 6 veces al día |
| agua embotellada con gas | <input checked="" type="radio"/> Nunca o menos 1 vez al mes<br><input type="radio"/> 1 a 3 veces mes<br><input type="radio"/> 1 vez semana<br><input type="radio"/> 2 a 4 veces semana<br><input type="radio"/> 5 a 6 veces semana<br><input type="radio"/> 1 vez al día<br><input type="radio"/> 2 a 3 veces al día<br><input type="radio"/> 5 a 6 veces al día<br><input type="radio"/> más 6 veces al día |
| zumو frutas embasado     | <input type="radio"/> Nunca o menos 1 vez al mes<br><input type="radio"/> 1 a 3 veces mes<br><input checked="" type="radio"/> 1 vez semana<br><input type="radio"/> 2 a 4 veces semana<br><input type="radio"/> 5 a 6 veces semana<br><input type="radio"/> 1 vez al día<br><input type="radio"/> 2 a 3 veces al día<br><input type="radio"/> 5 a 6 veces al día<br><input type="radio"/> más 6 veces al día |
| cafe                     | <input checked="" type="radio"/> Nunca o menos 1 vez al mes<br><input type="radio"/> 1 a 3 veces mes<br><input type="radio"/> 1 vez semana<br><input type="radio"/> 2 a 4 veces semana<br><input type="radio"/> 5 a 6 veces semana<br><input type="radio"/> 1 vez al día<br><input type="radio"/> 2 a 3 veces al día<br><input type="radio"/> 5 a 6 veces al día<br><input type="radio"/> más 6 veces al día |



|                       |                                                                                                                                                                                                                                                                                                                                                                                                              |
|-----------------------|--------------------------------------------------------------------------------------------------------------------------------------------------------------------------------------------------------------------------------------------------------------------------------------------------------------------------------------------------------------------------------------------------------------|
| cafe descafeinado     | <input checked="" type="radio"/> Nunca o menos 1 vez al mes<br><input type="radio"/> 1 a 3 veces mes<br><input type="radio"/> 1 vez semana<br><input type="radio"/> 2 a 4 veces semana<br><input type="radio"/> 5 a 6 veces semana<br><input type="radio"/> 1 vez al día<br><input type="radio"/> 2 a 3 veces al día<br><input type="radio"/> 5 a 6 veces al día<br><input type="radio"/> más 6 veces al día |
| te o infusión         | <input checked="" type="radio"/> Nunca o menos 1 vez al mes<br><input type="radio"/> 1 a 3 veces mes<br><input type="radio"/> 1 vez semana<br><input type="radio"/> 2 a 4 veces semana<br><input type="radio"/> 5 a 6 veces semana<br><input type="radio"/> 1 vez al día<br><input type="radio"/> 2 a 3 veces al día<br><input type="radio"/> 5 a 6 veces al día<br><input type="radio"/> más 6 veces al día |
| sopa o puré verduras  | <input type="radio"/> Nunca o menos 1 vez al mes<br><input type="radio"/> 1 a 3 veces mes<br><input type="radio"/> 1 vez semana<br><input type="radio"/> 2 a 4 veces semana<br><input checked="" type="radio"/> 5 a 6 veces semana<br><input type="radio"/> 1 vez al día<br><input type="radio"/> 2 a 3 veces al día<br><input type="radio"/> 5 a 6 veces al día<br><input type="radio"/> más 6 veces al día |
| croquetas pollo jamón | <input type="radio"/> Nunca o menos 1 vez al mes<br><input type="radio"/> 1 a 3 veces mes<br><input checked="" type="radio"/> 1 vez semana<br><input type="radio"/> 2 a 4 veces semana<br><input type="radio"/> 5 a 6 veces semana<br><input type="radio"/> 1 vez al día<br><input type="radio"/> 2 a 3 veces al día<br><input type="radio"/> 5 a 6 veces al día<br><input type="radio"/> más 6 veces al día |
| croquetas pescado     | <input type="radio"/> Nunca o menos 1 vez al mes<br><input checked="" type="radio"/> 1 a 3 veces mes<br><input type="radio"/> 1 vez semana<br><input type="radio"/> 2 a 4 veces semana<br><input type="radio"/> 5 a 6 veces semana<br><input type="radio"/> 1 vez al día<br><input type="radio"/> 2 a 3 veces al día<br><input type="radio"/> 5 a 6 veces al día<br><input type="radio"/> más 6 veces al día |
| mayonesa              | <input type="radio"/> Nunca o menos 1 vez al mes<br><input checked="" type="radio"/> 1 a 3 veces mes<br><input type="radio"/> 1 vez semana<br><input type="radio"/> 2 a 4 veces semana<br><input type="radio"/> 5 a 6 veces semana<br><input type="radio"/> 1 vez al día<br><input type="radio"/> 2 a 3 veces al día<br><input type="radio"/> 5 a 6 veces al día<br><input type="radio"/> más 6 veces al día |

|                  |                                                                                                                                                                                                                                                                                                                                                                                                              |
|------------------|--------------------------------------------------------------------------------------------------------------------------------------------------------------------------------------------------------------------------------------------------------------------------------------------------------------------------------------------------------------------------------------------------------------|
| salsa tomate     | <input checked="" type="radio"/> Nunca o menos 1 vez al mes<br><input type="radio"/> 1 a 3 veces mes<br><input type="radio"/> 1 vez semana<br><input type="radio"/> 2 a 4 veces semana<br><input type="radio"/> 5 a 6 veces semana<br><input type="radio"/> 1 vez al día<br><input type="radio"/> 2 a 3 veces al día<br><input type="radio"/> 5 a 6 veces al día<br><input type="radio"/> más 6 veces al día |
| ketchup          | <input checked="" type="radio"/> Nunca o menos 1 vez al mes<br><input type="radio"/> 1 a 3 veces mes<br><input type="radio"/> 1 vez semana<br><input type="radio"/> 2 a 4 veces semana<br><input type="radio"/> 5 a 6 veces semana<br><input type="radio"/> 1 vez al día<br><input type="radio"/> 2 a 3 veces al día<br><input type="radio"/> 5 a 6 veces al día<br><input type="radio"/> más 6 veces al día |
| sal              | <input type="radio"/> Nunca o menos 1 vez al mes<br><input checked="" type="radio"/> 1 a 3 veces mes<br><input type="radio"/> 1 vez semana<br><input type="radio"/> 2 a 4 veces semana<br><input type="radio"/> 5 a 6 veces semana<br><input type="radio"/> 1 vez al día<br><input type="radio"/> 2 a 3 veces al día<br><input type="radio"/> 5 a 6 veces al día<br><input type="radio"/> más 6 veces al día |
| ajo              | <input type="radio"/> Nunca o menos 1 vez al mes<br><input type="radio"/> 1 a 3 veces mes<br><input checked="" type="radio"/> 1 vez semana<br><input type="radio"/> 2 a 4 veces semana<br><input type="radio"/> 5 a 6 veces semana<br><input type="radio"/> 1 vez al día<br><input type="radio"/> 2 a 3 veces al día<br><input type="radio"/> 5 a 6 veces al día<br><input type="radio"/> más 6 veces al día |
| mermelada o miel | <input checked="" type="radio"/> Nunca o menos 1 vez al mes<br><input type="radio"/> 1 a 3 veces mes<br><input type="radio"/> 1 vez semana<br><input type="radio"/> 2 a 4 veces semana<br><input type="radio"/> 5 a 6 veces semana<br><input type="radio"/> 1 vez al día<br><input type="radio"/> 2 a 3 veces al día<br><input type="radio"/> 5 a 6 veces al día<br><input type="radio"/> más 6 veces al día |
| azúcar           | <input type="radio"/> Nunca o menos 1 vez al mes<br><input type="radio"/> 1 a 3 veces mes<br><input type="radio"/> 1 vez semana<br><input type="radio"/> 2 a 4 veces semana<br><input type="radio"/> 5 a 6 veces semana<br><input checked="" type="radio"/> 1 vez al día<br><input type="radio"/> 2 a 3 veces al día<br><input type="radio"/> 5 a 6 veces al día<br><input type="radio"/> más 6 veces al día |

|                                       |                                                                                                                                                                                                                                                                                                                                                                                                                                                                                                                               |
|---------------------------------------|-------------------------------------------------------------------------------------------------------------------------------------------------------------------------------------------------------------------------------------------------------------------------------------------------------------------------------------------------------------------------------------------------------------------------------------------------------------------------------------------------------------------------------|
| Otro alimento                         | [*DATA REMOVED*]                                                                                                                                                                                                                                                                                                                                                                                                                                                                                                              |
| suplementos vitamínicos               | <input checked="" type="radio"/> si<br><input type="radio"/> no                                                                                                                                                                                                                                                                                                                                                                                                                                                               |
| suplementos vitamínicos               | [*DATA REMOVED*]                                                                                                                                                                                                                                                                                                                                                                                                                                                                                                              |
| dieta previa                          | <input type="radio"/> si<br><input checked="" type="radio"/> no                                                                                                                                                                                                                                                                                                                                                                                                                                                               |
| motivo dieta                          | <input checked="" type="radio"/> no dieta<br><input type="radio"/> control peso<br><input type="radio"/> control colesterol<br><input type="radio"/> control diabetes<br><input type="radio"/> problemas estómago<br><input type="radio"/> problemas vesícula o hepáticos<br><input type="radio"/> HTA o cardiopatía<br><input type="radio"/> problemas renales<br><input type="radio"/> alergia alimentaria<br><input type="radio"/> ácido úrico elevado<br><input type="radio"/> vegetariana<br><input type="radio"/> otros |
| cambio alimentos año previo gestación | <input checked="" type="radio"/> si<br><input type="radio"/> no                                                                                                                                                                                                                                                                                                                                                                                                                                                               |
| cambio lácteos                        | <input type="radio"/> eliminado<br><input type="radio"/> disminuido<br><input checked="" type="radio"/> igual<br><input type="radio"/> aumentado<br><input type="radio"/> no sabe                                                                                                                                                                                                                                                                                                                                             |
| cambio huevos                         | <input type="radio"/> eliminado<br><input type="radio"/> disminuido<br><input checked="" type="radio"/> igual<br><input type="radio"/> aumentado<br><input type="radio"/> no sabe                                                                                                                                                                                                                                                                                                                                             |
| cambio carne                          | <input type="radio"/> eliminado<br><input type="radio"/> disminuido<br><input checked="" type="radio"/> igual<br><input type="radio"/> aumentado<br><input type="radio"/> no sabe                                                                                                                                                                                                                                                                                                                                             |
| cambio pescado                        | <input type="radio"/> eliminado<br><input type="radio"/> disminuido<br><input checked="" type="radio"/> igual<br><input type="radio"/> aumentado<br><input type="radio"/> no sabe                                                                                                                                                                                                                                                                                                                                             |
| cambio verduras                       | <input type="radio"/> eliminado<br><input type="radio"/> disminuido<br><input checked="" type="radio"/> igual<br><input type="radio"/> aumentado<br><input type="radio"/> no sabe                                                                                                                                                                                                                                                                                                                                             |

|                            |                                                                                                                                                                                                                        |
|----------------------------|------------------------------------------------------------------------------------------------------------------------------------------------------------------------------------------------------------------------|
| cambio legumbres           | <input type="radio"/> eliminado<br><input type="radio"/> disminuido<br><input checked="" type="radio"/> igual<br><input type="radio"/> aumentado<br><input type="radio"/> no sabe                                      |
| cambio fruta               | <input type="radio"/> eliminado<br><input type="radio"/> disminuido<br><input checked="" type="radio"/> igual<br><input type="radio"/> aumentado<br><input type="radio"/> no sabe                                      |
| cambio pan                 | <input type="radio"/> eliminado<br><input type="radio"/> disminuido<br><input checked="" type="radio"/> igual<br><input type="radio"/> aumentado<br><input type="radio"/> no sabe                                      |
| cambio aceite oliva        | <input type="radio"/> eliminado<br><input type="radio"/> disminuido<br><input checked="" type="radio"/> igual<br><input type="radio"/> aumentado<br><input type="radio"/> no sabe                                      |
| cambio mante o margarina   | <input type="radio"/> eliminado<br><input type="radio"/> disminuido<br><input checked="" type="radio"/> igual<br><input type="radio"/> aumentado<br><input type="radio"/> no sabe                                      |
| cambio azúcar y dulces     | <input type="radio"/> eliminado<br><input type="radio"/> disminuido<br><input checked="" type="radio"/> igual<br><input type="radio"/> aumentado<br><input type="radio"/> no sabe                                      |
| cambio bebidas alcohólicas | <input checked="" type="radio"/> eliminado<br><input type="radio"/> disminuido<br><input type="radio"/> igual<br><input type="radio"/> aumentado<br><input type="radio"/> no sabe                                      |
| frecuencia comidas fritas  | <input type="radio"/> a diario<br><input type="radio"/> 5 a 6 veces semana<br><input type="radio"/> 2 a 4 veces semana<br><input checked="" type="radio"/> 1 vez semana<br><input type="radio"/> menos de 1 vez semana |
| carne                      | <input type="radio"/> no como<br><input type="radio"/> cruda<br><input type="radio"/> poco hecha<br><input type="radio"/> hecha<br><input checked="" type="radio"/> muy hecha                                          |
| grasa visible carne        | <input type="radio"/> quita toda<br><input type="radio"/> quita mayoría<br><input checked="" type="radio"/> quita un poco<br><input type="radio"/> no quita nada                                                       |

|                                |                                                                                                                                                                                                                                                          |
|--------------------------------|----------------------------------------------------------------------------------------------------------------------------------------------------------------------------------------------------------------------------------------------------------|
| cocina carne                   | <input type="radio"/> a la plancha<br><input type="radio"/> a la parrilla<br><input checked="" type="radio"/> asada<br><input type="radio"/> frita<br><input type="radio"/> guisada                                                                      |
| tostado quemado carne          | <input checked="" type="radio"/> nunca<br><input type="radio"/> 1 vez mes<br><input type="radio"/> 2 a 3 veces mes<br><input type="radio"/> 1 vez semana<br><input type="radio"/> 2 a 3 semanas                                                          |
| tostado quemado pescado        | <input checked="" type="radio"/> nunca<br><input type="radio"/> 1 vez mes<br><input type="radio"/> 2 a 3 veces mes<br><input type="radio"/> 1 vez semana<br><input type="radio"/> 2 a 3 semanas                                                          |
| socarrat paella                | <input type="radio"/> nunca<br><input checked="" type="radio"/> 1 vez mes<br><input type="radio"/> 2 a 3 veces mes<br><input type="radio"/> 1 vez semana<br><input type="radio"/> 2 a 3 semanas                                                          |
| grasa o aceite cocinar         | <input type="radio"/> mantequilla<br><input type="radio"/> margarina<br><input checked="" type="radio"/> aceite oliva<br><input type="radio"/> aceite oliva virgen extra<br><input type="radio"/> aceite vegetal<br><input type="radio"/> mezcla aceites |
| grasa aceite aliñar            | <input type="radio"/> mantequilla<br><input type="radio"/> margarina<br><input type="radio"/> aceite oliva<br><input type="radio"/> aceite oliva virgen extra<br><input checked="" type="radio"/> aceite vegetal<br><input type="radio"/> mezcla aceites |
| grasa aceite freir             | <input type="radio"/> mantequilla<br><input type="radio"/> margarina<br><input type="radio"/> aceite oliva<br><input type="radio"/> aceite oliva virgen extra<br><input checked="" type="radio"/> aceite vegetal<br><input type="radio"/> mezcla aceites |
| Ejercicio cuestionario         | <input checked="" type="radio"/> si<br><input type="radio"/> no                                                                                                                                                                                          |
| horas de sueño incluido siesta | [*DATA REMOVED*]                                                                                                                                                                                                                                         |
| minutos siesta                 | [*DATA REMOVED*]                                                                                                                                                                                                                                         |
| horas televisión semana        | [*DATA REMOVED*]                                                                                                                                                                                                                                         |

|                                        |                                                                                                                                                                                                                                                                                                                                                                |
|----------------------------------------|----------------------------------------------------------------------------------------------------------------------------------------------------------------------------------------------------------------------------------------------------------------------------------------------------------------------------------------------------------------|
| actividad trabajo                      | <input type="radio"/> casi siempre sentado<br><input type="radio"/> sentado 50 por cien<br><input type="radio"/> casi siempre de pie, quieto<br><input type="radio"/> casi siempre levantado caminando y llevando pocas cosas<br><input type="radio"/> casi siempre levantado, caminando y llevado muchas cosas<br><input type="radio"/> trabajo manual pesado |
| tiempo caminar o bici al día           | <input type="radio"/> casi nunca<br><input type="radio"/> menos 20min día<br><input checked="" type="radio"/> 20 a 40 min día<br><input type="radio"/> 40 a 60 min día<br><input type="radio"/> 1h o 1h y media día<br><input type="radio"/> más de 1h y media al día                                                                                          |
| tiempo tareas casa al día              | <input type="radio"/> menos de 1h día<br><input checked="" type="radio"/> 1 a 2h día<br><input type="radio"/> 3 a 4h día<br><input type="radio"/> 5 a 6h día<br><input type="radio"/> 7 a 8h día<br><input type="radio"/> más de 8h día                                                                                                                        |
| tiempo libre televisión ordenador leer | <input type="radio"/> menos 1h día<br><input type="radio"/> 1h día<br><input type="radio"/> 2h día<br><input checked="" type="radio"/> 3h día<br><input type="radio"/> 4h día<br><input type="radio"/> 5 a 6h día<br><input type="radio"/> mas 6h día                                                                                                          |
| tiempo libre ejercicio o deporte       | <input type="radio"/> menos 1h semana<br><input checked="" type="radio"/> 1h semana<br><input type="radio"/> 2h semana<br><input type="radio"/> 3h semana<br><input type="radio"/> 4 a 5h semana<br><input type="radio"/> mas 5h semana                                                                                                                        |
| como se considera                      | <input type="radio"/> sedentaria<br><input checked="" type="radio"/> poco activa<br><input type="radio"/> moderadamente activa<br><input type="radio"/> bastante activa<br><input type="radio"/> muy activa<br><input type="radio"/> no sabe                                                                                                                   |
| FUR                                    | [*DATA REMOVED*]                                                                                                                                                                                                                                                                                                                                               |
| Semanas gestación 2T                   | [*DATA REMOVED*]                                                                                                                                                                                                                                                                                                                                               |
| Días gestación 2T                      | [*DATA REMOVED*]                                                                                                                                                                                                                                                                                                                                               |
| DBP 2T                                 | [*DATA REMOVED*]                                                                                                                                                                                                                                                                                                                                               |
| CC 2T                                  | [*DATA REMOVED*]                                                                                                                                                                                                                                                                                                                                               |
| AC 2T                                  | [*DATA REMOVED*]                                                                                                                                                                                                                                                                                                                                               |

|                                                   |                                                                                                                                                                                                 |
|---------------------------------------------------|-------------------------------------------------------------------------------------------------------------------------------------------------------------------------------------------------|
| LF 2T                                             | [*DATA REMOVED*]                                                                                                                                                                                |
| PFE 2T (Hadlock)                                  | [*DATA REMOVED*]                                                                                                                                                                                |
| Semanas gestación 3T                              | [*DATA REMOVED*]                                                                                                                                                                                |
| días 3T                                           | [*DATA REMOVED*]                                                                                                                                                                                |
| DBP 3T                                            | [*DATA REMOVED*]                                                                                                                                                                                |
| CC 3T                                             | [*DATA REMOVED*]                                                                                                                                                                                |
| AC 3T                                             | [*DATA REMOVED*]                                                                                                                                                                                |
| LF 3T                                             | [*DATA REMOVED*]                                                                                                                                                                                |
| PFE 3T (Hadlock)                                  | [*DATA REMOVED*]                                                                                                                                                                                |
| Semanas de gestación final                        | [*DATA REMOVED*]                                                                                                                                                                                |
| días gestación final                              | [*DATA REMOVED*]                                                                                                                                                                                |
| Localización placenta                             | <input type="radio"/> anterior<br><input type="radio"/> lateral derecha<br><input type="radio"/> lateral izquierda<br><input checked="" type="radio"/> posterior<br><input type="radio"/> fondo |
| Presentación longitudinal cefálica                | <input type="radio"/> no<br><input checked="" type="radio"/> si                                                                                                                                 |
| Dorso                                             | <input type="radio"/> izquierda anterior<br><input checked="" type="radio"/> izquierda posterior<br><input type="radio"/> derecha anterior<br><input type="radio"/> derecha posterior           |
| diámetro biparietal                               | [*DATA REMOVED*]                                                                                                                                                                                |
| Circunferencia craneal                            | [*DATA REMOVED*]                                                                                                                                                                                |
| Circunferencia abdominal                          | [*DATA REMOVED*]                                                                                                                                                                                |
| Longitud de femur                                 | [*DATA REMOVED*]                                                                                                                                                                                |
| tejido celular subcutáneo a nivel del muslo en mm | [*DATA REMOVED*]                                                                                                                                                                                |
| tejido celular subcutáneo en abdomen en mm        | [*DATA REMOVED*]                                                                                                                                                                                |
| Volumen del muslo en cm3                          | [*DATA REMOVED*]                                                                                                                                                                                |
| Peso fetal estimado según fórmula de Hadlock      | [*DATA REMOVED*]                                                                                                                                                                                |

|                                               |                                                                                                                                                          |
|-----------------------------------------------|----------------------------------------------------------------------------------------------------------------------------------------------------------|
| Percentil                                     | [*DATA REMOVED*]                                                                                                                                         |
| Peso fetal estimado según fórmula de Scioscia | <hr/>                                                                                                                                                    |
| Peso fetal estimado según fórmula de LEE      | <hr/>                                                                                                                                                    |
| Tipo de parto                                 | <input type="radio"/> eutocico<br><input type="radio"/> instrumentado/ventosa<br><input checked="" type="radio"/> cesarea                                |
| fecha de nacimiento                           | [*DATA REMOVED*]                                                                                                                                         |
| Días entre exploración y nacimiento           | [*DATA REMOVED*]                                                                                                                                         |
| Peso RN en g                                  | [*DATA REMOVED*]                                                                                                                                         |
| sexo                                          | <input type="radio"/> mujer<br><input checked="" type="radio"/> hombre                                                                                   |
| Apgar 1 minuto                                | [*DATA REMOVED*]                                                                                                                                         |
| Apgar 5 minutos                               | [*DATA REMOVED*]                                                                                                                                         |
| Apgar 10 minutos                              | <hr/>                                                                                                                                                    |
| antecedente Covid durante gestación           | <input type="radio"/> Yes<br><input checked="" type="radio"/> No                                                                                         |
| Nivel de estudios                             | <input type="radio"/> ninguno<br><input type="radio"/> primarios<br><input type="radio"/> secundarios<br><input checked="" type="radio"/> universitarios |



# Base\_datos\_estimacion\_peso\_fetal

|                                       |                                                                                                                                                                                                                                                                                      |
|---------------------------------------|--------------------------------------------------------------------------------------------------------------------------------------------------------------------------------------------------------------------------------------------------------------------------------------|
| Número de identificación participante | 29                                                                                                                                                                                                                                                                                   |
| CODIGO PARTICIPANTE                   |                                                                                                                                                                                                                                                                                      |
| Edad                                  | [*DATA REMOVED*]                                                                                                                                                                                                                                                                     |
| Gestaciones                           | <input checked="" type="radio"/> 1<br><input type="radio"/> 2<br><input type="radio"/> 3<br><input type="radio"/> mas de 3                                                                                                                                                           |
| partos                                | <input checked="" type="radio"/> 0<br><input type="radio"/> 1<br><input type="radio"/> 2<br><input type="radio"/> 3<br><input type="radio"/> mas de 3                                                                                                                                |
| cesáreas                              | <input checked="" type="radio"/> 0<br><input type="radio"/> 1<br><input type="radio"/> 2<br><input type="radio"/> 3<br><input type="radio"/> mas de 3                                                                                                                                |
| Abortos                               | <input checked="" type="radio"/> 0<br><input type="radio"/> 1<br><input type="radio"/> 2<br><input type="radio"/> 3<br><input type="radio"/> mas de 3                                                                                                                                |
| Tipo de gestacion                     | <input checked="" type="radio"/> espontanea<br><input type="radio"/> IAC inseminación artificial conyuge<br><input type="radio"/> IAD inseminación artificial donante<br><input type="radio"/> FIV Fecundación in Vitro<br><input type="radio"/> Ovodon FIV con donación de ovocitos |
| peso previo a embarazo                | [*DATA REMOVED*]                                                                                                                                                                                                                                                                     |
| Ganancia ponderal embarazo            | [*DATA REMOVED*]                                                                                                                                                                                                                                                                     |
| Talla madre                           | [*DATA REMOVED*]                                                                                                                                                                                                                                                                     |
| IMC previo embarazo                   | 21.64412070759625                                                                                                                                                                                                                                                                    |
| Patología obstétrica                  | <input checked="" type="radio"/> no<br><input type="radio"/> si                                                                                                                                                                                                                      |
| Diabetes pregestacional               | <input checked="" type="radio"/> no<br><input type="radio"/> si                                                                                                                                                                                                                      |
| Diabetes gestacional                  | <input checked="" type="radio"/> no<br><input type="radio"/> si                                                                                                                                                                                                                      |

|                                            |                                                                                                                                                                                      |
|--------------------------------------------|--------------------------------------------------------------------------------------------------------------------------------------------------------------------------------------|
| Diabetes gestacional con insulina          | <input checked="" type="radio"/> no<br><input type="radio"/> si                                                                                                                      |
| Diabetes gestacional con dieta y ejercicio | <input checked="" type="radio"/> no<br><input type="radio"/> si                                                                                                                      |
| Percentil fetos previos                    | <input checked="" type="radio"/> Nada<br><input type="radio"/> percentil menor de 10<br><input type="radio"/> percentil entre 10 y 90<br><input type="radio"/> percentil mayor de 90 |
| Exfumadora                                 | <input checked="" type="radio"/> Nada<br><input type="radio"/> menos de 5 años<br><input type="radio"/> 5 a 10 años<br><input type="radio"/> mayor o igual a 10 años                 |
| Hábito tabáquico                           | <input type="radio"/> no<br><input checked="" type="radio"/> si                                                                                                                      |
| fumadora                                   | [*DATA REMOVED*]                                                                                                                                                                     |
| Consumo otros tóxicos                      | <input checked="" type="radio"/> no<br><input type="radio"/> si                                                                                                                      |
| Hb 1T                                      | [*DATA REMOVED*]                                                                                                                                                                     |
| Htc 1T                                     | [*DATA REMOVED*]                                                                                                                                                                     |
| Hb 2T                                      | [*DATA REMOVED*]                                                                                                                                                                     |
| HTC 2T                                     | [*DATA REMOVED*]                                                                                                                                                                     |
| Hb 3T                                      | [*DATA REMOVED*]                                                                                                                                                                     |
| HTC 3T                                     | [*DATA REMOVED*]                                                                                                                                                                     |
| Suplemento FE oral                         | <input type="radio"/> si<br><input checked="" type="radio"/> no                                                                                                                      |
| Suplemento fe iv                           | <input type="radio"/> si<br><input checked="" type="radio"/> no                                                                                                                      |
| Transfusión                                | <input checked="" type="radio"/> no<br><input type="radio"/> si                                                                                                                      |
| Solicitada Vit D                           | <input checked="" type="radio"/> no<br><input type="radio"/> si                                                                                                                      |
| Deficit vit D                              | <input type="radio"/> no<br><input type="radio"/> si                                                                                                                                 |
| Suplemento vit D                           | <input type="radio"/> si<br><input type="radio"/> no                                                                                                                                 |

|                       |                                                                                                                                                                                                                                                                                                                                                                                                              |
|-----------------------|--------------------------------------------------------------------------------------------------------------------------------------------------------------------------------------------------------------------------------------------------------------------------------------------------------------------------------------------------------------------------------------------------------------|
| Dieta, cuestionario   | <input checked="" type="radio"/> sí<br><input type="radio"/> no                                                                                                                                                                                                                                                                                                                                              |
| Leche entera          | <input checked="" type="radio"/> Nunca o menos 1 vez al mes<br><input type="radio"/> 1 a 3 veces mes<br><input type="radio"/> 1 vez semana<br><input type="radio"/> 2 a 4 veces semana<br><input type="radio"/> 5 a 6 veces semana<br><input type="radio"/> 1 vez al día<br><input type="radio"/> 2 a 3 veces al día<br><input type="radio"/> 5 a 6 veces al día<br><input type="radio"/> más 6 veces al día |
| Leche semidesnatada   | <input checked="" type="radio"/> Nunca o menos 1 vez al mes<br><input type="radio"/> 1 a 3 veces mes<br><input type="radio"/> 1 vez semana<br><input type="radio"/> 2 a 4 veces semana<br><input type="radio"/> 5 a 6 veces semana<br><input type="radio"/> 1 vez al día<br><input type="radio"/> 2 a 3 veces al día<br><input type="radio"/> 5 a 6 veces al día<br><input type="radio"/> mas 6 veces al día |
| Leche desnatada       | <input checked="" type="radio"/> Nunca o menos 1 vez al mes<br><input type="radio"/> 1 a 3 veces mes<br><input type="radio"/> 1 vez semana<br><input type="radio"/> 2 a 4 veces semana<br><input type="radio"/> 5 a 6 veces semana<br><input type="radio"/> 1 vez al día<br><input type="radio"/> 2 a 3 veces al día<br><input type="radio"/> 5 a 6 veces al día<br><input type="radio"/> más 6 veces al día |
| Leche condensada      | <input checked="" type="radio"/> Nunca o menos 1 vez al mes<br><input type="radio"/> 1 a 3 veces mes<br><input type="radio"/> 1 vez semana<br><input type="radio"/> 2 a 4 veces semana<br><input type="radio"/> 5 a 6 veces semana<br><input type="radio"/> 1 vez al día<br><input type="radio"/> 2 a 3 veces al día<br><input type="radio"/> 5 a 6 veces al día<br><input type="radio"/> más 6 veces al día |
| nata o crema de leche | <input type="radio"/> Nunca o menos 1 vez al mes<br><input type="radio"/> 1 a 3 veces mes<br><input checked="" type="radio"/> 1 vez semana<br><input type="radio"/> 2 a 4 veces semana<br><input type="radio"/> 5 a 6 veces semana<br><input type="radio"/> 1 vez al día<br><input type="radio"/> 2 a 3 veces al día<br><input type="radio"/> 5 a 6 veces al día<br><input type="radio"/> más 6 veces al día |

|                                             |                                                                                                                                                                                                                                                                                                                                                                                                              |
|---------------------------------------------|--------------------------------------------------------------------------------------------------------------------------------------------------------------------------------------------------------------------------------------------------------------------------------------------------------------------------------------------------------------------------------------------------------------|
| Yogurt Entero                               | <input checked="" type="radio"/> Nunca o menos 1 vez al mes<br><input type="radio"/> 1 a 3 veces mes<br><input type="radio"/> 1 vez semana<br><input type="radio"/> 2 a 4 veces semana<br><input type="radio"/> 5 a 6 veces semana<br><input type="radio"/> 1 vez al día<br><input type="radio"/> 2 a 3 veces al día<br><input type="radio"/> 5 a 6 veces al día<br><input type="radio"/> más 6 veces al día |
| Yogurt desnatado                            | <input checked="" type="radio"/> Nunca o menos 1 vez al mes<br><input type="radio"/> 1 a 3 veces mes<br><input type="radio"/> 1 vez semana<br><input type="radio"/> 2 a 4 veces semana<br><input type="radio"/> 5 a 6 veces semana<br><input type="radio"/> 1 vez al día<br><input type="radio"/> 2 a 3 veces al día<br><input type="radio"/> 5 a 6 veces al día<br><input type="radio"/> más 6 veces al día |
| 100g requesón o queso blando o queso fresco | <input checked="" type="radio"/> Nunca o menos 1 vez al mes<br><input type="radio"/> 1 a 3 veces mes<br><input type="radio"/> 1 vez semana<br><input type="radio"/> 2 a 4 veces semana<br><input type="radio"/> 5 a 6 veces semana<br><input type="radio"/> 1 vez al día<br><input type="radio"/> 2 a 3 veces al día<br><input type="radio"/> 5 a 6 veces al día<br><input type="radio"/> más 6 veces al día |
| queso curado o semicurado o cremoso         | <input type="radio"/> Nunca o menos 1 vez al mes<br><input type="radio"/> 1 a 3 veces mes<br><input type="radio"/> 1 vez semana<br><input type="radio"/> 2 a 4 veces semana<br><input type="radio"/> 5 a 6 veces semana<br><input checked="" type="radio"/> 1 vez al día<br><input type="radio"/> 2 a 3 veces al día<br><input type="radio"/> 5 a 6 veces al día<br><input type="radio"/> más 6 veces al día |
| natillas flan pudding                       | <input checked="" type="radio"/> Nunca o menos 1 vez al mes<br><input type="radio"/> 1 a 3 veces mes<br><input type="radio"/> 1 vez semana<br><input type="radio"/> 2 a 4 veces semana<br><input type="radio"/> 5 a 6 veces semana<br><input type="radio"/> 1 vez al día<br><input type="radio"/> 2 a 3 veces al día<br><input type="radio"/> 5 a 6 veces al día<br><input type="radio"/> más 6 veces al día |
| Helado                                      | <input type="radio"/> Nunca o menos 1 vez al mes<br><input checked="" type="radio"/> 1 a 3 veces mes<br><input type="radio"/> 1 vez semana<br><input type="radio"/> 2 a 4 veces semana<br><input type="radio"/> 5 a 6 veces semana<br><input type="radio"/> 1 vez al día<br><input type="radio"/> 2 a 3 veces al día<br><input type="radio"/> 5 a 6 veces al día<br><input type="radio"/> más 6 veces al día |

|                                      |                                                                                                                                                                                                                                                                                                                                                                                                              |
|--------------------------------------|--------------------------------------------------------------------------------------------------------------------------------------------------------------------------------------------------------------------------------------------------------------------------------------------------------------------------------------------------------------------------------------------------------------|
| huevo                                | <input type="radio"/> Nunca o menos 1 vez al mes<br><input type="radio"/> 1 a 3 veces mes<br><input type="radio"/> 1 vez semana<br><input checked="" type="radio"/> 2 a 4 veces semana<br><input type="radio"/> 5 a 6 veces semana<br><input type="radio"/> 1 vez al día<br><input type="radio"/> 2 a 3 veces al día<br><input type="radio"/> 5 a 6 veces al día<br><input type="radio"/> más 6 veces al día |
| Pollo con piel                       | <input type="radio"/> Nunca o menos 1 vez al mes<br><input type="radio"/> 1 a 3 veces mes<br><input checked="" type="radio"/> 1 vez semana<br><input type="radio"/> 2 a 4 veces semana<br><input type="radio"/> 5 a 6 veces semana<br><input type="radio"/> 1 vez al día<br><input type="radio"/> 2 a 3 veces al día<br><input type="radio"/> 5 a 6 veces al día<br><input type="radio"/> más 6 veces al día |
| pollo sin piel                       | <input type="radio"/> Nunca o menos 1 vez al mes<br><input type="radio"/> 1 a 3 veces mes<br><input checked="" type="radio"/> 1 vez semana<br><input type="radio"/> 2 a 4 veces semana<br><input type="radio"/> 5 a 6 veces semana<br><input type="radio"/> 1 vez al día<br><input type="radio"/> 2 a 3 veces al día<br><input type="radio"/> 5 a 6 veces al día<br><input type="radio"/> más 6 veces al día |
| Ternera o cerdo o cordero            | <input type="radio"/> Nunca o menos 1 vez al mes<br><input type="radio"/> 1 a 3 veces mes<br><input type="radio"/> 1 vez semana<br><input checked="" type="radio"/> 2 a 4 veces semana<br><input type="radio"/> 5 a 6 veces semana<br><input type="radio"/> 1 vez al día<br><input type="radio"/> 2 a 3 veces al día<br><input type="radio"/> 5 a 6 veces al día<br><input type="radio"/> más 6 veces al día |
| carne caza: Conejo o codorniz o pato | <input checked="" type="radio"/> Nunca o menos 1 vez al mes<br><input type="radio"/> 1 a 3 veces mes<br><input type="radio"/> 1 vez semana<br><input type="radio"/> 2 a 4 veces semana<br><input type="radio"/> 5 a 6 veces semana<br><input type="radio"/> 1 vez al día<br><input type="radio"/> 2 a 3 veces al día<br><input type="radio"/> 5 a 6 veces al día<br><input type="radio"/> más 6 veces al día |
| Hígado de ternera o cerdo o pollo    | <input type="radio"/> Nunca o menos 1 vez al mes<br><input checked="" type="radio"/> 1 a 3 veces mes<br><input type="radio"/> 1 vez semana<br><input type="radio"/> 2 a 4 veces semana<br><input type="radio"/> 5 a 6 veces semana<br><input type="radio"/> 1 vez al día<br><input type="radio"/> 2 a 3 veces al día<br><input type="radio"/> 5 a 6 veces al día<br><input type="radio"/> más 6 veces al día |

|                     |                                                                                                                                                                                                                                                                                                                                                                                                              |
|---------------------|--------------------------------------------------------------------------------------------------------------------------------------------------------------------------------------------------------------------------------------------------------------------------------------------------------------------------------------------------------------------------------------------------------------|
| Vísceras            | <input checked="" type="radio"/> Nunca o menos 1 vez al mes<br><input type="radio"/> 1 a 3 veces mes<br><input type="radio"/> 1 vez semana<br><input type="radio"/> 2 a 4 veces semana<br><input type="radio"/> 5 a 6 veces semana<br><input type="radio"/> 1 vez al día<br><input type="radio"/> 2 a 3 veces al día<br><input type="radio"/> 5 a 6 veces al día<br><input type="radio"/> más 6 veces al día |
| Embutido            | <input type="radio"/> Nunca o menos 1 vez al mes<br><input checked="" type="radio"/> 1 a 3 veces mes<br><input type="radio"/> 1 vez semana<br><input type="radio"/> 2 a 4 veces semana<br><input type="radio"/> 5 a 6 veces semana<br><input type="radio"/> 1 vez al día<br><input type="radio"/> 2 a 3 veces al día<br><input type="radio"/> 5 a 6 veces al día<br><input type="radio"/> más 6 veces al día |
| Salchicha o similar | <input checked="" type="radio"/> Nunca o menos 1 vez al mes<br><input type="radio"/> 1 a 3 veces mes<br><input type="radio"/> 1 vez semana<br><input type="radio"/> 2 a 4 veces semana<br><input type="radio"/> 5 a 6 veces semana<br><input type="radio"/> 1 vez al día<br><input type="radio"/> 2 a 3 veces al día<br><input type="radio"/> 5 a 6 veces al día<br><input type="radio"/> más 6 veces al día |
| Pate o foiegras     | <input checked="" type="radio"/> Nunca o menos 1 vez al mes<br><input type="radio"/> 1 a 3 veces mes<br><input type="radio"/> 1 vez semana<br><input type="radio"/> 2 a 4 veces semana<br><input type="radio"/> 5 a 6 veces semana<br><input type="radio"/> 1 vez al día<br><input type="radio"/> 2 a 3 veces al día<br><input type="radio"/> 5 a 6 veces al día<br><input type="radio"/> más 6 veces al día |
| Hamburguesa         | <input type="radio"/> Nunca o menos 1 vez al mes<br><input type="radio"/> 1 a 3 veces mes<br><input type="radio"/> 1 vez semana<br><input checked="" type="radio"/> 2 a 4 veces semana<br><input type="radio"/> 5 a 6 veces semana<br><input type="radio"/> 1 vez al día<br><input type="radio"/> 2 a 3 veces al día<br><input type="radio"/> 5 a 6 veces al día<br><input type="radio"/> más 6 veces al día |
| tocino o bacon      | <input type="radio"/> Nunca o menos 1 vez al mes<br><input type="radio"/> 1 a 3 veces mes<br><input checked="" type="radio"/> 1 vez semana<br><input type="radio"/> 2 a 4 veces semana<br><input type="radio"/> 5 a 6 veces semana<br><input type="radio"/> 1 vez al día<br><input type="radio"/> 2 a 3 veces al día<br><input type="radio"/> 5 a 6 veces al día<br><input type="radio"/> más 6 veces al día |

---

Pescado frito

- ☐ Nunca o menos 1 vez al mes  
☐ 1 a 3 veces mes  
☐ 1 vez semana  
☒ 2 a 4 veces semana  
☐ 5 a 6 veces semana  
☐ 1 vez al día  
☐ 2 a 3 veces al día  
☐ 5 a 6 veces al día  
☐ más 6 veces al día

---

pescado hervido blanco

- ☐ Nunca o menos 1 vez al mes  
☐ 1 a 3 veces mes  
☒ 1 vez semana  
☐ 2 a 4 veces semana  
☐ 5 a 6 veces semana  
☐ 1 vez al día  
☐ 2 a 3 veces al día  
☐ 5 a 6 veces al día  
☐ más 6 veces al día

---

pescado hervido azul

- ☐ Nunca o menos 1 vez al mes  
☐ 1 a 3 veces mes  
☒ 1 vez semana  
☐ 2 a 4 veces semana  
☐ 5 a 6 veces semana  
☐ 1 vez al día  
☐ 2 a 3 veces al día  
☐ 5 a 6 veces al día  
☐ más 6 veces al día

---

otros pescado azul

- ☒ Nunca o menos 1 vez al mes  
☐ 1 a 3 veces mes  
☐ 1 vez semana  
☐ 2 a 4 veces semana  
☐ 5 a 6 veces semana  
☐ 1 vez al día  
☐ 2 a 3 veces al día  
☐ 5 a 6 veces al día  
☐ más 6 veces al día

---

atun conserva

- ☐ Nunca o menos 1 vez al mes  
☐ 1 a 3 veces mes  
☒ 1 vez semana  
☐ 2 a 4 veces semana  
☐ 5 a 6 veces semana  
☐ 1 vez al día  
☐ 2 a 3 veces al día  
☐ 5 a 6 veces al día  
☐ más 6 veces al día

---

sardina conserva

- ☒ Nunca o menos 1 vez al mes  
☐ 1 a 3 veces mes  
☐ 1 vez semana  
☐ 2 a 4 veces semana  
☐ 5 a 6 veces semana  
☐ 1 vez al día  
☐ 2 a 3 veces al día  
☐ 5 a 6 veces al día  
☐ más 6 veces al día

|                                         |                                                                                                                                                                                                                                                                                                                                                                                                              |
|-----------------------------------------|--------------------------------------------------------------------------------------------------------------------------------------------------------------------------------------------------------------------------------------------------------------------------------------------------------------------------------------------------------------------------------------------------------------|
| pescado ahumado                         | <input checked="" type="radio"/> Nunca o menos 1 vez al mes<br><input type="radio"/> 1 a 3 veces mes<br><input type="radio"/> 1 vez semana<br><input type="radio"/> 2 a 4 veces semana<br><input type="radio"/> 5 a 6 veces semana<br><input type="radio"/> 1 vez al día<br><input type="radio"/> 2 a 3 veces al día<br><input type="radio"/> 5 a 6 veces al día<br><input type="radio"/> más 6 veces al día |
| almejas o mejillones o ostras unos 100g | <input checked="" type="radio"/> Nunca o menos 1 vez al mes<br><input type="radio"/> 1 a 3 veces mes<br><input type="radio"/> 1 vez semana<br><input type="radio"/> 2 a 4 veces semana<br><input type="radio"/> 5 a 6 veces semana<br><input type="radio"/> 1 vez al día<br><input type="radio"/> 2 a 3 veces al día<br><input type="radio"/> 5 a 6 veces al día<br><input type="radio"/> más 6 veces al día |
| calamar o chipiron o sepia unos 100g    | <input type="radio"/> Nunca o menos 1 vez al mes<br><input type="radio"/> 1 a 3 veces mes<br><input checked="" type="radio"/> 1 vez semana<br><input type="radio"/> 2 a 4 veces semana<br><input type="radio"/> 5 a 6 veces semana<br><input type="radio"/> 1 vez al día<br><input type="radio"/> 2 a 3 veces al día<br><input type="radio"/> 5 a 6 veces al día<br><input type="radio"/> más 6 veces al día |
| marisco unos 100g                       | <input type="radio"/> Nunca o menos 1 vez al mes<br><input checked="" type="radio"/> 1 a 3 veces mes<br><input type="radio"/> 1 vez semana<br><input type="radio"/> 2 a 4 veces semana<br><input type="radio"/> 5 a 6 veces semana<br><input type="radio"/> 1 vez al día<br><input type="radio"/> 2 a 3 veces al día<br><input type="radio"/> 5 a 6 veces al día<br><input type="radio"/> más 6 veces al día |
| Espinacas o acelgas cocinadas           | <input type="radio"/> Nunca o menos 1 vez al mes<br><input type="radio"/> 1 a 3 veces mes<br><input type="radio"/> 1 vez semana<br><input checked="" type="radio"/> 2 a 4 veces semana<br><input type="radio"/> 5 a 6 veces semana<br><input type="radio"/> 1 vez al día<br><input type="radio"/> 2 a 3 veces al día<br><input type="radio"/> 5 a 6 veces al día<br><input type="radio"/> más 6 veces al día |
| Col o coliflor o brocoli cocinado       | <input type="radio"/> Nunca o menos 1 vez al mes<br><input type="radio"/> 1 a 3 veces mes<br><input type="radio"/> 1 vez semana<br><input checked="" type="radio"/> 2 a 4 veces semana<br><input type="radio"/> 5 a 6 veces semana<br><input type="radio"/> 1 vez al día<br><input type="radio"/> 2 a 3 veces al día<br><input type="radio"/> 5 a 6 veces al día<br><input type="radio"/> más 6 veces al día |



---

Lechuga o endivia o escarola

- ☐ Nunca o menos 1 vez al mes  
☐ 1 a 3 veces mes  
☐ 1 vez semana  
☒ 2 a 4 veces semana  
☐ 5 a 6 veces semana  
☐ 1 vez al día  
☐ 2 a 3 veces al día  
☐ 5 a 6 veces al día  
☐ más 6 veces al día

---

tomate ensalada

- ☐ Nunca o menos 1 vez al mes  
☐ 1 a 3 veces mes  
☐ 1 vez semana  
☒ 2 a 4 veces semana  
☐ 5 a 6 veces semana  
☐ 1 vez al día  
☐ 2 a 3 veces al día  
☐ 5 a 6 veces al día  
☐ más 6 veces al día

---

cebolla

- ☐ Nunca o menos 1 vez al mes  
☐ 1 a 3 veces mes  
☐ 1 vez semana  
☒ 2 a 4 veces semana  
☐ 5 a 6 veces semana  
☐ 1 vez al día  
☐ 2 a 3 veces al día  
☐ 5 a 6 veces al día  
☐ más 6 veces al día

---

Zanahoria o calabaza

- ☐ Nunca o menos 1 vez al mes  
☐ 1 a 3 veces mes  
☒ 1 vez semana  
☐ 2 a 4 veces semana  
☐ 5 a 6 veces semana  
☐ 1 vez al día  
☐ 2 a 3 veces al día  
☐ 5 a 6 veces al día  
☐ más 6 veces al día

---

Judías verdes

- ☒ Nunca o menos 1 vez al mes  
☐ 1 a 3 veces mes  
☐ 1 vez semana  
☐ 2 a 4 veces semana  
☐ 5 a 6 veces semana  
☐ 1 vez al día  
☐ 2 a 3 veces al día  
☐ 5 a 6 veces al día  
☐ más 6 veces al día

---

Berenjena o calabacin o pepino

- ☐ Nunca o menos 1 vez al mes  
☐ 1 a 3 veces mes  
☒ 1 vez semana  
☐ 2 a 4 veces semana  
☐ 5 a 6 veces semana  
☐ 1 vez al día  
☐ 2 a 3 veces al día  
☐ 5 a 6 veces al día  
☐ más 6 veces al día

|                       |                                                                                                                                                                                                                                                                                                                                                                                                              |
|-----------------------|--------------------------------------------------------------------------------------------------------------------------------------------------------------------------------------------------------------------------------------------------------------------------------------------------------------------------------------------------------------------------------------------------------------|
| pimiento              | <input type="radio"/> Nunca o menos 1 vez al mes<br><input checked="" type="radio"/> 1 a 3 veces mes<br><input type="radio"/> 1 vez semana<br><input type="radio"/> 2 a 4 veces semana<br><input type="radio"/> 5 a 6 veces semana<br><input type="radio"/> 1 vez al día<br><input type="radio"/> 2 a 3 veces al día<br><input type="radio"/> 5 a 6 veces al día<br><input type="radio"/> más 6 veces al día |
| alcachofa             | <input type="radio"/> Nunca o menos 1 vez al mes<br><input type="radio"/> 1 a 3 veces mes<br><input checked="" type="radio"/> 1 vez semana<br><input type="radio"/> 2 a 4 veces semana<br><input type="radio"/> 5 a 6 veces semana<br><input type="radio"/> 1 vez al día<br><input type="radio"/> 2 a 3 veces al día<br><input type="radio"/> 5 a 6 veces al día<br><input type="radio"/> más 6 veces al día |
| espárragos            | <input checked="" type="radio"/> Nunca o menos 1 vez al mes<br><input type="radio"/> 1 a 3 veces mes<br><input type="radio"/> 1 vez semana<br><input type="radio"/> 2 a 4 veces semana<br><input type="radio"/> 5 a 6 veces semana<br><input type="radio"/> 1 vez al día<br><input type="radio"/> 2 a 3 veces al día<br><input type="radio"/> 5 a 6 veces al día<br><input type="radio"/> más 6 veces al día |
| maíz hervido          | <input checked="" type="radio"/> Nunca o menos 1 vez al mes<br><input type="radio"/> 1 a 3 veces mes<br><input type="radio"/> 1 vez semana<br><input type="radio"/> 2 a 4 veces semana<br><input type="radio"/> 5 a 6 veces semana<br><input type="radio"/> 1 vez al día<br><input type="radio"/> 2 a 3 veces al día<br><input type="radio"/> 5 a 6 veces al día<br><input type="radio"/> más 6 veces al día |
| legumbres             | <input type="radio"/> Nunca o menos 1 vez al mes<br><input type="radio"/> 1 a 3 veces mes<br><input type="radio"/> 1 vez semana<br><input checked="" type="radio"/> 2 a 4 veces semana<br><input type="radio"/> 5 a 6 veces semana<br><input type="radio"/> 1 vez al día<br><input type="radio"/> 2 a 3 veces al día<br><input type="radio"/> 5 a 6 veces al día<br><input type="radio"/> más 6 veces al día |
| naranjas o mandarinas | <input type="radio"/> Nunca o menos 1 vez al mes<br><input type="radio"/> 1 a 3 veces mes<br><input type="radio"/> 1 vez semana<br><input type="radio"/> 2 a 4 veces semana<br><input type="radio"/> 5 a 6 veces semana<br><input checked="" type="radio"/> 1 vez al día<br><input type="radio"/> 2 a 3 veces al día<br><input type="radio"/> 5 a 6 veces al día<br><input type="radio"/> más 6 veces al día |

|                       |                                                                                                                                                                                                                                                                                                                                                                                                              |
|-----------------------|--------------------------------------------------------------------------------------------------------------------------------------------------------------------------------------------------------------------------------------------------------------------------------------------------------------------------------------------------------------------------------------------------------------|
| zum natural fruta     | <input type="radio"/> Nunca o menos 1 vez al mes<br><input type="radio"/> 1 a 3 veces mes<br><input checked="" type="radio"/> 1 vez semana<br><input type="radio"/> 2 a 4 veces semana<br><input type="radio"/> 5 a 6 veces semana<br><input type="radio"/> 1 vez al día<br><input type="radio"/> 2 a 3 veces al día<br><input type="radio"/> 5 a 6 veces al día<br><input type="radio"/> más 6 veces al día |
| platano               | <input type="radio"/> Nunca o menos 1 vez al mes<br><input type="radio"/> 1 a 3 veces mes<br><input type="radio"/> 1 vez semana<br><input type="radio"/> 2 a 4 veces semana<br><input type="radio"/> 5 a 6 veces semana<br><input checked="" type="radio"/> 1 vez al día<br><input type="radio"/> 2 a 3 veces al día<br><input type="radio"/> 5 a 6 veces al día<br><input type="radio"/> más 6 veces al día |
| manzana o pera        | <input type="radio"/> Nunca o menos 1 vez al mes<br><input type="radio"/> 1 a 3 veces mes<br><input type="radio"/> 1 vez semana<br><input type="radio"/> 2 a 4 veces semana<br><input type="radio"/> 5 a 6 veces semana<br><input checked="" type="radio"/> 1 vez al día<br><input type="radio"/> 2 a 3 veces al día<br><input type="radio"/> 5 a 6 veces al día<br><input type="radio"/> más 6 veces al día |
| melocotón o nectarina | <input checked="" type="radio"/> Nunca o menos 1 vez al mes<br><input type="radio"/> 1 a 3 veces mes<br><input type="radio"/> 1 vez semana<br><input type="radio"/> 2 a 4 veces semana<br><input type="radio"/> 5 a 6 veces semana<br><input type="radio"/> 1 vez al día<br><input type="radio"/> 2 a 3 veces al día<br><input type="radio"/> 5 a 6 veces al día<br><input type="radio"/> más 6 veces al día |
| sandia o melon        | <input type="radio"/> Nunca o menos 1 vez al mes<br><input checked="" type="radio"/> 1 a 3 veces mes<br><input type="radio"/> 1 vez semana<br><input type="radio"/> 2 a 4 veces semana<br><input type="radio"/> 5 a 6 veces semana<br><input type="radio"/> 1 vez al día<br><input type="radio"/> 2 a 3 veces al día<br><input type="radio"/> 5 a 6 veces al día<br><input type="radio"/> más 6 veces al día |
| uva                   | <input type="radio"/> Nunca o menos 1 vez al mes<br><input checked="" type="radio"/> 1 a 3 veces mes<br><input type="radio"/> 1 vez semana<br><input type="radio"/> 2 a 4 veces semana<br><input type="radio"/> 5 a 6 veces semana<br><input type="radio"/> 1 vez al día<br><input type="radio"/> 2 a 3 veces al día<br><input type="radio"/> 5 a 6 veces al día<br><input type="radio"/> más 6 veces al día |

|                 |                                                                                                                                                                                                                                                                                                                                                                                                              |
|-----------------|--------------------------------------------------------------------------------------------------------------------------------------------------------------------------------------------------------------------------------------------------------------------------------------------------------------------------------------------------------------------------------------------------------------|
| bruna o ciruela | <input checked="" type="radio"/> Nunca o menos 1 vez al mes<br><input type="radio"/> 1 a 3 veces mes<br><input type="radio"/> 1 vez semana<br><input type="radio"/> 2 a 4 veces semana<br><input type="radio"/> 5 a 6 veces semana<br><input type="radio"/> 1 vez al día<br><input type="radio"/> 2 a 3 veces al día<br><input type="radio"/> 5 a 6 veces al día<br><input type="radio"/> más 6 veces al día |
| kiwi            | <input type="radio"/> Nunca o menos 1 vez al mes<br><input checked="" type="radio"/> 1 a 3 veces mes<br><input type="radio"/> 1 vez semana<br><input type="radio"/> 2 a 4 veces semana<br><input type="radio"/> 5 a 6 veces semana<br><input type="radio"/> 1 vez al día<br><input type="radio"/> 2 a 3 veces al día<br><input type="radio"/> 5 a 6 veces al día<br><input type="radio"/> más 6 veces al día |
| aceituna        | <input type="radio"/> Nunca o menos 1 vez al mes<br><input type="radio"/> 1 a 3 veces mes<br><input checked="" type="radio"/> 1 vez semana<br><input type="radio"/> 2 a 4 veces semana<br><input type="radio"/> 5 a 6 veces semana<br><input type="radio"/> 1 vez al día<br><input type="radio"/> 2 a 3 veces al día<br><input type="radio"/> 5 a 6 veces al día<br><input type="radio"/> más 6 veces al día |
| frutos secos    | <input type="radio"/> Nunca o menos 1 vez al mes<br><input type="radio"/> 1 a 3 veces mes<br><input type="radio"/> 1 vez semana<br><input type="radio"/> 2 a 4 veces semana<br><input type="radio"/> 5 a 6 veces semana<br><input checked="" type="radio"/> 1 vez al día<br><input type="radio"/> 2 a 3 veces al día<br><input type="radio"/> 5 a 6 veces al día<br><input type="radio"/> más 6 veces al día |
| pan blanco      | <input type="radio"/> Nunca o menos 1 vez al mes<br><input type="radio"/> 1 a 3 veces mes<br><input type="radio"/> 1 vez semana<br><input type="radio"/> 2 a 4 veces semana<br><input type="radio"/> 5 a 6 veces semana<br><input checked="" type="radio"/> 1 vez al día<br><input type="radio"/> 2 a 3 veces al día<br><input type="radio"/> 5 a 6 veces al día<br><input type="radio"/> más 6 veces al día |
| pan integral    | <input type="radio"/> Nunca o menos 1 vez al mes<br><input checked="" type="radio"/> 1 a 3 veces mes<br><input type="radio"/> 1 vez semana<br><input type="radio"/> 2 a 4 veces semana<br><input type="radio"/> 5 a 6 veces semana<br><input type="radio"/> 1 vez al día<br><input type="radio"/> 2 a 3 veces al día<br><input type="radio"/> 5 a 6 veces al día<br><input type="radio"/> más 6 veces al día |

---

cereales desayuno

- ☒ Nunca o menos 1 vez al mes  
☐ 1 a 3 veces mes  
☐ 1 vez semana  
☐ 2 a 4 veces semana  
☐ 5 a 6 veces semana  
☐ 1 vez al día  
☐ 2 a 3 veces al día  
☐ 5 a 6 veces al día  
☐ más 6 veces al día

---

patatas fritas

- ☐ Nunca o menos 1 vez al mes  
☒ 1 a 3 veces mes  
☐ 1 vez semana  
☐ 2 a 4 veces semana  
☐ 5 a 6 veces semana  
☐ 1 vez al día  
☐ 2 a 3 veces al día  
☐ 5 a 6 veces al día  
☐ más 6 veces al día

---

patatas cocidas o asadas

- ☐ Nunca o menos 1 vez al mes  
☐ 1 a 3 veces mes  
☐ 1 vez semana  
☒ 2 a 4 veces semana  
☐ 5 a 6 veces semana  
☐ 1 vez al día  
☐ 2 a 3 veces al día  
☐ 5 a 6 veces al día  
☐ más 6 veces al día

---

bolsa papas

- ☐ Nunca o menos 1 vez al mes  
☐ 1 a 3 veces mes  
☒ 1 vez semana  
☐ 2 a 4 veces semana  
☐ 5 a 6 veces semana  
☐ 1 vez al día  
☐ 2 a 3 veces al día  
☐ 5 a 6 veces al día  
☐ más 6 veces al día

---

arroz cocinado

- ☐ Nunca o menos 1 vez al mes  
☐ 1 a 3 veces mes  
☐ 1 vez semana  
☒ 2 a 4 veces semana  
☐ 5 a 6 veces semana  
☐ 1 vez al día  
☐ 2 a 3 veces al día  
☐ 5 a 6 veces al día  
☐ más 6 veces al día

---

pasta

- ☐ Nunca o menos 1 vez al mes  
☐ 1 a 3 veces mes  
☐ 1 vez semana  
☒ 2 a 4 veces semana  
☐ 5 a 6 veces semana  
☐ 1 vez al día  
☐ 2 a 3 veces al día  
☐ 5 a 6 veces al día  
☐ más 6 veces al día

|                     |                                                                                                                                                                                                                                                                                                                                                                                                              |
|---------------------|--------------------------------------------------------------------------------------------------------------------------------------------------------------------------------------------------------------------------------------------------------------------------------------------------------------------------------------------------------------------------------------------------------------|
| pizza               | <input type="radio"/> Nunca o menos 1 vez al mes<br><input type="radio"/> 1 a 3 veces mes<br><input checked="" type="radio"/> 1 vez semana<br><input type="radio"/> 2 a 4 veces semana<br><input type="radio"/> 5 a 6 veces semana<br><input type="radio"/> 1 vez al día<br><input type="radio"/> 2 a 3 veces al día<br><input type="radio"/> 5 a 6 veces al día<br><input type="radio"/> más 6 veces al día |
| aceite oliva        | <input type="radio"/> Nunca o menos 1 vez al mes<br><input type="radio"/> 1 a 3 veces mes<br><input type="radio"/> 1 vez semana<br><input checked="" type="radio"/> 2 a 4 veces semana<br><input type="radio"/> 5 a 6 veces semana<br><input type="radio"/> 1 vez al día<br><input type="radio"/> 2 a 3 veces al día<br><input type="radio"/> 5 a 6 veces al día<br><input type="radio"/> más 6 veces al día |
| otros aceites       | <input type="radio"/> Nunca o menos 1 vez al mes<br><input type="radio"/> 1 a 3 veces mes<br><input type="radio"/> 1 vez semana<br><input type="radio"/> 2 a 4 veces semana<br><input type="radio"/> 5 a 6 veces semana<br><input checked="" type="radio"/> 1 vez al día<br><input type="radio"/> 2 a 3 veces al día<br><input type="radio"/> 5 a 6 veces al día<br><input type="radio"/> más 6 veces al día |
| margarina           | <input checked="" type="radio"/> Nunca o menos 1 vez al mes<br><input type="radio"/> 1 a 3 veces mes<br><input type="radio"/> 1 vez semana<br><input type="radio"/> 2 a 4 veces semana<br><input type="radio"/> 5 a 6 veces semana<br><input type="radio"/> 1 vez al día<br><input type="radio"/> 2 a 3 veces al día<br><input type="radio"/> 5 a 6 veces al día<br><input type="radio"/> más 6 veces al día |
| mantequilla         | <input checked="" type="radio"/> Nunca o menos 1 vez al mes<br><input type="radio"/> 1 a 3 veces mes<br><input type="radio"/> 1 vez semana<br><input type="radio"/> 2 a 4 veces semana<br><input type="radio"/> 5 a 6 veces semana<br><input type="radio"/> 1 vez al día<br><input type="radio"/> 2 a 3 veces al día<br><input type="radio"/> 5 a 6 veces al día<br><input type="radio"/> más 6 veces al día |
| galletas tipo maria | <input type="radio"/> Nunca o menos 1 vez al mes<br><input type="radio"/> 1 a 3 veces mes<br><input type="radio"/> 1 vez semana<br><input checked="" type="radio"/> 2 a 4 veces semana<br><input type="radio"/> 5 a 6 veces semana<br><input type="radio"/> 1 vez al día<br><input type="radio"/> 2 a 3 veces al día<br><input type="radio"/> 5 a 6 veces al día<br><input type="radio"/> más 6 veces al día |

|                           |                                                                                                                                                                                                                                                                                                                                                                                                              |
|---------------------------|--------------------------------------------------------------------------------------------------------------------------------------------------------------------------------------------------------------------------------------------------------------------------------------------------------------------------------------------------------------------------------------------------------------|
| galletas chocolate        | <input type="radio"/> Nunca o menos 1 vez al mes<br><input type="radio"/> 1 a 3 veces mes<br><input type="radio"/> 1 vez semana<br><input checked="" type="radio"/> 2 a 4 veces semana<br><input type="radio"/> 5 a 6 veces semana<br><input type="radio"/> 1 vez al día<br><input type="radio"/> 2 a 3 veces al día<br><input type="radio"/> 5 a 6 veces al día<br><input type="radio"/> más 6 veces al día |
| bollieria                 | <input type="radio"/> Nunca o menos 1 vez al mes<br><input type="radio"/> 1 a 3 veces mes<br><input type="radio"/> 1 vez semana<br><input type="radio"/> 2 a 4 veces semana<br><input type="radio"/> 5 a 6 veces semana<br><input type="radio"/> 1 vez al día<br><input checked="" type="radio"/> 2 a 3 veces al día<br><input type="radio"/> 5 a 6 veces al día<br><input type="radio"/> más 6 veces al día |
| chocolate o bombones      | <input type="radio"/> Nunca o menos 1 vez al mes<br><input type="radio"/> 1 a 3 veces mes<br><input type="radio"/> 1 vez semana<br><input type="radio"/> 2 a 4 veces semana<br><input type="radio"/> 5 a 6 veces semana<br><input checked="" type="radio"/> 1 vez al día<br><input type="radio"/> 2 a 3 veces al día<br><input type="radio"/> 5 a 6 veces al día<br><input type="radio"/> más 6 veces al día |
| chocolate polvo o colacao | <input type="radio"/> Nunca o menos 1 vez al mes<br><input type="radio"/> 1 a 3 veces mes<br><input type="radio"/> 1 vez semana<br><input type="radio"/> 2 a 4 veces semana<br><input type="radio"/> 5 a 6 veces semana<br><input checked="" type="radio"/> 1 vez al día<br><input type="radio"/> 2 a 3 veces al día<br><input type="radio"/> 5 a 6 veces al día<br><input type="radio"/> más 6 veces al día |
| vino tinto                | <input checked="" type="radio"/> Nunca o menos 1 vez al mes<br><input type="radio"/> 1 a 3 veces mes<br><input type="radio"/> 1 vez semana<br><input type="radio"/> 2 a 4 veces semana<br><input type="radio"/> 5 a 6 veces semana<br><input type="radio"/> 1 vez al día<br><input type="radio"/> 2 a 3 veces al día<br><input type="radio"/> 5 a 6 veces al día<br><input type="radio"/> más 6 veces al día |
| vino blanco               | <input checked="" type="radio"/> Nunca o menos 1 vez al mes<br><input type="radio"/> 1 a 3 veces mes<br><input type="radio"/> 1 vez semana<br><input type="radio"/> 2 a 4 veces semana<br><input type="radio"/> 5 a 6 veces semana<br><input type="radio"/> 1 vez al día<br><input type="radio"/> 2 a 3 veces al día<br><input type="radio"/> 5 a 6 veces al día<br><input type="radio"/> más 6 veces al día |

|                       |                                                                                                                                                                                                                                                                                                                                                                                                              |
|-----------------------|--------------------------------------------------------------------------------------------------------------------------------------------------------------------------------------------------------------------------------------------------------------------------------------------------------------------------------------------------------------------------------------------------------------|
| vino seco o vermut    | <input checked="" type="radio"/> Nunca o menos 1 vez al mes<br><input type="radio"/> 1 a 3 veces mes<br><input type="radio"/> 1 vez semana<br><input type="radio"/> 2 a 4 veces semana<br><input type="radio"/> 5 a 6 veces semana<br><input type="radio"/> 1 vez al día<br><input type="radio"/> 2 a 3 veces al día<br><input type="radio"/> 5 a 6 veces al día<br><input type="radio"/> más 6 veces al día |
| cerveza               | <input checked="" type="radio"/> Nunca o menos 1 vez al mes<br><input type="radio"/> 1 a 3 veces mes<br><input type="radio"/> 1 vez semana<br><input type="radio"/> 2 a 4 veces semana<br><input type="radio"/> 5 a 6 veces semana<br><input type="radio"/> 1 vez al día<br><input type="radio"/> 2 a 3 veces al día<br><input type="radio"/> 5 a 6 veces al día<br><input type="radio"/> más 6 veces al día |
| cerveza sin alcohol   | <input checked="" type="radio"/> Nunca o menos 1 vez al mes<br><input type="radio"/> 1 a 3 veces mes<br><input type="radio"/> 1 vez semana<br><input type="radio"/> 2 a 4 veces semana<br><input type="radio"/> 5 a 6 veces semana<br><input type="radio"/> 1 vez al día<br><input type="radio"/> 2 a 3 veces al día<br><input type="radio"/> 5 a 6 veces al día<br><input type="radio"/> más 6 veces al día |
| licores               | <input checked="" type="radio"/> Nunca o menos 1 vez al mes<br><input type="radio"/> 1 a 3 veces mes<br><input type="radio"/> 1 vez semana<br><input type="radio"/> 2 a 4 veces semana<br><input type="radio"/> 5 a 6 veces semana<br><input type="radio"/> 1 vez al día<br><input type="radio"/> 2 a 3 veces al día<br><input type="radio"/> 5 a 6 veces al día<br><input type="radio"/> más 6 veces al día |
| ginebra o ron o vodka | <input checked="" type="radio"/> Nunca o menos 1 vez al mes<br><input type="radio"/> 1 a 3 veces mes<br><input type="radio"/> 1 vez semana<br><input type="radio"/> 2 a 4 veces semana<br><input type="radio"/> 5 a 6 veces semana<br><input type="radio"/> 1 vez al día<br><input type="radio"/> 2 a 3 veces al día<br><input type="radio"/> 5 a 6 veces al día<br><input type="radio"/> más 6 veces al día |
| refresco normal       | <input type="radio"/> Nunca o menos 1 vez al mes<br><input type="radio"/> 1 a 3 veces mes<br><input type="radio"/> 1 vez semana<br><input checked="" type="radio"/> 2 a 4 veces semana<br><input type="radio"/> 5 a 6 veces semana<br><input type="radio"/> 1 vez al día<br><input type="radio"/> 2 a 3 veces al día<br><input type="radio"/> 5 a 6 veces al día<br><input type="radio"/> más 6 veces al día |



|                          |                                                                                                                                                                                                                                                                                                                                                                                                              |
|--------------------------|--------------------------------------------------------------------------------------------------------------------------------------------------------------------------------------------------------------------------------------------------------------------------------------------------------------------------------------------------------------------------------------------------------------|
| refresco sin azúcar      | <input type="radio"/> Nunca o menos 1 vez al mes<br><input type="radio"/> 1 a 3 veces mes<br><input type="radio"/> 1 vez semana<br><input type="radio"/> 2 a 4 veces semana<br><input checked="" type="radio"/> 5 a 6 veces semana<br><input type="radio"/> 1 vez al día<br><input type="radio"/> 2 a 3 veces al día<br><input type="radio"/> 5 a 6 veces al día<br><input type="radio"/> más 6 veces al día |
| Agua del grifo           | <input type="radio"/> Nunca o menos 1 vez al mes<br><input type="radio"/> 1 a 3 veces mes<br><input type="radio"/> 1 vez semana<br><input type="radio"/> 2 a 4 veces semana<br><input type="radio"/> 5 a 6 veces semana<br><input type="radio"/> 1 vez al día<br><input type="radio"/> 2 a 3 veces al día<br><input checked="" type="radio"/> 5 a 6 veces al día<br><input type="radio"/> más 6 veces al día |
| agua embotellada sin gas | <input type="radio"/> Nunca o menos 1 vez al mes<br><input type="radio"/> 1 a 3 veces mes<br><input checked="" type="radio"/> 1 vez semana<br><input type="radio"/> 2 a 4 veces semana<br><input type="radio"/> 5 a 6 veces semana<br><input type="radio"/> 1 vez al día<br><input type="radio"/> 2 a 3 veces al día<br><input type="radio"/> 5 a 6 veces al día<br><input type="radio"/> más 6 veces al día |
| agua embotellada con gas | <input checked="" type="radio"/> Nunca o menos 1 vez al mes<br><input type="radio"/> 1 a 3 veces mes<br><input type="radio"/> 1 vez semana<br><input type="radio"/> 2 a 4 veces semana<br><input type="radio"/> 5 a 6 veces semana<br><input type="radio"/> 1 vez al día<br><input type="radio"/> 2 a 3 veces al día<br><input type="radio"/> 5 a 6 veces al día<br><input type="radio"/> más 6 veces al día |
| zumos frutas emvasado    | <input checked="" type="radio"/> Nunca o menos 1 vez al mes<br><input type="radio"/> 1 a 3 veces mes<br><input type="radio"/> 1 vez semana<br><input type="radio"/> 2 a 4 veces semana<br><input type="radio"/> 5 a 6 veces semana<br><input type="radio"/> 1 vez al día<br><input type="radio"/> 2 a 3 veces al día<br><input type="radio"/> 5 a 6 veces al día<br><input type="radio"/> más 6 veces al día |
| café                     | <input checked="" type="radio"/> Nunca o menos 1 vez al mes<br><input type="radio"/> 1 a 3 veces mes<br><input type="radio"/> 1 vez semana<br><input type="radio"/> 2 a 4 veces semana<br><input type="radio"/> 5 a 6 veces semana<br><input type="radio"/> 1 vez al día<br><input type="radio"/> 2 a 3 veces al día<br><input type="radio"/> 5 a 6 veces al día<br><input type="radio"/> más 6 veces al día |

|                       |                                                                                                                                                                                                                                                                                                                                                                                                              |
|-----------------------|--------------------------------------------------------------------------------------------------------------------------------------------------------------------------------------------------------------------------------------------------------------------------------------------------------------------------------------------------------------------------------------------------------------|
| cafe descafeinado     | <input type="radio"/> Nunca o menos 1 vez al mes<br><input checked="" type="radio"/> 1 a 3 veces mes<br><input type="radio"/> 1 vez semana<br><input type="radio"/> 2 a 4 veces semana<br><input type="radio"/> 5 a 6 veces semana<br><input type="radio"/> 1 vez al día<br><input type="radio"/> 2 a 3 veces al día<br><input type="radio"/> 5 a 6 veces al día<br><input type="radio"/> más 6 veces al día |
| te o infusión         | <input type="radio"/> Nunca o menos 1 vez al mes<br><input checked="" type="radio"/> 1 a 3 veces mes<br><input type="radio"/> 1 vez semana<br><input type="radio"/> 2 a 4 veces semana<br><input type="radio"/> 5 a 6 veces semana<br><input type="radio"/> 1 vez al día<br><input type="radio"/> 2 a 3 veces al día<br><input type="radio"/> 5 a 6 veces al día<br><input type="radio"/> más 6 veces al día |
| sopa o puré verduras  | <input type="radio"/> Nunca o menos 1 vez al mes<br><input type="radio"/> 1 a 3 veces mes<br><input type="radio"/> 1 vez semana<br><input checked="" type="radio"/> 2 a 4 veces semana<br><input type="radio"/> 5 a 6 veces semana<br><input type="radio"/> 1 vez al día<br><input type="radio"/> 2 a 3 veces al día<br><input type="radio"/> 5 a 6 veces al día<br><input type="radio"/> más 6 veces al día |
| croquetas pollo jamón | <input type="radio"/> Nunca o menos 1 vez al mes<br><input type="radio"/> 1 a 3 veces mes<br><input checked="" type="radio"/> 1 vez semana<br><input type="radio"/> 2 a 4 veces semana<br><input type="radio"/> 5 a 6 veces semana<br><input type="radio"/> 1 vez al día<br><input type="radio"/> 2 a 3 veces al día<br><input type="radio"/> 5 a 6 veces al día<br><input type="radio"/> más 6 veces al día |
| croquetas pescado     | <input type="radio"/> Nunca o menos 1 vez al mes<br><input type="radio"/> 1 a 3 veces mes<br><input checked="" type="radio"/> 1 vez semana<br><input type="radio"/> 2 a 4 veces semana<br><input type="radio"/> 5 a 6 veces semana<br><input type="radio"/> 1 vez al día<br><input type="radio"/> 2 a 3 veces al día<br><input type="radio"/> 5 a 6 veces al día<br><input type="radio"/> más 6 veces al día |
| mayonesa              | <input type="radio"/> Nunca o menos 1 vez al mes<br><input checked="" type="radio"/> 1 a 3 veces mes<br><input type="radio"/> 1 vez semana<br><input type="radio"/> 2 a 4 veces semana<br><input type="radio"/> 5 a 6 veces semana<br><input type="radio"/> 1 vez al día<br><input type="radio"/> 2 a 3 veces al día<br><input type="radio"/> 5 a 6 veces al día<br><input type="radio"/> más 6 veces al día |

|                  |                                                                                                                                                                                                                                                                                                                                                                                                              |
|------------------|--------------------------------------------------------------------------------------------------------------------------------------------------------------------------------------------------------------------------------------------------------------------------------------------------------------------------------------------------------------------------------------------------------------|
| salsa tomate     | <input type="radio"/> Nunca o menos 1 vez al mes<br><input type="radio"/> 1 a 3 veces mes<br><input type="radio"/> 1 vez semana<br><input checked="" type="radio"/> 2 a 4 veces semana<br><input type="radio"/> 5 a 6 veces semana<br><input type="radio"/> 1 vez al día<br><input type="radio"/> 2 a 3 veces al día<br><input type="radio"/> 5 a 6 veces al día<br><input type="radio"/> más 6 veces al día |
| ketchup          | <input type="radio"/> Nunca o menos 1 vez al mes<br><input type="radio"/> 1 a 3 veces mes<br><input checked="" type="radio"/> 1 vez semana<br><input type="radio"/> 2 a 4 veces semana<br><input type="radio"/> 5 a 6 veces semana<br><input type="radio"/> 1 vez al día<br><input type="radio"/> 2 a 3 veces al día<br><input type="radio"/> 5 a 6 veces al día<br><input type="radio"/> más 6 veces al día |
| sal              | <input type="radio"/> Nunca o menos 1 vez al mes<br><input type="radio"/> 1 a 3 veces mes<br><input checked="" type="radio"/> 1 vez semana<br><input type="radio"/> 2 a 4 veces semana<br><input type="radio"/> 5 a 6 veces semana<br><input type="radio"/> 1 vez al día<br><input type="radio"/> 2 a 3 veces al día<br><input type="radio"/> 5 a 6 veces al día<br><input type="radio"/> más 6 veces al día |
| ajo              | <input type="radio"/> Nunca o menos 1 vez al mes<br><input type="radio"/> 1 a 3 veces mes<br><input type="radio"/> 1 vez semana<br><input checked="" type="radio"/> 2 a 4 veces semana<br><input type="radio"/> 5 a 6 veces semana<br><input type="radio"/> 1 vez al día<br><input type="radio"/> 2 a 3 veces al día<br><input type="radio"/> 5 a 6 veces al día<br><input type="radio"/> más 6 veces al día |
| mermelada o miel | <input type="radio"/> Nunca o menos 1 vez al mes<br><input checked="" type="radio"/> 1 a 3 veces mes<br><input type="radio"/> 1 vez semana<br><input type="radio"/> 2 a 4 veces semana<br><input type="radio"/> 5 a 6 veces semana<br><input type="radio"/> 1 vez al día<br><input type="radio"/> 2 a 3 veces al día<br><input type="radio"/> 5 a 6 veces al día<br><input type="radio"/> más 6 veces al día |
| azúcar           | <input type="radio"/> Nunca o menos 1 vez al mes<br><input type="radio"/> 1 a 3 veces mes<br><input type="radio"/> 1 vez semana<br><input type="radio"/> 2 a 4 veces semana<br><input type="radio"/> 5 a 6 veces semana<br><input checked="" type="radio"/> 1 vez al día<br><input type="radio"/> 2 a 3 veces al día<br><input type="radio"/> 5 a 6 veces al día<br><input type="radio"/> más 6 veces al día |

|                                       |                                                                                                                                                                                                                                                                                                                                                                                                                                                                                                                               |
|---------------------------------------|-------------------------------------------------------------------------------------------------------------------------------------------------------------------------------------------------------------------------------------------------------------------------------------------------------------------------------------------------------------------------------------------------------------------------------------------------------------------------------------------------------------------------------|
| Otro alimento                         | <hr/>                                                                                                                                                                                                                                                                                                                                                                                                                                                                                                                         |
| suplementos vitamínicos               | <input checked="" type="radio"/> si<br><input type="radio"/> no                                                                                                                                                                                                                                                                                                                                                                                                                                                               |
| suplementos vitamínicos               | <hr/>                                                                                                                                                                                                                                                                                                                                                                                                                                                                                                                         |
| dieta previa                          | <input type="radio"/> si<br><input checked="" type="radio"/> no                                                                                                                                                                                                                                                                                                                                                                                                                                                               |
| motivo dieta                          | <input checked="" type="radio"/> no dieta<br><input type="radio"/> control peso<br><input type="radio"/> control colesterol<br><input type="radio"/> control diabetes<br><input type="radio"/> problemas estómago<br><input type="radio"/> problemas vesícula o hepáticos<br><input type="radio"/> HTA o cardiopatía<br><input type="radio"/> problemas renales<br><input type="radio"/> alergia alimentaria<br><input type="radio"/> ácido úrico elevado<br><input type="radio"/> vegetariana<br><input type="radio"/> otros |
| cambio alimentos año previo gestación | <input checked="" type="radio"/> si<br><input type="radio"/> no                                                                                                                                                                                                                                                                                                                                                                                                                                                               |
| cambio lácteos                        | <input type="radio"/> eliminado<br><input checked="" type="radio"/> disminuido<br><input type="radio"/> igual<br><input type="radio"/> aumentado<br><input type="radio"/> no sabe                                                                                                                                                                                                                                                                                                                                             |
| cambio huevos                         | <input type="radio"/> eliminado<br><input type="radio"/> disminuido<br><input checked="" type="radio"/> igual<br><input type="radio"/> aumentado<br><input type="radio"/> no sabe                                                                                                                                                                                                                                                                                                                                             |
| cambio carne                          | <input type="radio"/> eliminado<br><input type="radio"/> disminuido<br><input checked="" type="radio"/> igual<br><input type="radio"/> aumentado<br><input type="radio"/> no sabe                                                                                                                                                                                                                                                                                                                                             |
| cambio pescado                        | <input type="radio"/> eliminado<br><input type="radio"/> disminuido<br><input checked="" type="radio"/> igual<br><input type="radio"/> aumentado<br><input type="radio"/> no sabe                                                                                                                                                                                                                                                                                                                                             |
| cambio verduras                       | <input type="radio"/> eliminado<br><input type="radio"/> disminuido<br><input type="radio"/> igual<br><input checked="" type="radio"/> aumentado<br><input type="radio"/> no sabe                                                                                                                                                                                                                                                                                                                                             |

|                            |                                                                                                                                                                                                                        |
|----------------------------|------------------------------------------------------------------------------------------------------------------------------------------------------------------------------------------------------------------------|
| cambio legumbres           | <input type="radio"/> eliminado<br><input type="radio"/> disminuido<br><input checked="" type="radio"/> igual<br><input type="radio"/> aumentado<br><input type="radio"/> no sabe                                      |
| cambio fruta               | <input type="radio"/> eliminado<br><input type="radio"/> disminuido<br><input type="radio"/> igual<br><input checked="" type="radio"/> aumentado<br><input type="radio"/> no sabe                                      |
| cambio pan                 | <input type="radio"/> eliminado<br><input type="radio"/> disminuido<br><input checked="" type="radio"/> igual<br><input type="radio"/> aumentado<br><input type="radio"/> no sabe                                      |
| cambio aceite oliva        | <input type="radio"/> eliminado<br><input type="radio"/> disminuido<br><input checked="" type="radio"/> igual<br><input type="radio"/> aumentado<br><input type="radio"/> no sabe                                      |
| cambio mante o margarina   | <input checked="" type="radio"/> eliminado<br><input type="radio"/> disminuido<br><input type="radio"/> igual<br><input type="radio"/> aumentado<br><input type="radio"/> no sabe                                      |
| cambio azúcar y dulces     | <input type="radio"/> eliminado<br><input type="radio"/> disminuido<br><input checked="" type="radio"/> igual<br><input type="radio"/> aumentado<br><input type="radio"/> no sabe                                      |
| cambio bebidas alcohólicas | <input checked="" type="radio"/> eliminado<br><input type="radio"/> disminuido<br><input type="radio"/> igual<br><input type="radio"/> aumentado<br><input type="radio"/> no sabe                                      |
| frecuencia comidas fritas  | <input type="radio"/> a diario<br><input type="radio"/> 5 a 6 veces semana<br><input type="radio"/> 2 a 4 veces semana<br><input checked="" type="radio"/> 1 vez semana<br><input type="radio"/> menos de 1 vez semana |
| carne                      | <input type="radio"/> no como<br><input type="radio"/> cruda<br><input type="radio"/> poco hecha<br><input type="radio"/> hecha<br><input checked="" type="radio"/> muy hecha                                          |
| grasa visible carne        | <input checked="" type="radio"/> quita toda<br><input type="radio"/> quita mayoría<br><input type="radio"/> quita un poco<br><input type="radio"/> no quita nada                                                       |

|                                |                                                                                                                                                                                                                                                          |
|--------------------------------|----------------------------------------------------------------------------------------------------------------------------------------------------------------------------------------------------------------------------------------------------------|
| cocina carne                   | <input checked="" type="radio"/> a la plancha<br><input type="radio"/> a la parrilla<br><input type="radio"/> asada<br><input type="radio"/> frita<br><input type="radio"/> guisada                                                                      |
| tostado quemado carne          | <input type="radio"/> nunca<br><input type="radio"/> 1 vez mes<br><input type="radio"/> 2 a 3 veces mes<br><input type="radio"/> 1 vez semana<br><input checked="" type="radio"/> 2 a 3 semanas                                                          |
| tostado quemado pescado        | <input type="radio"/> nunca<br><input type="radio"/> 1 vez mes<br><input type="radio"/> 2 a 3 veces mes<br><input type="radio"/> 1 vez semana<br><input checked="" type="radio"/> 2 a 3 semanas                                                          |
| socarrat paella                | <input type="radio"/> nunca<br><input type="radio"/> 1 vez mes<br><input type="radio"/> 2 a 3 veces mes<br><input checked="" type="radio"/> 1 vez semana<br><input type="radio"/> 2 a 3 semanas                                                          |
| grasa o aceite cocinar         | <input type="radio"/> mantequilla<br><input type="radio"/> margarina<br><input type="radio"/> aceite oliva<br><input checked="" type="radio"/> aceite oliva virgen extra<br><input type="radio"/> aceite vegetal<br><input type="radio"/> mezcla aceites |
| grasa aceite aliñar            | <input type="radio"/> mantequilla<br><input type="radio"/> margarina<br><input checked="" type="radio"/> aceite oliva<br><input type="radio"/> aceite oliva virgen extra<br><input type="radio"/> aceite vegetal<br><input type="radio"/> mezcla aceites |
| grasa aceite freir             | <input type="radio"/> mantequilla<br><input type="radio"/> margarina<br><input type="radio"/> aceite oliva<br><input type="radio"/> aceite oliva virgen extra<br><input checked="" type="radio"/> aceite vegetal<br><input type="radio"/> mezcla aceites |
| Ejercicio cuestionario         | <input checked="" type="radio"/> si<br><input type="radio"/> no                                                                                                                                                                                          |
| horas de sueño incluido siesta | [*DATA REMOVED*]                                                                                                                                                                                                                                         |
| minutos siesta                 | [*DATA REMOVED*]                                                                                                                                                                                                                                         |
| horas televisión semana        |                                                                                                                                                                                                                                                          |

|                                        |                                                                                                                                                                                                                                                                                                                                                                |
|----------------------------------------|----------------------------------------------------------------------------------------------------------------------------------------------------------------------------------------------------------------------------------------------------------------------------------------------------------------------------------------------------------------|
| actividad trabajo                      | <input type="radio"/> casi siempre sentado<br><input type="radio"/> sentado 50 por cien<br><input type="radio"/> casi siempre de pie, quieto<br><input type="radio"/> casi siempre levantado caminando y llevando pocas cosas<br><input type="radio"/> casi siempre levantado, caminando y llevado muchas cosas<br><input type="radio"/> trabajo manual pesado |
| tiempo caminar o bici al día           | <input type="radio"/> casi nunca<br><input type="radio"/> menos 20min día<br><input type="radio"/> 20 a 40 min día<br><input checked="" type="radio"/> 40 a 60 min día<br><input type="radio"/> 1h o 1h y media día<br><input type="radio"/> más de 1h y media al día                                                                                          |
| tiempo tareas casa al día              | <input type="radio"/> menos de 1h día<br><input type="radio"/> 1 a 2h día<br><input checked="" type="radio"/> 3 a 4h día<br><input type="radio"/> 5 a 6h día<br><input type="radio"/> 7 a 8h día<br><input type="radio"/> más de 8h día                                                                                                                        |
| tiempo libre televisión ordenador leer | <input type="radio"/> menos 1h día<br><input type="radio"/> 1h día<br><input type="radio"/> 2h día<br><input type="radio"/> 3h día<br><input type="radio"/> 4h día<br><input checked="" type="radio"/> 5 a 6h día<br><input type="radio"/> mas 6h día                                                                                                          |
| tiempo libre ejercicio o deporte       | <input type="radio"/> menos 1h semana<br><input type="radio"/> 1h semana<br><input type="radio"/> 2h semana<br><input type="radio"/> 3h semana<br><input checked="" type="radio"/> 4 a 5h semana<br><input type="radio"/> mas 5h semana                                                                                                                        |
| como se considera                      | <input type="radio"/> sedentaria<br><input type="radio"/> poco activa<br><input checked="" type="radio"/> moderadamente activa<br><input type="radio"/> bastante activa<br><input type="radio"/> muy activa<br><input type="radio"/> no sabe                                                                                                                   |
| FUR                                    | [*DATA REMOVED*]                                                                                                                                                                                                                                                                                                                                               |
| Semanas gestación 2T                   | [*DATA REMOVED*]                                                                                                                                                                                                                                                                                                                                               |
| Días gestación 2T                      | [*DATA REMOVED*]                                                                                                                                                                                                                                                                                                                                               |
| DBP 2T                                 | [*DATA REMOVED*]                                                                                                                                                                                                                                                                                                                                               |
| CC 2T                                  | [*DATA REMOVED*]                                                                                                                                                                                                                                                                                                                                               |
| AC 2T                                  | [*DATA REMOVED*]                                                                                                                                                                                                                                                                                                                                               |

|                                                   |                                                                                                                                                                                                 |
|---------------------------------------------------|-------------------------------------------------------------------------------------------------------------------------------------------------------------------------------------------------|
| LF 2T                                             | [*DATA REMOVED*]                                                                                                                                                                                |
| PFE 2T (Hadlock)                                  | [*DATA REMOVED*]                                                                                                                                                                                |
| Semanas gestación 3T                              | [*DATA REMOVED*]                                                                                                                                                                                |
| días 3T                                           | [*DATA REMOVED*]                                                                                                                                                                                |
| DBP 3T                                            | [*DATA REMOVED*]                                                                                                                                                                                |
| CC 3T                                             | [*DATA REMOVED*]                                                                                                                                                                                |
| AC 3T                                             | [*DATA REMOVED*]                                                                                                                                                                                |
| LF 3T                                             | [*DATA REMOVED*]                                                                                                                                                                                |
| PFE 3T (Hadlock)                                  | [*DATA REMOVED*]                                                                                                                                                                                |
| Semanas de gestación final                        | [*DATA REMOVED*]                                                                                                                                                                                |
| días gestación final                              | [*DATA REMOVED*]                                                                                                                                                                                |
| Localización placenta                             | <input checked="" type="radio"/> anterior<br><input type="radio"/> lateral derecha<br><input type="radio"/> lateral izquierda<br><input type="radio"/> posterior<br><input type="radio"/> fondo |
| Presentación longitudinal cefálica                | <input type="radio"/> no<br><input checked="" type="radio"/> si                                                                                                                                 |
| Dorso                                             | <input checked="" type="radio"/> izquierda anterior<br><input type="radio"/> izquierda posterior<br><input type="radio"/> derecha anterior<br><input type="radio"/> derecha posterior           |
| diámetro biparietal                               | [*DATA REMOVED*]                                                                                                                                                                                |
| Circunferencia craneal                            | [*DATA REMOVED*]                                                                                                                                                                                |
| Circunferencia abdominal                          | [*DATA REMOVED*]                                                                                                                                                                                |
| Longitud de femur                                 | [*DATA REMOVED*]                                                                                                                                                                                |
| tejido celular subcutáneo a nivel del muslo en mm | [*DATA REMOVED*]                                                                                                                                                                                |
| tejido celular subcutáneo en abdomen en mm        | [*DATA REMOVED*]                                                                                                                                                                                |
| Volumen del muslo en cm3                          | [*DATA REMOVED*]                                                                                                                                                                                |
| Peso fetal estimado según fórmula de Hadlock      | [*DATA REMOVED*]                                                                                                                                                                                |



|                                               |                                                                                                                                                          |
|-----------------------------------------------|----------------------------------------------------------------------------------------------------------------------------------------------------------|
| Percentil                                     | [*DATA REMOVED*]                                                                                                                                         |
| Peso fetal estimado según fórmula de Scioscia | <hr/>                                                                                                                                                    |
| Peso fetal estimado según fórmula de LEE      | <hr/>                                                                                                                                                    |
| Tipo de parto                                 | <input checked="" type="radio"/> eutocico<br><input type="radio"/> instrumentado/ventosa<br><input type="radio"/> cesarea                                |
| fecha de nacimiento                           | [*DATA REMOVED*]                                                                                                                                         |
| Días entre exploración y nacimiento           | [*DATA REMOVED*]                                                                                                                                         |
| Peso RN en g                                  | [*DATA REMOVED*]                                                                                                                                         |
| sexo                                          | <input checked="" type="radio"/> mujer<br><input type="radio"/> hombre                                                                                   |
| Apgar 1 minuto                                | [*DATA REMOVED*]                                                                                                                                         |
| Apgar 5 minutos                               | [*DATA REMOVED*]                                                                                                                                         |
| Apgar 10 minutos                              | <hr/>                                                                                                                                                    |
| antecedente Covid durante gestación           | <input checked="" type="radio"/> Yes<br><input type="radio"/> No                                                                                         |
| Nivel de estudios                             | <input type="radio"/> ninguno<br><input type="radio"/> primarios<br><input checked="" type="radio"/> secundarios<br><input type="radio"/> universitarios |

# Base\_datos\_estimacion\_peso\_fetal

|                                       |                                                                                                                                                                                                                                                                                      |
|---------------------------------------|--------------------------------------------------------------------------------------------------------------------------------------------------------------------------------------------------------------------------------------------------------------------------------------|
| Número de identificación participante | 30                                                                                                                                                                                                                                                                                   |
| CODIGO PARTICIPANTE                   |                                                                                                                                                                                                                                                                                      |
| Edad                                  | [*DATA REMOVED*]                                                                                                                                                                                                                                                                     |
| Gestaciones                           | <input type="radio"/> 1<br><input checked="" type="radio"/> 2<br><input type="radio"/> 3<br><input type="radio"/> mas de 3                                                                                                                                                           |
| partos                                | <input type="radio"/> 0<br><input checked="" type="radio"/> 1<br><input type="radio"/> 2<br><input type="radio"/> 3<br><input type="radio"/> mas de 3                                                                                                                                |
| cesáreas                              | <input checked="" type="radio"/> 0<br><input type="radio"/> 1<br><input type="radio"/> 2<br><input type="radio"/> 3<br><input type="radio"/> mas de 3                                                                                                                                |
| Abortos                               | <input checked="" type="radio"/> 0<br><input type="radio"/> 1<br><input type="radio"/> 2<br><input type="radio"/> 3<br><input type="radio"/> mas de 3                                                                                                                                |
| Tipo de gestacion                     | <input checked="" type="radio"/> espontanea<br><input type="radio"/> IAC inseminación artificial conyuge<br><input type="radio"/> IAD inseminación artificial donante<br><input type="radio"/> FIV Fecundación in Vitro<br><input type="radio"/> Ovodon FIV con donación de ovocitos |
| peso previo a embarazo                | [*DATA REMOVED*]                                                                                                                                                                                                                                                                     |
| Ganancia ponderal embarazo            | [*DATA REMOVED*]                                                                                                                                                                                                                                                                     |
| Talla madre                           | [*DATA REMOVED*]                                                                                                                                                                                                                                                                     |
| IMC previo embarazo                   | 26.171874999999996                                                                                                                                                                                                                                                                   |
| Patología obstétrica                  | <input type="radio"/> no<br><input checked="" type="radio"/> si                                                                                                                                                                                                                      |
| Diabetes pregestacional               | <input checked="" type="radio"/> no<br><input type="radio"/> si                                                                                                                                                                                                                      |
| Diabetes gestacional                  | <input type="radio"/> no<br><input checked="" type="radio"/> si                                                                                                                                                                                                                      |

|                                            |                                                                                                                                                                                      |
|--------------------------------------------|--------------------------------------------------------------------------------------------------------------------------------------------------------------------------------------|
| Diabetes gestacional con insulina          | <input checked="" type="radio"/> no<br><input type="radio"/> si                                                                                                                      |
| Diabetes gestacional con dieta y ejercicio | <input type="radio"/> no<br><input checked="" type="radio"/> si                                                                                                                      |
| Percentil fetos previos                    | <input type="radio"/> Nada<br><input type="radio"/> percentil menor de 10<br><input checked="" type="radio"/> percentil entre 10 y 90<br><input type="radio"/> percentil mayor de 90 |
| Exfumadora                                 | <input checked="" type="radio"/> Nada<br><input type="radio"/> menos de 5 años<br><input type="radio"/> 5 a 10 años<br><input type="radio"/> mayor o igual a 10 años                 |
| Hábito tabáquico                           | <input checked="" type="radio"/> no<br><input type="radio"/> si                                                                                                                      |
| fumadora                                   | [*DATA REMOVED*]                                                                                                                                                                     |
| Consumo otros tóxicos                      | <input checked="" type="radio"/> no<br><input type="radio"/> si                                                                                                                      |
| Hb 1T                                      | [*DATA REMOVED*]                                                                                                                                                                     |
| Htc 1T                                     | [*DATA REMOVED*]                                                                                                                                                                     |
| Hb 2T                                      | [*DATA REMOVED*]                                                                                                                                                                     |
| HTC 2T                                     | [*DATA REMOVED*]                                                                                                                                                                     |
| Hb 3T                                      | [*DATA REMOVED*]                                                                                                                                                                     |
| HTC 3T                                     | [*DATA REMOVED*]                                                                                                                                                                     |
| Suplemento FE oral                         | <input type="radio"/> si<br><input checked="" type="radio"/> no                                                                                                                      |
| Suplemento fe iv                           | <input type="radio"/> si<br><input checked="" type="radio"/> no                                                                                                                      |
| Transfusión                                | <input checked="" type="radio"/> no<br><input type="radio"/> si                                                                                                                      |
| Solicitada Vit D                           | <input checked="" type="radio"/> no<br><input type="radio"/> si                                                                                                                      |
| Deficit vit D                              | <input type="radio"/> no<br><input type="radio"/> si                                                                                                                                 |
| Suplemento vit D                           | <input type="radio"/> si<br><input type="radio"/> no                                                                                                                                 |

|                       |                                                                                                                                                                                                                                                                                                                                                                                                              |
|-----------------------|--------------------------------------------------------------------------------------------------------------------------------------------------------------------------------------------------------------------------------------------------------------------------------------------------------------------------------------------------------------------------------------------------------------|
| Dieta, cuestionario   | <input checked="" type="radio"/> sí<br><input type="radio"/> no                                                                                                                                                                                                                                                                                                                                              |
| Leche entera          | <input checked="" type="radio"/> Nunca o menos 1 vez al mes<br><input type="radio"/> 1 a 3 veces mes<br><input type="radio"/> 1 vez semana<br><input type="radio"/> 2 a 4 veces semana<br><input type="radio"/> 5 a 6 veces semana<br><input type="radio"/> 1 vez al día<br><input type="radio"/> 2 a 3 veces al día<br><input type="radio"/> 5 a 6 veces al día<br><input type="radio"/> más 6 veces al día |
| Leche semidesnatada   | <input type="radio"/> Nunca o menos 1 vez al mes<br><input type="radio"/> 1 a 3 veces mes<br><input type="radio"/> 1 vez semana<br><input type="radio"/> 2 a 4 veces semana<br><input type="radio"/> 5 a 6 veces semana<br><input checked="" type="radio"/> 1 vez al día<br><input type="radio"/> 2 a 3 veces al día<br><input type="radio"/> 5 a 6 veces al día<br><input type="radio"/> mas 6 veces al día |
| Leche desnatada       | <input checked="" type="radio"/> Nunca o menos 1 vez al mes<br><input type="radio"/> 1 a 3 veces mes<br><input type="radio"/> 1 vez semana<br><input type="radio"/> 2 a 4 veces semana<br><input type="radio"/> 5 a 6 veces semana<br><input type="radio"/> 1 vez al día<br><input type="radio"/> 2 a 3 veces al día<br><input type="radio"/> 5 a 6 veces al día<br><input type="radio"/> más 6 veces al día |
| Leche condensada      | <input type="radio"/> Nunca o menos 1 vez al mes<br><input checked="" type="radio"/> 1 a 3 veces mes<br><input type="radio"/> 1 vez semana<br><input type="radio"/> 2 a 4 veces semana<br><input type="radio"/> 5 a 6 veces semana<br><input type="radio"/> 1 vez al día<br><input type="radio"/> 2 a 3 veces al día<br><input type="radio"/> 5 a 6 veces al día<br><input type="radio"/> más 6 veces al día |
| nata o crema de leche | <input checked="" type="radio"/> Nunca o menos 1 vez al mes<br><input type="radio"/> 1 a 3 veces mes<br><input type="radio"/> 1 vez semana<br><input type="radio"/> 2 a 4 veces semana<br><input type="radio"/> 5 a 6 veces semana<br><input type="radio"/> 1 vez al día<br><input type="radio"/> 2 a 3 veces al día<br><input type="radio"/> 5 a 6 veces al día<br><input type="radio"/> más 6 veces al día |

|                                             |                                                                                                                                                                                                                                                                                                                                                                                                              |
|---------------------------------------------|--------------------------------------------------------------------------------------------------------------------------------------------------------------------------------------------------------------------------------------------------------------------------------------------------------------------------------------------------------------------------------------------------------------|
| Yogurt Entero                               | <input type="radio"/> Nunca o menos 1 vez al mes<br><input type="radio"/> 1 a 3 veces mes<br><input type="radio"/> 1 vez semana<br><input checked="" type="radio"/> 2 a 4 veces semana<br><input type="radio"/> 5 a 6 veces semana<br><input type="radio"/> 1 vez al día<br><input type="radio"/> 2 a 3 veces al día<br><input type="radio"/> 5 a 6 veces al día<br><input type="radio"/> más 6 veces al día |
| Yogurt desnatado                            | <input checked="" type="radio"/> Nunca o menos 1 vez al mes<br><input type="radio"/> 1 a 3 veces mes<br><input type="radio"/> 1 vez semana<br><input type="radio"/> 2 a 4 veces semana<br><input type="radio"/> 5 a 6 veces semana<br><input type="radio"/> 1 vez al día<br><input type="radio"/> 2 a 3 veces al día<br><input type="radio"/> 5 a 6 veces al día<br><input type="radio"/> más 6 veces al día |
| 100g requesón o queso blando o queso fresco | <input type="radio"/> Nunca o menos 1 vez al mes<br><input type="radio"/> 1 a 3 veces mes<br><input type="radio"/> 1 vez semana<br><input checked="" type="radio"/> 2 a 4 veces semana<br><input type="radio"/> 5 a 6 veces semana<br><input type="radio"/> 1 vez al día<br><input type="radio"/> 2 a 3 veces al día<br><input type="radio"/> 5 a 6 veces al día<br><input type="radio"/> más 6 veces al día |
| queso curado o semicurado o cremoso         | <input type="radio"/> Nunca o menos 1 vez al mes<br><input type="radio"/> 1 a 3 veces mes<br><input type="radio"/> 1 vez semana<br><input checked="" type="radio"/> 2 a 4 veces semana<br><input type="radio"/> 5 a 6 veces semana<br><input type="radio"/> 1 vez al día<br><input type="radio"/> 2 a 3 veces al día<br><input type="radio"/> 5 a 6 veces al día<br><input type="radio"/> más 6 veces al día |
| natillas flan pudding                       | <input type="radio"/> Nunca o menos 1 vez al mes<br><input type="radio"/> 1 a 3 veces mes<br><input type="radio"/> 1 vez semana<br><input checked="" type="radio"/> 2 a 4 veces semana<br><input type="radio"/> 5 a 6 veces semana<br><input type="radio"/> 1 vez al día<br><input type="radio"/> 2 a 3 veces al día<br><input type="radio"/> 5 a 6 veces al día<br><input type="radio"/> más 6 veces al día |
| Helado                                      | <input type="radio"/> Nunca o menos 1 vez al mes<br><input type="radio"/> 1 a 3 veces mes<br><input type="radio"/> 1 vez semana<br><input type="radio"/> 2 a 4 veces semana<br><input type="radio"/> 5 a 6 veces semana<br><input checked="" type="radio"/> 1 vez al día<br><input type="radio"/> 2 a 3 veces al día<br><input type="radio"/> 5 a 6 veces al día<br><input type="radio"/> más 6 veces al día |

|                                      |                                                                                                                                                                                                                                                                                                                                                                                                              |
|--------------------------------------|--------------------------------------------------------------------------------------------------------------------------------------------------------------------------------------------------------------------------------------------------------------------------------------------------------------------------------------------------------------------------------------------------------------|
| huevo                                | <input type="radio"/> Nunca o menos 1 vez al mes<br><input type="radio"/> 1 a 3 veces mes<br><input checked="" type="radio"/> 1 vez semana<br><input type="radio"/> 2 a 4 veces semana<br><input type="radio"/> 5 a 6 veces semana<br><input type="radio"/> 1 vez al día<br><input type="radio"/> 2 a 3 veces al día<br><input type="radio"/> 5 a 6 veces al día<br><input type="radio"/> más 6 veces al día |
| Pollo con piel                       | <input type="radio"/> Nunca o menos 1 vez al mes<br><input type="radio"/> 1 a 3 veces mes<br><input checked="" type="radio"/> 1 vez semana<br><input type="radio"/> 2 a 4 veces semana<br><input type="radio"/> 5 a 6 veces semana<br><input type="radio"/> 1 vez al día<br><input type="radio"/> 2 a 3 veces al día<br><input type="radio"/> 5 a 6 veces al día<br><input type="radio"/> más 6 veces al día |
| pollo sin piel                       | <input type="radio"/> Nunca o menos 1 vez al mes<br><input type="radio"/> 1 a 3 veces mes<br><input checked="" type="radio"/> 1 vez semana<br><input type="radio"/> 2 a 4 veces semana<br><input type="radio"/> 5 a 6 veces semana<br><input type="radio"/> 1 vez al día<br><input type="radio"/> 2 a 3 veces al día<br><input type="radio"/> 5 a 6 veces al día<br><input type="radio"/> más 6 veces al día |
| Ternera o cerdo o cordero            | <input type="radio"/> Nunca o menos 1 vez al mes<br><input type="radio"/> 1 a 3 veces mes<br><input type="radio"/> 1 vez semana<br><input checked="" type="radio"/> 2 a 4 veces semana<br><input type="radio"/> 5 a 6 veces semana<br><input type="radio"/> 1 vez al día<br><input type="radio"/> 2 a 3 veces al día<br><input type="radio"/> 5 a 6 veces al día<br><input type="radio"/> más 6 veces al día |
| carne caza: Conejo o codorniz o pato | <input checked="" type="radio"/> Nunca o menos 1 vez al mes<br><input type="radio"/> 1 a 3 veces mes<br><input type="radio"/> 1 vez semana<br><input type="radio"/> 2 a 4 veces semana<br><input type="radio"/> 5 a 6 veces semana<br><input type="radio"/> 1 vez al día<br><input type="radio"/> 2 a 3 veces al día<br><input type="radio"/> 5 a 6 veces al día<br><input type="radio"/> más 6 veces al día |
| Hígado de ternera o cerdo o pollo    | <input checked="" type="radio"/> Nunca o menos 1 vez al mes<br><input type="radio"/> 1 a 3 veces mes<br><input type="radio"/> 1 vez semana<br><input type="radio"/> 2 a 4 veces semana<br><input type="radio"/> 5 a 6 veces semana<br><input type="radio"/> 1 vez al día<br><input type="radio"/> 2 a 3 veces al día<br><input type="radio"/> 5 a 6 veces al día<br><input type="radio"/> más 6 veces al día |

|                     |                                                                                                                                                                                                                                                                                                                                                                                                              |
|---------------------|--------------------------------------------------------------------------------------------------------------------------------------------------------------------------------------------------------------------------------------------------------------------------------------------------------------------------------------------------------------------------------------------------------------|
| Vísceras            | <input checked="" type="radio"/> Nunca o menos 1 vez al mes<br><input type="radio"/> 1 a 3 veces mes<br><input type="radio"/> 1 vez semana<br><input type="radio"/> 2 a 4 veces semana<br><input type="radio"/> 5 a 6 veces semana<br><input type="radio"/> 1 vez al día<br><input type="radio"/> 2 a 3 veces al día<br><input type="radio"/> 5 a 6 veces al día<br><input type="radio"/> más 6 veces al día |
| Embutido            | <input type="radio"/> Nunca o menos 1 vez al mes<br><input type="radio"/> 1 a 3 veces mes<br><input type="radio"/> 1 vez semana<br><input checked="" type="radio"/> 2 a 4 veces semana<br><input type="radio"/> 5 a 6 veces semana<br><input type="radio"/> 1 vez al día<br><input type="radio"/> 2 a 3 veces al día<br><input type="radio"/> 5 a 6 veces al día<br><input type="radio"/> más 6 veces al día |
| Salchicha o similar | <input checked="" type="radio"/> Nunca o menos 1 vez al mes<br><input type="radio"/> 1 a 3 veces mes<br><input type="radio"/> 1 vez semana<br><input type="radio"/> 2 a 4 veces semana<br><input type="radio"/> 5 a 6 veces semana<br><input type="radio"/> 1 vez al día<br><input type="radio"/> 2 a 3 veces al día<br><input type="radio"/> 5 a 6 veces al día<br><input type="radio"/> más 6 veces al día |
| Pate o foiegras     | <input type="radio"/> Nunca o menos 1 vez al mes<br><input type="radio"/> 1 a 3 veces mes<br><input checked="" type="radio"/> 1 vez semana<br><input type="radio"/> 2 a 4 veces semana<br><input type="radio"/> 5 a 6 veces semana<br><input type="radio"/> 1 vez al día<br><input type="radio"/> 2 a 3 veces al día<br><input type="radio"/> 5 a 6 veces al día<br><input type="radio"/> más 6 veces al día |
| Hamburguesa         | <input type="radio"/> Nunca o menos 1 vez al mes<br><input type="radio"/> 1 a 3 veces mes<br><input checked="" type="radio"/> 1 vez semana<br><input type="radio"/> 2 a 4 veces semana<br><input type="radio"/> 5 a 6 veces semana<br><input type="radio"/> 1 vez al día<br><input type="radio"/> 2 a 3 veces al día<br><input type="radio"/> 5 a 6 veces al día<br><input type="radio"/> más 6 veces al día |
| tocino o bacon      | <input type="radio"/> Nunca o menos 1 vez al mes<br><input type="radio"/> 1 a 3 veces mes<br><input checked="" type="radio"/> 1 vez semana<br><input type="radio"/> 2 a 4 veces semana<br><input type="radio"/> 5 a 6 veces semana<br><input type="radio"/> 1 vez al día<br><input type="radio"/> 2 a 3 veces al día<br><input type="radio"/> 5 a 6 veces al día<br><input type="radio"/> más 6 veces al día |

---

Pescado frito

- ☐ Nunca o menos 1 vez al mes  
☐ 1 a 3 veces mes  
☒ 1 vez semana  
☐ 2 a 4 veces semana  
☐ 5 a 6 veces semana  
☐ 1 vez al día  
☐ 2 a 3 veces al día  
☐ 5 a 6 veces al día  
☐ más 6 veces al día

---

pescado hervido blanco

- ☐ Nunca o menos 1 vez al mes  
☐ 1 a 3 veces mes  
☒ 1 vez semana  
☐ 2 a 4 veces semana  
☐ 5 a 6 veces semana  
☐ 1 vez al día  
☐ 2 a 3 veces al día  
☐ 5 a 6 veces al día  
☐ más 6 veces al día

---

pescado hervido azul

- ☒ Nunca o menos 1 vez al mes  
☐ 1 a 3 veces mes  
☐ 1 vez semana  
☐ 2 a 4 veces semana  
☐ 5 a 6 veces semana  
☐ 1 vez al día  
☐ 2 a 3 veces al día  
☐ 5 a 6 veces al día  
☐ más 6 veces al día

---

otros pescado azul

- ☐ Nunca o menos 1 vez al mes  
☐ 1 a 3 veces mes  
☒ 1 vez semana  
☐ 2 a 4 veces semana  
☐ 5 a 6 veces semana  
☐ 1 vez al día  
☐ 2 a 3 veces al día  
☐ 5 a 6 veces al día  
☐ más 6 veces al día

---

atun conserva

- ☐ Nunca o menos 1 vez al mes  
☐ 1 a 3 veces mes  
☐ 1 vez semana  
☒ 2 a 4 veces semana  
☐ 5 a 6 veces semana  
☐ 1 vez al día  
☐ 2 a 3 veces al día  
☐ 5 a 6 veces al día  
☐ más 6 veces al día

---

sardina conserva

- ☒ Nunca o menos 1 vez al mes  
☐ 1 a 3 veces mes  
☐ 1 vez semana  
☐ 2 a 4 veces semana  
☐ 5 a 6 veces semana  
☐ 1 vez al día  
☐ 2 a 3 veces al día  
☐ 5 a 6 veces al día  
☐ más 6 veces al día



|                                         |                                                                                                                                                                                                                                                                                                                                                                                                              |
|-----------------------------------------|--------------------------------------------------------------------------------------------------------------------------------------------------------------------------------------------------------------------------------------------------------------------------------------------------------------------------------------------------------------------------------------------------------------|
| pescado ahumado                         | <input type="radio"/> Nunca o menos 1 vez al mes<br><input type="radio"/> 1 a 3 veces mes<br><input checked="" type="radio"/> 1 vez semana<br><input type="radio"/> 2 a 4 veces semana<br><input type="radio"/> 5 a 6 veces semana<br><input type="radio"/> 1 vez al día<br><input type="radio"/> 2 a 3 veces al día<br><input type="radio"/> 5 a 6 veces al día<br><input type="radio"/> más 6 veces al día |
| almejas o mejillones o ostras unos 100g | <input type="radio"/> Nunca o menos 1 vez al mes<br><input checked="" type="radio"/> 1 a 3 veces mes<br><input type="radio"/> 1 vez semana<br><input type="radio"/> 2 a 4 veces semana<br><input type="radio"/> 5 a 6 veces semana<br><input type="radio"/> 1 vez al día<br><input type="radio"/> 2 a 3 veces al día<br><input type="radio"/> 5 a 6 veces al día<br><input type="radio"/> más 6 veces al día |
| calamar o chipiron o sepia unos 100g    | <input type="radio"/> Nunca o menos 1 vez al mes<br><input checked="" type="radio"/> 1 a 3 veces mes<br><input type="radio"/> 1 vez semana<br><input type="radio"/> 2 a 4 veces semana<br><input type="radio"/> 5 a 6 veces semana<br><input type="radio"/> 1 vez al día<br><input type="radio"/> 2 a 3 veces al día<br><input type="radio"/> 5 a 6 veces al día<br><input type="radio"/> más 6 veces al día |
| marisco unos 100g                       | <input checked="" type="radio"/> Nunca o menos 1 vez al mes<br><input type="radio"/> 1 a 3 veces mes<br><input type="radio"/> 1 vez semana<br><input type="radio"/> 2 a 4 veces semana<br><input type="radio"/> 5 a 6 veces semana<br><input type="radio"/> 1 vez al día<br><input type="radio"/> 2 a 3 veces al día<br><input type="radio"/> 5 a 6 veces al día<br><input type="radio"/> más 6 veces al día |
| Espinacas o acelgas cocinadas           | <input type="radio"/> Nunca o menos 1 vez al mes<br><input type="radio"/> 1 a 3 veces mes<br><input checked="" type="radio"/> 1 vez semana<br><input type="radio"/> 2 a 4 veces semana<br><input type="radio"/> 5 a 6 veces semana<br><input type="radio"/> 1 vez al día<br><input type="radio"/> 2 a 3 veces al día<br><input type="radio"/> 5 a 6 veces al día<br><input type="radio"/> más 6 veces al día |
| Col o coliflor o brocoli cocinado       | <input checked="" type="radio"/> Nunca o menos 1 vez al mes<br><input type="radio"/> 1 a 3 veces mes<br><input type="radio"/> 1 vez semana<br><input type="radio"/> 2 a 4 veces semana<br><input type="radio"/> 5 a 6 veces semana<br><input type="radio"/> 1 vez al día<br><input type="radio"/> 2 a 3 veces al día<br><input type="radio"/> 5 a 6 veces al día<br><input type="radio"/> más 6 veces al día |

---

Lechuga o endivia o escarola

- ☐ Nunca o menos 1 vez al mes  
☐ 1 a 3 veces mes  
☐ 1 vez semana  
☒ 2 a 4 veces semana  
☐ 5 a 6 veces semana  
☐ 1 vez al día  
☐ 2 a 3 veces al día  
☐ 5 a 6 veces al día  
☐ más 6 veces al día

---

tomate ensalada

- ☐ Nunca o menos 1 vez al mes  
☐ 1 a 3 veces mes  
☐ 1 vez semana  
☒ 2 a 4 veces semana  
☐ 5 a 6 veces semana  
☐ 1 vez al día  
☐ 2 a 3 veces al día  
☐ 5 a 6 veces al día  
☐ más 6 veces al día

---

cebolla

- ☐ Nunca o menos 1 vez al mes  
☐ 1 a 3 veces mes  
☐ 1 vez semana  
☒ 2 a 4 veces semana  
☐ 5 a 6 veces semana  
☐ 1 vez al día  
☐ 2 a 3 veces al día  
☐ 5 a 6 veces al día  
☐ más 6 veces al día

---

Zanahoria o calabaza

- ☐ Nunca o menos 1 vez al mes  
☐ 1 a 3 veces mes  
☐ 1 vez semana  
☒ 2 a 4 veces semana  
☐ 5 a 6 veces semana  
☐ 1 vez al día  
☐ 2 a 3 veces al día  
☐ 5 a 6 veces al día  
☐ más 6 veces al día

---

Judías verdes

- ☐ Nunca o menos 1 vez al mes  
☐ 1 a 3 veces mes  
☒ 1 vez semana  
☐ 2 a 4 veces semana  
☐ 5 a 6 veces semana  
☐ 1 vez al día  
☐ 2 a 3 veces al día  
☐ 5 a 6 veces al día  
☐ más 6 veces al día

---

Berenjena o calabacín o pepino

- ☐ Nunca o menos 1 vez al mes  
☐ 1 a 3 veces mes  
☒ 1 vez semana  
☐ 2 a 4 veces semana  
☐ 5 a 6 veces semana  
☐ 1 vez al día  
☐ 2 a 3 veces al día  
☐ 5 a 6 veces al día  
☐ más 6 veces al día

|                       |                                                                                                                                                                                                                                                                                                                                                                                                              |
|-----------------------|--------------------------------------------------------------------------------------------------------------------------------------------------------------------------------------------------------------------------------------------------------------------------------------------------------------------------------------------------------------------------------------------------------------|
| pimiento              | <input type="radio"/> Nunca o menos 1 vez al mes<br><input checked="" type="radio"/> 1 a 3 veces mes<br><input type="radio"/> 1 vez semana<br><input type="radio"/> 2 a 4 veces semana<br><input type="radio"/> 5 a 6 veces semana<br><input type="radio"/> 1 vez al día<br><input type="radio"/> 2 a 3 veces al día<br><input type="radio"/> 5 a 6 veces al día<br><input type="radio"/> más 6 veces al día |
| alcachofa             | <input checked="" type="radio"/> Nunca o menos 1 vez al mes<br><input type="radio"/> 1 a 3 veces mes<br><input type="radio"/> 1 vez semana<br><input type="radio"/> 2 a 4 veces semana<br><input type="radio"/> 5 a 6 veces semana<br><input type="radio"/> 1 vez al día<br><input type="radio"/> 2 a 3 veces al día<br><input type="radio"/> 5 a 6 veces al día<br><input type="radio"/> más 6 veces al día |
| espárragos            | <input checked="" type="radio"/> Nunca o menos 1 vez al mes<br><input type="radio"/> 1 a 3 veces mes<br><input type="radio"/> 1 vez semana<br><input type="radio"/> 2 a 4 veces semana<br><input type="radio"/> 5 a 6 veces semana<br><input type="radio"/> 1 vez al día<br><input type="radio"/> 2 a 3 veces al día<br><input type="radio"/> 5 a 6 veces al día<br><input type="radio"/> más 6 veces al día |
| maíz hervido          | <input checked="" type="radio"/> Nunca o menos 1 vez al mes<br><input type="radio"/> 1 a 3 veces mes<br><input type="radio"/> 1 vez semana<br><input type="radio"/> 2 a 4 veces semana<br><input type="radio"/> 5 a 6 veces semana<br><input type="radio"/> 1 vez al día<br><input type="radio"/> 2 a 3 veces al día<br><input type="radio"/> 5 a 6 veces al día<br><input type="radio"/> más 6 veces al día |
| legumbres             | <input type="radio"/> Nunca o menos 1 vez al mes<br><input type="radio"/> 1 a 3 veces mes<br><input checked="" type="radio"/> 1 vez semana<br><input type="radio"/> 2 a 4 veces semana<br><input type="radio"/> 5 a 6 veces semana<br><input type="radio"/> 1 vez al día<br><input type="radio"/> 2 a 3 veces al día<br><input type="radio"/> 5 a 6 veces al día<br><input type="radio"/> más 6 veces al día |
| naranjas o mandarinas | <input type="radio"/> Nunca o menos 1 vez al mes<br><input type="radio"/> 1 a 3 veces mes<br><input checked="" type="radio"/> 1 vez semana<br><input type="radio"/> 2 a 4 veces semana<br><input type="radio"/> 5 a 6 veces semana<br><input type="radio"/> 1 vez al día<br><input type="radio"/> 2 a 3 veces al día<br><input type="radio"/> 5 a 6 veces al día<br><input type="radio"/> más 6 veces al día |

---

zumو natural fruta

- ☐ Nunca o menos 1 vez al mes  
☒ 1 a 3 veces mes  
☐ 1 vez semana  
☐ 2 a 4 veces semana  
☐ 5 a 6 veces semana  
☐ 1 vez al día  
☐ 2 a 3 veces al día  
☐ 5 a 6 veces al día  
☐ más 6 veces al día

---

platano

- ☐ Nunca o menos 1 vez al mes  
☐ 1 a 3 veces mes  
☒ 1 vez semana  
☐ 2 a 4 veces semana  
☐ 5 a 6 veces semana  
☐ 1 vez al día  
☐ 2 a 3 veces al día  
☐ 5 a 6 veces al día  
☐ más 6 veces al día

---

manzana o pera

- ☐ Nunca o menos 1 vez al mes  
☐ 1 a 3 veces mes  
☐ 1 vez semana  
☒ 2 a 4 veces semana  
☐ 5 a 6 veces semana  
☐ 1 vez al día  
☐ 2 a 3 veces al día  
☐ 5 a 6 veces al día  
☐ más 6 veces al día

---

melocotón o nectarina

- ☐ Nunca o menos 1 vez al mes  
☐ 1 a 3 veces mes  
☐ 1 vez semana  
☒ 2 a 4 veces semana  
☐ 5 a 6 veces semana  
☐ 1 vez al día  
☐ 2 a 3 veces al día  
☐ 5 a 6 veces al día  
☐ más 6 veces al día

---

sandia o melon

- ☐ Nunca o menos 1 vez al mes  
☐ 1 a 3 veces mes  
☐ 1 vez semana  
☒ 2 a 4 veces semana  
☐ 5 a 6 veces semana  
☐ 1 vez al día  
☐ 2 a 3 veces al día  
☐ 5 a 6 veces al día  
☐ más 6 veces al día

---

uva

- ☐ Nunca o menos 1 vez al mes  
☐ 1 a 3 veces mes  
☐ 1 vez semana  
☒ 2 a 4 veces semana  
☐ 5 a 6 veces semana  
☐ 1 vez al día  
☐ 2 a 3 veces al día  
☐ 5 a 6 veces al día  
☐ más 6 veces al día

---

bruna o ciruela

- ☐ Nunca o menos 1 vez al mes  
☐ 1 a 3 veces mes  
☐ 1 vez semana  
☒ 2 a 4 veces semana  
☐ 5 a 6 veces semana  
☐ 1 vez al día  
☐ 2 a 3 veces al día  
☐ 5 a 6 veces al día  
☐ más 6 veces al día

---

kiwi

- ☐ Nunca o menos 1 vez al mes  
☐ 1 a 3 veces mes  
☐ 1 vez semana  
☒ 2 a 4 veces semana  
☐ 5 a 6 veces semana  
☐ 1 vez al día  
☐ 2 a 3 veces al día  
☐ 5 a 6 veces al día  
☐ más 6 veces al día

---

aceituna

- ☐ Nunca o menos 1 vez al mes  
☐ 1 a 3 veces mes  
☒ 1 vez semana  
☐ 2 a 4 veces semana  
☐ 5 a 6 veces semana  
☐ 1 vez al día  
☐ 2 a 3 veces al día  
☐ 5 a 6 veces al día  
☐ más 6 veces al día

---

frutos secos

- ☐ Nunca o menos 1 vez al mes  
☐ 1 a 3 veces mes  
☒ 1 vez semana  
☐ 2 a 4 veces semana  
☐ 5 a 6 veces semana  
☐ 1 vez al día  
☐ 2 a 3 veces al día  
☐ 5 a 6 veces al día  
☐ más 6 veces al día

---

pan blanco

- ☐ Nunca o menos 1 vez al mes  
☐ 1 a 3 veces mes  
☒ 1 vez semana  
☐ 2 a 4 veces semana  
☐ 5 a 6 veces semana  
☐ 1 vez al día  
☐ 2 a 3 veces al día  
☐ 5 a 6 veces al día  
☐ más 6 veces al día

---

pan integral

- ☒ Nunca o menos 1 vez al mes  
☐ 1 a 3 veces mes  
☐ 1 vez semana  
☐ 2 a 4 veces semana  
☐ 5 a 6 veces semana  
☐ 1 vez al día  
☐ 2 a 3 veces al día  
☐ 5 a 6 veces al día  
☐ más 6 veces al día

---

cereales desayuno

- ☐ Nunca o menos 1 vez al mes  
☐ 1 a 3 veces mes  
☐ 1 vez semana  
☒ 2 a 4 veces semana  
☐ 5 a 6 veces semana  
☐ 1 vez al día  
☐ 2 a 3 veces al día  
☐ 5 a 6 veces al día  
☐ más 6 veces al día

---

patatas fritas

- ☐ Nunca o menos 1 vez al mes  
☐ 1 a 3 veces mes  
☐ 1 vez semana  
☒ 2 a 4 veces semana  
☐ 5 a 6 veces semana  
☐ 1 vez al día  
☐ 2 a 3 veces al día  
☐ 5 a 6 veces al día  
☐ más 6 veces al día

---

patatas cocidas o asadas

- ☐ Nunca o menos 1 vez al mes  
☐ 1 a 3 veces mes  
☒ 1 vez semana  
☐ 2 a 4 veces semana  
☐ 5 a 6 veces semana  
☐ 1 vez al día  
☐ 2 a 3 veces al día  
☐ 5 a 6 veces al día  
☐ más 6 veces al día

---

bolsa papas

- ☐ Nunca o menos 1 vez al mes  
☐ 1 a 3 veces mes  
☒ 1 vez semana  
☐ 2 a 4 veces semana  
☐ 5 a 6 veces semana  
☐ 1 vez al día  
☐ 2 a 3 veces al día  
☐ 5 a 6 veces al día  
☐ más 6 veces al día

---

arroz cocinado

- ☐ Nunca o menos 1 vez al mes  
☒ 1 a 3 veces mes  
☐ 1 vez semana  
☐ 2 a 4 veces semana  
☐ 5 a 6 veces semana  
☐ 1 vez al día  
☐ 2 a 3 veces al día  
☐ 5 a 6 veces al día  
☐ más 6 veces al día

---

pasta

- ☐ Nunca o menos 1 vez al mes  
☐ 1 a 3 veces mes  
☐ 1 vez semana  
☒ 2 a 4 veces semana  
☐ 5 a 6 veces semana  
☐ 1 vez al día  
☐ 2 a 3 veces al día  
☐ 5 a 6 veces al día  
☐ más 6 veces al día

|                     |                                                                                                                                                                                                                                                                                                                                                                                                              |
|---------------------|--------------------------------------------------------------------------------------------------------------------------------------------------------------------------------------------------------------------------------------------------------------------------------------------------------------------------------------------------------------------------------------------------------------|
| pizza               | <input type="radio"/> Nunca o menos 1 vez al mes<br><input type="radio"/> 1 a 3 veces mes<br><input checked="" type="radio"/> 1 vez semana<br><input type="radio"/> 2 a 4 veces semana<br><input type="radio"/> 5 a 6 veces semana<br><input type="radio"/> 1 vez al día<br><input type="radio"/> 2 a 3 veces al día<br><input type="radio"/> 5 a 6 veces al día<br><input type="radio"/> más 6 veces al día |
| aceite oliva        | <input type="radio"/> Nunca o menos 1 vez al mes<br><input type="radio"/> 1 a 3 veces mes<br><input type="radio"/> 1 vez semana<br><input checked="" type="radio"/> 2 a 4 veces semana<br><input type="radio"/> 5 a 6 veces semana<br><input type="radio"/> 1 vez al día<br><input type="radio"/> 2 a 3 veces al día<br><input type="radio"/> 5 a 6 veces al día<br><input type="radio"/> más 6 veces al día |
| otros aceites       | <input type="radio"/> Nunca o menos 1 vez al mes<br><input type="radio"/> 1 a 3 veces mes<br><input type="radio"/> 1 vez semana<br><input checked="" type="radio"/> 2 a 4 veces semana<br><input type="radio"/> 5 a 6 veces semana<br><input type="radio"/> 1 vez al día<br><input type="radio"/> 2 a 3 veces al día<br><input type="radio"/> 5 a 6 veces al día<br><input type="radio"/> más 6 veces al día |
| margarina           | <input checked="" type="radio"/> Nunca o menos 1 vez al mes<br><input type="radio"/> 1 a 3 veces mes<br><input type="radio"/> 1 vez semana<br><input type="radio"/> 2 a 4 veces semana<br><input type="radio"/> 5 a 6 veces semana<br><input type="radio"/> 1 vez al día<br><input type="radio"/> 2 a 3 veces al día<br><input type="radio"/> 5 a 6 veces al día<br><input type="radio"/> más 6 veces al día |
| mantequilla         | <input type="radio"/> Nunca o menos 1 vez al mes<br><input type="radio"/> 1 a 3 veces mes<br><input checked="" type="radio"/> 1 vez semana<br><input type="radio"/> 2 a 4 veces semana<br><input type="radio"/> 5 a 6 veces semana<br><input type="radio"/> 1 vez al día<br><input type="radio"/> 2 a 3 veces al día<br><input type="radio"/> 5 a 6 veces al día<br><input type="radio"/> más 6 veces al día |
| galletas tipo maria | <input type="radio"/> Nunca o menos 1 vez al mes<br><input checked="" type="radio"/> 1 a 3 veces mes<br><input type="radio"/> 1 vez semana<br><input type="radio"/> 2 a 4 veces semana<br><input type="radio"/> 5 a 6 veces semana<br><input type="radio"/> 1 vez al día<br><input type="radio"/> 2 a 3 veces al día<br><input type="radio"/> 5 a 6 veces al día<br><input type="radio"/> más 6 veces al día |

---

galletas chocolate

- ☐ Nunca o menos 1 vez al mes  
☐ 1 a 3 veces mes  
☐ 1 vez semana  
☒ 2 a 4 veces semana  
☐ 5 a 6 veces semana  
☐ 1 vez al día  
☐ 2 a 3 veces al día  
☐ 5 a 6 veces al día  
☐ más 6 veces al día

---

bolleria

- ☐ Nunca o menos 1 vez al mes  
☐ 1 a 3 veces mes  
☐ 1 vez semana  
☐ 2 a 4 veces semana  
☒ 5 a 6 veces semana  
☐ 1 vez al día  
☐ 2 a 3 veces al día  
☐ 5 a 6 veces al día  
☐ más 6 veces al día

---

chocolate o bombones

- ☐ Nunca o menos 1 vez al mes  
☐ 1 a 3 veces mes  
☐ 1 vez semana  
☐ 2 a 4 veces semana  
☒ 5 a 6 veces semana  
☐ 1 vez al día  
☐ 2 a 3 veces al día  
☐ 5 a 6 veces al día  
☐ más 6 veces al día

---

chocolate polvo o colacao

- ☐ Nunca o menos 1 vez al mes  
☐ 1 a 3 veces mes  
☐ 1 vez semana  
☐ 2 a 4 veces semana  
☒ 5 a 6 veces semana  
☐ 1 vez al día  
☐ 2 a 3 veces al día  
☐ 5 a 6 veces al día  
☐ más 6 veces al día

---

vino tinto

- ☒ Nunca o menos 1 vez al mes  
☐ 1 a 3 veces mes  
☐ 1 vez semana  
☐ 2 a 4 veces semana  
☐ 5 a 6 veces semana  
☐ 1 vez al día  
☐ 2 a 3 veces al día  
☐ 5 a 6 veces al día  
☐ más 6 veces al día

---

vino blanco

- ☒ Nunca o menos 1 vez al mes  
☐ 1 a 3 veces mes  
☐ 1 vez semana  
☐ 2 a 4 veces semana  
☐ 5 a 6 veces semana  
☐ 1 vez al día  
☐ 2 a 3 veces al día  
☐ 5 a 6 veces al día  
☐ más 6 veces al día



|                       |                                                                                                                                                                                                                                                                                                                                                                                                              |
|-----------------------|--------------------------------------------------------------------------------------------------------------------------------------------------------------------------------------------------------------------------------------------------------------------------------------------------------------------------------------------------------------------------------------------------------------|
| vino seco o vermut    | <input checked="" type="radio"/> Nunca o menos 1 vez al mes<br><input type="radio"/> 1 a 3 veces mes<br><input type="radio"/> 1 vez semana<br><input type="radio"/> 2 a 4 veces semana<br><input type="radio"/> 5 a 6 veces semana<br><input type="radio"/> 1 vez al día<br><input type="radio"/> 2 a 3 veces al día<br><input type="radio"/> 5 a 6 veces al día<br><input type="radio"/> más 6 veces al día |
| cerveza               | <input checked="" type="radio"/> Nunca o menos 1 vez al mes<br><input type="radio"/> 1 a 3 veces mes<br><input type="radio"/> 1 vez semana<br><input type="radio"/> 2 a 4 veces semana<br><input type="radio"/> 5 a 6 veces semana<br><input type="radio"/> 1 vez al día<br><input type="radio"/> 2 a 3 veces al día<br><input type="radio"/> 5 a 6 veces al día<br><input type="radio"/> más 6 veces al día |
| cerveza sin alcohol   | <input checked="" type="radio"/> Nunca o menos 1 vez al mes<br><input type="radio"/> 1 a 3 veces mes<br><input type="radio"/> 1 vez semana<br><input type="radio"/> 2 a 4 veces semana<br><input type="radio"/> 5 a 6 veces semana<br><input type="radio"/> 1 vez al día<br><input type="radio"/> 2 a 3 veces al día<br><input type="radio"/> 5 a 6 veces al día<br><input type="radio"/> más 6 veces al día |
| licores               | <input checked="" type="radio"/> Nunca o menos 1 vez al mes<br><input type="radio"/> 1 a 3 veces mes<br><input type="radio"/> 1 vez semana<br><input type="radio"/> 2 a 4 veces semana<br><input type="radio"/> 5 a 6 veces semana<br><input type="radio"/> 1 vez al día<br><input type="radio"/> 2 a 3 veces al día<br><input type="radio"/> 5 a 6 veces al día<br><input type="radio"/> más 6 veces al día |
| ginebra o ron o vodka | <input checked="" type="radio"/> Nunca o menos 1 vez al mes<br><input type="radio"/> 1 a 3 veces mes<br><input type="radio"/> 1 vez semana<br><input type="radio"/> 2 a 4 veces semana<br><input type="radio"/> 5 a 6 veces semana<br><input type="radio"/> 1 vez al día<br><input type="radio"/> 2 a 3 veces al día<br><input type="radio"/> 5 a 6 veces al día<br><input type="radio"/> más 6 veces al día |
| refresco normal       | <input checked="" type="radio"/> Nunca o menos 1 vez al mes<br><input type="radio"/> 1 a 3 veces mes<br><input type="radio"/> 1 vez semana<br><input type="radio"/> 2 a 4 veces semana<br><input type="radio"/> 5 a 6 veces semana<br><input type="radio"/> 1 vez al día<br><input type="radio"/> 2 a 3 veces al día<br><input type="radio"/> 5 a 6 veces al día<br><input type="radio"/> más 6 veces al día |

|                          |                                                                                                                                                                                                                                                                                                                                                                                                              |
|--------------------------|--------------------------------------------------------------------------------------------------------------------------------------------------------------------------------------------------------------------------------------------------------------------------------------------------------------------------------------------------------------------------------------------------------------|
| refresco sin azúcar      | <input checked="" type="radio"/> Nunca o menos 1 vez al mes<br><input type="radio"/> 1 a 3 veces mes<br><input type="radio"/> 1 vez semana<br><input type="radio"/> 2 a 4 veces semana<br><input type="radio"/> 5 a 6 veces semana<br><input type="radio"/> 1 vez al día<br><input type="radio"/> 2 a 3 veces al día<br><input type="radio"/> 5 a 6 veces al día<br><input type="radio"/> más 6 veces al día |
| Agua del grifo           | <input checked="" type="radio"/> Nunca o menos 1 vez al mes<br><input type="radio"/> 1 a 3 veces mes<br><input type="radio"/> 1 vez semana<br><input type="radio"/> 2 a 4 veces semana<br><input type="radio"/> 5 a 6 veces semana<br><input type="radio"/> 1 vez al día<br><input type="radio"/> 2 a 3 veces al día<br><input type="radio"/> 5 a 6 veces al día<br><input type="radio"/> más 6 veces al día |
| agua embotellada sin gas | <input type="radio"/> Nunca o menos 1 vez al mes<br><input type="radio"/> 1 a 3 veces mes<br><input type="radio"/> 1 vez semana<br><input type="radio"/> 2 a 4 veces semana<br><input type="radio"/> 5 a 6 veces semana<br><input type="radio"/> 1 vez al día<br><input type="radio"/> 2 a 3 veces al día<br><input type="radio"/> 5 a 6 veces al día<br><input checked="" type="radio"/> más 6 veces al día |
| agua embotellada con gas | <input checked="" type="radio"/> Nunca o menos 1 vez al mes<br><input type="radio"/> 1 a 3 veces mes<br><input type="radio"/> 1 vez semana<br><input type="radio"/> 2 a 4 veces semana<br><input type="radio"/> 5 a 6 veces semana<br><input type="radio"/> 1 vez al día<br><input type="radio"/> 2 a 3 veces al día<br><input type="radio"/> 5 a 6 veces al día<br><input type="radio"/> más 6 veces al día |
| zumو frutas embasado     | <input type="radio"/> Nunca o menos 1 vez al mes<br><input type="radio"/> 1 a 3 veces mes<br><input type="radio"/> 1 vez semana<br><input type="radio"/> 2 a 4 veces semana<br><input type="radio"/> 5 a 6 veces semana<br><input type="radio"/> 1 vez al día<br><input type="radio"/> 2 a 3 veces al día<br><input type="radio"/> 5 a 6 veces al día<br><input type="radio"/> más 6 veces al día            |
| cafe                     | <input checked="" type="radio"/> Nunca o menos 1 vez al mes<br><input type="radio"/> 1 a 3 veces mes<br><input type="radio"/> 1 vez semana<br><input type="radio"/> 2 a 4 veces semana<br><input type="radio"/> 5 a 6 veces semana<br><input type="radio"/> 1 vez al día<br><input type="radio"/> 2 a 3 veces al día<br><input type="radio"/> 5 a 6 veces al día<br><input type="radio"/> más 6 veces al día |

|                       |                                                                                                                                                                                                                                                                                                                                                                                                              |
|-----------------------|--------------------------------------------------------------------------------------------------------------------------------------------------------------------------------------------------------------------------------------------------------------------------------------------------------------------------------------------------------------------------------------------------------------|
| cafe descafeinado     | <input checked="" type="radio"/> Nunca o menos 1 vez al mes<br><input type="radio"/> 1 a 3 veces mes<br><input type="radio"/> 1 vez semana<br><input type="radio"/> 2 a 4 veces semana<br><input type="radio"/> 5 a 6 veces semana<br><input type="radio"/> 1 vez al día<br><input type="radio"/> 2 a 3 veces al día<br><input type="radio"/> 5 a 6 veces al día<br><input type="radio"/> más 6 veces al día |
| te o infusión         | <input checked="" type="radio"/> Nunca o menos 1 vez al mes<br><input type="radio"/> 1 a 3 veces mes<br><input type="radio"/> 1 vez semana<br><input type="radio"/> 2 a 4 veces semana<br><input type="radio"/> 5 a 6 veces semana<br><input type="radio"/> 1 vez al día<br><input type="radio"/> 2 a 3 veces al día<br><input type="radio"/> 5 a 6 veces al día<br><input type="radio"/> más 6 veces al día |
| sopa o puré verduras  | <input type="radio"/> Nunca o menos 1 vez al mes<br><input type="radio"/> 1 a 3 veces mes<br><input checked="" type="radio"/> 1 vez semana<br><input type="radio"/> 2 a 4 veces semana<br><input type="radio"/> 5 a 6 veces semana<br><input type="radio"/> 1 vez al día<br><input type="radio"/> 2 a 3 veces al día<br><input type="radio"/> 5 a 6 veces al día<br><input type="radio"/> más 6 veces al día |
| croquetas pollo jamón | <input type="radio"/> Nunca o menos 1 vez al mes<br><input type="radio"/> 1 a 3 veces mes<br><input checked="" type="radio"/> 1 vez semana<br><input type="radio"/> 2 a 4 veces semana<br><input type="radio"/> 5 a 6 veces semana<br><input type="radio"/> 1 vez al día<br><input type="radio"/> 2 a 3 veces al día<br><input type="radio"/> 5 a 6 veces al día<br><input type="radio"/> más 6 veces al día |
| croquetas pescado     | <input checked="" type="radio"/> Nunca o menos 1 vez al mes<br><input type="radio"/> 1 a 3 veces mes<br><input type="radio"/> 1 vez semana<br><input type="radio"/> 2 a 4 veces semana<br><input type="radio"/> 5 a 6 veces semana<br><input type="radio"/> 1 vez al día<br><input type="radio"/> 2 a 3 veces al día<br><input type="radio"/> 5 a 6 veces al día<br><input type="radio"/> más 6 veces al día |
| mayonesa              | <input type="radio"/> Nunca o menos 1 vez al mes<br><input type="radio"/> 1 a 3 veces mes<br><input type="radio"/> 1 vez semana<br><input checked="" type="radio"/> 2 a 4 veces semana<br><input type="radio"/> 5 a 6 veces semana<br><input type="radio"/> 1 vez al día<br><input type="radio"/> 2 a 3 veces al día<br><input type="radio"/> 5 a 6 veces al día<br><input type="radio"/> más 6 veces al día |

|                  |                                                                                                                                                                                                                                                                                                                                                                                                              |
|------------------|--------------------------------------------------------------------------------------------------------------------------------------------------------------------------------------------------------------------------------------------------------------------------------------------------------------------------------------------------------------------------------------------------------------|
| salsa tomate     | <input type="radio"/> Nunca o menos 1 vez al mes<br><input type="radio"/> 1 a 3 veces mes<br><input checked="" type="radio"/> 1 vez semana<br><input type="radio"/> 2 a 4 veces semana<br><input type="radio"/> 5 a 6 veces semana<br><input type="radio"/> 1 vez al día<br><input type="radio"/> 2 a 3 veces al día<br><input type="radio"/> 5 a 6 veces al día<br><input type="radio"/> más 6 veces al día |
| ketchup          | <input type="radio"/> Nunca o menos 1 vez al mes<br><input type="radio"/> 1 a 3 veces mes<br><input checked="" type="radio"/> 1 vez semana<br><input type="radio"/> 2 a 4 veces semana<br><input type="radio"/> 5 a 6 veces semana<br><input type="radio"/> 1 vez al día<br><input type="radio"/> 2 a 3 veces al día<br><input type="radio"/> 5 a 6 veces al día<br><input type="radio"/> más 6 veces al día |
| sal              | <input type="radio"/> Nunca o menos 1 vez al mes<br><input type="radio"/> 1 a 3 veces mes<br><input checked="" type="radio"/> 1 vez semana<br><input type="radio"/> 2 a 4 veces semana<br><input type="radio"/> 5 a 6 veces semana<br><input type="radio"/> 1 vez al día<br><input type="radio"/> 2 a 3 veces al día<br><input type="radio"/> 5 a 6 veces al día<br><input type="radio"/> más 6 veces al día |
| ajo              | <input type="radio"/> Nunca o menos 1 vez al mes<br><input type="radio"/> 1 a 3 veces mes<br><input checked="" type="radio"/> 1 vez semana<br><input type="radio"/> 2 a 4 veces semana<br><input type="radio"/> 5 a 6 veces semana<br><input type="radio"/> 1 vez al día<br><input type="radio"/> 2 a 3 veces al día<br><input type="radio"/> 5 a 6 veces al día<br><input type="radio"/> más 6 veces al día |
| mermelada o miel | <input type="radio"/> Nunca o menos 1 vez al mes<br><input type="radio"/> 1 a 3 veces mes<br><input type="radio"/> 1 vez semana<br><input checked="" type="radio"/> 2 a 4 veces semana<br><input type="radio"/> 5 a 6 veces semana<br><input type="radio"/> 1 vez al día<br><input type="radio"/> 2 a 3 veces al día<br><input type="radio"/> 5 a 6 veces al día<br><input type="radio"/> más 6 veces al día |
| azúcar           | <input type="radio"/> Nunca o menos 1 vez al mes<br><input type="radio"/> 1 a 3 veces mes<br><input type="radio"/> 1 vez semana<br><input checked="" type="radio"/> 2 a 4 veces semana<br><input type="radio"/> 5 a 6 veces semana<br><input type="radio"/> 1 vez al día<br><input type="radio"/> 2 a 3 veces al día<br><input type="radio"/> 5 a 6 veces al día<br><input type="radio"/> más 6 veces al día |

|                                       |                                                                                                                                                                                                                                                                                                                                                                                                                                                                                                                               |
|---------------------------------------|-------------------------------------------------------------------------------------------------------------------------------------------------------------------------------------------------------------------------------------------------------------------------------------------------------------------------------------------------------------------------------------------------------------------------------------------------------------------------------------------------------------------------------|
| Otro alimento                         |                                                                                                                                                                                                                                                                                                                                                                                                                                                                                                                               |
| suplementos vitamínicos               | <input checked="" type="radio"/> si<br><input type="radio"/> no                                                                                                                                                                                                                                                                                                                                                                                                                                                               |
| suplementos vitamínicos               | [*DATA REMOVED*]                                                                                                                                                                                                                                                                                                                                                                                                                                                                                                              |
| dieta previa                          | <input type="radio"/> si<br><input checked="" type="radio"/> no                                                                                                                                                                                                                                                                                                                                                                                                                                                               |
| motivo dieta                          | <input checked="" type="radio"/> no dieta<br><input type="radio"/> control peso<br><input type="radio"/> control colesterol<br><input type="radio"/> control diabetes<br><input type="radio"/> problemas estómago<br><input type="radio"/> problemas vesícula o hepáticos<br><input type="radio"/> HTA o cardiopatía<br><input type="radio"/> problemas renales<br><input type="radio"/> alergia alimentaria<br><input type="radio"/> ácido úrico elevado<br><input type="radio"/> vegetariana<br><input type="radio"/> otros |
| cambio alimentos año previo gestación | <input checked="" type="radio"/> si<br><input type="radio"/> no                                                                                                                                                                                                                                                                                                                                                                                                                                                               |
| cambio lácteos                        | <input type="radio"/> eliminado<br><input type="radio"/> disminuido<br><input checked="" type="radio"/> igual<br><input type="radio"/> aumentado<br><input type="radio"/> no sabe                                                                                                                                                                                                                                                                                                                                             |
| cambio huevos                         | <input type="radio"/> eliminado<br><input type="radio"/> disminuido<br><input checked="" type="radio"/> igual<br><input type="radio"/> aumentado<br><input type="radio"/> no sabe                                                                                                                                                                                                                                                                                                                                             |
| cambio carne                          | <input type="radio"/> eliminado<br><input type="radio"/> disminuido<br><input checked="" type="radio"/> igual<br><input type="radio"/> aumentado<br><input type="radio"/> no sabe                                                                                                                                                                                                                                                                                                                                             |
| cambio pescado                        | <input type="radio"/> eliminado<br><input type="radio"/> disminuido<br><input checked="" type="radio"/> igual<br><input type="radio"/> aumentado<br><input type="radio"/> no sabe                                                                                                                                                                                                                                                                                                                                             |
| cambio verduras                       | <input type="radio"/> eliminado<br><input type="radio"/> disminuido<br><input checked="" type="radio"/> igual<br><input type="radio"/> aumentado<br><input type="radio"/> no sabe                                                                                                                                                                                                                                                                                                                                             |

|                            |                                                                                                                                                                                                                        |
|----------------------------|------------------------------------------------------------------------------------------------------------------------------------------------------------------------------------------------------------------------|
| cambio legumbres           | <input type="radio"/> eliminado<br><input type="radio"/> disminuido<br><input checked="" type="radio"/> igual<br><input type="radio"/> aumentado<br><input type="radio"/> no sabe                                      |
| cambio fruta               | <input type="radio"/> eliminado<br><input type="radio"/> disminuido<br><input type="radio"/> igual<br><input checked="" type="radio"/> aumentado<br><input type="radio"/> no sabe                                      |
| cambio pan                 | <input type="radio"/> eliminado<br><input checked="" type="radio"/> disminuido<br><input type="radio"/> igual<br><input type="radio"/> aumentado<br><input type="radio"/> no sabe                                      |
| cambio aceite oliva        | <input type="radio"/> eliminado<br><input type="radio"/> disminuido<br><input checked="" type="radio"/> igual<br><input type="radio"/> aumentado<br><input type="radio"/> no sabe                                      |
| cambio mante o margarina   | <input type="radio"/> eliminado<br><input checked="" type="radio"/> disminuido<br><input type="radio"/> igual<br><input type="radio"/> aumentado<br><input type="radio"/> no sabe                                      |
| cambio azúcar y dulces     | <input type="radio"/> eliminado<br><input checked="" type="radio"/> disminuido<br><input type="radio"/> igual<br><input type="radio"/> aumentado<br><input type="radio"/> no sabe                                      |
| cambio bebidas alcohólicas | <input checked="" type="radio"/> eliminado<br><input type="radio"/> disminuido<br><input type="radio"/> igual<br><input type="radio"/> aumentado<br><input type="radio"/> no sabe                                      |
| frecuencia comidas fritas  | <input type="radio"/> a diario<br><input type="radio"/> 5 a 6 veces semana<br><input checked="" type="radio"/> 2 a 4 veces semana<br><input type="radio"/> 1 vez semana<br><input type="radio"/> menos de 1 vez semana |
| carne                      | <input type="radio"/> no como<br><input type="radio"/> cruda<br><input type="radio"/> poco hecha<br><input checked="" type="radio"/> hecha<br><input type="radio"/> muy hecha                                          |
| grasa visible carne        | <input type="radio"/> quita toda<br><input checked="" type="radio"/> quita mayoría<br><input type="radio"/> quita un poco<br><input type="radio"/> no quita nada                                                       |

|                                |                                                                                                                                                                                                                                                          |
|--------------------------------|----------------------------------------------------------------------------------------------------------------------------------------------------------------------------------------------------------------------------------------------------------|
| cocina carne                   | <input checked="" type="radio"/> a la plancha<br><input type="radio"/> a la parrilla<br><input type="radio"/> asada<br><input type="radio"/> frita<br><input type="radio"/> guisada                                                                      |
| tostado quemado carne          | <input type="radio"/> nunca<br><input checked="" type="radio"/> 1 vez mes<br><input type="radio"/> 2 a 3 veces mes<br><input type="radio"/> 1 vez semana<br><input type="radio"/> 2 a 3 semanas                                                          |
| tostado quemado pescado        | <input checked="" type="radio"/> nunca<br><input type="radio"/> 1 vez mes<br><input type="radio"/> 2 a 3 veces mes<br><input type="radio"/> 1 vez semana<br><input type="radio"/> 2 a 3 semanas                                                          |
| socarrat paella                | <input type="radio"/> nunca<br><input checked="" type="radio"/> 1 vez mes<br><input type="radio"/> 2 a 3 veces mes<br><input type="radio"/> 1 vez semana<br><input type="radio"/> 2 a 3 semanas                                                          |
| grasa o aceite cocinar         | <input type="radio"/> mantequilla<br><input type="radio"/> margarina<br><input checked="" type="radio"/> aceite oliva<br><input type="radio"/> aceite oliva virgen extra<br><input type="radio"/> aceite vegetal<br><input type="radio"/> mezcla aceites |
| grasa aceite aliñar            | <input type="radio"/> mantequilla<br><input type="radio"/> margarina<br><input checked="" type="radio"/> aceite oliva<br><input type="radio"/> aceite oliva virgen extra<br><input type="radio"/> aceite vegetal<br><input type="radio"/> mezcla aceites |
| grasa aceite freir             | <input type="radio"/> mantequilla<br><input type="radio"/> margarina<br><input checked="" type="radio"/> aceite oliva<br><input type="radio"/> aceite oliva virgen extra<br><input type="radio"/> aceite vegetal<br><input type="radio"/> mezcla aceites |
| Ejercicio cuestionario         | <input checked="" type="radio"/> si<br><input type="radio"/> no                                                                                                                                                                                          |
| horas de sueño incluido siesta | [*DATA REMOVED*]                                                                                                                                                                                                                                         |
| minutos siesta                 | [*DATA REMOVED*]                                                                                                                                                                                                                                         |
| horas televisión semana        | [*DATA REMOVED*]                                                                                                                                                                                                                                         |

|                                        |                                                                                                                                                                                                                                                                                                                                                                           |
|----------------------------------------|---------------------------------------------------------------------------------------------------------------------------------------------------------------------------------------------------------------------------------------------------------------------------------------------------------------------------------------------------------------------------|
| actividad trabajo                      | <input type="radio"/> casi siempre sentado<br><input type="radio"/> sentado 50 por cien<br><input type="radio"/> casi siempre de pie, quieto<br><input checked="" type="radio"/> casi siempre levantado caminando y llevando pocas cosas<br><input type="radio"/> casi siempre levantado, caminando y llevado muchas cosas<br><input type="radio"/> trabajo manual pesado |
| tiempo caminar o bici al día           | <input checked="" type="radio"/> casi nunca<br><input type="radio"/> menos 20min día<br><input type="radio"/> 20 a 40 min día<br><input type="radio"/> 40 a 60 min día<br><input type="radio"/> 1h o 1h y media día<br><input type="radio"/> más de 1h y media al día                                                                                                     |
| tiempo tareas casa al día              | <input type="radio"/> menos de 1h día<br><input checked="" type="radio"/> 1 a 2h día<br><input type="radio"/> 3 a 4h día<br><input type="radio"/> 5 a 6h día<br><input type="radio"/> 7 a 8h día<br><input type="radio"/> más de 8h día                                                                                                                                   |
| tiempo libre televisión ordenador leer | <input type="radio"/> menos 1h día<br><input type="radio"/> 1h día<br><input checked="" type="radio"/> 2h día<br><input type="radio"/> 3h día<br><input type="radio"/> 4h día<br><input type="radio"/> 5 a 6h día<br><input type="radio"/> mas 6h día                                                                                                                     |
| tiempo libre ejercicio o deporte       | <input checked="" type="radio"/> menos 1h semana<br><input type="radio"/> 1h semana<br><input type="radio"/> 2h semana<br><input type="radio"/> 3h semana<br><input type="radio"/> 4 a 5h semana<br><input type="radio"/> mas 5h semana                                                                                                                                   |
| como se considera                      | <input type="radio"/> sedentaria<br><input checked="" type="radio"/> poco activa<br><input type="radio"/> moderadamente activa<br><input type="radio"/> bastante activa<br><input type="radio"/> muy activa<br><input type="radio"/> no sabe                                                                                                                              |
| FUR                                    | [*DATA REMOVED*]                                                                                                                                                                                                                                                                                                                                                          |
| Semanas gestación 2T                   | [*DATA REMOVED*]                                                                                                                                                                                                                                                                                                                                                          |
| Días gestación 2T                      | [*DATA REMOVED*]                                                                                                                                                                                                                                                                                                                                                          |
| DBP 2T                                 | [*DATA REMOVED*]                                                                                                                                                                                                                                                                                                                                                          |
| CC 2T                                  | [*DATA REMOVED*]                                                                                                                                                                                                                                                                                                                                                          |
| AC 2T                                  | [*DATA REMOVED*]                                                                                                                                                                                                                                                                                                                                                          |



|                                                   |                                                                                                                                                                                                 |
|---------------------------------------------------|-------------------------------------------------------------------------------------------------------------------------------------------------------------------------------------------------|
| LF 2T                                             | [*DATA REMOVED*]                                                                                                                                                                                |
| PFE 2T (Hadlock)                                  | [*DATA REMOVED*]                                                                                                                                                                                |
| Semanas gestación 3T                              | [*DATA REMOVED*]                                                                                                                                                                                |
| días 3T                                           | [*DATA REMOVED*]                                                                                                                                                                                |
| DBP 3T                                            | [*DATA REMOVED*]                                                                                                                                                                                |
| CC 3T                                             | [*DATA REMOVED*]                                                                                                                                                                                |
| AC 3T                                             | [*DATA REMOVED*]                                                                                                                                                                                |
| LF 3T                                             | [*DATA REMOVED*]                                                                                                                                                                                |
| PFE 3T (Hadlock)                                  | [*DATA REMOVED*]                                                                                                                                                                                |
| Semanas de gestación final                        | [*DATA REMOVED*]                                                                                                                                                                                |
| días gestación final                              | [*DATA REMOVED*]                                                                                                                                                                                |
| Localización placenta                             | <input type="radio"/> anterior<br><input type="radio"/> lateral derecha<br><input type="radio"/> lateral izquierda<br><input checked="" type="radio"/> posterior<br><input type="radio"/> fondo |
| Presentación longitudinal cefálica                | <input type="radio"/> no<br><input checked="" type="radio"/> si                                                                                                                                 |
| Dorso                                             | <input checked="" type="radio"/> izquierda anterior<br><input type="radio"/> izquierda posterior<br><input type="radio"/> derecha anterior<br><input type="radio"/> derecha posterior           |
| diámetro biparietal                               | [*DATA REMOVED*]                                                                                                                                                                                |
| Circunferencia craneal                            | [*DATA REMOVED*]                                                                                                                                                                                |
| Circunferencia abdominal                          | [*DATA REMOVED*]                                                                                                                                                                                |
| Longitud de femur                                 | [*DATA REMOVED*]                                                                                                                                                                                |
| tejido celular subcutáneo a nivel del muslo en mm | [*DATA REMOVED*]                                                                                                                                                                                |
| tejido celular subcutáneo en abdomen en mm        | [*DATA REMOVED*]                                                                                                                                                                                |
| Volumen del muslo en cm3                          | [*DATA REMOVED*]                                                                                                                                                                                |
| Peso fetal estimado según fórmula de Hadlock      | [*DATA REMOVED*]                                                                                                                                                                                |

|                                               |                                                                                                                                                          |
|-----------------------------------------------|----------------------------------------------------------------------------------------------------------------------------------------------------------|
| Percentil                                     | [*DATA REMOVED*]                                                                                                                                         |
| Peso fetal estimado según fórmula de Scioscia | <hr/>                                                                                                                                                    |
| Peso fetal estimado según fórmula de LEE      | <hr/>                                                                                                                                                    |
| Tipo de parto                                 | <input checked="" type="radio"/> eutocico<br><input type="radio"/> instrumentado/ventosa<br><input type="radio"/> cesarea                                |
| fecha de nacimiento                           | [*DATA REMOVED*]                                                                                                                                         |
| Días entre exploración y nacimiento           | [*DATA REMOVED*]                                                                                                                                         |
| Peso RN en g                                  | [*DATA REMOVED*]                                                                                                                                         |
| sexo                                          | <input checked="" type="radio"/> mujer<br><input type="radio"/> hombre                                                                                   |
| Apgar 1 minuto                                | [*DATA REMOVED*]                                                                                                                                         |
| Apgar 5 minutos                               | [*DATA REMOVED*]                                                                                                                                         |
| Apgar 10 minutos                              | <hr/>                                                                                                                                                    |
| antecedente Covid durante gestación           | <input type="radio"/> Yes<br><input checked="" type="radio"/> No                                                                                         |
| Nivel de estudios                             | <input type="radio"/> ninguno<br><input checked="" type="radio"/> primarios<br><input type="radio"/> secundarios<br><input type="radio"/> universitarios |

## Base\_datos\_estimacion\_peso\_fetal

|                                       |                                                                                                                                                                                                                                                                                      |
|---------------------------------------|--------------------------------------------------------------------------------------------------------------------------------------------------------------------------------------------------------------------------------------------------------------------------------------|
| Número de identificación participante | 31                                                                                                                                                                                                                                                                                   |
| CODIGO PARTICIPANTE                   |                                                                                                                                                                                                                                                                                      |
| Edad                                  | [*DATA REMOVED*]                                                                                                                                                                                                                                                                     |
| Gestaciones                           | <input checked="" type="radio"/> 1<br><input type="radio"/> 2<br><input type="radio"/> 3<br><input type="radio"/> mas de 3                                                                                                                                                           |
| partos                                | <input checked="" type="radio"/> 0<br><input type="radio"/> 1<br><input type="radio"/> 2<br><input type="radio"/> 3<br><input type="radio"/> mas de 3                                                                                                                                |
| cesáreas                              | <input checked="" type="radio"/> 0<br><input type="radio"/> 1<br><input type="radio"/> 2<br><input type="radio"/> 3<br><input type="radio"/> mas de 3                                                                                                                                |
| Abortos                               | <input checked="" type="radio"/> 0<br><input type="radio"/> 1<br><input type="radio"/> 2<br><input type="radio"/> 3<br><input type="radio"/> mas de 3                                                                                                                                |
| Tipo de gestacion                     | <input type="radio"/> espontanea<br><input type="radio"/> IAC inseminación artificial conyuge<br><input type="radio"/> IAD inseminación artificial donante<br><input checked="" type="radio"/> FIV Fecundación in Vitro<br><input type="radio"/> Ovodon FIV con donación de ovocitos |
| peso previo a embarazo                | [*DATA REMOVED*]                                                                                                                                                                                                                                                                     |
| Ganancia ponderal embarazo            | [*DATA REMOVED*]                                                                                                                                                                                                                                                                     |
| Talla madre                           | [*DATA REMOVED*]                                                                                                                                                                                                                                                                     |
| IMC previo embarazo                   | 21.22280827689523                                                                                                                                                                                                                                                                    |
| Patología obstétrica                  | <input checked="" type="radio"/> no<br><input type="radio"/> si                                                                                                                                                                                                                      |
| Diabetes pregestacional               | <input checked="" type="radio"/> no<br><input type="radio"/> si                                                                                                                                                                                                                      |
| Diabetes gestacional                  | <input checked="" type="radio"/> no<br><input type="radio"/> si                                                                                                                                                                                                                      |

|                                            |                                                                                                                                                                                      |
|--------------------------------------------|--------------------------------------------------------------------------------------------------------------------------------------------------------------------------------------|
| Diabetes gestacional con insulina          | <input checked="" type="radio"/> no<br><input type="radio"/> si                                                                                                                      |
| Diabetes gestacional con dieta y ejercicio | <input checked="" type="radio"/> no<br><input type="radio"/> si                                                                                                                      |
| Percentil fetos previos                    | <input checked="" type="radio"/> Nada<br><input type="radio"/> percentil menor de 10<br><input type="radio"/> percentil entre 10 y 90<br><input type="radio"/> percentil mayor de 90 |
| Exfumadora                                 | <input checked="" type="radio"/> Nada<br><input type="radio"/> menos de 5 años<br><input type="radio"/> 5 a 10 años<br><input type="radio"/> mayor o igual a 10 años                 |
| Hábito tabáquico                           | <input checked="" type="radio"/> no<br><input type="radio"/> si                                                                                                                      |
| fumadora                                   | [*DATA REMOVED*]                                                                                                                                                                     |
| Consumo otros tóxicos                      | <input checked="" type="radio"/> no<br><input type="radio"/> si                                                                                                                      |
| Hb 1T                                      | [*DATA REMOVED*]                                                                                                                                                                     |
| Htc 1T                                     | [*DATA REMOVED*]                                                                                                                                                                     |
| Hb 2T                                      | [*DATA REMOVED*]                                                                                                                                                                     |
| HTC 2T                                     | [*DATA REMOVED*]                                                                                                                                                                     |
| Hb 3T                                      | [*DATA REMOVED*]                                                                                                                                                                     |
| HTC 3T                                     | [*DATA REMOVED*]                                                                                                                                                                     |
| Suplemento FE oral                         | <input checked="" type="radio"/> si<br><input type="radio"/> no                                                                                                                      |
| Suplemento fe iv                           | <input type="radio"/> si<br><input checked="" type="radio"/> no                                                                                                                      |
| Transfusión                                | <input checked="" type="radio"/> no<br><input type="radio"/> si                                                                                                                      |
| Solicitada Vit D                           | <input checked="" type="radio"/> no<br><input type="radio"/> si                                                                                                                      |
| Deficit vit D                              | <input type="radio"/> no<br><input type="radio"/> si                                                                                                                                 |
| Suplemento vit D                           | <input type="radio"/> si<br><input type="radio"/> no                                                                                                                                 |

|                       |                                                                                                                                                                                                                                                                                                                                                                                                              |
|-----------------------|--------------------------------------------------------------------------------------------------------------------------------------------------------------------------------------------------------------------------------------------------------------------------------------------------------------------------------------------------------------------------------------------------------------|
| Dieta, cuestionario   | <input checked="" type="radio"/> si<br><input type="radio"/> no                                                                                                                                                                                                                                                                                                                                              |
| Leche entera          | <input type="radio"/> Nunca o menos 1 vez al mes<br><input type="radio"/> 1 a 3 veces mes<br><input type="radio"/> 1 vez semana<br><input type="radio"/> 2 a 4 veces semana<br><input type="radio"/> 5 a 6 veces semana<br><input type="radio"/> 1 vez al día<br><input checked="" type="radio"/> 2 a 3 veces al día<br><input type="radio"/> 5 a 6 veces al día<br><input type="radio"/> más 6 veces al día |
| Leche semidesnatada   | <input checked="" type="radio"/> Nunca o menos 1 vez al mes<br><input type="radio"/> 1 a 3 veces mes<br><input type="radio"/> 1 vez semana<br><input type="radio"/> 2 a 4 veces semana<br><input type="radio"/> 5 a 6 veces semana<br><input type="radio"/> 1 vez al día<br><input type="radio"/> 2 a 3 veces al día<br><input type="radio"/> 5 a 6 veces al día<br><input type="radio"/> mas 6 veces al día |
| Leche desnatada       | <input checked="" type="radio"/> Nunca o menos 1 vez al mes<br><input type="radio"/> 1 a 3 veces mes<br><input type="radio"/> 1 vez semana<br><input type="radio"/> 2 a 4 veces semana<br><input type="radio"/> 5 a 6 veces semana<br><input type="radio"/> 1 vez al día<br><input type="radio"/> 2 a 3 veces al día<br><input type="radio"/> 5 a 6 veces al día<br><input type="radio"/> más 6 veces al día |
| Leche condensada      | <input checked="" type="radio"/> Nunca o menos 1 vez al mes<br><input type="radio"/> 1 a 3 veces mes<br><input type="radio"/> 1 vez semana<br><input type="radio"/> 2 a 4 veces semana<br><input type="radio"/> 5 a 6 veces semana<br><input type="radio"/> 1 vez al día<br><input type="radio"/> 2 a 3 veces al día<br><input type="radio"/> 5 a 6 veces al día<br><input type="radio"/> más 6 veces al día |
| nata o crema de leche | <input type="radio"/> Nunca o menos 1 vez al mes<br><input type="radio"/> 1 a 3 veces mes<br><input type="radio"/> 1 vez semana<br><input type="radio"/> 2 a 4 veces semana<br><input type="radio"/> 5 a 6 veces semana<br><input type="radio"/> 1 vez al día<br><input checked="" type="radio"/> 2 a 3 veces al día<br><input type="radio"/> 5 a 6 veces al día<br><input type="radio"/> más 6 veces al día |

|                                             |                                                                                                                                                                                                                                                                                                                                                                                                              |
|---------------------------------------------|--------------------------------------------------------------------------------------------------------------------------------------------------------------------------------------------------------------------------------------------------------------------------------------------------------------------------------------------------------------------------------------------------------------|
| Yogurt Entero                               | <input type="radio"/> Nunca o menos 1 vez al mes<br><input type="radio"/> 1 a 3 veces mes<br><input type="radio"/> 1 vez semana<br><input type="radio"/> 2 a 4 veces semana<br><input type="radio"/> 5 a 6 veces semana<br><input type="radio"/> 1 vez al día<br><input checked="" type="radio"/> 2 a 3 veces al día<br><input type="radio"/> 5 a 6 veces al día<br><input type="radio"/> más 6 veces al día |
| Yogurt desnatado                            | <input checked="" type="radio"/> Nunca o menos 1 vez al mes<br><input type="radio"/> 1 a 3 veces mes<br><input type="radio"/> 1 vez semana<br><input type="radio"/> 2 a 4 veces semana<br><input type="radio"/> 5 a 6 veces semana<br><input type="radio"/> 1 vez al día<br><input type="radio"/> 2 a 3 veces al día<br><input type="radio"/> 5 a 6 veces al día<br><input type="radio"/> más 6 veces al día |
| 100g requesón o queso blando o queso fresco | <input checked="" type="radio"/> Nunca o menos 1 vez al mes<br><input type="radio"/> 1 a 3 veces mes<br><input type="radio"/> 1 vez semana<br><input type="radio"/> 2 a 4 veces semana<br><input type="radio"/> 5 a 6 veces semana<br><input type="radio"/> 1 vez al día<br><input type="radio"/> 2 a 3 veces al día<br><input type="radio"/> 5 a 6 veces al día<br><input type="radio"/> más 6 veces al día |
| queso curado o semicurado o cremoso         | <input checked="" type="radio"/> Nunca o menos 1 vez al mes<br><input type="radio"/> 1 a 3 veces mes<br><input type="radio"/> 1 vez semana<br><input type="radio"/> 2 a 4 veces semana<br><input type="radio"/> 5 a 6 veces semana<br><input type="radio"/> 1 vez al día<br><input type="radio"/> 2 a 3 veces al día<br><input type="radio"/> 5 a 6 veces al día<br><input type="radio"/> más 6 veces al día |
| natillas flan pudding                       | <input type="radio"/> Nunca o menos 1 vez al mes<br><input checked="" type="radio"/> 1 a 3 veces mes<br><input type="radio"/> 1 vez semana<br><input type="radio"/> 2 a 4 veces semana<br><input type="radio"/> 5 a 6 veces semana<br><input type="radio"/> 1 vez al día<br><input type="radio"/> 2 a 3 veces al día<br><input type="radio"/> 5 a 6 veces al día<br><input type="radio"/> más 6 veces al día |
| Helado                                      | <input type="radio"/> Nunca o menos 1 vez al mes<br><input checked="" type="radio"/> 1 a 3 veces mes<br><input type="radio"/> 1 vez semana<br><input type="radio"/> 2 a 4 veces semana<br><input type="radio"/> 5 a 6 veces semana<br><input type="radio"/> 1 vez al día<br><input type="radio"/> 2 a 3 veces al día<br><input type="radio"/> 5 a 6 veces al día<br><input type="radio"/> más 6 veces al día |

|                                      |                                                                                                                                                                                                                                                                                                                                                                                                              |
|--------------------------------------|--------------------------------------------------------------------------------------------------------------------------------------------------------------------------------------------------------------------------------------------------------------------------------------------------------------------------------------------------------------------------------------------------------------|
| huevo                                | <input type="radio"/> Nunca o menos 1 vez al mes<br><input type="radio"/> 1 a 3 veces mes<br><input type="radio"/> 1 vez semana<br><input checked="" type="radio"/> 2 a 4 veces semana<br><input type="radio"/> 5 a 6 veces semana<br><input type="radio"/> 1 vez al día<br><input type="radio"/> 2 a 3 veces al día<br><input type="radio"/> 5 a 6 veces al día<br><input type="radio"/> más 6 veces al día |
| Pollo con piel                       | <input checked="" type="radio"/> Nunca o menos 1 vez al mes<br><input type="radio"/> 1 a 3 veces mes<br><input type="radio"/> 1 vez semana<br><input type="radio"/> 2 a 4 veces semana<br><input type="radio"/> 5 a 6 veces semana<br><input type="radio"/> 1 vez al día<br><input type="radio"/> 2 a 3 veces al día<br><input type="radio"/> 5 a 6 veces al día<br><input type="radio"/> más 6 veces al día |
| pollo sin piel                       | <input type="radio"/> Nunca o menos 1 vez al mes<br><input type="radio"/> 1 a 3 veces mes<br><input type="radio"/> 1 vez semana<br><input checked="" type="radio"/> 2 a 4 veces semana<br><input type="radio"/> 5 a 6 veces semana<br><input type="radio"/> 1 vez al día<br><input type="radio"/> 2 a 3 veces al día<br><input type="radio"/> 5 a 6 veces al día<br><input type="radio"/> más 6 veces al día |
| Ternera o cerdo o cordero            | <input type="radio"/> Nunca o menos 1 vez al mes<br><input type="radio"/> 1 a 3 veces mes<br><input type="radio"/> 1 vez semana<br><input checked="" type="radio"/> 2 a 4 veces semana<br><input type="radio"/> 5 a 6 veces semana<br><input type="radio"/> 1 vez al día<br><input type="radio"/> 2 a 3 veces al día<br><input type="radio"/> 5 a 6 veces al día<br><input type="radio"/> más 6 veces al día |
| carne caza: Conejo o codorniz o pato | <input checked="" type="radio"/> Nunca o menos 1 vez al mes<br><input type="radio"/> 1 a 3 veces mes<br><input type="radio"/> 1 vez semana<br><input type="radio"/> 2 a 4 veces semana<br><input type="radio"/> 5 a 6 veces semana<br><input type="radio"/> 1 vez al día<br><input type="radio"/> 2 a 3 veces al día<br><input type="radio"/> 5 a 6 veces al día<br><input type="radio"/> más 6 veces al día |
| Hígado de ternera o cerdo o pollo    | <input checked="" type="radio"/> Nunca o menos 1 vez al mes<br><input type="radio"/> 1 a 3 veces mes<br><input type="radio"/> 1 vez semana<br><input type="radio"/> 2 a 4 veces semana<br><input type="radio"/> 5 a 6 veces semana<br><input type="radio"/> 1 vez al día<br><input type="radio"/> 2 a 3 veces al día<br><input type="radio"/> 5 a 6 veces al día<br><input type="radio"/> más 6 veces al día |

|                     |                                                                                                                                                                                                                                                                                                                                                                                                              |
|---------------------|--------------------------------------------------------------------------------------------------------------------------------------------------------------------------------------------------------------------------------------------------------------------------------------------------------------------------------------------------------------------------------------------------------------|
| Vísceras            | <input checked="" type="radio"/> Nunca o menos 1 vez al mes<br><input type="radio"/> 1 a 3 veces mes<br><input type="radio"/> 1 vez semana<br><input type="radio"/> 2 a 4 veces semana<br><input type="radio"/> 5 a 6 veces semana<br><input type="radio"/> 1 vez al día<br><input type="radio"/> 2 a 3 veces al día<br><input type="radio"/> 5 a 6 veces al día<br><input type="radio"/> más 6 veces al día |
| Embutido            | <input checked="" type="radio"/> Nunca o menos 1 vez al mes<br><input type="radio"/> 1 a 3 veces mes<br><input type="radio"/> 1 vez semana<br><input type="radio"/> 2 a 4 veces semana<br><input type="radio"/> 5 a 6 veces semana<br><input type="radio"/> 1 vez al día<br><input type="radio"/> 2 a 3 veces al día<br><input type="radio"/> 5 a 6 veces al día<br><input type="radio"/> más 6 veces al día |
| Salchicha o similar | <input checked="" type="radio"/> Nunca o menos 1 vez al mes<br><input type="radio"/> 1 a 3 veces mes<br><input type="radio"/> 1 vez semana<br><input type="radio"/> 2 a 4 veces semana<br><input type="radio"/> 5 a 6 veces semana<br><input type="radio"/> 1 vez al día<br><input type="radio"/> 2 a 3 veces al día<br><input type="radio"/> 5 a 6 veces al día<br><input type="radio"/> más 6 veces al día |
| Pate o foiegras     | <input checked="" type="radio"/> Nunca o menos 1 vez al mes<br><input type="radio"/> 1 a 3 veces mes<br><input type="radio"/> 1 vez semana<br><input type="radio"/> 2 a 4 veces semana<br><input type="radio"/> 5 a 6 veces semana<br><input type="radio"/> 1 vez al día<br><input type="radio"/> 2 a 3 veces al día<br><input type="radio"/> 5 a 6 veces al día<br><input type="radio"/> más 6 veces al día |
| Hamburguesa         | <input type="radio"/> Nunca o menos 1 vez al mes<br><input type="radio"/> 1 a 3 veces mes<br><input checked="" type="radio"/> 1 vez semana<br><input type="radio"/> 2 a 4 veces semana<br><input type="radio"/> 5 a 6 veces semana<br><input type="radio"/> 1 vez al día<br><input type="radio"/> 2 a 3 veces al día<br><input type="radio"/> 5 a 6 veces al día<br><input type="radio"/> más 6 veces al día |
| tocino o bacon      | <input checked="" type="radio"/> Nunca o menos 1 vez al mes<br><input type="radio"/> 1 a 3 veces mes<br><input type="radio"/> 1 vez semana<br><input type="radio"/> 2 a 4 veces semana<br><input type="radio"/> 5 a 6 veces semana<br><input type="radio"/> 1 vez al día<br><input type="radio"/> 2 a 3 veces al día<br><input type="radio"/> 5 a 6 veces al día<br><input type="radio"/> más 6 veces al día |



---

Pescado frito

- ☐ Nunca o menos 1 vez al mes  
☒ 1 a 3 veces mes  
☐ 1 vez semana  
☐ 2 a 4 veces semana  
☐ 5 a 6 veces semana  
☐ 1 vez al día  
☐ 2 a 3 veces al día  
☐ 5 a 6 veces al día  
☐ más 6 veces al día

---

pescado hervido blanco

- ☐ Nunca o menos 1 vez al mes  
☐ 1 a 3 veces mes  
☒ 1 vez semana  
☐ 2 a 4 veces semana  
☐ 5 a 6 veces semana  
☐ 1 vez al día  
☐ 2 a 3 veces al día  
☐ 5 a 6 veces al día  
☐ más 6 veces al día

---

pescado hervido azul

- ☐ Nunca o menos 1 vez al mes  
☒ 1 a 3 veces mes  
☐ 1 vez semana  
☐ 2 a 4 veces semana  
☐ 5 a 6 veces semana  
☐ 1 vez al día  
☐ 2 a 3 veces al día  
☐ 5 a 6 veces al día  
☐ más 6 veces al día

---

otros pescado azul

- ☐ Nunca o menos 1 vez al mes  
☒ 1 a 3 veces mes  
☐ 1 vez semana  
☐ 2 a 4 veces semana  
☐ 5 a 6 veces semana  
☐ 1 vez al día  
☐ 2 a 3 veces al día  
☐ 5 a 6 veces al día  
☐ más 6 veces al día

---

atun conserva

- ☐ Nunca o menos 1 vez al mes  
☒ 1 a 3 veces mes  
☐ 1 vez semana  
☐ 2 a 4 veces semana  
☐ 5 a 6 veces semana  
☐ 1 vez al día  
☐ 2 a 3 veces al día  
☐ 5 a 6 veces al día  
☐ más 6 veces al día

---

sardina conserva

- ☒ Nunca o menos 1 vez al mes  
☐ 1 a 3 veces mes  
☐ 1 vez semana  
☐ 2 a 4 veces semana  
☐ 5 a 6 veces semana  
☐ 1 vez al día  
☐ 2 a 3 veces al día  
☐ 5 a 6 veces al día  
☐ más 6 veces al día

|                                         |                                                                                                                                                                                                                                                                                                                                                                                                              |
|-----------------------------------------|--------------------------------------------------------------------------------------------------------------------------------------------------------------------------------------------------------------------------------------------------------------------------------------------------------------------------------------------------------------------------------------------------------------|
| pescado ahumado                         | <input checked="" type="radio"/> Nunca o menos 1 vez al mes<br><input type="radio"/> 1 a 3 veces mes<br><input type="radio"/> 1 vez semana<br><input type="radio"/> 2 a 4 veces semana<br><input type="radio"/> 5 a 6 veces semana<br><input type="radio"/> 1 vez al día<br><input type="radio"/> 2 a 3 veces al día<br><input type="radio"/> 5 a 6 veces al día<br><input type="radio"/> más 6 veces al día |
| almejas o mejillones o ostras unos 100g | <input checked="" type="radio"/> Nunca o menos 1 vez al mes<br><input type="radio"/> 1 a 3 veces mes<br><input type="radio"/> 1 vez semana<br><input type="radio"/> 2 a 4 veces semana<br><input type="radio"/> 5 a 6 veces semana<br><input type="radio"/> 1 vez al día<br><input type="radio"/> 2 a 3 veces al día<br><input type="radio"/> 5 a 6 veces al día<br><input type="radio"/> más 6 veces al día |
| calamar o chipiron o sepia unos 100g    | <input type="radio"/> Nunca o menos 1 vez al mes<br><input checked="" type="radio"/> 1 a 3 veces mes<br><input type="radio"/> 1 vez semana<br><input type="radio"/> 2 a 4 veces semana<br><input type="radio"/> 5 a 6 veces semana<br><input type="radio"/> 1 vez al día<br><input type="radio"/> 2 a 3 veces al día<br><input type="radio"/> 5 a 6 veces al día<br><input type="radio"/> más 6 veces al día |
| marisco unos 100g                       | <input type="radio"/> Nunca o menos 1 vez al mes<br><input checked="" type="radio"/> 1 a 3 veces mes<br><input type="radio"/> 1 vez semana<br><input type="radio"/> 2 a 4 veces semana<br><input type="radio"/> 5 a 6 veces semana<br><input type="radio"/> 1 vez al día<br><input type="radio"/> 2 a 3 veces al día<br><input type="radio"/> 5 a 6 veces al día<br><input type="radio"/> más 6 veces al día |
| Espinacas o acelgas cocinadas           | <input checked="" type="radio"/> Nunca o menos 1 vez al mes<br><input type="radio"/> 1 a 3 veces mes<br><input type="radio"/> 1 vez semana<br><input type="radio"/> 2 a 4 veces semana<br><input type="radio"/> 5 a 6 veces semana<br><input type="radio"/> 1 vez al día<br><input type="radio"/> 2 a 3 veces al día<br><input type="radio"/> 5 a 6 veces al día<br><input type="radio"/> más 6 veces al día |
| Col o coliflor o brocoli cocinado       | <input checked="" type="radio"/> Nunca o menos 1 vez al mes<br><input type="radio"/> 1 a 3 veces mes<br><input type="radio"/> 1 vez semana<br><input type="radio"/> 2 a 4 veces semana<br><input type="radio"/> 5 a 6 veces semana<br><input type="radio"/> 1 vez al día<br><input type="radio"/> 2 a 3 veces al día<br><input type="radio"/> 5 a 6 veces al día<br><input type="radio"/> más 6 veces al día |

---

Lechuga o endivia o escarola

- ☐ Nunca o menos 1 vez al mes  
☐ 1 a 3 veces mes  
☐ 1 vez semana  
☐ 2 a 4 veces semana  
☐ 5 a 6 veces semana  
☒ 1 vez al día  
☐ 2 a 3 veces al día  
☐ 5 a 6 veces al día  
☐ más 6 veces al día

---

tomate ensalada

- ☐ Nunca o menos 1 vez al mes  
☐ 1 a 3 veces mes  
☐ 1 vez semana  
☐ 2 a 4 veces semana  
☐ 5 a 6 veces semana  
☒ 1 vez al día  
☐ 2 a 3 veces al día  
☐ 5 a 6 veces al día  
☐ más 6 veces al día

---

cebolla

- ☐ Nunca o menos 1 vez al mes  
☐ 1 a 3 veces mes  
☐ 1 vez semana  
☐ 2 a 4 veces semana  
☐ 5 a 6 veces semana  
☒ 1 vez al día  
☐ 2 a 3 veces al día  
☐ 5 a 6 veces al día  
☐ más 6 veces al día

---

Zanahoria o calabaza

- ☐ Nunca o menos 1 vez al mes  
☐ 1 a 3 veces mes  
☐ 1 vez semana  
☐ 2 a 4 veces semana  
☐ 5 a 6 veces semana  
☒ 1 vez al día  
☐ 2 a 3 veces al día  
☐ 5 a 6 veces al día  
☐ más 6 veces al día

---

Judías verdes

- ☐ Nunca o menos 1 vez al mes  
☐ 1 a 3 veces mes  
☐ 1 vez semana  
☐ 2 a 4 veces semana  
☐ 5 a 6 veces semana  
☒ 1 vez al día  
☐ 2 a 3 veces al día  
☐ 5 a 6 veces al día  
☐ más 6 veces al día

---

Berenjena o calabacin o pepino

- ☐ Nunca o menos 1 vez al mes  
☐ 1 a 3 veces mes  
☐ 1 vez semana  
☐ 2 a 4 veces semana  
☐ 5 a 6 veces semana  
☒ 1 vez al día  
☐ 2 a 3 veces al día  
☐ 5 a 6 veces al día  
☐ más 6 veces al día

|                       |                                                                                                                                                                                                                                                                                                                                                                                                              |
|-----------------------|--------------------------------------------------------------------------------------------------------------------------------------------------------------------------------------------------------------------------------------------------------------------------------------------------------------------------------------------------------------------------------------------------------------|
| pimiento              | <input type="radio"/> Nunca o menos 1 vez al mes<br><input type="radio"/> 1 a 3 veces mes<br><input type="radio"/> 1 vez semana<br><input type="radio"/> 2 a 4 veces semana<br><input type="radio"/> 5 a 6 veces semana<br><input checked="" type="radio"/> 1 vez al día<br><input type="radio"/> 2 a 3 veces al día<br><input type="radio"/> 5 a 6 veces al día<br><input type="radio"/> más 6 veces al día |
| alcachofa             | <input type="radio"/> Nunca o menos 1 vez al mes<br><input type="radio"/> 1 a 3 veces mes<br><input checked="" type="radio"/> 1 vez semana<br><input type="radio"/> 2 a 4 veces semana<br><input type="radio"/> 5 a 6 veces semana<br><input type="radio"/> 1 vez al día<br><input type="radio"/> 2 a 3 veces al día<br><input type="radio"/> 5 a 6 veces al día<br><input type="radio"/> más 6 veces al día |
| espárragos            | <input checked="" type="radio"/> Nunca o menos 1 vez al mes<br><input type="radio"/> 1 a 3 veces mes<br><input type="radio"/> 1 vez semana<br><input type="radio"/> 2 a 4 veces semana<br><input type="radio"/> 5 a 6 veces semana<br><input type="radio"/> 1 vez al día<br><input type="radio"/> 2 a 3 veces al día<br><input type="radio"/> 5 a 6 veces al día<br><input type="radio"/> más 6 veces al día |
| maíz hervido          | <input type="radio"/> Nunca o menos 1 vez al mes<br><input checked="" type="radio"/> 1 a 3 veces mes<br><input type="radio"/> 1 vez semana<br><input type="radio"/> 2 a 4 veces semana<br><input type="radio"/> 5 a 6 veces semana<br><input type="radio"/> 1 vez al día<br><input type="radio"/> 2 a 3 veces al día<br><input type="radio"/> 5 a 6 veces al día<br><input type="radio"/> más 6 veces al día |
| legumbres             | <input type="radio"/> Nunca o menos 1 vez al mes<br><input type="radio"/> 1 a 3 veces mes<br><input type="radio"/> 1 vez semana<br><input checked="" type="radio"/> 2 a 4 veces semana<br><input type="radio"/> 5 a 6 veces semana<br><input type="radio"/> 1 vez al día<br><input type="radio"/> 2 a 3 veces al día<br><input type="radio"/> 5 a 6 veces al día<br><input type="radio"/> más 6 veces al día |
| naranjas o mandarinas | <input type="radio"/> Nunca o menos 1 vez al mes<br><input type="radio"/> 1 a 3 veces mes<br><input type="radio"/> 1 vez semana<br><input type="radio"/> 2 a 4 veces semana<br><input type="radio"/> 5 a 6 veces semana<br><input type="radio"/> 1 vez al día<br><input checked="" type="radio"/> 2 a 3 veces al día<br><input type="radio"/> 5 a 6 veces al día<br><input type="radio"/> más 6 veces al día |

|                       |                                                                                                                                                                                                                                                                                                                                                                                                              |
|-----------------------|--------------------------------------------------------------------------------------------------------------------------------------------------------------------------------------------------------------------------------------------------------------------------------------------------------------------------------------------------------------------------------------------------------------|
| zum natural fruta     | <input type="radio"/> Nunca o menos 1 vez al mes<br><input type="radio"/> 1 a 3 veces mes<br><input type="radio"/> 1 vez semana<br><input checked="" type="radio"/> 2 a 4 veces semana<br><input type="radio"/> 5 a 6 veces semana<br><input type="radio"/> 1 vez al día<br><input type="radio"/> 2 a 3 veces al día<br><input type="radio"/> 5 a 6 veces al día<br><input type="radio"/> más 6 veces al día |
| platano               | <input type="radio"/> Nunca o menos 1 vez al mes<br><input type="radio"/> 1 a 3 veces mes<br><input type="radio"/> 1 vez semana<br><input type="radio"/> 2 a 4 veces semana<br><input type="radio"/> 5 a 6 veces semana<br><input checked="" type="radio"/> 1 vez al día<br><input type="radio"/> 2 a 3 veces al día<br><input type="radio"/> 5 a 6 veces al día<br><input type="radio"/> más 6 veces al día |
| manzana o pera        | <input type="radio"/> Nunca o menos 1 vez al mes<br><input type="radio"/> 1 a 3 veces mes<br><input type="radio"/> 1 vez semana<br><input type="radio"/> 2 a 4 veces semana<br><input type="radio"/> 5 a 6 veces semana<br><input checked="" type="radio"/> 1 vez al día<br><input type="radio"/> 2 a 3 veces al día<br><input type="radio"/> 5 a 6 veces al día<br><input type="radio"/> más 6 veces al día |
| melocotón o nectarina | <input type="radio"/> Nunca o menos 1 vez al mes<br><input type="radio"/> 1 a 3 veces mes<br><input type="radio"/> 1 vez semana<br><input type="radio"/> 2 a 4 veces semana<br><input type="radio"/> 5 a 6 veces semana<br><input checked="" type="radio"/> 1 vez al día<br><input type="radio"/> 2 a 3 veces al día<br><input type="radio"/> 5 a 6 veces al día<br><input type="radio"/> más 6 veces al día |
| sandia o melon        | <input type="radio"/> Nunca o menos 1 vez al mes<br><input type="radio"/> 1 a 3 veces mes<br><input type="radio"/> 1 vez semana<br><input checked="" type="radio"/> 2 a 4 veces semana<br><input type="radio"/> 5 a 6 veces semana<br><input type="radio"/> 1 vez al día<br><input type="radio"/> 2 a 3 veces al día<br><input type="radio"/> 5 a 6 veces al día<br><input type="radio"/> más 6 veces al día |
| uva                   | <input type="radio"/> Nunca o menos 1 vez al mes<br><input type="radio"/> 1 a 3 veces mes<br><input type="radio"/> 1 vez semana<br><input checked="" type="radio"/> 2 a 4 veces semana<br><input type="radio"/> 5 a 6 veces semana<br><input type="radio"/> 1 vez al día<br><input type="radio"/> 2 a 3 veces al día<br><input type="radio"/> 5 a 6 veces al día<br><input type="radio"/> más 6 veces al día |

---

bruna o ciruela

- ☐ Nunca o menos 1 vez al mes  
☒ 1 a 3 veces mes  
☐ 1 vez semana  
☐ 2 a 4 veces semana  
☐ 5 a 6 veces semana  
☐ 1 vez al día  
☐ 2 a 3 veces al día  
☐ 5 a 6 veces al día  
☐ más 6 veces al día

---

kiwi

- ☐ Nunca o menos 1 vez al mes  
☒ 1 a 3 veces mes  
☐ 1 vez semana  
☐ 2 a 4 veces semana  
☐ 5 a 6 veces semana  
☐ 1 vez al día  
☐ 2 a 3 veces al día  
☐ 5 a 6 veces al día  
☐ más 6 veces al día

---

aceituna

- ☐ Nunca o menos 1 vez al mes  
☒ 1 a 3 veces mes  
☐ 1 vez semana  
☐ 2 a 4 veces semana  
☐ 5 a 6 veces semana  
☐ 1 vez al día  
☐ 2 a 3 veces al día  
☐ 5 a 6 veces al día  
☐ más 6 veces al día

---

frutos secos

- ☐ Nunca o menos 1 vez al mes  
☒ 1 a 3 veces mes  
☐ 1 vez semana  
☐ 2 a 4 veces semana  
☐ 5 a 6 veces semana  
☐ 1 vez al día  
☐ 2 a 3 veces al día  
☐ 5 a 6 veces al día  
☐ más 6 veces al día

---

pan blanco

- ☐ Nunca o menos 1 vez al mes  
☐ 1 a 3 veces mes  
☐ 1 vez semana  
☒ 2 a 4 veces semana  
☐ 5 a 6 veces semana  
☐ 1 vez al día  
☐ 2 a 3 veces al día  
☐ 5 a 6 veces al día  
☐ más 6 veces al día

---

pan integral

- ☐ Nunca o menos 1 vez al mes  
☐ 1 a 3 veces mes  
☐ 1 vez semana  
☒ 2 a 4 veces semana  
☐ 5 a 6 veces semana  
☐ 1 vez al día  
☐ 2 a 3 veces al día  
☐ 5 a 6 veces al día  
☐ más 6 veces al día

---

cereales desayuno

- ☐ Nunca o menos 1 vez al mes  
☐ 1 a 3 veces mes  
☐ 1 vez semana  
☒ 2 a 4 veces semana  
☐ 5 a 6 veces semana  
☐ 1 vez al día  
☐ 2 a 3 veces al día  
☐ 5 a 6 veces al día  
☐ más 6 veces al día

---

patatas fritas

- ☐ Nunca o menos 1 vez al mes  
☒ 1 a 3 veces mes  
☐ 1 vez semana  
☐ 2 a 4 veces semana  
☐ 5 a 6 veces semana  
☐ 1 vez al día  
☐ 2 a 3 veces al día  
☐ 5 a 6 veces al día  
☐ más 6 veces al día

---

patatas cocidas o asadas

- ☐ Nunca o menos 1 vez al mes  
☐ 1 a 3 veces mes  
☒ 1 vez semana  
☐ 2 a 4 veces semana  
☐ 5 a 6 veces semana  
☐ 1 vez al día  
☐ 2 a 3 veces al día  
☐ 5 a 6 veces al día  
☐ más 6 veces al día

---

bolsa papas

- ☐ Nunca o menos 1 vez al mes  
☒ 1 a 3 veces mes  
☐ 1 vez semana  
☐ 2 a 4 veces semana  
☐ 5 a 6 veces semana  
☐ 1 vez al día  
☐ 2 a 3 veces al día  
☐ 5 a 6 veces al día  
☐ más 6 veces al día

---

arroz cocinado

- ☐ Nunca o menos 1 vez al mes  
☐ 1 a 3 veces mes  
☒ 1 vez semana  
☐ 2 a 4 veces semana  
☐ 5 a 6 veces semana  
☐ 1 vez al día  
☐ 2 a 3 veces al día  
☐ 5 a 6 veces al día  
☐ más 6 veces al día

---

pasta

- ☐ Nunca o menos 1 vez al mes  
☐ 1 a 3 veces mes  
☐ 1 vez semana  
☒ 2 a 4 veces semana  
☐ 5 a 6 veces semana  
☐ 1 vez al día  
☐ 2 a 3 veces al día  
☐ 5 a 6 veces al día  
☐ más 6 veces al día

|                     |                                                                                                                                                                                                                                                                                                                                                                                                              |
|---------------------|--------------------------------------------------------------------------------------------------------------------------------------------------------------------------------------------------------------------------------------------------------------------------------------------------------------------------------------------------------------------------------------------------------------|
| pizza               | <input type="radio"/> Nunca o menos 1 vez al mes<br><input checked="" type="radio"/> 1 a 3 veces mes<br><input type="radio"/> 1 vez semana<br><input type="radio"/> 2 a 4 veces semana<br><input type="radio"/> 5 a 6 veces semana<br><input type="radio"/> 1 vez al día<br><input type="radio"/> 2 a 3 veces al día<br><input type="radio"/> 5 a 6 veces al día<br><input type="radio"/> más 6 veces al día |
| aceite oliva        | <input type="radio"/> Nunca o menos 1 vez al mes<br><input type="radio"/> 1 a 3 veces mes<br><input type="radio"/> 1 vez semana<br><input type="radio"/> 2 a 4 veces semana<br><input type="radio"/> 5 a 6 veces semana<br><input checked="" type="radio"/> 1 vez al día<br><input type="radio"/> 2 a 3 veces al día<br><input type="radio"/> 5 a 6 veces al día<br><input type="radio"/> más 6 veces al día |
| otros aceites       | <input type="radio"/> Nunca o menos 1 vez al mes<br><input type="radio"/> 1 a 3 veces mes<br><input type="radio"/> 1 vez semana<br><input type="radio"/> 2 a 4 veces semana<br><input type="radio"/> 5 a 6 veces semana<br><input checked="" type="radio"/> 1 vez al día<br><input type="radio"/> 2 a 3 veces al día<br><input type="radio"/> 5 a 6 veces al día<br><input type="radio"/> más 6 veces al día |
| margarina           | <input type="radio"/> Nunca o menos 1 vez al mes<br><input type="radio"/> 1 a 3 veces mes<br><input checked="" type="radio"/> 1 vez semana<br><input type="radio"/> 2 a 4 veces semana<br><input type="radio"/> 5 a 6 veces semana<br><input type="radio"/> 1 vez al día<br><input type="radio"/> 2 a 3 veces al día<br><input type="radio"/> 5 a 6 veces al día<br><input type="radio"/> más 6 veces al día |
| mantequilla         | <input type="radio"/> Nunca o menos 1 vez al mes<br><input type="radio"/> 1 a 3 veces mes<br><input checked="" type="radio"/> 1 vez semana<br><input type="radio"/> 2 a 4 veces semana<br><input type="radio"/> 5 a 6 veces semana<br><input type="radio"/> 1 vez al día<br><input type="radio"/> 2 a 3 veces al día<br><input type="radio"/> 5 a 6 veces al día<br><input type="radio"/> más 6 veces al día |
| galletas tipo maria | <input type="radio"/> Nunca o menos 1 vez al mes<br><input type="radio"/> 1 a 3 veces mes<br><input type="radio"/> 1 vez semana<br><input checked="" type="radio"/> 2 a 4 veces semana<br><input type="radio"/> 5 a 6 veces semana<br><input type="radio"/> 1 vez al día<br><input type="radio"/> 2 a 3 veces al día<br><input type="radio"/> 5 a 6 veces al día<br><input type="radio"/> más 6 veces al día |



|                           |                                                                                                                                                                                                                                                                                                                                                                                                              |
|---------------------------|--------------------------------------------------------------------------------------------------------------------------------------------------------------------------------------------------------------------------------------------------------------------------------------------------------------------------------------------------------------------------------------------------------------|
| galletas chocolate        | <input type="radio"/> Nunca o menos 1 vez al mes<br><input type="radio"/> 1 a 3 veces mes<br><input type="radio"/> 1 vez semana<br><input checked="" type="radio"/> 2 a 4 veces semana<br><input type="radio"/> 5 a 6 veces semana<br><input type="radio"/> 1 vez al día<br><input type="radio"/> 2 a 3 veces al día<br><input type="radio"/> 5 a 6 veces al día<br><input type="radio"/> más 6 veces al día |
| bollieria                 | <input type="radio"/> Nunca o menos 1 vez al mes<br><input type="radio"/> 1 a 3 veces mes<br><input type="radio"/> 1 vez semana<br><input checked="" type="radio"/> 2 a 4 veces semana<br><input type="radio"/> 5 a 6 veces semana<br><input type="radio"/> 1 vez al día<br><input type="radio"/> 2 a 3 veces al día<br><input type="radio"/> 5 a 6 veces al día<br><input type="radio"/> más 6 veces al día |
| chocolate o bombones      | <input type="radio"/> Nunca o menos 1 vez al mes<br><input type="radio"/> 1 a 3 veces mes<br><input checked="" type="radio"/> 1 vez semana<br><input type="radio"/> 2 a 4 veces semana<br><input type="radio"/> 5 a 6 veces semana<br><input type="radio"/> 1 vez al día<br><input type="radio"/> 2 a 3 veces al día<br><input type="radio"/> 5 a 6 veces al día<br><input type="radio"/> más 6 veces al día |
| chocolate polvo o colacao | <input type="radio"/> Nunca o menos 1 vez al mes<br><input type="radio"/> 1 a 3 veces mes<br><input type="radio"/> 1 vez semana<br><input type="radio"/> 2 a 4 veces semana<br><input type="radio"/> 5 a 6 veces semana<br><input checked="" type="radio"/> 1 vez al día<br><input type="radio"/> 2 a 3 veces al día<br><input type="radio"/> 5 a 6 veces al día<br><input type="radio"/> más 6 veces al día |
| vino tinto                | <input checked="" type="radio"/> Nunca o menos 1 vez al mes<br><input type="radio"/> 1 a 3 veces mes<br><input type="radio"/> 1 vez semana<br><input type="radio"/> 2 a 4 veces semana<br><input type="radio"/> 5 a 6 veces semana<br><input type="radio"/> 1 vez al día<br><input type="radio"/> 2 a 3 veces al día<br><input type="radio"/> 5 a 6 veces al día<br><input type="radio"/> más 6 veces al día |
| vino blanco               | <input checked="" type="radio"/> Nunca o menos 1 vez al mes<br><input type="radio"/> 1 a 3 veces mes<br><input type="radio"/> 1 vez semana<br><input type="radio"/> 2 a 4 veces semana<br><input type="radio"/> 5 a 6 veces semana<br><input type="radio"/> 1 vez al día<br><input type="radio"/> 2 a 3 veces al día<br><input type="radio"/> 5 a 6 veces al día<br><input type="radio"/> más 6 veces al día |

|                       |                                                                                                                                                                                                                                                                                                                                                                                                              |
|-----------------------|--------------------------------------------------------------------------------------------------------------------------------------------------------------------------------------------------------------------------------------------------------------------------------------------------------------------------------------------------------------------------------------------------------------|
| vino seco o vermut    | <input checked="" type="radio"/> Nunca o menos 1 vez al mes<br><input type="radio"/> 1 a 3 veces mes<br><input type="radio"/> 1 vez semana<br><input type="radio"/> 2 a 4 veces semana<br><input type="radio"/> 5 a 6 veces semana<br><input type="radio"/> 1 vez al día<br><input type="radio"/> 2 a 3 veces al día<br><input type="radio"/> 5 a 6 veces al día<br><input type="radio"/> más 6 veces al día |
| cerveza               | <input checked="" type="radio"/> Nunca o menos 1 vez al mes<br><input type="radio"/> 1 a 3 veces mes<br><input type="radio"/> 1 vez semana<br><input type="radio"/> 2 a 4 veces semana<br><input type="radio"/> 5 a 6 veces semana<br><input type="radio"/> 1 vez al día<br><input type="radio"/> 2 a 3 veces al día<br><input type="radio"/> 5 a 6 veces al día<br><input type="radio"/> más 6 veces al día |
| cerveza sin alcohol   | <input checked="" type="radio"/> Nunca o menos 1 vez al mes<br><input type="radio"/> 1 a 3 veces mes<br><input type="radio"/> 1 vez semana<br><input type="radio"/> 2 a 4 veces semana<br><input type="radio"/> 5 a 6 veces semana<br><input type="radio"/> 1 vez al día<br><input type="radio"/> 2 a 3 veces al día<br><input type="radio"/> 5 a 6 veces al día<br><input type="radio"/> más 6 veces al día |
| licores               | <input checked="" type="radio"/> Nunca o menos 1 vez al mes<br><input type="radio"/> 1 a 3 veces mes<br><input type="radio"/> 1 vez semana<br><input type="radio"/> 2 a 4 veces semana<br><input type="radio"/> 5 a 6 veces semana<br><input type="radio"/> 1 vez al día<br><input type="radio"/> 2 a 3 veces al día<br><input type="radio"/> 5 a 6 veces al día<br><input type="radio"/> más 6 veces al día |
| ginebra o ron o vodka | <input checked="" type="radio"/> Nunca o menos 1 vez al mes<br><input type="radio"/> 1 a 3 veces mes<br><input type="radio"/> 1 vez semana<br><input type="radio"/> 2 a 4 veces semana<br><input type="radio"/> 5 a 6 veces semana<br><input type="radio"/> 1 vez al día<br><input type="radio"/> 2 a 3 veces al día<br><input type="radio"/> 5 a 6 veces al día<br><input type="radio"/> más 6 veces al día |
| refresco normal       | <input checked="" type="radio"/> Nunca o menos 1 vez al mes<br><input type="radio"/> 1 a 3 veces mes<br><input type="radio"/> 1 vez semana<br><input type="radio"/> 2 a 4 veces semana<br><input type="radio"/> 5 a 6 veces semana<br><input type="radio"/> 1 vez al día<br><input type="radio"/> 2 a 3 veces al día<br><input type="radio"/> 5 a 6 veces al día<br><input type="radio"/> más 6 veces al día |

|                          |                                                                                                                                                                                                                                                                                                                                                                                                              |
|--------------------------|--------------------------------------------------------------------------------------------------------------------------------------------------------------------------------------------------------------------------------------------------------------------------------------------------------------------------------------------------------------------------------------------------------------|
| refresco sin azúcar      | <input type="radio"/> Nunca o menos 1 vez al mes<br><input type="radio"/> 1 a 3 veces mes<br><input checked="" type="radio"/> 1 vez semana<br><input type="radio"/> 2 a 4 veces semana<br><input type="radio"/> 5 a 6 veces semana<br><input type="radio"/> 1 vez al día<br><input type="radio"/> 2 a 3 veces al día<br><input type="radio"/> 5 a 6 veces al día<br><input type="radio"/> más 6 veces al día |
| Agua del grifo           | <input checked="" type="radio"/> Nunca o menos 1 vez al mes<br><input type="radio"/> 1 a 3 veces mes<br><input type="radio"/> 1 vez semana<br><input type="radio"/> 2 a 4 veces semana<br><input type="radio"/> 5 a 6 veces semana<br><input type="radio"/> 1 vez al día<br><input type="radio"/> 2 a 3 veces al día<br><input type="radio"/> 5 a 6 veces al día<br><input type="radio"/> más 6 veces al día |
| agua embotellada sin gas | <input type="radio"/> Nunca o menos 1 vez al mes<br><input type="radio"/> 1 a 3 veces mes<br><input type="radio"/> 1 vez semana<br><input type="radio"/> 2 a 4 veces semana<br><input type="radio"/> 5 a 6 veces semana<br><input type="radio"/> 1 vez al día<br><input type="radio"/> 2 a 3 veces al día<br><input type="radio"/> 5 a 6 veces al día<br><input checked="" type="radio"/> más 6 veces al día |
| agua embotellada con gas | <input checked="" type="radio"/> Nunca o menos 1 vez al mes<br><input type="radio"/> 1 a 3 veces mes<br><input type="radio"/> 1 vez semana<br><input type="radio"/> 2 a 4 veces semana<br><input type="radio"/> 5 a 6 veces semana<br><input type="radio"/> 1 vez al día<br><input type="radio"/> 2 a 3 veces al día<br><input type="radio"/> 5 a 6 veces al día<br><input type="radio"/> más 6 veces al día |
| zumو frutas embasado     | <input type="radio"/> Nunca o menos 1 vez al mes<br><input type="radio"/> 1 a 3 veces mes<br><input checked="" type="radio"/> 1 vez semana<br><input type="radio"/> 2 a 4 veces semana<br><input type="radio"/> 5 a 6 veces semana<br><input type="radio"/> 1 vez al día<br><input type="radio"/> 2 a 3 veces al día<br><input type="radio"/> 5 a 6 veces al día<br><input type="radio"/> más 6 veces al día |
| cafe                     | <input checked="" type="radio"/> Nunca o menos 1 vez al mes<br><input type="radio"/> 1 a 3 veces mes<br><input type="radio"/> 1 vez semana<br><input type="radio"/> 2 a 4 veces semana<br><input type="radio"/> 5 a 6 veces semana<br><input type="radio"/> 1 vez al día<br><input type="radio"/> 2 a 3 veces al día<br><input type="radio"/> 5 a 6 veces al día<br><input type="radio"/> más 6 veces al día |

|                       |                                                                                                                                                                                                                                                                                                                                                                                                              |
|-----------------------|--------------------------------------------------------------------------------------------------------------------------------------------------------------------------------------------------------------------------------------------------------------------------------------------------------------------------------------------------------------------------------------------------------------|
| cafe descafeinado     | <input type="radio"/> Nunca o menos 1 vez al mes<br><input type="radio"/> 1 a 3 veces mes<br><input checked="" type="radio"/> 1 vez semana<br><input type="radio"/> 2 a 4 veces semana<br><input type="radio"/> 5 a 6 veces semana<br><input type="radio"/> 1 vez al día<br><input type="radio"/> 2 a 3 veces al día<br><input type="radio"/> 5 a 6 veces al día<br><input type="radio"/> más 6 veces al día |
| te o infusión         | <input checked="" type="radio"/> Nunca o menos 1 vez al mes<br><input type="radio"/> 1 a 3 veces mes<br><input type="radio"/> 1 vez semana<br><input type="radio"/> 2 a 4 veces semana<br><input type="radio"/> 5 a 6 veces semana<br><input type="radio"/> 1 vez al día<br><input type="radio"/> 2 a 3 veces al día<br><input type="radio"/> 5 a 6 veces al día<br><input type="radio"/> más 6 veces al día |
| sopa o puré verduras  | <input type="radio"/> Nunca o menos 1 vez al mes<br><input type="radio"/> 1 a 3 veces mes<br><input type="radio"/> 1 vez semana<br><input type="radio"/> 2 a 4 veces semana<br><input checked="" type="radio"/> 5 a 6 veces semana<br><input type="radio"/> 1 vez al día<br><input type="radio"/> 2 a 3 veces al día<br><input type="radio"/> 5 a 6 veces al día<br><input type="radio"/> más 6 veces al día |
| croquetas pollo jamón | <input checked="" type="radio"/> Nunca o menos 1 vez al mes<br><input type="radio"/> 1 a 3 veces mes<br><input type="radio"/> 1 vez semana<br><input type="radio"/> 2 a 4 veces semana<br><input type="radio"/> 5 a 6 veces semana<br><input type="radio"/> 1 vez al día<br><input type="radio"/> 2 a 3 veces al día<br><input type="radio"/> 5 a 6 veces al día<br><input type="radio"/> más 6 veces al día |
| croquetas pescado     | <input type="radio"/> Nunca o menos 1 vez al mes<br><input checked="" type="radio"/> 1 a 3 veces mes<br><input type="radio"/> 1 vez semana<br><input type="radio"/> 2 a 4 veces semana<br><input type="radio"/> 5 a 6 veces semana<br><input type="radio"/> 1 vez al día<br><input type="radio"/> 2 a 3 veces al día<br><input type="radio"/> 5 a 6 veces al día<br><input type="radio"/> más 6 veces al día |
| mayonesa              | <input type="radio"/> Nunca o menos 1 vez al mes<br><input checked="" type="radio"/> 1 a 3 veces mes<br><input type="radio"/> 1 vez semana<br><input type="radio"/> 2 a 4 veces semana<br><input type="radio"/> 5 a 6 veces semana<br><input type="radio"/> 1 vez al día<br><input type="radio"/> 2 a 3 veces al día<br><input type="radio"/> 5 a 6 veces al día<br><input type="radio"/> más 6 veces al día |

|                  |                                                                                                                                                                                                                                                                                                                                                                                                              |
|------------------|--------------------------------------------------------------------------------------------------------------------------------------------------------------------------------------------------------------------------------------------------------------------------------------------------------------------------------------------------------------------------------------------------------------|
| salsa tomate     | <input type="radio"/> Nunca o menos 1 vez al mes<br><input type="radio"/> 1 a 3 veces mes<br><input checked="" type="radio"/> 1 vez semana<br><input type="radio"/> 2 a 4 veces semana<br><input type="radio"/> 5 a 6 veces semana<br><input type="radio"/> 1 vez al día<br><input type="radio"/> 2 a 3 veces al día<br><input type="radio"/> 5 a 6 veces al día<br><input type="radio"/> más 6 veces al día |
| ketchup          | <input checked="" type="radio"/> Nunca o menos 1 vez al mes<br><input type="radio"/> 1 a 3 veces mes<br><input type="radio"/> 1 vez semana<br><input type="radio"/> 2 a 4 veces semana<br><input type="radio"/> 5 a 6 veces semana<br><input type="radio"/> 1 vez al día<br><input type="radio"/> 2 a 3 veces al día<br><input type="radio"/> 5 a 6 veces al día<br><input type="radio"/> más 6 veces al día |
| sal              | <input type="radio"/> Nunca o menos 1 vez al mes<br><input type="radio"/> 1 a 3 veces mes<br><input type="radio"/> 1 vez semana<br><input checked="" type="radio"/> 2 a 4 veces semana<br><input type="radio"/> 5 a 6 veces semana<br><input type="radio"/> 1 vez al día<br><input type="radio"/> 2 a 3 veces al día<br><input type="radio"/> 5 a 6 veces al día<br><input type="radio"/> más 6 veces al día |
| ajo              | <input type="radio"/> Nunca o menos 1 vez al mes<br><input type="radio"/> 1 a 3 veces mes<br><input type="radio"/> 1 vez semana<br><input checked="" type="radio"/> 2 a 4 veces semana<br><input type="radio"/> 5 a 6 veces semana<br><input type="radio"/> 1 vez al día<br><input type="radio"/> 2 a 3 veces al día<br><input type="radio"/> 5 a 6 veces al día<br><input type="radio"/> más 6 veces al día |
| mermelada o miel | <input checked="" type="radio"/> Nunca o menos 1 vez al mes<br><input type="radio"/> 1 a 3 veces mes<br><input type="radio"/> 1 vez semana<br><input type="radio"/> 2 a 4 veces semana<br><input type="radio"/> 5 a 6 veces semana<br><input type="radio"/> 1 vez al día<br><input type="radio"/> 2 a 3 veces al día<br><input type="radio"/> 5 a 6 veces al día<br><input type="radio"/> más 6 veces al día |
| azúcar           | <input type="radio"/> Nunca o menos 1 vez al mes<br><input type="radio"/> 1 a 3 veces mes<br><input type="radio"/> 1 vez semana<br><input checked="" type="radio"/> 2 a 4 veces semana<br><input type="radio"/> 5 a 6 veces semana<br><input type="radio"/> 1 vez al día<br><input type="radio"/> 2 a 3 veces al día<br><input type="radio"/> 5 a 6 veces al día<br><input type="radio"/> más 6 veces al día |

|                                       |                                                                                                                                                                                                                                                                                                                                                                                                                                                                                                                               |
|---------------------------------------|-------------------------------------------------------------------------------------------------------------------------------------------------------------------------------------------------------------------------------------------------------------------------------------------------------------------------------------------------------------------------------------------------------------------------------------------------------------------------------------------------------------------------------|
| Otro alimento                         |                                                                                                                                                                                                                                                                                                                                                                                                                                                                                                                               |
| suplementos vitamínicos               | <input checked="" type="radio"/> si<br><input type="radio"/> no                                                                                                                                                                                                                                                                                                                                                                                                                                                               |
| suplementos vitamínicos               | [*DATA REMOVED*]                                                                                                                                                                                                                                                                                                                                                                                                                                                                                                              |
| dieta previa                          | <input type="radio"/> si<br><input checked="" type="radio"/> no                                                                                                                                                                                                                                                                                                                                                                                                                                                               |
| motivo dieta                          | <input checked="" type="radio"/> no dieta<br><input type="radio"/> control peso<br><input type="radio"/> control colesterol<br><input type="radio"/> control diabetes<br><input type="radio"/> problemas estómago<br><input type="radio"/> problemas vesícula o hepáticos<br><input type="radio"/> HTA o cardiopatía<br><input type="radio"/> problemas renales<br><input type="radio"/> alergia alimentaria<br><input type="radio"/> ácido úrico elevado<br><input type="radio"/> vegetariana<br><input type="radio"/> otros |
| cambio alimentos año previo gestación | <input checked="" type="radio"/> si<br><input type="radio"/> no                                                                                                                                                                                                                                                                                                                                                                                                                                                               |
| cambio lácteos                        | <input type="radio"/> eliminado<br><input type="radio"/> disminuido<br><input checked="" type="radio"/> igual<br><input type="radio"/> aumentado<br><input type="radio"/> no sabe                                                                                                                                                                                                                                                                                                                                             |
| cambio huevos                         | <input type="radio"/> eliminado<br><input type="radio"/> disminuido<br><input checked="" type="radio"/> igual<br><input type="radio"/> aumentado<br><input type="radio"/> no sabe                                                                                                                                                                                                                                                                                                                                             |
| cambio carne                          | <input type="radio"/> eliminado<br><input type="radio"/> disminuido<br><input checked="" type="radio"/> igual<br><input type="radio"/> aumentado<br><input type="radio"/> no sabe                                                                                                                                                                                                                                                                                                                                             |
| cambio pescado                        | <input type="radio"/> eliminado<br><input type="radio"/> disminuido<br><input checked="" type="radio"/> igual<br><input type="radio"/> aumentado<br><input type="radio"/> no sabe                                                                                                                                                                                                                                                                                                                                             |
| cambio verduras                       | <input type="radio"/> eliminado<br><input type="radio"/> disminuido<br><input checked="" type="radio"/> igual<br><input type="radio"/> aumentado<br><input type="radio"/> no sabe                                                                                                                                                                                                                                                                                                                                             |

|                            |                                                                                                                                                                                                                        |
|----------------------------|------------------------------------------------------------------------------------------------------------------------------------------------------------------------------------------------------------------------|
| cambio legumbres           | <input type="radio"/> eliminado<br><input type="radio"/> disminuido<br><input checked="" type="radio"/> igual<br><input type="radio"/> aumentado<br><input type="radio"/> no sabe                                      |
| cambio fruta               | <input type="radio"/> eliminado<br><input type="radio"/> disminuido<br><input type="radio"/> igual<br><input checked="" type="radio"/> aumentado<br><input type="radio"/> no sabe                                      |
| cambio pan                 | <input type="radio"/> eliminado<br><input checked="" type="radio"/> disminuido<br><input type="radio"/> igual<br><input type="radio"/> aumentado<br><input type="radio"/> no sabe                                      |
| cambio aceite oliva        | <input type="radio"/> eliminado<br><input type="radio"/> disminuido<br><input checked="" type="radio"/> igual<br><input type="radio"/> aumentado<br><input type="radio"/> no sabe                                      |
| cambio mante o margarina   | <input type="radio"/> eliminado<br><input checked="" type="radio"/> disminuido<br><input type="radio"/> igual<br><input type="radio"/> aumentado<br><input type="radio"/> no sabe                                      |
| cambio azúcar y dulces     | <input type="radio"/> eliminado<br><input checked="" type="radio"/> disminuido<br><input type="radio"/> igual<br><input type="radio"/> aumentado<br><input type="radio"/> no sabe                                      |
| cambio bebidas alcohólicas | <input type="radio"/> eliminado<br><input type="radio"/> disminuido<br><input checked="" type="radio"/> igual<br><input type="radio"/> aumentado<br><input type="radio"/> no sabe                                      |
| frecuencia comidas fritas  | <input type="radio"/> a diario<br><input type="radio"/> 5 a 6 veces semana<br><input type="radio"/> 2 a 4 veces semana<br><input checked="" type="radio"/> 1 vez semana<br><input type="radio"/> menos de 1 vez semana |
| carne                      | <input type="radio"/> no como<br><input type="radio"/> cruda<br><input type="radio"/> poco hecha<br><input type="radio"/> hecha<br><input checked="" type="radio"/> muy hecha                                          |
| grasa visible carne        | <input checked="" type="radio"/> quita toda<br><input type="radio"/> quita mayoría<br><input type="radio"/> quita un poco<br><input type="radio"/> no quita nada                                                       |

|                                |                                                                                                                                                                                                                                                          |
|--------------------------------|----------------------------------------------------------------------------------------------------------------------------------------------------------------------------------------------------------------------------------------------------------|
| cocina carne                   | <input checked="" type="radio"/> a la plancha<br><input type="radio"/> a la parrilla<br><input type="radio"/> asada<br><input type="radio"/> frita<br><input type="radio"/> guisada                                                                      |
| tostado quemado carne          | <input checked="" type="radio"/> nunca<br><input type="radio"/> 1 vez mes<br><input type="radio"/> 2 a 3 veces mes<br><input type="radio"/> 1 vez semana<br><input type="radio"/> 2 a 3 semanas                                                          |
| tostado quemado pescado        | <input checked="" type="radio"/> nunca<br><input type="radio"/> 1 vez mes<br><input type="radio"/> 2 a 3 veces mes<br><input type="radio"/> 1 vez semana<br><input type="radio"/> 2 a 3 semanas                                                          |
| socarrat paella                | <input checked="" type="radio"/> nunca<br><input type="radio"/> 1 vez mes<br><input type="radio"/> 2 a 3 veces mes<br><input type="radio"/> 1 vez semana<br><input type="radio"/> 2 a 3 semanas                                                          |
| grasa o aceite cocinar         | <input type="radio"/> mantequilla<br><input type="radio"/> margarina<br><input checked="" type="radio"/> aceite oliva<br><input type="radio"/> aceite oliva virgen extra<br><input type="radio"/> aceite vegetal<br><input type="radio"/> mezcla aceites |
| grasa aceite aliñar            | <input type="radio"/> mantequilla<br><input type="radio"/> margarina<br><input checked="" type="radio"/> aceite oliva<br><input type="radio"/> aceite oliva virgen extra<br><input type="radio"/> aceite vegetal<br><input type="radio"/> mezcla aceites |
| grasa aceite freir             | <input type="radio"/> mantequilla<br><input type="radio"/> margarina<br><input checked="" type="radio"/> aceite oliva<br><input type="radio"/> aceite oliva virgen extra<br><input type="radio"/> aceite vegetal<br><input type="radio"/> mezcla aceites |
| Ejercicio cuestionario         | <input checked="" type="radio"/> si<br><input type="radio"/> no                                                                                                                                                                                          |
| horas de sueño incluido siesta | [*DATA REMOVED*]                                                                                                                                                                                                                                         |
| minutos siesta                 | [*DATA REMOVED*]                                                                                                                                                                                                                                         |
| horas televisión semana        | [*DATA REMOVED*]                                                                                                                                                                                                                                         |



|                                        |                                                                                                                                                                                                                                                                                                                                                                           |
|----------------------------------------|---------------------------------------------------------------------------------------------------------------------------------------------------------------------------------------------------------------------------------------------------------------------------------------------------------------------------------------------------------------------------|
| actividad trabajo                      | <input type="radio"/> casi siempre sentado<br><input type="radio"/> sentado 50 por cien<br><input type="radio"/> casi siempre de pie, quieto<br><input type="radio"/> casi siempre levantado caminando y llevando pocas cosas<br><input checked="" type="radio"/> casi siempre levantado, caminando y llevado muchas cosas<br><input type="radio"/> trabajo manual pesado |
| tiempo caminar o bici al día           | <input type="radio"/> casi nunca<br><input type="radio"/> menos 20min día<br><input type="radio"/> 20 a 40 min día<br><input type="radio"/> 40 a 60 min día<br><input checked="" type="radio"/> 1h o 1h y media día<br><input type="radio"/> más de 1h y media al día                                                                                                     |
| tiempo tareas casa al día              | <input type="radio"/> menos de 1h día<br><input checked="" type="radio"/> 1 a 2h día<br><input type="radio"/> 3 a 4h día<br><input type="radio"/> 5 a 6h día<br><input type="radio"/> 7 a 8h día<br><input type="radio"/> más de 8h día                                                                                                                                   |
| tiempo libre televisión ordenador leer | <input type="radio"/> menos 1h día<br><input type="radio"/> 1h día<br><input type="radio"/> 2h día<br><input type="radio"/> 3h día<br><input checked="" type="radio"/> 4h día<br><input type="radio"/> 5 a 6h día<br><input type="radio"/> mas 6h día                                                                                                                     |
| tiempo libre ejercicio o deporte       | <input type="radio"/> menos 1h semana<br><input type="radio"/> 1h semana<br><input type="radio"/> 2h semana<br><input type="radio"/> 3h semana<br><input type="radio"/> 4 a 5h semana<br><input checked="" type="radio"/> mas 5h semana                                                                                                                                   |
| como se considera                      | <input type="radio"/> sedentaria<br><input type="radio"/> poco activa<br><input type="radio"/> moderadamente activa<br><input checked="" type="radio"/> bastante activa<br><input type="radio"/> muy activa<br><input type="radio"/> no sabe                                                                                                                              |
| FUR                                    | [*DATA REMOVED*]                                                                                                                                                                                                                                                                                                                                                          |
| Semanas gestación 2T                   | [*DATA REMOVED*]                                                                                                                                                                                                                                                                                                                                                          |
| Días gestación 2T                      | [*DATA REMOVED*]                                                                                                                                                                                                                                                                                                                                                          |
| DBP 2T                                 | [*DATA REMOVED*]                                                                                                                                                                                                                                                                                                                                                          |
| CC 2T                                  | [*DATA REMOVED*]                                                                                                                                                                                                                                                                                                                                                          |
| AC 2T                                  | [*DATA REMOVED*]                                                                                                                                                                                                                                                                                                                                                          |

|                                                   |                                                                                                                                                                                                 |
|---------------------------------------------------|-------------------------------------------------------------------------------------------------------------------------------------------------------------------------------------------------|
| LF 2T                                             | [*DATA REMOVED*]                                                                                                                                                                                |
| PFE 2T (Hadlock)                                  | [*DATA REMOVED*]                                                                                                                                                                                |
| Semanas gestación 3T                              | [*DATA REMOVED*]                                                                                                                                                                                |
| días 3T                                           | [*DATA REMOVED*]                                                                                                                                                                                |
| DBP 3T                                            | [*DATA REMOVED*]                                                                                                                                                                                |
| CC 3T                                             | [*DATA REMOVED*]                                                                                                                                                                                |
| AC 3T                                             | [*DATA REMOVED*]                                                                                                                                                                                |
| LF 3T                                             | [*DATA REMOVED*]                                                                                                                                                                                |
| PFE 3T (Hadlock)                                  | [*DATA REMOVED*]                                                                                                                                                                                |
| Semanas de gestación final                        | [*DATA REMOVED*]                                                                                                                                                                                |
| días gestación final                              | [*DATA REMOVED*]                                                                                                                                                                                |
| Localización placenta                             | <input checked="" type="radio"/> anterior<br><input type="radio"/> lateral derecha<br><input type="radio"/> lateral izquierda<br><input type="radio"/> posterior<br><input type="radio"/> fondo |
| Presentación longitudinal cefálica                | <input type="radio"/> no<br><input checked="" type="radio"/> si                                                                                                                                 |
| Dorso                                             | <input checked="" type="radio"/> izquierda anterior<br><input type="radio"/> izquierda posterior<br><input type="radio"/> derecha anterior<br><input type="radio"/> derecha posterior           |
| diámetro biparietal                               | [*DATA REMOVED*]                                                                                                                                                                                |
| Circunferencia craneal                            | [*DATA REMOVED*]                                                                                                                                                                                |
| Circunferencia abdominal                          | [*DATA REMOVED*]                                                                                                                                                                                |
| Longitud de femur                                 | [*DATA REMOVED*]                                                                                                                                                                                |
| tejido celular subcutáneo a nivel del muslo en mm | [*DATA REMOVED*]                                                                                                                                                                                |
| tejido celular subcutáneo en abdomen en mm        | [*DATA REMOVED*]                                                                                                                                                                                |
| Volumen del muslo en cm3                          | [*DATA REMOVED*]                                                                                                                                                                                |
| Peso fetal estimado según fórmula de Hadlock      | [*DATA REMOVED*]                                                                                                                                                                                |

|                                               |                                                                                                                                                          |
|-----------------------------------------------|----------------------------------------------------------------------------------------------------------------------------------------------------------|
| Percentil                                     | [*DATA REMOVED*]                                                                                                                                         |
| Peso fetal estimado según fórmula de Scioscia | <hr/>                                                                                                                                                    |
| Peso fetal estimado según fórmula de LEE      | <hr/>                                                                                                                                                    |
| Tipo de parto                                 | <input checked="" type="radio"/> eutocico<br><input type="radio"/> instrumentado/ventosa<br><input type="radio"/> cesarea                                |
| fecha de nacimiento                           | [*DATA REMOVED*]                                                                                                                                         |
| Días entre exploración y nacimiento           | [*DATA REMOVED*]                                                                                                                                         |
| Peso RN en g                                  | [*DATA REMOVED*]                                                                                                                                         |
| sexo                                          | <input type="radio"/> mujer<br><input checked="" type="radio"/> hombre                                                                                   |
| Apgar 1 minuto                                | [*DATA REMOVED*]                                                                                                                                         |
| Apgar 5 minutos                               | [*DATA REMOVED*]                                                                                                                                         |
| Apgar 10 minutos                              | <hr/>                                                                                                                                                    |
| antecedente Covid durante gestación           | <input type="radio"/> Yes<br><input checked="" type="radio"/> No                                                                                         |
| Nivel de estudios                             | <input type="radio"/> ninguno<br><input type="radio"/> primarios<br><input checked="" type="radio"/> secundarios<br><input type="radio"/> universitarios |

# Base\_datos\_estimacion\_peso\_fetal

|                                       |                                                                                                                                                                                                                                                                                      |
|---------------------------------------|--------------------------------------------------------------------------------------------------------------------------------------------------------------------------------------------------------------------------------------------------------------------------------------|
| Número de identificación participante | 32                                                                                                                                                                                                                                                                                   |
| CODIGO PARTICIPANTE                   |                                                                                                                                                                                                                                                                                      |
| Edad                                  | [*DATA REMOVED*]                                                                                                                                                                                                                                                                     |
| Gestaciones                           | <input type="radio"/> 1<br><input checked="" type="radio"/> 2<br><input type="radio"/> 3<br><input type="radio"/> mas de 3                                                                                                                                                           |
| partos                                | <input type="radio"/> 0<br><input checked="" type="radio"/> 1<br><input type="radio"/> 2<br><input type="radio"/> 3<br><input type="radio"/> mas de 3                                                                                                                                |
| cesáreas                              | <input checked="" type="radio"/> 0<br><input type="radio"/> 1<br><input type="radio"/> 2<br><input type="radio"/> 3<br><input type="radio"/> mas de 3                                                                                                                                |
| Abortos                               | <input checked="" type="radio"/> 0<br><input type="radio"/> 1<br><input type="radio"/> 2<br><input type="radio"/> 3<br><input type="radio"/> mas de 3                                                                                                                                |
| Tipo de gestacion                     | <input checked="" type="radio"/> espontanea<br><input type="radio"/> IAC inseminación artificial conyuge<br><input type="radio"/> IAD inseminación artificial donante<br><input type="radio"/> FIV Fecundación in Vitro<br><input type="radio"/> Ovodon FIV con donación de ovocitos |
| peso previo a embarazo                | [*DATA REMOVED*]                                                                                                                                                                                                                                                                     |
| Ganancia ponderal embarazo            | [*DATA REMOVED*]                                                                                                                                                                                                                                                                     |
| Talla madre                           | [*DATA REMOVED*]                                                                                                                                                                                                                                                                     |
| IMC previo embarazo                   | 30.84627667295689                                                                                                                                                                                                                                                                    |
| Patología obstétrica                  | <input checked="" type="radio"/> no<br><input type="radio"/> si                                                                                                                                                                                                                      |
| Diabetes pregestacional               | <input checked="" type="radio"/> no<br><input type="radio"/> si                                                                                                                                                                                                                      |
| Diabetes gestacional                  | <input checked="" type="radio"/> no<br><input type="radio"/> si                                                                                                                                                                                                                      |

|                                            |                                                                                                                                                                                      |
|--------------------------------------------|--------------------------------------------------------------------------------------------------------------------------------------------------------------------------------------|
| Diabetes gestacional con insulina          | <input checked="" type="radio"/> no<br><input type="radio"/> si                                                                                                                      |
| Diabetes gestacional con dieta y ejercicio | <input checked="" type="radio"/> no<br><input type="radio"/> si                                                                                                                      |
| Percentil fetos previos                    | <input type="radio"/> Nada<br><input type="radio"/> percentil menor de 10<br><input checked="" type="radio"/> percentil entre 10 y 90<br><input type="radio"/> percentil mayor de 90 |
| Exfumadora                                 | <input checked="" type="radio"/> Nada<br><input type="radio"/> menos de 5 años<br><input type="radio"/> 5 a 10 años<br><input type="radio"/> mayor o igual a 10 años                 |
| Hábito tabáquico                           | <input checked="" type="radio"/> no<br><input type="radio"/> si                                                                                                                      |
| fumadora                                   | [*DATA REMOVED*]                                                                                                                                                                     |
| Consumo otros tóxicos                      | <input checked="" type="radio"/> no<br><input type="radio"/> si                                                                                                                      |
| Hb 1T                                      | [*DATA REMOVED*]                                                                                                                                                                     |
| Htc 1T                                     | [*DATA REMOVED*]                                                                                                                                                                     |
| Hb 2T                                      | [*DATA REMOVED*]                                                                                                                                                                     |
| HTC 2T                                     | [*DATA REMOVED*]                                                                                                                                                                     |
| Hb 3T                                      | [*DATA REMOVED*]                                                                                                                                                                     |
| HTC 3T                                     | [*DATA REMOVED*]                                                                                                                                                                     |
| Suplemento FE oral                         | <input type="radio"/> si<br><input checked="" type="radio"/> no                                                                                                                      |
| Suplemento fe iv                           | <input type="radio"/> si<br><input checked="" type="radio"/> no                                                                                                                      |
| Transfusión                                | <input checked="" type="radio"/> no<br><input type="radio"/> si                                                                                                                      |
| Solicitada Vit D                           | <input checked="" type="radio"/> no<br><input type="radio"/> si                                                                                                                      |
| Deficit vit D                              | <input type="radio"/> no<br><input type="radio"/> si                                                                                                                                 |
| Suplemento vit D                           | <input type="radio"/> si<br><input type="radio"/> no                                                                                                                                 |

|                       |                                                                                                                                                                                                                                                                                                                                                                                                              |
|-----------------------|--------------------------------------------------------------------------------------------------------------------------------------------------------------------------------------------------------------------------------------------------------------------------------------------------------------------------------------------------------------------------------------------------------------|
| Dieta, cuestionario   | <input checked="" type="radio"/> si<br><input type="radio"/> no                                                                                                                                                                                                                                                                                                                                              |
| Leche entera          | <input type="radio"/> Nunca o menos 1 vez al mes<br><input type="radio"/> 1 a 3 veces mes<br><input type="radio"/> 1 vez semana<br><input type="radio"/> 2 a 4 veces semana<br><input type="radio"/> 5 a 6 veces semana<br><input checked="" type="radio"/> 1 vez al día<br><input type="radio"/> 2 a 3 veces al día<br><input type="radio"/> 5 a 6 veces al día<br><input type="radio"/> más 6 veces al día |
| Leche semidesnatada   | <input type="radio"/> Nunca o menos 1 vez al mes<br><input type="radio"/> 1 a 3 veces mes<br><input type="radio"/> 1 vez semana<br><input type="radio"/> 2 a 4 veces semana<br><input type="radio"/> 5 a 6 veces semana<br><input type="radio"/> 1 vez al día<br><input type="radio"/> 2 a 3 veces al día<br><input type="radio"/> 5 a 6 veces al día<br><input type="radio"/> mas 6 veces al día            |
| Leche desnatada       | <input type="radio"/> Nunca o menos 1 vez al mes<br><input type="radio"/> 1 a 3 veces mes<br><input type="radio"/> 1 vez semana<br><input type="radio"/> 2 a 4 veces semana<br><input type="radio"/> 5 a 6 veces semana<br><input type="radio"/> 1 vez al día<br><input type="radio"/> 2 a 3 veces al día<br><input type="radio"/> 5 a 6 veces al día<br><input type="radio"/> más 6 veces al día            |
| Leche condensada      | <input type="radio"/> Nunca o menos 1 vez al mes<br><input type="radio"/> 1 a 3 veces mes<br><input type="radio"/> 1 vez semana<br><input type="radio"/> 2 a 4 veces semana<br><input type="radio"/> 5 a 6 veces semana<br><input type="radio"/> 1 vez al día<br><input type="radio"/> 2 a 3 veces al día<br><input type="radio"/> 5 a 6 veces al día<br><input type="radio"/> más 6 veces al día            |
| nata o crema de leche | <input type="radio"/> Nunca o menos 1 vez al mes<br><input type="radio"/> 1 a 3 veces mes<br><input type="radio"/> 1 vez semana<br><input type="radio"/> 2 a 4 veces semana<br><input type="radio"/> 5 a 6 veces semana<br><input type="radio"/> 1 vez al día<br><input type="radio"/> 2 a 3 veces al día<br><input type="radio"/> 5 a 6 veces al día<br><input type="radio"/> más 6 veces al día            |

|                                             |                                                                                                                                                                                                                                                                                                                                                                                                              |
|---------------------------------------------|--------------------------------------------------------------------------------------------------------------------------------------------------------------------------------------------------------------------------------------------------------------------------------------------------------------------------------------------------------------------------------------------------------------|
| Yogurt Entero                               | <input type="radio"/> Nunca o menos 1 vez al mes<br><input type="radio"/> 1 a 3 veces mes<br><input checked="" type="radio"/> 1 vez semana<br><input type="radio"/> 2 a 4 veces semana<br><input type="radio"/> 5 a 6 veces semana<br><input type="radio"/> 1 vez al día<br><input type="radio"/> 2 a 3 veces al día<br><input type="radio"/> 5 a 6 veces al día<br><input type="radio"/> más 6 veces al día |
| Yogurt desnatado                            | <input type="radio"/> Nunca o menos 1 vez al mes<br><input type="radio"/> 1 a 3 veces mes<br><input type="radio"/> 1 vez semana<br><input type="radio"/> 2 a 4 veces semana<br><input type="radio"/> 5 a 6 veces semana<br><input type="radio"/> 1 vez al día<br><input type="radio"/> 2 a 3 veces al día<br><input type="radio"/> 5 a 6 veces al día<br><input type="radio"/> más 6 veces al día            |
| 100g requesón o queso blando o queso fresco | <input type="radio"/> Nunca o menos 1 vez al mes<br><input type="radio"/> 1 a 3 veces mes<br><input type="radio"/> 1 vez semana<br><input type="radio"/> 2 a 4 veces semana<br><input type="radio"/> 5 a 6 veces semana<br><input type="radio"/> 1 vez al día<br><input type="radio"/> 2 a 3 veces al día<br><input type="radio"/> 5 a 6 veces al día<br><input type="radio"/> más 6 veces al día            |
| queso curado o semicurado o cremoso         | <input type="radio"/> Nunca o menos 1 vez al mes<br><input type="radio"/> 1 a 3 veces mes<br><input checked="" type="radio"/> 1 vez semana<br><input type="radio"/> 2 a 4 veces semana<br><input type="radio"/> 5 a 6 veces semana<br><input type="radio"/> 1 vez al día<br><input type="radio"/> 2 a 3 veces al día<br><input type="radio"/> 5 a 6 veces al día<br><input type="radio"/> más 6 veces al día |
| natillas flan pudding                       | <input type="radio"/> Nunca o menos 1 vez al mes<br><input type="radio"/> 1 a 3 veces mes<br><input type="radio"/> 1 vez semana<br><input type="radio"/> 2 a 4 veces semana<br><input type="radio"/> 5 a 6 veces semana<br><input type="radio"/> 1 vez al día<br><input type="radio"/> 2 a 3 veces al día<br><input type="radio"/> 5 a 6 veces al día<br><input type="radio"/> más 6 veces al día            |
| Helado                                      | <input type="radio"/> Nunca o menos 1 vez al mes<br><input type="radio"/> 1 a 3 veces mes<br><input type="radio"/> 1 vez semana<br><input checked="" type="radio"/> 2 a 4 veces semana<br><input type="radio"/> 5 a 6 veces semana<br><input type="radio"/> 1 vez al día<br><input type="radio"/> 2 a 3 veces al día<br><input type="radio"/> 5 a 6 veces al día<br><input type="radio"/> más 6 veces al día |

|                                      |                                                                                                                                                                                                                                                                                                                                                                                                              |
|--------------------------------------|--------------------------------------------------------------------------------------------------------------------------------------------------------------------------------------------------------------------------------------------------------------------------------------------------------------------------------------------------------------------------------------------------------------|
| huevo                                | <input type="radio"/> Nunca o menos 1 vez al mes<br><input type="radio"/> 1 a 3 veces mes<br><input checked="" type="radio"/> 1 vez semana<br><input type="radio"/> 2 a 4 veces semana<br><input type="radio"/> 5 a 6 veces semana<br><input type="radio"/> 1 vez al día<br><input type="radio"/> 2 a 3 veces al día<br><input type="radio"/> 5 a 6 veces al día<br><input type="radio"/> más 6 veces al día |
| Pollo con piel                       | <input type="radio"/> Nunca o menos 1 vez al mes<br><input type="radio"/> 1 a 3 veces mes<br><input type="radio"/> 1 vez semana<br><input type="radio"/> 2 a 4 veces semana<br><input type="radio"/> 5 a 6 veces semana<br><input type="radio"/> 1 vez al día<br><input type="radio"/> 2 a 3 veces al día<br><input type="radio"/> 5 a 6 veces al día<br><input type="radio"/> más 6 veces al día            |
| pollo sin piel                       | <input type="radio"/> Nunca o menos 1 vez al mes<br><input type="radio"/> 1 a 3 veces mes<br><input checked="" type="radio"/> 1 vez semana<br><input type="radio"/> 2 a 4 veces semana<br><input type="radio"/> 5 a 6 veces semana<br><input type="radio"/> 1 vez al día<br><input type="radio"/> 2 a 3 veces al día<br><input type="radio"/> 5 a 6 veces al día<br><input type="radio"/> más 6 veces al día |
| Ternera o cerdo o cordero            | <input type="radio"/> Nunca o menos 1 vez al mes<br><input type="radio"/> 1 a 3 veces mes<br><input checked="" type="radio"/> 1 vez semana<br><input type="radio"/> 2 a 4 veces semana<br><input type="radio"/> 5 a 6 veces semana<br><input type="radio"/> 1 vez al día<br><input type="radio"/> 2 a 3 veces al día<br><input type="radio"/> 5 a 6 veces al día<br><input type="radio"/> más 6 veces al día |
| carne caza: Conejo o codorniz o pato | <input checked="" type="radio"/> Nunca o menos 1 vez al mes<br><input type="radio"/> 1 a 3 veces mes<br><input type="radio"/> 1 vez semana<br><input type="radio"/> 2 a 4 veces semana<br><input type="radio"/> 5 a 6 veces semana<br><input type="radio"/> 1 vez al día<br><input type="radio"/> 2 a 3 veces al día<br><input type="radio"/> 5 a 6 veces al día<br><input type="radio"/> más 6 veces al día |
| Hígado de ternera o cerdo o pollo    | <input type="radio"/> Nunca o menos 1 vez al mes<br><input type="radio"/> 1 a 3 veces mes<br><input type="radio"/> 1 vez semana<br><input type="radio"/> 2 a 4 veces semana<br><input type="radio"/> 5 a 6 veces semana<br><input type="radio"/> 1 vez al día<br><input type="radio"/> 2 a 3 veces al día<br><input type="radio"/> 5 a 6 veces al día<br><input type="radio"/> más 6 veces al día            |



|                     |                                                                                                                                                                                                                                                                                                                                                                                                              |
|---------------------|--------------------------------------------------------------------------------------------------------------------------------------------------------------------------------------------------------------------------------------------------------------------------------------------------------------------------------------------------------------------------------------------------------------|
| Vísceras            | <input type="radio"/> Nunca o menos 1 vez al mes<br><input type="radio"/> 1 a 3 veces mes<br><input type="radio"/> 1 vez semana<br><input type="radio"/> 2 a 4 veces semana<br><input type="radio"/> 5 a 6 veces semana<br><input type="radio"/> 1 vez al día<br><input type="radio"/> 2 a 3 veces al día<br><input type="radio"/> 5 a 6 veces al día<br><input type="radio"/> más 6 veces al día            |
| Embutido            | <input checked="" type="radio"/> Nunca o menos 1 vez al mes<br><input type="radio"/> 1 a 3 veces mes<br><input type="radio"/> 1 vez semana<br><input type="radio"/> 2 a 4 veces semana<br><input type="radio"/> 5 a 6 veces semana<br><input type="radio"/> 1 vez al día<br><input type="radio"/> 2 a 3 veces al día<br><input type="radio"/> 5 a 6 veces al día<br><input type="radio"/> más 6 veces al día |
| Salchicha o similar | <input type="radio"/> Nunca o menos 1 vez al mes<br><input type="radio"/> 1 a 3 veces mes<br><input checked="" type="radio"/> 1 vez semana<br><input type="radio"/> 2 a 4 veces semana<br><input type="radio"/> 5 a 6 veces semana<br><input type="radio"/> 1 vez al día<br><input type="radio"/> 2 a 3 veces al día<br><input type="radio"/> 5 a 6 veces al día<br><input type="radio"/> más 6 veces al día |
| Pate o foiegras     | <input type="radio"/> Nunca o menos 1 vez al mes<br><input type="radio"/> 1 a 3 veces mes<br><input type="radio"/> 1 vez semana<br><input type="radio"/> 2 a 4 veces semana<br><input type="radio"/> 5 a 6 veces semana<br><input type="radio"/> 1 vez al día<br><input type="radio"/> 2 a 3 veces al día<br><input type="radio"/> 5 a 6 veces al día<br><input type="radio"/> más 6 veces al día            |
| Hamburguesa         | <input type="radio"/> Nunca o menos 1 vez al mes<br><input type="radio"/> 1 a 3 veces mes<br><input checked="" type="radio"/> 1 vez semana<br><input type="radio"/> 2 a 4 veces semana<br><input type="radio"/> 5 a 6 veces semana<br><input type="radio"/> 1 vez al día<br><input type="radio"/> 2 a 3 veces al día<br><input type="radio"/> 5 a 6 veces al día<br><input type="radio"/> más 6 veces al día |
| tocino o bacon      | <input type="radio"/> Nunca o menos 1 vez al mes<br><input type="radio"/> 1 a 3 veces mes<br><input type="radio"/> 1 vez semana<br><input type="radio"/> 2 a 4 veces semana<br><input type="radio"/> 5 a 6 veces semana<br><input type="radio"/> 1 vez al día<br><input type="radio"/> 2 a 3 veces al día<br><input type="radio"/> 5 a 6 veces al día<br><input type="radio"/> más 6 veces al día            |

---

Pescado frito

- ☐ Nunca o menos 1 vez al mes
- ☐ 1 a 3 veces mes
- ☐ 1 vez semana
- ☐ 2 a 4 veces semana
- ☐ 5 a 6 veces semana
- ☐ 1 vez al día
- ☐ 2 a 3 veces al día
- ☐ 5 a 6 veces al día
- ☐ más 6 veces al día

---

pescado hervido blanco

- ☐ Nunca o menos 1 vez al mes
- ☐ 1 a 3 veces mes
- ☐ 1 vez semana
- ☐ 2 a 4 veces semana
- ☐ 5 a 6 veces semana
- ☐ 1 vez al día
- ☐ 2 a 3 veces al día
- ☐ 5 a 6 veces al día
- ☐ más 6 veces al día

---

pescado hervido azul

- ☐ Nunca o menos 1 vez al mes
- ☐ 1 a 3 veces mes
- ☐ 1 vez semana
- ☐ 2 a 4 veces semana
- ☐ 5 a 6 veces semana
- ☐ 1 vez al día
- ☐ 2 a 3 veces al día
- ☐ 5 a 6 veces al día
- ☐ más 6 veces al día

---

otros pescado azul

- ☐ Nunca o menos 1 vez al mes
- ☒ 1 a 3 veces mes
- ☐ 1 vez semana
- ☐ 2 a 4 veces semana
- ☐ 5 a 6 veces semana
- ☐ 1 vez al día
- ☐ 2 a 3 veces al día
- ☐ 5 a 6 veces al día
- ☐ más 6 veces al día

---

atun conserva

- ☐ Nunca o menos 1 vez al mes
- ☐ 1 a 3 veces mes
- ☐ 1 vez semana
- ☐ 2 a 4 veces semana
- ☐ 5 a 6 veces semana
- ☐ 1 vez al día
- ☐ 2 a 3 veces al día
- ☐ 5 a 6 veces al día
- ☐ más 6 veces al día

---

sardina conserva

- ☐ Nunca o menos 1 vez al mes
- ☐ 1 a 3 veces mes
- ☐ 1 vez semana
- ☐ 2 a 4 veces semana
- ☐ 5 a 6 veces semana
- ☐ 1 vez al día
- ☐ 2 a 3 veces al día
- ☐ 5 a 6 veces al día
- ☐ más 6 veces al día

|                                         |                                                                                                                                                                                                                                                                                                                                                                                                              |
|-----------------------------------------|--------------------------------------------------------------------------------------------------------------------------------------------------------------------------------------------------------------------------------------------------------------------------------------------------------------------------------------------------------------------------------------------------------------|
| pescado ahumado                         | <input type="radio"/> Nunca o menos 1 vez al mes<br><input type="radio"/> 1 a 3 veces mes<br><input type="radio"/> 1 vez semana<br><input type="radio"/> 2 a 4 veces semana<br><input type="radio"/> 5 a 6 veces semana<br><input type="radio"/> 1 vez al día<br><input type="radio"/> 2 a 3 veces al día<br><input type="radio"/> 5 a 6 veces al día<br><input type="radio"/> más 6 veces al día            |
| almejas o mejillones o ostras unos 100g | <input type="radio"/> Nunca o menos 1 vez al mes<br><input checked="" type="radio"/> 1 a 3 veces mes<br><input type="radio"/> 1 vez semana<br><input type="radio"/> 2 a 4 veces semana<br><input type="radio"/> 5 a 6 veces semana<br><input type="radio"/> 1 vez al día<br><input type="radio"/> 2 a 3 veces al día<br><input type="radio"/> 5 a 6 veces al día<br><input type="radio"/> más 6 veces al día |
| calamar o chipiron o sepia unos 100g    | <input type="radio"/> Nunca o menos 1 vez al mes<br><input checked="" type="radio"/> 1 a 3 veces mes<br><input type="radio"/> 1 vez semana<br><input type="radio"/> 2 a 4 veces semana<br><input type="radio"/> 5 a 6 veces semana<br><input type="radio"/> 1 vez al día<br><input type="radio"/> 2 a 3 veces al día<br><input type="radio"/> 5 a 6 veces al día<br><input type="radio"/> más 6 veces al día |
| marisco unos 100g                       | <input type="radio"/> Nunca o menos 1 vez al mes<br><input checked="" type="radio"/> 1 a 3 veces mes<br><input type="radio"/> 1 vez semana<br><input type="radio"/> 2 a 4 veces semana<br><input type="radio"/> 5 a 6 veces semana<br><input type="radio"/> 1 vez al día<br><input type="radio"/> 2 a 3 veces al día<br><input type="radio"/> 5 a 6 veces al día<br><input type="radio"/> más 6 veces al día |
| Espinacas o acelgas cocinadas           | <input type="radio"/> Nunca o menos 1 vez al mes<br><input type="radio"/> 1 a 3 veces mes<br><input type="radio"/> 1 vez semana<br><input type="radio"/> 2 a 4 veces semana<br><input type="radio"/> 5 a 6 veces semana<br><input type="radio"/> 1 vez al día<br><input type="radio"/> 2 a 3 veces al día<br><input type="radio"/> 5 a 6 veces al día<br><input type="radio"/> más 6 veces al día            |
| Col o coliflor o brocoli cocinado       | <input type="radio"/> Nunca o menos 1 vez al mes<br><input type="radio"/> 1 a 3 veces mes<br><input type="radio"/> 1 vez semana<br><input type="radio"/> 2 a 4 veces semana<br><input type="radio"/> 5 a 6 veces semana<br><input type="radio"/> 1 vez al día<br><input type="radio"/> 2 a 3 veces al día<br><input type="radio"/> 5 a 6 veces al día<br><input type="radio"/> más 6 veces al día            |

---

Lechuga o endivia o escarola

- ☐ Nunca o menos 1 vez al mes  
☐ 1 a 3 veces mes  
☐ 1 vez semana  
☐ 2 a 4 veces semana  
☐ 5 a 6 veces semana  
☐ 1 vez al día  
☐ 2 a 3 veces al día  
☐ 5 a 6 veces al día  
☐ más 6 veces al día

---

tomate ensalada

- ☐ Nunca o menos 1 vez al mes  
☐ 1 a 3 veces mes  
☐ 1 vez semana  
☒ 2 a 4 veces semana  
☐ 5 a 6 veces semana  
☐ 1 vez al día  
☐ 2 a 3 veces al día  
☐ 5 a 6 veces al día  
☐ más 6 veces al día

---

cebolla

- ☐ Nunca o menos 1 vez al mes  
☐ 1 a 3 veces mes  
☒ 1 vez semana  
☐ 2 a 4 veces semana  
☐ 5 a 6 veces semana  
☐ 1 vez al día  
☐ 2 a 3 veces al día  
☐ 5 a 6 veces al día  
☐ más 6 veces al día

---

Zanahoria o calabaza

- ☐ Nunca o menos 1 vez al mes  
☐ 1 a 3 veces mes  
☒ 1 vez semana  
☐ 2 a 4 veces semana  
☐ 5 a 6 veces semana  
☐ 1 vez al día  
☐ 2 a 3 veces al día  
☐ 5 a 6 veces al día  
☐ más 6 veces al día

---

Judías verdes

- ☐ Nunca o menos 1 vez al mes  
☐ 1 a 3 veces mes  
☐ 1 vez semana  
☐ 2 a 4 veces semana  
☐ 5 a 6 veces semana  
☐ 1 vez al día  
☐ 2 a 3 veces al día  
☐ 5 a 6 veces al día  
☐ más 6 veces al día

---

Berenjena o calabacin o pepino

- ☐ Nunca o menos 1 vez al mes  
☐ 1 a 3 veces mes  
☐ 1 vez semana  
☐ 2 a 4 veces semana  
☐ 5 a 6 veces semana  
☐ 1 vez al día  
☐ 2 a 3 veces al día  
☐ 5 a 6 veces al día  
☐ más 6 veces al día

---

pimiento

- ☐ Nunca o menos 1 vez al mes
- ☐ 1 a 3 veces mes
- ☒ 1 vez semana
- ☐ 2 a 4 veces semana
- ☐ 5 a 6 veces semana
- ☐ 1 vez al día
- ☐ 2 a 3 veces al día
- ☐ 5 a 6 veces al día
- ☐ más 6 veces al día

---

alcachofa

- ☐ Nunca o menos 1 vez al mes
- ☐ 1 a 3 veces mes
- ☒ 1 vez semana
- ☐ 2 a 4 veces semana
- ☐ 5 a 6 veces semana
- ☐ 1 vez al día
- ☐ 2 a 3 veces al día
- ☐ 5 a 6 veces al día
- ☐ más 6 veces al día

---

espárragos

- ☐ Nunca o menos 1 vez al mes
- ☐ 1 a 3 veces mes
- ☐ 1 vez semana
- ☐ 2 a 4 veces semana
- ☐ 5 a 6 veces semana
- ☐ 1 vez al día
- ☐ 2 a 3 veces al día
- ☐ 5 a 6 veces al día
- ☐ más 6 veces al día

---

maíz hervido

- ☐ Nunca o menos 1 vez al mes
- ☐ 1 a 3 veces mes
- ☐ 1 vez semana
- ☐ 2 a 4 veces semana
- ☐ 5 a 6 veces semana
- ☐ 1 vez al día
- ☐ 2 a 3 veces al día
- ☐ 5 a 6 veces al día
- ☐ más 6 veces al día

---

legumbres

- ☐ Nunca o menos 1 vez al mes
- ☐ 1 a 3 veces mes
- ☐ 1 vez semana
- ☒ 2 a 4 veces semana
- ☐ 5 a 6 veces semana
- ☐ 1 vez al día
- ☐ 2 a 3 veces al día
- ☐ 5 a 6 veces al día
- ☐ más 6 veces al día

---

naranjas o mandarinas

- ☐ Nunca o menos 1 vez al mes
- ☐ 1 a 3 veces mes
- ☐ 1 vez semana
- ☒ 2 a 4 veces semana
- ☐ 5 a 6 veces semana
- ☐ 1 vez al día
- ☐ 2 a 3 veces al día
- ☐ 5 a 6 veces al día
- ☐ más 6 veces al día

---

zumو natural fruta

- ☐ Nunca o menos 1 vez al mes  
☐ 1 a 3 veces mes  
☐ 1 vez semana  
☐ 2 a 4 veces semana  
☐ 5 a 6 veces semana  
☐ 1 vez al día  
☐ 2 a 3 veces al día  
☐ 5 a 6 veces al día  
☐ más 6 veces al día

---

platano

- ☐ Nunca o menos 1 vez al mes  
☐ 1 a 3 veces mes  
☒ 1 vez semana  
☐ 2 a 4 veces semana  
☐ 5 a 6 veces semana  
☐ 1 vez al día  
☐ 2 a 3 veces al día  
☐ 5 a 6 veces al día  
☐ más 6 veces al día

---

manzana o pera

- ☐ Nunca o menos 1 vez al mes  
☐ 1 a 3 veces mes  
☐ 1 vez semana  
☐ 2 a 4 veces semana  
☐ 5 a 6 veces semana  
☐ 1 vez al día  
☐ 2 a 3 veces al día  
☐ 5 a 6 veces al día  
☐ más 6 veces al día

---

melocotón o nectarina

- ☐ Nunca o menos 1 vez al mes  
☐ 1 a 3 veces mes  
☐ 1 vez semana  
☒ 2 a 4 veces semana  
☐ 5 a 6 veces semana  
☐ 1 vez al día  
☐ 2 a 3 veces al día  
☐ 5 a 6 veces al día  
☐ más 6 veces al día

---

sandia o melon

- ☐ Nunca o menos 1 vez al mes  
☐ 1 a 3 veces mes  
☐ 1 vez semana  
☒ 2 a 4 veces semana  
☐ 5 a 6 veces semana  
☐ 1 vez al día  
☐ 2 a 3 veces al día  
☐ 5 a 6 veces al día  
☐ más 6 veces al día

---

uva

- ☐ Nunca o menos 1 vez al mes  
☐ 1 a 3 veces mes  
☐ 1 vez semana  
☐ 2 a 4 veces semana  
☐ 5 a 6 veces semana  
☐ 1 vez al día  
☐ 2 a 3 veces al día  
☐ 5 a 6 veces al día  
☐ más 6 veces al día

---

bruna o ciruela

- ☐ Nunca o menos 1 vez al mes  
☐ 1 a 3 veces mes  
☐ 1 vez semana  
☐ 2 a 4 veces semana  
☐ 5 a 6 veces semana  
☐ 1 vez al día  
☐ 2 a 3 veces al día  
☐ 5 a 6 veces al día  
☐ más 6 veces al día

---

kiwi

- ☐ Nunca o menos 1 vez al mes  
☐ 1 a 3 veces mes  
☐ 1 vez semana  
☐ 2 a 4 veces semana  
☐ 5 a 6 veces semana  
☐ 1 vez al día  
☐ 2 a 3 veces al día  
☐ 5 a 6 veces al día  
☐ más 6 veces al día

---

aceituna

- ☐ Nunca o menos 1 vez al mes  
☐ 1 a 3 veces mes  
☐ 1 vez semana  
☐ 2 a 4 veces semana  
☐ 5 a 6 veces semana  
☐ 1 vez al día  
☐ 2 a 3 veces al día  
☐ 5 a 6 veces al día  
☐ más 6 veces al día

---

frutos secos

- ☒ Nunca o menos 1 vez al mes  
☐ 1 a 3 veces mes  
☐ 1 vez semana  
☐ 2 a 4 veces semana  
☐ 5 a 6 veces semana  
☐ 1 vez al día  
☐ 2 a 3 veces al día  
☐ 5 a 6 veces al día  
☐ más 6 veces al día

---

pan blanco

- ☐ Nunca o menos 1 vez al mes  
☐ 1 a 3 veces mes  
☐ 1 vez semana  
☐ 2 a 4 veces semana  
☐ 5 a 6 veces semana  
☒ 1 vez al día  
☐ 2 a 3 veces al día  
☐ 5 a 6 veces al día  
☐ más 6 veces al día

---

pan integral

- ☒ Nunca o menos 1 vez al mes  
☐ 1 a 3 veces mes  
☐ 1 vez semana  
☐ 2 a 4 veces semana  
☐ 5 a 6 veces semana  
☐ 1 vez al día  
☐ 2 a 3 veces al día  
☐ 5 a 6 veces al día  
☐ más 6 veces al día

|                          |                                                                                                                                                                                                                                                                                                                                                                                                              |
|--------------------------|--------------------------------------------------------------------------------------------------------------------------------------------------------------------------------------------------------------------------------------------------------------------------------------------------------------------------------------------------------------------------------------------------------------|
| cereales desayuno        | <input checked="" type="radio"/> Nunca o menos 1 vez al mes<br><input type="radio"/> 1 a 3 veces mes<br><input type="radio"/> 1 vez semana<br><input type="radio"/> 2 a 4 veces semana<br><input type="radio"/> 5 a 6 veces semana<br><input type="radio"/> 1 vez al día<br><input type="radio"/> 2 a 3 veces al día<br><input type="radio"/> 5 a 6 veces al día<br><input type="radio"/> más 6 veces al día |
| patatas fritas           | <input type="radio"/> Nunca o menos 1 vez al mes<br><input checked="" type="radio"/> 1 a 3 veces mes<br><input type="radio"/> 1 vez semana<br><input type="radio"/> 2 a 4 veces semana<br><input type="radio"/> 5 a 6 veces semana<br><input type="radio"/> 1 vez al día<br><input type="radio"/> 2 a 3 veces al día<br><input type="radio"/> 5 a 6 veces al día<br><input type="radio"/> más 6 veces al día |
| patatas cocidas o asadas | <input type="radio"/> Nunca o menos 1 vez al mes<br><input type="radio"/> 1 a 3 veces mes<br><input type="radio"/> 1 vez semana<br><input checked="" type="radio"/> 2 a 4 veces semana<br><input type="radio"/> 5 a 6 veces semana<br><input type="radio"/> 1 vez al día<br><input type="radio"/> 2 a 3 veces al día<br><input type="radio"/> 5 a 6 veces al día<br><input type="radio"/> más 6 veces al día |
| bolsa papas              | <input checked="" type="radio"/> Nunca o menos 1 vez al mes<br><input type="radio"/> 1 a 3 veces mes<br><input type="radio"/> 1 vez semana<br><input type="radio"/> 2 a 4 veces semana<br><input type="radio"/> 5 a 6 veces semana<br><input type="radio"/> 1 vez al día<br><input type="radio"/> 2 a 3 veces al día<br><input type="radio"/> 5 a 6 veces al día<br><input type="radio"/> más 6 veces al día |
| arroz cocinado           | <input type="radio"/> Nunca o menos 1 vez al mes<br><input type="radio"/> 1 a 3 veces mes<br><input checked="" type="radio"/> 1 vez semana<br><input type="radio"/> 2 a 4 veces semana<br><input type="radio"/> 5 a 6 veces semana<br><input type="radio"/> 1 vez al día<br><input type="radio"/> 2 a 3 veces al día<br><input type="radio"/> 5 a 6 veces al día<br><input type="radio"/> más 6 veces al día |
| pasta                    | <input type="radio"/> Nunca o menos 1 vez al mes<br><input type="radio"/> 1 a 3 veces mes<br><input checked="" type="radio"/> 1 vez semana<br><input type="radio"/> 2 a 4 veces semana<br><input type="radio"/> 5 a 6 veces semana<br><input type="radio"/> 1 vez al día<br><input type="radio"/> 2 a 3 veces al día<br><input type="radio"/> 5 a 6 veces al día<br><input type="radio"/> más 6 veces al día |



|                     |                                                                                                                                                                                                                                                                                                                                                                                                              |
|---------------------|--------------------------------------------------------------------------------------------------------------------------------------------------------------------------------------------------------------------------------------------------------------------------------------------------------------------------------------------------------------------------------------------------------------|
| pizza               | <input type="radio"/> Nunca o menos 1 vez al mes<br><input type="radio"/> 1 a 3 veces mes<br><input checked="" type="radio"/> 1 vez semana<br><input type="radio"/> 2 a 4 veces semana<br><input type="radio"/> 5 a 6 veces semana<br><input type="radio"/> 1 vez al día<br><input type="radio"/> 2 a 3 veces al día<br><input type="radio"/> 5 a 6 veces al día<br><input type="radio"/> más 6 veces al día |
| aceite oliva        | <input type="radio"/> Nunca o menos 1 vez al mes<br><input type="radio"/> 1 a 3 veces mes<br><input type="radio"/> 1 vez semana<br><input type="radio"/> 2 a 4 veces semana<br><input type="radio"/> 5 a 6 veces semana<br><input checked="" type="radio"/> 1 vez al día<br><input type="radio"/> 2 a 3 veces al día<br><input type="radio"/> 5 a 6 veces al día<br><input type="radio"/> más 6 veces al día |
| otros aceites       | <input checked="" type="radio"/> Nunca o menos 1 vez al mes<br><input type="radio"/> 1 a 3 veces mes<br><input type="radio"/> 1 vez semana<br><input type="radio"/> 2 a 4 veces semana<br><input type="radio"/> 5 a 6 veces semana<br><input type="radio"/> 1 vez al día<br><input type="radio"/> 2 a 3 veces al día<br><input type="radio"/> 5 a 6 veces al día<br><input type="radio"/> más 6 veces al día |
| margarina           | <input checked="" type="radio"/> Nunca o menos 1 vez al mes<br><input type="radio"/> 1 a 3 veces mes<br><input type="radio"/> 1 vez semana<br><input type="radio"/> 2 a 4 veces semana<br><input type="radio"/> 5 a 6 veces semana<br><input type="radio"/> 1 vez al día<br><input type="radio"/> 2 a 3 veces al día<br><input type="radio"/> 5 a 6 veces al día<br><input type="radio"/> más 6 veces al día |
| mantequilla         | <input checked="" type="radio"/> Nunca o menos 1 vez al mes<br><input type="radio"/> 1 a 3 veces mes<br><input type="radio"/> 1 vez semana<br><input type="radio"/> 2 a 4 veces semana<br><input type="radio"/> 5 a 6 veces semana<br><input type="radio"/> 1 vez al día<br><input type="radio"/> 2 a 3 veces al día<br><input type="radio"/> 5 a 6 veces al día<br><input type="radio"/> más 6 veces al día |
| galletas tipo maria | <input type="radio"/> Nunca o menos 1 vez al mes<br><input type="radio"/> 1 a 3 veces mes<br><input type="radio"/> 1 vez semana<br><input type="radio"/> 2 a 4 veces semana<br><input type="radio"/> 5 a 6 veces semana<br><input type="radio"/> 1 vez al día<br><input type="radio"/> 2 a 3 veces al día<br><input checked="" type="radio"/> 5 a 6 veces al día<br><input type="radio"/> más 6 veces al día |

|                           |                                                                                                                                                                                                                                                                                                                                                                                                              |
|---------------------------|--------------------------------------------------------------------------------------------------------------------------------------------------------------------------------------------------------------------------------------------------------------------------------------------------------------------------------------------------------------------------------------------------------------|
| galletas chocolate        | <input checked="" type="radio"/> Nunca o menos 1 vez al mes<br><input type="radio"/> 1 a 3 veces mes<br><input type="radio"/> 1 vez semana<br><input type="radio"/> 2 a 4 veces semana<br><input type="radio"/> 5 a 6 veces semana<br><input type="radio"/> 1 vez al día<br><input type="radio"/> 2 a 3 veces al día<br><input type="radio"/> 5 a 6 veces al día<br><input type="radio"/> más 6 veces al día |
| bollieria                 | <input checked="" type="radio"/> Nunca o menos 1 vez al mes<br><input type="radio"/> 1 a 3 veces mes<br><input type="radio"/> 1 vez semana<br><input type="radio"/> 2 a 4 veces semana<br><input type="radio"/> 5 a 6 veces semana<br><input type="radio"/> 1 vez al día<br><input type="radio"/> 2 a 3 veces al día<br><input type="radio"/> 5 a 6 veces al día<br><input type="radio"/> más 6 veces al día |
| chocolate o bombones      | <input checked="" type="radio"/> Nunca o menos 1 vez al mes<br><input type="radio"/> 1 a 3 veces mes<br><input type="radio"/> 1 vez semana<br><input type="radio"/> 2 a 4 veces semana<br><input type="radio"/> 5 a 6 veces semana<br><input type="radio"/> 1 vez al día<br><input type="radio"/> 2 a 3 veces al día<br><input type="radio"/> 5 a 6 veces al día<br><input type="radio"/> más 6 veces al día |
| chocolate polvo o colacao | <input checked="" type="radio"/> Nunca o menos 1 vez al mes<br><input type="radio"/> 1 a 3 veces mes<br><input type="radio"/> 1 vez semana<br><input type="radio"/> 2 a 4 veces semana<br><input type="radio"/> 5 a 6 veces semana<br><input type="radio"/> 1 vez al día<br><input type="radio"/> 2 a 3 veces al día<br><input type="radio"/> 5 a 6 veces al día<br><input type="radio"/> más 6 veces al día |
| vino tinto                | <input type="radio"/> Nunca o menos 1 vez al mes<br><input type="radio"/> 1 a 3 veces mes<br><input type="radio"/> 1 vez semana<br><input type="radio"/> 2 a 4 veces semana<br><input type="radio"/> 5 a 6 veces semana<br><input type="radio"/> 1 vez al día<br><input type="radio"/> 2 a 3 veces al día<br><input type="radio"/> 5 a 6 veces al día<br><input type="radio"/> más 6 veces al día            |
| vino blanco               | <input type="radio"/> Nunca o menos 1 vez al mes<br><input type="radio"/> 1 a 3 veces mes<br><input type="radio"/> 1 vez semana<br><input type="radio"/> 2 a 4 veces semana<br><input type="radio"/> 5 a 6 veces semana<br><input type="radio"/> 1 vez al día<br><input type="radio"/> 2 a 3 veces al día<br><input type="radio"/> 5 a 6 veces al día<br><input type="radio"/> más 6 veces al día            |

|                       |                                                                                                                                                                                                                                                                                                                                                                                                              |
|-----------------------|--------------------------------------------------------------------------------------------------------------------------------------------------------------------------------------------------------------------------------------------------------------------------------------------------------------------------------------------------------------------------------------------------------------|
| vino seco o vermut    | <input type="radio"/> Nunca o menos 1 vez al mes<br><input type="radio"/> 1 a 3 veces mes<br><input type="radio"/> 1 vez semana<br><input type="radio"/> 2 a 4 veces semana<br><input type="radio"/> 5 a 6 veces semana<br><input type="radio"/> 1 vez al día<br><input type="radio"/> 2 a 3 veces al día<br><input type="radio"/> 5 a 6 veces al día<br><input type="radio"/> más 6 veces al día            |
| cerveza               | <input type="radio"/> Nunca o menos 1 vez al mes<br><input type="radio"/> 1 a 3 veces mes<br><input type="radio"/> 1 vez semana<br><input type="radio"/> 2 a 4 veces semana<br><input type="radio"/> 5 a 6 veces semana<br><input type="radio"/> 1 vez al día<br><input type="radio"/> 2 a 3 veces al día<br><input type="radio"/> 5 a 6 veces al día<br><input type="radio"/> más 6 veces al día            |
| cerveza sin alcohol   | <input checked="" type="radio"/> Nunca o menos 1 vez al mes<br><input type="radio"/> 1 a 3 veces mes<br><input type="radio"/> 1 vez semana<br><input type="radio"/> 2 a 4 veces semana<br><input type="radio"/> 5 a 6 veces semana<br><input type="radio"/> 1 vez al día<br><input type="radio"/> 2 a 3 veces al día<br><input type="radio"/> 5 a 6 veces al día<br><input type="radio"/> más 6 veces al día |
| licores               | <input type="radio"/> Nunca o menos 1 vez al mes<br><input type="radio"/> 1 a 3 veces mes<br><input type="radio"/> 1 vez semana<br><input type="radio"/> 2 a 4 veces semana<br><input type="radio"/> 5 a 6 veces semana<br><input type="radio"/> 1 vez al día<br><input type="radio"/> 2 a 3 veces al día<br><input type="radio"/> 5 a 6 veces al día<br><input type="radio"/> más 6 veces al día            |
| ginebra o ron o vodka | <input type="radio"/> Nunca o menos 1 vez al mes<br><input type="radio"/> 1 a 3 veces mes<br><input type="radio"/> 1 vez semana<br><input type="radio"/> 2 a 4 veces semana<br><input type="radio"/> 5 a 6 veces semana<br><input type="radio"/> 1 vez al día<br><input type="radio"/> 2 a 3 veces al día<br><input type="radio"/> 5 a 6 veces al día<br><input type="radio"/> más 6 veces al día            |
| refresco normal       | <input type="radio"/> Nunca o menos 1 vez al mes<br><input type="radio"/> 1 a 3 veces mes<br><input type="radio"/> 1 vez semana<br><input type="radio"/> 2 a 4 veces semana<br><input type="radio"/> 5 a 6 veces semana<br><input type="radio"/> 1 vez al día<br><input type="radio"/> 2 a 3 veces al día<br><input type="radio"/> 5 a 6 veces al día<br><input type="radio"/> más 6 veces al día            |

---

refresco sin azúcar

- ☐ Nunca o menos 1 vez al mes
- ☐ 1 a 3 veces mes
- ☐ 1 vez semana
- ☐ 2 a 4 veces semana
- ☐ 5 a 6 veces semana
- ☐ 1 vez al día
- ☐ 2 a 3 veces al día
- ☐ 5 a 6 veces al día
- ☐ más 6 veces al día

---

Agua del grifo

- ☐ Nunca o menos 1 vez al mes
- ☐ 1 a 3 veces mes
- ☐ 1 vez semana
- ☐ 2 a 4 veces semana
- ☐ 5 a 6 veces semana
- ☐ 1 vez al día
- ☐ 2 a 3 veces al día
- ☐ 5 a 6 veces al día
- ☐ más 6 veces al día

---

agua embotellada sin gas

- ☐ Nunca o menos 1 vez al mes
- ☐ 1 a 3 veces mes
- ☐ 1 vez semana
- ☐ 2 a 4 veces semana
- ☐ 5 a 6 veces semana
- ☐ 1 vez al día
- ☐ 2 a 3 veces al día
- ☒ 5 a 6 veces al día
- ☐ más 6 veces al día

---

agua embotellada con gas

- ☐ Nunca o menos 1 vez al mes
- ☐ 1 a 3 veces mes
- ☐ 1 vez semana
- ☐ 2 a 4 veces semana
- ☐ 5 a 6 veces semana
- ☐ 1 vez al día
- ☐ 2 a 3 veces al día
- ☐ 5 a 6 veces al día
- ☐ más 6 veces al día

---

zumو frutas embasado

- ☐ Nunca o menos 1 vez al mes
- ☐ 1 a 3 veces mes
- ☐ 1 vez semana
- ☐ 2 a 4 veces semana
- ☐ 5 a 6 veces semana
- ☐ 1 vez al día
- ☐ 2 a 3 veces al día
- ☐ 5 a 6 veces al día
- ☐ más 6 veces al día

---

cafe

- ☐ Nunca o menos 1 vez al mes
- ☐ 1 a 3 veces mes
- ☐ 1 vez semana
- ☐ 2 a 4 veces semana
- ☐ 5 a 6 veces semana
- ☐ 1 vez al día
- ☐ 2 a 3 veces al día
- ☐ 5 a 6 veces al día
- ☐ más 6 veces al día

---

|                   |                                                                                                                                                                                                                                                                                                                                                                                                              |
|-------------------|--------------------------------------------------------------------------------------------------------------------------------------------------------------------------------------------------------------------------------------------------------------------------------------------------------------------------------------------------------------------------------------------------------------|
| cafe descafeinado | <input type="radio"/> Nunca o menos 1 vez al mes<br><input type="radio"/> 1 a 3 veces mes<br><input type="radio"/> 1 vez semana<br><input type="radio"/> 2 a 4 veces semana<br><input type="radio"/> 5 a 6 veces semana<br><input checked="" type="radio"/> 1 vez al día<br><input type="radio"/> 2 a 3 veces al día<br><input type="radio"/> 5 a 6 veces al día<br><input type="radio"/> más 6 veces al día |
|-------------------|--------------------------------------------------------------------------------------------------------------------------------------------------------------------------------------------------------------------------------------------------------------------------------------------------------------------------------------------------------------------------------------------------------------|

---

|               |                                                                                                                                                                                                                                                                                                                                                                                                   |
|---------------|---------------------------------------------------------------------------------------------------------------------------------------------------------------------------------------------------------------------------------------------------------------------------------------------------------------------------------------------------------------------------------------------------|
| te o infusión | <input type="radio"/> Nunca o menos 1 vez al mes<br><input type="radio"/> 1 a 3 veces mes<br><input type="radio"/> 1 vez semana<br><input type="radio"/> 2 a 4 veces semana<br><input type="radio"/> 5 a 6 veces semana<br><input type="radio"/> 1 vez al día<br><input type="radio"/> 2 a 3 veces al día<br><input type="radio"/> 5 a 6 veces al día<br><input type="radio"/> más 6 veces al día |
|---------------|---------------------------------------------------------------------------------------------------------------------------------------------------------------------------------------------------------------------------------------------------------------------------------------------------------------------------------------------------------------------------------------------------|

---

|                      |                                                                                                                                                                                                                                                                                                                                                                                                   |
|----------------------|---------------------------------------------------------------------------------------------------------------------------------------------------------------------------------------------------------------------------------------------------------------------------------------------------------------------------------------------------------------------------------------------------|
| sopa o puré verduras | <input type="radio"/> Nunca o menos 1 vez al mes<br><input type="radio"/> 1 a 3 veces mes<br><input type="radio"/> 1 vez semana<br><input type="radio"/> 2 a 4 veces semana<br><input type="radio"/> 5 a 6 veces semana<br><input type="radio"/> 1 vez al día<br><input type="radio"/> 2 a 3 veces al día<br><input type="radio"/> 5 a 6 veces al día<br><input type="radio"/> más 6 veces al día |
|----------------------|---------------------------------------------------------------------------------------------------------------------------------------------------------------------------------------------------------------------------------------------------------------------------------------------------------------------------------------------------------------------------------------------------|

---

|                       |                                                                                                                                                                                                                                                                                                                                                                                                   |
|-----------------------|---------------------------------------------------------------------------------------------------------------------------------------------------------------------------------------------------------------------------------------------------------------------------------------------------------------------------------------------------------------------------------------------------|
| croquetas pollo jamón | <input type="radio"/> Nunca o menos 1 vez al mes<br><input type="radio"/> 1 a 3 veces mes<br><input type="radio"/> 1 vez semana<br><input type="radio"/> 2 a 4 veces semana<br><input type="radio"/> 5 a 6 veces semana<br><input type="radio"/> 1 vez al día<br><input type="radio"/> 2 a 3 veces al día<br><input type="radio"/> 5 a 6 veces al día<br><input type="radio"/> más 6 veces al día |
|-----------------------|---------------------------------------------------------------------------------------------------------------------------------------------------------------------------------------------------------------------------------------------------------------------------------------------------------------------------------------------------------------------------------------------------|

---

|                   |                                                                                                                                                                                                                                                                                                                                                                                                   |
|-------------------|---------------------------------------------------------------------------------------------------------------------------------------------------------------------------------------------------------------------------------------------------------------------------------------------------------------------------------------------------------------------------------------------------|
| croquetas pescado | <input type="radio"/> Nunca o menos 1 vez al mes<br><input type="radio"/> 1 a 3 veces mes<br><input type="radio"/> 1 vez semana<br><input type="radio"/> 2 a 4 veces semana<br><input type="radio"/> 5 a 6 veces semana<br><input type="radio"/> 1 vez al día<br><input type="radio"/> 2 a 3 veces al día<br><input type="radio"/> 5 a 6 veces al día<br><input type="radio"/> más 6 veces al día |
|-------------------|---------------------------------------------------------------------------------------------------------------------------------------------------------------------------------------------------------------------------------------------------------------------------------------------------------------------------------------------------------------------------------------------------|

---

|          |                                                                                                                                                                                                                                                                                                                                                                                                              |
|----------|--------------------------------------------------------------------------------------------------------------------------------------------------------------------------------------------------------------------------------------------------------------------------------------------------------------------------------------------------------------------------------------------------------------|
| mayonesa | <input type="radio"/> Nunca o menos 1 vez al mes<br><input type="radio"/> 1 a 3 veces mes<br><input checked="" type="radio"/> 1 vez semana<br><input type="radio"/> 2 a 4 veces semana<br><input type="radio"/> 5 a 6 veces semana<br><input type="radio"/> 1 vez al día<br><input type="radio"/> 2 a 3 veces al día<br><input type="radio"/> 5 a 6 veces al día<br><input type="radio"/> más 6 veces al día |
|----------|--------------------------------------------------------------------------------------------------------------------------------------------------------------------------------------------------------------------------------------------------------------------------------------------------------------------------------------------------------------------------------------------------------------|

---

|                  |                                                                                                                                                                                                                                                                                                                                                                                                              |
|------------------|--------------------------------------------------------------------------------------------------------------------------------------------------------------------------------------------------------------------------------------------------------------------------------------------------------------------------------------------------------------------------------------------------------------|
| salsa tomate     | <input type="radio"/> Nunca o menos 1 vez al mes<br><input type="radio"/> 1 a 3 veces mes<br><input checked="" type="radio"/> 1 vez semana<br><input type="radio"/> 2 a 4 veces semana<br><input type="radio"/> 5 a 6 veces semana<br><input type="radio"/> 1 vez al día<br><input type="radio"/> 2 a 3 veces al día<br><input type="radio"/> 5 a 6 veces al día<br><input type="radio"/> más 6 veces al día |
| ketchup          | <input type="radio"/> Nunca o menos 1 vez al mes<br><input type="radio"/> 1 a 3 veces mes<br><input type="radio"/> 1 vez semana<br><input type="radio"/> 2 a 4 veces semana<br><input type="radio"/> 5 a 6 veces semana<br><input type="radio"/> 1 vez al día<br><input type="radio"/> 2 a 3 veces al día<br><input type="radio"/> 5 a 6 veces al día<br><input type="radio"/> más 6 veces al día            |
| sal              | <input type="radio"/> Nunca o menos 1 vez al mes<br><input type="radio"/> 1 a 3 veces mes<br><input type="radio"/> 1 vez semana<br><input type="radio"/> 2 a 4 veces semana<br><input type="radio"/> 5 a 6 veces semana<br><input type="radio"/> 1 vez al día<br><input type="radio"/> 2 a 3 veces al día<br><input type="radio"/> 5 a 6 veces al día<br><input type="radio"/> más 6 veces al día            |
| ajo              | <input type="radio"/> Nunca o menos 1 vez al mes<br><input type="radio"/> 1 a 3 veces mes<br><input type="radio"/> 1 vez semana<br><input type="radio"/> 2 a 4 veces semana<br><input type="radio"/> 5 a 6 veces semana<br><input type="radio"/> 1 vez al día<br><input type="radio"/> 2 a 3 veces al día<br><input type="radio"/> 5 a 6 veces al día<br><input type="radio"/> más 6 veces al día            |
| mermelada o miel | <input type="radio"/> Nunca o menos 1 vez al mes<br><input type="radio"/> 1 a 3 veces mes<br><input type="radio"/> 1 vez semana<br><input type="radio"/> 2 a 4 veces semana<br><input type="radio"/> 5 a 6 veces semana<br><input type="radio"/> 1 vez al día<br><input type="radio"/> 2 a 3 veces al día<br><input type="radio"/> 5 a 6 veces al día<br><input type="radio"/> más 6 veces al día            |
| azúcar           | <input type="radio"/> Nunca o menos 1 vez al mes<br><input type="radio"/> 1 a 3 veces mes<br><input type="radio"/> 1 vez semana<br><input type="radio"/> 2 a 4 veces semana<br><input type="radio"/> 5 a 6 veces semana<br><input checked="" type="radio"/> 1 vez al día<br><input type="radio"/> 2 a 3 veces al día<br><input type="radio"/> 5 a 6 veces al día<br><input type="radio"/> más 6 veces al día |

|                                       |                                                                                                                                                                                                                                                                                                                                                                                                                                                                                                                               |
|---------------------------------------|-------------------------------------------------------------------------------------------------------------------------------------------------------------------------------------------------------------------------------------------------------------------------------------------------------------------------------------------------------------------------------------------------------------------------------------------------------------------------------------------------------------------------------|
| Otro alimento                         |                                                                                                                                                                                                                                                                                                                                                                                                                                                                                                                               |
| suplementos vitamínicos               | <input checked="" type="radio"/> si<br><input type="radio"/> no                                                                                                                                                                                                                                                                                                                                                                                                                                                               |
| suplementos vitamínicos               | [*DATA REMOVED*]                                                                                                                                                                                                                                                                                                                                                                                                                                                                                                              |
| dieta previa                          | <input type="radio"/> si<br><input checked="" type="radio"/> no                                                                                                                                                                                                                                                                                                                                                                                                                                                               |
| motivo dieta                          | <input checked="" type="radio"/> no dieta<br><input type="radio"/> control peso<br><input type="radio"/> control colesterol<br><input type="radio"/> control diabetes<br><input type="radio"/> problemas estómago<br><input type="radio"/> problemas vesícula o hepáticos<br><input type="radio"/> HTA o cardiopatía<br><input type="radio"/> problemas renales<br><input type="radio"/> alergia alimentaria<br><input type="radio"/> ácido úrico elevado<br><input type="radio"/> vegetariana<br><input type="radio"/> otros |
| cambio alimentos año previo gestación | <input checked="" type="radio"/> si<br><input type="radio"/> no                                                                                                                                                                                                                                                                                                                                                                                                                                                               |
| cambio lácteos                        | <input type="radio"/> eliminado<br><input type="radio"/> disminuido<br><input checked="" type="radio"/> igual<br><input type="radio"/> aumentado<br><input type="radio"/> no sabe                                                                                                                                                                                                                                                                                                                                             |
| cambio huevos                         | <input type="radio"/> eliminado<br><input type="radio"/> disminuido<br><input checked="" type="radio"/> igual<br><input type="radio"/> aumentado<br><input type="radio"/> no sabe                                                                                                                                                                                                                                                                                                                                             |
| cambio carne                          | <input type="radio"/> eliminado<br><input type="radio"/> disminuido<br><input checked="" type="radio"/> igual<br><input type="radio"/> aumentado<br><input type="radio"/> no sabe                                                                                                                                                                                                                                                                                                                                             |
| cambio pescado                        | <input type="radio"/> eliminado<br><input type="radio"/> disminuido<br><input checked="" type="radio"/> igual<br><input type="radio"/> aumentado<br><input type="radio"/> no sabe                                                                                                                                                                                                                                                                                                                                             |
| cambio verduras                       | <input type="radio"/> eliminado<br><input type="radio"/> disminuido<br><input checked="" type="radio"/> igual<br><input type="radio"/> aumentado<br><input type="radio"/> no sabe                                                                                                                                                                                                                                                                                                                                             |

|                            |                                                                                                                                                                                                                        |
|----------------------------|------------------------------------------------------------------------------------------------------------------------------------------------------------------------------------------------------------------------|
| cambio legumbres           | <input type="radio"/> eliminado<br><input type="radio"/> disminuido<br><input checked="" type="radio"/> igual<br><input type="radio"/> aumentado<br><input type="radio"/> no sabe                                      |
| cambio fruta               | <input type="radio"/> eliminado<br><input type="radio"/> disminuido<br><input checked="" type="radio"/> igual<br><input type="radio"/> aumentado<br><input type="radio"/> no sabe                                      |
| cambio pan                 | <input type="radio"/> eliminado<br><input type="radio"/> disminuido<br><input checked="" type="radio"/> igual<br><input type="radio"/> aumentado<br><input type="radio"/> no sabe                                      |
| cambio aceite oliva        | <input type="radio"/> eliminado<br><input type="radio"/> disminuido<br><input checked="" type="radio"/> igual<br><input type="radio"/> aumentado<br><input type="radio"/> no sabe                                      |
| cambio mante o margarina   | <input type="radio"/> eliminado<br><input type="radio"/> disminuido<br><input checked="" type="radio"/> igual<br><input type="radio"/> aumentado<br><input type="radio"/> no sabe                                      |
| cambio azúcar y dulces     | <input type="radio"/> eliminado<br><input checked="" type="radio"/> disminuido<br><input type="radio"/> igual<br><input type="radio"/> aumentado<br><input type="radio"/> no sabe                                      |
| cambio bebidas alcohólicas | <input checked="" type="radio"/> eliminado<br><input type="radio"/> disminuido<br><input type="radio"/> igual<br><input type="radio"/> aumentado<br><input type="radio"/> no sabe                                      |
| frecuencia comidas fritas  | <input type="radio"/> a diario<br><input type="radio"/> 5 a 6 veces semana<br><input type="radio"/> 2 a 4 veces semana<br><input checked="" type="radio"/> 1 vez semana<br><input type="radio"/> menos de 1 vez semana |
| carne                      | <input type="radio"/> no como<br><input type="radio"/> cruda<br><input type="radio"/> poco hecha<br><input checked="" type="radio"/> hecha<br><input type="radio"/> muy hecha                                          |
| grasa visible carne        | <input type="radio"/> quita toda<br><input checked="" type="radio"/> quita mayoría<br><input type="radio"/> quita un poco<br><input type="radio"/> no quita nada                                                       |



|                                |                                                                                                                                                                                                                                                          |
|--------------------------------|----------------------------------------------------------------------------------------------------------------------------------------------------------------------------------------------------------------------------------------------------------|
| cocina carne                   | <input type="radio"/> a la plancha<br><input type="radio"/> a la parrilla<br><input checked="" type="radio"/> asada<br><input type="radio"/> frita<br><input type="radio"/> guisada                                                                      |
| tostado quemado carne          | <input checked="" type="radio"/> nunca<br><input type="radio"/> 1 vez mes<br><input type="radio"/> 2 a 3 veces mes<br><input type="radio"/> 1 vez semana<br><input type="radio"/> 2 a 3 semanas                                                          |
| tostado quemado pescado        | <input checked="" type="radio"/> nunca<br><input type="radio"/> 1 vez mes<br><input type="radio"/> 2 a 3 veces mes<br><input type="radio"/> 1 vez semana<br><input type="radio"/> 2 a 3 semanas                                                          |
| socarrat paella                | <input type="radio"/> nunca<br><input type="radio"/> 1 vez mes<br><input type="radio"/> 2 a 3 veces mes<br><input checked="" type="radio"/> 1 vez semana<br><input type="radio"/> 2 a 3 semanas                                                          |
| grasa o aceite cocinar         | <input type="radio"/> mantequilla<br><input type="radio"/> margarina<br><input type="radio"/> aceite oliva<br><input checked="" type="radio"/> aceite oliva virgen extra<br><input type="radio"/> aceite vegetal<br><input type="radio"/> mezcla aceites |
| grasa aceite aliñar            | <input type="radio"/> mantequilla<br><input type="radio"/> margarina<br><input type="radio"/> aceite oliva<br><input checked="" type="radio"/> aceite oliva virgen extra<br><input type="radio"/> aceite vegetal<br><input type="radio"/> mezcla aceites |
| grasa aceite freir             | <input type="radio"/> mantequilla<br><input type="radio"/> margarina<br><input type="radio"/> aceite oliva<br><input checked="" type="radio"/> aceite oliva virgen extra<br><input type="radio"/> aceite vegetal<br><input type="radio"/> mezcla aceites |
| Ejercicio cuestionario         | <input checked="" type="radio"/> si<br><input type="radio"/> no                                                                                                                                                                                          |
| horas de sueño incluido siesta | [*DATA REMOVED*]                                                                                                                                                                                                                                         |
| minutos siesta                 | [*DATA REMOVED*]                                                                                                                                                                                                                                         |
| horas televisión semana        | [*DATA REMOVED*]                                                                                                                                                                                                                                         |

|                                        |                                                                                                                                                                                                                                                                                                                                                                           |
|----------------------------------------|---------------------------------------------------------------------------------------------------------------------------------------------------------------------------------------------------------------------------------------------------------------------------------------------------------------------------------------------------------------------------|
| actividad trabajo                      | <input checked="" type="radio"/> casi siempre sentado<br><input type="radio"/> sentado 50 por cien<br><input type="radio"/> casi siempre de pie, quieto<br><input type="radio"/> casi siempre levantado caminando y llevando pocas cosas<br><input type="radio"/> casi siempre levantado, caminando y llevado muchas cosas<br><input type="radio"/> trabajo manual pesado |
| tiempo caminar o bici al día           | <input type="radio"/> casi nunca<br><input type="radio"/> menos 20min día<br><input checked="" type="radio"/> 20 a 40 min día<br><input type="radio"/> 40 a 60 min día<br><input type="radio"/> 1h o 1h y media día<br><input type="radio"/> más de 1h y media al día                                                                                                     |
| tiempo tareas casa al día              | <input type="radio"/> menos de 1h día<br><input checked="" type="radio"/> 1 a 2h día<br><input type="radio"/> 3 a 4h día<br><input type="radio"/> 5 a 6h día<br><input type="radio"/> 7 a 8h día<br><input type="radio"/> más de 8h día                                                                                                                                   |
| tiempo libre televisión ordenador leer | <input type="radio"/> menos 1h día<br><input type="radio"/> 1h día<br><input checked="" type="radio"/> 2h día<br><input type="radio"/> 3h día<br><input type="radio"/> 4h día<br><input type="radio"/> 5 a 6h día<br><input type="radio"/> mas 6h día                                                                                                                     |
| tiempo libre ejercicio o deporte       | <input checked="" type="radio"/> menos 1h semana<br><input type="radio"/> 1h semana<br><input type="radio"/> 2h semana<br><input type="radio"/> 3h semana<br><input type="radio"/> 4 a 5h semana<br><input type="radio"/> mas 5h semana                                                                                                                                   |
| como se considera                      | <input type="radio"/> sedentaria<br><input checked="" type="radio"/> poco activa<br><input type="radio"/> moderadamente activa<br><input type="radio"/> bastante activa<br><input type="radio"/> muy activa<br><input type="radio"/> no sabe                                                                                                                              |
| FUR                                    | [*DATA REMOVED*]                                                                                                                                                                                                                                                                                                                                                          |
| Semanas gestación 2T                   | [*DATA REMOVED*]                                                                                                                                                                                                                                                                                                                                                          |
| Días gestación 2T                      | [*DATA REMOVED*]                                                                                                                                                                                                                                                                                                                                                          |
| DBP 2T                                 | [*DATA REMOVED*]                                                                                                                                                                                                                                                                                                                                                          |
| CC 2T                                  | [*DATA REMOVED*]                                                                                                                                                                                                                                                                                                                                                          |
| AC 2T                                  | [*DATA REMOVED*]                                                                                                                                                                                                                                                                                                                                                          |

|                                                   |                                                                                                                                                                                                 |
|---------------------------------------------------|-------------------------------------------------------------------------------------------------------------------------------------------------------------------------------------------------|
| LF 2T                                             | [*DATA REMOVED*]                                                                                                                                                                                |
| PFE 2T (Hadlock)                                  | [*DATA REMOVED*]                                                                                                                                                                                |
| Semanas gestación 3T                              | [*DATA REMOVED*]                                                                                                                                                                                |
| días 3T                                           | [*DATA REMOVED*]                                                                                                                                                                                |
| DBP 3T                                            | [*DATA REMOVED*]                                                                                                                                                                                |
| CC 3T                                             | [*DATA REMOVED*]                                                                                                                                                                                |
| AC 3T                                             | [*DATA REMOVED*]                                                                                                                                                                                |
| LF 3T                                             | [*DATA REMOVED*]                                                                                                                                                                                |
| PFE 3T (Hadlock)                                  | [*DATA REMOVED*]                                                                                                                                                                                |
| Semanas de gestación final                        | [*DATA REMOVED*]                                                                                                                                                                                |
| días gestación final                              | [*DATA REMOVED*]                                                                                                                                                                                |
| Localización placenta                             | <input checked="" type="radio"/> anterior<br><input type="radio"/> lateral derecha<br><input type="radio"/> lateral izquierda<br><input type="radio"/> posterior<br><input type="radio"/> fondo |
| Presentación longitudinal cefálica                | <input type="radio"/> no<br><input checked="" type="radio"/> si                                                                                                                                 |
| Dorso                                             | <input type="radio"/> izquierda anterior<br><input type="radio"/> izquierda posterior<br><input checked="" type="radio"/> derecha anterior<br><input type="radio"/> derecha posterior           |
| diámetro biparietal                               | [*DATA REMOVED*]                                                                                                                                                                                |
| Circunferencia craneal                            | [*DATA REMOVED*]                                                                                                                                                                                |
| Circunferencia abdominal                          | [*DATA REMOVED*]                                                                                                                                                                                |
| Longitud de femur                                 | [*DATA REMOVED*]                                                                                                                                                                                |
| tejido celular subcutáneo a nivel del muslo en mm | [*DATA REMOVED*]                                                                                                                                                                                |
| tejido celular subcutáneo en abdomen en mm        | [*DATA REMOVED*]                                                                                                                                                                                |
| Volumen del muslo en cm3                          | [*DATA REMOVED*]                                                                                                                                                                                |
| Peso fetal estimado según fórmula de Hadlock      | [*DATA REMOVED*]                                                                                                                                                                                |

|                                               |                                                                                                                                                          |
|-----------------------------------------------|----------------------------------------------------------------------------------------------------------------------------------------------------------|
| Percentil                                     | [*DATA REMOVED*]                                                                                                                                         |
| Peso fetal estimado según fórmula de Scioscia | <hr/>                                                                                                                                                    |
| Peso fetal estimado según fórmula de LEE      | <hr/>                                                                                                                                                    |
| Tipo de parto                                 | <input checked="" type="radio"/> eutocico<br><input type="radio"/> instrumentado/ventosa<br><input type="radio"/> cesarea                                |
| fecha de nacimiento                           | [*DATA REMOVED*]                                                                                                                                         |
| Días entre exploración y nacimiento           | [*DATA REMOVED*]                                                                                                                                         |
| Peso RN en g                                  | [*DATA REMOVED*]                                                                                                                                         |
| sexo                                          | <input checked="" type="radio"/> mujer<br><input type="radio"/> hombre                                                                                   |
| Apgar 1 minuto                                | [*DATA REMOVED*]                                                                                                                                         |
| Apgar 5 minutos                               | [*DATA REMOVED*]                                                                                                                                         |
| Apgar 10 minutos                              | <hr/>                                                                                                                                                    |
| antecedente Covid durante gestación           | <input type="radio"/> Yes<br><input checked="" type="radio"/> No                                                                                         |
| Nivel de estudios                             | <input type="radio"/> ninguno<br><input type="radio"/> primarios<br><input checked="" type="radio"/> secundarios<br><input type="radio"/> universitarios |

# Base\_datos\_estimacion\_peso\_fetal

|                                       |                                                                                                                                                                                                                                                                                      |
|---------------------------------------|--------------------------------------------------------------------------------------------------------------------------------------------------------------------------------------------------------------------------------------------------------------------------------------|
| Número de identificación participante | 33                                                                                                                                                                                                                                                                                   |
| CODIGO PARTICIPANTE                   |                                                                                                                                                                                                                                                                                      |
| Edad                                  | [*DATA REMOVED*]                                                                                                                                                                                                                                                                     |
| Gestaciones                           | <input checked="" type="radio"/> 1<br><input type="radio"/> 2<br><input type="radio"/> 3<br><input type="radio"/> mas de 3                                                                                                                                                           |
| partos                                | <input checked="" type="radio"/> 0<br><input type="radio"/> 1<br><input type="radio"/> 2<br><input type="radio"/> 3<br><input type="radio"/> mas de 3                                                                                                                                |
| cesáreas                              | <input checked="" type="radio"/> 0<br><input type="radio"/> 1<br><input type="radio"/> 2<br><input type="radio"/> 3<br><input type="radio"/> mas de 3                                                                                                                                |
| Abortos                               | <input checked="" type="radio"/> 0<br><input type="radio"/> 1<br><input type="radio"/> 2<br><input type="radio"/> 3<br><input type="radio"/> mas de 3                                                                                                                                |
| Tipo de gestacion                     | <input checked="" type="radio"/> espontanea<br><input type="radio"/> IAC inseminación artificial conyuge<br><input type="radio"/> IAD inseminación artificial donante<br><input type="radio"/> FIV Fecundación in Vitro<br><input type="radio"/> Ovodon FIV con donación de ovocitos |
| peso previo a embarazo                | [*DATA REMOVED*]                                                                                                                                                                                                                                                                     |
| Ganancia ponderal embarazo            | [*DATA REMOVED*]                                                                                                                                                                                                                                                                     |
| Talla madre                           | [*DATA REMOVED*]                                                                                                                                                                                                                                                                     |
| IMC previo embarazo                   | 19.607156612163443                                                                                                                                                                                                                                                                   |
| Patología obstétrica                  | <input checked="" type="radio"/> no<br><input type="radio"/> si                                                                                                                                                                                                                      |
| Diabetes pregestacional               | <input checked="" type="radio"/> no<br><input type="radio"/> si                                                                                                                                                                                                                      |
| Diabetes gestacional                  | <input checked="" type="radio"/> no<br><input type="radio"/> si                                                                                                                                                                                                                      |

|                                            |                                                                                                                                                                                      |
|--------------------------------------------|--------------------------------------------------------------------------------------------------------------------------------------------------------------------------------------|
| Diabetes gestacional con insulina          | <input checked="" type="radio"/> no<br><input type="radio"/> si                                                                                                                      |
| Diabetes gestacional con dieta y ejercicio | <input checked="" type="radio"/> no<br><input type="radio"/> si                                                                                                                      |
| Percentil fetos previos                    | <input checked="" type="radio"/> Nada<br><input type="radio"/> percentil menor de 10<br><input type="radio"/> percentil entre 10 y 90<br><input type="radio"/> percentil mayor de 90 |
| Exfumadora                                 | <input checked="" type="radio"/> Nada<br><input type="radio"/> menos de 5 años<br><input type="radio"/> 5 a 10 años<br><input type="radio"/> mayor o igual a 10 años                 |
| Hábito tabáquico                           | <input checked="" type="radio"/> no<br><input type="radio"/> si                                                                                                                      |
| fumadora                                   | [*DATA REMOVED*]                                                                                                                                                                     |
| Consumo otros tóxicos                      | <input checked="" type="radio"/> no<br><input type="radio"/> si                                                                                                                      |
| Hb 1T                                      | [*DATA REMOVED*]                                                                                                                                                                     |
| Htc 1T                                     | [*DATA REMOVED*]                                                                                                                                                                     |
| Hb 2T                                      | [*DATA REMOVED*]                                                                                                                                                                     |
| HTC 2T                                     | [*DATA REMOVED*]                                                                                                                                                                     |
| Hb 3T                                      | [*DATA REMOVED*]                                                                                                                                                                     |
| HTC 3T                                     | [*DATA REMOVED*]                                                                                                                                                                     |
| Suplemento FE oral                         | <input checked="" type="radio"/> si<br><input type="radio"/> no                                                                                                                      |
| Suplemento fe iv                           | <input type="radio"/> si<br><input checked="" type="radio"/> no                                                                                                                      |
| Transfusión                                | <input checked="" type="radio"/> no<br><input type="radio"/> si                                                                                                                      |
| Solicitada Vit D                           | <input checked="" type="radio"/> no<br><input type="radio"/> si                                                                                                                      |
| Deficit vit D                              | <input type="radio"/> no<br><input type="radio"/> si                                                                                                                                 |
| Suplemento vit D                           | <input type="radio"/> si<br><input type="radio"/> no                                                                                                                                 |

|                       |                                                                                                                                                                                                                                                                                                                                                                                                              |
|-----------------------|--------------------------------------------------------------------------------------------------------------------------------------------------------------------------------------------------------------------------------------------------------------------------------------------------------------------------------------------------------------------------------------------------------------|
| Dieta, cuestionario   | <input checked="" type="radio"/> sí<br><input type="radio"/> no                                                                                                                                                                                                                                                                                                                                              |
| Leche entera          | <input checked="" type="radio"/> Nunca o menos 1 vez al mes<br><input type="radio"/> 1 a 3 veces mes<br><input type="radio"/> 1 vez semana<br><input type="radio"/> 2 a 4 veces semana<br><input type="radio"/> 5 a 6 veces semana<br><input type="radio"/> 1 vez al día<br><input type="radio"/> 2 a 3 veces al día<br><input type="radio"/> 5 a 6 veces al día<br><input type="radio"/> más 6 veces al día |
| Leche semidesnatada   | <input type="radio"/> Nunca o menos 1 vez al mes<br><input type="radio"/> 1 a 3 veces mes<br><input type="radio"/> 1 vez semana<br><input type="radio"/> 2 a 4 veces semana<br><input type="radio"/> 5 a 6 veces semana<br><input checked="" type="radio"/> 1 vez al día<br><input type="radio"/> 2 a 3 veces al día<br><input type="radio"/> 5 a 6 veces al día<br><input type="radio"/> mas 6 veces al día |
| Leche desnatada       | <input checked="" type="radio"/> Nunca o menos 1 vez al mes<br><input type="radio"/> 1 a 3 veces mes<br><input type="radio"/> 1 vez semana<br><input type="radio"/> 2 a 4 veces semana<br><input type="radio"/> 5 a 6 veces semana<br><input type="radio"/> 1 vez al día<br><input type="radio"/> 2 a 3 veces al día<br><input type="radio"/> 5 a 6 veces al día<br><input type="radio"/> más 6 veces al día |
| Leche condensada      | <input checked="" type="radio"/> Nunca o menos 1 vez al mes<br><input type="radio"/> 1 a 3 veces mes<br><input type="radio"/> 1 vez semana<br><input type="radio"/> 2 a 4 veces semana<br><input type="radio"/> 5 a 6 veces semana<br><input type="radio"/> 1 vez al día<br><input type="radio"/> 2 a 3 veces al día<br><input type="radio"/> 5 a 6 veces al día<br><input type="radio"/> más 6 veces al día |
| nata o crema de leche | <input checked="" type="radio"/> Nunca o menos 1 vez al mes<br><input type="radio"/> 1 a 3 veces mes<br><input type="radio"/> 1 vez semana<br><input type="radio"/> 2 a 4 veces semana<br><input type="radio"/> 5 a 6 veces semana<br><input type="radio"/> 1 vez al día<br><input type="radio"/> 2 a 3 veces al día<br><input type="radio"/> 5 a 6 veces al día<br><input type="radio"/> más 6 veces al día |

|                                             |                                                                                                                                                                                                                                                                                                                                                                                                              |
|---------------------------------------------|--------------------------------------------------------------------------------------------------------------------------------------------------------------------------------------------------------------------------------------------------------------------------------------------------------------------------------------------------------------------------------------------------------------|
| Yogurt Entero                               | <input type="radio"/> Nunca o menos 1 vez al mes<br><input type="radio"/> 1 a 3 veces mes<br><input checked="" type="radio"/> 1 vez semana<br><input type="radio"/> 2 a 4 veces semana<br><input type="radio"/> 5 a 6 veces semana<br><input type="radio"/> 1 vez al día<br><input type="radio"/> 2 a 3 veces al día<br><input type="radio"/> 5 a 6 veces al día<br><input type="radio"/> más 6 veces al día |
| Yogurt desnatado                            | <input type="radio"/> Nunca o menos 1 vez al mes<br><input type="radio"/> 1 a 3 veces mes<br><input type="radio"/> 1 vez semana<br><input checked="" type="radio"/> 2 a 4 veces semana<br><input type="radio"/> 5 a 6 veces semana<br><input type="radio"/> 1 vez al día<br><input type="radio"/> 2 a 3 veces al día<br><input type="radio"/> 5 a 6 veces al día<br><input type="radio"/> más 6 veces al día |
| 100g requesón o queso blando o queso fresco | <input type="radio"/> Nunca o menos 1 vez al mes<br><input type="radio"/> 1 a 3 veces mes<br><input type="radio"/> 1 vez semana<br><input checked="" type="radio"/> 2 a 4 veces semana<br><input type="radio"/> 5 a 6 veces semana<br><input type="radio"/> 1 vez al día<br><input type="radio"/> 2 a 3 veces al día<br><input type="radio"/> 5 a 6 veces al día<br><input type="radio"/> más 6 veces al día |
| queso curado o semicurado o cremoso         | <input type="radio"/> Nunca o menos 1 vez al mes<br><input type="radio"/> 1 a 3 veces mes<br><input type="radio"/> 1 vez semana<br><input checked="" type="radio"/> 2 a 4 veces semana<br><input type="radio"/> 5 a 6 veces semana<br><input type="radio"/> 1 vez al día<br><input type="radio"/> 2 a 3 veces al día<br><input type="radio"/> 5 a 6 veces al día<br><input type="radio"/> más 6 veces al día |
| natillas flan pudding                       | <input checked="" type="radio"/> Nunca o menos 1 vez al mes<br><input type="radio"/> 1 a 3 veces mes<br><input type="radio"/> 1 vez semana<br><input type="radio"/> 2 a 4 veces semana<br><input type="radio"/> 5 a 6 veces semana<br><input type="radio"/> 1 vez al día<br><input type="radio"/> 2 a 3 veces al día<br><input type="radio"/> 5 a 6 veces al día<br><input type="radio"/> más 6 veces al día |
| Helado                                      | <input type="radio"/> Nunca o menos 1 vez al mes<br><input type="radio"/> 1 a 3 veces mes<br><input checked="" type="radio"/> 1 vez semana<br><input type="radio"/> 2 a 4 veces semana<br><input type="radio"/> 5 a 6 veces semana<br><input type="radio"/> 1 vez al día<br><input type="radio"/> 2 a 3 veces al día<br><input type="radio"/> 5 a 6 veces al día<br><input type="radio"/> más 6 veces al día |



|                                      |                                                                                                                                                                                                                                                                                                                                                                                                              |
|--------------------------------------|--------------------------------------------------------------------------------------------------------------------------------------------------------------------------------------------------------------------------------------------------------------------------------------------------------------------------------------------------------------------------------------------------------------|
| huevo                                | <input type="radio"/> Nunca o menos 1 vez al mes<br><input type="radio"/> 1 a 3 veces mes<br><input type="radio"/> 1 vez semana<br><input type="radio"/> 2 a 4 veces semana<br><input checked="" type="radio"/> 5 a 6 veces semana<br><input type="radio"/> 1 vez al día<br><input type="radio"/> 2 a 3 veces al día<br><input type="radio"/> 5 a 6 veces al día<br><input type="radio"/> más 6 veces al día |
| Pollo con piel                       | <input type="radio"/> Nunca o menos 1 vez al mes<br><input checked="" type="radio"/> 1 a 3 veces mes<br><input type="radio"/> 1 vez semana<br><input type="radio"/> 2 a 4 veces semana<br><input type="radio"/> 5 a 6 veces semana<br><input type="radio"/> 1 vez al día<br><input type="radio"/> 2 a 3 veces al día<br><input type="radio"/> 5 a 6 veces al día<br><input type="radio"/> más 6 veces al día |
| pollo sin piel                       | <input type="radio"/> Nunca o menos 1 vez al mes<br><input type="radio"/> 1 a 3 veces mes<br><input checked="" type="radio"/> 1 vez semana<br><input type="radio"/> 2 a 4 veces semana<br><input type="radio"/> 5 a 6 veces semana<br><input type="radio"/> 1 vez al día<br><input type="radio"/> 2 a 3 veces al día<br><input type="radio"/> 5 a 6 veces al día<br><input type="radio"/> más 6 veces al día |
| Ternera o cerdo o cordero            | <input type="radio"/> Nunca o menos 1 vez al mes<br><input type="radio"/> 1 a 3 veces mes<br><input type="radio"/> 1 vez semana<br><input checked="" type="radio"/> 2 a 4 veces semana<br><input type="radio"/> 5 a 6 veces semana<br><input type="radio"/> 1 vez al día<br><input type="radio"/> 2 a 3 veces al día<br><input type="radio"/> 5 a 6 veces al día<br><input type="radio"/> más 6 veces al día |
| carne caza: Conejo o codorniz o pato | <input checked="" type="radio"/> Nunca o menos 1 vez al mes<br><input type="radio"/> 1 a 3 veces mes<br><input type="radio"/> 1 vez semana<br><input type="radio"/> 2 a 4 veces semana<br><input type="radio"/> 5 a 6 veces semana<br><input type="radio"/> 1 vez al día<br><input type="radio"/> 2 a 3 veces al día<br><input type="radio"/> 5 a 6 veces al día<br><input type="radio"/> más 6 veces al día |
| Hígado de ternera o cerdo o pollo    | <input checked="" type="radio"/> Nunca o menos 1 vez al mes<br><input type="radio"/> 1 a 3 veces mes<br><input type="radio"/> 1 vez semana<br><input type="radio"/> 2 a 4 veces semana<br><input type="radio"/> 5 a 6 veces semana<br><input type="radio"/> 1 vez al día<br><input type="radio"/> 2 a 3 veces al día<br><input type="radio"/> 5 a 6 veces al día<br><input type="radio"/> más 6 veces al día |

|                     |                                                                                                                                                                                                                                                                                                                                                                                                              |
|---------------------|--------------------------------------------------------------------------------------------------------------------------------------------------------------------------------------------------------------------------------------------------------------------------------------------------------------------------------------------------------------------------------------------------------------|
| Vísceras            | <input checked="" type="radio"/> Nunca o menos 1 vez al mes<br><input type="radio"/> 1 a 3 veces mes<br><input type="radio"/> 1 vez semana<br><input type="radio"/> 2 a 4 veces semana<br><input type="radio"/> 5 a 6 veces semana<br><input type="radio"/> 1 vez al día<br><input type="radio"/> 2 a 3 veces al día<br><input type="radio"/> 5 a 6 veces al día<br><input type="radio"/> más 6 veces al día |
| Embutido            | <input checked="" type="radio"/> Nunca o menos 1 vez al mes<br><input type="radio"/> 1 a 3 veces mes<br><input type="radio"/> 1 vez semana<br><input type="radio"/> 2 a 4 veces semana<br><input type="radio"/> 5 a 6 veces semana<br><input type="radio"/> 1 vez al día<br><input type="radio"/> 2 a 3 veces al día<br><input type="radio"/> 5 a 6 veces al día<br><input type="radio"/> más 6 veces al día |
| Salchicha o similar | <input checked="" type="radio"/> Nunca o menos 1 vez al mes<br><input type="radio"/> 1 a 3 veces mes<br><input type="radio"/> 1 vez semana<br><input type="radio"/> 2 a 4 veces semana<br><input type="radio"/> 5 a 6 veces semana<br><input type="radio"/> 1 vez al día<br><input type="radio"/> 2 a 3 veces al día<br><input type="radio"/> 5 a 6 veces al día<br><input type="radio"/> más 6 veces al día |
| Pate o foiegras     | <input checked="" type="radio"/> Nunca o menos 1 vez al mes<br><input type="radio"/> 1 a 3 veces mes<br><input type="radio"/> 1 vez semana<br><input type="radio"/> 2 a 4 veces semana<br><input type="radio"/> 5 a 6 veces semana<br><input type="radio"/> 1 vez al día<br><input type="radio"/> 2 a 3 veces al día<br><input type="radio"/> 5 a 6 veces al día<br><input type="radio"/> más 6 veces al día |
| Hamburguesa         | <input type="radio"/> Nunca o menos 1 vez al mes<br><input type="radio"/> 1 a 3 veces mes<br><input checked="" type="radio"/> 1 vez semana<br><input type="radio"/> 2 a 4 veces semana<br><input type="radio"/> 5 a 6 veces semana<br><input type="radio"/> 1 vez al día<br><input type="radio"/> 2 a 3 veces al día<br><input type="radio"/> 5 a 6 veces al día<br><input type="radio"/> más 6 veces al día |
| tocino o bacon      | <input checked="" type="radio"/> Nunca o menos 1 vez al mes<br><input type="radio"/> 1 a 3 veces mes<br><input type="radio"/> 1 vez semana<br><input type="radio"/> 2 a 4 veces semana<br><input type="radio"/> 5 a 6 veces semana<br><input type="radio"/> 1 vez al día<br><input type="radio"/> 2 a 3 veces al día<br><input type="radio"/> 5 a 6 veces al día<br><input type="radio"/> más 6 veces al día |

---

|               |                                                                                                                                                                                                                                                                                                                                                                                                              |
|---------------|--------------------------------------------------------------------------------------------------------------------------------------------------------------------------------------------------------------------------------------------------------------------------------------------------------------------------------------------------------------------------------------------------------------|
| Pescado frito | <input checked="" type="radio"/> Nunca o menos 1 vez al mes<br><input type="radio"/> 1 a 3 veces mes<br><input type="radio"/> 1 vez semana<br><input type="radio"/> 2 a 4 veces semana<br><input type="radio"/> 5 a 6 veces semana<br><input type="radio"/> 1 vez al día<br><input type="radio"/> 2 a 3 veces al día<br><input type="radio"/> 5 a 6 veces al día<br><input type="radio"/> más 6 veces al día |
|---------------|--------------------------------------------------------------------------------------------------------------------------------------------------------------------------------------------------------------------------------------------------------------------------------------------------------------------------------------------------------------------------------------------------------------|

---

|                        |                                                                                                                                                                                                                                                                                                                                                                                                              |
|------------------------|--------------------------------------------------------------------------------------------------------------------------------------------------------------------------------------------------------------------------------------------------------------------------------------------------------------------------------------------------------------------------------------------------------------|
| pescado hervido blanco | <input checked="" type="radio"/> Nunca o menos 1 vez al mes<br><input type="radio"/> 1 a 3 veces mes<br><input type="radio"/> 1 vez semana<br><input type="radio"/> 2 a 4 veces semana<br><input type="radio"/> 5 a 6 veces semana<br><input type="radio"/> 1 vez al día<br><input type="radio"/> 2 a 3 veces al día<br><input type="radio"/> 5 a 6 veces al día<br><input type="radio"/> más 6 veces al día |
|------------------------|--------------------------------------------------------------------------------------------------------------------------------------------------------------------------------------------------------------------------------------------------------------------------------------------------------------------------------------------------------------------------------------------------------------|

---

|                      |                                                                                                                                                                                                                                                                                                                                                                                                              |
|----------------------|--------------------------------------------------------------------------------------------------------------------------------------------------------------------------------------------------------------------------------------------------------------------------------------------------------------------------------------------------------------------------------------------------------------|
| pescado hervido azul | <input type="radio"/> Nunca o menos 1 vez al mes<br><input type="radio"/> 1 a 3 veces mes<br><input checked="" type="radio"/> 1 vez semana<br><input type="radio"/> 2 a 4 veces semana<br><input type="radio"/> 5 a 6 veces semana<br><input type="radio"/> 1 vez al día<br><input type="radio"/> 2 a 3 veces al día<br><input type="radio"/> 5 a 6 veces al día<br><input type="radio"/> más 6 veces al día |
|----------------------|--------------------------------------------------------------------------------------------------------------------------------------------------------------------------------------------------------------------------------------------------------------------------------------------------------------------------------------------------------------------------------------------------------------|

---

|                    |                                                                                                                                                                                                                                                                                                                                                                                                              |
|--------------------|--------------------------------------------------------------------------------------------------------------------------------------------------------------------------------------------------------------------------------------------------------------------------------------------------------------------------------------------------------------------------------------------------------------|
| otros pescado azul | <input type="radio"/> Nunca o menos 1 vez al mes<br><input type="radio"/> 1 a 3 veces mes<br><input checked="" type="radio"/> 1 vez semana<br><input type="radio"/> 2 a 4 veces semana<br><input type="radio"/> 5 a 6 veces semana<br><input type="radio"/> 1 vez al día<br><input type="radio"/> 2 a 3 veces al día<br><input type="radio"/> 5 a 6 veces al día<br><input type="radio"/> más 6 veces al día |
|--------------------|--------------------------------------------------------------------------------------------------------------------------------------------------------------------------------------------------------------------------------------------------------------------------------------------------------------------------------------------------------------------------------------------------------------|

---

|               |                                                                                                                                                                                                                                                                                                                                                                                                              |
|---------------|--------------------------------------------------------------------------------------------------------------------------------------------------------------------------------------------------------------------------------------------------------------------------------------------------------------------------------------------------------------------------------------------------------------|
| atun conserva | <input type="radio"/> Nunca o menos 1 vez al mes<br><input type="radio"/> 1 a 3 veces mes<br><input checked="" type="radio"/> 1 vez semana<br><input type="radio"/> 2 a 4 veces semana<br><input type="radio"/> 5 a 6 veces semana<br><input type="radio"/> 1 vez al día<br><input type="radio"/> 2 a 3 veces al día<br><input type="radio"/> 5 a 6 veces al día<br><input type="radio"/> más 6 veces al día |
|---------------|--------------------------------------------------------------------------------------------------------------------------------------------------------------------------------------------------------------------------------------------------------------------------------------------------------------------------------------------------------------------------------------------------------------|

---

|                  |                                                                                                                                                                                                                                                                                                                                                                                                              |
|------------------|--------------------------------------------------------------------------------------------------------------------------------------------------------------------------------------------------------------------------------------------------------------------------------------------------------------------------------------------------------------------------------------------------------------|
| sardina conserva | <input checked="" type="radio"/> Nunca o menos 1 vez al mes<br><input type="radio"/> 1 a 3 veces mes<br><input type="radio"/> 1 vez semana<br><input type="radio"/> 2 a 4 veces semana<br><input type="radio"/> 5 a 6 veces semana<br><input type="radio"/> 1 vez al día<br><input type="radio"/> 2 a 3 veces al día<br><input type="radio"/> 5 a 6 veces al día<br><input type="radio"/> más 6 veces al día |
|------------------|--------------------------------------------------------------------------------------------------------------------------------------------------------------------------------------------------------------------------------------------------------------------------------------------------------------------------------------------------------------------------------------------------------------|

---

---

pescado ahumado

- ☒ Nunca o menos 1 vez al mes  
☐ 1 a 3 veces mes  
☐ 1 vez semana  
☐ 2 a 4 veces semana  
☐ 5 a 6 veces semana  
☐ 1 vez al día  
☐ 2 a 3 veces al día  
☐ 5 a 6 veces al día  
☐ más 6 veces al día

---

almejas o mejillones o ostras unos 100g

- ☒ Nunca o menos 1 vez al mes  
☐ 1 a 3 veces mes  
☐ 1 vez semana  
☐ 2 a 4 veces semana  
☐ 5 a 6 veces semana  
☐ 1 vez al día  
☐ 2 a 3 veces al día  
☐ 5 a 6 veces al día  
☐ más 6 veces al día

---

calamar o chipiron o sepia unos 100g

- ☒ Nunca o menos 1 vez al mes  
☐ 1 a 3 veces mes  
☐ 1 vez semana  
☐ 2 a 4 veces semana  
☐ 5 a 6 veces semana  
☐ 1 vez al día  
☐ 2 a 3 veces al día  
☐ 5 a 6 veces al día  
☐ más 6 veces al día

---

marisco unos 100g

- ☒ Nunca o menos 1 vez al mes  
☐ 1 a 3 veces mes  
☐ 1 vez semana  
☐ 2 a 4 veces semana  
☐ 5 a 6 veces semana  
☐ 1 vez al día  
☐ 2 a 3 veces al día  
☐ 5 a 6 veces al día  
☐ más 6 veces al día

---

Espinacas o acelgas cocinadas

- ☒ Nunca o menos 1 vez al mes  
☐ 1 a 3 veces mes  
☐ 1 vez semana  
☐ 2 a 4 veces semana  
☐ 5 a 6 veces semana  
☐ 1 vez al día  
☐ 2 a 3 veces al día  
☐ 5 a 6 veces al día  
☐ más 6 veces al día

---

Col o coliflor o brocoli cocinado

- ☒ Nunca o menos 1 vez al mes  
☐ 1 a 3 veces mes  
☐ 1 vez semana  
☐ 2 a 4 veces semana  
☐ 5 a 6 veces semana  
☐ 1 vez al día  
☐ 2 a 3 veces al día  
☐ 5 a 6 veces al día  
☐ más 6 veces al día

---

Lechuga o endivia o escarola

- ☐ Nunca o menos 1 vez al mes  
☐ 1 a 3 veces mes  
☐ 1 vez semana  
☐ 2 a 4 veces semana  
☐ 5 a 6 veces semana  
☐ 1 vez al día  
☒ 2 a 3 veces al día  
☐ 5 a 6 veces al día  
☐ más 6 veces al día

---

tomate ensalada

- ☐ Nunca o menos 1 vez al mes  
☐ 1 a 3 veces mes  
☐ 1 vez semana  
☐ 2 a 4 veces semana  
☐ 5 a 6 veces semana  
☒ 1 vez al día  
☐ 2 a 3 veces al día  
☐ 5 a 6 veces al día  
☐ más 6 veces al día

---

cebolla

- ☐ Nunca o menos 1 vez al mes  
☐ 1 a 3 veces mes  
☐ 1 vez semana  
☐ 2 a 4 veces semana  
☒ 5 a 6 veces semana  
☐ 1 vez al día  
☐ 2 a 3 veces al día  
☐ 5 a 6 veces al día  
☐ más 6 veces al día

---

Zanahoria o calabaza

- ☐ Nunca o menos 1 vez al mes  
☐ 1 a 3 veces mes  
☐ 1 vez semana  
☐ 2 a 4 veces semana  
☐ 5 a 6 veces semana  
☒ 1 vez al día  
☐ 2 a 3 veces al día  
☐ 5 a 6 veces al día  
☐ más 6 veces al día

---

Judías verdes

- ☒ Nunca o menos 1 vez al mes  
☐ 1 a 3 veces mes  
☐ 1 vez semana  
☐ 2 a 4 veces semana  
☐ 5 a 6 veces semana  
☐ 1 vez al día  
☐ 2 a 3 veces al día  
☐ 5 a 6 veces al día  
☐ más 6 veces al día

---

Berenjena o calabacin o pepino

- ☐ Nunca o menos 1 vez al mes  
☐ 1 a 3 veces mes  
☐ 1 vez semana  
☐ 2 a 4 veces semana  
☐ 5 a 6 veces semana  
☒ 1 vez al día  
☐ 2 a 3 veces al día  
☐ 5 a 6 veces al día  
☐ más 6 veces al día

|                       |                                                                                                                                                                                                                                                                                                                                                                                                              |
|-----------------------|--------------------------------------------------------------------------------------------------------------------------------------------------------------------------------------------------------------------------------------------------------------------------------------------------------------------------------------------------------------------------------------------------------------|
| pimiento              | <input type="radio"/> Nunca o menos 1 vez al mes<br><input type="radio"/> 1 a 3 veces mes<br><input type="radio"/> 1 vez semana<br><input type="radio"/> 2 a 4 veces semana<br><input type="radio"/> 5 a 6 veces semana<br><input checked="" type="radio"/> 1 vez al día<br><input type="radio"/> 2 a 3 veces al día<br><input type="radio"/> 5 a 6 veces al día<br><input type="radio"/> más 6 veces al día |
| alcachofa             | <input type="radio"/> Nunca o menos 1 vez al mes<br><input type="radio"/> 1 a 3 veces mes<br><input checked="" type="radio"/> 1 vez semana<br><input type="radio"/> 2 a 4 veces semana<br><input type="radio"/> 5 a 6 veces semana<br><input type="radio"/> 1 vez al día<br><input type="radio"/> 2 a 3 veces al día<br><input type="radio"/> 5 a 6 veces al día<br><input type="radio"/> más 6 veces al día |
| espárragos            | <input type="radio"/> Nunca o menos 1 vez al mes<br><input type="radio"/> 1 a 3 veces mes<br><input type="radio"/> 1 vez semana<br><input checked="" type="radio"/> 2 a 4 veces semana<br><input type="radio"/> 5 a 6 veces semana<br><input type="radio"/> 1 vez al día<br><input type="radio"/> 2 a 3 veces al día<br><input type="radio"/> 5 a 6 veces al día<br><input type="radio"/> más 6 veces al día |
| maíz hervido          | <input checked="" type="radio"/> Nunca o menos 1 vez al mes<br><input type="radio"/> 1 a 3 veces mes<br><input type="radio"/> 1 vez semana<br><input type="radio"/> 2 a 4 veces semana<br><input type="radio"/> 5 a 6 veces semana<br><input type="radio"/> 1 vez al día<br><input type="radio"/> 2 a 3 veces al día<br><input type="radio"/> 5 a 6 veces al día<br><input type="radio"/> más 6 veces al día |
| legumbres             | <input type="radio"/> Nunca o menos 1 vez al mes<br><input type="radio"/> 1 a 3 veces mes<br><input type="radio"/> 1 vez semana<br><input type="radio"/> 2 a 4 veces semana<br><input type="radio"/> 5 a 6 veces semana<br><input checked="" type="radio"/> 1 vez al día<br><input type="radio"/> 2 a 3 veces al día<br><input type="radio"/> 5 a 6 veces al día<br><input type="radio"/> más 6 veces al día |
| naranjas o mandarinas | <input checked="" type="radio"/> Nunca o menos 1 vez al mes<br><input type="radio"/> 1 a 3 veces mes<br><input type="radio"/> 1 vez semana<br><input type="radio"/> 2 a 4 veces semana<br><input type="radio"/> 5 a 6 veces semana<br><input type="radio"/> 1 vez al día<br><input type="radio"/> 2 a 3 veces al día<br><input type="radio"/> 5 a 6 veces al día<br><input type="radio"/> más 6 veces al día |

|                       |                                                                                                                                                                                                                                                                                                                                                                                                              |
|-----------------------|--------------------------------------------------------------------------------------------------------------------------------------------------------------------------------------------------------------------------------------------------------------------------------------------------------------------------------------------------------------------------------------------------------------|
| zum natural fruta     | <input checked="" type="radio"/> Nunca o menos 1 vez al mes<br><input type="radio"/> 1 a 3 veces mes<br><input type="radio"/> 1 vez semana<br><input type="radio"/> 2 a 4 veces semana<br><input type="radio"/> 5 a 6 veces semana<br><input type="radio"/> 1 vez al día<br><input type="radio"/> 2 a 3 veces al día<br><input type="radio"/> 5 a 6 veces al día<br><input type="radio"/> más 6 veces al día |
| platano               | <input type="radio"/> Nunca o menos 1 vez al mes<br><input type="radio"/> 1 a 3 veces mes<br><input checked="" type="radio"/> 1 vez semana<br><input type="radio"/> 2 a 4 veces semana<br><input type="radio"/> 5 a 6 veces semana<br><input type="radio"/> 1 vez al día<br><input type="radio"/> 2 a 3 veces al día<br><input type="radio"/> 5 a 6 veces al día<br><input type="radio"/> más 6 veces al día |
| manzana o pera        | <input type="radio"/> Nunca o menos 1 vez al mes<br><input type="radio"/> 1 a 3 veces mes<br><input type="radio"/> 1 vez semana<br><input type="radio"/> 2 a 4 veces semana<br><input type="radio"/> 5 a 6 veces semana<br><input checked="" type="radio"/> 1 vez al día<br><input type="radio"/> 2 a 3 veces al día<br><input type="radio"/> 5 a 6 veces al día<br><input type="radio"/> más 6 veces al día |
| melocotón o nectarina | <input type="radio"/> Nunca o menos 1 vez al mes<br><input type="radio"/> 1 a 3 veces mes<br><input type="radio"/> 1 vez semana<br><input type="radio"/> 2 a 4 veces semana<br><input type="radio"/> 5 a 6 veces semana<br><input checked="" type="radio"/> 1 vez al día<br><input type="radio"/> 2 a 3 veces al día<br><input type="radio"/> 5 a 6 veces al día<br><input type="radio"/> más 6 veces al día |
| sandia o melon        | <input type="radio"/> Nunca o menos 1 vez al mes<br><input type="radio"/> 1 a 3 veces mes<br><input type="radio"/> 1 vez semana<br><input type="radio"/> 2 a 4 veces semana<br><input type="radio"/> 5 a 6 veces semana<br><input checked="" type="radio"/> 1 vez al día<br><input type="radio"/> 2 a 3 veces al día<br><input type="radio"/> 5 a 6 veces al día<br><input type="radio"/> más 6 veces al día |
| uva                   | <input checked="" type="radio"/> Nunca o menos 1 vez al mes<br><input type="radio"/> 1 a 3 veces mes<br><input type="radio"/> 1 vez semana<br><input type="radio"/> 2 a 4 veces semana<br><input type="radio"/> 5 a 6 veces semana<br><input type="radio"/> 1 vez al día<br><input type="radio"/> 2 a 3 veces al día<br><input type="radio"/> 5 a 6 veces al día<br><input type="radio"/> más 6 veces al día |

---

bruna o ciruela

- ☐ Nunca o menos 1 vez al mes  
☐ 1 a 3 veces mes  
☒ 1 vez semana  
☐ 2 a 4 veces semana  
☐ 5 a 6 veces semana  
☐ 1 vez al día  
☐ 2 a 3 veces al día  
☐ 5 a 6 veces al día  
☐ más 6 veces al día

---

kiwi

- ☐ Nunca o menos 1 vez al mes  
☐ 1 a 3 veces mes  
☐ 1 vez semana  
☐ 2 a 4 veces semana  
☐ 5 a 6 veces semana  
☒ 1 vez al día  
☐ 2 a 3 veces al día  
☐ 5 a 6 veces al día  
☐ más 6 veces al día

---

aceituna

- ☐ Nunca o menos 1 vez al mes  
☐ 1 a 3 veces mes  
☒ 1 vez semana  
☐ 2 a 4 veces semana  
☐ 5 a 6 veces semana  
☐ 1 vez al día  
☐ 2 a 3 veces al día  
☐ 5 a 6 veces al día  
☐ más 6 veces al día

---

frutos secos

- ☐ Nunca o menos 1 vez al mes  
☐ 1 a 3 veces mes  
☒ 1 vez semana  
☐ 2 a 4 veces semana  
☐ 5 a 6 veces semana  
☐ 1 vez al día  
☐ 2 a 3 veces al día  
☐ 5 a 6 veces al día  
☐ más 6 veces al día

---

pan blanco

- ☐ Nunca o menos 1 vez al mes  
☐ 1 a 3 veces mes  
☒ 1 vez semana  
☐ 2 a 4 veces semana  
☐ 5 a 6 veces semana  
☐ 1 vez al día  
☐ 2 a 3 veces al día  
☐ 5 a 6 veces al día  
☐ más 6 veces al día

---

pan integral

- ☐ Nunca o menos 1 vez al mes  
☐ 1 a 3 veces mes  
☐ 1 vez semana  
☐ 2 a 4 veces semana  
☐ 5 a 6 veces semana  
☐ 1 vez al día  
☒ 2 a 3 veces al día  
☐ 5 a 6 veces al día  
☐ más 6 veces al día



|                          |                                                                                                                                                                                                                                                                                                                                                                                                              |
|--------------------------|--------------------------------------------------------------------------------------------------------------------------------------------------------------------------------------------------------------------------------------------------------------------------------------------------------------------------------------------------------------------------------------------------------------|
| cereales desayuno        | <input checked="" type="radio"/> Nunca o menos 1 vez al mes<br><input type="radio"/> 1 a 3 veces mes<br><input type="radio"/> 1 vez semana<br><input type="radio"/> 2 a 4 veces semana<br><input type="radio"/> 5 a 6 veces semana<br><input type="radio"/> 1 vez al día<br><input type="radio"/> 2 a 3 veces al día<br><input type="radio"/> 5 a 6 veces al día<br><input type="radio"/> más 6 veces al día |
| patatas fritas           | <input checked="" type="radio"/> Nunca o menos 1 vez al mes<br><input type="radio"/> 1 a 3 veces mes<br><input type="radio"/> 1 vez semana<br><input type="radio"/> 2 a 4 veces semana<br><input type="radio"/> 5 a 6 veces semana<br><input type="radio"/> 1 vez al día<br><input type="radio"/> 2 a 3 veces al día<br><input type="radio"/> 5 a 6 veces al día<br><input type="radio"/> más 6 veces al día |
| patatas cocidas o asadas | <input type="radio"/> Nunca o menos 1 vez al mes<br><input checked="" type="radio"/> 1 a 3 veces mes<br><input type="radio"/> 1 vez semana<br><input type="radio"/> 2 a 4 veces semana<br><input type="radio"/> 5 a 6 veces semana<br><input type="radio"/> 1 vez al día<br><input type="radio"/> 2 a 3 veces al día<br><input type="radio"/> 5 a 6 veces al día<br><input type="radio"/> más 6 veces al día |
| bolsa papas              | <input checked="" type="radio"/> Nunca o menos 1 vez al mes<br><input type="radio"/> 1 a 3 veces mes<br><input type="radio"/> 1 vez semana<br><input type="radio"/> 2 a 4 veces semana<br><input type="radio"/> 5 a 6 veces semana<br><input type="radio"/> 1 vez al día<br><input type="radio"/> 2 a 3 veces al día<br><input type="radio"/> 5 a 6 veces al día<br><input type="radio"/> más 6 veces al día |
| arroz cocinado           | <input type="radio"/> Nunca o menos 1 vez al mes<br><input type="radio"/> 1 a 3 veces mes<br><input type="radio"/> 1 vez semana<br><input checked="" type="radio"/> 2 a 4 veces semana<br><input type="radio"/> 5 a 6 veces semana<br><input type="radio"/> 1 vez al día<br><input type="radio"/> 2 a 3 veces al día<br><input type="radio"/> 5 a 6 veces al día<br><input type="radio"/> más 6 veces al día |
| pasta                    | <input type="radio"/> Nunca o menos 1 vez al mes<br><input type="radio"/> 1 a 3 veces mes<br><input type="radio"/> 1 vez semana<br><input checked="" type="radio"/> 2 a 4 veces semana<br><input type="radio"/> 5 a 6 veces semana<br><input type="radio"/> 1 vez al día<br><input type="radio"/> 2 a 3 veces al día<br><input type="radio"/> 5 a 6 veces al día<br><input type="radio"/> más 6 veces al día |

|                     |                                                                                                                                                                                                                                                                                                                                                                                                              |
|---------------------|--------------------------------------------------------------------------------------------------------------------------------------------------------------------------------------------------------------------------------------------------------------------------------------------------------------------------------------------------------------------------------------------------------------|
| pizza               | <input type="radio"/> Nunca o menos 1 vez al mes<br><input type="radio"/> 1 a 3 veces mes<br><input checked="" type="radio"/> 1 vez semana<br><input type="radio"/> 2 a 4 veces semana<br><input type="radio"/> 5 a 6 veces semana<br><input type="radio"/> 1 vez al día<br><input type="radio"/> 2 a 3 veces al día<br><input type="radio"/> 5 a 6 veces al día<br><input type="radio"/> más 6 veces al día |
| aceite oliva        | <input type="radio"/> Nunca o menos 1 vez al mes<br><input type="radio"/> 1 a 3 veces mes<br><input type="radio"/> 1 vez semana<br><input type="radio"/> 2 a 4 veces semana<br><input type="radio"/> 5 a 6 veces semana<br><input type="radio"/> 1 vez al día<br><input checked="" type="radio"/> 2 a 3 veces al día<br><input type="radio"/> 5 a 6 veces al día<br><input type="radio"/> más 6 veces al día |
| otros aceites       | <input type="radio"/> Nunca o menos 1 vez al mes<br><input type="radio"/> 1 a 3 veces mes<br><input type="radio"/> 1 vez semana<br><input type="radio"/> 2 a 4 veces semana<br><input checked="" type="radio"/> 5 a 6 veces semana<br><input type="radio"/> 1 vez al día<br><input type="radio"/> 2 a 3 veces al día<br><input type="radio"/> 5 a 6 veces al día<br><input type="radio"/> más 6 veces al día |
| margarina           | <input type="radio"/> Nunca o menos 1 vez al mes<br><input checked="" type="radio"/> 1 a 3 veces mes<br><input type="radio"/> 1 vez semana<br><input type="radio"/> 2 a 4 veces semana<br><input type="radio"/> 5 a 6 veces semana<br><input type="radio"/> 1 vez al día<br><input type="radio"/> 2 a 3 veces al día<br><input type="radio"/> 5 a 6 veces al día<br><input type="radio"/> más 6 veces al día |
| mantequilla         | <input checked="" type="radio"/> Nunca o menos 1 vez al mes<br><input type="radio"/> 1 a 3 veces mes<br><input type="radio"/> 1 vez semana<br><input type="radio"/> 2 a 4 veces semana<br><input type="radio"/> 5 a 6 veces semana<br><input type="radio"/> 1 vez al día<br><input type="radio"/> 2 a 3 veces al día<br><input type="radio"/> 5 a 6 veces al día<br><input type="radio"/> más 6 veces al día |
| galletas tipo maria | <input type="radio"/> Nunca o menos 1 vez al mes<br><input type="radio"/> 1 a 3 veces mes<br><input type="radio"/> 1 vez semana<br><input type="radio"/> 2 a 4 veces semana<br><input type="radio"/> 5 a 6 veces semana<br><input type="radio"/> 1 vez al día<br><input checked="" type="radio"/> 2 a 3 veces al día<br><input type="radio"/> 5 a 6 veces al día<br><input type="radio"/> más 6 veces al día |

---

galletas chocolate

- ☐ Nunca o menos 1 vez al mes  
☐ 1 a 3 veces mes  
☐ 1 vez semana  
☐ 2 a 4 veces semana  
☐ 5 a 6 veces semana  
☒ 1 vez al día  
☐ 2 a 3 veces al día  
☐ 5 a 6 veces al día  
☐ más 6 veces al día

---

bolleria

- ☐ Nunca o menos 1 vez al mes  
☐ 1 a 3 veces mes  
☐ 1 vez semana  
☐ 2 a 4 veces semana  
☒ 5 a 6 veces semana  
☐ 1 vez al día  
☐ 2 a 3 veces al día  
☐ 5 a 6 veces al día  
☐ más 6 veces al día

---

chocolate o bombones

- ☐ Nunca o menos 1 vez al mes  
☐ 1 a 3 veces mes  
☐ 1 vez semana  
☐ 2 a 4 veces semana  
☐ 5 a 6 veces semana  
☒ 1 vez al día  
☐ 2 a 3 veces al día  
☐ 5 a 6 veces al día  
☐ más 6 veces al día

---

chocolate polvo o colacao

- ☐ Nunca o menos 1 vez al mes  
☐ 1 a 3 veces mes  
☐ 1 vez semana  
☐ 2 a 4 veces semana  
☐ 5 a 6 veces semana  
☒ 1 vez al día  
☐ 2 a 3 veces al día  
☐ 5 a 6 veces al día  
☐ más 6 veces al día

---

vino tinto

- ☒ Nunca o menos 1 vez al mes  
☐ 1 a 3 veces mes  
☐ 1 vez semana  
☐ 2 a 4 veces semana  
☐ 5 a 6 veces semana  
☐ 1 vez al día  
☐ 2 a 3 veces al día  
☐ 5 a 6 veces al día  
☐ más 6 veces al día

---

vino blanco

- ☒ Nunca o menos 1 vez al mes  
☐ 1 a 3 veces mes  
☐ 1 vez semana  
☐ 2 a 4 veces semana  
☐ 5 a 6 veces semana  
☐ 1 vez al día  
☐ 2 a 3 veces al día  
☐ 5 a 6 veces al día  
☐ más 6 veces al día

|                       |                                                                                                                                                                                                                                                                                                                                                                                                              |
|-----------------------|--------------------------------------------------------------------------------------------------------------------------------------------------------------------------------------------------------------------------------------------------------------------------------------------------------------------------------------------------------------------------------------------------------------|
| vino seco o vermut    | <input checked="" type="radio"/> Nunca o menos 1 vez al mes<br><input type="radio"/> 1 a 3 veces mes<br><input type="radio"/> 1 vez semana<br><input type="radio"/> 2 a 4 veces semana<br><input type="radio"/> 5 a 6 veces semana<br><input type="radio"/> 1 vez al día<br><input type="radio"/> 2 a 3 veces al día<br><input type="radio"/> 5 a 6 veces al día<br><input type="radio"/> más 6 veces al día |
| cerveza               | <input checked="" type="radio"/> Nunca o menos 1 vez al mes<br><input type="radio"/> 1 a 3 veces mes<br><input type="radio"/> 1 vez semana<br><input type="radio"/> 2 a 4 veces semana<br><input type="radio"/> 5 a 6 veces semana<br><input type="radio"/> 1 vez al día<br><input type="radio"/> 2 a 3 veces al día<br><input type="radio"/> 5 a 6 veces al día<br><input type="radio"/> más 6 veces al día |
| cerveza sin alcohol   | <input type="radio"/> Nunca o menos 1 vez al mes<br><input checked="" type="radio"/> 1 a 3 veces mes<br><input type="radio"/> 1 vez semana<br><input type="radio"/> 2 a 4 veces semana<br><input type="radio"/> 5 a 6 veces semana<br><input type="radio"/> 1 vez al día<br><input type="radio"/> 2 a 3 veces al día<br><input type="radio"/> 5 a 6 veces al día<br><input type="radio"/> más 6 veces al día |
| licores               | <input checked="" type="radio"/> Nunca o menos 1 vez al mes<br><input type="radio"/> 1 a 3 veces mes<br><input type="radio"/> 1 vez semana<br><input type="radio"/> 2 a 4 veces semana<br><input type="radio"/> 5 a 6 veces semana<br><input type="radio"/> 1 vez al día<br><input type="radio"/> 2 a 3 veces al día<br><input type="radio"/> 5 a 6 veces al día<br><input type="radio"/> más 6 veces al día |
| ginebra o ron o vodka | <input checked="" type="radio"/> Nunca o menos 1 vez al mes<br><input type="radio"/> 1 a 3 veces mes<br><input type="radio"/> 1 vez semana<br><input type="radio"/> 2 a 4 veces semana<br><input type="radio"/> 5 a 6 veces semana<br><input type="radio"/> 1 vez al día<br><input type="radio"/> 2 a 3 veces al día<br><input type="radio"/> 5 a 6 veces al día<br><input type="radio"/> más 6 veces al día |
| refresco normal       | <input checked="" type="radio"/> Nunca o menos 1 vez al mes<br><input type="radio"/> 1 a 3 veces mes<br><input type="radio"/> 1 vez semana<br><input type="radio"/> 2 a 4 veces semana<br><input type="radio"/> 5 a 6 veces semana<br><input type="radio"/> 1 vez al día<br><input type="radio"/> 2 a 3 veces al día<br><input type="radio"/> 5 a 6 veces al día<br><input type="radio"/> más 6 veces al día |

|                           |                                                                                                                                                                                                                                                                                                                                                                                                              |
|---------------------------|--------------------------------------------------------------------------------------------------------------------------------------------------------------------------------------------------------------------------------------------------------------------------------------------------------------------------------------------------------------------------------------------------------------|
| refresco sin azúcar       | <input checked="" type="radio"/> Nunca o menos 1 vez al mes<br><input type="radio"/> 1 a 3 veces mes<br><input type="radio"/> 1 vez semana<br><input type="radio"/> 2 a 4 veces semana<br><input type="radio"/> 5 a 6 veces semana<br><input type="radio"/> 1 vez al día<br><input type="radio"/> 2 a 3 veces al día<br><input type="radio"/> 5 a 6 veces al día<br><input type="radio"/> más 6 veces al día |
| Agua del grifo            | <input checked="" type="radio"/> Nunca o menos 1 vez al mes<br><input type="radio"/> 1 a 3 veces mes<br><input type="radio"/> 1 vez semana<br><input type="radio"/> 2 a 4 veces semana<br><input type="radio"/> 5 a 6 veces semana<br><input type="radio"/> 1 vez al día<br><input type="radio"/> 2 a 3 veces al día<br><input type="radio"/> 5 a 6 veces al día<br><input type="radio"/> más 6 veces al día |
| agua embotellada sin gas  | <input type="radio"/> Nunca o menos 1 vez al mes<br><input type="radio"/> 1 a 3 veces mes<br><input type="radio"/> 1 vez semana<br><input type="radio"/> 2 a 4 veces semana<br><input type="radio"/> 5 a 6 veces semana<br><input type="radio"/> 1 vez al día<br><input type="radio"/> 2 a 3 veces al día<br><input type="radio"/> 5 a 6 veces al día<br><input checked="" type="radio"/> más 6 veces al día |
| agua embotellada con gas  | <input checked="" type="radio"/> Nunca o menos 1 vez al mes<br><input type="radio"/> 1 a 3 veces mes<br><input type="radio"/> 1 vez semana<br><input type="radio"/> 2 a 4 veces semana<br><input type="radio"/> 5 a 6 veces semana<br><input type="radio"/> 1 vez al día<br><input type="radio"/> 2 a 3 veces al día<br><input type="radio"/> 5 a 6 veces al día<br><input type="radio"/> más 6 veces al día |
| zumos frutas embotellados | <input checked="" type="radio"/> Nunca o menos 1 vez al mes<br><input type="radio"/> 1 a 3 veces mes<br><input type="radio"/> 1 vez semana<br><input type="radio"/> 2 a 4 veces semana<br><input type="radio"/> 5 a 6 veces semana<br><input type="radio"/> 1 vez al día<br><input type="radio"/> 2 a 3 veces al día<br><input type="radio"/> 5 a 6 veces al día<br><input type="radio"/> más 6 veces al día |
| café                      | <input checked="" type="radio"/> Nunca o menos 1 vez al mes<br><input type="radio"/> 1 a 3 veces mes<br><input type="radio"/> 1 vez semana<br><input type="radio"/> 2 a 4 veces semana<br><input type="radio"/> 5 a 6 veces semana<br><input type="radio"/> 1 vez al día<br><input type="radio"/> 2 a 3 veces al día<br><input type="radio"/> 5 a 6 veces al día<br><input type="radio"/> más 6 veces al día |

|                       |                                                                                                                                                                                                                                                                                                                                                                                                              |
|-----------------------|--------------------------------------------------------------------------------------------------------------------------------------------------------------------------------------------------------------------------------------------------------------------------------------------------------------------------------------------------------------------------------------------------------------|
| cafe descafeinado     | <input type="radio"/> Nunca o menos 1 vez al mes<br><input type="radio"/> 1 a 3 veces mes<br><input type="radio"/> 1 vez semana<br><input checked="" type="radio"/> 2 a 4 veces semana<br><input type="radio"/> 5 a 6 veces semana<br><input type="radio"/> 1 vez al día<br><input type="radio"/> 2 a 3 veces al día<br><input type="radio"/> 5 a 6 veces al día<br><input type="radio"/> más 6 veces al día |
| te o infusión         | <input type="radio"/> Nunca o menos 1 vez al mes<br><input type="radio"/> 1 a 3 veces mes<br><input checked="" type="radio"/> 1 vez semana<br><input type="radio"/> 2 a 4 veces semana<br><input type="radio"/> 5 a 6 veces semana<br><input type="radio"/> 1 vez al día<br><input type="radio"/> 2 a 3 veces al día<br><input type="radio"/> 5 a 6 veces al día<br><input type="radio"/> más 6 veces al día |
| sopa o puré verduras  | <input checked="" type="radio"/> Nunca o menos 1 vez al mes<br><input type="radio"/> 1 a 3 veces mes<br><input type="radio"/> 1 vez semana<br><input type="radio"/> 2 a 4 veces semana<br><input type="radio"/> 5 a 6 veces semana<br><input type="radio"/> 1 vez al día<br><input type="radio"/> 2 a 3 veces al día<br><input type="radio"/> 5 a 6 veces al día<br><input type="radio"/> más 6 veces al día |
| croquetas pollo jamón | <input type="radio"/> Nunca o menos 1 vez al mes<br><input checked="" type="radio"/> 1 a 3 veces mes<br><input type="radio"/> 1 vez semana<br><input type="radio"/> 2 a 4 veces semana<br><input type="radio"/> 5 a 6 veces semana<br><input type="radio"/> 1 vez al día<br><input type="radio"/> 2 a 3 veces al día<br><input type="radio"/> 5 a 6 veces al día<br><input type="radio"/> más 6 veces al día |
| croquetas pescado     | <input checked="" type="radio"/> Nunca o menos 1 vez al mes<br><input type="radio"/> 1 a 3 veces mes<br><input type="radio"/> 1 vez semana<br><input type="radio"/> 2 a 4 veces semana<br><input type="radio"/> 5 a 6 veces semana<br><input type="radio"/> 1 vez al día<br><input type="radio"/> 2 a 3 veces al día<br><input type="radio"/> 5 a 6 veces al día<br><input type="radio"/> más 6 veces al día |
| mayonesa              | <input type="radio"/> Nunca o menos 1 vez al mes<br><input checked="" type="radio"/> 1 a 3 veces mes<br><input type="radio"/> 1 vez semana<br><input type="radio"/> 2 a 4 veces semana<br><input type="radio"/> 5 a 6 veces semana<br><input type="radio"/> 1 vez al día<br><input type="radio"/> 2 a 3 veces al día<br><input type="radio"/> 5 a 6 veces al día<br><input type="radio"/> más 6 veces al día |

|                  |                                                                                                                                                                                                                                                                                                                                                                                                              |
|------------------|--------------------------------------------------------------------------------------------------------------------------------------------------------------------------------------------------------------------------------------------------------------------------------------------------------------------------------------------------------------------------------------------------------------|
| salsa tomate     | <input type="radio"/> Nunca o menos 1 vez al mes<br><input type="radio"/> 1 a 3 veces mes<br><input type="radio"/> 1 vez semana<br><input checked="" type="radio"/> 2 a 4 veces semana<br><input type="radio"/> 5 a 6 veces semana<br><input type="radio"/> 1 vez al día<br><input type="radio"/> 2 a 3 veces al día<br><input type="radio"/> 5 a 6 veces al día<br><input type="radio"/> más 6 veces al día |
| ketchup          | <input checked="" type="radio"/> Nunca o menos 1 vez al mes<br><input type="radio"/> 1 a 3 veces mes<br><input type="radio"/> 1 vez semana<br><input type="radio"/> 2 a 4 veces semana<br><input type="radio"/> 5 a 6 veces semana<br><input type="radio"/> 1 vez al día<br><input type="radio"/> 2 a 3 veces al día<br><input type="radio"/> 5 a 6 veces al día<br><input type="radio"/> más 6 veces al día |
| sal              | <input type="radio"/> Nunca o menos 1 vez al mes<br><input type="radio"/> 1 a 3 veces mes<br><input type="radio"/> 1 vez semana<br><input type="radio"/> 2 a 4 veces semana<br><input type="radio"/> 5 a 6 veces semana<br><input type="radio"/> 1 vez al día<br><input checked="" type="radio"/> 2 a 3 veces al día<br><input type="radio"/> 5 a 6 veces al día<br><input type="radio"/> más 6 veces al día |
| ajo              | <input type="radio"/> Nunca o menos 1 vez al mes<br><input type="radio"/> 1 a 3 veces mes<br><input type="radio"/> 1 vez semana<br><input type="radio"/> 2 a 4 veces semana<br><input checked="" type="radio"/> 5 a 6 veces semana<br><input type="radio"/> 1 vez al día<br><input type="radio"/> 2 a 3 veces al día<br><input type="radio"/> 5 a 6 veces al día<br><input type="radio"/> más 6 veces al día |
| mermelada o miel | <input checked="" type="radio"/> Nunca o menos 1 vez al mes<br><input type="radio"/> 1 a 3 veces mes<br><input type="radio"/> 1 vez semana<br><input type="radio"/> 2 a 4 veces semana<br><input type="radio"/> 5 a 6 veces semana<br><input type="radio"/> 1 vez al día<br><input type="radio"/> 2 a 3 veces al día<br><input type="radio"/> 5 a 6 veces al día<br><input type="radio"/> más 6 veces al día |
| azúcar           | <input checked="" type="radio"/> Nunca o menos 1 vez al mes<br><input type="radio"/> 1 a 3 veces mes<br><input type="radio"/> 1 vez semana<br><input type="radio"/> 2 a 4 veces semana<br><input type="radio"/> 5 a 6 veces semana<br><input type="radio"/> 1 vez al día<br><input type="radio"/> 2 a 3 veces al día<br><input type="radio"/> 5 a 6 veces al día<br><input type="radio"/> más 6 veces al día |

|                                       |                                                                                                                                                                                                                                                                                                                                                                                                                                                                                                                               |
|---------------------------------------|-------------------------------------------------------------------------------------------------------------------------------------------------------------------------------------------------------------------------------------------------------------------------------------------------------------------------------------------------------------------------------------------------------------------------------------------------------------------------------------------------------------------------------|
| Otro alimento                         |                                                                                                                                                                                                                                                                                                                                                                                                                                                                                                                               |
| suplementos vitamínicos               | <input checked="" type="radio"/> si<br><input type="radio"/> no                                                                                                                                                                                                                                                                                                                                                                                                                                                               |
| suplementos vitamínicos               | [*DATA REMOVED*]                                                                                                                                                                                                                                                                                                                                                                                                                                                                                                              |
| dieta previa                          | <input type="radio"/> si<br><input checked="" type="radio"/> no                                                                                                                                                                                                                                                                                                                                                                                                                                                               |
| motivo dieta                          | <input checked="" type="radio"/> no dieta<br><input type="radio"/> control peso<br><input type="radio"/> control colesterol<br><input type="radio"/> control diabetes<br><input type="radio"/> problemas estómago<br><input type="radio"/> problemas vesícula o hepáticos<br><input type="radio"/> HTA o cardiopatía<br><input type="radio"/> problemas renales<br><input type="radio"/> alergia alimentaria<br><input type="radio"/> ácido úrico elevado<br><input type="radio"/> vegetariana<br><input type="radio"/> otros |
| cambio alimentos año previo gestación | <input checked="" type="radio"/> si<br><input type="radio"/> no                                                                                                                                                                                                                                                                                                                                                                                                                                                               |
| cambio lácteos                        | <input type="radio"/> eliminado<br><input type="radio"/> disminuido<br><input type="radio"/> igual<br><input checked="" type="radio"/> aumentado<br><input type="radio"/> no sabe                                                                                                                                                                                                                                                                                                                                             |
| cambio huevos                         | <input type="radio"/> eliminado<br><input type="radio"/> disminuido<br><input checked="" type="radio"/> igual<br><input type="radio"/> aumentado<br><input type="radio"/> no sabe                                                                                                                                                                                                                                                                                                                                             |
| cambio carne                          | <input type="radio"/> eliminado<br><input type="radio"/> disminuido<br><input type="radio"/> igual<br><input checked="" type="radio"/> aumentado<br><input type="radio"/> no sabe                                                                                                                                                                                                                                                                                                                                             |
| cambio pescado                        | <input type="radio"/> eliminado<br><input type="radio"/> disminuido<br><input checked="" type="radio"/> igual<br><input type="radio"/> aumentado<br><input type="radio"/> no sabe                                                                                                                                                                                                                                                                                                                                             |
| cambio verduras                       | <input type="radio"/> eliminado<br><input type="radio"/> disminuido<br><input type="radio"/> igual<br><input checked="" type="radio"/> aumentado<br><input type="radio"/> no sabe                                                                                                                                                                                                                                                                                                                                             |



|                            |                                                                                                                                                                                                                        |
|----------------------------|------------------------------------------------------------------------------------------------------------------------------------------------------------------------------------------------------------------------|
| cambio legumbres           | <input type="radio"/> eliminado<br><input type="radio"/> disminuido<br><input type="radio"/> igual<br><input checked="" type="radio"/> aumentado<br><input type="radio"/> no sabe                                      |
| cambio fruta               | <input type="radio"/> eliminado<br><input type="radio"/> disminuido<br><input type="radio"/> igual<br><input checked="" type="radio"/> aumentado<br><input type="radio"/> no sabe                                      |
| cambio pan                 | <input type="radio"/> eliminado<br><input checked="" type="radio"/> disminuido<br><input type="radio"/> igual<br><input type="radio"/> aumentado<br><input type="radio"/> no sabe                                      |
| cambio aceite oliva        | <input type="radio"/> eliminado<br><input type="radio"/> disminuido<br><input checked="" type="radio"/> igual<br><input type="radio"/> aumentado<br><input type="radio"/> no sabe                                      |
| cambio mante o margarina   | <input type="radio"/> eliminado<br><input type="radio"/> disminuido<br><input checked="" type="radio"/> igual<br><input type="radio"/> aumentado<br><input type="radio"/> no sabe                                      |
| cambio azúcar y dulces     | <input type="radio"/> eliminado<br><input type="radio"/> disminuido<br><input type="radio"/> igual<br><input checked="" type="radio"/> aumentado<br><input type="radio"/> no sabe                                      |
| cambio bebidas alcohólicas | <input checked="" type="radio"/> eliminado<br><input type="radio"/> disminuido<br><input type="radio"/> igual<br><input type="radio"/> aumentado<br><input type="radio"/> no sabe                                      |
| frecuencia comidas fritas  | <input type="radio"/> a diario<br><input type="radio"/> 5 a 6 veces semana<br><input type="radio"/> 2 a 4 veces semana<br><input type="radio"/> 1 vez semana<br><input checked="" type="radio"/> menos de 1 vez semana |
| carne                      | <input type="radio"/> no como<br><input type="radio"/> cruda<br><input type="radio"/> poco hecha<br><input checked="" type="radio"/> hecha<br><input type="radio"/> muy hecha                                          |
| grasa visible carne        | <input type="radio"/> quita toda<br><input type="radio"/> quita mayoría<br><input checked="" type="radio"/> quita un poco<br><input type="radio"/> no quita nada                                                       |

|                                |                                                                                                                                                                                                                                                          |
|--------------------------------|----------------------------------------------------------------------------------------------------------------------------------------------------------------------------------------------------------------------------------------------------------|
| cocina carne                   | <input checked="" type="radio"/> a la plancha<br><input type="radio"/> a la parrilla<br><input type="radio"/> asada<br><input type="radio"/> frita<br><input type="radio"/> guisada                                                                      |
| tostado quemado carne          | <input checked="" type="radio"/> nunca<br><input type="radio"/> 1 vez mes<br><input type="radio"/> 2 a 3 veces mes<br><input type="radio"/> 1 vez semana<br><input type="radio"/> 2 a 3 semanas                                                          |
| tostado quemado pescado        | <input checked="" type="radio"/> nunca<br><input type="radio"/> 1 vez mes<br><input type="radio"/> 2 a 3 veces mes<br><input type="radio"/> 1 vez semana<br><input type="radio"/> 2 a 3 semanas                                                          |
| socarrat paella                | <input checked="" type="radio"/> nunca<br><input type="radio"/> 1 vez mes<br><input type="radio"/> 2 a 3 veces mes<br><input type="radio"/> 1 vez semana<br><input type="radio"/> 2 a 3 semanas                                                          |
| grasa o aceite cocinar         | <input type="radio"/> mantequilla<br><input type="radio"/> margarina<br><input type="radio"/> aceite oliva<br><input checked="" type="radio"/> aceite oliva virgen extra<br><input type="radio"/> aceite vegetal<br><input type="radio"/> mezcla aceites |
| grasa aceite aliñar            | <input type="radio"/> mantequilla<br><input type="radio"/> margarina<br><input type="radio"/> aceite oliva<br><input checked="" type="radio"/> aceite oliva virgen extra<br><input type="radio"/> aceite vegetal<br><input type="radio"/> mezcla aceites |
| grasa aceite freir             | <input type="radio"/> mantequilla<br><input type="radio"/> margarina<br><input type="radio"/> aceite oliva<br><input checked="" type="radio"/> aceite oliva virgen extra<br><input type="radio"/> aceite vegetal<br><input type="radio"/> mezcla aceites |
| Ejercicio cuestionario         | <input checked="" type="radio"/> si<br><input type="radio"/> no                                                                                                                                                                                          |
| horas de sueño incluido siesta | [*DATA REMOVED*]                                                                                                                                                                                                                                         |
| minutos siesta                 | [*DATA REMOVED*]                                                                                                                                                                                                                                         |
| horas televisión semana        | [*DATA REMOVED*]                                                                                                                                                                                                                                         |

|                                        |                                                                                                                                                                                                                                                                                                                                                                           |
|----------------------------------------|---------------------------------------------------------------------------------------------------------------------------------------------------------------------------------------------------------------------------------------------------------------------------------------------------------------------------------------------------------------------------|
| actividad trabajo                      | <input type="radio"/> casi siempre sentado<br><input type="radio"/> sentado 50 por cien<br><input type="radio"/> casi siempre de pie, quieto<br><input checked="" type="radio"/> casi siempre levantado caminando y llevando pocas cosas<br><input type="radio"/> casi siempre levantado, caminando y llevado muchas cosas<br><input type="radio"/> trabajo manual pesado |
| tiempo caminar o bici al día           | <input type="radio"/> casi nunca<br><input type="radio"/> menos 20min día<br><input type="radio"/> 20 a 40 min día<br><input checked="" type="radio"/> 40 a 60 min día<br><input type="radio"/> 1h o 1h y media día<br><input type="radio"/> más de 1h y media al día                                                                                                     |
| tiempo tareas casa al día              | <input type="radio"/> menos de 1h día<br><input checked="" type="radio"/> 1 a 2h día<br><input type="radio"/> 3 a 4h día<br><input type="radio"/> 5 a 6h día<br><input type="radio"/> 7 a 8h día<br><input type="radio"/> más de 8h día                                                                                                                                   |
| tiempo libre televisión ordenador leer | <input type="radio"/> menos 1h día<br><input type="radio"/> 1h día<br><input checked="" type="radio"/> 2h día<br><input type="radio"/> 3h día<br><input type="radio"/> 4h día<br><input type="radio"/> 5 a 6h día<br><input type="radio"/> mas 6h día                                                                                                                     |
| tiempo libre ejercicio o deporte       | <input type="radio"/> menos 1h semana<br><input type="radio"/> 1h semana<br><input type="radio"/> 2h semana<br><input type="radio"/> 3h semana<br><input type="radio"/> 4 a 5h semana<br><input checked="" type="radio"/> mas 5h semana                                                                                                                                   |
| como se considera                      | <input type="radio"/> sedentaria<br><input type="radio"/> poco activa<br><input type="radio"/> moderadamente activa<br><input checked="" type="radio"/> bastante activa<br><input type="radio"/> muy activa<br><input type="radio"/> no sabe                                                                                                                              |
| FUR                                    | [*DATA REMOVED*]                                                                                                                                                                                                                                                                                                                                                          |
| Semanas gestación 2T                   | [*DATA REMOVED*]                                                                                                                                                                                                                                                                                                                                                          |
| Días gestación 2T                      | [*DATA REMOVED*]                                                                                                                                                                                                                                                                                                                                                          |
| DBP 2T                                 | [*DATA REMOVED*]                                                                                                                                                                                                                                                                                                                                                          |
| CC 2T                                  | [*DATA REMOVED*]                                                                                                                                                                                                                                                                                                                                                          |
| AC 2T                                  | [*DATA REMOVED*]                                                                                                                                                                                                                                                                                                                                                          |

|                                                   |                                                                                                                                                                                                 |
|---------------------------------------------------|-------------------------------------------------------------------------------------------------------------------------------------------------------------------------------------------------|
| LF 2T                                             | [*DATA REMOVED*]                                                                                                                                                                                |
| PFE 2T (Hadlock)                                  | [*DATA REMOVED*]                                                                                                                                                                                |
| Semanas gestación 3T                              | [*DATA REMOVED*]                                                                                                                                                                                |
| días 3T                                           | [*DATA REMOVED*]                                                                                                                                                                                |
| DBP 3T                                            | [*DATA REMOVED*]                                                                                                                                                                                |
| CC 3T                                             | [*DATA REMOVED*]                                                                                                                                                                                |
| AC 3T                                             | [*DATA REMOVED*]                                                                                                                                                                                |
| LF 3T                                             | [*DATA REMOVED*]                                                                                                                                                                                |
| PFE 3T (Hadlock)                                  | [*DATA REMOVED*]                                                                                                                                                                                |
| Semanas de gestación final                        | [*DATA REMOVED*]                                                                                                                                                                                |
| días gestación final                              | [*DATA REMOVED*]                                                                                                                                                                                |
| Localización placenta                             | <input type="radio"/> anterior<br><input type="radio"/> lateral derecha<br><input type="radio"/> lateral izquierda<br><input checked="" type="radio"/> posterior<br><input type="radio"/> fondo |
| Presentación longitudinal cefálica                | <input type="radio"/> no<br><input checked="" type="radio"/> si                                                                                                                                 |
| Dorso                                             | <input type="radio"/> izquierda anterior<br><input type="radio"/> izquierda posterior<br><input type="radio"/> derecha anterior<br><input checked="" type="radio"/> derecha posterior           |
| diámetro biparietal                               | [*DATA REMOVED*]                                                                                                                                                                                |
| Circunferencia craneal                            | [*DATA REMOVED*]                                                                                                                                                                                |
| Circunferencia abdominal                          | [*DATA REMOVED*]                                                                                                                                                                                |
| Longitud de femur                                 | [*DATA REMOVED*]                                                                                                                                                                                |
| tejido celular subcutáneo a nivel del muslo en mm | [*DATA REMOVED*]                                                                                                                                                                                |
| tejido celular subcutáneo en abdomen en mm        | [*DATA REMOVED*]                                                                                                                                                                                |
| Volumen del muslo en cm3                          | [*DATA REMOVED*]                                                                                                                                                                                |
| Peso fetal estimado según fórmula de Hadlock      | [*DATA REMOVED*]                                                                                                                                                                                |

|                                               |                                                                                                                                                          |
|-----------------------------------------------|----------------------------------------------------------------------------------------------------------------------------------------------------------|
| Percentil                                     | [*DATA REMOVED*]                                                                                                                                         |
| Peso fetal estimado según fórmula de Scioscia | <hr/>                                                                                                                                                    |
| Peso fetal estimado según fórmula de LEE      | <hr/>                                                                                                                                                    |
| Tipo de parto                                 | <input type="radio"/> eutocico<br><input checked="" type="radio"/> instrumentado/ventosa<br><input type="radio"/> cesarea                                |
| fecha de nacimiento                           | [*DATA REMOVED*]                                                                                                                                         |
| Días entre exploración y nacimiento           | [*DATA REMOVED*]                                                                                                                                         |
| Peso RN en g                                  | [*DATA REMOVED*]                                                                                                                                         |
| sexo                                          | <input type="radio"/> mujer<br><input checked="" type="radio"/> hombre                                                                                   |
| Apgar 1 minuto                                | [*DATA REMOVED*]                                                                                                                                         |
| Apgar 5 minutos                               | [*DATA REMOVED*]                                                                                                                                         |
| Apgar 10 minutos                              | <hr/>                                                                                                                                                    |
| antecedente Covid durante gestación           | <input type="radio"/> Yes<br><input checked="" type="radio"/> No                                                                                         |
| Nivel de estudios                             | <input type="radio"/> ninguno<br><input type="radio"/> primarios<br><input type="radio"/> secundarios<br><input checked="" type="radio"/> universitarios |

# Base\_datos\_estimacion\_peso\_fetal

|                                       |                                                                                                                                                                                                                                                                                      |
|---------------------------------------|--------------------------------------------------------------------------------------------------------------------------------------------------------------------------------------------------------------------------------------------------------------------------------------|
| Número de identificación participante | 34                                                                                                                                                                                                                                                                                   |
| CODIGO PARTICIPANTE                   |                                                                                                                                                                                                                                                                                      |
| Edad                                  | [*DATA REMOVED*]                                                                                                                                                                                                                                                                     |
| Gestaciones                           | <input type="radio"/> 1<br><input type="radio"/> 2<br><input checked="" type="radio"/> 3<br><input type="radio"/> mas de 3                                                                                                                                                           |
| partos                                | <input type="radio"/> 0<br><input type="radio"/> 1<br><input checked="" type="radio"/> 2<br><input type="radio"/> 3<br><input type="radio"/> mas de 3                                                                                                                                |
| cesáreas                              | <input checked="" type="radio"/> 0<br><input type="radio"/> 1<br><input type="radio"/> 2<br><input type="radio"/> 3<br><input type="radio"/> mas de 3                                                                                                                                |
| Abortos                               | <input checked="" type="radio"/> 0<br><input type="radio"/> 1<br><input type="radio"/> 2<br><input type="radio"/> 3<br><input type="radio"/> mas de 3                                                                                                                                |
| Tipo de gestacion                     | <input checked="" type="radio"/> espontanea<br><input type="radio"/> IAC inseminación artificial conyuge<br><input type="radio"/> IAD inseminación artificial donante<br><input type="radio"/> FIV Fecundación in Vitro<br><input type="radio"/> Ovodon FIV con donación de ovocitos |
| peso previo a embarazo                | [*DATA REMOVED*]                                                                                                                                                                                                                                                                     |
| Ganancia ponderal embarazo            | [*DATA REMOVED*]                                                                                                                                                                                                                                                                     |
| Talla madre                           | [*DATA REMOVED*]                                                                                                                                                                                                                                                                     |
| IMC previo embarazo                   | 26.813590449954088                                                                                                                                                                                                                                                                   |
| Patología obstétrica                  | <input checked="" type="radio"/> no<br><input type="radio"/> si                                                                                                                                                                                                                      |
| Diabetes pregestacional               | <input checked="" type="radio"/> no<br><input type="radio"/> si                                                                                                                                                                                                                      |
| Diabetes gestacional                  | <input checked="" type="radio"/> no<br><input type="radio"/> si                                                                                                                                                                                                                      |

|                                            |                                                                                                                                                                                      |
|--------------------------------------------|--------------------------------------------------------------------------------------------------------------------------------------------------------------------------------------|
| Diabetes gestacional con insulina          | <input checked="" type="radio"/> no<br><input type="radio"/> si                                                                                                                      |
| Diabetes gestacional con dieta y ejercicio | <input checked="" type="radio"/> no<br><input type="radio"/> si                                                                                                                      |
| Percentil fetos previos                    | <input type="radio"/> Nada<br><input type="radio"/> percentil menor de 10<br><input checked="" type="radio"/> percentil entre 10 y 90<br><input type="radio"/> percentil mayor de 90 |
| Exfumadora                                 | <input checked="" type="radio"/> Nada<br><input type="radio"/> menos de 5 años<br><input type="radio"/> 5 a 10 años<br><input type="radio"/> mayor o igual a 10 años                 |
| Hábito tabáquico                           | <input checked="" type="radio"/> no<br><input type="radio"/> si                                                                                                                      |
| fumadora                                   | [*DATA REMOVED*]                                                                                                                                                                     |
| Consumo otros tóxicos                      | <input checked="" type="radio"/> no<br><input type="radio"/> si                                                                                                                      |
| Hb 1T                                      | [*DATA REMOVED*]                                                                                                                                                                     |
| Htc 1T                                     | [*DATA REMOVED*]                                                                                                                                                                     |
| Hb 2T                                      | [*DATA REMOVED*]                                                                                                                                                                     |
| HTC 2T                                     | [*DATA REMOVED*]                                                                                                                                                                     |
| Hb 3T                                      | [*DATA REMOVED*]                                                                                                                                                                     |
| HTC 3T                                     | [*DATA REMOVED*]                                                                                                                                                                     |
| Suplemento FE oral                         | <input checked="" type="radio"/> si<br><input type="radio"/> no                                                                                                                      |
| Suplemento fe iv                           | <input type="radio"/> si<br><input checked="" type="radio"/> no                                                                                                                      |
| Transfusión                                | <input checked="" type="radio"/> no<br><input type="radio"/> si                                                                                                                      |
| Solicitada Vit D                           | <input checked="" type="radio"/> no<br><input type="radio"/> si                                                                                                                      |
| Deficit vit D                              | <input type="radio"/> no<br><input type="radio"/> si                                                                                                                                 |
| Suplemento vit D                           | <input type="radio"/> si<br><input type="radio"/> no                                                                                                                                 |

|                       |                                                                                                                                                                                                                                                                                                                                                                                                              |
|-----------------------|--------------------------------------------------------------------------------------------------------------------------------------------------------------------------------------------------------------------------------------------------------------------------------------------------------------------------------------------------------------------------------------------------------------|
| Dieta, cuestionario   | <input checked="" type="radio"/> si<br><input type="radio"/> no                                                                                                                                                                                                                                                                                                                                              |
| Leche entera          | <input checked="" type="radio"/> Nunca o menos 1 vez al mes<br><input type="radio"/> 1 a 3 veces mes<br><input type="radio"/> 1 vez semana<br><input type="radio"/> 2 a 4 veces semana<br><input type="radio"/> 5 a 6 veces semana<br><input type="radio"/> 1 vez al día<br><input type="radio"/> 2 a 3 veces al día<br><input type="radio"/> 5 a 6 veces al día<br><input type="radio"/> más 6 veces al día |
| Leche semidesnatada   | <input checked="" type="radio"/> Nunca o menos 1 vez al mes<br><input type="radio"/> 1 a 3 veces mes<br><input type="radio"/> 1 vez semana<br><input type="radio"/> 2 a 4 veces semana<br><input type="radio"/> 5 a 6 veces semana<br><input type="radio"/> 1 vez al día<br><input type="radio"/> 2 a 3 veces al día<br><input type="radio"/> 5 a 6 veces al día<br><input type="radio"/> mas 6 veces al día |
| Leche desnatada       | <input type="radio"/> Nunca o menos 1 vez al mes<br><input type="radio"/> 1 a 3 veces mes<br><input type="radio"/> 1 vez semana<br><input type="radio"/> 2 a 4 veces semana<br><input type="radio"/> 5 a 6 veces semana<br><input checked="" type="radio"/> 1 vez al día<br><input type="radio"/> 2 a 3 veces al día<br><input type="radio"/> 5 a 6 veces al día<br><input type="radio"/> más 6 veces al día |
| Leche condensada      | <input checked="" type="radio"/> Nunca o menos 1 vez al mes<br><input type="radio"/> 1 a 3 veces mes<br><input type="radio"/> 1 vez semana<br><input type="radio"/> 2 a 4 veces semana<br><input type="radio"/> 5 a 6 veces semana<br><input type="radio"/> 1 vez al día<br><input type="radio"/> 2 a 3 veces al día<br><input type="radio"/> 5 a 6 veces al día<br><input type="radio"/> más 6 veces al día |
| nata o crema de leche | <input checked="" type="radio"/> Nunca o menos 1 vez al mes<br><input type="radio"/> 1 a 3 veces mes<br><input type="radio"/> 1 vez semana<br><input type="radio"/> 2 a 4 veces semana<br><input type="radio"/> 5 a 6 veces semana<br><input type="radio"/> 1 vez al día<br><input type="radio"/> 2 a 3 veces al día<br><input type="radio"/> 5 a 6 veces al día<br><input type="radio"/> más 6 veces al día |



---

Yogurt Entero

- ☒ Nunca o menos 1 vez al mes  
☐ 1 a 3 veces mes  
☐ 1 vez semana  
☐ 2 a 4 veces semana  
☐ 5 a 6 veces semana  
☐ 1 vez al día  
☐ 2 a 3 veces al día  
☐ 5 a 6 veces al día  
☐ más 6 veces al día

---

Yogurt desnatado

- ☐ Nunca o menos 1 vez al mes  
☐ 1 a 3 veces mes  
☐ 1 vez semana  
☐ 2 a 4 veces semana  
☒ 5 a 6 veces semana  
☐ 1 vez al día  
☐ 2 a 3 veces al día  
☐ 5 a 6 veces al día  
☐ más 6 veces al día

---

100g requesón o queso blando o queso fresco

- ☐ Nunca o menos 1 vez al mes  
☐ 1 a 3 veces mes  
☐ 1 vez semana  
☐ 2 a 4 veces semana  
☒ 5 a 6 veces semana  
☐ 1 vez al día  
☐ 2 a 3 veces al día  
☐ 5 a 6 veces al día  
☐ más 6 veces al día

---

queso curado o semicurado o cremoso

- ☐ Nunca o menos 1 vez al mes  
☒ 1 a 3 veces mes  
☐ 1 vez semana  
☐ 2 a 4 veces semana  
☐ 5 a 6 veces semana  
☐ 1 vez al día  
☐ 2 a 3 veces al día  
☐ 5 a 6 veces al día  
☐ más 6 veces al día

---

natillas flan pudding

- ☒ Nunca o menos 1 vez al mes  
☐ 1 a 3 veces mes  
☐ 1 vez semana  
☐ 2 a 4 veces semana  
☐ 5 a 6 veces semana  
☐ 1 vez al día  
☐ 2 a 3 veces al día  
☐ 5 a 6 veces al día  
☐ más 6 veces al día

---

Helado

- ☒ Nunca o menos 1 vez al mes  
☐ 1 a 3 veces mes  
☐ 1 vez semana  
☐ 2 a 4 veces semana  
☐ 5 a 6 veces semana  
☐ 1 vez al día  
☐ 2 a 3 veces al día  
☐ 5 a 6 veces al día  
☐ más 6 veces al día

|                                      |                                                                                                                                                                                                                                                                                                                                                                                                              |
|--------------------------------------|--------------------------------------------------------------------------------------------------------------------------------------------------------------------------------------------------------------------------------------------------------------------------------------------------------------------------------------------------------------------------------------------------------------|
| huevo                                | <input type="radio"/> Nunca o menos 1 vez al mes<br><input type="radio"/> 1 a 3 veces mes<br><input type="radio"/> 1 vez semana<br><input checked="" type="radio"/> 2 a 4 veces semana<br><input type="radio"/> 5 a 6 veces semana<br><input type="radio"/> 1 vez al día<br><input type="radio"/> 2 a 3 veces al día<br><input type="radio"/> 5 a 6 veces al día<br><input type="radio"/> más 6 veces al día |
| Pollo con piel                       | <input type="radio"/> Nunca o menos 1 vez al mes<br><input type="radio"/> 1 a 3 veces mes<br><input checked="" type="radio"/> 1 vez semana<br><input type="radio"/> 2 a 4 veces semana<br><input type="radio"/> 5 a 6 veces semana<br><input type="radio"/> 1 vez al día<br><input type="radio"/> 2 a 3 veces al día<br><input type="radio"/> 5 a 6 veces al día<br><input type="radio"/> más 6 veces al día |
| pollo sin piel                       | <input type="radio"/> Nunca o menos 1 vez al mes<br><input type="radio"/> 1 a 3 veces mes<br><input type="radio"/> 1 vez semana<br><input checked="" type="radio"/> 2 a 4 veces semana<br><input type="radio"/> 5 a 6 veces semana<br><input type="radio"/> 1 vez al día<br><input type="radio"/> 2 a 3 veces al día<br><input type="radio"/> 5 a 6 veces al día<br><input type="radio"/> más 6 veces al día |
| Ternera o cerdo o cordero            | <input type="radio"/> Nunca o menos 1 vez al mes<br><input checked="" type="radio"/> 1 a 3 veces mes<br><input type="radio"/> 1 vez semana<br><input type="radio"/> 2 a 4 veces semana<br><input type="radio"/> 5 a 6 veces semana<br><input type="radio"/> 1 vez al día<br><input type="radio"/> 2 a 3 veces al día<br><input type="radio"/> 5 a 6 veces al día<br><input type="radio"/> más 6 veces al día |
| carne caza: Conejo o codorniz o pato | <input type="radio"/> Nunca o menos 1 vez al mes<br><input checked="" type="radio"/> 1 a 3 veces mes<br><input type="radio"/> 1 vez semana<br><input type="radio"/> 2 a 4 veces semana<br><input type="radio"/> 5 a 6 veces semana<br><input type="radio"/> 1 vez al día<br><input type="radio"/> 2 a 3 veces al día<br><input type="radio"/> 5 a 6 veces al día<br><input type="radio"/> más 6 veces al día |
| Hígado de ternera o cerdo o pollo    | <input checked="" type="radio"/> Nunca o menos 1 vez al mes<br><input type="radio"/> 1 a 3 veces mes<br><input type="radio"/> 1 vez semana<br><input type="radio"/> 2 a 4 veces semana<br><input type="radio"/> 5 a 6 veces semana<br><input type="radio"/> 1 vez al día<br><input type="radio"/> 2 a 3 veces al día<br><input type="radio"/> 5 a 6 veces al día<br><input type="radio"/> más 6 veces al día |

---

Vísceras

- ☒ Nunca o menos 1 vez al mes  
☐ 1 a 3 veces mes  
☐ 1 vez semana  
☐ 2 a 4 veces semana  
☐ 5 a 6 veces semana  
☐ 1 vez al día  
☐ 2 a 3 veces al día  
☐ 5 a 6 veces al día  
☐ más 6 veces al día

---

Embutido

- ☒ Nunca o menos 1 vez al mes  
☐ 1 a 3 veces mes  
☐ 1 vez semana  
☐ 2 a 4 veces semana  
☐ 5 a 6 veces semana  
☐ 1 vez al día  
☐ 2 a 3 veces al día  
☐ 5 a 6 veces al día  
☐ más 6 veces al día

---

Salchicha o similar

- ☒ Nunca o menos 1 vez al mes  
☐ 1 a 3 veces mes  
☐ 1 vez semana  
☐ 2 a 4 veces semana  
☐ 5 a 6 veces semana  
☐ 1 vez al día  
☐ 2 a 3 veces al día  
☐ 5 a 6 veces al día  
☐ más 6 veces al día

---

Pate o foiegras

- ☒ Nunca o menos 1 vez al mes  
☐ 1 a 3 veces mes  
☐ 1 vez semana  
☐ 2 a 4 veces semana  
☐ 5 a 6 veces semana  
☐ 1 vez al día  
☐ 2 a 3 veces al día  
☐ 5 a 6 veces al día  
☐ más 6 veces al día

---

Hamburguesa

- ☐ Nunca o menos 1 vez al mes  
☐ 1 a 3 veces mes  
☒ 1 vez semana  
☐ 2 a 4 veces semana  
☐ 5 a 6 veces semana  
☐ 1 vez al día  
☐ 2 a 3 veces al día  
☐ 5 a 6 veces al día  
☐ más 6 veces al día

---

tocino o bacon

- ☒ Nunca o menos 1 vez al mes  
☐ 1 a 3 veces mes  
☐ 1 vez semana  
☐ 2 a 4 veces semana  
☐ 5 a 6 veces semana  
☐ 1 vez al día  
☐ 2 a 3 veces al día  
☐ 5 a 6 veces al día  
☐ más 6 veces al día

---

Pescado frito

- ☒ Nunca o menos 1 vez al mes  
☐ 1 a 3 veces mes  
☐ 1 vez semana  
☐ 2 a 4 veces semana  
☐ 5 a 6 veces semana  
☐ 1 vez al día  
☐ 2 a 3 veces al día  
☐ 5 a 6 veces al día  
☐ más 6 veces al día

---

pescado hervido blanco

- ☐ Nunca o menos 1 vez al mes  
☐ 1 a 3 veces mes  
☐ 1 vez semana  
☒ 2 a 4 veces semana  
☐ 5 a 6 veces semana  
☐ 1 vez al día  
☐ 2 a 3 veces al día  
☐ 5 a 6 veces al día  
☐ más 6 veces al día

---

pescado hervido azul

- ☐ Nunca o menos 1 vez al mes  
☒ 1 a 3 veces mes  
☐ 1 vez semana  
☐ 2 a 4 veces semana  
☐ 5 a 6 veces semana  
☐ 1 vez al día  
☐ 2 a 3 veces al día  
☐ 5 a 6 veces al día  
☐ más 6 veces al día

---

otros pescado azul

- ☐ Nunca o menos 1 vez al mes  
☒ 1 a 3 veces mes  
☐ 1 vez semana  
☐ 2 a 4 veces semana  
☐ 5 a 6 veces semana  
☐ 1 vez al día  
☐ 2 a 3 veces al día  
☐ 5 a 6 veces al día  
☐ más 6 veces al día

---

atun conserva

- ☐ Nunca o menos 1 vez al mes  
☐ 1 a 3 veces mes  
☒ 1 vez semana  
☐ 2 a 4 veces semana  
☐ 5 a 6 veces semana  
☐ 1 vez al día  
☐ 2 a 3 veces al día  
☐ 5 a 6 veces al día  
☐ más 6 veces al día

---

sardina conserva

- ☐ Nunca o menos 1 vez al mes  
☐ 1 a 3 veces mes  
☒ 1 vez semana  
☐ 2 a 4 veces semana  
☐ 5 a 6 veces semana  
☐ 1 vez al día  
☐ 2 a 3 veces al día  
☐ 5 a 6 veces al día  
☐ más 6 veces al día

|                                         |                                                                                                                                                                                                                                                                                                                                                                                                              |
|-----------------------------------------|--------------------------------------------------------------------------------------------------------------------------------------------------------------------------------------------------------------------------------------------------------------------------------------------------------------------------------------------------------------------------------------------------------------|
| pescado ahumado                         | <input checked="" type="radio"/> Nunca o menos 1 vez al mes<br><input type="radio"/> 1 a 3 veces mes<br><input type="radio"/> 1 vez semana<br><input type="radio"/> 2 a 4 veces semana<br><input type="radio"/> 5 a 6 veces semana<br><input type="radio"/> 1 vez al día<br><input type="radio"/> 2 a 3 veces al día<br><input type="radio"/> 5 a 6 veces al día<br><input type="radio"/> más 6 veces al día |
| almejas o mejillones o ostras unos 100g | <input type="radio"/> Nunca o menos 1 vez al mes<br><input type="radio"/> 1 a 3 veces mes<br><input type="radio"/> 1 vez semana<br><input checked="" type="radio"/> 2 a 4 veces semana<br><input type="radio"/> 5 a 6 veces semana<br><input type="radio"/> 1 vez al día<br><input type="radio"/> 2 a 3 veces al día<br><input type="radio"/> 5 a 6 veces al día<br><input type="radio"/> más 6 veces al día |
| calamar o chipiron o sepia unos 100g    | <input type="radio"/> Nunca o menos 1 vez al mes<br><input checked="" type="radio"/> 1 a 3 veces mes<br><input type="radio"/> 1 vez semana<br><input type="radio"/> 2 a 4 veces semana<br><input type="radio"/> 5 a 6 veces semana<br><input type="radio"/> 1 vez al día<br><input type="radio"/> 2 a 3 veces al día<br><input type="radio"/> 5 a 6 veces al día<br><input type="radio"/> más 6 veces al día |
| marisco unos 100g                       | <input type="radio"/> Nunca o menos 1 vez al mes<br><input checked="" type="radio"/> 1 a 3 veces mes<br><input type="radio"/> 1 vez semana<br><input type="radio"/> 2 a 4 veces semana<br><input type="radio"/> 5 a 6 veces semana<br><input type="radio"/> 1 vez al día<br><input type="radio"/> 2 a 3 veces al día<br><input type="radio"/> 5 a 6 veces al día<br><input type="radio"/> más 6 veces al día |
| Espinacas o acelgas cocinadas           | <input type="radio"/> Nunca o menos 1 vez al mes<br><input checked="" type="radio"/> 1 a 3 veces mes<br><input type="radio"/> 1 vez semana<br><input type="radio"/> 2 a 4 veces semana<br><input type="radio"/> 5 a 6 veces semana<br><input type="radio"/> 1 vez al día<br><input type="radio"/> 2 a 3 veces al día<br><input type="radio"/> 5 a 6 veces al día<br><input type="radio"/> más 6 veces al día |
| Col o coliflor o brocoli cocinado       | <input checked="" type="radio"/> Nunca o menos 1 vez al mes<br><input type="radio"/> 1 a 3 veces mes<br><input type="radio"/> 1 vez semana<br><input type="radio"/> 2 a 4 veces semana<br><input type="radio"/> 5 a 6 veces semana<br><input type="radio"/> 1 vez al día<br><input type="radio"/> 2 a 3 veces al día<br><input type="radio"/> 5 a 6 veces al día<br><input type="radio"/> más 6 veces al día |

---

Lechuga o endivia o escarola

- ☐ Nunca o menos 1 vez al mes  
☐ 1 a 3 veces mes  
☐ 1 vez semana  
☒ 2 a 4 veces semana  
☐ 5 a 6 veces semana  
☐ 1 vez al día  
☐ 2 a 3 veces al día  
☐ 5 a 6 veces al día  
☐ más 6 veces al día

---

tomate ensalada

- ☐ Nunca o menos 1 vez al mes  
☐ 1 a 3 veces mes  
☐ 1 vez semana  
☒ 2 a 4 veces semana  
☐ 5 a 6 veces semana  
☐ 1 vez al día  
☐ 2 a 3 veces al día  
☐ 5 a 6 veces al día  
☐ más 6 veces al día

---

cebolla

- ☐ Nunca o menos 1 vez al mes  
☒ 1 a 3 veces mes  
☐ 1 vez semana  
☐ 2 a 4 veces semana  
☐ 5 a 6 veces semana  
☐ 1 vez al día  
☐ 2 a 3 veces al día  
☐ 5 a 6 veces al día  
☐ más 6 veces al día

---

Zanahoria o calabaza

- ☐ Nunca o menos 1 vez al mes  
☒ 1 a 3 veces mes  
☐ 1 vez semana  
☐ 2 a 4 veces semana  
☐ 5 a 6 veces semana  
☐ 1 vez al día  
☐ 2 a 3 veces al día  
☐ 5 a 6 veces al día  
☐ más 6 veces al día

---

Judías verdes

- ☐ Nunca o menos 1 vez al mes  
☐ 1 a 3 veces mes  
☒ 1 vez semana  
☐ 2 a 4 veces semana  
☐ 5 a 6 veces semana  
☐ 1 vez al día  
☐ 2 a 3 veces al día  
☐ 5 a 6 veces al día  
☐ más 6 veces al día

---

Berenjena o calabacin o pepino

- ☐ Nunca o menos 1 vez al mes  
☐ 1 a 3 veces mes  
☒ 1 vez semana  
☐ 2 a 4 veces semana  
☐ 5 a 6 veces semana  
☐ 1 vez al día  
☐ 2 a 3 veces al día  
☐ 5 a 6 veces al día  
☐ más 6 veces al día

|                       |                                                                                                                                                                                                                                                                                                                                                                                                              |
|-----------------------|--------------------------------------------------------------------------------------------------------------------------------------------------------------------------------------------------------------------------------------------------------------------------------------------------------------------------------------------------------------------------------------------------------------|
| pimiento              | <input type="radio"/> Nunca o menos 1 vez al mes<br><input checked="" type="radio"/> 1 a 3 veces mes<br><input type="radio"/> 1 vez semana<br><input type="radio"/> 2 a 4 veces semana<br><input type="radio"/> 5 a 6 veces semana<br><input type="radio"/> 1 vez al día<br><input type="radio"/> 2 a 3 veces al día<br><input type="radio"/> 5 a 6 veces al día<br><input type="radio"/> más 6 veces al día |
| alcachofa             | <input type="radio"/> Nunca o menos 1 vez al mes<br><input checked="" type="radio"/> 1 a 3 veces mes<br><input type="radio"/> 1 vez semana<br><input type="radio"/> 2 a 4 veces semana<br><input type="radio"/> 5 a 6 veces semana<br><input type="radio"/> 1 vez al día<br><input type="radio"/> 2 a 3 veces al día<br><input type="radio"/> 5 a 6 veces al día<br><input type="radio"/> más 6 veces al día |
| espárragos            | <input type="radio"/> Nunca o menos 1 vez al mes<br><input checked="" type="radio"/> 1 a 3 veces mes<br><input type="radio"/> 1 vez semana<br><input type="radio"/> 2 a 4 veces semana<br><input type="radio"/> 5 a 6 veces semana<br><input type="radio"/> 1 vez al día<br><input type="radio"/> 2 a 3 veces al día<br><input type="radio"/> 5 a 6 veces al día<br><input type="radio"/> más 6 veces al día |
| maíz hervido          | <input type="radio"/> Nunca o menos 1 vez al mes<br><input checked="" type="radio"/> 1 a 3 veces mes<br><input type="radio"/> 1 vez semana<br><input type="radio"/> 2 a 4 veces semana<br><input type="radio"/> 5 a 6 veces semana<br><input type="radio"/> 1 vez al día<br><input type="radio"/> 2 a 3 veces al día<br><input type="radio"/> 5 a 6 veces al día<br><input type="radio"/> más 6 veces al día |
| legumbres             | <input type="radio"/> Nunca o menos 1 vez al mes<br><input type="radio"/> 1 a 3 veces mes<br><input type="radio"/> 1 vez semana<br><input checked="" type="radio"/> 2 a 4 veces semana<br><input type="radio"/> 5 a 6 veces semana<br><input type="radio"/> 1 vez al día<br><input type="radio"/> 2 a 3 veces al día<br><input type="radio"/> 5 a 6 veces al día<br><input type="radio"/> más 6 veces al día |
| naranjas o mandarinas | <input type="radio"/> Nunca o menos 1 vez al mes<br><input type="radio"/> 1 a 3 veces mes<br><input type="radio"/> 1 vez semana<br><input checked="" type="radio"/> 2 a 4 veces semana<br><input type="radio"/> 5 a 6 veces semana<br><input type="radio"/> 1 vez al día<br><input type="radio"/> 2 a 3 veces al día<br><input type="radio"/> 5 a 6 veces al día<br><input type="radio"/> más 6 veces al día |

---

zumو natural fruta

- ☒ Nunca o menos 1 vez al mes  
☐ 1 a 3 veces mes  
☐ 1 vez semana  
☐ 2 a 4 veces semana  
☐ 5 a 6 veces semana  
☐ 1 vez al día  
☐ 2 a 3 veces al día  
☐ 5 a 6 veces al día  
☐ más 6 veces al día

---

platano

- ☐ Nunca o menos 1 vez al mes  
☐ 1 a 3 veces mes  
☐ 1 vez semana  
☒ 2 a 4 veces semana  
☐ 5 a 6 veces semana  
☐ 1 vez al día  
☐ 2 a 3 veces al día  
☐ 5 a 6 veces al día  
☐ más 6 veces al día

---

manzana o pera

- ☐ Nunca o menos 1 vez al mes  
☐ 1 a 3 veces mes  
☐ 1 vez semana  
☐ 2 a 4 veces semana  
☒ 5 a 6 veces semana  
☐ 1 vez al día  
☐ 2 a 3 veces al día  
☐ 5 a 6 veces al día  
☐ más 6 veces al día

---

melocotón o nectarina

- ☒ Nunca o menos 1 vez al mes  
☐ 1 a 3 veces mes  
☐ 1 vez semana  
☐ 2 a 4 veces semana  
☐ 5 a 6 veces semana  
☐ 1 vez al día  
☐ 2 a 3 veces al día  
☐ 5 a 6 veces al día  
☐ más 6 veces al día

---

sandia o melon

- ☒ Nunca o menos 1 vez al mes  
☐ 1 a 3 veces mes  
☐ 1 vez semana  
☐ 2 a 4 veces semana  
☐ 5 a 6 veces semana  
☐ 1 vez al día  
☐ 2 a 3 veces al día  
☐ 5 a 6 veces al día  
☐ más 6 veces al día

---

uva

- ☒ Nunca o menos 1 vez al mes  
☐ 1 a 3 veces mes  
☐ 1 vez semana  
☐ 2 a 4 veces semana  
☐ 5 a 6 veces semana  
☐ 1 vez al día  
☐ 2 a 3 veces al día  
☐ 5 a 6 veces al día  
☐ más 6 veces al día



---

bruna o ciruela

- ☒ Nunca o menos 1 vez al mes  
☐ 1 a 3 veces mes  
☐ 1 vez semana  
☐ 2 a 4 veces semana  
☐ 5 a 6 veces semana  
☐ 1 vez al día  
☐ 2 a 3 veces al día  
☐ 5 a 6 veces al día  
☐ más 6 veces al día

---

kiwi

- ☒ Nunca o menos 1 vez al mes  
☐ 1 a 3 veces mes  
☐ 1 vez semana  
☐ 2 a 4 veces semana  
☐ 5 a 6 veces semana  
☐ 1 vez al día  
☐ 2 a 3 veces al día  
☐ 5 a 6 veces al día  
☐ más 6 veces al día

---

aceituna

- ☒ Nunca o menos 1 vez al mes  
☐ 1 a 3 veces mes  
☐ 1 vez semana  
☐ 2 a 4 veces semana  
☐ 5 a 6 veces semana  
☐ 1 vez al día  
☐ 2 a 3 veces al día  
☐ 5 a 6 veces al día  
☐ más 6 veces al día

---

frutos secos

- ☐ Nunca o menos 1 vez al mes  
☐ 1 a 3 veces mes  
☒ 1 vez semana  
☐ 2 a 4 veces semana  
☐ 5 a 6 veces semana  
☐ 1 vez al día  
☐ 2 a 3 veces al día  
☐ 5 a 6 veces al día  
☐ más 6 veces al día

---

pan blanco

- ☒ Nunca o menos 1 vez al mes  
☐ 1 a 3 veces mes  
☐ 1 vez semana  
☐ 2 a 4 veces semana  
☐ 5 a 6 veces semana  
☐ 1 vez al día  
☐ 2 a 3 veces al día  
☐ 5 a 6 veces al día  
☐ más 6 veces al día

---

pan integral

- ☐ Nunca o menos 1 vez al mes  
☐ 1 a 3 veces mes  
☐ 1 vez semana  
☐ 2 a 4 veces semana  
☐ 5 a 6 veces semana  
☒ 1 vez al día  
☐ 2 a 3 veces al día  
☐ 5 a 6 veces al día  
☐ más 6 veces al día

---

cereales desayuno

- ☐ Nunca o menos 1 vez al mes  
☐ 1 a 3 veces mes  
☐ 1 vez semana  
☐ 2 a 4 veces semana  
☐ 5 a 6 veces semana  
☒ 1 vez al día  
☐ 2 a 3 veces al día  
☐ 5 a 6 veces al día  
☐ más 6 veces al día

---

patatas fritas

- ☒ Nunca o menos 1 vez al mes  
☐ 1 a 3 veces mes  
☐ 1 vez semana  
☐ 2 a 4 veces semana  
☐ 5 a 6 veces semana  
☐ 1 vez al día  
☐ 2 a 3 veces al día  
☐ 5 a 6 veces al día  
☐ más 6 veces al día

---

patatas cocidas o asadas

- ☐ Nunca o menos 1 vez al mes  
☐ 1 a 3 veces mes  
☒ 1 vez semana  
☐ 2 a 4 veces semana  
☐ 5 a 6 veces semana  
☐ 1 vez al día  
☐ 2 a 3 veces al día  
☐ 5 a 6 veces al día  
☐ más 6 veces al día

---

bolsa papas

- ☒ Nunca o menos 1 vez al mes  
☐ 1 a 3 veces mes  
☐ 1 vez semana  
☐ 2 a 4 veces semana  
☐ 5 a 6 veces semana  
☐ 1 vez al día  
☐ 2 a 3 veces al día  
☐ 5 a 6 veces al día  
☐ más 6 veces al día

---

arroz cocinado

- ☐ Nunca o menos 1 vez al mes  
☐ 1 a 3 veces mes  
☐ 1 vez semana  
☒ 2 a 4 veces semana  
☐ 5 a 6 veces semana  
☐ 1 vez al día  
☐ 2 a 3 veces al día  
☐ 5 a 6 veces al día  
☐ más 6 veces al día

---

pasta

- ☐ Nunca o menos 1 vez al mes  
☐ 1 a 3 veces mes  
☐ 1 vez semana  
☒ 2 a 4 veces semana  
☐ 5 a 6 veces semana  
☐ 1 vez al día  
☐ 2 a 3 veces al día  
☐ 5 a 6 veces al día  
☐ más 6 veces al día

|                     |                                                                                                                                                                                                                                                                                                                                                                                                              |
|---------------------|--------------------------------------------------------------------------------------------------------------------------------------------------------------------------------------------------------------------------------------------------------------------------------------------------------------------------------------------------------------------------------------------------------------|
| pizza               | <input checked="" type="radio"/> Nunca o menos 1 vez al mes<br><input type="radio"/> 1 a 3 veces mes<br><input type="radio"/> 1 vez semana<br><input type="radio"/> 2 a 4 veces semana<br><input type="radio"/> 5 a 6 veces semana<br><input type="radio"/> 1 vez al día<br><input type="radio"/> 2 a 3 veces al día<br><input type="radio"/> 5 a 6 veces al día<br><input type="radio"/> más 6 veces al día |
| aceite oliva        | <input type="radio"/> Nunca o menos 1 vez al mes<br><input type="radio"/> 1 a 3 veces mes<br><input type="radio"/> 1 vez semana<br><input type="radio"/> 2 a 4 veces semana<br><input checked="" type="radio"/> 5 a 6 veces semana<br><input type="radio"/> 1 vez al día<br><input type="radio"/> 2 a 3 veces al día<br><input type="radio"/> 5 a 6 veces al día<br><input type="radio"/> más 6 veces al día |
| otros aceites       | <input type="radio"/> Nunca o menos 1 vez al mes<br><input checked="" type="radio"/> 1 a 3 veces mes<br><input type="radio"/> 1 vez semana<br><input type="radio"/> 2 a 4 veces semana<br><input type="radio"/> 5 a 6 veces semana<br><input type="radio"/> 1 vez al día<br><input type="radio"/> 2 a 3 veces al día<br><input type="radio"/> 5 a 6 veces al día<br><input type="radio"/> más 6 veces al día |
| margarina           | <input checked="" type="radio"/> Nunca o menos 1 vez al mes<br><input type="radio"/> 1 a 3 veces mes<br><input type="radio"/> 1 vez semana<br><input type="radio"/> 2 a 4 veces semana<br><input type="radio"/> 5 a 6 veces semana<br><input type="radio"/> 1 vez al día<br><input type="radio"/> 2 a 3 veces al día<br><input type="radio"/> 5 a 6 veces al día<br><input type="radio"/> más 6 veces al día |
| mantequilla         | <input checked="" type="radio"/> Nunca o menos 1 vez al mes<br><input type="radio"/> 1 a 3 veces mes<br><input type="radio"/> 1 vez semana<br><input type="radio"/> 2 a 4 veces semana<br><input type="radio"/> 5 a 6 veces semana<br><input type="radio"/> 1 vez al día<br><input type="radio"/> 2 a 3 veces al día<br><input type="radio"/> 5 a 6 veces al día<br><input type="radio"/> más 6 veces al día |
| galletas tipo maria | <input type="radio"/> Nunca o menos 1 vez al mes<br><input type="radio"/> 1 a 3 veces mes<br><input type="radio"/> 1 vez semana<br><input checked="" type="radio"/> 2 a 4 veces semana<br><input type="radio"/> 5 a 6 veces semana<br><input type="radio"/> 1 vez al día<br><input type="radio"/> 2 a 3 veces al día<br><input type="radio"/> 5 a 6 veces al día<br><input type="radio"/> más 6 veces al día |

|                           |                                                                                                                                                                                                                                                                                                                                                                                                              |
|---------------------------|--------------------------------------------------------------------------------------------------------------------------------------------------------------------------------------------------------------------------------------------------------------------------------------------------------------------------------------------------------------------------------------------------------------|
| galletas chocolate        | <input checked="" type="radio"/> Nunca o menos 1 vez al mes<br><input type="radio"/> 1 a 3 veces mes<br><input type="radio"/> 1 vez semana<br><input type="radio"/> 2 a 4 veces semana<br><input type="radio"/> 5 a 6 veces semana<br><input type="radio"/> 1 vez al día<br><input type="radio"/> 2 a 3 veces al día<br><input type="radio"/> 5 a 6 veces al día<br><input type="radio"/> más 6 veces al día |
| bollieria                 | <input checked="" type="radio"/> Nunca o menos 1 vez al mes<br><input type="radio"/> 1 a 3 veces mes<br><input type="radio"/> 1 vez semana<br><input type="radio"/> 2 a 4 veces semana<br><input type="radio"/> 5 a 6 veces semana<br><input type="radio"/> 1 vez al día<br><input type="radio"/> 2 a 3 veces al día<br><input type="radio"/> 5 a 6 veces al día<br><input type="radio"/> más 6 veces al día |
| chocolate o bombones      | <input checked="" type="radio"/> Nunca o menos 1 vez al mes<br><input type="radio"/> 1 a 3 veces mes<br><input type="radio"/> 1 vez semana<br><input type="radio"/> 2 a 4 veces semana<br><input type="radio"/> 5 a 6 veces semana<br><input type="radio"/> 1 vez al día<br><input type="radio"/> 2 a 3 veces al día<br><input type="radio"/> 5 a 6 veces al día<br><input type="radio"/> más 6 veces al día |
| chocolate polvo o colacao | <input type="radio"/> Nunca o menos 1 vez al mes<br><input checked="" type="radio"/> 1 a 3 veces mes<br><input type="radio"/> 1 vez semana<br><input type="radio"/> 2 a 4 veces semana<br><input type="radio"/> 5 a 6 veces semana<br><input type="radio"/> 1 vez al día<br><input type="radio"/> 2 a 3 veces al día<br><input type="radio"/> 5 a 6 veces al día<br><input type="radio"/> más 6 veces al día |
| vino tinto                | <input checked="" type="radio"/> Nunca o menos 1 vez al mes<br><input type="radio"/> 1 a 3 veces mes<br><input type="radio"/> 1 vez semana<br><input type="radio"/> 2 a 4 veces semana<br><input type="radio"/> 5 a 6 veces semana<br><input type="radio"/> 1 vez al día<br><input type="radio"/> 2 a 3 veces al día<br><input type="radio"/> 5 a 6 veces al día<br><input type="radio"/> más 6 veces al día |
| vino blanco               | <input checked="" type="radio"/> Nunca o menos 1 vez al mes<br><input type="radio"/> 1 a 3 veces mes<br><input type="radio"/> 1 vez semana<br><input type="radio"/> 2 a 4 veces semana<br><input type="radio"/> 5 a 6 veces semana<br><input type="radio"/> 1 vez al día<br><input type="radio"/> 2 a 3 veces al día<br><input type="radio"/> 5 a 6 veces al día<br><input type="radio"/> más 6 veces al día |

|                       |                                                                                                                                                                                                                                                                                                                                                                                                              |
|-----------------------|--------------------------------------------------------------------------------------------------------------------------------------------------------------------------------------------------------------------------------------------------------------------------------------------------------------------------------------------------------------------------------------------------------------|
| vino seco o vermut    | <input checked="" type="radio"/> Nunca o menos 1 vez al mes<br><input type="radio"/> 1 a 3 veces mes<br><input type="radio"/> 1 vez semana<br><input type="radio"/> 2 a 4 veces semana<br><input type="radio"/> 5 a 6 veces semana<br><input type="radio"/> 1 vez al día<br><input type="radio"/> 2 a 3 veces al día<br><input type="radio"/> 5 a 6 veces al día<br><input type="radio"/> más 6 veces al día |
| cerveza               | <input checked="" type="radio"/> Nunca o menos 1 vez al mes<br><input type="radio"/> 1 a 3 veces mes<br><input type="radio"/> 1 vez semana<br><input type="radio"/> 2 a 4 veces semana<br><input type="radio"/> 5 a 6 veces semana<br><input type="radio"/> 1 vez al día<br><input type="radio"/> 2 a 3 veces al día<br><input type="radio"/> 5 a 6 veces al día<br><input type="radio"/> más 6 veces al día |
| cerveza sin alcohol   | <input checked="" type="radio"/> Nunca o menos 1 vez al mes<br><input type="radio"/> 1 a 3 veces mes<br><input type="radio"/> 1 vez semana<br><input type="radio"/> 2 a 4 veces semana<br><input type="radio"/> 5 a 6 veces semana<br><input type="radio"/> 1 vez al día<br><input type="radio"/> 2 a 3 veces al día<br><input type="radio"/> 5 a 6 veces al día<br><input type="radio"/> más 6 veces al día |
| licores               | <input checked="" type="radio"/> Nunca o menos 1 vez al mes<br><input type="radio"/> 1 a 3 veces mes<br><input type="radio"/> 1 vez semana<br><input type="radio"/> 2 a 4 veces semana<br><input type="radio"/> 5 a 6 veces semana<br><input type="radio"/> 1 vez al día<br><input type="radio"/> 2 a 3 veces al día<br><input type="radio"/> 5 a 6 veces al día<br><input type="radio"/> más 6 veces al día |
| ginebra o ron o vodka | <input checked="" type="radio"/> Nunca o menos 1 vez al mes<br><input type="radio"/> 1 a 3 veces mes<br><input type="radio"/> 1 vez semana<br><input type="radio"/> 2 a 4 veces semana<br><input type="radio"/> 5 a 6 veces semana<br><input type="radio"/> 1 vez al día<br><input type="radio"/> 2 a 3 veces al día<br><input type="radio"/> 5 a 6 veces al día<br><input type="radio"/> más 6 veces al día |
| refresco normal       | <input checked="" type="radio"/> Nunca o menos 1 vez al mes<br><input type="radio"/> 1 a 3 veces mes<br><input type="radio"/> 1 vez semana<br><input type="radio"/> 2 a 4 veces semana<br><input type="radio"/> 5 a 6 veces semana<br><input type="radio"/> 1 vez al día<br><input type="radio"/> 2 a 3 veces al día<br><input type="radio"/> 5 a 6 veces al día<br><input type="radio"/> más 6 veces al día |

---

refresco sin azúcar

- ☒ Nunca o menos 1 vez al mes  
☐ 1 a 3 veces mes  
☐ 1 vez semana  
☐ 2 a 4 veces semana  
☐ 5 a 6 veces semana  
☐ 1 vez al día  
☐ 2 a 3 veces al día  
☐ 5 a 6 veces al día  
☐ más 6 veces al día

---

Agua del grifo

- ☐ Nunca o menos 1 vez al mes  
☐ 1 a 3 veces mes  
☐ 1 vez semana  
☐ 2 a 4 veces semana  
☐ 5 a 6 veces semana  
☐ 1 vez al día  
☐ 2 a 3 veces al día  
☒ 5 a 6 veces al día  
☐ más 6 veces al día

---

agua embotellada sin gas

- ☒ Nunca o menos 1 vez al mes  
☐ 1 a 3 veces mes  
☐ 1 vez semana  
☐ 2 a 4 veces semana  
☐ 5 a 6 veces semana  
☐ 1 vez al día  
☐ 2 a 3 veces al día  
☐ 5 a 6 veces al día  
☐ más 6 veces al día

---

agua embotellada con gas

- ☒ Nunca o menos 1 vez al mes  
☐ 1 a 3 veces mes  
☐ 1 vez semana  
☐ 2 a 4 veces semana  
☐ 5 a 6 veces semana  
☐ 1 vez al día  
☐ 2 a 3 veces al día  
☐ 5 a 6 veces al día  
☐ más 6 veces al día

---

zumو frutas embasado

- ☒ Nunca o menos 1 vez al mes  
☐ 1 a 3 veces mes  
☐ 1 vez semana  
☐ 2 a 4 veces semana  
☐ 5 a 6 veces semana  
☐ 1 vez al día  
☐ 2 a 3 veces al día  
☐ 5 a 6 veces al día  
☐ más 6 veces al día

---

cafe

- ☒ Nunca o menos 1 vez al mes  
☐ 1 a 3 veces mes  
☐ 1 vez semana  
☐ 2 a 4 veces semana  
☐ 5 a 6 veces semana  
☐ 1 vez al día  
☐ 2 a 3 veces al día  
☐ 5 a 6 veces al día  
☐ más 6 veces al día

|                       |                                                                                                                                                                                                                                                                                                                                                                                                              |
|-----------------------|--------------------------------------------------------------------------------------------------------------------------------------------------------------------------------------------------------------------------------------------------------------------------------------------------------------------------------------------------------------------------------------------------------------|
| cafe descafeinado     | <input checked="" type="radio"/> Nunca o menos 1 vez al mes<br><input type="radio"/> 1 a 3 veces mes<br><input type="radio"/> 1 vez semana<br><input type="radio"/> 2 a 4 veces semana<br><input type="radio"/> 5 a 6 veces semana<br><input type="radio"/> 1 vez al día<br><input type="radio"/> 2 a 3 veces al día<br><input type="radio"/> 5 a 6 veces al día<br><input type="radio"/> más 6 veces al día |
| te o infusión         | <input checked="" type="radio"/> Nunca o menos 1 vez al mes<br><input type="radio"/> 1 a 3 veces mes<br><input type="radio"/> 1 vez semana<br><input type="radio"/> 2 a 4 veces semana<br><input type="radio"/> 5 a 6 veces semana<br><input type="radio"/> 1 vez al día<br><input type="radio"/> 2 a 3 veces al día<br><input type="radio"/> 5 a 6 veces al día<br><input type="radio"/> más 6 veces al día |
| sopa o puré verduras  | <input type="radio"/> Nunca o menos 1 vez al mes<br><input type="radio"/> 1 a 3 veces mes<br><input type="radio"/> 1 vez semana<br><input checked="" type="radio"/> 2 a 4 veces semana<br><input type="radio"/> 5 a 6 veces semana<br><input type="radio"/> 1 vez al día<br><input type="radio"/> 2 a 3 veces al día<br><input type="radio"/> 5 a 6 veces al día<br><input type="radio"/> más 6 veces al día |
| croquetas pollo jamón | <input checked="" type="radio"/> Nunca o menos 1 vez al mes<br><input type="radio"/> 1 a 3 veces mes<br><input type="radio"/> 1 vez semana<br><input type="radio"/> 2 a 4 veces semana<br><input type="radio"/> 5 a 6 veces semana<br><input type="radio"/> 1 vez al día<br><input type="radio"/> 2 a 3 veces al día<br><input type="radio"/> 5 a 6 veces al día<br><input type="radio"/> más 6 veces al día |
| croquetas pescado     | <input type="radio"/> Nunca o menos 1 vez al mes<br><input checked="" type="radio"/> 1 a 3 veces mes<br><input type="radio"/> 1 vez semana<br><input type="radio"/> 2 a 4 veces semana<br><input type="radio"/> 5 a 6 veces semana<br><input type="radio"/> 1 vez al día<br><input type="radio"/> 2 a 3 veces al día<br><input type="radio"/> 5 a 6 veces al día<br><input type="radio"/> más 6 veces al día |
| mayonesa              | <input checked="" type="radio"/> Nunca o menos 1 vez al mes<br><input type="radio"/> 1 a 3 veces mes<br><input type="radio"/> 1 vez semana<br><input type="radio"/> 2 a 4 veces semana<br><input type="radio"/> 5 a 6 veces semana<br><input type="radio"/> 1 vez al día<br><input type="radio"/> 2 a 3 veces al día<br><input type="radio"/> 5 a 6 veces al día<br><input type="radio"/> más 6 veces al día |

|                  |                                                                                                                                                                                                                                                                                                                                                                                                              |
|------------------|--------------------------------------------------------------------------------------------------------------------------------------------------------------------------------------------------------------------------------------------------------------------------------------------------------------------------------------------------------------------------------------------------------------|
| salsa tomate     | <input type="radio"/> Nunca o menos 1 vez al mes<br><input type="radio"/> 1 a 3 veces mes<br><input checked="" type="radio"/> 1 vez semana<br><input type="radio"/> 2 a 4 veces semana<br><input type="radio"/> 5 a 6 veces semana<br><input type="radio"/> 1 vez al día<br><input type="radio"/> 2 a 3 veces al día<br><input type="radio"/> 5 a 6 veces al día<br><input type="radio"/> más 6 veces al día |
| ketchup          | <input checked="" type="radio"/> Nunca o menos 1 vez al mes<br><input type="radio"/> 1 a 3 veces mes<br><input type="radio"/> 1 vez semana<br><input type="radio"/> 2 a 4 veces semana<br><input type="radio"/> 5 a 6 veces semana<br><input type="radio"/> 1 vez al día<br><input type="radio"/> 2 a 3 veces al día<br><input type="radio"/> 5 a 6 veces al día<br><input type="radio"/> más 6 veces al día |
| sal              | <input type="radio"/> Nunca o menos 1 vez al mes<br><input type="radio"/> 1 a 3 veces mes<br><input type="radio"/> 1 vez semana<br><input type="radio"/> 2 a 4 veces semana<br><input checked="" type="radio"/> 5 a 6 veces semana<br><input type="radio"/> 1 vez al día<br><input type="radio"/> 2 a 3 veces al día<br><input type="radio"/> 5 a 6 veces al día<br><input type="radio"/> más 6 veces al día |
| ajo              | <input checked="" type="radio"/> Nunca o menos 1 vez al mes<br><input type="radio"/> 1 a 3 veces mes<br><input type="radio"/> 1 vez semana<br><input type="radio"/> 2 a 4 veces semana<br><input type="radio"/> 5 a 6 veces semana<br><input type="radio"/> 1 vez al día<br><input type="radio"/> 2 a 3 veces al día<br><input type="radio"/> 5 a 6 veces al día<br><input type="radio"/> más 6 veces al día |
| mermelada o miel | <input checked="" type="radio"/> Nunca o menos 1 vez al mes<br><input type="radio"/> 1 a 3 veces mes<br><input type="radio"/> 1 vez semana<br><input type="radio"/> 2 a 4 veces semana<br><input type="radio"/> 5 a 6 veces semana<br><input type="radio"/> 1 vez al día<br><input type="radio"/> 2 a 3 veces al día<br><input type="radio"/> 5 a 6 veces al día<br><input type="radio"/> más 6 veces al día |
| azúcar           | <input checked="" type="radio"/> Nunca o menos 1 vez al mes<br><input type="radio"/> 1 a 3 veces mes<br><input type="radio"/> 1 vez semana<br><input type="radio"/> 2 a 4 veces semana<br><input type="radio"/> 5 a 6 veces semana<br><input type="radio"/> 1 vez al día<br><input type="radio"/> 2 a 3 veces al día<br><input type="radio"/> 5 a 6 veces al día<br><input type="radio"/> más 6 veces al día |



|                                       |                                                                                                                                                                                                                                                                                                                                                                                                                                                                                                                               |
|---------------------------------------|-------------------------------------------------------------------------------------------------------------------------------------------------------------------------------------------------------------------------------------------------------------------------------------------------------------------------------------------------------------------------------------------------------------------------------------------------------------------------------------------------------------------------------|
| Otro alimento                         |                                                                                                                                                                                                                                                                                                                                                                                                                                                                                                                               |
| suplementos vitamínicos               | <input checked="" type="radio"/> si<br><input type="radio"/> no                                                                                                                                                                                                                                                                                                                                                                                                                                                               |
| suplementos vitamínicos               | [*DATA REMOVED*]                                                                                                                                                                                                                                                                                                                                                                                                                                                                                                              |
| dieta previa                          | <input checked="" type="radio"/> si<br><input type="radio"/> no                                                                                                                                                                                                                                                                                                                                                                                                                                                               |
| motivo dieta                          | <input type="radio"/> no dieta<br><input type="radio"/> control peso<br><input type="radio"/> control colesterol<br><input checked="" type="radio"/> control diabetes<br><input type="radio"/> problemas estómago<br><input type="radio"/> problemas vesícula o hepáticos<br><input type="radio"/> HTA o cardiopatía<br><input type="radio"/> problemas renales<br><input type="radio"/> alergia alimentaria<br><input type="radio"/> ácido úrico elevado<br><input type="radio"/> vegetariana<br><input type="radio"/> otros |
| cambio alimentos año previo gestación | <input checked="" type="radio"/> si<br><input type="radio"/> no                                                                                                                                                                                                                                                                                                                                                                                                                                                               |
| cambio lácteos                        | <input type="radio"/> eliminado<br><input checked="" type="radio"/> disminuido<br><input type="radio"/> igual<br><input type="radio"/> aumentado<br><input type="radio"/> no sabe                                                                                                                                                                                                                                                                                                                                             |
| cambio huevos                         | <input type="radio"/> eliminado<br><input type="radio"/> disminuido<br><input checked="" type="radio"/> igual<br><input type="radio"/> aumentado<br><input type="radio"/> no sabe                                                                                                                                                                                                                                                                                                                                             |
| cambio carne                          | <input type="radio"/> eliminado<br><input type="radio"/> disminuido<br><input checked="" type="radio"/> igual<br><input type="radio"/> aumentado<br><input type="radio"/> no sabe                                                                                                                                                                                                                                                                                                                                             |
| cambio pescado                        | <input type="radio"/> eliminado<br><input type="radio"/> disminuido<br><input checked="" type="radio"/> igual<br><input type="radio"/> aumentado<br><input type="radio"/> no sabe                                                                                                                                                                                                                                                                                                                                             |
| cambio verduras                       | <input type="radio"/> eliminado<br><input type="radio"/> disminuido<br><input type="radio"/> igual<br><input checked="" type="radio"/> aumentado<br><input type="radio"/> no sabe                                                                                                                                                                                                                                                                                                                                             |

|                            |                                                                                                                                                                                                                        |
|----------------------------|------------------------------------------------------------------------------------------------------------------------------------------------------------------------------------------------------------------------|
| cambio legumbres           | <input type="radio"/> eliminado<br><input type="radio"/> disminuido<br><input type="radio"/> igual<br><input checked="" type="radio"/> aumentado<br><input type="radio"/> no sabe                                      |
| cambio fruta               | <input type="radio"/> eliminado<br><input type="radio"/> disminuido<br><input type="radio"/> igual<br><input checked="" type="radio"/> aumentado<br><input type="radio"/> no sabe                                      |
| cambio pan                 | <input type="radio"/> eliminado<br><input checked="" type="radio"/> disminuido<br><input type="radio"/> igual<br><input type="radio"/> aumentado<br><input type="radio"/> no sabe                                      |
| cambio aceite oliva        | <input type="radio"/> eliminado<br><input type="radio"/> disminuido<br><input checked="" type="radio"/> igual<br><input type="radio"/> aumentado<br><input type="radio"/> no sabe                                      |
| cambio mante o margarina   | <input checked="" type="radio"/> eliminado<br><input type="radio"/> disminuido<br><input type="radio"/> igual<br><input type="radio"/> aumentado<br><input type="radio"/> no sabe                                      |
| cambio azúcar y dulces     | <input checked="" type="radio"/> eliminado<br><input type="radio"/> disminuido<br><input type="radio"/> igual<br><input type="radio"/> aumentado<br><input type="radio"/> no sabe                                      |
| cambio bebidas alcohólicas | <input type="radio"/> eliminado<br><input type="radio"/> disminuido<br><input checked="" type="radio"/> igual<br><input type="radio"/> aumentado<br><input type="radio"/> no sabe                                      |
| frecuencia comidas fritas  | <input type="radio"/> a diario<br><input type="radio"/> 5 a 6 veces semana<br><input checked="" type="radio"/> 2 a 4 veces semana<br><input type="radio"/> 1 vez semana<br><input type="radio"/> menos de 1 vez semana |
| carne                      | <input type="radio"/> no como<br><input type="radio"/> cruda<br><input type="radio"/> poco hecha<br><input checked="" type="radio"/> hecha<br><input type="radio"/> muy hecha                                          |
| grasa visible carne        | <input type="radio"/> quita toda<br><input type="radio"/> quita mayoría<br><input checked="" type="radio"/> quita un poco<br><input type="radio"/> no quita nada                                                       |

|                                |                                                                                                                                                                                                                                                          |
|--------------------------------|----------------------------------------------------------------------------------------------------------------------------------------------------------------------------------------------------------------------------------------------------------|
| cocina carne                   | <input type="radio"/> a la plancha<br><input type="radio"/> a la parrilla<br><input checked="" type="radio"/> asada<br><input type="radio"/> frita<br><input type="radio"/> guisada                                                                      |
| tostado quemado carne          | <input checked="" type="radio"/> nunca<br><input type="radio"/> 1 vez mes<br><input type="radio"/> 2 a 3 veces mes<br><input type="radio"/> 1 vez semana<br><input type="radio"/> 2 a 3 semanas                                                          |
| tostado quemado pescado        | <input checked="" type="radio"/> nunca<br><input type="radio"/> 1 vez mes<br><input type="radio"/> 2 a 3 veces mes<br><input type="radio"/> 1 vez semana<br><input type="radio"/> 2 a 3 semanas                                                          |
| socarrat paella                | <input checked="" type="radio"/> nunca<br><input type="radio"/> 1 vez mes<br><input type="radio"/> 2 a 3 veces mes<br><input type="radio"/> 1 vez semana<br><input type="radio"/> 2 a 3 semanas                                                          |
| grasa o aceite cocinar         | <input type="radio"/> mantequilla<br><input type="radio"/> margarina<br><input checked="" type="radio"/> aceite oliva<br><input type="radio"/> aceite oliva virgen extra<br><input type="radio"/> aceite vegetal<br><input type="radio"/> mezcla aceites |
| grasa aceite aliñar            | <input type="radio"/> mantequilla<br><input type="radio"/> margarina<br><input checked="" type="radio"/> aceite oliva<br><input type="radio"/> aceite oliva virgen extra<br><input type="radio"/> aceite vegetal<br><input type="radio"/> mezcla aceites |
| grasa aceite freir             | <input type="radio"/> mantequilla<br><input type="radio"/> margarina<br><input checked="" type="radio"/> aceite oliva<br><input type="radio"/> aceite oliva virgen extra<br><input type="radio"/> aceite vegetal<br><input type="radio"/> mezcla aceites |
| Ejercicio cuestionario         | <input checked="" type="radio"/> si<br><input type="radio"/> no                                                                                                                                                                                          |
| horas de sueño incluido siesta | [*DATA REMOVED*]                                                                                                                                                                                                                                         |
| minutos siesta                 | [*DATA REMOVED*]                                                                                                                                                                                                                                         |
| horas televisión semana        | [*DATA REMOVED*]                                                                                                                                                                                                                                         |

|                                        |                                                                                                                                                                                                                                                                                                                                                                           |
|----------------------------------------|---------------------------------------------------------------------------------------------------------------------------------------------------------------------------------------------------------------------------------------------------------------------------------------------------------------------------------------------------------------------------|
| actividad trabajo                      | <input type="radio"/> casi siempre sentado<br><input type="radio"/> sentado 50 por cien<br><input type="radio"/> casi siempre de pie, quieto<br><input checked="" type="radio"/> casi siempre levantado caminando y llevando pocas cosas<br><input type="radio"/> casi siempre levantado, caminando y llevado muchas cosas<br><input type="radio"/> trabajo manual pesado |
| tiempo caminar o bici al día           | <input type="radio"/> casi nunca<br><input type="radio"/> menos 20min día<br><input checked="" type="radio"/> 20 a 40 min día<br><input type="radio"/> 40 a 60 min día<br><input type="radio"/> 1h o 1h y media día<br><input type="radio"/> más de 1h y media al día                                                                                                     |
| tiempo tareas casa al día              | <input type="radio"/> menos de 1h día<br><input checked="" type="radio"/> 1 a 2h día<br><input type="radio"/> 3 a 4h día<br><input type="radio"/> 5 a 6h día<br><input type="radio"/> 7 a 8h día<br><input type="radio"/> más de 8h día                                                                                                                                   |
| tiempo libre televisión ordenador leer | <input type="radio"/> menos 1h día<br><input type="radio"/> 1h día<br><input checked="" type="radio"/> 2h día<br><input type="radio"/> 3h día<br><input type="radio"/> 4h día<br><input type="radio"/> 5 a 6h día<br><input type="radio"/> mas 6h día                                                                                                                     |
| tiempo libre ejercicio o deporte       | <input checked="" type="radio"/> menos 1h semana<br><input type="radio"/> 1h semana<br><input type="radio"/> 2h semana<br><input type="radio"/> 3h semana<br><input type="radio"/> 4 a 5h semana<br><input type="radio"/> mas 5h semana                                                                                                                                   |
| como se considera                      | <input type="radio"/> sedentaria<br><input type="radio"/> poco activa<br><input checked="" type="radio"/> moderadamente activa<br><input type="radio"/> bastante activa<br><input type="radio"/> muy activa<br><input type="radio"/> no sabe                                                                                                                              |
| FUR                                    | [*DATA REMOVED*]                                                                                                                                                                                                                                                                                                                                                          |
| Semanas gestación 2T                   | [*DATA REMOVED*]                                                                                                                                                                                                                                                                                                                                                          |
| Días gestación 2T                      | [*DATA REMOVED*]                                                                                                                                                                                                                                                                                                                                                          |
| DBP 2T                                 | [*DATA REMOVED*]                                                                                                                                                                                                                                                                                                                                                          |
| CC 2T                                  | [*DATA REMOVED*]                                                                                                                                                                                                                                                                                                                                                          |
| AC 2T                                  | [*DATA REMOVED*]                                                                                                                                                                                                                                                                                                                                                          |

|                                                   |                                                                                                                                                                                                 |
|---------------------------------------------------|-------------------------------------------------------------------------------------------------------------------------------------------------------------------------------------------------|
| LF 2T                                             | [*DATA REMOVED*]                                                                                                                                                                                |
| PFE 2T (Hadlock)                                  | [*DATA REMOVED*]                                                                                                                                                                                |
| Semanas gestación 3T                              | [*DATA REMOVED*]                                                                                                                                                                                |
| días 3T                                           | [*DATA REMOVED*]                                                                                                                                                                                |
| DBP 3T                                            | [*DATA REMOVED*]                                                                                                                                                                                |
| CC 3T                                             | [*DATA REMOVED*]                                                                                                                                                                                |
| AC 3T                                             | [*DATA REMOVED*]                                                                                                                                                                                |
| LF 3T                                             | [*DATA REMOVED*]                                                                                                                                                                                |
| PFE 3T (Hadlock)                                  | [*DATA REMOVED*]                                                                                                                                                                                |
| Semanas de gestación final                        | [*DATA REMOVED*]                                                                                                                                                                                |
| días gestación final                              | [*DATA REMOVED*]                                                                                                                                                                                |
| Localización placenta                             | <input type="radio"/> anterior<br><input type="radio"/> lateral derecha<br><input type="radio"/> lateral izquierda<br><input checked="" type="radio"/> posterior<br><input type="radio"/> fondo |
| Presentación longitudinal cefálica                | <input type="radio"/> no<br><input checked="" type="radio"/> si                                                                                                                                 |
| Dorso                                             | <input type="radio"/> izquierda anterior<br><input type="radio"/> izquierda posterior<br><input type="radio"/> derecha anterior<br><input checked="" type="radio"/> derecha posterior           |
| diámetro biparietal                               | [*DATA REMOVED*]                                                                                                                                                                                |
| Circunferencia craneal                            | [*DATA REMOVED*]                                                                                                                                                                                |
| Circunferencia abdominal                          | [*DATA REMOVED*]                                                                                                                                                                                |
| Longitud de femur                                 | [*DATA REMOVED*]                                                                                                                                                                                |
| tejido celular subcutáneo a nivel del muslo en mm | [*DATA REMOVED*]                                                                                                                                                                                |
| tejido celular subcutáneo en abdomen en mm        | [*DATA REMOVED*]                                                                                                                                                                                |
| Volumen del muslo en cm3                          | [*DATA REMOVED*]                                                                                                                                                                                |
| Peso fetal estimado según fórmula de Hadlock      | [*DATA REMOVED*]                                                                                                                                                                                |

|                                               |                                                                                                                                                          |
|-----------------------------------------------|----------------------------------------------------------------------------------------------------------------------------------------------------------|
| Percentil                                     | [*DATA REMOVED*]                                                                                                                                         |
| Peso fetal estimado según fórmula de Scioscia | <hr/>                                                                                                                                                    |
| Peso fetal estimado según fórmula de LEE      | <hr/>                                                                                                                                                    |
| Tipo de parto                                 | <input checked="" type="radio"/> eutocico<br><input type="radio"/> instrumentado/ventosa<br><input type="radio"/> cesarea                                |
| fecha de nacimiento                           | [*DATA REMOVED*]                                                                                                                                         |
| Días entre exploración y nacimiento           | [*DATA REMOVED*]                                                                                                                                         |
| Peso RN en g                                  | [*DATA REMOVED*]                                                                                                                                         |
| sexo                                          | <input type="radio"/> mujer<br><input checked="" type="radio"/> hombre                                                                                   |
| Apgar 1 minuto                                | [*DATA REMOVED*]                                                                                                                                         |
| Apgar 5 minutos                               | [*DATA REMOVED*]                                                                                                                                         |
| Apgar 10 minutos                              | <hr/>                                                                                                                                                    |
| antecedente Covid durante gestación           | <input type="radio"/> Yes<br><input checked="" type="radio"/> No                                                                                         |
| Nivel de estudios                             | <input type="radio"/> ninguno<br><input checked="" type="radio"/> primarios<br><input type="radio"/> secundarios<br><input type="radio"/> universitarios |

# Base\_datos\_estimacion\_peso\_fetal

|                                       |                                                                                                                                                                                                                                                                                      |
|---------------------------------------|--------------------------------------------------------------------------------------------------------------------------------------------------------------------------------------------------------------------------------------------------------------------------------------|
| Número de identificación participante | 35                                                                                                                                                                                                                                                                                   |
| CODIGO PARTICIPANTE                   |                                                                                                                                                                                                                                                                                      |
| Edad                                  | [*DATA REMOVED*]                                                                                                                                                                                                                                                                     |
| Gestaciones                           | <input type="radio"/> 1<br><input checked="" type="radio"/> 2<br><input type="radio"/> 3<br><input type="radio"/> mas de 3                                                                                                                                                           |
| partos                                | <input checked="" type="radio"/> 0<br><input type="radio"/> 1<br><input type="radio"/> 2<br><input type="radio"/> 3<br><input type="radio"/> mas de 3                                                                                                                                |
| cesáreas                              | <input checked="" type="radio"/> 0<br><input type="radio"/> 1<br><input type="radio"/> 2<br><input type="radio"/> 3<br><input type="radio"/> mas de 3                                                                                                                                |
| Abortos                               | <input type="radio"/> 0<br><input checked="" type="radio"/> 1<br><input type="radio"/> 2<br><input type="radio"/> 3<br><input type="radio"/> mas de 3                                                                                                                                |
| Tipo de gestacion                     | <input checked="" type="radio"/> espontanea<br><input type="radio"/> IAC inseminación artificial conyuge<br><input type="radio"/> IAD inseminación artificial donante<br><input type="radio"/> FIV Fecundación in Vitro<br><input type="radio"/> Ovodon FIV con donación de ovocitos |
| peso previo a embarazo                | [*DATA REMOVED*]                                                                                                                                                                                                                                                                     |
| Ganancia ponderal embarazo            |                                                                                                                                                                                                                                                                                      |
| Talla madre                           | [*DATA REMOVED*]                                                                                                                                                                                                                                                                     |
| IMC previo embarazo                   | 23.051754907792983                                                                                                                                                                                                                                                                   |
| Patología obstétrica                  | <input checked="" type="radio"/> no<br><input type="radio"/> si                                                                                                                                                                                                                      |
| Diabetes pregestacional               | <input checked="" type="radio"/> no<br><input type="radio"/> si                                                                                                                                                                                                                      |
| Diabetes gestacional                  | <input checked="" type="radio"/> no<br><input type="radio"/> si                                                                                                                                                                                                                      |

|                                            |                                                                                                                                                                                      |
|--------------------------------------------|--------------------------------------------------------------------------------------------------------------------------------------------------------------------------------------|
| Diabetes gestacional con insulina          | <input checked="" type="radio"/> no<br><input type="radio"/> si                                                                                                                      |
| Diabetes gestacional con dieta y ejercicio | <input checked="" type="radio"/> no<br><input type="radio"/> si                                                                                                                      |
| Percentil fetos previos                    | <input checked="" type="radio"/> Nada<br><input type="radio"/> percentil menor de 10<br><input type="radio"/> percentil entre 10 y 90<br><input type="radio"/> percentil mayor de 90 |
| Exfumadora                                 | <input checked="" type="radio"/> Nada<br><input type="radio"/> menos de 5 años<br><input type="radio"/> 5 a 10 años<br><input type="radio"/> mayor o igual a 10 años                 |
| Hábito tabáquico                           | <input checked="" type="radio"/> no<br><input type="radio"/> si                                                                                                                      |
| fumadora                                   | [*DATA REMOVED*]                                                                                                                                                                     |
| Consumo otros tóxicos                      | <input checked="" type="radio"/> no<br><input type="radio"/> si                                                                                                                      |
| Hb 1T                                      | _____                                                                                                                                                                                |
| Htc 1T                                     | _____                                                                                                                                                                                |
| Hb 2T                                      | _____                                                                                                                                                                                |
| HTC 2T                                     | _____                                                                                                                                                                                |
| Hb 3T                                      | [*DATA REMOVED*]                                                                                                                                                                     |
| HTC 3T                                     | [*DATA REMOVED*]                                                                                                                                                                     |
| Suplemento FE oral                         | <input checked="" type="radio"/> si<br><input type="radio"/> no                                                                                                                      |
| Suplemento fe iv                           | <input type="radio"/> si<br><input type="radio"/> no                                                                                                                                 |
| Transfusión                                | <input type="radio"/> no<br><input type="radio"/> si                                                                                                                                 |
| Solicitada Vit D                           | <input type="radio"/> no<br><input type="radio"/> si                                                                                                                                 |
| Deficit vit D                              | <input type="radio"/> no<br><input type="radio"/> si                                                                                                                                 |



|                       |                                                                                                                                                                                                                                                                                                                                                                                                              |
|-----------------------|--------------------------------------------------------------------------------------------------------------------------------------------------------------------------------------------------------------------------------------------------------------------------------------------------------------------------------------------------------------------------------------------------------------|
| Suplemento vit D      | <input type="radio"/> si<br><input type="radio"/> no                                                                                                                                                                                                                                                                                                                                                         |
| Dieta, cuestionario   | <input checked="" type="radio"/> si<br><input type="radio"/> no                                                                                                                                                                                                                                                                                                                                              |
| Leche entera          | <input checked="" type="radio"/> Nunca o menos 1 vez al mes<br><input type="radio"/> 1 a 3 veces mes<br><input type="radio"/> 1 vez semana<br><input type="radio"/> 2 a 4 veces semana<br><input type="radio"/> 5 a 6 veces semana<br><input type="radio"/> 1 vez al día<br><input type="radio"/> 2 a 3 veces al día<br><input type="radio"/> 5 a 6 veces al día<br><input type="radio"/> más 6 veces al día |
| Leche semidesnatada   | <input type="radio"/> Nunca o menos 1 vez al mes<br><input checked="" type="radio"/> 1 a 3 veces mes<br><input type="radio"/> 1 vez semana<br><input type="radio"/> 2 a 4 veces semana<br><input type="radio"/> 5 a 6 veces semana<br><input type="radio"/> 1 vez al día<br><input type="radio"/> 2 a 3 veces al día<br><input type="radio"/> 5 a 6 veces al día<br><input type="radio"/> mas 6 veces al día |
| Leche desnatada       | <input checked="" type="radio"/> Nunca o menos 1 vez al mes<br><input type="radio"/> 1 a 3 veces mes<br><input type="radio"/> 1 vez semana<br><input type="radio"/> 2 a 4 veces semana<br><input type="radio"/> 5 a 6 veces semana<br><input type="radio"/> 1 vez al día<br><input type="radio"/> 2 a 3 veces al día<br><input type="radio"/> 5 a 6 veces al día<br><input type="radio"/> más 6 veces al día |
| Leche condensada      | <input checked="" type="radio"/> Nunca o menos 1 vez al mes<br><input type="radio"/> 1 a 3 veces mes<br><input type="radio"/> 1 vez semana<br><input type="radio"/> 2 a 4 veces semana<br><input type="radio"/> 5 a 6 veces semana<br><input type="radio"/> 1 vez al día<br><input type="radio"/> 2 a 3 veces al día<br><input type="radio"/> 5 a 6 veces al día<br><input type="radio"/> más 6 veces al día |
| nata o crema de leche | <input type="radio"/> Nunca o menos 1 vez al mes<br><input checked="" type="radio"/> 1 a 3 veces mes<br><input type="radio"/> 1 vez semana<br><input type="radio"/> 2 a 4 veces semana<br><input type="radio"/> 5 a 6 veces semana<br><input type="radio"/> 1 vez al día<br><input type="radio"/> 2 a 3 veces al día<br><input type="radio"/> 5 a 6 veces al día<br><input type="radio"/> más 6 veces al día |

---

Yogurt Entero

- ☒ Nunca o menos 1 vez al mes  
☐ 1 a 3 veces mes  
☐ 1 vez semana  
☐ 2 a 4 veces semana  
☐ 5 a 6 veces semana  
☐ 1 vez al día  
☐ 2 a 3 veces al día  
☐ 5 a 6 veces al día  
☐ más 6 veces al día

---

Yogurt desnatado

- ☐ Nunca o menos 1 vez al mes  
☒ 1 a 3 veces mes  
☐ 1 vez semana  
☐ 2 a 4 veces semana  
☐ 5 a 6 veces semana  
☐ 1 vez al día  
☐ 2 a 3 veces al día  
☐ 5 a 6 veces al día  
☐ más 6 veces al día

---

100g requesón o queso blando o queso fresco

- ☐ Nunca o menos 1 vez al mes  
☒ 1 a 3 veces mes  
☐ 1 vez semana  
☐ 2 a 4 veces semana  
☐ 5 a 6 veces semana  
☐ 1 vez al día  
☐ 2 a 3 veces al día  
☐ 5 a 6 veces al día  
☐ más 6 veces al día

---

queso curado o semicurado o cremoso

- ☒ Nunca o menos 1 vez al mes  
☐ 1 a 3 veces mes  
☐ 1 vez semana  
☐ 2 a 4 veces semana  
☐ 5 a 6 veces semana  
☐ 1 vez al día  
☐ 2 a 3 veces al día  
☐ 5 a 6 veces al día  
☐ más 6 veces al día

---

natillas flan pudding

- ☐ Nunca o menos 1 vez al mes  
☒ 1 a 3 veces mes  
☐ 1 vez semana  
☐ 2 a 4 veces semana  
☐ 5 a 6 veces semana  
☐ 1 vez al día  
☐ 2 a 3 veces al día  
☐ 5 a 6 veces al día  
☐ más 6 veces al día

---

Helado

- ☐ Nunca o menos 1 vez al mes  
☐ 1 a 3 veces mes  
☐ 1 vez semana  
☒ 2 a 4 veces semana  
☐ 5 a 6 veces semana  
☐ 1 vez al día  
☐ 2 a 3 veces al día  
☐ 5 a 6 veces al día  
☐ más 6 veces al día

|                                      |                                                                                                                                                                                                                                                                                                                                                                                                              |
|--------------------------------------|--------------------------------------------------------------------------------------------------------------------------------------------------------------------------------------------------------------------------------------------------------------------------------------------------------------------------------------------------------------------------------------------------------------|
| huevo                                | <input type="radio"/> Nunca o menos 1 vez al mes<br><input type="radio"/> 1 a 3 veces mes<br><input type="radio"/> 1 vez semana<br><input checked="" type="radio"/> 2 a 4 veces semana<br><input type="radio"/> 5 a 6 veces semana<br><input type="radio"/> 1 vez al día<br><input type="radio"/> 2 a 3 veces al día<br><input type="radio"/> 5 a 6 veces al día<br><input type="radio"/> más 6 veces al día |
| Pollo con piel                       | <input type="radio"/> Nunca o menos 1 vez al mes<br><input checked="" type="radio"/> 1 a 3 veces mes<br><input type="radio"/> 1 vez semana<br><input type="radio"/> 2 a 4 veces semana<br><input type="radio"/> 5 a 6 veces semana<br><input type="radio"/> 1 vez al día<br><input type="radio"/> 2 a 3 veces al día<br><input type="radio"/> 5 a 6 veces al día<br><input type="radio"/> más 6 veces al día |
| pollo sin piel                       | <input type="radio"/> Nunca o menos 1 vez al mes<br><input type="radio"/> 1 a 3 veces mes<br><input checked="" type="radio"/> 1 vez semana<br><input type="radio"/> 2 a 4 veces semana<br><input type="radio"/> 5 a 6 veces semana<br><input type="radio"/> 1 vez al día<br><input type="radio"/> 2 a 3 veces al día<br><input type="radio"/> 5 a 6 veces al día<br><input type="radio"/> más 6 veces al día |
| Ternera o cerdo o cordero            | <input type="radio"/> Nunca o menos 1 vez al mes<br><input checked="" type="radio"/> 1 a 3 veces mes<br><input type="radio"/> 1 vez semana<br><input type="radio"/> 2 a 4 veces semana<br><input type="radio"/> 5 a 6 veces semana<br><input type="radio"/> 1 vez al día<br><input type="radio"/> 2 a 3 veces al día<br><input type="radio"/> 5 a 6 veces al día<br><input type="radio"/> más 6 veces al día |
| carne caza: Conejo o codorniz o pato | <input type="radio"/> Nunca o menos 1 vez al mes<br><input checked="" type="radio"/> 1 a 3 veces mes<br><input type="radio"/> 1 vez semana<br><input type="radio"/> 2 a 4 veces semana<br><input type="radio"/> 5 a 6 veces semana<br><input type="radio"/> 1 vez al día<br><input type="radio"/> 2 a 3 veces al día<br><input type="radio"/> 5 a 6 veces al día<br><input type="radio"/> más 6 veces al día |
| Hígado de ternera o cerdo o pollo    | <input checked="" type="radio"/> Nunca o menos 1 vez al mes<br><input type="radio"/> 1 a 3 veces mes<br><input type="radio"/> 1 vez semana<br><input type="radio"/> 2 a 4 veces semana<br><input type="radio"/> 5 a 6 veces semana<br><input type="radio"/> 1 vez al día<br><input type="radio"/> 2 a 3 veces al día<br><input type="radio"/> 5 a 6 veces al día<br><input type="radio"/> más 6 veces al día |

|                     |                                                                                                                                                                                                                                                                                                                                                                                                              |
|---------------------|--------------------------------------------------------------------------------------------------------------------------------------------------------------------------------------------------------------------------------------------------------------------------------------------------------------------------------------------------------------------------------------------------------------|
| Vísceras            | <input checked="" type="radio"/> Nunca o menos 1 vez al mes<br><input type="radio"/> 1 a 3 veces mes<br><input type="radio"/> 1 vez semana<br><input type="radio"/> 2 a 4 veces semana<br><input type="radio"/> 5 a 6 veces semana<br><input type="radio"/> 1 vez al día<br><input type="radio"/> 2 a 3 veces al día<br><input type="radio"/> 5 a 6 veces al día<br><input type="radio"/> más 6 veces al día |
| Embutido            | <input checked="" type="radio"/> Nunca o menos 1 vez al mes<br><input type="radio"/> 1 a 3 veces mes<br><input type="radio"/> 1 vez semana<br><input type="radio"/> 2 a 4 veces semana<br><input type="radio"/> 5 a 6 veces semana<br><input type="radio"/> 1 vez al día<br><input type="radio"/> 2 a 3 veces al día<br><input type="radio"/> 5 a 6 veces al día<br><input type="radio"/> más 6 veces al día |
| Salchicha o similar | <input checked="" type="radio"/> Nunca o menos 1 vez al mes<br><input type="radio"/> 1 a 3 veces mes<br><input type="radio"/> 1 vez semana<br><input type="radio"/> 2 a 4 veces semana<br><input type="radio"/> 5 a 6 veces semana<br><input type="radio"/> 1 vez al día<br><input type="radio"/> 2 a 3 veces al día<br><input type="radio"/> 5 a 6 veces al día<br><input type="radio"/> más 6 veces al día |
| Pate o foiegras     | <input checked="" type="radio"/> Nunca o menos 1 vez al mes<br><input type="radio"/> 1 a 3 veces mes<br><input type="radio"/> 1 vez semana<br><input type="radio"/> 2 a 4 veces semana<br><input type="radio"/> 5 a 6 veces semana<br><input type="radio"/> 1 vez al día<br><input type="radio"/> 2 a 3 veces al día<br><input type="radio"/> 5 a 6 veces al día<br><input type="radio"/> más 6 veces al día |
| Hamburguesa         | <input type="radio"/> Nunca o menos 1 vez al mes<br><input type="radio"/> 1 a 3 veces mes<br><input checked="" type="radio"/> 1 vez semana<br><input type="radio"/> 2 a 4 veces semana<br><input type="radio"/> 5 a 6 veces semana<br><input type="radio"/> 1 vez al día<br><input type="radio"/> 2 a 3 veces al día<br><input type="radio"/> 5 a 6 veces al día<br><input type="radio"/> más 6 veces al día |
| tocino o bacon      | <input checked="" type="radio"/> Nunca o menos 1 vez al mes<br><input type="radio"/> 1 a 3 veces mes<br><input type="radio"/> 1 vez semana<br><input type="radio"/> 2 a 4 veces semana<br><input type="radio"/> 5 a 6 veces semana<br><input type="radio"/> 1 vez al día<br><input type="radio"/> 2 a 3 veces al día<br><input type="radio"/> 5 a 6 veces al día<br><input type="radio"/> más 6 veces al día |

---

|               |                                                                                                                                                                                                                                                                                                                                                                                                              |
|---------------|--------------------------------------------------------------------------------------------------------------------------------------------------------------------------------------------------------------------------------------------------------------------------------------------------------------------------------------------------------------------------------------------------------------|
| Pescado frito | <input checked="" type="radio"/> Nunca o menos 1 vez al mes<br><input type="radio"/> 1 a 3 veces mes<br><input type="radio"/> 1 vez semana<br><input type="radio"/> 2 a 4 veces semana<br><input type="radio"/> 5 a 6 veces semana<br><input type="radio"/> 1 vez al día<br><input type="radio"/> 2 a 3 veces al día<br><input type="radio"/> 5 a 6 veces al día<br><input type="radio"/> más 6 veces al día |
|---------------|--------------------------------------------------------------------------------------------------------------------------------------------------------------------------------------------------------------------------------------------------------------------------------------------------------------------------------------------------------------------------------------------------------------|

---

|                        |                                                                                                                                                                                                                                                                                                                                                                                                              |
|------------------------|--------------------------------------------------------------------------------------------------------------------------------------------------------------------------------------------------------------------------------------------------------------------------------------------------------------------------------------------------------------------------------------------------------------|
| pescado hervido blanco | <input type="radio"/> Nunca o menos 1 vez al mes<br><input checked="" type="radio"/> 1 a 3 veces mes<br><input type="radio"/> 1 vez semana<br><input type="radio"/> 2 a 4 veces semana<br><input type="radio"/> 5 a 6 veces semana<br><input type="radio"/> 1 vez al día<br><input type="radio"/> 2 a 3 veces al día<br><input type="radio"/> 5 a 6 veces al día<br><input type="radio"/> más 6 veces al día |
|------------------------|--------------------------------------------------------------------------------------------------------------------------------------------------------------------------------------------------------------------------------------------------------------------------------------------------------------------------------------------------------------------------------------------------------------|

---

|                      |                                                                                                                                                                                                                                                                                                                                                                                                              |
|----------------------|--------------------------------------------------------------------------------------------------------------------------------------------------------------------------------------------------------------------------------------------------------------------------------------------------------------------------------------------------------------------------------------------------------------|
| pescado hervido azul | <input type="radio"/> Nunca o menos 1 vez al mes<br><input checked="" type="radio"/> 1 a 3 veces mes<br><input type="radio"/> 1 vez semana<br><input type="radio"/> 2 a 4 veces semana<br><input type="radio"/> 5 a 6 veces semana<br><input type="radio"/> 1 vez al día<br><input type="radio"/> 2 a 3 veces al día<br><input type="radio"/> 5 a 6 veces al día<br><input type="radio"/> más 6 veces al día |
|----------------------|--------------------------------------------------------------------------------------------------------------------------------------------------------------------------------------------------------------------------------------------------------------------------------------------------------------------------------------------------------------------------------------------------------------|

---

|                    |                                                                                                                                                                                                                                                                                                                                                                                                              |
|--------------------|--------------------------------------------------------------------------------------------------------------------------------------------------------------------------------------------------------------------------------------------------------------------------------------------------------------------------------------------------------------------------------------------------------------|
| otros pescado azul | <input type="radio"/> Nunca o menos 1 vez al mes<br><input type="radio"/> 1 a 3 veces mes<br><input checked="" type="radio"/> 1 vez semana<br><input type="radio"/> 2 a 4 veces semana<br><input type="radio"/> 5 a 6 veces semana<br><input type="radio"/> 1 vez al día<br><input type="radio"/> 2 a 3 veces al día<br><input type="radio"/> 5 a 6 veces al día<br><input type="radio"/> más 6 veces al día |
|--------------------|--------------------------------------------------------------------------------------------------------------------------------------------------------------------------------------------------------------------------------------------------------------------------------------------------------------------------------------------------------------------------------------------------------------|

---

|               |                                                                                                                                                                                                                                                                                                                                                                                                              |
|---------------|--------------------------------------------------------------------------------------------------------------------------------------------------------------------------------------------------------------------------------------------------------------------------------------------------------------------------------------------------------------------------------------------------------------|
| atun conserva | <input checked="" type="radio"/> Nunca o menos 1 vez al mes<br><input type="radio"/> 1 a 3 veces mes<br><input type="radio"/> 1 vez semana<br><input type="radio"/> 2 a 4 veces semana<br><input type="radio"/> 5 a 6 veces semana<br><input type="radio"/> 1 vez al día<br><input type="radio"/> 2 a 3 veces al día<br><input type="radio"/> 5 a 6 veces al día<br><input type="radio"/> más 6 veces al día |
|---------------|--------------------------------------------------------------------------------------------------------------------------------------------------------------------------------------------------------------------------------------------------------------------------------------------------------------------------------------------------------------------------------------------------------------|

---

|                  |                                                                                                                                                                                                                                                                                                                                                                                                              |
|------------------|--------------------------------------------------------------------------------------------------------------------------------------------------------------------------------------------------------------------------------------------------------------------------------------------------------------------------------------------------------------------------------------------------------------|
| sardina conserva | <input checked="" type="radio"/> Nunca o menos 1 vez al mes<br><input type="radio"/> 1 a 3 veces mes<br><input type="radio"/> 1 vez semana<br><input type="radio"/> 2 a 4 veces semana<br><input type="radio"/> 5 a 6 veces semana<br><input type="radio"/> 1 vez al día<br><input type="radio"/> 2 a 3 veces al día<br><input type="radio"/> 5 a 6 veces al día<br><input type="radio"/> más 6 veces al día |
|------------------|--------------------------------------------------------------------------------------------------------------------------------------------------------------------------------------------------------------------------------------------------------------------------------------------------------------------------------------------------------------------------------------------------------------|

---

---

pescado ahumado

- ☒ Nunca o menos 1 vez al mes  
☐ 1 a 3 veces mes  
☐ 1 vez semana  
☐ 2 a 4 veces semana  
☐ 5 a 6 veces semana  
☐ 1 vez al día  
☐ 2 a 3 veces al día  
☐ 5 a 6 veces al día  
☐ más 6 veces al día

---

almejas o mejillones o ostras unos 100g

- ☐ Nunca o menos 1 vez al mes  
☒ 1 a 3 veces mes  
☐ 1 vez semana  
☐ 2 a 4 veces semana  
☐ 5 a 6 veces semana  
☐ 1 vez al día  
☐ 2 a 3 veces al día  
☐ 5 a 6 veces al día  
☐ más 6 veces al día

---

calamar o chipiron o sepia unos 100g

- ☐ Nunca o menos 1 vez al mes  
☒ 1 a 3 veces mes  
☐ 1 vez semana  
☐ 2 a 4 veces semana  
☐ 5 a 6 veces semana  
☐ 1 vez al día  
☐ 2 a 3 veces al día  
☐ 5 a 6 veces al día  
☐ más 6 veces al día

---

marisco unos 100g

- ☐ Nunca o menos 1 vez al mes  
☒ 1 a 3 veces mes  
☐ 1 vez semana  
☐ 2 a 4 veces semana  
☐ 5 a 6 veces semana  
☐ 1 vez al día  
☐ 2 a 3 veces al día  
☐ 5 a 6 veces al día  
☐ más 6 veces al día

---

Espinacas o acelgas cocinadas

- ☐ Nunca o menos 1 vez al mes  
☐ 1 a 3 veces mes  
☒ 1 vez semana  
☐ 2 a 4 veces semana  
☐ 5 a 6 veces semana  
☐ 1 vez al día  
☐ 2 a 3 veces al día  
☐ 5 a 6 veces al día  
☐ más 6 veces al día

---

Col o coliflor o brocoli cocinado

- ☐ Nunca o menos 1 vez al mes  
☐ 1 a 3 veces mes  
☒ 1 vez semana  
☐ 2 a 4 veces semana  
☐ 5 a 6 veces semana  
☐ 1 vez al día  
☐ 2 a 3 veces al día  
☐ 5 a 6 veces al día  
☐ más 6 veces al día

---

Lechuga o endivia o escarola

- ☐ Nunca o menos 1 vez al mes  
☐ 1 a 3 veces mes  
☐ 1 vez semana  
☐ 2 a 4 veces semana  
☒ 5 a 6 veces semana  
☐ 1 vez al día  
☐ 2 a 3 veces al día  
☐ 5 a 6 veces al día  
☐ más 6 veces al día

---

tomate ensalada

- ☐ Nunca o menos 1 vez al mes  
☐ 1 a 3 veces mes  
☐ 1 vez semana  
☐ 2 a 4 veces semana  
☒ 5 a 6 veces semana  
☐ 1 vez al día  
☐ 2 a 3 veces al día  
☐ 5 a 6 veces al día  
☐ más 6 veces al día

---

cebolla

- ☐ Nunca o menos 1 vez al mes  
☐ 1 a 3 veces mes  
☐ 1 vez semana  
☐ 2 a 4 veces semana  
☒ 5 a 6 veces semana  
☐ 1 vez al día  
☐ 2 a 3 veces al día  
☐ 5 a 6 veces al día  
☐ más 6 veces al día

---

Zanahoria o calabaza

- ☐ Nunca o menos 1 vez al mes  
☐ 1 a 3 veces mes  
☐ 1 vez semana  
☐ 2 a 4 veces semana  
☒ 5 a 6 veces semana  
☐ 1 vez al día  
☐ 2 a 3 veces al día  
☐ 5 a 6 veces al día  
☐ más 6 veces al día

---

Judías verdes

- ☐ Nunca o menos 1 vez al mes  
☒ 1 a 3 veces mes  
☐ 1 vez semana  
☐ 2 a 4 veces semana  
☐ 5 a 6 veces semana  
☐ 1 vez al día  
☐ 2 a 3 veces al día  
☐ 5 a 6 veces al día  
☐ más 6 veces al día

---

Berenjena o calabacin o pepino

- ☐ Nunca o menos 1 vez al mes  
☐ 1 a 3 veces mes  
☒ 1 vez semana  
☐ 2 a 4 veces semana  
☐ 5 a 6 veces semana  
☐ 1 vez al día  
☐ 2 a 3 veces al día  
☐ 5 a 6 veces al día  
☐ más 6 veces al día

|                       |                                                                                                                                                                                                                                                                                                                                                                                                              |
|-----------------------|--------------------------------------------------------------------------------------------------------------------------------------------------------------------------------------------------------------------------------------------------------------------------------------------------------------------------------------------------------------------------------------------------------------|
| pimiento              | <input type="radio"/> Nunca o menos 1 vez al mes<br><input type="radio"/> 1 a 3 veces mes<br><input type="radio"/> 1 vez semana<br><input checked="" type="radio"/> 2 a 4 veces semana<br><input type="radio"/> 5 a 6 veces semana<br><input type="radio"/> 1 vez al día<br><input type="radio"/> 2 a 3 veces al día<br><input type="radio"/> 5 a 6 veces al día<br><input type="radio"/> más 6 veces al día |
| alcachofa             | <input type="radio"/> Nunca o menos 1 vez al mes<br><input checked="" type="radio"/> 1 a 3 veces mes<br><input type="radio"/> 1 vez semana<br><input type="radio"/> 2 a 4 veces semana<br><input type="radio"/> 5 a 6 veces semana<br><input type="radio"/> 1 vez al día<br><input type="radio"/> 2 a 3 veces al día<br><input type="radio"/> 5 a 6 veces al día<br><input type="radio"/> más 6 veces al día |
| espárragos            | <input checked="" type="radio"/> Nunca o menos 1 vez al mes<br><input type="radio"/> 1 a 3 veces mes<br><input type="radio"/> 1 vez semana<br><input type="radio"/> 2 a 4 veces semana<br><input type="radio"/> 5 a 6 veces semana<br><input type="radio"/> 1 vez al día<br><input type="radio"/> 2 a 3 veces al día<br><input type="radio"/> 5 a 6 veces al día<br><input type="radio"/> más 6 veces al día |
| maíz hervido          | <input checked="" type="radio"/> Nunca o menos 1 vez al mes<br><input type="radio"/> 1 a 3 veces mes<br><input type="radio"/> 1 vez semana<br><input type="radio"/> 2 a 4 veces semana<br><input type="radio"/> 5 a 6 veces semana<br><input type="radio"/> 1 vez al día<br><input type="radio"/> 2 a 3 veces al día<br><input type="radio"/> 5 a 6 veces al día<br><input type="radio"/> más 6 veces al día |
| legumbres             | <input type="radio"/> Nunca o menos 1 vez al mes<br><input type="radio"/> 1 a 3 veces mes<br><input type="radio"/> 1 vez semana<br><input checked="" type="radio"/> 2 a 4 veces semana<br><input type="radio"/> 5 a 6 veces semana<br><input type="radio"/> 1 vez al día<br><input type="radio"/> 2 a 3 veces al día<br><input type="radio"/> 5 a 6 veces al día<br><input type="radio"/> más 6 veces al día |
| naranjas o mandarinas | <input type="radio"/> Nunca o menos 1 vez al mes<br><input checked="" type="radio"/> 1 a 3 veces mes<br><input type="radio"/> 1 vez semana<br><input type="radio"/> 2 a 4 veces semana<br><input type="radio"/> 5 a 6 veces semana<br><input type="radio"/> 1 vez al día<br><input type="radio"/> 2 a 3 veces al día<br><input type="radio"/> 5 a 6 veces al día<br><input type="radio"/> más 6 veces al día |



|                       |                                                                                                                                                                                                                                                                                                                                                                                                              |
|-----------------------|--------------------------------------------------------------------------------------------------------------------------------------------------------------------------------------------------------------------------------------------------------------------------------------------------------------------------------------------------------------------------------------------------------------|
| zum natural fruta     | <input type="radio"/> Nunca o menos 1 vez al mes<br><input checked="" type="radio"/> 1 a 3 veces mes<br><input type="radio"/> 1 vez semana<br><input type="radio"/> 2 a 4 veces semana<br><input type="radio"/> 5 a 6 veces semana<br><input type="radio"/> 1 vez al día<br><input type="radio"/> 2 a 3 veces al día<br><input type="radio"/> 5 a 6 veces al día<br><input type="radio"/> más 6 veces al día |
| platano               | <input type="radio"/> Nunca o menos 1 vez al mes<br><input type="radio"/> 1 a 3 veces mes<br><input type="radio"/> 1 vez semana<br><input checked="" type="radio"/> 2 a 4 veces semana<br><input type="radio"/> 5 a 6 veces semana<br><input type="radio"/> 1 vez al día<br><input type="radio"/> 2 a 3 veces al día<br><input type="radio"/> 5 a 6 veces al día<br><input type="radio"/> más 6 veces al día |
| manzana o pera        | <input type="radio"/> Nunca o menos 1 vez al mes<br><input checked="" type="radio"/> 1 a 3 veces mes<br><input type="radio"/> 1 vez semana<br><input type="radio"/> 2 a 4 veces semana<br><input type="radio"/> 5 a 6 veces semana<br><input type="radio"/> 1 vez al día<br><input type="radio"/> 2 a 3 veces al día<br><input type="radio"/> 5 a 6 veces al día<br><input type="radio"/> más 6 veces al día |
| melocotón o nectarina | <input type="radio"/> Nunca o menos 1 vez al mes<br><input checked="" type="radio"/> 1 a 3 veces mes<br><input type="radio"/> 1 vez semana<br><input type="radio"/> 2 a 4 veces semana<br><input type="radio"/> 5 a 6 veces semana<br><input type="radio"/> 1 vez al día<br><input type="radio"/> 2 a 3 veces al día<br><input type="radio"/> 5 a 6 veces al día<br><input type="radio"/> más 6 veces al día |
| sandia o melon        | <input type="radio"/> Nunca o menos 1 vez al mes<br><input type="radio"/> 1 a 3 veces mes<br><input checked="" type="radio"/> 1 vez semana<br><input type="radio"/> 2 a 4 veces semana<br><input type="radio"/> 5 a 6 veces semana<br><input type="radio"/> 1 vez al día<br><input type="radio"/> 2 a 3 veces al día<br><input type="radio"/> 5 a 6 veces al día<br><input type="radio"/> más 6 veces al día |
| uva                   | <input type="radio"/> Nunca o menos 1 vez al mes<br><input type="radio"/> 1 a 3 veces mes<br><input checked="" type="radio"/> 1 vez semana<br><input type="radio"/> 2 a 4 veces semana<br><input type="radio"/> 5 a 6 veces semana<br><input type="radio"/> 1 vez al día<br><input type="radio"/> 2 a 3 veces al día<br><input type="radio"/> 5 a 6 veces al día<br><input type="radio"/> más 6 veces al día |

---

bruna o ciruela

- ☐ Nunca o menos 1 vez al mes  
☐ 1 a 3 veces mes  
☐ 1 vez semana  
☒ 2 a 4 veces semana  
☐ 5 a 6 veces semana  
☐ 1 vez al día  
☐ 2 a 3 veces al día  
☐ 5 a 6 veces al día  
☐ más 6 veces al día

---

kiwi

- ☐ Nunca o menos 1 vez al mes  
☐ 1 a 3 veces mes  
☒ 1 vez semana  
☐ 2 a 4 veces semana  
☐ 5 a 6 veces semana  
☐ 1 vez al día  
☐ 2 a 3 veces al día  
☐ 5 a 6 veces al día  
☐ más 6 veces al día

---

aceituna

- ☐ Nunca o menos 1 vez al mes  
☐ 1 a 3 veces mes  
☐ 1 vez semana  
☒ 2 a 4 veces semana  
☐ 5 a 6 veces semana  
☐ 1 vez al día  
☐ 2 a 3 veces al día  
☐ 5 a 6 veces al día  
☐ más 6 veces al día

---

frutos secos

- ☐ Nunca o menos 1 vez al mes  
☐ 1 a 3 veces mes  
☐ 1 vez semana  
☐ 2 a 4 veces semana  
☒ 5 a 6 veces semana  
☐ 1 vez al día  
☐ 2 a 3 veces al día  
☐ 5 a 6 veces al día  
☐ más 6 veces al día

---

pan blanco

- ☐ Nunca o menos 1 vez al mes  
☒ 1 a 3 veces mes  
☐ 1 vez semana  
☐ 2 a 4 veces semana  
☐ 5 a 6 veces semana  
☐ 1 vez al día  
☐ 2 a 3 veces al día  
☐ 5 a 6 veces al día  
☐ más 6 veces al día

---

pan integral

- ☐ Nunca o menos 1 vez al mes  
☐ 1 a 3 veces mes  
☐ 1 vez semana  
☐ 2 a 4 veces semana  
☐ 5 a 6 veces semana  
☐ 1 vez al día  
☒ 2 a 3 veces al día  
☐ 5 a 6 veces al día  
☐ más 6 veces al día

|                          |                                                                                                                                                                                                                                                                                                                                                                                                              |
|--------------------------|--------------------------------------------------------------------------------------------------------------------------------------------------------------------------------------------------------------------------------------------------------------------------------------------------------------------------------------------------------------------------------------------------------------|
| cereales desayuno        | <input checked="" type="radio"/> Nunca o menos 1 vez al mes<br><input type="radio"/> 1 a 3 veces mes<br><input type="radio"/> 1 vez semana<br><input type="radio"/> 2 a 4 veces semana<br><input type="radio"/> 5 a 6 veces semana<br><input type="radio"/> 1 vez al día<br><input type="radio"/> 2 a 3 veces al día<br><input type="radio"/> 5 a 6 veces al día<br><input type="radio"/> más 6 veces al día |
| patatas fritas           | <input type="radio"/> Nunca o menos 1 vez al mes<br><input checked="" type="radio"/> 1 a 3 veces mes<br><input type="radio"/> 1 vez semana<br><input type="radio"/> 2 a 4 veces semana<br><input type="radio"/> 5 a 6 veces semana<br><input type="radio"/> 1 vez al día<br><input type="radio"/> 2 a 3 veces al día<br><input type="radio"/> 5 a 6 veces al día<br><input type="radio"/> más 6 veces al día |
| patatas cocidas o asadas | <input type="radio"/> Nunca o menos 1 vez al mes<br><input type="radio"/> 1 a 3 veces mes<br><input type="radio"/> 1 vez semana<br><input checked="" type="radio"/> 2 a 4 veces semana<br><input type="radio"/> 5 a 6 veces semana<br><input type="radio"/> 1 vez al día<br><input type="radio"/> 2 a 3 veces al día<br><input type="radio"/> 5 a 6 veces al día<br><input type="radio"/> más 6 veces al día |
| bolsa papas              | <input type="radio"/> Nunca o menos 1 vez al mes<br><input checked="" type="radio"/> 1 a 3 veces mes<br><input type="radio"/> 1 vez semana<br><input type="radio"/> 2 a 4 veces semana<br><input type="radio"/> 5 a 6 veces semana<br><input type="radio"/> 1 vez al día<br><input type="radio"/> 2 a 3 veces al día<br><input type="radio"/> 5 a 6 veces al día<br><input type="radio"/> más 6 veces al día |
| arroz cocinado           | <input type="radio"/> Nunca o menos 1 vez al mes<br><input type="radio"/> 1 a 3 veces mes<br><input checked="" type="radio"/> 1 vez semana<br><input type="radio"/> 2 a 4 veces semana<br><input type="radio"/> 5 a 6 veces semana<br><input type="radio"/> 1 vez al día<br><input type="radio"/> 2 a 3 veces al día<br><input type="radio"/> 5 a 6 veces al día<br><input type="radio"/> más 6 veces al día |
| pasta                    | <input type="radio"/> Nunca o menos 1 vez al mes<br><input type="radio"/> 1 a 3 veces mes<br><input type="radio"/> 1 vez semana<br><input checked="" type="radio"/> 2 a 4 veces semana<br><input type="radio"/> 5 a 6 veces semana<br><input type="radio"/> 1 vez al día<br><input type="radio"/> 2 a 3 veces al día<br><input type="radio"/> 5 a 6 veces al día<br><input type="radio"/> más 6 veces al día |

|                     |                                                                                                                                                                                                                                                                                                                                                                                                              |
|---------------------|--------------------------------------------------------------------------------------------------------------------------------------------------------------------------------------------------------------------------------------------------------------------------------------------------------------------------------------------------------------------------------------------------------------|
| pizza               | <input type="radio"/> Nunca o menos 1 vez al mes<br><input checked="" type="radio"/> 1 a 3 veces mes<br><input type="radio"/> 1 vez semana<br><input type="radio"/> 2 a 4 veces semana<br><input type="radio"/> 5 a 6 veces semana<br><input type="radio"/> 1 vez al día<br><input type="radio"/> 2 a 3 veces al día<br><input type="radio"/> 5 a 6 veces al día<br><input type="radio"/> más 6 veces al día |
| aceite oliva        | <input type="radio"/> Nunca o menos 1 vez al mes<br><input type="radio"/> 1 a 3 veces mes<br><input type="radio"/> 1 vez semana<br><input type="radio"/> 2 a 4 veces semana<br><input type="radio"/> 5 a 6 veces semana<br><input type="radio"/> 1 vez al día<br><input checked="" type="radio"/> 2 a 3 veces al día<br><input type="radio"/> 5 a 6 veces al día<br><input type="radio"/> más 6 veces al día |
| otros aceites       | <input type="radio"/> Nunca o menos 1 vez al mes<br><input checked="" type="radio"/> 1 a 3 veces mes<br><input type="radio"/> 1 vez semana<br><input type="radio"/> 2 a 4 veces semana<br><input type="radio"/> 5 a 6 veces semana<br><input type="radio"/> 1 vez al día<br><input type="radio"/> 2 a 3 veces al día<br><input type="radio"/> 5 a 6 veces al día<br><input type="radio"/> más 6 veces al día |
| margarina           | <input checked="" type="radio"/> Nunca o menos 1 vez al mes<br><input type="radio"/> 1 a 3 veces mes<br><input type="radio"/> 1 vez semana<br><input type="radio"/> 2 a 4 veces semana<br><input type="radio"/> 5 a 6 veces semana<br><input type="radio"/> 1 vez al día<br><input type="radio"/> 2 a 3 veces al día<br><input type="radio"/> 5 a 6 veces al día<br><input type="radio"/> más 6 veces al día |
| mantequilla         | <input checked="" type="radio"/> Nunca o menos 1 vez al mes<br><input type="radio"/> 1 a 3 veces mes<br><input type="radio"/> 1 vez semana<br><input type="radio"/> 2 a 4 veces semana<br><input type="radio"/> 5 a 6 veces semana<br><input type="radio"/> 1 vez al día<br><input type="radio"/> 2 a 3 veces al día<br><input type="radio"/> 5 a 6 veces al día<br><input type="radio"/> más 6 veces al día |
| galletas tipo maria | <input type="radio"/> Nunca o menos 1 vez al mes<br><input type="radio"/> 1 a 3 veces mes<br><input type="radio"/> 1 vez semana<br><input checked="" type="radio"/> 2 a 4 veces semana<br><input type="radio"/> 5 a 6 veces semana<br><input type="radio"/> 1 vez al día<br><input type="radio"/> 2 a 3 veces al día<br><input type="radio"/> 5 a 6 veces al día<br><input type="radio"/> más 6 veces al día |

|                           |                                                                                                                                                                                                                                                                                                                                                                                                              |
|---------------------------|--------------------------------------------------------------------------------------------------------------------------------------------------------------------------------------------------------------------------------------------------------------------------------------------------------------------------------------------------------------------------------------------------------------|
| galletas chocolate        | <input type="radio"/> Nunca o menos 1 vez al mes<br><input type="radio"/> 1 a 3 veces mes<br><input type="radio"/> 1 vez semana<br><input type="radio"/> 2 a 4 veces semana<br><input checked="" type="radio"/> 5 a 6 veces semana<br><input type="radio"/> 1 vez al día<br><input type="radio"/> 2 a 3 veces al día<br><input type="radio"/> 5 a 6 veces al día<br><input type="radio"/> más 6 veces al día |
| bollieria                 | <input type="radio"/> Nunca o menos 1 vez al mes<br><input type="radio"/> 1 a 3 veces mes<br><input type="radio"/> 1 vez semana<br><input type="radio"/> 2 a 4 veces semana<br><input type="radio"/> 5 a 6 veces semana<br><input checked="" type="radio"/> 1 vez al día<br><input type="radio"/> 2 a 3 veces al día<br><input type="radio"/> 5 a 6 veces al día<br><input type="radio"/> más 6 veces al día |
| chocolate o bombones      | <input type="radio"/> Nunca o menos 1 vez al mes<br><input type="radio"/> 1 a 3 veces mes<br><input type="radio"/> 1 vez semana<br><input checked="" type="radio"/> 2 a 4 veces semana<br><input type="radio"/> 5 a 6 veces semana<br><input type="radio"/> 1 vez al día<br><input type="radio"/> 2 a 3 veces al día<br><input type="radio"/> 5 a 6 veces al día<br><input type="radio"/> más 6 veces al día |
| chocolate polvo o colacao | <input type="radio"/> Nunca o menos 1 vez al mes<br><input type="radio"/> 1 a 3 veces mes<br><input checked="" type="radio"/> 1 vez semana<br><input type="radio"/> 2 a 4 veces semana<br><input type="radio"/> 5 a 6 veces semana<br><input type="radio"/> 1 vez al día<br><input type="radio"/> 2 a 3 veces al día<br><input type="radio"/> 5 a 6 veces al día<br><input type="radio"/> más 6 veces al día |
| vino tinto                | <input checked="" type="radio"/> Nunca o menos 1 vez al mes<br><input type="radio"/> 1 a 3 veces mes<br><input type="radio"/> 1 vez semana<br><input type="radio"/> 2 a 4 veces semana<br><input type="radio"/> 5 a 6 veces semana<br><input type="radio"/> 1 vez al día<br><input type="radio"/> 2 a 3 veces al día<br><input type="radio"/> 5 a 6 veces al día<br><input type="radio"/> más 6 veces al día |
| vino blanco               | <input checked="" type="radio"/> Nunca o menos 1 vez al mes<br><input type="radio"/> 1 a 3 veces mes<br><input type="radio"/> 1 vez semana<br><input type="radio"/> 2 a 4 veces semana<br><input type="radio"/> 5 a 6 veces semana<br><input type="radio"/> 1 vez al día<br><input type="radio"/> 2 a 3 veces al día<br><input type="radio"/> 5 a 6 veces al día<br><input type="radio"/> más 6 veces al día |

|                       |                                                                                                                                                                                                                                                                                                                                                                                                              |
|-----------------------|--------------------------------------------------------------------------------------------------------------------------------------------------------------------------------------------------------------------------------------------------------------------------------------------------------------------------------------------------------------------------------------------------------------|
| vino seco o vermut    | <input checked="" type="radio"/> Nunca o menos 1 vez al mes<br><input type="radio"/> 1 a 3 veces mes<br><input type="radio"/> 1 vez semana<br><input type="radio"/> 2 a 4 veces semana<br><input type="radio"/> 5 a 6 veces semana<br><input type="radio"/> 1 vez al día<br><input type="radio"/> 2 a 3 veces al día<br><input type="radio"/> 5 a 6 veces al día<br><input type="radio"/> más 6 veces al día |
| cerveza               | <input checked="" type="radio"/> Nunca o menos 1 vez al mes<br><input type="radio"/> 1 a 3 veces mes<br><input type="radio"/> 1 vez semana<br><input type="radio"/> 2 a 4 veces semana<br><input type="radio"/> 5 a 6 veces semana<br><input type="radio"/> 1 vez al día<br><input type="radio"/> 2 a 3 veces al día<br><input type="radio"/> 5 a 6 veces al día<br><input type="radio"/> más 6 veces al día |
| cerveza sin alcohol   | <input type="radio"/> Nunca o menos 1 vez al mes<br><input checked="" type="radio"/> 1 a 3 veces mes<br><input type="radio"/> 1 vez semana<br><input type="radio"/> 2 a 4 veces semana<br><input type="radio"/> 5 a 6 veces semana<br><input type="radio"/> 1 vez al día<br><input type="radio"/> 2 a 3 veces al día<br><input type="radio"/> 5 a 6 veces al día<br><input type="radio"/> más 6 veces al día |
| licores               | <input checked="" type="radio"/> Nunca o menos 1 vez al mes<br><input type="radio"/> 1 a 3 veces mes<br><input type="radio"/> 1 vez semana<br><input type="radio"/> 2 a 4 veces semana<br><input type="radio"/> 5 a 6 veces semana<br><input type="radio"/> 1 vez al día<br><input type="radio"/> 2 a 3 veces al día<br><input type="radio"/> 5 a 6 veces al día<br><input type="radio"/> más 6 veces al día |
| ginebra o ron o vodka | <input checked="" type="radio"/> Nunca o menos 1 vez al mes<br><input type="radio"/> 1 a 3 veces mes<br><input type="radio"/> 1 vez semana<br><input type="radio"/> 2 a 4 veces semana<br><input type="radio"/> 5 a 6 veces semana<br><input type="radio"/> 1 vez al día<br><input type="radio"/> 2 a 3 veces al día<br><input type="radio"/> 5 a 6 veces al día<br><input type="radio"/> más 6 veces al día |
| refresco normal       | <input type="radio"/> Nunca o menos 1 vez al mes<br><input checked="" type="radio"/> 1 a 3 veces mes<br><input type="radio"/> 1 vez semana<br><input type="radio"/> 2 a 4 veces semana<br><input type="radio"/> 5 a 6 veces semana<br><input type="radio"/> 1 vez al día<br><input type="radio"/> 2 a 3 veces al día<br><input type="radio"/> 5 a 6 veces al día<br><input type="radio"/> más 6 veces al día |

---

|                     |                                                                                                                                                                                                                                                                                                                                                                                                              |
|---------------------|--------------------------------------------------------------------------------------------------------------------------------------------------------------------------------------------------------------------------------------------------------------------------------------------------------------------------------------------------------------------------------------------------------------|
| refresco sin azúcar | <input type="radio"/> Nunca o menos 1 vez al mes<br><input checked="" type="radio"/> 1 a 3 veces mes<br><input type="radio"/> 1 vez semana<br><input type="radio"/> 2 a 4 veces semana<br><input type="radio"/> 5 a 6 veces semana<br><input type="radio"/> 1 vez al día<br><input type="radio"/> 2 a 3 veces al día<br><input type="radio"/> 5 a 6 veces al día<br><input type="radio"/> más 6 veces al día |
|---------------------|--------------------------------------------------------------------------------------------------------------------------------------------------------------------------------------------------------------------------------------------------------------------------------------------------------------------------------------------------------------------------------------------------------------|

---

|                |                                                                                                                                                                                                                                                                                                                                                                                                              |
|----------------|--------------------------------------------------------------------------------------------------------------------------------------------------------------------------------------------------------------------------------------------------------------------------------------------------------------------------------------------------------------------------------------------------------------|
| Agua del grifo | <input checked="" type="radio"/> Nunca o menos 1 vez al mes<br><input type="radio"/> 1 a 3 veces mes<br><input type="radio"/> 1 vez semana<br><input type="radio"/> 2 a 4 veces semana<br><input type="radio"/> 5 a 6 veces semana<br><input type="radio"/> 1 vez al día<br><input type="radio"/> 2 a 3 veces al día<br><input type="radio"/> 5 a 6 veces al día<br><input type="radio"/> más 6 veces al día |
|----------------|--------------------------------------------------------------------------------------------------------------------------------------------------------------------------------------------------------------------------------------------------------------------------------------------------------------------------------------------------------------------------------------------------------------|

---

|                          |                                                                                                                                                                                                                                                                                                                                                                                                              |
|--------------------------|--------------------------------------------------------------------------------------------------------------------------------------------------------------------------------------------------------------------------------------------------------------------------------------------------------------------------------------------------------------------------------------------------------------|
| agua embotellada sin gas | <input type="radio"/> Nunca o menos 1 vez al mes<br><input type="radio"/> 1 a 3 veces mes<br><input type="radio"/> 1 vez semana<br><input type="radio"/> 2 a 4 veces semana<br><input type="radio"/> 5 a 6 veces semana<br><input type="radio"/> 1 vez al día<br><input type="radio"/> 2 a 3 veces al día<br><input type="radio"/> 5 a 6 veces al día<br><input checked="" type="radio"/> más 6 veces al día |
|--------------------------|--------------------------------------------------------------------------------------------------------------------------------------------------------------------------------------------------------------------------------------------------------------------------------------------------------------------------------------------------------------------------------------------------------------|

---

|                          |                                                                                                                                                                                                                                                                                                                                                                                                              |
|--------------------------|--------------------------------------------------------------------------------------------------------------------------------------------------------------------------------------------------------------------------------------------------------------------------------------------------------------------------------------------------------------------------------------------------------------|
| agua embotellada con gas | <input checked="" type="radio"/> Nunca o menos 1 vez al mes<br><input type="radio"/> 1 a 3 veces mes<br><input type="radio"/> 1 vez semana<br><input type="radio"/> 2 a 4 veces semana<br><input type="radio"/> 5 a 6 veces semana<br><input type="radio"/> 1 vez al día<br><input type="radio"/> 2 a 3 veces al día<br><input type="radio"/> 5 a 6 veces al día<br><input type="radio"/> más 6 veces al día |
|--------------------------|--------------------------------------------------------------------------------------------------------------------------------------------------------------------------------------------------------------------------------------------------------------------------------------------------------------------------------------------------------------------------------------------------------------|

---

|                      |                                                                                                                                                                                                                                                                                                                                                                                                              |
|----------------------|--------------------------------------------------------------------------------------------------------------------------------------------------------------------------------------------------------------------------------------------------------------------------------------------------------------------------------------------------------------------------------------------------------------|
| zumو frutas embasado | <input type="radio"/> Nunca o menos 1 vez al mes<br><input checked="" type="radio"/> 1 a 3 veces mes<br><input type="radio"/> 1 vez semana<br><input type="radio"/> 2 a 4 veces semana<br><input type="radio"/> 5 a 6 veces semana<br><input type="radio"/> 1 vez al día<br><input type="radio"/> 2 a 3 veces al día<br><input type="radio"/> 5 a 6 veces al día<br><input type="radio"/> más 6 veces al día |
|----------------------|--------------------------------------------------------------------------------------------------------------------------------------------------------------------------------------------------------------------------------------------------------------------------------------------------------------------------------------------------------------------------------------------------------------|

---

|      |                                                                                                                                                                                                                                                                                                                                                                                                              |
|------|--------------------------------------------------------------------------------------------------------------------------------------------------------------------------------------------------------------------------------------------------------------------------------------------------------------------------------------------------------------------------------------------------------------|
| cafe | <input type="radio"/> Nunca o menos 1 vez al mes<br><input type="radio"/> 1 a 3 veces mes<br><input type="radio"/> 1 vez semana<br><input type="radio"/> 2 a 4 veces semana<br><input checked="" type="radio"/> 5 a 6 veces semana<br><input type="radio"/> 1 vez al día<br><input type="radio"/> 2 a 3 veces al día<br><input type="radio"/> 5 a 6 veces al día<br><input type="radio"/> más 6 veces al día |
|------|--------------------------------------------------------------------------------------------------------------------------------------------------------------------------------------------------------------------------------------------------------------------------------------------------------------------------------------------------------------------------------------------------------------|

---

|                       |                                                                                                                                                                                                                                                                                                                                                                                                              |
|-----------------------|--------------------------------------------------------------------------------------------------------------------------------------------------------------------------------------------------------------------------------------------------------------------------------------------------------------------------------------------------------------------------------------------------------------|
| cafe descafeinado     | <input type="radio"/> Nunca o menos 1 vez al mes<br><input type="radio"/> 1 a 3 veces mes<br><input type="radio"/> 1 vez semana<br><input type="radio"/> 2 a 4 veces semana<br><input checked="" type="radio"/> 5 a 6 veces semana<br><input type="radio"/> 1 vez al día<br><input type="radio"/> 2 a 3 veces al día<br><input type="radio"/> 5 a 6 veces al día<br><input type="radio"/> más 6 veces al día |
| te o infusión         | <input checked="" type="radio"/> Nunca o menos 1 vez al mes<br><input type="radio"/> 1 a 3 veces mes<br><input type="radio"/> 1 vez semana<br><input type="radio"/> 2 a 4 veces semana<br><input type="radio"/> 5 a 6 veces semana<br><input type="radio"/> 1 vez al día<br><input type="radio"/> 2 a 3 veces al día<br><input type="radio"/> 5 a 6 veces al día<br><input type="radio"/> más 6 veces al día |
| sopa o puré verduras  | <input type="radio"/> Nunca o menos 1 vez al mes<br><input type="radio"/> 1 a 3 veces mes<br><input type="radio"/> 1 vez semana<br><input checked="" type="radio"/> 2 a 4 veces semana<br><input type="radio"/> 5 a 6 veces semana<br><input type="radio"/> 1 vez al día<br><input type="radio"/> 2 a 3 veces al día<br><input type="radio"/> 5 a 6 veces al día<br><input type="radio"/> más 6 veces al día |
| croquetas pollo jamón | <input checked="" type="radio"/> Nunca o menos 1 vez al mes<br><input type="radio"/> 1 a 3 veces mes<br><input type="radio"/> 1 vez semana<br><input type="radio"/> 2 a 4 veces semana<br><input type="radio"/> 5 a 6 veces semana<br><input type="radio"/> 1 vez al día<br><input type="radio"/> 2 a 3 veces al día<br><input type="radio"/> 5 a 6 veces al día<br><input type="radio"/> más 6 veces al día |
| croquetas pescado     | <input checked="" type="radio"/> Nunca o menos 1 vez al mes<br><input type="radio"/> 1 a 3 veces mes<br><input type="radio"/> 1 vez semana<br><input type="radio"/> 2 a 4 veces semana<br><input type="radio"/> 5 a 6 veces semana<br><input type="radio"/> 1 vez al día<br><input type="radio"/> 2 a 3 veces al día<br><input type="radio"/> 5 a 6 veces al día<br><input type="radio"/> más 6 veces al día |
| mayonesa              | <input checked="" type="radio"/> Nunca o menos 1 vez al mes<br><input type="radio"/> 1 a 3 veces mes<br><input type="radio"/> 1 vez semana<br><input type="radio"/> 2 a 4 veces semana<br><input type="radio"/> 5 a 6 veces semana<br><input type="radio"/> 1 vez al día<br><input type="radio"/> 2 a 3 veces al día<br><input type="radio"/> 5 a 6 veces al día<br><input type="radio"/> más 6 veces al día |



|                  |                                                                                                                                                                                                                                                                                                                                                                                                              |
|------------------|--------------------------------------------------------------------------------------------------------------------------------------------------------------------------------------------------------------------------------------------------------------------------------------------------------------------------------------------------------------------------------------------------------------|
| salsa tomate     | <input checked="" type="radio"/> Nunca o menos 1 vez al mes<br><input type="radio"/> 1 a 3 veces mes<br><input type="radio"/> 1 vez semana<br><input type="radio"/> 2 a 4 veces semana<br><input type="radio"/> 5 a 6 veces semana<br><input type="radio"/> 1 vez al día<br><input type="radio"/> 2 a 3 veces al día<br><input type="radio"/> 5 a 6 veces al día<br><input type="radio"/> más 6 veces al día |
| ketchup          | <input checked="" type="radio"/> Nunca o menos 1 vez al mes<br><input type="radio"/> 1 a 3 veces mes<br><input type="radio"/> 1 vez semana<br><input type="radio"/> 2 a 4 veces semana<br><input type="radio"/> 5 a 6 veces semana<br><input type="radio"/> 1 vez al día<br><input type="radio"/> 2 a 3 veces al día<br><input type="radio"/> 5 a 6 veces al día<br><input type="radio"/> más 6 veces al día |
| sal              | <input checked="" type="radio"/> Nunca o menos 1 vez al mes<br><input type="radio"/> 1 a 3 veces mes<br><input type="radio"/> 1 vez semana<br><input type="radio"/> 2 a 4 veces semana<br><input type="radio"/> 5 a 6 veces semana<br><input type="radio"/> 1 vez al día<br><input type="radio"/> 2 a 3 veces al día<br><input type="radio"/> 5 a 6 veces al día<br><input type="radio"/> más 6 veces al día |
| ajo              | <input type="radio"/> Nunca o menos 1 vez al mes<br><input type="radio"/> 1 a 3 veces mes<br><input type="radio"/> 1 vez semana<br><input checked="" type="radio"/> 2 a 4 veces semana<br><input type="radio"/> 5 a 6 veces semana<br><input type="radio"/> 1 vez al día<br><input type="radio"/> 2 a 3 veces al día<br><input type="radio"/> 5 a 6 veces al día<br><input type="radio"/> más 6 veces al día |
| mermelada o miel | <input checked="" type="radio"/> Nunca o menos 1 vez al mes<br><input type="radio"/> 1 a 3 veces mes<br><input type="radio"/> 1 vez semana<br><input type="radio"/> 2 a 4 veces semana<br><input type="radio"/> 5 a 6 veces semana<br><input type="radio"/> 1 vez al día<br><input type="radio"/> 2 a 3 veces al día<br><input type="radio"/> 5 a 6 veces al día<br><input type="radio"/> más 6 veces al día |
| azúcar           | <input checked="" type="radio"/> Nunca o menos 1 vez al mes<br><input type="radio"/> 1 a 3 veces mes<br><input type="radio"/> 1 vez semana<br><input type="radio"/> 2 a 4 veces semana<br><input type="radio"/> 5 a 6 veces semana<br><input type="radio"/> 1 vez al día<br><input type="radio"/> 2 a 3 veces al día<br><input type="radio"/> 5 a 6 veces al día<br><input type="radio"/> más 6 veces al día |

|                                       |                                                                                                                                                                                                                                                                                                                                                                                                                                                                                                                               |
|---------------------------------------|-------------------------------------------------------------------------------------------------------------------------------------------------------------------------------------------------------------------------------------------------------------------------------------------------------------------------------------------------------------------------------------------------------------------------------------------------------------------------------------------------------------------------------|
| Otro alimento                         | [*DATA REMOVED*]                                                                                                                                                                                                                                                                                                                                                                                                                                                                                                              |
| suplementos vitamínicos               | <input checked="" type="radio"/> si<br><input type="radio"/> no                                                                                                                                                                                                                                                                                                                                                                                                                                                               |
| suplementos vitamínicos               | [*DATA REMOVED*]                                                                                                                                                                                                                                                                                                                                                                                                                                                                                                              |
| dieta previa                          | <input type="radio"/> si<br><input checked="" type="radio"/> no                                                                                                                                                                                                                                                                                                                                                                                                                                                               |
| motivo dieta                          | <input checked="" type="radio"/> no dieta<br><input type="radio"/> control peso<br><input type="radio"/> control colesterol<br><input type="radio"/> control diabetes<br><input type="radio"/> problemas estómago<br><input type="radio"/> problemas vesícula o hepáticos<br><input type="radio"/> HTA o cardiopatía<br><input type="radio"/> problemas renales<br><input type="radio"/> alergia alimentaria<br><input type="radio"/> ácido úrico elevado<br><input type="radio"/> vegetariana<br><input type="radio"/> otros |
| cambio alimentos año previo gestación | <input checked="" type="radio"/> si<br><input type="radio"/> no                                                                                                                                                                                                                                                                                                                                                                                                                                                               |
| cambio lácteos                        | <input type="radio"/> eliminado<br><input type="radio"/> disminuido<br><input checked="" type="radio"/> igual<br><input type="radio"/> aumentado<br><input type="radio"/> no sabe                                                                                                                                                                                                                                                                                                                                             |
| cambio huevos                         | <input type="radio"/> eliminado<br><input type="radio"/> disminuido<br><input checked="" type="radio"/> igual<br><input type="radio"/> aumentado<br><input type="radio"/> no sabe                                                                                                                                                                                                                                                                                                                                             |
| cambio carne                          | <input type="radio"/> eliminado<br><input type="radio"/> disminuido<br><input checked="" type="radio"/> igual<br><input type="radio"/> aumentado<br><input type="radio"/> no sabe                                                                                                                                                                                                                                                                                                                                             |
| cambio pescado                        | <input type="radio"/> eliminado<br><input type="radio"/> disminuido<br><input checked="" type="radio"/> igual<br><input type="radio"/> aumentado<br><input type="radio"/> no sabe                                                                                                                                                                                                                                                                                                                                             |
| cambio verduras                       | <input type="radio"/> eliminado<br><input type="radio"/> disminuido<br><input checked="" type="radio"/> igual<br><input type="radio"/> aumentado<br><input type="radio"/> no sabe                                                                                                                                                                                                                                                                                                                                             |

|                            |                                                                                                                                                                                                                        |
|----------------------------|------------------------------------------------------------------------------------------------------------------------------------------------------------------------------------------------------------------------|
| cambio legumbres           | <input type="radio"/> eliminado<br><input type="radio"/> disminuido<br><input checked="" type="radio"/> igual<br><input type="radio"/> aumentado<br><input type="radio"/> no sabe                                      |
| cambio fruta               | <input type="radio"/> eliminado<br><input type="radio"/> disminuido<br><input checked="" type="radio"/> igual<br><input type="radio"/> aumentado<br><input type="radio"/> no sabe                                      |
| cambio pan                 | <input type="radio"/> eliminado<br><input type="radio"/> disminuido<br><input type="radio"/> igual<br><input checked="" type="radio"/> aumentado<br><input type="radio"/> no sabe                                      |
| cambio aceite oliva        | <input type="radio"/> eliminado<br><input type="radio"/> disminuido<br><input checked="" type="radio"/> igual<br><input type="radio"/> aumentado<br><input type="radio"/> no sabe                                      |
| cambio mante o margarina   | <input type="radio"/> eliminado<br><input type="radio"/> disminuido<br><input checked="" type="radio"/> igual<br><input type="radio"/> aumentado<br><input type="radio"/> no sabe                                      |
| cambio azúcar y dulces     | <input type="radio"/> eliminado<br><input type="radio"/> disminuido<br><input type="radio"/> igual<br><input checked="" type="radio"/> aumentado<br><input type="radio"/> no sabe                                      |
| cambio bebidas alcohólicas | <input type="radio"/> eliminado<br><input type="radio"/> disminuido<br><input checked="" type="radio"/> igual<br><input type="radio"/> aumentado<br><input type="radio"/> no sabe                                      |
| frecuencia comidas fritas  | <input type="radio"/> a diario<br><input type="radio"/> 5 a 6 veces semana<br><input type="radio"/> 2 a 4 veces semana<br><input type="radio"/> 1 vez semana<br><input checked="" type="radio"/> menos de 1 vez semana |
| carne                      | <input type="radio"/> no como<br><input type="radio"/> cruda<br><input type="radio"/> poco hecha<br><input checked="" type="radio"/> hecha<br><input type="radio"/> muy hecha                                          |
| grasa visible carne        | <input checked="" type="radio"/> quita toda<br><input type="radio"/> quita mayoría<br><input type="radio"/> quita un poco<br><input type="radio"/> no quita nada                                                       |

|                                |                                                                                                                                                                                                                                                          |
|--------------------------------|----------------------------------------------------------------------------------------------------------------------------------------------------------------------------------------------------------------------------------------------------------|
| cocina carne                   | <input checked="" type="radio"/> a la plancha<br><input type="radio"/> a la parrilla<br><input type="radio"/> asada<br><input type="radio"/> frita<br><input type="radio"/> guisada                                                                      |
| tostado quemado carne          | <input type="radio"/> nunca<br><input checked="" type="radio"/> 1 vez mes<br><input type="radio"/> 2 a 3 veces mes<br><input type="radio"/> 1 vez semana<br><input type="radio"/> 2 a 3 semanas                                                          |
| tostado quemado pescado        | <input checked="" type="radio"/> nunca<br><input type="radio"/> 1 vez mes<br><input type="radio"/> 2 a 3 veces mes<br><input type="radio"/> 1 vez semana<br><input type="radio"/> 2 a 3 semanas                                                          |
| socarrat paella                | <input type="radio"/> nunca<br><input type="radio"/> 1 vez mes<br><input checked="" type="radio"/> 2 a 3 veces mes<br><input type="radio"/> 1 vez semana<br><input type="radio"/> 2 a 3 semanas                                                          |
| grasa o aceite cocinar         | <input type="radio"/> mantequilla<br><input type="radio"/> margarina<br><input type="radio"/> aceite oliva<br><input checked="" type="radio"/> aceite oliva virgen extra<br><input type="radio"/> aceite vegetal<br><input type="radio"/> mezcla aceites |
| grasa aceite aliñar            | <input type="radio"/> mantequilla<br><input type="radio"/> margarina<br><input type="radio"/> aceite oliva<br><input type="radio"/> aceite oliva virgen extra<br><input type="radio"/> aceite vegetal<br><input checked="" type="radio"/> mezcla aceites |
| grasa aceite freir             | <input type="radio"/> mantequilla<br><input type="radio"/> margarina<br><input type="radio"/> aceite oliva<br><input type="radio"/> aceite oliva virgen extra<br><input type="radio"/> aceite vegetal<br><input checked="" type="radio"/> mezcla aceites |
| Ejercicio cuestionario         | <input checked="" type="radio"/> si<br><input type="radio"/> no                                                                                                                                                                                          |
| horas de sueño incluido siesta | [*DATA REMOVED*]                                                                                                                                                                                                                                         |
| minutos siesta                 | [*DATA REMOVED*]                                                                                                                                                                                                                                         |
| horas televisión semana        | [*DATA REMOVED*]                                                                                                                                                                                                                                         |

|                                        |                                                                                                                                                                                                                                                                                                                                                                           |
|----------------------------------------|---------------------------------------------------------------------------------------------------------------------------------------------------------------------------------------------------------------------------------------------------------------------------------------------------------------------------------------------------------------------------|
| actividad trabajo                      | <input type="radio"/> casi siempre sentado<br><input type="radio"/> sentado 50 por cien<br><input type="radio"/> casi siempre de pie, quieto<br><input type="radio"/> casi siempre levantado caminando y llevando pocas cosas<br><input checked="" type="radio"/> casi siempre levantado, caminando y llevado muchas cosas<br><input type="radio"/> trabajo manual pesado |
| tiempo caminar o bici al día           | <input type="radio"/> casi nunca<br><input type="radio"/> menos 20min día<br><input type="radio"/> 20 a 40 min día<br><input checked="" type="radio"/> 40 a 60 min día<br><input type="radio"/> 1h o 1h y media día<br><input type="radio"/> más de 1h y media al día                                                                                                     |
| tiempo tareas casa al día              | <input type="radio"/> menos de 1h día<br><input checked="" type="radio"/> 1 a 2h día<br><input type="radio"/> 3 a 4h día<br><input type="radio"/> 5 a 6h día<br><input type="radio"/> 7 a 8h día<br><input type="radio"/> más de 8h día                                                                                                                                   |
| tiempo libre televisión ordenador leer | <input type="radio"/> menos 1h día<br><input type="radio"/> 1h día<br><input checked="" type="radio"/> 2h día<br><input type="radio"/> 3h día<br><input type="radio"/> 4h día<br><input type="radio"/> 5 a 6h día<br><input type="radio"/> mas 6h día                                                                                                                     |
| tiempo libre ejercicio o deporte       | <input type="radio"/> menos 1h semana<br><input checked="" type="radio"/> 1h semana<br><input type="radio"/> 2h semana<br><input type="radio"/> 3h semana<br><input type="radio"/> 4 a 5h semana<br><input type="radio"/> mas 5h semana                                                                                                                                   |
| como se considera                      | <input type="radio"/> sedentaria<br><input type="radio"/> poco activa<br><input checked="" type="radio"/> moderadamente activa<br><input type="radio"/> bastante activa<br><input type="radio"/> muy activa<br><input type="radio"/> no sabe                                                                                                                              |
| FUR                                    | [*DATA REMOVED*]                                                                                                                                                                                                                                                                                                                                                          |
| Semanas gestación 2T                   | _____                                                                                                                                                                                                                                                                                                                                                                     |
| Días gestación 2T                      | _____                                                                                                                                                                                                                                                                                                                                                                     |
| DBP 2T                                 | _____                                                                                                                                                                                                                                                                                                                                                                     |
| CC 2T                                  | _____                                                                                                                                                                                                                                                                                                                                                                     |

|                                                   |                                                                                                                                                                                                 |
|---------------------------------------------------|-------------------------------------------------------------------------------------------------------------------------------------------------------------------------------------------------|
| AC 2T                                             |                                                                                                                                                                                                 |
| LF 2T                                             |                                                                                                                                                                                                 |
| PFE 2T (Hadlock)                                  |                                                                                                                                                                                                 |
| Semanas gestación 3T                              | [*DATA REMOVED*]                                                                                                                                                                                |
| días 3T                                           | [*DATA REMOVED*]                                                                                                                                                                                |
| DBP 3T                                            | [*DATA REMOVED*]                                                                                                                                                                                |
| CC 3T                                             | [*DATA REMOVED*]                                                                                                                                                                                |
| AC 3T                                             | [*DATA REMOVED*]                                                                                                                                                                                |
| LF 3T                                             | [*DATA REMOVED*]                                                                                                                                                                                |
| PFE 3T (Hadlock)                                  | [*DATA REMOVED*]                                                                                                                                                                                |
| Semanas de gestación final                        | [*DATA REMOVED*]                                                                                                                                                                                |
| días gestación final                              | [*DATA REMOVED*]                                                                                                                                                                                |
| Localización placenta                             | <input type="radio"/> anterior<br><input type="radio"/> lateral derecha<br><input type="radio"/> lateral izquierda<br><input checked="" type="radio"/> posterior<br><input type="radio"/> fondo |
| Presentación longitudinal cefálica                | <input type="radio"/> no<br><input checked="" type="radio"/> si                                                                                                                                 |
| Dorso                                             | <input type="radio"/> izquierda anterior<br><input type="radio"/> izquierda posterior<br><input checked="" type="radio"/> derecha anterior<br><input type="radio"/> derecha posterior           |
| diámetro biparietal                               | [*DATA REMOVED*]                                                                                                                                                                                |
| Circunferencia craneal                            | [*DATA REMOVED*]                                                                                                                                                                                |
| Circunferencia abdominal                          | [*DATA REMOVED*]                                                                                                                                                                                |
| Longitud de femur                                 | [*DATA REMOVED*]                                                                                                                                                                                |
| tejido celular subcutáneo a nivel del muslo en mm | [*DATA REMOVED*]                                                                                                                                                                                |
| tejido celular subcutáneo en abdomen en mm        | [*DATA REMOVED*]                                                                                                                                                                                |

|                                               |                                                                                                                                                          |
|-----------------------------------------------|----------------------------------------------------------------------------------------------------------------------------------------------------------|
| Volumen del muslo en cm3                      | [*DATA REMOVED*]                                                                                                                                         |
| Peso fetal estimado según fórmula de Hadlock  | [*DATA REMOVED*]                                                                                                                                         |
| Percentil                                     | [*DATA REMOVED*]                                                                                                                                         |
| Peso fetal estimado según fórmula de Scioscia | _____                                                                                                                                                    |
| Peso fetal estimado según fórmula de LEE      | _____                                                                                                                                                    |
| Tipo de parto                                 | <input checked="" type="radio"/> eutocico<br><input type="radio"/> instrumentado/ventosa<br><input type="radio"/> cesarea                                |
| fecha de nacimiento                           | [*DATA REMOVED*]                                                                                                                                         |
| Días entre exploración y nacimiento           | [*DATA REMOVED*]                                                                                                                                         |
| Peso RN en g                                  | [*DATA REMOVED*]                                                                                                                                         |
| sexo                                          | <input type="radio"/> mujer<br><input checked="" type="radio"/> hombre                                                                                   |
| Apgar 1 minuto                                | [*DATA REMOVED*]                                                                                                                                         |
| Apgar 5 minutos                               | [*DATA REMOVED*]                                                                                                                                         |
| Apgar 10 minutos                              | _____                                                                                                                                                    |
| antecedente Covid durante gestación           | <input type="radio"/> Yes<br><input checked="" type="radio"/> No                                                                                         |
| Nivel de estudios                             | <input type="radio"/> ninguno<br><input type="radio"/> primarios<br><input type="radio"/> secundarios<br><input checked="" type="radio"/> universitarios |

# Base\_datos\_estimacion\_peso\_fetal

|                                       |                                                                                                                                                                                                                                                                                      |
|---------------------------------------|--------------------------------------------------------------------------------------------------------------------------------------------------------------------------------------------------------------------------------------------------------------------------------------|
| Número de identificación participante | 36                                                                                                                                                                                                                                                                                   |
| CODIGO PARTICIPANTE                   |                                                                                                                                                                                                                                                                                      |
| Edad                                  | [*DATA REMOVED*]                                                                                                                                                                                                                                                                     |
| Gestaciones                           | <input checked="" type="radio"/> 1<br><input type="radio"/> 2<br><input type="radio"/> 3<br><input type="radio"/> mas de 3                                                                                                                                                           |
| partos                                | <input checked="" type="radio"/> 0<br><input type="radio"/> 1<br><input type="radio"/> 2<br><input type="radio"/> 3<br><input type="radio"/> mas de 3                                                                                                                                |
| cesáreas                              | <input checked="" type="radio"/> 0<br><input type="radio"/> 1<br><input type="radio"/> 2<br><input type="radio"/> 3<br><input type="radio"/> mas de 3                                                                                                                                |
| Abortos                               | <input checked="" type="radio"/> 0<br><input type="radio"/> 1<br><input type="radio"/> 2<br><input type="radio"/> 3<br><input type="radio"/> mas de 3                                                                                                                                |
| Tipo de gestacion                     | <input checked="" type="radio"/> espontanea<br><input type="radio"/> IAC inseminación artificial conyuge<br><input type="radio"/> IAD inseminación artificial donante<br><input type="radio"/> FIV Fecundación in Vitro<br><input type="radio"/> Ovodon FIV con donación de ovocitos |
| peso previo a embarazo                | [*DATA REMOVED*]                                                                                                                                                                                                                                                                     |
| Ganancia ponderal embarazo            | [*DATA REMOVED*]                                                                                                                                                                                                                                                                     |
| Talla madre                           | [*DATA REMOVED*]                                                                                                                                                                                                                                                                     |
| IMC previo embarazo                   | 31.09789075175771                                                                                                                                                                                                                                                                    |
| Patología obstétrica                  | <input checked="" type="radio"/> no<br><input type="radio"/> si                                                                                                                                                                                                                      |
| Diabetes pregestacional               | <input checked="" type="radio"/> no<br><input type="radio"/> si                                                                                                                                                                                                                      |
| Diabetes gestacional                  | <input checked="" type="radio"/> no<br><input type="radio"/> si                                                                                                                                                                                                                      |



|                                            |                                                                                                                                                                                      |
|--------------------------------------------|--------------------------------------------------------------------------------------------------------------------------------------------------------------------------------------|
| Diabetes gestacional con insulina          | <input checked="" type="radio"/> no<br><input type="radio"/> si                                                                                                                      |
| Diabetes gestacional con dieta y ejercicio | <input checked="" type="radio"/> no<br><input type="radio"/> si                                                                                                                      |
| Percentil fetos previos                    | <input checked="" type="radio"/> Nada<br><input type="radio"/> percentil menor de 10<br><input type="radio"/> percentil entre 10 y 90<br><input type="radio"/> percentil mayor de 90 |
| Exfumadora                                 | <input checked="" type="radio"/> Nada<br><input type="radio"/> menos de 5 años<br><input type="radio"/> 5 a 10 años<br><input type="radio"/> mayor o igual a 10 años                 |
| Hábito tabáquico                           | <input checked="" type="radio"/> no<br><input type="radio"/> si                                                                                                                      |
| fumadora                                   | [*DATA REMOVED*]                                                                                                                                                                     |
| Consumo otros tóxicos                      | <input checked="" type="radio"/> no<br><input type="radio"/> si                                                                                                                      |
| Hb 1T                                      | [*DATA REMOVED*]                                                                                                                                                                     |
| Htc 1T                                     | [*DATA REMOVED*]                                                                                                                                                                     |
| Hb 2T                                      | [*DATA REMOVED*]                                                                                                                                                                     |
| HTC 2T                                     | [*DATA REMOVED*]                                                                                                                                                                     |
| Hb 3T                                      | [*DATA REMOVED*]                                                                                                                                                                     |
| HTC 3T                                     | [*DATA REMOVED*]                                                                                                                                                                     |
| Suplemento FE oral                         | <input checked="" type="radio"/> si<br><input type="radio"/> no                                                                                                                      |
| Suplemento fe iv                           | <input type="radio"/> si<br><input checked="" type="radio"/> no                                                                                                                      |
| Transfusión                                | <input checked="" type="radio"/> no<br><input type="radio"/> si                                                                                                                      |
| Solicitada Vit D                           | <input type="radio"/> no<br><input checked="" type="radio"/> si                                                                                                                      |
| Deficit vit D                              | <input type="radio"/> no<br><input checked="" type="radio"/> si                                                                                                                      |
| Suplemento vit D                           | <input checked="" type="radio"/> si<br><input type="radio"/> no                                                                                                                      |

|                       |                                                                                                                                                                                                                                                                                                                                                                                                              |
|-----------------------|--------------------------------------------------------------------------------------------------------------------------------------------------------------------------------------------------------------------------------------------------------------------------------------------------------------------------------------------------------------------------------------------------------------|
| Dieta, cuestionario   | <input checked="" type="radio"/> si<br><input type="radio"/> no                                                                                                                                                                                                                                                                                                                                              |
| Leche entera          | <input checked="" type="radio"/> Nunca o menos 1 vez al mes<br><input type="radio"/> 1 a 3 veces mes<br><input type="radio"/> 1 vez semana<br><input type="radio"/> 2 a 4 veces semana<br><input type="radio"/> 5 a 6 veces semana<br><input type="radio"/> 1 vez al día<br><input type="radio"/> 2 a 3 veces al día<br><input type="radio"/> 5 a 6 veces al día<br><input type="radio"/> más 6 veces al día |
| Leche semidesnatada   | <input checked="" type="radio"/> Nunca o menos 1 vez al mes<br><input type="radio"/> 1 a 3 veces mes<br><input type="radio"/> 1 vez semana<br><input type="radio"/> 2 a 4 veces semana<br><input type="radio"/> 5 a 6 veces semana<br><input type="radio"/> 1 vez al día<br><input type="radio"/> 2 a 3 veces al día<br><input type="radio"/> 5 a 6 veces al día<br><input type="radio"/> mas 6 veces al día |
| Leche desnatada       | <input checked="" type="radio"/> Nunca o menos 1 vez al mes<br><input type="radio"/> 1 a 3 veces mes<br><input type="radio"/> 1 vez semana<br><input type="radio"/> 2 a 4 veces semana<br><input type="radio"/> 5 a 6 veces semana<br><input type="radio"/> 1 vez al día<br><input type="radio"/> 2 a 3 veces al día<br><input type="radio"/> 5 a 6 veces al día<br><input type="radio"/> más 6 veces al día |
| Leche condensada      | <input checked="" type="radio"/> Nunca o menos 1 vez al mes<br><input type="radio"/> 1 a 3 veces mes<br><input type="radio"/> 1 vez semana<br><input type="radio"/> 2 a 4 veces semana<br><input type="radio"/> 5 a 6 veces semana<br><input type="radio"/> 1 vez al día<br><input type="radio"/> 2 a 3 veces al día<br><input type="radio"/> 5 a 6 veces al día<br><input type="radio"/> más 6 veces al día |
| nata o crema de leche | <input checked="" type="radio"/> Nunca o menos 1 vez al mes<br><input type="radio"/> 1 a 3 veces mes<br><input type="radio"/> 1 vez semana<br><input type="radio"/> 2 a 4 veces semana<br><input type="radio"/> 5 a 6 veces semana<br><input type="radio"/> 1 vez al día<br><input type="radio"/> 2 a 3 veces al día<br><input type="radio"/> 5 a 6 veces al día<br><input type="radio"/> más 6 veces al día |

|                                             |                                                                                                                                                                                                                                                                                                                                                                                                              |
|---------------------------------------------|--------------------------------------------------------------------------------------------------------------------------------------------------------------------------------------------------------------------------------------------------------------------------------------------------------------------------------------------------------------------------------------------------------------|
| Yogurt Entero                               | <input checked="" type="radio"/> Nunca o menos 1 vez al mes<br><input type="radio"/> 1 a 3 veces mes<br><input type="radio"/> 1 vez semana<br><input type="radio"/> 2 a 4 veces semana<br><input type="radio"/> 5 a 6 veces semana<br><input type="radio"/> 1 vez al día<br><input type="radio"/> 2 a 3 veces al día<br><input type="radio"/> 5 a 6 veces al día<br><input type="radio"/> más 6 veces al día |
| Yogurt desnatado                            | <input checked="" type="radio"/> Nunca o menos 1 vez al mes<br><input type="radio"/> 1 a 3 veces mes<br><input type="radio"/> 1 vez semana<br><input type="radio"/> 2 a 4 veces semana<br><input type="radio"/> 5 a 6 veces semana<br><input type="radio"/> 1 vez al día<br><input type="radio"/> 2 a 3 veces al día<br><input type="radio"/> 5 a 6 veces al día<br><input type="radio"/> más 6 veces al día |
| 100g requesón o queso blando o queso fresco | <input type="radio"/> Nunca o menos 1 vez al mes<br><input type="radio"/> 1 a 3 veces mes<br><input type="radio"/> 1 vez semana<br><input checked="" type="radio"/> 2 a 4 veces semana<br><input type="radio"/> 5 a 6 veces semana<br><input type="radio"/> 1 vez al día<br><input type="radio"/> 2 a 3 veces al día<br><input type="radio"/> 5 a 6 veces al día<br><input type="radio"/> más 6 veces al día |
| queso curado o semicurado o cremoso         | <input type="radio"/> Nunca o menos 1 vez al mes<br><input type="radio"/> 1 a 3 veces mes<br><input type="radio"/> 1 vez semana<br><input checked="" type="radio"/> 2 a 4 veces semana<br><input type="radio"/> 5 a 6 veces semana<br><input type="radio"/> 1 vez al día<br><input type="radio"/> 2 a 3 veces al día<br><input type="radio"/> 5 a 6 veces al día<br><input type="radio"/> más 6 veces al día |
| natillas flan pudding                       | <input type="radio"/> Nunca o menos 1 vez al mes<br><input type="radio"/> 1 a 3 veces mes<br><input checked="" type="radio"/> 1 vez semana<br><input type="radio"/> 2 a 4 veces semana<br><input type="radio"/> 5 a 6 veces semana<br><input type="radio"/> 1 vez al día<br><input type="radio"/> 2 a 3 veces al día<br><input type="radio"/> 5 a 6 veces al día<br><input type="radio"/> más 6 veces al día |
| Helado                                      | <input type="radio"/> Nunca o menos 1 vez al mes<br><input type="radio"/> 1 a 3 veces mes<br><input checked="" type="radio"/> 1 vez semana<br><input type="radio"/> 2 a 4 veces semana<br><input type="radio"/> 5 a 6 veces semana<br><input type="radio"/> 1 vez al día<br><input type="radio"/> 2 a 3 veces al día<br><input type="radio"/> 5 a 6 veces al día<br><input type="radio"/> más 6 veces al día |

|                                      |                                                                                                                                                                                                                                                                                                                                                                                                              |
|--------------------------------------|--------------------------------------------------------------------------------------------------------------------------------------------------------------------------------------------------------------------------------------------------------------------------------------------------------------------------------------------------------------------------------------------------------------|
| huevo                                | <input type="radio"/> Nunca o menos 1 vez al mes<br><input type="radio"/> 1 a 3 veces mes<br><input type="radio"/> 1 vez semana<br><input checked="" type="radio"/> 2 a 4 veces semana<br><input type="radio"/> 5 a 6 veces semana<br><input type="radio"/> 1 vez al día<br><input type="radio"/> 2 a 3 veces al día<br><input type="radio"/> 5 a 6 veces al día<br><input type="radio"/> más 6 veces al día |
| Pollo con piel                       | <input type="radio"/> Nunca o menos 1 vez al mes<br><input type="radio"/> 1 a 3 veces mes<br><input checked="" type="radio"/> 1 vez semana<br><input type="radio"/> 2 a 4 veces semana<br><input type="radio"/> 5 a 6 veces semana<br><input type="radio"/> 1 vez al día<br><input type="radio"/> 2 a 3 veces al día<br><input type="radio"/> 5 a 6 veces al día<br><input type="radio"/> más 6 veces al día |
| pollo sin piel                       | <input type="radio"/> Nunca o menos 1 vez al mes<br><input type="radio"/> 1 a 3 veces mes<br><input checked="" type="radio"/> 1 vez semana<br><input type="radio"/> 2 a 4 veces semana<br><input type="radio"/> 5 a 6 veces semana<br><input type="radio"/> 1 vez al día<br><input type="radio"/> 2 a 3 veces al día<br><input type="radio"/> 5 a 6 veces al día<br><input type="radio"/> más 6 veces al día |
| Ternera o cerdo o cordero            | <input type="radio"/> Nunca o menos 1 vez al mes<br><input type="radio"/> 1 a 3 veces mes<br><input checked="" type="radio"/> 1 vez semana<br><input type="radio"/> 2 a 4 veces semana<br><input type="radio"/> 5 a 6 veces semana<br><input type="radio"/> 1 vez al día<br><input type="radio"/> 2 a 3 veces al día<br><input type="radio"/> 5 a 6 veces al día<br><input type="radio"/> más 6 veces al día |
| carne caza: Conejo o codorniz o pato | <input type="radio"/> Nunca o menos 1 vez al mes<br><input type="radio"/> 1 a 3 veces mes<br><input checked="" type="radio"/> 1 vez semana<br><input type="radio"/> 2 a 4 veces semana<br><input type="radio"/> 5 a 6 veces semana<br><input type="radio"/> 1 vez al día<br><input type="radio"/> 2 a 3 veces al día<br><input type="radio"/> 5 a 6 veces al día<br><input type="radio"/> más 6 veces al día |
| Hígado de ternera o cerdo o pollo    | <input checked="" type="radio"/> Nunca o menos 1 vez al mes<br><input type="radio"/> 1 a 3 veces mes<br><input type="radio"/> 1 vez semana<br><input type="radio"/> 2 a 4 veces semana<br><input type="radio"/> 5 a 6 veces semana<br><input type="radio"/> 1 vez al día<br><input type="radio"/> 2 a 3 veces al día<br><input type="radio"/> 5 a 6 veces al día<br><input type="radio"/> más 6 veces al día |

|                     |                                                                                                                                                                                                                                                                                                                                                                                                              |
|---------------------|--------------------------------------------------------------------------------------------------------------------------------------------------------------------------------------------------------------------------------------------------------------------------------------------------------------------------------------------------------------------------------------------------------------|
| Vísceras            | <input checked="" type="radio"/> Nunca o menos 1 vez al mes<br><input type="radio"/> 1 a 3 veces mes<br><input type="radio"/> 1 vez semana<br><input type="radio"/> 2 a 4 veces semana<br><input type="radio"/> 5 a 6 veces semana<br><input type="radio"/> 1 vez al día<br><input type="radio"/> 2 a 3 veces al día<br><input type="radio"/> 5 a 6 veces al día<br><input type="radio"/> más 6 veces al día |
| Embutido            | <input checked="" type="radio"/> Nunca o menos 1 vez al mes<br><input type="radio"/> 1 a 3 veces mes<br><input type="radio"/> 1 vez semana<br><input type="radio"/> 2 a 4 veces semana<br><input type="radio"/> 5 a 6 veces semana<br><input type="radio"/> 1 vez al día<br><input type="radio"/> 2 a 3 veces al día<br><input type="radio"/> 5 a 6 veces al día<br><input type="radio"/> más 6 veces al día |
| Salchicha o similar | <input checked="" type="radio"/> Nunca o menos 1 vez al mes<br><input type="radio"/> 1 a 3 veces mes<br><input type="radio"/> 1 vez semana<br><input type="radio"/> 2 a 4 veces semana<br><input type="radio"/> 5 a 6 veces semana<br><input type="radio"/> 1 vez al día<br><input type="radio"/> 2 a 3 veces al día<br><input type="radio"/> 5 a 6 veces al día<br><input type="radio"/> más 6 veces al día |
| Pate o foiegras     | <input checked="" type="radio"/> Nunca o menos 1 vez al mes<br><input type="radio"/> 1 a 3 veces mes<br><input type="radio"/> 1 vez semana<br><input type="radio"/> 2 a 4 veces semana<br><input type="radio"/> 5 a 6 veces semana<br><input type="radio"/> 1 vez al día<br><input type="radio"/> 2 a 3 veces al día<br><input type="radio"/> 5 a 6 veces al día<br><input type="radio"/> más 6 veces al día |
| Hamburguesa         | <input type="radio"/> Nunca o menos 1 vez al mes<br><input type="radio"/> 1 a 3 veces mes<br><input checked="" type="radio"/> 1 vez semana<br><input type="radio"/> 2 a 4 veces semana<br><input type="radio"/> 5 a 6 veces semana<br><input type="radio"/> 1 vez al día<br><input type="radio"/> 2 a 3 veces al día<br><input type="radio"/> 5 a 6 veces al día<br><input type="radio"/> más 6 veces al día |
| tocino o bacon      | <input checked="" type="radio"/> Nunca o menos 1 vez al mes<br><input type="radio"/> 1 a 3 veces mes<br><input type="radio"/> 1 vez semana<br><input type="radio"/> 2 a 4 veces semana<br><input type="radio"/> 5 a 6 veces semana<br><input type="radio"/> 1 vez al día<br><input type="radio"/> 2 a 3 veces al día<br><input type="radio"/> 5 a 6 veces al día<br><input type="radio"/> más 6 veces al día |

---

Pescado frito

- ☒ Nunca o menos 1 vez al mes  
☐ 1 a 3 veces mes  
☐ 1 vez semana  
☐ 2 a 4 veces semana  
☐ 5 a 6 veces semana  
☐ 1 vez al día  
☐ 2 a 3 veces al día  
☐ 5 a 6 veces al día  
☐ más 6 veces al día

---

pescado hervido blanco

- ☒ Nunca o menos 1 vez al mes  
☐ 1 a 3 veces mes  
☐ 1 vez semana  
☐ 2 a 4 veces semana  
☐ 5 a 6 veces semana  
☐ 1 vez al día  
☐ 2 a 3 veces al día  
☐ 5 a 6 veces al día  
☐ más 6 veces al día

---

pescado hervido azul

- ☒ Nunca o menos 1 vez al mes  
☐ 1 a 3 veces mes  
☐ 1 vez semana  
☐ 2 a 4 veces semana  
☐ 5 a 6 veces semana  
☐ 1 vez al día  
☐ 2 a 3 veces al día  
☐ 5 a 6 veces al día  
☐ más 6 veces al día

---

otros pescado azul

- ☒ Nunca o menos 1 vez al mes  
☐ 1 a 3 veces mes  
☐ 1 vez semana  
☐ 2 a 4 veces semana  
☐ 5 a 6 veces semana  
☐ 1 vez al día  
☐ 2 a 3 veces al día  
☐ 5 a 6 veces al día  
☐ más 6 veces al día

---

atun conserva

- ☒ Nunca o menos 1 vez al mes  
☐ 1 a 3 veces mes  
☐ 1 vez semana  
☐ 2 a 4 veces semana  
☐ 5 a 6 veces semana  
☐ 1 vez al día  
☐ 2 a 3 veces al día  
☐ 5 a 6 veces al día  
☐ más 6 veces al día

---

sardina conserva

- ☒ Nunca o menos 1 vez al mes  
☐ 1 a 3 veces mes  
☐ 1 vez semana  
☐ 2 a 4 veces semana  
☐ 5 a 6 veces semana  
☐ 1 vez al día  
☐ 2 a 3 veces al día  
☐ 5 a 6 veces al día  
☐ más 6 veces al día

|                                         |                                                                                                                                                                                                                                                                                                                                                                                                              |
|-----------------------------------------|--------------------------------------------------------------------------------------------------------------------------------------------------------------------------------------------------------------------------------------------------------------------------------------------------------------------------------------------------------------------------------------------------------------|
| pescado ahumado                         | <input checked="" type="radio"/> Nunca o menos 1 vez al mes<br><input type="radio"/> 1 a 3 veces mes<br><input type="radio"/> 1 vez semana<br><input type="radio"/> 2 a 4 veces semana<br><input type="radio"/> 5 a 6 veces semana<br><input type="radio"/> 1 vez al día<br><input type="radio"/> 2 a 3 veces al día<br><input type="radio"/> 5 a 6 veces al día<br><input type="radio"/> más 6 veces al día |
| almejas o mejillones o ostras unos 100g | <input checked="" type="radio"/> Nunca o menos 1 vez al mes<br><input type="radio"/> 1 a 3 veces mes<br><input type="radio"/> 1 vez semana<br><input type="radio"/> 2 a 4 veces semana<br><input type="radio"/> 5 a 6 veces semana<br><input type="radio"/> 1 vez al día<br><input type="radio"/> 2 a 3 veces al día<br><input type="radio"/> 5 a 6 veces al día<br><input type="radio"/> más 6 veces al día |
| calamar o chipiron o sepia unos 100g    | <input checked="" type="radio"/> Nunca o menos 1 vez al mes<br><input type="radio"/> 1 a 3 veces mes<br><input type="radio"/> 1 vez semana<br><input type="radio"/> 2 a 4 veces semana<br><input type="radio"/> 5 a 6 veces semana<br><input type="radio"/> 1 vez al día<br><input type="radio"/> 2 a 3 veces al día<br><input type="radio"/> 5 a 6 veces al día<br><input type="radio"/> más 6 veces al día |
| marisco unos 100g                       | <input type="radio"/> Nunca o menos 1 vez al mes<br><input type="radio"/> 1 a 3 veces mes<br><input checked="" type="radio"/> 1 vez semana<br><input type="radio"/> 2 a 4 veces semana<br><input type="radio"/> 5 a 6 veces semana<br><input type="radio"/> 1 vez al día<br><input type="radio"/> 2 a 3 veces al día<br><input type="radio"/> 5 a 6 veces al día<br><input type="radio"/> más 6 veces al día |
| Espinacas o acelgas cocinadas           | <input type="radio"/> Nunca o menos 1 vez al mes<br><input type="radio"/> 1 a 3 veces mes<br><input type="radio"/> 1 vez semana<br><input checked="" type="radio"/> 2 a 4 veces semana<br><input type="radio"/> 5 a 6 veces semana<br><input type="radio"/> 1 vez al día<br><input type="radio"/> 2 a 3 veces al día<br><input type="radio"/> 5 a 6 veces al día<br><input type="radio"/> más 6 veces al día |
| Col o coliflor o brocoli cocinado       | <input type="radio"/> Nunca o menos 1 vez al mes<br><input type="radio"/> 1 a 3 veces mes<br><input checked="" type="radio"/> 1 vez semana<br><input type="radio"/> 2 a 4 veces semana<br><input type="radio"/> 5 a 6 veces semana<br><input type="radio"/> 1 vez al día<br><input type="radio"/> 2 a 3 veces al día<br><input type="radio"/> 5 a 6 veces al día<br><input type="radio"/> más 6 veces al día |

---

Lechuga o endivia o escarola

- ☐ Nunca o menos 1 vez al mes  
☐ 1 a 3 veces mes  
☐ 1 vez semana  
☒ 2 a 4 veces semana  
☐ 5 a 6 veces semana  
☐ 1 vez al día  
☐ 2 a 3 veces al día  
☐ 5 a 6 veces al día  
☐ más 6 veces al día

---

tomate ensalada

- ☐ Nunca o menos 1 vez al mes  
☐ 1 a 3 veces mes  
☐ 1 vez semana  
☒ 2 a 4 veces semana  
☐ 5 a 6 veces semana  
☐ 1 vez al día  
☐ 2 a 3 veces al día  
☐ 5 a 6 veces al día  
☐ más 6 veces al día

---

cebolla

- ☐ Nunca o menos 1 vez al mes  
☐ 1 a 3 veces mes  
☐ 1 vez semana  
☒ 2 a 4 veces semana  
☐ 5 a 6 veces semana  
☐ 1 vez al día  
☐ 2 a 3 veces al día  
☐ 5 a 6 veces al día  
☐ más 6 veces al día

---

Zanahoria o calabaza

- ☐ Nunca o menos 1 vez al mes  
☐ 1 a 3 veces mes  
☐ 1 vez semana  
☒ 2 a 4 veces semana  
☐ 5 a 6 veces semana  
☐ 1 vez al día  
☐ 2 a 3 veces al día  
☐ 5 a 6 veces al día  
☐ más 6 veces al día

---

Judías verdes

- ☐ Nunca o menos 1 vez al mes  
☐ 1 a 3 veces mes  
☐ 1 vez semana  
☒ 2 a 4 veces semana  
☐ 5 a 6 veces semana  
☐ 1 vez al día  
☐ 2 a 3 veces al día  
☐ 5 a 6 veces al día  
☐ más 6 veces al día

---

Berenjena o calabacin o pepino

- ☐ Nunca o menos 1 vez al mes  
☐ 1 a 3 veces mes  
☒ 1 vez semana  
☐ 2 a 4 veces semana  
☐ 5 a 6 veces semana  
☐ 1 vez al día  
☐ 2 a 3 veces al día  
☐ 5 a 6 veces al día  
☐ más 6 veces al día



---

|          |                                                                                                                                                                                                                                                                                                                                                                                                              |
|----------|--------------------------------------------------------------------------------------------------------------------------------------------------------------------------------------------------------------------------------------------------------------------------------------------------------------------------------------------------------------------------------------------------------------|
| pimiento | <input type="radio"/> Nunca o menos 1 vez al mes<br><input type="radio"/> 1 a 3 veces mes<br><input checked="" type="radio"/> 1 vez semana<br><input type="radio"/> 2 a 4 veces semana<br><input type="radio"/> 5 a 6 veces semana<br><input type="radio"/> 1 vez al día<br><input type="radio"/> 2 a 3 veces al día<br><input type="radio"/> 5 a 6 veces al día<br><input type="radio"/> más 6 veces al día |
|----------|--------------------------------------------------------------------------------------------------------------------------------------------------------------------------------------------------------------------------------------------------------------------------------------------------------------------------------------------------------------------------------------------------------------|

---

|           |                                                                                                                                                                                                                                                                                                                                                                                                              |
|-----------|--------------------------------------------------------------------------------------------------------------------------------------------------------------------------------------------------------------------------------------------------------------------------------------------------------------------------------------------------------------------------------------------------------------|
| alcachofa | <input type="radio"/> Nunca o menos 1 vez al mes<br><input type="radio"/> 1 a 3 veces mes<br><input type="radio"/> 1 vez semana<br><input checked="" type="radio"/> 2 a 4 veces semana<br><input type="radio"/> 5 a 6 veces semana<br><input type="radio"/> 1 vez al día<br><input type="radio"/> 2 a 3 veces al día<br><input type="radio"/> 5 a 6 veces al día<br><input type="radio"/> más 6 veces al día |
|-----------|--------------------------------------------------------------------------------------------------------------------------------------------------------------------------------------------------------------------------------------------------------------------------------------------------------------------------------------------------------------------------------------------------------------|

---

|            |                                                                                                                                                                                                                                                                                                                                                                                                              |
|------------|--------------------------------------------------------------------------------------------------------------------------------------------------------------------------------------------------------------------------------------------------------------------------------------------------------------------------------------------------------------------------------------------------------------|
| espárragos | <input type="radio"/> Nunca o menos 1 vez al mes<br><input type="radio"/> 1 a 3 veces mes<br><input checked="" type="radio"/> 1 vez semana<br><input type="radio"/> 2 a 4 veces semana<br><input type="radio"/> 5 a 6 veces semana<br><input type="radio"/> 1 vez al día<br><input type="radio"/> 2 a 3 veces al día<br><input type="radio"/> 5 a 6 veces al día<br><input type="radio"/> más 6 veces al día |
|------------|--------------------------------------------------------------------------------------------------------------------------------------------------------------------------------------------------------------------------------------------------------------------------------------------------------------------------------------------------------------------------------------------------------------|

---

|              |                                                                                                                                                                                                                                                                                                                                                                                                              |
|--------------|--------------------------------------------------------------------------------------------------------------------------------------------------------------------------------------------------------------------------------------------------------------------------------------------------------------------------------------------------------------------------------------------------------------|
| maíz hervido | <input type="radio"/> Nunca o menos 1 vez al mes<br><input type="radio"/> 1 a 3 veces mes<br><input checked="" type="radio"/> 1 vez semana<br><input type="radio"/> 2 a 4 veces semana<br><input type="radio"/> 5 a 6 veces semana<br><input type="radio"/> 1 vez al día<br><input type="radio"/> 2 a 3 veces al día<br><input type="radio"/> 5 a 6 veces al día<br><input type="radio"/> más 6 veces al día |
|--------------|--------------------------------------------------------------------------------------------------------------------------------------------------------------------------------------------------------------------------------------------------------------------------------------------------------------------------------------------------------------------------------------------------------------|

---

|           |                                                                                                                                                                                                                                                                                                                                                                                                              |
|-----------|--------------------------------------------------------------------------------------------------------------------------------------------------------------------------------------------------------------------------------------------------------------------------------------------------------------------------------------------------------------------------------------------------------------|
| legumbres | <input type="radio"/> Nunca o menos 1 vez al mes<br><input type="radio"/> 1 a 3 veces mes<br><input checked="" type="radio"/> 1 vez semana<br><input type="radio"/> 2 a 4 veces semana<br><input type="radio"/> 5 a 6 veces semana<br><input type="radio"/> 1 vez al día<br><input type="radio"/> 2 a 3 veces al día<br><input type="radio"/> 5 a 6 veces al día<br><input type="radio"/> más 6 veces al día |
|-----------|--------------------------------------------------------------------------------------------------------------------------------------------------------------------------------------------------------------------------------------------------------------------------------------------------------------------------------------------------------------------------------------------------------------|

---

|                       |                                                                                                                                                                                                                                                                                                                                                                                                              |
|-----------------------|--------------------------------------------------------------------------------------------------------------------------------------------------------------------------------------------------------------------------------------------------------------------------------------------------------------------------------------------------------------------------------------------------------------|
| naranjas o mandarinas | <input type="radio"/> Nunca o menos 1 vez al mes<br><input type="radio"/> 1 a 3 veces mes<br><input type="radio"/> 1 vez semana<br><input type="radio"/> 2 a 4 veces semana<br><input checked="" type="radio"/> 5 a 6 veces semana<br><input type="radio"/> 1 vez al día<br><input type="radio"/> 2 a 3 veces al día<br><input type="radio"/> 5 a 6 veces al día<br><input type="radio"/> más 6 veces al día |
|-----------------------|--------------------------------------------------------------------------------------------------------------------------------------------------------------------------------------------------------------------------------------------------------------------------------------------------------------------------------------------------------------------------------------------------------------|

---

|                       |                                                                                                                                                                                                                                                                                                                                                                                                              |
|-----------------------|--------------------------------------------------------------------------------------------------------------------------------------------------------------------------------------------------------------------------------------------------------------------------------------------------------------------------------------------------------------------------------------------------------------|
| zum natural fruta     | <input type="radio"/> Nunca o menos 1 vez al mes<br><input type="radio"/> 1 a 3 veces mes<br><input checked="" type="radio"/> 1 vez semana<br><input type="radio"/> 2 a 4 veces semana<br><input type="radio"/> 5 a 6 veces semana<br><input type="radio"/> 1 vez al día<br><input type="radio"/> 2 a 3 veces al día<br><input type="radio"/> 5 a 6 veces al día<br><input type="radio"/> más 6 veces al día |
| platano               | <input type="radio"/> Nunca o menos 1 vez al mes<br><input type="radio"/> 1 a 3 veces mes<br><input type="radio"/> 1 vez semana<br><input checked="" type="radio"/> 2 a 4 veces semana<br><input type="radio"/> 5 a 6 veces semana<br><input type="radio"/> 1 vez al día<br><input type="radio"/> 2 a 3 veces al día<br><input type="radio"/> 5 a 6 veces al día<br><input type="radio"/> más 6 veces al día |
| manzana o pera        | <input type="radio"/> Nunca o menos 1 vez al mes<br><input type="radio"/> 1 a 3 veces mes<br><input checked="" type="radio"/> 1 vez semana<br><input type="radio"/> 2 a 4 veces semana<br><input type="radio"/> 5 a 6 veces semana<br><input type="radio"/> 1 vez al día<br><input type="radio"/> 2 a 3 veces al día<br><input type="radio"/> 5 a 6 veces al día<br><input type="radio"/> más 6 veces al día |
| melocotón o nectarina | <input type="radio"/> Nunca o menos 1 vez al mes<br><input type="radio"/> 1 a 3 veces mes<br><input checked="" type="radio"/> 1 vez semana<br><input type="radio"/> 2 a 4 veces semana<br><input type="radio"/> 5 a 6 veces semana<br><input type="radio"/> 1 vez al día<br><input type="radio"/> 2 a 3 veces al día<br><input type="radio"/> 5 a 6 veces al día<br><input type="radio"/> más 6 veces al día |
| sandia o melon        | <input type="radio"/> Nunca o menos 1 vez al mes<br><input type="radio"/> 1 a 3 veces mes<br><input checked="" type="radio"/> 1 vez semana<br><input type="radio"/> 2 a 4 veces semana<br><input type="radio"/> 5 a 6 veces semana<br><input type="radio"/> 1 vez al día<br><input type="radio"/> 2 a 3 veces al día<br><input type="radio"/> 5 a 6 veces al día<br><input type="radio"/> más 6 veces al día |
| uva                   | <input checked="" type="radio"/> Nunca o menos 1 vez al mes<br><input type="radio"/> 1 a 3 veces mes<br><input type="radio"/> 1 vez semana<br><input type="radio"/> 2 a 4 veces semana<br><input type="radio"/> 5 a 6 veces semana<br><input type="radio"/> 1 vez al día<br><input type="radio"/> 2 a 3 veces al día<br><input type="radio"/> 5 a 6 veces al día<br><input type="radio"/> más 6 veces al día |

---

bruna o ciruela

- ☐ Nunca o menos 1 vez al mes  
☐ 1 a 3 veces mes  
☐ 1 vez semana  
☒ 2 a 4 veces semana  
☐ 5 a 6 veces semana  
☐ 1 vez al día  
☐ 2 a 3 veces al día  
☐ 5 a 6 veces al día  
☐ más 6 veces al día

---

kiwi

- ☐ Nunca o menos 1 vez al mes  
☐ 1 a 3 veces mes  
☒ 1 vez semana  
☐ 2 a 4 veces semana  
☐ 5 a 6 veces semana  
☐ 1 vez al día  
☐ 2 a 3 veces al día  
☐ 5 a 6 veces al día  
☐ más 6 veces al día

---

aceituna

- ☐ Nunca o menos 1 vez al mes  
☐ 1 a 3 veces mes  
☒ 1 vez semana  
☐ 2 a 4 veces semana  
☐ 5 a 6 veces semana  
☐ 1 vez al día  
☐ 2 a 3 veces al día  
☐ 5 a 6 veces al día  
☐ más 6 veces al día

---

frutos secos

- ☐ Nunca o menos 1 vez al mes  
☐ 1 a 3 veces mes  
☐ 1 vez semana  
☐ 2 a 4 veces semana  
☒ 5 a 6 veces semana  
☐ 1 vez al día  
☐ 2 a 3 veces al día  
☐ 5 a 6 veces al día  
☐ más 6 veces al día

---

pan blanco

- ☐ Nunca o menos 1 vez al mes  
☐ 1 a 3 veces mes  
☐ 1 vez semana  
☒ 2 a 4 veces semana  
☐ 5 a 6 veces semana  
☐ 1 vez al día  
☐ 2 a 3 veces al día  
☐ 5 a 6 veces al día  
☐ más 6 veces al día

---

pan integral

- ☒ Nunca o menos 1 vez al mes  
☐ 1 a 3 veces mes  
☐ 1 vez semana  
☐ 2 a 4 veces semana  
☐ 5 a 6 veces semana  
☐ 1 vez al día  
☐ 2 a 3 veces al día  
☐ 5 a 6 veces al día  
☐ más 6 veces al día

---

|                   |                                                                                                                                                                                                                                                                                                                                                                                                              |
|-------------------|--------------------------------------------------------------------------------------------------------------------------------------------------------------------------------------------------------------------------------------------------------------------------------------------------------------------------------------------------------------------------------------------------------------|
| cereales desayuno | <input checked="" type="radio"/> Nunca o menos 1 vez al mes<br><input type="radio"/> 1 a 3 veces mes<br><input type="radio"/> 1 vez semana<br><input type="radio"/> 2 a 4 veces semana<br><input type="radio"/> 5 a 6 veces semana<br><input type="radio"/> 1 vez al día<br><input type="radio"/> 2 a 3 veces al día<br><input type="radio"/> 5 a 6 veces al día<br><input type="radio"/> más 6 veces al día |
|-------------------|--------------------------------------------------------------------------------------------------------------------------------------------------------------------------------------------------------------------------------------------------------------------------------------------------------------------------------------------------------------------------------------------------------------|

---

|                |                                                                                                                                                                                                                                                                                                                                                                                                              |
|----------------|--------------------------------------------------------------------------------------------------------------------------------------------------------------------------------------------------------------------------------------------------------------------------------------------------------------------------------------------------------------------------------------------------------------|
| patatas fritas | <input checked="" type="radio"/> Nunca o menos 1 vez al mes<br><input type="radio"/> 1 a 3 veces mes<br><input type="radio"/> 1 vez semana<br><input type="radio"/> 2 a 4 veces semana<br><input type="radio"/> 5 a 6 veces semana<br><input type="radio"/> 1 vez al día<br><input type="radio"/> 2 a 3 veces al día<br><input type="radio"/> 5 a 6 veces al día<br><input type="radio"/> más 6 veces al día |
|----------------|--------------------------------------------------------------------------------------------------------------------------------------------------------------------------------------------------------------------------------------------------------------------------------------------------------------------------------------------------------------------------------------------------------------|

---

|                          |                                                                                                                                                                                                                                                                                                                                                                                                              |
|--------------------------|--------------------------------------------------------------------------------------------------------------------------------------------------------------------------------------------------------------------------------------------------------------------------------------------------------------------------------------------------------------------------------------------------------------|
| patatas cocidas o asadas | <input type="radio"/> Nunca o menos 1 vez al mes<br><input type="radio"/> 1 a 3 veces mes<br><input type="radio"/> 1 vez semana<br><input checked="" type="radio"/> 2 a 4 veces semana<br><input type="radio"/> 5 a 6 veces semana<br><input type="radio"/> 1 vez al día<br><input type="radio"/> 2 a 3 veces al día<br><input type="radio"/> 5 a 6 veces al día<br><input type="radio"/> más 6 veces al día |
|--------------------------|--------------------------------------------------------------------------------------------------------------------------------------------------------------------------------------------------------------------------------------------------------------------------------------------------------------------------------------------------------------------------------------------------------------|

---

|             |                                                                                                                                                                                                                                                                                                                                                                                                              |
|-------------|--------------------------------------------------------------------------------------------------------------------------------------------------------------------------------------------------------------------------------------------------------------------------------------------------------------------------------------------------------------------------------------------------------------|
| bolsa papas | <input type="radio"/> Nunca o menos 1 vez al mes<br><input type="radio"/> 1 a 3 veces mes<br><input checked="" type="radio"/> 1 vez semana<br><input type="radio"/> 2 a 4 veces semana<br><input type="radio"/> 5 a 6 veces semana<br><input type="radio"/> 1 vez al día<br><input type="radio"/> 2 a 3 veces al día<br><input type="radio"/> 5 a 6 veces al día<br><input type="radio"/> más 6 veces al día |
|-------------|--------------------------------------------------------------------------------------------------------------------------------------------------------------------------------------------------------------------------------------------------------------------------------------------------------------------------------------------------------------------------------------------------------------|

---

|                |                                                                                                                                                                                                                                                                                                                                                                                                              |
|----------------|--------------------------------------------------------------------------------------------------------------------------------------------------------------------------------------------------------------------------------------------------------------------------------------------------------------------------------------------------------------------------------------------------------------|
| arroz cocinado | <input type="radio"/> Nunca o menos 1 vez al mes<br><input type="radio"/> 1 a 3 veces mes<br><input checked="" type="radio"/> 1 vez semana<br><input type="radio"/> 2 a 4 veces semana<br><input type="radio"/> 5 a 6 veces semana<br><input type="radio"/> 1 vez al día<br><input type="radio"/> 2 a 3 veces al día<br><input type="radio"/> 5 a 6 veces al día<br><input type="radio"/> más 6 veces al día |
|----------------|--------------------------------------------------------------------------------------------------------------------------------------------------------------------------------------------------------------------------------------------------------------------------------------------------------------------------------------------------------------------------------------------------------------|

---

|       |                                                                                                                                                                                                                                                                                                                                                                                                              |
|-------|--------------------------------------------------------------------------------------------------------------------------------------------------------------------------------------------------------------------------------------------------------------------------------------------------------------------------------------------------------------------------------------------------------------|
| pasta | <input type="radio"/> Nunca o menos 1 vez al mes<br><input type="radio"/> 1 a 3 veces mes<br><input type="radio"/> 1 vez semana<br><input type="radio"/> 2 a 4 veces semana<br><input checked="" type="radio"/> 5 a 6 veces semana<br><input type="radio"/> 1 vez al día<br><input type="radio"/> 2 a 3 veces al día<br><input type="radio"/> 5 a 6 veces al día<br><input type="radio"/> más 6 veces al día |
|-------|--------------------------------------------------------------------------------------------------------------------------------------------------------------------------------------------------------------------------------------------------------------------------------------------------------------------------------------------------------------------------------------------------------------|

---

|                     |                                                                                                                                                                                                                                                                                                                                                                                                              |
|---------------------|--------------------------------------------------------------------------------------------------------------------------------------------------------------------------------------------------------------------------------------------------------------------------------------------------------------------------------------------------------------------------------------------------------------|
| pizza               | <input type="radio"/> Nunca o menos 1 vez al mes<br><input checked="" type="radio"/> 1 a 3 veces mes<br><input type="radio"/> 1 vez semana<br><input type="radio"/> 2 a 4 veces semana<br><input type="radio"/> 5 a 6 veces semana<br><input type="radio"/> 1 vez al día<br><input type="radio"/> 2 a 3 veces al día<br><input type="radio"/> 5 a 6 veces al día<br><input type="radio"/> más 6 veces al día |
| aceite oliva        | <input type="radio"/> Nunca o menos 1 vez al mes<br><input type="radio"/> 1 a 3 veces mes<br><input type="radio"/> 1 vez semana<br><input type="radio"/> 2 a 4 veces semana<br><input type="radio"/> 5 a 6 veces semana<br><input type="radio"/> 1 vez al día<br><input checked="" type="radio"/> 2 a 3 veces al día<br><input type="radio"/> 5 a 6 veces al día<br><input type="radio"/> más 6 veces al día |
| otros aceites       | <input type="radio"/> Nunca o menos 1 vez al mes<br><input type="radio"/> 1 a 3 veces mes<br><input checked="" type="radio"/> 1 vez semana<br><input type="radio"/> 2 a 4 veces semana<br><input type="radio"/> 5 a 6 veces semana<br><input type="radio"/> 1 vez al día<br><input type="radio"/> 2 a 3 veces al día<br><input type="radio"/> 5 a 6 veces al día<br><input type="radio"/> más 6 veces al día |
| margarina           | <input checked="" type="radio"/> Nunca o menos 1 vez al mes<br><input type="radio"/> 1 a 3 veces mes<br><input type="radio"/> 1 vez semana<br><input type="radio"/> 2 a 4 veces semana<br><input type="radio"/> 5 a 6 veces semana<br><input type="radio"/> 1 vez al día<br><input type="radio"/> 2 a 3 veces al día<br><input type="radio"/> 5 a 6 veces al día<br><input type="radio"/> más 6 veces al día |
| mantequilla         | <input checked="" type="radio"/> Nunca o menos 1 vez al mes<br><input type="radio"/> 1 a 3 veces mes<br><input type="radio"/> 1 vez semana<br><input type="radio"/> 2 a 4 veces semana<br><input type="radio"/> 5 a 6 veces semana<br><input type="radio"/> 1 vez al día<br><input type="radio"/> 2 a 3 veces al día<br><input type="radio"/> 5 a 6 veces al día<br><input type="radio"/> más 6 veces al día |
| galletas tipo maria | <input type="radio"/> Nunca o menos 1 vez al mes<br><input type="radio"/> 1 a 3 veces mes<br><input type="radio"/> 1 vez semana<br><input checked="" type="radio"/> 2 a 4 veces semana<br><input type="radio"/> 5 a 6 veces semana<br><input type="radio"/> 1 vez al día<br><input type="radio"/> 2 a 3 veces al día<br><input type="radio"/> 5 a 6 veces al día<br><input type="radio"/> más 6 veces al día |

|                           |                                                                                                                                                                                                                                                                                                                                                                                                              |
|---------------------------|--------------------------------------------------------------------------------------------------------------------------------------------------------------------------------------------------------------------------------------------------------------------------------------------------------------------------------------------------------------------------------------------------------------|
| galletas chocolate        | <input type="radio"/> Nunca o menos 1 vez al mes<br><input type="radio"/> 1 a 3 veces mes<br><input checked="" type="radio"/> 1 vez semana<br><input type="radio"/> 2 a 4 veces semana<br><input type="radio"/> 5 a 6 veces semana<br><input type="radio"/> 1 vez al día<br><input type="radio"/> 2 a 3 veces al día<br><input type="radio"/> 5 a 6 veces al día<br><input type="radio"/> más 6 veces al día |
| bollieria                 | <input type="radio"/> Nunca o menos 1 vez al mes<br><input type="radio"/> 1 a 3 veces mes<br><input checked="" type="radio"/> 1 vez semana<br><input type="radio"/> 2 a 4 veces semana<br><input type="radio"/> 5 a 6 veces semana<br><input type="radio"/> 1 vez al día<br><input type="radio"/> 2 a 3 veces al día<br><input type="radio"/> 5 a 6 veces al día<br><input type="radio"/> más 6 veces al día |
| chocolate o bombones      | <input type="radio"/> Nunca o menos 1 vez al mes<br><input type="radio"/> 1 a 3 veces mes<br><input type="radio"/> 1 vez semana<br><input type="radio"/> 2 a 4 veces semana<br><input checked="" type="radio"/> 5 a 6 veces semana<br><input type="radio"/> 1 vez al día<br><input type="radio"/> 2 a 3 veces al día<br><input type="radio"/> 5 a 6 veces al día<br><input type="radio"/> más 6 veces al día |
| chocolate polvo o colacao | <input type="radio"/> Nunca o menos 1 vez al mes<br><input checked="" type="radio"/> 1 a 3 veces mes<br><input type="radio"/> 1 vez semana<br><input type="radio"/> 2 a 4 veces semana<br><input type="radio"/> 5 a 6 veces semana<br><input type="radio"/> 1 vez al día<br><input type="radio"/> 2 a 3 veces al día<br><input type="radio"/> 5 a 6 veces al día<br><input type="radio"/> más 6 veces al día |
| vino tinto                | <input checked="" type="radio"/> Nunca o menos 1 vez al mes<br><input type="radio"/> 1 a 3 veces mes<br><input type="radio"/> 1 vez semana<br><input type="radio"/> 2 a 4 veces semana<br><input type="radio"/> 5 a 6 veces semana<br><input type="radio"/> 1 vez al día<br><input type="radio"/> 2 a 3 veces al día<br><input type="radio"/> 5 a 6 veces al día<br><input type="radio"/> más 6 veces al día |
| vino blanco               | <input checked="" type="radio"/> Nunca o menos 1 vez al mes<br><input type="radio"/> 1 a 3 veces mes<br><input type="radio"/> 1 vez semana<br><input type="radio"/> 2 a 4 veces semana<br><input type="radio"/> 5 a 6 veces semana<br><input type="radio"/> 1 vez al día<br><input type="radio"/> 2 a 3 veces al día<br><input type="radio"/> 5 a 6 veces al día<br><input type="radio"/> más 6 veces al día |

---

|                    |                                                                                                                                                                                                                                                                                                                                                                                                              |
|--------------------|--------------------------------------------------------------------------------------------------------------------------------------------------------------------------------------------------------------------------------------------------------------------------------------------------------------------------------------------------------------------------------------------------------------|
| vino seco o vermut | <input checked="" type="radio"/> Nunca o menos 1 vez al mes<br><input type="radio"/> 1 a 3 veces mes<br><input type="radio"/> 1 vez semana<br><input type="radio"/> 2 a 4 veces semana<br><input type="radio"/> 5 a 6 veces semana<br><input type="radio"/> 1 vez al día<br><input type="radio"/> 2 a 3 veces al día<br><input type="radio"/> 5 a 6 veces al día<br><input type="radio"/> más 6 veces al día |
|--------------------|--------------------------------------------------------------------------------------------------------------------------------------------------------------------------------------------------------------------------------------------------------------------------------------------------------------------------------------------------------------------------------------------------------------|

---

|         |                                                                                                                                                                                                                                                                                                                                                                                                              |
|---------|--------------------------------------------------------------------------------------------------------------------------------------------------------------------------------------------------------------------------------------------------------------------------------------------------------------------------------------------------------------------------------------------------------------|
| cerveza | <input checked="" type="radio"/> Nunca o menos 1 vez al mes<br><input type="radio"/> 1 a 3 veces mes<br><input type="radio"/> 1 vez semana<br><input type="radio"/> 2 a 4 veces semana<br><input type="radio"/> 5 a 6 veces semana<br><input type="radio"/> 1 vez al día<br><input type="radio"/> 2 a 3 veces al día<br><input type="radio"/> 5 a 6 veces al día<br><input type="radio"/> más 6 veces al día |
|---------|--------------------------------------------------------------------------------------------------------------------------------------------------------------------------------------------------------------------------------------------------------------------------------------------------------------------------------------------------------------------------------------------------------------|

---

|                     |                                                                                                                                                                                                                                                                                                                                                                                                              |
|---------------------|--------------------------------------------------------------------------------------------------------------------------------------------------------------------------------------------------------------------------------------------------------------------------------------------------------------------------------------------------------------------------------------------------------------|
| cerveza sin alcohol | <input type="radio"/> Nunca o menos 1 vez al mes<br><input checked="" type="radio"/> 1 a 3 veces mes<br><input type="radio"/> 1 vez semana<br><input type="radio"/> 2 a 4 veces semana<br><input type="radio"/> 5 a 6 veces semana<br><input type="radio"/> 1 vez al día<br><input type="radio"/> 2 a 3 veces al día<br><input type="radio"/> 5 a 6 veces al día<br><input type="radio"/> más 6 veces al día |
|---------------------|--------------------------------------------------------------------------------------------------------------------------------------------------------------------------------------------------------------------------------------------------------------------------------------------------------------------------------------------------------------------------------------------------------------|

---

|         |                                                                                                                                                                                                                                                                                                                                                                                                              |
|---------|--------------------------------------------------------------------------------------------------------------------------------------------------------------------------------------------------------------------------------------------------------------------------------------------------------------------------------------------------------------------------------------------------------------|
| licores | <input checked="" type="radio"/> Nunca o menos 1 vez al mes<br><input type="radio"/> 1 a 3 veces mes<br><input type="radio"/> 1 vez semana<br><input type="radio"/> 2 a 4 veces semana<br><input type="radio"/> 5 a 6 veces semana<br><input type="radio"/> 1 vez al día<br><input type="radio"/> 2 a 3 veces al día<br><input type="radio"/> 5 a 6 veces al día<br><input type="radio"/> más 6 veces al día |
|---------|--------------------------------------------------------------------------------------------------------------------------------------------------------------------------------------------------------------------------------------------------------------------------------------------------------------------------------------------------------------------------------------------------------------|

---

|                       |                                                                                                                                                                                                                                                                                                                                                                                                              |
|-----------------------|--------------------------------------------------------------------------------------------------------------------------------------------------------------------------------------------------------------------------------------------------------------------------------------------------------------------------------------------------------------------------------------------------------------|
| ginebra o ron o vodka | <input checked="" type="radio"/> Nunca o menos 1 vez al mes<br><input type="radio"/> 1 a 3 veces mes<br><input type="radio"/> 1 vez semana<br><input type="radio"/> 2 a 4 veces semana<br><input type="radio"/> 5 a 6 veces semana<br><input type="radio"/> 1 vez al día<br><input type="radio"/> 2 a 3 veces al día<br><input type="radio"/> 5 a 6 veces al día<br><input type="radio"/> más 6 veces al día |
|-----------------------|--------------------------------------------------------------------------------------------------------------------------------------------------------------------------------------------------------------------------------------------------------------------------------------------------------------------------------------------------------------------------------------------------------------|

---

|                 |                                                                                                                                                                                                                                                                                                                                                                                                              |
|-----------------|--------------------------------------------------------------------------------------------------------------------------------------------------------------------------------------------------------------------------------------------------------------------------------------------------------------------------------------------------------------------------------------------------------------|
| refresco normal | <input type="radio"/> Nunca o menos 1 vez al mes<br><input checked="" type="radio"/> 1 a 3 veces mes<br><input type="radio"/> 1 vez semana<br><input type="radio"/> 2 a 4 veces semana<br><input type="radio"/> 5 a 6 veces semana<br><input type="radio"/> 1 vez al día<br><input type="radio"/> 2 a 3 veces al día<br><input type="radio"/> 5 a 6 veces al día<br><input type="radio"/> más 6 veces al día |
|-----------------|--------------------------------------------------------------------------------------------------------------------------------------------------------------------------------------------------------------------------------------------------------------------------------------------------------------------------------------------------------------------------------------------------------------|

---

|                          |                                                                                                                                                                                                                                                                                                                                                                                                              |
|--------------------------|--------------------------------------------------------------------------------------------------------------------------------------------------------------------------------------------------------------------------------------------------------------------------------------------------------------------------------------------------------------------------------------------------------------|
| refresco sin azúcar      | <input type="radio"/> Nunca o menos 1 vez al mes<br><input checked="" type="radio"/> 1 a 3 veces mes<br><input type="radio"/> 1 vez semana<br><input type="radio"/> 2 a 4 veces semana<br><input type="radio"/> 5 a 6 veces semana<br><input type="radio"/> 1 vez al día<br><input type="radio"/> 2 a 3 veces al día<br><input type="radio"/> 5 a 6 veces al día<br><input type="radio"/> más 6 veces al día |
| Agua del grifo           | <input checked="" type="radio"/> Nunca o menos 1 vez al mes<br><input type="radio"/> 1 a 3 veces mes<br><input type="radio"/> 1 vez semana<br><input type="radio"/> 2 a 4 veces semana<br><input type="radio"/> 5 a 6 veces semana<br><input type="radio"/> 1 vez al día<br><input type="radio"/> 2 a 3 veces al día<br><input type="radio"/> 5 a 6 veces al día<br><input type="radio"/> más 6 veces al día |
| agua embotellada sin gas | <input type="radio"/> Nunca o menos 1 vez al mes<br><input type="radio"/> 1 a 3 veces mes<br><input type="radio"/> 1 vez semana<br><input type="radio"/> 2 a 4 veces semana<br><input type="radio"/> 5 a 6 veces semana<br><input type="radio"/> 1 vez al día<br><input type="radio"/> 2 a 3 veces al día<br><input type="radio"/> 5 a 6 veces al día<br><input checked="" type="radio"/> más 6 veces al día |
| agua embotellada con gas | <input checked="" type="radio"/> Nunca o menos 1 vez al mes<br><input type="radio"/> 1 a 3 veces mes<br><input type="radio"/> 1 vez semana<br><input type="radio"/> 2 a 4 veces semana<br><input type="radio"/> 5 a 6 veces semana<br><input type="radio"/> 1 vez al día<br><input type="radio"/> 2 a 3 veces al día<br><input type="radio"/> 5 a 6 veces al día<br><input type="radio"/> más 6 veces al día |
| zumو frutas embasado     | <input type="radio"/> Nunca o menos 1 vez al mes<br><input checked="" type="radio"/> 1 a 3 veces mes<br><input type="radio"/> 1 vez semana<br><input type="radio"/> 2 a 4 veces semana<br><input type="radio"/> 5 a 6 veces semana<br><input type="radio"/> 1 vez al día<br><input type="radio"/> 2 a 3 veces al día<br><input type="radio"/> 5 a 6 veces al día<br><input type="radio"/> más 6 veces al día |
| cafe                     | <input checked="" type="radio"/> Nunca o menos 1 vez al mes<br><input type="radio"/> 1 a 3 veces mes<br><input type="radio"/> 1 vez semana<br><input type="radio"/> 2 a 4 veces semana<br><input type="radio"/> 5 a 6 veces semana<br><input type="radio"/> 1 vez al día<br><input type="radio"/> 2 a 3 veces al día<br><input type="radio"/> 5 a 6 veces al día<br><input type="radio"/> más 6 veces al día |



|                       |                                                                                                                                                                                                                                                                                                                                                                                                              |
|-----------------------|--------------------------------------------------------------------------------------------------------------------------------------------------------------------------------------------------------------------------------------------------------------------------------------------------------------------------------------------------------------------------------------------------------------|
| cafe descafeinado     | <input checked="" type="radio"/> Nunca o menos 1 vez al mes<br><input type="radio"/> 1 a 3 veces mes<br><input type="radio"/> 1 vez semana<br><input type="radio"/> 2 a 4 veces semana<br><input type="radio"/> 5 a 6 veces semana<br><input type="radio"/> 1 vez al día<br><input type="radio"/> 2 a 3 veces al día<br><input type="radio"/> 5 a 6 veces al día<br><input type="radio"/> más 6 veces al día |
| te o infusión         | <input checked="" type="radio"/> Nunca o menos 1 vez al mes<br><input type="radio"/> 1 a 3 veces mes<br><input type="radio"/> 1 vez semana<br><input type="radio"/> 2 a 4 veces semana<br><input type="radio"/> 5 a 6 veces semana<br><input type="radio"/> 1 vez al día<br><input type="radio"/> 2 a 3 veces al día<br><input type="radio"/> 5 a 6 veces al día<br><input type="radio"/> más 6 veces al día |
| sopa o puré verduras  | <input type="radio"/> Nunca o menos 1 vez al mes<br><input type="radio"/> 1 a 3 veces mes<br><input type="radio"/> 1 vez semana<br><input type="radio"/> 2 a 4 veces semana<br><input type="radio"/> 5 a 6 veces semana<br><input type="radio"/> 1 vez al día<br><input type="radio"/> 2 a 3 veces al día<br><input type="radio"/> 5 a 6 veces al día<br><input checked="" type="radio"/> más 6 veces al día |
| croquetas pollo jamón | <input type="radio"/> Nunca o menos 1 vez al mes<br><input checked="" type="radio"/> 1 a 3 veces mes<br><input type="radio"/> 1 vez semana<br><input type="radio"/> 2 a 4 veces semana<br><input type="radio"/> 5 a 6 veces semana<br><input type="radio"/> 1 vez al día<br><input type="radio"/> 2 a 3 veces al día<br><input type="radio"/> 5 a 6 veces al día<br><input type="radio"/> más 6 veces al día |
| croquetas pescado     | <input type="radio"/> Nunca o menos 1 vez al mes<br><input checked="" type="radio"/> 1 a 3 veces mes<br><input type="radio"/> 1 vez semana<br><input type="radio"/> 2 a 4 veces semana<br><input type="radio"/> 5 a 6 veces semana<br><input type="radio"/> 1 vez al día<br><input type="radio"/> 2 a 3 veces al día<br><input type="radio"/> 5 a 6 veces al día<br><input type="radio"/> más 6 veces al día |
| mayonesa              | <input type="radio"/> Nunca o menos 1 vez al mes<br><input type="radio"/> 1 a 3 veces mes<br><input checked="" type="radio"/> 1 vez semana<br><input type="radio"/> 2 a 4 veces semana<br><input type="radio"/> 5 a 6 veces semana<br><input type="radio"/> 1 vez al día<br><input type="radio"/> 2 a 3 veces al día<br><input type="radio"/> 5 a 6 veces al día<br><input type="radio"/> más 6 veces al día |

|                  |                                                                                                                                                                                                                                                                                                                                                                                                              |
|------------------|--------------------------------------------------------------------------------------------------------------------------------------------------------------------------------------------------------------------------------------------------------------------------------------------------------------------------------------------------------------------------------------------------------------|
| salsa tomate     | <input type="radio"/> Nunca o menos 1 vez al mes<br><input type="radio"/> 1 a 3 veces mes<br><input checked="" type="radio"/> 1 vez semana<br><input type="radio"/> 2 a 4 veces semana<br><input type="radio"/> 5 a 6 veces semana<br><input type="radio"/> 1 vez al día<br><input type="radio"/> 2 a 3 veces al día<br><input type="radio"/> 5 a 6 veces al día<br><input type="radio"/> más 6 veces al día |
| ketchup          | <input checked="" type="radio"/> Nunca o menos 1 vez al mes<br><input type="radio"/> 1 a 3 veces mes<br><input type="radio"/> 1 vez semana<br><input type="radio"/> 2 a 4 veces semana<br><input type="radio"/> 5 a 6 veces semana<br><input type="radio"/> 1 vez al día<br><input type="radio"/> 2 a 3 veces al día<br><input type="radio"/> 5 a 6 veces al día<br><input type="radio"/> más 6 veces al día |
| sal              | <input checked="" type="radio"/> Nunca o menos 1 vez al mes<br><input type="radio"/> 1 a 3 veces mes<br><input type="radio"/> 1 vez semana<br><input type="radio"/> 2 a 4 veces semana<br><input type="radio"/> 5 a 6 veces semana<br><input type="radio"/> 1 vez al día<br><input type="radio"/> 2 a 3 veces al día<br><input type="radio"/> 5 a 6 veces al día<br><input type="radio"/> más 6 veces al día |
| ajo              | <input checked="" type="radio"/> Nunca o menos 1 vez al mes<br><input type="radio"/> 1 a 3 veces mes<br><input type="radio"/> 1 vez semana<br><input type="radio"/> 2 a 4 veces semana<br><input type="radio"/> 5 a 6 veces semana<br><input type="radio"/> 1 vez al día<br><input type="radio"/> 2 a 3 veces al día<br><input type="radio"/> 5 a 6 veces al día<br><input type="radio"/> más 6 veces al día |
| mermelada o miel | <input checked="" type="radio"/> Nunca o menos 1 vez al mes<br><input type="radio"/> 1 a 3 veces mes<br><input type="radio"/> 1 vez semana<br><input type="radio"/> 2 a 4 veces semana<br><input type="radio"/> 5 a 6 veces semana<br><input type="radio"/> 1 vez al día<br><input type="radio"/> 2 a 3 veces al día<br><input type="radio"/> 5 a 6 veces al día<br><input type="radio"/> más 6 veces al día |
| azúcar           | <input checked="" type="radio"/> Nunca o menos 1 vez al mes<br><input type="radio"/> 1 a 3 veces mes<br><input type="radio"/> 1 vez semana<br><input type="radio"/> 2 a 4 veces semana<br><input type="radio"/> 5 a 6 veces semana<br><input type="radio"/> 1 vez al día<br><input type="radio"/> 2 a 3 veces al día<br><input type="radio"/> 5 a 6 veces al día<br><input type="radio"/> más 6 veces al día |

|                                       |                                                                                                                                                                                                                                                                                                                                                                                                                                                                                                                               |
|---------------------------------------|-------------------------------------------------------------------------------------------------------------------------------------------------------------------------------------------------------------------------------------------------------------------------------------------------------------------------------------------------------------------------------------------------------------------------------------------------------------------------------------------------------------------------------|
| Otro alimento                         |                                                                                                                                                                                                                                                                                                                                                                                                                                                                                                                               |
| suplementos vitamínicos               | <input checked="" type="radio"/> si<br><input type="radio"/> no                                                                                                                                                                                                                                                                                                                                                                                                                                                               |
| suplementos vitamínicos               | [*DATA REMOVED*]                                                                                                                                                                                                                                                                                                                                                                                                                                                                                                              |
| dieta previa                          | <input type="radio"/> si<br><input checked="" type="radio"/> no                                                                                                                                                                                                                                                                                                                                                                                                                                                               |
| motivo dieta                          | <input checked="" type="radio"/> no dieta<br><input type="radio"/> control peso<br><input type="radio"/> control colesterol<br><input type="radio"/> control diabetes<br><input type="radio"/> problemas estómago<br><input type="radio"/> problemas vesícula o hepáticos<br><input type="radio"/> HTA o cardiopatía<br><input type="radio"/> problemas renales<br><input type="radio"/> alergia alimentaria<br><input type="radio"/> ácido úrico elevado<br><input type="radio"/> vegetariana<br><input type="radio"/> otros |
| cambio alimentos año previo gestación | <input checked="" type="radio"/> si<br><input type="radio"/> no                                                                                                                                                                                                                                                                                                                                                                                                                                                               |
| cambio lácteos                        | <input checked="" type="radio"/> eliminado<br><input type="radio"/> disminuido<br><input type="radio"/> igual<br><input type="radio"/> aumentado<br><input type="radio"/> no sabe                                                                                                                                                                                                                                                                                                                                             |
| cambio huevos                         | <input type="radio"/> eliminado<br><input type="radio"/> disminuido<br><input checked="" type="radio"/> igual<br><input type="radio"/> aumentado<br><input type="radio"/> no sabe                                                                                                                                                                                                                                                                                                                                             |
| cambio carne                          | <input type="radio"/> eliminado<br><input checked="" type="radio"/> disminuido<br><input type="radio"/> igual<br><input type="radio"/> aumentado<br><input type="radio"/> no sabe                                                                                                                                                                                                                                                                                                                                             |
| cambio pescado                        | <input type="radio"/> eliminado<br><input checked="" type="radio"/> disminuido<br><input type="radio"/> igual<br><input type="radio"/> aumentado<br><input type="radio"/> no sabe                                                                                                                                                                                                                                                                                                                                             |
| cambio verduras                       | <input type="radio"/> eliminado<br><input type="radio"/> disminuido<br><input type="radio"/> igual<br><input checked="" type="radio"/> aumentado<br><input type="radio"/> no sabe                                                                                                                                                                                                                                                                                                                                             |

|                            |                                                                                                                                                                                                                        |
|----------------------------|------------------------------------------------------------------------------------------------------------------------------------------------------------------------------------------------------------------------|
| cambio legumbres           | <input type="radio"/> eliminado<br><input type="radio"/> disminuido<br><input type="radio"/> igual<br><input checked="" type="radio"/> aumentado<br><input type="radio"/> no sabe                                      |
| cambio fruta               | <input type="radio"/> eliminado<br><input type="radio"/> disminuido<br><input type="radio"/> igual<br><input checked="" type="radio"/> aumentado<br><input type="radio"/> no sabe                                      |
| cambio pan                 | <input type="radio"/> eliminado<br><input type="radio"/> disminuido<br><input checked="" type="radio"/> igual<br><input type="radio"/> aumentado<br><input type="radio"/> no sabe                                      |
| cambio aceite oliva        | <input type="radio"/> eliminado<br><input type="radio"/> disminuido<br><input checked="" type="radio"/> igual<br><input type="radio"/> aumentado<br><input type="radio"/> no sabe                                      |
| cambio mante o margarina   | <input checked="" type="radio"/> eliminado<br><input type="radio"/> disminuido<br><input type="radio"/> igual<br><input type="radio"/> aumentado<br><input type="radio"/> no sabe                                      |
| cambio azúcar y dulces     | <input type="radio"/> eliminado<br><input checked="" type="radio"/> disminuido<br><input type="radio"/> igual<br><input type="radio"/> aumentado<br><input type="radio"/> no sabe                                      |
| cambio bebidas alcohólicas | <input checked="" type="radio"/> eliminado<br><input type="radio"/> disminuido<br><input type="radio"/> igual<br><input type="radio"/> aumentado<br><input type="radio"/> no sabe                                      |
| frecuencia comidas fritas  | <input type="radio"/> a diario<br><input type="radio"/> 5 a 6 veces semana<br><input type="radio"/> 2 a 4 veces semana<br><input type="radio"/> 1 vez semana<br><input checked="" type="radio"/> menos de 1 vez semana |
| carne                      | <input type="radio"/> no como<br><input type="radio"/> cruda<br><input type="radio"/> poco hecha<br><input type="radio"/> hecha<br><input checked="" type="radio"/> muy hecha                                          |
| grasa visible carne        | <input checked="" type="radio"/> quita toda<br><input type="radio"/> quita mayoría<br><input type="radio"/> quita un poco<br><input type="radio"/> no quita nada                                                       |

|                                |                                                                                                                                                                                                                                                          |
|--------------------------------|----------------------------------------------------------------------------------------------------------------------------------------------------------------------------------------------------------------------------------------------------------|
| cocina carne                   | <input checked="" type="radio"/> a la plancha<br><input type="radio"/> a la parrilla<br><input type="radio"/> asada<br><input type="radio"/> frita<br><input type="radio"/> guisada                                                                      |
| tostado quemado carne          | <input type="radio"/> nunca<br><input type="radio"/> 1 vez mes<br><input type="radio"/> 2 a 3 veces mes<br><input type="radio"/> 1 vez semana<br><input type="radio"/> 2 a 3 semanas                                                                     |
| tostado quemado pescado        | <input type="radio"/> nunca<br><input type="radio"/> 1 vez mes<br><input type="radio"/> 2 a 3 veces mes<br><input type="radio"/> 1 vez semana<br><input type="radio"/> 2 a 3 semanas                                                                     |
| socarrat paella                | <input type="radio"/> nunca<br><input type="radio"/> 1 vez mes<br><input type="radio"/> 2 a 3 veces mes<br><input type="radio"/> 1 vez semana<br><input type="radio"/> 2 a 3 semanas                                                                     |
| grasa o aceite cocinar         | <input type="radio"/> mantequilla<br><input type="radio"/> margarina<br><input checked="" type="radio"/> aceite oliva<br><input type="radio"/> aceite oliva virgen extra<br><input type="radio"/> aceite vegetal<br><input type="radio"/> mezcla aceites |
| grasa aceite aliñar            | <input type="radio"/> mantequilla<br><input type="radio"/> margarina<br><input type="radio"/> aceite oliva<br><input type="radio"/> aceite oliva virgen extra<br><input type="radio"/> aceite vegetal<br><input type="radio"/> mezcla aceites            |
| grasa aceite freir             | <input type="radio"/> mantequilla<br><input type="radio"/> margarina<br><input type="radio"/> aceite oliva<br><input type="radio"/> aceite oliva virgen extra<br><input type="radio"/> aceite vegetal<br><input type="radio"/> mezcla aceites            |
| Ejercicio cuestionario         | <input checked="" type="radio"/> si<br><input type="radio"/> no                                                                                                                                                                                          |
| horas de sueño incluido siesta | [*DATA REMOVED*]                                                                                                                                                                                                                                         |
| minutos siesta                 | [*DATA REMOVED*]                                                                                                                                                                                                                                         |
| horas televisión semana        |                                                                                                                                                                                                                                                          |

|                                        |                                                                                                                                                                                                                                                                                                                                                                           |
|----------------------------------------|---------------------------------------------------------------------------------------------------------------------------------------------------------------------------------------------------------------------------------------------------------------------------------------------------------------------------------------------------------------------------|
| actividad trabajo                      | <input type="radio"/> casi siempre sentado<br><input type="radio"/> sentado 50 por cien<br><input type="radio"/> casi siempre de pie, quieto<br><input type="radio"/> casi siempre levantado caminando y llevando pocas cosas<br><input type="radio"/> casi siempre levantado, caminando y llevado muchas cosas<br><input checked="" type="radio"/> trabajo manual pesado |
| tiempo caminar o bici al día           | <input type="radio"/> casi nunca<br><input type="radio"/> menos 20min día<br><input type="radio"/> 20 a 40 min día<br><input type="radio"/> 40 a 60 min día<br><input checked="" type="radio"/> 1h o 1h y media día<br><input type="radio"/> más de 1h y media al día                                                                                                     |
| tiempo tareas casa al día              | <input type="radio"/> menos de 1h día<br><input checked="" type="radio"/> 1 a 2h día<br><input type="radio"/> 3 a 4h día<br><input type="radio"/> 5 a 6h día<br><input type="radio"/> 7 a 8h día<br><input type="radio"/> más de 8h día                                                                                                                                   |
| tiempo libre televisión ordenador leer | <input type="radio"/> menos 1h día<br><input type="radio"/> 1h día<br><input checked="" type="radio"/> 2h día<br><input type="radio"/> 3h día<br><input type="radio"/> 4h día<br><input type="radio"/> 5 a 6h día<br><input type="radio"/> mas 6h día                                                                                                                     |
| tiempo libre ejercicio o deporte       | <input type="radio"/> menos 1h semana<br><input type="radio"/> 1h semana<br><input type="radio"/> 2h semana<br><input type="radio"/> 3h semana<br><input type="radio"/> 4 a 5h semana<br><input checked="" type="radio"/> mas 5h semana                                                                                                                                   |
| como se considera                      | <input type="radio"/> sedentaria<br><input type="radio"/> poco activa<br><input type="radio"/> moderadamente activa<br><input type="radio"/> bastante activa<br><input type="radio"/> muy activa<br><input checked="" type="radio"/> no sabe                                                                                                                              |
| FUR                                    | [*DATA REMOVED*]                                                                                                                                                                                                                                                                                                                                                          |
| Semanas gestación 2T                   | [*DATA REMOVED*]                                                                                                                                                                                                                                                                                                                                                          |
| Días gestación 2T                      | [*DATA REMOVED*]                                                                                                                                                                                                                                                                                                                                                          |
| DBP 2T                                 | [*DATA REMOVED*]                                                                                                                                                                                                                                                                                                                                                          |
| CC 2T                                  | [*DATA REMOVED*]                                                                                                                                                                                                                                                                                                                                                          |
| AC 2T                                  | [*DATA REMOVED*]                                                                                                                                                                                                                                                                                                                                                          |

|                                                   |                                                                                                                                                                                                 |
|---------------------------------------------------|-------------------------------------------------------------------------------------------------------------------------------------------------------------------------------------------------|
| LF 2T                                             | [*DATA REMOVED*]                                                                                                                                                                                |
| PFE 2T (Hadlock)                                  | [*DATA REMOVED*]                                                                                                                                                                                |
| Semanas gestación 3T                              | [*DATA REMOVED*]                                                                                                                                                                                |
| días 3T                                           | [*DATA REMOVED*]                                                                                                                                                                                |
| DBP 3T                                            | [*DATA REMOVED*]                                                                                                                                                                                |
| CC 3T                                             | [*DATA REMOVED*]                                                                                                                                                                                |
| AC 3T                                             | [*DATA REMOVED*]                                                                                                                                                                                |
| LF 3T                                             | [*DATA REMOVED*]                                                                                                                                                                                |
| PFE 3T (Hadlock)                                  | [*DATA REMOVED*]                                                                                                                                                                                |
| Semanas de gestación final                        | [*DATA REMOVED*]                                                                                                                                                                                |
| días gestación final                              | [*DATA REMOVED*]                                                                                                                                                                                |
| Localización placenta                             | <input checked="" type="radio"/> anterior<br><input type="radio"/> lateral derecha<br><input type="radio"/> lateral izquierda<br><input type="radio"/> posterior<br><input type="radio"/> fondo |
| Presentación longitudinal cefálica                | <input type="radio"/> no<br><input checked="" type="radio"/> si                                                                                                                                 |
| Dorso                                             | <input type="radio"/> izquierda anterior<br><input type="radio"/> izquierda posterior<br><input type="radio"/> derecha anterior<br><input checked="" type="radio"/> derecha posterior           |
| diámetro biparietal                               | [*DATA REMOVED*]                                                                                                                                                                                |
| Circunferencia craneal                            | [*DATA REMOVED*]                                                                                                                                                                                |
| Circunferencia abdominal                          | [*DATA REMOVED*]                                                                                                                                                                                |
| Longitud de femur                                 | [*DATA REMOVED*]                                                                                                                                                                                |
| tejido celular subcutáneo a nivel del muslo en mm | [*DATA REMOVED*]                                                                                                                                                                                |
| tejido celular subcutáneo en abdomen en mm        | [*DATA REMOVED*]                                                                                                                                                                                |
| Volumen del muslo en cm3                          | [*DATA REMOVED*]                                                                                                                                                                                |
| Peso fetal estimado según fórmula de Hadlock      | [*DATA REMOVED*]                                                                                                                                                                                |

|                                               |                                                                                                                                               |
|-----------------------------------------------|-----------------------------------------------------------------------------------------------------------------------------------------------|
| Percentil                                     | [*DATA REMOVED*]                                                                                                                              |
| Peso fetal estimado según fórmula de Scioscia | <hr/>                                                                                                                                         |
| Peso fetal estimado según fórmula de LEE      | <hr/>                                                                                                                                         |
| Tipo de parto                                 | <input checked="" type="radio"/> eutocico<br><input type="radio"/> instrumentado/ventosa<br><input type="radio"/> cesarea                     |
| fecha de nacimiento                           | [*DATA REMOVED*]                                                                                                                              |
| Días entre exploración y nacimiento           | [*DATA REMOVED*]                                                                                                                              |
| Peso RN en g                                  | [*DATA REMOVED*]                                                                                                                              |
| sexo                                          | <input checked="" type="radio"/> mujer<br><input type="radio"/> hombre                                                                        |
| Apgar 1 minuto                                | [*DATA REMOVED*]                                                                                                                              |
| Apgar 5 minutos                               | [*DATA REMOVED*]                                                                                                                              |
| Apgar 10 minutos                              | <hr/>                                                                                                                                         |
| antecedente Covid durante gestación           | <input type="radio"/> Yes<br><input checked="" type="radio"/> No                                                                              |
| Nivel de estudios                             | <input type="radio"/> ninguno<br><input type="radio"/> primarios<br><input type="radio"/> secundarios<br><input type="radio"/> universitarios |



# Base\_datos\_estimacion\_peso\_fetal

|                                       |                                                                                                                                                                                                                                                                                      |
|---------------------------------------|--------------------------------------------------------------------------------------------------------------------------------------------------------------------------------------------------------------------------------------------------------------------------------------|
| Número de identificación participante | 37                                                                                                                                                                                                                                                                                   |
| CODIGO PARTICIPANTE                   |                                                                                                                                                                                                                                                                                      |
| Edad                                  | [*DATA REMOVED*]                                                                                                                                                                                                                                                                     |
| Gestaciones                           | <input type="radio"/> 1<br><input type="radio"/> 2<br><input checked="" type="radio"/> 3<br><input type="radio"/> mas de 3                                                                                                                                                           |
| partos                                | <input type="radio"/> 0<br><input checked="" type="radio"/> 1<br><input type="radio"/> 2<br><input type="radio"/> 3<br><input type="radio"/> mas de 3                                                                                                                                |
| cesáreas                              | <input checked="" type="radio"/> 0<br><input type="radio"/> 1<br><input type="radio"/> 2<br><input type="radio"/> 3<br><input type="radio"/> mas de 3                                                                                                                                |
| Abortos                               | <input type="radio"/> 0<br><input checked="" type="radio"/> 1<br><input type="radio"/> 2<br><input type="radio"/> 3<br><input type="radio"/> mas de 3                                                                                                                                |
| Tipo de gestacion                     | <input checked="" type="radio"/> espontanea<br><input type="radio"/> IAC inseminación artificial conyuge<br><input type="radio"/> IAD inseminación artificial donante<br><input type="radio"/> FIV Fecundación in Vitro<br><input type="radio"/> Ovodon FIV con donación de ovocitos |
| peso previo a embarazo                | [*DATA REMOVED*]                                                                                                                                                                                                                                                                     |
| Ganancia ponderal embarazo            | [*DATA REMOVED*]                                                                                                                                                                                                                                                                     |
| Talla madre                           | [*DATA REMOVED*]                                                                                                                                                                                                                                                                     |
| IMC previo embarazo                   | 22.308149910767405                                                                                                                                                                                                                                                                   |
| Patología obstétrica                  | <input checked="" type="radio"/> no<br><input type="radio"/> si                                                                                                                                                                                                                      |
| Diabetes pregestacional               | <input checked="" type="radio"/> no<br><input type="radio"/> si                                                                                                                                                                                                                      |
| Diabetes gestacional                  | <input checked="" type="radio"/> no<br><input type="radio"/> si                                                                                                                                                                                                                      |

|                                            |                                                                                                                                                                                      |
|--------------------------------------------|--------------------------------------------------------------------------------------------------------------------------------------------------------------------------------------|
| Diabetes gestacional con insulina          | <input checked="" type="radio"/> no<br><input type="radio"/> si                                                                                                                      |
| Diabetes gestacional con dieta y ejercicio | <input checked="" type="radio"/> no<br><input type="radio"/> si                                                                                                                      |
| Percentil fetos previos                    | <input type="radio"/> Nada<br><input type="radio"/> percentil menor de 10<br><input checked="" type="radio"/> percentil entre 10 y 90<br><input type="radio"/> percentil mayor de 90 |
| Exfumadora                                 | <input checked="" type="radio"/> Nada<br><input type="radio"/> menos de 5 años<br><input type="radio"/> 5 a 10 años<br><input type="radio"/> mayor o igual a 10 años                 |
| Hábito tabáquico                           | <input checked="" type="radio"/> no<br><input type="radio"/> si                                                                                                                      |
| fumadora                                   | [*DATA REMOVED*]                                                                                                                                                                     |
| Consumo otros tóxicos                      | <input checked="" type="radio"/> no<br><input type="radio"/> si                                                                                                                      |
| Hb 1T                                      | [*DATA REMOVED*]                                                                                                                                                                     |
| Htc 1T                                     | [*DATA REMOVED*]                                                                                                                                                                     |
| Hb 2T                                      | [*DATA REMOVED*]                                                                                                                                                                     |
| HTC 2T                                     | [*DATA REMOVED*]                                                                                                                                                                     |
| Hb 3T                                      | [*DATA REMOVED*]                                                                                                                                                                     |
| HTC 3T                                     | [*DATA REMOVED*]                                                                                                                                                                     |
| Suplemento FE oral                         | <input type="radio"/> si<br><input checked="" type="radio"/> no                                                                                                                      |
| Suplemento fe iv                           | <input type="radio"/> si<br><input checked="" type="radio"/> no                                                                                                                      |
| Transfusión                                | <input checked="" type="radio"/> no<br><input type="radio"/> si                                                                                                                      |
| Solicitada Vit D                           | <input checked="" type="radio"/> no<br><input type="radio"/> si                                                                                                                      |
| Deficit vit D                              | <input type="radio"/> no<br><input type="radio"/> si                                                                                                                                 |
| Suplemento vit D                           | <input type="radio"/> si<br><input type="radio"/> no                                                                                                                                 |

|                       |                                                                                                                                                                                                                                                                                                                                                                                                              |
|-----------------------|--------------------------------------------------------------------------------------------------------------------------------------------------------------------------------------------------------------------------------------------------------------------------------------------------------------------------------------------------------------------------------------------------------------|
| Dieta, cuestionario   | <input checked="" type="radio"/> sí<br><input type="radio"/> no                                                                                                                                                                                                                                                                                                                                              |
| Leche entera          | <input type="radio"/> Nunca o menos 1 vez al mes<br><input type="radio"/> 1 a 3 veces mes<br><input type="radio"/> 1 vez semana<br><input checked="" type="radio"/> 2 a 4 veces semana<br><input type="radio"/> 5 a 6 veces semana<br><input type="radio"/> 1 vez al día<br><input type="radio"/> 2 a 3 veces al día<br><input type="radio"/> 5 a 6 veces al día<br><input type="radio"/> más 6 veces al día |
| Leche semidesnatada   | <input checked="" type="radio"/> Nunca o menos 1 vez al mes<br><input type="radio"/> 1 a 3 veces mes<br><input type="radio"/> 1 vez semana<br><input type="radio"/> 2 a 4 veces semana<br><input type="radio"/> 5 a 6 veces semana<br><input type="radio"/> 1 vez al día<br><input type="radio"/> 2 a 3 veces al día<br><input type="radio"/> 5 a 6 veces al día<br><input type="radio"/> mas 6 veces al día |
| Leche desnatada       | <input checked="" type="radio"/> Nunca o menos 1 vez al mes<br><input type="radio"/> 1 a 3 veces mes<br><input type="radio"/> 1 vez semana<br><input type="radio"/> 2 a 4 veces semana<br><input type="radio"/> 5 a 6 veces semana<br><input type="radio"/> 1 vez al día<br><input type="radio"/> 2 a 3 veces al día<br><input type="radio"/> 5 a 6 veces al día<br><input type="radio"/> más 6 veces al día |
| Leche condensada      | <input type="radio"/> Nunca o menos 1 vez al mes<br><input checked="" type="radio"/> 1 a 3 veces mes<br><input type="radio"/> 1 vez semana<br><input type="radio"/> 2 a 4 veces semana<br><input type="radio"/> 5 a 6 veces semana<br><input type="radio"/> 1 vez al día<br><input type="radio"/> 2 a 3 veces al día<br><input type="radio"/> 5 a 6 veces al día<br><input type="radio"/> más 6 veces al día |
| nata o crema de leche | <input type="radio"/> Nunca o menos 1 vez al mes<br><input checked="" type="radio"/> 1 a 3 veces mes<br><input type="radio"/> 1 vez semana<br><input type="radio"/> 2 a 4 veces semana<br><input type="radio"/> 5 a 6 veces semana<br><input type="radio"/> 1 vez al día<br><input type="radio"/> 2 a 3 veces al día<br><input type="radio"/> 5 a 6 veces al día<br><input type="radio"/> más 6 veces al día |

---

Yogurt Entero

- ☐ Nunca o menos 1 vez al mes  
☐ 1 a 3 veces mes  
☐ 1 vez semana  
☒ 2 a 4 veces semana  
☐ 5 a 6 veces semana  
☐ 1 vez al día  
☐ 2 a 3 veces al día  
☐ 5 a 6 veces al día  
☐ más 6 veces al día

---

Yogurt desnatado

- ☒ Nunca o menos 1 vez al mes  
☐ 1 a 3 veces mes  
☐ 1 vez semana  
☐ 2 a 4 veces semana  
☐ 5 a 6 veces semana  
☐ 1 vez al día  
☐ 2 a 3 veces al día  
☐ 5 a 6 veces al día  
☐ más 6 veces al día

---

100g requesón o queso blando o queso fresco

- ☐ Nunca o menos 1 vez al mes  
☐ 1 a 3 veces mes  
☒ 1 vez semana  
☐ 2 a 4 veces semana  
☐ 5 a 6 veces semana  
☐ 1 vez al día  
☐ 2 a 3 veces al día  
☐ 5 a 6 veces al día  
☐ más 6 veces al día

---

queso curado o semicurado o cremoso

- ☐ Nunca o menos 1 vez al mes  
☐ 1 a 3 veces mes  
☒ 1 vez semana  
☐ 2 a 4 veces semana  
☐ 5 a 6 veces semana  
☐ 1 vez al día  
☐ 2 a 3 veces al día  
☐ 5 a 6 veces al día  
☐ más 6 veces al día

---

natillas flan pudding

- ☐ Nunca o menos 1 vez al mes  
☐ 1 a 3 veces mes  
☒ 1 vez semana  
☐ 2 a 4 veces semana  
☐ 5 a 6 veces semana  
☐ 1 vez al día  
☐ 2 a 3 veces al día  
☐ 5 a 6 veces al día  
☐ más 6 veces al día

---

Helado

- ☐ Nunca o menos 1 vez al mes  
☐ 1 a 3 veces mes  
☒ 1 vez semana  
☐ 2 a 4 veces semana  
☐ 5 a 6 veces semana  
☐ 1 vez al día  
☐ 2 a 3 veces al día  
☐ 5 a 6 veces al día  
☐ más 6 veces al día

|                                      |                                                                                                                                                                                                                                                                                                                                                                                                              |
|--------------------------------------|--------------------------------------------------------------------------------------------------------------------------------------------------------------------------------------------------------------------------------------------------------------------------------------------------------------------------------------------------------------------------------------------------------------|
| huevo                                | <input type="radio"/> Nunca o menos 1 vez al mes<br><input type="radio"/> 1 a 3 veces mes<br><input type="radio"/> 1 vez semana<br><input checked="" type="radio"/> 2 a 4 veces semana<br><input type="radio"/> 5 a 6 veces semana<br><input type="radio"/> 1 vez al día<br><input type="radio"/> 2 a 3 veces al día<br><input type="radio"/> 5 a 6 veces al día<br><input type="radio"/> más 6 veces al día |
| Pollo con piel                       | <input checked="" type="radio"/> Nunca o menos 1 vez al mes<br><input type="radio"/> 1 a 3 veces mes<br><input type="radio"/> 1 vez semana<br><input type="radio"/> 2 a 4 veces semana<br><input type="radio"/> 5 a 6 veces semana<br><input type="radio"/> 1 vez al día<br><input type="radio"/> 2 a 3 veces al día<br><input type="radio"/> 5 a 6 veces al día<br><input type="radio"/> más 6 veces al día |
| pollo sin piel                       | <input type="radio"/> Nunca o menos 1 vez al mes<br><input type="radio"/> 1 a 3 veces mes<br><input checked="" type="radio"/> 1 vez semana<br><input type="radio"/> 2 a 4 veces semana<br><input type="radio"/> 5 a 6 veces semana<br><input type="radio"/> 1 vez al día<br><input type="radio"/> 2 a 3 veces al día<br><input type="radio"/> 5 a 6 veces al día<br><input type="radio"/> más 6 veces al día |
| Ternera o cerdo o cordero            | <input type="radio"/> Nunca o menos 1 vez al mes<br><input type="radio"/> 1 a 3 veces mes<br><input checked="" type="radio"/> 1 vez semana<br><input type="radio"/> 2 a 4 veces semana<br><input type="radio"/> 5 a 6 veces semana<br><input type="radio"/> 1 vez al día<br><input type="radio"/> 2 a 3 veces al día<br><input type="radio"/> 5 a 6 veces al día<br><input type="radio"/> más 6 veces al día |
| carne caza: Conejo o codorniz o pato | <input checked="" type="radio"/> Nunca o menos 1 vez al mes<br><input type="radio"/> 1 a 3 veces mes<br><input type="radio"/> 1 vez semana<br><input type="radio"/> 2 a 4 veces semana<br><input type="radio"/> 5 a 6 veces semana<br><input type="radio"/> 1 vez al día<br><input type="radio"/> 2 a 3 veces al día<br><input type="radio"/> 5 a 6 veces al día<br><input type="radio"/> más 6 veces al día |
| Hígado de ternera o cerdo o pollo    | <input checked="" type="radio"/> Nunca o menos 1 vez al mes<br><input type="radio"/> 1 a 3 veces mes<br><input type="radio"/> 1 vez semana<br><input type="radio"/> 2 a 4 veces semana<br><input type="radio"/> 5 a 6 veces semana<br><input type="radio"/> 1 vez al día<br><input type="radio"/> 2 a 3 veces al día<br><input type="radio"/> 5 a 6 veces al día<br><input type="radio"/> más 6 veces al día |

|                     |                                                                                                                                                                                                                                                                                                                                                                                                              |
|---------------------|--------------------------------------------------------------------------------------------------------------------------------------------------------------------------------------------------------------------------------------------------------------------------------------------------------------------------------------------------------------------------------------------------------------|
| Vísceras            | <input checked="" type="radio"/> Nunca o menos 1 vez al mes<br><input type="radio"/> 1 a 3 veces mes<br><input type="radio"/> 1 vez semana<br><input type="radio"/> 2 a 4 veces semana<br><input type="radio"/> 5 a 6 veces semana<br><input type="radio"/> 1 vez al día<br><input type="radio"/> 2 a 3 veces al día<br><input type="radio"/> 5 a 6 veces al día<br><input type="radio"/> más 6 veces al día |
| Embutido            | <input checked="" type="radio"/> Nunca o menos 1 vez al mes<br><input type="radio"/> 1 a 3 veces mes<br><input type="radio"/> 1 vez semana<br><input type="radio"/> 2 a 4 veces semana<br><input type="radio"/> 5 a 6 veces semana<br><input type="radio"/> 1 vez al día<br><input type="radio"/> 2 a 3 veces al día<br><input type="radio"/> 5 a 6 veces al día<br><input type="radio"/> más 6 veces al día |
| Salchicha o similar | <input type="radio"/> Nunca o menos 1 vez al mes<br><input type="radio"/> 1 a 3 veces mes<br><input checked="" type="radio"/> 1 vez semana<br><input type="radio"/> 2 a 4 veces semana<br><input type="radio"/> 5 a 6 veces semana<br><input type="radio"/> 1 vez al día<br><input type="radio"/> 2 a 3 veces al día<br><input type="radio"/> 5 a 6 veces al día<br><input type="radio"/> más 6 veces al día |
| Pate o foiegras     | <input checked="" type="radio"/> Nunca o menos 1 vez al mes<br><input type="radio"/> 1 a 3 veces mes<br><input type="radio"/> 1 vez semana<br><input type="radio"/> 2 a 4 veces semana<br><input type="radio"/> 5 a 6 veces semana<br><input type="radio"/> 1 vez al día<br><input type="radio"/> 2 a 3 veces al día<br><input type="radio"/> 5 a 6 veces al día<br><input type="radio"/> más 6 veces al día |
| Hamburguesa         | <input type="radio"/> Nunca o menos 1 vez al mes<br><input type="radio"/> 1 a 3 veces mes<br><input checked="" type="radio"/> 1 vez semana<br><input type="radio"/> 2 a 4 veces semana<br><input type="radio"/> 5 a 6 veces semana<br><input type="radio"/> 1 vez al día<br><input type="radio"/> 2 a 3 veces al día<br><input type="radio"/> 5 a 6 veces al día<br><input type="radio"/> más 6 veces al día |
| tocino o bacon      | <input type="radio"/> Nunca o menos 1 vez al mes<br><input checked="" type="radio"/> 1 a 3 veces mes<br><input type="radio"/> 1 vez semana<br><input type="radio"/> 2 a 4 veces semana<br><input type="radio"/> 5 a 6 veces semana<br><input type="radio"/> 1 vez al día<br><input type="radio"/> 2 a 3 veces al día<br><input type="radio"/> 5 a 6 veces al día<br><input type="radio"/> más 6 veces al día |

|                        |                                                                                                                                                                                                                                                                                                                                                                                                              |
|------------------------|--------------------------------------------------------------------------------------------------------------------------------------------------------------------------------------------------------------------------------------------------------------------------------------------------------------------------------------------------------------------------------------------------------------|
| Pescado frito          | <input type="radio"/> Nunca o menos 1 vez al mes<br><input type="radio"/> 1 a 3 veces mes<br><input type="radio"/> 1 vez semana<br><input type="radio"/> 2 a 4 veces semana<br><input type="radio"/> 5 a 6 veces semana<br><input type="radio"/> 1 vez al día<br><input type="radio"/> 2 a 3 veces al día<br><input type="radio"/> 5 a 6 veces al día<br><input type="radio"/> más 6 veces al día            |
| pescado hervido blanco | <input type="radio"/> Nunca o menos 1 vez al mes<br><input type="radio"/> 1 a 3 veces mes<br><input checked="" type="radio"/> 1 vez semana<br><input type="radio"/> 2 a 4 veces semana<br><input type="radio"/> 5 a 6 veces semana<br><input type="radio"/> 1 vez al día<br><input type="radio"/> 2 a 3 veces al día<br><input type="radio"/> 5 a 6 veces al día<br><input type="radio"/> más 6 veces al día |
| pescado hervido azul   | <input checked="" type="radio"/> Nunca o menos 1 vez al mes<br><input type="radio"/> 1 a 3 veces mes<br><input type="radio"/> 1 vez semana<br><input type="radio"/> 2 a 4 veces semana<br><input type="radio"/> 5 a 6 veces semana<br><input type="radio"/> 1 vez al día<br><input type="radio"/> 2 a 3 veces al día<br><input type="radio"/> 5 a 6 veces al día<br><input type="radio"/> más 6 veces al día |
| otros pescado azul     | <input type="radio"/> Nunca o menos 1 vez al mes<br><input type="radio"/> 1 a 3 veces mes<br><input checked="" type="radio"/> 1 vez semana<br><input type="radio"/> 2 a 4 veces semana<br><input type="radio"/> 5 a 6 veces semana<br><input type="radio"/> 1 vez al día<br><input type="radio"/> 2 a 3 veces al día<br><input type="radio"/> 5 a 6 veces al día<br><input type="radio"/> más 6 veces al día |
| atun conserva          | <input type="radio"/> Nunca o menos 1 vez al mes<br><input checked="" type="radio"/> 1 a 3 veces mes<br><input type="radio"/> 1 vez semana<br><input type="radio"/> 2 a 4 veces semana<br><input type="radio"/> 5 a 6 veces semana<br><input type="radio"/> 1 vez al día<br><input type="radio"/> 2 a 3 veces al día<br><input type="radio"/> 5 a 6 veces al día<br><input type="radio"/> más 6 veces al día |
| sardina conserva       | <input checked="" type="radio"/> Nunca o menos 1 vez al mes<br><input type="radio"/> 1 a 3 veces mes<br><input type="radio"/> 1 vez semana<br><input type="radio"/> 2 a 4 veces semana<br><input type="radio"/> 5 a 6 veces semana<br><input type="radio"/> 1 vez al día<br><input type="radio"/> 2 a 3 veces al día<br><input type="radio"/> 5 a 6 veces al día<br><input type="radio"/> más 6 veces al día |

---

pescado ahumado

- ☒ Nunca o menos 1 vez al mes  
☐ 1 a 3 veces mes  
☐ 1 vez semana  
☐ 2 a 4 veces semana  
☐ 5 a 6 veces semana  
☐ 1 vez al día  
☐ 2 a 3 veces al día  
☐ 5 a 6 veces al día  
☐ más 6 veces al día

---

almejas o mejillones o ostras unos 100g

- ☐ Nunca o menos 1 vez al mes  
☒ 1 a 3 veces mes  
☐ 1 vez semana  
☐ 2 a 4 veces semana  
☐ 5 a 6 veces semana  
☐ 1 vez al día  
☐ 2 a 3 veces al día  
☐ 5 a 6 veces al día  
☐ más 6 veces al día

---

calamar o chipiron o sepia unos 100g

- ☐ Nunca o menos 1 vez al mes  
☒ 1 a 3 veces mes  
☐ 1 vez semana  
☐ 2 a 4 veces semana  
☐ 5 a 6 veces semana  
☐ 1 vez al día  
☐ 2 a 3 veces al día  
☐ 5 a 6 veces al día  
☐ más 6 veces al día

---

marisco unos 100g

- ☐ Nunca o menos 1 vez al mes  
☒ 1 a 3 veces mes  
☐ 1 vez semana  
☐ 2 a 4 veces semana  
☐ 5 a 6 veces semana  
☐ 1 vez al día  
☐ 2 a 3 veces al día  
☐ 5 a 6 veces al día  
☐ más 6 veces al día

---

Espinacas o acelgas cocinadas

- ☐ Nunca o menos 1 vez al mes  
☒ 1 a 3 veces mes  
☐ 1 vez semana  
☐ 2 a 4 veces semana  
☐ 5 a 6 veces semana  
☐ 1 vez al día  
☐ 2 a 3 veces al día  
☐ 5 a 6 veces al día  
☐ más 6 veces al día

---

Col o coliflor o brocoli cocinado

- ☐ Nunca o menos 1 vez al mes  
☐ 1 a 3 veces mes  
☒ 1 vez semana  
☐ 2 a 4 veces semana  
☐ 5 a 6 veces semana  
☐ 1 vez al día  
☐ 2 a 3 veces al día  
☐ 5 a 6 veces al día  
☐ más 6 veces al día



---

Lechuga o endivia o escarola

- ☐ Nunca o menos 1 vez al mes  
☐ 1 a 3 veces mes  
☒ 1 vez semana  
☐ 2 a 4 veces semana  
☐ 5 a 6 veces semana  
☐ 1 vez al día  
☐ 2 a 3 veces al día  
☐ 5 a 6 veces al día  
☐ más 6 veces al día

---

tomate ensalada

- ☐ Nunca o menos 1 vez al mes  
☐ 1 a 3 veces mes  
☐ 1 vez semana  
☒ 2 a 4 veces semana  
☐ 5 a 6 veces semana  
☐ 1 vez al día  
☐ 2 a 3 veces al día  
☐ 5 a 6 veces al día  
☐ más 6 veces al día

---

cebolla

- ☐ Nunca o menos 1 vez al mes  
☐ 1 a 3 veces mes  
☐ 1 vez semana  
☒ 2 a 4 veces semana  
☐ 5 a 6 veces semana  
☐ 1 vez al día  
☐ 2 a 3 veces al día  
☐ 5 a 6 veces al día  
☐ más 6 veces al día

---

Zanahoria o calabaza

- ☐ Nunca o menos 1 vez al mes  
☐ 1 a 3 veces mes  
☐ 1 vez semana  
☒ 2 a 4 veces semana  
☐ 5 a 6 veces semana  
☐ 1 vez al día  
☐ 2 a 3 veces al día  
☐ 5 a 6 veces al día  
☐ más 6 veces al día

---

Judías verdes

- ☒ Nunca o menos 1 vez al mes  
☐ 1 a 3 veces mes  
☐ 1 vez semana  
☐ 2 a 4 veces semana  
☐ 5 a 6 veces semana  
☐ 1 vez al día  
☐ 2 a 3 veces al día  
☐ 5 a 6 veces al día  
☐ más 6 veces al día

---

Berenjena o calabacin o pepino

- ☐ Nunca o menos 1 vez al mes  
☐ 1 a 3 veces mes  
☒ 1 vez semana  
☐ 2 a 4 veces semana  
☐ 5 a 6 veces semana  
☐ 1 vez al día  
☐ 2 a 3 veces al día  
☐ 5 a 6 veces al día  
☐ más 6 veces al día

|                       |                                                                                                                                                                                                                                                                                                                                                                                                              |
|-----------------------|--------------------------------------------------------------------------------------------------------------------------------------------------------------------------------------------------------------------------------------------------------------------------------------------------------------------------------------------------------------------------------------------------------------|
| pimiento              | <input type="radio"/> Nunca o menos 1 vez al mes<br><input type="radio"/> 1 a 3 veces mes<br><input checked="" type="radio"/> 1 vez semana<br><input type="radio"/> 2 a 4 veces semana<br><input type="radio"/> 5 a 6 veces semana<br><input type="radio"/> 1 vez al día<br><input type="radio"/> 2 a 3 veces al día<br><input type="radio"/> 5 a 6 veces al día<br><input type="radio"/> más 6 veces al día |
| alcachofa             | <input type="radio"/> Nunca o menos 1 vez al mes<br><input checked="" type="radio"/> 1 a 3 veces mes<br><input type="radio"/> 1 vez semana<br><input type="radio"/> 2 a 4 veces semana<br><input type="radio"/> 5 a 6 veces semana<br><input type="radio"/> 1 vez al día<br><input type="radio"/> 2 a 3 veces al día<br><input type="radio"/> 5 a 6 veces al día<br><input type="radio"/> más 6 veces al día |
| espárragos            | <input type="radio"/> Nunca o menos 1 vez al mes<br><input checked="" type="radio"/> 1 a 3 veces mes<br><input type="radio"/> 1 vez semana<br><input type="radio"/> 2 a 4 veces semana<br><input type="radio"/> 5 a 6 veces semana<br><input type="radio"/> 1 vez al día<br><input type="radio"/> 2 a 3 veces al día<br><input type="radio"/> 5 a 6 veces al día<br><input type="radio"/> más 6 veces al día |
| maíz hervido          | <input checked="" type="radio"/> Nunca o menos 1 vez al mes<br><input type="radio"/> 1 a 3 veces mes<br><input type="radio"/> 1 vez semana<br><input type="radio"/> 2 a 4 veces semana<br><input type="radio"/> 5 a 6 veces semana<br><input type="radio"/> 1 vez al día<br><input type="radio"/> 2 a 3 veces al día<br><input type="radio"/> 5 a 6 veces al día<br><input type="radio"/> más 6 veces al día |
| legumbres             | <input type="radio"/> Nunca o menos 1 vez al mes<br><input checked="" type="radio"/> 1 a 3 veces mes<br><input type="radio"/> 1 vez semana<br><input type="radio"/> 2 a 4 veces semana<br><input type="radio"/> 5 a 6 veces semana<br><input type="radio"/> 1 vez al día<br><input type="radio"/> 2 a 3 veces al día<br><input type="radio"/> 5 a 6 veces al día<br><input type="radio"/> más 6 veces al día |
| naranjas o mandarinas | <input type="radio"/> Nunca o menos 1 vez al mes<br><input checked="" type="radio"/> 1 a 3 veces mes<br><input type="radio"/> 1 vez semana<br><input type="radio"/> 2 a 4 veces semana<br><input type="radio"/> 5 a 6 veces semana<br><input type="radio"/> 1 vez al día<br><input type="radio"/> 2 a 3 veces al día<br><input type="radio"/> 5 a 6 veces al día<br><input type="radio"/> más 6 veces al día |

|                       |                                                                                                                                                                                                                                                                                                                                                                                                              |
|-----------------------|--------------------------------------------------------------------------------------------------------------------------------------------------------------------------------------------------------------------------------------------------------------------------------------------------------------------------------------------------------------------------------------------------------------|
| zum natural fruta     | <input checked="" type="radio"/> Nunca o menos 1 vez al mes<br><input type="radio"/> 1 a 3 veces mes<br><input type="radio"/> 1 vez semana<br><input type="radio"/> 2 a 4 veces semana<br><input type="radio"/> 5 a 6 veces semana<br><input type="radio"/> 1 vez al día<br><input type="radio"/> 2 a 3 veces al día<br><input type="radio"/> 5 a 6 veces al día<br><input type="radio"/> más 6 veces al día |
| platano               | <input type="radio"/> Nunca o menos 1 vez al mes<br><input type="radio"/> 1 a 3 veces mes<br><input type="radio"/> 1 vez semana<br><input checked="" type="radio"/> 2 a 4 veces semana<br><input type="radio"/> 5 a 6 veces semana<br><input type="radio"/> 1 vez al día<br><input type="radio"/> 2 a 3 veces al día<br><input type="radio"/> 5 a 6 veces al día<br><input type="radio"/> más 6 veces al día |
| manzana o pera        | <input type="radio"/> Nunca o menos 1 vez al mes<br><input type="radio"/> 1 a 3 veces mes<br><input type="radio"/> 1 vez semana<br><input type="radio"/> 2 a 4 veces semana<br><input type="radio"/> 5 a 6 veces semana<br><input checked="" type="radio"/> 1 vez al día<br><input type="radio"/> 2 a 3 veces al día<br><input type="radio"/> 5 a 6 veces al día<br><input type="radio"/> más 6 veces al día |
| melocotón o nectarina | <input type="radio"/> Nunca o menos 1 vez al mes<br><input checked="" type="radio"/> 1 a 3 veces mes<br><input type="radio"/> 1 vez semana<br><input type="radio"/> 2 a 4 veces semana<br><input type="radio"/> 5 a 6 veces semana<br><input type="radio"/> 1 vez al día<br><input type="radio"/> 2 a 3 veces al día<br><input type="radio"/> 5 a 6 veces al día<br><input type="radio"/> más 6 veces al día |
| sandia o melon        | <input checked="" type="radio"/> Nunca o menos 1 vez al mes<br><input type="radio"/> 1 a 3 veces mes<br><input type="radio"/> 1 vez semana<br><input type="radio"/> 2 a 4 veces semana<br><input type="radio"/> 5 a 6 veces semana<br><input type="radio"/> 1 vez al día<br><input type="radio"/> 2 a 3 veces al día<br><input type="radio"/> 5 a 6 veces al día<br><input type="radio"/> más 6 veces al día |
| uva                   | <input type="radio"/> Nunca o menos 1 vez al mes<br><input checked="" type="radio"/> 1 a 3 veces mes<br><input type="radio"/> 1 vez semana<br><input type="radio"/> 2 a 4 veces semana<br><input type="radio"/> 5 a 6 veces semana<br><input type="radio"/> 1 vez al día<br><input type="radio"/> 2 a 3 veces al día<br><input type="radio"/> 5 a 6 veces al día<br><input type="radio"/> más 6 veces al día |

---

bruna o ciruela

- ☐ Nunca o menos 1 vez al mes  
☐ 1 a 3 veces mes  
☒ 1 vez semana  
☐ 2 a 4 veces semana  
☐ 5 a 6 veces semana  
☐ 1 vez al día  
☐ 2 a 3 veces al día  
☐ 5 a 6 veces al día  
☐ más 6 veces al día

---

kiwi

- ☐ Nunca o menos 1 vez al mes  
☐ 1 a 3 veces mes  
☐ 1 vez semana  
☒ 2 a 4 veces semana  
☐ 5 a 6 veces semana  
☐ 1 vez al día  
☐ 2 a 3 veces al día  
☐ 5 a 6 veces al día  
☐ más 6 veces al día

---

aceituna

- ☒ Nunca o menos 1 vez al mes  
☐ 1 a 3 veces mes  
☐ 1 vez semana  
☐ 2 a 4 veces semana  
☐ 5 a 6 veces semana  
☐ 1 vez al día  
☐ 2 a 3 veces al día  
☐ 5 a 6 veces al día  
☐ más 6 veces al día

---

frutos secos

- ☐ Nunca o menos 1 vez al mes  
☐ 1 a 3 veces mes  
☐ 1 vez semana  
☒ 2 a 4 veces semana  
☐ 5 a 6 veces semana  
☐ 1 vez al día  
☐ 2 a 3 veces al día  
☐ 5 a 6 veces al día  
☐ más 6 veces al día

---

pan blanco

- ☐ Nunca o menos 1 vez al mes  
☐ 1 a 3 veces mes  
☐ 1 vez semana  
☐ 2 a 4 veces semana  
☐ 5 a 6 veces semana  
☒ 1 vez al día  
☐ 2 a 3 veces al día  
☐ 5 a 6 veces al día  
☐ más 6 veces al día

---

pan integral

- ☐ Nunca o menos 1 vez al mes  
☒ 1 a 3 veces mes  
☐ 1 vez semana  
☐ 2 a 4 veces semana  
☐ 5 a 6 veces semana  
☐ 1 vez al día  
☐ 2 a 3 veces al día  
☐ 5 a 6 veces al día  
☐ más 6 veces al día

|                          |                                                                                                                                                                                                                                                                                                                                                                                                              |
|--------------------------|--------------------------------------------------------------------------------------------------------------------------------------------------------------------------------------------------------------------------------------------------------------------------------------------------------------------------------------------------------------------------------------------------------------|
| cereales desayuno        | <input checked="" type="radio"/> Nunca o menos 1 vez al mes<br><input type="radio"/> 1 a 3 veces mes<br><input type="radio"/> 1 vez semana<br><input type="radio"/> 2 a 4 veces semana<br><input type="radio"/> 5 a 6 veces semana<br><input type="radio"/> 1 vez al día<br><input type="radio"/> 2 a 3 veces al día<br><input type="radio"/> 5 a 6 veces al día<br><input type="radio"/> más 6 veces al día |
| patatas fritas           | <input type="radio"/> Nunca o menos 1 vez al mes<br><input checked="" type="radio"/> 1 a 3 veces mes<br><input type="radio"/> 1 vez semana<br><input type="radio"/> 2 a 4 veces semana<br><input type="radio"/> 5 a 6 veces semana<br><input type="radio"/> 1 vez al día<br><input type="radio"/> 2 a 3 veces al día<br><input type="radio"/> 5 a 6 veces al día<br><input type="radio"/> más 6 veces al día |
| patatas cocidas o asadas | <input type="radio"/> Nunca o menos 1 vez al mes<br><input type="radio"/> 1 a 3 veces mes<br><input checked="" type="radio"/> 1 vez semana<br><input type="radio"/> 2 a 4 veces semana<br><input type="radio"/> 5 a 6 veces semana<br><input type="radio"/> 1 vez al día<br><input type="radio"/> 2 a 3 veces al día<br><input type="radio"/> 5 a 6 veces al día<br><input type="radio"/> más 6 veces al día |
| bolsa papas              | <input type="radio"/> Nunca o menos 1 vez al mes<br><input type="radio"/> 1 a 3 veces mes<br><input type="radio"/> 1 vez semana<br><input checked="" type="radio"/> 2 a 4 veces semana<br><input type="radio"/> 5 a 6 veces semana<br><input type="radio"/> 1 vez al día<br><input type="radio"/> 2 a 3 veces al día<br><input type="radio"/> 5 a 6 veces al día<br><input type="radio"/> más 6 veces al día |
| arroz cocinado           | <input checked="" type="radio"/> Nunca o menos 1 vez al mes<br><input type="radio"/> 1 a 3 veces mes<br><input type="radio"/> 1 vez semana<br><input type="radio"/> 2 a 4 veces semana<br><input type="radio"/> 5 a 6 veces semana<br><input type="radio"/> 1 vez al día<br><input type="radio"/> 2 a 3 veces al día<br><input type="radio"/> 5 a 6 veces al día<br><input type="radio"/> más 6 veces al día |
| pasta                    | <input type="radio"/> Nunca o menos 1 vez al mes<br><input type="radio"/> 1 a 3 veces mes<br><input checked="" type="radio"/> 1 vez semana<br><input type="radio"/> 2 a 4 veces semana<br><input type="radio"/> 5 a 6 veces semana<br><input type="radio"/> 1 vez al día<br><input type="radio"/> 2 a 3 veces al día<br><input type="radio"/> 5 a 6 veces al día<br><input type="radio"/> más 6 veces al día |

|                     |                                                                                                                                                                                                                                                                                                                                                                                                              |
|---------------------|--------------------------------------------------------------------------------------------------------------------------------------------------------------------------------------------------------------------------------------------------------------------------------------------------------------------------------------------------------------------------------------------------------------|
| pizza               | <input type="radio"/> Nunca o menos 1 vez al mes<br><input type="radio"/> 1 a 3 veces mes<br><input checked="" type="radio"/> 1 vez semana<br><input type="radio"/> 2 a 4 veces semana<br><input type="radio"/> 5 a 6 veces semana<br><input type="radio"/> 1 vez al día<br><input type="radio"/> 2 a 3 veces al día<br><input type="radio"/> 5 a 6 veces al día<br><input type="radio"/> más 6 veces al día |
| aceite oliva        | <input type="radio"/> Nunca o menos 1 vez al mes<br><input type="radio"/> 1 a 3 veces mes<br><input type="radio"/> 1 vez semana<br><input type="radio"/> 2 a 4 veces semana<br><input type="radio"/> 5 a 6 veces semana<br><input checked="" type="radio"/> 1 vez al día<br><input type="radio"/> 2 a 3 veces al día<br><input type="radio"/> 5 a 6 veces al día<br><input type="radio"/> más 6 veces al día |
| otros aceites       | <input checked="" type="radio"/> Nunca o menos 1 vez al mes<br><input type="radio"/> 1 a 3 veces mes<br><input type="radio"/> 1 vez semana<br><input type="radio"/> 2 a 4 veces semana<br><input type="radio"/> 5 a 6 veces semana<br><input type="radio"/> 1 vez al día<br><input type="radio"/> 2 a 3 veces al día<br><input type="radio"/> 5 a 6 veces al día<br><input type="radio"/> más 6 veces al día |
| margarina           | <input checked="" type="radio"/> Nunca o menos 1 vez al mes<br><input type="radio"/> 1 a 3 veces mes<br><input type="radio"/> 1 vez semana<br><input type="radio"/> 2 a 4 veces semana<br><input type="radio"/> 5 a 6 veces semana<br><input type="radio"/> 1 vez al día<br><input type="radio"/> 2 a 3 veces al día<br><input type="radio"/> 5 a 6 veces al día<br><input type="radio"/> más 6 veces al día |
| mantequilla         | <input checked="" type="radio"/> Nunca o menos 1 vez al mes<br><input type="radio"/> 1 a 3 veces mes<br><input type="radio"/> 1 vez semana<br><input type="radio"/> 2 a 4 veces semana<br><input type="radio"/> 5 a 6 veces semana<br><input type="radio"/> 1 vez al día<br><input type="radio"/> 2 a 3 veces al día<br><input type="radio"/> 5 a 6 veces al día<br><input type="radio"/> más 6 veces al día |
| galletas tipo maria | <input type="radio"/> Nunca o menos 1 vez al mes<br><input type="radio"/> 1 a 3 veces mes<br><input type="radio"/> 1 vez semana<br><input checked="" type="radio"/> 2 a 4 veces semana<br><input type="radio"/> 5 a 6 veces semana<br><input type="radio"/> 1 vez al día<br><input type="radio"/> 2 a 3 veces al día<br><input type="radio"/> 5 a 6 veces al día<br><input type="radio"/> más 6 veces al día |

|                           |                                                                                                                                                                                                                                                                                                                                                                                                              |
|---------------------------|--------------------------------------------------------------------------------------------------------------------------------------------------------------------------------------------------------------------------------------------------------------------------------------------------------------------------------------------------------------------------------------------------------------|
| galletas chocolate        | <input type="radio"/> Nunca o menos 1 vez al mes<br><input type="radio"/> 1 a 3 veces mes<br><input type="radio"/> 1 vez semana<br><input type="radio"/> 2 a 4 veces semana<br><input type="radio"/> 5 a 6 veces semana<br><input checked="" type="radio"/> 1 vez al día<br><input type="radio"/> 2 a 3 veces al día<br><input type="radio"/> 5 a 6 veces al día<br><input type="radio"/> más 6 veces al día |
| bollieria                 | <input type="radio"/> Nunca o menos 1 vez al mes<br><input type="radio"/> 1 a 3 veces mes<br><input checked="" type="radio"/> 1 vez semana<br><input type="radio"/> 2 a 4 veces semana<br><input type="radio"/> 5 a 6 veces semana<br><input type="radio"/> 1 vez al día<br><input type="radio"/> 2 a 3 veces al día<br><input type="radio"/> 5 a 6 veces al día<br><input type="radio"/> más 6 veces al día |
| chocolate o bombones      | <input type="radio"/> Nunca o menos 1 vez al mes<br><input type="radio"/> 1 a 3 veces mes<br><input type="radio"/> 1 vez semana<br><input type="radio"/> 2 a 4 veces semana<br><input type="radio"/> 5 a 6 veces semana<br><input checked="" type="radio"/> 1 vez al día<br><input type="radio"/> 2 a 3 veces al día<br><input type="radio"/> 5 a 6 veces al día<br><input type="radio"/> más 6 veces al día |
| chocolate polvo o colacao | <input type="radio"/> Nunca o menos 1 vez al mes<br><input type="radio"/> 1 a 3 veces mes<br><input type="radio"/> 1 vez semana<br><input type="radio"/> 2 a 4 veces semana<br><input type="radio"/> 5 a 6 veces semana<br><input checked="" type="radio"/> 1 vez al día<br><input type="radio"/> 2 a 3 veces al día<br><input type="radio"/> 5 a 6 veces al día<br><input type="radio"/> más 6 veces al día |
| vino tinto                | <input checked="" type="radio"/> Nunca o menos 1 vez al mes<br><input type="radio"/> 1 a 3 veces mes<br><input type="radio"/> 1 vez semana<br><input type="radio"/> 2 a 4 veces semana<br><input type="radio"/> 5 a 6 veces semana<br><input type="radio"/> 1 vez al día<br><input type="radio"/> 2 a 3 veces al día<br><input type="radio"/> 5 a 6 veces al día<br><input type="radio"/> más 6 veces al día |
| vino blanco               | <input checked="" type="radio"/> Nunca o menos 1 vez al mes<br><input type="radio"/> 1 a 3 veces mes<br><input type="radio"/> 1 vez semana<br><input type="radio"/> 2 a 4 veces semana<br><input type="radio"/> 5 a 6 veces semana<br><input type="radio"/> 1 vez al día<br><input type="radio"/> 2 a 3 veces al día<br><input type="radio"/> 5 a 6 veces al día<br><input type="radio"/> más 6 veces al día |

---

|                    |                                                                                                                                                                                                                                                                                                                                                                                                              |
|--------------------|--------------------------------------------------------------------------------------------------------------------------------------------------------------------------------------------------------------------------------------------------------------------------------------------------------------------------------------------------------------------------------------------------------------|
| vino seco o vermut | <input checked="" type="radio"/> Nunca o menos 1 vez al mes<br><input type="radio"/> 1 a 3 veces mes<br><input type="radio"/> 1 vez semana<br><input type="radio"/> 2 a 4 veces semana<br><input type="radio"/> 5 a 6 veces semana<br><input type="radio"/> 1 vez al día<br><input type="radio"/> 2 a 3 veces al día<br><input type="radio"/> 5 a 6 veces al día<br><input type="radio"/> más 6 veces al día |
|--------------------|--------------------------------------------------------------------------------------------------------------------------------------------------------------------------------------------------------------------------------------------------------------------------------------------------------------------------------------------------------------------------------------------------------------|

---

|         |                                                                                                                                                                                                                                                                                                                                                                                                              |
|---------|--------------------------------------------------------------------------------------------------------------------------------------------------------------------------------------------------------------------------------------------------------------------------------------------------------------------------------------------------------------------------------------------------------------|
| cerveza | <input checked="" type="radio"/> Nunca o menos 1 vez al mes<br><input type="radio"/> 1 a 3 veces mes<br><input type="radio"/> 1 vez semana<br><input type="radio"/> 2 a 4 veces semana<br><input type="radio"/> 5 a 6 veces semana<br><input type="radio"/> 1 vez al día<br><input type="radio"/> 2 a 3 veces al día<br><input type="radio"/> 5 a 6 veces al día<br><input type="radio"/> más 6 veces al día |
|---------|--------------------------------------------------------------------------------------------------------------------------------------------------------------------------------------------------------------------------------------------------------------------------------------------------------------------------------------------------------------------------------------------------------------|

---

|                     |                                                                                                                                                                                                                                                                                                                                                                                                              |
|---------------------|--------------------------------------------------------------------------------------------------------------------------------------------------------------------------------------------------------------------------------------------------------------------------------------------------------------------------------------------------------------------------------------------------------------|
| cerveza sin alcohol | <input type="radio"/> Nunca o menos 1 vez al mes<br><input type="radio"/> 1 a 3 veces mes<br><input type="radio"/> 1 vez semana<br><input checked="" type="radio"/> 2 a 4 veces semana<br><input type="radio"/> 5 a 6 veces semana<br><input type="radio"/> 1 vez al día<br><input type="radio"/> 2 a 3 veces al día<br><input type="radio"/> 5 a 6 veces al día<br><input type="radio"/> más 6 veces al día |
|---------------------|--------------------------------------------------------------------------------------------------------------------------------------------------------------------------------------------------------------------------------------------------------------------------------------------------------------------------------------------------------------------------------------------------------------|

---

|         |                                                                                                                                                                                                                                                                                                                                                                                                              |
|---------|--------------------------------------------------------------------------------------------------------------------------------------------------------------------------------------------------------------------------------------------------------------------------------------------------------------------------------------------------------------------------------------------------------------|
| licores | <input checked="" type="radio"/> Nunca o menos 1 vez al mes<br><input type="radio"/> 1 a 3 veces mes<br><input type="radio"/> 1 vez semana<br><input type="radio"/> 2 a 4 veces semana<br><input type="radio"/> 5 a 6 veces semana<br><input type="radio"/> 1 vez al día<br><input type="radio"/> 2 a 3 veces al día<br><input type="radio"/> 5 a 6 veces al día<br><input type="radio"/> más 6 veces al día |
|---------|--------------------------------------------------------------------------------------------------------------------------------------------------------------------------------------------------------------------------------------------------------------------------------------------------------------------------------------------------------------------------------------------------------------|

---

|                       |                                                                                                                                                                                                                                                                                                                                                                                                              |
|-----------------------|--------------------------------------------------------------------------------------------------------------------------------------------------------------------------------------------------------------------------------------------------------------------------------------------------------------------------------------------------------------------------------------------------------------|
| ginebra o ron o vodka | <input checked="" type="radio"/> Nunca o menos 1 vez al mes<br><input type="radio"/> 1 a 3 veces mes<br><input type="radio"/> 1 vez semana<br><input type="radio"/> 2 a 4 veces semana<br><input type="radio"/> 5 a 6 veces semana<br><input type="radio"/> 1 vez al día<br><input type="radio"/> 2 a 3 veces al día<br><input type="radio"/> 5 a 6 veces al día<br><input type="radio"/> más 6 veces al día |
|-----------------------|--------------------------------------------------------------------------------------------------------------------------------------------------------------------------------------------------------------------------------------------------------------------------------------------------------------------------------------------------------------------------------------------------------------|

---

|                 |                                                                                                                                                                                                                                                                                                                                                                                                              |
|-----------------|--------------------------------------------------------------------------------------------------------------------------------------------------------------------------------------------------------------------------------------------------------------------------------------------------------------------------------------------------------------------------------------------------------------|
| refresco normal | <input checked="" type="radio"/> Nunca o menos 1 vez al mes<br><input type="radio"/> 1 a 3 veces mes<br><input type="radio"/> 1 vez semana<br><input type="radio"/> 2 a 4 veces semana<br><input type="radio"/> 5 a 6 veces semana<br><input type="radio"/> 1 vez al día<br><input type="radio"/> 2 a 3 veces al día<br><input type="radio"/> 5 a 6 veces al día<br><input type="radio"/> más 6 veces al día |
|-----------------|--------------------------------------------------------------------------------------------------------------------------------------------------------------------------------------------------------------------------------------------------------------------------------------------------------------------------------------------------------------------------------------------------------------|

---



|                              |                                                                                                                                                                                                                                                                                                                                                                                                              |
|------------------------------|--------------------------------------------------------------------------------------------------------------------------------------------------------------------------------------------------------------------------------------------------------------------------------------------------------------------------------------------------------------------------------------------------------------|
| refresco sin azúcar          | <input type="radio"/> Nunca o menos 1 vez al mes<br><input type="radio"/> 1 a 3 veces mes<br><input checked="" type="radio"/> 1 vez semana<br><input type="radio"/> 2 a 4 veces semana<br><input type="radio"/> 5 a 6 veces semana<br><input type="radio"/> 1 vez al día<br><input type="radio"/> 2 a 3 veces al día<br><input type="radio"/> 5 a 6 veces al día<br><input type="radio"/> más 6 veces al día |
| Agua del grifo               | <input checked="" type="radio"/> Nunca o menos 1 vez al mes<br><input type="radio"/> 1 a 3 veces mes<br><input type="radio"/> 1 vez semana<br><input type="radio"/> 2 a 4 veces semana<br><input type="radio"/> 5 a 6 veces semana<br><input type="radio"/> 1 vez al día<br><input type="radio"/> 2 a 3 veces al día<br><input type="radio"/> 5 a 6 veces al día<br><input type="radio"/> más 6 veces al día |
| agua embotellada sin gas     | <input type="radio"/> Nunca o menos 1 vez al mes<br><input type="radio"/> 1 a 3 veces mes<br><input type="radio"/> 1 vez semana<br><input type="radio"/> 2 a 4 veces semana<br><input type="radio"/> 5 a 6 veces semana<br><input type="radio"/> 1 vez al día<br><input type="radio"/> 2 a 3 veces al día<br><input type="radio"/> 5 a 6 veces al día<br><input checked="" type="radio"/> más 6 veces al día |
| agua embotellada con gas     | <input checked="" type="radio"/> Nunca o menos 1 vez al mes<br><input type="radio"/> 1 a 3 veces mes<br><input type="radio"/> 1 vez semana<br><input type="radio"/> 2 a 4 veces semana<br><input type="radio"/> 5 a 6 veces semana<br><input type="radio"/> 1 vez al día<br><input type="radio"/> 2 a 3 veces al día<br><input type="radio"/> 5 a 6 veces al día<br><input type="radio"/> más 6 veces al día |
| zumos de frutas embotellados | <input type="radio"/> Nunca o menos 1 vez al mes<br><input type="radio"/> 1 a 3 veces mes<br><input type="radio"/> 1 vez semana<br><input checked="" type="radio"/> 2 a 4 veces semana<br><input type="radio"/> 5 a 6 veces semana<br><input type="radio"/> 1 vez al día<br><input type="radio"/> 2 a 3 veces al día<br><input type="radio"/> 5 a 6 veces al día<br><input type="radio"/> más 6 veces al día |
| café                         | <input type="radio"/> Nunca o menos 1 vez al mes<br><input type="radio"/> 1 a 3 veces mes<br><input checked="" type="radio"/> 1 vez semana<br><input type="radio"/> 2 a 4 veces semana<br><input type="radio"/> 5 a 6 veces semana<br><input type="radio"/> 1 vez al día<br><input type="radio"/> 2 a 3 veces al día<br><input type="radio"/> 5 a 6 veces al día<br><input type="radio"/> más 6 veces al día |

---

cafe descafeinado

- ☒ Nunca o menos 1 vez al mes  
☐ 1 a 3 veces mes  
☐ 1 vez semana  
☐ 2 a 4 veces semana  
☐ 5 a 6 veces semana  
☐ 1 vez al día  
☐ 2 a 3 veces al día  
☐ 5 a 6 veces al día  
☐ más 6 veces al día

---

te o infusión

- ☒ Nunca o menos 1 vez al mes  
☐ 1 a 3 veces mes  
☐ 1 vez semana  
☐ 2 a 4 veces semana  
☐ 5 a 6 veces semana  
☐ 1 vez al día  
☐ 2 a 3 veces al día  
☐ 5 a 6 veces al día  
☐ más 6 veces al día

---

sopa o puré verduras

- ☐ Nunca o menos 1 vez al mes  
☐ 1 a 3 veces mes  
☒ 1 vez semana  
☐ 2 a 4 veces semana  
☐ 5 a 6 veces semana  
☐ 1 vez al día  
☐ 2 a 3 veces al día  
☐ 5 a 6 veces al día  
☐ más 6 veces al día

---

croquetas pollo jamón

- ☐ Nunca o menos 1 vez al mes  
☒ 1 a 3 veces mes  
☐ 1 vez semana  
☐ 2 a 4 veces semana  
☐ 5 a 6 veces semana  
☐ 1 vez al día  
☐ 2 a 3 veces al día  
☐ 5 a 6 veces al día  
☐ más 6 veces al día

---

croquetas pescado

- ☐ Nunca o menos 1 vez al mes  
☒ 1 a 3 veces mes  
☐ 1 vez semana  
☐ 2 a 4 veces semana  
☐ 5 a 6 veces semana  
☐ 1 vez al día  
☐ 2 a 3 veces al día  
☐ 5 a 6 veces al día  
☐ más 6 veces al día

---

mayonesa

- ☐ Nunca o menos 1 vez al mes  
☒ 1 a 3 veces mes  
☐ 1 vez semana  
☐ 2 a 4 veces semana  
☐ 5 a 6 veces semana  
☐ 1 vez al día  
☐ 2 a 3 veces al día  
☐ 5 a 6 veces al día  
☐ más 6 veces al día

|                  |                                                                                                                                                                                                                                                                                                                                                                                                              |
|------------------|--------------------------------------------------------------------------------------------------------------------------------------------------------------------------------------------------------------------------------------------------------------------------------------------------------------------------------------------------------------------------------------------------------------|
| salsa tomate     | <input type="radio"/> Nunca o menos 1 vez al mes<br><input type="radio"/> 1 a 3 veces mes<br><input type="radio"/> 1 vez semana<br><input checked="" type="radio"/> 2 a 4 veces semana<br><input type="radio"/> 5 a 6 veces semana<br><input type="radio"/> 1 vez al día<br><input type="radio"/> 2 a 3 veces al día<br><input type="radio"/> 5 a 6 veces al día<br><input type="radio"/> más 6 veces al día |
| ketchup          | <input type="radio"/> Nunca o menos 1 vez al mes<br><input checked="" type="radio"/> 1 a 3 veces mes<br><input type="radio"/> 1 vez semana<br><input type="radio"/> 2 a 4 veces semana<br><input type="radio"/> 5 a 6 veces semana<br><input type="radio"/> 1 vez al día<br><input type="radio"/> 2 a 3 veces al día<br><input type="radio"/> 5 a 6 veces al día<br><input type="radio"/> más 6 veces al día |
| sal              | <input type="radio"/> Nunca o menos 1 vez al mes<br><input checked="" type="radio"/> 1 a 3 veces mes<br><input type="radio"/> 1 vez semana<br><input type="radio"/> 2 a 4 veces semana<br><input type="radio"/> 5 a 6 veces semana<br><input type="radio"/> 1 vez al día<br><input type="radio"/> 2 a 3 veces al día<br><input type="radio"/> 5 a 6 veces al día<br><input type="radio"/> más 6 veces al día |
| ajo              | <input type="radio"/> Nunca o menos 1 vez al mes<br><input type="radio"/> 1 a 3 veces mes<br><input checked="" type="radio"/> 1 vez semana<br><input type="radio"/> 2 a 4 veces semana<br><input type="radio"/> 5 a 6 veces semana<br><input type="radio"/> 1 vez al día<br><input type="radio"/> 2 a 3 veces al día<br><input type="radio"/> 5 a 6 veces al día<br><input type="radio"/> más 6 veces al día |
| mermelada o miel | <input checked="" type="radio"/> Nunca o menos 1 vez al mes<br><input type="radio"/> 1 a 3 veces mes<br><input type="radio"/> 1 vez semana<br><input type="radio"/> 2 a 4 veces semana<br><input type="radio"/> 5 a 6 veces semana<br><input type="radio"/> 1 vez al día<br><input type="radio"/> 2 a 3 veces al día<br><input type="radio"/> 5 a 6 veces al día<br><input type="radio"/> más 6 veces al día |
| azúcar           | <input type="radio"/> Nunca o menos 1 vez al mes<br><input type="radio"/> 1 a 3 veces mes<br><input type="radio"/> 1 vez semana<br><input checked="" type="radio"/> 2 a 4 veces semana<br><input type="radio"/> 5 a 6 veces semana<br><input type="radio"/> 1 vez al día<br><input type="radio"/> 2 a 3 veces al día<br><input type="radio"/> 5 a 6 veces al día<br><input type="radio"/> más 6 veces al día |

|                                       |                                                                                                                                                                                                                                                                                                                                                                                                                                                                                                                               |
|---------------------------------------|-------------------------------------------------------------------------------------------------------------------------------------------------------------------------------------------------------------------------------------------------------------------------------------------------------------------------------------------------------------------------------------------------------------------------------------------------------------------------------------------------------------------------------|
| Otro alimento                         |                                                                                                                                                                                                                                                                                                                                                                                                                                                                                                                               |
| suplementos vitamínicos               | <input checked="" type="radio"/> si<br><input type="radio"/> no                                                                                                                                                                                                                                                                                                                                                                                                                                                               |
| suplementos vitamínicos               | [*DATA REMOVED*]                                                                                                                                                                                                                                                                                                                                                                                                                                                                                                              |
| dieta previa                          | <input type="radio"/> si<br><input checked="" type="radio"/> no                                                                                                                                                                                                                                                                                                                                                                                                                                                               |
| motivo dieta                          | <input checked="" type="radio"/> no dieta<br><input type="radio"/> control peso<br><input type="radio"/> control colesterol<br><input type="radio"/> control diabetes<br><input type="radio"/> problemas estómago<br><input type="radio"/> problemas vesícula o hepáticos<br><input type="radio"/> HTA o cardiopatía<br><input type="radio"/> problemas renales<br><input type="radio"/> alergia alimentaria<br><input type="radio"/> ácido úrico elevado<br><input type="radio"/> vegetariana<br><input type="radio"/> otros |
| cambio alimentos año previo gestación | <input checked="" type="radio"/> si<br><input type="radio"/> no                                                                                                                                                                                                                                                                                                                                                                                                                                                               |
| cambio lácteos                        | <input type="radio"/> eliminado<br><input type="radio"/> disminuido<br><input checked="" type="radio"/> igual<br><input type="radio"/> aumentado<br><input type="radio"/> no sabe                                                                                                                                                                                                                                                                                                                                             |
| cambio huevos                         | <input type="radio"/> eliminado<br><input type="radio"/> disminuido<br><input checked="" type="radio"/> igual<br><input type="radio"/> aumentado<br><input type="radio"/> no sabe                                                                                                                                                                                                                                                                                                                                             |
| cambio carne                          | <input type="radio"/> eliminado<br><input type="radio"/> disminuido<br><input checked="" type="radio"/> igual<br><input type="radio"/> aumentado<br><input type="radio"/> no sabe                                                                                                                                                                                                                                                                                                                                             |
| cambio pescado                        | <input type="radio"/> eliminado<br><input type="radio"/> disminuido<br><input checked="" type="radio"/> igual<br><input type="radio"/> aumentado<br><input type="radio"/> no sabe                                                                                                                                                                                                                                                                                                                                             |
| cambio verduras                       | <input type="radio"/> eliminado<br><input type="radio"/> disminuido<br><input checked="" type="radio"/> igual<br><input type="radio"/> aumentado<br><input type="radio"/> no sabe                                                                                                                                                                                                                                                                                                                                             |

|                            |                                                                                                                                                                                                                        |
|----------------------------|------------------------------------------------------------------------------------------------------------------------------------------------------------------------------------------------------------------------|
| cambio legumbres           | <input type="radio"/> eliminado<br><input type="radio"/> disminuido<br><input checked="" type="radio"/> igual<br><input type="radio"/> aumentado<br><input type="radio"/> no sabe                                      |
| cambio fruta               | <input type="radio"/> eliminado<br><input type="radio"/> disminuido<br><input checked="" type="radio"/> igual<br><input type="radio"/> aumentado<br><input type="radio"/> no sabe                                      |
| cambio pan                 | <input type="radio"/> eliminado<br><input type="radio"/> disminuido<br><input checked="" type="radio"/> igual<br><input type="radio"/> aumentado<br><input type="radio"/> no sabe                                      |
| cambio aceite oliva        | <input type="radio"/> eliminado<br><input type="radio"/> disminuido<br><input checked="" type="radio"/> igual<br><input type="radio"/> aumentado<br><input type="radio"/> no sabe                                      |
| cambio mante o margarina   | <input type="radio"/> eliminado<br><input type="radio"/> disminuido<br><input checked="" type="radio"/> igual<br><input type="radio"/> aumentado<br><input type="radio"/> no sabe                                      |
| cambio azúcar y dulces     | <input type="radio"/> eliminado<br><input type="radio"/> disminuido<br><input checked="" type="radio"/> igual<br><input type="radio"/> aumentado<br><input type="radio"/> no sabe                                      |
| cambio bebidas alcohólicas | <input checked="" type="radio"/> eliminado<br><input type="radio"/> disminuido<br><input type="radio"/> igual<br><input type="radio"/> aumentado<br><input type="radio"/> no sabe                                      |
| frecuencia comidas fritas  | <input type="radio"/> a diario<br><input type="radio"/> 5 a 6 veces semana<br><input type="radio"/> 2 a 4 veces semana<br><input checked="" type="radio"/> 1 vez semana<br><input type="radio"/> menos de 1 vez semana |
| carne                      | <input type="radio"/> no como<br><input type="radio"/> cruda<br><input type="radio"/> poco hecha<br><input type="radio"/> hecha<br><input checked="" type="radio"/> muy hecha                                          |
| grasa visible carne        | <input type="radio"/> quita toda<br><input checked="" type="radio"/> quita mayoría<br><input type="radio"/> quita un poco<br><input type="radio"/> no quita nada                                                       |

|                                |                                                                                                                                                                                                                                                          |
|--------------------------------|----------------------------------------------------------------------------------------------------------------------------------------------------------------------------------------------------------------------------------------------------------|
| cocina carne                   | <input checked="" type="radio"/> a la plancha<br><input type="radio"/> a la parrilla<br><input type="radio"/> asada<br><input type="radio"/> frita<br><input type="radio"/> guisada                                                                      |
| tostado quemado carne          | <input checked="" type="radio"/> nunca<br><input type="radio"/> 1 vez mes<br><input type="radio"/> 2 a 3 veces mes<br><input type="radio"/> 1 vez semana<br><input type="radio"/> 2 a 3 semanas                                                          |
| tostado quemado pescado        | <input checked="" type="radio"/> nunca<br><input type="radio"/> 1 vez mes<br><input type="radio"/> 2 a 3 veces mes<br><input type="radio"/> 1 vez semana<br><input type="radio"/> 2 a 3 semanas                                                          |
| socarrat paella                | <input checked="" type="radio"/> nunca<br><input type="radio"/> 1 vez mes<br><input type="radio"/> 2 a 3 veces mes<br><input type="radio"/> 1 vez semana<br><input type="radio"/> 2 a 3 semanas                                                          |
| grasa o aceite cocinar         | <input type="radio"/> mantequilla<br><input type="radio"/> margarina<br><input checked="" type="radio"/> aceite oliva<br><input type="radio"/> aceite oliva virgen extra<br><input type="radio"/> aceite vegetal<br><input type="radio"/> mezcla aceites |
| grasa aceite aliñar            | <input type="radio"/> mantequilla<br><input type="radio"/> margarina<br><input checked="" type="radio"/> aceite oliva<br><input type="radio"/> aceite oliva virgen extra<br><input type="radio"/> aceite vegetal<br><input type="radio"/> mezcla aceites |
| grasa aceite freir             | <input type="radio"/> mantequilla<br><input type="radio"/> margarina<br><input type="radio"/> aceite oliva<br><input type="radio"/> aceite oliva virgen extra<br><input checked="" type="radio"/> aceite vegetal<br><input type="radio"/> mezcla aceites |
| Ejercicio cuestionario         | <input checked="" type="radio"/> si<br><input type="radio"/> no                                                                                                                                                                                          |
| horas de sueño incluido siesta | [*DATA REMOVED*]                                                                                                                                                                                                                                         |
| minutos siesta                 | [*DATA REMOVED*]                                                                                                                                                                                                                                         |
| horas televisión semana        | [*DATA REMOVED*]                                                                                                                                                                                                                                         |

|                                        |                                                                                                                                                                                                                                                                                                                                                                           |
|----------------------------------------|---------------------------------------------------------------------------------------------------------------------------------------------------------------------------------------------------------------------------------------------------------------------------------------------------------------------------------------------------------------------------|
| actividad trabajo                      | <input checked="" type="radio"/> casi siempre sentado<br><input type="radio"/> sentado 50 por cien<br><input type="radio"/> casi siempre de pie, quieto<br><input type="radio"/> casi siempre levantado caminando y llevando pocas cosas<br><input type="radio"/> casi siempre levantado, caminando y llevado muchas cosas<br><input type="radio"/> trabajo manual pesado |
| tiempo caminar o bici al día           | <input type="radio"/> casi nunca<br><input type="radio"/> menos 20min día<br><input type="radio"/> 20 a 40 min día<br><input checked="" type="radio"/> 40 a 60 min día<br><input type="radio"/> 1h o 1h y media día<br><input type="radio"/> más de 1h y media al día                                                                                                     |
| tiempo tareas casa al día              | <input type="radio"/> menos de 1h día<br><input checked="" type="radio"/> 1 a 2h día<br><input type="radio"/> 3 a 4h día<br><input type="radio"/> 5 a 6h día<br><input type="radio"/> 7 a 8h día<br><input type="radio"/> más de 8h día                                                                                                                                   |
| tiempo libre televisión ordenador leer | <input type="radio"/> menos 1h día<br><input type="radio"/> 1h día<br><input checked="" type="radio"/> 2h día<br><input type="radio"/> 3h día<br><input type="radio"/> 4h día<br><input type="radio"/> 5 a 6h día<br><input type="radio"/> mas 6h día                                                                                                                     |
| tiempo libre ejercicio o deporte       | <input checked="" type="radio"/> menos 1h semana<br><input type="radio"/> 1h semana<br><input type="radio"/> 2h semana<br><input type="radio"/> 3h semana<br><input type="radio"/> 4 a 5h semana<br><input type="radio"/> mas 5h semana                                                                                                                                   |
| como se considera                      | <input type="radio"/> sedentaria<br><input checked="" type="radio"/> poco activa<br><input type="radio"/> moderadamente activa<br><input type="radio"/> bastante activa<br><input type="radio"/> muy activa<br><input type="radio"/> no sabe                                                                                                                              |
| FUR                                    | [*DATA REMOVED*]                                                                                                                                                                                                                                                                                                                                                          |
| Semanas gestación 2T                   | [*DATA REMOVED*]                                                                                                                                                                                                                                                                                                                                                          |
| Días gestación 2T                      | [*DATA REMOVED*]                                                                                                                                                                                                                                                                                                                                                          |
| DBP 2T                                 | [*DATA REMOVED*]                                                                                                                                                                                                                                                                                                                                                          |
| CC 2T                                  | [*DATA REMOVED*]                                                                                                                                                                                                                                                                                                                                                          |
| AC 2T                                  | [*DATA REMOVED*]                                                                                                                                                                                                                                                                                                                                                          |

|                                                   |                                                                                                                                                                                                 |
|---------------------------------------------------|-------------------------------------------------------------------------------------------------------------------------------------------------------------------------------------------------|
| LF 2T                                             | [*DATA REMOVED*]                                                                                                                                                                                |
| PFE 2T (Hadlock)                                  | [*DATA REMOVED*]                                                                                                                                                                                |
| Semanas gestación 3T                              | [*DATA REMOVED*]                                                                                                                                                                                |
| días 3T                                           | [*DATA REMOVED*]                                                                                                                                                                                |
| DBP 3T                                            | [*DATA REMOVED*]                                                                                                                                                                                |
| CC 3T                                             | [*DATA REMOVED*]                                                                                                                                                                                |
| AC 3T                                             | [*DATA REMOVED*]                                                                                                                                                                                |
| LF 3T                                             | [*DATA REMOVED*]                                                                                                                                                                                |
| PFE 3T (Hadlock)                                  | [*DATA REMOVED*]                                                                                                                                                                                |
| Semanas de gestación final                        | [*DATA REMOVED*]                                                                                                                                                                                |
| días gestación final                              | [*DATA REMOVED*]                                                                                                                                                                                |
| Localización placenta                             | <input checked="" type="radio"/> anterior<br><input type="radio"/> lateral derecha<br><input type="radio"/> lateral izquierda<br><input type="radio"/> posterior<br><input type="radio"/> fondo |
| Presentación longitudinal cefálica                | <input type="radio"/> no<br><input checked="" type="radio"/> si                                                                                                                                 |
| Dorso                                             | <input checked="" type="radio"/> izquierda anterior<br><input type="radio"/> izquierda posterior<br><input type="radio"/> derecha anterior<br><input type="radio"/> derecha posterior           |
| diámetro biparietal                               | [*DATA REMOVED*]                                                                                                                                                                                |
| Circunferencia craneal                            | [*DATA REMOVED*]                                                                                                                                                                                |
| Circunferencia abdominal                          | [*DATA REMOVED*]                                                                                                                                                                                |
| Longitud de femur                                 | [*DATA REMOVED*]                                                                                                                                                                                |
| tejido celular subcutáneo a nivel del muslo en mm | [*DATA REMOVED*]                                                                                                                                                                                |
| tejido celular subcutáneo en abdomen en mm        | [*DATA REMOVED*]                                                                                                                                                                                |
| Volumen del muslo en cm3                          | [*DATA REMOVED*]                                                                                                                                                                                |
| Peso fetal estimado según fórmula de Hadlock      | [*DATA REMOVED*]                                                                                                                                                                                |



|                                               |                                                                                                                                                          |
|-----------------------------------------------|----------------------------------------------------------------------------------------------------------------------------------------------------------|
| Percentil                                     | [*DATA REMOVED*]                                                                                                                                         |
| Peso fetal estimado según fórmula de Scioscia | <hr/>                                                                                                                                                    |
| Peso fetal estimado según fórmula de LEE      | <hr/>                                                                                                                                                    |
| Tipo de parto                                 | <input checked="" type="radio"/> eutocico<br><input type="radio"/> instrumentado/ventosa<br><input type="radio"/> cesarea                                |
| fecha de nacimiento                           | [*DATA REMOVED*]                                                                                                                                         |
| Días entre exploración y nacimiento           | [*DATA REMOVED*]                                                                                                                                         |
| Peso RN en g                                  | [*DATA REMOVED*]                                                                                                                                         |
| sexo                                          | <input type="radio"/> mujer<br><input checked="" type="radio"/> hombre                                                                                   |
| Apgar 1 minuto                                | [*DATA REMOVED*]                                                                                                                                         |
| Apgar 5 minutos                               | [*DATA REMOVED*]                                                                                                                                         |
| Apgar 10 minutos                              | <hr/>                                                                                                                                                    |
| antecedente Covid durante gestación           | <input type="radio"/> Yes<br><input checked="" type="radio"/> No                                                                                         |
| Nivel de estudios                             | <input type="radio"/> ninguno<br><input type="radio"/> primarios<br><input type="radio"/> secundarios<br><input checked="" type="radio"/> universitarios |

# Base\_datos\_estimacion\_peso\_fetal

|                                       |                                                                                                                                                                                                                                                                                      |
|---------------------------------------|--------------------------------------------------------------------------------------------------------------------------------------------------------------------------------------------------------------------------------------------------------------------------------------|
| Número de identificación participante | 38                                                                                                                                                                                                                                                                                   |
| CODIGO PARTICIPANTE                   |                                                                                                                                                                                                                                                                                      |
| Edad                                  | [*DATA REMOVED*]                                                                                                                                                                                                                                                                     |
| Gestaciones                           | <input type="radio"/> 1<br><input checked="" type="radio"/> 2<br><input type="radio"/> 3<br><input type="radio"/> mas de 3                                                                                                                                                           |
| partos                                | <input type="radio"/> 0<br><input checked="" type="radio"/> 1<br><input type="radio"/> 2<br><input type="radio"/> 3<br><input type="radio"/> mas de 3                                                                                                                                |
| cesáreas                              | <input checked="" type="radio"/> 0<br><input type="radio"/> 1<br><input type="radio"/> 2<br><input type="radio"/> 3<br><input type="radio"/> mas de 3                                                                                                                                |
| Abortos                               | <input checked="" type="radio"/> 0<br><input type="radio"/> 1<br><input type="radio"/> 2<br><input type="radio"/> 3<br><input type="radio"/> mas de 3                                                                                                                                |
| Tipo de gestacion                     | <input checked="" type="radio"/> espontanea<br><input type="radio"/> IAC inseminación artificial conyuge<br><input type="radio"/> IAD inseminación artificial donante<br><input type="radio"/> FIV Fecundación in Vitro<br><input type="radio"/> Ovodon FIV con donación de ovocitos |
| peso previo a embarazo                | [*DATA REMOVED*]                                                                                                                                                                                                                                                                     |
| Ganancia ponderal embarazo            | [*DATA REMOVED*]                                                                                                                                                                                                                                                                     |
| Talla madre                           | [*DATA REMOVED*]                                                                                                                                                                                                                                                                     |
| IMC previo embarazo                   | 20.37273242630386                                                                                                                                                                                                                                                                    |
| Patología obstétrica                  | <input checked="" type="radio"/> no<br><input type="radio"/> si                                                                                                                                                                                                                      |
| Diabetes pregestacional               | <input checked="" type="radio"/> no<br><input type="radio"/> si                                                                                                                                                                                                                      |
| Diabetes gestacional                  | <input checked="" type="radio"/> no<br><input type="radio"/> si                                                                                                                                                                                                                      |

|                                            |                                                                                                                                                                                      |
|--------------------------------------------|--------------------------------------------------------------------------------------------------------------------------------------------------------------------------------------|
| Diabetes gestacional con insulina          | <input checked="" type="radio"/> no<br><input type="radio"/> si                                                                                                                      |
| Diabetes gestacional con dieta y ejercicio | <input checked="" type="radio"/> no<br><input type="radio"/> si                                                                                                                      |
| Percentil fetos previos                    | <input type="radio"/> Nada<br><input type="radio"/> percentil menor de 10<br><input checked="" type="radio"/> percentil entre 10 y 90<br><input type="radio"/> percentil mayor de 90 |
| Exfumadora                                 | <input checked="" type="radio"/> Nada<br><input type="radio"/> menos de 5 años<br><input type="radio"/> 5 a 10 años<br><input type="radio"/> mayor o igual a 10 años                 |
| Hábito tabáquico                           | <input checked="" type="radio"/> no<br><input type="radio"/> si                                                                                                                      |
| fumadora                                   | [*DATA REMOVED*]                                                                                                                                                                     |
| Consumo otros tóxicos                      | <input checked="" type="radio"/> no<br><input type="radio"/> si                                                                                                                      |
| Hb 1T                                      | [*DATA REMOVED*]                                                                                                                                                                     |
| Htc 1T                                     | [*DATA REMOVED*]                                                                                                                                                                     |
| Hb 2T                                      | [*DATA REMOVED*]                                                                                                                                                                     |
| HTC 2T                                     | [*DATA REMOVED*]                                                                                                                                                                     |
| Hb 3T                                      | [*DATA REMOVED*]                                                                                                                                                                     |
| HTC 3T                                     | [*DATA REMOVED*]                                                                                                                                                                     |
| Suplemento FE oral                         | <input checked="" type="radio"/> si<br><input type="radio"/> no                                                                                                                      |
| Suplemento fe iv                           | <input type="radio"/> si<br><input checked="" type="radio"/> no                                                                                                                      |
| Transfusión                                | <input checked="" type="radio"/> no<br><input type="radio"/> si                                                                                                                      |
| Solicitada Vit D                           | <input checked="" type="radio"/> no<br><input type="radio"/> si                                                                                                                      |
| Deficit vit D                              | <input type="radio"/> no<br><input type="radio"/> si                                                                                                                                 |
| Suplemento vit D                           | <input type="radio"/> si<br><input type="radio"/> no                                                                                                                                 |

|                       |                                                                                                                                                                                                                                                                                                                                                                                                              |
|-----------------------|--------------------------------------------------------------------------------------------------------------------------------------------------------------------------------------------------------------------------------------------------------------------------------------------------------------------------------------------------------------------------------------------------------------|
| Dieta, cuestionario   | <input checked="" type="radio"/> sí<br><input type="radio"/> no                                                                                                                                                                                                                                                                                                                                              |
| Leche entera          | <input checked="" type="radio"/> Nunca o menos 1 vez al mes<br><input type="radio"/> 1 a 3 veces mes<br><input type="radio"/> 1 vez semana<br><input type="radio"/> 2 a 4 veces semana<br><input type="radio"/> 5 a 6 veces semana<br><input type="radio"/> 1 vez al día<br><input type="radio"/> 2 a 3 veces al día<br><input type="radio"/> 5 a 6 veces al día<br><input type="radio"/> más 6 veces al día |
| Leche semidesnatada   | <input type="radio"/> Nunca o menos 1 vez al mes<br><input type="radio"/> 1 a 3 veces mes<br><input type="radio"/> 1 vez semana<br><input type="radio"/> 2 a 4 veces semana<br><input type="radio"/> 5 a 6 veces semana<br><input checked="" type="radio"/> 1 vez al día<br><input type="radio"/> 2 a 3 veces al día<br><input type="radio"/> 5 a 6 veces al día<br><input type="radio"/> mas 6 veces al día |
| Leche desnatada       | <input type="radio"/> Nunca o menos 1 vez al mes<br><input type="radio"/> 1 a 3 veces mes<br><input type="radio"/> 1 vez semana<br><input type="radio"/> 2 a 4 veces semana<br><input type="radio"/> 5 a 6 veces semana<br><input type="radio"/> 1 vez al día<br><input type="radio"/> 2 a 3 veces al día<br><input type="radio"/> 5 a 6 veces al día<br><input type="radio"/> más 6 veces al día            |
| Leche condensada      | <input checked="" type="radio"/> Nunca o menos 1 vez al mes<br><input type="radio"/> 1 a 3 veces mes<br><input type="radio"/> 1 vez semana<br><input type="radio"/> 2 a 4 veces semana<br><input type="radio"/> 5 a 6 veces semana<br><input type="radio"/> 1 vez al día<br><input type="radio"/> 2 a 3 veces al día<br><input type="radio"/> 5 a 6 veces al día<br><input type="radio"/> más 6 veces al día |
| nata o crema de leche | <input checked="" type="radio"/> Nunca o menos 1 vez al mes<br><input type="radio"/> 1 a 3 veces mes<br><input type="radio"/> 1 vez semana<br><input type="radio"/> 2 a 4 veces semana<br><input type="radio"/> 5 a 6 veces semana<br><input type="radio"/> 1 vez al día<br><input type="radio"/> 2 a 3 veces al día<br><input type="radio"/> 5 a 6 veces al día<br><input type="radio"/> más 6 veces al día |

|                                             |                                                                                                                                                                                                                                                                                                                                                                                                              |
|---------------------------------------------|--------------------------------------------------------------------------------------------------------------------------------------------------------------------------------------------------------------------------------------------------------------------------------------------------------------------------------------------------------------------------------------------------------------|
| Yogurt Entero                               | <input checked="" type="radio"/> Nunca o menos 1 vez al mes<br><input type="radio"/> 1 a 3 veces mes<br><input type="radio"/> 1 vez semana<br><input type="radio"/> 2 a 4 veces semana<br><input type="radio"/> 5 a 6 veces semana<br><input type="radio"/> 1 vez al día<br><input type="radio"/> 2 a 3 veces al día<br><input type="radio"/> 5 a 6 veces al día<br><input type="radio"/> más 6 veces al día |
| Yogurt desnatado                            | <input type="radio"/> Nunca o menos 1 vez al mes<br><input type="radio"/> 1 a 3 veces mes<br><input checked="" type="radio"/> 1 vez semana<br><input type="radio"/> 2 a 4 veces semana<br><input type="radio"/> 5 a 6 veces semana<br><input type="radio"/> 1 vez al día<br><input type="radio"/> 2 a 3 veces al día<br><input type="radio"/> 5 a 6 veces al día<br><input type="radio"/> más 6 veces al día |
| 100g requesón o queso blando o queso fresco | <input checked="" type="radio"/> Nunca o menos 1 vez al mes<br><input type="radio"/> 1 a 3 veces mes<br><input type="radio"/> 1 vez semana<br><input type="radio"/> 2 a 4 veces semana<br><input type="radio"/> 5 a 6 veces semana<br><input type="radio"/> 1 vez al día<br><input type="radio"/> 2 a 3 veces al día<br><input type="radio"/> 5 a 6 veces al día<br><input type="radio"/> más 6 veces al día |
| queso curado o semicurado o cremoso         | <input type="radio"/> Nunca o menos 1 vez al mes<br><input type="radio"/> 1 a 3 veces mes<br><input type="radio"/> 1 vez semana<br><input checked="" type="radio"/> 2 a 4 veces semana<br><input type="radio"/> 5 a 6 veces semana<br><input type="radio"/> 1 vez al día<br><input type="radio"/> 2 a 3 veces al día<br><input type="radio"/> 5 a 6 veces al día<br><input type="radio"/> más 6 veces al día |
| natillas flan pudding                       | <input type="radio"/> Nunca o menos 1 vez al mes<br><input type="radio"/> 1 a 3 veces mes<br><input type="radio"/> 1 vez semana<br><input checked="" type="radio"/> 2 a 4 veces semana<br><input type="radio"/> 5 a 6 veces semana<br><input type="radio"/> 1 vez al día<br><input type="radio"/> 2 a 3 veces al día<br><input type="radio"/> 5 a 6 veces al día<br><input type="radio"/> más 6 veces al día |
| Helado                                      | <input checked="" type="radio"/> Nunca o menos 1 vez al mes<br><input type="radio"/> 1 a 3 veces mes<br><input type="radio"/> 1 vez semana<br><input type="radio"/> 2 a 4 veces semana<br><input type="radio"/> 5 a 6 veces semana<br><input type="radio"/> 1 vez al día<br><input type="radio"/> 2 a 3 veces al día<br><input type="radio"/> 5 a 6 veces al día<br><input type="radio"/> más 6 veces al día |

|                                      |                                                                                                                                                                                                                                                                                                                                                                                                              |
|--------------------------------------|--------------------------------------------------------------------------------------------------------------------------------------------------------------------------------------------------------------------------------------------------------------------------------------------------------------------------------------------------------------------------------------------------------------|
| huevo                                | <input type="radio"/> Nunca o menos 1 vez al mes<br><input type="radio"/> 1 a 3 veces mes<br><input type="radio"/> 1 vez semana<br><input checked="" type="radio"/> 2 a 4 veces semana<br><input type="radio"/> 5 a 6 veces semana<br><input type="radio"/> 1 vez al día<br><input type="radio"/> 2 a 3 veces al día<br><input type="radio"/> 5 a 6 veces al día<br><input type="radio"/> más 6 veces al día |
| Pollo con piel                       | <input type="radio"/> Nunca o menos 1 vez al mes<br><input type="radio"/> 1 a 3 veces mes<br><input type="radio"/> 1 vez semana<br><input checked="" type="radio"/> 2 a 4 veces semana<br><input type="radio"/> 5 a 6 veces semana<br><input type="radio"/> 1 vez al día<br><input type="radio"/> 2 a 3 veces al día<br><input type="radio"/> 5 a 6 veces al día<br><input type="radio"/> más 6 veces al día |
| pollo sin piel                       | <input checked="" type="radio"/> Nunca o menos 1 vez al mes<br><input type="radio"/> 1 a 3 veces mes<br><input type="radio"/> 1 vez semana<br><input type="radio"/> 2 a 4 veces semana<br><input type="radio"/> 5 a 6 veces semana<br><input type="radio"/> 1 vez al día<br><input type="radio"/> 2 a 3 veces al día<br><input type="radio"/> 5 a 6 veces al día<br><input type="radio"/> más 6 veces al día |
| Ternera o cerdo o cordero            | <input type="radio"/> Nunca o menos 1 vez al mes<br><input type="radio"/> 1 a 3 veces mes<br><input type="radio"/> 1 vez semana<br><input checked="" type="radio"/> 2 a 4 veces semana<br><input type="radio"/> 5 a 6 veces semana<br><input type="radio"/> 1 vez al día<br><input type="radio"/> 2 a 3 veces al día<br><input type="radio"/> 5 a 6 veces al día<br><input type="radio"/> más 6 veces al día |
| carne caza: Conejo o codorniz o pato | <input type="radio"/> Nunca o menos 1 vez al mes<br><input type="radio"/> 1 a 3 veces mes<br><input checked="" type="radio"/> 1 vez semana<br><input type="radio"/> 2 a 4 veces semana<br><input type="radio"/> 5 a 6 veces semana<br><input type="radio"/> 1 vez al día<br><input type="radio"/> 2 a 3 veces al día<br><input type="radio"/> 5 a 6 veces al día<br><input type="radio"/> más 6 veces al día |
| Hígado de ternera o cerdo o pollo    | <input checked="" type="radio"/> Nunca o menos 1 vez al mes<br><input type="radio"/> 1 a 3 veces mes<br><input type="radio"/> 1 vez semana<br><input type="radio"/> 2 a 4 veces semana<br><input type="radio"/> 5 a 6 veces semana<br><input type="radio"/> 1 vez al día<br><input type="radio"/> 2 a 3 veces al día<br><input type="radio"/> 5 a 6 veces al día<br><input type="radio"/> más 6 veces al día |

|                     |                                                                                                                                                                                                                                                                                                                                                                                                              |
|---------------------|--------------------------------------------------------------------------------------------------------------------------------------------------------------------------------------------------------------------------------------------------------------------------------------------------------------------------------------------------------------------------------------------------------------|
| Vísceras            | <input checked="" type="radio"/> Nunca o menos 1 vez al mes<br><input type="radio"/> 1 a 3 veces mes<br><input type="radio"/> 1 vez semana<br><input type="radio"/> 2 a 4 veces semana<br><input type="radio"/> 5 a 6 veces semana<br><input type="radio"/> 1 vez al día<br><input type="radio"/> 2 a 3 veces al día<br><input type="radio"/> 5 a 6 veces al día<br><input type="radio"/> más 6 veces al día |
| Embutido            | <input checked="" type="radio"/> Nunca o menos 1 vez al mes<br><input type="radio"/> 1 a 3 veces mes<br><input type="radio"/> 1 vez semana<br><input type="radio"/> 2 a 4 veces semana<br><input type="radio"/> 5 a 6 veces semana<br><input type="radio"/> 1 vez al día<br><input type="radio"/> 2 a 3 veces al día<br><input type="radio"/> 5 a 6 veces al día<br><input type="radio"/> más 6 veces al día |
| Salchicha o similar | <input checked="" type="radio"/> Nunca o menos 1 vez al mes<br><input type="radio"/> 1 a 3 veces mes<br><input type="radio"/> 1 vez semana<br><input type="radio"/> 2 a 4 veces semana<br><input type="radio"/> 5 a 6 veces semana<br><input type="radio"/> 1 vez al día<br><input type="radio"/> 2 a 3 veces al día<br><input type="radio"/> 5 a 6 veces al día<br><input type="radio"/> más 6 veces al día |
| Pate o foiegras     | <input checked="" type="radio"/> Nunca o menos 1 vez al mes<br><input type="radio"/> 1 a 3 veces mes<br><input type="radio"/> 1 vez semana<br><input type="radio"/> 2 a 4 veces semana<br><input type="radio"/> 5 a 6 veces semana<br><input type="radio"/> 1 vez al día<br><input type="radio"/> 2 a 3 veces al día<br><input type="radio"/> 5 a 6 veces al día<br><input type="radio"/> más 6 veces al día |
| Hamburguesa         | <input checked="" type="radio"/> Nunca o menos 1 vez al mes<br><input type="radio"/> 1 a 3 veces mes<br><input type="radio"/> 1 vez semana<br><input type="radio"/> 2 a 4 veces semana<br><input type="radio"/> 5 a 6 veces semana<br><input type="radio"/> 1 vez al día<br><input type="radio"/> 2 a 3 veces al día<br><input type="radio"/> 5 a 6 veces al día<br><input type="radio"/> más 6 veces al día |
| tocino o bacon      | <input type="radio"/> Nunca o menos 1 vez al mes<br><input type="radio"/> 1 a 3 veces mes<br><input checked="" type="radio"/> 1 vez semana<br><input type="radio"/> 2 a 4 veces semana<br><input type="radio"/> 5 a 6 veces semana<br><input type="radio"/> 1 vez al día<br><input type="radio"/> 2 a 3 veces al día<br><input type="radio"/> 5 a 6 veces al día<br><input type="radio"/> más 6 veces al día |

|                        |                                                                                                                                                                                                                                                                                                                                                                                                              |
|------------------------|--------------------------------------------------------------------------------------------------------------------------------------------------------------------------------------------------------------------------------------------------------------------------------------------------------------------------------------------------------------------------------------------------------------|
| Pescado frito          | <input checked="" type="radio"/> Nunca o menos 1 vez al mes<br><input type="radio"/> 1 a 3 veces mes<br><input type="radio"/> 1 vez semana<br><input type="radio"/> 2 a 4 veces semana<br><input type="radio"/> 5 a 6 veces semana<br><input type="radio"/> 1 vez al día<br><input type="radio"/> 2 a 3 veces al día<br><input type="radio"/> 5 a 6 veces al día<br><input type="radio"/> más 6 veces al día |
| pescado hervido blanco | <input checked="" type="radio"/> Nunca o menos 1 vez al mes<br><input type="radio"/> 1 a 3 veces mes<br><input type="radio"/> 1 vez semana<br><input type="radio"/> 2 a 4 veces semana<br><input type="radio"/> 5 a 6 veces semana<br><input type="radio"/> 1 vez al día<br><input type="radio"/> 2 a 3 veces al día<br><input type="radio"/> 5 a 6 veces al día<br><input type="radio"/> más 6 veces al día |
| pescado hervido azul   | <input type="radio"/> Nunca o menos 1 vez al mes<br><input type="radio"/> 1 a 3 veces mes<br><input checked="" type="radio"/> 1 vez semana<br><input type="radio"/> 2 a 4 veces semana<br><input type="radio"/> 5 a 6 veces semana<br><input type="radio"/> 1 vez al día<br><input type="radio"/> 2 a 3 veces al día<br><input type="radio"/> 5 a 6 veces al día<br><input type="radio"/> más 6 veces al día |
| otros pescado azul     | <input type="radio"/> Nunca o menos 1 vez al mes<br><input type="radio"/> 1 a 3 veces mes<br><input type="radio"/> 1 vez semana<br><input checked="" type="radio"/> 2 a 4 veces semana<br><input type="radio"/> 5 a 6 veces semana<br><input type="radio"/> 1 vez al día<br><input type="radio"/> 2 a 3 veces al día<br><input type="radio"/> 5 a 6 veces al día<br><input type="radio"/> más 6 veces al día |
| atun conserva          | <input type="radio"/> Nunca o menos 1 vez al mes<br><input type="radio"/> 1 a 3 veces mes<br><input checked="" type="radio"/> 1 vez semana<br><input type="radio"/> 2 a 4 veces semana<br><input type="radio"/> 5 a 6 veces semana<br><input type="radio"/> 1 vez al día<br><input type="radio"/> 2 a 3 veces al día<br><input type="radio"/> 5 a 6 veces al día<br><input type="radio"/> más 6 veces al día |
| sardina conserva       | <input type="radio"/> Nunca o menos 1 vez al mes<br><input type="radio"/> 1 a 3 veces mes<br><input type="radio"/> 1 vez semana<br><input checked="" type="radio"/> 2 a 4 veces semana<br><input type="radio"/> 5 a 6 veces semana<br><input type="radio"/> 1 vez al día<br><input type="radio"/> 2 a 3 veces al día<br><input type="radio"/> 5 a 6 veces al día<br><input type="radio"/> más 6 veces al día |



---

pescado ahumado

- ☐ Nunca o menos 1 vez al mes  
☒ 1 a 3 veces mes  
☐ 1 vez semana  
☐ 2 a 4 veces semana  
☐ 5 a 6 veces semana  
☐ 1 vez al día  
☐ 2 a 3 veces al día  
☐ 5 a 6 veces al día  
☐ más 6 veces al día

---

almejas o mejillones o ostras unos 100g

- ☐ Nunca o menos 1 vez al mes  
☐ 1 a 3 veces mes  
☒ 1 vez semana  
☐ 2 a 4 veces semana  
☐ 5 a 6 veces semana  
☐ 1 vez al día  
☐ 2 a 3 veces al día  
☐ 5 a 6 veces al día  
☐ más 6 veces al día

---

calamar o chipiron o sepia unos 100g

- ☐ Nunca o menos 1 vez al mes  
☐ 1 a 3 veces mes  
☐ 1 vez semana  
☒ 2 a 4 veces semana  
☐ 5 a 6 veces semana  
☐ 1 vez al día  
☐ 2 a 3 veces al día  
☐ 5 a 6 veces al día  
☐ más 6 veces al día

---

marisco unos 100g

- ☐ Nunca o menos 1 vez al mes  
☒ 1 a 3 veces mes  
☐ 1 vez semana  
☐ 2 a 4 veces semana  
☐ 5 a 6 veces semana  
☐ 1 vez al día  
☐ 2 a 3 veces al día  
☐ 5 a 6 veces al día  
☐ más 6 veces al día

---

Espinacas o acelgas cocinadas

- ☐ Nunca o menos 1 vez al mes  
☐ 1 a 3 veces mes  
☒ 1 vez semana  
☐ 2 a 4 veces semana  
☐ 5 a 6 veces semana  
☐ 1 vez al día  
☐ 2 a 3 veces al día  
☐ 5 a 6 veces al día  
☐ más 6 veces al día

---

Col o coliflor o brocoli cocinado

- ☐ Nunca o menos 1 vez al mes  
☐ 1 a 3 veces mes  
☒ 1 vez semana  
☐ 2 a 4 veces semana  
☐ 5 a 6 veces semana  
☐ 1 vez al día  
☐ 2 a 3 veces al día  
☐ 5 a 6 veces al día  
☐ más 6 veces al día

---

Lechuga o endivia o escarola

- ☐ Nunca o menos 1 vez al mes  
☒ 1 a 3 veces mes  
☐ 1 vez semana  
☐ 2 a 4 veces semana  
☐ 5 a 6 veces semana  
☐ 1 vez al día  
☐ 2 a 3 veces al día  
☐ 5 a 6 veces al día  
☐ más 6 veces al día

---

tomate ensalada

- ☐ Nunca o menos 1 vez al mes  
☐ 1 a 3 veces mes  
☐ 1 vez semana  
☐ 2 a 4 veces semana  
☒ 5 a 6 veces semana  
☐ 1 vez al día  
☐ 2 a 3 veces al día  
☐ 5 a 6 veces al día  
☐ más 6 veces al día

---

cebolla

- ☐ Nunca o menos 1 vez al mes  
☐ 1 a 3 veces mes  
☐ 1 vez semana  
☒ 2 a 4 veces semana  
☐ 5 a 6 veces semana  
☐ 1 vez al día  
☐ 2 a 3 veces al día  
☐ 5 a 6 veces al día  
☐ más 6 veces al día

---

Zanahoria o calabaza

- ☐ Nunca o menos 1 vez al mes  
☐ 1 a 3 veces mes  
☐ 1 vez semana  
☐ 2 a 4 veces semana  
☒ 5 a 6 veces semana  
☐ 1 vez al día  
☐ 2 a 3 veces al día  
☐ 5 a 6 veces al día  
☐ más 6 veces al día

---

Judías verdes

- ☒ Nunca o menos 1 vez al mes  
☐ 1 a 3 veces mes  
☐ 1 vez semana  
☐ 2 a 4 veces semana  
☐ 5 a 6 veces semana  
☐ 1 vez al día  
☐ 2 a 3 veces al día  
☐ 5 a 6 veces al día  
☐ más 6 veces al día

---

Berenjena o calabacin o pepino

- ☐ Nunca o menos 1 vez al mes  
☐ 1 a 3 veces mes  
☐ 1 vez semana  
☒ 2 a 4 veces semana  
☐ 5 a 6 veces semana  
☐ 1 vez al día  
☐ 2 a 3 veces al día  
☐ 5 a 6 veces al día  
☐ más 6 veces al día

|                       |                                                                                                                                                                                                                                                                                                                                                                                                              |
|-----------------------|--------------------------------------------------------------------------------------------------------------------------------------------------------------------------------------------------------------------------------------------------------------------------------------------------------------------------------------------------------------------------------------------------------------|
| pimiento              | <input type="radio"/> Nunca o menos 1 vez al mes<br><input type="radio"/> 1 a 3 veces mes<br><input type="radio"/> 1 vez semana<br><input checked="" type="radio"/> 2 a 4 veces semana<br><input type="radio"/> 5 a 6 veces semana<br><input type="radio"/> 1 vez al día<br><input type="radio"/> 2 a 3 veces al día<br><input type="radio"/> 5 a 6 veces al día<br><input type="radio"/> más 6 veces al día |
| alcachofa             | <input type="radio"/> Nunca o menos 1 vez al mes<br><input checked="" type="radio"/> 1 a 3 veces mes<br><input type="radio"/> 1 vez semana<br><input type="radio"/> 2 a 4 veces semana<br><input type="radio"/> 5 a 6 veces semana<br><input type="radio"/> 1 vez al día<br><input type="radio"/> 2 a 3 veces al día<br><input type="radio"/> 5 a 6 veces al día<br><input type="radio"/> más 6 veces al día |
| espárragos            | <input type="radio"/> Nunca o menos 1 vez al mes<br><input checked="" type="radio"/> 1 a 3 veces mes<br><input type="radio"/> 1 vez semana<br><input type="radio"/> 2 a 4 veces semana<br><input type="radio"/> 5 a 6 veces semana<br><input type="radio"/> 1 vez al día<br><input type="radio"/> 2 a 3 veces al día<br><input type="radio"/> 5 a 6 veces al día<br><input type="radio"/> más 6 veces al día |
| maíz hervido          | <input checked="" type="radio"/> Nunca o menos 1 vez al mes<br><input type="radio"/> 1 a 3 veces mes<br><input type="radio"/> 1 vez semana<br><input type="radio"/> 2 a 4 veces semana<br><input type="radio"/> 5 a 6 veces semana<br><input type="radio"/> 1 vez al día<br><input type="radio"/> 2 a 3 veces al día<br><input type="radio"/> 5 a 6 veces al día<br><input type="radio"/> más 6 veces al día |
| legumbres             | <input type="radio"/> Nunca o menos 1 vez al mes<br><input type="radio"/> 1 a 3 veces mes<br><input type="radio"/> 1 vez semana<br><input checked="" type="radio"/> 2 a 4 veces semana<br><input type="radio"/> 5 a 6 veces semana<br><input type="radio"/> 1 vez al día<br><input type="radio"/> 2 a 3 veces al día<br><input type="radio"/> 5 a 6 veces al día<br><input type="radio"/> más 6 veces al día |
| naranjas o mandarinas | <input type="radio"/> Nunca o menos 1 vez al mes<br><input checked="" type="radio"/> 1 a 3 veces mes<br><input type="radio"/> 1 vez semana<br><input type="radio"/> 2 a 4 veces semana<br><input type="radio"/> 5 a 6 veces semana<br><input type="radio"/> 1 vez al día<br><input type="radio"/> 2 a 3 veces al día<br><input type="radio"/> 5 a 6 veces al día<br><input type="radio"/> más 6 veces al día |

---

zum natural fruta

- ☐ Nunca o menos 1 vez al mes  
☒ 1 a 3 veces mes  
☐ 1 vez semana  
☐ 2 a 4 veces semana  
☐ 5 a 6 veces semana  
☐ 1 vez al día  
☐ 2 a 3 veces al día  
☐ 5 a 6 veces al día  
☐ más 6 veces al día

---

platano

- ☐ Nunca o menos 1 vez al mes  
☐ 1 a 3 veces mes  
☐ 1 vez semana  
☒ 2 a 4 veces semana  
☐ 5 a 6 veces semana  
☐ 1 vez al día  
☐ 2 a 3 veces al día  
☐ 5 a 6 veces al día  
☐ más 6 veces al día

---

manzana o pera

- ☐ Nunca o menos 1 vez al mes  
☐ 1 a 3 veces mes  
☐ 1 vez semana  
☒ 2 a 4 veces semana  
☐ 5 a 6 veces semana  
☐ 1 vez al día  
☐ 2 a 3 veces al día  
☐ 5 a 6 veces al día  
☐ más 6 veces al día

---

melocotón o nectarina

- ☐ Nunca o menos 1 vez al mes  
☐ 1 a 3 veces mes  
☐ 1 vez semana  
☒ 2 a 4 veces semana  
☐ 5 a 6 veces semana  
☐ 1 vez al día  
☐ 2 a 3 veces al día  
☐ 5 a 6 veces al día  
☐ más 6 veces al día

---

sandia o melon

- ☐ Nunca o menos 1 vez al mes  
☐ 1 a 3 veces mes  
☐ 1 vez semana  
☒ 2 a 4 veces semana  
☐ 5 a 6 veces semana  
☐ 1 vez al día  
☐ 2 a 3 veces al día  
☐ 5 a 6 veces al día  
☐ más 6 veces al día

---

uva

- ☐ Nunca o menos 1 vez al mes  
☐ 1 a 3 veces mes  
☐ 1 vez semana  
☒ 2 a 4 veces semana  
☐ 5 a 6 veces semana  
☐ 1 vez al día  
☐ 2 a 3 veces al día  
☐ 5 a 6 veces al día  
☐ más 6 veces al día

---

bruna o ciruela

- ☐ Nunca o menos 1 vez al mes  
☐ 1 a 3 veces mes  
☐ 1 vez semana  
☐ 2 a 4 veces semana  
☒ 5 a 6 veces semana  
☐ 1 vez al día  
☐ 2 a 3 veces al día  
☐ 5 a 6 veces al día  
☐ más 6 veces al día

---

kiwi

- ☐ Nunca o menos 1 vez al mes  
☐ 1 a 3 veces mes  
☐ 1 vez semana  
☒ 2 a 4 veces semana  
☐ 5 a 6 veces semana  
☐ 1 vez al día  
☐ 2 a 3 veces al día  
☐ 5 a 6 veces al día  
☐ más 6 veces al día

---

aceituna

- ☐ Nunca o menos 1 vez al mes  
☐ 1 a 3 veces mes  
☐ 1 vez semana  
☒ 2 a 4 veces semana  
☐ 5 a 6 veces semana  
☐ 1 vez al día  
☐ 2 a 3 veces al día  
☐ 5 a 6 veces al día  
☐ más 6 veces al día

---

frutos secos

- ☐ Nunca o menos 1 vez al mes  
☐ 1 a 3 veces mes  
☐ 1 vez semana  
☐ 2 a 4 veces semana  
☐ 5 a 6 veces semana  
☒ 1 vez al día  
☐ 2 a 3 veces al día  
☐ 5 a 6 veces al día  
☐ más 6 veces al día

---

pan blanco

- ☐ Nunca o menos 1 vez al mes  
☐ 1 a 3 veces mes  
☒ 1 vez semana  
☐ 2 a 4 veces semana  
☐ 5 a 6 veces semana  
☐ 1 vez al día  
☐ 2 a 3 veces al día  
☐ 5 a 6 veces al día  
☐ más 6 veces al día

---

pan integral

- ☐ Nunca o menos 1 vez al mes  
☐ 1 a 3 veces mes  
☐ 1 vez semana  
☐ 2 a 4 veces semana  
☒ 5 a 6 veces semana  
☐ 1 vez al día  
☐ 2 a 3 veces al día  
☐ 5 a 6 veces al día  
☐ más 6 veces al día

---

cereales desayuno

- ☐ Nunca o menos 1 vez al mes  
☐ 1 a 3 veces mes  
☐ 1 vez semana  
☒ 2 a 4 veces semana  
☐ 5 a 6 veces semana  
☐ 1 vez al día  
☐ 2 a 3 veces al día  
☐ 5 a 6 veces al día  
☐ más 6 veces al día

---

patatas fritas

- ☐ Nunca o menos 1 vez al mes  
☒ 1 a 3 veces mes  
☐ 1 vez semana  
☐ 2 a 4 veces semana  
☐ 5 a 6 veces semana  
☐ 1 vez al día  
☐ 2 a 3 veces al día  
☐ 5 a 6 veces al día  
☐ más 6 veces al día

---

patatas cocidas o asadas

- ☐ Nunca o menos 1 vez al mes  
☐ 1 a 3 veces mes  
☐ 1 vez semana  
☒ 2 a 4 veces semana  
☐ 5 a 6 veces semana  
☐ 1 vez al día  
☐ 2 a 3 veces al día  
☐ 5 a 6 veces al día  
☐ más 6 veces al día

---

bolsa papas

- ☐ Nunca o menos 1 vez al mes  
☒ 1 a 3 veces mes  
☐ 1 vez semana  
☐ 2 a 4 veces semana  
☐ 5 a 6 veces semana  
☐ 1 vez al día  
☐ 2 a 3 veces al día  
☐ 5 a 6 veces al día  
☐ más 6 veces al día

---

arroz cocinado

- ☐ Nunca o menos 1 vez al mes  
☐ 1 a 3 veces mes  
☐ 1 vez semana  
☒ 2 a 4 veces semana  
☐ 5 a 6 veces semana  
☐ 1 vez al día  
☐ 2 a 3 veces al día  
☐ 5 a 6 veces al día  
☐ más 6 veces al día

---

pasta

- ☐ Nunca o menos 1 vez al mes  
☐ 1 a 3 veces mes  
☐ 1 vez semana  
☒ 2 a 4 veces semana  
☐ 5 a 6 veces semana  
☐ 1 vez al día  
☐ 2 a 3 veces al día  
☐ 5 a 6 veces al día  
☐ más 6 veces al día

|                     |                                                                                                                                                                                                                                                                                                                                                                                                              |
|---------------------|--------------------------------------------------------------------------------------------------------------------------------------------------------------------------------------------------------------------------------------------------------------------------------------------------------------------------------------------------------------------------------------------------------------|
| pizza               | <input type="radio"/> Nunca o menos 1 vez al mes<br><input type="radio"/> 1 a 3 veces mes<br><input checked="" type="radio"/> 1 vez semana<br><input type="radio"/> 2 a 4 veces semana<br><input type="radio"/> 5 a 6 veces semana<br><input type="radio"/> 1 vez al día<br><input type="radio"/> 2 a 3 veces al día<br><input type="radio"/> 5 a 6 veces al día<br><input type="radio"/> más 6 veces al día |
| aceite oliva        | <input type="radio"/> Nunca o menos 1 vez al mes<br><input type="radio"/> 1 a 3 veces mes<br><input type="radio"/> 1 vez semana<br><input type="radio"/> 2 a 4 veces semana<br><input type="radio"/> 5 a 6 veces semana<br><input type="radio"/> 1 vez al día<br><input checked="" type="radio"/> 2 a 3 veces al día<br><input type="radio"/> 5 a 6 veces al día<br><input type="radio"/> más 6 veces al día |
| otros aceites       | <input checked="" type="radio"/> Nunca o menos 1 vez al mes<br><input type="radio"/> 1 a 3 veces mes<br><input type="radio"/> 1 vez semana<br><input type="radio"/> 2 a 4 veces semana<br><input type="radio"/> 5 a 6 veces semana<br><input type="radio"/> 1 vez al día<br><input type="radio"/> 2 a 3 veces al día<br><input type="radio"/> 5 a 6 veces al día<br><input type="radio"/> más 6 veces al día |
| margarina           | <input checked="" type="radio"/> Nunca o menos 1 vez al mes<br><input type="radio"/> 1 a 3 veces mes<br><input type="radio"/> 1 vez semana<br><input type="radio"/> 2 a 4 veces semana<br><input type="radio"/> 5 a 6 veces semana<br><input type="radio"/> 1 vez al día<br><input type="radio"/> 2 a 3 veces al día<br><input type="radio"/> 5 a 6 veces al día<br><input type="radio"/> más 6 veces al día |
| mantequilla         | <input checked="" type="radio"/> Nunca o menos 1 vez al mes<br><input type="radio"/> 1 a 3 veces mes<br><input type="radio"/> 1 vez semana<br><input type="radio"/> 2 a 4 veces semana<br><input type="radio"/> 5 a 6 veces semana<br><input type="radio"/> 1 vez al día<br><input type="radio"/> 2 a 3 veces al día<br><input type="radio"/> 5 a 6 veces al día<br><input type="radio"/> más 6 veces al día |
| galletas tipo maria | <input checked="" type="radio"/> Nunca o menos 1 vez al mes<br><input type="radio"/> 1 a 3 veces mes<br><input type="radio"/> 1 vez semana<br><input type="radio"/> 2 a 4 veces semana<br><input type="radio"/> 5 a 6 veces semana<br><input type="radio"/> 1 vez al día<br><input type="radio"/> 2 a 3 veces al día<br><input type="radio"/> 5 a 6 veces al día<br><input type="radio"/> más 6 veces al día |

---

galletas chocolate

- ☐ Nunca o menos 1 vez al mes  
☒ 1 a 3 veces mes  
☐ 1 vez semana  
☐ 2 a 4 veces semana  
☐ 5 a 6 veces semana  
☐ 1 vez al día  
☐ 2 a 3 veces al día  
☐ 5 a 6 veces al día  
☐ más 6 veces al día

---

bolleria

- ☐ Nunca o menos 1 vez al mes  
☒ 1 a 3 veces mes  
☐ 1 vez semana  
☐ 2 a 4 veces semana  
☐ 5 a 6 veces semana  
☐ 1 vez al día  
☐ 2 a 3 veces al día  
☐ 5 a 6 veces al día  
☐ más 6 veces al día

---

chocolate o bombones

- ☐ Nunca o menos 1 vez al mes  
☐ 1 a 3 veces mes  
☐ 1 vez semana  
☐ 2 a 4 veces semana  
☒ 5 a 6 veces semana  
☐ 1 vez al día  
☐ 2 a 3 veces al día  
☐ 5 a 6 veces al día  
☐ más 6 veces al día

---

chocolate polvo o colacao

- ☒ Nunca o menos 1 vez al mes  
☐ 1 a 3 veces mes  
☐ 1 vez semana  
☐ 2 a 4 veces semana  
☐ 5 a 6 veces semana  
☐ 1 vez al día  
☐ 2 a 3 veces al día  
☐ 5 a 6 veces al día  
☐ más 6 veces al día

---

vino tinto

- ☒ Nunca o menos 1 vez al mes  
☐ 1 a 3 veces mes  
☐ 1 vez semana  
☐ 2 a 4 veces semana  
☐ 5 a 6 veces semana  
☐ 1 vez al día  
☐ 2 a 3 veces al día  
☐ 5 a 6 veces al día  
☐ más 6 veces al día

---

vino blanco

- ☒ Nunca o menos 1 vez al mes  
☐ 1 a 3 veces mes  
☐ 1 vez semana  
☐ 2 a 4 veces semana  
☐ 5 a 6 veces semana  
☐ 1 vez al día  
☐ 2 a 3 veces al día  
☐ 5 a 6 veces al día  
☐ más 6 veces al día



---

|                    |                                                                                                                                                                                                                                                                                                                                                                                                              |
|--------------------|--------------------------------------------------------------------------------------------------------------------------------------------------------------------------------------------------------------------------------------------------------------------------------------------------------------------------------------------------------------------------------------------------------------|
| vino seco o vermut | <input checked="" type="radio"/> Nunca o menos 1 vez al mes<br><input type="radio"/> 1 a 3 veces mes<br><input type="radio"/> 1 vez semana<br><input type="radio"/> 2 a 4 veces semana<br><input type="radio"/> 5 a 6 veces semana<br><input type="radio"/> 1 vez al día<br><input type="radio"/> 2 a 3 veces al día<br><input type="radio"/> 5 a 6 veces al día<br><input type="radio"/> más 6 veces al día |
|--------------------|--------------------------------------------------------------------------------------------------------------------------------------------------------------------------------------------------------------------------------------------------------------------------------------------------------------------------------------------------------------------------------------------------------------|

---

|         |                                                                                                                                                                                                                                                                                                                                                                                                              |
|---------|--------------------------------------------------------------------------------------------------------------------------------------------------------------------------------------------------------------------------------------------------------------------------------------------------------------------------------------------------------------------------------------------------------------|
| cerveza | <input checked="" type="radio"/> Nunca o menos 1 vez al mes<br><input type="radio"/> 1 a 3 veces mes<br><input type="radio"/> 1 vez semana<br><input type="radio"/> 2 a 4 veces semana<br><input type="radio"/> 5 a 6 veces semana<br><input type="radio"/> 1 vez al día<br><input type="radio"/> 2 a 3 veces al día<br><input type="radio"/> 5 a 6 veces al día<br><input type="radio"/> más 6 veces al día |
|---------|--------------------------------------------------------------------------------------------------------------------------------------------------------------------------------------------------------------------------------------------------------------------------------------------------------------------------------------------------------------------------------------------------------------|

---

|                     |                                                                                                                                                                                                                                                                                                                                                                                                              |
|---------------------|--------------------------------------------------------------------------------------------------------------------------------------------------------------------------------------------------------------------------------------------------------------------------------------------------------------------------------------------------------------------------------------------------------------|
| cerveza sin alcohol | <input type="radio"/> Nunca o menos 1 vez al mes<br><input type="radio"/> 1 a 3 veces mes<br><input checked="" type="radio"/> 1 vez semana<br><input type="radio"/> 2 a 4 veces semana<br><input type="radio"/> 5 a 6 veces semana<br><input type="radio"/> 1 vez al día<br><input type="radio"/> 2 a 3 veces al día<br><input type="radio"/> 5 a 6 veces al día<br><input type="radio"/> más 6 veces al día |
|---------------------|--------------------------------------------------------------------------------------------------------------------------------------------------------------------------------------------------------------------------------------------------------------------------------------------------------------------------------------------------------------------------------------------------------------|

---

|         |                                                                                                                                                                                                                                                                                                                                                                                                              |
|---------|--------------------------------------------------------------------------------------------------------------------------------------------------------------------------------------------------------------------------------------------------------------------------------------------------------------------------------------------------------------------------------------------------------------|
| licores | <input checked="" type="radio"/> Nunca o menos 1 vez al mes<br><input type="radio"/> 1 a 3 veces mes<br><input type="radio"/> 1 vez semana<br><input type="radio"/> 2 a 4 veces semana<br><input type="radio"/> 5 a 6 veces semana<br><input type="radio"/> 1 vez al día<br><input type="radio"/> 2 a 3 veces al día<br><input type="radio"/> 5 a 6 veces al día<br><input type="radio"/> más 6 veces al día |
|---------|--------------------------------------------------------------------------------------------------------------------------------------------------------------------------------------------------------------------------------------------------------------------------------------------------------------------------------------------------------------------------------------------------------------|

---

|                       |                                                                                                                                                                                                                                                                                                                                                                                                              |
|-----------------------|--------------------------------------------------------------------------------------------------------------------------------------------------------------------------------------------------------------------------------------------------------------------------------------------------------------------------------------------------------------------------------------------------------------|
| ginebra o ron o vodka | <input checked="" type="radio"/> Nunca o menos 1 vez al mes<br><input type="radio"/> 1 a 3 veces mes<br><input type="radio"/> 1 vez semana<br><input type="radio"/> 2 a 4 veces semana<br><input type="radio"/> 5 a 6 veces semana<br><input type="radio"/> 1 vez al día<br><input type="radio"/> 2 a 3 veces al día<br><input type="radio"/> 5 a 6 veces al día<br><input type="radio"/> más 6 veces al día |
|-----------------------|--------------------------------------------------------------------------------------------------------------------------------------------------------------------------------------------------------------------------------------------------------------------------------------------------------------------------------------------------------------------------------------------------------------|

---

|                 |                                                                                                                                                                                                                                                                                                                                                                                                              |
|-----------------|--------------------------------------------------------------------------------------------------------------------------------------------------------------------------------------------------------------------------------------------------------------------------------------------------------------------------------------------------------------------------------------------------------------|
| refresco normal | <input checked="" type="radio"/> Nunca o menos 1 vez al mes<br><input type="radio"/> 1 a 3 veces mes<br><input type="radio"/> 1 vez semana<br><input type="radio"/> 2 a 4 veces semana<br><input type="radio"/> 5 a 6 veces semana<br><input type="radio"/> 1 vez al día<br><input type="radio"/> 2 a 3 veces al día<br><input type="radio"/> 5 a 6 veces al día<br><input type="radio"/> más 6 veces al día |
|-----------------|--------------------------------------------------------------------------------------------------------------------------------------------------------------------------------------------------------------------------------------------------------------------------------------------------------------------------------------------------------------------------------------------------------------|

---

|                          |                                                                                                                                                                                                                                                                                                                                                                                                              |
|--------------------------|--------------------------------------------------------------------------------------------------------------------------------------------------------------------------------------------------------------------------------------------------------------------------------------------------------------------------------------------------------------------------------------------------------------|
| refresco sin azúcar      | <input checked="" type="radio"/> Nunca o menos 1 vez al mes<br><input type="radio"/> 1 a 3 veces mes<br><input type="radio"/> 1 vez semana<br><input type="radio"/> 2 a 4 veces semana<br><input type="radio"/> 5 a 6 veces semana<br><input type="radio"/> 1 vez al día<br><input type="radio"/> 2 a 3 veces al día<br><input type="radio"/> 5 a 6 veces al día<br><input type="radio"/> más 6 veces al día |
| Agua del grifo           | <input checked="" type="radio"/> Nunca o menos 1 vez al mes<br><input type="radio"/> 1 a 3 veces mes<br><input type="radio"/> 1 vez semana<br><input type="radio"/> 2 a 4 veces semana<br><input type="radio"/> 5 a 6 veces semana<br><input type="radio"/> 1 vez al día<br><input type="radio"/> 2 a 3 veces al día<br><input type="radio"/> 5 a 6 veces al día<br><input type="radio"/> más 6 veces al día |
| agua embotellada sin gas | <input type="radio"/> Nunca o menos 1 vez al mes<br><input type="radio"/> 1 a 3 veces mes<br><input type="radio"/> 1 vez semana<br><input type="radio"/> 2 a 4 veces semana<br><input type="radio"/> 5 a 6 veces semana<br><input type="radio"/> 1 vez al día<br><input type="radio"/> 2 a 3 veces al día<br><input type="radio"/> 5 a 6 veces al día<br><input checked="" type="radio"/> más 6 veces al día |
| agua embotellada con gas | <input checked="" type="radio"/> Nunca o menos 1 vez al mes<br><input type="radio"/> 1 a 3 veces mes<br><input type="radio"/> 1 vez semana<br><input type="radio"/> 2 a 4 veces semana<br><input type="radio"/> 5 a 6 veces semana<br><input type="radio"/> 1 vez al día<br><input type="radio"/> 2 a 3 veces al día<br><input type="radio"/> 5 a 6 veces al día<br><input type="radio"/> más 6 veces al día |
| zumو frutas embasado     | <input checked="" type="radio"/> Nunca o menos 1 vez al mes<br><input type="radio"/> 1 a 3 veces mes<br><input type="radio"/> 1 vez semana<br><input type="radio"/> 2 a 4 veces semana<br><input type="radio"/> 5 a 6 veces semana<br><input type="radio"/> 1 vez al día<br><input type="radio"/> 2 a 3 veces al día<br><input type="radio"/> 5 a 6 veces al día<br><input type="radio"/> más 6 veces al día |
| cafe                     | <input checked="" type="radio"/> Nunca o menos 1 vez al mes<br><input type="radio"/> 1 a 3 veces mes<br><input type="radio"/> 1 vez semana<br><input type="radio"/> 2 a 4 veces semana<br><input type="radio"/> 5 a 6 veces semana<br><input type="radio"/> 1 vez al día<br><input type="radio"/> 2 a 3 veces al día<br><input type="radio"/> 5 a 6 veces al día<br><input type="radio"/> más 6 veces al día |

|                       |                                                                                                                                                                                                                                                                                                                                                                                                              |
|-----------------------|--------------------------------------------------------------------------------------------------------------------------------------------------------------------------------------------------------------------------------------------------------------------------------------------------------------------------------------------------------------------------------------------------------------|
| cafe descafeinado     | <input type="radio"/> Nunca o menos 1 vez al mes<br><input type="radio"/> 1 a 3 veces mes<br><input type="radio"/> 1 vez semana<br><input type="radio"/> 2 a 4 veces semana<br><input type="radio"/> 5 a 6 veces semana<br><input checked="" type="radio"/> 1 vez al día<br><input type="radio"/> 2 a 3 veces al día<br><input type="radio"/> 5 a 6 veces al día<br><input type="radio"/> más 6 veces al día |
| te o infusión         | <input checked="" type="radio"/> Nunca o menos 1 vez al mes<br><input type="radio"/> 1 a 3 veces mes<br><input type="radio"/> 1 vez semana<br><input type="radio"/> 2 a 4 veces semana<br><input type="radio"/> 5 a 6 veces semana<br><input type="radio"/> 1 vez al día<br><input type="radio"/> 2 a 3 veces al día<br><input type="radio"/> 5 a 6 veces al día<br><input type="radio"/> más 6 veces al día |
| sopa o puré verduras  | <input type="radio"/> Nunca o menos 1 vez al mes<br><input type="radio"/> 1 a 3 veces mes<br><input type="radio"/> 1 vez semana<br><input checked="" type="radio"/> 2 a 4 veces semana<br><input type="radio"/> 5 a 6 veces semana<br><input type="radio"/> 1 vez al día<br><input type="radio"/> 2 a 3 veces al día<br><input type="radio"/> 5 a 6 veces al día<br><input type="radio"/> más 6 veces al día |
| croquetas pollo jamón | <input checked="" type="radio"/> Nunca o menos 1 vez al mes<br><input type="radio"/> 1 a 3 veces mes<br><input type="radio"/> 1 vez semana<br><input type="radio"/> 2 a 4 veces semana<br><input type="radio"/> 5 a 6 veces semana<br><input type="radio"/> 1 vez al día<br><input type="radio"/> 2 a 3 veces al día<br><input type="radio"/> 5 a 6 veces al día<br><input type="radio"/> más 6 veces al día |
| croquetas pescado     | <input checked="" type="radio"/> Nunca o menos 1 vez al mes<br><input type="radio"/> 1 a 3 veces mes<br><input type="radio"/> 1 vez semana<br><input type="radio"/> 2 a 4 veces semana<br><input type="radio"/> 5 a 6 veces semana<br><input type="radio"/> 1 vez al día<br><input type="radio"/> 2 a 3 veces al día<br><input type="radio"/> 5 a 6 veces al día<br><input type="radio"/> más 6 veces al día |
| mayonesa              | <input checked="" type="radio"/> Nunca o menos 1 vez al mes<br><input type="radio"/> 1 a 3 veces mes<br><input type="radio"/> 1 vez semana<br><input type="radio"/> 2 a 4 veces semana<br><input type="radio"/> 5 a 6 veces semana<br><input type="radio"/> 1 vez al día<br><input type="radio"/> 2 a 3 veces al día<br><input type="radio"/> 5 a 6 veces al día<br><input type="radio"/> más 6 veces al día |

|                  |                                                                                                                                                                                                                                                                                                                                                                                                              |
|------------------|--------------------------------------------------------------------------------------------------------------------------------------------------------------------------------------------------------------------------------------------------------------------------------------------------------------------------------------------------------------------------------------------------------------|
| salsa tomate     | <input type="radio"/> Nunca o menos 1 vez al mes<br><input type="radio"/> 1 a 3 veces mes<br><input type="radio"/> 1 vez semana<br><input type="radio"/> 2 a 4 veces semana<br><input checked="" type="radio"/> 5 a 6 veces semana<br><input type="radio"/> 1 vez al día<br><input type="radio"/> 2 a 3 veces al día<br><input type="radio"/> 5 a 6 veces al día<br><input type="radio"/> más 6 veces al día |
| ketchup          | <input checked="" type="radio"/> Nunca o menos 1 vez al mes<br><input type="radio"/> 1 a 3 veces mes<br><input type="radio"/> 1 vez semana<br><input type="radio"/> 2 a 4 veces semana<br><input type="radio"/> 5 a 6 veces semana<br><input type="radio"/> 1 vez al día<br><input type="radio"/> 2 a 3 veces al día<br><input type="radio"/> 5 a 6 veces al día<br><input type="radio"/> más 6 veces al día |
| sal              | <input type="radio"/> Nunca o menos 1 vez al mes<br><input type="radio"/> 1 a 3 veces mes<br><input type="radio"/> 1 vez semana<br><input type="radio"/> 2 a 4 veces semana<br><input type="radio"/> 5 a 6 veces semana<br><input type="radio"/> 1 vez al día<br><input checked="" type="radio"/> 2 a 3 veces al día<br><input type="radio"/> 5 a 6 veces al día<br><input type="radio"/> más 6 veces al día |
| ajo              | <input type="radio"/> Nunca o menos 1 vez al mes<br><input type="radio"/> 1 a 3 veces mes<br><input checked="" type="radio"/> 1 vez semana<br><input type="radio"/> 2 a 4 veces semana<br><input type="radio"/> 5 a 6 veces semana<br><input type="radio"/> 1 vez al día<br><input type="radio"/> 2 a 3 veces al día<br><input type="radio"/> 5 a 6 veces al día<br><input type="radio"/> más 6 veces al día |
| mermelada o miel | <input type="radio"/> Nunca o menos 1 vez al mes<br><input type="radio"/> 1 a 3 veces mes<br><input checked="" type="radio"/> 1 vez semana<br><input type="radio"/> 2 a 4 veces semana<br><input type="radio"/> 5 a 6 veces semana<br><input type="radio"/> 1 vez al día<br><input type="radio"/> 2 a 3 veces al día<br><input type="radio"/> 5 a 6 veces al día<br><input type="radio"/> más 6 veces al día |
| azúcar           | <input type="radio"/> Nunca o menos 1 vez al mes<br><input type="radio"/> 1 a 3 veces mes<br><input type="radio"/> 1 vez semana<br><input type="radio"/> 2 a 4 veces semana<br><input type="radio"/> 5 a 6 veces semana<br><input checked="" type="radio"/> 1 vez al día<br><input type="radio"/> 2 a 3 veces al día<br><input type="radio"/> 5 a 6 veces al día<br><input type="radio"/> más 6 veces al día |

|                                       |                                                                                                                                                                                                                                                                                                                                                                                                                                                                                                                               |
|---------------------------------------|-------------------------------------------------------------------------------------------------------------------------------------------------------------------------------------------------------------------------------------------------------------------------------------------------------------------------------------------------------------------------------------------------------------------------------------------------------------------------------------------------------------------------------|
| Otro alimento                         |                                                                                                                                                                                                                                                                                                                                                                                                                                                                                                                               |
| suplementos vitamínicos               | <input checked="" type="radio"/> si<br><input type="radio"/> no                                                                                                                                                                                                                                                                                                                                                                                                                                                               |
| suplementos vitamínicos               | [*DATA REMOVED*]                                                                                                                                                                                                                                                                                                                                                                                                                                                                                                              |
| dieta previa                          | <input type="radio"/> si<br><input checked="" type="radio"/> no                                                                                                                                                                                                                                                                                                                                                                                                                                                               |
| motivo dieta                          | <input checked="" type="radio"/> no dieta<br><input type="radio"/> control peso<br><input type="radio"/> control colesterol<br><input type="radio"/> control diabetes<br><input type="radio"/> problemas estómago<br><input type="radio"/> problemas vesícula o hepáticos<br><input type="radio"/> HTA o cardiopatía<br><input type="radio"/> problemas renales<br><input type="radio"/> alergia alimentaria<br><input type="radio"/> ácido úrico elevado<br><input type="radio"/> vegetariana<br><input type="radio"/> otros |
| cambio alimentos año previo gestación | <input type="radio"/> si<br><input checked="" type="radio"/> no                                                                                                                                                                                                                                                                                                                                                                                                                                                               |
| cambio lácteos                        | <input type="radio"/> eliminado<br><input type="radio"/> disminuido<br><input checked="" type="radio"/> igual<br><input type="radio"/> aumentado<br><input type="radio"/> no sabe                                                                                                                                                                                                                                                                                                                                             |
| cambio huevos                         | <input type="radio"/> eliminado<br><input type="radio"/> disminuido<br><input checked="" type="radio"/> igual<br><input type="radio"/> aumentado<br><input type="radio"/> no sabe                                                                                                                                                                                                                                                                                                                                             |
| cambio carne                          | <input type="radio"/> eliminado<br><input type="radio"/> disminuido<br><input checked="" type="radio"/> igual<br><input type="radio"/> aumentado<br><input type="radio"/> no sabe                                                                                                                                                                                                                                                                                                                                             |
| cambio pescado                        | <input type="radio"/> eliminado<br><input type="radio"/> disminuido<br><input checked="" type="radio"/> igual<br><input type="radio"/> aumentado<br><input type="radio"/> no sabe                                                                                                                                                                                                                                                                                                                                             |
| cambio verduras                       | <input type="radio"/> eliminado<br><input type="radio"/> disminuido<br><input checked="" type="radio"/> igual<br><input type="radio"/> aumentado<br><input type="radio"/> no sabe                                                                                                                                                                                                                                                                                                                                             |

|                            |                                                                                                                                                                                                                        |
|----------------------------|------------------------------------------------------------------------------------------------------------------------------------------------------------------------------------------------------------------------|
| cambio legumbres           | <input type="radio"/> eliminado<br><input type="radio"/> disminuido<br><input checked="" type="radio"/> igual<br><input type="radio"/> aumentado<br><input type="radio"/> no sabe                                      |
| cambio fruta               | <input type="radio"/> eliminado<br><input type="radio"/> disminuido<br><input checked="" type="radio"/> igual<br><input type="radio"/> aumentado<br><input type="radio"/> no sabe                                      |
| cambio pan                 | <input type="radio"/> eliminado<br><input type="radio"/> disminuido<br><input checked="" type="radio"/> igual<br><input type="radio"/> aumentado<br><input type="radio"/> no sabe                                      |
| cambio aceite oliva        | <input type="radio"/> eliminado<br><input type="radio"/> disminuido<br><input checked="" type="radio"/> igual<br><input type="radio"/> aumentado<br><input type="radio"/> no sabe                                      |
| cambio mante o margarina   | <input type="radio"/> eliminado<br><input type="radio"/> disminuido<br><input checked="" type="radio"/> igual<br><input type="radio"/> aumentado<br><input type="radio"/> no sabe                                      |
| cambio azúcar y dulces     | <input type="radio"/> eliminado<br><input type="radio"/> disminuido<br><input checked="" type="radio"/> igual<br><input type="radio"/> aumentado<br><input type="radio"/> no sabe                                      |
| cambio bebidas alcohólicas | <input type="radio"/> eliminado<br><input type="radio"/> disminuido<br><input checked="" type="radio"/> igual<br><input type="radio"/> aumentado<br><input type="radio"/> no sabe                                      |
| frecuencia comidas fritas  | <input type="radio"/> a diario<br><input type="radio"/> 5 a 6 veces semana<br><input type="radio"/> 2 a 4 veces semana<br><input type="radio"/> 1 vez semana<br><input checked="" type="radio"/> menos de 1 vez semana |
| carne                      | <input type="radio"/> no como<br><input type="radio"/> cruda<br><input type="radio"/> poco hecha<br><input checked="" type="radio"/> hecha<br><input type="radio"/> muy hecha                                          |
| grasa visible carne        | <input checked="" type="radio"/> quita toda<br><input type="radio"/> quita mayoría<br><input type="radio"/> quita un poco<br><input type="radio"/> no quita nada                                                       |

|                                |                                                                                                                                                                                                                                                          |
|--------------------------------|----------------------------------------------------------------------------------------------------------------------------------------------------------------------------------------------------------------------------------------------------------|
| cocina carne                   | <input checked="" type="radio"/> a la plancha<br><input type="radio"/> a la parrilla<br><input type="radio"/> asada<br><input type="radio"/> frita<br><input type="radio"/> guisada                                                                      |
| tostado quemado carne          | <input checked="" type="radio"/> nunca<br><input type="radio"/> 1 vez mes<br><input type="radio"/> 2 a 3 veces mes<br><input type="radio"/> 1 vez semana<br><input type="radio"/> 2 a 3 semanas                                                          |
| tostado quemado pescado        | <input checked="" type="radio"/> nunca<br><input type="radio"/> 1 vez mes<br><input type="radio"/> 2 a 3 veces mes<br><input type="radio"/> 1 vez semana<br><input type="radio"/> 2 a 3 semanas                                                          |
| socarrat paella                | <input checked="" type="radio"/> nunca<br><input type="radio"/> 1 vez mes<br><input type="radio"/> 2 a 3 veces mes<br><input type="radio"/> 1 vez semana<br><input type="radio"/> 2 a 3 semanas                                                          |
| grasa o aceite cocinar         | <input type="radio"/> mantequilla<br><input type="radio"/> margarina<br><input checked="" type="radio"/> aceite oliva<br><input type="radio"/> aceite oliva virgen extra<br><input type="radio"/> aceite vegetal<br><input type="radio"/> mezcla aceites |
| grasa aceite aliñar            | <input type="radio"/> mantequilla<br><input type="radio"/> margarina<br><input type="radio"/> aceite oliva<br><input checked="" type="radio"/> aceite oliva virgen extra<br><input type="radio"/> aceite vegetal<br><input type="radio"/> mezcla aceites |
| grasa aceite freir             | <input type="radio"/> mantequilla<br><input type="radio"/> margarina<br><input checked="" type="radio"/> aceite oliva<br><input type="radio"/> aceite oliva virgen extra<br><input type="radio"/> aceite vegetal<br><input type="radio"/> mezcla aceites |
| Ejercicio cuestionario         | <input checked="" type="radio"/> si<br><input type="radio"/> no                                                                                                                                                                                          |
| horas de sueño incluido siesta | [*DATA REMOVED*]                                                                                                                                                                                                                                         |
| minutos siesta                 | [*DATA REMOVED*]                                                                                                                                                                                                                                         |
| horas televisión semana        | [*DATA REMOVED*]                                                                                                                                                                                                                                         |

|                                        |                                                                                                                                                                                                                                                                                                                                                                           |
|----------------------------------------|---------------------------------------------------------------------------------------------------------------------------------------------------------------------------------------------------------------------------------------------------------------------------------------------------------------------------------------------------------------------------|
| actividad trabajo                      | <input type="radio"/> casi siempre sentado<br><input checked="" type="radio"/> sentado 50 por cien<br><input type="radio"/> casi siempre de pie, quieto<br><input type="radio"/> casi siempre levantado caminando y llevando pocas cosas<br><input type="radio"/> casi siempre levantado, caminando y llevado muchas cosas<br><input type="radio"/> trabajo manual pesado |
| tiempo caminar o bici al día           | <input type="radio"/> casi nunca<br><input type="radio"/> menos 20min día<br><input type="radio"/> 20 a 40 min día<br><input checked="" type="radio"/> 40 a 60 min día<br><input type="radio"/> 1h o 1h y media día<br><input type="radio"/> más de 1h y media al día                                                                                                     |
| tiempo tareas casa al día              | <input type="radio"/> menos de 1h día<br><input type="radio"/> 1 a 2h día<br><input checked="" type="radio"/> 3 a 4h día<br><input type="radio"/> 5 a 6h día<br><input type="radio"/> 7 a 8h día<br><input type="radio"/> más de 8h día                                                                                                                                   |
| tiempo libre televisión ordenador leer | <input type="radio"/> menos 1h día<br><input type="radio"/> 1h día<br><input checked="" type="radio"/> 2h día<br><input type="radio"/> 3h día<br><input type="radio"/> 4h día<br><input type="radio"/> 5 a 6h día<br><input type="radio"/> mas 6h día                                                                                                                     |
| tiempo libre ejercicio o deporte       | <input type="radio"/> menos 1h semana<br><input checked="" type="radio"/> 1h semana<br><input type="radio"/> 2h semana<br><input type="radio"/> 3h semana<br><input type="radio"/> 4 a 5h semana<br><input type="radio"/> mas 5h semana                                                                                                                                   |
| como se considera                      | <input type="radio"/> sedentaria<br><input type="radio"/> poco activa<br><input type="radio"/> moderadamente activa<br><input checked="" type="radio"/> bastante activa<br><input type="radio"/> muy activa<br><input type="radio"/> no sabe                                                                                                                              |
| FUR                                    | [*DATA REMOVED*]                                                                                                                                                                                                                                                                                                                                                          |
| Semanas gestación 2T                   | [*DATA REMOVED*]                                                                                                                                                                                                                                                                                                                                                          |
| Días gestación 2T                      | [*DATA REMOVED*]                                                                                                                                                                                                                                                                                                                                                          |
| DBP 2T                                 | [*DATA REMOVED*]                                                                                                                                                                                                                                                                                                                                                          |
| CC 2T                                  | [*DATA REMOVED*]                                                                                                                                                                                                                                                                                                                                                          |
| AC 2T                                  | [*DATA REMOVED*]                                                                                                                                                                                                                                                                                                                                                          |



|                                                   |                                                                                                                                                                                                 |
|---------------------------------------------------|-------------------------------------------------------------------------------------------------------------------------------------------------------------------------------------------------|
| LF 2T                                             | [*DATA REMOVED*]                                                                                                                                                                                |
| PFE 2T (Hadlock)                                  | [*DATA REMOVED*]                                                                                                                                                                                |
| Semanas gestación 3T                              | [*DATA REMOVED*]                                                                                                                                                                                |
| días 3T                                           | [*DATA REMOVED*]                                                                                                                                                                                |
| DBP 3T                                            | [*DATA REMOVED*]                                                                                                                                                                                |
| CC 3T                                             | [*DATA REMOVED*]                                                                                                                                                                                |
| AC 3T                                             | [*DATA REMOVED*]                                                                                                                                                                                |
| LF 3T                                             | [*DATA REMOVED*]                                                                                                                                                                                |
| PFE 3T (Hadlock)                                  | [*DATA REMOVED*]                                                                                                                                                                                |
| Semanas de gestación final                        | [*DATA REMOVED*]                                                                                                                                                                                |
| días gestación final                              | [*DATA REMOVED*]                                                                                                                                                                                |
| Localización placenta                             | <input checked="" type="radio"/> anterior<br><input type="radio"/> lateral derecha<br><input type="radio"/> lateral izquierda<br><input type="radio"/> posterior<br><input type="radio"/> fondo |
| Presentación longitudinal cefálica                | <input type="radio"/> no<br><input checked="" type="radio"/> si                                                                                                                                 |
| Dorso                                             | <input type="radio"/> izquierda anterior<br><input type="radio"/> izquierda posterior<br><input type="radio"/> derecha anterior<br><input checked="" type="radio"/> derecha posterior           |
| diámetro biparietal                               | [*DATA REMOVED*]                                                                                                                                                                                |
| Circunferencia craneal                            | [*DATA REMOVED*]                                                                                                                                                                                |
| Circunferencia abdominal                          | [*DATA REMOVED*]                                                                                                                                                                                |
| Longitud de femur                                 | [*DATA REMOVED*]                                                                                                                                                                                |
| tejido celular subcutáneo a nivel del muslo en mm | [*DATA REMOVED*]                                                                                                                                                                                |
| tejido celular subcutáneo en abdomen en mm        | [*DATA REMOVED*]                                                                                                                                                                                |
| Volumen del muslo en cm3                          | [*DATA REMOVED*]                                                                                                                                                                                |
| Peso fetal estimado según fórmula de Hadlock      | [*DATA REMOVED*]                                                                                                                                                                                |

|                                               |                                                                                                                                                          |
|-----------------------------------------------|----------------------------------------------------------------------------------------------------------------------------------------------------------|
| Percentil                                     | [*DATA REMOVED*]                                                                                                                                         |
| Peso fetal estimado según fórmula de Scioscia | <hr/>                                                                                                                                                    |
| Peso fetal estimado según fórmula de LEE      | <hr/>                                                                                                                                                    |
| Tipo de parto                                 | <input checked="" type="radio"/> eutocico<br><input type="radio"/> instrumentado/ventosa<br><input type="radio"/> cesarea                                |
| fecha de nacimiento                           | [*DATA REMOVED*]                                                                                                                                         |
| Días entre exploración y nacimiento           | [*DATA REMOVED*]                                                                                                                                         |
| Peso RN en g                                  | [*DATA REMOVED*]                                                                                                                                         |
| sexo                                          | <input checked="" type="radio"/> mujer<br><input type="radio"/> hombre                                                                                   |
| Apgar 1 minuto                                | [*DATA REMOVED*]                                                                                                                                         |
| Apgar 5 minutos                               | [*DATA REMOVED*]                                                                                                                                         |
| Apgar 10 minutos                              | <hr/>                                                                                                                                                    |
| antecedente Covid durante gestación           | <input type="radio"/> Yes<br><input checked="" type="radio"/> No                                                                                         |
| Nivel de estudios                             | <input type="radio"/> ninguno<br><input type="radio"/> primarios<br><input type="radio"/> secundarios<br><input checked="" type="radio"/> universitarios |

# Base\_datos\_estimacion\_peso\_fetal

|                                       |                                                                                                                                                                                                                                                                                      |
|---------------------------------------|--------------------------------------------------------------------------------------------------------------------------------------------------------------------------------------------------------------------------------------------------------------------------------------|
| Número de identificación participante | 39                                                                                                                                                                                                                                                                                   |
| CODIGO PARTICIPANTE                   |                                                                                                                                                                                                                                                                                      |
| Edad                                  | [*DATA REMOVED*]                                                                                                                                                                                                                                                                     |
| Gestaciones                           | <input type="radio"/> 1<br><input type="radio"/> 2<br><input checked="" type="radio"/> 3<br><input type="radio"/> mas de 3                                                                                                                                                           |
| partos                                | <input type="radio"/> 0<br><input type="radio"/> 1<br><input checked="" type="radio"/> 2<br><input type="radio"/> 3<br><input type="radio"/> mas de 3                                                                                                                                |
| cesáreas                              | <input checked="" type="radio"/> 0<br><input type="radio"/> 1<br><input type="radio"/> 2<br><input type="radio"/> 3<br><input type="radio"/> mas de 3                                                                                                                                |
| Abortos                               | <input checked="" type="radio"/> 0<br><input type="radio"/> 1<br><input type="radio"/> 2<br><input type="radio"/> 3<br><input type="radio"/> mas de 3                                                                                                                                |
| Tipo de gestacion                     | <input checked="" type="radio"/> espontanea<br><input type="radio"/> IAC inseminación artificial conyuge<br><input type="radio"/> IAD inseminación artificial donante<br><input type="radio"/> FIV Fecundación in Vitro<br><input type="radio"/> Ovodon FIV con donación de ovocitos |
| peso previo a embarazo                | [*DATA REMOVED*]                                                                                                                                                                                                                                                                     |
| Ganancia ponderal embarazo            | [*DATA REMOVED*]                                                                                                                                                                                                                                                                     |
| Talla madre                           | [*DATA REMOVED*]                                                                                                                                                                                                                                                                     |
| IMC previo embarazo                   | 20.936639118457304                                                                                                                                                                                                                                                                   |
| Patología obstétrica                  | <input checked="" type="radio"/> no<br><input type="radio"/> si                                                                                                                                                                                                                      |
| Diabetes pregestacional               | <input checked="" type="radio"/> no<br><input type="radio"/> si                                                                                                                                                                                                                      |
| Diabetes gestacional                  | <input checked="" type="radio"/> no<br><input type="radio"/> si                                                                                                                                                                                                                      |

|                                            |                                                                                                                                                                                      |
|--------------------------------------------|--------------------------------------------------------------------------------------------------------------------------------------------------------------------------------------|
| Diabetes gestacional con insulina          | <input checked="" type="radio"/> no<br><input type="radio"/> si                                                                                                                      |
| Diabetes gestacional con dieta y ejercicio | <input checked="" type="radio"/> no<br><input type="radio"/> si                                                                                                                      |
| Percentil fetos previos                    | <input type="radio"/> Nada<br><input type="radio"/> percentil menor de 10<br><input checked="" type="radio"/> percentil entre 10 y 90<br><input type="radio"/> percentil mayor de 90 |
| Exfumadora                                 | <input checked="" type="radio"/> Nada<br><input type="radio"/> menos de 5 años<br><input type="radio"/> 5 a 10 años<br><input type="radio"/> mayor o igual a 10 años                 |
| Hábito tabáquico                           | <input type="radio"/> no<br><input checked="" type="radio"/> si                                                                                                                      |
| fumadora                                   | [*DATA REMOVED*]                                                                                                                                                                     |
| Consumo otros tóxicos                      | <input checked="" type="radio"/> no<br><input type="radio"/> si                                                                                                                      |
| Hb 1T                                      | _____                                                                                                                                                                                |
| Htc 1T                                     | _____                                                                                                                                                                                |
| Hb 2T                                      | [*DATA REMOVED*]                                                                                                                                                                     |
| HTC 2T                                     | [*DATA REMOVED*]                                                                                                                                                                     |
| Hb 3T                                      | [*DATA REMOVED*]                                                                                                                                                                     |
| HTC 3T                                     | [*DATA REMOVED*]                                                                                                                                                                     |
| Suplemento FE oral                         | <input checked="" type="radio"/> si<br><input type="radio"/> no                                                                                                                      |
| Suplemento fe iv                           | <input type="radio"/> si<br><input type="radio"/> no                                                                                                                                 |
| Transfusión                                | <input type="radio"/> no<br><input type="radio"/> si                                                                                                                                 |
| Solicitada Vit D                           | <input type="radio"/> no<br><input checked="" type="radio"/> si                                                                                                                      |
| Deficit vit D                              | <input type="radio"/> no<br><input checked="" type="radio"/> si                                                                                                                      |

|                       |                                                                                                                                                                                                                                                                                                                                                                                                              |
|-----------------------|--------------------------------------------------------------------------------------------------------------------------------------------------------------------------------------------------------------------------------------------------------------------------------------------------------------------------------------------------------------------------------------------------------------|
| Suplemento vit D      | <input checked="" type="radio"/> si<br><input type="radio"/> no                                                                                                                                                                                                                                                                                                                                              |
| Dieta, cuestionario   | <input checked="" type="radio"/> si<br><input type="radio"/> no                                                                                                                                                                                                                                                                                                                                              |
| Leche entera          | <input type="radio"/> Nunca o menos 1 vez al mes<br><input type="radio"/> 1 a 3 veces mes<br><input type="radio"/> 1 vez semana<br><input type="radio"/> 2 a 4 veces semana<br><input type="radio"/> 5 a 6 veces semana<br><input checked="" type="radio"/> 1 vez al día<br><input type="radio"/> 2 a 3 veces al día<br><input type="radio"/> 5 a 6 veces al día<br><input type="radio"/> más 6 veces al día |
| Leche semidesnatada   | <input checked="" type="radio"/> Nunca o menos 1 vez al mes<br><input type="radio"/> 1 a 3 veces mes<br><input type="radio"/> 1 vez semana<br><input type="radio"/> 2 a 4 veces semana<br><input type="radio"/> 5 a 6 veces semana<br><input type="radio"/> 1 vez al día<br><input type="radio"/> 2 a 3 veces al día<br><input type="radio"/> 5 a 6 veces al día<br><input type="radio"/> mas 6 veces al día |
| Leche desnatada       | <input checked="" type="radio"/> Nunca o menos 1 vez al mes<br><input type="radio"/> 1 a 3 veces mes<br><input type="radio"/> 1 vez semana<br><input type="radio"/> 2 a 4 veces semana<br><input type="radio"/> 5 a 6 veces semana<br><input type="radio"/> 1 vez al día<br><input type="radio"/> 2 a 3 veces al día<br><input type="radio"/> 5 a 6 veces al día<br><input type="radio"/> más 6 veces al día |
| Leche condensada      | <input checked="" type="radio"/> Nunca o menos 1 vez al mes<br><input type="radio"/> 1 a 3 veces mes<br><input type="radio"/> 1 vez semana<br><input type="radio"/> 2 a 4 veces semana<br><input type="radio"/> 5 a 6 veces semana<br><input type="radio"/> 1 vez al día<br><input type="radio"/> 2 a 3 veces al día<br><input type="radio"/> 5 a 6 veces al día<br><input type="radio"/> más 6 veces al día |
| nata o crema de leche | <input type="radio"/> Nunca o menos 1 vez al mes<br><input checked="" type="radio"/> 1 a 3 veces mes<br><input type="radio"/> 1 vez semana<br><input type="radio"/> 2 a 4 veces semana<br><input type="radio"/> 5 a 6 veces semana<br><input type="radio"/> 1 vez al día<br><input type="radio"/> 2 a 3 veces al día<br><input type="radio"/> 5 a 6 veces al día<br><input type="radio"/> más 6 veces al día |

|                                             |                                                                                                                                                                                                                                                                                                                                                                                                              |
|---------------------------------------------|--------------------------------------------------------------------------------------------------------------------------------------------------------------------------------------------------------------------------------------------------------------------------------------------------------------------------------------------------------------------------------------------------------------|
| Yogurt Entero                               | <input type="radio"/> Nunca o menos 1 vez al mes<br><input type="radio"/> 1 a 3 veces mes<br><input checked="" type="radio"/> 1 vez semana<br><input type="radio"/> 2 a 4 veces semana<br><input type="radio"/> 5 a 6 veces semana<br><input type="radio"/> 1 vez al día<br><input type="radio"/> 2 a 3 veces al día<br><input type="radio"/> 5 a 6 veces al día<br><input type="radio"/> más 6 veces al día |
| Yogurt desnatado                            | <input checked="" type="radio"/> Nunca o menos 1 vez al mes<br><input type="radio"/> 1 a 3 veces mes<br><input type="radio"/> 1 vez semana<br><input type="radio"/> 2 a 4 veces semana<br><input type="radio"/> 5 a 6 veces semana<br><input type="radio"/> 1 vez al día<br><input type="radio"/> 2 a 3 veces al día<br><input type="radio"/> 5 a 6 veces al día<br><input type="radio"/> más 6 veces al día |
| 100g requesón o queso blando o queso fresco | <input type="radio"/> Nunca o menos 1 vez al mes<br><input type="radio"/> 1 a 3 veces mes<br><input checked="" type="radio"/> 1 vez semana<br><input type="radio"/> 2 a 4 veces semana<br><input type="radio"/> 5 a 6 veces semana<br><input type="radio"/> 1 vez al día<br><input type="radio"/> 2 a 3 veces al día<br><input type="radio"/> 5 a 6 veces al día<br><input type="radio"/> más 6 veces al día |
| queso curado o semicurado o cremoso         | <input type="radio"/> Nunca o menos 1 vez al mes<br><input type="radio"/> 1 a 3 veces mes<br><input type="radio"/> 1 vez semana<br><input type="radio"/> 2 a 4 veces semana<br><input checked="" type="radio"/> 5 a 6 veces semana<br><input type="radio"/> 1 vez al día<br><input type="radio"/> 2 a 3 veces al día<br><input type="radio"/> 5 a 6 veces al día<br><input type="radio"/> más 6 veces al día |
| natillas flan pudding                       | <input checked="" type="radio"/> Nunca o menos 1 vez al mes<br><input type="radio"/> 1 a 3 veces mes<br><input type="radio"/> 1 vez semana<br><input type="radio"/> 2 a 4 veces semana<br><input type="radio"/> 5 a 6 veces semana<br><input type="radio"/> 1 vez al día<br><input type="radio"/> 2 a 3 veces al día<br><input type="radio"/> 5 a 6 veces al día<br><input type="radio"/> más 6 veces al día |
| Helado                                      | <input type="radio"/> Nunca o menos 1 vez al mes<br><input checked="" type="radio"/> 1 a 3 veces mes<br><input type="radio"/> 1 vez semana<br><input type="radio"/> 2 a 4 veces semana<br><input type="radio"/> 5 a 6 veces semana<br><input type="radio"/> 1 vez al día<br><input type="radio"/> 2 a 3 veces al día<br><input type="radio"/> 5 a 6 veces al día<br><input type="radio"/> más 6 veces al día |

|                                      |                                                                                                                                                                                                                                                                                                                                                                                                              |
|--------------------------------------|--------------------------------------------------------------------------------------------------------------------------------------------------------------------------------------------------------------------------------------------------------------------------------------------------------------------------------------------------------------------------------------------------------------|
| huevo                                | <input type="radio"/> Nunca o menos 1 vez al mes<br><input type="radio"/> 1 a 3 veces mes<br><input type="radio"/> 1 vez semana<br><input checked="" type="radio"/> 2 a 4 veces semana<br><input type="radio"/> 5 a 6 veces semana<br><input type="radio"/> 1 vez al día<br><input type="radio"/> 2 a 3 veces al día<br><input type="radio"/> 5 a 6 veces al día<br><input type="radio"/> más 6 veces al día |
| Pollo con piel                       | <input type="radio"/> Nunca o menos 1 vez al mes<br><input checked="" type="radio"/> 1 a 3 veces mes<br><input type="radio"/> 1 vez semana<br><input type="radio"/> 2 a 4 veces semana<br><input type="radio"/> 5 a 6 veces semana<br><input type="radio"/> 1 vez al día<br><input type="radio"/> 2 a 3 veces al día<br><input type="radio"/> 5 a 6 veces al día<br><input type="radio"/> más 6 veces al día |
| pollo sin piel                       | <input type="radio"/> Nunca o menos 1 vez al mes<br><input type="radio"/> 1 a 3 veces mes<br><input checked="" type="radio"/> 1 vez semana<br><input type="radio"/> 2 a 4 veces semana<br><input type="radio"/> 5 a 6 veces semana<br><input type="radio"/> 1 vez al día<br><input type="radio"/> 2 a 3 veces al día<br><input type="radio"/> 5 a 6 veces al día<br><input type="radio"/> más 6 veces al día |
| Ternera o cerdo o cordero            | <input type="radio"/> Nunca o menos 1 vez al mes<br><input type="radio"/> 1 a 3 veces mes<br><input checked="" type="radio"/> 1 vez semana<br><input type="radio"/> 2 a 4 veces semana<br><input type="radio"/> 5 a 6 veces semana<br><input type="radio"/> 1 vez al día<br><input type="radio"/> 2 a 3 veces al día<br><input type="radio"/> 5 a 6 veces al día<br><input type="radio"/> más 6 veces al día |
| carne caza: Conejo o codorniz o pato | <input checked="" type="radio"/> Nunca o menos 1 vez al mes<br><input type="radio"/> 1 a 3 veces mes<br><input type="radio"/> 1 vez semana<br><input type="radio"/> 2 a 4 veces semana<br><input type="radio"/> 5 a 6 veces semana<br><input type="radio"/> 1 vez al día<br><input type="radio"/> 2 a 3 veces al día<br><input type="radio"/> 5 a 6 veces al día<br><input type="radio"/> más 6 veces al día |
| Hígado de ternera o cerdo o pollo    | <input type="radio"/> Nunca o menos 1 vez al mes<br><input checked="" type="radio"/> 1 a 3 veces mes<br><input type="radio"/> 1 vez semana<br><input type="radio"/> 2 a 4 veces semana<br><input type="radio"/> 5 a 6 veces semana<br><input type="radio"/> 1 vez al día<br><input type="radio"/> 2 a 3 veces al día<br><input type="radio"/> 5 a 6 veces al día<br><input type="radio"/> más 6 veces al día |

|                     |                                                                                                                                                                                                                                                                                                                                                                                                              |
|---------------------|--------------------------------------------------------------------------------------------------------------------------------------------------------------------------------------------------------------------------------------------------------------------------------------------------------------------------------------------------------------------------------------------------------------|
| Vísceras            | <input checked="" type="radio"/> Nunca o menos 1 vez al mes<br><input type="radio"/> 1 a 3 veces mes<br><input type="radio"/> 1 vez semana<br><input type="radio"/> 2 a 4 veces semana<br><input type="radio"/> 5 a 6 veces semana<br><input type="radio"/> 1 vez al día<br><input type="radio"/> 2 a 3 veces al día<br><input type="radio"/> 5 a 6 veces al día<br><input type="radio"/> más 6 veces al día |
| Embutido            | <input type="radio"/> Nunca o menos 1 vez al mes<br><input type="radio"/> 1 a 3 veces mes<br><input type="radio"/> 1 vez semana<br><input checked="" type="radio"/> 2 a 4 veces semana<br><input type="radio"/> 5 a 6 veces semana<br><input type="radio"/> 1 vez al día<br><input type="radio"/> 2 a 3 veces al día<br><input type="radio"/> 5 a 6 veces al día<br><input type="radio"/> más 6 veces al día |
| Salchicha o similar | <input type="radio"/> Nunca o menos 1 vez al mes<br><input checked="" type="radio"/> 1 a 3 veces mes<br><input type="radio"/> 1 vez semana<br><input type="radio"/> 2 a 4 veces semana<br><input type="radio"/> 5 a 6 veces semana<br><input type="radio"/> 1 vez al día<br><input type="radio"/> 2 a 3 veces al día<br><input type="radio"/> 5 a 6 veces al día<br><input type="radio"/> más 6 veces al día |
| Pate o foiegras     | <input checked="" type="radio"/> Nunca o menos 1 vez al mes<br><input type="radio"/> 1 a 3 veces mes<br><input type="radio"/> 1 vez semana<br><input type="radio"/> 2 a 4 veces semana<br><input type="radio"/> 5 a 6 veces semana<br><input type="radio"/> 1 vez al día<br><input type="radio"/> 2 a 3 veces al día<br><input type="radio"/> 5 a 6 veces al día<br><input type="radio"/> más 6 veces al día |
| Hamburguesa         | <input type="radio"/> Nunca o menos 1 vez al mes<br><input checked="" type="radio"/> 1 a 3 veces mes<br><input type="radio"/> 1 vez semana<br><input type="radio"/> 2 a 4 veces semana<br><input type="radio"/> 5 a 6 veces semana<br><input type="radio"/> 1 vez al día<br><input type="radio"/> 2 a 3 veces al día<br><input type="radio"/> 5 a 6 veces al día<br><input type="radio"/> más 6 veces al día |
| tocino o bacon      | <input checked="" type="radio"/> Nunca o menos 1 vez al mes<br><input type="radio"/> 1 a 3 veces mes<br><input type="radio"/> 1 vez semana<br><input type="radio"/> 2 a 4 veces semana<br><input type="radio"/> 5 a 6 veces semana<br><input type="radio"/> 1 vez al día<br><input type="radio"/> 2 a 3 veces al día<br><input type="radio"/> 5 a 6 veces al día<br><input type="radio"/> más 6 veces al día |



|                        |                                                                                                                                                                                                                                                                                                                                                                                                              |
|------------------------|--------------------------------------------------------------------------------------------------------------------------------------------------------------------------------------------------------------------------------------------------------------------------------------------------------------------------------------------------------------------------------------------------------------|
| Pescado frito          | <input checked="" type="radio"/> Nunca o menos 1 vez al mes<br><input type="radio"/> 1 a 3 veces mes<br><input type="radio"/> 1 vez semana<br><input type="radio"/> 2 a 4 veces semana<br><input type="radio"/> 5 a 6 veces semana<br><input type="radio"/> 1 vez al día<br><input type="radio"/> 2 a 3 veces al día<br><input type="radio"/> 5 a 6 veces al día<br><input type="radio"/> más 6 veces al día |
| pescado hervido blanco | <input type="radio"/> Nunca o menos 1 vez al mes<br><input type="radio"/> 1 a 3 veces mes<br><input type="radio"/> 1 vez semana<br><input checked="" type="radio"/> 2 a 4 veces semana<br><input type="radio"/> 5 a 6 veces semana<br><input type="radio"/> 1 vez al día<br><input type="radio"/> 2 a 3 veces al día<br><input type="radio"/> 5 a 6 veces al día<br><input type="radio"/> más 6 veces al día |
| pescado hervido azul   | <input type="radio"/> Nunca o menos 1 vez al mes<br><input checked="" type="radio"/> 1 a 3 veces mes<br><input type="radio"/> 1 vez semana<br><input type="radio"/> 2 a 4 veces semana<br><input type="radio"/> 5 a 6 veces semana<br><input type="radio"/> 1 vez al día<br><input type="radio"/> 2 a 3 veces al día<br><input type="radio"/> 5 a 6 veces al día<br><input type="radio"/> más 6 veces al día |
| otros pescado azul     | <input type="radio"/> Nunca o menos 1 vez al mes<br><input type="radio"/> 1 a 3 veces mes<br><input checked="" type="radio"/> 1 vez semana<br><input type="radio"/> 2 a 4 veces semana<br><input type="radio"/> 5 a 6 veces semana<br><input type="radio"/> 1 vez al día<br><input type="radio"/> 2 a 3 veces al día<br><input type="radio"/> 5 a 6 veces al día<br><input type="radio"/> más 6 veces al día |
| atun conserva          | <input type="radio"/> Nunca o menos 1 vez al mes<br><input type="radio"/> 1 a 3 veces mes<br><input type="radio"/> 1 vez semana<br><input checked="" type="radio"/> 2 a 4 veces semana<br><input type="radio"/> 5 a 6 veces semana<br><input type="radio"/> 1 vez al día<br><input type="radio"/> 2 a 3 veces al día<br><input type="radio"/> 5 a 6 veces al día<br><input type="radio"/> más 6 veces al día |
| sardina conserva       | <input type="radio"/> Nunca o menos 1 vez al mes<br><input type="radio"/> 1 a 3 veces mes<br><input checked="" type="radio"/> 1 vez semana<br><input type="radio"/> 2 a 4 veces semana<br><input type="radio"/> 5 a 6 veces semana<br><input type="radio"/> 1 vez al día<br><input type="radio"/> 2 a 3 veces al día<br><input type="radio"/> 5 a 6 veces al día<br><input type="radio"/> más 6 veces al día |

---

pescado ahumado

- ☐ Nunca o menos 1 vez al mes  
☐ 1 a 3 veces mes  
☒ 1 vez semana  
☐ 2 a 4 veces semana  
☐ 5 a 6 veces semana  
☐ 1 vez al día  
☐ 2 a 3 veces al día  
☐ 5 a 6 veces al día  
☐ más 6 veces al día

---

almejas o mejillones o ostras unos 100g

- ☐ Nunca o menos 1 vez al mes  
☒ 1 a 3 veces mes  
☐ 1 vez semana  
☐ 2 a 4 veces semana  
☐ 5 a 6 veces semana  
☐ 1 vez al día  
☐ 2 a 3 veces al día  
☐ 5 a 6 veces al día  
☐ más 6 veces al día

---

calamar o chipiron o sepia unos 100g

- ☐ Nunca o menos 1 vez al mes  
☐ 1 a 3 veces mes  
☒ 1 vez semana  
☐ 2 a 4 veces semana  
☐ 5 a 6 veces semana  
☐ 1 vez al día  
☐ 2 a 3 veces al día  
☐ 5 a 6 veces al día  
☐ más 6 veces al día

---

marisco unos 100g

- ☐ Nunca o menos 1 vez al mes  
☐ 1 a 3 veces mes  
☒ 1 vez semana  
☐ 2 a 4 veces semana  
☐ 5 a 6 veces semana  
☐ 1 vez al día  
☐ 2 a 3 veces al día  
☐ 5 a 6 veces al día  
☐ más 6 veces al día

---

Espinacas o acelgas cocinadas

- ☐ Nunca o menos 1 vez al mes  
☐ 1 a 3 veces mes  
☐ 1 vez semana  
☒ 2 a 4 veces semana  
☐ 5 a 6 veces semana  
☐ 1 vez al día  
☐ 2 a 3 veces al día  
☐ 5 a 6 veces al día  
☐ más 6 veces al día

---

Col o coliflor o brocoli cocinado

- ☐ Nunca o menos 1 vez al mes  
☒ 1 a 3 veces mes  
☐ 1 vez semana  
☐ 2 a 4 veces semana  
☐ 5 a 6 veces semana  
☐ 1 vez al día  
☐ 2 a 3 veces al día  
☐ 5 a 6 veces al día  
☐ más 6 veces al día

---

Lechuga o endivia o escarola

- ☐ Nunca o menos 1 vez al mes  
☐ 1 a 3 veces mes  
☐ 1 vez semana  
☒ 2 a 4 veces semana  
☐ 5 a 6 veces semana  
☐ 1 vez al día  
☐ 2 a 3 veces al día  
☐ 5 a 6 veces al día  
☐ más 6 veces al día

---

tomate ensalada

- ☐ Nunca o menos 1 vez al mes  
☐ 1 a 3 veces mes  
☐ 1 vez semana  
☐ 2 a 4 veces semana  
☒ 5 a 6 veces semana  
☐ 1 vez al día  
☐ 2 a 3 veces al día  
☐ 5 a 6 veces al día  
☐ más 6 veces al día

---

cebolla

- ☐ Nunca o menos 1 vez al mes  
☐ 1 a 3 veces mes  
☒ 1 vez semana  
☐ 2 a 4 veces semana  
☐ 5 a 6 veces semana  
☐ 1 vez al día  
☐ 2 a 3 veces al día  
☐ 5 a 6 veces al día  
☐ más 6 veces al día

---

Zanahoria o calabaza

- ☐ Nunca o menos 1 vez al mes  
☐ 1 a 3 veces mes  
☐ 1 vez semana  
☒ 2 a 4 veces semana  
☐ 5 a 6 veces semana  
☐ 1 vez al día  
☐ 2 a 3 veces al día  
☐ 5 a 6 veces al día  
☐ más 6 veces al día

---

Judías verdes

- ☐ Nunca o menos 1 vez al mes  
☐ 1 a 3 veces mes  
☐ 1 vez semana  
☒ 2 a 4 veces semana  
☐ 5 a 6 veces semana  
☐ 1 vez al día  
☐ 2 a 3 veces al día  
☐ 5 a 6 veces al día  
☐ más 6 veces al día

---

Berenjena o calabacin o pepino

- ☐ Nunca o menos 1 vez al mes  
☐ 1 a 3 veces mes  
☐ 1 vez semana  
☒ 2 a 4 veces semana  
☐ 5 a 6 veces semana  
☐ 1 vez al día  
☐ 2 a 3 veces al día  
☐ 5 a 6 veces al día  
☐ más 6 veces al día

---

pimiento

- ☐ Nunca o menos 1 vez al mes  
☐ 1 a 3 veces mes  
☐ 1 vez semana  
☒ 2 a 4 veces semana  
☐ 5 a 6 veces semana  
☐ 1 vez al día  
☐ 2 a 3 veces al día  
☐ 5 a 6 veces al día  
☐ más 6 veces al día

---

alcachofa

- ☐ Nunca o menos 1 vez al mes  
☐ 1 a 3 veces mes  
☒ 1 vez semana  
☐ 2 a 4 veces semana  
☐ 5 a 6 veces semana  
☐ 1 vez al día  
☐ 2 a 3 veces al día  
☐ 5 a 6 veces al día  
☐ más 6 veces al día

---

espárragos

- ☐ Nunca o menos 1 vez al mes  
☒ 1 a 3 veces mes  
☐ 1 vez semana  
☐ 2 a 4 veces semana  
☐ 5 a 6 veces semana  
☐ 1 vez al día  
☐ 2 a 3 veces al día  
☐ 5 a 6 veces al día  
☐ más 6 veces al día

---

maíz hervido

- ☐ Nunca o menos 1 vez al mes  
☐ 1 a 3 veces mes  
☒ 1 vez semana  
☐ 2 a 4 veces semana  
☐ 5 a 6 veces semana  
☐ 1 vez al día  
☐ 2 a 3 veces al día  
☐ 5 a 6 veces al día  
☐ más 6 veces al día

---

legumbres

- ☐ Nunca o menos 1 vez al mes  
☐ 1 a 3 veces mes  
☐ 1 vez semana  
☒ 2 a 4 veces semana  
☐ 5 a 6 veces semana  
☐ 1 vez al día  
☐ 2 a 3 veces al día  
☐ 5 a 6 veces al día  
☐ más 6 veces al día

---

naranjas o mandarinas

- ☐ Nunca o menos 1 vez al mes  
☐ 1 a 3 veces mes  
☐ 1 vez semana  
☐ 2 a 4 veces semana  
☒ 5 a 6 veces semana  
☐ 1 vez al día  
☐ 2 a 3 veces al día  
☐ 5 a 6 veces al día  
☐ más 6 veces al día

|                       |                                                                                                                                                                                                                                                                                                                                                                                                              |
|-----------------------|--------------------------------------------------------------------------------------------------------------------------------------------------------------------------------------------------------------------------------------------------------------------------------------------------------------------------------------------------------------------------------------------------------------|
| zum natural fruta     | <input type="radio"/> Nunca o menos 1 vez al mes<br><input checked="" type="radio"/> 1 a 3 veces mes<br><input type="radio"/> 1 vez semana<br><input type="radio"/> 2 a 4 veces semana<br><input type="radio"/> 5 a 6 veces semana<br><input type="radio"/> 1 vez al día<br><input type="radio"/> 2 a 3 veces al día<br><input type="radio"/> 5 a 6 veces al día<br><input type="radio"/> más 6 veces al día |
| platano               | <input type="radio"/> Nunca o menos 1 vez al mes<br><input type="radio"/> 1 a 3 veces mes<br><input type="radio"/> 1 vez semana<br><input checked="" type="radio"/> 2 a 4 veces semana<br><input type="radio"/> 5 a 6 veces semana<br><input type="radio"/> 1 vez al día<br><input type="radio"/> 2 a 3 veces al día<br><input type="radio"/> 5 a 6 veces al día<br><input type="radio"/> más 6 veces al día |
| manzana o pera        | <input type="radio"/> Nunca o menos 1 vez al mes<br><input checked="" type="radio"/> 1 a 3 veces mes<br><input type="radio"/> 1 vez semana<br><input type="radio"/> 2 a 4 veces semana<br><input type="radio"/> 5 a 6 veces semana<br><input type="radio"/> 1 vez al día<br><input type="radio"/> 2 a 3 veces al día<br><input type="radio"/> 5 a 6 veces al día<br><input type="radio"/> más 6 veces al día |
| melocotón o nectarina | <input type="radio"/> Nunca o menos 1 vez al mes<br><input type="radio"/> 1 a 3 veces mes<br><input type="radio"/> 1 vez semana<br><input type="radio"/> 2 a 4 veces semana<br><input checked="" type="radio"/> 5 a 6 veces semana<br><input type="radio"/> 1 vez al día<br><input type="radio"/> 2 a 3 veces al día<br><input type="radio"/> 5 a 6 veces al día<br><input type="radio"/> más 6 veces al día |
| sandia o melon        | <input type="radio"/> Nunca o menos 1 vez al mes<br><input type="radio"/> 1 a 3 veces mes<br><input type="radio"/> 1 vez semana<br><input type="radio"/> 2 a 4 veces semana<br><input checked="" type="radio"/> 5 a 6 veces semana<br><input type="radio"/> 1 vez al día<br><input type="radio"/> 2 a 3 veces al día<br><input type="radio"/> 5 a 6 veces al día<br><input type="radio"/> más 6 veces al día |
| uva                   | <input type="radio"/> Nunca o menos 1 vez al mes<br><input checked="" type="radio"/> 1 a 3 veces mes<br><input type="radio"/> 1 vez semana<br><input type="radio"/> 2 a 4 veces semana<br><input type="radio"/> 5 a 6 veces semana<br><input type="radio"/> 1 vez al día<br><input type="radio"/> 2 a 3 veces al día<br><input type="radio"/> 5 a 6 veces al día<br><input type="radio"/> más 6 veces al día |

---

bruna o ciruela

- ☐ Nunca o menos 1 vez al mes  
☐ 1 a 3 veces mes  
☐ 1 vez semana  
☒ 2 a 4 veces semana  
☐ 5 a 6 veces semana  
☐ 1 vez al día  
☐ 2 a 3 veces al día  
☐ 5 a 6 veces al día  
☐ más 6 veces al día

---

kiwi

- ☐ Nunca o menos 1 vez al mes  
☐ 1 a 3 veces mes  
☐ 1 vez semana  
☒ 2 a 4 veces semana  
☐ 5 a 6 veces semana  
☐ 1 vez al día  
☐ 2 a 3 veces al día  
☐ 5 a 6 veces al día  
☐ más 6 veces al día

---

aceituna

- ☐ Nunca o menos 1 vez al mes  
☐ 1 a 3 veces mes  
☒ 1 vez semana  
☐ 2 a 4 veces semana  
☐ 5 a 6 veces semana  
☐ 1 vez al día  
☐ 2 a 3 veces al día  
☐ 5 a 6 veces al día  
☐ más 6 veces al día

---

frutos secos

- ☐ Nunca o menos 1 vez al mes  
☐ 1 a 3 veces mes  
☐ 1 vez semana  
☐ 2 a 4 veces semana  
☒ 5 a 6 veces semana  
☐ 1 vez al día  
☐ 2 a 3 veces al día  
☐ 5 a 6 veces al día  
☐ más 6 veces al día

---

pan blanco

- ☐ Nunca o menos 1 vez al mes  
☐ 1 a 3 veces mes  
☐ 1 vez semana  
☐ 2 a 4 veces semana  
☐ 5 a 6 veces semana  
☒ 1 vez al día  
☐ 2 a 3 veces al día  
☐ 5 a 6 veces al día  
☐ más 6 veces al día

---

pan integral

- ☐ Nunca o menos 1 vez al mes  
☒ 1 a 3 veces mes  
☐ 1 vez semana  
☐ 2 a 4 veces semana  
☐ 5 a 6 veces semana  
☐ 1 vez al día  
☐ 2 a 3 veces al día  
☐ 5 a 6 veces al día  
☐ más 6 veces al día

|                          |                                                                                                                                                                                                                                                                                                                                                                                                              |
|--------------------------|--------------------------------------------------------------------------------------------------------------------------------------------------------------------------------------------------------------------------------------------------------------------------------------------------------------------------------------------------------------------------------------------------------------|
| cereales desayuno        | <input type="radio"/> Nunca o menos 1 vez al mes<br><input checked="" type="radio"/> 1 a 3 veces mes<br><input type="radio"/> 1 vez semana<br><input type="radio"/> 2 a 4 veces semana<br><input type="radio"/> 5 a 6 veces semana<br><input type="radio"/> 1 vez al día<br><input type="radio"/> 2 a 3 veces al día<br><input type="radio"/> 5 a 6 veces al día<br><input type="radio"/> más 6 veces al día |
| patatas fritas           | <input checked="" type="radio"/> Nunca o menos 1 vez al mes<br><input type="radio"/> 1 a 3 veces mes<br><input type="radio"/> 1 vez semana<br><input type="radio"/> 2 a 4 veces semana<br><input type="radio"/> 5 a 6 veces semana<br><input type="radio"/> 1 vez al día<br><input type="radio"/> 2 a 3 veces al día<br><input type="radio"/> 5 a 6 veces al día<br><input type="radio"/> más 6 veces al día |
| patatas cocidas o asadas | <input type="radio"/> Nunca o menos 1 vez al mes<br><input type="radio"/> 1 a 3 veces mes<br><input type="radio"/> 1 vez semana<br><input checked="" type="radio"/> 2 a 4 veces semana<br><input type="radio"/> 5 a 6 veces semana<br><input type="radio"/> 1 vez al día<br><input type="radio"/> 2 a 3 veces al día<br><input type="radio"/> 5 a 6 veces al día<br><input type="radio"/> más 6 veces al día |
| bolsa papas              | <input type="radio"/> Nunca o menos 1 vez al mes<br><input checked="" type="radio"/> 1 a 3 veces mes<br><input type="radio"/> 1 vez semana<br><input type="radio"/> 2 a 4 veces semana<br><input type="radio"/> 5 a 6 veces semana<br><input type="radio"/> 1 vez al día<br><input type="radio"/> 2 a 3 veces al día<br><input type="radio"/> 5 a 6 veces al día<br><input type="radio"/> más 6 veces al día |
| arroz cocinado           | <input type="radio"/> Nunca o menos 1 vez al mes<br><input type="radio"/> 1 a 3 veces mes<br><input type="radio"/> 1 vez semana<br><input checked="" type="radio"/> 2 a 4 veces semana<br><input type="radio"/> 5 a 6 veces semana<br><input type="radio"/> 1 vez al día<br><input type="radio"/> 2 a 3 veces al día<br><input type="radio"/> 5 a 6 veces al día<br><input type="radio"/> más 6 veces al día |
| pasta                    | <input type="radio"/> Nunca o menos 1 vez al mes<br><input type="radio"/> 1 a 3 veces mes<br><input checked="" type="radio"/> 1 vez semana<br><input type="radio"/> 2 a 4 veces semana<br><input type="radio"/> 5 a 6 veces semana<br><input type="radio"/> 1 vez al día<br><input type="radio"/> 2 a 3 veces al día<br><input type="radio"/> 5 a 6 veces al día<br><input type="radio"/> más 6 veces al día |

|                     |                                                                                                                                                                                                                                                                                                                                                                                                              |
|---------------------|--------------------------------------------------------------------------------------------------------------------------------------------------------------------------------------------------------------------------------------------------------------------------------------------------------------------------------------------------------------------------------------------------------------|
| pizza               | <input type="radio"/> Nunca o menos 1 vez al mes<br><input type="radio"/> 1 a 3 veces mes<br><input checked="" type="radio"/> 1 vez semana<br><input type="radio"/> 2 a 4 veces semana<br><input type="radio"/> 5 a 6 veces semana<br><input type="radio"/> 1 vez al día<br><input type="radio"/> 2 a 3 veces al día<br><input type="radio"/> 5 a 6 veces al día<br><input type="radio"/> más 6 veces al día |
| aceite oliva        | <input type="radio"/> Nunca o menos 1 vez al mes<br><input type="radio"/> 1 a 3 veces mes<br><input type="radio"/> 1 vez semana<br><input type="radio"/> 2 a 4 veces semana<br><input checked="" type="radio"/> 5 a 6 veces semana<br><input type="radio"/> 1 vez al día<br><input type="radio"/> 2 a 3 veces al día<br><input type="radio"/> 5 a 6 veces al día<br><input type="radio"/> más 6 veces al día |
| otros aceites       | <input checked="" type="radio"/> Nunca o menos 1 vez al mes<br><input type="radio"/> 1 a 3 veces mes<br><input type="radio"/> 1 vez semana<br><input type="radio"/> 2 a 4 veces semana<br><input type="radio"/> 5 a 6 veces semana<br><input type="radio"/> 1 vez al día<br><input type="radio"/> 2 a 3 veces al día<br><input type="radio"/> 5 a 6 veces al día<br><input type="radio"/> más 6 veces al día |
| margarina           | <input type="radio"/> Nunca o menos 1 vez al mes<br><input checked="" type="radio"/> 1 a 3 veces mes<br><input type="radio"/> 1 vez semana<br><input type="radio"/> 2 a 4 veces semana<br><input type="radio"/> 5 a 6 veces semana<br><input type="radio"/> 1 vez al día<br><input type="radio"/> 2 a 3 veces al día<br><input type="radio"/> 5 a 6 veces al día<br><input type="radio"/> más 6 veces al día |
| mantequilla         | <input checked="" type="radio"/> Nunca o menos 1 vez al mes<br><input type="radio"/> 1 a 3 veces mes<br><input type="radio"/> 1 vez semana<br><input type="radio"/> 2 a 4 veces semana<br><input type="radio"/> 5 a 6 veces semana<br><input type="radio"/> 1 vez al día<br><input type="radio"/> 2 a 3 veces al día<br><input type="radio"/> 5 a 6 veces al día<br><input type="radio"/> más 6 veces al día |
| galletas tipo maria | <input type="radio"/> Nunca o menos 1 vez al mes<br><input type="radio"/> 1 a 3 veces mes<br><input checked="" type="radio"/> 1 vez semana<br><input type="radio"/> 2 a 4 veces semana<br><input type="radio"/> 5 a 6 veces semana<br><input type="radio"/> 1 vez al día<br><input type="radio"/> 2 a 3 veces al día<br><input type="radio"/> 5 a 6 veces al día<br><input type="radio"/> más 6 veces al día |



|                           |                                                                                                                                                                                                                                                                                                                                                                                                              |
|---------------------------|--------------------------------------------------------------------------------------------------------------------------------------------------------------------------------------------------------------------------------------------------------------------------------------------------------------------------------------------------------------------------------------------------------------|
| galletas chocolate        | <input type="radio"/> Nunca o menos 1 vez al mes<br><input type="radio"/> 1 a 3 veces mes<br><input type="radio"/> 1 vez semana<br><input checked="" type="radio"/> 2 a 4 veces semana<br><input type="radio"/> 5 a 6 veces semana<br><input type="radio"/> 1 vez al día<br><input type="radio"/> 2 a 3 veces al día<br><input type="radio"/> 5 a 6 veces al día<br><input type="radio"/> más 6 veces al día |
| bollieria                 | <input type="radio"/> Nunca o menos 1 vez al mes<br><input type="radio"/> 1 a 3 veces mes<br><input type="radio"/> 1 vez semana<br><input checked="" type="radio"/> 2 a 4 veces semana<br><input type="radio"/> 5 a 6 veces semana<br><input type="radio"/> 1 vez al día<br><input type="radio"/> 2 a 3 veces al día<br><input type="radio"/> 5 a 6 veces al día<br><input type="radio"/> más 6 veces al día |
| chocolate o bombones      | <input type="radio"/> Nunca o menos 1 vez al mes<br><input type="radio"/> 1 a 3 veces mes<br><input type="radio"/> 1 vez semana<br><input checked="" type="radio"/> 2 a 4 veces semana<br><input type="radio"/> 5 a 6 veces semana<br><input type="radio"/> 1 vez al día<br><input type="radio"/> 2 a 3 veces al día<br><input type="radio"/> 5 a 6 veces al día<br><input type="radio"/> más 6 veces al día |
| chocolate polvo o colacao | <input type="radio"/> Nunca o menos 1 vez al mes<br><input type="radio"/> 1 a 3 veces mes<br><input type="radio"/> 1 vez semana<br><input checked="" type="radio"/> 2 a 4 veces semana<br><input type="radio"/> 5 a 6 veces semana<br><input type="radio"/> 1 vez al día<br><input type="radio"/> 2 a 3 veces al día<br><input type="radio"/> 5 a 6 veces al día<br><input type="radio"/> más 6 veces al día |
| vino tinto                | <input checked="" type="radio"/> Nunca o menos 1 vez al mes<br><input type="radio"/> 1 a 3 veces mes<br><input type="radio"/> 1 vez semana<br><input type="radio"/> 2 a 4 veces semana<br><input type="radio"/> 5 a 6 veces semana<br><input type="radio"/> 1 vez al día<br><input type="radio"/> 2 a 3 veces al día<br><input type="radio"/> 5 a 6 veces al día<br><input type="radio"/> más 6 veces al día |
| vino blanco               | <input checked="" type="radio"/> Nunca o menos 1 vez al mes<br><input type="radio"/> 1 a 3 veces mes<br><input type="radio"/> 1 vez semana<br><input type="radio"/> 2 a 4 veces semana<br><input type="radio"/> 5 a 6 veces semana<br><input type="radio"/> 1 vez al día<br><input type="radio"/> 2 a 3 veces al día<br><input type="radio"/> 5 a 6 veces al día<br><input type="radio"/> más 6 veces al día |

|                       |                                                                                                                                                                                                                                                                                                                                                                                                              |
|-----------------------|--------------------------------------------------------------------------------------------------------------------------------------------------------------------------------------------------------------------------------------------------------------------------------------------------------------------------------------------------------------------------------------------------------------|
| vino seco o vermut    | <input checked="" type="radio"/> Nunca o menos 1 vez al mes<br><input type="radio"/> 1 a 3 veces mes<br><input type="radio"/> 1 vez semana<br><input type="radio"/> 2 a 4 veces semana<br><input type="radio"/> 5 a 6 veces semana<br><input type="radio"/> 1 vez al día<br><input type="radio"/> 2 a 3 veces al día<br><input type="radio"/> 5 a 6 veces al día<br><input type="radio"/> más 6 veces al día |
| cerveza               | <input type="radio"/> Nunca o menos 1 vez al mes<br><input type="radio"/> 1 a 3 veces mes<br><input type="radio"/> 1 vez semana<br><input type="radio"/> 2 a 4 veces semana<br><input type="radio"/> 5 a 6 veces semana<br><input type="radio"/> 1 vez al día<br><input type="radio"/> 2 a 3 veces al día<br><input type="radio"/> 5 a 6 veces al día<br><input type="radio"/> más 6 veces al día            |
| cerveza sin alcohol   | <input type="radio"/> Nunca o menos 1 vez al mes<br><input checked="" type="radio"/> 1 a 3 veces mes<br><input type="radio"/> 1 vez semana<br><input type="radio"/> 2 a 4 veces semana<br><input type="radio"/> 5 a 6 veces semana<br><input type="radio"/> 1 vez al día<br><input type="radio"/> 2 a 3 veces al día<br><input type="radio"/> 5 a 6 veces al día<br><input type="radio"/> más 6 veces al día |
| licores               | <input checked="" type="radio"/> Nunca o menos 1 vez al mes<br><input type="radio"/> 1 a 3 veces mes<br><input type="radio"/> 1 vez semana<br><input type="radio"/> 2 a 4 veces semana<br><input type="radio"/> 5 a 6 veces semana<br><input type="radio"/> 1 vez al día<br><input type="radio"/> 2 a 3 veces al día<br><input type="radio"/> 5 a 6 veces al día<br><input type="radio"/> más 6 veces al día |
| ginebra o ron o vodka | <input checked="" type="radio"/> Nunca o menos 1 vez al mes<br><input type="radio"/> 1 a 3 veces mes<br><input type="radio"/> 1 vez semana<br><input type="radio"/> 2 a 4 veces semana<br><input type="radio"/> 5 a 6 veces semana<br><input type="radio"/> 1 vez al día<br><input type="radio"/> 2 a 3 veces al día<br><input type="radio"/> 5 a 6 veces al día<br><input type="radio"/> más 6 veces al día |
| refresco normal       | <input checked="" type="radio"/> Nunca o menos 1 vez al mes<br><input type="radio"/> 1 a 3 veces mes<br><input type="radio"/> 1 vez semana<br><input type="radio"/> 2 a 4 veces semana<br><input type="radio"/> 5 a 6 veces semana<br><input type="radio"/> 1 vez al día<br><input type="radio"/> 2 a 3 veces al día<br><input type="radio"/> 5 a 6 veces al día<br><input type="radio"/> más 6 veces al día |

|                          |                                                                                                                                                                                                                                                                                                                                                                                                              |
|--------------------------|--------------------------------------------------------------------------------------------------------------------------------------------------------------------------------------------------------------------------------------------------------------------------------------------------------------------------------------------------------------------------------------------------------------|
| refresco sin azúcar      | <input checked="" type="radio"/> Nunca o menos 1 vez al mes<br><input type="radio"/> 1 a 3 veces mes<br><input type="radio"/> 1 vez semana<br><input type="radio"/> 2 a 4 veces semana<br><input type="radio"/> 5 a 6 veces semana<br><input type="radio"/> 1 vez al día<br><input type="radio"/> 2 a 3 veces al día<br><input type="radio"/> 5 a 6 veces al día<br><input type="radio"/> más 6 veces al día |
| Agua del grifo           | <input checked="" type="radio"/> Nunca o menos 1 vez al mes<br><input type="radio"/> 1 a 3 veces mes<br><input type="radio"/> 1 vez semana<br><input type="radio"/> 2 a 4 veces semana<br><input type="radio"/> 5 a 6 veces semana<br><input type="radio"/> 1 vez al día<br><input type="radio"/> 2 a 3 veces al día<br><input type="radio"/> 5 a 6 veces al día<br><input type="radio"/> más 6 veces al día |
| agua embotellada sin gas | <input type="radio"/> Nunca o menos 1 vez al mes<br><input type="radio"/> 1 a 3 veces mes<br><input type="radio"/> 1 vez semana<br><input type="radio"/> 2 a 4 veces semana<br><input type="radio"/> 5 a 6 veces semana<br><input type="radio"/> 1 vez al día<br><input type="radio"/> 2 a 3 veces al día<br><input type="radio"/> 5 a 6 veces al día<br><input checked="" type="radio"/> más 6 veces al día |
| agua embotellada con gas | <input checked="" type="radio"/> Nunca o menos 1 vez al mes<br><input type="radio"/> 1 a 3 veces mes<br><input type="radio"/> 1 vez semana<br><input type="radio"/> 2 a 4 veces semana<br><input type="radio"/> 5 a 6 veces semana<br><input type="radio"/> 1 vez al día<br><input type="radio"/> 2 a 3 veces al día<br><input type="radio"/> 5 a 6 veces al día<br><input type="radio"/> más 6 veces al día |
| zumو frutas embasado     | <input checked="" type="radio"/> Nunca o menos 1 vez al mes<br><input type="radio"/> 1 a 3 veces mes<br><input type="radio"/> 1 vez semana<br><input type="radio"/> 2 a 4 veces semana<br><input type="radio"/> 5 a 6 veces semana<br><input type="radio"/> 1 vez al día<br><input type="radio"/> 2 a 3 veces al día<br><input type="radio"/> 5 a 6 veces al día<br><input type="radio"/> más 6 veces al día |
| cafe                     | <input checked="" type="radio"/> Nunca o menos 1 vez al mes<br><input type="radio"/> 1 a 3 veces mes<br><input type="radio"/> 1 vez semana<br><input type="radio"/> 2 a 4 veces semana<br><input type="radio"/> 5 a 6 veces semana<br><input type="radio"/> 1 vez al día<br><input type="radio"/> 2 a 3 veces al día<br><input type="radio"/> 5 a 6 veces al día<br><input type="radio"/> más 6 veces al día |

|                       |                                                                                                                                                                                                                                                                                                                                                                                                              |
|-----------------------|--------------------------------------------------------------------------------------------------------------------------------------------------------------------------------------------------------------------------------------------------------------------------------------------------------------------------------------------------------------------------------------------------------------|
| cafe descafeinado     | <input type="radio"/> Nunca o menos 1 vez al mes<br><input type="radio"/> 1 a 3 veces mes<br><input type="radio"/> 1 vez semana<br><input type="radio"/> 2 a 4 veces semana<br><input checked="" type="radio"/> 5 a 6 veces semana<br><input type="radio"/> 1 vez al día<br><input type="radio"/> 2 a 3 veces al día<br><input type="radio"/> 5 a 6 veces al día<br><input type="radio"/> más 6 veces al día |
| te o infusión         | <input checked="" type="radio"/> Nunca o menos 1 vez al mes<br><input type="radio"/> 1 a 3 veces mes<br><input type="radio"/> 1 vez semana<br><input type="radio"/> 2 a 4 veces semana<br><input type="radio"/> 5 a 6 veces semana<br><input type="radio"/> 1 vez al día<br><input type="radio"/> 2 a 3 veces al día<br><input type="radio"/> 5 a 6 veces al día<br><input type="radio"/> más 6 veces al día |
| sopa o puré verduras  | <input type="radio"/> Nunca o menos 1 vez al mes<br><input type="radio"/> 1 a 3 veces mes<br><input type="radio"/> 1 vez semana<br><input checked="" type="radio"/> 2 a 4 veces semana<br><input type="radio"/> 5 a 6 veces semana<br><input type="radio"/> 1 vez al día<br><input type="radio"/> 2 a 3 veces al día<br><input type="radio"/> 5 a 6 veces al día<br><input type="radio"/> más 6 veces al día |
| croquetas pollo jamón | <input type="radio"/> Nunca o menos 1 vez al mes<br><input checked="" type="radio"/> 1 a 3 veces mes<br><input type="radio"/> 1 vez semana<br><input type="radio"/> 2 a 4 veces semana<br><input type="radio"/> 5 a 6 veces semana<br><input type="radio"/> 1 vez al día<br><input type="radio"/> 2 a 3 veces al día<br><input type="radio"/> 5 a 6 veces al día<br><input type="radio"/> más 6 veces al día |
| croquetas pescado     | <input type="radio"/> Nunca o menos 1 vez al mes<br><input checked="" type="radio"/> 1 a 3 veces mes<br><input type="radio"/> 1 vez semana<br><input type="radio"/> 2 a 4 veces semana<br><input type="radio"/> 5 a 6 veces semana<br><input type="radio"/> 1 vez al día<br><input type="radio"/> 2 a 3 veces al día<br><input type="radio"/> 5 a 6 veces al día<br><input type="radio"/> más 6 veces al día |
| mayonesa              | <input type="radio"/> Nunca o menos 1 vez al mes<br><input checked="" type="radio"/> 1 a 3 veces mes<br><input type="radio"/> 1 vez semana<br><input type="radio"/> 2 a 4 veces semana<br><input type="radio"/> 5 a 6 veces semana<br><input type="radio"/> 1 vez al día<br><input type="radio"/> 2 a 3 veces al día<br><input type="radio"/> 5 a 6 veces al día<br><input type="radio"/> más 6 veces al día |

|                  |                                                                                                                                                                                                                                                                                                                                                                                                              |
|------------------|--------------------------------------------------------------------------------------------------------------------------------------------------------------------------------------------------------------------------------------------------------------------------------------------------------------------------------------------------------------------------------------------------------------|
| salsa tomate     | <input type="radio"/> Nunca o menos 1 vez al mes<br><input type="radio"/> 1 a 3 veces mes<br><input checked="" type="radio"/> 1 vez semana<br><input type="radio"/> 2 a 4 veces semana<br><input type="radio"/> 5 a 6 veces semana<br><input type="radio"/> 1 vez al día<br><input type="radio"/> 2 a 3 veces al día<br><input type="radio"/> 5 a 6 veces al día<br><input type="radio"/> más 6 veces al día |
| ketchup          | <input type="radio"/> Nunca o menos 1 vez al mes<br><input type="radio"/> 1 a 3 veces mes<br><input checked="" type="radio"/> 1 vez semana<br><input type="radio"/> 2 a 4 veces semana<br><input type="radio"/> 5 a 6 veces semana<br><input type="radio"/> 1 vez al día<br><input type="radio"/> 2 a 3 veces al día<br><input type="radio"/> 5 a 6 veces al día<br><input type="radio"/> más 6 veces al día |
| sal              | <input type="radio"/> Nunca o menos 1 vez al mes<br><input type="radio"/> 1 a 3 veces mes<br><input type="radio"/> 1 vez semana<br><input type="radio"/> 2 a 4 veces semana<br><input checked="" type="radio"/> 5 a 6 veces semana<br><input type="radio"/> 1 vez al día<br><input type="radio"/> 2 a 3 veces al día<br><input type="radio"/> 5 a 6 veces al día<br><input type="radio"/> más 6 veces al día |
| ajo              | <input type="radio"/> Nunca o menos 1 vez al mes<br><input type="radio"/> 1 a 3 veces mes<br><input type="radio"/> 1 vez semana<br><input type="radio"/> 2 a 4 veces semana<br><input checked="" type="radio"/> 5 a 6 veces semana<br><input type="radio"/> 1 vez al día<br><input type="radio"/> 2 a 3 veces al día<br><input type="radio"/> 5 a 6 veces al día<br><input type="radio"/> más 6 veces al día |
| mermelada o miel | <input type="radio"/> Nunca o menos 1 vez al mes<br><input checked="" type="radio"/> 1 a 3 veces mes<br><input type="radio"/> 1 vez semana<br><input type="radio"/> 2 a 4 veces semana<br><input type="radio"/> 5 a 6 veces semana<br><input type="radio"/> 1 vez al día<br><input type="radio"/> 2 a 3 veces al día<br><input type="radio"/> 5 a 6 veces al día<br><input type="radio"/> más 6 veces al día |
| azúcar           | <input type="radio"/> Nunca o menos 1 vez al mes<br><input type="radio"/> 1 a 3 veces mes<br><input type="radio"/> 1 vez semana<br><input type="radio"/> 2 a 4 veces semana<br><input type="radio"/> 5 a 6 veces semana<br><input checked="" type="radio"/> 1 vez al día<br><input type="radio"/> 2 a 3 veces al día<br><input type="radio"/> 5 a 6 veces al día<br><input type="radio"/> más 6 veces al día |

|                                       |                                                                                                                                                                                                                                                                                                                                                                                                                                                                                                                               |
|---------------------------------------|-------------------------------------------------------------------------------------------------------------------------------------------------------------------------------------------------------------------------------------------------------------------------------------------------------------------------------------------------------------------------------------------------------------------------------------------------------------------------------------------------------------------------------|
| Otro alimento                         |                                                                                                                                                                                                                                                                                                                                                                                                                                                                                                                               |
| suplementos vitamínicos               | <input checked="" type="radio"/> si<br><input type="radio"/> no                                                                                                                                                                                                                                                                                                                                                                                                                                                               |
| suplementos vitamínicos               | [*DATA REMOVED*]                                                                                                                                                                                                                                                                                                                                                                                                                                                                                                              |
| dieta previa                          | <input type="radio"/> si<br><input checked="" type="radio"/> no                                                                                                                                                                                                                                                                                                                                                                                                                                                               |
| motivo dieta                          | <input checked="" type="radio"/> no dieta<br><input type="radio"/> control peso<br><input type="radio"/> control colesterol<br><input type="radio"/> control diabetes<br><input type="radio"/> problemas estómago<br><input type="radio"/> problemas vesícula o hepáticos<br><input type="radio"/> HTA o cardiopatía<br><input type="radio"/> problemas renales<br><input type="radio"/> alergia alimentaria<br><input type="radio"/> ácido úrico elevado<br><input type="radio"/> vegetariana<br><input type="radio"/> otros |
| cambio alimentos año previo gestación | <input checked="" type="radio"/> si<br><input type="radio"/> no                                                                                                                                                                                                                                                                                                                                                                                                                                                               |
| cambio lácteos                        | <input type="radio"/> eliminado<br><input type="radio"/> disminuido<br><input checked="" type="radio"/> igual<br><input type="radio"/> aumentado<br><input type="radio"/> no sabe                                                                                                                                                                                                                                                                                                                                             |
| cambio huevos                         | <input type="radio"/> eliminado<br><input type="radio"/> disminuido<br><input checked="" type="radio"/> igual<br><input type="radio"/> aumentado<br><input type="radio"/> no sabe                                                                                                                                                                                                                                                                                                                                             |
| cambio carne                          | <input type="radio"/> eliminado<br><input type="radio"/> disminuido<br><input checked="" type="radio"/> igual<br><input type="radio"/> aumentado<br><input type="radio"/> no sabe                                                                                                                                                                                                                                                                                                                                             |
| cambio pescado                        | <input type="radio"/> eliminado<br><input type="radio"/> disminuido<br><input type="radio"/> igual<br><input checked="" type="radio"/> aumentado<br><input type="radio"/> no sabe                                                                                                                                                                                                                                                                                                                                             |
| cambio verduras                       | <input type="radio"/> eliminado<br><input type="radio"/> disminuido<br><input checked="" type="radio"/> igual<br><input type="radio"/> aumentado<br><input type="radio"/> no sabe                                                                                                                                                                                                                                                                                                                                             |

|                            |                                                                                                                                                                                                                        |
|----------------------------|------------------------------------------------------------------------------------------------------------------------------------------------------------------------------------------------------------------------|
| cambio legumbres           | <input type="radio"/> eliminado<br><input type="radio"/> disminuido<br><input checked="" type="radio"/> igual<br><input type="radio"/> aumentado<br><input type="radio"/> no sabe                                      |
| cambio fruta               | <input type="radio"/> eliminado<br><input type="radio"/> disminuido<br><input checked="" type="radio"/> igual<br><input type="radio"/> aumentado<br><input type="radio"/> no sabe                                      |
| cambio pan                 | <input type="radio"/> eliminado<br><input type="radio"/> disminuido<br><input checked="" type="radio"/> igual<br><input type="radio"/> aumentado<br><input type="radio"/> no sabe                                      |
| cambio aceite oliva        | <input type="radio"/> eliminado<br><input type="radio"/> disminuido<br><input checked="" type="radio"/> igual<br><input type="radio"/> aumentado<br><input type="radio"/> no sabe                                      |
| cambio mante o margarina   | <input type="radio"/> eliminado<br><input type="radio"/> disminuido<br><input checked="" type="radio"/> igual<br><input type="radio"/> aumentado<br><input type="radio"/> no sabe                                      |
| cambio azúcar y dulces     | <input type="radio"/> eliminado<br><input type="radio"/> disminuido<br><input type="radio"/> igual<br><input checked="" type="radio"/> aumentado<br><input type="radio"/> no sabe                                      |
| cambio bebidas alcohólicas | <input type="radio"/> eliminado<br><input type="radio"/> disminuido<br><input checked="" type="radio"/> igual<br><input type="radio"/> aumentado<br><input type="radio"/> no sabe                                      |
| frecuencia comidas fritas  | <input type="radio"/> a diario<br><input type="radio"/> 5 a 6 veces semana<br><input type="radio"/> 2 a 4 veces semana<br><input type="radio"/> 1 vez semana<br><input checked="" type="radio"/> menos de 1 vez semana |
| carne                      | <input type="radio"/> no como<br><input type="radio"/> cruda<br><input type="radio"/> poco hecha<br><input checked="" type="radio"/> hecha<br><input type="radio"/> muy hecha                                          |
| grasa visible carne        | <input checked="" type="radio"/> quita toda<br><input type="radio"/> quita mayoría<br><input type="radio"/> quita un poco<br><input type="radio"/> no quita nada                                                       |

|                                |                                                                                                                                                                                                                                                          |
|--------------------------------|----------------------------------------------------------------------------------------------------------------------------------------------------------------------------------------------------------------------------------------------------------|
| cocina carne                   | <input checked="" type="radio"/> a la plancha<br><input type="radio"/> a la parrilla<br><input type="radio"/> asada<br><input type="radio"/> frita<br><input type="radio"/> guisada                                                                      |
| tostado quemado carne          | <input checked="" type="radio"/> nunca<br><input type="radio"/> 1 vez mes<br><input type="radio"/> 2 a 3 veces mes<br><input type="radio"/> 1 vez semana<br><input type="radio"/> 2 a 3 semanas                                                          |
| tostado quemado pescado        | <input checked="" type="radio"/> nunca<br><input type="radio"/> 1 vez mes<br><input type="radio"/> 2 a 3 veces mes<br><input type="radio"/> 1 vez semana<br><input type="radio"/> 2 a 3 semanas                                                          |
| socarrat paella                | <input type="radio"/> nunca<br><input type="radio"/> 1 vez mes<br><input type="radio"/> 2 a 3 veces mes<br><input checked="" type="radio"/> 1 vez semana<br><input type="radio"/> 2 a 3 semanas                                                          |
| grasa o aceite cocinar         | <input type="radio"/> mantequilla<br><input type="radio"/> margarina<br><input type="radio"/> aceite oliva<br><input checked="" type="radio"/> aceite oliva virgen extra<br><input type="radio"/> aceite vegetal<br><input type="radio"/> mezcla aceites |
| grasa aceite aliñar            | <input type="radio"/> mantequilla<br><input type="radio"/> margarina<br><input type="radio"/> aceite oliva<br><input checked="" type="radio"/> aceite oliva virgen extra<br><input type="radio"/> aceite vegetal<br><input type="radio"/> mezcla aceites |
| grasa aceite freir             | <input type="radio"/> mantequilla<br><input type="radio"/> margarina<br><input checked="" type="radio"/> aceite oliva<br><input type="radio"/> aceite oliva virgen extra<br><input type="radio"/> aceite vegetal<br><input type="radio"/> mezcla aceites |
| Ejercicio cuestionario         | <input checked="" type="radio"/> si<br><input type="radio"/> no                                                                                                                                                                                          |
| horas de sueño incluido siesta | [*DATA REMOVED*]                                                                                                                                                                                                                                         |
| minutos siesta                 | [*DATA REMOVED*]                                                                                                                                                                                                                                         |
| horas televisión semana        | [*DATA REMOVED*]                                                                                                                                                                                                                                         |



|                                        |                                                                                                                                                                                                                                                                                                                                                                           |
|----------------------------------------|---------------------------------------------------------------------------------------------------------------------------------------------------------------------------------------------------------------------------------------------------------------------------------------------------------------------------------------------------------------------------|
| actividad trabajo                      | <input type="radio"/> casi siempre sentado<br><input type="radio"/> sentado 50 por cien<br><input checked="" type="radio"/> casi siempre de pie, quieto<br><input type="radio"/> casi siempre levantado caminando y llevando pocas cosas<br><input type="radio"/> casi siempre levantado, caminando y llevado muchas cosas<br><input type="radio"/> trabajo manual pesado |
| tiempo caminar o bici al día           | <input type="radio"/> casi nunca<br><input type="radio"/> menos 20min día<br><input type="radio"/> 20 a 40 min día<br><input checked="" type="radio"/> 40 a 60 min día<br><input type="radio"/> 1h o 1h y media día<br><input type="radio"/> más de 1h y media al día                                                                                                     |
| tiempo tareas casa al día              | <input type="radio"/> menos de 1h día<br><input type="radio"/> 1 a 2h día<br><input type="radio"/> 3 a 4h día<br><input checked="" type="radio"/> 5 a 6h día<br><input type="radio"/> 7 a 8h día<br><input type="radio"/> más de 8h día                                                                                                                                   |
| tiempo libre televisión ordenador leer | <input type="radio"/> menos 1h día<br><input checked="" type="radio"/> 1h día<br><input type="radio"/> 2h día<br><input type="radio"/> 3h día<br><input type="radio"/> 4h día<br><input type="radio"/> 5 a 6h día<br><input type="radio"/> mas 6h día                                                                                                                     |
| tiempo libre ejercicio o deporte       | <input type="radio"/> menos 1h semana<br><input type="radio"/> 1h semana<br><input type="radio"/> 2h semana<br><input type="radio"/> 3h semana<br><input checked="" type="radio"/> 4 a 5h semana<br><input type="radio"/> mas 5h semana                                                                                                                                   |
| como se considera                      | <input type="radio"/> sedentaria<br><input type="radio"/> poco activa<br><input type="radio"/> moderadamente activa<br><input checked="" type="radio"/> bastante activa<br><input type="radio"/> muy activa<br><input type="radio"/> no sabe                                                                                                                              |
| FUR                                    | [*DATA REMOVED*]                                                                                                                                                                                                                                                                                                                                                          |
| Semanas gestación 2T                   | [*DATA REMOVED*]                                                                                                                                                                                                                                                                                                                                                          |
| Días gestación 2T                      | [*DATA REMOVED*]                                                                                                                                                                                                                                                                                                                                                          |
| DBP 2T                                 | [*DATA REMOVED*]                                                                                                                                                                                                                                                                                                                                                          |
| CC 2T                                  | [*DATA REMOVED*]                                                                                                                                                                                                                                                                                                                                                          |
| AC 2T                                  | [*DATA REMOVED*]                                                                                                                                                                                                                                                                                                                                                          |

|                                                   |                                                                                                                                                                                                 |
|---------------------------------------------------|-------------------------------------------------------------------------------------------------------------------------------------------------------------------------------------------------|
| LF 2T                                             | [*DATA REMOVED*]                                                                                                                                                                                |
| PFE 2T (Hadlock)                                  | [*DATA REMOVED*]                                                                                                                                                                                |
| Semanas gestación 3T                              | [*DATA REMOVED*]                                                                                                                                                                                |
| días 3T                                           | [*DATA REMOVED*]                                                                                                                                                                                |
| DBP 3T                                            | [*DATA REMOVED*]                                                                                                                                                                                |
| CC 3T                                             | [*DATA REMOVED*]                                                                                                                                                                                |
| AC 3T                                             | [*DATA REMOVED*]                                                                                                                                                                                |
| LF 3T                                             | [*DATA REMOVED*]                                                                                                                                                                                |
| PFE 3T (Hadlock)                                  | [*DATA REMOVED*]                                                                                                                                                                                |
| Semanas de gestación final                        | [*DATA REMOVED*]                                                                                                                                                                                |
| días gestación final                              | [*DATA REMOVED*]                                                                                                                                                                                |
| Localización placenta                             | <input type="radio"/> anterior<br><input type="radio"/> lateral derecha<br><input type="radio"/> lateral izquierda<br><input type="radio"/> posterior<br><input checked="" type="radio"/> fondo |
| Presentación longitudinal cefálica                | <input type="radio"/> no<br><input checked="" type="radio"/> si                                                                                                                                 |
| Dorso                                             | <input checked="" type="radio"/> izquierda anterior<br><input type="radio"/> izquierda posterior<br><input type="radio"/> derecha anterior<br><input type="radio"/> derecha posterior           |
| diámetro biparietal                               | [*DATA REMOVED*]                                                                                                                                                                                |
| Circunferencia craneal                            | [*DATA REMOVED*]                                                                                                                                                                                |
| Circunferencia abdominal                          | [*DATA REMOVED*]                                                                                                                                                                                |
| Longitud de femur                                 | [*DATA REMOVED*]                                                                                                                                                                                |
| tejido celular subcutáneo a nivel del muslo en mm | [*DATA REMOVED*]                                                                                                                                                                                |
| tejido celular subcutáneo en abdomen en mm        | [*DATA REMOVED*]                                                                                                                                                                                |
| Volumen del muslo en cm3                          | [*DATA REMOVED*]                                                                                                                                                                                |
| Peso fetal estimado según fórmula de Hadlock      | [*DATA REMOVED*]                                                                                                                                                                                |

|                                               |                                                                                                                                                          |
|-----------------------------------------------|----------------------------------------------------------------------------------------------------------------------------------------------------------|
| Percentil                                     | [*DATA REMOVED*]                                                                                                                                         |
| Peso fetal estimado según fórmula de Scioscia | <hr/>                                                                                                                                                    |
| Peso fetal estimado según fórmula de LEE      | <hr/>                                                                                                                                                    |
| Tipo de parto                                 | <input checked="" type="radio"/> eutocico<br><input type="radio"/> instrumentado/ventosa<br><input type="radio"/> cesarea                                |
| fecha de nacimiento                           | [*DATA REMOVED*]                                                                                                                                         |
| Días entre exploración y nacimiento           | [*DATA REMOVED*]                                                                                                                                         |
| Peso RN en g                                  | [*DATA REMOVED*]                                                                                                                                         |
| sexo                                          | <input checked="" type="radio"/> mujer<br><input type="radio"/> hombre                                                                                   |
| Apgar 1 minuto                                | [*DATA REMOVED*]                                                                                                                                         |
| Apgar 5 minutos                               | [*DATA REMOVED*]                                                                                                                                         |
| Apgar 10 minutos                              | <hr/>                                                                                                                                                    |
| antecedente Covid durante gestación           | <input type="radio"/> Yes<br><input checked="" type="radio"/> No                                                                                         |
| Nivel de estudios                             | <input type="radio"/> ninguno<br><input type="radio"/> primarios<br><input checked="" type="radio"/> secundarios<br><input type="radio"/> universitarios |

# Base\_datos\_estimacion\_peso\_fetal

|                                       |                                                                                                                                                                                                                                                                                      |
|---------------------------------------|--------------------------------------------------------------------------------------------------------------------------------------------------------------------------------------------------------------------------------------------------------------------------------------|
| Número de identificación participante | 40                                                                                                                                                                                                                                                                                   |
| CODIGO PARTICIPANTE                   |                                                                                                                                                                                                                                                                                      |
| Edad                                  | [*DATA REMOVED*]                                                                                                                                                                                                                                                                     |
| Gestaciones                           | <input checked="" type="radio"/> 1<br><input type="radio"/> 2<br><input type="radio"/> 3<br><input type="radio"/> mas de 3                                                                                                                                                           |
| partos                                | <input checked="" type="radio"/> 0<br><input type="radio"/> 1<br><input type="radio"/> 2<br><input type="radio"/> 3<br><input type="radio"/> mas de 3                                                                                                                                |
| cesáreas                              | <input checked="" type="radio"/> 0<br><input type="radio"/> 1<br><input type="radio"/> 2<br><input type="radio"/> 3<br><input type="radio"/> mas de 3                                                                                                                                |
| Abortos                               | <input checked="" type="radio"/> 0<br><input type="radio"/> 1<br><input type="radio"/> 2<br><input type="radio"/> 3<br><input type="radio"/> mas de 3                                                                                                                                |
| Tipo de gestacion                     | <input checked="" type="radio"/> espontanea<br><input type="radio"/> IAC inseminación artificial conyuge<br><input type="radio"/> IAD inseminación artificial donante<br><input type="radio"/> FIV Fecundación in Vitro<br><input type="radio"/> Ovodon FIV con donación de ovocitos |
| peso previo a embarazo                | [*DATA REMOVED*]                                                                                                                                                                                                                                                                     |
| Ganancia ponderal embarazo            | [*DATA REMOVED*]                                                                                                                                                                                                                                                                     |
| Talla madre                           | [*DATA REMOVED*]                                                                                                                                                                                                                                                                     |
| IMC previo embarazo                   | 23.051754907792983                                                                                                                                                                                                                                                                   |
| Patología obstétrica                  | <input checked="" type="radio"/> no<br><input type="radio"/> si                                                                                                                                                                                                                      |
| Diabetes pregestacional               | <input checked="" type="radio"/> no<br><input type="radio"/> si                                                                                                                                                                                                                      |
| Diabetes gestacional                  | <input checked="" type="radio"/> no<br><input type="radio"/> si                                                                                                                                                                                                                      |

|                                            |                                                                                                                                                                                      |
|--------------------------------------------|--------------------------------------------------------------------------------------------------------------------------------------------------------------------------------------|
| Diabetes gestacional con insulina          | <input checked="" type="radio"/> no<br><input type="radio"/> si                                                                                                                      |
| Diabetes gestacional con dieta y ejercicio | <input checked="" type="radio"/> no<br><input type="radio"/> si                                                                                                                      |
| Percentil fetos previos                    | <input checked="" type="radio"/> Nada<br><input type="radio"/> percentil menor de 10<br><input type="radio"/> percentil entre 10 y 90<br><input type="radio"/> percentil mayor de 90 |
| Exfumadora                                 | <input checked="" type="radio"/> Nada<br><input type="radio"/> menos de 5 años<br><input type="radio"/> 5 a 10 años<br><input type="radio"/> mayor o igual a 10 años                 |
| Hábito tabáquico                           | <input checked="" type="radio"/> no<br><input type="radio"/> si                                                                                                                      |
| fumadora                                   | [*DATA REMOVED*]                                                                                                                                                                     |
| Consumo otros tóxicos                      | <input checked="" type="radio"/> no<br><input type="radio"/> si                                                                                                                      |
| Hb 1T                                      | [*DATA REMOVED*]                                                                                                                                                                     |
| Htc 1T                                     | [*DATA REMOVED*]                                                                                                                                                                     |
| Hb 2T                                      | [*DATA REMOVED*]                                                                                                                                                                     |
| HTC 2T                                     | [*DATA REMOVED*]                                                                                                                                                                     |
| Hb 3T                                      | [*DATA REMOVED*]                                                                                                                                                                     |
| HTC 3T                                     | [*DATA REMOVED*]                                                                                                                                                                     |
| Suplemento FE oral                         | <input checked="" type="radio"/> si<br><input type="radio"/> no                                                                                                                      |
| Suplemento fe iv                           | <input type="radio"/> si<br><input checked="" type="radio"/> no                                                                                                                      |
| Transfusión                                | <input checked="" type="radio"/> no<br><input type="radio"/> si                                                                                                                      |
| Solicitada Vit D                           | <input checked="" type="radio"/> no<br><input type="radio"/> si                                                                                                                      |
| Deficit vit D                              | <input type="radio"/> no<br><input type="radio"/> si                                                                                                                                 |
| Suplemento vit D                           | <input type="radio"/> si<br><input type="radio"/> no                                                                                                                                 |

|                       |                                                                                                                                                                                                                                                                                                                                                                                                              |
|-----------------------|--------------------------------------------------------------------------------------------------------------------------------------------------------------------------------------------------------------------------------------------------------------------------------------------------------------------------------------------------------------------------------------------------------------|
| Dieta, cuestionario   | <input checked="" type="radio"/> sí<br><input type="radio"/> no                                                                                                                                                                                                                                                                                                                                              |
| Leche entera          | <input checked="" type="radio"/> Nunca o menos 1 vez al mes<br><input type="radio"/> 1 a 3 veces mes<br><input type="radio"/> 1 vez semana<br><input type="radio"/> 2 a 4 veces semana<br><input type="radio"/> 5 a 6 veces semana<br><input type="radio"/> 1 vez al día<br><input type="radio"/> 2 a 3 veces al día<br><input type="radio"/> 5 a 6 veces al día<br><input type="radio"/> más 6 veces al día |
| Leche semidesnatada   | <input type="radio"/> Nunca o menos 1 vez al mes<br><input type="radio"/> 1 a 3 veces mes<br><input type="radio"/> 1 vez semana<br><input type="radio"/> 2 a 4 veces semana<br><input type="radio"/> 5 a 6 veces semana<br><input checked="" type="radio"/> 1 vez al día<br><input type="radio"/> 2 a 3 veces al día<br><input type="radio"/> 5 a 6 veces al día<br><input type="radio"/> mas 6 veces al día |
| Leche desnatada       | <input checked="" type="radio"/> Nunca o menos 1 vez al mes<br><input type="radio"/> 1 a 3 veces mes<br><input type="radio"/> 1 vez semana<br><input type="radio"/> 2 a 4 veces semana<br><input type="radio"/> 5 a 6 veces semana<br><input type="radio"/> 1 vez al día<br><input type="radio"/> 2 a 3 veces al día<br><input type="radio"/> 5 a 6 veces al día<br><input type="radio"/> más 6 veces al día |
| Leche condensada      | <input checked="" type="radio"/> Nunca o menos 1 vez al mes<br><input type="radio"/> 1 a 3 veces mes<br><input type="radio"/> 1 vez semana<br><input type="radio"/> 2 a 4 veces semana<br><input type="radio"/> 5 a 6 veces semana<br><input type="radio"/> 1 vez al día<br><input type="radio"/> 2 a 3 veces al día<br><input type="radio"/> 5 a 6 veces al día<br><input type="radio"/> más 6 veces al día |
| nata o crema de leche | <input checked="" type="radio"/> Nunca o menos 1 vez al mes<br><input type="radio"/> 1 a 3 veces mes<br><input type="radio"/> 1 vez semana<br><input type="radio"/> 2 a 4 veces semana<br><input type="radio"/> 5 a 6 veces semana<br><input type="radio"/> 1 vez al día<br><input type="radio"/> 2 a 3 veces al día<br><input type="radio"/> 5 a 6 veces al día<br><input type="radio"/> más 6 veces al día |

|                                             |                                                                                                                                                                                                                                                                                                                                                                                                              |
|---------------------------------------------|--------------------------------------------------------------------------------------------------------------------------------------------------------------------------------------------------------------------------------------------------------------------------------------------------------------------------------------------------------------------------------------------------------------|
| Yogurt Entero                               | <input type="radio"/> Nunca o menos 1 vez al mes<br><input type="radio"/> 1 a 3 veces mes<br><input type="radio"/> 1 vez semana<br><input type="radio"/> 2 a 4 veces semana<br><input checked="" type="radio"/> 5 a 6 veces semana<br><input type="radio"/> 1 vez al día<br><input type="radio"/> 2 a 3 veces al día<br><input type="radio"/> 5 a 6 veces al día<br><input type="radio"/> más 6 veces al día |
| Yogurt desnatado                            | <input type="radio"/> Nunca o menos 1 vez al mes<br><input checked="" type="radio"/> 1 a 3 veces mes<br><input type="radio"/> 1 vez semana<br><input type="radio"/> 2 a 4 veces semana<br><input type="radio"/> 5 a 6 veces semana<br><input type="radio"/> 1 vez al día<br><input type="radio"/> 2 a 3 veces al día<br><input type="radio"/> 5 a 6 veces al día<br><input type="radio"/> más 6 veces al día |
| 100g requesón o queso blando o queso fresco | <input checked="" type="radio"/> Nunca o menos 1 vez al mes<br><input type="radio"/> 1 a 3 veces mes<br><input type="radio"/> 1 vez semana<br><input type="radio"/> 2 a 4 veces semana<br><input type="radio"/> 5 a 6 veces semana<br><input type="radio"/> 1 vez al día<br><input type="radio"/> 2 a 3 veces al día<br><input type="radio"/> 5 a 6 veces al día<br><input type="radio"/> más 6 veces al día |
| queso curado o semicurado o cremoso         | <input type="radio"/> Nunca o menos 1 vez al mes<br><input type="radio"/> 1 a 3 veces mes<br><input type="radio"/> 1 vez semana<br><input checked="" type="radio"/> 2 a 4 veces semana<br><input type="radio"/> 5 a 6 veces semana<br><input type="radio"/> 1 vez al día<br><input type="radio"/> 2 a 3 veces al día<br><input type="radio"/> 5 a 6 veces al día<br><input type="radio"/> más 6 veces al día |
| natillas flan pudding                       | <input checked="" type="radio"/> Nunca o menos 1 vez al mes<br><input type="radio"/> 1 a 3 veces mes<br><input type="radio"/> 1 vez semana<br><input type="radio"/> 2 a 4 veces semana<br><input type="radio"/> 5 a 6 veces semana<br><input type="radio"/> 1 vez al día<br><input type="radio"/> 2 a 3 veces al día<br><input type="radio"/> 5 a 6 veces al día<br><input type="radio"/> más 6 veces al día |
| Helado                                      | <input checked="" type="radio"/> Nunca o menos 1 vez al mes<br><input type="radio"/> 1 a 3 veces mes<br><input type="radio"/> 1 vez semana<br><input type="radio"/> 2 a 4 veces semana<br><input type="radio"/> 5 a 6 veces semana<br><input type="radio"/> 1 vez al día<br><input type="radio"/> 2 a 3 veces al día<br><input type="radio"/> 5 a 6 veces al día<br><input type="radio"/> más 6 veces al día |

|                                      |                                                                                                                                                                                                                                                                                                                                                                                                              |
|--------------------------------------|--------------------------------------------------------------------------------------------------------------------------------------------------------------------------------------------------------------------------------------------------------------------------------------------------------------------------------------------------------------------------------------------------------------|
| huevo                                | <input type="radio"/> Nunca o menos 1 vez al mes<br><input type="radio"/> 1 a 3 veces mes<br><input type="radio"/> 1 vez semana<br><input checked="" type="radio"/> 2 a 4 veces semana<br><input type="radio"/> 5 a 6 veces semana<br><input type="radio"/> 1 vez al día<br><input type="radio"/> 2 a 3 veces al día<br><input type="radio"/> 5 a 6 veces al día<br><input type="radio"/> más 6 veces al día |
| Pollo con piel                       | <input checked="" type="radio"/> Nunca o menos 1 vez al mes<br><input type="radio"/> 1 a 3 veces mes<br><input type="radio"/> 1 vez semana<br><input type="radio"/> 2 a 4 veces semana<br><input type="radio"/> 5 a 6 veces semana<br><input type="radio"/> 1 vez al día<br><input type="radio"/> 2 a 3 veces al día<br><input type="radio"/> 5 a 6 veces al día<br><input type="radio"/> más 6 veces al día |
| pollo sin piel                       | <input type="radio"/> Nunca o menos 1 vez al mes<br><input type="radio"/> 1 a 3 veces mes<br><input type="radio"/> 1 vez semana<br><input checked="" type="radio"/> 2 a 4 veces semana<br><input type="radio"/> 5 a 6 veces semana<br><input type="radio"/> 1 vez al día<br><input type="radio"/> 2 a 3 veces al día<br><input type="radio"/> 5 a 6 veces al día<br><input type="radio"/> más 6 veces al día |
| Ternera o cerdo o cordero            | <input type="radio"/> Nunca o menos 1 vez al mes<br><input type="radio"/> 1 a 3 veces mes<br><input type="radio"/> 1 vez semana<br><input checked="" type="radio"/> 2 a 4 veces semana<br><input type="radio"/> 5 a 6 veces semana<br><input type="radio"/> 1 vez al día<br><input type="radio"/> 2 a 3 veces al día<br><input type="radio"/> 5 a 6 veces al día<br><input type="radio"/> más 6 veces al día |
| carne caza: Conejo o codorniz o pato | <input checked="" type="radio"/> Nunca o menos 1 vez al mes<br><input type="radio"/> 1 a 3 veces mes<br><input type="radio"/> 1 vez semana<br><input type="radio"/> 2 a 4 veces semana<br><input type="radio"/> 5 a 6 veces semana<br><input type="radio"/> 1 vez al día<br><input type="radio"/> 2 a 3 veces al día<br><input type="radio"/> 5 a 6 veces al día<br><input type="radio"/> más 6 veces al día |
| Hígado de ternera o cerdo o pollo    | <input checked="" type="radio"/> Nunca o menos 1 vez al mes<br><input type="radio"/> 1 a 3 veces mes<br><input type="radio"/> 1 vez semana<br><input type="radio"/> 2 a 4 veces semana<br><input type="radio"/> 5 a 6 veces semana<br><input type="radio"/> 1 vez al día<br><input type="radio"/> 2 a 3 veces al día<br><input type="radio"/> 5 a 6 veces al día<br><input type="radio"/> más 6 veces al día |



|                     |                                                                                                                                                                                                                                                                                                                                                                                                              |
|---------------------|--------------------------------------------------------------------------------------------------------------------------------------------------------------------------------------------------------------------------------------------------------------------------------------------------------------------------------------------------------------------------------------------------------------|
| Vísceras            | <input checked="" type="radio"/> Nunca o menos 1 vez al mes<br><input type="radio"/> 1 a 3 veces mes<br><input type="radio"/> 1 vez semana<br><input type="radio"/> 2 a 4 veces semana<br><input type="radio"/> 5 a 6 veces semana<br><input type="radio"/> 1 vez al día<br><input type="radio"/> 2 a 3 veces al día<br><input type="radio"/> 5 a 6 veces al día<br><input type="radio"/> más 6 veces al día |
| Embutido            | <input checked="" type="radio"/> Nunca o menos 1 vez al mes<br><input type="radio"/> 1 a 3 veces mes<br><input type="radio"/> 1 vez semana<br><input type="radio"/> 2 a 4 veces semana<br><input type="radio"/> 5 a 6 veces semana<br><input type="radio"/> 1 vez al día<br><input type="radio"/> 2 a 3 veces al día<br><input type="radio"/> 5 a 6 veces al día<br><input type="radio"/> más 6 veces al día |
| Salchicha o similar | <input checked="" type="radio"/> Nunca o menos 1 vez al mes<br><input type="radio"/> 1 a 3 veces mes<br><input type="radio"/> 1 vez semana<br><input type="radio"/> 2 a 4 veces semana<br><input type="radio"/> 5 a 6 veces semana<br><input type="radio"/> 1 vez al día<br><input type="radio"/> 2 a 3 veces al día<br><input type="radio"/> 5 a 6 veces al día<br><input type="radio"/> más 6 veces al día |
| Pate o foiegras     | <input checked="" type="radio"/> Nunca o menos 1 vez al mes<br><input type="radio"/> 1 a 3 veces mes<br><input type="radio"/> 1 vez semana<br><input type="radio"/> 2 a 4 veces semana<br><input type="radio"/> 5 a 6 veces semana<br><input type="radio"/> 1 vez al día<br><input type="radio"/> 2 a 3 veces al día<br><input type="radio"/> 5 a 6 veces al día<br><input type="radio"/> más 6 veces al día |
| Hamburguesa         | <input type="radio"/> Nunca o menos 1 vez al mes<br><input checked="" type="radio"/> 1 a 3 veces mes<br><input type="radio"/> 1 vez semana<br><input type="radio"/> 2 a 4 veces semana<br><input type="radio"/> 5 a 6 veces semana<br><input type="radio"/> 1 vez al día<br><input type="radio"/> 2 a 3 veces al día<br><input type="radio"/> 5 a 6 veces al día<br><input type="radio"/> más 6 veces al día |
| tocino o bacon      | <input checked="" type="radio"/> Nunca o menos 1 vez al mes<br><input type="radio"/> 1 a 3 veces mes<br><input type="radio"/> 1 vez semana<br><input type="radio"/> 2 a 4 veces semana<br><input type="radio"/> 5 a 6 veces semana<br><input type="radio"/> 1 vez al día<br><input type="radio"/> 2 a 3 veces al día<br><input type="radio"/> 5 a 6 veces al día<br><input type="radio"/> más 6 veces al día |

---

|               |                                                                                                                                                                                                                                                                                                                                                                                                              |
|---------------|--------------------------------------------------------------------------------------------------------------------------------------------------------------------------------------------------------------------------------------------------------------------------------------------------------------------------------------------------------------------------------------------------------------|
| Pescado frito | <input checked="" type="radio"/> Nunca o menos 1 vez al mes<br><input type="radio"/> 1 a 3 veces mes<br><input type="radio"/> 1 vez semana<br><input type="radio"/> 2 a 4 veces semana<br><input type="radio"/> 5 a 6 veces semana<br><input type="radio"/> 1 vez al día<br><input type="radio"/> 2 a 3 veces al día<br><input type="radio"/> 5 a 6 veces al día<br><input type="radio"/> más 6 veces al día |
|---------------|--------------------------------------------------------------------------------------------------------------------------------------------------------------------------------------------------------------------------------------------------------------------------------------------------------------------------------------------------------------------------------------------------------------|

---

|                        |                                                                                                                                                                                                                                                                                                                                                                                                              |
|------------------------|--------------------------------------------------------------------------------------------------------------------------------------------------------------------------------------------------------------------------------------------------------------------------------------------------------------------------------------------------------------------------------------------------------------|
| pescado hervido blanco | <input checked="" type="radio"/> Nunca o menos 1 vez al mes<br><input type="radio"/> 1 a 3 veces mes<br><input type="radio"/> 1 vez semana<br><input type="radio"/> 2 a 4 veces semana<br><input type="radio"/> 5 a 6 veces semana<br><input type="radio"/> 1 vez al día<br><input type="radio"/> 2 a 3 veces al día<br><input type="radio"/> 5 a 6 veces al día<br><input type="radio"/> más 6 veces al día |
|------------------------|--------------------------------------------------------------------------------------------------------------------------------------------------------------------------------------------------------------------------------------------------------------------------------------------------------------------------------------------------------------------------------------------------------------|

---

|                      |                                                                                                                                                                                                                                                                                                                                                                                                              |
|----------------------|--------------------------------------------------------------------------------------------------------------------------------------------------------------------------------------------------------------------------------------------------------------------------------------------------------------------------------------------------------------------------------------------------------------|
| pescado hervido azul | <input checked="" type="radio"/> Nunca o menos 1 vez al mes<br><input type="radio"/> 1 a 3 veces mes<br><input type="radio"/> 1 vez semana<br><input type="radio"/> 2 a 4 veces semana<br><input type="radio"/> 5 a 6 veces semana<br><input type="radio"/> 1 vez al día<br><input type="radio"/> 2 a 3 veces al día<br><input type="radio"/> 5 a 6 veces al día<br><input type="radio"/> más 6 veces al día |
|----------------------|--------------------------------------------------------------------------------------------------------------------------------------------------------------------------------------------------------------------------------------------------------------------------------------------------------------------------------------------------------------------------------------------------------------|

---

|                    |                                                                                                                                                                                                                                                                                                                                                                                                              |
|--------------------|--------------------------------------------------------------------------------------------------------------------------------------------------------------------------------------------------------------------------------------------------------------------------------------------------------------------------------------------------------------------------------------------------------------|
| otros pescado azul | <input type="radio"/> Nunca o menos 1 vez al mes<br><input type="radio"/> 1 a 3 veces mes<br><input type="radio"/> 1 vez semana<br><input checked="" type="radio"/> 2 a 4 veces semana<br><input type="radio"/> 5 a 6 veces semana<br><input type="radio"/> 1 vez al día<br><input type="radio"/> 2 a 3 veces al día<br><input type="radio"/> 5 a 6 veces al día<br><input type="radio"/> más 6 veces al día |
|--------------------|--------------------------------------------------------------------------------------------------------------------------------------------------------------------------------------------------------------------------------------------------------------------------------------------------------------------------------------------------------------------------------------------------------------|

---

|               |                                                                                                                                                                                                                                                                                                                                                                                                              |
|---------------|--------------------------------------------------------------------------------------------------------------------------------------------------------------------------------------------------------------------------------------------------------------------------------------------------------------------------------------------------------------------------------------------------------------|
| atun conserva | <input type="radio"/> Nunca o menos 1 vez al mes<br><input checked="" type="radio"/> 1 a 3 veces mes<br><input type="radio"/> 1 vez semana<br><input type="radio"/> 2 a 4 veces semana<br><input type="radio"/> 5 a 6 veces semana<br><input type="radio"/> 1 vez al día<br><input type="radio"/> 2 a 3 veces al día<br><input type="radio"/> 5 a 6 veces al día<br><input type="radio"/> más 6 veces al día |
|---------------|--------------------------------------------------------------------------------------------------------------------------------------------------------------------------------------------------------------------------------------------------------------------------------------------------------------------------------------------------------------------------------------------------------------|

---

|                  |                                                                                                                                                                                                                                                                                                                                                                                                              |
|------------------|--------------------------------------------------------------------------------------------------------------------------------------------------------------------------------------------------------------------------------------------------------------------------------------------------------------------------------------------------------------------------------------------------------------|
| sardina conserva | <input checked="" type="radio"/> Nunca o menos 1 vez al mes<br><input type="radio"/> 1 a 3 veces mes<br><input type="radio"/> 1 vez semana<br><input type="radio"/> 2 a 4 veces semana<br><input type="radio"/> 5 a 6 veces semana<br><input type="radio"/> 1 vez al día<br><input type="radio"/> 2 a 3 veces al día<br><input type="radio"/> 5 a 6 veces al día<br><input type="radio"/> más 6 veces al día |
|------------------|--------------------------------------------------------------------------------------------------------------------------------------------------------------------------------------------------------------------------------------------------------------------------------------------------------------------------------------------------------------------------------------------------------------|

---

---

pescado ahumado

- ☒ Nunca o menos 1 vez al mes  
☐ 1 a 3 veces mes  
☐ 1 vez semana  
☐ 2 a 4 veces semana  
☐ 5 a 6 veces semana  
☐ 1 vez al día  
☐ 2 a 3 veces al día  
☐ 5 a 6 veces al día  
☐ más 6 veces al día

---

almejas o mejillones o ostras unos 100g

- ☒ Nunca o menos 1 vez al mes  
☐ 1 a 3 veces mes  
☐ 1 vez semana  
☐ 2 a 4 veces semana  
☐ 5 a 6 veces semana  
☐ 1 vez al día  
☐ 2 a 3 veces al día  
☐ 5 a 6 veces al día  
☐ más 6 veces al día

---

calamar o chipiron o sepia unos 100g

- ☒ Nunca o menos 1 vez al mes  
☐ 1 a 3 veces mes  
☐ 1 vez semana  
☐ 2 a 4 veces semana  
☐ 5 a 6 veces semana  
☐ 1 vez al día  
☐ 2 a 3 veces al día  
☐ 5 a 6 veces al día  
☐ más 6 veces al día

---

marisco unos 100g

- ☒ Nunca o menos 1 vez al mes  
☐ 1 a 3 veces mes  
☐ 1 vez semana  
☐ 2 a 4 veces semana  
☐ 5 a 6 veces semana  
☐ 1 vez al día  
☐ 2 a 3 veces al día  
☐ 5 a 6 veces al día  
☐ más 6 veces al día

---

Espinacas o acelgas cocinadas

- ☐ Nunca o menos 1 vez al mes  
☐ 1 a 3 veces mes  
☒ 1 vez semana  
☐ 2 a 4 veces semana  
☐ 5 a 6 veces semana  
☐ 1 vez al día  
☐ 2 a 3 veces al día  
☐ 5 a 6 veces al día  
☐ más 6 veces al día

---

Col o coliflor o brocoli cocinado

- ☐ Nunca o menos 1 vez al mes  
☐ 1 a 3 veces mes  
☒ 1 vez semana  
☐ 2 a 4 veces semana  
☐ 5 a 6 veces semana  
☐ 1 vez al día  
☐ 2 a 3 veces al día  
☐ 5 a 6 veces al día  
☐ más 6 veces al día

---

Lechuga o endivia o escarola

- ☐ Nunca o menos 1 vez al mes  
☐ 1 a 3 veces mes  
☒ 1 vez semana  
☐ 2 a 4 veces semana  
☐ 5 a 6 veces semana  
☐ 1 vez al día  
☐ 2 a 3 veces al día  
☐ 5 a 6 veces al día  
☐ más 6 veces al día

---

tomate ensalada

- ☐ Nunca o menos 1 vez al mes  
☐ 1 a 3 veces mes  
☐ 1 vez semana  
☐ 2 a 4 veces semana  
☒ 5 a 6 veces semana  
☐ 1 vez al día  
☐ 2 a 3 veces al día  
☐ 5 a 6 veces al día  
☐ más 6 veces al día

---

cebolla

- ☐ Nunca o menos 1 vez al mes  
☐ 1 a 3 veces mes  
☐ 1 vez semana  
☐ 2 a 4 veces semana  
☒ 5 a 6 veces semana  
☐ 1 vez al día  
☐ 2 a 3 veces al día  
☐ 5 a 6 veces al día  
☐ más 6 veces al día

---

Zanahoria o calabaza

- ☐ Nunca o menos 1 vez al mes  
☐ 1 a 3 veces mes  
☒ 1 vez semana  
☐ 2 a 4 veces semana  
☐ 5 a 6 veces semana  
☐ 1 vez al día  
☐ 2 a 3 veces al día  
☐ 5 a 6 veces al día  
☐ más 6 veces al día

---

Judías verdes

- ☐ Nunca o menos 1 vez al mes  
☒ 1 a 3 veces mes  
☐ 1 vez semana  
☐ 2 a 4 veces semana  
☐ 5 a 6 veces semana  
☐ 1 vez al día  
☐ 2 a 3 veces al día  
☐ 5 a 6 veces al día  
☐ más 6 veces al día

---

Berenjena o calabacin o pepino

- ☐ Nunca o menos 1 vez al mes  
☐ 1 a 3 veces mes  
☒ 1 vez semana  
☐ 2 a 4 veces semana  
☐ 5 a 6 veces semana  
☐ 1 vez al día  
☐ 2 a 3 veces al día  
☐ 5 a 6 veces al día  
☐ más 6 veces al día

---

|          |                                                                                                                                                                                                                                                                                                                                                                                                              |
|----------|--------------------------------------------------------------------------------------------------------------------------------------------------------------------------------------------------------------------------------------------------------------------------------------------------------------------------------------------------------------------------------------------------------------|
| pimiento | <input type="radio"/> Nunca o menos 1 vez al mes<br><input type="radio"/> 1 a 3 veces mes<br><input checked="" type="radio"/> 1 vez semana<br><input type="radio"/> 2 a 4 veces semana<br><input type="radio"/> 5 a 6 veces semana<br><input type="radio"/> 1 vez al día<br><input type="radio"/> 2 a 3 veces al día<br><input type="radio"/> 5 a 6 veces al día<br><input type="radio"/> más 6 veces al día |
|----------|--------------------------------------------------------------------------------------------------------------------------------------------------------------------------------------------------------------------------------------------------------------------------------------------------------------------------------------------------------------------------------------------------------------|

---

|           |                                                                                                                                                                                                                                                                                                                                                                                                              |
|-----------|--------------------------------------------------------------------------------------------------------------------------------------------------------------------------------------------------------------------------------------------------------------------------------------------------------------------------------------------------------------------------------------------------------------|
| alcachofa | <input type="radio"/> Nunca o menos 1 vez al mes<br><input checked="" type="radio"/> 1 a 3 veces mes<br><input type="radio"/> 1 vez semana<br><input type="radio"/> 2 a 4 veces semana<br><input type="radio"/> 5 a 6 veces semana<br><input type="radio"/> 1 vez al día<br><input type="radio"/> 2 a 3 veces al día<br><input type="radio"/> 5 a 6 veces al día<br><input type="radio"/> más 6 veces al día |
|-----------|--------------------------------------------------------------------------------------------------------------------------------------------------------------------------------------------------------------------------------------------------------------------------------------------------------------------------------------------------------------------------------------------------------------|

---

|            |                                                                                                                                                                                                                                                                                                                                                                                                              |
|------------|--------------------------------------------------------------------------------------------------------------------------------------------------------------------------------------------------------------------------------------------------------------------------------------------------------------------------------------------------------------------------------------------------------------|
| espárragos | <input checked="" type="radio"/> Nunca o menos 1 vez al mes<br><input type="radio"/> 1 a 3 veces mes<br><input type="radio"/> 1 vez semana<br><input type="radio"/> 2 a 4 veces semana<br><input type="radio"/> 5 a 6 veces semana<br><input type="radio"/> 1 vez al día<br><input type="radio"/> 2 a 3 veces al día<br><input type="radio"/> 5 a 6 veces al día<br><input type="radio"/> más 6 veces al día |
|------------|--------------------------------------------------------------------------------------------------------------------------------------------------------------------------------------------------------------------------------------------------------------------------------------------------------------------------------------------------------------------------------------------------------------|

---

|              |                                                                                                                                                                                                                                                                                                                                                                                                              |
|--------------|--------------------------------------------------------------------------------------------------------------------------------------------------------------------------------------------------------------------------------------------------------------------------------------------------------------------------------------------------------------------------------------------------------------|
| maíz hervido | <input checked="" type="radio"/> Nunca o menos 1 vez al mes<br><input type="radio"/> 1 a 3 veces mes<br><input type="radio"/> 1 vez semana<br><input type="radio"/> 2 a 4 veces semana<br><input type="radio"/> 5 a 6 veces semana<br><input type="radio"/> 1 vez al día<br><input type="radio"/> 2 a 3 veces al día<br><input type="radio"/> 5 a 6 veces al día<br><input type="radio"/> más 6 veces al día |
|--------------|--------------------------------------------------------------------------------------------------------------------------------------------------------------------------------------------------------------------------------------------------------------------------------------------------------------------------------------------------------------------------------------------------------------|

---

|           |                                                                                                                                                                                                                                                                                                                                                                                                              |
|-----------|--------------------------------------------------------------------------------------------------------------------------------------------------------------------------------------------------------------------------------------------------------------------------------------------------------------------------------------------------------------------------------------------------------------|
| legumbres | <input type="radio"/> Nunca o menos 1 vez al mes<br><input type="radio"/> 1 a 3 veces mes<br><input checked="" type="radio"/> 1 vez semana<br><input type="radio"/> 2 a 4 veces semana<br><input type="radio"/> 5 a 6 veces semana<br><input type="radio"/> 1 vez al día<br><input type="radio"/> 2 a 3 veces al día<br><input type="radio"/> 5 a 6 veces al día<br><input type="radio"/> más 6 veces al día |
|-----------|--------------------------------------------------------------------------------------------------------------------------------------------------------------------------------------------------------------------------------------------------------------------------------------------------------------------------------------------------------------------------------------------------------------|

---

|                       |                                                                                                                                                                                                                                                                                                                                                                                                              |
|-----------------------|--------------------------------------------------------------------------------------------------------------------------------------------------------------------------------------------------------------------------------------------------------------------------------------------------------------------------------------------------------------------------------------------------------------|
| naranjas o mandarinas | <input type="radio"/> Nunca o menos 1 vez al mes<br><input type="radio"/> 1 a 3 veces mes<br><input type="radio"/> 1 vez semana<br><input type="radio"/> 2 a 4 veces semana<br><input type="radio"/> 5 a 6 veces semana<br><input checked="" type="radio"/> 1 vez al día<br><input type="radio"/> 2 a 3 veces al día<br><input type="radio"/> 5 a 6 veces al día<br><input type="radio"/> más 6 veces al día |
|-----------------------|--------------------------------------------------------------------------------------------------------------------------------------------------------------------------------------------------------------------------------------------------------------------------------------------------------------------------------------------------------------------------------------------------------------|

---

|                       |                                                                                                                                                                                                                                                                                                                                                                                                              |
|-----------------------|--------------------------------------------------------------------------------------------------------------------------------------------------------------------------------------------------------------------------------------------------------------------------------------------------------------------------------------------------------------------------------------------------------------|
| zum natural fruta     | <input checked="" type="radio"/> Nunca o menos 1 vez al mes<br><input type="radio"/> 1 a 3 veces mes<br><input type="radio"/> 1 vez semana<br><input type="radio"/> 2 a 4 veces semana<br><input type="radio"/> 5 a 6 veces semana<br><input type="radio"/> 1 vez al día<br><input type="radio"/> 2 a 3 veces al día<br><input type="radio"/> 5 a 6 veces al día<br><input type="radio"/> más 6 veces al día |
| platano               | <input type="radio"/> Nunca o menos 1 vez al mes<br><input type="radio"/> 1 a 3 veces mes<br><input type="radio"/> 1 vez semana<br><input type="radio"/> 2 a 4 veces semana<br><input type="radio"/> 5 a 6 veces semana<br><input checked="" type="radio"/> 1 vez al día<br><input type="radio"/> 2 a 3 veces al día<br><input type="radio"/> 5 a 6 veces al día<br><input type="radio"/> más 6 veces al día |
| manzana o pera        | <input checked="" type="radio"/> Nunca o menos 1 vez al mes<br><input type="radio"/> 1 a 3 veces mes<br><input type="radio"/> 1 vez semana<br><input type="radio"/> 2 a 4 veces semana<br><input type="radio"/> 5 a 6 veces semana<br><input type="radio"/> 1 vez al día<br><input type="radio"/> 2 a 3 veces al día<br><input type="radio"/> 5 a 6 veces al día<br><input type="radio"/> más 6 veces al día |
| melocotón o nectarina | <input checked="" type="radio"/> Nunca o menos 1 vez al mes<br><input type="radio"/> 1 a 3 veces mes<br><input type="radio"/> 1 vez semana<br><input type="radio"/> 2 a 4 veces semana<br><input type="radio"/> 5 a 6 veces semana<br><input type="radio"/> 1 vez al día<br><input type="radio"/> 2 a 3 veces al día<br><input type="radio"/> 5 a 6 veces al día<br><input type="radio"/> más 6 veces al día |
| sandia o melon        | <input checked="" type="radio"/> Nunca o menos 1 vez al mes<br><input type="radio"/> 1 a 3 veces mes<br><input type="radio"/> 1 vez semana<br><input type="radio"/> 2 a 4 veces semana<br><input type="radio"/> 5 a 6 veces semana<br><input type="radio"/> 1 vez al día<br><input type="radio"/> 2 a 3 veces al día<br><input type="radio"/> 5 a 6 veces al día<br><input type="radio"/> más 6 veces al día |
| uva                   | <input checked="" type="radio"/> Nunca o menos 1 vez al mes<br><input type="radio"/> 1 a 3 veces mes<br><input type="radio"/> 1 vez semana<br><input type="radio"/> 2 a 4 veces semana<br><input type="radio"/> 5 a 6 veces semana<br><input type="radio"/> 1 vez al día<br><input type="radio"/> 2 a 3 veces al día<br><input type="radio"/> 5 a 6 veces al día<br><input type="radio"/> más 6 veces al día |

|                 |                                                                                                                                                                                                                                                                                                                                                                                                              |
|-----------------|--------------------------------------------------------------------------------------------------------------------------------------------------------------------------------------------------------------------------------------------------------------------------------------------------------------------------------------------------------------------------------------------------------------|
| bruna o ciruela | <input checked="" type="radio"/> Nunca o menos 1 vez al mes<br><input type="radio"/> 1 a 3 veces mes<br><input type="radio"/> 1 vez semana<br><input type="radio"/> 2 a 4 veces semana<br><input type="radio"/> 5 a 6 veces semana<br><input type="radio"/> 1 vez al día<br><input type="radio"/> 2 a 3 veces al día<br><input type="radio"/> 5 a 6 veces al día<br><input type="radio"/> más 6 veces al día |
| kiwi            | <input type="radio"/> Nunca o menos 1 vez al mes<br><input type="radio"/> 1 a 3 veces mes<br><input type="radio"/> 1 vez semana<br><input type="radio"/> 2 a 4 veces semana<br><input type="radio"/> 5 a 6 veces semana<br><input checked="" type="radio"/> 1 vez al día<br><input type="radio"/> 2 a 3 veces al día<br><input type="radio"/> 5 a 6 veces al día<br><input type="radio"/> más 6 veces al día |
| aceituna        | <input type="radio"/> Nunca o menos 1 vez al mes<br><input type="radio"/> 1 a 3 veces mes<br><input type="radio"/> 1 vez semana<br><input type="radio"/> 2 a 4 veces semana<br><input checked="" type="radio"/> 5 a 6 veces semana<br><input type="radio"/> 1 vez al día<br><input type="radio"/> 2 a 3 veces al día<br><input type="radio"/> 5 a 6 veces al día<br><input type="radio"/> más 6 veces al día |
| frutos secos    | <input type="radio"/> Nunca o menos 1 vez al mes<br><input type="radio"/> 1 a 3 veces mes<br><input type="radio"/> 1 vez semana<br><input type="radio"/> 2 a 4 veces semana<br><input type="radio"/> 5 a 6 veces semana<br><input type="radio"/> 1 vez al día<br><input checked="" type="radio"/> 2 a 3 veces al día<br><input type="radio"/> 5 a 6 veces al día<br><input type="radio"/> más 6 veces al día |
| pan blanco      | <input checked="" type="radio"/> Nunca o menos 1 vez al mes<br><input type="radio"/> 1 a 3 veces mes<br><input type="radio"/> 1 vez semana<br><input type="radio"/> 2 a 4 veces semana<br><input type="radio"/> 5 a 6 veces semana<br><input type="radio"/> 1 vez al día<br><input type="radio"/> 2 a 3 veces al día<br><input type="radio"/> 5 a 6 veces al día<br><input type="radio"/> más 6 veces al día |
| pan integral    | <input type="radio"/> Nunca o menos 1 vez al mes<br><input type="radio"/> 1 a 3 veces mes<br><input type="radio"/> 1 vez semana<br><input checked="" type="radio"/> 2 a 4 veces semana<br><input type="radio"/> 5 a 6 veces semana<br><input type="radio"/> 1 vez al día<br><input type="radio"/> 2 a 3 veces al día<br><input type="radio"/> 5 a 6 veces al día<br><input type="radio"/> más 6 veces al día |

---

cereales desayuno

- ☐ Nunca o menos 1 vez al mes  
☐ 1 a 3 veces mes  
☐ 1 vez semana  
☐ 2 a 4 veces semana  
☐ 5 a 6 veces semana  
☒ 1 vez al día  
☐ 2 a 3 veces al día  
☐ 5 a 6 veces al día  
☐ más 6 veces al día

---

patatas fritas

- ☒ Nunca o menos 1 vez al mes  
☐ 1 a 3 veces mes  
☐ 1 vez semana  
☐ 2 a 4 veces semana  
☐ 5 a 6 veces semana  
☐ 1 vez al día  
☐ 2 a 3 veces al día  
☐ 5 a 6 veces al día  
☐ más 6 veces al día

---

patatas cocidas o asadas

- ☐ Nunca o menos 1 vez al mes  
☐ 1 a 3 veces mes  
☐ 1 vez semana  
☒ 2 a 4 veces semana  
☐ 5 a 6 veces semana  
☐ 1 vez al día  
☐ 2 a 3 veces al día  
☐ 5 a 6 veces al día  
☐ más 6 veces al día

---

bolsa papas

- ☒ Nunca o menos 1 vez al mes  
☐ 1 a 3 veces mes  
☐ 1 vez semana  
☐ 2 a 4 veces semana  
☐ 5 a 6 veces semana  
☐ 1 vez al día  
☐ 2 a 3 veces al día  
☐ 5 a 6 veces al día  
☐ más 6 veces al día

---

arroz cocinado

- ☐ Nunca o menos 1 vez al mes  
☐ 1 a 3 veces mes  
☒ 1 vez semana  
☐ 2 a 4 veces semana  
☐ 5 a 6 veces semana  
☐ 1 vez al día  
☐ 2 a 3 veces al día  
☐ 5 a 6 veces al día  
☐ más 6 veces al día

---

pasta

- ☐ Nunca o menos 1 vez al mes  
☒ 1 a 3 veces mes  
☐ 1 vez semana  
☐ 2 a 4 veces semana  
☐ 5 a 6 veces semana  
☐ 1 vez al día  
☐ 2 a 3 veces al día  
☐ 5 a 6 veces al día  
☐ más 6 veces al día



|                     |                                                                                                                                                                                                                                                                                                                                                                                                              |
|---------------------|--------------------------------------------------------------------------------------------------------------------------------------------------------------------------------------------------------------------------------------------------------------------------------------------------------------------------------------------------------------------------------------------------------------|
| pizza               | <input type="radio"/> Nunca o menos 1 vez al mes<br><input type="radio"/> 1 a 3 veces mes<br><input checked="" type="radio"/> 1 vez semana<br><input type="radio"/> 2 a 4 veces semana<br><input type="radio"/> 5 a 6 veces semana<br><input type="radio"/> 1 vez al día<br><input type="radio"/> 2 a 3 veces al día<br><input type="radio"/> 5 a 6 veces al día<br><input type="radio"/> más 6 veces al día |
| aceite oliva        | <input type="radio"/> Nunca o menos 1 vez al mes<br><input type="radio"/> 1 a 3 veces mes<br><input type="radio"/> 1 vez semana<br><input type="radio"/> 2 a 4 veces semana<br><input type="radio"/> 5 a 6 veces semana<br><input checked="" type="radio"/> 1 vez al día<br><input type="radio"/> 2 a 3 veces al día<br><input type="radio"/> 5 a 6 veces al día<br><input type="radio"/> más 6 veces al día |
| otros aceites       | <input checked="" type="radio"/> Nunca o menos 1 vez al mes<br><input type="radio"/> 1 a 3 veces mes<br><input type="radio"/> 1 vez semana<br><input type="radio"/> 2 a 4 veces semana<br><input type="radio"/> 5 a 6 veces semana<br><input type="radio"/> 1 vez al día<br><input type="radio"/> 2 a 3 veces al día<br><input type="radio"/> 5 a 6 veces al día<br><input type="radio"/> más 6 veces al día |
| margarina           | <input type="radio"/> Nunca o menos 1 vez al mes<br><input type="radio"/> 1 a 3 veces mes<br><input checked="" type="radio"/> 1 vez semana<br><input type="radio"/> 2 a 4 veces semana<br><input type="radio"/> 5 a 6 veces semana<br><input type="radio"/> 1 vez al día<br><input type="radio"/> 2 a 3 veces al día<br><input type="radio"/> 5 a 6 veces al día<br><input type="radio"/> más 6 veces al día |
| mantequilla         | <input checked="" type="radio"/> Nunca o menos 1 vez al mes<br><input type="radio"/> 1 a 3 veces mes<br><input type="radio"/> 1 vez semana<br><input type="radio"/> 2 a 4 veces semana<br><input type="radio"/> 5 a 6 veces semana<br><input type="radio"/> 1 vez al día<br><input type="radio"/> 2 a 3 veces al día<br><input type="radio"/> 5 a 6 veces al día<br><input type="radio"/> más 6 veces al día |
| galletas tipo maria | <input checked="" type="radio"/> Nunca o menos 1 vez al mes<br><input type="radio"/> 1 a 3 veces mes<br><input type="radio"/> 1 vez semana<br><input type="radio"/> 2 a 4 veces semana<br><input type="radio"/> 5 a 6 veces semana<br><input type="radio"/> 1 vez al día<br><input type="radio"/> 2 a 3 veces al día<br><input type="radio"/> 5 a 6 veces al día<br><input type="radio"/> más 6 veces al día |

|                           |                                                                                                                                                                                                                                                                                                                                                                                                              |
|---------------------------|--------------------------------------------------------------------------------------------------------------------------------------------------------------------------------------------------------------------------------------------------------------------------------------------------------------------------------------------------------------------------------------------------------------|
| galletas chocolate        | <input checked="" type="radio"/> Nunca o menos 1 vez al mes<br><input type="radio"/> 1 a 3 veces mes<br><input type="radio"/> 1 vez semana<br><input type="radio"/> 2 a 4 veces semana<br><input type="radio"/> 5 a 6 veces semana<br><input type="radio"/> 1 vez al día<br><input type="radio"/> 2 a 3 veces al día<br><input type="radio"/> 5 a 6 veces al día<br><input type="radio"/> más 6 veces al día |
| bollieria                 | <input checked="" type="radio"/> Nunca o menos 1 vez al mes<br><input type="radio"/> 1 a 3 veces mes<br><input type="radio"/> 1 vez semana<br><input type="radio"/> 2 a 4 veces semana<br><input type="radio"/> 5 a 6 veces semana<br><input type="radio"/> 1 vez al día<br><input type="radio"/> 2 a 3 veces al día<br><input type="radio"/> 5 a 6 veces al día<br><input type="radio"/> más 6 veces al día |
| chocolate o bombones      | <input checked="" type="radio"/> Nunca o menos 1 vez al mes<br><input type="radio"/> 1 a 3 veces mes<br><input type="radio"/> 1 vez semana<br><input type="radio"/> 2 a 4 veces semana<br><input type="radio"/> 5 a 6 veces semana<br><input type="radio"/> 1 vez al día<br><input type="radio"/> 2 a 3 veces al día<br><input type="radio"/> 5 a 6 veces al día<br><input type="radio"/> más 6 veces al día |
| chocolate polvo o colacao | <input checked="" type="radio"/> Nunca o menos 1 vez al mes<br><input type="radio"/> 1 a 3 veces mes<br><input type="radio"/> 1 vez semana<br><input type="radio"/> 2 a 4 veces semana<br><input type="radio"/> 5 a 6 veces semana<br><input type="radio"/> 1 vez al día<br><input type="radio"/> 2 a 3 veces al día<br><input type="radio"/> 5 a 6 veces al día<br><input type="radio"/> más 6 veces al día |
| vino tinto                | <input checked="" type="radio"/> Nunca o menos 1 vez al mes<br><input type="radio"/> 1 a 3 veces mes<br><input type="radio"/> 1 vez semana<br><input type="radio"/> 2 a 4 veces semana<br><input type="radio"/> 5 a 6 veces semana<br><input type="radio"/> 1 vez al día<br><input type="radio"/> 2 a 3 veces al día<br><input type="radio"/> 5 a 6 veces al día<br><input type="radio"/> más 6 veces al día |
| vino blanco               | <input checked="" type="radio"/> Nunca o menos 1 vez al mes<br><input type="radio"/> 1 a 3 veces mes<br><input type="radio"/> 1 vez semana<br><input type="radio"/> 2 a 4 veces semana<br><input type="radio"/> 5 a 6 veces semana<br><input type="radio"/> 1 vez al día<br><input type="radio"/> 2 a 3 veces al día<br><input type="radio"/> 5 a 6 veces al día<br><input type="radio"/> más 6 veces al día |

|                       |                                                                                                                                                                                                                                                                                                                                                                                                              |
|-----------------------|--------------------------------------------------------------------------------------------------------------------------------------------------------------------------------------------------------------------------------------------------------------------------------------------------------------------------------------------------------------------------------------------------------------|
| vino seco o vermut    | <input checked="" type="radio"/> Nunca o menos 1 vez al mes<br><input type="radio"/> 1 a 3 veces mes<br><input type="radio"/> 1 vez semana<br><input type="radio"/> 2 a 4 veces semana<br><input type="radio"/> 5 a 6 veces semana<br><input type="radio"/> 1 vez al día<br><input type="radio"/> 2 a 3 veces al día<br><input type="radio"/> 5 a 6 veces al día<br><input type="radio"/> más 6 veces al día |
| cerveza               | <input checked="" type="radio"/> Nunca o menos 1 vez al mes<br><input type="radio"/> 1 a 3 veces mes<br><input type="radio"/> 1 vez semana<br><input type="radio"/> 2 a 4 veces semana<br><input type="radio"/> 5 a 6 veces semana<br><input type="radio"/> 1 vez al día<br><input type="radio"/> 2 a 3 veces al día<br><input type="radio"/> 5 a 6 veces al día<br><input type="radio"/> más 6 veces al día |
| cerveza sin alcohol   | <input checked="" type="radio"/> Nunca o menos 1 vez al mes<br><input type="radio"/> 1 a 3 veces mes<br><input type="radio"/> 1 vez semana<br><input type="radio"/> 2 a 4 veces semana<br><input type="radio"/> 5 a 6 veces semana<br><input type="radio"/> 1 vez al día<br><input type="radio"/> 2 a 3 veces al día<br><input type="radio"/> 5 a 6 veces al día<br><input type="radio"/> más 6 veces al día |
| licores               | <input checked="" type="radio"/> Nunca o menos 1 vez al mes<br><input type="radio"/> 1 a 3 veces mes<br><input type="radio"/> 1 vez semana<br><input type="radio"/> 2 a 4 veces semana<br><input type="radio"/> 5 a 6 veces semana<br><input type="radio"/> 1 vez al día<br><input type="radio"/> 2 a 3 veces al día<br><input type="radio"/> 5 a 6 veces al día<br><input type="radio"/> más 6 veces al día |
| ginebra o ron o vodka | <input checked="" type="radio"/> Nunca o menos 1 vez al mes<br><input type="radio"/> 1 a 3 veces mes<br><input type="radio"/> 1 vez semana<br><input type="radio"/> 2 a 4 veces semana<br><input type="radio"/> 5 a 6 veces semana<br><input type="radio"/> 1 vez al día<br><input type="radio"/> 2 a 3 veces al día<br><input type="radio"/> 5 a 6 veces al día<br><input type="radio"/> más 6 veces al día |
| refresco normal       | <input checked="" type="radio"/> Nunca o menos 1 vez al mes<br><input type="radio"/> 1 a 3 veces mes<br><input type="radio"/> 1 vez semana<br><input type="radio"/> 2 a 4 veces semana<br><input type="radio"/> 5 a 6 veces semana<br><input type="radio"/> 1 vez al día<br><input type="radio"/> 2 a 3 veces al día<br><input type="radio"/> 5 a 6 veces al día<br><input type="radio"/> más 6 veces al día |

|                           |                                                                                                                                                                                                                                                                                                                                                                                                              |
|---------------------------|--------------------------------------------------------------------------------------------------------------------------------------------------------------------------------------------------------------------------------------------------------------------------------------------------------------------------------------------------------------------------------------------------------------|
| refresco sin azúcar       | <input checked="" type="radio"/> Nunca o menos 1 vez al mes<br><input type="radio"/> 1 a 3 veces mes<br><input type="radio"/> 1 vez semana<br><input type="radio"/> 2 a 4 veces semana<br><input type="radio"/> 5 a 6 veces semana<br><input type="radio"/> 1 vez al día<br><input type="radio"/> 2 a 3 veces al día<br><input type="radio"/> 5 a 6 veces al día<br><input type="radio"/> más 6 veces al día |
| Agua del grifo            | <input checked="" type="radio"/> Nunca o menos 1 vez al mes<br><input type="radio"/> 1 a 3 veces mes<br><input type="radio"/> 1 vez semana<br><input type="radio"/> 2 a 4 veces semana<br><input type="radio"/> 5 a 6 veces semana<br><input type="radio"/> 1 vez al día<br><input type="radio"/> 2 a 3 veces al día<br><input type="radio"/> 5 a 6 veces al día<br><input type="radio"/> más 6 veces al día |
| agua embotellada sin gas  | <input type="radio"/> Nunca o menos 1 vez al mes<br><input type="radio"/> 1 a 3 veces mes<br><input type="radio"/> 1 vez semana<br><input type="radio"/> 2 a 4 veces semana<br><input type="radio"/> 5 a 6 veces semana<br><input type="radio"/> 1 vez al día<br><input type="radio"/> 2 a 3 veces al día<br><input type="radio"/> 5 a 6 veces al día<br><input checked="" type="radio"/> más 6 veces al día |
| agua embotellada con gas  | <input checked="" type="radio"/> Nunca o menos 1 vez al mes<br><input type="radio"/> 1 a 3 veces mes<br><input type="radio"/> 1 vez semana<br><input type="radio"/> 2 a 4 veces semana<br><input type="radio"/> 5 a 6 veces semana<br><input type="radio"/> 1 vez al día<br><input type="radio"/> 2 a 3 veces al día<br><input type="radio"/> 5 a 6 veces al día<br><input type="radio"/> más 6 veces al día |
| zumos frutas embotellados | <input checked="" type="radio"/> Nunca o menos 1 vez al mes<br><input type="radio"/> 1 a 3 veces mes<br><input type="radio"/> 1 vez semana<br><input type="radio"/> 2 a 4 veces semana<br><input type="radio"/> 5 a 6 veces semana<br><input type="radio"/> 1 vez al día<br><input type="radio"/> 2 a 3 veces al día<br><input type="radio"/> 5 a 6 veces al día<br><input type="radio"/> más 6 veces al día |
| café                      | <input checked="" type="radio"/> Nunca o menos 1 vez al mes<br><input type="radio"/> 1 a 3 veces mes<br><input type="radio"/> 1 vez semana<br><input type="radio"/> 2 a 4 veces semana<br><input type="radio"/> 5 a 6 veces semana<br><input type="radio"/> 1 vez al día<br><input type="radio"/> 2 a 3 veces al día<br><input type="radio"/> 5 a 6 veces al día<br><input type="radio"/> más 6 veces al día |

|                       |                                                                                                                                                                                                                                                                                                                                                                                                              |
|-----------------------|--------------------------------------------------------------------------------------------------------------------------------------------------------------------------------------------------------------------------------------------------------------------------------------------------------------------------------------------------------------------------------------------------------------|
| cafe descafeinado     | <input checked="" type="radio"/> Nunca o menos 1 vez al mes<br><input type="radio"/> 1 a 3 veces mes<br><input type="radio"/> 1 vez semana<br><input type="radio"/> 2 a 4 veces semana<br><input type="radio"/> 5 a 6 veces semana<br><input type="radio"/> 1 vez al día<br><input type="radio"/> 2 a 3 veces al día<br><input type="radio"/> 5 a 6 veces al día<br><input type="radio"/> más 6 veces al día |
| te o infusión         | <input checked="" type="radio"/> Nunca o menos 1 vez al mes<br><input type="radio"/> 1 a 3 veces mes<br><input type="radio"/> 1 vez semana<br><input type="radio"/> 2 a 4 veces semana<br><input type="radio"/> 5 a 6 veces semana<br><input type="radio"/> 1 vez al día<br><input type="radio"/> 2 a 3 veces al día<br><input type="radio"/> 5 a 6 veces al día<br><input type="radio"/> más 6 veces al día |
| sopa o puré verduras  | <input type="radio"/> Nunca o menos 1 vez al mes<br><input type="radio"/> 1 a 3 veces mes<br><input type="radio"/> 1 vez semana<br><input checked="" type="radio"/> 2 a 4 veces semana<br><input type="radio"/> 5 a 6 veces semana<br><input type="radio"/> 1 vez al día<br><input type="radio"/> 2 a 3 veces al día<br><input type="radio"/> 5 a 6 veces al día<br><input type="radio"/> más 6 veces al día |
| croquetas pollo jamón | <input checked="" type="radio"/> Nunca o menos 1 vez al mes<br><input type="radio"/> 1 a 3 veces mes<br><input type="radio"/> 1 vez semana<br><input type="radio"/> 2 a 4 veces semana<br><input type="radio"/> 5 a 6 veces semana<br><input type="radio"/> 1 vez al día<br><input type="radio"/> 2 a 3 veces al día<br><input type="radio"/> 5 a 6 veces al día<br><input type="radio"/> más 6 veces al día |
| croquetas pescado     | <input checked="" type="radio"/> Nunca o menos 1 vez al mes<br><input type="radio"/> 1 a 3 veces mes<br><input type="radio"/> 1 vez semana<br><input type="radio"/> 2 a 4 veces semana<br><input type="radio"/> 5 a 6 veces semana<br><input type="radio"/> 1 vez al día<br><input type="radio"/> 2 a 3 veces al día<br><input type="radio"/> 5 a 6 veces al día<br><input type="radio"/> más 6 veces al día |
| mayonesa              | <input type="radio"/> Nunca o menos 1 vez al mes<br><input type="radio"/> 1 a 3 veces mes<br><input checked="" type="radio"/> 1 vez semana<br><input type="radio"/> 2 a 4 veces semana<br><input type="radio"/> 5 a 6 veces semana<br><input type="radio"/> 1 vez al día<br><input type="radio"/> 2 a 3 veces al día<br><input type="radio"/> 5 a 6 veces al día<br><input type="radio"/> más 6 veces al día |

---

salsa tomate

- ☐ Nunca o menos 1 vez al mes  
☐ 1 a 3 veces mes  
☒ 1 vez semana  
☐ 2 a 4 veces semana  
☐ 5 a 6 veces semana  
☐ 1 vez al día  
☐ 2 a 3 veces al día  
☐ 5 a 6 veces al día  
☐ más 6 veces al día

---

ketchup

- ☐ Nunca o menos 1 vez al mes  
☐ 1 a 3 veces mes  
☒ 1 vez semana  
☐ 2 a 4 veces semana  
☐ 5 a 6 veces semana  
☐ 1 vez al día  
☐ 2 a 3 veces al día  
☐ 5 a 6 veces al día  
☐ más 6 veces al día

---

sal

- ☐ Nunca o menos 1 vez al mes  
☐ 1 a 3 veces mes  
☐ 1 vez semana  
☐ 2 a 4 veces semana  
☐ 5 a 6 veces semana  
☒ 1 vez al día  
☐ 2 a 3 veces al día  
☐ 5 a 6 veces al día  
☐ más 6 veces al día

---

ajo

- ☐ Nunca o menos 1 vez al mes  
☐ 1 a 3 veces mes  
☐ 1 vez semana  
☐ 2 a 4 veces semana  
☐ 5 a 6 veces semana  
☒ 1 vez al día  
☐ 2 a 3 veces al día  
☐ 5 a 6 veces al día  
☐ más 6 veces al día

---

mermelada o miel

- ☐ Nunca o menos 1 vez al mes  
☐ 1 a 3 veces mes  
☒ 1 vez semana  
☐ 2 a 4 veces semana  
☐ 5 a 6 veces semana  
☐ 1 vez al día  
☐ 2 a 3 veces al día  
☐ 5 a 6 veces al día  
☐ más 6 veces al día

---

azúcar

- ☒ Nunca o menos 1 vez al mes  
☐ 1 a 3 veces mes  
☐ 1 vez semana  
☐ 2 a 4 veces semana  
☐ 5 a 6 veces semana  
☐ 1 vez al día  
☐ 2 a 3 veces al día  
☐ 5 a 6 veces al día  
☐ más 6 veces al día

|                                       |                                                                                                                                                                                                                                                                                                                                                                                                                                                                                                                               |
|---------------------------------------|-------------------------------------------------------------------------------------------------------------------------------------------------------------------------------------------------------------------------------------------------------------------------------------------------------------------------------------------------------------------------------------------------------------------------------------------------------------------------------------------------------------------------------|
| Otro alimento                         |                                                                                                                                                                                                                                                                                                                                                                                                                                                                                                                               |
| suplementos vitamínicos               | <input checked="" type="radio"/> si<br><input type="radio"/> no                                                                                                                                                                                                                                                                                                                                                                                                                                                               |
| suplementos vitamínicos               | [*DATA REMOVED*]                                                                                                                                                                                                                                                                                                                                                                                                                                                                                                              |
| dieta previa                          | <input type="radio"/> si<br><input checked="" type="radio"/> no                                                                                                                                                                                                                                                                                                                                                                                                                                                               |
| motivo dieta                          | <input checked="" type="radio"/> no dieta<br><input type="radio"/> control peso<br><input type="radio"/> control colesterol<br><input type="radio"/> control diabetes<br><input type="radio"/> problemas estómago<br><input type="radio"/> problemas vesícula o hepáticos<br><input type="radio"/> HTA o cardiopatía<br><input type="radio"/> problemas renales<br><input type="radio"/> alergia alimentaria<br><input type="radio"/> ácido úrico elevado<br><input type="radio"/> vegetariana<br><input type="radio"/> otros |
| cambio alimentos año previo gestación | <input checked="" type="radio"/> si<br><input type="radio"/> no                                                                                                                                                                                                                                                                                                                                                                                                                                                               |
| cambio lácteos                        | <input type="radio"/> eliminado<br><input type="radio"/> disminuido<br><input checked="" type="radio"/> igual<br><input type="radio"/> aumentado<br><input type="radio"/> no sabe                                                                                                                                                                                                                                                                                                                                             |
| cambio huevos                         | <input type="radio"/> eliminado<br><input type="radio"/> disminuido<br><input type="radio"/> igual<br><input checked="" type="radio"/> aumentado<br><input type="radio"/> no sabe                                                                                                                                                                                                                                                                                                                                             |
| cambio carne                          | <input type="radio"/> eliminado<br><input type="radio"/> disminuido<br><input type="radio"/> igual<br><input checked="" type="radio"/> aumentado<br><input type="radio"/> no sabe                                                                                                                                                                                                                                                                                                                                             |
| cambio pescado                        | <input type="radio"/> eliminado<br><input type="radio"/> disminuido<br><input type="radio"/> igual<br><input checked="" type="radio"/> aumentado<br><input type="radio"/> no sabe                                                                                                                                                                                                                                                                                                                                             |
| cambio verduras                       | <input type="radio"/> eliminado<br><input type="radio"/> disminuido<br><input type="radio"/> igual<br><input checked="" type="radio"/> aumentado<br><input type="radio"/> no sabe                                                                                                                                                                                                                                                                                                                                             |

|                            |                                                                                                                                                                                                                        |
|----------------------------|------------------------------------------------------------------------------------------------------------------------------------------------------------------------------------------------------------------------|
| cambio legumbres           | <input type="radio"/> eliminado<br><input type="radio"/> disminuido<br><input checked="" type="radio"/> igual<br><input type="radio"/> aumentado<br><input type="radio"/> no sabe                                      |
| cambio fruta               | <input type="radio"/> eliminado<br><input type="radio"/> disminuido<br><input type="radio"/> igual<br><input checked="" type="radio"/> aumentado<br><input type="radio"/> no sabe                                      |
| cambio pan                 | <input type="radio"/> eliminado<br><input checked="" type="radio"/> disminuido<br><input type="radio"/> igual<br><input type="radio"/> aumentado<br><input type="radio"/> no sabe                                      |
| cambio aceite oliva        | <input type="radio"/> eliminado<br><input type="radio"/> disminuido<br><input checked="" type="radio"/> igual<br><input type="radio"/> aumentado<br><input type="radio"/> no sabe                                      |
| cambio mante o margarina   | <input type="radio"/> eliminado<br><input checked="" type="radio"/> disminuido<br><input type="radio"/> igual<br><input type="radio"/> aumentado<br><input type="radio"/> no sabe                                      |
| cambio azúcar y dulces     | <input checked="" type="radio"/> eliminado<br><input type="radio"/> disminuido<br><input type="radio"/> igual<br><input type="radio"/> aumentado<br><input type="radio"/> no sabe                                      |
| cambio bebidas alcohólicas | <input checked="" type="radio"/> eliminado<br><input type="radio"/> disminuido<br><input type="radio"/> igual<br><input type="radio"/> aumentado<br><input type="radio"/> no sabe                                      |
| frecuencia comidas fritas  | <input type="radio"/> a diario<br><input type="radio"/> 5 a 6 veces semana<br><input type="radio"/> 2 a 4 veces semana<br><input type="radio"/> 1 vez semana<br><input checked="" type="radio"/> menos de 1 vez semana |
| carne                      | <input type="radio"/> no como<br><input type="radio"/> cruda<br><input type="radio"/> poco hecha<br><input type="radio"/> hecha<br><input checked="" type="radio"/> muy hecha                                          |
| grasa visible carne        | <input checked="" type="radio"/> quita toda<br><input type="radio"/> quita mayoría<br><input type="radio"/> quita un poco<br><input type="radio"/> no quita nada                                                       |



|                                |                                                                                                                                                                                                                                                          |
|--------------------------------|----------------------------------------------------------------------------------------------------------------------------------------------------------------------------------------------------------------------------------------------------------|
| cocina carne                   | <input type="radio"/> a la plancha<br><input type="radio"/> a la parrilla<br><input checked="" type="radio"/> asada<br><input type="radio"/> frita<br><input type="radio"/> guisada                                                                      |
| tostado quemado carne          | <input type="radio"/> nunca<br><input checked="" type="radio"/> 1 vez mes<br><input type="radio"/> 2 a 3 veces mes<br><input type="radio"/> 1 vez semana<br><input type="radio"/> 2 a 3 semanas                                                          |
| tostado quemado pescado        | <input type="radio"/> nunca<br><input type="radio"/> 1 vez mes<br><input checked="" type="radio"/> 2 a 3 veces mes<br><input type="radio"/> 1 vez semana<br><input type="radio"/> 2 a 3 semanas                                                          |
| socarrat paella                | <input type="radio"/> nunca<br><input checked="" type="radio"/> 1 vez mes<br><input type="radio"/> 2 a 3 veces mes<br><input type="radio"/> 1 vez semana<br><input type="radio"/> 2 a 3 semanas                                                          |
| grasa o aceite cocinar         | <input type="radio"/> mantequilla<br><input type="radio"/> margarina<br><input type="radio"/> aceite oliva<br><input checked="" type="radio"/> aceite oliva virgen extra<br><input type="radio"/> aceite vegetal<br><input type="radio"/> mezcla aceites |
| grasa aceite aliñar            | <input type="radio"/> mantequilla<br><input type="radio"/> margarina<br><input type="radio"/> aceite oliva<br><input checked="" type="radio"/> aceite oliva virgen extra<br><input type="radio"/> aceite vegetal<br><input type="radio"/> mezcla aceites |
| grasa aceite freir             | <input type="radio"/> mantequilla<br><input type="radio"/> margarina<br><input type="radio"/> aceite oliva<br><input checked="" type="radio"/> aceite oliva virgen extra<br><input type="radio"/> aceite vegetal<br><input type="radio"/> mezcla aceites |
| Ejercicio cuestionario         | <input checked="" type="radio"/> si<br><input type="radio"/> no                                                                                                                                                                                          |
| horas de sueño incluido siesta | [*DATA REMOVED*]                                                                                                                                                                                                                                         |
| minutos siesta                 | [*DATA REMOVED*]                                                                                                                                                                                                                                         |
| horas televisión semana        | [*DATA REMOVED*]                                                                                                                                                                                                                                         |

|                                        |                                                                                                                                                                                                                                                                                                                                                                           |
|----------------------------------------|---------------------------------------------------------------------------------------------------------------------------------------------------------------------------------------------------------------------------------------------------------------------------------------------------------------------------------------------------------------------------|
| actividad trabajo                      | <input type="radio"/> casi siempre sentado<br><input type="radio"/> sentado 50 por cien<br><input checked="" type="radio"/> casi siempre de pie, quieto<br><input type="radio"/> casi siempre levantado caminando y llevando pocas cosas<br><input type="radio"/> casi siempre levantado, caminando y llevado muchas cosas<br><input type="radio"/> trabajo manual pesado |
| tiempo caminar o bici al día           | <input type="radio"/> casi nunca<br><input type="radio"/> menos 20min día<br><input type="radio"/> 20 a 40 min día<br><input type="radio"/> 40 a 60 min día<br><input type="radio"/> 1h o 1h y media día<br><input checked="" type="radio"/> más de 1h y media al día                                                                                                     |
| tiempo tareas casa al día              | <input type="radio"/> menos de 1h día<br><input type="radio"/> 1 a 2h día<br><input checked="" type="radio"/> 3 a 4h día<br><input type="radio"/> 5 a 6h día<br><input type="radio"/> 7 a 8h día<br><input type="radio"/> más de 8h día                                                                                                                                   |
| tiempo libre televisión ordenador leer | <input type="radio"/> menos 1h día<br><input checked="" type="radio"/> 1h día<br><input type="radio"/> 2h día<br><input type="radio"/> 3h día<br><input type="radio"/> 4h día<br><input type="radio"/> 5 a 6h día<br><input type="radio"/> mas 6h día                                                                                                                     |
| tiempo libre ejercicio o deporte       | <input type="radio"/> menos 1h semana<br><input type="radio"/> 1h semana<br><input type="radio"/> 2h semana<br><input type="radio"/> 3h semana<br><input type="radio"/> 4 a 5h semana<br><input checked="" type="radio"/> mas 5h semana                                                                                                                                   |
| como se considera                      | <input type="radio"/> sedentaria<br><input type="radio"/> poco activa<br><input type="radio"/> moderadamente activa<br><input checked="" type="radio"/> bastante activa<br><input type="radio"/> muy activa<br><input type="radio"/> no sabe                                                                                                                              |
| FUR                                    | [*DATA REMOVED*]                                                                                                                                                                                                                                                                                                                                                          |
| Semanas gestación 2T                   | _____                                                                                                                                                                                                                                                                                                                                                                     |
| Días gestación 2T                      | _____                                                                                                                                                                                                                                                                                                                                                                     |
| DBP 2T                                 | _____                                                                                                                                                                                                                                                                                                                                                                     |
| CC 2T                                  | _____                                                                                                                                                                                                                                                                                                                                                                     |

|                                                   |                                                                                                                                                                                                 |
|---------------------------------------------------|-------------------------------------------------------------------------------------------------------------------------------------------------------------------------------------------------|
| AC 2T                                             |                                                                                                                                                                                                 |
| LF 2T                                             |                                                                                                                                                                                                 |
| PFE 2T (Hadlock)                                  |                                                                                                                                                                                                 |
| Semanas gestación 3T                              | [*DATA REMOVED*]                                                                                                                                                                                |
| días 3T                                           | [*DATA REMOVED*]                                                                                                                                                                                |
| DBP 3T                                            | [*DATA REMOVED*]                                                                                                                                                                                |
| CC 3T                                             | [*DATA REMOVED*]                                                                                                                                                                                |
| AC 3T                                             | [*DATA REMOVED*]                                                                                                                                                                                |
| LF 3T                                             | [*DATA REMOVED*]                                                                                                                                                                                |
| PFE 3T (Hadlock)                                  | [*DATA REMOVED*]                                                                                                                                                                                |
| Semanas de gestación final                        | [*DATA REMOVED*]                                                                                                                                                                                |
| días gestación final                              | [*DATA REMOVED*]                                                                                                                                                                                |
| Localización placenta                             | <input checked="" type="radio"/> anterior<br><input type="radio"/> lateral derecha<br><input type="radio"/> lateral izquierda<br><input type="radio"/> posterior<br><input type="radio"/> fondo |
| Presentación longitudinal cefálica                | <input type="radio"/> no<br><input checked="" type="radio"/> si                                                                                                                                 |
| Dorso                                             | <input checked="" type="radio"/> izquierda anterior<br><input type="radio"/> izquierda posterior<br><input type="radio"/> derecha anterior<br><input type="radio"/> derecha posterior           |
| diámetro biparietal                               | [*DATA REMOVED*]                                                                                                                                                                                |
| Circunferencia craneal                            | [*DATA REMOVED*]                                                                                                                                                                                |
| Circunferencia abdominal                          | [*DATA REMOVED*]                                                                                                                                                                                |
| Longitud de femur                                 | [*DATA REMOVED*]                                                                                                                                                                                |
| tejido celular subcutáneo a nivel del muslo en mm | [*DATA REMOVED*]                                                                                                                                                                                |
| tejido celular subcutáneo en abdomen en mm        | [*DATA REMOVED*]                                                                                                                                                                                |

|                                               |                                                                                                                                               |
|-----------------------------------------------|-----------------------------------------------------------------------------------------------------------------------------------------------|
| Volumen del muslo en cm3                      | [*DATA REMOVED*]                                                                                                                              |
| Peso fetal estimado según fórmula de Hadlock  | [*DATA REMOVED*]                                                                                                                              |
| Percentil                                     | [*DATA REMOVED*]                                                                                                                              |
| Peso fetal estimado según fórmula de Scioscia | _____                                                                                                                                         |
| Peso fetal estimado según fórmula de LEE      | _____                                                                                                                                         |
| Tipo de parto                                 | <input type="radio"/> eutocico<br><input type="radio"/> instrumentado/ventosa<br><input checked="" type="radio"/> cesarea                     |
| fecha de nacimiento                           | [*DATA REMOVED*]                                                                                                                              |
| Días entre exploración y nacimiento           | [*DATA REMOVED*]                                                                                                                              |
| Peso RN en g                                  | [*DATA REMOVED*]                                                                                                                              |
| sexo                                          | <input type="radio"/> mujer<br><input checked="" type="radio"/> hombre                                                                        |
| Apgar 1 minuto                                | [*DATA REMOVED*]                                                                                                                              |
| Apgar 5 minutos                               | [*DATA REMOVED*]                                                                                                                              |
| Apgar 10 minutos                              | [*DATA REMOVED*]                                                                                                                              |
| antecedente Covid durante gestación           | <input type="radio"/> Yes<br><input checked="" type="radio"/> No                                                                              |
| Nivel de estudios                             | <input type="radio"/> ninguno<br><input type="radio"/> primarios<br><input type="radio"/> secundarios<br><input type="radio"/> universitarios |

# Base\_datos\_estimacion\_peso\_fetal

|                                       |                                                                                                                                                                                                                                                                                      |
|---------------------------------------|--------------------------------------------------------------------------------------------------------------------------------------------------------------------------------------------------------------------------------------------------------------------------------------|
| Número de identificación participante | 41                                                                                                                                                                                                                                                                                   |
| CODIGO PARTICIPANTE                   |                                                                                                                                                                                                                                                                                      |
| Edad                                  | [*DATA REMOVED*]                                                                                                                                                                                                                                                                     |
| Gestaciones                           | <input checked="" type="radio"/> 1<br><input type="radio"/> 2<br><input type="radio"/> 3<br><input type="radio"/> mas de 3                                                                                                                                                           |
| partos                                | <input checked="" type="radio"/> 0<br><input type="radio"/> 1<br><input type="radio"/> 2<br><input type="radio"/> 3<br><input type="radio"/> mas de 3                                                                                                                                |
| cesáreas                              | <input checked="" type="radio"/> 0<br><input type="radio"/> 1<br><input type="radio"/> 2<br><input type="radio"/> 3<br><input type="radio"/> mas de 3                                                                                                                                |
| Abortos                               | <input checked="" type="radio"/> 0<br><input type="radio"/> 1<br><input type="radio"/> 2<br><input type="radio"/> 3<br><input type="radio"/> mas de 3                                                                                                                                |
| Tipo de gestacion                     | <input checked="" type="radio"/> espontanea<br><input type="radio"/> IAC inseminación artificial conyuge<br><input type="radio"/> IAD inseminación artificial donante<br><input type="radio"/> FIV Fecundación in Vitro<br><input type="radio"/> Ovodon FIV con donación de ovocitos |
| peso previo a embarazo                | [*DATA REMOVED*]                                                                                                                                                                                                                                                                     |
| Ganancia ponderal embarazo            | [*DATA REMOVED*]                                                                                                                                                                                                                                                                     |
| Talla madre                           | [*DATA REMOVED*]                                                                                                                                                                                                                                                                     |
| IMC previo embarazo                   | 19.607156612163443                                                                                                                                                                                                                                                                   |
| Patología obstétrica                  | <input checked="" type="radio"/> no<br><input type="radio"/> si                                                                                                                                                                                                                      |
| Diabetes pregestacional               | <input checked="" type="radio"/> no<br><input type="radio"/> si                                                                                                                                                                                                                      |
| Diabetes gestacional                  | <input checked="" type="radio"/> no<br><input type="radio"/> si                                                                                                                                                                                                                      |

|                                            |                                                                                                                                                                                      |
|--------------------------------------------|--------------------------------------------------------------------------------------------------------------------------------------------------------------------------------------|
| Diabetes gestacional con insulina          | <input checked="" type="radio"/> no<br><input type="radio"/> si                                                                                                                      |
| Diabetes gestacional con dieta y ejercicio | <input checked="" type="radio"/> no<br><input type="radio"/> si                                                                                                                      |
| Percentil fetos previos                    | <input checked="" type="radio"/> Nada<br><input type="radio"/> percentil menor de 10<br><input type="radio"/> percentil entre 10 y 90<br><input type="radio"/> percentil mayor de 90 |
| Exfumadora                                 | <input checked="" type="radio"/> Nada<br><input type="radio"/> menos de 5 años<br><input type="radio"/> 5 a 10 años<br><input type="radio"/> mayor o igual a 10 años                 |
| Hábito tabáquico                           | <input checked="" type="radio"/> no<br><input type="radio"/> si                                                                                                                      |
| fumadora                                   | [*DATA REMOVED*]                                                                                                                                                                     |
| Consumo otros tóxicos                      | <input checked="" type="radio"/> no<br><input type="radio"/> si                                                                                                                      |
| Hb 1T                                      | [*DATA REMOVED*]                                                                                                                                                                     |
| Htc 1T                                     | [*DATA REMOVED*]                                                                                                                                                                     |
| Hb 2T                                      | [*DATA REMOVED*]                                                                                                                                                                     |
| HTC 2T                                     | [*DATA REMOVED*]                                                                                                                                                                     |
| Hb 3T                                      | [*DATA REMOVED*]                                                                                                                                                                     |
| HTC 3T                                     | [*DATA REMOVED*]                                                                                                                                                                     |
| Suplemento FE oral                         | <input type="radio"/> si<br><input checked="" type="radio"/> no                                                                                                                      |
| Suplemento fe iv                           | <input type="radio"/> si<br><input checked="" type="radio"/> no                                                                                                                      |
| Transfusión                                | <input checked="" type="radio"/> no<br><input type="radio"/> si                                                                                                                      |
| Solicitada Vit D                           | <input checked="" type="radio"/> no<br><input type="radio"/> si                                                                                                                      |
| Deficit vit D                              | <input type="radio"/> no<br><input type="radio"/> si                                                                                                                                 |
| Suplemento vit D                           | <input type="radio"/> si<br><input type="radio"/> no                                                                                                                                 |

|                       |                                                                                                                                                                                                                                                                                                                                                                                                              |
|-----------------------|--------------------------------------------------------------------------------------------------------------------------------------------------------------------------------------------------------------------------------------------------------------------------------------------------------------------------------------------------------------------------------------------------------------|
| Dieta, cuestionario   | <input checked="" type="radio"/> si<br><input type="radio"/> no                                                                                                                                                                                                                                                                                                                                              |
| Leche entera          | <input checked="" type="radio"/> Nunca o menos 1 vez al mes<br><input type="radio"/> 1 a 3 veces mes<br><input type="radio"/> 1 vez semana<br><input type="radio"/> 2 a 4 veces semana<br><input type="radio"/> 5 a 6 veces semana<br><input type="radio"/> 1 vez al día<br><input type="radio"/> 2 a 3 veces al día<br><input type="radio"/> 5 a 6 veces al día<br><input type="radio"/> más 6 veces al día |
| Leche semidesnatada   | <input type="radio"/> Nunca o menos 1 vez al mes<br><input type="radio"/> 1 a 3 veces mes<br><input checked="" type="radio"/> 1 vez semana<br><input type="radio"/> 2 a 4 veces semana<br><input type="radio"/> 5 a 6 veces semana<br><input type="radio"/> 1 vez al día<br><input type="radio"/> 2 a 3 veces al día<br><input type="radio"/> 5 a 6 veces al día<br><input type="radio"/> mas 6 veces al día |
| Leche desnatada       | <input checked="" type="radio"/> Nunca o menos 1 vez al mes<br><input type="radio"/> 1 a 3 veces mes<br><input type="radio"/> 1 vez semana<br><input type="radio"/> 2 a 4 veces semana<br><input type="radio"/> 5 a 6 veces semana<br><input type="radio"/> 1 vez al día<br><input type="radio"/> 2 a 3 veces al día<br><input type="radio"/> 5 a 6 veces al día<br><input type="radio"/> más 6 veces al día |
| Leche condensada      | <input checked="" type="radio"/> Nunca o menos 1 vez al mes<br><input type="radio"/> 1 a 3 veces mes<br><input type="radio"/> 1 vez semana<br><input type="radio"/> 2 a 4 veces semana<br><input type="radio"/> 5 a 6 veces semana<br><input type="radio"/> 1 vez al día<br><input type="radio"/> 2 a 3 veces al día<br><input type="radio"/> 5 a 6 veces al día<br><input type="radio"/> más 6 veces al día |
| nata o crema de leche | <input type="radio"/> Nunca o menos 1 vez al mes<br><input checked="" type="radio"/> 1 a 3 veces mes<br><input type="radio"/> 1 vez semana<br><input type="radio"/> 2 a 4 veces semana<br><input type="radio"/> 5 a 6 veces semana<br><input type="radio"/> 1 vez al día<br><input type="radio"/> 2 a 3 veces al día<br><input type="radio"/> 5 a 6 veces al día<br><input type="radio"/> más 6 veces al día |

---

Yogurt Entero

- ☐ Nunca o menos 1 vez al mes  
☐ 1 a 3 veces mes  
☒ 1 vez semana  
☐ 2 a 4 veces semana  
☐ 5 a 6 veces semana  
☐ 1 vez al día  
☐ 2 a 3 veces al día  
☐ 5 a 6 veces al día  
☐ más 6 veces al día

---

Yogurt desnatado

- ☐ Nunca o menos 1 vez al mes  
☒ 1 a 3 veces mes  
☐ 1 vez semana  
☐ 2 a 4 veces semana  
☐ 5 a 6 veces semana  
☐ 1 vez al día  
☐ 2 a 3 veces al día  
☐ 5 a 6 veces al día  
☐ más 6 veces al día

---

100g requesón o queso blando o queso fresco

- ☐ Nunca o menos 1 vez al mes  
☒ 1 a 3 veces mes  
☐ 1 vez semana  
☐ 2 a 4 veces semana  
☐ 5 a 6 veces semana  
☐ 1 vez al día  
☐ 2 a 3 veces al día  
☐ 5 a 6 veces al día  
☐ más 6 veces al día

---

queso curado o semicurado o cremoso

- ☐ Nunca o menos 1 vez al mes  
☐ 1 a 3 veces mes  
☒ 1 vez semana  
☐ 2 a 4 veces semana  
☐ 5 a 6 veces semana  
☐ 1 vez al día  
☐ 2 a 3 veces al día  
☐ 5 a 6 veces al día  
☐ más 6 veces al día

---

natillas flan pudding

- ☐ Nunca o menos 1 vez al mes  
☒ 1 a 3 veces mes  
☐ 1 vez semana  
☐ 2 a 4 veces semana  
☐ 5 a 6 veces semana  
☐ 1 vez al día  
☐ 2 a 3 veces al día  
☐ 5 a 6 veces al día  
☐ más 6 veces al día

---

Helado

- ☒ Nunca o menos 1 vez al mes  
☐ 1 a 3 veces mes  
☐ 1 vez semana  
☐ 2 a 4 veces semana  
☐ 5 a 6 veces semana  
☐ 1 vez al día  
☐ 2 a 3 veces al día  
☐ 5 a 6 veces al día  
☐ más 6 veces al día



|                                      |                                                                                                                                                                                                                                                                                                                                                                                                              |
|--------------------------------------|--------------------------------------------------------------------------------------------------------------------------------------------------------------------------------------------------------------------------------------------------------------------------------------------------------------------------------------------------------------------------------------------------------------|
| huevo                                | <input type="radio"/> Nunca o menos 1 vez al mes<br><input type="radio"/> 1 a 3 veces mes<br><input type="radio"/> 1 vez semana<br><input checked="" type="radio"/> 2 a 4 veces semana<br><input type="radio"/> 5 a 6 veces semana<br><input type="radio"/> 1 vez al día<br><input type="radio"/> 2 a 3 veces al día<br><input type="radio"/> 5 a 6 veces al día<br><input type="radio"/> más 6 veces al día |
| Pollo con piel                       | <input type="radio"/> Nunca o menos 1 vez al mes<br><input checked="" type="radio"/> 1 a 3 veces mes<br><input type="radio"/> 1 vez semana<br><input type="radio"/> 2 a 4 veces semana<br><input type="radio"/> 5 a 6 veces semana<br><input type="radio"/> 1 vez al día<br><input type="radio"/> 2 a 3 veces al día<br><input type="radio"/> 5 a 6 veces al día<br><input type="radio"/> más 6 veces al día |
| pollo sin piel                       | <input type="radio"/> Nunca o menos 1 vez al mes<br><input checked="" type="radio"/> 1 a 3 veces mes<br><input type="radio"/> 1 vez semana<br><input type="radio"/> 2 a 4 veces semana<br><input type="radio"/> 5 a 6 veces semana<br><input type="radio"/> 1 vez al día<br><input type="radio"/> 2 a 3 veces al día<br><input type="radio"/> 5 a 6 veces al día<br><input type="radio"/> más 6 veces al día |
| Ternera o cerdo o cordero            | <input type="radio"/> Nunca o menos 1 vez al mes<br><input type="radio"/> 1 a 3 veces mes<br><input checked="" type="radio"/> 1 vez semana<br><input type="radio"/> 2 a 4 veces semana<br><input type="radio"/> 5 a 6 veces semana<br><input type="radio"/> 1 vez al día<br><input type="radio"/> 2 a 3 veces al día<br><input type="radio"/> 5 a 6 veces al día<br><input type="radio"/> más 6 veces al día |
| carne caza: Conejo o codorniz o pato | <input checked="" type="radio"/> Nunca o menos 1 vez al mes<br><input type="radio"/> 1 a 3 veces mes<br><input type="radio"/> 1 vez semana<br><input type="radio"/> 2 a 4 veces semana<br><input type="radio"/> 5 a 6 veces semana<br><input type="radio"/> 1 vez al día<br><input type="radio"/> 2 a 3 veces al día<br><input type="radio"/> 5 a 6 veces al día<br><input type="radio"/> más 6 veces al día |
| Hígado de ternera o cerdo o pollo    | <input checked="" type="radio"/> Nunca o menos 1 vez al mes<br><input type="radio"/> 1 a 3 veces mes<br><input type="radio"/> 1 vez semana<br><input type="radio"/> 2 a 4 veces semana<br><input type="radio"/> 5 a 6 veces semana<br><input type="radio"/> 1 vez al día<br><input type="radio"/> 2 a 3 veces al día<br><input type="radio"/> 5 a 6 veces al día<br><input type="radio"/> más 6 veces al día |

|                     |                                                                                                                                                                                                                                                                                                                                                                                                              |
|---------------------|--------------------------------------------------------------------------------------------------------------------------------------------------------------------------------------------------------------------------------------------------------------------------------------------------------------------------------------------------------------------------------------------------------------|
| Vísceras            | <input checked="" type="radio"/> Nunca o menos 1 vez al mes<br><input type="radio"/> 1 a 3 veces mes<br><input type="radio"/> 1 vez semana<br><input type="radio"/> 2 a 4 veces semana<br><input type="radio"/> 5 a 6 veces semana<br><input type="radio"/> 1 vez al día<br><input type="radio"/> 2 a 3 veces al día<br><input type="radio"/> 5 a 6 veces al día<br><input type="radio"/> más 6 veces al día |
| Embutido            | <input checked="" type="radio"/> Nunca o menos 1 vez al mes<br><input type="radio"/> 1 a 3 veces mes<br><input type="radio"/> 1 vez semana<br><input type="radio"/> 2 a 4 veces semana<br><input type="radio"/> 5 a 6 veces semana<br><input type="radio"/> 1 vez al día<br><input type="radio"/> 2 a 3 veces al día<br><input type="radio"/> 5 a 6 veces al día<br><input type="radio"/> más 6 veces al día |
| Salchicha o similar | <input type="radio"/> Nunca o menos 1 vez al mes<br><input checked="" type="radio"/> 1 a 3 veces mes<br><input type="radio"/> 1 vez semana<br><input type="radio"/> 2 a 4 veces semana<br><input type="radio"/> 5 a 6 veces semana<br><input type="radio"/> 1 vez al día<br><input type="radio"/> 2 a 3 veces al día<br><input type="radio"/> 5 a 6 veces al día<br><input type="radio"/> más 6 veces al día |
| Pate o foiegras     | <input checked="" type="radio"/> Nunca o menos 1 vez al mes<br><input type="radio"/> 1 a 3 veces mes<br><input type="radio"/> 1 vez semana<br><input type="radio"/> 2 a 4 veces semana<br><input type="radio"/> 5 a 6 veces semana<br><input type="radio"/> 1 vez al día<br><input type="radio"/> 2 a 3 veces al día<br><input type="radio"/> 5 a 6 veces al día<br><input type="radio"/> más 6 veces al día |
| Hamburguesa         | <input type="radio"/> Nunca o menos 1 vez al mes<br><input checked="" type="radio"/> 1 a 3 veces mes<br><input type="radio"/> 1 vez semana<br><input type="radio"/> 2 a 4 veces semana<br><input type="radio"/> 5 a 6 veces semana<br><input type="radio"/> 1 vez al día<br><input type="radio"/> 2 a 3 veces al día<br><input type="radio"/> 5 a 6 veces al día<br><input type="radio"/> más 6 veces al día |
| tocino o bacon      | <input checked="" type="radio"/> Nunca o menos 1 vez al mes<br><input type="radio"/> 1 a 3 veces mes<br><input type="radio"/> 1 vez semana<br><input type="radio"/> 2 a 4 veces semana<br><input type="radio"/> 5 a 6 veces semana<br><input type="radio"/> 1 vez al día<br><input type="radio"/> 2 a 3 veces al día<br><input type="radio"/> 5 a 6 veces al día<br><input type="radio"/> más 6 veces al día |

|                        |                                                                                                                                                                                                                                                                                                                                                                                                              |
|------------------------|--------------------------------------------------------------------------------------------------------------------------------------------------------------------------------------------------------------------------------------------------------------------------------------------------------------------------------------------------------------------------------------------------------------|
| Pescado frito          | <input checked="" type="radio"/> Nunca o menos 1 vez al mes<br><input type="radio"/> 1 a 3 veces mes<br><input type="radio"/> 1 vez semana<br><input type="radio"/> 2 a 4 veces semana<br><input type="radio"/> 5 a 6 veces semana<br><input type="radio"/> 1 vez al día<br><input type="radio"/> 2 a 3 veces al día<br><input type="radio"/> 5 a 6 veces al día<br><input type="radio"/> más 6 veces al día |
| pescado hervido blanco | <input type="radio"/> Nunca o menos 1 vez al mes<br><input checked="" type="radio"/> 1 a 3 veces mes<br><input type="radio"/> 1 vez semana<br><input type="radio"/> 2 a 4 veces semana<br><input type="radio"/> 5 a 6 veces semana<br><input type="radio"/> 1 vez al día<br><input type="radio"/> 2 a 3 veces al día<br><input type="radio"/> 5 a 6 veces al día<br><input type="radio"/> más 6 veces al día |
| pescado hervido azul   | <input type="radio"/> Nunca o menos 1 vez al mes<br><input checked="" type="radio"/> 1 a 3 veces mes<br><input type="radio"/> 1 vez semana<br><input type="radio"/> 2 a 4 veces semana<br><input type="radio"/> 5 a 6 veces semana<br><input type="radio"/> 1 vez al día<br><input type="radio"/> 2 a 3 veces al día<br><input type="radio"/> 5 a 6 veces al día<br><input type="radio"/> más 6 veces al día |
| otros pescado azul     | <input type="radio"/> Nunca o menos 1 vez al mes<br><input checked="" type="radio"/> 1 a 3 veces mes<br><input type="radio"/> 1 vez semana<br><input type="radio"/> 2 a 4 veces semana<br><input type="radio"/> 5 a 6 veces semana<br><input type="radio"/> 1 vez al día<br><input type="radio"/> 2 a 3 veces al día<br><input type="radio"/> 5 a 6 veces al día<br><input type="radio"/> más 6 veces al día |
| atun conserva          | <input type="radio"/> Nunca o menos 1 vez al mes<br><input type="radio"/> 1 a 3 veces mes<br><input checked="" type="radio"/> 1 vez semana<br><input type="radio"/> 2 a 4 veces semana<br><input type="radio"/> 5 a 6 veces semana<br><input type="radio"/> 1 vez al día<br><input type="radio"/> 2 a 3 veces al día<br><input type="radio"/> 5 a 6 veces al día<br><input type="radio"/> más 6 veces al día |
| sardina conserva       | <input checked="" type="radio"/> Nunca o menos 1 vez al mes<br><input type="radio"/> 1 a 3 veces mes<br><input type="radio"/> 1 vez semana<br><input type="radio"/> 2 a 4 veces semana<br><input type="radio"/> 5 a 6 veces semana<br><input type="radio"/> 1 vez al día<br><input type="radio"/> 2 a 3 veces al día<br><input type="radio"/> 5 a 6 veces al día<br><input type="radio"/> más 6 veces al día |

|                                         |                                                                                                                                                                                                                                                                                                                                                                                                              |
|-----------------------------------------|--------------------------------------------------------------------------------------------------------------------------------------------------------------------------------------------------------------------------------------------------------------------------------------------------------------------------------------------------------------------------------------------------------------|
| pescado ahumado                         | <input checked="" type="radio"/> Nunca o menos 1 vez al mes<br><input type="radio"/> 1 a 3 veces mes<br><input type="radio"/> 1 vez semana<br><input type="radio"/> 2 a 4 veces semana<br><input type="radio"/> 5 a 6 veces semana<br><input type="radio"/> 1 vez al día<br><input type="radio"/> 2 a 3 veces al día<br><input type="radio"/> 5 a 6 veces al día<br><input type="radio"/> más 6 veces al día |
| almejas o mejillones o ostras unos 100g | <input checked="" type="radio"/> Nunca o menos 1 vez al mes<br><input type="radio"/> 1 a 3 veces mes<br><input type="radio"/> 1 vez semana<br><input type="radio"/> 2 a 4 veces semana<br><input type="radio"/> 5 a 6 veces semana<br><input type="radio"/> 1 vez al día<br><input type="radio"/> 2 a 3 veces al día<br><input type="radio"/> 5 a 6 veces al día<br><input type="radio"/> más 6 veces al día |
| calamar o chipiron o sepia unos 100g    | <input checked="" type="radio"/> Nunca o menos 1 vez al mes<br><input type="radio"/> 1 a 3 veces mes<br><input type="radio"/> 1 vez semana<br><input type="radio"/> 2 a 4 veces semana<br><input type="radio"/> 5 a 6 veces semana<br><input type="radio"/> 1 vez al día<br><input type="radio"/> 2 a 3 veces al día<br><input type="radio"/> 5 a 6 veces al día<br><input type="radio"/> más 6 veces al día |
| marisco unos 100g                       | <input checked="" type="radio"/> Nunca o menos 1 vez al mes<br><input type="radio"/> 1 a 3 veces mes<br><input type="radio"/> 1 vez semana<br><input type="radio"/> 2 a 4 veces semana<br><input type="radio"/> 5 a 6 veces semana<br><input type="radio"/> 1 vez al día<br><input type="radio"/> 2 a 3 veces al día<br><input type="radio"/> 5 a 6 veces al día<br><input type="radio"/> más 6 veces al día |
| Espinacas o acelgas cocinadas           | <input type="radio"/> Nunca o menos 1 vez al mes<br><input checked="" type="radio"/> 1 a 3 veces mes<br><input type="radio"/> 1 vez semana<br><input type="radio"/> 2 a 4 veces semana<br><input type="radio"/> 5 a 6 veces semana<br><input type="radio"/> 1 vez al día<br><input type="radio"/> 2 a 3 veces al día<br><input type="radio"/> 5 a 6 veces al día<br><input type="radio"/> más 6 veces al día |
| Col o coliflor o brocoli cocinado       | <input type="radio"/> Nunca o menos 1 vez al mes<br><input type="radio"/> 1 a 3 veces mes<br><input type="radio"/> 1 vez semana<br><input type="radio"/> 2 a 4 veces semana<br><input checked="" type="radio"/> 5 a 6 veces semana<br><input type="radio"/> 1 vez al día<br><input type="radio"/> 2 a 3 veces al día<br><input type="radio"/> 5 a 6 veces al día<br><input type="radio"/> más 6 veces al día |

---

Lechuga o endivia o escarola

- ☐ Nunca o menos 1 vez al mes  
☒ 1 a 3 veces mes  
☐ 1 vez semana  
☐ 2 a 4 veces semana  
☐ 5 a 6 veces semana  
☐ 1 vez al día  
☐ 2 a 3 veces al día  
☐ 5 a 6 veces al día  
☐ más 6 veces al día

---

tomate ensalada

- ☐ Nunca o menos 1 vez al mes  
☐ 1 a 3 veces mes  
☒ 1 vez semana  
☐ 2 a 4 veces semana  
☐ 5 a 6 veces semana  
☐ 1 vez al día  
☐ 2 a 3 veces al día  
☐ 5 a 6 veces al día  
☐ más 6 veces al día

---

cebolla

- ☐ Nunca o menos 1 vez al mes  
☐ 1 a 3 veces mes  
☐ 1 vez semana  
☐ 2 a 4 veces semana  
☒ 5 a 6 veces semana  
☐ 1 vez al día  
☐ 2 a 3 veces al día  
☐ 5 a 6 veces al día  
☐ más 6 veces al día

---

Zanahoria o calabaza

- ☐ Nunca o menos 1 vez al mes  
☒ 1 a 3 veces mes  
☐ 1 vez semana  
☐ 2 a 4 veces semana  
☐ 5 a 6 veces semana  
☐ 1 vez al día  
☐ 2 a 3 veces al día  
☐ 5 a 6 veces al día  
☐ más 6 veces al día

---

Judías verdes

- ☐ Nunca o menos 1 vez al mes  
☐ 1 a 3 veces mes  
☐ 1 vez semana  
☐ 2 a 4 veces semana  
☒ 5 a 6 veces semana  
☐ 1 vez al día  
☐ 2 a 3 veces al día  
☐ 5 a 6 veces al día  
☐ más 6 veces al día

---

Berenjena o calabacin o pepino

- ☐ Nunca o menos 1 vez al mes  
☐ 1 a 3 veces mes  
☐ 1 vez semana  
☒ 2 a 4 veces semana  
☐ 5 a 6 veces semana  
☐ 1 vez al día  
☐ 2 a 3 veces al día  
☐ 5 a 6 veces al día  
☐ más 6 veces al día

|                       |                                                                                                                                                                                                                                                                                                                                                                                                              |
|-----------------------|--------------------------------------------------------------------------------------------------------------------------------------------------------------------------------------------------------------------------------------------------------------------------------------------------------------------------------------------------------------------------------------------------------------|
| pimiento              | <input type="radio"/> Nunca o menos 1 vez al mes<br><input type="radio"/> 1 a 3 veces mes<br><input checked="" type="radio"/> 1 vez semana<br><input type="radio"/> 2 a 4 veces semana<br><input type="radio"/> 5 a 6 veces semana<br><input type="radio"/> 1 vez al día<br><input type="radio"/> 2 a 3 veces al día<br><input type="radio"/> 5 a 6 veces al día<br><input type="radio"/> más 6 veces al día |
| alcachofa             | <input type="radio"/> Nunca o menos 1 vez al mes<br><input checked="" type="radio"/> 1 a 3 veces mes<br><input type="radio"/> 1 vez semana<br><input type="radio"/> 2 a 4 veces semana<br><input type="radio"/> 5 a 6 veces semana<br><input type="radio"/> 1 vez al día<br><input type="radio"/> 2 a 3 veces al día<br><input type="radio"/> 5 a 6 veces al día<br><input type="radio"/> más 6 veces al día |
| espárragos            | <input checked="" type="radio"/> Nunca o menos 1 vez al mes<br><input type="radio"/> 1 a 3 veces mes<br><input type="radio"/> 1 vez semana<br><input type="radio"/> 2 a 4 veces semana<br><input type="radio"/> 5 a 6 veces semana<br><input type="radio"/> 1 vez al día<br><input type="radio"/> 2 a 3 veces al día<br><input type="radio"/> 5 a 6 veces al día<br><input type="radio"/> más 6 veces al día |
| maíz hervido          | <input checked="" type="radio"/> Nunca o menos 1 vez al mes<br><input type="radio"/> 1 a 3 veces mes<br><input type="radio"/> 1 vez semana<br><input type="radio"/> 2 a 4 veces semana<br><input type="radio"/> 5 a 6 veces semana<br><input type="radio"/> 1 vez al día<br><input type="radio"/> 2 a 3 veces al día<br><input type="radio"/> 5 a 6 veces al día<br><input type="radio"/> más 6 veces al día |
| legumbres             | <input type="radio"/> Nunca o menos 1 vez al mes<br><input type="radio"/> 1 a 3 veces mes<br><input checked="" type="radio"/> 1 vez semana<br><input type="radio"/> 2 a 4 veces semana<br><input type="radio"/> 5 a 6 veces semana<br><input type="radio"/> 1 vez al día<br><input type="radio"/> 2 a 3 veces al día<br><input type="radio"/> 5 a 6 veces al día<br><input type="radio"/> más 6 veces al día |
| naranjas o mandarinas | <input type="radio"/> Nunca o menos 1 vez al mes<br><input type="radio"/> 1 a 3 veces mes<br><input type="radio"/> 1 vez semana<br><input type="radio"/> 2 a 4 veces semana<br><input type="radio"/> 5 a 6 veces semana<br><input checked="" type="radio"/> 1 vez al día<br><input type="radio"/> 2 a 3 veces al día<br><input type="radio"/> 5 a 6 veces al día<br><input type="radio"/> más 6 veces al día |

|                       |                                                                                                                                                                                                                                                                                                                                                                                                              |
|-----------------------|--------------------------------------------------------------------------------------------------------------------------------------------------------------------------------------------------------------------------------------------------------------------------------------------------------------------------------------------------------------------------------------------------------------|
| zum natural fruta     | <input type="radio"/> Nunca o menos 1 vez al mes<br><input type="radio"/> 1 a 3 veces mes<br><input type="radio"/> 1 vez semana<br><input checked="" type="radio"/> 2 a 4 veces semana<br><input type="radio"/> 5 a 6 veces semana<br><input type="radio"/> 1 vez al día<br><input type="radio"/> 2 a 3 veces al día<br><input type="radio"/> 5 a 6 veces al día<br><input type="radio"/> más 6 veces al día |
| platano               | <input type="radio"/> Nunca o menos 1 vez al mes<br><input type="radio"/> 1 a 3 veces mes<br><input checked="" type="radio"/> 1 vez semana<br><input type="radio"/> 2 a 4 veces semana<br><input type="radio"/> 5 a 6 veces semana<br><input type="radio"/> 1 vez al día<br><input type="radio"/> 2 a 3 veces al día<br><input type="radio"/> 5 a 6 veces al día<br><input type="radio"/> más 6 veces al día |
| manzana o pera        | <input type="radio"/> Nunca o menos 1 vez al mes<br><input type="radio"/> 1 a 3 veces mes<br><input checked="" type="radio"/> 1 vez semana<br><input type="radio"/> 2 a 4 veces semana<br><input type="radio"/> 5 a 6 veces semana<br><input type="radio"/> 1 vez al día<br><input type="radio"/> 2 a 3 veces al día<br><input type="radio"/> 5 a 6 veces al día<br><input type="radio"/> más 6 veces al día |
| melocotón o nectarina | <input type="radio"/> Nunca o menos 1 vez al mes<br><input checked="" type="radio"/> 1 a 3 veces mes<br><input type="radio"/> 1 vez semana<br><input type="radio"/> 2 a 4 veces semana<br><input type="radio"/> 5 a 6 veces semana<br><input type="radio"/> 1 vez al día<br><input type="radio"/> 2 a 3 veces al día<br><input type="radio"/> 5 a 6 veces al día<br><input type="radio"/> más 6 veces al día |
| sandia o melon        | <input checked="" type="radio"/> Nunca o menos 1 vez al mes<br><input type="radio"/> 1 a 3 veces mes<br><input type="radio"/> 1 vez semana<br><input type="radio"/> 2 a 4 veces semana<br><input type="radio"/> 5 a 6 veces semana<br><input type="radio"/> 1 vez al día<br><input type="radio"/> 2 a 3 veces al día<br><input type="radio"/> 5 a 6 veces al día<br><input type="radio"/> más 6 veces al día |
| uva                   | <input checked="" type="radio"/> Nunca o menos 1 vez al mes<br><input type="radio"/> 1 a 3 veces mes<br><input type="radio"/> 1 vez semana<br><input type="radio"/> 2 a 4 veces semana<br><input type="radio"/> 5 a 6 veces semana<br><input type="radio"/> 1 vez al día<br><input type="radio"/> 2 a 3 veces al día<br><input type="radio"/> 5 a 6 veces al día<br><input type="radio"/> más 6 veces al día |

|                 |                                                                                                                                                                                                                                                                                                                                                                                                              |
|-----------------|--------------------------------------------------------------------------------------------------------------------------------------------------------------------------------------------------------------------------------------------------------------------------------------------------------------------------------------------------------------------------------------------------------------|
| bruna o ciruela | <input checked="" type="radio"/> Nunca o menos 1 vez al mes<br><input type="radio"/> 1 a 3 veces mes<br><input type="radio"/> 1 vez semana<br><input type="radio"/> 2 a 4 veces semana<br><input type="radio"/> 5 a 6 veces semana<br><input type="radio"/> 1 vez al día<br><input type="radio"/> 2 a 3 veces al día<br><input type="radio"/> 5 a 6 veces al día<br><input type="radio"/> más 6 veces al día |
| kiwi            | <input checked="" type="radio"/> Nunca o menos 1 vez al mes<br><input type="radio"/> 1 a 3 veces mes<br><input type="radio"/> 1 vez semana<br><input type="radio"/> 2 a 4 veces semana<br><input type="radio"/> 5 a 6 veces semana<br><input type="radio"/> 1 vez al día<br><input type="radio"/> 2 a 3 veces al día<br><input type="radio"/> 5 a 6 veces al día<br><input type="radio"/> más 6 veces al día |
| aceituna        | <input type="radio"/> Nunca o menos 1 vez al mes<br><input type="radio"/> 1 a 3 veces mes<br><input checked="" type="radio"/> 1 vez semana<br><input type="radio"/> 2 a 4 veces semana<br><input type="radio"/> 5 a 6 veces semana<br><input type="radio"/> 1 vez al día<br><input type="radio"/> 2 a 3 veces al día<br><input type="radio"/> 5 a 6 veces al día<br><input type="radio"/> más 6 veces al día |
| frutos secos    | <input type="radio"/> Nunca o menos 1 vez al mes<br><input type="radio"/> 1 a 3 veces mes<br><input type="radio"/> 1 vez semana<br><input checked="" type="radio"/> 2 a 4 veces semana<br><input type="radio"/> 5 a 6 veces semana<br><input type="radio"/> 1 vez al día<br><input type="radio"/> 2 a 3 veces al día<br><input type="radio"/> 5 a 6 veces al día<br><input type="radio"/> más 6 veces al día |
| pan blanco      | <input type="radio"/> Nunca o menos 1 vez al mes<br><input type="radio"/> 1 a 3 veces mes<br><input type="radio"/> 1 vez semana<br><input checked="" type="radio"/> 2 a 4 veces semana<br><input type="radio"/> 5 a 6 veces semana<br><input type="radio"/> 1 vez al día<br><input type="radio"/> 2 a 3 veces al día<br><input type="radio"/> 5 a 6 veces al día<br><input type="radio"/> más 6 veces al día |
| pan integral    | <input checked="" type="radio"/> Nunca o menos 1 vez al mes<br><input type="radio"/> 1 a 3 veces mes<br><input type="radio"/> 1 vez semana<br><input type="radio"/> 2 a 4 veces semana<br><input type="radio"/> 5 a 6 veces semana<br><input type="radio"/> 1 vez al día<br><input type="radio"/> 2 a 3 veces al día<br><input type="radio"/> 5 a 6 veces al día<br><input type="radio"/> más 6 veces al día |



|                          |                                                                                                                                                                                                                                                                                                                                                                                                              |
|--------------------------|--------------------------------------------------------------------------------------------------------------------------------------------------------------------------------------------------------------------------------------------------------------------------------------------------------------------------------------------------------------------------------------------------------------|
| cereales desayuno        | <input checked="" type="radio"/> Nunca o menos 1 vez al mes<br><input type="radio"/> 1 a 3 veces mes<br><input type="radio"/> 1 vez semana<br><input type="radio"/> 2 a 4 veces semana<br><input type="radio"/> 5 a 6 veces semana<br><input type="radio"/> 1 vez al día<br><input type="radio"/> 2 a 3 veces al día<br><input type="radio"/> 5 a 6 veces al día<br><input type="radio"/> más 6 veces al día |
| patatas fritas           | <input type="radio"/> Nunca o menos 1 vez al mes<br><input checked="" type="radio"/> 1 a 3 veces mes<br><input type="radio"/> 1 vez semana<br><input type="radio"/> 2 a 4 veces semana<br><input type="radio"/> 5 a 6 veces semana<br><input type="radio"/> 1 vez al día<br><input type="radio"/> 2 a 3 veces al día<br><input type="radio"/> 5 a 6 veces al día<br><input type="radio"/> más 6 veces al día |
| patatas cocidas o asadas | <input checked="" type="radio"/> Nunca o menos 1 vez al mes<br><input type="radio"/> 1 a 3 veces mes<br><input type="radio"/> 1 vez semana<br><input type="radio"/> 2 a 4 veces semana<br><input type="radio"/> 5 a 6 veces semana<br><input type="radio"/> 1 vez al día<br><input type="radio"/> 2 a 3 veces al día<br><input type="radio"/> 5 a 6 veces al día<br><input type="radio"/> más 6 veces al día |
| bolsa papas              | <input checked="" type="radio"/> Nunca o menos 1 vez al mes<br><input type="radio"/> 1 a 3 veces mes<br><input type="radio"/> 1 vez semana<br><input type="radio"/> 2 a 4 veces semana<br><input type="radio"/> 5 a 6 veces semana<br><input type="radio"/> 1 vez al día<br><input type="radio"/> 2 a 3 veces al día<br><input type="radio"/> 5 a 6 veces al día<br><input type="radio"/> más 6 veces al día |
| arroz cocinado           | <input type="radio"/> Nunca o menos 1 vez al mes<br><input type="radio"/> 1 a 3 veces mes<br><input checked="" type="radio"/> 1 vez semana<br><input type="radio"/> 2 a 4 veces semana<br><input type="radio"/> 5 a 6 veces semana<br><input type="radio"/> 1 vez al día<br><input type="radio"/> 2 a 3 veces al día<br><input type="radio"/> 5 a 6 veces al día<br><input type="radio"/> más 6 veces al día |
| pasta                    | <input type="radio"/> Nunca o menos 1 vez al mes<br><input type="radio"/> 1 a 3 veces mes<br><input type="radio"/> 1 vez semana<br><input checked="" type="radio"/> 2 a 4 veces semana<br><input type="radio"/> 5 a 6 veces semana<br><input type="radio"/> 1 vez al día<br><input type="radio"/> 2 a 3 veces al día<br><input type="radio"/> 5 a 6 veces al día<br><input type="radio"/> más 6 veces al día |

|                     |                                                                                                                                                                                                                                                                                                                                                                                                              |
|---------------------|--------------------------------------------------------------------------------------------------------------------------------------------------------------------------------------------------------------------------------------------------------------------------------------------------------------------------------------------------------------------------------------------------------------|
| pizza               | <input type="radio"/> Nunca o menos 1 vez al mes<br><input type="radio"/> 1 a 3 veces mes<br><input checked="" type="radio"/> 1 vez semana<br><input type="radio"/> 2 a 4 veces semana<br><input type="radio"/> 5 a 6 veces semana<br><input type="radio"/> 1 vez al día<br><input type="radio"/> 2 a 3 veces al día<br><input type="radio"/> 5 a 6 veces al día<br><input type="radio"/> más 6 veces al día |
| aceite oliva        | <input type="radio"/> Nunca o menos 1 vez al mes<br><input type="radio"/> 1 a 3 veces mes<br><input checked="" type="radio"/> 1 vez semana<br><input type="radio"/> 2 a 4 veces semana<br><input type="radio"/> 5 a 6 veces semana<br><input type="radio"/> 1 vez al día<br><input type="radio"/> 2 a 3 veces al día<br><input type="radio"/> 5 a 6 veces al día<br><input type="radio"/> más 6 veces al día |
| otros aceites       | <input type="radio"/> Nunca o menos 1 vez al mes<br><input type="radio"/> 1 a 3 veces mes<br><input checked="" type="radio"/> 1 vez semana<br><input type="radio"/> 2 a 4 veces semana<br><input type="radio"/> 5 a 6 veces semana<br><input type="radio"/> 1 vez al día<br><input type="radio"/> 2 a 3 veces al día<br><input type="radio"/> 5 a 6 veces al día<br><input type="radio"/> más 6 veces al día |
| margarina           | <input type="radio"/> Nunca o menos 1 vez al mes<br><input type="radio"/> 1 a 3 veces mes<br><input checked="" type="radio"/> 1 vez semana<br><input type="radio"/> 2 a 4 veces semana<br><input type="radio"/> 5 a 6 veces semana<br><input type="radio"/> 1 vez al día<br><input type="radio"/> 2 a 3 veces al día<br><input type="radio"/> 5 a 6 veces al día<br><input type="radio"/> más 6 veces al día |
| mantequilla         | <input type="radio"/> Nunca o menos 1 vez al mes<br><input type="radio"/> 1 a 3 veces mes<br><input checked="" type="radio"/> 1 vez semana<br><input type="radio"/> 2 a 4 veces semana<br><input type="radio"/> 5 a 6 veces semana<br><input type="radio"/> 1 vez al día<br><input type="radio"/> 2 a 3 veces al día<br><input type="radio"/> 5 a 6 veces al día<br><input type="radio"/> más 6 veces al día |
| galletas tipo maria | <input type="radio"/> Nunca o menos 1 vez al mes<br><input checked="" type="radio"/> 1 a 3 veces mes<br><input type="radio"/> 1 vez semana<br><input type="radio"/> 2 a 4 veces semana<br><input type="radio"/> 5 a 6 veces semana<br><input type="radio"/> 1 vez al día<br><input type="radio"/> 2 a 3 veces al día<br><input type="radio"/> 5 a 6 veces al día<br><input type="radio"/> más 6 veces al día |

|                           |                                                                                                                                                                                                                                                                                                                                                                                                              |
|---------------------------|--------------------------------------------------------------------------------------------------------------------------------------------------------------------------------------------------------------------------------------------------------------------------------------------------------------------------------------------------------------------------------------------------------------|
| galletas chocolate        | <input checked="" type="radio"/> Nunca o menos 1 vez al mes<br><input type="radio"/> 1 a 3 veces mes<br><input type="radio"/> 1 vez semana<br><input type="radio"/> 2 a 4 veces semana<br><input type="radio"/> 5 a 6 veces semana<br><input type="radio"/> 1 vez al día<br><input type="radio"/> 2 a 3 veces al día<br><input type="radio"/> 5 a 6 veces al día<br><input type="radio"/> más 6 veces al día |
| bollieria                 | <input type="radio"/> Nunca o menos 1 vez al mes<br><input checked="" type="radio"/> 1 a 3 veces mes<br><input type="radio"/> 1 vez semana<br><input type="radio"/> 2 a 4 veces semana<br><input type="radio"/> 5 a 6 veces semana<br><input type="radio"/> 1 vez al día<br><input type="radio"/> 2 a 3 veces al día<br><input type="radio"/> 5 a 6 veces al día<br><input type="radio"/> más 6 veces al día |
| chocolate o bombones      | <input type="radio"/> Nunca o menos 1 vez al mes<br><input type="radio"/> 1 a 3 veces mes<br><input checked="" type="radio"/> 1 vez semana<br><input type="radio"/> 2 a 4 veces semana<br><input type="radio"/> 5 a 6 veces semana<br><input type="radio"/> 1 vez al día<br><input type="radio"/> 2 a 3 veces al día<br><input type="radio"/> 5 a 6 veces al día<br><input type="radio"/> más 6 veces al día |
| chocolate polvo o colacao | <input checked="" type="radio"/> Nunca o menos 1 vez al mes<br><input type="radio"/> 1 a 3 veces mes<br><input type="radio"/> 1 vez semana<br><input type="radio"/> 2 a 4 veces semana<br><input type="radio"/> 5 a 6 veces semana<br><input type="radio"/> 1 vez al día<br><input type="radio"/> 2 a 3 veces al día<br><input type="radio"/> 5 a 6 veces al día<br><input type="radio"/> más 6 veces al día |
| vino tinto                | <input checked="" type="radio"/> Nunca o menos 1 vez al mes<br><input type="radio"/> 1 a 3 veces mes<br><input type="radio"/> 1 vez semana<br><input type="radio"/> 2 a 4 veces semana<br><input type="radio"/> 5 a 6 veces semana<br><input type="radio"/> 1 vez al día<br><input type="radio"/> 2 a 3 veces al día<br><input type="radio"/> 5 a 6 veces al día<br><input type="radio"/> más 6 veces al día |
| vino blanco               | <input checked="" type="radio"/> Nunca o menos 1 vez al mes<br><input type="radio"/> 1 a 3 veces mes<br><input type="radio"/> 1 vez semana<br><input type="radio"/> 2 a 4 veces semana<br><input type="radio"/> 5 a 6 veces semana<br><input type="radio"/> 1 vez al día<br><input type="radio"/> 2 a 3 veces al día<br><input type="radio"/> 5 a 6 veces al día<br><input type="radio"/> más 6 veces al día |

|                       |                                                                                                                                                                                                                                                                                                                                                                                                              |
|-----------------------|--------------------------------------------------------------------------------------------------------------------------------------------------------------------------------------------------------------------------------------------------------------------------------------------------------------------------------------------------------------------------------------------------------------|
| vino seco o vermut    | <input checked="" type="radio"/> Nunca o menos 1 vez al mes<br><input type="radio"/> 1 a 3 veces mes<br><input type="radio"/> 1 vez semana<br><input type="radio"/> 2 a 4 veces semana<br><input type="radio"/> 5 a 6 veces semana<br><input type="radio"/> 1 vez al día<br><input type="radio"/> 2 a 3 veces al día<br><input type="radio"/> 5 a 6 veces al día<br><input type="radio"/> más 6 veces al día |
| cerveza               | <input checked="" type="radio"/> Nunca o menos 1 vez al mes<br><input type="radio"/> 1 a 3 veces mes<br><input type="radio"/> 1 vez semana<br><input type="radio"/> 2 a 4 veces semana<br><input type="radio"/> 5 a 6 veces semana<br><input type="radio"/> 1 vez al día<br><input type="radio"/> 2 a 3 veces al día<br><input type="radio"/> 5 a 6 veces al día<br><input type="radio"/> más 6 veces al día |
| cerveza sin alcohol   | <input checked="" type="radio"/> Nunca o menos 1 vez al mes<br><input type="radio"/> 1 a 3 veces mes<br><input type="radio"/> 1 vez semana<br><input type="radio"/> 2 a 4 veces semana<br><input type="radio"/> 5 a 6 veces semana<br><input type="radio"/> 1 vez al día<br><input type="radio"/> 2 a 3 veces al día<br><input type="radio"/> 5 a 6 veces al día<br><input type="radio"/> más 6 veces al día |
| licores               | <input checked="" type="radio"/> Nunca o menos 1 vez al mes<br><input type="radio"/> 1 a 3 veces mes<br><input type="radio"/> 1 vez semana<br><input type="radio"/> 2 a 4 veces semana<br><input type="radio"/> 5 a 6 veces semana<br><input type="radio"/> 1 vez al día<br><input type="radio"/> 2 a 3 veces al día<br><input type="radio"/> 5 a 6 veces al día<br><input type="radio"/> más 6 veces al día |
| ginebra o ron o vodka | <input checked="" type="radio"/> Nunca o menos 1 vez al mes<br><input type="radio"/> 1 a 3 veces mes<br><input type="radio"/> 1 vez semana<br><input type="radio"/> 2 a 4 veces semana<br><input type="radio"/> 5 a 6 veces semana<br><input type="radio"/> 1 vez al día<br><input type="radio"/> 2 a 3 veces al día<br><input type="radio"/> 5 a 6 veces al día<br><input type="radio"/> más 6 veces al día |
| refresco normal       | <input checked="" type="radio"/> Nunca o menos 1 vez al mes<br><input type="radio"/> 1 a 3 veces mes<br><input type="radio"/> 1 vez semana<br><input type="radio"/> 2 a 4 veces semana<br><input type="radio"/> 5 a 6 veces semana<br><input type="radio"/> 1 vez al día<br><input type="radio"/> 2 a 3 veces al día<br><input type="radio"/> 5 a 6 veces al día<br><input type="radio"/> más 6 veces al día |

---

refresco sin azúcar

- ☒ Nunca o menos 1 vez al mes  
☐ 1 a 3 veces mes  
☐ 1 vez semana  
☐ 2 a 4 veces semana  
☐ 5 a 6 veces semana  
☐ 1 vez al día  
☐ 2 a 3 veces al día  
☐ 5 a 6 veces al día  
☐ más 6 veces al día

---

Agua del grifo

- ☒ Nunca o menos 1 vez al mes  
☐ 1 a 3 veces mes  
☐ 1 vez semana  
☐ 2 a 4 veces semana  
☐ 5 a 6 veces semana  
☐ 1 vez al día  
☐ 2 a 3 veces al día  
☐ 5 a 6 veces al día  
☐ más 6 veces al día

---

agua embotellada sin gas

- ☐ Nunca o menos 1 vez al mes  
☐ 1 a 3 veces mes  
☐ 1 vez semana  
☐ 2 a 4 veces semana  
☐ 5 a 6 veces semana  
☐ 1 vez al día  
☐ 2 a 3 veces al día  
☒ 5 a 6 veces al día  
☐ más 6 veces al día

---

agua embotellada con gas

- ☐ Nunca o menos 1 vez al mes  
☐ 1 a 3 veces mes  
☐ 1 vez semana  
☒ 2 a 4 veces semana  
☐ 5 a 6 veces semana  
☐ 1 vez al día  
☐ 2 a 3 veces al día  
☐ 5 a 6 veces al día  
☐ más 6 veces al día

---

zumو frutas embasado

- ☒ Nunca o menos 1 vez al mes  
☐ 1 a 3 veces mes  
☐ 1 vez semana  
☐ 2 a 4 veces semana  
☐ 5 a 6 veces semana  
☐ 1 vez al día  
☐ 2 a 3 veces al día  
☐ 5 a 6 veces al día  
☐ más 6 veces al día

---

cafe

- ☒ Nunca o menos 1 vez al mes  
☐ 1 a 3 veces mes  
☐ 1 vez semana  
☐ 2 a 4 veces semana  
☐ 5 a 6 veces semana  
☐ 1 vez al día  
☐ 2 a 3 veces al día  
☐ 5 a 6 veces al día  
☐ más 6 veces al día

|                       |                                                                                                                                                                                                                                                                                                                                                                                                              |
|-----------------------|--------------------------------------------------------------------------------------------------------------------------------------------------------------------------------------------------------------------------------------------------------------------------------------------------------------------------------------------------------------------------------------------------------------|
| cafe descafeinado     | <input checked="" type="radio"/> Nunca o menos 1 vez al mes<br><input type="radio"/> 1 a 3 veces mes<br><input type="radio"/> 1 vez semana<br><input type="radio"/> 2 a 4 veces semana<br><input type="radio"/> 5 a 6 veces semana<br><input type="radio"/> 1 vez al día<br><input type="radio"/> 2 a 3 veces al día<br><input type="radio"/> 5 a 6 veces al día<br><input type="radio"/> más 6 veces al día |
| te o infusión         | <input type="radio"/> Nunca o menos 1 vez al mes<br><input type="radio"/> 1 a 3 veces mes<br><input checked="" type="radio"/> 1 vez semana<br><input type="radio"/> 2 a 4 veces semana<br><input type="radio"/> 5 a 6 veces semana<br><input type="radio"/> 1 vez al día<br><input type="radio"/> 2 a 3 veces al día<br><input type="radio"/> 5 a 6 veces al día<br><input type="radio"/> más 6 veces al día |
| sopa o puré verduras  | <input checked="" type="radio"/> Nunca o menos 1 vez al mes<br><input type="radio"/> 1 a 3 veces mes<br><input type="radio"/> 1 vez semana<br><input type="radio"/> 2 a 4 veces semana<br><input type="radio"/> 5 a 6 veces semana<br><input type="radio"/> 1 vez al día<br><input type="radio"/> 2 a 3 veces al día<br><input type="radio"/> 5 a 6 veces al día<br><input type="radio"/> más 6 veces al día |
| croquetas pollo jamón | <input checked="" type="radio"/> Nunca o menos 1 vez al mes<br><input type="radio"/> 1 a 3 veces mes<br><input type="radio"/> 1 vez semana<br><input type="radio"/> 2 a 4 veces semana<br><input type="radio"/> 5 a 6 veces semana<br><input type="radio"/> 1 vez al día<br><input type="radio"/> 2 a 3 veces al día<br><input type="radio"/> 5 a 6 veces al día<br><input type="radio"/> más 6 veces al día |
| croquetas pescado     | <input type="radio"/> Nunca o menos 1 vez al mes<br><input type="radio"/> 1 a 3 veces mes<br><input type="radio"/> 1 vez semana<br><input checked="" type="radio"/> 2 a 4 veces semana<br><input type="radio"/> 5 a 6 veces semana<br><input type="radio"/> 1 vez al día<br><input type="radio"/> 2 a 3 veces al día<br><input type="radio"/> 5 a 6 veces al día<br><input type="radio"/> más 6 veces al día |
| mayonesa              | <input type="radio"/> Nunca o menos 1 vez al mes<br><input type="radio"/> 1 a 3 veces mes<br><input checked="" type="radio"/> 1 vez semana<br><input type="radio"/> 2 a 4 veces semana<br><input type="radio"/> 5 a 6 veces semana<br><input type="radio"/> 1 vez al día<br><input type="radio"/> 2 a 3 veces al día<br><input type="radio"/> 5 a 6 veces al día<br><input type="radio"/> más 6 veces al día |

|                  |                                                                                                                                                                                                                                                                                                                                                                                                              |
|------------------|--------------------------------------------------------------------------------------------------------------------------------------------------------------------------------------------------------------------------------------------------------------------------------------------------------------------------------------------------------------------------------------------------------------|
| salsa tomate     | <input type="radio"/> Nunca o menos 1 vez al mes<br><input type="radio"/> 1 a 3 veces mes<br><input type="radio"/> 1 vez semana<br><input checked="" type="radio"/> 2 a 4 veces semana<br><input type="radio"/> 5 a 6 veces semana<br><input type="radio"/> 1 vez al día<br><input type="radio"/> 2 a 3 veces al día<br><input type="radio"/> 5 a 6 veces al día<br><input type="radio"/> más 6 veces al día |
| ketchup          | <input type="radio"/> Nunca o menos 1 vez al mes<br><input type="radio"/> 1 a 3 veces mes<br><input type="radio"/> 1 vez semana<br><input type="radio"/> 2 a 4 veces semana<br><input type="radio"/> 5 a 6 veces semana<br><input checked="" type="radio"/> 1 vez al día<br><input type="radio"/> 2 a 3 veces al día<br><input type="radio"/> 5 a 6 veces al día<br><input type="radio"/> más 6 veces al día |
| sal              | <input type="radio"/> Nunca o menos 1 vez al mes<br><input type="radio"/> 1 a 3 veces mes<br><input checked="" type="radio"/> 1 vez semana<br><input type="radio"/> 2 a 4 veces semana<br><input type="radio"/> 5 a 6 veces semana<br><input type="radio"/> 1 vez al día<br><input type="radio"/> 2 a 3 veces al día<br><input type="radio"/> 5 a 6 veces al día<br><input type="radio"/> más 6 veces al día |
| ajo              | <input type="radio"/> Nunca o menos 1 vez al mes<br><input checked="" type="radio"/> 1 a 3 veces mes<br><input type="radio"/> 1 vez semana<br><input type="radio"/> 2 a 4 veces semana<br><input type="radio"/> 5 a 6 veces semana<br><input type="radio"/> 1 vez al día<br><input type="radio"/> 2 a 3 veces al día<br><input type="radio"/> 5 a 6 veces al día<br><input type="radio"/> más 6 veces al día |
| mermelada o miel | <input type="radio"/> Nunca o menos 1 vez al mes<br><input checked="" type="radio"/> 1 a 3 veces mes<br><input type="radio"/> 1 vez semana<br><input type="radio"/> 2 a 4 veces semana<br><input type="radio"/> 5 a 6 veces semana<br><input type="radio"/> 1 vez al día<br><input type="radio"/> 2 a 3 veces al día<br><input type="radio"/> 5 a 6 veces al día<br><input type="radio"/> más 6 veces al día |
| azúcar           | <input type="radio"/> Nunca o menos 1 vez al mes<br><input type="radio"/> 1 a 3 veces mes<br><input type="radio"/> 1 vez semana<br><input type="radio"/> 2 a 4 veces semana<br><input type="radio"/> 5 a 6 veces semana<br><input type="radio"/> 1 vez al día<br><input type="radio"/> 2 a 3 veces al día<br><input type="radio"/> 5 a 6 veces al día<br><input type="radio"/> más 6 veces al día            |

|                                       |                                                                                                                                                                                                                                                                                                                                                                                                                                                                                                                               |
|---------------------------------------|-------------------------------------------------------------------------------------------------------------------------------------------------------------------------------------------------------------------------------------------------------------------------------------------------------------------------------------------------------------------------------------------------------------------------------------------------------------------------------------------------------------------------------|
| Otro alimento                         |                                                                                                                                                                                                                                                                                                                                                                                                                                                                                                                               |
| suplementos vitamínicos               | <input checked="" type="radio"/> si<br><input type="radio"/> no                                                                                                                                                                                                                                                                                                                                                                                                                                                               |
| suplementos vitamínicos               | [*DATA REMOVED*]                                                                                                                                                                                                                                                                                                                                                                                                                                                                                                              |
| dieta previa                          | <input type="radio"/> si<br><input checked="" type="radio"/> no                                                                                                                                                                                                                                                                                                                                                                                                                                                               |
| motivo dieta                          | <input checked="" type="radio"/> no dieta<br><input type="radio"/> control peso<br><input type="radio"/> control colesterol<br><input type="radio"/> control diabetes<br><input type="radio"/> problemas estómago<br><input type="radio"/> problemas vesícula o hepáticos<br><input type="radio"/> HTA o cardiopatía<br><input type="radio"/> problemas renales<br><input type="radio"/> alergia alimentaria<br><input type="radio"/> ácido úrico elevado<br><input type="radio"/> vegetariana<br><input type="radio"/> otros |
| cambio alimentos año previo gestación | <input checked="" type="radio"/> si<br><input type="radio"/> no                                                                                                                                                                                                                                                                                                                                                                                                                                                               |
| cambio lácteos                        | <input type="radio"/> eliminado<br><input type="radio"/> disminuido<br><input type="radio"/> igual<br><input checked="" type="radio"/> aumentado<br><input type="radio"/> no sabe                                                                                                                                                                                                                                                                                                                                             |
| cambio huevos                         | <input type="radio"/> eliminado<br><input type="radio"/> disminuido<br><input checked="" type="radio"/> igual<br><input type="radio"/> aumentado<br><input type="radio"/> no sabe                                                                                                                                                                                                                                                                                                                                             |
| cambio carne                          | <input type="radio"/> eliminado<br><input type="radio"/> disminuido<br><input checked="" type="radio"/> igual<br><input type="radio"/> aumentado<br><input type="radio"/> no sabe                                                                                                                                                                                                                                                                                                                                             |
| cambio pescado                        | <input type="radio"/> eliminado<br><input type="radio"/> disminuido<br><input checked="" type="radio"/> igual<br><input type="radio"/> aumentado<br><input type="radio"/> no sabe                                                                                                                                                                                                                                                                                                                                             |
| cambio verduras                       | <input type="radio"/> eliminado<br><input type="radio"/> disminuido<br><input type="radio"/> igual<br><input checked="" type="radio"/> aumentado<br><input type="radio"/> no sabe                                                                                                                                                                                                                                                                                                                                             |



|                            |                                                                                                                                                                                                                        |
|----------------------------|------------------------------------------------------------------------------------------------------------------------------------------------------------------------------------------------------------------------|
| cambio legumbres           | <input type="radio"/> eliminado<br><input type="radio"/> disminuido<br><input checked="" type="radio"/> igual<br><input type="radio"/> aumentado<br><input type="radio"/> no sabe                                      |
| cambio fruta               | <input type="radio"/> eliminado<br><input type="radio"/> disminuido<br><input type="radio"/> igual<br><input checked="" type="radio"/> aumentado<br><input type="radio"/> no sabe                                      |
| cambio pan                 | <input type="radio"/> eliminado<br><input type="radio"/> disminuido<br><input checked="" type="radio"/> igual<br><input type="radio"/> aumentado<br><input type="radio"/> no sabe                                      |
| cambio aceite oliva        | <input type="radio"/> eliminado<br><input type="radio"/> disminuido<br><input checked="" type="radio"/> igual<br><input type="radio"/> aumentado<br><input type="radio"/> no sabe                                      |
| cambio mante o margarina   | <input type="radio"/> eliminado<br><input type="radio"/> disminuido<br><input checked="" type="radio"/> igual<br><input type="radio"/> aumentado<br><input type="radio"/> no sabe                                      |
| cambio azúcar y dulces     | <input type="radio"/> eliminado<br><input checked="" type="radio"/> disminuido<br><input type="radio"/> igual<br><input type="radio"/> aumentado<br><input type="radio"/> no sabe                                      |
| cambio bebidas alcohólicas | <input checked="" type="radio"/> eliminado<br><input type="radio"/> disminuido<br><input type="radio"/> igual<br><input type="radio"/> aumentado<br><input type="radio"/> no sabe                                      |
| frecuencia comidas fritas  | <input type="radio"/> a diario<br><input type="radio"/> 5 a 6 veces semana<br><input type="radio"/> 2 a 4 veces semana<br><input type="radio"/> 1 vez semana<br><input checked="" type="radio"/> menos de 1 vez semana |
| carne                      | <input type="radio"/> no como<br><input type="radio"/> cruda<br><input type="radio"/> poco hecha<br><input checked="" type="radio"/> hecha<br><input type="radio"/> muy hecha                                          |
| grasa visible carne        | <input type="radio"/> quita toda<br><input checked="" type="radio"/> quita mayoría<br><input type="radio"/> quita un poco<br><input type="radio"/> no quita nada                                                       |

|                                |                                                                                                                                                                                                                                                          |
|--------------------------------|----------------------------------------------------------------------------------------------------------------------------------------------------------------------------------------------------------------------------------------------------------|
| cocina carne                   | <input checked="" type="radio"/> a la plancha<br><input type="radio"/> a la parrilla<br><input type="radio"/> asada<br><input type="radio"/> frita<br><input type="radio"/> guisada                                                                      |
| tostado quemado carne          | <input checked="" type="radio"/> nunca<br><input type="radio"/> 1 vez mes<br><input type="radio"/> 2 a 3 veces mes<br><input type="radio"/> 1 vez semana<br><input type="radio"/> 2 a 3 semanas                                                          |
| tostado quemado pescado        | <input checked="" type="radio"/> nunca<br><input type="radio"/> 1 vez mes<br><input type="radio"/> 2 a 3 veces mes<br><input type="radio"/> 1 vez semana<br><input type="radio"/> 2 a 3 semanas                                                          |
| socarrat paella                | <input checked="" type="radio"/> nunca<br><input type="radio"/> 1 vez mes<br><input type="radio"/> 2 a 3 veces mes<br><input type="radio"/> 1 vez semana<br><input type="radio"/> 2 a 3 semanas                                                          |
| grasa o aceite cocinar         | <input type="radio"/> mantequilla<br><input type="radio"/> margarina<br><input type="radio"/> aceite oliva<br><input checked="" type="radio"/> aceite oliva virgen extra<br><input type="radio"/> aceite vegetal<br><input type="radio"/> mezcla aceites |
| grasa aceite aliñar            | <input type="radio"/> mantequilla<br><input type="radio"/> margarina<br><input checked="" type="radio"/> aceite oliva<br><input type="radio"/> aceite oliva virgen extra<br><input type="radio"/> aceite vegetal<br><input type="radio"/> mezcla aceites |
| grasa aceite freir             | <input type="radio"/> mantequilla<br><input type="radio"/> margarina<br><input type="radio"/> aceite oliva<br><input type="radio"/> aceite oliva virgen extra<br><input checked="" type="radio"/> aceite vegetal<br><input type="radio"/> mezcla aceites |
| Ejercicio cuestionario         | <input checked="" type="radio"/> si<br><input type="radio"/> no                                                                                                                                                                                          |
| horas de sueño incluido siesta | [*DATA REMOVED*]                                                                                                                                                                                                                                         |
| minutos siesta                 | [*DATA REMOVED*]                                                                                                                                                                                                                                         |
| horas televisión semana        | [*DATA REMOVED*]                                                                                                                                                                                                                                         |

|                                        |                                                                                                                                                                                                                                                                                                                                                                           |
|----------------------------------------|---------------------------------------------------------------------------------------------------------------------------------------------------------------------------------------------------------------------------------------------------------------------------------------------------------------------------------------------------------------------------|
| actividad trabajo                      | <input type="radio"/> casi siempre sentado<br><input checked="" type="radio"/> sentado 50 por cien<br><input type="radio"/> casi siempre de pie, quieto<br><input type="radio"/> casi siempre levantado caminando y llevando pocas cosas<br><input type="radio"/> casi siempre levantado, caminando y llevado muchas cosas<br><input type="radio"/> trabajo manual pesado |
| tiempo caminar o bici al día           | <input type="radio"/> casi nunca<br><input checked="" type="radio"/> menos 20min día<br><input type="radio"/> 20 a 40 min día<br><input type="radio"/> 40 a 60 min día<br><input type="radio"/> 1h o 1h y media día<br><input type="radio"/> más de 1h y media al día                                                                                                     |
| tiempo tareas casa al día              | <input type="radio"/> menos de 1h día<br><input type="radio"/> 1 a 2h día<br><input checked="" type="radio"/> 3 a 4h día<br><input type="radio"/> 5 a 6h día<br><input type="radio"/> 7 a 8h día<br><input type="radio"/> más de 8h día                                                                                                                                   |
| tiempo libre televisión ordenador leer | <input type="radio"/> menos 1h día<br><input checked="" type="radio"/> 1h día<br><input type="radio"/> 2h día<br><input type="radio"/> 3h día<br><input type="radio"/> 4h día<br><input type="radio"/> 5 a 6h día<br><input type="radio"/> mas 6h día                                                                                                                     |
| tiempo libre ejercicio o deporte       | <input type="radio"/> menos 1h semana<br><input type="radio"/> 1h semana<br><input checked="" type="radio"/> 2h semana<br><input type="radio"/> 3h semana<br><input type="radio"/> 4 a 5h semana<br><input type="radio"/> mas 5h semana                                                                                                                                   |
| como se considera                      | <input type="radio"/> sedentaria<br><input checked="" type="radio"/> poco activa<br><input type="radio"/> moderadamente activa<br><input type="radio"/> bastante activa<br><input type="radio"/> muy activa<br><input type="radio"/> no sabe                                                                                                                              |
| FUR                                    | [*DATA REMOVED*]                                                                                                                                                                                                                                                                                                                                                          |
| Semanas gestación 2T                   | [*DATA REMOVED*]                                                                                                                                                                                                                                                                                                                                                          |
| Días gestación 2T                      | [*DATA REMOVED*]                                                                                                                                                                                                                                                                                                                                                          |
| DBP 2T                                 | [*DATA REMOVED*]                                                                                                                                                                                                                                                                                                                                                          |
| CC 2T                                  | [*DATA REMOVED*]                                                                                                                                                                                                                                                                                                                                                          |
| AC 2T                                  | [*DATA REMOVED*]                                                                                                                                                                                                                                                                                                                                                          |

|                                                   |                                                                                                                                                                                                 |
|---------------------------------------------------|-------------------------------------------------------------------------------------------------------------------------------------------------------------------------------------------------|
| LF 2T                                             | [*DATA REMOVED*]                                                                                                                                                                                |
| PFE 2T (Hadlock)                                  | [*DATA REMOVED*]                                                                                                                                                                                |
| Semanas gestación 3T                              | [*DATA REMOVED*]                                                                                                                                                                                |
| días 3T                                           | [*DATA REMOVED*]                                                                                                                                                                                |
| DBP 3T                                            | [*DATA REMOVED*]                                                                                                                                                                                |
| CC 3T                                             | [*DATA REMOVED*]                                                                                                                                                                                |
| AC 3T                                             | [*DATA REMOVED*]                                                                                                                                                                                |
| LF 3T                                             | [*DATA REMOVED*]                                                                                                                                                                                |
| PFE 3T (Hadlock)                                  | [*DATA REMOVED*]                                                                                                                                                                                |
| Semanas de gestación final                        | [*DATA REMOVED*]                                                                                                                                                                                |
| dias gestación final                              | [*DATA REMOVED*]                                                                                                                                                                                |
| Localización placenta                             | <input type="radio"/> anterior<br><input type="radio"/> lateral derecha<br><input type="radio"/> lateral izquierda<br><input checked="" type="radio"/> posterior<br><input type="radio"/> fondo |
| Presentación longitudinal cefálica                | <input type="radio"/> no<br><input checked="" type="radio"/> si                                                                                                                                 |
| Dorso                                             | <input type="radio"/> izquierda anterior<br><input type="radio"/> izquierda posterior<br><input type="radio"/> derecha anterior<br><input checked="" type="radio"/> derecha posterior           |
| diámetro biparietal                               | [*DATA REMOVED*]                                                                                                                                                                                |
| Circunferencia craneal                            | [*DATA REMOVED*]                                                                                                                                                                                |
| Circunferencia abdominal                          | [*DATA REMOVED*]                                                                                                                                                                                |
| Longitud de femur                                 | [*DATA REMOVED*]                                                                                                                                                                                |
| tejido celular subcutáneo a nivel del muslo en mm | [*DATA REMOVED*]                                                                                                                                                                                |
| tejido celular subcutáneo en abdomen en mm        | [*DATA REMOVED*]                                                                                                                                                                                |
| Volumen del muslo en cm3                          | [*DATA REMOVED*]                                                                                                                                                                                |
| Peso fetal estimado según fórmula de Hadlock      | [*DATA REMOVED*]                                                                                                                                                                                |

|                                               |                                                                                                                                                          |
|-----------------------------------------------|----------------------------------------------------------------------------------------------------------------------------------------------------------|
| Percentil                                     | [*DATA REMOVED*]                                                                                                                                         |
| Peso fetal estimado según fórmula de Scioscia | <hr/>                                                                                                                                                    |
| Peso fetal estimado según fórmula de LEE      | <hr/>                                                                                                                                                    |
| Tipo de parto                                 | <input type="radio"/> eutocico<br><input checked="" type="radio"/> instrumentado/ventosa<br><input type="radio"/> cesarea                                |
| fecha de nacimiento                           | [*DATA REMOVED*]                                                                                                                                         |
| Días entre exploración y nacimiento           | [*DATA REMOVED*]                                                                                                                                         |
| Peso RN en g                                  | [*DATA REMOVED*]                                                                                                                                         |
| sexo                                          | <input checked="" type="radio"/> mujer<br><input type="radio"/> hombre                                                                                   |
| Apgar 1 minuto                                | [*DATA REMOVED*]                                                                                                                                         |
| Apgar 5 minutos                               | [*DATA REMOVED*]                                                                                                                                         |
| Apgar 10 minutos                              | <hr/>                                                                                                                                                    |
| antecedente Covid durante gestación           | <input checked="" type="radio"/> Yes<br><input type="radio"/> No                                                                                         |
| Nivel de estudios                             | <input type="radio"/> ninguno<br><input type="radio"/> primarios<br><input checked="" type="radio"/> secundarios<br><input type="radio"/> universitarios |

# Base\_datos\_estimacion\_peso\_fetal

|                                       |                                                                                                                                                                                                                                                                                      |
|---------------------------------------|--------------------------------------------------------------------------------------------------------------------------------------------------------------------------------------------------------------------------------------------------------------------------------------|
| Número de identificación participante | 42                                                                                                                                                                                                                                                                                   |
| CODIGO PARTICIPANTE                   |                                                                                                                                                                                                                                                                                      |
| Edad                                  | [*DATA REMOVED*]                                                                                                                                                                                                                                                                     |
| Gestaciones                           | <input type="radio"/> 1<br><input type="radio"/> 2<br><input checked="" type="radio"/> 3<br><input type="radio"/> mas de 3                                                                                                                                                           |
| partos                                | <input type="radio"/> 0<br><input checked="" type="radio"/> 1<br><input type="radio"/> 2<br><input type="radio"/> 3<br><input type="radio"/> mas de 3                                                                                                                                |
| cesáreas                              | <input checked="" type="radio"/> 0<br><input type="radio"/> 1<br><input type="radio"/> 2<br><input type="radio"/> 3<br><input type="radio"/> mas de 3                                                                                                                                |
| Abortos                               | <input type="radio"/> 0<br><input checked="" type="radio"/> 1<br><input type="radio"/> 2<br><input type="radio"/> 3<br><input type="radio"/> mas de 3                                                                                                                                |
| Tipo de gestacion                     | <input checked="" type="radio"/> espontanea<br><input type="radio"/> IAC inseminación artificial conyuge<br><input type="radio"/> IAD inseminación artificial donante<br><input type="radio"/> FIV Fecundación in Vitro<br><input type="radio"/> Ovodon FIV con donación de ovocitos |
| peso previo a embarazo                | [*DATA REMOVED*]                                                                                                                                                                                                                                                                     |
| Ganancia ponderal embarazo            | [*DATA REMOVED*]                                                                                                                                                                                                                                                                     |
| Talla madre                           | [*DATA REMOVED*]                                                                                                                                                                                                                                                                     |
| IMC previo embarazo                   | 23.828124999999996                                                                                                                                                                                                                                                                   |
| Patología obstétrica                  | <input checked="" type="radio"/> no<br><input type="radio"/> si                                                                                                                                                                                                                      |
| Diabetes pregestacional               | <input checked="" type="radio"/> no<br><input type="radio"/> si                                                                                                                                                                                                                      |
| Diabetes gestacional                  | <input checked="" type="radio"/> no<br><input type="radio"/> si                                                                                                                                                                                                                      |

|                                            |                                                                                                                                                                                      |
|--------------------------------------------|--------------------------------------------------------------------------------------------------------------------------------------------------------------------------------------|
| Diabetes gestacional con insulina          | <input checked="" type="radio"/> no<br><input type="radio"/> si                                                                                                                      |
| Diabetes gestacional con dieta y ejercicio | <input checked="" type="radio"/> no<br><input type="radio"/> si                                                                                                                      |
| Percentil fetos previos                    | <input type="radio"/> Nada<br><input type="radio"/> percentil menor de 10<br><input checked="" type="radio"/> percentil entre 10 y 90<br><input type="radio"/> percentil mayor de 90 |
| Exfumadora                                 | <input checked="" type="radio"/> Nada<br><input type="radio"/> menos de 5 años<br><input type="radio"/> 5 a 10 años<br><input type="radio"/> mayor o igual a 10 años                 |
| Hábito tabáquico                           | <input checked="" type="radio"/> no<br><input type="radio"/> si                                                                                                                      |
| fumadora                                   | [*DATA REMOVED*]                                                                                                                                                                     |
| Consumo otros tóxicos                      | <input checked="" type="radio"/> no<br><input type="radio"/> si                                                                                                                      |
| Hb 1T                                      | [*DATA REMOVED*]                                                                                                                                                                     |
| Htc 1T                                     | [*DATA REMOVED*]                                                                                                                                                                     |
| Hb 2T                                      | [*DATA REMOVED*]                                                                                                                                                                     |
| HTC 2T                                     | [*DATA REMOVED*]                                                                                                                                                                     |
| Hb 3T                                      | [*DATA REMOVED*]                                                                                                                                                                     |
| HTC 3T                                     | [*DATA REMOVED*]                                                                                                                                                                     |
| Suplemento FE oral                         | <input type="radio"/> si<br><input checked="" type="radio"/> no                                                                                                                      |
| Suplemento fe iv                           | <input type="radio"/> si<br><input checked="" type="radio"/> no                                                                                                                      |
| Transfusión                                | <input checked="" type="radio"/> no<br><input type="radio"/> si                                                                                                                      |
| Solicitada Vit D                           | <input checked="" type="radio"/> no<br><input type="radio"/> si                                                                                                                      |
| Deficit vit D                              | <input type="radio"/> no<br><input type="radio"/> si                                                                                                                                 |
| Suplemento vit D                           | <input type="radio"/> si<br><input type="radio"/> no                                                                                                                                 |

|                       |                                                                                                                                                                                                                                                                                                                                                                                                              |
|-----------------------|--------------------------------------------------------------------------------------------------------------------------------------------------------------------------------------------------------------------------------------------------------------------------------------------------------------------------------------------------------------------------------------------------------------|
| Dieta, cuestionario   | <input checked="" type="radio"/> sí<br><input type="radio"/> no                                                                                                                                                                                                                                                                                                                                              |
| Leche entera          | <input checked="" type="radio"/> Nunca o menos 1 vez al mes<br><input type="radio"/> 1 a 3 veces mes<br><input type="radio"/> 1 vez semana<br><input type="radio"/> 2 a 4 veces semana<br><input type="radio"/> 5 a 6 veces semana<br><input type="radio"/> 1 vez al día<br><input type="radio"/> 2 a 3 veces al día<br><input type="radio"/> 5 a 6 veces al día<br><input type="radio"/> más 6 veces al día |
| Leche semidesnatada   | <input checked="" type="radio"/> Nunca o menos 1 vez al mes<br><input type="radio"/> 1 a 3 veces mes<br><input type="radio"/> 1 vez semana<br><input type="radio"/> 2 a 4 veces semana<br><input type="radio"/> 5 a 6 veces semana<br><input type="radio"/> 1 vez al día<br><input type="radio"/> 2 a 3 veces al día<br><input type="radio"/> 5 a 6 veces al día<br><input type="radio"/> mas 6 veces al día |
| Leche desnatada       | <input checked="" type="radio"/> Nunca o menos 1 vez al mes<br><input type="radio"/> 1 a 3 veces mes<br><input type="radio"/> 1 vez semana<br><input type="radio"/> 2 a 4 veces semana<br><input type="radio"/> 5 a 6 veces semana<br><input type="radio"/> 1 vez al día<br><input type="radio"/> 2 a 3 veces al día<br><input type="radio"/> 5 a 6 veces al día<br><input type="radio"/> más 6 veces al día |
| Leche condensada      | <input checked="" type="radio"/> Nunca o menos 1 vez al mes<br><input type="radio"/> 1 a 3 veces mes<br><input type="radio"/> 1 vez semana<br><input type="radio"/> 2 a 4 veces semana<br><input type="radio"/> 5 a 6 veces semana<br><input type="radio"/> 1 vez al día<br><input type="radio"/> 2 a 3 veces al día<br><input type="radio"/> 5 a 6 veces al día<br><input type="radio"/> más 6 veces al día |
| nata o crema de leche | <input checked="" type="radio"/> Nunca o menos 1 vez al mes<br><input type="radio"/> 1 a 3 veces mes<br><input type="radio"/> 1 vez semana<br><input type="radio"/> 2 a 4 veces semana<br><input type="radio"/> 5 a 6 veces semana<br><input type="radio"/> 1 vez al día<br><input type="radio"/> 2 a 3 veces al día<br><input type="radio"/> 5 a 6 veces al día<br><input type="radio"/> más 6 veces al día |



|                                             |                                                                                                                                                                                                                                                                                                                                                                                                              |
|---------------------------------------------|--------------------------------------------------------------------------------------------------------------------------------------------------------------------------------------------------------------------------------------------------------------------------------------------------------------------------------------------------------------------------------------------------------------|
| Yogurt Entero                               | <input type="radio"/> Nunca o menos 1 vez al mes<br><input type="radio"/> 1 a 3 veces mes<br><input type="radio"/> 1 vez semana<br><input checked="" type="radio"/> 2 a 4 veces semana<br><input type="radio"/> 5 a 6 veces semana<br><input type="radio"/> 1 vez al día<br><input type="radio"/> 2 a 3 veces al día<br><input type="radio"/> 5 a 6 veces al día<br><input type="radio"/> más 6 veces al día |
| Yogurt desnatado                            | <input type="radio"/> Nunca o menos 1 vez al mes<br><input type="radio"/> 1 a 3 veces mes<br><input type="radio"/> 1 vez semana<br><input checked="" type="radio"/> 2 a 4 veces semana<br><input type="radio"/> 5 a 6 veces semana<br><input type="radio"/> 1 vez al día<br><input type="radio"/> 2 a 3 veces al día<br><input type="radio"/> 5 a 6 veces al día<br><input type="radio"/> más 6 veces al día |
| 100g requesón o queso blando o queso fresco | <input type="radio"/> Nunca o menos 1 vez al mes<br><input type="radio"/> 1 a 3 veces mes<br><input type="radio"/> 1 vez semana<br><input type="radio"/> 2 a 4 veces semana<br><input type="radio"/> 5 a 6 veces semana<br><input checked="" type="radio"/> 1 vez al día<br><input type="radio"/> 2 a 3 veces al día<br><input type="radio"/> 5 a 6 veces al día<br><input type="radio"/> más 6 veces al día |
| queso curado o semicurado o cremoso         | <input type="radio"/> Nunca o menos 1 vez al mes<br><input type="radio"/> 1 a 3 veces mes<br><input type="radio"/> 1 vez semana<br><input checked="" type="radio"/> 2 a 4 veces semana<br><input type="radio"/> 5 a 6 veces semana<br><input type="radio"/> 1 vez al día<br><input type="radio"/> 2 a 3 veces al día<br><input type="radio"/> 5 a 6 veces al día<br><input type="radio"/> más 6 veces al día |
| natillas flan pudding                       | <input checked="" type="radio"/> Nunca o menos 1 vez al mes<br><input type="radio"/> 1 a 3 veces mes<br><input type="radio"/> 1 vez semana<br><input type="radio"/> 2 a 4 veces semana<br><input type="radio"/> 5 a 6 veces semana<br><input type="radio"/> 1 vez al día<br><input type="radio"/> 2 a 3 veces al día<br><input type="radio"/> 5 a 6 veces al día<br><input type="radio"/> más 6 veces al día |
| Helado                                      | <input checked="" type="radio"/> Nunca o menos 1 vez al mes<br><input type="radio"/> 1 a 3 veces mes<br><input type="radio"/> 1 vez semana<br><input type="radio"/> 2 a 4 veces semana<br><input type="radio"/> 5 a 6 veces semana<br><input type="radio"/> 1 vez al día<br><input type="radio"/> 2 a 3 veces al día<br><input type="radio"/> 5 a 6 veces al día<br><input type="radio"/> más 6 veces al día |

|                                      |                                                                                                                                                                                                                                                                                                                                                                                                              |
|--------------------------------------|--------------------------------------------------------------------------------------------------------------------------------------------------------------------------------------------------------------------------------------------------------------------------------------------------------------------------------------------------------------------------------------------------------------|
| huevo                                | <input type="radio"/> Nunca o menos 1 vez al mes<br><input type="radio"/> 1 a 3 veces mes<br><input type="radio"/> 1 vez semana<br><input checked="" type="radio"/> 2 a 4 veces semana<br><input type="radio"/> 5 a 6 veces semana<br><input type="radio"/> 1 vez al día<br><input type="radio"/> 2 a 3 veces al día<br><input type="radio"/> 5 a 6 veces al día<br><input type="radio"/> más 6 veces al día |
| Pollo con piel                       | <input type="radio"/> Nunca o menos 1 vez al mes<br><input type="radio"/> 1 a 3 veces mes<br><input checked="" type="radio"/> 1 vez semana<br><input type="radio"/> 2 a 4 veces semana<br><input type="radio"/> 5 a 6 veces semana<br><input type="radio"/> 1 vez al día<br><input type="radio"/> 2 a 3 veces al día<br><input type="radio"/> 5 a 6 veces al día<br><input type="radio"/> más 6 veces al día |
| pollo sin piel                       | <input type="radio"/> Nunca o menos 1 vez al mes<br><input type="radio"/> 1 a 3 veces mes<br><input type="radio"/> 1 vez semana<br><input checked="" type="radio"/> 2 a 4 veces semana<br><input type="radio"/> 5 a 6 veces semana<br><input type="radio"/> 1 vez al día<br><input type="radio"/> 2 a 3 veces al día<br><input type="radio"/> 5 a 6 veces al día<br><input type="radio"/> más 6 veces al día |
| Ternera o cerdo o cordero            | <input type="radio"/> Nunca o menos 1 vez al mes<br><input type="radio"/> 1 a 3 veces mes<br><input checked="" type="radio"/> 1 vez semana<br><input type="radio"/> 2 a 4 veces semana<br><input type="radio"/> 5 a 6 veces semana<br><input type="radio"/> 1 vez al día<br><input type="radio"/> 2 a 3 veces al día<br><input type="radio"/> 5 a 6 veces al día<br><input type="radio"/> más 6 veces al día |
| carne caza: Conejo o codorniz o pato | <input checked="" type="radio"/> Nunca o menos 1 vez al mes<br><input type="radio"/> 1 a 3 veces mes<br><input type="radio"/> 1 vez semana<br><input type="radio"/> 2 a 4 veces semana<br><input type="radio"/> 5 a 6 veces semana<br><input type="radio"/> 1 vez al día<br><input type="radio"/> 2 a 3 veces al día<br><input type="radio"/> 5 a 6 veces al día<br><input type="radio"/> más 6 veces al día |
| Hígado de ternera o cerdo o pollo    | <input checked="" type="radio"/> Nunca o menos 1 vez al mes<br><input type="radio"/> 1 a 3 veces mes<br><input type="radio"/> 1 vez semana<br><input type="radio"/> 2 a 4 veces semana<br><input type="radio"/> 5 a 6 veces semana<br><input type="radio"/> 1 vez al día<br><input type="radio"/> 2 a 3 veces al día<br><input type="radio"/> 5 a 6 veces al día<br><input type="radio"/> más 6 veces al día |

|                     |                                                                                                                                                                                                                                                                                                                                                                                                              |
|---------------------|--------------------------------------------------------------------------------------------------------------------------------------------------------------------------------------------------------------------------------------------------------------------------------------------------------------------------------------------------------------------------------------------------------------|
| Vísceras            | <input checked="" type="radio"/> Nunca o menos 1 vez al mes<br><input type="radio"/> 1 a 3 veces mes<br><input type="radio"/> 1 vez semana<br><input type="radio"/> 2 a 4 veces semana<br><input type="radio"/> 5 a 6 veces semana<br><input type="radio"/> 1 vez al día<br><input type="radio"/> 2 a 3 veces al día<br><input type="radio"/> 5 a 6 veces al día<br><input type="radio"/> más 6 veces al día |
| Embutido            | <input type="radio"/> Nunca o menos 1 vez al mes<br><input type="radio"/> 1 a 3 veces mes<br><input type="radio"/> 1 vez semana<br><input checked="" type="radio"/> 2 a 4 veces semana<br><input type="radio"/> 5 a 6 veces semana<br><input type="radio"/> 1 vez al día<br><input type="radio"/> 2 a 3 veces al día<br><input type="radio"/> 5 a 6 veces al día<br><input type="radio"/> más 6 veces al día |
| Salchicha o similar | <input type="radio"/> Nunca o menos 1 vez al mes<br><input type="radio"/> 1 a 3 veces mes<br><input checked="" type="radio"/> 1 vez semana<br><input type="radio"/> 2 a 4 veces semana<br><input type="radio"/> 5 a 6 veces semana<br><input type="radio"/> 1 vez al día<br><input type="radio"/> 2 a 3 veces al día<br><input type="radio"/> 5 a 6 veces al día<br><input type="radio"/> más 6 veces al día |
| Pate o foiegras     | <input checked="" type="radio"/> Nunca o menos 1 vez al mes<br><input type="radio"/> 1 a 3 veces mes<br><input type="radio"/> 1 vez semana<br><input type="radio"/> 2 a 4 veces semana<br><input type="radio"/> 5 a 6 veces semana<br><input type="radio"/> 1 vez al día<br><input type="radio"/> 2 a 3 veces al día<br><input type="radio"/> 5 a 6 veces al día<br><input type="radio"/> más 6 veces al día |
| Hamburguesa         | <input type="radio"/> Nunca o menos 1 vez al mes<br><input type="radio"/> 1 a 3 veces mes<br><input checked="" type="radio"/> 1 vez semana<br><input type="radio"/> 2 a 4 veces semana<br><input type="radio"/> 5 a 6 veces semana<br><input type="radio"/> 1 vez al día<br><input type="radio"/> 2 a 3 veces al día<br><input type="radio"/> 5 a 6 veces al día<br><input type="radio"/> más 6 veces al día |
| tocino o bacon      | <input type="radio"/> Nunca o menos 1 vez al mes<br><input checked="" type="radio"/> 1 a 3 veces mes<br><input type="radio"/> 1 vez semana<br><input type="radio"/> 2 a 4 veces semana<br><input type="radio"/> 5 a 6 veces semana<br><input type="radio"/> 1 vez al día<br><input type="radio"/> 2 a 3 veces al día<br><input type="radio"/> 5 a 6 veces al día<br><input type="radio"/> más 6 veces al día |

---

Pescado frito

- ☐ Nunca o menos 1 vez al mes  
☒ 1 a 3 veces mes  
☐ 1 vez semana  
☐ 2 a 4 veces semana  
☐ 5 a 6 veces semana  
☐ 1 vez al día  
☐ 2 a 3 veces al día  
☐ 5 a 6 veces al día  
☐ más 6 veces al día

---

pescado hervido blanco

- ☐ Nunca o menos 1 vez al mes  
☐ 1 a 3 veces mes  
☐ 1 vez semana  
☐ 2 a 4 veces semana  
☒ 5 a 6 veces semana  
☐ 1 vez al día  
☐ 2 a 3 veces al día  
☐ 5 a 6 veces al día  
☐ más 6 veces al día

---

pescado hervido azul

- ☐ Nunca o menos 1 vez al mes  
☐ 1 a 3 veces mes  
☐ 1 vez semana  
☒ 2 a 4 veces semana  
☐ 5 a 6 veces semana  
☐ 1 vez al día  
☐ 2 a 3 veces al día  
☐ 5 a 6 veces al día  
☐ más 6 veces al día

---

otros pescado azul

- ☐ Nunca o menos 1 vez al mes  
☒ 1 a 3 veces mes  
☐ 1 vez semana  
☐ 2 a 4 veces semana  
☐ 5 a 6 veces semana  
☐ 1 vez al día  
☐ 2 a 3 veces al día  
☐ 5 a 6 veces al día  
☐ más 6 veces al día

---

atun conserva

- ☐ Nunca o menos 1 vez al mes  
☐ 1 a 3 veces mes  
☐ 1 vez semana  
☒ 2 a 4 veces semana  
☐ 5 a 6 veces semana  
☐ 1 vez al día  
☐ 2 a 3 veces al día  
☐ 5 a 6 veces al día  
☐ más 6 veces al día

---

sardina conserva

- ☒ Nunca o menos 1 vez al mes  
☐ 1 a 3 veces mes  
☐ 1 vez semana  
☐ 2 a 4 veces semana  
☐ 5 a 6 veces semana  
☐ 1 vez al día  
☐ 2 a 3 veces al día  
☐ 5 a 6 veces al día  
☐ más 6 veces al día

|                                         |                                                                                                                                                                                                                                                                                                                                                                                                              |
|-----------------------------------------|--------------------------------------------------------------------------------------------------------------------------------------------------------------------------------------------------------------------------------------------------------------------------------------------------------------------------------------------------------------------------------------------------------------|
| pescado ahumado                         | <input type="radio"/> Nunca o menos 1 vez al mes<br><input type="radio"/> 1 a 3 veces mes<br><input checked="" type="radio"/> 1 vez semana<br><input type="radio"/> 2 a 4 veces semana<br><input type="radio"/> 5 a 6 veces semana<br><input type="radio"/> 1 vez al día<br><input type="radio"/> 2 a 3 veces al día<br><input type="radio"/> 5 a 6 veces al día<br><input type="radio"/> más 6 veces al día |
| almejas o mejillones o ostras unos 100g | <input type="radio"/> Nunca o menos 1 vez al mes<br><input checked="" type="radio"/> 1 a 3 veces mes<br><input type="radio"/> 1 vez semana<br><input type="radio"/> 2 a 4 veces semana<br><input type="radio"/> 5 a 6 veces semana<br><input type="radio"/> 1 vez al día<br><input type="radio"/> 2 a 3 veces al día<br><input type="radio"/> 5 a 6 veces al día<br><input type="radio"/> más 6 veces al día |
| calamar o chipiron o sepia unos 100g    | <input type="radio"/> Nunca o menos 1 vez al mes<br><input checked="" type="radio"/> 1 a 3 veces mes<br><input type="radio"/> 1 vez semana<br><input type="radio"/> 2 a 4 veces semana<br><input type="radio"/> 5 a 6 veces semana<br><input type="radio"/> 1 vez al día<br><input type="radio"/> 2 a 3 veces al día<br><input type="radio"/> 5 a 6 veces al día<br><input type="radio"/> más 6 veces al día |
| marisco unos 100g                       | <input type="radio"/> Nunca o menos 1 vez al mes<br><input checked="" type="radio"/> 1 a 3 veces mes<br><input type="radio"/> 1 vez semana<br><input type="radio"/> 2 a 4 veces semana<br><input type="radio"/> 5 a 6 veces semana<br><input type="radio"/> 1 vez al día<br><input type="radio"/> 2 a 3 veces al día<br><input type="radio"/> 5 a 6 veces al día<br><input type="radio"/> más 6 veces al día |
| Espinacas o acelgas cocinadas           | <input type="radio"/> Nunca o menos 1 vez al mes<br><input type="radio"/> 1 a 3 veces mes<br><input type="radio"/> 1 vez semana<br><input type="radio"/> 2 a 4 veces semana<br><input checked="" type="radio"/> 5 a 6 veces semana<br><input type="radio"/> 1 vez al día<br><input type="radio"/> 2 a 3 veces al día<br><input type="radio"/> 5 a 6 veces al día<br><input type="radio"/> más 6 veces al día |
| Col o coliflor o brocoli cocinado       | <input type="radio"/> Nunca o menos 1 vez al mes<br><input type="radio"/> 1 a 3 veces mes<br><input type="radio"/> 1 vez semana<br><input type="radio"/> 2 a 4 veces semana<br><input checked="" type="radio"/> 5 a 6 veces semana<br><input type="radio"/> 1 vez al día<br><input type="radio"/> 2 a 3 veces al día<br><input type="radio"/> 5 a 6 veces al día<br><input type="radio"/> más 6 veces al día |

---

Lechuga o endivia o escarola

- ☐ Nunca o menos 1 vez al mes  
☐ 1 a 3 veces mes  
☐ 1 vez semana  
☐ 2 a 4 veces semana  
☐ 5 a 6 veces semana  
☒ 1 vez al día  
☐ 2 a 3 veces al día  
☐ 5 a 6 veces al día  
☐ más 6 veces al día

---

tomate ensalada

- ☐ Nunca o menos 1 vez al mes  
☐ 1 a 3 veces mes  
☐ 1 vez semana  
☐ 2 a 4 veces semana  
☐ 5 a 6 veces semana  
☒ 1 vez al día  
☐ 2 a 3 veces al día  
☐ 5 a 6 veces al día  
☐ más 6 veces al día

---

cebolla

- ☐ Nunca o menos 1 vez al mes  
☐ 1 a 3 veces mes  
☒ 1 vez semana  
☐ 2 a 4 veces semana  
☐ 5 a 6 veces semana  
☐ 1 vez al día  
☐ 2 a 3 veces al día  
☐ 5 a 6 veces al día  
☐ más 6 veces al día

---

Zanahoria o calabaza

- ☐ Nunca o menos 1 vez al mes  
☐ 1 a 3 veces mes  
☒ 1 vez semana  
☐ 2 a 4 veces semana  
☐ 5 a 6 veces semana  
☐ 1 vez al día  
☐ 2 a 3 veces al día  
☐ 5 a 6 veces al día  
☐ más 6 veces al día

---

Judías verdes

- ☐ Nunca o menos 1 vez al mes  
☐ 1 a 3 veces mes  
☐ 1 vez semana  
☒ 2 a 4 veces semana  
☐ 5 a 6 veces semana  
☐ 1 vez al día  
☐ 2 a 3 veces al día  
☐ 5 a 6 veces al día  
☐ más 6 veces al día

---

Berenjena o calabacin o pepino

- ☐ Nunca o menos 1 vez al mes  
☐ 1 a 3 veces mes  
☐ 1 vez semana  
☒ 2 a 4 veces semana  
☐ 5 a 6 veces semana  
☐ 1 vez al día  
☐ 2 a 3 veces al día  
☐ 5 a 6 veces al día  
☐ más 6 veces al día

---

pimiento

- ☐ Nunca o menos 1 vez al mes
- ☐ 1 a 3 veces mes
- ☐ 1 vez semana
- ☒ 2 a 4 veces semana
- ☐ 5 a 6 veces semana
- ☐ 1 vez al día
- ☐ 2 a 3 veces al día
- ☐ 5 a 6 veces al día
- ☐ más 6 veces al día

---

alcachofa

- ☐ Nunca o menos 1 vez al mes
- ☐ 1 a 3 veces mes
- ☐ 1 vez semana
- ☒ 2 a 4 veces semana
- ☐ 5 a 6 veces semana
- ☐ 1 vez al día
- ☐ 2 a 3 veces al día
- ☐ 5 a 6 veces al día
- ☐ más 6 veces al día

---

espárragos

- ☐ Nunca o menos 1 vez al mes
- ☐ 1 a 3 veces mes
- ☒ 1 vez semana
- ☐ 2 a 4 veces semana
- ☐ 5 a 6 veces semana
- ☐ 1 vez al día
- ☐ 2 a 3 veces al día
- ☐ 5 a 6 veces al día
- ☐ más 6 veces al día

---

maíz hervido

- ☐ Nunca o menos 1 vez al mes
- ☐ 1 a 3 veces mes
- ☒ 1 vez semana
- ☐ 2 a 4 veces semana
- ☐ 5 a 6 veces semana
- ☐ 1 vez al día
- ☐ 2 a 3 veces al día
- ☐ 5 a 6 veces al día
- ☐ más 6 veces al día

---

legumbres

- ☐ Nunca o menos 1 vez al mes
- ☐ 1 a 3 veces mes
- ☒ 1 vez semana
- ☐ 2 a 4 veces semana
- ☐ 5 a 6 veces semana
- ☐ 1 vez al día
- ☐ 2 a 3 veces al día
- ☐ 5 a 6 veces al día
- ☐ más 6 veces al día

---

naranjas o mandarinas

- ☐ Nunca o menos 1 vez al mes
- ☐ 1 a 3 veces mes
- ☐ 1 vez semana
- ☐ 2 a 4 veces semana
- ☐ 5 a 6 veces semana
- ☐ 1 vez al día
- ☐ 2 a 3 veces al día
- ☐ 5 a 6 veces al día
- ☐ más 6 veces al día

|                       |                                                                                                                                                                                                                                                                                                                                                                                                              |
|-----------------------|--------------------------------------------------------------------------------------------------------------------------------------------------------------------------------------------------------------------------------------------------------------------------------------------------------------------------------------------------------------------------------------------------------------|
| zum natural fruta     | <input type="radio"/> Nunca o menos 1 vez al mes<br><input type="radio"/> 1 a 3 veces mes<br><input type="radio"/> 1 vez semana<br><input type="radio"/> 2 a 4 veces semana<br><input type="radio"/> 5 a 6 veces semana<br><input checked="" type="radio"/> 1 vez al día<br><input type="radio"/> 2 a 3 veces al día<br><input type="radio"/> 5 a 6 veces al día<br><input type="radio"/> más 6 veces al día |
| platano               | <input type="radio"/> Nunca o menos 1 vez al mes<br><input type="radio"/> 1 a 3 veces mes<br><input checked="" type="radio"/> 1 vez semana<br><input type="radio"/> 2 a 4 veces semana<br><input type="radio"/> 5 a 6 veces semana<br><input type="radio"/> 1 vez al día<br><input type="radio"/> 2 a 3 veces al día<br><input type="radio"/> 5 a 6 veces al día<br><input type="radio"/> más 6 veces al día |
| manzana o pera        | <input type="radio"/> Nunca o menos 1 vez al mes<br><input type="radio"/> 1 a 3 veces mes<br><input checked="" type="radio"/> 1 vez semana<br><input type="radio"/> 2 a 4 veces semana<br><input type="radio"/> 5 a 6 veces semana<br><input type="radio"/> 1 vez al día<br><input type="radio"/> 2 a 3 veces al día<br><input type="radio"/> 5 a 6 veces al día<br><input type="radio"/> más 6 veces al día |
| melocotón o nectarina | <input type="radio"/> Nunca o menos 1 vez al mes<br><input type="radio"/> 1 a 3 veces mes<br><input checked="" type="radio"/> 1 vez semana<br><input type="radio"/> 2 a 4 veces semana<br><input type="radio"/> 5 a 6 veces semana<br><input type="radio"/> 1 vez al día<br><input type="radio"/> 2 a 3 veces al día<br><input type="radio"/> 5 a 6 veces al día<br><input type="radio"/> más 6 veces al día |
| sandia o melon        | <input type="radio"/> Nunca o menos 1 vez al mes<br><input type="radio"/> 1 a 3 veces mes<br><input type="radio"/> 1 vez semana<br><input checked="" type="radio"/> 2 a 4 veces semana<br><input type="radio"/> 5 a 6 veces semana<br><input type="radio"/> 1 vez al día<br><input type="radio"/> 2 a 3 veces al día<br><input type="radio"/> 5 a 6 veces al día<br><input type="radio"/> más 6 veces al día |
| uva                   | <input type="radio"/> Nunca o menos 1 vez al mes<br><input type="radio"/> 1 a 3 veces mes<br><input checked="" type="radio"/> 1 vez semana<br><input type="radio"/> 2 a 4 veces semana<br><input type="radio"/> 5 a 6 veces semana<br><input type="radio"/> 1 vez al día<br><input type="radio"/> 2 a 3 veces al día<br><input type="radio"/> 5 a 6 veces al día<br><input type="radio"/> más 6 veces al día |



---

bruna o ciruela

- ☐ Nunca o menos 1 vez al mes  
☐ 1 a 3 veces mes  
☐ 1 vez semana  
☒ 2 a 4 veces semana  
☐ 5 a 6 veces semana  
☐ 1 vez al día  
☐ 2 a 3 veces al día  
☐ 5 a 6 veces al día  
☐ más 6 veces al día

---

kiwi

- ☐ Nunca o menos 1 vez al mes  
☐ 1 a 3 veces mes  
☐ 1 vez semana  
☒ 2 a 4 veces semana  
☐ 5 a 6 veces semana  
☐ 1 vez al día  
☐ 2 a 3 veces al día  
☐ 5 a 6 veces al día  
☐ más 6 veces al día

---

aceituna

- ☐ Nunca o menos 1 vez al mes  
☐ 1 a 3 veces mes  
☒ 1 vez semana  
☐ 2 a 4 veces semana  
☐ 5 a 6 veces semana  
☐ 1 vez al día  
☐ 2 a 3 veces al día  
☐ 5 a 6 veces al día  
☐ más 6 veces al día

---

frutos secos

- ☐ Nunca o menos 1 vez al mes  
☐ 1 a 3 veces mes  
☐ 1 vez semana  
☒ 2 a 4 veces semana  
☐ 5 a 6 veces semana  
☐ 1 vez al día  
☐ 2 a 3 veces al día  
☐ 5 a 6 veces al día  
☐ más 6 veces al día

---

pan blanco

- ☐ Nunca o menos 1 vez al mes  
☐ 1 a 3 veces mes  
☐ 1 vez semana  
☐ 2 a 4 veces semana  
☐ 5 a 6 veces semana  
☐ 1 vez al día  
☒ 2 a 3 veces al día  
☐ 5 a 6 veces al día  
☐ más 6 veces al día

---

pan integral

- ☐ Nunca o menos 1 vez al mes  
☐ 1 a 3 veces mes  
☐ 1 vez semana  
☐ 2 a 4 veces semana  
☐ 5 a 6 veces semana  
☐ 1 vez al día  
☒ 2 a 3 veces al día  
☐ 5 a 6 veces al día  
☐ más 6 veces al día

---

cereales desayuno

- ☐ Nunca o menos 1 vez al mes  
☒ 1 a 3 veces mes  
☐ 1 vez semana  
☐ 2 a 4 veces semana  
☐ 5 a 6 veces semana  
☐ 1 vez al día  
☐ 2 a 3 veces al día  
☐ 5 a 6 veces al día  
☐ más 6 veces al día

---

patatas fritas

- ☐ Nunca o menos 1 vez al mes  
☐ 1 a 3 veces mes  
☒ 1 vez semana  
☐ 2 a 4 veces semana  
☐ 5 a 6 veces semana  
☐ 1 vez al día  
☐ 2 a 3 veces al día  
☐ 5 a 6 veces al día  
☐ más 6 veces al día

---

patatas cocidas o asadas

- ☒ Nunca o menos 1 vez al mes  
☐ 1 a 3 veces mes  
☐ 1 vez semana  
☐ 2 a 4 veces semana  
☐ 5 a 6 veces semana  
☐ 1 vez al día  
☐ 2 a 3 veces al día  
☐ 5 a 6 veces al día  
☐ más 6 veces al día

---

bolsa papas

- ☐ Nunca o menos 1 vez al mes  
☐ 1 a 3 veces mes  
☒ 1 vez semana  
☐ 2 a 4 veces semana  
☐ 5 a 6 veces semana  
☐ 1 vez al día  
☐ 2 a 3 veces al día  
☐ 5 a 6 veces al día  
☐ más 6 veces al día

---

arroz cocinado

- ☐ Nunca o menos 1 vez al mes  
☐ 1 a 3 veces mes  
☒ 1 vez semana  
☐ 2 a 4 veces semana  
☐ 5 a 6 veces semana  
☐ 1 vez al día  
☐ 2 a 3 veces al día  
☐ 5 a 6 veces al día  
☐ más 6 veces al día

---

pasta

- ☐ Nunca o menos 1 vez al mes  
☐ 1 a 3 veces mes  
☒ 1 vez semana  
☐ 2 a 4 veces semana  
☐ 5 a 6 veces semana  
☐ 1 vez al día  
☐ 2 a 3 veces al día  
☐ 5 a 6 veces al día  
☐ más 6 veces al día

|                     |                                                                                                                                                                                                                                                                                                                                                                                                              |
|---------------------|--------------------------------------------------------------------------------------------------------------------------------------------------------------------------------------------------------------------------------------------------------------------------------------------------------------------------------------------------------------------------------------------------------------|
| pizza               | <input type="radio"/> Nunca o menos 1 vez al mes<br><input type="radio"/> 1 a 3 veces mes<br><input type="radio"/> 1 vez semana<br><input type="radio"/> 2 a 4 veces semana<br><input type="radio"/> 5 a 6 veces semana<br><input checked="" type="radio"/> 1 vez al día<br><input type="radio"/> 2 a 3 veces al día<br><input type="radio"/> 5 a 6 veces al día<br><input type="radio"/> más 6 veces al día |
| aceite oliva        | <input checked="" type="radio"/> Nunca o menos 1 vez al mes<br><input type="radio"/> 1 a 3 veces mes<br><input type="radio"/> 1 vez semana<br><input type="radio"/> 2 a 4 veces semana<br><input type="radio"/> 5 a 6 veces semana<br><input type="radio"/> 1 vez al día<br><input type="radio"/> 2 a 3 veces al día<br><input type="radio"/> 5 a 6 veces al día<br><input type="radio"/> más 6 veces al día |
| otros aceites       | <input checked="" type="radio"/> Nunca o menos 1 vez al mes<br><input type="radio"/> 1 a 3 veces mes<br><input type="radio"/> 1 vez semana<br><input type="radio"/> 2 a 4 veces semana<br><input type="radio"/> 5 a 6 veces semana<br><input type="radio"/> 1 vez al día<br><input type="radio"/> 2 a 3 veces al día<br><input type="radio"/> 5 a 6 veces al día<br><input type="radio"/> más 6 veces al día |
| margarina           | <input checked="" type="radio"/> Nunca o menos 1 vez al mes<br><input type="radio"/> 1 a 3 veces mes<br><input type="radio"/> 1 vez semana<br><input type="radio"/> 2 a 4 veces semana<br><input type="radio"/> 5 a 6 veces semana<br><input type="radio"/> 1 vez al día<br><input type="radio"/> 2 a 3 veces al día<br><input type="radio"/> 5 a 6 veces al día<br><input type="radio"/> más 6 veces al día |
| mantequilla         | <input type="radio"/> Nunca o menos 1 vez al mes<br><input type="radio"/> 1 a 3 veces mes<br><input type="radio"/> 1 vez semana<br><input checked="" type="radio"/> 2 a 4 veces semana<br><input type="radio"/> 5 a 6 veces semana<br><input type="radio"/> 1 vez al día<br><input type="radio"/> 2 a 3 veces al día<br><input type="radio"/> 5 a 6 veces al día<br><input type="radio"/> más 6 veces al día |
| galletas tipo maria | <input type="radio"/> Nunca o menos 1 vez al mes<br><input checked="" type="radio"/> 1 a 3 veces mes<br><input type="radio"/> 1 vez semana<br><input type="radio"/> 2 a 4 veces semana<br><input type="radio"/> 5 a 6 veces semana<br><input type="radio"/> 1 vez al día<br><input type="radio"/> 2 a 3 veces al día<br><input type="radio"/> 5 a 6 veces al día<br><input type="radio"/> más 6 veces al día |

|                           |                                                                                                                                                                                                                                                                                                                                                                                                              |
|---------------------------|--------------------------------------------------------------------------------------------------------------------------------------------------------------------------------------------------------------------------------------------------------------------------------------------------------------------------------------------------------------------------------------------------------------|
| galletas chocolate        | <input type="radio"/> Nunca o menos 1 vez al mes<br><input type="radio"/> 1 a 3 veces mes<br><input type="radio"/> 1 vez semana<br><input checked="" type="radio"/> 2 a 4 veces semana<br><input type="radio"/> 5 a 6 veces semana<br><input type="radio"/> 1 vez al día<br><input type="radio"/> 2 a 3 veces al día<br><input type="radio"/> 5 a 6 veces al día<br><input type="radio"/> más 6 veces al día |
| bollieria                 | <input type="radio"/> Nunca o menos 1 vez al mes<br><input checked="" type="radio"/> 1 a 3 veces mes<br><input type="radio"/> 1 vez semana<br><input type="radio"/> 2 a 4 veces semana<br><input type="radio"/> 5 a 6 veces semana<br><input type="radio"/> 1 vez al día<br><input type="radio"/> 2 a 3 veces al día<br><input type="radio"/> 5 a 6 veces al día<br><input type="radio"/> más 6 veces al día |
| chocolate o bombones      | <input type="radio"/> Nunca o menos 1 vez al mes<br><input checked="" type="radio"/> 1 a 3 veces mes<br><input type="radio"/> 1 vez semana<br><input type="radio"/> 2 a 4 veces semana<br><input type="radio"/> 5 a 6 veces semana<br><input type="radio"/> 1 vez al día<br><input type="radio"/> 2 a 3 veces al día<br><input type="radio"/> 5 a 6 veces al día<br><input type="radio"/> más 6 veces al día |
| chocolate polvo o colacao | <input checked="" type="radio"/> Nunca o menos 1 vez al mes<br><input type="radio"/> 1 a 3 veces mes<br><input type="radio"/> 1 vez semana<br><input type="radio"/> 2 a 4 veces semana<br><input type="radio"/> 5 a 6 veces semana<br><input type="radio"/> 1 vez al día<br><input type="radio"/> 2 a 3 veces al día<br><input type="radio"/> 5 a 6 veces al día<br><input type="radio"/> más 6 veces al día |
| vino tinto                | <input checked="" type="radio"/> Nunca o menos 1 vez al mes<br><input type="radio"/> 1 a 3 veces mes<br><input type="radio"/> 1 vez semana<br><input type="radio"/> 2 a 4 veces semana<br><input type="radio"/> 5 a 6 veces semana<br><input type="radio"/> 1 vez al día<br><input type="radio"/> 2 a 3 veces al día<br><input type="radio"/> 5 a 6 veces al día<br><input type="radio"/> más 6 veces al día |
| vino blanco               | <input checked="" type="radio"/> Nunca o menos 1 vez al mes<br><input type="radio"/> 1 a 3 veces mes<br><input type="radio"/> 1 vez semana<br><input type="radio"/> 2 a 4 veces semana<br><input type="radio"/> 5 a 6 veces semana<br><input type="radio"/> 1 vez al día<br><input type="radio"/> 2 a 3 veces al día<br><input type="radio"/> 5 a 6 veces al día<br><input type="radio"/> más 6 veces al día |

|                       |                                                                                                                                                                                                                                                                                                                                                                                                              |
|-----------------------|--------------------------------------------------------------------------------------------------------------------------------------------------------------------------------------------------------------------------------------------------------------------------------------------------------------------------------------------------------------------------------------------------------------|
| vino seco o vermut    | <input checked="" type="radio"/> Nunca o menos 1 vez al mes<br><input type="radio"/> 1 a 3 veces mes<br><input type="radio"/> 1 vez semana<br><input type="radio"/> 2 a 4 veces semana<br><input type="radio"/> 5 a 6 veces semana<br><input type="radio"/> 1 vez al día<br><input type="radio"/> 2 a 3 veces al día<br><input type="radio"/> 5 a 6 veces al día<br><input type="radio"/> más 6 veces al día |
| cerveza               | <input type="radio"/> Nunca o menos 1 vez al mes<br><input type="radio"/> 1 a 3 veces mes<br><input type="radio"/> 1 vez semana<br><input checked="" type="radio"/> 2 a 4 veces semana<br><input type="radio"/> 5 a 6 veces semana<br><input type="radio"/> 1 vez al día<br><input type="radio"/> 2 a 3 veces al día<br><input type="radio"/> 5 a 6 veces al día<br><input type="radio"/> más 6 veces al día |
| cerveza sin alcohol   | <input checked="" type="radio"/> Nunca o menos 1 vez al mes<br><input type="radio"/> 1 a 3 veces mes<br><input type="radio"/> 1 vez semana<br><input type="radio"/> 2 a 4 veces semana<br><input type="radio"/> 5 a 6 veces semana<br><input type="radio"/> 1 vez al día<br><input type="radio"/> 2 a 3 veces al día<br><input type="radio"/> 5 a 6 veces al día<br><input type="radio"/> más 6 veces al día |
| licores               | <input checked="" type="radio"/> Nunca o menos 1 vez al mes<br><input type="radio"/> 1 a 3 veces mes<br><input type="radio"/> 1 vez semana<br><input type="radio"/> 2 a 4 veces semana<br><input type="radio"/> 5 a 6 veces semana<br><input type="radio"/> 1 vez al día<br><input type="radio"/> 2 a 3 veces al día<br><input type="radio"/> 5 a 6 veces al día<br><input type="radio"/> más 6 veces al día |
| ginebra o ron o vodka | <input checked="" type="radio"/> Nunca o menos 1 vez al mes<br><input type="radio"/> 1 a 3 veces mes<br><input type="radio"/> 1 vez semana<br><input type="radio"/> 2 a 4 veces semana<br><input type="radio"/> 5 a 6 veces semana<br><input type="radio"/> 1 vez al día<br><input type="radio"/> 2 a 3 veces al día<br><input type="radio"/> 5 a 6 veces al día<br><input type="radio"/> más 6 veces al día |
| refresco normal       | <input type="radio"/> Nunca o menos 1 vez al mes<br><input checked="" type="radio"/> 1 a 3 veces mes<br><input type="radio"/> 1 vez semana<br><input type="radio"/> 2 a 4 veces semana<br><input type="radio"/> 5 a 6 veces semana<br><input type="radio"/> 1 vez al día<br><input type="radio"/> 2 a 3 veces al día<br><input type="radio"/> 5 a 6 veces al día<br><input type="radio"/> más 6 veces al día |

|                           |                                                                                                                                                                                                                                                                                                                                                                                                              |
|---------------------------|--------------------------------------------------------------------------------------------------------------------------------------------------------------------------------------------------------------------------------------------------------------------------------------------------------------------------------------------------------------------------------------------------------------|
| refresco sin azúcar       | <input type="radio"/> Nunca o menos 1 vez al mes<br><input checked="" type="radio"/> 1 a 3 veces mes<br><input type="radio"/> 1 vez semana<br><input type="radio"/> 2 a 4 veces semana<br><input type="radio"/> 5 a 6 veces semana<br><input type="radio"/> 1 vez al día<br><input type="radio"/> 2 a 3 veces al día<br><input type="radio"/> 5 a 6 veces al día<br><input type="radio"/> más 6 veces al día |
| Agua del grifo            | <input checked="" type="radio"/> Nunca o menos 1 vez al mes<br><input type="radio"/> 1 a 3 veces mes<br><input type="radio"/> 1 vez semana<br><input type="radio"/> 2 a 4 veces semana<br><input type="radio"/> 5 a 6 veces semana<br><input type="radio"/> 1 vez al día<br><input type="radio"/> 2 a 3 veces al día<br><input type="radio"/> 5 a 6 veces al día<br><input type="radio"/> más 6 veces al día |
| agua embotellada sin gas  | <input type="radio"/> Nunca o menos 1 vez al mes<br><input type="radio"/> 1 a 3 veces mes<br><input type="radio"/> 1 vez semana<br><input type="radio"/> 2 a 4 veces semana<br><input type="radio"/> 5 a 6 veces semana<br><input type="radio"/> 1 vez al día<br><input type="radio"/> 2 a 3 veces al día<br><input type="radio"/> 5 a 6 veces al día<br><input checked="" type="radio"/> más 6 veces al día |
| agua embotellada con gas  | <input checked="" type="radio"/> Nunca o menos 1 vez al mes<br><input type="radio"/> 1 a 3 veces mes<br><input type="radio"/> 1 vez semana<br><input type="radio"/> 2 a 4 veces semana<br><input type="radio"/> 5 a 6 veces semana<br><input type="radio"/> 1 vez al día<br><input type="radio"/> 2 a 3 veces al día<br><input type="radio"/> 5 a 6 veces al día<br><input type="radio"/> más 6 veces al día |
| zumos frutas embotellados | <input type="radio"/> Nunca o menos 1 vez al mes<br><input checked="" type="radio"/> 1 a 3 veces mes<br><input type="radio"/> 1 vez semana<br><input type="radio"/> 2 a 4 veces semana<br><input type="radio"/> 5 a 6 veces semana<br><input type="radio"/> 1 vez al día<br><input type="radio"/> 2 a 3 veces al día<br><input type="radio"/> 5 a 6 veces al día<br><input type="radio"/> más 6 veces al día |
| café                      | <input type="radio"/> Nunca o menos 1 vez al mes<br><input type="radio"/> 1 a 3 veces mes<br><input type="radio"/> 1 vez semana<br><input type="radio"/> 2 a 4 veces semana<br><input type="radio"/> 5 a 6 veces semana<br><input type="radio"/> 1 vez al día<br><input checked="" type="radio"/> 2 a 3 veces al día<br><input type="radio"/> 5 a 6 veces al día<br><input type="radio"/> más 6 veces al día |

---

cafe descafeinado

- ☐ Nunca o menos 1 vez al mes  
☐ 1 a 3 veces mes  
☐ 1 vez semana  
☐ 2 a 4 veces semana  
☐ 5 a 6 veces semana  
☒ 1 vez al día  
☐ 2 a 3 veces al día  
☐ 5 a 6 veces al día  
☐ más 6 veces al día

---

te o infusión

- ☐ Nunca o menos 1 vez al mes  
☐ 1 a 3 veces mes  
☐ 1 vez semana  
☒ 2 a 4 veces semana  
☐ 5 a 6 veces semana  
☐ 1 vez al día  
☐ 2 a 3 veces al día  
☐ 5 a 6 veces al día  
☐ más 6 veces al día

---

sopa o puré verduras

- ☐ Nunca o menos 1 vez al mes  
☐ 1 a 3 veces mes  
☐ 1 vez semana  
☒ 2 a 4 veces semana  
☐ 5 a 6 veces semana  
☐ 1 vez al día  
☐ 2 a 3 veces al día  
☐ 5 a 6 veces al día  
☐ más 6 veces al día

---

croquetas pollo jamón

- ☐ Nunca o menos 1 vez al mes  
☒ 1 a 3 veces mes  
☐ 1 vez semana  
☐ 2 a 4 veces semana  
☐ 5 a 6 veces semana  
☐ 1 vez al día  
☐ 2 a 3 veces al día  
☐ 5 a 6 veces al día  
☐ más 6 veces al día

---

croquetas pescado

- ☐ Nunca o menos 1 vez al mes  
☐ 1 a 3 veces mes  
☒ 1 vez semana  
☐ 2 a 4 veces semana  
☐ 5 a 6 veces semana  
☐ 1 vez al día  
☐ 2 a 3 veces al día  
☐ 5 a 6 veces al día  
☐ más 6 veces al día

---

mayonesa

- ☐ Nunca o menos 1 vez al mes  
☒ 1 a 3 veces mes  
☐ 1 vez semana  
☐ 2 a 4 veces semana  
☐ 5 a 6 veces semana  
☐ 1 vez al día  
☐ 2 a 3 veces al día  
☐ 5 a 6 veces al día  
☐ más 6 veces al día

|                  |                                                                                                                                                                                                                                                                                                                                                                                                              |
|------------------|--------------------------------------------------------------------------------------------------------------------------------------------------------------------------------------------------------------------------------------------------------------------------------------------------------------------------------------------------------------------------------------------------------------|
| salsa tomate     | <input type="radio"/> Nunca o menos 1 vez al mes<br><input type="radio"/> 1 a 3 veces mes<br><input checked="" type="radio"/> 1 vez semana<br><input type="radio"/> 2 a 4 veces semana<br><input type="radio"/> 5 a 6 veces semana<br><input type="radio"/> 1 vez al día<br><input type="radio"/> 2 a 3 veces al día<br><input type="radio"/> 5 a 6 veces al día<br><input type="radio"/> más 6 veces al día |
| ketchup          | <input type="radio"/> Nunca o menos 1 vez al mes<br><input checked="" type="radio"/> 1 a 3 veces mes<br><input type="radio"/> 1 vez semana<br><input type="radio"/> 2 a 4 veces semana<br><input type="radio"/> 5 a 6 veces semana<br><input type="radio"/> 1 vez al día<br><input type="radio"/> 2 a 3 veces al día<br><input type="radio"/> 5 a 6 veces al día<br><input type="radio"/> más 6 veces al día |
| sal              | <input type="radio"/> Nunca o menos 1 vez al mes<br><input type="radio"/> 1 a 3 veces mes<br><input type="radio"/> 1 vez semana<br><input type="radio"/> 2 a 4 veces semana<br><input type="radio"/> 5 a 6 veces semana<br><input checked="" type="radio"/> 1 vez al día<br><input type="radio"/> 2 a 3 veces al día<br><input type="radio"/> 5 a 6 veces al día<br><input type="radio"/> más 6 veces al día |
| ajo              | <input type="radio"/> Nunca o menos 1 vez al mes<br><input type="radio"/> 1 a 3 veces mes<br><input checked="" type="radio"/> 1 vez semana<br><input type="radio"/> 2 a 4 veces semana<br><input type="radio"/> 5 a 6 veces semana<br><input type="radio"/> 1 vez al día<br><input type="radio"/> 2 a 3 veces al día<br><input type="radio"/> 5 a 6 veces al día<br><input type="radio"/> más 6 veces al día |
| mermelada o miel | <input checked="" type="radio"/> Nunca o menos 1 vez al mes<br><input type="radio"/> 1 a 3 veces mes<br><input type="radio"/> 1 vez semana<br><input type="radio"/> 2 a 4 veces semana<br><input type="radio"/> 5 a 6 veces semana<br><input type="radio"/> 1 vez al día<br><input type="radio"/> 2 a 3 veces al día<br><input type="radio"/> 5 a 6 veces al día<br><input type="radio"/> más 6 veces al día |
| azúcar           | <input type="radio"/> Nunca o menos 1 vez al mes<br><input type="radio"/> 1 a 3 veces mes<br><input type="radio"/> 1 vez semana<br><input type="radio"/> 2 a 4 veces semana<br><input type="radio"/> 5 a 6 veces semana<br><input checked="" type="radio"/> 1 vez al día<br><input type="radio"/> 2 a 3 veces al día<br><input type="radio"/> 5 a 6 veces al día<br><input type="radio"/> más 6 veces al día |



|                                       |                                                                                                                                                                                                                                                                                                                                                                                                                                                                                                                               |
|---------------------------------------|-------------------------------------------------------------------------------------------------------------------------------------------------------------------------------------------------------------------------------------------------------------------------------------------------------------------------------------------------------------------------------------------------------------------------------------------------------------------------------------------------------------------------------|
| Otro alimento                         |                                                                                                                                                                                                                                                                                                                                                                                                                                                                                                                               |
| suplementos vitamínicos               | <input checked="" type="radio"/> si<br><input type="radio"/> no                                                                                                                                                                                                                                                                                                                                                                                                                                                               |
| suplementos vitamínicos               | [*DATA REMOVED*]                                                                                                                                                                                                                                                                                                                                                                                                                                                                                                              |
| dieta previa                          | <input type="radio"/> si<br><input checked="" type="radio"/> no                                                                                                                                                                                                                                                                                                                                                                                                                                                               |
| motivo dieta                          | <input checked="" type="radio"/> no dieta<br><input type="radio"/> control peso<br><input type="radio"/> control colesterol<br><input type="radio"/> control diabetes<br><input type="radio"/> problemas estómago<br><input type="radio"/> problemas vesícula o hepáticos<br><input type="radio"/> HTA o cardiopatía<br><input type="radio"/> problemas renales<br><input type="radio"/> alergia alimentaria<br><input type="radio"/> ácido úrico elevado<br><input type="radio"/> vegetariana<br><input type="radio"/> otros |
| cambio alimentos año previo gestación | <input type="radio"/> si<br><input checked="" type="radio"/> no                                                                                                                                                                                                                                                                                                                                                                                                                                                               |
| cambio lácteos                        | <input type="radio"/> eliminado<br><input type="radio"/> disminuido<br><input checked="" type="radio"/> igual<br><input type="radio"/> aumentado<br><input type="radio"/> no sabe                                                                                                                                                                                                                                                                                                                                             |
| cambio huevos                         | <input type="radio"/> eliminado<br><input type="radio"/> disminuido<br><input checked="" type="radio"/> igual<br><input type="radio"/> aumentado<br><input type="radio"/> no sabe                                                                                                                                                                                                                                                                                                                                             |
| cambio carne                          | <input type="radio"/> eliminado<br><input type="radio"/> disminuido<br><input checked="" type="radio"/> igual<br><input type="radio"/> aumentado<br><input type="radio"/> no sabe                                                                                                                                                                                                                                                                                                                                             |
| cambio pescado                        | <input type="radio"/> eliminado<br><input type="radio"/> disminuido<br><input checked="" type="radio"/> igual<br><input type="radio"/> aumentado<br><input type="radio"/> no sabe                                                                                                                                                                                                                                                                                                                                             |
| cambio verduras                       | <input type="radio"/> eliminado<br><input type="radio"/> disminuido<br><input checked="" type="radio"/> igual<br><input type="radio"/> aumentado<br><input type="radio"/> no sabe                                                                                                                                                                                                                                                                                                                                             |

|                            |                                                                                                                                                                                                                        |
|----------------------------|------------------------------------------------------------------------------------------------------------------------------------------------------------------------------------------------------------------------|
| cambio legumbres           | <input type="radio"/> eliminado<br><input type="radio"/> disminuido<br><input checked="" type="radio"/> igual<br><input type="radio"/> aumentado<br><input type="radio"/> no sabe                                      |
| cambio fruta               | <input type="radio"/> eliminado<br><input type="radio"/> disminuido<br><input checked="" type="radio"/> igual<br><input type="radio"/> aumentado<br><input type="radio"/> no sabe                                      |
| cambio pan                 | <input type="radio"/> eliminado<br><input type="radio"/> disminuido<br><input checked="" type="radio"/> igual<br><input type="radio"/> aumentado<br><input type="radio"/> no sabe                                      |
| cambio aceite oliva        | <input type="radio"/> eliminado<br><input type="radio"/> disminuido<br><input checked="" type="radio"/> igual<br><input type="radio"/> aumentado<br><input type="radio"/> no sabe                                      |
| cambio mante o margarina   | <input type="radio"/> eliminado<br><input type="radio"/> disminuido<br><input checked="" type="radio"/> igual<br><input type="radio"/> aumentado<br><input type="radio"/> no sabe                                      |
| cambio azúcar y dulces     | <input type="radio"/> eliminado<br><input type="radio"/> disminuido<br><input checked="" type="radio"/> igual<br><input type="radio"/> aumentado<br><input type="radio"/> no sabe                                      |
| cambio bebidas alcohólicas | <input type="radio"/> eliminado<br><input type="radio"/> disminuido<br><input checked="" type="radio"/> igual<br><input type="radio"/> aumentado<br><input type="radio"/> no sabe                                      |
| frecuencia comidas fritas  | <input type="radio"/> a diario<br><input type="radio"/> 5 a 6 veces semana<br><input type="radio"/> 2 a 4 veces semana<br><input type="radio"/> 1 vez semana<br><input checked="" type="radio"/> menos de 1 vez semana |
| carne                      | <input type="radio"/> no como<br><input type="radio"/> cruda<br><input type="radio"/> poco hecha<br><input checked="" type="radio"/> hecha<br><input type="radio"/> muy hecha                                          |
| grasa visible carne        | <input type="radio"/> quita toda<br><input checked="" type="radio"/> quita mayoría<br><input type="radio"/> quita un poco<br><input type="radio"/> no quita nada                                                       |

|                                |                                                                                                                                                                                                                                                          |
|--------------------------------|----------------------------------------------------------------------------------------------------------------------------------------------------------------------------------------------------------------------------------------------------------|
| cocina carne                   | <input checked="" type="radio"/> a la plancha<br><input type="radio"/> a la parrilla<br><input type="radio"/> asada<br><input type="radio"/> frita<br><input type="radio"/> guisada                                                                      |
| tostado quemado carne          | <input checked="" type="radio"/> nunca<br><input type="radio"/> 1 vez mes<br><input type="radio"/> 2 a 3 veces mes<br><input type="radio"/> 1 vez semana<br><input type="radio"/> 2 a 3 semanas                                                          |
| tostado quemado pescado        | <input checked="" type="radio"/> nunca<br><input type="radio"/> 1 vez mes<br><input type="radio"/> 2 a 3 veces mes<br><input type="radio"/> 1 vez semana<br><input type="radio"/> 2 a 3 semanas                                                          |
| socarrat paella                | <input type="radio"/> nunca<br><input type="radio"/> 1 vez mes<br><input type="radio"/> 2 a 3 veces mes<br><input checked="" type="radio"/> 1 vez semana<br><input type="radio"/> 2 a 3 semanas                                                          |
| grasa o aceite cocinar         | <input type="radio"/> mantequilla<br><input type="radio"/> margarina<br><input type="radio"/> aceite oliva<br><input checked="" type="radio"/> aceite oliva virgen extra<br><input type="radio"/> aceite vegetal<br><input type="radio"/> mezcla aceites |
| grasa aceite aliñar            | <input type="radio"/> mantequilla<br><input type="radio"/> margarina<br><input type="radio"/> aceite oliva<br><input checked="" type="radio"/> aceite oliva virgen extra<br><input type="radio"/> aceite vegetal<br><input type="radio"/> mezcla aceites |
| grasa aceite freir             | <input type="radio"/> mantequilla<br><input type="radio"/> margarina<br><input type="radio"/> aceite oliva<br><input checked="" type="radio"/> aceite oliva virgen extra<br><input type="radio"/> aceite vegetal<br><input type="radio"/> mezcla aceites |
| Ejercicio cuestionario         | <input checked="" type="radio"/> si<br><input type="radio"/> no                                                                                                                                                                                          |
| horas de sueño incluido siesta | [*DATA REMOVED*]                                                                                                                                                                                                                                         |
| minutos siesta                 | [*DATA REMOVED*]                                                                                                                                                                                                                                         |
| horas televisión semana        | [*DATA REMOVED*]                                                                                                                                                                                                                                         |

|                                        |                                                                                                                                                                                                                                                                                                                                                                           |
|----------------------------------------|---------------------------------------------------------------------------------------------------------------------------------------------------------------------------------------------------------------------------------------------------------------------------------------------------------------------------------------------------------------------------|
| actividad trabajo                      | <input type="radio"/> casi siempre sentado<br><input type="radio"/> sentado 50 por cien<br><input type="radio"/> casi siempre de pie, quieto<br><input checked="" type="radio"/> casi siempre levantado caminando y llevando pocas cosas<br><input type="radio"/> casi siempre levantado, caminando y llevado muchas cosas<br><input type="radio"/> trabajo manual pesado |
| tiempo caminar o bici al día           | <input type="radio"/> casi nunca<br><input type="radio"/> menos 20min día<br><input type="radio"/> 20 a 40 min día<br><input type="radio"/> 40 a 60 min día<br><input type="radio"/> 1h o 1h y media día<br><input checked="" type="radio"/> más de 1h y media al día                                                                                                     |
| tiempo tareas casa al día              | <input type="radio"/> menos de 1h día<br><input checked="" type="radio"/> 1 a 2h día<br><input type="radio"/> 3 a 4h día<br><input type="radio"/> 5 a 6h día<br><input type="radio"/> 7 a 8h día<br><input type="radio"/> más de 8h día                                                                                                                                   |
| tiempo libre televisión ordenador leer | <input type="radio"/> menos 1h día<br><input type="radio"/> 1h día<br><input checked="" type="radio"/> 2h día<br><input type="radio"/> 3h día<br><input type="radio"/> 4h día<br><input type="radio"/> 5 a 6h día<br><input type="radio"/> mas 6h día                                                                                                                     |
| tiempo libre ejercicio o deporte       | <input type="radio"/> menos 1h semana<br><input type="radio"/> 1h semana<br><input type="radio"/> 2h semana<br><input type="radio"/> 3h semana<br><input type="radio"/> 4 a 5h semana<br><input checked="" type="radio"/> mas 5h semana                                                                                                                                   |
| como se considera                      | <input type="radio"/> sedentaria<br><input type="radio"/> poco activa<br><input type="radio"/> moderadamente activa<br><input checked="" type="radio"/> bastante activa<br><input type="radio"/> muy activa<br><input type="radio"/> no sabe                                                                                                                              |
| FUR                                    | [*DATA REMOVED*]                                                                                                                                                                                                                                                                                                                                                          |
| Semanas gestación 2T                   | [*DATA REMOVED*]                                                                                                                                                                                                                                                                                                                                                          |
| Días gestación 2T                      | [*DATA REMOVED*]                                                                                                                                                                                                                                                                                                                                                          |
| DBP 2T                                 | [*DATA REMOVED*]                                                                                                                                                                                                                                                                                                                                                          |
| CC 2T                                  | [*DATA REMOVED*]                                                                                                                                                                                                                                                                                                                                                          |
| AC 2T                                  | [*DATA REMOVED*]                                                                                                                                                                                                                                                                                                                                                          |

|                                                   |                                                                                                                                                                                                 |
|---------------------------------------------------|-------------------------------------------------------------------------------------------------------------------------------------------------------------------------------------------------|
| LF 2T                                             | [*DATA REMOVED*]                                                                                                                                                                                |
| PFE 2T (Hadlock)                                  | [*DATA REMOVED*]                                                                                                                                                                                |
| Semanas gestación 3T                              | [*DATA REMOVED*]                                                                                                                                                                                |
| días 3T                                           | [*DATA REMOVED*]                                                                                                                                                                                |
| DBP 3T                                            | [*DATA REMOVED*]                                                                                                                                                                                |
| CC 3T                                             | [*DATA REMOVED*]                                                                                                                                                                                |
| AC 3T                                             | [*DATA REMOVED*]                                                                                                                                                                                |
| LF 3T                                             | [*DATA REMOVED*]                                                                                                                                                                                |
| PFE 3T (Hadlock)                                  | [*DATA REMOVED*]                                                                                                                                                                                |
| Semanas de gestación final                        | [*DATA REMOVED*]                                                                                                                                                                                |
| días gestación final                              | [*DATA REMOVED*]                                                                                                                                                                                |
| Localización placenta                             | <input checked="" type="radio"/> anterior<br><input type="radio"/> lateral derecha<br><input type="radio"/> lateral izquierda<br><input type="radio"/> posterior<br><input type="radio"/> fondo |
| Presentación longitudinal cefálica                | <input type="radio"/> no<br><input checked="" type="radio"/> si                                                                                                                                 |
| Dorso                                             | <input type="radio"/> izquierda anterior<br><input type="radio"/> izquierda posterior<br><input checked="" type="radio"/> derecha anterior<br><input type="radio"/> derecha posterior           |
| diámetro biparietal                               | [*DATA REMOVED*]                                                                                                                                                                                |
| Circunferencia craneal                            | [*DATA REMOVED*]                                                                                                                                                                                |
| Circunferencia abdominal                          | [*DATA REMOVED*]                                                                                                                                                                                |
| Longitud de femur                                 | [*DATA REMOVED*]                                                                                                                                                                                |
| tejido celular subcutáneo a nivel del muslo en mm | [*DATA REMOVED*]                                                                                                                                                                                |
| tejido celular subcutáneo en abdomen en mm        | [*DATA REMOVED*]                                                                                                                                                                                |
| Volumen del muslo en cm3                          | [*DATA REMOVED*]                                                                                                                                                                                |
| Peso fetal estimado según fórmula de Hadlock      | [*DATA REMOVED*]                                                                                                                                                                                |

|                                               |                                                                                                                                                          |
|-----------------------------------------------|----------------------------------------------------------------------------------------------------------------------------------------------------------|
| Percentil                                     | [*DATA REMOVED*]                                                                                                                                         |
| Peso fetal estimado según fórmula de Scioscia | <hr/>                                                                                                                                                    |
| Peso fetal estimado según fórmula de LEE      | <hr/>                                                                                                                                                    |
| Tipo de parto                                 | <input checked="" type="radio"/> eutocico<br><input type="radio"/> instrumentado/ventosa<br><input type="radio"/> cesarea                                |
| fecha de nacimiento                           | [*DATA REMOVED*]                                                                                                                                         |
| Días entre exploración y nacimiento           | [*DATA REMOVED*]                                                                                                                                         |
| Peso RN en g                                  | [*DATA REMOVED*]                                                                                                                                         |
| sexo                                          | <input type="radio"/> mujer<br><input checked="" type="radio"/> hombre                                                                                   |
| Apgar 1 minuto                                | [*DATA REMOVED*]                                                                                                                                         |
| Apgar 5 minutos                               | [*DATA REMOVED*]                                                                                                                                         |
| Apgar 10 minutos                              | <hr/>                                                                                                                                                    |
| antecedente Covid durante gestación           | <input type="radio"/> Yes<br><input checked="" type="radio"/> No                                                                                         |
| Nivel de estudios                             | <input type="radio"/> ninguno<br><input type="radio"/> primarios<br><input checked="" type="radio"/> secundarios<br><input type="radio"/> universitarios |

# Base\_datos\_estimacion\_peso\_fetal

|                                       |                                                                                                                                                                                                                                                                                      |
|---------------------------------------|--------------------------------------------------------------------------------------------------------------------------------------------------------------------------------------------------------------------------------------------------------------------------------------|
| Número de identificación participante | 43                                                                                                                                                                                                                                                                                   |
| CODIGO PARTICIPANTE                   |                                                                                                                                                                                                                                                                                      |
| Edad                                  | [*DATA REMOVED*]                                                                                                                                                                                                                                                                     |
| Gestaciones                           | <input checked="" type="radio"/> 1<br><input type="radio"/> 2<br><input type="radio"/> 3<br><input type="radio"/> mas de 3                                                                                                                                                           |
| partos                                | <input checked="" type="radio"/> 0<br><input type="radio"/> 1<br><input type="radio"/> 2<br><input type="radio"/> 3<br><input type="radio"/> mas de 3                                                                                                                                |
| cesáreas                              | <input checked="" type="radio"/> 0<br><input type="radio"/> 1<br><input type="radio"/> 2<br><input type="radio"/> 3<br><input type="radio"/> mas de 3                                                                                                                                |
| Abortos                               | <input checked="" type="radio"/> 0<br><input type="radio"/> 1<br><input type="radio"/> 2<br><input type="radio"/> 3<br><input type="radio"/> mas de 3                                                                                                                                |
| Tipo de gestacion                     | <input checked="" type="radio"/> espontanea<br><input type="radio"/> IAC inseminación artificial conyuge<br><input type="radio"/> IAD inseminación artificial donante<br><input type="radio"/> FIV Fecundación in Vitro<br><input type="radio"/> Ovodon FIV con donación de ovocitos |
| peso previo a embarazo                | [*DATA REMOVED*]                                                                                                                                                                                                                                                                     |
| Ganancia ponderal embarazo            | [*DATA REMOVED*]                                                                                                                                                                                                                                                                     |
| Talla madre                           | [*DATA REMOVED*]                                                                                                                                                                                                                                                                     |
| IMC previo embarazo                   | 31.239414355075468                                                                                                                                                                                                                                                                   |
| Patología obstétrica                  | <input checked="" type="radio"/> no<br><input type="radio"/> si                                                                                                                                                                                                                      |
| Diabetes pregestacional               | <input checked="" type="radio"/> no<br><input type="radio"/> si                                                                                                                                                                                                                      |
| Diabetes gestacional                  | <input checked="" type="radio"/> no<br><input type="radio"/> si                                                                                                                                                                                                                      |

|                                            |                                                                                                                                                                                      |
|--------------------------------------------|--------------------------------------------------------------------------------------------------------------------------------------------------------------------------------------|
| Diabetes gestacional con insulina          | <input checked="" type="radio"/> no<br><input type="radio"/> si                                                                                                                      |
| Diabetes gestacional con dieta y ejercicio | <input checked="" type="radio"/> no<br><input type="radio"/> si                                                                                                                      |
| Percentil fetos previos                    | <input checked="" type="radio"/> Nada<br><input type="radio"/> percentil menor de 10<br><input type="radio"/> percentil entre 10 y 90<br><input type="radio"/> percentil mayor de 90 |
| Exfumadora                                 | <input checked="" type="radio"/> Nada<br><input type="radio"/> menos de 5 años<br><input type="radio"/> 5 a 10 años<br><input type="radio"/> mayor o igual a 10 años                 |
| Hábito tabáquico                           | <input checked="" type="radio"/> no<br><input type="radio"/> si                                                                                                                      |
| fumadora                                   | [*DATA REMOVED*]                                                                                                                                                                     |
| Consumo otros tóxicos                      | <input checked="" type="radio"/> no<br><input type="radio"/> si                                                                                                                      |
| Hb 1T                                      | [*DATA REMOVED*]                                                                                                                                                                     |
| Htc 1T                                     | [*DATA REMOVED*]                                                                                                                                                                     |
| Hb 2T                                      | [*DATA REMOVED*]                                                                                                                                                                     |
| HTC 2T                                     | [*DATA REMOVED*]                                                                                                                                                                     |
| Hb 3T                                      | [*DATA REMOVED*]                                                                                                                                                                     |
| HTC 3T                                     | [*DATA REMOVED*]                                                                                                                                                                     |
| Suplemento FE oral                         | <input checked="" type="radio"/> si<br><input type="radio"/> no                                                                                                                      |
| Suplemento fe iv                           | <input type="radio"/> si<br><input checked="" type="radio"/> no                                                                                                                      |
| Transfusión                                | <input checked="" type="radio"/> no<br><input type="radio"/> si                                                                                                                      |
| Solicitada Vit D                           | <input type="radio"/> no<br><input checked="" type="radio"/> si                                                                                                                      |
| Deficit vit D                              | <input type="radio"/> no<br><input checked="" type="radio"/> si                                                                                                                      |
| Suplemento vit D                           | <input checked="" type="radio"/> si<br><input type="radio"/> no                                                                                                                      |



|                       |                                                                                                                                                                                                                                                                                                                                                                                                              |
|-----------------------|--------------------------------------------------------------------------------------------------------------------------------------------------------------------------------------------------------------------------------------------------------------------------------------------------------------------------------------------------------------------------------------------------------------|
| Dieta, cuestionario   | <input checked="" type="radio"/> si<br><input type="radio"/> no                                                                                                                                                                                                                                                                                                                                              |
| Leche entera          | <input type="radio"/> Nunca o menos 1 vez al mes<br><input type="radio"/> 1 a 3 veces mes<br><input type="radio"/> 1 vez semana<br><input type="radio"/> 2 a 4 veces semana<br><input checked="" type="radio"/> 5 a 6 veces semana<br><input type="radio"/> 1 vez al día<br><input type="radio"/> 2 a 3 veces al día<br><input type="radio"/> 5 a 6 veces al día<br><input type="radio"/> más 6 veces al día |
| Leche semidesnatada   | <input checked="" type="radio"/> Nunca o menos 1 vez al mes<br><input type="radio"/> 1 a 3 veces mes<br><input type="radio"/> 1 vez semana<br><input type="radio"/> 2 a 4 veces semana<br><input type="radio"/> 5 a 6 veces semana<br><input type="radio"/> 1 vez al día<br><input type="radio"/> 2 a 3 veces al día<br><input type="radio"/> 5 a 6 veces al día<br><input type="radio"/> mas 6 veces al día |
| Leche desnatada       | <input checked="" type="radio"/> Nunca o menos 1 vez al mes<br><input type="radio"/> 1 a 3 veces mes<br><input type="radio"/> 1 vez semana<br><input type="radio"/> 2 a 4 veces semana<br><input type="radio"/> 5 a 6 veces semana<br><input type="radio"/> 1 vez al día<br><input type="radio"/> 2 a 3 veces al día<br><input type="radio"/> 5 a 6 veces al día<br><input type="radio"/> más 6 veces al día |
| Leche condensada      | <input checked="" type="radio"/> Nunca o menos 1 vez al mes<br><input type="radio"/> 1 a 3 veces mes<br><input type="radio"/> 1 vez semana<br><input type="radio"/> 2 a 4 veces semana<br><input type="radio"/> 5 a 6 veces semana<br><input type="radio"/> 1 vez al día<br><input type="radio"/> 2 a 3 veces al día<br><input type="radio"/> 5 a 6 veces al día<br><input type="radio"/> más 6 veces al día |
| nata o crema de leche | <input type="radio"/> Nunca o menos 1 vez al mes<br><input type="radio"/> 1 a 3 veces mes<br><input type="radio"/> 1 vez semana<br><input checked="" type="radio"/> 2 a 4 veces semana<br><input type="radio"/> 5 a 6 veces semana<br><input type="radio"/> 1 vez al día<br><input type="radio"/> 2 a 3 veces al día<br><input type="radio"/> 5 a 6 veces al día<br><input type="radio"/> más 6 veces al día |

|                                             |                                                                                                                                                                                                                                                                                                                                                                                                              |
|---------------------------------------------|--------------------------------------------------------------------------------------------------------------------------------------------------------------------------------------------------------------------------------------------------------------------------------------------------------------------------------------------------------------------------------------------------------------|
| Yogurt Entero                               | <input checked="" type="radio"/> Nunca o menos 1 vez al mes<br><input type="radio"/> 1 a 3 veces mes<br><input type="radio"/> 1 vez semana<br><input type="radio"/> 2 a 4 veces semana<br><input type="radio"/> 5 a 6 veces semana<br><input type="radio"/> 1 vez al día<br><input type="radio"/> 2 a 3 veces al día<br><input type="radio"/> 5 a 6 veces al día<br><input type="radio"/> más 6 veces al día |
| Yogurt desnatado                            | <input checked="" type="radio"/> Nunca o menos 1 vez al mes<br><input type="radio"/> 1 a 3 veces mes<br><input type="radio"/> 1 vez semana<br><input type="radio"/> 2 a 4 veces semana<br><input type="radio"/> 5 a 6 veces semana<br><input type="radio"/> 1 vez al día<br><input type="radio"/> 2 a 3 veces al día<br><input type="radio"/> 5 a 6 veces al día<br><input type="radio"/> más 6 veces al día |
| 100g requesón o queso blando o queso fresco | <input checked="" type="radio"/> Nunca o menos 1 vez al mes<br><input type="radio"/> 1 a 3 veces mes<br><input type="radio"/> 1 vez semana<br><input type="radio"/> 2 a 4 veces semana<br><input type="radio"/> 5 a 6 veces semana<br><input type="radio"/> 1 vez al día<br><input type="radio"/> 2 a 3 veces al día<br><input type="radio"/> 5 a 6 veces al día<br><input type="radio"/> más 6 veces al día |
| queso curado o semicurado o cremoso         | <input checked="" type="radio"/> Nunca o menos 1 vez al mes<br><input type="radio"/> 1 a 3 veces mes<br><input type="radio"/> 1 vez semana<br><input type="radio"/> 2 a 4 veces semana<br><input type="radio"/> 5 a 6 veces semana<br><input type="radio"/> 1 vez al día<br><input type="radio"/> 2 a 3 veces al día<br><input type="radio"/> 5 a 6 veces al día<br><input type="radio"/> más 6 veces al día |
| natillas flan pudding                       | <input checked="" type="radio"/> Nunca o menos 1 vez al mes<br><input type="radio"/> 1 a 3 veces mes<br><input type="radio"/> 1 vez semana<br><input type="radio"/> 2 a 4 veces semana<br><input type="radio"/> 5 a 6 veces semana<br><input type="radio"/> 1 vez al día<br><input type="radio"/> 2 a 3 veces al día<br><input type="radio"/> 5 a 6 veces al día<br><input type="radio"/> más 6 veces al día |
| Helado                                      | <input type="radio"/> Nunca o menos 1 vez al mes<br><input type="radio"/> 1 a 3 veces mes<br><input checked="" type="radio"/> 1 vez semana<br><input type="radio"/> 2 a 4 veces semana<br><input type="radio"/> 5 a 6 veces semana<br><input type="radio"/> 1 vez al día<br><input type="radio"/> 2 a 3 veces al día<br><input type="radio"/> 5 a 6 veces al día<br><input type="radio"/> más 6 veces al día |

|                                      |                                                                                                                                                                                                                                                                                                                                                                                                              |
|--------------------------------------|--------------------------------------------------------------------------------------------------------------------------------------------------------------------------------------------------------------------------------------------------------------------------------------------------------------------------------------------------------------------------------------------------------------|
| huevo                                | <input type="radio"/> Nunca o menos 1 vez al mes<br><input type="radio"/> 1 a 3 veces mes<br><input type="radio"/> 1 vez semana<br><input checked="" type="radio"/> 2 a 4 veces semana<br><input type="radio"/> 5 a 6 veces semana<br><input type="radio"/> 1 vez al día<br><input type="radio"/> 2 a 3 veces al día<br><input type="radio"/> 5 a 6 veces al día<br><input type="radio"/> más 6 veces al día |
| Pollo con piel                       | <input type="radio"/> Nunca o menos 1 vez al mes<br><input type="radio"/> 1 a 3 veces mes<br><input type="radio"/> 1 vez semana<br><input checked="" type="radio"/> 2 a 4 veces semana<br><input type="radio"/> 5 a 6 veces semana<br><input type="radio"/> 1 vez al día<br><input type="radio"/> 2 a 3 veces al día<br><input type="radio"/> 5 a 6 veces al día<br><input type="radio"/> más 6 veces al día |
| pollo sin piel                       | <input type="radio"/> Nunca o menos 1 vez al mes<br><input type="radio"/> 1 a 3 veces mes<br><input type="radio"/> 1 vez semana<br><input checked="" type="radio"/> 2 a 4 veces semana<br><input type="radio"/> 5 a 6 veces semana<br><input type="radio"/> 1 vez al día<br><input type="radio"/> 2 a 3 veces al día<br><input type="radio"/> 5 a 6 veces al día<br><input type="radio"/> más 6 veces al día |
| Ternera o cerdo o cordero            | <input checked="" type="radio"/> Nunca o menos 1 vez al mes<br><input type="radio"/> 1 a 3 veces mes<br><input type="radio"/> 1 vez semana<br><input type="radio"/> 2 a 4 veces semana<br><input type="radio"/> 5 a 6 veces semana<br><input type="radio"/> 1 vez al día<br><input type="radio"/> 2 a 3 veces al día<br><input type="radio"/> 5 a 6 veces al día<br><input type="radio"/> más 6 veces al día |
| carne caza: Conejo o codorniz o pato | <input checked="" type="radio"/> Nunca o menos 1 vez al mes<br><input type="radio"/> 1 a 3 veces mes<br><input type="radio"/> 1 vez semana<br><input type="radio"/> 2 a 4 veces semana<br><input type="radio"/> 5 a 6 veces semana<br><input type="radio"/> 1 vez al día<br><input type="radio"/> 2 a 3 veces al día<br><input type="radio"/> 5 a 6 veces al día<br><input type="radio"/> más 6 veces al día |
| Hígado de ternera o cerdo o pollo    | <input checked="" type="radio"/> Nunca o menos 1 vez al mes<br><input type="radio"/> 1 a 3 veces mes<br><input type="radio"/> 1 vez semana<br><input type="radio"/> 2 a 4 veces semana<br><input type="radio"/> 5 a 6 veces semana<br><input type="radio"/> 1 vez al día<br><input type="radio"/> 2 a 3 veces al día<br><input type="radio"/> 5 a 6 veces al día<br><input type="radio"/> más 6 veces al día |

|                     |                                                                                                                                                                                                                                                                                                                                                                                                              |
|---------------------|--------------------------------------------------------------------------------------------------------------------------------------------------------------------------------------------------------------------------------------------------------------------------------------------------------------------------------------------------------------------------------------------------------------|
| Vísceras            | <input checked="" type="radio"/> Nunca o menos 1 vez al mes<br><input type="radio"/> 1 a 3 veces mes<br><input type="radio"/> 1 vez semana<br><input type="radio"/> 2 a 4 veces semana<br><input type="radio"/> 5 a 6 veces semana<br><input type="radio"/> 1 vez al día<br><input type="radio"/> 2 a 3 veces al día<br><input type="radio"/> 5 a 6 veces al día<br><input type="radio"/> más 6 veces al día |
| Embutido            | <input type="radio"/> Nunca o menos 1 vez al mes<br><input type="radio"/> 1 a 3 veces mes<br><input checked="" type="radio"/> 1 vez semana<br><input type="radio"/> 2 a 4 veces semana<br><input type="radio"/> 5 a 6 veces semana<br><input type="radio"/> 1 vez al día<br><input type="radio"/> 2 a 3 veces al día<br><input type="radio"/> 5 a 6 veces al día<br><input type="radio"/> más 6 veces al día |
| Salchicha o similar | <input checked="" type="radio"/> Nunca o menos 1 vez al mes<br><input type="radio"/> 1 a 3 veces mes<br><input type="radio"/> 1 vez semana<br><input type="radio"/> 2 a 4 veces semana<br><input type="radio"/> 5 a 6 veces semana<br><input type="radio"/> 1 vez al día<br><input type="radio"/> 2 a 3 veces al día<br><input type="radio"/> 5 a 6 veces al día<br><input type="radio"/> más 6 veces al día |
| Pate o foiegras     | <input checked="" type="radio"/> Nunca o menos 1 vez al mes<br><input type="radio"/> 1 a 3 veces mes<br><input type="radio"/> 1 vez semana<br><input type="radio"/> 2 a 4 veces semana<br><input type="radio"/> 5 a 6 veces semana<br><input type="radio"/> 1 vez al día<br><input type="radio"/> 2 a 3 veces al día<br><input type="radio"/> 5 a 6 veces al día<br><input type="radio"/> más 6 veces al día |
| Hamburguesa         | <input type="radio"/> Nunca o menos 1 vez al mes<br><input type="radio"/> 1 a 3 veces mes<br><input checked="" type="radio"/> 1 vez semana<br><input type="radio"/> 2 a 4 veces semana<br><input type="radio"/> 5 a 6 veces semana<br><input type="radio"/> 1 vez al día<br><input type="radio"/> 2 a 3 veces al día<br><input type="radio"/> 5 a 6 veces al día<br><input type="radio"/> más 6 veces al día |
| tocino o bacon      | <input checked="" type="radio"/> Nunca o menos 1 vez al mes<br><input type="radio"/> 1 a 3 veces mes<br><input type="radio"/> 1 vez semana<br><input type="radio"/> 2 a 4 veces semana<br><input type="radio"/> 5 a 6 veces semana<br><input type="radio"/> 1 vez al día<br><input type="radio"/> 2 a 3 veces al día<br><input type="radio"/> 5 a 6 veces al día<br><input type="radio"/> más 6 veces al día |

---

|               |                                                                                                                                                                                                                                                                                                                                                                                                              |
|---------------|--------------------------------------------------------------------------------------------------------------------------------------------------------------------------------------------------------------------------------------------------------------------------------------------------------------------------------------------------------------------------------------------------------------|
| Pescado frito | <input type="radio"/> Nunca o menos 1 vez al mes<br><input type="radio"/> 1 a 3 veces mes<br><input checked="" type="radio"/> 1 vez semana<br><input type="radio"/> 2 a 4 veces semana<br><input type="radio"/> 5 a 6 veces semana<br><input type="radio"/> 1 vez al día<br><input type="radio"/> 2 a 3 veces al día<br><input type="radio"/> 5 a 6 veces al día<br><input type="radio"/> más 6 veces al día |
|---------------|--------------------------------------------------------------------------------------------------------------------------------------------------------------------------------------------------------------------------------------------------------------------------------------------------------------------------------------------------------------------------------------------------------------|

---

|                        |                                                                                                                                                                                                                                                                                                                                                                                                              |
|------------------------|--------------------------------------------------------------------------------------------------------------------------------------------------------------------------------------------------------------------------------------------------------------------------------------------------------------------------------------------------------------------------------------------------------------|
| pescado hervido blanco | <input type="radio"/> Nunca o menos 1 vez al mes<br><input type="radio"/> 1 a 3 veces mes<br><input checked="" type="radio"/> 1 vez semana<br><input type="radio"/> 2 a 4 veces semana<br><input type="radio"/> 5 a 6 veces semana<br><input type="radio"/> 1 vez al día<br><input type="radio"/> 2 a 3 veces al día<br><input type="radio"/> 5 a 6 veces al día<br><input type="radio"/> más 6 veces al día |
|------------------------|--------------------------------------------------------------------------------------------------------------------------------------------------------------------------------------------------------------------------------------------------------------------------------------------------------------------------------------------------------------------------------------------------------------|

---

|                      |                                                                                                                                                                                                                                                                                                                                                                                                              |
|----------------------|--------------------------------------------------------------------------------------------------------------------------------------------------------------------------------------------------------------------------------------------------------------------------------------------------------------------------------------------------------------------------------------------------------------|
| pescado hervido azul | <input type="radio"/> Nunca o menos 1 vez al mes<br><input type="radio"/> 1 a 3 veces mes<br><input checked="" type="radio"/> 1 vez semana<br><input type="radio"/> 2 a 4 veces semana<br><input type="radio"/> 5 a 6 veces semana<br><input type="radio"/> 1 vez al día<br><input type="radio"/> 2 a 3 veces al día<br><input type="radio"/> 5 a 6 veces al día<br><input type="radio"/> más 6 veces al día |
|----------------------|--------------------------------------------------------------------------------------------------------------------------------------------------------------------------------------------------------------------------------------------------------------------------------------------------------------------------------------------------------------------------------------------------------------|

---

|                    |                                                                                                                                                                                                                                                                                                                                                                                                              |
|--------------------|--------------------------------------------------------------------------------------------------------------------------------------------------------------------------------------------------------------------------------------------------------------------------------------------------------------------------------------------------------------------------------------------------------------|
| otros pescado azul | <input type="radio"/> Nunca o menos 1 vez al mes<br><input type="radio"/> 1 a 3 veces mes<br><input checked="" type="radio"/> 1 vez semana<br><input type="radio"/> 2 a 4 veces semana<br><input type="radio"/> 5 a 6 veces semana<br><input type="radio"/> 1 vez al día<br><input type="radio"/> 2 a 3 veces al día<br><input type="radio"/> 5 a 6 veces al día<br><input type="radio"/> más 6 veces al día |
|--------------------|--------------------------------------------------------------------------------------------------------------------------------------------------------------------------------------------------------------------------------------------------------------------------------------------------------------------------------------------------------------------------------------------------------------|

---

|               |                                                                                                                                                                                                                                                                                                                                                                                                              |
|---------------|--------------------------------------------------------------------------------------------------------------------------------------------------------------------------------------------------------------------------------------------------------------------------------------------------------------------------------------------------------------------------------------------------------------|
| atun conserva | <input type="radio"/> Nunca o menos 1 vez al mes<br><input type="radio"/> 1 a 3 veces mes<br><input checked="" type="radio"/> 1 vez semana<br><input type="radio"/> 2 a 4 veces semana<br><input type="radio"/> 5 a 6 veces semana<br><input type="radio"/> 1 vez al día<br><input type="radio"/> 2 a 3 veces al día<br><input type="radio"/> 5 a 6 veces al día<br><input type="radio"/> más 6 veces al día |
|---------------|--------------------------------------------------------------------------------------------------------------------------------------------------------------------------------------------------------------------------------------------------------------------------------------------------------------------------------------------------------------------------------------------------------------|

---

|                  |                                                                                                                                                                                                                                                                                                                                                                                                              |
|------------------|--------------------------------------------------------------------------------------------------------------------------------------------------------------------------------------------------------------------------------------------------------------------------------------------------------------------------------------------------------------------------------------------------------------|
| sardina conserva | <input type="radio"/> Nunca o menos 1 vez al mes<br><input type="radio"/> 1 a 3 veces mes<br><input checked="" type="radio"/> 1 vez semana<br><input type="radio"/> 2 a 4 veces semana<br><input type="radio"/> 5 a 6 veces semana<br><input type="radio"/> 1 vez al día<br><input type="radio"/> 2 a 3 veces al día<br><input type="radio"/> 5 a 6 veces al día<br><input type="radio"/> más 6 veces al día |
|------------------|--------------------------------------------------------------------------------------------------------------------------------------------------------------------------------------------------------------------------------------------------------------------------------------------------------------------------------------------------------------------------------------------------------------|

---

|                                         |                                                                                                                                                                                                                                                                                                                                                                                                              |
|-----------------------------------------|--------------------------------------------------------------------------------------------------------------------------------------------------------------------------------------------------------------------------------------------------------------------------------------------------------------------------------------------------------------------------------------------------------------|
| pescado ahumado                         | <input type="radio"/> Nunca o menos 1 vez al mes<br><input type="radio"/> 1 a 3 veces mes<br><input type="radio"/> 1 vez semana<br><input type="radio"/> 2 a 4 veces semana<br><input type="radio"/> 5 a 6 veces semana<br><input type="radio"/> 1 vez al día<br><input type="radio"/> 2 a 3 veces al día<br><input type="radio"/> 5 a 6 veces al día<br><input type="radio"/> más 6 veces al día            |
| almejas o mejillones o ostras unos 100g | <input type="radio"/> Nunca o menos 1 vez al mes<br><input type="radio"/> 1 a 3 veces mes<br><input checked="" type="radio"/> 1 vez semana<br><input type="radio"/> 2 a 4 veces semana<br><input type="radio"/> 5 a 6 veces semana<br><input type="radio"/> 1 vez al día<br><input type="radio"/> 2 a 3 veces al día<br><input type="radio"/> 5 a 6 veces al día<br><input type="radio"/> más 6 veces al día |
| calamar o chipiron o sepia unos 100g    | <input type="radio"/> Nunca o menos 1 vez al mes<br><input type="radio"/> 1 a 3 veces mes<br><input checked="" type="radio"/> 1 vez semana<br><input type="radio"/> 2 a 4 veces semana<br><input type="radio"/> 5 a 6 veces semana<br><input type="radio"/> 1 vez al día<br><input type="radio"/> 2 a 3 veces al día<br><input type="radio"/> 5 a 6 veces al día<br><input type="radio"/> más 6 veces al día |
| marisco unos 100g                       | <input type="radio"/> Nunca o menos 1 vez al mes<br><input type="radio"/> 1 a 3 veces mes<br><input checked="" type="radio"/> 1 vez semana<br><input type="radio"/> 2 a 4 veces semana<br><input type="radio"/> 5 a 6 veces semana<br><input type="radio"/> 1 vez al día<br><input type="radio"/> 2 a 3 veces al día<br><input type="radio"/> 5 a 6 veces al día<br><input type="radio"/> más 6 veces al día |
| Espinacas o acelgas cocinadas           | <input checked="" type="radio"/> Nunca o menos 1 vez al mes<br><input type="radio"/> 1 a 3 veces mes<br><input type="radio"/> 1 vez semana<br><input type="radio"/> 2 a 4 veces semana<br><input type="radio"/> 5 a 6 veces semana<br><input type="radio"/> 1 vez al día<br><input type="radio"/> 2 a 3 veces al día<br><input type="radio"/> 5 a 6 veces al día<br><input type="radio"/> más 6 veces al día |
| Col o coliflor o brocoli cocinado       | <input checked="" type="radio"/> Nunca o menos 1 vez al mes<br><input type="radio"/> 1 a 3 veces mes<br><input type="radio"/> 1 vez semana<br><input type="radio"/> 2 a 4 veces semana<br><input type="radio"/> 5 a 6 veces semana<br><input type="radio"/> 1 vez al día<br><input type="radio"/> 2 a 3 veces al día<br><input type="radio"/> 5 a 6 veces al día<br><input type="radio"/> más 6 veces al día |

|                                |                                                                                                                                                                                                                                                                                                                                                                                                              |
|--------------------------------|--------------------------------------------------------------------------------------------------------------------------------------------------------------------------------------------------------------------------------------------------------------------------------------------------------------------------------------------------------------------------------------------------------------|
| Lechuga o endivia o escarola   | <input checked="" type="radio"/> Nunca o menos 1 vez al mes<br><input type="radio"/> 1 a 3 veces mes<br><input type="radio"/> 1 vez semana<br><input type="radio"/> 2 a 4 veces semana<br><input type="radio"/> 5 a 6 veces semana<br><input type="radio"/> 1 vez al día<br><input type="radio"/> 2 a 3 veces al día<br><input type="radio"/> 5 a 6 veces al día<br><input type="radio"/> más 6 veces al día |
| tomate ensalada                | <input type="radio"/> Nunca o menos 1 vez al mes<br><input checked="" type="radio"/> 1 a 3 veces mes<br><input type="radio"/> 1 vez semana<br><input type="radio"/> 2 a 4 veces semana<br><input type="radio"/> 5 a 6 veces semana<br><input type="radio"/> 1 vez al día<br><input type="radio"/> 2 a 3 veces al día<br><input type="radio"/> 5 a 6 veces al día<br><input type="radio"/> más 6 veces al día |
| cebolla                        | <input type="radio"/> Nunca o menos 1 vez al mes<br><input checked="" type="radio"/> 1 a 3 veces mes<br><input type="radio"/> 1 vez semana<br><input type="radio"/> 2 a 4 veces semana<br><input type="radio"/> 5 a 6 veces semana<br><input type="radio"/> 1 vez al día<br><input type="radio"/> 2 a 3 veces al día<br><input type="radio"/> 5 a 6 veces al día<br><input type="radio"/> más 6 veces al día |
| Zanahoria o calabaza           | <input type="radio"/> Nunca o menos 1 vez al mes<br><input checked="" type="radio"/> 1 a 3 veces mes<br><input type="radio"/> 1 vez semana<br><input type="radio"/> 2 a 4 veces semana<br><input type="radio"/> 5 a 6 veces semana<br><input type="radio"/> 1 vez al día<br><input type="radio"/> 2 a 3 veces al día<br><input type="radio"/> 5 a 6 veces al día<br><input type="radio"/> más 6 veces al día |
| Judías verdes                  | <input type="radio"/> Nunca o menos 1 vez al mes<br><input checked="" type="radio"/> 1 a 3 veces mes<br><input type="radio"/> 1 vez semana<br><input type="radio"/> 2 a 4 veces semana<br><input type="radio"/> 5 a 6 veces semana<br><input type="radio"/> 1 vez al día<br><input type="radio"/> 2 a 3 veces al día<br><input type="radio"/> 5 a 6 veces al día<br><input type="radio"/> más 6 veces al día |
| Berenjena o calabacin o pepino | <input type="radio"/> Nunca o menos 1 vez al mes<br><input checked="" type="radio"/> 1 a 3 veces mes<br><input type="radio"/> 1 vez semana<br><input type="radio"/> 2 a 4 veces semana<br><input type="radio"/> 5 a 6 veces semana<br><input type="radio"/> 1 vez al día<br><input type="radio"/> 2 a 3 veces al día<br><input type="radio"/> 5 a 6 veces al día<br><input type="radio"/> más 6 veces al día |

---

pimiento

- ☐ Nunca o menos 1 vez al mes  
☒ 1 a 3 veces mes  
☐ 1 vez semana  
☐ 2 a 4 veces semana  
☐ 5 a 6 veces semana  
☐ 1 vez al día  
☐ 2 a 3 veces al día  
☐ 5 a 6 veces al día  
☐ más 6 veces al día

---

alcachofa

- ☐ Nunca o menos 1 vez al mes  
☒ 1 a 3 veces mes  
☐ 1 vez semana  
☐ 2 a 4 veces semana  
☐ 5 a 6 veces semana  
☐ 1 vez al día  
☐ 2 a 3 veces al día  
☐ 5 a 6 veces al día  
☐ más 6 veces al día

---

espárragos

- ☐ Nunca o menos 1 vez al mes  
☒ 1 a 3 veces mes  
☐ 1 vez semana  
☐ 2 a 4 veces semana  
☐ 5 a 6 veces semana  
☐ 1 vez al día  
☐ 2 a 3 veces al día  
☐ 5 a 6 veces al día  
☐ más 6 veces al día

---

maíz hervido

- ☐ Nunca o menos 1 vez al mes  
☒ 1 a 3 veces mes  
☐ 1 vez semana  
☐ 2 a 4 veces semana  
☐ 5 a 6 veces semana  
☐ 1 vez al día  
☐ 2 a 3 veces al día  
☐ 5 a 6 veces al día  
☐ más 6 veces al día

---

legumbres

- ☐ Nunca o menos 1 vez al mes  
☒ 1 a 3 veces mes  
☐ 1 vez semana  
☐ 2 a 4 veces semana  
☐ 5 a 6 veces semana  
☐ 1 vez al día  
☐ 2 a 3 veces al día  
☐ 5 a 6 veces al día  
☐ más 6 veces al día

---

naranjas o mandarinas

- ☐ Nunca o menos 1 vez al mes  
☐ 1 a 3 veces mes  
☐ 1 vez semana  
☐ 2 a 4 veces semana  
☒ 5 a 6 veces semana  
☐ 1 vez al día  
☐ 2 a 3 veces al día  
☐ 5 a 6 veces al día  
☐ más 6 veces al día



|                       |                                                                                                                                                                                                                                                                                                                                                                                                              |
|-----------------------|--------------------------------------------------------------------------------------------------------------------------------------------------------------------------------------------------------------------------------------------------------------------------------------------------------------------------------------------------------------------------------------------------------------|
| zum natural fruta     | <input type="radio"/> Nunca o menos 1 vez al mes<br><input type="radio"/> 1 a 3 veces mes<br><input type="radio"/> 1 vez semana<br><input type="radio"/> 2 a 4 veces semana<br><input checked="" type="radio"/> 5 a 6 veces semana<br><input type="radio"/> 1 vez al día<br><input type="radio"/> 2 a 3 veces al día<br><input type="radio"/> 5 a 6 veces al día<br><input type="radio"/> más 6 veces al día |
| platano               | <input type="radio"/> Nunca o menos 1 vez al mes<br><input type="radio"/> 1 a 3 veces mes<br><input type="radio"/> 1 vez semana<br><input type="radio"/> 2 a 4 veces semana<br><input checked="" type="radio"/> 5 a 6 veces semana<br><input type="radio"/> 1 vez al día<br><input type="radio"/> 2 a 3 veces al día<br><input type="radio"/> 5 a 6 veces al día<br><input type="radio"/> más 6 veces al día |
| manzana o pera        | <input type="radio"/> Nunca o menos 1 vez al mes<br><input type="radio"/> 1 a 3 veces mes<br><input checked="" type="radio"/> 1 vez semana<br><input type="radio"/> 2 a 4 veces semana<br><input type="radio"/> 5 a 6 veces semana<br><input type="radio"/> 1 vez al día<br><input type="radio"/> 2 a 3 veces al día<br><input type="radio"/> 5 a 6 veces al día<br><input type="radio"/> más 6 veces al día |
| melocotón o nectarina | <input type="radio"/> Nunca o menos 1 vez al mes<br><input type="radio"/> 1 a 3 veces mes<br><input checked="" type="radio"/> 1 vez semana<br><input type="radio"/> 2 a 4 veces semana<br><input type="radio"/> 5 a 6 veces semana<br><input type="radio"/> 1 vez al día<br><input type="radio"/> 2 a 3 veces al día<br><input type="radio"/> 5 a 6 veces al día<br><input type="radio"/> más 6 veces al día |
| sandia o melon        | <input type="radio"/> Nunca o menos 1 vez al mes<br><input type="radio"/> 1 a 3 veces mes<br><input checked="" type="radio"/> 1 vez semana<br><input type="radio"/> 2 a 4 veces semana<br><input type="radio"/> 5 a 6 veces semana<br><input type="radio"/> 1 vez al día<br><input type="radio"/> 2 a 3 veces al día<br><input type="radio"/> 5 a 6 veces al día<br><input type="radio"/> más 6 veces al día |
| uva                   | <input type="radio"/> Nunca o menos 1 vez al mes<br><input type="radio"/> 1 a 3 veces mes<br><input checked="" type="radio"/> 1 vez semana<br><input type="radio"/> 2 a 4 veces semana<br><input type="radio"/> 5 a 6 veces semana<br><input type="radio"/> 1 vez al día<br><input type="radio"/> 2 a 3 veces al día<br><input type="radio"/> 5 a 6 veces al día<br><input type="radio"/> más 6 veces al día |

---

bruna o ciruela

- ☐ Nunca o menos 1 vez al mes  
☐ 1 a 3 veces mes  
☒ 1 vez semana  
☐ 2 a 4 veces semana  
☐ 5 a 6 veces semana  
☐ 1 vez al día  
☐ 2 a 3 veces al día  
☐ 5 a 6 veces al día  
☐ más 6 veces al día

---

kiwi

- ☐ Nunca o menos 1 vez al mes  
☐ 1 a 3 veces mes  
☒ 1 vez semana  
☐ 2 a 4 veces semana  
☐ 5 a 6 veces semana  
☐ 1 vez al día  
☐ 2 a 3 veces al día  
☐ 5 a 6 veces al día  
☐ más 6 veces al día

---

aceituna

- ☐ Nunca o menos 1 vez al mes  
☐ 1 a 3 veces mes  
☒ 1 vez semana  
☐ 2 a 4 veces semana  
☐ 5 a 6 veces semana  
☐ 1 vez al día  
☐ 2 a 3 veces al día  
☐ 5 a 6 veces al día  
☐ más 6 veces al día

---

frutos secos

- ☐ Nunca o menos 1 vez al mes  
☐ 1 a 3 veces mes  
☒ 1 vez semana  
☐ 2 a 4 veces semana  
☐ 5 a 6 veces semana  
☐ 1 vez al día  
☐ 2 a 3 veces al día  
☐ 5 a 6 veces al día  
☐ más 6 veces al día

---

pan blanco

- ☐ Nunca o menos 1 vez al mes  
☒ 1 a 3 veces mes  
☐ 1 vez semana  
☐ 2 a 4 veces semana  
☐ 5 a 6 veces semana  
☐ 1 vez al día  
☐ 2 a 3 veces al día  
☐ 5 a 6 veces al día  
☐ más 6 veces al día

---

pan integral

- ☐ Nunca o menos 1 vez al mes  
☐ 1 a 3 veces mes  
☒ 1 vez semana  
☐ 2 a 4 veces semana  
☐ 5 a 6 veces semana  
☐ 1 vez al día  
☐ 2 a 3 veces al día  
☐ 5 a 6 veces al día  
☐ más 6 veces al día

|                          |                                                                                                                                                                                                                                                                                                                                                                                                              |
|--------------------------|--------------------------------------------------------------------------------------------------------------------------------------------------------------------------------------------------------------------------------------------------------------------------------------------------------------------------------------------------------------------------------------------------------------|
| cereales desayuno        | <input type="radio"/> Nunca o menos 1 vez al mes<br><input checked="" type="radio"/> 1 a 3 veces mes<br><input type="radio"/> 1 vez semana<br><input type="radio"/> 2 a 4 veces semana<br><input type="radio"/> 5 a 6 veces semana<br><input type="radio"/> 1 vez al día<br><input type="radio"/> 2 a 3 veces al día<br><input type="radio"/> 5 a 6 veces al día<br><input type="radio"/> más 6 veces al día |
| patatas fritas           | <input type="radio"/> Nunca o menos 1 vez al mes<br><input type="radio"/> 1 a 3 veces mes<br><input checked="" type="radio"/> 1 vez semana<br><input type="radio"/> 2 a 4 veces semana<br><input type="radio"/> 5 a 6 veces semana<br><input type="radio"/> 1 vez al día<br><input type="radio"/> 2 a 3 veces al día<br><input type="radio"/> 5 a 6 veces al día<br><input type="radio"/> más 6 veces al día |
| patatas cocidas o asadas | <input type="radio"/> Nunca o menos 1 vez al mes<br><input checked="" type="radio"/> 1 a 3 veces mes<br><input type="radio"/> 1 vez semana<br><input type="radio"/> 2 a 4 veces semana<br><input type="radio"/> 5 a 6 veces semana<br><input type="radio"/> 1 vez al día<br><input type="radio"/> 2 a 3 veces al día<br><input type="radio"/> 5 a 6 veces al día<br><input type="radio"/> más 6 veces al día |
| bolsa papas              | <input type="radio"/> Nunca o menos 1 vez al mes<br><input checked="" type="radio"/> 1 a 3 veces mes<br><input type="radio"/> 1 vez semana<br><input type="radio"/> 2 a 4 veces semana<br><input type="radio"/> 5 a 6 veces semana<br><input type="radio"/> 1 vez al día<br><input type="radio"/> 2 a 3 veces al día<br><input type="radio"/> 5 a 6 veces al día<br><input type="radio"/> más 6 veces al día |
| arroz cocinado           | <input type="radio"/> Nunca o menos 1 vez al mes<br><input checked="" type="radio"/> 1 a 3 veces mes<br><input type="radio"/> 1 vez semana<br><input type="radio"/> 2 a 4 veces semana<br><input type="radio"/> 5 a 6 veces semana<br><input type="radio"/> 1 vez al día<br><input type="radio"/> 2 a 3 veces al día<br><input type="radio"/> 5 a 6 veces al día<br><input type="radio"/> más 6 veces al día |
| pasta                    | <input type="radio"/> Nunca o menos 1 vez al mes<br><input checked="" type="radio"/> 1 a 3 veces mes<br><input type="radio"/> 1 vez semana<br><input type="radio"/> 2 a 4 veces semana<br><input type="radio"/> 5 a 6 veces semana<br><input type="radio"/> 1 vez al día<br><input type="radio"/> 2 a 3 veces al día<br><input type="radio"/> 5 a 6 veces al día<br><input type="radio"/> más 6 veces al día |

|                     |                                                                                                                                                                                                                                                                                                                                                                                                              |
|---------------------|--------------------------------------------------------------------------------------------------------------------------------------------------------------------------------------------------------------------------------------------------------------------------------------------------------------------------------------------------------------------------------------------------------------|
| pizza               | <input type="radio"/> Nunca o menos 1 vez al mes<br><input checked="" type="radio"/> 1 a 3 veces mes<br><input type="radio"/> 1 vez semana<br><input type="radio"/> 2 a 4 veces semana<br><input type="radio"/> 5 a 6 veces semana<br><input type="radio"/> 1 vez al día<br><input type="radio"/> 2 a 3 veces al día<br><input type="radio"/> 5 a 6 veces al día<br><input type="radio"/> más 6 veces al día |
| aceite oliva        | <input type="radio"/> Nunca o menos 1 vez al mes<br><input checked="" type="radio"/> 1 a 3 veces mes<br><input type="radio"/> 1 vez semana<br><input type="radio"/> 2 a 4 veces semana<br><input type="radio"/> 5 a 6 veces semana<br><input type="radio"/> 1 vez al día<br><input type="radio"/> 2 a 3 veces al día<br><input type="radio"/> 5 a 6 veces al día<br><input type="radio"/> más 6 veces al día |
| otros aceites       | <input type="radio"/> Nunca o menos 1 vez al mes<br><input checked="" type="radio"/> 1 a 3 veces mes<br><input type="radio"/> 1 vez semana<br><input type="radio"/> 2 a 4 veces semana<br><input type="radio"/> 5 a 6 veces semana<br><input type="radio"/> 1 vez al día<br><input type="radio"/> 2 a 3 veces al día<br><input type="radio"/> 5 a 6 veces al día<br><input type="radio"/> más 6 veces al día |
| margarina           | <input type="radio"/> Nunca o menos 1 vez al mes<br><input checked="" type="radio"/> 1 a 3 veces mes<br><input type="radio"/> 1 vez semana<br><input type="radio"/> 2 a 4 veces semana<br><input type="radio"/> 5 a 6 veces semana<br><input type="radio"/> 1 vez al día<br><input type="radio"/> 2 a 3 veces al día<br><input type="radio"/> 5 a 6 veces al día<br><input type="radio"/> más 6 veces al día |
| mantequilla         | <input type="radio"/> Nunca o menos 1 vez al mes<br><input checked="" type="radio"/> 1 a 3 veces mes<br><input type="radio"/> 1 vez semana<br><input type="radio"/> 2 a 4 veces semana<br><input type="radio"/> 5 a 6 veces semana<br><input type="radio"/> 1 vez al día<br><input type="radio"/> 2 a 3 veces al día<br><input type="radio"/> 5 a 6 veces al día<br><input type="radio"/> más 6 veces al día |
| galletas tipo maria | <input type="radio"/> Nunca o menos 1 vez al mes<br><input type="radio"/> 1 a 3 veces mes<br><input type="radio"/> 1 vez semana<br><input type="radio"/> 2 a 4 veces semana<br><input type="radio"/> 5 a 6 veces semana<br><input type="radio"/> 1 vez al día<br><input type="radio"/> 2 a 3 veces al día<br><input type="radio"/> 5 a 6 veces al día<br><input type="radio"/> más 6 veces al día            |

|                           |                                                                                                                                                                                                                                                                                                                                                                                                              |
|---------------------------|--------------------------------------------------------------------------------------------------------------------------------------------------------------------------------------------------------------------------------------------------------------------------------------------------------------------------------------------------------------------------------------------------------------|
| galletas chocolate        | <input checked="" type="radio"/> Nunca o menos 1 vez al mes<br><input type="radio"/> 1 a 3 veces mes<br><input type="radio"/> 1 vez semana<br><input type="radio"/> 2 a 4 veces semana<br><input type="radio"/> 5 a 6 veces semana<br><input type="radio"/> 1 vez al día<br><input type="radio"/> 2 a 3 veces al día<br><input type="radio"/> 5 a 6 veces al día<br><input type="radio"/> más 6 veces al día |
| bollieria                 | <input type="radio"/> Nunca o menos 1 vez al mes<br><input checked="" type="radio"/> 1 a 3 veces mes<br><input type="radio"/> 1 vez semana<br><input type="radio"/> 2 a 4 veces semana<br><input type="radio"/> 5 a 6 veces semana<br><input type="radio"/> 1 vez al día<br><input type="radio"/> 2 a 3 veces al día<br><input type="radio"/> 5 a 6 veces al día<br><input type="radio"/> más 6 veces al día |
| chocolate o bombones      | <input type="radio"/> Nunca o menos 1 vez al mes<br><input checked="" type="radio"/> 1 a 3 veces mes<br><input type="radio"/> 1 vez semana<br><input type="radio"/> 2 a 4 veces semana<br><input type="radio"/> 5 a 6 veces semana<br><input type="radio"/> 1 vez al día<br><input type="radio"/> 2 a 3 veces al día<br><input type="radio"/> 5 a 6 veces al día<br><input type="radio"/> más 6 veces al día |
| chocolate polvo o colacao | <input type="radio"/> Nunca o menos 1 vez al mes<br><input checked="" type="radio"/> 1 a 3 veces mes<br><input type="radio"/> 1 vez semana<br><input type="radio"/> 2 a 4 veces semana<br><input type="radio"/> 5 a 6 veces semana<br><input type="radio"/> 1 vez al día<br><input type="radio"/> 2 a 3 veces al día<br><input type="radio"/> 5 a 6 veces al día<br><input type="radio"/> más 6 veces al día |
| vino tinto                | <input checked="" type="radio"/> Nunca o menos 1 vez al mes<br><input type="radio"/> 1 a 3 veces mes<br><input type="radio"/> 1 vez semana<br><input type="radio"/> 2 a 4 veces semana<br><input type="radio"/> 5 a 6 veces semana<br><input type="radio"/> 1 vez al día<br><input type="radio"/> 2 a 3 veces al día<br><input type="radio"/> 5 a 6 veces al día<br><input type="radio"/> más 6 veces al día |
| vino blanco               | <input checked="" type="radio"/> Nunca o menos 1 vez al mes<br><input type="radio"/> 1 a 3 veces mes<br><input type="radio"/> 1 vez semana<br><input type="radio"/> 2 a 4 veces semana<br><input type="radio"/> 5 a 6 veces semana<br><input type="radio"/> 1 vez al día<br><input type="radio"/> 2 a 3 veces al día<br><input type="radio"/> 5 a 6 veces al día<br><input type="radio"/> más 6 veces al día |

|                       |                                                                                                                                                                                                                                                                                                                                                                                                              |
|-----------------------|--------------------------------------------------------------------------------------------------------------------------------------------------------------------------------------------------------------------------------------------------------------------------------------------------------------------------------------------------------------------------------------------------------------|
| vino seco o vermut    | <input checked="" type="radio"/> Nunca o menos 1 vez al mes<br><input type="radio"/> 1 a 3 veces mes<br><input type="radio"/> 1 vez semana<br><input type="radio"/> 2 a 4 veces semana<br><input type="radio"/> 5 a 6 veces semana<br><input type="radio"/> 1 vez al día<br><input type="radio"/> 2 a 3 veces al día<br><input type="radio"/> 5 a 6 veces al día<br><input type="radio"/> más 6 veces al día |
| cerveza               | <input checked="" type="radio"/> Nunca o menos 1 vez al mes<br><input type="radio"/> 1 a 3 veces mes<br><input type="radio"/> 1 vez semana<br><input type="radio"/> 2 a 4 veces semana<br><input type="radio"/> 5 a 6 veces semana<br><input type="radio"/> 1 vez al día<br><input type="radio"/> 2 a 3 veces al día<br><input type="radio"/> 5 a 6 veces al día<br><input type="radio"/> más 6 veces al día |
| cerveza sin alcohol   | <input checked="" type="radio"/> Nunca o menos 1 vez al mes<br><input type="radio"/> 1 a 3 veces mes<br><input type="radio"/> 1 vez semana<br><input type="radio"/> 2 a 4 veces semana<br><input type="radio"/> 5 a 6 veces semana<br><input type="radio"/> 1 vez al día<br><input type="radio"/> 2 a 3 veces al día<br><input type="radio"/> 5 a 6 veces al día<br><input type="radio"/> más 6 veces al día |
| licores               | <input checked="" type="radio"/> Nunca o menos 1 vez al mes<br><input type="radio"/> 1 a 3 veces mes<br><input type="radio"/> 1 vez semana<br><input type="radio"/> 2 a 4 veces semana<br><input type="radio"/> 5 a 6 veces semana<br><input type="radio"/> 1 vez al día<br><input type="radio"/> 2 a 3 veces al día<br><input type="radio"/> 5 a 6 veces al día<br><input type="radio"/> más 6 veces al día |
| ginebra o ron o vodka | <input checked="" type="radio"/> Nunca o menos 1 vez al mes<br><input type="radio"/> 1 a 3 veces mes<br><input type="radio"/> 1 vez semana<br><input type="radio"/> 2 a 4 veces semana<br><input type="radio"/> 5 a 6 veces semana<br><input type="radio"/> 1 vez al día<br><input type="radio"/> 2 a 3 veces al día<br><input type="radio"/> 5 a 6 veces al día<br><input type="radio"/> más 6 veces al día |
| refresco normal       | <input checked="" type="radio"/> Nunca o menos 1 vez al mes<br><input type="radio"/> 1 a 3 veces mes<br><input type="radio"/> 1 vez semana<br><input type="radio"/> 2 a 4 veces semana<br><input type="radio"/> 5 a 6 veces semana<br><input type="radio"/> 1 vez al día<br><input type="radio"/> 2 a 3 veces al día<br><input type="radio"/> 5 a 6 veces al día<br><input type="radio"/> más 6 veces al día |

|                          |                                                                                                                                                                                                                                                                                                                                                                                                              |
|--------------------------|--------------------------------------------------------------------------------------------------------------------------------------------------------------------------------------------------------------------------------------------------------------------------------------------------------------------------------------------------------------------------------------------------------------|
| refresco sin azúcar      | <input checked="" type="radio"/> Nunca o menos 1 vez al mes<br><input type="radio"/> 1 a 3 veces mes<br><input type="radio"/> 1 vez semana<br><input type="radio"/> 2 a 4 veces semana<br><input type="radio"/> 5 a 6 veces semana<br><input type="radio"/> 1 vez al día<br><input type="radio"/> 2 a 3 veces al día<br><input type="radio"/> 5 a 6 veces al día<br><input type="radio"/> más 6 veces al día |
| Agua del grifo           | <input checked="" type="radio"/> Nunca o menos 1 vez al mes<br><input type="radio"/> 1 a 3 veces mes<br><input type="radio"/> 1 vez semana<br><input type="radio"/> 2 a 4 veces semana<br><input type="radio"/> 5 a 6 veces semana<br><input type="radio"/> 1 vez al día<br><input type="radio"/> 2 a 3 veces al día<br><input type="radio"/> 5 a 6 veces al día<br><input type="radio"/> más 6 veces al día |
| agua embotellada sin gas | <input checked="" type="radio"/> Nunca o menos 1 vez al mes<br><input type="radio"/> 1 a 3 veces mes<br><input type="radio"/> 1 vez semana<br><input type="radio"/> 2 a 4 veces semana<br><input type="radio"/> 5 a 6 veces semana<br><input type="radio"/> 1 vez al día<br><input type="radio"/> 2 a 3 veces al día<br><input type="radio"/> 5 a 6 veces al día<br><input type="radio"/> más 6 veces al día |
| agua embotellada con gas | <input checked="" type="radio"/> Nunca o menos 1 vez al mes<br><input type="radio"/> 1 a 3 veces mes<br><input type="radio"/> 1 vez semana<br><input type="radio"/> 2 a 4 veces semana<br><input type="radio"/> 5 a 6 veces semana<br><input type="radio"/> 1 vez al día<br><input type="radio"/> 2 a 3 veces al día<br><input type="radio"/> 5 a 6 veces al día<br><input type="radio"/> más 6 veces al día |
| zumو frutas embasado     | <input checked="" type="radio"/> Nunca o menos 1 vez al mes<br><input type="radio"/> 1 a 3 veces mes<br><input type="radio"/> 1 vez semana<br><input type="radio"/> 2 a 4 veces semana<br><input type="radio"/> 5 a 6 veces semana<br><input type="radio"/> 1 vez al día<br><input type="radio"/> 2 a 3 veces al día<br><input type="radio"/> 5 a 6 veces al día<br><input type="radio"/> más 6 veces al día |
| cafe                     | <input checked="" type="radio"/> Nunca o menos 1 vez al mes<br><input type="radio"/> 1 a 3 veces mes<br><input type="radio"/> 1 vez semana<br><input type="radio"/> 2 a 4 veces semana<br><input type="radio"/> 5 a 6 veces semana<br><input type="radio"/> 1 vez al día<br><input type="radio"/> 2 a 3 veces al día<br><input type="radio"/> 5 a 6 veces al día<br><input type="radio"/> más 6 veces al día |

|                       |                                                                                                                                                                                                                                                                                                                                                                                                              |
|-----------------------|--------------------------------------------------------------------------------------------------------------------------------------------------------------------------------------------------------------------------------------------------------------------------------------------------------------------------------------------------------------------------------------------------------------|
| cafe descafeinado     | <input checked="" type="radio"/> Nunca o menos 1 vez al mes<br><input type="radio"/> 1 a 3 veces mes<br><input type="radio"/> 1 vez semana<br><input type="radio"/> 2 a 4 veces semana<br><input type="radio"/> 5 a 6 veces semana<br><input type="radio"/> 1 vez al día<br><input type="radio"/> 2 a 3 veces al día<br><input type="radio"/> 5 a 6 veces al día<br><input type="radio"/> más 6 veces al día |
| te o infusión         | <input checked="" type="radio"/> Nunca o menos 1 vez al mes<br><input type="radio"/> 1 a 3 veces mes<br><input type="radio"/> 1 vez semana<br><input type="radio"/> 2 a 4 veces semana<br><input type="radio"/> 5 a 6 veces semana<br><input type="radio"/> 1 vez al día<br><input type="radio"/> 2 a 3 veces al día<br><input type="radio"/> 5 a 6 veces al día<br><input type="radio"/> más 6 veces al día |
| sopa o puré verduras  | <input type="radio"/> Nunca o menos 1 vez al mes<br><input type="radio"/> 1 a 3 veces mes<br><input checked="" type="radio"/> 1 vez semana<br><input type="radio"/> 2 a 4 veces semana<br><input type="radio"/> 5 a 6 veces semana<br><input type="radio"/> 1 vez al día<br><input type="radio"/> 2 a 3 veces al día<br><input type="radio"/> 5 a 6 veces al día<br><input type="radio"/> más 6 veces al día |
| croquetas pollo jamón | <input type="radio"/> Nunca o menos 1 vez al mes<br><input type="radio"/> 1 a 3 veces mes<br><input checked="" type="radio"/> 1 vez semana<br><input type="radio"/> 2 a 4 veces semana<br><input type="radio"/> 5 a 6 veces semana<br><input type="radio"/> 1 vez al día<br><input type="radio"/> 2 a 3 veces al día<br><input type="radio"/> 5 a 6 veces al día<br><input type="radio"/> más 6 veces al día |
| croquetas pescado     | <input type="radio"/> Nunca o menos 1 vez al mes<br><input type="radio"/> 1 a 3 veces mes<br><input checked="" type="radio"/> 1 vez semana<br><input type="radio"/> 2 a 4 veces semana<br><input type="radio"/> 5 a 6 veces semana<br><input type="radio"/> 1 vez al día<br><input type="radio"/> 2 a 3 veces al día<br><input type="radio"/> 5 a 6 veces al día<br><input type="radio"/> más 6 veces al día |
| mayonesa              | <input type="radio"/> Nunca o menos 1 vez al mes<br><input type="radio"/> 1 a 3 veces mes<br><input checked="" type="radio"/> 1 vez semana<br><input type="radio"/> 2 a 4 veces semana<br><input type="radio"/> 5 a 6 veces semana<br><input type="radio"/> 1 vez al día<br><input type="radio"/> 2 a 3 veces al día<br><input type="radio"/> 5 a 6 veces al día<br><input type="radio"/> más 6 veces al día |



|                  |                                                                                                                                                                                                                                                                                                                                                                                                              |
|------------------|--------------------------------------------------------------------------------------------------------------------------------------------------------------------------------------------------------------------------------------------------------------------------------------------------------------------------------------------------------------------------------------------------------------|
| salsa tomate     | <input type="radio"/> Nunca o menos 1 vez al mes<br><input type="radio"/> 1 a 3 veces mes<br><input checked="" type="radio"/> 1 vez semana<br><input type="radio"/> 2 a 4 veces semana<br><input type="radio"/> 5 a 6 veces semana<br><input type="radio"/> 1 vez al día<br><input type="radio"/> 2 a 3 veces al día<br><input type="radio"/> 5 a 6 veces al día<br><input type="radio"/> más 6 veces al día |
| ketchup          | <input type="radio"/> Nunca o menos 1 vez al mes<br><input type="radio"/> 1 a 3 veces mes<br><input checked="" type="radio"/> 1 vez semana<br><input type="radio"/> 2 a 4 veces semana<br><input type="radio"/> 5 a 6 veces semana<br><input type="radio"/> 1 vez al día<br><input type="radio"/> 2 a 3 veces al día<br><input type="radio"/> 5 a 6 veces al día<br><input type="radio"/> más 6 veces al día |
| sal              | <input type="radio"/> Nunca o menos 1 vez al mes<br><input type="radio"/> 1 a 3 veces mes<br><input checked="" type="radio"/> 1 vez semana<br><input type="radio"/> 2 a 4 veces semana<br><input type="radio"/> 5 a 6 veces semana<br><input type="radio"/> 1 vez al día<br><input type="radio"/> 2 a 3 veces al día<br><input type="radio"/> 5 a 6 veces al día<br><input type="radio"/> más 6 veces al día |
| ajo              | <input type="radio"/> Nunca o menos 1 vez al mes<br><input type="radio"/> 1 a 3 veces mes<br><input checked="" type="radio"/> 1 vez semana<br><input type="radio"/> 2 a 4 veces semana<br><input type="radio"/> 5 a 6 veces semana<br><input type="radio"/> 1 vez al día<br><input type="radio"/> 2 a 3 veces al día<br><input type="radio"/> 5 a 6 veces al día<br><input type="radio"/> más 6 veces al día |
| mermelada o miel | <input type="radio"/> Nunca o menos 1 vez al mes<br><input type="radio"/> 1 a 3 veces mes<br><input checked="" type="radio"/> 1 vez semana<br><input type="radio"/> 2 a 4 veces semana<br><input type="radio"/> 5 a 6 veces semana<br><input type="radio"/> 1 vez al día<br><input type="radio"/> 2 a 3 veces al día<br><input type="radio"/> 5 a 6 veces al día<br><input type="radio"/> más 6 veces al día |
| azúcar           | <input type="radio"/> Nunca o menos 1 vez al mes<br><input type="radio"/> 1 a 3 veces mes<br><input checked="" type="radio"/> 1 vez semana<br><input type="radio"/> 2 a 4 veces semana<br><input type="radio"/> 5 a 6 veces semana<br><input type="radio"/> 1 vez al día<br><input type="radio"/> 2 a 3 veces al día<br><input type="radio"/> 5 a 6 veces al día<br><input type="radio"/> más 6 veces al día |

|                                       |                                                                                                                                                                                                                                                                                                                                                                                                                                                                                                                               |
|---------------------------------------|-------------------------------------------------------------------------------------------------------------------------------------------------------------------------------------------------------------------------------------------------------------------------------------------------------------------------------------------------------------------------------------------------------------------------------------------------------------------------------------------------------------------------------|
| Otro alimento                         | <hr/>                                                                                                                                                                                                                                                                                                                                                                                                                                                                                                                         |
| suplementos vitamínicos               | <input checked="" type="radio"/> si<br><input type="radio"/> no                                                                                                                                                                                                                                                                                                                                                                                                                                                               |
| suplementos vitamínicos               | <hr/>                                                                                                                                                                                                                                                                                                                                                                                                                                                                                                                         |
| dieta previa                          | <input type="radio"/> si<br><input checked="" type="radio"/> no                                                                                                                                                                                                                                                                                                                                                                                                                                                               |
| motivo dieta                          | <input checked="" type="radio"/> no dieta<br><input type="radio"/> control peso<br><input type="radio"/> control colesterol<br><input type="radio"/> control diabetes<br><input type="radio"/> problemas estómago<br><input type="radio"/> problemas vesícula o hepáticos<br><input type="radio"/> HTA o cardiopatía<br><input type="radio"/> problemas renales<br><input type="radio"/> alergia alimentaria<br><input type="radio"/> ácido úrico elevado<br><input type="radio"/> vegetariana<br><input type="radio"/> otros |
| cambio alimentos año previo gestación | <input type="radio"/> si<br><input checked="" type="radio"/> no                                                                                                                                                                                                                                                                                                                                                                                                                                                               |
| cambio lácteos                        | <input type="radio"/> eliminado<br><input type="radio"/> disminuido<br><input checked="" type="radio"/> igual<br><input type="radio"/> aumentado<br><input type="radio"/> no sabe                                                                                                                                                                                                                                                                                                                                             |
| cambio huevos                         | <input type="radio"/> eliminado<br><input type="radio"/> disminuido<br><input checked="" type="radio"/> igual<br><input type="radio"/> aumentado<br><input type="radio"/> no sabe                                                                                                                                                                                                                                                                                                                                             |
| cambio carne                          | <input type="radio"/> eliminado<br><input type="radio"/> disminuido<br><input checked="" type="radio"/> igual<br><input type="radio"/> aumentado<br><input type="radio"/> no sabe                                                                                                                                                                                                                                                                                                                                             |
| cambio pescado                        | <input type="radio"/> eliminado<br><input type="radio"/> disminuido<br><input checked="" type="radio"/> igual<br><input type="radio"/> aumentado<br><input type="radio"/> no sabe                                                                                                                                                                                                                                                                                                                                             |
| cambio verduras                       | <input type="radio"/> eliminado<br><input type="radio"/> disminuido<br><input checked="" type="radio"/> igual<br><input type="radio"/> aumentado<br><input type="radio"/> no sabe                                                                                                                                                                                                                                                                                                                                             |

|                            |                                                                                                                                                                                                             |
|----------------------------|-------------------------------------------------------------------------------------------------------------------------------------------------------------------------------------------------------------|
| cambio legumbres           | <input type="radio"/> eliminado<br><input type="radio"/> disminuido<br><input checked="" type="radio"/> igual<br><input type="radio"/> aumentado<br><input type="radio"/> no sabe                           |
| cambio fruta               | <input type="radio"/> eliminado<br><input type="radio"/> disminuido<br><input checked="" type="radio"/> igual<br><input type="radio"/> aumentado<br><input type="radio"/> no sabe                           |
| cambio pan                 | <input type="radio"/> eliminado<br><input type="radio"/> disminuido<br><input checked="" type="radio"/> igual<br><input type="radio"/> aumentado<br><input type="radio"/> no sabe                           |
| cambio aceite oliva        | <input type="radio"/> eliminado<br><input type="radio"/> disminuido<br><input checked="" type="radio"/> igual<br><input type="radio"/> aumentado<br><input type="radio"/> no sabe                           |
| cambio mante o margarina   | <input type="radio"/> eliminado<br><input type="radio"/> disminuido<br><input checked="" type="radio"/> igual<br><input type="radio"/> aumentado<br><input type="radio"/> no sabe                           |
| cambio azúcar y dulces     | <input type="radio"/> eliminado<br><input type="radio"/> disminuido<br><input checked="" type="radio"/> igual<br><input type="radio"/> aumentado<br><input type="radio"/> no sabe                           |
| cambio bebidas alcohólicas | <input type="radio"/> eliminado<br><input type="radio"/> disminuido<br><input checked="" type="radio"/> igual<br><input type="radio"/> aumentado<br><input type="radio"/> no sabe                           |
| frecuencia comidas fritas  | <input type="radio"/> a diario<br><input type="radio"/> 5 a 6 veces semana<br><input type="radio"/> 2 a 4 veces semana<br><input type="radio"/> 1 vez semana<br><input type="radio"/> menos de 1 vez semana |
| carne                      | <input type="radio"/> no como<br><input type="radio"/> cruda<br><input type="radio"/> poco hecha<br><input type="radio"/> hecha<br><input checked="" type="radio"/> muy hecha                               |
| grasa visible carne        | <input type="radio"/> quita toda<br><input type="radio"/> quita mayoría<br><input type="radio"/> quita un poco<br><input checked="" type="radio"/> no quita nada                                            |

|                                |                                                                                                                                                                                                                                                          |
|--------------------------------|----------------------------------------------------------------------------------------------------------------------------------------------------------------------------------------------------------------------------------------------------------|
| cocina carne                   | <input type="radio"/> a la plancha<br><input type="radio"/> a la parrilla<br><input checked="" type="radio"/> asada<br><input type="radio"/> frita<br><input type="radio"/> guisada                                                                      |
| tostado quemado carne          | <input type="radio"/> nunca<br><input type="radio"/> 1 vez mes<br><input type="radio"/> 2 a 3 veces mes<br><input checked="" type="radio"/> 1 vez semana<br><input type="radio"/> 2 a 3 semanas                                                          |
| tostado quemado pescado        | <input type="radio"/> nunca<br><input type="radio"/> 1 vez mes<br><input type="radio"/> 2 a 3 veces mes<br><input checked="" type="radio"/> 1 vez semana<br><input type="radio"/> 2 a 3 semanas                                                          |
| socarrat paella                | <input type="radio"/> nunca<br><input type="radio"/> 1 vez mes<br><input type="radio"/> 2 a 3 veces mes<br><input checked="" type="radio"/> 1 vez semana<br><input type="radio"/> 2 a 3 semanas                                                          |
| grasa o aceite cocinar         | <input checked="" type="radio"/> mantequilla<br><input type="radio"/> margarina<br><input type="radio"/> aceite oliva<br><input type="radio"/> aceite oliva virgen extra<br><input type="radio"/> aceite vegetal<br><input type="radio"/> mezcla aceites |
| grasa aceite aliñar            | <input type="radio"/> mantequilla<br><input type="radio"/> margarina<br><input type="radio"/> aceite oliva<br><input type="radio"/> aceite oliva virgen extra<br><input type="radio"/> aceite vegetal<br><input type="radio"/> mezcla aceites            |
| grasa aceite freir             | <input checked="" type="radio"/> mantequilla<br><input type="radio"/> margarina<br><input type="radio"/> aceite oliva<br><input type="radio"/> aceite oliva virgen extra<br><input type="radio"/> aceite vegetal<br><input type="radio"/> mezcla aceites |
| Ejercicio cuestionario         | <input checked="" type="radio"/> si<br><input type="radio"/> no                                                                                                                                                                                          |
| horas de sueño incluido siesta | _____                                                                                                                                                                                                                                                    |
| minutos siesta                 | _____                                                                                                                                                                                                                                                    |
| horas televisión semana        | _____                                                                                                                                                                                                                                                    |

|                                        |                                                                                                                                                                                                                                                                                                                                                                           |
|----------------------------------------|---------------------------------------------------------------------------------------------------------------------------------------------------------------------------------------------------------------------------------------------------------------------------------------------------------------------------------------------------------------------------|
| actividad trabajo                      | <input type="radio"/> casi siempre sentado<br><input type="radio"/> sentado 50 por cien<br><input type="radio"/> casi siempre de pie, quieto<br><input checked="" type="radio"/> casi siempre levantado caminando y llevando pocas cosas<br><input type="radio"/> casi siempre levantado, caminando y llevado muchas cosas<br><input type="radio"/> trabajo manual pesado |
| tiempo caminar o bici al día           | <input checked="" type="radio"/> casi nunca<br><input type="radio"/> menos 20min día<br><input type="radio"/> 20 a 40 min día<br><input type="radio"/> 40 a 60 min día<br><input type="radio"/> 1h o 1h y media día<br><input type="radio"/> más de 1h y media al día                                                                                                     |
| tiempo tareas casa al día              | <input type="radio"/> menos de 1h día<br><input type="radio"/> 1 a 2h día<br><input checked="" type="radio"/> 3 a 4h día<br><input type="radio"/> 5 a 6h día<br><input type="radio"/> 7 a 8h día<br><input type="radio"/> más de 8h día                                                                                                                                   |
| tiempo libre televisión ordenador leer | <input type="radio"/> menos 1h día<br><input type="radio"/> 1h día<br><input type="radio"/> 2h día<br><input type="radio"/> 3h día<br><input type="radio"/> 4h día<br><input type="radio"/> 5 a 6h día<br><input checked="" type="radio"/> mas 6h día                                                                                                                     |
| tiempo libre ejercicio o deporte       | <input type="radio"/> menos 1h semana<br><input type="radio"/> 1h semana<br><input type="radio"/> 2h semana<br><input type="radio"/> 3h semana<br><input type="radio"/> 4 a 5h semana<br><input type="radio"/> mas 5h semana                                                                                                                                              |
| como se considera                      | <input type="radio"/> sedentaria<br><input type="radio"/> poco activa<br><input checked="" type="radio"/> moderadamente activa<br><input type="radio"/> bastante activa<br><input type="radio"/> muy activa<br><input type="radio"/> no sabe                                                                                                                              |
| FUR                                    | [*DATA REMOVED*]                                                                                                                                                                                                                                                                                                                                                          |
| Semanas gestación 2T                   | [*DATA REMOVED*]                                                                                                                                                                                                                                                                                                                                                          |
| Días gestación 2T                      | [*DATA REMOVED*]                                                                                                                                                                                                                                                                                                                                                          |
| DBP 2T                                 | [*DATA REMOVED*]                                                                                                                                                                                                                                                                                                                                                          |
| CC 2T                                  | [*DATA REMOVED*]                                                                                                                                                                                                                                                                                                                                                          |
| AC 2T                                  | [*DATA REMOVED*]                                                                                                                                                                                                                                                                                                                                                          |

|                                                   |                                                                                                                                                                                                 |
|---------------------------------------------------|-------------------------------------------------------------------------------------------------------------------------------------------------------------------------------------------------|
| LF 2T                                             | [*DATA REMOVED*]                                                                                                                                                                                |
| PFE 2T (Hadlock)                                  | [*DATA REMOVED*]                                                                                                                                                                                |
| Semanas gestación 3T                              | [*DATA REMOVED*]                                                                                                                                                                                |
| días 3T                                           | [*DATA REMOVED*]                                                                                                                                                                                |
| DBP 3T                                            | [*DATA REMOVED*]                                                                                                                                                                                |
| CC 3T                                             | [*DATA REMOVED*]                                                                                                                                                                                |
| AC 3T                                             | [*DATA REMOVED*]                                                                                                                                                                                |
| LF 3T                                             | [*DATA REMOVED*]                                                                                                                                                                                |
| PFE 3T (Hadlock)                                  | [*DATA REMOVED*]                                                                                                                                                                                |
| Semanas de gestación final                        | [*DATA REMOVED*]                                                                                                                                                                                |
| días gestación final                              | [*DATA REMOVED*]                                                                                                                                                                                |
| Localización placenta                             | <input type="radio"/> anterior<br><input type="radio"/> lateral derecha<br><input type="radio"/> lateral izquierda<br><input checked="" type="radio"/> posterior<br><input type="radio"/> fondo |
| Presentación longitudinal cefálica                | <input type="radio"/> no<br><input checked="" type="radio"/> si                                                                                                                                 |
| Dorso                                             | <input type="radio"/> izquierda anterior<br><input type="radio"/> izquierda posterior<br><input type="radio"/> derecha anterior<br><input checked="" type="radio"/> derecha posterior           |
| diámetro biparietal                               | [*DATA REMOVED*]                                                                                                                                                                                |
| Circunferencia craneal                            | [*DATA REMOVED*]                                                                                                                                                                                |
| Circunferencia abdominal                          | [*DATA REMOVED*]                                                                                                                                                                                |
| Longitud de femur                                 | [*DATA REMOVED*]                                                                                                                                                                                |
| tejido celular subcutáneo a nivel del muslo en mm | [*DATA REMOVED*]                                                                                                                                                                                |
| tejido celular subcutáneo en abdomen en mm        | [*DATA REMOVED*]                                                                                                                                                                                |
| Volumen del muslo en cm3                          | [*DATA REMOVED*]                                                                                                                                                                                |
| Peso fetal estimado según fórmula de Hadlock      | [*DATA REMOVED*]                                                                                                                                                                                |

|                                               |                                                                                                                                               |
|-----------------------------------------------|-----------------------------------------------------------------------------------------------------------------------------------------------|
| Percentil                                     | [*DATA REMOVED*]                                                                                                                              |
| Peso fetal estimado según fórmula de Scioscia | <hr/>                                                                                                                                         |
| Peso fetal estimado según fórmula de LEE      | <hr/>                                                                                                                                         |
| Tipo de parto                                 | <input type="radio"/> eutocico<br><input checked="" type="radio"/> instrumentado/ventosa<br><input type="radio"/> cesarea                     |
| fecha de nacimiento                           | [*DATA REMOVED*]                                                                                                                              |
| Días entre exploración y nacimiento           | [*DATA REMOVED*]                                                                                                                              |
| Peso RN en g                                  | [*DATA REMOVED*]                                                                                                                              |
| sexo                                          | <input checked="" type="radio"/> mujer<br><input type="radio"/> hombre                                                                        |
| Apgar 1 minuto                                | [*DATA REMOVED*]                                                                                                                              |
| Apgar 5 minutos                               | [*DATA REMOVED*]                                                                                                                              |
| Apgar 10 minutos                              | <hr/>                                                                                                                                         |
| antecedente Covid durante gestación           | <input type="radio"/> Yes<br><input checked="" type="radio"/> No                                                                              |
| Nivel de estudios                             | <input type="radio"/> ninguno<br><input type="radio"/> primarios<br><input type="radio"/> secundarios<br><input type="radio"/> universitarios |

# Base\_datos\_estimacion\_peso\_fetal

|                                       |                                                                                                                                                                                                                                                                                      |
|---------------------------------------|--------------------------------------------------------------------------------------------------------------------------------------------------------------------------------------------------------------------------------------------------------------------------------------|
| Número de identificación participante | 44                                                                                                                                                                                                                                                                                   |
| CODIGO PARTICIPANTE                   |                                                                                                                                                                                                                                                                                      |
| Edad                                  | [*DATA REMOVED*]                                                                                                                                                                                                                                                                     |
| Gestaciones                           | <input checked="" type="radio"/> 1<br><input type="radio"/> 2<br><input type="radio"/> 3<br><input type="radio"/> mas de 3                                                                                                                                                           |
| partos                                | <input checked="" type="radio"/> 0<br><input type="radio"/> 1<br><input type="radio"/> 2<br><input type="radio"/> 3<br><input type="radio"/> mas de 3                                                                                                                                |
| cesáreas                              | <input checked="" type="radio"/> 0<br><input type="radio"/> 1<br><input type="radio"/> 2<br><input type="radio"/> 3<br><input type="radio"/> mas de 3                                                                                                                                |
| Abortos                               | <input checked="" type="radio"/> 0<br><input type="radio"/> 1<br><input type="radio"/> 2<br><input type="radio"/> 3<br><input type="radio"/> mas de 3                                                                                                                                |
| Tipo de gestacion                     | <input checked="" type="radio"/> espontanea<br><input type="radio"/> IAC inseminación artificial conyuge<br><input type="radio"/> IAD inseminación artificial donante<br><input type="radio"/> FIV Fecundación in Vitro<br><input type="radio"/> Ovodon FIV con donación de ovocitos |
| peso previo a embarazo                | [*DATA REMOVED*]                                                                                                                                                                                                                                                                     |
| Ganancia ponderal embarazo            | [*DATA REMOVED*]                                                                                                                                                                                                                                                                     |
| Talla madre                           | [*DATA REMOVED*]                                                                                                                                                                                                                                                                     |
| IMC previo embarazo                   | 21.872422819032593                                                                                                                                                                                                                                                                   |
| Patología obstétrica                  | <input checked="" type="radio"/> no<br><input type="radio"/> si                                                                                                                                                                                                                      |
| Diabetes pregestacional               | <input checked="" type="radio"/> no<br><input type="radio"/> si                                                                                                                                                                                                                      |
| Diabetes gestacional                  | <input checked="" type="radio"/> no<br><input type="radio"/> si                                                                                                                                                                                                                      |



|                                            |                                                                                                                                                                                      |
|--------------------------------------------|--------------------------------------------------------------------------------------------------------------------------------------------------------------------------------------|
| Diabetes gestacional con insulina          | <input checked="" type="radio"/> no<br><input type="radio"/> si                                                                                                                      |
| Diabetes gestacional con dieta y ejercicio | <input checked="" type="radio"/> no<br><input type="radio"/> si                                                                                                                      |
| Percentil fetos previos                    | <input checked="" type="radio"/> Nada<br><input type="radio"/> percentil menor de 10<br><input type="radio"/> percentil entre 10 y 90<br><input type="radio"/> percentil mayor de 90 |
| Exfumadora                                 | <input checked="" type="radio"/> Nada<br><input type="radio"/> menos de 5 años<br><input type="radio"/> 5 a 10 años<br><input type="radio"/> mayor o igual a 10 años                 |
| Hábito tabáquico                           | <input checked="" type="radio"/> no<br><input type="radio"/> si                                                                                                                      |
| fumadora                                   | [*DATA REMOVED*]                                                                                                                                                                     |
| Consumo otros tóxicos                      | <input checked="" type="radio"/> no<br><input type="radio"/> si                                                                                                                      |
| Hb 1T                                      | [*DATA REMOVED*]                                                                                                                                                                     |
| Htc 1T                                     | [*DATA REMOVED*]                                                                                                                                                                     |
| Hb 2T                                      | [*DATA REMOVED*]                                                                                                                                                                     |
| HTC 2T                                     | [*DATA REMOVED*]                                                                                                                                                                     |
| Hb 3T                                      | [*DATA REMOVED*]                                                                                                                                                                     |
| HTC 3T                                     | [*DATA REMOVED*]                                                                                                                                                                     |
| Suplemento FE oral                         | <input checked="" type="radio"/> si<br><input type="radio"/> no                                                                                                                      |
| Suplemento fe iv                           | <input type="radio"/> si<br><input checked="" type="radio"/> no                                                                                                                      |
| Transfusión                                | <input checked="" type="radio"/> no<br><input type="radio"/> si                                                                                                                      |
| Solicitada Vit D                           | <input checked="" type="radio"/> no<br><input type="radio"/> si                                                                                                                      |
| Deficit vit D                              | <input type="radio"/> no<br><input type="radio"/> si                                                                                                                                 |
| Suplemento vit D                           | <input type="radio"/> si<br><input type="radio"/> no                                                                                                                                 |

|                       |                                                                                                                                                                                                                                                                                                                                                                                                              |
|-----------------------|--------------------------------------------------------------------------------------------------------------------------------------------------------------------------------------------------------------------------------------------------------------------------------------------------------------------------------------------------------------------------------------------------------------|
| Dieta, cuestionario   | <input checked="" type="radio"/> sí<br><input type="radio"/> no                                                                                                                                                                                                                                                                                                                                              |
| Leche entera          | <input checked="" type="radio"/> Nunca o menos 1 vez al mes<br><input type="radio"/> 1 a 3 veces mes<br><input type="radio"/> 1 vez semana<br><input type="radio"/> 2 a 4 veces semana<br><input type="radio"/> 5 a 6 veces semana<br><input type="radio"/> 1 vez al día<br><input type="radio"/> 2 a 3 veces al día<br><input type="radio"/> 5 a 6 veces al día<br><input type="radio"/> más 6 veces al día |
| Leche semidesnatada   | <input checked="" type="radio"/> Nunca o menos 1 vez al mes<br><input type="radio"/> 1 a 3 veces mes<br><input type="radio"/> 1 vez semana<br><input type="radio"/> 2 a 4 veces semana<br><input type="radio"/> 5 a 6 veces semana<br><input type="radio"/> 1 vez al día<br><input type="radio"/> 2 a 3 veces al día<br><input type="radio"/> 5 a 6 veces al día<br><input type="radio"/> mas 6 veces al día |
| Leche desnatada       | <input type="radio"/> Nunca o menos 1 vez al mes<br><input type="radio"/> 1 a 3 veces mes<br><input type="radio"/> 1 vez semana<br><input type="radio"/> 2 a 4 veces semana<br><input type="radio"/> 5 a 6 veces semana<br><input checked="" type="radio"/> 1 vez al día<br><input type="radio"/> 2 a 3 veces al día<br><input type="radio"/> 5 a 6 veces al día<br><input type="radio"/> más 6 veces al día |
| Leche condensada      | <input checked="" type="radio"/> Nunca o menos 1 vez al mes<br><input type="radio"/> 1 a 3 veces mes<br><input type="radio"/> 1 vez semana<br><input type="radio"/> 2 a 4 veces semana<br><input type="radio"/> 5 a 6 veces semana<br><input type="radio"/> 1 vez al día<br><input type="radio"/> 2 a 3 veces al día<br><input type="radio"/> 5 a 6 veces al día<br><input type="radio"/> más 6 veces al día |
| nata o crema de leche | <input type="radio"/> Nunca o menos 1 vez al mes<br><input type="radio"/> 1 a 3 veces mes<br><input type="radio"/> 1 vez semana<br><input type="radio"/> 2 a 4 veces semana<br><input type="radio"/> 5 a 6 veces semana<br><input type="radio"/> 1 vez al día<br><input type="radio"/> 2 a 3 veces al día<br><input type="radio"/> 5 a 6 veces al día<br><input type="radio"/> más 6 veces al día            |

|                                             |                                                                                                                                                                                                                                                                                                                                                                                                              |
|---------------------------------------------|--------------------------------------------------------------------------------------------------------------------------------------------------------------------------------------------------------------------------------------------------------------------------------------------------------------------------------------------------------------------------------------------------------------|
| Yogurt Entero                               | <input type="radio"/> Nunca o menos 1 vez al mes<br><input type="radio"/> 1 a 3 veces mes<br><input type="radio"/> 1 vez semana<br><input type="radio"/> 2 a 4 veces semana<br><input type="radio"/> 5 a 6 veces semana<br><input type="radio"/> 1 vez al día<br><input type="radio"/> 2 a 3 veces al día<br><input type="radio"/> 5 a 6 veces al día<br><input type="radio"/> más 6 veces al día            |
| Yogurt desnatado                            | <input type="radio"/> Nunca o menos 1 vez al mes<br><input type="radio"/> 1 a 3 veces mes<br><input checked="" type="radio"/> 1 vez semana<br><input type="radio"/> 2 a 4 veces semana<br><input type="radio"/> 5 a 6 veces semana<br><input type="radio"/> 1 vez al día<br><input type="radio"/> 2 a 3 veces al día<br><input type="radio"/> 5 a 6 veces al día<br><input type="radio"/> más 6 veces al día |
| 100g requesón o queso blando o queso fresco | <input checked="" type="radio"/> Nunca o menos 1 vez al mes<br><input type="radio"/> 1 a 3 veces mes<br><input type="radio"/> 1 vez semana<br><input type="radio"/> 2 a 4 veces semana<br><input type="radio"/> 5 a 6 veces semana<br><input type="radio"/> 1 vez al día<br><input type="radio"/> 2 a 3 veces al día<br><input type="radio"/> 5 a 6 veces al día<br><input type="radio"/> más 6 veces al día |
| queso curado o semicurado o cremoso         | <input type="radio"/> Nunca o menos 1 vez al mes<br><input type="radio"/> 1 a 3 veces mes<br><input checked="" type="radio"/> 1 vez semana<br><input type="radio"/> 2 a 4 veces semana<br><input type="radio"/> 5 a 6 veces semana<br><input type="radio"/> 1 vez al día<br><input type="radio"/> 2 a 3 veces al día<br><input type="radio"/> 5 a 6 veces al día<br><input type="radio"/> más 6 veces al día |
| natillas flan pudding                       | <input type="radio"/> Nunca o menos 1 vez al mes<br><input checked="" type="radio"/> 1 a 3 veces mes<br><input type="radio"/> 1 vez semana<br><input type="radio"/> 2 a 4 veces semana<br><input type="radio"/> 5 a 6 veces semana<br><input type="radio"/> 1 vez al día<br><input type="radio"/> 2 a 3 veces al día<br><input type="radio"/> 5 a 6 veces al día<br><input type="radio"/> más 6 veces al día |
| Helado                                      | <input checked="" type="radio"/> Nunca o menos 1 vez al mes<br><input type="radio"/> 1 a 3 veces mes<br><input type="radio"/> 1 vez semana<br><input type="radio"/> 2 a 4 veces semana<br><input type="radio"/> 5 a 6 veces semana<br><input type="radio"/> 1 vez al día<br><input type="radio"/> 2 a 3 veces al día<br><input type="radio"/> 5 a 6 veces al día<br><input type="radio"/> más 6 veces al día |

|                                      |                                                                                                                                                                                                                                                                                                                                                                                                              |
|--------------------------------------|--------------------------------------------------------------------------------------------------------------------------------------------------------------------------------------------------------------------------------------------------------------------------------------------------------------------------------------------------------------------------------------------------------------|
| huevo                                | <input type="radio"/> Nunca o menos 1 vez al mes<br><input type="radio"/> 1 a 3 veces mes<br><input checked="" type="radio"/> 1 vez semana<br><input type="radio"/> 2 a 4 veces semana<br><input type="radio"/> 5 a 6 veces semana<br><input type="radio"/> 1 vez al día<br><input type="radio"/> 2 a 3 veces al día<br><input type="radio"/> 5 a 6 veces al día<br><input type="radio"/> más 6 veces al día |
| Pollo con piel                       | <input type="radio"/> Nunca o menos 1 vez al mes<br><input type="radio"/> 1 a 3 veces mes<br><input checked="" type="radio"/> 1 vez semana<br><input type="radio"/> 2 a 4 veces semana<br><input type="radio"/> 5 a 6 veces semana<br><input type="radio"/> 1 vez al día<br><input type="radio"/> 2 a 3 veces al día<br><input type="radio"/> 5 a 6 veces al día<br><input type="radio"/> más 6 veces al día |
| pollo sin piel                       | <input checked="" type="radio"/> Nunca o menos 1 vez al mes<br><input type="radio"/> 1 a 3 veces mes<br><input type="radio"/> 1 vez semana<br><input type="radio"/> 2 a 4 veces semana<br><input type="radio"/> 5 a 6 veces semana<br><input type="radio"/> 1 vez al día<br><input type="radio"/> 2 a 3 veces al día<br><input type="radio"/> 5 a 6 veces al día<br><input type="radio"/> más 6 veces al día |
| Ternera o cerdo o cordero            | <input type="radio"/> Nunca o menos 1 vez al mes<br><input type="radio"/> 1 a 3 veces mes<br><input checked="" type="radio"/> 1 vez semana<br><input type="radio"/> 2 a 4 veces semana<br><input type="radio"/> 5 a 6 veces semana<br><input type="radio"/> 1 vez al día<br><input type="radio"/> 2 a 3 veces al día<br><input type="radio"/> 5 a 6 veces al día<br><input type="radio"/> más 6 veces al día |
| carne caza: Conejo o codorniz o pato | <input type="radio"/> Nunca o menos 1 vez al mes<br><input checked="" type="radio"/> 1 a 3 veces mes<br><input type="radio"/> 1 vez semana<br><input type="radio"/> 2 a 4 veces semana<br><input type="radio"/> 5 a 6 veces semana<br><input type="radio"/> 1 vez al día<br><input type="radio"/> 2 a 3 veces al día<br><input type="radio"/> 5 a 6 veces al día<br><input type="radio"/> más 6 veces al día |
| Hígado de ternera o cerdo o pollo    | <input checked="" type="radio"/> Nunca o menos 1 vez al mes<br><input type="radio"/> 1 a 3 veces mes<br><input type="radio"/> 1 vez semana<br><input type="radio"/> 2 a 4 veces semana<br><input type="radio"/> 5 a 6 veces semana<br><input type="radio"/> 1 vez al día<br><input type="radio"/> 2 a 3 veces al día<br><input type="radio"/> 5 a 6 veces al día<br><input type="radio"/> más 6 veces al día |

|                     |                                                                                                                                                                                                                                                                                                                                                                                                              |
|---------------------|--------------------------------------------------------------------------------------------------------------------------------------------------------------------------------------------------------------------------------------------------------------------------------------------------------------------------------------------------------------------------------------------------------------|
| Vísceras            | <input checked="" type="radio"/> Nunca o menos 1 vez al mes<br><input type="radio"/> 1 a 3 veces mes<br><input type="radio"/> 1 vez semana<br><input type="radio"/> 2 a 4 veces semana<br><input type="radio"/> 5 a 6 veces semana<br><input type="radio"/> 1 vez al día<br><input type="radio"/> 2 a 3 veces al día<br><input type="radio"/> 5 a 6 veces al día<br><input type="radio"/> más 6 veces al día |
| Embutido            | <input checked="" type="radio"/> Nunca o menos 1 vez al mes<br><input type="radio"/> 1 a 3 veces mes<br><input type="radio"/> 1 vez semana<br><input type="radio"/> 2 a 4 veces semana<br><input type="radio"/> 5 a 6 veces semana<br><input type="radio"/> 1 vez al día<br><input type="radio"/> 2 a 3 veces al día<br><input type="radio"/> 5 a 6 veces al día<br><input type="radio"/> más 6 veces al día |
| Salchicha o similar | <input checked="" type="radio"/> Nunca o menos 1 vez al mes<br><input type="radio"/> 1 a 3 veces mes<br><input type="radio"/> 1 vez semana<br><input type="radio"/> 2 a 4 veces semana<br><input type="radio"/> 5 a 6 veces semana<br><input type="radio"/> 1 vez al día<br><input type="radio"/> 2 a 3 veces al día<br><input type="radio"/> 5 a 6 veces al día<br><input type="radio"/> más 6 veces al día |
| Pate o foiegras     | <input checked="" type="radio"/> Nunca o menos 1 vez al mes<br><input type="radio"/> 1 a 3 veces mes<br><input type="radio"/> 1 vez semana<br><input type="radio"/> 2 a 4 veces semana<br><input type="radio"/> 5 a 6 veces semana<br><input type="radio"/> 1 vez al día<br><input type="radio"/> 2 a 3 veces al día<br><input type="radio"/> 5 a 6 veces al día<br><input type="radio"/> más 6 veces al día |
| Hamburguesa         | <input type="radio"/> Nunca o menos 1 vez al mes<br><input type="radio"/> 1 a 3 veces mes<br><input checked="" type="radio"/> 1 vez semana<br><input type="radio"/> 2 a 4 veces semana<br><input type="radio"/> 5 a 6 veces semana<br><input type="radio"/> 1 vez al día<br><input type="radio"/> 2 a 3 veces al día<br><input type="radio"/> 5 a 6 veces al día<br><input type="radio"/> más 6 veces al día |
| tocino o bacon      | <input checked="" type="radio"/> Nunca o menos 1 vez al mes<br><input type="radio"/> 1 a 3 veces mes<br><input type="radio"/> 1 vez semana<br><input type="radio"/> 2 a 4 veces semana<br><input type="radio"/> 5 a 6 veces semana<br><input type="radio"/> 1 vez al día<br><input type="radio"/> 2 a 3 veces al día<br><input type="radio"/> 5 a 6 veces al día<br><input type="radio"/> más 6 veces al día |

---

Pescado frito

- ☐ Nunca o menos 1 vez al mes  
☒ 1 a 3 veces mes  
☐ 1 vez semana  
☐ 2 a 4 veces semana  
☐ 5 a 6 veces semana  
☐ 1 vez al día  
☐ 2 a 3 veces al día  
☐ 5 a 6 veces al día  
☐ más 6 veces al día

---

pescado hervido blanco

- ☐ Nunca o menos 1 vez al mes  
☐ 1 a 3 veces mes  
☐ 1 vez semana  
☒ 2 a 4 veces semana  
☐ 5 a 6 veces semana  
☐ 1 vez al día  
☐ 2 a 3 veces al día  
☐ 5 a 6 veces al día  
☐ más 6 veces al día

---

pescado hervido azul

- ☒ Nunca o menos 1 vez al mes  
☐ 1 a 3 veces mes  
☐ 1 vez semana  
☐ 2 a 4 veces semana  
☐ 5 a 6 veces semana  
☐ 1 vez al día  
☐ 2 a 3 veces al día  
☐ 5 a 6 veces al día  
☐ más 6 veces al día

---

otros pescado azul

- ☒ Nunca o menos 1 vez al mes  
☐ 1 a 3 veces mes  
☐ 1 vez semana  
☐ 2 a 4 veces semana  
☐ 5 a 6 veces semana  
☐ 1 vez al día  
☐ 2 a 3 veces al día  
☐ 5 a 6 veces al día  
☐ más 6 veces al día

---

atun conserva

- ☒ Nunca o menos 1 vez al mes  
☐ 1 a 3 veces mes  
☐ 1 vez semana  
☐ 2 a 4 veces semana  
☐ 5 a 6 veces semana  
☐ 1 vez al día  
☐ 2 a 3 veces al día  
☐ 5 a 6 veces al día  
☐ más 6 veces al día

---

sardina conserva

- ☒ Nunca o menos 1 vez al mes  
☐ 1 a 3 veces mes  
☐ 1 vez semana  
☐ 2 a 4 veces semana  
☐ 5 a 6 veces semana  
☐ 1 vez al día  
☐ 2 a 3 veces al día  
☐ 5 a 6 veces al día  
☐ más 6 veces al día

|                                         |                                                                                                                                                                                                                                                                                                                                                                                                              |
|-----------------------------------------|--------------------------------------------------------------------------------------------------------------------------------------------------------------------------------------------------------------------------------------------------------------------------------------------------------------------------------------------------------------------------------------------------------------|
| pescado ahumado                         | <input checked="" type="radio"/> Nunca o menos 1 vez al mes<br><input type="radio"/> 1 a 3 veces mes<br><input type="radio"/> 1 vez semana<br><input type="radio"/> 2 a 4 veces semana<br><input type="radio"/> 5 a 6 veces semana<br><input type="radio"/> 1 vez al día<br><input type="radio"/> 2 a 3 veces al día<br><input type="radio"/> 5 a 6 veces al día<br><input type="radio"/> más 6 veces al día |
| almejas o mejillones o ostras unos 100g | <input type="radio"/> Nunca o menos 1 vez al mes<br><input type="radio"/> 1 a 3 veces mes<br><input type="radio"/> 1 vez semana<br><input checked="" type="radio"/> 2 a 4 veces semana<br><input type="radio"/> 5 a 6 veces semana<br><input type="radio"/> 1 vez al día<br><input type="radio"/> 2 a 3 veces al día<br><input type="radio"/> 5 a 6 veces al día<br><input type="radio"/> más 6 veces al día |
| calamar o chipiron o sepia unos 100g    | <input type="radio"/> Nunca o menos 1 vez al mes<br><input type="radio"/> 1 a 3 veces mes<br><input checked="" type="radio"/> 1 vez semana<br><input type="radio"/> 2 a 4 veces semana<br><input type="radio"/> 5 a 6 veces semana<br><input type="radio"/> 1 vez al día<br><input type="radio"/> 2 a 3 veces al día<br><input type="radio"/> 5 a 6 veces al día<br><input type="radio"/> más 6 veces al día |
| marisco unos 100g                       | <input type="radio"/> Nunca o menos 1 vez al mes<br><input type="radio"/> 1 a 3 veces mes<br><input checked="" type="radio"/> 1 vez semana<br><input type="radio"/> 2 a 4 veces semana<br><input type="radio"/> 5 a 6 veces semana<br><input type="radio"/> 1 vez al día<br><input type="radio"/> 2 a 3 veces al día<br><input type="radio"/> 5 a 6 veces al día<br><input type="radio"/> más 6 veces al día |
| Espinacas o acelgas cocinadas           | <input type="radio"/> Nunca o menos 1 vez al mes<br><input checked="" type="radio"/> 1 a 3 veces mes<br><input type="radio"/> 1 vez semana<br><input type="radio"/> 2 a 4 veces semana<br><input type="radio"/> 5 a 6 veces semana<br><input type="radio"/> 1 vez al día<br><input type="radio"/> 2 a 3 veces al día<br><input type="radio"/> 5 a 6 veces al día<br><input type="radio"/> más 6 veces al día |
| Col o coliflor o brocoli cocinado       | <input type="radio"/> Nunca o menos 1 vez al mes<br><input type="radio"/> 1 a 3 veces mes<br><input type="radio"/> 1 vez semana<br><input checked="" type="radio"/> 2 a 4 veces semana<br><input type="radio"/> 5 a 6 veces semana<br><input type="radio"/> 1 vez al día<br><input type="radio"/> 2 a 3 veces al día<br><input type="radio"/> 5 a 6 veces al día<br><input type="radio"/> más 6 veces al día |

---

Lechuga o endivia o escarola

- ☐ Nunca o menos 1 vez al mes  
☐ 1 a 3 veces mes  
☐ 1 vez semana  
☒ 2 a 4 veces semana  
☐ 5 a 6 veces semana  
☐ 1 vez al día  
☐ 2 a 3 veces al día  
☐ 5 a 6 veces al día  
☐ más 6 veces al día

---

tomate ensalada

- ☐ Nunca o menos 1 vez al mes  
☐ 1 a 3 veces mes  
☒ 1 vez semana  
☐ 2 a 4 veces semana  
☐ 5 a 6 veces semana  
☐ 1 vez al día  
☐ 2 a 3 veces al día  
☐ 5 a 6 veces al día  
☐ más 6 veces al día

---

cebolla

- ☐ Nunca o menos 1 vez al mes  
☐ 1 a 3 veces mes  
☒ 1 vez semana  
☐ 2 a 4 veces semana  
☐ 5 a 6 veces semana  
☐ 1 vez al día  
☐ 2 a 3 veces al día  
☐ 5 a 6 veces al día  
☐ más 6 veces al día

---

Zanahoria o calabaza

- ☐ Nunca o menos 1 vez al mes  
☐ 1 a 3 veces mes  
☒ 1 vez semana  
☐ 2 a 4 veces semana  
☐ 5 a 6 veces semana  
☐ 1 vez al día  
☐ 2 a 3 veces al día  
☐ 5 a 6 veces al día  
☐ más 6 veces al día

---

Judías verdes

- ☐ Nunca o menos 1 vez al mes  
☐ 1 a 3 veces mes  
☐ 1 vez semana  
☒ 2 a 4 veces semana  
☐ 5 a 6 veces semana  
☐ 1 vez al día  
☐ 2 a 3 veces al día  
☐ 5 a 6 veces al día  
☐ más 6 veces al día

---

Berenjena o calabacin o pepino

- ☐ Nunca o menos 1 vez al mes  
☐ 1 a 3 veces mes  
☒ 1 vez semana  
☐ 2 a 4 veces semana  
☐ 5 a 6 veces semana  
☐ 1 vez al día  
☐ 2 a 3 veces al día  
☐ 5 a 6 veces al día  
☐ más 6 veces al día



|                       |                                                                                                                                                                                                                                                                                                                                                                                                              |
|-----------------------|--------------------------------------------------------------------------------------------------------------------------------------------------------------------------------------------------------------------------------------------------------------------------------------------------------------------------------------------------------------------------------------------------------------|
| pimiento              | <input checked="" type="radio"/> Nunca o menos 1 vez al mes<br><input type="radio"/> 1 a 3 veces mes<br><input type="radio"/> 1 vez semana<br><input type="radio"/> 2 a 4 veces semana<br><input type="radio"/> 5 a 6 veces semana<br><input type="radio"/> 1 vez al día<br><input type="radio"/> 2 a 3 veces al día<br><input type="radio"/> 5 a 6 veces al día<br><input type="radio"/> más 6 veces al día |
| alcachofa             | <input checked="" type="radio"/> Nunca o menos 1 vez al mes<br><input type="radio"/> 1 a 3 veces mes<br><input type="radio"/> 1 vez semana<br><input type="radio"/> 2 a 4 veces semana<br><input type="radio"/> 5 a 6 veces semana<br><input type="radio"/> 1 vez al día<br><input type="radio"/> 2 a 3 veces al día<br><input type="radio"/> 5 a 6 veces al día<br><input type="radio"/> más 6 veces al día |
| espárragos            | <input type="radio"/> Nunca o menos 1 vez al mes<br><input type="radio"/> 1 a 3 veces mes<br><input checked="" type="radio"/> 1 vez semana<br><input type="radio"/> 2 a 4 veces semana<br><input type="radio"/> 5 a 6 veces semana<br><input type="radio"/> 1 vez al día<br><input type="radio"/> 2 a 3 veces al día<br><input type="radio"/> 5 a 6 veces al día<br><input type="radio"/> más 6 veces al día |
| maíz hervido          | <input type="radio"/> Nunca o menos 1 vez al mes<br><input type="radio"/> 1 a 3 veces mes<br><input checked="" type="radio"/> 1 vez semana<br><input type="radio"/> 2 a 4 veces semana<br><input type="radio"/> 5 a 6 veces semana<br><input type="radio"/> 1 vez al día<br><input type="radio"/> 2 a 3 veces al día<br><input type="radio"/> 5 a 6 veces al día<br><input type="radio"/> más 6 veces al día |
| legumbres             | <input type="radio"/> Nunca o menos 1 vez al mes<br><input type="radio"/> 1 a 3 veces mes<br><input checked="" type="radio"/> 1 vez semana<br><input type="radio"/> 2 a 4 veces semana<br><input type="radio"/> 5 a 6 veces semana<br><input type="radio"/> 1 vez al día<br><input type="radio"/> 2 a 3 veces al día<br><input type="radio"/> 5 a 6 veces al día<br><input type="radio"/> más 6 veces al día |
| naranjas o mandarinas | <input type="radio"/> Nunca o menos 1 vez al mes<br><input type="radio"/> 1 a 3 veces mes<br><input type="radio"/> 1 vez semana<br><input type="radio"/> 2 a 4 veces semana<br><input type="radio"/> 5 a 6 veces semana<br><input type="radio"/> 1 vez al día<br><input checked="" type="radio"/> 2 a 3 veces al día<br><input type="radio"/> 5 a 6 veces al día<br><input type="radio"/> más 6 veces al día |

---

|                    |                                                                                                                                                                                                                                                                                                                                                                                                              |
|--------------------|--------------------------------------------------------------------------------------------------------------------------------------------------------------------------------------------------------------------------------------------------------------------------------------------------------------------------------------------------------------------------------------------------------------|
| zumو natural fruta | <input type="radio"/> Nunca o menos 1 vez al mes<br><input type="radio"/> 1 a 3 veces mes<br><input checked="" type="radio"/> 1 vez semana<br><input type="radio"/> 2 a 4 veces semana<br><input type="radio"/> 5 a 6 veces semana<br><input type="radio"/> 1 vez al día<br><input type="radio"/> 2 a 3 veces al día<br><input type="radio"/> 5 a 6 veces al día<br><input type="radio"/> más 6 veces al día |
|--------------------|--------------------------------------------------------------------------------------------------------------------------------------------------------------------------------------------------------------------------------------------------------------------------------------------------------------------------------------------------------------------------------------------------------------|

---

|         |                                                                                                                                                                                                                                                                                                                                                                                                              |
|---------|--------------------------------------------------------------------------------------------------------------------------------------------------------------------------------------------------------------------------------------------------------------------------------------------------------------------------------------------------------------------------------------------------------------|
| platano | <input type="radio"/> Nunca o menos 1 vez al mes<br><input checked="" type="radio"/> 1 a 3 veces mes<br><input type="radio"/> 1 vez semana<br><input type="radio"/> 2 a 4 veces semana<br><input type="radio"/> 5 a 6 veces semana<br><input type="radio"/> 1 vez al día<br><input type="radio"/> 2 a 3 veces al día<br><input type="radio"/> 5 a 6 veces al día<br><input type="radio"/> más 6 veces al día |
|---------|--------------------------------------------------------------------------------------------------------------------------------------------------------------------------------------------------------------------------------------------------------------------------------------------------------------------------------------------------------------------------------------------------------------|

---

|                |                                                                                                                                                                                                                                                                                                                                                                                                              |
|----------------|--------------------------------------------------------------------------------------------------------------------------------------------------------------------------------------------------------------------------------------------------------------------------------------------------------------------------------------------------------------------------------------------------------------|
| manzana o pera | <input type="radio"/> Nunca o menos 1 vez al mes<br><input type="radio"/> 1 a 3 veces mes<br><input checked="" type="radio"/> 1 vez semana<br><input type="radio"/> 2 a 4 veces semana<br><input type="radio"/> 5 a 6 veces semana<br><input type="radio"/> 1 vez al día<br><input type="radio"/> 2 a 3 veces al día<br><input type="radio"/> 5 a 6 veces al día<br><input type="radio"/> más 6 veces al día |
|----------------|--------------------------------------------------------------------------------------------------------------------------------------------------------------------------------------------------------------------------------------------------------------------------------------------------------------------------------------------------------------------------------------------------------------|

---

|                       |                                                                                                                                                                                                                                                                                                                                                                                                              |
|-----------------------|--------------------------------------------------------------------------------------------------------------------------------------------------------------------------------------------------------------------------------------------------------------------------------------------------------------------------------------------------------------------------------------------------------------|
| melocotón o nectarina | <input type="radio"/> Nunca o menos 1 vez al mes<br><input type="radio"/> 1 a 3 veces mes<br><input checked="" type="radio"/> 1 vez semana<br><input type="radio"/> 2 a 4 veces semana<br><input type="radio"/> 5 a 6 veces semana<br><input type="radio"/> 1 vez al día<br><input type="radio"/> 2 a 3 veces al día<br><input type="radio"/> 5 a 6 veces al día<br><input type="radio"/> más 6 veces al día |
|-----------------------|--------------------------------------------------------------------------------------------------------------------------------------------------------------------------------------------------------------------------------------------------------------------------------------------------------------------------------------------------------------------------------------------------------------|

---

|                |                                                                                                                                                                                                                                                                                                                                                                                                              |
|----------------|--------------------------------------------------------------------------------------------------------------------------------------------------------------------------------------------------------------------------------------------------------------------------------------------------------------------------------------------------------------------------------------------------------------|
| sandia o melon | <input type="radio"/> Nunca o menos 1 vez al mes<br><input type="radio"/> 1 a 3 veces mes<br><input type="radio"/> 1 vez semana<br><input checked="" type="radio"/> 2 a 4 veces semana<br><input type="radio"/> 5 a 6 veces semana<br><input type="radio"/> 1 vez al día<br><input type="radio"/> 2 a 3 veces al día<br><input type="radio"/> 5 a 6 veces al día<br><input type="radio"/> más 6 veces al día |
|----------------|--------------------------------------------------------------------------------------------------------------------------------------------------------------------------------------------------------------------------------------------------------------------------------------------------------------------------------------------------------------------------------------------------------------|

---

|     |                                                                                                                                                                                                                                                                                                                                                                                                              |
|-----|--------------------------------------------------------------------------------------------------------------------------------------------------------------------------------------------------------------------------------------------------------------------------------------------------------------------------------------------------------------------------------------------------------------|
| uva | <input checked="" type="radio"/> Nunca o menos 1 vez al mes<br><input type="radio"/> 1 a 3 veces mes<br><input type="radio"/> 1 vez semana<br><input type="radio"/> 2 a 4 veces semana<br><input type="radio"/> 5 a 6 veces semana<br><input type="radio"/> 1 vez al día<br><input type="radio"/> 2 a 3 veces al día<br><input type="radio"/> 5 a 6 veces al día<br><input type="radio"/> más 6 veces al día |
|-----|--------------------------------------------------------------------------------------------------------------------------------------------------------------------------------------------------------------------------------------------------------------------------------------------------------------------------------------------------------------------------------------------------------------|

---

|                 |                                                                                                                                                                                                                                                                                                                                                                                                              |
|-----------------|--------------------------------------------------------------------------------------------------------------------------------------------------------------------------------------------------------------------------------------------------------------------------------------------------------------------------------------------------------------------------------------------------------------|
| bruna o ciruela | <input checked="" type="radio"/> Nunca o menos 1 vez al mes<br><input type="radio"/> 1 a 3 veces mes<br><input type="radio"/> 1 vez semana<br><input type="radio"/> 2 a 4 veces semana<br><input type="radio"/> 5 a 6 veces semana<br><input type="radio"/> 1 vez al día<br><input type="radio"/> 2 a 3 veces al día<br><input type="radio"/> 5 a 6 veces al día<br><input type="radio"/> más 6 veces al día |
| kiwi            | <input type="radio"/> Nunca o menos 1 vez al mes<br><input checked="" type="radio"/> 1 a 3 veces mes<br><input type="radio"/> 1 vez semana<br><input type="radio"/> 2 a 4 veces semana<br><input type="radio"/> 5 a 6 veces semana<br><input type="radio"/> 1 vez al día<br><input type="radio"/> 2 a 3 veces al día<br><input type="radio"/> 5 a 6 veces al día<br><input type="radio"/> más 6 veces al día |
| aceituna        | <input type="radio"/> Nunca o menos 1 vez al mes<br><input type="radio"/> 1 a 3 veces mes<br><input checked="" type="radio"/> 1 vez semana<br><input type="radio"/> 2 a 4 veces semana<br><input type="radio"/> 5 a 6 veces semana<br><input type="radio"/> 1 vez al día<br><input type="radio"/> 2 a 3 veces al día<br><input type="radio"/> 5 a 6 veces al día<br><input type="radio"/> más 6 veces al día |
| frutos secos    | <input type="radio"/> Nunca o menos 1 vez al mes<br><input type="radio"/> 1 a 3 veces mes<br><input type="radio"/> 1 vez semana<br><input checked="" type="radio"/> 2 a 4 veces semana<br><input type="radio"/> 5 a 6 veces semana<br><input type="radio"/> 1 vez al día<br><input type="radio"/> 2 a 3 veces al día<br><input type="radio"/> 5 a 6 veces al día<br><input type="radio"/> más 6 veces al día |
| pan blanco      | <input type="radio"/> Nunca o menos 1 vez al mes<br><input type="radio"/> 1 a 3 veces mes<br><input type="radio"/> 1 vez semana<br><input type="radio"/> 2 a 4 veces semana<br><input type="radio"/> 5 a 6 veces semana<br><input type="radio"/> 1 vez al día<br><input checked="" type="radio"/> 2 a 3 veces al día<br><input type="radio"/> 5 a 6 veces al día<br><input type="radio"/> más 6 veces al día |
| pan integral    | <input checked="" type="radio"/> Nunca o menos 1 vez al mes<br><input type="radio"/> 1 a 3 veces mes<br><input type="radio"/> 1 vez semana<br><input type="radio"/> 2 a 4 veces semana<br><input type="radio"/> 5 a 6 veces semana<br><input type="radio"/> 1 vez al día<br><input type="radio"/> 2 a 3 veces al día<br><input type="radio"/> 5 a 6 veces al día<br><input type="radio"/> más 6 veces al día |

---

cereales desayuno

- ☐ Nunca o menos 1 vez al mes  
☐ 1 a 3 veces mes  
☐ 1 vez semana  
☒ 2 a 4 veces semana  
☐ 5 a 6 veces semana  
☐ 1 vez al día  
☐ 2 a 3 veces al día  
☐ 5 a 6 veces al día  
☐ más 6 veces al día

---

patatas fritas

- ☒ Nunca o menos 1 vez al mes  
☐ 1 a 3 veces mes  
☐ 1 vez semana  
☐ 2 a 4 veces semana  
☐ 5 a 6 veces semana  
☐ 1 vez al día  
☐ 2 a 3 veces al día  
☐ 5 a 6 veces al día  
☐ más 6 veces al día

---

patatas cocidas o asadas

- ☐ Nunca o menos 1 vez al mes  
☐ 1 a 3 veces mes  
☒ 1 vez semana  
☐ 2 a 4 veces semana  
☐ 5 a 6 veces semana  
☐ 1 vez al día  
☐ 2 a 3 veces al día  
☐ 5 a 6 veces al día  
☐ más 6 veces al día

---

bolsa papas

- ☐ Nunca o menos 1 vez al mes  
☒ 1 a 3 veces mes  
☐ 1 vez semana  
☐ 2 a 4 veces semana  
☐ 5 a 6 veces semana  
☐ 1 vez al día  
☐ 2 a 3 veces al día  
☐ 5 a 6 veces al día  
☐ más 6 veces al día

---

arroz cocinado

- ☐ Nunca o menos 1 vez al mes  
☐ 1 a 3 veces mes  
☒ 1 vez semana  
☐ 2 a 4 veces semana  
☐ 5 a 6 veces semana  
☐ 1 vez al día  
☐ 2 a 3 veces al día  
☐ 5 a 6 veces al día  
☐ más 6 veces al día

---

pasta

- ☐ Nunca o menos 1 vez al mes  
☐ 1 a 3 veces mes  
☐ 1 vez semana  
☒ 2 a 4 veces semana  
☐ 5 a 6 veces semana  
☐ 1 vez al día  
☐ 2 a 3 veces al día  
☐ 5 a 6 veces al día  
☐ más 6 veces al día

|                     |                                                                                                                                                                                                                                                                                                                                                                                                              |
|---------------------|--------------------------------------------------------------------------------------------------------------------------------------------------------------------------------------------------------------------------------------------------------------------------------------------------------------------------------------------------------------------------------------------------------------|
| pizza               | <input type="radio"/> Nunca o menos 1 vez al mes<br><input checked="" type="radio"/> 1 a 3 veces mes<br><input type="radio"/> 1 vez semana<br><input type="radio"/> 2 a 4 veces semana<br><input type="radio"/> 5 a 6 veces semana<br><input type="radio"/> 1 vez al día<br><input type="radio"/> 2 a 3 veces al día<br><input type="radio"/> 5 a 6 veces al día<br><input type="radio"/> más 6 veces al día |
| aceite oliva        | <input type="radio"/> Nunca o menos 1 vez al mes<br><input type="radio"/> 1 a 3 veces mes<br><input type="radio"/> 1 vez semana<br><input type="radio"/> 2 a 4 veces semana<br><input type="radio"/> 5 a 6 veces semana<br><input checked="" type="radio"/> 1 vez al día<br><input type="radio"/> 2 a 3 veces al día<br><input type="radio"/> 5 a 6 veces al día<br><input type="radio"/> más 6 veces al día |
| otros aceites       | <input type="radio"/> Nunca o menos 1 vez al mes<br><input checked="" type="radio"/> 1 a 3 veces mes<br><input type="radio"/> 1 vez semana<br><input type="radio"/> 2 a 4 veces semana<br><input type="radio"/> 5 a 6 veces semana<br><input type="radio"/> 1 vez al día<br><input type="radio"/> 2 a 3 veces al día<br><input type="radio"/> 5 a 6 veces al día<br><input type="radio"/> más 6 veces al día |
| margarina           | <input checked="" type="radio"/> Nunca o menos 1 vez al mes<br><input type="radio"/> 1 a 3 veces mes<br><input type="radio"/> 1 vez semana<br><input type="radio"/> 2 a 4 veces semana<br><input type="radio"/> 5 a 6 veces semana<br><input type="radio"/> 1 vez al día<br><input type="radio"/> 2 a 3 veces al día<br><input type="radio"/> 5 a 6 veces al día<br><input type="radio"/> más 6 veces al día |
| mantequilla         | <input type="radio"/> Nunca o menos 1 vez al mes<br><input type="radio"/> 1 a 3 veces mes<br><input checked="" type="radio"/> 1 vez semana<br><input type="radio"/> 2 a 4 veces semana<br><input type="radio"/> 5 a 6 veces semana<br><input type="radio"/> 1 vez al día<br><input type="radio"/> 2 a 3 veces al día<br><input type="radio"/> 5 a 6 veces al día<br><input type="radio"/> más 6 veces al día |
| galletas tipo maria | <input type="radio"/> Nunca o menos 1 vez al mes<br><input type="radio"/> 1 a 3 veces mes<br><input type="radio"/> 1 vez semana<br><input checked="" type="radio"/> 2 a 4 veces semana<br><input type="radio"/> 5 a 6 veces semana<br><input type="radio"/> 1 vez al día<br><input type="radio"/> 2 a 3 veces al día<br><input type="radio"/> 5 a 6 veces al día<br><input type="radio"/> más 6 veces al día |

|                           |                                                                                                                                                                                                                                                                                                                                                                                                              |
|---------------------------|--------------------------------------------------------------------------------------------------------------------------------------------------------------------------------------------------------------------------------------------------------------------------------------------------------------------------------------------------------------------------------------------------------------|
| galletas chocolate        | <input checked="" type="radio"/> Nunca o menos 1 vez al mes<br><input type="radio"/> 1 a 3 veces mes<br><input type="radio"/> 1 vez semana<br><input type="radio"/> 2 a 4 veces semana<br><input type="radio"/> 5 a 6 veces semana<br><input type="radio"/> 1 vez al día<br><input type="radio"/> 2 a 3 veces al día<br><input type="radio"/> 5 a 6 veces al día<br><input type="radio"/> más 6 veces al día |
| bollieria                 | <input type="radio"/> Nunca o menos 1 vez al mes<br><input checked="" type="radio"/> 1 a 3 veces mes<br><input type="radio"/> 1 vez semana<br><input type="radio"/> 2 a 4 veces semana<br><input type="radio"/> 5 a 6 veces semana<br><input type="radio"/> 1 vez al día<br><input type="radio"/> 2 a 3 veces al día<br><input type="radio"/> 5 a 6 veces al día<br><input type="radio"/> más 6 veces al día |
| chocolate o bombones      | <input type="radio"/> Nunca o menos 1 vez al mes<br><input checked="" type="radio"/> 1 a 3 veces mes<br><input type="radio"/> 1 vez semana<br><input type="radio"/> 2 a 4 veces semana<br><input type="radio"/> 5 a 6 veces semana<br><input type="radio"/> 1 vez al día<br><input type="radio"/> 2 a 3 veces al día<br><input type="radio"/> 5 a 6 veces al día<br><input type="radio"/> más 6 veces al día |
| chocolate polvo o colacao | <input checked="" type="radio"/> Nunca o menos 1 vez al mes<br><input type="radio"/> 1 a 3 veces mes<br><input type="radio"/> 1 vez semana<br><input type="radio"/> 2 a 4 veces semana<br><input type="radio"/> 5 a 6 veces semana<br><input type="radio"/> 1 vez al día<br><input type="radio"/> 2 a 3 veces al día<br><input type="radio"/> 5 a 6 veces al día<br><input type="radio"/> más 6 veces al día |
| vino tinto                | <input checked="" type="radio"/> Nunca o menos 1 vez al mes<br><input type="radio"/> 1 a 3 veces mes<br><input type="radio"/> 1 vez semana<br><input type="radio"/> 2 a 4 veces semana<br><input type="radio"/> 5 a 6 veces semana<br><input type="radio"/> 1 vez al día<br><input type="radio"/> 2 a 3 veces al día<br><input type="radio"/> 5 a 6 veces al día<br><input type="radio"/> más 6 veces al día |
| vino blanco               | <input checked="" type="radio"/> Nunca o menos 1 vez al mes<br><input type="radio"/> 1 a 3 veces mes<br><input type="radio"/> 1 vez semana<br><input type="radio"/> 2 a 4 veces semana<br><input type="radio"/> 5 a 6 veces semana<br><input type="radio"/> 1 vez al día<br><input type="radio"/> 2 a 3 veces al día<br><input type="radio"/> 5 a 6 veces al día<br><input type="radio"/> más 6 veces al día |

---

|                    |                                                                                                                                                                                                                                                                                                                                                                                                              |
|--------------------|--------------------------------------------------------------------------------------------------------------------------------------------------------------------------------------------------------------------------------------------------------------------------------------------------------------------------------------------------------------------------------------------------------------|
| vino seco o vermut | <input checked="" type="radio"/> Nunca o menos 1 vez al mes<br><input type="radio"/> 1 a 3 veces mes<br><input type="radio"/> 1 vez semana<br><input type="radio"/> 2 a 4 veces semana<br><input type="radio"/> 5 a 6 veces semana<br><input type="radio"/> 1 vez al día<br><input type="radio"/> 2 a 3 veces al día<br><input type="radio"/> 5 a 6 veces al día<br><input type="radio"/> más 6 veces al día |
|--------------------|--------------------------------------------------------------------------------------------------------------------------------------------------------------------------------------------------------------------------------------------------------------------------------------------------------------------------------------------------------------------------------------------------------------|

---

|         |                                                                                                                                                                                                                                                                                                                                                                                                              |
|---------|--------------------------------------------------------------------------------------------------------------------------------------------------------------------------------------------------------------------------------------------------------------------------------------------------------------------------------------------------------------------------------------------------------------|
| cerveza | <input checked="" type="radio"/> Nunca o menos 1 vez al mes<br><input type="radio"/> 1 a 3 veces mes<br><input type="radio"/> 1 vez semana<br><input type="radio"/> 2 a 4 veces semana<br><input type="radio"/> 5 a 6 veces semana<br><input type="radio"/> 1 vez al día<br><input type="radio"/> 2 a 3 veces al día<br><input type="radio"/> 5 a 6 veces al día<br><input type="radio"/> más 6 veces al día |
|---------|--------------------------------------------------------------------------------------------------------------------------------------------------------------------------------------------------------------------------------------------------------------------------------------------------------------------------------------------------------------------------------------------------------------|

---

|                     |                                                                                                                                                                                                                                                                                                                                                                                                              |
|---------------------|--------------------------------------------------------------------------------------------------------------------------------------------------------------------------------------------------------------------------------------------------------------------------------------------------------------------------------------------------------------------------------------------------------------|
| cerveza sin alcohol | <input type="radio"/> Nunca o menos 1 vez al mes<br><input checked="" type="radio"/> 1 a 3 veces mes<br><input type="radio"/> 1 vez semana<br><input type="radio"/> 2 a 4 veces semana<br><input type="radio"/> 5 a 6 veces semana<br><input type="radio"/> 1 vez al día<br><input type="radio"/> 2 a 3 veces al día<br><input type="radio"/> 5 a 6 veces al día<br><input type="radio"/> más 6 veces al día |
|---------------------|--------------------------------------------------------------------------------------------------------------------------------------------------------------------------------------------------------------------------------------------------------------------------------------------------------------------------------------------------------------------------------------------------------------|

---

|         |                                                                                                                                                                                                                                                                                                                                                                                                              |
|---------|--------------------------------------------------------------------------------------------------------------------------------------------------------------------------------------------------------------------------------------------------------------------------------------------------------------------------------------------------------------------------------------------------------------|
| licores | <input checked="" type="radio"/> Nunca o menos 1 vez al mes<br><input type="radio"/> 1 a 3 veces mes<br><input type="radio"/> 1 vez semana<br><input type="radio"/> 2 a 4 veces semana<br><input type="radio"/> 5 a 6 veces semana<br><input type="radio"/> 1 vez al día<br><input type="radio"/> 2 a 3 veces al día<br><input type="radio"/> 5 a 6 veces al día<br><input type="radio"/> más 6 veces al día |
|---------|--------------------------------------------------------------------------------------------------------------------------------------------------------------------------------------------------------------------------------------------------------------------------------------------------------------------------------------------------------------------------------------------------------------|

---

|                       |                                                                                                                                                                                                                                                                                                                                                                                                              |
|-----------------------|--------------------------------------------------------------------------------------------------------------------------------------------------------------------------------------------------------------------------------------------------------------------------------------------------------------------------------------------------------------------------------------------------------------|
| ginebra o ron o vodka | <input checked="" type="radio"/> Nunca o menos 1 vez al mes<br><input type="radio"/> 1 a 3 veces mes<br><input type="radio"/> 1 vez semana<br><input type="radio"/> 2 a 4 veces semana<br><input type="radio"/> 5 a 6 veces semana<br><input type="radio"/> 1 vez al día<br><input type="radio"/> 2 a 3 veces al día<br><input type="radio"/> 5 a 6 veces al día<br><input type="radio"/> más 6 veces al día |
|-----------------------|--------------------------------------------------------------------------------------------------------------------------------------------------------------------------------------------------------------------------------------------------------------------------------------------------------------------------------------------------------------------------------------------------------------|

---

|                 |                                                                                                                                                                                                                                                                                                                                                                                                              |
|-----------------|--------------------------------------------------------------------------------------------------------------------------------------------------------------------------------------------------------------------------------------------------------------------------------------------------------------------------------------------------------------------------------------------------------------|
| refresco normal | <input type="radio"/> Nunca o menos 1 vez al mes<br><input checked="" type="radio"/> 1 a 3 veces mes<br><input type="radio"/> 1 vez semana<br><input type="radio"/> 2 a 4 veces semana<br><input type="radio"/> 5 a 6 veces semana<br><input type="radio"/> 1 vez al día<br><input type="radio"/> 2 a 3 veces al día<br><input type="radio"/> 5 a 6 veces al día<br><input type="radio"/> más 6 veces al día |
|-----------------|--------------------------------------------------------------------------------------------------------------------------------------------------------------------------------------------------------------------------------------------------------------------------------------------------------------------------------------------------------------------------------------------------------------|

---

---

refresco sin azúcar

- ☐ Nunca o menos 1 vez al mes  
☒ 1 a 3 veces mes  
☐ 1 vez semana  
☐ 2 a 4 veces semana  
☐ 5 a 6 veces semana  
☐ 1 vez al día  
☐ 2 a 3 veces al día  
☐ 5 a 6 veces al día  
☐ más 6 veces al día

---

Agua del grifo

- ☒ Nunca o menos 1 vez al mes  
☐ 1 a 3 veces mes  
☐ 1 vez semana  
☐ 2 a 4 veces semana  
☐ 5 a 6 veces semana  
☐ 1 vez al día  
☐ 2 a 3 veces al día  
☐ 5 a 6 veces al día  
☐ más 6 veces al día

---

agua embotellada sin gas

- ☐ Nunca o menos 1 vez al mes  
☐ 1 a 3 veces mes  
☐ 1 vez semana  
☐ 2 a 4 veces semana  
☐ 5 a 6 veces semana  
☐ 1 vez al día  
☐ 2 a 3 veces al día  
☐ 5 a 6 veces al día  
☒ más 6 veces al día

---

agua embotellada con gas

- ☒ Nunca o menos 1 vez al mes  
☐ 1 a 3 veces mes  
☐ 1 vez semana  
☐ 2 a 4 veces semana  
☐ 5 a 6 veces semana  
☐ 1 vez al día  
☐ 2 a 3 veces al día  
☐ 5 a 6 veces al día  
☐ más 6 veces al día

---

zumو frutas embasado

- ☐ Nunca o menos 1 vez al mes  
☒ 1 a 3 veces mes  
☐ 1 vez semana  
☐ 2 a 4 veces semana  
☐ 5 a 6 veces semana  
☐ 1 vez al día  
☐ 2 a 3 veces al día  
☐ 5 a 6 veces al día  
☐ más 6 veces al día

---

cafe

- ☐ Nunca o menos 1 vez al mes  
☒ 1 a 3 veces mes  
☐ 1 vez semana  
☐ 2 a 4 veces semana  
☐ 5 a 6 veces semana  
☐ 1 vez al día  
☐ 2 a 3 veces al día  
☐ 5 a 6 veces al día  
☐ más 6 veces al día



|                       |                                                                                                                                                                                                                                                                                                                                                                                                              |
|-----------------------|--------------------------------------------------------------------------------------------------------------------------------------------------------------------------------------------------------------------------------------------------------------------------------------------------------------------------------------------------------------------------------------------------------------|
| cafe descafeinado     | <input type="radio"/> Nunca o menos 1 vez al mes<br><input checked="" type="radio"/> 1 a 3 veces mes<br><input type="radio"/> 1 vez semana<br><input type="radio"/> 2 a 4 veces semana<br><input type="radio"/> 5 a 6 veces semana<br><input type="radio"/> 1 vez al día<br><input type="radio"/> 2 a 3 veces al día<br><input type="radio"/> 5 a 6 veces al día<br><input type="radio"/> más 6 veces al día |
| te o infusión         | <input checked="" type="radio"/> Nunca o menos 1 vez al mes<br><input type="radio"/> 1 a 3 veces mes<br><input type="radio"/> 1 vez semana<br><input type="radio"/> 2 a 4 veces semana<br><input type="radio"/> 5 a 6 veces semana<br><input type="radio"/> 1 vez al día<br><input type="radio"/> 2 a 3 veces al día<br><input type="radio"/> 5 a 6 veces al día<br><input type="radio"/> más 6 veces al día |
| sopa o puré verduras  | <input type="radio"/> Nunca o menos 1 vez al mes<br><input type="radio"/> 1 a 3 veces mes<br><input type="radio"/> 1 vez semana<br><input checked="" type="radio"/> 2 a 4 veces semana<br><input type="radio"/> 5 a 6 veces semana<br><input type="radio"/> 1 vez al día<br><input type="radio"/> 2 a 3 veces al día<br><input type="radio"/> 5 a 6 veces al día<br><input type="radio"/> más 6 veces al día |
| croquetas pollo jamón | <input type="radio"/> Nunca o menos 1 vez al mes<br><input checked="" type="radio"/> 1 a 3 veces mes<br><input type="radio"/> 1 vez semana<br><input type="radio"/> 2 a 4 veces semana<br><input type="radio"/> 5 a 6 veces semana<br><input type="radio"/> 1 vez al día<br><input type="radio"/> 2 a 3 veces al día<br><input type="radio"/> 5 a 6 veces al día<br><input type="radio"/> más 6 veces al día |
| croquetas pescado     | <input checked="" type="radio"/> Nunca o menos 1 vez al mes<br><input type="radio"/> 1 a 3 veces mes<br><input type="radio"/> 1 vez semana<br><input type="radio"/> 2 a 4 veces semana<br><input type="radio"/> 5 a 6 veces semana<br><input type="radio"/> 1 vez al día<br><input type="radio"/> 2 a 3 veces al día<br><input type="radio"/> 5 a 6 veces al día<br><input type="radio"/> más 6 veces al día |
| mayonesa              | <input type="radio"/> Nunca o menos 1 vez al mes<br><input checked="" type="radio"/> 1 a 3 veces mes<br><input type="radio"/> 1 vez semana<br><input type="radio"/> 2 a 4 veces semana<br><input type="radio"/> 5 a 6 veces semana<br><input type="radio"/> 1 vez al día<br><input type="radio"/> 2 a 3 veces al día<br><input type="radio"/> 5 a 6 veces al día<br><input type="radio"/> más 6 veces al día |

---

salsa tomate

- ☒ Nunca o menos 1 vez al mes  
☐ 1 a 3 veces mes  
☐ 1 vez semana  
☐ 2 a 4 veces semana  
☐ 5 a 6 veces semana  
☐ 1 vez al día  
☐ 2 a 3 veces al día  
☐ 5 a 6 veces al día  
☐ más 6 veces al día

---

ketchup

- ☐ Nunca o menos 1 vez al mes  
☒ 1 a 3 veces mes  
☐ 1 vez semana  
☐ 2 a 4 veces semana  
☐ 5 a 6 veces semana  
☐ 1 vez al día  
☐ 2 a 3 veces al día  
☐ 5 a 6 veces al día  
☐ más 6 veces al día

---

sal

- ☒ Nunca o menos 1 vez al mes  
☐ 1 a 3 veces mes  
☐ 1 vez semana  
☐ 2 a 4 veces semana  
☐ 5 a 6 veces semana  
☐ 1 vez al día  
☐ 2 a 3 veces al día  
☐ 5 a 6 veces al día  
☐ más 6 veces al día

---

ajo

- ☒ Nunca o menos 1 vez al mes  
☐ 1 a 3 veces mes  
☐ 1 vez semana  
☐ 2 a 4 veces semana  
☐ 5 a 6 veces semana  
☐ 1 vez al día  
☐ 2 a 3 veces al día  
☐ 5 a 6 veces al día  
☐ más 6 veces al día

---

mermelada o miel

- ☐ Nunca o menos 1 vez al mes  
☒ 1 a 3 veces mes  
☐ 1 vez semana  
☐ 2 a 4 veces semana  
☐ 5 a 6 veces semana  
☐ 1 vez al día  
☐ 2 a 3 veces al día  
☐ 5 a 6 veces al día  
☐ más 6 veces al día

---

azúcar

- ☐ Nunca o menos 1 vez al mes  
☒ 1 a 3 veces mes  
☐ 1 vez semana  
☐ 2 a 4 veces semana  
☐ 5 a 6 veces semana  
☐ 1 vez al día  
☐ 2 a 3 veces al día  
☐ 5 a 6 veces al día  
☐ más 6 veces al día

|                                       |                                                                                                                                                                                                                                                                                                                                                                                                                                                                                                                               |
|---------------------------------------|-------------------------------------------------------------------------------------------------------------------------------------------------------------------------------------------------------------------------------------------------------------------------------------------------------------------------------------------------------------------------------------------------------------------------------------------------------------------------------------------------------------------------------|
| Otro alimento                         |                                                                                                                                                                                                                                                                                                                                                                                                                                                                                                                               |
| suplementos vitamínicos               | <input checked="" type="radio"/> si<br><input type="radio"/> no                                                                                                                                                                                                                                                                                                                                                                                                                                                               |
| suplementos vitamínicos               | [*DATA REMOVED*]                                                                                                                                                                                                                                                                                                                                                                                                                                                                                                              |
| dieta previa                          | <input type="radio"/> si<br><input checked="" type="radio"/> no                                                                                                                                                                                                                                                                                                                                                                                                                                                               |
| motivo dieta                          | <input checked="" type="radio"/> no dieta<br><input type="radio"/> control peso<br><input type="radio"/> control colesterol<br><input type="radio"/> control diabetes<br><input type="radio"/> problemas estómago<br><input type="radio"/> problemas vesícula o hepáticos<br><input type="radio"/> HTA o cardiopatía<br><input type="radio"/> problemas renales<br><input type="radio"/> alergia alimentaria<br><input type="radio"/> ácido úrico elevado<br><input type="radio"/> vegetariana<br><input type="radio"/> otros |
| cambio alimentos año previo gestación | <input type="radio"/> si<br><input checked="" type="radio"/> no                                                                                                                                                                                                                                                                                                                                                                                                                                                               |
| cambio lácteos                        | <input type="radio"/> eliminado<br><input type="radio"/> disminuido<br><input checked="" type="radio"/> igual<br><input type="radio"/> aumentado<br><input type="radio"/> no sabe                                                                                                                                                                                                                                                                                                                                             |
| cambio huevos                         | <input type="radio"/> eliminado<br><input type="radio"/> disminuido<br><input checked="" type="radio"/> igual<br><input type="radio"/> aumentado<br><input type="radio"/> no sabe                                                                                                                                                                                                                                                                                                                                             |
| cambio carne                          | <input type="radio"/> eliminado<br><input checked="" type="radio"/> disminuido<br><input type="radio"/> igual<br><input type="radio"/> aumentado<br><input type="radio"/> no sabe                                                                                                                                                                                                                                                                                                                                             |
| cambio pescado                        | <input type="radio"/> eliminado<br><input type="radio"/> disminuido<br><input type="radio"/> igual<br><input checked="" type="radio"/> aumentado<br><input type="radio"/> no sabe                                                                                                                                                                                                                                                                                                                                             |
| cambio verduras                       | <input type="radio"/> eliminado<br><input type="radio"/> disminuido<br><input type="radio"/> igual<br><input checked="" type="radio"/> aumentado<br><input type="radio"/> no sabe                                                                                                                                                                                                                                                                                                                                             |

|                            |                                                                                                                                                                                                                        |
|----------------------------|------------------------------------------------------------------------------------------------------------------------------------------------------------------------------------------------------------------------|
| cambio legumbres           | <input type="radio"/> eliminado<br><input type="radio"/> disminuido<br><input checked="" type="radio"/> igual<br><input type="radio"/> aumentado<br><input type="radio"/> no sabe                                      |
| cambio fruta               | <input type="radio"/> eliminado<br><input type="radio"/> disminuido<br><input checked="" type="radio"/> igual<br><input type="radio"/> aumentado<br><input type="radio"/> no sabe                                      |
| cambio pan                 | <input type="radio"/> eliminado<br><input type="radio"/> disminuido<br><input type="radio"/> igual<br><input checked="" type="radio"/> aumentado<br><input type="radio"/> no sabe                                      |
| cambio aceite oliva        | <input type="radio"/> eliminado<br><input type="radio"/> disminuido<br><input checked="" type="radio"/> igual<br><input type="radio"/> aumentado<br><input type="radio"/> no sabe                                      |
| cambio mante o margarina   | <input type="radio"/> eliminado<br><input type="radio"/> disminuido<br><input checked="" type="radio"/> igual<br><input type="radio"/> aumentado<br><input type="radio"/> no sabe                                      |
| cambio azúcar y dulces     | <input type="radio"/> eliminado<br><input checked="" type="radio"/> disminuido<br><input type="radio"/> igual<br><input type="radio"/> aumentado<br><input type="radio"/> no sabe                                      |
| cambio bebidas alcohólicas | <input checked="" type="radio"/> eliminado<br><input type="radio"/> disminuido<br><input type="radio"/> igual<br><input type="radio"/> aumentado<br><input type="radio"/> no sabe                                      |
| frecuencia comidas fritas  | <input type="radio"/> a diario<br><input type="radio"/> 5 a 6 veces semana<br><input type="radio"/> 2 a 4 veces semana<br><input type="radio"/> 1 vez semana<br><input checked="" type="radio"/> menos de 1 vez semana |
| carne                      | <input type="radio"/> no como<br><input type="radio"/> cruda<br><input type="radio"/> poco hecha<br><input checked="" type="radio"/> hecha<br><input type="radio"/> muy hecha                                          |
| grasa visible carne        | <input type="radio"/> quita toda<br><input checked="" type="radio"/> quita mayoría<br><input type="radio"/> quita un poco<br><input type="radio"/> no quita nada                                                       |

|                                |                                                                                                                                                                                                                                                          |
|--------------------------------|----------------------------------------------------------------------------------------------------------------------------------------------------------------------------------------------------------------------------------------------------------|
| cocina carne                   | <input type="radio"/> a la plancha<br><input checked="" type="radio"/> a la parrilla<br><input type="radio"/> asada<br><input type="radio"/> frita<br><input type="radio"/> guisada                                                                      |
| tostado quemado carne          | <input type="radio"/> nunca<br><input type="radio"/> 1 vez mes<br><input type="radio"/> 2 a 3 veces mes<br><input type="radio"/> 1 vez semana<br><input type="radio"/> 2 a 3 semanas                                                                     |
| tostado quemado pescado        | <input checked="" type="radio"/> nunca<br><input type="radio"/> 1 vez mes<br><input type="radio"/> 2 a 3 veces mes<br><input type="radio"/> 1 vez semana<br><input type="radio"/> 2 a 3 semanas                                                          |
| socarrat paella                | <input checked="" type="radio"/> nunca<br><input type="radio"/> 1 vez mes<br><input type="radio"/> 2 a 3 veces mes<br><input type="radio"/> 1 vez semana<br><input type="radio"/> 2 a 3 semanas                                                          |
| grasa o aceite cocinar         | <input type="radio"/> mantequilla<br><input type="radio"/> margarina<br><input type="radio"/> aceite oliva<br><input checked="" type="radio"/> aceite oliva virgen extra<br><input type="radio"/> aceite vegetal<br><input type="radio"/> mezcla aceites |
| grasa aceite aliñar            | <input type="radio"/> mantequilla<br><input type="radio"/> margarina<br><input type="radio"/> aceite oliva<br><input checked="" type="radio"/> aceite oliva virgen extra<br><input type="radio"/> aceite vegetal<br><input type="radio"/> mezcla aceites |
| grasa aceite freir             | <input type="radio"/> mantequilla<br><input type="radio"/> margarina<br><input type="radio"/> aceite oliva<br><input type="radio"/> aceite oliva virgen extra<br><input type="radio"/> aceite vegetal<br><input type="radio"/> mezcla aceites            |
| Ejercicio cuestionario         | <input checked="" type="radio"/> si<br><input type="radio"/> no                                                                                                                                                                                          |
| horas de sueño incluido siesta | [*DATA REMOVED*]                                                                                                                                                                                                                                         |
| minutos siesta                 | [*DATA REMOVED*]                                                                                                                                                                                                                                         |
| horas televisión semana        | [*DATA REMOVED*]                                                                                                                                                                                                                                         |

|                                        |                                                                                                                                                                                                                                                                                                                                                                           |
|----------------------------------------|---------------------------------------------------------------------------------------------------------------------------------------------------------------------------------------------------------------------------------------------------------------------------------------------------------------------------------------------------------------------------|
| actividad trabajo                      | <input type="radio"/> casi siempre sentado<br><input checked="" type="radio"/> sentado 50 por cien<br><input type="radio"/> casi siempre de pie, quieto<br><input type="radio"/> casi siempre levantado caminando y llevando pocas cosas<br><input type="radio"/> casi siempre levantado, caminando y llevado muchas cosas<br><input type="radio"/> trabajo manual pesado |
| tiempo caminar o bici al día           | <input type="radio"/> casi nunca<br><input type="radio"/> menos 20min día<br><input checked="" type="radio"/> 20 a 40 min día<br><input type="radio"/> 40 a 60 min día<br><input type="radio"/> 1h o 1h y media día<br><input type="radio"/> más de 1h y media al día                                                                                                     |
| tiempo tareas casa al día              | <input type="radio"/> menos de 1h día<br><input checked="" type="radio"/> 1 a 2h día<br><input type="radio"/> 3 a 4h día<br><input type="radio"/> 5 a 6h día<br><input type="radio"/> 7 a 8h día<br><input type="radio"/> más de 8h día                                                                                                                                   |
| tiempo libre televisión ordenador leer | <input type="radio"/> menos 1h día<br><input checked="" type="radio"/> 1h día<br><input type="radio"/> 2h día<br><input type="radio"/> 3h día<br><input type="radio"/> 4h día<br><input type="radio"/> 5 a 6h día<br><input type="radio"/> mas 6h día                                                                                                                     |
| tiempo libre ejercicio o deporte       | <input type="radio"/> menos 1h semana<br><input type="radio"/> 1h semana<br><input type="radio"/> 2h semana<br><input type="radio"/> 3h semana<br><input checked="" type="radio"/> 4 a 5h semana<br><input type="radio"/> mas 5h semana                                                                                                                                   |
| como se considera                      | <input type="radio"/> sedentaria<br><input type="radio"/> poco activa<br><input checked="" type="radio"/> moderadamente activa<br><input type="radio"/> bastante activa<br><input type="radio"/> muy activa<br><input type="radio"/> no sabe                                                                                                                              |
| FUR                                    | [*DATA REMOVED*]                                                                                                                                                                                                                                                                                                                                                          |
| Semanas gestación 2T                   | [*DATA REMOVED*]                                                                                                                                                                                                                                                                                                                                                          |
| Días gestación 2T                      | [*DATA REMOVED*]                                                                                                                                                                                                                                                                                                                                                          |
| DBP 2T                                 | [*DATA REMOVED*]                                                                                                                                                                                                                                                                                                                                                          |
| CC 2T                                  | [*DATA REMOVED*]                                                                                                                                                                                                                                                                                                                                                          |
| AC 2T                                  | [*DATA REMOVED*]                                                                                                                                                                                                                                                                                                                                                          |

|                                                   |                                                                                                                                                                                                 |
|---------------------------------------------------|-------------------------------------------------------------------------------------------------------------------------------------------------------------------------------------------------|
| LF 2T                                             | [*DATA REMOVED*]                                                                                                                                                                                |
| PFE 2T (Hadlock)                                  | [*DATA REMOVED*]                                                                                                                                                                                |
| Semanas gestación 3T                              | [*DATA REMOVED*]                                                                                                                                                                                |
| días 3T                                           | [*DATA REMOVED*]                                                                                                                                                                                |
| DBP 3T                                            | [*DATA REMOVED*]                                                                                                                                                                                |
| CC 3T                                             | [*DATA REMOVED*]                                                                                                                                                                                |
| AC 3T                                             | [*DATA REMOVED*]                                                                                                                                                                                |
| LF 3T                                             | [*DATA REMOVED*]                                                                                                                                                                                |
| PFE 3T (Hadlock)                                  | [*DATA REMOVED*]                                                                                                                                                                                |
| Semanas de gestación final                        | [*DATA REMOVED*]                                                                                                                                                                                |
| días gestación final                              | [*DATA REMOVED*]                                                                                                                                                                                |
| Localización placenta                             | <input type="radio"/> anterior<br><input type="radio"/> lateral derecha<br><input type="radio"/> lateral izquierda<br><input checked="" type="radio"/> posterior<br><input type="radio"/> fondo |
| Presentación longitudinal cefálica                | <input type="radio"/> no<br><input checked="" type="radio"/> si                                                                                                                                 |
| Dorso                                             | <input type="radio"/> izquierda anterior<br><input type="radio"/> izquierda posterior<br><input checked="" type="radio"/> derecha anterior<br><input type="radio"/> derecha posterior           |
| diámetro biparietal                               | [*DATA REMOVED*]                                                                                                                                                                                |
| Circunferencia craneal                            | [*DATA REMOVED*]                                                                                                                                                                                |
| Circunferencia abdominal                          | [*DATA REMOVED*]                                                                                                                                                                                |
| Longitud de femur                                 | [*DATA REMOVED*]                                                                                                                                                                                |
| tejido celular subcutáneo a nivel del muslo en mm | [*DATA REMOVED*]                                                                                                                                                                                |
| tejido celular subcutáneo en abdomen en mm        | [*DATA REMOVED*]                                                                                                                                                                                |
| Volumen del muslo en cm3                          | [*DATA REMOVED*]                                                                                                                                                                                |
| Peso fetal estimado según fórmula de Hadlock      | [*DATA REMOVED*]                                                                                                                                                                                |

|                                               |                                                                                                                                                          |
|-----------------------------------------------|----------------------------------------------------------------------------------------------------------------------------------------------------------|
| Percentil                                     | [*DATA REMOVED*]                                                                                                                                         |
| Peso fetal estimado según fórmula de Scioscia | <hr/>                                                                                                                                                    |
| Peso fetal estimado según fórmula de LEE      | <hr/>                                                                                                                                                    |
| Tipo de parto                                 | <input checked="" type="radio"/> eutocico<br><input type="radio"/> instrumentado/ventosa<br><input type="radio"/> cesarea                                |
| fecha de nacimiento                           | [*DATA REMOVED*]                                                                                                                                         |
| Días entre exploración y nacimiento           | [*DATA REMOVED*]                                                                                                                                         |
| Peso RN en g                                  | [*DATA REMOVED*]                                                                                                                                         |
| sexo                                          | <input checked="" type="radio"/> mujer<br><input type="radio"/> hombre                                                                                   |
| Apgar 1 minuto                                | [*DATA REMOVED*]                                                                                                                                         |
| Apgar 5 minutos                               | [*DATA REMOVED*]                                                                                                                                         |
| Apgar 10 minutos                              | <hr/>                                                                                                                                                    |
| antecedente Covid durante gestación           | <input type="radio"/> Yes<br><input checked="" type="radio"/> No                                                                                         |
| Nivel de estudios                             | <input type="radio"/> ninguno<br><input type="radio"/> primarios<br><input checked="" type="radio"/> secundarios<br><input type="radio"/> universitarios |



# Base\_datos\_estimacion\_peso\_fetal

|                                       |                                                                                                                                                                                                                                                                                      |
|---------------------------------------|--------------------------------------------------------------------------------------------------------------------------------------------------------------------------------------------------------------------------------------------------------------------------------------|
| Número de identificación participante | 45                                                                                                                                                                                                                                                                                   |
| CODIGO PARTICIPANTE                   |                                                                                                                                                                                                                                                                                      |
| Edad                                  | [*DATA REMOVED*]                                                                                                                                                                                                                                                                     |
| Gestaciones                           | <input checked="" type="radio"/> 1<br><input type="radio"/> 2<br><input type="radio"/> 3<br><input type="radio"/> mas de 3                                                                                                                                                           |
| partos                                | <input checked="" type="radio"/> 0<br><input type="radio"/> 1<br><input type="radio"/> 2<br><input type="radio"/> 3<br><input type="radio"/> mas de 3                                                                                                                                |
| cesáreas                              | <input checked="" type="radio"/> 0<br><input type="radio"/> 1<br><input type="radio"/> 2<br><input type="radio"/> 3<br><input type="radio"/> mas de 3                                                                                                                                |
| Abortos                               | <input checked="" type="radio"/> 0<br><input type="radio"/> 1<br><input type="radio"/> 2<br><input type="radio"/> 3<br><input type="radio"/> mas de 3                                                                                                                                |
| Tipo de gestacion                     | <input checked="" type="radio"/> espontanea<br><input type="radio"/> IAC inseminación artificial conyuge<br><input type="radio"/> IAD inseminación artificial donante<br><input type="radio"/> FIV Fecundación in Vitro<br><input type="radio"/> Ovodon FIV con donación de ovocitos |
| peso previo a embarazo                | [*DATA REMOVED*]                                                                                                                                                                                                                                                                     |
| Ganancia ponderal embarazo            | [*DATA REMOVED*]                                                                                                                                                                                                                                                                     |
| Talla madre                           | [*DATA REMOVED*]                                                                                                                                                                                                                                                                     |
| IMC previo embarazo                   | 18.666666666666668                                                                                                                                                                                                                                                                   |
| Patología obstétrica                  | <input checked="" type="radio"/> no<br><input type="radio"/> si                                                                                                                                                                                                                      |
| Diabetes pregestacional               | <input checked="" type="radio"/> no<br><input type="radio"/> si                                                                                                                                                                                                                      |
| Diabetes gestacional                  | <input checked="" type="radio"/> no<br><input type="radio"/> si                                                                                                                                                                                                                      |

|                                            |                                                                                                                                                                                      |
|--------------------------------------------|--------------------------------------------------------------------------------------------------------------------------------------------------------------------------------------|
| Diabetes gestacional con insulina          | <input checked="" type="radio"/> no<br><input type="radio"/> si                                                                                                                      |
| Diabetes gestacional con dieta y ejercicio | <input checked="" type="radio"/> no<br><input type="radio"/> si                                                                                                                      |
| Percentil fetos previos                    | <input checked="" type="radio"/> Nada<br><input type="radio"/> percentil menor de 10<br><input type="radio"/> percentil entre 10 y 90<br><input type="radio"/> percentil mayor de 90 |
| Exfumadora                                 | <input checked="" type="radio"/> Nada<br><input type="radio"/> menos de 5 años<br><input type="radio"/> 5 a 10 años<br><input type="radio"/> mayor o igual a 10 años                 |
| Hábito tabáquico                           | <input type="radio"/> no<br><input checked="" type="radio"/> si                                                                                                                      |
| fumadora                                   | [*DATA REMOVED*]                                                                                                                                                                     |
| Consumo otros tóxicos                      | <input checked="" type="radio"/> no<br><input type="radio"/> si                                                                                                                      |
| Hb 1T                                      | [*DATA REMOVED*]                                                                                                                                                                     |
| Htc 1T                                     | [*DATA REMOVED*]                                                                                                                                                                     |
| Hb 2T                                      | [*DATA REMOVED*]                                                                                                                                                                     |
| HTC 2T                                     | [*DATA REMOVED*]                                                                                                                                                                     |
| Hb 3T                                      | [*DATA REMOVED*]                                                                                                                                                                     |
| HTC 3T                                     | [*DATA REMOVED*]                                                                                                                                                                     |
| Suplemento FE oral                         | <input checked="" type="radio"/> si<br><input type="radio"/> no                                                                                                                      |
| Suplemento fe iv                           | <input checked="" type="radio"/> si<br><input type="radio"/> no                                                                                                                      |
| Transfusión                                | <input checked="" type="radio"/> no<br><input type="radio"/> si                                                                                                                      |
| Solicitada Vit D                           | <input checked="" type="radio"/> no<br><input type="radio"/> si                                                                                                                      |
| Deficit vit D                              | <input type="radio"/> no<br><input type="radio"/> si                                                                                                                                 |
| Suplemento vit D                           | <input type="radio"/> si<br><input type="radio"/> no                                                                                                                                 |

|                       |                                                                                                                                                                                                                                                                                                                                                                                                              |
|-----------------------|--------------------------------------------------------------------------------------------------------------------------------------------------------------------------------------------------------------------------------------------------------------------------------------------------------------------------------------------------------------------------------------------------------------|
| Dieta, cuestionario   | <input checked="" type="radio"/> sí<br><input type="radio"/> no                                                                                                                                                                                                                                                                                                                                              |
| Leche entera          | <input checked="" type="radio"/> Nunca o menos 1 vez al mes<br><input type="radio"/> 1 a 3 veces mes<br><input type="radio"/> 1 vez semana<br><input type="radio"/> 2 a 4 veces semana<br><input type="radio"/> 5 a 6 veces semana<br><input type="radio"/> 1 vez al día<br><input type="radio"/> 2 a 3 veces al día<br><input type="radio"/> 5 a 6 veces al día<br><input type="radio"/> más 6 veces al día |
| Leche semidesnatada   | <input checked="" type="radio"/> Nunca o menos 1 vez al mes<br><input type="radio"/> 1 a 3 veces mes<br><input type="radio"/> 1 vez semana<br><input type="radio"/> 2 a 4 veces semana<br><input type="radio"/> 5 a 6 veces semana<br><input type="radio"/> 1 vez al día<br><input type="radio"/> 2 a 3 veces al día<br><input type="radio"/> 5 a 6 veces al día<br><input type="radio"/> mas 6 veces al día |
| Leche desnatada       | <input checked="" type="radio"/> Nunca o menos 1 vez al mes<br><input type="radio"/> 1 a 3 veces mes<br><input type="radio"/> 1 vez semana<br><input type="radio"/> 2 a 4 veces semana<br><input type="radio"/> 5 a 6 veces semana<br><input type="radio"/> 1 vez al día<br><input type="radio"/> 2 a 3 veces al día<br><input type="radio"/> 5 a 6 veces al día<br><input type="radio"/> más 6 veces al día |
| Leche condensada      | <input checked="" type="radio"/> Nunca o menos 1 vez al mes<br><input type="radio"/> 1 a 3 veces mes<br><input type="radio"/> 1 vez semana<br><input type="radio"/> 2 a 4 veces semana<br><input type="radio"/> 5 a 6 veces semana<br><input type="radio"/> 1 vez al día<br><input type="radio"/> 2 a 3 veces al día<br><input type="radio"/> 5 a 6 veces al día<br><input type="radio"/> más 6 veces al día |
| nata o crema de leche | <input type="radio"/> Nunca o menos 1 vez al mes<br><input checked="" type="radio"/> 1 a 3 veces mes<br><input type="radio"/> 1 vez semana<br><input type="radio"/> 2 a 4 veces semana<br><input type="radio"/> 5 a 6 veces semana<br><input type="radio"/> 1 vez al día<br><input type="radio"/> 2 a 3 veces al día<br><input type="radio"/> 5 a 6 veces al día<br><input type="radio"/> más 6 veces al día |

|                                             |                                                                                                                                                                                                                                                                                                                                                                                                              |
|---------------------------------------------|--------------------------------------------------------------------------------------------------------------------------------------------------------------------------------------------------------------------------------------------------------------------------------------------------------------------------------------------------------------------------------------------------------------|
| Yogurt Entero                               | <input checked="" type="radio"/> Nunca o menos 1 vez al mes<br><input type="radio"/> 1 a 3 veces mes<br><input type="radio"/> 1 vez semana<br><input type="radio"/> 2 a 4 veces semana<br><input type="radio"/> 5 a 6 veces semana<br><input type="radio"/> 1 vez al día<br><input type="radio"/> 2 a 3 veces al día<br><input type="radio"/> 5 a 6 veces al día<br><input type="radio"/> más 6 veces al día |
| Yogurt desnatado                            | <input checked="" type="radio"/> Nunca o menos 1 vez al mes<br><input type="radio"/> 1 a 3 veces mes<br><input type="radio"/> 1 vez semana<br><input type="radio"/> 2 a 4 veces semana<br><input type="radio"/> 5 a 6 veces semana<br><input type="radio"/> 1 vez al día<br><input type="radio"/> 2 a 3 veces al día<br><input type="radio"/> 5 a 6 veces al día<br><input type="radio"/> más 6 veces al día |
| 100g requesón o queso blando o queso fresco | <input checked="" type="radio"/> Nunca o menos 1 vez al mes<br><input type="radio"/> 1 a 3 veces mes<br><input type="radio"/> 1 vez semana<br><input type="radio"/> 2 a 4 veces semana<br><input type="radio"/> 5 a 6 veces semana<br><input type="radio"/> 1 vez al día<br><input type="radio"/> 2 a 3 veces al día<br><input type="radio"/> 5 a 6 veces al día<br><input type="radio"/> más 6 veces al día |
| queso curado o semicurado o cremoso         | <input type="radio"/> Nunca o menos 1 vez al mes<br><input type="radio"/> 1 a 3 veces mes<br><input type="radio"/> 1 vez semana<br><input checked="" type="radio"/> 2 a 4 veces semana<br><input type="radio"/> 5 a 6 veces semana<br><input type="radio"/> 1 vez al día<br><input type="radio"/> 2 a 3 veces al día<br><input type="radio"/> 5 a 6 veces al día<br><input type="radio"/> más 6 veces al día |
| natillas flan pudding                       | <input type="radio"/> Nunca o menos 1 vez al mes<br><input type="radio"/> 1 a 3 veces mes<br><input type="radio"/> 1 vez semana<br><input type="radio"/> 2 a 4 veces semana<br><input checked="" type="radio"/> 5 a 6 veces semana<br><input type="radio"/> 1 vez al día<br><input type="radio"/> 2 a 3 veces al día<br><input type="radio"/> 5 a 6 veces al día<br><input type="radio"/> más 6 veces al día |
| Helado                                      | <input type="radio"/> Nunca o menos 1 vez al mes<br><input type="radio"/> 1 a 3 veces mes<br><input type="radio"/> 1 vez semana<br><input type="radio"/> 2 a 4 veces semana<br><input type="radio"/> 5 a 6 veces semana<br><input checked="" type="radio"/> 1 vez al día<br><input type="radio"/> 2 a 3 veces al día<br><input type="radio"/> 5 a 6 veces al día<br><input type="radio"/> más 6 veces al día |

|                                      |                                                                                                                                                                                                                                                                                                                                                                                                              |
|--------------------------------------|--------------------------------------------------------------------------------------------------------------------------------------------------------------------------------------------------------------------------------------------------------------------------------------------------------------------------------------------------------------------------------------------------------------|
| huevo                                | <input type="radio"/> Nunca o menos 1 vez al mes<br><input type="radio"/> 1 a 3 veces mes<br><input type="radio"/> 1 vez semana<br><input type="radio"/> 2 a 4 veces semana<br><input checked="" type="radio"/> 5 a 6 veces semana<br><input type="radio"/> 1 vez al día<br><input type="radio"/> 2 a 3 veces al día<br><input type="radio"/> 5 a 6 veces al día<br><input type="radio"/> más 6 veces al día |
| Pollo con piel                       | <input type="radio"/> Nunca o menos 1 vez al mes<br><input type="radio"/> 1 a 3 veces mes<br><input type="radio"/> 1 vez semana<br><input type="radio"/> 2 a 4 veces semana<br><input type="radio"/> 5 a 6 veces semana<br><input checked="" type="radio"/> 1 vez al día<br><input type="radio"/> 2 a 3 veces al día<br><input type="radio"/> 5 a 6 veces al día<br><input type="radio"/> más 6 veces al día |
| pollo sin piel                       | <input type="radio"/> Nunca o menos 1 vez al mes<br><input type="radio"/> 1 a 3 veces mes<br><input type="radio"/> 1 vez semana<br><input type="radio"/> 2 a 4 veces semana<br><input type="radio"/> 5 a 6 veces semana<br><input checked="" type="radio"/> 1 vez al día<br><input type="radio"/> 2 a 3 veces al día<br><input type="radio"/> 5 a 6 veces al día<br><input type="radio"/> más 6 veces al día |
| Ternera o cerdo o cordero            | <input type="radio"/> Nunca o menos 1 vez al mes<br><input type="radio"/> 1 a 3 veces mes<br><input type="radio"/> 1 vez semana<br><input type="radio"/> 2 a 4 veces semana<br><input type="radio"/> 5 a 6 veces semana<br><input type="radio"/> 1 vez al día<br><input checked="" type="radio"/> 2 a 3 veces al día<br><input type="radio"/> 5 a 6 veces al día<br><input type="radio"/> más 6 veces al día |
| carne caza: Conejo o codorniz o pato | <input checked="" type="radio"/> Nunca o menos 1 vez al mes<br><input type="radio"/> 1 a 3 veces mes<br><input type="radio"/> 1 vez semana<br><input type="radio"/> 2 a 4 veces semana<br><input type="radio"/> 5 a 6 veces semana<br><input type="radio"/> 1 vez al día<br><input type="radio"/> 2 a 3 veces al día<br><input type="radio"/> 5 a 6 veces al día<br><input type="radio"/> más 6 veces al día |
| Hígado de ternera o cerdo o pollo    | <input checked="" type="radio"/> Nunca o menos 1 vez al mes<br><input type="radio"/> 1 a 3 veces mes<br><input type="radio"/> 1 vez semana<br><input type="radio"/> 2 a 4 veces semana<br><input type="radio"/> 5 a 6 veces semana<br><input type="radio"/> 1 vez al día<br><input type="radio"/> 2 a 3 veces al día<br><input type="radio"/> 5 a 6 veces al día<br><input type="radio"/> más 6 veces al día |

|                     |                                                                                                                                                                                                                                                                                                                                                                                                              |
|---------------------|--------------------------------------------------------------------------------------------------------------------------------------------------------------------------------------------------------------------------------------------------------------------------------------------------------------------------------------------------------------------------------------------------------------|
| Vísceras            | <input checked="" type="radio"/> Nunca o menos 1 vez al mes<br><input type="radio"/> 1 a 3 veces mes<br><input type="radio"/> 1 vez semana<br><input type="radio"/> 2 a 4 veces semana<br><input type="radio"/> 5 a 6 veces semana<br><input type="radio"/> 1 vez al día<br><input type="radio"/> 2 a 3 veces al día<br><input type="radio"/> 5 a 6 veces al día<br><input type="radio"/> más 6 veces al día |
| Embutido            | <input type="radio"/> Nunca o menos 1 vez al mes<br><input type="radio"/> 1 a 3 veces mes<br><input type="radio"/> 1 vez semana<br><input type="radio"/> 2 a 4 veces semana<br><input checked="" type="radio"/> 5 a 6 veces semana<br><input type="radio"/> 1 vez al día<br><input type="radio"/> 2 a 3 veces al día<br><input type="radio"/> 5 a 6 veces al día<br><input type="radio"/> más 6 veces al día |
| Salchicha o similar | <input type="radio"/> Nunca o menos 1 vez al mes<br><input type="radio"/> 1 a 3 veces mes<br><input type="radio"/> 1 vez semana<br><input checked="" type="radio"/> 2 a 4 veces semana<br><input type="radio"/> 5 a 6 veces semana<br><input type="radio"/> 1 vez al día<br><input type="radio"/> 2 a 3 veces al día<br><input type="radio"/> 5 a 6 veces al día<br><input type="radio"/> más 6 veces al día |
| Pate o foiegras     | <input checked="" type="radio"/> Nunca o menos 1 vez al mes<br><input type="radio"/> 1 a 3 veces mes<br><input type="radio"/> 1 vez semana<br><input type="radio"/> 2 a 4 veces semana<br><input type="radio"/> 5 a 6 veces semana<br><input type="radio"/> 1 vez al día<br><input type="radio"/> 2 a 3 veces al día<br><input type="radio"/> 5 a 6 veces al día<br><input type="radio"/> más 6 veces al día |
| Hamburguesa         | <input type="radio"/> Nunca o menos 1 vez al mes<br><input type="radio"/> 1 a 3 veces mes<br><input checked="" type="radio"/> 1 vez semana<br><input type="radio"/> 2 a 4 veces semana<br><input type="radio"/> 5 a 6 veces semana<br><input type="radio"/> 1 vez al día<br><input type="radio"/> 2 a 3 veces al día<br><input type="radio"/> 5 a 6 veces al día<br><input type="radio"/> más 6 veces al día |
| tocino o bacon      | <input type="radio"/> Nunca o menos 1 vez al mes<br><input type="radio"/> 1 a 3 veces mes<br><input type="radio"/> 1 vez semana<br><input type="radio"/> 2 a 4 veces semana<br><input checked="" type="radio"/> 5 a 6 veces semana<br><input type="radio"/> 1 vez al día<br><input type="radio"/> 2 a 3 veces al día<br><input type="radio"/> 5 a 6 veces al día<br><input type="radio"/> más 6 veces al día |

---

Pescado frito

- ☐ Nunca o menos 1 vez al mes  
☒ 1 a 3 veces mes  
☐ 1 vez semana  
☐ 2 a 4 veces semana  
☐ 5 a 6 veces semana  
☐ 1 vez al día  
☐ 2 a 3 veces al día  
☐ 5 a 6 veces al día  
☐ más 6 veces al día

---

pescado hervido blanco

- ☒ Nunca o menos 1 vez al mes  
☐ 1 a 3 veces mes  
☐ 1 vez semana  
☐ 2 a 4 veces semana  
☐ 5 a 6 veces semana  
☐ 1 vez al día  
☐ 2 a 3 veces al día  
☐ 5 a 6 veces al día  
☐ más 6 veces al día

---

pescado hervido azul

- ☒ Nunca o menos 1 vez al mes  
☐ 1 a 3 veces mes  
☐ 1 vez semana  
☐ 2 a 4 veces semana  
☐ 5 a 6 veces semana  
☐ 1 vez al día  
☐ 2 a 3 veces al día  
☐ 5 a 6 veces al día  
☐ más 6 veces al día

---

otros pescado azul

- ☐ Nunca o menos 1 vez al mes  
☐ 1 a 3 veces mes  
☐ 1 vez semana  
☐ 2 a 4 veces semana  
☒ 5 a 6 veces semana  
☐ 1 vez al día  
☐ 2 a 3 veces al día  
☐ 5 a 6 veces al día  
☐ más 6 veces al día

---

atun conserva

- ☐ Nunca o menos 1 vez al mes  
☐ 1 a 3 veces mes  
☒ 1 vez semana  
☐ 2 a 4 veces semana  
☐ 5 a 6 veces semana  
☐ 1 vez al día  
☐ 2 a 3 veces al día  
☐ 5 a 6 veces al día  
☐ más 6 veces al día

---

sardina conserva

- ☒ Nunca o menos 1 vez al mes  
☐ 1 a 3 veces mes  
☐ 1 vez semana  
☐ 2 a 4 veces semana  
☐ 5 a 6 veces semana  
☐ 1 vez al día  
☐ 2 a 3 veces al día  
☐ 5 a 6 veces al día  
☐ más 6 veces al día

|                                         |                                                                                                                                                                                                                                                                                                                                                                                                              |
|-----------------------------------------|--------------------------------------------------------------------------------------------------------------------------------------------------------------------------------------------------------------------------------------------------------------------------------------------------------------------------------------------------------------------------------------------------------------|
| pescado ahumado                         | <input checked="" type="radio"/> Nunca o menos 1 vez al mes<br><input type="radio"/> 1 a 3 veces mes<br><input type="radio"/> 1 vez semana<br><input type="radio"/> 2 a 4 veces semana<br><input type="radio"/> 5 a 6 veces semana<br><input type="radio"/> 1 vez al día<br><input type="radio"/> 2 a 3 veces al día<br><input type="radio"/> 5 a 6 veces al día<br><input type="radio"/> más 6 veces al día |
| almejas o mejillones o ostras unos 100g | <input type="radio"/> Nunca o menos 1 vez al mes<br><input checked="" type="radio"/> 1 a 3 veces mes<br><input type="radio"/> 1 vez semana<br><input type="radio"/> 2 a 4 veces semana<br><input type="radio"/> 5 a 6 veces semana<br><input type="radio"/> 1 vez al día<br><input type="radio"/> 2 a 3 veces al día<br><input type="radio"/> 5 a 6 veces al día<br><input type="radio"/> más 6 veces al día |
| calamar o chipiron o sepia unos 100g    | <input type="radio"/> Nunca o menos 1 vez al mes<br><input type="radio"/> 1 a 3 veces mes<br><input type="radio"/> 1 vez semana<br><input checked="" type="radio"/> 2 a 4 veces semana<br><input type="radio"/> 5 a 6 veces semana<br><input type="radio"/> 1 vez al día<br><input type="radio"/> 2 a 3 veces al día<br><input type="radio"/> 5 a 6 veces al día<br><input type="radio"/> más 6 veces al día |
| marisco unos 100g                       | <input type="radio"/> Nunca o menos 1 vez al mes<br><input checked="" type="radio"/> 1 a 3 veces mes<br><input type="radio"/> 1 vez semana<br><input type="radio"/> 2 a 4 veces semana<br><input type="radio"/> 5 a 6 veces semana<br><input type="radio"/> 1 vez al día<br><input type="radio"/> 2 a 3 veces al día<br><input type="radio"/> 5 a 6 veces al día<br><input type="radio"/> más 6 veces al día |
| Espinacas o acelgas cocinadas           | <input checked="" type="radio"/> Nunca o menos 1 vez al mes<br><input type="radio"/> 1 a 3 veces mes<br><input type="radio"/> 1 vez semana<br><input type="radio"/> 2 a 4 veces semana<br><input type="radio"/> 5 a 6 veces semana<br><input type="radio"/> 1 vez al día<br><input type="radio"/> 2 a 3 veces al día<br><input type="radio"/> 5 a 6 veces al día<br><input type="radio"/> más 6 veces al día |
| Col o coliflor o brocoli cocinado       | <input checked="" type="radio"/> Nunca o menos 1 vez al mes<br><input type="radio"/> 1 a 3 veces mes<br><input type="radio"/> 1 vez semana<br><input type="radio"/> 2 a 4 veces semana<br><input type="radio"/> 5 a 6 veces semana<br><input type="radio"/> 1 vez al día<br><input type="radio"/> 2 a 3 veces al día<br><input type="radio"/> 5 a 6 veces al día<br><input type="radio"/> más 6 veces al día |



|                                |                                                                                                                                                                                                                                                                                                                                                                                                              |
|--------------------------------|--------------------------------------------------------------------------------------------------------------------------------------------------------------------------------------------------------------------------------------------------------------------------------------------------------------------------------------------------------------------------------------------------------------|
| Lechuga o endivia o escarola   | <input checked="" type="radio"/> Nunca o menos 1 vez al mes<br><input type="radio"/> 1 a 3 veces mes<br><input type="radio"/> 1 vez semana<br><input type="radio"/> 2 a 4 veces semana<br><input type="radio"/> 5 a 6 veces semana<br><input type="radio"/> 1 vez al día<br><input type="radio"/> 2 a 3 veces al día<br><input type="radio"/> 5 a 6 veces al día<br><input type="radio"/> más 6 veces al día |
| tomate ensalada                | <input type="radio"/> Nunca o menos 1 vez al mes<br><input checked="" type="radio"/> 1 a 3 veces mes<br><input type="radio"/> 1 vez semana<br><input type="radio"/> 2 a 4 veces semana<br><input type="radio"/> 5 a 6 veces semana<br><input type="radio"/> 1 vez al día<br><input type="radio"/> 2 a 3 veces al día<br><input type="radio"/> 5 a 6 veces al día<br><input type="radio"/> más 6 veces al día |
| cebolla                        | <input type="radio"/> Nunca o menos 1 vez al mes<br><input type="radio"/> 1 a 3 veces mes<br><input type="radio"/> 1 vez semana<br><input type="radio"/> 2 a 4 veces semana<br><input checked="" type="radio"/> 5 a 6 veces semana<br><input type="radio"/> 1 vez al día<br><input type="radio"/> 2 a 3 veces al día<br><input type="radio"/> 5 a 6 veces al día<br><input type="radio"/> más 6 veces al día |
| Zanahoria o calabaza           | <input type="radio"/> Nunca o menos 1 vez al mes<br><input type="radio"/> 1 a 3 veces mes<br><input type="radio"/> 1 vez semana<br><input checked="" type="radio"/> 2 a 4 veces semana<br><input type="radio"/> 5 a 6 veces semana<br><input type="radio"/> 1 vez al día<br><input type="radio"/> 2 a 3 veces al día<br><input type="radio"/> 5 a 6 veces al día<br><input type="radio"/> más 6 veces al día |
| Judías verdes                  | <input type="radio"/> Nunca o menos 1 vez al mes<br><input type="radio"/> 1 a 3 veces mes<br><input checked="" type="radio"/> 1 vez semana<br><input type="radio"/> 2 a 4 veces semana<br><input type="radio"/> 5 a 6 veces semana<br><input type="radio"/> 1 vez al día<br><input type="radio"/> 2 a 3 veces al día<br><input type="radio"/> 5 a 6 veces al día<br><input type="radio"/> más 6 veces al día |
| Berenjena o calabacin o pepino | <input checked="" type="radio"/> Nunca o menos 1 vez al mes<br><input type="radio"/> 1 a 3 veces mes<br><input type="radio"/> 1 vez semana<br><input type="radio"/> 2 a 4 veces semana<br><input type="radio"/> 5 a 6 veces semana<br><input type="radio"/> 1 vez al día<br><input type="radio"/> 2 a 3 veces al día<br><input type="radio"/> 5 a 6 veces al día<br><input type="radio"/> más 6 veces al día |

---

pimiento

- ☐ Nunca o menos 1 vez al mes
- ☐ 1 a 3 veces mes
- ☐ 1 vez semana
- ☐ 2 a 4 veces semana
- ☒ 5 a 6 veces semana
- ☐ 1 vez al día
- ☐ 2 a 3 veces al día
- ☐ 5 a 6 veces al día
- ☐ más 6 veces al día

---

alcachofa

- ☒ Nunca o menos 1 vez al mes
- ☐ 1 a 3 veces mes
- ☐ 1 vez semana
- ☐ 2 a 4 veces semana
- ☐ 5 a 6 veces semana
- ☐ 1 vez al día
- ☐ 2 a 3 veces al día
- ☐ 5 a 6 veces al día
- ☐ más 6 veces al día

---

espárragos

- ☒ Nunca o menos 1 vez al mes
- ☐ 1 a 3 veces mes
- ☐ 1 vez semana
- ☐ 2 a 4 veces semana
- ☐ 5 a 6 veces semana
- ☐ 1 vez al día
- ☐ 2 a 3 veces al día
- ☐ 5 a 6 veces al día
- ☐ más 6 veces al día

---

maíz hervido

- ☒ Nunca o menos 1 vez al mes
- ☐ 1 a 3 veces mes
- ☐ 1 vez semana
- ☐ 2 a 4 veces semana
- ☐ 5 a 6 veces semana
- ☐ 1 vez al día
- ☐ 2 a 3 veces al día
- ☐ 5 a 6 veces al día
- ☐ más 6 veces al día

---

legumbres

- ☐ Nunca o menos 1 vez al mes
- ☐ 1 a 3 veces mes
- ☐ 1 vez semana
- ☒ 2 a 4 veces semana
- ☐ 5 a 6 veces semana
- ☐ 1 vez al día
- ☐ 2 a 3 veces al día
- ☐ 5 a 6 veces al día
- ☐ más 6 veces al día

---

naranjas o mandarinas

- ☒ Nunca o menos 1 vez al mes
- ☐ 1 a 3 veces mes
- ☐ 1 vez semana
- ☐ 2 a 4 veces semana
- ☐ 5 a 6 veces semana
- ☐ 1 vez al día
- ☐ 2 a 3 veces al día
- ☐ 5 a 6 veces al día
- ☐ más 6 veces al día

|                       |                                                                                                                                                                                                                                                                                                                                                                                                              |
|-----------------------|--------------------------------------------------------------------------------------------------------------------------------------------------------------------------------------------------------------------------------------------------------------------------------------------------------------------------------------------------------------------------------------------------------------|
| zum natural fruta     | <input checked="" type="radio"/> Nunca o menos 1 vez al mes<br><input type="radio"/> 1 a 3 veces mes<br><input type="radio"/> 1 vez semana<br><input type="radio"/> 2 a 4 veces semana<br><input type="radio"/> 5 a 6 veces semana<br><input type="radio"/> 1 vez al día<br><input type="radio"/> 2 a 3 veces al día<br><input type="radio"/> 5 a 6 veces al día<br><input type="radio"/> más 6 veces al día |
| platano               | <input type="radio"/> Nunca o menos 1 vez al mes<br><input type="radio"/> 1 a 3 veces mes<br><input checked="" type="radio"/> 1 vez semana<br><input type="radio"/> 2 a 4 veces semana<br><input type="radio"/> 5 a 6 veces semana<br><input type="radio"/> 1 vez al día<br><input type="radio"/> 2 a 3 veces al día<br><input type="radio"/> 5 a 6 veces al día<br><input type="radio"/> más 6 veces al día |
| manzana o pera        | <input type="radio"/> Nunca o menos 1 vez al mes<br><input type="radio"/> 1 a 3 veces mes<br><input checked="" type="radio"/> 1 vez semana<br><input type="radio"/> 2 a 4 veces semana<br><input type="radio"/> 5 a 6 veces semana<br><input type="radio"/> 1 vez al día<br><input type="radio"/> 2 a 3 veces al día<br><input type="radio"/> 5 a 6 veces al día<br><input type="radio"/> más 6 veces al día |
| melocotón o nectarina | <input checked="" type="radio"/> Nunca o menos 1 vez al mes<br><input type="radio"/> 1 a 3 veces mes<br><input type="radio"/> 1 vez semana<br><input type="radio"/> 2 a 4 veces semana<br><input type="radio"/> 5 a 6 veces semana<br><input type="radio"/> 1 vez al día<br><input type="radio"/> 2 a 3 veces al día<br><input type="radio"/> 5 a 6 veces al día<br><input type="radio"/> más 6 veces al día |
| sandia o melon        | <input type="radio"/> Nunca o menos 1 vez al mes<br><input type="radio"/> 1 a 3 veces mes<br><input checked="" type="radio"/> 1 vez semana<br><input type="radio"/> 2 a 4 veces semana<br><input type="radio"/> 5 a 6 veces semana<br><input type="radio"/> 1 vez al día<br><input type="radio"/> 2 a 3 veces al día<br><input type="radio"/> 5 a 6 veces al día<br><input type="radio"/> más 6 veces al día |
| uva                   | <input checked="" type="radio"/> Nunca o menos 1 vez al mes<br><input type="radio"/> 1 a 3 veces mes<br><input type="radio"/> 1 vez semana<br><input type="radio"/> 2 a 4 veces semana<br><input type="radio"/> 5 a 6 veces semana<br><input type="radio"/> 1 vez al día<br><input type="radio"/> 2 a 3 veces al día<br><input type="radio"/> 5 a 6 veces al día<br><input type="radio"/> más 6 veces al día |

---

bruna o ciruela

- ☒ Nunca o menos 1 vez al mes  
☐ 1 a 3 veces mes  
☐ 1 vez semana  
☐ 2 a 4 veces semana  
☐ 5 a 6 veces semana  
☐ 1 vez al día  
☐ 2 a 3 veces al día  
☐ 5 a 6 veces al día  
☐ más 6 veces al día

---

kiwi

- ☒ Nunca o menos 1 vez al mes  
☐ 1 a 3 veces mes  
☐ 1 vez semana  
☐ 2 a 4 veces semana  
☐ 5 a 6 veces semana  
☐ 1 vez al día  
☐ 2 a 3 veces al día  
☐ 5 a 6 veces al día  
☐ más 6 veces al día

---

aceituna

- ☐ Nunca o menos 1 vez al mes  
☐ 1 a 3 veces mes  
☐ 1 vez semana  
☒ 2 a 4 veces semana  
☐ 5 a 6 veces semana  
☐ 1 vez al día  
☐ 2 a 3 veces al día  
☐ 5 a 6 veces al día  
☐ más 6 veces al día

---

frutos secos

- ☒ Nunca o menos 1 vez al mes  
☐ 1 a 3 veces mes  
☐ 1 vez semana  
☐ 2 a 4 veces semana  
☐ 5 a 6 veces semana  
☐ 1 vez al día  
☐ 2 a 3 veces al día  
☐ 5 a 6 veces al día  
☐ más 6 veces al día

---

pan blanco

- ☐ Nunca o menos 1 vez al mes  
☒ 1 a 3 veces mes  
☐ 1 vez semana  
☐ 2 a 4 veces semana  
☐ 5 a 6 veces semana  
☐ 1 vez al día  
☐ 2 a 3 veces al día  
☐ 5 a 6 veces al día  
☐ más 6 veces al día

---

pan integral

- ☒ Nunca o menos 1 vez al mes  
☐ 1 a 3 veces mes  
☐ 1 vez semana  
☐ 2 a 4 veces semana  
☐ 5 a 6 veces semana  
☐ 1 vez al día  
☐ 2 a 3 veces al día  
☐ 5 a 6 veces al día  
☐ más 6 veces al día

|                          |                                                                                                                                                                                                                                                                                                                                                                                                              |
|--------------------------|--------------------------------------------------------------------------------------------------------------------------------------------------------------------------------------------------------------------------------------------------------------------------------------------------------------------------------------------------------------------------------------------------------------|
| cereales desayuno        | <input checked="" type="radio"/> Nunca o menos 1 vez al mes<br><input type="radio"/> 1 a 3 veces mes<br><input type="radio"/> 1 vez semana<br><input type="radio"/> 2 a 4 veces semana<br><input type="radio"/> 5 a 6 veces semana<br><input type="radio"/> 1 vez al día<br><input type="radio"/> 2 a 3 veces al día<br><input type="radio"/> 5 a 6 veces al día<br><input type="radio"/> más 6 veces al día |
| patatas fritas           | <input type="radio"/> Nunca o menos 1 vez al mes<br><input type="radio"/> 1 a 3 veces mes<br><input type="radio"/> 1 vez semana<br><input type="radio"/> 2 a 4 veces semana<br><input checked="" type="radio"/> 5 a 6 veces semana<br><input type="radio"/> 1 vez al día<br><input type="radio"/> 2 a 3 veces al día<br><input type="radio"/> 5 a 6 veces al día<br><input type="radio"/> más 6 veces al día |
| patatas cocidas o asadas | <input type="radio"/> Nunca o menos 1 vez al mes<br><input type="radio"/> 1 a 3 veces mes<br><input type="radio"/> 1 vez semana<br><input type="radio"/> 2 a 4 veces semana<br><input checked="" type="radio"/> 5 a 6 veces semana<br><input type="radio"/> 1 vez al día<br><input type="radio"/> 2 a 3 veces al día<br><input type="radio"/> 5 a 6 veces al día<br><input type="radio"/> más 6 veces al día |
| bolsa papas              | <input type="radio"/> Nunca o menos 1 vez al mes<br><input type="radio"/> 1 a 3 veces mes<br><input type="radio"/> 1 vez semana<br><input checked="" type="radio"/> 2 a 4 veces semana<br><input type="radio"/> 5 a 6 veces semana<br><input type="radio"/> 1 vez al día<br><input type="radio"/> 2 a 3 veces al día<br><input type="radio"/> 5 a 6 veces al día<br><input type="radio"/> más 6 veces al día |
| arroz cocinado           | <input type="radio"/> Nunca o menos 1 vez al mes<br><input type="radio"/> 1 a 3 veces mes<br><input type="radio"/> 1 vez semana<br><input type="radio"/> 2 a 4 veces semana<br><input checked="" type="radio"/> 5 a 6 veces semana<br><input type="radio"/> 1 vez al día<br><input type="radio"/> 2 a 3 veces al día<br><input type="radio"/> 5 a 6 veces al día<br><input type="radio"/> más 6 veces al día |
| pasta                    | <input type="radio"/> Nunca o menos 1 vez al mes<br><input type="radio"/> 1 a 3 veces mes<br><input type="radio"/> 1 vez semana<br><input type="radio"/> 2 a 4 veces semana<br><input checked="" type="radio"/> 5 a 6 veces semana<br><input type="radio"/> 1 vez al día<br><input type="radio"/> 2 a 3 veces al día<br><input type="radio"/> 5 a 6 veces al día<br><input type="radio"/> más 6 veces al día |

|                     |                                                                                                                                                                                                                                                                                                                                                                                                              |
|---------------------|--------------------------------------------------------------------------------------------------------------------------------------------------------------------------------------------------------------------------------------------------------------------------------------------------------------------------------------------------------------------------------------------------------------|
| pizza               | <input type="radio"/> Nunca o menos 1 vez al mes<br><input type="radio"/> 1 a 3 veces mes<br><input checked="" type="radio"/> 1 vez semana<br><input type="radio"/> 2 a 4 veces semana<br><input type="radio"/> 5 a 6 veces semana<br><input type="radio"/> 1 vez al día<br><input type="radio"/> 2 a 3 veces al día<br><input type="radio"/> 5 a 6 veces al día<br><input type="radio"/> más 6 veces al día |
| aceite oliva        | <input checked="" type="radio"/> Nunca o menos 1 vez al mes<br><input type="radio"/> 1 a 3 veces mes<br><input type="radio"/> 1 vez semana<br><input type="radio"/> 2 a 4 veces semana<br><input type="radio"/> 5 a 6 veces semana<br><input type="radio"/> 1 vez al día<br><input type="radio"/> 2 a 3 veces al día<br><input type="radio"/> 5 a 6 veces al día<br><input type="radio"/> más 6 veces al día |
| otros aceites       | <input type="radio"/> Nunca o menos 1 vez al mes<br><input type="radio"/> 1 a 3 veces mes<br><input type="radio"/> 1 vez semana<br><input type="radio"/> 2 a 4 veces semana<br><input type="radio"/> 5 a 6 veces semana<br><input checked="" type="radio"/> 1 vez al día<br><input type="radio"/> 2 a 3 veces al día<br><input type="radio"/> 5 a 6 veces al día<br><input type="radio"/> más 6 veces al día |
| margarina           | <input checked="" type="radio"/> Nunca o menos 1 vez al mes<br><input type="radio"/> 1 a 3 veces mes<br><input type="radio"/> 1 vez semana<br><input type="radio"/> 2 a 4 veces semana<br><input type="radio"/> 5 a 6 veces semana<br><input type="radio"/> 1 vez al día<br><input type="radio"/> 2 a 3 veces al día<br><input type="radio"/> 5 a 6 veces al día<br><input type="radio"/> más 6 veces al día |
| mantequilla         | <input checked="" type="radio"/> Nunca o menos 1 vez al mes<br><input type="radio"/> 1 a 3 veces mes<br><input type="radio"/> 1 vez semana<br><input type="radio"/> 2 a 4 veces semana<br><input type="radio"/> 5 a 6 veces semana<br><input type="radio"/> 1 vez al día<br><input type="radio"/> 2 a 3 veces al día<br><input type="radio"/> 5 a 6 veces al día<br><input type="radio"/> más 6 veces al día |
| galletas tipo maria | <input checked="" type="radio"/> Nunca o menos 1 vez al mes<br><input type="radio"/> 1 a 3 veces mes<br><input type="radio"/> 1 vez semana<br><input type="radio"/> 2 a 4 veces semana<br><input type="radio"/> 5 a 6 veces semana<br><input type="radio"/> 1 vez al día<br><input type="radio"/> 2 a 3 veces al día<br><input type="radio"/> 5 a 6 veces al día<br><input type="radio"/> más 6 veces al día |

|                           |                                                                                                                                                                                                                                                                                                                                                                                                              |
|---------------------------|--------------------------------------------------------------------------------------------------------------------------------------------------------------------------------------------------------------------------------------------------------------------------------------------------------------------------------------------------------------------------------------------------------------|
| galletas chocolate        | <input type="radio"/> Nunca o menos 1 vez al mes<br><input type="radio"/> 1 a 3 veces mes<br><input type="radio"/> 1 vez semana<br><input type="radio"/> 2 a 4 veces semana<br><input checked="" type="radio"/> 5 a 6 veces semana<br><input type="radio"/> 1 vez al día<br><input type="radio"/> 2 a 3 veces al día<br><input type="radio"/> 5 a 6 veces al día<br><input type="radio"/> más 6 veces al día |
| bollieria                 | <input type="radio"/> Nunca o menos 1 vez al mes<br><input type="radio"/> 1 a 3 veces mes<br><input type="radio"/> 1 vez semana<br><input type="radio"/> 2 a 4 veces semana<br><input type="radio"/> 5 a 6 veces semana<br><input checked="" type="radio"/> 1 vez al día<br><input type="radio"/> 2 a 3 veces al día<br><input type="radio"/> 5 a 6 veces al día<br><input type="radio"/> más 6 veces al día |
| chocolate o bombones      | <input type="radio"/> Nunca o menos 1 vez al mes<br><input type="radio"/> 1 a 3 veces mes<br><input type="radio"/> 1 vez semana<br><input type="radio"/> 2 a 4 veces semana<br><input type="radio"/> 5 a 6 veces semana<br><input checked="" type="radio"/> 1 vez al día<br><input type="radio"/> 2 a 3 veces al día<br><input type="radio"/> 5 a 6 veces al día<br><input type="radio"/> más 6 veces al día |
| chocolate polvo o colacao | <input checked="" type="radio"/> Nunca o menos 1 vez al mes<br><input type="radio"/> 1 a 3 veces mes<br><input type="radio"/> 1 vez semana<br><input type="radio"/> 2 a 4 veces semana<br><input type="radio"/> 5 a 6 veces semana<br><input type="radio"/> 1 vez al día<br><input type="radio"/> 2 a 3 veces al día<br><input type="radio"/> 5 a 6 veces al día<br><input type="radio"/> más 6 veces al día |
| vino tinto                | <input checked="" type="radio"/> Nunca o menos 1 vez al mes<br><input type="radio"/> 1 a 3 veces mes<br><input type="radio"/> 1 vez semana<br><input type="radio"/> 2 a 4 veces semana<br><input type="radio"/> 5 a 6 veces semana<br><input type="radio"/> 1 vez al día<br><input type="radio"/> 2 a 3 veces al día<br><input type="radio"/> 5 a 6 veces al día<br><input type="radio"/> más 6 veces al día |
| vino blanco               | <input checked="" type="radio"/> Nunca o menos 1 vez al mes<br><input type="radio"/> 1 a 3 veces mes<br><input type="radio"/> 1 vez semana<br><input type="radio"/> 2 a 4 veces semana<br><input type="radio"/> 5 a 6 veces semana<br><input type="radio"/> 1 vez al día<br><input type="radio"/> 2 a 3 veces al día<br><input type="radio"/> 5 a 6 veces al día<br><input type="radio"/> más 6 veces al día |

|                       |                                                                                                                                                                                                                                                                                                                                                                                                              |
|-----------------------|--------------------------------------------------------------------------------------------------------------------------------------------------------------------------------------------------------------------------------------------------------------------------------------------------------------------------------------------------------------------------------------------------------------|
| vino seco o vermut    | <input checked="" type="radio"/> Nunca o menos 1 vez al mes<br><input type="radio"/> 1 a 3 veces mes<br><input type="radio"/> 1 vez semana<br><input type="radio"/> 2 a 4 veces semana<br><input type="radio"/> 5 a 6 veces semana<br><input type="radio"/> 1 vez al día<br><input type="radio"/> 2 a 3 veces al día<br><input type="radio"/> 5 a 6 veces al día<br><input type="radio"/> más 6 veces al día |
| cerveza               | <input checked="" type="radio"/> Nunca o menos 1 vez al mes<br><input type="radio"/> 1 a 3 veces mes<br><input type="radio"/> 1 vez semana<br><input type="radio"/> 2 a 4 veces semana<br><input type="radio"/> 5 a 6 veces semana<br><input type="radio"/> 1 vez al día<br><input type="radio"/> 2 a 3 veces al día<br><input type="radio"/> 5 a 6 veces al día<br><input type="radio"/> más 6 veces al día |
| cerveza sin alcohol   | <input checked="" type="radio"/> Nunca o menos 1 vez al mes<br><input type="radio"/> 1 a 3 veces mes<br><input type="radio"/> 1 vez semana<br><input type="radio"/> 2 a 4 veces semana<br><input type="radio"/> 5 a 6 veces semana<br><input type="radio"/> 1 vez al día<br><input type="radio"/> 2 a 3 veces al día<br><input type="radio"/> 5 a 6 veces al día<br><input type="radio"/> más 6 veces al día |
| licores               | <input checked="" type="radio"/> Nunca o menos 1 vez al mes<br><input type="radio"/> 1 a 3 veces mes<br><input type="radio"/> 1 vez semana<br><input type="radio"/> 2 a 4 veces semana<br><input type="radio"/> 5 a 6 veces semana<br><input type="radio"/> 1 vez al día<br><input type="radio"/> 2 a 3 veces al día<br><input type="radio"/> 5 a 6 veces al día<br><input type="radio"/> más 6 veces al día |
| ginebra o ron o vodka | <input checked="" type="radio"/> Nunca o menos 1 vez al mes<br><input type="radio"/> 1 a 3 veces mes<br><input type="radio"/> 1 vez semana<br><input type="radio"/> 2 a 4 veces semana<br><input type="radio"/> 5 a 6 veces semana<br><input type="radio"/> 1 vez al día<br><input type="radio"/> 2 a 3 veces al día<br><input type="radio"/> 5 a 6 veces al día<br><input type="radio"/> más 6 veces al día |
| refresco normal       | <input type="radio"/> Nunca o menos 1 vez al mes<br><input type="radio"/> 1 a 3 veces mes<br><input type="radio"/> 1 vez semana<br><input type="radio"/> 2 a 4 veces semana<br><input checked="" type="radio"/> 5 a 6 veces semana<br><input type="radio"/> 1 vez al día<br><input type="radio"/> 2 a 3 veces al día<br><input type="radio"/> 5 a 6 veces al día<br><input type="radio"/> más 6 veces al día |



|                          |                                                                                                                                                                                                                                                                                                                                                                                                              |
|--------------------------|--------------------------------------------------------------------------------------------------------------------------------------------------------------------------------------------------------------------------------------------------------------------------------------------------------------------------------------------------------------------------------------------------------------|
| refresco sin azúcar      | <input checked="" type="radio"/> Nunca o menos 1 vez al mes<br><input type="radio"/> 1 a 3 veces mes<br><input type="radio"/> 1 vez semana<br><input type="radio"/> 2 a 4 veces semana<br><input type="radio"/> 5 a 6 veces semana<br><input type="radio"/> 1 vez al día<br><input type="radio"/> 2 a 3 veces al día<br><input type="radio"/> 5 a 6 veces al día<br><input type="radio"/> más 6 veces al día |
| Agua del grifo           | <input checked="" type="radio"/> Nunca o menos 1 vez al mes<br><input type="radio"/> 1 a 3 veces mes<br><input type="radio"/> 1 vez semana<br><input type="radio"/> 2 a 4 veces semana<br><input type="radio"/> 5 a 6 veces semana<br><input type="radio"/> 1 vez al día<br><input type="radio"/> 2 a 3 veces al día<br><input type="radio"/> 5 a 6 veces al día<br><input type="radio"/> más 6 veces al día |
| agua embotellada sin gas | <input type="radio"/> Nunca o menos 1 vez al mes<br><input type="radio"/> 1 a 3 veces mes<br><input type="radio"/> 1 vez semana<br><input type="radio"/> 2 a 4 veces semana<br><input type="radio"/> 5 a 6 veces semana<br><input type="radio"/> 1 vez al día<br><input type="radio"/> 2 a 3 veces al día<br><input type="radio"/> 5 a 6 veces al día<br><input checked="" type="radio"/> más 6 veces al día |
| agua embotellada con gas | <input checked="" type="radio"/> Nunca o menos 1 vez al mes<br><input type="radio"/> 1 a 3 veces mes<br><input type="radio"/> 1 vez semana<br><input type="radio"/> 2 a 4 veces semana<br><input type="radio"/> 5 a 6 veces semana<br><input type="radio"/> 1 vez al día<br><input type="radio"/> 2 a 3 veces al día<br><input type="radio"/> 5 a 6 veces al día<br><input type="radio"/> más 6 veces al día |
| zumو frutas embasado     | <input checked="" type="radio"/> Nunca o menos 1 vez al mes<br><input type="radio"/> 1 a 3 veces mes<br><input type="radio"/> 1 vez semana<br><input type="radio"/> 2 a 4 veces semana<br><input type="radio"/> 5 a 6 veces semana<br><input type="radio"/> 1 vez al día<br><input type="radio"/> 2 a 3 veces al día<br><input type="radio"/> 5 a 6 veces al día<br><input type="radio"/> más 6 veces al día |
| cafe                     | <input checked="" type="radio"/> Nunca o menos 1 vez al mes<br><input type="radio"/> 1 a 3 veces mes<br><input type="radio"/> 1 vez semana<br><input type="radio"/> 2 a 4 veces semana<br><input type="radio"/> 5 a 6 veces semana<br><input type="radio"/> 1 vez al día<br><input type="radio"/> 2 a 3 veces al día<br><input type="radio"/> 5 a 6 veces al día<br><input type="radio"/> más 6 veces al día |

|                       |                                                                                                                                                                                                                                                                                                                                                                                                              |
|-----------------------|--------------------------------------------------------------------------------------------------------------------------------------------------------------------------------------------------------------------------------------------------------------------------------------------------------------------------------------------------------------------------------------------------------------|
| cafe descafeinado     | <input checked="" type="radio"/> Nunca o menos 1 vez al mes<br><input type="radio"/> 1 a 3 veces mes<br><input type="radio"/> 1 vez semana<br><input type="radio"/> 2 a 4 veces semana<br><input type="radio"/> 5 a 6 veces semana<br><input type="radio"/> 1 vez al día<br><input type="radio"/> 2 a 3 veces al día<br><input type="radio"/> 5 a 6 veces al día<br><input type="radio"/> más 6 veces al día |
| te o infusión         | <input checked="" type="radio"/> Nunca o menos 1 vez al mes<br><input type="radio"/> 1 a 3 veces mes<br><input type="radio"/> 1 vez semana<br><input type="radio"/> 2 a 4 veces semana<br><input type="radio"/> 5 a 6 veces semana<br><input type="radio"/> 1 vez al día<br><input type="radio"/> 2 a 3 veces al día<br><input type="radio"/> 5 a 6 veces al día<br><input type="radio"/> más 6 veces al día |
| sopa o puré verduras  | <input type="radio"/> Nunca o menos 1 vez al mes<br><input checked="" type="radio"/> 1 a 3 veces mes<br><input type="radio"/> 1 vez semana<br><input type="radio"/> 2 a 4 veces semana<br><input type="radio"/> 5 a 6 veces semana<br><input type="radio"/> 1 vez al día<br><input type="radio"/> 2 a 3 veces al día<br><input type="radio"/> 5 a 6 veces al día<br><input type="radio"/> más 6 veces al día |
| croquetas pollo jamón | <input type="radio"/> Nunca o menos 1 vez al mes<br><input type="radio"/> 1 a 3 veces mes<br><input type="radio"/> 1 vez semana<br><input type="radio"/> 2 a 4 veces semana<br><input type="radio"/> 5 a 6 veces semana<br><input checked="" type="radio"/> 1 vez al día<br><input type="radio"/> 2 a 3 veces al día<br><input type="radio"/> 5 a 6 veces al día<br><input type="radio"/> más 6 veces al día |
| croquetas pescado     | <input type="radio"/> Nunca o menos 1 vez al mes<br><input type="radio"/> 1 a 3 veces mes<br><input type="radio"/> 1 vez semana<br><input type="radio"/> 2 a 4 veces semana<br><input type="radio"/> 5 a 6 veces semana<br><input checked="" type="radio"/> 1 vez al día<br><input type="radio"/> 2 a 3 veces al día<br><input type="radio"/> 5 a 6 veces al día<br><input type="radio"/> más 6 veces al día |
| mayonesa              | <input type="radio"/> Nunca o menos 1 vez al mes<br><input type="radio"/> 1 a 3 veces mes<br><input checked="" type="radio"/> 1 vez semana<br><input type="radio"/> 2 a 4 veces semana<br><input type="radio"/> 5 a 6 veces semana<br><input type="radio"/> 1 vez al día<br><input type="radio"/> 2 a 3 veces al día<br><input type="radio"/> 5 a 6 veces al día<br><input type="radio"/> más 6 veces al día |

|                  |                                                                                                                                                                                                                                                                                                                                                                                                              |
|------------------|--------------------------------------------------------------------------------------------------------------------------------------------------------------------------------------------------------------------------------------------------------------------------------------------------------------------------------------------------------------------------------------------------------------|
| salsa tomate     | <input type="radio"/> Nunca o menos 1 vez al mes<br><input type="radio"/> 1 a 3 veces mes<br><input type="radio"/> 1 vez semana<br><input type="radio"/> 2 a 4 veces semana<br><input checked="" type="radio"/> 5 a 6 veces semana<br><input type="radio"/> 1 vez al día<br><input type="radio"/> 2 a 3 veces al día<br><input type="radio"/> 5 a 6 veces al día<br><input type="radio"/> más 6 veces al día |
| ketchup          | <input checked="" type="radio"/> Nunca o menos 1 vez al mes<br><input type="radio"/> 1 a 3 veces mes<br><input type="radio"/> 1 vez semana<br><input type="radio"/> 2 a 4 veces semana<br><input type="radio"/> 5 a 6 veces semana<br><input type="radio"/> 1 vez al día<br><input type="radio"/> 2 a 3 veces al día<br><input type="radio"/> 5 a 6 veces al día<br><input type="radio"/> más 6 veces al día |
| sal              | <input type="radio"/> Nunca o menos 1 vez al mes<br><input type="radio"/> 1 a 3 veces mes<br><input type="radio"/> 1 vez semana<br><input type="radio"/> 2 a 4 veces semana<br><input type="radio"/> 5 a 6 veces semana<br><input type="radio"/> 1 vez al día<br><input checked="" type="radio"/> 2 a 3 veces al día<br><input type="radio"/> 5 a 6 veces al día<br><input type="radio"/> más 6 veces al día |
| ajo              | <input type="radio"/> Nunca o menos 1 vez al mes<br><input type="radio"/> 1 a 3 veces mes<br><input type="radio"/> 1 vez semana<br><input checked="" type="radio"/> 2 a 4 veces semana<br><input type="radio"/> 5 a 6 veces semana<br><input type="radio"/> 1 vez al día<br><input type="radio"/> 2 a 3 veces al día<br><input type="radio"/> 5 a 6 veces al día<br><input type="radio"/> más 6 veces al día |
| mermelada o miel | <input checked="" type="radio"/> Nunca o menos 1 vez al mes<br><input type="radio"/> 1 a 3 veces mes<br><input type="radio"/> 1 vez semana<br><input type="radio"/> 2 a 4 veces semana<br><input type="radio"/> 5 a 6 veces semana<br><input type="radio"/> 1 vez al día<br><input type="radio"/> 2 a 3 veces al día<br><input type="radio"/> 5 a 6 veces al día<br><input type="radio"/> más 6 veces al día |
| azúcar           | <input checked="" type="radio"/> Nunca o menos 1 vez al mes<br><input type="radio"/> 1 a 3 veces mes<br><input type="radio"/> 1 vez semana<br><input type="radio"/> 2 a 4 veces semana<br><input type="radio"/> 5 a 6 veces semana<br><input type="radio"/> 1 vez al día<br><input type="radio"/> 2 a 3 veces al día<br><input type="radio"/> 5 a 6 veces al día<br><input type="radio"/> más 6 veces al día |

|                                       |                                                                                                                                                                                                                                                                                                                                                                                                                                                                                                                               |
|---------------------------------------|-------------------------------------------------------------------------------------------------------------------------------------------------------------------------------------------------------------------------------------------------------------------------------------------------------------------------------------------------------------------------------------------------------------------------------------------------------------------------------------------------------------------------------|
| Otro alimento                         | <hr/>                                                                                                                                                                                                                                                                                                                                                                                                                                                                                                                         |
| suplementos vitamínicos               | <input checked="" type="radio"/> si<br><input type="radio"/> no                                                                                                                                                                                                                                                                                                                                                                                                                                                               |
| suplementos vitamínicos               | <hr/>                                                                                                                                                                                                                                                                                                                                                                                                                                                                                                                         |
| dieta previa                          | <input type="radio"/> si<br><input checked="" type="radio"/> no                                                                                                                                                                                                                                                                                                                                                                                                                                                               |
| motivo dieta                          | <input checked="" type="radio"/> no dieta<br><input type="radio"/> control peso<br><input type="radio"/> control colesterol<br><input type="radio"/> control diabetes<br><input type="radio"/> problemas estómago<br><input type="radio"/> problemas vesícula o hepáticos<br><input type="radio"/> HTA o cardiopatía<br><input type="radio"/> problemas renales<br><input type="radio"/> alergia alimentaria<br><input type="radio"/> ácido úrico elevado<br><input type="radio"/> vegetariana<br><input type="radio"/> otros |
| cambio alimentos año previo gestación | <input checked="" type="radio"/> si<br><input type="radio"/> no                                                                                                                                                                                                                                                                                                                                                                                                                                                               |
| cambio lácteos                        | <input type="radio"/> eliminado<br><input type="radio"/> disminuido<br><input type="radio"/> igual<br><input checked="" type="radio"/> aumentado<br><input type="radio"/> no sabe                                                                                                                                                                                                                                                                                                                                             |
| cambio huevos                         | <input type="radio"/> eliminado<br><input type="radio"/> disminuido<br><input type="radio"/> igual<br><input checked="" type="radio"/> aumentado<br><input type="radio"/> no sabe                                                                                                                                                                                                                                                                                                                                             |
| cambio carne                          | <input type="radio"/> eliminado<br><input type="radio"/> disminuido<br><input type="radio"/> igual<br><input checked="" type="radio"/> aumentado<br><input type="radio"/> no sabe                                                                                                                                                                                                                                                                                                                                             |
| cambio pescado                        | <input type="radio"/> eliminado<br><input type="radio"/> disminuido<br><input type="radio"/> igual<br><input checked="" type="radio"/> aumentado<br><input type="radio"/> no sabe                                                                                                                                                                                                                                                                                                                                             |
| cambio verduras                       | <input type="radio"/> eliminado<br><input type="radio"/> disminuido<br><input type="radio"/> igual<br><input checked="" type="radio"/> aumentado<br><input type="radio"/> no sabe                                                                                                                                                                                                                                                                                                                                             |

|                            |                                                                                                                                                                                                                        |
|----------------------------|------------------------------------------------------------------------------------------------------------------------------------------------------------------------------------------------------------------------|
| cambio legumbres           | <input type="radio"/> eliminado<br><input type="radio"/> disminuido<br><input type="radio"/> igual<br><input checked="" type="radio"/> aumentado<br><input type="radio"/> no sabe                                      |
| cambio fruta               | <input type="radio"/> eliminado<br><input type="radio"/> disminuido<br><input type="radio"/> igual<br><input checked="" type="radio"/> aumentado<br><input type="radio"/> no sabe                                      |
| cambio pan                 | <input type="radio"/> eliminado<br><input type="radio"/> disminuido<br><input type="radio"/> igual<br><input checked="" type="radio"/> aumentado<br><input type="radio"/> no sabe                                      |
| cambio aceite oliva        | <input type="radio"/> eliminado<br><input type="radio"/> disminuido<br><input type="radio"/> igual<br><input checked="" type="radio"/> aumentado<br><input type="radio"/> no sabe                                      |
| cambio mante o margarina   | <input type="radio"/> eliminado<br><input checked="" type="radio"/> disminuido<br><input type="radio"/> igual<br><input type="radio"/> aumentado<br><input type="radio"/> no sabe                                      |
| cambio azúcar y dulces     | <input type="radio"/> eliminado<br><input type="radio"/> disminuido<br><input checked="" type="radio"/> igual<br><input type="radio"/> aumentado<br><input type="radio"/> no sabe                                      |
| cambio bebidas alcohólicas | <input checked="" type="radio"/> eliminado<br><input type="radio"/> disminuido<br><input type="radio"/> igual<br><input type="radio"/> aumentado<br><input type="radio"/> no sabe                                      |
| frecuencia comidas fritas  | <input checked="" type="radio"/> a diario<br><input type="radio"/> 5 a 6 veces semana<br><input type="radio"/> 2 a 4 veces semana<br><input type="radio"/> 1 vez semana<br><input type="radio"/> menos de 1 vez semana |
| carne                      | <input type="radio"/> no como<br><input type="radio"/> cruda<br><input type="radio"/> poco hecha<br><input checked="" type="radio"/> hecha<br><input type="radio"/> muy hecha                                          |
| grasa visible carne        | <input type="radio"/> quita toda<br><input type="radio"/> quita mayoría<br><input checked="" type="radio"/> quita un poco<br><input type="radio"/> no quita nada                                                       |

|                                |                                                                                                                                                                                                                                                          |
|--------------------------------|----------------------------------------------------------------------------------------------------------------------------------------------------------------------------------------------------------------------------------------------------------|
| cocina carne                   | <input type="radio"/> a la plancha<br><input type="radio"/> a la parrilla<br><input type="radio"/> asada<br><input checked="" type="radio"/> frita<br><input type="radio"/> guisada                                                                      |
| tostado quemado carne          | <input checked="" type="radio"/> nunca<br><input type="radio"/> 1 vez mes<br><input type="radio"/> 2 a 3 veces mes<br><input type="radio"/> 1 vez semana<br><input type="radio"/> 2 a 3 semanas                                                          |
| tostado quemado pescado        | <input checked="" type="radio"/> nunca<br><input type="radio"/> 1 vez mes<br><input type="radio"/> 2 a 3 veces mes<br><input type="radio"/> 1 vez semana<br><input type="radio"/> 2 a 3 semanas                                                          |
| socarrat paella                | <input type="radio"/> nunca<br><input checked="" type="radio"/> 1 vez mes<br><input type="radio"/> 2 a 3 veces mes<br><input type="radio"/> 1 vez semana<br><input type="radio"/> 2 a 3 semanas                                                          |
| grasa o aceite cocinar         | <input type="radio"/> mantequilla<br><input type="radio"/> margarina<br><input type="radio"/> aceite oliva<br><input type="radio"/> aceite oliva virgen extra<br><input type="radio"/> aceite vegetal<br><input type="radio"/> mezcla aceites            |
| grasa aceite aliñar            | <input type="radio"/> mantequilla<br><input type="radio"/> margarina<br><input type="radio"/> aceite oliva<br><input type="radio"/> aceite oliva virgen extra<br><input type="radio"/> aceite vegetal<br><input type="radio"/> mezcla aceites            |
| grasa aceite freir             | <input type="radio"/> mantequilla<br><input type="radio"/> margarina<br><input type="radio"/> aceite oliva<br><input checked="" type="radio"/> aceite oliva virgen extra<br><input type="radio"/> aceite vegetal<br><input type="radio"/> mezcla aceites |
| Ejercicio cuestionario         | <input checked="" type="radio"/> si<br><input type="radio"/> no                                                                                                                                                                                          |
| horas de sueño incluido siesta | [*DATA REMOVED*]                                                                                                                                                                                                                                         |
| minutos siesta                 | [*DATA REMOVED*]                                                                                                                                                                                                                                         |
| horas televisión semana        | [*DATA REMOVED*]                                                                                                                                                                                                                                         |

|                                        |                                                                                                                                                                                                                                                                                                                                                                           |
|----------------------------------------|---------------------------------------------------------------------------------------------------------------------------------------------------------------------------------------------------------------------------------------------------------------------------------------------------------------------------------------------------------------------------|
| actividad trabajo                      | <input type="radio"/> casi siempre sentado<br><input checked="" type="radio"/> sentado 50 por cien<br><input type="radio"/> casi siempre de pie, quieto<br><input type="radio"/> casi siempre levantado caminando y llevando pocas cosas<br><input type="radio"/> casi siempre levantado, caminando y llevado muchas cosas<br><input type="radio"/> trabajo manual pesado |
| tiempo caminar o bici al día           | <input type="radio"/> casi nunca<br><input type="radio"/> menos 20min día<br><input type="radio"/> 20 a 40 min día<br><input checked="" type="radio"/> 40 a 60 min día<br><input type="radio"/> 1h o 1h y media día<br><input type="radio"/> más de 1h y media al día                                                                                                     |
| tiempo tareas casa al día              | <input type="radio"/> menos de 1h día<br><input type="radio"/> 1 a 2h día<br><input checked="" type="radio"/> 3 a 4h día<br><input type="radio"/> 5 a 6h día<br><input type="radio"/> 7 a 8h día<br><input type="radio"/> más de 8h día                                                                                                                                   |
| tiempo libre televisión ordenador leer | <input type="radio"/> menos 1h día<br><input type="radio"/> 1h día<br><input type="radio"/> 2h día<br><input type="radio"/> 3h día<br><input type="radio"/> 4h día<br><input checked="" type="radio"/> 5 a 6h día<br><input type="radio"/> mas 6h día                                                                                                                     |
| tiempo libre ejercicio o deporte       | <input type="radio"/> menos 1h semana<br><input type="radio"/> 1h semana<br><input type="radio"/> 2h semana<br><input type="radio"/> 3h semana<br><input type="radio"/> 4 a 5h semana<br><input checked="" type="radio"/> mas 5h semana                                                                                                                                   |
| como se considera                      | <input type="radio"/> sedentaria<br><input checked="" type="radio"/> poco activa<br><input type="radio"/> moderadamente activa<br><input type="radio"/> bastante activa<br><input type="radio"/> muy activa<br><input type="radio"/> no sabe                                                                                                                              |
| FUR                                    | [*DATA REMOVED*]                                                                                                                                                                                                                                                                                                                                                          |
| Semanas gestación 2T                   | [*DATA REMOVED*]                                                                                                                                                                                                                                                                                                                                                          |
| Días gestación 2T                      | [*DATA REMOVED*]                                                                                                                                                                                                                                                                                                                                                          |
| DBP 2T                                 | [*DATA REMOVED*]                                                                                                                                                                                                                                                                                                                                                          |
| CC 2T                                  | [*DATA REMOVED*]                                                                                                                                                                                                                                                                                                                                                          |
| AC 2T                                  | [*DATA REMOVED*]                                                                                                                                                                                                                                                                                                                                                          |

|                                                   |                                                                                                                                                                                                 |
|---------------------------------------------------|-------------------------------------------------------------------------------------------------------------------------------------------------------------------------------------------------|
| LF 2T                                             | [*DATA REMOVED*]                                                                                                                                                                                |
| PFE 2T (Hadlock)                                  | [*DATA REMOVED*]                                                                                                                                                                                |
| Semanas gestación 3T                              | [*DATA REMOVED*]                                                                                                                                                                                |
| días 3T                                           | [*DATA REMOVED*]                                                                                                                                                                                |
| DBP 3T                                            | [*DATA REMOVED*]                                                                                                                                                                                |
| CC 3T                                             | [*DATA REMOVED*]                                                                                                                                                                                |
| AC 3T                                             | [*DATA REMOVED*]                                                                                                                                                                                |
| LF 3T                                             | [*DATA REMOVED*]                                                                                                                                                                                |
| PFE 3T (Hadlock)                                  | [*DATA REMOVED*]                                                                                                                                                                                |
| Semanas de gestación final                        | [*DATA REMOVED*]                                                                                                                                                                                |
| días gestación final                              | [*DATA REMOVED*]                                                                                                                                                                                |
| Localización placenta                             | <input checked="" type="radio"/> anterior<br><input type="radio"/> lateral derecha<br><input type="radio"/> lateral izquierda<br><input type="radio"/> posterior<br><input type="radio"/> fondo |
| Presentación longitudinal cefálica                | <input type="radio"/> no<br><input checked="" type="radio"/> si                                                                                                                                 |
| Dorso                                             | <input checked="" type="radio"/> izquierda anterior<br><input type="radio"/> izquierda posterior<br><input type="radio"/> derecha anterior<br><input type="radio"/> derecha posterior           |
| diámetro biparietal                               | [*DATA REMOVED*]                                                                                                                                                                                |
| Circunferencia craneal                            | [*DATA REMOVED*]                                                                                                                                                                                |
| Circunferencia abdominal                          | [*DATA REMOVED*]                                                                                                                                                                                |
| Longitud de femur                                 | [*DATA REMOVED*]                                                                                                                                                                                |
| tejido celular subcutáneo a nivel del muslo en mm | [*DATA REMOVED*]                                                                                                                                                                                |
| tejido celular subcutáneo en abdomen en mm        | [*DATA REMOVED*]                                                                                                                                                                                |
| Volumen del muslo en cm3                          | [*DATA REMOVED*]                                                                                                                                                                                |
| Peso fetal estimado según fórmula de Hadlock      | [*DATA REMOVED*]                                                                                                                                                                                |



|                                               |                                                                                                                                               |
|-----------------------------------------------|-----------------------------------------------------------------------------------------------------------------------------------------------|
| Percentil                                     | [*DATA REMOVED*]                                                                                                                              |
| Peso fetal estimado según fórmula de Scioscia | <hr/>                                                                                                                                         |
| Peso fetal estimado según fórmula de LEE      | <hr/>                                                                                                                                         |
| Tipo de parto                                 | <input type="radio"/> eutocico<br><input checked="" type="radio"/> instrumentado/ventosa<br><input type="radio"/> cesarea                     |
| fecha de nacimiento                           | [*DATA REMOVED*]                                                                                                                              |
| Días entre exploración y nacimiento           | [*DATA REMOVED*]                                                                                                                              |
| Peso RN en g                                  | [*DATA REMOVED*]                                                                                                                              |
| sexo                                          | <input type="radio"/> mujer<br><input checked="" type="radio"/> hombre                                                                        |
| Apgar 1 minuto                                | [*DATA REMOVED*]                                                                                                                              |
| Apgar 5 minutos                               | [*DATA REMOVED*]                                                                                                                              |
| Apgar 10 minutos                              | <hr/>                                                                                                                                         |
| antecedente Covid durante gestación           | <input type="radio"/> Yes<br><input checked="" type="radio"/> No                                                                              |
| Nivel de estudios                             | <input type="radio"/> ninguno<br><input type="radio"/> primarios<br><input type="radio"/> secundarios<br><input type="radio"/> universitarios |

# Base\_datos\_estimacion\_peso\_fetal

|                                       |                                                                                                                                                                                                                                                                                      |
|---------------------------------------|--------------------------------------------------------------------------------------------------------------------------------------------------------------------------------------------------------------------------------------------------------------------------------------|
| Número de identificación participante | 46                                                                                                                                                                                                                                                                                   |
| CODIGO PARTICIPANTE                   |                                                                                                                                                                                                                                                                                      |
| Edad                                  | [*DATA REMOVED*]                                                                                                                                                                                                                                                                     |
| Gestaciones                           | <input type="radio"/> 1<br><input type="radio"/> 2<br><input checked="" type="radio"/> 3<br><input type="radio"/> mas de 3                                                                                                                                                           |
| partos                                | <input type="radio"/> 0<br><input type="radio"/> 1<br><input checked="" type="radio"/> 2<br><input type="radio"/> 3<br><input type="radio"/> mas de 3                                                                                                                                |
| cesáreas                              | <input checked="" type="radio"/> 0<br><input type="radio"/> 1<br><input type="radio"/> 2<br><input type="radio"/> 3<br><input type="radio"/> mas de 3                                                                                                                                |
| Abortos                               | <input checked="" type="radio"/> 0<br><input type="radio"/> 1<br><input type="radio"/> 2<br><input type="radio"/> 3<br><input type="radio"/> mas de 3                                                                                                                                |
| Tipo de gestacion                     | <input checked="" type="radio"/> espontanea<br><input type="radio"/> IAC inseminación artificial conyuge<br><input type="radio"/> IAD inseminación artificial donante<br><input type="radio"/> FIV Fecundación in Vitro<br><input type="radio"/> Ovodon FIV con donación de ovocitos |
| peso previo a embarazo                | [*DATA REMOVED*]                                                                                                                                                                                                                                                                     |
| Ganancia ponderal embarazo            | [*DATA REMOVED*]                                                                                                                                                                                                                                                                     |
| Talla madre                           | [*DATA REMOVED*]                                                                                                                                                                                                                                                                     |
| IMC previo embarazo                   | 27.390918560240728                                                                                                                                                                                                                                                                   |
| Patología obstétrica                  | <input checked="" type="radio"/> no<br><input type="radio"/> si                                                                                                                                                                                                                      |
| Diabetes pregestacional               | <input checked="" type="radio"/> no<br><input type="radio"/> si                                                                                                                                                                                                                      |
| Diabetes gestacional                  | <input checked="" type="radio"/> no<br><input type="radio"/> si                                                                                                                                                                                                                      |

|                                            |                                                                                                                                                                                      |
|--------------------------------------------|--------------------------------------------------------------------------------------------------------------------------------------------------------------------------------------|
| Diabetes gestacional con insulina          | <input checked="" type="radio"/> no<br><input type="radio"/> si                                                                                                                      |
| Diabetes gestacional con dieta y ejercicio | <input checked="" type="radio"/> no<br><input type="radio"/> si                                                                                                                      |
| Percentil fetos previos                    | <input type="radio"/> Nada<br><input type="radio"/> percentil menor de 10<br><input checked="" type="radio"/> percentil entre 10 y 90<br><input type="radio"/> percentil mayor de 90 |
| Exfumadora                                 | <input checked="" type="radio"/> Nada<br><input type="radio"/> menos de 5 años<br><input type="radio"/> 5 a 10 años<br><input type="radio"/> mayor o igual a 10 años                 |
| Hábito tabáquico                           | <input checked="" type="radio"/> no<br><input type="radio"/> si                                                                                                                      |
| fumadora                                   | [*DATA REMOVED*]                                                                                                                                                                     |
| Consumo otros tóxicos                      | <input checked="" type="radio"/> no<br><input type="radio"/> si                                                                                                                      |
| Hb 1T                                      | [*DATA REMOVED*]                                                                                                                                                                     |
| Htc 1T                                     | [*DATA REMOVED*]                                                                                                                                                                     |
| Hb 2T                                      | [*DATA REMOVED*]                                                                                                                                                                     |
| HTC 2T                                     | [*DATA REMOVED*]                                                                                                                                                                     |
| Hb 3T                                      | [*DATA REMOVED*]                                                                                                                                                                     |
| HTC 3T                                     | [*DATA REMOVED*]                                                                                                                                                                     |
| Suplemento FE oral                         | <input type="radio"/> si<br><input checked="" type="radio"/> no                                                                                                                      |
| Suplemento fe iv                           | <input type="radio"/> si<br><input checked="" type="radio"/> no                                                                                                                      |
| Transfusión                                | <input checked="" type="radio"/> no<br><input type="radio"/> si                                                                                                                      |
| Solicitada Vit D                           | <input checked="" type="radio"/> no<br><input type="radio"/> si                                                                                                                      |
| Deficit vit D                              | <input type="radio"/> no<br><input type="radio"/> si                                                                                                                                 |
| Suplemento vit D                           | <input type="radio"/> si<br><input type="radio"/> no                                                                                                                                 |

|                       |                                                                                                                                                                                                                                                                                                                                                                                                              |
|-----------------------|--------------------------------------------------------------------------------------------------------------------------------------------------------------------------------------------------------------------------------------------------------------------------------------------------------------------------------------------------------------------------------------------------------------|
| Dieta, cuestionario   | <input checked="" type="radio"/> si<br><input type="radio"/> no                                                                                                                                                                                                                                                                                                                                              |
| Leche entera          | <input checked="" type="radio"/> Nunca o menos 1 vez al mes<br><input type="radio"/> 1 a 3 veces mes<br><input type="radio"/> 1 vez semana<br><input type="radio"/> 2 a 4 veces semana<br><input type="radio"/> 5 a 6 veces semana<br><input type="radio"/> 1 vez al día<br><input type="radio"/> 2 a 3 veces al día<br><input type="radio"/> 5 a 6 veces al día<br><input type="radio"/> más 6 veces al día |
| Leche semidesnatada   | <input type="radio"/> Nunca o menos 1 vez al mes<br><input type="radio"/> 1 a 3 veces mes<br><input type="radio"/> 1 vez semana<br><input type="radio"/> 2 a 4 veces semana<br><input type="radio"/> 5 a 6 veces semana<br><input type="radio"/> 1 vez al día<br><input checked="" type="radio"/> 2 a 3 veces al día<br><input type="radio"/> 5 a 6 veces al día<br><input type="radio"/> mas 6 veces al día |
| Leche desnatada       | <input checked="" type="radio"/> Nunca o menos 1 vez al mes<br><input type="radio"/> 1 a 3 veces mes<br><input type="radio"/> 1 vez semana<br><input type="radio"/> 2 a 4 veces semana<br><input type="radio"/> 5 a 6 veces semana<br><input type="radio"/> 1 vez al día<br><input type="radio"/> 2 a 3 veces al día<br><input type="radio"/> 5 a 6 veces al día<br><input type="radio"/> más 6 veces al día |
| Leche condensada      | <input checked="" type="radio"/> Nunca o menos 1 vez al mes<br><input type="radio"/> 1 a 3 veces mes<br><input type="radio"/> 1 vez semana<br><input type="radio"/> 2 a 4 veces semana<br><input type="radio"/> 5 a 6 veces semana<br><input type="radio"/> 1 vez al día<br><input type="radio"/> 2 a 3 veces al día<br><input type="radio"/> 5 a 6 veces al día<br><input type="radio"/> más 6 veces al día |
| nata o crema de leche | <input type="radio"/> Nunca o menos 1 vez al mes<br><input checked="" type="radio"/> 1 a 3 veces mes<br><input type="radio"/> 1 vez semana<br><input type="radio"/> 2 a 4 veces semana<br><input type="radio"/> 5 a 6 veces semana<br><input type="radio"/> 1 vez al día<br><input type="radio"/> 2 a 3 veces al día<br><input type="radio"/> 5 a 6 veces al día<br><input type="radio"/> más 6 veces al día |

|                                             |                                                                                                                                                                                                                                                                                                                                                                                                              |
|---------------------------------------------|--------------------------------------------------------------------------------------------------------------------------------------------------------------------------------------------------------------------------------------------------------------------------------------------------------------------------------------------------------------------------------------------------------------|
| Yogurt Entero                               | <input type="radio"/> Nunca o menos 1 vez al mes<br><input type="radio"/> 1 a 3 veces mes<br><input type="radio"/> 1 vez semana<br><input checked="" type="radio"/> 2 a 4 veces semana<br><input type="radio"/> 5 a 6 veces semana<br><input type="radio"/> 1 vez al día<br><input type="radio"/> 2 a 3 veces al día<br><input type="radio"/> 5 a 6 veces al día<br><input type="radio"/> más 6 veces al día |
| Yogurt desnatado                            | <input checked="" type="radio"/> Nunca o menos 1 vez al mes<br><input type="radio"/> 1 a 3 veces mes<br><input type="radio"/> 1 vez semana<br><input type="radio"/> 2 a 4 veces semana<br><input type="radio"/> 5 a 6 veces semana<br><input type="radio"/> 1 vez al día<br><input type="radio"/> 2 a 3 veces al día<br><input type="radio"/> 5 a 6 veces al día<br><input type="radio"/> más 6 veces al día |
| 100g requesón o queso blando o queso fresco | <input type="radio"/> Nunca o menos 1 vez al mes<br><input type="radio"/> 1 a 3 veces mes<br><input type="radio"/> 1 vez semana<br><input checked="" type="radio"/> 2 a 4 veces semana<br><input type="radio"/> 5 a 6 veces semana<br><input type="radio"/> 1 vez al día<br><input type="radio"/> 2 a 3 veces al día<br><input type="radio"/> 5 a 6 veces al día<br><input type="radio"/> más 6 veces al día |
| queso curado o semicurado o cremoso         | <input type="radio"/> Nunca o menos 1 vez al mes<br><input type="radio"/> 1 a 3 veces mes<br><input checked="" type="radio"/> 1 vez semana<br><input type="radio"/> 2 a 4 veces semana<br><input type="radio"/> 5 a 6 veces semana<br><input type="radio"/> 1 vez al día<br><input type="radio"/> 2 a 3 veces al día<br><input type="radio"/> 5 a 6 veces al día<br><input type="radio"/> más 6 veces al día |
| natillas flan pudding                       | <input type="radio"/> Nunca o menos 1 vez al mes<br><input type="radio"/> 1 a 3 veces mes<br><input type="radio"/> 1 vez semana<br><input checked="" type="radio"/> 2 a 4 veces semana<br><input type="radio"/> 5 a 6 veces semana<br><input type="radio"/> 1 vez al día<br><input type="radio"/> 2 a 3 veces al día<br><input type="radio"/> 5 a 6 veces al día<br><input type="radio"/> más 6 veces al día |
| Helado                                      | <input checked="" type="radio"/> Nunca o menos 1 vez al mes<br><input type="radio"/> 1 a 3 veces mes<br><input type="radio"/> 1 vez semana<br><input type="radio"/> 2 a 4 veces semana<br><input type="radio"/> 5 a 6 veces semana<br><input type="radio"/> 1 vez al día<br><input type="radio"/> 2 a 3 veces al día<br><input type="radio"/> 5 a 6 veces al día<br><input type="radio"/> más 6 veces al día |

|                                      |                                                                                                                                                                                                                                                                                                                                                                                                              |
|--------------------------------------|--------------------------------------------------------------------------------------------------------------------------------------------------------------------------------------------------------------------------------------------------------------------------------------------------------------------------------------------------------------------------------------------------------------|
| huevo                                | <input type="radio"/> Nunca o menos 1 vez al mes<br><input type="radio"/> 1 a 3 veces mes<br><input type="radio"/> 1 vez semana<br><input checked="" type="radio"/> 2 a 4 veces semana<br><input type="radio"/> 5 a 6 veces semana<br><input type="radio"/> 1 vez al día<br><input type="radio"/> 2 a 3 veces al día<br><input type="radio"/> 5 a 6 veces al día<br><input type="radio"/> más 6 veces al día |
| Pollo con piel                       | <input checked="" type="radio"/> Nunca o menos 1 vez al mes<br><input type="radio"/> 1 a 3 veces mes<br><input type="radio"/> 1 vez semana<br><input type="radio"/> 2 a 4 veces semana<br><input type="radio"/> 5 a 6 veces semana<br><input type="radio"/> 1 vez al día<br><input type="radio"/> 2 a 3 veces al día<br><input type="radio"/> 5 a 6 veces al día<br><input type="radio"/> más 6 veces al día |
| pollo sin piel                       | <input type="radio"/> Nunca o menos 1 vez al mes<br><input type="radio"/> 1 a 3 veces mes<br><input type="radio"/> 1 vez semana<br><input type="radio"/> 2 a 4 veces semana<br><input checked="" type="radio"/> 5 a 6 veces semana<br><input type="radio"/> 1 vez al día<br><input type="radio"/> 2 a 3 veces al día<br><input type="radio"/> 5 a 6 veces al día<br><input type="radio"/> más 6 veces al día |
| Ternera o cerdo o cordero            | <input type="radio"/> Nunca o menos 1 vez al mes<br><input type="radio"/> 1 a 3 veces mes<br><input type="radio"/> 1 vez semana<br><input checked="" type="radio"/> 2 a 4 veces semana<br><input type="radio"/> 5 a 6 veces semana<br><input type="radio"/> 1 vez al día<br><input type="radio"/> 2 a 3 veces al día<br><input type="radio"/> 5 a 6 veces al día<br><input type="radio"/> más 6 veces al día |
| carne caza: Conejo o codorniz o pato | <input checked="" type="radio"/> Nunca o menos 1 vez al mes<br><input type="radio"/> 1 a 3 veces mes<br><input type="radio"/> 1 vez semana<br><input type="radio"/> 2 a 4 veces semana<br><input type="radio"/> 5 a 6 veces semana<br><input type="radio"/> 1 vez al día<br><input type="radio"/> 2 a 3 veces al día<br><input type="radio"/> 5 a 6 veces al día<br><input type="radio"/> más 6 veces al día |
| Hígado de ternera o cerdo o pollo    | <input type="radio"/> Nunca o menos 1 vez al mes<br><input type="radio"/> 1 a 3 veces mes<br><input checked="" type="radio"/> 1 vez semana<br><input type="radio"/> 2 a 4 veces semana<br><input type="radio"/> 5 a 6 veces semana<br><input type="radio"/> 1 vez al día<br><input type="radio"/> 2 a 3 veces al día<br><input type="radio"/> 5 a 6 veces al día<br><input type="radio"/> más 6 veces al día |

|                     |                                                                                                                                                                                                                                                                                                                                                                                                              |
|---------------------|--------------------------------------------------------------------------------------------------------------------------------------------------------------------------------------------------------------------------------------------------------------------------------------------------------------------------------------------------------------------------------------------------------------|
| Vísceras            | <input checked="" type="radio"/> Nunca o menos 1 vez al mes<br><input type="radio"/> 1 a 3 veces mes<br><input type="radio"/> 1 vez semana<br><input type="radio"/> 2 a 4 veces semana<br><input type="radio"/> 5 a 6 veces semana<br><input type="radio"/> 1 vez al día<br><input type="radio"/> 2 a 3 veces al día<br><input type="radio"/> 5 a 6 veces al día<br><input type="radio"/> más 6 veces al día |
| Embutido            | <input checked="" type="radio"/> Nunca o menos 1 vez al mes<br><input type="radio"/> 1 a 3 veces mes<br><input type="radio"/> 1 vez semana<br><input type="radio"/> 2 a 4 veces semana<br><input type="radio"/> 5 a 6 veces semana<br><input type="radio"/> 1 vez al día<br><input type="radio"/> 2 a 3 veces al día<br><input type="radio"/> 5 a 6 veces al día<br><input type="radio"/> más 6 veces al día |
| Salchicha o similar | <input checked="" type="radio"/> Nunca o menos 1 vez al mes<br><input type="radio"/> 1 a 3 veces mes<br><input type="radio"/> 1 vez semana<br><input type="radio"/> 2 a 4 veces semana<br><input type="radio"/> 5 a 6 veces semana<br><input type="radio"/> 1 vez al día<br><input type="radio"/> 2 a 3 veces al día<br><input type="radio"/> 5 a 6 veces al día<br><input type="radio"/> más 6 veces al día |
| Pate o foiegras     | <input checked="" type="radio"/> Nunca o menos 1 vez al mes<br><input type="radio"/> 1 a 3 veces mes<br><input type="radio"/> 1 vez semana<br><input type="radio"/> 2 a 4 veces semana<br><input type="radio"/> 5 a 6 veces semana<br><input type="radio"/> 1 vez al día<br><input type="radio"/> 2 a 3 veces al día<br><input type="radio"/> 5 a 6 veces al día<br><input type="radio"/> más 6 veces al día |
| Hamburguesa         | <input type="radio"/> Nunca o menos 1 vez al mes<br><input type="radio"/> 1 a 3 veces mes<br><input checked="" type="radio"/> 1 vez semana<br><input type="radio"/> 2 a 4 veces semana<br><input type="radio"/> 5 a 6 veces semana<br><input type="radio"/> 1 vez al día<br><input type="radio"/> 2 a 3 veces al día<br><input type="radio"/> 5 a 6 veces al día<br><input type="radio"/> más 6 veces al día |
| tocino o bacon      | <input checked="" type="radio"/> Nunca o menos 1 vez al mes<br><input type="radio"/> 1 a 3 veces mes<br><input type="radio"/> 1 vez semana<br><input type="radio"/> 2 a 4 veces semana<br><input type="radio"/> 5 a 6 veces semana<br><input type="radio"/> 1 vez al día<br><input type="radio"/> 2 a 3 veces al día<br><input type="radio"/> 5 a 6 veces al día<br><input type="radio"/> más 6 veces al día |

---

|               |                                                                                                                                                                                                                                                                                                                                                                                                              |
|---------------|--------------------------------------------------------------------------------------------------------------------------------------------------------------------------------------------------------------------------------------------------------------------------------------------------------------------------------------------------------------------------------------------------------------|
| Pescado frito | <input type="radio"/> Nunca o menos 1 vez al mes<br><input type="radio"/> 1 a 3 veces mes<br><input checked="" type="radio"/> 1 vez semana<br><input type="radio"/> 2 a 4 veces semana<br><input type="radio"/> 5 a 6 veces semana<br><input type="radio"/> 1 vez al día<br><input type="radio"/> 2 a 3 veces al día<br><input type="radio"/> 5 a 6 veces al día<br><input type="radio"/> más 6 veces al día |
|---------------|--------------------------------------------------------------------------------------------------------------------------------------------------------------------------------------------------------------------------------------------------------------------------------------------------------------------------------------------------------------------------------------------------------------|

---

|                        |                                                                                                                                                                                                                                                                                                                                                                                                              |
|------------------------|--------------------------------------------------------------------------------------------------------------------------------------------------------------------------------------------------------------------------------------------------------------------------------------------------------------------------------------------------------------------------------------------------------------|
| pescado hervido blanco | <input type="radio"/> Nunca o menos 1 vez al mes<br><input type="radio"/> 1 a 3 veces mes<br><input type="radio"/> 1 vez semana<br><input checked="" type="radio"/> 2 a 4 veces semana<br><input type="radio"/> 5 a 6 veces semana<br><input type="radio"/> 1 vez al día<br><input type="radio"/> 2 a 3 veces al día<br><input type="radio"/> 5 a 6 veces al día<br><input type="radio"/> más 6 veces al día |
|------------------------|--------------------------------------------------------------------------------------------------------------------------------------------------------------------------------------------------------------------------------------------------------------------------------------------------------------------------------------------------------------------------------------------------------------|

---

|                      |                                                                                                                                                                                                                                                                                                                                                                                                              |
|----------------------|--------------------------------------------------------------------------------------------------------------------------------------------------------------------------------------------------------------------------------------------------------------------------------------------------------------------------------------------------------------------------------------------------------------|
| pescado hervido azul | <input checked="" type="radio"/> Nunca o menos 1 vez al mes<br><input type="radio"/> 1 a 3 veces mes<br><input type="radio"/> 1 vez semana<br><input type="radio"/> 2 a 4 veces semana<br><input type="radio"/> 5 a 6 veces semana<br><input type="radio"/> 1 vez al día<br><input type="radio"/> 2 a 3 veces al día<br><input type="radio"/> 5 a 6 veces al día<br><input type="radio"/> más 6 veces al día |
|----------------------|--------------------------------------------------------------------------------------------------------------------------------------------------------------------------------------------------------------------------------------------------------------------------------------------------------------------------------------------------------------------------------------------------------------|

---

|                    |                                                                                                                                                                                                                                                                                                                                                                                                              |
|--------------------|--------------------------------------------------------------------------------------------------------------------------------------------------------------------------------------------------------------------------------------------------------------------------------------------------------------------------------------------------------------------------------------------------------------|
| otros pescado azul | <input type="radio"/> Nunca o menos 1 vez al mes<br><input type="radio"/> 1 a 3 veces mes<br><input checked="" type="radio"/> 1 vez semana<br><input type="radio"/> 2 a 4 veces semana<br><input type="radio"/> 5 a 6 veces semana<br><input type="radio"/> 1 vez al día<br><input type="radio"/> 2 a 3 veces al día<br><input type="radio"/> 5 a 6 veces al día<br><input type="radio"/> más 6 veces al día |
|--------------------|--------------------------------------------------------------------------------------------------------------------------------------------------------------------------------------------------------------------------------------------------------------------------------------------------------------------------------------------------------------------------------------------------------------|

---

|               |                                                                                                                                                                                                                                                                                                                                                                                                              |
|---------------|--------------------------------------------------------------------------------------------------------------------------------------------------------------------------------------------------------------------------------------------------------------------------------------------------------------------------------------------------------------------------------------------------------------|
| atun conserva | <input type="radio"/> Nunca o menos 1 vez al mes<br><input type="radio"/> 1 a 3 veces mes<br><input checked="" type="radio"/> 1 vez semana<br><input type="radio"/> 2 a 4 veces semana<br><input type="radio"/> 5 a 6 veces semana<br><input type="radio"/> 1 vez al día<br><input type="radio"/> 2 a 3 veces al día<br><input type="radio"/> 5 a 6 veces al día<br><input type="radio"/> más 6 veces al día |
|---------------|--------------------------------------------------------------------------------------------------------------------------------------------------------------------------------------------------------------------------------------------------------------------------------------------------------------------------------------------------------------------------------------------------------------|

---

|                  |                                                                                                                                                                                                                                                                                                                                                                                                              |
|------------------|--------------------------------------------------------------------------------------------------------------------------------------------------------------------------------------------------------------------------------------------------------------------------------------------------------------------------------------------------------------------------------------------------------------|
| sardina conserva | <input checked="" type="radio"/> Nunca o menos 1 vez al mes<br><input type="radio"/> 1 a 3 veces mes<br><input type="radio"/> 1 vez semana<br><input type="radio"/> 2 a 4 veces semana<br><input type="radio"/> 5 a 6 veces semana<br><input type="radio"/> 1 vez al día<br><input type="radio"/> 2 a 3 veces al día<br><input type="radio"/> 5 a 6 veces al día<br><input type="radio"/> más 6 veces al día |
|------------------|--------------------------------------------------------------------------------------------------------------------------------------------------------------------------------------------------------------------------------------------------------------------------------------------------------------------------------------------------------------------------------------------------------------|

---



|                                         |                                                                                                                                                                                                                                                                                                                                                                                                              |
|-----------------------------------------|--------------------------------------------------------------------------------------------------------------------------------------------------------------------------------------------------------------------------------------------------------------------------------------------------------------------------------------------------------------------------------------------------------------|
| pescado ahumado                         | <input checked="" type="radio"/> Nunca o menos 1 vez al mes<br><input type="radio"/> 1 a 3 veces mes<br><input type="radio"/> 1 vez semana<br><input type="radio"/> 2 a 4 veces semana<br><input type="radio"/> 5 a 6 veces semana<br><input type="radio"/> 1 vez al día<br><input type="radio"/> 2 a 3 veces al día<br><input type="radio"/> 5 a 6 veces al día<br><input type="radio"/> más 6 veces al día |
| almejas o mejillones o ostras unos 100g | <input type="radio"/> Nunca o menos 1 vez al mes<br><input checked="" type="radio"/> 1 a 3 veces mes<br><input type="radio"/> 1 vez semana<br><input type="radio"/> 2 a 4 veces semana<br><input type="radio"/> 5 a 6 veces semana<br><input type="radio"/> 1 vez al día<br><input type="radio"/> 2 a 3 veces al día<br><input type="radio"/> 5 a 6 veces al día<br><input type="radio"/> más 6 veces al día |
| calamar o chipiron o sepia unos 100g    | <input checked="" type="radio"/> Nunca o menos 1 vez al mes<br><input type="radio"/> 1 a 3 veces mes<br><input type="radio"/> 1 vez semana<br><input type="radio"/> 2 a 4 veces semana<br><input type="radio"/> 5 a 6 veces semana<br><input type="radio"/> 1 vez al día<br><input type="radio"/> 2 a 3 veces al día<br><input type="radio"/> 5 a 6 veces al día<br><input type="radio"/> más 6 veces al día |
| marisco unos 100g                       | <input type="radio"/> Nunca o menos 1 vez al mes<br><input type="radio"/> 1 a 3 veces mes<br><input type="radio"/> 1 vez semana<br><input checked="" type="radio"/> 2 a 4 veces semana<br><input type="radio"/> 5 a 6 veces semana<br><input type="radio"/> 1 vez al día<br><input type="radio"/> 2 a 3 veces al día<br><input type="radio"/> 5 a 6 veces al día<br><input type="radio"/> más 6 veces al día |
| Espinacas o acelgas cocinadas           | <input type="radio"/> Nunca o menos 1 vez al mes<br><input type="radio"/> 1 a 3 veces mes<br><input type="radio"/> 1 vez semana<br><input checked="" type="radio"/> 2 a 4 veces semana<br><input type="radio"/> 5 a 6 veces semana<br><input type="radio"/> 1 vez al día<br><input type="radio"/> 2 a 3 veces al día<br><input type="radio"/> 5 a 6 veces al día<br><input type="radio"/> más 6 veces al día |
| Col o coliflor o brocoli cocinado       | <input type="radio"/> Nunca o menos 1 vez al mes<br><input type="radio"/> 1 a 3 veces mes<br><input type="radio"/> 1 vez semana<br><input checked="" type="radio"/> 2 a 4 veces semana<br><input type="radio"/> 5 a 6 veces semana<br><input type="radio"/> 1 vez al día<br><input type="radio"/> 2 a 3 veces al día<br><input type="radio"/> 5 a 6 veces al día<br><input type="radio"/> más 6 veces al día |

---

Lechuga o endivia o escarola

- ☐ Nunca o menos 1 vez al mes  
☐ 1 a 3 veces mes  
☐ 1 vez semana  
☒ 2 a 4 veces semana  
☐ 5 a 6 veces semana  
☐ 1 vez al día  
☐ 2 a 3 veces al día  
☐ 5 a 6 veces al día  
☐ más 6 veces al día

---

tomate ensalada

- ☐ Nunca o menos 1 vez al mes  
☐ 1 a 3 veces mes  
☐ 1 vez semana  
☒ 2 a 4 veces semana  
☐ 5 a 6 veces semana  
☐ 1 vez al día  
☐ 2 a 3 veces al día  
☐ 5 a 6 veces al día  
☐ más 6 veces al día

---

cebolla

- ☒ Nunca o menos 1 vez al mes  
☐ 1 a 3 veces mes  
☐ 1 vez semana  
☐ 2 a 4 veces semana  
☐ 5 a 6 veces semana  
☐ 1 vez al día  
☐ 2 a 3 veces al día  
☐ 5 a 6 veces al día  
☐ más 6 veces al día

---

Zanahoria o calabaza

- ☒ Nunca o menos 1 vez al mes  
☐ 1 a 3 veces mes  
☐ 1 vez semana  
☐ 2 a 4 veces semana  
☐ 5 a 6 veces semana  
☐ 1 vez al día  
☐ 2 a 3 veces al día  
☐ 5 a 6 veces al día  
☐ más 6 veces al día

---

Judías verdes

- ☒ Nunca o menos 1 vez al mes  
☐ 1 a 3 veces mes  
☐ 1 vez semana  
☐ 2 a 4 veces semana  
☐ 5 a 6 veces semana  
☐ 1 vez al día  
☐ 2 a 3 veces al día  
☐ 5 a 6 veces al día  
☐ más 6 veces al día

---

Berenjena o calabacin o pepino

- ☒ Nunca o menos 1 vez al mes  
☐ 1 a 3 veces mes  
☐ 1 vez semana  
☐ 2 a 4 veces semana  
☐ 5 a 6 veces semana  
☐ 1 vez al día  
☐ 2 a 3 veces al día  
☐ 5 a 6 veces al día  
☐ más 6 veces al día

|                       |                                                                                                                                                                                                                                                                                                                                                                                                              |
|-----------------------|--------------------------------------------------------------------------------------------------------------------------------------------------------------------------------------------------------------------------------------------------------------------------------------------------------------------------------------------------------------------------------------------------------------|
| pimiento              | <input checked="" type="radio"/> Nunca o menos 1 vez al mes<br><input type="radio"/> 1 a 3 veces mes<br><input type="radio"/> 1 vez semana<br><input type="radio"/> 2 a 4 veces semana<br><input type="radio"/> 5 a 6 veces semana<br><input type="radio"/> 1 vez al día<br><input type="radio"/> 2 a 3 veces al día<br><input type="radio"/> 5 a 6 veces al día<br><input type="radio"/> más 6 veces al día |
| alcachofa             | <input type="radio"/> Nunca o menos 1 vez al mes<br><input type="radio"/> 1 a 3 veces mes<br><input type="radio"/> 1 vez semana<br><input checked="" type="radio"/> 2 a 4 veces semana<br><input type="radio"/> 5 a 6 veces semana<br><input type="radio"/> 1 vez al día<br><input type="radio"/> 2 a 3 veces al día<br><input type="radio"/> 5 a 6 veces al día<br><input type="radio"/> más 6 veces al día |
| espárragos            | <input type="radio"/> Nunca o menos 1 vez al mes<br><input type="radio"/> 1 a 3 veces mes<br><input type="radio"/> 1 vez semana<br><input checked="" type="radio"/> 2 a 4 veces semana<br><input type="radio"/> 5 a 6 veces semana<br><input type="radio"/> 1 vez al día<br><input type="radio"/> 2 a 3 veces al día<br><input type="radio"/> 5 a 6 veces al día<br><input type="radio"/> más 6 veces al día |
| maíz hervido          | <input type="radio"/> Nunca o menos 1 vez al mes<br><input type="radio"/> 1 a 3 veces mes<br><input type="radio"/> 1 vez semana<br><input checked="" type="radio"/> 2 a 4 veces semana<br><input type="radio"/> 5 a 6 veces semana<br><input type="radio"/> 1 vez al día<br><input type="radio"/> 2 a 3 veces al día<br><input type="radio"/> 5 a 6 veces al día<br><input type="radio"/> más 6 veces al día |
| legumbres             | <input type="radio"/> Nunca o menos 1 vez al mes<br><input type="radio"/> 1 a 3 veces mes<br><input type="radio"/> 1 vez semana<br><input checked="" type="radio"/> 2 a 4 veces semana<br><input type="radio"/> 5 a 6 veces semana<br><input type="radio"/> 1 vez al día<br><input type="radio"/> 2 a 3 veces al día<br><input type="radio"/> 5 a 6 veces al día<br><input type="radio"/> más 6 veces al día |
| naranjas o mandarinas | <input type="radio"/> Nunca o menos 1 vez al mes<br><input type="radio"/> 1 a 3 veces mes<br><input checked="" type="radio"/> 1 vez semana<br><input type="radio"/> 2 a 4 veces semana<br><input type="radio"/> 5 a 6 veces semana<br><input type="radio"/> 1 vez al día<br><input type="radio"/> 2 a 3 veces al día<br><input type="radio"/> 5 a 6 veces al día<br><input type="radio"/> más 6 veces al día |

---

|                    |                                                                                                                                                                                                                                                                                                                                                                                                              |
|--------------------|--------------------------------------------------------------------------------------------------------------------------------------------------------------------------------------------------------------------------------------------------------------------------------------------------------------------------------------------------------------------------------------------------------------|
| zumو natural fruta | <input type="radio"/> Nunca o menos 1 vez al mes<br><input type="radio"/> 1 a 3 veces mes<br><input type="radio"/> 1 vez semana<br><input checked="" type="radio"/> 2 a 4 veces semana<br><input type="radio"/> 5 a 6 veces semana<br><input type="radio"/> 1 vez al día<br><input type="radio"/> 2 a 3 veces al día<br><input type="radio"/> 5 a 6 veces al día<br><input type="radio"/> más 6 veces al día |
|--------------------|--------------------------------------------------------------------------------------------------------------------------------------------------------------------------------------------------------------------------------------------------------------------------------------------------------------------------------------------------------------------------------------------------------------|

---

|         |                                                                                                                                                                                                                                                                                                                                                                                                              |
|---------|--------------------------------------------------------------------------------------------------------------------------------------------------------------------------------------------------------------------------------------------------------------------------------------------------------------------------------------------------------------------------------------------------------------|
| platano | <input type="radio"/> Nunca o menos 1 vez al mes<br><input type="radio"/> 1 a 3 veces mes<br><input checked="" type="radio"/> 1 vez semana<br><input type="radio"/> 2 a 4 veces semana<br><input type="radio"/> 5 a 6 veces semana<br><input type="radio"/> 1 vez al día<br><input type="radio"/> 2 a 3 veces al día<br><input type="radio"/> 5 a 6 veces al día<br><input type="radio"/> más 6 veces al día |
|---------|--------------------------------------------------------------------------------------------------------------------------------------------------------------------------------------------------------------------------------------------------------------------------------------------------------------------------------------------------------------------------------------------------------------|

---

|                |                                                                                                                                                                                                                                                                                                                                                                                                              |
|----------------|--------------------------------------------------------------------------------------------------------------------------------------------------------------------------------------------------------------------------------------------------------------------------------------------------------------------------------------------------------------------------------------------------------------|
| manzana o pera | <input type="radio"/> Nunca o menos 1 vez al mes<br><input type="radio"/> 1 a 3 veces mes<br><input checked="" type="radio"/> 1 vez semana<br><input type="radio"/> 2 a 4 veces semana<br><input type="radio"/> 5 a 6 veces semana<br><input type="radio"/> 1 vez al día<br><input type="radio"/> 2 a 3 veces al día<br><input type="radio"/> 5 a 6 veces al día<br><input type="radio"/> más 6 veces al día |
|----------------|--------------------------------------------------------------------------------------------------------------------------------------------------------------------------------------------------------------------------------------------------------------------------------------------------------------------------------------------------------------------------------------------------------------|

---

|                       |                                                                                                                                                                                                                                                                                                                                                                                                              |
|-----------------------|--------------------------------------------------------------------------------------------------------------------------------------------------------------------------------------------------------------------------------------------------------------------------------------------------------------------------------------------------------------------------------------------------------------|
| melocotón o nectarina | <input type="radio"/> Nunca o menos 1 vez al mes<br><input type="radio"/> 1 a 3 veces mes<br><input checked="" type="radio"/> 1 vez semana<br><input type="radio"/> 2 a 4 veces semana<br><input type="radio"/> 5 a 6 veces semana<br><input type="radio"/> 1 vez al día<br><input type="radio"/> 2 a 3 veces al día<br><input type="radio"/> 5 a 6 veces al día<br><input type="radio"/> más 6 veces al día |
|-----------------------|--------------------------------------------------------------------------------------------------------------------------------------------------------------------------------------------------------------------------------------------------------------------------------------------------------------------------------------------------------------------------------------------------------------|

---

|                |                                                                                                                                                                                                                                                                                                                                                                                                              |
|----------------|--------------------------------------------------------------------------------------------------------------------------------------------------------------------------------------------------------------------------------------------------------------------------------------------------------------------------------------------------------------------------------------------------------------|
| sandia o melon | <input type="radio"/> Nunca o menos 1 vez al mes<br><input type="radio"/> 1 a 3 veces mes<br><input checked="" type="radio"/> 1 vez semana<br><input type="radio"/> 2 a 4 veces semana<br><input type="radio"/> 5 a 6 veces semana<br><input type="radio"/> 1 vez al día<br><input type="radio"/> 2 a 3 veces al día<br><input type="radio"/> 5 a 6 veces al día<br><input type="radio"/> más 6 veces al día |
|----------------|--------------------------------------------------------------------------------------------------------------------------------------------------------------------------------------------------------------------------------------------------------------------------------------------------------------------------------------------------------------------------------------------------------------|

---

|     |                                                                                                                                                                                                                                                                                                                                                                                                              |
|-----|--------------------------------------------------------------------------------------------------------------------------------------------------------------------------------------------------------------------------------------------------------------------------------------------------------------------------------------------------------------------------------------------------------------|
| uva | <input type="radio"/> Nunca o menos 1 vez al mes<br><input type="radio"/> 1 a 3 veces mes<br><input checked="" type="radio"/> 1 vez semana<br><input type="radio"/> 2 a 4 veces semana<br><input type="radio"/> 5 a 6 veces semana<br><input type="radio"/> 1 vez al día<br><input type="radio"/> 2 a 3 veces al día<br><input type="radio"/> 5 a 6 veces al día<br><input type="radio"/> más 6 veces al día |
|-----|--------------------------------------------------------------------------------------------------------------------------------------------------------------------------------------------------------------------------------------------------------------------------------------------------------------------------------------------------------------------------------------------------------------|

---

---

bruna o ciruela

- ☐ Nunca o menos 1 vez al mes  
☐ 1 a 3 veces mes  
☒ 1 vez semana  
☐ 2 a 4 veces semana  
☐ 5 a 6 veces semana  
☐ 1 vez al día  
☐ 2 a 3 veces al día  
☐ 5 a 6 veces al día  
☐ más 6 veces al día

---

kiwi

- ☒ Nunca o menos 1 vez al mes  
☐ 1 a 3 veces mes  
☐ 1 vez semana  
☐ 2 a 4 veces semana  
☐ 5 a 6 veces semana  
☐ 1 vez al día  
☐ 2 a 3 veces al día  
☐ 5 a 6 veces al día  
☐ más 6 veces al día

---

aceituna

- ☐ Nunca o menos 1 vez al mes  
☒ 1 a 3 veces mes  
☐ 1 vez semana  
☐ 2 a 4 veces semana  
☐ 5 a 6 veces semana  
☐ 1 vez al día  
☐ 2 a 3 veces al día  
☐ 5 a 6 veces al día  
☐ más 6 veces al día

---

frutos secos

- ☐ Nunca o menos 1 vez al mes  
☒ 1 a 3 veces mes  
☐ 1 vez semana  
☐ 2 a 4 veces semana  
☐ 5 a 6 veces semana  
☐ 1 vez al día  
☐ 2 a 3 veces al día  
☐ 5 a 6 veces al día  
☐ más 6 veces al día

---

pan blanco

- ☐ Nunca o menos 1 vez al mes  
☐ 1 a 3 veces mes  
☐ 1 vez semana  
☒ 2 a 4 veces semana  
☐ 5 a 6 veces semana  
☐ 1 vez al día  
☐ 2 a 3 veces al día  
☐ 5 a 6 veces al día  
☐ más 6 veces al día

---

pan integral

- ☒ Nunca o menos 1 vez al mes  
☐ 1 a 3 veces mes  
☐ 1 vez semana  
☐ 2 a 4 veces semana  
☐ 5 a 6 veces semana  
☐ 1 vez al día  
☐ 2 a 3 veces al día  
☐ 5 a 6 veces al día  
☐ más 6 veces al día

---

cereales desayuno

- ☐ Nunca o menos 1 vez al mes  
☐ 1 a 3 veces mes  
☒ 1 vez semana  
☐ 2 a 4 veces semana  
☐ 5 a 6 veces semana  
☐ 1 vez al día  
☐ 2 a 3 veces al día  
☐ 5 a 6 veces al día  
☐ más 6 veces al día

---

patatas fritas

- ☒ Nunca o menos 1 vez al mes  
☐ 1 a 3 veces mes  
☐ 1 vez semana  
☐ 2 a 4 veces semana  
☐ 5 a 6 veces semana  
☐ 1 vez al día  
☐ 2 a 3 veces al día  
☐ 5 a 6 veces al día  
☐ más 6 veces al día

---

patatas cocidas o asadas

- ☐ Nunca o menos 1 vez al mes  
☐ 1 a 3 veces mes  
☐ 1 vez semana  
☒ 2 a 4 veces semana  
☐ 5 a 6 veces semana  
☐ 1 vez al día  
☐ 2 a 3 veces al día  
☐ 5 a 6 veces al día  
☐ más 6 veces al día

---

bolsa papas

- ☒ Nunca o menos 1 vez al mes  
☐ 1 a 3 veces mes  
☐ 1 vez semana  
☐ 2 a 4 veces semana  
☐ 5 a 6 veces semana  
☐ 1 vez al día  
☐ 2 a 3 veces al día  
☐ 5 a 6 veces al día  
☐ más 6 veces al día

---

arroz cocinado

- ☐ Nunca o menos 1 vez al mes  
☐ 1 a 3 veces mes  
☒ 1 vez semana  
☐ 2 a 4 veces semana  
☐ 5 a 6 veces semana  
☐ 1 vez al día  
☐ 2 a 3 veces al día  
☐ 5 a 6 veces al día  
☐ más 6 veces al día

---

pasta

- ☐ Nunca o menos 1 vez al mes  
☐ 1 a 3 veces mes  
☒ 1 vez semana  
☐ 2 a 4 veces semana  
☐ 5 a 6 veces semana  
☐ 1 vez al día  
☐ 2 a 3 veces al día  
☐ 5 a 6 veces al día  
☐ más 6 veces al día

|                     |                                                                                                                                                                                                                                                                                                                                                                                                              |
|---------------------|--------------------------------------------------------------------------------------------------------------------------------------------------------------------------------------------------------------------------------------------------------------------------------------------------------------------------------------------------------------------------------------------------------------|
| pizza               | <input type="radio"/> Nunca o menos 1 vez al mes<br><input type="radio"/> 1 a 3 veces mes<br><input checked="" type="radio"/> 1 vez semana<br><input type="radio"/> 2 a 4 veces semana<br><input type="radio"/> 5 a 6 veces semana<br><input type="radio"/> 1 vez al día<br><input type="radio"/> 2 a 3 veces al día<br><input type="radio"/> 5 a 6 veces al día<br><input type="radio"/> más 6 veces al día |
| aceite oliva        | <input type="radio"/> Nunca o menos 1 vez al mes<br><input type="radio"/> 1 a 3 veces mes<br><input type="radio"/> 1 vez semana<br><input checked="" type="radio"/> 2 a 4 veces semana<br><input type="radio"/> 5 a 6 veces semana<br><input type="radio"/> 1 vez al día<br><input type="radio"/> 2 a 3 veces al día<br><input type="radio"/> 5 a 6 veces al día<br><input type="radio"/> más 6 veces al día |
| otros aceites       | <input checked="" type="radio"/> Nunca o menos 1 vez al mes<br><input type="radio"/> 1 a 3 veces mes<br><input type="radio"/> 1 vez semana<br><input type="radio"/> 2 a 4 veces semana<br><input type="radio"/> 5 a 6 veces semana<br><input type="radio"/> 1 vez al día<br><input type="radio"/> 2 a 3 veces al día<br><input type="radio"/> 5 a 6 veces al día<br><input type="radio"/> más 6 veces al día |
| margarina           | <input checked="" type="radio"/> Nunca o menos 1 vez al mes<br><input type="radio"/> 1 a 3 veces mes<br><input type="radio"/> 1 vez semana<br><input type="radio"/> 2 a 4 veces semana<br><input type="radio"/> 5 a 6 veces semana<br><input type="radio"/> 1 vez al día<br><input type="radio"/> 2 a 3 veces al día<br><input type="radio"/> 5 a 6 veces al día<br><input type="radio"/> más 6 veces al día |
| mantequilla         | <input checked="" type="radio"/> Nunca o menos 1 vez al mes<br><input type="radio"/> 1 a 3 veces mes<br><input type="radio"/> 1 vez semana<br><input type="radio"/> 2 a 4 veces semana<br><input type="radio"/> 5 a 6 veces semana<br><input type="radio"/> 1 vez al día<br><input type="radio"/> 2 a 3 veces al día<br><input type="radio"/> 5 a 6 veces al día<br><input type="radio"/> más 6 veces al día |
| galletas tipo maria | <input type="radio"/> Nunca o menos 1 vez al mes<br><input type="radio"/> 1 a 3 veces mes<br><input type="radio"/> 1 vez semana<br><input checked="" type="radio"/> 2 a 4 veces semana<br><input type="radio"/> 5 a 6 veces semana<br><input type="radio"/> 1 vez al día<br><input type="radio"/> 2 a 3 veces al día<br><input type="radio"/> 5 a 6 veces al día<br><input type="radio"/> más 6 veces al día |

|                           |                                                                                                                                                                                                                                                                                                                                                                                                              |
|---------------------------|--------------------------------------------------------------------------------------------------------------------------------------------------------------------------------------------------------------------------------------------------------------------------------------------------------------------------------------------------------------------------------------------------------------|
| galletas chocolate        | <input checked="" type="radio"/> Nunca o menos 1 vez al mes<br><input type="radio"/> 1 a 3 veces mes<br><input type="radio"/> 1 vez semana<br><input type="radio"/> 2 a 4 veces semana<br><input type="radio"/> 5 a 6 veces semana<br><input type="radio"/> 1 vez al día<br><input type="radio"/> 2 a 3 veces al día<br><input type="radio"/> 5 a 6 veces al día<br><input type="radio"/> más 6 veces al día |
| bollieria                 | <input type="radio"/> Nunca o menos 1 vez al mes<br><input type="radio"/> 1 a 3 veces mes<br><input checked="" type="radio"/> 1 vez semana<br><input type="radio"/> 2 a 4 veces semana<br><input type="radio"/> 5 a 6 veces semana<br><input type="radio"/> 1 vez al día<br><input type="radio"/> 2 a 3 veces al día<br><input type="radio"/> 5 a 6 veces al día<br><input type="radio"/> más 6 veces al día |
| chocolate o bombones      | <input checked="" type="radio"/> Nunca o menos 1 vez al mes<br><input type="radio"/> 1 a 3 veces mes<br><input type="radio"/> 1 vez semana<br><input type="radio"/> 2 a 4 veces semana<br><input type="radio"/> 5 a 6 veces semana<br><input type="radio"/> 1 vez al día<br><input type="radio"/> 2 a 3 veces al día<br><input type="radio"/> 5 a 6 veces al día<br><input type="radio"/> más 6 veces al día |
| chocolate polvo o colacao | <input type="radio"/> Nunca o menos 1 vez al mes<br><input type="radio"/> 1 a 3 veces mes<br><input type="radio"/> 1 vez semana<br><input checked="" type="radio"/> 2 a 4 veces semana<br><input type="radio"/> 5 a 6 veces semana<br><input type="radio"/> 1 vez al día<br><input type="radio"/> 2 a 3 veces al día<br><input type="radio"/> 5 a 6 veces al día<br><input type="radio"/> más 6 veces al día |
| vino tinto                | <input checked="" type="radio"/> Nunca o menos 1 vez al mes<br><input type="radio"/> 1 a 3 veces mes<br><input type="radio"/> 1 vez semana<br><input type="radio"/> 2 a 4 veces semana<br><input type="radio"/> 5 a 6 veces semana<br><input type="radio"/> 1 vez al día<br><input type="radio"/> 2 a 3 veces al día<br><input type="radio"/> 5 a 6 veces al día<br><input type="radio"/> más 6 veces al día |
| vino blanco               | <input checked="" type="radio"/> Nunca o menos 1 vez al mes<br><input type="radio"/> 1 a 3 veces mes<br><input type="radio"/> 1 vez semana<br><input type="radio"/> 2 a 4 veces semana<br><input type="radio"/> 5 a 6 veces semana<br><input type="radio"/> 1 vez al día<br><input type="radio"/> 2 a 3 veces al día<br><input type="radio"/> 5 a 6 veces al día<br><input type="radio"/> más 6 veces al día |



|                       |                                                                                                                                                                                                                                                                                                                                                                                                              |
|-----------------------|--------------------------------------------------------------------------------------------------------------------------------------------------------------------------------------------------------------------------------------------------------------------------------------------------------------------------------------------------------------------------------------------------------------|
| vino seco o vermut    | <input checked="" type="radio"/> Nunca o menos 1 vez al mes<br><input type="radio"/> 1 a 3 veces mes<br><input type="radio"/> 1 vez semana<br><input type="radio"/> 2 a 4 veces semana<br><input type="radio"/> 5 a 6 veces semana<br><input type="radio"/> 1 vez al día<br><input type="radio"/> 2 a 3 veces al día<br><input type="radio"/> 5 a 6 veces al día<br><input type="radio"/> más 6 veces al día |
| cerveza               | <input checked="" type="radio"/> Nunca o menos 1 vez al mes<br><input type="radio"/> 1 a 3 veces mes<br><input type="radio"/> 1 vez semana<br><input type="radio"/> 2 a 4 veces semana<br><input type="radio"/> 5 a 6 veces semana<br><input type="radio"/> 1 vez al día<br><input type="radio"/> 2 a 3 veces al día<br><input type="radio"/> 5 a 6 veces al día<br><input type="radio"/> más 6 veces al día |
| cerveza sin alcohol   | <input checked="" type="radio"/> Nunca o menos 1 vez al mes<br><input type="radio"/> 1 a 3 veces mes<br><input type="radio"/> 1 vez semana<br><input type="radio"/> 2 a 4 veces semana<br><input type="radio"/> 5 a 6 veces semana<br><input type="radio"/> 1 vez al día<br><input type="radio"/> 2 a 3 veces al día<br><input type="radio"/> 5 a 6 veces al día<br><input type="radio"/> más 6 veces al día |
| licores               | <input checked="" type="radio"/> Nunca o menos 1 vez al mes<br><input type="radio"/> 1 a 3 veces mes<br><input type="radio"/> 1 vez semana<br><input type="radio"/> 2 a 4 veces semana<br><input type="radio"/> 5 a 6 veces semana<br><input type="radio"/> 1 vez al día<br><input type="radio"/> 2 a 3 veces al día<br><input type="radio"/> 5 a 6 veces al día<br><input type="radio"/> más 6 veces al día |
| ginebra o ron o vodka | <input checked="" type="radio"/> Nunca o menos 1 vez al mes<br><input type="radio"/> 1 a 3 veces mes<br><input type="radio"/> 1 vez semana<br><input type="radio"/> 2 a 4 veces semana<br><input type="radio"/> 5 a 6 veces semana<br><input type="radio"/> 1 vez al día<br><input type="radio"/> 2 a 3 veces al día<br><input type="radio"/> 5 a 6 veces al día<br><input type="radio"/> más 6 veces al día |
| refresco normal       | <input type="radio"/> Nunca o menos 1 vez al mes<br><input type="radio"/> 1 a 3 veces mes<br><input checked="" type="radio"/> 1 vez semana<br><input type="radio"/> 2 a 4 veces semana<br><input type="radio"/> 5 a 6 veces semana<br><input type="radio"/> 1 vez al día<br><input type="radio"/> 2 a 3 veces al día<br><input type="radio"/> 5 a 6 veces al día<br><input type="radio"/> más 6 veces al día |

|                          |                                                                                                                                                                                                                                                                                                                                                                                                              |
|--------------------------|--------------------------------------------------------------------------------------------------------------------------------------------------------------------------------------------------------------------------------------------------------------------------------------------------------------------------------------------------------------------------------------------------------------|
| refresco sin azúcar      | <input type="radio"/> Nunca o menos 1 vez al mes<br><input type="radio"/> 1 a 3 veces mes<br><input checked="" type="radio"/> 1 vez semana<br><input type="radio"/> 2 a 4 veces semana<br><input type="radio"/> 5 a 6 veces semana<br><input type="radio"/> 1 vez al día<br><input type="radio"/> 2 a 3 veces al día<br><input type="radio"/> 5 a 6 veces al día<br><input type="radio"/> más 6 veces al día |
| Agua del grifo           | <input checked="" type="radio"/> Nunca o menos 1 vez al mes<br><input type="radio"/> 1 a 3 veces mes<br><input type="radio"/> 1 vez semana<br><input type="radio"/> 2 a 4 veces semana<br><input type="radio"/> 5 a 6 veces semana<br><input type="radio"/> 1 vez al día<br><input type="radio"/> 2 a 3 veces al día<br><input type="radio"/> 5 a 6 veces al día<br><input type="radio"/> más 6 veces al día |
| agua embotellada sin gas | <input type="radio"/> Nunca o menos 1 vez al mes<br><input type="radio"/> 1 a 3 veces mes<br><input type="radio"/> 1 vez semana<br><input type="radio"/> 2 a 4 veces semana<br><input type="radio"/> 5 a 6 veces semana<br><input type="radio"/> 1 vez al día<br><input type="radio"/> 2 a 3 veces al día<br><input type="radio"/> 5 a 6 veces al día<br><input checked="" type="radio"/> más 6 veces al día |
| agua embotellada con gas | <input checked="" type="radio"/> Nunca o menos 1 vez al mes<br><input type="radio"/> 1 a 3 veces mes<br><input type="radio"/> 1 vez semana<br><input type="radio"/> 2 a 4 veces semana<br><input type="radio"/> 5 a 6 veces semana<br><input type="radio"/> 1 vez al día<br><input type="radio"/> 2 a 3 veces al día<br><input type="radio"/> 5 a 6 veces al día<br><input type="radio"/> más 6 veces al día |
| zumو frutas embasado     | <input type="radio"/> Nunca o menos 1 vez al mes<br><input type="radio"/> 1 a 3 veces mes<br><input checked="" type="radio"/> 1 vez semana<br><input type="radio"/> 2 a 4 veces semana<br><input type="radio"/> 5 a 6 veces semana<br><input type="radio"/> 1 vez al día<br><input type="radio"/> 2 a 3 veces al día<br><input type="radio"/> 5 a 6 veces al día<br><input type="radio"/> más 6 veces al día |
| cafe                     | <input checked="" type="radio"/> Nunca o menos 1 vez al mes<br><input type="radio"/> 1 a 3 veces mes<br><input type="radio"/> 1 vez semana<br><input type="radio"/> 2 a 4 veces semana<br><input type="radio"/> 5 a 6 veces semana<br><input type="radio"/> 1 vez al día<br><input type="radio"/> 2 a 3 veces al día<br><input type="radio"/> 5 a 6 veces al día<br><input type="radio"/> más 6 veces al día |

|                       |                                                                                                                                                                                                                                                                                                                                                                                                              |
|-----------------------|--------------------------------------------------------------------------------------------------------------------------------------------------------------------------------------------------------------------------------------------------------------------------------------------------------------------------------------------------------------------------------------------------------------|
| cafe descafeinado     | <input checked="" type="radio"/> Nunca o menos 1 vez al mes<br><input type="radio"/> 1 a 3 veces mes<br><input type="radio"/> 1 vez semana<br><input type="radio"/> 2 a 4 veces semana<br><input type="radio"/> 5 a 6 veces semana<br><input type="radio"/> 1 vez al día<br><input type="radio"/> 2 a 3 veces al día<br><input type="radio"/> 5 a 6 veces al día<br><input type="radio"/> más 6 veces al día |
| te o infusión         | <input checked="" type="radio"/> Nunca o menos 1 vez al mes<br><input type="radio"/> 1 a 3 veces mes<br><input type="radio"/> 1 vez semana<br><input type="radio"/> 2 a 4 veces semana<br><input type="radio"/> 5 a 6 veces semana<br><input type="radio"/> 1 vez al día<br><input type="radio"/> 2 a 3 veces al día<br><input type="radio"/> 5 a 6 veces al día<br><input type="radio"/> más 6 veces al día |
| sopa o puré verduras  | <input type="radio"/> Nunca o menos 1 vez al mes<br><input type="radio"/> 1 a 3 veces mes<br><input type="radio"/> 1 vez semana<br><input checked="" type="radio"/> 2 a 4 veces semana<br><input type="radio"/> 5 a 6 veces semana<br><input type="radio"/> 1 vez al día<br><input type="radio"/> 2 a 3 veces al día<br><input type="radio"/> 5 a 6 veces al día<br><input type="radio"/> más 6 veces al día |
| croquetas pollo jamón | <input type="radio"/> Nunca o menos 1 vez al mes<br><input type="radio"/> 1 a 3 veces mes<br><input checked="" type="radio"/> 1 vez semana<br><input type="radio"/> 2 a 4 veces semana<br><input type="radio"/> 5 a 6 veces semana<br><input type="radio"/> 1 vez al día<br><input type="radio"/> 2 a 3 veces al día<br><input type="radio"/> 5 a 6 veces al día<br><input type="radio"/> más 6 veces al día |
| croquetas pescado     | <input type="radio"/> Nunca o menos 1 vez al mes<br><input checked="" type="radio"/> 1 a 3 veces mes<br><input type="radio"/> 1 vez semana<br><input type="radio"/> 2 a 4 veces semana<br><input type="radio"/> 5 a 6 veces semana<br><input type="radio"/> 1 vez al día<br><input type="radio"/> 2 a 3 veces al día<br><input type="radio"/> 5 a 6 veces al día<br><input type="radio"/> más 6 veces al día |
| mayonesa              | <input type="radio"/> Nunca o menos 1 vez al mes<br><input checked="" type="radio"/> 1 a 3 veces mes<br><input type="radio"/> 1 vez semana<br><input type="radio"/> 2 a 4 veces semana<br><input type="radio"/> 5 a 6 veces semana<br><input type="radio"/> 1 vez al día<br><input type="radio"/> 2 a 3 veces al día<br><input type="radio"/> 5 a 6 veces al día<br><input type="radio"/> más 6 veces al día |

|                  |                                                                                                                                                                                                                                                                                                                                                                                                              |
|------------------|--------------------------------------------------------------------------------------------------------------------------------------------------------------------------------------------------------------------------------------------------------------------------------------------------------------------------------------------------------------------------------------------------------------|
| salsa tomate     | <input type="radio"/> Nunca o menos 1 vez al mes<br><input checked="" type="radio"/> 1 a 3 veces mes<br><input type="radio"/> 1 vez semana<br><input type="radio"/> 2 a 4 veces semana<br><input type="radio"/> 5 a 6 veces semana<br><input type="radio"/> 1 vez al día<br><input type="radio"/> 2 a 3 veces al día<br><input type="radio"/> 5 a 6 veces al día<br><input type="radio"/> más 6 veces al día |
| ketchup          | <input checked="" type="radio"/> Nunca o menos 1 vez al mes<br><input type="radio"/> 1 a 3 veces mes<br><input type="radio"/> 1 vez semana<br><input type="radio"/> 2 a 4 veces semana<br><input type="radio"/> 5 a 6 veces semana<br><input type="radio"/> 1 vez al día<br><input type="radio"/> 2 a 3 veces al día<br><input type="radio"/> 5 a 6 veces al día<br><input type="radio"/> más 6 veces al día |
| sal              | <input checked="" type="radio"/> Nunca o menos 1 vez al mes<br><input type="radio"/> 1 a 3 veces mes<br><input type="radio"/> 1 vez semana<br><input type="radio"/> 2 a 4 veces semana<br><input type="radio"/> 5 a 6 veces semana<br><input type="radio"/> 1 vez al día<br><input type="radio"/> 2 a 3 veces al día<br><input type="radio"/> 5 a 6 veces al día<br><input type="radio"/> más 6 veces al día |
| ajo              | <input checked="" type="radio"/> Nunca o menos 1 vez al mes<br><input type="radio"/> 1 a 3 veces mes<br><input type="radio"/> 1 vez semana<br><input type="radio"/> 2 a 4 veces semana<br><input type="radio"/> 5 a 6 veces semana<br><input type="radio"/> 1 vez al día<br><input type="radio"/> 2 a 3 veces al día<br><input type="radio"/> 5 a 6 veces al día<br><input type="radio"/> más 6 veces al día |
| mermelada o miel | <input checked="" type="radio"/> Nunca o menos 1 vez al mes<br><input type="radio"/> 1 a 3 veces mes<br><input type="radio"/> 1 vez semana<br><input type="radio"/> 2 a 4 veces semana<br><input type="radio"/> 5 a 6 veces semana<br><input type="radio"/> 1 vez al día<br><input type="radio"/> 2 a 3 veces al día<br><input type="radio"/> 5 a 6 veces al día<br><input type="radio"/> más 6 veces al día |
| azúcar           | <input checked="" type="radio"/> Nunca o menos 1 vez al mes<br><input type="radio"/> 1 a 3 veces mes<br><input type="radio"/> 1 vez semana<br><input type="radio"/> 2 a 4 veces semana<br><input type="radio"/> 5 a 6 veces semana<br><input type="radio"/> 1 vez al día<br><input type="radio"/> 2 a 3 veces al día<br><input type="radio"/> 5 a 6 veces al día<br><input type="radio"/> más 6 veces al día |

|                                       |                                                                                                                                                                                                                                                                                                                                                                                                                                                                                                                               |
|---------------------------------------|-------------------------------------------------------------------------------------------------------------------------------------------------------------------------------------------------------------------------------------------------------------------------------------------------------------------------------------------------------------------------------------------------------------------------------------------------------------------------------------------------------------------------------|
| Otro alimento                         | <hr/>                                                                                                                                                                                                                                                                                                                                                                                                                                                                                                                         |
| suplementos vitamínicos               | <input checked="" type="radio"/> si<br><input type="radio"/> no                                                                                                                                                                                                                                                                                                                                                                                                                                                               |
| suplementos vitamínicos               | <hr/>                                                                                                                                                                                                                                                                                                                                                                                                                                                                                                                         |
| dieta previa                          | <input type="radio"/> si<br><input checked="" type="radio"/> no                                                                                                                                                                                                                                                                                                                                                                                                                                                               |
| motivo dieta                          | <input checked="" type="radio"/> no dieta<br><input type="radio"/> control peso<br><input type="radio"/> control colesterol<br><input type="radio"/> control diabetes<br><input type="radio"/> problemas estómago<br><input type="radio"/> problemas vesícula o hepáticos<br><input type="radio"/> HTA o cardiopatía<br><input type="radio"/> problemas renales<br><input type="radio"/> alergia alimentaria<br><input type="radio"/> ácido úrico elevado<br><input type="radio"/> vegetariana<br><input type="radio"/> otros |
| cambio alimentos año previo gestación | <input type="radio"/> si<br><input checked="" type="radio"/> no                                                                                                                                                                                                                                                                                                                                                                                                                                                               |
| cambio lácteos                        | <input type="radio"/> eliminado<br><input type="radio"/> disminuido<br><input checked="" type="radio"/> igual<br><input type="radio"/> aumentado<br><input type="radio"/> no sabe                                                                                                                                                                                                                                                                                                                                             |
| cambio huevos                         | <input type="radio"/> eliminado<br><input type="radio"/> disminuido<br><input checked="" type="radio"/> igual<br><input type="radio"/> aumentado<br><input type="radio"/> no sabe                                                                                                                                                                                                                                                                                                                                             |
| cambio carne                          | <input type="radio"/> eliminado<br><input type="radio"/> disminuido<br><input checked="" type="radio"/> igual<br><input type="radio"/> aumentado<br><input type="radio"/> no sabe                                                                                                                                                                                                                                                                                                                                             |
| cambio pescado                        | <input type="radio"/> eliminado<br><input type="radio"/> disminuido<br><input checked="" type="radio"/> igual<br><input type="radio"/> aumentado<br><input type="radio"/> no sabe                                                                                                                                                                                                                                                                                                                                             |
| cambio verduras                       | <input type="radio"/> eliminado<br><input type="radio"/> disminuido<br><input checked="" type="radio"/> igual<br><input type="radio"/> aumentado<br><input type="radio"/> no sabe                                                                                                                                                                                                                                                                                                                                             |

|                            |                                                                                                                                                                                                                        |
|----------------------------|------------------------------------------------------------------------------------------------------------------------------------------------------------------------------------------------------------------------|
| cambio legumbres           | <input type="radio"/> eliminado<br><input type="radio"/> disminuido<br><input checked="" type="radio"/> igual<br><input type="radio"/> aumentado<br><input type="radio"/> no sabe                                      |
| cambio fruta               | <input type="radio"/> eliminado<br><input type="radio"/> disminuido<br><input checked="" type="radio"/> igual<br><input type="radio"/> aumentado<br><input type="radio"/> no sabe                                      |
| cambio pan                 | <input type="radio"/> eliminado<br><input type="radio"/> disminuido<br><input checked="" type="radio"/> igual<br><input type="radio"/> aumentado<br><input type="radio"/> no sabe                                      |
| cambio aceite oliva        | <input type="radio"/> eliminado<br><input type="radio"/> disminuido<br><input checked="" type="radio"/> igual<br><input type="radio"/> aumentado<br><input type="radio"/> no sabe                                      |
| cambio mante o margarina   | <input type="radio"/> eliminado<br><input type="radio"/> disminuido<br><input checked="" type="radio"/> igual<br><input type="radio"/> aumentado<br><input type="radio"/> no sabe                                      |
| cambio azúcar y dulces     | <input type="radio"/> eliminado<br><input type="radio"/> disminuido<br><input checked="" type="radio"/> igual<br><input type="radio"/> aumentado<br><input type="radio"/> no sabe                                      |
| cambio bebidas alcohólicas | <input type="radio"/> eliminado<br><input type="radio"/> disminuido<br><input checked="" type="radio"/> igual<br><input type="radio"/> aumentado<br><input type="radio"/> no sabe                                      |
| frecuencia comidas fritas  | <input type="radio"/> a diario<br><input type="radio"/> 5 a 6 veces semana<br><input type="radio"/> 2 a 4 veces semana<br><input checked="" type="radio"/> 1 vez semana<br><input type="radio"/> menos de 1 vez semana |
| carne                      | <input type="radio"/> no como<br><input type="radio"/> cruda<br><input type="radio"/> poco hecha<br><input checked="" type="radio"/> hecha<br><input type="radio"/> muy hecha                                          |
| grasa visible carne        | <input checked="" type="radio"/> quita toda<br><input type="radio"/> quita mayoría<br><input type="radio"/> quita un poco<br><input type="radio"/> no quita nada                                                       |

|                                |                                                                                                                                                                                                                                                          |
|--------------------------------|----------------------------------------------------------------------------------------------------------------------------------------------------------------------------------------------------------------------------------------------------------|
| cocina carne                   | <input checked="" type="radio"/> a la plancha<br><input type="radio"/> a la parrilla<br><input type="radio"/> asada<br><input type="radio"/> frita<br><input type="radio"/> guisada                                                                      |
| tostado quemado carne          | <input checked="" type="radio"/> nunca<br><input type="radio"/> 1 vez mes<br><input type="radio"/> 2 a 3 veces mes<br><input type="radio"/> 1 vez semana<br><input type="radio"/> 2 a 3 semanas                                                          |
| tostado quemado pescado        | <input checked="" type="radio"/> nunca<br><input type="radio"/> 1 vez mes<br><input type="radio"/> 2 a 3 veces mes<br><input type="radio"/> 1 vez semana<br><input type="radio"/> 2 a 3 semanas                                                          |
| socarrat paella                | <input type="radio"/> nunca<br><input type="radio"/> 1 vez mes<br><input checked="" type="radio"/> 2 a 3 veces mes<br><input type="radio"/> 1 vez semana<br><input type="radio"/> 2 a 3 semanas                                                          |
| grasa o aceite cocinar         | <input type="radio"/> mantequilla<br><input type="radio"/> margarina<br><input checked="" type="radio"/> aceite oliva<br><input type="radio"/> aceite oliva virgen extra<br><input type="radio"/> aceite vegetal<br><input type="radio"/> mezcla aceites |
| grasa aceite aliñar            | <input type="radio"/> mantequilla<br><input type="radio"/> margarina<br><input checked="" type="radio"/> aceite oliva<br><input type="radio"/> aceite oliva virgen extra<br><input type="radio"/> aceite vegetal<br><input type="radio"/> mezcla aceites |
| grasa aceite freir             | <input type="radio"/> mantequilla<br><input type="radio"/> margarina<br><input checked="" type="radio"/> aceite oliva<br><input type="radio"/> aceite oliva virgen extra<br><input type="radio"/> aceite vegetal<br><input type="radio"/> mezcla aceites |
| Ejercicio cuestionario         | <input checked="" type="radio"/> si<br><input type="radio"/> no                                                                                                                                                                                          |
| horas de sueño incluido siesta | _____                                                                                                                                                                                                                                                    |
| minutos siesta                 | _____                                                                                                                                                                                                                                                    |
| horas televisión semana        | _____                                                                                                                                                                                                                                                    |

|                                        |                                                                                                                                                                                                                                                                                                                                                                |
|----------------------------------------|----------------------------------------------------------------------------------------------------------------------------------------------------------------------------------------------------------------------------------------------------------------------------------------------------------------------------------------------------------------|
| actividad trabajo                      | <input type="radio"/> casi siempre sentado<br><input type="radio"/> sentado 50 por cien<br><input type="radio"/> casi siempre de pie, quieto<br><input type="radio"/> casi siempre levantado caminando y llevando pocas cosas<br><input type="radio"/> casi siempre levantado, caminando y llevado muchas cosas<br><input type="radio"/> trabajo manual pesado |
| tiempo caminar o bici al día           | <input type="radio"/> casi nunca<br><input type="radio"/> menos 20min día<br><input type="radio"/> 20 a 40 min día<br><input type="radio"/> 40 a 60 min día<br><input type="radio"/> 1h o 1h y media día<br><input type="radio"/> más de 1h y media al día                                                                                                     |
| tiempo tareas casa al día              | <input type="radio"/> menos de 1h día<br><input type="radio"/> 1 a 2h día<br><input type="radio"/> 3 a 4h día<br><input type="radio"/> 5 a 6h día<br><input type="radio"/> 7 a 8h día<br><input type="radio"/> más de 8h día                                                                                                                                   |
| tiempo libre televisión ordenador leer | <input type="radio"/> menos 1h día<br><input checked="" type="radio"/> 1h día<br><input type="radio"/> 2h día<br><input type="radio"/> 3h día<br><input type="radio"/> 4h día<br><input type="radio"/> 5 a 6h día<br><input type="radio"/> mas 6h día                                                                                                          |
| tiempo libre ejercicio o deporte       | <input type="radio"/> menos 1h semana<br><input type="radio"/> 1h semana<br><input type="radio"/> 2h semana<br><input checked="" type="radio"/> 3h semana<br><input type="radio"/> 4 a 5h semana<br><input type="radio"/> mas 5h semana                                                                                                                        |
| como se considera                      | <input type="radio"/> sedentaria<br><input type="radio"/> poco activa<br><input type="radio"/> moderadamente activa<br><input checked="" type="radio"/> bastante activa<br><input type="radio"/> muy activa<br><input type="radio"/> no sabe                                                                                                                   |
| FUR                                    | [*DATA REMOVED*]                                                                                                                                                                                                                                                                                                                                               |
| Semanas gestación 2T                   | [*DATA REMOVED*]                                                                                                                                                                                                                                                                                                                                               |
| Días gestación 2T                      | [*DATA REMOVED*]                                                                                                                                                                                                                                                                                                                                               |
| DBP 2T                                 | [*DATA REMOVED*]                                                                                                                                                                                                                                                                                                                                               |
| CC 2T                                  | [*DATA REMOVED*]                                                                                                                                                                                                                                                                                                                                               |
| AC 2T                                  | [*DATA REMOVED*]                                                                                                                                                                                                                                                                                                                                               |



|                                                   |                                                                                                                                                                                                 |
|---------------------------------------------------|-------------------------------------------------------------------------------------------------------------------------------------------------------------------------------------------------|
| LF 2T                                             | [*DATA REMOVED*]                                                                                                                                                                                |
| PFE 2T (Hadlock)                                  | [*DATA REMOVED*]                                                                                                                                                                                |
| Semanas gestación 3T                              | [*DATA REMOVED*]                                                                                                                                                                                |
| días 3T                                           | [*DATA REMOVED*]                                                                                                                                                                                |
| DBP 3T                                            | [*DATA REMOVED*]                                                                                                                                                                                |
| CC 3T                                             | [*DATA REMOVED*]                                                                                                                                                                                |
| AC 3T                                             | [*DATA REMOVED*]                                                                                                                                                                                |
| LF 3T                                             | [*DATA REMOVED*]                                                                                                                                                                                |
| PFE 3T (Hadlock)                                  | [*DATA REMOVED*]                                                                                                                                                                                |
| Semanas de gestación final                        | [*DATA REMOVED*]                                                                                                                                                                                |
| días gestación final                              | [*DATA REMOVED*]                                                                                                                                                                                |
| Localización placenta                             | <input checked="" type="radio"/> anterior<br><input type="radio"/> lateral derecha<br><input type="radio"/> lateral izquierda<br><input type="radio"/> posterior<br><input type="radio"/> fondo |
| Presentación longitudinal cefálica                | <input type="radio"/> no<br><input checked="" type="radio"/> si                                                                                                                                 |
| Dorso                                             | <input type="radio"/> izquierda anterior<br><input type="radio"/> izquierda posterior<br><input checked="" type="radio"/> derecha anterior<br><input type="radio"/> derecha posterior           |
| diámetro biparietal                               | [*DATA REMOVED*]                                                                                                                                                                                |
| Circunferencia craneal                            | [*DATA REMOVED*]                                                                                                                                                                                |
| Circunferencia abdominal                          | [*DATA REMOVED*]                                                                                                                                                                                |
| Longitud de femur                                 | [*DATA REMOVED*]                                                                                                                                                                                |
| tejido celular subcutáneo a nivel del muslo en mm | [*DATA REMOVED*]                                                                                                                                                                                |
| tejido celular subcutáneo en abdomen en mm        | [*DATA REMOVED*]                                                                                                                                                                                |
| Volumen del muslo en cm3                          | [*DATA REMOVED*]                                                                                                                                                                                |
| Peso fetal estimado según fórmula de Hadlock      | [*DATA REMOVED*]                                                                                                                                                                                |

|                                               |                                                                                                                                                          |
|-----------------------------------------------|----------------------------------------------------------------------------------------------------------------------------------------------------------|
| Percentil                                     | [*DATA REMOVED*]                                                                                                                                         |
| Peso fetal estimado según fórmula de Scioscia | <hr/>                                                                                                                                                    |
| Peso fetal estimado según fórmula de LEE      | <hr/>                                                                                                                                                    |
| Tipo de parto                                 | <input checked="" type="radio"/> eutocico<br><input type="radio"/> instrumentado/ventosa<br><input type="radio"/> cesarea                                |
| fecha de nacimiento                           | [*DATA REMOVED*]                                                                                                                                         |
| Días entre exploración y nacimiento           | [*DATA REMOVED*]                                                                                                                                         |
| Peso RN en g                                  | [*DATA REMOVED*]                                                                                                                                         |
| sexo                                          | <input checked="" type="radio"/> mujer<br><input type="radio"/> hombre                                                                                   |
| Apgar 1 minuto                                | [*DATA REMOVED*]                                                                                                                                         |
| Apgar 5 minutos                               | [*DATA REMOVED*]                                                                                                                                         |
| Apgar 10 minutos                              | <hr/>                                                                                                                                                    |
| antecedente Covid durante gestación           | <input type="radio"/> Yes<br><input checked="" type="radio"/> No                                                                                         |
| Nivel de estudios                             | <input type="radio"/> ninguno<br><input checked="" type="radio"/> primarios<br><input type="radio"/> secundarios<br><input type="radio"/> universitarios |

# Base\_datos\_estimacion\_peso\_fetal

|                                       |                                                                                                                                                                                                                                                                                      |
|---------------------------------------|--------------------------------------------------------------------------------------------------------------------------------------------------------------------------------------------------------------------------------------------------------------------------------------|
| Número de identificación participante | 47                                                                                                                                                                                                                                                                                   |
| CODIGO PARTICIPANTE                   |                                                                                                                                                                                                                                                                                      |
| Edad                                  | [*DATA REMOVED*]                                                                                                                                                                                                                                                                     |
| Gestaciones                           | <input type="radio"/> 1<br><input type="radio"/> 2<br><input type="radio"/> 3<br><input checked="" type="radio"/> mas de 3                                                                                                                                                           |
| partos                                | <input type="radio"/> 0<br><input checked="" type="radio"/> 1<br><input type="radio"/> 2<br><input type="radio"/> 3<br><input type="radio"/> mas de 3                                                                                                                                |
| cesáreas                              | <input checked="" type="radio"/> 0<br><input type="radio"/> 1<br><input type="radio"/> 2<br><input type="radio"/> 3<br><input type="radio"/> mas de 3                                                                                                                                |
| Abortos                               | <input type="radio"/> 0<br><input type="radio"/> 1<br><input checked="" type="radio"/> 2<br><input type="radio"/> 3<br><input type="radio"/> mas de 3                                                                                                                                |
| Tipo de gestacion                     | <input checked="" type="radio"/> espontanea<br><input type="radio"/> IAC inseminación artificial conyuge<br><input type="radio"/> IAD inseminación artificial donante<br><input type="radio"/> FIV Fecundación in Vitro<br><input type="radio"/> Ovodon FIV con donación de ovocitos |
| peso previo a embarazo                | [*DATA REMOVED*]                                                                                                                                                                                                                                                                     |
| Ganancia ponderal embarazo            | [*DATA REMOVED*]                                                                                                                                                                                                                                                                     |
| Talla madre                           | [*DATA REMOVED*]                                                                                                                                                                                                                                                                     |
| IMC previo embarazo                   | 24.840980089578082                                                                                                                                                                                                                                                                   |
| Patología obstétrica                  | <input checked="" type="radio"/> no<br><input type="radio"/> si                                                                                                                                                                                                                      |
| Diabetes pregestacional               | <input checked="" type="radio"/> no<br><input type="radio"/> si                                                                                                                                                                                                                      |
| Diabetes gestacional                  | <input checked="" type="radio"/> no<br><input type="radio"/> si                                                                                                                                                                                                                      |

|                                            |                                                                                                                                                                                      |
|--------------------------------------------|--------------------------------------------------------------------------------------------------------------------------------------------------------------------------------------|
| Diabetes gestacional con insulina          | <input checked="" type="radio"/> no<br><input type="radio"/> si                                                                                                                      |
| Diabetes gestacional con dieta y ejercicio | <input checked="" type="radio"/> no<br><input type="radio"/> si                                                                                                                      |
| Percentil fetos previos                    | <input type="radio"/> Nada<br><input type="radio"/> percentil menor de 10<br><input checked="" type="radio"/> percentil entre 10 y 90<br><input type="radio"/> percentil mayor de 90 |
| Exfumadora                                 | <input type="radio"/> Nada<br><input checked="" type="radio"/> menos de 5 años<br><input type="radio"/> 5 a 10 años<br><input type="radio"/> mayor o igual a 10 años                 |
| Hábito tabáquico                           | <input checked="" type="radio"/> no<br><input type="radio"/> si                                                                                                                      |
| fumadora                                   | [*DATA REMOVED*]                                                                                                                                                                     |
| Consumo otros tóxicos                      | <input checked="" type="radio"/> no<br><input type="radio"/> si                                                                                                                      |
| Hb 1T                                      | [*DATA REMOVED*]                                                                                                                                                                     |
| Htc 1T                                     | [*DATA REMOVED*]                                                                                                                                                                     |
| Hb 2T                                      | [*DATA REMOVED*]                                                                                                                                                                     |
| HTC 2T                                     | [*DATA REMOVED*]                                                                                                                                                                     |
| Hb 3T                                      | [*DATA REMOVED*]                                                                                                                                                                     |
| HTC 3T                                     | [*DATA REMOVED*]                                                                                                                                                                     |
| Suplemento FE oral                         | <input checked="" type="radio"/> si<br><input type="radio"/> no                                                                                                                      |
| Suplemento fe iv                           | <input type="radio"/> si<br><input checked="" type="radio"/> no                                                                                                                      |
| Transfusión                                | <input checked="" type="radio"/> no<br><input type="radio"/> si                                                                                                                      |
| Solicitada Vit D                           | <input checked="" type="radio"/> no<br><input type="radio"/> si                                                                                                                      |
| Deficit vit D                              | <input type="radio"/> no<br><input type="radio"/> si                                                                                                                                 |
| Suplemento vit D                           | <input type="radio"/> si<br><input type="radio"/> no                                                                                                                                 |

|                       |                                                                                                                                                                                                                                                                                                                                                                                                              |
|-----------------------|--------------------------------------------------------------------------------------------------------------------------------------------------------------------------------------------------------------------------------------------------------------------------------------------------------------------------------------------------------------------------------------------------------------|
| Dieta, cuestionario   | <input checked="" type="radio"/> sí<br><input type="radio"/> no                                                                                                                                                                                                                                                                                                                                              |
| Leche entera          | <input checked="" type="radio"/> Nunca o menos 1 vez al mes<br><input type="radio"/> 1 a 3 veces mes<br><input type="radio"/> 1 vez semana<br><input type="radio"/> 2 a 4 veces semana<br><input type="radio"/> 5 a 6 veces semana<br><input type="radio"/> 1 vez al día<br><input type="radio"/> 2 a 3 veces al día<br><input type="radio"/> 5 a 6 veces al día<br><input type="radio"/> más 6 veces al día |
| Leche semidesnatada   | <input checked="" type="radio"/> Nunca o menos 1 vez al mes<br><input type="radio"/> 1 a 3 veces mes<br><input type="radio"/> 1 vez semana<br><input type="radio"/> 2 a 4 veces semana<br><input type="radio"/> 5 a 6 veces semana<br><input type="radio"/> 1 vez al día<br><input type="radio"/> 2 a 3 veces al día<br><input type="radio"/> 5 a 6 veces al día<br><input type="radio"/> mas 6 veces al día |
| Leche desnatada       | <input type="radio"/> Nunca o menos 1 vez al mes<br><input type="radio"/> 1 a 3 veces mes<br><input type="radio"/> 1 vez semana<br><input type="radio"/> 2 a 4 veces semana<br><input type="radio"/> 5 a 6 veces semana<br><input type="radio"/> 1 vez al día<br><input checked="" type="radio"/> 2 a 3 veces al día<br><input type="radio"/> 5 a 6 veces al día<br><input type="radio"/> más 6 veces al día |
| Leche condensada      | <input checked="" type="radio"/> Nunca o menos 1 vez al mes<br><input type="radio"/> 1 a 3 veces mes<br><input type="radio"/> 1 vez semana<br><input type="radio"/> 2 a 4 veces semana<br><input type="radio"/> 5 a 6 veces semana<br><input type="radio"/> 1 vez al día<br><input type="radio"/> 2 a 3 veces al día<br><input type="radio"/> 5 a 6 veces al día<br><input type="radio"/> más 6 veces al día |
| nata o crema de leche | <input type="radio"/> Nunca o menos 1 vez al mes<br><input type="radio"/> 1 a 3 veces mes<br><input type="radio"/> 1 vez semana<br><input type="radio"/> 2 a 4 veces semana<br><input type="radio"/> 5 a 6 veces semana<br><input checked="" type="radio"/> 1 vez al día<br><input type="radio"/> 2 a 3 veces al día<br><input type="radio"/> 5 a 6 veces al día<br><input type="radio"/> más 6 veces al día |

|                                             |                                                                                                                                                                                                                                                                                                                                                                                                              |
|---------------------------------------------|--------------------------------------------------------------------------------------------------------------------------------------------------------------------------------------------------------------------------------------------------------------------------------------------------------------------------------------------------------------------------------------------------------------|
| Yogurt Entero                               | <input checked="" type="radio"/> Nunca o menos 1 vez al mes<br><input type="radio"/> 1 a 3 veces mes<br><input type="radio"/> 1 vez semana<br><input type="radio"/> 2 a 4 veces semana<br><input type="radio"/> 5 a 6 veces semana<br><input type="radio"/> 1 vez al día<br><input type="radio"/> 2 a 3 veces al día<br><input type="radio"/> 5 a 6 veces al día<br><input type="radio"/> más 6 veces al día |
| Yogurt desnatado                            | <input checked="" type="radio"/> Nunca o menos 1 vez al mes<br><input type="radio"/> 1 a 3 veces mes<br><input type="radio"/> 1 vez semana<br><input type="radio"/> 2 a 4 veces semana<br><input type="radio"/> 5 a 6 veces semana<br><input type="radio"/> 1 vez al día<br><input type="radio"/> 2 a 3 veces al día<br><input type="radio"/> 5 a 6 veces al día<br><input type="radio"/> más 6 veces al día |
| 100g requesón o queso blando o queso fresco | <input checked="" type="radio"/> Nunca o menos 1 vez al mes<br><input type="radio"/> 1 a 3 veces mes<br><input type="radio"/> 1 vez semana<br><input type="radio"/> 2 a 4 veces semana<br><input type="radio"/> 5 a 6 veces semana<br><input type="radio"/> 1 vez al día<br><input type="radio"/> 2 a 3 veces al día<br><input type="radio"/> 5 a 6 veces al día<br><input type="radio"/> más 6 veces al día |
| queso curado o semicurado o cremoso         | <input type="radio"/> Nunca o menos 1 vez al mes<br><input type="radio"/> 1 a 3 veces mes<br><input type="radio"/> 1 vez semana<br><input checked="" type="radio"/> 2 a 4 veces semana<br><input type="radio"/> 5 a 6 veces semana<br><input type="radio"/> 1 vez al día<br><input type="radio"/> 2 a 3 veces al día<br><input type="radio"/> 5 a 6 veces al día<br><input type="radio"/> más 6 veces al día |
| natillas flan pudding                       | <input checked="" type="radio"/> Nunca o menos 1 vez al mes<br><input type="radio"/> 1 a 3 veces mes<br><input type="radio"/> 1 vez semana<br><input type="radio"/> 2 a 4 veces semana<br><input type="radio"/> 5 a 6 veces semana<br><input type="radio"/> 1 vez al día<br><input type="radio"/> 2 a 3 veces al día<br><input type="radio"/> 5 a 6 veces al día<br><input type="radio"/> más 6 veces al día |
| Helado                                      | <input checked="" type="radio"/> Nunca o menos 1 vez al mes<br><input type="radio"/> 1 a 3 veces mes<br><input type="radio"/> 1 vez semana<br><input type="radio"/> 2 a 4 veces semana<br><input type="radio"/> 5 a 6 veces semana<br><input type="radio"/> 1 vez al día<br><input type="radio"/> 2 a 3 veces al día<br><input type="radio"/> 5 a 6 veces al día<br><input type="radio"/> más 6 veces al día |

|                                      |                                                                                                                                                                                                                                                                                                                                                                                                              |
|--------------------------------------|--------------------------------------------------------------------------------------------------------------------------------------------------------------------------------------------------------------------------------------------------------------------------------------------------------------------------------------------------------------------------------------------------------------|
| huevo                                | <input type="radio"/> Nunca o menos 1 vez al mes<br><input type="radio"/> 1 a 3 veces mes<br><input type="radio"/> 1 vez semana<br><input checked="" type="radio"/> 2 a 4 veces semana<br><input type="radio"/> 5 a 6 veces semana<br><input type="radio"/> 1 vez al día<br><input type="radio"/> 2 a 3 veces al día<br><input type="radio"/> 5 a 6 veces al día<br><input type="radio"/> más 6 veces al día |
| Pollo con piel                       | <input type="radio"/> Nunca o menos 1 vez al mes<br><input type="radio"/> 1 a 3 veces mes<br><input checked="" type="radio"/> 1 vez semana<br><input type="radio"/> 2 a 4 veces semana<br><input type="radio"/> 5 a 6 veces semana<br><input type="radio"/> 1 vez al día<br><input type="radio"/> 2 a 3 veces al día<br><input type="radio"/> 5 a 6 veces al día<br><input type="radio"/> más 6 veces al día |
| pollo sin piel                       | <input type="radio"/> Nunca o menos 1 vez al mes<br><input type="radio"/> 1 a 3 veces mes<br><input checked="" type="radio"/> 1 vez semana<br><input type="radio"/> 2 a 4 veces semana<br><input type="radio"/> 5 a 6 veces semana<br><input type="radio"/> 1 vez al día<br><input type="radio"/> 2 a 3 veces al día<br><input type="radio"/> 5 a 6 veces al día<br><input type="radio"/> más 6 veces al día |
| Ternera o cerdo o cordero            | <input type="radio"/> Nunca o menos 1 vez al mes<br><input type="radio"/> 1 a 3 veces mes<br><input type="radio"/> 1 vez semana<br><input checked="" type="radio"/> 2 a 4 veces semana<br><input type="radio"/> 5 a 6 veces semana<br><input type="radio"/> 1 vez al día<br><input type="radio"/> 2 a 3 veces al día<br><input type="radio"/> 5 a 6 veces al día<br><input type="radio"/> más 6 veces al día |
| carne caza: Conejo o codorniz o pato | <input checked="" type="radio"/> Nunca o menos 1 vez al mes<br><input type="radio"/> 1 a 3 veces mes<br><input type="radio"/> 1 vez semana<br><input type="radio"/> 2 a 4 veces semana<br><input type="radio"/> 5 a 6 veces semana<br><input type="radio"/> 1 vez al día<br><input type="radio"/> 2 a 3 veces al día<br><input type="radio"/> 5 a 6 veces al día<br><input type="radio"/> más 6 veces al día |
| Hígado de ternera o cerdo o pollo    | <input type="radio"/> Nunca o menos 1 vez al mes<br><input type="radio"/> 1 a 3 veces mes<br><input type="radio"/> 1 vez semana<br><input type="radio"/> 2 a 4 veces semana<br><input type="radio"/> 5 a 6 veces semana<br><input checked="" type="radio"/> 1 vez al día<br><input type="radio"/> 2 a 3 veces al día<br><input type="radio"/> 5 a 6 veces al día<br><input type="radio"/> más 6 veces al día |

|                     |                                                                                                                                                                                                                                                                                                                                                                                                              |
|---------------------|--------------------------------------------------------------------------------------------------------------------------------------------------------------------------------------------------------------------------------------------------------------------------------------------------------------------------------------------------------------------------------------------------------------|
| Vísceras            | <input checked="" type="radio"/> Nunca o menos 1 vez al mes<br><input type="radio"/> 1 a 3 veces mes<br><input type="radio"/> 1 vez semana<br><input type="radio"/> 2 a 4 veces semana<br><input type="radio"/> 5 a 6 veces semana<br><input type="radio"/> 1 vez al día<br><input type="radio"/> 2 a 3 veces al día<br><input type="radio"/> 5 a 6 veces al día<br><input type="radio"/> más 6 veces al día |
| Embutido            | <input checked="" type="radio"/> Nunca o menos 1 vez al mes<br><input type="radio"/> 1 a 3 veces mes<br><input type="radio"/> 1 vez semana<br><input type="radio"/> 2 a 4 veces semana<br><input type="radio"/> 5 a 6 veces semana<br><input type="radio"/> 1 vez al día<br><input type="radio"/> 2 a 3 veces al día<br><input type="radio"/> 5 a 6 veces al día<br><input type="radio"/> más 6 veces al día |
| Salchicha o similar | <input checked="" type="radio"/> Nunca o menos 1 vez al mes<br><input type="radio"/> 1 a 3 veces mes<br><input type="radio"/> 1 vez semana<br><input type="radio"/> 2 a 4 veces semana<br><input type="radio"/> 5 a 6 veces semana<br><input type="radio"/> 1 vez al día<br><input type="radio"/> 2 a 3 veces al día<br><input type="radio"/> 5 a 6 veces al día<br><input type="radio"/> más 6 veces al día |
| Pate o foiegras     | <input checked="" type="radio"/> Nunca o menos 1 vez al mes<br><input type="radio"/> 1 a 3 veces mes<br><input type="radio"/> 1 vez semana<br><input type="radio"/> 2 a 4 veces semana<br><input type="radio"/> 5 a 6 veces semana<br><input type="radio"/> 1 vez al día<br><input type="radio"/> 2 a 3 veces al día<br><input type="radio"/> 5 a 6 veces al día<br><input type="radio"/> más 6 veces al día |
| Hamburguesa         | <input type="radio"/> Nunca o menos 1 vez al mes<br><input type="radio"/> 1 a 3 veces mes<br><input checked="" type="radio"/> 1 vez semana<br><input type="radio"/> 2 a 4 veces semana<br><input type="radio"/> 5 a 6 veces semana<br><input type="radio"/> 1 vez al día<br><input type="radio"/> 2 a 3 veces al día<br><input type="radio"/> 5 a 6 veces al día<br><input type="radio"/> más 6 veces al día |
| tocino o bacon      | <input checked="" type="radio"/> Nunca o menos 1 vez al mes<br><input type="radio"/> 1 a 3 veces mes<br><input type="radio"/> 1 vez semana<br><input type="radio"/> 2 a 4 veces semana<br><input type="radio"/> 5 a 6 veces semana<br><input type="radio"/> 1 vez al día<br><input type="radio"/> 2 a 3 veces al día<br><input type="radio"/> 5 a 6 veces al día<br><input type="radio"/> más 6 veces al día |



|                        |                                                                                                                                                                                                                                                                                                                                                                                                              |
|------------------------|--------------------------------------------------------------------------------------------------------------------------------------------------------------------------------------------------------------------------------------------------------------------------------------------------------------------------------------------------------------------------------------------------------------|
| Pescado frito          | <input type="radio"/> Nunca o menos 1 vez al mes<br><input type="radio"/> 1 a 3 veces mes<br><input type="radio"/> 1 vez semana<br><input checked="" type="radio"/> 2 a 4 veces semana<br><input type="radio"/> 5 a 6 veces semana<br><input type="radio"/> 1 vez al día<br><input type="radio"/> 2 a 3 veces al día<br><input type="radio"/> 5 a 6 veces al día<br><input type="radio"/> más 6 veces al día |
| pescado hervido blanco | <input type="radio"/> Nunca o menos 1 vez al mes<br><input checked="" type="radio"/> 1 a 3 veces mes<br><input type="radio"/> 1 vez semana<br><input type="radio"/> 2 a 4 veces semana<br><input type="radio"/> 5 a 6 veces semana<br><input type="radio"/> 1 vez al día<br><input type="radio"/> 2 a 3 veces al día<br><input type="radio"/> 5 a 6 veces al día<br><input type="radio"/> más 6 veces al día |
| pescado hervido azul   | <input checked="" type="radio"/> Nunca o menos 1 vez al mes<br><input type="radio"/> 1 a 3 veces mes<br><input type="radio"/> 1 vez semana<br><input type="radio"/> 2 a 4 veces semana<br><input type="radio"/> 5 a 6 veces semana<br><input type="radio"/> 1 vez al día<br><input type="radio"/> 2 a 3 veces al día<br><input type="radio"/> 5 a 6 veces al día<br><input type="radio"/> más 6 veces al día |
| otros pescado azul     | <input checked="" type="radio"/> Nunca o menos 1 vez al mes<br><input type="radio"/> 1 a 3 veces mes<br><input type="radio"/> 1 vez semana<br><input type="radio"/> 2 a 4 veces semana<br><input type="radio"/> 5 a 6 veces semana<br><input type="radio"/> 1 vez al día<br><input type="radio"/> 2 a 3 veces al día<br><input type="radio"/> 5 a 6 veces al día<br><input type="radio"/> más 6 veces al día |
| atun conserva          | <input checked="" type="radio"/> Nunca o menos 1 vez al mes<br><input type="radio"/> 1 a 3 veces mes<br><input type="radio"/> 1 vez semana<br><input type="radio"/> 2 a 4 veces semana<br><input type="radio"/> 5 a 6 veces semana<br><input type="radio"/> 1 vez al día<br><input type="radio"/> 2 a 3 veces al día<br><input type="radio"/> 5 a 6 veces al día<br><input type="radio"/> más 6 veces al día |
| sardina conserva       | <input checked="" type="radio"/> Nunca o menos 1 vez al mes<br><input type="radio"/> 1 a 3 veces mes<br><input type="radio"/> 1 vez semana<br><input type="radio"/> 2 a 4 veces semana<br><input type="radio"/> 5 a 6 veces semana<br><input type="radio"/> 1 vez al día<br><input type="radio"/> 2 a 3 veces al día<br><input type="radio"/> 5 a 6 veces al día<br><input type="radio"/> más 6 veces al día |

|                                         |                                                                                                                                                                                                                                                                                                                                                                                                              |
|-----------------------------------------|--------------------------------------------------------------------------------------------------------------------------------------------------------------------------------------------------------------------------------------------------------------------------------------------------------------------------------------------------------------------------------------------------------------|
| pescado ahumado                         | <input checked="" type="radio"/> Nunca o menos 1 vez al mes<br><input type="radio"/> 1 a 3 veces mes<br><input type="radio"/> 1 vez semana<br><input type="radio"/> 2 a 4 veces semana<br><input type="radio"/> 5 a 6 veces semana<br><input type="radio"/> 1 vez al día<br><input type="radio"/> 2 a 3 veces al día<br><input type="radio"/> 5 a 6 veces al día<br><input type="radio"/> más 6 veces al día |
| almejas o mejillones o ostras unos 100g | <input type="radio"/> Nunca o menos 1 vez al mes<br><input type="radio"/> 1 a 3 veces mes<br><input checked="" type="radio"/> 1 vez semana<br><input type="radio"/> 2 a 4 veces semana<br><input type="radio"/> 5 a 6 veces semana<br><input type="radio"/> 1 vez al día<br><input type="radio"/> 2 a 3 veces al día<br><input type="radio"/> 5 a 6 veces al día<br><input type="radio"/> más 6 veces al día |
| calamar o chipiron o sepia unos 100g    | <input checked="" type="radio"/> Nunca o menos 1 vez al mes<br><input type="radio"/> 1 a 3 veces mes<br><input type="radio"/> 1 vez semana<br><input type="radio"/> 2 a 4 veces semana<br><input type="radio"/> 5 a 6 veces semana<br><input type="radio"/> 1 vez al día<br><input type="radio"/> 2 a 3 veces al día<br><input type="radio"/> 5 a 6 veces al día<br><input type="radio"/> más 6 veces al día |
| marisco unos 100g                       | <input type="radio"/> Nunca o menos 1 vez al mes<br><input checked="" type="radio"/> 1 a 3 veces mes<br><input type="radio"/> 1 vez semana<br><input type="radio"/> 2 a 4 veces semana<br><input type="radio"/> 5 a 6 veces semana<br><input type="radio"/> 1 vez al día<br><input type="radio"/> 2 a 3 veces al día<br><input type="radio"/> 5 a 6 veces al día<br><input type="radio"/> más 6 veces al día |
| Espinacas o acelgas cocinadas           | <input type="radio"/> Nunca o menos 1 vez al mes<br><input checked="" type="radio"/> 1 a 3 veces mes<br><input type="radio"/> 1 vez semana<br><input type="radio"/> 2 a 4 veces semana<br><input type="radio"/> 5 a 6 veces semana<br><input type="radio"/> 1 vez al día<br><input type="radio"/> 2 a 3 veces al día<br><input type="radio"/> 5 a 6 veces al día<br><input type="radio"/> más 6 veces al día |
| Col o coliflor o brocoli cocinado       | <input checked="" type="radio"/> Nunca o menos 1 vez al mes<br><input type="radio"/> 1 a 3 veces mes<br><input type="radio"/> 1 vez semana<br><input type="radio"/> 2 a 4 veces semana<br><input type="radio"/> 5 a 6 veces semana<br><input type="radio"/> 1 vez al día<br><input type="radio"/> 2 a 3 veces al día<br><input type="radio"/> 5 a 6 veces al día<br><input type="radio"/> más 6 veces al día |

---

Lechuga o endivia o escarola

- ☐ Nunca o menos 1 vez al mes  
☒ 1 a 3 veces mes  
☐ 1 vez semana  
☐ 2 a 4 veces semana  
☐ 5 a 6 veces semana  
☐ 1 vez al día  
☐ 2 a 3 veces al día  
☐ 5 a 6 veces al día  
☐ más 6 veces al día

---

tomate ensalada

- ☐ Nunca o menos 1 vez al mes  
☐ 1 a 3 veces mes  
☐ 1 vez semana  
☐ 2 a 4 veces semana  
☐ 5 a 6 veces semana  
☒ 1 vez al día  
☐ 2 a 3 veces al día  
☐ 5 a 6 veces al día  
☐ más 6 veces al día

---

cebolla

- ☐ Nunca o menos 1 vez al mes  
☐ 1 a 3 veces mes  
☐ 1 vez semana  
☐ 2 a 4 veces semana  
☐ 5 a 6 veces semana  
☐ 1 vez al día  
☐ 2 a 3 veces al día  
☐ 5 a 6 veces al día  
☒ más 6 veces al día

---

Zanahoria o calabaza

- ☐ Nunca o menos 1 vez al mes  
☐ 1 a 3 veces mes  
☐ 1 vez semana  
☐ 2 a 4 veces semana  
☐ 5 a 6 veces semana  
☐ 1 vez al día  
☒ 2 a 3 veces al día  
☐ 5 a 6 veces al día  
☐ más 6 veces al día

---

Judías verdes

- ☐ Nunca o menos 1 vez al mes  
☐ 1 a 3 veces mes  
☒ 1 vez semana  
☐ 2 a 4 veces semana  
☐ 5 a 6 veces semana  
☐ 1 vez al día  
☐ 2 a 3 veces al día  
☐ 5 a 6 veces al día  
☐ más 6 veces al día

---

Berenjena o calabacin o pepino

- ☐ Nunca o menos 1 vez al mes  
☐ 1 a 3 veces mes  
☒ 1 vez semana  
☐ 2 a 4 veces semana  
☐ 5 a 6 veces semana  
☐ 1 vez al día  
☐ 2 a 3 veces al día  
☐ 5 a 6 veces al día  
☐ más 6 veces al día

|                       |                                                                                                                                                                                                                                                                                                                                                                                                              |
|-----------------------|--------------------------------------------------------------------------------------------------------------------------------------------------------------------------------------------------------------------------------------------------------------------------------------------------------------------------------------------------------------------------------------------------------------|
| pimiento              | <input type="radio"/> Nunca o menos 1 vez al mes<br><input checked="" type="radio"/> 1 a 3 veces mes<br><input type="radio"/> 1 vez semana<br><input type="radio"/> 2 a 4 veces semana<br><input type="radio"/> 5 a 6 veces semana<br><input type="radio"/> 1 vez al día<br><input type="radio"/> 2 a 3 veces al día<br><input type="radio"/> 5 a 6 veces al día<br><input type="radio"/> más 6 veces al día |
| alcachofa             | <input type="radio"/> Nunca o menos 1 vez al mes<br><input checked="" type="radio"/> 1 a 3 veces mes<br><input type="radio"/> 1 vez semana<br><input type="radio"/> 2 a 4 veces semana<br><input type="radio"/> 5 a 6 veces semana<br><input type="radio"/> 1 vez al día<br><input type="radio"/> 2 a 3 veces al día<br><input type="radio"/> 5 a 6 veces al día<br><input type="radio"/> más 6 veces al día |
| espárragos            | <input checked="" type="radio"/> Nunca o menos 1 vez al mes<br><input type="radio"/> 1 a 3 veces mes<br><input type="radio"/> 1 vez semana<br><input type="radio"/> 2 a 4 veces semana<br><input type="radio"/> 5 a 6 veces semana<br><input type="radio"/> 1 vez al día<br><input type="radio"/> 2 a 3 veces al día<br><input type="radio"/> 5 a 6 veces al día<br><input type="radio"/> más 6 veces al día |
| maíz hervido          | <input checked="" type="radio"/> Nunca o menos 1 vez al mes<br><input type="radio"/> 1 a 3 veces mes<br><input type="radio"/> 1 vez semana<br><input type="radio"/> 2 a 4 veces semana<br><input type="radio"/> 5 a 6 veces semana<br><input type="radio"/> 1 vez al día<br><input type="radio"/> 2 a 3 veces al día<br><input type="radio"/> 5 a 6 veces al día<br><input type="radio"/> más 6 veces al día |
| legumbres             | <input type="radio"/> Nunca o menos 1 vez al mes<br><input type="radio"/> 1 a 3 veces mes<br><input checked="" type="radio"/> 1 vez semana<br><input type="radio"/> 2 a 4 veces semana<br><input type="radio"/> 5 a 6 veces semana<br><input type="radio"/> 1 vez al día<br><input type="radio"/> 2 a 3 veces al día<br><input type="radio"/> 5 a 6 veces al día<br><input type="radio"/> más 6 veces al día |
| naranjas o mandarinas | <input type="radio"/> Nunca o menos 1 vez al mes<br><input type="radio"/> 1 a 3 veces mes<br><input type="radio"/> 1 vez semana<br><input type="radio"/> 2 a 4 veces semana<br><input type="radio"/> 5 a 6 veces semana<br><input type="radio"/> 1 vez al día<br><input type="radio"/> 2 a 3 veces al día<br><input type="radio"/> 5 a 6 veces al día<br><input checked="" type="radio"/> más 6 veces al día |

|                       |                                                                                                                                                                                                                                                                                                                                                                                                              |
|-----------------------|--------------------------------------------------------------------------------------------------------------------------------------------------------------------------------------------------------------------------------------------------------------------------------------------------------------------------------------------------------------------------------------------------------------|
| zum natural fruta     | <input checked="" type="radio"/> Nunca o menos 1 vez al mes<br><input type="radio"/> 1 a 3 veces mes<br><input type="radio"/> 1 vez semana<br><input type="radio"/> 2 a 4 veces semana<br><input type="radio"/> 5 a 6 veces semana<br><input type="radio"/> 1 vez al día<br><input type="radio"/> 2 a 3 veces al día<br><input type="radio"/> 5 a 6 veces al día<br><input type="radio"/> más 6 veces al día |
| platano               | <input checked="" type="radio"/> Nunca o menos 1 vez al mes<br><input type="radio"/> 1 a 3 veces mes<br><input type="radio"/> 1 vez semana<br><input type="radio"/> 2 a 4 veces semana<br><input type="radio"/> 5 a 6 veces semana<br><input type="radio"/> 1 vez al día<br><input type="radio"/> 2 a 3 veces al día<br><input type="radio"/> 5 a 6 veces al día<br><input type="radio"/> más 6 veces al día |
| manzana o pera        | <input checked="" type="radio"/> Nunca o menos 1 vez al mes<br><input type="radio"/> 1 a 3 veces mes<br><input type="radio"/> 1 vez semana<br><input type="radio"/> 2 a 4 veces semana<br><input type="radio"/> 5 a 6 veces semana<br><input type="radio"/> 1 vez al día<br><input type="radio"/> 2 a 3 veces al día<br><input type="radio"/> 5 a 6 veces al día<br><input type="radio"/> más 6 veces al día |
| melocotón o nectarina | <input checked="" type="radio"/> Nunca o menos 1 vez al mes<br><input type="radio"/> 1 a 3 veces mes<br><input type="radio"/> 1 vez semana<br><input type="radio"/> 2 a 4 veces semana<br><input type="radio"/> 5 a 6 veces semana<br><input type="radio"/> 1 vez al día<br><input type="radio"/> 2 a 3 veces al día<br><input type="radio"/> 5 a 6 veces al día<br><input type="radio"/> más 6 veces al día |
| sandia o melon        | <input checked="" type="radio"/> Nunca o menos 1 vez al mes<br><input type="radio"/> 1 a 3 veces mes<br><input type="radio"/> 1 vez semana<br><input type="radio"/> 2 a 4 veces semana<br><input type="radio"/> 5 a 6 veces semana<br><input type="radio"/> 1 vez al día<br><input type="radio"/> 2 a 3 veces al día<br><input type="radio"/> 5 a 6 veces al día<br><input type="radio"/> más 6 veces al día |
| uva                   | <input type="radio"/> Nunca o menos 1 vez al mes<br><input type="radio"/> 1 a 3 veces mes<br><input type="radio"/> 1 vez semana<br><input type="radio"/> 2 a 4 veces semana<br><input type="radio"/> 5 a 6 veces semana<br><input type="radio"/> 1 vez al día<br><input type="radio"/> 2 a 3 veces al día<br><input type="radio"/> 5 a 6 veces al día<br><input checked="" type="radio"/> más 6 veces al día |

|                 |                                                                                                                                                                                                                                                                                                                                                                                                              |
|-----------------|--------------------------------------------------------------------------------------------------------------------------------------------------------------------------------------------------------------------------------------------------------------------------------------------------------------------------------------------------------------------------------------------------------------|
| bruna o ciruela | <input type="radio"/> Nunca o menos 1 vez al mes<br><input type="radio"/> 1 a 3 veces mes<br><input type="radio"/> 1 vez semana<br><input type="radio"/> 2 a 4 veces semana<br><input type="radio"/> 5 a 6 veces semana<br><input type="radio"/> 1 vez al día<br><input checked="" type="radio"/> 2 a 3 veces al día<br><input type="radio"/> 5 a 6 veces al día<br><input type="radio"/> más 6 veces al día |
| kiwi            | <input checked="" type="radio"/> Nunca o menos 1 vez al mes<br><input type="radio"/> 1 a 3 veces mes<br><input type="radio"/> 1 vez semana<br><input type="radio"/> 2 a 4 veces semana<br><input type="radio"/> 5 a 6 veces semana<br><input type="radio"/> 1 vez al día<br><input type="radio"/> 2 a 3 veces al día<br><input type="radio"/> 5 a 6 veces al día<br><input type="radio"/> más 6 veces al día |
| aceituna        | <input type="radio"/> Nunca o menos 1 vez al mes<br><input type="radio"/> 1 a 3 veces mes<br><input type="radio"/> 1 vez semana<br><input type="radio"/> 2 a 4 veces semana<br><input checked="" type="radio"/> 5 a 6 veces semana<br><input type="radio"/> 1 vez al día<br><input type="radio"/> 2 a 3 veces al día<br><input type="radio"/> 5 a 6 veces al día<br><input type="radio"/> más 6 veces al día |
| frutos secos    | <input checked="" type="radio"/> Nunca o menos 1 vez al mes<br><input type="radio"/> 1 a 3 veces mes<br><input type="radio"/> 1 vez semana<br><input type="radio"/> 2 a 4 veces semana<br><input type="radio"/> 5 a 6 veces semana<br><input type="radio"/> 1 vez al día<br><input type="radio"/> 2 a 3 veces al día<br><input type="radio"/> 5 a 6 veces al día<br><input type="radio"/> más 6 veces al día |
| pan blanco      | <input type="radio"/> Nunca o menos 1 vez al mes<br><input type="radio"/> 1 a 3 veces mes<br><input type="radio"/> 1 vez semana<br><input type="radio"/> 2 a 4 veces semana<br><input type="radio"/> 5 a 6 veces semana<br><input type="radio"/> 1 vez al día<br><input type="radio"/> 2 a 3 veces al día<br><input type="radio"/> 5 a 6 veces al día<br><input checked="" type="radio"/> más 6 veces al día |
| pan integral    | <input checked="" type="radio"/> Nunca o menos 1 vez al mes<br><input type="radio"/> 1 a 3 veces mes<br><input type="radio"/> 1 vez semana<br><input type="radio"/> 2 a 4 veces semana<br><input type="radio"/> 5 a 6 veces semana<br><input type="radio"/> 1 vez al día<br><input type="radio"/> 2 a 3 veces al día<br><input type="radio"/> 5 a 6 veces al día<br><input type="radio"/> más 6 veces al día |

|                          |                                                                                                                                                                                                                                                                                                                                                                                                              |
|--------------------------|--------------------------------------------------------------------------------------------------------------------------------------------------------------------------------------------------------------------------------------------------------------------------------------------------------------------------------------------------------------------------------------------------------------|
| cereales desayuno        | <input checked="" type="radio"/> Nunca o menos 1 vez al mes<br><input type="radio"/> 1 a 3 veces mes<br><input type="radio"/> 1 vez semana<br><input type="radio"/> 2 a 4 veces semana<br><input type="radio"/> 5 a 6 veces semana<br><input type="radio"/> 1 vez al día<br><input type="radio"/> 2 a 3 veces al día<br><input type="radio"/> 5 a 6 veces al día<br><input type="radio"/> más 6 veces al día |
| patatas fritas           | <input type="radio"/> Nunca o menos 1 vez al mes<br><input type="radio"/> 1 a 3 veces mes<br><input type="radio"/> 1 vez semana<br><input type="radio"/> 2 a 4 veces semana<br><input type="radio"/> 5 a 6 veces semana<br><input checked="" type="radio"/> 1 vez al día<br><input type="radio"/> 2 a 3 veces al día<br><input type="radio"/> 5 a 6 veces al día<br><input type="radio"/> más 6 veces al día |
| patatas cocidas o asadas | <input checked="" type="radio"/> Nunca o menos 1 vez al mes<br><input type="radio"/> 1 a 3 veces mes<br><input type="radio"/> 1 vez semana<br><input type="radio"/> 2 a 4 veces semana<br><input type="radio"/> 5 a 6 veces semana<br><input type="radio"/> 1 vez al día<br><input type="radio"/> 2 a 3 veces al día<br><input type="radio"/> 5 a 6 veces al día<br><input type="radio"/> más 6 veces al día |
| bolsa papas              | <input type="radio"/> Nunca o menos 1 vez al mes<br><input type="radio"/> 1 a 3 veces mes<br><input checked="" type="radio"/> 1 vez semana<br><input type="radio"/> 2 a 4 veces semana<br><input type="radio"/> 5 a 6 veces semana<br><input type="radio"/> 1 vez al día<br><input type="radio"/> 2 a 3 veces al día<br><input type="radio"/> 5 a 6 veces al día<br><input type="radio"/> más 6 veces al día |
| arroz cocinado           | <input checked="" type="radio"/> Nunca o menos 1 vez al mes<br><input type="radio"/> 1 a 3 veces mes<br><input type="radio"/> 1 vez semana<br><input type="radio"/> 2 a 4 veces semana<br><input type="radio"/> 5 a 6 veces semana<br><input type="radio"/> 1 vez al día<br><input type="radio"/> 2 a 3 veces al día<br><input type="radio"/> 5 a 6 veces al día<br><input type="radio"/> más 6 veces al día |
| pasta                    | <input type="radio"/> Nunca o menos 1 vez al mes<br><input type="radio"/> 1 a 3 veces mes<br><input checked="" type="radio"/> 1 vez semana<br><input type="radio"/> 2 a 4 veces semana<br><input type="radio"/> 5 a 6 veces semana<br><input type="radio"/> 1 vez al día<br><input type="radio"/> 2 a 3 veces al día<br><input type="radio"/> 5 a 6 veces al día<br><input type="radio"/> más 6 veces al día |

|                     |                                                                                                                                                                                                                                                                                                                                                                                                              |
|---------------------|--------------------------------------------------------------------------------------------------------------------------------------------------------------------------------------------------------------------------------------------------------------------------------------------------------------------------------------------------------------------------------------------------------------|
| pizza               | <input type="radio"/> Nunca o menos 1 vez al mes<br><input checked="" type="radio"/> 1 a 3 veces mes<br><input type="radio"/> 1 vez semana<br><input type="radio"/> 2 a 4 veces semana<br><input type="radio"/> 5 a 6 veces semana<br><input type="radio"/> 1 vez al día<br><input type="radio"/> 2 a 3 veces al día<br><input type="radio"/> 5 a 6 veces al día<br><input type="radio"/> más 6 veces al día |
| aceite oliva        | <input type="radio"/> Nunca o menos 1 vez al mes<br><input type="radio"/> 1 a 3 veces mes<br><input type="radio"/> 1 vez semana<br><input type="radio"/> 2 a 4 veces semana<br><input type="radio"/> 5 a 6 veces semana<br><input type="radio"/> 1 vez al día<br><input type="radio"/> 2 a 3 veces al día<br><input type="radio"/> 5 a 6 veces al día<br><input checked="" type="radio"/> más 6 veces al día |
| otros aceites       | <input checked="" type="radio"/> Nunca o menos 1 vez al mes<br><input type="radio"/> 1 a 3 veces mes<br><input type="radio"/> 1 vez semana<br><input type="radio"/> 2 a 4 veces semana<br><input type="radio"/> 5 a 6 veces semana<br><input type="radio"/> 1 vez al día<br><input type="radio"/> 2 a 3 veces al día<br><input type="radio"/> 5 a 6 veces al día<br><input type="radio"/> más 6 veces al día |
| margarina           | <input type="radio"/> Nunca o menos 1 vez al mes<br><input type="radio"/> 1 a 3 veces mes<br><input type="radio"/> 1 vez semana<br><input type="radio"/> 2 a 4 veces semana<br><input type="radio"/> 5 a 6 veces semana<br><input type="radio"/> 1 vez al día<br><input type="radio"/> 2 a 3 veces al día<br><input type="radio"/> 5 a 6 veces al día<br><input checked="" type="radio"/> más 6 veces al día |
| mantequilla         | <input checked="" type="radio"/> Nunca o menos 1 vez al mes<br><input type="radio"/> 1 a 3 veces mes<br><input type="radio"/> 1 vez semana<br><input type="radio"/> 2 a 4 veces semana<br><input type="radio"/> 5 a 6 veces semana<br><input type="radio"/> 1 vez al día<br><input type="radio"/> 2 a 3 veces al día<br><input type="radio"/> 5 a 6 veces al día<br><input type="radio"/> más 6 veces al día |
| galletas tipo maria | <input checked="" type="radio"/> Nunca o menos 1 vez al mes<br><input type="radio"/> 1 a 3 veces mes<br><input type="radio"/> 1 vez semana<br><input type="radio"/> 2 a 4 veces semana<br><input type="radio"/> 5 a 6 veces semana<br><input type="radio"/> 1 vez al día<br><input type="radio"/> 2 a 3 veces al día<br><input type="radio"/> 5 a 6 veces al día<br><input type="radio"/> más 6 veces al día |



---

galletas chocolate

- ☒ Nunca o menos 1 vez al mes  
☐ 1 a 3 veces mes  
☐ 1 vez semana  
☐ 2 a 4 veces semana  
☐ 5 a 6 veces semana  
☐ 1 vez al día  
☐ 2 a 3 veces al día  
☐ 5 a 6 veces al día  
☐ más 6 veces al día

---

bolleria

- ☒ Nunca o menos 1 vez al mes  
☐ 1 a 3 veces mes  
☐ 1 vez semana  
☐ 2 a 4 veces semana  
☐ 5 a 6 veces semana  
☐ 1 vez al día  
☐ 2 a 3 veces al día  
☐ 5 a 6 veces al día  
☐ más 6 veces al día

---

chocolate o bombones

- ☐ Nunca o menos 1 vez al mes  
☐ 1 a 3 veces mes  
☐ 1 vez semana  
☐ 2 a 4 veces semana  
☐ 5 a 6 veces semana  
☐ 1 vez al día  
☒ 2 a 3 veces al día  
☐ 5 a 6 veces al día  
☐ más 6 veces al día

---

chocolate polvo o colacao

- ☒ Nunca o menos 1 vez al mes  
☐ 1 a 3 veces mes  
☐ 1 vez semana  
☐ 2 a 4 veces semana  
☐ 5 a 6 veces semana  
☐ 1 vez al día  
☐ 2 a 3 veces al día  
☐ 5 a 6 veces al día  
☐ más 6 veces al día

---

vino tinto

- ☒ Nunca o menos 1 vez al mes  
☐ 1 a 3 veces mes  
☐ 1 vez semana  
☐ 2 a 4 veces semana  
☐ 5 a 6 veces semana  
☐ 1 vez al día  
☐ 2 a 3 veces al día  
☐ 5 a 6 veces al día  
☐ más 6 veces al día

---

vino blanco

- ☒ Nunca o menos 1 vez al mes  
☐ 1 a 3 veces mes  
☐ 1 vez semana  
☐ 2 a 4 veces semana  
☐ 5 a 6 veces semana  
☐ 1 vez al día  
☐ 2 a 3 veces al día  
☐ 5 a 6 veces al día  
☐ más 6 veces al día

|                       |                                                                                                                                                                                                                                                                                                                                                                                                              |
|-----------------------|--------------------------------------------------------------------------------------------------------------------------------------------------------------------------------------------------------------------------------------------------------------------------------------------------------------------------------------------------------------------------------------------------------------|
| vino seco o vermut    | <input checked="" type="radio"/> Nunca o menos 1 vez al mes<br><input type="radio"/> 1 a 3 veces mes<br><input type="radio"/> 1 vez semana<br><input type="radio"/> 2 a 4 veces semana<br><input type="radio"/> 5 a 6 veces semana<br><input type="radio"/> 1 vez al día<br><input type="radio"/> 2 a 3 veces al día<br><input type="radio"/> 5 a 6 veces al día<br><input type="radio"/> más 6 veces al día |
| cerveza               | <input checked="" type="radio"/> Nunca o menos 1 vez al mes<br><input type="radio"/> 1 a 3 veces mes<br><input type="radio"/> 1 vez semana<br><input type="radio"/> 2 a 4 veces semana<br><input type="radio"/> 5 a 6 veces semana<br><input type="radio"/> 1 vez al día<br><input type="radio"/> 2 a 3 veces al día<br><input type="radio"/> 5 a 6 veces al día<br><input type="radio"/> más 6 veces al día |
| cerveza sin alcohol   | <input type="radio"/> Nunca o menos 1 vez al mes<br><input type="radio"/> 1 a 3 veces mes<br><input type="radio"/> 1 vez semana<br><input checked="" type="radio"/> 2 a 4 veces semana<br><input type="radio"/> 5 a 6 veces semana<br><input type="radio"/> 1 vez al día<br><input type="radio"/> 2 a 3 veces al día<br><input type="radio"/> 5 a 6 veces al día<br><input type="radio"/> más 6 veces al día |
| licores               | <input checked="" type="radio"/> Nunca o menos 1 vez al mes<br><input type="radio"/> 1 a 3 veces mes<br><input type="radio"/> 1 vez semana<br><input type="radio"/> 2 a 4 veces semana<br><input type="radio"/> 5 a 6 veces semana<br><input type="radio"/> 1 vez al día<br><input type="radio"/> 2 a 3 veces al día<br><input type="radio"/> 5 a 6 veces al día<br><input type="radio"/> más 6 veces al día |
| ginebra o ron o vodka | <input checked="" type="radio"/> Nunca o menos 1 vez al mes<br><input type="radio"/> 1 a 3 veces mes<br><input type="radio"/> 1 vez semana<br><input type="radio"/> 2 a 4 veces semana<br><input type="radio"/> 5 a 6 veces semana<br><input type="radio"/> 1 vez al día<br><input type="radio"/> 2 a 3 veces al día<br><input type="radio"/> 5 a 6 veces al día<br><input type="radio"/> más 6 veces al día |
| refresco normal       | <input checked="" type="radio"/> Nunca o menos 1 vez al mes<br><input type="radio"/> 1 a 3 veces mes<br><input type="radio"/> 1 vez semana<br><input type="radio"/> 2 a 4 veces semana<br><input type="radio"/> 5 a 6 veces semana<br><input type="radio"/> 1 vez al día<br><input type="radio"/> 2 a 3 veces al día<br><input type="radio"/> 5 a 6 veces al día<br><input type="radio"/> más 6 veces al día |

|                          |                                                                                                                                                                                                                                                                                                                                                                                                              |
|--------------------------|--------------------------------------------------------------------------------------------------------------------------------------------------------------------------------------------------------------------------------------------------------------------------------------------------------------------------------------------------------------------------------------------------------------|
| refresco sin azúcar      | <input checked="" type="radio"/> Nunca o menos 1 vez al mes<br><input type="radio"/> 1 a 3 veces mes<br><input type="radio"/> 1 vez semana<br><input type="radio"/> 2 a 4 veces semana<br><input type="radio"/> 5 a 6 veces semana<br><input type="radio"/> 1 vez al día<br><input type="radio"/> 2 a 3 veces al día<br><input type="radio"/> 5 a 6 veces al día<br><input type="radio"/> más 6 veces al día |
| Agua del grifo           | <input checked="" type="radio"/> Nunca o menos 1 vez al mes<br><input type="radio"/> 1 a 3 veces mes<br><input type="radio"/> 1 vez semana<br><input type="radio"/> 2 a 4 veces semana<br><input type="radio"/> 5 a 6 veces semana<br><input type="radio"/> 1 vez al día<br><input type="radio"/> 2 a 3 veces al día<br><input type="radio"/> 5 a 6 veces al día<br><input type="radio"/> más 6 veces al día |
| agua embotellada sin gas | <input type="radio"/> Nunca o menos 1 vez al mes<br><input type="radio"/> 1 a 3 veces mes<br><input type="radio"/> 1 vez semana<br><input type="radio"/> 2 a 4 veces semana<br><input type="radio"/> 5 a 6 veces semana<br><input type="radio"/> 1 vez al día<br><input type="radio"/> 2 a 3 veces al día<br><input type="radio"/> 5 a 6 veces al día<br><input checked="" type="radio"/> más 6 veces al día |
| agua embotellada con gas | <input checked="" type="radio"/> Nunca o menos 1 vez al mes<br><input type="radio"/> 1 a 3 veces mes<br><input type="radio"/> 1 vez semana<br><input type="radio"/> 2 a 4 veces semana<br><input type="radio"/> 5 a 6 veces semana<br><input type="radio"/> 1 vez al día<br><input type="radio"/> 2 a 3 veces al día<br><input type="radio"/> 5 a 6 veces al día<br><input type="radio"/> más 6 veces al día |
| zumو frutas embasado     | <input checked="" type="radio"/> Nunca o menos 1 vez al mes<br><input type="radio"/> 1 a 3 veces mes<br><input type="radio"/> 1 vez semana<br><input type="radio"/> 2 a 4 veces semana<br><input type="radio"/> 5 a 6 veces semana<br><input type="radio"/> 1 vez al día<br><input type="radio"/> 2 a 3 veces al día<br><input type="radio"/> 5 a 6 veces al día<br><input type="radio"/> más 6 veces al día |
| cafe                     | <input checked="" type="radio"/> Nunca o menos 1 vez al mes<br><input type="radio"/> 1 a 3 veces mes<br><input type="radio"/> 1 vez semana<br><input type="radio"/> 2 a 4 veces semana<br><input type="radio"/> 5 a 6 veces semana<br><input type="radio"/> 1 vez al día<br><input type="radio"/> 2 a 3 veces al día<br><input type="radio"/> 5 a 6 veces al día<br><input type="radio"/> más 6 veces al día |

|                       |                                                                                                                                                                                                                                                                                                                                                                                                              |
|-----------------------|--------------------------------------------------------------------------------------------------------------------------------------------------------------------------------------------------------------------------------------------------------------------------------------------------------------------------------------------------------------------------------------------------------------|
| cafe descafeinado     | <input checked="" type="radio"/> Nunca o menos 1 vez al mes<br><input type="radio"/> 1 a 3 veces mes<br><input type="radio"/> 1 vez semana<br><input type="radio"/> 2 a 4 veces semana<br><input type="radio"/> 5 a 6 veces semana<br><input type="radio"/> 1 vez al día<br><input type="radio"/> 2 a 3 veces al día<br><input type="radio"/> 5 a 6 veces al día<br><input type="radio"/> más 6 veces al día |
| te o infusión         | <input type="radio"/> Nunca o menos 1 vez al mes<br><input type="radio"/> 1 a 3 veces mes<br><input checked="" type="radio"/> 1 vez semana<br><input type="radio"/> 2 a 4 veces semana<br><input type="radio"/> 5 a 6 veces semana<br><input type="radio"/> 1 vez al día<br><input type="radio"/> 2 a 3 veces al día<br><input type="radio"/> 5 a 6 veces al día<br><input type="radio"/> más 6 veces al día |
| sopa o puré verduras  | <input checked="" type="radio"/> Nunca o menos 1 vez al mes<br><input type="radio"/> 1 a 3 veces mes<br><input type="radio"/> 1 vez semana<br><input type="radio"/> 2 a 4 veces semana<br><input type="radio"/> 5 a 6 veces semana<br><input type="radio"/> 1 vez al día<br><input type="radio"/> 2 a 3 veces al día<br><input type="radio"/> 5 a 6 veces al día<br><input type="radio"/> más 6 veces al día |
| croquetas pollo jamón | <input checked="" type="radio"/> Nunca o menos 1 vez al mes<br><input type="radio"/> 1 a 3 veces mes<br><input type="radio"/> 1 vez semana<br><input type="radio"/> 2 a 4 veces semana<br><input type="radio"/> 5 a 6 veces semana<br><input type="radio"/> 1 vez al día<br><input type="radio"/> 2 a 3 veces al día<br><input type="radio"/> 5 a 6 veces al día<br><input type="radio"/> más 6 veces al día |
| croquetas pescado     | <input checked="" type="radio"/> Nunca o menos 1 vez al mes<br><input type="radio"/> 1 a 3 veces mes<br><input type="radio"/> 1 vez semana<br><input type="radio"/> 2 a 4 veces semana<br><input type="radio"/> 5 a 6 veces semana<br><input type="radio"/> 1 vez al día<br><input type="radio"/> 2 a 3 veces al día<br><input type="radio"/> 5 a 6 veces al día<br><input type="radio"/> más 6 veces al día |
| mayonesa              | <input checked="" type="radio"/> Nunca o menos 1 vez al mes<br><input type="radio"/> 1 a 3 veces mes<br><input type="radio"/> 1 vez semana<br><input type="radio"/> 2 a 4 veces semana<br><input type="radio"/> 5 a 6 veces semana<br><input type="radio"/> 1 vez al día<br><input type="radio"/> 2 a 3 veces al día<br><input type="radio"/> 5 a 6 veces al día<br><input type="radio"/> más 6 veces al día |

|                  |                                                                                                                                                                                                                                                                                                                                                                                                              |
|------------------|--------------------------------------------------------------------------------------------------------------------------------------------------------------------------------------------------------------------------------------------------------------------------------------------------------------------------------------------------------------------------------------------------------------|
| salsa tomate     | <input checked="" type="radio"/> Nunca o menos 1 vez al mes<br><input type="radio"/> 1 a 3 veces mes<br><input type="radio"/> 1 vez semana<br><input type="radio"/> 2 a 4 veces semana<br><input type="radio"/> 5 a 6 veces semana<br><input type="radio"/> 1 vez al día<br><input type="radio"/> 2 a 3 veces al día<br><input type="radio"/> 5 a 6 veces al día<br><input type="radio"/> más 6 veces al día |
| ketchup          | <input checked="" type="radio"/> Nunca o menos 1 vez al mes<br><input type="radio"/> 1 a 3 veces mes<br><input type="radio"/> 1 vez semana<br><input type="radio"/> 2 a 4 veces semana<br><input type="radio"/> 5 a 6 veces semana<br><input type="radio"/> 1 vez al día<br><input type="radio"/> 2 a 3 veces al día<br><input type="radio"/> 5 a 6 veces al día<br><input type="radio"/> más 6 veces al día |
| sal              | <input type="radio"/> Nunca o menos 1 vez al mes<br><input type="radio"/> 1 a 3 veces mes<br><input type="radio"/> 1 vez semana<br><input type="radio"/> 2 a 4 veces semana<br><input type="radio"/> 5 a 6 veces semana<br><input type="radio"/> 1 vez al día<br><input type="radio"/> 2 a 3 veces al día<br><input type="radio"/> 5 a 6 veces al día<br><input checked="" type="radio"/> más 6 veces al día |
| ajo              | <input checked="" type="radio"/> Nunca o menos 1 vez al mes<br><input type="radio"/> 1 a 3 veces mes<br><input type="radio"/> 1 vez semana<br><input type="radio"/> 2 a 4 veces semana<br><input type="radio"/> 5 a 6 veces semana<br><input type="radio"/> 1 vez al día<br><input type="radio"/> 2 a 3 veces al día<br><input type="radio"/> 5 a 6 veces al día<br><input type="radio"/> más 6 veces al día |
| mermelada o miel | <input type="radio"/> Nunca o menos 1 vez al mes<br><input type="radio"/> 1 a 3 veces mes<br><input type="radio"/> 1 vez semana<br><input type="radio"/> 2 a 4 veces semana<br><input type="radio"/> 5 a 6 veces semana<br><input type="radio"/> 1 vez al día<br><input type="radio"/> 2 a 3 veces al día<br><input type="radio"/> 5 a 6 veces al día<br><input checked="" type="radio"/> más 6 veces al día |
| azúcar           | <input type="radio"/> Nunca o menos 1 vez al mes<br><input type="radio"/> 1 a 3 veces mes<br><input type="radio"/> 1 vez semana<br><input type="radio"/> 2 a 4 veces semana<br><input type="radio"/> 5 a 6 veces semana<br><input type="radio"/> 1 vez al día<br><input type="radio"/> 2 a 3 veces al día<br><input type="radio"/> 5 a 6 veces al día<br><input checked="" type="radio"/> más 6 veces al día |

|                                       |                                                                                                                                                                                                                                                                                                                                                                                                                                                                                                                               |
|---------------------------------------|-------------------------------------------------------------------------------------------------------------------------------------------------------------------------------------------------------------------------------------------------------------------------------------------------------------------------------------------------------------------------------------------------------------------------------------------------------------------------------------------------------------------------------|
| Otro alimento                         | <hr/>                                                                                                                                                                                                                                                                                                                                                                                                                                                                                                                         |
| suplementos vitamínicos               | <input type="radio"/> si<br><input checked="" type="radio"/> no                                                                                                                                                                                                                                                                                                                                                                                                                                                               |
| suplementos vitamínicos               | <hr/>                                                                                                                                                                                                                                                                                                                                                                                                                                                                                                                         |
| dieta previa                          | <input type="radio"/> si<br><input checked="" type="radio"/> no                                                                                                                                                                                                                                                                                                                                                                                                                                                               |
| motivo dieta                          | <input checked="" type="radio"/> no dieta<br><input type="radio"/> control peso<br><input type="radio"/> control colesterol<br><input type="radio"/> control diabetes<br><input type="radio"/> problemas estómago<br><input type="radio"/> problemas vesícula o hepáticos<br><input type="radio"/> HTA o cardiopatía<br><input type="radio"/> problemas renales<br><input type="radio"/> alergia alimentaria<br><input type="radio"/> ácido úrico elevado<br><input type="radio"/> vegetariana<br><input type="radio"/> otros |
| cambio alimentos año previo gestación | <input type="radio"/> si<br><input checked="" type="radio"/> no                                                                                                                                                                                                                                                                                                                                                                                                                                                               |
| cambio lácteos                        | <input type="radio"/> eliminado<br><input type="radio"/> disminuido<br><input checked="" type="radio"/> igual<br><input type="radio"/> aumentado<br><input type="radio"/> no sabe                                                                                                                                                                                                                                                                                                                                             |
| cambio huevos                         | <input type="radio"/> eliminado<br><input type="radio"/> disminuido<br><input checked="" type="radio"/> igual<br><input type="radio"/> aumentado<br><input type="radio"/> no sabe                                                                                                                                                                                                                                                                                                                                             |
| cambio carne                          | <input type="radio"/> eliminado<br><input type="radio"/> disminuido<br><input checked="" type="radio"/> igual<br><input type="radio"/> aumentado<br><input type="radio"/> no sabe                                                                                                                                                                                                                                                                                                                                             |
| cambio pescado                        | <input type="radio"/> eliminado<br><input type="radio"/> disminuido<br><input checked="" type="radio"/> igual<br><input type="radio"/> aumentado<br><input type="radio"/> no sabe                                                                                                                                                                                                                                                                                                                                             |
| cambio verduras                       | <input type="radio"/> eliminado<br><input type="radio"/> disminuido<br><input checked="" type="radio"/> igual<br><input type="radio"/> aumentado<br><input type="radio"/> no sabe                                                                                                                                                                                                                                                                                                                                             |

|                            |                                                                                                                                                                                                                        |
|----------------------------|------------------------------------------------------------------------------------------------------------------------------------------------------------------------------------------------------------------------|
| cambio legumbres           | <input type="radio"/> eliminado<br><input type="radio"/> disminuido<br><input checked="" type="radio"/> igual<br><input type="radio"/> aumentado<br><input type="radio"/> no sabe                                      |
| cambio fruta               | <input type="radio"/> eliminado<br><input type="radio"/> disminuido<br><input checked="" type="radio"/> igual<br><input type="radio"/> aumentado<br><input type="radio"/> no sabe                                      |
| cambio pan                 | <input type="radio"/> eliminado<br><input type="radio"/> disminuido<br><input checked="" type="radio"/> igual<br><input type="radio"/> aumentado<br><input type="radio"/> no sabe                                      |
| cambio aceite oliva        | <input type="radio"/> eliminado<br><input type="radio"/> disminuido<br><input checked="" type="radio"/> igual<br><input type="radio"/> aumentado<br><input type="radio"/> no sabe                                      |
| cambio mante o margarina   | <input type="radio"/> eliminado<br><input type="radio"/> disminuido<br><input checked="" type="radio"/> igual<br><input type="radio"/> aumentado<br><input type="radio"/> no sabe                                      |
| cambio azúcar y dulces     | <input type="radio"/> eliminado<br><input type="radio"/> disminuido<br><input checked="" type="radio"/> igual<br><input type="radio"/> aumentado<br><input type="radio"/> no sabe                                      |
| cambio bebidas alcohólicas | <input type="radio"/> eliminado<br><input type="radio"/> disminuido<br><input checked="" type="radio"/> igual<br><input type="radio"/> aumentado<br><input type="radio"/> no sabe                                      |
| frecuencia comidas fritas  | <input type="radio"/> a diario<br><input type="radio"/> 5 a 6 veces semana<br><input checked="" type="radio"/> 2 a 4 veces semana<br><input type="radio"/> 1 vez semana<br><input type="radio"/> menos de 1 vez semana |
| carne                      | <input type="radio"/> no como<br><input type="radio"/> cruda<br><input type="radio"/> poco hecha<br><input type="radio"/> hecha<br><input checked="" type="radio"/> muy hecha                                          |
| grasa visible carne        | <input type="radio"/> quita toda<br><input type="radio"/> quita mayoría<br><input type="radio"/> quita un poco<br><input checked="" type="radio"/> no quita nada                                                       |

|                                |                                                                                                                                                                                                                                                          |
|--------------------------------|----------------------------------------------------------------------------------------------------------------------------------------------------------------------------------------------------------------------------------------------------------|
| cocina carne                   | <input checked="" type="radio"/> a la plancha<br><input type="radio"/> a la parrilla<br><input type="radio"/> asada<br><input type="radio"/> frita<br><input type="radio"/> guisada                                                                      |
| tostado quemado carne          | <input checked="" type="radio"/> nunca<br><input type="radio"/> 1 vez mes<br><input type="radio"/> 2 a 3 veces mes<br><input type="radio"/> 1 vez semana<br><input type="radio"/> 2 a 3 semanas                                                          |
| tostado quemado pescado        | <input checked="" type="radio"/> nunca<br><input type="radio"/> 1 vez mes<br><input type="radio"/> 2 a 3 veces mes<br><input type="radio"/> 1 vez semana<br><input type="radio"/> 2 a 3 semanas                                                          |
| socarrat paella                | <input type="radio"/> nunca<br><input type="radio"/> 1 vez mes<br><input type="radio"/> 2 a 3 veces mes<br><input checked="" type="radio"/> 1 vez semana<br><input type="radio"/> 2 a 3 semanas                                                          |
| grasa o aceite cocinar         | <input type="radio"/> mantequilla<br><input type="radio"/> margarina<br><input type="radio"/> aceite oliva<br><input checked="" type="radio"/> aceite oliva virgen extra<br><input type="radio"/> aceite vegetal<br><input type="radio"/> mezcla aceites |
| grasa aceite aliñar            | <input type="radio"/> mantequilla<br><input type="radio"/> margarina<br><input type="radio"/> aceite oliva<br><input checked="" type="radio"/> aceite oliva virgen extra<br><input type="radio"/> aceite vegetal<br><input type="radio"/> mezcla aceites |
| grasa aceite freir             | <input type="radio"/> mantequilla<br><input type="radio"/> margarina<br><input type="radio"/> aceite oliva<br><input checked="" type="radio"/> aceite oliva virgen extra<br><input type="radio"/> aceite vegetal<br><input type="radio"/> mezcla aceites |
| Ejercicio cuestionario         | <input checked="" type="radio"/> si<br><input type="radio"/> no                                                                                                                                                                                          |
| horas de sueño incluido siesta | [*DATA REMOVED*]                                                                                                                                                                                                                                         |
| minutos siesta                 | [*DATA REMOVED*]                                                                                                                                                                                                                                         |
| horas televisión semana        | [*DATA REMOVED*]                                                                                                                                                                                                                                         |



|                                        |                                                                                                                                                                                                                                                                                                                                                                           |
|----------------------------------------|---------------------------------------------------------------------------------------------------------------------------------------------------------------------------------------------------------------------------------------------------------------------------------------------------------------------------------------------------------------------------|
| actividad trabajo                      | <input type="radio"/> casi siempre sentado<br><input type="radio"/> sentado 50 por cien<br><input type="radio"/> casi siempre de pie, quieto<br><input type="radio"/> casi siempre levantado caminando y llevando pocas cosas<br><input checked="" type="radio"/> casi siempre levantado, caminando y llevado muchas cosas<br><input type="radio"/> trabajo manual pesado |
| tiempo caminar o bici al día           | <input checked="" type="radio"/> casi nunca<br><input type="radio"/> menos 20min día<br><input type="radio"/> 20 a 40 min día<br><input type="radio"/> 40 a 60 min día<br><input type="radio"/> 1h o 1h y media día<br><input type="radio"/> más de 1h y media al día                                                                                                     |
| tiempo tareas casa al día              | <input type="radio"/> menos de 1h día<br><input type="radio"/> 1 a 2h día<br><input type="radio"/> 3 a 4h día<br><input type="radio"/> 5 a 6h día<br><input checked="" type="radio"/> 7 a 8h día<br><input type="radio"/> más de 8h día                                                                                                                                   |
| tiempo libre televisión ordenador leer | <input type="radio"/> menos 1h día<br><input type="radio"/> 1h día<br><input type="radio"/> 2h día<br><input type="radio"/> 3h día<br><input checked="" type="radio"/> 4h día<br><input type="radio"/> 5 a 6h día<br><input type="radio"/> mas 6h día                                                                                                                     |
| tiempo libre ejercicio o deporte       | <input checked="" type="radio"/> menos 1h semana<br><input type="radio"/> 1h semana<br><input type="radio"/> 2h semana<br><input type="radio"/> 3h semana<br><input type="radio"/> 4 a 5h semana<br><input type="radio"/> mas 5h semana                                                                                                                                   |
| como se considera                      | <input checked="" type="radio"/> sedentaria<br><input type="radio"/> poco activa<br><input type="radio"/> moderadamente activa<br><input type="radio"/> bastante activa<br><input type="radio"/> muy activa<br><input type="radio"/> no sabe                                                                                                                              |
| FUR                                    | [*DATA REMOVED*]                                                                                                                                                                                                                                                                                                                                                          |
| Semanas gestación 2T                   | [*DATA REMOVED*]                                                                                                                                                                                                                                                                                                                                                          |
| Días gestación 2T                      | [*DATA REMOVED*]                                                                                                                                                                                                                                                                                                                                                          |
| DBP 2T                                 | [*DATA REMOVED*]                                                                                                                                                                                                                                                                                                                                                          |
| CC 2T                                  | [*DATA REMOVED*]                                                                                                                                                                                                                                                                                                                                                          |
| AC 2T                                  | [*DATA REMOVED*]                                                                                                                                                                                                                                                                                                                                                          |

|                                                   |                                                                                                                                                                                                 |
|---------------------------------------------------|-------------------------------------------------------------------------------------------------------------------------------------------------------------------------------------------------|
| LF 2T                                             | [*DATA REMOVED*]                                                                                                                                                                                |
| PFE 2T (Hadlock)                                  | [*DATA REMOVED*]                                                                                                                                                                                |
| Semanas gestación 3T                              | [*DATA REMOVED*]                                                                                                                                                                                |
| días 3T                                           | [*DATA REMOVED*]                                                                                                                                                                                |
| DBP 3T                                            | [*DATA REMOVED*]                                                                                                                                                                                |
| CC 3T                                             | [*DATA REMOVED*]                                                                                                                                                                                |
| AC 3T                                             | [*DATA REMOVED*]                                                                                                                                                                                |
| LF 3T                                             | [*DATA REMOVED*]                                                                                                                                                                                |
| PFE 3T (Hadlock)                                  | [*DATA REMOVED*]                                                                                                                                                                                |
| Semanas de gestación final                        | [*DATA REMOVED*]                                                                                                                                                                                |
| días gestación final                              | [*DATA REMOVED*]                                                                                                                                                                                |
| Localización placenta                             | <input type="radio"/> anterior<br><input type="radio"/> lateral derecha<br><input type="radio"/> lateral izquierda<br><input checked="" type="radio"/> posterior<br><input type="radio"/> fondo |
| Presentación longitudinal cefálica                | <input type="radio"/> no<br><input checked="" type="radio"/> si                                                                                                                                 |
| Dorso                                             | <input checked="" type="radio"/> izquierda anterior<br><input type="radio"/> izquierda posterior<br><input type="radio"/> derecha anterior<br><input type="radio"/> derecha posterior           |
| diámetro biparietal                               | [*DATA REMOVED*]                                                                                                                                                                                |
| Circunferencia craneal                            | [*DATA REMOVED*]                                                                                                                                                                                |
| Circunferencia abdominal                          | [*DATA REMOVED*]                                                                                                                                                                                |
| Longitud de femur                                 | [*DATA REMOVED*]                                                                                                                                                                                |
| tejido celular subcutáneo a nivel del muslo en mm | [*DATA REMOVED*]                                                                                                                                                                                |
| tejido celular subcutáneo en abdomen en mm        | [*DATA REMOVED*]                                                                                                                                                                                |
| Volumen del muslo en cm3                          | [*DATA REMOVED*]                                                                                                                                                                                |
| Peso fetal estimado según fórmula de Hadlock      | [*DATA REMOVED*]                                                                                                                                                                                |

|                                               |                                                                                                                                                          |
|-----------------------------------------------|----------------------------------------------------------------------------------------------------------------------------------------------------------|
| Percentil                                     | [*DATA REMOVED*]                                                                                                                                         |
| Peso fetal estimado según fórmula de Scioscia | <hr/>                                                                                                                                                    |
| Peso fetal estimado según fórmula de LEE      | <hr/>                                                                                                                                                    |
| Tipo de parto                                 | <input checked="" type="radio"/> eutocico<br><input type="radio"/> instrumentado/ventosa<br><input type="radio"/> cesarea                                |
| fecha de nacimiento                           | [*DATA REMOVED*]                                                                                                                                         |
| Días entre exploración y nacimiento           | [*DATA REMOVED*]                                                                                                                                         |
| Peso RN en g                                  | [*DATA REMOVED*]                                                                                                                                         |
| sexo                                          | <input type="radio"/> mujer<br><input checked="" type="radio"/> hombre                                                                                   |
| Apgar 1 minuto                                | [*DATA REMOVED*]                                                                                                                                         |
| Apgar 5 minutos                               | [*DATA REMOVED*]                                                                                                                                         |
| Apgar 10 minutos                              | <hr/>                                                                                                                                                    |
| antecedente Covid durante gestación           | <input type="radio"/> Yes<br><input checked="" type="radio"/> No                                                                                         |
| Nivel de estudios                             | <input type="radio"/> ninguno<br><input checked="" type="radio"/> primarios<br><input type="radio"/> secundarios<br><input type="radio"/> universitarios |

# Base\_datos\_estimacion\_peso\_fetal

|                                       |                                                                                                                                                                                                                                                                                      |
|---------------------------------------|--------------------------------------------------------------------------------------------------------------------------------------------------------------------------------------------------------------------------------------------------------------------------------------|
| Número de identificación participante | 48                                                                                                                                                                                                                                                                                   |
| CODIGO PARTICIPANTE                   |                                                                                                                                                                                                                                                                                      |
| Edad                                  | [*DATA REMOVED*]                                                                                                                                                                                                                                                                     |
| Gestaciones                           | <input checked="" type="radio"/> 1<br><input type="radio"/> 2<br><input type="radio"/> 3<br><input type="radio"/> mas de 3                                                                                                                                                           |
| partos                                | <input checked="" type="radio"/> 0<br><input type="radio"/> 1<br><input type="radio"/> 2<br><input type="radio"/> 3<br><input type="radio"/> mas de 3                                                                                                                                |
| cesáreas                              | <input checked="" type="radio"/> 0<br><input type="radio"/> 1<br><input type="radio"/> 2<br><input type="radio"/> 3<br><input type="radio"/> mas de 3                                                                                                                                |
| Abortos                               | <input checked="" type="radio"/> 0<br><input type="radio"/> 1<br><input type="radio"/> 2<br><input type="radio"/> 3<br><input type="radio"/> mas de 3                                                                                                                                |
| Tipo de gestacion                     | <input checked="" type="radio"/> espontanea<br><input type="radio"/> IAC inseminación artificial conyuge<br><input type="radio"/> IAD inseminación artificial donante<br><input type="radio"/> FIV Fecundación in Vitro<br><input type="radio"/> Ovodon FIV con donación de ovocitos |
| peso previo a embarazo                | [*DATA REMOVED*]                                                                                                                                                                                                                                                                     |
| Ganancia ponderal embarazo            | [*DATA REMOVED*]                                                                                                                                                                                                                                                                     |
| Talla madre                           | [*DATA REMOVED*]                                                                                                                                                                                                                                                                     |
| IMC previo embarazo                   | 21.71806608974573                                                                                                                                                                                                                                                                    |
| Patología obstétrica                  | <input checked="" type="radio"/> no<br><input type="radio"/> si                                                                                                                                                                                                                      |
| Diabetes pregestacional               | <input checked="" type="radio"/> no<br><input type="radio"/> si                                                                                                                                                                                                                      |
| Diabetes gestacional                  | <input checked="" type="radio"/> no<br><input type="radio"/> si                                                                                                                                                                                                                      |

|                                            |                                                                                                                                                                                      |
|--------------------------------------------|--------------------------------------------------------------------------------------------------------------------------------------------------------------------------------------|
| Diabetes gestacional con insulina          | <input checked="" type="radio"/> no<br><input type="radio"/> si                                                                                                                      |
| Diabetes gestacional con dieta y ejercicio | <input checked="" type="radio"/> no<br><input type="radio"/> si                                                                                                                      |
| Percentil fetos previos                    | <input checked="" type="radio"/> Nada<br><input type="radio"/> percentil menor de 10<br><input type="radio"/> percentil entre 10 y 90<br><input type="radio"/> percentil mayor de 90 |
| Exfumadora                                 | <input checked="" type="radio"/> Nada<br><input type="radio"/> menos de 5 años<br><input type="radio"/> 5 a 10 años<br><input type="radio"/> mayor o igual a 10 años                 |
| Hábito tabáquico                           | <input checked="" type="radio"/> no<br><input type="radio"/> si                                                                                                                      |
| fumadora                                   | [*DATA REMOVED*]                                                                                                                                                                     |
| Consumo otros tóxicos                      | <input checked="" type="radio"/> no<br><input type="radio"/> si                                                                                                                      |
| Hb 1T                                      | [*DATA REMOVED*]                                                                                                                                                                     |
| Htc 1T                                     | [*DATA REMOVED*]                                                                                                                                                                     |
| Hb 2T                                      | [*DATA REMOVED*]                                                                                                                                                                     |
| HTC 2T                                     | [*DATA REMOVED*]                                                                                                                                                                     |
| Hb 3T                                      | [*DATA REMOVED*]                                                                                                                                                                     |
| HTC 3T                                     | [*DATA REMOVED*]                                                                                                                                                                     |
| Suplemento FE oral                         | <input type="radio"/> si<br><input checked="" type="radio"/> no                                                                                                                      |
| Suplemento fe iv                           | <input type="radio"/> si<br><input checked="" type="radio"/> no                                                                                                                      |
| Transfusión                                | <input checked="" type="radio"/> no<br><input type="radio"/> si                                                                                                                      |
| Solicitada Vit D                           | <input checked="" type="radio"/> no<br><input type="radio"/> si                                                                                                                      |
| Deficit vit D                              | <input type="radio"/> no<br><input type="radio"/> si                                                                                                                                 |
| Suplemento vit D                           | <input type="radio"/> si<br><input type="radio"/> no                                                                                                                                 |

|                       |                                                                                                                                                                                                                                                                                                                                                                                                              |
|-----------------------|--------------------------------------------------------------------------------------------------------------------------------------------------------------------------------------------------------------------------------------------------------------------------------------------------------------------------------------------------------------------------------------------------------------|
| Dieta, cuestionario   | <input checked="" type="radio"/> si<br><input type="radio"/> no                                                                                                                                                                                                                                                                                                                                              |
| Leche entera          | <input checked="" type="radio"/> Nunca o menos 1 vez al mes<br><input type="radio"/> 1 a 3 veces mes<br><input type="radio"/> 1 vez semana<br><input type="radio"/> 2 a 4 veces semana<br><input type="radio"/> 5 a 6 veces semana<br><input type="radio"/> 1 vez al día<br><input type="radio"/> 2 a 3 veces al día<br><input type="radio"/> 5 a 6 veces al día<br><input type="radio"/> más 6 veces al día |
| Leche semidesnatada   | <input type="radio"/> Nunca o menos 1 vez al mes<br><input type="radio"/> 1 a 3 veces mes<br><input type="radio"/> 1 vez semana<br><input type="radio"/> 2 a 4 veces semana<br><input type="radio"/> 5 a 6 veces semana<br><input checked="" type="radio"/> 1 vez al día<br><input type="radio"/> 2 a 3 veces al día<br><input type="radio"/> 5 a 6 veces al día<br><input type="radio"/> mas 6 veces al día |
| Leche desnatada       | <input checked="" type="radio"/> Nunca o menos 1 vez al mes<br><input type="radio"/> 1 a 3 veces mes<br><input type="radio"/> 1 vez semana<br><input type="radio"/> 2 a 4 veces semana<br><input type="radio"/> 5 a 6 veces semana<br><input type="radio"/> 1 vez al día<br><input type="radio"/> 2 a 3 veces al día<br><input type="radio"/> 5 a 6 veces al día<br><input type="radio"/> más 6 veces al día |
| Leche condensada      | <input checked="" type="radio"/> Nunca o menos 1 vez al mes<br><input type="radio"/> 1 a 3 veces mes<br><input type="radio"/> 1 vez semana<br><input type="radio"/> 2 a 4 veces semana<br><input type="radio"/> 5 a 6 veces semana<br><input type="radio"/> 1 vez al día<br><input type="radio"/> 2 a 3 veces al día<br><input type="radio"/> 5 a 6 veces al día<br><input type="radio"/> más 6 veces al día |
| nata o crema de leche | <input checked="" type="radio"/> Nunca o menos 1 vez al mes<br><input type="radio"/> 1 a 3 veces mes<br><input type="radio"/> 1 vez semana<br><input type="radio"/> 2 a 4 veces semana<br><input type="radio"/> 5 a 6 veces semana<br><input type="radio"/> 1 vez al día<br><input type="radio"/> 2 a 3 veces al día<br><input type="radio"/> 5 a 6 veces al día<br><input type="radio"/> más 6 veces al día |

|                                             |                                                                                                                                                                                                                                                                                                                                                                                                              |
|---------------------------------------------|--------------------------------------------------------------------------------------------------------------------------------------------------------------------------------------------------------------------------------------------------------------------------------------------------------------------------------------------------------------------------------------------------------------|
| Yogurt Entero                               | <input checked="" type="radio"/> Nunca o menos 1 vez al mes<br><input type="radio"/> 1 a 3 veces mes<br><input type="radio"/> 1 vez semana<br><input type="radio"/> 2 a 4 veces semana<br><input type="radio"/> 5 a 6 veces semana<br><input type="radio"/> 1 vez al día<br><input type="radio"/> 2 a 3 veces al día<br><input type="radio"/> 5 a 6 veces al día<br><input type="radio"/> más 6 veces al día |
| Yogurt desnatado                            | <input checked="" type="radio"/> Nunca o menos 1 vez al mes<br><input type="radio"/> 1 a 3 veces mes<br><input type="radio"/> 1 vez semana<br><input type="radio"/> 2 a 4 veces semana<br><input type="radio"/> 5 a 6 veces semana<br><input type="radio"/> 1 vez al día<br><input type="radio"/> 2 a 3 veces al día<br><input type="radio"/> 5 a 6 veces al día<br><input type="radio"/> más 6 veces al día |
| 100g requesón o queso blando o queso fresco | <input checked="" type="radio"/> Nunca o menos 1 vez al mes<br><input type="radio"/> 1 a 3 veces mes<br><input type="radio"/> 1 vez semana<br><input type="radio"/> 2 a 4 veces semana<br><input type="radio"/> 5 a 6 veces semana<br><input type="radio"/> 1 vez al día<br><input type="radio"/> 2 a 3 veces al día<br><input type="radio"/> 5 a 6 veces al día<br><input type="radio"/> más 6 veces al día |
| queso curado o semicurado o cremoso         | <input type="radio"/> Nunca o menos 1 vez al mes<br><input type="radio"/> 1 a 3 veces mes<br><input type="radio"/> 1 vez semana<br><input type="radio"/> 2 a 4 veces semana<br><input checked="" type="radio"/> 5 a 6 veces semana<br><input type="radio"/> 1 vez al día<br><input type="radio"/> 2 a 3 veces al día<br><input type="radio"/> 5 a 6 veces al día<br><input type="radio"/> más 6 veces al día |
| natillas flan pudding                       | <input checked="" type="radio"/> Nunca o menos 1 vez al mes<br><input type="radio"/> 1 a 3 veces mes<br><input type="radio"/> 1 vez semana<br><input type="radio"/> 2 a 4 veces semana<br><input type="radio"/> 5 a 6 veces semana<br><input type="radio"/> 1 vez al día<br><input type="radio"/> 2 a 3 veces al día<br><input type="radio"/> 5 a 6 veces al día<br><input type="radio"/> más 6 veces al día |
| Helado                                      | <input type="radio"/> Nunca o menos 1 vez al mes<br><input type="radio"/> 1 a 3 veces mes<br><input type="radio"/> 1 vez semana<br><input checked="" type="radio"/> 2 a 4 veces semana<br><input type="radio"/> 5 a 6 veces semana<br><input type="radio"/> 1 vez al día<br><input type="radio"/> 2 a 3 veces al día<br><input type="radio"/> 5 a 6 veces al día<br><input type="radio"/> más 6 veces al día |

|                                      |                                                                                                                                                                                                                                                                                                                                                                                                              |
|--------------------------------------|--------------------------------------------------------------------------------------------------------------------------------------------------------------------------------------------------------------------------------------------------------------------------------------------------------------------------------------------------------------------------------------------------------------|
| huevo                                | <input type="radio"/> Nunca o menos 1 vez al mes<br><input type="radio"/> 1 a 3 veces mes<br><input type="radio"/> 1 vez semana<br><input type="radio"/> 2 a 4 veces semana<br><input checked="" type="radio"/> 5 a 6 veces semana<br><input type="radio"/> 1 vez al día<br><input type="radio"/> 2 a 3 veces al día<br><input type="radio"/> 5 a 6 veces al día<br><input type="radio"/> más 6 veces al día |
| Pollo con piel                       | <input type="radio"/> Nunca o menos 1 vez al mes<br><input type="radio"/> 1 a 3 veces mes<br><input type="radio"/> 1 vez semana<br><input checked="" type="radio"/> 2 a 4 veces semana<br><input type="radio"/> 5 a 6 veces semana<br><input type="radio"/> 1 vez al día<br><input type="radio"/> 2 a 3 veces al día<br><input type="radio"/> 5 a 6 veces al día<br><input type="radio"/> más 6 veces al día |
| pollo sin piel                       | <input type="radio"/> Nunca o menos 1 vez al mes<br><input checked="" type="radio"/> 1 a 3 veces mes<br><input type="radio"/> 1 vez semana<br><input type="radio"/> 2 a 4 veces semana<br><input type="radio"/> 5 a 6 veces semana<br><input type="radio"/> 1 vez al día<br><input type="radio"/> 2 a 3 veces al día<br><input type="radio"/> 5 a 6 veces al día<br><input type="radio"/> más 6 veces al día |
| Ternera o cerdo o cordero            | <input type="radio"/> Nunca o menos 1 vez al mes<br><input type="radio"/> 1 a 3 veces mes<br><input type="radio"/> 1 vez semana<br><input type="radio"/> 2 a 4 veces semana<br><input checked="" type="radio"/> 5 a 6 veces semana<br><input type="radio"/> 1 vez al día<br><input type="radio"/> 2 a 3 veces al día<br><input type="radio"/> 5 a 6 veces al día<br><input type="radio"/> más 6 veces al día |
| carne caza: Conejo o codorniz o pato | <input checked="" type="radio"/> Nunca o menos 1 vez al mes<br><input type="radio"/> 1 a 3 veces mes<br><input type="radio"/> 1 vez semana<br><input type="radio"/> 2 a 4 veces semana<br><input type="radio"/> 5 a 6 veces semana<br><input type="radio"/> 1 vez al día<br><input type="radio"/> 2 a 3 veces al día<br><input type="radio"/> 5 a 6 veces al día<br><input type="radio"/> más 6 veces al día |
| Hígado de ternera o cerdo o pollo    | <input type="radio"/> Nunca o menos 1 vez al mes<br><input checked="" type="radio"/> 1 a 3 veces mes<br><input type="radio"/> 1 vez semana<br><input type="radio"/> 2 a 4 veces semana<br><input type="radio"/> 5 a 6 veces semana<br><input type="radio"/> 1 vez al día<br><input type="radio"/> 2 a 3 veces al día<br><input type="radio"/> 5 a 6 veces al día<br><input type="radio"/> más 6 veces al día |



|                     |                                                                                                                                                                                                                                                                                                                                                                                                              |
|---------------------|--------------------------------------------------------------------------------------------------------------------------------------------------------------------------------------------------------------------------------------------------------------------------------------------------------------------------------------------------------------------------------------------------------------|
| Vísceras            | <input type="radio"/> Nunca o menos 1 vez al mes<br><input checked="" type="radio"/> 1 a 3 veces mes<br><input type="radio"/> 1 vez semana<br><input type="radio"/> 2 a 4 veces semana<br><input type="radio"/> 5 a 6 veces semana<br><input type="radio"/> 1 vez al día<br><input type="radio"/> 2 a 3 veces al día<br><input type="radio"/> 5 a 6 veces al día<br><input type="radio"/> más 6 veces al día |
| Embutido            | <input checked="" type="radio"/> Nunca o menos 1 vez al mes<br><input type="radio"/> 1 a 3 veces mes<br><input type="radio"/> 1 vez semana<br><input type="radio"/> 2 a 4 veces semana<br><input type="radio"/> 5 a 6 veces semana<br><input type="radio"/> 1 vez al día<br><input type="radio"/> 2 a 3 veces al día<br><input type="radio"/> 5 a 6 veces al día<br><input type="radio"/> más 6 veces al día |
| Salchicha o similar | <input type="radio"/> Nunca o menos 1 vez al mes<br><input checked="" type="radio"/> 1 a 3 veces mes<br><input type="radio"/> 1 vez semana<br><input type="radio"/> 2 a 4 veces semana<br><input type="radio"/> 5 a 6 veces semana<br><input type="radio"/> 1 vez al día<br><input type="radio"/> 2 a 3 veces al día<br><input type="radio"/> 5 a 6 veces al día<br><input type="radio"/> más 6 veces al día |
| Pate o foiegras     | <input checked="" type="radio"/> Nunca o menos 1 vez al mes<br><input type="radio"/> 1 a 3 veces mes<br><input type="radio"/> 1 vez semana<br><input type="radio"/> 2 a 4 veces semana<br><input type="radio"/> 5 a 6 veces semana<br><input type="radio"/> 1 vez al día<br><input type="radio"/> 2 a 3 veces al día<br><input type="radio"/> 5 a 6 veces al día<br><input type="radio"/> más 6 veces al día |
| Hamburguesa         | <input type="radio"/> Nunca o menos 1 vez al mes<br><input type="radio"/> 1 a 3 veces mes<br><input checked="" type="radio"/> 1 vez semana<br><input type="radio"/> 2 a 4 veces semana<br><input type="radio"/> 5 a 6 veces semana<br><input type="radio"/> 1 vez al día<br><input type="radio"/> 2 a 3 veces al día<br><input type="radio"/> 5 a 6 veces al día<br><input type="radio"/> más 6 veces al día |
| tocino o bacon      | <input type="radio"/> Nunca o menos 1 vez al mes<br><input checked="" type="radio"/> 1 a 3 veces mes<br><input type="radio"/> 1 vez semana<br><input type="radio"/> 2 a 4 veces semana<br><input type="radio"/> 5 a 6 veces semana<br><input type="radio"/> 1 vez al día<br><input type="radio"/> 2 a 3 veces al día<br><input type="radio"/> 5 a 6 veces al día<br><input type="radio"/> más 6 veces al día |

---

Pescado frito

- ☐ Nunca o menos 1 vez al mes  
☒ 1 a 3 veces mes  
☐ 1 vez semana  
☐ 2 a 4 veces semana  
☐ 5 a 6 veces semana  
☐ 1 vez al día  
☐ 2 a 3 veces al día  
☐ 5 a 6 veces al día  
☐ más 6 veces al día

---

pescado hervido blanco

- ☐ Nunca o menos 1 vez al mes  
☒ 1 a 3 veces mes  
☐ 1 vez semana  
☐ 2 a 4 veces semana  
☐ 5 a 6 veces semana  
☐ 1 vez al día  
☐ 2 a 3 veces al día  
☐ 5 a 6 veces al día  
☐ más 6 veces al día

---

pescado hervido azul

- ☐ Nunca o menos 1 vez al mes  
☐ 1 a 3 veces mes  
☒ 1 vez semana  
☐ 2 a 4 veces semana  
☐ 5 a 6 veces semana  
☐ 1 vez al día  
☐ 2 a 3 veces al día  
☐ 5 a 6 veces al día  
☐ más 6 veces al día

---

otros pescado azul

- ☐ Nunca o menos 1 vez al mes  
☐ 1 a 3 veces mes  
☒ 1 vez semana  
☐ 2 a 4 veces semana  
☐ 5 a 6 veces semana  
☐ 1 vez al día  
☐ 2 a 3 veces al día  
☐ 5 a 6 veces al día  
☐ más 6 veces al día

---

atun conserva

- ☒ Nunca o menos 1 vez al mes  
☐ 1 a 3 veces mes  
☐ 1 vez semana  
☐ 2 a 4 veces semana  
☐ 5 a 6 veces semana  
☐ 1 vez al día  
☐ 2 a 3 veces al día  
☐ 5 a 6 veces al día  
☐ más 6 veces al día

---

sardina conserva

- ☒ Nunca o menos 1 vez al mes  
☐ 1 a 3 veces mes  
☐ 1 vez semana  
☐ 2 a 4 veces semana  
☐ 5 a 6 veces semana  
☐ 1 vez al día  
☐ 2 a 3 veces al día  
☐ 5 a 6 veces al día  
☐ más 6 veces al día

|                                         |                                                                                                                                                                                                                                                                                                                                                                                                              |
|-----------------------------------------|--------------------------------------------------------------------------------------------------------------------------------------------------------------------------------------------------------------------------------------------------------------------------------------------------------------------------------------------------------------------------------------------------------------|
| pescado ahumado                         | <input type="radio"/> Nunca o menos 1 vez al mes<br><input checked="" type="radio"/> 1 a 3 veces mes<br><input type="radio"/> 1 vez semana<br><input type="radio"/> 2 a 4 veces semana<br><input type="radio"/> 5 a 6 veces semana<br><input type="radio"/> 1 vez al día<br><input type="radio"/> 2 a 3 veces al día<br><input type="radio"/> 5 a 6 veces al día<br><input type="radio"/> más 6 veces al día |
| almejas o mejillones o ostras unos 100g | <input checked="" type="radio"/> Nunca o menos 1 vez al mes<br><input type="radio"/> 1 a 3 veces mes<br><input type="radio"/> 1 vez semana<br><input type="radio"/> 2 a 4 veces semana<br><input type="radio"/> 5 a 6 veces semana<br><input type="radio"/> 1 vez al día<br><input type="radio"/> 2 a 3 veces al día<br><input type="radio"/> 5 a 6 veces al día<br><input type="radio"/> más 6 veces al día |
| calamar o chipiron o sepia unos 100g    | <input type="radio"/> Nunca o menos 1 vez al mes<br><input checked="" type="radio"/> 1 a 3 veces mes<br><input type="radio"/> 1 vez semana<br><input type="radio"/> 2 a 4 veces semana<br><input type="radio"/> 5 a 6 veces semana<br><input type="radio"/> 1 vez al día<br><input type="radio"/> 2 a 3 veces al día<br><input type="radio"/> 5 a 6 veces al día<br><input type="radio"/> más 6 veces al día |
| marisco unos 100g                       | <input type="radio"/> Nunca o menos 1 vez al mes<br><input checked="" type="radio"/> 1 a 3 veces mes<br><input type="radio"/> 1 vez semana<br><input type="radio"/> 2 a 4 veces semana<br><input type="radio"/> 5 a 6 veces semana<br><input type="radio"/> 1 vez al día<br><input type="radio"/> 2 a 3 veces al día<br><input type="radio"/> 5 a 6 veces al día<br><input type="radio"/> más 6 veces al día |
| Espinacas o acelgas cocinadas           | <input type="radio"/> Nunca o menos 1 vez al mes<br><input checked="" type="radio"/> 1 a 3 veces mes<br><input type="radio"/> 1 vez semana<br><input type="radio"/> 2 a 4 veces semana<br><input type="radio"/> 5 a 6 veces semana<br><input type="radio"/> 1 vez al día<br><input type="radio"/> 2 a 3 veces al día<br><input type="radio"/> 5 a 6 veces al día<br><input type="radio"/> más 6 veces al día |
| Col o coliflor o brocoli cocinado       | <input type="radio"/> Nunca o menos 1 vez al mes<br><input checked="" type="radio"/> 1 a 3 veces mes<br><input type="radio"/> 1 vez semana<br><input type="radio"/> 2 a 4 veces semana<br><input type="radio"/> 5 a 6 veces semana<br><input type="radio"/> 1 vez al día<br><input type="radio"/> 2 a 3 veces al día<br><input type="radio"/> 5 a 6 veces al día<br><input type="radio"/> más 6 veces al día |

---

Lechuga o endivia o escarola

- ☐ Nunca o menos 1 vez al mes  
☒ 1 a 3 veces mes  
☐ 1 vez semana  
☐ 2 a 4 veces semana  
☐ 5 a 6 veces semana  
☐ 1 vez al día  
☐ 2 a 3 veces al día  
☐ 5 a 6 veces al día  
☐ más 6 veces al día

---

tomate ensalada

- ☒ Nunca o menos 1 vez al mes  
☐ 1 a 3 veces mes  
☐ 1 vez semana  
☐ 2 a 4 veces semana  
☐ 5 a 6 veces semana  
☐ 1 vez al día  
☐ 2 a 3 veces al día  
☐ 5 a 6 veces al día  
☐ más 6 veces al día

---

cebolla

- ☒ Nunca o menos 1 vez al mes  
☐ 1 a 3 veces mes  
☐ 1 vez semana  
☐ 2 a 4 veces semana  
☐ 5 a 6 veces semana  
☐ 1 vez al día  
☐ 2 a 3 veces al día  
☐ 5 a 6 veces al día  
☐ más 6 veces al día

---

Zanahoria o calabaza

- ☐ Nunca o menos 1 vez al mes  
☐ 1 a 3 veces mes  
☐ 1 vez semana  
☐ 2 a 4 veces semana  
☐ 5 a 6 veces semana  
☐ 1 vez al día  
☒ 2 a 3 veces al día  
☐ 5 a 6 veces al día  
☐ más 6 veces al día

---

Judías verdes

- ☒ Nunca o menos 1 vez al mes  
☐ 1 a 3 veces mes  
☐ 1 vez semana  
☐ 2 a 4 veces semana  
☐ 5 a 6 veces semana  
☐ 1 vez al día  
☐ 2 a 3 veces al día  
☐ 5 a 6 veces al día  
☐ más 6 veces al día

---

Berenjena o calabacin o pepino

- ☐ Nunca o menos 1 vez al mes  
☐ 1 a 3 veces mes  
☐ 1 vez semana  
☐ 2 a 4 veces semana  
☒ 5 a 6 veces semana  
☐ 1 vez al día  
☐ 2 a 3 veces al día  
☐ 5 a 6 veces al día  
☐ más 6 veces al día

|                       |                                                                                                                                                                                                                                                                                                                                                                                                              |
|-----------------------|--------------------------------------------------------------------------------------------------------------------------------------------------------------------------------------------------------------------------------------------------------------------------------------------------------------------------------------------------------------------------------------------------------------|
| pimiento              | <input type="radio"/> Nunca o menos 1 vez al mes<br><input type="radio"/> 1 a 3 veces mes<br><input type="radio"/> 1 vez semana<br><input type="radio"/> 2 a 4 veces semana<br><input checked="" type="radio"/> 5 a 6 veces semana<br><input type="radio"/> 1 vez al día<br><input type="radio"/> 2 a 3 veces al día<br><input type="radio"/> 5 a 6 veces al día<br><input type="radio"/> más 6 veces al día |
| alcachofa             | <input checked="" type="radio"/> Nunca o menos 1 vez al mes<br><input type="radio"/> 1 a 3 veces mes<br><input type="radio"/> 1 vez semana<br><input type="radio"/> 2 a 4 veces semana<br><input type="radio"/> 5 a 6 veces semana<br><input type="radio"/> 1 vez al día<br><input type="radio"/> 2 a 3 veces al día<br><input type="radio"/> 5 a 6 veces al día<br><input type="radio"/> más 6 veces al día |
| espárragos            | <input checked="" type="radio"/> Nunca o menos 1 vez al mes<br><input type="radio"/> 1 a 3 veces mes<br><input type="radio"/> 1 vez semana<br><input type="radio"/> 2 a 4 veces semana<br><input type="radio"/> 5 a 6 veces semana<br><input type="radio"/> 1 vez al día<br><input type="radio"/> 2 a 3 veces al día<br><input type="radio"/> 5 a 6 veces al día<br><input type="radio"/> más 6 veces al día |
| maíz hervido          | <input checked="" type="radio"/> Nunca o menos 1 vez al mes<br><input type="radio"/> 1 a 3 veces mes<br><input type="radio"/> 1 vez semana<br><input type="radio"/> 2 a 4 veces semana<br><input type="radio"/> 5 a 6 veces semana<br><input type="radio"/> 1 vez al día<br><input type="radio"/> 2 a 3 veces al día<br><input type="radio"/> 5 a 6 veces al día<br><input type="radio"/> más 6 veces al día |
| legumbres             | <input type="radio"/> Nunca o menos 1 vez al mes<br><input type="radio"/> 1 a 3 veces mes<br><input type="radio"/> 1 vez semana<br><input checked="" type="radio"/> 2 a 4 veces semana<br><input type="radio"/> 5 a 6 veces semana<br><input type="radio"/> 1 vez al día<br><input type="radio"/> 2 a 3 veces al día<br><input type="radio"/> 5 a 6 veces al día<br><input type="radio"/> más 6 veces al día |
| naranjas o mandarinas | <input checked="" type="radio"/> Nunca o menos 1 vez al mes<br><input type="radio"/> 1 a 3 veces mes<br><input type="radio"/> 1 vez semana<br><input type="radio"/> 2 a 4 veces semana<br><input type="radio"/> 5 a 6 veces semana<br><input type="radio"/> 1 vez al día<br><input type="radio"/> 2 a 3 veces al día<br><input type="radio"/> 5 a 6 veces al día<br><input type="radio"/> más 6 veces al día |

|                       |                                                                                                                                                                                                                                                                                                                                                                                                              |
|-----------------------|--------------------------------------------------------------------------------------------------------------------------------------------------------------------------------------------------------------------------------------------------------------------------------------------------------------------------------------------------------------------------------------------------------------|
| zum natural fruta     | <input checked="" type="radio"/> Nunca o menos 1 vez al mes<br><input type="radio"/> 1 a 3 veces mes<br><input type="radio"/> 1 vez semana<br><input type="radio"/> 2 a 4 veces semana<br><input type="radio"/> 5 a 6 veces semana<br><input type="radio"/> 1 vez al día<br><input type="radio"/> 2 a 3 veces al día<br><input type="radio"/> 5 a 6 veces al día<br><input type="radio"/> más 6 veces al día |
| platano               | <input checked="" type="radio"/> Nunca o menos 1 vez al mes<br><input type="radio"/> 1 a 3 veces mes<br><input type="radio"/> 1 vez semana<br><input type="radio"/> 2 a 4 veces semana<br><input type="radio"/> 5 a 6 veces semana<br><input type="radio"/> 1 vez al día<br><input type="radio"/> 2 a 3 veces al día<br><input type="radio"/> 5 a 6 veces al día<br><input type="radio"/> más 6 veces al día |
| manzana o pera        | <input type="radio"/> Nunca o menos 1 vez al mes<br><input type="radio"/> 1 a 3 veces mes<br><input type="radio"/> 1 vez semana<br><input checked="" type="radio"/> 2 a 4 veces semana<br><input type="radio"/> 5 a 6 veces semana<br><input type="radio"/> 1 vez al día<br><input type="radio"/> 2 a 3 veces al día<br><input type="radio"/> 5 a 6 veces al día<br><input type="radio"/> más 6 veces al día |
| melocotón o nectarina | <input checked="" type="radio"/> Nunca o menos 1 vez al mes<br><input type="radio"/> 1 a 3 veces mes<br><input type="radio"/> 1 vez semana<br><input type="radio"/> 2 a 4 veces semana<br><input type="radio"/> 5 a 6 veces semana<br><input type="radio"/> 1 vez al día<br><input type="radio"/> 2 a 3 veces al día<br><input type="radio"/> 5 a 6 veces al día<br><input type="radio"/> más 6 veces al día |
| sandia o melon        | <input checked="" type="radio"/> Nunca o menos 1 vez al mes<br><input type="radio"/> 1 a 3 veces mes<br><input type="radio"/> 1 vez semana<br><input type="radio"/> 2 a 4 veces semana<br><input type="radio"/> 5 a 6 veces semana<br><input type="radio"/> 1 vez al día<br><input type="radio"/> 2 a 3 veces al día<br><input type="radio"/> 5 a 6 veces al día<br><input type="radio"/> más 6 veces al día |
| uva                   | <input checked="" type="radio"/> Nunca o menos 1 vez al mes<br><input type="radio"/> 1 a 3 veces mes<br><input type="radio"/> 1 vez semana<br><input type="radio"/> 2 a 4 veces semana<br><input type="radio"/> 5 a 6 veces semana<br><input type="radio"/> 1 vez al día<br><input type="radio"/> 2 a 3 veces al día<br><input type="radio"/> 5 a 6 veces al día<br><input type="radio"/> más 6 veces al día |

---

bruna o ciruela

- ☒ Nunca o menos 1 vez al mes  
☐ 1 a 3 veces mes  
☐ 1 vez semana  
☐ 2 a 4 veces semana  
☐ 5 a 6 veces semana  
☐ 1 vez al día  
☐ 2 a 3 veces al día  
☐ 5 a 6 veces al día  
☐ más 6 veces al día

---

kiwi

- ☒ Nunca o menos 1 vez al mes  
☐ 1 a 3 veces mes  
☐ 1 vez semana  
☐ 2 a 4 veces semana  
☐ 5 a 6 veces semana  
☐ 1 vez al día  
☐ 2 a 3 veces al día  
☐ 5 a 6 veces al día  
☐ más 6 veces al día

---

aceituna

- ☒ Nunca o menos 1 vez al mes  
☐ 1 a 3 veces mes  
☐ 1 vez semana  
☐ 2 a 4 veces semana  
☐ 5 a 6 veces semana  
☐ 1 vez al día  
☐ 2 a 3 veces al día  
☐ 5 a 6 veces al día  
☐ más 6 veces al día

---

frutos secos

- ☐ Nunca o menos 1 vez al mes  
☐ 1 a 3 veces mes  
☐ 1 vez semana  
☐ 2 a 4 veces semana  
☐ 5 a 6 veces semana  
☒ 1 vez al día  
☐ 2 a 3 veces al día  
☐ 5 a 6 veces al día  
☐ más 6 veces al día

---

pan blanco

- ☐ Nunca o menos 1 vez al mes  
☐ 1 a 3 veces mes  
☐ 1 vez semana  
☐ 2 a 4 veces semana  
☐ 5 a 6 veces semana  
☒ 1 vez al día  
☐ 2 a 3 veces al día  
☐ 5 a 6 veces al día  
☐ más 6 veces al día

---

pan integral

- ☒ Nunca o menos 1 vez al mes  
☐ 1 a 3 veces mes  
☐ 1 vez semana  
☐ 2 a 4 veces semana  
☐ 5 a 6 veces semana  
☐ 1 vez al día  
☐ 2 a 3 veces al día  
☐ 5 a 6 veces al día  
☐ más 6 veces al día

---

cereales desayuno

- ☐ Nunca o menos 1 vez al mes  
☐ 1 a 3 veces mes  
☐ 1 vez semana  
☐ 2 a 4 veces semana  
☐ 5 a 6 veces semana  
☒ 1 vez al día  
☐ 2 a 3 veces al día  
☐ 5 a 6 veces al día  
☐ más 6 veces al día

---

patatas fritas

- ☐ Nunca o menos 1 vez al mes  
☐ 1 a 3 veces mes  
☐ 1 vez semana  
☒ 2 a 4 veces semana  
☐ 5 a 6 veces semana  
☐ 1 vez al día  
☐ 2 a 3 veces al día  
☐ 5 a 6 veces al día  
☐ más 6 veces al día

---

patatas cocidas o asadas

- ☐ Nunca o menos 1 vez al mes  
☐ 1 a 3 veces mes  
☐ 1 vez semana  
☒ 2 a 4 veces semana  
☐ 5 a 6 veces semana  
☐ 1 vez al día  
☐ 2 a 3 veces al día  
☐ 5 a 6 veces al día  
☐ más 6 veces al día

---

bolsa papas

- ☐ Nunca o menos 1 vez al mes  
☐ 1 a 3 veces mes  
☒ 1 vez semana  
☐ 2 a 4 veces semana  
☐ 5 a 6 veces semana  
☐ 1 vez al día  
☐ 2 a 3 veces al día  
☐ 5 a 6 veces al día  
☐ más 6 veces al día

---

arroz cocinado

- ☐ Nunca o menos 1 vez al mes  
☐ 1 a 3 veces mes  
☐ 1 vez semana  
☐ 2 a 4 veces semana  
☒ 5 a 6 veces semana  
☐ 1 vez al día  
☐ 2 a 3 veces al día  
☐ 5 a 6 veces al día  
☐ más 6 veces al día

---

pasta

- ☐ Nunca o menos 1 vez al mes  
☐ 1 a 3 veces mes  
☐ 1 vez semana  
☐ 2 a 4 veces semana  
☒ 5 a 6 veces semana  
☐ 1 vez al día  
☐ 2 a 3 veces al día  
☐ 5 a 6 veces al día  
☐ más 6 veces al día



|                     |                                                                                                                                                                                                                                                                                                                                                                                                              |
|---------------------|--------------------------------------------------------------------------------------------------------------------------------------------------------------------------------------------------------------------------------------------------------------------------------------------------------------------------------------------------------------------------------------------------------------|
| pizza               | <input type="radio"/> Nunca o menos 1 vez al mes<br><input type="radio"/> 1 a 3 veces mes<br><input type="radio"/> 1 vez semana<br><input checked="" type="radio"/> 2 a 4 veces semana<br><input type="radio"/> 5 a 6 veces semana<br><input type="radio"/> 1 vez al día<br><input type="radio"/> 2 a 3 veces al día<br><input type="radio"/> 5 a 6 veces al día<br><input type="radio"/> más 6 veces al día |
| aceite oliva        | <input type="radio"/> Nunca o menos 1 vez al mes<br><input type="radio"/> 1 a 3 veces mes<br><input type="radio"/> 1 vez semana<br><input type="radio"/> 2 a 4 veces semana<br><input type="radio"/> 5 a 6 veces semana<br><input checked="" type="radio"/> 1 vez al día<br><input type="radio"/> 2 a 3 veces al día<br><input type="radio"/> 5 a 6 veces al día<br><input type="radio"/> más 6 veces al día |
| otros aceites       | <input checked="" type="radio"/> Nunca o menos 1 vez al mes<br><input type="radio"/> 1 a 3 veces mes<br><input type="radio"/> 1 vez semana<br><input type="radio"/> 2 a 4 veces semana<br><input type="radio"/> 5 a 6 veces semana<br><input type="radio"/> 1 vez al día<br><input type="radio"/> 2 a 3 veces al día<br><input type="radio"/> 5 a 6 veces al día<br><input type="radio"/> más 6 veces al día |
| margarina           | <input checked="" type="radio"/> Nunca o menos 1 vez al mes<br><input type="radio"/> 1 a 3 veces mes<br><input type="radio"/> 1 vez semana<br><input type="radio"/> 2 a 4 veces semana<br><input type="radio"/> 5 a 6 veces semana<br><input type="radio"/> 1 vez al día<br><input type="radio"/> 2 a 3 veces al día<br><input type="radio"/> 5 a 6 veces al día<br><input type="radio"/> más 6 veces al día |
| mantequilla         | <input checked="" type="radio"/> Nunca o menos 1 vez al mes<br><input type="radio"/> 1 a 3 veces mes<br><input type="radio"/> 1 vez semana<br><input type="radio"/> 2 a 4 veces semana<br><input type="radio"/> 5 a 6 veces semana<br><input type="radio"/> 1 vez al día<br><input type="radio"/> 2 a 3 veces al día<br><input type="radio"/> 5 a 6 veces al día<br><input type="radio"/> más 6 veces al día |
| galletas tipo maria | <input type="radio"/> Nunca o menos 1 vez al mes<br><input type="radio"/> 1 a 3 veces mes<br><input checked="" type="radio"/> 1 vez semana<br><input type="radio"/> 2 a 4 veces semana<br><input type="radio"/> 5 a 6 veces semana<br><input type="radio"/> 1 vez al día<br><input type="radio"/> 2 a 3 veces al día<br><input type="radio"/> 5 a 6 veces al día<br><input type="radio"/> más 6 veces al día |

|                           |                                                                                                                                                                                                                                                                                                                                                                                                              |
|---------------------------|--------------------------------------------------------------------------------------------------------------------------------------------------------------------------------------------------------------------------------------------------------------------------------------------------------------------------------------------------------------------------------------------------------------|
| galletas chocolate        | <input type="radio"/> Nunca o menos 1 vez al mes<br><input type="radio"/> 1 a 3 veces mes<br><input type="radio"/> 1 vez semana<br><input type="radio"/> 2 a 4 veces semana<br><input type="radio"/> 5 a 6 veces semana<br><input type="radio"/> 1 vez al día<br><input type="radio"/> 2 a 3 veces al día<br><input type="radio"/> 5 a 6 veces al día<br><input type="radio"/> más 6 veces al día            |
| bollieria                 | <input type="radio"/> Nunca o menos 1 vez al mes<br><input type="radio"/> 1 a 3 veces mes<br><input type="radio"/> 1 vez semana<br><input type="radio"/> 2 a 4 veces semana<br><input type="radio"/> 5 a 6 veces semana<br><input checked="" type="radio"/> 1 vez al día<br><input type="radio"/> 2 a 3 veces al día<br><input type="radio"/> 5 a 6 veces al día<br><input type="radio"/> más 6 veces al día |
| chocolate o bombones      | <input type="radio"/> Nunca o menos 1 vez al mes<br><input checked="" type="radio"/> 1 a 3 veces mes<br><input type="radio"/> 1 vez semana<br><input type="radio"/> 2 a 4 veces semana<br><input type="radio"/> 5 a 6 veces semana<br><input type="radio"/> 1 vez al día<br><input type="radio"/> 2 a 3 veces al día<br><input type="radio"/> 5 a 6 veces al día<br><input type="radio"/> más 6 veces al día |
| chocolate polvo o colacao | <input type="radio"/> Nunca o menos 1 vez al mes<br><input type="radio"/> 1 a 3 veces mes<br><input type="radio"/> 1 vez semana<br><input type="radio"/> 2 a 4 veces semana<br><input type="radio"/> 5 a 6 veces semana<br><input checked="" type="radio"/> 1 vez al día<br><input type="radio"/> 2 a 3 veces al día<br><input type="radio"/> 5 a 6 veces al día<br><input type="radio"/> más 6 veces al día |
| vino tinto                | <input checked="" type="radio"/> Nunca o menos 1 vez al mes<br><input type="radio"/> 1 a 3 veces mes<br><input type="radio"/> 1 vez semana<br><input type="radio"/> 2 a 4 veces semana<br><input type="radio"/> 5 a 6 veces semana<br><input type="radio"/> 1 vez al día<br><input type="radio"/> 2 a 3 veces al día<br><input type="radio"/> 5 a 6 veces al día<br><input type="radio"/> más 6 veces al día |
| vino blanco               | <input checked="" type="radio"/> Nunca o menos 1 vez al mes<br><input type="radio"/> 1 a 3 veces mes<br><input type="radio"/> 1 vez semana<br><input type="radio"/> 2 a 4 veces semana<br><input type="radio"/> 5 a 6 veces semana<br><input type="radio"/> 1 vez al día<br><input type="radio"/> 2 a 3 veces al día<br><input type="radio"/> 5 a 6 veces al día<br><input type="radio"/> más 6 veces al día |

|                       |                                                                                                                                                                                                                                                                                                                                                                                                              |
|-----------------------|--------------------------------------------------------------------------------------------------------------------------------------------------------------------------------------------------------------------------------------------------------------------------------------------------------------------------------------------------------------------------------------------------------------|
| vino seco o vermut    | <input checked="" type="radio"/> Nunca o menos 1 vez al mes<br><input type="radio"/> 1 a 3 veces mes<br><input type="radio"/> 1 vez semana<br><input type="radio"/> 2 a 4 veces semana<br><input type="radio"/> 5 a 6 veces semana<br><input type="radio"/> 1 vez al día<br><input type="radio"/> 2 a 3 veces al día<br><input type="radio"/> 5 a 6 veces al día<br><input type="radio"/> más 6 veces al día |
| cerveza               | <input checked="" type="radio"/> Nunca o menos 1 vez al mes<br><input type="radio"/> 1 a 3 veces mes<br><input type="radio"/> 1 vez semana<br><input type="radio"/> 2 a 4 veces semana<br><input type="radio"/> 5 a 6 veces semana<br><input type="radio"/> 1 vez al día<br><input type="radio"/> 2 a 3 veces al día<br><input type="radio"/> 5 a 6 veces al día<br><input type="radio"/> más 6 veces al día |
| cerveza sin alcohol   | <input type="radio"/> Nunca o menos 1 vez al mes<br><input checked="" type="radio"/> 1 a 3 veces mes<br><input type="radio"/> 1 vez semana<br><input type="radio"/> 2 a 4 veces semana<br><input type="radio"/> 5 a 6 veces semana<br><input type="radio"/> 1 vez al día<br><input type="radio"/> 2 a 3 veces al día<br><input type="radio"/> 5 a 6 veces al día<br><input type="radio"/> más 6 veces al día |
| licores               | <input checked="" type="radio"/> Nunca o menos 1 vez al mes<br><input type="radio"/> 1 a 3 veces mes<br><input type="radio"/> 1 vez semana<br><input type="radio"/> 2 a 4 veces semana<br><input type="radio"/> 5 a 6 veces semana<br><input type="radio"/> 1 vez al día<br><input type="radio"/> 2 a 3 veces al día<br><input type="radio"/> 5 a 6 veces al día<br><input type="radio"/> más 6 veces al día |
| ginebra o ron o vodka | <input checked="" type="radio"/> Nunca o menos 1 vez al mes<br><input type="radio"/> 1 a 3 veces mes<br><input type="radio"/> 1 vez semana<br><input type="radio"/> 2 a 4 veces semana<br><input type="radio"/> 5 a 6 veces semana<br><input type="radio"/> 1 vez al día<br><input type="radio"/> 2 a 3 veces al día<br><input type="radio"/> 5 a 6 veces al día<br><input type="radio"/> más 6 veces al día |
| refresco normal       | <input checked="" type="radio"/> Nunca o menos 1 vez al mes<br><input type="radio"/> 1 a 3 veces mes<br><input type="radio"/> 1 vez semana<br><input type="radio"/> 2 a 4 veces semana<br><input type="radio"/> 5 a 6 veces semana<br><input type="radio"/> 1 vez al día<br><input type="radio"/> 2 a 3 veces al día<br><input type="radio"/> 5 a 6 veces al día<br><input type="radio"/> más 6 veces al día |

|                          |                                                                                                                                                                                                                                                                                                                                                                                                              |
|--------------------------|--------------------------------------------------------------------------------------------------------------------------------------------------------------------------------------------------------------------------------------------------------------------------------------------------------------------------------------------------------------------------------------------------------------|
| refresco sin azúcar      | <input checked="" type="radio"/> Nunca o menos 1 vez al mes<br><input type="radio"/> 1 a 3 veces mes<br><input type="radio"/> 1 vez semana<br><input type="radio"/> 2 a 4 veces semana<br><input type="radio"/> 5 a 6 veces semana<br><input type="radio"/> 1 vez al día<br><input type="radio"/> 2 a 3 veces al día<br><input type="radio"/> 5 a 6 veces al día<br><input type="radio"/> más 6 veces al día |
| Agua del grifo           | <input checked="" type="radio"/> Nunca o menos 1 vez al mes<br><input type="radio"/> 1 a 3 veces mes<br><input type="radio"/> 1 vez semana<br><input type="radio"/> 2 a 4 veces semana<br><input type="radio"/> 5 a 6 veces semana<br><input type="radio"/> 1 vez al día<br><input type="radio"/> 2 a 3 veces al día<br><input type="radio"/> 5 a 6 veces al día<br><input type="radio"/> más 6 veces al día |
| agua embotellada sin gas | <input type="radio"/> Nunca o menos 1 vez al mes<br><input type="radio"/> 1 a 3 veces mes<br><input type="radio"/> 1 vez semana<br><input type="radio"/> 2 a 4 veces semana<br><input type="radio"/> 5 a 6 veces semana<br><input type="radio"/> 1 vez al día<br><input type="radio"/> 2 a 3 veces al día<br><input checked="" type="radio"/> 5 a 6 veces al día<br><input type="radio"/> más 6 veces al día |
| agua embotellada con gas | <input checked="" type="radio"/> Nunca o menos 1 vez al mes<br><input type="radio"/> 1 a 3 veces mes<br><input type="radio"/> 1 vez semana<br><input type="radio"/> 2 a 4 veces semana<br><input type="radio"/> 5 a 6 veces semana<br><input type="radio"/> 1 vez al día<br><input type="radio"/> 2 a 3 veces al día<br><input type="radio"/> 5 a 6 veces al día<br><input type="radio"/> más 6 veces al día |
| zumو frutas embasado     | <input checked="" type="radio"/> Nunca o menos 1 vez al mes<br><input type="radio"/> 1 a 3 veces mes<br><input type="radio"/> 1 vez semana<br><input type="radio"/> 2 a 4 veces semana<br><input type="radio"/> 5 a 6 veces semana<br><input type="radio"/> 1 vez al día<br><input type="radio"/> 2 a 3 veces al día<br><input type="radio"/> 5 a 6 veces al día<br><input type="radio"/> más 6 veces al día |
| cafe                     | <input checked="" type="radio"/> Nunca o menos 1 vez al mes<br><input type="radio"/> 1 a 3 veces mes<br><input type="radio"/> 1 vez semana<br><input type="radio"/> 2 a 4 veces semana<br><input type="radio"/> 5 a 6 veces semana<br><input type="radio"/> 1 vez al día<br><input type="radio"/> 2 a 3 veces al día<br><input type="radio"/> 5 a 6 veces al día<br><input type="radio"/> más 6 veces al día |

|                       |                                                                                                                                                                                                                                                                                                                                                                                                              |
|-----------------------|--------------------------------------------------------------------------------------------------------------------------------------------------------------------------------------------------------------------------------------------------------------------------------------------------------------------------------------------------------------------------------------------------------------|
| cafe descafeinado     | <input checked="" type="radio"/> Nunca o menos 1 vez al mes<br><input type="radio"/> 1 a 3 veces mes<br><input type="radio"/> 1 vez semana<br><input type="radio"/> 2 a 4 veces semana<br><input type="radio"/> 5 a 6 veces semana<br><input type="radio"/> 1 vez al día<br><input type="radio"/> 2 a 3 veces al día<br><input type="radio"/> 5 a 6 veces al día<br><input type="radio"/> más 6 veces al día |
| te o infusión         | <input type="radio"/> Nunca o menos 1 vez al mes<br><input type="radio"/> 1 a 3 veces mes<br><input type="radio"/> 1 vez semana<br><input checked="" type="radio"/> 2 a 4 veces semana<br><input type="radio"/> 5 a 6 veces semana<br><input type="radio"/> 1 vez al día<br><input type="radio"/> 2 a 3 veces al día<br><input type="radio"/> 5 a 6 veces al día<br><input type="radio"/> más 6 veces al día |
| sopa o puré verduras  | <input type="radio"/> Nunca o menos 1 vez al mes<br><input type="radio"/> 1 a 3 veces mes<br><input type="radio"/> 1 vez semana<br><input checked="" type="radio"/> 2 a 4 veces semana<br><input type="radio"/> 5 a 6 veces semana<br><input type="radio"/> 1 vez al día<br><input type="radio"/> 2 a 3 veces al día<br><input type="radio"/> 5 a 6 veces al día<br><input type="radio"/> más 6 veces al día |
| croquetas pollo jamón | <input type="radio"/> Nunca o menos 1 vez al mes<br><input checked="" type="radio"/> 1 a 3 veces mes<br><input type="radio"/> 1 vez semana<br><input type="radio"/> 2 a 4 veces semana<br><input type="radio"/> 5 a 6 veces semana<br><input type="radio"/> 1 vez al día<br><input type="radio"/> 2 a 3 veces al día<br><input type="radio"/> 5 a 6 veces al día<br><input type="radio"/> más 6 veces al día |
| croquetas pescado     | <input type="radio"/> Nunca o menos 1 vez al mes<br><input checked="" type="radio"/> 1 a 3 veces mes<br><input type="radio"/> 1 vez semana<br><input type="radio"/> 2 a 4 veces semana<br><input type="radio"/> 5 a 6 veces semana<br><input type="radio"/> 1 vez al día<br><input type="radio"/> 2 a 3 veces al día<br><input type="radio"/> 5 a 6 veces al día<br><input type="radio"/> más 6 veces al día |
| mayonesa              | <input checked="" type="radio"/> Nunca o menos 1 vez al mes<br><input type="radio"/> 1 a 3 veces mes<br><input type="radio"/> 1 vez semana<br><input type="radio"/> 2 a 4 veces semana<br><input type="radio"/> 5 a 6 veces semana<br><input type="radio"/> 1 vez al día<br><input type="radio"/> 2 a 3 veces al día<br><input type="radio"/> 5 a 6 veces al día<br><input type="radio"/> más 6 veces al día |

|                  |                                                                                                                                                                                                                                                                                                                                                                                                              |
|------------------|--------------------------------------------------------------------------------------------------------------------------------------------------------------------------------------------------------------------------------------------------------------------------------------------------------------------------------------------------------------------------------------------------------------|
| salsa tomate     | <input checked="" type="radio"/> Nunca o menos 1 vez al mes<br><input type="radio"/> 1 a 3 veces mes<br><input type="radio"/> 1 vez semana<br><input type="radio"/> 2 a 4 veces semana<br><input type="radio"/> 5 a 6 veces semana<br><input type="radio"/> 1 vez al día<br><input type="radio"/> 2 a 3 veces al día<br><input type="radio"/> 5 a 6 veces al día<br><input type="radio"/> más 6 veces al día |
| ketchup          | <input checked="" type="radio"/> Nunca o menos 1 vez al mes<br><input type="radio"/> 1 a 3 veces mes<br><input type="radio"/> 1 vez semana<br><input type="radio"/> 2 a 4 veces semana<br><input type="radio"/> 5 a 6 veces semana<br><input type="radio"/> 1 vez al día<br><input type="radio"/> 2 a 3 veces al día<br><input type="radio"/> 5 a 6 veces al día<br><input type="radio"/> más 6 veces al día |
| sal              | <input type="radio"/> Nunca o menos 1 vez al mes<br><input type="radio"/> 1 a 3 veces mes<br><input checked="" type="radio"/> 1 vez semana<br><input type="radio"/> 2 a 4 veces semana<br><input type="radio"/> 5 a 6 veces semana<br><input type="radio"/> 1 vez al día<br><input type="radio"/> 2 a 3 veces al día<br><input type="radio"/> 5 a 6 veces al día<br><input type="radio"/> más 6 veces al día |
| ajo              | <input checked="" type="radio"/> Nunca o menos 1 vez al mes<br><input type="radio"/> 1 a 3 veces mes<br><input type="radio"/> 1 vez semana<br><input type="radio"/> 2 a 4 veces semana<br><input type="radio"/> 5 a 6 veces semana<br><input type="radio"/> 1 vez al día<br><input type="radio"/> 2 a 3 veces al día<br><input type="radio"/> 5 a 6 veces al día<br><input type="radio"/> más 6 veces al día |
| mermelada o miel | <input checked="" type="radio"/> Nunca o menos 1 vez al mes<br><input type="radio"/> 1 a 3 veces mes<br><input type="radio"/> 1 vez semana<br><input type="radio"/> 2 a 4 veces semana<br><input type="radio"/> 5 a 6 veces semana<br><input type="radio"/> 1 vez al día<br><input type="radio"/> 2 a 3 veces al día<br><input type="radio"/> 5 a 6 veces al día<br><input type="radio"/> más 6 veces al día |
| azúcar           | <input checked="" type="radio"/> Nunca o menos 1 vez al mes<br><input type="radio"/> 1 a 3 veces mes<br><input type="radio"/> 1 vez semana<br><input type="radio"/> 2 a 4 veces semana<br><input type="radio"/> 5 a 6 veces semana<br><input type="radio"/> 1 vez al día<br><input type="radio"/> 2 a 3 veces al día<br><input type="radio"/> 5 a 6 veces al día<br><input type="radio"/> más 6 veces al día |

|                                       |                                                                                                                                                                                                                                                                                                                                                                                                                                                                                                                               |
|---------------------------------------|-------------------------------------------------------------------------------------------------------------------------------------------------------------------------------------------------------------------------------------------------------------------------------------------------------------------------------------------------------------------------------------------------------------------------------------------------------------------------------------------------------------------------------|
| Otro alimento                         | <hr/>                                                                                                                                                                                                                                                                                                                                                                                                                                                                                                                         |
| suplementos vitamínicos               | <input type="radio"/> si<br><input checked="" type="radio"/> no                                                                                                                                                                                                                                                                                                                                                                                                                                                               |
| suplementos vitamínicos               | <hr/>                                                                                                                                                                                                                                                                                                                                                                                                                                                                                                                         |
| dieta previa                          | <input type="radio"/> si<br><input checked="" type="radio"/> no                                                                                                                                                                                                                                                                                                                                                                                                                                                               |
| motivo dieta                          | <input checked="" type="radio"/> no dieta<br><input type="radio"/> control peso<br><input type="radio"/> control colesterol<br><input type="radio"/> control diabetes<br><input type="radio"/> problemas estómago<br><input type="radio"/> problemas vesícula o hepáticos<br><input type="radio"/> HTA o cardiopatía<br><input type="radio"/> problemas renales<br><input type="radio"/> alergia alimentaria<br><input type="radio"/> ácido úrico elevado<br><input type="radio"/> vegetariana<br><input type="radio"/> otros |
| cambio alimentos año previo gestación | <input type="radio"/> si<br><input checked="" type="radio"/> no                                                                                                                                                                                                                                                                                                                                                                                                                                                               |
| cambio lácteos                        | <input type="radio"/> eliminado<br><input type="radio"/> disminuido<br><input type="radio"/> igual<br><input type="radio"/> aumentado<br><input type="radio"/> no sabe                                                                                                                                                                                                                                                                                                                                                        |
| cambio huevos                         | <input type="radio"/> eliminado<br><input type="radio"/> disminuido<br><input type="radio"/> igual<br><input type="radio"/> aumentado<br><input type="radio"/> no sabe                                                                                                                                                                                                                                                                                                                                                        |
| cambio carne                          | <input type="radio"/> eliminado<br><input type="radio"/> disminuido<br><input type="radio"/> igual<br><input type="radio"/> aumentado<br><input type="radio"/> no sabe                                                                                                                                                                                                                                                                                                                                                        |
| cambio pescado                        | <input type="radio"/> eliminado<br><input type="radio"/> disminuido<br><input type="radio"/> igual<br><input type="radio"/> aumentado<br><input type="radio"/> no sabe                                                                                                                                                                                                                                                                                                                                                        |
| cambio verduras                       | <input type="radio"/> eliminado<br><input type="radio"/> disminuido<br><input type="radio"/> igual<br><input type="radio"/> aumentado<br><input type="radio"/> no sabe                                                                                                                                                                                                                                                                                                                                                        |

|                            |                                                                                                                                                                                                                        |
|----------------------------|------------------------------------------------------------------------------------------------------------------------------------------------------------------------------------------------------------------------|
| cambio legumbres           | <input type="radio"/> eliminado<br><input type="radio"/> disminuido<br><input type="radio"/> igual<br><input type="radio"/> aumentado<br><input type="radio"/> no sabe                                                 |
| cambio fruta               | <input type="radio"/> eliminado<br><input type="radio"/> disminuido<br><input type="radio"/> igual<br><input type="radio"/> aumentado<br><input type="radio"/> no sabe                                                 |
| cambio pan                 | <input type="radio"/> eliminado<br><input type="radio"/> disminuido<br><input type="radio"/> igual<br><input type="radio"/> aumentado<br><input type="radio"/> no sabe                                                 |
| cambio aceite oliva        | <input type="radio"/> eliminado<br><input type="radio"/> disminuido<br><input type="radio"/> igual<br><input type="radio"/> aumentado<br><input type="radio"/> no sabe                                                 |
| cambio mante o margarina   | <input type="radio"/> eliminado<br><input type="radio"/> disminuido<br><input type="radio"/> igual<br><input type="radio"/> aumentado<br><input type="radio"/> no sabe                                                 |
| cambio azúcar y dulces     | <input type="radio"/> eliminado<br><input type="radio"/> disminuido<br><input type="radio"/> igual<br><input type="radio"/> aumentado<br><input type="radio"/> no sabe                                                 |
| cambio bebidas alcohólicas | <input type="radio"/> eliminado<br><input type="radio"/> disminuido<br><input type="radio"/> igual<br><input type="radio"/> aumentado<br><input type="radio"/> no sabe                                                 |
| frecuencia comidas fritas  | <input type="radio"/> a diario<br><input type="radio"/> 5 a 6 veces semana<br><input type="radio"/> 2 a 4 veces semana<br><input checked="" type="radio"/> 1 vez semana<br><input type="radio"/> menos de 1 vez semana |
| carne                      | <input type="radio"/> no como<br><input type="radio"/> cruda<br><input type="radio"/> poco hecha<br><input type="radio"/> hecha<br><input checked="" type="radio"/> muy hecha                                          |
| grasa visible carne        | <input checked="" type="radio"/> quita toda<br><input type="radio"/> quita mayoría<br><input type="radio"/> quita un poco<br><input type="radio"/> no quita nada                                                       |



|                                |                                                                                                                                                                                                                                                          |
|--------------------------------|----------------------------------------------------------------------------------------------------------------------------------------------------------------------------------------------------------------------------------------------------------|
| cocina carne                   | <input checked="" type="radio"/> a la plancha<br><input type="radio"/> a la parrilla<br><input type="radio"/> asada<br><input type="radio"/> frita<br><input type="radio"/> guisada                                                                      |
| tostado quemado carne          | <input type="radio"/> nunca<br><input checked="" type="radio"/> 1 vez mes<br><input type="radio"/> 2 a 3 veces mes<br><input type="radio"/> 1 vez semana<br><input type="radio"/> 2 a 3 semanas                                                          |
| tostado quemado pescado        | <input type="radio"/> nunca<br><input checked="" type="radio"/> 1 vez mes<br><input type="radio"/> 2 a 3 veces mes<br><input type="radio"/> 1 vez semana<br><input type="radio"/> 2 a 3 semanas                                                          |
| socarrat paella                | <input checked="" type="radio"/> nunca<br><input type="radio"/> 1 vez mes<br><input type="radio"/> 2 a 3 veces mes<br><input type="radio"/> 1 vez semana<br><input type="radio"/> 2 a 3 semanas                                                          |
| grasa o aceite cocinar         | <input type="radio"/> mantequilla<br><input type="radio"/> margarina<br><input type="radio"/> aceite oliva<br><input checked="" type="radio"/> aceite oliva virgen extra<br><input type="radio"/> aceite vegetal<br><input type="radio"/> mezcla aceites |
| grasa aceite aliñar            | <input type="radio"/> mantequilla<br><input type="radio"/> margarina<br><input type="radio"/> aceite oliva<br><input checked="" type="radio"/> aceite oliva virgen extra<br><input type="radio"/> aceite vegetal<br><input type="radio"/> mezcla aceites |
| grasa aceite freir             | <input type="radio"/> mantequilla<br><input type="radio"/> margarina<br><input type="radio"/> aceite oliva<br><input checked="" type="radio"/> aceite oliva virgen extra<br><input type="radio"/> aceite vegetal<br><input type="radio"/> mezcla aceites |
| Ejercicio cuestionario         | <input checked="" type="radio"/> si<br><input type="radio"/> no                                                                                                                                                                                          |
| horas de sueño incluido siesta | [*DATA REMOVED*]                                                                                                                                                                                                                                         |
| minutos siesta                 | _____                                                                                                                                                                                                                                                    |
| horas televisión semana        | _____                                                                                                                                                                                                                                                    |

|                                        |                                                                                                                                                                                                                                                                                                                                                                           |
|----------------------------------------|---------------------------------------------------------------------------------------------------------------------------------------------------------------------------------------------------------------------------------------------------------------------------------------------------------------------------------------------------------------------------|
| actividad trabajo                      | <input type="radio"/> casi siempre sentado<br><input checked="" type="radio"/> sentado 50 por cien<br><input type="radio"/> casi siempre de pie, quieto<br><input type="radio"/> casi siempre levantado caminando y llevando pocas cosas<br><input type="radio"/> casi siempre levantado, caminando y llevado muchas cosas<br><input type="radio"/> trabajo manual pesado |
| tiempo caminar o bici al día           | <input type="radio"/> casi nunca<br><input type="radio"/> menos 20min día<br><input type="radio"/> 20 a 40 min día<br><input type="radio"/> 40 a 60 min día<br><input type="radio"/> 1h o 1h y media día<br><input checked="" type="radio"/> más de 1h y media al día                                                                                                     |
| tiempo tareas casa al día              | <input type="radio"/> menos de 1h día<br><input checked="" type="radio"/> 1 a 2h día<br><input type="radio"/> 3 a 4h día<br><input type="radio"/> 5 a 6h día<br><input type="radio"/> 7 a 8h día<br><input type="radio"/> más de 8h día                                                                                                                                   |
| tiempo libre televisión ordenador leer | <input type="radio"/> menos 1h día<br><input type="radio"/> 1h día<br><input checked="" type="radio"/> 2h día<br><input type="radio"/> 3h día<br><input type="radio"/> 4h día<br><input type="radio"/> 5 a 6h día<br><input type="radio"/> mas 6h día                                                                                                                     |
| tiempo libre ejercicio o deporte       | <input type="radio"/> menos 1h semana<br><input type="radio"/> 1h semana<br><input type="radio"/> 2h semana<br><input type="radio"/> 3h semana<br><input type="radio"/> 4 a 5h semana<br><input checked="" type="radio"/> mas 5h semana                                                                                                                                   |
| como se considera                      | <input type="radio"/> sedentaria<br><input type="radio"/> poco activa<br><input type="radio"/> moderadamente activa<br><input type="radio"/> bastante activa<br><input checked="" type="radio"/> muy activa<br><input type="radio"/> no sabe                                                                                                                              |
| FUR                                    | [*DATA REMOVED*]                                                                                                                                                                                                                                                                                                                                                          |
| Semanas gestación 2T                   | [*DATA REMOVED*]                                                                                                                                                                                                                                                                                                                                                          |
| Días gestación 2T                      | [*DATA REMOVED*]                                                                                                                                                                                                                                                                                                                                                          |
| DBP 2T                                 | [*DATA REMOVED*]                                                                                                                                                                                                                                                                                                                                                          |
| CC 2T                                  | [*DATA REMOVED*]                                                                                                                                                                                                                                                                                                                                                          |
| AC 2T                                  | [*DATA REMOVED*]                                                                                                                                                                                                                                                                                                                                                          |

|                                                   |                                                                                                                                                                                                 |
|---------------------------------------------------|-------------------------------------------------------------------------------------------------------------------------------------------------------------------------------------------------|
| LF 2T                                             | [*DATA REMOVED*]                                                                                                                                                                                |
| PFE 2T (Hadlock)                                  | [*DATA REMOVED*]                                                                                                                                                                                |
| Semanas gestación 3T                              | [*DATA REMOVED*]                                                                                                                                                                                |
| días 3T                                           | [*DATA REMOVED*]                                                                                                                                                                                |
| DBP 3T                                            | [*DATA REMOVED*]                                                                                                                                                                                |
| CC 3T                                             | [*DATA REMOVED*]                                                                                                                                                                                |
| AC 3T                                             | [*DATA REMOVED*]                                                                                                                                                                                |
| LF 3T                                             | [*DATA REMOVED*]                                                                                                                                                                                |
| PFE 3T (Hadlock)                                  | [*DATA REMOVED*]                                                                                                                                                                                |
| Semanas de gestación final                        | [*DATA REMOVED*]                                                                                                                                                                                |
| días gestación final                              | [*DATA REMOVED*]                                                                                                                                                                                |
| Localización placenta                             | <input checked="" type="radio"/> anterior<br><input type="radio"/> lateral derecha<br><input type="radio"/> lateral izquierda<br><input type="radio"/> posterior<br><input type="radio"/> fondo |
| Presentación longitudinal cefálica                | <input type="radio"/> no<br><input checked="" type="radio"/> si                                                                                                                                 |
| Dorso                                             | <input type="radio"/> izquierda anterior<br><input checked="" type="radio"/> izquierda posterior<br><input type="radio"/> derecha anterior<br><input type="radio"/> derecha posterior           |
| diámetro biparietal                               | [*DATA REMOVED*]                                                                                                                                                                                |
| Circunferencia craneal                            | [*DATA REMOVED*]                                                                                                                                                                                |
| Circunferencia abdominal                          | [*DATA REMOVED*]                                                                                                                                                                                |
| Longitud de femur                                 | [*DATA REMOVED*]                                                                                                                                                                                |
| tejido celular subcutáneo a nivel del muslo en mm | [*DATA REMOVED*]                                                                                                                                                                                |
| tejido celular subcutáneo en abdomen en mm        | [*DATA REMOVED*]                                                                                                                                                                                |
| Volumen del muslo en cm3                          | [*DATA REMOVED*]                                                                                                                                                                                |
| Peso fetal estimado según fórmula de Hadlock      | [*DATA REMOVED*]                                                                                                                                                                                |

|                                               |                                                                                                                                                          |
|-----------------------------------------------|----------------------------------------------------------------------------------------------------------------------------------------------------------|
| Percentil                                     | [*DATA REMOVED*]                                                                                                                                         |
| Peso fetal estimado según fórmula de Scioscia | <hr/>                                                                                                                                                    |
| Peso fetal estimado según fórmula de LEE      | <hr/>                                                                                                                                                    |
| Tipo de parto                                 | <input checked="" type="radio"/> eutocico<br><input type="radio"/> instrumentado/ventosa<br><input type="radio"/> cesarea                                |
| fecha de nacimiento                           | [*DATA REMOVED*]                                                                                                                                         |
| Días entre exploración y nacimiento           | [*DATA REMOVED*]                                                                                                                                         |
| Peso RN en g                                  | [*DATA REMOVED*]                                                                                                                                         |
| sexo                                          | <input type="radio"/> mujer<br><input checked="" type="radio"/> hombre                                                                                   |
| Apgar 1 minuto                                | [*DATA REMOVED*]                                                                                                                                         |
| Apgar 5 minutos                               | [*DATA REMOVED*]                                                                                                                                         |
| Apgar 10 minutos                              | <hr/>                                                                                                                                                    |
| antecedente Covid durante gestación           | <input type="radio"/> Yes<br><input checked="" type="radio"/> No                                                                                         |
| Nivel de estudios                             | <input type="radio"/> ninguno<br><input type="radio"/> primarios<br><input type="radio"/> secundarios<br><input checked="" type="radio"/> universitarios |

# Base\_datos\_estimacion\_peso\_fetal

|                                       |                                                                                                                                                                                                                                                                                      |
|---------------------------------------|--------------------------------------------------------------------------------------------------------------------------------------------------------------------------------------------------------------------------------------------------------------------------------------|
| Número de identificación participante | 49                                                                                                                                                                                                                                                                                   |
| CODIGO PARTICIPANTE                   |                                                                                                                                                                                                                                                                                      |
| Edad                                  | [*DATA REMOVED*]                                                                                                                                                                                                                                                                     |
| Gestaciones                           | <input type="radio"/> 1<br><input checked="" type="radio"/> 2<br><input type="radio"/> 3<br><input type="radio"/> mas de 3                                                                                                                                                           |
| partos                                | <input type="radio"/> 0<br><input checked="" type="radio"/> 1<br><input type="radio"/> 2<br><input type="radio"/> 3<br><input type="radio"/> mas de 3                                                                                                                                |
| cesáreas                              | <input checked="" type="radio"/> 0<br><input type="radio"/> 1<br><input type="radio"/> 2<br><input type="radio"/> 3<br><input type="radio"/> mas de 3                                                                                                                                |
| Abortos                               | <input checked="" type="radio"/> 0<br><input type="radio"/> 1<br><input type="radio"/> 2<br><input type="radio"/> 3<br><input type="radio"/> mas de 3                                                                                                                                |
| Tipo de gestacion                     | <input checked="" type="radio"/> espontanea<br><input type="radio"/> IAC inseminación artificial conyuge<br><input type="radio"/> IAD inseminación artificial donante<br><input type="radio"/> FIV Fecundación in Vitro<br><input type="radio"/> Ovodon FIV con donación de ovocitos |
| peso previo a embarazo                | [*DATA REMOVED*]                                                                                                                                                                                                                                                                     |
| Ganancia ponderal embarazo            | [*DATA REMOVED*]                                                                                                                                                                                                                                                                     |
| Talla madre                           | [*DATA REMOVED*]                                                                                                                                                                                                                                                                     |
| IMC previo embarazo                   | 19.48696145124717                                                                                                                                                                                                                                                                    |
| Patología obstétrica                  | <input checked="" type="radio"/> no<br><input type="radio"/> si                                                                                                                                                                                                                      |
| Diabetes pregestacional               | <input checked="" type="radio"/> no<br><input type="radio"/> si                                                                                                                                                                                                                      |
| Diabetes gestacional                  | <input checked="" type="radio"/> no<br><input type="radio"/> si                                                                                                                                                                                                                      |

|                                            |                                                                                                                                                                                      |
|--------------------------------------------|--------------------------------------------------------------------------------------------------------------------------------------------------------------------------------------|
| Diabetes gestacional con insulina          | <input checked="" type="radio"/> no<br><input type="radio"/> si                                                                                                                      |
| Diabetes gestacional con dieta y ejercicio | <input checked="" type="radio"/> no<br><input type="radio"/> si                                                                                                                      |
| Percentil fetos previos                    | <input type="radio"/> Nada<br><input type="radio"/> percentil menor de 10<br><input checked="" type="radio"/> percentil entre 10 y 90<br><input type="radio"/> percentil mayor de 90 |
| Exfumadora                                 | <input checked="" type="radio"/> Nada<br><input type="radio"/> menos de 5 años<br><input type="radio"/> 5 a 10 años<br><input type="radio"/> mayor o igual a 10 años                 |
| Hábito tabáquico                           | <input checked="" type="radio"/> no<br><input type="radio"/> si                                                                                                                      |
| fumadora                                   | [*DATA REMOVED*]                                                                                                                                                                     |
| Consumo otros tóxicos                      | <input checked="" type="radio"/> no<br><input type="radio"/> si                                                                                                                      |
| Hb 1T                                      | [*DATA REMOVED*]                                                                                                                                                                     |
| Htc 1T                                     | [*DATA REMOVED*]                                                                                                                                                                     |
| Hb 2T                                      | [*DATA REMOVED*]                                                                                                                                                                     |
| HTC 2T                                     | [*DATA REMOVED*]                                                                                                                                                                     |
| Hb 3T                                      | [*DATA REMOVED*]                                                                                                                                                                     |
| HTC 3T                                     | [*DATA REMOVED*]                                                                                                                                                                     |
| Suplemento FE oral                         | <input type="radio"/> si<br><input checked="" type="radio"/> no                                                                                                                      |
| Suplemento fe iv                           | <input type="radio"/> si<br><input checked="" type="radio"/> no                                                                                                                      |
| Transfusión                                | <input checked="" type="radio"/> no<br><input type="radio"/> si                                                                                                                      |
| Solicitada Vit D                           | <input checked="" type="radio"/> no<br><input type="radio"/> si                                                                                                                      |
| Deficit vit D                              | <input type="radio"/> no<br><input type="radio"/> si                                                                                                                                 |
| Suplemento vit D                           | <input type="radio"/> si<br><input type="radio"/> no                                                                                                                                 |

|                       |                                                                                                                                                                                                                                                                                                                                                                                                              |
|-----------------------|--------------------------------------------------------------------------------------------------------------------------------------------------------------------------------------------------------------------------------------------------------------------------------------------------------------------------------------------------------------------------------------------------------------|
| Dieta, cuestionario   | <input checked="" type="radio"/> si<br><input type="radio"/> no                                                                                                                                                                                                                                                                                                                                              |
| Leche entera          | <input checked="" type="radio"/> Nunca o menos 1 vez al mes<br><input type="radio"/> 1 a 3 veces mes<br><input type="radio"/> 1 vez semana<br><input type="radio"/> 2 a 4 veces semana<br><input type="radio"/> 5 a 6 veces semana<br><input type="radio"/> 1 vez al día<br><input type="radio"/> 2 a 3 veces al día<br><input type="radio"/> 5 a 6 veces al día<br><input type="radio"/> más 6 veces al día |
| Leche semidesnatada   | <input type="radio"/> Nunca o menos 1 vez al mes<br><input type="radio"/> 1 a 3 veces mes<br><input type="radio"/> 1 vez semana<br><input type="radio"/> 2 a 4 veces semana<br><input type="radio"/> 5 a 6 veces semana<br><input type="radio"/> 1 vez al día<br><input checked="" type="radio"/> 2 a 3 veces al día<br><input type="radio"/> 5 a 6 veces al día<br><input type="radio"/> mas 6 veces al día |
| Leche desnatada       | <input checked="" type="radio"/> Nunca o menos 1 vez al mes<br><input type="radio"/> 1 a 3 veces mes<br><input type="radio"/> 1 vez semana<br><input type="radio"/> 2 a 4 veces semana<br><input type="radio"/> 5 a 6 veces semana<br><input type="radio"/> 1 vez al día<br><input type="radio"/> 2 a 3 veces al día<br><input type="radio"/> 5 a 6 veces al día<br><input type="radio"/> más 6 veces al día |
| Leche condensada      | <input checked="" type="radio"/> Nunca o menos 1 vez al mes<br><input type="radio"/> 1 a 3 veces mes<br><input type="radio"/> 1 vez semana<br><input type="radio"/> 2 a 4 veces semana<br><input type="radio"/> 5 a 6 veces semana<br><input type="radio"/> 1 vez al día<br><input type="radio"/> 2 a 3 veces al día<br><input type="radio"/> 5 a 6 veces al día<br><input type="radio"/> más 6 veces al día |
| nata o crema de leche | <input type="radio"/> Nunca o menos 1 vez al mes<br><input checked="" type="radio"/> 1 a 3 veces mes<br><input type="radio"/> 1 vez semana<br><input type="radio"/> 2 a 4 veces semana<br><input type="radio"/> 5 a 6 veces semana<br><input type="radio"/> 1 vez al día<br><input type="radio"/> 2 a 3 veces al día<br><input type="radio"/> 5 a 6 veces al día<br><input type="radio"/> más 6 veces al día |

|                                             |                                                                                                                                                                                                                                                                                                                                                                                                              |
|---------------------------------------------|--------------------------------------------------------------------------------------------------------------------------------------------------------------------------------------------------------------------------------------------------------------------------------------------------------------------------------------------------------------------------------------------------------------|
| Yogurt Entero                               | <input type="radio"/> Nunca o menos 1 vez al mes<br><input checked="" type="radio"/> 1 a 3 veces mes<br><input type="radio"/> 1 vez semana<br><input type="radio"/> 2 a 4 veces semana<br><input type="radio"/> 5 a 6 veces semana<br><input type="radio"/> 1 vez al día<br><input type="radio"/> 2 a 3 veces al día<br><input type="radio"/> 5 a 6 veces al día<br><input type="radio"/> más 6 veces al día |
| Yogurt desnatado                            | <input type="radio"/> Nunca o menos 1 vez al mes<br><input type="radio"/> 1 a 3 veces mes<br><input type="radio"/> 1 vez semana<br><input type="radio"/> 2 a 4 veces semana<br><input type="radio"/> 5 a 6 veces semana<br><input checked="" type="radio"/> 1 vez al día<br><input type="radio"/> 2 a 3 veces al día<br><input type="radio"/> 5 a 6 veces al día<br><input type="radio"/> más 6 veces al día |
| 100g requesón o queso blando o queso fresco | <input checked="" type="radio"/> Nunca o menos 1 vez al mes<br><input type="radio"/> 1 a 3 veces mes<br><input type="radio"/> 1 vez semana<br><input type="radio"/> 2 a 4 veces semana<br><input type="radio"/> 5 a 6 veces semana<br><input type="radio"/> 1 vez al día<br><input type="radio"/> 2 a 3 veces al día<br><input type="radio"/> 5 a 6 veces al día<br><input type="radio"/> más 6 veces al día |
| queso curado o semicurado o cremoso         | <input type="radio"/> Nunca o menos 1 vez al mes<br><input type="radio"/> 1 a 3 veces mes<br><input type="radio"/> 1 vez semana<br><input type="radio"/> 2 a 4 veces semana<br><input type="radio"/> 5 a 6 veces semana<br><input checked="" type="radio"/> 1 vez al día<br><input type="radio"/> 2 a 3 veces al día<br><input type="radio"/> 5 a 6 veces al día<br><input type="radio"/> más 6 veces al día |
| natillas flan pudding                       | <input type="radio"/> Nunca o menos 1 vez al mes<br><input type="radio"/> 1 a 3 veces mes<br><input type="radio"/> 1 vez semana<br><input checked="" type="radio"/> 2 a 4 veces semana<br><input type="radio"/> 5 a 6 veces semana<br><input type="radio"/> 1 vez al día<br><input type="radio"/> 2 a 3 veces al día<br><input type="radio"/> 5 a 6 veces al día<br><input type="radio"/> más 6 veces al día |
| Helado                                      | <input checked="" type="radio"/> Nunca o menos 1 vez al mes<br><input type="radio"/> 1 a 3 veces mes<br><input type="radio"/> 1 vez semana<br><input type="radio"/> 2 a 4 veces semana<br><input type="radio"/> 5 a 6 veces semana<br><input type="radio"/> 1 vez al día<br><input type="radio"/> 2 a 3 veces al día<br><input type="radio"/> 5 a 6 veces al día<br><input type="radio"/> más 6 veces al día |



|                                      |                                                                                                                                                                                                                                                                                                                                                                                                              |
|--------------------------------------|--------------------------------------------------------------------------------------------------------------------------------------------------------------------------------------------------------------------------------------------------------------------------------------------------------------------------------------------------------------------------------------------------------------|
| huevo                                | <input type="radio"/> Nunca o menos 1 vez al mes<br><input type="radio"/> 1 a 3 veces mes<br><input type="radio"/> 1 vez semana<br><input checked="" type="radio"/> 2 a 4 veces semana<br><input type="radio"/> 5 a 6 veces semana<br><input type="radio"/> 1 vez al día<br><input type="radio"/> 2 a 3 veces al día<br><input type="radio"/> 5 a 6 veces al día<br><input type="radio"/> más 6 veces al día |
| Pollo con piel                       | <input checked="" type="radio"/> Nunca o menos 1 vez al mes<br><input type="radio"/> 1 a 3 veces mes<br><input type="radio"/> 1 vez semana<br><input type="radio"/> 2 a 4 veces semana<br><input type="radio"/> 5 a 6 veces semana<br><input type="radio"/> 1 vez al día<br><input type="radio"/> 2 a 3 veces al día<br><input type="radio"/> 5 a 6 veces al día<br><input type="radio"/> más 6 veces al día |
| pollo sin piel                       | <input type="radio"/> Nunca o menos 1 vez al mes<br><input type="radio"/> 1 a 3 veces mes<br><input type="radio"/> 1 vez semana<br><input checked="" type="radio"/> 2 a 4 veces semana<br><input type="radio"/> 5 a 6 veces semana<br><input type="radio"/> 1 vez al día<br><input type="radio"/> 2 a 3 veces al día<br><input type="radio"/> 5 a 6 veces al día<br><input type="radio"/> más 6 veces al día |
| Ternera o cerdo o cordero            | <input type="radio"/> Nunca o menos 1 vez al mes<br><input type="radio"/> 1 a 3 veces mes<br><input type="radio"/> 1 vez semana<br><input checked="" type="radio"/> 2 a 4 veces semana<br><input type="radio"/> 5 a 6 veces semana<br><input type="radio"/> 1 vez al día<br><input type="radio"/> 2 a 3 veces al día<br><input type="radio"/> 5 a 6 veces al día<br><input type="radio"/> más 6 veces al día |
| carne caza: Conejo o codorniz o pato | <input checked="" type="radio"/> Nunca o menos 1 vez al mes<br><input type="radio"/> 1 a 3 veces mes<br><input type="radio"/> 1 vez semana<br><input type="radio"/> 2 a 4 veces semana<br><input type="radio"/> 5 a 6 veces semana<br><input type="radio"/> 1 vez al día<br><input type="radio"/> 2 a 3 veces al día<br><input type="radio"/> 5 a 6 veces al día<br><input type="radio"/> más 6 veces al día |
| Hígado de ternera o cerdo o pollo    | <input checked="" type="radio"/> Nunca o menos 1 vez al mes<br><input type="radio"/> 1 a 3 veces mes<br><input type="radio"/> 1 vez semana<br><input type="radio"/> 2 a 4 veces semana<br><input type="radio"/> 5 a 6 veces semana<br><input type="radio"/> 1 vez al día<br><input type="radio"/> 2 a 3 veces al día<br><input type="radio"/> 5 a 6 veces al día<br><input type="radio"/> más 6 veces al día |

|                     |                                                                                                                                                                                                                                                                                                                                                                                                              |
|---------------------|--------------------------------------------------------------------------------------------------------------------------------------------------------------------------------------------------------------------------------------------------------------------------------------------------------------------------------------------------------------------------------------------------------------|
| Vísceras            | <input checked="" type="radio"/> Nunca o menos 1 vez al mes<br><input type="radio"/> 1 a 3 veces mes<br><input type="radio"/> 1 vez semana<br><input type="radio"/> 2 a 4 veces semana<br><input type="radio"/> 5 a 6 veces semana<br><input type="radio"/> 1 vez al día<br><input type="radio"/> 2 a 3 veces al día<br><input type="radio"/> 5 a 6 veces al día<br><input type="radio"/> más 6 veces al día |
| Embutido            | <input type="radio"/> Nunca o menos 1 vez al mes<br><input checked="" type="radio"/> 1 a 3 veces mes<br><input type="radio"/> 1 vez semana<br><input type="radio"/> 2 a 4 veces semana<br><input type="radio"/> 5 a 6 veces semana<br><input type="radio"/> 1 vez al día<br><input type="radio"/> 2 a 3 veces al día<br><input type="radio"/> 5 a 6 veces al día<br><input type="radio"/> más 6 veces al día |
| Salchicha o similar | <input type="radio"/> Nunca o menos 1 vez al mes<br><input checked="" type="radio"/> 1 a 3 veces mes<br><input type="radio"/> 1 vez semana<br><input type="radio"/> 2 a 4 veces semana<br><input type="radio"/> 5 a 6 veces semana<br><input type="radio"/> 1 vez al día<br><input type="radio"/> 2 a 3 veces al día<br><input type="radio"/> 5 a 6 veces al día<br><input type="radio"/> más 6 veces al día |
| Pate o foiegras     | <input checked="" type="radio"/> Nunca o menos 1 vez al mes<br><input type="radio"/> 1 a 3 veces mes<br><input type="radio"/> 1 vez semana<br><input type="radio"/> 2 a 4 veces semana<br><input type="radio"/> 5 a 6 veces semana<br><input type="radio"/> 1 vez al día<br><input type="radio"/> 2 a 3 veces al día<br><input type="radio"/> 5 a 6 veces al día<br><input type="radio"/> más 6 veces al día |
| Hamburguesa         | <input type="radio"/> Nunca o menos 1 vez al mes<br><input type="radio"/> 1 a 3 veces mes<br><input type="radio"/> 1 vez semana<br><input checked="" type="radio"/> 2 a 4 veces semana<br><input type="radio"/> 5 a 6 veces semana<br><input type="radio"/> 1 vez al día<br><input type="radio"/> 2 a 3 veces al día<br><input type="radio"/> 5 a 6 veces al día<br><input type="radio"/> más 6 veces al día |
| tocino o bacon      | <input checked="" type="radio"/> Nunca o menos 1 vez al mes<br><input type="radio"/> 1 a 3 veces mes<br><input type="radio"/> 1 vez semana<br><input type="radio"/> 2 a 4 veces semana<br><input type="radio"/> 5 a 6 veces semana<br><input type="radio"/> 1 vez al día<br><input type="radio"/> 2 a 3 veces al día<br><input type="radio"/> 5 a 6 veces al día<br><input type="radio"/> más 6 veces al día |

|                        |                                                                                                                                                                                                                                                                                                                                                                                                              |
|------------------------|--------------------------------------------------------------------------------------------------------------------------------------------------------------------------------------------------------------------------------------------------------------------------------------------------------------------------------------------------------------------------------------------------------------|
| Pescado frito          | <input type="radio"/> Nunca o menos 1 vez al mes<br><input checked="" type="radio"/> 1 a 3 veces mes<br><input type="radio"/> 1 vez semana<br><input type="radio"/> 2 a 4 veces semana<br><input type="radio"/> 5 a 6 veces semana<br><input type="radio"/> 1 vez al día<br><input type="radio"/> 2 a 3 veces al día<br><input type="radio"/> 5 a 6 veces al día<br><input type="radio"/> más 6 veces al día |
| pescado hervido blanco | <input type="radio"/> Nunca o menos 1 vez al mes<br><input checked="" type="radio"/> 1 a 3 veces mes<br><input type="radio"/> 1 vez semana<br><input type="radio"/> 2 a 4 veces semana<br><input type="radio"/> 5 a 6 veces semana<br><input type="radio"/> 1 vez al día<br><input type="radio"/> 2 a 3 veces al día<br><input type="radio"/> 5 a 6 veces al día<br><input type="radio"/> más 6 veces al día |
| pescado hervido azul   | <input checked="" type="radio"/> Nunca o menos 1 vez al mes<br><input type="radio"/> 1 a 3 veces mes<br><input type="radio"/> 1 vez semana<br><input type="radio"/> 2 a 4 veces semana<br><input type="radio"/> 5 a 6 veces semana<br><input type="radio"/> 1 vez al día<br><input type="radio"/> 2 a 3 veces al día<br><input type="radio"/> 5 a 6 veces al día<br><input type="radio"/> más 6 veces al día |
| otros pescado azul     | <input type="radio"/> Nunca o menos 1 vez al mes<br><input checked="" type="radio"/> 1 a 3 veces mes<br><input type="radio"/> 1 vez semana<br><input type="radio"/> 2 a 4 veces semana<br><input type="radio"/> 5 a 6 veces semana<br><input type="radio"/> 1 vez al día<br><input type="radio"/> 2 a 3 veces al día<br><input type="radio"/> 5 a 6 veces al día<br><input type="radio"/> más 6 veces al día |
| atun conserva          | <input checked="" type="radio"/> Nunca o menos 1 vez al mes<br><input type="radio"/> 1 a 3 veces mes<br><input type="radio"/> 1 vez semana<br><input type="radio"/> 2 a 4 veces semana<br><input type="radio"/> 5 a 6 veces semana<br><input type="radio"/> 1 vez al día<br><input type="radio"/> 2 a 3 veces al día<br><input type="radio"/> 5 a 6 veces al día<br><input type="radio"/> más 6 veces al día |
| sardina conserva       | <input checked="" type="radio"/> Nunca o menos 1 vez al mes<br><input type="radio"/> 1 a 3 veces mes<br><input type="radio"/> 1 vez semana<br><input type="radio"/> 2 a 4 veces semana<br><input type="radio"/> 5 a 6 veces semana<br><input type="radio"/> 1 vez al día<br><input type="radio"/> 2 a 3 veces al día<br><input type="radio"/> 5 a 6 veces al día<br><input type="radio"/> más 6 veces al día |

|                                         |                                                                                                                                                                                                                                                                                                                                                                                                              |
|-----------------------------------------|--------------------------------------------------------------------------------------------------------------------------------------------------------------------------------------------------------------------------------------------------------------------------------------------------------------------------------------------------------------------------------------------------------------|
| pescado ahumado                         | <input checked="" type="radio"/> Nunca o menos 1 vez al mes<br><input type="radio"/> 1 a 3 veces mes<br><input type="radio"/> 1 vez semana<br><input type="radio"/> 2 a 4 veces semana<br><input type="radio"/> 5 a 6 veces semana<br><input type="radio"/> 1 vez al día<br><input type="radio"/> 2 a 3 veces al día<br><input type="radio"/> 5 a 6 veces al día<br><input type="radio"/> más 6 veces al día |
| almejas o mejillones o ostras unos 100g | <input type="radio"/> Nunca o menos 1 vez al mes<br><input checked="" type="radio"/> 1 a 3 veces mes<br><input type="radio"/> 1 vez semana<br><input type="radio"/> 2 a 4 veces semana<br><input type="radio"/> 5 a 6 veces semana<br><input type="radio"/> 1 vez al día<br><input type="radio"/> 2 a 3 veces al día<br><input type="radio"/> 5 a 6 veces al día<br><input type="radio"/> más 6 veces al día |
| calamar o chipiron o sepia unos 100g    | <input type="radio"/> Nunca o menos 1 vez al mes<br><input checked="" type="radio"/> 1 a 3 veces mes<br><input type="radio"/> 1 vez semana<br><input type="radio"/> 2 a 4 veces semana<br><input type="radio"/> 5 a 6 veces semana<br><input type="radio"/> 1 vez al día<br><input type="radio"/> 2 a 3 veces al día<br><input type="radio"/> 5 a 6 veces al día<br><input type="radio"/> más 6 veces al día |
| marisco unos 100g                       | <input checked="" type="radio"/> Nunca o menos 1 vez al mes<br><input type="radio"/> 1 a 3 veces mes<br><input type="radio"/> 1 vez semana<br><input type="radio"/> 2 a 4 veces semana<br><input type="radio"/> 5 a 6 veces semana<br><input type="radio"/> 1 vez al día<br><input type="radio"/> 2 a 3 veces al día<br><input type="radio"/> 5 a 6 veces al día<br><input type="radio"/> más 6 veces al día |
| Espinacas o acelgas cocinadas           | <input type="radio"/> Nunca o menos 1 vez al mes<br><input type="radio"/> 1 a 3 veces mes<br><input checked="" type="radio"/> 1 vez semana<br><input type="radio"/> 2 a 4 veces semana<br><input type="radio"/> 5 a 6 veces semana<br><input type="radio"/> 1 vez al día<br><input type="radio"/> 2 a 3 veces al día<br><input type="radio"/> 5 a 6 veces al día<br><input type="radio"/> más 6 veces al día |
| Col o coliflor o brocoli cocinado       | <input type="radio"/> Nunca o menos 1 vez al mes<br><input type="radio"/> 1 a 3 veces mes<br><input checked="" type="radio"/> 1 vez semana<br><input type="radio"/> 2 a 4 veces semana<br><input type="radio"/> 5 a 6 veces semana<br><input type="radio"/> 1 vez al día<br><input type="radio"/> 2 a 3 veces al día<br><input type="radio"/> 5 a 6 veces al día<br><input type="radio"/> más 6 veces al día |

---

Lechuga o endivia o escarola

- ☐ Nunca o menos 1 vez al mes  
☐ 1 a 3 veces mes  
☐ 1 vez semana  
☒ 2 a 4 veces semana  
☐ 5 a 6 veces semana  
☐ 1 vez al día  
☐ 2 a 3 veces al día  
☐ 5 a 6 veces al día  
☐ más 6 veces al día

---

tomate ensalada

- ☐ Nunca o menos 1 vez al mes  
☐ 1 a 3 veces mes  
☐ 1 vez semana  
☒ 2 a 4 veces semana  
☐ 5 a 6 veces semana  
☐ 1 vez al día  
☐ 2 a 3 veces al día  
☐ 5 a 6 veces al día  
☐ más 6 veces al día

---

cebolla

- ☐ Nunca o menos 1 vez al mes  
☐ 1 a 3 veces mes  
☐ 1 vez semana  
☐ 2 a 4 veces semana  
☒ 5 a 6 veces semana  
☐ 1 vez al día  
☐ 2 a 3 veces al día  
☐ 5 a 6 veces al día  
☐ más 6 veces al día

---

Zanahoria o calabaza

- ☐ Nunca o menos 1 vez al mes  
☐ 1 a 3 veces mes  
☐ 1 vez semana  
☐ 2 a 4 veces semana  
☒ 5 a 6 veces semana  
☐ 1 vez al día  
☐ 2 a 3 veces al día  
☐ 5 a 6 veces al día  
☐ más 6 veces al día

---

Judías verdes

- ☐ Nunca o menos 1 vez al mes  
☐ 1 a 3 veces mes  
☐ 1 vez semana  
☒ 2 a 4 veces semana  
☐ 5 a 6 veces semana  
☐ 1 vez al día  
☐ 2 a 3 veces al día  
☐ 5 a 6 veces al día  
☐ más 6 veces al día

---

Berenjena o calabacin o pepino

- ☐ Nunca o menos 1 vez al mes  
☐ 1 a 3 veces mes  
☐ 1 vez semana  
☒ 2 a 4 veces semana  
☐ 5 a 6 veces semana  
☐ 1 vez al día  
☐ 2 a 3 veces al día  
☐ 5 a 6 veces al día  
☐ más 6 veces al día

|                       |                                                                                                                                                                                                                                                                                                                                                                                                              |
|-----------------------|--------------------------------------------------------------------------------------------------------------------------------------------------------------------------------------------------------------------------------------------------------------------------------------------------------------------------------------------------------------------------------------------------------------|
| pimiento              | <input type="radio"/> Nunca o menos 1 vez al mes<br><input type="radio"/> 1 a 3 veces mes<br><input checked="" type="radio"/> 1 vez semana<br><input type="radio"/> 2 a 4 veces semana<br><input type="radio"/> 5 a 6 veces semana<br><input type="radio"/> 1 vez al día<br><input type="radio"/> 2 a 3 veces al día<br><input type="radio"/> 5 a 6 veces al día<br><input type="radio"/> más 6 veces al día |
| alcachofa             | <input type="radio"/> Nunca o menos 1 vez al mes<br><input type="radio"/> 1 a 3 veces mes<br><input checked="" type="radio"/> 1 vez semana<br><input type="radio"/> 2 a 4 veces semana<br><input type="radio"/> 5 a 6 veces semana<br><input type="radio"/> 1 vez al día<br><input type="radio"/> 2 a 3 veces al día<br><input type="radio"/> 5 a 6 veces al día<br><input type="radio"/> más 6 veces al día |
| espárragos            | <input type="radio"/> Nunca o menos 1 vez al mes<br><input type="radio"/> 1 a 3 veces mes<br><input checked="" type="radio"/> 1 vez semana<br><input type="radio"/> 2 a 4 veces semana<br><input type="radio"/> 5 a 6 veces semana<br><input type="radio"/> 1 vez al día<br><input type="radio"/> 2 a 3 veces al día<br><input type="radio"/> 5 a 6 veces al día<br><input type="radio"/> más 6 veces al día |
| maíz hervido          | <input type="radio"/> Nunca o menos 1 vez al mes<br><input checked="" type="radio"/> 1 a 3 veces mes<br><input type="radio"/> 1 vez semana<br><input type="radio"/> 2 a 4 veces semana<br><input type="radio"/> 5 a 6 veces semana<br><input type="radio"/> 1 vez al día<br><input type="radio"/> 2 a 3 veces al día<br><input type="radio"/> 5 a 6 veces al día<br><input type="radio"/> más 6 veces al día |
| legumbres             | <input type="radio"/> Nunca o menos 1 vez al mes<br><input type="radio"/> 1 a 3 veces mes<br><input type="radio"/> 1 vez semana<br><input checked="" type="radio"/> 2 a 4 veces semana<br><input type="radio"/> 5 a 6 veces semana<br><input type="radio"/> 1 vez al día<br><input type="radio"/> 2 a 3 veces al día<br><input type="radio"/> 5 a 6 veces al día<br><input type="radio"/> más 6 veces al día |
| naranjas o mandarinas | <input type="radio"/> Nunca o menos 1 vez al mes<br><input type="radio"/> 1 a 3 veces mes<br><input type="radio"/> 1 vez semana<br><input type="radio"/> 2 a 4 veces semana<br><input type="radio"/> 5 a 6 veces semana<br><input checked="" type="radio"/> 1 vez al día<br><input type="radio"/> 2 a 3 veces al día<br><input type="radio"/> 5 a 6 veces al día<br><input type="radio"/> más 6 veces al día |

|                       |                                                                                                                                                                                                                                                                                                                                                                                                              |
|-----------------------|--------------------------------------------------------------------------------------------------------------------------------------------------------------------------------------------------------------------------------------------------------------------------------------------------------------------------------------------------------------------------------------------------------------|
| zum natural fruta     | <input checked="" type="radio"/> Nunca o menos 1 vez al mes<br><input type="radio"/> 1 a 3 veces mes<br><input type="radio"/> 1 vez semana<br><input type="radio"/> 2 a 4 veces semana<br><input type="radio"/> 5 a 6 veces semana<br><input type="radio"/> 1 vez al día<br><input type="radio"/> 2 a 3 veces al día<br><input type="radio"/> 5 a 6 veces al día<br><input type="radio"/> más 6 veces al día |
| platano               | <input type="radio"/> Nunca o menos 1 vez al mes<br><input type="radio"/> 1 a 3 veces mes<br><input type="radio"/> 1 vez semana<br><input type="radio"/> 2 a 4 veces semana<br><input type="radio"/> 5 a 6 veces semana<br><input checked="" type="radio"/> 1 vez al día<br><input type="radio"/> 2 a 3 veces al día<br><input type="radio"/> 5 a 6 veces al día<br><input type="radio"/> más 6 veces al día |
| manzana o pera        | <input type="radio"/> Nunca o menos 1 vez al mes<br><input type="radio"/> 1 a 3 veces mes<br><input type="radio"/> 1 vez semana<br><input type="radio"/> 2 a 4 veces semana<br><input type="radio"/> 5 a 6 veces semana<br><input checked="" type="radio"/> 1 vez al día<br><input type="radio"/> 2 a 3 veces al día<br><input type="radio"/> 5 a 6 veces al día<br><input type="radio"/> más 6 veces al día |
| melocotón o nectarina | <input type="radio"/> Nunca o menos 1 vez al mes<br><input type="radio"/> 1 a 3 veces mes<br><input type="radio"/> 1 vez semana<br><input type="radio"/> 2 a 4 veces semana<br><input type="radio"/> 5 a 6 veces semana<br><input checked="" type="radio"/> 1 vez al día<br><input type="radio"/> 2 a 3 veces al día<br><input type="radio"/> 5 a 6 veces al día<br><input type="radio"/> más 6 veces al día |
| sandia o melon        | <input type="radio"/> Nunca o menos 1 vez al mes<br><input type="radio"/> 1 a 3 veces mes<br><input type="radio"/> 1 vez semana<br><input type="radio"/> 2 a 4 veces semana<br><input type="radio"/> 5 a 6 veces semana<br><input checked="" type="radio"/> 1 vez al día<br><input type="radio"/> 2 a 3 veces al día<br><input type="radio"/> 5 a 6 veces al día<br><input type="radio"/> más 6 veces al día |
| uva                   | <input type="radio"/> Nunca o menos 1 vez al mes<br><input type="radio"/> 1 a 3 veces mes<br><input type="radio"/> 1 vez semana<br><input type="radio"/> 2 a 4 veces semana<br><input type="radio"/> 5 a 6 veces semana<br><input checked="" type="radio"/> 1 vez al día<br><input type="radio"/> 2 a 3 veces al día<br><input type="radio"/> 5 a 6 veces al día<br><input type="radio"/> más 6 veces al día |

|                 |                                                                                                                                                                                                                                                                                                                                                                                                              |
|-----------------|--------------------------------------------------------------------------------------------------------------------------------------------------------------------------------------------------------------------------------------------------------------------------------------------------------------------------------------------------------------------------------------------------------------|
| bruna o ciruela | <input type="radio"/> Nunca o menos 1 vez al mes<br><input checked="" type="radio"/> 1 a 3 veces mes<br><input type="radio"/> 1 vez semana<br><input type="radio"/> 2 a 4 veces semana<br><input type="radio"/> 5 a 6 veces semana<br><input type="radio"/> 1 vez al día<br><input type="radio"/> 2 a 3 veces al día<br><input type="radio"/> 5 a 6 veces al día<br><input type="radio"/> más 6 veces al día |
| kiwi            | <input checked="" type="radio"/> Nunca o menos 1 vez al mes<br><input type="radio"/> 1 a 3 veces mes<br><input type="radio"/> 1 vez semana<br><input type="radio"/> 2 a 4 veces semana<br><input type="radio"/> 5 a 6 veces semana<br><input type="radio"/> 1 vez al día<br><input type="radio"/> 2 a 3 veces al día<br><input type="radio"/> 5 a 6 veces al día<br><input type="radio"/> más 6 veces al día |
| aceituna        | <input checked="" type="radio"/> Nunca o menos 1 vez al mes<br><input type="radio"/> 1 a 3 veces mes<br><input type="radio"/> 1 vez semana<br><input type="radio"/> 2 a 4 veces semana<br><input type="radio"/> 5 a 6 veces semana<br><input type="radio"/> 1 vez al día<br><input type="radio"/> 2 a 3 veces al día<br><input type="radio"/> 5 a 6 veces al día<br><input type="radio"/> más 6 veces al día |
| frutos secos    | <input type="radio"/> Nunca o menos 1 vez al mes<br><input type="radio"/> 1 a 3 veces mes<br><input checked="" type="radio"/> 1 vez semana<br><input type="radio"/> 2 a 4 veces semana<br><input type="radio"/> 5 a 6 veces semana<br><input type="radio"/> 1 vez al día<br><input type="radio"/> 2 a 3 veces al día<br><input type="radio"/> 5 a 6 veces al día<br><input type="radio"/> más 6 veces al día |
| pan blanco      | <input type="radio"/> Nunca o menos 1 vez al mes<br><input type="radio"/> 1 a 3 veces mes<br><input type="radio"/> 1 vez semana<br><input checked="" type="radio"/> 2 a 4 veces semana<br><input type="radio"/> 5 a 6 veces semana<br><input type="radio"/> 1 vez al día<br><input type="radio"/> 2 a 3 veces al día<br><input type="radio"/> 5 a 6 veces al día<br><input type="radio"/> más 6 veces al día |
| pan integral    | <input type="radio"/> Nunca o menos 1 vez al mes<br><input type="radio"/> 1 a 3 veces mes<br><input type="radio"/> 1 vez semana<br><input type="radio"/> 2 a 4 veces semana<br><input type="radio"/> 5 a 6 veces semana<br><input type="radio"/> 1 vez al día<br><input checked="" type="radio"/> 2 a 3 veces al día<br><input type="radio"/> 5 a 6 veces al día<br><input type="radio"/> más 6 veces al día |



|                          |                                                                                                                                                                                                                                                                                                                                                                                                              |
|--------------------------|--------------------------------------------------------------------------------------------------------------------------------------------------------------------------------------------------------------------------------------------------------------------------------------------------------------------------------------------------------------------------------------------------------------|
| cereales desayuno        | <input type="radio"/> Nunca o menos 1 vez al mes<br><input type="radio"/> 1 a 3 veces mes<br><input checked="" type="radio"/> 1 vez semana<br><input type="radio"/> 2 a 4 veces semana<br><input type="radio"/> 5 a 6 veces semana<br><input type="radio"/> 1 vez al día<br><input type="radio"/> 2 a 3 veces al día<br><input type="radio"/> 5 a 6 veces al día<br><input type="radio"/> más 6 veces al día |
| patatas fritas           | <input checked="" type="radio"/> Nunca o menos 1 vez al mes<br><input type="radio"/> 1 a 3 veces mes<br><input type="radio"/> 1 vez semana<br><input type="radio"/> 2 a 4 veces semana<br><input type="radio"/> 5 a 6 veces semana<br><input type="radio"/> 1 vez al día<br><input type="radio"/> 2 a 3 veces al día<br><input type="radio"/> 5 a 6 veces al día<br><input type="radio"/> más 6 veces al día |
| patatas cocidas o asadas | <input type="radio"/> Nunca o menos 1 vez al mes<br><input type="radio"/> 1 a 3 veces mes<br><input type="radio"/> 1 vez semana<br><input checked="" type="radio"/> 2 a 4 veces semana<br><input type="radio"/> 5 a 6 veces semana<br><input type="radio"/> 1 vez al día<br><input type="radio"/> 2 a 3 veces al día<br><input type="radio"/> 5 a 6 veces al día<br><input type="radio"/> más 6 veces al día |
| bolsa papas              | <input type="radio"/> Nunca o menos 1 vez al mes<br><input checked="" type="radio"/> 1 a 3 veces mes<br><input type="radio"/> 1 vez semana<br><input type="radio"/> 2 a 4 veces semana<br><input type="radio"/> 5 a 6 veces semana<br><input type="radio"/> 1 vez al día<br><input type="radio"/> 2 a 3 veces al día<br><input type="radio"/> 5 a 6 veces al día<br><input type="radio"/> más 6 veces al día |
| arroz cocinado           | <input type="radio"/> Nunca o menos 1 vez al mes<br><input type="radio"/> 1 a 3 veces mes<br><input type="radio"/> 1 vez semana<br><input checked="" type="radio"/> 2 a 4 veces semana<br><input type="radio"/> 5 a 6 veces semana<br><input type="radio"/> 1 vez al día<br><input type="radio"/> 2 a 3 veces al día<br><input type="radio"/> 5 a 6 veces al día<br><input type="radio"/> más 6 veces al día |
| pasta                    | <input type="radio"/> Nunca o menos 1 vez al mes<br><input type="radio"/> 1 a 3 veces mes<br><input type="radio"/> 1 vez semana<br><input checked="" type="radio"/> 2 a 4 veces semana<br><input type="radio"/> 5 a 6 veces semana<br><input type="radio"/> 1 vez al día<br><input type="radio"/> 2 a 3 veces al día<br><input type="radio"/> 5 a 6 veces al día<br><input type="radio"/> más 6 veces al día |

|                     |                                                                                                                                                                                                                                                                                                                                                                                                              |
|---------------------|--------------------------------------------------------------------------------------------------------------------------------------------------------------------------------------------------------------------------------------------------------------------------------------------------------------------------------------------------------------------------------------------------------------|
| pizza               | <input type="radio"/> Nunca o menos 1 vez al mes<br><input type="radio"/> 1 a 3 veces mes<br><input checked="" type="radio"/> 1 vez semana<br><input type="radio"/> 2 a 4 veces semana<br><input type="radio"/> 5 a 6 veces semana<br><input type="radio"/> 1 vez al día<br><input type="radio"/> 2 a 3 veces al día<br><input type="radio"/> 5 a 6 veces al día<br><input type="radio"/> más 6 veces al día |
| aceite oliva        | <input type="radio"/> Nunca o menos 1 vez al mes<br><input type="radio"/> 1 a 3 veces mes<br><input type="radio"/> 1 vez semana<br><input type="radio"/> 2 a 4 veces semana<br><input type="radio"/> 5 a 6 veces semana<br><input checked="" type="radio"/> 1 vez al día<br><input type="radio"/> 2 a 3 veces al día<br><input type="radio"/> 5 a 6 veces al día<br><input type="radio"/> más 6 veces al día |
| otros aceites       | <input checked="" type="radio"/> Nunca o menos 1 vez al mes<br><input type="radio"/> 1 a 3 veces mes<br><input type="radio"/> 1 vez semana<br><input type="radio"/> 2 a 4 veces semana<br><input type="radio"/> 5 a 6 veces semana<br><input type="radio"/> 1 vez al día<br><input type="radio"/> 2 a 3 veces al día<br><input type="radio"/> 5 a 6 veces al día<br><input type="radio"/> más 6 veces al día |
| margarina           | <input type="radio"/> Nunca o menos 1 vez al mes<br><input type="radio"/> 1 a 3 veces mes<br><input checked="" type="radio"/> 1 vez semana<br><input type="radio"/> 2 a 4 veces semana<br><input type="radio"/> 5 a 6 veces semana<br><input type="radio"/> 1 vez al día<br><input type="radio"/> 2 a 3 veces al día<br><input type="radio"/> 5 a 6 veces al día<br><input type="radio"/> más 6 veces al día |
| mantequilla         | <input checked="" type="radio"/> Nunca o menos 1 vez al mes<br><input type="radio"/> 1 a 3 veces mes<br><input type="radio"/> 1 vez semana<br><input type="radio"/> 2 a 4 veces semana<br><input type="radio"/> 5 a 6 veces semana<br><input type="radio"/> 1 vez al día<br><input type="radio"/> 2 a 3 veces al día<br><input type="radio"/> 5 a 6 veces al día<br><input type="radio"/> más 6 veces al día |
| galletas tipo maria | <input type="radio"/> Nunca o menos 1 vez al mes<br><input type="radio"/> 1 a 3 veces mes<br><input type="radio"/> 1 vez semana<br><input type="radio"/> 2 a 4 veces semana<br><input type="radio"/> 5 a 6 veces semana<br><input checked="" type="radio"/> 1 vez al día<br><input type="radio"/> 2 a 3 veces al día<br><input type="radio"/> 5 a 6 veces al día<br><input type="radio"/> más 6 veces al día |

|                           |                                                                                                                                                                                                                                                                                                                                                                                                              |
|---------------------------|--------------------------------------------------------------------------------------------------------------------------------------------------------------------------------------------------------------------------------------------------------------------------------------------------------------------------------------------------------------------------------------------------------------|
| galletas chocolate        | <input type="radio"/> Nunca o menos 1 vez al mes<br><input type="radio"/> 1 a 3 veces mes<br><input checked="" type="radio"/> 1 vez semana<br><input type="radio"/> 2 a 4 veces semana<br><input type="radio"/> 5 a 6 veces semana<br><input type="radio"/> 1 vez al día<br><input type="radio"/> 2 a 3 veces al día<br><input type="radio"/> 5 a 6 veces al día<br><input type="radio"/> más 6 veces al día |
| bollieria                 | <input type="radio"/> Nunca o menos 1 vez al mes<br><input type="radio"/> 1 a 3 veces mes<br><input checked="" type="radio"/> 1 vez semana<br><input type="radio"/> 2 a 4 veces semana<br><input type="radio"/> 5 a 6 veces semana<br><input type="radio"/> 1 vez al día<br><input type="radio"/> 2 a 3 veces al día<br><input type="radio"/> 5 a 6 veces al día<br><input type="radio"/> más 6 veces al día |
| chocolate o bombones      | <input type="radio"/> Nunca o menos 1 vez al mes<br><input type="radio"/> 1 a 3 veces mes<br><input checked="" type="radio"/> 1 vez semana<br><input type="radio"/> 2 a 4 veces semana<br><input type="radio"/> 5 a 6 veces semana<br><input type="radio"/> 1 vez al día<br><input type="radio"/> 2 a 3 veces al día<br><input type="radio"/> 5 a 6 veces al día<br><input type="radio"/> más 6 veces al día |
| chocolate polvo o colacao | <input type="radio"/> Nunca o menos 1 vez al mes<br><input type="radio"/> 1 a 3 veces mes<br><input type="radio"/> 1 vez semana<br><input checked="" type="radio"/> 2 a 4 veces semana<br><input type="radio"/> 5 a 6 veces semana<br><input type="radio"/> 1 vez al día<br><input type="radio"/> 2 a 3 veces al día<br><input type="radio"/> 5 a 6 veces al día<br><input type="radio"/> más 6 veces al día |
| vino tinto                | <input checked="" type="radio"/> Nunca o menos 1 vez al mes<br><input type="radio"/> 1 a 3 veces mes<br><input type="radio"/> 1 vez semana<br><input type="radio"/> 2 a 4 veces semana<br><input type="radio"/> 5 a 6 veces semana<br><input type="radio"/> 1 vez al día<br><input type="radio"/> 2 a 3 veces al día<br><input type="radio"/> 5 a 6 veces al día<br><input type="radio"/> más 6 veces al día |
| vino blanco               | <input checked="" type="radio"/> Nunca o menos 1 vez al mes<br><input type="radio"/> 1 a 3 veces mes<br><input type="radio"/> 1 vez semana<br><input type="radio"/> 2 a 4 veces semana<br><input type="radio"/> 5 a 6 veces semana<br><input type="radio"/> 1 vez al día<br><input type="radio"/> 2 a 3 veces al día<br><input type="radio"/> 5 a 6 veces al día<br><input type="radio"/> más 6 veces al día |

|                       |                                                                                                                                                                                                                                                                                                                                                                                                              |
|-----------------------|--------------------------------------------------------------------------------------------------------------------------------------------------------------------------------------------------------------------------------------------------------------------------------------------------------------------------------------------------------------------------------------------------------------|
| vino seco o vermut    | <input checked="" type="radio"/> Nunca o menos 1 vez al mes<br><input type="radio"/> 1 a 3 veces mes<br><input type="radio"/> 1 vez semana<br><input type="radio"/> 2 a 4 veces semana<br><input type="radio"/> 5 a 6 veces semana<br><input type="radio"/> 1 vez al día<br><input type="radio"/> 2 a 3 veces al día<br><input type="radio"/> 5 a 6 veces al día<br><input type="radio"/> más 6 veces al día |
| cerveza               | <input checked="" type="radio"/> Nunca o menos 1 vez al mes<br><input type="radio"/> 1 a 3 veces mes<br><input type="radio"/> 1 vez semana<br><input type="radio"/> 2 a 4 veces semana<br><input type="radio"/> 5 a 6 veces semana<br><input type="radio"/> 1 vez al día<br><input type="radio"/> 2 a 3 veces al día<br><input type="radio"/> 5 a 6 veces al día<br><input type="radio"/> más 6 veces al día |
| cerveza sin alcohol   | <input checked="" type="radio"/> Nunca o menos 1 vez al mes<br><input type="radio"/> 1 a 3 veces mes<br><input type="radio"/> 1 vez semana<br><input type="radio"/> 2 a 4 veces semana<br><input type="radio"/> 5 a 6 veces semana<br><input type="radio"/> 1 vez al día<br><input type="radio"/> 2 a 3 veces al día<br><input type="radio"/> 5 a 6 veces al día<br><input type="radio"/> más 6 veces al día |
| licores               | <input checked="" type="radio"/> Nunca o menos 1 vez al mes<br><input type="radio"/> 1 a 3 veces mes<br><input type="radio"/> 1 vez semana<br><input type="radio"/> 2 a 4 veces semana<br><input type="radio"/> 5 a 6 veces semana<br><input type="radio"/> 1 vez al día<br><input type="radio"/> 2 a 3 veces al día<br><input type="radio"/> 5 a 6 veces al día<br><input type="radio"/> más 6 veces al día |
| ginebra o ron o vodka | <input checked="" type="radio"/> Nunca o menos 1 vez al mes<br><input type="radio"/> 1 a 3 veces mes<br><input type="radio"/> 1 vez semana<br><input type="radio"/> 2 a 4 veces semana<br><input type="radio"/> 5 a 6 veces semana<br><input type="radio"/> 1 vez al día<br><input type="radio"/> 2 a 3 veces al día<br><input type="radio"/> 5 a 6 veces al día<br><input type="radio"/> más 6 veces al día |
| refresco normal       | <input checked="" type="radio"/> Nunca o menos 1 vez al mes<br><input type="radio"/> 1 a 3 veces mes<br><input type="radio"/> 1 vez semana<br><input type="radio"/> 2 a 4 veces semana<br><input type="radio"/> 5 a 6 veces semana<br><input type="radio"/> 1 vez al día<br><input type="radio"/> 2 a 3 veces al día<br><input type="radio"/> 5 a 6 veces al día<br><input type="radio"/> más 6 veces al día |

|                          |                                                                                                                                                                                                                                                                                                                                                                                                              |
|--------------------------|--------------------------------------------------------------------------------------------------------------------------------------------------------------------------------------------------------------------------------------------------------------------------------------------------------------------------------------------------------------------------------------------------------------|
| refresco sin azúcar      | <input checked="" type="radio"/> Nunca o menos 1 vez al mes<br><input type="radio"/> 1 a 3 veces mes<br><input type="radio"/> 1 vez semana<br><input type="radio"/> 2 a 4 veces semana<br><input type="radio"/> 5 a 6 veces semana<br><input type="radio"/> 1 vez al día<br><input type="radio"/> 2 a 3 veces al día<br><input type="radio"/> 5 a 6 veces al día<br><input type="radio"/> más 6 veces al día |
| Agua del grifo           | <input checked="" type="radio"/> Nunca o menos 1 vez al mes<br><input type="radio"/> 1 a 3 veces mes<br><input type="radio"/> 1 vez semana<br><input type="radio"/> 2 a 4 veces semana<br><input type="radio"/> 5 a 6 veces semana<br><input type="radio"/> 1 vez al día<br><input type="radio"/> 2 a 3 veces al día<br><input type="radio"/> 5 a 6 veces al día<br><input type="radio"/> más 6 veces al día |
| agua embotellada sin gas | <input type="radio"/> Nunca o menos 1 vez al mes<br><input type="radio"/> 1 a 3 veces mes<br><input type="radio"/> 1 vez semana<br><input type="radio"/> 2 a 4 veces semana<br><input type="radio"/> 5 a 6 veces semana<br><input type="radio"/> 1 vez al día<br><input type="radio"/> 2 a 3 veces al día<br><input type="radio"/> 5 a 6 veces al día<br><input checked="" type="radio"/> más 6 veces al día |
| agua embotellada con gas | <input type="radio"/> Nunca o menos 1 vez al mes<br><input type="radio"/> 1 a 3 veces mes<br><input type="radio"/> 1 vez semana<br><input type="radio"/> 2 a 4 veces semana<br><input type="radio"/> 5 a 6 veces semana<br><input type="radio"/> 1 vez al día<br><input type="radio"/> 2 a 3 veces al día<br><input type="radio"/> 5 a 6 veces al día<br><input type="radio"/> más 6 veces al día            |
| zumو frutas embasado     | <input checked="" type="radio"/> Nunca o menos 1 vez al mes<br><input type="radio"/> 1 a 3 veces mes<br><input type="radio"/> 1 vez semana<br><input type="radio"/> 2 a 4 veces semana<br><input type="radio"/> 5 a 6 veces semana<br><input type="radio"/> 1 vez al día<br><input type="radio"/> 2 a 3 veces al día<br><input type="radio"/> 5 a 6 veces al día<br><input type="radio"/> más 6 veces al día |
| cafe                     | <input type="radio"/> Nunca o menos 1 vez al mes<br><input checked="" type="radio"/> 1 a 3 veces mes<br><input type="radio"/> 1 vez semana<br><input type="radio"/> 2 a 4 veces semana<br><input type="radio"/> 5 a 6 veces semana<br><input type="radio"/> 1 vez al día<br><input type="radio"/> 2 a 3 veces al día<br><input type="radio"/> 5 a 6 veces al día<br><input type="radio"/> más 6 veces al día |

|                       |                                                                                                                                                                                                                                                                                                                                                                                                              |
|-----------------------|--------------------------------------------------------------------------------------------------------------------------------------------------------------------------------------------------------------------------------------------------------------------------------------------------------------------------------------------------------------------------------------------------------------|
| cafe descafeinado     | <input type="radio"/> Nunca o menos 1 vez al mes<br><input checked="" type="radio"/> 1 a 3 veces mes<br><input type="radio"/> 1 vez semana<br><input type="radio"/> 2 a 4 veces semana<br><input type="radio"/> 5 a 6 veces semana<br><input type="radio"/> 1 vez al día<br><input type="radio"/> 2 a 3 veces al día<br><input type="radio"/> 5 a 6 veces al día<br><input type="radio"/> más 6 veces al día |
| te o infusión         | <input checked="" type="radio"/> Nunca o menos 1 vez al mes<br><input type="radio"/> 1 a 3 veces mes<br><input type="radio"/> 1 vez semana<br><input type="radio"/> 2 a 4 veces semana<br><input type="radio"/> 5 a 6 veces semana<br><input type="radio"/> 1 vez al día<br><input type="radio"/> 2 a 3 veces al día<br><input type="radio"/> 5 a 6 veces al día<br><input type="radio"/> más 6 veces al día |
| sopa o puré verduras  | <input type="radio"/> Nunca o menos 1 vez al mes<br><input type="radio"/> 1 a 3 veces mes<br><input type="radio"/> 1 vez semana<br><input checked="" type="radio"/> 2 a 4 veces semana<br><input type="radio"/> 5 a 6 veces semana<br><input type="radio"/> 1 vez al día<br><input type="radio"/> 2 a 3 veces al día<br><input type="radio"/> 5 a 6 veces al día<br><input type="radio"/> más 6 veces al día |
| croquetas pollo jamón | <input type="radio"/> Nunca o menos 1 vez al mes<br><input checked="" type="radio"/> 1 a 3 veces mes<br><input type="radio"/> 1 vez semana<br><input type="radio"/> 2 a 4 veces semana<br><input type="radio"/> 5 a 6 veces semana<br><input type="radio"/> 1 vez al día<br><input type="radio"/> 2 a 3 veces al día<br><input type="radio"/> 5 a 6 veces al día<br><input type="radio"/> más 6 veces al día |
| croquetas pescado     | <input type="radio"/> Nunca o menos 1 vez al mes<br><input checked="" type="radio"/> 1 a 3 veces mes<br><input type="radio"/> 1 vez semana<br><input type="radio"/> 2 a 4 veces semana<br><input type="radio"/> 5 a 6 veces semana<br><input type="radio"/> 1 vez al día<br><input type="radio"/> 2 a 3 veces al día<br><input type="radio"/> 5 a 6 veces al día<br><input type="radio"/> más 6 veces al día |
| mayonesa              | <input type="radio"/> Nunca o menos 1 vez al mes<br><input type="radio"/> 1 a 3 veces mes<br><input checked="" type="radio"/> 1 vez semana<br><input type="radio"/> 2 a 4 veces semana<br><input type="radio"/> 5 a 6 veces semana<br><input type="radio"/> 1 vez al día<br><input type="radio"/> 2 a 3 veces al día<br><input type="radio"/> 5 a 6 veces al día<br><input type="radio"/> más 6 veces al día |

|                  |                                                                                                                                                                                                                                                                                                                                                                                                              |
|------------------|--------------------------------------------------------------------------------------------------------------------------------------------------------------------------------------------------------------------------------------------------------------------------------------------------------------------------------------------------------------------------------------------------------------|
| salsa tomate     | <input type="radio"/> Nunca o menos 1 vez al mes<br><input type="radio"/> 1 a 3 veces mes<br><input checked="" type="radio"/> 1 vez semana<br><input type="radio"/> 2 a 4 veces semana<br><input type="radio"/> 5 a 6 veces semana<br><input type="radio"/> 1 vez al día<br><input type="radio"/> 2 a 3 veces al día<br><input type="radio"/> 5 a 6 veces al día<br><input type="radio"/> más 6 veces al día |
| ketchup          | <input checked="" type="radio"/> Nunca o menos 1 vez al mes<br><input type="radio"/> 1 a 3 veces mes<br><input type="radio"/> 1 vez semana<br><input type="radio"/> 2 a 4 veces semana<br><input type="radio"/> 5 a 6 veces semana<br><input type="radio"/> 1 vez al día<br><input type="radio"/> 2 a 3 veces al día<br><input type="radio"/> 5 a 6 veces al día<br><input type="radio"/> más 6 veces al día |
| sal              | <input type="radio"/> Nunca o menos 1 vez al mes<br><input type="radio"/> 1 a 3 veces mes<br><input type="radio"/> 1 vez semana<br><input checked="" type="radio"/> 2 a 4 veces semana<br><input type="radio"/> 5 a 6 veces semana<br><input type="radio"/> 1 vez al día<br><input type="radio"/> 2 a 3 veces al día<br><input type="radio"/> 5 a 6 veces al día<br><input type="radio"/> más 6 veces al día |
| ajo              | <input type="radio"/> Nunca o menos 1 vez al mes<br><input type="radio"/> 1 a 3 veces mes<br><input type="radio"/> 1 vez semana<br><input checked="" type="radio"/> 2 a 4 veces semana<br><input type="radio"/> 5 a 6 veces semana<br><input type="radio"/> 1 vez al día<br><input type="radio"/> 2 a 3 veces al día<br><input type="radio"/> 5 a 6 veces al día<br><input type="radio"/> más 6 veces al día |
| mermelada o miel | <input type="radio"/> Nunca o menos 1 vez al mes<br><input type="radio"/> 1 a 3 veces mes<br><input checked="" type="radio"/> 1 vez semana<br><input type="radio"/> 2 a 4 veces semana<br><input type="radio"/> 5 a 6 veces semana<br><input type="radio"/> 1 vez al día<br><input type="radio"/> 2 a 3 veces al día<br><input type="radio"/> 5 a 6 veces al día<br><input type="radio"/> más 6 veces al día |
| azúcar           | <input type="radio"/> Nunca o menos 1 vez al mes<br><input type="radio"/> 1 a 3 veces mes<br><input checked="" type="radio"/> 1 vez semana<br><input type="radio"/> 2 a 4 veces semana<br><input type="radio"/> 5 a 6 veces semana<br><input type="radio"/> 1 vez al día<br><input type="radio"/> 2 a 3 veces al día<br><input type="radio"/> 5 a 6 veces al día<br><input type="radio"/> más 6 veces al día |

|                                       |                                                                                                                                                                                                                                                                                                                                                                                                                                                                                                                               |
|---------------------------------------|-------------------------------------------------------------------------------------------------------------------------------------------------------------------------------------------------------------------------------------------------------------------------------------------------------------------------------------------------------------------------------------------------------------------------------------------------------------------------------------------------------------------------------|
| Otro alimento                         |                                                                                                                                                                                                                                                                                                                                                                                                                                                                                                                               |
| suplementos vitamínicos               | <input checked="" type="radio"/> si<br><input type="radio"/> no                                                                                                                                                                                                                                                                                                                                                                                                                                                               |
| suplementos vitamínicos               | [*DATA REMOVED*]                                                                                                                                                                                                                                                                                                                                                                                                                                                                                                              |
| dieta previa                          | <input checked="" type="radio"/> si<br><input type="radio"/> no                                                                                                                                                                                                                                                                                                                                                                                                                                                               |
| motivo dieta                          | <input type="radio"/> no dieta<br><input type="radio"/> control peso<br><input type="radio"/> control colesterol<br><input type="radio"/> control diabetes<br><input type="radio"/> problemas estómago<br><input type="radio"/> problemas vesícula o hepáticos<br><input type="radio"/> HTA o cardiopatía<br><input type="radio"/> problemas renales<br><input type="radio"/> alergia alimentaria<br><input type="radio"/> ácido úrico elevado<br><input type="radio"/> vegetariana<br><input checked="" type="radio"/> otros |
| cambio alimentos año previo gestación | <input checked="" type="radio"/> si<br><input type="radio"/> no                                                                                                                                                                                                                                                                                                                                                                                                                                                               |
| cambio lácteos                        | <input type="radio"/> eliminado<br><input type="radio"/> disminuido<br><input type="radio"/> igual<br><input checked="" type="radio"/> aumentado<br><input type="radio"/> no sabe                                                                                                                                                                                                                                                                                                                                             |
| cambio huevos                         | <input type="radio"/> eliminado<br><input type="radio"/> disminuido<br><input checked="" type="radio"/> igual<br><input type="radio"/> aumentado<br><input type="radio"/> no sabe                                                                                                                                                                                                                                                                                                                                             |
| cambio carne                          | <input type="radio"/> eliminado<br><input type="radio"/> disminuido<br><input type="radio"/> igual<br><input checked="" type="radio"/> aumentado<br><input type="radio"/> no sabe                                                                                                                                                                                                                                                                                                                                             |
| cambio pescado                        | <input type="radio"/> eliminado<br><input type="radio"/> disminuido<br><input type="radio"/> igual<br><input checked="" type="radio"/> aumentado<br><input type="radio"/> no sabe                                                                                                                                                                                                                                                                                                                                             |
| cambio verduras                       | <input type="radio"/> eliminado<br><input type="radio"/> disminuido<br><input type="radio"/> igual<br><input checked="" type="radio"/> aumentado<br><input type="radio"/> no sabe                                                                                                                                                                                                                                                                                                                                             |



|                            |                                                                                                                                                                                                                        |
|----------------------------|------------------------------------------------------------------------------------------------------------------------------------------------------------------------------------------------------------------------|
| cambio legumbres           | <input type="radio"/> eliminado<br><input type="radio"/> disminuido<br><input type="radio"/> igual<br><input checked="" type="radio"/> aumentado<br><input type="radio"/> no sabe                                      |
| cambio fruta               | <input type="radio"/> eliminado<br><input type="radio"/> disminuido<br><input type="radio"/> igual<br><input checked="" type="radio"/> aumentado<br><input type="radio"/> no sabe                                      |
| cambio pan                 | <input type="radio"/> eliminado<br><input type="radio"/> disminuido<br><input checked="" type="radio"/> igual<br><input type="radio"/> aumentado<br><input type="radio"/> no sabe                                      |
| cambio aceite oliva        | <input type="radio"/> eliminado<br><input type="radio"/> disminuido<br><input checked="" type="radio"/> igual<br><input type="radio"/> aumentado<br><input type="radio"/> no sabe                                      |
| cambio mante o margarina   | <input type="radio"/> eliminado<br><input checked="" type="radio"/> disminuido<br><input type="radio"/> igual<br><input type="radio"/> aumentado<br><input type="radio"/> no sabe                                      |
| cambio azúcar y dulces     | <input type="radio"/> eliminado<br><input checked="" type="radio"/> disminuido<br><input type="radio"/> igual<br><input type="radio"/> aumentado<br><input type="radio"/> no sabe                                      |
| cambio bebidas alcohólicas | <input checked="" type="radio"/> eliminado<br><input type="radio"/> disminuido<br><input type="radio"/> igual<br><input type="radio"/> aumentado<br><input type="radio"/> no sabe                                      |
| frecuencia comidas fritas  | <input type="radio"/> a diario<br><input type="radio"/> 5 a 6 veces semana<br><input type="radio"/> 2 a 4 veces semana<br><input type="radio"/> 1 vez semana<br><input checked="" type="radio"/> menos de 1 vez semana |
| carne                      | <input type="radio"/> no como<br><input type="radio"/> cruda<br><input type="radio"/> poco hecha<br><input type="radio"/> hecha<br><input checked="" type="radio"/> muy hecha                                          |
| grasa visible carne        | <input type="radio"/> quita toda<br><input checked="" type="radio"/> quita mayoría<br><input type="radio"/> quita un poco<br><input type="radio"/> no quita nada                                                       |

|                                |                                                                                                                                                                                                                                                          |
|--------------------------------|----------------------------------------------------------------------------------------------------------------------------------------------------------------------------------------------------------------------------------------------------------|
| cocina carne                   | <input checked="" type="radio"/> a la plancha<br><input type="radio"/> a la parrilla<br><input type="radio"/> asada<br><input type="radio"/> frita<br><input type="radio"/> guisada                                                                      |
| tostado quemado carne          | <input checked="" type="radio"/> nunca<br><input type="radio"/> 1 vez mes<br><input type="radio"/> 2 a 3 veces mes<br><input type="radio"/> 1 vez semana<br><input type="radio"/> 2 a 3 semanas                                                          |
| tostado quemado pescado        | <input checked="" type="radio"/> nunca<br><input type="radio"/> 1 vez mes<br><input type="radio"/> 2 a 3 veces mes<br><input type="radio"/> 1 vez semana<br><input type="radio"/> 2 a 3 semanas                                                          |
| socarrat paella                | <input checked="" type="radio"/> nunca<br><input type="radio"/> 1 vez mes<br><input type="radio"/> 2 a 3 veces mes<br><input type="radio"/> 1 vez semana<br><input type="radio"/> 2 a 3 semanas                                                          |
| grasa o aceite cocinar         | <input type="radio"/> mantequilla<br><input type="radio"/> margarina<br><input checked="" type="radio"/> aceite oliva<br><input type="radio"/> aceite oliva virgen extra<br><input type="radio"/> aceite vegetal<br><input type="radio"/> mezcla aceites |
| grasa aceite aliñar            | <input type="radio"/> mantequilla<br><input type="radio"/> margarina<br><input type="radio"/> aceite oliva<br><input checked="" type="radio"/> aceite oliva virgen extra<br><input type="radio"/> aceite vegetal<br><input type="radio"/> mezcla aceites |
| grasa aceite freir             | <input type="radio"/> mantequilla<br><input type="radio"/> margarina<br><input checked="" type="radio"/> aceite oliva<br><input type="radio"/> aceite oliva virgen extra<br><input type="radio"/> aceite vegetal<br><input type="radio"/> mezcla aceites |
| Ejercicio cuestionario         | <input checked="" type="radio"/> si<br><input type="radio"/> no                                                                                                                                                                                          |
| horas de sueño incluido siesta | [*DATA REMOVED*]                                                                                                                                                                                                                                         |
| minutos siesta                 | [*DATA REMOVED*]                                                                                                                                                                                                                                         |
| horas televisión semana        | [*DATA REMOVED*]                                                                                                                                                                                                                                         |

|                                        |                                                                                                                                                                                                                                                                                                                                                                |
|----------------------------------------|----------------------------------------------------------------------------------------------------------------------------------------------------------------------------------------------------------------------------------------------------------------------------------------------------------------------------------------------------------------|
| actividad trabajo                      | <input type="radio"/> casi siempre sentado<br><input type="radio"/> sentado 50 por cien<br><input type="radio"/> casi siempre de pie, quieto<br><input type="radio"/> casi siempre levantado caminando y llevando pocas cosas<br><input type="radio"/> casi siempre levantado, caminando y llevado muchas cosas<br><input type="radio"/> trabajo manual pesado |
| tiempo caminar o bici al día           | <input type="radio"/> casi nunca<br><input type="radio"/> menos 20min día<br><input checked="" type="radio"/> 20 a 40 min día<br><input type="radio"/> 40 a 60 min día<br><input type="radio"/> 1h o 1h y media día<br><input type="radio"/> más de 1h y media al día                                                                                          |
| tiempo tareas casa al día              | <input type="radio"/> menos de 1h día<br><input checked="" type="radio"/> 1 a 2h día<br><input type="radio"/> 3 a 4h día<br><input type="radio"/> 5 a 6h día<br><input type="radio"/> 7 a 8h día<br><input type="radio"/> más de 8h día                                                                                                                        |
| tiempo libre televisión ordenador leer | <input type="radio"/> menos 1h día<br><input type="radio"/> 1h día<br><input checked="" type="radio"/> 2h día<br><input type="radio"/> 3h día<br><input type="radio"/> 4h día<br><input type="radio"/> 5 a 6h día<br><input type="radio"/> mas 6h día                                                                                                          |
| tiempo libre ejercicio o deporte       | <input type="radio"/> menos 1h semana<br><input type="radio"/> 1h semana<br><input type="radio"/> 2h semana<br><input type="radio"/> 3h semana<br><input checked="" type="radio"/> 4 a 5h semana<br><input type="radio"/> mas 5h semana                                                                                                                        |
| como se considera                      | <input type="radio"/> sedentaria<br><input type="radio"/> poco activa<br><input checked="" type="radio"/> moderadamente activa<br><input type="radio"/> bastante activa<br><input type="radio"/> muy activa<br><input type="radio"/> no sabe                                                                                                                   |
| FUR                                    | [*DATA REMOVED*]                                                                                                                                                                                                                                                                                                                                               |
| Semanas gestación 2T                   | [*DATA REMOVED*]                                                                                                                                                                                                                                                                                                                                               |
| Días gestación 2T                      | [*DATA REMOVED*]                                                                                                                                                                                                                                                                                                                                               |
| DBP 2T                                 | [*DATA REMOVED*]                                                                                                                                                                                                                                                                                                                                               |
| CC 2T                                  | [*DATA REMOVED*]                                                                                                                                                                                                                                                                                                                                               |
| AC 2T                                  | [*DATA REMOVED*]                                                                                                                                                                                                                                                                                                                                               |

|                                                   |                                                                                                                                                                                                 |
|---------------------------------------------------|-------------------------------------------------------------------------------------------------------------------------------------------------------------------------------------------------|
| LF 2T                                             | [*DATA REMOVED*]                                                                                                                                                                                |
| PFE 2T (Hadlock)                                  | [*DATA REMOVED*]                                                                                                                                                                                |
| Semanas gestación 3T                              | [*DATA REMOVED*]                                                                                                                                                                                |
| días 3T                                           | [*DATA REMOVED*]                                                                                                                                                                                |
| DBP 3T                                            | [*DATA REMOVED*]                                                                                                                                                                                |
| CC 3T                                             | [*DATA REMOVED*]                                                                                                                                                                                |
| AC 3T                                             | [*DATA REMOVED*]                                                                                                                                                                                |
| LF 3T                                             | [*DATA REMOVED*]                                                                                                                                                                                |
| PFE 3T (Hadlock)                                  | [*DATA REMOVED*]                                                                                                                                                                                |
| Semanas de gestación final                        | [*DATA REMOVED*]                                                                                                                                                                                |
| días gestación final                              | [*DATA REMOVED*]                                                                                                                                                                                |
| Localización placenta                             | <input checked="" type="radio"/> anterior<br><input type="radio"/> lateral derecha<br><input type="radio"/> lateral izquierda<br><input type="radio"/> posterior<br><input type="radio"/> fondo |
| Presentación longitudinal cefálica                | <input type="radio"/> no<br><input checked="" type="radio"/> si                                                                                                                                 |
| Dorso                                             | <input checked="" type="radio"/> izquierda anterior<br><input type="radio"/> izquierda posterior<br><input type="radio"/> derecha anterior<br><input type="radio"/> derecha posterior           |
| diámetro biparietal                               | [*DATA REMOVED*]                                                                                                                                                                                |
| Circunferencia craneal                            | [*DATA REMOVED*]                                                                                                                                                                                |
| Circunferencia abdominal                          | [*DATA REMOVED*]                                                                                                                                                                                |
| Longitud de femur                                 | [*DATA REMOVED*]                                                                                                                                                                                |
| tejido celular subcutáneo a nivel del muslo en mm | [*DATA REMOVED*]                                                                                                                                                                                |
| tejido celular subcutáneo en abdomen en mm        | [*DATA REMOVED*]                                                                                                                                                                                |
| Volumen del muslo en cm3                          | [*DATA REMOVED*]                                                                                                                                                                                |
| Peso fetal estimado según fórmula de Hadlock      | [*DATA REMOVED*]                                                                                                                                                                                |

|                                               |                                                                                                                                                          |
|-----------------------------------------------|----------------------------------------------------------------------------------------------------------------------------------------------------------|
| Percentil                                     | [*DATA REMOVED*]                                                                                                                                         |
| Peso fetal estimado según fórmula de Scioscia | <hr/>                                                                                                                                                    |
| Peso fetal estimado según fórmula de LEE      | <hr/>                                                                                                                                                    |
| Tipo de parto                                 | <input checked="" type="radio"/> eutocico<br><input type="radio"/> instrumentado/ventosa<br><input type="radio"/> cesarea                                |
| fecha de nacimiento                           | [*DATA REMOVED*]                                                                                                                                         |
| Días entre exploración y nacimiento           | [*DATA REMOVED*]                                                                                                                                         |
| Peso RN en g                                  | [*DATA REMOVED*]                                                                                                                                         |
| sexo                                          | <input type="radio"/> mujer<br><input checked="" type="radio"/> hombre                                                                                   |
| Apgar 1 minuto                                | [*DATA REMOVED*]                                                                                                                                         |
| Apgar 5 minutos                               | [*DATA REMOVED*]                                                                                                                                         |
| Apgar 10 minutos                              | <hr/>                                                                                                                                                    |
| antecedente Covid durante gestación           | <input type="radio"/> Yes<br><input checked="" type="radio"/> No                                                                                         |
| Nivel de estudios                             | <input type="radio"/> ninguno<br><input type="radio"/> primarios<br><input type="radio"/> secundarios<br><input checked="" type="radio"/> universitarios |

# Base\_datos\_estimacion\_peso\_fetal

|                                       |                                                                                                                                                                                                                                                                                      |
|---------------------------------------|--------------------------------------------------------------------------------------------------------------------------------------------------------------------------------------------------------------------------------------------------------------------------------------|
| Número de identificación participante | 50                                                                                                                                                                                                                                                                                   |
| CODIGO PARTICIPANTE                   |                                                                                                                                                                                                                                                                                      |
| Edad                                  | [*DATA REMOVED*]                                                                                                                                                                                                                                                                     |
| Gestaciones                           | <input type="radio"/> 1<br><input type="radio"/> 2<br><input checked="" type="radio"/> 3<br><input type="radio"/> mas de 3                                                                                                                                                           |
| partos                                | <input type="radio"/> 0<br><input type="radio"/> 1<br><input checked="" type="radio"/> 2<br><input type="radio"/> 3<br><input type="radio"/> mas de 3                                                                                                                                |
| cesáreas                              | <input type="radio"/> 0<br><input type="radio"/> 1<br><input type="radio"/> 2<br><input type="radio"/> 3<br><input type="radio"/> mas de 3                                                                                                                                           |
| Abortos                               | <input type="radio"/> 0<br><input checked="" type="radio"/> 1<br><input type="radio"/> 2<br><input type="radio"/> 3<br><input type="radio"/> mas de 3                                                                                                                                |
| Tipo de gestacion                     | <input checked="" type="radio"/> espontanea<br><input type="radio"/> IAC inseminación artificial conyuge<br><input type="radio"/> IAD inseminación artificial donante<br><input type="radio"/> FIV Fecundación in Vitro<br><input type="radio"/> Ovodon FIV con donación de ovocitos |
| peso previo a embarazo                | [*DATA REMOVED*]                                                                                                                                                                                                                                                                     |
| Ganancia ponderal embarazo            | [*DATA REMOVED*]                                                                                                                                                                                                                                                                     |
| Talla madre                           | [*DATA REMOVED*]                                                                                                                                                                                                                                                                     |
| IMC previo embarazo                   | 28.719723183391007                                                                                                                                                                                                                                                                   |
| Patología obstétrica                  | <input checked="" type="radio"/> no<br><input type="radio"/> si                                                                                                                                                                                                                      |
| Diabetes pregestacional               | <input checked="" type="radio"/> no<br><input type="radio"/> si                                                                                                                                                                                                                      |
| Diabetes gestacional                  | <input checked="" type="radio"/> no<br><input type="radio"/> si                                                                                                                                                                                                                      |

|                                            |                                                                                                                                                                                      |
|--------------------------------------------|--------------------------------------------------------------------------------------------------------------------------------------------------------------------------------------|
| Diabetes gestacional con insulina          | <input checked="" type="radio"/> no<br><input type="radio"/> si                                                                                                                      |
| Diabetes gestacional con dieta y ejercicio | <input checked="" type="radio"/> no<br><input type="radio"/> si                                                                                                                      |
| Percentil fetos previos                    | <input type="radio"/> Nada<br><input type="radio"/> percentil menor de 10<br><input type="radio"/> percentil entre 10 y 90<br><input checked="" type="radio"/> percentil mayor de 90 |
| Exfumadora                                 | <input checked="" type="radio"/> Nada<br><input type="radio"/> menos de 5 años<br><input type="radio"/> 5 a 10 años<br><input type="radio"/> mayor o igual a 10 años                 |
| Hábito tabáquico                           | <input checked="" type="radio"/> no<br><input type="radio"/> si                                                                                                                      |
| fumadora                                   | [*DATA REMOVED*]                                                                                                                                                                     |
| Consumo otros tóxicos                      | <input checked="" type="radio"/> no<br><input type="radio"/> si                                                                                                                      |
| Hb 1T                                      | _____                                                                                                                                                                                |
| Htc 1T                                     | _____                                                                                                                                                                                |
| Hb 2T                                      | [*DATA REMOVED*]                                                                                                                                                                     |
| HTC 2T                                     | [*DATA REMOVED*]                                                                                                                                                                     |
| Hb 3T                                      | [*DATA REMOVED*]                                                                                                                                                                     |
| HTC 3T                                     | [*DATA REMOVED*]                                                                                                                                                                     |
| Suplemento FE oral                         | <input checked="" type="radio"/> si<br><input type="radio"/> no                                                                                                                      |
| Suplemento fe iv                           | <input type="radio"/> si<br><input checked="" type="radio"/> no                                                                                                                      |
| Transfusión                                | <input checked="" type="radio"/> no<br><input type="radio"/> si                                                                                                                      |
| Solicitada Vit D                           | <input checked="" type="radio"/> no<br><input type="radio"/> si                                                                                                                      |
| Deficit vit D                              | <input type="radio"/> no<br><input type="radio"/> si                                                                                                                                 |

|                       |                                                                                                                                                                                                                                                                                                                                                                                                              |
|-----------------------|--------------------------------------------------------------------------------------------------------------------------------------------------------------------------------------------------------------------------------------------------------------------------------------------------------------------------------------------------------------------------------------------------------------|
| Suplemento vit D      | <input type="radio"/> si<br><input type="radio"/> no                                                                                                                                                                                                                                                                                                                                                         |
| Dieta, cuestionario   | <input checked="" type="radio"/> si<br><input type="radio"/> no                                                                                                                                                                                                                                                                                                                                              |
| Leche entera          | <input type="radio"/> Nunca o menos 1 vez al mes<br><input type="radio"/> 1 a 3 veces mes<br><input type="radio"/> 1 vez semana<br><input type="radio"/> 2 a 4 veces semana<br><input type="radio"/> 5 a 6 veces semana<br><input checked="" type="radio"/> 1 vez al día<br><input type="radio"/> 2 a 3 veces al día<br><input type="radio"/> 5 a 6 veces al día<br><input type="radio"/> más 6 veces al día |
| Leche semidesnatada   | <input checked="" type="radio"/> Nunca o menos 1 vez al mes<br><input type="radio"/> 1 a 3 veces mes<br><input type="radio"/> 1 vez semana<br><input type="radio"/> 2 a 4 veces semana<br><input type="radio"/> 5 a 6 veces semana<br><input type="radio"/> 1 vez al día<br><input type="radio"/> 2 a 3 veces al día<br><input type="radio"/> 5 a 6 veces al día<br><input type="radio"/> mas 6 veces al día |
| Leche desnatada       | <input checked="" type="radio"/> Nunca o menos 1 vez al mes<br><input type="radio"/> 1 a 3 veces mes<br><input type="radio"/> 1 vez semana<br><input type="radio"/> 2 a 4 veces semana<br><input type="radio"/> 5 a 6 veces semana<br><input type="radio"/> 1 vez al día<br><input type="radio"/> 2 a 3 veces al día<br><input type="radio"/> 5 a 6 veces al día<br><input type="radio"/> más 6 veces al día |
| Leche condensada      | <input checked="" type="radio"/> Nunca o menos 1 vez al mes<br><input type="radio"/> 1 a 3 veces mes<br><input type="radio"/> 1 vez semana<br><input type="radio"/> 2 a 4 veces semana<br><input type="radio"/> 5 a 6 veces semana<br><input type="radio"/> 1 vez al día<br><input type="radio"/> 2 a 3 veces al día<br><input type="radio"/> 5 a 6 veces al día<br><input type="radio"/> más 6 veces al día |
| nata o crema de leche | <input type="radio"/> Nunca o menos 1 vez al mes<br><input type="radio"/> 1 a 3 veces mes<br><input checked="" type="radio"/> 1 vez semana<br><input type="radio"/> 2 a 4 veces semana<br><input type="radio"/> 5 a 6 veces semana<br><input type="radio"/> 1 vez al día<br><input type="radio"/> 2 a 3 veces al día<br><input type="radio"/> 5 a 6 veces al día<br><input type="radio"/> más 6 veces al día |



|                                             |                                                                                                                                                                                                                                                                                                                                                                                                              |
|---------------------------------------------|--------------------------------------------------------------------------------------------------------------------------------------------------------------------------------------------------------------------------------------------------------------------------------------------------------------------------------------------------------------------------------------------------------------|
| Yogurt Entero                               | <input type="radio"/> Nunca o menos 1 vez al mes<br><input type="radio"/> 1 a 3 veces mes<br><input type="radio"/> 1 vez semana<br><input checked="" type="radio"/> 2 a 4 veces semana<br><input type="radio"/> 5 a 6 veces semana<br><input type="radio"/> 1 vez al día<br><input type="radio"/> 2 a 3 veces al día<br><input type="radio"/> 5 a 6 veces al día<br><input type="radio"/> más 6 veces al día |
| Yogurt desnatado                            | <input checked="" type="radio"/> Nunca o menos 1 vez al mes<br><input type="radio"/> 1 a 3 veces mes<br><input type="radio"/> 1 vez semana<br><input type="radio"/> 2 a 4 veces semana<br><input type="radio"/> 5 a 6 veces semana<br><input type="radio"/> 1 vez al día<br><input type="radio"/> 2 a 3 veces al día<br><input type="radio"/> 5 a 6 veces al día<br><input type="radio"/> más 6 veces al día |
| 100g requesón o queso blando o queso fresco | <input type="radio"/> Nunca o menos 1 vez al mes<br><input type="radio"/> 1 a 3 veces mes<br><input type="radio"/> 1 vez semana<br><input type="radio"/> 2 a 4 veces semana<br><input type="radio"/> 5 a 6 veces semana<br><input checked="" type="radio"/> 1 vez al día<br><input type="radio"/> 2 a 3 veces al día<br><input type="radio"/> 5 a 6 veces al día<br><input type="radio"/> más 6 veces al día |
| queso curado o semicurado o cremoso         | <input type="radio"/> Nunca o menos 1 vez al mes<br><input type="radio"/> 1 a 3 veces mes<br><input type="radio"/> 1 vez semana<br><input checked="" type="radio"/> 2 a 4 veces semana<br><input type="radio"/> 5 a 6 veces semana<br><input type="radio"/> 1 vez al día<br><input type="radio"/> 2 a 3 veces al día<br><input type="radio"/> 5 a 6 veces al día<br><input type="radio"/> más 6 veces al día |
| natillas flan pudding                       | <input checked="" type="radio"/> Nunca o menos 1 vez al mes<br><input type="radio"/> 1 a 3 veces mes<br><input type="radio"/> 1 vez semana<br><input type="radio"/> 2 a 4 veces semana<br><input type="radio"/> 5 a 6 veces semana<br><input type="radio"/> 1 vez al día<br><input type="radio"/> 2 a 3 veces al día<br><input type="radio"/> 5 a 6 veces al día<br><input type="radio"/> más 6 veces al día |
| Helado                                      | <input type="radio"/> Nunca o menos 1 vez al mes<br><input type="radio"/> 1 a 3 veces mes<br><input checked="" type="radio"/> 1 vez semana<br><input type="radio"/> 2 a 4 veces semana<br><input type="radio"/> 5 a 6 veces semana<br><input type="radio"/> 1 vez al día<br><input type="radio"/> 2 a 3 veces al día<br><input type="radio"/> 5 a 6 veces al día<br><input type="radio"/> más 6 veces al día |

|                                      |                                                                                                                                                                                                                                                                                                                                                                                                              |
|--------------------------------------|--------------------------------------------------------------------------------------------------------------------------------------------------------------------------------------------------------------------------------------------------------------------------------------------------------------------------------------------------------------------------------------------------------------|
| huevo                                | <input type="radio"/> Nunca o menos 1 vez al mes<br><input type="radio"/> 1 a 3 veces mes<br><input type="radio"/> 1 vez semana<br><input checked="" type="radio"/> 2 a 4 veces semana<br><input type="radio"/> 5 a 6 veces semana<br><input type="radio"/> 1 vez al día<br><input type="radio"/> 2 a 3 veces al día<br><input type="radio"/> 5 a 6 veces al día<br><input type="radio"/> más 6 veces al día |
| Pollo con piel                       | <input type="radio"/> Nunca o menos 1 vez al mes<br><input type="radio"/> 1 a 3 veces mes<br><input type="radio"/> 1 vez semana<br><input checked="" type="radio"/> 2 a 4 veces semana<br><input type="radio"/> 5 a 6 veces semana<br><input type="radio"/> 1 vez al día<br><input type="radio"/> 2 a 3 veces al día<br><input type="radio"/> 5 a 6 veces al día<br><input type="radio"/> más 6 veces al día |
| pollo sin piel                       | <input type="radio"/> Nunca o menos 1 vez al mes<br><input type="radio"/> 1 a 3 veces mes<br><input type="radio"/> 1 vez semana<br><input type="radio"/> 2 a 4 veces semana<br><input type="radio"/> 5 a 6 veces semana<br><input type="radio"/> 1 vez al día<br><input type="radio"/> 2 a 3 veces al día<br><input type="radio"/> 5 a 6 veces al día<br><input type="radio"/> más 6 veces al día            |
| Ternera o cerdo o cordero            | <input type="radio"/> Nunca o menos 1 vez al mes<br><input type="radio"/> 1 a 3 veces mes<br><input checked="" type="radio"/> 1 vez semana<br><input type="radio"/> 2 a 4 veces semana<br><input type="radio"/> 5 a 6 veces semana<br><input type="radio"/> 1 vez al día<br><input type="radio"/> 2 a 3 veces al día<br><input type="radio"/> 5 a 6 veces al día<br><input type="radio"/> más 6 veces al día |
| carne caza: Conejo o codorniz o pato | <input type="radio"/> Nunca o menos 1 vez al mes<br><input type="radio"/> 1 a 3 veces mes<br><input checked="" type="radio"/> 1 vez semana<br><input type="radio"/> 2 a 4 veces semana<br><input type="radio"/> 5 a 6 veces semana<br><input type="radio"/> 1 vez al día<br><input type="radio"/> 2 a 3 veces al día<br><input type="radio"/> 5 a 6 veces al día<br><input type="radio"/> más 6 veces al día |
| Hígado de ternera o cerdo o pollo    | <input checked="" type="radio"/> Nunca o menos 1 vez al mes<br><input type="radio"/> 1 a 3 veces mes<br><input type="radio"/> 1 vez semana<br><input type="radio"/> 2 a 4 veces semana<br><input type="radio"/> 5 a 6 veces semana<br><input type="radio"/> 1 vez al día<br><input type="radio"/> 2 a 3 veces al día<br><input type="radio"/> 5 a 6 veces al día<br><input type="radio"/> más 6 veces al día |

|                     |                                                                                                                                                                                                                                                                                                                                                                                                              |
|---------------------|--------------------------------------------------------------------------------------------------------------------------------------------------------------------------------------------------------------------------------------------------------------------------------------------------------------------------------------------------------------------------------------------------------------|
| Vísceras            | <input checked="" type="radio"/> Nunca o menos 1 vez al mes<br><input type="radio"/> 1 a 3 veces mes<br><input type="radio"/> 1 vez semana<br><input type="radio"/> 2 a 4 veces semana<br><input type="radio"/> 5 a 6 veces semana<br><input type="radio"/> 1 vez al día<br><input type="radio"/> 2 a 3 veces al día<br><input type="radio"/> 5 a 6 veces al día<br><input type="radio"/> más 6 veces al día |
| Embutido            | <input type="radio"/> Nunca o menos 1 vez al mes<br><input type="radio"/> 1 a 3 veces mes<br><input type="radio"/> 1 vez semana<br><input checked="" type="radio"/> 2 a 4 veces semana<br><input type="radio"/> 5 a 6 veces semana<br><input type="radio"/> 1 vez al día<br><input type="radio"/> 2 a 3 veces al día<br><input type="radio"/> 5 a 6 veces al día<br><input type="radio"/> más 6 veces al día |
| Salchicha o similar | <input checked="" type="radio"/> Nunca o menos 1 vez al mes<br><input type="radio"/> 1 a 3 veces mes<br><input type="radio"/> 1 vez semana<br><input type="radio"/> 2 a 4 veces semana<br><input type="radio"/> 5 a 6 veces semana<br><input type="radio"/> 1 vez al día<br><input type="radio"/> 2 a 3 veces al día<br><input type="radio"/> 5 a 6 veces al día<br><input type="radio"/> más 6 veces al día |
| Pate o foiegras     | <input type="radio"/> Nunca o menos 1 vez al mes<br><input type="radio"/> 1 a 3 veces mes<br><input type="radio"/> 1 vez semana<br><input type="radio"/> 2 a 4 veces semana<br><input type="radio"/> 5 a 6 veces semana<br><input type="radio"/> 1 vez al día<br><input type="radio"/> 2 a 3 veces al día<br><input type="radio"/> 5 a 6 veces al día<br><input type="radio"/> más 6 veces al día            |
| Hamburguesa         | <input type="radio"/> Nunca o menos 1 vez al mes<br><input type="radio"/> 1 a 3 veces mes<br><input checked="" type="radio"/> 1 vez semana<br><input type="radio"/> 2 a 4 veces semana<br><input type="radio"/> 5 a 6 veces semana<br><input type="radio"/> 1 vez al día<br><input type="radio"/> 2 a 3 veces al día<br><input type="radio"/> 5 a 6 veces al día<br><input type="radio"/> más 6 veces al día |
| tocino o bacon      | <input checked="" type="radio"/> Nunca o menos 1 vez al mes<br><input type="radio"/> 1 a 3 veces mes<br><input type="radio"/> 1 vez semana<br><input type="radio"/> 2 a 4 veces semana<br><input type="radio"/> 5 a 6 veces semana<br><input type="radio"/> 1 vez al día<br><input type="radio"/> 2 a 3 veces al día<br><input type="radio"/> 5 a 6 veces al día<br><input type="radio"/> más 6 veces al día |

|                        |                                                                                                                                                                                                                                                                                                                                                                                                              |
|------------------------|--------------------------------------------------------------------------------------------------------------------------------------------------------------------------------------------------------------------------------------------------------------------------------------------------------------------------------------------------------------------------------------------------------------|
| Pescado frito          | <input type="radio"/> Nunca o menos 1 vez al mes<br><input type="radio"/> 1 a 3 veces mes<br><input type="radio"/> 1 vez semana<br><input type="radio"/> 2 a 4 veces semana<br><input type="radio"/> 5 a 6 veces semana<br><input type="radio"/> 1 vez al día<br><input type="radio"/> 2 a 3 veces al día<br><input type="radio"/> 5 a 6 veces al día<br><input type="radio"/> más 6 veces al día            |
| pescado hervido blanco | <input type="radio"/> Nunca o menos 1 vez al mes<br><input type="radio"/> 1 a 3 veces mes<br><input checked="" type="radio"/> 1 vez semana<br><input type="radio"/> 2 a 4 veces semana<br><input type="radio"/> 5 a 6 veces semana<br><input type="radio"/> 1 vez al día<br><input type="radio"/> 2 a 3 veces al día<br><input type="radio"/> 5 a 6 veces al día<br><input type="radio"/> más 6 veces al día |
| pescado hervido azul   | <input type="radio"/> Nunca o menos 1 vez al mes<br><input type="radio"/> 1 a 3 veces mes<br><input checked="" type="radio"/> 1 vez semana<br><input type="radio"/> 2 a 4 veces semana<br><input type="radio"/> 5 a 6 veces semana<br><input type="radio"/> 1 vez al día<br><input type="radio"/> 2 a 3 veces al día<br><input type="radio"/> 5 a 6 veces al día<br><input type="radio"/> más 6 veces al día |
| otros pescado azul     | <input type="radio"/> Nunca o menos 1 vez al mes<br><input type="radio"/> 1 a 3 veces mes<br><input checked="" type="radio"/> 1 vez semana<br><input type="radio"/> 2 a 4 veces semana<br><input type="radio"/> 5 a 6 veces semana<br><input type="radio"/> 1 vez al día<br><input type="radio"/> 2 a 3 veces al día<br><input type="radio"/> 5 a 6 veces al día<br><input type="radio"/> más 6 veces al día |
| atun conserva          | <input type="radio"/> Nunca o menos 1 vez al mes<br><input type="radio"/> 1 a 3 veces mes<br><input checked="" type="radio"/> 1 vez semana<br><input type="radio"/> 2 a 4 veces semana<br><input type="radio"/> 5 a 6 veces semana<br><input type="radio"/> 1 vez al día<br><input type="radio"/> 2 a 3 veces al día<br><input type="radio"/> 5 a 6 veces al día<br><input type="radio"/> más 6 veces al día |
| sardina conserva       | <input checked="" type="radio"/> Nunca o menos 1 vez al mes<br><input type="radio"/> 1 a 3 veces mes<br><input type="radio"/> 1 vez semana<br><input type="radio"/> 2 a 4 veces semana<br><input type="radio"/> 5 a 6 veces semana<br><input type="radio"/> 1 vez al día<br><input type="radio"/> 2 a 3 veces al día<br><input type="radio"/> 5 a 6 veces al día<br><input type="radio"/> más 6 veces al día |

|                                         |                                                                                                                                                                                                                                                                                                                                                                                                              |
|-----------------------------------------|--------------------------------------------------------------------------------------------------------------------------------------------------------------------------------------------------------------------------------------------------------------------------------------------------------------------------------------------------------------------------------------------------------------|
| pescado ahumado                         | <input type="radio"/> Nunca o menos 1 vez al mes<br><input type="radio"/> 1 a 3 veces mes<br><input checked="" type="radio"/> 1 vez semana<br><input type="radio"/> 2 a 4 veces semana<br><input type="radio"/> 5 a 6 veces semana<br><input type="radio"/> 1 vez al día<br><input type="radio"/> 2 a 3 veces al día<br><input type="radio"/> 5 a 6 veces al día<br><input type="radio"/> más 6 veces al día |
| almejas o mejillones o ostras unos 100g | <input type="radio"/> Nunca o menos 1 vez al mes<br><input checked="" type="radio"/> 1 a 3 veces mes<br><input type="radio"/> 1 vez semana<br><input type="radio"/> 2 a 4 veces semana<br><input type="radio"/> 5 a 6 veces semana<br><input type="radio"/> 1 vez al día<br><input type="radio"/> 2 a 3 veces al día<br><input type="radio"/> 5 a 6 veces al día<br><input type="radio"/> más 6 veces al día |
| calamar o chipiron o sepia unos 100g    | <input type="radio"/> Nunca o menos 1 vez al mes<br><input checked="" type="radio"/> 1 a 3 veces mes<br><input type="radio"/> 1 vez semana<br><input type="radio"/> 2 a 4 veces semana<br><input type="radio"/> 5 a 6 veces semana<br><input type="radio"/> 1 vez al día<br><input type="radio"/> 2 a 3 veces al día<br><input type="radio"/> 5 a 6 veces al día<br><input type="radio"/> más 6 veces al día |
| marisco unos 100g                       | <input type="radio"/> Nunca o menos 1 vez al mes<br><input checked="" type="radio"/> 1 a 3 veces mes<br><input type="radio"/> 1 vez semana<br><input type="radio"/> 2 a 4 veces semana<br><input type="radio"/> 5 a 6 veces semana<br><input type="radio"/> 1 vez al día<br><input type="radio"/> 2 a 3 veces al día<br><input type="radio"/> 5 a 6 veces al día<br><input type="radio"/> más 6 veces al día |
| Espinacas o acelgas cocinadas           | <input type="radio"/> Nunca o menos 1 vez al mes<br><input type="radio"/> 1 a 3 veces mes<br><input type="radio"/> 1 vez semana<br><input checked="" type="radio"/> 2 a 4 veces semana<br><input type="radio"/> 5 a 6 veces semana<br><input type="radio"/> 1 vez al día<br><input type="radio"/> 2 a 3 veces al día<br><input type="radio"/> 5 a 6 veces al día<br><input type="radio"/> más 6 veces al día |
| Col o coliflor o brocoli cocinado       | <input type="radio"/> Nunca o menos 1 vez al mes<br><input type="radio"/> 1 a 3 veces mes<br><input type="radio"/> 1 vez semana<br><input checked="" type="radio"/> 2 a 4 veces semana<br><input type="radio"/> 5 a 6 veces semana<br><input type="radio"/> 1 vez al día<br><input type="radio"/> 2 a 3 veces al día<br><input type="radio"/> 5 a 6 veces al día<br><input type="radio"/> más 6 veces al día |

---

Lechuga o endivia o escarola

- ☐ Nunca o menos 1 vez al mes  
☐ 1 a 3 veces mes  
☐ 1 vez semana  
☒ 2 a 4 veces semana  
☐ 5 a 6 veces semana  
☐ 1 vez al día  
☐ 2 a 3 veces al día  
☐ 5 a 6 veces al día  
☐ más 6 veces al día

---

tomate ensalada

- ☐ Nunca o menos 1 vez al mes  
☐ 1 a 3 veces mes  
☐ 1 vez semana  
☒ 2 a 4 veces semana  
☐ 5 a 6 veces semana  
☐ 1 vez al día  
☐ 2 a 3 veces al día  
☐ 5 a 6 veces al día  
☐ más 6 veces al día

---

cebolla

- ☐ Nunca o menos 1 vez al mes  
☐ 1 a 3 veces mes  
☐ 1 vez semana  
☒ 2 a 4 veces semana  
☐ 5 a 6 veces semana  
☐ 1 vez al día  
☐ 2 a 3 veces al día  
☐ 5 a 6 veces al día  
☐ más 6 veces al día

---

Zanahoria o calabaza

- ☐ Nunca o menos 1 vez al mes  
☐ 1 a 3 veces mes  
☐ 1 vez semana  
☒ 2 a 4 veces semana  
☐ 5 a 6 veces semana  
☐ 1 vez al día  
☐ 2 a 3 veces al día  
☐ 5 a 6 veces al día  
☐ más 6 veces al día

---

Judías verdes

- ☐ Nunca o menos 1 vez al mes  
☐ 1 a 3 veces mes  
☐ 1 vez semana  
☒ 2 a 4 veces semana  
☐ 5 a 6 veces semana  
☐ 1 vez al día  
☐ 2 a 3 veces al día  
☐ 5 a 6 veces al día  
☐ más 6 veces al día

---

Berenjena o calabacin o pepino

- ☐ Nunca o menos 1 vez al mes  
☐ 1 a 3 veces mes  
☒ 1 vez semana  
☐ 2 a 4 veces semana  
☐ 5 a 6 veces semana  
☐ 1 vez al día  
☐ 2 a 3 veces al día  
☐ 5 a 6 veces al día  
☐ más 6 veces al día

---

|          |                                                                                                                                                                                                                                                                                                                                                                                                              |
|----------|--------------------------------------------------------------------------------------------------------------------------------------------------------------------------------------------------------------------------------------------------------------------------------------------------------------------------------------------------------------------------------------------------------------|
| pimiento | <input type="radio"/> Nunca o menos 1 vez al mes<br><input type="radio"/> 1 a 3 veces mes<br><input checked="" type="radio"/> 1 vez semana<br><input type="radio"/> 2 a 4 veces semana<br><input type="radio"/> 5 a 6 veces semana<br><input type="radio"/> 1 vez al día<br><input type="radio"/> 2 a 3 veces al día<br><input type="radio"/> 5 a 6 veces al día<br><input type="radio"/> más 6 veces al día |
|----------|--------------------------------------------------------------------------------------------------------------------------------------------------------------------------------------------------------------------------------------------------------------------------------------------------------------------------------------------------------------------------------------------------------------|

---

|           |                                                                                                                                                                                                                                                                                                                                                                                                              |
|-----------|--------------------------------------------------------------------------------------------------------------------------------------------------------------------------------------------------------------------------------------------------------------------------------------------------------------------------------------------------------------------------------------------------------------|
| alcachofa | <input type="radio"/> Nunca o menos 1 vez al mes<br><input type="radio"/> 1 a 3 veces mes<br><input checked="" type="radio"/> 1 vez semana<br><input type="radio"/> 2 a 4 veces semana<br><input type="radio"/> 5 a 6 veces semana<br><input type="radio"/> 1 vez al día<br><input type="radio"/> 2 a 3 veces al día<br><input type="radio"/> 5 a 6 veces al día<br><input type="radio"/> más 6 veces al día |
|-----------|--------------------------------------------------------------------------------------------------------------------------------------------------------------------------------------------------------------------------------------------------------------------------------------------------------------------------------------------------------------------------------------------------------------|

---

|            |                                                                                                                                                                                                                                                                                                                                                                                                              |
|------------|--------------------------------------------------------------------------------------------------------------------------------------------------------------------------------------------------------------------------------------------------------------------------------------------------------------------------------------------------------------------------------------------------------------|
| espárragos | <input type="radio"/> Nunca o menos 1 vez al mes<br><input type="radio"/> 1 a 3 veces mes<br><input checked="" type="radio"/> 1 vez semana<br><input type="radio"/> 2 a 4 veces semana<br><input type="radio"/> 5 a 6 veces semana<br><input type="radio"/> 1 vez al día<br><input type="radio"/> 2 a 3 veces al día<br><input type="radio"/> 5 a 6 veces al día<br><input type="radio"/> más 6 veces al día |
|------------|--------------------------------------------------------------------------------------------------------------------------------------------------------------------------------------------------------------------------------------------------------------------------------------------------------------------------------------------------------------------------------------------------------------|

---

|              |                                                                                                                                                                                                                                                                                                                                                                                                              |
|--------------|--------------------------------------------------------------------------------------------------------------------------------------------------------------------------------------------------------------------------------------------------------------------------------------------------------------------------------------------------------------------------------------------------------------|
| maíz hervido | <input type="radio"/> Nunca o menos 1 vez al mes<br><input type="radio"/> 1 a 3 veces mes<br><input checked="" type="radio"/> 1 vez semana<br><input type="radio"/> 2 a 4 veces semana<br><input type="radio"/> 5 a 6 veces semana<br><input type="radio"/> 1 vez al día<br><input type="radio"/> 2 a 3 veces al día<br><input type="radio"/> 5 a 6 veces al día<br><input type="radio"/> más 6 veces al día |
|--------------|--------------------------------------------------------------------------------------------------------------------------------------------------------------------------------------------------------------------------------------------------------------------------------------------------------------------------------------------------------------------------------------------------------------|

---

|           |                                                                                                                                                                                                                                                                                                                                                                                                              |
|-----------|--------------------------------------------------------------------------------------------------------------------------------------------------------------------------------------------------------------------------------------------------------------------------------------------------------------------------------------------------------------------------------------------------------------|
| legumbres | <input type="radio"/> Nunca o menos 1 vez al mes<br><input type="radio"/> 1 a 3 veces mes<br><input type="radio"/> 1 vez semana<br><input checked="" type="radio"/> 2 a 4 veces semana<br><input type="radio"/> 5 a 6 veces semana<br><input type="radio"/> 1 vez al día<br><input type="radio"/> 2 a 3 veces al día<br><input type="radio"/> 5 a 6 veces al día<br><input type="radio"/> más 6 veces al día |
|-----------|--------------------------------------------------------------------------------------------------------------------------------------------------------------------------------------------------------------------------------------------------------------------------------------------------------------------------------------------------------------------------------------------------------------|

---

|                       |                                                                                                                                                                                                                                                                                                                                                                                                              |
|-----------------------|--------------------------------------------------------------------------------------------------------------------------------------------------------------------------------------------------------------------------------------------------------------------------------------------------------------------------------------------------------------------------------------------------------------|
| naranjas o mandarinas | <input type="radio"/> Nunca o menos 1 vez al mes<br><input type="radio"/> 1 a 3 veces mes<br><input type="radio"/> 1 vez semana<br><input type="radio"/> 2 a 4 veces semana<br><input type="radio"/> 5 a 6 veces semana<br><input checked="" type="radio"/> 1 vez al día<br><input type="radio"/> 2 a 3 veces al día<br><input type="radio"/> 5 a 6 veces al día<br><input type="radio"/> más 6 veces al día |
|-----------------------|--------------------------------------------------------------------------------------------------------------------------------------------------------------------------------------------------------------------------------------------------------------------------------------------------------------------------------------------------------------------------------------------------------------|

---

|                       |                                                                                                                                                                                                                                                                                                                                                                                                              |
|-----------------------|--------------------------------------------------------------------------------------------------------------------------------------------------------------------------------------------------------------------------------------------------------------------------------------------------------------------------------------------------------------------------------------------------------------|
| zum natural fruta     | <input checked="" type="radio"/> Nunca o menos 1 vez al mes<br><input type="radio"/> 1 a 3 veces mes<br><input type="radio"/> 1 vez semana<br><input type="radio"/> 2 a 4 veces semana<br><input type="radio"/> 5 a 6 veces semana<br><input type="radio"/> 1 vez al día<br><input type="radio"/> 2 a 3 veces al día<br><input type="radio"/> 5 a 6 veces al día<br><input type="radio"/> más 6 veces al día |
| platano               | <input type="radio"/> Nunca o menos 1 vez al mes<br><input type="radio"/> 1 a 3 veces mes<br><input type="radio"/> 1 vez semana<br><input type="radio"/> 2 a 4 veces semana<br><input type="radio"/> 5 a 6 veces semana<br><input checked="" type="radio"/> 1 vez al día<br><input type="radio"/> 2 a 3 veces al día<br><input type="radio"/> 5 a 6 veces al día<br><input type="radio"/> más 6 veces al día |
| manzana o pera        | <input type="radio"/> Nunca o menos 1 vez al mes<br><input type="radio"/> 1 a 3 veces mes<br><input type="radio"/> 1 vez semana<br><input type="radio"/> 2 a 4 veces semana<br><input type="radio"/> 5 a 6 veces semana<br><input checked="" type="radio"/> 1 vez al día<br><input type="radio"/> 2 a 3 veces al día<br><input type="radio"/> 5 a 6 veces al día<br><input type="radio"/> más 6 veces al día |
| melocotón o nectarina | <input type="radio"/> Nunca o menos 1 vez al mes<br><input type="radio"/> 1 a 3 veces mes<br><input type="radio"/> 1 vez semana<br><input type="radio"/> 2 a 4 veces semana<br><input type="radio"/> 5 a 6 veces semana<br><input checked="" type="radio"/> 1 vez al día<br><input type="radio"/> 2 a 3 veces al día<br><input type="radio"/> 5 a 6 veces al día<br><input type="radio"/> más 6 veces al día |
| sandia o melon        | <input type="radio"/> Nunca o menos 1 vez al mes<br><input type="radio"/> 1 a 3 veces mes<br><input type="radio"/> 1 vez semana<br><input type="radio"/> 2 a 4 veces semana<br><input type="radio"/> 5 a 6 veces semana<br><input type="radio"/> 1 vez al día<br><input type="radio"/> 2 a 3 veces al día<br><input type="radio"/> 5 a 6 veces al día<br><input type="radio"/> más 6 veces al día            |
| uva                   | <input type="radio"/> Nunca o menos 1 vez al mes<br><input type="radio"/> 1 a 3 veces mes<br><input type="radio"/> 1 vez semana<br><input type="radio"/> 2 a 4 veces semana<br><input type="radio"/> 5 a 6 veces semana<br><input type="radio"/> 1 vez al día<br><input type="radio"/> 2 a 3 veces al día<br><input type="radio"/> 5 a 6 veces al día<br><input type="radio"/> más 6 veces al día            |



---

bruna o ciruela

- ☒ Nunca o menos 1 vez al mes  
☐ 1 a 3 veces mes  
☐ 1 vez semana  
☐ 2 a 4 veces semana  
☐ 5 a 6 veces semana  
☐ 1 vez al día  
☐ 2 a 3 veces al día  
☐ 5 a 6 veces al día  
☐ más 6 veces al día

---

kiwi

- ☐ Nunca o menos 1 vez al mes  
☒ 1 a 3 veces mes  
☐ 1 vez semana  
☐ 2 a 4 veces semana  
☐ 5 a 6 veces semana  
☐ 1 vez al día  
☐ 2 a 3 veces al día  
☐ 5 a 6 veces al día  
☐ más 6 veces al día

---

aceituna

- ☐ Nunca o menos 1 vez al mes  
☒ 1 a 3 veces mes  
☐ 1 vez semana  
☐ 2 a 4 veces semana  
☐ 5 a 6 veces semana  
☐ 1 vez al día  
☐ 2 a 3 veces al día  
☐ 5 a 6 veces al día  
☐ más 6 veces al día

---

frutos secos

- ☐ Nunca o menos 1 vez al mes  
☐ 1 a 3 veces mes  
☐ 1 vez semana  
☐ 2 a 4 veces semana  
☐ 5 a 6 veces semana  
☒ 1 vez al día  
☐ 2 a 3 veces al día  
☐ 5 a 6 veces al día  
☐ más 6 veces al día

---

pan blanco

- ☐ Nunca o menos 1 vez al mes  
☐ 1 a 3 veces mes  
☐ 1 vez semana  
☒ 2 a 4 veces semana  
☐ 5 a 6 veces semana  
☐ 1 vez al día  
☐ 2 a 3 veces al día  
☐ 5 a 6 veces al día  
☐ más 6 veces al día

---

pan integral

- ☐ Nunca o menos 1 vez al mes  
☐ 1 a 3 veces mes  
☐ 1 vez semana  
☐ 2 a 4 veces semana  
☐ 5 a 6 veces semana  
☒ 1 vez al día  
☐ 2 a 3 veces al día  
☐ 5 a 6 veces al día  
☐ más 6 veces al día

---

cereales desayuno

- ☐ Nunca o menos 1 vez al mes
- ☐ 1 a 3 veces mes
- ☐ 1 vez semana
- ☐ 2 a 4 veces semana
- ☐ 5 a 6 veces semana
- ☐ 1 vez al día
- ☐ 2 a 3 veces al día
- ☐ 5 a 6 veces al día
- ☐ más 6 veces al día

---

patatas fritas

- ☐ Nunca o menos 1 vez al mes
- ☐ 1 a 3 veces mes
- ☐ 1 vez semana
- ☐ 2 a 4 veces semana
- ☐ 5 a 6 veces semana
- ☐ 1 vez al día
- ☐ 2 a 3 veces al día
- ☐ 5 a 6 veces al día
- ☐ más 6 veces al día

---

patatas cocidas o asadas

- ☐ Nunca o menos 1 vez al mes
- ☐ 1 a 3 veces mes
- ☒ 1 vez semana
- ☐ 2 a 4 veces semana
- ☐ 5 a 6 veces semana
- ☐ 1 vez al día
- ☐ 2 a 3 veces al día
- ☐ 5 a 6 veces al día
- ☐ más 6 veces al día

---

bolsa papas

- ☐ Nunca o menos 1 vez al mes
- ☐ 1 a 3 veces mes
- ☐ 1 vez semana
- ☒ 2 a 4 veces semana
- ☐ 5 a 6 veces semana
- ☐ 1 vez al día
- ☐ 2 a 3 veces al día
- ☐ 5 a 6 veces al día
- ☐ más 6 veces al día

---

arroz cocinado

- ☐ Nunca o menos 1 vez al mes
- ☐ 1 a 3 veces mes
- ☒ 1 vez semana
- ☐ 2 a 4 veces semana
- ☐ 5 a 6 veces semana
- ☐ 1 vez al día
- ☐ 2 a 3 veces al día
- ☐ 5 a 6 veces al día
- ☐ más 6 veces al día

---

pasta

- ☐ Nunca o menos 1 vez al mes
- ☐ 1 a 3 veces mes
- ☐ 1 vez semana
- ☒ 2 a 4 veces semana
- ☐ 5 a 6 veces semana
- ☐ 1 vez al día
- ☐ 2 a 3 veces al día
- ☐ 5 a 6 veces al día
- ☐ más 6 veces al día

|                     |                                                                                                                                                                                                                                                                                                                                                                                                              |
|---------------------|--------------------------------------------------------------------------------------------------------------------------------------------------------------------------------------------------------------------------------------------------------------------------------------------------------------------------------------------------------------------------------------------------------------|
| pizza               | <input type="radio"/> Nunca o menos 1 vez al mes<br><input type="radio"/> 1 a 3 veces mes<br><input type="radio"/> 1 vez semana<br><input checked="" type="radio"/> 2 a 4 veces semana<br><input type="radio"/> 5 a 6 veces semana<br><input type="radio"/> 1 vez al día<br><input type="radio"/> 2 a 3 veces al día<br><input type="radio"/> 5 a 6 veces al día<br><input type="radio"/> más 6 veces al día |
| aceite oliva        | <input type="radio"/> Nunca o menos 1 vez al mes<br><input type="radio"/> 1 a 3 veces mes<br><input type="radio"/> 1 vez semana<br><input type="radio"/> 2 a 4 veces semana<br><input type="radio"/> 5 a 6 veces semana<br><input checked="" type="radio"/> 1 vez al día<br><input type="radio"/> 2 a 3 veces al día<br><input type="radio"/> 5 a 6 veces al día<br><input type="radio"/> más 6 veces al día |
| otros aceites       | <input checked="" type="radio"/> Nunca o menos 1 vez al mes<br><input type="radio"/> 1 a 3 veces mes<br><input type="radio"/> 1 vez semana<br><input type="radio"/> 2 a 4 veces semana<br><input type="radio"/> 5 a 6 veces semana<br><input type="radio"/> 1 vez al día<br><input type="radio"/> 2 a 3 veces al día<br><input type="radio"/> 5 a 6 veces al día<br><input type="radio"/> más 6 veces al día |
| margarina           | <input checked="" type="radio"/> Nunca o menos 1 vez al mes<br><input type="radio"/> 1 a 3 veces mes<br><input type="radio"/> 1 vez semana<br><input type="radio"/> 2 a 4 veces semana<br><input type="radio"/> 5 a 6 veces semana<br><input type="radio"/> 1 vez al día<br><input type="radio"/> 2 a 3 veces al día<br><input type="radio"/> 5 a 6 veces al día<br><input type="radio"/> más 6 veces al día |
| mantequilla         | <input checked="" type="radio"/> Nunca o menos 1 vez al mes<br><input type="radio"/> 1 a 3 veces mes<br><input type="radio"/> 1 vez semana<br><input type="radio"/> 2 a 4 veces semana<br><input type="radio"/> 5 a 6 veces semana<br><input type="radio"/> 1 vez al día<br><input type="radio"/> 2 a 3 veces al día<br><input type="radio"/> 5 a 6 veces al día<br><input type="radio"/> más 6 veces al día |
| galletas tipo maria | <input type="radio"/> Nunca o menos 1 vez al mes<br><input type="radio"/> 1 a 3 veces mes<br><input type="radio"/> 1 vez semana<br><input checked="" type="radio"/> 2 a 4 veces semana<br><input type="radio"/> 5 a 6 veces semana<br><input type="radio"/> 1 vez al día<br><input type="radio"/> 2 a 3 veces al día<br><input type="radio"/> 5 a 6 veces al día<br><input type="radio"/> más 6 veces al día |

|                           |                                                                                                                                                                                                                                                                                                                                                                                                              |
|---------------------------|--------------------------------------------------------------------------------------------------------------------------------------------------------------------------------------------------------------------------------------------------------------------------------------------------------------------------------------------------------------------------------------------------------------|
| galletas chocolate        | <input type="radio"/> Nunca o menos 1 vez al mes<br><input type="radio"/> 1 a 3 veces mes<br><input type="radio"/> 1 vez semana<br><input checked="" type="radio"/> 2 a 4 veces semana<br><input type="radio"/> 5 a 6 veces semana<br><input type="radio"/> 1 vez al día<br><input type="radio"/> 2 a 3 veces al día<br><input type="radio"/> 5 a 6 veces al día<br><input type="radio"/> más 6 veces al día |
| bollieria                 | <input type="radio"/> Nunca o menos 1 vez al mes<br><input checked="" type="radio"/> 1 a 3 veces mes<br><input type="radio"/> 1 vez semana<br><input type="radio"/> 2 a 4 veces semana<br><input type="radio"/> 5 a 6 veces semana<br><input type="radio"/> 1 vez al día<br><input type="radio"/> 2 a 3 veces al día<br><input type="radio"/> 5 a 6 veces al día<br><input type="radio"/> más 6 veces al día |
| chocolate o bombones      | <input checked="" type="radio"/> Nunca o menos 1 vez al mes<br><input type="radio"/> 1 a 3 veces mes<br><input type="radio"/> 1 vez semana<br><input type="radio"/> 2 a 4 veces semana<br><input type="radio"/> 5 a 6 veces semana<br><input type="radio"/> 1 vez al día<br><input type="radio"/> 2 a 3 veces al día<br><input type="radio"/> 5 a 6 veces al día<br><input type="radio"/> más 6 veces al día |
| chocolate polvo o colacao | <input checked="" type="radio"/> Nunca o menos 1 vez al mes<br><input type="radio"/> 1 a 3 veces mes<br><input type="radio"/> 1 vez semana<br><input type="radio"/> 2 a 4 veces semana<br><input type="radio"/> 5 a 6 veces semana<br><input type="radio"/> 1 vez al día<br><input type="radio"/> 2 a 3 veces al día<br><input type="radio"/> 5 a 6 veces al día<br><input type="radio"/> más 6 veces al día |
| vino tinto                | <input checked="" type="radio"/> Nunca o menos 1 vez al mes<br><input type="radio"/> 1 a 3 veces mes<br><input type="radio"/> 1 vez semana<br><input type="radio"/> 2 a 4 veces semana<br><input type="radio"/> 5 a 6 veces semana<br><input type="radio"/> 1 vez al día<br><input type="radio"/> 2 a 3 veces al día<br><input type="radio"/> 5 a 6 veces al día<br><input type="radio"/> más 6 veces al día |
| vino blanco               | <input checked="" type="radio"/> Nunca o menos 1 vez al mes<br><input type="radio"/> 1 a 3 veces mes<br><input type="radio"/> 1 vez semana<br><input type="radio"/> 2 a 4 veces semana<br><input type="radio"/> 5 a 6 veces semana<br><input type="radio"/> 1 vez al día<br><input type="radio"/> 2 a 3 veces al día<br><input type="radio"/> 5 a 6 veces al día<br><input type="radio"/> más 6 veces al día |

|                       |                                                                                                                                                                                                                                                                                                                                                                                                              |
|-----------------------|--------------------------------------------------------------------------------------------------------------------------------------------------------------------------------------------------------------------------------------------------------------------------------------------------------------------------------------------------------------------------------------------------------------|
| vino seco o vermut    | <input checked="" type="radio"/> Nunca o menos 1 vez al mes<br><input type="radio"/> 1 a 3 veces mes<br><input type="radio"/> 1 vez semana<br><input type="radio"/> 2 a 4 veces semana<br><input type="radio"/> 5 a 6 veces semana<br><input type="radio"/> 1 vez al día<br><input type="radio"/> 2 a 3 veces al día<br><input type="radio"/> 5 a 6 veces al día<br><input type="radio"/> más 6 veces al día |
| cerveza               | <input checked="" type="radio"/> Nunca o menos 1 vez al mes<br><input type="radio"/> 1 a 3 veces mes<br><input type="radio"/> 1 vez semana<br><input type="radio"/> 2 a 4 veces semana<br><input type="radio"/> 5 a 6 veces semana<br><input type="radio"/> 1 vez al día<br><input type="radio"/> 2 a 3 veces al día<br><input type="radio"/> 5 a 6 veces al día<br><input type="radio"/> más 6 veces al día |
| cerveza sin alcohol   | <input checked="" type="radio"/> Nunca o menos 1 vez al mes<br><input type="radio"/> 1 a 3 veces mes<br><input type="radio"/> 1 vez semana<br><input type="radio"/> 2 a 4 veces semana<br><input type="radio"/> 5 a 6 veces semana<br><input type="radio"/> 1 vez al día<br><input type="radio"/> 2 a 3 veces al día<br><input type="radio"/> 5 a 6 veces al día<br><input type="radio"/> más 6 veces al día |
| licores               | <input checked="" type="radio"/> Nunca o menos 1 vez al mes<br><input type="radio"/> 1 a 3 veces mes<br><input type="radio"/> 1 vez semana<br><input type="radio"/> 2 a 4 veces semana<br><input type="radio"/> 5 a 6 veces semana<br><input type="radio"/> 1 vez al día<br><input type="radio"/> 2 a 3 veces al día<br><input type="radio"/> 5 a 6 veces al día<br><input type="radio"/> más 6 veces al día |
| ginebra o ron o vodka | <input checked="" type="radio"/> Nunca o menos 1 vez al mes<br><input type="radio"/> 1 a 3 veces mes<br><input type="radio"/> 1 vez semana<br><input type="radio"/> 2 a 4 veces semana<br><input type="radio"/> 5 a 6 veces semana<br><input type="radio"/> 1 vez al día<br><input type="radio"/> 2 a 3 veces al día<br><input type="radio"/> 5 a 6 veces al día<br><input type="radio"/> más 6 veces al día |
| refresco normal       | <input type="radio"/> Nunca o menos 1 vez al mes<br><input type="radio"/> 1 a 3 veces mes<br><input checked="" type="radio"/> 1 vez semana<br><input type="radio"/> 2 a 4 veces semana<br><input type="radio"/> 5 a 6 veces semana<br><input type="radio"/> 1 vez al día<br><input type="radio"/> 2 a 3 veces al día<br><input type="radio"/> 5 a 6 veces al día<br><input type="radio"/> más 6 veces al día |

|                          |                                                                                                                                                                                                                                                                                                                                                                                                              |
|--------------------------|--------------------------------------------------------------------------------------------------------------------------------------------------------------------------------------------------------------------------------------------------------------------------------------------------------------------------------------------------------------------------------------------------------------|
| refresco sin azúcar      | <input checked="" type="radio"/> Nunca o menos 1 vez al mes<br><input type="radio"/> 1 a 3 veces mes<br><input type="radio"/> 1 vez semana<br><input type="radio"/> 2 a 4 veces semana<br><input type="radio"/> 5 a 6 veces semana<br><input type="radio"/> 1 vez al día<br><input type="radio"/> 2 a 3 veces al día<br><input type="radio"/> 5 a 6 veces al día<br><input type="radio"/> más 6 veces al día |
| Agua del grifo           | <input checked="" type="radio"/> Nunca o menos 1 vez al mes<br><input type="radio"/> 1 a 3 veces mes<br><input type="radio"/> 1 vez semana<br><input type="radio"/> 2 a 4 veces semana<br><input type="radio"/> 5 a 6 veces semana<br><input type="radio"/> 1 vez al día<br><input type="radio"/> 2 a 3 veces al día<br><input type="radio"/> 5 a 6 veces al día<br><input type="radio"/> más 6 veces al día |
| agua embotellada sin gas | <input type="radio"/> Nunca o menos 1 vez al mes<br><input type="radio"/> 1 a 3 veces mes<br><input type="radio"/> 1 vez semana<br><input type="radio"/> 2 a 4 veces semana<br><input type="radio"/> 5 a 6 veces semana<br><input type="radio"/> 1 vez al día<br><input type="radio"/> 2 a 3 veces al día<br><input checked="" type="radio"/> 5 a 6 veces al día<br><input type="radio"/> más 6 veces al día |
| agua embotellada con gas | <input checked="" type="radio"/> Nunca o menos 1 vez al mes<br><input type="radio"/> 1 a 3 veces mes<br><input type="radio"/> 1 vez semana<br><input type="radio"/> 2 a 4 veces semana<br><input type="radio"/> 5 a 6 veces semana<br><input type="radio"/> 1 vez al día<br><input type="radio"/> 2 a 3 veces al día<br><input type="radio"/> 5 a 6 veces al día<br><input type="radio"/> más 6 veces al día |
| zumو frutas embasado     | <input checked="" type="radio"/> Nunca o menos 1 vez al mes<br><input type="radio"/> 1 a 3 veces mes<br><input type="radio"/> 1 vez semana<br><input type="radio"/> 2 a 4 veces semana<br><input type="radio"/> 5 a 6 veces semana<br><input type="radio"/> 1 vez al día<br><input type="radio"/> 2 a 3 veces al día<br><input type="radio"/> 5 a 6 veces al día<br><input type="radio"/> más 6 veces al día |
| cafe                     | <input type="radio"/> Nunca o menos 1 vez al mes<br><input type="radio"/> 1 a 3 veces mes<br><input type="radio"/> 1 vez semana<br><input type="radio"/> 2 a 4 veces semana<br><input type="radio"/> 5 a 6 veces semana<br><input type="radio"/> 1 vez al día<br><input checked="" type="radio"/> 2 a 3 veces al día<br><input type="radio"/> 5 a 6 veces al día<br><input type="radio"/> más 6 veces al día |

|                       |                                                                                                                                                                                                                                                                                                                                                                                                              |
|-----------------------|--------------------------------------------------------------------------------------------------------------------------------------------------------------------------------------------------------------------------------------------------------------------------------------------------------------------------------------------------------------------------------------------------------------|
| cafe descafeinado     | <input checked="" type="radio"/> Nunca o menos 1 vez al mes<br><input type="radio"/> 1 a 3 veces mes<br><input type="radio"/> 1 vez semana<br><input type="radio"/> 2 a 4 veces semana<br><input type="radio"/> 5 a 6 veces semana<br><input type="radio"/> 1 vez al día<br><input type="radio"/> 2 a 3 veces al día<br><input type="radio"/> 5 a 6 veces al día<br><input type="radio"/> más 6 veces al día |
| te o infusión         | <input checked="" type="radio"/> Nunca o menos 1 vez al mes<br><input type="radio"/> 1 a 3 veces mes<br><input type="radio"/> 1 vez semana<br><input type="radio"/> 2 a 4 veces semana<br><input type="radio"/> 5 a 6 veces semana<br><input type="radio"/> 1 vez al día<br><input type="radio"/> 2 a 3 veces al día<br><input type="radio"/> 5 a 6 veces al día<br><input type="radio"/> más 6 veces al día |
| sopa o puré verduras  | <input type="radio"/> Nunca o menos 1 vez al mes<br><input type="radio"/> 1 a 3 veces mes<br><input type="radio"/> 1 vez semana<br><input checked="" type="radio"/> 2 a 4 veces semana<br><input type="radio"/> 5 a 6 veces semana<br><input type="radio"/> 1 vez al día<br><input type="radio"/> 2 a 3 veces al día<br><input type="radio"/> 5 a 6 veces al día<br><input type="radio"/> más 6 veces al día |
| croquetas pollo jamón | <input type="radio"/> Nunca o menos 1 vez al mes<br><input type="radio"/> 1 a 3 veces mes<br><input checked="" type="radio"/> 1 vez semana<br><input type="radio"/> 2 a 4 veces semana<br><input type="radio"/> 5 a 6 veces semana<br><input type="radio"/> 1 vez al día<br><input type="radio"/> 2 a 3 veces al día<br><input type="radio"/> 5 a 6 veces al día<br><input type="radio"/> más 6 veces al día |
| croquetas pescado     | <input type="radio"/> Nunca o menos 1 vez al mes<br><input type="radio"/> 1 a 3 veces mes<br><input checked="" type="radio"/> 1 vez semana<br><input type="radio"/> 2 a 4 veces semana<br><input type="radio"/> 5 a 6 veces semana<br><input type="radio"/> 1 vez al día<br><input type="radio"/> 2 a 3 veces al día<br><input type="radio"/> 5 a 6 veces al día<br><input type="radio"/> más 6 veces al día |
| mayonesa              | <input type="radio"/> Nunca o menos 1 vez al mes<br><input checked="" type="radio"/> 1 a 3 veces mes<br><input type="radio"/> 1 vez semana<br><input type="radio"/> 2 a 4 veces semana<br><input type="radio"/> 5 a 6 veces semana<br><input type="radio"/> 1 vez al día<br><input type="radio"/> 2 a 3 veces al día<br><input type="radio"/> 5 a 6 veces al día<br><input type="radio"/> más 6 veces al día |

|                  |                                                                                                                                                                                                                                                                                                                                                                                                              |
|------------------|--------------------------------------------------------------------------------------------------------------------------------------------------------------------------------------------------------------------------------------------------------------------------------------------------------------------------------------------------------------------------------------------------------------|
| salsa tomate     | <input type="radio"/> Nunca o menos 1 vez al mes<br><input type="radio"/> 1 a 3 veces mes<br><input type="radio"/> 1 vez semana<br><input checked="" type="radio"/> 2 a 4 veces semana<br><input type="radio"/> 5 a 6 veces semana<br><input type="radio"/> 1 vez al día<br><input type="radio"/> 2 a 3 veces al día<br><input type="radio"/> 5 a 6 veces al día<br><input type="radio"/> más 6 veces al día |
| ketchup          | <input type="radio"/> Nunca o menos 1 vez al mes<br><input type="radio"/> 1 a 3 veces mes<br><input checked="" type="radio"/> 1 vez semana<br><input type="radio"/> 2 a 4 veces semana<br><input type="radio"/> 5 a 6 veces semana<br><input type="radio"/> 1 vez al día<br><input type="radio"/> 2 a 3 veces al día<br><input type="radio"/> 5 a 6 veces al día<br><input type="radio"/> más 6 veces al día |
| sal              | <input type="radio"/> Nunca o menos 1 vez al mes<br><input type="radio"/> 1 a 3 veces mes<br><input type="radio"/> 1 vez semana<br><input type="radio"/> 2 a 4 veces semana<br><input type="radio"/> 5 a 6 veces semana<br><input checked="" type="radio"/> 1 vez al día<br><input type="radio"/> 2 a 3 veces al día<br><input type="radio"/> 5 a 6 veces al día<br><input type="radio"/> más 6 veces al día |
| ajo              | <input type="radio"/> Nunca o menos 1 vez al mes<br><input type="radio"/> 1 a 3 veces mes<br><input type="radio"/> 1 vez semana<br><input checked="" type="radio"/> 2 a 4 veces semana<br><input type="radio"/> 5 a 6 veces semana<br><input type="radio"/> 1 vez al día<br><input type="radio"/> 2 a 3 veces al día<br><input type="radio"/> 5 a 6 veces al día<br><input type="radio"/> más 6 veces al día |
| mermelada o miel | <input type="radio"/> Nunca o menos 1 vez al mes<br><input type="radio"/> 1 a 3 veces mes<br><input type="radio"/> 1 vez semana<br><input type="radio"/> 2 a 4 veces semana<br><input type="radio"/> 5 a 6 veces semana<br><input checked="" type="radio"/> 1 vez al día<br><input type="radio"/> 2 a 3 veces al día<br><input type="radio"/> 5 a 6 veces al día<br><input type="radio"/> más 6 veces al día |
| azúcar           | <input type="radio"/> Nunca o menos 1 vez al mes<br><input type="radio"/> 1 a 3 veces mes<br><input type="radio"/> 1 vez semana<br><input type="radio"/> 2 a 4 veces semana<br><input type="radio"/> 5 a 6 veces semana<br><input checked="" type="radio"/> 1 vez al día<br><input type="radio"/> 2 a 3 veces al día<br><input type="radio"/> 5 a 6 veces al día<br><input type="radio"/> más 6 veces al día |



|                                       |                                                                                                                                                                                                                                                                                                                                                                                                                                                                                                                               |
|---------------------------------------|-------------------------------------------------------------------------------------------------------------------------------------------------------------------------------------------------------------------------------------------------------------------------------------------------------------------------------------------------------------------------------------------------------------------------------------------------------------------------------------------------------------------------------|
| Otro alimento                         | <hr/>                                                                                                                                                                                                                                                                                                                                                                                                                                                                                                                         |
| suplementos vitamínicos               | <input type="radio"/> si<br><input checked="" type="radio"/> no                                                                                                                                                                                                                                                                                                                                                                                                                                                               |
| suplementos vitamínicos               | <hr/>                                                                                                                                                                                                                                                                                                                                                                                                                                                                                                                         |
| dieta previa                          | <input type="radio"/> si<br><input checked="" type="radio"/> no                                                                                                                                                                                                                                                                                                                                                                                                                                                               |
| motivo dieta                          | <input checked="" type="radio"/> no dieta<br><input type="radio"/> control peso<br><input type="radio"/> control colesterol<br><input type="radio"/> control diabetes<br><input type="radio"/> problemas estómago<br><input type="radio"/> problemas vesícula o hepáticos<br><input type="radio"/> HTA o cardiopatía<br><input type="radio"/> problemas renales<br><input type="radio"/> alergia alimentaria<br><input type="radio"/> ácido úrico elevado<br><input type="radio"/> vegetariana<br><input type="radio"/> otros |
| cambio alimentos año previo gestación | <input checked="" type="radio"/> si<br><input type="radio"/> no                                                                                                                                                                                                                                                                                                                                                                                                                                                               |
| cambio lácteos                        | <input type="radio"/> eliminado<br><input type="radio"/> disminuido<br><input checked="" type="radio"/> igual<br><input type="radio"/> aumentado<br><input type="radio"/> no sabe                                                                                                                                                                                                                                                                                                                                             |
| cambio huevos                         | <input type="radio"/> eliminado<br><input type="radio"/> disminuido<br><input checked="" type="radio"/> igual<br><input type="radio"/> aumentado<br><input type="radio"/> no sabe                                                                                                                                                                                                                                                                                                                                             |
| cambio carne                          | <input type="radio"/> eliminado<br><input type="radio"/> disminuido<br><input checked="" type="radio"/> igual<br><input type="radio"/> aumentado<br><input type="radio"/> no sabe                                                                                                                                                                                                                                                                                                                                             |
| cambio pescado                        | <input type="radio"/> eliminado<br><input type="radio"/> disminuido<br><input checked="" type="radio"/> igual<br><input type="radio"/> aumentado<br><input type="radio"/> no sabe                                                                                                                                                                                                                                                                                                                                             |
| cambio verduras                       | <input type="radio"/> eliminado<br><input type="radio"/> disminuido<br><input checked="" type="radio"/> igual<br><input type="radio"/> aumentado<br><input type="radio"/> no sabe                                                                                                                                                                                                                                                                                                                                             |

|                            |                                                                                                                                                                                                                        |
|----------------------------|------------------------------------------------------------------------------------------------------------------------------------------------------------------------------------------------------------------------|
| cambio legumbres           | <input type="radio"/> eliminado<br><input type="radio"/> disminuido<br><input checked="" type="radio"/> igual<br><input type="radio"/> aumentado<br><input type="radio"/> no sabe                                      |
| cambio fruta               | <input type="radio"/> eliminado<br><input type="radio"/> disminuido<br><input checked="" type="radio"/> igual<br><input type="radio"/> aumentado<br><input type="radio"/> no sabe                                      |
| cambio pan                 | <input type="radio"/> eliminado<br><input type="radio"/> disminuido<br><input checked="" type="radio"/> igual<br><input type="radio"/> aumentado<br><input type="radio"/> no sabe                                      |
| cambio aceite oliva        | <input type="radio"/> eliminado<br><input type="radio"/> disminuido<br><input checked="" type="radio"/> igual<br><input type="radio"/> aumentado<br><input type="radio"/> no sabe                                      |
| cambio mante o margarina   | <input type="radio"/> eliminado<br><input type="radio"/> disminuido<br><input checked="" type="radio"/> igual<br><input type="radio"/> aumentado<br><input type="radio"/> no sabe                                      |
| cambio azúcar y dulces     | <input type="radio"/> eliminado<br><input type="radio"/> disminuido<br><input checked="" type="radio"/> igual<br><input type="radio"/> aumentado<br><input type="radio"/> no sabe                                      |
| cambio bebidas alcohólicas | <input checked="" type="radio"/> eliminado<br><input type="radio"/> disminuido<br><input type="radio"/> igual<br><input type="radio"/> aumentado<br><input type="radio"/> no sabe                                      |
| frecuencia comidas fritas  | <input type="radio"/> a diario<br><input type="radio"/> 5 a 6 veces semana<br><input checked="" type="radio"/> 2 a 4 veces semana<br><input type="radio"/> 1 vez semana<br><input type="radio"/> menos de 1 vez semana |
| carne                      | <input type="radio"/> no como<br><input type="radio"/> cruda<br><input type="radio"/> poco hecha<br><input checked="" type="radio"/> hecha<br><input type="radio"/> muy hecha                                          |
| grasa visible carne        | <input type="radio"/> quita toda<br><input type="radio"/> quita mayoría<br><input checked="" type="radio"/> quita un poco<br><input type="radio"/> no quita nada                                                       |

|                                |                                                                                                                                                                                                                                                          |
|--------------------------------|----------------------------------------------------------------------------------------------------------------------------------------------------------------------------------------------------------------------------------------------------------|
| cocina carne                   | <input checked="" type="radio"/> a la plancha<br><input type="radio"/> a la parrilla<br><input type="radio"/> asada<br><input type="radio"/> frita<br><input type="radio"/> guisada                                                                      |
| tostado quemado carne          | <input type="radio"/> nunca<br><input checked="" type="radio"/> 1 vez mes<br><input type="radio"/> 2 a 3 veces mes<br><input type="radio"/> 1 vez semana<br><input type="radio"/> 2 a 3 semanas                                                          |
| tostado quemado pescado        | <input checked="" type="radio"/> nunca<br><input type="radio"/> 1 vez mes<br><input type="radio"/> 2 a 3 veces mes<br><input type="radio"/> 1 vez semana<br><input type="radio"/> 2 a 3 semanas                                                          |
| socarrat paella                | <input type="radio"/> nunca<br><input type="radio"/> 1 vez mes<br><input type="radio"/> 2 a 3 veces mes<br><input checked="" type="radio"/> 1 vez semana<br><input type="radio"/> 2 a 3 semanas                                                          |
| grasa o aceite cocinar         | <input type="radio"/> mantequilla<br><input type="radio"/> margarina<br><input type="radio"/> aceite oliva<br><input type="radio"/> aceite oliva virgen extra<br><input type="radio"/> aceite vegetal<br><input type="radio"/> mezcla aceites            |
| grasa aceite aliñar            | <input type="radio"/> mantequilla<br><input type="radio"/> margarina<br><input checked="" type="radio"/> aceite oliva<br><input type="radio"/> aceite oliva virgen extra<br><input type="radio"/> aceite vegetal<br><input type="radio"/> mezcla aceites |
| grasa aceite freir             | <input type="radio"/> mantequilla<br><input type="radio"/> margarina<br><input type="radio"/> aceite oliva<br><input type="radio"/> aceite oliva virgen extra<br><input type="radio"/> aceite vegetal<br><input type="radio"/> mezcla aceites            |
| Ejercicio cuestionario         | <input checked="" type="radio"/> si<br><input type="radio"/> no                                                                                                                                                                                          |
| horas de sueño incluido siesta | _____                                                                                                                                                                                                                                                    |
| minutos siesta                 | _____                                                                                                                                                                                                                                                    |
| horas televisión semana        | [*DATA REMOVED*]                                                                                                                                                                                                                                         |

|                                        |                                                                                                                                                                                                                                                                                                                                                                           |
|----------------------------------------|---------------------------------------------------------------------------------------------------------------------------------------------------------------------------------------------------------------------------------------------------------------------------------------------------------------------------------------------------------------------------|
| actividad trabajo                      | <input type="radio"/> casi siempre sentado<br><input checked="" type="radio"/> sentado 50 por cien<br><input type="radio"/> casi siempre de pie, quieto<br><input type="radio"/> casi siempre levantado caminando y llevando pocas cosas<br><input type="radio"/> casi siempre levantado, caminando y llevado muchas cosas<br><input type="radio"/> trabajo manual pesado |
| tiempo caminar o bici al día           | <input checked="" type="radio"/> casi nunca<br><input type="radio"/> menos 20min día<br><input type="radio"/> 20 a 40 min día<br><input type="radio"/> 40 a 60 min día<br><input type="radio"/> 1h o 1h y media día<br><input type="radio"/> más de 1h y media al día                                                                                                     |
| tiempo tareas casa al día              | <input type="radio"/> menos de 1h día<br><input checked="" type="radio"/> 1 a 2h día<br><input type="radio"/> 3 a 4h día<br><input type="radio"/> 5 a 6h día<br><input type="radio"/> 7 a 8h día<br><input type="radio"/> más de 8h día                                                                                                                                   |
| tiempo libre televisión ordenador leer | <input type="radio"/> menos 1h día<br><input checked="" type="radio"/> 1h día<br><input type="radio"/> 2h día<br><input type="radio"/> 3h día<br><input type="radio"/> 4h día<br><input type="radio"/> 5 a 6h día<br><input type="radio"/> mas 6h día                                                                                                                     |
| tiempo libre ejercicio o deporte       | <input type="radio"/> menos 1h semana<br><input checked="" type="radio"/> 1h semana<br><input type="radio"/> 2h semana<br><input type="radio"/> 3h semana<br><input type="radio"/> 4 a 5h semana<br><input type="radio"/> mas 5h semana                                                                                                                                   |
| como se considera                      | <input type="radio"/> sedentaria<br><input type="radio"/> poco activa<br><input checked="" type="radio"/> moderadamente activa<br><input type="radio"/> bastante activa<br><input type="radio"/> muy activa<br><input type="radio"/> no sabe                                                                                                                              |
| FUR                                    | [*DATA REMOVED*]                                                                                                                                                                                                                                                                                                                                                          |
| Semanas gestación 2T                   | [*DATA REMOVED*]                                                                                                                                                                                                                                                                                                                                                          |
| Días gestación 2T                      | [*DATA REMOVED*]                                                                                                                                                                                                                                                                                                                                                          |
| DBP 2T                                 | [*DATA REMOVED*]                                                                                                                                                                                                                                                                                                                                                          |
| CC 2T                                  | [*DATA REMOVED*]                                                                                                                                                                                                                                                                                                                                                          |
| AC 2T                                  | [*DATA REMOVED*]                                                                                                                                                                                                                                                                                                                                                          |

|                                                   |                                                                                                                                                                                                 |
|---------------------------------------------------|-------------------------------------------------------------------------------------------------------------------------------------------------------------------------------------------------|
| LF 2T                                             | [*DATA REMOVED*]                                                                                                                                                                                |
| PFE 2T (Hadlock)                                  | [*DATA REMOVED*]                                                                                                                                                                                |
| Semanas gestación 3T                              | [*DATA REMOVED*]                                                                                                                                                                                |
| días 3T                                           | [*DATA REMOVED*]                                                                                                                                                                                |
| DBP 3T                                            | [*DATA REMOVED*]                                                                                                                                                                                |
| CC 3T                                             | [*DATA REMOVED*]                                                                                                                                                                                |
| AC 3T                                             | [*DATA REMOVED*]                                                                                                                                                                                |
| LF 3T                                             | [*DATA REMOVED*]                                                                                                                                                                                |
| PFE 3T (Hadlock)                                  | [*DATA REMOVED*]                                                                                                                                                                                |
| Semanas de gestación final                        | [*DATA REMOVED*]                                                                                                                                                                                |
| días gestación final                              | [*DATA REMOVED*]                                                                                                                                                                                |
| Localización placenta                             | <input checked="" type="radio"/> anterior<br><input type="radio"/> lateral derecha<br><input type="radio"/> lateral izquierda<br><input type="radio"/> posterior<br><input type="radio"/> fondo |
| Presentación longitudinal cefálica                | <input type="radio"/> no<br><input checked="" type="radio"/> si                                                                                                                                 |
| Dorso                                             | <input type="radio"/> izquierda anterior<br><input type="radio"/> izquierda posterior<br><input checked="" type="radio"/> derecha anterior<br><input type="radio"/> derecha posterior           |
| diámetro biparietal                               | [*DATA REMOVED*]                                                                                                                                                                                |
| Circunferencia craneal                            | [*DATA REMOVED*]                                                                                                                                                                                |
| Circunferencia abdominal                          | [*DATA REMOVED*]                                                                                                                                                                                |
| Longitud de femur                                 | [*DATA REMOVED*]                                                                                                                                                                                |
| tejido celular subcutáneo a nivel del muslo en mm | [*DATA REMOVED*]                                                                                                                                                                                |
| tejido celular subcutáneo en abdomen en mm        | [*DATA REMOVED*]                                                                                                                                                                                |
| Volumen del muslo en cm3                          | [*DATA REMOVED*]                                                                                                                                                                                |
| Peso fetal estimado según fórmula de Hadlock      | [*DATA REMOVED*]                                                                                                                                                                                |

|                                               |                                                                                                                                                          |
|-----------------------------------------------|----------------------------------------------------------------------------------------------------------------------------------------------------------|
| Percentil                                     | [*DATA REMOVED*]                                                                                                                                         |
| Peso fetal estimado según fórmula de Scioscia | <hr/>                                                                                                                                                    |
| Peso fetal estimado según fórmula de LEE      | <hr/>                                                                                                                                                    |
| Tipo de parto                                 | <input checked="" type="radio"/> eutocico<br><input type="radio"/> instrumentado/ventosa<br><input type="radio"/> cesarea                                |
| fecha de nacimiento                           | [*DATA REMOVED*]                                                                                                                                         |
| Días entre exploración y nacimiento           | [*DATA REMOVED*]                                                                                                                                         |
| Peso RN en g                                  | [*DATA REMOVED*]                                                                                                                                         |
| sexo                                          | <input type="radio"/> mujer<br><input checked="" type="radio"/> hombre                                                                                   |
| Apgar 1 minuto                                | [*DATA REMOVED*]                                                                                                                                         |
| Apgar 5 minutos                               | [*DATA REMOVED*]                                                                                                                                         |
| Apgar 10 minutos                              | <hr/>                                                                                                                                                    |
| antecedente Covid durante gestación           | <input type="radio"/> Yes<br><input checked="" type="radio"/> No                                                                                         |
| Nivel de estudios                             | <input type="radio"/> ninguno<br><input type="radio"/> primarios<br><input type="radio"/> secundarios<br><input checked="" type="radio"/> universitarios |

# Base\_datos\_estimacion\_peso\_fetal

|                                       |                                                                                                                                                                                                                                                                                      |
|---------------------------------------|--------------------------------------------------------------------------------------------------------------------------------------------------------------------------------------------------------------------------------------------------------------------------------------|
| Número de identificación participante | 51                                                                                                                                                                                                                                                                                   |
| CODIGO PARTICIPANTE                   |                                                                                                                                                                                                                                                                                      |
| Edad                                  | [*DATA REMOVED*]                                                                                                                                                                                                                                                                     |
| Gestaciones                           | <input checked="" type="radio"/> 1<br><input type="radio"/> 2<br><input type="radio"/> 3<br><input type="radio"/> mas de 3                                                                                                                                                           |
| partos                                | <input checked="" type="radio"/> 0<br><input type="radio"/> 1<br><input type="radio"/> 2<br><input type="radio"/> 3<br><input type="radio"/> mas de 3                                                                                                                                |
| cesáreas                              | <input checked="" type="radio"/> 0<br><input type="radio"/> 1<br><input type="radio"/> 2<br><input type="radio"/> 3<br><input type="radio"/> mas de 3                                                                                                                                |
| Abortos                               | <input checked="" type="radio"/> 0<br><input type="radio"/> 1<br><input type="radio"/> 2<br><input type="radio"/> 3<br><input type="radio"/> mas de 3                                                                                                                                |
| Tipo de gestacion                     | <input checked="" type="radio"/> espontanea<br><input type="radio"/> IAC inseminación artificial conyuge<br><input type="radio"/> IAD inseminación artificial donante<br><input type="radio"/> FIV Fecundación in Vitro<br><input type="radio"/> Ovodon FIV con donación de ovocitos |
| peso previo a embarazo                | [*DATA REMOVED*]                                                                                                                                                                                                                                                                     |
| Ganancia ponderal embarazo            | [*DATA REMOVED*]                                                                                                                                                                                                                                                                     |
| Talla madre                           | [*DATA REMOVED*]                                                                                                                                                                                                                                                                     |
| IMC previo embarazo                   | 18.93700290367378                                                                                                                                                                                                                                                                    |
| Patología obstétrica                  | <input checked="" type="radio"/> no<br><input type="radio"/> si                                                                                                                                                                                                                      |
| Diabetes pregestacional               | <input checked="" type="radio"/> no<br><input type="radio"/> si                                                                                                                                                                                                                      |
| Diabetes gestacional                  | <input checked="" type="radio"/> no<br><input type="radio"/> si                                                                                                                                                                                                                      |

|                                            |                                                                                                                                                                                      |
|--------------------------------------------|--------------------------------------------------------------------------------------------------------------------------------------------------------------------------------------|
| Diabetes gestacional con insulina          | <input checked="" type="radio"/> no<br><input type="radio"/> si                                                                                                                      |
| Diabetes gestacional con dieta y ejercicio | <input checked="" type="radio"/> no<br><input type="radio"/> si                                                                                                                      |
| Percentil fetos previos                    | <input checked="" type="radio"/> Nada<br><input type="radio"/> percentil menor de 10<br><input type="radio"/> percentil entre 10 y 90<br><input type="radio"/> percentil mayor de 90 |
| Exfumadora                                 | <input type="radio"/> Nada<br><input checked="" type="radio"/> menos de 5 años<br><input type="radio"/> 5 a 10 años<br><input type="radio"/> mayor o igual a 10 años                 |
| Hábito tabáquico                           | <input checked="" type="radio"/> no<br><input type="radio"/> si                                                                                                                      |
| fumadora                                   | [*DATA REMOVED*]                                                                                                                                                                     |
| Consumo otros tóxicos                      | <input checked="" type="radio"/> no<br><input type="radio"/> si                                                                                                                      |
| Hb 1T                                      | _____                                                                                                                                                                                |
| Htc 1T                                     | _____                                                                                                                                                                                |
| Hb 2T                                      | _____                                                                                                                                                                                |
| HTC 2T                                     | _____                                                                                                                                                                                |
| Hb 3T                                      | _____                                                                                                                                                                                |
| HTC 3T                                     | _____                                                                                                                                                                                |
| Suplemento FE oral                         | <input type="radio"/> si<br><input checked="" type="radio"/> no                                                                                                                      |
| Suplemento fe iv                           | <input type="radio"/> si<br><input checked="" type="radio"/> no                                                                                                                      |
| Transfusión                                | <input checked="" type="radio"/> no<br><input type="radio"/> si                                                                                                                      |
| Solicitada Vit D                           | <input checked="" type="radio"/> no<br><input type="radio"/> si                                                                                                                      |



|                       |                                                                                                                                                                                                                                                                                                                                                                                                              |
|-----------------------|--------------------------------------------------------------------------------------------------------------------------------------------------------------------------------------------------------------------------------------------------------------------------------------------------------------------------------------------------------------------------------------------------------------|
| Deficit vit D         | <input type="radio"/> no<br><input type="radio"/> si                                                                                                                                                                                                                                                                                                                                                         |
| Suplemento vit D      | <input type="radio"/> si<br><input type="radio"/> no                                                                                                                                                                                                                                                                                                                                                         |
| Dieta, cuestionario   | <input checked="" type="radio"/> si<br><input type="radio"/> no                                                                                                                                                                                                                                                                                                                                              |
| Leche entera          | <input checked="" type="radio"/> Nunca o menos 1 vez al mes<br><input type="radio"/> 1 a 3 veces mes<br><input type="radio"/> 1 vez semana<br><input type="radio"/> 2 a 4 veces semana<br><input type="radio"/> 5 a 6 veces semana<br><input type="radio"/> 1 vez al día<br><input type="radio"/> 2 a 3 veces al día<br><input type="radio"/> 5 a 6 veces al día<br><input type="radio"/> más 6 veces al día |
| Leche semidesnatada   | <input checked="" type="radio"/> Nunca o menos 1 vez al mes<br><input type="radio"/> 1 a 3 veces mes<br><input type="radio"/> 1 vez semana<br><input type="radio"/> 2 a 4 veces semana<br><input type="radio"/> 5 a 6 veces semana<br><input type="radio"/> 1 vez al día<br><input type="radio"/> 2 a 3 veces al día<br><input type="radio"/> 5 a 6 veces al día<br><input type="radio"/> mas 6 veces al día |
| Leche desnatada       | <input checked="" type="radio"/> Nunca o menos 1 vez al mes<br><input type="radio"/> 1 a 3 veces mes<br><input type="radio"/> 1 vez semana<br><input type="radio"/> 2 a 4 veces semana<br><input type="radio"/> 5 a 6 veces semana<br><input type="radio"/> 1 vez al día<br><input type="radio"/> 2 a 3 veces al día<br><input type="radio"/> 5 a 6 veces al día<br><input type="radio"/> más 6 veces al día |
| Leche condensada      | <input type="radio"/> Nunca o menos 1 vez al mes<br><input type="radio"/> 1 a 3 veces mes<br><input checked="" type="radio"/> 1 vez semana<br><input type="radio"/> 2 a 4 veces semana<br><input type="radio"/> 5 a 6 veces semana<br><input type="radio"/> 1 vez al día<br><input type="radio"/> 2 a 3 veces al día<br><input type="radio"/> 5 a 6 veces al día<br><input type="radio"/> más 6 veces al día |
| nata o crema de leche | <input checked="" type="radio"/> Nunca o menos 1 vez al mes<br><input type="radio"/> 1 a 3 veces mes<br><input type="radio"/> 1 vez semana<br><input type="radio"/> 2 a 4 veces semana<br><input type="radio"/> 5 a 6 veces semana<br><input type="radio"/> 1 vez al día<br><input type="radio"/> 2 a 3 veces al día<br><input type="radio"/> 5 a 6 veces al día<br><input type="radio"/> más 6 veces al día |

|                                             |                                                                                                                                                                                                                                                                                                                                                                                                              |
|---------------------------------------------|--------------------------------------------------------------------------------------------------------------------------------------------------------------------------------------------------------------------------------------------------------------------------------------------------------------------------------------------------------------------------------------------------------------|
| Yogurt Entero                               | <input checked="" type="radio"/> Nunca o menos 1 vez al mes<br><input type="radio"/> 1 a 3 veces mes<br><input type="radio"/> 1 vez semana<br><input type="radio"/> 2 a 4 veces semana<br><input type="radio"/> 5 a 6 veces semana<br><input type="radio"/> 1 vez al día<br><input type="radio"/> 2 a 3 veces al día<br><input type="radio"/> 5 a 6 veces al día<br><input type="radio"/> más 6 veces al día |
| Yogurt desnatado                            | <input checked="" type="radio"/> Nunca o menos 1 vez al mes<br><input type="radio"/> 1 a 3 veces mes<br><input type="radio"/> 1 vez semana<br><input type="radio"/> 2 a 4 veces semana<br><input type="radio"/> 5 a 6 veces semana<br><input type="radio"/> 1 vez al día<br><input type="radio"/> 2 a 3 veces al día<br><input type="radio"/> 5 a 6 veces al día<br><input type="radio"/> más 6 veces al día |
| 100g requesón o queso blando o queso fresco | <input type="radio"/> Nunca o menos 1 vez al mes<br><input checked="" type="radio"/> 1 a 3 veces mes<br><input type="radio"/> 1 vez semana<br><input type="radio"/> 2 a 4 veces semana<br><input type="radio"/> 5 a 6 veces semana<br><input type="radio"/> 1 vez al día<br><input type="radio"/> 2 a 3 veces al día<br><input type="radio"/> 5 a 6 veces al día<br><input type="radio"/> más 6 veces al día |
| queso curado o semicurado o cremoso         | <input type="radio"/> Nunca o menos 1 vez al mes<br><input checked="" type="radio"/> 1 a 3 veces mes<br><input type="radio"/> 1 vez semana<br><input type="radio"/> 2 a 4 veces semana<br><input type="radio"/> 5 a 6 veces semana<br><input type="radio"/> 1 vez al día<br><input type="radio"/> 2 a 3 veces al día<br><input type="radio"/> 5 a 6 veces al día<br><input type="radio"/> más 6 veces al día |
| natillas flan pudding                       | <input checked="" type="radio"/> Nunca o menos 1 vez al mes<br><input type="radio"/> 1 a 3 veces mes<br><input type="radio"/> 1 vez semana<br><input type="radio"/> 2 a 4 veces semana<br><input type="radio"/> 5 a 6 veces semana<br><input type="radio"/> 1 vez al día<br><input type="radio"/> 2 a 3 veces al día<br><input type="radio"/> 5 a 6 veces al día<br><input type="radio"/> más 6 veces al día |
| Helado                                      | <input checked="" type="radio"/> Nunca o menos 1 vez al mes<br><input type="radio"/> 1 a 3 veces mes<br><input type="radio"/> 1 vez semana<br><input type="radio"/> 2 a 4 veces semana<br><input type="radio"/> 5 a 6 veces semana<br><input type="radio"/> 1 vez al día<br><input type="radio"/> 2 a 3 veces al día<br><input type="radio"/> 5 a 6 veces al día<br><input type="radio"/> más 6 veces al día |

|                                      |                                                                                                                                                                                                                                                                                                                                                                                                              |
|--------------------------------------|--------------------------------------------------------------------------------------------------------------------------------------------------------------------------------------------------------------------------------------------------------------------------------------------------------------------------------------------------------------------------------------------------------------|
| huevo                                | <input type="radio"/> Nunca o menos 1 vez al mes<br><input type="radio"/> 1 a 3 veces mes<br><input type="radio"/> 1 vez semana<br><input checked="" type="radio"/> 2 a 4 veces semana<br><input type="radio"/> 5 a 6 veces semana<br><input type="radio"/> 1 vez al día<br><input type="radio"/> 2 a 3 veces al día<br><input type="radio"/> 5 a 6 veces al día<br><input type="radio"/> más 6 veces al día |
| Pollo con piel                       | <input checked="" type="radio"/> Nunca o menos 1 vez al mes<br><input type="radio"/> 1 a 3 veces mes<br><input type="radio"/> 1 vez semana<br><input type="radio"/> 2 a 4 veces semana<br><input type="radio"/> 5 a 6 veces semana<br><input type="radio"/> 1 vez al día<br><input type="radio"/> 2 a 3 veces al día<br><input type="radio"/> 5 a 6 veces al día<br><input type="radio"/> más 6 veces al día |
| pollo sin piel                       | <input type="radio"/> Nunca o menos 1 vez al mes<br><input type="radio"/> 1 a 3 veces mes<br><input type="radio"/> 1 vez semana<br><input checked="" type="radio"/> 2 a 4 veces semana<br><input type="radio"/> 5 a 6 veces semana<br><input type="radio"/> 1 vez al día<br><input type="radio"/> 2 a 3 veces al día<br><input type="radio"/> 5 a 6 veces al día<br><input type="radio"/> más 6 veces al día |
| Ternera o cerdo o cordero            | <input type="radio"/> Nunca o menos 1 vez al mes<br><input type="radio"/> 1 a 3 veces mes<br><input type="radio"/> 1 vez semana<br><input checked="" type="radio"/> 2 a 4 veces semana<br><input type="radio"/> 5 a 6 veces semana<br><input type="radio"/> 1 vez al día<br><input type="radio"/> 2 a 3 veces al día<br><input type="radio"/> 5 a 6 veces al día<br><input type="radio"/> más 6 veces al día |
| carne caza: Conejo o codorniz o pato | <input checked="" type="radio"/> Nunca o menos 1 vez al mes<br><input type="radio"/> 1 a 3 veces mes<br><input type="radio"/> 1 vez semana<br><input type="radio"/> 2 a 4 veces semana<br><input type="radio"/> 5 a 6 veces semana<br><input type="radio"/> 1 vez al día<br><input type="radio"/> 2 a 3 veces al día<br><input type="radio"/> 5 a 6 veces al día<br><input type="radio"/> más 6 veces al día |
| Hígado de ternera o cerdo o pollo    | <input checked="" type="radio"/> Nunca o menos 1 vez al mes<br><input type="radio"/> 1 a 3 veces mes<br><input type="radio"/> 1 vez semana<br><input type="radio"/> 2 a 4 veces semana<br><input type="radio"/> 5 a 6 veces semana<br><input type="radio"/> 1 vez al día<br><input type="radio"/> 2 a 3 veces al día<br><input type="radio"/> 5 a 6 veces al día<br><input type="radio"/> más 6 veces al día |

|                     |                                                                                                                                                                                                                                                                                                                                                                                                              |
|---------------------|--------------------------------------------------------------------------------------------------------------------------------------------------------------------------------------------------------------------------------------------------------------------------------------------------------------------------------------------------------------------------------------------------------------|
| Vísceras            | <input checked="" type="radio"/> Nunca o menos 1 vez al mes<br><input type="radio"/> 1 a 3 veces mes<br><input type="radio"/> 1 vez semana<br><input type="radio"/> 2 a 4 veces semana<br><input type="radio"/> 5 a 6 veces semana<br><input type="radio"/> 1 vez al día<br><input type="radio"/> 2 a 3 veces al día<br><input type="radio"/> 5 a 6 veces al día<br><input type="radio"/> más 6 veces al día |
| Embutido            | <input type="radio"/> Nunca o menos 1 vez al mes<br><input checked="" type="radio"/> 1 a 3 veces mes<br><input type="radio"/> 1 vez semana<br><input type="radio"/> 2 a 4 veces semana<br><input type="radio"/> 5 a 6 veces semana<br><input type="radio"/> 1 vez al día<br><input type="radio"/> 2 a 3 veces al día<br><input type="radio"/> 5 a 6 veces al día<br><input type="radio"/> más 6 veces al día |
| Salchicha o similar | <input checked="" type="radio"/> Nunca o menos 1 vez al mes<br><input type="radio"/> 1 a 3 veces mes<br><input type="radio"/> 1 vez semana<br><input type="radio"/> 2 a 4 veces semana<br><input type="radio"/> 5 a 6 veces semana<br><input type="radio"/> 1 vez al día<br><input type="radio"/> 2 a 3 veces al día<br><input type="radio"/> 5 a 6 veces al día<br><input type="radio"/> más 6 veces al día |
| Pate o foiegras     | <input checked="" type="radio"/> Nunca o menos 1 vez al mes<br><input type="radio"/> 1 a 3 veces mes<br><input type="radio"/> 1 vez semana<br><input type="radio"/> 2 a 4 veces semana<br><input type="radio"/> 5 a 6 veces semana<br><input type="radio"/> 1 vez al día<br><input type="radio"/> 2 a 3 veces al día<br><input type="radio"/> 5 a 6 veces al día<br><input type="radio"/> más 6 veces al día |
| Hamburguesa         | <input checked="" type="radio"/> Nunca o menos 1 vez al mes<br><input type="radio"/> 1 a 3 veces mes<br><input type="radio"/> 1 vez semana<br><input type="radio"/> 2 a 4 veces semana<br><input type="radio"/> 5 a 6 veces semana<br><input type="radio"/> 1 vez al día<br><input type="radio"/> 2 a 3 veces al día<br><input type="radio"/> 5 a 6 veces al día<br><input type="radio"/> más 6 veces al día |
| tocino o bacon      | <input checked="" type="radio"/> Nunca o menos 1 vez al mes<br><input type="radio"/> 1 a 3 veces mes<br><input type="radio"/> 1 vez semana<br><input type="radio"/> 2 a 4 veces semana<br><input type="radio"/> 5 a 6 veces semana<br><input type="radio"/> 1 vez al día<br><input type="radio"/> 2 a 3 veces al día<br><input type="radio"/> 5 a 6 veces al día<br><input type="radio"/> más 6 veces al día |

|                        |                                                                                                                                                                                                                                                                                                                                                                                                              |
|------------------------|--------------------------------------------------------------------------------------------------------------------------------------------------------------------------------------------------------------------------------------------------------------------------------------------------------------------------------------------------------------------------------------------------------------|
| Pescado frito          | <input checked="" type="radio"/> Nunca o menos 1 vez al mes<br><input type="radio"/> 1 a 3 veces mes<br><input type="radio"/> 1 vez semana<br><input type="radio"/> 2 a 4 veces semana<br><input type="radio"/> 5 a 6 veces semana<br><input type="radio"/> 1 vez al día<br><input type="radio"/> 2 a 3 veces al día<br><input type="radio"/> 5 a 6 veces al día<br><input type="radio"/> más 6 veces al día |
| pescado hervido blanco | <input type="radio"/> Nunca o menos 1 vez al mes<br><input checked="" type="radio"/> 1 a 3 veces mes<br><input type="radio"/> 1 vez semana<br><input type="radio"/> 2 a 4 veces semana<br><input type="radio"/> 5 a 6 veces semana<br><input type="radio"/> 1 vez al día<br><input type="radio"/> 2 a 3 veces al día<br><input type="radio"/> 5 a 6 veces al día<br><input type="radio"/> más 6 veces al día |
| pescado hervido azul   | <input checked="" type="radio"/> Nunca o menos 1 vez al mes<br><input type="radio"/> 1 a 3 veces mes<br><input type="radio"/> 1 vez semana<br><input type="radio"/> 2 a 4 veces semana<br><input type="radio"/> 5 a 6 veces semana<br><input type="radio"/> 1 vez al día<br><input type="radio"/> 2 a 3 veces al día<br><input type="radio"/> 5 a 6 veces al día<br><input type="radio"/> más 6 veces al día |
| otros pescado azul     | <input type="radio"/> Nunca o menos 1 vez al mes<br><input checked="" type="radio"/> 1 a 3 veces mes<br><input type="radio"/> 1 vez semana<br><input type="radio"/> 2 a 4 veces semana<br><input type="radio"/> 5 a 6 veces semana<br><input type="radio"/> 1 vez al día<br><input type="radio"/> 2 a 3 veces al día<br><input type="radio"/> 5 a 6 veces al día<br><input type="radio"/> más 6 veces al día |
| atun conserva          | <input type="radio"/> Nunca o menos 1 vez al mes<br><input checked="" type="radio"/> 1 a 3 veces mes<br><input type="radio"/> 1 vez semana<br><input type="radio"/> 2 a 4 veces semana<br><input type="radio"/> 5 a 6 veces semana<br><input type="radio"/> 1 vez al día<br><input type="radio"/> 2 a 3 veces al día<br><input type="radio"/> 5 a 6 veces al día<br><input type="radio"/> más 6 veces al día |
| sardina conserva       | <input checked="" type="radio"/> Nunca o menos 1 vez al mes<br><input type="radio"/> 1 a 3 veces mes<br><input type="radio"/> 1 vez semana<br><input type="radio"/> 2 a 4 veces semana<br><input type="radio"/> 5 a 6 veces semana<br><input type="radio"/> 1 vez al día<br><input type="radio"/> 2 a 3 veces al día<br><input type="radio"/> 5 a 6 veces al día<br><input type="radio"/> más 6 veces al día |

|                                         |                                                                                                                                                                                                                                                                                                                                                                                                              |
|-----------------------------------------|--------------------------------------------------------------------------------------------------------------------------------------------------------------------------------------------------------------------------------------------------------------------------------------------------------------------------------------------------------------------------------------------------------------|
| pescado ahumado                         | <input checked="" type="radio"/> Nunca o menos 1 vez al mes<br><input type="radio"/> 1 a 3 veces mes<br><input type="radio"/> 1 vez semana<br><input type="radio"/> 2 a 4 veces semana<br><input type="radio"/> 5 a 6 veces semana<br><input type="radio"/> 1 vez al día<br><input type="radio"/> 2 a 3 veces al día<br><input type="radio"/> 5 a 6 veces al día<br><input type="radio"/> más 6 veces al día |
| almejas o mejillones o ostras unos 100g | <input checked="" type="radio"/> Nunca o menos 1 vez al mes<br><input type="radio"/> 1 a 3 veces mes<br><input type="radio"/> 1 vez semana<br><input type="radio"/> 2 a 4 veces semana<br><input type="radio"/> 5 a 6 veces semana<br><input type="radio"/> 1 vez al día<br><input type="radio"/> 2 a 3 veces al día<br><input type="radio"/> 5 a 6 veces al día<br><input type="radio"/> más 6 veces al día |
| calamar o chipiron o sepia unos 100g    | <input type="radio"/> Nunca o menos 1 vez al mes<br><input checked="" type="radio"/> 1 a 3 veces mes<br><input type="radio"/> 1 vez semana<br><input type="radio"/> 2 a 4 veces semana<br><input type="radio"/> 5 a 6 veces semana<br><input type="radio"/> 1 vez al día<br><input type="radio"/> 2 a 3 veces al día<br><input type="radio"/> 5 a 6 veces al día<br><input type="radio"/> más 6 veces al día |
| marisco unos 100g                       | <input checked="" type="radio"/> Nunca o menos 1 vez al mes<br><input type="radio"/> 1 a 3 veces mes<br><input type="radio"/> 1 vez semana<br><input type="radio"/> 2 a 4 veces semana<br><input type="radio"/> 5 a 6 veces semana<br><input type="radio"/> 1 vez al día<br><input type="radio"/> 2 a 3 veces al día<br><input type="radio"/> 5 a 6 veces al día<br><input type="radio"/> más 6 veces al día |
| Espinacas o acelgas cocinadas           | <input checked="" type="radio"/> Nunca o menos 1 vez al mes<br><input type="radio"/> 1 a 3 veces mes<br><input type="radio"/> 1 vez semana<br><input type="radio"/> 2 a 4 veces semana<br><input type="radio"/> 5 a 6 veces semana<br><input type="radio"/> 1 vez al día<br><input type="radio"/> 2 a 3 veces al día<br><input type="radio"/> 5 a 6 veces al día<br><input type="radio"/> más 6 veces al día |
| Col o coliflor o brocoli cocinado       | <input type="radio"/> Nunca o menos 1 vez al mes<br><input type="radio"/> 1 a 3 veces mes<br><input checked="" type="radio"/> 1 vez semana<br><input type="radio"/> 2 a 4 veces semana<br><input type="radio"/> 5 a 6 veces semana<br><input type="radio"/> 1 vez al día<br><input type="radio"/> 2 a 3 veces al día<br><input type="radio"/> 5 a 6 veces al día<br><input type="radio"/> más 6 veces al día |

---

Lechuga o endivia o escarola

- ☐ Nunca o menos 1 vez al mes  
☒ 1 a 3 veces mes  
☐ 1 vez semana  
☐ 2 a 4 veces semana  
☐ 5 a 6 veces semana  
☐ 1 vez al día  
☐ 2 a 3 veces al día  
☐ 5 a 6 veces al día  
☐ más 6 veces al día

---

tomate ensalada

- ☐ Nunca o menos 1 vez al mes  
☐ 1 a 3 veces mes  
☐ 1 vez semana  
☒ 2 a 4 veces semana  
☐ 5 a 6 veces semana  
☐ 1 vez al día  
☐ 2 a 3 veces al día  
☐ 5 a 6 veces al día  
☐ más 6 veces al día

---

cebolla

- ☐ Nunca o menos 1 vez al mes  
☐ 1 a 3 veces mes  
☐ 1 vez semana  
☒ 2 a 4 veces semana  
☐ 5 a 6 veces semana  
☐ 1 vez al día  
☐ 2 a 3 veces al día  
☐ 5 a 6 veces al día  
☐ más 6 veces al día

---

Zanahoria o calabaza

- ☐ Nunca o menos 1 vez al mes  
☐ 1 a 3 veces mes  
☐ 1 vez semana  
☒ 2 a 4 veces semana  
☐ 5 a 6 veces semana  
☐ 1 vez al día  
☐ 2 a 3 veces al día  
☐ 5 a 6 veces al día  
☐ más 6 veces al día

---

Judías verdes

- ☐ Nunca o menos 1 vez al mes  
☐ 1 a 3 veces mes  
☐ 1 vez semana  
☒ 2 a 4 veces semana  
☐ 5 a 6 veces semana  
☐ 1 vez al día  
☐ 2 a 3 veces al día  
☐ 5 a 6 veces al día  
☐ más 6 veces al día

---

Berenjena o calabacin o pepino

- ☐ Nunca o menos 1 vez al mes  
☐ 1 a 3 veces mes  
☐ 1 vez semana  
☒ 2 a 4 veces semana  
☐ 5 a 6 veces semana  
☐ 1 vez al día  
☐ 2 a 3 veces al día  
☐ 5 a 6 veces al día  
☐ más 6 veces al día

|                       |                                                                                                                                                                                                                                                                                                                                                                                                              |
|-----------------------|--------------------------------------------------------------------------------------------------------------------------------------------------------------------------------------------------------------------------------------------------------------------------------------------------------------------------------------------------------------------------------------------------------------|
| pimiento              | <input type="radio"/> Nunca o menos 1 vez al mes<br><input type="radio"/> 1 a 3 veces mes<br><input type="radio"/> 1 vez semana<br><input checked="" type="radio"/> 2 a 4 veces semana<br><input type="radio"/> 5 a 6 veces semana<br><input type="radio"/> 1 vez al día<br><input type="radio"/> 2 a 3 veces al día<br><input type="radio"/> 5 a 6 veces al día<br><input type="radio"/> más 6 veces al día |
| alcachofa             | <input type="radio"/> Nunca o menos 1 vez al mes<br><input type="radio"/> 1 a 3 veces mes<br><input type="radio"/> 1 vez semana<br><input checked="" type="radio"/> 2 a 4 veces semana<br><input type="radio"/> 5 a 6 veces semana<br><input type="radio"/> 1 vez al día<br><input type="radio"/> 2 a 3 veces al día<br><input type="radio"/> 5 a 6 veces al día<br><input type="radio"/> más 6 veces al día |
| espárragos            | <input type="radio"/> Nunca o menos 1 vez al mes<br><input type="radio"/> 1 a 3 veces mes<br><input type="radio"/> 1 vez semana<br><input checked="" type="radio"/> 2 a 4 veces semana<br><input type="radio"/> 5 a 6 veces semana<br><input type="radio"/> 1 vez al día<br><input type="radio"/> 2 a 3 veces al día<br><input type="radio"/> 5 a 6 veces al día<br><input type="radio"/> más 6 veces al día |
| maíz hervido          | <input type="radio"/> Nunca o menos 1 vez al mes<br><input checked="" type="radio"/> 1 a 3 veces mes<br><input type="radio"/> 1 vez semana<br><input type="radio"/> 2 a 4 veces semana<br><input type="radio"/> 5 a 6 veces semana<br><input type="radio"/> 1 vez al día<br><input type="radio"/> 2 a 3 veces al día<br><input type="radio"/> 5 a 6 veces al día<br><input type="radio"/> más 6 veces al día |
| legumbres             | <input type="radio"/> Nunca o menos 1 vez al mes<br><input checked="" type="radio"/> 1 a 3 veces mes<br><input type="radio"/> 1 vez semana<br><input type="radio"/> 2 a 4 veces semana<br><input type="radio"/> 5 a 6 veces semana<br><input type="radio"/> 1 vez al día<br><input type="radio"/> 2 a 3 veces al día<br><input type="radio"/> 5 a 6 veces al día<br><input type="radio"/> más 6 veces al día |
| naranjas o mandarinas | <input type="radio"/> Nunca o menos 1 vez al mes<br><input type="radio"/> 1 a 3 veces mes<br><input type="radio"/> 1 vez semana<br><input type="radio"/> 2 a 4 veces semana<br><input checked="" type="radio"/> 5 a 6 veces semana<br><input type="radio"/> 1 vez al día<br><input type="radio"/> 2 a 3 veces al día<br><input type="radio"/> 5 a 6 veces al día<br><input type="radio"/> más 6 veces al día |



|                       |                                                                                                                                                                                                                                                                                                                                                                                                              |
|-----------------------|--------------------------------------------------------------------------------------------------------------------------------------------------------------------------------------------------------------------------------------------------------------------------------------------------------------------------------------------------------------------------------------------------------------|
| zum natural fruta     | <input type="radio"/> Nunca o menos 1 vez al mes<br><input checked="" type="radio"/> 1 a 3 veces mes<br><input type="radio"/> 1 vez semana<br><input type="radio"/> 2 a 4 veces semana<br><input type="radio"/> 5 a 6 veces semana<br><input type="radio"/> 1 vez al día<br><input type="radio"/> 2 a 3 veces al día<br><input type="radio"/> 5 a 6 veces al día<br><input type="radio"/> más 6 veces al día |
| platano               | <input type="radio"/> Nunca o menos 1 vez al mes<br><input type="radio"/> 1 a 3 veces mes<br><input type="radio"/> 1 vez semana<br><input checked="" type="radio"/> 2 a 4 veces semana<br><input type="radio"/> 5 a 6 veces semana<br><input type="radio"/> 1 vez al día<br><input type="radio"/> 2 a 3 veces al día<br><input type="radio"/> 5 a 6 veces al día<br><input type="radio"/> más 6 veces al día |
| manzana o pera        | <input checked="" type="radio"/> Nunca o menos 1 vez al mes<br><input type="radio"/> 1 a 3 veces mes<br><input type="radio"/> 1 vez semana<br><input type="radio"/> 2 a 4 veces semana<br><input type="radio"/> 5 a 6 veces semana<br><input type="radio"/> 1 vez al día<br><input type="radio"/> 2 a 3 veces al día<br><input type="radio"/> 5 a 6 veces al día<br><input type="radio"/> más 6 veces al día |
| melocotón o nectarina | <input type="radio"/> Nunca o menos 1 vez al mes<br><input checked="" type="radio"/> 1 a 3 veces mes<br><input type="radio"/> 1 vez semana<br><input type="radio"/> 2 a 4 veces semana<br><input type="radio"/> 5 a 6 veces semana<br><input type="radio"/> 1 vez al día<br><input type="radio"/> 2 a 3 veces al día<br><input type="radio"/> 5 a 6 veces al día<br><input type="radio"/> más 6 veces al día |
| sandia o melon        | <input type="radio"/> Nunca o menos 1 vez al mes<br><input checked="" type="radio"/> 1 a 3 veces mes<br><input type="radio"/> 1 vez semana<br><input type="radio"/> 2 a 4 veces semana<br><input type="radio"/> 5 a 6 veces semana<br><input type="radio"/> 1 vez al día<br><input type="radio"/> 2 a 3 veces al día<br><input type="radio"/> 5 a 6 veces al día<br><input type="radio"/> más 6 veces al día |
| uva                   | <input type="radio"/> Nunca o menos 1 vez al mes<br><input type="radio"/> 1 a 3 veces mes<br><input type="radio"/> 1 vez semana<br><input checked="" type="radio"/> 2 a 4 veces semana<br><input type="radio"/> 5 a 6 veces semana<br><input type="radio"/> 1 vez al día<br><input type="radio"/> 2 a 3 veces al día<br><input type="radio"/> 5 a 6 veces al día<br><input type="radio"/> más 6 veces al día |

|                 |                                                                                                                                                                                                                                                                                                                                                                                                              |
|-----------------|--------------------------------------------------------------------------------------------------------------------------------------------------------------------------------------------------------------------------------------------------------------------------------------------------------------------------------------------------------------------------------------------------------------|
| bruna o ciruela | <input checked="" type="radio"/> Nunca o menos 1 vez al mes<br><input type="radio"/> 1 a 3 veces mes<br><input type="radio"/> 1 vez semana<br><input type="radio"/> 2 a 4 veces semana<br><input type="radio"/> 5 a 6 veces semana<br><input type="radio"/> 1 vez al día<br><input type="radio"/> 2 a 3 veces al día<br><input type="radio"/> 5 a 6 veces al día<br><input type="radio"/> más 6 veces al día |
| kiwi            | <input type="radio"/> Nunca o menos 1 vez al mes<br><input checked="" type="radio"/> 1 a 3 veces mes<br><input type="radio"/> 1 vez semana<br><input type="radio"/> 2 a 4 veces semana<br><input type="radio"/> 5 a 6 veces semana<br><input type="radio"/> 1 vez al día<br><input type="radio"/> 2 a 3 veces al día<br><input type="radio"/> 5 a 6 veces al día<br><input type="radio"/> más 6 veces al día |
| aceituna        | <input checked="" type="radio"/> Nunca o menos 1 vez al mes<br><input type="radio"/> 1 a 3 veces mes<br><input type="radio"/> 1 vez semana<br><input type="radio"/> 2 a 4 veces semana<br><input type="radio"/> 5 a 6 veces semana<br><input type="radio"/> 1 vez al día<br><input type="radio"/> 2 a 3 veces al día<br><input type="radio"/> 5 a 6 veces al día<br><input type="radio"/> más 6 veces al día |
| frutos secos    | <input type="radio"/> Nunca o menos 1 vez al mes<br><input type="radio"/> 1 a 3 veces mes<br><input type="radio"/> 1 vez semana<br><input type="radio"/> 2 a 4 veces semana<br><input checked="" type="radio"/> 5 a 6 veces semana<br><input type="radio"/> 1 vez al día<br><input type="radio"/> 2 a 3 veces al día<br><input type="radio"/> 5 a 6 veces al día<br><input type="radio"/> más 6 veces al día |
| pan blanco      | <input type="radio"/> Nunca o menos 1 vez al mes<br><input checked="" type="radio"/> 1 a 3 veces mes<br><input type="radio"/> 1 vez semana<br><input type="radio"/> 2 a 4 veces semana<br><input type="radio"/> 5 a 6 veces semana<br><input type="radio"/> 1 vez al día<br><input type="radio"/> 2 a 3 veces al día<br><input type="radio"/> 5 a 6 veces al día<br><input type="radio"/> más 6 veces al día |
| pan integral    | <input type="radio"/> Nunca o menos 1 vez al mes<br><input type="radio"/> 1 a 3 veces mes<br><input type="radio"/> 1 vez semana<br><input checked="" type="radio"/> 2 a 4 veces semana<br><input type="radio"/> 5 a 6 veces semana<br><input type="radio"/> 1 vez al día<br><input type="radio"/> 2 a 3 veces al día<br><input type="radio"/> 5 a 6 veces al día<br><input type="radio"/> más 6 veces al día |

|                          |                                                                                                                                                                                                                                                                                                                                                                                                              |
|--------------------------|--------------------------------------------------------------------------------------------------------------------------------------------------------------------------------------------------------------------------------------------------------------------------------------------------------------------------------------------------------------------------------------------------------------|
| cereales desayuno        | <input checked="" type="radio"/> Nunca o menos 1 vez al mes<br><input type="radio"/> 1 a 3 veces mes<br><input type="radio"/> 1 vez semana<br><input type="radio"/> 2 a 4 veces semana<br><input type="radio"/> 5 a 6 veces semana<br><input type="radio"/> 1 vez al día<br><input type="radio"/> 2 a 3 veces al día<br><input type="radio"/> 5 a 6 veces al día<br><input type="radio"/> más 6 veces al día |
| patatas fritas           | <input checked="" type="radio"/> Nunca o menos 1 vez al mes<br><input type="radio"/> 1 a 3 veces mes<br><input type="radio"/> 1 vez semana<br><input type="radio"/> 2 a 4 veces semana<br><input type="radio"/> 5 a 6 veces semana<br><input type="radio"/> 1 vez al día<br><input type="radio"/> 2 a 3 veces al día<br><input type="radio"/> 5 a 6 veces al día<br><input type="radio"/> más 6 veces al día |
| patatas cocidas o asadas | <input type="radio"/> Nunca o menos 1 vez al mes<br><input type="radio"/> 1 a 3 veces mes<br><input checked="" type="radio"/> 1 vez semana<br><input type="radio"/> 2 a 4 veces semana<br><input type="radio"/> 5 a 6 veces semana<br><input type="radio"/> 1 vez al día<br><input type="radio"/> 2 a 3 veces al día<br><input type="radio"/> 5 a 6 veces al día<br><input type="radio"/> más 6 veces al día |
| bolsa papas              | <input type="radio"/> Nunca o menos 1 vez al mes<br><input checked="" type="radio"/> 1 a 3 veces mes<br><input type="radio"/> 1 vez semana<br><input type="radio"/> 2 a 4 veces semana<br><input type="radio"/> 5 a 6 veces semana<br><input type="radio"/> 1 vez al día<br><input type="radio"/> 2 a 3 veces al día<br><input type="radio"/> 5 a 6 veces al día<br><input type="radio"/> más 6 veces al día |
| arroz cocinado           | <input type="radio"/> Nunca o menos 1 vez al mes<br><input type="radio"/> 1 a 3 veces mes<br><input type="radio"/> 1 vez semana<br><input checked="" type="radio"/> 2 a 4 veces semana<br><input type="radio"/> 5 a 6 veces semana<br><input type="radio"/> 1 vez al día<br><input type="radio"/> 2 a 3 veces al día<br><input type="radio"/> 5 a 6 veces al día<br><input type="radio"/> más 6 veces al día |
| pasta                    | <input type="radio"/> Nunca o menos 1 vez al mes<br><input type="radio"/> 1 a 3 veces mes<br><input type="radio"/> 1 vez semana<br><input checked="" type="radio"/> 2 a 4 veces semana<br><input type="radio"/> 5 a 6 veces semana<br><input type="radio"/> 1 vez al día<br><input type="radio"/> 2 a 3 veces al día<br><input type="radio"/> 5 a 6 veces al día<br><input type="radio"/> más 6 veces al día |

|                     |                                                                                                                                                                                                                                                                                                                                                                                                              |
|---------------------|--------------------------------------------------------------------------------------------------------------------------------------------------------------------------------------------------------------------------------------------------------------------------------------------------------------------------------------------------------------------------------------------------------------|
| pizza               | <input type="radio"/> Nunca o menos 1 vez al mes<br><input checked="" type="radio"/> 1 a 3 veces mes<br><input type="radio"/> 1 vez semana<br><input type="radio"/> 2 a 4 veces semana<br><input type="radio"/> 5 a 6 veces semana<br><input type="radio"/> 1 vez al día<br><input type="radio"/> 2 a 3 veces al día<br><input type="radio"/> 5 a 6 veces al día<br><input type="radio"/> más 6 veces al día |
| aceite oliva        | <input type="radio"/> Nunca o menos 1 vez al mes<br><input type="radio"/> 1 a 3 veces mes<br><input type="radio"/> 1 vez semana<br><input type="radio"/> 2 a 4 veces semana<br><input type="radio"/> 5 a 6 veces semana<br><input checked="" type="radio"/> 1 vez al día<br><input type="radio"/> 2 a 3 veces al día<br><input type="radio"/> 5 a 6 veces al día<br><input type="radio"/> más 6 veces al día |
| otros aceites       | <input checked="" type="radio"/> Nunca o menos 1 vez al mes<br><input type="radio"/> 1 a 3 veces mes<br><input type="radio"/> 1 vez semana<br><input type="radio"/> 2 a 4 veces semana<br><input type="radio"/> 5 a 6 veces semana<br><input type="radio"/> 1 vez al día<br><input type="radio"/> 2 a 3 veces al día<br><input type="radio"/> 5 a 6 veces al día<br><input type="radio"/> más 6 veces al día |
| margarina           | <input checked="" type="radio"/> Nunca o menos 1 vez al mes<br><input type="radio"/> 1 a 3 veces mes<br><input type="radio"/> 1 vez semana<br><input type="radio"/> 2 a 4 veces semana<br><input type="radio"/> 5 a 6 veces semana<br><input type="radio"/> 1 vez al día<br><input type="radio"/> 2 a 3 veces al día<br><input type="radio"/> 5 a 6 veces al día<br><input type="radio"/> más 6 veces al día |
| mantequilla         | <input checked="" type="radio"/> Nunca o menos 1 vez al mes<br><input type="radio"/> 1 a 3 veces mes<br><input type="radio"/> 1 vez semana<br><input type="radio"/> 2 a 4 veces semana<br><input type="radio"/> 5 a 6 veces semana<br><input type="radio"/> 1 vez al día<br><input type="radio"/> 2 a 3 veces al día<br><input type="radio"/> 5 a 6 veces al día<br><input type="radio"/> más 6 veces al día |
| galletas tipo maria | <input type="radio"/> Nunca o menos 1 vez al mes<br><input type="radio"/> 1 a 3 veces mes<br><input type="radio"/> 1 vez semana<br><input type="radio"/> 2 a 4 veces semana<br><input type="radio"/> 5 a 6 veces semana<br><input checked="" type="radio"/> 1 vez al día<br><input type="radio"/> 2 a 3 veces al día<br><input type="radio"/> 5 a 6 veces al día<br><input type="radio"/> más 6 veces al día |

|                           |                                                                                                                                                                                                                                                                                                                                                                                                              |
|---------------------------|--------------------------------------------------------------------------------------------------------------------------------------------------------------------------------------------------------------------------------------------------------------------------------------------------------------------------------------------------------------------------------------------------------------|
| galletas chocolate        | <input checked="" type="radio"/> Nunca o menos 1 vez al mes<br><input type="radio"/> 1 a 3 veces mes<br><input type="radio"/> 1 vez semana<br><input type="radio"/> 2 a 4 veces semana<br><input type="radio"/> 5 a 6 veces semana<br><input type="radio"/> 1 vez al día<br><input type="radio"/> 2 a 3 veces al día<br><input type="radio"/> 5 a 6 veces al día<br><input type="radio"/> más 6 veces al día |
| bollieria                 | <input type="radio"/> Nunca o menos 1 vez al mes<br><input checked="" type="radio"/> 1 a 3 veces mes<br><input type="radio"/> 1 vez semana<br><input type="radio"/> 2 a 4 veces semana<br><input type="radio"/> 5 a 6 veces semana<br><input type="radio"/> 1 vez al día<br><input type="radio"/> 2 a 3 veces al día<br><input type="radio"/> 5 a 6 veces al día<br><input type="radio"/> más 6 veces al día |
| chocolate o bombones      | <input type="radio"/> Nunca o menos 1 vez al mes<br><input checked="" type="radio"/> 1 a 3 veces mes<br><input type="radio"/> 1 vez semana<br><input type="radio"/> 2 a 4 veces semana<br><input type="radio"/> 5 a 6 veces semana<br><input type="radio"/> 1 vez al día<br><input type="radio"/> 2 a 3 veces al día<br><input type="radio"/> 5 a 6 veces al día<br><input type="radio"/> más 6 veces al día |
| chocolate polvo o colacao | <input checked="" type="radio"/> Nunca o menos 1 vez al mes<br><input type="radio"/> 1 a 3 veces mes<br><input type="radio"/> 1 vez semana<br><input type="radio"/> 2 a 4 veces semana<br><input type="radio"/> 5 a 6 veces semana<br><input type="radio"/> 1 vez al día<br><input type="radio"/> 2 a 3 veces al día<br><input type="radio"/> 5 a 6 veces al día<br><input type="radio"/> más 6 veces al día |
| vino tinto                | <input checked="" type="radio"/> Nunca o menos 1 vez al mes<br><input type="radio"/> 1 a 3 veces mes<br><input type="radio"/> 1 vez semana<br><input type="radio"/> 2 a 4 veces semana<br><input type="radio"/> 5 a 6 veces semana<br><input type="radio"/> 1 vez al día<br><input type="radio"/> 2 a 3 veces al día<br><input type="radio"/> 5 a 6 veces al día<br><input type="radio"/> más 6 veces al día |
| vino blanco               | <input checked="" type="radio"/> Nunca o menos 1 vez al mes<br><input type="radio"/> 1 a 3 veces mes<br><input type="radio"/> 1 vez semana<br><input type="radio"/> 2 a 4 veces semana<br><input type="radio"/> 5 a 6 veces semana<br><input type="radio"/> 1 vez al día<br><input type="radio"/> 2 a 3 veces al día<br><input type="radio"/> 5 a 6 veces al día<br><input type="radio"/> más 6 veces al día |

|                       |                                                                                                                                                                                                                                                                                                                                                                                                              |
|-----------------------|--------------------------------------------------------------------------------------------------------------------------------------------------------------------------------------------------------------------------------------------------------------------------------------------------------------------------------------------------------------------------------------------------------------|
| vino seco o vermut    | <input checked="" type="radio"/> Nunca o menos 1 vez al mes<br><input type="radio"/> 1 a 3 veces mes<br><input type="radio"/> 1 vez semana<br><input type="radio"/> 2 a 4 veces semana<br><input type="radio"/> 5 a 6 veces semana<br><input type="radio"/> 1 vez al día<br><input type="radio"/> 2 a 3 veces al día<br><input type="radio"/> 5 a 6 veces al día<br><input type="radio"/> más 6 veces al día |
| cerveza               | <input checked="" type="radio"/> Nunca o menos 1 vez al mes<br><input type="radio"/> 1 a 3 veces mes<br><input type="radio"/> 1 vez semana<br><input type="radio"/> 2 a 4 veces semana<br><input type="radio"/> 5 a 6 veces semana<br><input type="radio"/> 1 vez al día<br><input type="radio"/> 2 a 3 veces al día<br><input type="radio"/> 5 a 6 veces al día<br><input type="radio"/> más 6 veces al día |
| cerveza sin alcohol   | <input checked="" type="radio"/> Nunca o menos 1 vez al mes<br><input type="radio"/> 1 a 3 veces mes<br><input type="radio"/> 1 vez semana<br><input type="radio"/> 2 a 4 veces semana<br><input type="radio"/> 5 a 6 veces semana<br><input type="radio"/> 1 vez al día<br><input type="radio"/> 2 a 3 veces al día<br><input type="radio"/> 5 a 6 veces al día<br><input type="radio"/> más 6 veces al día |
| licores               | <input checked="" type="radio"/> Nunca o menos 1 vez al mes<br><input type="radio"/> 1 a 3 veces mes<br><input type="radio"/> 1 vez semana<br><input type="radio"/> 2 a 4 veces semana<br><input type="radio"/> 5 a 6 veces semana<br><input type="radio"/> 1 vez al día<br><input type="radio"/> 2 a 3 veces al día<br><input type="radio"/> 5 a 6 veces al día<br><input type="radio"/> más 6 veces al día |
| ginebra o ron o vodka | <input checked="" type="radio"/> Nunca o menos 1 vez al mes<br><input type="radio"/> 1 a 3 veces mes<br><input type="radio"/> 1 vez semana<br><input type="radio"/> 2 a 4 veces semana<br><input type="radio"/> 5 a 6 veces semana<br><input type="radio"/> 1 vez al día<br><input type="radio"/> 2 a 3 veces al día<br><input type="radio"/> 5 a 6 veces al día<br><input type="radio"/> más 6 veces al día |
| refresco normal       | <input type="radio"/> Nunca o menos 1 vez al mes<br><input type="radio"/> 1 a 3 veces mes<br><input checked="" type="radio"/> 1 vez semana<br><input type="radio"/> 2 a 4 veces semana<br><input type="radio"/> 5 a 6 veces semana<br><input type="radio"/> 1 vez al día<br><input type="radio"/> 2 a 3 veces al día<br><input type="radio"/> 5 a 6 veces al día<br><input type="radio"/> más 6 veces al día |

---

|                     |                                                                                                                                                                                                                                                                                                                                                                                                              |
|---------------------|--------------------------------------------------------------------------------------------------------------------------------------------------------------------------------------------------------------------------------------------------------------------------------------------------------------------------------------------------------------------------------------------------------------|
| refresco sin azúcar | <input type="radio"/> Nunca o menos 1 vez al mes<br><input type="radio"/> 1 a 3 veces mes<br><input type="radio"/> 1 vez semana<br><input checked="" type="radio"/> 2 a 4 veces semana<br><input type="radio"/> 5 a 6 veces semana<br><input type="radio"/> 1 vez al día<br><input type="radio"/> 2 a 3 veces al día<br><input type="radio"/> 5 a 6 veces al día<br><input type="radio"/> más 6 veces al día |
|---------------------|--------------------------------------------------------------------------------------------------------------------------------------------------------------------------------------------------------------------------------------------------------------------------------------------------------------------------------------------------------------------------------------------------------------|

---

|                |                                                                                                                                                                                                                                                                                                                                                                                                              |
|----------------|--------------------------------------------------------------------------------------------------------------------------------------------------------------------------------------------------------------------------------------------------------------------------------------------------------------------------------------------------------------------------------------------------------------|
| Agua del grifo | <input checked="" type="radio"/> Nunca o menos 1 vez al mes<br><input type="radio"/> 1 a 3 veces mes<br><input type="radio"/> 1 vez semana<br><input type="radio"/> 2 a 4 veces semana<br><input type="radio"/> 5 a 6 veces semana<br><input type="radio"/> 1 vez al día<br><input type="radio"/> 2 a 3 veces al día<br><input type="radio"/> 5 a 6 veces al día<br><input type="radio"/> más 6 veces al día |
|----------------|--------------------------------------------------------------------------------------------------------------------------------------------------------------------------------------------------------------------------------------------------------------------------------------------------------------------------------------------------------------------------------------------------------------|

---

|                          |                                                                                                                                                                                                                                                                                                                                                                                                              |
|--------------------------|--------------------------------------------------------------------------------------------------------------------------------------------------------------------------------------------------------------------------------------------------------------------------------------------------------------------------------------------------------------------------------------------------------------|
| agua embotellada sin gas | <input type="radio"/> Nunca o menos 1 vez al mes<br><input type="radio"/> 1 a 3 veces mes<br><input type="radio"/> 1 vez semana<br><input type="radio"/> 2 a 4 veces semana<br><input type="radio"/> 5 a 6 veces semana<br><input type="radio"/> 1 vez al día<br><input type="radio"/> 2 a 3 veces al día<br><input type="radio"/> 5 a 6 veces al día<br><input checked="" type="radio"/> más 6 veces al día |
|--------------------------|--------------------------------------------------------------------------------------------------------------------------------------------------------------------------------------------------------------------------------------------------------------------------------------------------------------------------------------------------------------------------------------------------------------|

---

|                          |                                                                                                                                                                                                                                                                                                                                                                                                              |
|--------------------------|--------------------------------------------------------------------------------------------------------------------------------------------------------------------------------------------------------------------------------------------------------------------------------------------------------------------------------------------------------------------------------------------------------------|
| agua embotellada con gas | <input checked="" type="radio"/> Nunca o menos 1 vez al mes<br><input type="radio"/> 1 a 3 veces mes<br><input type="radio"/> 1 vez semana<br><input type="radio"/> 2 a 4 veces semana<br><input type="radio"/> 5 a 6 veces semana<br><input type="radio"/> 1 vez al día<br><input type="radio"/> 2 a 3 veces al día<br><input type="radio"/> 5 a 6 veces al día<br><input type="radio"/> más 6 veces al día |
|--------------------------|--------------------------------------------------------------------------------------------------------------------------------------------------------------------------------------------------------------------------------------------------------------------------------------------------------------------------------------------------------------------------------------------------------------|

---

|                           |                                                                                                                                                                                                                                                                                                                                                                                                              |
|---------------------------|--------------------------------------------------------------------------------------------------------------------------------------------------------------------------------------------------------------------------------------------------------------------------------------------------------------------------------------------------------------------------------------------------------------|
| zumos frutas embotellados | <input type="radio"/> Nunca o menos 1 vez al mes<br><input checked="" type="radio"/> 1 a 3 veces mes<br><input type="radio"/> 1 vez semana<br><input type="radio"/> 2 a 4 veces semana<br><input type="radio"/> 5 a 6 veces semana<br><input type="radio"/> 1 vez al día<br><input type="radio"/> 2 a 3 veces al día<br><input type="radio"/> 5 a 6 veces al día<br><input type="radio"/> más 6 veces al día |
|---------------------------|--------------------------------------------------------------------------------------------------------------------------------------------------------------------------------------------------------------------------------------------------------------------------------------------------------------------------------------------------------------------------------------------------------------|

---

|      |                                                                                                                                                                                                                                                                                                                                                                                                              |
|------|--------------------------------------------------------------------------------------------------------------------------------------------------------------------------------------------------------------------------------------------------------------------------------------------------------------------------------------------------------------------------------------------------------------|
| café | <input type="radio"/> Nunca o menos 1 vez al mes<br><input type="radio"/> 1 a 3 veces mes<br><input type="radio"/> 1 vez semana<br><input type="radio"/> 2 a 4 veces semana<br><input type="radio"/> 5 a 6 veces semana<br><input checked="" type="radio"/> 1 vez al día<br><input type="radio"/> 2 a 3 veces al día<br><input type="radio"/> 5 a 6 veces al día<br><input type="radio"/> más 6 veces al día |
|------|--------------------------------------------------------------------------------------------------------------------------------------------------------------------------------------------------------------------------------------------------------------------------------------------------------------------------------------------------------------------------------------------------------------|

---

|                       |                                                                                                                                                                                                                                                                                                                                                                                                              |
|-----------------------|--------------------------------------------------------------------------------------------------------------------------------------------------------------------------------------------------------------------------------------------------------------------------------------------------------------------------------------------------------------------------------------------------------------|
| cafe descafeinado     | <input type="radio"/> Nunca o menos 1 vez al mes<br><input type="radio"/> 1 a 3 veces mes<br><input checked="" type="radio"/> 1 vez semana<br><input type="radio"/> 2 a 4 veces semana<br><input type="radio"/> 5 a 6 veces semana<br><input type="radio"/> 1 vez al día<br><input type="radio"/> 2 a 3 veces al día<br><input type="radio"/> 5 a 6 veces al día<br><input type="radio"/> más 6 veces al día |
| te o infusión         | <input checked="" type="radio"/> Nunca o menos 1 vez al mes<br><input type="radio"/> 1 a 3 veces mes<br><input type="radio"/> 1 vez semana<br><input type="radio"/> 2 a 4 veces semana<br><input type="radio"/> 5 a 6 veces semana<br><input type="radio"/> 1 vez al día<br><input type="radio"/> 2 a 3 veces al día<br><input type="radio"/> 5 a 6 veces al día<br><input type="radio"/> más 6 veces al día |
| sopa o puré verduras  | <input type="radio"/> Nunca o menos 1 vez al mes<br><input checked="" type="radio"/> 1 a 3 veces mes<br><input type="radio"/> 1 vez semana<br><input type="radio"/> 2 a 4 veces semana<br><input type="radio"/> 5 a 6 veces semana<br><input type="radio"/> 1 vez al día<br><input type="radio"/> 2 a 3 veces al día<br><input type="radio"/> 5 a 6 veces al día<br><input type="radio"/> más 6 veces al día |
| croquetas pollo jamón | <input type="radio"/> Nunca o menos 1 vez al mes<br><input checked="" type="radio"/> 1 a 3 veces mes<br><input type="radio"/> 1 vez semana<br><input type="radio"/> 2 a 4 veces semana<br><input type="radio"/> 5 a 6 veces semana<br><input type="radio"/> 1 vez al día<br><input type="radio"/> 2 a 3 veces al día<br><input type="radio"/> 5 a 6 veces al día<br><input type="radio"/> más 6 veces al día |
| croquetas pescado     | <input checked="" type="radio"/> Nunca o menos 1 vez al mes<br><input type="radio"/> 1 a 3 veces mes<br><input type="radio"/> 1 vez semana<br><input type="radio"/> 2 a 4 veces semana<br><input type="radio"/> 5 a 6 veces semana<br><input type="radio"/> 1 vez al día<br><input type="radio"/> 2 a 3 veces al día<br><input type="radio"/> 5 a 6 veces al día<br><input type="radio"/> más 6 veces al día |
| mayonesa              | <input type="radio"/> Nunca o menos 1 vez al mes<br><input checked="" type="radio"/> 1 a 3 veces mes<br><input type="radio"/> 1 vez semana<br><input type="radio"/> 2 a 4 veces semana<br><input type="radio"/> 5 a 6 veces semana<br><input type="radio"/> 1 vez al día<br><input type="radio"/> 2 a 3 veces al día<br><input type="radio"/> 5 a 6 veces al día<br><input type="radio"/> más 6 veces al día |



|                  |                                                                                                                                                                                                                                                                                                                                                                                                              |
|------------------|--------------------------------------------------------------------------------------------------------------------------------------------------------------------------------------------------------------------------------------------------------------------------------------------------------------------------------------------------------------------------------------------------------------|
| salsa tomate     | <input type="radio"/> Nunca o menos 1 vez al mes<br><input type="radio"/> 1 a 3 veces mes<br><input type="radio"/> 1 vez semana<br><input checked="" type="radio"/> 2 a 4 veces semana<br><input type="radio"/> 5 a 6 veces semana<br><input type="radio"/> 1 vez al día<br><input type="radio"/> 2 a 3 veces al día<br><input type="radio"/> 5 a 6 veces al día<br><input type="radio"/> más 6 veces al día |
| ketchup          | <input checked="" type="radio"/> Nunca o menos 1 vez al mes<br><input type="radio"/> 1 a 3 veces mes<br><input type="radio"/> 1 vez semana<br><input type="radio"/> 2 a 4 veces semana<br><input type="radio"/> 5 a 6 veces semana<br><input type="radio"/> 1 vez al día<br><input type="radio"/> 2 a 3 veces al día<br><input type="radio"/> 5 a 6 veces al día<br><input type="radio"/> más 6 veces al día |
| sal              | <input type="radio"/> Nunca o menos 1 vez al mes<br><input type="radio"/> 1 a 3 veces mes<br><input type="radio"/> 1 vez semana<br><input type="radio"/> 2 a 4 veces semana<br><input checked="" type="radio"/> 5 a 6 veces semana<br><input type="radio"/> 1 vez al día<br><input type="radio"/> 2 a 3 veces al día<br><input type="radio"/> 5 a 6 veces al día<br><input type="radio"/> más 6 veces al día |
| ajo              | <input type="radio"/> Nunca o menos 1 vez al mes<br><input checked="" type="radio"/> 1 a 3 veces mes<br><input type="radio"/> 1 vez semana<br><input type="radio"/> 2 a 4 veces semana<br><input type="radio"/> 5 a 6 veces semana<br><input type="radio"/> 1 vez al día<br><input type="radio"/> 2 a 3 veces al día<br><input type="radio"/> 5 a 6 veces al día<br><input type="radio"/> más 6 veces al día |
| mermelada o miel | <input checked="" type="radio"/> Nunca o menos 1 vez al mes<br><input type="radio"/> 1 a 3 veces mes<br><input type="radio"/> 1 vez semana<br><input type="radio"/> 2 a 4 veces semana<br><input type="radio"/> 5 a 6 veces semana<br><input type="radio"/> 1 vez al día<br><input type="radio"/> 2 a 3 veces al día<br><input type="radio"/> 5 a 6 veces al día<br><input type="radio"/> más 6 veces al día |
| azúcar           | <input type="radio"/> Nunca o menos 1 vez al mes<br><input checked="" type="radio"/> 1 a 3 veces mes<br><input type="radio"/> 1 vez semana<br><input type="radio"/> 2 a 4 veces semana<br><input type="radio"/> 5 a 6 veces semana<br><input type="radio"/> 1 vez al día<br><input type="radio"/> 2 a 3 veces al día<br><input type="radio"/> 5 a 6 veces al día<br><input type="radio"/> más 6 veces al día |

|                                       |                                                                                                                                                                                                                                                                                                                                                                                                                                                                                                                               |
|---------------------------------------|-------------------------------------------------------------------------------------------------------------------------------------------------------------------------------------------------------------------------------------------------------------------------------------------------------------------------------------------------------------------------------------------------------------------------------------------------------------------------------------------------------------------------------|
| Otro alimento                         |                                                                                                                                                                                                                                                                                                                                                                                                                                                                                                                               |
| suplementos vitamínicos               | <input checked="" type="radio"/> si<br><input type="radio"/> no                                                                                                                                                                                                                                                                                                                                                                                                                                                               |
| suplementos vitamínicos               | [*DATA REMOVED*]                                                                                                                                                                                                                                                                                                                                                                                                                                                                                                              |
| dieta previa                          | <input type="radio"/> si<br><input checked="" type="radio"/> no                                                                                                                                                                                                                                                                                                                                                                                                                                                               |
| motivo dieta                          | <input checked="" type="radio"/> no dieta<br><input type="radio"/> control peso<br><input type="radio"/> control colesterol<br><input type="radio"/> control diabetes<br><input type="radio"/> problemas estómago<br><input type="radio"/> problemas vesícula o hepáticos<br><input type="radio"/> HTA o cardiopatía<br><input type="radio"/> problemas renales<br><input type="radio"/> alergia alimentaria<br><input type="radio"/> ácido úrico elevado<br><input type="radio"/> vegetariana<br><input type="radio"/> otros |
| cambio alimentos año previo gestación | <input type="radio"/> si<br><input checked="" type="radio"/> no                                                                                                                                                                                                                                                                                                                                                                                                                                                               |
| cambio lácteos                        | <input type="radio"/> eliminado<br><input type="radio"/> disminuido<br><input type="radio"/> igual<br><input type="radio"/> aumentado<br><input type="radio"/> no sabe                                                                                                                                                                                                                                                                                                                                                        |
| cambio huevos                         | <input type="radio"/> eliminado<br><input type="radio"/> disminuido<br><input type="radio"/> igual<br><input type="radio"/> aumentado<br><input type="radio"/> no sabe                                                                                                                                                                                                                                                                                                                                                        |
| cambio carne                          | <input type="radio"/> eliminado<br><input type="radio"/> disminuido<br><input type="radio"/> igual<br><input type="radio"/> aumentado<br><input type="radio"/> no sabe                                                                                                                                                                                                                                                                                                                                                        |
| cambio pescado                        | <input type="radio"/> eliminado<br><input type="radio"/> disminuido<br><input type="radio"/> igual<br><input type="radio"/> aumentado<br><input type="radio"/> no sabe                                                                                                                                                                                                                                                                                                                                                        |
| cambio verduras                       | <input type="radio"/> eliminado<br><input type="radio"/> disminuido<br><input type="radio"/> igual<br><input type="radio"/> aumentado<br><input type="radio"/> no sabe                                                                                                                                                                                                                                                                                                                                                        |

|                            |                                                                                                                                                                                                                        |
|----------------------------|------------------------------------------------------------------------------------------------------------------------------------------------------------------------------------------------------------------------|
| cambio legumbres           | <input type="radio"/> eliminado<br><input type="radio"/> disminuido<br><input type="radio"/> igual<br><input type="radio"/> aumentado<br><input type="radio"/> no sabe                                                 |
| cambio fruta               | <input type="radio"/> eliminado<br><input type="radio"/> disminuido<br><input type="radio"/> igual<br><input type="radio"/> aumentado<br><input type="radio"/> no sabe                                                 |
| cambio pan                 | <input type="radio"/> eliminado<br><input type="radio"/> disminuido<br><input type="radio"/> igual<br><input type="radio"/> aumentado<br><input type="radio"/> no sabe                                                 |
| cambio aceite oliva        | <input type="radio"/> eliminado<br><input type="radio"/> disminuido<br><input type="radio"/> igual<br><input type="radio"/> aumentado<br><input type="radio"/> no sabe                                                 |
| cambio mante o margarina   | <input type="radio"/> eliminado<br><input type="radio"/> disminuido<br><input type="radio"/> igual<br><input type="radio"/> aumentado<br><input type="radio"/> no sabe                                                 |
| cambio azúcar y dulces     | <input type="radio"/> eliminado<br><input type="radio"/> disminuido<br><input type="radio"/> igual<br><input type="radio"/> aumentado<br><input type="radio"/> no sabe                                                 |
| cambio bebidas alcohólicas | <input type="radio"/> eliminado<br><input type="radio"/> disminuido<br><input type="radio"/> igual<br><input type="radio"/> aumentado<br><input type="radio"/> no sabe                                                 |
| frecuencia comidas fritas  | <input type="radio"/> a diario<br><input type="radio"/> 5 a 6 veces semana<br><input type="radio"/> 2 a 4 veces semana<br><input type="radio"/> 1 vez semana<br><input checked="" type="radio"/> menos de 1 vez semana |
| carne                      | <input type="radio"/> no como<br><input type="radio"/> cruda<br><input type="radio"/> poco hecha<br><input type="radio"/> hecha<br><input checked="" type="radio"/> muy hecha                                          |
| grasa visible carne        | <input checked="" type="radio"/> quita toda<br><input type="radio"/> quita mayoría<br><input type="radio"/> quita un poco<br><input type="radio"/> no quita nada                                                       |

|                                |                                                                                                                                                                                                                                                          |
|--------------------------------|----------------------------------------------------------------------------------------------------------------------------------------------------------------------------------------------------------------------------------------------------------|
| cocina carne                   | <input checked="" type="radio"/> a la plancha<br><input type="radio"/> a la parrilla<br><input type="radio"/> asada<br><input type="radio"/> frita<br><input type="radio"/> guisada                                                                      |
| tostado quemado carne          | <input checked="" type="radio"/> nunca<br><input type="radio"/> 1 vez mes<br><input type="radio"/> 2 a 3 veces mes<br><input type="radio"/> 1 vez semana<br><input type="radio"/> 2 a 3 semanas                                                          |
| tostado quemado pescado        | <input checked="" type="radio"/> nunca<br><input type="radio"/> 1 vez mes<br><input type="radio"/> 2 a 3 veces mes<br><input type="radio"/> 1 vez semana<br><input type="radio"/> 2 a 3 semanas                                                          |
| socarrat paella                | <input checked="" type="radio"/> nunca<br><input type="radio"/> 1 vez mes<br><input type="radio"/> 2 a 3 veces mes<br><input type="radio"/> 1 vez semana<br><input type="radio"/> 2 a 3 semanas                                                          |
| grasa o aceite cocinar         | <input type="radio"/> mantequilla<br><input type="radio"/> margarina<br><input type="radio"/> aceite oliva<br><input checked="" type="radio"/> aceite oliva virgen extra<br><input type="radio"/> aceite vegetal<br><input type="radio"/> mezcla aceites |
| grasa aceite aliñar            | <input type="radio"/> mantequilla<br><input type="radio"/> margarina<br><input type="radio"/> aceite oliva<br><input checked="" type="radio"/> aceite oliva virgen extra<br><input type="radio"/> aceite vegetal<br><input type="radio"/> mezcla aceites |
| grasa aceite freir             | <input type="radio"/> mantequilla<br><input type="radio"/> margarina<br><input type="radio"/> aceite oliva<br><input checked="" type="radio"/> aceite oliva virgen extra<br><input type="radio"/> aceite vegetal<br><input type="radio"/> mezcla aceites |
| Ejercicio cuestionario         | <input checked="" type="radio"/> si<br><input type="radio"/> no                                                                                                                                                                                          |
| horas de sueño incluido siesta | [*DATA REMOVED*]                                                                                                                                                                                                                                         |
| minutos siesta                 | [*DATA REMOVED*]                                                                                                                                                                                                                                         |
| horas televisión semana        | [*DATA REMOVED*]                                                                                                                                                                                                                                         |

|                                        |                                                                                                                                                                                                                                                                                                                                                                           |
|----------------------------------------|---------------------------------------------------------------------------------------------------------------------------------------------------------------------------------------------------------------------------------------------------------------------------------------------------------------------------------------------------------------------------|
| actividad trabajo                      | <input type="radio"/> casi siempre sentado<br><input type="radio"/> sentado 50 por cien<br><input type="radio"/> casi siempre de pie, quieto<br><input checked="" type="radio"/> casi siempre levantado caminando y llevando pocas cosas<br><input type="radio"/> casi siempre levantado, caminando y llevado muchas cosas<br><input type="radio"/> trabajo manual pesado |
| tiempo caminar o bici al día           | <input type="radio"/> casi nunca<br><input type="radio"/> menos 20min día<br><input type="radio"/> 20 a 40 min día<br><input checked="" type="radio"/> 40 a 60 min día<br><input type="radio"/> 1h o 1h y media día<br><input type="radio"/> más de 1h y media al día                                                                                                     |
| tiempo tareas casa al día              | <input type="radio"/> menos de 1h día<br><input checked="" type="radio"/> 1 a 2h día<br><input type="radio"/> 3 a 4h día<br><input type="radio"/> 5 a 6h día<br><input type="radio"/> 7 a 8h día<br><input type="radio"/> más de 8h día                                                                                                                                   |
| tiempo libre televisión ordenador leer | <input type="radio"/> menos 1h día<br><input checked="" type="radio"/> 1h día<br><input type="radio"/> 2h día<br><input type="radio"/> 3h día<br><input type="radio"/> 4h día<br><input type="radio"/> 5 a 6h día<br><input type="radio"/> mas 6h día                                                                                                                     |
| tiempo libre ejercicio o deporte       | <input type="radio"/> menos 1h semana<br><input type="radio"/> 1h semana<br><input checked="" type="radio"/> 2h semana<br><input type="radio"/> 3h semana<br><input type="radio"/> 4 a 5h semana<br><input type="radio"/> mas 5h semana                                                                                                                                   |
| como se considera                      | <input type="radio"/> sedentaria<br><input checked="" type="radio"/> poco activa<br><input type="radio"/> moderadamente activa<br><input type="radio"/> bastante activa<br><input type="radio"/> muy activa<br><input type="radio"/> no sabe                                                                                                                              |
| FUR                                    | [*DATA REMOVED*]                                                                                                                                                                                                                                                                                                                                                          |
| Semanas gestación 2T                   | _____                                                                                                                                                                                                                                                                                                                                                                     |
| Días gestación 2T                      | _____                                                                                                                                                                                                                                                                                                                                                                     |
| DBP 2T                                 | _____                                                                                                                                                                                                                                                                                                                                                                     |
| CC 2T                                  | _____                                                                                                                                                                                                                                                                                                                                                                     |

|                                                   |                                                                                                                                                                                                 |
|---------------------------------------------------|-------------------------------------------------------------------------------------------------------------------------------------------------------------------------------------------------|
| AC 2T                                             |                                                                                                                                                                                                 |
| LF 2T                                             |                                                                                                                                                                                                 |
| PFE 2T (Hadlock)                                  |                                                                                                                                                                                                 |
| Semanas gestación 3T                              | [*DATA REMOVED*]                                                                                                                                                                                |
| días 3T                                           | [*DATA REMOVED*]                                                                                                                                                                                |
| DBP 3T                                            | [*DATA REMOVED*]                                                                                                                                                                                |
| CC 3T                                             | [*DATA REMOVED*]                                                                                                                                                                                |
| AC 3T                                             | [*DATA REMOVED*]                                                                                                                                                                                |
| LF 3T                                             | [*DATA REMOVED*]                                                                                                                                                                                |
| PFE 3T (Hadlock)                                  | [*DATA REMOVED*]                                                                                                                                                                                |
| Semanas de gestación final                        | [*DATA REMOVED*]                                                                                                                                                                                |
| días gestación final                              | [*DATA REMOVED*]                                                                                                                                                                                |
| Localización placenta                             | <input checked="" type="radio"/> anterior<br><input type="radio"/> lateral derecha<br><input type="radio"/> lateral izquierda<br><input type="radio"/> posterior<br><input type="radio"/> fondo |
| Presentación longitudinal cefálica                | <input type="radio"/> no<br><input checked="" type="radio"/> si                                                                                                                                 |
| Dorso                                             | <input checked="" type="radio"/> izquierda anterior<br><input type="radio"/> izquierda posterior<br><input type="radio"/> derecha anterior<br><input type="radio"/> derecha posterior           |
| diámetro biparietal                               | [*DATA REMOVED*]                                                                                                                                                                                |
| Circunferencia craneal                            | [*DATA REMOVED*]                                                                                                                                                                                |
| Circunferencia abdominal                          | [*DATA REMOVED*]                                                                                                                                                                                |
| Longitud de femur                                 | [*DATA REMOVED*]                                                                                                                                                                                |
| tejido celular subcutáneo a nivel del muslo en mm | [*DATA REMOVED*]                                                                                                                                                                                |
| tejido celular subcutáneo en abdomen en mm        | [*DATA REMOVED*]                                                                                                                                                                                |

|                                               |                                                                                                                                                          |
|-----------------------------------------------|----------------------------------------------------------------------------------------------------------------------------------------------------------|
| Volumen del muslo en cm3                      | [*DATA REMOVED*]                                                                                                                                         |
| Peso fetal estimado según fórmula de Hadlock  | [*DATA REMOVED*]                                                                                                                                         |
| Percentil                                     | [*DATA REMOVED*]                                                                                                                                         |
| Peso fetal estimado según fórmula de Scioscia | _____                                                                                                                                                    |
| Peso fetal estimado según fórmula de LEE      | _____                                                                                                                                                    |
| Tipo de parto                                 | <input checked="" type="radio"/> eutocico<br><input type="radio"/> instrumentado/ventosa<br><input type="radio"/> cesarea                                |
| fecha de nacimiento                           | [*DATA REMOVED*]                                                                                                                                         |
| Días entre exploración y nacimiento           | [*DATA REMOVED*]                                                                                                                                         |
| Peso RN en g                                  | [*DATA REMOVED*]                                                                                                                                         |
| sexo                                          | <input checked="" type="radio"/> mujer<br><input type="radio"/> hombre                                                                                   |
| Apgar 1 minuto                                | [*DATA REMOVED*]                                                                                                                                         |
| Apgar 5 minutos                               | [*DATA REMOVED*]                                                                                                                                         |
| Apgar 10 minutos                              | _____                                                                                                                                                    |
| antecedente Covid durante gestación           | <input type="radio"/> Yes<br><input checked="" type="radio"/> No                                                                                         |
| Nivel de estudios                             | <input type="radio"/> ninguno<br><input type="radio"/> primarios<br><input checked="" type="radio"/> secundarios<br><input type="radio"/> universitarios |

# Base\_datos\_estimacion\_peso\_fetal

|                                       |                                                                                                                                                                                                                                                                                      |
|---------------------------------------|--------------------------------------------------------------------------------------------------------------------------------------------------------------------------------------------------------------------------------------------------------------------------------------|
| Número de identificación participante | 52                                                                                                                                                                                                                                                                                   |
| CODIGO PARTICIPANTE                   |                                                                                                                                                                                                                                                                                      |
| Edad                                  | [*DATA REMOVED*]                                                                                                                                                                                                                                                                     |
| Gestaciones                           | <input type="radio"/> 1<br><input type="radio"/> 2<br><input checked="" type="radio"/> 3<br><input type="radio"/> mas de 3                                                                                                                                                           |
| partos                                | <input type="radio"/> 0<br><input type="radio"/> 1<br><input checked="" type="radio"/> 2<br><input type="radio"/> 3<br><input type="radio"/> mas de 3                                                                                                                                |
| cesáreas                              | <input checked="" type="radio"/> 0<br><input type="radio"/> 1<br><input type="radio"/> 2<br><input type="radio"/> 3<br><input type="radio"/> mas de 3                                                                                                                                |
| Abortos                               | <input checked="" type="radio"/> 0<br><input type="radio"/> 1<br><input type="radio"/> 2<br><input type="radio"/> 3<br><input type="radio"/> mas de 3                                                                                                                                |
| Tipo de gestacion                     | <input checked="" type="radio"/> espontanea<br><input type="radio"/> IAC inseminación artificial conyuge<br><input type="radio"/> IAD inseminación artificial donante<br><input type="radio"/> FIV Fecundación in Vitro<br><input type="radio"/> Ovodon FIV con donación de ovocitos |
| peso previo a embarazo                | [*DATA REMOVED*]                                                                                                                                                                                                                                                                     |
| Ganancia ponderal embarazo            | [*DATA REMOVED*]                                                                                                                                                                                                                                                                     |
| Talla madre                           | [*DATA REMOVED*]                                                                                                                                                                                                                                                                     |
| IMC previo embarazo                   | 25.781249999999996                                                                                                                                                                                                                                                                   |
| Patología obstétrica                  | <input checked="" type="radio"/> no<br><input type="radio"/> si                                                                                                                                                                                                                      |
| Diabetes pregestacional               | <input checked="" type="radio"/> no<br><input type="radio"/> si                                                                                                                                                                                                                      |
| Diabetes gestacional                  | <input checked="" type="radio"/> no<br><input type="radio"/> si                                                                                                                                                                                                                      |



|                                            |                                                                                                                                                                                      |
|--------------------------------------------|--------------------------------------------------------------------------------------------------------------------------------------------------------------------------------------|
| Diabetes gestacional con insulina          | <input checked="" type="radio"/> no<br><input type="radio"/> si                                                                                                                      |
| Diabetes gestacional con dieta y ejercicio | <input checked="" type="radio"/> no<br><input type="radio"/> si                                                                                                                      |
| Percentil fetos previos                    | <input type="radio"/> Nada<br><input checked="" type="radio"/> percentil menor de 10<br><input type="radio"/> percentil entre 10 y 90<br><input type="radio"/> percentil mayor de 90 |
| Exfumadora                                 | <input checked="" type="radio"/> Nada<br><input type="radio"/> menos de 5 años<br><input type="radio"/> 5 a 10 años<br><input type="radio"/> mayor o igual a 10 años                 |
| Hábito tabáquico                           | <input checked="" type="radio"/> no<br><input type="radio"/> si                                                                                                                      |
| fumadora                                   | [*DATA REMOVED*]                                                                                                                                                                     |
| Consumo otros tóxicos                      | <input checked="" type="radio"/> no<br><input type="radio"/> si                                                                                                                      |
| Hb 1T                                      | [*DATA REMOVED*]                                                                                                                                                                     |
| Htc 1T                                     | [*DATA REMOVED*]                                                                                                                                                                     |
| Hb 2T                                      | [*DATA REMOVED*]                                                                                                                                                                     |
| HTC 2T                                     | [*DATA REMOVED*]                                                                                                                                                                     |
| Hb 3T                                      | [*DATA REMOVED*]                                                                                                                                                                     |
| HTC 3T                                     | [*DATA REMOVED*]                                                                                                                                                                     |
| Suplemento FE oral                         | <input type="radio"/> si<br><input checked="" type="radio"/> no                                                                                                                      |
| Suplemento fe iv                           | <input type="radio"/> si<br><input checked="" type="radio"/> no                                                                                                                      |
| Transfusión                                | <input checked="" type="radio"/> no<br><input type="radio"/> si                                                                                                                      |
| Solicitada Vit D                           | <input checked="" type="radio"/> no<br><input type="radio"/> si                                                                                                                      |
| Deficit vit D                              | <input type="radio"/> no<br><input type="radio"/> si                                                                                                                                 |
| Suplemento vit D                           | <input type="radio"/> si<br><input type="radio"/> no                                                                                                                                 |

|                       |                                                                                                                                                                                                                                                                                                                                                                                                              |
|-----------------------|--------------------------------------------------------------------------------------------------------------------------------------------------------------------------------------------------------------------------------------------------------------------------------------------------------------------------------------------------------------------------------------------------------------|
| Dieta, cuestionario   | <input checked="" type="radio"/> sí<br><input type="radio"/> no                                                                                                                                                                                                                                                                                                                                              |
| Leche entera          | <input checked="" type="radio"/> Nunca o menos 1 vez al mes<br><input type="radio"/> 1 a 3 veces mes<br><input type="radio"/> 1 vez semana<br><input type="radio"/> 2 a 4 veces semana<br><input type="radio"/> 5 a 6 veces semana<br><input type="radio"/> 1 vez al día<br><input type="radio"/> 2 a 3 veces al día<br><input type="radio"/> 5 a 6 veces al día<br><input type="radio"/> más 6 veces al día |
| Leche semidesnatada   | <input checked="" type="radio"/> Nunca o menos 1 vez al mes<br><input type="radio"/> 1 a 3 veces mes<br><input type="radio"/> 1 vez semana<br><input type="radio"/> 2 a 4 veces semana<br><input type="radio"/> 5 a 6 veces semana<br><input type="radio"/> 1 vez al día<br><input type="radio"/> 2 a 3 veces al día<br><input type="radio"/> 5 a 6 veces al día<br><input type="radio"/> mas 6 veces al día |
| Leche desnatada       | <input type="radio"/> Nunca o menos 1 vez al mes<br><input type="radio"/> 1 a 3 veces mes<br><input type="radio"/> 1 vez semana<br><input type="radio"/> 2 a 4 veces semana<br><input type="radio"/> 5 a 6 veces semana<br><input type="radio"/> 1 vez al día<br><input checked="" type="radio"/> 2 a 3 veces al día<br><input type="radio"/> 5 a 6 veces al día<br><input type="radio"/> más 6 veces al día |
| Leche condensada      | <input checked="" type="radio"/> Nunca o menos 1 vez al mes<br><input type="radio"/> 1 a 3 veces mes<br><input type="radio"/> 1 vez semana<br><input type="radio"/> 2 a 4 veces semana<br><input type="radio"/> 5 a 6 veces semana<br><input type="radio"/> 1 vez al día<br><input type="radio"/> 2 a 3 veces al día<br><input type="radio"/> 5 a 6 veces al día<br><input type="radio"/> más 6 veces al día |
| nata o crema de leche | <input type="radio"/> Nunca o menos 1 vez al mes<br><input type="radio"/> 1 a 3 veces mes<br><input checked="" type="radio"/> 1 vez semana<br><input type="radio"/> 2 a 4 veces semana<br><input type="radio"/> 5 a 6 veces semana<br><input type="radio"/> 1 vez al día<br><input type="radio"/> 2 a 3 veces al día<br><input type="radio"/> 5 a 6 veces al día<br><input type="radio"/> más 6 veces al día |

|                                             |                                                                                                                                                                                                                                                                                                                                                                                                              |
|---------------------------------------------|--------------------------------------------------------------------------------------------------------------------------------------------------------------------------------------------------------------------------------------------------------------------------------------------------------------------------------------------------------------------------------------------------------------|
| Yogurt Entero                               | <input checked="" type="radio"/> Nunca o menos 1 vez al mes<br><input type="radio"/> 1 a 3 veces mes<br><input type="radio"/> 1 vez semana<br><input type="radio"/> 2 a 4 veces semana<br><input type="radio"/> 5 a 6 veces semana<br><input type="radio"/> 1 vez al día<br><input type="radio"/> 2 a 3 veces al día<br><input type="radio"/> 5 a 6 veces al día<br><input type="radio"/> más 6 veces al día |
| Yogurt desnatado                            | <input type="radio"/> Nunca o menos 1 vez al mes<br><input type="radio"/> 1 a 3 veces mes<br><input type="radio"/> 1 vez semana<br><input checked="" type="radio"/> 2 a 4 veces semana<br><input type="radio"/> 5 a 6 veces semana<br><input type="radio"/> 1 vez al día<br><input type="radio"/> 2 a 3 veces al día<br><input type="radio"/> 5 a 6 veces al día<br><input type="radio"/> más 6 veces al día |
| 100g requesón o queso blando o queso fresco | <input type="radio"/> Nunca o menos 1 vez al mes<br><input type="radio"/> 1 a 3 veces mes<br><input checked="" type="radio"/> 1 vez semana<br><input type="radio"/> 2 a 4 veces semana<br><input type="radio"/> 5 a 6 veces semana<br><input type="radio"/> 1 vez al día<br><input type="radio"/> 2 a 3 veces al día<br><input type="radio"/> 5 a 6 veces al día<br><input type="radio"/> más 6 veces al día |
| queso curado o semicurado o cremoso         | <input type="radio"/> Nunca o menos 1 vez al mes<br><input type="radio"/> 1 a 3 veces mes<br><input checked="" type="radio"/> 1 vez semana<br><input type="radio"/> 2 a 4 veces semana<br><input type="radio"/> 5 a 6 veces semana<br><input type="radio"/> 1 vez al día<br><input type="radio"/> 2 a 3 veces al día<br><input type="radio"/> 5 a 6 veces al día<br><input type="radio"/> más 6 veces al día |
| natillas flan pudding                       | <input checked="" type="radio"/> Nunca o menos 1 vez al mes<br><input type="radio"/> 1 a 3 veces mes<br><input type="radio"/> 1 vez semana<br><input type="radio"/> 2 a 4 veces semana<br><input type="radio"/> 5 a 6 veces semana<br><input type="radio"/> 1 vez al día<br><input type="radio"/> 2 a 3 veces al día<br><input type="radio"/> 5 a 6 veces al día<br><input type="radio"/> más 6 veces al día |
| Helado                                      | <input checked="" type="radio"/> Nunca o menos 1 vez al mes<br><input type="radio"/> 1 a 3 veces mes<br><input type="radio"/> 1 vez semana<br><input type="radio"/> 2 a 4 veces semana<br><input type="radio"/> 5 a 6 veces semana<br><input type="radio"/> 1 vez al día<br><input type="radio"/> 2 a 3 veces al día<br><input type="radio"/> 5 a 6 veces al día<br><input type="radio"/> más 6 veces al día |

|                                      |                                                                                                                                                                                                                                                                                                                                                                                                              |
|--------------------------------------|--------------------------------------------------------------------------------------------------------------------------------------------------------------------------------------------------------------------------------------------------------------------------------------------------------------------------------------------------------------------------------------------------------------|
| huevo                                | <input type="radio"/> Nunca o menos 1 vez al mes<br><input type="radio"/> 1 a 3 veces mes<br><input type="radio"/> 1 vez semana<br><input checked="" type="radio"/> 2 a 4 veces semana<br><input type="radio"/> 5 a 6 veces semana<br><input type="radio"/> 1 vez al día<br><input type="radio"/> 2 a 3 veces al día<br><input type="radio"/> 5 a 6 veces al día<br><input type="radio"/> más 6 veces al día |
| Pollo con piel                       | <input type="radio"/> Nunca o menos 1 vez al mes<br><input checked="" type="radio"/> 1 a 3 veces mes<br><input type="radio"/> 1 vez semana<br><input type="radio"/> 2 a 4 veces semana<br><input type="radio"/> 5 a 6 veces semana<br><input type="radio"/> 1 vez al día<br><input type="radio"/> 2 a 3 veces al día<br><input type="radio"/> 5 a 6 veces al día<br><input type="radio"/> más 6 veces al día |
| pollo sin piel                       | <input type="radio"/> Nunca o menos 1 vez al mes<br><input type="radio"/> 1 a 3 veces mes<br><input type="radio"/> 1 vez semana<br><input type="radio"/> 2 a 4 veces semana<br><input checked="" type="radio"/> 5 a 6 veces semana<br><input type="radio"/> 1 vez al día<br><input type="radio"/> 2 a 3 veces al día<br><input type="radio"/> 5 a 6 veces al día<br><input type="radio"/> más 6 veces al día |
| Ternera o cerdo o cordero            | <input type="radio"/> Nunca o menos 1 vez al mes<br><input type="radio"/> 1 a 3 veces mes<br><input type="radio"/> 1 vez semana<br><input checked="" type="radio"/> 2 a 4 veces semana<br><input type="radio"/> 5 a 6 veces semana<br><input type="radio"/> 1 vez al día<br><input type="radio"/> 2 a 3 veces al día<br><input type="radio"/> 5 a 6 veces al día<br><input type="radio"/> más 6 veces al día |
| carne caza: Conejo o codorniz o pato | <input type="radio"/> Nunca o menos 1 vez al mes<br><input type="radio"/> 1 a 3 veces mes<br><input checked="" type="radio"/> 1 vez semana<br><input type="radio"/> 2 a 4 veces semana<br><input type="radio"/> 5 a 6 veces semana<br><input type="radio"/> 1 vez al día<br><input type="radio"/> 2 a 3 veces al día<br><input type="radio"/> 5 a 6 veces al día<br><input type="radio"/> más 6 veces al día |
| Hígado de ternera o cerdo o pollo    | <input checked="" type="radio"/> Nunca o menos 1 vez al mes<br><input type="radio"/> 1 a 3 veces mes<br><input type="radio"/> 1 vez semana<br><input type="radio"/> 2 a 4 veces semana<br><input type="radio"/> 5 a 6 veces semana<br><input type="radio"/> 1 vez al día<br><input type="radio"/> 2 a 3 veces al día<br><input type="radio"/> 5 a 6 veces al día<br><input type="radio"/> más 6 veces al día |

|                     |                                                                                                                                                                                                                                                                                                                                                                                                              |
|---------------------|--------------------------------------------------------------------------------------------------------------------------------------------------------------------------------------------------------------------------------------------------------------------------------------------------------------------------------------------------------------------------------------------------------------|
| Vísceras            | <input type="radio"/> Nunca o menos 1 vez al mes<br><input checked="" type="radio"/> 1 a 3 veces mes<br><input type="radio"/> 1 vez semana<br><input type="radio"/> 2 a 4 veces semana<br><input type="radio"/> 5 a 6 veces semana<br><input type="radio"/> 1 vez al día<br><input type="radio"/> 2 a 3 veces al día<br><input type="radio"/> 5 a 6 veces al día<br><input type="radio"/> más 6 veces al día |
| Embutido            | <input type="radio"/> Nunca o menos 1 vez al mes<br><input checked="" type="radio"/> 1 a 3 veces mes<br><input type="radio"/> 1 vez semana<br><input type="radio"/> 2 a 4 veces semana<br><input type="radio"/> 5 a 6 veces semana<br><input type="radio"/> 1 vez al día<br><input type="radio"/> 2 a 3 veces al día<br><input type="radio"/> 5 a 6 veces al día<br><input type="radio"/> más 6 veces al día |
| Salchicha o similar | <input checked="" type="radio"/> Nunca o menos 1 vez al mes<br><input type="radio"/> 1 a 3 veces mes<br><input type="radio"/> 1 vez semana<br><input type="radio"/> 2 a 4 veces semana<br><input type="radio"/> 5 a 6 veces semana<br><input type="radio"/> 1 vez al día<br><input type="radio"/> 2 a 3 veces al día<br><input type="radio"/> 5 a 6 veces al día<br><input type="radio"/> más 6 veces al día |
| Pate o foiegras     | <input checked="" type="radio"/> Nunca o menos 1 vez al mes<br><input type="radio"/> 1 a 3 veces mes<br><input type="radio"/> 1 vez semana<br><input type="radio"/> 2 a 4 veces semana<br><input type="radio"/> 5 a 6 veces semana<br><input type="radio"/> 1 vez al día<br><input type="radio"/> 2 a 3 veces al día<br><input type="radio"/> 5 a 6 veces al día<br><input type="radio"/> más 6 veces al día |
| Hamburguesa         | <input type="radio"/> Nunca o menos 1 vez al mes<br><input type="radio"/> 1 a 3 veces mes<br><input type="radio"/> 1 vez semana<br><input type="radio"/> 2 a 4 veces semana<br><input checked="" type="radio"/> 5 a 6 veces semana<br><input type="radio"/> 1 vez al día<br><input type="radio"/> 2 a 3 veces al día<br><input type="radio"/> 5 a 6 veces al día<br><input type="radio"/> más 6 veces al día |
| tocino o bacon      | <input checked="" type="radio"/> Nunca o menos 1 vez al mes<br><input type="radio"/> 1 a 3 veces mes<br><input type="radio"/> 1 vez semana<br><input type="radio"/> 2 a 4 veces semana<br><input type="radio"/> 5 a 6 veces semana<br><input type="radio"/> 1 vez al día<br><input type="radio"/> 2 a 3 veces al día<br><input type="radio"/> 5 a 6 veces al día<br><input type="radio"/> más 6 veces al día |

---

Pescado frito

- ☐ Nunca o menos 1 vez al mes  
☒ 1 a 3 veces mes  
☐ 1 vez semana  
☐ 2 a 4 veces semana  
☐ 5 a 6 veces semana  
☐ 1 vez al día  
☐ 2 a 3 veces al día  
☐ 5 a 6 veces al día  
☐ más 6 veces al día

---

pescado hervido blanco

- ☐ Nunca o menos 1 vez al mes  
☐ 1 a 3 veces mes  
☒ 1 vez semana  
☐ 2 a 4 veces semana  
☐ 5 a 6 veces semana  
☐ 1 vez al día  
☐ 2 a 3 veces al día  
☐ 5 a 6 veces al día  
☐ más 6 veces al día

---

pescado hervido azul

- ☐ Nunca o menos 1 vez al mes  
☐ 1 a 3 veces mes  
☒ 1 vez semana  
☐ 2 a 4 veces semana  
☐ 5 a 6 veces semana  
☐ 1 vez al día  
☐ 2 a 3 veces al día  
☐ 5 a 6 veces al día  
☐ más 6 veces al día

---

otros pescado azul

- ☐ Nunca o menos 1 vez al mes  
☒ 1 a 3 veces mes  
☐ 1 vez semana  
☐ 2 a 4 veces semana  
☐ 5 a 6 veces semana  
☐ 1 vez al día  
☐ 2 a 3 veces al día  
☐ 5 a 6 veces al día  
☐ más 6 veces al día

---

atun conserva

- ☐ Nunca o menos 1 vez al mes  
☐ 1 a 3 veces mes  
☒ 1 vez semana  
☐ 2 a 4 veces semana  
☐ 5 a 6 veces semana  
☐ 1 vez al día  
☐ 2 a 3 veces al día  
☐ 5 a 6 veces al día  
☐ más 6 veces al día

---

sardina conserva

- ☐ Nunca o menos 1 vez al mes  
☐ 1 a 3 veces mes  
☒ 1 vez semana  
☐ 2 a 4 veces semana  
☐ 5 a 6 veces semana  
☐ 1 vez al día  
☐ 2 a 3 veces al día  
☐ 5 a 6 veces al día  
☐ más 6 veces al día

|                                         |                                                                                                                                                                                                                                                                                                                                                                                                              |
|-----------------------------------------|--------------------------------------------------------------------------------------------------------------------------------------------------------------------------------------------------------------------------------------------------------------------------------------------------------------------------------------------------------------------------------------------------------------|
| pescado ahumado                         | <input checked="" type="radio"/> Nunca o menos 1 vez al mes<br><input type="radio"/> 1 a 3 veces mes<br><input type="radio"/> 1 vez semana<br><input type="radio"/> 2 a 4 veces semana<br><input type="radio"/> 5 a 6 veces semana<br><input type="radio"/> 1 vez al día<br><input type="radio"/> 2 a 3 veces al día<br><input type="radio"/> 5 a 6 veces al día<br><input type="radio"/> más 6 veces al día |
| almejas o mejillones o ostras unos 100g | <input type="radio"/> Nunca o menos 1 vez al mes<br><input type="radio"/> 1 a 3 veces mes<br><input checked="" type="radio"/> 1 vez semana<br><input type="radio"/> 2 a 4 veces semana<br><input type="radio"/> 5 a 6 veces semana<br><input type="radio"/> 1 vez al día<br><input type="radio"/> 2 a 3 veces al día<br><input type="radio"/> 5 a 6 veces al día<br><input type="radio"/> más 6 veces al día |
| calamar o chipiron o sepia unos 100g    | <input type="radio"/> Nunca o menos 1 vez al mes<br><input checked="" type="radio"/> 1 a 3 veces mes<br><input type="radio"/> 1 vez semana<br><input type="radio"/> 2 a 4 veces semana<br><input type="radio"/> 5 a 6 veces semana<br><input type="radio"/> 1 vez al día<br><input type="radio"/> 2 a 3 veces al día<br><input type="radio"/> 5 a 6 veces al día<br><input type="radio"/> más 6 veces al día |
| marisco unos 100g                       | <input type="radio"/> Nunca o menos 1 vez al mes<br><input checked="" type="radio"/> 1 a 3 veces mes<br><input type="radio"/> 1 vez semana<br><input type="radio"/> 2 a 4 veces semana<br><input type="radio"/> 5 a 6 veces semana<br><input type="radio"/> 1 vez al día<br><input type="radio"/> 2 a 3 veces al día<br><input type="radio"/> 5 a 6 veces al día<br><input type="radio"/> más 6 veces al día |
| Espinacas o acelgas cocinadas           | <input type="radio"/> Nunca o menos 1 vez al mes<br><input type="radio"/> 1 a 3 veces mes<br><input checked="" type="radio"/> 1 vez semana<br><input type="radio"/> 2 a 4 veces semana<br><input type="radio"/> 5 a 6 veces semana<br><input type="radio"/> 1 vez al día<br><input type="radio"/> 2 a 3 veces al día<br><input type="radio"/> 5 a 6 veces al día<br><input type="radio"/> más 6 veces al día |
| Col o coliflor o brocoli cocinado       | <input type="radio"/> Nunca o menos 1 vez al mes<br><input checked="" type="radio"/> 1 a 3 veces mes<br><input type="radio"/> 1 vez semana<br><input type="radio"/> 2 a 4 veces semana<br><input type="radio"/> 5 a 6 veces semana<br><input type="radio"/> 1 vez al día<br><input type="radio"/> 2 a 3 veces al día<br><input type="radio"/> 5 a 6 veces al día<br><input type="radio"/> más 6 veces al día |

---

Lechuga o endivia o escarola

- ☐ Nunca o menos 1 vez al mes  
☐ 1 a 3 veces mes  
☒ 1 vez semana  
☐ 2 a 4 veces semana  
☐ 5 a 6 veces semana  
☐ 1 vez al día  
☐ 2 a 3 veces al día  
☐ 5 a 6 veces al día  
☐ más 6 veces al día

---

tomate ensalada

- ☐ Nunca o menos 1 vez al mes  
☐ 1 a 3 veces mes  
☒ 1 vez semana  
☐ 2 a 4 veces semana  
☐ 5 a 6 veces semana  
☐ 1 vez al día  
☐ 2 a 3 veces al día  
☐ 5 a 6 veces al día  
☐ más 6 veces al día

---

cebolla

- ☐ Nunca o menos 1 vez al mes  
☐ 1 a 3 veces mes  
☒ 1 vez semana  
☐ 2 a 4 veces semana  
☐ 5 a 6 veces semana  
☐ 1 vez al día  
☐ 2 a 3 veces al día  
☐ 5 a 6 veces al día  
☐ más 6 veces al día

---

Zanahoria o calabaza

- ☐ Nunca o menos 1 vez al mes  
☐ 1 a 3 veces mes  
☒ 1 vez semana  
☐ 2 a 4 veces semana  
☐ 5 a 6 veces semana  
☐ 1 vez al día  
☐ 2 a 3 veces al día  
☐ 5 a 6 veces al día  
☐ más 6 veces al día

---

Judías verdes

- ☐ Nunca o menos 1 vez al mes  
☐ 1 a 3 veces mes  
☒ 1 vez semana  
☐ 2 a 4 veces semana  
☐ 5 a 6 veces semana  
☐ 1 vez al día  
☐ 2 a 3 veces al día  
☐ 5 a 6 veces al día  
☐ más 6 veces al día

---

Berenjena o calabacin o pepino

- ☐ Nunca o menos 1 vez al mes  
☐ 1 a 3 veces mes  
☒ 1 vez semana  
☐ 2 a 4 veces semana  
☐ 5 a 6 veces semana  
☐ 1 vez al día  
☐ 2 a 3 veces al día  
☐ 5 a 6 veces al día  
☐ más 6 veces al día



|                       |                                                                                                                                                                                                                                                                                                                                                                                                              |
|-----------------------|--------------------------------------------------------------------------------------------------------------------------------------------------------------------------------------------------------------------------------------------------------------------------------------------------------------------------------------------------------------------------------------------------------------|
| pimiento              | <input type="radio"/> Nunca o menos 1 vez al mes<br><input checked="" type="radio"/> 1 a 3 veces mes<br><input type="radio"/> 1 vez semana<br><input type="radio"/> 2 a 4 veces semana<br><input type="radio"/> 5 a 6 veces semana<br><input type="radio"/> 1 vez al día<br><input type="radio"/> 2 a 3 veces al día<br><input type="radio"/> 5 a 6 veces al día<br><input type="radio"/> más 6 veces al día |
| alcachofa             | <input type="radio"/> Nunca o menos 1 vez al mes<br><input type="radio"/> 1 a 3 veces mes<br><input checked="" type="radio"/> 1 vez semana<br><input type="radio"/> 2 a 4 veces semana<br><input type="radio"/> 5 a 6 veces semana<br><input type="radio"/> 1 vez al día<br><input type="radio"/> 2 a 3 veces al día<br><input type="radio"/> 5 a 6 veces al día<br><input type="radio"/> más 6 veces al día |
| espárragos            | <input type="radio"/> Nunca o menos 1 vez al mes<br><input checked="" type="radio"/> 1 a 3 veces mes<br><input type="radio"/> 1 vez semana<br><input type="radio"/> 2 a 4 veces semana<br><input type="radio"/> 5 a 6 veces semana<br><input type="radio"/> 1 vez al día<br><input type="radio"/> 2 a 3 veces al día<br><input type="radio"/> 5 a 6 veces al día<br><input type="radio"/> más 6 veces al día |
| maíz hervido          | <input checked="" type="radio"/> Nunca o menos 1 vez al mes<br><input type="radio"/> 1 a 3 veces mes<br><input type="radio"/> 1 vez semana<br><input type="radio"/> 2 a 4 veces semana<br><input type="radio"/> 5 a 6 veces semana<br><input type="radio"/> 1 vez al día<br><input type="radio"/> 2 a 3 veces al día<br><input type="radio"/> 5 a 6 veces al día<br><input type="radio"/> más 6 veces al día |
| legumbres             | <input type="radio"/> Nunca o menos 1 vez al mes<br><input type="radio"/> 1 a 3 veces mes<br><input checked="" type="radio"/> 1 vez semana<br><input type="radio"/> 2 a 4 veces semana<br><input type="radio"/> 5 a 6 veces semana<br><input type="radio"/> 1 vez al día<br><input type="radio"/> 2 a 3 veces al día<br><input type="radio"/> 5 a 6 veces al día<br><input type="radio"/> más 6 veces al día |
| naranjas o mandarinas | <input type="radio"/> Nunca o menos 1 vez al mes<br><input type="radio"/> 1 a 3 veces mes<br><input type="radio"/> 1 vez semana<br><input checked="" type="radio"/> 2 a 4 veces semana<br><input type="radio"/> 5 a 6 veces semana<br><input type="radio"/> 1 vez al día<br><input type="radio"/> 2 a 3 veces al día<br><input type="radio"/> 5 a 6 veces al día<br><input type="radio"/> más 6 veces al día |

|                       |                                                                                                                                                                                                                                                                                                                                                                                                              |
|-----------------------|--------------------------------------------------------------------------------------------------------------------------------------------------------------------------------------------------------------------------------------------------------------------------------------------------------------------------------------------------------------------------------------------------------------|
| zum natural fruta     | <input type="radio"/> Nunca o menos 1 vez al mes<br><input type="radio"/> 1 a 3 veces mes<br><input type="radio"/> 1 vez semana<br><input type="radio"/> 2 a 4 veces semana<br><input checked="" type="radio"/> 5 a 6 veces semana<br><input type="radio"/> 1 vez al día<br><input type="radio"/> 2 a 3 veces al día<br><input type="radio"/> 5 a 6 veces al día<br><input type="radio"/> más 6 veces al día |
| platano               | <input type="radio"/> Nunca o menos 1 vez al mes<br><input type="radio"/> 1 a 3 veces mes<br><input type="radio"/> 1 vez semana<br><input checked="" type="radio"/> 2 a 4 veces semana<br><input type="radio"/> 5 a 6 veces semana<br><input type="radio"/> 1 vez al día<br><input type="radio"/> 2 a 3 veces al día<br><input type="radio"/> 5 a 6 veces al día<br><input type="radio"/> más 6 veces al día |
| manzana o pera        | <input type="radio"/> Nunca o menos 1 vez al mes<br><input type="radio"/> 1 a 3 veces mes<br><input type="radio"/> 1 vez semana<br><input checked="" type="radio"/> 2 a 4 veces semana<br><input type="radio"/> 5 a 6 veces semana<br><input type="radio"/> 1 vez al día<br><input type="radio"/> 2 a 3 veces al día<br><input type="radio"/> 5 a 6 veces al día<br><input type="radio"/> más 6 veces al día |
| melocotón o nectarina | <input type="radio"/> Nunca o menos 1 vez al mes<br><input type="radio"/> 1 a 3 veces mes<br><input checked="" type="radio"/> 1 vez semana<br><input type="radio"/> 2 a 4 veces semana<br><input type="radio"/> 5 a 6 veces semana<br><input type="radio"/> 1 vez al día<br><input type="radio"/> 2 a 3 veces al día<br><input type="radio"/> 5 a 6 veces al día<br><input type="radio"/> más 6 veces al día |
| sandia o melon        | <input checked="" type="radio"/> Nunca o menos 1 vez al mes<br><input type="radio"/> 1 a 3 veces mes<br><input type="radio"/> 1 vez semana<br><input type="radio"/> 2 a 4 veces semana<br><input type="radio"/> 5 a 6 veces semana<br><input type="radio"/> 1 vez al día<br><input type="radio"/> 2 a 3 veces al día<br><input type="radio"/> 5 a 6 veces al día<br><input type="radio"/> más 6 veces al día |
| uva                   | <input type="radio"/> Nunca o menos 1 vez al mes<br><input type="radio"/> 1 a 3 veces mes<br><input checked="" type="radio"/> 1 vez semana<br><input type="radio"/> 2 a 4 veces semana<br><input type="radio"/> 5 a 6 veces semana<br><input type="radio"/> 1 vez al día<br><input type="radio"/> 2 a 3 veces al día<br><input type="radio"/> 5 a 6 veces al día<br><input type="radio"/> más 6 veces al día |

---

bruna o ciruela

- ☐ Nunca o menos 1 vez al mes  
☐ 1 a 3 veces mes  
☒ 1 vez semana  
☐ 2 a 4 veces semana  
☐ 5 a 6 veces semana  
☐ 1 vez al día  
☐ 2 a 3 veces al día  
☐ 5 a 6 veces al día  
☐ más 6 veces al día

---

kiwi

- ☐ Nunca o menos 1 vez al mes  
☒ 1 a 3 veces mes  
☐ 1 vez semana  
☐ 2 a 4 veces semana  
☐ 5 a 6 veces semana  
☐ 1 vez al día  
☐ 2 a 3 veces al día  
☐ 5 a 6 veces al día  
☐ más 6 veces al día

---

aceituna

- ☐ Nunca o menos 1 vez al mes  
☐ 1 a 3 veces mes  
☒ 1 vez semana  
☐ 2 a 4 veces semana  
☐ 5 a 6 veces semana  
☐ 1 vez al día  
☐ 2 a 3 veces al día  
☐ 5 a 6 veces al día  
☐ más 6 veces al día

---

frutos secos

- ☐ Nunca o menos 1 vez al mes  
☐ 1 a 3 veces mes  
☐ 1 vez semana  
☒ 2 a 4 veces semana  
☐ 5 a 6 veces semana  
☐ 1 vez al día  
☐ 2 a 3 veces al día  
☐ 5 a 6 veces al día  
☐ más 6 veces al día

---

pan blanco

- ☐ Nunca o menos 1 vez al mes  
☐ 1 a 3 veces mes  
☐ 1 vez semana  
☒ 2 a 4 veces semana  
☐ 5 a 6 veces semana  
☐ 1 vez al día  
☐ 2 a 3 veces al día  
☐ 5 a 6 veces al día  
☐ más 6 veces al día

---

pan integral

- ☐ Nunca o menos 1 vez al mes  
☐ 1 a 3 veces mes  
☒ 1 vez semana  
☐ 2 a 4 veces semana  
☐ 5 a 6 veces semana  
☐ 1 vez al día  
☐ 2 a 3 veces al día  
☐ 5 a 6 veces al día  
☐ más 6 veces al día

|                          |                                                                                                                                                                                                                                                                                                                                                                                                              |
|--------------------------|--------------------------------------------------------------------------------------------------------------------------------------------------------------------------------------------------------------------------------------------------------------------------------------------------------------------------------------------------------------------------------------------------------------|
| cereales desayuno        | <input type="radio"/> Nunca o menos 1 vez al mes<br><input type="radio"/> 1 a 3 veces mes<br><input type="radio"/> 1 vez semana<br><input type="radio"/> 2 a 4 veces semana<br><input type="radio"/> 5 a 6 veces semana<br><input checked="" type="radio"/> 1 vez al día<br><input type="radio"/> 2 a 3 veces al día<br><input type="radio"/> 5 a 6 veces al día<br><input type="radio"/> más 6 veces al día |
| patatas fritas           | <input type="radio"/> Nunca o menos 1 vez al mes<br><input checked="" type="radio"/> 1 a 3 veces mes<br><input type="radio"/> 1 vez semana<br><input type="radio"/> 2 a 4 veces semana<br><input type="radio"/> 5 a 6 veces semana<br><input type="radio"/> 1 vez al día<br><input type="radio"/> 2 a 3 veces al día<br><input type="radio"/> 5 a 6 veces al día<br><input type="radio"/> más 6 veces al día |
| patatas cocidas o asadas | <input type="radio"/> Nunca o menos 1 vez al mes<br><input type="radio"/> 1 a 3 veces mes<br><input checked="" type="radio"/> 1 vez semana<br><input type="radio"/> 2 a 4 veces semana<br><input type="radio"/> 5 a 6 veces semana<br><input type="radio"/> 1 vez al día<br><input type="radio"/> 2 a 3 veces al día<br><input type="radio"/> 5 a 6 veces al día<br><input type="radio"/> más 6 veces al día |
| bolsa papas              | <input checked="" type="radio"/> Nunca o menos 1 vez al mes<br><input type="radio"/> 1 a 3 veces mes<br><input type="radio"/> 1 vez semana<br><input type="radio"/> 2 a 4 veces semana<br><input type="radio"/> 5 a 6 veces semana<br><input type="radio"/> 1 vez al día<br><input type="radio"/> 2 a 3 veces al día<br><input type="radio"/> 5 a 6 veces al día<br><input type="radio"/> más 6 veces al día |
| arroz cocinado           | <input type="radio"/> Nunca o menos 1 vez al mes<br><input type="radio"/> 1 a 3 veces mes<br><input checked="" type="radio"/> 1 vez semana<br><input type="radio"/> 2 a 4 veces semana<br><input type="radio"/> 5 a 6 veces semana<br><input type="radio"/> 1 vez al día<br><input type="radio"/> 2 a 3 veces al día<br><input type="radio"/> 5 a 6 veces al día<br><input type="radio"/> más 6 veces al día |
| pasta                    | <input type="radio"/> Nunca o menos 1 vez al mes<br><input type="radio"/> 1 a 3 veces mes<br><input checked="" type="radio"/> 1 vez semana<br><input type="radio"/> 2 a 4 veces semana<br><input type="radio"/> 5 a 6 veces semana<br><input type="radio"/> 1 vez al día<br><input type="radio"/> 2 a 3 veces al día<br><input type="radio"/> 5 a 6 veces al día<br><input type="radio"/> más 6 veces al día |

|                     |                                                                                                                                                                                                                                                                                                                                                                                                              |
|---------------------|--------------------------------------------------------------------------------------------------------------------------------------------------------------------------------------------------------------------------------------------------------------------------------------------------------------------------------------------------------------------------------------------------------------|
| pizza               | <input type="radio"/> Nunca o menos 1 vez al mes<br><input type="radio"/> 1 a 3 veces mes<br><input checked="" type="radio"/> 1 vez semana<br><input type="radio"/> 2 a 4 veces semana<br><input type="radio"/> 5 a 6 veces semana<br><input type="radio"/> 1 vez al día<br><input type="radio"/> 2 a 3 veces al día<br><input type="radio"/> 5 a 6 veces al día<br><input type="radio"/> más 6 veces al día |
| aceite oliva        | <input type="radio"/> Nunca o menos 1 vez al mes<br><input type="radio"/> 1 a 3 veces mes<br><input type="radio"/> 1 vez semana<br><input type="radio"/> 2 a 4 veces semana<br><input type="radio"/> 5 a 6 veces semana<br><input checked="" type="radio"/> 1 vez al día<br><input type="radio"/> 2 a 3 veces al día<br><input type="radio"/> 5 a 6 veces al día<br><input type="radio"/> más 6 veces al día |
| otros aceites       | <input checked="" type="radio"/> Nunca o menos 1 vez al mes<br><input type="radio"/> 1 a 3 veces mes<br><input type="radio"/> 1 vez semana<br><input type="radio"/> 2 a 4 veces semana<br><input type="radio"/> 5 a 6 veces semana<br><input type="radio"/> 1 vez al día<br><input type="radio"/> 2 a 3 veces al día<br><input type="radio"/> 5 a 6 veces al día<br><input type="radio"/> más 6 veces al día |
| margarina           | <input type="radio"/> Nunca o menos 1 vez al mes<br><input checked="" type="radio"/> 1 a 3 veces mes<br><input type="radio"/> 1 vez semana<br><input type="radio"/> 2 a 4 veces semana<br><input type="radio"/> 5 a 6 veces semana<br><input type="radio"/> 1 vez al día<br><input type="radio"/> 2 a 3 veces al día<br><input type="radio"/> 5 a 6 veces al día<br><input type="radio"/> más 6 veces al día |
| mantequilla         | <input checked="" type="radio"/> Nunca o menos 1 vez al mes<br><input type="radio"/> 1 a 3 veces mes<br><input type="radio"/> 1 vez semana<br><input type="radio"/> 2 a 4 veces semana<br><input type="radio"/> 5 a 6 veces semana<br><input type="radio"/> 1 vez al día<br><input type="radio"/> 2 a 3 veces al día<br><input type="radio"/> 5 a 6 veces al día<br><input type="radio"/> más 6 veces al día |
| galletas tipo maria | <input type="radio"/> Nunca o menos 1 vez al mes<br><input type="radio"/> 1 a 3 veces mes<br><input checked="" type="radio"/> 1 vez semana<br><input type="radio"/> 2 a 4 veces semana<br><input type="radio"/> 5 a 6 veces semana<br><input type="radio"/> 1 vez al día<br><input type="radio"/> 2 a 3 veces al día<br><input type="radio"/> 5 a 6 veces al día<br><input type="radio"/> más 6 veces al día |

|                           |                                                                                                                                                                                                                                                                                                                                                                                                              |
|---------------------------|--------------------------------------------------------------------------------------------------------------------------------------------------------------------------------------------------------------------------------------------------------------------------------------------------------------------------------------------------------------------------------------------------------------|
| galletas chocolate        | <input checked="" type="radio"/> Nunca o menos 1 vez al mes<br><input type="radio"/> 1 a 3 veces mes<br><input type="radio"/> 1 vez semana<br><input type="radio"/> 2 a 4 veces semana<br><input type="radio"/> 5 a 6 veces semana<br><input type="radio"/> 1 vez al día<br><input type="radio"/> 2 a 3 veces al día<br><input type="radio"/> 5 a 6 veces al día<br><input type="radio"/> más 6 veces al día |
| bollieria                 | <input type="radio"/> Nunca o menos 1 vez al mes<br><input checked="" type="radio"/> 1 a 3 veces mes<br><input type="radio"/> 1 vez semana<br><input type="radio"/> 2 a 4 veces semana<br><input type="radio"/> 5 a 6 veces semana<br><input type="radio"/> 1 vez al día<br><input type="radio"/> 2 a 3 veces al día<br><input type="radio"/> 5 a 6 veces al día<br><input type="radio"/> más 6 veces al día |
| chocolate o bombones      | <input checked="" type="radio"/> Nunca o menos 1 vez al mes<br><input type="radio"/> 1 a 3 veces mes<br><input type="radio"/> 1 vez semana<br><input type="radio"/> 2 a 4 veces semana<br><input type="radio"/> 5 a 6 veces semana<br><input type="radio"/> 1 vez al día<br><input type="radio"/> 2 a 3 veces al día<br><input type="radio"/> 5 a 6 veces al día<br><input type="radio"/> más 6 veces al día |
| chocolate polvo o colacao | <input type="radio"/> Nunca o menos 1 vez al mes<br><input type="radio"/> 1 a 3 veces mes<br><input checked="" type="radio"/> 1 vez semana<br><input type="radio"/> 2 a 4 veces semana<br><input type="radio"/> 5 a 6 veces semana<br><input type="radio"/> 1 vez al día<br><input type="radio"/> 2 a 3 veces al día<br><input type="radio"/> 5 a 6 veces al día<br><input type="radio"/> más 6 veces al día |
| vino tinto                | <input checked="" type="radio"/> Nunca o menos 1 vez al mes<br><input type="radio"/> 1 a 3 veces mes<br><input type="radio"/> 1 vez semana<br><input type="radio"/> 2 a 4 veces semana<br><input type="radio"/> 5 a 6 veces semana<br><input type="radio"/> 1 vez al día<br><input type="radio"/> 2 a 3 veces al día<br><input type="radio"/> 5 a 6 veces al día<br><input type="radio"/> más 6 veces al día |
| vino blanco               | <input checked="" type="radio"/> Nunca o menos 1 vez al mes<br><input type="radio"/> 1 a 3 veces mes<br><input type="radio"/> 1 vez semana<br><input type="radio"/> 2 a 4 veces semana<br><input type="radio"/> 5 a 6 veces semana<br><input type="radio"/> 1 vez al día<br><input type="radio"/> 2 a 3 veces al día<br><input type="radio"/> 5 a 6 veces al día<br><input type="radio"/> más 6 veces al día |

|                       |                                                                                                                                                                                                                                                                                                                                                                                                              |
|-----------------------|--------------------------------------------------------------------------------------------------------------------------------------------------------------------------------------------------------------------------------------------------------------------------------------------------------------------------------------------------------------------------------------------------------------|
| vino seco o vermut    | <input checked="" type="radio"/> Nunca o menos 1 vez al mes<br><input type="radio"/> 1 a 3 veces mes<br><input type="radio"/> 1 vez semana<br><input type="radio"/> 2 a 4 veces semana<br><input type="radio"/> 5 a 6 veces semana<br><input type="radio"/> 1 vez al día<br><input type="radio"/> 2 a 3 veces al día<br><input type="radio"/> 5 a 6 veces al día<br><input type="radio"/> más 6 veces al día |
| cerveza               | <input checked="" type="radio"/> Nunca o menos 1 vez al mes<br><input type="radio"/> 1 a 3 veces mes<br><input type="radio"/> 1 vez semana<br><input type="radio"/> 2 a 4 veces semana<br><input type="radio"/> 5 a 6 veces semana<br><input type="radio"/> 1 vez al día<br><input type="radio"/> 2 a 3 veces al día<br><input type="radio"/> 5 a 6 veces al día<br><input type="radio"/> más 6 veces al día |
| cerveza sin alcohol   | <input type="radio"/> Nunca o menos 1 vez al mes<br><input type="radio"/> 1 a 3 veces mes<br><input checked="" type="radio"/> 1 vez semana<br><input type="radio"/> 2 a 4 veces semana<br><input type="radio"/> 5 a 6 veces semana<br><input type="radio"/> 1 vez al día<br><input type="radio"/> 2 a 3 veces al día<br><input type="radio"/> 5 a 6 veces al día<br><input type="radio"/> más 6 veces al día |
| licores               | <input checked="" type="radio"/> Nunca o menos 1 vez al mes<br><input type="radio"/> 1 a 3 veces mes<br><input type="radio"/> 1 vez semana<br><input type="radio"/> 2 a 4 veces semana<br><input type="radio"/> 5 a 6 veces semana<br><input type="radio"/> 1 vez al día<br><input type="radio"/> 2 a 3 veces al día<br><input type="radio"/> 5 a 6 veces al día<br><input type="radio"/> más 6 veces al día |
| ginebra o ron o vodka | <input checked="" type="radio"/> Nunca o menos 1 vez al mes<br><input type="radio"/> 1 a 3 veces mes<br><input type="radio"/> 1 vez semana<br><input type="radio"/> 2 a 4 veces semana<br><input type="radio"/> 5 a 6 veces semana<br><input type="radio"/> 1 vez al día<br><input type="radio"/> 2 a 3 veces al día<br><input type="radio"/> 5 a 6 veces al día<br><input type="radio"/> más 6 veces al día |
| refresco normal       | <input checked="" type="radio"/> Nunca o menos 1 vez al mes<br><input type="radio"/> 1 a 3 veces mes<br><input type="radio"/> 1 vez semana<br><input type="radio"/> 2 a 4 veces semana<br><input type="radio"/> 5 a 6 veces semana<br><input type="radio"/> 1 vez al día<br><input type="radio"/> 2 a 3 veces al día<br><input type="radio"/> 5 a 6 veces al día<br><input type="radio"/> más 6 veces al día |

|                           |                                                                                                                                                                                                                                                                                                                                                                                                              |
|---------------------------|--------------------------------------------------------------------------------------------------------------------------------------------------------------------------------------------------------------------------------------------------------------------------------------------------------------------------------------------------------------------------------------------------------------|
| refresco sin azúcar       | <input checked="" type="radio"/> Nunca o menos 1 vez al mes<br><input type="radio"/> 1 a 3 veces mes<br><input type="radio"/> 1 vez semana<br><input type="radio"/> 2 a 4 veces semana<br><input type="radio"/> 5 a 6 veces semana<br><input type="radio"/> 1 vez al día<br><input type="radio"/> 2 a 3 veces al día<br><input type="radio"/> 5 a 6 veces al día<br><input type="radio"/> más 6 veces al día |
| Agua del grifo            | <input checked="" type="radio"/> Nunca o menos 1 vez al mes<br><input type="radio"/> 1 a 3 veces mes<br><input type="radio"/> 1 vez semana<br><input type="radio"/> 2 a 4 veces semana<br><input type="radio"/> 5 a 6 veces semana<br><input type="radio"/> 1 vez al día<br><input type="radio"/> 2 a 3 veces al día<br><input type="radio"/> 5 a 6 veces al día<br><input type="radio"/> más 6 veces al día |
| agua embotellada sin gas  | <input type="radio"/> Nunca o menos 1 vez al mes<br><input type="radio"/> 1 a 3 veces mes<br><input type="radio"/> 1 vez semana<br><input type="radio"/> 2 a 4 veces semana<br><input type="radio"/> 5 a 6 veces semana<br><input type="radio"/> 1 vez al día<br><input type="radio"/> 2 a 3 veces al día<br><input type="radio"/> 5 a 6 veces al día<br><input checked="" type="radio"/> más 6 veces al día |
| agua embotellada con gas  | <input checked="" type="radio"/> Nunca o menos 1 vez al mes<br><input type="radio"/> 1 a 3 veces mes<br><input type="radio"/> 1 vez semana<br><input type="radio"/> 2 a 4 veces semana<br><input type="radio"/> 5 a 6 veces semana<br><input type="radio"/> 1 vez al día<br><input type="radio"/> 2 a 3 veces al día<br><input type="radio"/> 5 a 6 veces al día<br><input type="radio"/> más 6 veces al día |
| zumos frutas embotellados | <input type="radio"/> Nunca o menos 1 vez al mes<br><input checked="" type="radio"/> 1 a 3 veces mes<br><input type="radio"/> 1 vez semana<br><input type="radio"/> 2 a 4 veces semana<br><input type="radio"/> 5 a 6 veces semana<br><input type="radio"/> 1 vez al día<br><input type="radio"/> 2 a 3 veces al día<br><input type="radio"/> 5 a 6 veces al día<br><input type="radio"/> más 6 veces al día |
| café                      | <input type="radio"/> Nunca o menos 1 vez al mes<br><input type="radio"/> 1 a 3 veces mes<br><input type="radio"/> 1 vez semana<br><input type="radio"/> 2 a 4 veces semana<br><input type="radio"/> 5 a 6 veces semana<br><input type="radio"/> 1 vez al día<br><input checked="" type="radio"/> 2 a 3 veces al día<br><input type="radio"/> 5 a 6 veces al día<br><input type="radio"/> más 6 veces al día |



|                       |                                                                                                                                                                                                                                                                                                                                                                                                              |
|-----------------------|--------------------------------------------------------------------------------------------------------------------------------------------------------------------------------------------------------------------------------------------------------------------------------------------------------------------------------------------------------------------------------------------------------------|
| cafe descafeinado     | <input checked="" type="radio"/> Nunca o menos 1 vez al mes<br><input type="radio"/> 1 a 3 veces mes<br><input type="radio"/> 1 vez semana<br><input type="radio"/> 2 a 4 veces semana<br><input type="radio"/> 5 a 6 veces semana<br><input type="radio"/> 1 vez al día<br><input type="radio"/> 2 a 3 veces al día<br><input type="radio"/> 5 a 6 veces al día<br><input type="radio"/> más 6 veces al día |
| te o infusión         | <input type="radio"/> Nunca o menos 1 vez al mes<br><input type="radio"/> 1 a 3 veces mes<br><input type="radio"/> 1 vez semana<br><input type="radio"/> 2 a 4 veces semana<br><input type="radio"/> 5 a 6 veces semana<br><input checked="" type="radio"/> 1 vez al día<br><input type="radio"/> 2 a 3 veces al día<br><input type="radio"/> 5 a 6 veces al día<br><input type="radio"/> más 6 veces al día |
| sopa o puré verduras  | <input type="radio"/> Nunca o menos 1 vez al mes<br><input type="radio"/> 1 a 3 veces mes<br><input type="radio"/> 1 vez semana<br><input checked="" type="radio"/> 2 a 4 veces semana<br><input type="radio"/> 5 a 6 veces semana<br><input type="radio"/> 1 vez al día<br><input type="radio"/> 2 a 3 veces al día<br><input type="radio"/> 5 a 6 veces al día<br><input type="radio"/> más 6 veces al día |
| croquetas pollo jamón | <input type="radio"/> Nunca o menos 1 vez al mes<br><input checked="" type="radio"/> 1 a 3 veces mes<br><input type="radio"/> 1 vez semana<br><input type="radio"/> 2 a 4 veces semana<br><input type="radio"/> 5 a 6 veces semana<br><input type="radio"/> 1 vez al día<br><input type="radio"/> 2 a 3 veces al día<br><input type="radio"/> 5 a 6 veces al día<br><input type="radio"/> más 6 veces al día |
| croquetas pescado     | <input checked="" type="radio"/> Nunca o menos 1 vez al mes<br><input type="radio"/> 1 a 3 veces mes<br><input type="radio"/> 1 vez semana<br><input type="radio"/> 2 a 4 veces semana<br><input type="radio"/> 5 a 6 veces semana<br><input type="radio"/> 1 vez al día<br><input type="radio"/> 2 a 3 veces al día<br><input type="radio"/> 5 a 6 veces al día<br><input type="radio"/> más 6 veces al día |
| mayonesa              | <input type="radio"/> Nunca o menos 1 vez al mes<br><input checked="" type="radio"/> 1 a 3 veces mes<br><input type="radio"/> 1 vez semana<br><input type="radio"/> 2 a 4 veces semana<br><input type="radio"/> 5 a 6 veces semana<br><input type="radio"/> 1 vez al día<br><input type="radio"/> 2 a 3 veces al día<br><input type="radio"/> 5 a 6 veces al día<br><input type="radio"/> más 6 veces al día |

|                  |                                                                                                                                                                                                                                                                                                                                                                                                              |
|------------------|--------------------------------------------------------------------------------------------------------------------------------------------------------------------------------------------------------------------------------------------------------------------------------------------------------------------------------------------------------------------------------------------------------------|
| salsa tomate     | <input type="radio"/> Nunca o menos 1 vez al mes<br><input checked="" type="radio"/> 1 a 3 veces mes<br><input type="radio"/> 1 vez semana<br><input type="radio"/> 2 a 4 veces semana<br><input type="radio"/> 5 a 6 veces semana<br><input type="radio"/> 1 vez al día<br><input type="radio"/> 2 a 3 veces al día<br><input type="radio"/> 5 a 6 veces al día<br><input type="radio"/> más 6 veces al día |
| ketchup          | <input type="radio"/> Nunca o menos 1 vez al mes<br><input checked="" type="radio"/> 1 a 3 veces mes<br><input type="radio"/> 1 vez semana<br><input type="radio"/> 2 a 4 veces semana<br><input type="radio"/> 5 a 6 veces semana<br><input type="radio"/> 1 vez al día<br><input type="radio"/> 2 a 3 veces al día<br><input type="radio"/> 5 a 6 veces al día<br><input type="radio"/> más 6 veces al día |
| sal              | <input type="radio"/> Nunca o menos 1 vez al mes<br><input checked="" type="radio"/> 1 a 3 veces mes<br><input type="radio"/> 1 vez semana<br><input type="radio"/> 2 a 4 veces semana<br><input type="radio"/> 5 a 6 veces semana<br><input type="radio"/> 1 vez al día<br><input type="radio"/> 2 a 3 veces al día<br><input type="radio"/> 5 a 6 veces al día<br><input type="radio"/> más 6 veces al día |
| ajo              | <input type="radio"/> Nunca o menos 1 vez al mes<br><input type="radio"/> 1 a 3 veces mes<br><input checked="" type="radio"/> 1 vez semana<br><input type="radio"/> 2 a 4 veces semana<br><input type="radio"/> 5 a 6 veces semana<br><input type="radio"/> 1 vez al día<br><input type="radio"/> 2 a 3 veces al día<br><input type="radio"/> 5 a 6 veces al día<br><input type="radio"/> más 6 veces al día |
| mermelada o miel | <input type="radio"/> Nunca o menos 1 vez al mes<br><input type="radio"/> 1 a 3 veces mes<br><input checked="" type="radio"/> 1 vez semana<br><input type="radio"/> 2 a 4 veces semana<br><input type="radio"/> 5 a 6 veces semana<br><input type="radio"/> 1 vez al día<br><input type="radio"/> 2 a 3 veces al día<br><input type="radio"/> 5 a 6 veces al día<br><input type="radio"/> más 6 veces al día |
| azúcar           | <input type="radio"/> Nunca o menos 1 vez al mes<br><input type="radio"/> 1 a 3 veces mes<br><input type="radio"/> 1 vez semana<br><input type="radio"/> 2 a 4 veces semana<br><input type="radio"/> 5 a 6 veces semana<br><input type="radio"/> 1 vez al día<br><input type="radio"/> 2 a 3 veces al día<br><input type="radio"/> 5 a 6 veces al día<br><input type="radio"/> más 6 veces al día            |

|                                       |                                                                                                                                                                                                                                                                                                                                                                                                                                                                                                                               |
|---------------------------------------|-------------------------------------------------------------------------------------------------------------------------------------------------------------------------------------------------------------------------------------------------------------------------------------------------------------------------------------------------------------------------------------------------------------------------------------------------------------------------------------------------------------------------------|
| Otro alimento                         | <hr/>                                                                                                                                                                                                                                                                                                                                                                                                                                                                                                                         |
| suplementos vitamínicos               | <input type="radio"/> si<br><input checked="" type="radio"/> no                                                                                                                                                                                                                                                                                                                                                                                                                                                               |
| suplementos vitamínicos               | <hr/>                                                                                                                                                                                                                                                                                                                                                                                                                                                                                                                         |
| dieta previa                          | <input type="radio"/> si<br><input checked="" type="radio"/> no                                                                                                                                                                                                                                                                                                                                                                                                                                                               |
| motivo dieta                          | <input checked="" type="radio"/> no dieta<br><input type="radio"/> control peso<br><input type="radio"/> control colesterol<br><input type="radio"/> control diabetes<br><input type="radio"/> problemas estómago<br><input type="radio"/> problemas vesícula o hepáticos<br><input type="radio"/> HTA o cardiopatía<br><input type="radio"/> problemas renales<br><input type="radio"/> alergia alimentaria<br><input type="radio"/> ácido úrico elevado<br><input type="radio"/> vegetariana<br><input type="radio"/> otros |
| cambio alimentos año previo gestación | <input type="radio"/> si<br><input checked="" type="radio"/> no                                                                                                                                                                                                                                                                                                                                                                                                                                                               |
| cambio lácteos                        | <input type="radio"/> eliminado<br><input type="radio"/> disminuido<br><input checked="" type="radio"/> igual<br><input type="radio"/> aumentado<br><input type="radio"/> no sabe                                                                                                                                                                                                                                                                                                                                             |
| cambio huevos                         | <input type="radio"/> eliminado<br><input type="radio"/> disminuido<br><input checked="" type="radio"/> igual<br><input type="radio"/> aumentado<br><input type="radio"/> no sabe                                                                                                                                                                                                                                                                                                                                             |
| cambio carne                          | <input type="radio"/> eliminado<br><input type="radio"/> disminuido<br><input checked="" type="radio"/> igual<br><input type="radio"/> aumentado<br><input type="radio"/> no sabe                                                                                                                                                                                                                                                                                                                                             |
| cambio pescado                        | <input type="radio"/> eliminado<br><input type="radio"/> disminuido<br><input checked="" type="radio"/> igual<br><input type="radio"/> aumentado<br><input type="radio"/> no sabe                                                                                                                                                                                                                                                                                                                                             |
| cambio verduras                       | <input type="radio"/> eliminado<br><input type="radio"/> disminuido<br><input checked="" type="radio"/> igual<br><input type="radio"/> aumentado<br><input type="radio"/> no sabe                                                                                                                                                                                                                                                                                                                                             |

|                            |                                                                                                                                                                                                                        |
|----------------------------|------------------------------------------------------------------------------------------------------------------------------------------------------------------------------------------------------------------------|
| cambio legumbres           | <input type="radio"/> eliminado<br><input type="radio"/> disminuido<br><input checked="" type="radio"/> igual<br><input type="radio"/> aumentado<br><input type="radio"/> no sabe                                      |
| cambio fruta               | <input type="radio"/> eliminado<br><input type="radio"/> disminuido<br><input checked="" type="radio"/> igual<br><input type="radio"/> aumentado<br><input type="radio"/> no sabe                                      |
| cambio pan                 | <input type="radio"/> eliminado<br><input type="radio"/> disminuido<br><input checked="" type="radio"/> igual<br><input type="radio"/> aumentado<br><input type="radio"/> no sabe                                      |
| cambio aceite oliva        | <input type="radio"/> eliminado<br><input type="radio"/> disminuido<br><input checked="" type="radio"/> igual<br><input type="radio"/> aumentado<br><input type="radio"/> no sabe                                      |
| cambio mante o margarina   | <input type="radio"/> eliminado<br><input type="radio"/> disminuido<br><input checked="" type="radio"/> igual<br><input type="radio"/> aumentado<br><input type="radio"/> no sabe                                      |
| cambio azúcar y dulces     | <input type="radio"/> eliminado<br><input type="radio"/> disminuido<br><input checked="" type="radio"/> igual<br><input type="radio"/> aumentado<br><input type="radio"/> no sabe                                      |
| cambio bebidas alcohólicas | <input type="radio"/> eliminado<br><input type="radio"/> disminuido<br><input checked="" type="radio"/> igual<br><input type="radio"/> aumentado<br><input type="radio"/> no sabe                                      |
| frecuencia comidas fritas  | <input type="radio"/> a diario<br><input type="radio"/> 5 a 6 veces semana<br><input type="radio"/> 2 a 4 veces semana<br><input type="radio"/> 1 vez semana<br><input checked="" type="radio"/> menos de 1 vez semana |
| carne                      | <input type="radio"/> no como<br><input type="radio"/> cruda<br><input type="radio"/> poco hecha<br><input checked="" type="radio"/> hecha<br><input type="radio"/> muy hecha                                          |
| grasa visible carne        | <input type="radio"/> quita toda<br><input checked="" type="radio"/> quita mayoría<br><input type="radio"/> quita un poco<br><input type="radio"/> no quita nada                                                       |

|                                |                                                                                                                                                                                                                                                          |
|--------------------------------|----------------------------------------------------------------------------------------------------------------------------------------------------------------------------------------------------------------------------------------------------------|
| cocina carne                   | <input checked="" type="radio"/> a la plancha<br><input type="radio"/> a la parrilla<br><input type="radio"/> asada<br><input type="radio"/> frita<br><input type="radio"/> guisada                                                                      |
| tostado quemado carne          | <input checked="" type="radio"/> nunca<br><input type="radio"/> 1 vez mes<br><input type="radio"/> 2 a 3 veces mes<br><input type="radio"/> 1 vez semana<br><input type="radio"/> 2 a 3 semanas                                                          |
| tostado quemado pescado        | <input checked="" type="radio"/> nunca<br><input type="radio"/> 1 vez mes<br><input type="radio"/> 2 a 3 veces mes<br><input type="radio"/> 1 vez semana<br><input type="radio"/> 2 a 3 semanas                                                          |
| socarrat paella                | <input checked="" type="radio"/> nunca<br><input type="radio"/> 1 vez mes<br><input type="radio"/> 2 a 3 veces mes<br><input type="radio"/> 1 vez semana<br><input type="radio"/> 2 a 3 semanas                                                          |
| grasa o aceite cocinar         | <input type="radio"/> mantequilla<br><input type="radio"/> margarina<br><input checked="" type="radio"/> aceite oliva<br><input type="radio"/> aceite oliva virgen extra<br><input type="radio"/> aceite vegetal<br><input type="radio"/> mezcla aceites |
| grasa aceite aliñar            | <input type="radio"/> mantequilla<br><input type="radio"/> margarina<br><input type="radio"/> aceite oliva<br><input checked="" type="radio"/> aceite oliva virgen extra<br><input type="radio"/> aceite vegetal<br><input type="radio"/> mezcla aceites |
| grasa aceite freir             | <input type="radio"/> mantequilla<br><input type="radio"/> margarina<br><input checked="" type="radio"/> aceite oliva<br><input type="radio"/> aceite oliva virgen extra<br><input type="radio"/> aceite vegetal<br><input type="radio"/> mezcla aceites |
| Ejercicio cuestionario         | <input checked="" type="radio"/> si<br><input type="radio"/> no                                                                                                                                                                                          |
| horas de sueño incluido siesta | [*DATA REMOVED*]                                                                                                                                                                                                                                         |
| minutos siesta                 | [*DATA REMOVED*]                                                                                                                                                                                                                                         |
| horas televisión semana        | [*DATA REMOVED*]                                                                                                                                                                                                                                         |

|                                        |                                                                                                                                                                                                                                                                                                                                                                           |
|----------------------------------------|---------------------------------------------------------------------------------------------------------------------------------------------------------------------------------------------------------------------------------------------------------------------------------------------------------------------------------------------------------------------------|
| actividad trabajo                      | <input checked="" type="radio"/> casi siempre sentado<br><input type="radio"/> sentado 50 por cien<br><input type="radio"/> casi siempre de pie, quieto<br><input type="radio"/> casi siempre levantado caminando y llevando pocas cosas<br><input type="radio"/> casi siempre levantado, caminando y llevado muchas cosas<br><input type="radio"/> trabajo manual pesado |
| tiempo caminar o bici al día           | <input type="radio"/> casi nunca<br><input type="radio"/> menos 20min día<br><input type="radio"/> 20 a 40 min día<br><input checked="" type="radio"/> 40 a 60 min día<br><input type="radio"/> 1h o 1h y media día<br><input type="radio"/> más de 1h y media al día                                                                                                     |
| tiempo tareas casa al día              | <input type="radio"/> menos de 1h día<br><input checked="" type="radio"/> 1 a 2h día<br><input type="radio"/> 3 a 4h día<br><input type="radio"/> 5 a 6h día<br><input type="radio"/> 7 a 8h día<br><input type="radio"/> más de 8h día                                                                                                                                   |
| tiempo libre televisión ordenador leer | <input type="radio"/> menos 1h día<br><input checked="" type="radio"/> 1h día<br><input type="radio"/> 2h día<br><input type="radio"/> 3h día<br><input type="radio"/> 4h día<br><input type="radio"/> 5 a 6h día<br><input type="radio"/> mas 6h día                                                                                                                     |
| tiempo libre ejercicio o deporte       | <input type="radio"/> menos 1h semana<br><input type="radio"/> 1h semana<br><input type="radio"/> 2h semana<br><input checked="" type="radio"/> 3h semana<br><input type="radio"/> 4 a 5h semana<br><input type="radio"/> mas 5h semana                                                                                                                                   |
| como se considera                      | <input type="radio"/> sedentaria<br><input checked="" type="radio"/> poco activa<br><input type="radio"/> moderadamente activa<br><input type="radio"/> bastante activa<br><input type="radio"/> muy activa<br><input type="radio"/> no sabe                                                                                                                              |
| FUR                                    | [*DATA REMOVED*]                                                                                                                                                                                                                                                                                                                                                          |
| Semanas gestación 2T                   | [*DATA REMOVED*]                                                                                                                                                                                                                                                                                                                                                          |
| Días gestación 2T                      | [*DATA REMOVED*]                                                                                                                                                                                                                                                                                                                                                          |
| DBP 2T                                 | [*DATA REMOVED*]                                                                                                                                                                                                                                                                                                                                                          |
| CC 2T                                  | [*DATA REMOVED*]                                                                                                                                                                                                                                                                                                                                                          |
| AC 2T                                  | [*DATA REMOVED*]                                                                                                                                                                                                                                                                                                                                                          |

|                                                   |                                                                                                                                                                                                 |
|---------------------------------------------------|-------------------------------------------------------------------------------------------------------------------------------------------------------------------------------------------------|
| LF 2T                                             | [*DATA REMOVED*]                                                                                                                                                                                |
| PFE 2T (Hadlock)                                  | [*DATA REMOVED*]                                                                                                                                                                                |
| Semanas gestación 3T                              | [*DATA REMOVED*]                                                                                                                                                                                |
| días 3T                                           | [*DATA REMOVED*]                                                                                                                                                                                |
| DBP 3T                                            | [*DATA REMOVED*]                                                                                                                                                                                |
| CC 3T                                             | [*DATA REMOVED*]                                                                                                                                                                                |
| AC 3T                                             | [*DATA REMOVED*]                                                                                                                                                                                |
| LF 3T                                             | [*DATA REMOVED*]                                                                                                                                                                                |
| PFE 3T (Hadlock)                                  | [*DATA REMOVED*]                                                                                                                                                                                |
| Semanas de gestación final                        | [*DATA REMOVED*]                                                                                                                                                                                |
| días gestación final                              | [*DATA REMOVED*]                                                                                                                                                                                |
| Localización placenta                             | <input type="radio"/> anterior<br><input type="radio"/> lateral derecha<br><input type="radio"/> lateral izquierda<br><input checked="" type="radio"/> posterior<br><input type="radio"/> fondo |
| Presentación longitudinal cefálica                | <input type="radio"/> no<br><input checked="" type="radio"/> si                                                                                                                                 |
| Dorso                                             | <input type="radio"/> izquierda anterior<br><input type="radio"/> izquierda posterior<br><input checked="" type="radio"/> derecha anterior<br><input type="radio"/> derecha posterior           |
| diámetro biparietal                               | [*DATA REMOVED*]                                                                                                                                                                                |
| Circunferencia craneal                            | [*DATA REMOVED*]                                                                                                                                                                                |
| Circunferencia abdominal                          | [*DATA REMOVED*]                                                                                                                                                                                |
| Longitud de femur                                 | [*DATA REMOVED*]                                                                                                                                                                                |
| tejido celular subcutáneo a nivel del muslo en mm | [*DATA REMOVED*]                                                                                                                                                                                |
| tejido celular subcutáneo en abdomen en mm        | [*DATA REMOVED*]                                                                                                                                                                                |
| Volumen del muslo en cm3                          | [*DATA REMOVED*]                                                                                                                                                                                |
| Peso fetal estimado según fórmula de Hadlock      | [*DATA REMOVED*]                                                                                                                                                                                |

|                                               |                                                                                                                                                          |
|-----------------------------------------------|----------------------------------------------------------------------------------------------------------------------------------------------------------|
| Percentil                                     | [*DATA REMOVED*]                                                                                                                                         |
| Peso fetal estimado según fórmula de Scioscia | <hr/>                                                                                                                                                    |
| Peso fetal estimado según fórmula de LEE      | <hr/>                                                                                                                                                    |
| Tipo de parto                                 | <input checked="" type="radio"/> eutocico<br><input type="radio"/> instrumentado/ventosa<br><input type="radio"/> cesarea                                |
| fecha de nacimiento                           | [*DATA REMOVED*]                                                                                                                                         |
| Días entre exploración y nacimiento           | [*DATA REMOVED*]                                                                                                                                         |
| Peso RN en g                                  | [*DATA REMOVED*]                                                                                                                                         |
| sexo                                          | <input type="radio"/> mujer<br><input checked="" type="radio"/> hombre                                                                                   |
| Apgar 1 minuto                                | [*DATA REMOVED*]                                                                                                                                         |
| Apgar 5 minutos                               | [*DATA REMOVED*]                                                                                                                                         |
| Apgar 10 minutos                              | <hr/>                                                                                                                                                    |
| antecedente Covid durante gestación           | <input type="radio"/> Yes<br><input checked="" type="radio"/> No                                                                                         |
| Nivel de estudios                             | <input type="radio"/> ninguno<br><input type="radio"/> primarios<br><input checked="" type="radio"/> secundarios<br><input type="radio"/> universitarios |



# Base\_datos\_estimacion\_peso\_fetal

|                                       |                                                                                                                                                                                                                                                                                      |
|---------------------------------------|--------------------------------------------------------------------------------------------------------------------------------------------------------------------------------------------------------------------------------------------------------------------------------------|
| Número de identificación participante | 53                                                                                                                                                                                                                                                                                   |
| CODIGO PARTICIPANTE                   |                                                                                                                                                                                                                                                                                      |
| Edad                                  | [*DATA REMOVED*]                                                                                                                                                                                                                                                                     |
| Gestaciones                           | <input type="radio"/> 1<br><input type="radio"/> 2<br><input checked="" type="radio"/> 3<br><input type="radio"/> mas de 3                                                                                                                                                           |
| partos                                | <input type="radio"/> 0<br><input checked="" type="radio"/> 1<br><input type="radio"/> 2<br><input type="radio"/> 3<br><input type="radio"/> mas de 3                                                                                                                                |
| cesáreas                              | <input checked="" type="radio"/> 0<br><input type="radio"/> 1<br><input type="radio"/> 2<br><input type="radio"/> 3<br><input type="radio"/> mas de 3                                                                                                                                |
| Abortos                               | <input type="radio"/> 0<br><input checked="" type="radio"/> 1<br><input type="radio"/> 2<br><input type="radio"/> 3<br><input type="radio"/> mas de 3                                                                                                                                |
| Tipo de gestacion                     | <input checked="" type="radio"/> espontanea<br><input type="radio"/> IAC inseminación artificial conyuge<br><input type="radio"/> IAD inseminación artificial donante<br><input type="radio"/> FIV Fecundación in Vitro<br><input type="radio"/> Ovodon FIV con donación de ovocitos |
| peso previo a embarazo                | [*DATA REMOVED*]                                                                                                                                                                                                                                                                     |
| Ganancia ponderal embarazo            | [*DATA REMOVED*]                                                                                                                                                                                                                                                                     |
| Talla madre                           | [*DATA REMOVED*]                                                                                                                                                                                                                                                                     |
| IMC previo embarazo                   | 30.11027889645828                                                                                                                                                                                                                                                                    |
| Patología obstétrica                  | <input checked="" type="radio"/> no<br><input type="radio"/> si                                                                                                                                                                                                                      |
| Diabetes pregestacional               | <input checked="" type="radio"/> no<br><input type="radio"/> si                                                                                                                                                                                                                      |
| Diabetes gestacional                  | <input checked="" type="radio"/> no<br><input type="radio"/> si                                                                                                                                                                                                                      |

|                                            |                                                                                                                                                                                      |
|--------------------------------------------|--------------------------------------------------------------------------------------------------------------------------------------------------------------------------------------|
| Diabetes gestacional con insulina          | <input checked="" type="radio"/> no<br><input type="radio"/> si                                                                                                                      |
| Diabetes gestacional con dieta y ejercicio | <input checked="" type="radio"/> no<br><input type="radio"/> si                                                                                                                      |
| Percentil fetos previos                    | <input type="radio"/> Nada<br><input type="radio"/> percentil menor de 10<br><input checked="" type="radio"/> percentil entre 10 y 90<br><input type="radio"/> percentil mayor de 90 |
| Exfumadora                                 | <input checked="" type="radio"/> Nada<br><input type="radio"/> menos de 5 años<br><input type="radio"/> 5 a 10 años<br><input type="radio"/> mayor o igual a 10 años                 |
| Hábito tabáquico                           | <input checked="" type="radio"/> no<br><input type="radio"/> si                                                                                                                      |
| fumadora                                   | [*DATA REMOVED*]                                                                                                                                                                     |
| Consumo otros tóxicos                      | <input checked="" type="radio"/> no<br><input type="radio"/> si                                                                                                                      |
| Hb 1T                                      | [*DATA REMOVED*]                                                                                                                                                                     |
| Htc 1T                                     | [*DATA REMOVED*]                                                                                                                                                                     |
| Hb 2T                                      | [*DATA REMOVED*]                                                                                                                                                                     |
| HTC 2T                                     | [*DATA REMOVED*]                                                                                                                                                                     |
| Hb 3T                                      | [*DATA REMOVED*]                                                                                                                                                                     |
| HTC 3T                                     | [*DATA REMOVED*]                                                                                                                                                                     |
| Suplemento FE oral                         | <input checked="" type="radio"/> si<br><input type="radio"/> no                                                                                                                      |
| Suplemento fe iv                           | <input type="radio"/> si<br><input checked="" type="radio"/> no                                                                                                                      |
| Transfusión                                | <input checked="" type="radio"/> no<br><input type="radio"/> si                                                                                                                      |
| Solicitada Vit D                           | <input type="radio"/> no<br><input checked="" type="radio"/> si                                                                                                                      |
| Deficit vit D                              | <input type="radio"/> no<br><input checked="" type="radio"/> si                                                                                                                      |
| Suplemento vit D                           | <input checked="" type="radio"/> si<br><input type="radio"/> no                                                                                                                      |

|                       |                                                                                                                                                                                                                                                                                                                                                                                                              |
|-----------------------|--------------------------------------------------------------------------------------------------------------------------------------------------------------------------------------------------------------------------------------------------------------------------------------------------------------------------------------------------------------------------------------------------------------|
| Dieta, cuestionario   | <input checked="" type="radio"/> si<br><input type="radio"/> no                                                                                                                                                                                                                                                                                                                                              |
| Leche entera          | <input type="radio"/> Nunca o menos 1 vez al mes<br><input checked="" type="radio"/> 1 a 3 veces mes<br><input type="radio"/> 1 vez semana<br><input type="radio"/> 2 a 4 veces semana<br><input type="radio"/> 5 a 6 veces semana<br><input type="radio"/> 1 vez al día<br><input type="radio"/> 2 a 3 veces al día<br><input type="radio"/> 5 a 6 veces al día<br><input type="radio"/> más 6 veces al día |
| Leche semidesnatada   | <input checked="" type="radio"/> Nunca o menos 1 vez al mes<br><input type="radio"/> 1 a 3 veces mes<br><input type="radio"/> 1 vez semana<br><input type="radio"/> 2 a 4 veces semana<br><input type="radio"/> 5 a 6 veces semana<br><input type="radio"/> 1 vez al día<br><input type="radio"/> 2 a 3 veces al día<br><input type="radio"/> 5 a 6 veces al día<br><input type="radio"/> mas 6 veces al día |
| Leche desnatada       | <input checked="" type="radio"/> Nunca o menos 1 vez al mes<br><input type="radio"/> 1 a 3 veces mes<br><input type="radio"/> 1 vez semana<br><input type="radio"/> 2 a 4 veces semana<br><input type="radio"/> 5 a 6 veces semana<br><input type="radio"/> 1 vez al día<br><input type="radio"/> 2 a 3 veces al día<br><input type="radio"/> 5 a 6 veces al día<br><input type="radio"/> más 6 veces al día |
| Leche condensada      | <input checked="" type="radio"/> Nunca o menos 1 vez al mes<br><input type="radio"/> 1 a 3 veces mes<br><input type="radio"/> 1 vez semana<br><input type="radio"/> 2 a 4 veces semana<br><input type="radio"/> 5 a 6 veces semana<br><input type="radio"/> 1 vez al día<br><input type="radio"/> 2 a 3 veces al día<br><input type="radio"/> 5 a 6 veces al día<br><input type="radio"/> más 6 veces al día |
| nata o crema de leche | <input checked="" type="radio"/> Nunca o menos 1 vez al mes<br><input type="radio"/> 1 a 3 veces mes<br><input type="radio"/> 1 vez semana<br><input type="radio"/> 2 a 4 veces semana<br><input type="radio"/> 5 a 6 veces semana<br><input type="radio"/> 1 vez al día<br><input type="radio"/> 2 a 3 veces al día<br><input type="radio"/> 5 a 6 veces al día<br><input type="radio"/> más 6 veces al día |

|                                             |                                                                                                                                                                                                                                                                                                                                                                                                              |
|---------------------------------------------|--------------------------------------------------------------------------------------------------------------------------------------------------------------------------------------------------------------------------------------------------------------------------------------------------------------------------------------------------------------------------------------------------------------|
| Yogurt Entero                               | <input checked="" type="radio"/> Nunca o menos 1 vez al mes<br><input type="radio"/> 1 a 3 veces mes<br><input type="radio"/> 1 vez semana<br><input type="radio"/> 2 a 4 veces semana<br><input type="radio"/> 5 a 6 veces semana<br><input type="radio"/> 1 vez al día<br><input type="radio"/> 2 a 3 veces al día<br><input type="radio"/> 5 a 6 veces al día<br><input type="radio"/> más 6 veces al día |
| Yogurt desnatado                            | <input type="radio"/> Nunca o menos 1 vez al mes<br><input checked="" type="radio"/> 1 a 3 veces mes<br><input type="radio"/> 1 vez semana<br><input type="radio"/> 2 a 4 veces semana<br><input type="radio"/> 5 a 6 veces semana<br><input type="radio"/> 1 vez al día<br><input type="radio"/> 2 a 3 veces al día<br><input type="radio"/> 5 a 6 veces al día<br><input type="radio"/> más 6 veces al día |
| 100g requesón o queso blando o queso fresco | <input type="radio"/> Nunca o menos 1 vez al mes<br><input type="radio"/> 1 a 3 veces mes<br><input checked="" type="radio"/> 1 vez semana<br><input type="radio"/> 2 a 4 veces semana<br><input type="radio"/> 5 a 6 veces semana<br><input type="radio"/> 1 vez al día<br><input type="radio"/> 2 a 3 veces al día<br><input type="radio"/> 5 a 6 veces al día<br><input type="radio"/> más 6 veces al día |
| queso curado o semicurado o cremoso         | <input type="radio"/> Nunca o menos 1 vez al mes<br><input type="radio"/> 1 a 3 veces mes<br><input checked="" type="radio"/> 1 vez semana<br><input type="radio"/> 2 a 4 veces semana<br><input type="radio"/> 5 a 6 veces semana<br><input type="radio"/> 1 vez al día<br><input type="radio"/> 2 a 3 veces al día<br><input type="radio"/> 5 a 6 veces al día<br><input type="radio"/> más 6 veces al día |
| natillas flan pudding                       | <input checked="" type="radio"/> Nunca o menos 1 vez al mes<br><input type="radio"/> 1 a 3 veces mes<br><input type="radio"/> 1 vez semana<br><input type="radio"/> 2 a 4 veces semana<br><input type="radio"/> 5 a 6 veces semana<br><input type="radio"/> 1 vez al día<br><input type="radio"/> 2 a 3 veces al día<br><input type="radio"/> 5 a 6 veces al día<br><input type="radio"/> más 6 veces al día |
| Helado                                      | <input checked="" type="radio"/> Nunca o menos 1 vez al mes<br><input type="radio"/> 1 a 3 veces mes<br><input type="radio"/> 1 vez semana<br><input type="radio"/> 2 a 4 veces semana<br><input type="radio"/> 5 a 6 veces semana<br><input type="radio"/> 1 vez al día<br><input type="radio"/> 2 a 3 veces al día<br><input type="radio"/> 5 a 6 veces al día<br><input type="radio"/> más 6 veces al día |

|                                      |                                                                                                                                                                                                                                                                                                                                                                                                              |
|--------------------------------------|--------------------------------------------------------------------------------------------------------------------------------------------------------------------------------------------------------------------------------------------------------------------------------------------------------------------------------------------------------------------------------------------------------------|
| huevo                                | <input type="radio"/> Nunca o menos 1 vez al mes<br><input type="radio"/> 1 a 3 veces mes<br><input checked="" type="radio"/> 1 vez semana<br><input type="radio"/> 2 a 4 veces semana<br><input type="radio"/> 5 a 6 veces semana<br><input type="radio"/> 1 vez al día<br><input type="radio"/> 2 a 3 veces al día<br><input type="radio"/> 5 a 6 veces al día<br><input type="radio"/> más 6 veces al día |
| Pollo con piel                       | <input checked="" type="radio"/> Nunca o menos 1 vez al mes<br><input type="radio"/> 1 a 3 veces mes<br><input type="radio"/> 1 vez semana<br><input type="radio"/> 2 a 4 veces semana<br><input type="radio"/> 5 a 6 veces semana<br><input type="radio"/> 1 vez al día<br><input type="radio"/> 2 a 3 veces al día<br><input type="radio"/> 5 a 6 veces al día<br><input type="radio"/> más 6 veces al día |
| pollo sin piel                       | <input type="radio"/> Nunca o menos 1 vez al mes<br><input type="radio"/> 1 a 3 veces mes<br><input type="radio"/> 1 vez semana<br><input checked="" type="radio"/> 2 a 4 veces semana<br><input type="radio"/> 5 a 6 veces semana<br><input type="radio"/> 1 vez al día<br><input type="radio"/> 2 a 3 veces al día<br><input type="radio"/> 5 a 6 veces al día<br><input type="radio"/> más 6 veces al día |
| Ternera o cerdo o cordero            | <input checked="" type="radio"/> Nunca o menos 1 vez al mes<br><input type="radio"/> 1 a 3 veces mes<br><input type="radio"/> 1 vez semana<br><input type="radio"/> 2 a 4 veces semana<br><input type="radio"/> 5 a 6 veces semana<br><input type="radio"/> 1 vez al día<br><input type="radio"/> 2 a 3 veces al día<br><input type="radio"/> 5 a 6 veces al día<br><input type="radio"/> más 6 veces al día |
| carne caza: Conejo o codorniz o pato | <input checked="" type="radio"/> Nunca o menos 1 vez al mes<br><input type="radio"/> 1 a 3 veces mes<br><input type="radio"/> 1 vez semana<br><input type="radio"/> 2 a 4 veces semana<br><input type="radio"/> 5 a 6 veces semana<br><input type="radio"/> 1 vez al día<br><input type="radio"/> 2 a 3 veces al día<br><input type="radio"/> 5 a 6 veces al día<br><input type="radio"/> más 6 veces al día |
| Hígado de ternera o cerdo o pollo    | <input checked="" type="radio"/> Nunca o menos 1 vez al mes<br><input type="radio"/> 1 a 3 veces mes<br><input type="radio"/> 1 vez semana<br><input type="radio"/> 2 a 4 veces semana<br><input type="radio"/> 5 a 6 veces semana<br><input type="radio"/> 1 vez al día<br><input type="radio"/> 2 a 3 veces al día<br><input type="radio"/> 5 a 6 veces al día<br><input type="radio"/> más 6 veces al día |

|                     |                                                                                                                                                                                                                                                                                                                                                                                                              |
|---------------------|--------------------------------------------------------------------------------------------------------------------------------------------------------------------------------------------------------------------------------------------------------------------------------------------------------------------------------------------------------------------------------------------------------------|
| Vísceras            | <input checked="" type="radio"/> Nunca o menos 1 vez al mes<br><input type="radio"/> 1 a 3 veces mes<br><input type="radio"/> 1 vez semana<br><input type="radio"/> 2 a 4 veces semana<br><input type="radio"/> 5 a 6 veces semana<br><input type="radio"/> 1 vez al día<br><input type="radio"/> 2 a 3 veces al día<br><input type="radio"/> 5 a 6 veces al día<br><input type="radio"/> más 6 veces al día |
| Embutido            | <input checked="" type="radio"/> Nunca o menos 1 vez al mes<br><input type="radio"/> 1 a 3 veces mes<br><input type="radio"/> 1 vez semana<br><input type="radio"/> 2 a 4 veces semana<br><input type="radio"/> 5 a 6 veces semana<br><input type="radio"/> 1 vez al día<br><input type="radio"/> 2 a 3 veces al día<br><input type="radio"/> 5 a 6 veces al día<br><input type="radio"/> más 6 veces al día |
| Salchicha o similar | <input type="radio"/> Nunca o menos 1 vez al mes<br><input checked="" type="radio"/> 1 a 3 veces mes<br><input type="radio"/> 1 vez semana<br><input type="radio"/> 2 a 4 veces semana<br><input type="radio"/> 5 a 6 veces semana<br><input type="radio"/> 1 vez al día<br><input type="radio"/> 2 a 3 veces al día<br><input type="radio"/> 5 a 6 veces al día<br><input type="radio"/> más 6 veces al día |
| Pate o foiegras     | <input checked="" type="radio"/> Nunca o menos 1 vez al mes<br><input type="radio"/> 1 a 3 veces mes<br><input type="radio"/> 1 vez semana<br><input type="radio"/> 2 a 4 veces semana<br><input type="radio"/> 5 a 6 veces semana<br><input type="radio"/> 1 vez al día<br><input type="radio"/> 2 a 3 veces al día<br><input type="radio"/> 5 a 6 veces al día<br><input type="radio"/> más 6 veces al día |
| Hamburguesa         | <input type="radio"/> Nunca o menos 1 vez al mes<br><input type="radio"/> 1 a 3 veces mes<br><input type="radio"/> 1 vez semana<br><input type="radio"/> 2 a 4 veces semana<br><input type="radio"/> 5 a 6 veces semana<br><input type="radio"/> 1 vez al día<br><input type="radio"/> 2 a 3 veces al día<br><input type="radio"/> 5 a 6 veces al día<br><input type="radio"/> más 6 veces al día            |
| tocino o bacon      | <input type="radio"/> Nunca o menos 1 vez al mes<br><input checked="" type="radio"/> 1 a 3 veces mes<br><input type="radio"/> 1 vez semana<br><input type="radio"/> 2 a 4 veces semana<br><input type="radio"/> 5 a 6 veces semana<br><input type="radio"/> 1 vez al día<br><input type="radio"/> 2 a 3 veces al día<br><input type="radio"/> 5 a 6 veces al día<br><input type="radio"/> más 6 veces al día |

|                        |                                                                                                                                                                                                                                                                                                                                                                                                              |
|------------------------|--------------------------------------------------------------------------------------------------------------------------------------------------------------------------------------------------------------------------------------------------------------------------------------------------------------------------------------------------------------------------------------------------------------|
| Pescado frito          | <input checked="" type="radio"/> Nunca o menos 1 vez al mes<br><input type="radio"/> 1 a 3 veces mes<br><input type="radio"/> 1 vez semana<br><input type="radio"/> 2 a 4 veces semana<br><input type="radio"/> 5 a 6 veces semana<br><input type="radio"/> 1 vez al día<br><input type="radio"/> 2 a 3 veces al día<br><input type="radio"/> 5 a 6 veces al día<br><input type="radio"/> más 6 veces al día |
| pescado hervido blanco | <input checked="" type="radio"/> Nunca o menos 1 vez al mes<br><input type="radio"/> 1 a 3 veces mes<br><input type="radio"/> 1 vez semana<br><input type="radio"/> 2 a 4 veces semana<br><input type="radio"/> 5 a 6 veces semana<br><input type="radio"/> 1 vez al día<br><input type="radio"/> 2 a 3 veces al día<br><input type="radio"/> 5 a 6 veces al día<br><input type="radio"/> más 6 veces al día |
| pescado hervido azul   | <input type="radio"/> Nunca o menos 1 vez al mes<br><input type="radio"/> 1 a 3 veces mes<br><input type="radio"/> 1 vez semana<br><input checked="" type="radio"/> 2 a 4 veces semana<br><input type="radio"/> 5 a 6 veces semana<br><input type="radio"/> 1 vez al día<br><input type="radio"/> 2 a 3 veces al día<br><input type="radio"/> 5 a 6 veces al día<br><input type="radio"/> más 6 veces al día |
| otros pescado azul     | <input type="radio"/> Nunca o menos 1 vez al mes<br><input type="radio"/> 1 a 3 veces mes<br><input checked="" type="radio"/> 1 vez semana<br><input type="radio"/> 2 a 4 veces semana<br><input type="radio"/> 5 a 6 veces semana<br><input type="radio"/> 1 vez al día<br><input type="radio"/> 2 a 3 veces al día<br><input type="radio"/> 5 a 6 veces al día<br><input type="radio"/> más 6 veces al día |
| atun conserva          | <input type="radio"/> Nunca o menos 1 vez al mes<br><input type="radio"/> 1 a 3 veces mes<br><input checked="" type="radio"/> 1 vez semana<br><input type="radio"/> 2 a 4 veces semana<br><input type="radio"/> 5 a 6 veces semana<br><input type="radio"/> 1 vez al día<br><input type="radio"/> 2 a 3 veces al día<br><input type="radio"/> 5 a 6 veces al día<br><input type="radio"/> más 6 veces al día |
| sardina conserva       | <input checked="" type="radio"/> Nunca o menos 1 vez al mes<br><input type="radio"/> 1 a 3 veces mes<br><input type="radio"/> 1 vez semana<br><input type="radio"/> 2 a 4 veces semana<br><input type="radio"/> 5 a 6 veces semana<br><input type="radio"/> 1 vez al día<br><input type="radio"/> 2 a 3 veces al día<br><input type="radio"/> 5 a 6 veces al día<br><input type="radio"/> más 6 veces al día |

|                                         |                                                                                                                                                                                                                                                                                                                                                                                                              |
|-----------------------------------------|--------------------------------------------------------------------------------------------------------------------------------------------------------------------------------------------------------------------------------------------------------------------------------------------------------------------------------------------------------------------------------------------------------------|
| pescado ahumado                         | <input checked="" type="radio"/> Nunca o menos 1 vez al mes<br><input type="radio"/> 1 a 3 veces mes<br><input type="radio"/> 1 vez semana<br><input type="radio"/> 2 a 4 veces semana<br><input type="radio"/> 5 a 6 veces semana<br><input type="radio"/> 1 vez al día<br><input type="radio"/> 2 a 3 veces al día<br><input type="radio"/> 5 a 6 veces al día<br><input type="radio"/> más 6 veces al día |
| almejas o mejillones o ostras unos 100g | <input checked="" type="radio"/> Nunca o menos 1 vez al mes<br><input type="radio"/> 1 a 3 veces mes<br><input type="radio"/> 1 vez semana<br><input type="radio"/> 2 a 4 veces semana<br><input type="radio"/> 5 a 6 veces semana<br><input type="radio"/> 1 vez al día<br><input type="radio"/> 2 a 3 veces al día<br><input type="radio"/> 5 a 6 veces al día<br><input type="radio"/> más 6 veces al día |
| calamar o chipiron o sepia unos 100g    | <input type="radio"/> Nunca o menos 1 vez al mes<br><input checked="" type="radio"/> 1 a 3 veces mes<br><input type="radio"/> 1 vez semana<br><input type="radio"/> 2 a 4 veces semana<br><input type="radio"/> 5 a 6 veces semana<br><input type="radio"/> 1 vez al día<br><input type="radio"/> 2 a 3 veces al día<br><input type="radio"/> 5 a 6 veces al día<br><input type="radio"/> más 6 veces al día |
| marisco unos 100g                       | <input type="radio"/> Nunca o menos 1 vez al mes<br><input type="radio"/> 1 a 3 veces mes<br><input checked="" type="radio"/> 1 vez semana<br><input type="radio"/> 2 a 4 veces semana<br><input type="radio"/> 5 a 6 veces semana<br><input type="radio"/> 1 vez al día<br><input type="radio"/> 2 a 3 veces al día<br><input type="radio"/> 5 a 6 veces al día<br><input type="radio"/> más 6 veces al día |
| Espinacas o acelgas cocinadas           | <input type="radio"/> Nunca o menos 1 vez al mes<br><input type="radio"/> 1 a 3 veces mes<br><input checked="" type="radio"/> 1 vez semana<br><input type="radio"/> 2 a 4 veces semana<br><input type="radio"/> 5 a 6 veces semana<br><input type="radio"/> 1 vez al día<br><input type="radio"/> 2 a 3 veces al día<br><input type="radio"/> 5 a 6 veces al día<br><input type="radio"/> más 6 veces al día |
| Col o coliflor o brocoli cocinado       | <input type="radio"/> Nunca o menos 1 vez al mes<br><input type="radio"/> 1 a 3 veces mes<br><input checked="" type="radio"/> 1 vez semana<br><input type="radio"/> 2 a 4 veces semana<br><input type="radio"/> 5 a 6 veces semana<br><input type="radio"/> 1 vez al día<br><input type="radio"/> 2 a 3 veces al día<br><input type="radio"/> 5 a 6 veces al día<br><input type="radio"/> más 6 veces al día |



|                                |                                                                                                                                                                                                                                                                                                                                                                                                              |
|--------------------------------|--------------------------------------------------------------------------------------------------------------------------------------------------------------------------------------------------------------------------------------------------------------------------------------------------------------------------------------------------------------------------------------------------------------|
| Lechuga o endivia o escarola   | <input type="radio"/> Nunca o menos 1 vez al mes<br><input checked="" type="radio"/> 1 a 3 veces mes<br><input type="radio"/> 1 vez semana<br><input type="radio"/> 2 a 4 veces semana<br><input type="radio"/> 5 a 6 veces semana<br><input type="radio"/> 1 vez al día<br><input type="radio"/> 2 a 3 veces al día<br><input type="radio"/> 5 a 6 veces al día<br><input type="radio"/> más 6 veces al día |
| tomate ensalada                | <input type="radio"/> Nunca o menos 1 vez al mes<br><input type="radio"/> 1 a 3 veces mes<br><input type="radio"/> 1 vez semana<br><input checked="" type="radio"/> 2 a 4 veces semana<br><input type="radio"/> 5 a 6 veces semana<br><input type="radio"/> 1 vez al día<br><input type="radio"/> 2 a 3 veces al día<br><input type="radio"/> 5 a 6 veces al día<br><input type="radio"/> más 6 veces al día |
| cebolla                        | <input checked="" type="radio"/> Nunca o menos 1 vez al mes<br><input type="radio"/> 1 a 3 veces mes<br><input type="radio"/> 1 vez semana<br><input type="radio"/> 2 a 4 veces semana<br><input type="radio"/> 5 a 6 veces semana<br><input type="radio"/> 1 vez al día<br><input type="radio"/> 2 a 3 veces al día<br><input type="radio"/> 5 a 6 veces al día<br><input type="radio"/> más 6 veces al día |
| Zanahoria o calabaza           | <input checked="" type="radio"/> Nunca o menos 1 vez al mes<br><input type="radio"/> 1 a 3 veces mes<br><input type="radio"/> 1 vez semana<br><input type="radio"/> 2 a 4 veces semana<br><input type="radio"/> 5 a 6 veces semana<br><input type="radio"/> 1 vez al día<br><input type="radio"/> 2 a 3 veces al día<br><input type="radio"/> 5 a 6 veces al día<br><input type="radio"/> más 6 veces al día |
| Judías verdes                  | <input checked="" type="radio"/> Nunca o menos 1 vez al mes<br><input type="radio"/> 1 a 3 veces mes<br><input type="radio"/> 1 vez semana<br><input type="radio"/> 2 a 4 veces semana<br><input type="radio"/> 5 a 6 veces semana<br><input type="radio"/> 1 vez al día<br><input type="radio"/> 2 a 3 veces al día<br><input type="radio"/> 5 a 6 veces al día<br><input type="radio"/> más 6 veces al día |
| Berenjena o calabacin o pepino | <input type="radio"/> Nunca o menos 1 vez al mes<br><input type="radio"/> 1 a 3 veces mes<br><input type="radio"/> 1 vez semana<br><input checked="" type="radio"/> 2 a 4 veces semana<br><input type="radio"/> 5 a 6 veces semana<br><input type="radio"/> 1 vez al día<br><input type="radio"/> 2 a 3 veces al día<br><input type="radio"/> 5 a 6 veces al día<br><input type="radio"/> más 6 veces al día |

|                       |                                                                                                                                                                                                                                                                                                                                                                                                              |
|-----------------------|--------------------------------------------------------------------------------------------------------------------------------------------------------------------------------------------------------------------------------------------------------------------------------------------------------------------------------------------------------------------------------------------------------------|
| pimiento              | <input type="radio"/> Nunca o menos 1 vez al mes<br><input type="radio"/> 1 a 3 veces mes<br><input type="radio"/> 1 vez semana<br><input checked="" type="radio"/> 2 a 4 veces semana<br><input type="radio"/> 5 a 6 veces semana<br><input type="radio"/> 1 vez al día<br><input type="radio"/> 2 a 3 veces al día<br><input type="radio"/> 5 a 6 veces al día<br><input type="radio"/> más 6 veces al día |
| alcachofa             | <input type="radio"/> Nunca o menos 1 vez al mes<br><input type="radio"/> 1 a 3 veces mes<br><input type="radio"/> 1 vez semana<br><input checked="" type="radio"/> 2 a 4 veces semana<br><input type="radio"/> 5 a 6 veces semana<br><input type="radio"/> 1 vez al día<br><input type="radio"/> 2 a 3 veces al día<br><input type="radio"/> 5 a 6 veces al día<br><input type="radio"/> más 6 veces al día |
| espárragos            | <input type="radio"/> Nunca o menos 1 vez al mes<br><input type="radio"/> 1 a 3 veces mes<br><input type="radio"/> 1 vez semana<br><input checked="" type="radio"/> 2 a 4 veces semana<br><input type="radio"/> 5 a 6 veces semana<br><input type="radio"/> 1 vez al día<br><input type="radio"/> 2 a 3 veces al día<br><input type="radio"/> 5 a 6 veces al día<br><input type="radio"/> más 6 veces al día |
| maíz hervido          | <input checked="" type="radio"/> Nunca o menos 1 vez al mes<br><input type="radio"/> 1 a 3 veces mes<br><input type="radio"/> 1 vez semana<br><input type="radio"/> 2 a 4 veces semana<br><input type="radio"/> 5 a 6 veces semana<br><input type="radio"/> 1 vez al día<br><input type="radio"/> 2 a 3 veces al día<br><input type="radio"/> 5 a 6 veces al día<br><input type="radio"/> más 6 veces al día |
| legumbres             | <input type="radio"/> Nunca o menos 1 vez al mes<br><input type="radio"/> 1 a 3 veces mes<br><input type="radio"/> 1 vez semana<br><input checked="" type="radio"/> 2 a 4 veces semana<br><input type="radio"/> 5 a 6 veces semana<br><input type="radio"/> 1 vez al día<br><input type="radio"/> 2 a 3 veces al día<br><input type="radio"/> 5 a 6 veces al día<br><input type="radio"/> más 6 veces al día |
| naranjas o mandarinas | <input type="radio"/> Nunca o menos 1 vez al mes<br><input type="radio"/> 1 a 3 veces mes<br><input type="radio"/> 1 vez semana<br><input checked="" type="radio"/> 2 a 4 veces semana<br><input type="radio"/> 5 a 6 veces semana<br><input type="radio"/> 1 vez al día<br><input type="radio"/> 2 a 3 veces al día<br><input type="radio"/> 5 a 6 veces al día<br><input type="radio"/> más 6 veces al día |

|                       |                                                                                                                                                                                                                                                                                                                                                                                                              |
|-----------------------|--------------------------------------------------------------------------------------------------------------------------------------------------------------------------------------------------------------------------------------------------------------------------------------------------------------------------------------------------------------------------------------------------------------|
| zum natural fruta     | <input checked="" type="radio"/> Nunca o menos 1 vez al mes<br><input type="radio"/> 1 a 3 veces mes<br><input type="radio"/> 1 vez semana<br><input type="radio"/> 2 a 4 veces semana<br><input type="radio"/> 5 a 6 veces semana<br><input type="radio"/> 1 vez al día<br><input type="radio"/> 2 a 3 veces al día<br><input type="radio"/> 5 a 6 veces al día<br><input type="radio"/> más 6 veces al día |
| platano               | <input type="radio"/> Nunca o menos 1 vez al mes<br><input type="radio"/> 1 a 3 veces mes<br><input checked="" type="radio"/> 1 vez semana<br><input type="radio"/> 2 a 4 veces semana<br><input type="radio"/> 5 a 6 veces semana<br><input type="radio"/> 1 vez al día<br><input type="radio"/> 2 a 3 veces al día<br><input type="radio"/> 5 a 6 veces al día<br><input type="radio"/> más 6 veces al día |
| manzana o pera        | <input type="radio"/> Nunca o menos 1 vez al mes<br><input type="radio"/> 1 a 3 veces mes<br><input checked="" type="radio"/> 1 vez semana<br><input type="radio"/> 2 a 4 veces semana<br><input type="radio"/> 5 a 6 veces semana<br><input type="radio"/> 1 vez al día<br><input type="radio"/> 2 a 3 veces al día<br><input type="radio"/> 5 a 6 veces al día<br><input type="radio"/> más 6 veces al día |
| melocotón o nectarina | <input type="radio"/> Nunca o menos 1 vez al mes<br><input type="radio"/> 1 a 3 veces mes<br><input type="radio"/> 1 vez semana<br><input type="radio"/> 2 a 4 veces semana<br><input checked="" type="radio"/> 5 a 6 veces semana<br><input type="radio"/> 1 vez al día<br><input type="radio"/> 2 a 3 veces al día<br><input type="radio"/> 5 a 6 veces al día<br><input type="radio"/> más 6 veces al día |
| sandia o melon        | <input type="radio"/> Nunca o menos 1 vez al mes<br><input type="radio"/> 1 a 3 veces mes<br><input type="radio"/> 1 vez semana<br><input type="radio"/> 2 a 4 veces semana<br><input checked="" type="radio"/> 5 a 6 veces semana<br><input type="radio"/> 1 vez al día<br><input type="radio"/> 2 a 3 veces al día<br><input type="radio"/> 5 a 6 veces al día<br><input type="radio"/> más 6 veces al día |
| uva                   | <input checked="" type="radio"/> Nunca o menos 1 vez al mes<br><input type="radio"/> 1 a 3 veces mes<br><input type="radio"/> 1 vez semana<br><input type="radio"/> 2 a 4 veces semana<br><input type="radio"/> 5 a 6 veces semana<br><input type="radio"/> 1 vez al día<br><input type="radio"/> 2 a 3 veces al día<br><input type="radio"/> 5 a 6 veces al día<br><input type="radio"/> más 6 veces al día |

---

bruna o ciruela

- ☐ Nunca o menos 1 vez al mes  
☐ 1 a 3 veces mes  
☒ 1 vez semana  
☐ 2 a 4 veces semana  
☐ 5 a 6 veces semana  
☐ 1 vez al día  
☐ 2 a 3 veces al día  
☐ 5 a 6 veces al día  
☐ más 6 veces al día

---

kiwi

- ☐ Nunca o menos 1 vez al mes  
☒ 1 a 3 veces mes  
☐ 1 vez semana  
☐ 2 a 4 veces semana  
☐ 5 a 6 veces semana  
☐ 1 vez al día  
☐ 2 a 3 veces al día  
☐ 5 a 6 veces al día  
☐ más 6 veces al día

---

aceituna

- ☒ Nunca o menos 1 vez al mes  
☐ 1 a 3 veces mes  
☐ 1 vez semana  
☐ 2 a 4 veces semana  
☐ 5 a 6 veces semana  
☐ 1 vez al día  
☐ 2 a 3 veces al día  
☐ 5 a 6 veces al día  
☐ más 6 veces al día

---

frutos secos

- ☐ Nunca o menos 1 vez al mes  
☒ 1 a 3 veces mes  
☐ 1 vez semana  
☐ 2 a 4 veces semana  
☐ 5 a 6 veces semana  
☐ 1 vez al día  
☐ 2 a 3 veces al día  
☐ 5 a 6 veces al día  
☐ más 6 veces al día

---

pan blanco

- ☐ Nunca o menos 1 vez al mes  
☒ 1 a 3 veces mes  
☐ 1 vez semana  
☐ 2 a 4 veces semana  
☐ 5 a 6 veces semana  
☐ 1 vez al día  
☐ 2 a 3 veces al día  
☐ 5 a 6 veces al día  
☐ más 6 veces al día

---

pan integral

- ☐ Nunca o menos 1 vez al mes  
☒ 1 a 3 veces mes  
☐ 1 vez semana  
☐ 2 a 4 veces semana  
☐ 5 a 6 veces semana  
☐ 1 vez al día  
☐ 2 a 3 veces al día  
☐ 5 a 6 veces al día  
☐ más 6 veces al día

---

|                   |                                                                                                                                                                                                                                                                                                                                                                                                              |
|-------------------|--------------------------------------------------------------------------------------------------------------------------------------------------------------------------------------------------------------------------------------------------------------------------------------------------------------------------------------------------------------------------------------------------------------|
| cereales desayuno | <input checked="" type="radio"/> Nunca o menos 1 vez al mes<br><input type="radio"/> 1 a 3 veces mes<br><input type="radio"/> 1 vez semana<br><input type="radio"/> 2 a 4 veces semana<br><input type="radio"/> 5 a 6 veces semana<br><input type="radio"/> 1 vez al día<br><input type="radio"/> 2 a 3 veces al día<br><input type="radio"/> 5 a 6 veces al día<br><input type="radio"/> más 6 veces al día |
|-------------------|--------------------------------------------------------------------------------------------------------------------------------------------------------------------------------------------------------------------------------------------------------------------------------------------------------------------------------------------------------------------------------------------------------------|

---

|                |                                                                                                                                                                                                                                                                                                                                                                                                              |
|----------------|--------------------------------------------------------------------------------------------------------------------------------------------------------------------------------------------------------------------------------------------------------------------------------------------------------------------------------------------------------------------------------------------------------------|
| patatas fritas | <input checked="" type="radio"/> Nunca o menos 1 vez al mes<br><input type="radio"/> 1 a 3 veces mes<br><input type="radio"/> 1 vez semana<br><input type="radio"/> 2 a 4 veces semana<br><input type="radio"/> 5 a 6 veces semana<br><input type="radio"/> 1 vez al día<br><input type="radio"/> 2 a 3 veces al día<br><input type="radio"/> 5 a 6 veces al día<br><input type="radio"/> más 6 veces al día |
|----------------|--------------------------------------------------------------------------------------------------------------------------------------------------------------------------------------------------------------------------------------------------------------------------------------------------------------------------------------------------------------------------------------------------------------|

---

|                          |                                                                                                                                                                                                                                                                                                                                                                                                              |
|--------------------------|--------------------------------------------------------------------------------------------------------------------------------------------------------------------------------------------------------------------------------------------------------------------------------------------------------------------------------------------------------------------------------------------------------------|
| patatas cocidas o asadas | <input type="radio"/> Nunca o menos 1 vez al mes<br><input checked="" type="radio"/> 1 a 3 veces mes<br><input type="radio"/> 1 vez semana<br><input type="radio"/> 2 a 4 veces semana<br><input type="radio"/> 5 a 6 veces semana<br><input type="radio"/> 1 vez al día<br><input type="radio"/> 2 a 3 veces al día<br><input type="radio"/> 5 a 6 veces al día<br><input type="radio"/> más 6 veces al día |
|--------------------------|--------------------------------------------------------------------------------------------------------------------------------------------------------------------------------------------------------------------------------------------------------------------------------------------------------------------------------------------------------------------------------------------------------------|

---

|             |                                                                                                                                                                                                                                                                                                                                                                                                              |
|-------------|--------------------------------------------------------------------------------------------------------------------------------------------------------------------------------------------------------------------------------------------------------------------------------------------------------------------------------------------------------------------------------------------------------------|
| bolsa papas | <input checked="" type="radio"/> Nunca o menos 1 vez al mes<br><input type="radio"/> 1 a 3 veces mes<br><input type="radio"/> 1 vez semana<br><input type="radio"/> 2 a 4 veces semana<br><input type="radio"/> 5 a 6 veces semana<br><input type="radio"/> 1 vez al día<br><input type="radio"/> 2 a 3 veces al día<br><input type="radio"/> 5 a 6 veces al día<br><input type="radio"/> más 6 veces al día |
|-------------|--------------------------------------------------------------------------------------------------------------------------------------------------------------------------------------------------------------------------------------------------------------------------------------------------------------------------------------------------------------------------------------------------------------|

---

|                |                                                                                                                                                                                                                                                                                                                                                                                                              |
|----------------|--------------------------------------------------------------------------------------------------------------------------------------------------------------------------------------------------------------------------------------------------------------------------------------------------------------------------------------------------------------------------------------------------------------|
| arroz cocinado | <input type="radio"/> Nunca o menos 1 vez al mes<br><input type="radio"/> 1 a 3 veces mes<br><input checked="" type="radio"/> 1 vez semana<br><input type="radio"/> 2 a 4 veces semana<br><input type="radio"/> 5 a 6 veces semana<br><input type="radio"/> 1 vez al día<br><input type="radio"/> 2 a 3 veces al día<br><input type="radio"/> 5 a 6 veces al día<br><input type="radio"/> más 6 veces al día |
|----------------|--------------------------------------------------------------------------------------------------------------------------------------------------------------------------------------------------------------------------------------------------------------------------------------------------------------------------------------------------------------------------------------------------------------|

---

|       |                                                                                                                                                                                                                                                                                                                                                                                                              |
|-------|--------------------------------------------------------------------------------------------------------------------------------------------------------------------------------------------------------------------------------------------------------------------------------------------------------------------------------------------------------------------------------------------------------------|
| pasta | <input type="radio"/> Nunca o menos 1 vez al mes<br><input type="radio"/> 1 a 3 veces mes<br><input checked="" type="radio"/> 1 vez semana<br><input type="radio"/> 2 a 4 veces semana<br><input type="radio"/> 5 a 6 veces semana<br><input type="radio"/> 1 vez al día<br><input type="radio"/> 2 a 3 veces al día<br><input type="radio"/> 5 a 6 veces al día<br><input type="radio"/> más 6 veces al día |
|-------|--------------------------------------------------------------------------------------------------------------------------------------------------------------------------------------------------------------------------------------------------------------------------------------------------------------------------------------------------------------------------------------------------------------|

---

|                     |                                                                                                                                                                                                                                                                                                                                                                                                              |
|---------------------|--------------------------------------------------------------------------------------------------------------------------------------------------------------------------------------------------------------------------------------------------------------------------------------------------------------------------------------------------------------------------------------------------------------|
| pizza               | <input checked="" type="radio"/> Nunca o menos 1 vez al mes<br><input type="radio"/> 1 a 3 veces mes<br><input type="radio"/> 1 vez semana<br><input type="radio"/> 2 a 4 veces semana<br><input type="radio"/> 5 a 6 veces semana<br><input type="radio"/> 1 vez al día<br><input type="radio"/> 2 a 3 veces al día<br><input type="radio"/> 5 a 6 veces al día<br><input type="radio"/> más 6 veces al día |
| aceite oliva        | <input type="radio"/> Nunca o menos 1 vez al mes<br><input checked="" type="radio"/> 1 a 3 veces mes<br><input type="radio"/> 1 vez semana<br><input type="radio"/> 2 a 4 veces semana<br><input type="radio"/> 5 a 6 veces semana<br><input type="radio"/> 1 vez al día<br><input type="radio"/> 2 a 3 veces al día<br><input type="radio"/> 5 a 6 veces al día<br><input type="radio"/> más 6 veces al día |
| otros aceites       | <input checked="" type="radio"/> Nunca o menos 1 vez al mes<br><input type="radio"/> 1 a 3 veces mes<br><input type="radio"/> 1 vez semana<br><input type="radio"/> 2 a 4 veces semana<br><input type="radio"/> 5 a 6 veces semana<br><input type="radio"/> 1 vez al día<br><input type="radio"/> 2 a 3 veces al día<br><input type="radio"/> 5 a 6 veces al día<br><input type="radio"/> más 6 veces al día |
| margarina           | <input checked="" type="radio"/> Nunca o menos 1 vez al mes<br><input type="radio"/> 1 a 3 veces mes<br><input type="radio"/> 1 vez semana<br><input type="radio"/> 2 a 4 veces semana<br><input type="radio"/> 5 a 6 veces semana<br><input type="radio"/> 1 vez al día<br><input type="radio"/> 2 a 3 veces al día<br><input type="radio"/> 5 a 6 veces al día<br><input type="radio"/> más 6 veces al día |
| mantequilla         | <input checked="" type="radio"/> Nunca o menos 1 vez al mes<br><input type="radio"/> 1 a 3 veces mes<br><input type="radio"/> 1 vez semana<br><input type="radio"/> 2 a 4 veces semana<br><input type="radio"/> 5 a 6 veces semana<br><input type="radio"/> 1 vez al día<br><input type="radio"/> 2 a 3 veces al día<br><input type="radio"/> 5 a 6 veces al día<br><input type="radio"/> más 6 veces al día |
| galletas tipo maria | <input type="radio"/> Nunca o menos 1 vez al mes<br><input checked="" type="radio"/> 1 a 3 veces mes<br><input type="radio"/> 1 vez semana<br><input type="radio"/> 2 a 4 veces semana<br><input type="radio"/> 5 a 6 veces semana<br><input type="radio"/> 1 vez al día<br><input type="radio"/> 2 a 3 veces al día<br><input type="radio"/> 5 a 6 veces al día<br><input type="radio"/> más 6 veces al día |

|                           |                                                                                                                                                                                                                                                                                                                                                                                                              |
|---------------------------|--------------------------------------------------------------------------------------------------------------------------------------------------------------------------------------------------------------------------------------------------------------------------------------------------------------------------------------------------------------------------------------------------------------|
| galletas chocolate        | <input checked="" type="radio"/> Nunca o menos 1 vez al mes<br><input type="radio"/> 1 a 3 veces mes<br><input type="radio"/> 1 vez semana<br><input type="radio"/> 2 a 4 veces semana<br><input type="radio"/> 5 a 6 veces semana<br><input type="radio"/> 1 vez al día<br><input type="radio"/> 2 a 3 veces al día<br><input type="radio"/> 5 a 6 veces al día<br><input type="radio"/> más 6 veces al día |
| bollieria                 | <input checked="" type="radio"/> Nunca o menos 1 vez al mes<br><input type="radio"/> 1 a 3 veces mes<br><input type="radio"/> 1 vez semana<br><input type="radio"/> 2 a 4 veces semana<br><input type="radio"/> 5 a 6 veces semana<br><input type="radio"/> 1 vez al día<br><input type="radio"/> 2 a 3 veces al día<br><input type="radio"/> 5 a 6 veces al día<br><input type="radio"/> más 6 veces al día |
| chocolate o bombones      | <input checked="" type="radio"/> Nunca o menos 1 vez al mes<br><input type="radio"/> 1 a 3 veces mes<br><input type="radio"/> 1 vez semana<br><input type="radio"/> 2 a 4 veces semana<br><input type="radio"/> 5 a 6 veces semana<br><input type="radio"/> 1 vez al día<br><input type="radio"/> 2 a 3 veces al día<br><input type="radio"/> 5 a 6 veces al día<br><input type="radio"/> más 6 veces al día |
| chocolate polvo o colacao | <input checked="" type="radio"/> Nunca o menos 1 vez al mes<br><input type="radio"/> 1 a 3 veces mes<br><input type="radio"/> 1 vez semana<br><input type="radio"/> 2 a 4 veces semana<br><input type="radio"/> 5 a 6 veces semana<br><input type="radio"/> 1 vez al día<br><input type="radio"/> 2 a 3 veces al día<br><input type="radio"/> 5 a 6 veces al día<br><input type="radio"/> más 6 veces al día |
| vino tinto                | <input checked="" type="radio"/> Nunca o menos 1 vez al mes<br><input type="radio"/> 1 a 3 veces mes<br><input type="radio"/> 1 vez semana<br><input type="radio"/> 2 a 4 veces semana<br><input type="radio"/> 5 a 6 veces semana<br><input type="radio"/> 1 vez al día<br><input type="radio"/> 2 a 3 veces al día<br><input type="radio"/> 5 a 6 veces al día<br><input type="radio"/> más 6 veces al día |
| vino blanco               | <input checked="" type="radio"/> Nunca o menos 1 vez al mes<br><input type="radio"/> 1 a 3 veces mes<br><input type="radio"/> 1 vez semana<br><input type="radio"/> 2 a 4 veces semana<br><input type="radio"/> 5 a 6 veces semana<br><input type="radio"/> 1 vez al día<br><input type="radio"/> 2 a 3 veces al día<br><input type="radio"/> 5 a 6 veces al día<br><input type="radio"/> más 6 veces al día |

|                       |                                                                                                                                                                                                                                                                                                                                                                                                              |
|-----------------------|--------------------------------------------------------------------------------------------------------------------------------------------------------------------------------------------------------------------------------------------------------------------------------------------------------------------------------------------------------------------------------------------------------------|
| vino seco o vermut    | <input checked="" type="radio"/> Nunca o menos 1 vez al mes<br><input type="radio"/> 1 a 3 veces mes<br><input type="radio"/> 1 vez semana<br><input type="radio"/> 2 a 4 veces semana<br><input type="radio"/> 5 a 6 veces semana<br><input type="radio"/> 1 vez al día<br><input type="radio"/> 2 a 3 veces al día<br><input type="radio"/> 5 a 6 veces al día<br><input type="radio"/> más 6 veces al día |
| cerveza               | <input checked="" type="radio"/> Nunca o menos 1 vez al mes<br><input type="radio"/> 1 a 3 veces mes<br><input type="radio"/> 1 vez semana<br><input type="radio"/> 2 a 4 veces semana<br><input type="radio"/> 5 a 6 veces semana<br><input type="radio"/> 1 vez al día<br><input type="radio"/> 2 a 3 veces al día<br><input type="radio"/> 5 a 6 veces al día<br><input type="radio"/> más 6 veces al día |
| cerveza sin alcohol   | <input type="radio"/> Nunca o menos 1 vez al mes<br><input checked="" type="radio"/> 1 a 3 veces mes<br><input type="radio"/> 1 vez semana<br><input type="radio"/> 2 a 4 veces semana<br><input type="radio"/> 5 a 6 veces semana<br><input type="radio"/> 1 vez al día<br><input type="radio"/> 2 a 3 veces al día<br><input type="radio"/> 5 a 6 veces al día<br><input type="radio"/> más 6 veces al día |
| licores               | <input checked="" type="radio"/> Nunca o menos 1 vez al mes<br><input type="radio"/> 1 a 3 veces mes<br><input type="radio"/> 1 vez semana<br><input type="radio"/> 2 a 4 veces semana<br><input type="radio"/> 5 a 6 veces semana<br><input type="radio"/> 1 vez al día<br><input type="radio"/> 2 a 3 veces al día<br><input type="radio"/> 5 a 6 veces al día<br><input type="radio"/> más 6 veces al día |
| ginebra o ron o vodka | <input checked="" type="radio"/> Nunca o menos 1 vez al mes<br><input type="radio"/> 1 a 3 veces mes<br><input type="radio"/> 1 vez semana<br><input type="radio"/> 2 a 4 veces semana<br><input type="radio"/> 5 a 6 veces semana<br><input type="radio"/> 1 vez al día<br><input type="radio"/> 2 a 3 veces al día<br><input type="radio"/> 5 a 6 veces al día<br><input type="radio"/> más 6 veces al día |
| refresco normal       | <input checked="" type="radio"/> Nunca o menos 1 vez al mes<br><input type="radio"/> 1 a 3 veces mes<br><input type="radio"/> 1 vez semana<br><input type="radio"/> 2 a 4 veces semana<br><input type="radio"/> 5 a 6 veces semana<br><input type="radio"/> 1 vez al día<br><input type="radio"/> 2 a 3 veces al día<br><input type="radio"/> 5 a 6 veces al día<br><input type="radio"/> más 6 veces al día |



|                          |                                                                                                                                                                                                                                                                                                                                                                                                              |
|--------------------------|--------------------------------------------------------------------------------------------------------------------------------------------------------------------------------------------------------------------------------------------------------------------------------------------------------------------------------------------------------------------------------------------------------------|
| refresco sin azúcar      | <input checked="" type="radio"/> Nunca o menos 1 vez al mes<br><input type="radio"/> 1 a 3 veces mes<br><input type="radio"/> 1 vez semana<br><input type="radio"/> 2 a 4 veces semana<br><input type="radio"/> 5 a 6 veces semana<br><input type="radio"/> 1 vez al día<br><input type="radio"/> 2 a 3 veces al día<br><input type="radio"/> 5 a 6 veces al día<br><input type="radio"/> más 6 veces al día |
| Agua del grifo           | <input type="radio"/> Nunca o menos 1 vez al mes<br><input type="radio"/> 1 a 3 veces mes<br><input type="radio"/> 1 vez semana<br><input type="radio"/> 2 a 4 veces semana<br><input type="radio"/> 5 a 6 veces semana<br><input type="radio"/> 1 vez al día<br><input type="radio"/> 2 a 3 veces al día<br><input type="radio"/> 5 a 6 veces al día<br><input checked="" type="radio"/> más 6 veces al día |
| agua embotellada sin gas | <input type="radio"/> Nunca o menos 1 vez al mes<br><input type="radio"/> 1 a 3 veces mes<br><input type="radio"/> 1 vez semana<br><input type="radio"/> 2 a 4 veces semana<br><input type="radio"/> 5 a 6 veces semana<br><input type="radio"/> 1 vez al día<br><input type="radio"/> 2 a 3 veces al día<br><input type="radio"/> 5 a 6 veces al día<br><input checked="" type="radio"/> más 6 veces al día |
| agua embotellada con gas | <input checked="" type="radio"/> Nunca o menos 1 vez al mes<br><input type="radio"/> 1 a 3 veces mes<br><input type="radio"/> 1 vez semana<br><input type="radio"/> 2 a 4 veces semana<br><input type="radio"/> 5 a 6 veces semana<br><input type="radio"/> 1 vez al día<br><input type="radio"/> 2 a 3 veces al día<br><input type="radio"/> 5 a 6 veces al día<br><input type="radio"/> más 6 veces al día |
| zumو frutas embasado     | <input checked="" type="radio"/> Nunca o menos 1 vez al mes<br><input type="radio"/> 1 a 3 veces mes<br><input type="radio"/> 1 vez semana<br><input type="radio"/> 2 a 4 veces semana<br><input type="radio"/> 5 a 6 veces semana<br><input type="radio"/> 1 vez al día<br><input type="radio"/> 2 a 3 veces al día<br><input type="radio"/> 5 a 6 veces al día<br><input type="radio"/> más 6 veces al día |
| cafe                     | <input checked="" type="radio"/> Nunca o menos 1 vez al mes<br><input type="radio"/> 1 a 3 veces mes<br><input type="radio"/> 1 vez semana<br><input type="radio"/> 2 a 4 veces semana<br><input type="radio"/> 5 a 6 veces semana<br><input type="radio"/> 1 vez al día<br><input type="radio"/> 2 a 3 veces al día<br><input type="radio"/> 5 a 6 veces al día<br><input type="radio"/> más 6 veces al día |

|                       |                                                                                                                                                                                                                                                                                                                                                                                                              |
|-----------------------|--------------------------------------------------------------------------------------------------------------------------------------------------------------------------------------------------------------------------------------------------------------------------------------------------------------------------------------------------------------------------------------------------------------|
| cafe descafeinado     | <input checked="" type="radio"/> Nunca o menos 1 vez al mes<br><input type="radio"/> 1 a 3 veces mes<br><input type="radio"/> 1 vez semana<br><input type="radio"/> 2 a 4 veces semana<br><input type="radio"/> 5 a 6 veces semana<br><input type="radio"/> 1 vez al día<br><input type="radio"/> 2 a 3 veces al día<br><input type="radio"/> 5 a 6 veces al día<br><input type="radio"/> más 6 veces al día |
| te o infusión         | <input type="radio"/> Nunca o menos 1 vez al mes<br><input checked="" type="radio"/> 1 a 3 veces mes<br><input type="radio"/> 1 vez semana<br><input type="radio"/> 2 a 4 veces semana<br><input type="radio"/> 5 a 6 veces semana<br><input type="radio"/> 1 vez al día<br><input type="radio"/> 2 a 3 veces al día<br><input type="radio"/> 5 a 6 veces al día<br><input type="radio"/> más 6 veces al día |
| sopa o puré verduras  | <input checked="" type="radio"/> Nunca o menos 1 vez al mes<br><input type="radio"/> 1 a 3 veces mes<br><input type="radio"/> 1 vez semana<br><input type="radio"/> 2 a 4 veces semana<br><input type="radio"/> 5 a 6 veces semana<br><input type="radio"/> 1 vez al día<br><input type="radio"/> 2 a 3 veces al día<br><input type="radio"/> 5 a 6 veces al día<br><input type="radio"/> más 6 veces al día |
| croquetas pollo jamón | <input checked="" type="radio"/> Nunca o menos 1 vez al mes<br><input type="radio"/> 1 a 3 veces mes<br><input type="radio"/> 1 vez semana<br><input type="radio"/> 2 a 4 veces semana<br><input type="radio"/> 5 a 6 veces semana<br><input type="radio"/> 1 vez al día<br><input type="radio"/> 2 a 3 veces al día<br><input type="radio"/> 5 a 6 veces al día<br><input type="radio"/> más 6 veces al día |
| croquetas pescado     | <input type="radio"/> Nunca o menos 1 vez al mes<br><input checked="" type="radio"/> 1 a 3 veces mes<br><input type="radio"/> 1 vez semana<br><input type="radio"/> 2 a 4 veces semana<br><input type="radio"/> 5 a 6 veces semana<br><input type="radio"/> 1 vez al día<br><input type="radio"/> 2 a 3 veces al día<br><input type="radio"/> 5 a 6 veces al día<br><input type="radio"/> más 6 veces al día |
| mayonesa              | <input type="radio"/> Nunca o menos 1 vez al mes<br><input checked="" type="radio"/> 1 a 3 veces mes<br><input type="radio"/> 1 vez semana<br><input type="radio"/> 2 a 4 veces semana<br><input type="radio"/> 5 a 6 veces semana<br><input type="radio"/> 1 vez al día<br><input type="radio"/> 2 a 3 veces al día<br><input type="radio"/> 5 a 6 veces al día<br><input type="radio"/> más 6 veces al día |

|                  |                                                                                                                                                                                                                                                                                                                                                                                                              |
|------------------|--------------------------------------------------------------------------------------------------------------------------------------------------------------------------------------------------------------------------------------------------------------------------------------------------------------------------------------------------------------------------------------------------------------|
| salsa tomate     | <input checked="" type="radio"/> Nunca o menos 1 vez al mes<br><input type="radio"/> 1 a 3 veces mes<br><input type="radio"/> 1 vez semana<br><input type="radio"/> 2 a 4 veces semana<br><input type="radio"/> 5 a 6 veces semana<br><input type="radio"/> 1 vez al día<br><input type="radio"/> 2 a 3 veces al día<br><input type="radio"/> 5 a 6 veces al día<br><input type="radio"/> más 6 veces al día |
| ketchup          | <input type="radio"/> Nunca o menos 1 vez al mes<br><input type="radio"/> 1 a 3 veces mes<br><input type="radio"/> 1 vez semana<br><input type="radio"/> 2 a 4 veces semana<br><input checked="" type="radio"/> 5 a 6 veces semana<br><input type="radio"/> 1 vez al día<br><input type="radio"/> 2 a 3 veces al día<br><input type="radio"/> 5 a 6 veces al día<br><input type="radio"/> más 6 veces al día |
| sal              | <input checked="" type="radio"/> Nunca o menos 1 vez al mes<br><input type="radio"/> 1 a 3 veces mes<br><input type="radio"/> 1 vez semana<br><input type="radio"/> 2 a 4 veces semana<br><input type="radio"/> 5 a 6 veces semana<br><input type="radio"/> 1 vez al día<br><input type="radio"/> 2 a 3 veces al día<br><input type="radio"/> 5 a 6 veces al día<br><input type="radio"/> más 6 veces al día |
| ajo              | <input checked="" type="radio"/> Nunca o menos 1 vez al mes<br><input type="radio"/> 1 a 3 veces mes<br><input type="radio"/> 1 vez semana<br><input type="radio"/> 2 a 4 veces semana<br><input type="radio"/> 5 a 6 veces semana<br><input type="radio"/> 1 vez al día<br><input type="radio"/> 2 a 3 veces al día<br><input type="radio"/> 5 a 6 veces al día<br><input type="radio"/> más 6 veces al día |
| mermelada o miel | <input checked="" type="radio"/> Nunca o menos 1 vez al mes<br><input type="radio"/> 1 a 3 veces mes<br><input type="radio"/> 1 vez semana<br><input type="radio"/> 2 a 4 veces semana<br><input type="radio"/> 5 a 6 veces semana<br><input type="radio"/> 1 vez al día<br><input type="radio"/> 2 a 3 veces al día<br><input type="radio"/> 5 a 6 veces al día<br><input type="radio"/> más 6 veces al día |
| azúcar           | <input type="radio"/> Nunca o menos 1 vez al mes<br><input type="radio"/> 1 a 3 veces mes<br><input type="radio"/> 1 vez semana<br><input type="radio"/> 2 a 4 veces semana<br><input type="radio"/> 5 a 6 veces semana<br><input type="radio"/> 1 vez al día<br><input type="radio"/> 2 a 3 veces al día<br><input type="radio"/> 5 a 6 veces al día<br><input type="radio"/> más 6 veces al día            |

|                                       |                                                                                                                                                                                                                                                                                                                                                                                                                                                                                                                               |
|---------------------------------------|-------------------------------------------------------------------------------------------------------------------------------------------------------------------------------------------------------------------------------------------------------------------------------------------------------------------------------------------------------------------------------------------------------------------------------------------------------------------------------------------------------------------------------|
| Otro alimento                         |                                                                                                                                                                                                                                                                                                                                                                                                                                                                                                                               |
| suplementos vitamínicos               | <input checked="" type="radio"/> si<br><input type="radio"/> no                                                                                                                                                                                                                                                                                                                                                                                                                                                               |
| suplementos vitamínicos               | [*DATA REMOVED*]                                                                                                                                                                                                                                                                                                                                                                                                                                                                                                              |
| dieta previa                          | <input checked="" type="radio"/> si<br><input type="radio"/> no                                                                                                                                                                                                                                                                                                                                                                                                                                                               |
| motivo dieta                          | <input type="radio"/> no dieta<br><input checked="" type="radio"/> control peso<br><input type="radio"/> control colesterol<br><input type="radio"/> control diabetes<br><input type="radio"/> problemas estómago<br><input type="radio"/> problemas vesícula o hepáticos<br><input type="radio"/> HTA o cardiopatía<br><input type="radio"/> problemas renales<br><input type="radio"/> alergia alimentaria<br><input type="radio"/> ácido úrico elevado<br><input type="radio"/> vegetariana<br><input type="radio"/> otros |
| cambio alimentos año previo gestación | <input type="radio"/> si<br><input checked="" type="radio"/> no                                                                                                                                                                                                                                                                                                                                                                                                                                                               |
| cambio lácteos                        | <input type="radio"/> eliminado<br><input type="radio"/> disminuido<br><input checked="" type="radio"/> igual<br><input type="radio"/> aumentado<br><input type="radio"/> no sabe                                                                                                                                                                                                                                                                                                                                             |
| cambio huevos                         | <input type="radio"/> eliminado<br><input type="radio"/> disminuido<br><input checked="" type="radio"/> igual<br><input type="radio"/> aumentado<br><input type="radio"/> no sabe                                                                                                                                                                                                                                                                                                                                             |
| cambio carne                          | <input type="radio"/> eliminado<br><input type="radio"/> disminuido<br><input checked="" type="radio"/> igual<br><input type="radio"/> aumentado<br><input type="radio"/> no sabe                                                                                                                                                                                                                                                                                                                                             |
| cambio pescado                        | <input type="radio"/> eliminado<br><input type="radio"/> disminuido<br><input checked="" type="radio"/> igual<br><input type="radio"/> aumentado<br><input type="radio"/> no sabe                                                                                                                                                                                                                                                                                                                                             |
| cambio verduras                       | <input type="radio"/> eliminado<br><input type="radio"/> disminuido<br><input checked="" type="radio"/> igual<br><input type="radio"/> aumentado<br><input type="radio"/> no sabe                                                                                                                                                                                                                                                                                                                                             |

|                            |                                                                                                                                                                                                                        |
|----------------------------|------------------------------------------------------------------------------------------------------------------------------------------------------------------------------------------------------------------------|
| cambio legumbres           | <input type="radio"/> eliminado<br><input type="radio"/> disminuido<br><input checked="" type="radio"/> igual<br><input type="radio"/> aumentado<br><input type="radio"/> no sabe                                      |
| cambio fruta               | <input type="radio"/> eliminado<br><input type="radio"/> disminuido<br><input checked="" type="radio"/> igual<br><input type="radio"/> aumentado<br><input type="radio"/> no sabe                                      |
| cambio pan                 | <input type="radio"/> eliminado<br><input type="radio"/> disminuido<br><input checked="" type="radio"/> igual<br><input type="radio"/> aumentado<br><input type="radio"/> no sabe                                      |
| cambio aceite oliva        | <input type="radio"/> eliminado<br><input type="radio"/> disminuido<br><input checked="" type="radio"/> igual<br><input type="radio"/> aumentado<br><input type="radio"/> no sabe                                      |
| cambio mante o margarina   | <input type="radio"/> eliminado<br><input type="radio"/> disminuido<br><input checked="" type="radio"/> igual<br><input type="radio"/> aumentado<br><input type="radio"/> no sabe                                      |
| cambio azúcar y dulces     | <input type="radio"/> eliminado<br><input type="radio"/> disminuido<br><input checked="" type="radio"/> igual<br><input type="radio"/> aumentado<br><input type="radio"/> no sabe                                      |
| cambio bebidas alcohólicas | <input type="radio"/> eliminado<br><input type="radio"/> disminuido<br><input checked="" type="radio"/> igual<br><input type="radio"/> aumentado<br><input type="radio"/> no sabe                                      |
| frecuencia comidas fritas  | <input type="radio"/> a diario<br><input type="radio"/> 5 a 6 veces semana<br><input type="radio"/> 2 a 4 veces semana<br><input type="radio"/> 1 vez semana<br><input checked="" type="radio"/> menos de 1 vez semana |
| carne                      | <input type="radio"/> no como<br><input type="radio"/> cruda<br><input type="radio"/> poco hecha<br><input checked="" type="radio"/> hecha<br><input type="radio"/> muy hecha                                          |
| grasa visible carne        | <input checked="" type="radio"/> quita toda<br><input type="radio"/> quita mayoría<br><input type="radio"/> quita un poco<br><input type="radio"/> no quita nada                                                       |

|                                |                                                                                                                                                                                                                                                          |
|--------------------------------|----------------------------------------------------------------------------------------------------------------------------------------------------------------------------------------------------------------------------------------------------------|
| cocina carne                   | <input checked="" type="radio"/> a la plancha<br><input type="radio"/> a la parrilla<br><input type="radio"/> asada<br><input type="radio"/> frita<br><input type="radio"/> guisada                                                                      |
| tostado quemado carne          | <input checked="" type="radio"/> nunca<br><input type="radio"/> 1 vez mes<br><input type="radio"/> 2 a 3 veces mes<br><input type="radio"/> 1 vez semana<br><input type="radio"/> 2 a 3 semanas                                                          |
| tostado quemado pescado        | <input checked="" type="radio"/> nunca<br><input type="radio"/> 1 vez mes<br><input type="radio"/> 2 a 3 veces mes<br><input type="radio"/> 1 vez semana<br><input type="radio"/> 2 a 3 semanas                                                          |
| socarrat paella                | <input checked="" type="radio"/> nunca<br><input type="radio"/> 1 vez mes<br><input type="radio"/> 2 a 3 veces mes<br><input type="radio"/> 1 vez semana<br><input type="radio"/> 2 a 3 semanas                                                          |
| grasa o aceite cocinar         | <input type="radio"/> mantequilla<br><input type="radio"/> margarina<br><input type="radio"/> aceite oliva<br><input checked="" type="radio"/> aceite oliva virgen extra<br><input type="radio"/> aceite vegetal<br><input type="radio"/> mezcla aceites |
| grasa aceite aliñar            | <input type="radio"/> mantequilla<br><input type="radio"/> margarina<br><input type="radio"/> aceite oliva<br><input checked="" type="radio"/> aceite oliva virgen extra<br><input type="radio"/> aceite vegetal<br><input type="radio"/> mezcla aceites |
| grasa aceite freir             | <input type="radio"/> mantequilla<br><input type="radio"/> margarina<br><input type="radio"/> aceite oliva<br><input type="radio"/> aceite oliva virgen extra<br><input type="radio"/> aceite vegetal<br><input type="radio"/> mezcla aceites            |
| Ejercicio cuestionario         | <input checked="" type="radio"/> si<br><input type="radio"/> no                                                                                                                                                                                          |
| horas de sueño incluido siesta | [*DATA REMOVED*]                                                                                                                                                                                                                                         |
| minutos siesta                 | [*DATA REMOVED*]                                                                                                                                                                                                                                         |
| horas televisión semana        |                                                                                                                                                                                                                                                          |

|                                        |                                                                                                                                                                                                                                                                                                                                                                           |
|----------------------------------------|---------------------------------------------------------------------------------------------------------------------------------------------------------------------------------------------------------------------------------------------------------------------------------------------------------------------------------------------------------------------------|
| actividad trabajo                      | <input type="radio"/> casi siempre sentado<br><input type="radio"/> sentado 50 por cien<br><input type="radio"/> casi siempre de pie, quieto<br><input checked="" type="radio"/> casi siempre levantado caminando y llevando pocas cosas<br><input type="radio"/> casi siempre levantado, caminando y llevado muchas cosas<br><input type="radio"/> trabajo manual pesado |
| tiempo caminar o bici al día           | <input type="radio"/> casi nunca<br><input type="radio"/> menos 20min día<br><input type="radio"/> 20 a 40 min día<br><input type="radio"/> 40 a 60 min día<br><input checked="" type="radio"/> 1h o 1h y media día<br><input type="radio"/> más de 1h y media al día                                                                                                     |
| tiempo tareas casa al día              | <input type="radio"/> menos de 1h día<br><input checked="" type="radio"/> 1 a 2h día<br><input type="radio"/> 3 a 4h día<br><input type="radio"/> 5 a 6h día<br><input type="radio"/> 7 a 8h día<br><input type="radio"/> más de 8h día                                                                                                                                   |
| tiempo libre televisión ordenador leer | <input type="radio"/> menos 1h día<br><input checked="" type="radio"/> 1h día<br><input type="radio"/> 2h día<br><input type="radio"/> 3h día<br><input type="radio"/> 4h día<br><input type="radio"/> 5 a 6h día<br><input type="radio"/> mas 6h día                                                                                                                     |
| tiempo libre ejercicio o deporte       | <input type="radio"/> menos 1h semana<br><input type="radio"/> 1h semana<br><input type="radio"/> 2h semana<br><input checked="" type="radio"/> 3h semana<br><input type="radio"/> 4 a 5h semana<br><input type="radio"/> mas 5h semana                                                                                                                                   |
| como se considera                      | <input type="radio"/> sedentaria<br><input type="radio"/> poco activa<br><input checked="" type="radio"/> moderadamente activa<br><input type="radio"/> bastante activa<br><input type="radio"/> muy activa<br><input type="radio"/> no sabe                                                                                                                              |
| FUR                                    | [*DATA REMOVED*]                                                                                                                                                                                                                                                                                                                                                          |
| Semanas gestación 2T                   | [*DATA REMOVED*]                                                                                                                                                                                                                                                                                                                                                          |
| Días gestación 2T                      | [*DATA REMOVED*]                                                                                                                                                                                                                                                                                                                                                          |
| DBP 2T                                 | [*DATA REMOVED*]                                                                                                                                                                                                                                                                                                                                                          |
| CC 2T                                  | [*DATA REMOVED*]                                                                                                                                                                                                                                                                                                                                                          |
| AC 2T                                  | [*DATA REMOVED*]                                                                                                                                                                                                                                                                                                                                                          |

|                                                   |                                                                                                                                                                                                 |
|---------------------------------------------------|-------------------------------------------------------------------------------------------------------------------------------------------------------------------------------------------------|
| LF 2T                                             | [*DATA REMOVED*]                                                                                                                                                                                |
| PFE 2T (Hadlock)                                  | [*DATA REMOVED*]                                                                                                                                                                                |
| Semanas gestación 3T                              | [*DATA REMOVED*]                                                                                                                                                                                |
| días 3T                                           | [*DATA REMOVED*]                                                                                                                                                                                |
| DBP 3T                                            | [*DATA REMOVED*]                                                                                                                                                                                |
| CC 3T                                             | [*DATA REMOVED*]                                                                                                                                                                                |
| AC 3T                                             | [*DATA REMOVED*]                                                                                                                                                                                |
| LF 3T                                             | [*DATA REMOVED*]                                                                                                                                                                                |
| PFE 3T (Hadlock)                                  | [*DATA REMOVED*]                                                                                                                                                                                |
| Semanas de gestación final                        | [*DATA REMOVED*]                                                                                                                                                                                |
| días gestación final                              | [*DATA REMOVED*]                                                                                                                                                                                |
| Localización placenta                             | <input type="radio"/> anterior<br><input type="radio"/> lateral derecha<br><input type="radio"/> lateral izquierda<br><input checked="" type="radio"/> posterior<br><input type="radio"/> fondo |
| Presentación longitudinal cefálica                | <input type="radio"/> no<br><input checked="" type="radio"/> si                                                                                                                                 |
| Dorso                                             | <input checked="" type="radio"/> izquierda anterior<br><input type="radio"/> izquierda posterior<br><input type="radio"/> derecha anterior<br><input type="radio"/> derecha posterior           |
| diámetro biparietal                               | [*DATA REMOVED*]                                                                                                                                                                                |
| Circunferencia craneal                            | [*DATA REMOVED*]                                                                                                                                                                                |
| Circunferencia abdominal                          | [*DATA REMOVED*]                                                                                                                                                                                |
| Longitud de femur                                 | [*DATA REMOVED*]                                                                                                                                                                                |
| tejido celular subcutáneo a nivel del muslo en mm | [*DATA REMOVED*]                                                                                                                                                                                |
| tejido celular subcutáneo en abdomen en mm        | [*DATA REMOVED*]                                                                                                                                                                                |
| Volumen del muslo en cm3                          | [*DATA REMOVED*]                                                                                                                                                                                |
| Peso fetal estimado según fórmula de Hadlock      | [*DATA REMOVED*]                                                                                                                                                                                |



|                                               |                                                                                                                                                          |
|-----------------------------------------------|----------------------------------------------------------------------------------------------------------------------------------------------------------|
| Percentil                                     | [*DATA REMOVED*]                                                                                                                                         |
| Peso fetal estimado según fórmula de Scioscia | <hr/>                                                                                                                                                    |
| Peso fetal estimado según fórmula de LEE      | <hr/>                                                                                                                                                    |
| Tipo de parto                                 | <input checked="" type="radio"/> eutocico<br><input type="radio"/> instrumentado/ventosa<br><input type="radio"/> cesarea                                |
| fecha de nacimiento                           | [*DATA REMOVED*]                                                                                                                                         |
| Días entre exploración y nacimiento           | [*DATA REMOVED*]                                                                                                                                         |
| Peso RN en g                                  | [*DATA REMOVED*]                                                                                                                                         |
| sexo                                          | <input checked="" type="radio"/> mujer<br><input type="radio"/> hombre                                                                                   |
| Apgar 1 minuto                                | [*DATA REMOVED*]                                                                                                                                         |
| Apgar 5 minutos                               | [*DATA REMOVED*]                                                                                                                                         |
| Apgar 10 minutos                              | <hr/>                                                                                                                                                    |
| antecedente Covid durante gestación           | <input type="radio"/> Yes<br><input checked="" type="radio"/> No                                                                                         |
| Nivel de estudios                             | <input type="radio"/> ninguno<br><input type="radio"/> primarios<br><input checked="" type="radio"/> secundarios<br><input type="radio"/> universitarios |

# Base\_datos\_estimacion\_peso\_fetal

|                                       |                                                                                                                                                                                                                                                                                      |
|---------------------------------------|--------------------------------------------------------------------------------------------------------------------------------------------------------------------------------------------------------------------------------------------------------------------------------------|
| Número de identificación participante | 54                                                                                                                                                                                                                                                                                   |
| CODIGO PARTICIPANTE                   |                                                                                                                                                                                                                                                                                      |
| Edad                                  | [*DATA REMOVED*]                                                                                                                                                                                                                                                                     |
| Gestaciones                           | <input type="radio"/> 1<br><input checked="" type="radio"/> 2<br><input type="radio"/> 3<br><input type="radio"/> mas de 3                                                                                                                                                           |
| partos                                | <input checked="" type="radio"/> 0<br><input type="radio"/> 1<br><input type="radio"/> 2<br><input type="radio"/> 3<br><input type="radio"/> mas de 3                                                                                                                                |
| cesáreas                              | <input checked="" type="radio"/> 0<br><input type="radio"/> 1<br><input type="radio"/> 2<br><input type="radio"/> 3<br><input type="radio"/> mas de 3                                                                                                                                |
| Abortos                               | <input type="radio"/> 0<br><input checked="" type="radio"/> 1<br><input type="radio"/> 2<br><input type="radio"/> 3<br><input type="radio"/> mas de 3                                                                                                                                |
| Tipo de gestacion                     | <input checked="" type="radio"/> espontanea<br><input type="radio"/> IAC inseminación artificial conyuge<br><input type="radio"/> IAD inseminación artificial donante<br><input type="radio"/> FIV Fecundación in Vitro<br><input type="radio"/> Ovodon FIV con donación de ovocitos |
| peso previo a embarazo                | [*DATA REMOVED*]                                                                                                                                                                                                                                                                     |
| Ganancia ponderal embarazo            |                                                                                                                                                                                                                                                                                      |
| Talla madre                           | [*DATA REMOVED*]                                                                                                                                                                                                                                                                     |
| IMC previo embarazo                   | 26.05835362467427                                                                                                                                                                                                                                                                    |
| Patología obstétrica                  | <input type="radio"/> no<br><input checked="" type="radio"/> si                                                                                                                                                                                                                      |
| Diabetes pregestacional               | <input checked="" type="radio"/> no<br><input type="radio"/> si                                                                                                                                                                                                                      |
| Diabetes gestacional                  | <input type="radio"/> no<br><input checked="" type="radio"/> si                                                                                                                                                                                                                      |

|                                            |                                                                                                                                                                                      |
|--------------------------------------------|--------------------------------------------------------------------------------------------------------------------------------------------------------------------------------------|
| Diabetes gestacional con insulina          | <input checked="" type="radio"/> no<br><input type="radio"/> si                                                                                                                      |
| Diabetes gestacional con dieta y ejercicio | <input type="radio"/> no<br><input checked="" type="radio"/> si                                                                                                                      |
| Percentil fetos previos                    | <input checked="" type="radio"/> Nada<br><input type="radio"/> percentil menor de 10<br><input type="radio"/> percentil entre 10 y 90<br><input type="radio"/> percentil mayor de 90 |
| Exfumadora                                 | <input checked="" type="radio"/> Nada<br><input type="radio"/> menos de 5 años<br><input type="radio"/> 5 a 10 años<br><input type="radio"/> mayor o igual a 10 años                 |
| Hábito tabáquico                           | <input type="radio"/> no<br><input checked="" type="radio"/> si                                                                                                                      |
| fumadora                                   | [*DATA REMOVED*]                                                                                                                                                                     |
| Consumo otros tóxicos                      | <input checked="" type="radio"/> no<br><input type="radio"/> si                                                                                                                      |
| Hb 1T                                      | [*DATA REMOVED*]                                                                                                                                                                     |
| Htc 1T                                     | [*DATA REMOVED*]                                                                                                                                                                     |
| Hb 2T                                      | [*DATA REMOVED*]                                                                                                                                                                     |
| HTC 2T                                     | [*DATA REMOVED*]                                                                                                                                                                     |
| Hb 3T                                      | [*DATA REMOVED*]                                                                                                                                                                     |
| HTC 3T                                     | [*DATA REMOVED*]                                                                                                                                                                     |
| Suplemento FE oral                         | <input type="radio"/> si<br><input type="radio"/> no                                                                                                                                 |
| Suplemento fe iv                           | <input type="radio"/> si<br><input type="radio"/> no                                                                                                                                 |
| Transfusión                                | <input type="radio"/> no<br><input type="radio"/> si                                                                                                                                 |
| Solicitada Vit D                           | <input type="radio"/> no<br><input checked="" type="radio"/> si                                                                                                                      |
| Deficit vit D                              | <input checked="" type="radio"/> no<br><input type="radio"/> si                                                                                                                      |
| Suplemento vit D                           | <input type="radio"/> si<br><input checked="" type="radio"/> no                                                                                                                      |

|                       |                                                                                                                                                                                                                                                                                                                                                                                                              |
|-----------------------|--------------------------------------------------------------------------------------------------------------------------------------------------------------------------------------------------------------------------------------------------------------------------------------------------------------------------------------------------------------------------------------------------------------|
| Dieta, cuestionario   | <input checked="" type="radio"/> sí<br><input type="radio"/> no                                                                                                                                                                                                                                                                                                                                              |
| Leche entera          | <input checked="" type="radio"/> Nunca o menos 1 vez al mes<br><input type="radio"/> 1 a 3 veces mes<br><input type="radio"/> 1 vez semana<br><input type="radio"/> 2 a 4 veces semana<br><input type="radio"/> 5 a 6 veces semana<br><input type="radio"/> 1 vez al día<br><input type="radio"/> 2 a 3 veces al día<br><input type="radio"/> 5 a 6 veces al día<br><input type="radio"/> más 6 veces al día |
| Leche semidesnatada   | <input checked="" type="radio"/> Nunca o menos 1 vez al mes<br><input type="radio"/> 1 a 3 veces mes<br><input type="radio"/> 1 vez semana<br><input type="radio"/> 2 a 4 veces semana<br><input type="radio"/> 5 a 6 veces semana<br><input type="radio"/> 1 vez al día<br><input type="radio"/> 2 a 3 veces al día<br><input type="radio"/> 5 a 6 veces al día<br><input type="radio"/> mas 6 veces al día |
| Leche desnatada       | <input checked="" type="radio"/> Nunca o menos 1 vez al mes<br><input type="radio"/> 1 a 3 veces mes<br><input type="radio"/> 1 vez semana<br><input type="radio"/> 2 a 4 veces semana<br><input type="radio"/> 5 a 6 veces semana<br><input type="radio"/> 1 vez al día<br><input type="radio"/> 2 a 3 veces al día<br><input type="radio"/> 5 a 6 veces al día<br><input type="radio"/> más 6 veces al día |
| Leche condensada      | <input checked="" type="radio"/> Nunca o menos 1 vez al mes<br><input type="radio"/> 1 a 3 veces mes<br><input type="radio"/> 1 vez semana<br><input type="radio"/> 2 a 4 veces semana<br><input type="radio"/> 5 a 6 veces semana<br><input type="radio"/> 1 vez al día<br><input type="radio"/> 2 a 3 veces al día<br><input type="radio"/> 5 a 6 veces al día<br><input type="radio"/> más 6 veces al día |
| nata o crema de leche | <input checked="" type="radio"/> Nunca o menos 1 vez al mes<br><input type="radio"/> 1 a 3 veces mes<br><input type="radio"/> 1 vez semana<br><input type="radio"/> 2 a 4 veces semana<br><input type="radio"/> 5 a 6 veces semana<br><input type="radio"/> 1 vez al día<br><input type="radio"/> 2 a 3 veces al día<br><input type="radio"/> 5 a 6 veces al día<br><input type="radio"/> más 6 veces al día |

|                                             |                                                                                                                                                                                                                                                                                                                                                                                                              |
|---------------------------------------------|--------------------------------------------------------------------------------------------------------------------------------------------------------------------------------------------------------------------------------------------------------------------------------------------------------------------------------------------------------------------------------------------------------------|
| Yogurt Entero                               | <input checked="" type="radio"/> Nunca o menos 1 vez al mes<br><input type="radio"/> 1 a 3 veces mes<br><input type="radio"/> 1 vez semana<br><input type="radio"/> 2 a 4 veces semana<br><input type="radio"/> 5 a 6 veces semana<br><input type="radio"/> 1 vez al día<br><input type="radio"/> 2 a 3 veces al día<br><input type="radio"/> 5 a 6 veces al día<br><input type="radio"/> más 6 veces al día |
| Yogurt desnatado                            | <input type="radio"/> Nunca o menos 1 vez al mes<br><input type="radio"/> 1 a 3 veces mes<br><input type="radio"/> 1 vez semana<br><input type="radio"/> 2 a 4 veces semana<br><input type="radio"/> 5 a 6 veces semana<br><input checked="" type="radio"/> 1 vez al día<br><input type="radio"/> 2 a 3 veces al día<br><input type="radio"/> 5 a 6 veces al día<br><input type="radio"/> más 6 veces al día |
| 100g requesón o queso blando o queso fresco | <input checked="" type="radio"/> Nunca o menos 1 vez al mes<br><input type="radio"/> 1 a 3 veces mes<br><input type="radio"/> 1 vez semana<br><input type="radio"/> 2 a 4 veces semana<br><input type="radio"/> 5 a 6 veces semana<br><input type="radio"/> 1 vez al día<br><input type="radio"/> 2 a 3 veces al día<br><input type="radio"/> 5 a 6 veces al día<br><input type="radio"/> más 6 veces al día |
| queso curado o semicurado o cremoso         | <input type="radio"/> Nunca o menos 1 vez al mes<br><input type="radio"/> 1 a 3 veces mes<br><input type="radio"/> 1 vez semana<br><input checked="" type="radio"/> 2 a 4 veces semana<br><input type="radio"/> 5 a 6 veces semana<br><input type="radio"/> 1 vez al día<br><input type="radio"/> 2 a 3 veces al día<br><input type="radio"/> 5 a 6 veces al día<br><input type="radio"/> más 6 veces al día |
| natillas flan pudding                       | <input checked="" type="radio"/> Nunca o menos 1 vez al mes<br><input type="radio"/> 1 a 3 veces mes<br><input type="radio"/> 1 vez semana<br><input type="radio"/> 2 a 4 veces semana<br><input type="radio"/> 5 a 6 veces semana<br><input type="radio"/> 1 vez al día<br><input type="radio"/> 2 a 3 veces al día<br><input type="radio"/> 5 a 6 veces al día<br><input type="radio"/> más 6 veces al día |
| Helado                                      | <input checked="" type="radio"/> Nunca o menos 1 vez al mes<br><input type="radio"/> 1 a 3 veces mes<br><input type="radio"/> 1 vez semana<br><input type="radio"/> 2 a 4 veces semana<br><input type="radio"/> 5 a 6 veces semana<br><input type="radio"/> 1 vez al día<br><input type="radio"/> 2 a 3 veces al día<br><input type="radio"/> 5 a 6 veces al día<br><input type="radio"/> más 6 veces al día |

|                                      |                                                                                                                                                                                                                                                                                                                                                                                                              |
|--------------------------------------|--------------------------------------------------------------------------------------------------------------------------------------------------------------------------------------------------------------------------------------------------------------------------------------------------------------------------------------------------------------------------------------------------------------|
| huevo                                | <input type="radio"/> Nunca o menos 1 vez al mes<br><input type="radio"/> 1 a 3 veces mes<br><input type="radio"/> 1 vez semana<br><input checked="" type="radio"/> 2 a 4 veces semana<br><input type="radio"/> 5 a 6 veces semana<br><input type="radio"/> 1 vez al día<br><input type="radio"/> 2 a 3 veces al día<br><input type="radio"/> 5 a 6 veces al día<br><input type="radio"/> más 6 veces al día |
| Pollo con piel                       | <input type="radio"/> Nunca o menos 1 vez al mes<br><input type="radio"/> 1 a 3 veces mes<br><input checked="" type="radio"/> 1 vez semana<br><input type="radio"/> 2 a 4 veces semana<br><input type="radio"/> 5 a 6 veces semana<br><input type="radio"/> 1 vez al día<br><input type="radio"/> 2 a 3 veces al día<br><input type="radio"/> 5 a 6 veces al día<br><input type="radio"/> más 6 veces al día |
| pollo sin piel                       | <input checked="" type="radio"/> Nunca o menos 1 vez al mes<br><input type="radio"/> 1 a 3 veces mes<br><input type="radio"/> 1 vez semana<br><input type="radio"/> 2 a 4 veces semana<br><input type="radio"/> 5 a 6 veces semana<br><input type="radio"/> 1 vez al día<br><input type="radio"/> 2 a 3 veces al día<br><input type="radio"/> 5 a 6 veces al día<br><input type="radio"/> más 6 veces al día |
| Ternera o cerdo o cordero            | <input type="radio"/> Nunca o menos 1 vez al mes<br><input type="radio"/> 1 a 3 veces mes<br><input checked="" type="radio"/> 1 vez semana<br><input type="radio"/> 2 a 4 veces semana<br><input type="radio"/> 5 a 6 veces semana<br><input type="radio"/> 1 vez al día<br><input type="radio"/> 2 a 3 veces al día<br><input type="radio"/> 5 a 6 veces al día<br><input type="radio"/> más 6 veces al día |
| carne caza: Conejo o codorniz o pato | <input checked="" type="radio"/> Nunca o menos 1 vez al mes<br><input type="radio"/> 1 a 3 veces mes<br><input type="radio"/> 1 vez semana<br><input type="radio"/> 2 a 4 veces semana<br><input type="radio"/> 5 a 6 veces semana<br><input type="radio"/> 1 vez al día<br><input type="radio"/> 2 a 3 veces al día<br><input type="radio"/> 5 a 6 veces al día<br><input type="radio"/> más 6 veces al día |
| Hígado de ternera o cerdo o pollo    | <input checked="" type="radio"/> Nunca o menos 1 vez al mes<br><input type="radio"/> 1 a 3 veces mes<br><input type="radio"/> 1 vez semana<br><input type="radio"/> 2 a 4 veces semana<br><input type="radio"/> 5 a 6 veces semana<br><input type="radio"/> 1 vez al día<br><input type="radio"/> 2 a 3 veces al día<br><input type="radio"/> 5 a 6 veces al día<br><input type="radio"/> más 6 veces al día |

|                     |                                                                                                                                                                                                                                                                                                                                                                                                              |
|---------------------|--------------------------------------------------------------------------------------------------------------------------------------------------------------------------------------------------------------------------------------------------------------------------------------------------------------------------------------------------------------------------------------------------------------|
| Vísceras            | <input checked="" type="radio"/> Nunca o menos 1 vez al mes<br><input type="radio"/> 1 a 3 veces mes<br><input type="radio"/> 1 vez semana<br><input type="radio"/> 2 a 4 veces semana<br><input type="radio"/> 5 a 6 veces semana<br><input type="radio"/> 1 vez al día<br><input type="radio"/> 2 a 3 veces al día<br><input type="radio"/> 5 a 6 veces al día<br><input type="radio"/> más 6 veces al día |
| Embutido            | <input checked="" type="radio"/> Nunca o menos 1 vez al mes<br><input type="radio"/> 1 a 3 veces mes<br><input type="radio"/> 1 vez semana<br><input type="radio"/> 2 a 4 veces semana<br><input type="radio"/> 5 a 6 veces semana<br><input type="radio"/> 1 vez al día<br><input type="radio"/> 2 a 3 veces al día<br><input type="radio"/> 5 a 6 veces al día<br><input type="radio"/> más 6 veces al día |
| Salchicha o similar | <input type="radio"/> Nunca o menos 1 vez al mes<br><input checked="" type="radio"/> 1 a 3 veces mes<br><input type="radio"/> 1 vez semana<br><input type="radio"/> 2 a 4 veces semana<br><input type="radio"/> 5 a 6 veces semana<br><input type="radio"/> 1 vez al día<br><input type="radio"/> 2 a 3 veces al día<br><input type="radio"/> 5 a 6 veces al día<br><input type="radio"/> más 6 veces al día |
| Pate o foiegras     | <input checked="" type="radio"/> Nunca o menos 1 vez al mes<br><input type="radio"/> 1 a 3 veces mes<br><input type="radio"/> 1 vez semana<br><input type="radio"/> 2 a 4 veces semana<br><input type="radio"/> 5 a 6 veces semana<br><input type="radio"/> 1 vez al día<br><input type="radio"/> 2 a 3 veces al día<br><input type="radio"/> 5 a 6 veces al día<br><input type="radio"/> más 6 veces al día |
| Hamburguesa         | <input type="radio"/> Nunca o menos 1 vez al mes<br><input checked="" type="radio"/> 1 a 3 veces mes<br><input type="radio"/> 1 vez semana<br><input type="radio"/> 2 a 4 veces semana<br><input type="radio"/> 5 a 6 veces semana<br><input type="radio"/> 1 vez al día<br><input type="radio"/> 2 a 3 veces al día<br><input type="radio"/> 5 a 6 veces al día<br><input type="radio"/> más 6 veces al día |
| tocino o bacon      | <input type="radio"/> Nunca o menos 1 vez al mes<br><input type="radio"/> 1 a 3 veces mes<br><input checked="" type="radio"/> 1 vez semana<br><input type="radio"/> 2 a 4 veces semana<br><input type="radio"/> 5 a 6 veces semana<br><input type="radio"/> 1 vez al día<br><input type="radio"/> 2 a 3 veces al día<br><input type="radio"/> 5 a 6 veces al día<br><input type="radio"/> más 6 veces al día |

---

|               |                                                                                                                                                                                                                                                                                                                                                                                                              |
|---------------|--------------------------------------------------------------------------------------------------------------------------------------------------------------------------------------------------------------------------------------------------------------------------------------------------------------------------------------------------------------------------------------------------------------|
| Pescado frito | <input type="radio"/> Nunca o menos 1 vez al mes<br><input checked="" type="radio"/> 1 a 3 veces mes<br><input type="radio"/> 1 vez semana<br><input type="radio"/> 2 a 4 veces semana<br><input type="radio"/> 5 a 6 veces semana<br><input type="radio"/> 1 vez al día<br><input type="radio"/> 2 a 3 veces al día<br><input type="radio"/> 5 a 6 veces al día<br><input type="radio"/> más 6 veces al día |
|---------------|--------------------------------------------------------------------------------------------------------------------------------------------------------------------------------------------------------------------------------------------------------------------------------------------------------------------------------------------------------------------------------------------------------------|

---

|                        |                                                                                                                                                                                                                                                                                                                                                                                                              |
|------------------------|--------------------------------------------------------------------------------------------------------------------------------------------------------------------------------------------------------------------------------------------------------------------------------------------------------------------------------------------------------------------------------------------------------------|
| pescado hervido blanco | <input type="radio"/> Nunca o menos 1 vez al mes<br><input checked="" type="radio"/> 1 a 3 veces mes<br><input type="radio"/> 1 vez semana<br><input type="radio"/> 2 a 4 veces semana<br><input type="radio"/> 5 a 6 veces semana<br><input type="radio"/> 1 vez al día<br><input type="radio"/> 2 a 3 veces al día<br><input type="radio"/> 5 a 6 veces al día<br><input type="radio"/> más 6 veces al día |
|------------------------|--------------------------------------------------------------------------------------------------------------------------------------------------------------------------------------------------------------------------------------------------------------------------------------------------------------------------------------------------------------------------------------------------------------|

---

|                      |                                                                                                                                                                                                                                                                                                                                                                                                              |
|----------------------|--------------------------------------------------------------------------------------------------------------------------------------------------------------------------------------------------------------------------------------------------------------------------------------------------------------------------------------------------------------------------------------------------------------|
| pescado hervido azul | <input type="radio"/> Nunca o menos 1 vez al mes<br><input checked="" type="radio"/> 1 a 3 veces mes<br><input type="radio"/> 1 vez semana<br><input type="radio"/> 2 a 4 veces semana<br><input type="radio"/> 5 a 6 veces semana<br><input type="radio"/> 1 vez al día<br><input type="radio"/> 2 a 3 veces al día<br><input type="radio"/> 5 a 6 veces al día<br><input type="radio"/> más 6 veces al día |
|----------------------|--------------------------------------------------------------------------------------------------------------------------------------------------------------------------------------------------------------------------------------------------------------------------------------------------------------------------------------------------------------------------------------------------------------|

---

|                    |                                                                                                                                                                                                                                                                                                                                                                                                              |
|--------------------|--------------------------------------------------------------------------------------------------------------------------------------------------------------------------------------------------------------------------------------------------------------------------------------------------------------------------------------------------------------------------------------------------------------|
| otros pescado azul | <input checked="" type="radio"/> Nunca o menos 1 vez al mes<br><input type="radio"/> 1 a 3 veces mes<br><input type="radio"/> 1 vez semana<br><input type="radio"/> 2 a 4 veces semana<br><input type="radio"/> 5 a 6 veces semana<br><input type="radio"/> 1 vez al día<br><input type="radio"/> 2 a 3 veces al día<br><input type="radio"/> 5 a 6 veces al día<br><input type="radio"/> más 6 veces al día |
|--------------------|--------------------------------------------------------------------------------------------------------------------------------------------------------------------------------------------------------------------------------------------------------------------------------------------------------------------------------------------------------------------------------------------------------------|

---

|               |                                                                                                                                                                                                                                                                                                                                                                                                              |
|---------------|--------------------------------------------------------------------------------------------------------------------------------------------------------------------------------------------------------------------------------------------------------------------------------------------------------------------------------------------------------------------------------------------------------------|
| atun conserva | <input type="radio"/> Nunca o menos 1 vez al mes<br><input type="radio"/> 1 a 3 veces mes<br><input checked="" type="radio"/> 1 vez semana<br><input type="radio"/> 2 a 4 veces semana<br><input type="radio"/> 5 a 6 veces semana<br><input type="radio"/> 1 vez al día<br><input type="radio"/> 2 a 3 veces al día<br><input type="radio"/> 5 a 6 veces al día<br><input type="radio"/> más 6 veces al día |
|---------------|--------------------------------------------------------------------------------------------------------------------------------------------------------------------------------------------------------------------------------------------------------------------------------------------------------------------------------------------------------------------------------------------------------------|

---

|                  |                                                                                                                                                                                                                                                                                                                                                                                                              |
|------------------|--------------------------------------------------------------------------------------------------------------------------------------------------------------------------------------------------------------------------------------------------------------------------------------------------------------------------------------------------------------------------------------------------------------|
| sardina conserva | <input checked="" type="radio"/> Nunca o menos 1 vez al mes<br><input type="radio"/> 1 a 3 veces mes<br><input type="radio"/> 1 vez semana<br><input type="radio"/> 2 a 4 veces semana<br><input type="radio"/> 5 a 6 veces semana<br><input type="radio"/> 1 vez al día<br><input type="radio"/> 2 a 3 veces al día<br><input type="radio"/> 5 a 6 veces al día<br><input type="radio"/> más 6 veces al día |
|------------------|--------------------------------------------------------------------------------------------------------------------------------------------------------------------------------------------------------------------------------------------------------------------------------------------------------------------------------------------------------------------------------------------------------------|

---



|                                         |                                                                                                                                                                                                                                                                                                                                                                                                              |
|-----------------------------------------|--------------------------------------------------------------------------------------------------------------------------------------------------------------------------------------------------------------------------------------------------------------------------------------------------------------------------------------------------------------------------------------------------------------|
| pescado ahumado                         | <input checked="" type="radio"/> Nunca o menos 1 vez al mes<br><input type="radio"/> 1 a 3 veces mes<br><input type="radio"/> 1 vez semana<br><input type="radio"/> 2 a 4 veces semana<br><input type="radio"/> 5 a 6 veces semana<br><input type="radio"/> 1 vez al día<br><input type="radio"/> 2 a 3 veces al día<br><input type="radio"/> 5 a 6 veces al día<br><input type="radio"/> más 6 veces al día |
| almejas o mejillones o ostras unos 100g | <input type="radio"/> Nunca o menos 1 vez al mes<br><input checked="" type="radio"/> 1 a 3 veces mes<br><input type="radio"/> 1 vez semana<br><input type="radio"/> 2 a 4 veces semana<br><input type="radio"/> 5 a 6 veces semana<br><input type="radio"/> 1 vez al día<br><input type="radio"/> 2 a 3 veces al día<br><input type="radio"/> 5 a 6 veces al día<br><input type="radio"/> más 6 veces al día |
| calamar o chipiron o sepia unos 100g    | <input type="radio"/> Nunca o menos 1 vez al mes<br><input checked="" type="radio"/> 1 a 3 veces mes<br><input type="radio"/> 1 vez semana<br><input type="radio"/> 2 a 4 veces semana<br><input type="radio"/> 5 a 6 veces semana<br><input type="radio"/> 1 vez al día<br><input type="radio"/> 2 a 3 veces al día<br><input type="radio"/> 5 a 6 veces al día<br><input type="radio"/> más 6 veces al día |
| marisco unos 100g                       | <input type="radio"/> Nunca o menos 1 vez al mes<br><input checked="" type="radio"/> 1 a 3 veces mes<br><input type="radio"/> 1 vez semana<br><input type="radio"/> 2 a 4 veces semana<br><input type="radio"/> 5 a 6 veces semana<br><input type="radio"/> 1 vez al día<br><input type="radio"/> 2 a 3 veces al día<br><input type="radio"/> 5 a 6 veces al día<br><input type="radio"/> más 6 veces al día |
| Espinacas o acelgas cocinadas           | <input checked="" type="radio"/> Nunca o menos 1 vez al mes<br><input type="radio"/> 1 a 3 veces mes<br><input type="radio"/> 1 vez semana<br><input type="radio"/> 2 a 4 veces semana<br><input type="radio"/> 5 a 6 veces semana<br><input type="radio"/> 1 vez al día<br><input type="radio"/> 2 a 3 veces al día<br><input type="radio"/> 5 a 6 veces al día<br><input type="radio"/> más 6 veces al día |
| Col o coliflor o brocoli cocinado       | <input checked="" type="radio"/> Nunca o menos 1 vez al mes<br><input type="radio"/> 1 a 3 veces mes<br><input type="radio"/> 1 vez semana<br><input type="radio"/> 2 a 4 veces semana<br><input type="radio"/> 5 a 6 veces semana<br><input type="radio"/> 1 vez al día<br><input type="radio"/> 2 a 3 veces al día<br><input type="radio"/> 5 a 6 veces al día<br><input type="radio"/> más 6 veces al día |

---

|                              |                                                                                                                                                                                                                                                                                                                                                                                                              |
|------------------------------|--------------------------------------------------------------------------------------------------------------------------------------------------------------------------------------------------------------------------------------------------------------------------------------------------------------------------------------------------------------------------------------------------------------|
| Lechuga o endivia o escarola | <input type="radio"/> Nunca o menos 1 vez al mes<br><input type="radio"/> 1 a 3 veces mes<br><input type="radio"/> 1 vez semana<br><input checked="" type="radio"/> 2 a 4 veces semana<br><input type="radio"/> 5 a 6 veces semana<br><input type="radio"/> 1 vez al día<br><input type="radio"/> 2 a 3 veces al día<br><input type="radio"/> 5 a 6 veces al día<br><input type="radio"/> más 6 veces al día |
|------------------------------|--------------------------------------------------------------------------------------------------------------------------------------------------------------------------------------------------------------------------------------------------------------------------------------------------------------------------------------------------------------------------------------------------------------|

---

|                 |                                                                                                                                                                                                                                                                                                                                                                                                              |
|-----------------|--------------------------------------------------------------------------------------------------------------------------------------------------------------------------------------------------------------------------------------------------------------------------------------------------------------------------------------------------------------------------------------------------------------|
| tomate ensalada | <input type="radio"/> Nunca o menos 1 vez al mes<br><input type="radio"/> 1 a 3 veces mes<br><input type="radio"/> 1 vez semana<br><input type="radio"/> 2 a 4 veces semana<br><input checked="" type="radio"/> 5 a 6 veces semana<br><input type="radio"/> 1 vez al día<br><input type="radio"/> 2 a 3 veces al día<br><input type="radio"/> 5 a 6 veces al día<br><input type="radio"/> más 6 veces al día |
|-----------------|--------------------------------------------------------------------------------------------------------------------------------------------------------------------------------------------------------------------------------------------------------------------------------------------------------------------------------------------------------------------------------------------------------------|

---

|         |                                                                                                                                                                                                                                                                                                                                                                                                              |
|---------|--------------------------------------------------------------------------------------------------------------------------------------------------------------------------------------------------------------------------------------------------------------------------------------------------------------------------------------------------------------------------------------------------------------|
| cebolla | <input type="radio"/> Nunca o menos 1 vez al mes<br><input type="radio"/> 1 a 3 veces mes<br><input type="radio"/> 1 vez semana<br><input checked="" type="radio"/> 2 a 4 veces semana<br><input type="radio"/> 5 a 6 veces semana<br><input type="radio"/> 1 vez al día<br><input type="radio"/> 2 a 3 veces al día<br><input type="radio"/> 5 a 6 veces al día<br><input type="radio"/> más 6 veces al día |
|---------|--------------------------------------------------------------------------------------------------------------------------------------------------------------------------------------------------------------------------------------------------------------------------------------------------------------------------------------------------------------------------------------------------------------|

---

|                      |                                                                                                                                                                                                                                                                                                                                                                                                              |
|----------------------|--------------------------------------------------------------------------------------------------------------------------------------------------------------------------------------------------------------------------------------------------------------------------------------------------------------------------------------------------------------------------------------------------------------|
| Zanahoria o calabaza | <input type="radio"/> Nunca o menos 1 vez al mes<br><input type="radio"/> 1 a 3 veces mes<br><input checked="" type="radio"/> 1 vez semana<br><input type="radio"/> 2 a 4 veces semana<br><input type="radio"/> 5 a 6 veces semana<br><input type="radio"/> 1 vez al día<br><input type="radio"/> 2 a 3 veces al día<br><input type="radio"/> 5 a 6 veces al día<br><input type="radio"/> más 6 veces al día |
|----------------------|--------------------------------------------------------------------------------------------------------------------------------------------------------------------------------------------------------------------------------------------------------------------------------------------------------------------------------------------------------------------------------------------------------------|

---

|               |                                                                                                                                                                                                                                                                                                                                                                                                              |
|---------------|--------------------------------------------------------------------------------------------------------------------------------------------------------------------------------------------------------------------------------------------------------------------------------------------------------------------------------------------------------------------------------------------------------------|
| Judías verdes | <input type="radio"/> Nunca o menos 1 vez al mes<br><input checked="" type="radio"/> 1 a 3 veces mes<br><input type="radio"/> 1 vez semana<br><input type="radio"/> 2 a 4 veces semana<br><input type="radio"/> 5 a 6 veces semana<br><input type="radio"/> 1 vez al día<br><input type="radio"/> 2 a 3 veces al día<br><input type="radio"/> 5 a 6 veces al día<br><input type="radio"/> más 6 veces al día |
|---------------|--------------------------------------------------------------------------------------------------------------------------------------------------------------------------------------------------------------------------------------------------------------------------------------------------------------------------------------------------------------------------------------------------------------|

---

|                                |                                                                                                                                                                                                                                                                                                                                                                                                              |
|--------------------------------|--------------------------------------------------------------------------------------------------------------------------------------------------------------------------------------------------------------------------------------------------------------------------------------------------------------------------------------------------------------------------------------------------------------|
| Berenjena o calabacin o pepino | <input type="radio"/> Nunca o menos 1 vez al mes<br><input type="radio"/> 1 a 3 veces mes<br><input checked="" type="radio"/> 1 vez semana<br><input type="radio"/> 2 a 4 veces semana<br><input type="radio"/> 5 a 6 veces semana<br><input type="radio"/> 1 vez al día<br><input type="radio"/> 2 a 3 veces al día<br><input type="radio"/> 5 a 6 veces al día<br><input type="radio"/> más 6 veces al día |
|--------------------------------|--------------------------------------------------------------------------------------------------------------------------------------------------------------------------------------------------------------------------------------------------------------------------------------------------------------------------------------------------------------------------------------------------------------|

---

---

|          |                                                                                                                                                                                                                                                                                                                                                                                                              |
|----------|--------------------------------------------------------------------------------------------------------------------------------------------------------------------------------------------------------------------------------------------------------------------------------------------------------------------------------------------------------------------------------------------------------------|
| pimiento | <input type="radio"/> Nunca o menos 1 vez al mes<br><input checked="" type="radio"/> 1 a 3 veces mes<br><input type="radio"/> 1 vez semana<br><input type="radio"/> 2 a 4 veces semana<br><input type="radio"/> 5 a 6 veces semana<br><input type="radio"/> 1 vez al día<br><input type="radio"/> 2 a 3 veces al día<br><input type="radio"/> 5 a 6 veces al día<br><input type="radio"/> más 6 veces al día |
|----------|--------------------------------------------------------------------------------------------------------------------------------------------------------------------------------------------------------------------------------------------------------------------------------------------------------------------------------------------------------------------------------------------------------------|

---

|           |                                                                                                                                                                                                                                                                                                                                                                                                              |
|-----------|--------------------------------------------------------------------------------------------------------------------------------------------------------------------------------------------------------------------------------------------------------------------------------------------------------------------------------------------------------------------------------------------------------------|
| alcachofa | <input checked="" type="radio"/> Nunca o menos 1 vez al mes<br><input type="radio"/> 1 a 3 veces mes<br><input type="radio"/> 1 vez semana<br><input type="radio"/> 2 a 4 veces semana<br><input type="radio"/> 5 a 6 veces semana<br><input type="radio"/> 1 vez al día<br><input type="radio"/> 2 a 3 veces al día<br><input type="radio"/> 5 a 6 veces al día<br><input type="radio"/> más 6 veces al día |
|-----------|--------------------------------------------------------------------------------------------------------------------------------------------------------------------------------------------------------------------------------------------------------------------------------------------------------------------------------------------------------------------------------------------------------------|

---

|            |                                                                                                                                                                                                                                                                                                                                                                                                              |
|------------|--------------------------------------------------------------------------------------------------------------------------------------------------------------------------------------------------------------------------------------------------------------------------------------------------------------------------------------------------------------------------------------------------------------|
| espárragos | <input checked="" type="radio"/> Nunca o menos 1 vez al mes<br><input type="radio"/> 1 a 3 veces mes<br><input type="radio"/> 1 vez semana<br><input type="radio"/> 2 a 4 veces semana<br><input type="radio"/> 5 a 6 veces semana<br><input type="radio"/> 1 vez al día<br><input type="radio"/> 2 a 3 veces al día<br><input type="radio"/> 5 a 6 veces al día<br><input type="radio"/> más 6 veces al día |
|------------|--------------------------------------------------------------------------------------------------------------------------------------------------------------------------------------------------------------------------------------------------------------------------------------------------------------------------------------------------------------------------------------------------------------|

---

|              |                                                                                                                                                                                                                                                                                                                                                                                                              |
|--------------|--------------------------------------------------------------------------------------------------------------------------------------------------------------------------------------------------------------------------------------------------------------------------------------------------------------------------------------------------------------------------------------------------------------|
| maíz hervido | <input type="radio"/> Nunca o menos 1 vez al mes<br><input checked="" type="radio"/> 1 a 3 veces mes<br><input type="radio"/> 1 vez semana<br><input type="radio"/> 2 a 4 veces semana<br><input type="radio"/> 5 a 6 veces semana<br><input type="radio"/> 1 vez al día<br><input type="radio"/> 2 a 3 veces al día<br><input type="radio"/> 5 a 6 veces al día<br><input type="radio"/> más 6 veces al día |
|--------------|--------------------------------------------------------------------------------------------------------------------------------------------------------------------------------------------------------------------------------------------------------------------------------------------------------------------------------------------------------------------------------------------------------------|

---

|           |                                                                                                                                                                                                                                                                                                                                                                                                              |
|-----------|--------------------------------------------------------------------------------------------------------------------------------------------------------------------------------------------------------------------------------------------------------------------------------------------------------------------------------------------------------------------------------------------------------------|
| legumbres | <input type="radio"/> Nunca o menos 1 vez al mes<br><input checked="" type="radio"/> 1 a 3 veces mes<br><input type="radio"/> 1 vez semana<br><input type="radio"/> 2 a 4 veces semana<br><input type="radio"/> 5 a 6 veces semana<br><input type="radio"/> 1 vez al día<br><input type="radio"/> 2 a 3 veces al día<br><input type="radio"/> 5 a 6 veces al día<br><input type="radio"/> más 6 veces al día |
|-----------|--------------------------------------------------------------------------------------------------------------------------------------------------------------------------------------------------------------------------------------------------------------------------------------------------------------------------------------------------------------------------------------------------------------|

---

|                       |                                                                                                                                                                                                                                                                                                                                                                                                              |
|-----------------------|--------------------------------------------------------------------------------------------------------------------------------------------------------------------------------------------------------------------------------------------------------------------------------------------------------------------------------------------------------------------------------------------------------------|
| naranjas o mandarinas | <input type="radio"/> Nunca o menos 1 vez al mes<br><input checked="" type="radio"/> 1 a 3 veces mes<br><input type="radio"/> 1 vez semana<br><input type="radio"/> 2 a 4 veces semana<br><input type="radio"/> 5 a 6 veces semana<br><input type="radio"/> 1 vez al día<br><input type="radio"/> 2 a 3 veces al día<br><input type="radio"/> 5 a 6 veces al día<br><input type="radio"/> más 6 veces al día |
|-----------------------|--------------------------------------------------------------------------------------------------------------------------------------------------------------------------------------------------------------------------------------------------------------------------------------------------------------------------------------------------------------------------------------------------------------|

---

|                       |                                                                                                                                                                                                                                                                                                                                                                                                              |
|-----------------------|--------------------------------------------------------------------------------------------------------------------------------------------------------------------------------------------------------------------------------------------------------------------------------------------------------------------------------------------------------------------------------------------------------------|
| zum natural fruta     | <input type="radio"/> Nunca o menos 1 vez al mes<br><input checked="" type="radio"/> 1 a 3 veces mes<br><input type="radio"/> 1 vez semana<br><input type="radio"/> 2 a 4 veces semana<br><input type="radio"/> 5 a 6 veces semana<br><input type="radio"/> 1 vez al día<br><input type="radio"/> 2 a 3 veces al día<br><input type="radio"/> 5 a 6 veces al día<br><input type="radio"/> más 6 veces al día |
| platano               | <input checked="" type="radio"/> Nunca o menos 1 vez al mes<br><input type="radio"/> 1 a 3 veces mes<br><input type="radio"/> 1 vez semana<br><input type="radio"/> 2 a 4 veces semana<br><input type="radio"/> 5 a 6 veces semana<br><input type="radio"/> 1 vez al día<br><input type="radio"/> 2 a 3 veces al día<br><input type="radio"/> 5 a 6 veces al día<br><input type="radio"/> más 6 veces al día |
| manzana o pera        | <input type="radio"/> Nunca o menos 1 vez al mes<br><input checked="" type="radio"/> 1 a 3 veces mes<br><input type="radio"/> 1 vez semana<br><input type="radio"/> 2 a 4 veces semana<br><input type="radio"/> 5 a 6 veces semana<br><input type="radio"/> 1 vez al día<br><input type="radio"/> 2 a 3 veces al día<br><input type="radio"/> 5 a 6 veces al día<br><input type="radio"/> más 6 veces al día |
| melocotón o nectarina | <input checked="" type="radio"/> Nunca o menos 1 vez al mes<br><input type="radio"/> 1 a 3 veces mes<br><input type="radio"/> 1 vez semana<br><input type="radio"/> 2 a 4 veces semana<br><input type="radio"/> 5 a 6 veces semana<br><input type="radio"/> 1 vez al día<br><input type="radio"/> 2 a 3 veces al día<br><input type="radio"/> 5 a 6 veces al día<br><input type="radio"/> más 6 veces al día |
| sandia o melon        | <input type="radio"/> Nunca o menos 1 vez al mes<br><input type="radio"/> 1 a 3 veces mes<br><input type="radio"/> 1 vez semana<br><input type="radio"/> 2 a 4 veces semana<br><input checked="" type="radio"/> 5 a 6 veces semana<br><input type="radio"/> 1 vez al día<br><input type="radio"/> 2 a 3 veces al día<br><input type="radio"/> 5 a 6 veces al día<br><input type="radio"/> más 6 veces al día |
| uva                   | <input checked="" type="radio"/> Nunca o menos 1 vez al mes<br><input type="radio"/> 1 a 3 veces mes<br><input type="radio"/> 1 vez semana<br><input type="radio"/> 2 a 4 veces semana<br><input type="radio"/> 5 a 6 veces semana<br><input type="radio"/> 1 vez al día<br><input type="radio"/> 2 a 3 veces al día<br><input type="radio"/> 5 a 6 veces al día<br><input type="radio"/> más 6 veces al día |

---

bruna o ciruela

- ☐ Nunca o menos 1 vez al mes  
☒ 1 a 3 veces mes  
☐ 1 vez semana  
☐ 2 a 4 veces semana  
☐ 5 a 6 veces semana  
☐ 1 vez al día  
☐ 2 a 3 veces al día  
☐ 5 a 6 veces al día  
☐ más 6 veces al día

---

kiwi

- ☐ Nunca o menos 1 vez al mes  
☒ 1 a 3 veces mes  
☐ 1 vez semana  
☐ 2 a 4 veces semana  
☐ 5 a 6 veces semana  
☐ 1 vez al día  
☐ 2 a 3 veces al día  
☐ 5 a 6 veces al día  
☐ más 6 veces al día

---

aceituna

- ☐ Nunca o menos 1 vez al mes  
☒ 1 a 3 veces mes  
☐ 1 vez semana  
☐ 2 a 4 veces semana  
☐ 5 a 6 veces semana  
☐ 1 vez al día  
☐ 2 a 3 veces al día  
☐ 5 a 6 veces al día  
☐ más 6 veces al día

---

frutos secos

- ☐ Nunca o menos 1 vez al mes  
☒ 1 a 3 veces mes  
☐ 1 vez semana  
☐ 2 a 4 veces semana  
☐ 5 a 6 veces semana  
☐ 1 vez al día  
☐ 2 a 3 veces al día  
☐ 5 a 6 veces al día  
☐ más 6 veces al día

---

pan blanco

- ☐ Nunca o menos 1 vez al mes  
☐ 1 a 3 veces mes  
☐ 1 vez semana  
☐ 2 a 4 veces semana  
☐ 5 a 6 veces semana  
☒ 1 vez al día  
☐ 2 a 3 veces al día  
☐ 5 a 6 veces al día  
☐ más 6 veces al día

---

pan integral

- ☐ Nunca o menos 1 vez al mes  
☒ 1 a 3 veces mes  
☐ 1 vez semana  
☐ 2 a 4 veces semana  
☐ 5 a 6 veces semana  
☐ 1 vez al día  
☐ 2 a 3 veces al día  
☐ 5 a 6 veces al día  
☐ más 6 veces al día

---

cereales desayuno

- ☒ Nunca o menos 1 vez al mes  
☐ 1 a 3 veces mes  
☐ 1 vez semana  
☐ 2 a 4 veces semana  
☐ 5 a 6 veces semana  
☐ 1 vez al día  
☐ 2 a 3 veces al día  
☐ 5 a 6 veces al día  
☐ más 6 veces al día

---

patatas fritas

- ☐ Nunca o menos 1 vez al mes  
☒ 1 a 3 veces mes  
☐ 1 vez semana  
☐ 2 a 4 veces semana  
☐ 5 a 6 veces semana  
☐ 1 vez al día  
☐ 2 a 3 veces al día  
☐ 5 a 6 veces al día  
☐ más 6 veces al día

---

patatas cocidas o asadas

- ☐ Nunca o menos 1 vez al mes  
☒ 1 a 3 veces mes  
☐ 1 vez semana  
☐ 2 a 4 veces semana  
☐ 5 a 6 veces semana  
☐ 1 vez al día  
☐ 2 a 3 veces al día  
☐ 5 a 6 veces al día  
☐ más 6 veces al día

---

bolsa papas

- ☐ Nunca o menos 1 vez al mes  
☐ 1 a 3 veces mes  
☒ 1 vez semana  
☐ 2 a 4 veces semana  
☐ 5 a 6 veces semana  
☐ 1 vez al día  
☐ 2 a 3 veces al día  
☐ 5 a 6 veces al día  
☐ más 6 veces al día

---

arroz cocinado

- ☐ Nunca o menos 1 vez al mes  
☐ 1 a 3 veces mes  
☒ 1 vez semana  
☐ 2 a 4 veces semana  
☐ 5 a 6 veces semana  
☐ 1 vez al día  
☐ 2 a 3 veces al día  
☐ 5 a 6 veces al día  
☐ más 6 veces al día

---

pasta

- ☐ Nunca o menos 1 vez al mes  
☐ 1 a 3 veces mes  
☒ 1 vez semana  
☐ 2 a 4 veces semana  
☐ 5 a 6 veces semana  
☐ 1 vez al día  
☐ 2 a 3 veces al día  
☐ 5 a 6 veces al día  
☐ más 6 veces al día

|                     |                                                                                                                                                                                                                                                                                                                                                                                                              |
|---------------------|--------------------------------------------------------------------------------------------------------------------------------------------------------------------------------------------------------------------------------------------------------------------------------------------------------------------------------------------------------------------------------------------------------------|
| pizza               | <input type="radio"/> Nunca o menos 1 vez al mes<br><input checked="" type="radio"/> 1 a 3 veces mes<br><input type="radio"/> 1 vez semana<br><input type="radio"/> 2 a 4 veces semana<br><input type="radio"/> 5 a 6 veces semana<br><input type="radio"/> 1 vez al día<br><input type="radio"/> 2 a 3 veces al día<br><input type="radio"/> 5 a 6 veces al día<br><input type="radio"/> más 6 veces al día |
| aceite oliva        | <input type="radio"/> Nunca o menos 1 vez al mes<br><input type="radio"/> 1 a 3 veces mes<br><input type="radio"/> 1 vez semana<br><input checked="" type="radio"/> 2 a 4 veces semana<br><input type="radio"/> 5 a 6 veces semana<br><input type="radio"/> 1 vez al día<br><input type="radio"/> 2 a 3 veces al día<br><input type="radio"/> 5 a 6 veces al día<br><input type="radio"/> más 6 veces al día |
| otros aceites       | <input checked="" type="radio"/> Nunca o menos 1 vez al mes<br><input type="radio"/> 1 a 3 veces mes<br><input type="radio"/> 1 vez semana<br><input type="radio"/> 2 a 4 veces semana<br><input type="radio"/> 5 a 6 veces semana<br><input type="radio"/> 1 vez al día<br><input type="radio"/> 2 a 3 veces al día<br><input type="radio"/> 5 a 6 veces al día<br><input type="radio"/> más 6 veces al día |
| margarina           | <input checked="" type="radio"/> Nunca o menos 1 vez al mes<br><input type="radio"/> 1 a 3 veces mes<br><input type="radio"/> 1 vez semana<br><input type="radio"/> 2 a 4 veces semana<br><input type="radio"/> 5 a 6 veces semana<br><input type="radio"/> 1 vez al día<br><input type="radio"/> 2 a 3 veces al día<br><input type="radio"/> 5 a 6 veces al día<br><input type="radio"/> más 6 veces al día |
| mantequilla         | <input checked="" type="radio"/> Nunca o menos 1 vez al mes<br><input type="radio"/> 1 a 3 veces mes<br><input type="radio"/> 1 vez semana<br><input type="radio"/> 2 a 4 veces semana<br><input type="radio"/> 5 a 6 veces semana<br><input type="radio"/> 1 vez al día<br><input type="radio"/> 2 a 3 veces al día<br><input type="radio"/> 5 a 6 veces al día<br><input type="radio"/> más 6 veces al día |
| galletas tipo maria | <input type="radio"/> Nunca o menos 1 vez al mes<br><input type="radio"/> 1 a 3 veces mes<br><input type="radio"/> 1 vez semana<br><input type="radio"/> 2 a 4 veces semana<br><input type="radio"/> 5 a 6 veces semana<br><input type="radio"/> 1 vez al día<br><input checked="" type="radio"/> 2 a 3 veces al día<br><input type="radio"/> 5 a 6 veces al día<br><input type="radio"/> más 6 veces al día |

---

galletas chocolate

- ☒ Nunca o menos 1 vez al mes  
☐ 1 a 3 veces mes  
☐ 1 vez semana  
☐ 2 a 4 veces semana  
☐ 5 a 6 veces semana  
☐ 1 vez al día  
☐ 2 a 3 veces al día  
☐ 5 a 6 veces al día  
☐ más 6 veces al día

---

bolleria

- ☒ Nunca o menos 1 vez al mes  
☐ 1 a 3 veces mes  
☐ 1 vez semana  
☐ 2 a 4 veces semana  
☐ 5 a 6 veces semana  
☐ 1 vez al día  
☐ 2 a 3 veces al día  
☐ 5 a 6 veces al día  
☐ más 6 veces al día

---

chocolate o bombones

- ☐ Nunca o menos 1 vez al mes  
☒ 1 a 3 veces mes  
☐ 1 vez semana  
☐ 2 a 4 veces semana  
☐ 5 a 6 veces semana  
☐ 1 vez al día  
☐ 2 a 3 veces al día  
☐ 5 a 6 veces al día  
☐ más 6 veces al día

---

chocolate polvo o colacao

- ☒ Nunca o menos 1 vez al mes  
☐ 1 a 3 veces mes  
☐ 1 vez semana  
☐ 2 a 4 veces semana  
☐ 5 a 6 veces semana  
☐ 1 vez al día  
☐ 2 a 3 veces al día  
☐ 5 a 6 veces al día  
☐ más 6 veces al día

---

vino tinto

- ☒ Nunca o menos 1 vez al mes  
☐ 1 a 3 veces mes  
☐ 1 vez semana  
☐ 2 a 4 veces semana  
☐ 5 a 6 veces semana  
☐ 1 vez al día  
☐ 2 a 3 veces al día  
☐ 5 a 6 veces al día  
☐ más 6 veces al día

---

vino blanco

- ☒ Nunca o menos 1 vez al mes  
☐ 1 a 3 veces mes  
☐ 1 vez semana  
☐ 2 a 4 veces semana  
☐ 5 a 6 veces semana  
☐ 1 vez al día  
☐ 2 a 3 veces al día  
☐ 5 a 6 veces al día  
☐ más 6 veces al día



|                       |                                                                                                                                                                                                                                                                                                                                                                                                              |
|-----------------------|--------------------------------------------------------------------------------------------------------------------------------------------------------------------------------------------------------------------------------------------------------------------------------------------------------------------------------------------------------------------------------------------------------------|
| vino seco o vermut    | <input checked="" type="radio"/> Nunca o menos 1 vez al mes<br><input type="radio"/> 1 a 3 veces mes<br><input type="radio"/> 1 vez semana<br><input type="radio"/> 2 a 4 veces semana<br><input type="radio"/> 5 a 6 veces semana<br><input type="radio"/> 1 vez al día<br><input type="radio"/> 2 a 3 veces al día<br><input type="radio"/> 5 a 6 veces al día<br><input type="radio"/> más 6 veces al día |
| cerveza               | <input checked="" type="radio"/> Nunca o menos 1 vez al mes<br><input type="radio"/> 1 a 3 veces mes<br><input type="radio"/> 1 vez semana<br><input type="radio"/> 2 a 4 veces semana<br><input type="radio"/> 5 a 6 veces semana<br><input type="radio"/> 1 vez al día<br><input type="radio"/> 2 a 3 veces al día<br><input type="radio"/> 5 a 6 veces al día<br><input type="radio"/> más 6 veces al día |
| cerveza sin alcohol   | <input checked="" type="radio"/> Nunca o menos 1 vez al mes<br><input type="radio"/> 1 a 3 veces mes<br><input type="radio"/> 1 vez semana<br><input type="radio"/> 2 a 4 veces semana<br><input type="radio"/> 5 a 6 veces semana<br><input type="radio"/> 1 vez al día<br><input type="radio"/> 2 a 3 veces al día<br><input type="radio"/> 5 a 6 veces al día<br><input type="radio"/> más 6 veces al día |
| licores               | <input checked="" type="radio"/> Nunca o menos 1 vez al mes<br><input type="radio"/> 1 a 3 veces mes<br><input type="radio"/> 1 vez semana<br><input type="radio"/> 2 a 4 veces semana<br><input type="radio"/> 5 a 6 veces semana<br><input type="radio"/> 1 vez al día<br><input type="radio"/> 2 a 3 veces al día<br><input type="radio"/> 5 a 6 veces al día<br><input type="radio"/> más 6 veces al día |
| ginebra o ron o vodka | <input checked="" type="radio"/> Nunca o menos 1 vez al mes<br><input type="radio"/> 1 a 3 veces mes<br><input type="radio"/> 1 vez semana<br><input type="radio"/> 2 a 4 veces semana<br><input type="radio"/> 5 a 6 veces semana<br><input type="radio"/> 1 vez al día<br><input type="radio"/> 2 a 3 veces al día<br><input type="radio"/> 5 a 6 veces al día<br><input type="radio"/> más 6 veces al día |
| refresco normal       | <input checked="" type="radio"/> Nunca o menos 1 vez al mes<br><input type="radio"/> 1 a 3 veces mes<br><input type="radio"/> 1 vez semana<br><input type="radio"/> 2 a 4 veces semana<br><input type="radio"/> 5 a 6 veces semana<br><input type="radio"/> 1 vez al día<br><input type="radio"/> 2 a 3 veces al día<br><input type="radio"/> 5 a 6 veces al día<br><input type="radio"/> más 6 veces al día |

|                          |                                                                                                                                                                                                                                                                                                                                                                                                              |
|--------------------------|--------------------------------------------------------------------------------------------------------------------------------------------------------------------------------------------------------------------------------------------------------------------------------------------------------------------------------------------------------------------------------------------------------------|
| refresco sin azúcar      | <input checked="" type="radio"/> Nunca o menos 1 vez al mes<br><input type="radio"/> 1 a 3 veces mes<br><input type="radio"/> 1 vez semana<br><input type="radio"/> 2 a 4 veces semana<br><input type="radio"/> 5 a 6 veces semana<br><input type="radio"/> 1 vez al día<br><input type="radio"/> 2 a 3 veces al día<br><input type="radio"/> 5 a 6 veces al día<br><input type="radio"/> más 6 veces al día |
| Agua del grifo           | <input checked="" type="radio"/> Nunca o menos 1 vez al mes<br><input type="radio"/> 1 a 3 veces mes<br><input type="radio"/> 1 vez semana<br><input type="radio"/> 2 a 4 veces semana<br><input type="radio"/> 5 a 6 veces semana<br><input type="radio"/> 1 vez al día<br><input type="radio"/> 2 a 3 veces al día<br><input type="radio"/> 5 a 6 veces al día<br><input type="radio"/> más 6 veces al día |
| agua embotellada sin gas | <input type="radio"/> Nunca o menos 1 vez al mes<br><input type="radio"/> 1 a 3 veces mes<br><input type="radio"/> 1 vez semana<br><input type="radio"/> 2 a 4 veces semana<br><input type="radio"/> 5 a 6 veces semana<br><input type="radio"/> 1 vez al día<br><input type="radio"/> 2 a 3 veces al día<br><input type="radio"/> 5 a 6 veces al día<br><input checked="" type="radio"/> más 6 veces al día |
| agua embotellada con gas | <input checked="" type="radio"/> Nunca o menos 1 vez al mes<br><input type="radio"/> 1 a 3 veces mes<br><input type="radio"/> 1 vez semana<br><input type="radio"/> 2 a 4 veces semana<br><input type="radio"/> 5 a 6 veces semana<br><input type="radio"/> 1 vez al día<br><input type="radio"/> 2 a 3 veces al día<br><input type="radio"/> 5 a 6 veces al día<br><input type="radio"/> más 6 veces al día |
| zumو frutas embasado     | <input checked="" type="radio"/> Nunca o menos 1 vez al mes<br><input type="radio"/> 1 a 3 veces mes<br><input type="radio"/> 1 vez semana<br><input type="radio"/> 2 a 4 veces semana<br><input type="radio"/> 5 a 6 veces semana<br><input type="radio"/> 1 vez al día<br><input type="radio"/> 2 a 3 veces al día<br><input type="radio"/> 5 a 6 veces al día<br><input type="radio"/> más 6 veces al día |
| cafe                     | <input checked="" type="radio"/> Nunca o menos 1 vez al mes<br><input type="radio"/> 1 a 3 veces mes<br><input type="radio"/> 1 vez semana<br><input type="radio"/> 2 a 4 veces semana<br><input type="radio"/> 5 a 6 veces semana<br><input type="radio"/> 1 vez al día<br><input type="radio"/> 2 a 3 veces al día<br><input type="radio"/> 5 a 6 veces al día<br><input type="radio"/> más 6 veces al día |

|                       |                                                                                                                                                                                                                                                                                                                                                                                                              |
|-----------------------|--------------------------------------------------------------------------------------------------------------------------------------------------------------------------------------------------------------------------------------------------------------------------------------------------------------------------------------------------------------------------------------------------------------|
| cafe descafeinado     | <input checked="" type="radio"/> Nunca o menos 1 vez al mes<br><input type="radio"/> 1 a 3 veces mes<br><input type="radio"/> 1 vez semana<br><input type="radio"/> 2 a 4 veces semana<br><input type="radio"/> 5 a 6 veces semana<br><input type="radio"/> 1 vez al día<br><input type="radio"/> 2 a 3 veces al día<br><input type="radio"/> 5 a 6 veces al día<br><input type="radio"/> más 6 veces al día |
| te o infusión         | <input checked="" type="radio"/> Nunca o menos 1 vez al mes<br><input type="radio"/> 1 a 3 veces mes<br><input type="radio"/> 1 vez semana<br><input type="radio"/> 2 a 4 veces semana<br><input type="radio"/> 5 a 6 veces semana<br><input type="radio"/> 1 vez al día<br><input type="radio"/> 2 a 3 veces al día<br><input type="radio"/> 5 a 6 veces al día<br><input type="radio"/> más 6 veces al día |
| sopa o puré verduras  | <input type="radio"/> Nunca o menos 1 vez al mes<br><input checked="" type="radio"/> 1 a 3 veces mes<br><input type="radio"/> 1 vez semana<br><input type="radio"/> 2 a 4 veces semana<br><input type="radio"/> 5 a 6 veces semana<br><input type="radio"/> 1 vez al día<br><input type="radio"/> 2 a 3 veces al día<br><input type="radio"/> 5 a 6 veces al día<br><input type="radio"/> más 6 veces al día |
| croquetas pollo jamón | <input checked="" type="radio"/> Nunca o menos 1 vez al mes<br><input type="radio"/> 1 a 3 veces mes<br><input type="radio"/> 1 vez semana<br><input type="radio"/> 2 a 4 veces semana<br><input type="radio"/> 5 a 6 veces semana<br><input type="radio"/> 1 vez al día<br><input type="radio"/> 2 a 3 veces al día<br><input type="radio"/> 5 a 6 veces al día<br><input type="radio"/> más 6 veces al día |
| croquetas pescado     | <input type="radio"/> Nunca o menos 1 vez al mes<br><input checked="" type="radio"/> 1 a 3 veces mes<br><input type="radio"/> 1 vez semana<br><input type="radio"/> 2 a 4 veces semana<br><input type="radio"/> 5 a 6 veces semana<br><input type="radio"/> 1 vez al día<br><input type="radio"/> 2 a 3 veces al día<br><input type="radio"/> 5 a 6 veces al día<br><input type="radio"/> más 6 veces al día |
| mayonesa              | <input type="radio"/> Nunca o menos 1 vez al mes<br><input checked="" type="radio"/> 1 a 3 veces mes<br><input type="radio"/> 1 vez semana<br><input type="radio"/> 2 a 4 veces semana<br><input type="radio"/> 5 a 6 veces semana<br><input type="radio"/> 1 vez al día<br><input type="radio"/> 2 a 3 veces al día<br><input type="radio"/> 5 a 6 veces al día<br><input type="radio"/> más 6 veces al día |

|                  |                                                                                                                                                                                                                                                                                                                                                                                                              |
|------------------|--------------------------------------------------------------------------------------------------------------------------------------------------------------------------------------------------------------------------------------------------------------------------------------------------------------------------------------------------------------------------------------------------------------|
| salsa tomate     | <input type="radio"/> Nunca o menos 1 vez al mes<br><input checked="" type="radio"/> 1 a 3 veces mes<br><input type="radio"/> 1 vez semana<br><input type="radio"/> 2 a 4 veces semana<br><input type="radio"/> 5 a 6 veces semana<br><input type="radio"/> 1 vez al día<br><input type="radio"/> 2 a 3 veces al día<br><input type="radio"/> 5 a 6 veces al día<br><input type="radio"/> más 6 veces al día |
| ketchup          | <input checked="" type="radio"/> Nunca o menos 1 vez al mes<br><input type="radio"/> 1 a 3 veces mes<br><input type="radio"/> 1 vez semana<br><input type="radio"/> 2 a 4 veces semana<br><input type="radio"/> 5 a 6 veces semana<br><input type="radio"/> 1 vez al día<br><input type="radio"/> 2 a 3 veces al día<br><input type="radio"/> 5 a 6 veces al día<br><input type="radio"/> más 6 veces al día |
| sal              | <input type="radio"/> Nunca o menos 1 vez al mes<br><input type="radio"/> 1 a 3 veces mes<br><input type="radio"/> 1 vez semana<br><input checked="" type="radio"/> 2 a 4 veces semana<br><input type="radio"/> 5 a 6 veces semana<br><input type="radio"/> 1 vez al día<br><input type="radio"/> 2 a 3 veces al día<br><input type="radio"/> 5 a 6 veces al día<br><input type="radio"/> más 6 veces al día |
| ajo              | <input type="radio"/> Nunca o menos 1 vez al mes<br><input checked="" type="radio"/> 1 a 3 veces mes<br><input type="radio"/> 1 vez semana<br><input type="radio"/> 2 a 4 veces semana<br><input type="radio"/> 5 a 6 veces semana<br><input type="radio"/> 1 vez al día<br><input type="radio"/> 2 a 3 veces al día<br><input type="radio"/> 5 a 6 veces al día<br><input type="radio"/> más 6 veces al día |
| mermelada o miel | <input checked="" type="radio"/> Nunca o menos 1 vez al mes<br><input type="radio"/> 1 a 3 veces mes<br><input type="radio"/> 1 vez semana<br><input type="radio"/> 2 a 4 veces semana<br><input type="radio"/> 5 a 6 veces semana<br><input type="radio"/> 1 vez al día<br><input type="radio"/> 2 a 3 veces al día<br><input type="radio"/> 5 a 6 veces al día<br><input type="radio"/> más 6 veces al día |
| azúcar           | <input checked="" type="radio"/> Nunca o menos 1 vez al mes<br><input type="radio"/> 1 a 3 veces mes<br><input type="radio"/> 1 vez semana<br><input type="radio"/> 2 a 4 veces semana<br><input type="radio"/> 5 a 6 veces semana<br><input type="radio"/> 1 vez al día<br><input type="radio"/> 2 a 3 veces al día<br><input type="radio"/> 5 a 6 veces al día<br><input type="radio"/> más 6 veces al día |

|                                       |                                                                                                                                                                                                                                                                                                                                                                                                                                                                                                                               |
|---------------------------------------|-------------------------------------------------------------------------------------------------------------------------------------------------------------------------------------------------------------------------------------------------------------------------------------------------------------------------------------------------------------------------------------------------------------------------------------------------------------------------------------------------------------------------------|
| Otro alimento                         |                                                                                                                                                                                                                                                                                                                                                                                                                                                                                                                               |
| suplementos vitamínicos               | <input checked="" type="radio"/> si<br><input type="radio"/> no                                                                                                                                                                                                                                                                                                                                                                                                                                                               |
| suplementos vitamínicos               | [*DATA REMOVED*]                                                                                                                                                                                                                                                                                                                                                                                                                                                                                                              |
| dieta previa                          | <input checked="" type="radio"/> si<br><input type="radio"/> no                                                                                                                                                                                                                                                                                                                                                                                                                                                               |
| motivo dieta                          | <input type="radio"/> no dieta<br><input type="radio"/> control peso<br><input type="radio"/> control colesterol<br><input checked="" type="radio"/> control diabetes<br><input type="radio"/> problemas estómago<br><input type="radio"/> problemas vesícula o hepáticos<br><input type="radio"/> HTA o cardiopatía<br><input type="radio"/> problemas renales<br><input type="radio"/> alergia alimentaria<br><input type="radio"/> ácido úrico elevado<br><input type="radio"/> vegetariana<br><input type="radio"/> otros |
| cambio alimentos año previo gestación | <input type="radio"/> si<br><input checked="" type="radio"/> no                                                                                                                                                                                                                                                                                                                                                                                                                                                               |
| cambio lácteos                        | <input type="radio"/> eliminado<br><input type="radio"/> disminuido<br><input type="radio"/> igual<br><input type="radio"/> aumentado<br><input type="radio"/> no sabe                                                                                                                                                                                                                                                                                                                                                        |
| cambio huevos                         | <input type="radio"/> eliminado<br><input type="radio"/> disminuido<br><input type="radio"/> igual<br><input type="radio"/> aumentado<br><input type="radio"/> no sabe                                                                                                                                                                                                                                                                                                                                                        |
| cambio carne                          | <input type="radio"/> eliminado<br><input type="radio"/> disminuido<br><input type="radio"/> igual<br><input type="radio"/> aumentado<br><input type="radio"/> no sabe                                                                                                                                                                                                                                                                                                                                                        |
| cambio pescado                        | <input type="radio"/> eliminado<br><input type="radio"/> disminuido<br><input type="radio"/> igual<br><input type="radio"/> aumentado<br><input type="radio"/> no sabe                                                                                                                                                                                                                                                                                                                                                        |
| cambio verduras                       | <input type="radio"/> eliminado<br><input type="radio"/> disminuido<br><input type="radio"/> igual<br><input type="radio"/> aumentado<br><input type="radio"/> no sabe                                                                                                                                                                                                                                                                                                                                                        |

|                            |                                                                                                                                                                                                                        |
|----------------------------|------------------------------------------------------------------------------------------------------------------------------------------------------------------------------------------------------------------------|
| cambio legumbres           | <input type="radio"/> eliminado<br><input type="radio"/> disminuido<br><input type="radio"/> igual<br><input type="radio"/> aumentado<br><input type="radio"/> no sabe                                                 |
| cambio fruta               | <input type="radio"/> eliminado<br><input type="radio"/> disminuido<br><input type="radio"/> igual<br><input type="radio"/> aumentado<br><input type="radio"/> no sabe                                                 |
| cambio pan                 | <input type="radio"/> eliminado<br><input type="radio"/> disminuido<br><input type="radio"/> igual<br><input type="radio"/> aumentado<br><input type="radio"/> no sabe                                                 |
| cambio aceite oliva        | <input type="radio"/> eliminado<br><input type="radio"/> disminuido<br><input type="radio"/> igual<br><input type="radio"/> aumentado<br><input type="radio"/> no sabe                                                 |
| cambio mante o margarina   | <input type="radio"/> eliminado<br><input type="radio"/> disminuido<br><input type="radio"/> igual<br><input type="radio"/> aumentado<br><input type="radio"/> no sabe                                                 |
| cambio azúcar y dulces     | <input type="radio"/> eliminado<br><input type="radio"/> disminuido<br><input type="radio"/> igual<br><input type="radio"/> aumentado<br><input type="radio"/> no sabe                                                 |
| cambio bebidas alcohólicas | <input type="radio"/> eliminado<br><input type="radio"/> disminuido<br><input type="radio"/> igual<br><input type="radio"/> aumentado<br><input type="radio"/> no sabe                                                 |
| frecuencia comidas fritas  | <input type="radio"/> a diario<br><input type="radio"/> 5 a 6 veces semana<br><input type="radio"/> 2 a 4 veces semana<br><input type="radio"/> 1 vez semana<br><input checked="" type="radio"/> menos de 1 vez semana |
| carne                      | <input type="radio"/> no como<br><input type="radio"/> cruda<br><input type="radio"/> poco hecha<br><input checked="" type="radio"/> hecha<br><input type="radio"/> muy hecha                                          |
| grasa visible carne        | <input type="radio"/> quita toda<br><input type="radio"/> quita mayoría<br><input type="radio"/> quita un poco<br><input checked="" type="radio"/> no quita nada                                                       |

|                                |                                                                                                                                                                                                                                                          |
|--------------------------------|----------------------------------------------------------------------------------------------------------------------------------------------------------------------------------------------------------------------------------------------------------|
| cocina carne                   | <input type="radio"/> a la plancha<br><input type="radio"/> a la parrilla<br><input type="radio"/> asada<br><input type="radio"/> frita<br><input checked="" type="radio"/> guisada                                                                      |
| tostado quemado carne          | <input checked="" type="radio"/> nunca<br><input type="radio"/> 1 vez mes<br><input type="radio"/> 2 a 3 veces mes<br><input type="radio"/> 1 vez semana<br><input type="radio"/> 2 a 3 semanas                                                          |
| tostado quemado pescado        | <input checked="" type="radio"/> nunca<br><input type="radio"/> 1 vez mes<br><input type="radio"/> 2 a 3 veces mes<br><input type="radio"/> 1 vez semana<br><input type="radio"/> 2 a 3 semanas                                                          |
| socarrat paella                | <input checked="" type="radio"/> nunca<br><input type="radio"/> 1 vez mes<br><input type="radio"/> 2 a 3 veces mes<br><input type="radio"/> 1 vez semana<br><input type="radio"/> 2 a 3 semanas                                                          |
| grasa o aceite cocinar         | <input type="radio"/> mantequilla<br><input type="radio"/> margarina<br><input checked="" type="radio"/> aceite oliva<br><input type="radio"/> aceite oliva virgen extra<br><input type="radio"/> aceite vegetal<br><input type="radio"/> mezcla aceites |
| grasa aceite aliñar            | <input type="radio"/> mantequilla<br><input type="radio"/> margarina<br><input type="radio"/> aceite oliva<br><input checked="" type="radio"/> aceite oliva virgen extra<br><input type="radio"/> aceite vegetal<br><input type="radio"/> mezcla aceites |
| grasa aceite freir             | <input type="radio"/> mantequilla<br><input type="radio"/> margarina<br><input type="radio"/> aceite oliva<br><input checked="" type="radio"/> aceite oliva virgen extra<br><input type="radio"/> aceite vegetal<br><input type="radio"/> mezcla aceites |
| Ejercicio cuestionario         | <input checked="" type="radio"/> si<br><input type="radio"/> no                                                                                                                                                                                          |
| horas de sueño incluido siesta | [*DATA REMOVED*]                                                                                                                                                                                                                                         |
| minutos siesta                 | [*DATA REMOVED*]                                                                                                                                                                                                                                         |
| horas televisión semana        | [*DATA REMOVED*]                                                                                                                                                                                                                                         |

|                                        |                                                                                                                                                                                                                                                                                                                                                                |
|----------------------------------------|----------------------------------------------------------------------------------------------------------------------------------------------------------------------------------------------------------------------------------------------------------------------------------------------------------------------------------------------------------------|
| actividad trabajo                      | <input type="radio"/> casi siempre sentado<br><input type="radio"/> sentado 50 por cien<br><input type="radio"/> casi siempre de pie, quieto<br><input type="radio"/> casi siempre levantado caminando y llevando pocas cosas<br><input type="radio"/> casi siempre levantado, caminando y llevado muchas cosas<br><input type="radio"/> trabajo manual pesado |
| tiempo caminar o bici al día           | <input type="radio"/> casi nunca<br><input type="radio"/> menos 20min día<br><input type="radio"/> 20 a 40 min día<br><input checked="" type="radio"/> 40 a 60 min día<br><input type="radio"/> 1h o 1h y media día<br><input type="radio"/> más de 1h y media al día                                                                                          |
| tiempo tareas casa al día              | <input type="radio"/> menos de 1h día<br><input checked="" type="radio"/> 1 a 2h día<br><input type="radio"/> 3 a 4h día<br><input type="radio"/> 5 a 6h día<br><input type="radio"/> 7 a 8h día<br><input type="radio"/> más de 8h día                                                                                                                        |
| tiempo libre televisión ordenador leer | <input type="radio"/> menos 1h día<br><input type="radio"/> 1h día<br><input type="radio"/> 2h día<br><input type="radio"/> 3h día<br><input checked="" type="radio"/> 4h día<br><input type="radio"/> 5 a 6h día<br><input type="radio"/> mas 6h día                                                                                                          |
| tiempo libre ejercicio o deporte       | <input type="radio"/> menos 1h semana<br><input type="radio"/> 1h semana<br><input type="radio"/> 2h semana<br><input type="radio"/> 3h semana<br><input checked="" type="radio"/> 4 a 5h semana<br><input type="radio"/> mas 5h semana                                                                                                                        |
| como se considera                      | <input type="radio"/> sedentaria<br><input type="radio"/> poco activa<br><input checked="" type="radio"/> moderadamente activa<br><input type="radio"/> bastante activa<br><input type="radio"/> muy activa<br><input type="radio"/> no sabe                                                                                                                   |
| FUR                                    | [*DATA REMOVED*]                                                                                                                                                                                                                                                                                                                                               |
| Semanas gestación 2T                   | [*DATA REMOVED*]                                                                                                                                                                                                                                                                                                                                               |
| Días gestación 2T                      | [*DATA REMOVED*]                                                                                                                                                                                                                                                                                                                                               |
| DBP 2T                                 | [*DATA REMOVED*]                                                                                                                                                                                                                                                                                                                                               |
| CC 2T                                  | [*DATA REMOVED*]                                                                                                                                                                                                                                                                                                                                               |
| AC 2T                                  | [*DATA REMOVED*]                                                                                                                                                                                                                                                                                                                                               |



|                                                   |                                                                                                                                                                                                 |
|---------------------------------------------------|-------------------------------------------------------------------------------------------------------------------------------------------------------------------------------------------------|
| LF 2T                                             | [*DATA REMOVED*]                                                                                                                                                                                |
| PFE 2T (Hadlock)                                  | [*DATA REMOVED*]                                                                                                                                                                                |
| Semanas gestación 3T                              | [*DATA REMOVED*]                                                                                                                                                                                |
| días 3T                                           | [*DATA REMOVED*]                                                                                                                                                                                |
| DBP 3T                                            | [*DATA REMOVED*]                                                                                                                                                                                |
| CC 3T                                             | [*DATA REMOVED*]                                                                                                                                                                                |
| AC 3T                                             | [*DATA REMOVED*]                                                                                                                                                                                |
| LF 3T                                             | [*DATA REMOVED*]                                                                                                                                                                                |
| PFE 3T (Hadlock)                                  | [*DATA REMOVED*]                                                                                                                                                                                |
| Semanas de gestación final                        | [*DATA REMOVED*]                                                                                                                                                                                |
| dias gestación final                              | [*DATA REMOVED*]                                                                                                                                                                                |
| Localización placenta                             | <input checked="" type="radio"/> anterior<br><input type="radio"/> lateral derecha<br><input type="radio"/> lateral izquierda<br><input type="radio"/> posterior<br><input type="radio"/> fondo |
| Presentación longitudinal cefálica                | <input type="radio"/> no<br><input checked="" type="radio"/> si                                                                                                                                 |
| Dorso                                             | <input type="radio"/> izquierda anterior<br><input checked="" type="radio"/> izquierda posterior<br><input type="radio"/> derecha anterior<br><input type="radio"/> derecha posterior           |
| diámetro biparietal                               | [*DATA REMOVED*]                                                                                                                                                                                |
| Circunferencia craneal                            | [*DATA REMOVED*]                                                                                                                                                                                |
| Circunferencia abdominal                          | [*DATA REMOVED*]                                                                                                                                                                                |
| Longitud de femur                                 | [*DATA REMOVED*]                                                                                                                                                                                |
| tejido celular subcutáneo a nivel del muslo en mm | [*DATA REMOVED*]                                                                                                                                                                                |
| tejido celular subcutáneo en abdomen en mm        | [*DATA REMOVED*]                                                                                                                                                                                |
| Volumen del muslo en cm3                          | [*DATA REMOVED*]                                                                                                                                                                                |
| Peso fetal estimado según fórmula de Hadlock      | [*DATA REMOVED*]                                                                                                                                                                                |

|                                               |                                                                                                                                               |
|-----------------------------------------------|-----------------------------------------------------------------------------------------------------------------------------------------------|
| Percentil                                     | [*DATA REMOVED*]                                                                                                                              |
| Peso fetal estimado según fórmula de Scioscia | <hr/>                                                                                                                                         |
| Peso fetal estimado según fórmula de LEE      | <hr/>                                                                                                                                         |
| Tipo de parto                                 | <input type="radio"/> eutocico<br><input type="radio"/> instrumentado/ventosa<br><input checked="" type="radio"/> cesarea                     |
| fecha de nacimiento                           | [*DATA REMOVED*]                                                                                                                              |
| Días entre exploración y nacimiento           | [*DATA REMOVED*]                                                                                                                              |
| Peso RN en g                                  | [*DATA REMOVED*]                                                                                                                              |
| sexo                                          | <input type="radio"/> mujer<br><input checked="" type="radio"/> hombre                                                                        |
| Apgar 1 minuto                                | [*DATA REMOVED*]                                                                                                                              |
| Apgar 5 minutos                               | [*DATA REMOVED*]                                                                                                                              |
| Apgar 10 minutos                              | <hr/>                                                                                                                                         |
| antecedente Covid durante gestación           | <input type="radio"/> Yes<br><input checked="" type="radio"/> No                                                                              |
| Nivel de estudios                             | <input type="radio"/> ninguno<br><input type="radio"/> primarios<br><input type="radio"/> secundarios<br><input type="radio"/> universitarios |

# Base\_datos\_estimacion\_peso\_fetal

|                                       |                                                                                                                                                                                                                                                                                      |
|---------------------------------------|--------------------------------------------------------------------------------------------------------------------------------------------------------------------------------------------------------------------------------------------------------------------------------------|
| Número de identificación participante | 55                                                                                                                                                                                                                                                                                   |
| CODIGO PARTICIPANTE                   |                                                                                                                                                                                                                                                                                      |
| Edad                                  | [*DATA REMOVED*]                                                                                                                                                                                                                                                                     |
| Gestaciones                           | <input type="radio"/> 1<br><input type="radio"/> 2<br><input type="radio"/> 3<br><input checked="" type="radio"/> mas de 3                                                                                                                                                           |
| partos                                | <input type="radio"/> 0<br><input checked="" type="radio"/> 1<br><input type="radio"/> 2<br><input type="radio"/> 3<br><input type="radio"/> mas de 3                                                                                                                                |
| cesáreas                              | <input checked="" type="radio"/> 0<br><input type="radio"/> 1<br><input type="radio"/> 2<br><input type="radio"/> 3<br><input type="radio"/> mas de 3                                                                                                                                |
| Abortos                               | <input type="radio"/> 0<br><input type="radio"/> 1<br><input checked="" type="radio"/> 2<br><input type="radio"/> 3<br><input type="radio"/> mas de 3                                                                                                                                |
| Tipo de gestacion                     | <input checked="" type="radio"/> espontanea<br><input type="radio"/> IAC inseminación artificial conyuge<br><input type="radio"/> IAD inseminación artificial donante<br><input type="radio"/> FIV Fecundación in Vitro<br><input type="radio"/> Ovodon FIV con donación de ovocitos |
| peso previo a embarazo                | [*DATA REMOVED*]                                                                                                                                                                                                                                                                     |
| Ganancia ponderal embarazo            | [*DATA REMOVED*]                                                                                                                                                                                                                                                                     |
| Talla madre                           | [*DATA REMOVED*]                                                                                                                                                                                                                                                                     |
| IMC previo embarazo                   | 21.6712580348944                                                                                                                                                                                                                                                                     |
| Patología obstétrica                  | <input checked="" type="radio"/> no<br><input type="radio"/> si                                                                                                                                                                                                                      |
| Diabetes pregestacional               | <input checked="" type="radio"/> no<br><input type="radio"/> si                                                                                                                                                                                                                      |
| Diabetes gestacional                  | <input checked="" type="radio"/> no<br><input type="radio"/> si                                                                                                                                                                                                                      |

|                                            |                                                                                                                                                                                      |
|--------------------------------------------|--------------------------------------------------------------------------------------------------------------------------------------------------------------------------------------|
| Diabetes gestacional con insulina          | <input checked="" type="radio"/> no<br><input type="radio"/> si                                                                                                                      |
| Diabetes gestacional con dieta y ejercicio | <input checked="" type="radio"/> no<br><input type="radio"/> si                                                                                                                      |
| Percentil fetos previos                    | <input type="radio"/> Nada<br><input type="radio"/> percentil menor de 10<br><input checked="" type="radio"/> percentil entre 10 y 90<br><input type="radio"/> percentil mayor de 90 |
| Exfumadora                                 | <input type="radio"/> Nada<br><input type="radio"/> menos de 5 años<br><input checked="" type="radio"/> 5 a 10 años<br><input type="radio"/> mayor o igual a 10 años                 |
| Hábito tabáquico                           | <input checked="" type="radio"/> no<br><input type="radio"/> si                                                                                                                      |
| fumadora                                   | [*DATA REMOVED*]                                                                                                                                                                     |
| Consumo otros tóxicos                      | <input checked="" type="radio"/> no<br><input type="radio"/> si                                                                                                                      |
| Hb 1T                                      | _____                                                                                                                                                                                |
| Htc 1T                                     | _____                                                                                                                                                                                |
| Hb 2T                                      | _____                                                                                                                                                                                |
| HTC 2T                                     | _____                                                                                                                                                                                |
| Hb 3T                                      | _____                                                                                                                                                                                |
| HTC 3T                                     | _____                                                                                                                                                                                |
| Suplemento FE oral                         | <input checked="" type="radio"/> si<br><input type="radio"/> no                                                                                                                      |
| Suplemento fe iv                           | <input type="radio"/> si<br><input checked="" type="radio"/> no                                                                                                                      |
| Transfusión                                | <input checked="" type="radio"/> no<br><input type="radio"/> si                                                                                                                      |
| Solicitada Vit D                           | <input checked="" type="radio"/> no<br><input type="radio"/> si                                                                                                                      |

|                       |                                                                                                                                                                                                                                                                                                                                                                                                              |
|-----------------------|--------------------------------------------------------------------------------------------------------------------------------------------------------------------------------------------------------------------------------------------------------------------------------------------------------------------------------------------------------------------------------------------------------------|
| Deficit vit D         | <input type="radio"/> no<br><input type="radio"/> si                                                                                                                                                                                                                                                                                                                                                         |
| Suplemento vit D      | <input type="radio"/> si<br><input type="radio"/> no                                                                                                                                                                                                                                                                                                                                                         |
| Dieta, cuestionario   | <input checked="" type="radio"/> si<br><input type="radio"/> no                                                                                                                                                                                                                                                                                                                                              |
| Leche entera          | <input type="radio"/> Nunca o menos 1 vez al mes<br><input checked="" type="radio"/> 1 a 3 veces mes<br><input type="radio"/> 1 vez semana<br><input type="radio"/> 2 a 4 veces semana<br><input type="radio"/> 5 a 6 veces semana<br><input type="radio"/> 1 vez al día<br><input type="radio"/> 2 a 3 veces al día<br><input type="radio"/> 5 a 6 veces al día<br><input type="radio"/> más 6 veces al día |
| Leche semidesnatada   | <input type="radio"/> Nunca o menos 1 vez al mes<br><input type="radio"/> 1 a 3 veces mes<br><input type="radio"/> 1 vez semana<br><input type="radio"/> 2 a 4 veces semana<br><input type="radio"/> 5 a 6 veces semana<br><input type="radio"/> 1 vez al día<br><input type="radio"/> 2 a 3 veces al día<br><input type="radio"/> 5 a 6 veces al día<br><input type="radio"/> mas 6 veces al día            |
| Leche desnatada       | <input type="radio"/> Nunca o menos 1 vez al mes<br><input type="radio"/> 1 a 3 veces mes<br><input type="radio"/> 1 vez semana<br><input type="radio"/> 2 a 4 veces semana<br><input type="radio"/> 5 a 6 veces semana<br><input type="radio"/> 1 vez al día<br><input type="radio"/> 2 a 3 veces al día<br><input type="radio"/> 5 a 6 veces al día<br><input type="radio"/> más 6 veces al día            |
| Leche condensada      | <input type="radio"/> Nunca o menos 1 vez al mes<br><input type="radio"/> 1 a 3 veces mes<br><input type="radio"/> 1 vez semana<br><input type="radio"/> 2 a 4 veces semana<br><input type="radio"/> 5 a 6 veces semana<br><input type="radio"/> 1 vez al día<br><input type="radio"/> 2 a 3 veces al día<br><input type="radio"/> 5 a 6 veces al día<br><input type="radio"/> más 6 veces al día            |
| nata o crema de leche | <input type="radio"/> Nunca o menos 1 vez al mes<br><input type="radio"/> 1 a 3 veces mes<br><input type="radio"/> 1 vez semana<br><input type="radio"/> 2 a 4 veces semana<br><input type="radio"/> 5 a 6 veces semana<br><input type="radio"/> 1 vez al día<br><input type="radio"/> 2 a 3 veces al día<br><input type="radio"/> 5 a 6 veces al día<br><input type="radio"/> más 6 veces al día            |

|                                             |                                                                                                                                                                                                                                                                                                                                                                                                              |
|---------------------------------------------|--------------------------------------------------------------------------------------------------------------------------------------------------------------------------------------------------------------------------------------------------------------------------------------------------------------------------------------------------------------------------------------------------------------|
| Yogurt Entero                               | <input type="radio"/> Nunca o menos 1 vez al mes<br><input type="radio"/> 1 a 3 veces mes<br><input type="radio"/> 1 vez semana<br><input type="radio"/> 2 a 4 veces semana<br><input type="radio"/> 5 a 6 veces semana<br><input type="radio"/> 1 vez al día<br><input type="radio"/> 2 a 3 veces al día<br><input type="radio"/> 5 a 6 veces al día<br><input type="radio"/> más 6 veces al día            |
| Yogurt desnatado                            | <input type="radio"/> Nunca o menos 1 vez al mes<br><input checked="" type="radio"/> 1 a 3 veces mes<br><input type="radio"/> 1 vez semana<br><input type="radio"/> 2 a 4 veces semana<br><input type="radio"/> 5 a 6 veces semana<br><input type="radio"/> 1 vez al día<br><input type="radio"/> 2 a 3 veces al día<br><input type="radio"/> 5 a 6 veces al día<br><input type="radio"/> más 6 veces al día |
| 100g requesón o queso blando o queso fresco | <input type="radio"/> Nunca o menos 1 vez al mes<br><input type="radio"/> 1 a 3 veces mes<br><input type="radio"/> 1 vez semana<br><input type="radio"/> 2 a 4 veces semana<br><input type="radio"/> 5 a 6 veces semana<br><input type="radio"/> 1 vez al día<br><input type="radio"/> 2 a 3 veces al día<br><input type="radio"/> 5 a 6 veces al día<br><input type="radio"/> más 6 veces al día            |
| queso curado o semicurado o cremoso         | <input type="radio"/> Nunca o menos 1 vez al mes<br><input type="radio"/> 1 a 3 veces mes<br><input type="radio"/> 1 vez semana<br><input type="radio"/> 2 a 4 veces semana<br><input type="radio"/> 5 a 6 veces semana<br><input checked="" type="radio"/> 1 vez al día<br><input type="radio"/> 2 a 3 veces al día<br><input type="radio"/> 5 a 6 veces al día<br><input type="radio"/> más 6 veces al día |
| natillas flan pudding                       | <input type="radio"/> Nunca o menos 1 vez al mes<br><input type="radio"/> 1 a 3 veces mes<br><input checked="" type="radio"/> 1 vez semana<br><input type="radio"/> 2 a 4 veces semana<br><input type="radio"/> 5 a 6 veces semana<br><input type="radio"/> 1 vez al día<br><input type="radio"/> 2 a 3 veces al día<br><input type="radio"/> 5 a 6 veces al día<br><input type="radio"/> más 6 veces al día |
| Helado                                      | <input type="radio"/> Nunca o menos 1 vez al mes<br><input type="radio"/> 1 a 3 veces mes<br><input type="radio"/> 1 vez semana<br><input type="radio"/> 2 a 4 veces semana<br><input type="radio"/> 5 a 6 veces semana<br><input type="radio"/> 1 vez al día<br><input type="radio"/> 2 a 3 veces al día<br><input type="radio"/> 5 a 6 veces al día<br><input type="radio"/> más 6 veces al día            |

|                                      |                                                                                                                                                                                                                                                                                                                                                                                                              |
|--------------------------------------|--------------------------------------------------------------------------------------------------------------------------------------------------------------------------------------------------------------------------------------------------------------------------------------------------------------------------------------------------------------------------------------------------------------|
| huevo                                | <input checked="" type="radio"/> Nunca o menos 1 vez al mes<br><input type="radio"/> 1 a 3 veces mes<br><input type="radio"/> 1 vez semana<br><input type="radio"/> 2 a 4 veces semana<br><input type="radio"/> 5 a 6 veces semana<br><input type="radio"/> 1 vez al día<br><input type="radio"/> 2 a 3 veces al día<br><input type="radio"/> 5 a 6 veces al día<br><input type="radio"/> más 6 veces al día |
| Pollo con piel                       | <input type="radio"/> Nunca o menos 1 vez al mes<br><input type="radio"/> 1 a 3 veces mes<br><input type="radio"/> 1 vez semana<br><input checked="" type="radio"/> 2 a 4 veces semana<br><input type="radio"/> 5 a 6 veces semana<br><input type="radio"/> 1 vez al día<br><input type="radio"/> 2 a 3 veces al día<br><input type="radio"/> 5 a 6 veces al día<br><input type="radio"/> más 6 veces al día |
| pollo sin piel                       | <input checked="" type="radio"/> Nunca o menos 1 vez al mes<br><input type="radio"/> 1 a 3 veces mes<br><input type="radio"/> 1 vez semana<br><input type="radio"/> 2 a 4 veces semana<br><input type="radio"/> 5 a 6 veces semana<br><input type="radio"/> 1 vez al día<br><input type="radio"/> 2 a 3 veces al día<br><input type="radio"/> 5 a 6 veces al día<br><input type="radio"/> más 6 veces al día |
| Ternera o cerdo o cordero            | <input checked="" type="radio"/> Nunca o menos 1 vez al mes<br><input type="radio"/> 1 a 3 veces mes<br><input type="radio"/> 1 vez semana<br><input type="radio"/> 2 a 4 veces semana<br><input type="radio"/> 5 a 6 veces semana<br><input type="radio"/> 1 vez al día<br><input type="radio"/> 2 a 3 veces al día<br><input type="radio"/> 5 a 6 veces al día<br><input type="radio"/> más 6 veces al día |
| carne caza: Conejo o codorniz o pato | <input checked="" type="radio"/> Nunca o menos 1 vez al mes<br><input type="radio"/> 1 a 3 veces mes<br><input type="radio"/> 1 vez semana<br><input type="radio"/> 2 a 4 veces semana<br><input type="radio"/> 5 a 6 veces semana<br><input type="radio"/> 1 vez al día<br><input type="radio"/> 2 a 3 veces al día<br><input type="radio"/> 5 a 6 veces al día<br><input type="radio"/> más 6 veces al día |
| Hígado de ternera o cerdo o pollo    | <input checked="" type="radio"/> Nunca o menos 1 vez al mes<br><input type="radio"/> 1 a 3 veces mes<br><input type="radio"/> 1 vez semana<br><input type="radio"/> 2 a 4 veces semana<br><input type="radio"/> 5 a 6 veces semana<br><input type="radio"/> 1 vez al día<br><input type="radio"/> 2 a 3 veces al día<br><input type="radio"/> 5 a 6 veces al día<br><input type="radio"/> más 6 veces al día |

|                     |                                                                                                                                                                                                                                                                                                                                                                                                              |
|---------------------|--------------------------------------------------------------------------------------------------------------------------------------------------------------------------------------------------------------------------------------------------------------------------------------------------------------------------------------------------------------------------------------------------------------|
| Vísceras            | <input checked="" type="radio"/> Nunca o menos 1 vez al mes<br><input type="radio"/> 1 a 3 veces mes<br><input type="radio"/> 1 vez semana<br><input type="radio"/> 2 a 4 veces semana<br><input type="radio"/> 5 a 6 veces semana<br><input type="radio"/> 1 vez al día<br><input type="radio"/> 2 a 3 veces al día<br><input type="radio"/> 5 a 6 veces al día<br><input type="radio"/> más 6 veces al día |
| Embutido            | <input checked="" type="radio"/> Nunca o menos 1 vez al mes<br><input type="radio"/> 1 a 3 veces mes<br><input type="radio"/> 1 vez semana<br><input type="radio"/> 2 a 4 veces semana<br><input type="radio"/> 5 a 6 veces semana<br><input type="radio"/> 1 vez al día<br><input type="radio"/> 2 a 3 veces al día<br><input type="radio"/> 5 a 6 veces al día<br><input type="radio"/> más 6 veces al día |
| Salchicha o similar | <input checked="" type="radio"/> Nunca o menos 1 vez al mes<br><input type="radio"/> 1 a 3 veces mes<br><input type="radio"/> 1 vez semana<br><input type="radio"/> 2 a 4 veces semana<br><input type="radio"/> 5 a 6 veces semana<br><input type="radio"/> 1 vez al día<br><input type="radio"/> 2 a 3 veces al día<br><input type="radio"/> 5 a 6 veces al día<br><input type="radio"/> más 6 veces al día |
| Pate o foiegras     | <input checked="" type="radio"/> Nunca o menos 1 vez al mes<br><input type="radio"/> 1 a 3 veces mes<br><input type="radio"/> 1 vez semana<br><input type="radio"/> 2 a 4 veces semana<br><input type="radio"/> 5 a 6 veces semana<br><input type="radio"/> 1 vez al día<br><input type="radio"/> 2 a 3 veces al día<br><input type="radio"/> 5 a 6 veces al día<br><input type="radio"/> más 6 veces al día |
| Hamburguesa         | <input checked="" type="radio"/> Nunca o menos 1 vez al mes<br><input type="radio"/> 1 a 3 veces mes<br><input type="radio"/> 1 vez semana<br><input type="radio"/> 2 a 4 veces semana<br><input type="radio"/> 5 a 6 veces semana<br><input type="radio"/> 1 vez al día<br><input type="radio"/> 2 a 3 veces al día<br><input type="radio"/> 5 a 6 veces al día<br><input type="radio"/> más 6 veces al día |
| tocino o bacon      | <input checked="" type="radio"/> Nunca o menos 1 vez al mes<br><input type="radio"/> 1 a 3 veces mes<br><input type="radio"/> 1 vez semana<br><input type="radio"/> 2 a 4 veces semana<br><input type="radio"/> 5 a 6 veces semana<br><input type="radio"/> 1 vez al día<br><input type="radio"/> 2 a 3 veces al día<br><input type="radio"/> 5 a 6 veces al día<br><input type="radio"/> más 6 veces al día |



---

|               |                                                                                                                                                                                                                                                                                                                                                                                                              |
|---------------|--------------------------------------------------------------------------------------------------------------------------------------------------------------------------------------------------------------------------------------------------------------------------------------------------------------------------------------------------------------------------------------------------------------|
| Pescado frito | <input checked="" type="radio"/> Nunca o menos 1 vez al mes<br><input type="radio"/> 1 a 3 veces mes<br><input type="radio"/> 1 vez semana<br><input type="radio"/> 2 a 4 veces semana<br><input type="radio"/> 5 a 6 veces semana<br><input type="radio"/> 1 vez al día<br><input type="radio"/> 2 a 3 veces al día<br><input type="radio"/> 5 a 6 veces al día<br><input type="radio"/> más 6 veces al día |
|---------------|--------------------------------------------------------------------------------------------------------------------------------------------------------------------------------------------------------------------------------------------------------------------------------------------------------------------------------------------------------------------------------------------------------------|

---

|                        |                                                                                                                                                                                                                                                                                                                                                                                                              |
|------------------------|--------------------------------------------------------------------------------------------------------------------------------------------------------------------------------------------------------------------------------------------------------------------------------------------------------------------------------------------------------------------------------------------------------------|
| pescado hervido blanco | <input checked="" type="radio"/> Nunca o menos 1 vez al mes<br><input type="radio"/> 1 a 3 veces mes<br><input type="radio"/> 1 vez semana<br><input type="radio"/> 2 a 4 veces semana<br><input type="radio"/> 5 a 6 veces semana<br><input type="radio"/> 1 vez al día<br><input type="radio"/> 2 a 3 veces al día<br><input type="radio"/> 5 a 6 veces al día<br><input type="radio"/> más 6 veces al día |
|------------------------|--------------------------------------------------------------------------------------------------------------------------------------------------------------------------------------------------------------------------------------------------------------------------------------------------------------------------------------------------------------------------------------------------------------|

---

|                      |                                                                                                                                                                                                                                                                                                                                                                                                              |
|----------------------|--------------------------------------------------------------------------------------------------------------------------------------------------------------------------------------------------------------------------------------------------------------------------------------------------------------------------------------------------------------------------------------------------------------|
| pescado hervido azul | <input checked="" type="radio"/> Nunca o menos 1 vez al mes<br><input type="radio"/> 1 a 3 veces mes<br><input type="radio"/> 1 vez semana<br><input type="radio"/> 2 a 4 veces semana<br><input type="radio"/> 5 a 6 veces semana<br><input type="radio"/> 1 vez al día<br><input type="radio"/> 2 a 3 veces al día<br><input type="radio"/> 5 a 6 veces al día<br><input type="radio"/> más 6 veces al día |
|----------------------|--------------------------------------------------------------------------------------------------------------------------------------------------------------------------------------------------------------------------------------------------------------------------------------------------------------------------------------------------------------------------------------------------------------|

---

|                    |                                                                                                                                                                                                                                                                                                                                                                                                              |
|--------------------|--------------------------------------------------------------------------------------------------------------------------------------------------------------------------------------------------------------------------------------------------------------------------------------------------------------------------------------------------------------------------------------------------------------|
| otros pescado azul | <input type="radio"/> Nunca o menos 1 vez al mes<br><input type="radio"/> 1 a 3 veces mes<br><input type="radio"/> 1 vez semana<br><input checked="" type="radio"/> 2 a 4 veces semana<br><input type="radio"/> 5 a 6 veces semana<br><input type="radio"/> 1 vez al día<br><input type="radio"/> 2 a 3 veces al día<br><input type="radio"/> 5 a 6 veces al día<br><input type="radio"/> más 6 veces al día |
|--------------------|--------------------------------------------------------------------------------------------------------------------------------------------------------------------------------------------------------------------------------------------------------------------------------------------------------------------------------------------------------------------------------------------------------------|

---

|               |                                                                                                                                                                                                                                                                                                                                                                                                              |
|---------------|--------------------------------------------------------------------------------------------------------------------------------------------------------------------------------------------------------------------------------------------------------------------------------------------------------------------------------------------------------------------------------------------------------------|
| atun conserva | <input type="radio"/> Nunca o menos 1 vez al mes<br><input type="radio"/> 1 a 3 veces mes<br><input checked="" type="radio"/> 1 vez semana<br><input type="radio"/> 2 a 4 veces semana<br><input type="radio"/> 5 a 6 veces semana<br><input type="radio"/> 1 vez al día<br><input type="radio"/> 2 a 3 veces al día<br><input type="radio"/> 5 a 6 veces al día<br><input type="radio"/> más 6 veces al día |
|---------------|--------------------------------------------------------------------------------------------------------------------------------------------------------------------------------------------------------------------------------------------------------------------------------------------------------------------------------------------------------------------------------------------------------------|

---

|                  |                                                                                                                                                                                                                                                                                                                                                                                                              |
|------------------|--------------------------------------------------------------------------------------------------------------------------------------------------------------------------------------------------------------------------------------------------------------------------------------------------------------------------------------------------------------------------------------------------------------|
| sardina conserva | <input checked="" type="radio"/> Nunca o menos 1 vez al mes<br><input type="radio"/> 1 a 3 veces mes<br><input type="radio"/> 1 vez semana<br><input type="radio"/> 2 a 4 veces semana<br><input type="radio"/> 5 a 6 veces semana<br><input type="radio"/> 1 vez al día<br><input type="radio"/> 2 a 3 veces al día<br><input type="radio"/> 5 a 6 veces al día<br><input type="radio"/> más 6 veces al día |
|------------------|--------------------------------------------------------------------------------------------------------------------------------------------------------------------------------------------------------------------------------------------------------------------------------------------------------------------------------------------------------------------------------------------------------------|

---

---

pescado ahumado

- ☐ Nunca o menos 1 vez al mes  
☒ 1 a 3 veces mes  
☐ 1 vez semana  
☐ 2 a 4 veces semana  
☐ 5 a 6 veces semana  
☐ 1 vez al día  
☐ 2 a 3 veces al día  
☐ 5 a 6 veces al día  
☐ más 6 veces al día

---

almejas o mejillones o ostras unos 100g

- ☐ Nunca o menos 1 vez al mes  
☒ 1 a 3 veces mes  
☐ 1 vez semana  
☐ 2 a 4 veces semana  
☐ 5 a 6 veces semana  
☐ 1 vez al día  
☐ 2 a 3 veces al día  
☐ 5 a 6 veces al día  
☐ más 6 veces al día

---

calamar o chipiron o sepia unos 100g

- ☐ Nunca o menos 1 vez al mes  
☒ 1 a 3 veces mes  
☐ 1 vez semana  
☐ 2 a 4 veces semana  
☐ 5 a 6 veces semana  
☐ 1 vez al día  
☐ 2 a 3 veces al día  
☐ 5 a 6 veces al día  
☐ más 6 veces al día

---

marisco unos 100g

- ☒ Nunca o menos 1 vez al mes  
☐ 1 a 3 veces mes  
☐ 1 vez semana  
☐ 2 a 4 veces semana  
☐ 5 a 6 veces semana  
☐ 1 vez al día  
☐ 2 a 3 veces al día  
☐ 5 a 6 veces al día  
☐ más 6 veces al día

---

Espinacas o acelgas cocinadas

- ☐ Nunca o menos 1 vez al mes  
☐ 1 a 3 veces mes  
☐ 1 vez semana  
☒ 2 a 4 veces semana  
☐ 5 a 6 veces semana  
☐ 1 vez al día  
☐ 2 a 3 veces al día  
☐ 5 a 6 veces al día  
☐ más 6 veces al día

---

Col o coliflor o brocoli cocinado

- ☐ Nunca o menos 1 vez al mes  
☐ 1 a 3 veces mes  
☐ 1 vez semana  
☒ 2 a 4 veces semana  
☐ 5 a 6 veces semana  
☐ 1 vez al día  
☐ 2 a 3 veces al día  
☐ 5 a 6 veces al día  
☐ más 6 veces al día

---

|                              |                                                                                                                                                                                                                                                                                                                                                                                                              |
|------------------------------|--------------------------------------------------------------------------------------------------------------------------------------------------------------------------------------------------------------------------------------------------------------------------------------------------------------------------------------------------------------------------------------------------------------|
| Lechuga o endivia o escarola | <input type="radio"/> Nunca o menos 1 vez al mes<br><input type="radio"/> 1 a 3 veces mes<br><input type="radio"/> 1 vez semana<br><input type="radio"/> 2 a 4 veces semana<br><input type="radio"/> 5 a 6 veces semana<br><input checked="" type="radio"/> 1 vez al día<br><input type="radio"/> 2 a 3 veces al día<br><input type="radio"/> 5 a 6 veces al día<br><input type="radio"/> más 6 veces al día |
|------------------------------|--------------------------------------------------------------------------------------------------------------------------------------------------------------------------------------------------------------------------------------------------------------------------------------------------------------------------------------------------------------------------------------------------------------|

---

|                 |                                                                                                                                                                                                                                                                                                                                                                                                              |
|-----------------|--------------------------------------------------------------------------------------------------------------------------------------------------------------------------------------------------------------------------------------------------------------------------------------------------------------------------------------------------------------------------------------------------------------|
| tomate ensalada | <input type="radio"/> Nunca o menos 1 vez al mes<br><input type="radio"/> 1 a 3 veces mes<br><input checked="" type="radio"/> 1 vez semana<br><input type="radio"/> 2 a 4 veces semana<br><input type="radio"/> 5 a 6 veces semana<br><input type="radio"/> 1 vez al día<br><input type="radio"/> 2 a 3 veces al día<br><input type="radio"/> 5 a 6 veces al día<br><input type="radio"/> más 6 veces al día |
|-----------------|--------------------------------------------------------------------------------------------------------------------------------------------------------------------------------------------------------------------------------------------------------------------------------------------------------------------------------------------------------------------------------------------------------------|

---

|         |                                                                                                                                                                                                                                                                                                                                                                                                              |
|---------|--------------------------------------------------------------------------------------------------------------------------------------------------------------------------------------------------------------------------------------------------------------------------------------------------------------------------------------------------------------------------------------------------------------|
| cebolla | <input checked="" type="radio"/> Nunca o menos 1 vez al mes<br><input type="radio"/> 1 a 3 veces mes<br><input type="radio"/> 1 vez semana<br><input type="radio"/> 2 a 4 veces semana<br><input type="radio"/> 5 a 6 veces semana<br><input type="radio"/> 1 vez al día<br><input type="radio"/> 2 a 3 veces al día<br><input type="radio"/> 5 a 6 veces al día<br><input type="radio"/> más 6 veces al día |
|---------|--------------------------------------------------------------------------------------------------------------------------------------------------------------------------------------------------------------------------------------------------------------------------------------------------------------------------------------------------------------------------------------------------------------|

---

|                      |                                                                                                                                                                                                                                                                                                                                                                                                              |
|----------------------|--------------------------------------------------------------------------------------------------------------------------------------------------------------------------------------------------------------------------------------------------------------------------------------------------------------------------------------------------------------------------------------------------------------|
| Zanahoria o calabaza | <input type="radio"/> Nunca o menos 1 vez al mes<br><input type="radio"/> 1 a 3 veces mes<br><input type="radio"/> 1 vez semana<br><input type="radio"/> 2 a 4 veces semana<br><input type="radio"/> 5 a 6 veces semana<br><input checked="" type="radio"/> 1 vez al día<br><input type="radio"/> 2 a 3 veces al día<br><input type="radio"/> 5 a 6 veces al día<br><input type="radio"/> más 6 veces al día |
|----------------------|--------------------------------------------------------------------------------------------------------------------------------------------------------------------------------------------------------------------------------------------------------------------------------------------------------------------------------------------------------------------------------------------------------------|

---

|               |                                                                                                                                                                                                                                                                                                                                                                                                              |
|---------------|--------------------------------------------------------------------------------------------------------------------------------------------------------------------------------------------------------------------------------------------------------------------------------------------------------------------------------------------------------------------------------------------------------------|
| Judías verdes | <input type="radio"/> Nunca o menos 1 vez al mes<br><input type="radio"/> 1 a 3 veces mes<br><input checked="" type="radio"/> 1 vez semana<br><input type="radio"/> 2 a 4 veces semana<br><input type="radio"/> 5 a 6 veces semana<br><input type="radio"/> 1 vez al día<br><input type="radio"/> 2 a 3 veces al día<br><input type="radio"/> 5 a 6 veces al día<br><input type="radio"/> más 6 veces al día |
|---------------|--------------------------------------------------------------------------------------------------------------------------------------------------------------------------------------------------------------------------------------------------------------------------------------------------------------------------------------------------------------------------------------------------------------|

---

|                                |                                                                                                                                                                                                                                                                                                                                                                                                              |
|--------------------------------|--------------------------------------------------------------------------------------------------------------------------------------------------------------------------------------------------------------------------------------------------------------------------------------------------------------------------------------------------------------------------------------------------------------|
| Berenjena o calabacin o pepino | <input type="radio"/> Nunca o menos 1 vez al mes<br><input type="radio"/> 1 a 3 veces mes<br><input type="radio"/> 1 vez semana<br><input type="radio"/> 2 a 4 veces semana<br><input checked="" type="radio"/> 5 a 6 veces semana<br><input type="radio"/> 1 vez al día<br><input type="radio"/> 2 a 3 veces al día<br><input type="radio"/> 5 a 6 veces al día<br><input type="radio"/> más 6 veces al día |
|--------------------------------|--------------------------------------------------------------------------------------------------------------------------------------------------------------------------------------------------------------------------------------------------------------------------------------------------------------------------------------------------------------------------------------------------------------|

---

|                       |                                                                                                                                                                                                                                                                                                                                                                                                              |
|-----------------------|--------------------------------------------------------------------------------------------------------------------------------------------------------------------------------------------------------------------------------------------------------------------------------------------------------------------------------------------------------------------------------------------------------------|
| pimiento              | <input checked="" type="radio"/> Nunca o menos 1 vez al mes<br><input type="radio"/> 1 a 3 veces mes<br><input type="radio"/> 1 vez semana<br><input type="radio"/> 2 a 4 veces semana<br><input type="radio"/> 5 a 6 veces semana<br><input type="radio"/> 1 vez al día<br><input type="radio"/> 2 a 3 veces al día<br><input type="radio"/> 5 a 6 veces al día<br><input type="radio"/> más 6 veces al día |
| alcachofa             | <input type="radio"/> Nunca o menos 1 vez al mes<br><input type="radio"/> 1 a 3 veces mes<br><input type="radio"/> 1 vez semana<br><input checked="" type="radio"/> 2 a 4 veces semana<br><input type="radio"/> 5 a 6 veces semana<br><input type="radio"/> 1 vez al día<br><input type="radio"/> 2 a 3 veces al día<br><input type="radio"/> 5 a 6 veces al día<br><input type="radio"/> más 6 veces al día |
| espárragos            | <input type="radio"/> Nunca o menos 1 vez al mes<br><input type="radio"/> 1 a 3 veces mes<br><input type="radio"/> 1 vez semana<br><input checked="" type="radio"/> 2 a 4 veces semana<br><input type="radio"/> 5 a 6 veces semana<br><input type="radio"/> 1 vez al día<br><input type="radio"/> 2 a 3 veces al día<br><input type="radio"/> 5 a 6 veces al día<br><input type="radio"/> más 6 veces al día |
| maíz hervido          | <input type="radio"/> Nunca o menos 1 vez al mes<br><input type="radio"/> 1 a 3 veces mes<br><input type="radio"/> 1 vez semana<br><input checked="" type="radio"/> 2 a 4 veces semana<br><input type="radio"/> 5 a 6 veces semana<br><input type="radio"/> 1 vez al día<br><input type="radio"/> 2 a 3 veces al día<br><input type="radio"/> 5 a 6 veces al día<br><input type="radio"/> más 6 veces al día |
| legumbres             | <input type="radio"/> Nunca o menos 1 vez al mes<br><input type="radio"/> 1 a 3 veces mes<br><input type="radio"/> 1 vez semana<br><input checked="" type="radio"/> 2 a 4 veces semana<br><input type="radio"/> 5 a 6 veces semana<br><input type="radio"/> 1 vez al día<br><input type="radio"/> 2 a 3 veces al día<br><input type="radio"/> 5 a 6 veces al día<br><input type="radio"/> más 6 veces al día |
| naranjas o mandarinas | <input checked="" type="radio"/> Nunca o menos 1 vez al mes<br><input type="radio"/> 1 a 3 veces mes<br><input type="radio"/> 1 vez semana<br><input type="radio"/> 2 a 4 veces semana<br><input type="radio"/> 5 a 6 veces semana<br><input type="radio"/> 1 vez al día<br><input type="radio"/> 2 a 3 veces al día<br><input type="radio"/> 5 a 6 veces al día<br><input type="radio"/> más 6 veces al día |

|                       |                                                                                                                                                                                                                                                                                                                                                                                                              |
|-----------------------|--------------------------------------------------------------------------------------------------------------------------------------------------------------------------------------------------------------------------------------------------------------------------------------------------------------------------------------------------------------------------------------------------------------|
| zum natural fruta     | <input checked="" type="radio"/> Nunca o menos 1 vez al mes<br><input type="radio"/> 1 a 3 veces mes<br><input type="radio"/> 1 vez semana<br><input type="radio"/> 2 a 4 veces semana<br><input type="radio"/> 5 a 6 veces semana<br><input type="radio"/> 1 vez al día<br><input type="radio"/> 2 a 3 veces al día<br><input type="radio"/> 5 a 6 veces al día<br><input type="radio"/> más 6 veces al día |
| platano               | <input type="radio"/> Nunca o menos 1 vez al mes<br><input checked="" type="radio"/> 1 a 3 veces mes<br><input type="radio"/> 1 vez semana<br><input type="radio"/> 2 a 4 veces semana<br><input type="radio"/> 5 a 6 veces semana<br><input type="radio"/> 1 vez al día<br><input type="radio"/> 2 a 3 veces al día<br><input type="radio"/> 5 a 6 veces al día<br><input type="radio"/> más 6 veces al día |
| manzana o pera        | <input type="radio"/> Nunca o menos 1 vez al mes<br><input type="radio"/> 1 a 3 veces mes<br><input type="radio"/> 1 vez semana<br><input checked="" type="radio"/> 2 a 4 veces semana<br><input type="radio"/> 5 a 6 veces semana<br><input type="radio"/> 1 vez al día<br><input type="radio"/> 2 a 3 veces al día<br><input type="radio"/> 5 a 6 veces al día<br><input type="radio"/> más 6 veces al día |
| melocotón o nectarina | <input checked="" type="radio"/> Nunca o menos 1 vez al mes<br><input type="radio"/> 1 a 3 veces mes<br><input type="radio"/> 1 vez semana<br><input type="radio"/> 2 a 4 veces semana<br><input type="radio"/> 5 a 6 veces semana<br><input type="radio"/> 1 vez al día<br><input type="radio"/> 2 a 3 veces al día<br><input type="radio"/> 5 a 6 veces al día<br><input type="radio"/> más 6 veces al día |
| sandia o melon        | <input type="radio"/> Nunca o menos 1 vez al mes<br><input type="radio"/> 1 a 3 veces mes<br><input type="radio"/> 1 vez semana<br><input type="radio"/> 2 a 4 veces semana<br><input type="radio"/> 5 a 6 veces semana<br><input type="radio"/> 1 vez al día<br><input checked="" type="radio"/> 2 a 3 veces al día<br><input type="radio"/> 5 a 6 veces al día<br><input type="radio"/> más 6 veces al día |
| uva                   | <input checked="" type="radio"/> Nunca o menos 1 vez al mes<br><input type="radio"/> 1 a 3 veces mes<br><input type="radio"/> 1 vez semana<br><input type="radio"/> 2 a 4 veces semana<br><input type="radio"/> 5 a 6 veces semana<br><input type="radio"/> 1 vez al día<br><input type="radio"/> 2 a 3 veces al día<br><input type="radio"/> 5 a 6 veces al día<br><input type="radio"/> más 6 veces al día |

|                 |                                                                                                                                                                                                                                                                                                                                                                                                              |
|-----------------|--------------------------------------------------------------------------------------------------------------------------------------------------------------------------------------------------------------------------------------------------------------------------------------------------------------------------------------------------------------------------------------------------------------|
| bruna o ciruela | <input checked="" type="radio"/> Nunca o menos 1 vez al mes<br><input type="radio"/> 1 a 3 veces mes<br><input type="radio"/> 1 vez semana<br><input type="radio"/> 2 a 4 veces semana<br><input type="radio"/> 5 a 6 veces semana<br><input type="radio"/> 1 vez al día<br><input type="radio"/> 2 a 3 veces al día<br><input type="radio"/> 5 a 6 veces al día<br><input type="radio"/> más 6 veces al día |
| kiwi            | <input checked="" type="radio"/> Nunca o menos 1 vez al mes<br><input type="radio"/> 1 a 3 veces mes<br><input type="radio"/> 1 vez semana<br><input type="radio"/> 2 a 4 veces semana<br><input type="radio"/> 5 a 6 veces semana<br><input type="radio"/> 1 vez al día<br><input type="radio"/> 2 a 3 veces al día<br><input type="radio"/> 5 a 6 veces al día<br><input type="radio"/> más 6 veces al día |
| aceituna        | <input type="radio"/> Nunca o menos 1 vez al mes<br><input type="radio"/> 1 a 3 veces mes<br><input checked="" type="radio"/> 1 vez semana<br><input type="radio"/> 2 a 4 veces semana<br><input type="radio"/> 5 a 6 veces semana<br><input type="radio"/> 1 vez al día<br><input type="radio"/> 2 a 3 veces al día<br><input type="radio"/> 5 a 6 veces al día<br><input type="radio"/> más 6 veces al día |
| frutos secos    | <input type="radio"/> Nunca o menos 1 vez al mes<br><input type="radio"/> 1 a 3 veces mes<br><input type="radio"/> 1 vez semana<br><input type="radio"/> 2 a 4 veces semana<br><input type="radio"/> 5 a 6 veces semana<br><input checked="" type="radio"/> 1 vez al día<br><input type="radio"/> 2 a 3 veces al día<br><input type="radio"/> 5 a 6 veces al día<br><input type="radio"/> más 6 veces al día |
| pan blanco      | <input checked="" type="radio"/> Nunca o menos 1 vez al mes<br><input type="radio"/> 1 a 3 veces mes<br><input type="radio"/> 1 vez semana<br><input type="radio"/> 2 a 4 veces semana<br><input type="radio"/> 5 a 6 veces semana<br><input type="radio"/> 1 vez al día<br><input type="radio"/> 2 a 3 veces al día<br><input type="radio"/> 5 a 6 veces al día<br><input type="radio"/> más 6 veces al día |
| pan integral    | <input type="radio"/> Nunca o menos 1 vez al mes<br><input type="radio"/> 1 a 3 veces mes<br><input type="radio"/> 1 vez semana<br><input checked="" type="radio"/> 2 a 4 veces semana<br><input type="radio"/> 5 a 6 veces semana<br><input type="radio"/> 1 vez al día<br><input type="radio"/> 2 a 3 veces al día<br><input type="radio"/> 5 a 6 veces al día<br><input type="radio"/> más 6 veces al día |

---

cereales desayuno

- ☐ Nunca o menos 1 vez al mes  
☒ 1 a 3 veces mes  
☐ 1 vez semana  
☐ 2 a 4 veces semana  
☐ 5 a 6 veces semana  
☐ 1 vez al día  
☐ 2 a 3 veces al día  
☐ 5 a 6 veces al día  
☐ más 6 veces al día

---

patatas fritas

- ☒ Nunca o menos 1 vez al mes  
☐ 1 a 3 veces mes  
☐ 1 vez semana  
☐ 2 a 4 veces semana  
☐ 5 a 6 veces semana  
☐ 1 vez al día  
☐ 2 a 3 veces al día  
☐ 5 a 6 veces al día  
☐ más 6 veces al día

---

patatas cocidas o asadas

- ☐ Nunca o menos 1 vez al mes  
☒ 1 a 3 veces mes  
☐ 1 vez semana  
☐ 2 a 4 veces semana  
☐ 5 a 6 veces semana  
☐ 1 vez al día  
☐ 2 a 3 veces al día  
☐ 5 a 6 veces al día  
☐ más 6 veces al día

---

bolsa papas

- ☒ Nunca o menos 1 vez al mes  
☐ 1 a 3 veces mes  
☐ 1 vez semana  
☐ 2 a 4 veces semana  
☐ 5 a 6 veces semana  
☐ 1 vez al día  
☐ 2 a 3 veces al día  
☐ 5 a 6 veces al día  
☐ más 6 veces al día

---

arroz cocinado

- ☐ Nunca o menos 1 vez al mes  
☐ 1 a 3 veces mes  
☐ 1 vez semana  
☒ 2 a 4 veces semana  
☐ 5 a 6 veces semana  
☐ 1 vez al día  
☐ 2 a 3 veces al día  
☐ 5 a 6 veces al día  
☐ más 6 veces al día

---

pasta

- ☐ Nunca o menos 1 vez al mes  
☐ 1 a 3 veces mes  
☒ 1 vez semana  
☐ 2 a 4 veces semana  
☐ 5 a 6 veces semana  
☐ 1 vez al día  
☐ 2 a 3 veces al día  
☐ 5 a 6 veces al día  
☐ más 6 veces al día

|                     |                                                                                                                                                                                                                                                                                                                                                                                                              |
|---------------------|--------------------------------------------------------------------------------------------------------------------------------------------------------------------------------------------------------------------------------------------------------------------------------------------------------------------------------------------------------------------------------------------------------------|
| pizza               | <input type="radio"/> Nunca o menos 1 vez al mes<br><input checked="" type="radio"/> 1 a 3 veces mes<br><input type="radio"/> 1 vez semana<br><input type="radio"/> 2 a 4 veces semana<br><input type="radio"/> 5 a 6 veces semana<br><input type="radio"/> 1 vez al día<br><input type="radio"/> 2 a 3 veces al día<br><input type="radio"/> 5 a 6 veces al día<br><input type="radio"/> más 6 veces al día |
| aceite oliva        | <input type="radio"/> Nunca o menos 1 vez al mes<br><input type="radio"/> 1 a 3 veces mes<br><input type="radio"/> 1 vez semana<br><input type="radio"/> 2 a 4 veces semana<br><input type="radio"/> 5 a 6 veces semana<br><input type="radio"/> 1 vez al día<br><input type="radio"/> 2 a 3 veces al día<br><input checked="" type="radio"/> 5 a 6 veces al día<br><input type="radio"/> más 6 veces al día |
| otros aceites       | <input checked="" type="radio"/> Nunca o menos 1 vez al mes<br><input type="radio"/> 1 a 3 veces mes<br><input type="radio"/> 1 vez semana<br><input type="radio"/> 2 a 4 veces semana<br><input type="radio"/> 5 a 6 veces semana<br><input type="radio"/> 1 vez al día<br><input type="radio"/> 2 a 3 veces al día<br><input type="radio"/> 5 a 6 veces al día<br><input type="radio"/> más 6 veces al día |
| margarina           | <input checked="" type="radio"/> Nunca o menos 1 vez al mes<br><input type="radio"/> 1 a 3 veces mes<br><input type="radio"/> 1 vez semana<br><input type="radio"/> 2 a 4 veces semana<br><input type="radio"/> 5 a 6 veces semana<br><input type="radio"/> 1 vez al día<br><input type="radio"/> 2 a 3 veces al día<br><input type="radio"/> 5 a 6 veces al día<br><input type="radio"/> más 6 veces al día |
| mantequilla         | <input checked="" type="radio"/> Nunca o menos 1 vez al mes<br><input type="radio"/> 1 a 3 veces mes<br><input type="radio"/> 1 vez semana<br><input type="radio"/> 2 a 4 veces semana<br><input type="radio"/> 5 a 6 veces semana<br><input type="radio"/> 1 vez al día<br><input type="radio"/> 2 a 3 veces al día<br><input type="radio"/> 5 a 6 veces al día<br><input type="radio"/> más 6 veces al día |
| galletas tipo maria | <input type="radio"/> Nunca o menos 1 vez al mes<br><input type="radio"/> 1 a 3 veces mes<br><input type="radio"/> 1 vez semana<br><input type="radio"/> 2 a 4 veces semana<br><input type="radio"/> 5 a 6 veces semana<br><input checked="" type="radio"/> 1 vez al día<br><input type="radio"/> 2 a 3 veces al día<br><input type="radio"/> 5 a 6 veces al día<br><input type="radio"/> más 6 veces al día |



|                           |                                                                                                                                                                                                                                                                                                                                                                                                              |
|---------------------------|--------------------------------------------------------------------------------------------------------------------------------------------------------------------------------------------------------------------------------------------------------------------------------------------------------------------------------------------------------------------------------------------------------------|
| galletas chocolate        | <input checked="" type="radio"/> Nunca o menos 1 vez al mes<br><input type="radio"/> 1 a 3 veces mes<br><input type="radio"/> 1 vez semana<br><input type="radio"/> 2 a 4 veces semana<br><input type="radio"/> 5 a 6 veces semana<br><input type="radio"/> 1 vez al día<br><input type="radio"/> 2 a 3 veces al día<br><input type="radio"/> 5 a 6 veces al día<br><input type="radio"/> más 6 veces al día |
| bollieria                 | <input checked="" type="radio"/> Nunca o menos 1 vez al mes<br><input type="radio"/> 1 a 3 veces mes<br><input type="radio"/> 1 vez semana<br><input type="radio"/> 2 a 4 veces semana<br><input type="radio"/> 5 a 6 veces semana<br><input type="radio"/> 1 vez al día<br><input type="radio"/> 2 a 3 veces al día<br><input type="radio"/> 5 a 6 veces al día<br><input type="radio"/> más 6 veces al día |
| chocolate o bombones      | <input checked="" type="radio"/> Nunca o menos 1 vez al mes<br><input type="radio"/> 1 a 3 veces mes<br><input type="radio"/> 1 vez semana<br><input type="radio"/> 2 a 4 veces semana<br><input type="radio"/> 5 a 6 veces semana<br><input type="radio"/> 1 vez al día<br><input type="radio"/> 2 a 3 veces al día<br><input type="radio"/> 5 a 6 veces al día<br><input type="radio"/> más 6 veces al día |
| chocolate polvo o colacao | <input checked="" type="radio"/> Nunca o menos 1 vez al mes<br><input type="radio"/> 1 a 3 veces mes<br><input type="radio"/> 1 vez semana<br><input type="radio"/> 2 a 4 veces semana<br><input type="radio"/> 5 a 6 veces semana<br><input type="radio"/> 1 vez al día<br><input type="radio"/> 2 a 3 veces al día<br><input type="radio"/> 5 a 6 veces al día<br><input type="radio"/> más 6 veces al día |
| vino tinto                | <input checked="" type="radio"/> Nunca o menos 1 vez al mes<br><input type="radio"/> 1 a 3 veces mes<br><input type="radio"/> 1 vez semana<br><input type="radio"/> 2 a 4 veces semana<br><input type="radio"/> 5 a 6 veces semana<br><input type="radio"/> 1 vez al día<br><input type="radio"/> 2 a 3 veces al día<br><input type="radio"/> 5 a 6 veces al día<br><input type="radio"/> más 6 veces al día |
| vino blanco               | <input checked="" type="radio"/> Nunca o menos 1 vez al mes<br><input type="radio"/> 1 a 3 veces mes<br><input type="radio"/> 1 vez semana<br><input type="radio"/> 2 a 4 veces semana<br><input type="radio"/> 5 a 6 veces semana<br><input type="radio"/> 1 vez al día<br><input type="radio"/> 2 a 3 veces al día<br><input type="radio"/> 5 a 6 veces al día<br><input type="radio"/> más 6 veces al día |

|                       |                                                                                                                                                                                                                                                                                                                                                                                                              |
|-----------------------|--------------------------------------------------------------------------------------------------------------------------------------------------------------------------------------------------------------------------------------------------------------------------------------------------------------------------------------------------------------------------------------------------------------|
| vino seco o vermut    | <input checked="" type="radio"/> Nunca o menos 1 vez al mes<br><input type="radio"/> 1 a 3 veces mes<br><input type="radio"/> 1 vez semana<br><input type="radio"/> 2 a 4 veces semana<br><input type="radio"/> 5 a 6 veces semana<br><input type="radio"/> 1 vez al día<br><input type="radio"/> 2 a 3 veces al día<br><input type="radio"/> 5 a 6 veces al día<br><input type="radio"/> más 6 veces al día |
| cerveza               | <input checked="" type="radio"/> Nunca o menos 1 vez al mes<br><input type="radio"/> 1 a 3 veces mes<br><input type="radio"/> 1 vez semana<br><input type="radio"/> 2 a 4 veces semana<br><input type="radio"/> 5 a 6 veces semana<br><input type="radio"/> 1 vez al día<br><input type="radio"/> 2 a 3 veces al día<br><input type="radio"/> 5 a 6 veces al día<br><input type="radio"/> más 6 veces al día |
| cerveza sin alcohol   | <input checked="" type="radio"/> Nunca o menos 1 vez al mes<br><input type="radio"/> 1 a 3 veces mes<br><input type="radio"/> 1 vez semana<br><input type="radio"/> 2 a 4 veces semana<br><input type="radio"/> 5 a 6 veces semana<br><input type="radio"/> 1 vez al día<br><input type="radio"/> 2 a 3 veces al día<br><input type="radio"/> 5 a 6 veces al día<br><input type="radio"/> más 6 veces al día |
| licores               | <input checked="" type="radio"/> Nunca o menos 1 vez al mes<br><input type="radio"/> 1 a 3 veces mes<br><input type="radio"/> 1 vez semana<br><input type="radio"/> 2 a 4 veces semana<br><input type="radio"/> 5 a 6 veces semana<br><input type="radio"/> 1 vez al día<br><input type="radio"/> 2 a 3 veces al día<br><input type="radio"/> 5 a 6 veces al día<br><input type="radio"/> más 6 veces al día |
| ginebra o ron o vodka | <input checked="" type="radio"/> Nunca o menos 1 vez al mes<br><input type="radio"/> 1 a 3 veces mes<br><input type="radio"/> 1 vez semana<br><input type="radio"/> 2 a 4 veces semana<br><input type="radio"/> 5 a 6 veces semana<br><input type="radio"/> 1 vez al día<br><input type="radio"/> 2 a 3 veces al día<br><input type="radio"/> 5 a 6 veces al día<br><input type="radio"/> más 6 veces al día |
| refresco normal       | <input checked="" type="radio"/> Nunca o menos 1 vez al mes<br><input type="radio"/> 1 a 3 veces mes<br><input type="radio"/> 1 vez semana<br><input type="radio"/> 2 a 4 veces semana<br><input type="radio"/> 5 a 6 veces semana<br><input type="radio"/> 1 vez al día<br><input type="radio"/> 2 a 3 veces al día<br><input type="radio"/> 5 a 6 veces al día<br><input type="radio"/> más 6 veces al día |

|                          |                                                                                                                                                                                                                                                                                                                                                                                                              |
|--------------------------|--------------------------------------------------------------------------------------------------------------------------------------------------------------------------------------------------------------------------------------------------------------------------------------------------------------------------------------------------------------------------------------------------------------|
| refresco sin azúcar      | <input checked="" type="radio"/> Nunca o menos 1 vez al mes<br><input type="radio"/> 1 a 3 veces mes<br><input type="radio"/> 1 vez semana<br><input type="radio"/> 2 a 4 veces semana<br><input type="radio"/> 5 a 6 veces semana<br><input type="radio"/> 1 vez al día<br><input type="radio"/> 2 a 3 veces al día<br><input type="radio"/> 5 a 6 veces al día<br><input type="radio"/> más 6 veces al día |
| Agua del grifo           | <input type="radio"/> Nunca o menos 1 vez al mes<br><input type="radio"/> 1 a 3 veces mes<br><input type="radio"/> 1 vez semana<br><input type="radio"/> 2 a 4 veces semana<br><input type="radio"/> 5 a 6 veces semana<br><input type="radio"/> 1 vez al día<br><input type="radio"/> 2 a 3 veces al día<br><input type="radio"/> 5 a 6 veces al día<br><input checked="" type="radio"/> más 6 veces al día |
| agua embotellada sin gas | <input checked="" type="radio"/> Nunca o menos 1 vez al mes<br><input type="radio"/> 1 a 3 veces mes<br><input type="radio"/> 1 vez semana<br><input type="radio"/> 2 a 4 veces semana<br><input type="radio"/> 5 a 6 veces semana<br><input type="radio"/> 1 vez al día<br><input type="radio"/> 2 a 3 veces al día<br><input type="radio"/> 5 a 6 veces al día<br><input type="radio"/> más 6 veces al día |
| agua embotellada con gas | <input checked="" type="radio"/> Nunca o menos 1 vez al mes<br><input type="radio"/> 1 a 3 veces mes<br><input type="radio"/> 1 vez semana<br><input type="radio"/> 2 a 4 veces semana<br><input type="radio"/> 5 a 6 veces semana<br><input type="radio"/> 1 vez al día<br><input type="radio"/> 2 a 3 veces al día<br><input type="radio"/> 5 a 6 veces al día<br><input type="radio"/> más 6 veces al día |
| zumو frutas embasado     | <input checked="" type="radio"/> Nunca o menos 1 vez al mes<br><input type="radio"/> 1 a 3 veces mes<br><input type="radio"/> 1 vez semana<br><input type="radio"/> 2 a 4 veces semana<br><input type="radio"/> 5 a 6 veces semana<br><input type="radio"/> 1 vez al día<br><input type="radio"/> 2 a 3 veces al día<br><input type="radio"/> 5 a 6 veces al día<br><input type="radio"/> más 6 veces al día |
| cafe                     | <input type="radio"/> Nunca o menos 1 vez al mes<br><input type="radio"/> 1 a 3 veces mes<br><input type="radio"/> 1 vez semana<br><input type="radio"/> 2 a 4 veces semana<br><input type="radio"/> 5 a 6 veces semana<br><input checked="" type="radio"/> 1 vez al día<br><input type="radio"/> 2 a 3 veces al día<br><input type="radio"/> 5 a 6 veces al día<br><input type="radio"/> más 6 veces al día |

|                       |                                                                                                                                                                                                                                                                                                                                                                                                              |
|-----------------------|--------------------------------------------------------------------------------------------------------------------------------------------------------------------------------------------------------------------------------------------------------------------------------------------------------------------------------------------------------------------------------------------------------------|
| cafe descafeinado     | <input checked="" type="radio"/> Nunca o menos 1 vez al mes<br><input type="radio"/> 1 a 3 veces mes<br><input type="radio"/> 1 vez semana<br><input type="radio"/> 2 a 4 veces semana<br><input type="radio"/> 5 a 6 veces semana<br><input type="radio"/> 1 vez al día<br><input type="radio"/> 2 a 3 veces al día<br><input type="radio"/> 5 a 6 veces al día<br><input type="radio"/> más 6 veces al día |
| te o infusión         | <input checked="" type="radio"/> Nunca o menos 1 vez al mes<br><input type="radio"/> 1 a 3 veces mes<br><input type="radio"/> 1 vez semana<br><input type="radio"/> 2 a 4 veces semana<br><input type="radio"/> 5 a 6 veces semana<br><input type="radio"/> 1 vez al día<br><input type="radio"/> 2 a 3 veces al día<br><input type="radio"/> 5 a 6 veces al día<br><input type="radio"/> más 6 veces al día |
| sopa o puré verduras  | <input type="radio"/> Nunca o menos 1 vez al mes<br><input type="radio"/> 1 a 3 veces mes<br><input checked="" type="radio"/> 1 vez semana<br><input type="radio"/> 2 a 4 veces semana<br><input type="radio"/> 5 a 6 veces semana<br><input type="radio"/> 1 vez al día<br><input type="radio"/> 2 a 3 veces al día<br><input type="radio"/> 5 a 6 veces al día<br><input type="radio"/> más 6 veces al día |
| croquetas pollo jamón | <input checked="" type="radio"/> Nunca o menos 1 vez al mes<br><input type="radio"/> 1 a 3 veces mes<br><input type="radio"/> 1 vez semana<br><input type="radio"/> 2 a 4 veces semana<br><input type="radio"/> 5 a 6 veces semana<br><input type="radio"/> 1 vez al día<br><input type="radio"/> 2 a 3 veces al día<br><input type="radio"/> 5 a 6 veces al día<br><input type="radio"/> más 6 veces al día |
| croquetas pescado     | <input checked="" type="radio"/> Nunca o menos 1 vez al mes<br><input type="radio"/> 1 a 3 veces mes<br><input type="radio"/> 1 vez semana<br><input type="radio"/> 2 a 4 veces semana<br><input type="radio"/> 5 a 6 veces semana<br><input type="radio"/> 1 vez al día<br><input type="radio"/> 2 a 3 veces al día<br><input type="radio"/> 5 a 6 veces al día<br><input type="radio"/> más 6 veces al día |
| mayonesa              | <input checked="" type="radio"/> Nunca o menos 1 vez al mes<br><input type="radio"/> 1 a 3 veces mes<br><input type="radio"/> 1 vez semana<br><input type="radio"/> 2 a 4 veces semana<br><input type="radio"/> 5 a 6 veces semana<br><input type="radio"/> 1 vez al día<br><input type="radio"/> 2 a 3 veces al día<br><input type="radio"/> 5 a 6 veces al día<br><input type="radio"/> más 6 veces al día |

|                  |                                                                                                                                                                                                                                                                                                                                                                                                              |
|------------------|--------------------------------------------------------------------------------------------------------------------------------------------------------------------------------------------------------------------------------------------------------------------------------------------------------------------------------------------------------------------------------------------------------------|
| salsa tomate     | <input type="radio"/> Nunca o menos 1 vez al mes<br><input type="radio"/> 1 a 3 veces mes<br><input checked="" type="radio"/> 1 vez semana<br><input type="radio"/> 2 a 4 veces semana<br><input type="radio"/> 5 a 6 veces semana<br><input type="radio"/> 1 vez al día<br><input type="radio"/> 2 a 3 veces al día<br><input type="radio"/> 5 a 6 veces al día<br><input type="radio"/> más 6 veces al día |
| ketchup          | <input checked="" type="radio"/> Nunca o menos 1 vez al mes<br><input type="radio"/> 1 a 3 veces mes<br><input type="radio"/> 1 vez semana<br><input type="radio"/> 2 a 4 veces semana<br><input type="radio"/> 5 a 6 veces semana<br><input type="radio"/> 1 vez al día<br><input type="radio"/> 2 a 3 veces al día<br><input type="radio"/> 5 a 6 veces al día<br><input type="radio"/> más 6 veces al día |
| sal              | <input checked="" type="radio"/> Nunca o menos 1 vez al mes<br><input type="radio"/> 1 a 3 veces mes<br><input type="radio"/> 1 vez semana<br><input type="radio"/> 2 a 4 veces semana<br><input type="radio"/> 5 a 6 veces semana<br><input type="radio"/> 1 vez al día<br><input type="radio"/> 2 a 3 veces al día<br><input type="radio"/> 5 a 6 veces al día<br><input type="radio"/> más 6 veces al día |
| ajo              | <input type="radio"/> Nunca o menos 1 vez al mes<br><input type="radio"/> 1 a 3 veces mes<br><input type="radio"/> 1 vez semana<br><input checked="" type="radio"/> 2 a 4 veces semana<br><input type="radio"/> 5 a 6 veces semana<br><input type="radio"/> 1 vez al día<br><input type="radio"/> 2 a 3 veces al día<br><input type="radio"/> 5 a 6 veces al día<br><input type="radio"/> más 6 veces al día |
| mermelada o miel | <input checked="" type="radio"/> Nunca o menos 1 vez al mes<br><input type="radio"/> 1 a 3 veces mes<br><input type="radio"/> 1 vez semana<br><input type="radio"/> 2 a 4 veces semana<br><input type="radio"/> 5 a 6 veces semana<br><input type="radio"/> 1 vez al día<br><input type="radio"/> 2 a 3 veces al día<br><input type="radio"/> 5 a 6 veces al día<br><input type="radio"/> más 6 veces al día |
| azúcar           | <input checked="" type="radio"/> Nunca o menos 1 vez al mes<br><input type="radio"/> 1 a 3 veces mes<br><input type="radio"/> 1 vez semana<br><input type="radio"/> 2 a 4 veces semana<br><input type="radio"/> 5 a 6 veces semana<br><input type="radio"/> 1 vez al día<br><input type="radio"/> 2 a 3 veces al día<br><input type="radio"/> 5 a 6 veces al día<br><input type="radio"/> más 6 veces al día |

|                                       |                                                                                                                                                                                                                                                                                                                                                                                                                                                                                                                               |
|---------------------------------------|-------------------------------------------------------------------------------------------------------------------------------------------------------------------------------------------------------------------------------------------------------------------------------------------------------------------------------------------------------------------------------------------------------------------------------------------------------------------------------------------------------------------------------|
| Otro alimento                         | [*DATA REMOVED*]                                                                                                                                                                                                                                                                                                                                                                                                                                                                                                              |
| suplementos vitamínicos               | <input type="radio"/> si<br><input checked="" type="radio"/> no                                                                                                                                                                                                                                                                                                                                                                                                                                                               |
| suplementos vitamínicos               | [*DATA REMOVED*]                                                                                                                                                                                                                                                                                                                                                                                                                                                                                                              |
| dieta previa                          | <input checked="" type="radio"/> si<br><input type="radio"/> no                                                                                                                                                                                                                                                                                                                                                                                                                                                               |
| motivo dieta                          | <input checked="" type="radio"/> no dieta<br><input type="radio"/> control peso<br><input type="radio"/> control colesterol<br><input type="radio"/> control diabetes<br><input type="radio"/> problemas estómago<br><input type="radio"/> problemas vesícula o hepáticos<br><input type="radio"/> HTA o cardiopatía<br><input type="radio"/> problemas renales<br><input type="radio"/> alergia alimentaria<br><input type="radio"/> ácido úrico elevado<br><input type="radio"/> vegetariana<br><input type="radio"/> otros |
| cambio alimentos año previo gestación | <input type="radio"/> si<br><input checked="" type="radio"/> no                                                                                                                                                                                                                                                                                                                                                                                                                                                               |
| cambio lácteos                        | <input type="radio"/> eliminado<br><input type="radio"/> disminuido<br><input checked="" type="radio"/> igual<br><input type="radio"/> aumentado<br><input type="radio"/> no sabe                                                                                                                                                                                                                                                                                                                                             |
| cambio huevos                         | <input type="radio"/> eliminado<br><input type="radio"/> disminuido<br><input checked="" type="radio"/> igual<br><input type="radio"/> aumentado<br><input type="radio"/> no sabe                                                                                                                                                                                                                                                                                                                                             |
| cambio carne                          | <input type="radio"/> eliminado<br><input type="radio"/> disminuido<br><input checked="" type="radio"/> igual<br><input type="radio"/> aumentado<br><input type="radio"/> no sabe                                                                                                                                                                                                                                                                                                                                             |
| cambio pescado                        | <input type="radio"/> eliminado<br><input type="radio"/> disminuido<br><input checked="" type="radio"/> igual<br><input type="radio"/> aumentado<br><input type="radio"/> no sabe                                                                                                                                                                                                                                                                                                                                             |
| cambio verduras                       | <input type="radio"/> eliminado<br><input type="radio"/> disminuido<br><input checked="" type="radio"/> igual<br><input type="radio"/> aumentado<br><input type="radio"/> no sabe                                                                                                                                                                                                                                                                                                                                             |

|                            |                                                                                                                                                                                                                        |
|----------------------------|------------------------------------------------------------------------------------------------------------------------------------------------------------------------------------------------------------------------|
| cambio legumbres           | <input type="radio"/> eliminado<br><input type="radio"/> disminuido<br><input checked="" type="radio"/> igual<br><input type="radio"/> aumentado<br><input type="radio"/> no sabe                                      |
| cambio fruta               | <input type="radio"/> eliminado<br><input type="radio"/> disminuido<br><input checked="" type="radio"/> igual<br><input type="radio"/> aumentado<br><input type="radio"/> no sabe                                      |
| cambio pan                 | <input type="radio"/> eliminado<br><input type="radio"/> disminuido<br><input checked="" type="radio"/> igual<br><input type="radio"/> aumentado<br><input type="radio"/> no sabe                                      |
| cambio aceite oliva        | <input type="radio"/> eliminado<br><input type="radio"/> disminuido<br><input checked="" type="radio"/> igual<br><input type="radio"/> aumentado<br><input type="radio"/> no sabe                                      |
| cambio mante o margarina   | <input type="radio"/> eliminado<br><input type="radio"/> disminuido<br><input checked="" type="radio"/> igual<br><input type="radio"/> aumentado<br><input type="radio"/> no sabe                                      |
| cambio azúcar y dulces     | <input type="radio"/> eliminado<br><input type="radio"/> disminuido<br><input checked="" type="radio"/> igual<br><input type="radio"/> aumentado<br><input type="radio"/> no sabe                                      |
| cambio bebidas alcohólicas | <input type="radio"/> eliminado<br><input type="radio"/> disminuido<br><input checked="" type="radio"/> igual<br><input type="radio"/> aumentado<br><input type="radio"/> no sabe                                      |
| frecuencia comidas fritas  | <input type="radio"/> a diario<br><input type="radio"/> 5 a 6 veces semana<br><input type="radio"/> 2 a 4 veces semana<br><input type="radio"/> 1 vez semana<br><input checked="" type="radio"/> menos de 1 vez semana |
| carne                      | <input checked="" type="radio"/> no como<br><input type="radio"/> cruda<br><input type="radio"/> poco hecha<br><input type="radio"/> hecha<br><input type="radio"/> muy hecha                                          |
| grasa visible carne        | <input type="radio"/> quita toda<br><input type="radio"/> quita mayoría<br><input type="radio"/> quita un poco<br><input type="radio"/> no quita nada                                                                  |

|                                |                                                                                                                                                                                                                                                          |
|--------------------------------|----------------------------------------------------------------------------------------------------------------------------------------------------------------------------------------------------------------------------------------------------------|
| cocina carne                   | <input type="radio"/> a la plancha<br><input type="radio"/> a la parrilla<br><input type="radio"/> asada<br><input type="radio"/> frita<br><input type="radio"/> guisada                                                                                 |
| tostado quemado carne          | <input type="radio"/> nunca<br><input type="radio"/> 1 vez mes<br><input type="radio"/> 2 a 3 veces mes<br><input type="radio"/> 1 vez semana<br><input type="radio"/> 2 a 3 semanas                                                                     |
| tostado quemado pescado        | <input checked="" type="radio"/> nunca<br><input type="radio"/> 1 vez mes<br><input type="radio"/> 2 a 3 veces mes<br><input type="radio"/> 1 vez semana<br><input type="radio"/> 2 a 3 semanas                                                          |
| socarrat paella                | <input checked="" type="radio"/> nunca<br><input type="radio"/> 1 vez mes<br><input type="radio"/> 2 a 3 veces mes<br><input type="radio"/> 1 vez semana<br><input type="radio"/> 2 a 3 semanas                                                          |
| grasa o aceite cocinar         | <input type="radio"/> mantequilla<br><input type="radio"/> margarina<br><input type="radio"/> aceite oliva<br><input checked="" type="radio"/> aceite oliva virgen extra<br><input type="radio"/> aceite vegetal<br><input type="radio"/> mezcla aceites |
| grasa aceite aliñar            | <input type="radio"/> mantequilla<br><input type="radio"/> margarina<br><input type="radio"/> aceite oliva<br><input checked="" type="radio"/> aceite oliva virgen extra<br><input type="radio"/> aceite vegetal<br><input type="radio"/> mezcla aceites |
| grasa aceite freir             | <input type="radio"/> mantequilla<br><input type="radio"/> margarina<br><input type="radio"/> aceite oliva<br><input checked="" type="radio"/> aceite oliva virgen extra<br><input type="radio"/> aceite vegetal<br><input type="radio"/> mezcla aceites |
| Ejercicio cuestionario         | <input checked="" type="radio"/> si<br><input type="radio"/> no                                                                                                                                                                                          |
| horas de sueño incluido siesta | [*DATA REMOVED*]                                                                                                                                                                                                                                         |
| minutos siesta                 | [*DATA REMOVED*]                                                                                                                                                                                                                                         |
| horas televisión semana        | [*DATA REMOVED*]                                                                                                                                                                                                                                         |



|                                        |                                                                                                                                                                                                                                                                                                                                                                           |
|----------------------------------------|---------------------------------------------------------------------------------------------------------------------------------------------------------------------------------------------------------------------------------------------------------------------------------------------------------------------------------------------------------------------------|
| actividad trabajo                      | <input checked="" type="radio"/> casi siempre sentado<br><input type="radio"/> sentado 50 por cien<br><input type="radio"/> casi siempre de pie, quieto<br><input type="radio"/> casi siempre levantado caminando y llevando pocas cosas<br><input type="radio"/> casi siempre levantado, caminando y llevado muchas cosas<br><input type="radio"/> trabajo manual pesado |
| tiempo caminar o bici al día           | <input type="radio"/> casi nunca<br><input type="radio"/> menos 20min día<br><input checked="" type="radio"/> 20 a 40 min día<br><input type="radio"/> 40 a 60 min día<br><input type="radio"/> 1h o 1h y media día<br><input type="radio"/> más de 1h y media al día                                                                                                     |
| tiempo tareas casa al día              | <input type="radio"/> menos de 1h día<br><input checked="" type="radio"/> 1 a 2h día<br><input type="radio"/> 3 a 4h día<br><input type="radio"/> 5 a 6h día<br><input type="radio"/> 7 a 8h día<br><input type="radio"/> más de 8h día                                                                                                                                   |
| tiempo libre televisión ordenador leer | <input checked="" type="radio"/> menos 1h día<br><input type="radio"/> 1h día<br><input type="radio"/> 2h día<br><input type="radio"/> 3h día<br><input type="radio"/> 4h día<br><input type="radio"/> 5 a 6h día<br><input type="radio"/> mas 6h día                                                                                                                     |
| tiempo libre ejercicio o deporte       | <input type="radio"/> menos 1h semana<br><input type="radio"/> 1h semana<br><input type="radio"/> 2h semana<br><input checked="" type="radio"/> 3h semana<br><input type="radio"/> 4 a 5h semana<br><input type="radio"/> mas 5h semana                                                                                                                                   |
| como se considera                      | <input type="radio"/> sedentaria<br><input type="radio"/> poco activa<br><input checked="" type="radio"/> moderadamente activa<br><input type="radio"/> bastante activa<br><input type="radio"/> muy activa<br><input type="radio"/> no sabe                                                                                                                              |
| FUR                                    | [*DATA REMOVED*]                                                                                                                                                                                                                                                                                                                                                          |
| Semanas gestación 2T                   | _____                                                                                                                                                                                                                                                                                                                                                                     |
| Días gestación 2T                      | _____                                                                                                                                                                                                                                                                                                                                                                     |
| DBP 2T                                 | _____                                                                                                                                                                                                                                                                                                                                                                     |
| CC 2T                                  | _____                                                                                                                                                                                                                                                                                                                                                                     |

|                                                   |                                                                                                                                                                                                 |
|---------------------------------------------------|-------------------------------------------------------------------------------------------------------------------------------------------------------------------------------------------------|
| AC 2T                                             |                                                                                                                                                                                                 |
| LF 2T                                             |                                                                                                                                                                                                 |
| PFE 2T (Hadlock)                                  |                                                                                                                                                                                                 |
| Semanas gestación 3T                              | [*DATA REMOVED*]                                                                                                                                                                                |
| días 3T                                           | [*DATA REMOVED*]                                                                                                                                                                                |
| DBP 3T                                            | [*DATA REMOVED*]                                                                                                                                                                                |
| CC 3T                                             | [*DATA REMOVED*]                                                                                                                                                                                |
| AC 3T                                             | [*DATA REMOVED*]                                                                                                                                                                                |
| LF 3T                                             | [*DATA REMOVED*]                                                                                                                                                                                |
| PFE 3T (Hadlock)                                  | [*DATA REMOVED*]                                                                                                                                                                                |
| Semanas de gestación final                        | [*DATA REMOVED*]                                                                                                                                                                                |
| días gestación final                              | [*DATA REMOVED*]                                                                                                                                                                                |
| Localización placenta                             | <input checked="" type="radio"/> anterior<br><input type="radio"/> lateral derecha<br><input type="radio"/> lateral izquierda<br><input type="radio"/> posterior<br><input type="radio"/> fondo |
| Presentación longitudinal cefálica                | <input type="radio"/> no<br><input checked="" type="radio"/> si                                                                                                                                 |
| Dorso                                             | <input type="radio"/> izquierda anterior<br><input type="radio"/> izquierda posterior<br><input checked="" type="radio"/> derecha anterior<br><input type="radio"/> derecha posterior           |
| diámetro biparietal                               | [*DATA REMOVED*]                                                                                                                                                                                |
| Circunferencia craneal                            | [*DATA REMOVED*]                                                                                                                                                                                |
| Circunferencia abdominal                          | [*DATA REMOVED*]                                                                                                                                                                                |
| Longitud de femur                                 | [*DATA REMOVED*]                                                                                                                                                                                |
| tejido celular subcutáneo a nivel del muslo en mm | [*DATA REMOVED*]                                                                                                                                                                                |
| tejido celular subcutáneo en abdomen en mm        | [*DATA REMOVED*]                                                                                                                                                                                |

|                                               |                                                                                                                                                          |
|-----------------------------------------------|----------------------------------------------------------------------------------------------------------------------------------------------------------|
| Volumen del muslo en cm3                      | [*DATA REMOVED*]                                                                                                                                         |
| Peso fetal estimado según fórmula de Hadlock  | [*DATA REMOVED*]                                                                                                                                         |
| Percentil                                     | [*DATA REMOVED*]                                                                                                                                         |
| Peso fetal estimado según fórmula de Scioscia | _____                                                                                                                                                    |
| Peso fetal estimado según fórmula de LEE      | _____                                                                                                                                                    |
| Tipo de parto                                 | <input checked="" type="radio"/> eutocico<br><input type="radio"/> instrumentado/ventosa<br><input type="radio"/> cesarea                                |
| fecha de nacimiento                           | [*DATA REMOVED*]                                                                                                                                         |
| Días entre exploración y nacimiento           | [*DATA REMOVED*]                                                                                                                                         |
| Peso RN en g                                  | [*DATA REMOVED*]                                                                                                                                         |
| sexo                                          | <input type="radio"/> mujer<br><input checked="" type="radio"/> hombre                                                                                   |
| Apgar 1 minuto                                | [*DATA REMOVED*]                                                                                                                                         |
| Apgar 5 minutos                               | [*DATA REMOVED*]                                                                                                                                         |
| Apgar 10 minutos                              | _____                                                                                                                                                    |
| antecedente Covid durante gestación           | <input type="radio"/> Yes<br><input checked="" type="radio"/> No                                                                                         |
| Nivel de estudios                             | <input type="radio"/> ninguno<br><input type="radio"/> primarios<br><input type="radio"/> secundarios<br><input checked="" type="radio"/> universitarios |

# Base\_datos\_estimacion\_peso\_fetal

|                                       |                                                                                                                                                                                                                                                                                      |
|---------------------------------------|--------------------------------------------------------------------------------------------------------------------------------------------------------------------------------------------------------------------------------------------------------------------------------------|
| Número de identificación participante | 56                                                                                                                                                                                                                                                                                   |
| CODIGO PARTICIPANTE                   |                                                                                                                                                                                                                                                                                      |
| Edad                                  | [*DATA REMOVED*]                                                                                                                                                                                                                                                                     |
| Gestaciones                           | <input type="radio"/> 1<br><input checked="" type="radio"/> 2<br><input type="radio"/> 3<br><input type="radio"/> mas de 3                                                                                                                                                           |
| partos                                | <input type="radio"/> 0<br><input checked="" type="radio"/> 1<br><input type="radio"/> 2<br><input type="radio"/> 3<br><input type="radio"/> mas de 3                                                                                                                                |
| cesáreas                              | <input checked="" type="radio"/> 0<br><input type="radio"/> 1<br><input type="radio"/> 2<br><input type="radio"/> 3<br><input type="radio"/> mas de 3                                                                                                                                |
| Abortos                               | <input checked="" type="radio"/> 0<br><input type="radio"/> 1<br><input type="radio"/> 2<br><input type="radio"/> 3<br><input type="radio"/> mas de 3                                                                                                                                |
| Tipo de gestacion                     | <input checked="" type="radio"/> espontanea<br><input type="radio"/> IAC inseminación artificial conyuge<br><input type="radio"/> IAD inseminación artificial donante<br><input type="radio"/> FIV Fecundación in Vitro<br><input type="radio"/> Ovodon FIV con donación de ovocitos |
| peso previo a embarazo                | [*DATA REMOVED*]                                                                                                                                                                                                                                                                     |
| Ganancia ponderal embarazo            | [*DATA REMOVED*]                                                                                                                                                                                                                                                                     |
| Talla madre                           | [*DATA REMOVED*]                                                                                                                                                                                                                                                                     |
| IMC previo embarazo                   | 21.829952199932254                                                                                                                                                                                                                                                                   |
| Patología obstétrica                  | <input checked="" type="radio"/> no<br><input type="radio"/> si                                                                                                                                                                                                                      |
| Diabetes pregestacional               | <input checked="" type="radio"/> no<br><input type="radio"/> si                                                                                                                                                                                                                      |
| Diabetes gestacional                  | <input checked="" type="radio"/> no<br><input type="radio"/> si                                                                                                                                                                                                                      |

|                                            |                                                                                                                                                                                      |
|--------------------------------------------|--------------------------------------------------------------------------------------------------------------------------------------------------------------------------------------|
| Diabetes gestacional con insulina          | <input checked="" type="radio"/> no<br><input type="radio"/> si                                                                                                                      |
| Diabetes gestacional con dieta y ejercicio | <input checked="" type="radio"/> no<br><input type="radio"/> si                                                                                                                      |
| Percentil fetos previos                    | <input type="radio"/> Nada<br><input type="radio"/> percentil menor de 10<br><input checked="" type="radio"/> percentil entre 10 y 90<br><input type="radio"/> percentil mayor de 90 |
| Exfumadora                                 | <input checked="" type="radio"/> Nada<br><input type="radio"/> menos de 5 años<br><input type="radio"/> 5 a 10 años<br><input type="radio"/> mayor o igual a 10 años                 |
| Hábito tabáquico                           | <input checked="" type="radio"/> no<br><input type="radio"/> si                                                                                                                      |
| fumadora                                   | [*DATA REMOVED*]                                                                                                                                                                     |
| Consumo otros tóxicos                      | <input checked="" type="radio"/> no<br><input type="radio"/> si                                                                                                                      |
| Hb 1T                                      | [*DATA REMOVED*]                                                                                                                                                                     |
| Htc 1T                                     | [*DATA REMOVED*]                                                                                                                                                                     |
| Hb 2T                                      | [*DATA REMOVED*]                                                                                                                                                                     |
| HTC 2T                                     | [*DATA REMOVED*]                                                                                                                                                                     |
| Hb 3T                                      | [*DATA REMOVED*]                                                                                                                                                                     |
| HTC 3T                                     | [*DATA REMOVED*]                                                                                                                                                                     |
| Suplemento FE oral                         | <input type="radio"/> si<br><input checked="" type="radio"/> no                                                                                                                      |
| Suplemento fe iv                           | <input type="radio"/> si<br><input checked="" type="radio"/> no                                                                                                                      |
| Transfusión                                | <input checked="" type="radio"/> no<br><input type="radio"/> si                                                                                                                      |
| Solicitada Vit D                           | <input checked="" type="radio"/> no<br><input type="radio"/> si                                                                                                                      |
| Deficit vit D                              | <input type="radio"/> no<br><input type="radio"/> si                                                                                                                                 |
| Suplemento vit D                           | <input type="radio"/> si<br><input type="radio"/> no                                                                                                                                 |

|                       |                                                                                                                                                                                                                                                                                                                                                                                                              |
|-----------------------|--------------------------------------------------------------------------------------------------------------------------------------------------------------------------------------------------------------------------------------------------------------------------------------------------------------------------------------------------------------------------------------------------------------|
| Dieta, cuestionario   | <input checked="" type="radio"/> sí<br><input type="radio"/> no                                                                                                                                                                                                                                                                                                                                              |
| Leche entera          | <input type="radio"/> Nunca o menos 1 vez al mes<br><input type="radio"/> 1 a 3 veces mes<br><input type="radio"/> 1 vez semana<br><input type="radio"/> 2 a 4 veces semana<br><input type="radio"/> 5 a 6 veces semana<br><input checked="" type="radio"/> 1 vez al día<br><input type="radio"/> 2 a 3 veces al día<br><input type="radio"/> 5 a 6 veces al día<br><input type="radio"/> más 6 veces al día |
| Leche semidesnatada   | <input checked="" type="radio"/> Nunca o menos 1 vez al mes<br><input type="radio"/> 1 a 3 veces mes<br><input type="radio"/> 1 vez semana<br><input type="radio"/> 2 a 4 veces semana<br><input type="radio"/> 5 a 6 veces semana<br><input type="radio"/> 1 vez al día<br><input type="radio"/> 2 a 3 veces al día<br><input type="radio"/> 5 a 6 veces al día<br><input type="radio"/> mas 6 veces al día |
| Leche desnatada       | <input checked="" type="radio"/> Nunca o menos 1 vez al mes<br><input type="radio"/> 1 a 3 veces mes<br><input type="radio"/> 1 vez semana<br><input type="radio"/> 2 a 4 veces semana<br><input type="radio"/> 5 a 6 veces semana<br><input type="radio"/> 1 vez al día<br><input type="radio"/> 2 a 3 veces al día<br><input type="radio"/> 5 a 6 veces al día<br><input type="radio"/> más 6 veces al día |
| Leche condensada      | <input checked="" type="radio"/> Nunca o menos 1 vez al mes<br><input type="radio"/> 1 a 3 veces mes<br><input type="radio"/> 1 vez semana<br><input type="radio"/> 2 a 4 veces semana<br><input type="radio"/> 5 a 6 veces semana<br><input type="radio"/> 1 vez al día<br><input type="radio"/> 2 a 3 veces al día<br><input type="radio"/> 5 a 6 veces al día<br><input type="radio"/> más 6 veces al día |
| nata o crema de leche | <input checked="" type="radio"/> Nunca o menos 1 vez al mes<br><input type="radio"/> 1 a 3 veces mes<br><input type="radio"/> 1 vez semana<br><input type="radio"/> 2 a 4 veces semana<br><input type="radio"/> 5 a 6 veces semana<br><input type="radio"/> 1 vez al día<br><input type="radio"/> 2 a 3 veces al día<br><input type="radio"/> 5 a 6 veces al día<br><input type="radio"/> más 6 veces al día |

|                                             |                                                                                                                                                                                                                                                                                                                                                                                                              |
|---------------------------------------------|--------------------------------------------------------------------------------------------------------------------------------------------------------------------------------------------------------------------------------------------------------------------------------------------------------------------------------------------------------------------------------------------------------------|
| Yogurt Entero                               | <input type="radio"/> Nunca o menos 1 vez al mes<br><input type="radio"/> 1 a 3 veces mes<br><input type="radio"/> 1 vez semana<br><input type="radio"/> 2 a 4 veces semana<br><input type="radio"/> 5 a 6 veces semana<br><input checked="" type="radio"/> 1 vez al día<br><input type="radio"/> 2 a 3 veces al día<br><input type="radio"/> 5 a 6 veces al día<br><input type="radio"/> más 6 veces al día |
| Yogurt desnatado                            | <input checked="" type="radio"/> Nunca o menos 1 vez al mes<br><input type="radio"/> 1 a 3 veces mes<br><input type="radio"/> 1 vez semana<br><input type="radio"/> 2 a 4 veces semana<br><input type="radio"/> 5 a 6 veces semana<br><input type="radio"/> 1 vez al día<br><input type="radio"/> 2 a 3 veces al día<br><input type="radio"/> 5 a 6 veces al día<br><input type="radio"/> más 6 veces al día |
| 100g requesón o queso blando o queso fresco | <input type="radio"/> Nunca o menos 1 vez al mes<br><input type="radio"/> 1 a 3 veces mes<br><input type="radio"/> 1 vez semana<br><input type="radio"/> 2 a 4 veces semana<br><input type="radio"/> 5 a 6 veces semana<br><input type="radio"/> 1 vez al día<br><input checked="" type="radio"/> 2 a 3 veces al día<br><input type="radio"/> 5 a 6 veces al día<br><input type="radio"/> más 6 veces al día |
| queso curado o semicurado o cremoso         | <input type="radio"/> Nunca o menos 1 vez al mes<br><input type="radio"/> 1 a 3 veces mes<br><input type="radio"/> 1 vez semana<br><input type="radio"/> 2 a 4 veces semana<br><input type="radio"/> 5 a 6 veces semana<br><input checked="" type="radio"/> 1 vez al día<br><input type="radio"/> 2 a 3 veces al día<br><input type="radio"/> 5 a 6 veces al día<br><input type="radio"/> más 6 veces al día |
| natillas flan pudding                       | <input checked="" type="radio"/> Nunca o menos 1 vez al mes<br><input type="radio"/> 1 a 3 veces mes<br><input type="radio"/> 1 vez semana<br><input type="radio"/> 2 a 4 veces semana<br><input type="radio"/> 5 a 6 veces semana<br><input type="radio"/> 1 vez al día<br><input type="radio"/> 2 a 3 veces al día<br><input type="radio"/> 5 a 6 veces al día<br><input type="radio"/> más 6 veces al día |
| Helado                                      | <input type="radio"/> Nunca o menos 1 vez al mes<br><input type="radio"/> 1 a 3 veces mes<br><input type="radio"/> 1 vez semana<br><input checked="" type="radio"/> 2 a 4 veces semana<br><input type="radio"/> 5 a 6 veces semana<br><input type="radio"/> 1 vez al día<br><input type="radio"/> 2 a 3 veces al día<br><input type="radio"/> 5 a 6 veces al día<br><input type="radio"/> más 6 veces al día |

|                                      |                                                                                                                                                                                                                                                                                                                                                                                                              |
|--------------------------------------|--------------------------------------------------------------------------------------------------------------------------------------------------------------------------------------------------------------------------------------------------------------------------------------------------------------------------------------------------------------------------------------------------------------|
| huevo                                | <input type="radio"/> Nunca o menos 1 vez al mes<br><input type="radio"/> 1 a 3 veces mes<br><input type="radio"/> 1 vez semana<br><input checked="" type="radio"/> 2 a 4 veces semana<br><input type="radio"/> 5 a 6 veces semana<br><input type="radio"/> 1 vez al día<br><input type="radio"/> 2 a 3 veces al día<br><input type="radio"/> 5 a 6 veces al día<br><input type="radio"/> más 6 veces al día |
| Pollo con piel                       | <input type="radio"/> Nunca o menos 1 vez al mes<br><input type="radio"/> 1 a 3 veces mes<br><input checked="" type="radio"/> 1 vez semana<br><input type="radio"/> 2 a 4 veces semana<br><input type="radio"/> 5 a 6 veces semana<br><input type="radio"/> 1 vez al día<br><input type="radio"/> 2 a 3 veces al día<br><input type="radio"/> 5 a 6 veces al día<br><input type="radio"/> más 6 veces al día |
| pollo sin piel                       | <input type="radio"/> Nunca o menos 1 vez al mes<br><input type="radio"/> 1 a 3 veces mes<br><input checked="" type="radio"/> 1 vez semana<br><input type="radio"/> 2 a 4 veces semana<br><input type="radio"/> 5 a 6 veces semana<br><input type="radio"/> 1 vez al día<br><input type="radio"/> 2 a 3 veces al día<br><input type="radio"/> 5 a 6 veces al día<br><input type="radio"/> más 6 veces al día |
| Ternera o cerdo o cordero            | <input type="radio"/> Nunca o menos 1 vez al mes<br><input type="radio"/> 1 a 3 veces mes<br><input checked="" type="radio"/> 1 vez semana<br><input type="radio"/> 2 a 4 veces semana<br><input type="radio"/> 5 a 6 veces semana<br><input type="radio"/> 1 vez al día<br><input type="radio"/> 2 a 3 veces al día<br><input type="radio"/> 5 a 6 veces al día<br><input type="radio"/> más 6 veces al día |
| carne caza: Conejo o codorniz o pato | <input type="radio"/> Nunca o menos 1 vez al mes<br><input type="radio"/> 1 a 3 veces mes<br><input checked="" type="radio"/> 1 vez semana<br><input type="radio"/> 2 a 4 veces semana<br><input type="radio"/> 5 a 6 veces semana<br><input type="radio"/> 1 vez al día<br><input type="radio"/> 2 a 3 veces al día<br><input type="radio"/> 5 a 6 veces al día<br><input type="radio"/> más 6 veces al día |
| Hígado de ternera o cerdo o pollo    | <input type="radio"/> Nunca o menos 1 vez al mes<br><input checked="" type="radio"/> 1 a 3 veces mes<br><input type="radio"/> 1 vez semana<br><input type="radio"/> 2 a 4 veces semana<br><input type="radio"/> 5 a 6 veces semana<br><input type="radio"/> 1 vez al día<br><input type="radio"/> 2 a 3 veces al día<br><input type="radio"/> 5 a 6 veces al día<br><input type="radio"/> más 6 veces al día |



|                     |                                                                                                                                                                                                                                                                                                                                                                                                              |
|---------------------|--------------------------------------------------------------------------------------------------------------------------------------------------------------------------------------------------------------------------------------------------------------------------------------------------------------------------------------------------------------------------------------------------------------|
| Vísceras            | <input checked="" type="radio"/> Nunca o menos 1 vez al mes<br><input type="radio"/> 1 a 3 veces mes<br><input type="radio"/> 1 vez semana<br><input type="radio"/> 2 a 4 veces semana<br><input type="radio"/> 5 a 6 veces semana<br><input type="radio"/> 1 vez al día<br><input type="radio"/> 2 a 3 veces al día<br><input type="radio"/> 5 a 6 veces al día<br><input type="radio"/> más 6 veces al día |
| Embutido            | <input checked="" type="radio"/> Nunca o menos 1 vez al mes<br><input type="radio"/> 1 a 3 veces mes<br><input type="radio"/> 1 vez semana<br><input type="radio"/> 2 a 4 veces semana<br><input type="radio"/> 5 a 6 veces semana<br><input type="radio"/> 1 vez al día<br><input type="radio"/> 2 a 3 veces al día<br><input type="radio"/> 5 a 6 veces al día<br><input type="radio"/> más 6 veces al día |
| Salchicha o similar | <input checked="" type="radio"/> Nunca o menos 1 vez al mes<br><input type="radio"/> 1 a 3 veces mes<br><input type="radio"/> 1 vez semana<br><input type="radio"/> 2 a 4 veces semana<br><input type="radio"/> 5 a 6 veces semana<br><input type="radio"/> 1 vez al día<br><input type="radio"/> 2 a 3 veces al día<br><input type="radio"/> 5 a 6 veces al día<br><input type="radio"/> más 6 veces al día |
| Pate o foiegras     | <input checked="" type="radio"/> Nunca o menos 1 vez al mes<br><input type="radio"/> 1 a 3 veces mes<br><input type="radio"/> 1 vez semana<br><input type="radio"/> 2 a 4 veces semana<br><input type="radio"/> 5 a 6 veces semana<br><input type="radio"/> 1 vez al día<br><input type="radio"/> 2 a 3 veces al día<br><input type="radio"/> 5 a 6 veces al día<br><input type="radio"/> más 6 veces al día |
| Hamburguesa         | <input type="radio"/> Nunca o menos 1 vez al mes<br><input checked="" type="radio"/> 1 a 3 veces mes<br><input type="radio"/> 1 vez semana<br><input type="radio"/> 2 a 4 veces semana<br><input type="radio"/> 5 a 6 veces semana<br><input type="radio"/> 1 vez al día<br><input type="radio"/> 2 a 3 veces al día<br><input type="radio"/> 5 a 6 veces al día<br><input type="radio"/> más 6 veces al día |
| tocino o bacon      | <input checked="" type="radio"/> Nunca o menos 1 vez al mes<br><input type="radio"/> 1 a 3 veces mes<br><input type="radio"/> 1 vez semana<br><input type="radio"/> 2 a 4 veces semana<br><input type="radio"/> 5 a 6 veces semana<br><input type="radio"/> 1 vez al día<br><input type="radio"/> 2 a 3 veces al día<br><input type="radio"/> 5 a 6 veces al día<br><input type="radio"/> más 6 veces al día |

---

Pescado frito

- ☐ Nunca o menos 1 vez al mes  
☒ 1 a 3 veces mes  
☐ 1 vez semana  
☐ 2 a 4 veces semana  
☐ 5 a 6 veces semana  
☐ 1 vez al día  
☐ 2 a 3 veces al día  
☐ 5 a 6 veces al día  
☐ más 6 veces al día

---

pescado hervido blanco

- ☐ Nunca o menos 1 vez al mes  
☐ 1 a 3 veces mes  
☐ 1 vez semana  
☐ 2 a 4 veces semana  
☐ 5 a 6 veces semana  
☒ 1 vez al día  
☐ 2 a 3 veces al día  
☐ 5 a 6 veces al día  
☐ más 6 veces al día

---

pescado hervido azul

- ☐ Nunca o menos 1 vez al mes  
☐ 1 a 3 veces mes  
☐ 1 vez semana  
☒ 2 a 4 veces semana  
☐ 5 a 6 veces semana  
☐ 1 vez al día  
☐ 2 a 3 veces al día  
☐ 5 a 6 veces al día  
☐ más 6 veces al día

---

otros pescado azul

- ☐ Nunca o menos 1 vez al mes  
☒ 1 a 3 veces mes  
☐ 1 vez semana  
☐ 2 a 4 veces semana  
☐ 5 a 6 veces semana  
☐ 1 vez al día  
☐ 2 a 3 veces al día  
☐ 5 a 6 veces al día  
☐ más 6 veces al día

---

atun conserva

- ☐ Nunca o menos 1 vez al mes  
☐ 1 a 3 veces mes  
☒ 1 vez semana  
☐ 2 a 4 veces semana  
☐ 5 a 6 veces semana  
☐ 1 vez al día  
☐ 2 a 3 veces al día  
☐ 5 a 6 veces al día  
☐ más 6 veces al día

---

sardina conserva

- ☐ Nunca o menos 1 vez al mes  
☒ 1 a 3 veces mes  
☐ 1 vez semana  
☐ 2 a 4 veces semana  
☐ 5 a 6 veces semana  
☐ 1 vez al día  
☐ 2 a 3 veces al día  
☐ 5 a 6 veces al día  
☐ más 6 veces al día

---

pescado ahumado

- ☐ Nunca o menos 1 vez al mes  
☒ 1 a 3 veces mes  
☐ 1 vez semana  
☐ 2 a 4 veces semana  
☐ 5 a 6 veces semana  
☐ 1 vez al día  
☐ 2 a 3 veces al día  
☐ 5 a 6 veces al día  
☐ más 6 veces al día

---

almejas o mejillones o ostras unos 100g

- ☐ Nunca o menos 1 vez al mes  
☒ 1 a 3 veces mes  
☐ 1 vez semana  
☐ 2 a 4 veces semana  
☐ 5 a 6 veces semana  
☐ 1 vez al día  
☐ 2 a 3 veces al día  
☐ 5 a 6 veces al día  
☐ más 6 veces al día

---

calamar o chipiron o sepia unos 100g

- ☐ Nunca o menos 1 vez al mes  
☒ 1 a 3 veces mes  
☐ 1 vez semana  
☐ 2 a 4 veces semana  
☐ 5 a 6 veces semana  
☐ 1 vez al día  
☐ 2 a 3 veces al día  
☐ 5 a 6 veces al día  
☐ más 6 veces al día

---

marisco unos 100g

- ☐ Nunca o menos 1 vez al mes  
☒ 1 a 3 veces mes  
☐ 1 vez semana  
☐ 2 a 4 veces semana  
☐ 5 a 6 veces semana  
☐ 1 vez al día  
☐ 2 a 3 veces al día  
☐ 5 a 6 veces al día  
☐ más 6 veces al día

---

Espinacas o acelgas cocinadas

- ☐ Nunca o menos 1 vez al mes  
☐ 1 a 3 veces mes  
☒ 1 vez semana  
☐ 2 a 4 veces semana  
☐ 5 a 6 veces semana  
☐ 1 vez al día  
☐ 2 a 3 veces al día  
☐ 5 a 6 veces al día  
☐ más 6 veces al día

---

Col o coliflor o brocoli cocinado

- ☐ Nunca o menos 1 vez al mes  
☐ 1 a 3 veces mes  
☒ 1 vez semana  
☐ 2 a 4 veces semana  
☐ 5 a 6 veces semana  
☐ 1 vez al día  
☐ 2 a 3 veces al día  
☐ 5 a 6 veces al día  
☐ más 6 veces al día

---

Lechuga o endivia o escarola

- ☐ Nunca o menos 1 vez al mes  
☐ 1 a 3 veces mes  
☐ 1 vez semana  
☐ 2 a 4 veces semana  
☐ 5 a 6 veces semana  
☒ 1 vez al día  
☐ 2 a 3 veces al día  
☐ 5 a 6 veces al día  
☐ más 6 veces al día

---

tomate ensalada

- ☐ Nunca o menos 1 vez al mes  
☐ 1 a 3 veces mes  
☐ 1 vez semana  
☐ 2 a 4 veces semana  
☐ 5 a 6 veces semana  
☒ 1 vez al día  
☐ 2 a 3 veces al día  
☐ 5 a 6 veces al día  
☐ más 6 veces al día

---

cebolla

- ☐ Nunca o menos 1 vez al mes  
☐ 1 a 3 veces mes  
☐ 1 vez semana  
☒ 2 a 4 veces semana  
☐ 5 a 6 veces semana  
☐ 1 vez al día  
☐ 2 a 3 veces al día  
☐ 5 a 6 veces al día  
☐ más 6 veces al día

---

Zanahoria o calabaza

- ☐ Nunca o menos 1 vez al mes  
☐ 1 a 3 veces mes  
☐ 1 vez semana  
☐ 2 a 4 veces semana  
☒ 5 a 6 veces semana  
☐ 1 vez al día  
☐ 2 a 3 veces al día  
☐ 5 a 6 veces al día  
☐ más 6 veces al día

---

Judías verdes

- ☐ Nunca o menos 1 vez al mes  
☐ 1 a 3 veces mes  
☐ 1 vez semana  
☒ 2 a 4 veces semana  
☐ 5 a 6 veces semana  
☐ 1 vez al día  
☐ 2 a 3 veces al día  
☐ 5 a 6 veces al día  
☐ más 6 veces al día

---

Berenjena o calabacin o pepino

- ☐ Nunca o menos 1 vez al mes  
☐ 1 a 3 veces mes  
☐ 1 vez semana  
☐ 2 a 4 veces semana  
☒ 5 a 6 veces semana  
☐ 1 vez al día  
☐ 2 a 3 veces al día  
☐ 5 a 6 veces al día  
☐ más 6 veces al día

|                       |                                                                                                                                                                                                                                                                                                                                                                                                              |
|-----------------------|--------------------------------------------------------------------------------------------------------------------------------------------------------------------------------------------------------------------------------------------------------------------------------------------------------------------------------------------------------------------------------------------------------------|
| pimiento              | <input checked="" type="radio"/> Nunca o menos 1 vez al mes<br><input type="radio"/> 1 a 3 veces mes<br><input type="radio"/> 1 vez semana<br><input type="radio"/> 2 a 4 veces semana<br><input type="radio"/> 5 a 6 veces semana<br><input type="radio"/> 1 vez al día<br><input type="radio"/> 2 a 3 veces al día<br><input type="radio"/> 5 a 6 veces al día<br><input type="radio"/> más 6 veces al día |
| alcachofa             | <input type="radio"/> Nunca o menos 1 vez al mes<br><input checked="" type="radio"/> 1 a 3 veces mes<br><input type="radio"/> 1 vez semana<br><input type="radio"/> 2 a 4 veces semana<br><input type="radio"/> 5 a 6 veces semana<br><input type="radio"/> 1 vez al día<br><input type="radio"/> 2 a 3 veces al día<br><input type="radio"/> 5 a 6 veces al día<br><input type="radio"/> más 6 veces al día |
| espárragos            | <input type="radio"/> Nunca o menos 1 vez al mes<br><input type="radio"/> 1 a 3 veces mes<br><input type="radio"/> 1 vez semana<br><input checked="" type="radio"/> 2 a 4 veces semana<br><input type="radio"/> 5 a 6 veces semana<br><input type="radio"/> 1 vez al día<br><input type="radio"/> 2 a 3 veces al día<br><input type="radio"/> 5 a 6 veces al día<br><input type="radio"/> más 6 veces al día |
| maíz hervido          | <input type="radio"/> Nunca o menos 1 vez al mes<br><input checked="" type="radio"/> 1 a 3 veces mes<br><input type="radio"/> 1 vez semana<br><input type="radio"/> 2 a 4 veces semana<br><input type="radio"/> 5 a 6 veces semana<br><input type="radio"/> 1 vez al día<br><input type="radio"/> 2 a 3 veces al día<br><input type="radio"/> 5 a 6 veces al día<br><input type="radio"/> más 6 veces al día |
| legumbres             | <input type="radio"/> Nunca o menos 1 vez al mes<br><input type="radio"/> 1 a 3 veces mes<br><input type="radio"/> 1 vez semana<br><input checked="" type="radio"/> 2 a 4 veces semana<br><input type="radio"/> 5 a 6 veces semana<br><input type="radio"/> 1 vez al día<br><input type="radio"/> 2 a 3 veces al día<br><input type="radio"/> 5 a 6 veces al día<br><input type="radio"/> más 6 veces al día |
| naranjas o mandarinas | <input type="radio"/> Nunca o menos 1 vez al mes<br><input type="radio"/> 1 a 3 veces mes<br><input checked="" type="radio"/> 1 vez semana<br><input type="radio"/> 2 a 4 veces semana<br><input type="radio"/> 5 a 6 veces semana<br><input type="radio"/> 1 vez al día<br><input type="radio"/> 2 a 3 veces al día<br><input type="radio"/> 5 a 6 veces al día<br><input type="radio"/> más 6 veces al día |

|                       |                                                                                                                                                                                                                                                                                                                                                                                                              |
|-----------------------|--------------------------------------------------------------------------------------------------------------------------------------------------------------------------------------------------------------------------------------------------------------------------------------------------------------------------------------------------------------------------------------------------------------|
| zum natural fruta     | <input checked="" type="radio"/> Nunca o menos 1 vez al mes<br><input type="radio"/> 1 a 3 veces mes<br><input type="radio"/> 1 vez semana<br><input type="radio"/> 2 a 4 veces semana<br><input type="radio"/> 5 a 6 veces semana<br><input type="radio"/> 1 vez al día<br><input type="radio"/> 2 a 3 veces al día<br><input type="radio"/> 5 a 6 veces al día<br><input type="radio"/> más 6 veces al día |
| platano               | <input type="radio"/> Nunca o menos 1 vez al mes<br><input type="radio"/> 1 a 3 veces mes<br><input checked="" type="radio"/> 1 vez semana<br><input type="radio"/> 2 a 4 veces semana<br><input type="radio"/> 5 a 6 veces semana<br><input type="radio"/> 1 vez al día<br><input type="radio"/> 2 a 3 veces al día<br><input type="radio"/> 5 a 6 veces al día<br><input type="radio"/> más 6 veces al día |
| manzana o pera        | <input type="radio"/> Nunca o menos 1 vez al mes<br><input type="radio"/> 1 a 3 veces mes<br><input type="radio"/> 1 vez semana<br><input checked="" type="radio"/> 2 a 4 veces semana<br><input type="radio"/> 5 a 6 veces semana<br><input type="radio"/> 1 vez al día<br><input type="radio"/> 2 a 3 veces al día<br><input type="radio"/> 5 a 6 veces al día<br><input type="radio"/> más 6 veces al día |
| melocotón o nectarina | <input type="radio"/> Nunca o menos 1 vez al mes<br><input type="radio"/> 1 a 3 veces mes<br><input type="radio"/> 1 vez semana<br><input checked="" type="radio"/> 2 a 4 veces semana<br><input type="radio"/> 5 a 6 veces semana<br><input type="radio"/> 1 vez al día<br><input type="radio"/> 2 a 3 veces al día<br><input type="radio"/> 5 a 6 veces al día<br><input type="radio"/> más 6 veces al día |
| sandia o melon        | <input type="radio"/> Nunca o menos 1 vez al mes<br><input type="radio"/> 1 a 3 veces mes<br><input type="radio"/> 1 vez semana<br><input checked="" type="radio"/> 2 a 4 veces semana<br><input type="radio"/> 5 a 6 veces semana<br><input type="radio"/> 1 vez al día<br><input type="radio"/> 2 a 3 veces al día<br><input type="radio"/> 5 a 6 veces al día<br><input type="radio"/> más 6 veces al día |
| uva                   | <input type="radio"/> Nunca o menos 1 vez al mes<br><input type="radio"/> 1 a 3 veces mes<br><input type="radio"/> 1 vez semana<br><input checked="" type="radio"/> 2 a 4 veces semana<br><input type="radio"/> 5 a 6 veces semana<br><input type="radio"/> 1 vez al día<br><input type="radio"/> 2 a 3 veces al día<br><input type="radio"/> 5 a 6 veces al día<br><input type="radio"/> más 6 veces al día |

|                 |                                                                                                                                                                                                                                                                                                                                                                                                              |
|-----------------|--------------------------------------------------------------------------------------------------------------------------------------------------------------------------------------------------------------------------------------------------------------------------------------------------------------------------------------------------------------------------------------------------------------|
| bruna o ciruela | <input type="radio"/> Nunca o menos 1 vez al mes<br><input type="radio"/> 1 a 3 veces mes<br><input type="radio"/> 1 vez semana<br><input checked="" type="radio"/> 2 a 4 veces semana<br><input type="radio"/> 5 a 6 veces semana<br><input type="radio"/> 1 vez al día<br><input type="radio"/> 2 a 3 veces al día<br><input type="radio"/> 5 a 6 veces al día<br><input type="radio"/> más 6 veces al día |
| kiwi            | <input type="radio"/> Nunca o menos 1 vez al mes<br><input type="radio"/> 1 a 3 veces mes<br><input type="radio"/> 1 vez semana<br><input type="radio"/> 2 a 4 veces semana<br><input type="radio"/> 5 a 6 veces semana<br><input checked="" type="radio"/> 1 vez al día<br><input type="radio"/> 2 a 3 veces al día<br><input type="radio"/> 5 a 6 veces al día<br><input type="radio"/> más 6 veces al día |
| aceituna        | <input type="radio"/> Nunca o menos 1 vez al mes<br><input checked="" type="radio"/> 1 a 3 veces mes<br><input type="radio"/> 1 vez semana<br><input type="radio"/> 2 a 4 veces semana<br><input type="radio"/> 5 a 6 veces semana<br><input type="radio"/> 1 vez al día<br><input type="radio"/> 2 a 3 veces al día<br><input type="radio"/> 5 a 6 veces al día<br><input type="radio"/> más 6 veces al día |
| frutos secos    | <input type="radio"/> Nunca o menos 1 vez al mes<br><input checked="" type="radio"/> 1 a 3 veces mes<br><input type="radio"/> 1 vez semana<br><input type="radio"/> 2 a 4 veces semana<br><input type="radio"/> 5 a 6 veces semana<br><input type="radio"/> 1 vez al día<br><input type="radio"/> 2 a 3 veces al día<br><input type="radio"/> 5 a 6 veces al día<br><input type="radio"/> más 6 veces al día |
| pan blanco      | <input type="radio"/> Nunca o menos 1 vez al mes<br><input type="radio"/> 1 a 3 veces mes<br><input type="radio"/> 1 vez semana<br><input type="radio"/> 2 a 4 veces semana<br><input type="radio"/> 5 a 6 veces semana<br><input checked="" type="radio"/> 1 vez al día<br><input type="radio"/> 2 a 3 veces al día<br><input type="radio"/> 5 a 6 veces al día<br><input type="radio"/> más 6 veces al día |
| pan integral    | <input type="radio"/> Nunca o menos 1 vez al mes<br><input type="radio"/> 1 a 3 veces mes<br><input type="radio"/> 1 vez semana<br><input checked="" type="radio"/> 2 a 4 veces semana<br><input type="radio"/> 5 a 6 veces semana<br><input type="radio"/> 1 vez al día<br><input type="radio"/> 2 a 3 veces al día<br><input type="radio"/> 5 a 6 veces al día<br><input type="radio"/> más 6 veces al día |

---

cereales desayuno

- ☐ Nunca o menos 1 vez al mes  
☐ 1 a 3 veces mes  
☐ 1 vez semana  
☐ 2 a 4 veces semana  
☐ 5 a 6 veces semana  
☒ 1 vez al día  
☐ 2 a 3 veces al día  
☐ 5 a 6 veces al día  
☐ más 6 veces al día

---

patatas fritas

- ☐ Nunca o menos 1 vez al mes  
☒ 1 a 3 veces mes  
☐ 1 vez semana  
☐ 2 a 4 veces semana  
☐ 5 a 6 veces semana  
☐ 1 vez al día  
☐ 2 a 3 veces al día  
☐ 5 a 6 veces al día  
☐ más 6 veces al día

---

patatas cocidas o asadas

- ☐ Nunca o menos 1 vez al mes  
☐ 1 a 3 veces mes  
☐ 1 vez semana  
☒ 2 a 4 veces semana  
☐ 5 a 6 veces semana  
☐ 1 vez al día  
☐ 2 a 3 veces al día  
☐ 5 a 6 veces al día  
☐ más 6 veces al día

---

bolsa papas

- ☒ Nunca o menos 1 vez al mes  
☐ 1 a 3 veces mes  
☐ 1 vez semana  
☐ 2 a 4 veces semana  
☐ 5 a 6 veces semana  
☐ 1 vez al día  
☐ 2 a 3 veces al día  
☐ 5 a 6 veces al día  
☐ más 6 veces al día

---

arroz cocinado

- ☐ Nunca o menos 1 vez al mes  
☐ 1 a 3 veces mes  
☒ 1 vez semana  
☐ 2 a 4 veces semana  
☐ 5 a 6 veces semana  
☐ 1 vez al día  
☐ 2 a 3 veces al día  
☐ 5 a 6 veces al día  
☐ más 6 veces al día

---

pasta

- ☐ Nunca o menos 1 vez al mes  
☐ 1 a 3 veces mes  
☒ 1 vez semana  
☐ 2 a 4 veces semana  
☐ 5 a 6 veces semana  
☐ 1 vez al día  
☐ 2 a 3 veces al día  
☐ 5 a 6 veces al día  
☐ más 6 veces al día



|                     |                                                                                                                                                                                                                                                                                                                                                                                                              |
|---------------------|--------------------------------------------------------------------------------------------------------------------------------------------------------------------------------------------------------------------------------------------------------------------------------------------------------------------------------------------------------------------------------------------------------------|
| pizza               | <input type="radio"/> Nunca o menos 1 vez al mes<br><input type="radio"/> 1 a 3 veces mes<br><input checked="" type="radio"/> 1 vez semana<br><input type="radio"/> 2 a 4 veces semana<br><input type="radio"/> 5 a 6 veces semana<br><input type="radio"/> 1 vez al día<br><input type="radio"/> 2 a 3 veces al día<br><input type="radio"/> 5 a 6 veces al día<br><input type="radio"/> más 6 veces al día |
| aceite oliva        | <input type="radio"/> Nunca o menos 1 vez al mes<br><input type="radio"/> 1 a 3 veces mes<br><input type="radio"/> 1 vez semana<br><input type="radio"/> 2 a 4 veces semana<br><input type="radio"/> 5 a 6 veces semana<br><input type="radio"/> 1 vez al día<br><input type="radio"/> 2 a 3 veces al día<br><input type="radio"/> 5 a 6 veces al día<br><input type="radio"/> más 6 veces al día            |
| otros aceites       | <input type="radio"/> Nunca o menos 1 vez al mes<br><input type="radio"/> 1 a 3 veces mes<br><input type="radio"/> 1 vez semana<br><input type="radio"/> 2 a 4 veces semana<br><input type="radio"/> 5 a 6 veces semana<br><input checked="" type="radio"/> 1 vez al día<br><input type="radio"/> 2 a 3 veces al día<br><input type="radio"/> 5 a 6 veces al día<br><input type="radio"/> más 6 veces al día |
| margarina           | <input checked="" type="radio"/> Nunca o menos 1 vez al mes<br><input type="radio"/> 1 a 3 veces mes<br><input type="radio"/> 1 vez semana<br><input type="radio"/> 2 a 4 veces semana<br><input type="radio"/> 5 a 6 veces semana<br><input type="radio"/> 1 vez al día<br><input type="radio"/> 2 a 3 veces al día<br><input type="radio"/> 5 a 6 veces al día<br><input type="radio"/> más 6 veces al día |
| mantequilla         | <input checked="" type="radio"/> Nunca o menos 1 vez al mes<br><input type="radio"/> 1 a 3 veces mes<br><input type="radio"/> 1 vez semana<br><input type="radio"/> 2 a 4 veces semana<br><input type="radio"/> 5 a 6 veces semana<br><input type="radio"/> 1 vez al día<br><input type="radio"/> 2 a 3 veces al día<br><input type="radio"/> 5 a 6 veces al día<br><input type="radio"/> más 6 veces al día |
| galletas tipo maria | <input checked="" type="radio"/> Nunca o menos 1 vez al mes<br><input type="radio"/> 1 a 3 veces mes<br><input type="radio"/> 1 vez semana<br><input type="radio"/> 2 a 4 veces semana<br><input type="radio"/> 5 a 6 veces semana<br><input type="radio"/> 1 vez al día<br><input type="radio"/> 2 a 3 veces al día<br><input type="radio"/> 5 a 6 veces al día<br><input type="radio"/> más 6 veces al día |

|                           |                                                                                                                                                                                                                                                                                                                                                                                                              |
|---------------------------|--------------------------------------------------------------------------------------------------------------------------------------------------------------------------------------------------------------------------------------------------------------------------------------------------------------------------------------------------------------------------------------------------------------|
| galletas chocolate        | <input checked="" type="radio"/> Nunca o menos 1 vez al mes<br><input type="radio"/> 1 a 3 veces mes<br><input type="radio"/> 1 vez semana<br><input type="radio"/> 2 a 4 veces semana<br><input type="radio"/> 5 a 6 veces semana<br><input type="radio"/> 1 vez al día<br><input type="radio"/> 2 a 3 veces al día<br><input type="radio"/> 5 a 6 veces al día<br><input type="radio"/> más 6 veces al día |
| bollieria                 | <input type="radio"/> Nunca o menos 1 vez al mes<br><input checked="" type="radio"/> 1 a 3 veces mes<br><input type="radio"/> 1 vez semana<br><input type="radio"/> 2 a 4 veces semana<br><input type="radio"/> 5 a 6 veces semana<br><input type="radio"/> 1 vez al día<br><input type="radio"/> 2 a 3 veces al día<br><input type="radio"/> 5 a 6 veces al día<br><input type="radio"/> más 6 veces al día |
| chocolate o bombones      | <input type="radio"/> Nunca o menos 1 vez al mes<br><input checked="" type="radio"/> 1 a 3 veces mes<br><input type="radio"/> 1 vez semana<br><input type="radio"/> 2 a 4 veces semana<br><input type="radio"/> 5 a 6 veces semana<br><input type="radio"/> 1 vez al día<br><input type="radio"/> 2 a 3 veces al día<br><input type="radio"/> 5 a 6 veces al día<br><input type="radio"/> más 6 veces al día |
| chocolate polvo o colacao | <input type="radio"/> Nunca o menos 1 vez al mes<br><input checked="" type="radio"/> 1 a 3 veces mes<br><input type="radio"/> 1 vez semana<br><input type="radio"/> 2 a 4 veces semana<br><input type="radio"/> 5 a 6 veces semana<br><input type="radio"/> 1 vez al día<br><input type="radio"/> 2 a 3 veces al día<br><input type="radio"/> 5 a 6 veces al día<br><input type="radio"/> más 6 veces al día |
| vino tinto                | <input checked="" type="radio"/> Nunca o menos 1 vez al mes<br><input type="radio"/> 1 a 3 veces mes<br><input type="radio"/> 1 vez semana<br><input type="radio"/> 2 a 4 veces semana<br><input type="radio"/> 5 a 6 veces semana<br><input type="radio"/> 1 vez al día<br><input type="radio"/> 2 a 3 veces al día<br><input type="radio"/> 5 a 6 veces al día<br><input type="radio"/> más 6 veces al día |
| vino blanco               | <input checked="" type="radio"/> Nunca o menos 1 vez al mes<br><input type="radio"/> 1 a 3 veces mes<br><input type="radio"/> 1 vez semana<br><input type="radio"/> 2 a 4 veces semana<br><input type="radio"/> 5 a 6 veces semana<br><input type="radio"/> 1 vez al día<br><input type="radio"/> 2 a 3 veces al día<br><input type="radio"/> 5 a 6 veces al día<br><input type="radio"/> más 6 veces al día |

|                       |                                                                                                                                                                                                                                                                                                                                                                                                              |
|-----------------------|--------------------------------------------------------------------------------------------------------------------------------------------------------------------------------------------------------------------------------------------------------------------------------------------------------------------------------------------------------------------------------------------------------------|
| vino seco o vermut    | <input checked="" type="radio"/> Nunca o menos 1 vez al mes<br><input type="radio"/> 1 a 3 veces mes<br><input type="radio"/> 1 vez semana<br><input type="radio"/> 2 a 4 veces semana<br><input type="radio"/> 5 a 6 veces semana<br><input type="radio"/> 1 vez al día<br><input type="radio"/> 2 a 3 veces al día<br><input type="radio"/> 5 a 6 veces al día<br><input type="radio"/> más 6 veces al día |
| cerveza               | <input checked="" type="radio"/> Nunca o menos 1 vez al mes<br><input type="radio"/> 1 a 3 veces mes<br><input type="radio"/> 1 vez semana<br><input type="radio"/> 2 a 4 veces semana<br><input type="radio"/> 5 a 6 veces semana<br><input type="radio"/> 1 vez al día<br><input type="radio"/> 2 a 3 veces al día<br><input type="radio"/> 5 a 6 veces al día<br><input type="radio"/> más 6 veces al día |
| cerveza sin alcohol   | <input checked="" type="radio"/> Nunca o menos 1 vez al mes<br><input type="radio"/> 1 a 3 veces mes<br><input type="radio"/> 1 vez semana<br><input type="radio"/> 2 a 4 veces semana<br><input type="radio"/> 5 a 6 veces semana<br><input type="radio"/> 1 vez al día<br><input type="radio"/> 2 a 3 veces al día<br><input type="radio"/> 5 a 6 veces al día<br><input type="radio"/> más 6 veces al día |
| licores               | <input checked="" type="radio"/> Nunca o menos 1 vez al mes<br><input type="radio"/> 1 a 3 veces mes<br><input type="radio"/> 1 vez semana<br><input type="radio"/> 2 a 4 veces semana<br><input type="radio"/> 5 a 6 veces semana<br><input type="radio"/> 1 vez al día<br><input type="radio"/> 2 a 3 veces al día<br><input type="radio"/> 5 a 6 veces al día<br><input type="radio"/> más 6 veces al día |
| ginebra o ron o vodka | <input checked="" type="radio"/> Nunca o menos 1 vez al mes<br><input type="radio"/> 1 a 3 veces mes<br><input type="radio"/> 1 vez semana<br><input type="radio"/> 2 a 4 veces semana<br><input type="radio"/> 5 a 6 veces semana<br><input type="radio"/> 1 vez al día<br><input type="radio"/> 2 a 3 veces al día<br><input type="radio"/> 5 a 6 veces al día<br><input type="radio"/> más 6 veces al día |
| refresco normal       | <input checked="" type="radio"/> Nunca o menos 1 vez al mes<br><input type="radio"/> 1 a 3 veces mes<br><input type="radio"/> 1 vez semana<br><input type="radio"/> 2 a 4 veces semana<br><input type="radio"/> 5 a 6 veces semana<br><input type="radio"/> 1 vez al día<br><input type="radio"/> 2 a 3 veces al día<br><input type="radio"/> 5 a 6 veces al día<br><input type="radio"/> más 6 veces al día |

|                          |                                                                                                                                                                                                                                                                                                                                                                                                              |
|--------------------------|--------------------------------------------------------------------------------------------------------------------------------------------------------------------------------------------------------------------------------------------------------------------------------------------------------------------------------------------------------------------------------------------------------------|
| refresco sin azúcar      | <input checked="" type="radio"/> Nunca o menos 1 vez al mes<br><input type="radio"/> 1 a 3 veces mes<br><input type="radio"/> 1 vez semana<br><input type="radio"/> 2 a 4 veces semana<br><input type="radio"/> 5 a 6 veces semana<br><input type="radio"/> 1 vez al día<br><input type="radio"/> 2 a 3 veces al día<br><input type="radio"/> 5 a 6 veces al día<br><input type="radio"/> más 6 veces al día |
| Agua del grifo           | <input checked="" type="radio"/> Nunca o menos 1 vez al mes<br><input type="radio"/> 1 a 3 veces mes<br><input type="radio"/> 1 vez semana<br><input type="radio"/> 2 a 4 veces semana<br><input type="radio"/> 5 a 6 veces semana<br><input type="radio"/> 1 vez al día<br><input type="radio"/> 2 a 3 veces al día<br><input type="radio"/> 5 a 6 veces al día<br><input type="radio"/> más 6 veces al día |
| agua embotellada sin gas | <input type="radio"/> Nunca o menos 1 vez al mes<br><input type="radio"/> 1 a 3 veces mes<br><input type="radio"/> 1 vez semana<br><input type="radio"/> 2 a 4 veces semana<br><input type="radio"/> 5 a 6 veces semana<br><input type="radio"/> 1 vez al día<br><input type="radio"/> 2 a 3 veces al día<br><input checked="" type="radio"/> 5 a 6 veces al día<br><input type="radio"/> más 6 veces al día |
| agua embotellada con gas | <input checked="" type="radio"/> Nunca o menos 1 vez al mes<br><input type="radio"/> 1 a 3 veces mes<br><input type="radio"/> 1 vez semana<br><input type="radio"/> 2 a 4 veces semana<br><input type="radio"/> 5 a 6 veces semana<br><input type="radio"/> 1 vez al día<br><input type="radio"/> 2 a 3 veces al día<br><input type="radio"/> 5 a 6 veces al día<br><input type="radio"/> más 6 veces al día |
| zumو frutas embasado     | <input type="radio"/> Nunca o menos 1 vez al mes<br><input checked="" type="radio"/> 1 a 3 veces mes<br><input type="radio"/> 1 vez semana<br><input type="radio"/> 2 a 4 veces semana<br><input type="radio"/> 5 a 6 veces semana<br><input type="radio"/> 1 vez al día<br><input type="radio"/> 2 a 3 veces al día<br><input type="radio"/> 5 a 6 veces al día<br><input type="radio"/> más 6 veces al día |
| cafe                     | <input checked="" type="radio"/> Nunca o menos 1 vez al mes<br><input type="radio"/> 1 a 3 veces mes<br><input type="radio"/> 1 vez semana<br><input type="radio"/> 2 a 4 veces semana<br><input type="radio"/> 5 a 6 veces semana<br><input type="radio"/> 1 vez al día<br><input type="radio"/> 2 a 3 veces al día<br><input type="radio"/> 5 a 6 veces al día<br><input type="radio"/> más 6 veces al día |

|                       |                                                                                                                                                                                                                                                                                                                                                                                                              |
|-----------------------|--------------------------------------------------------------------------------------------------------------------------------------------------------------------------------------------------------------------------------------------------------------------------------------------------------------------------------------------------------------------------------------------------------------|
| cafe descafeinado     | <input type="radio"/> Nunca o menos 1 vez al mes<br><input checked="" type="radio"/> 1 a 3 veces mes<br><input type="radio"/> 1 vez semana<br><input type="radio"/> 2 a 4 veces semana<br><input type="radio"/> 5 a 6 veces semana<br><input type="radio"/> 1 vez al día<br><input type="radio"/> 2 a 3 veces al día<br><input type="radio"/> 5 a 6 veces al día<br><input type="radio"/> más 6 veces al día |
| te o infusión         | <input type="radio"/> Nunca o menos 1 vez al mes<br><input checked="" type="radio"/> 1 a 3 veces mes<br><input type="radio"/> 1 vez semana<br><input type="radio"/> 2 a 4 veces semana<br><input type="radio"/> 5 a 6 veces semana<br><input type="radio"/> 1 vez al día<br><input type="radio"/> 2 a 3 veces al día<br><input type="radio"/> 5 a 6 veces al día<br><input type="radio"/> más 6 veces al día |
| sopa o puré verduras  | <input type="radio"/> Nunca o menos 1 vez al mes<br><input type="radio"/> 1 a 3 veces mes<br><input type="radio"/> 1 vez semana<br><input checked="" type="radio"/> 2 a 4 veces semana<br><input type="radio"/> 5 a 6 veces semana<br><input type="radio"/> 1 vez al día<br><input type="radio"/> 2 a 3 veces al día<br><input type="radio"/> 5 a 6 veces al día<br><input type="radio"/> más 6 veces al día |
| croquetas pollo jamón | <input type="radio"/> Nunca o menos 1 vez al mes<br><input type="radio"/> 1 a 3 veces mes<br><input checked="" type="radio"/> 1 vez semana<br><input type="radio"/> 2 a 4 veces semana<br><input type="radio"/> 5 a 6 veces semana<br><input type="radio"/> 1 vez al día<br><input type="radio"/> 2 a 3 veces al día<br><input type="radio"/> 5 a 6 veces al día<br><input type="radio"/> más 6 veces al día |
| croquetas pescado     | <input type="radio"/> Nunca o menos 1 vez al mes<br><input type="radio"/> 1 a 3 veces mes<br><input checked="" type="radio"/> 1 vez semana<br><input type="radio"/> 2 a 4 veces semana<br><input type="radio"/> 5 a 6 veces semana<br><input type="radio"/> 1 vez al día<br><input type="radio"/> 2 a 3 veces al día<br><input type="radio"/> 5 a 6 veces al día<br><input type="radio"/> más 6 veces al día |
| mayonesa              | <input checked="" type="radio"/> Nunca o menos 1 vez al mes<br><input type="radio"/> 1 a 3 veces mes<br><input type="radio"/> 1 vez semana<br><input type="radio"/> 2 a 4 veces semana<br><input type="radio"/> 5 a 6 veces semana<br><input type="radio"/> 1 vez al día<br><input type="radio"/> 2 a 3 veces al día<br><input type="radio"/> 5 a 6 veces al día<br><input type="radio"/> más 6 veces al día |

|                  |                                                                                                                                                                                                                                                                                                                                                                                                              |
|------------------|--------------------------------------------------------------------------------------------------------------------------------------------------------------------------------------------------------------------------------------------------------------------------------------------------------------------------------------------------------------------------------------------------------------|
| salsa tomate     | <input type="radio"/> Nunca o menos 1 vez al mes<br><input checked="" type="radio"/> 1 a 3 veces mes<br><input type="radio"/> 1 vez semana<br><input type="radio"/> 2 a 4 veces semana<br><input type="radio"/> 5 a 6 veces semana<br><input type="radio"/> 1 vez al día<br><input type="radio"/> 2 a 3 veces al día<br><input type="radio"/> 5 a 6 veces al día<br><input type="radio"/> más 6 veces al día |
| ketchup          | <input checked="" type="radio"/> Nunca o menos 1 vez al mes<br><input type="radio"/> 1 a 3 veces mes<br><input type="radio"/> 1 vez semana<br><input type="radio"/> 2 a 4 veces semana<br><input type="radio"/> 5 a 6 veces semana<br><input type="radio"/> 1 vez al día<br><input type="radio"/> 2 a 3 veces al día<br><input type="radio"/> 5 a 6 veces al día<br><input type="radio"/> más 6 veces al día |
| sal              | <input checked="" type="radio"/> Nunca o menos 1 vez al mes<br><input type="radio"/> 1 a 3 veces mes<br><input type="radio"/> 1 vez semana<br><input type="radio"/> 2 a 4 veces semana<br><input type="radio"/> 5 a 6 veces semana<br><input type="radio"/> 1 vez al día<br><input type="radio"/> 2 a 3 veces al día<br><input type="radio"/> 5 a 6 veces al día<br><input type="radio"/> más 6 veces al día |
| ajo              | <input checked="" type="radio"/> Nunca o menos 1 vez al mes<br><input type="radio"/> 1 a 3 veces mes<br><input type="radio"/> 1 vez semana<br><input type="radio"/> 2 a 4 veces semana<br><input type="radio"/> 5 a 6 veces semana<br><input type="radio"/> 1 vez al día<br><input type="radio"/> 2 a 3 veces al día<br><input type="radio"/> 5 a 6 veces al día<br><input type="radio"/> más 6 veces al día |
| mermelada o miel | <input type="radio"/> Nunca o menos 1 vez al mes<br><input checked="" type="radio"/> 1 a 3 veces mes<br><input type="radio"/> 1 vez semana<br><input type="radio"/> 2 a 4 veces semana<br><input type="radio"/> 5 a 6 veces semana<br><input type="radio"/> 1 vez al día<br><input type="radio"/> 2 a 3 veces al día<br><input type="radio"/> 5 a 6 veces al día<br><input type="radio"/> más 6 veces al día |
| azúcar           | <input type="radio"/> Nunca o menos 1 vez al mes<br><input checked="" type="radio"/> 1 a 3 veces mes<br><input type="radio"/> 1 vez semana<br><input type="radio"/> 2 a 4 veces semana<br><input type="radio"/> 5 a 6 veces semana<br><input type="radio"/> 1 vez al día<br><input type="radio"/> 2 a 3 veces al día<br><input type="radio"/> 5 a 6 veces al día<br><input type="radio"/> más 6 veces al día |

|                                       |                                                                                                                                                                                                                                                                                                                                                                                                                                                                                                                               |
|---------------------------------------|-------------------------------------------------------------------------------------------------------------------------------------------------------------------------------------------------------------------------------------------------------------------------------------------------------------------------------------------------------------------------------------------------------------------------------------------------------------------------------------------------------------------------------|
| Otro alimento                         | [*DATA REMOVED*]                                                                                                                                                                                                                                                                                                                                                                                                                                                                                                              |
| suplementos vitamínicos               | <input type="radio"/> si<br><input checked="" type="radio"/> no                                                                                                                                                                                                                                                                                                                                                                                                                                                               |
| suplementos vitamínicos               |                                                                                                                                                                                                                                                                                                                                                                                                                                                                                                                               |
| dieta previa                          | <input type="radio"/> si<br><input checked="" type="radio"/> no                                                                                                                                                                                                                                                                                                                                                                                                                                                               |
| motivo dieta                          | <input checked="" type="radio"/> no dieta<br><input type="radio"/> control peso<br><input type="radio"/> control colesterol<br><input type="radio"/> control diabetes<br><input type="radio"/> problemas estómago<br><input type="radio"/> problemas vesícula o hepáticos<br><input type="radio"/> HTA o cardiopatía<br><input type="radio"/> problemas renales<br><input type="radio"/> alergia alimentaria<br><input type="radio"/> ácido úrico elevado<br><input type="radio"/> vegetariana<br><input type="radio"/> otros |
| cambio alimentos año previo gestación | <input checked="" type="radio"/> si<br><input type="radio"/> no                                                                                                                                                                                                                                                                                                                                                                                                                                                               |
| cambio lácteos                        | <input type="radio"/> eliminado<br><input type="radio"/> disminuido<br><input checked="" type="radio"/> igual<br><input type="radio"/> aumentado<br><input type="radio"/> no sabe                                                                                                                                                                                                                                                                                                                                             |
| cambio huevos                         | <input type="radio"/> eliminado<br><input type="radio"/> disminuido<br><input checked="" type="radio"/> igual<br><input type="radio"/> aumentado<br><input type="radio"/> no sabe                                                                                                                                                                                                                                                                                                                                             |
| cambio carne                          | <input type="radio"/> eliminado<br><input type="radio"/> disminuido<br><input checked="" type="radio"/> igual<br><input type="radio"/> aumentado<br><input type="radio"/> no sabe                                                                                                                                                                                                                                                                                                                                             |
| cambio pescado                        | <input type="radio"/> eliminado<br><input type="radio"/> disminuido<br><input checked="" type="radio"/> igual<br><input type="radio"/> aumentado<br><input type="radio"/> no sabe                                                                                                                                                                                                                                                                                                                                             |
| cambio verduras                       | <input type="radio"/> eliminado<br><input type="radio"/> disminuido<br><input checked="" type="radio"/> igual<br><input type="radio"/> aumentado<br><input type="radio"/> no sabe                                                                                                                                                                                                                                                                                                                                             |

|                            |                                                                                                                                                                                                                        |
|----------------------------|------------------------------------------------------------------------------------------------------------------------------------------------------------------------------------------------------------------------|
| cambio legumbres           | <input type="radio"/> eliminado<br><input type="radio"/> disminuido<br><input checked="" type="radio"/> igual<br><input type="radio"/> aumentado<br><input type="radio"/> no sabe                                      |
| cambio fruta               | <input type="radio"/> eliminado<br><input type="radio"/> disminuido<br><input checked="" type="radio"/> igual<br><input type="radio"/> aumentado<br><input type="radio"/> no sabe                                      |
| cambio pan                 | <input type="radio"/> eliminado<br><input type="radio"/> disminuido<br><input checked="" type="radio"/> igual<br><input type="radio"/> aumentado<br><input type="radio"/> no sabe                                      |
| cambio aceite oliva        | <input type="radio"/> eliminado<br><input type="radio"/> disminuido<br><input checked="" type="radio"/> igual<br><input type="radio"/> aumentado<br><input type="radio"/> no sabe                                      |
| cambio mante o margarina   | <input type="radio"/> eliminado<br><input type="radio"/> disminuido<br><input checked="" type="radio"/> igual<br><input type="radio"/> aumentado<br><input type="radio"/> no sabe                                      |
| cambio azúcar y dulces     | <input type="radio"/> eliminado<br><input checked="" type="radio"/> disminuido<br><input type="radio"/> igual<br><input type="radio"/> aumentado<br><input type="radio"/> no sabe                                      |
| cambio bebidas alcohólicas | <input type="radio"/> eliminado<br><input type="radio"/> disminuido<br><input checked="" type="radio"/> igual<br><input type="radio"/> aumentado<br><input type="radio"/> no sabe                                      |
| frecuencia comidas fritas  | <input type="radio"/> a diario<br><input type="radio"/> 5 a 6 veces semana<br><input type="radio"/> 2 a 4 veces semana<br><input type="radio"/> 1 vez semana<br><input checked="" type="radio"/> menos de 1 vez semana |
| carne                      | <input type="radio"/> no como<br><input type="radio"/> cruda<br><input type="radio"/> poco hecha<br><input checked="" type="radio"/> hecha<br><input type="radio"/> muy hecha                                          |
| grasa visible carne        | <input type="radio"/> quita toda<br><input checked="" type="radio"/> quita mayoría<br><input type="radio"/> quita un poco<br><input type="radio"/> no quita nada                                                       |



|                                |                                                                                                                                                                                                                                                          |
|--------------------------------|----------------------------------------------------------------------------------------------------------------------------------------------------------------------------------------------------------------------------------------------------------|
| cocina carne                   | <input checked="" type="radio"/> a la plancha<br><input type="radio"/> a la parrilla<br><input type="radio"/> asada<br><input type="radio"/> frita<br><input type="radio"/> guisada                                                                      |
| tostado quemado carne          | <input checked="" type="radio"/> nunca<br><input type="radio"/> 1 vez mes<br><input type="radio"/> 2 a 3 veces mes<br><input type="radio"/> 1 vez semana<br><input type="radio"/> 2 a 3 semanas                                                          |
| tostado quemado pescado        | <input checked="" type="radio"/> nunca<br><input type="radio"/> 1 vez mes<br><input type="radio"/> 2 a 3 veces mes<br><input type="radio"/> 1 vez semana<br><input type="radio"/> 2 a 3 semanas                                                          |
| socarrat paella                | <input checked="" type="radio"/> nunca<br><input type="radio"/> 1 vez mes<br><input type="radio"/> 2 a 3 veces mes<br><input type="radio"/> 1 vez semana<br><input type="radio"/> 2 a 3 semanas                                                          |
| grasa o aceite cocinar         | <input type="radio"/> mantequilla<br><input type="radio"/> margarina<br><input type="radio"/> aceite oliva<br><input checked="" type="radio"/> aceite oliva virgen extra<br><input type="radio"/> aceite vegetal<br><input type="radio"/> mezcla aceites |
| grasa aceite aliñar            | <input type="radio"/> mantequilla<br><input type="radio"/> margarina<br><input type="radio"/> aceite oliva<br><input checked="" type="radio"/> aceite oliva virgen extra<br><input type="radio"/> aceite vegetal<br><input type="radio"/> mezcla aceites |
| grasa aceite freir             | <input type="radio"/> mantequilla<br><input type="radio"/> margarina<br><input type="radio"/> aceite oliva<br><input checked="" type="radio"/> aceite oliva virgen extra<br><input type="radio"/> aceite vegetal<br><input type="radio"/> mezcla aceites |
| Ejercicio cuestionario         | <input checked="" type="radio"/> si<br><input type="radio"/> no                                                                                                                                                                                          |
| horas de sueño incluido siesta | [*DATA REMOVED*]                                                                                                                                                                                                                                         |
| minutos siesta                 | [*DATA REMOVED*]                                                                                                                                                                                                                                         |
| horas televisión semana        | [*DATA REMOVED*]                                                                                                                                                                                                                                         |

|                                        |                                                                                                                                                                                                                                                                                                                                                                           |
|----------------------------------------|---------------------------------------------------------------------------------------------------------------------------------------------------------------------------------------------------------------------------------------------------------------------------------------------------------------------------------------------------------------------------|
| actividad trabajo                      | <input type="radio"/> casi siempre sentado<br><input type="radio"/> sentado 50 por cien<br><input type="radio"/> casi siempre de pie, quieto<br><input checked="" type="radio"/> casi siempre levantado caminando y llevando pocas cosas<br><input type="radio"/> casi siempre levantado, caminando y llevado muchas cosas<br><input type="radio"/> trabajo manual pesado |
| tiempo caminar o bici al día           | <input type="radio"/> casi nunca<br><input type="radio"/> menos 20min día<br><input type="radio"/> 20 a 40 min día<br><input type="radio"/> 40 a 60 min día<br><input type="radio"/> 1h o 1h y media día<br><input checked="" type="radio"/> más de 1h y media al día                                                                                                     |
| tiempo tareas casa al día              | <input type="radio"/> menos de 1h día<br><input type="radio"/> 1 a 2h día<br><input checked="" type="radio"/> 3 a 4h día<br><input type="radio"/> 5 a 6h día<br><input type="radio"/> 7 a 8h día<br><input type="radio"/> más de 8h día                                                                                                                                   |
| tiempo libre televisión ordenador leer | <input type="radio"/> menos 1h día<br><input type="radio"/> 1h día<br><input type="radio"/> 2h día<br><input checked="" type="radio"/> 3h día<br><input type="radio"/> 4h día<br><input type="radio"/> 5 a 6h día<br><input type="radio"/> mas 6h día                                                                                                                     |
| tiempo libre ejercicio o deporte       | <input type="radio"/> menos 1h semana<br><input type="radio"/> 1h semana<br><input type="radio"/> 2h semana<br><input type="radio"/> 3h semana<br><input type="radio"/> 4 a 5h semana<br><input checked="" type="radio"/> mas 5h semana                                                                                                                                   |
| como se considera                      | <input type="radio"/> sedentaria<br><input type="radio"/> poco activa<br><input type="radio"/> moderadamente activa<br><input checked="" type="radio"/> bastante activa<br><input type="radio"/> muy activa<br><input type="radio"/> no sabe                                                                                                                              |
| FUR                                    | [*DATA REMOVED*]                                                                                                                                                                                                                                                                                                                                                          |
| Semanas gestación 2T                   | [*DATA REMOVED*]                                                                                                                                                                                                                                                                                                                                                          |
| Días gestación 2T                      | [*DATA REMOVED*]                                                                                                                                                                                                                                                                                                                                                          |
| DBP 2T                                 | [*DATA REMOVED*]                                                                                                                                                                                                                                                                                                                                                          |
| CC 2T                                  | [*DATA REMOVED*]                                                                                                                                                                                                                                                                                                                                                          |
| AC 2T                                  | [*DATA REMOVED*]                                                                                                                                                                                                                                                                                                                                                          |

|                                                   |                                                                                                                                                                                                 |
|---------------------------------------------------|-------------------------------------------------------------------------------------------------------------------------------------------------------------------------------------------------|
| LF 2T                                             | [*DATA REMOVED*]                                                                                                                                                                                |
| PFE 2T (Hadlock)                                  | [*DATA REMOVED*]                                                                                                                                                                                |
| Semanas gestación 3T                              | [*DATA REMOVED*]                                                                                                                                                                                |
| días 3T                                           | [*DATA REMOVED*]                                                                                                                                                                                |
| DBP 3T                                            | [*DATA REMOVED*]                                                                                                                                                                                |
| CC 3T                                             | [*DATA REMOVED*]                                                                                                                                                                                |
| AC 3T                                             | [*DATA REMOVED*]                                                                                                                                                                                |
| LF 3T                                             | [*DATA REMOVED*]                                                                                                                                                                                |
| PFE 3T (Hadlock)                                  | [*DATA REMOVED*]                                                                                                                                                                                |
| Semanas de gestación final                        | [*DATA REMOVED*]                                                                                                                                                                                |
| días gestación final                              | [*DATA REMOVED*]                                                                                                                                                                                |
| Localización placenta                             | <input type="radio"/> anterior<br><input type="radio"/> lateral derecha<br><input type="radio"/> lateral izquierda<br><input checked="" type="radio"/> posterior<br><input type="radio"/> fondo |
| Presentación longitudinal cefálica                | <input type="radio"/> no<br><input checked="" type="radio"/> si                                                                                                                                 |
| Dorso                                             | <input type="radio"/> izquierda anterior<br><input type="radio"/> izquierda posterior<br><input type="radio"/> derecha anterior<br><input checked="" type="radio"/> derecha posterior           |
| diámetro biparietal                               | [*DATA REMOVED*]                                                                                                                                                                                |
| Circunferencia craneal                            | [*DATA REMOVED*]                                                                                                                                                                                |
| Circunferencia abdominal                          | [*DATA REMOVED*]                                                                                                                                                                                |
| Longitud de femur                                 | [*DATA REMOVED*]                                                                                                                                                                                |
| tejido celular subcutáneo a nivel del muslo en mm | [*DATA REMOVED*]                                                                                                                                                                                |
| tejido celular subcutáneo en abdomen en mm        | [*DATA REMOVED*]                                                                                                                                                                                |
| Volumen del muslo en cm3                          | [*DATA REMOVED*]                                                                                                                                                                                |
| Peso fetal estimado según fórmula de Hadlock      | [*DATA REMOVED*]                                                                                                                                                                                |

|                                               |                                                                                                                                                          |
|-----------------------------------------------|----------------------------------------------------------------------------------------------------------------------------------------------------------|
| Percentil                                     | [*DATA REMOVED*]                                                                                                                                         |
| Peso fetal estimado según fórmula de Scioscia | <hr/>                                                                                                                                                    |
| Peso fetal estimado según fórmula de LEE      | <hr/>                                                                                                                                                    |
| Tipo de parto                                 | <input checked="" type="radio"/> eutocico<br><input type="radio"/> instrumentado/ventosa<br><input type="radio"/> cesarea                                |
| fecha de nacimiento                           | [*DATA REMOVED*]                                                                                                                                         |
| Días entre exploración y nacimiento           | [*DATA REMOVED*]                                                                                                                                         |
| Peso RN en g                                  | [*DATA REMOVED*]                                                                                                                                         |
| sexo                                          | <input checked="" type="radio"/> mujer<br><input type="radio"/> hombre                                                                                   |
| Apgar 1 minuto                                | [*DATA REMOVED*]                                                                                                                                         |
| Apgar 5 minutos                               | [*DATA REMOVED*]                                                                                                                                         |
| Apgar 10 minutos                              | <hr/>                                                                                                                                                    |
| antecedente Covid durante gestación           | <input type="radio"/> Yes<br><input checked="" type="radio"/> No                                                                                         |
| Nivel de estudios                             | <input type="radio"/> ninguno<br><input type="radio"/> primarios<br><input type="radio"/> secundarios<br><input checked="" type="radio"/> universitarios |

# Base\_datos\_estimacion\_peso\_fetal

|                                       |                                                                                                                                                                                                                                                                                      |
|---------------------------------------|--------------------------------------------------------------------------------------------------------------------------------------------------------------------------------------------------------------------------------------------------------------------------------------|
| Número de identificación participante | 57                                                                                                                                                                                                                                                                                   |
| CODIGO PARTICIPANTE                   |                                                                                                                                                                                                                                                                                      |
| Edad                                  | [*DATA REMOVED*]                                                                                                                                                                                                                                                                     |
| Gestaciones                           | <input checked="" type="radio"/> 1<br><input type="radio"/> 2<br><input type="radio"/> 3<br><input type="radio"/> mas de 3                                                                                                                                                           |
| partos                                | <input checked="" type="radio"/> 0<br><input type="radio"/> 1<br><input type="radio"/> 2<br><input type="radio"/> 3<br><input type="radio"/> mas de 3                                                                                                                                |
| cesáreas                              | <input checked="" type="radio"/> 0<br><input type="radio"/> 1<br><input type="radio"/> 2<br><input type="radio"/> 3<br><input type="radio"/> mas de 3                                                                                                                                |
| Abortos                               | <input checked="" type="radio"/> 0<br><input type="radio"/> 1<br><input type="radio"/> 2<br><input type="radio"/> 3<br><input type="radio"/> mas de 3                                                                                                                                |
| Tipo de gestacion                     | <input checked="" type="radio"/> espontanea<br><input type="radio"/> IAC inseminación artificial conyuge<br><input type="radio"/> IAD inseminación artificial donante<br><input type="radio"/> FIV Fecundación in Vitro<br><input type="radio"/> Ovodon FIV con donación de ovocitos |
| peso previo a embarazo                | [*DATA REMOVED*]                                                                                                                                                                                                                                                                     |
| Ganancia ponderal embarazo            | [*DATA REMOVED*]                                                                                                                                                                                                                                                                     |
| Talla madre                           | [*DATA REMOVED*]                                                                                                                                                                                                                                                                     |
| IMC previo embarazo                   | 21.20310522895934                                                                                                                                                                                                                                                                    |
| Patología obstétrica                  | <input checked="" type="radio"/> no<br><input type="radio"/> si                                                                                                                                                                                                                      |
| Diabetes pregestacional               | <input checked="" type="radio"/> no<br><input type="radio"/> si                                                                                                                                                                                                                      |
| Diabetes gestacional                  | <input checked="" type="radio"/> no<br><input type="radio"/> si                                                                                                                                                                                                                      |

|                                            |                                                                                                                                                                                      |
|--------------------------------------------|--------------------------------------------------------------------------------------------------------------------------------------------------------------------------------------|
| Diabetes gestacional con insulina          | <input checked="" type="radio"/> no<br><input type="radio"/> si                                                                                                                      |
| Diabetes gestacional con dieta y ejercicio | <input checked="" type="radio"/> no<br><input type="radio"/> si                                                                                                                      |
| Percentil fetos previos                    | <input checked="" type="radio"/> Nada<br><input type="radio"/> percentil menor de 10<br><input type="radio"/> percentil entre 10 y 90<br><input type="radio"/> percentil mayor de 90 |
| Exfumadora                                 | <input type="radio"/> Nada<br><input checked="" type="radio"/> menos de 5 años<br><input type="radio"/> 5 a 10 años<br><input type="radio"/> mayor o igual a 10 años                 |
| Hábito tabáquico                           | <input checked="" type="radio"/> no<br><input type="radio"/> si                                                                                                                      |
| fumadora                                   | [*DATA REMOVED*]                                                                                                                                                                     |
| Consumo otros tóxicos                      | <input checked="" type="radio"/> no<br><input type="radio"/> si                                                                                                                      |
| Hb 1T                                      | _____                                                                                                                                                                                |
| Htc 1T                                     | _____                                                                                                                                                                                |
| Hb 2T                                      | _____                                                                                                                                                                                |
| HTC 2T                                     | _____                                                                                                                                                                                |
| Hb 3T                                      | _____                                                                                                                                                                                |
| HTC 3T                                     | _____                                                                                                                                                                                |
| Suplemento FE oral                         | <input checked="" type="radio"/> si<br><input type="radio"/> no                                                                                                                      |
| Suplemento fe iv                           | <input type="radio"/> si<br><input checked="" type="radio"/> no                                                                                                                      |
| Transfusión                                | <input checked="" type="radio"/> no<br><input type="radio"/> si                                                                                                                      |
| Solicitada Vit D                           | <input checked="" type="radio"/> no<br><input type="radio"/> si                                                                                                                      |

|                       |                                                                                                                                                                                                                                                                                                                                                                                                              |
|-----------------------|--------------------------------------------------------------------------------------------------------------------------------------------------------------------------------------------------------------------------------------------------------------------------------------------------------------------------------------------------------------------------------------------------------------|
| Deficit vit D         | <input type="radio"/> no<br><input type="radio"/> si                                                                                                                                                                                                                                                                                                                                                         |
| Suplemento vit D      | <input type="radio"/> si<br><input type="radio"/> no                                                                                                                                                                                                                                                                                                                                                         |
| Dieta, cuestionario   | <input checked="" type="radio"/> si<br><input type="radio"/> no                                                                                                                                                                                                                                                                                                                                              |
| Leche entera          | <input checked="" type="radio"/> Nunca o menos 1 vez al mes<br><input type="radio"/> 1 a 3 veces mes<br><input type="radio"/> 1 vez semana<br><input type="radio"/> 2 a 4 veces semana<br><input type="radio"/> 5 a 6 veces semana<br><input type="radio"/> 1 vez al día<br><input type="radio"/> 2 a 3 veces al día<br><input type="radio"/> 5 a 6 veces al día<br><input type="radio"/> más 6 veces al día |
| Leche semidesnatada   | <input checked="" type="radio"/> Nunca o menos 1 vez al mes<br><input type="radio"/> 1 a 3 veces mes<br><input type="radio"/> 1 vez semana<br><input type="radio"/> 2 a 4 veces semana<br><input type="radio"/> 5 a 6 veces semana<br><input type="radio"/> 1 vez al día<br><input type="radio"/> 2 a 3 veces al día<br><input type="radio"/> 5 a 6 veces al día<br><input type="radio"/> mas 6 veces al día |
| Leche desnatada       | <input checked="" type="radio"/> Nunca o menos 1 vez al mes<br><input type="radio"/> 1 a 3 veces mes<br><input type="radio"/> 1 vez semana<br><input type="radio"/> 2 a 4 veces semana<br><input type="radio"/> 5 a 6 veces semana<br><input type="radio"/> 1 vez al día<br><input type="radio"/> 2 a 3 veces al día<br><input type="radio"/> 5 a 6 veces al día<br><input type="radio"/> más 6 veces al día |
| Leche condensada      | <input checked="" type="radio"/> Nunca o menos 1 vez al mes<br><input type="radio"/> 1 a 3 veces mes<br><input type="radio"/> 1 vez semana<br><input type="radio"/> 2 a 4 veces semana<br><input type="radio"/> 5 a 6 veces semana<br><input type="radio"/> 1 vez al día<br><input type="radio"/> 2 a 3 veces al día<br><input type="radio"/> 5 a 6 veces al día<br><input type="radio"/> más 6 veces al día |
| nata o crema de leche | <input checked="" type="radio"/> Nunca o menos 1 vez al mes<br><input type="radio"/> 1 a 3 veces mes<br><input type="radio"/> 1 vez semana<br><input type="radio"/> 2 a 4 veces semana<br><input type="radio"/> 5 a 6 veces semana<br><input type="radio"/> 1 vez al día<br><input type="radio"/> 2 a 3 veces al día<br><input type="radio"/> 5 a 6 veces al día<br><input type="radio"/> más 6 veces al día |

|                                             |                                                                                                                                                                                                                                                                                                                                                                                                              |
|---------------------------------------------|--------------------------------------------------------------------------------------------------------------------------------------------------------------------------------------------------------------------------------------------------------------------------------------------------------------------------------------------------------------------------------------------------------------|
| Yogurt Entero                               | <input type="radio"/> Nunca o menos 1 vez al mes<br><input type="radio"/> 1 a 3 veces mes<br><input type="radio"/> 1 vez semana<br><input checked="" type="radio"/> 2 a 4 veces semana<br><input type="radio"/> 5 a 6 veces semana<br><input type="radio"/> 1 vez al día<br><input type="radio"/> 2 a 3 veces al día<br><input type="radio"/> 5 a 6 veces al día<br><input type="radio"/> más 6 veces al día |
| Yogurt desnatado                            | <input type="radio"/> Nunca o menos 1 vez al mes<br><input type="radio"/> 1 a 3 veces mes<br><input type="radio"/> 1 vez semana<br><input type="radio"/> 2 a 4 veces semana<br><input type="radio"/> 5 a 6 veces semana<br><input type="radio"/> 1 vez al día<br><input type="radio"/> 2 a 3 veces al día<br><input type="radio"/> 5 a 6 veces al día<br><input type="radio"/> más 6 veces al día            |
| 100g requesón o queso blando o queso fresco | <input type="radio"/> Nunca o menos 1 vez al mes<br><input type="radio"/> 1 a 3 veces mes<br><input checked="" type="radio"/> 1 vez semana<br><input type="radio"/> 2 a 4 veces semana<br><input type="radio"/> 5 a 6 veces semana<br><input type="radio"/> 1 vez al día<br><input type="radio"/> 2 a 3 veces al día<br><input type="radio"/> 5 a 6 veces al día<br><input type="radio"/> más 6 veces al día |
| queso curado o semicurado o cremoso         | <input type="radio"/> Nunca o menos 1 vez al mes<br><input type="radio"/> 1 a 3 veces mes<br><input type="radio"/> 1 vez semana<br><input type="radio"/> 2 a 4 veces semana<br><input checked="" type="radio"/> 5 a 6 veces semana<br><input type="radio"/> 1 vez al día<br><input type="radio"/> 2 a 3 veces al día<br><input type="radio"/> 5 a 6 veces al día<br><input type="radio"/> más 6 veces al día |
| natillas flan pudding                       | <input type="radio"/> Nunca o menos 1 vez al mes<br><input checked="" type="radio"/> 1 a 3 veces mes<br><input type="radio"/> 1 vez semana<br><input type="radio"/> 2 a 4 veces semana<br><input type="radio"/> 5 a 6 veces semana<br><input type="radio"/> 1 vez al día<br><input type="radio"/> 2 a 3 veces al día<br><input type="radio"/> 5 a 6 veces al día<br><input type="radio"/> más 6 veces al día |
| Helado                                      | <input type="radio"/> Nunca o menos 1 vez al mes<br><input checked="" type="radio"/> 1 a 3 veces mes<br><input type="radio"/> 1 vez semana<br><input type="radio"/> 2 a 4 veces semana<br><input type="radio"/> 5 a 6 veces semana<br><input type="radio"/> 1 vez al día<br><input type="radio"/> 2 a 3 veces al día<br><input type="radio"/> 5 a 6 veces al día<br><input type="radio"/> más 6 veces al día |



|                                      |                                                                                                                                                                                                                                                                                                                                                                                                              |
|--------------------------------------|--------------------------------------------------------------------------------------------------------------------------------------------------------------------------------------------------------------------------------------------------------------------------------------------------------------------------------------------------------------------------------------------------------------|
| huevo                                | <input type="radio"/> Nunca o menos 1 vez al mes<br><input type="radio"/> 1 a 3 veces mes<br><input type="radio"/> 1 vez semana<br><input checked="" type="radio"/> 2 a 4 veces semana<br><input type="radio"/> 5 a 6 veces semana<br><input type="radio"/> 1 vez al día<br><input type="radio"/> 2 a 3 veces al día<br><input type="radio"/> 5 a 6 veces al día<br><input type="radio"/> más 6 veces al día |
| Pollo con piel                       | <input type="radio"/> Nunca o menos 1 vez al mes<br><input checked="" type="radio"/> 1 a 3 veces mes<br><input type="radio"/> 1 vez semana<br><input type="radio"/> 2 a 4 veces semana<br><input type="radio"/> 5 a 6 veces semana<br><input type="radio"/> 1 vez al día<br><input type="radio"/> 2 a 3 veces al día<br><input type="radio"/> 5 a 6 veces al día<br><input type="radio"/> más 6 veces al día |
| pollo sin piel                       | <input type="radio"/> Nunca o menos 1 vez al mes<br><input type="radio"/> 1 a 3 veces mes<br><input checked="" type="radio"/> 1 vez semana<br><input type="radio"/> 2 a 4 veces semana<br><input type="radio"/> 5 a 6 veces semana<br><input type="radio"/> 1 vez al día<br><input type="radio"/> 2 a 3 veces al día<br><input type="radio"/> 5 a 6 veces al día<br><input type="radio"/> más 6 veces al día |
| Ternera o cerdo o cordero            | <input type="radio"/> Nunca o menos 1 vez al mes<br><input type="radio"/> 1 a 3 veces mes<br><input type="radio"/> 1 vez semana<br><input checked="" type="radio"/> 2 a 4 veces semana<br><input type="radio"/> 5 a 6 veces semana<br><input type="radio"/> 1 vez al día<br><input type="radio"/> 2 a 3 veces al día<br><input type="radio"/> 5 a 6 veces al día<br><input type="radio"/> más 6 veces al día |
| carne caza: Conejo o codorniz o pato | <input checked="" type="radio"/> Nunca o menos 1 vez al mes<br><input type="radio"/> 1 a 3 veces mes<br><input type="radio"/> 1 vez semana<br><input type="radio"/> 2 a 4 veces semana<br><input type="radio"/> 5 a 6 veces semana<br><input type="radio"/> 1 vez al día<br><input type="radio"/> 2 a 3 veces al día<br><input type="radio"/> 5 a 6 veces al día<br><input type="radio"/> más 6 veces al día |
| Hígado de ternera o cerdo o pollo    | <input checked="" type="radio"/> Nunca o menos 1 vez al mes<br><input type="radio"/> 1 a 3 veces mes<br><input type="radio"/> 1 vez semana<br><input type="radio"/> 2 a 4 veces semana<br><input type="radio"/> 5 a 6 veces semana<br><input type="radio"/> 1 vez al día<br><input type="radio"/> 2 a 3 veces al día<br><input type="radio"/> 5 a 6 veces al día<br><input type="radio"/> más 6 veces al día |

|                     |                                                                                                                                                                                                                                                                                                                                                                                                              |
|---------------------|--------------------------------------------------------------------------------------------------------------------------------------------------------------------------------------------------------------------------------------------------------------------------------------------------------------------------------------------------------------------------------------------------------------|
| Vísceras            | <input checked="" type="radio"/> Nunca o menos 1 vez al mes<br><input type="radio"/> 1 a 3 veces mes<br><input type="radio"/> 1 vez semana<br><input type="radio"/> 2 a 4 veces semana<br><input type="radio"/> 5 a 6 veces semana<br><input type="radio"/> 1 vez al día<br><input type="radio"/> 2 a 3 veces al día<br><input type="radio"/> 5 a 6 veces al día<br><input type="radio"/> más 6 veces al día |
| Embutido            | <input type="radio"/> Nunca o menos 1 vez al mes<br><input type="radio"/> 1 a 3 veces mes<br><input type="radio"/> 1 vez semana<br><input type="radio"/> 2 a 4 veces semana<br><input type="radio"/> 5 a 6 veces semana<br><input checked="" type="radio"/> 1 vez al día<br><input type="radio"/> 2 a 3 veces al día<br><input type="radio"/> 5 a 6 veces al día<br><input type="radio"/> más 6 veces al día |
| Salchicha o similar | <input type="radio"/> Nunca o menos 1 vez al mes<br><input checked="" type="radio"/> 1 a 3 veces mes<br><input type="radio"/> 1 vez semana<br><input type="radio"/> 2 a 4 veces semana<br><input type="radio"/> 5 a 6 veces semana<br><input type="radio"/> 1 vez al día<br><input type="radio"/> 2 a 3 veces al día<br><input type="radio"/> 5 a 6 veces al día<br><input type="radio"/> más 6 veces al día |
| Pate o foiegras     | <input checked="" type="radio"/> Nunca o menos 1 vez al mes<br><input type="radio"/> 1 a 3 veces mes<br><input type="radio"/> 1 vez semana<br><input type="radio"/> 2 a 4 veces semana<br><input type="radio"/> 5 a 6 veces semana<br><input type="radio"/> 1 vez al día<br><input type="radio"/> 2 a 3 veces al día<br><input type="radio"/> 5 a 6 veces al día<br><input type="radio"/> más 6 veces al día |
| Hamburguesa         | <input type="radio"/> Nunca o menos 1 vez al mes<br><input checked="" type="radio"/> 1 a 3 veces mes<br><input type="radio"/> 1 vez semana<br><input type="radio"/> 2 a 4 veces semana<br><input type="radio"/> 5 a 6 veces semana<br><input type="radio"/> 1 vez al día<br><input type="radio"/> 2 a 3 veces al día<br><input type="radio"/> 5 a 6 veces al día<br><input type="radio"/> más 6 veces al día |
| tocino o bacon      | <input checked="" type="radio"/> Nunca o menos 1 vez al mes<br><input type="radio"/> 1 a 3 veces mes<br><input type="radio"/> 1 vez semana<br><input type="radio"/> 2 a 4 veces semana<br><input type="radio"/> 5 a 6 veces semana<br><input type="radio"/> 1 vez al día<br><input type="radio"/> 2 a 3 veces al día<br><input type="radio"/> 5 a 6 veces al día<br><input type="radio"/> más 6 veces al día |

---

Pescado frito

- ☐ Nunca o menos 1 vez al mes  
☐ 1 a 3 veces mes  
☒ 1 vez semana  
☐ 2 a 4 veces semana  
☐ 5 a 6 veces semana  
☐ 1 vez al día  
☐ 2 a 3 veces al día  
☐ 5 a 6 veces al día  
☐ más 6 veces al día

---

pescado hervido blanco

- ☐ Nunca o menos 1 vez al mes  
☐ 1 a 3 veces mes  
☐ 1 vez semana  
☒ 2 a 4 veces semana  
☐ 5 a 6 veces semana  
☐ 1 vez al día  
☐ 2 a 3 veces al día  
☐ 5 a 6 veces al día  
☐ más 6 veces al día

---

pescado hervido azul

- ☒ Nunca o menos 1 vez al mes  
☐ 1 a 3 veces mes  
☐ 1 vez semana  
☐ 2 a 4 veces semana  
☐ 5 a 6 veces semana  
☐ 1 vez al día  
☐ 2 a 3 veces al día  
☐ 5 a 6 veces al día  
☐ más 6 veces al día

---

otros pescado azul

- ☐ Nunca o menos 1 vez al mes  
☐ 1 a 3 veces mes  
☐ 1 vez semana  
☒ 2 a 4 veces semana  
☐ 5 a 6 veces semana  
☐ 1 vez al día  
☐ 2 a 3 veces al día  
☐ 5 a 6 veces al día  
☐ más 6 veces al día

---

atun conserva

- ☐ Nunca o menos 1 vez al mes  
☐ 1 a 3 veces mes  
☐ 1 vez semana  
☒ 2 a 4 veces semana  
☐ 5 a 6 veces semana  
☐ 1 vez al día  
☐ 2 a 3 veces al día  
☐ 5 a 6 veces al día  
☐ más 6 veces al día

---

sardina conserva

- ☒ Nunca o menos 1 vez al mes  
☐ 1 a 3 veces mes  
☐ 1 vez semana  
☐ 2 a 4 veces semana  
☐ 5 a 6 veces semana  
☐ 1 vez al día  
☐ 2 a 3 veces al día  
☐ 5 a 6 veces al día  
☐ más 6 veces al día

|                                         |                                                                                                                                                                                                                                                                                                                                                                                                              |
|-----------------------------------------|--------------------------------------------------------------------------------------------------------------------------------------------------------------------------------------------------------------------------------------------------------------------------------------------------------------------------------------------------------------------------------------------------------------|
| pescado ahumado                         | <input checked="" type="radio"/> Nunca o menos 1 vez al mes<br><input type="radio"/> 1 a 3 veces mes<br><input type="radio"/> 1 vez semana<br><input type="radio"/> 2 a 4 veces semana<br><input type="radio"/> 5 a 6 veces semana<br><input type="radio"/> 1 vez al día<br><input type="radio"/> 2 a 3 veces al día<br><input type="radio"/> 5 a 6 veces al día<br><input type="radio"/> más 6 veces al día |
| almejas o mejillones o ostras unos 100g | <input type="radio"/> Nunca o menos 1 vez al mes<br><input type="radio"/> 1 a 3 veces mes<br><input checked="" type="radio"/> 1 vez semana<br><input type="radio"/> 2 a 4 veces semana<br><input type="radio"/> 5 a 6 veces semana<br><input type="radio"/> 1 vez al día<br><input type="radio"/> 2 a 3 veces al día<br><input type="radio"/> 5 a 6 veces al día<br><input type="radio"/> más 6 veces al día |
| calamar o chipiron o sepia unos 100g    | <input type="radio"/> Nunca o menos 1 vez al mes<br><input type="radio"/> 1 a 3 veces mes<br><input type="radio"/> 1 vez semana<br><input checked="" type="radio"/> 2 a 4 veces semana<br><input type="radio"/> 5 a 6 veces semana<br><input type="radio"/> 1 vez al día<br><input type="radio"/> 2 a 3 veces al día<br><input type="radio"/> 5 a 6 veces al día<br><input type="radio"/> más 6 veces al día |
| marisco unos 100g                       | <input type="radio"/> Nunca o menos 1 vez al mes<br><input type="radio"/> 1 a 3 veces mes<br><input checked="" type="radio"/> 1 vez semana<br><input type="radio"/> 2 a 4 veces semana<br><input type="radio"/> 5 a 6 veces semana<br><input type="radio"/> 1 vez al día<br><input type="radio"/> 2 a 3 veces al día<br><input type="radio"/> 5 a 6 veces al día<br><input type="radio"/> más 6 veces al día |
| Espinacas o acelgas cocinadas           | <input type="radio"/> Nunca o menos 1 vez al mes<br><input type="radio"/> 1 a 3 veces mes<br><input type="radio"/> 1 vez semana<br><input checked="" type="radio"/> 2 a 4 veces semana<br><input type="radio"/> 5 a 6 veces semana<br><input type="radio"/> 1 vez al día<br><input type="radio"/> 2 a 3 veces al día<br><input type="radio"/> 5 a 6 veces al día<br><input type="radio"/> más 6 veces al día |
| Col o coliflor o brocoli cocinado       | <input type="radio"/> Nunca o menos 1 vez al mes<br><input type="radio"/> 1 a 3 veces mes<br><input type="radio"/> 1 vez semana<br><input checked="" type="radio"/> 2 a 4 veces semana<br><input type="radio"/> 5 a 6 veces semana<br><input type="radio"/> 1 vez al día<br><input type="radio"/> 2 a 3 veces al día<br><input type="radio"/> 5 a 6 veces al día<br><input type="radio"/> más 6 veces al día |

---

Lechuga o endivia o escarola

- ☐ Nunca o menos 1 vez al mes  
☐ 1 a 3 veces mes  
☐ 1 vez semana  
☐ 2 a 4 veces semana  
☒ 5 a 6 veces semana  
☐ 1 vez al día  
☐ 2 a 3 veces al día  
☐ 5 a 6 veces al día  
☐ más 6 veces al día

---

tomate ensalada

- ☐ Nunca o menos 1 vez al mes  
☐ 1 a 3 veces mes  
☐ 1 vez semana  
☐ 2 a 4 veces semana  
☐ 5 a 6 veces semana  
☒ 1 vez al día  
☐ 2 a 3 veces al día  
☐ 5 a 6 veces al día  
☐ más 6 veces al día

---

cebolla

- ☐ Nunca o menos 1 vez al mes  
☐ 1 a 3 veces mes  
☐ 1 vez semana  
☐ 2 a 4 veces semana  
☒ 5 a 6 veces semana  
☐ 1 vez al día  
☐ 2 a 3 veces al día  
☐ 5 a 6 veces al día  
☐ más 6 veces al día

---

Zanahoria o calabaza

- ☐ Nunca o menos 1 vez al mes  
☐ 1 a 3 veces mes  
☒ 1 vez semana  
☐ 2 a 4 veces semana  
☐ 5 a 6 veces semana  
☐ 1 vez al día  
☐ 2 a 3 veces al día  
☐ 5 a 6 veces al día  
☐ más 6 veces al día

---

Judías verdes

- ☐ Nunca o menos 1 vez al mes  
☒ 1 a 3 veces mes  
☐ 1 vez semana  
☐ 2 a 4 veces semana  
☐ 5 a 6 veces semana  
☐ 1 vez al día  
☐ 2 a 3 veces al día  
☐ 5 a 6 veces al día  
☐ más 6 veces al día

---

Berenjena o calabacin o pepino

- ☐ Nunca o menos 1 vez al mes  
☐ 1 a 3 veces mes  
☒ 1 vez semana  
☐ 2 a 4 veces semana  
☐ 5 a 6 veces semana  
☐ 1 vez al día  
☐ 2 a 3 veces al día  
☐ 5 a 6 veces al día  
☐ más 6 veces al día

|                       |                                                                                                                                                                                                                                                                                                                                                                                                              |
|-----------------------|--------------------------------------------------------------------------------------------------------------------------------------------------------------------------------------------------------------------------------------------------------------------------------------------------------------------------------------------------------------------------------------------------------------|
| pimiento              | <input type="radio"/> Nunca o menos 1 vez al mes<br><input type="radio"/> 1 a 3 veces mes<br><input checked="" type="radio"/> 1 vez semana<br><input type="radio"/> 2 a 4 veces semana<br><input type="radio"/> 5 a 6 veces semana<br><input type="radio"/> 1 vez al día<br><input type="radio"/> 2 a 3 veces al día<br><input type="radio"/> 5 a 6 veces al día<br><input type="radio"/> más 6 veces al día |
| alcachofa             | <input type="radio"/> Nunca o menos 1 vez al mes<br><input type="radio"/> 1 a 3 veces mes<br><input checked="" type="radio"/> 1 vez semana<br><input type="radio"/> 2 a 4 veces semana<br><input type="radio"/> 5 a 6 veces semana<br><input type="radio"/> 1 vez al día<br><input type="radio"/> 2 a 3 veces al día<br><input type="radio"/> 5 a 6 veces al día<br><input type="radio"/> más 6 veces al día |
| espárragos            | <input type="radio"/> Nunca o menos 1 vez al mes<br><input type="radio"/> 1 a 3 veces mes<br><input type="radio"/> 1 vez semana<br><input type="radio"/> 2 a 4 veces semana<br><input checked="" type="radio"/> 5 a 6 veces semana<br><input type="radio"/> 1 vez al día<br><input type="radio"/> 2 a 3 veces al día<br><input type="radio"/> 5 a 6 veces al día<br><input type="radio"/> más 6 veces al día |
| maíz hervido          | <input checked="" type="radio"/> Nunca o menos 1 vez al mes<br><input type="radio"/> 1 a 3 veces mes<br><input type="radio"/> 1 vez semana<br><input type="radio"/> 2 a 4 veces semana<br><input type="radio"/> 5 a 6 veces semana<br><input type="radio"/> 1 vez al día<br><input type="radio"/> 2 a 3 veces al día<br><input type="radio"/> 5 a 6 veces al día<br><input type="radio"/> más 6 veces al día |
| legumbres             | <input type="radio"/> Nunca o menos 1 vez al mes<br><input type="radio"/> 1 a 3 veces mes<br><input type="radio"/> 1 vez semana<br><input checked="" type="radio"/> 2 a 4 veces semana<br><input type="radio"/> 5 a 6 veces semana<br><input type="radio"/> 1 vez al día<br><input type="radio"/> 2 a 3 veces al día<br><input type="radio"/> 5 a 6 veces al día<br><input type="radio"/> más 6 veces al día |
| naranjas o mandarinas | <input type="radio"/> Nunca o menos 1 vez al mes<br><input type="radio"/> 1 a 3 veces mes<br><input type="radio"/> 1 vez semana<br><input checked="" type="radio"/> 2 a 4 veces semana<br><input type="radio"/> 5 a 6 veces semana<br><input type="radio"/> 1 vez al día<br><input type="radio"/> 2 a 3 veces al día<br><input type="radio"/> 5 a 6 veces al día<br><input type="radio"/> más 6 veces al día |

---

|                    |                                                                                                                                                                                                                                                                                                                                                                                                              |
|--------------------|--------------------------------------------------------------------------------------------------------------------------------------------------------------------------------------------------------------------------------------------------------------------------------------------------------------------------------------------------------------------------------------------------------------|
| zumو natural fruta | <input type="radio"/> Nunca o menos 1 vez al mes<br><input type="radio"/> 1 a 3 veces mes<br><input type="radio"/> 1 vez semana<br><input type="radio"/> 2 a 4 veces semana<br><input type="radio"/> 5 a 6 veces semana<br><input checked="" type="radio"/> 1 vez al día<br><input type="radio"/> 2 a 3 veces al día<br><input type="radio"/> 5 a 6 veces al día<br><input type="radio"/> más 6 veces al día |
|--------------------|--------------------------------------------------------------------------------------------------------------------------------------------------------------------------------------------------------------------------------------------------------------------------------------------------------------------------------------------------------------------------------------------------------------|

---

|         |                                                                                                                                                                                                                                                                                                                                                                                                              |
|---------|--------------------------------------------------------------------------------------------------------------------------------------------------------------------------------------------------------------------------------------------------------------------------------------------------------------------------------------------------------------------------------------------------------------|
| platano | <input type="radio"/> Nunca o menos 1 vez al mes<br><input type="radio"/> 1 a 3 veces mes<br><input type="radio"/> 1 vez semana<br><input type="radio"/> 2 a 4 veces semana<br><input type="radio"/> 5 a 6 veces semana<br><input checked="" type="radio"/> 1 vez al día<br><input type="radio"/> 2 a 3 veces al día<br><input type="radio"/> 5 a 6 veces al día<br><input type="radio"/> más 6 veces al día |
|---------|--------------------------------------------------------------------------------------------------------------------------------------------------------------------------------------------------------------------------------------------------------------------------------------------------------------------------------------------------------------------------------------------------------------|

---

|                |                                                                                                                                                                                                                                                                                                                                                                                                              |
|----------------|--------------------------------------------------------------------------------------------------------------------------------------------------------------------------------------------------------------------------------------------------------------------------------------------------------------------------------------------------------------------------------------------------------------|
| manzana o pera | <input type="radio"/> Nunca o menos 1 vez al mes<br><input checked="" type="radio"/> 1 a 3 veces mes<br><input type="radio"/> 1 vez semana<br><input type="radio"/> 2 a 4 veces semana<br><input type="radio"/> 5 a 6 veces semana<br><input type="radio"/> 1 vez al día<br><input type="radio"/> 2 a 3 veces al día<br><input type="radio"/> 5 a 6 veces al día<br><input type="radio"/> más 6 veces al día |
|----------------|--------------------------------------------------------------------------------------------------------------------------------------------------------------------------------------------------------------------------------------------------------------------------------------------------------------------------------------------------------------------------------------------------------------|

---

|                       |                                                                                                                                                                                                                                                                                                                                                                                                              |
|-----------------------|--------------------------------------------------------------------------------------------------------------------------------------------------------------------------------------------------------------------------------------------------------------------------------------------------------------------------------------------------------------------------------------------------------------|
| melocotón o nectarina | <input type="radio"/> Nunca o menos 1 vez al mes<br><input type="radio"/> 1 a 3 veces mes<br><input type="radio"/> 1 vez semana<br><input checked="" type="radio"/> 2 a 4 veces semana<br><input type="radio"/> 5 a 6 veces semana<br><input type="radio"/> 1 vez al día<br><input type="radio"/> 2 a 3 veces al día<br><input type="radio"/> 5 a 6 veces al día<br><input type="radio"/> más 6 veces al día |
|-----------------------|--------------------------------------------------------------------------------------------------------------------------------------------------------------------------------------------------------------------------------------------------------------------------------------------------------------------------------------------------------------------------------------------------------------|

---

|                |                                                                                                                                                                                                                                                                                                                                                                                                              |
|----------------|--------------------------------------------------------------------------------------------------------------------------------------------------------------------------------------------------------------------------------------------------------------------------------------------------------------------------------------------------------------------------------------------------------------|
| sandia o melon | <input type="radio"/> Nunca o menos 1 vez al mes<br><input type="radio"/> 1 a 3 veces mes<br><input type="radio"/> 1 vez semana<br><input checked="" type="radio"/> 2 a 4 veces semana<br><input type="radio"/> 5 a 6 veces semana<br><input type="radio"/> 1 vez al día<br><input type="radio"/> 2 a 3 veces al día<br><input type="radio"/> 5 a 6 veces al día<br><input type="radio"/> más 6 veces al día |
|----------------|--------------------------------------------------------------------------------------------------------------------------------------------------------------------------------------------------------------------------------------------------------------------------------------------------------------------------------------------------------------------------------------------------------------|

---

|     |                                                                                                                                                                                                                                                                                                                                                                                                              |
|-----|--------------------------------------------------------------------------------------------------------------------------------------------------------------------------------------------------------------------------------------------------------------------------------------------------------------------------------------------------------------------------------------------------------------|
| uva | <input type="radio"/> Nunca o menos 1 vez al mes<br><input type="radio"/> 1 a 3 veces mes<br><input type="radio"/> 1 vez semana<br><input checked="" type="radio"/> 2 a 4 veces semana<br><input type="radio"/> 5 a 6 veces semana<br><input type="radio"/> 1 vez al día<br><input type="radio"/> 2 a 3 veces al día<br><input type="radio"/> 5 a 6 veces al día<br><input type="radio"/> más 6 veces al día |
|-----|--------------------------------------------------------------------------------------------------------------------------------------------------------------------------------------------------------------------------------------------------------------------------------------------------------------------------------------------------------------------------------------------------------------|

---

|                 |                                                                                                                                                                                                                                                                                                                                                                                                              |
|-----------------|--------------------------------------------------------------------------------------------------------------------------------------------------------------------------------------------------------------------------------------------------------------------------------------------------------------------------------------------------------------------------------------------------------------|
| bruna o ciruela | <input type="radio"/> Nunca o menos 1 vez al mes<br><input checked="" type="radio"/> 1 a 3 veces mes<br><input type="radio"/> 1 vez semana<br><input type="radio"/> 2 a 4 veces semana<br><input type="radio"/> 5 a 6 veces semana<br><input type="radio"/> 1 vez al día<br><input type="radio"/> 2 a 3 veces al día<br><input type="radio"/> 5 a 6 veces al día<br><input type="radio"/> más 6 veces al día |
| kiwi            | <input type="radio"/> Nunca o menos 1 vez al mes<br><input type="radio"/> 1 a 3 veces mes<br><input type="radio"/> 1 vez semana<br><input type="radio"/> 2 a 4 veces semana<br><input type="radio"/> 5 a 6 veces semana<br><input checked="" type="radio"/> 1 vez al día<br><input type="radio"/> 2 a 3 veces al día<br><input type="radio"/> 5 a 6 veces al día<br><input type="radio"/> más 6 veces al día |
| aceituna        | <input type="radio"/> Nunca o menos 1 vez al mes<br><input type="radio"/> 1 a 3 veces mes<br><input type="radio"/> 1 vez semana<br><input type="radio"/> 2 a 4 veces semana<br><input checked="" type="radio"/> 5 a 6 veces semana<br><input type="radio"/> 1 vez al día<br><input type="radio"/> 2 a 3 veces al día<br><input type="radio"/> 5 a 6 veces al día<br><input type="radio"/> más 6 veces al día |
| frutos secos    | <input type="radio"/> Nunca o menos 1 vez al mes<br><input type="radio"/> 1 a 3 veces mes<br><input type="radio"/> 1 vez semana<br><input type="radio"/> 2 a 4 veces semana<br><input type="radio"/> 5 a 6 veces semana<br><input checked="" type="radio"/> 1 vez al día<br><input type="radio"/> 2 a 3 veces al día<br><input type="radio"/> 5 a 6 veces al día<br><input type="radio"/> más 6 veces al día |
| pan blanco      | <input type="radio"/> Nunca o menos 1 vez al mes<br><input type="radio"/> 1 a 3 veces mes<br><input type="radio"/> 1 vez semana<br><input type="radio"/> 2 a 4 veces semana<br><input type="radio"/> 5 a 6 veces semana<br><input type="radio"/> 1 vez al día<br><input checked="" type="radio"/> 2 a 3 veces al día<br><input type="radio"/> 5 a 6 veces al día<br><input type="radio"/> más 6 veces al día |
| pan integral    | <input type="radio"/> Nunca o menos 1 vez al mes<br><input type="radio"/> 1 a 3 veces mes<br><input type="radio"/> 1 vez semana<br><input type="radio"/> 2 a 4 veces semana<br><input type="radio"/> 5 a 6 veces semana<br><input checked="" type="radio"/> 1 vez al día<br><input type="radio"/> 2 a 3 veces al día<br><input type="radio"/> 5 a 6 veces al día<br><input type="radio"/> más 6 veces al día |



|                          |                                                                                                                                                                                                                                                                                                                                                                                                              |
|--------------------------|--------------------------------------------------------------------------------------------------------------------------------------------------------------------------------------------------------------------------------------------------------------------------------------------------------------------------------------------------------------------------------------------------------------|
| cereales desayuno        | <input checked="" type="radio"/> Nunca o menos 1 vez al mes<br><input type="radio"/> 1 a 3 veces mes<br><input type="radio"/> 1 vez semana<br><input type="radio"/> 2 a 4 veces semana<br><input type="radio"/> 5 a 6 veces semana<br><input type="radio"/> 1 vez al día<br><input type="radio"/> 2 a 3 veces al día<br><input type="radio"/> 5 a 6 veces al día<br><input type="radio"/> más 6 veces al día |
| patatas fritas           | <input type="radio"/> Nunca o menos 1 vez al mes<br><input checked="" type="radio"/> 1 a 3 veces mes<br><input type="radio"/> 1 vez semana<br><input type="radio"/> 2 a 4 veces semana<br><input type="radio"/> 5 a 6 veces semana<br><input type="radio"/> 1 vez al día<br><input type="radio"/> 2 a 3 veces al día<br><input type="radio"/> 5 a 6 veces al día<br><input type="radio"/> más 6 veces al día |
| patatas cocidas o asadas | <input type="radio"/> Nunca o menos 1 vez al mes<br><input type="radio"/> 1 a 3 veces mes<br><input checked="" type="radio"/> 1 vez semana<br><input type="radio"/> 2 a 4 veces semana<br><input type="radio"/> 5 a 6 veces semana<br><input type="radio"/> 1 vez al día<br><input type="radio"/> 2 a 3 veces al día<br><input type="radio"/> 5 a 6 veces al día<br><input type="radio"/> más 6 veces al día |
| bolsa papas              | <input type="radio"/> Nunca o menos 1 vez al mes<br><input type="radio"/> 1 a 3 veces mes<br><input type="radio"/> 1 vez semana<br><input checked="" type="radio"/> 2 a 4 veces semana<br><input type="radio"/> 5 a 6 veces semana<br><input type="radio"/> 1 vez al día<br><input type="radio"/> 2 a 3 veces al día<br><input type="radio"/> 5 a 6 veces al día<br><input type="radio"/> más 6 veces al día |
| arroz cocinado           | <input type="radio"/> Nunca o menos 1 vez al mes<br><input type="radio"/> 1 a 3 veces mes<br><input type="radio"/> 1 vez semana<br><input checked="" type="radio"/> 2 a 4 veces semana<br><input type="radio"/> 5 a 6 veces semana<br><input type="radio"/> 1 vez al día<br><input type="radio"/> 2 a 3 veces al día<br><input type="radio"/> 5 a 6 veces al día<br><input type="radio"/> más 6 veces al día |
| pasta                    | <input type="radio"/> Nunca o menos 1 vez al mes<br><input type="radio"/> 1 a 3 veces mes<br><input type="radio"/> 1 vez semana<br><input checked="" type="radio"/> 2 a 4 veces semana<br><input type="radio"/> 5 a 6 veces semana<br><input type="radio"/> 1 vez al día<br><input type="radio"/> 2 a 3 veces al día<br><input type="radio"/> 5 a 6 veces al día<br><input type="radio"/> más 6 veces al día |

|                     |                                                                                                                                                                                                                                                                                                                                                                                                              |
|---------------------|--------------------------------------------------------------------------------------------------------------------------------------------------------------------------------------------------------------------------------------------------------------------------------------------------------------------------------------------------------------------------------------------------------------|
| pizza               | <input type="radio"/> Nunca o menos 1 vez al mes<br><input type="radio"/> 1 a 3 veces mes<br><input checked="" type="radio"/> 1 vez semana<br><input type="radio"/> 2 a 4 veces semana<br><input type="radio"/> 5 a 6 veces semana<br><input type="radio"/> 1 vez al día<br><input type="radio"/> 2 a 3 veces al día<br><input type="radio"/> 5 a 6 veces al día<br><input type="radio"/> más 6 veces al día |
| aceite oliva        | <input type="radio"/> Nunca o menos 1 vez al mes<br><input type="radio"/> 1 a 3 veces mes<br><input type="radio"/> 1 vez semana<br><input type="radio"/> 2 a 4 veces semana<br><input type="radio"/> 5 a 6 veces semana<br><input type="radio"/> 1 vez al día<br><input checked="" type="radio"/> 2 a 3 veces al día<br><input type="radio"/> 5 a 6 veces al día<br><input type="radio"/> más 6 veces al día |
| otros aceites       | <input checked="" type="radio"/> Nunca o menos 1 vez al mes<br><input type="radio"/> 1 a 3 veces mes<br><input type="radio"/> 1 vez semana<br><input type="radio"/> 2 a 4 veces semana<br><input type="radio"/> 5 a 6 veces semana<br><input type="radio"/> 1 vez al día<br><input type="radio"/> 2 a 3 veces al día<br><input type="radio"/> 5 a 6 veces al día<br><input type="radio"/> más 6 veces al día |
| margarina           | <input type="radio"/> Nunca o menos 1 vez al mes<br><input checked="" type="radio"/> 1 a 3 veces mes<br><input type="radio"/> 1 vez semana<br><input type="radio"/> 2 a 4 veces semana<br><input type="radio"/> 5 a 6 veces semana<br><input type="radio"/> 1 vez al día<br><input type="radio"/> 2 a 3 veces al día<br><input type="radio"/> 5 a 6 veces al día<br><input type="radio"/> más 6 veces al día |
| mantequilla         | <input type="radio"/> Nunca o menos 1 vez al mes<br><input checked="" type="radio"/> 1 a 3 veces mes<br><input type="radio"/> 1 vez semana<br><input type="radio"/> 2 a 4 veces semana<br><input type="radio"/> 5 a 6 veces semana<br><input type="radio"/> 1 vez al día<br><input type="radio"/> 2 a 3 veces al día<br><input type="radio"/> 5 a 6 veces al día<br><input type="radio"/> más 6 veces al día |
| galletas tipo maria | <input checked="" type="radio"/> Nunca o menos 1 vez al mes<br><input type="radio"/> 1 a 3 veces mes<br><input type="radio"/> 1 vez semana<br><input type="radio"/> 2 a 4 veces semana<br><input type="radio"/> 5 a 6 veces semana<br><input type="radio"/> 1 vez al día<br><input type="radio"/> 2 a 3 veces al día<br><input type="radio"/> 5 a 6 veces al día<br><input type="radio"/> más 6 veces al día |

|                           |                                                                                                                                                                                                                                                                                                                                                                                                              |
|---------------------------|--------------------------------------------------------------------------------------------------------------------------------------------------------------------------------------------------------------------------------------------------------------------------------------------------------------------------------------------------------------------------------------------------------------|
| galletas chocolate        | <input type="radio"/> Nunca o menos 1 vez al mes<br><input type="radio"/> 1 a 3 veces mes<br><input type="radio"/> 1 vez semana<br><input checked="" type="radio"/> 2 a 4 veces semana<br><input type="radio"/> 5 a 6 veces semana<br><input type="radio"/> 1 vez al día<br><input type="radio"/> 2 a 3 veces al día<br><input type="radio"/> 5 a 6 veces al día<br><input type="radio"/> más 6 veces al día |
| bollieria                 | <input type="radio"/> Nunca o menos 1 vez al mes<br><input type="radio"/> 1 a 3 veces mes<br><input type="radio"/> 1 vez semana<br><input type="radio"/> 2 a 4 veces semana<br><input type="radio"/> 5 a 6 veces semana<br><input checked="" type="radio"/> 1 vez al día<br><input type="radio"/> 2 a 3 veces al día<br><input type="radio"/> 5 a 6 veces al día<br><input type="radio"/> más 6 veces al día |
| chocolate o bombones      | <input type="radio"/> Nunca o menos 1 vez al mes<br><input type="radio"/> 1 a 3 veces mes<br><input type="radio"/> 1 vez semana<br><input checked="" type="radio"/> 2 a 4 veces semana<br><input type="radio"/> 5 a 6 veces semana<br><input type="radio"/> 1 vez al día<br><input type="radio"/> 2 a 3 veces al día<br><input type="radio"/> 5 a 6 veces al día<br><input type="radio"/> más 6 veces al día |
| chocolate polvo o colacao | <input checked="" type="radio"/> Nunca o menos 1 vez al mes<br><input type="radio"/> 1 a 3 veces mes<br><input type="radio"/> 1 vez semana<br><input type="radio"/> 2 a 4 veces semana<br><input type="radio"/> 5 a 6 veces semana<br><input type="radio"/> 1 vez al día<br><input type="radio"/> 2 a 3 veces al día<br><input type="radio"/> 5 a 6 veces al día<br><input type="radio"/> más 6 veces al día |
| vino tinto                | <input checked="" type="radio"/> Nunca o menos 1 vez al mes<br><input type="radio"/> 1 a 3 veces mes<br><input type="radio"/> 1 vez semana<br><input type="radio"/> 2 a 4 veces semana<br><input type="radio"/> 5 a 6 veces semana<br><input type="radio"/> 1 vez al día<br><input type="radio"/> 2 a 3 veces al día<br><input type="radio"/> 5 a 6 veces al día<br><input type="radio"/> más 6 veces al día |
| vino blanco               | <input checked="" type="radio"/> Nunca o menos 1 vez al mes<br><input type="radio"/> 1 a 3 veces mes<br><input type="radio"/> 1 vez semana<br><input type="radio"/> 2 a 4 veces semana<br><input type="radio"/> 5 a 6 veces semana<br><input type="radio"/> 1 vez al día<br><input type="radio"/> 2 a 3 veces al día<br><input type="radio"/> 5 a 6 veces al día<br><input type="radio"/> más 6 veces al día |

|                       |                                                                                                                                                                                                                                                                                                                                                                                                              |
|-----------------------|--------------------------------------------------------------------------------------------------------------------------------------------------------------------------------------------------------------------------------------------------------------------------------------------------------------------------------------------------------------------------------------------------------------|
| vino seco o vermut    | <input checked="" type="radio"/> Nunca o menos 1 vez al mes<br><input type="radio"/> 1 a 3 veces mes<br><input type="radio"/> 1 vez semana<br><input type="radio"/> 2 a 4 veces semana<br><input type="radio"/> 5 a 6 veces semana<br><input type="radio"/> 1 vez al día<br><input type="radio"/> 2 a 3 veces al día<br><input type="radio"/> 5 a 6 veces al día<br><input type="radio"/> más 6 veces al día |
| cerveza               | <input checked="" type="radio"/> Nunca o menos 1 vez al mes<br><input type="radio"/> 1 a 3 veces mes<br><input type="radio"/> 1 vez semana<br><input type="radio"/> 2 a 4 veces semana<br><input type="radio"/> 5 a 6 veces semana<br><input type="radio"/> 1 vez al día<br><input type="radio"/> 2 a 3 veces al día<br><input type="radio"/> 5 a 6 veces al día<br><input type="radio"/> más 6 veces al día |
| cerveza sin alcohol   | <input type="radio"/> Nunca o menos 1 vez al mes<br><input type="radio"/> 1 a 3 veces mes<br><input checked="" type="radio"/> 1 vez semana<br><input type="radio"/> 2 a 4 veces semana<br><input type="radio"/> 5 a 6 veces semana<br><input type="radio"/> 1 vez al día<br><input type="radio"/> 2 a 3 veces al día<br><input type="radio"/> 5 a 6 veces al día<br><input type="radio"/> más 6 veces al día |
| licores               | <input checked="" type="radio"/> Nunca o menos 1 vez al mes<br><input type="radio"/> 1 a 3 veces mes<br><input type="radio"/> 1 vez semana<br><input type="radio"/> 2 a 4 veces semana<br><input type="radio"/> 5 a 6 veces semana<br><input type="radio"/> 1 vez al día<br><input type="radio"/> 2 a 3 veces al día<br><input type="radio"/> 5 a 6 veces al día<br><input type="radio"/> más 6 veces al día |
| ginebra o ron o vodka | <input checked="" type="radio"/> Nunca o menos 1 vez al mes<br><input type="radio"/> 1 a 3 veces mes<br><input type="radio"/> 1 vez semana<br><input type="radio"/> 2 a 4 veces semana<br><input type="radio"/> 5 a 6 veces semana<br><input type="radio"/> 1 vez al día<br><input type="radio"/> 2 a 3 veces al día<br><input type="radio"/> 5 a 6 veces al día<br><input type="radio"/> más 6 veces al día |
| refresco normal       | <input type="radio"/> Nunca o menos 1 vez al mes<br><input type="radio"/> 1 a 3 veces mes<br><input checked="" type="radio"/> 1 vez semana<br><input type="radio"/> 2 a 4 veces semana<br><input type="radio"/> 5 a 6 veces semana<br><input type="radio"/> 1 vez al día<br><input type="radio"/> 2 a 3 veces al día<br><input type="radio"/> 5 a 6 veces al día<br><input type="radio"/> más 6 veces al día |

|                          |                                                                                                                                                                                                                                                                                                                                                                                                              |
|--------------------------|--------------------------------------------------------------------------------------------------------------------------------------------------------------------------------------------------------------------------------------------------------------------------------------------------------------------------------------------------------------------------------------------------------------|
| refresco sin azúcar      | <input type="radio"/> Nunca o menos 1 vez al mes<br><input type="radio"/> 1 a 3 veces mes<br><input type="radio"/> 1 vez semana<br><input checked="" type="radio"/> 2 a 4 veces semana<br><input type="radio"/> 5 a 6 veces semana<br><input type="radio"/> 1 vez al día<br><input type="radio"/> 2 a 3 veces al día<br><input type="radio"/> 5 a 6 veces al día<br><input type="radio"/> más 6 veces al día |
| Agua del grifo           | <input checked="" type="radio"/> Nunca o menos 1 vez al mes<br><input type="radio"/> 1 a 3 veces mes<br><input type="radio"/> 1 vez semana<br><input type="radio"/> 2 a 4 veces semana<br><input type="radio"/> 5 a 6 veces semana<br><input type="radio"/> 1 vez al día<br><input type="radio"/> 2 a 3 veces al día<br><input type="radio"/> 5 a 6 veces al día<br><input type="radio"/> más 6 veces al día |
| agua embotellada sin gas | <input type="radio"/> Nunca o menos 1 vez al mes<br><input type="radio"/> 1 a 3 veces mes<br><input type="radio"/> 1 vez semana<br><input type="radio"/> 2 a 4 veces semana<br><input type="radio"/> 5 a 6 veces semana<br><input type="radio"/> 1 vez al día<br><input type="radio"/> 2 a 3 veces al día<br><input type="radio"/> 5 a 6 veces al día<br><input checked="" type="radio"/> más 6 veces al día |
| agua embotellada con gas | <input type="radio"/> Nunca o menos 1 vez al mes<br><input type="radio"/> 1 a 3 veces mes<br><input checked="" type="radio"/> 1 vez semana<br><input type="radio"/> 2 a 4 veces semana<br><input type="radio"/> 5 a 6 veces semana<br><input type="radio"/> 1 vez al día<br><input type="radio"/> 2 a 3 veces al día<br><input type="radio"/> 5 a 6 veces al día<br><input type="radio"/> más 6 veces al día |
| zumو frutas embasado     | <input type="radio"/> Nunca o menos 1 vez al mes<br><input type="radio"/> 1 a 3 veces mes<br><input type="radio"/> 1 vez semana<br><input type="radio"/> 2 a 4 veces semana<br><input type="radio"/> 5 a 6 veces semana<br><input checked="" type="radio"/> 1 vez al día<br><input type="radio"/> 2 a 3 veces al día<br><input type="radio"/> 5 a 6 veces al día<br><input type="radio"/> más 6 veces al día |
| cafe                     | <input checked="" type="radio"/> Nunca o menos 1 vez al mes<br><input type="radio"/> 1 a 3 veces mes<br><input type="radio"/> 1 vez semana<br><input type="radio"/> 2 a 4 veces semana<br><input type="radio"/> 5 a 6 veces semana<br><input type="radio"/> 1 vez al día<br><input type="radio"/> 2 a 3 veces al día<br><input type="radio"/> 5 a 6 veces al día<br><input type="radio"/> más 6 veces al día |

|                       |                                                                                                                                                                                                                                                                                                                                                                                                              |
|-----------------------|--------------------------------------------------------------------------------------------------------------------------------------------------------------------------------------------------------------------------------------------------------------------------------------------------------------------------------------------------------------------------------------------------------------|
| cafe descafeinado     | <input type="radio"/> Nunca o menos 1 vez al mes<br><input type="radio"/> 1 a 3 veces mes<br><input type="radio"/> 1 vez semana<br><input type="radio"/> 2 a 4 veces semana<br><input type="radio"/> 5 a 6 veces semana<br><input checked="" type="radio"/> 1 vez al día<br><input type="radio"/> 2 a 3 veces al día<br><input type="radio"/> 5 a 6 veces al día<br><input type="radio"/> más 6 veces al día |
| te o infusión         | <input checked="" type="radio"/> Nunca o menos 1 vez al mes<br><input type="radio"/> 1 a 3 veces mes<br><input type="radio"/> 1 vez semana<br><input type="radio"/> 2 a 4 veces semana<br><input type="radio"/> 5 a 6 veces semana<br><input type="radio"/> 1 vez al día<br><input type="radio"/> 2 a 3 veces al día<br><input type="radio"/> 5 a 6 veces al día<br><input type="radio"/> más 6 veces al día |
| sopa o puré verduras  | <input type="radio"/> Nunca o menos 1 vez al mes<br><input type="radio"/> 1 a 3 veces mes<br><input type="radio"/> 1 vez semana<br><input checked="" type="radio"/> 2 a 4 veces semana<br><input type="radio"/> 5 a 6 veces semana<br><input type="radio"/> 1 vez al día<br><input type="radio"/> 2 a 3 veces al día<br><input type="radio"/> 5 a 6 veces al día<br><input type="radio"/> más 6 veces al día |
| croquetas pollo jamón | <input type="radio"/> Nunca o menos 1 vez al mes<br><input type="radio"/> 1 a 3 veces mes<br><input checked="" type="radio"/> 1 vez semana<br><input type="radio"/> 2 a 4 veces semana<br><input type="radio"/> 5 a 6 veces semana<br><input type="radio"/> 1 vez al día<br><input type="radio"/> 2 a 3 veces al día<br><input type="radio"/> 5 a 6 veces al día<br><input type="radio"/> más 6 veces al día |
| croquetas pescado     | <input checked="" type="radio"/> Nunca o menos 1 vez al mes<br><input type="radio"/> 1 a 3 veces mes<br><input type="radio"/> 1 vez semana<br><input type="radio"/> 2 a 4 veces semana<br><input type="radio"/> 5 a 6 veces semana<br><input type="radio"/> 1 vez al día<br><input type="radio"/> 2 a 3 veces al día<br><input type="radio"/> 5 a 6 veces al día<br><input type="radio"/> más 6 veces al día |
| mayonesa              | <input checked="" type="radio"/> Nunca o menos 1 vez al mes<br><input type="radio"/> 1 a 3 veces mes<br><input type="radio"/> 1 vez semana<br><input type="radio"/> 2 a 4 veces semana<br><input type="radio"/> 5 a 6 veces semana<br><input type="radio"/> 1 vez al día<br><input type="radio"/> 2 a 3 veces al día<br><input type="radio"/> 5 a 6 veces al día<br><input type="radio"/> más 6 veces al día |

|                  |                                                                                                                                                                                                                                                                                                                                                                                                              |
|------------------|--------------------------------------------------------------------------------------------------------------------------------------------------------------------------------------------------------------------------------------------------------------------------------------------------------------------------------------------------------------------------------------------------------------|
| salsa tomate     | <input type="radio"/> Nunca o menos 1 vez al mes<br><input type="radio"/> 1 a 3 veces mes<br><input type="radio"/> 1 vez semana<br><input checked="" type="radio"/> 2 a 4 veces semana<br><input type="radio"/> 5 a 6 veces semana<br><input type="radio"/> 1 vez al día<br><input type="radio"/> 2 a 3 veces al día<br><input type="radio"/> 5 a 6 veces al día<br><input type="radio"/> más 6 veces al día |
| ketchup          | <input type="radio"/> Nunca o menos 1 vez al mes<br><input checked="" type="radio"/> 1 a 3 veces mes<br><input type="radio"/> 1 vez semana<br><input type="radio"/> 2 a 4 veces semana<br><input type="radio"/> 5 a 6 veces semana<br><input type="radio"/> 1 vez al día<br><input type="radio"/> 2 a 3 veces al día<br><input type="radio"/> 5 a 6 veces al día<br><input type="radio"/> más 6 veces al día |
| sal              | <input type="radio"/> Nunca o menos 1 vez al mes<br><input type="radio"/> 1 a 3 veces mes<br><input type="radio"/> 1 vez semana<br><input type="radio"/> 2 a 4 veces semana<br><input type="radio"/> 5 a 6 veces semana<br><input type="radio"/> 1 vez al día<br><input checked="" type="radio"/> 2 a 3 veces al día<br><input type="radio"/> 5 a 6 veces al día<br><input type="radio"/> más 6 veces al día |
| ajo              | <input type="radio"/> Nunca o menos 1 vez al mes<br><input type="radio"/> 1 a 3 veces mes<br><input checked="" type="radio"/> 1 vez semana<br><input type="radio"/> 2 a 4 veces semana<br><input type="radio"/> 5 a 6 veces semana<br><input type="radio"/> 1 vez al día<br><input type="radio"/> 2 a 3 veces al día<br><input type="radio"/> 5 a 6 veces al día<br><input type="radio"/> más 6 veces al día |
| mermelada o miel | <input type="radio"/> Nunca o menos 1 vez al mes<br><input type="radio"/> 1 a 3 veces mes<br><input type="radio"/> 1 vez semana<br><input type="radio"/> 2 a 4 veces semana<br><input type="radio"/> 5 a 6 veces semana<br><input checked="" type="radio"/> 1 vez al día<br><input type="radio"/> 2 a 3 veces al día<br><input type="radio"/> 5 a 6 veces al día<br><input type="radio"/> más 6 veces al día |
| azúcar           | <input type="radio"/> Nunca o menos 1 vez al mes<br><input type="radio"/> 1 a 3 veces mes<br><input type="radio"/> 1 vez semana<br><input type="radio"/> 2 a 4 veces semana<br><input type="radio"/> 5 a 6 veces semana<br><input checked="" type="radio"/> 1 vez al día<br><input type="radio"/> 2 a 3 veces al día<br><input type="radio"/> 5 a 6 veces al día<br><input type="radio"/> más 6 veces al día |

|                                       |                                                                                                                                                                                                                                                                                                                                                                                                                                                                                                                               |
|---------------------------------------|-------------------------------------------------------------------------------------------------------------------------------------------------------------------------------------------------------------------------------------------------------------------------------------------------------------------------------------------------------------------------------------------------------------------------------------------------------------------------------------------------------------------------------|
| Otro alimento                         |                                                                                                                                                                                                                                                                                                                                                                                                                                                                                                                               |
| suplementos vitamínicos               | <input checked="" type="radio"/> si<br><input type="radio"/> no                                                                                                                                                                                                                                                                                                                                                                                                                                                               |
| suplementos vitamínicos               | [*DATA REMOVED*]                                                                                                                                                                                                                                                                                                                                                                                                                                                                                                              |
| dieta previa                          | <input type="radio"/> si<br><input checked="" type="radio"/> no                                                                                                                                                                                                                                                                                                                                                                                                                                                               |
| motivo dieta                          | <input checked="" type="radio"/> no dieta<br><input type="radio"/> control peso<br><input type="radio"/> control colesterol<br><input type="radio"/> control diabetes<br><input type="radio"/> problemas estómago<br><input type="radio"/> problemas vesícula o hepáticos<br><input type="radio"/> HTA o cardiopatía<br><input type="radio"/> problemas renales<br><input type="radio"/> alergia alimentaria<br><input type="radio"/> ácido úrico elevado<br><input type="radio"/> vegetariana<br><input type="radio"/> otros |
| cambio alimentos año previo gestación | <input checked="" type="radio"/> si<br><input type="radio"/> no                                                                                                                                                                                                                                                                                                                                                                                                                                                               |
| cambio lácteos                        | <input type="radio"/> eliminado<br><input type="radio"/> disminuido<br><input checked="" type="radio"/> igual<br><input type="radio"/> aumentado<br><input type="radio"/> no sabe                                                                                                                                                                                                                                                                                                                                             |
| cambio huevos                         | <input type="radio"/> eliminado<br><input type="radio"/> disminuido<br><input type="radio"/> igual<br><input checked="" type="radio"/> aumentado<br><input type="radio"/> no sabe                                                                                                                                                                                                                                                                                                                                             |
| cambio carne                          | <input type="radio"/> eliminado<br><input type="radio"/> disminuido<br><input type="radio"/> igual<br><input checked="" type="radio"/> aumentado<br><input type="radio"/> no sabe                                                                                                                                                                                                                                                                                                                                             |
| cambio pescado                        | <input type="radio"/> eliminado<br><input type="radio"/> disminuido<br><input type="radio"/> igual<br><input checked="" type="radio"/> aumentado<br><input type="radio"/> no sabe                                                                                                                                                                                                                                                                                                                                             |
| cambio verduras                       | <input type="radio"/> eliminado<br><input type="radio"/> disminuido<br><input type="radio"/> igual<br><input checked="" type="radio"/> aumentado<br><input type="radio"/> no sabe                                                                                                                                                                                                                                                                                                                                             |



|                            |                                                                                                                                                                                                                        |
|----------------------------|------------------------------------------------------------------------------------------------------------------------------------------------------------------------------------------------------------------------|
| cambio legumbres           | <input type="radio"/> eliminado<br><input type="radio"/> disminuido<br><input checked="" type="radio"/> igual<br><input type="radio"/> aumentado<br><input type="radio"/> no sabe                                      |
| cambio fruta               | <input type="radio"/> eliminado<br><input type="radio"/> disminuido<br><input type="radio"/> igual<br><input checked="" type="radio"/> aumentado<br><input type="radio"/> no sabe                                      |
| cambio pan                 | <input type="radio"/> eliminado<br><input type="radio"/> disminuido<br><input checked="" type="radio"/> igual<br><input type="radio"/> aumentado<br><input type="radio"/> no sabe                                      |
| cambio aceite oliva        | <input type="radio"/> eliminado<br><input type="radio"/> disminuido<br><input checked="" type="radio"/> igual<br><input type="radio"/> aumentado<br><input type="radio"/> no sabe                                      |
| cambio mante o margarina   | <input type="radio"/> eliminado<br><input type="radio"/> disminuido<br><input checked="" type="radio"/> igual<br><input type="radio"/> aumentado<br><input type="radio"/> no sabe                                      |
| cambio azúcar y dulces     | <input type="radio"/> eliminado<br><input type="radio"/> disminuido<br><input type="radio"/> igual<br><input checked="" type="radio"/> aumentado<br><input type="radio"/> no sabe                                      |
| cambio bebidas alcohólicas | <input checked="" type="radio"/> eliminado<br><input type="radio"/> disminuido<br><input type="radio"/> igual<br><input type="radio"/> aumentado<br><input type="radio"/> no sabe                                      |
| frecuencia comidas fritas  | <input type="radio"/> a diario<br><input type="radio"/> 5 a 6 veces semana<br><input checked="" type="radio"/> 2 a 4 veces semana<br><input type="radio"/> 1 vez semana<br><input type="radio"/> menos de 1 vez semana |
| carne                      | <input type="radio"/> no como<br><input type="radio"/> cruda<br><input type="radio"/> poco hecha<br><input type="radio"/> hecha<br><input checked="" type="radio"/> muy hecha                                          |
| grasa visible carne        | <input type="radio"/> quita toda<br><input checked="" type="radio"/> quita mayoría<br><input type="radio"/> quita un poco<br><input type="radio"/> no quita nada                                                       |

|                                |                                                                                                                                                                                                                                                          |
|--------------------------------|----------------------------------------------------------------------------------------------------------------------------------------------------------------------------------------------------------------------------------------------------------|
| cocina carne                   | <input type="radio"/> a la plancha<br><input type="radio"/> a la parrilla<br><input checked="" type="radio"/> asada<br><input type="radio"/> frita<br><input type="radio"/> guisada                                                                      |
| tostado quemado carne          | <input type="radio"/> nunca<br><input type="radio"/> 1 vez mes<br><input type="radio"/> 2 a 3 veces mes<br><input type="radio"/> 1 vez semana<br><input type="radio"/> 2 a 3 semanas                                                                     |
| tostado quemado pescado        | <input type="radio"/> nunca<br><input type="radio"/> 1 vez mes<br><input type="radio"/> 2 a 3 veces mes<br><input type="radio"/> 1 vez semana<br><input type="radio"/> 2 a 3 semanas                                                                     |
| socarrat paella                | <input type="radio"/> nunca<br><input type="radio"/> 1 vez mes<br><input type="radio"/> 2 a 3 veces mes<br><input type="radio"/> 1 vez semana<br><input type="radio"/> 2 a 3 semanas                                                                     |
| grasa o aceite cocinar         | <input type="radio"/> mantequilla<br><input type="radio"/> margarina<br><input type="radio"/> aceite oliva<br><input checked="" type="radio"/> aceite oliva virgen extra<br><input type="radio"/> aceite vegetal<br><input type="radio"/> mezcla aceites |
| grasa aceite aliñar            | <input type="radio"/> mantequilla<br><input type="radio"/> margarina<br><input type="radio"/> aceite oliva<br><input checked="" type="radio"/> aceite oliva virgen extra<br><input type="radio"/> aceite vegetal<br><input type="radio"/> mezcla aceites |
| grasa aceite freir             | <input type="radio"/> mantequilla<br><input type="radio"/> margarina<br><input type="radio"/> aceite oliva<br><input checked="" type="radio"/> aceite oliva virgen extra<br><input type="radio"/> aceite vegetal<br><input type="radio"/> mezcla aceites |
| Ejercicio cuestionario         | <input checked="" type="radio"/> si<br><input type="radio"/> no                                                                                                                                                                                          |
| horas de sueño incluido siesta | [*DATA REMOVED*]                                                                                                                                                                                                                                         |
| minutos siesta                 | [*DATA REMOVED*]                                                                                                                                                                                                                                         |
| horas televisión semana        | [*DATA REMOVED*]                                                                                                                                                                                                                                         |

|                                        |                                                                                                                                                                                                                                                                                                                                                                           |
|----------------------------------------|---------------------------------------------------------------------------------------------------------------------------------------------------------------------------------------------------------------------------------------------------------------------------------------------------------------------------------------------------------------------------|
| actividad trabajo                      | <input checked="" type="radio"/> casi siempre sentado<br><input type="radio"/> sentado 50 por cien<br><input type="radio"/> casi siempre de pie, quieto<br><input type="radio"/> casi siempre levantado caminando y llevando pocas cosas<br><input type="radio"/> casi siempre levantado, caminando y llevado muchas cosas<br><input type="radio"/> trabajo manual pesado |
| tiempo caminar o bici al día           | <input type="radio"/> casi nunca<br><input type="radio"/> menos 20min día<br><input type="radio"/> 20 a 40 min día<br><input checked="" type="radio"/> 40 a 60 min día<br><input type="radio"/> 1h o 1h y media día<br><input type="radio"/> más de 1h y media al día                                                                                                     |
| tiempo tareas casa al día              | <input type="radio"/> menos de 1h día<br><input checked="" type="radio"/> 1 a 2h día<br><input type="radio"/> 3 a 4h día<br><input type="radio"/> 5 a 6h día<br><input type="radio"/> 7 a 8h día<br><input type="radio"/> más de 8h día                                                                                                                                   |
| tiempo libre televisión ordenador leer | <input type="radio"/> menos 1h día<br><input type="radio"/> 1h día<br><input type="radio"/> 2h día<br><input type="radio"/> 3h día<br><input checked="" type="radio"/> 4h día<br><input type="radio"/> 5 a 6h día<br><input type="radio"/> mas 6h día                                                                                                                     |
| tiempo libre ejercicio o deporte       | <input type="radio"/> menos 1h semana<br><input type="radio"/> 1h semana<br><input checked="" type="radio"/> 2h semana<br><input type="radio"/> 3h semana<br><input type="radio"/> 4 a 5h semana<br><input type="radio"/> mas 5h semana                                                                                                                                   |
| como se considera                      | <input type="radio"/> sedentaria<br><input type="radio"/> poco activa<br><input checked="" type="radio"/> moderadamente activa<br><input type="radio"/> bastante activa<br><input type="radio"/> muy activa<br><input type="radio"/> no sabe                                                                                                                              |
| FUR                                    | [*DATA REMOVED*]                                                                                                                                                                                                                                                                                                                                                          |
| Semanas gestación 2T                   | _____                                                                                                                                                                                                                                                                                                                                                                     |
| Días gestación 2T                      | _____                                                                                                                                                                                                                                                                                                                                                                     |
| DBP 2T                                 | _____                                                                                                                                                                                                                                                                                                                                                                     |
| CC 2T                                  | _____                                                                                                                                                                                                                                                                                                                                                                     |

|                                                   |                                                                                                                                                                                                 |
|---------------------------------------------------|-------------------------------------------------------------------------------------------------------------------------------------------------------------------------------------------------|
| AC 2T                                             |                                                                                                                                                                                                 |
| LF 2T                                             |                                                                                                                                                                                                 |
| PFE 2T (Hadlock)                                  |                                                                                                                                                                                                 |
| Semanas gestación 3T                              | [*DATA REMOVED*]                                                                                                                                                                                |
| días 3T                                           | [*DATA REMOVED*]                                                                                                                                                                                |
| DBP 3T                                            | [*DATA REMOVED*]                                                                                                                                                                                |
| CC 3T                                             | [*DATA REMOVED*]                                                                                                                                                                                |
| AC 3T                                             | [*DATA REMOVED*]                                                                                                                                                                                |
| LF 3T                                             | [*DATA REMOVED*]                                                                                                                                                                                |
| PFE 3T (Hadlock)                                  | [*DATA REMOVED*]                                                                                                                                                                                |
| Semanas de gestación final                        | [*DATA REMOVED*]                                                                                                                                                                                |
| días gestación final                              | [*DATA REMOVED*]                                                                                                                                                                                |
| Localización placenta                             | <input type="radio"/> anterior<br><input type="radio"/> lateral derecha<br><input type="radio"/> lateral izquierda<br><input type="radio"/> posterior<br><input checked="" type="radio"/> fondo |
| Presentación longitudinal cefálica                | <input type="radio"/> no<br><input checked="" type="radio"/> si                                                                                                                                 |
| Dorso                                             | <input checked="" type="radio"/> izquierda anterior<br><input type="radio"/> izquierda posterior<br><input type="radio"/> derecha anterior<br><input type="radio"/> derecha posterior           |
| diámetro biparietal                               | [*DATA REMOVED*]                                                                                                                                                                                |
| Circunferencia craneal                            | [*DATA REMOVED*]                                                                                                                                                                                |
| Circunferencia abdominal                          | [*DATA REMOVED*]                                                                                                                                                                                |
| Longitud de femur                                 | [*DATA REMOVED*]                                                                                                                                                                                |
| tejido celular subcutáneo a nivel del muslo en mm | [*DATA REMOVED*]                                                                                                                                                                                |
| tejido celular subcutáneo en abdomen en mm        | [*DATA REMOVED*]                                                                                                                                                                                |

|                                               |                                                                                                                                                          |
|-----------------------------------------------|----------------------------------------------------------------------------------------------------------------------------------------------------------|
| Volumen del muslo en cm3                      | [*DATA REMOVED*]                                                                                                                                         |
| Peso fetal estimado según fórmula de Hadlock  | [*DATA REMOVED*]                                                                                                                                         |
| Percentil                                     | [*DATA REMOVED*]                                                                                                                                         |
| Peso fetal estimado según fórmula de Scioscia | _____                                                                                                                                                    |
| Peso fetal estimado según fórmula de LEE      | _____                                                                                                                                                    |
| Tipo de parto                                 | <input checked="" type="radio"/> eutocico<br><input type="radio"/> instrumentado/ventosa<br><input type="radio"/> cesarea                                |
| fecha de nacimiento                           | [*DATA REMOVED*]                                                                                                                                         |
| Días entre exploración y nacimiento           | [*DATA REMOVED*]                                                                                                                                         |
| Peso RN en g                                  | [*DATA REMOVED*]                                                                                                                                         |
| sexo                                          | <input checked="" type="radio"/> mujer<br><input type="radio"/> hombre                                                                                   |
| Apgar 1 minuto                                | [*DATA REMOVED*]                                                                                                                                         |
| Apgar 5 minutos                               | [*DATA REMOVED*]                                                                                                                                         |
| Apgar 10 minutos                              | _____                                                                                                                                                    |
| antecedente Covid durante gestación           | <input type="radio"/> Yes<br><input checked="" type="radio"/> No                                                                                         |
| Nivel de estudios                             | <input type="radio"/> ninguno<br><input type="radio"/> primarios<br><input type="radio"/> secundarios<br><input checked="" type="radio"/> universitarios |

## Base\_datos\_estimacion\_peso\_fetal

|                                       |                                                                                                                                                                                                                                                                                      |
|---------------------------------------|--------------------------------------------------------------------------------------------------------------------------------------------------------------------------------------------------------------------------------------------------------------------------------------|
| Número de identificación participante | 58                                                                                                                                                                                                                                                                                   |
| CODIGO PARTICIPANTE                   |                                                                                                                                                                                                                                                                                      |
| Edad                                  | [*DATA REMOVED*]                                                                                                                                                                                                                                                                     |
| Gestaciones                           | <input type="radio"/> 1<br><input checked="" type="radio"/> 2<br><input type="radio"/> 3<br><input type="radio"/> mas de 3                                                                                                                                                           |
| partos                                | <input type="radio"/> 0<br><input checked="" type="radio"/> 1<br><input type="radio"/> 2<br><input type="radio"/> 3<br><input type="radio"/> mas de 3                                                                                                                                |
| cesáreas                              | <input checked="" type="radio"/> 0<br><input type="radio"/> 1<br><input type="radio"/> 2<br><input type="radio"/> 3<br><input type="radio"/> mas de 3                                                                                                                                |
| Abortos                               | <input checked="" type="radio"/> 0<br><input type="radio"/> 1<br><input type="radio"/> 2<br><input type="radio"/> 3<br><input type="radio"/> mas de 3                                                                                                                                |
| Tipo de gestacion                     | <input checked="" type="radio"/> espontanea<br><input type="radio"/> IAC inseminación artificial conyuge<br><input type="radio"/> IAD inseminación artificial donante<br><input type="radio"/> FIV Fecundación in Vitro<br><input type="radio"/> Ovodon FIV con donación de ovocitos |
| peso previo a embarazo                | [*DATA REMOVED*]                                                                                                                                                                                                                                                                     |
| Ganancia ponderal embarazo            |                                                                                                                                                                                                                                                                                      |
| Talla madre                           | [*DATA REMOVED*]                                                                                                                                                                                                                                                                     |
| IMC previo embarazo                   | 24.840980089578082                                                                                                                                                                                                                                                                   |
| Patología obstétrica                  | <input checked="" type="radio"/> no<br><input type="radio"/> si                                                                                                                                                                                                                      |
| Diabetes pregestacional               | <input checked="" type="radio"/> no<br><input type="radio"/> si                                                                                                                                                                                                                      |
| Diabetes gestacional                  | <input checked="" type="radio"/> no<br><input type="radio"/> si                                                                                                                                                                                                                      |

|                                            |                                                                                                                                                                                      |
|--------------------------------------------|--------------------------------------------------------------------------------------------------------------------------------------------------------------------------------------|
| Diabetes gestacional con insulina          | <input checked="" type="radio"/> no<br><input type="radio"/> si                                                                                                                      |
| Diabetes gestacional con dieta y ejercicio | <input checked="" type="radio"/> no<br><input type="radio"/> si                                                                                                                      |
| Percentil fetos previos                    | <input type="radio"/> Nada<br><input type="radio"/> percentil menor de 10<br><input checked="" type="radio"/> percentil entre 10 y 90<br><input type="radio"/> percentil mayor de 90 |
| Exfumadora                                 | <input checked="" type="radio"/> Nada<br><input type="radio"/> menos de 5 años<br><input type="radio"/> 5 a 10 años<br><input type="radio"/> mayor o igual a 10 años                 |
| Hábito tabáquico                           | <input checked="" type="radio"/> no<br><input type="radio"/> si                                                                                                                      |
| fumadora                                   | [*DATA REMOVED*]                                                                                                                                                                     |
| Consumo otros tóxicos                      | <input checked="" type="radio"/> no<br><input type="radio"/> si                                                                                                                      |
| Hb 1T                                      | _____                                                                                                                                                                                |
| Htc 1T                                     | _____                                                                                                                                                                                |
| Hb 2T                                      | _____                                                                                                                                                                                |
| HTC 2T                                     | _____                                                                                                                                                                                |
| Hb 3T                                      | _____                                                                                                                                                                                |
| HTC 3T                                     | _____                                                                                                                                                                                |
| Suplemento FE oral                         | <input checked="" type="radio"/> si<br><input type="radio"/> no                                                                                                                      |
| Suplemento fe iv                           | <input type="radio"/> si<br><input checked="" type="radio"/> no                                                                                                                      |
| Transfusión                                | <input checked="" type="radio"/> no<br><input type="radio"/> si                                                                                                                      |
| Solicitada Vit D                           | <input checked="" type="radio"/> no<br><input type="radio"/> si                                                                                                                      |

|                       |                                                                                                                                                                                                                                                                                                                                                                                                              |
|-----------------------|--------------------------------------------------------------------------------------------------------------------------------------------------------------------------------------------------------------------------------------------------------------------------------------------------------------------------------------------------------------------------------------------------------------|
| Deficit vit D         | <input type="radio"/> no<br><input type="radio"/> si                                                                                                                                                                                                                                                                                                                                                         |
| Suplemento vit D      | <input type="radio"/> si<br><input type="radio"/> no                                                                                                                                                                                                                                                                                                                                                         |
| Dieta, cuestionario   | <input checked="" type="radio"/> si<br><input type="radio"/> no                                                                                                                                                                                                                                                                                                                                              |
| Leche entera          | <input type="radio"/> Nunca o menos 1 vez al mes<br><input type="radio"/> 1 a 3 veces mes<br><input type="radio"/> 1 vez semana<br><input type="radio"/> 2 a 4 veces semana<br><input type="radio"/> 5 a 6 veces semana<br><input checked="" type="radio"/> 1 vez al día<br><input type="radio"/> 2 a 3 veces al día<br><input type="radio"/> 5 a 6 veces al día<br><input type="radio"/> más 6 veces al día |
| Leche semidesnatada   | <input checked="" type="radio"/> Nunca o menos 1 vez al mes<br><input type="radio"/> 1 a 3 veces mes<br><input type="radio"/> 1 vez semana<br><input type="radio"/> 2 a 4 veces semana<br><input type="radio"/> 5 a 6 veces semana<br><input type="radio"/> 1 vez al día<br><input type="radio"/> 2 a 3 veces al día<br><input type="radio"/> 5 a 6 veces al día<br><input type="radio"/> mas 6 veces al día |
| Leche desnatada       | <input checked="" type="radio"/> Nunca o menos 1 vez al mes<br><input type="radio"/> 1 a 3 veces mes<br><input type="radio"/> 1 vez semana<br><input type="radio"/> 2 a 4 veces semana<br><input type="radio"/> 5 a 6 veces semana<br><input type="radio"/> 1 vez al día<br><input type="radio"/> 2 a 3 veces al día<br><input type="radio"/> 5 a 6 veces al día<br><input type="radio"/> más 6 veces al día |
| Leche condensada      | <input checked="" type="radio"/> Nunca o menos 1 vez al mes<br><input type="radio"/> 1 a 3 veces mes<br><input type="radio"/> 1 vez semana<br><input type="radio"/> 2 a 4 veces semana<br><input type="radio"/> 5 a 6 veces semana<br><input type="radio"/> 1 vez al día<br><input type="radio"/> 2 a 3 veces al día<br><input type="radio"/> 5 a 6 veces al día<br><input type="radio"/> más 6 veces al día |
| nata o crema de leche | <input type="radio"/> Nunca o menos 1 vez al mes<br><input checked="" type="radio"/> 1 a 3 veces mes<br><input type="radio"/> 1 vez semana<br><input type="radio"/> 2 a 4 veces semana<br><input type="radio"/> 5 a 6 veces semana<br><input type="radio"/> 1 vez al día<br><input type="radio"/> 2 a 3 veces al día<br><input type="radio"/> 5 a 6 veces al día<br><input type="radio"/> más 6 veces al día |



|                                             |                                                                                                                                                                                                                                                                                                                                                                                                              |
|---------------------------------------------|--------------------------------------------------------------------------------------------------------------------------------------------------------------------------------------------------------------------------------------------------------------------------------------------------------------------------------------------------------------------------------------------------------------|
| Yogurt Entero                               | <input type="radio"/> Nunca o menos 1 vez al mes<br><input checked="" type="radio"/> 1 a 3 veces mes<br><input type="radio"/> 1 vez semana<br><input type="radio"/> 2 a 4 veces semana<br><input type="radio"/> 5 a 6 veces semana<br><input type="radio"/> 1 vez al día<br><input type="radio"/> 2 a 3 veces al día<br><input type="radio"/> 5 a 6 veces al día<br><input type="radio"/> más 6 veces al día |
| Yogurt desnatado                            | <input checked="" type="radio"/> Nunca o menos 1 vez al mes<br><input type="radio"/> 1 a 3 veces mes<br><input type="radio"/> 1 vez semana<br><input type="radio"/> 2 a 4 veces semana<br><input type="radio"/> 5 a 6 veces semana<br><input type="radio"/> 1 vez al día<br><input type="radio"/> 2 a 3 veces al día<br><input type="radio"/> 5 a 6 veces al día<br><input type="radio"/> más 6 veces al día |
| 100g requesón o queso blando o queso fresco | <input type="radio"/> Nunca o menos 1 vez al mes<br><input type="radio"/> 1 a 3 veces mes<br><input type="radio"/> 1 vez semana<br><input type="radio"/> 2 a 4 veces semana<br><input checked="" type="radio"/> 5 a 6 veces semana<br><input type="radio"/> 1 vez al día<br><input type="radio"/> 2 a 3 veces al día<br><input type="radio"/> 5 a 6 veces al día<br><input type="radio"/> más 6 veces al día |
| queso curado o semicurado o cremoso         | <input type="radio"/> Nunca o menos 1 vez al mes<br><input type="radio"/> 1 a 3 veces mes<br><input checked="" type="radio"/> 1 vez semana<br><input type="radio"/> 2 a 4 veces semana<br><input type="radio"/> 5 a 6 veces semana<br><input type="radio"/> 1 vez al día<br><input type="radio"/> 2 a 3 veces al día<br><input type="radio"/> 5 a 6 veces al día<br><input type="radio"/> más 6 veces al día |
| natillas flan pudding                       | <input checked="" type="radio"/> Nunca o menos 1 vez al mes<br><input type="radio"/> 1 a 3 veces mes<br><input type="radio"/> 1 vez semana<br><input type="radio"/> 2 a 4 veces semana<br><input type="radio"/> 5 a 6 veces semana<br><input type="radio"/> 1 vez al día<br><input type="radio"/> 2 a 3 veces al día<br><input type="radio"/> 5 a 6 veces al día<br><input type="radio"/> más 6 veces al día |
| Helado                                      | <input type="radio"/> Nunca o menos 1 vez al mes<br><input type="radio"/> 1 a 3 veces mes<br><input checked="" type="radio"/> 1 vez semana<br><input type="radio"/> 2 a 4 veces semana<br><input type="radio"/> 5 a 6 veces semana<br><input type="radio"/> 1 vez al día<br><input type="radio"/> 2 a 3 veces al día<br><input type="radio"/> 5 a 6 veces al día<br><input type="radio"/> más 6 veces al día |

|                                      |                                                                                                                                                                                                                                                                                                                                                                                                              |
|--------------------------------------|--------------------------------------------------------------------------------------------------------------------------------------------------------------------------------------------------------------------------------------------------------------------------------------------------------------------------------------------------------------------------------------------------------------|
| huevo                                | <input type="radio"/> Nunca o menos 1 vez al mes<br><input type="radio"/> 1 a 3 veces mes<br><input type="radio"/> 1 vez semana<br><input checked="" type="radio"/> 2 a 4 veces semana<br><input type="radio"/> 5 a 6 veces semana<br><input type="radio"/> 1 vez al día<br><input type="radio"/> 2 a 3 veces al día<br><input type="radio"/> 5 a 6 veces al día<br><input type="radio"/> más 6 veces al día |
| Pollo con piel                       | <input type="radio"/> Nunca o menos 1 vez al mes<br><input type="radio"/> 1 a 3 veces mes<br><input checked="" type="radio"/> 1 vez semana<br><input type="radio"/> 2 a 4 veces semana<br><input type="radio"/> 5 a 6 veces semana<br><input type="radio"/> 1 vez al día<br><input type="radio"/> 2 a 3 veces al día<br><input type="radio"/> 5 a 6 veces al día<br><input type="radio"/> más 6 veces al día |
| pollo sin piel                       | <input type="radio"/> Nunca o menos 1 vez al mes<br><input type="radio"/> 1 a 3 veces mes<br><input checked="" type="radio"/> 1 vez semana<br><input type="radio"/> 2 a 4 veces semana<br><input type="radio"/> 5 a 6 veces semana<br><input type="radio"/> 1 vez al día<br><input type="radio"/> 2 a 3 veces al día<br><input type="radio"/> 5 a 6 veces al día<br><input type="radio"/> más 6 veces al día |
| Ternera o cerdo o cordero            | <input type="radio"/> Nunca o menos 1 vez al mes<br><input type="radio"/> 1 a 3 veces mes<br><input type="radio"/> 1 vez semana<br><input checked="" type="radio"/> 2 a 4 veces semana<br><input type="radio"/> 5 a 6 veces semana<br><input type="radio"/> 1 vez al día<br><input type="radio"/> 2 a 3 veces al día<br><input type="radio"/> 5 a 6 veces al día<br><input type="radio"/> más 6 veces al día |
| carne caza: Conejo o codorniz o pato | <input type="radio"/> Nunca o menos 1 vez al mes<br><input checked="" type="radio"/> 1 a 3 veces mes<br><input type="radio"/> 1 vez semana<br><input type="radio"/> 2 a 4 veces semana<br><input type="radio"/> 5 a 6 veces semana<br><input type="radio"/> 1 vez al día<br><input type="radio"/> 2 a 3 veces al día<br><input type="radio"/> 5 a 6 veces al día<br><input type="radio"/> más 6 veces al día |
| Hígado de ternera o cerdo o pollo    | <input checked="" type="radio"/> Nunca o menos 1 vez al mes<br><input type="radio"/> 1 a 3 veces mes<br><input type="radio"/> 1 vez semana<br><input type="radio"/> 2 a 4 veces semana<br><input type="radio"/> 5 a 6 veces semana<br><input type="radio"/> 1 vez al día<br><input type="radio"/> 2 a 3 veces al día<br><input type="radio"/> 5 a 6 veces al día<br><input type="radio"/> más 6 veces al día |

|                     |                                                                                                                                                                                                                                                                                                                                                                                                              |
|---------------------|--------------------------------------------------------------------------------------------------------------------------------------------------------------------------------------------------------------------------------------------------------------------------------------------------------------------------------------------------------------------------------------------------------------|
| Vísceras            | <input checked="" type="radio"/> Nunca o menos 1 vez al mes<br><input type="radio"/> 1 a 3 veces mes<br><input type="radio"/> 1 vez semana<br><input type="radio"/> 2 a 4 veces semana<br><input type="radio"/> 5 a 6 veces semana<br><input type="radio"/> 1 vez al día<br><input type="radio"/> 2 a 3 veces al día<br><input type="radio"/> 5 a 6 veces al día<br><input type="radio"/> más 6 veces al día |
| Embutido            | <input checked="" type="radio"/> Nunca o menos 1 vez al mes<br><input type="radio"/> 1 a 3 veces mes<br><input type="radio"/> 1 vez semana<br><input type="radio"/> 2 a 4 veces semana<br><input type="radio"/> 5 a 6 veces semana<br><input type="radio"/> 1 vez al día<br><input type="radio"/> 2 a 3 veces al día<br><input type="radio"/> 5 a 6 veces al día<br><input type="radio"/> más 6 veces al día |
| Salchicha o similar | <input checked="" type="radio"/> Nunca o menos 1 vez al mes<br><input type="radio"/> 1 a 3 veces mes<br><input type="radio"/> 1 vez semana<br><input type="radio"/> 2 a 4 veces semana<br><input type="radio"/> 5 a 6 veces semana<br><input type="radio"/> 1 vez al día<br><input type="radio"/> 2 a 3 veces al día<br><input type="radio"/> 5 a 6 veces al día<br><input type="radio"/> más 6 veces al día |
| Pate o foiegras     | <input type="radio"/> Nunca o menos 1 vez al mes<br><input checked="" type="radio"/> 1 a 3 veces mes<br><input type="radio"/> 1 vez semana<br><input type="radio"/> 2 a 4 veces semana<br><input type="radio"/> 5 a 6 veces semana<br><input type="radio"/> 1 vez al día<br><input type="radio"/> 2 a 3 veces al día<br><input type="radio"/> 5 a 6 veces al día<br><input type="radio"/> más 6 veces al día |
| Hamburguesa         | <input type="radio"/> Nunca o menos 1 vez al mes<br><input checked="" type="radio"/> 1 a 3 veces mes<br><input type="radio"/> 1 vez semana<br><input type="radio"/> 2 a 4 veces semana<br><input type="radio"/> 5 a 6 veces semana<br><input type="radio"/> 1 vez al día<br><input type="radio"/> 2 a 3 veces al día<br><input type="radio"/> 5 a 6 veces al día<br><input type="radio"/> más 6 veces al día |
| tocino o bacon      | <input type="radio"/> Nunca o menos 1 vez al mes<br><input checked="" type="radio"/> 1 a 3 veces mes<br><input type="radio"/> 1 vez semana<br><input type="radio"/> 2 a 4 veces semana<br><input type="radio"/> 5 a 6 veces semana<br><input type="radio"/> 1 vez al día<br><input type="radio"/> 2 a 3 veces al día<br><input type="radio"/> 5 a 6 veces al día<br><input type="radio"/> más 6 veces al día |

---

|               |                                                                                                                                                                                                                                                                                                                                                                                                              |
|---------------|--------------------------------------------------------------------------------------------------------------------------------------------------------------------------------------------------------------------------------------------------------------------------------------------------------------------------------------------------------------------------------------------------------------|
| Pescado frito | <input checked="" type="radio"/> Nunca o menos 1 vez al mes<br><input type="radio"/> 1 a 3 veces mes<br><input type="radio"/> 1 vez semana<br><input type="radio"/> 2 a 4 veces semana<br><input type="radio"/> 5 a 6 veces semana<br><input type="radio"/> 1 vez al día<br><input type="radio"/> 2 a 3 veces al día<br><input type="radio"/> 5 a 6 veces al día<br><input type="radio"/> más 6 veces al día |
|---------------|--------------------------------------------------------------------------------------------------------------------------------------------------------------------------------------------------------------------------------------------------------------------------------------------------------------------------------------------------------------------------------------------------------------|

---

|                        |                                                                                                                                                                                                                                                                                                                                                                                                              |
|------------------------|--------------------------------------------------------------------------------------------------------------------------------------------------------------------------------------------------------------------------------------------------------------------------------------------------------------------------------------------------------------------------------------------------------------|
| pescado hervido blanco | <input type="radio"/> Nunca o menos 1 vez al mes<br><input type="radio"/> 1 a 3 veces mes<br><input checked="" type="radio"/> 1 vez semana<br><input type="radio"/> 2 a 4 veces semana<br><input type="radio"/> 5 a 6 veces semana<br><input type="radio"/> 1 vez al día<br><input type="radio"/> 2 a 3 veces al día<br><input type="radio"/> 5 a 6 veces al día<br><input type="radio"/> más 6 veces al día |
|------------------------|--------------------------------------------------------------------------------------------------------------------------------------------------------------------------------------------------------------------------------------------------------------------------------------------------------------------------------------------------------------------------------------------------------------|

---

|                      |                                                                                                                                                                                                                                                                                                                                                                                                              |
|----------------------|--------------------------------------------------------------------------------------------------------------------------------------------------------------------------------------------------------------------------------------------------------------------------------------------------------------------------------------------------------------------------------------------------------------|
| pescado hervido azul | <input type="radio"/> Nunca o menos 1 vez al mes<br><input type="radio"/> 1 a 3 veces mes<br><input checked="" type="radio"/> 1 vez semana<br><input type="radio"/> 2 a 4 veces semana<br><input type="radio"/> 5 a 6 veces semana<br><input type="radio"/> 1 vez al día<br><input type="radio"/> 2 a 3 veces al día<br><input type="radio"/> 5 a 6 veces al día<br><input type="radio"/> más 6 veces al día |
|----------------------|--------------------------------------------------------------------------------------------------------------------------------------------------------------------------------------------------------------------------------------------------------------------------------------------------------------------------------------------------------------------------------------------------------------|

---

|                    |                                                                                                                                                                                                                                                                                                                                                                                                              |
|--------------------|--------------------------------------------------------------------------------------------------------------------------------------------------------------------------------------------------------------------------------------------------------------------------------------------------------------------------------------------------------------------------------------------------------------|
| otros pescado azul | <input type="radio"/> Nunca o menos 1 vez al mes<br><input type="radio"/> 1 a 3 veces mes<br><input type="radio"/> 1 vez semana<br><input checked="" type="radio"/> 2 a 4 veces semana<br><input type="radio"/> 5 a 6 veces semana<br><input type="radio"/> 1 vez al día<br><input type="radio"/> 2 a 3 veces al día<br><input type="radio"/> 5 a 6 veces al día<br><input type="radio"/> más 6 veces al día |
|--------------------|--------------------------------------------------------------------------------------------------------------------------------------------------------------------------------------------------------------------------------------------------------------------------------------------------------------------------------------------------------------------------------------------------------------|

---

|               |                                                                                                                                                                                                                                                                                                                                                                                                              |
|---------------|--------------------------------------------------------------------------------------------------------------------------------------------------------------------------------------------------------------------------------------------------------------------------------------------------------------------------------------------------------------------------------------------------------------|
| atun conserva | <input type="radio"/> Nunca o menos 1 vez al mes<br><input type="radio"/> 1 a 3 veces mes<br><input checked="" type="radio"/> 1 vez semana<br><input type="radio"/> 2 a 4 veces semana<br><input type="radio"/> 5 a 6 veces semana<br><input type="radio"/> 1 vez al día<br><input type="radio"/> 2 a 3 veces al día<br><input type="radio"/> 5 a 6 veces al día<br><input type="radio"/> más 6 veces al día |
|---------------|--------------------------------------------------------------------------------------------------------------------------------------------------------------------------------------------------------------------------------------------------------------------------------------------------------------------------------------------------------------------------------------------------------------|

---

|                  |                                                                                                                                                                                                                                                                                                                                                                                                              |
|------------------|--------------------------------------------------------------------------------------------------------------------------------------------------------------------------------------------------------------------------------------------------------------------------------------------------------------------------------------------------------------------------------------------------------------|
| sardina conserva | <input type="radio"/> Nunca o menos 1 vez al mes<br><input type="radio"/> 1 a 3 veces mes<br><input checked="" type="radio"/> 1 vez semana<br><input type="radio"/> 2 a 4 veces semana<br><input type="radio"/> 5 a 6 veces semana<br><input type="radio"/> 1 vez al día<br><input type="radio"/> 2 a 3 veces al día<br><input type="radio"/> 5 a 6 veces al día<br><input type="radio"/> más 6 veces al día |
|------------------|--------------------------------------------------------------------------------------------------------------------------------------------------------------------------------------------------------------------------------------------------------------------------------------------------------------------------------------------------------------------------------------------------------------|

---

|                                         |                                                                                                                                                                                                                                                                                                                                                                                                              |
|-----------------------------------------|--------------------------------------------------------------------------------------------------------------------------------------------------------------------------------------------------------------------------------------------------------------------------------------------------------------------------------------------------------------------------------------------------------------|
| pescado ahumado                         | <input type="radio"/> Nunca o menos 1 vez al mes<br><input type="radio"/> 1 a 3 veces mes<br><input checked="" type="radio"/> 1 vez semana<br><input type="radio"/> 2 a 4 veces semana<br><input type="radio"/> 5 a 6 veces semana<br><input type="radio"/> 1 vez al día<br><input type="radio"/> 2 a 3 veces al día<br><input type="radio"/> 5 a 6 veces al día<br><input type="radio"/> más 6 veces al día |
| almejas o mejillones o ostras unos 100g | <input type="radio"/> Nunca o menos 1 vez al mes<br><input type="radio"/> 1 a 3 veces mes<br><input type="radio"/> 1 vez semana<br><input type="radio"/> 2 a 4 veces semana<br><input checked="" type="radio"/> 5 a 6 veces semana<br><input type="radio"/> 1 vez al día<br><input type="radio"/> 2 a 3 veces al día<br><input type="radio"/> 5 a 6 veces al día<br><input type="radio"/> más 6 veces al día |
| calamar o chipiron o sepia unos 100g    | <input type="radio"/> Nunca o menos 1 vez al mes<br><input checked="" type="radio"/> 1 a 3 veces mes<br><input type="radio"/> 1 vez semana<br><input type="radio"/> 2 a 4 veces semana<br><input type="radio"/> 5 a 6 veces semana<br><input type="radio"/> 1 vez al día<br><input type="radio"/> 2 a 3 veces al día<br><input type="radio"/> 5 a 6 veces al día<br><input type="radio"/> más 6 veces al día |
| marisco unos 100g                       | <input type="radio"/> Nunca o menos 1 vez al mes<br><input checked="" type="radio"/> 1 a 3 veces mes<br><input type="radio"/> 1 vez semana<br><input type="radio"/> 2 a 4 veces semana<br><input type="radio"/> 5 a 6 veces semana<br><input type="radio"/> 1 vez al día<br><input type="radio"/> 2 a 3 veces al día<br><input type="radio"/> 5 a 6 veces al día<br><input type="radio"/> más 6 veces al día |
| Espinacas o acelgas cocinadas           | <input checked="" type="radio"/> Nunca o menos 1 vez al mes<br><input type="radio"/> 1 a 3 veces mes<br><input type="radio"/> 1 vez semana<br><input type="radio"/> 2 a 4 veces semana<br><input type="radio"/> 5 a 6 veces semana<br><input type="radio"/> 1 vez al día<br><input type="radio"/> 2 a 3 veces al día<br><input type="radio"/> 5 a 6 veces al día<br><input type="radio"/> más 6 veces al día |
| Col o coliflor o brocoli cocinado       | <input type="radio"/> Nunca o menos 1 vez al mes<br><input checked="" type="radio"/> 1 a 3 veces mes<br><input type="radio"/> 1 vez semana<br><input type="radio"/> 2 a 4 veces semana<br><input type="radio"/> 5 a 6 veces semana<br><input type="radio"/> 1 vez al día<br><input type="radio"/> 2 a 3 veces al día<br><input type="radio"/> 5 a 6 veces al día<br><input type="radio"/> más 6 veces al día |

---

Lechuga o endivia o escarola

- ☐ Nunca o menos 1 vez al mes  
☐ 1 a 3 veces mes  
☒ 1 vez semana  
☐ 2 a 4 veces semana  
☐ 5 a 6 veces semana  
☐ 1 vez al día  
☐ 2 a 3 veces al día  
☐ 5 a 6 veces al día  
☐ más 6 veces al día

---

tomate ensalada

- ☐ Nunca o menos 1 vez al mes  
☐ 1 a 3 veces mes  
☐ 1 vez semana  
☐ 2 a 4 veces semana  
☒ 5 a 6 veces semana  
☐ 1 vez al día  
☐ 2 a 3 veces al día  
☐ 5 a 6 veces al día  
☐ más 6 veces al día

---

cebolla

- ☐ Nunca o menos 1 vez al mes  
☐ 1 a 3 veces mes  
☐ 1 vez semana  
☐ 2 a 4 veces semana  
☒ 5 a 6 veces semana  
☐ 1 vez al día  
☐ 2 a 3 veces al día  
☐ 5 a 6 veces al día  
☐ más 6 veces al día

---

Zanahoria o calabaza

- ☐ Nunca o menos 1 vez al mes  
☐ 1 a 3 veces mes  
☐ 1 vez semana  
☐ 2 a 4 veces semana  
☐ 5 a 6 veces semana  
☐ 1 vez al día  
☐ 2 a 3 veces al día  
☒ 5 a 6 veces al día  
☐ más 6 veces al día

---

Judías verdes

- ☐ Nunca o menos 1 vez al mes  
☐ 1 a 3 veces mes  
☒ 1 vez semana  
☐ 2 a 4 veces semana  
☐ 5 a 6 veces semana  
☐ 1 vez al día  
☐ 2 a 3 veces al día  
☐ 5 a 6 veces al día  
☐ más 6 veces al día

---

Berenjena o calabacin o pepino

- ☐ Nunca o menos 1 vez al mes  
☐ 1 a 3 veces mes  
☐ 1 vez semana  
☐ 2 a 4 veces semana  
☒ 5 a 6 veces semana  
☐ 1 vez al día  
☐ 2 a 3 veces al día  
☐ 5 a 6 veces al día  
☐ más 6 veces al día

|                       |                                                                                                                                                                                                                                                                                                                                                                                                              |
|-----------------------|--------------------------------------------------------------------------------------------------------------------------------------------------------------------------------------------------------------------------------------------------------------------------------------------------------------------------------------------------------------------------------------------------------------|
| pimiento              | <input type="radio"/> Nunca o menos 1 vez al mes<br><input type="radio"/> 1 a 3 veces mes<br><input type="radio"/> 1 vez semana<br><input type="radio"/> 2 a 4 veces semana<br><input checked="" type="radio"/> 5 a 6 veces semana<br><input type="radio"/> 1 vez al día<br><input type="radio"/> 2 a 3 veces al día<br><input type="radio"/> 5 a 6 veces al día<br><input type="radio"/> más 6 veces al día |
| alcachofa             | <input type="radio"/> Nunca o menos 1 vez al mes<br><input checked="" type="radio"/> 1 a 3 veces mes<br><input type="radio"/> 1 vez semana<br><input type="radio"/> 2 a 4 veces semana<br><input type="radio"/> 5 a 6 veces semana<br><input type="radio"/> 1 vez al día<br><input type="radio"/> 2 a 3 veces al día<br><input type="radio"/> 5 a 6 veces al día<br><input type="radio"/> más 6 veces al día |
| espárragos            | <input checked="" type="radio"/> Nunca o menos 1 vez al mes<br><input type="radio"/> 1 a 3 veces mes<br><input type="radio"/> 1 vez semana<br><input type="radio"/> 2 a 4 veces semana<br><input type="radio"/> 5 a 6 veces semana<br><input type="radio"/> 1 vez al día<br><input type="radio"/> 2 a 3 veces al día<br><input type="radio"/> 5 a 6 veces al día<br><input type="radio"/> más 6 veces al día |
| maíz hervido          | <input checked="" type="radio"/> Nunca o menos 1 vez al mes<br><input type="radio"/> 1 a 3 veces mes<br><input type="radio"/> 1 vez semana<br><input type="radio"/> 2 a 4 veces semana<br><input type="radio"/> 5 a 6 veces semana<br><input type="radio"/> 1 vez al día<br><input type="radio"/> 2 a 3 veces al día<br><input type="radio"/> 5 a 6 veces al día<br><input type="radio"/> más 6 veces al día |
| legumbres             | <input type="radio"/> Nunca o menos 1 vez al mes<br><input type="radio"/> 1 a 3 veces mes<br><input checked="" type="radio"/> 1 vez semana<br><input type="radio"/> 2 a 4 veces semana<br><input type="radio"/> 5 a 6 veces semana<br><input type="radio"/> 1 vez al día<br><input type="radio"/> 2 a 3 veces al día<br><input type="radio"/> 5 a 6 veces al día<br><input type="radio"/> más 6 veces al día |
| naranjas o mandarinas | <input type="radio"/> Nunca o menos 1 vez al mes<br><input type="radio"/> 1 a 3 veces mes<br><input checked="" type="radio"/> 1 vez semana<br><input type="radio"/> 2 a 4 veces semana<br><input type="radio"/> 5 a 6 veces semana<br><input type="radio"/> 1 vez al día<br><input type="radio"/> 2 a 3 veces al día<br><input type="radio"/> 5 a 6 veces al día<br><input type="radio"/> más 6 veces al día |

|                       |                                                                                                                                                                                                                                                                                                                                                                                                              |
|-----------------------|--------------------------------------------------------------------------------------------------------------------------------------------------------------------------------------------------------------------------------------------------------------------------------------------------------------------------------------------------------------------------------------------------------------|
| zum natural fruta     | <input checked="" type="radio"/> Nunca o menos 1 vez al mes<br><input type="radio"/> 1 a 3 veces mes<br><input type="radio"/> 1 vez semana<br><input type="radio"/> 2 a 4 veces semana<br><input type="radio"/> 5 a 6 veces semana<br><input type="radio"/> 1 vez al día<br><input type="radio"/> 2 a 3 veces al día<br><input type="radio"/> 5 a 6 veces al día<br><input type="radio"/> más 6 veces al día |
| platano               | <input type="radio"/> Nunca o menos 1 vez al mes<br><input type="radio"/> 1 a 3 veces mes<br><input checked="" type="radio"/> 1 vez semana<br><input type="radio"/> 2 a 4 veces semana<br><input type="radio"/> 5 a 6 veces semana<br><input type="radio"/> 1 vez al día<br><input type="radio"/> 2 a 3 veces al día<br><input type="radio"/> 5 a 6 veces al día<br><input type="radio"/> más 6 veces al día |
| manzana o pera        | <input type="radio"/> Nunca o menos 1 vez al mes<br><input type="radio"/> 1 a 3 veces mes<br><input checked="" type="radio"/> 1 vez semana<br><input type="radio"/> 2 a 4 veces semana<br><input type="radio"/> 5 a 6 veces semana<br><input type="radio"/> 1 vez al día<br><input type="radio"/> 2 a 3 veces al día<br><input type="radio"/> 5 a 6 veces al día<br><input type="radio"/> más 6 veces al día |
| melocotón o nectarina | <input type="radio"/> Nunca o menos 1 vez al mes<br><input type="radio"/> 1 a 3 veces mes<br><input checked="" type="radio"/> 1 vez semana<br><input type="radio"/> 2 a 4 veces semana<br><input type="radio"/> 5 a 6 veces semana<br><input type="radio"/> 1 vez al día<br><input type="radio"/> 2 a 3 veces al día<br><input type="radio"/> 5 a 6 veces al día<br><input type="radio"/> más 6 veces al día |
| sandia o melon        | <input type="radio"/> Nunca o menos 1 vez al mes<br><input type="radio"/> 1 a 3 veces mes<br><input checked="" type="radio"/> 1 vez semana<br><input type="radio"/> 2 a 4 veces semana<br><input type="radio"/> 5 a 6 veces semana<br><input type="radio"/> 1 vez al día<br><input type="radio"/> 2 a 3 veces al día<br><input type="radio"/> 5 a 6 veces al día<br><input type="radio"/> más 6 veces al día |
| uva                   | <input type="radio"/> Nunca o menos 1 vez al mes<br><input checked="" type="radio"/> 1 a 3 veces mes<br><input type="radio"/> 1 vez semana<br><input type="radio"/> 2 a 4 veces semana<br><input type="radio"/> 5 a 6 veces semana<br><input type="radio"/> 1 vez al día<br><input type="radio"/> 2 a 3 veces al día<br><input type="radio"/> 5 a 6 veces al día<br><input type="radio"/> más 6 veces al día |



|                 |                                                                                                                                                                                                                                                                                                                                                                                                              |
|-----------------|--------------------------------------------------------------------------------------------------------------------------------------------------------------------------------------------------------------------------------------------------------------------------------------------------------------------------------------------------------------------------------------------------------------|
| bruna o ciruela | <input checked="" type="radio"/> Nunca o menos 1 vez al mes<br><input type="radio"/> 1 a 3 veces mes<br><input type="radio"/> 1 vez semana<br><input type="radio"/> 2 a 4 veces semana<br><input type="radio"/> 5 a 6 veces semana<br><input type="radio"/> 1 vez al día<br><input type="radio"/> 2 a 3 veces al día<br><input type="radio"/> 5 a 6 veces al día<br><input type="radio"/> más 6 veces al día |
| kiwi            | <input checked="" type="radio"/> Nunca o menos 1 vez al mes<br><input type="radio"/> 1 a 3 veces mes<br><input type="radio"/> 1 vez semana<br><input type="radio"/> 2 a 4 veces semana<br><input type="radio"/> 5 a 6 veces semana<br><input type="radio"/> 1 vez al día<br><input type="radio"/> 2 a 3 veces al día<br><input type="radio"/> 5 a 6 veces al día<br><input type="radio"/> más 6 veces al día |
| aceituna        | <input checked="" type="radio"/> Nunca o menos 1 vez al mes<br><input type="radio"/> 1 a 3 veces mes<br><input type="radio"/> 1 vez semana<br><input type="radio"/> 2 a 4 veces semana<br><input type="radio"/> 5 a 6 veces semana<br><input type="radio"/> 1 vez al día<br><input type="radio"/> 2 a 3 veces al día<br><input type="radio"/> 5 a 6 veces al día<br><input type="radio"/> más 6 veces al día |
| frutos secos    | <input type="radio"/> Nunca o menos 1 vez al mes<br><input type="radio"/> 1 a 3 veces mes<br><input type="radio"/> 1 vez semana<br><input type="radio"/> 2 a 4 veces semana<br><input type="radio"/> 5 a 6 veces semana<br><input checked="" type="radio"/> 1 vez al día<br><input type="radio"/> 2 a 3 veces al día<br><input type="radio"/> 5 a 6 veces al día<br><input type="radio"/> más 6 veces al día |
| pan blanco      | <input type="radio"/> Nunca o menos 1 vez al mes<br><input checked="" type="radio"/> 1 a 3 veces mes<br><input type="radio"/> 1 vez semana<br><input type="radio"/> 2 a 4 veces semana<br><input type="radio"/> 5 a 6 veces semana<br><input type="radio"/> 1 vez al día<br><input type="radio"/> 2 a 3 veces al día<br><input type="radio"/> 5 a 6 veces al día<br><input type="radio"/> más 6 veces al día |
| pan integral    | <input type="radio"/> Nunca o menos 1 vez al mes<br><input type="radio"/> 1 a 3 veces mes<br><input type="radio"/> 1 vez semana<br><input type="radio"/> 2 a 4 veces semana<br><input type="radio"/> 5 a 6 veces semana<br><input checked="" type="radio"/> 1 vez al día<br><input type="radio"/> 2 a 3 veces al día<br><input type="radio"/> 5 a 6 veces al día<br><input type="radio"/> más 6 veces al día |

|                          |                                                                                                                                                                                                                                                                                                                                                                                                              |
|--------------------------|--------------------------------------------------------------------------------------------------------------------------------------------------------------------------------------------------------------------------------------------------------------------------------------------------------------------------------------------------------------------------------------------------------------|
| cereales desayuno        | <input type="radio"/> Nunca o menos 1 vez al mes<br><input checked="" type="radio"/> 1 a 3 veces mes<br><input type="radio"/> 1 vez semana<br><input type="radio"/> 2 a 4 veces semana<br><input type="radio"/> 5 a 6 veces semana<br><input type="radio"/> 1 vez al día<br><input type="radio"/> 2 a 3 veces al día<br><input type="radio"/> 5 a 6 veces al día<br><input type="radio"/> más 6 veces al día |
| patatas fritas           | <input type="radio"/> Nunca o menos 1 vez al mes<br><input checked="" type="radio"/> 1 a 3 veces mes<br><input type="radio"/> 1 vez semana<br><input type="radio"/> 2 a 4 veces semana<br><input type="radio"/> 5 a 6 veces semana<br><input type="radio"/> 1 vez al día<br><input type="radio"/> 2 a 3 veces al día<br><input type="radio"/> 5 a 6 veces al día<br><input type="radio"/> más 6 veces al día |
| patatas cocidas o asadas | <input type="radio"/> Nunca o menos 1 vez al mes<br><input checked="" type="radio"/> 1 a 3 veces mes<br><input type="radio"/> 1 vez semana<br><input type="radio"/> 2 a 4 veces semana<br><input type="radio"/> 5 a 6 veces semana<br><input type="radio"/> 1 vez al día<br><input type="radio"/> 2 a 3 veces al día<br><input type="radio"/> 5 a 6 veces al día<br><input type="radio"/> más 6 veces al día |
| bolsa papas              | <input checked="" type="radio"/> Nunca o menos 1 vez al mes<br><input type="radio"/> 1 a 3 veces mes<br><input type="radio"/> 1 vez semana<br><input type="radio"/> 2 a 4 veces semana<br><input type="radio"/> 5 a 6 veces semana<br><input type="radio"/> 1 vez al día<br><input type="radio"/> 2 a 3 veces al día<br><input type="radio"/> 5 a 6 veces al día<br><input type="radio"/> más 6 veces al día |
| arroz cocinado           | <input type="radio"/> Nunca o menos 1 vez al mes<br><input type="radio"/> 1 a 3 veces mes<br><input type="radio"/> 1 vez semana<br><input checked="" type="radio"/> 2 a 4 veces semana<br><input type="radio"/> 5 a 6 veces semana<br><input type="radio"/> 1 vez al día<br><input type="radio"/> 2 a 3 veces al día<br><input type="radio"/> 5 a 6 veces al día<br><input type="radio"/> más 6 veces al día |
| pasta                    | <input type="radio"/> Nunca o menos 1 vez al mes<br><input type="radio"/> 1 a 3 veces mes<br><input type="radio"/> 1 vez semana<br><input checked="" type="radio"/> 2 a 4 veces semana<br><input type="radio"/> 5 a 6 veces semana<br><input type="radio"/> 1 vez al día<br><input type="radio"/> 2 a 3 veces al día<br><input type="radio"/> 5 a 6 veces al día<br><input type="radio"/> más 6 veces al día |

|                     |                                                                                                                                                                                                                                                                                                                                                                                                              |
|---------------------|--------------------------------------------------------------------------------------------------------------------------------------------------------------------------------------------------------------------------------------------------------------------------------------------------------------------------------------------------------------------------------------------------------------|
| pizza               | <input type="radio"/> Nunca o menos 1 vez al mes<br><input type="radio"/> 1 a 3 veces mes<br><input checked="" type="radio"/> 1 vez semana<br><input type="radio"/> 2 a 4 veces semana<br><input type="radio"/> 5 a 6 veces semana<br><input type="radio"/> 1 vez al día<br><input type="radio"/> 2 a 3 veces al día<br><input type="radio"/> 5 a 6 veces al día<br><input type="radio"/> más 6 veces al día |
| aceite oliva        | <input type="radio"/> Nunca o menos 1 vez al mes<br><input type="radio"/> 1 a 3 veces mes<br><input type="radio"/> 1 vez semana<br><input checked="" type="radio"/> 2 a 4 veces semana<br><input type="radio"/> 5 a 6 veces semana<br><input type="radio"/> 1 vez al día<br><input type="radio"/> 2 a 3 veces al día<br><input type="radio"/> 5 a 6 veces al día<br><input type="radio"/> más 6 veces al día |
| otros aceites       | <input checked="" type="radio"/> Nunca o menos 1 vez al mes<br><input type="radio"/> 1 a 3 veces mes<br><input type="radio"/> 1 vez semana<br><input type="radio"/> 2 a 4 veces semana<br><input type="radio"/> 5 a 6 veces semana<br><input type="radio"/> 1 vez al día<br><input type="radio"/> 2 a 3 veces al día<br><input type="radio"/> 5 a 6 veces al día<br><input type="radio"/> más 6 veces al día |
| margarina           | <input checked="" type="radio"/> Nunca o menos 1 vez al mes<br><input type="radio"/> 1 a 3 veces mes<br><input type="radio"/> 1 vez semana<br><input type="radio"/> 2 a 4 veces semana<br><input type="radio"/> 5 a 6 veces semana<br><input type="radio"/> 1 vez al día<br><input type="radio"/> 2 a 3 veces al día<br><input type="radio"/> 5 a 6 veces al día<br><input type="radio"/> más 6 veces al día |
| mantequilla         | <input checked="" type="radio"/> Nunca o menos 1 vez al mes<br><input type="radio"/> 1 a 3 veces mes<br><input type="radio"/> 1 vez semana<br><input type="radio"/> 2 a 4 veces semana<br><input type="radio"/> 5 a 6 veces semana<br><input type="radio"/> 1 vez al día<br><input type="radio"/> 2 a 3 veces al día<br><input type="radio"/> 5 a 6 veces al día<br><input type="radio"/> más 6 veces al día |
| galletas tipo maria | <input checked="" type="radio"/> Nunca o menos 1 vez al mes<br><input type="radio"/> 1 a 3 veces mes<br><input type="radio"/> 1 vez semana<br><input type="radio"/> 2 a 4 veces semana<br><input type="radio"/> 5 a 6 veces semana<br><input type="radio"/> 1 vez al día<br><input type="radio"/> 2 a 3 veces al día<br><input type="radio"/> 5 a 6 veces al día<br><input type="radio"/> más 6 veces al día |

|                           |                                                                                                                                                                                                                                                                                                                                                                                                              |
|---------------------------|--------------------------------------------------------------------------------------------------------------------------------------------------------------------------------------------------------------------------------------------------------------------------------------------------------------------------------------------------------------------------------------------------------------|
| galletas chocolate        | <input type="radio"/> Nunca o menos 1 vez al mes<br><input checked="" type="radio"/> 1 a 3 veces mes<br><input type="radio"/> 1 vez semana<br><input type="radio"/> 2 a 4 veces semana<br><input type="radio"/> 5 a 6 veces semana<br><input type="radio"/> 1 vez al día<br><input type="radio"/> 2 a 3 veces al día<br><input type="radio"/> 5 a 6 veces al día<br><input type="radio"/> más 6 veces al día |
| bollieria                 | <input type="radio"/> Nunca o menos 1 vez al mes<br><input checked="" type="radio"/> 1 a 3 veces mes<br><input type="radio"/> 1 vez semana<br><input type="radio"/> 2 a 4 veces semana<br><input type="radio"/> 5 a 6 veces semana<br><input type="radio"/> 1 vez al día<br><input type="radio"/> 2 a 3 veces al día<br><input type="radio"/> 5 a 6 veces al día<br><input type="radio"/> más 6 veces al día |
| chocolate o bombones      | <input type="radio"/> Nunca o menos 1 vez al mes<br><input type="radio"/> 1 a 3 veces mes<br><input checked="" type="radio"/> 1 vez semana<br><input type="radio"/> 2 a 4 veces semana<br><input type="radio"/> 5 a 6 veces semana<br><input type="radio"/> 1 vez al día<br><input type="radio"/> 2 a 3 veces al día<br><input type="radio"/> 5 a 6 veces al día<br><input type="radio"/> más 6 veces al día |
| chocolate polvo o colacao | <input checked="" type="radio"/> Nunca o menos 1 vez al mes<br><input type="radio"/> 1 a 3 veces mes<br><input type="radio"/> 1 vez semana<br><input type="radio"/> 2 a 4 veces semana<br><input type="radio"/> 5 a 6 veces semana<br><input type="radio"/> 1 vez al día<br><input type="radio"/> 2 a 3 veces al día<br><input type="radio"/> 5 a 6 veces al día<br><input type="radio"/> más 6 veces al día |
| vino tinto                | <input checked="" type="radio"/> Nunca o menos 1 vez al mes<br><input type="radio"/> 1 a 3 veces mes<br><input type="radio"/> 1 vez semana<br><input type="radio"/> 2 a 4 veces semana<br><input type="radio"/> 5 a 6 veces semana<br><input type="radio"/> 1 vez al día<br><input type="radio"/> 2 a 3 veces al día<br><input type="radio"/> 5 a 6 veces al día<br><input type="radio"/> más 6 veces al día |
| vino blanco               | <input checked="" type="radio"/> Nunca o menos 1 vez al mes<br><input type="radio"/> 1 a 3 veces mes<br><input type="radio"/> 1 vez semana<br><input type="radio"/> 2 a 4 veces semana<br><input type="radio"/> 5 a 6 veces semana<br><input type="radio"/> 1 vez al día<br><input type="radio"/> 2 a 3 veces al día<br><input type="radio"/> 5 a 6 veces al día<br><input type="radio"/> más 6 veces al día |

|                       |                                                                                                                                                                                                                                                                                                                                                                                                              |
|-----------------------|--------------------------------------------------------------------------------------------------------------------------------------------------------------------------------------------------------------------------------------------------------------------------------------------------------------------------------------------------------------------------------------------------------------|
| vino seco o vermut    | <input checked="" type="radio"/> Nunca o menos 1 vez al mes<br><input type="radio"/> 1 a 3 veces mes<br><input type="radio"/> 1 vez semana<br><input type="radio"/> 2 a 4 veces semana<br><input type="radio"/> 5 a 6 veces semana<br><input type="radio"/> 1 vez al día<br><input type="radio"/> 2 a 3 veces al día<br><input type="radio"/> 5 a 6 veces al día<br><input type="radio"/> más 6 veces al día |
| cerveza               | <input checked="" type="radio"/> Nunca o menos 1 vez al mes<br><input type="radio"/> 1 a 3 veces mes<br><input type="radio"/> 1 vez semana<br><input type="radio"/> 2 a 4 veces semana<br><input type="radio"/> 5 a 6 veces semana<br><input type="radio"/> 1 vez al día<br><input type="radio"/> 2 a 3 veces al día<br><input type="radio"/> 5 a 6 veces al día<br><input type="radio"/> más 6 veces al día |
| cerveza sin alcohol   | <input type="radio"/> Nunca o menos 1 vez al mes<br><input type="radio"/> 1 a 3 veces mes<br><input type="radio"/> 1 vez semana<br><input checked="" type="radio"/> 2 a 4 veces semana<br><input type="radio"/> 5 a 6 veces semana<br><input type="radio"/> 1 vez al día<br><input type="radio"/> 2 a 3 veces al día<br><input type="radio"/> 5 a 6 veces al día<br><input type="radio"/> más 6 veces al día |
| licores               | <input checked="" type="radio"/> Nunca o menos 1 vez al mes<br><input type="radio"/> 1 a 3 veces mes<br><input type="radio"/> 1 vez semana<br><input type="radio"/> 2 a 4 veces semana<br><input type="radio"/> 5 a 6 veces semana<br><input type="radio"/> 1 vez al día<br><input type="radio"/> 2 a 3 veces al día<br><input type="radio"/> 5 a 6 veces al día<br><input type="radio"/> más 6 veces al día |
| ginebra o ron o vodka | <input checked="" type="radio"/> Nunca o menos 1 vez al mes<br><input type="radio"/> 1 a 3 veces mes<br><input type="radio"/> 1 vez semana<br><input type="radio"/> 2 a 4 veces semana<br><input type="radio"/> 5 a 6 veces semana<br><input type="radio"/> 1 vez al día<br><input type="radio"/> 2 a 3 veces al día<br><input type="radio"/> 5 a 6 veces al día<br><input type="radio"/> más 6 veces al día |
| refresco normal       | <input checked="" type="radio"/> Nunca o menos 1 vez al mes<br><input type="radio"/> 1 a 3 veces mes<br><input type="radio"/> 1 vez semana<br><input type="radio"/> 2 a 4 veces semana<br><input type="radio"/> 5 a 6 veces semana<br><input type="radio"/> 1 vez al día<br><input type="radio"/> 2 a 3 veces al día<br><input type="radio"/> 5 a 6 veces al día<br><input type="radio"/> más 6 veces al día |

|                           |                                                                                                                                                                                                                                                                                                                                                                                                              |
|---------------------------|--------------------------------------------------------------------------------------------------------------------------------------------------------------------------------------------------------------------------------------------------------------------------------------------------------------------------------------------------------------------------------------------------------------|
| refresco sin azúcar       | <input checked="" type="radio"/> Nunca o menos 1 vez al mes<br><input type="radio"/> 1 a 3 veces mes<br><input type="radio"/> 1 vez semana<br><input type="radio"/> 2 a 4 veces semana<br><input type="radio"/> 5 a 6 veces semana<br><input type="radio"/> 1 vez al día<br><input type="radio"/> 2 a 3 veces al día<br><input type="radio"/> 5 a 6 veces al día<br><input type="radio"/> más 6 veces al día |
| Agua del grifo            | <input type="radio"/> Nunca o menos 1 vez al mes<br><input type="radio"/> 1 a 3 veces mes<br><input type="radio"/> 1 vez semana<br><input type="radio"/> 2 a 4 veces semana<br><input type="radio"/> 5 a 6 veces semana<br><input type="radio"/> 1 vez al día<br><input type="radio"/> 2 a 3 veces al día<br><input type="radio"/> 5 a 6 veces al día<br><input checked="" type="radio"/> más 6 veces al día |
| agua embotellada sin gas  | <input checked="" type="radio"/> Nunca o menos 1 vez al mes<br><input type="radio"/> 1 a 3 veces mes<br><input type="radio"/> 1 vez semana<br><input type="radio"/> 2 a 4 veces semana<br><input type="radio"/> 5 a 6 veces semana<br><input type="radio"/> 1 vez al día<br><input type="radio"/> 2 a 3 veces al día<br><input type="radio"/> 5 a 6 veces al día<br><input type="radio"/> más 6 veces al día |
| agua embotellada con gas  | <input checked="" type="radio"/> Nunca o menos 1 vez al mes<br><input type="radio"/> 1 a 3 veces mes<br><input type="radio"/> 1 vez semana<br><input type="radio"/> 2 a 4 veces semana<br><input type="radio"/> 5 a 6 veces semana<br><input type="radio"/> 1 vez al día<br><input type="radio"/> 2 a 3 veces al día<br><input type="radio"/> 5 a 6 veces al día<br><input type="radio"/> más 6 veces al día |
| zumos frutas embotellados | <input checked="" type="radio"/> Nunca o menos 1 vez al mes<br><input type="radio"/> 1 a 3 veces mes<br><input type="radio"/> 1 vez semana<br><input type="radio"/> 2 a 4 veces semana<br><input type="radio"/> 5 a 6 veces semana<br><input type="radio"/> 1 vez al día<br><input type="radio"/> 2 a 3 veces al día<br><input type="radio"/> 5 a 6 veces al día<br><input type="radio"/> más 6 veces al día |
| café                      | <input type="radio"/> Nunca o menos 1 vez al mes<br><input type="radio"/> 1 a 3 veces mes<br><input type="radio"/> 1 vez semana<br><input type="radio"/> 2 a 4 veces semana<br><input type="radio"/> 5 a 6 veces semana<br><input checked="" type="radio"/> 1 vez al día<br><input type="radio"/> 2 a 3 veces al día<br><input type="radio"/> 5 a 6 veces al día<br><input type="radio"/> más 6 veces al día |

|                       |                                                                                                                                                                                                                                                                                                                                                                                                              |
|-----------------------|--------------------------------------------------------------------------------------------------------------------------------------------------------------------------------------------------------------------------------------------------------------------------------------------------------------------------------------------------------------------------------------------------------------|
| cafe descafeinado     | <input checked="" type="radio"/> Nunca o menos 1 vez al mes<br><input type="radio"/> 1 a 3 veces mes<br><input type="radio"/> 1 vez semana<br><input type="radio"/> 2 a 4 veces semana<br><input type="radio"/> 5 a 6 veces semana<br><input type="radio"/> 1 vez al día<br><input type="radio"/> 2 a 3 veces al día<br><input type="radio"/> 5 a 6 veces al día<br><input type="radio"/> más 6 veces al día |
| te o infusión         | <input checked="" type="radio"/> Nunca o menos 1 vez al mes<br><input type="radio"/> 1 a 3 veces mes<br><input type="radio"/> 1 vez semana<br><input type="radio"/> 2 a 4 veces semana<br><input type="radio"/> 5 a 6 veces semana<br><input type="radio"/> 1 vez al día<br><input type="radio"/> 2 a 3 veces al día<br><input type="radio"/> 5 a 6 veces al día<br><input type="radio"/> más 6 veces al día |
| sopa o puré verduras  | <input type="radio"/> Nunca o menos 1 vez al mes<br><input type="radio"/> 1 a 3 veces mes<br><input checked="" type="radio"/> 1 vez semana<br><input type="radio"/> 2 a 4 veces semana<br><input type="radio"/> 5 a 6 veces semana<br><input type="radio"/> 1 vez al día<br><input type="radio"/> 2 a 3 veces al día<br><input type="radio"/> 5 a 6 veces al día<br><input type="radio"/> más 6 veces al día |
| croquetas pollo jamón | <input type="radio"/> Nunca o menos 1 vez al mes<br><input checked="" type="radio"/> 1 a 3 veces mes<br><input type="radio"/> 1 vez semana<br><input type="radio"/> 2 a 4 veces semana<br><input type="radio"/> 5 a 6 veces semana<br><input type="radio"/> 1 vez al día<br><input type="radio"/> 2 a 3 veces al día<br><input type="radio"/> 5 a 6 veces al día<br><input type="radio"/> más 6 veces al día |
| croquetas pescado     | <input checked="" type="radio"/> Nunca o menos 1 vez al mes<br><input type="radio"/> 1 a 3 veces mes<br><input type="radio"/> 1 vez semana<br><input type="radio"/> 2 a 4 veces semana<br><input type="radio"/> 5 a 6 veces semana<br><input type="radio"/> 1 vez al día<br><input type="radio"/> 2 a 3 veces al día<br><input type="radio"/> 5 a 6 veces al día<br><input type="radio"/> más 6 veces al día |
| mayonesa              | <input checked="" type="radio"/> Nunca o menos 1 vez al mes<br><input type="radio"/> 1 a 3 veces mes<br><input type="radio"/> 1 vez semana<br><input type="radio"/> 2 a 4 veces semana<br><input type="radio"/> 5 a 6 veces semana<br><input type="radio"/> 1 vez al día<br><input type="radio"/> 2 a 3 veces al día<br><input type="radio"/> 5 a 6 veces al día<br><input type="radio"/> más 6 veces al día |

|                  |                                                                                                                                                                                                                                                                                                                                                                                                              |
|------------------|--------------------------------------------------------------------------------------------------------------------------------------------------------------------------------------------------------------------------------------------------------------------------------------------------------------------------------------------------------------------------------------------------------------|
| salsa tomate     | <input type="radio"/> Nunca o menos 1 vez al mes<br><input type="radio"/> 1 a 3 veces mes<br><input checked="" type="radio"/> 1 vez semana<br><input type="radio"/> 2 a 4 veces semana<br><input type="radio"/> 5 a 6 veces semana<br><input type="radio"/> 1 vez al día<br><input type="radio"/> 2 a 3 veces al día<br><input type="radio"/> 5 a 6 veces al día<br><input type="radio"/> más 6 veces al día |
| ketchup          | <input checked="" type="radio"/> Nunca o menos 1 vez al mes<br><input type="radio"/> 1 a 3 veces mes<br><input type="radio"/> 1 vez semana<br><input type="radio"/> 2 a 4 veces semana<br><input type="radio"/> 5 a 6 veces semana<br><input type="radio"/> 1 vez al día<br><input type="radio"/> 2 a 3 veces al día<br><input type="radio"/> 5 a 6 veces al día<br><input type="radio"/> más 6 veces al día |
| sal              | <input type="radio"/> Nunca o menos 1 vez al mes<br><input type="radio"/> 1 a 3 veces mes<br><input type="radio"/> 1 vez semana<br><input type="radio"/> 2 a 4 veces semana<br><input type="radio"/> 5 a 6 veces semana<br><input type="radio"/> 1 vez al día<br><input checked="" type="radio"/> 2 a 3 veces al día<br><input type="radio"/> 5 a 6 veces al día<br><input type="radio"/> más 6 veces al día |
| ajo              | <input type="radio"/> Nunca o menos 1 vez al mes<br><input type="radio"/> 1 a 3 veces mes<br><input type="radio"/> 1 vez semana<br><input checked="" type="radio"/> 2 a 4 veces semana<br><input type="radio"/> 5 a 6 veces semana<br><input type="radio"/> 1 vez al día<br><input type="radio"/> 2 a 3 veces al día<br><input type="radio"/> 5 a 6 veces al día<br><input type="radio"/> más 6 veces al día |
| mermelada o miel | <input type="radio"/> Nunca o menos 1 vez al mes<br><input checked="" type="radio"/> 1 a 3 veces mes<br><input type="radio"/> 1 vez semana<br><input type="radio"/> 2 a 4 veces semana<br><input type="radio"/> 5 a 6 veces semana<br><input type="radio"/> 1 vez al día<br><input type="radio"/> 2 a 3 veces al día<br><input type="radio"/> 5 a 6 veces al día<br><input type="radio"/> más 6 veces al día |
| azúcar           | <input type="radio"/> Nunca o menos 1 vez al mes<br><input checked="" type="radio"/> 1 a 3 veces mes<br><input type="radio"/> 1 vez semana<br><input type="radio"/> 2 a 4 veces semana<br><input type="radio"/> 5 a 6 veces semana<br><input type="radio"/> 1 vez al día<br><input type="radio"/> 2 a 3 veces al día<br><input type="radio"/> 5 a 6 veces al día<br><input type="radio"/> más 6 veces al día |



|                                       |                                                                                                                                                                                                                                                                                                                                                                                                                                                                                                                               |
|---------------------------------------|-------------------------------------------------------------------------------------------------------------------------------------------------------------------------------------------------------------------------------------------------------------------------------------------------------------------------------------------------------------------------------------------------------------------------------------------------------------------------------------------------------------------------------|
| Otro alimento                         | [*DATA REMOVED*]                                                                                                                                                                                                                                                                                                                                                                                                                                                                                                              |
| suplementos vitamínicos               | <input type="radio"/> si<br><input checked="" type="radio"/> no                                                                                                                                                                                                                                                                                                                                                                                                                                                               |
| suplementos vitamínicos               |                                                                                                                                                                                                                                                                                                                                                                                                                                                                                                                               |
| dieta previa                          | <input type="radio"/> si<br><input checked="" type="radio"/> no                                                                                                                                                                                                                                                                                                                                                                                                                                                               |
| motivo dieta                          | <input checked="" type="radio"/> no dieta<br><input type="radio"/> control peso<br><input type="radio"/> control colesterol<br><input type="radio"/> control diabetes<br><input type="radio"/> problemas estómago<br><input type="radio"/> problemas vesícula o hepáticos<br><input type="radio"/> HTA o cardiopatía<br><input type="radio"/> problemas renales<br><input type="radio"/> alergia alimentaria<br><input type="radio"/> ácido úrico elevado<br><input type="radio"/> vegetariana<br><input type="radio"/> otros |
| cambio alimentos año previo gestación | <input checked="" type="radio"/> si<br><input type="radio"/> no                                                                                                                                                                                                                                                                                                                                                                                                                                                               |
| cambio lácteos                        | <input type="radio"/> eliminado<br><input type="radio"/> disminuido<br><input checked="" type="radio"/> igual<br><input type="radio"/> aumentado<br><input type="radio"/> no sabe                                                                                                                                                                                                                                                                                                                                             |
| cambio huevos                         | <input type="radio"/> eliminado<br><input type="radio"/> disminuido<br><input checked="" type="radio"/> igual<br><input type="radio"/> aumentado<br><input type="radio"/> no sabe                                                                                                                                                                                                                                                                                                                                             |
| cambio carne                          | <input type="radio"/> eliminado<br><input type="radio"/> disminuido<br><input checked="" type="radio"/> igual<br><input type="radio"/> aumentado<br><input type="radio"/> no sabe                                                                                                                                                                                                                                                                                                                                             |
| cambio pescado                        | <input type="radio"/> eliminado<br><input type="radio"/> disminuido<br><input checked="" type="radio"/> igual<br><input type="radio"/> aumentado<br><input type="radio"/> no sabe                                                                                                                                                                                                                                                                                                                                             |
| cambio verduras                       | <input type="radio"/> eliminado<br><input type="radio"/> disminuido<br><input checked="" type="radio"/> igual<br><input type="radio"/> aumentado<br><input type="radio"/> no sabe                                                                                                                                                                                                                                                                                                                                             |

|                            |                                                                                                                                                                                                                        |
|----------------------------|------------------------------------------------------------------------------------------------------------------------------------------------------------------------------------------------------------------------|
| cambio legumbres           | <input type="radio"/> eliminado<br><input type="radio"/> disminuido<br><input checked="" type="radio"/> igual<br><input type="radio"/> aumentado<br><input type="radio"/> no sabe                                      |
| cambio fruta               | <input type="radio"/> eliminado<br><input type="radio"/> disminuido<br><input type="radio"/> igual<br><input checked="" type="radio"/> aumentado<br><input type="radio"/> no sabe                                      |
| cambio pan                 | <input type="radio"/> eliminado<br><input type="radio"/> disminuido<br><input checked="" type="radio"/> igual<br><input type="radio"/> aumentado<br><input type="radio"/> no sabe                                      |
| cambio aceite oliva        | <input type="radio"/> eliminado<br><input type="radio"/> disminuido<br><input checked="" type="radio"/> igual<br><input type="radio"/> aumentado<br><input type="radio"/> no sabe                                      |
| cambio mante o margarina   | <input type="radio"/> eliminado<br><input type="radio"/> disminuido<br><input checked="" type="radio"/> igual<br><input type="radio"/> aumentado<br><input type="radio"/> no sabe                                      |
| cambio azúcar y dulces     | <input type="radio"/> eliminado<br><input type="radio"/> disminuido<br><input checked="" type="radio"/> igual<br><input type="radio"/> aumentado<br><input type="radio"/> no sabe                                      |
| cambio bebidas alcohólicas | <input checked="" type="radio"/> eliminado<br><input type="radio"/> disminuido<br><input type="radio"/> igual<br><input type="radio"/> aumentado<br><input type="radio"/> no sabe                                      |
| frecuencia comidas fritas  | <input type="radio"/> a diario<br><input type="radio"/> 5 a 6 veces semana<br><input type="radio"/> 2 a 4 veces semana<br><input type="radio"/> 1 vez semana<br><input checked="" type="radio"/> menos de 1 vez semana |
| carne                      | <input type="radio"/> no como<br><input type="radio"/> cruda<br><input checked="" type="radio"/> poco hecha<br><input type="radio"/> hecha<br><input type="radio"/> muy hecha                                          |
| grasa visible carne        | <input type="radio"/> quita toda<br><input type="radio"/> quita mayoría<br><input checked="" type="radio"/> quita un poco<br><input type="radio"/> no quita nada                                                       |

|                                |                                                                                                                                                                                                                                                          |
|--------------------------------|----------------------------------------------------------------------------------------------------------------------------------------------------------------------------------------------------------------------------------------------------------|
| cocina carne                   | <input checked="" type="radio"/> a la plancha<br><input type="radio"/> a la parrilla<br><input type="radio"/> asada<br><input type="radio"/> frita<br><input type="radio"/> guisada                                                                      |
| tostado quemado carne          | <input checked="" type="radio"/> nunca<br><input type="radio"/> 1 vez mes<br><input type="radio"/> 2 a 3 veces mes<br><input type="radio"/> 1 vez semana<br><input type="radio"/> 2 a 3 semanas                                                          |
| tostado quemado pescado        | <input checked="" type="radio"/> nunca<br><input type="radio"/> 1 vez mes<br><input type="radio"/> 2 a 3 veces mes<br><input type="radio"/> 1 vez semana<br><input type="radio"/> 2 a 3 semanas                                                          |
| socarrat paella                | <input checked="" type="radio"/> nunca<br><input type="radio"/> 1 vez mes<br><input type="radio"/> 2 a 3 veces mes<br><input type="radio"/> 1 vez semana<br><input type="radio"/> 2 a 3 semanas                                                          |
| grasa o aceite cocinar         | <input type="radio"/> mantequilla<br><input type="radio"/> margarina<br><input type="radio"/> aceite oliva<br><input checked="" type="radio"/> aceite oliva virgen extra<br><input type="radio"/> aceite vegetal<br><input type="radio"/> mezcla aceites |
| grasa aceite aliñar            | <input type="radio"/> mantequilla<br><input type="radio"/> margarina<br><input type="radio"/> aceite oliva<br><input checked="" type="radio"/> aceite oliva virgen extra<br><input type="radio"/> aceite vegetal<br><input type="radio"/> mezcla aceites |
| grasa aceite freir             | <input type="radio"/> mantequilla<br><input type="radio"/> margarina<br><input type="radio"/> aceite oliva<br><input checked="" type="radio"/> aceite oliva virgen extra<br><input type="radio"/> aceite vegetal<br><input type="radio"/> mezcla aceites |
| Ejercicio cuestionario         | <input checked="" type="radio"/> si<br><input type="radio"/> no                                                                                                                                                                                          |
| horas de sueño incluido siesta | [*DATA REMOVED*]                                                                                                                                                                                                                                         |
| minutos siesta                 | [*DATA REMOVED*]                                                                                                                                                                                                                                         |
| horas televisión semana        | [*DATA REMOVED*]                                                                                                                                                                                                                                         |

|                                        |                                                                                                                                                                                                                                                                                                                                                                           |
|----------------------------------------|---------------------------------------------------------------------------------------------------------------------------------------------------------------------------------------------------------------------------------------------------------------------------------------------------------------------------------------------------------------------------|
| actividad trabajo                      | <input type="radio"/> casi siempre sentado<br><input type="radio"/> sentado 50 por cien<br><input checked="" type="radio"/> casi siempre de pie, quieto<br><input type="radio"/> casi siempre levantado caminando y llevando pocas cosas<br><input type="radio"/> casi siempre levantado, caminando y llevado muchas cosas<br><input type="radio"/> trabajo manual pesado |
| tiempo caminar o bici al día           | <input type="radio"/> casi nunca<br><input type="radio"/> menos 20min día<br><input checked="" type="radio"/> 20 a 40 min día<br><input type="radio"/> 40 a 60 min día<br><input type="radio"/> 1h o 1h y media día<br><input type="radio"/> más de 1h y media al día                                                                                                     |
| tiempo tareas casa al día              | <input type="radio"/> menos de 1h día<br><input checked="" type="radio"/> 1 a 2h día<br><input type="radio"/> 3 a 4h día<br><input type="radio"/> 5 a 6h día<br><input type="radio"/> 7 a 8h día<br><input type="radio"/> más de 8h día                                                                                                                                   |
| tiempo libre televisión ordenador leer | <input type="radio"/> menos 1h día<br><input type="radio"/> 1h día<br><input type="radio"/> 2h día<br><input checked="" type="radio"/> 3h día<br><input type="radio"/> 4h día<br><input type="radio"/> 5 a 6h día<br><input type="radio"/> mas 6h día                                                                                                                     |
| tiempo libre ejercicio o deporte       | <input type="radio"/> menos 1h semana<br><input type="radio"/> 1h semana<br><input checked="" type="radio"/> 2h semana<br><input type="radio"/> 3h semana<br><input type="radio"/> 4 a 5h semana<br><input type="radio"/> mas 5h semana                                                                                                                                   |
| como se considera                      | <input type="radio"/> sedentaria<br><input checked="" type="radio"/> poco activa<br><input type="radio"/> moderadamente activa<br><input type="radio"/> bastante activa<br><input type="radio"/> muy activa<br><input type="radio"/> no sabe                                                                                                                              |
| FUR                                    | [*DATA REMOVED*]                                                                                                                                                                                                                                                                                                                                                          |
| Semanas gestación 2T                   | _____                                                                                                                                                                                                                                                                                                                                                                     |
| Días gestación 2T                      | _____                                                                                                                                                                                                                                                                                                                                                                     |
| DBP 2T                                 | _____                                                                                                                                                                                                                                                                                                                                                                     |
| CC 2T                                  | _____                                                                                                                                                                                                                                                                                                                                                                     |

|                                                   |                                                                                                                                                                                                 |
|---------------------------------------------------|-------------------------------------------------------------------------------------------------------------------------------------------------------------------------------------------------|
| AC 2T                                             |                                                                                                                                                                                                 |
| LF 2T                                             |                                                                                                                                                                                                 |
| PFE 2T (Hadlock)                                  |                                                                                                                                                                                                 |
| Semanas gestación 3T                              | [*DATA REMOVED*]                                                                                                                                                                                |
| días 3T                                           | [*DATA REMOVED*]                                                                                                                                                                                |
| DBP 3T                                            | [*DATA REMOVED*]                                                                                                                                                                                |
| CC 3T                                             | [*DATA REMOVED*]                                                                                                                                                                                |
| AC 3T                                             | [*DATA REMOVED*]                                                                                                                                                                                |
| LF 3T                                             | [*DATA REMOVED*]                                                                                                                                                                                |
| PFE 3T (Hadlock)                                  | [*DATA REMOVED*]                                                                                                                                                                                |
| Semanas de gestación final                        | [*DATA REMOVED*]                                                                                                                                                                                |
| días gestación final                              | [*DATA REMOVED*]                                                                                                                                                                                |
| Localización placenta                             | <input checked="" type="radio"/> anterior<br><input type="radio"/> lateral derecha<br><input type="radio"/> lateral izquierda<br><input type="radio"/> posterior<br><input type="radio"/> fondo |
| Presentación longitudinal cefálica                | <input type="radio"/> no<br><input checked="" type="radio"/> si                                                                                                                                 |
| Dorso                                             | <input checked="" type="radio"/> izquierda anterior<br><input type="radio"/> izquierda posterior<br><input type="radio"/> derecha anterior<br><input type="radio"/> derecha posterior           |
| diámetro biparietal                               | [*DATA REMOVED*]                                                                                                                                                                                |
| Circunferencia craneal                            | [*DATA REMOVED*]                                                                                                                                                                                |
| Circunferencia abdominal                          | [*DATA REMOVED*]                                                                                                                                                                                |
| Longitud de femur                                 | [*DATA REMOVED*]                                                                                                                                                                                |
| tejido celular subcutáneo a nivel del muslo en mm | [*DATA REMOVED*]                                                                                                                                                                                |
| tejido celular subcutáneo en abdomen en mm        | [*DATA REMOVED*]                                                                                                                                                                                |

|                                               |                                                                                                                                                          |
|-----------------------------------------------|----------------------------------------------------------------------------------------------------------------------------------------------------------|
| Volumen del muslo en cm3                      | [*DATA REMOVED*]                                                                                                                                         |
| Peso fetal estimado según fórmula de Hadlock  | [*DATA REMOVED*]                                                                                                                                         |
| Percentil                                     | [*DATA REMOVED*]                                                                                                                                         |
| Peso fetal estimado según fórmula de Scioscia | _____                                                                                                                                                    |
| Peso fetal estimado según fórmula de LEE      | _____                                                                                                                                                    |
| Tipo de parto                                 | <input checked="" type="radio"/> eutocico<br><input type="radio"/> instrumentado/ventosa<br><input type="radio"/> cesarea                                |
| fecha de nacimiento                           | [*DATA REMOVED*]                                                                                                                                         |
| Días entre exploración y nacimiento           | [*DATA REMOVED*]                                                                                                                                         |
| Peso RN en g                                  | [*DATA REMOVED*]                                                                                                                                         |
| sexo                                          | <input type="radio"/> mujer<br><input checked="" type="radio"/> hombre                                                                                   |
| Apgar 1 minuto                                | [*DATA REMOVED*]                                                                                                                                         |
| Apgar 5 minutos                               | [*DATA REMOVED*]                                                                                                                                         |
| Apgar 10 minutos                              | _____                                                                                                                                                    |
| antecedente Covid durante gestación           | <input type="radio"/> Yes<br><input checked="" type="radio"/> No                                                                                         |
| Nivel de estudios                             | <input type="radio"/> ninguno<br><input type="radio"/> primarios<br><input checked="" type="radio"/> secundarios<br><input type="radio"/> universitarios |

# Base\_datos\_estimacion\_peso\_fetal

|                                       |                                                                                                                                                                                                                                                                                      |
|---------------------------------------|--------------------------------------------------------------------------------------------------------------------------------------------------------------------------------------------------------------------------------------------------------------------------------------|
| Número de identificación participante | 59                                                                                                                                                                                                                                                                                   |
| CODIGO PARTICIPANTE                   |                                                                                                                                                                                                                                                                                      |
| Edad                                  | [*DATA REMOVED*]                                                                                                                                                                                                                                                                     |
| Gestaciones                           | <input type="radio"/> 1<br><input checked="" type="radio"/> 2<br><input type="radio"/> 3<br><input type="radio"/> mas de 3                                                                                                                                                           |
| partos                                | <input type="radio"/> 0<br><input checked="" type="radio"/> 1<br><input type="radio"/> 2<br><input type="radio"/> 3<br><input type="radio"/> mas de 3                                                                                                                                |
| cesáreas                              | <input checked="" type="radio"/> 0<br><input type="radio"/> 1<br><input type="radio"/> 2<br><input type="radio"/> 3<br><input type="radio"/> mas de 3                                                                                                                                |
| Abortos                               | <input checked="" type="radio"/> 0<br><input type="radio"/> 1<br><input type="radio"/> 2<br><input type="radio"/> 3<br><input type="radio"/> mas de 3                                                                                                                                |
| Tipo de gestacion                     | <input checked="" type="radio"/> espontanea<br><input type="radio"/> IAC inseminación artificial conyuge<br><input type="radio"/> IAD inseminación artificial donante<br><input type="radio"/> FIV Fecundación in Vitro<br><input type="radio"/> Ovodon FIV con donación de ovocitos |
| peso previo a embarazo                | [*DATA REMOVED*]                                                                                                                                                                                                                                                                     |
| Ganancia ponderal embarazo            | [*DATA REMOVED*]                                                                                                                                                                                                                                                                     |
| Talla madre                           | [*DATA REMOVED*]                                                                                                                                                                                                                                                                     |
| IMC previo embarazo                   | 22.95908765854944                                                                                                                                                                                                                                                                    |
| Patología obstétrica                  | <input checked="" type="radio"/> no<br><input type="radio"/> si                                                                                                                                                                                                                      |
| Diabetes pregestacional               | <input checked="" type="radio"/> no<br><input type="radio"/> si                                                                                                                                                                                                                      |
| Diabetes gestacional                  | <input type="radio"/> no<br><input checked="" type="radio"/> si                                                                                                                                                                                                                      |

|                                            |                                                                                                                                                                                      |
|--------------------------------------------|--------------------------------------------------------------------------------------------------------------------------------------------------------------------------------------|
| Diabetes gestacional con insulina          | <input checked="" type="radio"/> no<br><input type="radio"/> si                                                                                                                      |
| Diabetes gestacional con dieta y ejercicio | <input type="radio"/> no<br><input checked="" type="radio"/> si                                                                                                                      |
| Percentil fetos previos                    | <input type="radio"/> Nada<br><input checked="" type="radio"/> percentil menor de 10<br><input type="radio"/> percentil entre 10 y 90<br><input type="radio"/> percentil mayor de 90 |
| Exfumadora                                 | <input type="radio"/> Nada<br><input type="radio"/> menos de 5 años<br><input checked="" type="radio"/> 5 a 10 años<br><input type="radio"/> mayor o igual a 10 años                 |
| Hábito tabáquico                           | <input checked="" type="radio"/> no<br><input type="radio"/> si                                                                                                                      |
| fumadora                                   | [*DATA REMOVED*]                                                                                                                                                                     |
| Consumo otros tóxicos                      | <input checked="" type="radio"/> no<br><input type="radio"/> si                                                                                                                      |
| Hb 1T                                      | [*DATA REMOVED*]                                                                                                                                                                     |
| Htc 1T                                     | [*DATA REMOVED*]                                                                                                                                                                     |
| Hb 2T                                      | [*DATA REMOVED*]                                                                                                                                                                     |
| HTC 2T                                     | [*DATA REMOVED*]                                                                                                                                                                     |
| Hb 3T                                      | [*DATA REMOVED*]                                                                                                                                                                     |
| HTC 3T                                     | [*DATA REMOVED*]                                                                                                                                                                     |
| Suplemento FE oral                         | <input type="radio"/> si<br><input checked="" type="radio"/> no                                                                                                                      |
| Suplemento fe iv                           | <input type="radio"/> si<br><input checked="" type="radio"/> no                                                                                                                      |
| Transfusión                                | <input checked="" type="radio"/> no<br><input type="radio"/> si                                                                                                                      |
| Solicitada Vit D                           | <input checked="" type="radio"/> no<br><input type="radio"/> si                                                                                                                      |
| Deficit vit D                              | <input type="radio"/> no<br><input type="radio"/> si                                                                                                                                 |
| Suplemento vit D                           | <input type="radio"/> si<br><input type="radio"/> no                                                                                                                                 |



|                       |                                                                                                                                                                                                                                                                                                                                                                                                              |
|-----------------------|--------------------------------------------------------------------------------------------------------------------------------------------------------------------------------------------------------------------------------------------------------------------------------------------------------------------------------------------------------------------------------------------------------------|
| Dieta, cuestionario   | <input checked="" type="radio"/> sí<br><input type="radio"/> no                                                                                                                                                                                                                                                                                                                                              |
| Leche entera          | <input checked="" type="radio"/> Nunca o menos 1 vez al mes<br><input type="radio"/> 1 a 3 veces mes<br><input type="radio"/> 1 vez semana<br><input type="radio"/> 2 a 4 veces semana<br><input type="radio"/> 5 a 6 veces semana<br><input type="radio"/> 1 vez al día<br><input type="radio"/> 2 a 3 veces al día<br><input type="radio"/> 5 a 6 veces al día<br><input type="radio"/> más 6 veces al día |
| Leche semidesnatada   | <input checked="" type="radio"/> Nunca o menos 1 vez al mes<br><input type="radio"/> 1 a 3 veces mes<br><input type="radio"/> 1 vez semana<br><input type="radio"/> 2 a 4 veces semana<br><input type="radio"/> 5 a 6 veces semana<br><input type="radio"/> 1 vez al día<br><input type="radio"/> 2 a 3 veces al día<br><input type="radio"/> 5 a 6 veces al día<br><input type="radio"/> mas 6 veces al día |
| Leche desnatada       | <input type="radio"/> Nunca o menos 1 vez al mes<br><input type="radio"/> 1 a 3 veces mes<br><input type="radio"/> 1 vez semana<br><input type="radio"/> 2 a 4 veces semana<br><input type="radio"/> 5 a 6 veces semana<br><input checked="" type="radio"/> 1 vez al día<br><input type="radio"/> 2 a 3 veces al día<br><input type="radio"/> 5 a 6 veces al día<br><input type="radio"/> más 6 veces al día |
| Leche condensada      | <input checked="" type="radio"/> Nunca o menos 1 vez al mes<br><input type="radio"/> 1 a 3 veces mes<br><input type="radio"/> 1 vez semana<br><input type="radio"/> 2 a 4 veces semana<br><input type="radio"/> 5 a 6 veces semana<br><input type="radio"/> 1 vez al día<br><input type="radio"/> 2 a 3 veces al día<br><input type="radio"/> 5 a 6 veces al día<br><input type="radio"/> más 6 veces al día |
| nata o crema de leche | <input checked="" type="radio"/> Nunca o menos 1 vez al mes<br><input type="radio"/> 1 a 3 veces mes<br><input type="radio"/> 1 vez semana<br><input type="radio"/> 2 a 4 veces semana<br><input type="radio"/> 5 a 6 veces semana<br><input type="radio"/> 1 vez al día<br><input type="radio"/> 2 a 3 veces al día<br><input type="radio"/> 5 a 6 veces al día<br><input type="radio"/> más 6 veces al día |

|                                             |                                                                                                                                                                                                                                                                                                                                                                                                              |
|---------------------------------------------|--------------------------------------------------------------------------------------------------------------------------------------------------------------------------------------------------------------------------------------------------------------------------------------------------------------------------------------------------------------------------------------------------------------|
| Yogurt Entero                               | <input checked="" type="radio"/> Nunca o menos 1 vez al mes<br><input type="radio"/> 1 a 3 veces mes<br><input type="radio"/> 1 vez semana<br><input type="radio"/> 2 a 4 veces semana<br><input type="radio"/> 5 a 6 veces semana<br><input type="radio"/> 1 vez al día<br><input type="radio"/> 2 a 3 veces al día<br><input type="radio"/> 5 a 6 veces al día<br><input type="radio"/> más 6 veces al día |
| Yogurt desnatado                            | <input type="radio"/> Nunca o menos 1 vez al mes<br><input checked="" type="radio"/> 1 a 3 veces mes<br><input type="radio"/> 1 vez semana<br><input type="radio"/> 2 a 4 veces semana<br><input type="radio"/> 5 a 6 veces semana<br><input type="radio"/> 1 vez al día<br><input type="radio"/> 2 a 3 veces al día<br><input type="radio"/> 5 a 6 veces al día<br><input type="radio"/> más 6 veces al día |
| 100g requesón o queso blando o queso fresco | <input type="radio"/> Nunca o menos 1 vez al mes<br><input type="radio"/> 1 a 3 veces mes<br><input checked="" type="radio"/> 1 vez semana<br><input type="radio"/> 2 a 4 veces semana<br><input type="radio"/> 5 a 6 veces semana<br><input type="radio"/> 1 vez al día<br><input type="radio"/> 2 a 3 veces al día<br><input type="radio"/> 5 a 6 veces al día<br><input type="radio"/> más 6 veces al día |
| queso curado o semicurado o cremoso         | <input type="radio"/> Nunca o menos 1 vez al mes<br><input type="radio"/> 1 a 3 veces mes<br><input checked="" type="radio"/> 1 vez semana<br><input type="radio"/> 2 a 4 veces semana<br><input type="radio"/> 5 a 6 veces semana<br><input type="radio"/> 1 vez al día<br><input type="radio"/> 2 a 3 veces al día<br><input type="radio"/> 5 a 6 veces al día<br><input type="radio"/> más 6 veces al día |
| natillas flan pudding                       | <input checked="" type="radio"/> Nunca o menos 1 vez al mes<br><input type="radio"/> 1 a 3 veces mes<br><input type="radio"/> 1 vez semana<br><input type="radio"/> 2 a 4 veces semana<br><input type="radio"/> 5 a 6 veces semana<br><input type="radio"/> 1 vez al día<br><input type="radio"/> 2 a 3 veces al día<br><input type="radio"/> 5 a 6 veces al día<br><input type="radio"/> más 6 veces al día |
| Helado                                      | <input checked="" type="radio"/> Nunca o menos 1 vez al mes<br><input type="radio"/> 1 a 3 veces mes<br><input type="radio"/> 1 vez semana<br><input type="radio"/> 2 a 4 veces semana<br><input type="radio"/> 5 a 6 veces semana<br><input type="radio"/> 1 vez al día<br><input type="radio"/> 2 a 3 veces al día<br><input type="radio"/> 5 a 6 veces al día<br><input type="radio"/> más 6 veces al día |

|                                      |                                                                                                                                                                                                                                                                                                                                                                                                              |
|--------------------------------------|--------------------------------------------------------------------------------------------------------------------------------------------------------------------------------------------------------------------------------------------------------------------------------------------------------------------------------------------------------------------------------------------------------------|
| huevo                                | <input type="radio"/> Nunca o menos 1 vez al mes<br><input type="radio"/> 1 a 3 veces mes<br><input checked="" type="radio"/> 1 vez semana<br><input type="radio"/> 2 a 4 veces semana<br><input type="radio"/> 5 a 6 veces semana<br><input type="radio"/> 1 vez al día<br><input type="radio"/> 2 a 3 veces al día<br><input type="radio"/> 5 a 6 veces al día<br><input type="radio"/> más 6 veces al día |
| Pollo con piel                       | <input checked="" type="radio"/> Nunca o menos 1 vez al mes<br><input type="radio"/> 1 a 3 veces mes<br><input type="radio"/> 1 vez semana<br><input type="radio"/> 2 a 4 veces semana<br><input type="radio"/> 5 a 6 veces semana<br><input type="radio"/> 1 vez al día<br><input type="radio"/> 2 a 3 veces al día<br><input type="radio"/> 5 a 6 veces al día<br><input type="radio"/> más 6 veces al día |
| pollo sin piel                       | <input type="radio"/> Nunca o menos 1 vez al mes<br><input type="radio"/> 1 a 3 veces mes<br><input type="radio"/> 1 vez semana<br><input checked="" type="radio"/> 2 a 4 veces semana<br><input type="radio"/> 5 a 6 veces semana<br><input type="radio"/> 1 vez al día<br><input type="radio"/> 2 a 3 veces al día<br><input type="radio"/> 5 a 6 veces al día<br><input type="radio"/> más 6 veces al día |
| Ternera o cerdo o cordero            | <input type="radio"/> Nunca o menos 1 vez al mes<br><input type="radio"/> 1 a 3 veces mes<br><input checked="" type="radio"/> 1 vez semana<br><input type="radio"/> 2 a 4 veces semana<br><input type="radio"/> 5 a 6 veces semana<br><input type="radio"/> 1 vez al día<br><input type="radio"/> 2 a 3 veces al día<br><input type="radio"/> 5 a 6 veces al día<br><input type="radio"/> más 6 veces al día |
| carne caza: Conejo o codorniz o pato | <input checked="" type="radio"/> Nunca o menos 1 vez al mes<br><input type="radio"/> 1 a 3 veces mes<br><input type="radio"/> 1 vez semana<br><input type="radio"/> 2 a 4 veces semana<br><input type="radio"/> 5 a 6 veces semana<br><input type="radio"/> 1 vez al día<br><input type="radio"/> 2 a 3 veces al día<br><input type="radio"/> 5 a 6 veces al día<br><input type="radio"/> más 6 veces al día |
| Hígado de ternera o cerdo o pollo    | <input checked="" type="radio"/> Nunca o menos 1 vez al mes<br><input type="radio"/> 1 a 3 veces mes<br><input type="radio"/> 1 vez semana<br><input type="radio"/> 2 a 4 veces semana<br><input type="radio"/> 5 a 6 veces semana<br><input type="radio"/> 1 vez al día<br><input type="radio"/> 2 a 3 veces al día<br><input type="radio"/> 5 a 6 veces al día<br><input type="radio"/> más 6 veces al día |

|                     |                                                                                                                                                                                                                                                                                                                                                                                                              |
|---------------------|--------------------------------------------------------------------------------------------------------------------------------------------------------------------------------------------------------------------------------------------------------------------------------------------------------------------------------------------------------------------------------------------------------------|
| Vísceras            | <input checked="" type="radio"/> Nunca o menos 1 vez al mes<br><input type="radio"/> 1 a 3 veces mes<br><input type="radio"/> 1 vez semana<br><input type="radio"/> 2 a 4 veces semana<br><input type="radio"/> 5 a 6 veces semana<br><input type="radio"/> 1 vez al día<br><input type="radio"/> 2 a 3 veces al día<br><input type="radio"/> 5 a 6 veces al día<br><input type="radio"/> más 6 veces al día |
| Embutido            | <input checked="" type="radio"/> Nunca o menos 1 vez al mes<br><input type="radio"/> 1 a 3 veces mes<br><input type="radio"/> 1 vez semana<br><input type="radio"/> 2 a 4 veces semana<br><input type="radio"/> 5 a 6 veces semana<br><input type="radio"/> 1 vez al día<br><input type="radio"/> 2 a 3 veces al día<br><input type="radio"/> 5 a 6 veces al día<br><input type="radio"/> más 6 veces al día |
| Salchicha o similar | <input type="radio"/> Nunca o menos 1 vez al mes<br><input checked="" type="radio"/> 1 a 3 veces mes<br><input type="radio"/> 1 vez semana<br><input type="radio"/> 2 a 4 veces semana<br><input type="radio"/> 5 a 6 veces semana<br><input type="radio"/> 1 vez al día<br><input type="radio"/> 2 a 3 veces al día<br><input type="radio"/> 5 a 6 veces al día<br><input type="radio"/> más 6 veces al día |
| Pate o foiegras     | <input checked="" type="radio"/> Nunca o menos 1 vez al mes<br><input type="radio"/> 1 a 3 veces mes<br><input type="radio"/> 1 vez semana<br><input type="radio"/> 2 a 4 veces semana<br><input type="radio"/> 5 a 6 veces semana<br><input type="radio"/> 1 vez al día<br><input type="radio"/> 2 a 3 veces al día<br><input type="radio"/> 5 a 6 veces al día<br><input type="radio"/> más 6 veces al día |
| Hamburguesa         | <input type="radio"/> Nunca o menos 1 vez al mes<br><input type="radio"/> 1 a 3 veces mes<br><input type="radio"/> 1 vez semana<br><input checked="" type="radio"/> 2 a 4 veces semana<br><input type="radio"/> 5 a 6 veces semana<br><input type="radio"/> 1 vez al día<br><input type="radio"/> 2 a 3 veces al día<br><input type="radio"/> 5 a 6 veces al día<br><input type="radio"/> más 6 veces al día |
| tocino o bacon      | <input checked="" type="radio"/> Nunca o menos 1 vez al mes<br><input type="radio"/> 1 a 3 veces mes<br><input type="radio"/> 1 vez semana<br><input type="radio"/> 2 a 4 veces semana<br><input type="radio"/> 5 a 6 veces semana<br><input type="radio"/> 1 vez al día<br><input type="radio"/> 2 a 3 veces al día<br><input type="radio"/> 5 a 6 veces al día<br><input type="radio"/> más 6 veces al día |

|                        |                                                                                                                                                                                                                                                                                                                                                                                                              |
|------------------------|--------------------------------------------------------------------------------------------------------------------------------------------------------------------------------------------------------------------------------------------------------------------------------------------------------------------------------------------------------------------------------------------------------------|
| Pescado frito          | <input checked="" type="radio"/> Nunca o menos 1 vez al mes<br><input type="radio"/> 1 a 3 veces mes<br><input type="radio"/> 1 vez semana<br><input type="radio"/> 2 a 4 veces semana<br><input type="radio"/> 5 a 6 veces semana<br><input type="radio"/> 1 vez al día<br><input type="radio"/> 2 a 3 veces al día<br><input type="radio"/> 5 a 6 veces al día<br><input type="radio"/> más 6 veces al día |
| pescado hervido blanco | <input type="radio"/> Nunca o menos 1 vez al mes<br><input type="radio"/> 1 a 3 veces mes<br><input checked="" type="radio"/> 1 vez semana<br><input type="radio"/> 2 a 4 veces semana<br><input type="radio"/> 5 a 6 veces semana<br><input type="radio"/> 1 vez al día<br><input type="radio"/> 2 a 3 veces al día<br><input type="radio"/> 5 a 6 veces al día<br><input type="radio"/> más 6 veces al día |
| pescado hervido azul   | <input type="radio"/> Nunca o menos 1 vez al mes<br><input type="radio"/> 1 a 3 veces mes<br><input checked="" type="radio"/> 1 vez semana<br><input type="radio"/> 2 a 4 veces semana<br><input type="radio"/> 5 a 6 veces semana<br><input type="radio"/> 1 vez al día<br><input type="radio"/> 2 a 3 veces al día<br><input type="radio"/> 5 a 6 veces al día<br><input type="radio"/> más 6 veces al día |
| otros pescado azul     | <input type="radio"/> Nunca o menos 1 vez al mes<br><input type="radio"/> 1 a 3 veces mes<br><input checked="" type="radio"/> 1 vez semana<br><input type="radio"/> 2 a 4 veces semana<br><input type="radio"/> 5 a 6 veces semana<br><input type="radio"/> 1 vez al día<br><input type="radio"/> 2 a 3 veces al día<br><input type="radio"/> 5 a 6 veces al día<br><input type="radio"/> más 6 veces al día |
| atun conserva          | <input type="radio"/> Nunca o menos 1 vez al mes<br><input type="radio"/> 1 a 3 veces mes<br><input checked="" type="radio"/> 1 vez semana<br><input type="radio"/> 2 a 4 veces semana<br><input type="radio"/> 5 a 6 veces semana<br><input type="radio"/> 1 vez al día<br><input type="radio"/> 2 a 3 veces al día<br><input type="radio"/> 5 a 6 veces al día<br><input type="radio"/> más 6 veces al día |
| sardina conserva       | <input checked="" type="radio"/> Nunca o menos 1 vez al mes<br><input type="radio"/> 1 a 3 veces mes<br><input type="radio"/> 1 vez semana<br><input type="radio"/> 2 a 4 veces semana<br><input type="radio"/> 5 a 6 veces semana<br><input type="radio"/> 1 vez al día<br><input type="radio"/> 2 a 3 veces al día<br><input type="radio"/> 5 a 6 veces al día<br><input type="radio"/> más 6 veces al día |

|                                         |                                                                                                                                                                                                                                                                                                                                                                                                              |
|-----------------------------------------|--------------------------------------------------------------------------------------------------------------------------------------------------------------------------------------------------------------------------------------------------------------------------------------------------------------------------------------------------------------------------------------------------------------|
| pescado ahumado                         | <input checked="" type="radio"/> Nunca o menos 1 vez al mes<br><input type="radio"/> 1 a 3 veces mes<br><input type="radio"/> 1 vez semana<br><input type="radio"/> 2 a 4 veces semana<br><input type="radio"/> 5 a 6 veces semana<br><input type="radio"/> 1 vez al día<br><input type="radio"/> 2 a 3 veces al día<br><input type="radio"/> 5 a 6 veces al día<br><input type="radio"/> más 6 veces al día |
| almejas o mejillones o ostras unos 100g | <input type="radio"/> Nunca o menos 1 vez al mes<br><input type="radio"/> 1 a 3 veces mes<br><input type="radio"/> 1 vez semana<br><input checked="" type="radio"/> 2 a 4 veces semana<br><input type="radio"/> 5 a 6 veces semana<br><input type="radio"/> 1 vez al día<br><input type="radio"/> 2 a 3 veces al día<br><input type="radio"/> 5 a 6 veces al día<br><input type="radio"/> más 6 veces al día |
| calamar o chipiron o sepia unos 100g    | <input type="radio"/> Nunca o menos 1 vez al mes<br><input type="radio"/> 1 a 3 veces mes<br><input checked="" type="radio"/> 1 vez semana<br><input type="radio"/> 2 a 4 veces semana<br><input type="radio"/> 5 a 6 veces semana<br><input type="radio"/> 1 vez al día<br><input type="radio"/> 2 a 3 veces al día<br><input type="radio"/> 5 a 6 veces al día<br><input type="radio"/> más 6 veces al día |
| marisco unos 100g                       | <input type="radio"/> Nunca o menos 1 vez al mes<br><input type="radio"/> 1 a 3 veces mes<br><input checked="" type="radio"/> 1 vez semana<br><input type="radio"/> 2 a 4 veces semana<br><input type="radio"/> 5 a 6 veces semana<br><input type="radio"/> 1 vez al día<br><input type="radio"/> 2 a 3 veces al día<br><input type="radio"/> 5 a 6 veces al día<br><input type="radio"/> más 6 veces al día |
| Espinacas o acelgas cocinadas           | <input type="radio"/> Nunca o menos 1 vez al mes<br><input type="radio"/> 1 a 3 veces mes<br><input checked="" type="radio"/> 1 vez semana<br><input type="radio"/> 2 a 4 veces semana<br><input type="radio"/> 5 a 6 veces semana<br><input type="radio"/> 1 vez al día<br><input type="radio"/> 2 a 3 veces al día<br><input type="radio"/> 5 a 6 veces al día<br><input type="radio"/> más 6 veces al día |
| Col o coliflor o brocoli cocinado       | <input type="radio"/> Nunca o menos 1 vez al mes<br><input type="radio"/> 1 a 3 veces mes<br><input checked="" type="radio"/> 1 vez semana<br><input type="radio"/> 2 a 4 veces semana<br><input type="radio"/> 5 a 6 veces semana<br><input type="radio"/> 1 vez al día<br><input type="radio"/> 2 a 3 veces al día<br><input type="radio"/> 5 a 6 veces al día<br><input type="radio"/> más 6 veces al día |

---

Lechuga o endivia o escarola

- ☐ Nunca o menos 1 vez al mes  
☐ 1 a 3 veces mes  
☐ 1 vez semana  
☐ 2 a 4 veces semana  
☐ 5 a 6 veces semana  
☒ 1 vez al día  
☐ 2 a 3 veces al día  
☐ 5 a 6 veces al día  
☐ más 6 veces al día

---

tomate ensalada

- ☐ Nunca o menos 1 vez al mes  
☐ 1 a 3 veces mes  
☐ 1 vez semana  
☐ 2 a 4 veces semana  
☐ 5 a 6 veces semana  
☒ 1 vez al día  
☐ 2 a 3 veces al día  
☐ 5 a 6 veces al día  
☐ más 6 veces al día

---

cebolla

- ☐ Nunca o menos 1 vez al mes  
☐ 1 a 3 veces mes  
☐ 1 vez semana  
☒ 2 a 4 veces semana  
☐ 5 a 6 veces semana  
☐ 1 vez al día  
☐ 2 a 3 veces al día  
☐ 5 a 6 veces al día  
☐ más 6 veces al día

---

Zanahoria o calabaza

- ☒ Nunca o menos 1 vez al mes  
☐ 1 a 3 veces mes  
☐ 1 vez semana  
☐ 2 a 4 veces semana  
☐ 5 a 6 veces semana  
☐ 1 vez al día  
☐ 2 a 3 veces al día  
☐ 5 a 6 veces al día  
☐ más 6 veces al día

---

Judías verdes

- ☐ Nunca o menos 1 vez al mes  
☐ 1 a 3 veces mes  
☒ 1 vez semana  
☐ 2 a 4 veces semana  
☐ 5 a 6 veces semana  
☐ 1 vez al día  
☐ 2 a 3 veces al día  
☐ 5 a 6 veces al día  
☐ más 6 veces al día

---

Berenjena o calabacin o pepino

- ☐ Nunca o menos 1 vez al mes  
☐ 1 a 3 veces mes  
☒ 1 vez semana  
☐ 2 a 4 veces semana  
☐ 5 a 6 veces semana  
☐ 1 vez al día  
☐ 2 a 3 veces al día  
☐ 5 a 6 veces al día  
☐ más 6 veces al día

|                       |                                                                                                                                                                                                                                                                                                                                                                                                              |
|-----------------------|--------------------------------------------------------------------------------------------------------------------------------------------------------------------------------------------------------------------------------------------------------------------------------------------------------------------------------------------------------------------------------------------------------------|
| pimiento              | <input type="radio"/> Nunca o menos 1 vez al mes<br><input type="radio"/> 1 a 3 veces mes<br><input checked="" type="radio"/> 1 vez semana<br><input type="radio"/> 2 a 4 veces semana<br><input type="radio"/> 5 a 6 veces semana<br><input type="radio"/> 1 vez al día<br><input type="radio"/> 2 a 3 veces al día<br><input type="radio"/> 5 a 6 veces al día<br><input type="radio"/> más 6 veces al día |
| alcachofa             | <input type="radio"/> Nunca o menos 1 vez al mes<br><input checked="" type="radio"/> 1 a 3 veces mes<br><input type="radio"/> 1 vez semana<br><input type="radio"/> 2 a 4 veces semana<br><input type="radio"/> 5 a 6 veces semana<br><input type="radio"/> 1 vez al día<br><input type="radio"/> 2 a 3 veces al día<br><input type="radio"/> 5 a 6 veces al día<br><input type="radio"/> más 6 veces al día |
| espárragos            | <input type="radio"/> Nunca o menos 1 vez al mes<br><input type="radio"/> 1 a 3 veces mes<br><input checked="" type="radio"/> 1 vez semana<br><input type="radio"/> 2 a 4 veces semana<br><input type="radio"/> 5 a 6 veces semana<br><input type="radio"/> 1 vez al día<br><input type="radio"/> 2 a 3 veces al día<br><input type="radio"/> 5 a 6 veces al día<br><input type="radio"/> más 6 veces al día |
| maíz hervido          | <input checked="" type="radio"/> Nunca o menos 1 vez al mes<br><input type="radio"/> 1 a 3 veces mes<br><input type="radio"/> 1 vez semana<br><input type="radio"/> 2 a 4 veces semana<br><input type="radio"/> 5 a 6 veces semana<br><input type="radio"/> 1 vez al día<br><input type="radio"/> 2 a 3 veces al día<br><input type="radio"/> 5 a 6 veces al día<br><input type="radio"/> más 6 veces al día |
| legumbres             | <input type="radio"/> Nunca o menos 1 vez al mes<br><input type="radio"/> 1 a 3 veces mes<br><input type="radio"/> 1 vez semana<br><input checked="" type="radio"/> 2 a 4 veces semana<br><input type="radio"/> 5 a 6 veces semana<br><input type="radio"/> 1 vez al día<br><input type="radio"/> 2 a 3 veces al día<br><input type="radio"/> 5 a 6 veces al día<br><input type="radio"/> más 6 veces al día |
| naranjas o mandarinas | <input checked="" type="radio"/> Nunca o menos 1 vez al mes<br><input type="radio"/> 1 a 3 veces mes<br><input type="radio"/> 1 vez semana<br><input type="radio"/> 2 a 4 veces semana<br><input type="radio"/> 5 a 6 veces semana<br><input type="radio"/> 1 vez al día<br><input type="radio"/> 2 a 3 veces al día<br><input type="radio"/> 5 a 6 veces al día<br><input type="radio"/> más 6 veces al día |



|                       |                                                                                                                                                                                                                                                                                                                                                                                                              |
|-----------------------|--------------------------------------------------------------------------------------------------------------------------------------------------------------------------------------------------------------------------------------------------------------------------------------------------------------------------------------------------------------------------------------------------------------|
| zum natural fruta     | <input checked="" type="radio"/> Nunca o menos 1 vez al mes<br><input type="radio"/> 1 a 3 veces mes<br><input type="radio"/> 1 vez semana<br><input type="radio"/> 2 a 4 veces semana<br><input type="radio"/> 5 a 6 veces semana<br><input type="radio"/> 1 vez al día<br><input type="radio"/> 2 a 3 veces al día<br><input type="radio"/> 5 a 6 veces al día<br><input type="radio"/> más 6 veces al día |
| platano               | <input checked="" type="radio"/> Nunca o menos 1 vez al mes<br><input type="radio"/> 1 a 3 veces mes<br><input type="radio"/> 1 vez semana<br><input type="radio"/> 2 a 4 veces semana<br><input type="radio"/> 5 a 6 veces semana<br><input type="radio"/> 1 vez al día<br><input type="radio"/> 2 a 3 veces al día<br><input type="radio"/> 5 a 6 veces al día<br><input type="radio"/> más 6 veces al día |
| manzana o pera        | <input type="radio"/> Nunca o menos 1 vez al mes<br><input type="radio"/> 1 a 3 veces mes<br><input checked="" type="radio"/> 1 vez semana<br><input type="radio"/> 2 a 4 veces semana<br><input type="radio"/> 5 a 6 veces semana<br><input type="radio"/> 1 vez al día<br><input type="radio"/> 2 a 3 veces al día<br><input type="radio"/> 5 a 6 veces al día<br><input type="radio"/> más 6 veces al día |
| melocotón o nectarina | <input type="radio"/> Nunca o menos 1 vez al mes<br><input type="radio"/> 1 a 3 veces mes<br><input checked="" type="radio"/> 1 vez semana<br><input type="radio"/> 2 a 4 veces semana<br><input type="radio"/> 5 a 6 veces semana<br><input type="radio"/> 1 vez al día<br><input type="radio"/> 2 a 3 veces al día<br><input type="radio"/> 5 a 6 veces al día<br><input type="radio"/> más 6 veces al día |
| sandia o melon        | <input type="radio"/> Nunca o menos 1 vez al mes<br><input type="radio"/> 1 a 3 veces mes<br><input type="radio"/> 1 vez semana<br><input checked="" type="radio"/> 2 a 4 veces semana<br><input type="radio"/> 5 a 6 veces semana<br><input type="radio"/> 1 vez al día<br><input type="radio"/> 2 a 3 veces al día<br><input type="radio"/> 5 a 6 veces al día<br><input type="radio"/> más 6 veces al día |
| uva                   | <input checked="" type="radio"/> Nunca o menos 1 vez al mes<br><input type="radio"/> 1 a 3 veces mes<br><input type="radio"/> 1 vez semana<br><input type="radio"/> 2 a 4 veces semana<br><input type="radio"/> 5 a 6 veces semana<br><input type="radio"/> 1 vez al día<br><input type="radio"/> 2 a 3 veces al día<br><input type="radio"/> 5 a 6 veces al día<br><input type="radio"/> más 6 veces al día |

|                 |                                                                                                                                                                                                                                                                                                                                                                                                              |
|-----------------|--------------------------------------------------------------------------------------------------------------------------------------------------------------------------------------------------------------------------------------------------------------------------------------------------------------------------------------------------------------------------------------------------------------|
| bruna o ciruela | <input type="radio"/> Nunca o menos 1 vez al mes<br><input type="radio"/> 1 a 3 veces mes<br><input type="radio"/> 1 vez semana<br><input type="radio"/> 2 a 4 veces semana<br><input type="radio"/> 5 a 6 veces semana<br><input checked="" type="radio"/> 1 vez al día<br><input type="radio"/> 2 a 3 veces al día<br><input type="radio"/> 5 a 6 veces al día<br><input type="radio"/> más 6 veces al día |
| kiwi            | <input type="radio"/> Nunca o menos 1 vez al mes<br><input type="radio"/> 1 a 3 veces mes<br><input checked="" type="radio"/> 1 vez semana<br><input type="radio"/> 2 a 4 veces semana<br><input type="radio"/> 5 a 6 veces semana<br><input type="radio"/> 1 vez al día<br><input type="radio"/> 2 a 3 veces al día<br><input type="radio"/> 5 a 6 veces al día<br><input type="radio"/> más 6 veces al día |
| aceituna        | <input type="radio"/> Nunca o menos 1 vez al mes<br><input type="radio"/> 1 a 3 veces mes<br><input checked="" type="radio"/> 1 vez semana<br><input type="radio"/> 2 a 4 veces semana<br><input type="radio"/> 5 a 6 veces semana<br><input type="radio"/> 1 vez al día<br><input type="radio"/> 2 a 3 veces al día<br><input type="radio"/> 5 a 6 veces al día<br><input type="radio"/> más 6 veces al día |
| frutos secos    | <input type="radio"/> Nunca o menos 1 vez al mes<br><input type="radio"/> 1 a 3 veces mes<br><input type="radio"/> 1 vez semana<br><input checked="" type="radio"/> 2 a 4 veces semana<br><input type="radio"/> 5 a 6 veces semana<br><input type="radio"/> 1 vez al día<br><input type="radio"/> 2 a 3 veces al día<br><input type="radio"/> 5 a 6 veces al día<br><input type="radio"/> más 6 veces al día |
| pan blanco      | <input checked="" type="radio"/> Nunca o menos 1 vez al mes<br><input type="radio"/> 1 a 3 veces mes<br><input type="radio"/> 1 vez semana<br><input type="radio"/> 2 a 4 veces semana<br><input type="radio"/> 5 a 6 veces semana<br><input type="radio"/> 1 vez al día<br><input type="radio"/> 2 a 3 veces al día<br><input type="radio"/> 5 a 6 veces al día<br><input type="radio"/> más 6 veces al día |
| pan integral    | <input type="radio"/> Nunca o menos 1 vez al mes<br><input type="radio"/> 1 a 3 veces mes<br><input type="radio"/> 1 vez semana<br><input checked="" type="radio"/> 2 a 4 veces semana<br><input type="radio"/> 5 a 6 veces semana<br><input type="radio"/> 1 vez al día<br><input type="radio"/> 2 a 3 veces al día<br><input type="radio"/> 5 a 6 veces al día<br><input type="radio"/> más 6 veces al día |

|                          |                                                                                                                                                                                                                                                                                                                                                                                                              |
|--------------------------|--------------------------------------------------------------------------------------------------------------------------------------------------------------------------------------------------------------------------------------------------------------------------------------------------------------------------------------------------------------------------------------------------------------|
| cereales desayuno        | <input checked="" type="radio"/> Nunca o menos 1 vez al mes<br><input type="radio"/> 1 a 3 veces mes<br><input type="radio"/> 1 vez semana<br><input type="radio"/> 2 a 4 veces semana<br><input type="radio"/> 5 a 6 veces semana<br><input type="radio"/> 1 vez al día<br><input type="radio"/> 2 a 3 veces al día<br><input type="radio"/> 5 a 6 veces al día<br><input type="radio"/> más 6 veces al día |
| patatas fritas           | <input type="radio"/> Nunca o menos 1 vez al mes<br><input checked="" type="radio"/> 1 a 3 veces mes<br><input type="radio"/> 1 vez semana<br><input type="radio"/> 2 a 4 veces semana<br><input type="radio"/> 5 a 6 veces semana<br><input type="radio"/> 1 vez al día<br><input type="radio"/> 2 a 3 veces al día<br><input type="radio"/> 5 a 6 veces al día<br><input type="radio"/> más 6 veces al día |
| patatas cocidas o asadas | <input type="radio"/> Nunca o menos 1 vez al mes<br><input checked="" type="radio"/> 1 a 3 veces mes<br><input type="radio"/> 1 vez semana<br><input type="radio"/> 2 a 4 veces semana<br><input type="radio"/> 5 a 6 veces semana<br><input type="radio"/> 1 vez al día<br><input type="radio"/> 2 a 3 veces al día<br><input type="radio"/> 5 a 6 veces al día<br><input type="radio"/> más 6 veces al día |
| bolsa papas              | <input checked="" type="radio"/> Nunca o menos 1 vez al mes<br><input type="radio"/> 1 a 3 veces mes<br><input type="radio"/> 1 vez semana<br><input type="radio"/> 2 a 4 veces semana<br><input type="radio"/> 5 a 6 veces semana<br><input type="radio"/> 1 vez al día<br><input type="radio"/> 2 a 3 veces al día<br><input type="radio"/> 5 a 6 veces al día<br><input type="radio"/> más 6 veces al día |
| arroz cocinado           | <input type="radio"/> Nunca o menos 1 vez al mes<br><input type="radio"/> 1 a 3 veces mes<br><input checked="" type="radio"/> 1 vez semana<br><input type="radio"/> 2 a 4 veces semana<br><input type="radio"/> 5 a 6 veces semana<br><input type="radio"/> 1 vez al día<br><input type="radio"/> 2 a 3 veces al día<br><input type="radio"/> 5 a 6 veces al día<br><input type="radio"/> más 6 veces al día |
| pasta                    | <input type="radio"/> Nunca o menos 1 vez al mes<br><input type="radio"/> 1 a 3 veces mes<br><input checked="" type="radio"/> 1 vez semana<br><input type="radio"/> 2 a 4 veces semana<br><input type="radio"/> 5 a 6 veces semana<br><input type="radio"/> 1 vez al día<br><input type="radio"/> 2 a 3 veces al día<br><input type="radio"/> 5 a 6 veces al día<br><input type="radio"/> más 6 veces al día |

|                     |                                                                                                                                                                                                                                                                                                                                                                                                              |
|---------------------|--------------------------------------------------------------------------------------------------------------------------------------------------------------------------------------------------------------------------------------------------------------------------------------------------------------------------------------------------------------------------------------------------------------|
| pizza               | <input type="radio"/> Nunca o menos 1 vez al mes<br><input type="radio"/> 1 a 3 veces mes<br><input checked="" type="radio"/> 1 vez semana<br><input type="radio"/> 2 a 4 veces semana<br><input type="radio"/> 5 a 6 veces semana<br><input type="radio"/> 1 vez al día<br><input type="radio"/> 2 a 3 veces al día<br><input type="radio"/> 5 a 6 veces al día<br><input type="radio"/> más 6 veces al día |
| aceite oliva        | <input type="radio"/> Nunca o menos 1 vez al mes<br><input type="radio"/> 1 a 3 veces mes<br><input type="radio"/> 1 vez semana<br><input type="radio"/> 2 a 4 veces semana<br><input type="radio"/> 5 a 6 veces semana<br><input type="radio"/> 1 vez al día<br><input checked="" type="radio"/> 2 a 3 veces al día<br><input type="radio"/> 5 a 6 veces al día<br><input type="radio"/> más 6 veces al día |
| otros aceites       | <input type="radio"/> Nunca o menos 1 vez al mes<br><input checked="" type="radio"/> 1 a 3 veces mes<br><input type="radio"/> 1 vez semana<br><input type="radio"/> 2 a 4 veces semana<br><input type="radio"/> 5 a 6 veces semana<br><input type="radio"/> 1 vez al día<br><input type="radio"/> 2 a 3 veces al día<br><input type="radio"/> 5 a 6 veces al día<br><input type="radio"/> más 6 veces al día |
| margarina           | <input checked="" type="radio"/> Nunca o menos 1 vez al mes<br><input type="radio"/> 1 a 3 veces mes<br><input type="radio"/> 1 vez semana<br><input type="radio"/> 2 a 4 veces semana<br><input type="radio"/> 5 a 6 veces semana<br><input type="radio"/> 1 vez al día<br><input type="radio"/> 2 a 3 veces al día<br><input type="radio"/> 5 a 6 veces al día<br><input type="radio"/> más 6 veces al día |
| mantequilla         | <input type="radio"/> Nunca o menos 1 vez al mes<br><input type="radio"/> 1 a 3 veces mes<br><input checked="" type="radio"/> 1 vez semana<br><input type="radio"/> 2 a 4 veces semana<br><input type="radio"/> 5 a 6 veces semana<br><input type="radio"/> 1 vez al día<br><input type="radio"/> 2 a 3 veces al día<br><input type="radio"/> 5 a 6 veces al día<br><input type="radio"/> más 6 veces al día |
| galletas tipo maria | <input checked="" type="radio"/> Nunca o menos 1 vez al mes<br><input type="radio"/> 1 a 3 veces mes<br><input type="radio"/> 1 vez semana<br><input type="radio"/> 2 a 4 veces semana<br><input type="radio"/> 5 a 6 veces semana<br><input type="radio"/> 1 vez al día<br><input type="radio"/> 2 a 3 veces al día<br><input type="radio"/> 5 a 6 veces al día<br><input type="radio"/> más 6 veces al día |

|                           |                                                                                                                                                                                                                                                                                                                                                                                                              |
|---------------------------|--------------------------------------------------------------------------------------------------------------------------------------------------------------------------------------------------------------------------------------------------------------------------------------------------------------------------------------------------------------------------------------------------------------|
| galletas chocolate        | <input checked="" type="radio"/> Nunca o menos 1 vez al mes<br><input type="radio"/> 1 a 3 veces mes<br><input type="radio"/> 1 vez semana<br><input type="radio"/> 2 a 4 veces semana<br><input type="radio"/> 5 a 6 veces semana<br><input type="radio"/> 1 vez al día<br><input type="radio"/> 2 a 3 veces al día<br><input type="radio"/> 5 a 6 veces al día<br><input type="radio"/> más 6 veces al día |
| bollieria                 | <input checked="" type="radio"/> Nunca o menos 1 vez al mes<br><input type="radio"/> 1 a 3 veces mes<br><input type="radio"/> 1 vez semana<br><input type="radio"/> 2 a 4 veces semana<br><input type="radio"/> 5 a 6 veces semana<br><input type="radio"/> 1 vez al día<br><input type="radio"/> 2 a 3 veces al día<br><input type="radio"/> 5 a 6 veces al día<br><input type="radio"/> más 6 veces al día |
| chocolate o bombones      | <input checked="" type="radio"/> Nunca o menos 1 vez al mes<br><input type="radio"/> 1 a 3 veces mes<br><input type="radio"/> 1 vez semana<br><input type="radio"/> 2 a 4 veces semana<br><input type="radio"/> 5 a 6 veces semana<br><input type="radio"/> 1 vez al día<br><input type="radio"/> 2 a 3 veces al día<br><input type="radio"/> 5 a 6 veces al día<br><input type="radio"/> más 6 veces al día |
| chocolate polvo o colacao | <input checked="" type="radio"/> Nunca o menos 1 vez al mes<br><input type="radio"/> 1 a 3 veces mes<br><input type="radio"/> 1 vez semana<br><input type="radio"/> 2 a 4 veces semana<br><input type="radio"/> 5 a 6 veces semana<br><input type="radio"/> 1 vez al día<br><input type="radio"/> 2 a 3 veces al día<br><input type="radio"/> 5 a 6 veces al día<br><input type="radio"/> más 6 veces al día |
| vino tinto                | <input checked="" type="radio"/> Nunca o menos 1 vez al mes<br><input type="radio"/> 1 a 3 veces mes<br><input type="radio"/> 1 vez semana<br><input type="radio"/> 2 a 4 veces semana<br><input type="radio"/> 5 a 6 veces semana<br><input type="radio"/> 1 vez al día<br><input type="radio"/> 2 a 3 veces al día<br><input type="radio"/> 5 a 6 veces al día<br><input type="radio"/> más 6 veces al día |
| vino blanco               | <input checked="" type="radio"/> Nunca o menos 1 vez al mes<br><input type="radio"/> 1 a 3 veces mes<br><input type="radio"/> 1 vez semana<br><input type="radio"/> 2 a 4 veces semana<br><input type="radio"/> 5 a 6 veces semana<br><input type="radio"/> 1 vez al día<br><input type="radio"/> 2 a 3 veces al día<br><input type="radio"/> 5 a 6 veces al día<br><input type="radio"/> más 6 veces al día |

|                       |                                                                                                                                                                                                                                                                                                                                                                                                              |
|-----------------------|--------------------------------------------------------------------------------------------------------------------------------------------------------------------------------------------------------------------------------------------------------------------------------------------------------------------------------------------------------------------------------------------------------------|
| vino seco o vermut    | <input checked="" type="radio"/> Nunca o menos 1 vez al mes<br><input type="radio"/> 1 a 3 veces mes<br><input type="radio"/> 1 vez semana<br><input type="radio"/> 2 a 4 veces semana<br><input type="radio"/> 5 a 6 veces semana<br><input type="radio"/> 1 vez al día<br><input type="radio"/> 2 a 3 veces al día<br><input type="radio"/> 5 a 6 veces al día<br><input type="radio"/> más 6 veces al día |
| cerveza               | <input checked="" type="radio"/> Nunca o menos 1 vez al mes<br><input type="radio"/> 1 a 3 veces mes<br><input type="radio"/> 1 vez semana<br><input type="radio"/> 2 a 4 veces semana<br><input type="radio"/> 5 a 6 veces semana<br><input type="radio"/> 1 vez al día<br><input type="radio"/> 2 a 3 veces al día<br><input type="radio"/> 5 a 6 veces al día<br><input type="radio"/> más 6 veces al día |
| cerveza sin alcohol   | <input checked="" type="radio"/> Nunca o menos 1 vez al mes<br><input type="radio"/> 1 a 3 veces mes<br><input type="radio"/> 1 vez semana<br><input type="radio"/> 2 a 4 veces semana<br><input type="radio"/> 5 a 6 veces semana<br><input type="radio"/> 1 vez al día<br><input type="radio"/> 2 a 3 veces al día<br><input type="radio"/> 5 a 6 veces al día<br><input type="radio"/> más 6 veces al día |
| licores               | <input checked="" type="radio"/> Nunca o menos 1 vez al mes<br><input type="radio"/> 1 a 3 veces mes<br><input type="radio"/> 1 vez semana<br><input type="radio"/> 2 a 4 veces semana<br><input type="radio"/> 5 a 6 veces semana<br><input type="radio"/> 1 vez al día<br><input type="radio"/> 2 a 3 veces al día<br><input type="radio"/> 5 a 6 veces al día<br><input type="radio"/> más 6 veces al día |
| ginebra o ron o vodka | <input checked="" type="radio"/> Nunca o menos 1 vez al mes<br><input type="radio"/> 1 a 3 veces mes<br><input type="radio"/> 1 vez semana<br><input type="radio"/> 2 a 4 veces semana<br><input type="radio"/> 5 a 6 veces semana<br><input type="radio"/> 1 vez al día<br><input type="radio"/> 2 a 3 veces al día<br><input type="radio"/> 5 a 6 veces al día<br><input type="radio"/> más 6 veces al día |
| refresco normal       | <input checked="" type="radio"/> Nunca o menos 1 vez al mes<br><input type="radio"/> 1 a 3 veces mes<br><input type="radio"/> 1 vez semana<br><input type="radio"/> 2 a 4 veces semana<br><input type="radio"/> 5 a 6 veces semana<br><input type="radio"/> 1 vez al día<br><input type="radio"/> 2 a 3 veces al día<br><input type="radio"/> 5 a 6 veces al día<br><input type="radio"/> más 6 veces al día |

|                          |                                                                                                                                                                                                                                                                                                                                                                                                              |
|--------------------------|--------------------------------------------------------------------------------------------------------------------------------------------------------------------------------------------------------------------------------------------------------------------------------------------------------------------------------------------------------------------------------------------------------------|
| refresco sin azúcar      | <input checked="" type="radio"/> Nunca o menos 1 vez al mes<br><input type="radio"/> 1 a 3 veces mes<br><input type="radio"/> 1 vez semana<br><input type="radio"/> 2 a 4 veces semana<br><input type="radio"/> 5 a 6 veces semana<br><input type="radio"/> 1 vez al día<br><input type="radio"/> 2 a 3 veces al día<br><input type="radio"/> 5 a 6 veces al día<br><input type="radio"/> más 6 veces al día |
| Agua del grifo           | <input checked="" type="radio"/> Nunca o menos 1 vez al mes<br><input type="radio"/> 1 a 3 veces mes<br><input type="radio"/> 1 vez semana<br><input type="radio"/> 2 a 4 veces semana<br><input type="radio"/> 5 a 6 veces semana<br><input type="radio"/> 1 vez al día<br><input type="radio"/> 2 a 3 veces al día<br><input type="radio"/> 5 a 6 veces al día<br><input type="radio"/> más 6 veces al día |
| agua embotellada sin gas | <input type="radio"/> Nunca o menos 1 vez al mes<br><input type="radio"/> 1 a 3 veces mes<br><input type="radio"/> 1 vez semana<br><input type="radio"/> 2 a 4 veces semana<br><input type="radio"/> 5 a 6 veces semana<br><input type="radio"/> 1 vez al día<br><input type="radio"/> 2 a 3 veces al día<br><input type="radio"/> 5 a 6 veces al día<br><input checked="" type="radio"/> más 6 veces al día |
| agua embotellada con gas | <input checked="" type="radio"/> Nunca o menos 1 vez al mes<br><input type="radio"/> 1 a 3 veces mes<br><input type="radio"/> 1 vez semana<br><input type="radio"/> 2 a 4 veces semana<br><input type="radio"/> 5 a 6 veces semana<br><input type="radio"/> 1 vez al día<br><input type="radio"/> 2 a 3 veces al día<br><input type="radio"/> 5 a 6 veces al día<br><input type="radio"/> más 6 veces al día |
| zumو frutas embasado     | <input checked="" type="radio"/> Nunca o menos 1 vez al mes<br><input type="radio"/> 1 a 3 veces mes<br><input type="radio"/> 1 vez semana<br><input type="radio"/> 2 a 4 veces semana<br><input type="radio"/> 5 a 6 veces semana<br><input type="radio"/> 1 vez al día<br><input type="radio"/> 2 a 3 veces al día<br><input type="radio"/> 5 a 6 veces al día<br><input type="radio"/> más 6 veces al día |
| cafe                     | <input checked="" type="radio"/> Nunca o menos 1 vez al mes<br><input type="radio"/> 1 a 3 veces mes<br><input type="radio"/> 1 vez semana<br><input type="radio"/> 2 a 4 veces semana<br><input type="radio"/> 5 a 6 veces semana<br><input type="radio"/> 1 vez al día<br><input type="radio"/> 2 a 3 veces al día<br><input type="radio"/> 5 a 6 veces al día<br><input type="radio"/> más 6 veces al día |

---

cafe descafeinado

- ☐ Nunca o menos 1 vez al mes  
☐ 1 a 3 veces mes  
☐ 1 vez semana  
☐ 2 a 4 veces semana  
☐ 5 a 6 veces semana  
☒ 1 vez al día  
☐ 2 a 3 veces al día  
☐ 5 a 6 veces al día  
☐ más 6 veces al día

---

te o infusión

- ☐ Nunca o menos 1 vez al mes  
☐ 1 a 3 veces mes  
☒ 1 vez semana  
☐ 2 a 4 veces semana  
☐ 5 a 6 veces semana  
☐ 1 vez al día  
☐ 2 a 3 veces al día  
☐ 5 a 6 veces al día  
☐ más 6 veces al día

---

sopa o puré verduras

- ☐ Nunca o menos 1 vez al mes  
☒ 1 a 3 veces mes  
☐ 1 vez semana  
☐ 2 a 4 veces semana  
☐ 5 a 6 veces semana  
☐ 1 vez al día  
☐ 2 a 3 veces al día  
☐ 5 a 6 veces al día  
☐ más 6 veces al día

---

croquetas pollo jamón

- ☐ Nunca o menos 1 vez al mes  
☐ 1 a 3 veces mes  
☒ 1 vez semana  
☐ 2 a 4 veces semana  
☐ 5 a 6 veces semana  
☐ 1 vez al día  
☐ 2 a 3 veces al día  
☐ 5 a 6 veces al día  
☐ más 6 veces al día

---

croquetas pescado

- ☐ Nunca o menos 1 vez al mes  
☐ 1 a 3 veces mes  
☒ 1 vez semana  
☐ 2 a 4 veces semana  
☐ 5 a 6 veces semana  
☐ 1 vez al día  
☐ 2 a 3 veces al día  
☐ 5 a 6 veces al día  
☐ más 6 veces al día

---

mayonesa

- ☐ Nunca o menos 1 vez al mes  
☐ 1 a 3 veces mes  
☒ 1 vez semana  
☐ 2 a 4 veces semana  
☐ 5 a 6 veces semana  
☐ 1 vez al día  
☐ 2 a 3 veces al día  
☐ 5 a 6 veces al día  
☐ más 6 veces al día



|                  |                                                                                                                                                                                                                                                                                                                                                                                                              |
|------------------|--------------------------------------------------------------------------------------------------------------------------------------------------------------------------------------------------------------------------------------------------------------------------------------------------------------------------------------------------------------------------------------------------------------|
| salsa tomate     | <input type="radio"/> Nunca o menos 1 vez al mes<br><input type="radio"/> 1 a 3 veces mes<br><input checked="" type="radio"/> 1 vez semana<br><input type="radio"/> 2 a 4 veces semana<br><input type="radio"/> 5 a 6 veces semana<br><input type="radio"/> 1 vez al día<br><input type="radio"/> 2 a 3 veces al día<br><input type="radio"/> 5 a 6 veces al día<br><input type="radio"/> más 6 veces al día |
| ketchup          | <input checked="" type="radio"/> Nunca o menos 1 vez al mes<br><input type="radio"/> 1 a 3 veces mes<br><input type="radio"/> 1 vez semana<br><input type="radio"/> 2 a 4 veces semana<br><input type="radio"/> 5 a 6 veces semana<br><input type="radio"/> 1 vez al día<br><input type="radio"/> 2 a 3 veces al día<br><input type="radio"/> 5 a 6 veces al día<br><input type="radio"/> más 6 veces al día |
| sal              | <input type="radio"/> Nunca o menos 1 vez al mes<br><input type="radio"/> 1 a 3 veces mes<br><input type="radio"/> 1 vez semana<br><input type="radio"/> 2 a 4 veces semana<br><input type="radio"/> 5 a 6 veces semana<br><input checked="" type="radio"/> 1 vez al día<br><input type="radio"/> 2 a 3 veces al día<br><input type="radio"/> 5 a 6 veces al día<br><input type="radio"/> más 6 veces al día |
| ajo              | <input type="radio"/> Nunca o menos 1 vez al mes<br><input type="radio"/> 1 a 3 veces mes<br><input type="radio"/> 1 vez semana<br><input checked="" type="radio"/> 2 a 4 veces semana<br><input type="radio"/> 5 a 6 veces semana<br><input type="radio"/> 1 vez al día<br><input type="radio"/> 2 a 3 veces al día<br><input type="radio"/> 5 a 6 veces al día<br><input type="radio"/> más 6 veces al día |
| mermelada o miel | <input checked="" type="radio"/> Nunca o menos 1 vez al mes<br><input type="radio"/> 1 a 3 veces mes<br><input type="radio"/> 1 vez semana<br><input type="radio"/> 2 a 4 veces semana<br><input type="radio"/> 5 a 6 veces semana<br><input type="radio"/> 1 vez al día<br><input type="radio"/> 2 a 3 veces al día<br><input type="radio"/> 5 a 6 veces al día<br><input type="radio"/> más 6 veces al día |
| azúcar           | <input checked="" type="radio"/> Nunca o menos 1 vez al mes<br><input type="radio"/> 1 a 3 veces mes<br><input type="radio"/> 1 vez semana<br><input type="radio"/> 2 a 4 veces semana<br><input type="radio"/> 5 a 6 veces semana<br><input type="radio"/> 1 vez al día<br><input type="radio"/> 2 a 3 veces al día<br><input type="radio"/> 5 a 6 veces al día<br><input type="radio"/> más 6 veces al día |

|                                       |                                                                                                                                                                                                                                                                                                                                                                                                                                                                                                                               |
|---------------------------------------|-------------------------------------------------------------------------------------------------------------------------------------------------------------------------------------------------------------------------------------------------------------------------------------------------------------------------------------------------------------------------------------------------------------------------------------------------------------------------------------------------------------------------------|
| Otro alimento                         |                                                                                                                                                                                                                                                                                                                                                                                                                                                                                                                               |
| suplementos vitamínicos               | <input checked="" type="radio"/> si<br><input type="radio"/> no                                                                                                                                                                                                                                                                                                                                                                                                                                                               |
| suplementos vitamínicos               | [*DATA REMOVED*]                                                                                                                                                                                                                                                                                                                                                                                                                                                                                                              |
| dieta previa                          | <input checked="" type="radio"/> si<br><input type="radio"/> no                                                                                                                                                                                                                                                                                                                                                                                                                                                               |
| motivo dieta                          | <input type="radio"/> no dieta<br><input type="radio"/> control peso<br><input type="radio"/> control colesterol<br><input checked="" type="radio"/> control diabetes<br><input type="radio"/> problemas estómago<br><input type="radio"/> problemas vesícula o hepáticos<br><input type="radio"/> HTA o cardiopatía<br><input type="radio"/> problemas renales<br><input type="radio"/> alergia alimentaria<br><input type="radio"/> ácido úrico elevado<br><input type="radio"/> vegetariana<br><input type="radio"/> otros |
| cambio alimentos año previo gestación | <input checked="" type="radio"/> si<br><input type="radio"/> no                                                                                                                                                                                                                                                                                                                                                                                                                                                               |
| cambio lácteos                        | <input type="radio"/> eliminado<br><input type="radio"/> disminuido<br><input checked="" type="radio"/> igual<br><input type="radio"/> aumentado<br><input type="radio"/> no sabe                                                                                                                                                                                                                                                                                                                                             |
| cambio huevos                         | <input type="radio"/> eliminado<br><input type="radio"/> disminuido<br><input checked="" type="radio"/> igual<br><input type="radio"/> aumentado<br><input type="radio"/> no sabe                                                                                                                                                                                                                                                                                                                                             |
| cambio carne                          | <input type="radio"/> eliminado<br><input type="radio"/> disminuido<br><input checked="" type="radio"/> igual<br><input type="radio"/> aumentado<br><input type="radio"/> no sabe                                                                                                                                                                                                                                                                                                                                             |
| cambio pescado                        | <input type="radio"/> eliminado<br><input type="radio"/> disminuido<br><input checked="" type="radio"/> igual<br><input type="radio"/> aumentado<br><input type="radio"/> no sabe                                                                                                                                                                                                                                                                                                                                             |
| cambio verduras                       | <input type="radio"/> eliminado<br><input type="radio"/> disminuido<br><input checked="" type="radio"/> igual<br><input type="radio"/> aumentado<br><input type="radio"/> no sabe                                                                                                                                                                                                                                                                                                                                             |

|                            |                                                                                                                                                                                                                        |
|----------------------------|------------------------------------------------------------------------------------------------------------------------------------------------------------------------------------------------------------------------|
| cambio legumbres           | <input type="radio"/> eliminado<br><input type="radio"/> disminuido<br><input checked="" type="radio"/> igual<br><input type="radio"/> aumentado<br><input type="radio"/> no sabe                                      |
| cambio fruta               | <input type="radio"/> eliminado<br><input type="radio"/> disminuido<br><input checked="" type="radio"/> igual<br><input type="radio"/> aumentado<br><input type="radio"/> no sabe                                      |
| cambio pan                 | <input type="radio"/> eliminado<br><input type="radio"/> disminuido<br><input checked="" type="radio"/> igual<br><input type="radio"/> aumentado<br><input type="radio"/> no sabe                                      |
| cambio aceite oliva        | <input type="radio"/> eliminado<br><input type="radio"/> disminuido<br><input checked="" type="radio"/> igual<br><input type="radio"/> aumentado<br><input type="radio"/> no sabe                                      |
| cambio mante o margarina   | <input checked="" type="radio"/> eliminado<br><input type="radio"/> disminuido<br><input type="radio"/> igual<br><input type="radio"/> aumentado<br><input type="radio"/> no sabe                                      |
| cambio azúcar y dulces     | <input checked="" type="radio"/> eliminado<br><input type="radio"/> disminuido<br><input type="radio"/> igual<br><input type="radio"/> aumentado<br><input type="radio"/> no sabe                                      |
| cambio bebidas alcohólicas | <input checked="" type="radio"/> eliminado<br><input type="radio"/> disminuido<br><input type="radio"/> igual<br><input type="radio"/> aumentado<br><input type="radio"/> no sabe                                      |
| frecuencia comidas fritas  | <input type="radio"/> a diario<br><input type="radio"/> 5 a 6 veces semana<br><input type="radio"/> 2 a 4 veces semana<br><input checked="" type="radio"/> 1 vez semana<br><input type="radio"/> menos de 1 vez semana |
| carne                      | <input type="radio"/> no como<br><input type="radio"/> cruda<br><input type="radio"/> poco hecha<br><input type="radio"/> hecha<br><input checked="" type="radio"/> muy hecha                                          |
| grasa visible carne        | <input checked="" type="radio"/> quita toda<br><input type="radio"/> quita mayoría<br><input type="radio"/> quita un poco<br><input type="radio"/> no quita nada                                                       |

|                                |                                                                                                                                                                                                                                                          |
|--------------------------------|----------------------------------------------------------------------------------------------------------------------------------------------------------------------------------------------------------------------------------------------------------|
| cocina carne                   | <input checked="" type="radio"/> a la plancha<br><input type="radio"/> a la parrilla<br><input type="radio"/> asada<br><input type="radio"/> frita<br><input type="radio"/> guisada                                                                      |
| tostado quemado carne          | <input type="radio"/> nunca<br><input checked="" type="radio"/> 1 vez mes<br><input type="radio"/> 2 a 3 veces mes<br><input type="radio"/> 1 vez semana<br><input type="radio"/> 2 a 3 semanas                                                          |
| tostado quemado pescado        | <input checked="" type="radio"/> nunca<br><input type="radio"/> 1 vez mes<br><input type="radio"/> 2 a 3 veces mes<br><input type="radio"/> 1 vez semana<br><input type="radio"/> 2 a 3 semanas                                                          |
| socarrat paella                | <input checked="" type="radio"/> nunca<br><input type="radio"/> 1 vez mes<br><input type="radio"/> 2 a 3 veces mes<br><input type="radio"/> 1 vez semana<br><input type="radio"/> 2 a 3 semanas                                                          |
| grasa o aceite cocinar         | <input type="radio"/> mantequilla<br><input type="radio"/> margarina<br><input type="radio"/> aceite oliva<br><input checked="" type="radio"/> aceite oliva virgen extra<br><input type="radio"/> aceite vegetal<br><input type="radio"/> mezcla aceites |
| grasa aceite aliñar            | <input type="radio"/> mantequilla<br><input type="radio"/> margarina<br><input type="radio"/> aceite oliva<br><input checked="" type="radio"/> aceite oliva virgen extra<br><input type="radio"/> aceite vegetal<br><input type="radio"/> mezcla aceites |
| grasa aceite freir             | <input type="radio"/> mantequilla<br><input type="radio"/> margarina<br><input type="radio"/> aceite oliva<br><input type="radio"/> aceite oliva virgen extra<br><input type="radio"/> aceite vegetal<br><input type="radio"/> mezcla aceites            |
| Ejercicio cuestionario         | <input checked="" type="radio"/> si<br><input type="radio"/> no                                                                                                                                                                                          |
| horas de sueño incluido siesta | [*DATA REMOVED*]                                                                                                                                                                                                                                         |
| minutos siesta                 | [*DATA REMOVED*]                                                                                                                                                                                                                                         |
| horas televisión semana        | [*DATA REMOVED*]                                                                                                                                                                                                                                         |

|                                        |                                                                                                                                                                                                                                                                                                                                                                           |
|----------------------------------------|---------------------------------------------------------------------------------------------------------------------------------------------------------------------------------------------------------------------------------------------------------------------------------------------------------------------------------------------------------------------------|
| actividad trabajo                      | <input type="radio"/> casi siempre sentado<br><input type="radio"/> sentado 50 por cien<br><input type="radio"/> casi siempre de pie, quieto<br><input checked="" type="radio"/> casi siempre levantado caminando y llevando pocas cosas<br><input type="radio"/> casi siempre levantado, caminando y llevado muchas cosas<br><input type="radio"/> trabajo manual pesado |
| tiempo caminar o bici al día           | <input type="radio"/> casi nunca<br><input checked="" type="radio"/> menos 20min día<br><input type="radio"/> 20 a 40 min día<br><input type="radio"/> 40 a 60 min día<br><input type="radio"/> 1h o 1h y media día<br><input type="radio"/> más de 1h y media al día                                                                                                     |
| tiempo tareas casa al día              | <input type="radio"/> menos de 1h día<br><input type="radio"/> 1 a 2h día<br><input checked="" type="radio"/> 3 a 4h día<br><input type="radio"/> 5 a 6h día<br><input type="radio"/> 7 a 8h día<br><input type="radio"/> más de 8h día                                                                                                                                   |
| tiempo libre televisión ordenador leer | <input type="radio"/> menos 1h día<br><input type="radio"/> 1h día<br><input type="radio"/> 2h día<br><input type="radio"/> 3h día<br><input type="radio"/> 4h día<br><input type="radio"/> 5 a 6h día<br><input type="radio"/> mas 6h día                                                                                                                                |
| tiempo libre ejercicio o deporte       | <input type="radio"/> menos 1h semana<br><input type="radio"/> 1h semana<br><input checked="" type="radio"/> 2h semana<br><input type="radio"/> 3h semana<br><input type="radio"/> 4 a 5h semana<br><input type="radio"/> mas 5h semana                                                                                                                                   |
| como se considera                      | <input type="radio"/> sedentaria<br><input checked="" type="radio"/> poco activa<br><input type="radio"/> moderadamente activa<br><input type="radio"/> bastante activa<br><input type="radio"/> muy activa<br><input type="radio"/> no sabe                                                                                                                              |
| FUR                                    | [*DATA REMOVED*]                                                                                                                                                                                                                                                                                                                                                          |
| Semanas gestación 2T                   | [*DATA REMOVED*]                                                                                                                                                                                                                                                                                                                                                          |
| Días gestación 2T                      | [*DATA REMOVED*]                                                                                                                                                                                                                                                                                                                                                          |
| DBP 2T                                 | [*DATA REMOVED*]                                                                                                                                                                                                                                                                                                                                                          |
| CC 2T                                  | [*DATA REMOVED*]                                                                                                                                                                                                                                                                                                                                                          |
| AC 2T                                  | [*DATA REMOVED*]                                                                                                                                                                                                                                                                                                                                                          |

|                                                   |                                                                                                                                                                                                 |
|---------------------------------------------------|-------------------------------------------------------------------------------------------------------------------------------------------------------------------------------------------------|
| LF 2T                                             | [*DATA REMOVED*]                                                                                                                                                                                |
| PFE 2T (Hadlock)                                  | [*DATA REMOVED*]                                                                                                                                                                                |
| Semanas gestación 3T                              | [*DATA REMOVED*]                                                                                                                                                                                |
| días 3T                                           | [*DATA REMOVED*]                                                                                                                                                                                |
| DBP 3T                                            | [*DATA REMOVED*]                                                                                                                                                                                |
| CC 3T                                             | [*DATA REMOVED*]                                                                                                                                                                                |
| AC 3T                                             | [*DATA REMOVED*]                                                                                                                                                                                |
| LF 3T                                             | [*DATA REMOVED*]                                                                                                                                                                                |
| PFE 3T (Hadlock)                                  | [*DATA REMOVED*]                                                                                                                                                                                |
| Semanas de gestación final                        | [*DATA REMOVED*]                                                                                                                                                                                |
| días gestación final                              | [*DATA REMOVED*]                                                                                                                                                                                |
| Localización placenta                             | <input type="radio"/> anterior<br><input type="radio"/> lateral derecha<br><input type="radio"/> lateral izquierda<br><input type="radio"/> posterior<br><input checked="" type="radio"/> fondo |
| Presentación longitudinal cefálica                | <input type="radio"/> no<br><input checked="" type="radio"/> si                                                                                                                                 |
| Dorso                                             | <input type="radio"/> izquierda anterior<br><input type="radio"/> izquierda posterior<br><input checked="" type="radio"/> derecha anterior<br><input type="radio"/> derecha posterior           |
| diámetro biparietal                               | [*DATA REMOVED*]                                                                                                                                                                                |
| Circunferencia craneal                            | [*DATA REMOVED*]                                                                                                                                                                                |
| Circunferencia abdominal                          | [*DATA REMOVED*]                                                                                                                                                                                |
| Longitud de femur                                 | [*DATA REMOVED*]                                                                                                                                                                                |
| tejido celular subcutáneo a nivel del muslo en mm | [*DATA REMOVED*]                                                                                                                                                                                |
| tejido celular subcutáneo en abdomen en mm        | [*DATA REMOVED*]                                                                                                                                                                                |
| Volumen del muslo en cm3                          | [*DATA REMOVED*]                                                                                                                                                                                |
| Peso fetal estimado según fórmula de Hadlock      | [*DATA REMOVED*]                                                                                                                                                                                |

|                                               |                                                                                                                                                          |
|-----------------------------------------------|----------------------------------------------------------------------------------------------------------------------------------------------------------|
| Percentil                                     | [*DATA REMOVED*]                                                                                                                                         |
| Peso fetal estimado según fórmula de Scioscia | <hr/>                                                                                                                                                    |
| Peso fetal estimado según fórmula de LEE      | <hr/>                                                                                                                                                    |
| Tipo de parto                                 | <input checked="" type="radio"/> eutocico<br><input type="radio"/> instrumentado/ventosa<br><input type="radio"/> cesarea                                |
| fecha de nacimiento                           | [*DATA REMOVED*]                                                                                                                                         |
| Días entre exploración y nacimiento           | [*DATA REMOVED*]                                                                                                                                         |
| Peso RN en g                                  | [*DATA REMOVED*]                                                                                                                                         |
| sexo                                          | <input checked="" type="radio"/> mujer<br><input type="radio"/> hombre                                                                                   |
| Apgar 1 minuto                                | [*DATA REMOVED*]                                                                                                                                         |
| Apgar 5 minutos                               | [*DATA REMOVED*]                                                                                                                                         |
| Apgar 10 minutos                              | <hr/>                                                                                                                                                    |
| antecedente Covid durante gestación           | <input type="radio"/> Yes<br><input checked="" type="radio"/> No                                                                                         |
| Nivel de estudios                             | <input type="radio"/> ninguno<br><input type="radio"/> primarios<br><input checked="" type="radio"/> secundarios<br><input type="radio"/> universitarios |

# Base\_datos\_estimacion\_peso\_fetal

|                                       |                                                                                                                                                                                                                                                                                      |
|---------------------------------------|--------------------------------------------------------------------------------------------------------------------------------------------------------------------------------------------------------------------------------------------------------------------------------------|
| Número de identificación participante | 60                                                                                                                                                                                                                                                                                   |
| CODIGO PARTICIPANTE                   |                                                                                                                                                                                                                                                                                      |
| Edad                                  | [*DATA REMOVED*]                                                                                                                                                                                                                                                                     |
| Gestaciones                           | <input type="radio"/> 1<br><input type="radio"/> 2<br><input checked="" type="radio"/> 3<br><input type="radio"/> mas de 3                                                                                                                                                           |
| partos                                | <input type="radio"/> 0<br><input type="radio"/> 1<br><input checked="" type="radio"/> 2<br><input type="radio"/> 3<br><input type="radio"/> mas de 3                                                                                                                                |
| cesáreas                              | <input checked="" type="radio"/> 0<br><input type="radio"/> 1<br><input type="radio"/> 2<br><input type="radio"/> 3<br><input type="radio"/> mas de 3                                                                                                                                |
| Abortos                               | <input checked="" type="radio"/> 0<br><input type="radio"/> 1<br><input type="radio"/> 2<br><input type="radio"/> 3<br><input type="radio"/> mas de 3                                                                                                                                |
| Tipo de gestacion                     | <input checked="" type="radio"/> espontanea<br><input type="radio"/> IAC inseminación artificial conyuge<br><input type="radio"/> IAD inseminación artificial donante<br><input type="radio"/> FIV Fecundación in Vitro<br><input type="radio"/> Ovodon FIV con donación de ovocitos |
| peso previo a embarazo                | [*DATA REMOVED*]                                                                                                                                                                                                                                                                     |
| Ganancia ponderal embarazo            | [*DATA REMOVED*]                                                                                                                                                                                                                                                                     |
| Talla madre                           | [*DATA REMOVED*]                                                                                                                                                                                                                                                                     |
| IMC previo embarazo                   | 18.645344042454013                                                                                                                                                                                                                                                                   |
| Patología obstétrica                  | <input checked="" type="radio"/> no<br><input type="radio"/> si                                                                                                                                                                                                                      |
| Diabetes pregestacional               | <input checked="" type="radio"/> no<br><input type="radio"/> si                                                                                                                                                                                                                      |
| Diabetes gestacional                  | <input checked="" type="radio"/> no<br><input type="radio"/> si                                                                                                                                                                                                                      |



|                                            |                                                                                                                                                                                      |
|--------------------------------------------|--------------------------------------------------------------------------------------------------------------------------------------------------------------------------------------|
| Diabetes gestacional con insulina          | <input checked="" type="radio"/> no<br><input type="radio"/> si                                                                                                                      |
| Diabetes gestacional con dieta y ejercicio | <input checked="" type="radio"/> no<br><input type="radio"/> si                                                                                                                      |
| Percentil fetos previos                    | <input type="radio"/> Nada<br><input checked="" type="radio"/> percentil menor de 10<br><input type="radio"/> percentil entre 10 y 90<br><input type="radio"/> percentil mayor de 90 |
| Exfumadora                                 | <input checked="" type="radio"/> Nada<br><input type="radio"/> menos de 5 años<br><input type="radio"/> 5 a 10 años<br><input type="radio"/> mayor o igual a 10 años                 |
| Hábito tabáquico                           | <input checked="" type="radio"/> no<br><input type="radio"/> si                                                                                                                      |
| fumadora                                   | [*DATA REMOVED*]                                                                                                                                                                     |
| Consumo otros tóxicos                      | <input checked="" type="radio"/> no<br><input type="radio"/> si                                                                                                                      |
| Hb 1T                                      | [*DATA REMOVED*]                                                                                                                                                                     |
| Htc 1T                                     | [*DATA REMOVED*]                                                                                                                                                                     |
| Hb 2T                                      | [*DATA REMOVED*]                                                                                                                                                                     |
| HTC 2T                                     | [*DATA REMOVED*]                                                                                                                                                                     |
| Hb 3T                                      | [*DATA REMOVED*]                                                                                                                                                                     |
| HTC 3T                                     | [*DATA REMOVED*]                                                                                                                                                                     |
| Suplemento FE oral                         | <input type="radio"/> si<br><input checked="" type="radio"/> no                                                                                                                      |
| Suplemento fe iv                           | <input type="radio"/> si<br><input checked="" type="radio"/> no                                                                                                                      |
| Transfusión                                | <input checked="" type="radio"/> no<br><input type="radio"/> si                                                                                                                      |
| Solicitada Vit D                           | <input checked="" type="radio"/> no<br><input type="radio"/> si                                                                                                                      |
| Deficit vit D                              | <input type="radio"/> no<br><input type="radio"/> si                                                                                                                                 |
| Suplemento vit D                           | <input type="radio"/> si<br><input type="radio"/> no                                                                                                                                 |

|                       |                                                                                                                                                                                                                                                                                                                                                                                                              |
|-----------------------|--------------------------------------------------------------------------------------------------------------------------------------------------------------------------------------------------------------------------------------------------------------------------------------------------------------------------------------------------------------------------------------------------------------|
| Dieta, cuestionario   | <input checked="" type="radio"/> sí<br><input type="radio"/> no                                                                                                                                                                                                                                                                                                                                              |
| Leche entera          | <input checked="" type="radio"/> Nunca o menos 1 vez al mes<br><input type="radio"/> 1 a 3 veces mes<br><input type="radio"/> 1 vez semana<br><input type="radio"/> 2 a 4 veces semana<br><input type="radio"/> 5 a 6 veces semana<br><input type="radio"/> 1 vez al día<br><input type="radio"/> 2 a 3 veces al día<br><input type="radio"/> 5 a 6 veces al día<br><input type="radio"/> más 6 veces al día |
| Leche semidesnatada   | <input checked="" type="radio"/> Nunca o menos 1 vez al mes<br><input type="radio"/> 1 a 3 veces mes<br><input type="radio"/> 1 vez semana<br><input type="radio"/> 2 a 4 veces semana<br><input type="radio"/> 5 a 6 veces semana<br><input type="radio"/> 1 vez al día<br><input type="radio"/> 2 a 3 veces al día<br><input type="radio"/> 5 a 6 veces al día<br><input type="radio"/> mas 6 veces al día |
| Leche desnatada       | <input checked="" type="radio"/> Nunca o menos 1 vez al mes<br><input type="radio"/> 1 a 3 veces mes<br><input type="radio"/> 1 vez semana<br><input type="radio"/> 2 a 4 veces semana<br><input type="radio"/> 5 a 6 veces semana<br><input type="radio"/> 1 vez al día<br><input type="radio"/> 2 a 3 veces al día<br><input type="radio"/> 5 a 6 veces al día<br><input type="radio"/> más 6 veces al día |
| Leche condensada      | <input checked="" type="radio"/> Nunca o menos 1 vez al mes<br><input type="radio"/> 1 a 3 veces mes<br><input type="radio"/> 1 vez semana<br><input type="radio"/> 2 a 4 veces semana<br><input type="radio"/> 5 a 6 veces semana<br><input type="radio"/> 1 vez al día<br><input type="radio"/> 2 a 3 veces al día<br><input type="radio"/> 5 a 6 veces al día<br><input type="radio"/> más 6 veces al día |
| nata o crema de leche | <input type="radio"/> Nunca o menos 1 vez al mes<br><input checked="" type="radio"/> 1 a 3 veces mes<br><input type="radio"/> 1 vez semana<br><input type="radio"/> 2 a 4 veces semana<br><input type="radio"/> 5 a 6 veces semana<br><input type="radio"/> 1 vez al día<br><input type="radio"/> 2 a 3 veces al día<br><input type="radio"/> 5 a 6 veces al día<br><input type="radio"/> más 6 veces al día |

|                                             |                                                                                                                                                                                                                                                                                                                                                                                                              |
|---------------------------------------------|--------------------------------------------------------------------------------------------------------------------------------------------------------------------------------------------------------------------------------------------------------------------------------------------------------------------------------------------------------------------------------------------------------------|
| Yogurt Entero                               | <input type="radio"/> Nunca o menos 1 vez al mes<br><input type="radio"/> 1 a 3 veces mes<br><input checked="" type="radio"/> 1 vez semana<br><input type="radio"/> 2 a 4 veces semana<br><input type="radio"/> 5 a 6 veces semana<br><input type="radio"/> 1 vez al día<br><input type="radio"/> 2 a 3 veces al día<br><input type="radio"/> 5 a 6 veces al día<br><input type="radio"/> más 6 veces al día |
| Yogurt desnatado                            | <input checked="" type="radio"/> Nunca o menos 1 vez al mes<br><input type="radio"/> 1 a 3 veces mes<br><input type="radio"/> 1 vez semana<br><input type="radio"/> 2 a 4 veces semana<br><input type="radio"/> 5 a 6 veces semana<br><input type="radio"/> 1 vez al día<br><input type="radio"/> 2 a 3 veces al día<br><input type="radio"/> 5 a 6 veces al día<br><input type="radio"/> más 6 veces al día |
| 100g requesón o queso blando o queso fresco | <input type="radio"/> Nunca o menos 1 vez al mes<br><input type="radio"/> 1 a 3 veces mes<br><input type="radio"/> 1 vez semana<br><input checked="" type="radio"/> 2 a 4 veces semana<br><input type="radio"/> 5 a 6 veces semana<br><input type="radio"/> 1 vez al día<br><input type="radio"/> 2 a 3 veces al día<br><input type="radio"/> 5 a 6 veces al día<br><input type="radio"/> más 6 veces al día |
| queso curado o semicurado o cremoso         | <input type="radio"/> Nunca o menos 1 vez al mes<br><input type="radio"/> 1 a 3 veces mes<br><input checked="" type="radio"/> 1 vez semana<br><input type="radio"/> 2 a 4 veces semana<br><input type="radio"/> 5 a 6 veces semana<br><input type="radio"/> 1 vez al día<br><input type="radio"/> 2 a 3 veces al día<br><input type="radio"/> 5 a 6 veces al día<br><input type="radio"/> más 6 veces al día |
| natillas flan pudding                       | <input checked="" type="radio"/> Nunca o menos 1 vez al mes<br><input type="radio"/> 1 a 3 veces mes<br><input type="radio"/> 1 vez semana<br><input type="radio"/> 2 a 4 veces semana<br><input type="radio"/> 5 a 6 veces semana<br><input type="radio"/> 1 vez al día<br><input type="radio"/> 2 a 3 veces al día<br><input type="radio"/> 5 a 6 veces al día<br><input type="radio"/> más 6 veces al día |
| Helado                                      | <input type="radio"/> Nunca o menos 1 vez al mes<br><input type="radio"/> 1 a 3 veces mes<br><input checked="" type="radio"/> 1 vez semana<br><input type="radio"/> 2 a 4 veces semana<br><input type="radio"/> 5 a 6 veces semana<br><input type="radio"/> 1 vez al día<br><input type="radio"/> 2 a 3 veces al día<br><input type="radio"/> 5 a 6 veces al día<br><input type="radio"/> más 6 veces al día |

|                                      |                                                                                                                                                                                                                                                                                                                                                                                                              |
|--------------------------------------|--------------------------------------------------------------------------------------------------------------------------------------------------------------------------------------------------------------------------------------------------------------------------------------------------------------------------------------------------------------------------------------------------------------|
| huevo                                | <input type="radio"/> Nunca o menos 1 vez al mes<br><input type="radio"/> 1 a 3 veces mes<br><input type="radio"/> 1 vez semana<br><input checked="" type="radio"/> 2 a 4 veces semana<br><input type="radio"/> 5 a 6 veces semana<br><input type="radio"/> 1 vez al día<br><input type="radio"/> 2 a 3 veces al día<br><input type="radio"/> 5 a 6 veces al día<br><input type="radio"/> más 6 veces al día |
| Pollo con piel                       | <input checked="" type="radio"/> Nunca o menos 1 vez al mes<br><input type="radio"/> 1 a 3 veces mes<br><input type="radio"/> 1 vez semana<br><input type="radio"/> 2 a 4 veces semana<br><input type="radio"/> 5 a 6 veces semana<br><input type="radio"/> 1 vez al día<br><input type="radio"/> 2 a 3 veces al día<br><input type="radio"/> 5 a 6 veces al día<br><input type="radio"/> más 6 veces al día |
| pollo sin piel                       | <input type="radio"/> Nunca o menos 1 vez al mes<br><input type="radio"/> 1 a 3 veces mes<br><input checked="" type="radio"/> 1 vez semana<br><input type="radio"/> 2 a 4 veces semana<br><input type="radio"/> 5 a 6 veces semana<br><input type="radio"/> 1 vez al día<br><input type="radio"/> 2 a 3 veces al día<br><input type="radio"/> 5 a 6 veces al día<br><input type="radio"/> más 6 veces al día |
| Ternera o cerdo o cordero            | <input type="radio"/> Nunca o menos 1 vez al mes<br><input checked="" type="radio"/> 1 a 3 veces mes<br><input type="radio"/> 1 vez semana<br><input type="radio"/> 2 a 4 veces semana<br><input type="radio"/> 5 a 6 veces semana<br><input type="radio"/> 1 vez al día<br><input type="radio"/> 2 a 3 veces al día<br><input type="radio"/> 5 a 6 veces al día<br><input type="radio"/> más 6 veces al día |
| carne caza: Conejo o codorniz o pato | <input checked="" type="radio"/> Nunca o menos 1 vez al mes<br><input type="radio"/> 1 a 3 veces mes<br><input type="radio"/> 1 vez semana<br><input type="radio"/> 2 a 4 veces semana<br><input type="radio"/> 5 a 6 veces semana<br><input type="radio"/> 1 vez al día<br><input type="radio"/> 2 a 3 veces al día<br><input type="radio"/> 5 a 6 veces al día<br><input type="radio"/> más 6 veces al día |
| Hígado de ternera o cerdo o pollo    | <input type="radio"/> Nunca o menos 1 vez al mes<br><input type="radio"/> 1 a 3 veces mes<br><input checked="" type="radio"/> 1 vez semana<br><input type="radio"/> 2 a 4 veces semana<br><input type="radio"/> 5 a 6 veces semana<br><input type="radio"/> 1 vez al día<br><input type="radio"/> 2 a 3 veces al día<br><input type="radio"/> 5 a 6 veces al día<br><input type="radio"/> más 6 veces al día |

|                     |                                                                                                                                                                                                                                                                                                                                                                                                              |
|---------------------|--------------------------------------------------------------------------------------------------------------------------------------------------------------------------------------------------------------------------------------------------------------------------------------------------------------------------------------------------------------------------------------------------------------|
| Vísceras            | <input checked="" type="radio"/> Nunca o menos 1 vez al mes<br><input type="radio"/> 1 a 3 veces mes<br><input type="radio"/> 1 vez semana<br><input type="radio"/> 2 a 4 veces semana<br><input type="radio"/> 5 a 6 veces semana<br><input type="radio"/> 1 vez al día<br><input type="radio"/> 2 a 3 veces al día<br><input type="radio"/> 5 a 6 veces al día<br><input type="radio"/> más 6 veces al día |
| Embutido            | <input type="radio"/> Nunca o menos 1 vez al mes<br><input type="radio"/> 1 a 3 veces mes<br><input checked="" type="radio"/> 1 vez semana<br><input type="radio"/> 2 a 4 veces semana<br><input type="radio"/> 5 a 6 veces semana<br><input type="radio"/> 1 vez al día<br><input type="radio"/> 2 a 3 veces al día<br><input type="radio"/> 5 a 6 veces al día<br><input type="radio"/> más 6 veces al día |
| Salchicha o similar | <input type="radio"/> Nunca o menos 1 vez al mes<br><input type="radio"/> 1 a 3 veces mes<br><input checked="" type="radio"/> 1 vez semana<br><input type="radio"/> 2 a 4 veces semana<br><input type="radio"/> 5 a 6 veces semana<br><input type="radio"/> 1 vez al día<br><input type="radio"/> 2 a 3 veces al día<br><input type="radio"/> 5 a 6 veces al día<br><input type="radio"/> más 6 veces al día |
| Pate o foiegras     | <input checked="" type="radio"/> Nunca o menos 1 vez al mes<br><input type="radio"/> 1 a 3 veces mes<br><input type="radio"/> 1 vez semana<br><input type="radio"/> 2 a 4 veces semana<br><input type="radio"/> 5 a 6 veces semana<br><input type="radio"/> 1 vez al día<br><input type="radio"/> 2 a 3 veces al día<br><input type="radio"/> 5 a 6 veces al día<br><input type="radio"/> más 6 veces al día |
| Hamburguesa         | <input type="radio"/> Nunca o menos 1 vez al mes<br><input type="radio"/> 1 a 3 veces mes<br><input checked="" type="radio"/> 1 vez semana<br><input type="radio"/> 2 a 4 veces semana<br><input type="radio"/> 5 a 6 veces semana<br><input type="radio"/> 1 vez al día<br><input type="radio"/> 2 a 3 veces al día<br><input type="radio"/> 5 a 6 veces al día<br><input type="radio"/> más 6 veces al día |
| tocino o bacon      | <input checked="" type="radio"/> Nunca o menos 1 vez al mes<br><input type="radio"/> 1 a 3 veces mes<br><input type="radio"/> 1 vez semana<br><input type="radio"/> 2 a 4 veces semana<br><input type="radio"/> 5 a 6 veces semana<br><input type="radio"/> 1 vez al día<br><input type="radio"/> 2 a 3 veces al día<br><input type="radio"/> 5 a 6 veces al día<br><input type="radio"/> más 6 veces al día |

---

Pescado frito

- ☒ Nunca o menos 1 vez al mes  
☐ 1 a 3 veces mes  
☐ 1 vez semana  
☐ 2 a 4 veces semana  
☐ 5 a 6 veces semana  
☐ 1 vez al día  
☐ 2 a 3 veces al día  
☐ 5 a 6 veces al día  
☐ más 6 veces al día

---

pescado hervido blanco

- ☐ Nunca o menos 1 vez al mes  
☒ 1 a 3 veces mes  
☐ 1 vez semana  
☐ 2 a 4 veces semana  
☐ 5 a 6 veces semana  
☐ 1 vez al día  
☐ 2 a 3 veces al día  
☐ 5 a 6 veces al día  
☐ más 6 veces al día

---

pescado hervido azul

- ☐ Nunca o menos 1 vez al mes  
☒ 1 a 3 veces mes  
☐ 1 vez semana  
☐ 2 a 4 veces semana  
☐ 5 a 6 veces semana  
☐ 1 vez al día  
☐ 2 a 3 veces al día  
☐ 5 a 6 veces al día  
☐ más 6 veces al día

---

otros pescado azul

- ☒ Nunca o menos 1 vez al mes  
☐ 1 a 3 veces mes  
☐ 1 vez semana  
☐ 2 a 4 veces semana  
☐ 5 a 6 veces semana  
☐ 1 vez al día  
☐ 2 a 3 veces al día  
☐ 5 a 6 veces al día  
☐ más 6 veces al día

---

atun conserva

- ☐ Nunca o menos 1 vez al mes  
☐ 1 a 3 veces mes  
☒ 1 vez semana  
☐ 2 a 4 veces semana  
☐ 5 a 6 veces semana  
☐ 1 vez al día  
☐ 2 a 3 veces al día  
☐ 5 a 6 veces al día  
☐ más 6 veces al día

---

sardina conserva

- ☒ Nunca o menos 1 vez al mes  
☐ 1 a 3 veces mes  
☐ 1 vez semana  
☐ 2 a 4 veces semana  
☐ 5 a 6 veces semana  
☐ 1 vez al día  
☐ 2 a 3 veces al día  
☐ 5 a 6 veces al día  
☐ más 6 veces al día

|                                         |                                                                                                                                                                                                                                                                                                                                                                                                              |
|-----------------------------------------|--------------------------------------------------------------------------------------------------------------------------------------------------------------------------------------------------------------------------------------------------------------------------------------------------------------------------------------------------------------------------------------------------------------|
| pescado ahumado                         | <input checked="" type="radio"/> Nunca o menos 1 vez al mes<br><input type="radio"/> 1 a 3 veces mes<br><input type="radio"/> 1 vez semana<br><input type="radio"/> 2 a 4 veces semana<br><input type="radio"/> 5 a 6 veces semana<br><input type="radio"/> 1 vez al día<br><input type="radio"/> 2 a 3 veces al día<br><input type="radio"/> 5 a 6 veces al día<br><input type="radio"/> más 6 veces al día |
| almejas o mejillones o ostras unos 100g | <input type="radio"/> Nunca o menos 1 vez al mes<br><input checked="" type="radio"/> 1 a 3 veces mes<br><input type="radio"/> 1 vez semana<br><input type="radio"/> 2 a 4 veces semana<br><input type="radio"/> 5 a 6 veces semana<br><input type="radio"/> 1 vez al día<br><input type="radio"/> 2 a 3 veces al día<br><input type="radio"/> 5 a 6 veces al día<br><input type="radio"/> más 6 veces al día |
| calamar o chipiron o sepia unos 100g    | <input type="radio"/> Nunca o menos 1 vez al mes<br><input checked="" type="radio"/> 1 a 3 veces mes<br><input type="radio"/> 1 vez semana<br><input type="radio"/> 2 a 4 veces semana<br><input type="radio"/> 5 a 6 veces semana<br><input type="radio"/> 1 vez al día<br><input type="radio"/> 2 a 3 veces al día<br><input type="radio"/> 5 a 6 veces al día<br><input type="radio"/> más 6 veces al día |
| marisco unos 100g                       | <input checked="" type="radio"/> Nunca o menos 1 vez al mes<br><input type="radio"/> 1 a 3 veces mes<br><input type="radio"/> 1 vez semana<br><input type="radio"/> 2 a 4 veces semana<br><input type="radio"/> 5 a 6 veces semana<br><input type="radio"/> 1 vez al día<br><input type="radio"/> 2 a 3 veces al día<br><input type="radio"/> 5 a 6 veces al día<br><input type="radio"/> más 6 veces al día |
| Espinacas o acelgas cocinadas           | <input type="radio"/> Nunca o menos 1 vez al mes<br><input checked="" type="radio"/> 1 a 3 veces mes<br><input type="radio"/> 1 vez semana<br><input type="radio"/> 2 a 4 veces semana<br><input type="radio"/> 5 a 6 veces semana<br><input type="radio"/> 1 vez al día<br><input type="radio"/> 2 a 3 veces al día<br><input type="radio"/> 5 a 6 veces al día<br><input type="radio"/> más 6 veces al día |
| Col o coliflor o brocoli cocinado       | <input checked="" type="radio"/> Nunca o menos 1 vez al mes<br><input type="radio"/> 1 a 3 veces mes<br><input type="radio"/> 1 vez semana<br><input type="radio"/> 2 a 4 veces semana<br><input type="radio"/> 5 a 6 veces semana<br><input type="radio"/> 1 vez al día<br><input type="radio"/> 2 a 3 veces al día<br><input type="radio"/> 5 a 6 veces al día<br><input type="radio"/> más 6 veces al día |

---

Lechuga o endivia o escarola

- ☐ Nunca o menos 1 vez al mes  
☐ 1 a 3 veces mes  
☐ 1 vez semana  
☒ 2 a 4 veces semana  
☐ 5 a 6 veces semana  
☐ 1 vez al día  
☐ 2 a 3 veces al día  
☐ 5 a 6 veces al día  
☐ más 6 veces al día

---

tomate ensalada

- ☐ Nunca o menos 1 vez al mes  
☐ 1 a 3 veces mes  
☐ 1 vez semana  
☒ 2 a 4 veces semana  
☐ 5 a 6 veces semana  
☐ 1 vez al día  
☐ 2 a 3 veces al día  
☐ 5 a 6 veces al día  
☐ más 6 veces al día

---

cebolla

- ☐ Nunca o menos 1 vez al mes  
☒ 1 a 3 veces mes  
☐ 1 vez semana  
☐ 2 a 4 veces semana  
☐ 5 a 6 veces semana  
☐ 1 vez al día  
☐ 2 a 3 veces al día  
☐ 5 a 6 veces al día  
☐ más 6 veces al día

---

Zanahoria o calabaza

- ☐ Nunca o menos 1 vez al mes  
☐ 1 a 3 veces mes  
☐ 1 vez semana  
☒ 2 a 4 veces semana  
☐ 5 a 6 veces semana  
☐ 1 vez al día  
☐ 2 a 3 veces al día  
☐ 5 a 6 veces al día  
☐ más 6 veces al día

---

Judías verdes

- ☐ Nunca o menos 1 vez al mes  
☐ 1 a 3 veces mes  
☐ 1 vez semana  
☒ 2 a 4 veces semana  
☐ 5 a 6 veces semana  
☐ 1 vez al día  
☐ 2 a 3 veces al día  
☐ 5 a 6 veces al día  
☐ más 6 veces al día

---

Berenjena o calabacin o pepino

- ☐ Nunca o menos 1 vez al mes  
☐ 1 a 3 veces mes  
☒ 1 vez semana  
☐ 2 a 4 veces semana  
☐ 5 a 6 veces semana  
☐ 1 vez al día  
☐ 2 a 3 veces al día  
☐ 5 a 6 veces al día  
☐ más 6 veces al día



|                       |                                                                                                                                                                                                                                                                                                                                                                                                              |
|-----------------------|--------------------------------------------------------------------------------------------------------------------------------------------------------------------------------------------------------------------------------------------------------------------------------------------------------------------------------------------------------------------------------------------------------------|
| pimiento              | <input type="radio"/> Nunca o menos 1 vez al mes<br><input checked="" type="radio"/> 1 a 3 veces mes<br><input type="radio"/> 1 vez semana<br><input type="radio"/> 2 a 4 veces semana<br><input type="radio"/> 5 a 6 veces semana<br><input type="radio"/> 1 vez al día<br><input type="radio"/> 2 a 3 veces al día<br><input type="radio"/> 5 a 6 veces al día<br><input type="radio"/> más 6 veces al día |
| alcachofa             | <input type="radio"/> Nunca o menos 1 vez al mes<br><input checked="" type="radio"/> 1 a 3 veces mes<br><input type="radio"/> 1 vez semana<br><input type="radio"/> 2 a 4 veces semana<br><input type="radio"/> 5 a 6 veces semana<br><input type="radio"/> 1 vez al día<br><input type="radio"/> 2 a 3 veces al día<br><input type="radio"/> 5 a 6 veces al día<br><input type="radio"/> más 6 veces al día |
| espárragos            | <input type="radio"/> Nunca o menos 1 vez al mes<br><input checked="" type="radio"/> 1 a 3 veces mes<br><input type="radio"/> 1 vez semana<br><input type="radio"/> 2 a 4 veces semana<br><input type="radio"/> 5 a 6 veces semana<br><input type="radio"/> 1 vez al día<br><input type="radio"/> 2 a 3 veces al día<br><input type="radio"/> 5 a 6 veces al día<br><input type="radio"/> más 6 veces al día |
| maíz hervido          | <input checked="" type="radio"/> Nunca o menos 1 vez al mes<br><input type="radio"/> 1 a 3 veces mes<br><input type="radio"/> 1 vez semana<br><input type="radio"/> 2 a 4 veces semana<br><input type="radio"/> 5 a 6 veces semana<br><input type="radio"/> 1 vez al día<br><input type="radio"/> 2 a 3 veces al día<br><input type="radio"/> 5 a 6 veces al día<br><input type="radio"/> más 6 veces al día |
| legumbres             | <input type="radio"/> Nunca o menos 1 vez al mes<br><input type="radio"/> 1 a 3 veces mes<br><input checked="" type="radio"/> 1 vez semana<br><input type="radio"/> 2 a 4 veces semana<br><input type="radio"/> 5 a 6 veces semana<br><input type="radio"/> 1 vez al día<br><input type="radio"/> 2 a 3 veces al día<br><input type="radio"/> 5 a 6 veces al día<br><input type="radio"/> más 6 veces al día |
| naranjas o mandarinas | <input type="radio"/> Nunca o menos 1 vez al mes<br><input type="radio"/> 1 a 3 veces mes<br><input checked="" type="radio"/> 1 vez semana<br><input type="radio"/> 2 a 4 veces semana<br><input type="radio"/> 5 a 6 veces semana<br><input type="radio"/> 1 vez al día<br><input type="radio"/> 2 a 3 veces al día<br><input type="radio"/> 5 a 6 veces al día<br><input type="radio"/> más 6 veces al día |

---

|                    |                                                                                                                                                                                                                                                                                                                                                                                                              |
|--------------------|--------------------------------------------------------------------------------------------------------------------------------------------------------------------------------------------------------------------------------------------------------------------------------------------------------------------------------------------------------------------------------------------------------------|
| zumو natural fruta | <input type="radio"/> Nunca o menos 1 vez al mes<br><input type="radio"/> 1 a 3 veces mes<br><input checked="" type="radio"/> 1 vez semana<br><input type="radio"/> 2 a 4 veces semana<br><input type="radio"/> 5 a 6 veces semana<br><input type="radio"/> 1 vez al día<br><input type="radio"/> 2 a 3 veces al día<br><input type="radio"/> 5 a 6 veces al día<br><input type="radio"/> más 6 veces al día |
|--------------------|--------------------------------------------------------------------------------------------------------------------------------------------------------------------------------------------------------------------------------------------------------------------------------------------------------------------------------------------------------------------------------------------------------------|

---

|         |                                                                                                                                                                                                                                                                                                                                                                                                              |
|---------|--------------------------------------------------------------------------------------------------------------------------------------------------------------------------------------------------------------------------------------------------------------------------------------------------------------------------------------------------------------------------------------------------------------|
| platano | <input type="radio"/> Nunca o menos 1 vez al mes<br><input checked="" type="radio"/> 1 a 3 veces mes<br><input type="radio"/> 1 vez semana<br><input type="radio"/> 2 a 4 veces semana<br><input type="radio"/> 5 a 6 veces semana<br><input type="radio"/> 1 vez al día<br><input type="radio"/> 2 a 3 veces al día<br><input type="radio"/> 5 a 6 veces al día<br><input type="radio"/> más 6 veces al día |
|---------|--------------------------------------------------------------------------------------------------------------------------------------------------------------------------------------------------------------------------------------------------------------------------------------------------------------------------------------------------------------------------------------------------------------|

---

|                |                                                                                                                                                                                                                                                                                                                                                                                                              |
|----------------|--------------------------------------------------------------------------------------------------------------------------------------------------------------------------------------------------------------------------------------------------------------------------------------------------------------------------------------------------------------------------------------------------------------|
| manzana o pera | <input type="radio"/> Nunca o menos 1 vez al mes<br><input type="radio"/> 1 a 3 veces mes<br><input checked="" type="radio"/> 1 vez semana<br><input type="radio"/> 2 a 4 veces semana<br><input type="radio"/> 5 a 6 veces semana<br><input type="radio"/> 1 vez al día<br><input type="radio"/> 2 a 3 veces al día<br><input type="radio"/> 5 a 6 veces al día<br><input type="radio"/> más 6 veces al día |
|----------------|--------------------------------------------------------------------------------------------------------------------------------------------------------------------------------------------------------------------------------------------------------------------------------------------------------------------------------------------------------------------------------------------------------------|

---

|                       |                                                                                                                                                                                                                                                                                                                                                                                                              |
|-----------------------|--------------------------------------------------------------------------------------------------------------------------------------------------------------------------------------------------------------------------------------------------------------------------------------------------------------------------------------------------------------------------------------------------------------|
| melocotón o nectarina | <input type="radio"/> Nunca o menos 1 vez al mes<br><input checked="" type="radio"/> 1 a 3 veces mes<br><input type="radio"/> 1 vez semana<br><input type="radio"/> 2 a 4 veces semana<br><input type="radio"/> 5 a 6 veces semana<br><input type="radio"/> 1 vez al día<br><input type="radio"/> 2 a 3 veces al día<br><input type="radio"/> 5 a 6 veces al día<br><input type="radio"/> más 6 veces al día |
|-----------------------|--------------------------------------------------------------------------------------------------------------------------------------------------------------------------------------------------------------------------------------------------------------------------------------------------------------------------------------------------------------------------------------------------------------|

---

|                |                                                                                                                                                                                                                                                                                                                                                                                                              |
|----------------|--------------------------------------------------------------------------------------------------------------------------------------------------------------------------------------------------------------------------------------------------------------------------------------------------------------------------------------------------------------------------------------------------------------|
| sandia o melon | <input type="radio"/> Nunca o menos 1 vez al mes<br><input type="radio"/> 1 a 3 veces mes<br><input type="radio"/> 1 vez semana<br><input type="radio"/> 2 a 4 veces semana<br><input type="radio"/> 5 a 6 veces semana<br><input type="radio"/> 1 vez al día<br><input checked="" type="radio"/> 2 a 3 veces al día<br><input type="radio"/> 5 a 6 veces al día<br><input type="radio"/> más 6 veces al día |
|----------------|--------------------------------------------------------------------------------------------------------------------------------------------------------------------------------------------------------------------------------------------------------------------------------------------------------------------------------------------------------------------------------------------------------------|

---

|     |                                                                                                                                                                                                                                                                                                                                                                                                              |
|-----|--------------------------------------------------------------------------------------------------------------------------------------------------------------------------------------------------------------------------------------------------------------------------------------------------------------------------------------------------------------------------------------------------------------|
| uva | <input type="radio"/> Nunca o menos 1 vez al mes<br><input checked="" type="radio"/> 1 a 3 veces mes<br><input type="radio"/> 1 vez semana<br><input type="radio"/> 2 a 4 veces semana<br><input type="radio"/> 5 a 6 veces semana<br><input type="radio"/> 1 vez al día<br><input type="radio"/> 2 a 3 veces al día<br><input type="radio"/> 5 a 6 veces al día<br><input type="radio"/> más 6 veces al día |
|-----|--------------------------------------------------------------------------------------------------------------------------------------------------------------------------------------------------------------------------------------------------------------------------------------------------------------------------------------------------------------------------------------------------------------|

---

---

bruna o ciruela

- ☐ Nunca o menos 1 vez al mes  
☐ 1 a 3 veces mes  
☐ 1 vez semana  
☐ 2 a 4 veces semana  
☐ 5 a 6 veces semana  
☒ 1 vez al día  
☐ 2 a 3 veces al día  
☐ 5 a 6 veces al día  
☐ más 6 veces al día

---

kiwi

- ☐ Nunca o menos 1 vez al mes  
☒ 1 a 3 veces mes  
☐ 1 vez semana  
☐ 2 a 4 veces semana  
☐ 5 a 6 veces semana  
☐ 1 vez al día  
☐ 2 a 3 veces al día  
☐ 5 a 6 veces al día  
☐ más 6 veces al día

---

aceituna

- ☒ Nunca o menos 1 vez al mes  
☐ 1 a 3 veces mes  
☐ 1 vez semana  
☐ 2 a 4 veces semana  
☐ 5 a 6 veces semana  
☐ 1 vez al día  
☐ 2 a 3 veces al día  
☐ 5 a 6 veces al día  
☐ más 6 veces al día

---

frutos secos

- ☐ Nunca o menos 1 vez al mes  
☐ 1 a 3 veces mes  
☒ 1 vez semana  
☐ 2 a 4 veces semana  
☐ 5 a 6 veces semana  
☐ 1 vez al día  
☐ 2 a 3 veces al día  
☐ 5 a 6 veces al día  
☐ más 6 veces al día

---

pan blanco

- ☐ Nunca o menos 1 vez al mes  
☐ 1 a 3 veces mes  
☒ 1 vez semana  
☐ 2 a 4 veces semana  
☐ 5 a 6 veces semana  
☐ 1 vez al día  
☐ 2 a 3 veces al día  
☐ 5 a 6 veces al día  
☐ más 6 veces al día

---

pan integral

- ☐ Nunca o menos 1 vez al mes  
☐ 1 a 3 veces mes  
☐ 1 vez semana  
☒ 2 a 4 veces semana  
☐ 5 a 6 veces semana  
☐ 1 vez al día  
☐ 2 a 3 veces al día  
☐ 5 a 6 veces al día  
☐ más 6 veces al día

|                          |                                                                                                                                                                                                                                                                                                                                                                                                              |
|--------------------------|--------------------------------------------------------------------------------------------------------------------------------------------------------------------------------------------------------------------------------------------------------------------------------------------------------------------------------------------------------------------------------------------------------------|
| cereales desayuno        | <input checked="" type="radio"/> Nunca o menos 1 vez al mes<br><input type="radio"/> 1 a 3 veces mes<br><input type="radio"/> 1 vez semana<br><input type="radio"/> 2 a 4 veces semana<br><input type="radio"/> 5 a 6 veces semana<br><input type="radio"/> 1 vez al día<br><input type="radio"/> 2 a 3 veces al día<br><input type="radio"/> 5 a 6 veces al día<br><input type="radio"/> más 6 veces al día |
| patatas fritas           | <input type="radio"/> Nunca o menos 1 vez al mes<br><input checked="" type="radio"/> 1 a 3 veces mes<br><input type="radio"/> 1 vez semana<br><input type="radio"/> 2 a 4 veces semana<br><input type="radio"/> 5 a 6 veces semana<br><input type="radio"/> 1 vez al día<br><input type="radio"/> 2 a 3 veces al día<br><input type="radio"/> 5 a 6 veces al día<br><input type="radio"/> más 6 veces al día |
| patatas cocidas o asadas | <input type="radio"/> Nunca o menos 1 vez al mes<br><input checked="" type="radio"/> 1 a 3 veces mes<br><input type="radio"/> 1 vez semana<br><input type="radio"/> 2 a 4 veces semana<br><input type="radio"/> 5 a 6 veces semana<br><input type="radio"/> 1 vez al día<br><input type="radio"/> 2 a 3 veces al día<br><input type="radio"/> 5 a 6 veces al día<br><input type="radio"/> más 6 veces al día |
| bolsa papas              | <input type="radio"/> Nunca o menos 1 vez al mes<br><input checked="" type="radio"/> 1 a 3 veces mes<br><input type="radio"/> 1 vez semana<br><input type="radio"/> 2 a 4 veces semana<br><input type="radio"/> 5 a 6 veces semana<br><input type="radio"/> 1 vez al día<br><input type="radio"/> 2 a 3 veces al día<br><input type="radio"/> 5 a 6 veces al día<br><input type="radio"/> más 6 veces al día |
| arroz cocinado           | <input type="radio"/> Nunca o menos 1 vez al mes<br><input type="radio"/> 1 a 3 veces mes<br><input type="radio"/> 1 vez semana<br><input checked="" type="radio"/> 2 a 4 veces semana<br><input type="radio"/> 5 a 6 veces semana<br><input type="radio"/> 1 vez al día<br><input type="radio"/> 2 a 3 veces al día<br><input type="radio"/> 5 a 6 veces al día<br><input type="radio"/> más 6 veces al día |
| pasta                    | <input type="radio"/> Nunca o menos 1 vez al mes<br><input type="radio"/> 1 a 3 veces mes<br><input type="radio"/> 1 vez semana<br><input checked="" type="radio"/> 2 a 4 veces semana<br><input type="radio"/> 5 a 6 veces semana<br><input type="radio"/> 1 vez al día<br><input type="radio"/> 2 a 3 veces al día<br><input type="radio"/> 5 a 6 veces al día<br><input type="radio"/> más 6 veces al día |

|                     |                                                                                                                                                                                                                                                                                                                                                                                                              |
|---------------------|--------------------------------------------------------------------------------------------------------------------------------------------------------------------------------------------------------------------------------------------------------------------------------------------------------------------------------------------------------------------------------------------------------------|
| pizza               | <input type="radio"/> Nunca o menos 1 vez al mes<br><input type="radio"/> 1 a 3 veces mes<br><input checked="" type="radio"/> 1 vez semana<br><input type="radio"/> 2 a 4 veces semana<br><input type="radio"/> 5 a 6 veces semana<br><input type="radio"/> 1 vez al día<br><input type="radio"/> 2 a 3 veces al día<br><input type="radio"/> 5 a 6 veces al día<br><input type="radio"/> más 6 veces al día |
| aceite oliva        | <input type="radio"/> Nunca o menos 1 vez al mes<br><input type="radio"/> 1 a 3 veces mes<br><input type="radio"/> 1 vez semana<br><input checked="" type="radio"/> 2 a 4 veces semana<br><input type="radio"/> 5 a 6 veces semana<br><input type="radio"/> 1 vez al día<br><input type="radio"/> 2 a 3 veces al día<br><input type="radio"/> 5 a 6 veces al día<br><input type="radio"/> más 6 veces al día |
| otros aceites       | <input type="radio"/> Nunca o menos 1 vez al mes<br><input checked="" type="radio"/> 1 a 3 veces mes<br><input type="radio"/> 1 vez semana<br><input type="radio"/> 2 a 4 veces semana<br><input type="radio"/> 5 a 6 veces semana<br><input type="radio"/> 1 vez al día<br><input type="radio"/> 2 a 3 veces al día<br><input type="radio"/> 5 a 6 veces al día<br><input type="radio"/> más 6 veces al día |
| margarina           | <input checked="" type="radio"/> Nunca o menos 1 vez al mes<br><input type="radio"/> 1 a 3 veces mes<br><input type="radio"/> 1 vez semana<br><input type="radio"/> 2 a 4 veces semana<br><input type="radio"/> 5 a 6 veces semana<br><input type="radio"/> 1 vez al día<br><input type="radio"/> 2 a 3 veces al día<br><input type="radio"/> 5 a 6 veces al día<br><input type="radio"/> más 6 veces al día |
| mantequilla         | <input checked="" type="radio"/> Nunca o menos 1 vez al mes<br><input type="radio"/> 1 a 3 veces mes<br><input type="radio"/> 1 vez semana<br><input type="radio"/> 2 a 4 veces semana<br><input type="radio"/> 5 a 6 veces semana<br><input type="radio"/> 1 vez al día<br><input type="radio"/> 2 a 3 veces al día<br><input type="radio"/> 5 a 6 veces al día<br><input type="radio"/> más 6 veces al día |
| galletas tipo maria | <input type="radio"/> Nunca o menos 1 vez al mes<br><input checked="" type="radio"/> 1 a 3 veces mes<br><input type="radio"/> 1 vez semana<br><input type="radio"/> 2 a 4 veces semana<br><input type="radio"/> 5 a 6 veces semana<br><input type="radio"/> 1 vez al día<br><input type="radio"/> 2 a 3 veces al día<br><input type="radio"/> 5 a 6 veces al día<br><input type="radio"/> más 6 veces al día |

|                           |                                                                                                                                                                                                                                                                                                                                                                                                              |
|---------------------------|--------------------------------------------------------------------------------------------------------------------------------------------------------------------------------------------------------------------------------------------------------------------------------------------------------------------------------------------------------------------------------------------------------------|
| galletas chocolate        | <input type="radio"/> Nunca o menos 1 vez al mes<br><input checked="" type="radio"/> 1 a 3 veces mes<br><input type="radio"/> 1 vez semana<br><input type="radio"/> 2 a 4 veces semana<br><input type="radio"/> 5 a 6 veces semana<br><input type="radio"/> 1 vez al día<br><input type="radio"/> 2 a 3 veces al día<br><input type="radio"/> 5 a 6 veces al día<br><input type="radio"/> más 6 veces al día |
| bollieria                 | <input type="radio"/> Nunca o menos 1 vez al mes<br><input type="radio"/> 1 a 3 veces mes<br><input checked="" type="radio"/> 1 vez semana<br><input type="radio"/> 2 a 4 veces semana<br><input type="radio"/> 5 a 6 veces semana<br><input type="radio"/> 1 vez al día<br><input type="radio"/> 2 a 3 veces al día<br><input type="radio"/> 5 a 6 veces al día<br><input type="radio"/> más 6 veces al día |
| chocolate o bombones      | <input type="radio"/> Nunca o menos 1 vez al mes<br><input type="radio"/> 1 a 3 veces mes<br><input checked="" type="radio"/> 1 vez semana<br><input type="radio"/> 2 a 4 veces semana<br><input type="radio"/> 5 a 6 veces semana<br><input type="radio"/> 1 vez al día<br><input type="radio"/> 2 a 3 veces al día<br><input type="radio"/> 5 a 6 veces al día<br><input type="radio"/> más 6 veces al día |
| chocolate polvo o colacao | <input checked="" type="radio"/> Nunca o menos 1 vez al mes<br><input type="radio"/> 1 a 3 veces mes<br><input type="radio"/> 1 vez semana<br><input type="radio"/> 2 a 4 veces semana<br><input type="radio"/> 5 a 6 veces semana<br><input type="radio"/> 1 vez al día<br><input type="radio"/> 2 a 3 veces al día<br><input type="radio"/> 5 a 6 veces al día<br><input type="radio"/> más 6 veces al día |
| vino tinto                | <input checked="" type="radio"/> Nunca o menos 1 vez al mes<br><input type="radio"/> 1 a 3 veces mes<br><input type="radio"/> 1 vez semana<br><input type="radio"/> 2 a 4 veces semana<br><input type="radio"/> 5 a 6 veces semana<br><input type="radio"/> 1 vez al día<br><input type="radio"/> 2 a 3 veces al día<br><input type="radio"/> 5 a 6 veces al día<br><input type="radio"/> más 6 veces al día |
| vino blanco               | <input checked="" type="radio"/> Nunca o menos 1 vez al mes<br><input type="radio"/> 1 a 3 veces mes<br><input type="radio"/> 1 vez semana<br><input type="radio"/> 2 a 4 veces semana<br><input type="radio"/> 5 a 6 veces semana<br><input type="radio"/> 1 vez al día<br><input type="radio"/> 2 a 3 veces al día<br><input type="radio"/> 5 a 6 veces al día<br><input type="radio"/> más 6 veces al día |

|                       |                                                                                                                                                                                                                                                                                                                                                                                                              |
|-----------------------|--------------------------------------------------------------------------------------------------------------------------------------------------------------------------------------------------------------------------------------------------------------------------------------------------------------------------------------------------------------------------------------------------------------|
| vino seco o vermut    | <input checked="" type="radio"/> Nunca o menos 1 vez al mes<br><input type="radio"/> 1 a 3 veces mes<br><input type="radio"/> 1 vez semana<br><input type="radio"/> 2 a 4 veces semana<br><input type="radio"/> 5 a 6 veces semana<br><input type="radio"/> 1 vez al día<br><input type="radio"/> 2 a 3 veces al día<br><input type="radio"/> 5 a 6 veces al día<br><input type="radio"/> más 6 veces al día |
| cerveza               | <input checked="" type="radio"/> Nunca o menos 1 vez al mes<br><input type="radio"/> 1 a 3 veces mes<br><input type="radio"/> 1 vez semana<br><input type="radio"/> 2 a 4 veces semana<br><input type="radio"/> 5 a 6 veces semana<br><input type="radio"/> 1 vez al día<br><input type="radio"/> 2 a 3 veces al día<br><input type="radio"/> 5 a 6 veces al día<br><input type="radio"/> más 6 veces al día |
| cerveza sin alcohol   | <input checked="" type="radio"/> Nunca o menos 1 vez al mes<br><input type="radio"/> 1 a 3 veces mes<br><input type="radio"/> 1 vez semana<br><input type="radio"/> 2 a 4 veces semana<br><input type="radio"/> 5 a 6 veces semana<br><input type="radio"/> 1 vez al día<br><input type="radio"/> 2 a 3 veces al día<br><input type="radio"/> 5 a 6 veces al día<br><input type="radio"/> más 6 veces al día |
| licores               | <input checked="" type="radio"/> Nunca o menos 1 vez al mes<br><input type="radio"/> 1 a 3 veces mes<br><input type="radio"/> 1 vez semana<br><input type="radio"/> 2 a 4 veces semana<br><input type="radio"/> 5 a 6 veces semana<br><input type="radio"/> 1 vez al día<br><input type="radio"/> 2 a 3 veces al día<br><input type="radio"/> 5 a 6 veces al día<br><input type="radio"/> más 6 veces al día |
| ginebra o ron o vodka | <input checked="" type="radio"/> Nunca o menos 1 vez al mes<br><input type="radio"/> 1 a 3 veces mes<br><input type="radio"/> 1 vez semana<br><input type="radio"/> 2 a 4 veces semana<br><input type="radio"/> 5 a 6 veces semana<br><input type="radio"/> 1 vez al día<br><input type="radio"/> 2 a 3 veces al día<br><input type="radio"/> 5 a 6 veces al día<br><input type="radio"/> más 6 veces al día |
| refresco normal       | <input type="radio"/> Nunca o menos 1 vez al mes<br><input checked="" type="radio"/> 1 a 3 veces mes<br><input type="radio"/> 1 vez semana<br><input type="radio"/> 2 a 4 veces semana<br><input type="radio"/> 5 a 6 veces semana<br><input type="radio"/> 1 vez al día<br><input type="radio"/> 2 a 3 veces al día<br><input type="radio"/> 5 a 6 veces al día<br><input type="radio"/> más 6 veces al día |

|                           |                                                                                                                                                                                                                                                                                                                                                                                                              |
|---------------------------|--------------------------------------------------------------------------------------------------------------------------------------------------------------------------------------------------------------------------------------------------------------------------------------------------------------------------------------------------------------------------------------------------------------|
| refresco sin azúcar       | <input type="radio"/> Nunca o menos 1 vez al mes<br><input type="radio"/> 1 a 3 veces mes<br><input type="radio"/> 1 vez semana<br><input type="radio"/> 2 a 4 veces semana<br><input type="radio"/> 5 a 6 veces semana<br><input type="radio"/> 1 vez al día<br><input type="radio"/> 2 a 3 veces al día<br><input type="radio"/> 5 a 6 veces al día<br><input type="radio"/> más 6 veces al día            |
| Agua del grifo            | <input checked="" type="radio"/> Nunca o menos 1 vez al mes<br><input type="radio"/> 1 a 3 veces mes<br><input type="radio"/> 1 vez semana<br><input type="radio"/> 2 a 4 veces semana<br><input type="radio"/> 5 a 6 veces semana<br><input type="radio"/> 1 vez al día<br><input type="radio"/> 2 a 3 veces al día<br><input type="radio"/> 5 a 6 veces al día<br><input type="radio"/> más 6 veces al día |
| agua embotellada sin gas  | <input type="radio"/> Nunca o menos 1 vez al mes<br><input type="radio"/> 1 a 3 veces mes<br><input type="radio"/> 1 vez semana<br><input type="radio"/> 2 a 4 veces semana<br><input type="radio"/> 5 a 6 veces semana<br><input type="radio"/> 1 vez al día<br><input type="radio"/> 2 a 3 veces al día<br><input checked="" type="radio"/> 5 a 6 veces al día<br><input type="radio"/> más 6 veces al día |
| agua embotellada con gas  | <input checked="" type="radio"/> Nunca o menos 1 vez al mes<br><input type="radio"/> 1 a 3 veces mes<br><input type="radio"/> 1 vez semana<br><input type="radio"/> 2 a 4 veces semana<br><input type="radio"/> 5 a 6 veces semana<br><input type="radio"/> 1 vez al día<br><input type="radio"/> 2 a 3 veces al día<br><input type="radio"/> 5 a 6 veces al día<br><input type="radio"/> más 6 veces al día |
| zumos frutas embotellados | <input type="radio"/> Nunca o menos 1 vez al mes<br><input type="radio"/> 1 a 3 veces mes<br><input type="radio"/> 1 vez semana<br><input checked="" type="radio"/> 2 a 4 veces semana<br><input type="radio"/> 5 a 6 veces semana<br><input type="radio"/> 1 vez al día<br><input type="radio"/> 2 a 3 veces al día<br><input type="radio"/> 5 a 6 veces al día<br><input type="radio"/> más 6 veces al día |
| café                      | <input checked="" type="radio"/> Nunca o menos 1 vez al mes<br><input type="radio"/> 1 a 3 veces mes<br><input type="radio"/> 1 vez semana<br><input type="radio"/> 2 a 4 veces semana<br><input type="radio"/> 5 a 6 veces semana<br><input type="radio"/> 1 vez al día<br><input type="radio"/> 2 a 3 veces al día<br><input type="radio"/> 5 a 6 veces al día<br><input type="radio"/> más 6 veces al día |



|                       |                                                                                                                                                                                                                                                                                                                                                                                                              |
|-----------------------|--------------------------------------------------------------------------------------------------------------------------------------------------------------------------------------------------------------------------------------------------------------------------------------------------------------------------------------------------------------------------------------------------------------|
| cafe descafeinado     | <input checked="" type="radio"/> Nunca o menos 1 vez al mes<br><input type="radio"/> 1 a 3 veces mes<br><input type="radio"/> 1 vez semana<br><input type="radio"/> 2 a 4 veces semana<br><input type="radio"/> 5 a 6 veces semana<br><input type="radio"/> 1 vez al día<br><input type="radio"/> 2 a 3 veces al día<br><input type="radio"/> 5 a 6 veces al día<br><input type="radio"/> más 6 veces al día |
| te o infusión         | <input checked="" type="radio"/> Nunca o menos 1 vez al mes<br><input type="radio"/> 1 a 3 veces mes<br><input type="radio"/> 1 vez semana<br><input type="radio"/> 2 a 4 veces semana<br><input type="radio"/> 5 a 6 veces semana<br><input type="radio"/> 1 vez al día<br><input type="radio"/> 2 a 3 veces al día<br><input type="radio"/> 5 a 6 veces al día<br><input type="radio"/> más 6 veces al día |
| sopa o puré verduras  | <input type="radio"/> Nunca o menos 1 vez al mes<br><input type="radio"/> 1 a 3 veces mes<br><input checked="" type="radio"/> 1 vez semana<br><input type="radio"/> 2 a 4 veces semana<br><input type="radio"/> 5 a 6 veces semana<br><input type="radio"/> 1 vez al día<br><input type="radio"/> 2 a 3 veces al día<br><input type="radio"/> 5 a 6 veces al día<br><input type="radio"/> más 6 veces al día |
| croquetas pollo jamón | <input type="radio"/> Nunca o menos 1 vez al mes<br><input checked="" type="radio"/> 1 a 3 veces mes<br><input type="radio"/> 1 vez semana<br><input type="radio"/> 2 a 4 veces semana<br><input type="radio"/> 5 a 6 veces semana<br><input type="radio"/> 1 vez al día<br><input type="radio"/> 2 a 3 veces al día<br><input type="radio"/> 5 a 6 veces al día<br><input type="radio"/> más 6 veces al día |
| croquetas pescado     | <input type="radio"/> Nunca o menos 1 vez al mes<br><input checked="" type="radio"/> 1 a 3 veces mes<br><input type="radio"/> 1 vez semana<br><input type="radio"/> 2 a 4 veces semana<br><input type="radio"/> 5 a 6 veces semana<br><input type="radio"/> 1 vez al día<br><input type="radio"/> 2 a 3 veces al día<br><input type="radio"/> 5 a 6 veces al día<br><input type="radio"/> más 6 veces al día |
| mayonesa              | <input checked="" type="radio"/> Nunca o menos 1 vez al mes<br><input type="radio"/> 1 a 3 veces mes<br><input type="radio"/> 1 vez semana<br><input type="radio"/> 2 a 4 veces semana<br><input type="radio"/> 5 a 6 veces semana<br><input type="radio"/> 1 vez al día<br><input type="radio"/> 2 a 3 veces al día<br><input type="radio"/> 5 a 6 veces al día<br><input type="radio"/> más 6 veces al día |

|                  |                                                                                                                                                                                                                                                                                                                                                                                                              |
|------------------|--------------------------------------------------------------------------------------------------------------------------------------------------------------------------------------------------------------------------------------------------------------------------------------------------------------------------------------------------------------------------------------------------------------|
| salsa tomate     | <input type="radio"/> Nunca o menos 1 vez al mes<br><input checked="" type="radio"/> 1 a 3 veces mes<br><input type="radio"/> 1 vez semana<br><input type="radio"/> 2 a 4 veces semana<br><input type="radio"/> 5 a 6 veces semana<br><input type="radio"/> 1 vez al día<br><input type="radio"/> 2 a 3 veces al día<br><input type="radio"/> 5 a 6 veces al día<br><input type="radio"/> más 6 veces al día |
| ketchup          | <input type="radio"/> Nunca o menos 1 vez al mes<br><input checked="" type="radio"/> 1 a 3 veces mes<br><input type="radio"/> 1 vez semana<br><input type="radio"/> 2 a 4 veces semana<br><input type="radio"/> 5 a 6 veces semana<br><input type="radio"/> 1 vez al día<br><input type="radio"/> 2 a 3 veces al día<br><input type="radio"/> 5 a 6 veces al día<br><input type="radio"/> más 6 veces al día |
| sal              | <input type="radio"/> Nunca o menos 1 vez al mes<br><input type="radio"/> 1 a 3 veces mes<br><input checked="" type="radio"/> 1 vez semana<br><input type="radio"/> 2 a 4 veces semana<br><input type="radio"/> 5 a 6 veces semana<br><input type="radio"/> 1 vez al día<br><input type="radio"/> 2 a 3 veces al día<br><input type="radio"/> 5 a 6 veces al día<br><input type="radio"/> más 6 veces al día |
| ajo              | <input checked="" type="radio"/> Nunca o menos 1 vez al mes<br><input type="radio"/> 1 a 3 veces mes<br><input type="radio"/> 1 vez semana<br><input type="radio"/> 2 a 4 veces semana<br><input type="radio"/> 5 a 6 veces semana<br><input type="radio"/> 1 vez al día<br><input type="radio"/> 2 a 3 veces al día<br><input type="radio"/> 5 a 6 veces al día<br><input type="radio"/> más 6 veces al día |
| mermelada o miel | <input checked="" type="radio"/> Nunca o menos 1 vez al mes<br><input type="radio"/> 1 a 3 veces mes<br><input type="radio"/> 1 vez semana<br><input type="radio"/> 2 a 4 veces semana<br><input type="radio"/> 5 a 6 veces semana<br><input type="radio"/> 1 vez al día<br><input type="radio"/> 2 a 3 veces al día<br><input type="radio"/> 5 a 6 veces al día<br><input type="radio"/> más 6 veces al día |
| azúcar           | <input type="radio"/> Nunca o menos 1 vez al mes<br><input checked="" type="radio"/> 1 a 3 veces mes<br><input type="radio"/> 1 vez semana<br><input type="radio"/> 2 a 4 veces semana<br><input type="radio"/> 5 a 6 veces semana<br><input type="radio"/> 1 vez al día<br><input type="radio"/> 2 a 3 veces al día<br><input type="radio"/> 5 a 6 veces al día<br><input type="radio"/> más 6 veces al día |

|                                       |                                                                                                                                                                                                                                                                                                                                                                                                                                                                                                                               |
|---------------------------------------|-------------------------------------------------------------------------------------------------------------------------------------------------------------------------------------------------------------------------------------------------------------------------------------------------------------------------------------------------------------------------------------------------------------------------------------------------------------------------------------------------------------------------------|
| Otro alimento                         |                                                                                                                                                                                                                                                                                                                                                                                                                                                                                                                               |
| suplementos vitamínicos               | <input checked="" type="radio"/> si<br><input type="radio"/> no                                                                                                                                                                                                                                                                                                                                                                                                                                                               |
| suplementos vitamínicos               | [*DATA REMOVED*]                                                                                                                                                                                                                                                                                                                                                                                                                                                                                                              |
| dieta previa                          | <input type="radio"/> si<br><input checked="" type="radio"/> no                                                                                                                                                                                                                                                                                                                                                                                                                                                               |
| motivo dieta                          | <input checked="" type="radio"/> no dieta<br><input type="radio"/> control peso<br><input type="radio"/> control colesterol<br><input type="radio"/> control diabetes<br><input type="radio"/> problemas estómago<br><input type="radio"/> problemas vesícula o hepáticos<br><input type="radio"/> HTA o cardiopatía<br><input type="radio"/> problemas renales<br><input type="radio"/> alergia alimentaria<br><input type="radio"/> ácido úrico elevado<br><input type="radio"/> vegetariana<br><input type="radio"/> otros |
| cambio alimentos año previo gestación | <input checked="" type="radio"/> si<br><input type="radio"/> no                                                                                                                                                                                                                                                                                                                                                                                                                                                               |
| cambio lácteos                        | <input type="radio"/> eliminado<br><input type="radio"/> disminuido<br><input checked="" type="radio"/> igual<br><input type="radio"/> aumentado<br><input type="radio"/> no sabe                                                                                                                                                                                                                                                                                                                                             |
| cambio huevos                         | <input type="radio"/> eliminado<br><input type="radio"/> disminuido<br><input checked="" type="radio"/> igual<br><input type="radio"/> aumentado<br><input type="radio"/> no sabe                                                                                                                                                                                                                                                                                                                                             |
| cambio carne                          | <input type="radio"/> eliminado<br><input type="radio"/> disminuido<br><input checked="" type="radio"/> igual<br><input type="radio"/> aumentado<br><input type="radio"/> no sabe                                                                                                                                                                                                                                                                                                                                             |
| cambio pescado                        | <input type="radio"/> eliminado<br><input type="radio"/> disminuido<br><input checked="" type="radio"/> igual<br><input type="radio"/> aumentado<br><input type="radio"/> no sabe                                                                                                                                                                                                                                                                                                                                             |
| cambio verduras                       | <input type="radio"/> eliminado<br><input type="radio"/> disminuido<br><input checked="" type="radio"/> igual<br><input type="radio"/> aumentado<br><input type="radio"/> no sabe                                                                                                                                                                                                                                                                                                                                             |

|                            |                                                                                                                                                                                                                        |
|----------------------------|------------------------------------------------------------------------------------------------------------------------------------------------------------------------------------------------------------------------|
| cambio legumbres           | <input type="radio"/> eliminado<br><input type="radio"/> disminuido<br><input checked="" type="radio"/> igual<br><input type="radio"/> aumentado<br><input type="radio"/> no sabe                                      |
| cambio fruta               | <input type="radio"/> eliminado<br><input type="radio"/> disminuido<br><input checked="" type="radio"/> igual<br><input type="radio"/> aumentado<br><input type="radio"/> no sabe                                      |
| cambio pan                 | <input type="radio"/> eliminado<br><input type="radio"/> disminuido<br><input checked="" type="radio"/> igual<br><input type="radio"/> aumentado<br><input type="radio"/> no sabe                                      |
| cambio aceite oliva        | <input type="radio"/> eliminado<br><input type="radio"/> disminuido<br><input checked="" type="radio"/> igual<br><input type="radio"/> aumentado<br><input type="radio"/> no sabe                                      |
| cambio mante o margarina   | <input type="radio"/> eliminado<br><input type="radio"/> disminuido<br><input checked="" type="radio"/> igual<br><input type="radio"/> aumentado<br><input type="radio"/> no sabe                                      |
| cambio azúcar y dulces     | <input type="radio"/> eliminado<br><input type="radio"/> disminuido<br><input checked="" type="radio"/> igual<br><input type="radio"/> aumentado<br><input type="radio"/> no sabe                                      |
| cambio bebidas alcohólicas | <input checked="" type="radio"/> eliminado<br><input type="radio"/> disminuido<br><input type="radio"/> igual<br><input type="radio"/> aumentado<br><input type="radio"/> no sabe                                      |
| frecuencia comidas fritas  | <input type="radio"/> a diario<br><input type="radio"/> 5 a 6 veces semana<br><input type="radio"/> 2 a 4 veces semana<br><input checked="" type="radio"/> 1 vez semana<br><input type="radio"/> menos de 1 vez semana |
| carne                      | <input type="radio"/> no como<br><input type="radio"/> cruda<br><input type="radio"/> poco hecha<br><input checked="" type="radio"/> hecha<br><input type="radio"/> muy hecha                                          |
| grasa visible carne        | <input checked="" type="radio"/> quita toda<br><input type="radio"/> quita mayoría<br><input type="radio"/> quita un poco<br><input type="radio"/> no quita nada                                                       |

|                                |                                                                                                                                                                                                                                                          |
|--------------------------------|----------------------------------------------------------------------------------------------------------------------------------------------------------------------------------------------------------------------------------------------------------|
| cocina carne                   | <input checked="" type="radio"/> a la plancha<br><input type="radio"/> a la parrilla<br><input type="radio"/> asada<br><input type="radio"/> frita<br><input type="radio"/> guisada                                                                      |
| tostado quemado carne          | <input checked="" type="radio"/> nunca<br><input type="radio"/> 1 vez mes<br><input type="radio"/> 2 a 3 veces mes<br><input type="radio"/> 1 vez semana<br><input type="radio"/> 2 a 3 semanas                                                          |
| tostado quemado pescado        | <input checked="" type="radio"/> nunca<br><input type="radio"/> 1 vez mes<br><input type="radio"/> 2 a 3 veces mes<br><input type="radio"/> 1 vez semana<br><input type="radio"/> 2 a 3 semanas                                                          |
| socarrat paella                | <input checked="" type="radio"/> nunca<br><input type="radio"/> 1 vez mes<br><input type="radio"/> 2 a 3 veces mes<br><input type="radio"/> 1 vez semana<br><input type="radio"/> 2 a 3 semanas                                                          |
| grasa o aceite cocinar         | <input type="radio"/> mantequilla<br><input type="radio"/> margarina<br><input type="radio"/> aceite oliva<br><input checked="" type="radio"/> aceite oliva virgen extra<br><input type="radio"/> aceite vegetal<br><input type="radio"/> mezcla aceites |
| grasa aceite aliñar            | <input type="radio"/> mantequilla<br><input type="radio"/> margarina<br><input type="radio"/> aceite oliva<br><input checked="" type="radio"/> aceite oliva virgen extra<br><input type="radio"/> aceite vegetal<br><input type="radio"/> mezcla aceites |
| grasa aceite freir             | <input type="radio"/> mantequilla<br><input type="radio"/> margarina<br><input type="radio"/> aceite oliva<br><input checked="" type="radio"/> aceite oliva virgen extra<br><input type="radio"/> aceite vegetal<br><input type="radio"/> mezcla aceites |
| Ejercicio cuestionario         | <input checked="" type="radio"/> si<br><input type="radio"/> no                                                                                                                                                                                          |
| horas de sueño incluido siesta | _____                                                                                                                                                                                                                                                    |
| minutos siesta                 | _____                                                                                                                                                                                                                                                    |
| horas televisión semana        | [*DATA REMOVED*]                                                                                                                                                                                                                                         |

|                                        |                                                                                                                                                                                                                                                                                                                                                                           |
|----------------------------------------|---------------------------------------------------------------------------------------------------------------------------------------------------------------------------------------------------------------------------------------------------------------------------------------------------------------------------------------------------------------------------|
| actividad trabajo                      | <input type="radio"/> casi siempre sentado<br><input type="radio"/> sentado 50 por cien<br><input checked="" type="radio"/> casi siempre de pie, quieto<br><input type="radio"/> casi siempre levantado caminando y llevando pocas cosas<br><input type="radio"/> casi siempre levantado, caminando y llevado muchas cosas<br><input type="radio"/> trabajo manual pesado |
| tiempo caminar o bici al día           | <input type="radio"/> casi nunca<br><input type="radio"/> menos 20min día<br><input checked="" type="radio"/> 20 a 40 min día<br><input type="radio"/> 40 a 60 min día<br><input type="radio"/> 1h o 1h y media día<br><input type="radio"/> más de 1h y media al día                                                                                                     |
| tiempo tareas casa al día              | <input type="radio"/> menos de 1h día<br><input checked="" type="radio"/> 1 a 2h día<br><input type="radio"/> 3 a 4h día<br><input type="radio"/> 5 a 6h día<br><input type="radio"/> 7 a 8h día<br><input type="radio"/> más de 8h día                                                                                                                                   |
| tiempo libre televisión ordenador leer | <input type="radio"/> menos 1h día<br><input type="radio"/> 1h día<br><input checked="" type="radio"/> 2h día<br><input type="radio"/> 3h día<br><input type="radio"/> 4h día<br><input type="radio"/> 5 a 6h día<br><input type="radio"/> mas 6h día                                                                                                                     |
| tiempo libre ejercicio o deporte       | <input checked="" type="radio"/> menos 1h semana<br><input type="radio"/> 1h semana<br><input type="radio"/> 2h semana<br><input type="radio"/> 3h semana<br><input type="radio"/> 4 a 5h semana<br><input type="radio"/> mas 5h semana                                                                                                                                   |
| como se considera                      | <input type="radio"/> sedentaria<br><input type="radio"/> poco activa<br><input checked="" type="radio"/> moderadamente activa<br><input type="radio"/> bastante activa<br><input type="radio"/> muy activa<br><input type="radio"/> no sabe                                                                                                                              |
| FUR                                    | [*DATA REMOVED*]                                                                                                                                                                                                                                                                                                                                                          |
| Semanas gestación 2T                   | [*DATA REMOVED*]                                                                                                                                                                                                                                                                                                                                                          |
| Días gestación 2T                      | [*DATA REMOVED*]                                                                                                                                                                                                                                                                                                                                                          |
| DBP 2T                                 | [*DATA REMOVED*]                                                                                                                                                                                                                                                                                                                                                          |
| CC 2T                                  | [*DATA REMOVED*]                                                                                                                                                                                                                                                                                                                                                          |
| AC 2T                                  | [*DATA REMOVED*]                                                                                                                                                                                                                                                                                                                                                          |

|                                                   |                                                                                                                                                                                                 |
|---------------------------------------------------|-------------------------------------------------------------------------------------------------------------------------------------------------------------------------------------------------|
| LF 2T                                             | [*DATA REMOVED*]                                                                                                                                                                                |
| PFE 2T (Hadlock)                                  | [*DATA REMOVED*]                                                                                                                                                                                |
| Semanas gestación 3T                              | [*DATA REMOVED*]                                                                                                                                                                                |
| días 3T                                           | [*DATA REMOVED*]                                                                                                                                                                                |
| DBP 3T                                            | [*DATA REMOVED*]                                                                                                                                                                                |
| CC 3T                                             | [*DATA REMOVED*]                                                                                                                                                                                |
| AC 3T                                             | [*DATA REMOVED*]                                                                                                                                                                                |
| LF 3T                                             | [*DATA REMOVED*]                                                                                                                                                                                |
| PFE 3T (Hadlock)                                  | [*DATA REMOVED*]                                                                                                                                                                                |
| Semanas de gestación final                        | [*DATA REMOVED*]                                                                                                                                                                                |
| días gestación final                              | [*DATA REMOVED*]                                                                                                                                                                                |
| Localización placenta                             | <input checked="" type="radio"/> anterior<br><input type="radio"/> lateral derecha<br><input type="radio"/> lateral izquierda<br><input type="radio"/> posterior<br><input type="radio"/> fondo |
| Presentación longitudinal cefálica                | <input type="radio"/> no<br><input checked="" type="radio"/> si                                                                                                                                 |
| Dorso                                             | <input type="radio"/> izquierda anterior<br><input checked="" type="radio"/> izquierda posterior<br><input type="radio"/> derecha anterior<br><input type="radio"/> derecha posterior           |
| diámetro biparietal                               | [*DATA REMOVED*]                                                                                                                                                                                |
| Circunferencia craneal                            | [*DATA REMOVED*]                                                                                                                                                                                |
| Circunferencia abdominal                          | [*DATA REMOVED*]                                                                                                                                                                                |
| Longitud de femur                                 | [*DATA REMOVED*]                                                                                                                                                                                |
| tejido celular subcutáneo a nivel del muslo en mm | [*DATA REMOVED*]                                                                                                                                                                                |
| tejido celular subcutáneo en abdomen en mm        | [*DATA REMOVED*]                                                                                                                                                                                |
| Volumen del muslo en cm3                          | [*DATA REMOVED*]                                                                                                                                                                                |
| Peso fetal estimado según fórmula de Hadlock      | [*DATA REMOVED*]                                                                                                                                                                                |

|                                               |                                                                                                                                                          |
|-----------------------------------------------|----------------------------------------------------------------------------------------------------------------------------------------------------------|
| Percentil                                     | [*DATA REMOVED*]                                                                                                                                         |
| Peso fetal estimado según fórmula de Scioscia | <hr/>                                                                                                                                                    |
| Peso fetal estimado según fórmula de LEE      | <hr/>                                                                                                                                                    |
| Tipo de parto                                 | <input checked="" type="radio"/> eutocico<br><input type="radio"/> instrumentado/ventosa<br><input type="radio"/> cesarea                                |
| fecha de nacimiento                           | [*DATA REMOVED*]                                                                                                                                         |
| Días entre exploración y nacimiento           | [*DATA REMOVED*]                                                                                                                                         |
| Peso RN en g                                  | [*DATA REMOVED*]                                                                                                                                         |
| sexo                                          | <input checked="" type="radio"/> mujer<br><input type="radio"/> hombre                                                                                   |
| Apgar 1 minuto                                | [*DATA REMOVED*]                                                                                                                                         |
| Apgar 5 minutos                               | [*DATA REMOVED*]                                                                                                                                         |
| Apgar 10 minutos                              | <hr/>                                                                                                                                                    |
| antecedente Covid durante gestación           | <input type="radio"/> Yes<br><input checked="" type="radio"/> No                                                                                         |
| Nivel de estudios                             | <input type="radio"/> ninguno<br><input type="radio"/> primarios<br><input checked="" type="radio"/> secundarios<br><input type="radio"/> universitarios |



# Base\_datos\_estimacion\_peso\_fetal

|                                       |                                                                                                                                                                                                                                                                                      |
|---------------------------------------|--------------------------------------------------------------------------------------------------------------------------------------------------------------------------------------------------------------------------------------------------------------------------------------|
| Número de identificación participante | 61                                                                                                                                                                                                                                                                                   |
| CODIGO PARTICIPANTE                   |                                                                                                                                                                                                                                                                                      |
| Edad                                  | [*DATA REMOVED*]                                                                                                                                                                                                                                                                     |
| Gestaciones                           | <input type="radio"/> 1<br><input type="radio"/> 2<br><input checked="" type="radio"/> 3<br><input type="radio"/> mas de 3                                                                                                                                                           |
| partos                                | <input type="radio"/> 0<br><input checked="" type="radio"/> 1<br><input type="radio"/> 2<br><input type="radio"/> 3<br><input type="radio"/> mas de 3                                                                                                                                |
| cesáreas                              | <input checked="" type="radio"/> 0<br><input type="radio"/> 1<br><input type="radio"/> 2<br><input type="radio"/> 3<br><input type="radio"/> mas de 3                                                                                                                                |
| Abortos                               | <input type="radio"/> 0<br><input checked="" type="radio"/> 1<br><input type="radio"/> 2<br><input type="radio"/> 3<br><input type="radio"/> mas de 3                                                                                                                                |
| Tipo de gestacion                     | <input checked="" type="radio"/> espontanea<br><input type="radio"/> IAC inseminación artificial conyuge<br><input type="radio"/> IAD inseminación artificial donante<br><input type="radio"/> FIV Fecundación in Vitro<br><input type="radio"/> Ovodon FIV con donación de ovocitos |
| peso previo a embarazo                | [*DATA REMOVED*]                                                                                                                                                                                                                                                                     |
| Ganancia ponderal embarazo            | [*DATA REMOVED*]                                                                                                                                                                                                                                                                     |
| Talla madre                           | [*DATA REMOVED*]                                                                                                                                                                                                                                                                     |
| IMC previo embarazo                   | 24.158817968558527                                                                                                                                                                                                                                                                   |
| Patología obstétrica                  | <input checked="" type="radio"/> no<br><input type="radio"/> si                                                                                                                                                                                                                      |
| Diabetes pregestacional               | <input checked="" type="radio"/> no<br><input type="radio"/> si                                                                                                                                                                                                                      |
| Diabetes gestacional                  | <input checked="" type="radio"/> no<br><input type="radio"/> si                                                                                                                                                                                                                      |

|                                            |                                                                                                                                                                                      |
|--------------------------------------------|--------------------------------------------------------------------------------------------------------------------------------------------------------------------------------------|
| Diabetes gestacional con insulina          | <input checked="" type="radio"/> no<br><input type="radio"/> si                                                                                                                      |
| Diabetes gestacional con dieta y ejercicio | <input checked="" type="radio"/> no<br><input type="radio"/> si                                                                                                                      |
| Percentil fetos previos                    | <input type="radio"/> Nada<br><input checked="" type="radio"/> percentil menor de 10<br><input type="radio"/> percentil entre 10 y 90<br><input type="radio"/> percentil mayor de 90 |
| Exfumadora                                 | <input type="radio"/> Nada<br><input type="radio"/> menos de 5 años<br><input type="radio"/> 5 a 10 años<br><input checked="" type="radio"/> mayor o igual a 10 años                 |
| Hábito tabáquico                           | <input checked="" type="radio"/> no<br><input type="radio"/> si                                                                                                                      |
| fumadora                                   | [*DATA REMOVED*]                                                                                                                                                                     |
| Consumo otros tóxicos                      | <input checked="" type="radio"/> no<br><input type="radio"/> si                                                                                                                      |
| Hb 1T                                      | [*DATA REMOVED*]                                                                                                                                                                     |
| Htc 1T                                     | [*DATA REMOVED*]                                                                                                                                                                     |
| Hb 2T                                      | [*DATA REMOVED*]                                                                                                                                                                     |
| HTC 2T                                     | [*DATA REMOVED*]                                                                                                                                                                     |
| Hb 3T                                      | [*DATA REMOVED*]                                                                                                                                                                     |
| HTC 3T                                     | [*DATA REMOVED*]                                                                                                                                                                     |
| Suplemento FE oral                         | <input checked="" type="radio"/> si<br><input type="radio"/> no                                                                                                                      |
| Suplemento fe iv                           | <input type="radio"/> si<br><input checked="" type="radio"/> no                                                                                                                      |
| Transfusión                                | <input checked="" type="radio"/> no<br><input type="radio"/> si                                                                                                                      |
| Solicitada Vit D                           | <input checked="" type="radio"/> no<br><input type="radio"/> si                                                                                                                      |
| Deficit vit D                              | <input type="radio"/> no<br><input type="radio"/> si                                                                                                                                 |
| Suplemento vit D                           | <input type="radio"/> si<br><input type="radio"/> no                                                                                                                                 |

|                       |                                                                                                                                                                                                                                                                                                                                                                                                              |
|-----------------------|--------------------------------------------------------------------------------------------------------------------------------------------------------------------------------------------------------------------------------------------------------------------------------------------------------------------------------------------------------------------------------------------------------------|
| Dieta, cuestionario   | <input checked="" type="radio"/> sí<br><input type="radio"/> no                                                                                                                                                                                                                                                                                                                                              |
| Leche entera          | <input checked="" type="radio"/> Nunca o menos 1 vez al mes<br><input type="radio"/> 1 a 3 veces mes<br><input type="radio"/> 1 vez semana<br><input type="radio"/> 2 a 4 veces semana<br><input type="radio"/> 5 a 6 veces semana<br><input type="radio"/> 1 vez al día<br><input type="radio"/> 2 a 3 veces al día<br><input type="radio"/> 5 a 6 veces al día<br><input type="radio"/> más 6 veces al día |
| Leche semidesnatada   | <input type="radio"/> Nunca o menos 1 vez al mes<br><input checked="" type="radio"/> 1 a 3 veces mes<br><input type="radio"/> 1 vez semana<br><input type="radio"/> 2 a 4 veces semana<br><input type="radio"/> 5 a 6 veces semana<br><input type="radio"/> 1 vez al día<br><input type="radio"/> 2 a 3 veces al día<br><input type="radio"/> 5 a 6 veces al día<br><input type="radio"/> mas 6 veces al día |
| Leche desnatada       | <input checked="" type="radio"/> Nunca o menos 1 vez al mes<br><input type="radio"/> 1 a 3 veces mes<br><input type="radio"/> 1 vez semana<br><input type="radio"/> 2 a 4 veces semana<br><input type="radio"/> 5 a 6 veces semana<br><input type="radio"/> 1 vez al día<br><input type="radio"/> 2 a 3 veces al día<br><input type="radio"/> 5 a 6 veces al día<br><input type="radio"/> más 6 veces al día |
| Leche condensada      | <input checked="" type="radio"/> Nunca o menos 1 vez al mes<br><input type="radio"/> 1 a 3 veces mes<br><input type="radio"/> 1 vez semana<br><input type="radio"/> 2 a 4 veces semana<br><input type="radio"/> 5 a 6 veces semana<br><input type="radio"/> 1 vez al día<br><input type="radio"/> 2 a 3 veces al día<br><input type="radio"/> 5 a 6 veces al día<br><input type="radio"/> más 6 veces al día |
| nata o crema de leche | <input checked="" type="radio"/> Nunca o menos 1 vez al mes<br><input type="radio"/> 1 a 3 veces mes<br><input type="radio"/> 1 vez semana<br><input type="radio"/> 2 a 4 veces semana<br><input type="radio"/> 5 a 6 veces semana<br><input type="radio"/> 1 vez al día<br><input type="radio"/> 2 a 3 veces al día<br><input type="radio"/> 5 a 6 veces al día<br><input type="radio"/> más 6 veces al día |

|                                             |                                                                                                                                                                                                                                                                                                                                                                                                              |
|---------------------------------------------|--------------------------------------------------------------------------------------------------------------------------------------------------------------------------------------------------------------------------------------------------------------------------------------------------------------------------------------------------------------------------------------------------------------|
| Yogurt Entero                               | <input checked="" type="radio"/> Nunca o menos 1 vez al mes<br><input type="radio"/> 1 a 3 veces mes<br><input type="radio"/> 1 vez semana<br><input type="radio"/> 2 a 4 veces semana<br><input type="radio"/> 5 a 6 veces semana<br><input type="radio"/> 1 vez al día<br><input type="radio"/> 2 a 3 veces al día<br><input type="radio"/> 5 a 6 veces al día<br><input type="radio"/> más 6 veces al día |
| Yogurt desnatado                            | <input type="radio"/> Nunca o menos 1 vez al mes<br><input type="radio"/> 1 a 3 veces mes<br><input checked="" type="radio"/> 1 vez semana<br><input type="radio"/> 2 a 4 veces semana<br><input type="radio"/> 5 a 6 veces semana<br><input type="radio"/> 1 vez al día<br><input type="radio"/> 2 a 3 veces al día<br><input type="radio"/> 5 a 6 veces al día<br><input type="radio"/> más 6 veces al día |
| 100g requesón o queso blando o queso fresco | <input type="radio"/> Nunca o menos 1 vez al mes<br><input type="radio"/> 1 a 3 veces mes<br><input type="radio"/> 1 vez semana<br><input type="radio"/> 2 a 4 veces semana<br><input type="radio"/> 5 a 6 veces semana<br><input type="radio"/> 1 vez al día<br><input type="radio"/> 2 a 3 veces al día<br><input checked="" type="radio"/> 5 a 6 veces al día<br><input type="radio"/> más 6 veces al día |
| queso curado o semicurado o cremoso         | <input type="radio"/> Nunca o menos 1 vez al mes<br><input type="radio"/> 1 a 3 veces mes<br><input checked="" type="radio"/> 1 vez semana<br><input type="radio"/> 2 a 4 veces semana<br><input type="radio"/> 5 a 6 veces semana<br><input type="radio"/> 1 vez al día<br><input type="radio"/> 2 a 3 veces al día<br><input type="radio"/> 5 a 6 veces al día<br><input type="radio"/> más 6 veces al día |
| natillas flan pudding                       | <input checked="" type="radio"/> Nunca o menos 1 vez al mes<br><input type="radio"/> 1 a 3 veces mes<br><input type="radio"/> 1 vez semana<br><input type="radio"/> 2 a 4 veces semana<br><input type="radio"/> 5 a 6 veces semana<br><input type="radio"/> 1 vez al día<br><input type="radio"/> 2 a 3 veces al día<br><input type="radio"/> 5 a 6 veces al día<br><input type="radio"/> más 6 veces al día |
| Helado                                      | <input type="radio"/> Nunca o menos 1 vez al mes<br><input type="radio"/> 1 a 3 veces mes<br><input type="radio"/> 1 vez semana<br><input checked="" type="radio"/> 2 a 4 veces semana<br><input type="radio"/> 5 a 6 veces semana<br><input type="radio"/> 1 vez al día<br><input type="radio"/> 2 a 3 veces al día<br><input type="radio"/> 5 a 6 veces al día<br><input type="radio"/> más 6 veces al día |

|                                      |                                                                                                                                                                                                                                                                                                                                                                                                              |
|--------------------------------------|--------------------------------------------------------------------------------------------------------------------------------------------------------------------------------------------------------------------------------------------------------------------------------------------------------------------------------------------------------------------------------------------------------------|
| huevo                                | <input type="radio"/> Nunca o menos 1 vez al mes<br><input type="radio"/> 1 a 3 veces mes<br><input type="radio"/> 1 vez semana<br><input checked="" type="radio"/> 2 a 4 veces semana<br><input type="radio"/> 5 a 6 veces semana<br><input type="radio"/> 1 vez al día<br><input type="radio"/> 2 a 3 veces al día<br><input type="radio"/> 5 a 6 veces al día<br><input type="radio"/> más 6 veces al día |
| Pollo con piel                       | <input type="radio"/> Nunca o menos 1 vez al mes<br><input type="radio"/> 1 a 3 veces mes<br><input checked="" type="radio"/> 1 vez semana<br><input type="radio"/> 2 a 4 veces semana<br><input type="radio"/> 5 a 6 veces semana<br><input type="radio"/> 1 vez al día<br><input type="radio"/> 2 a 3 veces al día<br><input type="radio"/> 5 a 6 veces al día<br><input type="radio"/> más 6 veces al día |
| pollo sin piel                       | <input type="radio"/> Nunca o menos 1 vez al mes<br><input type="radio"/> 1 a 3 veces mes<br><input checked="" type="radio"/> 1 vez semana<br><input type="radio"/> 2 a 4 veces semana<br><input type="radio"/> 5 a 6 veces semana<br><input type="radio"/> 1 vez al día<br><input type="radio"/> 2 a 3 veces al día<br><input type="radio"/> 5 a 6 veces al día<br><input type="radio"/> más 6 veces al día |
| Ternera o cerdo o cordero            | <input checked="" type="radio"/> Nunca o menos 1 vez al mes<br><input type="radio"/> 1 a 3 veces mes<br><input type="radio"/> 1 vez semana<br><input type="radio"/> 2 a 4 veces semana<br><input type="radio"/> 5 a 6 veces semana<br><input type="radio"/> 1 vez al día<br><input type="radio"/> 2 a 3 veces al día<br><input type="radio"/> 5 a 6 veces al día<br><input type="radio"/> más 6 veces al día |
| carne caza: Conejo o codorniz o pato | <input checked="" type="radio"/> Nunca o menos 1 vez al mes<br><input type="radio"/> 1 a 3 veces mes<br><input type="radio"/> 1 vez semana<br><input type="radio"/> 2 a 4 veces semana<br><input type="radio"/> 5 a 6 veces semana<br><input type="radio"/> 1 vez al día<br><input type="radio"/> 2 a 3 veces al día<br><input type="radio"/> 5 a 6 veces al día<br><input type="radio"/> más 6 veces al día |
| Hígado de ternera o cerdo o pollo    | <input type="radio"/> Nunca o menos 1 vez al mes<br><input type="radio"/> 1 a 3 veces mes<br><input checked="" type="radio"/> 1 vez semana<br><input type="radio"/> 2 a 4 veces semana<br><input type="radio"/> 5 a 6 veces semana<br><input type="radio"/> 1 vez al día<br><input type="radio"/> 2 a 3 veces al día<br><input type="radio"/> 5 a 6 veces al día<br><input type="radio"/> más 6 veces al día |

|                     |                                                                                                                                                                                                                                                                                                                                                                                                              |
|---------------------|--------------------------------------------------------------------------------------------------------------------------------------------------------------------------------------------------------------------------------------------------------------------------------------------------------------------------------------------------------------------------------------------------------------|
| Vísceras            | <input checked="" type="radio"/> Nunca o menos 1 vez al mes<br><input type="radio"/> 1 a 3 veces mes<br><input type="radio"/> 1 vez semana<br><input type="radio"/> 2 a 4 veces semana<br><input type="radio"/> 5 a 6 veces semana<br><input type="radio"/> 1 vez al día<br><input type="radio"/> 2 a 3 veces al día<br><input type="radio"/> 5 a 6 veces al día<br><input type="radio"/> más 6 veces al día |
| Embutido            | <input type="radio"/> Nunca o menos 1 vez al mes<br><input type="radio"/> 1 a 3 veces mes<br><input checked="" type="radio"/> 1 vez semana<br><input type="radio"/> 2 a 4 veces semana<br><input type="radio"/> 5 a 6 veces semana<br><input type="radio"/> 1 vez al día<br><input type="radio"/> 2 a 3 veces al día<br><input type="radio"/> 5 a 6 veces al día<br><input type="radio"/> más 6 veces al día |
| Salchicha o similar | <input checked="" type="radio"/> Nunca o menos 1 vez al mes<br><input type="radio"/> 1 a 3 veces mes<br><input type="radio"/> 1 vez semana<br><input type="radio"/> 2 a 4 veces semana<br><input type="radio"/> 5 a 6 veces semana<br><input type="radio"/> 1 vez al día<br><input type="radio"/> 2 a 3 veces al día<br><input type="radio"/> 5 a 6 veces al día<br><input type="radio"/> más 6 veces al día |
| Pate o foiegras     | <input checked="" type="radio"/> Nunca o menos 1 vez al mes<br><input type="radio"/> 1 a 3 veces mes<br><input type="radio"/> 1 vez semana<br><input type="radio"/> 2 a 4 veces semana<br><input type="radio"/> 5 a 6 veces semana<br><input type="radio"/> 1 vez al día<br><input type="radio"/> 2 a 3 veces al día<br><input type="radio"/> 5 a 6 veces al día<br><input type="radio"/> más 6 veces al día |
| Hamburguesa         | <input type="radio"/> Nunca o menos 1 vez al mes<br><input type="radio"/> 1 a 3 veces mes<br><input checked="" type="radio"/> 1 vez semana<br><input type="radio"/> 2 a 4 veces semana<br><input type="radio"/> 5 a 6 veces semana<br><input type="radio"/> 1 vez al día<br><input type="radio"/> 2 a 3 veces al día<br><input type="radio"/> 5 a 6 veces al día<br><input type="radio"/> más 6 veces al día |
| tocino o bacon      | <input type="radio"/> Nunca o menos 1 vez al mes<br><input checked="" type="radio"/> 1 a 3 veces mes<br><input type="radio"/> 1 vez semana<br><input type="radio"/> 2 a 4 veces semana<br><input type="radio"/> 5 a 6 veces semana<br><input type="radio"/> 1 vez al día<br><input type="radio"/> 2 a 3 veces al día<br><input type="radio"/> 5 a 6 veces al día<br><input type="radio"/> más 6 veces al día |

|                        |                                                                                                                                                                                                                                                                                                                                                                                                              |
|------------------------|--------------------------------------------------------------------------------------------------------------------------------------------------------------------------------------------------------------------------------------------------------------------------------------------------------------------------------------------------------------------------------------------------------------|
| Pescado frito          | <input type="radio"/> Nunca o menos 1 vez al mes<br><input checked="" type="radio"/> 1 a 3 veces mes<br><input type="radio"/> 1 vez semana<br><input type="radio"/> 2 a 4 veces semana<br><input type="radio"/> 5 a 6 veces semana<br><input type="radio"/> 1 vez al día<br><input type="radio"/> 2 a 3 veces al día<br><input type="radio"/> 5 a 6 veces al día<br><input type="radio"/> más 6 veces al día |
| pescado hervido blanco | <input type="radio"/> Nunca o menos 1 vez al mes<br><input checked="" type="radio"/> 1 a 3 veces mes<br><input type="radio"/> 1 vez semana<br><input type="radio"/> 2 a 4 veces semana<br><input type="radio"/> 5 a 6 veces semana<br><input type="radio"/> 1 vez al día<br><input type="radio"/> 2 a 3 veces al día<br><input type="radio"/> 5 a 6 veces al día<br><input type="radio"/> más 6 veces al día |
| pescado hervido azul   | <input type="radio"/> Nunca o menos 1 vez al mes<br><input type="radio"/> 1 a 3 veces mes<br><input type="radio"/> 1 vez semana<br><input checked="" type="radio"/> 2 a 4 veces semana<br><input type="radio"/> 5 a 6 veces semana<br><input type="radio"/> 1 vez al día<br><input type="radio"/> 2 a 3 veces al día<br><input type="radio"/> 5 a 6 veces al día<br><input type="radio"/> más 6 veces al día |
| otros pescado azul     | <input type="radio"/> Nunca o menos 1 vez al mes<br><input type="radio"/> 1 a 3 veces mes<br><input checked="" type="radio"/> 1 vez semana<br><input type="radio"/> 2 a 4 veces semana<br><input type="radio"/> 5 a 6 veces semana<br><input type="radio"/> 1 vez al día<br><input type="radio"/> 2 a 3 veces al día<br><input type="radio"/> 5 a 6 veces al día<br><input type="radio"/> más 6 veces al día |
| atun conserva          | <input type="radio"/> Nunca o menos 1 vez al mes<br><input type="radio"/> 1 a 3 veces mes<br><input checked="" type="radio"/> 1 vez semana<br><input type="radio"/> 2 a 4 veces semana<br><input type="radio"/> 5 a 6 veces semana<br><input type="radio"/> 1 vez al día<br><input type="radio"/> 2 a 3 veces al día<br><input type="radio"/> 5 a 6 veces al día<br><input type="radio"/> más 6 veces al día |
| sardina conserva       | <input checked="" type="radio"/> Nunca o menos 1 vez al mes<br><input type="radio"/> 1 a 3 veces mes<br><input type="radio"/> 1 vez semana<br><input type="radio"/> 2 a 4 veces semana<br><input type="radio"/> 5 a 6 veces semana<br><input type="radio"/> 1 vez al día<br><input type="radio"/> 2 a 3 veces al día<br><input type="radio"/> 5 a 6 veces al día<br><input type="radio"/> más 6 veces al día |

|                                         |                                                                                                                                                                                                                                                                                                                                                                                                              |
|-----------------------------------------|--------------------------------------------------------------------------------------------------------------------------------------------------------------------------------------------------------------------------------------------------------------------------------------------------------------------------------------------------------------------------------------------------------------|
| pescado ahumado                         | <input checked="" type="radio"/> Nunca o menos 1 vez al mes<br><input type="radio"/> 1 a 3 veces mes<br><input type="radio"/> 1 vez semana<br><input type="radio"/> 2 a 4 veces semana<br><input type="radio"/> 5 a 6 veces semana<br><input type="radio"/> 1 vez al día<br><input type="radio"/> 2 a 3 veces al día<br><input type="radio"/> 5 a 6 veces al día<br><input type="radio"/> más 6 veces al día |
| almejas o mejillones o ostras unos 100g | <input checked="" type="radio"/> Nunca o menos 1 vez al mes<br><input type="radio"/> 1 a 3 veces mes<br><input type="radio"/> 1 vez semana<br><input type="radio"/> 2 a 4 veces semana<br><input type="radio"/> 5 a 6 veces semana<br><input type="radio"/> 1 vez al día<br><input type="radio"/> 2 a 3 veces al día<br><input type="radio"/> 5 a 6 veces al día<br><input type="radio"/> más 6 veces al día |
| calamar o chipiron o sepia unos 100g    | <input type="radio"/> Nunca o menos 1 vez al mes<br><input type="radio"/> 1 a 3 veces mes<br><input checked="" type="radio"/> 1 vez semana<br><input type="radio"/> 2 a 4 veces semana<br><input type="radio"/> 5 a 6 veces semana<br><input type="radio"/> 1 vez al día<br><input type="radio"/> 2 a 3 veces al día<br><input type="radio"/> 5 a 6 veces al día<br><input type="radio"/> más 6 veces al día |
| marisco unos 100g                       | <input type="radio"/> Nunca o menos 1 vez al mes<br><input type="radio"/> 1 a 3 veces mes<br><input checked="" type="radio"/> 1 vez semana<br><input type="radio"/> 2 a 4 veces semana<br><input type="radio"/> 5 a 6 veces semana<br><input type="radio"/> 1 vez al día<br><input type="radio"/> 2 a 3 veces al día<br><input type="radio"/> 5 a 6 veces al día<br><input type="radio"/> más 6 veces al día |
| Espinacas o acelgas cocinadas           | <input type="radio"/> Nunca o menos 1 vez al mes<br><input checked="" type="radio"/> 1 a 3 veces mes<br><input type="radio"/> 1 vez semana<br><input type="radio"/> 2 a 4 veces semana<br><input type="radio"/> 5 a 6 veces semana<br><input type="radio"/> 1 vez al día<br><input type="radio"/> 2 a 3 veces al día<br><input type="radio"/> 5 a 6 veces al día<br><input type="radio"/> más 6 veces al día |
| Col o coliflor o brocoli cocinado       | <input type="radio"/> Nunca o menos 1 vez al mes<br><input checked="" type="radio"/> 1 a 3 veces mes<br><input type="radio"/> 1 vez semana<br><input type="radio"/> 2 a 4 veces semana<br><input type="radio"/> 5 a 6 veces semana<br><input type="radio"/> 1 vez al día<br><input type="radio"/> 2 a 3 veces al día<br><input type="radio"/> 5 a 6 veces al día<br><input type="radio"/> más 6 veces al día |



---

Lechuga o endivia o escarola

- ☐ Nunca o menos 1 vez al mes  
☐ 1 a 3 veces mes  
☐ 1 vez semana  
☐ 2 a 4 veces semana  
☒ 5 a 6 veces semana  
☐ 1 vez al día  
☐ 2 a 3 veces al día  
☐ 5 a 6 veces al día  
☐ más 6 veces al día

---

tomate ensalada

- ☐ Nunca o menos 1 vez al mes  
☐ 1 a 3 veces mes  
☐ 1 vez semana  
☐ 2 a 4 veces semana  
☒ 5 a 6 veces semana  
☐ 1 vez al día  
☐ 2 a 3 veces al día  
☐ 5 a 6 veces al día  
☐ más 6 veces al día

---

cebolla

- ☐ Nunca o menos 1 vez al mes  
☐ 1 a 3 veces mes  
☐ 1 vez semana  
☐ 2 a 4 veces semana  
☒ 5 a 6 veces semana  
☐ 1 vez al día  
☐ 2 a 3 veces al día  
☐ 5 a 6 veces al día  
☐ más 6 veces al día

---

Zanahoria o calabaza

- ☐ Nunca o menos 1 vez al mes  
☐ 1 a 3 veces mes  
☒ 1 vez semana  
☐ 2 a 4 veces semana  
☐ 5 a 6 veces semana  
☐ 1 vez al día  
☐ 2 a 3 veces al día  
☐ 5 a 6 veces al día  
☐ más 6 veces al día

---

Judías verdes

- ☐ Nunca o menos 1 vez al mes  
☐ 1 a 3 veces mes  
☐ 1 vez semana  
☐ 2 a 4 veces semana  
☒ 5 a 6 veces semana  
☐ 1 vez al día  
☐ 2 a 3 veces al día  
☐ 5 a 6 veces al día  
☐ más 6 veces al día

---

Berenjena o calabacin o pepino

- ☐ Nunca o menos 1 vez al mes  
☐ 1 a 3 veces mes  
☐ 1 vez semana  
☒ 2 a 4 veces semana  
☐ 5 a 6 veces semana  
☐ 1 vez al día  
☐ 2 a 3 veces al día  
☐ 5 a 6 veces al día  
☐ más 6 veces al día

|                       |                                                                                                                                                                                                                                                                                                                                                                                                              |
|-----------------------|--------------------------------------------------------------------------------------------------------------------------------------------------------------------------------------------------------------------------------------------------------------------------------------------------------------------------------------------------------------------------------------------------------------|
| pimiento              | <input type="radio"/> Nunca o menos 1 vez al mes<br><input type="radio"/> 1 a 3 veces mes<br><input type="radio"/> 1 vez semana<br><input checked="" type="radio"/> 2 a 4 veces semana<br><input type="radio"/> 5 a 6 veces semana<br><input type="radio"/> 1 vez al día<br><input type="radio"/> 2 a 3 veces al día<br><input type="radio"/> 5 a 6 veces al día<br><input type="radio"/> más 6 veces al día |
| alcachofa             | <input checked="" type="radio"/> Nunca o menos 1 vez al mes<br><input type="radio"/> 1 a 3 veces mes<br><input type="radio"/> 1 vez semana<br><input type="radio"/> 2 a 4 veces semana<br><input type="radio"/> 5 a 6 veces semana<br><input type="radio"/> 1 vez al día<br><input type="radio"/> 2 a 3 veces al día<br><input type="radio"/> 5 a 6 veces al día<br><input type="radio"/> más 6 veces al día |
| espárragos            | <input checked="" type="radio"/> Nunca o menos 1 vez al mes<br><input type="radio"/> 1 a 3 veces mes<br><input type="radio"/> 1 vez semana<br><input type="radio"/> 2 a 4 veces semana<br><input type="radio"/> 5 a 6 veces semana<br><input type="radio"/> 1 vez al día<br><input type="radio"/> 2 a 3 veces al día<br><input type="radio"/> 5 a 6 veces al día<br><input type="radio"/> más 6 veces al día |
| maíz hervido          | <input checked="" type="radio"/> Nunca o menos 1 vez al mes<br><input type="radio"/> 1 a 3 veces mes<br><input type="radio"/> 1 vez semana<br><input type="radio"/> 2 a 4 veces semana<br><input type="radio"/> 5 a 6 veces semana<br><input type="radio"/> 1 vez al día<br><input type="radio"/> 2 a 3 veces al día<br><input type="radio"/> 5 a 6 veces al día<br><input type="radio"/> más 6 veces al día |
| legumbres             | <input type="radio"/> Nunca o menos 1 vez al mes<br><input checked="" type="radio"/> 1 a 3 veces mes<br><input type="radio"/> 1 vez semana<br><input type="radio"/> 2 a 4 veces semana<br><input type="radio"/> 5 a 6 veces semana<br><input type="radio"/> 1 vez al día<br><input type="radio"/> 2 a 3 veces al día<br><input type="radio"/> 5 a 6 veces al día<br><input type="radio"/> más 6 veces al día |
| naranjas o mandarinas | <input checked="" type="radio"/> Nunca o menos 1 vez al mes<br><input type="radio"/> 1 a 3 veces mes<br><input type="radio"/> 1 vez semana<br><input type="radio"/> 2 a 4 veces semana<br><input type="radio"/> 5 a 6 veces semana<br><input type="radio"/> 1 vez al día<br><input type="radio"/> 2 a 3 veces al día<br><input type="radio"/> 5 a 6 veces al día<br><input type="radio"/> más 6 veces al día |

|                       |                                                                                                                                                                                                                                                                                                                                                                                                              |
|-----------------------|--------------------------------------------------------------------------------------------------------------------------------------------------------------------------------------------------------------------------------------------------------------------------------------------------------------------------------------------------------------------------------------------------------------|
| zum natural fruta     | <input checked="" type="radio"/> Nunca o menos 1 vez al mes<br><input type="radio"/> 1 a 3 veces mes<br><input type="radio"/> 1 vez semana<br><input type="radio"/> 2 a 4 veces semana<br><input type="radio"/> 5 a 6 veces semana<br><input type="radio"/> 1 vez al día<br><input type="radio"/> 2 a 3 veces al día<br><input type="radio"/> 5 a 6 veces al día<br><input type="radio"/> más 6 veces al día |
| platano               | <input type="radio"/> Nunca o menos 1 vez al mes<br><input type="radio"/> 1 a 3 veces mes<br><input checked="" type="radio"/> 1 vez semana<br><input type="radio"/> 2 a 4 veces semana<br><input type="radio"/> 5 a 6 veces semana<br><input type="radio"/> 1 vez al día<br><input type="radio"/> 2 a 3 veces al día<br><input type="radio"/> 5 a 6 veces al día<br><input type="radio"/> más 6 veces al día |
| manzana o pera        | <input type="radio"/> Nunca o menos 1 vez al mes<br><input type="radio"/> 1 a 3 veces mes<br><input checked="" type="radio"/> 1 vez semana<br><input type="radio"/> 2 a 4 veces semana<br><input type="radio"/> 5 a 6 veces semana<br><input type="radio"/> 1 vez al día<br><input type="radio"/> 2 a 3 veces al día<br><input type="radio"/> 5 a 6 veces al día<br><input type="radio"/> más 6 veces al día |
| melocotón o nectarina | <input type="radio"/> Nunca o menos 1 vez al mes<br><input type="radio"/> 1 a 3 veces mes<br><input checked="" type="radio"/> 1 vez semana<br><input type="radio"/> 2 a 4 veces semana<br><input type="radio"/> 5 a 6 veces semana<br><input type="radio"/> 1 vez al día<br><input type="radio"/> 2 a 3 veces al día<br><input type="radio"/> 5 a 6 veces al día<br><input type="radio"/> más 6 veces al día |
| sandia o melon        | <input type="radio"/> Nunca o menos 1 vez al mes<br><input type="radio"/> 1 a 3 veces mes<br><input type="radio"/> 1 vez semana<br><input checked="" type="radio"/> 2 a 4 veces semana<br><input type="radio"/> 5 a 6 veces semana<br><input type="radio"/> 1 vez al día<br><input type="radio"/> 2 a 3 veces al día<br><input type="radio"/> 5 a 6 veces al día<br><input type="radio"/> más 6 veces al día |
| uva                   | <input type="radio"/> Nunca o menos 1 vez al mes<br><input checked="" type="radio"/> 1 a 3 veces mes<br><input type="radio"/> 1 vez semana<br><input type="radio"/> 2 a 4 veces semana<br><input type="radio"/> 5 a 6 veces semana<br><input type="radio"/> 1 vez al día<br><input type="radio"/> 2 a 3 veces al día<br><input type="radio"/> 5 a 6 veces al día<br><input type="radio"/> más 6 veces al día |

|                 |                                                                                                                                                                                                                                                                                                                                                                                                              |
|-----------------|--------------------------------------------------------------------------------------------------------------------------------------------------------------------------------------------------------------------------------------------------------------------------------------------------------------------------------------------------------------------------------------------------------------|
| bruna o ciruela | <input checked="" type="radio"/> Nunca o menos 1 vez al mes<br><input type="radio"/> 1 a 3 veces mes<br><input type="radio"/> 1 vez semana<br><input type="radio"/> 2 a 4 veces semana<br><input type="radio"/> 5 a 6 veces semana<br><input type="radio"/> 1 vez al día<br><input type="radio"/> 2 a 3 veces al día<br><input type="radio"/> 5 a 6 veces al día<br><input type="radio"/> más 6 veces al día |
| kiwi            | <input type="radio"/> Nunca o menos 1 vez al mes<br><input type="radio"/> 1 a 3 veces mes<br><input type="radio"/> 1 vez semana<br><input checked="" type="radio"/> 2 a 4 veces semana<br><input type="radio"/> 5 a 6 veces semana<br><input type="radio"/> 1 vez al día<br><input type="radio"/> 2 a 3 veces al día<br><input type="radio"/> 5 a 6 veces al día<br><input type="radio"/> más 6 veces al día |
| aceituna        | <input checked="" type="radio"/> Nunca o menos 1 vez al mes<br><input type="radio"/> 1 a 3 veces mes<br><input type="radio"/> 1 vez semana<br><input type="radio"/> 2 a 4 veces semana<br><input type="radio"/> 5 a 6 veces semana<br><input type="radio"/> 1 vez al día<br><input type="radio"/> 2 a 3 veces al día<br><input type="radio"/> 5 a 6 veces al día<br><input type="radio"/> más 6 veces al día |
| frutos secos    | <input type="radio"/> Nunca o menos 1 vez al mes<br><input type="radio"/> 1 a 3 veces mes<br><input type="radio"/> 1 vez semana<br><input checked="" type="radio"/> 2 a 4 veces semana<br><input type="radio"/> 5 a 6 veces semana<br><input type="radio"/> 1 vez al día<br><input type="radio"/> 2 a 3 veces al día<br><input type="radio"/> 5 a 6 veces al día<br><input type="radio"/> más 6 veces al día |
| pan blanco      | <input checked="" type="radio"/> Nunca o menos 1 vez al mes<br><input type="radio"/> 1 a 3 veces mes<br><input type="radio"/> 1 vez semana<br><input type="radio"/> 2 a 4 veces semana<br><input type="radio"/> 5 a 6 veces semana<br><input type="radio"/> 1 vez al día<br><input type="radio"/> 2 a 3 veces al día<br><input type="radio"/> 5 a 6 veces al día<br><input type="radio"/> más 6 veces al día |
| pan integral    | <input type="radio"/> Nunca o menos 1 vez al mes<br><input type="radio"/> 1 a 3 veces mes<br><input type="radio"/> 1 vez semana<br><input type="radio"/> 2 a 4 veces semana<br><input type="radio"/> 5 a 6 veces semana<br><input checked="" type="radio"/> 1 vez al día<br><input type="radio"/> 2 a 3 veces al día<br><input type="radio"/> 5 a 6 veces al día<br><input type="radio"/> más 6 veces al día |

---

|                   |                                                                                                                                                                                                                                                                                                                                                                                                              |
|-------------------|--------------------------------------------------------------------------------------------------------------------------------------------------------------------------------------------------------------------------------------------------------------------------------------------------------------------------------------------------------------------------------------------------------------|
| cereales desayuno | <input checked="" type="radio"/> Nunca o menos 1 vez al mes<br><input type="radio"/> 1 a 3 veces mes<br><input type="radio"/> 1 vez semana<br><input type="radio"/> 2 a 4 veces semana<br><input type="radio"/> 5 a 6 veces semana<br><input type="radio"/> 1 vez al día<br><input type="radio"/> 2 a 3 veces al día<br><input type="radio"/> 5 a 6 veces al día<br><input type="radio"/> más 6 veces al día |
|-------------------|--------------------------------------------------------------------------------------------------------------------------------------------------------------------------------------------------------------------------------------------------------------------------------------------------------------------------------------------------------------------------------------------------------------|

---

|                |                                                                                                                                                                                                                                                                                                                                                                                                              |
|----------------|--------------------------------------------------------------------------------------------------------------------------------------------------------------------------------------------------------------------------------------------------------------------------------------------------------------------------------------------------------------------------------------------------------------|
| patatas fritas | <input type="radio"/> Nunca o menos 1 vez al mes<br><input checked="" type="radio"/> 1 a 3 veces mes<br><input type="radio"/> 1 vez semana<br><input type="radio"/> 2 a 4 veces semana<br><input type="radio"/> 5 a 6 veces semana<br><input type="radio"/> 1 vez al día<br><input type="radio"/> 2 a 3 veces al día<br><input type="radio"/> 5 a 6 veces al día<br><input type="radio"/> más 6 veces al día |
|----------------|--------------------------------------------------------------------------------------------------------------------------------------------------------------------------------------------------------------------------------------------------------------------------------------------------------------------------------------------------------------------------------------------------------------|

---

|                          |                                                                                                                                                                                                                                                                                                                                                                                                              |
|--------------------------|--------------------------------------------------------------------------------------------------------------------------------------------------------------------------------------------------------------------------------------------------------------------------------------------------------------------------------------------------------------------------------------------------------------|
| patatas cocidas o asadas | <input checked="" type="radio"/> Nunca o menos 1 vez al mes<br><input type="radio"/> 1 a 3 veces mes<br><input type="radio"/> 1 vez semana<br><input type="radio"/> 2 a 4 veces semana<br><input type="radio"/> 5 a 6 veces semana<br><input type="radio"/> 1 vez al día<br><input type="radio"/> 2 a 3 veces al día<br><input type="radio"/> 5 a 6 veces al día<br><input type="radio"/> más 6 veces al día |
|--------------------------|--------------------------------------------------------------------------------------------------------------------------------------------------------------------------------------------------------------------------------------------------------------------------------------------------------------------------------------------------------------------------------------------------------------|

---

|             |                                                                                                                                                                                                                                                                                                                                                                                                              |
|-------------|--------------------------------------------------------------------------------------------------------------------------------------------------------------------------------------------------------------------------------------------------------------------------------------------------------------------------------------------------------------------------------------------------------------|
| bolsa papas | <input type="radio"/> Nunca o menos 1 vez al mes<br><input type="radio"/> 1 a 3 veces mes<br><input type="radio"/> 1 vez semana<br><input checked="" type="radio"/> 2 a 4 veces semana<br><input type="radio"/> 5 a 6 veces semana<br><input type="radio"/> 1 vez al día<br><input type="radio"/> 2 a 3 veces al día<br><input type="radio"/> 5 a 6 veces al día<br><input type="radio"/> más 6 veces al día |
|-------------|--------------------------------------------------------------------------------------------------------------------------------------------------------------------------------------------------------------------------------------------------------------------------------------------------------------------------------------------------------------------------------------------------------------|

---

|                |                                                                                                                                                                                                                                                                                                                                                                                                              |
|----------------|--------------------------------------------------------------------------------------------------------------------------------------------------------------------------------------------------------------------------------------------------------------------------------------------------------------------------------------------------------------------------------------------------------------|
| arroz cocinado | <input type="radio"/> Nunca o menos 1 vez al mes<br><input type="radio"/> 1 a 3 veces mes<br><input checked="" type="radio"/> 1 vez semana<br><input type="radio"/> 2 a 4 veces semana<br><input type="radio"/> 5 a 6 veces semana<br><input type="radio"/> 1 vez al día<br><input type="radio"/> 2 a 3 veces al día<br><input type="radio"/> 5 a 6 veces al día<br><input type="radio"/> más 6 veces al día |
|----------------|--------------------------------------------------------------------------------------------------------------------------------------------------------------------------------------------------------------------------------------------------------------------------------------------------------------------------------------------------------------------------------------------------------------|

---

|       |                                                                                                                                                                                                                                                                                                                                                                                                              |
|-------|--------------------------------------------------------------------------------------------------------------------------------------------------------------------------------------------------------------------------------------------------------------------------------------------------------------------------------------------------------------------------------------------------------------|
| pasta | <input type="radio"/> Nunca o menos 1 vez al mes<br><input type="radio"/> 1 a 3 veces mes<br><input type="radio"/> 1 vez semana<br><input checked="" type="radio"/> 2 a 4 veces semana<br><input type="radio"/> 5 a 6 veces semana<br><input type="radio"/> 1 vez al día<br><input type="radio"/> 2 a 3 veces al día<br><input type="radio"/> 5 a 6 veces al día<br><input type="radio"/> más 6 veces al día |
|-------|--------------------------------------------------------------------------------------------------------------------------------------------------------------------------------------------------------------------------------------------------------------------------------------------------------------------------------------------------------------------------------------------------------------|

---

|                     |                                                                                                                                                                                                                                                                                                                                                                                                              |
|---------------------|--------------------------------------------------------------------------------------------------------------------------------------------------------------------------------------------------------------------------------------------------------------------------------------------------------------------------------------------------------------------------------------------------------------|
| pizza               | <input type="radio"/> Nunca o menos 1 vez al mes<br><input checked="" type="radio"/> 1 a 3 veces mes<br><input type="radio"/> 1 vez semana<br><input type="radio"/> 2 a 4 veces semana<br><input type="radio"/> 5 a 6 veces semana<br><input type="radio"/> 1 vez al día<br><input type="radio"/> 2 a 3 veces al día<br><input type="radio"/> 5 a 6 veces al día<br><input type="radio"/> más 6 veces al día |
| aceite oliva        | <input type="radio"/> Nunca o menos 1 vez al mes<br><input type="radio"/> 1 a 3 veces mes<br><input type="radio"/> 1 vez semana<br><input type="radio"/> 2 a 4 veces semana<br><input type="radio"/> 5 a 6 veces semana<br><input checked="" type="radio"/> 1 vez al día<br><input type="radio"/> 2 a 3 veces al día<br><input type="radio"/> 5 a 6 veces al día<br><input type="radio"/> más 6 veces al día |
| otros aceites       | <input type="radio"/> Nunca o menos 1 vez al mes<br><input type="radio"/> 1 a 3 veces mes<br><input type="radio"/> 1 vez semana<br><input checked="" type="radio"/> 2 a 4 veces semana<br><input type="radio"/> 5 a 6 veces semana<br><input type="radio"/> 1 vez al día<br><input type="radio"/> 2 a 3 veces al día<br><input type="radio"/> 5 a 6 veces al día<br><input type="radio"/> más 6 veces al día |
| margarina           | <input checked="" type="radio"/> Nunca o menos 1 vez al mes<br><input type="radio"/> 1 a 3 veces mes<br><input type="radio"/> 1 vez semana<br><input type="radio"/> 2 a 4 veces semana<br><input type="radio"/> 5 a 6 veces semana<br><input type="radio"/> 1 vez al día<br><input type="radio"/> 2 a 3 veces al día<br><input type="radio"/> 5 a 6 veces al día<br><input type="radio"/> más 6 veces al día |
| mantequilla         | <input checked="" type="radio"/> Nunca o menos 1 vez al mes<br><input type="radio"/> 1 a 3 veces mes<br><input type="radio"/> 1 vez semana<br><input type="radio"/> 2 a 4 veces semana<br><input type="radio"/> 5 a 6 veces semana<br><input type="radio"/> 1 vez al día<br><input type="radio"/> 2 a 3 veces al día<br><input type="radio"/> 5 a 6 veces al día<br><input type="radio"/> más 6 veces al día |
| galletas tipo maria | <input checked="" type="radio"/> Nunca o menos 1 vez al mes<br><input type="radio"/> 1 a 3 veces mes<br><input type="radio"/> 1 vez semana<br><input type="radio"/> 2 a 4 veces semana<br><input type="radio"/> 5 a 6 veces semana<br><input type="radio"/> 1 vez al día<br><input type="radio"/> 2 a 3 veces al día<br><input type="radio"/> 5 a 6 veces al día<br><input type="radio"/> más 6 veces al día |

|                           |                                                                                                                                                                                                                                                                                                                                                                                                              |
|---------------------------|--------------------------------------------------------------------------------------------------------------------------------------------------------------------------------------------------------------------------------------------------------------------------------------------------------------------------------------------------------------------------------------------------------------|
| galletas chocolate        | <input checked="" type="radio"/> Nunca o menos 1 vez al mes<br><input type="radio"/> 1 a 3 veces mes<br><input type="radio"/> 1 vez semana<br><input type="radio"/> 2 a 4 veces semana<br><input type="radio"/> 5 a 6 veces semana<br><input type="radio"/> 1 vez al día<br><input type="radio"/> 2 a 3 veces al día<br><input type="radio"/> 5 a 6 veces al día<br><input type="radio"/> más 6 veces al día |
| bollieria                 | <input type="radio"/> Nunca o menos 1 vez al mes<br><input checked="" type="radio"/> 1 a 3 veces mes<br><input type="radio"/> 1 vez semana<br><input type="radio"/> 2 a 4 veces semana<br><input type="radio"/> 5 a 6 veces semana<br><input type="radio"/> 1 vez al día<br><input type="radio"/> 2 a 3 veces al día<br><input type="radio"/> 5 a 6 veces al día<br><input type="radio"/> más 6 veces al día |
| chocolate o bombones      | <input type="radio"/> Nunca o menos 1 vez al mes<br><input type="radio"/> 1 a 3 veces mes<br><input type="radio"/> 1 vez semana<br><input type="radio"/> 2 a 4 veces semana<br><input checked="" type="radio"/> 5 a 6 veces semana<br><input type="radio"/> 1 vez al día<br><input type="radio"/> 2 a 3 veces al día<br><input type="radio"/> 5 a 6 veces al día<br><input type="radio"/> más 6 veces al día |
| chocolate polvo o colacao | <input checked="" type="radio"/> Nunca o menos 1 vez al mes<br><input type="radio"/> 1 a 3 veces mes<br><input type="radio"/> 1 vez semana<br><input type="radio"/> 2 a 4 veces semana<br><input type="radio"/> 5 a 6 veces semana<br><input type="radio"/> 1 vez al día<br><input type="radio"/> 2 a 3 veces al día<br><input type="radio"/> 5 a 6 veces al día<br><input type="radio"/> más 6 veces al día |
| vino tinto                | <input checked="" type="radio"/> Nunca o menos 1 vez al mes<br><input type="radio"/> 1 a 3 veces mes<br><input type="radio"/> 1 vez semana<br><input type="radio"/> 2 a 4 veces semana<br><input type="radio"/> 5 a 6 veces semana<br><input type="radio"/> 1 vez al día<br><input type="radio"/> 2 a 3 veces al día<br><input type="radio"/> 5 a 6 veces al día<br><input type="radio"/> más 6 veces al día |
| vino blanco               | <input checked="" type="radio"/> Nunca o menos 1 vez al mes<br><input type="radio"/> 1 a 3 veces mes<br><input type="radio"/> 1 vez semana<br><input type="radio"/> 2 a 4 veces semana<br><input type="radio"/> 5 a 6 veces semana<br><input type="radio"/> 1 vez al día<br><input type="radio"/> 2 a 3 veces al día<br><input type="radio"/> 5 a 6 veces al día<br><input type="radio"/> más 6 veces al día |

|                       |                                                                                                                                                                                                                                                                                                                                                                                                              |
|-----------------------|--------------------------------------------------------------------------------------------------------------------------------------------------------------------------------------------------------------------------------------------------------------------------------------------------------------------------------------------------------------------------------------------------------------|
| vino seco o vermut    | <input checked="" type="radio"/> Nunca o menos 1 vez al mes<br><input type="radio"/> 1 a 3 veces mes<br><input type="radio"/> 1 vez semana<br><input type="radio"/> 2 a 4 veces semana<br><input type="radio"/> 5 a 6 veces semana<br><input type="radio"/> 1 vez al día<br><input type="radio"/> 2 a 3 veces al día<br><input type="radio"/> 5 a 6 veces al día<br><input type="radio"/> más 6 veces al día |
| cerveza               | <input checked="" type="radio"/> Nunca o menos 1 vez al mes<br><input type="radio"/> 1 a 3 veces mes<br><input type="radio"/> 1 vez semana<br><input type="radio"/> 2 a 4 veces semana<br><input type="radio"/> 5 a 6 veces semana<br><input type="radio"/> 1 vez al día<br><input type="radio"/> 2 a 3 veces al día<br><input type="radio"/> 5 a 6 veces al día<br><input type="radio"/> más 6 veces al día |
| cerveza sin alcohol   | <input checked="" type="radio"/> Nunca o menos 1 vez al mes<br><input type="radio"/> 1 a 3 veces mes<br><input type="radio"/> 1 vez semana<br><input type="radio"/> 2 a 4 veces semana<br><input type="radio"/> 5 a 6 veces semana<br><input type="radio"/> 1 vez al día<br><input type="radio"/> 2 a 3 veces al día<br><input type="radio"/> 5 a 6 veces al día<br><input type="radio"/> más 6 veces al día |
| licores               | <input checked="" type="radio"/> Nunca o menos 1 vez al mes<br><input type="radio"/> 1 a 3 veces mes<br><input type="radio"/> 1 vez semana<br><input type="radio"/> 2 a 4 veces semana<br><input type="radio"/> 5 a 6 veces semana<br><input type="radio"/> 1 vez al día<br><input type="radio"/> 2 a 3 veces al día<br><input type="radio"/> 5 a 6 veces al día<br><input type="radio"/> más 6 veces al día |
| ginebra o ron o vodka | <input checked="" type="radio"/> Nunca o menos 1 vez al mes<br><input type="radio"/> 1 a 3 veces mes<br><input type="radio"/> 1 vez semana<br><input type="radio"/> 2 a 4 veces semana<br><input type="radio"/> 5 a 6 veces semana<br><input type="radio"/> 1 vez al día<br><input type="radio"/> 2 a 3 veces al día<br><input type="radio"/> 5 a 6 veces al día<br><input type="radio"/> más 6 veces al día |
| refresco normal       | <input checked="" type="radio"/> Nunca o menos 1 vez al mes<br><input type="radio"/> 1 a 3 veces mes<br><input type="radio"/> 1 vez semana<br><input type="radio"/> 2 a 4 veces semana<br><input type="radio"/> 5 a 6 veces semana<br><input type="radio"/> 1 vez al día<br><input type="radio"/> 2 a 3 veces al día<br><input type="radio"/> 5 a 6 veces al día<br><input type="radio"/> más 6 veces al día |



|                          |                                                                                                                                                                                                                                                                                                                                                                                                              |
|--------------------------|--------------------------------------------------------------------------------------------------------------------------------------------------------------------------------------------------------------------------------------------------------------------------------------------------------------------------------------------------------------------------------------------------------------|
| refresco sin azúcar      | <input checked="" type="radio"/> Nunca o menos 1 vez al mes<br><input type="radio"/> 1 a 3 veces mes<br><input type="radio"/> 1 vez semana<br><input type="radio"/> 2 a 4 veces semana<br><input type="radio"/> 5 a 6 veces semana<br><input type="radio"/> 1 vez al día<br><input type="radio"/> 2 a 3 veces al día<br><input type="radio"/> 5 a 6 veces al día<br><input type="radio"/> más 6 veces al día |
| Agua del grifo           | <input type="radio"/> Nunca o menos 1 vez al mes<br><input type="radio"/> 1 a 3 veces mes<br><input type="radio"/> 1 vez semana<br><input type="radio"/> 2 a 4 veces semana<br><input type="radio"/> 5 a 6 veces semana<br><input type="radio"/> 1 vez al día<br><input type="radio"/> 2 a 3 veces al día<br><input type="radio"/> 5 a 6 veces al día<br><input checked="" type="radio"/> más 6 veces al día |
| agua embotellada sin gas | <input type="radio"/> Nunca o menos 1 vez al mes<br><input type="radio"/> 1 a 3 veces mes<br><input type="radio"/> 1 vez semana<br><input checked="" type="radio"/> 2 a 4 veces semana<br><input type="radio"/> 5 a 6 veces semana<br><input type="radio"/> 1 vez al día<br><input type="radio"/> 2 a 3 veces al día<br><input type="radio"/> 5 a 6 veces al día<br><input type="radio"/> más 6 veces al día |
| agua embotellada con gas | <input checked="" type="radio"/> Nunca o menos 1 vez al mes<br><input type="radio"/> 1 a 3 veces mes<br><input type="radio"/> 1 vez semana<br><input type="radio"/> 2 a 4 veces semana<br><input type="radio"/> 5 a 6 veces semana<br><input type="radio"/> 1 vez al día<br><input type="radio"/> 2 a 3 veces al día<br><input type="radio"/> 5 a 6 veces al día<br><input type="radio"/> más 6 veces al día |
| zumو frutas embasado     | <input checked="" type="radio"/> Nunca o menos 1 vez al mes<br><input type="radio"/> 1 a 3 veces mes<br><input type="radio"/> 1 vez semana<br><input type="radio"/> 2 a 4 veces semana<br><input type="radio"/> 5 a 6 veces semana<br><input type="radio"/> 1 vez al día<br><input type="radio"/> 2 a 3 veces al día<br><input type="radio"/> 5 a 6 veces al día<br><input type="radio"/> más 6 veces al día |
| cafe                     | <input type="radio"/> Nunca o menos 1 vez al mes<br><input type="radio"/> 1 a 3 veces mes<br><input type="radio"/> 1 vez semana<br><input type="radio"/> 2 a 4 veces semana<br><input type="radio"/> 5 a 6 veces semana<br><input checked="" type="radio"/> 1 vez al día<br><input type="radio"/> 2 a 3 veces al día<br><input type="radio"/> 5 a 6 veces al día<br><input type="radio"/> más 6 veces al día |

|                       |                                                                                                                                                                                                                                                                                                                                                                                                              |
|-----------------------|--------------------------------------------------------------------------------------------------------------------------------------------------------------------------------------------------------------------------------------------------------------------------------------------------------------------------------------------------------------------------------------------------------------|
| cafe descafeinado     | <input type="radio"/> Nunca o menos 1 vez al mes<br><input type="radio"/> 1 a 3 veces mes<br><input type="radio"/> 1 vez semana<br><input type="radio"/> 2 a 4 veces semana<br><input type="radio"/> 5 a 6 veces semana<br><input checked="" type="radio"/> 1 vez al día<br><input type="radio"/> 2 a 3 veces al día<br><input type="radio"/> 5 a 6 veces al día<br><input type="radio"/> más 6 veces al día |
| te o infusión         | <input type="radio"/> Nunca o menos 1 vez al mes<br><input checked="" type="radio"/> 1 a 3 veces mes<br><input type="radio"/> 1 vez semana<br><input type="radio"/> 2 a 4 veces semana<br><input type="radio"/> 5 a 6 veces semana<br><input type="radio"/> 1 vez al día<br><input type="radio"/> 2 a 3 veces al día<br><input type="radio"/> 5 a 6 veces al día<br><input type="radio"/> más 6 veces al día |
| sopa o puré verduras  | <input type="radio"/> Nunca o menos 1 vez al mes<br><input type="radio"/> 1 a 3 veces mes<br><input type="radio"/> 1 vez semana<br><input checked="" type="radio"/> 2 a 4 veces semana<br><input type="radio"/> 5 a 6 veces semana<br><input type="radio"/> 1 vez al día<br><input type="radio"/> 2 a 3 veces al día<br><input type="radio"/> 5 a 6 veces al día<br><input type="radio"/> más 6 veces al día |
| croquetas pollo jamón | <input type="radio"/> Nunca o menos 1 vez al mes<br><input type="radio"/> 1 a 3 veces mes<br><input checked="" type="radio"/> 1 vez semana<br><input type="radio"/> 2 a 4 veces semana<br><input type="radio"/> 5 a 6 veces semana<br><input type="radio"/> 1 vez al día<br><input type="radio"/> 2 a 3 veces al día<br><input type="radio"/> 5 a 6 veces al día<br><input type="radio"/> más 6 veces al día |
| croquetas pescado     | <input type="radio"/> Nunca o menos 1 vez al mes<br><input checked="" type="radio"/> 1 a 3 veces mes<br><input type="radio"/> 1 vez semana<br><input type="radio"/> 2 a 4 veces semana<br><input type="radio"/> 5 a 6 veces semana<br><input type="radio"/> 1 vez al día<br><input type="radio"/> 2 a 3 veces al día<br><input type="radio"/> 5 a 6 veces al día<br><input type="radio"/> más 6 veces al día |
| mayonesa              | <input checked="" type="radio"/> Nunca o menos 1 vez al mes<br><input type="radio"/> 1 a 3 veces mes<br><input type="radio"/> 1 vez semana<br><input type="radio"/> 2 a 4 veces semana<br><input type="radio"/> 5 a 6 veces semana<br><input type="radio"/> 1 vez al día<br><input type="radio"/> 2 a 3 veces al día<br><input type="radio"/> 5 a 6 veces al día<br><input type="radio"/> más 6 veces al día |

---

salsa tomate

- ☐ Nunca o menos 1 vez al mes  
☒ 1 a 3 veces mes  
☐ 1 vez semana  
☐ 2 a 4 veces semana  
☐ 5 a 6 veces semana  
☐ 1 vez al día  
☐ 2 a 3 veces al día  
☐ 5 a 6 veces al día  
☐ más 6 veces al día

---

ketchup

- ☐ Nunca o menos 1 vez al mes  
☐ 1 a 3 veces mes  
☐ 1 vez semana  
☒ 2 a 4 veces semana  
☐ 5 a 6 veces semana  
☐ 1 vez al día  
☐ 2 a 3 veces al día  
☐ 5 a 6 veces al día  
☐ más 6 veces al día

---

sal

- ☒ Nunca o menos 1 vez al mes  
☐ 1 a 3 veces mes  
☐ 1 vez semana  
☐ 2 a 4 veces semana  
☐ 5 a 6 veces semana  
☐ 1 vez al día  
☐ 2 a 3 veces al día  
☐ 5 a 6 veces al día  
☐ más 6 veces al día

---

ajo

- ☐ Nunca o menos 1 vez al mes  
☒ 1 a 3 veces mes  
☐ 1 vez semana  
☐ 2 a 4 veces semana  
☐ 5 a 6 veces semana  
☐ 1 vez al día  
☐ 2 a 3 veces al día  
☐ 5 a 6 veces al día  
☐ más 6 veces al día

---

mermelada o miel

- ☐ Nunca o menos 1 vez al mes  
☐ 1 a 3 veces mes  
☒ 1 vez semana  
☐ 2 a 4 veces semana  
☐ 5 a 6 veces semana  
☐ 1 vez al día  
☐ 2 a 3 veces al día  
☐ 5 a 6 veces al día  
☐ más 6 veces al día

---

azúcar

- ☒ Nunca o menos 1 vez al mes  
☐ 1 a 3 veces mes  
☐ 1 vez semana  
☐ 2 a 4 veces semana  
☐ 5 a 6 veces semana  
☐ 1 vez al día  
☐ 2 a 3 veces al día  
☐ 5 a 6 veces al día  
☐ más 6 veces al día

|                                       |                                                                                                                                                                                                                                                                                                                                                                                                                                                                                                                               |
|---------------------------------------|-------------------------------------------------------------------------------------------------------------------------------------------------------------------------------------------------------------------------------------------------------------------------------------------------------------------------------------------------------------------------------------------------------------------------------------------------------------------------------------------------------------------------------|
| Otro alimento                         | [*DATA REMOVED*]                                                                                                                                                                                                                                                                                                                                                                                                                                                                                                              |
| suplementos vitamínicos               | <input checked="" type="radio"/> si<br><input type="radio"/> no                                                                                                                                                                                                                                                                                                                                                                                                                                                               |
| suplementos vitamínicos               | [*DATA REMOVED*]                                                                                                                                                                                                                                                                                                                                                                                                                                                                                                              |
| dieta previa                          | <input type="radio"/> si<br><input checked="" type="radio"/> no                                                                                                                                                                                                                                                                                                                                                                                                                                                               |
| motivo dieta                          | <input checked="" type="radio"/> no dieta<br><input type="radio"/> control peso<br><input type="radio"/> control colesterol<br><input type="radio"/> control diabetes<br><input type="radio"/> problemas estómago<br><input type="radio"/> problemas vesícula o hepáticos<br><input type="radio"/> HTA o cardiopatía<br><input type="radio"/> problemas renales<br><input type="radio"/> alergia alimentaria<br><input type="radio"/> ácido úrico elevado<br><input type="radio"/> vegetariana<br><input type="radio"/> otros |
| cambio alimentos año previo gestación | <input type="radio"/> si<br><input checked="" type="radio"/> no                                                                                                                                                                                                                                                                                                                                                                                                                                                               |
| cambio lácteos                        | <input type="radio"/> eliminado<br><input type="radio"/> disminuido<br><input checked="" type="radio"/> igual<br><input type="radio"/> aumentado<br><input type="radio"/> no sabe                                                                                                                                                                                                                                                                                                                                             |
| cambio huevos                         | <input type="radio"/> eliminado<br><input type="radio"/> disminuido<br><input checked="" type="radio"/> igual<br><input type="radio"/> aumentado<br><input type="radio"/> no sabe                                                                                                                                                                                                                                                                                                                                             |
| cambio carne                          | <input type="radio"/> eliminado<br><input type="radio"/> disminuido<br><input checked="" type="radio"/> igual<br><input type="radio"/> aumentado<br><input type="radio"/> no sabe                                                                                                                                                                                                                                                                                                                                             |
| cambio pescado                        | <input type="radio"/> eliminado<br><input type="radio"/> disminuido<br><input checked="" type="radio"/> igual<br><input type="radio"/> aumentado<br><input type="radio"/> no sabe                                                                                                                                                                                                                                                                                                                                             |
| cambio verduras                       | <input type="radio"/> eliminado<br><input type="radio"/> disminuido<br><input checked="" type="radio"/> igual<br><input type="radio"/> aumentado<br><input type="radio"/> no sabe                                                                                                                                                                                                                                                                                                                                             |

|                            |                                                                                                                                                                                                                        |
|----------------------------|------------------------------------------------------------------------------------------------------------------------------------------------------------------------------------------------------------------------|
| cambio legumbres           | <input type="radio"/> eliminado<br><input type="radio"/> disminuido<br><input checked="" type="radio"/> igual<br><input type="radio"/> aumentado<br><input type="radio"/> no sabe                                      |
| cambio fruta               | <input type="radio"/> eliminado<br><input type="radio"/> disminuido<br><input checked="" type="radio"/> igual<br><input type="radio"/> aumentado<br><input type="radio"/> no sabe                                      |
| cambio pan                 | <input type="radio"/> eliminado<br><input type="radio"/> disminuido<br><input checked="" type="radio"/> igual<br><input type="radio"/> aumentado<br><input type="radio"/> no sabe                                      |
| cambio aceite oliva        | <input type="radio"/> eliminado<br><input type="radio"/> disminuido<br><input checked="" type="radio"/> igual<br><input type="radio"/> aumentado<br><input type="radio"/> no sabe                                      |
| cambio mante o margarina   | <input type="radio"/> eliminado<br><input type="radio"/> disminuido<br><input checked="" type="radio"/> igual<br><input type="radio"/> aumentado<br><input type="radio"/> no sabe                                      |
| cambio azúcar y dulces     | <input type="radio"/> eliminado<br><input type="radio"/> disminuido<br><input checked="" type="radio"/> igual<br><input type="radio"/> aumentado<br><input type="radio"/> no sabe                                      |
| cambio bebidas alcohólicas | <input type="radio"/> eliminado<br><input type="radio"/> disminuido<br><input checked="" type="radio"/> igual<br><input type="radio"/> aumentado<br><input type="radio"/> no sabe                                      |
| frecuencia comidas fritas  | <input type="radio"/> a diario<br><input checked="" type="radio"/> 5 a 6 veces semana<br><input type="radio"/> 2 a 4 veces semana<br><input type="radio"/> 1 vez semana<br><input type="radio"/> menos de 1 vez semana |
| carne                      | <input type="radio"/> no como<br><input type="radio"/> cruda<br><input type="radio"/> poco hecha<br><input checked="" type="radio"/> hecha<br><input type="radio"/> muy hecha                                          |
| grasa visible carne        | <input checked="" type="radio"/> quita toda<br><input type="radio"/> quita mayoría<br><input type="radio"/> quita un poco<br><input type="radio"/> no quita nada                                                       |

|                                |                                                                                                                                                                                                                                                          |
|--------------------------------|----------------------------------------------------------------------------------------------------------------------------------------------------------------------------------------------------------------------------------------------------------|
| cocina carne                   | <input checked="" type="radio"/> a la plancha<br><input type="radio"/> a la parrilla<br><input type="radio"/> asada<br><input type="radio"/> frita<br><input type="radio"/> guisada                                                                      |
| tostado quemado carne          | <input checked="" type="radio"/> nunca<br><input type="radio"/> 1 vez mes<br><input type="radio"/> 2 a 3 veces mes<br><input type="radio"/> 1 vez semana<br><input type="radio"/> 2 a 3 semanas                                                          |
| tostado quemado pescado        | <input checked="" type="radio"/> nunca<br><input type="radio"/> 1 vez mes<br><input type="radio"/> 2 a 3 veces mes<br><input type="radio"/> 1 vez semana<br><input type="radio"/> 2 a 3 semanas                                                          |
| socarrat paella                | <input checked="" type="radio"/> nunca<br><input type="radio"/> 1 vez mes<br><input type="radio"/> 2 a 3 veces mes<br><input type="radio"/> 1 vez semana<br><input type="radio"/> 2 a 3 semanas                                                          |
| grasa o aceite cocinar         | <input type="radio"/> mantequilla<br><input type="radio"/> margarina<br><input type="radio"/> aceite oliva<br><input checked="" type="radio"/> aceite oliva virgen extra<br><input type="radio"/> aceite vegetal<br><input type="radio"/> mezcla aceites |
| grasa aceite aliñar            | <input type="radio"/> mantequilla<br><input type="radio"/> margarina<br><input type="radio"/> aceite oliva<br><input checked="" type="radio"/> aceite oliva virgen extra<br><input type="radio"/> aceite vegetal<br><input type="radio"/> mezcla aceites |
| grasa aceite freir             | <input type="radio"/> mantequilla<br><input type="radio"/> margarina<br><input type="radio"/> aceite oliva<br><input checked="" type="radio"/> aceite oliva virgen extra<br><input type="radio"/> aceite vegetal<br><input type="radio"/> mezcla aceites |
| Ejercicio cuestionario         | <input checked="" type="radio"/> si<br><input type="radio"/> no                                                                                                                                                                                          |
| horas de sueño incluido siesta | [*DATA REMOVED*]                                                                                                                                                                                                                                         |
| minutos siesta                 | [*DATA REMOVED*]                                                                                                                                                                                                                                         |
| horas televisión semana        | [*DATA REMOVED*]                                                                                                                                                                                                                                         |

|                                        |                                                                                                                                                                                                                                                                                                                                                                           |
|----------------------------------------|---------------------------------------------------------------------------------------------------------------------------------------------------------------------------------------------------------------------------------------------------------------------------------------------------------------------------------------------------------------------------|
| actividad trabajo                      | <input checked="" type="radio"/> casi siempre sentado<br><input type="radio"/> sentado 50 por cien<br><input type="radio"/> casi siempre de pie, quieto<br><input type="radio"/> casi siempre levantado caminando y llevando pocas cosas<br><input type="radio"/> casi siempre levantado, caminando y llevado muchas cosas<br><input type="radio"/> trabajo manual pesado |
| tiempo caminar o bici al día           | <input type="radio"/> casi nunca<br><input checked="" type="radio"/> menos 20min día<br><input type="radio"/> 20 a 40 min día<br><input type="radio"/> 40 a 60 min día<br><input type="radio"/> 1h o 1h y media día<br><input type="radio"/> más de 1h y media al día                                                                                                     |
| tiempo tareas casa al día              | <input type="radio"/> menos de 1h día<br><input checked="" type="radio"/> 1 a 2h día<br><input type="radio"/> 3 a 4h día<br><input type="radio"/> 5 a 6h día<br><input type="radio"/> 7 a 8h día<br><input type="radio"/> más de 8h día                                                                                                                                   |
| tiempo libre televisión ordenador leer | <input type="radio"/> menos 1h día<br><input type="radio"/> 1h día<br><input checked="" type="radio"/> 2h día<br><input type="radio"/> 3h día<br><input type="radio"/> 4h día<br><input type="radio"/> 5 a 6h día<br><input type="radio"/> mas 6h día                                                                                                                     |
| tiempo libre ejercicio o deporte       | <input checked="" type="radio"/> menos 1h semana<br><input type="radio"/> 1h semana<br><input type="radio"/> 2h semana<br><input type="radio"/> 3h semana<br><input type="radio"/> 4 a 5h semana<br><input type="radio"/> mas 5h semana                                                                                                                                   |
| como se considera                      | <input type="radio"/> sedentaria<br><input type="radio"/> poco activa<br><input checked="" type="radio"/> moderadamente activa<br><input type="radio"/> bastante activa<br><input type="radio"/> muy activa<br><input type="radio"/> no sabe                                                                                                                              |
| FUR                                    | [*DATA REMOVED*]                                                                                                                                                                                                                                                                                                                                                          |
| Semanas gestación 2T                   | [*DATA REMOVED*]                                                                                                                                                                                                                                                                                                                                                          |
| Días gestación 2T                      | [*DATA REMOVED*]                                                                                                                                                                                                                                                                                                                                                          |
| DBP 2T                                 | [*DATA REMOVED*]                                                                                                                                                                                                                                                                                                                                                          |
| CC 2T                                  | [*DATA REMOVED*]                                                                                                                                                                                                                                                                                                                                                          |
| AC 2T                                  | [*DATA REMOVED*]                                                                                                                                                                                                                                                                                                                                                          |

|                                                   |                                                                                                                                                                                                 |
|---------------------------------------------------|-------------------------------------------------------------------------------------------------------------------------------------------------------------------------------------------------|
| LF 2T                                             | [*DATA REMOVED*]                                                                                                                                                                                |
| PFE 2T (Hadlock)                                  | [*DATA REMOVED*]                                                                                                                                                                                |
| Semanas gestación 3T                              | [*DATA REMOVED*]                                                                                                                                                                                |
| días 3T                                           | [*DATA REMOVED*]                                                                                                                                                                                |
| DBP 3T                                            | [*DATA REMOVED*]                                                                                                                                                                                |
| CC 3T                                             | [*DATA REMOVED*]                                                                                                                                                                                |
| AC 3T                                             | [*DATA REMOVED*]                                                                                                                                                                                |
| LF 3T                                             | [*DATA REMOVED*]                                                                                                                                                                                |
| PFE 3T (Hadlock)                                  | [*DATA REMOVED*]                                                                                                                                                                                |
| Semanas de gestación final                        | [*DATA REMOVED*]                                                                                                                                                                                |
| días gestación final                              | [*DATA REMOVED*]                                                                                                                                                                                |
| Localización placenta                             | <input type="radio"/> anterior<br><input type="radio"/> lateral derecha<br><input type="radio"/> lateral izquierda<br><input type="radio"/> posterior<br><input checked="" type="radio"/> fondo |
| Presentación longitudinal cefálica                | <input type="radio"/> no<br><input checked="" type="radio"/> si                                                                                                                                 |
| Dorso                                             | <input type="radio"/> izquierda anterior<br><input checked="" type="radio"/> izquierda posterior<br><input type="radio"/> derecha anterior<br><input type="radio"/> derecha posterior           |
| diámetro biparietal                               | [*DATA REMOVED*]                                                                                                                                                                                |
| Circunferencia craneal                            | [*DATA REMOVED*]                                                                                                                                                                                |
| Circunferencia abdominal                          | [*DATA REMOVED*]                                                                                                                                                                                |
| Longitud de femur                                 | [*DATA REMOVED*]                                                                                                                                                                                |
| tejido celular subcutáneo a nivel del muslo en mm | [*DATA REMOVED*]                                                                                                                                                                                |
| tejido celular subcutáneo en abdomen en mm        | [*DATA REMOVED*]                                                                                                                                                                                |
| Volumen del muslo en cm3                          | [*DATA REMOVED*]                                                                                                                                                                                |
| Peso fetal estimado según fórmula de Hadlock      | [*DATA REMOVED*]                                                                                                                                                                                |



|                                               |                                                                                                                                                          |
|-----------------------------------------------|----------------------------------------------------------------------------------------------------------------------------------------------------------|
| Percentil                                     | [*DATA REMOVED*]                                                                                                                                         |
| Peso fetal estimado según fórmula de Scioscia | <hr/>                                                                                                                                                    |
| Peso fetal estimado según fórmula de LEE      | <hr/>                                                                                                                                                    |
| Tipo de parto                                 | <input checked="" type="radio"/> eutocico<br><input type="radio"/> instrumentado/ventosa<br><input type="radio"/> cesarea                                |
| fecha de nacimiento                           | [*DATA REMOVED*]                                                                                                                                         |
| Días entre exploración y nacimiento           | [*DATA REMOVED*]                                                                                                                                         |
| Peso RN en g                                  | [*DATA REMOVED*]                                                                                                                                         |
| sexo                                          | <input checked="" type="radio"/> mujer<br><input type="radio"/> hombre                                                                                   |
| Apgar 1 minuto                                | [*DATA REMOVED*]                                                                                                                                         |
| Apgar 5 minutos                               | [*DATA REMOVED*]                                                                                                                                         |
| Apgar 10 minutos                              | <hr/>                                                                                                                                                    |
| antecedente Covid durante gestación           | <input type="radio"/> Yes<br><input checked="" type="radio"/> No                                                                                         |
| Nivel de estudios                             | <input type="radio"/> ninguno<br><input type="radio"/> primarios<br><input checked="" type="radio"/> secundarios<br><input type="radio"/> universitarios |

# Base\_datos\_estimacion\_peso\_fetal

|                                       |                                                                                                                                                                                                                                                                                      |
|---------------------------------------|--------------------------------------------------------------------------------------------------------------------------------------------------------------------------------------------------------------------------------------------------------------------------------------|
| Número de identificación participante | 62                                                                                                                                                                                                                                                                                   |
| CODIGO PARTICIPANTE                   |                                                                                                                                                                                                                                                                                      |
| Edad                                  | [*DATA REMOVED*]                                                                                                                                                                                                                                                                     |
| Gestaciones                           | <input checked="" type="radio"/> 1<br><input type="radio"/> 2<br><input type="radio"/> 3<br><input type="radio"/> mas de 3                                                                                                                                                           |
| partos                                | <input checked="" type="radio"/> 0<br><input type="radio"/> 1<br><input type="radio"/> 2<br><input type="radio"/> 3<br><input type="radio"/> mas de 3                                                                                                                                |
| cesáreas                              | <input checked="" type="radio"/> 0<br><input type="radio"/> 1<br><input type="radio"/> 2<br><input type="radio"/> 3<br><input type="radio"/> mas de 3                                                                                                                                |
| Abortos                               | <input checked="" type="radio"/> 0<br><input type="radio"/> 1<br><input type="radio"/> 2<br><input type="radio"/> 3<br><input type="radio"/> mas de 3                                                                                                                                |
| Tipo de gestacion                     | <input checked="" type="radio"/> espontanea<br><input type="radio"/> IAC inseminación artificial conyuge<br><input type="radio"/> IAD inseminación artificial donante<br><input type="radio"/> FIV Fecundación in Vitro<br><input type="radio"/> Ovodon FIV con donación de ovocitos |
| peso previo a embarazo                | [*DATA REMOVED*]                                                                                                                                                                                                                                                                     |
| Ganancia ponderal embarazo            | [*DATA REMOVED*]                                                                                                                                                                                                                                                                     |
| Talla madre                           | [*DATA REMOVED*]                                                                                                                                                                                                                                                                     |
| IMC previo embarazo                   | 20.519134092541297                                                                                                                                                                                                                                                                   |
| Patología obstétrica                  | <input checked="" type="radio"/> no<br><input type="radio"/> si                                                                                                                                                                                                                      |
| Diabetes pregestacional               | <input checked="" type="radio"/> no<br><input type="radio"/> si                                                                                                                                                                                                                      |
| Diabetes gestacional                  | <input checked="" type="radio"/> no<br><input type="radio"/> si                                                                                                                                                                                                                      |

|                                            |                                                                                                                                                                                      |
|--------------------------------------------|--------------------------------------------------------------------------------------------------------------------------------------------------------------------------------------|
| Diabetes gestacional con insulina          | <input checked="" type="radio"/> no<br><input type="radio"/> si                                                                                                                      |
| Diabetes gestacional con dieta y ejercicio | <input checked="" type="radio"/> no<br><input type="radio"/> si                                                                                                                      |
| Percentil fetos previos                    | <input checked="" type="radio"/> Nada<br><input type="radio"/> percentil menor de 10<br><input type="radio"/> percentil entre 10 y 90<br><input type="radio"/> percentil mayor de 90 |
| Exfumadora                                 | <input checked="" type="radio"/> Nada<br><input type="radio"/> menos de 5 años<br><input type="radio"/> 5 a 10 años<br><input type="radio"/> mayor o igual a 10 años                 |
| Hábito tabáquico                           | <input checked="" type="radio"/> no<br><input type="radio"/> si                                                                                                                      |
| fumadora                                   | [*DATA REMOVED*]                                                                                                                                                                     |
| Consumo otros tóxicos                      | <input checked="" type="radio"/> no<br><input type="radio"/> si                                                                                                                      |
| Hb 1T                                      | [*DATA REMOVED*]                                                                                                                                                                     |
| Htc 1T                                     | [*DATA REMOVED*]                                                                                                                                                                     |
| Hb 2T                                      | [*DATA REMOVED*]                                                                                                                                                                     |
| HTC 2T                                     | [*DATA REMOVED*]                                                                                                                                                                     |
| Hb 3T                                      | [*DATA REMOVED*]                                                                                                                                                                     |
| HTC 3T                                     | [*DATA REMOVED*]                                                                                                                                                                     |
| Suplemento FE oral                         | <input checked="" type="radio"/> si<br><input type="radio"/> no                                                                                                                      |
| Suplemento fe iv                           | <input type="radio"/> si<br><input checked="" type="radio"/> no                                                                                                                      |
| Transfusión                                | <input checked="" type="radio"/> no<br><input type="radio"/> si                                                                                                                      |
| Solicitada Vit D                           | <input checked="" type="radio"/> no<br><input type="radio"/> si                                                                                                                      |
| Deficit vit D                              | <input type="radio"/> no<br><input type="radio"/> si                                                                                                                                 |
| Suplemento vit D                           | <input type="radio"/> si<br><input type="radio"/> no                                                                                                                                 |

|                       |                                                                                                                                                                                                                                                                                                                                                                                                              |
|-----------------------|--------------------------------------------------------------------------------------------------------------------------------------------------------------------------------------------------------------------------------------------------------------------------------------------------------------------------------------------------------------------------------------------------------------|
| Dieta, cuestionario   | <input checked="" type="radio"/> sí<br><input type="radio"/> no                                                                                                                                                                                                                                                                                                                                              |
| Leche entera          | <input checked="" type="radio"/> Nunca o menos 1 vez al mes<br><input type="radio"/> 1 a 3 veces mes<br><input type="radio"/> 1 vez semana<br><input type="radio"/> 2 a 4 veces semana<br><input type="radio"/> 5 a 6 veces semana<br><input type="radio"/> 1 vez al día<br><input type="radio"/> 2 a 3 veces al día<br><input type="radio"/> 5 a 6 veces al día<br><input type="radio"/> más 6 veces al día |
| Leche semidesnatada   | <input type="radio"/> Nunca o menos 1 vez al mes<br><input type="radio"/> 1 a 3 veces mes<br><input type="radio"/> 1 vez semana<br><input type="radio"/> 2 a 4 veces semana<br><input type="radio"/> 5 a 6 veces semana<br><input checked="" type="radio"/> 1 vez al día<br><input type="radio"/> 2 a 3 veces al día<br><input type="radio"/> 5 a 6 veces al día<br><input type="radio"/> mas 6 veces al día |
| Leche desnatada       | <input checked="" type="radio"/> Nunca o menos 1 vez al mes<br><input type="radio"/> 1 a 3 veces mes<br><input type="radio"/> 1 vez semana<br><input type="radio"/> 2 a 4 veces semana<br><input type="radio"/> 5 a 6 veces semana<br><input type="radio"/> 1 vez al día<br><input type="radio"/> 2 a 3 veces al día<br><input type="radio"/> 5 a 6 veces al día<br><input type="radio"/> más 6 veces al día |
| Leche condensada      | <input checked="" type="radio"/> Nunca o menos 1 vez al mes<br><input type="radio"/> 1 a 3 veces mes<br><input type="radio"/> 1 vez semana<br><input type="radio"/> 2 a 4 veces semana<br><input type="radio"/> 5 a 6 veces semana<br><input type="radio"/> 1 vez al día<br><input type="radio"/> 2 a 3 veces al día<br><input type="radio"/> 5 a 6 veces al día<br><input type="radio"/> más 6 veces al día |
| nata o crema de leche | <input checked="" type="radio"/> Nunca o menos 1 vez al mes<br><input type="radio"/> 1 a 3 veces mes<br><input type="radio"/> 1 vez semana<br><input type="radio"/> 2 a 4 veces semana<br><input type="radio"/> 5 a 6 veces semana<br><input type="radio"/> 1 vez al día<br><input type="radio"/> 2 a 3 veces al día<br><input type="radio"/> 5 a 6 veces al día<br><input type="radio"/> más 6 veces al día |

|                                             |                                                                                                                                                                                                                                                                                                                                                                                                              |
|---------------------------------------------|--------------------------------------------------------------------------------------------------------------------------------------------------------------------------------------------------------------------------------------------------------------------------------------------------------------------------------------------------------------------------------------------------------------|
| Yogurt Entero                               | <input type="radio"/> Nunca o menos 1 vez al mes<br><input checked="" type="radio"/> 1 a 3 veces mes<br><input type="radio"/> 1 vez semana<br><input type="radio"/> 2 a 4 veces semana<br><input type="radio"/> 5 a 6 veces semana<br><input type="radio"/> 1 vez al día<br><input type="radio"/> 2 a 3 veces al día<br><input type="radio"/> 5 a 6 veces al día<br><input type="radio"/> más 6 veces al día |
| Yogurt desnatado                            | <input checked="" type="radio"/> Nunca o menos 1 vez al mes<br><input type="radio"/> 1 a 3 veces mes<br><input type="radio"/> 1 vez semana<br><input type="radio"/> 2 a 4 veces semana<br><input type="radio"/> 5 a 6 veces semana<br><input type="radio"/> 1 vez al día<br><input type="radio"/> 2 a 3 veces al día<br><input type="radio"/> 5 a 6 veces al día<br><input type="radio"/> más 6 veces al día |
| 100g requesón o queso blando o queso fresco | <input type="radio"/> Nunca o menos 1 vez al mes<br><input type="radio"/> 1 a 3 veces mes<br><input type="radio"/> 1 vez semana<br><input checked="" type="radio"/> 2 a 4 veces semana<br><input type="radio"/> 5 a 6 veces semana<br><input type="radio"/> 1 vez al día<br><input type="radio"/> 2 a 3 veces al día<br><input type="radio"/> 5 a 6 veces al día<br><input type="radio"/> más 6 veces al día |
| queso curado o semicurado o cremoso         | <input type="radio"/> Nunca o menos 1 vez al mes<br><input type="radio"/> 1 a 3 veces mes<br><input checked="" type="radio"/> 1 vez semana<br><input type="radio"/> 2 a 4 veces semana<br><input type="radio"/> 5 a 6 veces semana<br><input type="radio"/> 1 vez al día<br><input type="radio"/> 2 a 3 veces al día<br><input type="radio"/> 5 a 6 veces al día<br><input type="radio"/> más 6 veces al día |
| natillas flan pudding                       | <input checked="" type="radio"/> Nunca o menos 1 vez al mes<br><input type="radio"/> 1 a 3 veces mes<br><input type="radio"/> 1 vez semana<br><input type="radio"/> 2 a 4 veces semana<br><input type="radio"/> 5 a 6 veces semana<br><input type="radio"/> 1 vez al día<br><input type="radio"/> 2 a 3 veces al día<br><input type="radio"/> 5 a 6 veces al día<br><input type="radio"/> más 6 veces al día |
| Helado                                      | <input type="radio"/> Nunca o menos 1 vez al mes<br><input type="radio"/> 1 a 3 veces mes<br><input checked="" type="radio"/> 1 vez semana<br><input type="radio"/> 2 a 4 veces semana<br><input type="radio"/> 5 a 6 veces semana<br><input type="radio"/> 1 vez al día<br><input type="radio"/> 2 a 3 veces al día<br><input type="radio"/> 5 a 6 veces al día<br><input type="radio"/> más 6 veces al día |

|                                      |                                                                                                                                                                                                                                                                                                                                                                                                              |
|--------------------------------------|--------------------------------------------------------------------------------------------------------------------------------------------------------------------------------------------------------------------------------------------------------------------------------------------------------------------------------------------------------------------------------------------------------------|
| huevo                                | <input type="radio"/> Nunca o menos 1 vez al mes<br><input type="radio"/> 1 a 3 veces mes<br><input type="radio"/> 1 vez semana<br><input checked="" type="radio"/> 2 a 4 veces semana<br><input type="radio"/> 5 a 6 veces semana<br><input type="radio"/> 1 vez al día<br><input type="radio"/> 2 a 3 veces al día<br><input type="radio"/> 5 a 6 veces al día<br><input type="radio"/> más 6 veces al día |
| Pollo con piel                       | <input checked="" type="radio"/> Nunca o menos 1 vez al mes<br><input type="radio"/> 1 a 3 veces mes<br><input type="radio"/> 1 vez semana<br><input type="radio"/> 2 a 4 veces semana<br><input type="radio"/> 5 a 6 veces semana<br><input type="radio"/> 1 vez al día<br><input type="radio"/> 2 a 3 veces al día<br><input type="radio"/> 5 a 6 veces al día<br><input type="radio"/> más 6 veces al día |
| pollo sin piel                       | <input type="radio"/> Nunca o menos 1 vez al mes<br><input checked="" type="radio"/> 1 a 3 veces mes<br><input type="radio"/> 1 vez semana<br><input type="radio"/> 2 a 4 veces semana<br><input type="radio"/> 5 a 6 veces semana<br><input type="radio"/> 1 vez al día<br><input type="radio"/> 2 a 3 veces al día<br><input type="radio"/> 5 a 6 veces al día<br><input type="radio"/> más 6 veces al día |
| Ternera o cerdo o cordero            | <input type="radio"/> Nunca o menos 1 vez al mes<br><input checked="" type="radio"/> 1 a 3 veces mes<br><input type="radio"/> 1 vez semana<br><input type="radio"/> 2 a 4 veces semana<br><input type="radio"/> 5 a 6 veces semana<br><input type="radio"/> 1 vez al día<br><input type="radio"/> 2 a 3 veces al día<br><input type="radio"/> 5 a 6 veces al día<br><input type="radio"/> más 6 veces al día |
| carne caza: Conejo o codorniz o pato | <input checked="" type="radio"/> Nunca o menos 1 vez al mes<br><input type="radio"/> 1 a 3 veces mes<br><input type="radio"/> 1 vez semana<br><input type="radio"/> 2 a 4 veces semana<br><input type="radio"/> 5 a 6 veces semana<br><input type="radio"/> 1 vez al día<br><input type="radio"/> 2 a 3 veces al día<br><input type="radio"/> 5 a 6 veces al día<br><input type="radio"/> más 6 veces al día |
| Hígado de ternera o cerdo o pollo    | <input checked="" type="radio"/> Nunca o menos 1 vez al mes<br><input type="radio"/> 1 a 3 veces mes<br><input type="radio"/> 1 vez semana<br><input type="radio"/> 2 a 4 veces semana<br><input type="radio"/> 5 a 6 veces semana<br><input type="radio"/> 1 vez al día<br><input type="radio"/> 2 a 3 veces al día<br><input type="radio"/> 5 a 6 veces al día<br><input type="radio"/> más 6 veces al día |

|                     |                                                                                                                                                                                                                                                                                                                                                                                                              |
|---------------------|--------------------------------------------------------------------------------------------------------------------------------------------------------------------------------------------------------------------------------------------------------------------------------------------------------------------------------------------------------------------------------------------------------------|
| Vísceras            | <input checked="" type="radio"/> Nunca o menos 1 vez al mes<br><input type="radio"/> 1 a 3 veces mes<br><input type="radio"/> 1 vez semana<br><input type="radio"/> 2 a 4 veces semana<br><input type="radio"/> 5 a 6 veces semana<br><input type="radio"/> 1 vez al día<br><input type="radio"/> 2 a 3 veces al día<br><input type="radio"/> 5 a 6 veces al día<br><input type="radio"/> más 6 veces al día |
| Embutido            | <input type="radio"/> Nunca o menos 1 vez al mes<br><input checked="" type="radio"/> 1 a 3 veces mes<br><input type="radio"/> 1 vez semana<br><input type="radio"/> 2 a 4 veces semana<br><input type="radio"/> 5 a 6 veces semana<br><input type="radio"/> 1 vez al día<br><input type="radio"/> 2 a 3 veces al día<br><input type="radio"/> 5 a 6 veces al día<br><input type="radio"/> más 6 veces al día |
| Salchicha o similar | <input checked="" type="radio"/> Nunca o menos 1 vez al mes<br><input type="radio"/> 1 a 3 veces mes<br><input type="radio"/> 1 vez semana<br><input type="radio"/> 2 a 4 veces semana<br><input type="radio"/> 5 a 6 veces semana<br><input type="radio"/> 1 vez al día<br><input type="radio"/> 2 a 3 veces al día<br><input type="radio"/> 5 a 6 veces al día<br><input type="radio"/> más 6 veces al día |
| Pate o foiegras     | <input checked="" type="radio"/> Nunca o menos 1 vez al mes<br><input type="radio"/> 1 a 3 veces mes<br><input type="radio"/> 1 vez semana<br><input type="radio"/> 2 a 4 veces semana<br><input type="radio"/> 5 a 6 veces semana<br><input type="radio"/> 1 vez al día<br><input type="radio"/> 2 a 3 veces al día<br><input type="radio"/> 5 a 6 veces al día<br><input type="radio"/> más 6 veces al día |
| Hamburguesa         | <input type="radio"/> Nunca o menos 1 vez al mes<br><input checked="" type="radio"/> 1 a 3 veces mes<br><input type="radio"/> 1 vez semana<br><input type="radio"/> 2 a 4 veces semana<br><input type="radio"/> 5 a 6 veces semana<br><input type="radio"/> 1 vez al día<br><input type="radio"/> 2 a 3 veces al día<br><input type="radio"/> 5 a 6 veces al día<br><input type="radio"/> más 6 veces al día |
| tocino o bacon      | <input type="radio"/> Nunca o menos 1 vez al mes<br><input checked="" type="radio"/> 1 a 3 veces mes<br><input type="radio"/> 1 vez semana<br><input type="radio"/> 2 a 4 veces semana<br><input type="radio"/> 5 a 6 veces semana<br><input type="radio"/> 1 vez al día<br><input type="radio"/> 2 a 3 veces al día<br><input type="radio"/> 5 a 6 veces al día<br><input type="radio"/> más 6 veces al día |

|                        |                                                                                                                                                                                                                                                                                                                                                                                                              |
|------------------------|--------------------------------------------------------------------------------------------------------------------------------------------------------------------------------------------------------------------------------------------------------------------------------------------------------------------------------------------------------------------------------------------------------------|
| Pescado frito          | <input checked="" type="radio"/> Nunca o menos 1 vez al mes<br><input type="radio"/> 1 a 3 veces mes<br><input type="radio"/> 1 vez semana<br><input type="radio"/> 2 a 4 veces semana<br><input type="radio"/> 5 a 6 veces semana<br><input type="radio"/> 1 vez al día<br><input type="radio"/> 2 a 3 veces al día<br><input type="radio"/> 5 a 6 veces al día<br><input type="radio"/> más 6 veces al día |
| pescado hervido blanco | <input type="radio"/> Nunca o menos 1 vez al mes<br><input checked="" type="radio"/> 1 a 3 veces mes<br><input type="radio"/> 1 vez semana<br><input type="radio"/> 2 a 4 veces semana<br><input type="radio"/> 5 a 6 veces semana<br><input type="radio"/> 1 vez al día<br><input type="radio"/> 2 a 3 veces al día<br><input type="radio"/> 5 a 6 veces al día<br><input type="radio"/> más 6 veces al día |
| pescado hervido azul   | <input type="radio"/> Nunca o menos 1 vez al mes<br><input checked="" type="radio"/> 1 a 3 veces mes<br><input type="radio"/> 1 vez semana<br><input type="radio"/> 2 a 4 veces semana<br><input type="radio"/> 5 a 6 veces semana<br><input type="radio"/> 1 vez al día<br><input type="radio"/> 2 a 3 veces al día<br><input type="radio"/> 5 a 6 veces al día<br><input type="radio"/> más 6 veces al día |
| otros pescado azul     | <input type="radio"/> Nunca o menos 1 vez al mes<br><input checked="" type="radio"/> 1 a 3 veces mes<br><input type="radio"/> 1 vez semana<br><input type="radio"/> 2 a 4 veces semana<br><input type="radio"/> 5 a 6 veces semana<br><input type="radio"/> 1 vez al día<br><input type="radio"/> 2 a 3 veces al día<br><input type="radio"/> 5 a 6 veces al día<br><input type="radio"/> más 6 veces al día |
| atun conserva          | <input type="radio"/> Nunca o menos 1 vez al mes<br><input type="radio"/> 1 a 3 veces mes<br><input checked="" type="radio"/> 1 vez semana<br><input type="radio"/> 2 a 4 veces semana<br><input type="radio"/> 5 a 6 veces semana<br><input type="radio"/> 1 vez al día<br><input type="radio"/> 2 a 3 veces al día<br><input type="radio"/> 5 a 6 veces al día<br><input type="radio"/> más 6 veces al día |
| sardina conserva       | <input checked="" type="radio"/> Nunca o menos 1 vez al mes<br><input type="radio"/> 1 a 3 veces mes<br><input type="radio"/> 1 vez semana<br><input type="radio"/> 2 a 4 veces semana<br><input type="radio"/> 5 a 6 veces semana<br><input type="radio"/> 1 vez al día<br><input type="radio"/> 2 a 3 veces al día<br><input type="radio"/> 5 a 6 veces al día<br><input type="radio"/> más 6 veces al día |



|                                         |                                                                                                                                                                                                                                                                                                                                                                                                              |
|-----------------------------------------|--------------------------------------------------------------------------------------------------------------------------------------------------------------------------------------------------------------------------------------------------------------------------------------------------------------------------------------------------------------------------------------------------------------|
| pescado ahumado                         | <input checked="" type="radio"/> Nunca o menos 1 vez al mes<br><input type="radio"/> 1 a 3 veces mes<br><input type="radio"/> 1 vez semana<br><input type="radio"/> 2 a 4 veces semana<br><input type="radio"/> 5 a 6 veces semana<br><input type="radio"/> 1 vez al día<br><input type="radio"/> 2 a 3 veces al día<br><input type="radio"/> 5 a 6 veces al día<br><input type="radio"/> más 6 veces al día |
| almejas o mejillones o ostras unos 100g | <input checked="" type="radio"/> Nunca o menos 1 vez al mes<br><input type="radio"/> 1 a 3 veces mes<br><input type="radio"/> 1 vez semana<br><input type="radio"/> 2 a 4 veces semana<br><input type="radio"/> 5 a 6 veces semana<br><input type="radio"/> 1 vez al día<br><input type="radio"/> 2 a 3 veces al día<br><input type="radio"/> 5 a 6 veces al día<br><input type="radio"/> más 6 veces al día |
| calamar o chipiron o sepia unos 100g    | <input type="radio"/> Nunca o menos 1 vez al mes<br><input checked="" type="radio"/> 1 a 3 veces mes<br><input type="radio"/> 1 vez semana<br><input type="radio"/> 2 a 4 veces semana<br><input type="radio"/> 5 a 6 veces semana<br><input type="radio"/> 1 vez al día<br><input type="radio"/> 2 a 3 veces al día<br><input type="radio"/> 5 a 6 veces al día<br><input type="radio"/> más 6 veces al día |
| marisco unos 100g                       | <input checked="" type="radio"/> Nunca o menos 1 vez al mes<br><input type="radio"/> 1 a 3 veces mes<br><input type="radio"/> 1 vez semana<br><input type="radio"/> 2 a 4 veces semana<br><input type="radio"/> 5 a 6 veces semana<br><input type="radio"/> 1 vez al día<br><input type="radio"/> 2 a 3 veces al día<br><input type="radio"/> 5 a 6 veces al día<br><input type="radio"/> más 6 veces al día |
| Espinacas o acelgas cocinadas           | <input checked="" type="radio"/> Nunca o menos 1 vez al mes<br><input type="radio"/> 1 a 3 veces mes<br><input type="radio"/> 1 vez semana<br><input type="radio"/> 2 a 4 veces semana<br><input type="radio"/> 5 a 6 veces semana<br><input type="radio"/> 1 vez al día<br><input type="radio"/> 2 a 3 veces al día<br><input type="radio"/> 5 a 6 veces al día<br><input type="radio"/> más 6 veces al día |
| Col o coliflor o brocoli cocinado       | <input type="radio"/> Nunca o menos 1 vez al mes<br><input type="radio"/> 1 a 3 veces mes<br><input checked="" type="radio"/> 1 vez semana<br><input type="radio"/> 2 a 4 veces semana<br><input type="radio"/> 5 a 6 veces semana<br><input type="radio"/> 1 vez al día<br><input type="radio"/> 2 a 3 veces al día<br><input type="radio"/> 5 a 6 veces al día<br><input type="radio"/> más 6 veces al día |

---

Lechuga o endivia o escarola

- ☐ Nunca o menos 1 vez al mes  
☐ 1 a 3 veces mes  
☐ 1 vez semana  
☒ 2 a 4 veces semana  
☐ 5 a 6 veces semana  
☐ 1 vez al día  
☐ 2 a 3 veces al día  
☐ 5 a 6 veces al día  
☐ más 6 veces al día

---

tomate ensalada

- ☐ Nunca o menos 1 vez al mes  
☐ 1 a 3 veces mes  
☐ 1 vez semana  
☐ 2 a 4 veces semana  
☒ 5 a 6 veces semana  
☐ 1 vez al día  
☐ 2 a 3 veces al día  
☐ 5 a 6 veces al día  
☐ más 6 veces al día

---

cebolla

- ☐ Nunca o menos 1 vez al mes  
☐ 1 a 3 veces mes  
☐ 1 vez semana  
☐ 2 a 4 veces semana  
☒ 5 a 6 veces semana  
☐ 1 vez al día  
☐ 2 a 3 veces al día  
☐ 5 a 6 veces al día  
☐ más 6 veces al día

---

Zanahoria o calabaza

- ☐ Nunca o menos 1 vez al mes  
☐ 1 a 3 veces mes  
☐ 1 vez semana  
☒ 2 a 4 veces semana  
☐ 5 a 6 veces semana  
☐ 1 vez al día  
☐ 2 a 3 veces al día  
☐ 5 a 6 veces al día  
☐ más 6 veces al día

---

Judías verdes

- ☒ Nunca o menos 1 vez al mes  
☐ 1 a 3 veces mes  
☐ 1 vez semana  
☐ 2 a 4 veces semana  
☐ 5 a 6 veces semana  
☐ 1 vez al día  
☐ 2 a 3 veces al día  
☐ 5 a 6 veces al día  
☐ más 6 veces al día

---

Berenjena o calabacin o pepino

- ☐ Nunca o menos 1 vez al mes  
☐ 1 a 3 veces mes  
☒ 1 vez semana  
☐ 2 a 4 veces semana  
☐ 5 a 6 veces semana  
☐ 1 vez al día  
☐ 2 a 3 veces al día  
☐ 5 a 6 veces al día  
☐ más 6 veces al día

pimiento

- ☐ Nunca o menos 1 vez al mes  
☒ 1 a 3 veces mes  
☐ 1 vez semana  
☐ 2 a 4 veces semana  
☐ 5 a 6 veces semana  
☐ 1 vez al día  
☐ 2 a 3 veces al día  
☐ 5 a 6 veces al día  
☐ más 6 veces al día

alcachofa

- ☒ Nunca o menos 1 vez al mes  
☐ 1 a 3 veces mes  
☐ 1 vez semana  
☐ 2 a 4 veces semana  
☐ 5 a 6 veces semana  
☐ 1 vez al día  
☐ 2 a 3 veces al día  
☐ 5 a 6 veces al día  
☐ más 6 veces al día

espárragos

- ☒ Nunca o menos 1 vez al mes  
☐ 1 a 3 veces mes  
☐ 1 vez semana  
☐ 2 a 4 veces semana  
☐ 5 a 6 veces semana  
☐ 1 vez al día  
☐ 2 a 3 veces al día  
☐ 5 a 6 veces al día  
☐ más 6 veces al día

maíz hervido

- ☐ Nunca o menos 1 vez al mes  
☐ 1 a 3 veces mes  
☐ 1 vez semana  
☒ 2 a 4 veces semana  
☐ 5 a 6 veces semana  
☐ 1 vez al día  
☐ 2 a 3 veces al día  
☐ 5 a 6 veces al día  
☐ más 6 veces al día

legumbres

- ☐ Nunca o menos 1 vez al mes  
☐ 1 a 3 veces mes  
☒ 1 vez semana  
☐ 2 a 4 veces semana  
☐ 5 a 6 veces semana  
☐ 1 vez al día  
☐ 2 a 3 veces al día  
☐ 5 a 6 veces al día  
☐ más 6 veces al día

naranjas o mandarinas

- ☐ Nunca o menos 1 vez al mes  
☐ 1 a 3 veces mes  
☒ 1 vez semana  
☐ 2 a 4 veces semana  
☐ 5 a 6 veces semana  
☐ 1 vez al día  
☐ 2 a 3 veces al día  
☐ 5 a 6 veces al día  
☐ más 6 veces al día

|                       |                                                                                                                                                                                                                                                                                                                                                                                                              |
|-----------------------|--------------------------------------------------------------------------------------------------------------------------------------------------------------------------------------------------------------------------------------------------------------------------------------------------------------------------------------------------------------------------------------------------------------|
| zum natural fruta     | <input type="radio"/> Nunca o menos 1 vez al mes<br><input type="radio"/> 1 a 3 veces mes<br><input checked="" type="radio"/> 1 vez semana<br><input type="radio"/> 2 a 4 veces semana<br><input type="radio"/> 5 a 6 veces semana<br><input type="radio"/> 1 vez al día<br><input type="radio"/> 2 a 3 veces al día<br><input type="radio"/> 5 a 6 veces al día<br><input type="radio"/> más 6 veces al día |
| platano               | <input type="radio"/> Nunca o menos 1 vez al mes<br><input checked="" type="radio"/> 1 a 3 veces mes<br><input type="radio"/> 1 vez semana<br><input type="radio"/> 2 a 4 veces semana<br><input type="radio"/> 5 a 6 veces semana<br><input type="radio"/> 1 vez al día<br><input type="radio"/> 2 a 3 veces al día<br><input type="radio"/> 5 a 6 veces al día<br><input type="radio"/> más 6 veces al día |
| manzana o pera        | <input type="radio"/> Nunca o menos 1 vez al mes<br><input type="radio"/> 1 a 3 veces mes<br><input checked="" type="radio"/> 1 vez semana<br><input type="radio"/> 2 a 4 veces semana<br><input type="radio"/> 5 a 6 veces semana<br><input type="radio"/> 1 vez al día<br><input type="radio"/> 2 a 3 veces al día<br><input type="radio"/> 5 a 6 veces al día<br><input type="radio"/> más 6 veces al día |
| melocotón o nectarina | <input type="radio"/> Nunca o menos 1 vez al mes<br><input type="radio"/> 1 a 3 veces mes<br><input checked="" type="radio"/> 1 vez semana<br><input type="radio"/> 2 a 4 veces semana<br><input type="radio"/> 5 a 6 veces semana<br><input type="radio"/> 1 vez al día<br><input type="radio"/> 2 a 3 veces al día<br><input type="radio"/> 5 a 6 veces al día<br><input type="radio"/> más 6 veces al día |
| sandia o melon        | <input type="radio"/> Nunca o menos 1 vez al mes<br><input type="radio"/> 1 a 3 veces mes<br><input checked="" type="radio"/> 1 vez semana<br><input type="radio"/> 2 a 4 veces semana<br><input type="radio"/> 5 a 6 veces semana<br><input type="radio"/> 1 vez al día<br><input type="radio"/> 2 a 3 veces al día<br><input type="radio"/> 5 a 6 veces al día<br><input type="radio"/> más 6 veces al día |
| uva                   | <input checked="" type="radio"/> Nunca o menos 1 vez al mes<br><input type="radio"/> 1 a 3 veces mes<br><input type="radio"/> 1 vez semana<br><input type="radio"/> 2 a 4 veces semana<br><input type="radio"/> 5 a 6 veces semana<br><input type="radio"/> 1 vez al día<br><input type="radio"/> 2 a 3 veces al día<br><input type="radio"/> 5 a 6 veces al día<br><input type="radio"/> más 6 veces al día |

---

bruna o ciruela

- ☒ Nunca o menos 1 vez al mes  
☐ 1 a 3 veces mes  
☐ 1 vez semana  
☐ 2 a 4 veces semana  
☐ 5 a 6 veces semana  
☐ 1 vez al día  
☐ 2 a 3 veces al día  
☐ 5 a 6 veces al día  
☐ más 6 veces al día

---

kiwi

- ☒ Nunca o menos 1 vez al mes  
☐ 1 a 3 veces mes  
☐ 1 vez semana  
☐ 2 a 4 veces semana  
☐ 5 a 6 veces semana  
☐ 1 vez al día  
☐ 2 a 3 veces al día  
☐ 5 a 6 veces al día  
☐ más 6 veces al día

---

aceituna

- ☒ Nunca o menos 1 vez al mes  
☐ 1 a 3 veces mes  
☐ 1 vez semana  
☐ 2 a 4 veces semana  
☐ 5 a 6 veces semana  
☐ 1 vez al día  
☐ 2 a 3 veces al día  
☐ 5 a 6 veces al día  
☐ más 6 veces al día

---

frutos secos

- ☐ Nunca o menos 1 vez al mes  
☐ 1 a 3 veces mes  
☐ 1 vez semana  
☒ 2 a 4 veces semana  
☐ 5 a 6 veces semana  
☐ 1 vez al día  
☐ 2 a 3 veces al día  
☐ 5 a 6 veces al día  
☐ más 6 veces al día

---

pan blanco

- ☐ Nunca o menos 1 vez al mes  
☐ 1 a 3 veces mes  
☒ 1 vez semana  
☐ 2 a 4 veces semana  
☐ 5 a 6 veces semana  
☐ 1 vez al día  
☐ 2 a 3 veces al día  
☐ 5 a 6 veces al día  
☐ más 6 veces al día

---

pan integral

- ☒ Nunca o menos 1 vez al mes  
☐ 1 a 3 veces mes  
☐ 1 vez semana  
☐ 2 a 4 veces semana  
☐ 5 a 6 veces semana  
☐ 1 vez al día  
☐ 2 a 3 veces al día  
☐ 5 a 6 veces al día  
☐ más 6 veces al día

|                          |                                                                                                                                                                                                                                                                                                                                                                                                              |
|--------------------------|--------------------------------------------------------------------------------------------------------------------------------------------------------------------------------------------------------------------------------------------------------------------------------------------------------------------------------------------------------------------------------------------------------------|
| cereales desayuno        | <input type="radio"/> Nunca o menos 1 vez al mes<br><input type="radio"/> 1 a 3 veces mes<br><input type="radio"/> 1 vez semana<br><input type="radio"/> 2 a 4 veces semana<br><input checked="" type="radio"/> 5 a 6 veces semana<br><input type="radio"/> 1 vez al día<br><input type="radio"/> 2 a 3 veces al día<br><input type="radio"/> 5 a 6 veces al día<br><input type="radio"/> más 6 veces al día |
| patatas fritas           | <input type="radio"/> Nunca o menos 1 vez al mes<br><input type="radio"/> 1 a 3 veces mes<br><input checked="" type="radio"/> 1 vez semana<br><input type="radio"/> 2 a 4 veces semana<br><input type="radio"/> 5 a 6 veces semana<br><input type="radio"/> 1 vez al día<br><input type="radio"/> 2 a 3 veces al día<br><input type="radio"/> 5 a 6 veces al día<br><input type="radio"/> más 6 veces al día |
| patatas cocidas o asadas | <input checked="" type="radio"/> Nunca o menos 1 vez al mes<br><input type="radio"/> 1 a 3 veces mes<br><input type="radio"/> 1 vez semana<br><input type="radio"/> 2 a 4 veces semana<br><input type="radio"/> 5 a 6 veces semana<br><input type="radio"/> 1 vez al día<br><input type="radio"/> 2 a 3 veces al día<br><input type="radio"/> 5 a 6 veces al día<br><input type="radio"/> más 6 veces al día |
| bolsa papas              | <input type="radio"/> Nunca o menos 1 vez al mes<br><input checked="" type="radio"/> 1 a 3 veces mes<br><input type="radio"/> 1 vez semana<br><input type="radio"/> 2 a 4 veces semana<br><input type="radio"/> 5 a 6 veces semana<br><input type="radio"/> 1 vez al día<br><input type="radio"/> 2 a 3 veces al día<br><input type="radio"/> 5 a 6 veces al día<br><input type="radio"/> más 6 veces al día |
| arroz cocinado           | <input type="radio"/> Nunca o menos 1 vez al mes<br><input type="radio"/> 1 a 3 veces mes<br><input type="radio"/> 1 vez semana<br><input checked="" type="radio"/> 2 a 4 veces semana<br><input type="radio"/> 5 a 6 veces semana<br><input type="radio"/> 1 vez al día<br><input type="radio"/> 2 a 3 veces al día<br><input type="radio"/> 5 a 6 veces al día<br><input type="radio"/> más 6 veces al día |
| pasta                    | <input type="radio"/> Nunca o menos 1 vez al mes<br><input type="radio"/> 1 a 3 veces mes<br><input type="radio"/> 1 vez semana<br><input checked="" type="radio"/> 2 a 4 veces semana<br><input type="radio"/> 5 a 6 veces semana<br><input type="radio"/> 1 vez al día<br><input type="radio"/> 2 a 3 veces al día<br><input type="radio"/> 5 a 6 veces al día<br><input type="radio"/> más 6 veces al día |

|                     |                                                                                                                                                                                                                                                                                                                                                                                                              |
|---------------------|--------------------------------------------------------------------------------------------------------------------------------------------------------------------------------------------------------------------------------------------------------------------------------------------------------------------------------------------------------------------------------------------------------------|
| pizza               | <input type="radio"/> Nunca o menos 1 vez al mes<br><input type="radio"/> 1 a 3 veces mes<br><input checked="" type="radio"/> 1 vez semana<br><input type="radio"/> 2 a 4 veces semana<br><input type="radio"/> 5 a 6 veces semana<br><input type="radio"/> 1 vez al día<br><input type="radio"/> 2 a 3 veces al día<br><input type="radio"/> 5 a 6 veces al día<br><input type="radio"/> más 6 veces al día |
| aceite oliva        | <input type="radio"/> Nunca o menos 1 vez al mes<br><input type="radio"/> 1 a 3 veces mes<br><input type="radio"/> 1 vez semana<br><input type="radio"/> 2 a 4 veces semana<br><input type="radio"/> 5 a 6 veces semana<br><input checked="" type="radio"/> 1 vez al día<br><input type="radio"/> 2 a 3 veces al día<br><input type="radio"/> 5 a 6 veces al día<br><input type="radio"/> más 6 veces al día |
| otros aceites       | <input checked="" type="radio"/> Nunca o menos 1 vez al mes<br><input type="radio"/> 1 a 3 veces mes<br><input type="radio"/> 1 vez semana<br><input type="radio"/> 2 a 4 veces semana<br><input type="radio"/> 5 a 6 veces semana<br><input type="radio"/> 1 vez al día<br><input type="radio"/> 2 a 3 veces al día<br><input type="radio"/> 5 a 6 veces al día<br><input type="radio"/> más 6 veces al día |
| margarina           | <input type="radio"/> Nunca o menos 1 vez al mes<br><input checked="" type="radio"/> 1 a 3 veces mes<br><input type="radio"/> 1 vez semana<br><input type="radio"/> 2 a 4 veces semana<br><input type="radio"/> 5 a 6 veces semana<br><input type="radio"/> 1 vez al día<br><input type="radio"/> 2 a 3 veces al día<br><input type="radio"/> 5 a 6 veces al día<br><input type="radio"/> más 6 veces al día |
| mantequilla         | <input type="radio"/> Nunca o menos 1 vez al mes<br><input checked="" type="radio"/> 1 a 3 veces mes<br><input type="radio"/> 1 vez semana<br><input type="radio"/> 2 a 4 veces semana<br><input type="radio"/> 5 a 6 veces semana<br><input type="radio"/> 1 vez al día<br><input type="radio"/> 2 a 3 veces al día<br><input type="radio"/> 5 a 6 veces al día<br><input type="radio"/> más 6 veces al día |
| galletas tipo maria | <input checked="" type="radio"/> Nunca o menos 1 vez al mes<br><input type="radio"/> 1 a 3 veces mes<br><input type="radio"/> 1 vez semana<br><input type="radio"/> 2 a 4 veces semana<br><input type="radio"/> 5 a 6 veces semana<br><input type="radio"/> 1 vez al día<br><input type="radio"/> 2 a 3 veces al día<br><input type="radio"/> 5 a 6 veces al día<br><input type="radio"/> más 6 veces al día |

|                           |                                                                                                                                                                                                                                                                                                                                                                                                              |
|---------------------------|--------------------------------------------------------------------------------------------------------------------------------------------------------------------------------------------------------------------------------------------------------------------------------------------------------------------------------------------------------------------------------------------------------------|
| galletas chocolate        | <input type="radio"/> Nunca o menos 1 vez al mes<br><input type="radio"/> 1 a 3 veces mes<br><input type="radio"/> 1 vez semana<br><input type="radio"/> 2 a 4 veces semana<br><input checked="" type="radio"/> 5 a 6 veces semana<br><input type="radio"/> 1 vez al día<br><input type="radio"/> 2 a 3 veces al día<br><input type="radio"/> 5 a 6 veces al día<br><input type="radio"/> más 6 veces al día |
| bollieria                 | <input type="radio"/> Nunca o menos 1 vez al mes<br><input type="radio"/> 1 a 3 veces mes<br><input type="radio"/> 1 vez semana<br><input checked="" type="radio"/> 2 a 4 veces semana<br><input type="radio"/> 5 a 6 veces semana<br><input type="radio"/> 1 vez al día<br><input type="radio"/> 2 a 3 veces al día<br><input type="radio"/> 5 a 6 veces al día<br><input type="radio"/> más 6 veces al día |
| chocolate o bombones      | <input type="radio"/> Nunca o menos 1 vez al mes<br><input type="radio"/> 1 a 3 veces mes<br><input checked="" type="radio"/> 1 vez semana<br><input type="radio"/> 2 a 4 veces semana<br><input type="radio"/> 5 a 6 veces semana<br><input type="radio"/> 1 vez al día<br><input type="radio"/> 2 a 3 veces al día<br><input type="radio"/> 5 a 6 veces al día<br><input type="radio"/> más 6 veces al día |
| chocolate polvo o colacao | <input type="radio"/> Nunca o menos 1 vez al mes<br><input type="radio"/> 1 a 3 veces mes<br><input type="radio"/> 1 vez semana<br><input type="radio"/> 2 a 4 veces semana<br><input type="radio"/> 5 a 6 veces semana<br><input checked="" type="radio"/> 1 vez al día<br><input type="radio"/> 2 a 3 veces al día<br><input type="radio"/> 5 a 6 veces al día<br><input type="radio"/> más 6 veces al día |
| vino tinto                | <input checked="" type="radio"/> Nunca o menos 1 vez al mes<br><input type="radio"/> 1 a 3 veces mes<br><input type="radio"/> 1 vez semana<br><input type="radio"/> 2 a 4 veces semana<br><input type="radio"/> 5 a 6 veces semana<br><input type="radio"/> 1 vez al día<br><input type="radio"/> 2 a 3 veces al día<br><input type="radio"/> 5 a 6 veces al día<br><input type="radio"/> más 6 veces al día |
| vino blanco               | <input checked="" type="radio"/> Nunca o menos 1 vez al mes<br><input type="radio"/> 1 a 3 veces mes<br><input type="radio"/> 1 vez semana<br><input type="radio"/> 2 a 4 veces semana<br><input type="radio"/> 5 a 6 veces semana<br><input type="radio"/> 1 vez al día<br><input type="radio"/> 2 a 3 veces al día<br><input type="radio"/> 5 a 6 veces al día<br><input type="radio"/> más 6 veces al día |



|                       |                                                                                                                                                                                                                                                                                                                                                                                                              |
|-----------------------|--------------------------------------------------------------------------------------------------------------------------------------------------------------------------------------------------------------------------------------------------------------------------------------------------------------------------------------------------------------------------------------------------------------|
| vino seco o vermut    | <input checked="" type="radio"/> Nunca o menos 1 vez al mes<br><input type="radio"/> 1 a 3 veces mes<br><input type="radio"/> 1 vez semana<br><input type="radio"/> 2 a 4 veces semana<br><input type="radio"/> 5 a 6 veces semana<br><input type="radio"/> 1 vez al día<br><input type="radio"/> 2 a 3 veces al día<br><input type="radio"/> 5 a 6 veces al día<br><input type="radio"/> más 6 veces al día |
| cerveza               | <input type="radio"/> Nunca o menos 1 vez al mes<br><input checked="" type="radio"/> 1 a 3 veces mes<br><input type="radio"/> 1 vez semana<br><input type="radio"/> 2 a 4 veces semana<br><input type="radio"/> 5 a 6 veces semana<br><input type="radio"/> 1 vez al día<br><input type="radio"/> 2 a 3 veces al día<br><input type="radio"/> 5 a 6 veces al día<br><input type="radio"/> más 6 veces al día |
| cerveza sin alcohol   | <input type="radio"/> Nunca o menos 1 vez al mes<br><input checked="" type="radio"/> 1 a 3 veces mes<br><input type="radio"/> 1 vez semana<br><input type="radio"/> 2 a 4 veces semana<br><input type="radio"/> 5 a 6 veces semana<br><input type="radio"/> 1 vez al día<br><input type="radio"/> 2 a 3 veces al día<br><input type="radio"/> 5 a 6 veces al día<br><input type="radio"/> más 6 veces al día |
| licores               | <input checked="" type="radio"/> Nunca o menos 1 vez al mes<br><input type="radio"/> 1 a 3 veces mes<br><input type="radio"/> 1 vez semana<br><input type="radio"/> 2 a 4 veces semana<br><input type="radio"/> 5 a 6 veces semana<br><input type="radio"/> 1 vez al día<br><input type="radio"/> 2 a 3 veces al día<br><input type="radio"/> 5 a 6 veces al día<br><input type="radio"/> más 6 veces al día |
| ginebra o ron o vodka | <input checked="" type="radio"/> Nunca o menos 1 vez al mes<br><input type="radio"/> 1 a 3 veces mes<br><input type="radio"/> 1 vez semana<br><input type="radio"/> 2 a 4 veces semana<br><input type="radio"/> 5 a 6 veces semana<br><input type="radio"/> 1 vez al día<br><input type="radio"/> 2 a 3 veces al día<br><input type="radio"/> 5 a 6 veces al día<br><input type="radio"/> más 6 veces al día |
| refresco normal       | <input checked="" type="radio"/> Nunca o menos 1 vez al mes<br><input type="radio"/> 1 a 3 veces mes<br><input type="radio"/> 1 vez semana<br><input type="radio"/> 2 a 4 veces semana<br><input type="radio"/> 5 a 6 veces semana<br><input type="radio"/> 1 vez al día<br><input type="radio"/> 2 a 3 veces al día<br><input type="radio"/> 5 a 6 veces al día<br><input type="radio"/> más 6 veces al día |

|                          |                                                                                                                                                                                                                                                                                                                                                                                                              |
|--------------------------|--------------------------------------------------------------------------------------------------------------------------------------------------------------------------------------------------------------------------------------------------------------------------------------------------------------------------------------------------------------------------------------------------------------|
| refresco sin azúcar      | <input type="radio"/> Nunca o menos 1 vez al mes<br><input type="radio"/> 1 a 3 veces mes<br><input checked="" type="radio"/> 1 vez semana<br><input type="radio"/> 2 a 4 veces semana<br><input type="radio"/> 5 a 6 veces semana<br><input type="radio"/> 1 vez al día<br><input type="radio"/> 2 a 3 veces al día<br><input type="radio"/> 5 a 6 veces al día<br><input type="radio"/> más 6 veces al día |
| Agua del grifo           | <input checked="" type="radio"/> Nunca o menos 1 vez al mes<br><input type="radio"/> 1 a 3 veces mes<br><input type="radio"/> 1 vez semana<br><input type="radio"/> 2 a 4 veces semana<br><input type="radio"/> 5 a 6 veces semana<br><input type="radio"/> 1 vez al día<br><input type="radio"/> 2 a 3 veces al día<br><input type="radio"/> 5 a 6 veces al día<br><input type="radio"/> más 6 veces al día |
| agua embotellada sin gas | <input type="radio"/> Nunca o menos 1 vez al mes<br><input type="radio"/> 1 a 3 veces mes<br><input type="radio"/> 1 vez semana<br><input type="radio"/> 2 a 4 veces semana<br><input type="radio"/> 5 a 6 veces semana<br><input type="radio"/> 1 vez al día<br><input type="radio"/> 2 a 3 veces al día<br><input type="radio"/> 5 a 6 veces al día<br><input checked="" type="radio"/> más 6 veces al día |
| agua embotellada con gas | <input checked="" type="radio"/> Nunca o menos 1 vez al mes<br><input type="radio"/> 1 a 3 veces mes<br><input type="radio"/> 1 vez semana<br><input type="radio"/> 2 a 4 veces semana<br><input type="radio"/> 5 a 6 veces semana<br><input type="radio"/> 1 vez al día<br><input type="radio"/> 2 a 3 veces al día<br><input type="radio"/> 5 a 6 veces al día<br><input type="radio"/> más 6 veces al día |
| zumو frutas embasado     | <input type="radio"/> Nunca o menos 1 vez al mes<br><input type="radio"/> 1 a 3 veces mes<br><input checked="" type="radio"/> 1 vez semana<br><input type="radio"/> 2 a 4 veces semana<br><input type="radio"/> 5 a 6 veces semana<br><input type="radio"/> 1 vez al día<br><input type="radio"/> 2 a 3 veces al día<br><input type="radio"/> 5 a 6 veces al día<br><input type="radio"/> más 6 veces al día |
| cafe                     | <input type="radio"/> Nunca o menos 1 vez al mes<br><input checked="" type="radio"/> 1 a 3 veces mes<br><input type="radio"/> 1 vez semana<br><input type="radio"/> 2 a 4 veces semana<br><input type="radio"/> 5 a 6 veces semana<br><input type="radio"/> 1 vez al día<br><input type="radio"/> 2 a 3 veces al día<br><input type="radio"/> 5 a 6 veces al día<br><input type="radio"/> más 6 veces al día |

|                       |                                                                                                                                                                                                                                                                                                                                                                                                              |
|-----------------------|--------------------------------------------------------------------------------------------------------------------------------------------------------------------------------------------------------------------------------------------------------------------------------------------------------------------------------------------------------------------------------------------------------------|
| cafe descafeinado     | <input checked="" type="radio"/> Nunca o menos 1 vez al mes<br><input type="radio"/> 1 a 3 veces mes<br><input type="radio"/> 1 vez semana<br><input type="radio"/> 2 a 4 veces semana<br><input type="radio"/> 5 a 6 veces semana<br><input type="radio"/> 1 vez al día<br><input type="radio"/> 2 a 3 veces al día<br><input type="radio"/> 5 a 6 veces al día<br><input type="radio"/> más 6 veces al día |
| te o infusión         | <input type="radio"/> Nunca o menos 1 vez al mes<br><input type="radio"/> 1 a 3 veces mes<br><input checked="" type="radio"/> 1 vez semana<br><input type="radio"/> 2 a 4 veces semana<br><input type="radio"/> 5 a 6 veces semana<br><input type="radio"/> 1 vez al día<br><input type="radio"/> 2 a 3 veces al día<br><input type="radio"/> 5 a 6 veces al día<br><input type="radio"/> más 6 veces al día |
| sopa o puré verduras  | <input type="radio"/> Nunca o menos 1 vez al mes<br><input type="radio"/> 1 a 3 veces mes<br><input checked="" type="radio"/> 1 vez semana<br><input type="radio"/> 2 a 4 veces semana<br><input type="radio"/> 5 a 6 veces semana<br><input type="radio"/> 1 vez al día<br><input type="radio"/> 2 a 3 veces al día<br><input type="radio"/> 5 a 6 veces al día<br><input type="radio"/> más 6 veces al día |
| croquetas pollo jamón | <input type="radio"/> Nunca o menos 1 vez al mes<br><input checked="" type="radio"/> 1 a 3 veces mes<br><input type="radio"/> 1 vez semana<br><input type="radio"/> 2 a 4 veces semana<br><input type="radio"/> 5 a 6 veces semana<br><input type="radio"/> 1 vez al día<br><input type="radio"/> 2 a 3 veces al día<br><input type="radio"/> 5 a 6 veces al día<br><input type="radio"/> más 6 veces al día |
| croquetas pescado     | <input checked="" type="radio"/> Nunca o menos 1 vez al mes<br><input type="radio"/> 1 a 3 veces mes<br><input type="radio"/> 1 vez semana<br><input type="radio"/> 2 a 4 veces semana<br><input type="radio"/> 5 a 6 veces semana<br><input type="radio"/> 1 vez al día<br><input type="radio"/> 2 a 3 veces al día<br><input type="radio"/> 5 a 6 veces al día<br><input type="radio"/> más 6 veces al día |
| mayonesa              | <input checked="" type="radio"/> Nunca o menos 1 vez al mes<br><input type="radio"/> 1 a 3 veces mes<br><input type="radio"/> 1 vez semana<br><input type="radio"/> 2 a 4 veces semana<br><input type="radio"/> 5 a 6 veces semana<br><input type="radio"/> 1 vez al día<br><input type="radio"/> 2 a 3 veces al día<br><input type="radio"/> 5 a 6 veces al día<br><input type="radio"/> más 6 veces al día |

|                  |                                                                                                                                                                                                                                                                                                                                                                                                              |
|------------------|--------------------------------------------------------------------------------------------------------------------------------------------------------------------------------------------------------------------------------------------------------------------------------------------------------------------------------------------------------------------------------------------------------------|
| salsa tomate     | <input type="radio"/> Nunca o menos 1 vez al mes<br><input type="radio"/> 1 a 3 veces mes<br><input type="radio"/> 1 vez semana<br><input checked="" type="radio"/> 2 a 4 veces semana<br><input type="radio"/> 5 a 6 veces semana<br><input type="radio"/> 1 vez al día<br><input type="radio"/> 2 a 3 veces al día<br><input type="radio"/> 5 a 6 veces al día<br><input type="radio"/> más 6 veces al día |
| ketchup          | <input checked="" type="radio"/> Nunca o menos 1 vez al mes<br><input type="radio"/> 1 a 3 veces mes<br><input type="radio"/> 1 vez semana<br><input type="radio"/> 2 a 4 veces semana<br><input type="radio"/> 5 a 6 veces semana<br><input type="radio"/> 1 vez al día<br><input type="radio"/> 2 a 3 veces al día<br><input type="radio"/> 5 a 6 veces al día<br><input type="radio"/> más 6 veces al día |
| sal              | <input type="radio"/> Nunca o menos 1 vez al mes<br><input type="radio"/> 1 a 3 veces mes<br><input type="radio"/> 1 vez semana<br><input checked="" type="radio"/> 2 a 4 veces semana<br><input type="radio"/> 5 a 6 veces semana<br><input type="radio"/> 1 vez al día<br><input type="radio"/> 2 a 3 veces al día<br><input type="radio"/> 5 a 6 veces al día<br><input type="radio"/> más 6 veces al día |
| ajo              | <input type="radio"/> Nunca o menos 1 vez al mes<br><input checked="" type="radio"/> 1 a 3 veces mes<br><input type="radio"/> 1 vez semana<br><input type="radio"/> 2 a 4 veces semana<br><input type="radio"/> 5 a 6 veces semana<br><input type="radio"/> 1 vez al día<br><input type="radio"/> 2 a 3 veces al día<br><input type="radio"/> 5 a 6 veces al día<br><input type="radio"/> más 6 veces al día |
| mermelada o miel | <input type="radio"/> Nunca o menos 1 vez al mes<br><input type="radio"/> 1 a 3 veces mes<br><input type="radio"/> 1 vez semana<br><input checked="" type="radio"/> 2 a 4 veces semana<br><input type="radio"/> 5 a 6 veces semana<br><input type="radio"/> 1 vez al día<br><input type="radio"/> 2 a 3 veces al día<br><input type="radio"/> 5 a 6 veces al día<br><input type="radio"/> más 6 veces al día |
| azúcar           | <input type="radio"/> Nunca o menos 1 vez al mes<br><input type="radio"/> 1 a 3 veces mes<br><input type="radio"/> 1 vez semana<br><input checked="" type="radio"/> 2 a 4 veces semana<br><input type="radio"/> 5 a 6 veces semana<br><input type="radio"/> 1 vez al día<br><input type="radio"/> 2 a 3 veces al día<br><input type="radio"/> 5 a 6 veces al día<br><input type="radio"/> más 6 veces al día |

|                                       |                                                                                                                                                                                                                                                                                                                                                                                                                                                                                                                               |
|---------------------------------------|-------------------------------------------------------------------------------------------------------------------------------------------------------------------------------------------------------------------------------------------------------------------------------------------------------------------------------------------------------------------------------------------------------------------------------------------------------------------------------------------------------------------------------|
| Otro alimento                         | [*DATA REMOVED*]                                                                                                                                                                                                                                                                                                                                                                                                                                                                                                              |
| suplementos vitamínicos               | <input checked="" type="radio"/> si<br><input type="radio"/> no                                                                                                                                                                                                                                                                                                                                                                                                                                                               |
| suplementos vitamínicos               |                                                                                                                                                                                                                                                                                                                                                                                                                                                                                                                               |
| dieta previa                          | <input type="radio"/> si<br><input checked="" type="radio"/> no                                                                                                                                                                                                                                                                                                                                                                                                                                                               |
| motivo dieta                          | <input checked="" type="radio"/> no dieta<br><input type="radio"/> control peso<br><input type="radio"/> control colesterol<br><input type="radio"/> control diabetes<br><input type="radio"/> problemas estómago<br><input type="radio"/> problemas vesícula o hepáticos<br><input type="radio"/> HTA o cardiopatía<br><input type="radio"/> problemas renales<br><input type="radio"/> alergia alimentaria<br><input type="radio"/> ácido úrico elevado<br><input type="radio"/> vegetariana<br><input type="radio"/> otros |
| cambio alimentos año previo gestación | <input checked="" type="radio"/> si<br><input type="radio"/> no                                                                                                                                                                                                                                                                                                                                                                                                                                                               |
| cambio lácteos                        | <input type="radio"/> eliminado<br><input type="radio"/> disminuido<br><input checked="" type="radio"/> igual<br><input type="radio"/> aumentado<br><input type="radio"/> no sabe                                                                                                                                                                                                                                                                                                                                             |
| cambio huevos                         | <input type="radio"/> eliminado<br><input type="radio"/> disminuido<br><input checked="" type="radio"/> igual<br><input type="radio"/> aumentado<br><input type="radio"/> no sabe                                                                                                                                                                                                                                                                                                                                             |
| cambio carne                          | <input type="radio"/> eliminado<br><input type="radio"/> disminuido<br><input checked="" type="radio"/> igual<br><input type="radio"/> aumentado<br><input type="radio"/> no sabe                                                                                                                                                                                                                                                                                                                                             |
| cambio pescado                        | <input type="radio"/> eliminado<br><input type="radio"/> disminuido<br><input checked="" type="radio"/> igual<br><input type="radio"/> aumentado<br><input type="radio"/> no sabe                                                                                                                                                                                                                                                                                                                                             |
| cambio verduras                       | <input type="radio"/> eliminado<br><input type="radio"/> disminuido<br><input checked="" type="radio"/> igual<br><input type="radio"/> aumentado<br><input type="radio"/> no sabe                                                                                                                                                                                                                                                                                                                                             |

|                            |                                                                                                                                                                                                                        |
|----------------------------|------------------------------------------------------------------------------------------------------------------------------------------------------------------------------------------------------------------------|
| cambio legumbres           | <input type="radio"/> eliminado<br><input type="radio"/> disminuido<br><input checked="" type="radio"/> igual<br><input type="radio"/> aumentado<br><input type="radio"/> no sabe                                      |
| cambio fruta               | <input type="radio"/> eliminado<br><input type="radio"/> disminuido<br><input checked="" type="radio"/> igual<br><input type="radio"/> aumentado<br><input type="radio"/> no sabe                                      |
| cambio pan                 | <input type="radio"/> eliminado<br><input type="radio"/> disminuido<br><input checked="" type="radio"/> igual<br><input type="radio"/> aumentado<br><input type="radio"/> no sabe                                      |
| cambio aceite oliva        | <input type="radio"/> eliminado<br><input type="radio"/> disminuido<br><input checked="" type="radio"/> igual<br><input type="radio"/> aumentado<br><input type="radio"/> no sabe                                      |
| cambio mante o margarina   | <input type="radio"/> eliminado<br><input type="radio"/> disminuido<br><input checked="" type="radio"/> igual<br><input type="radio"/> aumentado<br><input type="radio"/> no sabe                                      |
| cambio azúcar y dulces     | <input type="radio"/> eliminado<br><input type="radio"/> disminuido<br><input checked="" type="radio"/> igual<br><input type="radio"/> aumentado<br><input type="radio"/> no sabe                                      |
| cambio bebidas alcohólicas | <input checked="" type="radio"/> eliminado<br><input type="radio"/> disminuido<br><input type="radio"/> igual<br><input type="radio"/> aumentado<br><input type="radio"/> no sabe                                      |
| frecuencia comidas fritas  | <input type="radio"/> a diario<br><input type="radio"/> 5 a 6 veces semana<br><input type="radio"/> 2 a 4 veces semana<br><input checked="" type="radio"/> 1 vez semana<br><input type="radio"/> menos de 1 vez semana |
| carne                      | <input type="radio"/> no como<br><input type="radio"/> cruda<br><input checked="" type="radio"/> poco hecha<br><input type="radio"/> hecha<br><input type="radio"/> muy hecha                                          |
| grasa visible carne        | <input checked="" type="radio"/> quita toda<br><input type="radio"/> quita mayoría<br><input type="radio"/> quita un poco<br><input type="radio"/> no quita nada                                                       |

|                                |                                                                                                                                                                                                                                                          |
|--------------------------------|----------------------------------------------------------------------------------------------------------------------------------------------------------------------------------------------------------------------------------------------------------|
| cocina carne                   | <input checked="" type="radio"/> a la plancha<br><input type="radio"/> a la parrilla<br><input type="radio"/> asada<br><input type="radio"/> frita<br><input type="radio"/> guisada                                                                      |
| tostado quemado carne          | <input checked="" type="radio"/> nunca<br><input type="radio"/> 1 vez mes<br><input type="radio"/> 2 a 3 veces mes<br><input type="radio"/> 1 vez semana<br><input type="radio"/> 2 a 3 semanas                                                          |
| tostado quemado pescado        | <input checked="" type="radio"/> nunca<br><input type="radio"/> 1 vez mes<br><input type="radio"/> 2 a 3 veces mes<br><input type="radio"/> 1 vez semana<br><input type="radio"/> 2 a 3 semanas                                                          |
| socarrat paella                | <input type="radio"/> nunca<br><input checked="" type="radio"/> 1 vez mes<br><input type="radio"/> 2 a 3 veces mes<br><input type="radio"/> 1 vez semana<br><input type="radio"/> 2 a 3 semanas                                                          |
| grasa o aceite cocinar         | <input type="radio"/> mantequilla<br><input type="radio"/> margarina<br><input checked="" type="radio"/> aceite oliva<br><input type="radio"/> aceite oliva virgen extra<br><input type="radio"/> aceite vegetal<br><input type="radio"/> mezcla aceites |
| grasa aceite aliñar            | <input type="radio"/> mantequilla<br><input type="radio"/> margarina<br><input type="radio"/> aceite oliva<br><input checked="" type="radio"/> aceite oliva virgen extra<br><input type="radio"/> aceite vegetal<br><input type="radio"/> mezcla aceites |
| grasa aceite freir             | <input type="radio"/> mantequilla<br><input type="radio"/> margarina<br><input checked="" type="radio"/> aceite oliva<br><input type="radio"/> aceite oliva virgen extra<br><input type="radio"/> aceite vegetal<br><input type="radio"/> mezcla aceites |
| Ejercicio cuestionario         | <input checked="" type="radio"/> si<br><input type="radio"/> no                                                                                                                                                                                          |
| horas de sueño incluido siesta | [*DATA REMOVED*]                                                                                                                                                                                                                                         |
| minutos siesta                 | [*DATA REMOVED*]                                                                                                                                                                                                                                         |
| horas televisión semana        | [*DATA REMOVED*]                                                                                                                                                                                                                                         |

|                                        |                                                                                                                                                                                                                                                                                                                                                                |
|----------------------------------------|----------------------------------------------------------------------------------------------------------------------------------------------------------------------------------------------------------------------------------------------------------------------------------------------------------------------------------------------------------------|
| actividad trabajo                      | <input type="radio"/> casi siempre sentado<br><input type="radio"/> sentado 50 por cien<br><input type="radio"/> casi siempre de pie, quieto<br><input type="radio"/> casi siempre levantado caminando y llevando pocas cosas<br><input type="radio"/> casi siempre levantado, caminando y llevado muchas cosas<br><input type="radio"/> trabajo manual pesado |
| tiempo caminar o bici al día           | <input type="radio"/> casi nunca<br><input type="radio"/> menos 20min día<br><input checked="" type="radio"/> 20 a 40 min día<br><input type="radio"/> 40 a 60 min día<br><input type="radio"/> 1h o 1h y media día<br><input type="radio"/> más de 1h y media al día                                                                                          |
| tiempo tareas casa al día              | <input type="radio"/> menos de 1h día<br><input checked="" type="radio"/> 1 a 2h día<br><input type="radio"/> 3 a 4h día<br><input type="radio"/> 5 a 6h día<br><input type="radio"/> 7 a 8h día<br><input type="radio"/> más de 8h día                                                                                                                        |
| tiempo libre televisión ordenador leer | <input type="radio"/> menos 1h día<br><input type="radio"/> 1h día<br><input type="radio"/> 2h día<br><input checked="" type="radio"/> 3h día<br><input type="radio"/> 4h día<br><input type="radio"/> 5 a 6h día<br><input type="radio"/> mas 6h día                                                                                                          |
| tiempo libre ejercicio o deporte       | <input type="radio"/> menos 1h semana<br><input type="radio"/> 1h semana<br><input type="radio"/> 2h semana<br><input type="radio"/> 3h semana<br><input checked="" type="radio"/> 4 a 5h semana<br><input type="radio"/> mas 5h semana                                                                                                                        |
| como se considera                      | <input type="radio"/> sedentaria<br><input type="radio"/> poco activa<br><input checked="" type="radio"/> moderadamente activa<br><input type="radio"/> bastante activa<br><input type="radio"/> muy activa<br><input type="radio"/> no sabe                                                                                                                   |
| FUR                                    | [*DATA REMOVED*]                                                                                                                                                                                                                                                                                                                                               |
| Semanas gestación 2T                   | [*DATA REMOVED*]                                                                                                                                                                                                                                                                                                                                               |
| Días gestación 2T                      | [*DATA REMOVED*]                                                                                                                                                                                                                                                                                                                                               |
| DBP 2T                                 | [*DATA REMOVED*]                                                                                                                                                                                                                                                                                                                                               |
| CC 2T                                  | [*DATA REMOVED*]                                                                                                                                                                                                                                                                                                                                               |
| AC 2T                                  | [*DATA REMOVED*]                                                                                                                                                                                                                                                                                                                                               |



|                                                   |                                                                                                                                                                                                 |
|---------------------------------------------------|-------------------------------------------------------------------------------------------------------------------------------------------------------------------------------------------------|
| LF 2T                                             | [*DATA REMOVED*]                                                                                                                                                                                |
| PFE 2T (Hadlock)                                  | [*DATA REMOVED*]                                                                                                                                                                                |
| Semanas gestación 3T                              | [*DATA REMOVED*]                                                                                                                                                                                |
| días 3T                                           | [*DATA REMOVED*]                                                                                                                                                                                |
| DBP 3T                                            | [*DATA REMOVED*]                                                                                                                                                                                |
| CC 3T                                             | [*DATA REMOVED*]                                                                                                                                                                                |
| AC 3T                                             | [*DATA REMOVED*]                                                                                                                                                                                |
| LF 3T                                             | [*DATA REMOVED*]                                                                                                                                                                                |
| PFE 3T (Hadlock)                                  | [*DATA REMOVED*]                                                                                                                                                                                |
| Semanas de gestación final                        | [*DATA REMOVED*]                                                                                                                                                                                |
| días gestación final                              | [*DATA REMOVED*]                                                                                                                                                                                |
| Localización placenta                             | <input checked="" type="radio"/> anterior<br><input type="radio"/> lateral derecha<br><input type="radio"/> lateral izquierda<br><input type="radio"/> posterior<br><input type="radio"/> fondo |
| Presentación longitudinal cefálica                | <input type="radio"/> no<br><input checked="" type="radio"/> si                                                                                                                                 |
| Dorso                                             | <input type="radio"/> izquierda anterior<br><input type="radio"/> izquierda posterior<br><input type="radio"/> derecha anterior<br><input checked="" type="radio"/> derecha posterior           |
| diámetro biparietal                               | [*DATA REMOVED*]                                                                                                                                                                                |
| Circunferencia craneal                            | [*DATA REMOVED*]                                                                                                                                                                                |
| Circunferencia abdominal                          | [*DATA REMOVED*]                                                                                                                                                                                |
| Longitud de femur                                 | [*DATA REMOVED*]                                                                                                                                                                                |
| tejido celular subcutáneo a nivel del muslo en mm | [*DATA REMOVED*]                                                                                                                                                                                |
| tejido celular subcutáneo en abdomen en mm        | [*DATA REMOVED*]                                                                                                                                                                                |
| Volumen del muslo en cm3                          | [*DATA REMOVED*]                                                                                                                                                                                |
| Peso fetal estimado según fórmula de Hadlock      | [*DATA REMOVED*]                                                                                                                                                                                |

|                                               |                                                                                                                                                          |
|-----------------------------------------------|----------------------------------------------------------------------------------------------------------------------------------------------------------|
| Percentil                                     | [*DATA REMOVED*]                                                                                                                                         |
| Peso fetal estimado según fórmula de Scioscia | <hr/>                                                                                                                                                    |
| Peso fetal estimado según fórmula de LEE      | <hr/>                                                                                                                                                    |
| Tipo de parto                                 | <input type="radio"/> eutocico<br><input checked="" type="radio"/> instrumentado/ventosa<br><input type="radio"/> cesarea                                |
| fecha de nacimiento                           | [*DATA REMOVED*]                                                                                                                                         |
| Días entre exploración y nacimiento           | [*DATA REMOVED*]                                                                                                                                         |
| Peso RN en g                                  | [*DATA REMOVED*]                                                                                                                                         |
| sexo                                          | <input type="radio"/> mujer<br><input checked="" type="radio"/> hombre                                                                                   |
| Apgar 1 minuto                                | [*DATA REMOVED*]                                                                                                                                         |
| Apgar 5 minutos                               | [*DATA REMOVED*]                                                                                                                                         |
| Apgar 10 minutos                              | <hr/>                                                                                                                                                    |
| antecedente Covid durante gestación           | <input type="radio"/> Yes<br><input checked="" type="radio"/> No                                                                                         |
| Nivel de estudios                             | <input type="radio"/> ninguno<br><input type="radio"/> primarios<br><input type="radio"/> secundarios<br><input checked="" type="radio"/> universitarios |

# Base\_datos\_estimacion\_peso\_fetal

|                                       |                                                                                                                                                                                                                                                                                      |
|---------------------------------------|--------------------------------------------------------------------------------------------------------------------------------------------------------------------------------------------------------------------------------------------------------------------------------------|
| Número de identificación participante | 63                                                                                                                                                                                                                                                                                   |
| CODIGO PARTICIPANTE                   |                                                                                                                                                                                                                                                                                      |
| Edad                                  | [*DATA REMOVED*]                                                                                                                                                                                                                                                                     |
| Gestaciones                           | <input type="radio"/> 1<br><input checked="" type="radio"/> 2<br><input type="radio"/> 3<br><input type="radio"/> mas de 3                                                                                                                                                           |
| partos                                | <input type="radio"/> 0<br><input checked="" type="radio"/> 1<br><input type="radio"/> 2<br><input type="radio"/> 3<br><input type="radio"/> mas de 3                                                                                                                                |
| cesáreas                              | <input checked="" type="radio"/> 0<br><input type="radio"/> 1<br><input type="radio"/> 2<br><input type="radio"/> 3<br><input type="radio"/> mas de 3                                                                                                                                |
| Abortos                               | <input checked="" type="radio"/> 0<br><input type="radio"/> 1<br><input type="radio"/> 2<br><input type="radio"/> 3<br><input type="radio"/> mas de 3                                                                                                                                |
| Tipo de gestacion                     | <input checked="" type="radio"/> espontanea<br><input type="radio"/> IAC inseminación artificial conyuge<br><input type="radio"/> IAD inseminación artificial donante<br><input type="radio"/> FIV Fecundación in Vitro<br><input type="radio"/> Ovodon FIV con donación de ovocitos |
| peso previo a embarazo                | [*DATA REMOVED*]                                                                                                                                                                                                                                                                     |
| Ganancia ponderal embarazo            | [*DATA REMOVED*]                                                                                                                                                                                                                                                                     |
| Talla madre                           | [*DATA REMOVED*]                                                                                                                                                                                                                                                                     |
| IMC previo embarazo                   | 23.875114784205696                                                                                                                                                                                                                                                                   |
| Patología obstétrica                  | <input checked="" type="radio"/> no<br><input type="radio"/> si                                                                                                                                                                                                                      |
| Diabetes pregestacional               | <input checked="" type="radio"/> no<br><input type="radio"/> si                                                                                                                                                                                                                      |
| Diabetes gestacional                  | <input checked="" type="radio"/> no<br><input type="radio"/> si                                                                                                                                                                                                                      |

|                                            |                                                                                                                                                                                      |
|--------------------------------------------|--------------------------------------------------------------------------------------------------------------------------------------------------------------------------------------|
| Diabetes gestacional con insulina          | <input checked="" type="radio"/> no<br><input type="radio"/> si                                                                                                                      |
| Diabetes gestacional con dieta y ejercicio | <input checked="" type="radio"/> no<br><input type="radio"/> si                                                                                                                      |
| Percentil fetos previos                    | <input type="radio"/> Nada<br><input type="radio"/> percentil menor de 10<br><input checked="" type="radio"/> percentil entre 10 y 90<br><input type="radio"/> percentil mayor de 90 |
| Exfumadora                                 | <input checked="" type="radio"/> Nada<br><input type="radio"/> menos de 5 años<br><input type="radio"/> 5 a 10 años<br><input type="radio"/> mayor o igual a 10 años                 |
| Hábito tabáquico                           | <input checked="" type="radio"/> no<br><input type="radio"/> si                                                                                                                      |
| fumadora                                   | [*DATA REMOVED*]                                                                                                                                                                     |
| Consumo otros tóxicos                      | <input checked="" type="radio"/> no<br><input type="radio"/> si                                                                                                                      |
| Hb 1T                                      | _____                                                                                                                                                                                |
| Htc 1T                                     | _____                                                                                                                                                                                |
| Hb 2T                                      | _____                                                                                                                                                                                |
| HTC 2T                                     | _____                                                                                                                                                                                |
| Hb 3T                                      | _____                                                                                                                                                                                |
| HTC 3T                                     | _____                                                                                                                                                                                |
| Suplemento FE oral                         | <input type="radio"/> si<br><input checked="" type="radio"/> no                                                                                                                      |
| Suplemento fe iv                           | <input type="radio"/> si<br><input checked="" type="radio"/> no                                                                                                                      |
| Transfusión                                | <input checked="" type="radio"/> no<br><input type="radio"/> si                                                                                                                      |
| Solicitada Vit D                           | <input checked="" type="radio"/> no<br><input type="radio"/> si                                                                                                                      |

|                       |                                                                                                                                                                                                                                                                                                                                                                                                              |
|-----------------------|--------------------------------------------------------------------------------------------------------------------------------------------------------------------------------------------------------------------------------------------------------------------------------------------------------------------------------------------------------------------------------------------------------------|
| Deficit vit D         | <input type="radio"/> no<br><input type="radio"/> si                                                                                                                                                                                                                                                                                                                                                         |
| Suplemento vit D      | <input type="radio"/> si<br><input type="radio"/> no                                                                                                                                                                                                                                                                                                                                                         |
| Dieta, cuestionario   | <input checked="" type="radio"/> si<br><input type="radio"/> no                                                                                                                                                                                                                                                                                                                                              |
| Leche entera          | <input checked="" type="radio"/> Nunca o menos 1 vez al mes<br><input type="radio"/> 1 a 3 veces mes<br><input type="radio"/> 1 vez semana<br><input type="radio"/> 2 a 4 veces semana<br><input type="radio"/> 5 a 6 veces semana<br><input type="radio"/> 1 vez al día<br><input type="radio"/> 2 a 3 veces al día<br><input type="radio"/> 5 a 6 veces al día<br><input type="radio"/> más 6 veces al día |
| Leche semidesnatada   | <input checked="" type="radio"/> Nunca o menos 1 vez al mes<br><input type="radio"/> 1 a 3 veces mes<br><input type="radio"/> 1 vez semana<br><input type="radio"/> 2 a 4 veces semana<br><input type="radio"/> 5 a 6 veces semana<br><input type="radio"/> 1 vez al día<br><input type="radio"/> 2 a 3 veces al día<br><input type="radio"/> 5 a 6 veces al día<br><input type="radio"/> mas 6 veces al día |
| Leche desnatada       | <input checked="" type="radio"/> Nunca o menos 1 vez al mes<br><input type="radio"/> 1 a 3 veces mes<br><input type="radio"/> 1 vez semana<br><input type="radio"/> 2 a 4 veces semana<br><input type="radio"/> 5 a 6 veces semana<br><input type="radio"/> 1 vez al día<br><input type="radio"/> 2 a 3 veces al día<br><input type="radio"/> 5 a 6 veces al día<br><input type="radio"/> más 6 veces al día |
| Leche condensada      | <input checked="" type="radio"/> Nunca o menos 1 vez al mes<br><input type="radio"/> 1 a 3 veces mes<br><input type="radio"/> 1 vez semana<br><input type="radio"/> 2 a 4 veces semana<br><input type="radio"/> 5 a 6 veces semana<br><input type="radio"/> 1 vez al día<br><input type="radio"/> 2 a 3 veces al día<br><input type="radio"/> 5 a 6 veces al día<br><input type="radio"/> más 6 veces al día |
| nata o crema de leche | <input checked="" type="radio"/> Nunca o menos 1 vez al mes<br><input type="radio"/> 1 a 3 veces mes<br><input type="radio"/> 1 vez semana<br><input type="radio"/> 2 a 4 veces semana<br><input type="radio"/> 5 a 6 veces semana<br><input type="radio"/> 1 vez al día<br><input type="radio"/> 2 a 3 veces al día<br><input type="radio"/> 5 a 6 veces al día<br><input type="radio"/> más 6 veces al día |

|                                             |                                                                                                                                                                                                                                                                                                                                                                                                              |
|---------------------------------------------|--------------------------------------------------------------------------------------------------------------------------------------------------------------------------------------------------------------------------------------------------------------------------------------------------------------------------------------------------------------------------------------------------------------|
| Yogurt Entero                               | <input type="radio"/> Nunca o menos 1 vez al mes<br><input type="radio"/> 1 a 3 veces mes<br><input type="radio"/> 1 vez semana<br><input type="radio"/> 2 a 4 veces semana<br><input type="radio"/> 5 a 6 veces semana<br><input checked="" type="radio"/> 1 vez al día<br><input type="radio"/> 2 a 3 veces al día<br><input type="radio"/> 5 a 6 veces al día<br><input type="radio"/> más 6 veces al día |
| Yogurt desnatado                            | <input checked="" type="radio"/> Nunca o menos 1 vez al mes<br><input type="radio"/> 1 a 3 veces mes<br><input type="radio"/> 1 vez semana<br><input type="radio"/> 2 a 4 veces semana<br><input type="radio"/> 5 a 6 veces semana<br><input type="radio"/> 1 vez al día<br><input type="radio"/> 2 a 3 veces al día<br><input type="radio"/> 5 a 6 veces al día<br><input type="radio"/> más 6 veces al día |
| 100g requesón o queso blando o queso fresco | <input type="radio"/> Nunca o menos 1 vez al mes<br><input type="radio"/> 1 a 3 veces mes<br><input type="radio"/> 1 vez semana<br><input type="radio"/> 2 a 4 veces semana<br><input checked="" type="radio"/> 5 a 6 veces semana<br><input type="radio"/> 1 vez al día<br><input type="radio"/> 2 a 3 veces al día<br><input type="radio"/> 5 a 6 veces al día<br><input type="radio"/> más 6 veces al día |
| queso curado o semicurado o cremoso         | <input type="radio"/> Nunca o menos 1 vez al mes<br><input type="radio"/> 1 a 3 veces mes<br><input type="radio"/> 1 vez semana<br><input type="radio"/> 2 a 4 veces semana<br><input type="radio"/> 5 a 6 veces semana<br><input checked="" type="radio"/> 1 vez al día<br><input type="radio"/> 2 a 3 veces al día<br><input type="radio"/> 5 a 6 veces al día<br><input type="radio"/> más 6 veces al día |
| natillas flan pudding                       | <input checked="" type="radio"/> Nunca o menos 1 vez al mes<br><input type="radio"/> 1 a 3 veces mes<br><input type="radio"/> 1 vez semana<br><input type="radio"/> 2 a 4 veces semana<br><input type="radio"/> 5 a 6 veces semana<br><input type="radio"/> 1 vez al día<br><input type="radio"/> 2 a 3 veces al día<br><input type="radio"/> 5 a 6 veces al día<br><input type="radio"/> más 6 veces al día |
| Helado                                      | <input type="radio"/> Nunca o menos 1 vez al mes<br><input type="radio"/> 1 a 3 veces mes<br><input checked="" type="radio"/> 1 vez semana<br><input type="radio"/> 2 a 4 veces semana<br><input type="radio"/> 5 a 6 veces semana<br><input type="radio"/> 1 vez al día<br><input type="radio"/> 2 a 3 veces al día<br><input type="radio"/> 5 a 6 veces al día<br><input type="radio"/> más 6 veces al día |

|                                      |                                                                                                                                                                                                                                                                                                                                                                                                              |
|--------------------------------------|--------------------------------------------------------------------------------------------------------------------------------------------------------------------------------------------------------------------------------------------------------------------------------------------------------------------------------------------------------------------------------------------------------------|
| huevo                                | <input type="radio"/> Nunca o menos 1 vez al mes<br><input type="radio"/> 1 a 3 veces mes<br><input type="radio"/> 1 vez semana<br><input checked="" type="radio"/> 2 a 4 veces semana<br><input type="radio"/> 5 a 6 veces semana<br><input type="radio"/> 1 vez al día<br><input type="radio"/> 2 a 3 veces al día<br><input type="radio"/> 5 a 6 veces al día<br><input type="radio"/> más 6 veces al día |
| Pollo con piel                       | <input type="radio"/> Nunca o menos 1 vez al mes<br><input checked="" type="radio"/> 1 a 3 veces mes<br><input type="radio"/> 1 vez semana<br><input type="radio"/> 2 a 4 veces semana<br><input type="radio"/> 5 a 6 veces semana<br><input type="radio"/> 1 vez al día<br><input type="radio"/> 2 a 3 veces al día<br><input type="radio"/> 5 a 6 veces al día<br><input type="radio"/> más 6 veces al día |
| pollo sin piel                       | <input type="radio"/> Nunca o menos 1 vez al mes<br><input checked="" type="radio"/> 1 a 3 veces mes<br><input type="radio"/> 1 vez semana<br><input type="radio"/> 2 a 4 veces semana<br><input type="radio"/> 5 a 6 veces semana<br><input type="radio"/> 1 vez al día<br><input type="radio"/> 2 a 3 veces al día<br><input type="radio"/> 5 a 6 veces al día<br><input type="radio"/> más 6 veces al día |
| Ternera o cerdo o cordero            | <input type="radio"/> Nunca o menos 1 vez al mes<br><input type="radio"/> 1 a 3 veces mes<br><input checked="" type="radio"/> 1 vez semana<br><input type="radio"/> 2 a 4 veces semana<br><input type="radio"/> 5 a 6 veces semana<br><input type="radio"/> 1 vez al día<br><input type="radio"/> 2 a 3 veces al día<br><input type="radio"/> 5 a 6 veces al día<br><input type="radio"/> más 6 veces al día |
| carne caza: Conejo o codorniz o pato | <input checked="" type="radio"/> Nunca o menos 1 vez al mes<br><input type="radio"/> 1 a 3 veces mes<br><input type="radio"/> 1 vez semana<br><input type="radio"/> 2 a 4 veces semana<br><input type="radio"/> 5 a 6 veces semana<br><input type="radio"/> 1 vez al día<br><input type="radio"/> 2 a 3 veces al día<br><input type="radio"/> 5 a 6 veces al día<br><input type="radio"/> más 6 veces al día |
| Hígado de ternera o cerdo o pollo    | <input checked="" type="radio"/> Nunca o menos 1 vez al mes<br><input type="radio"/> 1 a 3 veces mes<br><input type="radio"/> 1 vez semana<br><input type="radio"/> 2 a 4 veces semana<br><input type="radio"/> 5 a 6 veces semana<br><input type="radio"/> 1 vez al día<br><input type="radio"/> 2 a 3 veces al día<br><input type="radio"/> 5 a 6 veces al día<br><input type="radio"/> más 6 veces al día |

|                     |                                                                                                                                                                                                                                                                                                                                                                                                              |
|---------------------|--------------------------------------------------------------------------------------------------------------------------------------------------------------------------------------------------------------------------------------------------------------------------------------------------------------------------------------------------------------------------------------------------------------|
| Vísceras            | <input checked="" type="radio"/> Nunca o menos 1 vez al mes<br><input type="radio"/> 1 a 3 veces mes<br><input type="radio"/> 1 vez semana<br><input type="radio"/> 2 a 4 veces semana<br><input type="radio"/> 5 a 6 veces semana<br><input type="radio"/> 1 vez al día<br><input type="radio"/> 2 a 3 veces al día<br><input type="radio"/> 5 a 6 veces al día<br><input type="radio"/> más 6 veces al día |
| Embutido            | <input type="radio"/> Nunca o menos 1 vez al mes<br><input type="radio"/> 1 a 3 veces mes<br><input checked="" type="radio"/> 1 vez semana<br><input type="radio"/> 2 a 4 veces semana<br><input type="radio"/> 5 a 6 veces semana<br><input type="radio"/> 1 vez al día<br><input type="radio"/> 2 a 3 veces al día<br><input type="radio"/> 5 a 6 veces al día<br><input type="radio"/> más 6 veces al día |
| Salchicha o similar | <input checked="" type="radio"/> Nunca o menos 1 vez al mes<br><input type="radio"/> 1 a 3 veces mes<br><input type="radio"/> 1 vez semana<br><input type="radio"/> 2 a 4 veces semana<br><input type="radio"/> 5 a 6 veces semana<br><input type="radio"/> 1 vez al día<br><input type="radio"/> 2 a 3 veces al día<br><input type="radio"/> 5 a 6 veces al día<br><input type="radio"/> más 6 veces al día |
| Pate o foiegras     | <input checked="" type="radio"/> Nunca o menos 1 vez al mes<br><input type="radio"/> 1 a 3 veces mes<br><input type="radio"/> 1 vez semana<br><input type="radio"/> 2 a 4 veces semana<br><input type="radio"/> 5 a 6 veces semana<br><input type="radio"/> 1 vez al día<br><input type="radio"/> 2 a 3 veces al día<br><input type="radio"/> 5 a 6 veces al día<br><input type="radio"/> más 6 veces al día |
| Hamburguesa         | <input type="radio"/> Nunca o menos 1 vez al mes<br><input type="radio"/> 1 a 3 veces mes<br><input checked="" type="radio"/> 1 vez semana<br><input type="radio"/> 2 a 4 veces semana<br><input type="radio"/> 5 a 6 veces semana<br><input type="radio"/> 1 vez al día<br><input type="radio"/> 2 a 3 veces al día<br><input type="radio"/> 5 a 6 veces al día<br><input type="radio"/> más 6 veces al día |
| tocino o bacon      | <input checked="" type="radio"/> Nunca o menos 1 vez al mes<br><input type="radio"/> 1 a 3 veces mes<br><input type="radio"/> 1 vez semana<br><input type="radio"/> 2 a 4 veces semana<br><input type="radio"/> 5 a 6 veces semana<br><input type="radio"/> 1 vez al día<br><input type="radio"/> 2 a 3 veces al día<br><input type="radio"/> 5 a 6 veces al día<br><input type="radio"/> más 6 veces al día |



|                        |                                                                                                                                                                                                                                                                                                                                                                                                              |
|------------------------|--------------------------------------------------------------------------------------------------------------------------------------------------------------------------------------------------------------------------------------------------------------------------------------------------------------------------------------------------------------------------------------------------------------|
| Pescado frito          | <input checked="" type="radio"/> Nunca o menos 1 vez al mes<br><input type="radio"/> 1 a 3 veces mes<br><input type="radio"/> 1 vez semana<br><input type="radio"/> 2 a 4 veces semana<br><input type="radio"/> 5 a 6 veces semana<br><input type="radio"/> 1 vez al día<br><input type="radio"/> 2 a 3 veces al día<br><input type="radio"/> 5 a 6 veces al día<br><input type="radio"/> más 6 veces al día |
| pescado hervido blanco | <input type="radio"/> Nunca o menos 1 vez al mes<br><input type="radio"/> 1 a 3 veces mes<br><input checked="" type="radio"/> 1 vez semana<br><input type="radio"/> 2 a 4 veces semana<br><input type="radio"/> 5 a 6 veces semana<br><input type="radio"/> 1 vez al día<br><input type="radio"/> 2 a 3 veces al día<br><input type="radio"/> 5 a 6 veces al día<br><input type="radio"/> más 6 veces al día |
| pescado hervido azul   | <input type="radio"/> Nunca o menos 1 vez al mes<br><input type="radio"/> 1 a 3 veces mes<br><input checked="" type="radio"/> 1 vez semana<br><input type="radio"/> 2 a 4 veces semana<br><input type="radio"/> 5 a 6 veces semana<br><input type="radio"/> 1 vez al día<br><input type="radio"/> 2 a 3 veces al día<br><input type="radio"/> 5 a 6 veces al día<br><input type="radio"/> más 6 veces al día |
| otros pescado azul     | <input type="radio"/> Nunca o menos 1 vez al mes<br><input type="radio"/> 1 a 3 veces mes<br><input checked="" type="radio"/> 1 vez semana<br><input type="radio"/> 2 a 4 veces semana<br><input type="radio"/> 5 a 6 veces semana<br><input type="radio"/> 1 vez al día<br><input type="radio"/> 2 a 3 veces al día<br><input type="radio"/> 5 a 6 veces al día<br><input type="radio"/> más 6 veces al día |
| atun conserva          | <input type="radio"/> Nunca o menos 1 vez al mes<br><input checked="" type="radio"/> 1 a 3 veces mes<br><input type="radio"/> 1 vez semana<br><input type="radio"/> 2 a 4 veces semana<br><input type="radio"/> 5 a 6 veces semana<br><input type="radio"/> 1 vez al día<br><input type="radio"/> 2 a 3 veces al día<br><input type="radio"/> 5 a 6 veces al día<br><input type="radio"/> más 6 veces al día |
| sardina conserva       | <input checked="" type="radio"/> Nunca o menos 1 vez al mes<br><input type="radio"/> 1 a 3 veces mes<br><input type="radio"/> 1 vez semana<br><input type="radio"/> 2 a 4 veces semana<br><input type="radio"/> 5 a 6 veces semana<br><input type="radio"/> 1 vez al día<br><input type="radio"/> 2 a 3 veces al día<br><input type="radio"/> 5 a 6 veces al día<br><input type="radio"/> más 6 veces al día |

|                                         |                                                                                                                                                                                                                                                                                                                                                                                                              |
|-----------------------------------------|--------------------------------------------------------------------------------------------------------------------------------------------------------------------------------------------------------------------------------------------------------------------------------------------------------------------------------------------------------------------------------------------------------------|
| pescado ahumado                         | <input checked="" type="radio"/> Nunca o menos 1 vez al mes<br><input type="radio"/> 1 a 3 veces mes<br><input type="radio"/> 1 vez semana<br><input type="radio"/> 2 a 4 veces semana<br><input type="radio"/> 5 a 6 veces semana<br><input type="radio"/> 1 vez al día<br><input type="radio"/> 2 a 3 veces al día<br><input type="radio"/> 5 a 6 veces al día<br><input type="radio"/> más 6 veces al día |
| almejas o mejillones o ostras unos 100g | <input type="radio"/> Nunca o menos 1 vez al mes<br><input checked="" type="radio"/> 1 a 3 veces mes<br><input type="radio"/> 1 vez semana<br><input type="radio"/> 2 a 4 veces semana<br><input type="radio"/> 5 a 6 veces semana<br><input type="radio"/> 1 vez al día<br><input type="radio"/> 2 a 3 veces al día<br><input type="radio"/> 5 a 6 veces al día<br><input type="radio"/> más 6 veces al día |
| calamar o chipiron o sepia unos 100g    | <input checked="" type="radio"/> Nunca o menos 1 vez al mes<br><input type="radio"/> 1 a 3 veces mes<br><input type="radio"/> 1 vez semana<br><input type="radio"/> 2 a 4 veces semana<br><input type="radio"/> 5 a 6 veces semana<br><input type="radio"/> 1 vez al día<br><input type="radio"/> 2 a 3 veces al día<br><input type="radio"/> 5 a 6 veces al día<br><input type="radio"/> más 6 veces al día |
| marisco unos 100g                       | <input checked="" type="radio"/> Nunca o menos 1 vez al mes<br><input type="radio"/> 1 a 3 veces mes<br><input type="radio"/> 1 vez semana<br><input type="radio"/> 2 a 4 veces semana<br><input type="radio"/> 5 a 6 veces semana<br><input type="radio"/> 1 vez al día<br><input type="radio"/> 2 a 3 veces al día<br><input type="radio"/> 5 a 6 veces al día<br><input type="radio"/> más 6 veces al día |
| Espinacas o acelgas cocinadas           | <input type="radio"/> Nunca o menos 1 vez al mes<br><input type="radio"/> 1 a 3 veces mes<br><input type="radio"/> 1 vez semana<br><input checked="" type="radio"/> 2 a 4 veces semana<br><input type="radio"/> 5 a 6 veces semana<br><input type="radio"/> 1 vez al día<br><input type="radio"/> 2 a 3 veces al día<br><input type="radio"/> 5 a 6 veces al día<br><input type="radio"/> más 6 veces al día |
| Col o coliflor o brocoli cocinado       | <input type="radio"/> Nunca o menos 1 vez al mes<br><input type="radio"/> 1 a 3 veces mes<br><input type="radio"/> 1 vez semana<br><input checked="" type="radio"/> 2 a 4 veces semana<br><input type="radio"/> 5 a 6 veces semana<br><input type="radio"/> 1 vez al día<br><input type="radio"/> 2 a 3 veces al día<br><input type="radio"/> 5 a 6 veces al día<br><input type="radio"/> más 6 veces al día |

---

Lechuga o endivia o escarola

- ☐ Nunca o menos 1 vez al mes  
☐ 1 a 3 veces mes  
☒ 1 vez semana  
☐ 2 a 4 veces semana  
☐ 5 a 6 veces semana  
☐ 1 vez al día  
☐ 2 a 3 veces al día  
☐ 5 a 6 veces al día  
☐ más 6 veces al día

---

tomate ensalada

- ☐ Nunca o menos 1 vez al mes  
☐ 1 a 3 veces mes  
☒ 1 vez semana  
☐ 2 a 4 veces semana  
☐ 5 a 6 veces semana  
☐ 1 vez al día  
☐ 2 a 3 veces al día  
☐ 5 a 6 veces al día  
☐ más 6 veces al día

---

cebolla

- ☐ Nunca o menos 1 vez al mes  
☐ 1 a 3 veces mes  
☒ 1 vez semana  
☐ 2 a 4 veces semana  
☐ 5 a 6 veces semana  
☐ 1 vez al día  
☐ 2 a 3 veces al día  
☐ 5 a 6 veces al día  
☐ más 6 veces al día

---

Zanahoria o calabaza

- ☐ Nunca o menos 1 vez al mes  
☐ 1 a 3 veces mes  
☒ 1 vez semana  
☐ 2 a 4 veces semana  
☐ 5 a 6 veces semana  
☐ 1 vez al día  
☐ 2 a 3 veces al día  
☐ 5 a 6 veces al día  
☐ más 6 veces al día

---

Judías verdes

- ☐ Nunca o menos 1 vez al mes  
☐ 1 a 3 veces mes  
☒ 1 vez semana  
☐ 2 a 4 veces semana  
☐ 5 a 6 veces semana  
☐ 1 vez al día  
☐ 2 a 3 veces al día  
☐ 5 a 6 veces al día  
☐ más 6 veces al día

---

Berenjena o calabacin o pepino

- ☐ Nunca o menos 1 vez al mes  
☐ 1 a 3 veces mes  
☒ 1 vez semana  
☐ 2 a 4 veces semana  
☐ 5 a 6 veces semana  
☐ 1 vez al día  
☐ 2 a 3 veces al día  
☐ 5 a 6 veces al día  
☐ más 6 veces al día

|                       |                                                                                                                                                                                                                                                                                                                                                                                                              |
|-----------------------|--------------------------------------------------------------------------------------------------------------------------------------------------------------------------------------------------------------------------------------------------------------------------------------------------------------------------------------------------------------------------------------------------------------|
| pimiento              | <input type="radio"/> Nunca o menos 1 vez al mes<br><input checked="" type="radio"/> 1 a 3 veces mes<br><input type="radio"/> 1 vez semana<br><input type="radio"/> 2 a 4 veces semana<br><input type="radio"/> 5 a 6 veces semana<br><input type="radio"/> 1 vez al día<br><input type="radio"/> 2 a 3 veces al día<br><input type="radio"/> 5 a 6 veces al día<br><input type="radio"/> más 6 veces al día |
| alcachofa             | <input checked="" type="radio"/> Nunca o menos 1 vez al mes<br><input type="radio"/> 1 a 3 veces mes<br><input type="radio"/> 1 vez semana<br><input type="radio"/> 2 a 4 veces semana<br><input type="radio"/> 5 a 6 veces semana<br><input type="radio"/> 1 vez al día<br><input type="radio"/> 2 a 3 veces al día<br><input type="radio"/> 5 a 6 veces al día<br><input type="radio"/> más 6 veces al día |
| espárragos            | <input checked="" type="radio"/> Nunca o menos 1 vez al mes<br><input type="radio"/> 1 a 3 veces mes<br><input type="radio"/> 1 vez semana<br><input type="radio"/> 2 a 4 veces semana<br><input type="radio"/> 5 a 6 veces semana<br><input type="radio"/> 1 vez al día<br><input type="radio"/> 2 a 3 veces al día<br><input type="radio"/> 5 a 6 veces al día<br><input type="radio"/> más 6 veces al día |
| maíz hervido          | <input checked="" type="radio"/> Nunca o menos 1 vez al mes<br><input type="radio"/> 1 a 3 veces mes<br><input type="radio"/> 1 vez semana<br><input type="radio"/> 2 a 4 veces semana<br><input type="radio"/> 5 a 6 veces semana<br><input type="radio"/> 1 vez al día<br><input type="radio"/> 2 a 3 veces al día<br><input type="radio"/> 5 a 6 veces al día<br><input type="radio"/> más 6 veces al día |
| legumbres             | <input type="radio"/> Nunca o menos 1 vez al mes<br><input type="radio"/> 1 a 3 veces mes<br><input checked="" type="radio"/> 1 vez semana<br><input type="radio"/> 2 a 4 veces semana<br><input type="radio"/> 5 a 6 veces semana<br><input type="radio"/> 1 vez al día<br><input type="radio"/> 2 a 3 veces al día<br><input type="radio"/> 5 a 6 veces al día<br><input type="radio"/> más 6 veces al día |
| naranjas o mandarinas | <input type="radio"/> Nunca o menos 1 vez al mes<br><input type="radio"/> 1 a 3 veces mes<br><input checked="" type="radio"/> 1 vez semana<br><input type="radio"/> 2 a 4 veces semana<br><input type="radio"/> 5 a 6 veces semana<br><input type="radio"/> 1 vez al día<br><input type="radio"/> 2 a 3 veces al día<br><input type="radio"/> 5 a 6 veces al día<br><input type="radio"/> más 6 veces al día |

---

zumو natural fruta

- ☒ Nunca o menos 1 vez al mes  
☐ 1 a 3 veces mes  
☐ 1 vez semana  
☐ 2 a 4 veces semana  
☐ 5 a 6 veces semana  
☐ 1 vez al día  
☐ 2 a 3 veces al día  
☐ 5 a 6 veces al día  
☐ más 6 veces al día

---

platano

- ☐ Nunca o menos 1 vez al mes  
☐ 1 a 3 veces mes  
☐ 1 vez semana  
☒ 2 a 4 veces semana  
☐ 5 a 6 veces semana  
☐ 1 vez al día  
☐ 2 a 3 veces al día  
☐ 5 a 6 veces al día  
☐ más 6 veces al día

---

manzana o pera

- ☐ Nunca o menos 1 vez al mes  
☐ 1 a 3 veces mes  
☐ 1 vez semana  
☒ 2 a 4 veces semana  
☐ 5 a 6 veces semana  
☐ 1 vez al día  
☐ 2 a 3 veces al día  
☐ 5 a 6 veces al día  
☐ más 6 veces al día

---

melocotón o nectarina

- ☐ Nunca o menos 1 vez al mes  
☒ 1 a 3 veces mes  
☐ 1 vez semana  
☐ 2 a 4 veces semana  
☐ 5 a 6 veces semana  
☐ 1 vez al día  
☐ 2 a 3 veces al día  
☐ 5 a 6 veces al día  
☐ más 6 veces al día

---

sandia o melon

- ☐ Nunca o menos 1 vez al mes  
☐ 1 a 3 veces mes  
☐ 1 vez semana  
☒ 2 a 4 veces semana  
☐ 5 a 6 veces semana  
☐ 1 vez al día  
☐ 2 a 3 veces al día  
☐ 5 a 6 veces al día  
☐ más 6 veces al día

---

uva

- ☒ Nunca o menos 1 vez al mes  
☐ 1 a 3 veces mes  
☐ 1 vez semana  
☐ 2 a 4 veces semana  
☐ 5 a 6 veces semana  
☐ 1 vez al día  
☐ 2 a 3 veces al día  
☐ 5 a 6 veces al día  
☐ más 6 veces al día

---

bruna o ciruela

- ☒ Nunca o menos 1 vez al mes  
☐ 1 a 3 veces mes  
☐ 1 vez semana  
☐ 2 a 4 veces semana  
☐ 5 a 6 veces semana  
☐ 1 vez al día  
☐ 2 a 3 veces al día  
☐ 5 a 6 veces al día  
☐ más 6 veces al día

---

kiwi

- ☐ Nunca o menos 1 vez al mes  
☒ 1 a 3 veces mes  
☐ 1 vez semana  
☐ 2 a 4 veces semana  
☐ 5 a 6 veces semana  
☐ 1 vez al día  
☐ 2 a 3 veces al día  
☐ 5 a 6 veces al día  
☐ más 6 veces al día

---

aceituna

- ☐ Nunca o menos 1 vez al mes  
☒ 1 a 3 veces mes  
☐ 1 vez semana  
☐ 2 a 4 veces semana  
☐ 5 a 6 veces semana  
☐ 1 vez al día  
☐ 2 a 3 veces al día  
☐ 5 a 6 veces al día  
☐ más 6 veces al día

---

frutos secos

- ☐ Nunca o menos 1 vez al mes  
☐ 1 a 3 veces mes  
☒ 1 vez semana  
☐ 2 a 4 veces semana  
☐ 5 a 6 veces semana  
☐ 1 vez al día  
☐ 2 a 3 veces al día  
☐ 5 a 6 veces al día  
☐ más 6 veces al día

---

pan blanco

- ☐ Nunca o menos 1 vez al mes  
☐ 1 a 3 veces mes  
☐ 1 vez semana  
☐ 2 a 4 veces semana  
☒ 5 a 6 veces semana  
☐ 1 vez al día  
☐ 2 a 3 veces al día  
☐ 5 a 6 veces al día  
☐ más 6 veces al día

---

pan integral

- ☐ Nunca o menos 1 vez al mes  
☐ 1 a 3 veces mes  
☐ 1 vez semana  
☒ 2 a 4 veces semana  
☐ 5 a 6 veces semana  
☐ 1 vez al día  
☐ 2 a 3 veces al día  
☐ 5 a 6 veces al día  
☐ más 6 veces al día

---

|                   |                                                                                                                                                                                                                                                                                                                                                                                                              |
|-------------------|--------------------------------------------------------------------------------------------------------------------------------------------------------------------------------------------------------------------------------------------------------------------------------------------------------------------------------------------------------------------------------------------------------------|
| cereales desayuno | <input checked="" type="radio"/> Nunca o menos 1 vez al mes<br><input type="radio"/> 1 a 3 veces mes<br><input type="radio"/> 1 vez semana<br><input type="radio"/> 2 a 4 veces semana<br><input type="radio"/> 5 a 6 veces semana<br><input type="radio"/> 1 vez al día<br><input type="radio"/> 2 a 3 veces al día<br><input type="radio"/> 5 a 6 veces al día<br><input type="radio"/> más 6 veces al día |
|-------------------|--------------------------------------------------------------------------------------------------------------------------------------------------------------------------------------------------------------------------------------------------------------------------------------------------------------------------------------------------------------------------------------------------------------|

---

|                |                                                                                                                                                                                                                                                                                                                                                                                                              |
|----------------|--------------------------------------------------------------------------------------------------------------------------------------------------------------------------------------------------------------------------------------------------------------------------------------------------------------------------------------------------------------------------------------------------------------|
| patatas fritas | <input checked="" type="radio"/> Nunca o menos 1 vez al mes<br><input type="radio"/> 1 a 3 veces mes<br><input type="radio"/> 1 vez semana<br><input type="radio"/> 2 a 4 veces semana<br><input type="radio"/> 5 a 6 veces semana<br><input type="radio"/> 1 vez al día<br><input type="radio"/> 2 a 3 veces al día<br><input type="radio"/> 5 a 6 veces al día<br><input type="radio"/> más 6 veces al día |
|----------------|--------------------------------------------------------------------------------------------------------------------------------------------------------------------------------------------------------------------------------------------------------------------------------------------------------------------------------------------------------------------------------------------------------------|

---

|                          |                                                                                                                                                                                                                                                                                                                                                                                                              |
|--------------------------|--------------------------------------------------------------------------------------------------------------------------------------------------------------------------------------------------------------------------------------------------------------------------------------------------------------------------------------------------------------------------------------------------------------|
| patatas cocidas o asadas | <input type="radio"/> Nunca o menos 1 vez al mes<br><input type="radio"/> 1 a 3 veces mes<br><input checked="" type="radio"/> 1 vez semana<br><input type="radio"/> 2 a 4 veces semana<br><input type="radio"/> 5 a 6 veces semana<br><input type="radio"/> 1 vez al día<br><input type="radio"/> 2 a 3 veces al día<br><input type="radio"/> 5 a 6 veces al día<br><input type="radio"/> más 6 veces al día |
|--------------------------|--------------------------------------------------------------------------------------------------------------------------------------------------------------------------------------------------------------------------------------------------------------------------------------------------------------------------------------------------------------------------------------------------------------|

---

|             |                                                                                                                                                                                                                                                                                                                                                                                                              |
|-------------|--------------------------------------------------------------------------------------------------------------------------------------------------------------------------------------------------------------------------------------------------------------------------------------------------------------------------------------------------------------------------------------------------------------|
| bolsa papas | <input checked="" type="radio"/> Nunca o menos 1 vez al mes<br><input type="radio"/> 1 a 3 veces mes<br><input type="radio"/> 1 vez semana<br><input type="radio"/> 2 a 4 veces semana<br><input type="radio"/> 5 a 6 veces semana<br><input type="radio"/> 1 vez al día<br><input type="radio"/> 2 a 3 veces al día<br><input type="radio"/> 5 a 6 veces al día<br><input type="radio"/> más 6 veces al día |
|-------------|--------------------------------------------------------------------------------------------------------------------------------------------------------------------------------------------------------------------------------------------------------------------------------------------------------------------------------------------------------------------------------------------------------------|

---

|                |                                                                                                                                                                                                                                                                                                                                                                                                              |
|----------------|--------------------------------------------------------------------------------------------------------------------------------------------------------------------------------------------------------------------------------------------------------------------------------------------------------------------------------------------------------------------------------------------------------------|
| arroz cocinado | <input type="radio"/> Nunca o menos 1 vez al mes<br><input type="radio"/> 1 a 3 veces mes<br><input type="radio"/> 1 vez semana<br><input checked="" type="radio"/> 2 a 4 veces semana<br><input type="radio"/> 5 a 6 veces semana<br><input type="radio"/> 1 vez al día<br><input type="radio"/> 2 a 3 veces al día<br><input type="radio"/> 5 a 6 veces al día<br><input type="radio"/> más 6 veces al día |
|----------------|--------------------------------------------------------------------------------------------------------------------------------------------------------------------------------------------------------------------------------------------------------------------------------------------------------------------------------------------------------------------------------------------------------------|

---

|       |                                                                                                                                                                                                                                                                                                                                                                                                              |
|-------|--------------------------------------------------------------------------------------------------------------------------------------------------------------------------------------------------------------------------------------------------------------------------------------------------------------------------------------------------------------------------------------------------------------|
| pasta | <input type="radio"/> Nunca o menos 1 vez al mes<br><input type="radio"/> 1 a 3 veces mes<br><input checked="" type="radio"/> 1 vez semana<br><input type="radio"/> 2 a 4 veces semana<br><input type="radio"/> 5 a 6 veces semana<br><input type="radio"/> 1 vez al día<br><input type="radio"/> 2 a 3 veces al día<br><input type="radio"/> 5 a 6 veces al día<br><input type="radio"/> más 6 veces al día |
|-------|--------------------------------------------------------------------------------------------------------------------------------------------------------------------------------------------------------------------------------------------------------------------------------------------------------------------------------------------------------------------------------------------------------------|

---

|                     |                                                                                                                                                                                                                                                                                                                                                                                                              |
|---------------------|--------------------------------------------------------------------------------------------------------------------------------------------------------------------------------------------------------------------------------------------------------------------------------------------------------------------------------------------------------------------------------------------------------------|
| pizza               | <input type="radio"/> Nunca o menos 1 vez al mes<br><input checked="" type="radio"/> 1 a 3 veces mes<br><input type="radio"/> 1 vez semana<br><input type="radio"/> 2 a 4 veces semana<br><input type="radio"/> 5 a 6 veces semana<br><input type="radio"/> 1 vez al día<br><input type="radio"/> 2 a 3 veces al día<br><input type="radio"/> 5 a 6 veces al día<br><input type="radio"/> más 6 veces al día |
| aceite oliva        | <input type="radio"/> Nunca o menos 1 vez al mes<br><input type="radio"/> 1 a 3 veces mes<br><input type="radio"/> 1 vez semana<br><input type="radio"/> 2 a 4 veces semana<br><input type="radio"/> 5 a 6 veces semana<br><input checked="" type="radio"/> 1 vez al día<br><input type="radio"/> 2 a 3 veces al día<br><input type="radio"/> 5 a 6 veces al día<br><input type="radio"/> más 6 veces al día |
| otros aceites       | <input checked="" type="radio"/> Nunca o menos 1 vez al mes<br><input type="radio"/> 1 a 3 veces mes<br><input type="radio"/> 1 vez semana<br><input type="radio"/> 2 a 4 veces semana<br><input type="radio"/> 5 a 6 veces semana<br><input type="radio"/> 1 vez al día<br><input type="radio"/> 2 a 3 veces al día<br><input type="radio"/> 5 a 6 veces al día<br><input type="radio"/> más 6 veces al día |
| margarina           | <input checked="" type="radio"/> Nunca o menos 1 vez al mes<br><input type="radio"/> 1 a 3 veces mes<br><input type="radio"/> 1 vez semana<br><input type="radio"/> 2 a 4 veces semana<br><input type="radio"/> 5 a 6 veces semana<br><input type="radio"/> 1 vez al día<br><input type="radio"/> 2 a 3 veces al día<br><input type="radio"/> 5 a 6 veces al día<br><input type="radio"/> más 6 veces al día |
| mantequilla         | <input checked="" type="radio"/> Nunca o menos 1 vez al mes<br><input type="radio"/> 1 a 3 veces mes<br><input type="radio"/> 1 vez semana<br><input type="radio"/> 2 a 4 veces semana<br><input type="radio"/> 5 a 6 veces semana<br><input type="radio"/> 1 vez al día<br><input type="radio"/> 2 a 3 veces al día<br><input type="radio"/> 5 a 6 veces al día<br><input type="radio"/> más 6 veces al día |
| galletas tipo maria | <input checked="" type="radio"/> Nunca o menos 1 vez al mes<br><input type="radio"/> 1 a 3 veces mes<br><input type="radio"/> 1 vez semana<br><input type="radio"/> 2 a 4 veces semana<br><input type="radio"/> 5 a 6 veces semana<br><input type="radio"/> 1 vez al día<br><input type="radio"/> 2 a 3 veces al día<br><input type="radio"/> 5 a 6 veces al día<br><input type="radio"/> más 6 veces al día |



|                           |                                                                                                                                                                                                                                                                                                                                                                                                              |
|---------------------------|--------------------------------------------------------------------------------------------------------------------------------------------------------------------------------------------------------------------------------------------------------------------------------------------------------------------------------------------------------------------------------------------------------------|
| galletas chocolate        | <input type="radio"/> Nunca o menos 1 vez al mes<br><input checked="" type="radio"/> 1 a 3 veces mes<br><input type="radio"/> 1 vez semana<br><input type="radio"/> 2 a 4 veces semana<br><input type="radio"/> 5 a 6 veces semana<br><input type="radio"/> 1 vez al día<br><input type="radio"/> 2 a 3 veces al día<br><input type="radio"/> 5 a 6 veces al día<br><input type="radio"/> más 6 veces al día |
| bollieria                 | <input type="radio"/> Nunca o menos 1 vez al mes<br><input checked="" type="radio"/> 1 a 3 veces mes<br><input type="radio"/> 1 vez semana<br><input type="radio"/> 2 a 4 veces semana<br><input type="radio"/> 5 a 6 veces semana<br><input type="radio"/> 1 vez al día<br><input type="radio"/> 2 a 3 veces al día<br><input type="radio"/> 5 a 6 veces al día<br><input type="radio"/> más 6 veces al día |
| chocolate o bombones      | <input type="radio"/> Nunca o menos 1 vez al mes<br><input checked="" type="radio"/> 1 a 3 veces mes<br><input type="radio"/> 1 vez semana<br><input type="radio"/> 2 a 4 veces semana<br><input type="radio"/> 5 a 6 veces semana<br><input type="radio"/> 1 vez al día<br><input type="radio"/> 2 a 3 veces al día<br><input type="radio"/> 5 a 6 veces al día<br><input type="radio"/> más 6 veces al día |
| chocolate polvo o colacao | <input checked="" type="radio"/> Nunca o menos 1 vez al mes<br><input type="radio"/> 1 a 3 veces mes<br><input type="radio"/> 1 vez semana<br><input type="radio"/> 2 a 4 veces semana<br><input type="radio"/> 5 a 6 veces semana<br><input type="radio"/> 1 vez al día<br><input type="radio"/> 2 a 3 veces al día<br><input type="radio"/> 5 a 6 veces al día<br><input type="radio"/> más 6 veces al día |
| vino tinto                | <input checked="" type="radio"/> Nunca o menos 1 vez al mes<br><input type="radio"/> 1 a 3 veces mes<br><input type="radio"/> 1 vez semana<br><input type="radio"/> 2 a 4 veces semana<br><input type="radio"/> 5 a 6 veces semana<br><input type="radio"/> 1 vez al día<br><input type="radio"/> 2 a 3 veces al día<br><input type="radio"/> 5 a 6 veces al día<br><input type="radio"/> más 6 veces al día |
| vino blanco               | <input checked="" type="radio"/> Nunca o menos 1 vez al mes<br><input type="radio"/> 1 a 3 veces mes<br><input type="radio"/> 1 vez semana<br><input type="radio"/> 2 a 4 veces semana<br><input type="radio"/> 5 a 6 veces semana<br><input type="radio"/> 1 vez al día<br><input type="radio"/> 2 a 3 veces al día<br><input type="radio"/> 5 a 6 veces al día<br><input type="radio"/> más 6 veces al día |

|                       |                                                                                                                                                                                                                                                                                                                                                                                                              |
|-----------------------|--------------------------------------------------------------------------------------------------------------------------------------------------------------------------------------------------------------------------------------------------------------------------------------------------------------------------------------------------------------------------------------------------------------|
| vino seco o vermut    | <input checked="" type="radio"/> Nunca o menos 1 vez al mes<br><input type="radio"/> 1 a 3 veces mes<br><input type="radio"/> 1 vez semana<br><input type="radio"/> 2 a 4 veces semana<br><input type="radio"/> 5 a 6 veces semana<br><input type="radio"/> 1 vez al día<br><input type="radio"/> 2 a 3 veces al día<br><input type="radio"/> 5 a 6 veces al día<br><input type="radio"/> más 6 veces al día |
| cerveza               | <input checked="" type="radio"/> Nunca o menos 1 vez al mes<br><input type="radio"/> 1 a 3 veces mes<br><input type="radio"/> 1 vez semana<br><input type="radio"/> 2 a 4 veces semana<br><input type="radio"/> 5 a 6 veces semana<br><input type="radio"/> 1 vez al día<br><input type="radio"/> 2 a 3 veces al día<br><input type="radio"/> 5 a 6 veces al día<br><input type="radio"/> más 6 veces al día |
| cerveza sin alcohol   | <input checked="" type="radio"/> Nunca o menos 1 vez al mes<br><input type="radio"/> 1 a 3 veces mes<br><input type="radio"/> 1 vez semana<br><input type="radio"/> 2 a 4 veces semana<br><input type="radio"/> 5 a 6 veces semana<br><input type="radio"/> 1 vez al día<br><input type="radio"/> 2 a 3 veces al día<br><input type="radio"/> 5 a 6 veces al día<br><input type="radio"/> más 6 veces al día |
| licores               | <input checked="" type="radio"/> Nunca o menos 1 vez al mes<br><input type="radio"/> 1 a 3 veces mes<br><input type="radio"/> 1 vez semana<br><input type="radio"/> 2 a 4 veces semana<br><input type="radio"/> 5 a 6 veces semana<br><input type="radio"/> 1 vez al día<br><input type="radio"/> 2 a 3 veces al día<br><input type="radio"/> 5 a 6 veces al día<br><input type="radio"/> más 6 veces al día |
| ginebra o ron o vodka | <input checked="" type="radio"/> Nunca o menos 1 vez al mes<br><input type="radio"/> 1 a 3 veces mes<br><input type="radio"/> 1 vez semana<br><input type="radio"/> 2 a 4 veces semana<br><input type="radio"/> 5 a 6 veces semana<br><input type="radio"/> 1 vez al día<br><input type="radio"/> 2 a 3 veces al día<br><input type="radio"/> 5 a 6 veces al día<br><input type="radio"/> más 6 veces al día |
| refresco normal       | <input type="radio"/> Nunca o menos 1 vez al mes<br><input type="radio"/> 1 a 3 veces mes<br><input checked="" type="radio"/> 1 vez semana<br><input type="radio"/> 2 a 4 veces semana<br><input type="radio"/> 5 a 6 veces semana<br><input type="radio"/> 1 vez al día<br><input type="radio"/> 2 a 3 veces al día<br><input type="radio"/> 5 a 6 veces al día<br><input type="radio"/> más 6 veces al día |

|                           |                                                                                                                                                                                                                                                                                                                                                                                                              |
|---------------------------|--------------------------------------------------------------------------------------------------------------------------------------------------------------------------------------------------------------------------------------------------------------------------------------------------------------------------------------------------------------------------------------------------------------|
| refresco sin azúcar       | <input type="radio"/> Nunca o menos 1 vez al mes<br><input checked="" type="radio"/> 1 a 3 veces mes<br><input type="radio"/> 1 vez semana<br><input type="radio"/> 2 a 4 veces semana<br><input type="radio"/> 5 a 6 veces semana<br><input type="radio"/> 1 vez al día<br><input type="radio"/> 2 a 3 veces al día<br><input type="radio"/> 5 a 6 veces al día<br><input type="radio"/> más 6 veces al día |
| Agua del grifo            | <input checked="" type="radio"/> Nunca o menos 1 vez al mes<br><input type="radio"/> 1 a 3 veces mes<br><input type="radio"/> 1 vez semana<br><input type="radio"/> 2 a 4 veces semana<br><input type="radio"/> 5 a 6 veces semana<br><input type="radio"/> 1 vez al día<br><input type="radio"/> 2 a 3 veces al día<br><input type="radio"/> 5 a 6 veces al día<br><input type="radio"/> más 6 veces al día |
| agua embotellada sin gas  | <input type="radio"/> Nunca o menos 1 vez al mes<br><input type="radio"/> 1 a 3 veces mes<br><input type="radio"/> 1 vez semana<br><input type="radio"/> 2 a 4 veces semana<br><input type="radio"/> 5 a 6 veces semana<br><input type="radio"/> 1 vez al día<br><input checked="" type="radio"/> 2 a 3 veces al día<br><input type="radio"/> 5 a 6 veces al día<br><input type="radio"/> más 6 veces al día |
| agua embotellada con gas  | <input checked="" type="radio"/> Nunca o menos 1 vez al mes<br><input type="radio"/> 1 a 3 veces mes<br><input type="radio"/> 1 vez semana<br><input type="radio"/> 2 a 4 veces semana<br><input type="radio"/> 5 a 6 veces semana<br><input type="radio"/> 1 vez al día<br><input type="radio"/> 2 a 3 veces al día<br><input type="radio"/> 5 a 6 veces al día<br><input type="radio"/> más 6 veces al día |
| zumos frutas embotellados | <input checked="" type="radio"/> Nunca o menos 1 vez al mes<br><input type="radio"/> 1 a 3 veces mes<br><input type="radio"/> 1 vez semana<br><input type="radio"/> 2 a 4 veces semana<br><input type="radio"/> 5 a 6 veces semana<br><input type="radio"/> 1 vez al día<br><input type="radio"/> 2 a 3 veces al día<br><input type="radio"/> 5 a 6 veces al día<br><input type="radio"/> más 6 veces al día |
| café                      | <input type="radio"/> Nunca o menos 1 vez al mes<br><input type="radio"/> 1 a 3 veces mes<br><input type="radio"/> 1 vez semana<br><input type="radio"/> 2 a 4 veces semana<br><input type="radio"/> 5 a 6 veces semana<br><input checked="" type="radio"/> 1 vez al día<br><input type="radio"/> 2 a 3 veces al día<br><input type="radio"/> 5 a 6 veces al día<br><input type="radio"/> más 6 veces al día |

|                       |                                                                                                                                                                                                                                                                                                                                                                                                              |
|-----------------------|--------------------------------------------------------------------------------------------------------------------------------------------------------------------------------------------------------------------------------------------------------------------------------------------------------------------------------------------------------------------------------------------------------------|
| cafe descafeinado     | <input type="radio"/> Nunca o menos 1 vez al mes<br><input type="radio"/> 1 a 3 veces mes<br><input type="radio"/> 1 vez semana<br><input type="radio"/> 2 a 4 veces semana<br><input type="radio"/> 5 a 6 veces semana<br><input checked="" type="radio"/> 1 vez al día<br><input type="radio"/> 2 a 3 veces al día<br><input type="radio"/> 5 a 6 veces al día<br><input type="radio"/> más 6 veces al día |
| te o infusión         | <input type="radio"/> Nunca o menos 1 vez al mes<br><input type="radio"/> 1 a 3 veces mes<br><input type="radio"/> 1 vez semana<br><input checked="" type="radio"/> 2 a 4 veces semana<br><input type="radio"/> 5 a 6 veces semana<br><input type="radio"/> 1 vez al día<br><input type="radio"/> 2 a 3 veces al día<br><input type="radio"/> 5 a 6 veces al día<br><input type="radio"/> más 6 veces al día |
| sopa o puré verduras  | <input type="radio"/> Nunca o menos 1 vez al mes<br><input type="radio"/> 1 a 3 veces mes<br><input type="radio"/> 1 vez semana<br><input checked="" type="radio"/> 2 a 4 veces semana<br><input type="radio"/> 5 a 6 veces semana<br><input type="radio"/> 1 vez al día<br><input type="radio"/> 2 a 3 veces al día<br><input type="radio"/> 5 a 6 veces al día<br><input type="radio"/> más 6 veces al día |
| croquetas pollo jamón | <input type="radio"/> Nunca o menos 1 vez al mes<br><input checked="" type="radio"/> 1 a 3 veces mes<br><input type="radio"/> 1 vez semana<br><input type="radio"/> 2 a 4 veces semana<br><input type="radio"/> 5 a 6 veces semana<br><input type="radio"/> 1 vez al día<br><input type="radio"/> 2 a 3 veces al día<br><input type="radio"/> 5 a 6 veces al día<br><input type="radio"/> más 6 veces al día |
| croquetas pescado     | <input checked="" type="radio"/> Nunca o menos 1 vez al mes<br><input type="radio"/> 1 a 3 veces mes<br><input type="radio"/> 1 vez semana<br><input type="radio"/> 2 a 4 veces semana<br><input type="radio"/> 5 a 6 veces semana<br><input type="radio"/> 1 vez al día<br><input type="radio"/> 2 a 3 veces al día<br><input type="radio"/> 5 a 6 veces al día<br><input type="radio"/> más 6 veces al día |
| mayonesa              | <input checked="" type="radio"/> Nunca o menos 1 vez al mes<br><input type="radio"/> 1 a 3 veces mes<br><input type="radio"/> 1 vez semana<br><input type="radio"/> 2 a 4 veces semana<br><input type="radio"/> 5 a 6 veces semana<br><input type="radio"/> 1 vez al día<br><input type="radio"/> 2 a 3 veces al día<br><input type="radio"/> 5 a 6 veces al día<br><input type="radio"/> más 6 veces al día |

|                  |                                                                                                                                                                                                                                                                                                                                                                                                              |
|------------------|--------------------------------------------------------------------------------------------------------------------------------------------------------------------------------------------------------------------------------------------------------------------------------------------------------------------------------------------------------------------------------------------------------------|
| salsa tomate     | <input type="radio"/> Nunca o menos 1 vez al mes<br><input type="radio"/> 1 a 3 veces mes<br><input checked="" type="radio"/> 1 vez semana<br><input type="radio"/> 2 a 4 veces semana<br><input type="radio"/> 5 a 6 veces semana<br><input type="radio"/> 1 vez al día<br><input type="radio"/> 2 a 3 veces al día<br><input type="radio"/> 5 a 6 veces al día<br><input type="radio"/> más 6 veces al día |
| ketchup          | <input type="radio"/> Nunca o menos 1 vez al mes<br><input checked="" type="radio"/> 1 a 3 veces mes<br><input type="radio"/> 1 vez semana<br><input type="radio"/> 2 a 4 veces semana<br><input type="radio"/> 5 a 6 veces semana<br><input type="radio"/> 1 vez al día<br><input type="radio"/> 2 a 3 veces al día<br><input type="radio"/> 5 a 6 veces al día<br><input type="radio"/> más 6 veces al día |
| sal              | <input type="radio"/> Nunca o menos 1 vez al mes<br><input type="radio"/> 1 a 3 veces mes<br><input type="radio"/> 1 vez semana<br><input type="radio"/> 2 a 4 veces semana<br><input type="radio"/> 5 a 6 veces semana<br><input checked="" type="radio"/> 1 vez al día<br><input type="radio"/> 2 a 3 veces al día<br><input type="radio"/> 5 a 6 veces al día<br><input type="radio"/> más 6 veces al día |
| ajo              | <input checked="" type="radio"/> Nunca o menos 1 vez al mes<br><input type="radio"/> 1 a 3 veces mes<br><input type="radio"/> 1 vez semana<br><input type="radio"/> 2 a 4 veces semana<br><input type="radio"/> 5 a 6 veces semana<br><input type="radio"/> 1 vez al día<br><input type="radio"/> 2 a 3 veces al día<br><input type="radio"/> 5 a 6 veces al día<br><input type="radio"/> más 6 veces al día |
| mermelada o miel | <input checked="" type="radio"/> Nunca o menos 1 vez al mes<br><input type="radio"/> 1 a 3 veces mes<br><input type="radio"/> 1 vez semana<br><input type="radio"/> 2 a 4 veces semana<br><input type="radio"/> 5 a 6 veces semana<br><input type="radio"/> 1 vez al día<br><input type="radio"/> 2 a 3 veces al día<br><input type="radio"/> 5 a 6 veces al día<br><input type="radio"/> más 6 veces al día |
| azúcar           | <input type="radio"/> Nunca o menos 1 vez al mes<br><input type="radio"/> 1 a 3 veces mes<br><input type="radio"/> 1 vez semana<br><input checked="" type="radio"/> 2 a 4 veces semana<br><input type="radio"/> 5 a 6 veces semana<br><input type="radio"/> 1 vez al día<br><input type="radio"/> 2 a 3 veces al día<br><input type="radio"/> 5 a 6 veces al día<br><input type="radio"/> más 6 veces al día |

|                                       |                                                                                                                                                                                                                                                                                                                                                                                                                                                                                                                               |
|---------------------------------------|-------------------------------------------------------------------------------------------------------------------------------------------------------------------------------------------------------------------------------------------------------------------------------------------------------------------------------------------------------------------------------------------------------------------------------------------------------------------------------------------------------------------------------|
| Otro alimento                         |                                                                                                                                                                                                                                                                                                                                                                                                                                                                                                                               |
| suplementos vitamínicos               | <input checked="" type="radio"/> si<br><input type="radio"/> no                                                                                                                                                                                                                                                                                                                                                                                                                                                               |
| suplementos vitamínicos               | [*DATA REMOVED*]                                                                                                                                                                                                                                                                                                                                                                                                                                                                                                              |
| dieta previa                          | <input type="radio"/> si<br><input checked="" type="radio"/> no                                                                                                                                                                                                                                                                                                                                                                                                                                                               |
| motivo dieta                          | <input checked="" type="radio"/> no dieta<br><input type="radio"/> control peso<br><input type="radio"/> control colesterol<br><input type="radio"/> control diabetes<br><input type="radio"/> problemas estómago<br><input type="radio"/> problemas vesícula o hepáticos<br><input type="radio"/> HTA o cardiopatía<br><input type="radio"/> problemas renales<br><input type="radio"/> alergia alimentaria<br><input type="radio"/> ácido úrico elevado<br><input type="radio"/> vegetariana<br><input type="radio"/> otros |
| cambio alimentos año previo gestación | <input checked="" type="radio"/> si<br><input type="radio"/> no                                                                                                                                                                                                                                                                                                                                                                                                                                                               |
| cambio lácteos                        | <input type="radio"/> eliminado<br><input type="radio"/> disminuido<br><input checked="" type="radio"/> igual<br><input type="radio"/> aumentado<br><input type="radio"/> no sabe                                                                                                                                                                                                                                                                                                                                             |
| cambio huevos                         | <input type="radio"/> eliminado<br><input type="radio"/> disminuido<br><input checked="" type="radio"/> igual<br><input type="radio"/> aumentado<br><input type="radio"/> no sabe                                                                                                                                                                                                                                                                                                                                             |
| cambio carne                          | <input type="radio"/> eliminado<br><input type="radio"/> disminuido<br><input checked="" type="radio"/> igual<br><input type="radio"/> aumentado<br><input type="radio"/> no sabe                                                                                                                                                                                                                                                                                                                                             |
| cambio pescado                        | <input type="radio"/> eliminado<br><input type="radio"/> disminuido<br><input checked="" type="radio"/> igual<br><input type="radio"/> aumentado<br><input type="radio"/> no sabe                                                                                                                                                                                                                                                                                                                                             |
| cambio verduras                       | <input type="radio"/> eliminado<br><input type="radio"/> disminuido<br><input checked="" type="radio"/> igual<br><input type="radio"/> aumentado<br><input type="radio"/> no sabe                                                                                                                                                                                                                                                                                                                                             |

|                            |                                                                                                                                                                                                                        |
|----------------------------|------------------------------------------------------------------------------------------------------------------------------------------------------------------------------------------------------------------------|
| cambio legumbres           | <input type="radio"/> eliminado<br><input type="radio"/> disminuido<br><input checked="" type="radio"/> igual<br><input type="radio"/> aumentado<br><input type="radio"/> no sabe                                      |
| cambio fruta               | <input type="radio"/> eliminado<br><input type="radio"/> disminuido<br><input checked="" type="radio"/> igual<br><input type="radio"/> aumentado<br><input type="radio"/> no sabe                                      |
| cambio pan                 | <input type="radio"/> eliminado<br><input type="radio"/> disminuido<br><input checked="" type="radio"/> igual<br><input type="radio"/> aumentado<br><input type="radio"/> no sabe                                      |
| cambio aceite oliva        | <input type="radio"/> eliminado<br><input type="radio"/> disminuido<br><input checked="" type="radio"/> igual<br><input type="radio"/> aumentado<br><input type="radio"/> no sabe                                      |
| cambio mante o margarina   | <input type="radio"/> eliminado<br><input type="radio"/> disminuido<br><input checked="" type="radio"/> igual<br><input type="radio"/> aumentado<br><input type="radio"/> no sabe                                      |
| cambio azúcar y dulces     | <input type="radio"/> eliminado<br><input type="radio"/> disminuido<br><input checked="" type="radio"/> igual<br><input type="radio"/> aumentado<br><input type="radio"/> no sabe                                      |
| cambio bebidas alcohólicas | <input checked="" type="radio"/> eliminado<br><input type="radio"/> disminuido<br><input type="radio"/> igual<br><input type="radio"/> aumentado<br><input type="radio"/> no sabe                                      |
| frecuencia comidas fritas  | <input type="radio"/> a diario<br><input type="radio"/> 5 a 6 veces semana<br><input type="radio"/> 2 a 4 veces semana<br><input type="radio"/> 1 vez semana<br><input checked="" type="radio"/> menos de 1 vez semana |
| carne                      | <input type="radio"/> no como<br><input type="radio"/> cruda<br><input type="radio"/> poco hecha<br><input type="radio"/> hecha<br><input checked="" type="radio"/> muy hecha                                          |
| grasa visible carne        | <input type="radio"/> quita toda<br><input checked="" type="radio"/> quita mayoría<br><input type="radio"/> quita un poco<br><input type="radio"/> no quita nada                                                       |

|                                |                                                                                                                                                                                                                                                          |
|--------------------------------|----------------------------------------------------------------------------------------------------------------------------------------------------------------------------------------------------------------------------------------------------------|
| cocina carne                   | <input checked="" type="radio"/> a la plancha<br><input type="radio"/> a la parrilla<br><input type="radio"/> asada<br><input type="radio"/> frita<br><input type="radio"/> guisada                                                                      |
| tostado quemado carne          | <input checked="" type="radio"/> nunca<br><input type="radio"/> 1 vez mes<br><input type="radio"/> 2 a 3 veces mes<br><input type="radio"/> 1 vez semana<br><input type="radio"/> 2 a 3 semanas                                                          |
| tostado quemado pescado        | <input checked="" type="radio"/> nunca<br><input type="radio"/> 1 vez mes<br><input type="radio"/> 2 a 3 veces mes<br><input type="radio"/> 1 vez semana<br><input type="radio"/> 2 a 3 semanas                                                          |
| socarrat paella                | <input checked="" type="radio"/> nunca<br><input type="radio"/> 1 vez mes<br><input type="radio"/> 2 a 3 veces mes<br><input type="radio"/> 1 vez semana<br><input type="radio"/> 2 a 3 semanas                                                          |
| grasa o aceite cocinar         | <input type="radio"/> mantequilla<br><input type="radio"/> margarina<br><input type="radio"/> aceite oliva<br><input checked="" type="radio"/> aceite oliva virgen extra<br><input type="radio"/> aceite vegetal<br><input type="radio"/> mezcla aceites |
| grasa aceite aliñar            | <input type="radio"/> mantequilla<br><input type="radio"/> margarina<br><input type="radio"/> aceite oliva<br><input checked="" type="radio"/> aceite oliva virgen extra<br><input type="radio"/> aceite vegetal<br><input type="radio"/> mezcla aceites |
| grasa aceite freir             | <input type="radio"/> mantequilla<br><input type="radio"/> margarina<br><input type="radio"/> aceite oliva<br><input checked="" type="radio"/> aceite oliva virgen extra<br><input type="radio"/> aceite vegetal<br><input type="radio"/> mezcla aceites |
| Ejercicio cuestionario         | <input checked="" type="radio"/> si<br><input type="radio"/> no                                                                                                                                                                                          |
| horas de sueño incluido siesta | [*DATA REMOVED*]                                                                                                                                                                                                                                         |
| minutos siesta                 | [*DATA REMOVED*]                                                                                                                                                                                                                                         |
| horas televisión semana        | [*DATA REMOVED*]                                                                                                                                                                                                                                         |



|                                        |                                                                                                                                                                                                                                                                                                                                                                           |
|----------------------------------------|---------------------------------------------------------------------------------------------------------------------------------------------------------------------------------------------------------------------------------------------------------------------------------------------------------------------------------------------------------------------------|
| actividad trabajo                      | <input type="radio"/> casi siempre sentado<br><input checked="" type="radio"/> sentado 50 por cien<br><input type="radio"/> casi siempre de pie, quieto<br><input type="radio"/> casi siempre levantado caminando y llevando pocas cosas<br><input type="radio"/> casi siempre levantado, caminando y llevado muchas cosas<br><input type="radio"/> trabajo manual pesado |
| tiempo caminar o bici al día           | <input type="radio"/> casi nunca<br><input type="radio"/> menos 20min día<br><input checked="" type="radio"/> 20 a 40 min día<br><input type="radio"/> 40 a 60 min día<br><input type="radio"/> 1h o 1h y media día<br><input type="radio"/> más de 1h y media al día                                                                                                     |
| tiempo tareas casa al día              | <input type="radio"/> menos de 1h día<br><input checked="" type="radio"/> 1 a 2h día<br><input type="radio"/> 3 a 4h día<br><input type="radio"/> 5 a 6h día<br><input type="radio"/> 7 a 8h día<br><input type="radio"/> más de 8h día                                                                                                                                   |
| tiempo libre televisión ordenador leer | <input type="radio"/> menos 1h día<br><input checked="" type="radio"/> 1h día<br><input type="radio"/> 2h día<br><input type="radio"/> 3h día<br><input type="radio"/> 4h día<br><input type="radio"/> 5 a 6h día<br><input type="radio"/> mas 6h día                                                                                                                     |
| tiempo libre ejercicio o deporte       | <input type="radio"/> menos 1h semana<br><input checked="" type="radio"/> 1h semana<br><input type="radio"/> 2h semana<br><input type="radio"/> 3h semana<br><input type="radio"/> 4 a 5h semana<br><input type="radio"/> mas 5h semana                                                                                                                                   |
| como se considera                      | <input type="radio"/> sedentaria<br><input checked="" type="radio"/> poco activa<br><input type="radio"/> moderadamente activa<br><input type="radio"/> bastante activa<br><input type="radio"/> muy activa<br><input type="radio"/> no sabe                                                                                                                              |
| FUR                                    | [*DATA REMOVED*]                                                                                                                                                                                                                                                                                                                                                          |
| Semanas gestación 2T                   | _____                                                                                                                                                                                                                                                                                                                                                                     |
| Días gestación 2T                      | _____                                                                                                                                                                                                                                                                                                                                                                     |
| DBP 2T                                 | _____                                                                                                                                                                                                                                                                                                                                                                     |
| CC 2T                                  | _____                                                                                                                                                                                                                                                                                                                                                                     |

|                                                   |                                                                                                                                                                                                 |
|---------------------------------------------------|-------------------------------------------------------------------------------------------------------------------------------------------------------------------------------------------------|
| AC 2T                                             |                                                                                                                                                                                                 |
| LF 2T                                             |                                                                                                                                                                                                 |
| PFE 2T (Hadlock)                                  |                                                                                                                                                                                                 |
| Semanas gestación 3T                              | [*DATA REMOVED*]                                                                                                                                                                                |
| días 3T                                           | [*DATA REMOVED*]                                                                                                                                                                                |
| DBP 3T                                            | [*DATA REMOVED*]                                                                                                                                                                                |
| CC 3T                                             | [*DATA REMOVED*]                                                                                                                                                                                |
| AC 3T                                             | [*DATA REMOVED*]                                                                                                                                                                                |
| LF 3T                                             | [*DATA REMOVED*]                                                                                                                                                                                |
| PFE 3T (Hadlock)                                  | [*DATA REMOVED*]                                                                                                                                                                                |
| Semanas de gestación final                        | [*DATA REMOVED*]                                                                                                                                                                                |
| días gestación final                              | [*DATA REMOVED*]                                                                                                                                                                                |
| Localización placenta                             | <input checked="" type="radio"/> anterior<br><input type="radio"/> lateral derecha<br><input type="radio"/> lateral izquierda<br><input type="radio"/> posterior<br><input type="radio"/> fondo |
| Presentación longitudinal cefálica                | <input type="radio"/> no<br><input checked="" type="radio"/> si                                                                                                                                 |
| Dorso                                             | <input type="radio"/> izquierda anterior<br><input checked="" type="radio"/> izquierda posterior<br><input type="radio"/> derecha anterior<br><input type="radio"/> derecha posterior           |
| diámetro biparietal                               | [*DATA REMOVED*]                                                                                                                                                                                |
| Circunferencia craneal                            | [*DATA REMOVED*]                                                                                                                                                                                |
| Circunferencia abdominal                          | [*DATA REMOVED*]                                                                                                                                                                                |
| Longitud de femur                                 | [*DATA REMOVED*]                                                                                                                                                                                |
| tejido celular subcutáneo a nivel del muslo en mm | [*DATA REMOVED*]                                                                                                                                                                                |
| tejido celular subcutáneo en abdomen en mm        | [*DATA REMOVED*]                                                                                                                                                                                |

|                                               |                                                                                                                                                          |
|-----------------------------------------------|----------------------------------------------------------------------------------------------------------------------------------------------------------|
| Volumen del muslo en cm3                      | [*DATA REMOVED*]                                                                                                                                         |
| Peso fetal estimado según fórmula de Hadlock  | [*DATA REMOVED*]                                                                                                                                         |
| Percentil                                     | [*DATA REMOVED*]                                                                                                                                         |
| Peso fetal estimado según fórmula de Scioscia | _____                                                                                                                                                    |
| Peso fetal estimado según fórmula de LEE      | _____                                                                                                                                                    |
| Tipo de parto                                 | <input checked="" type="radio"/> eutocico<br><input type="radio"/> instrumentado/ventosa<br><input type="radio"/> cesarea                                |
| fecha de nacimiento                           | [*DATA REMOVED*]                                                                                                                                         |
| Días entre exploración y nacimiento           | [*DATA REMOVED*]                                                                                                                                         |
| Peso RN en g                                  | [*DATA REMOVED*]                                                                                                                                         |
| sexo                                          | <input checked="" type="radio"/> mujer<br><input type="radio"/> hombre                                                                                   |
| Apgar 1 minuto                                | [*DATA REMOVED*]                                                                                                                                         |
| Apgar 5 minutos                               | [*DATA REMOVED*]                                                                                                                                         |
| Apgar 10 minutos                              | _____                                                                                                                                                    |
| antecedente Covid durante gestación           | <input type="radio"/> Yes<br><input checked="" type="radio"/> No                                                                                         |
| Nivel de estudios                             | <input type="radio"/> ninguno<br><input type="radio"/> primarios<br><input type="radio"/> secundarios<br><input checked="" type="radio"/> universitarios |

# Base\_datos\_estimacion\_peso\_fetal

|                                       |                                                                                                                                                                                                                                                                                      |
|---------------------------------------|--------------------------------------------------------------------------------------------------------------------------------------------------------------------------------------------------------------------------------------------------------------------------------------|
| Número de identificación participante | 64                                                                                                                                                                                                                                                                                   |
| CODIGO PARTICIPANTE                   |                                                                                                                                                                                                                                                                                      |
| Edad                                  | [*DATA REMOVED*]                                                                                                                                                                                                                                                                     |
| Gestaciones                           | <input type="radio"/> 1<br><input checked="" type="radio"/> 2<br><input type="radio"/> 3<br><input type="radio"/> mas de 3                                                                                                                                                           |
| partos                                | <input type="radio"/> 0<br><input checked="" type="radio"/> 1<br><input type="radio"/> 2<br><input type="radio"/> 3<br><input type="radio"/> mas de 3                                                                                                                                |
| cesáreas                              | <input checked="" type="radio"/> 0<br><input type="radio"/> 1<br><input type="radio"/> 2<br><input type="radio"/> 3<br><input type="radio"/> mas de 3                                                                                                                                |
| Abortos                               | <input checked="" type="radio"/> 0<br><input type="radio"/> 1<br><input type="radio"/> 2<br><input type="radio"/> 3<br><input type="radio"/> mas de 3                                                                                                                                |
| Tipo de gestacion                     | <input checked="" type="radio"/> espontanea<br><input type="radio"/> IAC inseminación artificial conyuge<br><input type="radio"/> IAD inseminación artificial donante<br><input type="radio"/> FIV Fecundación in Vitro<br><input type="radio"/> Ovodon FIV con donación de ovocitos |
| peso previo a embarazo                | [*DATA REMOVED*]                                                                                                                                                                                                                                                                     |
| Ganancia ponderal embarazo            | [*DATA REMOVED*]                                                                                                                                                                                                                                                                     |
| Talla madre                           | [*DATA REMOVED*]                                                                                                                                                                                                                                                                     |
| IMC previo embarazo                   | 26.672763298277697                                                                                                                                                                                                                                                                   |
| Patología obstétrica                  | <input checked="" type="radio"/> no<br><input type="radio"/> si                                                                                                                                                                                                                      |
| Diabetes pregestacional               | <input checked="" type="radio"/> no<br><input type="radio"/> si                                                                                                                                                                                                                      |
| Diabetes gestacional                  | <input checked="" type="radio"/> no<br><input type="radio"/> si                                                                                                                                                                                                                      |

|                                            |                                                                                                                                                                                      |
|--------------------------------------------|--------------------------------------------------------------------------------------------------------------------------------------------------------------------------------------|
| Diabetes gestacional con insulina          | <input checked="" type="radio"/> no<br><input type="radio"/> si                                                                                                                      |
| Diabetes gestacional con dieta y ejercicio | <input checked="" type="radio"/> no<br><input type="radio"/> si                                                                                                                      |
| Percentil fetos previos                    | <input type="radio"/> Nada<br><input checked="" type="radio"/> percentil menor de 10<br><input type="radio"/> percentil entre 10 y 90<br><input type="radio"/> percentil mayor de 90 |
| Exfumadora                                 | <input type="radio"/> Nada<br><input checked="" type="radio"/> menos de 5 años<br><input type="radio"/> 5 a 10 años<br><input type="radio"/> mayor o igual a 10 años                 |
| Hábito tabáquico                           | <input checked="" type="radio"/> no<br><input type="radio"/> si                                                                                                                      |
| fumadora                                   | [*DATA REMOVED*]                                                                                                                                                                     |
| Consumo otros tóxicos                      | <input checked="" type="radio"/> no<br><input type="radio"/> si                                                                                                                      |
| Hb 1T                                      | [*DATA REMOVED*]                                                                                                                                                                     |
| Htc 1T                                     | [*DATA REMOVED*]                                                                                                                                                                     |
| Hb 2T                                      | [*DATA REMOVED*]                                                                                                                                                                     |
| HTC 2T                                     | [*DATA REMOVED*]                                                                                                                                                                     |
| Hb 3T                                      | [*DATA REMOVED*]                                                                                                                                                                     |
| HTC 3T                                     | [*DATA REMOVED*]                                                                                                                                                                     |
| Suplemento FE oral                         | <input checked="" type="radio"/> si<br><input type="radio"/> no                                                                                                                      |
| Suplemento fe iv                           | <input type="radio"/> si<br><input checked="" type="radio"/> no                                                                                                                      |
| Transfusión                                | <input checked="" type="radio"/> no<br><input type="radio"/> si                                                                                                                      |
| Solicitada Vit D                           | <input checked="" type="radio"/> no<br><input type="radio"/> si                                                                                                                      |
| Deficit vit D                              | <input type="radio"/> no<br><input type="radio"/> si                                                                                                                                 |
| Suplemento vit D                           | <input type="radio"/> si<br><input type="radio"/> no                                                                                                                                 |

|                       |                                                                                                                                                                                                                                                                                                                                                                                                              |
|-----------------------|--------------------------------------------------------------------------------------------------------------------------------------------------------------------------------------------------------------------------------------------------------------------------------------------------------------------------------------------------------------------------------------------------------------|
| Dieta, cuestionario   | <input checked="" type="radio"/> sí<br><input type="radio"/> no                                                                                                                                                                                                                                                                                                                                              |
| Leche entera          | <input type="radio"/> Nunca o menos 1 vez al mes<br><input type="radio"/> 1 a 3 veces mes<br><input type="radio"/> 1 vez semana<br><input type="radio"/> 2 a 4 veces semana<br><input type="radio"/> 5 a 6 veces semana<br><input type="radio"/> 1 vez al día<br><input type="radio"/> 2 a 3 veces al día<br><input type="radio"/> 5 a 6 veces al día<br><input type="radio"/> más 6 veces al día            |
| Leche semidesnatada   | <input type="radio"/> Nunca o menos 1 vez al mes<br><input type="radio"/> 1 a 3 veces mes<br><input type="radio"/> 1 vez semana<br><input type="radio"/> 2 a 4 veces semana<br><input type="radio"/> 5 a 6 veces semana<br><input type="radio"/> 1 vez al día<br><input type="radio"/> 2 a 3 veces al día<br><input type="radio"/> 5 a 6 veces al día<br><input type="radio"/> mas 6 veces al día            |
| Leche desnatada       | <input type="radio"/> Nunca o menos 1 vez al mes<br><input type="radio"/> 1 a 3 veces mes<br><input type="radio"/> 1 vez semana<br><input type="radio"/> 2 a 4 veces semana<br><input type="radio"/> 5 a 6 veces semana<br><input type="radio"/> 1 vez al día<br><input checked="" type="radio"/> 2 a 3 veces al día<br><input type="radio"/> 5 a 6 veces al día<br><input type="radio"/> más 6 veces al día |
| Leche condensada      | <input type="radio"/> Nunca o menos 1 vez al mes<br><input type="radio"/> 1 a 3 veces mes<br><input type="radio"/> 1 vez semana<br><input type="radio"/> 2 a 4 veces semana<br><input type="radio"/> 5 a 6 veces semana<br><input type="radio"/> 1 vez al día<br><input type="radio"/> 2 a 3 veces al día<br><input type="radio"/> 5 a 6 veces al día<br><input type="radio"/> más 6 veces al día            |
| nata o crema de leche | <input type="radio"/> Nunca o menos 1 vez al mes<br><input type="radio"/> 1 a 3 veces mes<br><input type="radio"/> 1 vez semana<br><input type="radio"/> 2 a 4 veces semana<br><input type="radio"/> 5 a 6 veces semana<br><input type="radio"/> 1 vez al día<br><input type="radio"/> 2 a 3 veces al día<br><input type="radio"/> 5 a 6 veces al día<br><input type="radio"/> más 6 veces al día            |

|                                             |                                                                                                                                                                                                                                                                                                                                                                                                              |
|---------------------------------------------|--------------------------------------------------------------------------------------------------------------------------------------------------------------------------------------------------------------------------------------------------------------------------------------------------------------------------------------------------------------------------------------------------------------|
| Yogurt Entero                               | <input type="radio"/> Nunca o menos 1 vez al mes<br><input type="radio"/> 1 a 3 veces mes<br><input type="radio"/> 1 vez semana<br><input type="radio"/> 2 a 4 veces semana<br><input type="radio"/> 5 a 6 veces semana<br><input type="radio"/> 1 vez al día<br><input type="radio"/> 2 a 3 veces al día<br><input type="radio"/> 5 a 6 veces al día<br><input type="radio"/> más 6 veces al día            |
| Yogurt desnatado                            | <input type="radio"/> Nunca o menos 1 vez al mes<br><input type="radio"/> 1 a 3 veces mes<br><input type="radio"/> 1 vez semana<br><input type="radio"/> 2 a 4 veces semana<br><input type="radio"/> 5 a 6 veces semana<br><input type="radio"/> 1 vez al día<br><input type="radio"/> 2 a 3 veces al día<br><input type="radio"/> 5 a 6 veces al día<br><input type="radio"/> más 6 veces al día            |
| 100g requesón o queso blando o queso fresco | <input type="radio"/> Nunca o menos 1 vez al mes<br><input type="radio"/> 1 a 3 veces mes<br><input type="radio"/> 1 vez semana<br><input type="radio"/> 2 a 4 veces semana<br><input type="radio"/> 5 a 6 veces semana<br><input type="radio"/> 1 vez al día<br><input type="radio"/> 2 a 3 veces al día<br><input type="radio"/> 5 a 6 veces al día<br><input type="radio"/> más 6 veces al día            |
| queso curado o semicurado o cremoso         | <input type="radio"/> Nunca o menos 1 vez al mes<br><input type="radio"/> 1 a 3 veces mes<br><input type="radio"/> 1 vez semana<br><input checked="" type="radio"/> 2 a 4 veces semana<br><input type="radio"/> 5 a 6 veces semana<br><input type="radio"/> 1 vez al día<br><input type="radio"/> 2 a 3 veces al día<br><input type="radio"/> 5 a 6 veces al día<br><input type="radio"/> más 6 veces al día |
| natillas flan pudding                       | <input type="radio"/> Nunca o menos 1 vez al mes<br><input type="radio"/> 1 a 3 veces mes<br><input type="radio"/> 1 vez semana<br><input checked="" type="radio"/> 2 a 4 veces semana<br><input type="radio"/> 5 a 6 veces semana<br><input type="radio"/> 1 vez al día<br><input type="radio"/> 2 a 3 veces al día<br><input type="radio"/> 5 a 6 veces al día<br><input type="radio"/> más 6 veces al día |
| Helado                                      | <input type="radio"/> Nunca o menos 1 vez al mes<br><input type="radio"/> 1 a 3 veces mes<br><input checked="" type="radio"/> 1 vez semana<br><input type="radio"/> 2 a 4 veces semana<br><input type="radio"/> 5 a 6 veces semana<br><input type="radio"/> 1 vez al día<br><input type="radio"/> 2 a 3 veces al día<br><input type="radio"/> 5 a 6 veces al día<br><input type="radio"/> más 6 veces al día |

|                                      |                                                                                                                                                                                                                                                                                                                                                                                                              |
|--------------------------------------|--------------------------------------------------------------------------------------------------------------------------------------------------------------------------------------------------------------------------------------------------------------------------------------------------------------------------------------------------------------------------------------------------------------|
| huevo                                | <input type="radio"/> Nunca o menos 1 vez al mes<br><input type="radio"/> 1 a 3 veces mes<br><input checked="" type="radio"/> 1 vez semana<br><input type="radio"/> 2 a 4 veces semana<br><input type="radio"/> 5 a 6 veces semana<br><input type="radio"/> 1 vez al día<br><input type="radio"/> 2 a 3 veces al día<br><input type="radio"/> 5 a 6 veces al día<br><input type="radio"/> más 6 veces al día |
| Pollo con piel                       | <input type="radio"/> Nunca o menos 1 vez al mes<br><input type="radio"/> 1 a 3 veces mes<br><input type="radio"/> 1 vez semana<br><input type="radio"/> 2 a 4 veces semana<br><input type="radio"/> 5 a 6 veces semana<br><input type="radio"/> 1 vez al día<br><input type="radio"/> 2 a 3 veces al día<br><input type="radio"/> 5 a 6 veces al día<br><input type="radio"/> más 6 veces al día            |
| pollo sin piel                       | <input type="radio"/> Nunca o menos 1 vez al mes<br><input type="radio"/> 1 a 3 veces mes<br><input checked="" type="radio"/> 1 vez semana<br><input type="radio"/> 2 a 4 veces semana<br><input type="radio"/> 5 a 6 veces semana<br><input type="radio"/> 1 vez al día<br><input type="radio"/> 2 a 3 veces al día<br><input type="radio"/> 5 a 6 veces al día<br><input type="radio"/> más 6 veces al día |
| Ternera o cerdo o cordero            | <input type="radio"/> Nunca o menos 1 vez al mes<br><input type="radio"/> 1 a 3 veces mes<br><input type="radio"/> 1 vez semana<br><input type="radio"/> 2 a 4 veces semana<br><input type="radio"/> 5 a 6 veces semana<br><input type="radio"/> 1 vez al día<br><input type="radio"/> 2 a 3 veces al día<br><input type="radio"/> 5 a 6 veces al día<br><input type="radio"/> más 6 veces al día            |
| carne caza: Conejo o codorniz o pato | <input type="radio"/> Nunca o menos 1 vez al mes<br><input type="radio"/> 1 a 3 veces mes<br><input type="radio"/> 1 vez semana<br><input type="radio"/> 2 a 4 veces semana<br><input type="radio"/> 5 a 6 veces semana<br><input type="radio"/> 1 vez al día<br><input type="radio"/> 2 a 3 veces al día<br><input type="radio"/> 5 a 6 veces al día<br><input type="radio"/> más 6 veces al día            |
| Hígado de ternera o cerdo o pollo    | <input type="radio"/> Nunca o menos 1 vez al mes<br><input type="radio"/> 1 a 3 veces mes<br><input type="radio"/> 1 vez semana<br><input type="radio"/> 2 a 4 veces semana<br><input type="radio"/> 5 a 6 veces semana<br><input type="radio"/> 1 vez al día<br><input type="radio"/> 2 a 3 veces al día<br><input type="radio"/> 5 a 6 veces al día<br><input type="radio"/> más 6 veces al día            |



|                     |                                                                                                                                                                                                                                                                                                                                                                                                              |
|---------------------|--------------------------------------------------------------------------------------------------------------------------------------------------------------------------------------------------------------------------------------------------------------------------------------------------------------------------------------------------------------------------------------------------------------|
| Vísceras            | <input type="radio"/> Nunca o menos 1 vez al mes<br><input type="radio"/> 1 a 3 veces mes<br><input type="radio"/> 1 vez semana<br><input type="radio"/> 2 a 4 veces semana<br><input type="radio"/> 5 a 6 veces semana<br><input type="radio"/> 1 vez al día<br><input type="radio"/> 2 a 3 veces al día<br><input type="radio"/> 5 a 6 veces al día<br><input type="radio"/> más 6 veces al día            |
| Embutido            | <input type="radio"/> Nunca o menos 1 vez al mes<br><input type="radio"/> 1 a 3 veces mes<br><input type="radio"/> 1 vez semana<br><input type="radio"/> 2 a 4 veces semana<br><input type="radio"/> 5 a 6 veces semana<br><input type="radio"/> 1 vez al día<br><input type="radio"/> 2 a 3 veces al día<br><input type="radio"/> 5 a 6 veces al día<br><input type="radio"/> más 6 veces al día            |
| Salchicha o similar | <input type="radio"/> Nunca o menos 1 vez al mes<br><input type="radio"/> 1 a 3 veces mes<br><input type="radio"/> 1 vez semana<br><input type="radio"/> 2 a 4 veces semana<br><input type="radio"/> 5 a 6 veces semana<br><input type="radio"/> 1 vez al día<br><input type="radio"/> 2 a 3 veces al día<br><input type="radio"/> 5 a 6 veces al día<br><input type="radio"/> más 6 veces al día            |
| Pate o foiegras     | <input type="radio"/> Nunca o menos 1 vez al mes<br><input type="radio"/> 1 a 3 veces mes<br><input type="radio"/> 1 vez semana<br><input type="radio"/> 2 a 4 veces semana<br><input type="radio"/> 5 a 6 veces semana<br><input type="radio"/> 1 vez al día<br><input type="radio"/> 2 a 3 veces al día<br><input type="radio"/> 5 a 6 veces al día<br><input type="radio"/> más 6 veces al día            |
| Hamburguesa         | <input type="radio"/> Nunca o menos 1 vez al mes<br><input type="radio"/> 1 a 3 veces mes<br><input type="radio"/> 1 vez semana<br><input type="radio"/> 2 a 4 veces semana<br><input type="radio"/> 5 a 6 veces semana<br><input type="radio"/> 1 vez al día<br><input type="radio"/> 2 a 3 veces al día<br><input type="radio"/> 5 a 6 veces al día<br><input type="radio"/> más 6 veces al día            |
| tocino o bacon      | <input type="radio"/> Nunca o menos 1 vez al mes<br><input type="radio"/> 1 a 3 veces mes<br><input checked="" type="radio"/> 1 vez semana<br><input type="radio"/> 2 a 4 veces semana<br><input type="radio"/> 5 a 6 veces semana<br><input type="radio"/> 1 vez al día<br><input type="radio"/> 2 a 3 veces al día<br><input type="radio"/> 5 a 6 veces al día<br><input type="radio"/> más 6 veces al día |

---

Pescado frito

- ☐ Nunca o menos 1 vez al mes  
☐ 1 a 3 veces mes  
☒ 1 vez semana  
☐ 2 a 4 veces semana  
☐ 5 a 6 veces semana  
☐ 1 vez al día  
☐ 2 a 3 veces al día  
☐ 5 a 6 veces al día  
☐ más 6 veces al día

---

pescado hervido blanco

- ☐ Nunca o menos 1 vez al mes  
☐ 1 a 3 veces mes  
☐ 1 vez semana  
☐ 2 a 4 veces semana  
☐ 5 a 6 veces semana  
☐ 1 vez al día  
☐ 2 a 3 veces al día  
☐ 5 a 6 veces al día  
☐ más 6 veces al día

---

pescado hervido azul

- ☐ Nunca o menos 1 vez al mes  
☐ 1 a 3 veces mes  
☐ 1 vez semana  
☐ 2 a 4 veces semana  
☐ 5 a 6 veces semana  
☐ 1 vez al día  
☐ 2 a 3 veces al día  
☐ 5 a 6 veces al día  
☐ más 6 veces al día

---

otros pescado azul

- ☐ Nunca o menos 1 vez al mes  
☐ 1 a 3 veces mes  
☐ 1 vez semana  
☐ 2 a 4 veces semana  
☐ 5 a 6 veces semana  
☐ 1 vez al día  
☐ 2 a 3 veces al día  
☐ 5 a 6 veces al día  
☐ más 6 veces al día

---

atun conserva

- ☐ Nunca o menos 1 vez al mes  
☐ 1 a 3 veces mes  
☐ 1 vez semana  
☐ 2 a 4 veces semana  
☐ 5 a 6 veces semana  
☐ 1 vez al día  
☐ 2 a 3 veces al día  
☐ 5 a 6 veces al día  
☐ más 6 veces al día

---

sardina conserva

- ☐ Nunca o menos 1 vez al mes  
☐ 1 a 3 veces mes  
☐ 1 vez semana  
☐ 2 a 4 veces semana  
☐ 5 a 6 veces semana  
☐ 1 vez al día  
☐ 2 a 3 veces al día  
☐ 5 a 6 veces al día  
☐ más 6 veces al día

---

pescado ahumado

- ☐ Nunca o menos 1 vez al mes
- ☐ 1 a 3 veces mes
- ☐ 1 vez semana
- ☐ 2 a 4 veces semana
- ☐ 5 a 6 veces semana
- ☐ 1 vez al día
- ☐ 2 a 3 veces al día
- ☐ 5 a 6 veces al día
- ☐ más 6 veces al día

---

almejas o mejillones o ostras unos 100g

- ☐ Nunca o menos 1 vez al mes
- ☐ 1 a 3 veces mes
- ☐ 1 vez semana
- ☐ 2 a 4 veces semana
- ☐ 5 a 6 veces semana
- ☐ 1 vez al día
- ☐ 2 a 3 veces al día
- ☐ 5 a 6 veces al día
- ☐ más 6 veces al día

---

calamar o chipiron o sepia unos 100g

- ☐ Nunca o menos 1 vez al mes
- ☐ 1 a 3 veces mes
- ☐ 1 vez semana
- ☐ 2 a 4 veces semana
- ☐ 5 a 6 veces semana
- ☐ 1 vez al día
- ☐ 2 a 3 veces al día
- ☐ 5 a 6 veces al día
- ☐ más 6 veces al día

---

marisco unos 100g

- ☐ Nunca o menos 1 vez al mes
- ☐ 1 a 3 veces mes
- ☐ 1 vez semana
- ☐ 2 a 4 veces semana
- ☐ 5 a 6 veces semana
- ☐ 1 vez al día
- ☐ 2 a 3 veces al día
- ☐ 5 a 6 veces al día
- ☐ más 6 veces al día

---

Espinacas o acelgas cocinadas

- ☐ Nunca o menos 1 vez al mes
- ☐ 1 a 3 veces mes
- ☐ 1 vez semana
- ☐ 2 a 4 veces semana
- ☐ 5 a 6 veces semana
- ☐ 1 vez al día
- ☐ 2 a 3 veces al día
- ☐ 5 a 6 veces al día
- ☐ más 6 veces al día

---

Col o coliflor o brocoli cocinado

- ☐ Nunca o menos 1 vez al mes
- ☐ 1 a 3 veces mes
- ☐ 1 vez semana
- ☐ 2 a 4 veces semana
- ☐ 5 a 6 veces semana
- ☐ 1 vez al día
- ☐ 2 a 3 veces al día
- ☐ 5 a 6 veces al día
- ☐ más 6 veces al día

---

Lechuga o endivia o escarola

- ☐ Nunca o menos 1 vez al mes  
☒ 1 a 3 veces mes  
☐ 1 vez semana  
☐ 2 a 4 veces semana  
☐ 5 a 6 veces semana  
☐ 1 vez al día  
☐ 2 a 3 veces al día  
☐ 5 a 6 veces al día  
☐ más 6 veces al día

---

tomate ensalada

- ☐ Nunca o menos 1 vez al mes  
☐ 1 a 3 veces mes  
☐ 1 vez semana  
☐ 2 a 4 veces semana  
☐ 5 a 6 veces semana  
☐ 1 vez al día  
☐ 2 a 3 veces al día  
☐ 5 a 6 veces al día  
☐ más 6 veces al día

---

cebolla

- ☐ Nunca o menos 1 vez al mes  
☐ 1 a 3 veces mes  
☒ 1 vez semana  
☐ 2 a 4 veces semana  
☐ 5 a 6 veces semana  
☐ 1 vez al día  
☐ 2 a 3 veces al día  
☐ 5 a 6 veces al día  
☐ más 6 veces al día

---

Zanahoria o calabaza

- ☐ Nunca o menos 1 vez al mes  
☐ 1 a 3 veces mes  
☒ 1 vez semana  
☐ 2 a 4 veces semana  
☐ 5 a 6 veces semana  
☐ 1 vez al día  
☐ 2 a 3 veces al día  
☐ 5 a 6 veces al día  
☐ más 6 veces al día

---

Judías verdes

- ☐ Nunca o menos 1 vez al mes  
☐ 1 a 3 veces mes  
☒ 1 vez semana  
☐ 2 a 4 veces semana  
☐ 5 a 6 veces semana  
☐ 1 vez al día  
☐ 2 a 3 veces al día  
☐ 5 a 6 veces al día  
☐ más 6 veces al día

---

Berenjena o calabacin o pepino

- ☐ Nunca o menos 1 vez al mes  
☐ 1 a 3 veces mes  
☐ 1 vez semana  
☐ 2 a 4 veces semana  
☐ 5 a 6 veces semana  
☐ 1 vez al día  
☐ 2 a 3 veces al día  
☐ 5 a 6 veces al día  
☐ más 6 veces al día

|                       |                                                                                                                                                                                                                                                                                                                                                                                                              |
|-----------------------|--------------------------------------------------------------------------------------------------------------------------------------------------------------------------------------------------------------------------------------------------------------------------------------------------------------------------------------------------------------------------------------------------------------|
| pimiento              | <input type="radio"/> Nunca o menos 1 vez al mes<br><input type="radio"/> 1 a 3 veces mes<br><input type="radio"/> 1 vez semana<br><input type="radio"/> 2 a 4 veces semana<br><input type="radio"/> 5 a 6 veces semana<br><input type="radio"/> 1 vez al día<br><input type="radio"/> 2 a 3 veces al día<br><input type="radio"/> 5 a 6 veces al día<br><input type="radio"/> más 6 veces al día            |
| alcachofa             | <input type="radio"/> Nunca o menos 1 vez al mes<br><input type="radio"/> 1 a 3 veces mes<br><input type="radio"/> 1 vez semana<br><input type="radio"/> 2 a 4 veces semana<br><input type="radio"/> 5 a 6 veces semana<br><input type="radio"/> 1 vez al día<br><input type="radio"/> 2 a 3 veces al día<br><input type="radio"/> 5 a 6 veces al día<br><input type="radio"/> más 6 veces al día            |
| espárragos            | <input type="radio"/> Nunca o menos 1 vez al mes<br><input type="radio"/> 1 a 3 veces mes<br><input type="radio"/> 1 vez semana<br><input type="radio"/> 2 a 4 veces semana<br><input type="radio"/> 5 a 6 veces semana<br><input type="radio"/> 1 vez al día<br><input type="radio"/> 2 a 3 veces al día<br><input type="radio"/> 5 a 6 veces al día<br><input type="radio"/> más 6 veces al día            |
| maíz hervido          | <input type="radio"/> Nunca o menos 1 vez al mes<br><input type="radio"/> 1 a 3 veces mes<br><input type="radio"/> 1 vez semana<br><input type="radio"/> 2 a 4 veces semana<br><input type="radio"/> 5 a 6 veces semana<br><input type="radio"/> 1 vez al día<br><input type="radio"/> 2 a 3 veces al día<br><input type="radio"/> 5 a 6 veces al día<br><input type="radio"/> más 6 veces al día            |
| legumbres             | <input type="radio"/> Nunca o menos 1 vez al mes<br><input type="radio"/> 1 a 3 veces mes<br><input checked="" type="radio"/> 1 vez semana<br><input type="radio"/> 2 a 4 veces semana<br><input type="radio"/> 5 a 6 veces semana<br><input type="radio"/> 1 vez al día<br><input type="radio"/> 2 a 3 veces al día<br><input type="radio"/> 5 a 6 veces al día<br><input type="radio"/> más 6 veces al día |
| naranjas o mandarinas | <input type="radio"/> Nunca o menos 1 vez al mes<br><input type="radio"/> 1 a 3 veces mes<br><input type="radio"/> 1 vez semana<br><input type="radio"/> 2 a 4 veces semana<br><input type="radio"/> 5 a 6 veces semana<br><input type="radio"/> 1 vez al día<br><input type="radio"/> 2 a 3 veces al día<br><input type="radio"/> 5 a 6 veces al día<br><input type="radio"/> más 6 veces al día            |

|                       |                                                                                                                                                                                                                                                                                                                                                                                                              |
|-----------------------|--------------------------------------------------------------------------------------------------------------------------------------------------------------------------------------------------------------------------------------------------------------------------------------------------------------------------------------------------------------------------------------------------------------|
| zum natural fruta     | <input type="radio"/> Nunca o menos 1 vez al mes<br><input type="radio"/> 1 a 3 veces mes<br><input type="radio"/> 1 vez semana<br><input type="radio"/> 2 a 4 veces semana<br><input type="radio"/> 5 a 6 veces semana<br><input checked="" type="radio"/> 1 vez al día<br><input type="radio"/> 2 a 3 veces al día<br><input type="radio"/> 5 a 6 veces al día<br><input type="radio"/> más 6 veces al día |
| platano               | <input type="radio"/> Nunca o menos 1 vez al mes<br><input type="radio"/> 1 a 3 veces mes<br><input checked="" type="radio"/> 1 vez semana<br><input type="radio"/> 2 a 4 veces semana<br><input type="radio"/> 5 a 6 veces semana<br><input type="radio"/> 1 vez al día<br><input type="radio"/> 2 a 3 veces al día<br><input type="radio"/> 5 a 6 veces al día<br><input type="radio"/> más 6 veces al día |
| manzana o pera        | <input type="radio"/> Nunca o menos 1 vez al mes<br><input type="radio"/> 1 a 3 veces mes<br><input checked="" type="radio"/> 1 vez semana<br><input type="radio"/> 2 a 4 veces semana<br><input type="radio"/> 5 a 6 veces semana<br><input type="radio"/> 1 vez al día<br><input type="radio"/> 2 a 3 veces al día<br><input type="radio"/> 5 a 6 veces al día<br><input type="radio"/> más 6 veces al día |
| melocotón o nectarina | <input type="radio"/> Nunca o menos 1 vez al mes<br><input type="radio"/> 1 a 3 veces mes<br><input type="radio"/> 1 vez semana<br><input type="radio"/> 2 a 4 veces semana<br><input type="radio"/> 5 a 6 veces semana<br><input type="radio"/> 1 vez al día<br><input type="radio"/> 2 a 3 veces al día<br><input type="radio"/> 5 a 6 veces al día<br><input type="radio"/> más 6 veces al día            |
| sandia o melon        | <input type="radio"/> Nunca o menos 1 vez al mes<br><input type="radio"/> 1 a 3 veces mes<br><input type="radio"/> 1 vez semana<br><input type="radio"/> 2 a 4 veces semana<br><input type="radio"/> 5 a 6 veces semana<br><input type="radio"/> 1 vez al día<br><input type="radio"/> 2 a 3 veces al día<br><input type="radio"/> 5 a 6 veces al día<br><input type="radio"/> más 6 veces al día            |
| uva                   | <input type="radio"/> Nunca o menos 1 vez al mes<br><input type="radio"/> 1 a 3 veces mes<br><input type="radio"/> 1 vez semana<br><input type="radio"/> 2 a 4 veces semana<br><input type="radio"/> 5 a 6 veces semana<br><input type="radio"/> 1 vez al día<br><input type="radio"/> 2 a 3 veces al día<br><input type="radio"/> 5 a 6 veces al día<br><input type="radio"/> más 6 veces al día            |

---

bruna o ciruela

- ☐ Nunca o menos 1 vez al mes
- ☐ 1 a 3 veces mes
- ☐ 1 vez semana
- ☐ 2 a 4 veces semana
- ☐ 5 a 6 veces semana
- ☐ 1 vez al día
- ☐ 2 a 3 veces al día
- ☐ 5 a 6 veces al día
- ☐ más 6 veces al día

---

kiwi

- ☐ Nunca o menos 1 vez al mes
- ☐ 1 a 3 veces mes
- ☐ 1 vez semana
- ☐ 2 a 4 veces semana
- ☐ 5 a 6 veces semana
- ☐ 1 vez al día
- ☐ 2 a 3 veces al día
- ☐ 5 a 6 veces al día
- ☐ más 6 veces al día

---

aceituna

- ☐ Nunca o menos 1 vez al mes
- ☐ 1 a 3 veces mes
- ☒ 1 vez semana
- ☐ 2 a 4 veces semana
- ☐ 5 a 6 veces semana
- ☐ 1 vez al día
- ☐ 2 a 3 veces al día
- ☐ 5 a 6 veces al día
- ☐ más 6 veces al día

---

frutos secos

- ☐ Nunca o menos 1 vez al mes
- ☐ 1 a 3 veces mes
- ☒ 1 vez semana
- ☐ 2 a 4 veces semana
- ☐ 5 a 6 veces semana
- ☐ 1 vez al día
- ☐ 2 a 3 veces al día
- ☐ 5 a 6 veces al día
- ☐ más 6 veces al día

---

pan blanco

- ☐ Nunca o menos 1 vez al mes
- ☐ 1 a 3 veces mes
- ☐ 1 vez semana
- ☐ 2 a 4 veces semana
- ☐ 5 a 6 veces semana
- ☒ 1 vez al día
- ☐ 2 a 3 veces al día
- ☐ 5 a 6 veces al día
- ☐ más 6 veces al día

---

pan integral

- ☐ Nunca o menos 1 vez al mes
- ☐ 1 a 3 veces mes
- ☐ 1 vez semana
- ☐ 2 a 4 veces semana
- ☐ 5 a 6 veces semana
- ☐ 1 vez al día
- ☐ 2 a 3 veces al día
- ☐ 5 a 6 veces al día
- ☐ más 6 veces al día

---

cereales desayuno

- ☐ Nunca o menos 1 vez al mes  
☐ 1 a 3 veces mes  
☐ 1 vez semana  
☐ 2 a 4 veces semana  
☐ 5 a 6 veces semana  
☒ 1 vez al día  
☐ 2 a 3 veces al día  
☐ 5 a 6 veces al día  
☐ más 6 veces al día

---

patatas fritas

- ☐ Nunca o menos 1 vez al mes  
☐ 1 a 3 veces mes  
☐ 1 vez semana  
☐ 2 a 4 veces semana  
☐ 5 a 6 veces semana  
☐ 1 vez al día  
☐ 2 a 3 veces al día  
☐ 5 a 6 veces al día  
☐ más 6 veces al día

---

patatas cocidas o asadas

- ☐ Nunca o menos 1 vez al mes  
☐ 1 a 3 veces mes  
☒ 1 vez semana  
☐ 2 a 4 veces semana  
☐ 5 a 6 veces semana  
☐ 1 vez al día  
☐ 2 a 3 veces al día  
☐ 5 a 6 veces al día  
☐ más 6 veces al día

---

bolsa papas

- ☐ Nunca o menos 1 vez al mes  
☐ 1 a 3 veces mes  
☐ 1 vez semana  
☐ 2 a 4 veces semana  
☐ 5 a 6 veces semana  
☐ 1 vez al día  
☐ 2 a 3 veces al día  
☐ 5 a 6 veces al día  
☐ más 6 veces al día

---

arroz cocinado

- ☐ Nunca o menos 1 vez al mes  
☐ 1 a 3 veces mes  
☒ 1 vez semana  
☐ 2 a 4 veces semana  
☐ 5 a 6 veces semana  
☐ 1 vez al día  
☐ 2 a 3 veces al día  
☐ 5 a 6 veces al día  
☐ más 6 veces al día

---

pasta

- ☐ Nunca o menos 1 vez al mes  
☐ 1 a 3 veces mes  
☒ 1 vez semana  
☐ 2 a 4 veces semana  
☐ 5 a 6 veces semana  
☐ 1 vez al día  
☐ 2 a 3 veces al día  
☐ 5 a 6 veces al día  
☐ más 6 veces al día



|                     |                                                                                                                                                                                                                                                                                                                                                                                                              |
|---------------------|--------------------------------------------------------------------------------------------------------------------------------------------------------------------------------------------------------------------------------------------------------------------------------------------------------------------------------------------------------------------------------------------------------------|
| pizza               | <input type="radio"/> Nunca o menos 1 vez al mes<br><input type="radio"/> 1 a 3 veces mes<br><input checked="" type="radio"/> 1 vez semana<br><input type="radio"/> 2 a 4 veces semana<br><input type="radio"/> 5 a 6 veces semana<br><input type="radio"/> 1 vez al día<br><input type="radio"/> 2 a 3 veces al día<br><input type="radio"/> 5 a 6 veces al día<br><input type="radio"/> más 6 veces al día |
| aceite oliva        | <input type="radio"/> Nunca o menos 1 vez al mes<br><input type="radio"/> 1 a 3 veces mes<br><input type="radio"/> 1 vez semana<br><input type="radio"/> 2 a 4 veces semana<br><input type="radio"/> 5 a 6 veces semana<br><input checked="" type="radio"/> 1 vez al día<br><input type="radio"/> 2 a 3 veces al día<br><input type="radio"/> 5 a 6 veces al día<br><input type="radio"/> más 6 veces al día |
| otros aceites       | <input type="radio"/> Nunca o menos 1 vez al mes<br><input type="radio"/> 1 a 3 veces mes<br><input type="radio"/> 1 vez semana<br><input type="radio"/> 2 a 4 veces semana<br><input type="radio"/> 5 a 6 veces semana<br><input type="radio"/> 1 vez al día<br><input type="radio"/> 2 a 3 veces al día<br><input type="radio"/> 5 a 6 veces al día<br><input type="radio"/> más 6 veces al día            |
| margarina           | <input type="radio"/> Nunca o menos 1 vez al mes<br><input type="radio"/> 1 a 3 veces mes<br><input type="radio"/> 1 vez semana<br><input type="radio"/> 2 a 4 veces semana<br><input type="radio"/> 5 a 6 veces semana<br><input type="radio"/> 1 vez al día<br><input type="radio"/> 2 a 3 veces al día<br><input type="radio"/> 5 a 6 veces al día<br><input type="radio"/> más 6 veces al día            |
| mantequilla         | <input type="radio"/> Nunca o menos 1 vez al mes<br><input type="radio"/> 1 a 3 veces mes<br><input type="radio"/> 1 vez semana<br><input type="radio"/> 2 a 4 veces semana<br><input type="radio"/> 5 a 6 veces semana<br><input type="radio"/> 1 vez al día<br><input type="radio"/> 2 a 3 veces al día<br><input type="radio"/> 5 a 6 veces al día<br><input type="radio"/> más 6 veces al día            |
| galletas tipo maria | <input type="radio"/> Nunca o menos 1 vez al mes<br><input type="radio"/> 1 a 3 veces mes<br><input type="radio"/> 1 vez semana<br><input type="radio"/> 2 a 4 veces semana<br><input type="radio"/> 5 a 6 veces semana<br><input type="radio"/> 1 vez al día<br><input type="radio"/> 2 a 3 veces al día<br><input type="radio"/> 5 a 6 veces al día<br><input type="radio"/> más 6 veces al día            |

|                           |                                                                                                                                                                                                                                                                                                                                                                                                              |
|---------------------------|--------------------------------------------------------------------------------------------------------------------------------------------------------------------------------------------------------------------------------------------------------------------------------------------------------------------------------------------------------------------------------------------------------------|
| galletas chocolate        | <input type="radio"/> Nunca o menos 1 vez al mes<br><input type="radio"/> 1 a 3 veces mes<br><input type="radio"/> 1 vez semana<br><input type="radio"/> 2 a 4 veces semana<br><input type="radio"/> 5 a 6 veces semana<br><input type="radio"/> 1 vez al día<br><input type="radio"/> 2 a 3 veces al día<br><input type="radio"/> 5 a 6 veces al día<br><input type="radio"/> más 6 veces al día            |
| bollieria                 | <input type="radio"/> Nunca o menos 1 vez al mes<br><input type="radio"/> 1 a 3 veces mes<br><input checked="" type="radio"/> 1 vez semana<br><input type="radio"/> 2 a 4 veces semana<br><input type="radio"/> 5 a 6 veces semana<br><input type="radio"/> 1 vez al día<br><input type="radio"/> 2 a 3 veces al día<br><input type="radio"/> 5 a 6 veces al día<br><input type="radio"/> más 6 veces al día |
| chocolate o bombones      | <input type="radio"/> Nunca o menos 1 vez al mes<br><input type="radio"/> 1 a 3 veces mes<br><input type="radio"/> 1 vez semana<br><input type="radio"/> 2 a 4 veces semana<br><input type="radio"/> 5 a 6 veces semana<br><input type="radio"/> 1 vez al día<br><input type="radio"/> 2 a 3 veces al día<br><input type="radio"/> 5 a 6 veces al día<br><input type="radio"/> más 6 veces al día            |
| chocolate polvo o colacao | <input type="radio"/> Nunca o menos 1 vez al mes<br><input type="radio"/> 1 a 3 veces mes<br><input type="radio"/> 1 vez semana<br><input type="radio"/> 2 a 4 veces semana<br><input type="radio"/> 5 a 6 veces semana<br><input checked="" type="radio"/> 1 vez al día<br><input type="radio"/> 2 a 3 veces al día<br><input type="radio"/> 5 a 6 veces al día<br><input type="radio"/> más 6 veces al día |
| vino tinto                | <input type="radio"/> Nunca o menos 1 vez al mes<br><input type="radio"/> 1 a 3 veces mes<br><input type="radio"/> 1 vez semana<br><input type="radio"/> 2 a 4 veces semana<br><input type="radio"/> 5 a 6 veces semana<br><input type="radio"/> 1 vez al día<br><input type="radio"/> 2 a 3 veces al día<br><input type="radio"/> 5 a 6 veces al día<br><input type="radio"/> más 6 veces al día            |
| vino blanco               | <input type="radio"/> Nunca o menos 1 vez al mes<br><input type="radio"/> 1 a 3 veces mes<br><input type="radio"/> 1 vez semana<br><input type="radio"/> 2 a 4 veces semana<br><input type="radio"/> 5 a 6 veces semana<br><input type="radio"/> 1 vez al día<br><input type="radio"/> 2 a 3 veces al día<br><input type="radio"/> 5 a 6 veces al día<br><input type="radio"/> más 6 veces al día            |

|                       |                                                                                                                                                                                                                                                                                                                                                                                                              |
|-----------------------|--------------------------------------------------------------------------------------------------------------------------------------------------------------------------------------------------------------------------------------------------------------------------------------------------------------------------------------------------------------------------------------------------------------|
| vino seco o vermut    | <input type="radio"/> Nunca o menos 1 vez al mes<br><input type="radio"/> 1 a 3 veces mes<br><input type="radio"/> 1 vez semana<br><input type="radio"/> 2 a 4 veces semana<br><input type="radio"/> 5 a 6 veces semana<br><input type="radio"/> 1 vez al día<br><input type="radio"/> 2 a 3 veces al día<br><input type="radio"/> 5 a 6 veces al día<br><input type="radio"/> más 6 veces al día            |
| cerveza               | <input type="radio"/> Nunca o menos 1 vez al mes<br><input type="radio"/> 1 a 3 veces mes<br><input type="radio"/> 1 vez semana<br><input type="radio"/> 2 a 4 veces semana<br><input type="radio"/> 5 a 6 veces semana<br><input type="radio"/> 1 vez al día<br><input type="radio"/> 2 a 3 veces al día<br><input type="radio"/> 5 a 6 veces al día<br><input type="radio"/> más 6 veces al día            |
| cerveza sin alcohol   | <input type="radio"/> Nunca o menos 1 vez al mes<br><input type="radio"/> 1 a 3 veces mes<br><input type="radio"/> 1 vez semana<br><input type="radio"/> 2 a 4 veces semana<br><input type="radio"/> 5 a 6 veces semana<br><input type="radio"/> 1 vez al día<br><input type="radio"/> 2 a 3 veces al día<br><input type="radio"/> 5 a 6 veces al día<br><input type="radio"/> más 6 veces al día            |
| licores               | <input type="radio"/> Nunca o menos 1 vez al mes<br><input type="radio"/> 1 a 3 veces mes<br><input type="radio"/> 1 vez semana<br><input type="radio"/> 2 a 4 veces semana<br><input type="radio"/> 5 a 6 veces semana<br><input type="radio"/> 1 vez al día<br><input type="radio"/> 2 a 3 veces al día<br><input type="radio"/> 5 a 6 veces al día<br><input type="radio"/> más 6 veces al día            |
| ginebra o ron o vodka | <input type="radio"/> Nunca o menos 1 vez al mes<br><input type="radio"/> 1 a 3 veces mes<br><input type="radio"/> 1 vez semana<br><input type="radio"/> 2 a 4 veces semana<br><input type="radio"/> 5 a 6 veces semana<br><input type="radio"/> 1 vez al día<br><input type="radio"/> 2 a 3 veces al día<br><input type="radio"/> 5 a 6 veces al día<br><input type="radio"/> más 6 veces al día            |
| refresco normal       | <input type="radio"/> Nunca o menos 1 vez al mes<br><input checked="" type="radio"/> 1 a 3 veces mes<br><input type="radio"/> 1 vez semana<br><input type="radio"/> 2 a 4 veces semana<br><input type="radio"/> 5 a 6 veces semana<br><input type="radio"/> 1 vez al día<br><input type="radio"/> 2 a 3 veces al día<br><input type="radio"/> 5 a 6 veces al día<br><input type="radio"/> más 6 veces al día |

---

refresco sin azúcar

- ☐ Nunca o menos 1 vez al mes
- ☐ 1 a 3 veces mes
- ☐ 1 vez semana
- ☐ 2 a 4 veces semana
- ☐ 5 a 6 veces semana
- ☐ 1 vez al día
- ☐ 2 a 3 veces al día
- ☐ 5 a 6 veces al día
- ☐ más 6 veces al día

---

Agua del grifo

- ☐ Nunca o menos 1 vez al mes
- ☐ 1 a 3 veces mes
- ☐ 1 vez semana
- ☐ 2 a 4 veces semana
- ☐ 5 a 6 veces semana
- ☐ 1 vez al día
- ☐ 2 a 3 veces al día
- ☐ 5 a 6 veces al día
- ☐ más 6 veces al día

---

agua embotellada sin gas

- ☐ Nunca o menos 1 vez al mes
- ☐ 1 a 3 veces mes
- ☐ 1 vez semana
- ☐ 2 a 4 veces semana
- ☐ 5 a 6 veces semana
- ☐ 1 vez al día
- ☒ 2 a 3 veces al día
- ☐ 5 a 6 veces al día
- ☐ más 6 veces al día

---

agua embotellada con gas

- ☐ Nunca o menos 1 vez al mes
- ☐ 1 a 3 veces mes
- ☐ 1 vez semana
- ☐ 2 a 4 veces semana
- ☐ 5 a 6 veces semana
- ☐ 1 vez al día
- ☐ 2 a 3 veces al día
- ☐ 5 a 6 veces al día
- ☐ más 6 veces al día

---

zumو frutas embasado

- ☐ Nunca o menos 1 vez al mes
- ☐ 1 a 3 veces mes
- ☐ 1 vez semana
- ☐ 2 a 4 veces semana
- ☐ 5 a 6 veces semana
- ☐ 1 vez al día
- ☐ 2 a 3 veces al día
- ☐ 5 a 6 veces al día
- ☐ más 6 veces al día

---

cafe

- ☐ Nunca o menos 1 vez al mes
- ☐ 1 a 3 veces mes
- ☐ 1 vez semana
- ☐ 2 a 4 veces semana
- ☐ 5 a 6 veces semana
- ☐ 1 vez al día
- ☐ 2 a 3 veces al día
- ☐ 5 a 6 veces al día
- ☐ más 6 veces al día

|                       |                                                                                                                                                                                                                                                                                                                                                                                                              |
|-----------------------|--------------------------------------------------------------------------------------------------------------------------------------------------------------------------------------------------------------------------------------------------------------------------------------------------------------------------------------------------------------------------------------------------------------|
| cafe descafeinado     | <input type="radio"/> Nunca o menos 1 vez al mes<br><input type="radio"/> 1 a 3 veces mes<br><input type="radio"/> 1 vez semana<br><input type="radio"/> 2 a 4 veces semana<br><input type="radio"/> 5 a 6 veces semana<br><input type="radio"/> 1 vez al día<br><input type="radio"/> 2 a 3 veces al día<br><input type="radio"/> 5 a 6 veces al día<br><input type="radio"/> más 6 veces al día            |
| te o infusión         | <input type="radio"/> Nunca o menos 1 vez al mes<br><input type="radio"/> 1 a 3 veces mes<br><input type="radio"/> 1 vez semana<br><input type="radio"/> 2 a 4 veces semana<br><input type="radio"/> 5 a 6 veces semana<br><input type="radio"/> 1 vez al día<br><input checked="" type="radio"/> 2 a 3 veces al día<br><input type="radio"/> 5 a 6 veces al día<br><input type="radio"/> más 6 veces al día |
| sopa o puré verduras  | <input type="radio"/> Nunca o menos 1 vez al mes<br><input type="radio"/> 1 a 3 veces mes<br><input type="radio"/> 1 vez semana<br><input type="radio"/> 2 a 4 veces semana<br><input type="radio"/> 5 a 6 veces semana<br><input type="radio"/> 1 vez al día<br><input type="radio"/> 2 a 3 veces al día<br><input type="radio"/> 5 a 6 veces al día<br><input type="radio"/> más 6 veces al día            |
| croquetas pollo jamón | <input type="radio"/> Nunca o menos 1 vez al mes<br><input type="radio"/> 1 a 3 veces mes<br><input type="radio"/> 1 vez semana<br><input type="radio"/> 2 a 4 veces semana<br><input type="radio"/> 5 a 6 veces semana<br><input type="radio"/> 1 vez al día<br><input type="radio"/> 2 a 3 veces al día<br><input type="radio"/> 5 a 6 veces al día<br><input type="radio"/> más 6 veces al día            |
| croquetas pescado     | <input type="radio"/> Nunca o menos 1 vez al mes<br><input type="radio"/> 1 a 3 veces mes<br><input checked="" type="radio"/> 1 vez semana<br><input type="radio"/> 2 a 4 veces semana<br><input type="radio"/> 5 a 6 veces semana<br><input type="radio"/> 1 vez al día<br><input type="radio"/> 2 a 3 veces al día<br><input type="radio"/> 5 a 6 veces al día<br><input type="radio"/> más 6 veces al día |
| mayonesa              | <input type="radio"/> Nunca o menos 1 vez al mes<br><input type="radio"/> 1 a 3 veces mes<br><input type="radio"/> 1 vez semana<br><input type="radio"/> 2 a 4 veces semana<br><input type="radio"/> 5 a 6 veces semana<br><input type="radio"/> 1 vez al día<br><input type="radio"/> 2 a 3 veces al día<br><input type="radio"/> 5 a 6 veces al día<br><input type="radio"/> más 6 veces al día            |

|                  |                                                                                                                                                                                                                                                                                                                                                                                                              |
|------------------|--------------------------------------------------------------------------------------------------------------------------------------------------------------------------------------------------------------------------------------------------------------------------------------------------------------------------------------------------------------------------------------------------------------|
| salsa tomate     | <input type="radio"/> Nunca o menos 1 vez al mes<br><input type="radio"/> 1 a 3 veces mes<br><input type="radio"/> 1 vez semana<br><input type="radio"/> 2 a 4 veces semana<br><input type="radio"/> 5 a 6 veces semana<br><input type="radio"/> 1 vez al día<br><input type="radio"/> 2 a 3 veces al día<br><input type="radio"/> 5 a 6 veces al día<br><input type="radio"/> más 6 veces al día            |
| ketchup          | <input type="radio"/> Nunca o menos 1 vez al mes<br><input type="radio"/> 1 a 3 veces mes<br><input type="radio"/> 1 vez semana<br><input type="radio"/> 2 a 4 veces semana<br><input type="radio"/> 5 a 6 veces semana<br><input type="radio"/> 1 vez al día<br><input type="radio"/> 2 a 3 veces al día<br><input type="radio"/> 5 a 6 veces al día<br><input type="radio"/> más 6 veces al día            |
| sal              | <input type="radio"/> Nunca o menos 1 vez al mes<br><input type="radio"/> 1 a 3 veces mes<br><input type="radio"/> 1 vez semana<br><input type="radio"/> 2 a 4 veces semana<br><input type="radio"/> 5 a 6 veces semana<br><input checked="" type="radio"/> 1 vez al día<br><input type="radio"/> 2 a 3 veces al día<br><input type="radio"/> 5 a 6 veces al día<br><input type="radio"/> más 6 veces al día |
| ajo              | <input type="radio"/> Nunca o menos 1 vez al mes<br><input type="radio"/> 1 a 3 veces mes<br><input type="radio"/> 1 vez semana<br><input type="radio"/> 2 a 4 veces semana<br><input type="radio"/> 5 a 6 veces semana<br><input type="radio"/> 1 vez al día<br><input type="radio"/> 2 a 3 veces al día<br><input type="radio"/> 5 a 6 veces al día<br><input type="radio"/> más 6 veces al día            |
| mermelada o miel | <input type="radio"/> Nunca o menos 1 vez al mes<br><input type="radio"/> 1 a 3 veces mes<br><input type="radio"/> 1 vez semana<br><input type="radio"/> 2 a 4 veces semana<br><input type="radio"/> 5 a 6 veces semana<br><input type="radio"/> 1 vez al día<br><input type="radio"/> 2 a 3 veces al día<br><input type="radio"/> 5 a 6 veces al día<br><input type="radio"/> más 6 veces al día            |
| azúcar           | <input type="radio"/> Nunca o menos 1 vez al mes<br><input type="radio"/> 1 a 3 veces mes<br><input type="radio"/> 1 vez semana<br><input type="radio"/> 2 a 4 veces semana<br><input type="radio"/> 5 a 6 veces semana<br><input checked="" type="radio"/> 1 vez al día<br><input type="radio"/> 2 a 3 veces al día<br><input type="radio"/> 5 a 6 veces al día<br><input type="radio"/> más 6 veces al día |

|                                       |                                                                                                                                                                                                                                                                                                                                                                                                                                                                                                                               |
|---------------------------------------|-------------------------------------------------------------------------------------------------------------------------------------------------------------------------------------------------------------------------------------------------------------------------------------------------------------------------------------------------------------------------------------------------------------------------------------------------------------------------------------------------------------------------------|
| Otro alimento                         | <hr/>                                                                                                                                                                                                                                                                                                                                                                                                                                                                                                                         |
| suplementos vitamínicos               | <input type="radio"/> si<br><input checked="" type="radio"/> no                                                                                                                                                                                                                                                                                                                                                                                                                                                               |
| suplementos vitamínicos               | <hr/>                                                                                                                                                                                                                                                                                                                                                                                                                                                                                                                         |
| dieta previa                          | <input type="radio"/> si<br><input checked="" type="radio"/> no                                                                                                                                                                                                                                                                                                                                                                                                                                                               |
| motivo dieta                          | <input checked="" type="radio"/> no dieta<br><input type="radio"/> control peso<br><input type="radio"/> control colesterol<br><input type="radio"/> control diabetes<br><input type="radio"/> problemas estómago<br><input type="radio"/> problemas vesícula o hepáticos<br><input type="radio"/> HTA o cardiopatía<br><input type="radio"/> problemas renales<br><input type="radio"/> alergia alimentaria<br><input type="radio"/> ácido úrico elevado<br><input type="radio"/> vegetariana<br><input type="radio"/> otros |
| cambio alimentos año previo gestación | <input checked="" type="radio"/> si<br><input type="radio"/> no                                                                                                                                                                                                                                                                                                                                                                                                                                                               |
| cambio lácteos                        | <input type="radio"/> eliminado<br><input type="radio"/> disminuido<br><input checked="" type="radio"/> igual<br><input type="radio"/> aumentado<br><input type="radio"/> no sabe                                                                                                                                                                                                                                                                                                                                             |
| cambio huevos                         | <input type="radio"/> eliminado<br><input type="radio"/> disminuido<br><input checked="" type="radio"/> igual<br><input type="radio"/> aumentado<br><input type="radio"/> no sabe                                                                                                                                                                                                                                                                                                                                             |
| cambio carne                          | <input type="radio"/> eliminado<br><input type="radio"/> disminuido<br><input checked="" type="radio"/> igual<br><input type="radio"/> aumentado<br><input type="radio"/> no sabe                                                                                                                                                                                                                                                                                                                                             |
| cambio pescado                        | <input type="radio"/> eliminado<br><input checked="" type="radio"/> disminuido<br><input type="radio"/> igual<br><input type="radio"/> aumentado<br><input type="radio"/> no sabe                                                                                                                                                                                                                                                                                                                                             |
| cambio verduras                       | <input type="radio"/> eliminado<br><input type="radio"/> disminuido<br><input checked="" type="radio"/> igual<br><input type="radio"/> aumentado<br><input type="radio"/> no sabe                                                                                                                                                                                                                                                                                                                                             |

|                            |                                                                                                                                                                                                                        |
|----------------------------|------------------------------------------------------------------------------------------------------------------------------------------------------------------------------------------------------------------------|
| cambio legumbres           | <input type="radio"/> eliminado<br><input type="radio"/> disminuido<br><input checked="" type="radio"/> igual<br><input type="radio"/> aumentado<br><input type="radio"/> no sabe                                      |
| cambio fruta               | <input type="radio"/> eliminado<br><input type="radio"/> disminuido<br><input checked="" type="radio"/> igual<br><input type="radio"/> aumentado<br><input type="radio"/> no sabe                                      |
| cambio pan                 | <input type="radio"/> eliminado<br><input type="radio"/> disminuido<br><input checked="" type="radio"/> igual<br><input type="radio"/> aumentado<br><input type="radio"/> no sabe                                      |
| cambio aceite oliva        | <input type="radio"/> eliminado<br><input type="radio"/> disminuido<br><input checked="" type="radio"/> igual<br><input type="radio"/> aumentado<br><input type="radio"/> no sabe                                      |
| cambio mante o margarina   | <input checked="" type="radio"/> eliminado<br><input type="radio"/> disminuido<br><input type="radio"/> igual<br><input type="radio"/> aumentado<br><input type="radio"/> no sabe                                      |
| cambio azúcar y dulces     | <input type="radio"/> eliminado<br><input type="radio"/> disminuido<br><input checked="" type="radio"/> igual<br><input type="radio"/> aumentado<br><input type="radio"/> no sabe                                      |
| cambio bebidas alcohólicas | <input checked="" type="radio"/> eliminado<br><input type="radio"/> disminuido<br><input type="radio"/> igual<br><input type="radio"/> aumentado<br><input type="radio"/> no sabe                                      |
| frecuencia comidas fritas  | <input type="radio"/> a diario<br><input type="radio"/> 5 a 6 veces semana<br><input checked="" type="radio"/> 2 a 4 veces semana<br><input type="radio"/> 1 vez semana<br><input type="radio"/> menos de 1 vez semana |
| carne                      | <input type="radio"/> no como<br><input type="radio"/> cruda<br><input type="radio"/> poco hecha<br><input type="radio"/> hecha<br><input checked="" type="radio"/> muy hecha                                          |
| grasa visible carne        | <input checked="" type="radio"/> quita toda<br><input type="radio"/> quita mayoría<br><input type="radio"/> quita un poco<br><input type="radio"/> no quita nada                                                       |



|                                |                                                                                                                                                                                                                                                          |
|--------------------------------|----------------------------------------------------------------------------------------------------------------------------------------------------------------------------------------------------------------------------------------------------------|
| cocina carne                   | <input checked="" type="radio"/> a la plancha<br><input type="radio"/> a la parrilla<br><input type="radio"/> asada<br><input type="radio"/> frita<br><input type="radio"/> guisada                                                                      |
| tostado quemado carne          | <input checked="" type="radio"/> nunca<br><input type="radio"/> 1 vez mes<br><input type="radio"/> 2 a 3 veces mes<br><input type="radio"/> 1 vez semana<br><input type="radio"/> 2 a 3 semanas                                                          |
| tostado quemado pescado        | <input checked="" type="radio"/> nunca<br><input type="radio"/> 1 vez mes<br><input type="radio"/> 2 a 3 veces mes<br><input type="radio"/> 1 vez semana<br><input type="radio"/> 2 a 3 semanas                                                          |
| socarrat paella                | <input type="radio"/> nunca<br><input type="radio"/> 1 vez mes<br><input type="radio"/> 2 a 3 veces mes<br><input checked="" type="radio"/> 1 vez semana<br><input type="radio"/> 2 a 3 semanas                                                          |
| grasa o aceite cocinar         | <input type="radio"/> mantequilla<br><input type="radio"/> margarina<br><input checked="" type="radio"/> aceite oliva<br><input type="radio"/> aceite oliva virgen extra<br><input type="radio"/> aceite vegetal<br><input type="radio"/> mezcla aceites |
| grasa aceite aliñar            | <input type="radio"/> mantequilla<br><input type="radio"/> margarina<br><input checked="" type="radio"/> aceite oliva<br><input type="radio"/> aceite oliva virgen extra<br><input type="radio"/> aceite vegetal<br><input type="radio"/> mezcla aceites |
| grasa aceite freir             | <input type="radio"/> mantequilla<br><input type="radio"/> margarina<br><input checked="" type="radio"/> aceite oliva<br><input type="radio"/> aceite oliva virgen extra<br><input type="radio"/> aceite vegetal<br><input type="radio"/> mezcla aceites |
| Ejercicio cuestionario         | <input checked="" type="radio"/> si<br><input type="radio"/> no                                                                                                                                                                                          |
| horas de sueño incluido siesta | [*DATA REMOVED*]                                                                                                                                                                                                                                         |
| minutos siesta                 | [*DATA REMOVED*]                                                                                                                                                                                                                                         |
| horas televisión semana        |                                                                                                                                                                                                                                                          |

|                                        |                                                                                                                                                                                                                                                                                                                                                                           |
|----------------------------------------|---------------------------------------------------------------------------------------------------------------------------------------------------------------------------------------------------------------------------------------------------------------------------------------------------------------------------------------------------------------------------|
| actividad trabajo                      | <input type="radio"/> casi siempre sentado<br><input type="radio"/> sentado 50 por cien<br><input type="radio"/> casi siempre de pie, quieto<br><input checked="" type="radio"/> casi siempre levantado caminando y llevando pocas cosas<br><input type="radio"/> casi siempre levantado, caminando y llevado muchas cosas<br><input type="radio"/> trabajo manual pesado |
| tiempo caminar o bici al día           | <input type="radio"/> casi nunca<br><input type="radio"/> menos 20min día<br><input type="radio"/> 20 a 40 min día<br><input type="radio"/> 40 a 60 min día<br><input type="radio"/> 1h o 1h y media día<br><input checked="" type="radio"/> más de 1h y media al día                                                                                                     |
| tiempo tareas casa al día              | <input type="radio"/> menos de 1h día<br><input type="radio"/> 1 a 2h día<br><input checked="" type="radio"/> 3 a 4h día<br><input type="radio"/> 5 a 6h día<br><input type="radio"/> 7 a 8h día<br><input type="radio"/> más de 8h día                                                                                                                                   |
| tiempo libre televisión ordenador leer | <input type="radio"/> menos 1h día<br><input checked="" type="radio"/> 1h día<br><input type="radio"/> 2h día<br><input type="radio"/> 3h día<br><input type="radio"/> 4h día<br><input type="radio"/> 5 a 6h día<br><input type="radio"/> mas 6h día                                                                                                                     |
| tiempo libre ejercicio o deporte       | <input type="radio"/> menos 1h semana<br><input checked="" type="radio"/> 1h semana<br><input type="radio"/> 2h semana<br><input type="radio"/> 3h semana<br><input type="radio"/> 4 a 5h semana<br><input type="radio"/> mas 5h semana                                                                                                                                   |
| como se considera                      | <input type="radio"/> sedentaria<br><input type="radio"/> poco activa<br><input type="radio"/> moderadamente activa<br><input checked="" type="radio"/> bastante activa<br><input type="radio"/> muy activa<br><input type="radio"/> no sabe                                                                                                                              |
| FUR                                    | [*DATA REMOVED*]                                                                                                                                                                                                                                                                                                                                                          |
| Semanas gestación 2T                   | [*DATA REMOVED*]                                                                                                                                                                                                                                                                                                                                                          |
| Días gestación 2T                      | [*DATA REMOVED*]                                                                                                                                                                                                                                                                                                                                                          |
| DBP 2T                                 | [*DATA REMOVED*]                                                                                                                                                                                                                                                                                                                                                          |
| CC 2T                                  | [*DATA REMOVED*]                                                                                                                                                                                                                                                                                                                                                          |
| AC 2T                                  | [*DATA REMOVED*]                                                                                                                                                                                                                                                                                                                                                          |

|                                                   |                                                                                                                                                                                                 |
|---------------------------------------------------|-------------------------------------------------------------------------------------------------------------------------------------------------------------------------------------------------|
| LF 2T                                             | [*DATA REMOVED*]                                                                                                                                                                                |
| PFE 2T (Hadlock)                                  | [*DATA REMOVED*]                                                                                                                                                                                |
| Semanas gestación 3T                              | [*DATA REMOVED*]                                                                                                                                                                                |
| días 3T                                           | [*DATA REMOVED*]                                                                                                                                                                                |
| DBP 3T                                            | [*DATA REMOVED*]                                                                                                                                                                                |
| CC 3T                                             | [*DATA REMOVED*]                                                                                                                                                                                |
| AC 3T                                             | [*DATA REMOVED*]                                                                                                                                                                                |
| LF 3T                                             | [*DATA REMOVED*]                                                                                                                                                                                |
| PFE 3T (Hadlock)                                  | [*DATA REMOVED*]                                                                                                                                                                                |
| Semanas de gestación final                        | [*DATA REMOVED*]                                                                                                                                                                                |
| días gestación final                              | [*DATA REMOVED*]                                                                                                                                                                                |
| Localización placenta                             | <input type="radio"/> anterior<br><input type="radio"/> lateral derecha<br><input type="radio"/> lateral izquierda<br><input checked="" type="radio"/> posterior<br><input type="radio"/> fondo |
| Presentación longitudinal cefálica                | <input type="radio"/> no<br><input checked="" type="radio"/> si                                                                                                                                 |
| Dorso                                             | <input type="radio"/> izquierda anterior<br><input type="radio"/> izquierda posterior<br><input checked="" type="radio"/> derecha anterior<br><input type="radio"/> derecha posterior           |
| diámetro biparietal                               | [*DATA REMOVED*]                                                                                                                                                                                |
| Circunferencia craneal                            | [*DATA REMOVED*]                                                                                                                                                                                |
| Circunferencia abdominal                          | [*DATA REMOVED*]                                                                                                                                                                                |
| Longitud de femur                                 | [*DATA REMOVED*]                                                                                                                                                                                |
| tejido celular subcutáneo a nivel del muslo en mm | [*DATA REMOVED*]                                                                                                                                                                                |
| tejido celular subcutáneo en abdomen en mm        | [*DATA REMOVED*]                                                                                                                                                                                |
| Volumen del muslo en cm3                          | [*DATA REMOVED*]                                                                                                                                                                                |
| Peso fetal estimado según fórmula de Hadlock      | [*DATA REMOVED*]                                                                                                                                                                                |

|                                               |                                                                                                                                                          |
|-----------------------------------------------|----------------------------------------------------------------------------------------------------------------------------------------------------------|
| Percentil                                     | [*DATA REMOVED*]                                                                                                                                         |
| Peso fetal estimado según fórmula de Scioscia | <hr/>                                                                                                                                                    |
| Peso fetal estimado según fórmula de LEE      | <hr/>                                                                                                                                                    |
| Tipo de parto                                 | <input checked="" type="radio"/> eutocico<br><input type="radio"/> instrumentado/ventosa<br><input type="radio"/> cesarea                                |
| fecha de nacimiento                           | [*DATA REMOVED*]                                                                                                                                         |
| Días entre exploración y nacimiento           | [*DATA REMOVED*]                                                                                                                                         |
| Peso RN en g                                  | [*DATA REMOVED*]                                                                                                                                         |
| sexo                                          | <input checked="" type="radio"/> mujer<br><input type="radio"/> hombre                                                                                   |
| Apgar 1 minuto                                | [*DATA REMOVED*]                                                                                                                                         |
| Apgar 5 minutos                               | [*DATA REMOVED*]                                                                                                                                         |
| Apgar 10 minutos                              | <hr/>                                                                                                                                                    |
| antecedente Covid durante gestación           | <input type="radio"/> Yes<br><input checked="" type="radio"/> No                                                                                         |
| Nivel de estudios                             | <input type="radio"/> ninguno<br><input type="radio"/> primarios<br><input checked="" type="radio"/> secundarios<br><input type="radio"/> universitarios |

# Base\_datos\_estimacion\_peso\_fetal

|                                       |                                                                                                                                                                                                                                                                                      |
|---------------------------------------|--------------------------------------------------------------------------------------------------------------------------------------------------------------------------------------------------------------------------------------------------------------------------------------|
| Número de identificación participante | 65                                                                                                                                                                                                                                                                                   |
| CODIGO PARTICIPANTE                   |                                                                                                                                                                                                                                                                                      |
| Edad                                  | [*DATA REMOVED*]                                                                                                                                                                                                                                                                     |
| Gestaciones                           | <input type="radio"/> 1<br><input checked="" type="radio"/> 2<br><input type="radio"/> 3<br><input type="radio"/> mas de 3                                                                                                                                                           |
| partos                                | <input checked="" type="radio"/> 0<br><input type="radio"/> 1<br><input type="radio"/> 2<br><input type="radio"/> 3<br><input type="radio"/> mas de 3                                                                                                                                |
| cesáreas                              | <input type="radio"/> 0<br><input checked="" type="radio"/> 1<br><input type="radio"/> 2<br><input type="radio"/> 3<br><input type="radio"/> mas de 3                                                                                                                                |
| Abortos                               | <input checked="" type="radio"/> 0<br><input type="radio"/> 1<br><input type="radio"/> 2<br><input type="radio"/> 3<br><input type="radio"/> mas de 3                                                                                                                                |
| Tipo de gestacion                     | <input checked="" type="radio"/> espontanea<br><input type="radio"/> IAC inseminación artificial conyuge<br><input type="radio"/> IAD inseminación artificial donante<br><input type="radio"/> FIV Fecundación in Vitro<br><input type="radio"/> Ovodon FIV con donación de ovocitos |
| peso previo a embarazo                | [*DATA REMOVED*]                                                                                                                                                                                                                                                                     |
| Ganancia ponderal embarazo            | [*DATA REMOVED*]                                                                                                                                                                                                                                                                     |
| Talla madre                           | [*DATA REMOVED*]                                                                                                                                                                                                                                                                     |
| IMC previo embarazo                   | 28.167517006802726                                                                                                                                                                                                                                                                   |
| Patología obstétrica                  | <input checked="" type="radio"/> no<br><input type="radio"/> si                                                                                                                                                                                                                      |
| Diabetes pregestacional               | <input checked="" type="radio"/> no<br><input type="radio"/> si                                                                                                                                                                                                                      |
| Diabetes gestacional                  | <input checked="" type="radio"/> no<br><input type="radio"/> si                                                                                                                                                                                                                      |

|                                            |                                                                                                                                                                                      |
|--------------------------------------------|--------------------------------------------------------------------------------------------------------------------------------------------------------------------------------------|
| Diabetes gestacional con insulina          | <input checked="" type="radio"/> no<br><input type="radio"/> si                                                                                                                      |
| Diabetes gestacional con dieta y ejercicio | <input checked="" type="radio"/> no<br><input type="radio"/> si                                                                                                                      |
| Percentil fetos previos                    | <input type="radio"/> Nada<br><input type="radio"/> percentil menor de 10<br><input checked="" type="radio"/> percentil entre 10 y 90<br><input type="radio"/> percentil mayor de 90 |
| Exfumadora                                 | <input type="radio"/> Nada<br><input checked="" type="radio"/> menos de 5 años<br><input type="radio"/> 5 a 10 años<br><input type="radio"/> mayor o igual a 10 años                 |
| Hábito tabáquico                           | <input checked="" type="radio"/> no<br><input type="radio"/> si                                                                                                                      |
| fumadora                                   | [*DATA REMOVED*]                                                                                                                                                                     |
| Consumo otros tóxicos                      | <input checked="" type="radio"/> no<br><input type="radio"/> si                                                                                                                      |
| Hb 1T                                      | _____                                                                                                                                                                                |
| Htc 1T                                     | _____                                                                                                                                                                                |
| Hb 2T                                      | _____                                                                                                                                                                                |
| HTC 2T                                     | _____                                                                                                                                                                                |
| Hb 3T                                      | _____                                                                                                                                                                                |
| HTC 3T                                     | _____                                                                                                                                                                                |
| Suplemento FE oral                         | <input checked="" type="radio"/> si<br><input type="radio"/> no                                                                                                                      |
| Suplemento fe iv                           | <input type="radio"/> si<br><input checked="" type="radio"/> no                                                                                                                      |
| Transfusión                                | <input checked="" type="radio"/> no<br><input type="radio"/> si                                                                                                                      |
| Solicitada Vit D                           | <input checked="" type="radio"/> no<br><input type="radio"/> si                                                                                                                      |

|                       |                                                                                                                                                                                                                                                                                                                                                                                                              |
|-----------------------|--------------------------------------------------------------------------------------------------------------------------------------------------------------------------------------------------------------------------------------------------------------------------------------------------------------------------------------------------------------------------------------------------------------|
| Deficit vit D         | <input type="radio"/> no<br><input type="radio"/> si                                                                                                                                                                                                                                                                                                                                                         |
| Suplemento vit D      | <input type="radio"/> si<br><input type="radio"/> no                                                                                                                                                                                                                                                                                                                                                         |
| Dieta, cuestionario   | <input checked="" type="radio"/> si<br><input type="radio"/> no                                                                                                                                                                                                                                                                                                                                              |
| Leche entera          | <input type="radio"/> Nunca o menos 1 vez al mes<br><input checked="" type="radio"/> 1 a 3 veces mes<br><input type="radio"/> 1 vez semana<br><input type="radio"/> 2 a 4 veces semana<br><input type="radio"/> 5 a 6 veces semana<br><input type="radio"/> 1 vez al día<br><input type="radio"/> 2 a 3 veces al día<br><input type="radio"/> 5 a 6 veces al día<br><input type="radio"/> más 6 veces al día |
| Leche semidesnatada   | <input checked="" type="radio"/> Nunca o menos 1 vez al mes<br><input type="radio"/> 1 a 3 veces mes<br><input type="radio"/> 1 vez semana<br><input type="radio"/> 2 a 4 veces semana<br><input type="radio"/> 5 a 6 veces semana<br><input type="radio"/> 1 vez al día<br><input type="radio"/> 2 a 3 veces al día<br><input type="radio"/> 5 a 6 veces al día<br><input type="radio"/> mas 6 veces al día |
| Leche desnatada       | <input checked="" type="radio"/> Nunca o menos 1 vez al mes<br><input type="radio"/> 1 a 3 veces mes<br><input type="radio"/> 1 vez semana<br><input type="radio"/> 2 a 4 veces semana<br><input type="radio"/> 5 a 6 veces semana<br><input type="radio"/> 1 vez al día<br><input type="radio"/> 2 a 3 veces al día<br><input type="radio"/> 5 a 6 veces al día<br><input type="radio"/> más 6 veces al día |
| Leche condensada      | <input checked="" type="radio"/> Nunca o menos 1 vez al mes<br><input type="radio"/> 1 a 3 veces mes<br><input type="radio"/> 1 vez semana<br><input type="radio"/> 2 a 4 veces semana<br><input type="radio"/> 5 a 6 veces semana<br><input type="radio"/> 1 vez al día<br><input type="radio"/> 2 a 3 veces al día<br><input type="radio"/> 5 a 6 veces al día<br><input type="radio"/> más 6 veces al día |
| nata o crema de leche | <input type="radio"/> Nunca o menos 1 vez al mes<br><input checked="" type="radio"/> 1 a 3 veces mes<br><input type="radio"/> 1 vez semana<br><input type="radio"/> 2 a 4 veces semana<br><input type="radio"/> 5 a 6 veces semana<br><input type="radio"/> 1 vez al día<br><input type="radio"/> 2 a 3 veces al día<br><input type="radio"/> 5 a 6 veces al día<br><input type="radio"/> más 6 veces al día |

|                                             |                                                                                                                                                                                                                                                                                                                                                                                                              |
|---------------------------------------------|--------------------------------------------------------------------------------------------------------------------------------------------------------------------------------------------------------------------------------------------------------------------------------------------------------------------------------------------------------------------------------------------------------------|
| Yogurt Entero                               | <input type="radio"/> Nunca o menos 1 vez al mes<br><input checked="" type="radio"/> 1 a 3 veces mes<br><input type="radio"/> 1 vez semana<br><input type="radio"/> 2 a 4 veces semana<br><input type="radio"/> 5 a 6 veces semana<br><input type="radio"/> 1 vez al día<br><input type="radio"/> 2 a 3 veces al día<br><input type="radio"/> 5 a 6 veces al día<br><input type="radio"/> más 6 veces al día |
| Yogurt desnatado                            | <input checked="" type="radio"/> Nunca o menos 1 vez al mes<br><input type="radio"/> 1 a 3 veces mes<br><input type="radio"/> 1 vez semana<br><input type="radio"/> 2 a 4 veces semana<br><input type="radio"/> 5 a 6 veces semana<br><input type="radio"/> 1 vez al día<br><input type="radio"/> 2 a 3 veces al día<br><input type="radio"/> 5 a 6 veces al día<br><input type="radio"/> más 6 veces al día |
| 100g requesón o queso blando o queso fresco | <input type="radio"/> Nunca o menos 1 vez al mes<br><input checked="" type="radio"/> 1 a 3 veces mes<br><input type="radio"/> 1 vez semana<br><input type="radio"/> 2 a 4 veces semana<br><input type="radio"/> 5 a 6 veces semana<br><input type="radio"/> 1 vez al día<br><input type="radio"/> 2 a 3 veces al día<br><input type="radio"/> 5 a 6 veces al día<br><input type="radio"/> más 6 veces al día |
| queso curado o semicurado o cremoso         | <input type="radio"/> Nunca o menos 1 vez al mes<br><input type="radio"/> 1 a 3 veces mes<br><input checked="" type="radio"/> 1 vez semana<br><input type="radio"/> 2 a 4 veces semana<br><input type="radio"/> 5 a 6 veces semana<br><input type="radio"/> 1 vez al día<br><input type="radio"/> 2 a 3 veces al día<br><input type="radio"/> 5 a 6 veces al día<br><input type="radio"/> más 6 veces al día |
| natillas flan pudding                       | <input checked="" type="radio"/> Nunca o menos 1 vez al mes<br><input type="radio"/> 1 a 3 veces mes<br><input type="radio"/> 1 vez semana<br><input type="radio"/> 2 a 4 veces semana<br><input type="radio"/> 5 a 6 veces semana<br><input type="radio"/> 1 vez al día<br><input type="radio"/> 2 a 3 veces al día<br><input type="radio"/> 5 a 6 veces al día<br><input type="radio"/> más 6 veces al día |
| Helado                                      | <input type="radio"/> Nunca o menos 1 vez al mes<br><input checked="" type="radio"/> 1 a 3 veces mes<br><input type="radio"/> 1 vez semana<br><input type="radio"/> 2 a 4 veces semana<br><input type="radio"/> 5 a 6 veces semana<br><input type="radio"/> 1 vez al día<br><input type="radio"/> 2 a 3 veces al día<br><input type="radio"/> 5 a 6 veces al día<br><input type="radio"/> más 6 veces al día |



|                                      |                                                                                                                                                                                                                                                                                                                                                                                                              |
|--------------------------------------|--------------------------------------------------------------------------------------------------------------------------------------------------------------------------------------------------------------------------------------------------------------------------------------------------------------------------------------------------------------------------------------------------------------|
| huevo                                | <input type="radio"/> Nunca o menos 1 vez al mes<br><input type="radio"/> 1 a 3 veces mes<br><input checked="" type="radio"/> 1 vez semana<br><input type="radio"/> 2 a 4 veces semana<br><input type="radio"/> 5 a 6 veces semana<br><input type="radio"/> 1 vez al día<br><input type="radio"/> 2 a 3 veces al día<br><input type="radio"/> 5 a 6 veces al día<br><input type="radio"/> más 6 veces al día |
| Pollo con piel                       | <input type="radio"/> Nunca o menos 1 vez al mes<br><input type="radio"/> 1 a 3 veces mes<br><input checked="" type="radio"/> 1 vez semana<br><input type="radio"/> 2 a 4 veces semana<br><input type="radio"/> 5 a 6 veces semana<br><input type="radio"/> 1 vez al día<br><input type="radio"/> 2 a 3 veces al día<br><input type="radio"/> 5 a 6 veces al día<br><input type="radio"/> más 6 veces al día |
| pollo sin piel                       | <input checked="" type="radio"/> Nunca o menos 1 vez al mes<br><input type="radio"/> 1 a 3 veces mes<br><input type="radio"/> 1 vez semana<br><input type="radio"/> 2 a 4 veces semana<br><input type="radio"/> 5 a 6 veces semana<br><input type="radio"/> 1 vez al día<br><input type="radio"/> 2 a 3 veces al día<br><input type="radio"/> 5 a 6 veces al día<br><input type="radio"/> más 6 veces al día |
| Ternera o cerdo o cordero            | <input type="radio"/> Nunca o menos 1 vez al mes<br><input type="radio"/> 1 a 3 veces mes<br><input checked="" type="radio"/> 1 vez semana<br><input type="radio"/> 2 a 4 veces semana<br><input type="radio"/> 5 a 6 veces semana<br><input type="radio"/> 1 vez al día<br><input type="radio"/> 2 a 3 veces al día<br><input type="radio"/> 5 a 6 veces al día<br><input type="radio"/> más 6 veces al día |
| carne caza: Conejo o codorniz o pato | <input checked="" type="radio"/> Nunca o menos 1 vez al mes<br><input type="radio"/> 1 a 3 veces mes<br><input type="radio"/> 1 vez semana<br><input type="radio"/> 2 a 4 veces semana<br><input type="radio"/> 5 a 6 veces semana<br><input type="radio"/> 1 vez al día<br><input type="radio"/> 2 a 3 veces al día<br><input type="radio"/> 5 a 6 veces al día<br><input type="radio"/> más 6 veces al día |
| Hígado de ternera o cerdo o pollo    | <input checked="" type="radio"/> Nunca o menos 1 vez al mes<br><input type="radio"/> 1 a 3 veces mes<br><input type="radio"/> 1 vez semana<br><input type="radio"/> 2 a 4 veces semana<br><input type="radio"/> 5 a 6 veces semana<br><input type="radio"/> 1 vez al día<br><input type="radio"/> 2 a 3 veces al día<br><input type="radio"/> 5 a 6 veces al día<br><input type="radio"/> más 6 veces al día |

|                     |                                                                                                                                                                                                                                                                                                                                                                                                              |
|---------------------|--------------------------------------------------------------------------------------------------------------------------------------------------------------------------------------------------------------------------------------------------------------------------------------------------------------------------------------------------------------------------------------------------------------|
| Vísceras            | <input checked="" type="radio"/> Nunca o menos 1 vez al mes<br><input type="radio"/> 1 a 3 veces mes<br><input type="radio"/> 1 vez semana<br><input type="radio"/> 2 a 4 veces semana<br><input type="radio"/> 5 a 6 veces semana<br><input type="radio"/> 1 vez al día<br><input type="radio"/> 2 a 3 veces al día<br><input type="radio"/> 5 a 6 veces al día<br><input type="radio"/> más 6 veces al día |
| Embutido            | <input type="radio"/> Nunca o menos 1 vez al mes<br><input checked="" type="radio"/> 1 a 3 veces mes<br><input type="radio"/> 1 vez semana<br><input type="radio"/> 2 a 4 veces semana<br><input type="radio"/> 5 a 6 veces semana<br><input type="radio"/> 1 vez al día<br><input type="radio"/> 2 a 3 veces al día<br><input type="radio"/> 5 a 6 veces al día<br><input type="radio"/> más 6 veces al día |
| Salchicha o similar | <input type="radio"/> Nunca o menos 1 vez al mes<br><input checked="" type="radio"/> 1 a 3 veces mes<br><input type="radio"/> 1 vez semana<br><input type="radio"/> 2 a 4 veces semana<br><input type="radio"/> 5 a 6 veces semana<br><input type="radio"/> 1 vez al día<br><input type="radio"/> 2 a 3 veces al día<br><input type="radio"/> 5 a 6 veces al día<br><input type="radio"/> más 6 veces al día |
| Pate o foiegras     | <input checked="" type="radio"/> Nunca o menos 1 vez al mes<br><input type="radio"/> 1 a 3 veces mes<br><input type="radio"/> 1 vez semana<br><input type="radio"/> 2 a 4 veces semana<br><input type="radio"/> 5 a 6 veces semana<br><input type="radio"/> 1 vez al día<br><input type="radio"/> 2 a 3 veces al día<br><input type="radio"/> 5 a 6 veces al día<br><input type="radio"/> más 6 veces al día |
| Hamburguesa         | <input checked="" type="radio"/> Nunca o menos 1 vez al mes<br><input type="radio"/> 1 a 3 veces mes<br><input type="radio"/> 1 vez semana<br><input type="radio"/> 2 a 4 veces semana<br><input type="radio"/> 5 a 6 veces semana<br><input type="radio"/> 1 vez al día<br><input type="radio"/> 2 a 3 veces al día<br><input type="radio"/> 5 a 6 veces al día<br><input type="radio"/> más 6 veces al día |
| tocino o bacon      | <input checked="" type="radio"/> Nunca o menos 1 vez al mes<br><input type="radio"/> 1 a 3 veces mes<br><input type="radio"/> 1 vez semana<br><input type="radio"/> 2 a 4 veces semana<br><input type="radio"/> 5 a 6 veces semana<br><input type="radio"/> 1 vez al día<br><input type="radio"/> 2 a 3 veces al día<br><input type="radio"/> 5 a 6 veces al día<br><input type="radio"/> más 6 veces al día |

---

Pescado frito

- ☐ Nunca o menos 1 vez al mes  
☒ 1 a 3 veces mes  
☐ 1 vez semana  
☐ 2 a 4 veces semana  
☐ 5 a 6 veces semana  
☐ 1 vez al día  
☐ 2 a 3 veces al día  
☐ 5 a 6 veces al día  
☐ más 6 veces al día

---

pescado hervido blanco

- ☐ Nunca o menos 1 vez al mes  
☒ 1 a 3 veces mes  
☐ 1 vez semana  
☐ 2 a 4 veces semana  
☐ 5 a 6 veces semana  
☐ 1 vez al día  
☐ 2 a 3 veces al día  
☐ 5 a 6 veces al día  
☐ más 6 veces al día

---

pescado hervido azul

- ☐ Nunca o menos 1 vez al mes  
☒ 1 a 3 veces mes  
☐ 1 vez semana  
☐ 2 a 4 veces semana  
☐ 5 a 6 veces semana  
☐ 1 vez al día  
☐ 2 a 3 veces al día  
☐ 5 a 6 veces al día  
☐ más 6 veces al día

---

otros pescado azul

- ☐ Nunca o menos 1 vez al mes  
☒ 1 a 3 veces mes  
☐ 1 vez semana  
☐ 2 a 4 veces semana  
☐ 5 a 6 veces semana  
☐ 1 vez al día  
☐ 2 a 3 veces al día  
☐ 5 a 6 veces al día  
☐ más 6 veces al día

---

atun conserva

- ☐ Nunca o menos 1 vez al mes  
☒ 1 a 3 veces mes  
☐ 1 vez semana  
☐ 2 a 4 veces semana  
☐ 5 a 6 veces semana  
☐ 1 vez al día  
☐ 2 a 3 veces al día  
☐ 5 a 6 veces al día  
☐ más 6 veces al día

---

sardina conserva

- ☒ Nunca o menos 1 vez al mes  
☐ 1 a 3 veces mes  
☐ 1 vez semana  
☐ 2 a 4 veces semana  
☐ 5 a 6 veces semana  
☐ 1 vez al día  
☐ 2 a 3 veces al día  
☐ 5 a 6 veces al día  
☐ más 6 veces al día

|                                         |                                                                                                                                                                                                                                                                                                                                                                                                              |
|-----------------------------------------|--------------------------------------------------------------------------------------------------------------------------------------------------------------------------------------------------------------------------------------------------------------------------------------------------------------------------------------------------------------------------------------------------------------|
| pescado ahumado                         | <input checked="" type="radio"/> Nunca o menos 1 vez al mes<br><input type="radio"/> 1 a 3 veces mes<br><input type="radio"/> 1 vez semana<br><input type="radio"/> 2 a 4 veces semana<br><input type="radio"/> 5 a 6 veces semana<br><input type="radio"/> 1 vez al día<br><input type="radio"/> 2 a 3 veces al día<br><input type="radio"/> 5 a 6 veces al día<br><input type="radio"/> más 6 veces al día |
| almejas o mejillones o ostras unos 100g | <input type="radio"/> Nunca o menos 1 vez al mes<br><input checked="" type="radio"/> 1 a 3 veces mes<br><input type="radio"/> 1 vez semana<br><input type="radio"/> 2 a 4 veces semana<br><input type="radio"/> 5 a 6 veces semana<br><input type="radio"/> 1 vez al día<br><input type="radio"/> 2 a 3 veces al día<br><input type="radio"/> 5 a 6 veces al día<br><input type="radio"/> más 6 veces al día |
| calamar o chipiron o sepia unos 100g    | <input type="radio"/> Nunca o menos 1 vez al mes<br><input checked="" type="radio"/> 1 a 3 veces mes<br><input type="radio"/> 1 vez semana<br><input type="radio"/> 2 a 4 veces semana<br><input type="radio"/> 5 a 6 veces semana<br><input type="radio"/> 1 vez al día<br><input type="radio"/> 2 a 3 veces al día<br><input type="radio"/> 5 a 6 veces al día<br><input type="radio"/> más 6 veces al día |
| marisco unos 100g                       | <input type="radio"/> Nunca o menos 1 vez al mes<br><input checked="" type="radio"/> 1 a 3 veces mes<br><input type="radio"/> 1 vez semana<br><input type="radio"/> 2 a 4 veces semana<br><input type="radio"/> 5 a 6 veces semana<br><input type="radio"/> 1 vez al día<br><input type="radio"/> 2 a 3 veces al día<br><input type="radio"/> 5 a 6 veces al día<br><input type="radio"/> más 6 veces al día |
| Espinacas o acelgas cocinadas           | <input type="radio"/> Nunca o menos 1 vez al mes<br><input checked="" type="radio"/> 1 a 3 veces mes<br><input type="radio"/> 1 vez semana<br><input type="radio"/> 2 a 4 veces semana<br><input type="radio"/> 5 a 6 veces semana<br><input type="radio"/> 1 vez al día<br><input type="radio"/> 2 a 3 veces al día<br><input type="radio"/> 5 a 6 veces al día<br><input type="radio"/> más 6 veces al día |
| Col o coliflor o brocoli cocinado       | <input type="radio"/> Nunca o menos 1 vez al mes<br><input checked="" type="radio"/> 1 a 3 veces mes<br><input type="radio"/> 1 vez semana<br><input type="radio"/> 2 a 4 veces semana<br><input type="radio"/> 5 a 6 veces semana<br><input type="radio"/> 1 vez al día<br><input type="radio"/> 2 a 3 veces al día<br><input type="radio"/> 5 a 6 veces al día<br><input type="radio"/> más 6 veces al día |

---

Lechuga o endivia o escarola

- ☐ Nunca o menos 1 vez al mes  
☒ 1 a 3 veces mes  
☐ 1 vez semana  
☐ 2 a 4 veces semana  
☐ 5 a 6 veces semana  
☐ 1 vez al día  
☐ 2 a 3 veces al día  
☐ 5 a 6 veces al día  
☐ más 6 veces al día

---

tomate ensalada

- ☐ Nunca o menos 1 vez al mes  
☐ 1 a 3 veces mes  
☒ 1 vez semana  
☐ 2 a 4 veces semana  
☐ 5 a 6 veces semana  
☐ 1 vez al día  
☐ 2 a 3 veces al día  
☐ 5 a 6 veces al día  
☐ más 6 veces al día

---

cebolla

- ☐ Nunca o menos 1 vez al mes  
☐ 1 a 3 veces mes  
☒ 1 vez semana  
☐ 2 a 4 veces semana  
☐ 5 a 6 veces semana  
☐ 1 vez al día  
☐ 2 a 3 veces al día  
☐ 5 a 6 veces al día  
☐ más 6 veces al día

---

Zanahoria o calabaza

- ☐ Nunca o menos 1 vez al mes  
☐ 1 a 3 veces mes  
☐ 1 vez semana  
☒ 2 a 4 veces semana  
☐ 5 a 6 veces semana  
☐ 1 vez al día  
☐ 2 a 3 veces al día  
☐ 5 a 6 veces al día  
☐ más 6 veces al día

---

Judías verdes

- ☐ Nunca o menos 1 vez al mes  
☐ 1 a 3 veces mes  
☒ 1 vez semana  
☐ 2 a 4 veces semana  
☐ 5 a 6 veces semana  
☐ 1 vez al día  
☐ 2 a 3 veces al día  
☐ 5 a 6 veces al día  
☐ más 6 veces al día

---

Berenjena o calabacin o pepino

- ☐ Nunca o menos 1 vez al mes  
☐ 1 a 3 veces mes  
☐ 1 vez semana  
☒ 2 a 4 veces semana  
☐ 5 a 6 veces semana  
☐ 1 vez al día  
☐ 2 a 3 veces al día  
☐ 5 a 6 veces al día  
☐ más 6 veces al día

---

pimiento

- ☐ Nunca o menos 1 vez al mes  
☐ 1 a 3 veces mes  
☒ 1 vez semana  
☐ 2 a 4 veces semana  
☐ 5 a 6 veces semana  
☐ 1 vez al día  
☐ 2 a 3 veces al día  
☐ 5 a 6 veces al día  
☐ más 6 veces al día

---

alcachofa

- ☐ Nunca o menos 1 vez al mes  
☒ 1 a 3 veces mes  
☐ 1 vez semana  
☐ 2 a 4 veces semana  
☐ 5 a 6 veces semana  
☐ 1 vez al día  
☐ 2 a 3 veces al día  
☐ 5 a 6 veces al día  
☐ más 6 veces al día

---

espárragos

- ☐ Nunca o menos 1 vez al mes  
☒ 1 a 3 veces mes  
☐ 1 vez semana  
☐ 2 a 4 veces semana  
☐ 5 a 6 veces semana  
☐ 1 vez al día  
☐ 2 a 3 veces al día  
☐ 5 a 6 veces al día  
☐ más 6 veces al día

---

maíz hervido

- ☐ Nunca o menos 1 vez al mes  
☒ 1 a 3 veces mes  
☐ 1 vez semana  
☐ 2 a 4 veces semana  
☐ 5 a 6 veces semana  
☐ 1 vez al día  
☐ 2 a 3 veces al día  
☐ 5 a 6 veces al día  
☐ más 6 veces al día

---

legumbres

- ☐ Nunca o menos 1 vez al mes  
☐ 1 a 3 veces mes  
☒ 1 vez semana  
☐ 2 a 4 veces semana  
☐ 5 a 6 veces semana  
☐ 1 vez al día  
☐ 2 a 3 veces al día  
☐ 5 a 6 veces al día  
☐ más 6 veces al día

---

naranjas o mandarinas

- ☐ Nunca o menos 1 vez al mes  
☐ 1 a 3 veces mes  
☐ 1 vez semana  
☒ 2 a 4 veces semana  
☐ 5 a 6 veces semana  
☐ 1 vez al día  
☐ 2 a 3 veces al día  
☐ 5 a 6 veces al día  
☐ más 6 veces al día

---

|                    |                                                                                                                                                                                                                                                                                                                                                                                                              |
|--------------------|--------------------------------------------------------------------------------------------------------------------------------------------------------------------------------------------------------------------------------------------------------------------------------------------------------------------------------------------------------------------------------------------------------------|
| zumو natural fruta | <input type="radio"/> Nunca o menos 1 vez al mes<br><input type="radio"/> 1 a 3 veces mes<br><input type="radio"/> 1 vez semana<br><input checked="" type="radio"/> 2 a 4 veces semana<br><input type="radio"/> 5 a 6 veces semana<br><input type="radio"/> 1 vez al día<br><input type="radio"/> 2 a 3 veces al día<br><input type="radio"/> 5 a 6 veces al día<br><input type="radio"/> más 6 veces al día |
|--------------------|--------------------------------------------------------------------------------------------------------------------------------------------------------------------------------------------------------------------------------------------------------------------------------------------------------------------------------------------------------------------------------------------------------------|

---

|         |                                                                                                                                                                                                                                                                                                                                                                                                              |
|---------|--------------------------------------------------------------------------------------------------------------------------------------------------------------------------------------------------------------------------------------------------------------------------------------------------------------------------------------------------------------------------------------------------------------|
| platano | <input type="radio"/> Nunca o menos 1 vez al mes<br><input checked="" type="radio"/> 1 a 3 veces mes<br><input type="radio"/> 1 vez semana<br><input type="radio"/> 2 a 4 veces semana<br><input type="radio"/> 5 a 6 veces semana<br><input type="radio"/> 1 vez al día<br><input type="radio"/> 2 a 3 veces al día<br><input type="radio"/> 5 a 6 veces al día<br><input type="radio"/> más 6 veces al día |
|---------|--------------------------------------------------------------------------------------------------------------------------------------------------------------------------------------------------------------------------------------------------------------------------------------------------------------------------------------------------------------------------------------------------------------|

---

|                |                                                                                                                                                                                                                                                                                                                                                                                                              |
|----------------|--------------------------------------------------------------------------------------------------------------------------------------------------------------------------------------------------------------------------------------------------------------------------------------------------------------------------------------------------------------------------------------------------------------|
| manzana o pera | <input type="radio"/> Nunca o menos 1 vez al mes<br><input type="radio"/> 1 a 3 veces mes<br><input type="radio"/> 1 vez semana<br><input checked="" type="radio"/> 2 a 4 veces semana<br><input type="radio"/> 5 a 6 veces semana<br><input type="radio"/> 1 vez al día<br><input type="radio"/> 2 a 3 veces al día<br><input type="radio"/> 5 a 6 veces al día<br><input type="radio"/> más 6 veces al día |
|----------------|--------------------------------------------------------------------------------------------------------------------------------------------------------------------------------------------------------------------------------------------------------------------------------------------------------------------------------------------------------------------------------------------------------------|

---

|                       |                                                                                                                                                                                                                                                                                                                                                                                                              |
|-----------------------|--------------------------------------------------------------------------------------------------------------------------------------------------------------------------------------------------------------------------------------------------------------------------------------------------------------------------------------------------------------------------------------------------------------|
| melocotón o nectarina | <input type="radio"/> Nunca o menos 1 vez al mes<br><input checked="" type="radio"/> 1 a 3 veces mes<br><input type="radio"/> 1 vez semana<br><input type="radio"/> 2 a 4 veces semana<br><input type="radio"/> 5 a 6 veces semana<br><input type="radio"/> 1 vez al día<br><input type="radio"/> 2 a 3 veces al día<br><input type="radio"/> 5 a 6 veces al día<br><input type="radio"/> más 6 veces al día |
|-----------------------|--------------------------------------------------------------------------------------------------------------------------------------------------------------------------------------------------------------------------------------------------------------------------------------------------------------------------------------------------------------------------------------------------------------|

---

|                |                                                                                                                                                                                                                                                                                                                                                                                                              |
|----------------|--------------------------------------------------------------------------------------------------------------------------------------------------------------------------------------------------------------------------------------------------------------------------------------------------------------------------------------------------------------------------------------------------------------|
| sandia o melon | <input checked="" type="radio"/> Nunca o menos 1 vez al mes<br><input type="radio"/> 1 a 3 veces mes<br><input type="radio"/> 1 vez semana<br><input type="radio"/> 2 a 4 veces semana<br><input type="radio"/> 5 a 6 veces semana<br><input type="radio"/> 1 vez al día<br><input type="radio"/> 2 a 3 veces al día<br><input type="radio"/> 5 a 6 veces al día<br><input type="radio"/> más 6 veces al día |
|----------------|--------------------------------------------------------------------------------------------------------------------------------------------------------------------------------------------------------------------------------------------------------------------------------------------------------------------------------------------------------------------------------------------------------------|

---

|     |                                                                                                                                                                                                                                                                                                                                                                                                              |
|-----|--------------------------------------------------------------------------------------------------------------------------------------------------------------------------------------------------------------------------------------------------------------------------------------------------------------------------------------------------------------------------------------------------------------|
| uva | <input checked="" type="radio"/> Nunca o menos 1 vez al mes<br><input type="radio"/> 1 a 3 veces mes<br><input type="radio"/> 1 vez semana<br><input type="radio"/> 2 a 4 veces semana<br><input type="radio"/> 5 a 6 veces semana<br><input type="radio"/> 1 vez al día<br><input type="radio"/> 2 a 3 veces al día<br><input type="radio"/> 5 a 6 veces al día<br><input type="radio"/> más 6 veces al día |
|-----|--------------------------------------------------------------------------------------------------------------------------------------------------------------------------------------------------------------------------------------------------------------------------------------------------------------------------------------------------------------------------------------------------------------|

---

|                 |                                                                                                                                                                                                                                                                                                                                                                                                              |
|-----------------|--------------------------------------------------------------------------------------------------------------------------------------------------------------------------------------------------------------------------------------------------------------------------------------------------------------------------------------------------------------------------------------------------------------|
| bruna o ciruela | <input type="radio"/> Nunca o menos 1 vez al mes<br><input checked="" type="radio"/> 1 a 3 veces mes<br><input type="radio"/> 1 vez semana<br><input type="radio"/> 2 a 4 veces semana<br><input type="radio"/> 5 a 6 veces semana<br><input type="radio"/> 1 vez al día<br><input type="radio"/> 2 a 3 veces al día<br><input type="radio"/> 5 a 6 veces al día<br><input type="radio"/> más 6 veces al día |
| kiwi            | <input type="radio"/> Nunca o menos 1 vez al mes<br><input type="radio"/> 1 a 3 veces mes<br><input type="radio"/> 1 vez semana<br><input type="radio"/> 2 a 4 veces semana<br><input checked="" type="radio"/> 5 a 6 veces semana<br><input type="radio"/> 1 vez al día<br><input type="radio"/> 2 a 3 veces al día<br><input type="radio"/> 5 a 6 veces al día<br><input type="radio"/> más 6 veces al día |
| aceituna        | <input type="radio"/> Nunca o menos 1 vez al mes<br><input type="radio"/> 1 a 3 veces mes<br><input checked="" type="radio"/> 1 vez semana<br><input type="radio"/> 2 a 4 veces semana<br><input type="radio"/> 5 a 6 veces semana<br><input type="radio"/> 1 vez al día<br><input type="radio"/> 2 a 3 veces al día<br><input type="radio"/> 5 a 6 veces al día<br><input type="radio"/> más 6 veces al día |
| frutos secos    | <input type="radio"/> Nunca o menos 1 vez al mes<br><input type="radio"/> 1 a 3 veces mes<br><input type="radio"/> 1 vez semana<br><input type="radio"/> 2 a 4 veces semana<br><input type="radio"/> 5 a 6 veces semana<br><input checked="" type="radio"/> 1 vez al día<br><input type="radio"/> 2 a 3 veces al día<br><input type="radio"/> 5 a 6 veces al día<br><input type="radio"/> más 6 veces al día |
| pan blanco      | <input checked="" type="radio"/> Nunca o menos 1 vez al mes<br><input type="radio"/> 1 a 3 veces mes<br><input type="radio"/> 1 vez semana<br><input type="radio"/> 2 a 4 veces semana<br><input type="radio"/> 5 a 6 veces semana<br><input type="radio"/> 1 vez al día<br><input type="radio"/> 2 a 3 veces al día<br><input type="radio"/> 5 a 6 veces al día<br><input type="radio"/> más 6 veces al día |
| pan integral    | <input type="radio"/> Nunca o menos 1 vez al mes<br><input type="radio"/> 1 a 3 veces mes<br><input type="radio"/> 1 vez semana<br><input type="radio"/> 2 a 4 veces semana<br><input type="radio"/> 5 a 6 veces semana<br><input type="radio"/> 1 vez al día<br><input checked="" type="radio"/> 2 a 3 veces al día<br><input type="radio"/> 5 a 6 veces al día<br><input type="radio"/> más 6 veces al día |



|                          |                                                                                                                                                                                                                                                                                                                                                                                                              |
|--------------------------|--------------------------------------------------------------------------------------------------------------------------------------------------------------------------------------------------------------------------------------------------------------------------------------------------------------------------------------------------------------------------------------------------------------|
| cereales desayuno        | <input checked="" type="radio"/> Nunca o menos 1 vez al mes<br><input type="radio"/> 1 a 3 veces mes<br><input type="radio"/> 1 vez semana<br><input type="radio"/> 2 a 4 veces semana<br><input type="radio"/> 5 a 6 veces semana<br><input type="radio"/> 1 vez al día<br><input type="radio"/> 2 a 3 veces al día<br><input type="radio"/> 5 a 6 veces al día<br><input type="radio"/> más 6 veces al día |
| patatas fritas           | <input type="radio"/> Nunca o menos 1 vez al mes<br><input checked="" type="radio"/> 1 a 3 veces mes<br><input type="radio"/> 1 vez semana<br><input type="radio"/> 2 a 4 veces semana<br><input type="radio"/> 5 a 6 veces semana<br><input type="radio"/> 1 vez al día<br><input type="radio"/> 2 a 3 veces al día<br><input type="radio"/> 5 a 6 veces al día<br><input type="radio"/> más 6 veces al día |
| patatas cocidas o asadas | <input type="radio"/> Nunca o menos 1 vez al mes<br><input checked="" type="radio"/> 1 a 3 veces mes<br><input type="radio"/> 1 vez semana<br><input type="radio"/> 2 a 4 veces semana<br><input type="radio"/> 5 a 6 veces semana<br><input type="radio"/> 1 vez al día<br><input type="radio"/> 2 a 3 veces al día<br><input type="radio"/> 5 a 6 veces al día<br><input type="radio"/> más 6 veces al día |
| bolsa papas              | <input type="radio"/> Nunca o menos 1 vez al mes<br><input checked="" type="radio"/> 1 a 3 veces mes<br><input type="radio"/> 1 vez semana<br><input type="radio"/> 2 a 4 veces semana<br><input type="radio"/> 5 a 6 veces semana<br><input type="radio"/> 1 vez al día<br><input type="radio"/> 2 a 3 veces al día<br><input type="radio"/> 5 a 6 veces al día<br><input type="radio"/> más 6 veces al día |
| arroz cocinado           | <input type="radio"/> Nunca o menos 1 vez al mes<br><input type="radio"/> 1 a 3 veces mes<br><input checked="" type="radio"/> 1 vez semana<br><input type="radio"/> 2 a 4 veces semana<br><input type="radio"/> 5 a 6 veces semana<br><input type="radio"/> 1 vez al día<br><input type="radio"/> 2 a 3 veces al día<br><input type="radio"/> 5 a 6 veces al día<br><input type="radio"/> más 6 veces al día |
| pasta                    | <input type="radio"/> Nunca o menos 1 vez al mes<br><input type="radio"/> 1 a 3 veces mes<br><input checked="" type="radio"/> 1 vez semana<br><input type="radio"/> 2 a 4 veces semana<br><input type="radio"/> 5 a 6 veces semana<br><input type="radio"/> 1 vez al día<br><input type="radio"/> 2 a 3 veces al día<br><input type="radio"/> 5 a 6 veces al día<br><input type="radio"/> más 6 veces al día |

|                     |                                                                                                                                                                                                                                                                                                                                                                                                              |
|---------------------|--------------------------------------------------------------------------------------------------------------------------------------------------------------------------------------------------------------------------------------------------------------------------------------------------------------------------------------------------------------------------------------------------------------|
| pizza               | <input checked="" type="radio"/> Nunca o menos 1 vez al mes<br><input type="radio"/> 1 a 3 veces mes<br><input type="radio"/> 1 vez semana<br><input type="radio"/> 2 a 4 veces semana<br><input type="radio"/> 5 a 6 veces semana<br><input type="radio"/> 1 vez al día<br><input type="radio"/> 2 a 3 veces al día<br><input type="radio"/> 5 a 6 veces al día<br><input type="radio"/> más 6 veces al día |
| aceite oliva        | <input type="radio"/> Nunca o menos 1 vez al mes<br><input type="radio"/> 1 a 3 veces mes<br><input type="radio"/> 1 vez semana<br><input type="radio"/> 2 a 4 veces semana<br><input type="radio"/> 5 a 6 veces semana<br><input checked="" type="radio"/> 1 vez al día<br><input type="radio"/> 2 a 3 veces al día<br><input type="radio"/> 5 a 6 veces al día<br><input type="radio"/> más 6 veces al día |
| otros aceites       | <input checked="" type="radio"/> Nunca o menos 1 vez al mes<br><input type="radio"/> 1 a 3 veces mes<br><input type="radio"/> 1 vez semana<br><input type="radio"/> 2 a 4 veces semana<br><input type="radio"/> 5 a 6 veces semana<br><input type="radio"/> 1 vez al día<br><input type="radio"/> 2 a 3 veces al día<br><input type="radio"/> 5 a 6 veces al día<br><input type="radio"/> más 6 veces al día |
| margarina           | <input checked="" type="radio"/> Nunca o menos 1 vez al mes<br><input type="radio"/> 1 a 3 veces mes<br><input type="radio"/> 1 vez semana<br><input type="radio"/> 2 a 4 veces semana<br><input type="radio"/> 5 a 6 veces semana<br><input type="radio"/> 1 vez al día<br><input type="radio"/> 2 a 3 veces al día<br><input type="radio"/> 5 a 6 veces al día<br><input type="radio"/> más 6 veces al día |
| mantequilla         | <input checked="" type="radio"/> Nunca o menos 1 vez al mes<br><input type="radio"/> 1 a 3 veces mes<br><input type="radio"/> 1 vez semana<br><input type="radio"/> 2 a 4 veces semana<br><input type="radio"/> 5 a 6 veces semana<br><input type="radio"/> 1 vez al día<br><input type="radio"/> 2 a 3 veces al día<br><input type="radio"/> 5 a 6 veces al día<br><input type="radio"/> más 6 veces al día |
| galletas tipo maria | <input type="radio"/> Nunca o menos 1 vez al mes<br><input type="radio"/> 1 a 3 veces mes<br><input checked="" type="radio"/> 1 vez semana<br><input type="radio"/> 2 a 4 veces semana<br><input type="radio"/> 5 a 6 veces semana<br><input type="radio"/> 1 vez al día<br><input type="radio"/> 2 a 3 veces al día<br><input type="radio"/> 5 a 6 veces al día<br><input type="radio"/> más 6 veces al día |

|                           |                                                                                                                                                                                                                                                                                                                                                                                                              |
|---------------------------|--------------------------------------------------------------------------------------------------------------------------------------------------------------------------------------------------------------------------------------------------------------------------------------------------------------------------------------------------------------------------------------------------------------|
| galletas chocolate        | <input type="radio"/> Nunca o menos 1 vez al mes<br><input checked="" type="radio"/> 1 a 3 veces mes<br><input type="radio"/> 1 vez semana<br><input type="radio"/> 2 a 4 veces semana<br><input type="radio"/> 5 a 6 veces semana<br><input type="radio"/> 1 vez al día<br><input type="radio"/> 2 a 3 veces al día<br><input type="radio"/> 5 a 6 veces al día<br><input type="radio"/> más 6 veces al día |
| bollieria                 | <input type="radio"/> Nunca o menos 1 vez al mes<br><input checked="" type="radio"/> 1 a 3 veces mes<br><input type="radio"/> 1 vez semana<br><input type="radio"/> 2 a 4 veces semana<br><input type="radio"/> 5 a 6 veces semana<br><input type="radio"/> 1 vez al día<br><input type="radio"/> 2 a 3 veces al día<br><input type="radio"/> 5 a 6 veces al día<br><input type="radio"/> más 6 veces al día |
| chocolate o bombones      | <input type="radio"/> Nunca o menos 1 vez al mes<br><input type="radio"/> 1 a 3 veces mes<br><input type="radio"/> 1 vez semana<br><input type="radio"/> 2 a 4 veces semana<br><input type="radio"/> 5 a 6 veces semana<br><input checked="" type="radio"/> 1 vez al día<br><input type="radio"/> 2 a 3 veces al día<br><input type="radio"/> 5 a 6 veces al día<br><input type="radio"/> más 6 veces al día |
| chocolate polvo o colacao | <input checked="" type="radio"/> Nunca o menos 1 vez al mes<br><input type="radio"/> 1 a 3 veces mes<br><input type="radio"/> 1 vez semana<br><input type="radio"/> 2 a 4 veces semana<br><input type="radio"/> 5 a 6 veces semana<br><input type="radio"/> 1 vez al día<br><input type="radio"/> 2 a 3 veces al día<br><input type="radio"/> 5 a 6 veces al día<br><input type="radio"/> más 6 veces al día |
| vino tinto                | <input checked="" type="radio"/> Nunca o menos 1 vez al mes<br><input type="radio"/> 1 a 3 veces mes<br><input type="radio"/> 1 vez semana<br><input type="radio"/> 2 a 4 veces semana<br><input type="radio"/> 5 a 6 veces semana<br><input type="radio"/> 1 vez al día<br><input type="radio"/> 2 a 3 veces al día<br><input type="radio"/> 5 a 6 veces al día<br><input type="radio"/> más 6 veces al día |
| vino blanco               | <input checked="" type="radio"/> Nunca o menos 1 vez al mes<br><input type="radio"/> 1 a 3 veces mes<br><input type="radio"/> 1 vez semana<br><input type="radio"/> 2 a 4 veces semana<br><input type="radio"/> 5 a 6 veces semana<br><input type="radio"/> 1 vez al día<br><input type="radio"/> 2 a 3 veces al día<br><input type="radio"/> 5 a 6 veces al día<br><input type="radio"/> más 6 veces al día |

|                       |                                                                                                                                                                                                                                                                                                                                                                                                              |
|-----------------------|--------------------------------------------------------------------------------------------------------------------------------------------------------------------------------------------------------------------------------------------------------------------------------------------------------------------------------------------------------------------------------------------------------------|
| vino seco o vermut    | <input checked="" type="radio"/> Nunca o menos 1 vez al mes<br><input type="radio"/> 1 a 3 veces mes<br><input type="radio"/> 1 vez semana<br><input type="radio"/> 2 a 4 veces semana<br><input type="radio"/> 5 a 6 veces semana<br><input type="radio"/> 1 vez al día<br><input type="radio"/> 2 a 3 veces al día<br><input type="radio"/> 5 a 6 veces al día<br><input type="radio"/> más 6 veces al día |
| cerveza               | <input checked="" type="radio"/> Nunca o menos 1 vez al mes<br><input type="radio"/> 1 a 3 veces mes<br><input type="radio"/> 1 vez semana<br><input type="radio"/> 2 a 4 veces semana<br><input type="radio"/> 5 a 6 veces semana<br><input type="radio"/> 1 vez al día<br><input type="radio"/> 2 a 3 veces al día<br><input type="radio"/> 5 a 6 veces al día<br><input type="radio"/> más 6 veces al día |
| cerveza sin alcohol   | <input type="radio"/> Nunca o menos 1 vez al mes<br><input checked="" type="radio"/> 1 a 3 veces mes<br><input type="radio"/> 1 vez semana<br><input type="radio"/> 2 a 4 veces semana<br><input type="radio"/> 5 a 6 veces semana<br><input type="radio"/> 1 vez al día<br><input type="radio"/> 2 a 3 veces al día<br><input type="radio"/> 5 a 6 veces al día<br><input type="radio"/> más 6 veces al día |
| licores               | <input checked="" type="radio"/> Nunca o menos 1 vez al mes<br><input type="radio"/> 1 a 3 veces mes<br><input type="radio"/> 1 vez semana<br><input type="radio"/> 2 a 4 veces semana<br><input type="radio"/> 5 a 6 veces semana<br><input type="radio"/> 1 vez al día<br><input type="radio"/> 2 a 3 veces al día<br><input type="radio"/> 5 a 6 veces al día<br><input type="radio"/> más 6 veces al día |
| ginebra o ron o vodka | <input checked="" type="radio"/> Nunca o menos 1 vez al mes<br><input type="radio"/> 1 a 3 veces mes<br><input type="radio"/> 1 vez semana<br><input type="radio"/> 2 a 4 veces semana<br><input type="radio"/> 5 a 6 veces semana<br><input type="radio"/> 1 vez al día<br><input type="radio"/> 2 a 3 veces al día<br><input type="radio"/> 5 a 6 veces al día<br><input type="radio"/> más 6 veces al día |
| refresco normal       | <input checked="" type="radio"/> Nunca o menos 1 vez al mes<br><input type="radio"/> 1 a 3 veces mes<br><input type="radio"/> 1 vez semana<br><input type="radio"/> 2 a 4 veces semana<br><input type="radio"/> 5 a 6 veces semana<br><input type="radio"/> 1 vez al día<br><input type="radio"/> 2 a 3 veces al día<br><input type="radio"/> 5 a 6 veces al día<br><input type="radio"/> más 6 veces al día |

---

|                     |                                                                                                                                                                                                                                                                                                                                                                                                              |
|---------------------|--------------------------------------------------------------------------------------------------------------------------------------------------------------------------------------------------------------------------------------------------------------------------------------------------------------------------------------------------------------------------------------------------------------|
| refresco sin azúcar | <input checked="" type="radio"/> Nunca o menos 1 vez al mes<br><input type="radio"/> 1 a 3 veces mes<br><input type="radio"/> 1 vez semana<br><input type="radio"/> 2 a 4 veces semana<br><input type="radio"/> 5 a 6 veces semana<br><input type="radio"/> 1 vez al día<br><input type="radio"/> 2 a 3 veces al día<br><input type="radio"/> 5 a 6 veces al día<br><input type="radio"/> más 6 veces al día |
|---------------------|--------------------------------------------------------------------------------------------------------------------------------------------------------------------------------------------------------------------------------------------------------------------------------------------------------------------------------------------------------------------------------------------------------------|

---

|                |                                                                                                                                                                                                                                                                                                                                                                                                              |
|----------------|--------------------------------------------------------------------------------------------------------------------------------------------------------------------------------------------------------------------------------------------------------------------------------------------------------------------------------------------------------------------------------------------------------------|
| Agua del grifo | <input type="radio"/> Nunca o menos 1 vez al mes<br><input type="radio"/> 1 a 3 veces mes<br><input type="radio"/> 1 vez semana<br><input type="radio"/> 2 a 4 veces semana<br><input type="radio"/> 5 a 6 veces semana<br><input type="radio"/> 1 vez al día<br><input type="radio"/> 2 a 3 veces al día<br><input type="radio"/> 5 a 6 veces al día<br><input checked="" type="radio"/> más 6 veces al día |
|----------------|--------------------------------------------------------------------------------------------------------------------------------------------------------------------------------------------------------------------------------------------------------------------------------------------------------------------------------------------------------------------------------------------------------------|

---

|                          |                                                                                                                                                                                                                                                                                                                                                                                                              |
|--------------------------|--------------------------------------------------------------------------------------------------------------------------------------------------------------------------------------------------------------------------------------------------------------------------------------------------------------------------------------------------------------------------------------------------------------|
| agua embotellada sin gas | <input type="radio"/> Nunca o menos 1 vez al mes<br><input checked="" type="radio"/> 1 a 3 veces mes<br><input type="radio"/> 1 vez semana<br><input type="radio"/> 2 a 4 veces semana<br><input type="radio"/> 5 a 6 veces semana<br><input type="radio"/> 1 vez al día<br><input type="radio"/> 2 a 3 veces al día<br><input type="radio"/> 5 a 6 veces al día<br><input type="radio"/> más 6 veces al día |
|--------------------------|--------------------------------------------------------------------------------------------------------------------------------------------------------------------------------------------------------------------------------------------------------------------------------------------------------------------------------------------------------------------------------------------------------------|

---

|                          |                                                                                                                                                                                                                                                                                                                                                                                                              |
|--------------------------|--------------------------------------------------------------------------------------------------------------------------------------------------------------------------------------------------------------------------------------------------------------------------------------------------------------------------------------------------------------------------------------------------------------|
| agua embotellada con gas | <input type="radio"/> Nunca o menos 1 vez al mes<br><input checked="" type="radio"/> 1 a 3 veces mes<br><input type="radio"/> 1 vez semana<br><input type="radio"/> 2 a 4 veces semana<br><input type="radio"/> 5 a 6 veces semana<br><input type="radio"/> 1 vez al día<br><input type="radio"/> 2 a 3 veces al día<br><input type="radio"/> 5 a 6 veces al día<br><input type="radio"/> más 6 veces al día |
|--------------------------|--------------------------------------------------------------------------------------------------------------------------------------------------------------------------------------------------------------------------------------------------------------------------------------------------------------------------------------------------------------------------------------------------------------|

---

|                      |                                                                                                                                                                                                                                                                                                                                                                                                              |
|----------------------|--------------------------------------------------------------------------------------------------------------------------------------------------------------------------------------------------------------------------------------------------------------------------------------------------------------------------------------------------------------------------------------------------------------|
| zumو frutas embasado | <input checked="" type="radio"/> Nunca o menos 1 vez al mes<br><input type="radio"/> 1 a 3 veces mes<br><input type="radio"/> 1 vez semana<br><input type="radio"/> 2 a 4 veces semana<br><input type="radio"/> 5 a 6 veces semana<br><input type="radio"/> 1 vez al día<br><input type="radio"/> 2 a 3 veces al día<br><input type="radio"/> 5 a 6 veces al día<br><input type="radio"/> más 6 veces al día |
|----------------------|--------------------------------------------------------------------------------------------------------------------------------------------------------------------------------------------------------------------------------------------------------------------------------------------------------------------------------------------------------------------------------------------------------------|

---

|      |                                                                                                                                                                                                                                                                                                                                                                                                              |
|------|--------------------------------------------------------------------------------------------------------------------------------------------------------------------------------------------------------------------------------------------------------------------------------------------------------------------------------------------------------------------------------------------------------------|
| cafe | <input checked="" type="radio"/> Nunca o menos 1 vez al mes<br><input type="radio"/> 1 a 3 veces mes<br><input type="radio"/> 1 vez semana<br><input type="radio"/> 2 a 4 veces semana<br><input type="radio"/> 5 a 6 veces semana<br><input type="radio"/> 1 vez al día<br><input type="radio"/> 2 a 3 veces al día<br><input type="radio"/> 5 a 6 veces al día<br><input type="radio"/> más 6 veces al día |
|------|--------------------------------------------------------------------------------------------------------------------------------------------------------------------------------------------------------------------------------------------------------------------------------------------------------------------------------------------------------------------------------------------------------------|

---

|                       |                                                                                                                                                                                                                                                                                                                                                                                                              |
|-----------------------|--------------------------------------------------------------------------------------------------------------------------------------------------------------------------------------------------------------------------------------------------------------------------------------------------------------------------------------------------------------------------------------------------------------|
| cafe descafeinado     | <input checked="" type="radio"/> Nunca o menos 1 vez al mes<br><input type="radio"/> 1 a 3 veces mes<br><input type="radio"/> 1 vez semana<br><input type="radio"/> 2 a 4 veces semana<br><input type="radio"/> 5 a 6 veces semana<br><input type="radio"/> 1 vez al día<br><input type="radio"/> 2 a 3 veces al día<br><input type="radio"/> 5 a 6 veces al día<br><input type="radio"/> más 6 veces al día |
| te o infusión         | <input type="radio"/> Nunca o menos 1 vez al mes<br><input type="radio"/> 1 a 3 veces mes<br><input type="radio"/> 1 vez semana<br><input checked="" type="radio"/> 2 a 4 veces semana<br><input type="radio"/> 5 a 6 veces semana<br><input type="radio"/> 1 vez al día<br><input type="radio"/> 2 a 3 veces al día<br><input type="radio"/> 5 a 6 veces al día<br><input type="radio"/> más 6 veces al día |
| sopa o puré verduras  | <input type="radio"/> Nunca o menos 1 vez al mes<br><input type="radio"/> 1 a 3 veces mes<br><input checked="" type="radio"/> 1 vez semana<br><input type="radio"/> 2 a 4 veces semana<br><input type="radio"/> 5 a 6 veces semana<br><input type="radio"/> 1 vez al día<br><input type="radio"/> 2 a 3 veces al día<br><input type="radio"/> 5 a 6 veces al día<br><input type="radio"/> más 6 veces al día |
| croquetas pollo jamón | <input checked="" type="radio"/> Nunca o menos 1 vez al mes<br><input type="radio"/> 1 a 3 veces mes<br><input type="radio"/> 1 vez semana<br><input type="radio"/> 2 a 4 veces semana<br><input type="radio"/> 5 a 6 veces semana<br><input type="radio"/> 1 vez al día<br><input type="radio"/> 2 a 3 veces al día<br><input type="radio"/> 5 a 6 veces al día<br><input type="radio"/> más 6 veces al día |
| croquetas pescado     | <input checked="" type="radio"/> Nunca o menos 1 vez al mes<br><input type="radio"/> 1 a 3 veces mes<br><input type="radio"/> 1 vez semana<br><input type="radio"/> 2 a 4 veces semana<br><input type="radio"/> 5 a 6 veces semana<br><input type="radio"/> 1 vez al día<br><input type="radio"/> 2 a 3 veces al día<br><input type="radio"/> 5 a 6 veces al día<br><input type="radio"/> más 6 veces al día |
| mayonesa              | <input checked="" type="radio"/> Nunca o menos 1 vez al mes<br><input type="radio"/> 1 a 3 veces mes<br><input type="radio"/> 1 vez semana<br><input type="radio"/> 2 a 4 veces semana<br><input type="radio"/> 5 a 6 veces semana<br><input type="radio"/> 1 vez al día<br><input type="radio"/> 2 a 3 veces al día<br><input type="radio"/> 5 a 6 veces al día<br><input type="radio"/> más 6 veces al día |

|                  |                                                                                                                                                                                                                                                                                                                                                                                                              |
|------------------|--------------------------------------------------------------------------------------------------------------------------------------------------------------------------------------------------------------------------------------------------------------------------------------------------------------------------------------------------------------------------------------------------------------|
| salsa tomate     | <input type="radio"/> Nunca o menos 1 vez al mes<br><input type="radio"/> 1 a 3 veces mes<br><input checked="" type="radio"/> 1 vez semana<br><input type="radio"/> 2 a 4 veces semana<br><input type="radio"/> 5 a 6 veces semana<br><input type="radio"/> 1 vez al día<br><input type="radio"/> 2 a 3 veces al día<br><input type="radio"/> 5 a 6 veces al día<br><input type="radio"/> más 6 veces al día |
| ketchup          | <input checked="" type="radio"/> Nunca o menos 1 vez al mes<br><input type="radio"/> 1 a 3 veces mes<br><input type="radio"/> 1 vez semana<br><input type="radio"/> 2 a 4 veces semana<br><input type="radio"/> 5 a 6 veces semana<br><input type="radio"/> 1 vez al día<br><input type="radio"/> 2 a 3 veces al día<br><input type="radio"/> 5 a 6 veces al día<br><input type="radio"/> más 6 veces al día |
| sal              | <input checked="" type="radio"/> Nunca o menos 1 vez al mes<br><input type="radio"/> 1 a 3 veces mes<br><input type="radio"/> 1 vez semana<br><input type="radio"/> 2 a 4 veces semana<br><input type="radio"/> 5 a 6 veces semana<br><input type="radio"/> 1 vez al día<br><input type="radio"/> 2 a 3 veces al día<br><input type="radio"/> 5 a 6 veces al día<br><input type="radio"/> más 6 veces al día |
| ajo              | <input type="radio"/> Nunca o menos 1 vez al mes<br><input type="radio"/> 1 a 3 veces mes<br><input type="radio"/> 1 vez semana<br><input type="radio"/> 2 a 4 veces semana<br><input type="radio"/> 5 a 6 veces semana<br><input checked="" type="radio"/> 1 vez al día<br><input type="radio"/> 2 a 3 veces al día<br><input type="radio"/> 5 a 6 veces al día<br><input type="radio"/> más 6 veces al día |
| mermelada o miel | <input type="radio"/> Nunca o menos 1 vez al mes<br><input type="radio"/> 1 a 3 veces mes<br><input checked="" type="radio"/> 1 vez semana<br><input type="radio"/> 2 a 4 veces semana<br><input type="radio"/> 5 a 6 veces semana<br><input type="radio"/> 1 vez al día<br><input type="radio"/> 2 a 3 veces al día<br><input type="radio"/> 5 a 6 veces al día<br><input type="radio"/> más 6 veces al día |
| azúcar           | <input type="radio"/> Nunca o menos 1 vez al mes<br><input checked="" type="radio"/> 1 a 3 veces mes<br><input type="radio"/> 1 vez semana<br><input type="radio"/> 2 a 4 veces semana<br><input type="radio"/> 5 a 6 veces semana<br><input type="radio"/> 1 vez al día<br><input type="radio"/> 2 a 3 veces al día<br><input type="radio"/> 5 a 6 veces al día<br><input type="radio"/> más 6 veces al día |

|                                       |                                                                                                                                                                                                                                                                                                                                                                                                                                                                                                                               |
|---------------------------------------|-------------------------------------------------------------------------------------------------------------------------------------------------------------------------------------------------------------------------------------------------------------------------------------------------------------------------------------------------------------------------------------------------------------------------------------------------------------------------------------------------------------------------------|
| Otro alimento                         | [*DATA REMOVED*]                                                                                                                                                                                                                                                                                                                                                                                                                                                                                                              |
| suplementos vitamínicos               | <input type="radio"/> si<br><input checked="" type="radio"/> no                                                                                                                                                                                                                                                                                                                                                                                                                                                               |
| suplementos vitamínicos               |                                                                                                                                                                                                                                                                                                                                                                                                                                                                                                                               |
| dieta previa                          | <input type="radio"/> si<br><input checked="" type="radio"/> no                                                                                                                                                                                                                                                                                                                                                                                                                                                               |
| motivo dieta                          | <input checked="" type="radio"/> no dieta<br><input type="radio"/> control peso<br><input type="radio"/> control colesterol<br><input type="radio"/> control diabetes<br><input type="radio"/> problemas estómago<br><input type="radio"/> problemas vesícula o hepáticos<br><input type="radio"/> HTA o cardiopatía<br><input type="radio"/> problemas renales<br><input type="radio"/> alergia alimentaria<br><input type="radio"/> ácido úrico elevado<br><input type="radio"/> vegetariana<br><input type="radio"/> otros |
| cambio alimentos año previo gestación | <input checked="" type="radio"/> si<br><input type="radio"/> no                                                                                                                                                                                                                                                                                                                                                                                                                                                               |
| cambio lácteos                        | <input type="radio"/> eliminado<br><input type="radio"/> disminuido<br><input checked="" type="radio"/> igual<br><input type="radio"/> aumentado<br><input type="radio"/> no sabe                                                                                                                                                                                                                                                                                                                                             |
| cambio huevos                         | <input type="radio"/> eliminado<br><input type="radio"/> disminuido<br><input checked="" type="radio"/> igual<br><input type="radio"/> aumentado<br><input type="radio"/> no sabe                                                                                                                                                                                                                                                                                                                                             |
| cambio carne                          | <input type="radio"/> eliminado<br><input type="radio"/> disminuido<br><input checked="" type="radio"/> igual<br><input type="radio"/> aumentado<br><input type="radio"/> no sabe                                                                                                                                                                                                                                                                                                                                             |
| cambio pescado                        | <input type="radio"/> eliminado<br><input type="radio"/> disminuido<br><input checked="" type="radio"/> igual<br><input type="radio"/> aumentado<br><input type="radio"/> no sabe                                                                                                                                                                                                                                                                                                                                             |
| cambio verduras                       | <input type="radio"/> eliminado<br><input type="radio"/> disminuido<br><input checked="" type="radio"/> igual<br><input type="radio"/> aumentado<br><input type="radio"/> no sabe                                                                                                                                                                                                                                                                                                                                             |



|                            |                                                                                                                                                                                                                        |
|----------------------------|------------------------------------------------------------------------------------------------------------------------------------------------------------------------------------------------------------------------|
| cambio legumbres           | <input type="radio"/> eliminado<br><input type="radio"/> disminuido<br><input checked="" type="radio"/> igual<br><input type="radio"/> aumentado<br><input type="radio"/> no sabe                                      |
| cambio fruta               | <input type="radio"/> eliminado<br><input type="radio"/> disminuido<br><input checked="" type="radio"/> igual<br><input type="radio"/> aumentado<br><input type="radio"/> no sabe                                      |
| cambio pan                 | <input type="radio"/> eliminado<br><input type="radio"/> disminuido<br><input checked="" type="radio"/> igual<br><input type="radio"/> aumentado<br><input type="radio"/> no sabe                                      |
| cambio aceite oliva        | <input type="radio"/> eliminado<br><input type="radio"/> disminuido<br><input checked="" type="radio"/> igual<br><input type="radio"/> aumentado<br><input type="radio"/> no sabe                                      |
| cambio mante o margarina   | <input type="radio"/> eliminado<br><input type="radio"/> disminuido<br><input checked="" type="radio"/> igual<br><input type="radio"/> aumentado<br><input type="radio"/> no sabe                                      |
| cambio azúcar y dulces     | <input type="radio"/> eliminado<br><input type="radio"/> disminuido<br><input checked="" type="radio"/> igual<br><input type="radio"/> aumentado<br><input type="radio"/> no sabe                                      |
| cambio bebidas alcohólicas | <input checked="" type="radio"/> eliminado<br><input type="radio"/> disminuido<br><input type="radio"/> igual<br><input type="radio"/> aumentado<br><input type="radio"/> no sabe                                      |
| frecuencia comidas fritas  | <input type="radio"/> a diario<br><input type="radio"/> 5 a 6 veces semana<br><input type="radio"/> 2 a 4 veces semana<br><input checked="" type="radio"/> 1 vez semana<br><input type="radio"/> menos de 1 vez semana |
| carne                      | <input type="radio"/> no como<br><input type="radio"/> cruda<br><input type="radio"/> poco hecha<br><input checked="" type="radio"/> hecha<br><input type="radio"/> muy hecha                                          |
| grasa visible carne        | <input type="radio"/> quita toda<br><input checked="" type="radio"/> quita mayoría<br><input type="radio"/> quita un poco<br><input type="radio"/> no quita nada                                                       |

|                                |                                                                                                                                                                                                                                                          |
|--------------------------------|----------------------------------------------------------------------------------------------------------------------------------------------------------------------------------------------------------------------------------------------------------|
| cocina carne                   | <input type="radio"/> a la plancha<br><input type="radio"/> a la parrilla<br><input type="radio"/> asada<br><input type="radio"/> frita<br><input checked="" type="radio"/> guisada                                                                      |
| tostado quemado carne          | <input checked="" type="radio"/> nunca<br><input type="radio"/> 1 vez mes<br><input type="radio"/> 2 a 3 veces mes<br><input type="radio"/> 1 vez semana<br><input type="radio"/> 2 a 3 semanas                                                          |
| tostado quemado pescado        | <input type="radio"/> nunca<br><input type="radio"/> 1 vez mes<br><input type="radio"/> 2 a 3 veces mes<br><input checked="" type="radio"/> 1 vez semana<br><input type="radio"/> 2 a 3 semanas                                                          |
| socarrat paella                | <input type="radio"/> nunca<br><input type="radio"/> 1 vez mes<br><input type="radio"/> 2 a 3 veces mes<br><input checked="" type="radio"/> 1 vez semana<br><input type="radio"/> 2 a 3 semanas                                                          |
| grasa o aceite cocinar         | <input type="radio"/> mantequilla<br><input type="radio"/> margarina<br><input type="radio"/> aceite oliva<br><input checked="" type="radio"/> aceite oliva virgen extra<br><input type="radio"/> aceite vegetal<br><input type="radio"/> mezcla aceites |
| grasa aceite aliñar            | <input type="radio"/> mantequilla<br><input type="radio"/> margarina<br><input type="radio"/> aceite oliva<br><input checked="" type="radio"/> aceite oliva virgen extra<br><input type="radio"/> aceite vegetal<br><input type="radio"/> mezcla aceites |
| grasa aceite freir             | <input type="radio"/> mantequilla<br><input type="radio"/> margarina<br><input type="radio"/> aceite oliva<br><input type="radio"/> aceite oliva virgen extra<br><input checked="" type="radio"/> aceite vegetal<br><input type="radio"/> mezcla aceites |
| Ejercicio cuestionario         | <input checked="" type="radio"/> si<br><input type="radio"/> no                                                                                                                                                                                          |
| horas de sueño incluido siesta | [*DATA REMOVED*]                                                                                                                                                                                                                                         |
| minutos siesta                 | [*DATA REMOVED*]                                                                                                                                                                                                                                         |
| horas televisión semana        | [*DATA REMOVED*]                                                                                                                                                                                                                                         |

|                                        |                                                                                                                                                                                                                                                                                                                                                                           |
|----------------------------------------|---------------------------------------------------------------------------------------------------------------------------------------------------------------------------------------------------------------------------------------------------------------------------------------------------------------------------------------------------------------------------|
| actividad trabajo                      | <input type="radio"/> casi siempre sentado<br><input type="radio"/> sentado 50 por cien<br><input type="radio"/> casi siempre de pie, quieto<br><input checked="" type="radio"/> casi siempre levantado caminando y llevando pocas cosas<br><input type="radio"/> casi siempre levantado, caminando y llevado muchas cosas<br><input type="radio"/> trabajo manual pesado |
| tiempo caminar o bici al día           | <input type="radio"/> casi nunca<br><input type="radio"/> menos 20min día<br><input type="radio"/> 20 a 40 min día<br><input checked="" type="radio"/> 40 a 60 min día<br><input type="radio"/> 1h o 1h y media día<br><input type="radio"/> más de 1h y media al día                                                                                                     |
| tiempo tareas casa al día              | <input type="radio"/> menos de 1h día<br><input type="radio"/> 1 a 2h día<br><input type="radio"/> 3 a 4h día<br><input checked="" type="radio"/> 5 a 6h día<br><input type="radio"/> 7 a 8h día<br><input type="radio"/> más de 8h día                                                                                                                                   |
| tiempo libre televisión ordenador leer | <input checked="" type="radio"/> menos 1h día<br><input type="radio"/> 1h día<br><input type="radio"/> 2h día<br><input type="radio"/> 3h día<br><input type="radio"/> 4h día<br><input type="radio"/> 5 a 6h día<br><input type="radio"/> mas 6h día                                                                                                                     |
| tiempo libre ejercicio o deporte       | <input type="radio"/> menos 1h semana<br><input checked="" type="radio"/> 1h semana<br><input type="radio"/> 2h semana<br><input type="radio"/> 3h semana<br><input type="radio"/> 4 a 5h semana<br><input type="radio"/> mas 5h semana                                                                                                                                   |
| como se considera                      | <input type="radio"/> sedentaria<br><input type="radio"/> poco activa<br><input checked="" type="radio"/> moderadamente activa<br><input type="radio"/> bastante activa<br><input type="radio"/> muy activa<br><input type="radio"/> no sabe                                                                                                                              |
| FUR                                    | [*DATA REMOVED*]                                                                                                                                                                                                                                                                                                                                                          |
| Semanas gestación 2T                   | _____                                                                                                                                                                                                                                                                                                                                                                     |
| Días gestación 2T                      | _____                                                                                                                                                                                                                                                                                                                                                                     |
| DBP 2T                                 | _____                                                                                                                                                                                                                                                                                                                                                                     |
| CC 2T                                  | _____                                                                                                                                                                                                                                                                                                                                                                     |

|                                                   |                                                                                                                                                                                                 |
|---------------------------------------------------|-------------------------------------------------------------------------------------------------------------------------------------------------------------------------------------------------|
| AC 2T                                             |                                                                                                                                                                                                 |
| LF 2T                                             |                                                                                                                                                                                                 |
| PFE 2T (Hadlock)                                  |                                                                                                                                                                                                 |
| Semanas gestación 3T                              | [*DATA REMOVED*]                                                                                                                                                                                |
| días 3T                                           | [*DATA REMOVED*]                                                                                                                                                                                |
| DBP 3T                                            | [*DATA REMOVED*]                                                                                                                                                                                |
| CC 3T                                             | [*DATA REMOVED*]                                                                                                                                                                                |
| AC 3T                                             | [*DATA REMOVED*]                                                                                                                                                                                |
| LF 3T                                             | [*DATA REMOVED*]                                                                                                                                                                                |
| PFE 3T (Hadlock)                                  | [*DATA REMOVED*]                                                                                                                                                                                |
| Semanas de gestación final                        | [*DATA REMOVED*]                                                                                                                                                                                |
| días gestación final                              | [*DATA REMOVED*]                                                                                                                                                                                |
| Localización placenta                             | <input type="radio"/> anterior<br><input type="radio"/> lateral derecha<br><input type="radio"/> lateral izquierda<br><input type="radio"/> posterior<br><input checked="" type="radio"/> fondo |
| Presentación longitudinal cefálica                | <input type="radio"/> no<br><input checked="" type="radio"/> si                                                                                                                                 |
| Dorso                                             | <input type="radio"/> izquierda anterior<br><input checked="" type="radio"/> izquierda posterior<br><input type="radio"/> derecha anterior<br><input type="radio"/> derecha posterior           |
| diámetro biparietal                               | [*DATA REMOVED*]                                                                                                                                                                                |
| Circunferencia craneal                            | [*DATA REMOVED*]                                                                                                                                                                                |
| Circunferencia abdominal                          | [*DATA REMOVED*]                                                                                                                                                                                |
| Longitud de femur                                 | [*DATA REMOVED*]                                                                                                                                                                                |
| tejido celular subcutáneo a nivel del muslo en mm | [*DATA REMOVED*]                                                                                                                                                                                |
| tejido celular subcutáneo en abdomen en mm        | [*DATA REMOVED*]                                                                                                                                                                                |

|                                               |                                                                                                                                                          |
|-----------------------------------------------|----------------------------------------------------------------------------------------------------------------------------------------------------------|
| Volumen del muslo en cm3                      | [*DATA REMOVED*]                                                                                                                                         |
| Peso fetal estimado según fórmula de Hadlock  | [*DATA REMOVED*]                                                                                                                                         |
| Percentil                                     | [*DATA REMOVED*]                                                                                                                                         |
| Peso fetal estimado según fórmula de Scioscia | _____                                                                                                                                                    |
| Peso fetal estimado según fórmula de LEE      | _____                                                                                                                                                    |
| Tipo de parto                                 | <input checked="" type="radio"/> eutocico<br><input type="radio"/> instrumentado/ventosa<br><input type="radio"/> cesarea                                |
| fecha de nacimiento                           | [*DATA REMOVED*]                                                                                                                                         |
| Días entre exploración y nacimiento           | [*DATA REMOVED*]                                                                                                                                         |
| Peso RN en g                                  | [*DATA REMOVED*]                                                                                                                                         |
| sexo                                          | <input type="radio"/> mujer<br><input checked="" type="radio"/> hombre                                                                                   |
| Apgar 1 minuto                                | [*DATA REMOVED*]                                                                                                                                         |
| Apgar 5 minutos                               | [*DATA REMOVED*]                                                                                                                                         |
| Apgar 10 minutos                              | _____                                                                                                                                                    |
| antecedente Covid durante gestación           | <input type="radio"/> Yes<br><input checked="" type="radio"/> No                                                                                         |
| Nivel de estudios                             | <input type="radio"/> ninguno<br><input type="radio"/> primarios<br><input checked="" type="radio"/> secundarios<br><input type="radio"/> universitarios |

# Base\_datos\_estimacion\_peso\_fetal

|                                       |                                                                                                                                                                                                                                                                                      |
|---------------------------------------|--------------------------------------------------------------------------------------------------------------------------------------------------------------------------------------------------------------------------------------------------------------------------------------|
| Número de identificación participante | 66                                                                                                                                                                                                                                                                                   |
| CODIGO PARTICIPANTE                   |                                                                                                                                                                                                                                                                                      |
| Edad                                  | [*DATA REMOVED*]                                                                                                                                                                                                                                                                     |
| Gestaciones                           | <input type="radio"/> 1<br><input type="radio"/> 2<br><input checked="" type="radio"/> 3<br><input type="radio"/> mas de 3                                                                                                                                                           |
| partos                                | <input type="radio"/> 0<br><input checked="" type="radio"/> 1<br><input type="radio"/> 2<br><input type="radio"/> 3<br><input type="radio"/> mas de 3                                                                                                                                |
| cesáreas                              | <input checked="" type="radio"/> 0<br><input type="radio"/> 1<br><input type="radio"/> 2<br><input type="radio"/> 3<br><input type="radio"/> mas de 3                                                                                                                                |
| Abortos                               | <input type="radio"/> 0<br><input checked="" type="radio"/> 1<br><input type="radio"/> 2<br><input type="radio"/> 3<br><input type="radio"/> mas de 3                                                                                                                                |
| Tipo de gestacion                     | <input checked="" type="radio"/> espontanea<br><input type="radio"/> IAC inseminación artificial conyuge<br><input type="radio"/> IAD inseminación artificial donante<br><input type="radio"/> FIV Fecundación in Vitro<br><input type="radio"/> Ovodon FIV con donación de ovocitos |
| peso previo a embarazo                | [*DATA REMOVED*]                                                                                                                                                                                                                                                                     |
| Ganancia ponderal embarazo            | [*DATA REMOVED*]                                                                                                                                                                                                                                                                     |
| Talla madre                           | [*DATA REMOVED*]                                                                                                                                                                                                                                                                     |
| IMC previo embarazo                   | 23.888440980620498                                                                                                                                                                                                                                                                   |
| Patología obstétrica                  | <input checked="" type="radio"/> no<br><input type="radio"/> si                                                                                                                                                                                                                      |
| Diabetes pregestacional               | <input checked="" type="radio"/> no<br><input type="radio"/> si                                                                                                                                                                                                                      |
| Diabetes gestacional                  | <input checked="" type="radio"/> no<br><input type="radio"/> si                                                                                                                                                                                                                      |

|                                            |                                                                                                                                                                                      |
|--------------------------------------------|--------------------------------------------------------------------------------------------------------------------------------------------------------------------------------------|
| Diabetes gestacional con insulina          | <input checked="" type="radio"/> no<br><input type="radio"/> si                                                                                                                      |
| Diabetes gestacional con dieta y ejercicio | <input checked="" type="radio"/> no<br><input type="radio"/> si                                                                                                                      |
| Percentil fetos previos                    | <input type="radio"/> Nada<br><input type="radio"/> percentil menor de 10<br><input checked="" type="radio"/> percentil entre 10 y 90<br><input type="radio"/> percentil mayor de 90 |
| Exfumadora                                 | <input checked="" type="radio"/> Nada<br><input type="radio"/> menos de 5 años<br><input type="radio"/> 5 a 10 años<br><input type="radio"/> mayor o igual a 10 años                 |
| Hábito tabáquico                           | <input type="radio"/> no<br><input checked="" type="radio"/> si                                                                                                                      |
| fumadora                                   | [*DATA REMOVED*]                                                                                                                                                                     |
| Consumo otros tóxicos                      | <input checked="" type="radio"/> no<br><input type="radio"/> si                                                                                                                      |
| Hb 1T                                      | _____                                                                                                                                                                                |
| Htc 1T                                     | _____                                                                                                                                                                                |
| Hb 2T                                      | [*DATA REMOVED*]                                                                                                                                                                     |
| HTC 2T                                     | [*DATA REMOVED*]                                                                                                                                                                     |
| Hb 3T                                      | [*DATA REMOVED*]                                                                                                                                                                     |
| HTC 3T                                     | [*DATA REMOVED*]                                                                                                                                                                     |
| Suplemento FE oral                         | <input type="radio"/> si<br><input checked="" type="radio"/> no                                                                                                                      |
| Suplemento fe iv                           | <input type="radio"/> si<br><input checked="" type="radio"/> no                                                                                                                      |
| Transfusión                                | <input checked="" type="radio"/> no<br><input type="radio"/> si                                                                                                                      |
| Solicitada Vit D                           | <input checked="" type="radio"/> no<br><input type="radio"/> si                                                                                                                      |
| Deficit vit D                              | <input type="radio"/> no<br><input type="radio"/> si                                                                                                                                 |

|                       |                                                                                                                                                                                                                                                                                                                                                                                                   |
|-----------------------|---------------------------------------------------------------------------------------------------------------------------------------------------------------------------------------------------------------------------------------------------------------------------------------------------------------------------------------------------------------------------------------------------|
| Suplemento vit D      | <input type="radio"/> si<br><input type="radio"/> no                                                                                                                                                                                                                                                                                                                                              |
| Dieta, cuestionario   | <input type="radio"/> si<br><input checked="" type="radio"/> no                                                                                                                                                                                                                                                                                                                                   |
| Leche entera          | <input type="radio"/> Nunca o menos 1 vez al mes<br><input type="radio"/> 1 a 3 veces mes<br><input type="radio"/> 1 vez semana<br><input type="radio"/> 2 a 4 veces semana<br><input type="radio"/> 5 a 6 veces semana<br><input type="radio"/> 1 vez al día<br><input type="radio"/> 2 a 3 veces al día<br><input type="radio"/> 5 a 6 veces al día<br><input type="radio"/> más 6 veces al día |
| Leche semidesnatada   | <input type="radio"/> Nunca o menos 1 vez al mes<br><input type="radio"/> 1 a 3 veces mes<br><input type="radio"/> 1 vez semana<br><input type="radio"/> 2 a 4 veces semana<br><input type="radio"/> 5 a 6 veces semana<br><input type="radio"/> 1 vez al día<br><input type="radio"/> 2 a 3 veces al día<br><input type="radio"/> 5 a 6 veces al día<br><input type="radio"/> mas 6 veces al día |
| Leche desnatada       | <input type="radio"/> Nunca o menos 1 vez al mes<br><input type="radio"/> 1 a 3 veces mes<br><input type="radio"/> 1 vez semana<br><input type="radio"/> 2 a 4 veces semana<br><input type="radio"/> 5 a 6 veces semana<br><input type="radio"/> 1 vez al día<br><input type="radio"/> 2 a 3 veces al día<br><input type="radio"/> 5 a 6 veces al día<br><input type="radio"/> más 6 veces al día |
| Leche condensada      | <input type="radio"/> Nunca o menos 1 vez al mes<br><input type="radio"/> 1 a 3 veces mes<br><input type="radio"/> 1 vez semana<br><input type="radio"/> 2 a 4 veces semana<br><input type="radio"/> 5 a 6 veces semana<br><input type="radio"/> 1 vez al día<br><input type="radio"/> 2 a 3 veces al día<br><input type="radio"/> 5 a 6 veces al día<br><input type="radio"/> más 6 veces al día |
| nata o crema de leche | <input type="radio"/> Nunca o menos 1 vez al mes<br><input type="radio"/> 1 a 3 veces mes<br><input type="radio"/> 1 vez semana<br><input type="radio"/> 2 a 4 veces semana<br><input type="radio"/> 5 a 6 veces semana<br><input type="radio"/> 1 vez al día<br><input type="radio"/> 2 a 3 veces al día<br><input type="radio"/> 5 a 6 veces al día<br><input type="radio"/> más 6 veces al día |



|                                             |                                                                                                                                                                                                                                                                                                                                                                                                   |
|---------------------------------------------|---------------------------------------------------------------------------------------------------------------------------------------------------------------------------------------------------------------------------------------------------------------------------------------------------------------------------------------------------------------------------------------------------|
| Yogurt Entero                               | <input type="radio"/> Nunca o menos 1 vez al mes<br><input type="radio"/> 1 a 3 veces mes<br><input type="radio"/> 1 vez semana<br><input type="radio"/> 2 a 4 veces semana<br><input type="radio"/> 5 a 6 veces semana<br><input type="radio"/> 1 vez al día<br><input type="radio"/> 2 a 3 veces al día<br><input type="radio"/> 5 a 6 veces al día<br><input type="radio"/> más 6 veces al día |
| Yogurt desnatado                            | <input type="radio"/> Nunca o menos 1 vez al mes<br><input type="radio"/> 1 a 3 veces mes<br><input type="radio"/> 1 vez semana<br><input type="radio"/> 2 a 4 veces semana<br><input type="radio"/> 5 a 6 veces semana<br><input type="radio"/> 1 vez al día<br><input type="radio"/> 2 a 3 veces al día<br><input type="radio"/> 5 a 6 veces al día<br><input type="radio"/> más 6 veces al día |
| 100g requesón o queso blando o queso fresco | <input type="radio"/> Nunca o menos 1 vez al mes<br><input type="radio"/> 1 a 3 veces mes<br><input type="radio"/> 1 vez semana<br><input type="radio"/> 2 a 4 veces semana<br><input type="radio"/> 5 a 6 veces semana<br><input type="radio"/> 1 vez al día<br><input type="radio"/> 2 a 3 veces al día<br><input type="radio"/> 5 a 6 veces al día<br><input type="radio"/> más 6 veces al día |
| queso curado o semicurado o cremoso         | <input type="radio"/> Nunca o menos 1 vez al mes<br><input type="radio"/> 1 a 3 veces mes<br><input type="radio"/> 1 vez semana<br><input type="radio"/> 2 a 4 veces semana<br><input type="radio"/> 5 a 6 veces semana<br><input type="radio"/> 1 vez al día<br><input type="radio"/> 2 a 3 veces al día<br><input type="radio"/> 5 a 6 veces al día<br><input type="radio"/> más 6 veces al día |
| natillas flan pudding                       | <input type="radio"/> Nunca o menos 1 vez al mes<br><input type="radio"/> 1 a 3 veces mes<br><input type="radio"/> 1 vez semana<br><input type="radio"/> 2 a 4 veces semana<br><input type="radio"/> 5 a 6 veces semana<br><input type="radio"/> 1 vez al día<br><input type="radio"/> 2 a 3 veces al día<br><input type="radio"/> 5 a 6 veces al día<br><input type="radio"/> más 6 veces al día |
| Helado                                      | <input type="radio"/> Nunca o menos 1 vez al mes<br><input type="radio"/> 1 a 3 veces mes<br><input type="radio"/> 1 vez semana<br><input type="radio"/> 2 a 4 veces semana<br><input type="radio"/> 5 a 6 veces semana<br><input type="radio"/> 1 vez al día<br><input type="radio"/> 2 a 3 veces al día<br><input type="radio"/> 5 a 6 veces al día<br><input type="radio"/> más 6 veces al día |

|                                      |                                                                                                                                                                                                                                                                                                                                                                                                   |
|--------------------------------------|---------------------------------------------------------------------------------------------------------------------------------------------------------------------------------------------------------------------------------------------------------------------------------------------------------------------------------------------------------------------------------------------------|
| huevo                                | <input type="radio"/> Nunca o menos 1 vez al mes<br><input type="radio"/> 1 a 3 veces mes<br><input type="radio"/> 1 vez semana<br><input type="radio"/> 2 a 4 veces semana<br><input type="radio"/> 5 a 6 veces semana<br><input type="radio"/> 1 vez al día<br><input type="radio"/> 2 a 3 veces al día<br><input type="radio"/> 5 a 6 veces al día<br><input type="radio"/> más 6 veces al día |
| Pollo con piel                       | <input type="radio"/> Nunca o menos 1 vez al mes<br><input type="radio"/> 1 a 3 veces mes<br><input type="radio"/> 1 vez semana<br><input type="radio"/> 2 a 4 veces semana<br><input type="radio"/> 5 a 6 veces semana<br><input type="radio"/> 1 vez al día<br><input type="radio"/> 2 a 3 veces al día<br><input type="radio"/> 5 a 6 veces al día<br><input type="radio"/> más 6 veces al día |
| pollo sin piel                       | <input type="radio"/> Nunca o menos 1 vez al mes<br><input type="radio"/> 1 a 3 veces mes<br><input type="radio"/> 1 vez semana<br><input type="radio"/> 2 a 4 veces semana<br><input type="radio"/> 5 a 6 veces semana<br><input type="radio"/> 1 vez al día<br><input type="radio"/> 2 a 3 veces al día<br><input type="radio"/> 5 a 6 veces al día<br><input type="radio"/> más 6 veces al día |
| Ternera o cerdo o cordero            | <input type="radio"/> Nunca o menos 1 vez al mes<br><input type="radio"/> 1 a 3 veces mes<br><input type="radio"/> 1 vez semana<br><input type="radio"/> 2 a 4 veces semana<br><input type="radio"/> 5 a 6 veces semana<br><input type="radio"/> 1 vez al día<br><input type="radio"/> 2 a 3 veces al día<br><input type="radio"/> 5 a 6 veces al día<br><input type="radio"/> más 6 veces al día |
| carne caza: Conejo o codorniz o pato | <input type="radio"/> Nunca o menos 1 vez al mes<br><input type="radio"/> 1 a 3 veces mes<br><input type="radio"/> 1 vez semana<br><input type="radio"/> 2 a 4 veces semana<br><input type="radio"/> 5 a 6 veces semana<br><input type="radio"/> 1 vez al día<br><input type="radio"/> 2 a 3 veces al día<br><input type="radio"/> 5 a 6 veces al día<br><input type="radio"/> más 6 veces al día |
| Hígado de ternera o cerdo o pollo    | <input type="radio"/> Nunca o menos 1 vez al mes<br><input type="radio"/> 1 a 3 veces mes<br><input type="radio"/> 1 vez semana<br><input type="radio"/> 2 a 4 veces semana<br><input type="radio"/> 5 a 6 veces semana<br><input type="radio"/> 1 vez al día<br><input type="radio"/> 2 a 3 veces al día<br><input type="radio"/> 5 a 6 veces al día<br><input type="radio"/> más 6 veces al día |

|                     |                                                                                                                                                                                                                                                                                                                                                                                                   |
|---------------------|---------------------------------------------------------------------------------------------------------------------------------------------------------------------------------------------------------------------------------------------------------------------------------------------------------------------------------------------------------------------------------------------------|
| Vísceras            | <input type="radio"/> Nunca o menos 1 vez al mes<br><input type="radio"/> 1 a 3 veces mes<br><input type="radio"/> 1 vez semana<br><input type="radio"/> 2 a 4 veces semana<br><input type="radio"/> 5 a 6 veces semana<br><input type="radio"/> 1 vez al día<br><input type="radio"/> 2 a 3 veces al día<br><input type="radio"/> 5 a 6 veces al día<br><input type="radio"/> más 6 veces al día |
| Embutido            | <input type="radio"/> Nunca o menos 1 vez al mes<br><input type="radio"/> 1 a 3 veces mes<br><input type="radio"/> 1 vez semana<br><input type="radio"/> 2 a 4 veces semana<br><input type="radio"/> 5 a 6 veces semana<br><input type="radio"/> 1 vez al día<br><input type="radio"/> 2 a 3 veces al día<br><input type="radio"/> 5 a 6 veces al día<br><input type="radio"/> más 6 veces al día |
| Salchicha o similar | <input type="radio"/> Nunca o menos 1 vez al mes<br><input type="radio"/> 1 a 3 veces mes<br><input type="radio"/> 1 vez semana<br><input type="radio"/> 2 a 4 veces semana<br><input type="radio"/> 5 a 6 veces semana<br><input type="radio"/> 1 vez al día<br><input type="radio"/> 2 a 3 veces al día<br><input type="radio"/> 5 a 6 veces al día<br><input type="radio"/> más 6 veces al día |
| Pate o foiegras     | <input type="radio"/> Nunca o menos 1 vez al mes<br><input type="radio"/> 1 a 3 veces mes<br><input type="radio"/> 1 vez semana<br><input type="radio"/> 2 a 4 veces semana<br><input type="radio"/> 5 a 6 veces semana<br><input type="radio"/> 1 vez al día<br><input type="radio"/> 2 a 3 veces al día<br><input type="radio"/> 5 a 6 veces al día<br><input type="radio"/> más 6 veces al día |
| Hamburguesa         | <input type="radio"/> Nunca o menos 1 vez al mes<br><input type="radio"/> 1 a 3 veces mes<br><input type="radio"/> 1 vez semana<br><input type="radio"/> 2 a 4 veces semana<br><input type="radio"/> 5 a 6 veces semana<br><input type="radio"/> 1 vez al día<br><input type="radio"/> 2 a 3 veces al día<br><input type="radio"/> 5 a 6 veces al día<br><input type="radio"/> más 6 veces al día |
| tocino o bacon      | <input type="radio"/> Nunca o menos 1 vez al mes<br><input type="radio"/> 1 a 3 veces mes<br><input type="radio"/> 1 vez semana<br><input type="radio"/> 2 a 4 veces semana<br><input type="radio"/> 5 a 6 veces semana<br><input type="radio"/> 1 vez al día<br><input type="radio"/> 2 a 3 veces al día<br><input type="radio"/> 5 a 6 veces al día<br><input type="radio"/> más 6 veces al día |

---

|               |                                                                                                                                                                                                                                                                                                                                                                                                   |
|---------------|---------------------------------------------------------------------------------------------------------------------------------------------------------------------------------------------------------------------------------------------------------------------------------------------------------------------------------------------------------------------------------------------------|
| Pescado frito | <input type="radio"/> Nunca o menos 1 vez al mes<br><input type="radio"/> 1 a 3 veces mes<br><input type="radio"/> 1 vez semana<br><input type="radio"/> 2 a 4 veces semana<br><input type="radio"/> 5 a 6 veces semana<br><input type="radio"/> 1 vez al día<br><input type="radio"/> 2 a 3 veces al día<br><input type="radio"/> 5 a 6 veces al día<br><input type="radio"/> más 6 veces al día |
|---------------|---------------------------------------------------------------------------------------------------------------------------------------------------------------------------------------------------------------------------------------------------------------------------------------------------------------------------------------------------------------------------------------------------|

---

|                        |                                                                                                                                                                                                                                                                                                                                                                                                   |
|------------------------|---------------------------------------------------------------------------------------------------------------------------------------------------------------------------------------------------------------------------------------------------------------------------------------------------------------------------------------------------------------------------------------------------|
| pescado hervido blanco | <input type="radio"/> Nunca o menos 1 vez al mes<br><input type="radio"/> 1 a 3 veces mes<br><input type="radio"/> 1 vez semana<br><input type="radio"/> 2 a 4 veces semana<br><input type="radio"/> 5 a 6 veces semana<br><input type="radio"/> 1 vez al día<br><input type="radio"/> 2 a 3 veces al día<br><input type="radio"/> 5 a 6 veces al día<br><input type="radio"/> más 6 veces al día |
|------------------------|---------------------------------------------------------------------------------------------------------------------------------------------------------------------------------------------------------------------------------------------------------------------------------------------------------------------------------------------------------------------------------------------------|

---

|                      |                                                                                                                                                                                                                                                                                                                                                                                                   |
|----------------------|---------------------------------------------------------------------------------------------------------------------------------------------------------------------------------------------------------------------------------------------------------------------------------------------------------------------------------------------------------------------------------------------------|
| pescado hervido azul | <input type="radio"/> Nunca o menos 1 vez al mes<br><input type="radio"/> 1 a 3 veces mes<br><input type="radio"/> 1 vez semana<br><input type="radio"/> 2 a 4 veces semana<br><input type="radio"/> 5 a 6 veces semana<br><input type="radio"/> 1 vez al día<br><input type="radio"/> 2 a 3 veces al día<br><input type="radio"/> 5 a 6 veces al día<br><input type="radio"/> más 6 veces al día |
|----------------------|---------------------------------------------------------------------------------------------------------------------------------------------------------------------------------------------------------------------------------------------------------------------------------------------------------------------------------------------------------------------------------------------------|

---

|                    |                                                                                                                                                                                                                                                                                                                                                                                                   |
|--------------------|---------------------------------------------------------------------------------------------------------------------------------------------------------------------------------------------------------------------------------------------------------------------------------------------------------------------------------------------------------------------------------------------------|
| otros pescado azul | <input type="radio"/> Nunca o menos 1 vez al mes<br><input type="radio"/> 1 a 3 veces mes<br><input type="radio"/> 1 vez semana<br><input type="radio"/> 2 a 4 veces semana<br><input type="radio"/> 5 a 6 veces semana<br><input type="radio"/> 1 vez al día<br><input type="radio"/> 2 a 3 veces al día<br><input type="radio"/> 5 a 6 veces al día<br><input type="radio"/> más 6 veces al día |
|--------------------|---------------------------------------------------------------------------------------------------------------------------------------------------------------------------------------------------------------------------------------------------------------------------------------------------------------------------------------------------------------------------------------------------|

---

|               |                                                                                                                                                                                                                                                                                                                                                                                                   |
|---------------|---------------------------------------------------------------------------------------------------------------------------------------------------------------------------------------------------------------------------------------------------------------------------------------------------------------------------------------------------------------------------------------------------|
| atun conserva | <input type="radio"/> Nunca o menos 1 vez al mes<br><input type="radio"/> 1 a 3 veces mes<br><input type="radio"/> 1 vez semana<br><input type="radio"/> 2 a 4 veces semana<br><input type="radio"/> 5 a 6 veces semana<br><input type="radio"/> 1 vez al día<br><input type="radio"/> 2 a 3 veces al día<br><input type="radio"/> 5 a 6 veces al día<br><input type="radio"/> más 6 veces al día |
|---------------|---------------------------------------------------------------------------------------------------------------------------------------------------------------------------------------------------------------------------------------------------------------------------------------------------------------------------------------------------------------------------------------------------|

---

|                  |                                                                                                                                                                                                                                                                                                                                                                                                   |
|------------------|---------------------------------------------------------------------------------------------------------------------------------------------------------------------------------------------------------------------------------------------------------------------------------------------------------------------------------------------------------------------------------------------------|
| sardina conserva | <input type="radio"/> Nunca o menos 1 vez al mes<br><input type="radio"/> 1 a 3 veces mes<br><input type="radio"/> 1 vez semana<br><input type="radio"/> 2 a 4 veces semana<br><input type="radio"/> 5 a 6 veces semana<br><input type="radio"/> 1 vez al día<br><input type="radio"/> 2 a 3 veces al día<br><input type="radio"/> 5 a 6 veces al día<br><input type="radio"/> más 6 veces al día |
|------------------|---------------------------------------------------------------------------------------------------------------------------------------------------------------------------------------------------------------------------------------------------------------------------------------------------------------------------------------------------------------------------------------------------|

---

---

pescado ahumado

- ☐ Nunca o menos 1 vez al mes
- ☐ 1 a 3 veces mes
- ☐ 1 vez semana
- ☐ 2 a 4 veces semana
- ☐ 5 a 6 veces semana
- ☐ 1 vez al día
- ☐ 2 a 3 veces al día
- ☐ 5 a 6 veces al día
- ☐ más 6 veces al día

---

almejas o mejillones o ostras unos 100g

- ☐ Nunca o menos 1 vez al mes
- ☐ 1 a 3 veces mes
- ☐ 1 vez semana
- ☐ 2 a 4 veces semana
- ☐ 5 a 6 veces semana
- ☐ 1 vez al día
- ☐ 2 a 3 veces al día
- ☐ 5 a 6 veces al día
- ☐ más 6 veces al día

---

calamar o chipiron o sepia unos 100g

- ☐ Nunca o menos 1 vez al mes
- ☐ 1 a 3 veces mes
- ☐ 1 vez semana
- ☐ 2 a 4 veces semana
- ☐ 5 a 6 veces semana
- ☐ 1 vez al día
- ☐ 2 a 3 veces al día
- ☐ 5 a 6 veces al día
- ☐ más 6 veces al día

---

marisco unos 100g

- ☐ Nunca o menos 1 vez al mes
- ☐ 1 a 3 veces mes
- ☐ 1 vez semana
- ☐ 2 a 4 veces semana
- ☐ 5 a 6 veces semana
- ☐ 1 vez al día
- ☐ 2 a 3 veces al día
- ☐ 5 a 6 veces al día
- ☐ más 6 veces al día

---

Espinacas o acelgas cocinadas

- ☐ Nunca o menos 1 vez al mes
- ☐ 1 a 3 veces mes
- ☐ 1 vez semana
- ☐ 2 a 4 veces semana
- ☐ 5 a 6 veces semana
- ☐ 1 vez al día
- ☐ 2 a 3 veces al día
- ☐ 5 a 6 veces al día
- ☐ más 6 veces al día

---

Col o coliflor o brocoli cocinado

- ☐ Nunca o menos 1 vez al mes
- ☐ 1 a 3 veces mes
- ☐ 1 vez semana
- ☐ 2 a 4 veces semana
- ☐ 5 a 6 veces semana
- ☐ 1 vez al día
- ☐ 2 a 3 veces al día
- ☐ 5 a 6 veces al día
- ☐ más 6 veces al día

---

Lechuga o endivia o escarola

- ☐ Nunca o menos 1 vez al mes
- ☐ 1 a 3 veces mes
- ☐ 1 vez semana
- ☐ 2 a 4 veces semana
- ☐ 5 a 6 veces semana
- ☐ 1 vez al día
- ☐ 2 a 3 veces al día
- ☐ 5 a 6 veces al día
- ☐ más 6 veces al día

---

tomate ensalada

- ☐ Nunca o menos 1 vez al mes
- ☐ 1 a 3 veces mes
- ☐ 1 vez semana
- ☐ 2 a 4 veces semana
- ☐ 5 a 6 veces semana
- ☐ 1 vez al día
- ☐ 2 a 3 veces al día
- ☐ 5 a 6 veces al día
- ☐ más 6 veces al día

---

cebolla

- ☐ Nunca o menos 1 vez al mes
- ☐ 1 a 3 veces mes
- ☐ 1 vez semana
- ☐ 2 a 4 veces semana
- ☐ 5 a 6 veces semana
- ☐ 1 vez al día
- ☐ 2 a 3 veces al día
- ☐ 5 a 6 veces al día
- ☐ más 6 veces al día

---

Zanahoria o calabaza

- ☐ Nunca o menos 1 vez al mes
- ☐ 1 a 3 veces mes
- ☐ 1 vez semana
- ☐ 2 a 4 veces semana
- ☐ 5 a 6 veces semana
- ☐ 1 vez al día
- ☐ 2 a 3 veces al día
- ☐ 5 a 6 veces al día
- ☐ más 6 veces al día

---

Judías verdes

- ☐ Nunca o menos 1 vez al mes
- ☐ 1 a 3 veces mes
- ☐ 1 vez semana
- ☐ 2 a 4 veces semana
- ☐ 5 a 6 veces semana
- ☐ 1 vez al día
- ☐ 2 a 3 veces al día
- ☐ 5 a 6 veces al día
- ☐ más 6 veces al día

---

Berenjena o calabacin o pepino

- ☐ Nunca o menos 1 vez al mes
- ☐ 1 a 3 veces mes
- ☐ 1 vez semana
- ☐ 2 a 4 veces semana
- ☐ 5 a 6 veces semana
- ☐ 1 vez al día
- ☐ 2 a 3 veces al día
- ☐ 5 a 6 veces al día
- ☐ más 6 veces al día

---

pimiento

- ☐ Nunca o menos 1 vez al mes
- ☐ 1 a 3 veces mes
- ☐ 1 vez semana
- ☐ 2 a 4 veces semana
- ☐ 5 a 6 veces semana
- ☐ 1 vez al día
- ☐ 2 a 3 veces al día
- ☐ 5 a 6 veces al día
- ☐ más 6 veces al día

---

alcachofa

- ☐ Nunca o menos 1 vez al mes
- ☐ 1 a 3 veces mes
- ☐ 1 vez semana
- ☐ 2 a 4 veces semana
- ☐ 5 a 6 veces semana
- ☐ 1 vez al día
- ☐ 2 a 3 veces al día
- ☐ 5 a 6 veces al día
- ☐ más 6 veces al día

---

espárragos

- ☐ Nunca o menos 1 vez al mes
- ☐ 1 a 3 veces mes
- ☐ 1 vez semana
- ☐ 2 a 4 veces semana
- ☐ 5 a 6 veces semana
- ☐ 1 vez al día
- ☐ 2 a 3 veces al día
- ☐ 5 a 6 veces al día
- ☐ más 6 veces al día

---

maíz hervido

- ☐ Nunca o menos 1 vez al mes
- ☐ 1 a 3 veces mes
- ☐ 1 vez semana
- ☐ 2 a 4 veces semana
- ☐ 5 a 6 veces semana
- ☐ 1 vez al día
- ☐ 2 a 3 veces al día
- ☐ 5 a 6 veces al día
- ☐ más 6 veces al día

---

legumbres

- ☐ Nunca o menos 1 vez al mes
- ☐ 1 a 3 veces mes
- ☐ 1 vez semana
- ☐ 2 a 4 veces semana
- ☐ 5 a 6 veces semana
- ☐ 1 vez al día
- ☐ 2 a 3 veces al día
- ☐ 5 a 6 veces al día
- ☐ más 6 veces al día

---

naranjas o mandarinas

- ☐ Nunca o menos 1 vez al mes
- ☐ 1 a 3 veces mes
- ☐ 1 vez semana
- ☐ 2 a 4 veces semana
- ☐ 5 a 6 veces semana
- ☐ 1 vez al día
- ☐ 2 a 3 veces al día
- ☐ 5 a 6 veces al día
- ☐ más 6 veces al día

|                       |                                                                                                                                                                                                                                                                                                                                                                                                   |
|-----------------------|---------------------------------------------------------------------------------------------------------------------------------------------------------------------------------------------------------------------------------------------------------------------------------------------------------------------------------------------------------------------------------------------------|
| zum natural fruta     | <input type="radio"/> Nunca o menos 1 vez al mes<br><input type="radio"/> 1 a 3 veces mes<br><input type="radio"/> 1 vez semana<br><input type="radio"/> 2 a 4 veces semana<br><input type="radio"/> 5 a 6 veces semana<br><input type="radio"/> 1 vez al día<br><input type="radio"/> 2 a 3 veces al día<br><input type="radio"/> 5 a 6 veces al día<br><input type="radio"/> más 6 veces al día |
| platano               | <input type="radio"/> Nunca o menos 1 vez al mes<br><input type="radio"/> 1 a 3 veces mes<br><input type="radio"/> 1 vez semana<br><input type="radio"/> 2 a 4 veces semana<br><input type="radio"/> 5 a 6 veces semana<br><input type="radio"/> 1 vez al día<br><input type="radio"/> 2 a 3 veces al día<br><input type="radio"/> 5 a 6 veces al día<br><input type="radio"/> más 6 veces al día |
| manzana o pera        | <input type="radio"/> Nunca o menos 1 vez al mes<br><input type="radio"/> 1 a 3 veces mes<br><input type="radio"/> 1 vez semana<br><input type="radio"/> 2 a 4 veces semana<br><input type="radio"/> 5 a 6 veces semana<br><input type="radio"/> 1 vez al día<br><input type="radio"/> 2 a 3 veces al día<br><input type="radio"/> 5 a 6 veces al día<br><input type="radio"/> más 6 veces al día |
| melocotón o nectarina | <input type="radio"/> Nunca o menos 1 vez al mes<br><input type="radio"/> 1 a 3 veces mes<br><input type="radio"/> 1 vez semana<br><input type="radio"/> 2 a 4 veces semana<br><input type="radio"/> 5 a 6 veces semana<br><input type="radio"/> 1 vez al día<br><input type="radio"/> 2 a 3 veces al día<br><input type="radio"/> 5 a 6 veces al día<br><input type="radio"/> más 6 veces al día |
| sandia o melon        | <input type="radio"/> Nunca o menos 1 vez al mes<br><input type="radio"/> 1 a 3 veces mes<br><input type="radio"/> 1 vez semana<br><input type="radio"/> 2 a 4 veces semana<br><input type="radio"/> 5 a 6 veces semana<br><input type="radio"/> 1 vez al día<br><input type="radio"/> 2 a 3 veces al día<br><input type="radio"/> 5 a 6 veces al día<br><input type="radio"/> más 6 veces al día |
| uva                   | <input type="radio"/> Nunca o menos 1 vez al mes<br><input type="radio"/> 1 a 3 veces mes<br><input type="radio"/> 1 vez semana<br><input type="radio"/> 2 a 4 veces semana<br><input type="radio"/> 5 a 6 veces semana<br><input type="radio"/> 1 vez al día<br><input type="radio"/> 2 a 3 veces al día<br><input type="radio"/> 5 a 6 veces al día<br><input type="radio"/> más 6 veces al día |



---

bruna o ciruela

- ☐ Nunca o menos 1 vez al mes
- ☐ 1 a 3 veces mes
- ☐ 1 vez semana
- ☐ 2 a 4 veces semana
- ☐ 5 a 6 veces semana
- ☐ 1 vez al día
- ☐ 2 a 3 veces al día
- ☐ 5 a 6 veces al día
- ☐ más 6 veces al día

---

kiwi

- ☐ Nunca o menos 1 vez al mes
- ☐ 1 a 3 veces mes
- ☐ 1 vez semana
- ☐ 2 a 4 veces semana
- ☐ 5 a 6 veces semana
- ☐ 1 vez al día
- ☐ 2 a 3 veces al día
- ☐ 5 a 6 veces al día
- ☐ más 6 veces al día

---

aceituna

- ☐ Nunca o menos 1 vez al mes
- ☐ 1 a 3 veces mes
- ☐ 1 vez semana
- ☐ 2 a 4 veces semana
- ☐ 5 a 6 veces semana
- ☐ 1 vez al día
- ☐ 2 a 3 veces al día
- ☐ 5 a 6 veces al día
- ☐ más 6 veces al día

---

frutos secos

- ☐ Nunca o menos 1 vez al mes
- ☐ 1 a 3 veces mes
- ☐ 1 vez semana
- ☐ 2 a 4 veces semana
- ☐ 5 a 6 veces semana
- ☐ 1 vez al día
- ☐ 2 a 3 veces al día
- ☐ 5 a 6 veces al día
- ☐ más 6 veces al día

---

pan blanco

- ☐ Nunca o menos 1 vez al mes
- ☐ 1 a 3 veces mes
- ☐ 1 vez semana
- ☐ 2 a 4 veces semana
- ☐ 5 a 6 veces semana
- ☐ 1 vez al día
- ☐ 2 a 3 veces al día
- ☐ 5 a 6 veces al día
- ☐ más 6 veces al día

---

pan integral

- ☐ Nunca o menos 1 vez al mes
- ☐ 1 a 3 veces mes
- ☐ 1 vez semana
- ☐ 2 a 4 veces semana
- ☐ 5 a 6 veces semana
- ☐ 1 vez al día
- ☐ 2 a 3 veces al día
- ☐ 5 a 6 veces al día
- ☐ más 6 veces al día

---

cereales desayuno

- ☐ Nunca o menos 1 vez al mes
- ☐ 1 a 3 veces mes
- ☐ 1 vez semana
- ☐ 2 a 4 veces semana
- ☐ 5 a 6 veces semana
- ☐ 1 vez al día
- ☐ 2 a 3 veces al día
- ☐ 5 a 6 veces al día
- ☐ más 6 veces al día

---

patatas fritas

- ☐ Nunca o menos 1 vez al mes
- ☐ 1 a 3 veces mes
- ☐ 1 vez semana
- ☐ 2 a 4 veces semana
- ☐ 5 a 6 veces semana
- ☐ 1 vez al día
- ☐ 2 a 3 veces al día
- ☐ 5 a 6 veces al día
- ☐ más 6 veces al día

---

patatas cocidas o asadas

- ☐ Nunca o menos 1 vez al mes
- ☐ 1 a 3 veces mes
- ☐ 1 vez semana
- ☐ 2 a 4 veces semana
- ☐ 5 a 6 veces semana
- ☐ 1 vez al día
- ☐ 2 a 3 veces al día
- ☐ 5 a 6 veces al día
- ☐ más 6 veces al día

---

bolsa papas

- ☐ Nunca o menos 1 vez al mes
- ☐ 1 a 3 veces mes
- ☐ 1 vez semana
- ☐ 2 a 4 veces semana
- ☐ 5 a 6 veces semana
- ☐ 1 vez al día
- ☐ 2 a 3 veces al día
- ☐ 5 a 6 veces al día
- ☐ más 6 veces al día

---

arroz cocinado

- ☐ Nunca o menos 1 vez al mes
- ☐ 1 a 3 veces mes
- ☐ 1 vez semana
- ☐ 2 a 4 veces semana
- ☐ 5 a 6 veces semana
- ☐ 1 vez al día
- ☐ 2 a 3 veces al día
- ☐ 5 a 6 veces al día
- ☐ más 6 veces al día

---

pasta

- ☐ Nunca o menos 1 vez al mes
- ☐ 1 a 3 veces mes
- ☐ 1 vez semana
- ☐ 2 a 4 veces semana
- ☐ 5 a 6 veces semana
- ☐ 1 vez al día
- ☐ 2 a 3 veces al día
- ☐ 5 a 6 veces al día
- ☐ más 6 veces al día

|                     |                                                                                                                                                                                                                                                                                                                                                                                                   |
|---------------------|---------------------------------------------------------------------------------------------------------------------------------------------------------------------------------------------------------------------------------------------------------------------------------------------------------------------------------------------------------------------------------------------------|
| pizza               | <input type="radio"/> Nunca o menos 1 vez al mes<br><input type="radio"/> 1 a 3 veces mes<br><input type="radio"/> 1 vez semana<br><input type="radio"/> 2 a 4 veces semana<br><input type="radio"/> 5 a 6 veces semana<br><input type="radio"/> 1 vez al día<br><input type="radio"/> 2 a 3 veces al día<br><input type="radio"/> 5 a 6 veces al día<br><input type="radio"/> más 6 veces al día |
| aceite oliva        | <input type="radio"/> Nunca o menos 1 vez al mes<br><input type="radio"/> 1 a 3 veces mes<br><input type="radio"/> 1 vez semana<br><input type="radio"/> 2 a 4 veces semana<br><input type="radio"/> 5 a 6 veces semana<br><input type="radio"/> 1 vez al día<br><input type="radio"/> 2 a 3 veces al día<br><input type="radio"/> 5 a 6 veces al día<br><input type="radio"/> más 6 veces al día |
| otros aceites       | <input type="radio"/> Nunca o menos 1 vez al mes<br><input type="radio"/> 1 a 3 veces mes<br><input type="radio"/> 1 vez semana<br><input type="radio"/> 2 a 4 veces semana<br><input type="radio"/> 5 a 6 veces semana<br><input type="radio"/> 1 vez al día<br><input type="radio"/> 2 a 3 veces al día<br><input type="radio"/> 5 a 6 veces al día<br><input type="radio"/> más 6 veces al día |
| margarina           | <input type="radio"/> Nunca o menos 1 vez al mes<br><input type="radio"/> 1 a 3 veces mes<br><input type="radio"/> 1 vez semana<br><input type="radio"/> 2 a 4 veces semana<br><input type="radio"/> 5 a 6 veces semana<br><input type="radio"/> 1 vez al día<br><input type="radio"/> 2 a 3 veces al día<br><input type="radio"/> 5 a 6 veces al día<br><input type="radio"/> más 6 veces al día |
| mantequilla         | <input type="radio"/> Nunca o menos 1 vez al mes<br><input type="radio"/> 1 a 3 veces mes<br><input type="radio"/> 1 vez semana<br><input type="radio"/> 2 a 4 veces semana<br><input type="radio"/> 5 a 6 veces semana<br><input type="radio"/> 1 vez al día<br><input type="radio"/> 2 a 3 veces al día<br><input type="radio"/> 5 a 6 veces al día<br><input type="radio"/> más 6 veces al día |
| galletas tipo maria | <input type="radio"/> Nunca o menos 1 vez al mes<br><input type="radio"/> 1 a 3 veces mes<br><input type="radio"/> 1 vez semana<br><input type="radio"/> 2 a 4 veces semana<br><input type="radio"/> 5 a 6 veces semana<br><input type="radio"/> 1 vez al día<br><input type="radio"/> 2 a 3 veces al día<br><input type="radio"/> 5 a 6 veces al día<br><input type="radio"/> más 6 veces al día |

---

galletas chocolate

- ☐ Nunca o menos 1 vez al mes
- ☐ 1 a 3 veces mes
- ☐ 1 vez semana
- ☐ 2 a 4 veces semana
- ☐ 5 a 6 veces semana
- ☐ 1 vez al día
- ☐ 2 a 3 veces al día
- ☐ 5 a 6 veces al día
- ☐ más 6 veces al día

---

bolleria

- ☐ Nunca o menos 1 vez al mes
- ☐ 1 a 3 veces mes
- ☐ 1 vez semana
- ☐ 2 a 4 veces semana
- ☐ 5 a 6 veces semana
- ☐ 1 vez al día
- ☐ 2 a 3 veces al día
- ☐ 5 a 6 veces al día
- ☐ más 6 veces al día

---

chocolate o bombones

- ☐ Nunca o menos 1 vez al mes
- ☐ 1 a 3 veces mes
- ☐ 1 vez semana
- ☐ 2 a 4 veces semana
- ☐ 5 a 6 veces semana
- ☐ 1 vez al día
- ☐ 2 a 3 veces al día
- ☐ 5 a 6 veces al día
- ☐ más 6 veces al día

---

chocolate polvo o colacao

- ☐ Nunca o menos 1 vez al mes
- ☐ 1 a 3 veces mes
- ☐ 1 vez semana
- ☐ 2 a 4 veces semana
- ☐ 5 a 6 veces semana
- ☐ 1 vez al día
- ☐ 2 a 3 veces al día
- ☐ 5 a 6 veces al día
- ☐ más 6 veces al día

---

vino tinto

- ☐ Nunca o menos 1 vez al mes
- ☐ 1 a 3 veces mes
- ☐ 1 vez semana
- ☐ 2 a 4 veces semana
- ☐ 5 a 6 veces semana
- ☐ 1 vez al día
- ☐ 2 a 3 veces al día
- ☐ 5 a 6 veces al día
- ☐ más 6 veces al día

---

vino blanco

- ☐ Nunca o menos 1 vez al mes
- ☐ 1 a 3 veces mes
- ☐ 1 vez semana
- ☐ 2 a 4 veces semana
- ☐ 5 a 6 veces semana
- ☐ 1 vez al día
- ☐ 2 a 3 veces al día
- ☐ 5 a 6 veces al día
- ☐ más 6 veces al día

|                       |                                                                                                                                                                                                                                                                                                                                                                                                   |
|-----------------------|---------------------------------------------------------------------------------------------------------------------------------------------------------------------------------------------------------------------------------------------------------------------------------------------------------------------------------------------------------------------------------------------------|
| vino seco o vermut    | <input type="radio"/> Nunca o menos 1 vez al mes<br><input type="radio"/> 1 a 3 veces mes<br><input type="radio"/> 1 vez semana<br><input type="radio"/> 2 a 4 veces semana<br><input type="radio"/> 5 a 6 veces semana<br><input type="radio"/> 1 vez al día<br><input type="radio"/> 2 a 3 veces al día<br><input type="radio"/> 5 a 6 veces al día<br><input type="radio"/> más 6 veces al día |
| cerveza               | <input type="radio"/> Nunca o menos 1 vez al mes<br><input type="radio"/> 1 a 3 veces mes<br><input type="radio"/> 1 vez semana<br><input type="radio"/> 2 a 4 veces semana<br><input type="radio"/> 5 a 6 veces semana<br><input type="radio"/> 1 vez al día<br><input type="radio"/> 2 a 3 veces al día<br><input type="radio"/> 5 a 6 veces al día<br><input type="radio"/> más 6 veces al día |
| cerveza sin alcohol   | <input type="radio"/> Nunca o menos 1 vez al mes<br><input type="radio"/> 1 a 3 veces mes<br><input type="radio"/> 1 vez semana<br><input type="radio"/> 2 a 4 veces semana<br><input type="radio"/> 5 a 6 veces semana<br><input type="radio"/> 1 vez al día<br><input type="radio"/> 2 a 3 veces al día<br><input type="radio"/> 5 a 6 veces al día<br><input type="radio"/> más 6 veces al día |
| licores               | <input type="radio"/> Nunca o menos 1 vez al mes<br><input type="radio"/> 1 a 3 veces mes<br><input type="radio"/> 1 vez semana<br><input type="radio"/> 2 a 4 veces semana<br><input type="radio"/> 5 a 6 veces semana<br><input type="radio"/> 1 vez al día<br><input type="radio"/> 2 a 3 veces al día<br><input type="radio"/> 5 a 6 veces al día<br><input type="radio"/> más 6 veces al día |
| ginebra o ron o vodka | <input type="radio"/> Nunca o menos 1 vez al mes<br><input type="radio"/> 1 a 3 veces mes<br><input type="radio"/> 1 vez semana<br><input type="radio"/> 2 a 4 veces semana<br><input type="radio"/> 5 a 6 veces semana<br><input type="radio"/> 1 vez al día<br><input type="radio"/> 2 a 3 veces al día<br><input type="radio"/> 5 a 6 veces al día<br><input type="radio"/> más 6 veces al día |
| refresco normal       | <input type="radio"/> Nunca o menos 1 vez al mes<br><input type="radio"/> 1 a 3 veces mes<br><input type="radio"/> 1 vez semana<br><input type="radio"/> 2 a 4 veces semana<br><input type="radio"/> 5 a 6 veces semana<br><input type="radio"/> 1 vez al día<br><input type="radio"/> 2 a 3 veces al día<br><input type="radio"/> 5 a 6 veces al día<br><input type="radio"/> más 6 veces al día |

---

|                     |                                                                                                                                                                                                                                                                                                                                                                                                   |
|---------------------|---------------------------------------------------------------------------------------------------------------------------------------------------------------------------------------------------------------------------------------------------------------------------------------------------------------------------------------------------------------------------------------------------|
| refresco sin azúcar | <input type="radio"/> Nunca o menos 1 vez al mes<br><input type="radio"/> 1 a 3 veces mes<br><input type="radio"/> 1 vez semana<br><input type="radio"/> 2 a 4 veces semana<br><input type="radio"/> 5 a 6 veces semana<br><input type="radio"/> 1 vez al día<br><input type="radio"/> 2 a 3 veces al día<br><input type="radio"/> 5 a 6 veces al día<br><input type="radio"/> más 6 veces al día |
|---------------------|---------------------------------------------------------------------------------------------------------------------------------------------------------------------------------------------------------------------------------------------------------------------------------------------------------------------------------------------------------------------------------------------------|

---

|                |                                                                                                                                                                                                                                                                                                                                                                                                   |
|----------------|---------------------------------------------------------------------------------------------------------------------------------------------------------------------------------------------------------------------------------------------------------------------------------------------------------------------------------------------------------------------------------------------------|
| Agua del grifo | <input type="radio"/> Nunca o menos 1 vez al mes<br><input type="radio"/> 1 a 3 veces mes<br><input type="radio"/> 1 vez semana<br><input type="radio"/> 2 a 4 veces semana<br><input type="radio"/> 5 a 6 veces semana<br><input type="radio"/> 1 vez al día<br><input type="radio"/> 2 a 3 veces al día<br><input type="radio"/> 5 a 6 veces al día<br><input type="radio"/> más 6 veces al día |
|----------------|---------------------------------------------------------------------------------------------------------------------------------------------------------------------------------------------------------------------------------------------------------------------------------------------------------------------------------------------------------------------------------------------------|

---

|                          |                                                                                                                                                                                                                                                                                                                                                                                                   |
|--------------------------|---------------------------------------------------------------------------------------------------------------------------------------------------------------------------------------------------------------------------------------------------------------------------------------------------------------------------------------------------------------------------------------------------|
| agua embotellada sin gas | <input type="radio"/> Nunca o menos 1 vez al mes<br><input type="radio"/> 1 a 3 veces mes<br><input type="radio"/> 1 vez semana<br><input type="radio"/> 2 a 4 veces semana<br><input type="radio"/> 5 a 6 veces semana<br><input type="radio"/> 1 vez al día<br><input type="radio"/> 2 a 3 veces al día<br><input type="radio"/> 5 a 6 veces al día<br><input type="radio"/> más 6 veces al día |
|--------------------------|---------------------------------------------------------------------------------------------------------------------------------------------------------------------------------------------------------------------------------------------------------------------------------------------------------------------------------------------------------------------------------------------------|

---

|                          |                                                                                                                                                                                                                                                                                                                                                                                                   |
|--------------------------|---------------------------------------------------------------------------------------------------------------------------------------------------------------------------------------------------------------------------------------------------------------------------------------------------------------------------------------------------------------------------------------------------|
| agua embotellada con gas | <input type="radio"/> Nunca o menos 1 vez al mes<br><input type="radio"/> 1 a 3 veces mes<br><input type="radio"/> 1 vez semana<br><input type="radio"/> 2 a 4 veces semana<br><input type="radio"/> 5 a 6 veces semana<br><input type="radio"/> 1 vez al día<br><input type="radio"/> 2 a 3 veces al día<br><input type="radio"/> 5 a 6 veces al día<br><input type="radio"/> más 6 veces al día |
|--------------------------|---------------------------------------------------------------------------------------------------------------------------------------------------------------------------------------------------------------------------------------------------------------------------------------------------------------------------------------------------------------------------------------------------|

---

|                      |                                                                                                                                                                                                                                                                                                                                                                                                   |
|----------------------|---------------------------------------------------------------------------------------------------------------------------------------------------------------------------------------------------------------------------------------------------------------------------------------------------------------------------------------------------------------------------------------------------|
| zumو frutas embasado | <input type="radio"/> Nunca o menos 1 vez al mes<br><input type="radio"/> 1 a 3 veces mes<br><input type="radio"/> 1 vez semana<br><input type="radio"/> 2 a 4 veces semana<br><input type="radio"/> 5 a 6 veces semana<br><input type="radio"/> 1 vez al día<br><input type="radio"/> 2 a 3 veces al día<br><input type="radio"/> 5 a 6 veces al día<br><input type="radio"/> más 6 veces al día |
|----------------------|---------------------------------------------------------------------------------------------------------------------------------------------------------------------------------------------------------------------------------------------------------------------------------------------------------------------------------------------------------------------------------------------------|

---

|      |                                                                                                                                                                                                                                                                                                                                                                                                   |
|------|---------------------------------------------------------------------------------------------------------------------------------------------------------------------------------------------------------------------------------------------------------------------------------------------------------------------------------------------------------------------------------------------------|
| cafe | <input type="radio"/> Nunca o menos 1 vez al mes<br><input type="radio"/> 1 a 3 veces mes<br><input type="radio"/> 1 vez semana<br><input type="radio"/> 2 a 4 veces semana<br><input type="radio"/> 5 a 6 veces semana<br><input type="radio"/> 1 vez al día<br><input type="radio"/> 2 a 3 veces al día<br><input type="radio"/> 5 a 6 veces al día<br><input type="radio"/> más 6 veces al día |
|------|---------------------------------------------------------------------------------------------------------------------------------------------------------------------------------------------------------------------------------------------------------------------------------------------------------------------------------------------------------------------------------------------------|

---

---

cafe descafeinado

- ☐ Nunca o menos 1 vez al mes
- ☐ 1 a 3 veces mes
- ☐ 1 vez semana
- ☐ 2 a 4 veces semana
- ☐ 5 a 6 veces semana
- ☐ 1 vez al día
- ☐ 2 a 3 veces al día
- ☐ 5 a 6 veces al día
- ☐ más 6 veces al día

---

te o infusión

- ☐ Nunca o menos 1 vez al mes
- ☐ 1 a 3 veces mes
- ☐ 1 vez semana
- ☐ 2 a 4 veces semana
- ☐ 5 a 6 veces semana
- ☐ 1 vez al día
- ☐ 2 a 3 veces al día
- ☐ 5 a 6 veces al día
- ☐ más 6 veces al día

---

sopa o puré verduras

- ☐ Nunca o menos 1 vez al mes
- ☐ 1 a 3 veces mes
- ☐ 1 vez semana
- ☐ 2 a 4 veces semana
- ☐ 5 a 6 veces semana
- ☐ 1 vez al día
- ☐ 2 a 3 veces al día
- ☐ 5 a 6 veces al día
- ☐ más 6 veces al día

---

croquetas pollo jamón

- ☐ Nunca o menos 1 vez al mes
- ☐ 1 a 3 veces mes
- ☐ 1 vez semana
- ☐ 2 a 4 veces semana
- ☐ 5 a 6 veces semana
- ☐ 1 vez al día
- ☐ 2 a 3 veces al día
- ☐ 5 a 6 veces al día
- ☐ más 6 veces al día

---

croquetas pescado

- ☐ Nunca o menos 1 vez al mes
- ☐ 1 a 3 veces mes
- ☐ 1 vez semana
- ☐ 2 a 4 veces semana
- ☐ 5 a 6 veces semana
- ☐ 1 vez al día
- ☐ 2 a 3 veces al día
- ☐ 5 a 6 veces al día
- ☐ más 6 veces al día

---

mayonesa

- ☐ Nunca o menos 1 vez al mes
- ☐ 1 a 3 veces mes
- ☐ 1 vez semana
- ☐ 2 a 4 veces semana
- ☐ 5 a 6 veces semana
- ☐ 1 vez al día
- ☐ 2 a 3 veces al día
- ☐ 5 a 6 veces al día
- ☐ más 6 veces al día

|                  |                                                                                                                                                                                                                                                                                                                                                                                                   |
|------------------|---------------------------------------------------------------------------------------------------------------------------------------------------------------------------------------------------------------------------------------------------------------------------------------------------------------------------------------------------------------------------------------------------|
| salsa tomate     | <input type="radio"/> Nunca o menos 1 vez al mes<br><input type="radio"/> 1 a 3 veces mes<br><input type="radio"/> 1 vez semana<br><input type="radio"/> 2 a 4 veces semana<br><input type="radio"/> 5 a 6 veces semana<br><input type="radio"/> 1 vez al día<br><input type="radio"/> 2 a 3 veces al día<br><input type="radio"/> 5 a 6 veces al día<br><input type="radio"/> más 6 veces al día |
| ketchup          | <input type="radio"/> Nunca o menos 1 vez al mes<br><input type="radio"/> 1 a 3 veces mes<br><input type="radio"/> 1 vez semana<br><input type="radio"/> 2 a 4 veces semana<br><input type="radio"/> 5 a 6 veces semana<br><input type="radio"/> 1 vez al día<br><input type="radio"/> 2 a 3 veces al día<br><input type="radio"/> 5 a 6 veces al día<br><input type="radio"/> más 6 veces al día |
| sal              | <input type="radio"/> Nunca o menos 1 vez al mes<br><input type="radio"/> 1 a 3 veces mes<br><input type="radio"/> 1 vez semana<br><input type="radio"/> 2 a 4 veces semana<br><input type="radio"/> 5 a 6 veces semana<br><input type="radio"/> 1 vez al día<br><input type="radio"/> 2 a 3 veces al día<br><input type="radio"/> 5 a 6 veces al día<br><input type="radio"/> más 6 veces al día |
| ajo              | <input type="radio"/> Nunca o menos 1 vez al mes<br><input type="radio"/> 1 a 3 veces mes<br><input type="radio"/> 1 vez semana<br><input type="radio"/> 2 a 4 veces semana<br><input type="radio"/> 5 a 6 veces semana<br><input type="radio"/> 1 vez al día<br><input type="radio"/> 2 a 3 veces al día<br><input type="radio"/> 5 a 6 veces al día<br><input type="radio"/> más 6 veces al día |
| mermelada o miel | <input type="radio"/> Nunca o menos 1 vez al mes<br><input type="radio"/> 1 a 3 veces mes<br><input type="radio"/> 1 vez semana<br><input type="radio"/> 2 a 4 veces semana<br><input type="radio"/> 5 a 6 veces semana<br><input type="radio"/> 1 vez al día<br><input type="radio"/> 2 a 3 veces al día<br><input type="radio"/> 5 a 6 veces al día<br><input type="radio"/> más 6 veces al día |
| azúcar           | <input type="radio"/> Nunca o menos 1 vez al mes<br><input type="radio"/> 1 a 3 veces mes<br><input type="radio"/> 1 vez semana<br><input type="radio"/> 2 a 4 veces semana<br><input type="radio"/> 5 a 6 veces semana<br><input type="radio"/> 1 vez al día<br><input type="radio"/> 2 a 3 veces al día<br><input type="radio"/> 5 a 6 veces al día<br><input type="radio"/> más 6 veces al día |



|                                       |                                                                                                                                                                                                                                                                                                                                                                                                                                                                                                                    |
|---------------------------------------|--------------------------------------------------------------------------------------------------------------------------------------------------------------------------------------------------------------------------------------------------------------------------------------------------------------------------------------------------------------------------------------------------------------------------------------------------------------------------------------------------------------------|
| Otro alimento                         | <hr/>                                                                                                                                                                                                                                                                                                                                                                                                                                                                                                              |
| suplementos vitamínicos               | <input type="radio"/> si<br><input type="radio"/> no                                                                                                                                                                                                                                                                                                                                                                                                                                                               |
| suplementos vitamínicos               | <hr/>                                                                                                                                                                                                                                                                                                                                                                                                                                                                                                              |
| dieta previa                          | <input type="radio"/> si<br><input type="radio"/> no                                                                                                                                                                                                                                                                                                                                                                                                                                                               |
| motivo dieta                          | <input type="radio"/> no dieta<br><input type="radio"/> control peso<br><input type="radio"/> control colesterol<br><input type="radio"/> control diabetes<br><input type="radio"/> problemas estómago<br><input type="radio"/> problemas vesícula o hepáticos<br><input type="radio"/> HTA o cardiopatía<br><input type="radio"/> problemas renales<br><input type="radio"/> alergia alimentaria<br><input type="radio"/> ácido úrico elevado<br><input type="radio"/> vegetariana<br><input type="radio"/> otros |
| cambio alimentos año previo gestación | <input type="radio"/> si<br><input type="radio"/> no                                                                                                                                                                                                                                                                                                                                                                                                                                                               |
| cambio lácteos                        | <input type="radio"/> eliminado<br><input type="radio"/> disminuido<br><input type="radio"/> igual<br><input type="radio"/> aumentado<br><input type="radio"/> no sabe                                                                                                                                                                                                                                                                                                                                             |
| cambio huevos                         | <input type="radio"/> eliminado<br><input type="radio"/> disminuido<br><input type="radio"/> igual<br><input type="radio"/> aumentado<br><input type="radio"/> no sabe                                                                                                                                                                                                                                                                                                                                             |
| cambio carne                          | <input type="radio"/> eliminado<br><input type="radio"/> disminuido<br><input type="radio"/> igual<br><input type="radio"/> aumentado<br><input type="radio"/> no sabe                                                                                                                                                                                                                                                                                                                                             |
| cambio pescado                        | <input type="radio"/> eliminado<br><input type="radio"/> disminuido<br><input type="radio"/> igual<br><input type="radio"/> aumentado<br><input type="radio"/> no sabe                                                                                                                                                                                                                                                                                                                                             |
| cambio verduras                       | <input type="radio"/> eliminado<br><input type="radio"/> disminuido<br><input type="radio"/> igual<br><input type="radio"/> aumentado<br><input type="radio"/> no sabe                                                                                                                                                                                                                                                                                                                                             |

|                            |                                                                                                                                                                                                             |
|----------------------------|-------------------------------------------------------------------------------------------------------------------------------------------------------------------------------------------------------------|
| cambio legumbres           | <input type="radio"/> eliminado<br><input type="radio"/> disminuido<br><input type="radio"/> igual<br><input type="radio"/> aumentado<br><input type="radio"/> no sabe                                      |
| cambio fruta               | <input type="radio"/> eliminado<br><input type="radio"/> disminuido<br><input type="radio"/> igual<br><input type="radio"/> aumentado<br><input type="radio"/> no sabe                                      |
| cambio pan                 | <input type="radio"/> eliminado<br><input type="radio"/> disminuido<br><input type="radio"/> igual<br><input type="radio"/> aumentado<br><input type="radio"/> no sabe                                      |
| cambio aceite oliva        | <input type="radio"/> eliminado<br><input type="radio"/> disminuido<br><input type="radio"/> igual<br><input type="radio"/> aumentado<br><input type="radio"/> no sabe                                      |
| cambio mante o margarina   | <input type="radio"/> eliminado<br><input type="radio"/> disminuido<br><input type="radio"/> igual<br><input type="radio"/> aumentado<br><input type="radio"/> no sabe                                      |
| cambio azúcar y dulces     | <input type="radio"/> eliminado<br><input type="radio"/> disminuido<br><input type="radio"/> igual<br><input type="radio"/> aumentado<br><input type="radio"/> no sabe                                      |
| cambio bebidas alcohólicas | <input type="radio"/> eliminado<br><input type="radio"/> disminuido<br><input type="radio"/> igual<br><input type="radio"/> aumentado<br><input type="radio"/> no sabe                                      |
| frecuencia comidas fritas  | <input type="radio"/> a diario<br><input type="radio"/> 5 a 6 veces semana<br><input type="radio"/> 2 a 4 veces semana<br><input type="radio"/> 1 vez semana<br><input type="radio"/> menos de 1 vez semana |
| carne                      | <input type="radio"/> no como<br><input type="radio"/> cruda<br><input type="radio"/> poco hecha<br><input type="radio"/> hecha<br><input type="radio"/> muy hecha                                          |
| grasa visible carne        | <input type="radio"/> quita toda<br><input type="radio"/> quita mayoría<br><input type="radio"/> quita un poco<br><input type="radio"/> no quita nada                                                       |

|                                |                                                                                                                                                                                                                                               |
|--------------------------------|-----------------------------------------------------------------------------------------------------------------------------------------------------------------------------------------------------------------------------------------------|
| cocina carne                   | <input type="radio"/> a la plancha<br><input type="radio"/> a la parrilla<br><input type="radio"/> asada<br><input type="radio"/> frita<br><input type="radio"/> guisada                                                                      |
| tostado quemado carne          | <input type="radio"/> nunca<br><input type="radio"/> 1 vez mes<br><input type="radio"/> 2 a 3 veces mes<br><input type="radio"/> 1 vez semana<br><input type="radio"/> 2 a 3 semanas                                                          |
| tostado quemado pescado        | <input type="radio"/> nunca<br><input type="radio"/> 1 vez mes<br><input type="radio"/> 2 a 3 veces mes<br><input type="radio"/> 1 vez semana<br><input type="radio"/> 2 a 3 semanas                                                          |
| socarrat paella                | <input type="radio"/> nunca<br><input type="radio"/> 1 vez mes<br><input type="radio"/> 2 a 3 veces mes<br><input type="radio"/> 1 vez semana<br><input type="radio"/> 2 a 3 semanas                                                          |
| grasa o aceite cocinar         | <input type="radio"/> mantequilla<br><input type="radio"/> margarina<br><input type="radio"/> aceite oliva<br><input type="radio"/> aceite oliva virgen extra<br><input type="radio"/> aceite vegetal<br><input type="radio"/> mezcla aceites |
| grasa aceite aliñar            | <input type="radio"/> mantequilla<br><input type="radio"/> margarina<br><input type="radio"/> aceite oliva<br><input type="radio"/> aceite oliva virgen extra<br><input type="radio"/> aceite vegetal<br><input type="radio"/> mezcla aceites |
| grasa aceite freir             | <input type="radio"/> mantequilla<br><input type="radio"/> margarina<br><input type="radio"/> aceite oliva<br><input type="radio"/> aceite oliva virgen extra<br><input type="radio"/> aceite vegetal<br><input type="radio"/> mezcla aceites |
| Ejercicio cuestionario         | <input type="radio"/> si<br><input type="radio"/> no                                                                                                                                                                                          |
| horas de sueño incluido siesta | _____                                                                                                                                                                                                                                         |
| minutos siesta                 | _____                                                                                                                                                                                                                                         |
| horas televisión semana        | _____                                                                                                                                                                                                                                         |

|                                        |                                                                                                                                                                                                                                                                                                                                                                |
|----------------------------------------|----------------------------------------------------------------------------------------------------------------------------------------------------------------------------------------------------------------------------------------------------------------------------------------------------------------------------------------------------------------|
| actividad trabajo                      | <input type="radio"/> casi siempre sentado<br><input type="radio"/> sentado 50 por cien<br><input type="radio"/> casi siempre de pie, quieto<br><input type="radio"/> casi siempre levantado caminando y llevando pocas cosas<br><input type="radio"/> casi siempre levantado, caminando y llevado muchas cosas<br><input type="radio"/> trabajo manual pesado |
| tiempo caminar o bici al día           | <input type="radio"/> casi nunca<br><input type="radio"/> menos 20min día<br><input type="radio"/> 20 a 40 min día<br><input type="radio"/> 40 a 60 min día<br><input type="radio"/> 1h o 1h y media día<br><input type="radio"/> más de 1h y media al día                                                                                                     |
| tiempo tareas casa al día              | <input type="radio"/> menos de 1h día<br><input type="radio"/> 1 a 2h día<br><input type="radio"/> 3 a 4h día<br><input type="radio"/> 5 a 6h día<br><input type="radio"/> 7 a 8h día<br><input type="radio"/> más de 8h día                                                                                                                                   |
| tiempo libre televisión ordenador leer | <input type="radio"/> menos 1h día<br><input type="radio"/> 1h día<br><input type="radio"/> 2h día<br><input type="radio"/> 3h día<br><input type="radio"/> 4h día<br><input type="radio"/> 5 a 6h día<br><input type="radio"/> mas 6h día                                                                                                                     |
| tiempo libre ejercicio o deporte       | <input type="radio"/> menos 1h semana<br><input type="radio"/> 1h semana<br><input type="radio"/> 2h semana<br><input type="radio"/> 3h semana<br><input type="radio"/> 4 a 5h semana<br><input type="radio"/> mas 5h semana                                                                                                                                   |
| como se considera                      | <input type="radio"/> sedentaria<br><input type="radio"/> poco activa<br><input type="radio"/> moderadamente activa<br><input type="radio"/> bastante activa<br><input type="radio"/> muy activa<br><input type="radio"/> no sabe                                                                                                                              |
| FUR                                    | [*DATA REMOVED*]                                                                                                                                                                                                                                                                                                                                               |
| Semanas gestación 2T                   | _____                                                                                                                                                                                                                                                                                                                                                          |
| Días gestación 2T                      | _____                                                                                                                                                                                                                                                                                                                                                          |
| DBP 2T                                 | _____                                                                                                                                                                                                                                                                                                                                                          |
| CC 2T                                  | _____                                                                                                                                                                                                                                                                                                                                                          |

|                                                   |                                                                                                                                                                                                 |
|---------------------------------------------------|-------------------------------------------------------------------------------------------------------------------------------------------------------------------------------------------------|
| AC 2T                                             |                                                                                                                                                                                                 |
| LF 2T                                             |                                                                                                                                                                                                 |
| PFE 2T (Hadlock)                                  |                                                                                                                                                                                                 |
| Semanas gestación 3T                              | [*DATA REMOVED*]                                                                                                                                                                                |
| días 3T                                           | [*DATA REMOVED*]                                                                                                                                                                                |
| DBP 3T                                            | [*DATA REMOVED*]                                                                                                                                                                                |
| CC 3T                                             | [*DATA REMOVED*]                                                                                                                                                                                |
| AC 3T                                             | [*DATA REMOVED*]                                                                                                                                                                                |
| LF 3T                                             | [*DATA REMOVED*]                                                                                                                                                                                |
| PFE 3T (Hadlock)                                  | [*DATA REMOVED*]                                                                                                                                                                                |
| Semanas de gestación final                        | [*DATA REMOVED*]                                                                                                                                                                                |
| días gestación final                              | [*DATA REMOVED*]                                                                                                                                                                                |
| Localización placenta                             | <input checked="" type="radio"/> anterior<br><input type="radio"/> lateral derecha<br><input type="radio"/> lateral izquierda<br><input type="radio"/> posterior<br><input type="radio"/> fondo |
| Presentación longitudinal cefálica                | <input type="radio"/> no<br><input checked="" type="radio"/> si                                                                                                                                 |
| Dorso                                             | <input type="radio"/> izquierda anterior<br><input type="radio"/> izquierda posterior<br><input type="radio"/> derecha anterior<br><input checked="" type="radio"/> derecha posterior           |
| diámetro biparietal                               | [*DATA REMOVED*]                                                                                                                                                                                |
| Circunferencia craneal                            | [*DATA REMOVED*]                                                                                                                                                                                |
| Circunferencia abdominal                          | [*DATA REMOVED*]                                                                                                                                                                                |
| Longitud de femur                                 | [*DATA REMOVED*]                                                                                                                                                                                |
| tejido celular subcutáneo a nivel del muslo en mm | [*DATA REMOVED*]                                                                                                                                                                                |
| tejido celular subcutáneo en abdomen en mm        | [*DATA REMOVED*]                                                                                                                                                                                |

|                                               |                                                                                                                                                          |
|-----------------------------------------------|----------------------------------------------------------------------------------------------------------------------------------------------------------|
| Volumen del muslo en cm3                      | [*DATA REMOVED*]                                                                                                                                         |
| Peso fetal estimado según fórmula de Hadlock  | [*DATA REMOVED*]                                                                                                                                         |
| Percentil                                     | [*DATA REMOVED*]                                                                                                                                         |
| Peso fetal estimado según fórmula de Scioscia | _____                                                                                                                                                    |
| Peso fetal estimado según fórmula de LEE      | _____                                                                                                                                                    |
| Tipo de parto                                 | <input checked="" type="radio"/> eutocico<br><input type="radio"/> instrumentado/ventosa<br><input type="radio"/> cesarea                                |
| fecha de nacimiento                           | [*DATA REMOVED*]                                                                                                                                         |
| Días entre exploración y nacimiento           | [*DATA REMOVED*]                                                                                                                                         |
| Peso RN en g                                  | [*DATA REMOVED*]                                                                                                                                         |
| sexo                                          | <input checked="" type="radio"/> mujer<br><input type="radio"/> hombre                                                                                   |
| Apgar 1 minuto                                | [*DATA REMOVED*]                                                                                                                                         |
| Apgar 5 minutos                               | [*DATA REMOVED*]                                                                                                                                         |
| Apgar 10 minutos                              | _____                                                                                                                                                    |
| antecedente Covid durante gestación           | <input type="radio"/> Yes<br><input checked="" type="radio"/> No                                                                                         |
| Nivel de estudios                             | <input type="radio"/> ninguno<br><input type="radio"/> primarios<br><input checked="" type="radio"/> secundarios<br><input type="radio"/> universitarios |

# Base\_datos\_estimacion\_peso\_fetal

|                                       |                                                                                                                                                                                                                                                                                      |
|---------------------------------------|--------------------------------------------------------------------------------------------------------------------------------------------------------------------------------------------------------------------------------------------------------------------------------------|
| Número de identificación participante | 67                                                                                                                                                                                                                                                                                   |
| CODIGO PARTICIPANTE                   |                                                                                                                                                                                                                                                                                      |
| Edad                                  | [*DATA REMOVED*]                                                                                                                                                                                                                                                                     |
| Gestaciones                           | <input type="radio"/> 1<br><input checked="" type="radio"/> 2<br><input type="radio"/> 3<br><input type="radio"/> mas de 3                                                                                                                                                           |
| partos                                | <input checked="" type="radio"/> 0<br><input type="radio"/> 1<br><input type="radio"/> 2<br><input type="radio"/> 3<br><input type="radio"/> mas de 3                                                                                                                                |
| cesáreas                              | <input checked="" type="radio"/> 0<br><input type="radio"/> 1<br><input type="radio"/> 2<br><input type="radio"/> 3<br><input type="radio"/> mas de 3                                                                                                                                |
| Abortos                               | <input type="radio"/> 0<br><input checked="" type="radio"/> 1<br><input type="radio"/> 2<br><input type="radio"/> 3<br><input type="radio"/> mas de 3                                                                                                                                |
| Tipo de gestacion                     | <input type="radio"/> espontanea<br><input type="radio"/> IAC inseminación artificial conyuge<br><input type="radio"/> IAD inseminación artificial donante<br><input checked="" type="radio"/> FIV Fecundación in Vitro<br><input type="radio"/> Ovodon FIV con donación de ovocitos |
| peso previo a embarazo                | [*DATA REMOVED*]                                                                                                                                                                                                                                                                     |
| Ganancia ponderal embarazo            | [*DATA REMOVED*]                                                                                                                                                                                                                                                                     |
| Talla madre                           | [*DATA REMOVED*]                                                                                                                                                                                                                                                                     |
| IMC previo embarazo                   | 27.60945175517229                                                                                                                                                                                                                                                                    |
| Patología obstétrica                  | <input checked="" type="radio"/> no<br><input type="radio"/> si                                                                                                                                                                                                                      |
| Diabetes pregestacional               | <input checked="" type="radio"/> no<br><input type="radio"/> si                                                                                                                                                                                                                      |
| Diabetes gestacional                  | <input checked="" type="radio"/> no<br><input type="radio"/> si                                                                                                                                                                                                                      |

|                                            |                                                                                                                                                                                      |
|--------------------------------------------|--------------------------------------------------------------------------------------------------------------------------------------------------------------------------------------|
| Diabetes gestacional con insulina          | <input checked="" type="radio"/> no<br><input type="radio"/> si                                                                                                                      |
| Diabetes gestacional con dieta y ejercicio | <input checked="" type="radio"/> no<br><input type="radio"/> si                                                                                                                      |
| Percentil fetos previos                    | <input checked="" type="radio"/> Nada<br><input type="radio"/> percentil menor de 10<br><input type="radio"/> percentil entre 10 y 90<br><input type="radio"/> percentil mayor de 90 |
| Exfumadora                                 | <input checked="" type="radio"/> Nada<br><input type="radio"/> menos de 5 años<br><input type="radio"/> 5 a 10 años<br><input type="radio"/> mayor o igual a 10 años                 |
| Hábito tabáquico                           | <input checked="" type="radio"/> no<br><input type="radio"/> si                                                                                                                      |
| fumadora                                   | [*DATA REMOVED*]                                                                                                                                                                     |
| Consumo otros tóxicos                      | <input checked="" type="radio"/> no<br><input type="radio"/> si                                                                                                                      |
| Hb 1T                                      | _____                                                                                                                                                                                |
| Htc 1T                                     | _____                                                                                                                                                                                |
| Hb 2T                                      | _____                                                                                                                                                                                |
| HTC 2T                                     | _____                                                                                                                                                                                |
| Hb 3T                                      | _____                                                                                                                                                                                |
| HTC 3T                                     | _____                                                                                                                                                                                |
| Suplemento FE oral                         | <input checked="" type="radio"/> si<br><input type="radio"/> no                                                                                                                      |
| Suplemento fe iv                           | <input type="radio"/> si<br><input checked="" type="radio"/> no                                                                                                                      |
| Transfusión                                | <input checked="" type="radio"/> no<br><input type="radio"/> si                                                                                                                      |
| Solicitada Vit D                           | <input checked="" type="radio"/> no<br><input type="radio"/> si                                                                                                                      |



|                       |                                                                                                                                                                                                                                                                                                                                                                                                              |
|-----------------------|--------------------------------------------------------------------------------------------------------------------------------------------------------------------------------------------------------------------------------------------------------------------------------------------------------------------------------------------------------------------------------------------------------------|
| Deficit vit D         | <input type="radio"/> no<br><input type="radio"/> si                                                                                                                                                                                                                                                                                                                                                         |
| Suplemento vit D      | <input type="radio"/> si<br><input type="radio"/> no                                                                                                                                                                                                                                                                                                                                                         |
| Dieta, cuestionario   | <input checked="" type="radio"/> si<br><input type="radio"/> no                                                                                                                                                                                                                                                                                                                                              |
| Leche entera          | <input type="radio"/> Nunca o menos 1 vez al mes<br><input checked="" type="radio"/> 1 a 3 veces mes<br><input type="radio"/> 1 vez semana<br><input type="radio"/> 2 a 4 veces semana<br><input type="radio"/> 5 a 6 veces semana<br><input type="radio"/> 1 vez al día<br><input type="radio"/> 2 a 3 veces al día<br><input type="radio"/> 5 a 6 veces al día<br><input type="radio"/> más 6 veces al día |
| Leche semidesnatada   | <input type="radio"/> Nunca o menos 1 vez al mes<br><input checked="" type="radio"/> 1 a 3 veces mes<br><input type="radio"/> 1 vez semana<br><input type="radio"/> 2 a 4 veces semana<br><input type="radio"/> 5 a 6 veces semana<br><input type="radio"/> 1 vez al día<br><input type="radio"/> 2 a 3 veces al día<br><input type="radio"/> 5 a 6 veces al día<br><input type="radio"/> mas 6 veces al día |
| Leche desnatada       | <input type="radio"/> Nunca o menos 1 vez al mes<br><input checked="" type="radio"/> 1 a 3 veces mes<br><input type="radio"/> 1 vez semana<br><input type="radio"/> 2 a 4 veces semana<br><input type="radio"/> 5 a 6 veces semana<br><input type="radio"/> 1 vez al día<br><input type="radio"/> 2 a 3 veces al día<br><input type="radio"/> 5 a 6 veces al día<br><input type="radio"/> más 6 veces al día |
| Leche condensada      | <input type="radio"/> Nunca o menos 1 vez al mes<br><input checked="" type="radio"/> 1 a 3 veces mes<br><input type="radio"/> 1 vez semana<br><input type="radio"/> 2 a 4 veces semana<br><input type="radio"/> 5 a 6 veces semana<br><input type="radio"/> 1 vez al día<br><input type="radio"/> 2 a 3 veces al día<br><input type="radio"/> 5 a 6 veces al día<br><input type="radio"/> más 6 veces al día |
| nata o crema de leche | <input type="radio"/> Nunca o menos 1 vez al mes<br><input checked="" type="radio"/> 1 a 3 veces mes<br><input type="radio"/> 1 vez semana<br><input type="radio"/> 2 a 4 veces semana<br><input type="radio"/> 5 a 6 veces semana<br><input type="radio"/> 1 vez al día<br><input type="radio"/> 2 a 3 veces al día<br><input type="radio"/> 5 a 6 veces al día<br><input type="radio"/> más 6 veces al día |

|                                             |                                                                                                                                                                                                                                                                                                                                                                                                              |
|---------------------------------------------|--------------------------------------------------------------------------------------------------------------------------------------------------------------------------------------------------------------------------------------------------------------------------------------------------------------------------------------------------------------------------------------------------------------|
| Yogurt Entero                               | <input checked="" type="radio"/> Nunca o menos 1 vez al mes<br><input type="radio"/> 1 a 3 veces mes<br><input type="radio"/> 1 vez semana<br><input type="radio"/> 2 a 4 veces semana<br><input type="radio"/> 5 a 6 veces semana<br><input type="radio"/> 1 vez al día<br><input type="radio"/> 2 a 3 veces al día<br><input type="radio"/> 5 a 6 veces al día<br><input type="radio"/> más 6 veces al día |
| Yogurt desnatado                            | <input type="radio"/> Nunca o menos 1 vez al mes<br><input type="radio"/> 1 a 3 veces mes<br><input type="radio"/> 1 vez semana<br><input type="radio"/> 2 a 4 veces semana<br><input type="radio"/> 5 a 6 veces semana<br><input checked="" type="radio"/> 1 vez al día<br><input type="radio"/> 2 a 3 veces al día<br><input type="radio"/> 5 a 6 veces al día<br><input type="radio"/> más 6 veces al día |
| 100g requesón o queso blando o queso fresco | <input type="radio"/> Nunca o menos 1 vez al mes<br><input checked="" type="radio"/> 1 a 3 veces mes<br><input type="radio"/> 1 vez semana<br><input type="radio"/> 2 a 4 veces semana<br><input type="radio"/> 5 a 6 veces semana<br><input type="radio"/> 1 vez al día<br><input type="radio"/> 2 a 3 veces al día<br><input type="radio"/> 5 a 6 veces al día<br><input type="radio"/> más 6 veces al día |
| queso curado o semicurado o cremoso         | <input type="radio"/> Nunca o menos 1 vez al mes<br><input type="radio"/> 1 a 3 veces mes<br><input type="radio"/> 1 vez semana<br><input checked="" type="radio"/> 2 a 4 veces semana<br><input type="radio"/> 5 a 6 veces semana<br><input type="radio"/> 1 vez al día<br><input type="radio"/> 2 a 3 veces al día<br><input type="radio"/> 5 a 6 veces al día<br><input type="radio"/> más 6 veces al día |
| natillas flan pudding                       | <input type="radio"/> Nunca o menos 1 vez al mes<br><input type="radio"/> 1 a 3 veces mes<br><input checked="" type="radio"/> 1 vez semana<br><input type="radio"/> 2 a 4 veces semana<br><input type="radio"/> 5 a 6 veces semana<br><input type="radio"/> 1 vez al día<br><input type="radio"/> 2 a 3 veces al día<br><input type="radio"/> 5 a 6 veces al día<br><input type="radio"/> más 6 veces al día |
| Helado                                      | <input checked="" type="radio"/> Nunca o menos 1 vez al mes<br><input type="radio"/> 1 a 3 veces mes<br><input type="radio"/> 1 vez semana<br><input type="radio"/> 2 a 4 veces semana<br><input type="radio"/> 5 a 6 veces semana<br><input type="radio"/> 1 vez al día<br><input type="radio"/> 2 a 3 veces al día<br><input type="radio"/> 5 a 6 veces al día<br><input type="radio"/> más 6 veces al día |

|                                      |                                                                                                                                                                                                                                                                                                                                                                                                              |
|--------------------------------------|--------------------------------------------------------------------------------------------------------------------------------------------------------------------------------------------------------------------------------------------------------------------------------------------------------------------------------------------------------------------------------------------------------------|
| huevo                                | <input type="radio"/> Nunca o menos 1 vez al mes<br><input type="radio"/> 1 a 3 veces mes<br><input checked="" type="radio"/> 1 vez semana<br><input type="radio"/> 2 a 4 veces semana<br><input type="radio"/> 5 a 6 veces semana<br><input type="radio"/> 1 vez al día<br><input type="radio"/> 2 a 3 veces al día<br><input type="radio"/> 5 a 6 veces al día<br><input type="radio"/> más 6 veces al día |
| Pollo con piel                       | <input checked="" type="radio"/> Nunca o menos 1 vez al mes<br><input type="radio"/> 1 a 3 veces mes<br><input type="radio"/> 1 vez semana<br><input type="radio"/> 2 a 4 veces semana<br><input type="radio"/> 5 a 6 veces semana<br><input type="radio"/> 1 vez al día<br><input type="radio"/> 2 a 3 veces al día<br><input type="radio"/> 5 a 6 veces al día<br><input type="radio"/> más 6 veces al día |
| pollo sin piel                       | <input type="radio"/> Nunca o menos 1 vez al mes<br><input type="radio"/> 1 a 3 veces mes<br><input checked="" type="radio"/> 1 vez semana<br><input type="radio"/> 2 a 4 veces semana<br><input type="radio"/> 5 a 6 veces semana<br><input type="radio"/> 1 vez al día<br><input type="radio"/> 2 a 3 veces al día<br><input type="radio"/> 5 a 6 veces al día<br><input type="radio"/> más 6 veces al día |
| Ternera o cerdo o cordero            | <input type="radio"/> Nunca o menos 1 vez al mes<br><input checked="" type="radio"/> 1 a 3 veces mes<br><input type="radio"/> 1 vez semana<br><input type="radio"/> 2 a 4 veces semana<br><input type="radio"/> 5 a 6 veces semana<br><input type="radio"/> 1 vez al día<br><input type="radio"/> 2 a 3 veces al día<br><input type="radio"/> 5 a 6 veces al día<br><input type="radio"/> más 6 veces al día |
| carne caza: Conejo o codorniz o pato | <input type="radio"/> Nunca o menos 1 vez al mes<br><input checked="" type="radio"/> 1 a 3 veces mes<br><input type="radio"/> 1 vez semana<br><input type="radio"/> 2 a 4 veces semana<br><input type="radio"/> 5 a 6 veces semana<br><input type="radio"/> 1 vez al día<br><input type="radio"/> 2 a 3 veces al día<br><input type="radio"/> 5 a 6 veces al día<br><input type="radio"/> más 6 veces al día |
| Hígado de ternera o cerdo o pollo    | <input checked="" type="radio"/> Nunca o menos 1 vez al mes<br><input type="radio"/> 1 a 3 veces mes<br><input type="radio"/> 1 vez semana<br><input type="radio"/> 2 a 4 veces semana<br><input type="radio"/> 5 a 6 veces semana<br><input type="radio"/> 1 vez al día<br><input type="radio"/> 2 a 3 veces al día<br><input type="radio"/> 5 a 6 veces al día<br><input type="radio"/> más 6 veces al día |

|                     |                                                                                                                                                                                                                                                                                                                                                                                                              |
|---------------------|--------------------------------------------------------------------------------------------------------------------------------------------------------------------------------------------------------------------------------------------------------------------------------------------------------------------------------------------------------------------------------------------------------------|
| Vísceras            | <input checked="" type="radio"/> Nunca o menos 1 vez al mes<br><input type="radio"/> 1 a 3 veces mes<br><input type="radio"/> 1 vez semana<br><input type="radio"/> 2 a 4 veces semana<br><input type="radio"/> 5 a 6 veces semana<br><input type="radio"/> 1 vez al día<br><input type="radio"/> 2 a 3 veces al día<br><input type="radio"/> 5 a 6 veces al día<br><input type="radio"/> más 6 veces al día |
| Embutido            | <input checked="" type="radio"/> Nunca o menos 1 vez al mes<br><input type="radio"/> 1 a 3 veces mes<br><input type="radio"/> 1 vez semana<br><input type="radio"/> 2 a 4 veces semana<br><input type="radio"/> 5 a 6 veces semana<br><input type="radio"/> 1 vez al día<br><input type="radio"/> 2 a 3 veces al día<br><input type="radio"/> 5 a 6 veces al día<br><input type="radio"/> más 6 veces al día |
| Salchicha o similar | <input type="radio"/> Nunca o menos 1 vez al mes<br><input checked="" type="radio"/> 1 a 3 veces mes<br><input type="radio"/> 1 vez semana<br><input type="radio"/> 2 a 4 veces semana<br><input type="radio"/> 5 a 6 veces semana<br><input type="radio"/> 1 vez al día<br><input type="radio"/> 2 a 3 veces al día<br><input type="radio"/> 5 a 6 veces al día<br><input type="radio"/> más 6 veces al día |
| Pate o foiegras     | <input checked="" type="radio"/> Nunca o menos 1 vez al mes<br><input type="radio"/> 1 a 3 veces mes<br><input type="radio"/> 1 vez semana<br><input type="radio"/> 2 a 4 veces semana<br><input type="radio"/> 5 a 6 veces semana<br><input type="radio"/> 1 vez al día<br><input type="radio"/> 2 a 3 veces al día<br><input type="radio"/> 5 a 6 veces al día<br><input type="radio"/> más 6 veces al día |
| Hamburguesa         | <input type="radio"/> Nunca o menos 1 vez al mes<br><input checked="" type="radio"/> 1 a 3 veces mes<br><input type="radio"/> 1 vez semana<br><input type="radio"/> 2 a 4 veces semana<br><input type="radio"/> 5 a 6 veces semana<br><input type="radio"/> 1 vez al día<br><input type="radio"/> 2 a 3 veces al día<br><input type="radio"/> 5 a 6 veces al día<br><input type="radio"/> más 6 veces al día |
| tocino o bacon      | <input type="radio"/> Nunca o menos 1 vez al mes<br><input checked="" type="radio"/> 1 a 3 veces mes<br><input type="radio"/> 1 vez semana<br><input type="radio"/> 2 a 4 veces semana<br><input type="radio"/> 5 a 6 veces semana<br><input type="radio"/> 1 vez al día<br><input type="radio"/> 2 a 3 veces al día<br><input type="radio"/> 5 a 6 veces al día<br><input type="radio"/> más 6 veces al día |

---

Pescado frito

- ☐ Nunca o menos 1 vez al mes  
☒ 1 a 3 veces mes  
☐ 1 vez semana  
☐ 2 a 4 veces semana  
☐ 5 a 6 veces semana  
☐ 1 vez al día  
☐ 2 a 3 veces al día  
☐ 5 a 6 veces al día  
☐ más 6 veces al día

---

pescado hervido blanco

- ☐ Nunca o menos 1 vez al mes  
☐ 1 a 3 veces mes  
☒ 1 vez semana  
☐ 2 a 4 veces semana  
☐ 5 a 6 veces semana  
☐ 1 vez al día  
☐ 2 a 3 veces al día  
☐ 5 a 6 veces al día  
☐ más 6 veces al día

---

pescado hervido azul

- ☐ Nunca o menos 1 vez al mes  
☒ 1 a 3 veces mes  
☐ 1 vez semana  
☐ 2 a 4 veces semana  
☐ 5 a 6 veces semana  
☐ 1 vez al día  
☐ 2 a 3 veces al día  
☐ 5 a 6 veces al día  
☐ más 6 veces al día

---

otros pescado azul

- ☐ Nunca o menos 1 vez al mes  
☒ 1 a 3 veces mes  
☐ 1 vez semana  
☐ 2 a 4 veces semana  
☐ 5 a 6 veces semana  
☐ 1 vez al día  
☐ 2 a 3 veces al día  
☐ 5 a 6 veces al día  
☐ más 6 veces al día

---

atun conserva

- ☐ Nunca o menos 1 vez al mes  
☐ 1 a 3 veces mes  
☒ 1 vez semana  
☐ 2 a 4 veces semana  
☐ 5 a 6 veces semana  
☐ 1 vez al día  
☐ 2 a 3 veces al día  
☐ 5 a 6 veces al día  
☐ más 6 veces al día

---

sardina conserva

- ☒ Nunca o menos 1 vez al mes  
☐ 1 a 3 veces mes  
☐ 1 vez semana  
☐ 2 a 4 veces semana  
☐ 5 a 6 veces semana  
☐ 1 vez al día  
☐ 2 a 3 veces al día  
☐ 5 a 6 veces al día  
☐ más 6 veces al día

|                                         |                                                                                                                                                                                                                                                                                                                                                                                                              |
|-----------------------------------------|--------------------------------------------------------------------------------------------------------------------------------------------------------------------------------------------------------------------------------------------------------------------------------------------------------------------------------------------------------------------------------------------------------------|
| pescado ahumado                         | <input checked="" type="radio"/> Nunca o menos 1 vez al mes<br><input type="radio"/> 1 a 3 veces mes<br><input type="radio"/> 1 vez semana<br><input type="radio"/> 2 a 4 veces semana<br><input type="radio"/> 5 a 6 veces semana<br><input type="radio"/> 1 vez al día<br><input type="radio"/> 2 a 3 veces al día<br><input type="radio"/> 5 a 6 veces al día<br><input type="radio"/> más 6 veces al día |
| almejas o mejillones o ostras unos 100g | <input type="radio"/> Nunca o menos 1 vez al mes<br><input checked="" type="radio"/> 1 a 3 veces mes<br><input type="radio"/> 1 vez semana<br><input type="radio"/> 2 a 4 veces semana<br><input type="radio"/> 5 a 6 veces semana<br><input type="radio"/> 1 vez al día<br><input type="radio"/> 2 a 3 veces al día<br><input type="radio"/> 5 a 6 veces al día<br><input type="radio"/> más 6 veces al día |
| calamar o chipiron o sepia unos 100g    | <input type="radio"/> Nunca o menos 1 vez al mes<br><input checked="" type="radio"/> 1 a 3 veces mes<br><input type="radio"/> 1 vez semana<br><input type="radio"/> 2 a 4 veces semana<br><input type="radio"/> 5 a 6 veces semana<br><input type="radio"/> 1 vez al día<br><input type="radio"/> 2 a 3 veces al día<br><input type="radio"/> 5 a 6 veces al día<br><input type="radio"/> más 6 veces al día |
| marisco unos 100g                       | <input type="radio"/> Nunca o menos 1 vez al mes<br><input checked="" type="radio"/> 1 a 3 veces mes<br><input type="radio"/> 1 vez semana<br><input type="radio"/> 2 a 4 veces semana<br><input type="radio"/> 5 a 6 veces semana<br><input type="radio"/> 1 vez al día<br><input type="radio"/> 2 a 3 veces al día<br><input type="radio"/> 5 a 6 veces al día<br><input type="radio"/> más 6 veces al día |
| Espinacas o acelgas cocinadas           | <input checked="" type="radio"/> Nunca o menos 1 vez al mes<br><input type="radio"/> 1 a 3 veces mes<br><input type="radio"/> 1 vez semana<br><input type="radio"/> 2 a 4 veces semana<br><input type="radio"/> 5 a 6 veces semana<br><input type="radio"/> 1 vez al día<br><input type="radio"/> 2 a 3 veces al día<br><input type="radio"/> 5 a 6 veces al día<br><input type="radio"/> más 6 veces al día |
| Col o coliflor o brocoli cocinado       | <input type="radio"/> Nunca o menos 1 vez al mes<br><input checked="" type="radio"/> 1 a 3 veces mes<br><input type="radio"/> 1 vez semana<br><input type="radio"/> 2 a 4 veces semana<br><input type="radio"/> 5 a 6 veces semana<br><input type="radio"/> 1 vez al día<br><input type="radio"/> 2 a 3 veces al día<br><input type="radio"/> 5 a 6 veces al día<br><input type="radio"/> más 6 veces al día |

---

Lechuga o endivia o escarola

- ☐ Nunca o menos 1 vez al mes  
☒ 1 a 3 veces mes  
☐ 1 vez semana  
☐ 2 a 4 veces semana  
☐ 5 a 6 veces semana  
☐ 1 vez al día  
☐ 2 a 3 veces al día  
☐ 5 a 6 veces al día  
☐ más 6 veces al día

---

tomate ensalada

- ☐ Nunca o menos 1 vez al mes  
☒ 1 a 3 veces mes  
☐ 1 vez semana  
☐ 2 a 4 veces semana  
☐ 5 a 6 veces semana  
☐ 1 vez al día  
☐ 2 a 3 veces al día  
☐ 5 a 6 veces al día  
☐ más 6 veces al día

---

cebolla

- ☒ Nunca o menos 1 vez al mes  
☐ 1 a 3 veces mes  
☐ 1 vez semana  
☐ 2 a 4 veces semana  
☐ 5 a 6 veces semana  
☐ 1 vez al día  
☐ 2 a 3 veces al día  
☐ 5 a 6 veces al día  
☐ más 6 veces al día

---

Zanahoria o calabaza

- ☐ Nunca o menos 1 vez al mes  
☒ 1 a 3 veces mes  
☐ 1 vez semana  
☐ 2 a 4 veces semana  
☐ 5 a 6 veces semana  
☐ 1 vez al día  
☐ 2 a 3 veces al día  
☐ 5 a 6 veces al día  
☐ más 6 veces al día

---

Judías verdes

- ☒ Nunca o menos 1 vez al mes  
☐ 1 a 3 veces mes  
☐ 1 vez semana  
☐ 2 a 4 veces semana  
☐ 5 a 6 veces semana  
☐ 1 vez al día  
☐ 2 a 3 veces al día  
☐ 5 a 6 veces al día  
☐ más 6 veces al día

---

Berenjena o calabacin o pepino

- ☐ Nunca o menos 1 vez al mes  
☒ 1 a 3 veces mes  
☐ 1 vez semana  
☐ 2 a 4 veces semana  
☐ 5 a 6 veces semana  
☐ 1 vez al día  
☐ 2 a 3 veces al día  
☐ 5 a 6 veces al día  
☐ más 6 veces al día

|                       |                                                                                                                                                                                                                                                                                                                                                                                                              |
|-----------------------|--------------------------------------------------------------------------------------------------------------------------------------------------------------------------------------------------------------------------------------------------------------------------------------------------------------------------------------------------------------------------------------------------------------|
| pimiento              | <input checked="" type="radio"/> Nunca o menos 1 vez al mes<br><input type="radio"/> 1 a 3 veces mes<br><input type="radio"/> 1 vez semana<br><input type="radio"/> 2 a 4 veces semana<br><input type="radio"/> 5 a 6 veces semana<br><input type="radio"/> 1 vez al día<br><input type="radio"/> 2 a 3 veces al día<br><input type="radio"/> 5 a 6 veces al día<br><input type="radio"/> más 6 veces al día |
| alcachofa             | <input type="radio"/> Nunca o menos 1 vez al mes<br><input type="radio"/> 1 a 3 veces mes<br><input checked="" type="radio"/> 1 vez semana<br><input type="radio"/> 2 a 4 veces semana<br><input type="radio"/> 5 a 6 veces semana<br><input type="radio"/> 1 vez al día<br><input type="radio"/> 2 a 3 veces al día<br><input type="radio"/> 5 a 6 veces al día<br><input type="radio"/> más 6 veces al día |
| espárragos            | <input type="radio"/> Nunca o menos 1 vez al mes<br><input type="radio"/> 1 a 3 veces mes<br><input checked="" type="radio"/> 1 vez semana<br><input type="radio"/> 2 a 4 veces semana<br><input type="radio"/> 5 a 6 veces semana<br><input type="radio"/> 1 vez al día<br><input type="radio"/> 2 a 3 veces al día<br><input type="radio"/> 5 a 6 veces al día<br><input type="radio"/> más 6 veces al día |
| maíz hervido          | <input checked="" type="radio"/> Nunca o menos 1 vez al mes<br><input type="radio"/> 1 a 3 veces mes<br><input type="radio"/> 1 vez semana<br><input type="radio"/> 2 a 4 veces semana<br><input type="radio"/> 5 a 6 veces semana<br><input type="radio"/> 1 vez al día<br><input type="radio"/> 2 a 3 veces al día<br><input type="radio"/> 5 a 6 veces al día<br><input type="radio"/> más 6 veces al día |
| legumbres             | <input type="radio"/> Nunca o menos 1 vez al mes<br><input type="radio"/> 1 a 3 veces mes<br><input type="radio"/> 1 vez semana<br><input checked="" type="radio"/> 2 a 4 veces semana<br><input type="radio"/> 5 a 6 veces semana<br><input type="radio"/> 1 vez al día<br><input type="radio"/> 2 a 3 veces al día<br><input type="radio"/> 5 a 6 veces al día<br><input type="radio"/> más 6 veces al día |
| naranjas o mandarinas | <input type="radio"/> Nunca o menos 1 vez al mes<br><input type="radio"/> 1 a 3 veces mes<br><input type="radio"/> 1 vez semana<br><input checked="" type="radio"/> 2 a 4 veces semana<br><input type="radio"/> 5 a 6 veces semana<br><input type="radio"/> 1 vez al día<br><input type="radio"/> 2 a 3 veces al día<br><input type="radio"/> 5 a 6 veces al día<br><input type="radio"/> más 6 veces al día |



|                       |                                                                                                                                                                                                                                                                                                                                                                                                              |
|-----------------------|--------------------------------------------------------------------------------------------------------------------------------------------------------------------------------------------------------------------------------------------------------------------------------------------------------------------------------------------------------------------------------------------------------------|
| zum natural fruta     | <input type="radio"/> Nunca o menos 1 vez al mes<br><input checked="" type="radio"/> 1 a 3 veces mes<br><input type="radio"/> 1 vez semana<br><input type="radio"/> 2 a 4 veces semana<br><input type="radio"/> 5 a 6 veces semana<br><input type="radio"/> 1 vez al día<br><input type="radio"/> 2 a 3 veces al día<br><input type="radio"/> 5 a 6 veces al día<br><input type="radio"/> más 6 veces al día |
| platano               | <input type="radio"/> Nunca o menos 1 vez al mes<br><input type="radio"/> 1 a 3 veces mes<br><input type="radio"/> 1 vez semana<br><input type="radio"/> 2 a 4 veces semana<br><input checked="" type="radio"/> 5 a 6 veces semana<br><input type="radio"/> 1 vez al día<br><input type="radio"/> 2 a 3 veces al día<br><input type="radio"/> 5 a 6 veces al día<br><input type="radio"/> más 6 veces al día |
| manzana o pera        | <input type="radio"/> Nunca o menos 1 vez al mes<br><input type="radio"/> 1 a 3 veces mes<br><input type="radio"/> 1 vez semana<br><input checked="" type="radio"/> 2 a 4 veces semana<br><input type="radio"/> 5 a 6 veces semana<br><input type="radio"/> 1 vez al día<br><input type="radio"/> 2 a 3 veces al día<br><input type="radio"/> 5 a 6 veces al día<br><input type="radio"/> más 6 veces al día |
| melocotón o nectarina | <input type="radio"/> Nunca o menos 1 vez al mes<br><input checked="" type="radio"/> 1 a 3 veces mes<br><input type="radio"/> 1 vez semana<br><input type="radio"/> 2 a 4 veces semana<br><input type="radio"/> 5 a 6 veces semana<br><input type="radio"/> 1 vez al día<br><input type="radio"/> 2 a 3 veces al día<br><input type="radio"/> 5 a 6 veces al día<br><input type="radio"/> más 6 veces al día |
| sandia o melon        | <input type="radio"/> Nunca o menos 1 vez al mes<br><input checked="" type="radio"/> 1 a 3 veces mes<br><input type="radio"/> 1 vez semana<br><input type="radio"/> 2 a 4 veces semana<br><input type="radio"/> 5 a 6 veces semana<br><input type="radio"/> 1 vez al día<br><input type="radio"/> 2 a 3 veces al día<br><input type="radio"/> 5 a 6 veces al día<br><input type="radio"/> más 6 veces al día |
| uva                   | <input checked="" type="radio"/> Nunca o menos 1 vez al mes<br><input type="radio"/> 1 a 3 veces mes<br><input type="radio"/> 1 vez semana<br><input type="radio"/> 2 a 4 veces semana<br><input type="radio"/> 5 a 6 veces semana<br><input type="radio"/> 1 vez al día<br><input type="radio"/> 2 a 3 veces al día<br><input type="radio"/> 5 a 6 veces al día<br><input type="radio"/> más 6 veces al día |

|                 |                                                                                                                                                                                                                                                                                                                                                                                                              |
|-----------------|--------------------------------------------------------------------------------------------------------------------------------------------------------------------------------------------------------------------------------------------------------------------------------------------------------------------------------------------------------------------------------------------------------------|
| bruna o ciruela | <input checked="" type="radio"/> Nunca o menos 1 vez al mes<br><input type="radio"/> 1 a 3 veces mes<br><input type="radio"/> 1 vez semana<br><input type="radio"/> 2 a 4 veces semana<br><input type="radio"/> 5 a 6 veces semana<br><input type="radio"/> 1 vez al día<br><input type="radio"/> 2 a 3 veces al día<br><input type="radio"/> 5 a 6 veces al día<br><input type="radio"/> más 6 veces al día |
| kiwi            | <input type="radio"/> Nunca o menos 1 vez al mes<br><input type="radio"/> 1 a 3 veces mes<br><input checked="" type="radio"/> 1 vez semana<br><input type="radio"/> 2 a 4 veces semana<br><input type="radio"/> 5 a 6 veces semana<br><input type="radio"/> 1 vez al día<br><input type="radio"/> 2 a 3 veces al día<br><input type="radio"/> 5 a 6 veces al día<br><input type="radio"/> más 6 veces al día |
| aceituna        | <input type="radio"/> Nunca o menos 1 vez al mes<br><input type="radio"/> 1 a 3 veces mes<br><input checked="" type="radio"/> 1 vez semana<br><input type="radio"/> 2 a 4 veces semana<br><input type="radio"/> 5 a 6 veces semana<br><input type="radio"/> 1 vez al día<br><input type="radio"/> 2 a 3 veces al día<br><input type="radio"/> 5 a 6 veces al día<br><input type="radio"/> más 6 veces al día |
| frutos secos    | <input type="radio"/> Nunca o menos 1 vez al mes<br><input type="radio"/> 1 a 3 veces mes<br><input checked="" type="radio"/> 1 vez semana<br><input type="radio"/> 2 a 4 veces semana<br><input type="radio"/> 5 a 6 veces semana<br><input type="radio"/> 1 vez al día<br><input type="radio"/> 2 a 3 veces al día<br><input type="radio"/> 5 a 6 veces al día<br><input type="radio"/> más 6 veces al día |
| pan blanco      | <input checked="" type="radio"/> Nunca o menos 1 vez al mes<br><input type="radio"/> 1 a 3 veces mes<br><input type="radio"/> 1 vez semana<br><input type="radio"/> 2 a 4 veces semana<br><input type="radio"/> 5 a 6 veces semana<br><input type="radio"/> 1 vez al día<br><input type="radio"/> 2 a 3 veces al día<br><input type="radio"/> 5 a 6 veces al día<br><input type="radio"/> más 6 veces al día |
| pan integral    | <input type="radio"/> Nunca o menos 1 vez al mes<br><input type="radio"/> 1 a 3 veces mes<br><input checked="" type="radio"/> 1 vez semana<br><input type="radio"/> 2 a 4 veces semana<br><input type="radio"/> 5 a 6 veces semana<br><input type="radio"/> 1 vez al día<br><input type="radio"/> 2 a 3 veces al día<br><input type="radio"/> 5 a 6 veces al día<br><input type="radio"/> más 6 veces al día |

---

cereales desayuno

- ☐ Nunca o menos 1 vez al mes  
☒ 1 a 3 veces mes  
☐ 1 vez semana  
☐ 2 a 4 veces semana  
☐ 5 a 6 veces semana  
☐ 1 vez al día  
☐ 2 a 3 veces al día  
☐ 5 a 6 veces al día  
☐ más 6 veces al día

---

patatas fritas

- ☐ Nunca o menos 1 vez al mes  
☐ 1 a 3 veces mes  
☒ 1 vez semana  
☐ 2 a 4 veces semana  
☐ 5 a 6 veces semana  
☐ 1 vez al día  
☐ 2 a 3 veces al día  
☐ 5 a 6 veces al día  
☐ más 6 veces al día

---

patatas cocidas o asadas

- ☐ Nunca o menos 1 vez al mes  
☐ 1 a 3 veces mes  
☒ 1 vez semana  
☐ 2 a 4 veces semana  
☐ 5 a 6 veces semana  
☐ 1 vez al día  
☐ 2 a 3 veces al día  
☐ 5 a 6 veces al día  
☐ más 6 veces al día

---

bolsa papas

- ☐ Nunca o menos 1 vez al mes  
☐ 1 a 3 veces mes  
☒ 1 vez semana  
☐ 2 a 4 veces semana  
☐ 5 a 6 veces semana  
☐ 1 vez al día  
☐ 2 a 3 veces al día  
☐ 5 a 6 veces al día  
☐ más 6 veces al día

---

arroz cocinado

- ☐ Nunca o menos 1 vez al mes  
☐ 1 a 3 veces mes  
☒ 1 vez semana  
☐ 2 a 4 veces semana  
☐ 5 a 6 veces semana  
☐ 1 vez al día  
☐ 2 a 3 veces al día  
☐ 5 a 6 veces al día  
☐ más 6 veces al día

---

pasta

- ☐ Nunca o menos 1 vez al mes  
☐ 1 a 3 veces mes  
☒ 1 vez semana  
☐ 2 a 4 veces semana  
☐ 5 a 6 veces semana  
☐ 1 vez al día  
☐ 2 a 3 veces al día  
☐ 5 a 6 veces al día  
☐ más 6 veces al día

|                     |                                                                                                                                                                                                                                                                                                                                                                                                              |
|---------------------|--------------------------------------------------------------------------------------------------------------------------------------------------------------------------------------------------------------------------------------------------------------------------------------------------------------------------------------------------------------------------------------------------------------|
| pizza               | <input type="radio"/> Nunca o menos 1 vez al mes<br><input type="radio"/> 1 a 3 veces mes<br><input checked="" type="radio"/> 1 vez semana<br><input type="radio"/> 2 a 4 veces semana<br><input type="radio"/> 5 a 6 veces semana<br><input type="radio"/> 1 vez al día<br><input type="radio"/> 2 a 3 veces al día<br><input type="radio"/> 5 a 6 veces al día<br><input type="radio"/> más 6 veces al día |
| aceite oliva        | <input type="radio"/> Nunca o menos 1 vez al mes<br><input type="radio"/> 1 a 3 veces mes<br><input checked="" type="radio"/> 1 vez semana<br><input type="radio"/> 2 a 4 veces semana<br><input type="radio"/> 5 a 6 veces semana<br><input type="radio"/> 1 vez al día<br><input type="radio"/> 2 a 3 veces al día<br><input type="radio"/> 5 a 6 veces al día<br><input type="radio"/> más 6 veces al día |
| otros aceites       | <input type="radio"/> Nunca o menos 1 vez al mes<br><input type="radio"/> 1 a 3 veces mes<br><input checked="" type="radio"/> 1 vez semana<br><input type="radio"/> 2 a 4 veces semana<br><input type="radio"/> 5 a 6 veces semana<br><input type="radio"/> 1 vez al día<br><input type="radio"/> 2 a 3 veces al día<br><input type="radio"/> 5 a 6 veces al día<br><input type="radio"/> más 6 veces al día |
| margarina           | <input checked="" type="radio"/> Nunca o menos 1 vez al mes<br><input type="radio"/> 1 a 3 veces mes<br><input type="radio"/> 1 vez semana<br><input type="radio"/> 2 a 4 veces semana<br><input type="radio"/> 5 a 6 veces semana<br><input type="radio"/> 1 vez al día<br><input type="radio"/> 2 a 3 veces al día<br><input type="radio"/> 5 a 6 veces al día<br><input type="radio"/> más 6 veces al día |
| mantequilla         | <input checked="" type="radio"/> Nunca o menos 1 vez al mes<br><input type="radio"/> 1 a 3 veces mes<br><input type="radio"/> 1 vez semana<br><input type="radio"/> 2 a 4 veces semana<br><input type="radio"/> 5 a 6 veces semana<br><input type="radio"/> 1 vez al día<br><input type="radio"/> 2 a 3 veces al día<br><input type="radio"/> 5 a 6 veces al día<br><input type="radio"/> más 6 veces al día |
| galletas tipo maria | <input type="radio"/> Nunca o menos 1 vez al mes<br><input type="radio"/> 1 a 3 veces mes<br><input type="radio"/> 1 vez semana<br><input checked="" type="radio"/> 2 a 4 veces semana<br><input type="radio"/> 5 a 6 veces semana<br><input type="radio"/> 1 vez al día<br><input type="radio"/> 2 a 3 veces al día<br><input type="radio"/> 5 a 6 veces al día<br><input type="radio"/> más 6 veces al día |

|                           |                                                                                                                                                                                                                                                                                                                                                                                                              |
|---------------------------|--------------------------------------------------------------------------------------------------------------------------------------------------------------------------------------------------------------------------------------------------------------------------------------------------------------------------------------------------------------------------------------------------------------|
| galletas chocolate        | <input type="radio"/> Nunca o menos 1 vez al mes<br><input checked="" type="radio"/> 1 a 3 veces mes<br><input type="radio"/> 1 vez semana<br><input type="radio"/> 2 a 4 veces semana<br><input type="radio"/> 5 a 6 veces semana<br><input type="radio"/> 1 vez al día<br><input type="radio"/> 2 a 3 veces al día<br><input type="radio"/> 5 a 6 veces al día<br><input type="radio"/> más 6 veces al día |
| bollieria                 | <input type="radio"/> Nunca o menos 1 vez al mes<br><input type="radio"/> 1 a 3 veces mes<br><input checked="" type="radio"/> 1 vez semana<br><input type="radio"/> 2 a 4 veces semana<br><input type="radio"/> 5 a 6 veces semana<br><input type="radio"/> 1 vez al día<br><input type="radio"/> 2 a 3 veces al día<br><input type="radio"/> 5 a 6 veces al día<br><input type="radio"/> más 6 veces al día |
| chocolate o bombones      | <input type="radio"/> Nunca o menos 1 vez al mes<br><input type="radio"/> 1 a 3 veces mes<br><input checked="" type="radio"/> 1 vez semana<br><input type="radio"/> 2 a 4 veces semana<br><input type="radio"/> 5 a 6 veces semana<br><input type="radio"/> 1 vez al día<br><input type="radio"/> 2 a 3 veces al día<br><input type="radio"/> 5 a 6 veces al día<br><input type="radio"/> más 6 veces al día |
| chocolate polvo o colacao | <input type="radio"/> Nunca o menos 1 vez al mes<br><input type="radio"/> 1 a 3 veces mes<br><input type="radio"/> 1 vez semana<br><input checked="" type="radio"/> 2 a 4 veces semana<br><input type="radio"/> 5 a 6 veces semana<br><input type="radio"/> 1 vez al día<br><input type="radio"/> 2 a 3 veces al día<br><input type="radio"/> 5 a 6 veces al día<br><input type="radio"/> más 6 veces al día |
| vino tinto                | <input checked="" type="radio"/> Nunca o menos 1 vez al mes<br><input type="radio"/> 1 a 3 veces mes<br><input type="radio"/> 1 vez semana<br><input type="radio"/> 2 a 4 veces semana<br><input type="radio"/> 5 a 6 veces semana<br><input type="radio"/> 1 vez al día<br><input type="radio"/> 2 a 3 veces al día<br><input type="radio"/> 5 a 6 veces al día<br><input type="radio"/> más 6 veces al día |
| vino blanco               | <input checked="" type="radio"/> Nunca o menos 1 vez al mes<br><input type="radio"/> 1 a 3 veces mes<br><input type="radio"/> 1 vez semana<br><input type="radio"/> 2 a 4 veces semana<br><input type="radio"/> 5 a 6 veces semana<br><input type="radio"/> 1 vez al día<br><input type="radio"/> 2 a 3 veces al día<br><input type="radio"/> 5 a 6 veces al día<br><input type="radio"/> más 6 veces al día |

|                       |                                                                                                                                                                                                                                                                                                                                                                                                              |
|-----------------------|--------------------------------------------------------------------------------------------------------------------------------------------------------------------------------------------------------------------------------------------------------------------------------------------------------------------------------------------------------------------------------------------------------------|
| vino seco o vermut    | <input checked="" type="radio"/> Nunca o menos 1 vez al mes<br><input type="radio"/> 1 a 3 veces mes<br><input type="radio"/> 1 vez semana<br><input type="radio"/> 2 a 4 veces semana<br><input type="radio"/> 5 a 6 veces semana<br><input type="radio"/> 1 vez al día<br><input type="radio"/> 2 a 3 veces al día<br><input type="radio"/> 5 a 6 veces al día<br><input type="radio"/> más 6 veces al día |
| cerveza               | <input checked="" type="radio"/> Nunca o menos 1 vez al mes<br><input type="radio"/> 1 a 3 veces mes<br><input type="radio"/> 1 vez semana<br><input type="radio"/> 2 a 4 veces semana<br><input type="radio"/> 5 a 6 veces semana<br><input type="radio"/> 1 vez al día<br><input type="radio"/> 2 a 3 veces al día<br><input type="radio"/> 5 a 6 veces al día<br><input type="radio"/> más 6 veces al día |
| cerveza sin alcohol   | <input checked="" type="radio"/> Nunca o menos 1 vez al mes<br><input type="radio"/> 1 a 3 veces mes<br><input type="radio"/> 1 vez semana<br><input type="radio"/> 2 a 4 veces semana<br><input type="radio"/> 5 a 6 veces semana<br><input type="radio"/> 1 vez al día<br><input type="radio"/> 2 a 3 veces al día<br><input type="radio"/> 5 a 6 veces al día<br><input type="radio"/> más 6 veces al día |
| licores               | <input checked="" type="radio"/> Nunca o menos 1 vez al mes<br><input type="radio"/> 1 a 3 veces mes<br><input type="radio"/> 1 vez semana<br><input type="radio"/> 2 a 4 veces semana<br><input type="radio"/> 5 a 6 veces semana<br><input type="radio"/> 1 vez al día<br><input type="radio"/> 2 a 3 veces al día<br><input type="radio"/> 5 a 6 veces al día<br><input type="radio"/> más 6 veces al día |
| ginebra o ron o vodka | <input checked="" type="radio"/> Nunca o menos 1 vez al mes<br><input type="radio"/> 1 a 3 veces mes<br><input type="radio"/> 1 vez semana<br><input type="radio"/> 2 a 4 veces semana<br><input type="radio"/> 5 a 6 veces semana<br><input type="radio"/> 1 vez al día<br><input type="radio"/> 2 a 3 veces al día<br><input type="radio"/> 5 a 6 veces al día<br><input type="radio"/> más 6 veces al día |
| refresco normal       | <input checked="" type="radio"/> Nunca o menos 1 vez al mes<br><input type="radio"/> 1 a 3 veces mes<br><input type="radio"/> 1 vez semana<br><input type="radio"/> 2 a 4 veces semana<br><input type="radio"/> 5 a 6 veces semana<br><input type="radio"/> 1 vez al día<br><input type="radio"/> 2 a 3 veces al día<br><input type="radio"/> 5 a 6 veces al día<br><input type="radio"/> más 6 veces al día |

|                           |                                                                                                                                                                                                                                                                                                                                                                                                              |
|---------------------------|--------------------------------------------------------------------------------------------------------------------------------------------------------------------------------------------------------------------------------------------------------------------------------------------------------------------------------------------------------------------------------------------------------------|
| refresco sin azúcar       | <input checked="" type="radio"/> Nunca o menos 1 vez al mes<br><input type="radio"/> 1 a 3 veces mes<br><input type="radio"/> 1 vez semana<br><input type="radio"/> 2 a 4 veces semana<br><input type="radio"/> 5 a 6 veces semana<br><input type="radio"/> 1 vez al día<br><input type="radio"/> 2 a 3 veces al día<br><input type="radio"/> 5 a 6 veces al día<br><input type="radio"/> más 6 veces al día |
| Agua del grifo            | <input checked="" type="radio"/> Nunca o menos 1 vez al mes<br><input type="radio"/> 1 a 3 veces mes<br><input type="radio"/> 1 vez semana<br><input type="radio"/> 2 a 4 veces semana<br><input type="radio"/> 5 a 6 veces semana<br><input type="radio"/> 1 vez al día<br><input type="radio"/> 2 a 3 veces al día<br><input type="radio"/> 5 a 6 veces al día<br><input type="radio"/> más 6 veces al día |
| agua embotellada sin gas  | <input type="radio"/> Nunca o menos 1 vez al mes<br><input type="radio"/> 1 a 3 veces mes<br><input type="radio"/> 1 vez semana<br><input type="radio"/> 2 a 4 veces semana<br><input type="radio"/> 5 a 6 veces semana<br><input type="radio"/> 1 vez al día<br><input type="radio"/> 2 a 3 veces al día<br><input type="radio"/> 5 a 6 veces al día<br><input checked="" type="radio"/> más 6 veces al día |
| agua embotellada con gas  | <input checked="" type="radio"/> Nunca o menos 1 vez al mes<br><input type="radio"/> 1 a 3 veces mes<br><input type="radio"/> 1 vez semana<br><input type="radio"/> 2 a 4 veces semana<br><input type="radio"/> 5 a 6 veces semana<br><input type="radio"/> 1 vez al día<br><input type="radio"/> 2 a 3 veces al día<br><input type="radio"/> 5 a 6 veces al día<br><input type="radio"/> más 6 veces al día |
| zumos frutas embotellados | <input type="radio"/> Nunca o menos 1 vez al mes<br><input type="radio"/> 1 a 3 veces mes<br><input type="radio"/> 1 vez semana<br><input type="radio"/> 2 a 4 veces semana<br><input type="radio"/> 5 a 6 veces semana<br><input checked="" type="radio"/> 1 vez al día<br><input type="radio"/> 2 a 3 veces al día<br><input type="radio"/> 5 a 6 veces al día<br><input type="radio"/> más 6 veces al día |
| café                      | <input checked="" type="radio"/> Nunca o menos 1 vez al mes<br><input type="radio"/> 1 a 3 veces mes<br><input type="radio"/> 1 vez semana<br><input type="radio"/> 2 a 4 veces semana<br><input type="radio"/> 5 a 6 veces semana<br><input type="radio"/> 1 vez al día<br><input type="radio"/> 2 a 3 veces al día<br><input type="radio"/> 5 a 6 veces al día<br><input type="radio"/> más 6 veces al día |

|                       |                                                                                                                                                                                                                                                                                                                                                                                                              |
|-----------------------|--------------------------------------------------------------------------------------------------------------------------------------------------------------------------------------------------------------------------------------------------------------------------------------------------------------------------------------------------------------------------------------------------------------|
| cafe descafeinado     | <input checked="" type="radio"/> Nunca o menos 1 vez al mes<br><input type="radio"/> 1 a 3 veces mes<br><input type="radio"/> 1 vez semana<br><input type="radio"/> 2 a 4 veces semana<br><input type="radio"/> 5 a 6 veces semana<br><input type="radio"/> 1 vez al día<br><input type="radio"/> 2 a 3 veces al día<br><input type="radio"/> 5 a 6 veces al día<br><input type="radio"/> más 6 veces al día |
| te o infusión         | <input type="radio"/> Nunca o menos 1 vez al mes<br><input type="radio"/> 1 a 3 veces mes<br><input checked="" type="radio"/> 1 vez semana<br><input type="radio"/> 2 a 4 veces semana<br><input type="radio"/> 5 a 6 veces semana<br><input type="radio"/> 1 vez al día<br><input type="radio"/> 2 a 3 veces al día<br><input type="radio"/> 5 a 6 veces al día<br><input type="radio"/> más 6 veces al día |
| sopa o puré verduras  | <input type="radio"/> Nunca o menos 1 vez al mes<br><input type="radio"/> 1 a 3 veces mes<br><input checked="" type="radio"/> 1 vez semana<br><input type="radio"/> 2 a 4 veces semana<br><input type="radio"/> 5 a 6 veces semana<br><input type="radio"/> 1 vez al día<br><input type="radio"/> 2 a 3 veces al día<br><input type="radio"/> 5 a 6 veces al día<br><input type="radio"/> más 6 veces al día |
| croquetas pollo jamón | <input type="radio"/> Nunca o menos 1 vez al mes<br><input checked="" type="radio"/> 1 a 3 veces mes<br><input type="radio"/> 1 vez semana<br><input type="radio"/> 2 a 4 veces semana<br><input type="radio"/> 5 a 6 veces semana<br><input type="radio"/> 1 vez al día<br><input type="radio"/> 2 a 3 veces al día<br><input type="radio"/> 5 a 6 veces al día<br><input type="radio"/> más 6 veces al día |
| croquetas pescado     | <input type="radio"/> Nunca o menos 1 vez al mes<br><input type="radio"/> 1 a 3 veces mes<br><input checked="" type="radio"/> 1 vez semana<br><input type="radio"/> 2 a 4 veces semana<br><input type="radio"/> 5 a 6 veces semana<br><input type="radio"/> 1 vez al día<br><input type="radio"/> 2 a 3 veces al día<br><input type="radio"/> 5 a 6 veces al día<br><input type="radio"/> más 6 veces al día |
| mayonesa              | <input type="radio"/> Nunca o menos 1 vez al mes<br><input type="radio"/> 1 a 3 veces mes<br><input checked="" type="radio"/> 1 vez semana<br><input type="radio"/> 2 a 4 veces semana<br><input type="radio"/> 5 a 6 veces semana<br><input type="radio"/> 1 vez al día<br><input type="radio"/> 2 a 3 veces al día<br><input type="radio"/> 5 a 6 veces al día<br><input type="radio"/> más 6 veces al día |



|                  |                                                                                                                                                                                                                                                                                                                                                                                                              |
|------------------|--------------------------------------------------------------------------------------------------------------------------------------------------------------------------------------------------------------------------------------------------------------------------------------------------------------------------------------------------------------------------------------------------------------|
| salsa tomate     | <input type="radio"/> Nunca o menos 1 vez al mes<br><input type="radio"/> 1 a 3 veces mes<br><input checked="" type="radio"/> 1 vez semana<br><input type="radio"/> 2 a 4 veces semana<br><input type="radio"/> 5 a 6 veces semana<br><input type="radio"/> 1 vez al día<br><input type="radio"/> 2 a 3 veces al día<br><input type="radio"/> 5 a 6 veces al día<br><input type="radio"/> más 6 veces al día |
| ketchup          | <input type="radio"/> Nunca o menos 1 vez al mes<br><input type="radio"/> 1 a 3 veces mes<br><input checked="" type="radio"/> 1 vez semana<br><input type="radio"/> 2 a 4 veces semana<br><input type="radio"/> 5 a 6 veces semana<br><input type="radio"/> 1 vez al día<br><input type="radio"/> 2 a 3 veces al día<br><input type="radio"/> 5 a 6 veces al día<br><input type="radio"/> más 6 veces al día |
| sal              | <input type="radio"/> Nunca o menos 1 vez al mes<br><input type="radio"/> 1 a 3 veces mes<br><input checked="" type="radio"/> 1 vez semana<br><input type="radio"/> 2 a 4 veces semana<br><input type="radio"/> 5 a 6 veces semana<br><input type="radio"/> 1 vez al día<br><input type="radio"/> 2 a 3 veces al día<br><input type="radio"/> 5 a 6 veces al día<br><input type="radio"/> más 6 veces al día |
| ajo              | <input checked="" type="radio"/> Nunca o menos 1 vez al mes<br><input type="radio"/> 1 a 3 veces mes<br><input type="radio"/> 1 vez semana<br><input type="radio"/> 2 a 4 veces semana<br><input type="radio"/> 5 a 6 veces semana<br><input type="radio"/> 1 vez al día<br><input type="radio"/> 2 a 3 veces al día<br><input type="radio"/> 5 a 6 veces al día<br><input type="radio"/> más 6 veces al día |
| mermelada o miel | <input type="radio"/> Nunca o menos 1 vez al mes<br><input checked="" type="radio"/> 1 a 3 veces mes<br><input type="radio"/> 1 vez semana<br><input type="radio"/> 2 a 4 veces semana<br><input type="radio"/> 5 a 6 veces semana<br><input type="radio"/> 1 vez al día<br><input type="radio"/> 2 a 3 veces al día<br><input type="radio"/> 5 a 6 veces al día<br><input type="radio"/> más 6 veces al día |
| azúcar           | <input type="radio"/> Nunca o menos 1 vez al mes<br><input type="radio"/> 1 a 3 veces mes<br><input checked="" type="radio"/> 1 vez semana<br><input type="radio"/> 2 a 4 veces semana<br><input type="radio"/> 5 a 6 veces semana<br><input type="radio"/> 1 vez al día<br><input type="radio"/> 2 a 3 veces al día<br><input type="radio"/> 5 a 6 veces al día<br><input type="radio"/> más 6 veces al día |

|                                       |                                                                                                                                                                                                                                                                                                                                                                                                                                                                                                                               |
|---------------------------------------|-------------------------------------------------------------------------------------------------------------------------------------------------------------------------------------------------------------------------------------------------------------------------------------------------------------------------------------------------------------------------------------------------------------------------------------------------------------------------------------------------------------------------------|
| Otro alimento                         |                                                                                                                                                                                                                                                                                                                                                                                                                                                                                                                               |
| suplementos vitamínicos               | <input checked="" type="radio"/> si<br><input type="radio"/> no                                                                                                                                                                                                                                                                                                                                                                                                                                                               |
| suplementos vitamínicos               | [*DATA REMOVED*]                                                                                                                                                                                                                                                                                                                                                                                                                                                                                                              |
| dieta previa                          | <input type="radio"/> si<br><input checked="" type="radio"/> no                                                                                                                                                                                                                                                                                                                                                                                                                                                               |
| motivo dieta                          | <input checked="" type="radio"/> no dieta<br><input type="radio"/> control peso<br><input type="radio"/> control colesterol<br><input type="radio"/> control diabetes<br><input type="radio"/> problemas estómago<br><input type="radio"/> problemas vesícula o hepáticos<br><input type="radio"/> HTA o cardiopatía<br><input type="radio"/> problemas renales<br><input type="radio"/> alergia alimentaria<br><input type="radio"/> ácido úrico elevado<br><input type="radio"/> vegetariana<br><input type="radio"/> otros |
| cambio alimentos año previo gestación | <input type="radio"/> si<br><input checked="" type="radio"/> no                                                                                                                                                                                                                                                                                                                                                                                                                                                               |
| cambio lácteos                        | <input type="radio"/> eliminado<br><input type="radio"/> disminuido<br><input type="radio"/> igual<br><input type="radio"/> aumentado<br><input type="radio"/> no sabe                                                                                                                                                                                                                                                                                                                                                        |
| cambio huevos                         | <input type="radio"/> eliminado<br><input type="radio"/> disminuido<br><input type="radio"/> igual<br><input type="radio"/> aumentado<br><input type="radio"/> no sabe                                                                                                                                                                                                                                                                                                                                                        |
| cambio carne                          | <input type="radio"/> eliminado<br><input type="radio"/> disminuido<br><input type="radio"/> igual<br><input type="radio"/> aumentado<br><input type="radio"/> no sabe                                                                                                                                                                                                                                                                                                                                                        |
| cambio pescado                        | <input type="radio"/> eliminado<br><input type="radio"/> disminuido<br><input type="radio"/> igual<br><input type="radio"/> aumentado<br><input type="radio"/> no sabe                                                                                                                                                                                                                                                                                                                                                        |
| cambio verduras                       | <input type="radio"/> eliminado<br><input type="radio"/> disminuido<br><input type="radio"/> igual<br><input type="radio"/> aumentado<br><input type="radio"/> no sabe                                                                                                                                                                                                                                                                                                                                                        |

|                            |                                                                                                                                                                                                                        |
|----------------------------|------------------------------------------------------------------------------------------------------------------------------------------------------------------------------------------------------------------------|
| cambio legumbres           | <input type="radio"/> eliminado<br><input type="radio"/> disminuido<br><input type="radio"/> igual<br><input type="radio"/> aumentado<br><input type="radio"/> no sabe                                                 |
| cambio fruta               | <input type="radio"/> eliminado<br><input type="radio"/> disminuido<br><input type="radio"/> igual<br><input type="radio"/> aumentado<br><input type="radio"/> no sabe                                                 |
| cambio pan                 | <input type="radio"/> eliminado<br><input type="radio"/> disminuido<br><input type="radio"/> igual<br><input type="radio"/> aumentado<br><input type="radio"/> no sabe                                                 |
| cambio aceite oliva        | <input type="radio"/> eliminado<br><input type="radio"/> disminuido<br><input type="radio"/> igual<br><input type="radio"/> aumentado<br><input type="radio"/> no sabe                                                 |
| cambio mante o margarina   | <input type="radio"/> eliminado<br><input type="radio"/> disminuido<br><input type="radio"/> igual<br><input type="radio"/> aumentado<br><input type="radio"/> no sabe                                                 |
| cambio azúcar y dulces     | <input type="radio"/> eliminado<br><input type="radio"/> disminuido<br><input type="radio"/> igual<br><input type="radio"/> aumentado<br><input type="radio"/> no sabe                                                 |
| cambio bebidas alcohólicas | <input type="radio"/> eliminado<br><input type="radio"/> disminuido<br><input type="radio"/> igual<br><input type="radio"/> aumentado<br><input type="radio"/> no sabe                                                 |
| frecuencia comidas fritas  | <input type="radio"/> a diario<br><input type="radio"/> 5 a 6 veces semana<br><input type="radio"/> 2 a 4 veces semana<br><input checked="" type="radio"/> 1 vez semana<br><input type="radio"/> menos de 1 vez semana |
| carne                      | <input type="radio"/> no como<br><input type="radio"/> cruda<br><input type="radio"/> poco hecha<br><input type="radio"/> hecha<br><input checked="" type="radio"/> muy hecha                                          |
| grasa visible carne        | <input checked="" type="radio"/> quita toda<br><input type="radio"/> quita mayoría<br><input type="radio"/> quita un poco<br><input type="radio"/> no quita nada                                                       |

|                                |                                                                                                                                                                                                                                                          |
|--------------------------------|----------------------------------------------------------------------------------------------------------------------------------------------------------------------------------------------------------------------------------------------------------|
| cocina carne                   | <input checked="" type="radio"/> a la plancha<br><input type="radio"/> a la parrilla<br><input type="radio"/> asada<br><input type="radio"/> frita<br><input type="radio"/> guisada                                                                      |
| tostado quemado carne          | <input checked="" type="radio"/> nunca<br><input type="radio"/> 1 vez mes<br><input type="radio"/> 2 a 3 veces mes<br><input type="radio"/> 1 vez semana<br><input type="radio"/> 2 a 3 semanas                                                          |
| tostado quemado pescado        | <input checked="" type="radio"/> nunca<br><input type="radio"/> 1 vez mes<br><input type="radio"/> 2 a 3 veces mes<br><input type="radio"/> 1 vez semana<br><input type="radio"/> 2 a 3 semanas                                                          |
| socarrat paella                | <input checked="" type="radio"/> nunca<br><input type="radio"/> 1 vez mes<br><input type="radio"/> 2 a 3 veces mes<br><input type="radio"/> 1 vez semana<br><input type="radio"/> 2 a 3 semanas                                                          |
| grasa o aceite cocinar         | <input type="radio"/> mantequilla<br><input type="radio"/> margarina<br><input checked="" type="radio"/> aceite oliva<br><input type="radio"/> aceite oliva virgen extra<br><input type="radio"/> aceite vegetal<br><input type="radio"/> mezcla aceites |
| grasa aceite aliñar            | <input type="radio"/> mantequilla<br><input type="radio"/> margarina<br><input checked="" type="radio"/> aceite oliva<br><input type="radio"/> aceite oliva virgen extra<br><input type="radio"/> aceite vegetal<br><input type="radio"/> mezcla aceites |
| grasa aceite freir             | <input type="radio"/> mantequilla<br><input type="radio"/> margarina<br><input checked="" type="radio"/> aceite oliva<br><input type="radio"/> aceite oliva virgen extra<br><input type="radio"/> aceite vegetal<br><input type="radio"/> mezcla aceites |
| Ejercicio cuestionario         | <input checked="" type="radio"/> si<br><input type="radio"/> no                                                                                                                                                                                          |
| horas de sueño incluido siesta | [*DATA REMOVED*]                                                                                                                                                                                                                                         |
| minutos siesta                 | [*DATA REMOVED*]                                                                                                                                                                                                                                         |
| horas televisión semana        | [*DATA REMOVED*]                                                                                                                                                                                                                                         |

|                                        |                                                                                                                                                                                                                                                                                                                                                                           |
|----------------------------------------|---------------------------------------------------------------------------------------------------------------------------------------------------------------------------------------------------------------------------------------------------------------------------------------------------------------------------------------------------------------------------|
| actividad trabajo                      | <input checked="" type="radio"/> casi siempre sentado<br><input type="radio"/> sentado 50 por cien<br><input type="radio"/> casi siempre de pie, quieto<br><input type="radio"/> casi siempre levantado caminando y llevando pocas cosas<br><input type="radio"/> casi siempre levantado, caminando y llevado muchas cosas<br><input type="radio"/> trabajo manual pesado |
| tiempo caminar o bici al día           | <input type="radio"/> casi nunca<br><input type="radio"/> menos 20min día<br><input checked="" type="radio"/> 20 a 40 min día<br><input type="radio"/> 40 a 60 min día<br><input type="radio"/> 1h o 1h y media día<br><input type="radio"/> más de 1h y media al día                                                                                                     |
| tiempo tareas casa al día              | <input type="radio"/> menos de 1h día<br><input checked="" type="radio"/> 1 a 2h día<br><input type="radio"/> 3 a 4h día<br><input type="radio"/> 5 a 6h día<br><input type="radio"/> 7 a 8h día<br><input type="radio"/> más de 8h día                                                                                                                                   |
| tiempo libre televisión ordenador leer | <input type="radio"/> menos 1h día<br><input type="radio"/> 1h día<br><input checked="" type="radio"/> 2h día<br><input type="radio"/> 3h día<br><input type="radio"/> 4h día<br><input type="radio"/> 5 a 6h día<br><input type="radio"/> mas 6h día                                                                                                                     |
| tiempo libre ejercicio o deporte       | <input type="radio"/> menos 1h semana<br><input type="radio"/> 1h semana<br><input type="radio"/> 2h semana<br><input type="radio"/> 3h semana<br><input checked="" type="radio"/> 4 a 5h semana<br><input type="radio"/> mas 5h semana                                                                                                                                   |
| como se considera                      | <input type="radio"/> sedentaria<br><input checked="" type="radio"/> poco activa<br><input type="radio"/> moderadamente activa<br><input type="radio"/> bastante activa<br><input type="radio"/> muy activa<br><input type="radio"/> no sabe                                                                                                                              |
| FUR                                    | [*DATA REMOVED*]                                                                                                                                                                                                                                                                                                                                                          |
| Semanas gestación 2T                   | [*DATA REMOVED*]                                                                                                                                                                                                                                                                                                                                                          |
| Días gestación 2T                      | [*DATA REMOVED*]                                                                                                                                                                                                                                                                                                                                                          |
| DBP 2T                                 | [*DATA REMOVED*]                                                                                                                                                                                                                                                                                                                                                          |
| CC 2T                                  | [*DATA REMOVED*]                                                                                                                                                                                                                                                                                                                                                          |
| AC 2T                                  | [*DATA REMOVED*]                                                                                                                                                                                                                                                                                                                                                          |

|                                                   |                                                                                                                                                                                                 |
|---------------------------------------------------|-------------------------------------------------------------------------------------------------------------------------------------------------------------------------------------------------|
| LF 2T                                             | [*DATA REMOVED*]                                                                                                                                                                                |
| PFE 2T (Hadlock)                                  | [*DATA REMOVED*]                                                                                                                                                                                |
| Semanas gestación 3T                              | [*DATA REMOVED*]                                                                                                                                                                                |
| días 3T                                           | [*DATA REMOVED*]                                                                                                                                                                                |
| DBP 3T                                            | [*DATA REMOVED*]                                                                                                                                                                                |
| CC 3T                                             | [*DATA REMOVED*]                                                                                                                                                                                |
| AC 3T                                             | [*DATA REMOVED*]                                                                                                                                                                                |
| LF 3T                                             | [*DATA REMOVED*]                                                                                                                                                                                |
| PFE 3T (Hadlock)                                  | [*DATA REMOVED*]                                                                                                                                                                                |
| Semanas de gestación final                        | [*DATA REMOVED*]                                                                                                                                                                                |
| días gestación final                              | [*DATA REMOVED*]                                                                                                                                                                                |
| Localización placenta                             | <input checked="" type="radio"/> anterior<br><input type="radio"/> lateral derecha<br><input type="radio"/> lateral izquierda<br><input type="radio"/> posterior<br><input type="radio"/> fondo |
| Presentación longitudinal cefálica                | <input type="radio"/> no<br><input checked="" type="radio"/> si                                                                                                                                 |
| Dorso                                             | <input type="radio"/> izquierda anterior<br><input type="radio"/> izquierda posterior<br><input checked="" type="radio"/> derecha anterior<br><input type="radio"/> derecha posterior           |
| diámetro biparietal                               | [*DATA REMOVED*]                                                                                                                                                                                |
| Circunferencia craneal                            | [*DATA REMOVED*]                                                                                                                                                                                |
| Circunferencia abdominal                          | [*DATA REMOVED*]                                                                                                                                                                                |
| Longitud de femur                                 | [*DATA REMOVED*]                                                                                                                                                                                |
| tejido celular subcutáneo a nivel del muslo en mm | [*DATA REMOVED*]                                                                                                                                                                                |
| tejido celular subcutáneo en abdomen en mm        | [*DATA REMOVED*]                                                                                                                                                                                |
| Volumen del muslo en cm3                          | [*DATA REMOVED*]                                                                                                                                                                                |
| Peso fetal estimado según fórmula de Hadlock      | [*DATA REMOVED*]                                                                                                                                                                                |

|                                               |                                                                                                                                                          |
|-----------------------------------------------|----------------------------------------------------------------------------------------------------------------------------------------------------------|
| Percentil                                     | [*DATA REMOVED*]                                                                                                                                         |
| Peso fetal estimado según fórmula de Scioscia | <hr/>                                                                                                                                                    |
| Peso fetal estimado según fórmula de LEE      | <hr/>                                                                                                                                                    |
| Tipo de parto                                 | <input checked="" type="radio"/> eutocico<br><input type="radio"/> instrumentado/ventosa<br><input type="radio"/> cesarea                                |
| fecha de nacimiento                           | [*DATA REMOVED*]                                                                                                                                         |
| Días entre exploración y nacimiento           | [*DATA REMOVED*]                                                                                                                                         |
| Peso RN en g                                  | [*DATA REMOVED*]                                                                                                                                         |
| sexo                                          | <input type="radio"/> mujer<br><input checked="" type="radio"/> hombre                                                                                   |
| Apgar 1 minuto                                | <hr/>                                                                                                                                                    |
| Apgar 5 minutos                               | <hr/>                                                                                                                                                    |
| Apgar 10 minutos                              | <hr/>                                                                                                                                                    |
| antecedente Covid durante gestación           | <input type="radio"/> Yes<br><input checked="" type="radio"/> No                                                                                         |
| Nivel de estudios                             | <input type="radio"/> ninguno<br><input type="radio"/> primarios<br><input type="radio"/> secundarios<br><input checked="" type="radio"/> universitarios |

# Base\_datos\_estimacion\_peso\_fetal

|                                       |                                                                                                                                                                                                                                                                                      |
|---------------------------------------|--------------------------------------------------------------------------------------------------------------------------------------------------------------------------------------------------------------------------------------------------------------------------------------|
| Número de identificación participante | 68                                                                                                                                                                                                                                                                                   |
| CODIGO PARTICIPANTE                   |                                                                                                                                                                                                                                                                                      |
| Edad                                  | [*DATA REMOVED*]                                                                                                                                                                                                                                                                     |
| Gestaciones                           | <input type="radio"/> 1<br><input type="radio"/> 2<br><input checked="" type="radio"/> 3<br><input type="radio"/> mas de 3                                                                                                                                                           |
| partos                                | <input type="radio"/> 0<br><input type="radio"/> 1<br><input checked="" type="radio"/> 2<br><input type="radio"/> 3<br><input type="radio"/> mas de 3                                                                                                                                |
| cesáreas                              | <input checked="" type="radio"/> 0<br><input type="radio"/> 1<br><input type="radio"/> 2<br><input type="radio"/> 3<br><input type="radio"/> mas de 3                                                                                                                                |
| Abortos                               | <input checked="" type="radio"/> 0<br><input type="radio"/> 1<br><input type="radio"/> 2<br><input type="radio"/> 3<br><input type="radio"/> mas de 3                                                                                                                                |
| Tipo de gestacion                     | <input checked="" type="radio"/> espontanea<br><input type="radio"/> IAC inseminación artificial conyuge<br><input type="radio"/> IAD inseminación artificial donante<br><input type="radio"/> FIV Fecundación in Vitro<br><input type="radio"/> Ovodon FIV con donación de ovocitos |
| peso previo a embarazo                | [*DATA REMOVED*]                                                                                                                                                                                                                                                                     |
| Ganancia ponderal embarazo            | [*DATA REMOVED*]                                                                                                                                                                                                                                                                     |
| Talla madre                           | [*DATA REMOVED*]                                                                                                                                                                                                                                                                     |
| IMC previo embarazo                   | 24.524346347059055                                                                                                                                                                                                                                                                   |
| Patología obstétrica                  | <input checked="" type="radio"/> no<br><input type="radio"/> si                                                                                                                                                                                                                      |
| Diabetes pregestacional               | <input checked="" type="radio"/> no<br><input type="radio"/> si                                                                                                                                                                                                                      |
| Diabetes gestacional                  | <input checked="" type="radio"/> no<br><input type="radio"/> si                                                                                                                                                                                                                      |



|                                            |                                                                                                                                                                                      |
|--------------------------------------------|--------------------------------------------------------------------------------------------------------------------------------------------------------------------------------------|
| Diabetes gestacional con insulina          | <input checked="" type="radio"/> no<br><input type="radio"/> si                                                                                                                      |
| Diabetes gestacional con dieta y ejercicio | <input checked="" type="radio"/> no<br><input type="radio"/> si                                                                                                                      |
| Percentil fetos previos                    | <input type="radio"/> Nada<br><input type="radio"/> percentil menor de 10<br><input type="radio"/> percentil entre 10 y 90<br><input checked="" type="radio"/> percentil mayor de 90 |
| Exfumadora                                 | <input checked="" type="radio"/> Nada<br><input type="radio"/> menos de 5 años<br><input type="radio"/> 5 a 10 años<br><input type="radio"/> mayor o igual a 10 años                 |
| Hábito tabáquico                           | <input checked="" type="radio"/> no<br><input type="radio"/> si                                                                                                                      |
| fumadora                                   | [*DATA REMOVED*]                                                                                                                                                                     |
| Consumo otros tóxicos                      | <input checked="" type="radio"/> no<br><input type="radio"/> si                                                                                                                      |
| Hb 1T                                      | [*DATA REMOVED*]                                                                                                                                                                     |
| Htc 1T                                     | [*DATA REMOVED*]                                                                                                                                                                     |
| Hb 2T                                      | [*DATA REMOVED*]                                                                                                                                                                     |
| HTC 2T                                     | [*DATA REMOVED*]                                                                                                                                                                     |
| Hb 3T                                      | [*DATA REMOVED*]                                                                                                                                                                     |
| HTC 3T                                     | [*DATA REMOVED*]                                                                                                                                                                     |
| Suplemento FE oral                         | <input checked="" type="radio"/> si<br><input type="radio"/> no                                                                                                                      |
| Suplemento fe iv                           | <input type="radio"/> si<br><input checked="" type="radio"/> no                                                                                                                      |
| Transfusión                                | <input checked="" type="radio"/> no<br><input type="radio"/> si                                                                                                                      |
| Solicitada Vit D                           | <input checked="" type="radio"/> no<br><input type="radio"/> si                                                                                                                      |
| Deficit vit D                              | <input type="radio"/> no<br><input type="radio"/> si                                                                                                                                 |
| Suplemento vit D                           | <input type="radio"/> si<br><input type="radio"/> no                                                                                                                                 |

|                       |                                                                                                                                                                                                                                                                                                                                                                                                              |
|-----------------------|--------------------------------------------------------------------------------------------------------------------------------------------------------------------------------------------------------------------------------------------------------------------------------------------------------------------------------------------------------------------------------------------------------------|
| Dieta, cuestionario   | <input checked="" type="radio"/> si<br><input type="radio"/> no                                                                                                                                                                                                                                                                                                                                              |
| Leche entera          | <input checked="" type="radio"/> Nunca o menos 1 vez al mes<br><input type="radio"/> 1 a 3 veces mes<br><input type="radio"/> 1 vez semana<br><input type="radio"/> 2 a 4 veces semana<br><input type="radio"/> 5 a 6 veces semana<br><input type="radio"/> 1 vez al día<br><input type="radio"/> 2 a 3 veces al día<br><input type="radio"/> 5 a 6 veces al día<br><input type="radio"/> más 6 veces al día |
| Leche semidesnatada   | <input checked="" type="radio"/> Nunca o menos 1 vez al mes<br><input type="radio"/> 1 a 3 veces mes<br><input type="radio"/> 1 vez semana<br><input type="radio"/> 2 a 4 veces semana<br><input type="radio"/> 5 a 6 veces semana<br><input type="radio"/> 1 vez al día<br><input type="radio"/> 2 a 3 veces al día<br><input type="radio"/> 5 a 6 veces al día<br><input type="radio"/> mas 6 veces al día |
| Leche desnatada       | <input type="radio"/> Nunca o menos 1 vez al mes<br><input type="radio"/> 1 a 3 veces mes<br><input type="radio"/> 1 vez semana<br><input type="radio"/> 2 a 4 veces semana<br><input type="radio"/> 5 a 6 veces semana<br><input checked="" type="radio"/> 1 vez al día<br><input type="radio"/> 2 a 3 veces al día<br><input type="radio"/> 5 a 6 veces al día<br><input type="radio"/> más 6 veces al día |
| Leche condensada      | <input checked="" type="radio"/> Nunca o menos 1 vez al mes<br><input type="radio"/> 1 a 3 veces mes<br><input type="radio"/> 1 vez semana<br><input type="radio"/> 2 a 4 veces semana<br><input type="radio"/> 5 a 6 veces semana<br><input type="radio"/> 1 vez al día<br><input type="radio"/> 2 a 3 veces al día<br><input type="radio"/> 5 a 6 veces al día<br><input type="radio"/> más 6 veces al día |
| nata o crema de leche | <input type="radio"/> Nunca o menos 1 vez al mes<br><input checked="" type="radio"/> 1 a 3 veces mes<br><input type="radio"/> 1 vez semana<br><input type="radio"/> 2 a 4 veces semana<br><input type="radio"/> 5 a 6 veces semana<br><input type="radio"/> 1 vez al día<br><input type="radio"/> 2 a 3 veces al día<br><input type="radio"/> 5 a 6 veces al día<br><input type="radio"/> más 6 veces al día |

|                                             |                                                                                                                                                                                                                                                                                                                                                                                                              |
|---------------------------------------------|--------------------------------------------------------------------------------------------------------------------------------------------------------------------------------------------------------------------------------------------------------------------------------------------------------------------------------------------------------------------------------------------------------------|
| Yogurt Entero                               | <input checked="" type="radio"/> Nunca o menos 1 vez al mes<br><input type="radio"/> 1 a 3 veces mes<br><input type="radio"/> 1 vez semana<br><input type="radio"/> 2 a 4 veces semana<br><input type="radio"/> 5 a 6 veces semana<br><input type="radio"/> 1 vez al día<br><input type="radio"/> 2 a 3 veces al día<br><input type="radio"/> 5 a 6 veces al día<br><input type="radio"/> más 6 veces al día |
| Yogurt desnatado                            | <input checked="" type="radio"/> Nunca o menos 1 vez al mes<br><input type="radio"/> 1 a 3 veces mes<br><input type="radio"/> 1 vez semana<br><input type="radio"/> 2 a 4 veces semana<br><input type="radio"/> 5 a 6 veces semana<br><input type="radio"/> 1 vez al día<br><input type="radio"/> 2 a 3 veces al día<br><input type="radio"/> 5 a 6 veces al día<br><input type="radio"/> más 6 veces al día |
| 100g requesón o queso blando o queso fresco | <input type="radio"/> Nunca o menos 1 vez al mes<br><input checked="" type="radio"/> 1 a 3 veces mes<br><input type="radio"/> 1 vez semana<br><input type="radio"/> 2 a 4 veces semana<br><input type="radio"/> 5 a 6 veces semana<br><input type="radio"/> 1 vez al día<br><input type="radio"/> 2 a 3 veces al día<br><input type="radio"/> 5 a 6 veces al día<br><input type="radio"/> más 6 veces al día |
| queso curado o semicurado o cremoso         | <input type="radio"/> Nunca o menos 1 vez al mes<br><input checked="" type="radio"/> 1 a 3 veces mes<br><input type="radio"/> 1 vez semana<br><input type="radio"/> 2 a 4 veces semana<br><input type="radio"/> 5 a 6 veces semana<br><input type="radio"/> 1 vez al día<br><input type="radio"/> 2 a 3 veces al día<br><input type="radio"/> 5 a 6 veces al día<br><input type="radio"/> más 6 veces al día |
| natillas flan pudding                       | <input type="radio"/> Nunca o menos 1 vez al mes<br><input checked="" type="radio"/> 1 a 3 veces mes<br><input type="radio"/> 1 vez semana<br><input type="radio"/> 2 a 4 veces semana<br><input type="radio"/> 5 a 6 veces semana<br><input type="radio"/> 1 vez al día<br><input type="radio"/> 2 a 3 veces al día<br><input type="radio"/> 5 a 6 veces al día<br><input type="radio"/> más 6 veces al día |
| Helado                                      | <input checked="" type="radio"/> Nunca o menos 1 vez al mes<br><input type="radio"/> 1 a 3 veces mes<br><input type="radio"/> 1 vez semana<br><input type="radio"/> 2 a 4 veces semana<br><input type="radio"/> 5 a 6 veces semana<br><input type="radio"/> 1 vez al día<br><input type="radio"/> 2 a 3 veces al día<br><input type="radio"/> 5 a 6 veces al día<br><input type="radio"/> más 6 veces al día |

|                                      |                                                                                                                                                                                                                                                                                                                                                                                                              |
|--------------------------------------|--------------------------------------------------------------------------------------------------------------------------------------------------------------------------------------------------------------------------------------------------------------------------------------------------------------------------------------------------------------------------------------------------------------|
| huevo                                | <input type="radio"/> Nunca o menos 1 vez al mes<br><input type="radio"/> 1 a 3 veces mes<br><input checked="" type="radio"/> 1 vez semana<br><input type="radio"/> 2 a 4 veces semana<br><input type="radio"/> 5 a 6 veces semana<br><input type="radio"/> 1 vez al día<br><input type="radio"/> 2 a 3 veces al día<br><input type="radio"/> 5 a 6 veces al día<br><input type="radio"/> más 6 veces al día |
| Pollo con piel                       | <input type="radio"/> Nunca o menos 1 vez al mes<br><input checked="" type="radio"/> 1 a 3 veces mes<br><input type="radio"/> 1 vez semana<br><input type="radio"/> 2 a 4 veces semana<br><input type="radio"/> 5 a 6 veces semana<br><input type="radio"/> 1 vez al día<br><input type="radio"/> 2 a 3 veces al día<br><input type="radio"/> 5 a 6 veces al día<br><input type="radio"/> más 6 veces al día |
| pollo sin piel                       | <input type="radio"/> Nunca o menos 1 vez al mes<br><input type="radio"/> 1 a 3 veces mes<br><input checked="" type="radio"/> 1 vez semana<br><input type="radio"/> 2 a 4 veces semana<br><input type="radio"/> 5 a 6 veces semana<br><input type="radio"/> 1 vez al día<br><input type="radio"/> 2 a 3 veces al día<br><input type="radio"/> 5 a 6 veces al día<br><input type="radio"/> más 6 veces al día |
| Ternera o cerdo o cordero            | <input type="radio"/> Nunca o menos 1 vez al mes<br><input checked="" type="radio"/> 1 a 3 veces mes<br><input type="radio"/> 1 vez semana<br><input type="radio"/> 2 a 4 veces semana<br><input type="radio"/> 5 a 6 veces semana<br><input type="radio"/> 1 vez al día<br><input type="radio"/> 2 a 3 veces al día<br><input type="radio"/> 5 a 6 veces al día<br><input type="radio"/> más 6 veces al día |
| carne caza: Conejo o codorniz o pato | <input checked="" type="radio"/> Nunca o menos 1 vez al mes<br><input type="radio"/> 1 a 3 veces mes<br><input type="radio"/> 1 vez semana<br><input type="radio"/> 2 a 4 veces semana<br><input type="radio"/> 5 a 6 veces semana<br><input type="radio"/> 1 vez al día<br><input type="radio"/> 2 a 3 veces al día<br><input type="radio"/> 5 a 6 veces al día<br><input type="radio"/> más 6 veces al día |
| Hígado de ternera o cerdo o pollo    | <input checked="" type="radio"/> Nunca o menos 1 vez al mes<br><input type="radio"/> 1 a 3 veces mes<br><input type="radio"/> 1 vez semana<br><input type="radio"/> 2 a 4 veces semana<br><input type="radio"/> 5 a 6 veces semana<br><input type="radio"/> 1 vez al día<br><input type="radio"/> 2 a 3 veces al día<br><input type="radio"/> 5 a 6 veces al día<br><input type="radio"/> más 6 veces al día |

|                     |                                                                                                                                                                                                                                                                                                                                                                                                              |
|---------------------|--------------------------------------------------------------------------------------------------------------------------------------------------------------------------------------------------------------------------------------------------------------------------------------------------------------------------------------------------------------------------------------------------------------|
| Vísceras            | <input checked="" type="radio"/> Nunca o menos 1 vez al mes<br><input type="radio"/> 1 a 3 veces mes<br><input type="radio"/> 1 vez semana<br><input type="radio"/> 2 a 4 veces semana<br><input type="radio"/> 5 a 6 veces semana<br><input type="radio"/> 1 vez al día<br><input type="radio"/> 2 a 3 veces al día<br><input type="radio"/> 5 a 6 veces al día<br><input type="radio"/> más 6 veces al día |
| Embutido            | <input type="radio"/> Nunca o menos 1 vez al mes<br><input type="radio"/> 1 a 3 veces mes<br><input checked="" type="radio"/> 1 vez semana<br><input type="radio"/> 2 a 4 veces semana<br><input type="radio"/> 5 a 6 veces semana<br><input type="radio"/> 1 vez al día<br><input type="radio"/> 2 a 3 veces al día<br><input type="radio"/> 5 a 6 veces al día<br><input type="radio"/> más 6 veces al día |
| Salchicha o similar | <input checked="" type="radio"/> Nunca o menos 1 vez al mes<br><input type="radio"/> 1 a 3 veces mes<br><input type="radio"/> 1 vez semana<br><input type="radio"/> 2 a 4 veces semana<br><input type="radio"/> 5 a 6 veces semana<br><input type="radio"/> 1 vez al día<br><input type="radio"/> 2 a 3 veces al día<br><input type="radio"/> 5 a 6 veces al día<br><input type="radio"/> más 6 veces al día |
| Pate o foiegras     | <input checked="" type="radio"/> Nunca o menos 1 vez al mes<br><input type="radio"/> 1 a 3 veces mes<br><input type="radio"/> 1 vez semana<br><input type="radio"/> 2 a 4 veces semana<br><input type="radio"/> 5 a 6 veces semana<br><input type="radio"/> 1 vez al día<br><input type="radio"/> 2 a 3 veces al día<br><input type="radio"/> 5 a 6 veces al día<br><input type="radio"/> más 6 veces al día |
| Hamburguesa         | <input type="radio"/> Nunca o menos 1 vez al mes<br><input type="radio"/> 1 a 3 veces mes<br><input checked="" type="radio"/> 1 vez semana<br><input type="radio"/> 2 a 4 veces semana<br><input type="radio"/> 5 a 6 veces semana<br><input type="radio"/> 1 vez al día<br><input type="radio"/> 2 a 3 veces al día<br><input type="radio"/> 5 a 6 veces al día<br><input type="radio"/> más 6 veces al día |
| tocino o bacon      | <input checked="" type="radio"/> Nunca o menos 1 vez al mes<br><input type="radio"/> 1 a 3 veces mes<br><input type="radio"/> 1 vez semana<br><input type="radio"/> 2 a 4 veces semana<br><input type="radio"/> 5 a 6 veces semana<br><input type="radio"/> 1 vez al día<br><input type="radio"/> 2 a 3 veces al día<br><input type="radio"/> 5 a 6 veces al día<br><input type="radio"/> más 6 veces al día |

---

|               |                                                                                                                                                                                                                                                                                                                                                                                                              |
|---------------|--------------------------------------------------------------------------------------------------------------------------------------------------------------------------------------------------------------------------------------------------------------------------------------------------------------------------------------------------------------------------------------------------------------|
| Pescado frito | <input checked="" type="radio"/> Nunca o menos 1 vez al mes<br><input type="radio"/> 1 a 3 veces mes<br><input type="radio"/> 1 vez semana<br><input type="radio"/> 2 a 4 veces semana<br><input type="radio"/> 5 a 6 veces semana<br><input type="radio"/> 1 vez al día<br><input type="radio"/> 2 a 3 veces al día<br><input type="radio"/> 5 a 6 veces al día<br><input type="radio"/> más 6 veces al día |
|---------------|--------------------------------------------------------------------------------------------------------------------------------------------------------------------------------------------------------------------------------------------------------------------------------------------------------------------------------------------------------------------------------------------------------------|

---

|                        |                                                                                                                                                                                                                                                                                                                                                                                                              |
|------------------------|--------------------------------------------------------------------------------------------------------------------------------------------------------------------------------------------------------------------------------------------------------------------------------------------------------------------------------------------------------------------------------------------------------------|
| pescado hervido blanco | <input checked="" type="radio"/> Nunca o menos 1 vez al mes<br><input type="radio"/> 1 a 3 veces mes<br><input type="radio"/> 1 vez semana<br><input type="radio"/> 2 a 4 veces semana<br><input type="radio"/> 5 a 6 veces semana<br><input type="radio"/> 1 vez al día<br><input type="radio"/> 2 a 3 veces al día<br><input type="radio"/> 5 a 6 veces al día<br><input type="radio"/> más 6 veces al día |
|------------------------|--------------------------------------------------------------------------------------------------------------------------------------------------------------------------------------------------------------------------------------------------------------------------------------------------------------------------------------------------------------------------------------------------------------|

---

|                      |                                                                                                                                                                                                                                                                                                                                                                                                              |
|----------------------|--------------------------------------------------------------------------------------------------------------------------------------------------------------------------------------------------------------------------------------------------------------------------------------------------------------------------------------------------------------------------------------------------------------|
| pescado hervido azul | <input checked="" type="radio"/> Nunca o menos 1 vez al mes<br><input type="radio"/> 1 a 3 veces mes<br><input type="radio"/> 1 vez semana<br><input type="radio"/> 2 a 4 veces semana<br><input type="radio"/> 5 a 6 veces semana<br><input type="radio"/> 1 vez al día<br><input type="radio"/> 2 a 3 veces al día<br><input type="radio"/> 5 a 6 veces al día<br><input type="radio"/> más 6 veces al día |
|----------------------|--------------------------------------------------------------------------------------------------------------------------------------------------------------------------------------------------------------------------------------------------------------------------------------------------------------------------------------------------------------------------------------------------------------|

---

|                    |                                                                                                                                                                                                                                                                                                                                                                                                              |
|--------------------|--------------------------------------------------------------------------------------------------------------------------------------------------------------------------------------------------------------------------------------------------------------------------------------------------------------------------------------------------------------------------------------------------------------|
| otros pescado azul | <input type="radio"/> Nunca o menos 1 vez al mes<br><input type="radio"/> 1 a 3 veces mes<br><input checked="" type="radio"/> 1 vez semana<br><input type="radio"/> 2 a 4 veces semana<br><input type="radio"/> 5 a 6 veces semana<br><input type="radio"/> 1 vez al día<br><input type="radio"/> 2 a 3 veces al día<br><input type="radio"/> 5 a 6 veces al día<br><input type="radio"/> más 6 veces al día |
|--------------------|--------------------------------------------------------------------------------------------------------------------------------------------------------------------------------------------------------------------------------------------------------------------------------------------------------------------------------------------------------------------------------------------------------------|

---

|               |                                                                                                                                                                                                                                                                                                                                                                                                              |
|---------------|--------------------------------------------------------------------------------------------------------------------------------------------------------------------------------------------------------------------------------------------------------------------------------------------------------------------------------------------------------------------------------------------------------------|
| atun conserva | <input type="radio"/> Nunca o menos 1 vez al mes<br><input checked="" type="radio"/> 1 a 3 veces mes<br><input type="radio"/> 1 vez semana<br><input type="radio"/> 2 a 4 veces semana<br><input type="radio"/> 5 a 6 veces semana<br><input type="radio"/> 1 vez al día<br><input type="radio"/> 2 a 3 veces al día<br><input type="radio"/> 5 a 6 veces al día<br><input type="radio"/> más 6 veces al día |
|---------------|--------------------------------------------------------------------------------------------------------------------------------------------------------------------------------------------------------------------------------------------------------------------------------------------------------------------------------------------------------------------------------------------------------------|

---

|                  |                                                                                                                                                                                                                                                                                                                                                                                                              |
|------------------|--------------------------------------------------------------------------------------------------------------------------------------------------------------------------------------------------------------------------------------------------------------------------------------------------------------------------------------------------------------------------------------------------------------|
| sardina conserva | <input checked="" type="radio"/> Nunca o menos 1 vez al mes<br><input type="radio"/> 1 a 3 veces mes<br><input type="radio"/> 1 vez semana<br><input type="radio"/> 2 a 4 veces semana<br><input type="radio"/> 5 a 6 veces semana<br><input type="radio"/> 1 vez al día<br><input type="radio"/> 2 a 3 veces al día<br><input type="radio"/> 5 a 6 veces al día<br><input type="radio"/> más 6 veces al día |
|------------------|--------------------------------------------------------------------------------------------------------------------------------------------------------------------------------------------------------------------------------------------------------------------------------------------------------------------------------------------------------------------------------------------------------------|

---

|                                         |                                                                                                                                                                                                                                                                                                                                                                                                              |
|-----------------------------------------|--------------------------------------------------------------------------------------------------------------------------------------------------------------------------------------------------------------------------------------------------------------------------------------------------------------------------------------------------------------------------------------------------------------|
| pescado ahumado                         | <input checked="" type="radio"/> Nunca o menos 1 vez al mes<br><input type="radio"/> 1 a 3 veces mes<br><input type="radio"/> 1 vez semana<br><input type="radio"/> 2 a 4 veces semana<br><input type="radio"/> 5 a 6 veces semana<br><input type="radio"/> 1 vez al día<br><input type="radio"/> 2 a 3 veces al día<br><input type="radio"/> 5 a 6 veces al día<br><input type="radio"/> más 6 veces al día |
| almejas o mejillones o ostras unos 100g | <input checked="" type="radio"/> Nunca o menos 1 vez al mes<br><input type="radio"/> 1 a 3 veces mes<br><input type="radio"/> 1 vez semana<br><input type="radio"/> 2 a 4 veces semana<br><input type="radio"/> 5 a 6 veces semana<br><input type="radio"/> 1 vez al día<br><input type="radio"/> 2 a 3 veces al día<br><input type="radio"/> 5 a 6 veces al día<br><input type="radio"/> más 6 veces al día |
| calamar o chipiron o sepia unos 100g    | <input checked="" type="radio"/> Nunca o menos 1 vez al mes<br><input type="radio"/> 1 a 3 veces mes<br><input type="radio"/> 1 vez semana<br><input type="radio"/> 2 a 4 veces semana<br><input type="radio"/> 5 a 6 veces semana<br><input type="radio"/> 1 vez al día<br><input type="radio"/> 2 a 3 veces al día<br><input type="radio"/> 5 a 6 veces al día<br><input type="radio"/> más 6 veces al día |
| marisco unos 100g                       | <input checked="" type="radio"/> Nunca o menos 1 vez al mes<br><input type="radio"/> 1 a 3 veces mes<br><input type="radio"/> 1 vez semana<br><input type="radio"/> 2 a 4 veces semana<br><input type="radio"/> 5 a 6 veces semana<br><input type="radio"/> 1 vez al día<br><input type="radio"/> 2 a 3 veces al día<br><input type="radio"/> 5 a 6 veces al día<br><input type="radio"/> más 6 veces al día |
| Espinacas o acelgas cocinadas           | <input type="radio"/> Nunca o menos 1 vez al mes<br><input checked="" type="radio"/> 1 a 3 veces mes<br><input type="radio"/> 1 vez semana<br><input type="radio"/> 2 a 4 veces semana<br><input type="radio"/> 5 a 6 veces semana<br><input type="radio"/> 1 vez al día<br><input type="radio"/> 2 a 3 veces al día<br><input type="radio"/> 5 a 6 veces al día<br><input type="radio"/> más 6 veces al día |
| Col o coliflor o brocoli cocinado       | <input type="radio"/> Nunca o menos 1 vez al mes<br><input type="radio"/> 1 a 3 veces mes<br><input checked="" type="radio"/> 1 vez semana<br><input type="radio"/> 2 a 4 veces semana<br><input type="radio"/> 5 a 6 veces semana<br><input type="radio"/> 1 vez al día<br><input type="radio"/> 2 a 3 veces al día<br><input type="radio"/> 5 a 6 veces al día<br><input type="radio"/> más 6 veces al día |

---

Lechuga o endivia o escarola

- ☐ Nunca o menos 1 vez al mes  
☐ 1 a 3 veces mes  
☐ 1 vez semana  
☐ 2 a 4 veces semana  
☒ 5 a 6 veces semana  
☐ 1 vez al día  
☐ 2 a 3 veces al día  
☐ 5 a 6 veces al día  
☐ más 6 veces al día

---

tomate ensalada

- ☐ Nunca o menos 1 vez al mes  
☐ 1 a 3 veces mes  
☐ 1 vez semana  
☐ 2 a 4 veces semana  
☒ 5 a 6 veces semana  
☐ 1 vez al día  
☐ 2 a 3 veces al día  
☐ 5 a 6 veces al día  
☐ más 6 veces al día

---

cebolla

- ☐ Nunca o menos 1 vez al mes  
☐ 1 a 3 veces mes  
☐ 1 vez semana  
☐ 2 a 4 veces semana  
☒ 5 a 6 veces semana  
☐ 1 vez al día  
☐ 2 a 3 veces al día  
☐ 5 a 6 veces al día  
☐ más 6 veces al día

---

Zanahoria o calabaza

- ☐ Nunca o menos 1 vez al mes  
☐ 1 a 3 veces mes  
☐ 1 vez semana  
☐ 2 a 4 veces semana  
☒ 5 a 6 veces semana  
☐ 1 vez al día  
☐ 2 a 3 veces al día  
☐ 5 a 6 veces al día  
☐ más 6 veces al día

---

Judías verdes

- ☐ Nunca o menos 1 vez al mes  
☐ 1 a 3 veces mes  
☒ 1 vez semana  
☐ 2 a 4 veces semana  
☐ 5 a 6 veces semana  
☐ 1 vez al día  
☐ 2 a 3 veces al día  
☐ 5 a 6 veces al día  
☐ más 6 veces al día

---

Berenjena o calabacin o pepino

- ☐ Nunca o menos 1 vez al mes  
☐ 1 a 3 veces mes  
☐ 1 vez semana  
☐ 2 a 4 veces semana  
☒ 5 a 6 veces semana  
☐ 1 vez al día  
☐ 2 a 3 veces al día  
☐ 5 a 6 veces al día  
☐ más 6 veces al día



---

|          |                                                                                                                                                                                                                                                                                                                                                                                                              |
|----------|--------------------------------------------------------------------------------------------------------------------------------------------------------------------------------------------------------------------------------------------------------------------------------------------------------------------------------------------------------------------------------------------------------------|
| pimiento | <input type="radio"/> Nunca o menos 1 vez al mes<br><input type="radio"/> 1 a 3 veces mes<br><input type="radio"/> 1 vez semana<br><input type="radio"/> 2 a 4 veces semana<br><input checked="" type="radio"/> 5 a 6 veces semana<br><input type="radio"/> 1 vez al día<br><input type="radio"/> 2 a 3 veces al día<br><input type="radio"/> 5 a 6 veces al día<br><input type="radio"/> más 6 veces al día |
|----------|--------------------------------------------------------------------------------------------------------------------------------------------------------------------------------------------------------------------------------------------------------------------------------------------------------------------------------------------------------------------------------------------------------------|

---

|           |                                                                                                                                                                                                                                                                                                                                                                                                              |
|-----------|--------------------------------------------------------------------------------------------------------------------------------------------------------------------------------------------------------------------------------------------------------------------------------------------------------------------------------------------------------------------------------------------------------------|
| alcachofa | <input type="radio"/> Nunca o menos 1 vez al mes<br><input type="radio"/> 1 a 3 veces mes<br><input type="radio"/> 1 vez semana<br><input type="radio"/> 2 a 4 veces semana<br><input checked="" type="radio"/> 5 a 6 veces semana<br><input type="radio"/> 1 vez al día<br><input type="radio"/> 2 a 3 veces al día<br><input type="radio"/> 5 a 6 veces al día<br><input type="radio"/> más 6 veces al día |
|-----------|--------------------------------------------------------------------------------------------------------------------------------------------------------------------------------------------------------------------------------------------------------------------------------------------------------------------------------------------------------------------------------------------------------------|

---

|            |                                                                                                                                                                                                                                                                                                                                                                                                              |
|------------|--------------------------------------------------------------------------------------------------------------------------------------------------------------------------------------------------------------------------------------------------------------------------------------------------------------------------------------------------------------------------------------------------------------|
| espárragos | <input type="radio"/> Nunca o menos 1 vez al mes<br><input type="radio"/> 1 a 3 veces mes<br><input type="radio"/> 1 vez semana<br><input type="radio"/> 2 a 4 veces semana<br><input checked="" type="radio"/> 5 a 6 veces semana<br><input type="radio"/> 1 vez al día<br><input type="radio"/> 2 a 3 veces al día<br><input type="radio"/> 5 a 6 veces al día<br><input type="radio"/> más 6 veces al día |
|------------|--------------------------------------------------------------------------------------------------------------------------------------------------------------------------------------------------------------------------------------------------------------------------------------------------------------------------------------------------------------------------------------------------------------|

---

|              |                                                                                                                                                                                                                                                                                                                                                                                                              |
|--------------|--------------------------------------------------------------------------------------------------------------------------------------------------------------------------------------------------------------------------------------------------------------------------------------------------------------------------------------------------------------------------------------------------------------|
| maíz hervido | <input type="radio"/> Nunca o menos 1 vez al mes<br><input checked="" type="radio"/> 1 a 3 veces mes<br><input type="radio"/> 1 vez semana<br><input type="radio"/> 2 a 4 veces semana<br><input type="radio"/> 5 a 6 veces semana<br><input type="radio"/> 1 vez al día<br><input type="radio"/> 2 a 3 veces al día<br><input type="radio"/> 5 a 6 veces al día<br><input type="radio"/> más 6 veces al día |
|--------------|--------------------------------------------------------------------------------------------------------------------------------------------------------------------------------------------------------------------------------------------------------------------------------------------------------------------------------------------------------------------------------------------------------------|

---

|           |                                                                                                                                                                                                                                                                                                                                                                                                              |
|-----------|--------------------------------------------------------------------------------------------------------------------------------------------------------------------------------------------------------------------------------------------------------------------------------------------------------------------------------------------------------------------------------------------------------------|
| legumbres | <input type="radio"/> Nunca o menos 1 vez al mes<br><input type="radio"/> 1 a 3 veces mes<br><input type="radio"/> 1 vez semana<br><input checked="" type="radio"/> 2 a 4 veces semana<br><input type="radio"/> 5 a 6 veces semana<br><input type="radio"/> 1 vez al día<br><input type="radio"/> 2 a 3 veces al día<br><input type="radio"/> 5 a 6 veces al día<br><input type="radio"/> más 6 veces al día |
|-----------|--------------------------------------------------------------------------------------------------------------------------------------------------------------------------------------------------------------------------------------------------------------------------------------------------------------------------------------------------------------------------------------------------------------|

---

|                       |                                                                                                                                                                                                                                                                                                                                                                                                              |
|-----------------------|--------------------------------------------------------------------------------------------------------------------------------------------------------------------------------------------------------------------------------------------------------------------------------------------------------------------------------------------------------------------------------------------------------------|
| naranjas o mandarinas | <input type="radio"/> Nunca o menos 1 vez al mes<br><input type="radio"/> 1 a 3 veces mes<br><input type="radio"/> 1 vez semana<br><input type="radio"/> 2 a 4 veces semana<br><input checked="" type="radio"/> 5 a 6 veces semana<br><input type="radio"/> 1 vez al día<br><input type="radio"/> 2 a 3 veces al día<br><input type="radio"/> 5 a 6 veces al día<br><input type="radio"/> más 6 veces al día |
|-----------------------|--------------------------------------------------------------------------------------------------------------------------------------------------------------------------------------------------------------------------------------------------------------------------------------------------------------------------------------------------------------------------------------------------------------|

---

---

zumو natural fruta

- ☐ Nunca o menos 1 vez al mes  
☒ 1 a 3 veces mes  
☐ 1 vez semana  
☐ 2 a 4 veces semana  
☐ 5 a 6 veces semana  
☐ 1 vez al día  
☐ 2 a 3 veces al día  
☐ 5 a 6 veces al día  
☐ más 6 veces al día

---

platano

- ☐ Nunca o menos 1 vez al mes  
☐ 1 a 3 veces mes  
☒ 1 vez semana  
☐ 2 a 4 veces semana  
☐ 5 a 6 veces semana  
☐ 1 vez al día  
☐ 2 a 3 veces al día  
☐ 5 a 6 veces al día  
☐ más 6 veces al día

---

manzana o pera

- ☐ Nunca o menos 1 vez al mes  
☐ 1 a 3 veces mes  
☐ 1 vez semana  
☐ 2 a 4 veces semana  
☒ 5 a 6 veces semana  
☐ 1 vez al día  
☐ 2 a 3 veces al día  
☐ 5 a 6 veces al día  
☐ más 6 veces al día

---

melocotón o nectarina

- ☐ Nunca o menos 1 vez al mes  
☐ 1 a 3 veces mes  
☐ 1 vez semana  
☐ 2 a 4 veces semana  
☒ 5 a 6 veces semana  
☐ 1 vez al día  
☐ 2 a 3 veces al día  
☐ 5 a 6 veces al día  
☐ más 6 veces al día

---

sandia o melon

- ☐ Nunca o menos 1 vez al mes  
☐ 1 a 3 veces mes  
☐ 1 vez semana  
☐ 2 a 4 veces semana  
☒ 5 a 6 veces semana  
☐ 1 vez al día  
☐ 2 a 3 veces al día  
☐ 5 a 6 veces al día  
☐ más 6 veces al día

---

uva

- ☐ Nunca o menos 1 vez al mes  
☐ 1 a 3 veces mes  
☐ 1 vez semana  
☒ 2 a 4 veces semana  
☐ 5 a 6 veces semana  
☐ 1 vez al día  
☐ 2 a 3 veces al día  
☐ 5 a 6 veces al día  
☐ más 6 veces al día

---

bruna o ciruela

- ☐ Nunca o menos 1 vez al mes  
☒ 1 a 3 veces mes  
☐ 1 vez semana  
☐ 2 a 4 veces semana  
☐ 5 a 6 veces semana  
☐ 1 vez al día  
☐ 2 a 3 veces al día  
☐ 5 a 6 veces al día  
☐ más 6 veces al día

---

kiwi

- ☐ Nunca o menos 1 vez al mes  
☐ 1 a 3 veces mes  
☐ 1 vez semana  
☒ 2 a 4 veces semana  
☐ 5 a 6 veces semana  
☐ 1 vez al día  
☐ 2 a 3 veces al día  
☐ 5 a 6 veces al día  
☐ más 6 veces al día

---

aceituna

- ☐ Nunca o menos 1 vez al mes  
☒ 1 a 3 veces mes  
☐ 1 vez semana  
☐ 2 a 4 veces semana  
☐ 5 a 6 veces semana  
☐ 1 vez al día  
☐ 2 a 3 veces al día  
☐ 5 a 6 veces al día  
☐ más 6 veces al día

---

frutos secos

- ☐ Nunca o menos 1 vez al mes  
☒ 1 a 3 veces mes  
☐ 1 vez semana  
☐ 2 a 4 veces semana  
☐ 5 a 6 veces semana  
☐ 1 vez al día  
☐ 2 a 3 veces al día  
☐ 5 a 6 veces al día  
☐ más 6 veces al día

---

pan blanco

- ☐ Nunca o menos 1 vez al mes  
☒ 1 a 3 veces mes  
☐ 1 vez semana  
☐ 2 a 4 veces semana  
☐ 5 a 6 veces semana  
☐ 1 vez al día  
☐ 2 a 3 veces al día  
☐ 5 a 6 veces al día  
☐ más 6 veces al día

---

pan integral

- ☒ Nunca o menos 1 vez al mes  
☐ 1 a 3 veces mes  
☐ 1 vez semana  
☐ 2 a 4 veces semana  
☐ 5 a 6 veces semana  
☐ 1 vez al día  
☐ 2 a 3 veces al día  
☐ 5 a 6 veces al día  
☐ más 6 veces al día

|                          |                                                                                                                                                                                                                                                                                                                                                                                                              |
|--------------------------|--------------------------------------------------------------------------------------------------------------------------------------------------------------------------------------------------------------------------------------------------------------------------------------------------------------------------------------------------------------------------------------------------------------|
| cereales desayuno        | <input checked="" type="radio"/> Nunca o menos 1 vez al mes<br><input type="radio"/> 1 a 3 veces mes<br><input type="radio"/> 1 vez semana<br><input type="radio"/> 2 a 4 veces semana<br><input type="radio"/> 5 a 6 veces semana<br><input type="radio"/> 1 vez al día<br><input type="radio"/> 2 a 3 veces al día<br><input type="radio"/> 5 a 6 veces al día<br><input type="radio"/> más 6 veces al día |
| patatas fritas           | <input type="radio"/> Nunca o menos 1 vez al mes<br><input checked="" type="radio"/> 1 a 3 veces mes<br><input type="radio"/> 1 vez semana<br><input type="radio"/> 2 a 4 veces semana<br><input type="radio"/> 5 a 6 veces semana<br><input type="radio"/> 1 vez al día<br><input type="radio"/> 2 a 3 veces al día<br><input type="radio"/> 5 a 6 veces al día<br><input type="radio"/> más 6 veces al día |
| patatas cocidas o asadas | <input type="radio"/> Nunca o menos 1 vez al mes<br><input checked="" type="radio"/> 1 a 3 veces mes<br><input type="radio"/> 1 vez semana<br><input type="radio"/> 2 a 4 veces semana<br><input type="radio"/> 5 a 6 veces semana<br><input type="radio"/> 1 vez al día<br><input type="radio"/> 2 a 3 veces al día<br><input type="radio"/> 5 a 6 veces al día<br><input type="radio"/> más 6 veces al día |
| bolsa papas              | <input type="radio"/> Nunca o menos 1 vez al mes<br><input checked="" type="radio"/> 1 a 3 veces mes<br><input type="radio"/> 1 vez semana<br><input type="radio"/> 2 a 4 veces semana<br><input type="radio"/> 5 a 6 veces semana<br><input type="radio"/> 1 vez al día<br><input type="radio"/> 2 a 3 veces al día<br><input type="radio"/> 5 a 6 veces al día<br><input type="radio"/> más 6 veces al día |
| arroz cocinado           | <input type="radio"/> Nunca o menos 1 vez al mes<br><input type="radio"/> 1 a 3 veces mes<br><input checked="" type="radio"/> 1 vez semana<br><input type="radio"/> 2 a 4 veces semana<br><input type="radio"/> 5 a 6 veces semana<br><input type="radio"/> 1 vez al día<br><input type="radio"/> 2 a 3 veces al día<br><input type="radio"/> 5 a 6 veces al día<br><input type="radio"/> más 6 veces al día |
| pasta                    | <input type="radio"/> Nunca o menos 1 vez al mes<br><input type="radio"/> 1 a 3 veces mes<br><input checked="" type="radio"/> 1 vez semana<br><input type="radio"/> 2 a 4 veces semana<br><input type="radio"/> 5 a 6 veces semana<br><input type="radio"/> 1 vez al día<br><input type="radio"/> 2 a 3 veces al día<br><input type="radio"/> 5 a 6 veces al día<br><input type="radio"/> más 6 veces al día |

|                     |                                                                                                                                                                                                                                                                                                                                                                                                              |
|---------------------|--------------------------------------------------------------------------------------------------------------------------------------------------------------------------------------------------------------------------------------------------------------------------------------------------------------------------------------------------------------------------------------------------------------|
| pizza               | <input type="radio"/> Nunca o menos 1 vez al mes<br><input type="radio"/> 1 a 3 veces mes<br><input checked="" type="radio"/> 1 vez semana<br><input type="radio"/> 2 a 4 veces semana<br><input type="radio"/> 5 a 6 veces semana<br><input type="radio"/> 1 vez al día<br><input type="radio"/> 2 a 3 veces al día<br><input type="radio"/> 5 a 6 veces al día<br><input type="radio"/> más 6 veces al día |
| aceite oliva        | <input type="radio"/> Nunca o menos 1 vez al mes<br><input checked="" type="radio"/> 1 a 3 veces mes<br><input type="radio"/> 1 vez semana<br><input type="radio"/> 2 a 4 veces semana<br><input type="radio"/> 5 a 6 veces semana<br><input type="radio"/> 1 vez al día<br><input type="radio"/> 2 a 3 veces al día<br><input type="radio"/> 5 a 6 veces al día<br><input type="radio"/> más 6 veces al día |
| otros aceites       | <input checked="" type="radio"/> Nunca o menos 1 vez al mes<br><input type="radio"/> 1 a 3 veces mes<br><input type="radio"/> 1 vez semana<br><input type="radio"/> 2 a 4 veces semana<br><input type="radio"/> 5 a 6 veces semana<br><input type="radio"/> 1 vez al día<br><input type="radio"/> 2 a 3 veces al día<br><input type="radio"/> 5 a 6 veces al día<br><input type="radio"/> más 6 veces al día |
| margarina           | <input checked="" type="radio"/> Nunca o menos 1 vez al mes<br><input type="radio"/> 1 a 3 veces mes<br><input type="radio"/> 1 vez semana<br><input type="radio"/> 2 a 4 veces semana<br><input type="radio"/> 5 a 6 veces semana<br><input type="radio"/> 1 vez al día<br><input type="radio"/> 2 a 3 veces al día<br><input type="radio"/> 5 a 6 veces al día<br><input type="radio"/> más 6 veces al día |
| mantequilla         | <input checked="" type="radio"/> Nunca o menos 1 vez al mes<br><input type="radio"/> 1 a 3 veces mes<br><input type="radio"/> 1 vez semana<br><input type="radio"/> 2 a 4 veces semana<br><input type="radio"/> 5 a 6 veces semana<br><input type="radio"/> 1 vez al día<br><input type="radio"/> 2 a 3 veces al día<br><input type="radio"/> 5 a 6 veces al día<br><input type="radio"/> más 6 veces al día |
| galletas tipo maria | <input type="radio"/> Nunca o menos 1 vez al mes<br><input checked="" type="radio"/> 1 a 3 veces mes<br><input type="radio"/> 1 vez semana<br><input type="radio"/> 2 a 4 veces semana<br><input type="radio"/> 5 a 6 veces semana<br><input type="radio"/> 1 vez al día<br><input type="radio"/> 2 a 3 veces al día<br><input type="radio"/> 5 a 6 veces al día<br><input type="radio"/> más 6 veces al día |

---

galletas chocolate

- ☐ Nunca o menos 1 vez al mes  
☒ 1 a 3 veces mes  
☐ 1 vez semana  
☐ 2 a 4 veces semana  
☐ 5 a 6 veces semana  
☐ 1 vez al día  
☐ 2 a 3 veces al día  
☐ 5 a 6 veces al día  
☐ más 6 veces al día

---

bolleria

- ☒ Nunca o menos 1 vez al mes  
☐ 1 a 3 veces mes  
☐ 1 vez semana  
☐ 2 a 4 veces semana  
☐ 5 a 6 veces semana  
☐ 1 vez al día  
☐ 2 a 3 veces al día  
☐ 5 a 6 veces al día  
☐ más 6 veces al día

---

chocolate o bombones

- ☐ Nunca o menos 1 vez al mes  
☐ 1 a 3 veces mes  
☐ 1 vez semana  
☒ 2 a 4 veces semana  
☐ 5 a 6 veces semana  
☐ 1 vez al día  
☐ 2 a 3 veces al día  
☐ 5 a 6 veces al día  
☐ más 6 veces al día

---

chocolate polvo o colacao

- ☐ Nunca o menos 1 vez al mes  
☐ 1 a 3 veces mes  
☐ 1 vez semana  
☐ 2 a 4 veces semana  
☐ 5 a 6 veces semana  
☒ 1 vez al día  
☐ 2 a 3 veces al día  
☐ 5 a 6 veces al día  
☐ más 6 veces al día

---

vino tinto

- ☒ Nunca o menos 1 vez al mes  
☐ 1 a 3 veces mes  
☐ 1 vez semana  
☐ 2 a 4 veces semana  
☐ 5 a 6 veces semana  
☐ 1 vez al día  
☐ 2 a 3 veces al día  
☐ 5 a 6 veces al día  
☐ más 6 veces al día

---

vino blanco

- ☒ Nunca o menos 1 vez al mes  
☐ 1 a 3 veces mes  
☐ 1 vez semana  
☐ 2 a 4 veces semana  
☐ 5 a 6 veces semana  
☐ 1 vez al día  
☐ 2 a 3 veces al día  
☐ 5 a 6 veces al día  
☐ más 6 veces al día

---

|                    |                                                                                                                                                                                                                                                                                                                                                                                                              |
|--------------------|--------------------------------------------------------------------------------------------------------------------------------------------------------------------------------------------------------------------------------------------------------------------------------------------------------------------------------------------------------------------------------------------------------------|
| vino seco o vermut | <input checked="" type="radio"/> Nunca o menos 1 vez al mes<br><input type="radio"/> 1 a 3 veces mes<br><input type="radio"/> 1 vez semana<br><input type="radio"/> 2 a 4 veces semana<br><input type="radio"/> 5 a 6 veces semana<br><input type="radio"/> 1 vez al día<br><input type="radio"/> 2 a 3 veces al día<br><input type="radio"/> 5 a 6 veces al día<br><input type="radio"/> más 6 veces al día |
|--------------------|--------------------------------------------------------------------------------------------------------------------------------------------------------------------------------------------------------------------------------------------------------------------------------------------------------------------------------------------------------------------------------------------------------------|

---

|         |                                                                                                                                                                                                                                                                                                                                                                                                              |
|---------|--------------------------------------------------------------------------------------------------------------------------------------------------------------------------------------------------------------------------------------------------------------------------------------------------------------------------------------------------------------------------------------------------------------|
| cerveza | <input type="radio"/> Nunca o menos 1 vez al mes<br><input checked="" type="radio"/> 1 a 3 veces mes<br><input type="radio"/> 1 vez semana<br><input type="radio"/> 2 a 4 veces semana<br><input type="radio"/> 5 a 6 veces semana<br><input type="radio"/> 1 vez al día<br><input type="radio"/> 2 a 3 veces al día<br><input type="radio"/> 5 a 6 veces al día<br><input type="radio"/> más 6 veces al día |
|---------|--------------------------------------------------------------------------------------------------------------------------------------------------------------------------------------------------------------------------------------------------------------------------------------------------------------------------------------------------------------------------------------------------------------|

---

|                     |                                                                                                                                                                                                                                                                                                                                                                                                              |
|---------------------|--------------------------------------------------------------------------------------------------------------------------------------------------------------------------------------------------------------------------------------------------------------------------------------------------------------------------------------------------------------------------------------------------------------|
| cerveza sin alcohol | <input type="radio"/> Nunca o menos 1 vez al mes<br><input checked="" type="radio"/> 1 a 3 veces mes<br><input type="radio"/> 1 vez semana<br><input type="radio"/> 2 a 4 veces semana<br><input type="radio"/> 5 a 6 veces semana<br><input type="radio"/> 1 vez al día<br><input type="radio"/> 2 a 3 veces al día<br><input type="radio"/> 5 a 6 veces al día<br><input type="radio"/> más 6 veces al día |
|---------------------|--------------------------------------------------------------------------------------------------------------------------------------------------------------------------------------------------------------------------------------------------------------------------------------------------------------------------------------------------------------------------------------------------------------|

---

|         |                                                                                                                                                                                                                                                                                                                                                                                                              |
|---------|--------------------------------------------------------------------------------------------------------------------------------------------------------------------------------------------------------------------------------------------------------------------------------------------------------------------------------------------------------------------------------------------------------------|
| licores | <input checked="" type="radio"/> Nunca o menos 1 vez al mes<br><input type="radio"/> 1 a 3 veces mes<br><input type="radio"/> 1 vez semana<br><input type="radio"/> 2 a 4 veces semana<br><input type="radio"/> 5 a 6 veces semana<br><input type="radio"/> 1 vez al día<br><input type="radio"/> 2 a 3 veces al día<br><input type="radio"/> 5 a 6 veces al día<br><input type="radio"/> más 6 veces al día |
|---------|--------------------------------------------------------------------------------------------------------------------------------------------------------------------------------------------------------------------------------------------------------------------------------------------------------------------------------------------------------------------------------------------------------------|

---

|                       |                                                                                                                                                                                                                                                                                                                                                                                                              |
|-----------------------|--------------------------------------------------------------------------------------------------------------------------------------------------------------------------------------------------------------------------------------------------------------------------------------------------------------------------------------------------------------------------------------------------------------|
| ginebra o ron o vodka | <input checked="" type="radio"/> Nunca o menos 1 vez al mes<br><input type="radio"/> 1 a 3 veces mes<br><input type="radio"/> 1 vez semana<br><input type="radio"/> 2 a 4 veces semana<br><input type="radio"/> 5 a 6 veces semana<br><input type="radio"/> 1 vez al día<br><input type="radio"/> 2 a 3 veces al día<br><input type="radio"/> 5 a 6 veces al día<br><input type="radio"/> más 6 veces al día |
|-----------------------|--------------------------------------------------------------------------------------------------------------------------------------------------------------------------------------------------------------------------------------------------------------------------------------------------------------------------------------------------------------------------------------------------------------|

---

|                 |                                                                                                                                                                                                                                                                                                                                                                                                              |
|-----------------|--------------------------------------------------------------------------------------------------------------------------------------------------------------------------------------------------------------------------------------------------------------------------------------------------------------------------------------------------------------------------------------------------------------|
| refresco normal | <input type="radio"/> Nunca o menos 1 vez al mes<br><input checked="" type="radio"/> 1 a 3 veces mes<br><input type="radio"/> 1 vez semana<br><input type="radio"/> 2 a 4 veces semana<br><input type="radio"/> 5 a 6 veces semana<br><input type="radio"/> 1 vez al día<br><input type="radio"/> 2 a 3 veces al día<br><input type="radio"/> 5 a 6 veces al día<br><input type="radio"/> más 6 veces al día |
|-----------------|--------------------------------------------------------------------------------------------------------------------------------------------------------------------------------------------------------------------------------------------------------------------------------------------------------------------------------------------------------------------------------------------------------------|

---

|                          |                                                                                                                                                                                                                                                                                                                                                                                                              |
|--------------------------|--------------------------------------------------------------------------------------------------------------------------------------------------------------------------------------------------------------------------------------------------------------------------------------------------------------------------------------------------------------------------------------------------------------|
| refresco sin azúcar      | <input checked="" type="radio"/> Nunca o menos 1 vez al mes<br><input type="radio"/> 1 a 3 veces mes<br><input type="radio"/> 1 vez semana<br><input type="radio"/> 2 a 4 veces semana<br><input type="radio"/> 5 a 6 veces semana<br><input type="radio"/> 1 vez al día<br><input type="radio"/> 2 a 3 veces al día<br><input type="radio"/> 5 a 6 veces al día<br><input type="radio"/> más 6 veces al día |
| Agua del grifo           | <input checked="" type="radio"/> Nunca o menos 1 vez al mes<br><input type="radio"/> 1 a 3 veces mes<br><input type="radio"/> 1 vez semana<br><input type="radio"/> 2 a 4 veces semana<br><input type="radio"/> 5 a 6 veces semana<br><input type="radio"/> 1 vez al día<br><input type="radio"/> 2 a 3 veces al día<br><input type="radio"/> 5 a 6 veces al día<br><input type="radio"/> más 6 veces al día |
| agua embotellada sin gas | <input checked="" type="radio"/> Nunca o menos 1 vez al mes<br><input type="radio"/> 1 a 3 veces mes<br><input type="radio"/> 1 vez semana<br><input type="radio"/> 2 a 4 veces semana<br><input type="radio"/> 5 a 6 veces semana<br><input type="radio"/> 1 vez al día<br><input type="radio"/> 2 a 3 veces al día<br><input type="radio"/> 5 a 6 veces al día<br><input type="radio"/> más 6 veces al día |
| agua embotellada con gas | <input checked="" type="radio"/> Nunca o menos 1 vez al mes<br><input type="radio"/> 1 a 3 veces mes<br><input type="radio"/> 1 vez semana<br><input type="radio"/> 2 a 4 veces semana<br><input type="radio"/> 5 a 6 veces semana<br><input type="radio"/> 1 vez al día<br><input type="radio"/> 2 a 3 veces al día<br><input type="radio"/> 5 a 6 veces al día<br><input type="radio"/> más 6 veces al día |
| zumو frutas embasado     | <input checked="" type="radio"/> Nunca o menos 1 vez al mes<br><input type="radio"/> 1 a 3 veces mes<br><input type="radio"/> 1 vez semana<br><input type="radio"/> 2 a 4 veces semana<br><input type="radio"/> 5 a 6 veces semana<br><input type="radio"/> 1 vez al día<br><input type="radio"/> 2 a 3 veces al día<br><input type="radio"/> 5 a 6 veces al día<br><input type="radio"/> más 6 veces al día |
| cafe                     | <input checked="" type="radio"/> Nunca o menos 1 vez al mes<br><input type="radio"/> 1 a 3 veces mes<br><input type="radio"/> 1 vez semana<br><input type="radio"/> 2 a 4 veces semana<br><input type="radio"/> 5 a 6 veces semana<br><input type="radio"/> 1 vez al día<br><input type="radio"/> 2 a 3 veces al día<br><input type="radio"/> 5 a 6 veces al día<br><input type="radio"/> más 6 veces al día |



|                       |                                                                                                                                                                                                                                                                                                                                                                                                              |
|-----------------------|--------------------------------------------------------------------------------------------------------------------------------------------------------------------------------------------------------------------------------------------------------------------------------------------------------------------------------------------------------------------------------------------------------------|
| cafe descafeinado     | <input checked="" type="radio"/> Nunca o menos 1 vez al mes<br><input type="radio"/> 1 a 3 veces mes<br><input type="radio"/> 1 vez semana<br><input type="radio"/> 2 a 4 veces semana<br><input type="radio"/> 5 a 6 veces semana<br><input type="radio"/> 1 vez al día<br><input type="radio"/> 2 a 3 veces al día<br><input type="radio"/> 5 a 6 veces al día<br><input type="radio"/> más 6 veces al día |
| te o infusión         | <input checked="" type="radio"/> Nunca o menos 1 vez al mes<br><input type="radio"/> 1 a 3 veces mes<br><input type="radio"/> 1 vez semana<br><input type="radio"/> 2 a 4 veces semana<br><input type="radio"/> 5 a 6 veces semana<br><input type="radio"/> 1 vez al día<br><input type="radio"/> 2 a 3 veces al día<br><input type="radio"/> 5 a 6 veces al día<br><input type="radio"/> más 6 veces al día |
| sopa o puré verduras  | <input type="radio"/> Nunca o menos 1 vez al mes<br><input type="radio"/> 1 a 3 veces mes<br><input checked="" type="radio"/> 1 vez semana<br><input type="radio"/> 2 a 4 veces semana<br><input type="radio"/> 5 a 6 veces semana<br><input type="radio"/> 1 vez al día<br><input type="radio"/> 2 a 3 veces al día<br><input type="radio"/> 5 a 6 veces al día<br><input type="radio"/> más 6 veces al día |
| croquetas pollo jamón | <input type="radio"/> Nunca o menos 1 vez al mes<br><input checked="" type="radio"/> 1 a 3 veces mes<br><input type="radio"/> 1 vez semana<br><input type="radio"/> 2 a 4 veces semana<br><input type="radio"/> 5 a 6 veces semana<br><input type="radio"/> 1 vez al día<br><input type="radio"/> 2 a 3 veces al día<br><input type="radio"/> 5 a 6 veces al día<br><input type="radio"/> más 6 veces al día |
| croquetas pescado     | <input checked="" type="radio"/> Nunca o menos 1 vez al mes<br><input type="radio"/> 1 a 3 veces mes<br><input type="radio"/> 1 vez semana<br><input type="radio"/> 2 a 4 veces semana<br><input type="radio"/> 5 a 6 veces semana<br><input type="radio"/> 1 vez al día<br><input type="radio"/> 2 a 3 veces al día<br><input type="radio"/> 5 a 6 veces al día<br><input type="radio"/> más 6 veces al día |
| mayonesa              | <input type="radio"/> Nunca o menos 1 vez al mes<br><input checked="" type="radio"/> 1 a 3 veces mes<br><input type="radio"/> 1 vez semana<br><input type="radio"/> 2 a 4 veces semana<br><input type="radio"/> 5 a 6 veces semana<br><input type="radio"/> 1 vez al día<br><input type="radio"/> 2 a 3 veces al día<br><input type="radio"/> 5 a 6 veces al día<br><input type="radio"/> más 6 veces al día |

|                  |                                                                                                                                                                                                                                                                                                                                                                                                              |
|------------------|--------------------------------------------------------------------------------------------------------------------------------------------------------------------------------------------------------------------------------------------------------------------------------------------------------------------------------------------------------------------------------------------------------------|
| salsa tomate     | <input type="radio"/> Nunca o menos 1 vez al mes<br><input checked="" type="radio"/> 1 a 3 veces mes<br><input type="radio"/> 1 vez semana<br><input type="radio"/> 2 a 4 veces semana<br><input type="radio"/> 5 a 6 veces semana<br><input type="radio"/> 1 vez al día<br><input type="radio"/> 2 a 3 veces al día<br><input type="radio"/> 5 a 6 veces al día<br><input type="radio"/> más 6 veces al día |
| ketchup          | <input checked="" type="radio"/> Nunca o menos 1 vez al mes<br><input type="radio"/> 1 a 3 veces mes<br><input type="radio"/> 1 vez semana<br><input type="radio"/> 2 a 4 veces semana<br><input type="radio"/> 5 a 6 veces semana<br><input type="radio"/> 1 vez al día<br><input type="radio"/> 2 a 3 veces al día<br><input type="radio"/> 5 a 6 veces al día<br><input type="radio"/> más 6 veces al día |
| sal              | <input type="radio"/> Nunca o menos 1 vez al mes<br><input type="radio"/> 1 a 3 veces mes<br><input checked="" type="radio"/> 1 vez semana<br><input type="radio"/> 2 a 4 veces semana<br><input type="radio"/> 5 a 6 veces semana<br><input type="radio"/> 1 vez al día<br><input type="radio"/> 2 a 3 veces al día<br><input type="radio"/> 5 a 6 veces al día<br><input type="radio"/> más 6 veces al día |
| ajo              | <input type="radio"/> Nunca o menos 1 vez al mes<br><input type="radio"/> 1 a 3 veces mes<br><input type="radio"/> 1 vez semana<br><input checked="" type="radio"/> 2 a 4 veces semana<br><input type="radio"/> 5 a 6 veces semana<br><input type="radio"/> 1 vez al día<br><input type="radio"/> 2 a 3 veces al día<br><input type="radio"/> 5 a 6 veces al día<br><input type="radio"/> más 6 veces al día |
| mermelada o miel | <input checked="" type="radio"/> Nunca o menos 1 vez al mes<br><input type="radio"/> 1 a 3 veces mes<br><input type="radio"/> 1 vez semana<br><input type="radio"/> 2 a 4 veces semana<br><input type="radio"/> 5 a 6 veces semana<br><input type="radio"/> 1 vez al día<br><input type="radio"/> 2 a 3 veces al día<br><input type="radio"/> 5 a 6 veces al día<br><input type="radio"/> más 6 veces al día |
| azúcar           | <input checked="" type="radio"/> Nunca o menos 1 vez al mes<br><input type="radio"/> 1 a 3 veces mes<br><input type="radio"/> 1 vez semana<br><input type="radio"/> 2 a 4 veces semana<br><input type="radio"/> 5 a 6 veces semana<br><input type="radio"/> 1 vez al día<br><input type="radio"/> 2 a 3 veces al día<br><input type="radio"/> 5 a 6 veces al día<br><input type="radio"/> más 6 veces al día |

|                                       |                                                                                                                                                                                                                                                                                                                                                                                                                                                                                                                               |
|---------------------------------------|-------------------------------------------------------------------------------------------------------------------------------------------------------------------------------------------------------------------------------------------------------------------------------------------------------------------------------------------------------------------------------------------------------------------------------------------------------------------------------------------------------------------------------|
| Otro alimento                         |                                                                                                                                                                                                                                                                                                                                                                                                                                                                                                                               |
| suplementos vitamínicos               | <input checked="" type="radio"/> si<br><input type="radio"/> no                                                                                                                                                                                                                                                                                                                                                                                                                                                               |
| suplementos vitamínicos               | [*DATA REMOVED*]                                                                                                                                                                                                                                                                                                                                                                                                                                                                                                              |
| dieta previa                          | <input type="radio"/> si<br><input checked="" type="radio"/> no                                                                                                                                                                                                                                                                                                                                                                                                                                                               |
| motivo dieta                          | <input checked="" type="radio"/> no dieta<br><input type="radio"/> control peso<br><input type="radio"/> control colesterol<br><input type="radio"/> control diabetes<br><input type="radio"/> problemas estómago<br><input type="radio"/> problemas vesícula o hepáticos<br><input type="radio"/> HTA o cardiopatía<br><input type="radio"/> problemas renales<br><input type="radio"/> alergia alimentaria<br><input type="radio"/> ácido úrico elevado<br><input type="radio"/> vegetariana<br><input type="radio"/> otros |
| cambio alimentos año previo gestación | <input type="radio"/> si<br><input type="radio"/> no                                                                                                                                                                                                                                                                                                                                                                                                                                                                          |
| cambio lácteos                        | <input type="radio"/> eliminado<br><input type="radio"/> disminuido<br><input type="radio"/> igual<br><input type="radio"/> aumentado<br><input type="radio"/> no sabe                                                                                                                                                                                                                                                                                                                                                        |
| cambio huevos                         | <input type="radio"/> eliminado<br><input type="radio"/> disminuido<br><input type="radio"/> igual<br><input type="radio"/> aumentado<br><input type="radio"/> no sabe                                                                                                                                                                                                                                                                                                                                                        |
| cambio carne                          | <input type="radio"/> eliminado<br><input type="radio"/> disminuido<br><input type="radio"/> igual<br><input type="radio"/> aumentado<br><input type="radio"/> no sabe                                                                                                                                                                                                                                                                                                                                                        |
| cambio pescado                        | <input type="radio"/> eliminado<br><input type="radio"/> disminuido<br><input type="radio"/> igual<br><input type="radio"/> aumentado<br><input type="radio"/> no sabe                                                                                                                                                                                                                                                                                                                                                        |
| cambio verduras                       | <input type="radio"/> eliminado<br><input type="radio"/> disminuido<br><input type="radio"/> igual<br><input type="radio"/> aumentado<br><input type="radio"/> no sabe                                                                                                                                                                                                                                                                                                                                                        |

|                            |                                                                                                                                                                                                                        |
|----------------------------|------------------------------------------------------------------------------------------------------------------------------------------------------------------------------------------------------------------------|
| cambio legumbres           | <input type="radio"/> eliminado<br><input type="radio"/> disminuido<br><input type="radio"/> igual<br><input type="radio"/> aumentado<br><input type="radio"/> no sabe                                                 |
| cambio fruta               | <input type="radio"/> eliminado<br><input type="radio"/> disminuido<br><input type="radio"/> igual<br><input type="radio"/> aumentado<br><input type="radio"/> no sabe                                                 |
| cambio pan                 | <input type="radio"/> eliminado<br><input type="radio"/> disminuido<br><input type="radio"/> igual<br><input type="radio"/> aumentado<br><input type="radio"/> no sabe                                                 |
| cambio aceite oliva        | <input type="radio"/> eliminado<br><input type="radio"/> disminuido<br><input type="radio"/> igual<br><input type="radio"/> aumentado<br><input type="radio"/> no sabe                                                 |
| cambio mante o margarina   | <input type="radio"/> eliminado<br><input type="radio"/> disminuido<br><input type="radio"/> igual<br><input type="radio"/> aumentado<br><input type="radio"/> no sabe                                                 |
| cambio azúcar y dulces     | <input type="radio"/> eliminado<br><input type="radio"/> disminuido<br><input type="radio"/> igual<br><input type="radio"/> aumentado<br><input type="radio"/> no sabe                                                 |
| cambio bebidas alcohólicas | <input type="radio"/> eliminado<br><input type="radio"/> disminuido<br><input type="radio"/> igual<br><input type="radio"/> aumentado<br><input type="radio"/> no sabe                                                 |
| frecuencia comidas fritas  | <input type="radio"/> a diario<br><input type="radio"/> 5 a 6 veces semana<br><input type="radio"/> 2 a 4 veces semana<br><input type="radio"/> 1 vez semana<br><input checked="" type="radio"/> menos de 1 vez semana |
| carne                      | <input type="radio"/> no como<br><input type="radio"/> cruda<br><input type="radio"/> poco hecha<br><input type="radio"/> hecha<br><input checked="" type="radio"/> muy hecha                                          |
| grasa visible carne        | <input checked="" type="radio"/> quita toda<br><input type="radio"/> quita mayoría<br><input type="radio"/> quita un poco<br><input type="radio"/> no quita nada                                                       |

|                                |                                                                                                                                                                                                                                                          |
|--------------------------------|----------------------------------------------------------------------------------------------------------------------------------------------------------------------------------------------------------------------------------------------------------|
| cocina carne                   | <input checked="" type="radio"/> a la plancha<br><input type="radio"/> a la parrilla<br><input type="radio"/> asada<br><input type="radio"/> frita<br><input type="radio"/> guisada                                                                      |
| tostado quemado carne          | <input checked="" type="radio"/> nunca<br><input type="radio"/> 1 vez mes<br><input type="radio"/> 2 a 3 veces mes<br><input type="radio"/> 1 vez semana<br><input type="radio"/> 2 a 3 semanas                                                          |
| tostado quemado pescado        | <input checked="" type="radio"/> nunca<br><input type="radio"/> 1 vez mes<br><input type="radio"/> 2 a 3 veces mes<br><input type="radio"/> 1 vez semana<br><input type="radio"/> 2 a 3 semanas                                                          |
| socarrat paella                | <input type="radio"/> nunca<br><input type="radio"/> 1 vez mes<br><input checked="" type="radio"/> 2 a 3 veces mes<br><input type="radio"/> 1 vez semana<br><input type="radio"/> 2 a 3 semanas                                                          |
| grasa o aceite cocinar         | <input type="radio"/> mantequilla<br><input type="radio"/> margarina<br><input type="radio"/> aceite oliva<br><input checked="" type="radio"/> aceite oliva virgen extra<br><input type="radio"/> aceite vegetal<br><input type="radio"/> mezcla aceites |
| grasa aceite aliñar            | <input type="radio"/> mantequilla<br><input type="radio"/> margarina<br><input type="radio"/> aceite oliva<br><input checked="" type="radio"/> aceite oliva virgen extra<br><input type="radio"/> aceite vegetal<br><input type="radio"/> mezcla aceites |
| grasa aceite freir             | <input type="radio"/> mantequilla<br><input type="radio"/> margarina<br><input type="radio"/> aceite oliva<br><input type="radio"/> aceite oliva virgen extra<br><input type="radio"/> aceite vegetal<br><input type="radio"/> mezcla aceites            |
| Ejercicio cuestionario         | <input type="radio"/> si<br><input type="radio"/> no                                                                                                                                                                                                     |
| horas de sueño incluido siesta | _____                                                                                                                                                                                                                                                    |
| minutos siesta                 | _____                                                                                                                                                                                                                                                    |
| horas televisión semana        | [*DATA REMOVED*]                                                                                                                                                                                                                                         |

|                                        |                                                                                                                                                                                                                                                                                                                                                                           |
|----------------------------------------|---------------------------------------------------------------------------------------------------------------------------------------------------------------------------------------------------------------------------------------------------------------------------------------------------------------------------------------------------------------------------|
| actividad trabajo                      | <input type="radio"/> casi siempre sentado<br><input type="radio"/> sentado 50 por cien<br><input type="radio"/> casi siempre de pie, quieto<br><input checked="" type="radio"/> casi siempre levantado caminando y llevando pocas cosas<br><input type="radio"/> casi siempre levantado, caminando y llevado muchas cosas<br><input type="radio"/> trabajo manual pesado |
| tiempo caminar o bici al día           | <input type="radio"/> casi nunca<br><input type="radio"/> menos 20min día<br><input checked="" type="radio"/> 20 a 40 min día<br><input type="radio"/> 40 a 60 min día<br><input type="radio"/> 1h o 1h y media día<br><input type="radio"/> más de 1h y media al día                                                                                                     |
| tiempo tareas casa al día              | <input type="radio"/> menos de 1h día<br><input checked="" type="radio"/> 1 a 2h día<br><input type="radio"/> 3 a 4h día<br><input type="radio"/> 5 a 6h día<br><input type="radio"/> 7 a 8h día<br><input type="radio"/> más de 8h día                                                                                                                                   |
| tiempo libre televisión ordenador leer | <input type="radio"/> menos 1h día<br><input checked="" type="radio"/> 1h día<br><input type="radio"/> 2h día<br><input type="radio"/> 3h día<br><input type="radio"/> 4h día<br><input type="radio"/> 5 a 6h día<br><input type="radio"/> mas 6h día                                                                                                                     |
| tiempo libre ejercicio o deporte       | <input type="radio"/> menos 1h semana<br><input type="radio"/> 1h semana<br><input type="radio"/> 2h semana<br><input checked="" type="radio"/> 3h semana<br><input type="radio"/> 4 a 5h semana<br><input type="radio"/> mas 5h semana                                                                                                                                   |
| como se considera                      | <input type="radio"/> sedentaria<br><input type="radio"/> poco activa<br><input type="radio"/> moderadamente activa<br><input checked="" type="radio"/> bastante activa<br><input type="radio"/> muy activa<br><input type="radio"/> no sabe                                                                                                                              |
| FUR                                    | [*DATA REMOVED*]                                                                                                                                                                                                                                                                                                                                                          |
| Semanas gestación 2T                   | [*DATA REMOVED*]                                                                                                                                                                                                                                                                                                                                                          |
| Días gestación 2T                      | [*DATA REMOVED*]                                                                                                                                                                                                                                                                                                                                                          |
| DBP 2T                                 | [*DATA REMOVED*]                                                                                                                                                                                                                                                                                                                                                          |
| CC 2T                                  | [*DATA REMOVED*]                                                                                                                                                                                                                                                                                                                                                          |
| AC 2T                                  | [*DATA REMOVED*]                                                                                                                                                                                                                                                                                                                                                          |

|                                                   |                                                                                                                                                                                                 |
|---------------------------------------------------|-------------------------------------------------------------------------------------------------------------------------------------------------------------------------------------------------|
| LF 2T                                             | [*DATA REMOVED*]                                                                                                                                                                                |
| PFE 2T (Hadlock)                                  | [*DATA REMOVED*]                                                                                                                                                                                |
| Semanas gestación 3T                              | [*DATA REMOVED*]                                                                                                                                                                                |
| días 3T                                           | [*DATA REMOVED*]                                                                                                                                                                                |
| DBP 3T                                            | [*DATA REMOVED*]                                                                                                                                                                                |
| CC 3T                                             | [*DATA REMOVED*]                                                                                                                                                                                |
| AC 3T                                             | [*DATA REMOVED*]                                                                                                                                                                                |
| LF 3T                                             | [*DATA REMOVED*]                                                                                                                                                                                |
| PFE 3T (Hadlock)                                  | [*DATA REMOVED*]                                                                                                                                                                                |
| Semanas de gestación final                        | [*DATA REMOVED*]                                                                                                                                                                                |
| días gestación final                              | [*DATA REMOVED*]                                                                                                                                                                                |
| Localización placenta                             | <input checked="" type="radio"/> anterior<br><input type="radio"/> lateral derecha<br><input type="radio"/> lateral izquierda<br><input type="radio"/> posterior<br><input type="radio"/> fondo |
| Presentación longitudinal cefálica                | <input type="radio"/> no<br><input checked="" type="radio"/> si                                                                                                                                 |
| Dorso                                             | <input type="radio"/> izquierda anterior<br><input type="radio"/> izquierda posterior<br><input checked="" type="radio"/> derecha anterior<br><input type="radio"/> derecha posterior           |
| diámetro biparietal                               | [*DATA REMOVED*]                                                                                                                                                                                |
| Circunferencia craneal                            | [*DATA REMOVED*]                                                                                                                                                                                |
| Circunferencia abdominal                          | [*DATA REMOVED*]                                                                                                                                                                                |
| Longitud de femur                                 | [*DATA REMOVED*]                                                                                                                                                                                |
| tejido celular subcutáneo a nivel del muslo en mm | [*DATA REMOVED*]                                                                                                                                                                                |
| tejido celular subcutáneo en abdomen en mm        | [*DATA REMOVED*]                                                                                                                                                                                |
| Volumen del muslo en cm3                          | [*DATA REMOVED*]                                                                                                                                                                                |
| Peso fetal estimado según fórmula de Hadlock      | [*DATA REMOVED*]                                                                                                                                                                                |

|                                               |                                                                                                                                                          |
|-----------------------------------------------|----------------------------------------------------------------------------------------------------------------------------------------------------------|
| Percentil                                     | [*DATA REMOVED*]                                                                                                                                         |
| Peso fetal estimado según fórmula de Scioscia | <hr/>                                                                                                                                                    |
| Peso fetal estimado según fórmula de LEE      | <hr/>                                                                                                                                                    |
| Tipo de parto                                 | <input checked="" type="radio"/> eutocico<br><input type="radio"/> instrumentado/ventosa<br><input type="radio"/> cesarea                                |
| fecha de nacimiento                           | [*DATA REMOVED*]                                                                                                                                         |
| Días entre exploración y nacimiento           | [*DATA REMOVED*]                                                                                                                                         |
| Peso RN en g                                  | [*DATA REMOVED*]                                                                                                                                         |
| sexo                                          | <input checked="" type="radio"/> mujer<br><input type="radio"/> hombre                                                                                   |
| Apgar 1 minuto                                | [*DATA REMOVED*]                                                                                                                                         |
| Apgar 5 minutos                               | [*DATA REMOVED*]                                                                                                                                         |
| Apgar 10 minutos                              | <hr/>                                                                                                                                                    |
| antecedente Covid durante gestación           | <input type="radio"/> Yes<br><input checked="" type="radio"/> No                                                                                         |
| Nivel de estudios                             | <input type="radio"/> ninguno<br><input type="radio"/> primarios<br><input checked="" type="radio"/> secundarios<br><input type="radio"/> universitarios |



# Base\_datos\_estimacion\_peso\_fetal

|                                       |                                                                                                                                                                                                                                                                                      |
|---------------------------------------|--------------------------------------------------------------------------------------------------------------------------------------------------------------------------------------------------------------------------------------------------------------------------------------|
| Número de identificación participante | 69                                                                                                                                                                                                                                                                                   |
| CODIGO PARTICIPANTE                   |                                                                                                                                                                                                                                                                                      |
| Edad                                  | [*DATA REMOVED*]                                                                                                                                                                                                                                                                     |
| Gestaciones                           | <input type="radio"/> 1<br><input type="radio"/> 2<br><input checked="" type="radio"/> 3<br><input type="radio"/> mas de 3                                                                                                                                                           |
| partos                                | <input checked="" type="radio"/> 0<br><input type="radio"/> 1<br><input type="radio"/> 2<br><input type="radio"/> 3<br><input type="radio"/> mas de 3                                                                                                                                |
| cesáreas                              | <input checked="" type="radio"/> 0<br><input type="radio"/> 1<br><input type="radio"/> 2<br><input type="radio"/> 3<br><input type="radio"/> mas de 3                                                                                                                                |
| Abortos                               | <input type="radio"/> 0<br><input type="radio"/> 1<br><input checked="" type="radio"/> 2<br><input type="radio"/> 3<br><input type="radio"/> mas de 3                                                                                                                                |
| Tipo de gestacion                     | <input checked="" type="radio"/> espontanea<br><input type="radio"/> IAC inseminación artificial conyuge<br><input type="radio"/> IAD inseminación artificial donante<br><input type="radio"/> FIV Fecundación in Vitro<br><input type="radio"/> Ovodon FIV con donación de ovocitos |
| peso previo a embarazo                | [*DATA REMOVED*]                                                                                                                                                                                                                                                                     |
| Ganancia ponderal embarazo            |                                                                                                                                                                                                                                                                                      |
| Talla madre                           | [*DATA REMOVED*]                                                                                                                                                                                                                                                                     |
| IMC previo embarazo                   | 26.14268848035082                                                                                                                                                                                                                                                                    |
| Patología obstétrica                  | <input checked="" type="radio"/> no<br><input type="radio"/> si                                                                                                                                                                                                                      |
| Diabetes pregestacional               | <input checked="" type="radio"/> no<br><input type="radio"/> si                                                                                                                                                                                                                      |
| Diabetes gestacional                  | <input checked="" type="radio"/> no<br><input type="radio"/> si                                                                                                                                                                                                                      |

|                                            |                                                                                                                                                                                      |
|--------------------------------------------|--------------------------------------------------------------------------------------------------------------------------------------------------------------------------------------|
| Diabetes gestacional con insulina          | <input checked="" type="radio"/> no<br><input type="radio"/> si                                                                                                                      |
| Diabetes gestacional con dieta y ejercicio | <input checked="" type="radio"/> no<br><input type="radio"/> si                                                                                                                      |
| Percentil fetos previos                    | <input checked="" type="radio"/> Nada<br><input type="radio"/> percentil menor de 10<br><input type="radio"/> percentil entre 10 y 90<br><input type="radio"/> percentil mayor de 90 |
| Exfumadora                                 | <input checked="" type="radio"/> Nada<br><input type="radio"/> menos de 5 años<br><input type="radio"/> 5 a 10 años<br><input type="radio"/> mayor o igual a 10 años                 |
| Hábito tabáquico                           | <input checked="" type="radio"/> no<br><input type="radio"/> si                                                                                                                      |
| fumadora                                   | [*DATA REMOVED*]                                                                                                                                                                     |
| Consumo otros tóxicos                      | <input checked="" type="radio"/> no<br><input type="radio"/> si                                                                                                                      |
| Hb 1T                                      | [*DATA REMOVED*]                                                                                                                                                                     |
| Htc 1T                                     | [*DATA REMOVED*]                                                                                                                                                                     |
| Hb 2T                                      | [*DATA REMOVED*]                                                                                                                                                                     |
| HTC 2T                                     | [*DATA REMOVED*]                                                                                                                                                                     |
| Hb 3T                                      | [*DATA REMOVED*]                                                                                                                                                                     |
| HTC 3T                                     | [*DATA REMOVED*]                                                                                                                                                                     |
| Suplemento FE oral                         | <input checked="" type="radio"/> si<br><input type="radio"/> no                                                                                                                      |
| Suplemento fe iv                           | <input type="radio"/> si<br><input checked="" type="radio"/> no                                                                                                                      |
| Transfusión                                | <input checked="" type="radio"/> no<br><input type="radio"/> si                                                                                                                      |
| Solicitada Vit D                           | <input checked="" type="radio"/> no<br><input type="radio"/> si                                                                                                                      |
| Deficit vit D                              | <input type="radio"/> no<br><input type="radio"/> si                                                                                                                                 |
| Suplemento vit D                           | <input type="radio"/> si<br><input type="radio"/> no                                                                                                                                 |

|                       |                                                                                                                                                                                                                                                                                                                                                                                                              |
|-----------------------|--------------------------------------------------------------------------------------------------------------------------------------------------------------------------------------------------------------------------------------------------------------------------------------------------------------------------------------------------------------------------------------------------------------|
| Dieta, cuestionario   | <input checked="" type="radio"/> si<br><input type="radio"/> no                                                                                                                                                                                                                                                                                                                                              |
| Leche entera          | <input checked="" type="radio"/> Nunca o menos 1 vez al mes<br><input type="radio"/> 1 a 3 veces mes<br><input type="radio"/> 1 vez semana<br><input type="radio"/> 2 a 4 veces semana<br><input type="radio"/> 5 a 6 veces semana<br><input type="radio"/> 1 vez al día<br><input type="radio"/> 2 a 3 veces al día<br><input type="radio"/> 5 a 6 veces al día<br><input type="radio"/> más 6 veces al día |
| Leche semidesnatada   | <input type="radio"/> Nunca o menos 1 vez al mes<br><input checked="" type="radio"/> 1 a 3 veces mes<br><input type="radio"/> 1 vez semana<br><input type="radio"/> 2 a 4 veces semana<br><input type="radio"/> 5 a 6 veces semana<br><input type="radio"/> 1 vez al día<br><input type="radio"/> 2 a 3 veces al día<br><input type="radio"/> 5 a 6 veces al día<br><input type="radio"/> mas 6 veces al día |
| Leche desnatada       | <input checked="" type="radio"/> Nunca o menos 1 vez al mes<br><input type="radio"/> 1 a 3 veces mes<br><input type="radio"/> 1 vez semana<br><input type="radio"/> 2 a 4 veces semana<br><input type="radio"/> 5 a 6 veces semana<br><input type="radio"/> 1 vez al día<br><input type="radio"/> 2 a 3 veces al día<br><input type="radio"/> 5 a 6 veces al día<br><input type="radio"/> más 6 veces al día |
| Leche condensada      | <input checked="" type="radio"/> Nunca o menos 1 vez al mes<br><input type="radio"/> 1 a 3 veces mes<br><input type="radio"/> 1 vez semana<br><input type="radio"/> 2 a 4 veces semana<br><input type="radio"/> 5 a 6 veces semana<br><input type="radio"/> 1 vez al día<br><input type="radio"/> 2 a 3 veces al día<br><input type="radio"/> 5 a 6 veces al día<br><input type="radio"/> más 6 veces al día |
| nata o crema de leche | <input type="radio"/> Nunca o menos 1 vez al mes<br><input checked="" type="radio"/> 1 a 3 veces mes<br><input type="radio"/> 1 vez semana<br><input type="radio"/> 2 a 4 veces semana<br><input type="radio"/> 5 a 6 veces semana<br><input type="radio"/> 1 vez al día<br><input type="radio"/> 2 a 3 veces al día<br><input type="radio"/> 5 a 6 veces al día<br><input type="radio"/> más 6 veces al día |

|                                             |                                                                                                                                                                                                                                                                                                                                                                                                              |
|---------------------------------------------|--------------------------------------------------------------------------------------------------------------------------------------------------------------------------------------------------------------------------------------------------------------------------------------------------------------------------------------------------------------------------------------------------------------|
| Yogurt Entero                               | <input type="radio"/> Nunca o menos 1 vez al mes<br><input type="radio"/> 1 a 3 veces mes<br><input checked="" type="radio"/> 1 vez semana<br><input type="radio"/> 2 a 4 veces semana<br><input type="radio"/> 5 a 6 veces semana<br><input type="radio"/> 1 vez al día<br><input type="radio"/> 2 a 3 veces al día<br><input type="radio"/> 5 a 6 veces al día<br><input type="radio"/> más 6 veces al día |
| Yogurt desnatado                            | <input checked="" type="radio"/> Nunca o menos 1 vez al mes<br><input type="radio"/> 1 a 3 veces mes<br><input type="radio"/> 1 vez semana<br><input type="radio"/> 2 a 4 veces semana<br><input type="radio"/> 5 a 6 veces semana<br><input type="radio"/> 1 vez al día<br><input type="radio"/> 2 a 3 veces al día<br><input type="radio"/> 5 a 6 veces al día<br><input type="radio"/> más 6 veces al día |
| 100g requesón o queso blando o queso fresco | <input checked="" type="radio"/> Nunca o menos 1 vez al mes<br><input type="radio"/> 1 a 3 veces mes<br><input type="radio"/> 1 vez semana<br><input type="radio"/> 2 a 4 veces semana<br><input type="radio"/> 5 a 6 veces semana<br><input type="radio"/> 1 vez al día<br><input type="radio"/> 2 a 3 veces al día<br><input type="radio"/> 5 a 6 veces al día<br><input type="radio"/> más 6 veces al día |
| queso curado o semicurado o cremoso         | <input type="radio"/> Nunca o menos 1 vez al mes<br><input type="radio"/> 1 a 3 veces mes<br><input checked="" type="radio"/> 1 vez semana<br><input type="radio"/> 2 a 4 veces semana<br><input type="radio"/> 5 a 6 veces semana<br><input type="radio"/> 1 vez al día<br><input type="radio"/> 2 a 3 veces al día<br><input type="radio"/> 5 a 6 veces al día<br><input type="radio"/> más 6 veces al día |
| natillas flan pudding                       | <input type="radio"/> Nunca o menos 1 vez al mes<br><input checked="" type="radio"/> 1 a 3 veces mes<br><input type="radio"/> 1 vez semana<br><input type="radio"/> 2 a 4 veces semana<br><input type="radio"/> 5 a 6 veces semana<br><input type="radio"/> 1 vez al día<br><input type="radio"/> 2 a 3 veces al día<br><input type="radio"/> 5 a 6 veces al día<br><input type="radio"/> más 6 veces al día |
| Helado                                      | <input checked="" type="radio"/> Nunca o menos 1 vez al mes<br><input type="radio"/> 1 a 3 veces mes<br><input type="radio"/> 1 vez semana<br><input type="radio"/> 2 a 4 veces semana<br><input type="radio"/> 5 a 6 veces semana<br><input type="radio"/> 1 vez al día<br><input type="radio"/> 2 a 3 veces al día<br><input type="radio"/> 5 a 6 veces al día<br><input type="radio"/> más 6 veces al día |

|                                      |                                                                                                                                                                                                                                                                                                                                                                                                              |
|--------------------------------------|--------------------------------------------------------------------------------------------------------------------------------------------------------------------------------------------------------------------------------------------------------------------------------------------------------------------------------------------------------------------------------------------------------------|
| huevo                                | <input type="radio"/> Nunca o menos 1 vez al mes<br><input type="radio"/> 1 a 3 veces mes<br><input type="radio"/> 1 vez semana<br><input checked="" type="radio"/> 2 a 4 veces semana<br><input type="radio"/> 5 a 6 veces semana<br><input type="radio"/> 1 vez al día<br><input type="radio"/> 2 a 3 veces al día<br><input type="radio"/> 5 a 6 veces al día<br><input type="radio"/> más 6 veces al día |
| Pollo con piel                       | <input checked="" type="radio"/> Nunca o menos 1 vez al mes<br><input type="radio"/> 1 a 3 veces mes<br><input type="radio"/> 1 vez semana<br><input type="radio"/> 2 a 4 veces semana<br><input type="radio"/> 5 a 6 veces semana<br><input type="radio"/> 1 vez al día<br><input type="radio"/> 2 a 3 veces al día<br><input type="radio"/> 5 a 6 veces al día<br><input type="radio"/> más 6 veces al día |
| pollo sin piel                       | <input type="radio"/> Nunca o menos 1 vez al mes<br><input type="radio"/> 1 a 3 veces mes<br><input checked="" type="radio"/> 1 vez semana<br><input type="radio"/> 2 a 4 veces semana<br><input type="radio"/> 5 a 6 veces semana<br><input type="radio"/> 1 vez al día<br><input type="radio"/> 2 a 3 veces al día<br><input type="radio"/> 5 a 6 veces al día<br><input type="radio"/> más 6 veces al día |
| Ternera o cerdo o cordero            | <input type="radio"/> Nunca o menos 1 vez al mes<br><input checked="" type="radio"/> 1 a 3 veces mes<br><input type="radio"/> 1 vez semana<br><input type="radio"/> 2 a 4 veces semana<br><input type="radio"/> 5 a 6 veces semana<br><input type="radio"/> 1 vez al día<br><input type="radio"/> 2 a 3 veces al día<br><input type="radio"/> 5 a 6 veces al día<br><input type="radio"/> más 6 veces al día |
| carne caza: Conejo o codorniz o pato | <input checked="" type="radio"/> Nunca o menos 1 vez al mes<br><input type="radio"/> 1 a 3 veces mes<br><input type="radio"/> 1 vez semana<br><input type="radio"/> 2 a 4 veces semana<br><input type="radio"/> 5 a 6 veces semana<br><input type="radio"/> 1 vez al día<br><input type="radio"/> 2 a 3 veces al día<br><input type="radio"/> 5 a 6 veces al día<br><input type="radio"/> más 6 veces al día |
| Hígado de ternera o cerdo o pollo    | <input checked="" type="radio"/> Nunca o menos 1 vez al mes<br><input type="radio"/> 1 a 3 veces mes<br><input type="radio"/> 1 vez semana<br><input type="radio"/> 2 a 4 veces semana<br><input type="radio"/> 5 a 6 veces semana<br><input type="radio"/> 1 vez al día<br><input type="radio"/> 2 a 3 veces al día<br><input type="radio"/> 5 a 6 veces al día<br><input type="radio"/> más 6 veces al día |

|                     |                                                                                                                                                                                                                                                                                                                                                                                                              |
|---------------------|--------------------------------------------------------------------------------------------------------------------------------------------------------------------------------------------------------------------------------------------------------------------------------------------------------------------------------------------------------------------------------------------------------------|
| Vísceras            | <input checked="" type="radio"/> Nunca o menos 1 vez al mes<br><input type="radio"/> 1 a 3 veces mes<br><input type="radio"/> 1 vez semana<br><input type="radio"/> 2 a 4 veces semana<br><input type="radio"/> 5 a 6 veces semana<br><input type="radio"/> 1 vez al día<br><input type="radio"/> 2 a 3 veces al día<br><input type="radio"/> 5 a 6 veces al día<br><input type="radio"/> más 6 veces al día |
| Embutido            | <input checked="" type="radio"/> Nunca o menos 1 vez al mes<br><input type="radio"/> 1 a 3 veces mes<br><input type="radio"/> 1 vez semana<br><input type="radio"/> 2 a 4 veces semana<br><input type="radio"/> 5 a 6 veces semana<br><input type="radio"/> 1 vez al día<br><input type="radio"/> 2 a 3 veces al día<br><input type="radio"/> 5 a 6 veces al día<br><input type="radio"/> más 6 veces al día |
| Salchicha o similar | <input type="radio"/> Nunca o menos 1 vez al mes<br><input type="radio"/> 1 a 3 veces mes<br><input checked="" type="radio"/> 1 vez semana<br><input type="radio"/> 2 a 4 veces semana<br><input type="radio"/> 5 a 6 veces semana<br><input type="radio"/> 1 vez al día<br><input type="radio"/> 2 a 3 veces al día<br><input type="radio"/> 5 a 6 veces al día<br><input type="radio"/> más 6 veces al día |
| Pate o foiegras     | <input checked="" type="radio"/> Nunca o menos 1 vez al mes<br><input type="radio"/> 1 a 3 veces mes<br><input type="radio"/> 1 vez semana<br><input type="radio"/> 2 a 4 veces semana<br><input type="radio"/> 5 a 6 veces semana<br><input type="radio"/> 1 vez al día<br><input type="radio"/> 2 a 3 veces al día<br><input type="radio"/> 5 a 6 veces al día<br><input type="radio"/> más 6 veces al día |
| Hamburguesa         | <input type="radio"/> Nunca o menos 1 vez al mes<br><input type="radio"/> 1 a 3 veces mes<br><input checked="" type="radio"/> 1 vez semana<br><input type="radio"/> 2 a 4 veces semana<br><input type="radio"/> 5 a 6 veces semana<br><input type="radio"/> 1 vez al día<br><input type="radio"/> 2 a 3 veces al día<br><input type="radio"/> 5 a 6 veces al día<br><input type="radio"/> más 6 veces al día |
| tocino o bacon      | <input checked="" type="radio"/> Nunca o menos 1 vez al mes<br><input type="radio"/> 1 a 3 veces mes<br><input type="radio"/> 1 vez semana<br><input type="radio"/> 2 a 4 veces semana<br><input type="radio"/> 5 a 6 veces semana<br><input type="radio"/> 1 vez al día<br><input type="radio"/> 2 a 3 veces al día<br><input type="radio"/> 5 a 6 veces al día<br><input type="radio"/> más 6 veces al día |

|                        |                                                                                                                                                                                                                                                                                                                                                                                                              |
|------------------------|--------------------------------------------------------------------------------------------------------------------------------------------------------------------------------------------------------------------------------------------------------------------------------------------------------------------------------------------------------------------------------------------------------------|
| Pescado frito          | <input checked="" type="radio"/> Nunca o menos 1 vez al mes<br><input type="radio"/> 1 a 3 veces mes<br><input type="radio"/> 1 vez semana<br><input type="radio"/> 2 a 4 veces semana<br><input type="radio"/> 5 a 6 veces semana<br><input type="radio"/> 1 vez al día<br><input type="radio"/> 2 a 3 veces al día<br><input type="radio"/> 5 a 6 veces al día<br><input type="radio"/> más 6 veces al día |
| pescado hervido blanco | <input type="radio"/> Nunca o menos 1 vez al mes<br><input type="radio"/> 1 a 3 veces mes<br><input type="radio"/> 1 vez semana<br><input checked="" type="radio"/> 2 a 4 veces semana<br><input type="radio"/> 5 a 6 veces semana<br><input type="radio"/> 1 vez al día<br><input type="radio"/> 2 a 3 veces al día<br><input type="radio"/> 5 a 6 veces al día<br><input type="radio"/> más 6 veces al día |
| pescado hervido azul   | <input checked="" type="radio"/> Nunca o menos 1 vez al mes<br><input type="radio"/> 1 a 3 veces mes<br><input type="radio"/> 1 vez semana<br><input type="radio"/> 2 a 4 veces semana<br><input type="radio"/> 5 a 6 veces semana<br><input type="radio"/> 1 vez al día<br><input type="radio"/> 2 a 3 veces al día<br><input type="radio"/> 5 a 6 veces al día<br><input type="radio"/> más 6 veces al día |
| otros pescado azul     | <input type="radio"/> Nunca o menos 1 vez al mes<br><input checked="" type="radio"/> 1 a 3 veces mes<br><input type="radio"/> 1 vez semana<br><input type="radio"/> 2 a 4 veces semana<br><input type="radio"/> 5 a 6 veces semana<br><input type="radio"/> 1 vez al día<br><input type="radio"/> 2 a 3 veces al día<br><input type="radio"/> 5 a 6 veces al día<br><input type="radio"/> más 6 veces al día |
| atun conserva          | <input type="radio"/> Nunca o menos 1 vez al mes<br><input checked="" type="radio"/> 1 a 3 veces mes<br><input type="radio"/> 1 vez semana<br><input type="radio"/> 2 a 4 veces semana<br><input type="radio"/> 5 a 6 veces semana<br><input type="radio"/> 1 vez al día<br><input type="radio"/> 2 a 3 veces al día<br><input type="radio"/> 5 a 6 veces al día<br><input type="radio"/> más 6 veces al día |
| sardina conserva       | <input checked="" type="radio"/> Nunca o menos 1 vez al mes<br><input type="radio"/> 1 a 3 veces mes<br><input type="radio"/> 1 vez semana<br><input type="radio"/> 2 a 4 veces semana<br><input type="radio"/> 5 a 6 veces semana<br><input type="radio"/> 1 vez al día<br><input type="radio"/> 2 a 3 veces al día<br><input type="radio"/> 5 a 6 veces al día<br><input type="radio"/> más 6 veces al día |

|                                         |                                                                                                                                                                                                                                                                                                                                                                                                              |
|-----------------------------------------|--------------------------------------------------------------------------------------------------------------------------------------------------------------------------------------------------------------------------------------------------------------------------------------------------------------------------------------------------------------------------------------------------------------|
| pescado ahumado                         | <input checked="" type="radio"/> Nunca o menos 1 vez al mes<br><input type="radio"/> 1 a 3 veces mes<br><input type="radio"/> 1 vez semana<br><input type="radio"/> 2 a 4 veces semana<br><input type="radio"/> 5 a 6 veces semana<br><input type="radio"/> 1 vez al día<br><input type="radio"/> 2 a 3 veces al día<br><input type="radio"/> 5 a 6 veces al día<br><input type="radio"/> más 6 veces al día |
| almejas o mejillones o ostras unos 100g | <input type="radio"/> Nunca o menos 1 vez al mes<br><input type="radio"/> 1 a 3 veces mes<br><input checked="" type="radio"/> 1 vez semana<br><input type="radio"/> 2 a 4 veces semana<br><input type="radio"/> 5 a 6 veces semana<br><input type="radio"/> 1 vez al día<br><input type="radio"/> 2 a 3 veces al día<br><input type="radio"/> 5 a 6 veces al día<br><input type="radio"/> más 6 veces al día |
| calamar o chipiron o sepia unos 100g    | <input type="radio"/> Nunca o menos 1 vez al mes<br><input type="radio"/> 1 a 3 veces mes<br><input checked="" type="radio"/> 1 vez semana<br><input type="radio"/> 2 a 4 veces semana<br><input type="radio"/> 5 a 6 veces semana<br><input type="radio"/> 1 vez al día<br><input type="radio"/> 2 a 3 veces al día<br><input type="radio"/> 5 a 6 veces al día<br><input type="radio"/> más 6 veces al día |
| marisco unos 100g                       | <input type="radio"/> Nunca o menos 1 vez al mes<br><input type="radio"/> 1 a 3 veces mes<br><input checked="" type="radio"/> 1 vez semana<br><input type="radio"/> 2 a 4 veces semana<br><input type="radio"/> 5 a 6 veces semana<br><input type="radio"/> 1 vez al día<br><input type="radio"/> 2 a 3 veces al día<br><input type="radio"/> 5 a 6 veces al día<br><input type="radio"/> más 6 veces al día |
| Espinacas o acelgas cocinadas           | <input type="radio"/> Nunca o menos 1 vez al mes<br><input checked="" type="radio"/> 1 a 3 veces mes<br><input type="radio"/> 1 vez semana<br><input type="radio"/> 2 a 4 veces semana<br><input type="radio"/> 5 a 6 veces semana<br><input type="radio"/> 1 vez al día<br><input type="radio"/> 2 a 3 veces al día<br><input type="radio"/> 5 a 6 veces al día<br><input type="radio"/> más 6 veces al día |
| Col o coliflor o brocoli cocinado       | <input type="radio"/> Nunca o menos 1 vez al mes<br><input checked="" type="radio"/> 1 a 3 veces mes<br><input type="radio"/> 1 vez semana<br><input type="radio"/> 2 a 4 veces semana<br><input type="radio"/> 5 a 6 veces semana<br><input type="radio"/> 1 vez al día<br><input type="radio"/> 2 a 3 veces al día<br><input type="radio"/> 5 a 6 veces al día<br><input type="radio"/> más 6 veces al día |



---

Lechuga o endivia o escarola

- ☐ Nunca o menos 1 vez al mes  
☐ 1 a 3 veces mes  
☐ 1 vez semana  
☒ 2 a 4 veces semana  
☐ 5 a 6 veces semana  
☐ 1 vez al día  
☐ 2 a 3 veces al día  
☐ 5 a 6 veces al día  
☐ más 6 veces al día

---

tomate ensalada

- ☐ Nunca o menos 1 vez al mes  
☐ 1 a 3 veces mes  
☐ 1 vez semana  
☒ 2 a 4 veces semana  
☐ 5 a 6 veces semana  
☐ 1 vez al día  
☐ 2 a 3 veces al día  
☐ 5 a 6 veces al día  
☐ más 6 veces al día

---

cebolla

- ☐ Nunca o menos 1 vez al mes  
☐ 1 a 3 veces mes  
☐ 1 vez semana  
☐ 2 a 4 veces semana  
☒ 5 a 6 veces semana  
☐ 1 vez al día  
☐ 2 a 3 veces al día  
☐ 5 a 6 veces al día  
☐ más 6 veces al día

---

Zanahoria o calabaza

- ☐ Nunca o menos 1 vez al mes  
☐ 1 a 3 veces mes  
☐ 1 vez semana  
☒ 2 a 4 veces semana  
☐ 5 a 6 veces semana  
☐ 1 vez al día  
☐ 2 a 3 veces al día  
☐ 5 a 6 veces al día  
☐ más 6 veces al día

---

Judías verdes

- ☐ Nunca o menos 1 vez al mes  
☐ 1 a 3 veces mes  
☒ 1 vez semana  
☐ 2 a 4 veces semana  
☐ 5 a 6 veces semana  
☐ 1 vez al día  
☐ 2 a 3 veces al día  
☐ 5 a 6 veces al día  
☐ más 6 veces al día

---

Berenjena o calabacin o pepino

- ☐ Nunca o menos 1 vez al mes  
☐ 1 a 3 veces mes  
☒ 1 vez semana  
☐ 2 a 4 veces semana  
☐ 5 a 6 veces semana  
☐ 1 vez al día  
☐ 2 a 3 veces al día  
☐ 5 a 6 veces al día  
☐ más 6 veces al día

|                       |                                                                                                                                                                                                                                                                                                                                                                                                              |
|-----------------------|--------------------------------------------------------------------------------------------------------------------------------------------------------------------------------------------------------------------------------------------------------------------------------------------------------------------------------------------------------------------------------------------------------------|
| pimiento              | <input type="radio"/> Nunca o menos 1 vez al mes<br><input type="radio"/> 1 a 3 veces mes<br><input type="radio"/> 1 vez semana<br><input checked="" type="radio"/> 2 a 4 veces semana<br><input type="radio"/> 5 a 6 veces semana<br><input type="radio"/> 1 vez al día<br><input type="radio"/> 2 a 3 veces al día<br><input type="radio"/> 5 a 6 veces al día<br><input type="radio"/> más 6 veces al día |
| alcachofa             | <input type="radio"/> Nunca o menos 1 vez al mes<br><input type="radio"/> 1 a 3 veces mes<br><input type="radio"/> 1 vez semana<br><input checked="" type="radio"/> 2 a 4 veces semana<br><input type="radio"/> 5 a 6 veces semana<br><input type="radio"/> 1 vez al día<br><input type="radio"/> 2 a 3 veces al día<br><input type="radio"/> 5 a 6 veces al día<br><input type="radio"/> más 6 veces al día |
| espárragos            | <input type="radio"/> Nunca o menos 1 vez al mes<br><input type="radio"/> 1 a 3 veces mes<br><input type="radio"/> 1 vez semana<br><input checked="" type="radio"/> 2 a 4 veces semana<br><input type="radio"/> 5 a 6 veces semana<br><input type="radio"/> 1 vez al día<br><input type="radio"/> 2 a 3 veces al día<br><input type="radio"/> 5 a 6 veces al día<br><input type="radio"/> más 6 veces al día |
| maíz hervido          | <input type="radio"/> Nunca o menos 1 vez al mes<br><input type="radio"/> 1 a 3 veces mes<br><input checked="" type="radio"/> 1 vez semana<br><input type="radio"/> 2 a 4 veces semana<br><input type="radio"/> 5 a 6 veces semana<br><input type="radio"/> 1 vez al día<br><input type="radio"/> 2 a 3 veces al día<br><input type="radio"/> 5 a 6 veces al día<br><input type="radio"/> más 6 veces al día |
| legumbres             | <input type="radio"/> Nunca o menos 1 vez al mes<br><input type="radio"/> 1 a 3 veces mes<br><input type="radio"/> 1 vez semana<br><input checked="" type="radio"/> 2 a 4 veces semana<br><input type="radio"/> 5 a 6 veces semana<br><input type="radio"/> 1 vez al día<br><input type="radio"/> 2 a 3 veces al día<br><input type="radio"/> 5 a 6 veces al día<br><input type="radio"/> más 6 veces al día |
| naranjas o mandarinas | <input type="radio"/> Nunca o menos 1 vez al mes<br><input type="radio"/> 1 a 3 veces mes<br><input type="radio"/> 1 vez semana<br><input checked="" type="radio"/> 2 a 4 veces semana<br><input type="radio"/> 5 a 6 veces semana<br><input type="radio"/> 1 vez al día<br><input type="radio"/> 2 a 3 veces al día<br><input type="radio"/> 5 a 6 veces al día<br><input type="radio"/> más 6 veces al día |

|                       |                                                                                                                                                                                                                                                                                                                                                                                                              |
|-----------------------|--------------------------------------------------------------------------------------------------------------------------------------------------------------------------------------------------------------------------------------------------------------------------------------------------------------------------------------------------------------------------------------------------------------|
| zum natural fruta     | <input type="radio"/> Nunca o menos 1 vez al mes<br><input type="radio"/> 1 a 3 veces mes<br><input checked="" type="radio"/> 1 vez semana<br><input type="radio"/> 2 a 4 veces semana<br><input type="radio"/> 5 a 6 veces semana<br><input type="radio"/> 1 vez al día<br><input type="radio"/> 2 a 3 veces al día<br><input type="radio"/> 5 a 6 veces al día<br><input type="radio"/> más 6 veces al día |
| platano               | <input type="radio"/> Nunca o menos 1 vez al mes<br><input type="radio"/> 1 a 3 veces mes<br><input checked="" type="radio"/> 1 vez semana<br><input type="radio"/> 2 a 4 veces semana<br><input type="radio"/> 5 a 6 veces semana<br><input type="radio"/> 1 vez al día<br><input type="radio"/> 2 a 3 veces al día<br><input type="radio"/> 5 a 6 veces al día<br><input type="radio"/> más 6 veces al día |
| manzana o pera        | <input type="radio"/> Nunca o menos 1 vez al mes<br><input type="radio"/> 1 a 3 veces mes<br><input type="radio"/> 1 vez semana<br><input checked="" type="radio"/> 2 a 4 veces semana<br><input type="radio"/> 5 a 6 veces semana<br><input type="radio"/> 1 vez al día<br><input type="radio"/> 2 a 3 veces al día<br><input type="radio"/> 5 a 6 veces al día<br><input type="radio"/> más 6 veces al día |
| melocotón o nectarina | <input type="radio"/> Nunca o menos 1 vez al mes<br><input type="radio"/> 1 a 3 veces mes<br><input checked="" type="radio"/> 1 vez semana<br><input type="radio"/> 2 a 4 veces semana<br><input type="radio"/> 5 a 6 veces semana<br><input type="radio"/> 1 vez al día<br><input type="radio"/> 2 a 3 veces al día<br><input type="radio"/> 5 a 6 veces al día<br><input type="radio"/> más 6 veces al día |
| sandia o melon        | <input checked="" type="radio"/> Nunca o menos 1 vez al mes<br><input type="radio"/> 1 a 3 veces mes<br><input type="radio"/> 1 vez semana<br><input type="radio"/> 2 a 4 veces semana<br><input type="radio"/> 5 a 6 veces semana<br><input type="radio"/> 1 vez al día<br><input type="radio"/> 2 a 3 veces al día<br><input type="radio"/> 5 a 6 veces al día<br><input type="radio"/> más 6 veces al día |
| uva                   | <input type="radio"/> Nunca o menos 1 vez al mes<br><input type="radio"/> 1 a 3 veces mes<br><input checked="" type="radio"/> 1 vez semana<br><input type="radio"/> 2 a 4 veces semana<br><input type="radio"/> 5 a 6 veces semana<br><input type="radio"/> 1 vez al día<br><input type="radio"/> 2 a 3 veces al día<br><input type="radio"/> 5 a 6 veces al día<br><input type="radio"/> más 6 veces al día |

|                 |                                                                                                                                                                                                                                                                                                                                                                                                              |
|-----------------|--------------------------------------------------------------------------------------------------------------------------------------------------------------------------------------------------------------------------------------------------------------------------------------------------------------------------------------------------------------------------------------------------------------|
| bruna o ciruela | <input checked="" type="radio"/> Nunca o menos 1 vez al mes<br><input type="radio"/> 1 a 3 veces mes<br><input type="radio"/> 1 vez semana<br><input type="radio"/> 2 a 4 veces semana<br><input type="radio"/> 5 a 6 veces semana<br><input type="radio"/> 1 vez al día<br><input type="radio"/> 2 a 3 veces al día<br><input type="radio"/> 5 a 6 veces al día<br><input type="radio"/> más 6 veces al día |
| kiwi            | <input checked="" type="radio"/> Nunca o menos 1 vez al mes<br><input type="radio"/> 1 a 3 veces mes<br><input type="radio"/> 1 vez semana<br><input type="radio"/> 2 a 4 veces semana<br><input type="radio"/> 5 a 6 veces semana<br><input type="radio"/> 1 vez al día<br><input type="radio"/> 2 a 3 veces al día<br><input type="radio"/> 5 a 6 veces al día<br><input type="radio"/> más 6 veces al día |
| aceituna        | <input type="radio"/> Nunca o menos 1 vez al mes<br><input checked="" type="radio"/> 1 a 3 veces mes<br><input type="radio"/> 1 vez semana<br><input type="radio"/> 2 a 4 veces semana<br><input type="radio"/> 5 a 6 veces semana<br><input type="radio"/> 1 vez al día<br><input type="radio"/> 2 a 3 veces al día<br><input type="radio"/> 5 a 6 veces al día<br><input type="radio"/> más 6 veces al día |
| frutos secos    | <input type="radio"/> Nunca o menos 1 vez al mes<br><input checked="" type="radio"/> 1 a 3 veces mes<br><input type="radio"/> 1 vez semana<br><input type="radio"/> 2 a 4 veces semana<br><input type="radio"/> 5 a 6 veces semana<br><input type="radio"/> 1 vez al día<br><input type="radio"/> 2 a 3 veces al día<br><input type="radio"/> 5 a 6 veces al día<br><input type="radio"/> más 6 veces al día |
| pan blanco      | <input type="radio"/> Nunca o menos 1 vez al mes<br><input checked="" type="radio"/> 1 a 3 veces mes<br><input type="radio"/> 1 vez semana<br><input type="radio"/> 2 a 4 veces semana<br><input type="radio"/> 5 a 6 veces semana<br><input type="radio"/> 1 vez al día<br><input type="radio"/> 2 a 3 veces al día<br><input type="radio"/> 5 a 6 veces al día<br><input type="radio"/> más 6 veces al día |
| pan integral    | <input type="radio"/> Nunca o menos 1 vez al mes<br><input type="radio"/> 1 a 3 veces mes<br><input type="radio"/> 1 vez semana<br><input type="radio"/> 2 a 4 veces semana<br><input checked="" type="radio"/> 5 a 6 veces semana<br><input type="radio"/> 1 vez al día<br><input type="radio"/> 2 a 3 veces al día<br><input type="radio"/> 5 a 6 veces al día<br><input type="radio"/> más 6 veces al día |

|                          |                                                                                                                                                                                                                                                                                                                                                                                                              |
|--------------------------|--------------------------------------------------------------------------------------------------------------------------------------------------------------------------------------------------------------------------------------------------------------------------------------------------------------------------------------------------------------------------------------------------------------|
| cereales desayuno        | <input checked="" type="radio"/> Nunca o menos 1 vez al mes<br><input type="radio"/> 1 a 3 veces mes<br><input type="radio"/> 1 vez semana<br><input type="radio"/> 2 a 4 veces semana<br><input type="radio"/> 5 a 6 veces semana<br><input type="radio"/> 1 vez al día<br><input type="radio"/> 2 a 3 veces al día<br><input type="radio"/> 5 a 6 veces al día<br><input type="radio"/> más 6 veces al día |
| patatas fritas           | <input type="radio"/> Nunca o menos 1 vez al mes<br><input checked="" type="radio"/> 1 a 3 veces mes<br><input type="radio"/> 1 vez semana<br><input type="radio"/> 2 a 4 veces semana<br><input type="radio"/> 5 a 6 veces semana<br><input type="radio"/> 1 vez al día<br><input type="radio"/> 2 a 3 veces al día<br><input type="radio"/> 5 a 6 veces al día<br><input type="radio"/> más 6 veces al día |
| patatas cocidas o asadas | <input type="radio"/> Nunca o menos 1 vez al mes<br><input type="radio"/> 1 a 3 veces mes<br><input checked="" type="radio"/> 1 vez semana<br><input type="radio"/> 2 a 4 veces semana<br><input type="radio"/> 5 a 6 veces semana<br><input type="radio"/> 1 vez al día<br><input type="radio"/> 2 a 3 veces al día<br><input type="radio"/> 5 a 6 veces al día<br><input type="radio"/> más 6 veces al día |
| bolsa papas              | <input type="radio"/> Nunca o menos 1 vez al mes<br><input checked="" type="radio"/> 1 a 3 veces mes<br><input type="radio"/> 1 vez semana<br><input type="radio"/> 2 a 4 veces semana<br><input type="radio"/> 5 a 6 veces semana<br><input type="radio"/> 1 vez al día<br><input type="radio"/> 2 a 3 veces al día<br><input type="radio"/> 5 a 6 veces al día<br><input type="radio"/> más 6 veces al día |
| arroz cocinado           | <input type="radio"/> Nunca o menos 1 vez al mes<br><input type="radio"/> 1 a 3 veces mes<br><input checked="" type="radio"/> 1 vez semana<br><input type="radio"/> 2 a 4 veces semana<br><input type="radio"/> 5 a 6 veces semana<br><input type="radio"/> 1 vez al día<br><input type="radio"/> 2 a 3 veces al día<br><input type="radio"/> 5 a 6 veces al día<br><input type="radio"/> más 6 veces al día |
| pasta                    | <input type="radio"/> Nunca o menos 1 vez al mes<br><input type="radio"/> 1 a 3 veces mes<br><input checked="" type="radio"/> 1 vez semana<br><input type="radio"/> 2 a 4 veces semana<br><input type="radio"/> 5 a 6 veces semana<br><input type="radio"/> 1 vez al día<br><input type="radio"/> 2 a 3 veces al día<br><input type="radio"/> 5 a 6 veces al día<br><input type="radio"/> más 6 veces al día |

|                     |                                                                                                                                                                                                                                                                                                                                                                                                              |
|---------------------|--------------------------------------------------------------------------------------------------------------------------------------------------------------------------------------------------------------------------------------------------------------------------------------------------------------------------------------------------------------------------------------------------------------|
| pizza               | <input type="radio"/> Nunca o menos 1 vez al mes<br><input type="radio"/> 1 a 3 veces mes<br><input checked="" type="radio"/> 1 vez semana<br><input type="radio"/> 2 a 4 veces semana<br><input type="radio"/> 5 a 6 veces semana<br><input type="radio"/> 1 vez al día<br><input type="radio"/> 2 a 3 veces al día<br><input type="radio"/> 5 a 6 veces al día<br><input type="radio"/> más 6 veces al día |
| aceite oliva        | <input type="radio"/> Nunca o menos 1 vez al mes<br><input type="radio"/> 1 a 3 veces mes<br><input type="radio"/> 1 vez semana<br><input type="radio"/> 2 a 4 veces semana<br><input checked="" type="radio"/> 5 a 6 veces semana<br><input type="radio"/> 1 vez al día<br><input type="radio"/> 2 a 3 veces al día<br><input type="radio"/> 5 a 6 veces al día<br><input type="radio"/> más 6 veces al día |
| otros aceites       | <input checked="" type="radio"/> Nunca o menos 1 vez al mes<br><input type="radio"/> 1 a 3 veces mes<br><input type="radio"/> 1 vez semana<br><input type="radio"/> 2 a 4 veces semana<br><input type="radio"/> 5 a 6 veces semana<br><input type="radio"/> 1 vez al día<br><input type="radio"/> 2 a 3 veces al día<br><input type="radio"/> 5 a 6 veces al día<br><input type="radio"/> más 6 veces al día |
| margarina           | <input checked="" type="radio"/> Nunca o menos 1 vez al mes<br><input type="radio"/> 1 a 3 veces mes<br><input type="radio"/> 1 vez semana<br><input type="radio"/> 2 a 4 veces semana<br><input type="radio"/> 5 a 6 veces semana<br><input type="radio"/> 1 vez al día<br><input type="radio"/> 2 a 3 veces al día<br><input type="radio"/> 5 a 6 veces al día<br><input type="radio"/> más 6 veces al día |
| mantequilla         | <input type="radio"/> Nunca o menos 1 vez al mes<br><input checked="" type="radio"/> 1 a 3 veces mes<br><input type="radio"/> 1 vez semana<br><input type="radio"/> 2 a 4 veces semana<br><input type="radio"/> 5 a 6 veces semana<br><input type="radio"/> 1 vez al día<br><input type="radio"/> 2 a 3 veces al día<br><input type="radio"/> 5 a 6 veces al día<br><input type="radio"/> más 6 veces al día |
| galletas tipo maria | <input checked="" type="radio"/> Nunca o menos 1 vez al mes<br><input type="radio"/> 1 a 3 veces mes<br><input type="radio"/> 1 vez semana<br><input type="radio"/> 2 a 4 veces semana<br><input type="radio"/> 5 a 6 veces semana<br><input type="radio"/> 1 vez al día<br><input type="radio"/> 2 a 3 veces al día<br><input type="radio"/> 5 a 6 veces al día<br><input type="radio"/> más 6 veces al día |

|                           |                                                                                                                                                                                                                                                                                                                                                                                                              |
|---------------------------|--------------------------------------------------------------------------------------------------------------------------------------------------------------------------------------------------------------------------------------------------------------------------------------------------------------------------------------------------------------------------------------------------------------|
| galletas chocolate        | <input checked="" type="radio"/> Nunca o menos 1 vez al mes<br><input type="radio"/> 1 a 3 veces mes<br><input type="radio"/> 1 vez semana<br><input type="radio"/> 2 a 4 veces semana<br><input type="radio"/> 5 a 6 veces semana<br><input type="radio"/> 1 vez al día<br><input type="radio"/> 2 a 3 veces al día<br><input type="radio"/> 5 a 6 veces al día<br><input type="radio"/> más 6 veces al día |
| bollieria                 | <input type="radio"/> Nunca o menos 1 vez al mes<br><input type="radio"/> 1 a 3 veces mes<br><input checked="" type="radio"/> 1 vez semana<br><input type="radio"/> 2 a 4 veces semana<br><input type="radio"/> 5 a 6 veces semana<br><input type="radio"/> 1 vez al día<br><input type="radio"/> 2 a 3 veces al día<br><input type="radio"/> 5 a 6 veces al día<br><input type="radio"/> más 6 veces al día |
| chocolate o bombones      | <input type="radio"/> Nunca o menos 1 vez al mes<br><input type="radio"/> 1 a 3 veces mes<br><input type="radio"/> 1 vez semana<br><input checked="" type="radio"/> 2 a 4 veces semana<br><input type="radio"/> 5 a 6 veces semana<br><input type="radio"/> 1 vez al día<br><input type="radio"/> 2 a 3 veces al día<br><input type="radio"/> 5 a 6 veces al día<br><input type="radio"/> más 6 veces al día |
| chocolate polvo o colacao | <input checked="" type="radio"/> Nunca o menos 1 vez al mes<br><input type="radio"/> 1 a 3 veces mes<br><input type="radio"/> 1 vez semana<br><input type="radio"/> 2 a 4 veces semana<br><input type="radio"/> 5 a 6 veces semana<br><input type="radio"/> 1 vez al día<br><input type="radio"/> 2 a 3 veces al día<br><input type="radio"/> 5 a 6 veces al día<br><input type="radio"/> más 6 veces al día |
| vino tinto                | <input checked="" type="radio"/> Nunca o menos 1 vez al mes<br><input type="radio"/> 1 a 3 veces mes<br><input type="radio"/> 1 vez semana<br><input type="radio"/> 2 a 4 veces semana<br><input type="radio"/> 5 a 6 veces semana<br><input type="radio"/> 1 vez al día<br><input type="radio"/> 2 a 3 veces al día<br><input type="radio"/> 5 a 6 veces al día<br><input type="radio"/> más 6 veces al día |
| vino blanco               | <input checked="" type="radio"/> Nunca o menos 1 vez al mes<br><input type="radio"/> 1 a 3 veces mes<br><input type="radio"/> 1 vez semana<br><input type="radio"/> 2 a 4 veces semana<br><input type="radio"/> 5 a 6 veces semana<br><input type="radio"/> 1 vez al día<br><input type="radio"/> 2 a 3 veces al día<br><input type="radio"/> 5 a 6 veces al día<br><input type="radio"/> más 6 veces al día |

|                       |                                                                                                                                                                                                                                                                                                                                                                                                              |
|-----------------------|--------------------------------------------------------------------------------------------------------------------------------------------------------------------------------------------------------------------------------------------------------------------------------------------------------------------------------------------------------------------------------------------------------------|
| vino seco o vermut    | <input checked="" type="radio"/> Nunca o menos 1 vez al mes<br><input type="radio"/> 1 a 3 veces mes<br><input type="radio"/> 1 vez semana<br><input type="radio"/> 2 a 4 veces semana<br><input type="radio"/> 5 a 6 veces semana<br><input type="radio"/> 1 vez al día<br><input type="radio"/> 2 a 3 veces al día<br><input type="radio"/> 5 a 6 veces al día<br><input type="radio"/> más 6 veces al día |
| cerveza               | <input checked="" type="radio"/> Nunca o menos 1 vez al mes<br><input type="radio"/> 1 a 3 veces mes<br><input type="radio"/> 1 vez semana<br><input type="radio"/> 2 a 4 veces semana<br><input type="radio"/> 5 a 6 veces semana<br><input type="radio"/> 1 vez al día<br><input type="radio"/> 2 a 3 veces al día<br><input type="radio"/> 5 a 6 veces al día<br><input type="radio"/> más 6 veces al día |
| cerveza sin alcohol   | <input checked="" type="radio"/> Nunca o menos 1 vez al mes<br><input type="radio"/> 1 a 3 veces mes<br><input type="radio"/> 1 vez semana<br><input type="radio"/> 2 a 4 veces semana<br><input type="radio"/> 5 a 6 veces semana<br><input type="radio"/> 1 vez al día<br><input type="radio"/> 2 a 3 veces al día<br><input type="radio"/> 5 a 6 veces al día<br><input type="radio"/> más 6 veces al día |
| licores               | <input checked="" type="radio"/> Nunca o menos 1 vez al mes<br><input type="radio"/> 1 a 3 veces mes<br><input type="radio"/> 1 vez semana<br><input type="radio"/> 2 a 4 veces semana<br><input type="radio"/> 5 a 6 veces semana<br><input type="radio"/> 1 vez al día<br><input type="radio"/> 2 a 3 veces al día<br><input type="radio"/> 5 a 6 veces al día<br><input type="radio"/> más 6 veces al día |
| ginebra o ron o vodka | <input checked="" type="radio"/> Nunca o menos 1 vez al mes<br><input type="radio"/> 1 a 3 veces mes<br><input type="radio"/> 1 vez semana<br><input type="radio"/> 2 a 4 veces semana<br><input type="radio"/> 5 a 6 veces semana<br><input type="radio"/> 1 vez al día<br><input type="radio"/> 2 a 3 veces al día<br><input type="radio"/> 5 a 6 veces al día<br><input type="radio"/> más 6 veces al día |
| refresco normal       | <input type="radio"/> Nunca o menos 1 vez al mes<br><input checked="" type="radio"/> 1 a 3 veces mes<br><input type="radio"/> 1 vez semana<br><input type="radio"/> 2 a 4 veces semana<br><input type="radio"/> 5 a 6 veces semana<br><input type="radio"/> 1 vez al día<br><input type="radio"/> 2 a 3 veces al día<br><input type="radio"/> 5 a 6 veces al día<br><input type="radio"/> más 6 veces al día |



|                          |                                                                                                                                                                                                                                                                                                                                                                                                              |
|--------------------------|--------------------------------------------------------------------------------------------------------------------------------------------------------------------------------------------------------------------------------------------------------------------------------------------------------------------------------------------------------------------------------------------------------------|
| refresco sin azúcar      | <input type="radio"/> Nunca o menos 1 vez al mes<br><input type="radio"/> 1 a 3 veces mes<br><input checked="" type="radio"/> 1 vez semana<br><input type="radio"/> 2 a 4 veces semana<br><input type="radio"/> 5 a 6 veces semana<br><input type="radio"/> 1 vez al día<br><input type="radio"/> 2 a 3 veces al día<br><input type="radio"/> 5 a 6 veces al día<br><input type="radio"/> más 6 veces al día |
| Agua del grifo           | <input checked="" type="radio"/> Nunca o menos 1 vez al mes<br><input type="radio"/> 1 a 3 veces mes<br><input type="radio"/> 1 vez semana<br><input type="radio"/> 2 a 4 veces semana<br><input type="radio"/> 5 a 6 veces semana<br><input type="radio"/> 1 vez al día<br><input type="radio"/> 2 a 3 veces al día<br><input type="radio"/> 5 a 6 veces al día<br><input type="radio"/> más 6 veces al día |
| agua embotellada sin gas | <input type="radio"/> Nunca o menos 1 vez al mes<br><input type="radio"/> 1 a 3 veces mes<br><input type="radio"/> 1 vez semana<br><input type="radio"/> 2 a 4 veces semana<br><input type="radio"/> 5 a 6 veces semana<br><input type="radio"/> 1 vez al día<br><input type="radio"/> 2 a 3 veces al día<br><input checked="" type="radio"/> 5 a 6 veces al día<br><input type="radio"/> más 6 veces al día |
| agua embotellada con gas | <input checked="" type="radio"/> Nunca o menos 1 vez al mes<br><input type="radio"/> 1 a 3 veces mes<br><input type="radio"/> 1 vez semana<br><input type="radio"/> 2 a 4 veces semana<br><input type="radio"/> 5 a 6 veces semana<br><input type="radio"/> 1 vez al día<br><input type="radio"/> 2 a 3 veces al día<br><input type="radio"/> 5 a 6 veces al día<br><input type="radio"/> más 6 veces al día |
| zumو frutas embasado     | <input checked="" type="radio"/> Nunca o menos 1 vez al mes<br><input type="radio"/> 1 a 3 veces mes<br><input type="radio"/> 1 vez semana<br><input type="radio"/> 2 a 4 veces semana<br><input type="radio"/> 5 a 6 veces semana<br><input type="radio"/> 1 vez al día<br><input type="radio"/> 2 a 3 veces al día<br><input type="radio"/> 5 a 6 veces al día<br><input type="radio"/> más 6 veces al día |
| cafe                     | <input checked="" type="radio"/> Nunca o menos 1 vez al mes<br><input type="radio"/> 1 a 3 veces mes<br><input type="radio"/> 1 vez semana<br><input type="radio"/> 2 a 4 veces semana<br><input type="radio"/> 5 a 6 veces semana<br><input type="radio"/> 1 vez al día<br><input type="radio"/> 2 a 3 veces al día<br><input type="radio"/> 5 a 6 veces al día<br><input type="radio"/> más 6 veces al día |

|                       |                                                                                                                                                                                                                                                                                                                                                                                                              |
|-----------------------|--------------------------------------------------------------------------------------------------------------------------------------------------------------------------------------------------------------------------------------------------------------------------------------------------------------------------------------------------------------------------------------------------------------|
| cafe descafeinado     | <input checked="" type="radio"/> Nunca o menos 1 vez al mes<br><input type="radio"/> 1 a 3 veces mes<br><input type="radio"/> 1 vez semana<br><input type="radio"/> 2 a 4 veces semana<br><input type="radio"/> 5 a 6 veces semana<br><input type="radio"/> 1 vez al día<br><input type="radio"/> 2 a 3 veces al día<br><input type="radio"/> 5 a 6 veces al día<br><input type="radio"/> más 6 veces al día |
| te o infusión         | <input checked="" type="radio"/> Nunca o menos 1 vez al mes<br><input type="radio"/> 1 a 3 veces mes<br><input type="radio"/> 1 vez semana<br><input type="radio"/> 2 a 4 veces semana<br><input type="radio"/> 5 a 6 veces semana<br><input type="radio"/> 1 vez al día<br><input type="radio"/> 2 a 3 veces al día<br><input type="radio"/> 5 a 6 veces al día<br><input type="radio"/> más 6 veces al día |
| sopa o puré verduras  | <input type="radio"/> Nunca o menos 1 vez al mes<br><input type="radio"/> 1 a 3 veces mes<br><input type="radio"/> 1 vez semana<br><input checked="" type="radio"/> 2 a 4 veces semana<br><input type="radio"/> 5 a 6 veces semana<br><input type="radio"/> 1 vez al día<br><input type="radio"/> 2 a 3 veces al día<br><input type="radio"/> 5 a 6 veces al día<br><input type="radio"/> más 6 veces al día |
| croquetas pollo jamón | <input type="radio"/> Nunca o menos 1 vez al mes<br><input checked="" type="radio"/> 1 a 3 veces mes<br><input type="radio"/> 1 vez semana<br><input type="radio"/> 2 a 4 veces semana<br><input type="radio"/> 5 a 6 veces semana<br><input type="radio"/> 1 vez al día<br><input type="radio"/> 2 a 3 veces al día<br><input type="radio"/> 5 a 6 veces al día<br><input type="radio"/> más 6 veces al día |
| croquetas pescado     | <input checked="" type="radio"/> Nunca o menos 1 vez al mes<br><input type="radio"/> 1 a 3 veces mes<br><input type="radio"/> 1 vez semana<br><input type="radio"/> 2 a 4 veces semana<br><input type="radio"/> 5 a 6 veces semana<br><input type="radio"/> 1 vez al día<br><input type="radio"/> 2 a 3 veces al día<br><input type="radio"/> 5 a 6 veces al día<br><input type="radio"/> más 6 veces al día |
| mayonesa              | <input checked="" type="radio"/> Nunca o menos 1 vez al mes<br><input type="radio"/> 1 a 3 veces mes<br><input type="radio"/> 1 vez semana<br><input type="radio"/> 2 a 4 veces semana<br><input type="radio"/> 5 a 6 veces semana<br><input type="radio"/> 1 vez al día<br><input type="radio"/> 2 a 3 veces al día<br><input type="radio"/> 5 a 6 veces al día<br><input type="radio"/> más 6 veces al día |

|                  |                                                                                                                                                                                                                                                                                                                                                                                                              |
|------------------|--------------------------------------------------------------------------------------------------------------------------------------------------------------------------------------------------------------------------------------------------------------------------------------------------------------------------------------------------------------------------------------------------------------|
| salsa tomate     | <input type="radio"/> Nunca o menos 1 vez al mes<br><input checked="" type="radio"/> 1 a 3 veces mes<br><input type="radio"/> 1 vez semana<br><input type="radio"/> 2 a 4 veces semana<br><input type="radio"/> 5 a 6 veces semana<br><input type="radio"/> 1 vez al día<br><input type="radio"/> 2 a 3 veces al día<br><input type="radio"/> 5 a 6 veces al día<br><input type="radio"/> más 6 veces al día |
| ketchup          | <input type="radio"/> Nunca o menos 1 vez al mes<br><input checked="" type="radio"/> 1 a 3 veces mes<br><input type="radio"/> 1 vez semana<br><input type="radio"/> 2 a 4 veces semana<br><input type="radio"/> 5 a 6 veces semana<br><input type="radio"/> 1 vez al día<br><input type="radio"/> 2 a 3 veces al día<br><input type="radio"/> 5 a 6 veces al día<br><input type="radio"/> más 6 veces al día |
| sal              | <input type="radio"/> Nunca o menos 1 vez al mes<br><input type="radio"/> 1 a 3 veces mes<br><input type="radio"/> 1 vez semana<br><input type="radio"/> 2 a 4 veces semana<br><input checked="" type="radio"/> 5 a 6 veces semana<br><input type="radio"/> 1 vez al día<br><input type="radio"/> 2 a 3 veces al día<br><input type="radio"/> 5 a 6 veces al día<br><input type="radio"/> más 6 veces al día |
| ajo              | <input type="radio"/> Nunca o menos 1 vez al mes<br><input type="radio"/> 1 a 3 veces mes<br><input type="radio"/> 1 vez semana<br><input type="radio"/> 2 a 4 veces semana<br><input checked="" type="radio"/> 5 a 6 veces semana<br><input type="radio"/> 1 vez al día<br><input type="radio"/> 2 a 3 veces al día<br><input type="radio"/> 5 a 6 veces al día<br><input type="radio"/> más 6 veces al día |
| mermelada o miel | <input type="radio"/> Nunca o menos 1 vez al mes<br><input checked="" type="radio"/> 1 a 3 veces mes<br><input type="radio"/> 1 vez semana<br><input type="radio"/> 2 a 4 veces semana<br><input type="radio"/> 5 a 6 veces semana<br><input type="radio"/> 1 vez al día<br><input type="radio"/> 2 a 3 veces al día<br><input type="radio"/> 5 a 6 veces al día<br><input type="radio"/> más 6 veces al día |
| azúcar           | <input type="radio"/> Nunca o menos 1 vez al mes<br><input checked="" type="radio"/> 1 a 3 veces mes<br><input type="radio"/> 1 vez semana<br><input type="radio"/> 2 a 4 veces semana<br><input type="radio"/> 5 a 6 veces semana<br><input type="radio"/> 1 vez al día<br><input type="radio"/> 2 a 3 veces al día<br><input type="radio"/> 5 a 6 veces al día<br><input type="radio"/> más 6 veces al día |

|                                       |                                                                                                                                                                                                                                                                                                                                                                                                                                                                                                                               |
|---------------------------------------|-------------------------------------------------------------------------------------------------------------------------------------------------------------------------------------------------------------------------------------------------------------------------------------------------------------------------------------------------------------------------------------------------------------------------------------------------------------------------------------------------------------------------------|
| Otro alimento                         | [*DATA REMOVED*]                                                                                                                                                                                                                                                                                                                                                                                                                                                                                                              |
| suplementos vitamínicos               | <input type="radio"/> si<br><input checked="" type="radio"/> no                                                                                                                                                                                                                                                                                                                                                                                                                                                               |
| suplementos vitamínicos               |                                                                                                                                                                                                                                                                                                                                                                                                                                                                                                                               |
| dieta previa                          | <input type="radio"/> si<br><input checked="" type="radio"/> no                                                                                                                                                                                                                                                                                                                                                                                                                                                               |
| motivo dieta                          | <input checked="" type="radio"/> no dieta<br><input type="radio"/> control peso<br><input type="radio"/> control colesterol<br><input type="radio"/> control diabetes<br><input type="radio"/> problemas estómago<br><input type="radio"/> problemas vesícula o hepáticos<br><input type="radio"/> HTA o cardiopatía<br><input type="radio"/> problemas renales<br><input type="radio"/> alergia alimentaria<br><input type="radio"/> ácido úrico elevado<br><input type="radio"/> vegetariana<br><input type="radio"/> otros |
| cambio alimentos año previo gestación | <input checked="" type="radio"/> si<br><input type="radio"/> no                                                                                                                                                                                                                                                                                                                                                                                                                                                               |
| cambio lácteos                        | <input type="radio"/> eliminado<br><input type="radio"/> disminuido<br><input checked="" type="radio"/> igual<br><input type="radio"/> aumentado<br><input type="radio"/> no sabe                                                                                                                                                                                                                                                                                                                                             |
| cambio huevos                         | <input type="radio"/> eliminado<br><input type="radio"/> disminuido<br><input checked="" type="radio"/> igual<br><input type="radio"/> aumentado<br><input type="radio"/> no sabe                                                                                                                                                                                                                                                                                                                                             |
| cambio carne                          | <input type="radio"/> eliminado<br><input type="radio"/> disminuido<br><input type="radio"/> igual<br><input checked="" type="radio"/> aumentado<br><input type="radio"/> no sabe                                                                                                                                                                                                                                                                                                                                             |
| cambio pescado                        | <input type="radio"/> eliminado<br><input type="radio"/> disminuido<br><input type="radio"/> igual<br><input checked="" type="radio"/> aumentado<br><input type="radio"/> no sabe                                                                                                                                                                                                                                                                                                                                             |
| cambio verduras                       | <input type="radio"/> eliminado<br><input type="radio"/> disminuido<br><input checked="" type="radio"/> igual<br><input type="radio"/> aumentado<br><input type="radio"/> no sabe                                                                                                                                                                                                                                                                                                                                             |

|                            |                                                                                                                                                                                                                        |
|----------------------------|------------------------------------------------------------------------------------------------------------------------------------------------------------------------------------------------------------------------|
| cambio legumbres           | <input type="radio"/> eliminado<br><input type="radio"/> disminuido<br><input checked="" type="radio"/> igual<br><input type="radio"/> aumentado<br><input type="radio"/> no sabe                                      |
| cambio fruta               | <input type="radio"/> eliminado<br><input type="radio"/> disminuido<br><input type="radio"/> igual<br><input checked="" type="radio"/> aumentado<br><input type="radio"/> no sabe                                      |
| cambio pan                 | <input type="radio"/> eliminado<br><input checked="" type="radio"/> disminuido<br><input type="radio"/> igual<br><input type="radio"/> aumentado<br><input type="radio"/> no sabe                                      |
| cambio aceite oliva        | <input type="radio"/> eliminado<br><input type="radio"/> disminuido<br><input checked="" type="radio"/> igual<br><input type="radio"/> aumentado<br><input type="radio"/> no sabe                                      |
| cambio mante o margarina   | <input type="radio"/> eliminado<br><input checked="" type="radio"/> disminuido<br><input type="radio"/> igual<br><input type="radio"/> aumentado<br><input type="radio"/> no sabe                                      |
| cambio azúcar y dulces     | <input type="radio"/> eliminado<br><input type="radio"/> disminuido<br><input checked="" type="radio"/> igual<br><input type="radio"/> aumentado<br><input type="radio"/> no sabe                                      |
| cambio bebidas alcohólicas | <input checked="" type="radio"/> eliminado<br><input type="radio"/> disminuido<br><input type="radio"/> igual<br><input type="radio"/> aumentado<br><input type="radio"/> no sabe                                      |
| frecuencia comidas fritas  | <input type="radio"/> a diario<br><input type="radio"/> 5 a 6 veces semana<br><input type="radio"/> 2 a 4 veces semana<br><input type="radio"/> 1 vez semana<br><input checked="" type="radio"/> menos de 1 vez semana |
| carne                      | <input type="radio"/> no como<br><input type="radio"/> cruda<br><input type="radio"/> poco hecha<br><input type="radio"/> hecha<br><input checked="" type="radio"/> muy hecha                                          |
| grasa visible carne        | <input checked="" type="radio"/> quita toda<br><input type="radio"/> quita mayoría<br><input type="radio"/> quita un poco<br><input type="radio"/> no quita nada                                                       |

|                                |                                                                                                                                                                                                                                                          |
|--------------------------------|----------------------------------------------------------------------------------------------------------------------------------------------------------------------------------------------------------------------------------------------------------|
| cocina carne                   | <input checked="" type="radio"/> a la plancha<br><input type="radio"/> a la parrilla<br><input type="radio"/> asada<br><input type="radio"/> frita<br><input type="radio"/> guisada                                                                      |
| tostado quemado carne          | <input checked="" type="radio"/> nunca<br><input type="radio"/> 1 vez mes<br><input type="radio"/> 2 a 3 veces mes<br><input type="radio"/> 1 vez semana<br><input type="radio"/> 2 a 3 semanas                                                          |
| tostado quemado pescado        | <input type="radio"/> nunca<br><input checked="" type="radio"/> 1 vez mes<br><input type="radio"/> 2 a 3 veces mes<br><input type="radio"/> 1 vez semana<br><input type="radio"/> 2 a 3 semanas                                                          |
| socarrat paella                | <input checked="" type="radio"/> nunca<br><input type="radio"/> 1 vez mes<br><input type="radio"/> 2 a 3 veces mes<br><input type="radio"/> 1 vez semana<br><input type="radio"/> 2 a 3 semanas                                                          |
| grasa o aceite cocinar         | <input type="radio"/> mantequilla<br><input type="radio"/> margarina<br><input checked="" type="radio"/> aceite oliva<br><input type="radio"/> aceite oliva virgen extra<br><input type="radio"/> aceite vegetal<br><input type="radio"/> mezcla aceites |
| grasa aceite aliñar            | <input type="radio"/> mantequilla<br><input type="radio"/> margarina<br><input checked="" type="radio"/> aceite oliva<br><input type="radio"/> aceite oliva virgen extra<br><input type="radio"/> aceite vegetal<br><input type="radio"/> mezcla aceites |
| grasa aceite freir             | <input type="radio"/> mantequilla<br><input type="radio"/> margarina<br><input type="radio"/> aceite oliva<br><input type="radio"/> aceite oliva virgen extra<br><input checked="" type="radio"/> aceite vegetal<br><input type="radio"/> mezcla aceites |
| Ejercicio cuestionario         | <input checked="" type="radio"/> si<br><input type="radio"/> no                                                                                                                                                                                          |
| horas de sueño incluido siesta | [*DATA REMOVED*]                                                                                                                                                                                                                                         |
| minutos siesta                 | [*DATA REMOVED*]                                                                                                                                                                                                                                         |
| horas televisión semana        |                                                                                                                                                                                                                                                          |

|                                        |                                                                                                                                                                                                                                                                                                                                                                           |
|----------------------------------------|---------------------------------------------------------------------------------------------------------------------------------------------------------------------------------------------------------------------------------------------------------------------------------------------------------------------------------------------------------------------------|
| actividad trabajo                      | <input type="radio"/> casi siempre sentado<br><input type="radio"/> sentado 50 por cien<br><input type="radio"/> casi siempre de pie, quieto<br><input checked="" type="radio"/> casi siempre levantado caminando y llevando pocas cosas<br><input type="radio"/> casi siempre levantado, caminando y llevado muchas cosas<br><input type="radio"/> trabajo manual pesado |
| tiempo caminar o bici al día           | <input type="radio"/> casi nunca<br><input type="radio"/> menos 20min día<br><input checked="" type="radio"/> 20 a 40 min día<br><input type="radio"/> 40 a 60 min día<br><input type="radio"/> 1h o 1h y media día<br><input type="radio"/> más de 1h y media al día                                                                                                     |
| tiempo tareas casa al día              | <input type="radio"/> menos de 1h día<br><input type="radio"/> 1 a 2h día<br><input checked="" type="radio"/> 3 a 4h día<br><input type="radio"/> 5 a 6h día<br><input type="radio"/> 7 a 8h día<br><input type="radio"/> más de 8h día                                                                                                                                   |
| tiempo libre televisión ordenador leer | <input type="radio"/> menos 1h día<br><input type="radio"/> 1h día<br><input type="radio"/> 2h día<br><input checked="" type="radio"/> 3h día<br><input type="radio"/> 4h día<br><input type="radio"/> 5 a 6h día<br><input type="radio"/> mas 6h día                                                                                                                     |
| tiempo libre ejercicio o deporte       | <input type="radio"/> menos 1h semana<br><input type="radio"/> 1h semana<br><input type="radio"/> 2h semana<br><input checked="" type="radio"/> 3h semana<br><input type="radio"/> 4 a 5h semana<br><input type="radio"/> mas 5h semana                                                                                                                                   |
| como se considera                      | <input type="radio"/> sedentaria<br><input type="radio"/> poco activa<br><input checked="" type="radio"/> moderadamente activa<br><input type="radio"/> bastante activa<br><input type="radio"/> muy activa<br><input type="radio"/> no sabe                                                                                                                              |
| FUR                                    | [*DATA REMOVED*]                                                                                                                                                                                                                                                                                                                                                          |
| Semanas gestación 2T                   | [*DATA REMOVED*]                                                                                                                                                                                                                                                                                                                                                          |
| Días gestación 2T                      | [*DATA REMOVED*]                                                                                                                                                                                                                                                                                                                                                          |
| DBP 2T                                 | [*DATA REMOVED*]                                                                                                                                                                                                                                                                                                                                                          |
| CC 2T                                  | [*DATA REMOVED*]                                                                                                                                                                                                                                                                                                                                                          |
| AC 2T                                  | [*DATA REMOVED*]                                                                                                                                                                                                                                                                                                                                                          |

|                                                   |                                                                                                                                                                                                 |
|---------------------------------------------------|-------------------------------------------------------------------------------------------------------------------------------------------------------------------------------------------------|
| LF 2T                                             | [*DATA REMOVED*]                                                                                                                                                                                |
| PFE 2T (Hadlock)                                  | [*DATA REMOVED*]                                                                                                                                                                                |
| Semanas gestación 3T                              | [*DATA REMOVED*]                                                                                                                                                                                |
| días 3T                                           | [*DATA REMOVED*]                                                                                                                                                                                |
| DBP 3T                                            | [*DATA REMOVED*]                                                                                                                                                                                |
| CC 3T                                             | [*DATA REMOVED*]                                                                                                                                                                                |
| AC 3T                                             | [*DATA REMOVED*]                                                                                                                                                                                |
| LF 3T                                             | [*DATA REMOVED*]                                                                                                                                                                                |
| PFE 3T (Hadlock)                                  | [*DATA REMOVED*]                                                                                                                                                                                |
| Semanas de gestación final                        | [*DATA REMOVED*]                                                                                                                                                                                |
| días gestación final                              | [*DATA REMOVED*]                                                                                                                                                                                |
| Localización placenta                             | <input checked="" type="radio"/> anterior<br><input type="radio"/> lateral derecha<br><input type="radio"/> lateral izquierda<br><input type="radio"/> posterior<br><input type="radio"/> fondo |
| Presentación longitudinal cefálica                | <input type="radio"/> no<br><input checked="" type="radio"/> si                                                                                                                                 |
| Dorso                                             | <input checked="" type="radio"/> izquierda anterior<br><input type="radio"/> izquierda posterior<br><input type="radio"/> derecha anterior<br><input type="radio"/> derecha posterior           |
| diámetro biparietal                               | [*DATA REMOVED*]                                                                                                                                                                                |
| Circunferencia craneal                            | [*DATA REMOVED*]                                                                                                                                                                                |
| Circunferencia abdominal                          | [*DATA REMOVED*]                                                                                                                                                                                |
| Longitud de femur                                 | [*DATA REMOVED*]                                                                                                                                                                                |
| tejido celular subcutáneo a nivel del muslo en mm | [*DATA REMOVED*]                                                                                                                                                                                |
| tejido celular subcutáneo en abdomen en mm        | [*DATA REMOVED*]                                                                                                                                                                                |
| Volumen del muslo en cm3                          | [*DATA REMOVED*]                                                                                                                                                                                |
| Peso fetal estimado según fórmula de Hadlock      | [*DATA REMOVED*]                                                                                                                                                                                |



|                                               |                                                                                                                                                          |
|-----------------------------------------------|----------------------------------------------------------------------------------------------------------------------------------------------------------|
| Percentil                                     | [*DATA REMOVED*]                                                                                                                                         |
| Peso fetal estimado según fórmula de Scioscia | <hr/>                                                                                                                                                    |
| Peso fetal estimado según fórmula de LEE      | <hr/>                                                                                                                                                    |
| Tipo de parto                                 | <input type="radio"/> eutocico<br><input type="radio"/> instrumentado/ventosa<br><input checked="" type="radio"/> cesarea                                |
| fecha de nacimiento                           | [*DATA REMOVED*]                                                                                                                                         |
| Días entre exploración y nacimiento           | [*DATA REMOVED*]                                                                                                                                         |
| Peso RN en g                                  | [*DATA REMOVED*]                                                                                                                                         |
| sexo                                          | <input checked="" type="radio"/> mujer<br><input type="radio"/> hombre                                                                                   |
| Apgar 1 minuto                                | [*DATA REMOVED*]                                                                                                                                         |
| Apgar 5 minutos                               | [*DATA REMOVED*]                                                                                                                                         |
| Apgar 10 minutos                              | <hr/>                                                                                                                                                    |
| antecedente Covid durante gestación           | <input type="radio"/> Yes<br><input checked="" type="radio"/> No                                                                                         |
| Nivel de estudios                             | <input type="radio"/> ninguno<br><input type="radio"/> primarios<br><input type="radio"/> secundarios<br><input checked="" type="radio"/> universitarios |

# Base\_datos\_estimacion\_peso\_fetal

|                                       |                                                                                                                                                                                                                                                                                      |
|---------------------------------------|--------------------------------------------------------------------------------------------------------------------------------------------------------------------------------------------------------------------------------------------------------------------------------------|
| Número de identificación participante | 70                                                                                                                                                                                                                                                                                   |
| CODIGO PARTICIPANTE                   |                                                                                                                                                                                                                                                                                      |
| Edad                                  | [*DATA REMOVED*]                                                                                                                                                                                                                                                                     |
| Gestaciones                           | <input type="radio"/> 1<br><input checked="" type="radio"/> 2<br><input type="radio"/> 3<br><input type="radio"/> mas de 3                                                                                                                                                           |
| partos                                | <input type="radio"/> 0<br><input checked="" type="radio"/> 1<br><input type="radio"/> 2<br><input type="radio"/> 3<br><input type="radio"/> mas de 3                                                                                                                                |
| cesáreas                              | <input checked="" type="radio"/> 0<br><input type="radio"/> 1<br><input type="radio"/> 2<br><input type="radio"/> 3<br><input type="radio"/> mas de 3                                                                                                                                |
| Abortos                               | <input checked="" type="radio"/> 0<br><input type="radio"/> 1<br><input type="radio"/> 2<br><input type="radio"/> 3<br><input type="radio"/> mas de 3                                                                                                                                |
| Tipo de gestacion                     | <input checked="" type="radio"/> espontanea<br><input type="radio"/> IAC inseminación artificial conyuge<br><input type="radio"/> IAD inseminación artificial donante<br><input type="radio"/> FIV Fecundación in Vitro<br><input type="radio"/> Ovodon FIV con donación de ovocitos |
| peso previo a embarazo                | [*DATA REMOVED*]                                                                                                                                                                                                                                                                     |
| Ganancia ponderal embarazo            | [*DATA REMOVED*]                                                                                                                                                                                                                                                                     |
| Talla madre                           | [*DATA REMOVED*]                                                                                                                                                                                                                                                                     |
| IMC previo embarazo                   | 20.449137418203453                                                                                                                                                                                                                                                                   |
| Patología obstétrica                  | <input checked="" type="radio"/> no<br><input type="radio"/> si                                                                                                                                                                                                                      |
| Diabetes pregestacional               | <input checked="" type="radio"/> no<br><input type="radio"/> si                                                                                                                                                                                                                      |
| Diabetes gestacional                  | <input checked="" type="radio"/> no<br><input type="radio"/> si                                                                                                                                                                                                                      |

|                                            |                                                                                                                                                                                      |
|--------------------------------------------|--------------------------------------------------------------------------------------------------------------------------------------------------------------------------------------|
| Diabetes gestacional con insulina          | <input checked="" type="radio"/> no<br><input type="radio"/> si                                                                                                                      |
| Diabetes gestacional con dieta y ejercicio | <input checked="" type="radio"/> no<br><input type="radio"/> si                                                                                                                      |
| Percentil fetos previos                    | <input type="radio"/> Nada<br><input type="radio"/> percentil menor de 10<br><input checked="" type="radio"/> percentil entre 10 y 90<br><input type="radio"/> percentil mayor de 90 |
| Exfumadora                                 | <input checked="" type="radio"/> Nada<br><input type="radio"/> menos de 5 años<br><input type="radio"/> 5 a 10 años<br><input type="radio"/> mayor o igual a 10 años                 |
| Hábito tabáquico                           | <input checked="" type="radio"/> no<br><input type="radio"/> si                                                                                                                      |
| fumadora                                   | [*DATA REMOVED*]                                                                                                                                                                     |
| Consumo otros tóxicos                      | <input checked="" type="radio"/> no<br><input type="radio"/> si                                                                                                                      |
| Hb 1T                                      | [*DATA REMOVED*]                                                                                                                                                                     |
| Htc 1T                                     | [*DATA REMOVED*]                                                                                                                                                                     |
| Hb 2T                                      | [*DATA REMOVED*]                                                                                                                                                                     |
| HTC 2T                                     | [*DATA REMOVED*]                                                                                                                                                                     |
| Hb 3T                                      | [*DATA REMOVED*]                                                                                                                                                                     |
| HTC 3T                                     | [*DATA REMOVED*]                                                                                                                                                                     |
| Suplemento FE oral                         | <input checked="" type="radio"/> si<br><input type="radio"/> no                                                                                                                      |
| Suplemento fe iv                           | <input type="radio"/> si<br><input checked="" type="radio"/> no                                                                                                                      |
| Transfusión                                | <input checked="" type="radio"/> no<br><input type="radio"/> si                                                                                                                      |
| Solicitada Vit D                           | <input checked="" type="radio"/> no<br><input type="radio"/> si                                                                                                                      |
| Deficit vit D                              | <input checked="" type="radio"/> no<br><input type="radio"/> si                                                                                                                      |
| Suplemento vit D                           | <input type="radio"/> si<br><input checked="" type="radio"/> no                                                                                                                      |

|                       |                                                                                                                                                                                                                                                                                                                                                                                                              |
|-----------------------|--------------------------------------------------------------------------------------------------------------------------------------------------------------------------------------------------------------------------------------------------------------------------------------------------------------------------------------------------------------------------------------------------------------|
| Dieta, cuestionario   | <input checked="" type="radio"/> sí<br><input type="radio"/> no                                                                                                                                                                                                                                                                                                                                              |
| Leche entera          | <input checked="" type="radio"/> Nunca o menos 1 vez al mes<br><input type="radio"/> 1 a 3 veces mes<br><input type="radio"/> 1 vez semana<br><input type="radio"/> 2 a 4 veces semana<br><input type="radio"/> 5 a 6 veces semana<br><input type="radio"/> 1 vez al día<br><input type="radio"/> 2 a 3 veces al día<br><input type="radio"/> 5 a 6 veces al día<br><input type="radio"/> más 6 veces al día |
| Leche semidesnatada   | <input checked="" type="radio"/> Nunca o menos 1 vez al mes<br><input type="radio"/> 1 a 3 veces mes<br><input type="radio"/> 1 vez semana<br><input type="radio"/> 2 a 4 veces semana<br><input type="radio"/> 5 a 6 veces semana<br><input type="radio"/> 1 vez al día<br><input type="radio"/> 2 a 3 veces al día<br><input type="radio"/> 5 a 6 veces al día<br><input type="radio"/> mas 6 veces al día |
| Leche desnatada       | <input type="radio"/> Nunca o menos 1 vez al mes<br><input type="radio"/> 1 a 3 veces mes<br><input type="radio"/> 1 vez semana<br><input type="radio"/> 2 a 4 veces semana<br><input type="radio"/> 5 a 6 veces semana<br><input checked="" type="radio"/> 1 vez al día<br><input type="radio"/> 2 a 3 veces al día<br><input type="radio"/> 5 a 6 veces al día<br><input type="radio"/> más 6 veces al día |
| Leche condensada      | <input checked="" type="radio"/> Nunca o menos 1 vez al mes<br><input type="radio"/> 1 a 3 veces mes<br><input type="radio"/> 1 vez semana<br><input type="radio"/> 2 a 4 veces semana<br><input type="radio"/> 5 a 6 veces semana<br><input type="radio"/> 1 vez al día<br><input type="radio"/> 2 a 3 veces al día<br><input type="radio"/> 5 a 6 veces al día<br><input type="radio"/> más 6 veces al día |
| nata o crema de leche | <input type="radio"/> Nunca o menos 1 vez al mes<br><input checked="" type="radio"/> 1 a 3 veces mes<br><input type="radio"/> 1 vez semana<br><input type="radio"/> 2 a 4 veces semana<br><input type="radio"/> 5 a 6 veces semana<br><input type="radio"/> 1 vez al día<br><input type="radio"/> 2 a 3 veces al día<br><input type="radio"/> 5 a 6 veces al día<br><input type="radio"/> más 6 veces al día |

|                                             |                                                                                                                                                                                                                                                                                                                                                                                                              |
|---------------------------------------------|--------------------------------------------------------------------------------------------------------------------------------------------------------------------------------------------------------------------------------------------------------------------------------------------------------------------------------------------------------------------------------------------------------------|
| Yogurt Entero                               | <input checked="" type="radio"/> Nunca o menos 1 vez al mes<br><input type="radio"/> 1 a 3 veces mes<br><input type="radio"/> 1 vez semana<br><input type="radio"/> 2 a 4 veces semana<br><input type="radio"/> 5 a 6 veces semana<br><input type="radio"/> 1 vez al día<br><input type="radio"/> 2 a 3 veces al día<br><input type="radio"/> 5 a 6 veces al día<br><input type="radio"/> más 6 veces al día |
| Yogurt desnatado                            | <input checked="" type="radio"/> Nunca o menos 1 vez al mes<br><input type="radio"/> 1 a 3 veces mes<br><input type="radio"/> 1 vez semana<br><input type="radio"/> 2 a 4 veces semana<br><input type="radio"/> 5 a 6 veces semana<br><input type="radio"/> 1 vez al día<br><input type="radio"/> 2 a 3 veces al día<br><input type="radio"/> 5 a 6 veces al día<br><input type="radio"/> más 6 veces al día |
| 100g requesón o queso blando o queso fresco | <input checked="" type="radio"/> Nunca o menos 1 vez al mes<br><input type="radio"/> 1 a 3 veces mes<br><input type="radio"/> 1 vez semana<br><input type="radio"/> 2 a 4 veces semana<br><input type="radio"/> 5 a 6 veces semana<br><input type="radio"/> 1 vez al día<br><input type="radio"/> 2 a 3 veces al día<br><input type="radio"/> 5 a 6 veces al día<br><input type="radio"/> más 6 veces al día |
| queso curado o semicurado o cremoso         | <input type="radio"/> Nunca o menos 1 vez al mes<br><input type="radio"/> 1 a 3 veces mes<br><input type="radio"/> 1 vez semana<br><input type="radio"/> 2 a 4 veces semana<br><input checked="" type="radio"/> 5 a 6 veces semana<br><input type="radio"/> 1 vez al día<br><input type="radio"/> 2 a 3 veces al día<br><input type="radio"/> 5 a 6 veces al día<br><input type="radio"/> más 6 veces al día |
| natillas flan pudding                       | <input type="radio"/> Nunca o menos 1 vez al mes<br><input checked="" type="radio"/> 1 a 3 veces mes<br><input type="radio"/> 1 vez semana<br><input type="radio"/> 2 a 4 veces semana<br><input type="radio"/> 5 a 6 veces semana<br><input type="radio"/> 1 vez al día<br><input type="radio"/> 2 a 3 veces al día<br><input type="radio"/> 5 a 6 veces al día<br><input type="radio"/> más 6 veces al día |
| Helado                                      | <input type="radio"/> Nunca o menos 1 vez al mes<br><input checked="" type="radio"/> 1 a 3 veces mes<br><input type="radio"/> 1 vez semana<br><input type="radio"/> 2 a 4 veces semana<br><input type="radio"/> 5 a 6 veces semana<br><input type="radio"/> 1 vez al día<br><input type="radio"/> 2 a 3 veces al día<br><input type="radio"/> 5 a 6 veces al día<br><input type="radio"/> más 6 veces al día |

|                                      |                                                                                                                                                                                                                                                                                                                                                                                                              |
|--------------------------------------|--------------------------------------------------------------------------------------------------------------------------------------------------------------------------------------------------------------------------------------------------------------------------------------------------------------------------------------------------------------------------------------------------------------|
| huevo                                | <input type="radio"/> Nunca o menos 1 vez al mes<br><input type="radio"/> 1 a 3 veces mes<br><input type="radio"/> 1 vez semana<br><input checked="" type="radio"/> 2 a 4 veces semana<br><input type="radio"/> 5 a 6 veces semana<br><input type="radio"/> 1 vez al día<br><input type="radio"/> 2 a 3 veces al día<br><input type="radio"/> 5 a 6 veces al día<br><input type="radio"/> más 6 veces al día |
| Pollo con piel                       | <input checked="" type="radio"/> Nunca o menos 1 vez al mes<br><input type="radio"/> 1 a 3 veces mes<br><input type="radio"/> 1 vez semana<br><input type="radio"/> 2 a 4 veces semana<br><input type="radio"/> 5 a 6 veces semana<br><input type="radio"/> 1 vez al día<br><input type="radio"/> 2 a 3 veces al día<br><input type="radio"/> 5 a 6 veces al día<br><input type="radio"/> más 6 veces al día |
| pollo sin piel                       | <input type="radio"/> Nunca o menos 1 vez al mes<br><input type="radio"/> 1 a 3 veces mes<br><input checked="" type="radio"/> 1 vez semana<br><input type="radio"/> 2 a 4 veces semana<br><input type="radio"/> 5 a 6 veces semana<br><input type="radio"/> 1 vez al día<br><input type="radio"/> 2 a 3 veces al día<br><input type="radio"/> 5 a 6 veces al día<br><input type="radio"/> más 6 veces al día |
| Ternera o cerdo o cordero            | <input type="radio"/> Nunca o menos 1 vez al mes<br><input type="radio"/> 1 a 3 veces mes<br><input checked="" type="radio"/> 1 vez semana<br><input type="radio"/> 2 a 4 veces semana<br><input type="radio"/> 5 a 6 veces semana<br><input type="radio"/> 1 vez al día<br><input type="radio"/> 2 a 3 veces al día<br><input type="radio"/> 5 a 6 veces al día<br><input type="radio"/> más 6 veces al día |
| carne caza: Conejo o codorniz o pato | <input checked="" type="radio"/> Nunca o menos 1 vez al mes<br><input type="radio"/> 1 a 3 veces mes<br><input type="radio"/> 1 vez semana<br><input type="radio"/> 2 a 4 veces semana<br><input type="radio"/> 5 a 6 veces semana<br><input type="radio"/> 1 vez al día<br><input type="radio"/> 2 a 3 veces al día<br><input type="radio"/> 5 a 6 veces al día<br><input type="radio"/> más 6 veces al día |
| Hígado de ternera o cerdo o pollo    | <input checked="" type="radio"/> Nunca o menos 1 vez al mes<br><input type="radio"/> 1 a 3 veces mes<br><input type="radio"/> 1 vez semana<br><input type="radio"/> 2 a 4 veces semana<br><input type="radio"/> 5 a 6 veces semana<br><input type="radio"/> 1 vez al día<br><input type="radio"/> 2 a 3 veces al día<br><input type="radio"/> 5 a 6 veces al día<br><input type="radio"/> más 6 veces al día |

|                     |                                                                                                                                                                                                                                                                                                                                                                                                              |
|---------------------|--------------------------------------------------------------------------------------------------------------------------------------------------------------------------------------------------------------------------------------------------------------------------------------------------------------------------------------------------------------------------------------------------------------|
| Vísceras            | <input checked="" type="radio"/> Nunca o menos 1 vez al mes<br><input type="radio"/> 1 a 3 veces mes<br><input type="radio"/> 1 vez semana<br><input type="radio"/> 2 a 4 veces semana<br><input type="radio"/> 5 a 6 veces semana<br><input type="radio"/> 1 vez al día<br><input type="radio"/> 2 a 3 veces al día<br><input type="radio"/> 5 a 6 veces al día<br><input type="radio"/> más 6 veces al día |
| Embutido            | <input type="radio"/> Nunca o menos 1 vez al mes<br><input checked="" type="radio"/> 1 a 3 veces mes<br><input type="radio"/> 1 vez semana<br><input type="radio"/> 2 a 4 veces semana<br><input type="radio"/> 5 a 6 veces semana<br><input type="radio"/> 1 vez al día<br><input type="radio"/> 2 a 3 veces al día<br><input type="radio"/> 5 a 6 veces al día<br><input type="radio"/> más 6 veces al día |
| Salchicha o similar | <input checked="" type="radio"/> Nunca o menos 1 vez al mes<br><input type="radio"/> 1 a 3 veces mes<br><input type="radio"/> 1 vez semana<br><input type="radio"/> 2 a 4 veces semana<br><input type="radio"/> 5 a 6 veces semana<br><input type="radio"/> 1 vez al día<br><input type="radio"/> 2 a 3 veces al día<br><input type="radio"/> 5 a 6 veces al día<br><input type="radio"/> más 6 veces al día |
| Pate o foiegras     | <input type="radio"/> Nunca o menos 1 vez al mes<br><input checked="" type="radio"/> 1 a 3 veces mes<br><input type="radio"/> 1 vez semana<br><input type="radio"/> 2 a 4 veces semana<br><input type="radio"/> 5 a 6 veces semana<br><input type="radio"/> 1 vez al día<br><input type="radio"/> 2 a 3 veces al día<br><input type="radio"/> 5 a 6 veces al día<br><input type="radio"/> más 6 veces al día |
| Hamburguesa         | <input type="radio"/> Nunca o menos 1 vez al mes<br><input type="radio"/> 1 a 3 veces mes<br><input checked="" type="radio"/> 1 vez semana<br><input type="radio"/> 2 a 4 veces semana<br><input type="radio"/> 5 a 6 veces semana<br><input type="radio"/> 1 vez al día<br><input type="radio"/> 2 a 3 veces al día<br><input type="radio"/> 5 a 6 veces al día<br><input type="radio"/> más 6 veces al día |
| tocino o bacon      | <input type="radio"/> Nunca o menos 1 vez al mes<br><input type="radio"/> 1 a 3 veces mes<br><input checked="" type="radio"/> 1 vez semana<br><input type="radio"/> 2 a 4 veces semana<br><input type="radio"/> 5 a 6 veces semana<br><input type="radio"/> 1 vez al día<br><input type="radio"/> 2 a 3 veces al día<br><input type="radio"/> 5 a 6 veces al día<br><input type="radio"/> más 6 veces al día |

---

Pescado frito

- ☐ Nunca o menos 1 vez al mes  
☒ 1 a 3 veces mes  
☐ 1 vez semana  
☐ 2 a 4 veces semana  
☐ 5 a 6 veces semana  
☐ 1 vez al día  
☐ 2 a 3 veces al día  
☐ 5 a 6 veces al día  
☐ más 6 veces al día

---

pescado hervido blanco

- ☒ Nunca o menos 1 vez al mes  
☐ 1 a 3 veces mes  
☐ 1 vez semana  
☐ 2 a 4 veces semana  
☐ 5 a 6 veces semana  
☐ 1 vez al día  
☐ 2 a 3 veces al día  
☐ 5 a 6 veces al día  
☐ más 6 veces al día

---

pescado hervido azul

- ☐ Nunca o menos 1 vez al mes  
☒ 1 a 3 veces mes  
☐ 1 vez semana  
☐ 2 a 4 veces semana  
☐ 5 a 6 veces semana  
☐ 1 vez al día  
☐ 2 a 3 veces al día  
☐ 5 a 6 veces al día  
☐ más 6 veces al día

---

otros pescado azul

- ☐ Nunca o menos 1 vez al mes  
☒ 1 a 3 veces mes  
☐ 1 vez semana  
☐ 2 a 4 veces semana  
☐ 5 a 6 veces semana  
☐ 1 vez al día  
☐ 2 a 3 veces al día  
☐ 5 a 6 veces al día  
☐ más 6 veces al día

---

atun conserva

- ☐ Nunca o menos 1 vez al mes  
☐ 1 a 3 veces mes  
☒ 1 vez semana  
☐ 2 a 4 veces semana  
☐ 5 a 6 veces semana  
☐ 1 vez al día  
☐ 2 a 3 veces al día  
☐ 5 a 6 veces al día  
☐ más 6 veces al día

---

sardina conserva

- ☐ Nunca o menos 1 vez al mes  
☒ 1 a 3 veces mes  
☐ 1 vez semana  
☐ 2 a 4 veces semana  
☐ 5 a 6 veces semana  
☐ 1 vez al día  
☐ 2 a 3 veces al día  
☐ 5 a 6 veces al día  
☐ más 6 veces al día



|                                         |                                                                                                                                                                                                                                                                                                                                                                                                              |
|-----------------------------------------|--------------------------------------------------------------------------------------------------------------------------------------------------------------------------------------------------------------------------------------------------------------------------------------------------------------------------------------------------------------------------------------------------------------|
| pescado ahumado                         | <input checked="" type="radio"/> Nunca o menos 1 vez al mes<br><input type="radio"/> 1 a 3 veces mes<br><input type="radio"/> 1 vez semana<br><input type="radio"/> 2 a 4 veces semana<br><input type="radio"/> 5 a 6 veces semana<br><input type="radio"/> 1 vez al día<br><input type="radio"/> 2 a 3 veces al día<br><input type="radio"/> 5 a 6 veces al día<br><input type="radio"/> más 6 veces al día |
| almejas o mejillones o ostras unos 100g | <input checked="" type="radio"/> Nunca o menos 1 vez al mes<br><input type="radio"/> 1 a 3 veces mes<br><input type="radio"/> 1 vez semana<br><input type="radio"/> 2 a 4 veces semana<br><input type="radio"/> 5 a 6 veces semana<br><input type="radio"/> 1 vez al día<br><input type="radio"/> 2 a 3 veces al día<br><input type="radio"/> 5 a 6 veces al día<br><input type="radio"/> más 6 veces al día |
| calamar o chipiron o sepia unos 100g    | <input type="radio"/> Nunca o menos 1 vez al mes<br><input checked="" type="radio"/> 1 a 3 veces mes<br><input type="radio"/> 1 vez semana<br><input type="radio"/> 2 a 4 veces semana<br><input type="radio"/> 5 a 6 veces semana<br><input type="radio"/> 1 vez al día<br><input type="radio"/> 2 a 3 veces al día<br><input type="radio"/> 5 a 6 veces al día<br><input type="radio"/> más 6 veces al día |
| marisco unos 100g                       | <input type="radio"/> Nunca o menos 1 vez al mes<br><input checked="" type="radio"/> 1 a 3 veces mes<br><input type="radio"/> 1 vez semana<br><input type="radio"/> 2 a 4 veces semana<br><input type="radio"/> 5 a 6 veces semana<br><input type="radio"/> 1 vez al día<br><input type="radio"/> 2 a 3 veces al día<br><input type="radio"/> 5 a 6 veces al día<br><input type="radio"/> más 6 veces al día |
| Espinacas o acelgas cocinadas           | <input type="radio"/> Nunca o menos 1 vez al mes<br><input type="radio"/> 1 a 3 veces mes<br><input checked="" type="radio"/> 1 vez semana<br><input type="radio"/> 2 a 4 veces semana<br><input type="radio"/> 5 a 6 veces semana<br><input type="radio"/> 1 vez al día<br><input type="radio"/> 2 a 3 veces al día<br><input type="radio"/> 5 a 6 veces al día<br><input type="radio"/> más 6 veces al día |
| Col o coliflor o brocoli cocinado       | <input type="radio"/> Nunca o menos 1 vez al mes<br><input type="radio"/> 1 a 3 veces mes<br><input checked="" type="radio"/> 1 vez semana<br><input type="radio"/> 2 a 4 veces semana<br><input type="radio"/> 5 a 6 veces semana<br><input type="radio"/> 1 vez al día<br><input type="radio"/> 2 a 3 veces al día<br><input type="radio"/> 5 a 6 veces al día<br><input type="radio"/> más 6 veces al día |

---

Lechuga o endivia o escarola

- ☐ Nunca o menos 1 vez al mes  
☒ 1 a 3 veces mes  
☐ 1 vez semana  
☐ 2 a 4 veces semana  
☐ 5 a 6 veces semana  
☐ 1 vez al día  
☐ 2 a 3 veces al día  
☐ 5 a 6 veces al día  
☐ más 6 veces al día

---

tomate ensalada

- ☐ Nunca o menos 1 vez al mes  
☒ 1 a 3 veces mes  
☐ 1 vez semana  
☐ 2 a 4 veces semana  
☐ 5 a 6 veces semana  
☐ 1 vez al día  
☐ 2 a 3 veces al día  
☐ 5 a 6 veces al día  
☐ más 6 veces al día

---

cebolla

- ☐ Nunca o menos 1 vez al mes  
☒ 1 a 3 veces mes  
☐ 1 vez semana  
☐ 2 a 4 veces semana  
☐ 5 a 6 veces semana  
☐ 1 vez al día  
☐ 2 a 3 veces al día  
☐ 5 a 6 veces al día  
☐ más 6 veces al día

---

Zanahoria o calabaza

- ☐ Nunca o menos 1 vez al mes  
☒ 1 a 3 veces mes  
☐ 1 vez semana  
☐ 2 a 4 veces semana  
☐ 5 a 6 veces semana  
☐ 1 vez al día  
☐ 2 a 3 veces al día  
☐ 5 a 6 veces al día  
☐ más 6 veces al día

---

Judías verdes

- ☒ Nunca o menos 1 vez al mes  
☐ 1 a 3 veces mes  
☐ 1 vez semana  
☐ 2 a 4 veces semana  
☐ 5 a 6 veces semana  
☐ 1 vez al día  
☐ 2 a 3 veces al día  
☐ 5 a 6 veces al día  
☐ más 6 veces al día

---

Berenjena o calabacin o pepino

- ☐ Nunca o menos 1 vez al mes  
☒ 1 a 3 veces mes  
☐ 1 vez semana  
☐ 2 a 4 veces semana  
☐ 5 a 6 veces semana  
☐ 1 vez al día  
☐ 2 a 3 veces al día  
☐ 5 a 6 veces al día  
☐ más 6 veces al día

|                       |                                                                                                                                                                                                                                                                                                                                                                                                              |
|-----------------------|--------------------------------------------------------------------------------------------------------------------------------------------------------------------------------------------------------------------------------------------------------------------------------------------------------------------------------------------------------------------------------------------------------------|
| pimiento              | <input type="radio"/> Nunca o menos 1 vez al mes<br><input checked="" type="radio"/> 1 a 3 veces mes<br><input type="radio"/> 1 vez semana<br><input type="radio"/> 2 a 4 veces semana<br><input type="radio"/> 5 a 6 veces semana<br><input type="radio"/> 1 vez al día<br><input type="radio"/> 2 a 3 veces al día<br><input type="radio"/> 5 a 6 veces al día<br><input type="radio"/> más 6 veces al día |
| alcachofa             | <input type="radio"/> Nunca o menos 1 vez al mes<br><input type="radio"/> 1 a 3 veces mes<br><input checked="" type="radio"/> 1 vez semana<br><input type="radio"/> 2 a 4 veces semana<br><input type="radio"/> 5 a 6 veces semana<br><input type="radio"/> 1 vez al día<br><input type="radio"/> 2 a 3 veces al día<br><input type="radio"/> 5 a 6 veces al día<br><input type="radio"/> más 6 veces al día |
| espárragos            | <input type="radio"/> Nunca o menos 1 vez al mes<br><input type="radio"/> 1 a 3 veces mes<br><input checked="" type="radio"/> 1 vez semana<br><input type="radio"/> 2 a 4 veces semana<br><input type="radio"/> 5 a 6 veces semana<br><input type="radio"/> 1 vez al día<br><input type="radio"/> 2 a 3 veces al día<br><input type="radio"/> 5 a 6 veces al día<br><input type="radio"/> más 6 veces al día |
| maíz hervido          | <input checked="" type="radio"/> Nunca o menos 1 vez al mes<br><input type="radio"/> 1 a 3 veces mes<br><input type="radio"/> 1 vez semana<br><input type="radio"/> 2 a 4 veces semana<br><input type="radio"/> 5 a 6 veces semana<br><input type="radio"/> 1 vez al día<br><input type="radio"/> 2 a 3 veces al día<br><input type="radio"/> 5 a 6 veces al día<br><input type="radio"/> más 6 veces al día |
| legumbres             | <input type="radio"/> Nunca o menos 1 vez al mes<br><input type="radio"/> 1 a 3 veces mes<br><input type="radio"/> 1 vez semana<br><input checked="" type="radio"/> 2 a 4 veces semana<br><input type="radio"/> 5 a 6 veces semana<br><input type="radio"/> 1 vez al día<br><input type="radio"/> 2 a 3 veces al día<br><input type="radio"/> 5 a 6 veces al día<br><input type="radio"/> más 6 veces al día |
| naranjas o mandarinas | <input type="radio"/> Nunca o menos 1 vez al mes<br><input type="radio"/> 1 a 3 veces mes<br><input type="radio"/> 1 vez semana<br><input type="radio"/> 2 a 4 veces semana<br><input type="radio"/> 5 a 6 veces semana<br><input checked="" type="radio"/> 1 vez al día<br><input type="radio"/> 2 a 3 veces al día<br><input type="radio"/> 5 a 6 veces al día<br><input type="radio"/> más 6 veces al día |

|                       |                                                                                                                                                                                                                                                                                                                                                                                                              |
|-----------------------|--------------------------------------------------------------------------------------------------------------------------------------------------------------------------------------------------------------------------------------------------------------------------------------------------------------------------------------------------------------------------------------------------------------|
| zum natural fruta     | <input type="radio"/> Nunca o menos 1 vez al mes<br><input type="radio"/> 1 a 3 veces mes<br><input type="radio"/> 1 vez semana<br><input type="radio"/> 2 a 4 veces semana<br><input type="radio"/> 5 a 6 veces semana<br><input checked="" type="radio"/> 1 vez al día<br><input type="radio"/> 2 a 3 veces al día<br><input type="radio"/> 5 a 6 veces al día<br><input type="radio"/> más 6 veces al día |
| platano               | <input type="radio"/> Nunca o menos 1 vez al mes<br><input type="radio"/> 1 a 3 veces mes<br><input type="radio"/> 1 vez semana<br><input type="radio"/> 2 a 4 veces semana<br><input type="radio"/> 5 a 6 veces semana<br><input checked="" type="radio"/> 1 vez al día<br><input type="radio"/> 2 a 3 veces al día<br><input type="radio"/> 5 a 6 veces al día<br><input type="radio"/> más 6 veces al día |
| manzana o pera        | <input type="radio"/> Nunca o menos 1 vez al mes<br><input type="radio"/> 1 a 3 veces mes<br><input type="radio"/> 1 vez semana<br><input type="radio"/> 2 a 4 veces semana<br><input type="radio"/> 5 a 6 veces semana<br><input checked="" type="radio"/> 1 vez al día<br><input type="radio"/> 2 a 3 veces al día<br><input type="radio"/> 5 a 6 veces al día<br><input type="radio"/> más 6 veces al día |
| melocotón o nectarina | <input checked="" type="radio"/> Nunca o menos 1 vez al mes<br><input type="radio"/> 1 a 3 veces mes<br><input type="radio"/> 1 vez semana<br><input type="radio"/> 2 a 4 veces semana<br><input type="radio"/> 5 a 6 veces semana<br><input type="radio"/> 1 vez al día<br><input type="radio"/> 2 a 3 veces al día<br><input type="radio"/> 5 a 6 veces al día<br><input type="radio"/> más 6 veces al día |
| sandia o melon        | <input checked="" type="radio"/> Nunca o menos 1 vez al mes<br><input type="radio"/> 1 a 3 veces mes<br><input type="radio"/> 1 vez semana<br><input type="radio"/> 2 a 4 veces semana<br><input type="radio"/> 5 a 6 veces semana<br><input type="radio"/> 1 vez al día<br><input type="radio"/> 2 a 3 veces al día<br><input type="radio"/> 5 a 6 veces al día<br><input type="radio"/> más 6 veces al día |
| uva                   | <input checked="" type="radio"/> Nunca o menos 1 vez al mes<br><input type="radio"/> 1 a 3 veces mes<br><input type="radio"/> 1 vez semana<br><input type="radio"/> 2 a 4 veces semana<br><input type="radio"/> 5 a 6 veces semana<br><input type="radio"/> 1 vez al día<br><input type="radio"/> 2 a 3 veces al día<br><input type="radio"/> 5 a 6 veces al día<br><input type="radio"/> más 6 veces al día |

---

bruna o ciruela

- ☒ Nunca o menos 1 vez al mes  
☐ 1 a 3 veces mes  
☐ 1 vez semana  
☐ 2 a 4 veces semana  
☐ 5 a 6 veces semana  
☐ 1 vez al día  
☐ 2 a 3 veces al día  
☐ 5 a 6 veces al día  
☐ más 6 veces al día

---

kiwi

- ☐ Nunca o menos 1 vez al mes  
☒ 1 a 3 veces mes  
☐ 1 vez semana  
☐ 2 a 4 veces semana  
☐ 5 a 6 veces semana  
☐ 1 vez al día  
☐ 2 a 3 veces al día  
☐ 5 a 6 veces al día  
☐ más 6 veces al día

---

aceituna

- ☐ Nunca o menos 1 vez al mes  
☒ 1 a 3 veces mes  
☐ 1 vez semana  
☐ 2 a 4 veces semana  
☐ 5 a 6 veces semana  
☐ 1 vez al día  
☐ 2 a 3 veces al día  
☐ 5 a 6 veces al día  
☐ más 6 veces al día

---

frutos secos

- ☐ Nunca o menos 1 vez al mes  
☐ 1 a 3 veces mes  
☐ 1 vez semana  
☐ 2 a 4 veces semana  
☒ 5 a 6 veces semana  
☐ 1 vez al día  
☐ 2 a 3 veces al día  
☐ 5 a 6 veces al día  
☐ más 6 veces al día

---

pan blanco

- ☐ Nunca o menos 1 vez al mes  
☐ 1 a 3 veces mes  
☐ 1 vez semana  
☒ 2 a 4 veces semana  
☐ 5 a 6 veces semana  
☐ 1 vez al día  
☐ 2 a 3 veces al día  
☐ 5 a 6 veces al día  
☐ más 6 veces al día

---

pan integral

- ☒ Nunca o menos 1 vez al mes  
☐ 1 a 3 veces mes  
☐ 1 vez semana  
☐ 2 a 4 veces semana  
☐ 5 a 6 veces semana  
☐ 1 vez al día  
☐ 2 a 3 veces al día  
☐ 5 a 6 veces al día  
☐ más 6 veces al día

|                          |                                                                                                                                                                                                                                                                                                                                                                                                              |
|--------------------------|--------------------------------------------------------------------------------------------------------------------------------------------------------------------------------------------------------------------------------------------------------------------------------------------------------------------------------------------------------------------------------------------------------------|
| cereales desayuno        | <input checked="" type="radio"/> Nunca o menos 1 vez al mes<br><input type="radio"/> 1 a 3 veces mes<br><input type="radio"/> 1 vez semana<br><input type="radio"/> 2 a 4 veces semana<br><input type="radio"/> 5 a 6 veces semana<br><input type="radio"/> 1 vez al día<br><input type="radio"/> 2 a 3 veces al día<br><input type="radio"/> 5 a 6 veces al día<br><input type="radio"/> más 6 veces al día |
| patatas fritas           | <input type="radio"/> Nunca o menos 1 vez al mes<br><input type="radio"/> 1 a 3 veces mes<br><input checked="" type="radio"/> 1 vez semana<br><input type="radio"/> 2 a 4 veces semana<br><input type="radio"/> 5 a 6 veces semana<br><input type="radio"/> 1 vez al día<br><input type="radio"/> 2 a 3 veces al día<br><input type="radio"/> 5 a 6 veces al día<br><input type="radio"/> más 6 veces al día |
| patatas cocidas o asadas | <input type="radio"/> Nunca o menos 1 vez al mes<br><input type="radio"/> 1 a 3 veces mes<br><input checked="" type="radio"/> 1 vez semana<br><input type="radio"/> 2 a 4 veces semana<br><input type="radio"/> 5 a 6 veces semana<br><input type="radio"/> 1 vez al día<br><input type="radio"/> 2 a 3 veces al día<br><input type="radio"/> 5 a 6 veces al día<br><input type="radio"/> más 6 veces al día |
| bolsa papas              | <input type="radio"/> Nunca o menos 1 vez al mes<br><input type="radio"/> 1 a 3 veces mes<br><input checked="" type="radio"/> 1 vez semana<br><input type="radio"/> 2 a 4 veces semana<br><input type="radio"/> 5 a 6 veces semana<br><input type="radio"/> 1 vez al día<br><input type="radio"/> 2 a 3 veces al día<br><input type="radio"/> 5 a 6 veces al día<br><input type="radio"/> más 6 veces al día |
| arroz cocinado           | <input type="radio"/> Nunca o menos 1 vez al mes<br><input type="radio"/> 1 a 3 veces mes<br><input type="radio"/> 1 vez semana<br><input checked="" type="radio"/> 2 a 4 veces semana<br><input type="radio"/> 5 a 6 veces semana<br><input type="radio"/> 1 vez al día<br><input type="radio"/> 2 a 3 veces al día<br><input type="radio"/> 5 a 6 veces al día<br><input type="radio"/> más 6 veces al día |
| pasta                    | <input type="radio"/> Nunca o menos 1 vez al mes<br><input type="radio"/> 1 a 3 veces mes<br><input type="radio"/> 1 vez semana<br><input checked="" type="radio"/> 2 a 4 veces semana<br><input type="radio"/> 5 a 6 veces semana<br><input type="radio"/> 1 vez al día<br><input type="radio"/> 2 a 3 veces al día<br><input type="radio"/> 5 a 6 veces al día<br><input type="radio"/> más 6 veces al día |

|                     |                                                                                                                                                                                                                                                                                                                                                                                                              |
|---------------------|--------------------------------------------------------------------------------------------------------------------------------------------------------------------------------------------------------------------------------------------------------------------------------------------------------------------------------------------------------------------------------------------------------------|
| pizza               | <input type="radio"/> Nunca o menos 1 vez al mes<br><input type="radio"/> 1 a 3 veces mes<br><input checked="" type="radio"/> 1 vez semana<br><input type="radio"/> 2 a 4 veces semana<br><input type="radio"/> 5 a 6 veces semana<br><input type="radio"/> 1 vez al día<br><input type="radio"/> 2 a 3 veces al día<br><input type="radio"/> 5 a 6 veces al día<br><input type="radio"/> más 6 veces al día |
| aceite oliva        | <input type="radio"/> Nunca o menos 1 vez al mes<br><input type="radio"/> 1 a 3 veces mes<br><input type="radio"/> 1 vez semana<br><input type="radio"/> 2 a 4 veces semana<br><input type="radio"/> 5 a 6 veces semana<br><input type="radio"/> 1 vez al día<br><input checked="" type="radio"/> 2 a 3 veces al día<br><input type="radio"/> 5 a 6 veces al día<br><input type="radio"/> más 6 veces al día |
| otros aceites       | <input checked="" type="radio"/> Nunca o menos 1 vez al mes<br><input type="radio"/> 1 a 3 veces mes<br><input type="radio"/> 1 vez semana<br><input type="radio"/> 2 a 4 veces semana<br><input type="radio"/> 5 a 6 veces semana<br><input type="radio"/> 1 vez al día<br><input type="radio"/> 2 a 3 veces al día<br><input type="radio"/> 5 a 6 veces al día<br><input type="radio"/> más 6 veces al día |
| margarina           | <input checked="" type="radio"/> Nunca o menos 1 vez al mes<br><input type="radio"/> 1 a 3 veces mes<br><input type="radio"/> 1 vez semana<br><input type="radio"/> 2 a 4 veces semana<br><input type="radio"/> 5 a 6 veces semana<br><input type="radio"/> 1 vez al día<br><input type="radio"/> 2 a 3 veces al día<br><input type="radio"/> 5 a 6 veces al día<br><input type="radio"/> más 6 veces al día |
| mantequilla         | <input checked="" type="radio"/> Nunca o menos 1 vez al mes<br><input type="radio"/> 1 a 3 veces mes<br><input type="radio"/> 1 vez semana<br><input type="radio"/> 2 a 4 veces semana<br><input type="radio"/> 5 a 6 veces semana<br><input type="radio"/> 1 vez al día<br><input type="radio"/> 2 a 3 veces al día<br><input type="radio"/> 5 a 6 veces al día<br><input type="radio"/> más 6 veces al día |
| galletas tipo maria | <input checked="" type="radio"/> Nunca o menos 1 vez al mes<br><input type="radio"/> 1 a 3 veces mes<br><input type="radio"/> 1 vez semana<br><input type="radio"/> 2 a 4 veces semana<br><input type="radio"/> 5 a 6 veces semana<br><input type="radio"/> 1 vez al día<br><input type="radio"/> 2 a 3 veces al día<br><input type="radio"/> 5 a 6 veces al día<br><input type="radio"/> más 6 veces al día |

|                           |                                                                                                                                                                                                                                                                                                                                                                                                              |
|---------------------------|--------------------------------------------------------------------------------------------------------------------------------------------------------------------------------------------------------------------------------------------------------------------------------------------------------------------------------------------------------------------------------------------------------------|
| galletas chocolate        | <input type="radio"/> Nunca o menos 1 vez al mes<br><input type="radio"/> 1 a 3 veces mes<br><input checked="" type="radio"/> 1 vez semana<br><input type="radio"/> 2 a 4 veces semana<br><input type="radio"/> 5 a 6 veces semana<br><input type="radio"/> 1 vez al día<br><input type="radio"/> 2 a 3 veces al día<br><input type="radio"/> 5 a 6 veces al día<br><input type="radio"/> más 6 veces al día |
| bollieria                 | <input type="radio"/> Nunca o menos 1 vez al mes<br><input type="radio"/> 1 a 3 veces mes<br><input checked="" type="radio"/> 1 vez semana<br><input type="radio"/> 2 a 4 veces semana<br><input type="radio"/> 5 a 6 veces semana<br><input type="radio"/> 1 vez al día<br><input type="radio"/> 2 a 3 veces al día<br><input type="radio"/> 5 a 6 veces al día<br><input type="radio"/> más 6 veces al día |
| chocolate o bombones      | <input type="radio"/> Nunca o menos 1 vez al mes<br><input type="radio"/> 1 a 3 veces mes<br><input checked="" type="radio"/> 1 vez semana<br><input type="radio"/> 2 a 4 veces semana<br><input type="radio"/> 5 a 6 veces semana<br><input type="radio"/> 1 vez al día<br><input type="radio"/> 2 a 3 veces al día<br><input type="radio"/> 5 a 6 veces al día<br><input type="radio"/> más 6 veces al día |
| chocolate polvo o colacao | <input type="radio"/> Nunca o menos 1 vez al mes<br><input type="radio"/> 1 a 3 veces mes<br><input type="radio"/> 1 vez semana<br><input type="radio"/> 2 a 4 veces semana<br><input type="radio"/> 5 a 6 veces semana<br><input checked="" type="radio"/> 1 vez al día<br><input type="radio"/> 2 a 3 veces al día<br><input type="radio"/> 5 a 6 veces al día<br><input type="radio"/> más 6 veces al día |
| vino tinto                | <input checked="" type="radio"/> Nunca o menos 1 vez al mes<br><input type="radio"/> 1 a 3 veces mes<br><input type="radio"/> 1 vez semana<br><input type="radio"/> 2 a 4 veces semana<br><input type="radio"/> 5 a 6 veces semana<br><input type="radio"/> 1 vez al día<br><input type="radio"/> 2 a 3 veces al día<br><input type="radio"/> 5 a 6 veces al día<br><input type="radio"/> más 6 veces al día |
| vino blanco               | <input checked="" type="radio"/> Nunca o menos 1 vez al mes<br><input type="radio"/> 1 a 3 veces mes<br><input type="radio"/> 1 vez semana<br><input type="radio"/> 2 a 4 veces semana<br><input type="radio"/> 5 a 6 veces semana<br><input type="radio"/> 1 vez al día<br><input type="radio"/> 2 a 3 veces al día<br><input type="radio"/> 5 a 6 veces al día<br><input type="radio"/> más 6 veces al día |



|                       |                                                                                                                                                                                                                                                                                                                                                                                                              |
|-----------------------|--------------------------------------------------------------------------------------------------------------------------------------------------------------------------------------------------------------------------------------------------------------------------------------------------------------------------------------------------------------------------------------------------------------|
| vino seco o vermut    | <input checked="" type="radio"/> Nunca o menos 1 vez al mes<br><input type="radio"/> 1 a 3 veces mes<br><input type="radio"/> 1 vez semana<br><input type="radio"/> 2 a 4 veces semana<br><input type="radio"/> 5 a 6 veces semana<br><input type="radio"/> 1 vez al día<br><input type="radio"/> 2 a 3 veces al día<br><input type="radio"/> 5 a 6 veces al día<br><input type="radio"/> más 6 veces al día |
| cerveza               | <input checked="" type="radio"/> Nunca o menos 1 vez al mes<br><input type="radio"/> 1 a 3 veces mes<br><input type="radio"/> 1 vez semana<br><input type="radio"/> 2 a 4 veces semana<br><input type="radio"/> 5 a 6 veces semana<br><input type="radio"/> 1 vez al día<br><input type="radio"/> 2 a 3 veces al día<br><input type="radio"/> 5 a 6 veces al día<br><input type="radio"/> más 6 veces al día |
| cerveza sin alcohol   | <input type="radio"/> Nunca o menos 1 vez al mes<br><input type="radio"/> 1 a 3 veces mes<br><input checked="" type="radio"/> 1 vez semana<br><input type="radio"/> 2 a 4 veces semana<br><input type="radio"/> 5 a 6 veces semana<br><input type="radio"/> 1 vez al día<br><input type="radio"/> 2 a 3 veces al día<br><input type="radio"/> 5 a 6 veces al día<br><input type="radio"/> más 6 veces al día |
| licores               | <input checked="" type="radio"/> Nunca o menos 1 vez al mes<br><input type="radio"/> 1 a 3 veces mes<br><input type="radio"/> 1 vez semana<br><input type="radio"/> 2 a 4 veces semana<br><input type="radio"/> 5 a 6 veces semana<br><input type="radio"/> 1 vez al día<br><input type="radio"/> 2 a 3 veces al día<br><input type="radio"/> 5 a 6 veces al día<br><input type="radio"/> más 6 veces al día |
| ginebra o ron o vodka | <input checked="" type="radio"/> Nunca o menos 1 vez al mes<br><input type="radio"/> 1 a 3 veces mes<br><input type="radio"/> 1 vez semana<br><input type="radio"/> 2 a 4 veces semana<br><input type="radio"/> 5 a 6 veces semana<br><input type="radio"/> 1 vez al día<br><input type="radio"/> 2 a 3 veces al día<br><input type="radio"/> 5 a 6 veces al día<br><input type="radio"/> más 6 veces al día |
| refresco normal       | <input checked="" type="radio"/> Nunca o menos 1 vez al mes<br><input type="radio"/> 1 a 3 veces mes<br><input type="radio"/> 1 vez semana<br><input type="radio"/> 2 a 4 veces semana<br><input type="radio"/> 5 a 6 veces semana<br><input type="radio"/> 1 vez al día<br><input type="radio"/> 2 a 3 veces al día<br><input type="radio"/> 5 a 6 veces al día<br><input type="radio"/> más 6 veces al día |

|                          |                                                                                                                                                                                                                                                                                                                                                                                                              |
|--------------------------|--------------------------------------------------------------------------------------------------------------------------------------------------------------------------------------------------------------------------------------------------------------------------------------------------------------------------------------------------------------------------------------------------------------|
| refresco sin azúcar      | <input checked="" type="radio"/> Nunca o menos 1 vez al mes<br><input type="radio"/> 1 a 3 veces mes<br><input type="radio"/> 1 vez semana<br><input type="radio"/> 2 a 4 veces semana<br><input type="radio"/> 5 a 6 veces semana<br><input type="radio"/> 1 vez al día<br><input type="radio"/> 2 a 3 veces al día<br><input type="radio"/> 5 a 6 veces al día<br><input type="radio"/> más 6 veces al día |
| Agua del grifo           | <input checked="" type="radio"/> Nunca o menos 1 vez al mes<br><input type="radio"/> 1 a 3 veces mes<br><input type="radio"/> 1 vez semana<br><input type="radio"/> 2 a 4 veces semana<br><input type="radio"/> 5 a 6 veces semana<br><input type="radio"/> 1 vez al día<br><input type="radio"/> 2 a 3 veces al día<br><input type="radio"/> 5 a 6 veces al día<br><input type="radio"/> más 6 veces al día |
| agua embotellada sin gas | <input type="radio"/> Nunca o menos 1 vez al mes<br><input type="radio"/> 1 a 3 veces mes<br><input type="radio"/> 1 vez semana<br><input type="radio"/> 2 a 4 veces semana<br><input type="radio"/> 5 a 6 veces semana<br><input type="radio"/> 1 vez al día<br><input type="radio"/> 2 a 3 veces al día<br><input checked="" type="radio"/> 5 a 6 veces al día<br><input type="radio"/> más 6 veces al día |
| agua embotellada con gas | <input checked="" type="radio"/> Nunca o menos 1 vez al mes<br><input type="radio"/> 1 a 3 veces mes<br><input type="radio"/> 1 vez semana<br><input type="radio"/> 2 a 4 veces semana<br><input type="radio"/> 5 a 6 veces semana<br><input type="radio"/> 1 vez al día<br><input type="radio"/> 2 a 3 veces al día<br><input type="radio"/> 5 a 6 veces al día<br><input type="radio"/> más 6 veces al día |
| zumو frutas embasado     | <input checked="" type="radio"/> Nunca o menos 1 vez al mes<br><input type="radio"/> 1 a 3 veces mes<br><input type="radio"/> 1 vez semana<br><input type="radio"/> 2 a 4 veces semana<br><input type="radio"/> 5 a 6 veces semana<br><input type="radio"/> 1 vez al día<br><input type="radio"/> 2 a 3 veces al día<br><input type="radio"/> 5 a 6 veces al día<br><input type="radio"/> más 6 veces al día |
| cafe                     | <input checked="" type="radio"/> Nunca o menos 1 vez al mes<br><input type="radio"/> 1 a 3 veces mes<br><input type="radio"/> 1 vez semana<br><input type="radio"/> 2 a 4 veces semana<br><input type="radio"/> 5 a 6 veces semana<br><input type="radio"/> 1 vez al día<br><input type="radio"/> 2 a 3 veces al día<br><input type="radio"/> 5 a 6 veces al día<br><input type="radio"/> más 6 veces al día |

|                       |                                                                                                                                                                                                                                                                                                                                                                                                              |
|-----------------------|--------------------------------------------------------------------------------------------------------------------------------------------------------------------------------------------------------------------------------------------------------------------------------------------------------------------------------------------------------------------------------------------------------------|
| cafe descafeinado     | <input checked="" type="radio"/> Nunca o menos 1 vez al mes<br><input type="radio"/> 1 a 3 veces mes<br><input type="radio"/> 1 vez semana<br><input type="radio"/> 2 a 4 veces semana<br><input type="radio"/> 5 a 6 veces semana<br><input type="radio"/> 1 vez al día<br><input type="radio"/> 2 a 3 veces al día<br><input type="radio"/> 5 a 6 veces al día<br><input type="radio"/> más 6 veces al día |
| te o infusión         | <input checked="" type="radio"/> Nunca o menos 1 vez al mes<br><input type="radio"/> 1 a 3 veces mes<br><input type="radio"/> 1 vez semana<br><input type="radio"/> 2 a 4 veces semana<br><input type="radio"/> 5 a 6 veces semana<br><input type="radio"/> 1 vez al día<br><input type="radio"/> 2 a 3 veces al día<br><input type="radio"/> 5 a 6 veces al día<br><input type="radio"/> más 6 veces al día |
| sopa o puré verduras  | <input type="radio"/> Nunca o menos 1 vez al mes<br><input type="radio"/> 1 a 3 veces mes<br><input type="radio"/> 1 vez semana<br><input checked="" type="radio"/> 2 a 4 veces semana<br><input type="radio"/> 5 a 6 veces semana<br><input type="radio"/> 1 vez al día<br><input type="radio"/> 2 a 3 veces al día<br><input type="radio"/> 5 a 6 veces al día<br><input type="radio"/> más 6 veces al día |
| croquetas pollo jamón | <input type="radio"/> Nunca o menos 1 vez al mes<br><input checked="" type="radio"/> 1 a 3 veces mes<br><input type="radio"/> 1 vez semana<br><input type="radio"/> 2 a 4 veces semana<br><input type="radio"/> 5 a 6 veces semana<br><input type="radio"/> 1 vez al día<br><input type="radio"/> 2 a 3 veces al día<br><input type="radio"/> 5 a 6 veces al día<br><input type="radio"/> más 6 veces al día |
| croquetas pescado     | <input checked="" type="radio"/> Nunca o menos 1 vez al mes<br><input type="radio"/> 1 a 3 veces mes<br><input type="radio"/> 1 vez semana<br><input type="radio"/> 2 a 4 veces semana<br><input type="radio"/> 5 a 6 veces semana<br><input type="radio"/> 1 vez al día<br><input type="radio"/> 2 a 3 veces al día<br><input type="radio"/> 5 a 6 veces al día<br><input type="radio"/> más 6 veces al día |
| mayonesa              | <input type="radio"/> Nunca o menos 1 vez al mes<br><input type="radio"/> 1 a 3 veces mes<br><input type="radio"/> 1 vez semana<br><input type="radio"/> 2 a 4 veces semana<br><input type="radio"/> 5 a 6 veces semana<br><input type="radio"/> 1 vez al día<br><input type="radio"/> 2 a 3 veces al día<br><input type="radio"/> 5 a 6 veces al día<br><input type="radio"/> más 6 veces al día            |

|                  |                                                                                                                                                                                                                                                                                                                                                                                                              |
|------------------|--------------------------------------------------------------------------------------------------------------------------------------------------------------------------------------------------------------------------------------------------------------------------------------------------------------------------------------------------------------------------------------------------------------|
| salsa tomate     | <input type="radio"/> Nunca o menos 1 vez al mes<br><input type="radio"/> 1 a 3 veces mes<br><input type="radio"/> 1 vez semana<br><input checked="" type="radio"/> 2 a 4 veces semana<br><input type="radio"/> 5 a 6 veces semana<br><input type="radio"/> 1 vez al día<br><input type="radio"/> 2 a 3 veces al día<br><input type="radio"/> 5 a 6 veces al día<br><input type="radio"/> más 6 veces al día |
| ketchup          | <input checked="" type="radio"/> Nunca o menos 1 vez al mes<br><input type="radio"/> 1 a 3 veces mes<br><input type="radio"/> 1 vez semana<br><input type="radio"/> 2 a 4 veces semana<br><input type="radio"/> 5 a 6 veces semana<br><input type="radio"/> 1 vez al día<br><input type="radio"/> 2 a 3 veces al día<br><input type="radio"/> 5 a 6 veces al día<br><input type="radio"/> más 6 veces al día |
| sal              | <input checked="" type="radio"/> Nunca o menos 1 vez al mes<br><input type="radio"/> 1 a 3 veces mes<br><input type="radio"/> 1 vez semana<br><input type="radio"/> 2 a 4 veces semana<br><input type="radio"/> 5 a 6 veces semana<br><input type="radio"/> 1 vez al día<br><input type="radio"/> 2 a 3 veces al día<br><input type="radio"/> 5 a 6 veces al día<br><input type="radio"/> más 6 veces al día |
| ajo              | <input checked="" type="radio"/> Nunca o menos 1 vez al mes<br><input type="radio"/> 1 a 3 veces mes<br><input type="radio"/> 1 vez semana<br><input type="radio"/> 2 a 4 veces semana<br><input type="radio"/> 5 a 6 veces semana<br><input type="radio"/> 1 vez al día<br><input type="radio"/> 2 a 3 veces al día<br><input type="radio"/> 5 a 6 veces al día<br><input type="radio"/> más 6 veces al día |
| mermelada o miel | <input checked="" type="radio"/> Nunca o menos 1 vez al mes<br><input type="radio"/> 1 a 3 veces mes<br><input type="radio"/> 1 vez semana<br><input type="radio"/> 2 a 4 veces semana<br><input type="radio"/> 5 a 6 veces semana<br><input type="radio"/> 1 vez al día<br><input type="radio"/> 2 a 3 veces al día<br><input type="radio"/> 5 a 6 veces al día<br><input type="radio"/> más 6 veces al día |
| azúcar           | <input checked="" type="radio"/> Nunca o menos 1 vez al mes<br><input type="radio"/> 1 a 3 veces mes<br><input type="radio"/> 1 vez semana<br><input type="radio"/> 2 a 4 veces semana<br><input type="radio"/> 5 a 6 veces semana<br><input type="radio"/> 1 vez al día<br><input type="radio"/> 2 a 3 veces al día<br><input type="radio"/> 5 a 6 veces al día<br><input type="radio"/> más 6 veces al día |

|                                       |                                                                                                                                                                                                                                                                                                                                                                                                                                                                                                                               |
|---------------------------------------|-------------------------------------------------------------------------------------------------------------------------------------------------------------------------------------------------------------------------------------------------------------------------------------------------------------------------------------------------------------------------------------------------------------------------------------------------------------------------------------------------------------------------------|
| Otro alimento                         |                                                                                                                                                                                                                                                                                                                                                                                                                                                                                                                               |
| suplementos vitamínicos               | <input type="radio"/> si<br><input checked="" type="radio"/> no                                                                                                                                                                                                                                                                                                                                                                                                                                                               |
| suplementos vitamínicos               |                                                                                                                                                                                                                                                                                                                                                                                                                                                                                                                               |
| dieta previa                          | <input type="radio"/> si<br><input checked="" type="radio"/> no                                                                                                                                                                                                                                                                                                                                                                                                                                                               |
| motivo dieta                          | <input checked="" type="radio"/> no dieta<br><input type="radio"/> control peso<br><input type="radio"/> control colesterol<br><input type="radio"/> control diabetes<br><input type="radio"/> problemas estómago<br><input type="radio"/> problemas vesícula o hepáticos<br><input type="radio"/> HTA o cardiopatía<br><input type="radio"/> problemas renales<br><input type="radio"/> alergia alimentaria<br><input type="radio"/> ácido úrico elevado<br><input type="radio"/> vegetariana<br><input type="radio"/> otros |
| cambio alimentos año previo gestación | <input checked="" type="radio"/> si<br><input type="radio"/> no                                                                                                                                                                                                                                                                                                                                                                                                                                                               |
| cambio lácteos                        | <input type="radio"/> eliminado<br><input type="radio"/> disminuido<br><input checked="" type="radio"/> igual<br><input type="radio"/> aumentado<br><input type="radio"/> no sabe                                                                                                                                                                                                                                                                                                                                             |
| cambio huevos                         | <input type="radio"/> eliminado<br><input type="radio"/> disminuido<br><input checked="" type="radio"/> igual<br><input type="radio"/> aumentado<br><input type="radio"/> no sabe                                                                                                                                                                                                                                                                                                                                             |
| cambio carne                          | <input type="radio"/> eliminado<br><input type="radio"/> disminuido<br><input type="radio"/> igual<br><input checked="" type="radio"/> aumentado<br><input type="radio"/> no sabe                                                                                                                                                                                                                                                                                                                                             |
| cambio pescado                        | <input type="radio"/> eliminado<br><input type="radio"/> disminuido<br><input type="radio"/> igual<br><input checked="" type="radio"/> aumentado<br><input type="radio"/> no sabe                                                                                                                                                                                                                                                                                                                                             |
| cambio verduras                       | <input type="radio"/> eliminado<br><input type="radio"/> disminuido<br><input type="radio"/> igual<br><input checked="" type="radio"/> aumentado<br><input type="radio"/> no sabe                                                                                                                                                                                                                                                                                                                                             |

|                            |                                                                                                                                                                                                                        |
|----------------------------|------------------------------------------------------------------------------------------------------------------------------------------------------------------------------------------------------------------------|
| cambio legumbres           | <input type="radio"/> eliminado<br><input type="radio"/> disminuido<br><input checked="" type="radio"/> igual<br><input type="radio"/> aumentado<br><input type="radio"/> no sabe                                      |
| cambio fruta               | <input type="radio"/> eliminado<br><input type="radio"/> disminuido<br><input checked="" type="radio"/> igual<br><input type="radio"/> aumentado<br><input type="radio"/> no sabe                                      |
| cambio pan                 | <input type="radio"/> eliminado<br><input type="radio"/> disminuido<br><input checked="" type="radio"/> igual<br><input type="radio"/> aumentado<br><input type="radio"/> no sabe                                      |
| cambio aceite oliva        | <input type="radio"/> eliminado<br><input type="radio"/> disminuido<br><input checked="" type="radio"/> igual<br><input type="radio"/> aumentado<br><input type="radio"/> no sabe                                      |
| cambio mante o margarina   | <input checked="" type="radio"/> eliminado<br><input type="radio"/> disminuido<br><input type="radio"/> igual<br><input type="radio"/> aumentado<br><input type="radio"/> no sabe                                      |
| cambio azúcar y dulces     | <input type="radio"/> eliminado<br><input checked="" type="radio"/> disminuido<br><input type="radio"/> igual<br><input type="radio"/> aumentado<br><input type="radio"/> no sabe                                      |
| cambio bebidas alcohólicas | <input checked="" type="radio"/> eliminado<br><input type="radio"/> disminuido<br><input type="radio"/> igual<br><input type="radio"/> aumentado<br><input type="radio"/> no sabe                                      |
| frecuencia comidas fritas  | <input type="radio"/> a diario<br><input type="radio"/> 5 a 6 veces semana<br><input type="radio"/> 2 a 4 veces semana<br><input checked="" type="radio"/> 1 vez semana<br><input type="radio"/> menos de 1 vez semana |
| carne                      | <input type="radio"/> no como<br><input type="radio"/> cruda<br><input type="radio"/> poco hecha<br><input type="radio"/> hecha<br><input checked="" type="radio"/> muy hecha                                          |
| grasa visible carne        | <input checked="" type="radio"/> quita toda<br><input type="radio"/> quita mayoría<br><input type="radio"/> quita un poco<br><input type="radio"/> no quita nada                                                       |

|                                |                                                                                                                                                                                                                                                          |
|--------------------------------|----------------------------------------------------------------------------------------------------------------------------------------------------------------------------------------------------------------------------------------------------------|
| cocina carne                   | <input checked="" type="radio"/> a la plancha<br><input type="radio"/> a la parrilla<br><input type="radio"/> asada<br><input type="radio"/> frita<br><input type="radio"/> guisada                                                                      |
| tostado quemado carne          | <input type="radio"/> nunca<br><input checked="" type="radio"/> 1 vez mes<br><input type="radio"/> 2 a 3 veces mes<br><input type="radio"/> 1 vez semana<br><input type="radio"/> 2 a 3 semanas                                                          |
| tostado quemado pescado        | <input type="radio"/> nunca<br><input type="radio"/> 1 vez mes<br><input checked="" type="radio"/> 2 a 3 veces mes<br><input type="radio"/> 1 vez semana<br><input type="radio"/> 2 a 3 semanas                                                          |
| socarrat paella                | <input checked="" type="radio"/> nunca<br><input type="radio"/> 1 vez mes<br><input type="radio"/> 2 a 3 veces mes<br><input type="radio"/> 1 vez semana<br><input type="radio"/> 2 a 3 semanas                                                          |
| grasa o aceite cocinar         | <input type="radio"/> mantequilla<br><input type="radio"/> margarina<br><input type="radio"/> aceite oliva<br><input checked="" type="radio"/> aceite oliva virgen extra<br><input type="radio"/> aceite vegetal<br><input type="radio"/> mezcla aceites |
| grasa aceite aliñar            | <input type="radio"/> mantequilla<br><input type="radio"/> margarina<br><input type="radio"/> aceite oliva<br><input checked="" type="radio"/> aceite oliva virgen extra<br><input type="radio"/> aceite vegetal<br><input type="radio"/> mezcla aceites |
| grasa aceite freir             | <input type="radio"/> mantequilla<br><input type="radio"/> margarina<br><input type="radio"/> aceite oliva<br><input checked="" type="radio"/> aceite oliva virgen extra<br><input type="radio"/> aceite vegetal<br><input type="radio"/> mezcla aceites |
| Ejercicio cuestionario         | <input checked="" type="radio"/> si<br><input type="radio"/> no                                                                                                                                                                                          |
| horas de sueño incluido siesta | [*DATA REMOVED*]                                                                                                                                                                                                                                         |
| minutos siesta                 | [*DATA REMOVED*]                                                                                                                                                                                                                                         |
| horas televisión semana        | [*DATA REMOVED*]                                                                                                                                                                                                                                         |

|                                        |                                                                                                                                                                                                                                                                                                                                                                           |
|----------------------------------------|---------------------------------------------------------------------------------------------------------------------------------------------------------------------------------------------------------------------------------------------------------------------------------------------------------------------------------------------------------------------------|
| actividad trabajo                      | <input checked="" type="radio"/> casi siempre sentado<br><input type="radio"/> sentado 50 por cien<br><input type="radio"/> casi siempre de pie, quieto<br><input type="radio"/> casi siempre levantado caminando y llevando pocas cosas<br><input type="radio"/> casi siempre levantado, caminando y llevado muchas cosas<br><input type="radio"/> trabajo manual pesado |
| tiempo caminar o bici al día           | <input type="radio"/> casi nunca<br><input type="radio"/> menos 20min día<br><input type="radio"/> 20 a 40 min día<br><input checked="" type="radio"/> 40 a 60 min día<br><input type="radio"/> 1h o 1h y media día<br><input type="radio"/> más de 1h y media al día                                                                                                     |
| tiempo tareas casa al día              | <input type="radio"/> menos de 1h día<br><input checked="" type="radio"/> 1 a 2h día<br><input type="radio"/> 3 a 4h día<br><input type="radio"/> 5 a 6h día<br><input type="radio"/> 7 a 8h día<br><input type="radio"/> más de 8h día                                                                                                                                   |
| tiempo libre televisión ordenador leer | <input checked="" type="radio"/> menos 1h día<br><input type="radio"/> 1h día<br><input type="radio"/> 2h día<br><input type="radio"/> 3h día<br><input type="radio"/> 4h día<br><input type="radio"/> 5 a 6h día<br><input type="radio"/> mas 6h día                                                                                                                     |
| tiempo libre ejercicio o deporte       | <input type="radio"/> menos 1h semana<br><input type="radio"/> 1h semana<br><input type="radio"/> 2h semana<br><input checked="" type="radio"/> 3h semana<br><input type="radio"/> 4 a 5h semana<br><input type="radio"/> mas 5h semana                                                                                                                                   |
| como se considera                      | <input type="radio"/> sedentaria<br><input type="radio"/> poco activa<br><input checked="" type="radio"/> moderadamente activa<br><input type="radio"/> bastante activa<br><input type="radio"/> muy activa<br><input type="radio"/> no sabe                                                                                                                              |
| FUR                                    | [*DATA REMOVED*]                                                                                                                                                                                                                                                                                                                                                          |
| Semanas gestación 2T                   | [*DATA REMOVED*]                                                                                                                                                                                                                                                                                                                                                          |
| Días gestación 2T                      | [*DATA REMOVED*]                                                                                                                                                                                                                                                                                                                                                          |
| DBP 2T                                 | [*DATA REMOVED*]                                                                                                                                                                                                                                                                                                                                                          |
| CC 2T                                  | [*DATA REMOVED*]                                                                                                                                                                                                                                                                                                                                                          |
| AC 2T                                  | [*DATA REMOVED*]                                                                                                                                                                                                                                                                                                                                                          |



|                                                   |                                                                                                                                                                                                 |
|---------------------------------------------------|-------------------------------------------------------------------------------------------------------------------------------------------------------------------------------------------------|
| LF 2T                                             | [*DATA REMOVED*]                                                                                                                                                                                |
| PFE 2T (Hadlock)                                  | [*DATA REMOVED*]                                                                                                                                                                                |
| Semanas gestación 3T                              | [*DATA REMOVED*]                                                                                                                                                                                |
| días 3T                                           | [*DATA REMOVED*]                                                                                                                                                                                |
| DBP 3T                                            | [*DATA REMOVED*]                                                                                                                                                                                |
| CC 3T                                             | [*DATA REMOVED*]                                                                                                                                                                                |
| AC 3T                                             | [*DATA REMOVED*]                                                                                                                                                                                |
| LF 3T                                             | [*DATA REMOVED*]                                                                                                                                                                                |
| PFE 3T (Hadlock)                                  | [*DATA REMOVED*]                                                                                                                                                                                |
| Semanas de gestación final                        | [*DATA REMOVED*]                                                                                                                                                                                |
| días gestación final                              | [*DATA REMOVED*]                                                                                                                                                                                |
| Localización placenta                             | <input type="radio"/> anterior<br><input type="radio"/> lateral derecha<br><input type="radio"/> lateral izquierda<br><input type="radio"/> posterior<br><input checked="" type="radio"/> fondo |
| Presentación longitudinal cefálica                | <input type="radio"/> no<br><input checked="" type="radio"/> si                                                                                                                                 |
| Dorso                                             | <input checked="" type="radio"/> izquierda anterior<br><input type="radio"/> izquierda posterior<br><input type="radio"/> derecha anterior<br><input type="radio"/> derecha posterior           |
| diámetro biparietal                               | [*DATA REMOVED*]                                                                                                                                                                                |
| Circunferencia craneal                            | [*DATA REMOVED*]                                                                                                                                                                                |
| Circunferencia abdominal                          | [*DATA REMOVED*]                                                                                                                                                                                |
| Longitud de femur                                 | [*DATA REMOVED*]                                                                                                                                                                                |
| tejido celular subcutáneo a nivel del muslo en mm | [*DATA REMOVED*]                                                                                                                                                                                |
| tejido celular subcutáneo en abdomen en mm        | [*DATA REMOVED*]                                                                                                                                                                                |
| Volumen del muslo en cm3                          | [*DATA REMOVED*]                                                                                                                                                                                |
| Peso fetal estimado según fórmula de Hadlock      | [*DATA REMOVED*]                                                                                                                                                                                |

|                                               |                                                                                                                                                          |
|-----------------------------------------------|----------------------------------------------------------------------------------------------------------------------------------------------------------|
| Percentil                                     | [*DATA REMOVED*]                                                                                                                                         |
| Peso fetal estimado según fórmula de Scioscia | <hr/>                                                                                                                                                    |
| Peso fetal estimado según fórmula de LEE      | <hr/>                                                                                                                                                    |
| Tipo de parto                                 | <input checked="" type="radio"/> eutocico<br><input type="radio"/> instrumentado/ventosa<br><input type="radio"/> cesarea                                |
| fecha de nacimiento                           | [*DATA REMOVED*]                                                                                                                                         |
| Días entre exploración y nacimiento           | [*DATA REMOVED*]                                                                                                                                         |
| Peso RN en g                                  | [*DATA REMOVED*]                                                                                                                                         |
| sexo                                          | <input type="radio"/> mujer<br><input checked="" type="radio"/> hombre                                                                                   |
| Apgar 1 minuto                                | [*DATA REMOVED*]                                                                                                                                         |
| Apgar 5 minutos                               | [*DATA REMOVED*]                                                                                                                                         |
| Apgar 10 minutos                              | <hr/>                                                                                                                                                    |
| antecedente Covid durante gestación           | <input type="radio"/> Yes<br><input checked="" type="radio"/> No                                                                                         |
| Nivel de estudios                             | <input type="radio"/> ninguno<br><input type="radio"/> primarios<br><input type="radio"/> secundarios<br><input checked="" type="radio"/> universitarios |

# Base\_datos\_estimacion\_peso\_fetal

|                                       |                                                                                                                                                                                                                                                                                      |
|---------------------------------------|--------------------------------------------------------------------------------------------------------------------------------------------------------------------------------------------------------------------------------------------------------------------------------------|
| Número de identificación participante | 71                                                                                                                                                                                                                                                                                   |
| CODIGO PARTICIPANTE                   |                                                                                                                                                                                                                                                                                      |
| Edad                                  | [*DATA REMOVED*]                                                                                                                                                                                                                                                                     |
| Gestaciones                           | <input checked="" type="radio"/> 1<br><input type="radio"/> 2<br><input type="radio"/> 3<br><input type="radio"/> mas de 3                                                                                                                                                           |
| partos                                | <input checked="" type="radio"/> 0<br><input type="radio"/> 1<br><input type="radio"/> 2<br><input type="radio"/> 3<br><input type="radio"/> mas de 3                                                                                                                                |
| cesáreas                              | <input checked="" type="radio"/> 0<br><input type="radio"/> 1<br><input type="radio"/> 2<br><input type="radio"/> 3<br><input type="radio"/> mas de 3                                                                                                                                |
| Abortos                               | <input checked="" type="radio"/> 0<br><input type="radio"/> 1<br><input type="radio"/> 2<br><input type="radio"/> 3<br><input type="radio"/> mas de 3                                                                                                                                |
| Tipo de gestacion                     | <input checked="" type="radio"/> espontanea<br><input type="radio"/> IAC inseminación artificial conyuge<br><input type="radio"/> IAD inseminación artificial donante<br><input type="radio"/> FIV Fecundación in Vitro<br><input type="radio"/> Ovodon FIV con donación de ovocitos |
| peso previo a embarazo                | [*DATA REMOVED*]                                                                                                                                                                                                                                                                     |
| Ganancia ponderal embarazo            | [*DATA REMOVED*]                                                                                                                                                                                                                                                                     |
| Talla madre                           | [*DATA REMOVED*]                                                                                                                                                                                                                                                                     |
| IMC previo embarazo                   | 25.95155709342561                                                                                                                                                                                                                                                                    |
| Patología obstétrica                  | <input checked="" type="radio"/> no<br><input type="radio"/> si                                                                                                                                                                                                                      |
| Diabetes pregestacional               | <input checked="" type="radio"/> no<br><input type="radio"/> si                                                                                                                                                                                                                      |
| Diabetes gestacional                  | <input checked="" type="radio"/> no<br><input type="radio"/> si                                                                                                                                                                                                                      |

|                                            |                                                                                                                                                                                      |
|--------------------------------------------|--------------------------------------------------------------------------------------------------------------------------------------------------------------------------------------|
| Diabetes gestacional con insulina          | <input checked="" type="radio"/> no<br><input type="radio"/> si                                                                                                                      |
| Diabetes gestacional con dieta y ejercicio | <input checked="" type="radio"/> no<br><input type="radio"/> si                                                                                                                      |
| Percentil fetos previos                    | <input checked="" type="radio"/> Nada<br><input type="radio"/> percentil menor de 10<br><input type="radio"/> percentil entre 10 y 90<br><input type="radio"/> percentil mayor de 90 |
| Exfumadora                                 | <input checked="" type="radio"/> Nada<br><input type="radio"/> menos de 5 años<br><input type="radio"/> 5 a 10 años<br><input type="radio"/> mayor o igual a 10 años                 |
| Hábito tabáquico                           | <input checked="" type="radio"/> no<br><input type="radio"/> si                                                                                                                      |
| fumadora                                   | [*DATA REMOVED*]                                                                                                                                                                     |
| Consumo otros tóxicos                      | <input checked="" type="radio"/> no<br><input type="radio"/> si                                                                                                                      |
| Hb 1T                                      | _____                                                                                                                                                                                |
| Htc 1T                                     | _____                                                                                                                                                                                |
| Hb 2T                                      | _____                                                                                                                                                                                |
| HTC 2T                                     | _____                                                                                                                                                                                |
| Hb 3T                                      | _____                                                                                                                                                                                |
| HTC 3T                                     | _____                                                                                                                                                                                |
| Suplemento FE oral                         | <input checked="" type="radio"/> si<br><input type="radio"/> no                                                                                                                      |
| Suplemento fe iv                           | <input type="radio"/> si<br><input type="radio"/> no                                                                                                                                 |
| Transfusión                                | <input type="radio"/> no<br><input type="radio"/> si                                                                                                                                 |
| Solicitada Vit D                           | <input type="radio"/> no<br><input checked="" type="radio"/> si                                                                                                                      |

|                       |                                                                                                                                                                                                                                                                                                                                                                                                              |
|-----------------------|--------------------------------------------------------------------------------------------------------------------------------------------------------------------------------------------------------------------------------------------------------------------------------------------------------------------------------------------------------------------------------------------------------------|
| Deficit vit D         | <input type="radio"/> no<br><input checked="" type="radio"/> si                                                                                                                                                                                                                                                                                                                                              |
| Suplemento vit D      | <input checked="" type="radio"/> si<br><input type="radio"/> no                                                                                                                                                                                                                                                                                                                                              |
| Dieta, cuestionario   | <input checked="" type="radio"/> si<br><input type="radio"/> no                                                                                                                                                                                                                                                                                                                                              |
| Leche entera          | <input checked="" type="radio"/> Nunca o menos 1 vez al mes<br><input type="radio"/> 1 a 3 veces mes<br><input type="radio"/> 1 vez semana<br><input type="radio"/> 2 a 4 veces semana<br><input type="radio"/> 5 a 6 veces semana<br><input type="radio"/> 1 vez al día<br><input type="radio"/> 2 a 3 veces al día<br><input type="radio"/> 5 a 6 veces al día<br><input type="radio"/> más 6 veces al día |
| Leche semidesnatada   | <input type="radio"/> Nunca o menos 1 vez al mes<br><input type="radio"/> 1 a 3 veces mes<br><input type="radio"/> 1 vez semana<br><input type="radio"/> 2 a 4 veces semana<br><input type="radio"/> 5 a 6 veces semana<br><input checked="" type="radio"/> 1 vez al día<br><input type="radio"/> 2 a 3 veces al día<br><input type="radio"/> 5 a 6 veces al día<br><input type="radio"/> mas 6 veces al día |
| Leche desnatada       | <input checked="" type="radio"/> Nunca o menos 1 vez al mes<br><input type="radio"/> 1 a 3 veces mes<br><input type="radio"/> 1 vez semana<br><input type="radio"/> 2 a 4 veces semana<br><input type="radio"/> 5 a 6 veces semana<br><input type="radio"/> 1 vez al día<br><input type="radio"/> 2 a 3 veces al día<br><input type="radio"/> 5 a 6 veces al día<br><input type="radio"/> más 6 veces al día |
| Leche condensada      | <input checked="" type="radio"/> Nunca o menos 1 vez al mes<br><input type="radio"/> 1 a 3 veces mes<br><input type="radio"/> 1 vez semana<br><input type="radio"/> 2 a 4 veces semana<br><input type="radio"/> 5 a 6 veces semana<br><input type="radio"/> 1 vez al día<br><input type="radio"/> 2 a 3 veces al día<br><input type="radio"/> 5 a 6 veces al día<br><input type="radio"/> más 6 veces al día |
| nata o crema de leche | <input type="radio"/> Nunca o menos 1 vez al mes<br><input type="radio"/> 1 a 3 veces mes<br><input checked="" type="radio"/> 1 vez semana<br><input type="radio"/> 2 a 4 veces semana<br><input type="radio"/> 5 a 6 veces semana<br><input type="radio"/> 1 vez al día<br><input type="radio"/> 2 a 3 veces al día<br><input type="radio"/> 5 a 6 veces al día<br><input type="radio"/> más 6 veces al día |

|                                             |                                                                                                                                                                                                                                                                                                                                                                                                              |
|---------------------------------------------|--------------------------------------------------------------------------------------------------------------------------------------------------------------------------------------------------------------------------------------------------------------------------------------------------------------------------------------------------------------------------------------------------------------|
| Yogurt Entero                               | <input type="radio"/> Nunca o menos 1 vez al mes<br><input type="radio"/> 1 a 3 veces mes<br><input type="radio"/> 1 vez semana<br><input type="radio"/> 2 a 4 veces semana<br><input checked="" type="radio"/> 5 a 6 veces semana<br><input type="radio"/> 1 vez al día<br><input type="radio"/> 2 a 3 veces al día<br><input type="radio"/> 5 a 6 veces al día<br><input type="radio"/> más 6 veces al día |
| Yogurt desnatado                            | <input type="radio"/> Nunca o menos 1 vez al mes<br><input type="radio"/> 1 a 3 veces mes<br><input type="radio"/> 1 vez semana<br><input type="radio"/> 2 a 4 veces semana<br><input type="radio"/> 5 a 6 veces semana<br><input type="radio"/> 1 vez al día<br><input type="radio"/> 2 a 3 veces al día<br><input type="radio"/> 5 a 6 veces al día<br><input type="radio"/> más 6 veces al día            |
| 100g requesón o queso blando o queso fresco | <input type="radio"/> Nunca o menos 1 vez al mes<br><input type="radio"/> 1 a 3 veces mes<br><input type="radio"/> 1 vez semana<br><input checked="" type="radio"/> 2 a 4 veces semana<br><input type="radio"/> 5 a 6 veces semana<br><input type="radio"/> 1 vez al día<br><input type="radio"/> 2 a 3 veces al día<br><input type="radio"/> 5 a 6 veces al día<br><input type="radio"/> más 6 veces al día |
| queso curado o semicurado o cremoso         | <input type="radio"/> Nunca o menos 1 vez al mes<br><input type="radio"/> 1 a 3 veces mes<br><input checked="" type="radio"/> 1 vez semana<br><input type="radio"/> 2 a 4 veces semana<br><input type="radio"/> 5 a 6 veces semana<br><input type="radio"/> 1 vez al día<br><input type="radio"/> 2 a 3 veces al día<br><input type="radio"/> 5 a 6 veces al día<br><input type="radio"/> más 6 veces al día |
| natillas flan pudding                       | <input type="radio"/> Nunca o menos 1 vez al mes<br><input type="radio"/> 1 a 3 veces mes<br><input checked="" type="radio"/> 1 vez semana<br><input type="radio"/> 2 a 4 veces semana<br><input type="radio"/> 5 a 6 veces semana<br><input type="radio"/> 1 vez al día<br><input type="radio"/> 2 a 3 veces al día<br><input type="radio"/> 5 a 6 veces al día<br><input type="radio"/> más 6 veces al día |
| Helado                                      | <input checked="" type="radio"/> Nunca o menos 1 vez al mes<br><input type="radio"/> 1 a 3 veces mes<br><input type="radio"/> 1 vez semana<br><input type="radio"/> 2 a 4 veces semana<br><input type="radio"/> 5 a 6 veces semana<br><input type="radio"/> 1 vez al día<br><input type="radio"/> 2 a 3 veces al día<br><input type="radio"/> 5 a 6 veces al día<br><input type="radio"/> más 6 veces al día |

|                                      |                                                                                                                                                                                                                                                                                                                                                                                                              |
|--------------------------------------|--------------------------------------------------------------------------------------------------------------------------------------------------------------------------------------------------------------------------------------------------------------------------------------------------------------------------------------------------------------------------------------------------------------|
| huevo                                | <input type="radio"/> Nunca o menos 1 vez al mes<br><input type="radio"/> 1 a 3 veces mes<br><input type="radio"/> 1 vez semana<br><input checked="" type="radio"/> 2 a 4 veces semana<br><input type="radio"/> 5 a 6 veces semana<br><input type="radio"/> 1 vez al día<br><input type="radio"/> 2 a 3 veces al día<br><input type="radio"/> 5 a 6 veces al día<br><input type="radio"/> más 6 veces al día |
| Pollo con piel                       | <input type="radio"/> Nunca o menos 1 vez al mes<br><input type="radio"/> 1 a 3 veces mes<br><input checked="" type="radio"/> 1 vez semana<br><input type="radio"/> 2 a 4 veces semana<br><input type="radio"/> 5 a 6 veces semana<br><input type="radio"/> 1 vez al día<br><input type="radio"/> 2 a 3 veces al día<br><input type="radio"/> 5 a 6 veces al día<br><input type="radio"/> más 6 veces al día |
| pollo sin piel                       | <input type="radio"/> Nunca o menos 1 vez al mes<br><input type="radio"/> 1 a 3 veces mes<br><input type="radio"/> 1 vez semana<br><input checked="" type="radio"/> 2 a 4 veces semana<br><input type="radio"/> 5 a 6 veces semana<br><input type="radio"/> 1 vez al día<br><input type="radio"/> 2 a 3 veces al día<br><input type="radio"/> 5 a 6 veces al día<br><input type="radio"/> más 6 veces al día |
| Ternera o cerdo o cordero            | <input type="radio"/> Nunca o menos 1 vez al mes<br><input type="radio"/> 1 a 3 veces mes<br><input type="radio"/> 1 vez semana<br><input checked="" type="radio"/> 2 a 4 veces semana<br><input type="radio"/> 5 a 6 veces semana<br><input type="radio"/> 1 vez al día<br><input type="radio"/> 2 a 3 veces al día<br><input type="radio"/> 5 a 6 veces al día<br><input type="radio"/> más 6 veces al día |
| carne caza: Conejo o codorniz o pato | <input type="radio"/> Nunca o menos 1 vez al mes<br><input checked="" type="radio"/> 1 a 3 veces mes<br><input type="radio"/> 1 vez semana<br><input type="radio"/> 2 a 4 veces semana<br><input type="radio"/> 5 a 6 veces semana<br><input type="radio"/> 1 vez al día<br><input type="radio"/> 2 a 3 veces al día<br><input type="radio"/> 5 a 6 veces al día<br><input type="radio"/> más 6 veces al día |
| Hígado de ternera o cerdo o pollo    | <input checked="" type="radio"/> Nunca o menos 1 vez al mes<br><input type="radio"/> 1 a 3 veces mes<br><input type="radio"/> 1 vez semana<br><input type="radio"/> 2 a 4 veces semana<br><input type="radio"/> 5 a 6 veces semana<br><input type="radio"/> 1 vez al día<br><input type="radio"/> 2 a 3 veces al día<br><input type="radio"/> 5 a 6 veces al día<br><input type="radio"/> más 6 veces al día |

|                     |                                                                                                                                                                                                                                                                                                                                                                                                              |
|---------------------|--------------------------------------------------------------------------------------------------------------------------------------------------------------------------------------------------------------------------------------------------------------------------------------------------------------------------------------------------------------------------------------------------------------|
| Vísceras            | <input checked="" type="radio"/> Nunca o menos 1 vez al mes<br><input type="radio"/> 1 a 3 veces mes<br><input type="radio"/> 1 vez semana<br><input type="radio"/> 2 a 4 veces semana<br><input type="radio"/> 5 a 6 veces semana<br><input type="radio"/> 1 vez al día<br><input type="radio"/> 2 a 3 veces al día<br><input type="radio"/> 5 a 6 veces al día<br><input type="radio"/> más 6 veces al día |
| Embutido            | <input checked="" type="radio"/> Nunca o menos 1 vez al mes<br><input type="radio"/> 1 a 3 veces mes<br><input type="radio"/> 1 vez semana<br><input type="radio"/> 2 a 4 veces semana<br><input type="radio"/> 5 a 6 veces semana<br><input type="radio"/> 1 vez al día<br><input type="radio"/> 2 a 3 veces al día<br><input type="radio"/> 5 a 6 veces al día<br><input type="radio"/> más 6 veces al día |
| Salchicha o similar | <input type="radio"/> Nunca o menos 1 vez al mes<br><input type="radio"/> 1 a 3 veces mes<br><input checked="" type="radio"/> 1 vez semana<br><input type="radio"/> 2 a 4 veces semana<br><input type="radio"/> 5 a 6 veces semana<br><input type="radio"/> 1 vez al día<br><input type="radio"/> 2 a 3 veces al día<br><input type="radio"/> 5 a 6 veces al día<br><input type="radio"/> más 6 veces al día |
| Pate o foiegras     | <input checked="" type="radio"/> Nunca o menos 1 vez al mes<br><input type="radio"/> 1 a 3 veces mes<br><input type="radio"/> 1 vez semana<br><input type="radio"/> 2 a 4 veces semana<br><input type="radio"/> 5 a 6 veces semana<br><input type="radio"/> 1 vez al día<br><input type="radio"/> 2 a 3 veces al día<br><input type="radio"/> 5 a 6 veces al día<br><input type="radio"/> más 6 veces al día |
| Hamburguesa         | <input type="radio"/> Nunca o menos 1 vez al mes<br><input type="radio"/> 1 a 3 veces mes<br><input checked="" type="radio"/> 1 vez semana<br><input type="radio"/> 2 a 4 veces semana<br><input type="radio"/> 5 a 6 veces semana<br><input type="radio"/> 1 vez al día<br><input type="radio"/> 2 a 3 veces al día<br><input type="radio"/> 5 a 6 veces al día<br><input type="radio"/> más 6 veces al día |
| tocino o bacon      | <input type="radio"/> Nunca o menos 1 vez al mes<br><input type="radio"/> 1 a 3 veces mes<br><input checked="" type="radio"/> 1 vez semana<br><input type="radio"/> 2 a 4 veces semana<br><input type="radio"/> 5 a 6 veces semana<br><input type="radio"/> 1 vez al día<br><input type="radio"/> 2 a 3 veces al día<br><input type="radio"/> 5 a 6 veces al día<br><input type="radio"/> más 6 veces al día |



|                        |                                                                                                                                                                                                                                                                                                                                                                                                              |
|------------------------|--------------------------------------------------------------------------------------------------------------------------------------------------------------------------------------------------------------------------------------------------------------------------------------------------------------------------------------------------------------------------------------------------------------|
| Pescado frito          | <input checked="" type="radio"/> Nunca o menos 1 vez al mes<br><input type="radio"/> 1 a 3 veces mes<br><input type="radio"/> 1 vez semana<br><input type="radio"/> 2 a 4 veces semana<br><input type="radio"/> 5 a 6 veces semana<br><input type="radio"/> 1 vez al día<br><input type="radio"/> 2 a 3 veces al día<br><input type="radio"/> 5 a 6 veces al día<br><input type="radio"/> más 6 veces al día |
| pescado hervido blanco | <input type="radio"/> Nunca o menos 1 vez al mes<br><input type="radio"/> 1 a 3 veces mes<br><input checked="" type="radio"/> 1 vez semana<br><input type="radio"/> 2 a 4 veces semana<br><input type="radio"/> 5 a 6 veces semana<br><input type="radio"/> 1 vez al día<br><input type="radio"/> 2 a 3 veces al día<br><input type="radio"/> 5 a 6 veces al día<br><input type="radio"/> más 6 veces al día |
| pescado hervido azul   | <input checked="" type="radio"/> Nunca o menos 1 vez al mes<br><input type="radio"/> 1 a 3 veces mes<br><input type="radio"/> 1 vez semana<br><input type="radio"/> 2 a 4 veces semana<br><input type="radio"/> 5 a 6 veces semana<br><input type="radio"/> 1 vez al día<br><input type="radio"/> 2 a 3 veces al día<br><input type="radio"/> 5 a 6 veces al día<br><input type="radio"/> más 6 veces al día |
| otros pescado azul     | <input type="radio"/> Nunca o menos 1 vez al mes<br><input type="radio"/> 1 a 3 veces mes<br><input checked="" type="radio"/> 1 vez semana<br><input type="radio"/> 2 a 4 veces semana<br><input type="radio"/> 5 a 6 veces semana<br><input type="radio"/> 1 vez al día<br><input type="radio"/> 2 a 3 veces al día<br><input type="radio"/> 5 a 6 veces al día<br><input type="radio"/> más 6 veces al día |
| atun conserva          | <input type="radio"/> Nunca o menos 1 vez al mes<br><input checked="" type="radio"/> 1 a 3 veces mes<br><input type="radio"/> 1 vez semana<br><input type="radio"/> 2 a 4 veces semana<br><input type="radio"/> 5 a 6 veces semana<br><input type="radio"/> 1 vez al día<br><input type="radio"/> 2 a 3 veces al día<br><input type="radio"/> 5 a 6 veces al día<br><input type="radio"/> más 6 veces al día |
| sardina conserva       | <input checked="" type="radio"/> Nunca o menos 1 vez al mes<br><input type="radio"/> 1 a 3 veces mes<br><input type="radio"/> 1 vez semana<br><input type="radio"/> 2 a 4 veces semana<br><input type="radio"/> 5 a 6 veces semana<br><input type="radio"/> 1 vez al día<br><input type="radio"/> 2 a 3 veces al día<br><input type="radio"/> 5 a 6 veces al día<br><input type="radio"/> más 6 veces al día |

|                                         |                                                                                                                                                                                                                                                                                                                                                                                                              |
|-----------------------------------------|--------------------------------------------------------------------------------------------------------------------------------------------------------------------------------------------------------------------------------------------------------------------------------------------------------------------------------------------------------------------------------------------------------------|
| pescado ahumado                         | <input checked="" type="radio"/> Nunca o menos 1 vez al mes<br><input type="radio"/> 1 a 3 veces mes<br><input type="radio"/> 1 vez semana<br><input type="radio"/> 2 a 4 veces semana<br><input type="radio"/> 5 a 6 veces semana<br><input type="radio"/> 1 vez al día<br><input type="radio"/> 2 a 3 veces al día<br><input type="radio"/> 5 a 6 veces al día<br><input type="radio"/> más 6 veces al día |
| almejas o mejillones o ostras unos 100g | <input type="radio"/> Nunca o menos 1 vez al mes<br><input type="radio"/> 1 a 3 veces mes<br><input type="radio"/> 1 vez semana<br><input checked="" type="radio"/> 2 a 4 veces semana<br><input type="radio"/> 5 a 6 veces semana<br><input type="radio"/> 1 vez al día<br><input type="radio"/> 2 a 3 veces al día<br><input type="radio"/> 5 a 6 veces al día<br><input type="radio"/> más 6 veces al día |
| calamar o chipiron o sepia unos 100g    | <input type="radio"/> Nunca o menos 1 vez al mes<br><input type="radio"/> 1 a 3 veces mes<br><input checked="" type="radio"/> 1 vez semana<br><input type="radio"/> 2 a 4 veces semana<br><input type="radio"/> 5 a 6 veces semana<br><input type="radio"/> 1 vez al día<br><input type="radio"/> 2 a 3 veces al día<br><input type="radio"/> 5 a 6 veces al día<br><input type="radio"/> más 6 veces al día |
| marisco unos 100g                       | <input type="radio"/> Nunca o menos 1 vez al mes<br><input type="radio"/> 1 a 3 veces mes<br><input checked="" type="radio"/> 1 vez semana<br><input type="radio"/> 2 a 4 veces semana<br><input type="radio"/> 5 a 6 veces semana<br><input type="radio"/> 1 vez al día<br><input type="radio"/> 2 a 3 veces al día<br><input type="radio"/> 5 a 6 veces al día<br><input type="radio"/> más 6 veces al día |
| Espinacas o acelgas cocinadas           | <input checked="" type="radio"/> Nunca o menos 1 vez al mes<br><input type="radio"/> 1 a 3 veces mes<br><input type="radio"/> 1 vez semana<br><input type="radio"/> 2 a 4 veces semana<br><input type="radio"/> 5 a 6 veces semana<br><input type="radio"/> 1 vez al día<br><input type="radio"/> 2 a 3 veces al día<br><input type="radio"/> 5 a 6 veces al día<br><input type="radio"/> más 6 veces al día |
| Col o coliflor o brocoli cocinado       | <input type="radio"/> Nunca o menos 1 vez al mes<br><input type="radio"/> 1 a 3 veces mes<br><input checked="" type="radio"/> 1 vez semana<br><input type="radio"/> 2 a 4 veces semana<br><input type="radio"/> 5 a 6 veces semana<br><input type="radio"/> 1 vez al día<br><input type="radio"/> 2 a 3 veces al día<br><input type="radio"/> 5 a 6 veces al día<br><input type="radio"/> más 6 veces al día |

---

|                              |                                                                                                                                                                                                                                                                                                                                                                                                              |
|------------------------------|--------------------------------------------------------------------------------------------------------------------------------------------------------------------------------------------------------------------------------------------------------------------------------------------------------------------------------------------------------------------------------------------------------------|
| Lechuga o endivia o escarola | <input type="radio"/> Nunca o menos 1 vez al mes<br><input type="radio"/> 1 a 3 veces mes<br><input type="radio"/> 1 vez semana<br><input checked="" type="radio"/> 2 a 4 veces semana<br><input type="radio"/> 5 a 6 veces semana<br><input type="radio"/> 1 vez al día<br><input type="radio"/> 2 a 3 veces al día<br><input type="radio"/> 5 a 6 veces al día<br><input type="radio"/> más 6 veces al día |
|------------------------------|--------------------------------------------------------------------------------------------------------------------------------------------------------------------------------------------------------------------------------------------------------------------------------------------------------------------------------------------------------------------------------------------------------------|

---

|                 |                                                                                                                                                                                                                                                                                                                                                                                                              |
|-----------------|--------------------------------------------------------------------------------------------------------------------------------------------------------------------------------------------------------------------------------------------------------------------------------------------------------------------------------------------------------------------------------------------------------------|
| tomate ensalada | <input type="radio"/> Nunca o menos 1 vez al mes<br><input type="radio"/> 1 a 3 veces mes<br><input type="radio"/> 1 vez semana<br><input checked="" type="radio"/> 2 a 4 veces semana<br><input type="radio"/> 5 a 6 veces semana<br><input type="radio"/> 1 vez al día<br><input type="radio"/> 2 a 3 veces al día<br><input type="radio"/> 5 a 6 veces al día<br><input type="radio"/> más 6 veces al día |
|-----------------|--------------------------------------------------------------------------------------------------------------------------------------------------------------------------------------------------------------------------------------------------------------------------------------------------------------------------------------------------------------------------------------------------------------|

---

|         |                                                                                                                                                                                                                                                                                                                                                                                                              |
|---------|--------------------------------------------------------------------------------------------------------------------------------------------------------------------------------------------------------------------------------------------------------------------------------------------------------------------------------------------------------------------------------------------------------------|
| cebolla | <input type="radio"/> Nunca o menos 1 vez al mes<br><input type="radio"/> 1 a 3 veces mes<br><input checked="" type="radio"/> 1 vez semana<br><input type="radio"/> 2 a 4 veces semana<br><input type="radio"/> 5 a 6 veces semana<br><input type="radio"/> 1 vez al día<br><input type="radio"/> 2 a 3 veces al día<br><input type="radio"/> 5 a 6 veces al día<br><input type="radio"/> más 6 veces al día |
|---------|--------------------------------------------------------------------------------------------------------------------------------------------------------------------------------------------------------------------------------------------------------------------------------------------------------------------------------------------------------------------------------------------------------------|

---

|                      |                                                                                                                                                                                                                                                                                                                                                                                                              |
|----------------------|--------------------------------------------------------------------------------------------------------------------------------------------------------------------------------------------------------------------------------------------------------------------------------------------------------------------------------------------------------------------------------------------------------------|
| Zanahoria o calabaza | <input type="radio"/> Nunca o menos 1 vez al mes<br><input type="radio"/> 1 a 3 veces mes<br><input checked="" type="radio"/> 1 vez semana<br><input type="radio"/> 2 a 4 veces semana<br><input type="radio"/> 5 a 6 veces semana<br><input type="radio"/> 1 vez al día<br><input type="radio"/> 2 a 3 veces al día<br><input type="radio"/> 5 a 6 veces al día<br><input type="radio"/> más 6 veces al día |
|----------------------|--------------------------------------------------------------------------------------------------------------------------------------------------------------------------------------------------------------------------------------------------------------------------------------------------------------------------------------------------------------------------------------------------------------|

---

|               |                                                                                                                                                                                                                                                                                                                                                                                                              |
|---------------|--------------------------------------------------------------------------------------------------------------------------------------------------------------------------------------------------------------------------------------------------------------------------------------------------------------------------------------------------------------------------------------------------------------|
| Judías verdes | <input checked="" type="radio"/> Nunca o menos 1 vez al mes<br><input type="radio"/> 1 a 3 veces mes<br><input type="radio"/> 1 vez semana<br><input type="radio"/> 2 a 4 veces semana<br><input type="radio"/> 5 a 6 veces semana<br><input type="radio"/> 1 vez al día<br><input type="radio"/> 2 a 3 veces al día<br><input type="radio"/> 5 a 6 veces al día<br><input type="radio"/> más 6 veces al día |
|---------------|--------------------------------------------------------------------------------------------------------------------------------------------------------------------------------------------------------------------------------------------------------------------------------------------------------------------------------------------------------------------------------------------------------------|

---

|                                |                                                                                                                                                                                                                                                                                                                                                                                                              |
|--------------------------------|--------------------------------------------------------------------------------------------------------------------------------------------------------------------------------------------------------------------------------------------------------------------------------------------------------------------------------------------------------------------------------------------------------------|
| Berenjena o calabacin o pepino | <input type="radio"/> Nunca o menos 1 vez al mes<br><input checked="" type="radio"/> 1 a 3 veces mes<br><input type="radio"/> 1 vez semana<br><input type="radio"/> 2 a 4 veces semana<br><input type="radio"/> 5 a 6 veces semana<br><input type="radio"/> 1 vez al día<br><input type="radio"/> 2 a 3 veces al día<br><input type="radio"/> 5 a 6 veces al día<br><input type="radio"/> más 6 veces al día |
|--------------------------------|--------------------------------------------------------------------------------------------------------------------------------------------------------------------------------------------------------------------------------------------------------------------------------------------------------------------------------------------------------------------------------------------------------------|

---

|                       |                                                                                                                                                                                                                                                                                                                                                                                                              |
|-----------------------|--------------------------------------------------------------------------------------------------------------------------------------------------------------------------------------------------------------------------------------------------------------------------------------------------------------------------------------------------------------------------------------------------------------|
| pimiento              | <input checked="" type="radio"/> Nunca o menos 1 vez al mes<br><input type="radio"/> 1 a 3 veces mes<br><input type="radio"/> 1 vez semana<br><input type="radio"/> 2 a 4 veces semana<br><input type="radio"/> 5 a 6 veces semana<br><input type="radio"/> 1 vez al día<br><input type="radio"/> 2 a 3 veces al día<br><input type="radio"/> 5 a 6 veces al día<br><input type="radio"/> más 6 veces al día |
| alcachofa             | <input type="radio"/> Nunca o menos 1 vez al mes<br><input checked="" type="radio"/> 1 a 3 veces mes<br><input type="radio"/> 1 vez semana<br><input type="radio"/> 2 a 4 veces semana<br><input type="radio"/> 5 a 6 veces semana<br><input type="radio"/> 1 vez al día<br><input type="radio"/> 2 a 3 veces al día<br><input type="radio"/> 5 a 6 veces al día<br><input type="radio"/> más 6 veces al día |
| espárragos            | <input checked="" type="radio"/> Nunca o menos 1 vez al mes<br><input type="radio"/> 1 a 3 veces mes<br><input type="radio"/> 1 vez semana<br><input type="radio"/> 2 a 4 veces semana<br><input type="radio"/> 5 a 6 veces semana<br><input type="radio"/> 1 vez al día<br><input type="radio"/> 2 a 3 veces al día<br><input type="radio"/> 5 a 6 veces al día<br><input type="radio"/> más 6 veces al día |
| maíz hervido          | <input checked="" type="radio"/> Nunca o menos 1 vez al mes<br><input type="radio"/> 1 a 3 veces mes<br><input type="radio"/> 1 vez semana<br><input type="radio"/> 2 a 4 veces semana<br><input type="radio"/> 5 a 6 veces semana<br><input type="radio"/> 1 vez al día<br><input type="radio"/> 2 a 3 veces al día<br><input type="radio"/> 5 a 6 veces al día<br><input type="radio"/> más 6 veces al día |
| legumbres             | <input type="radio"/> Nunca o menos 1 vez al mes<br><input type="radio"/> 1 a 3 veces mes<br><input type="radio"/> 1 vez semana<br><input checked="" type="radio"/> 2 a 4 veces semana<br><input type="radio"/> 5 a 6 veces semana<br><input type="radio"/> 1 vez al día<br><input type="radio"/> 2 a 3 veces al día<br><input type="radio"/> 5 a 6 veces al día<br><input type="radio"/> más 6 veces al día |
| naranjas o mandarinas | <input type="radio"/> Nunca o menos 1 vez al mes<br><input type="radio"/> 1 a 3 veces mes<br><input type="radio"/> 1 vez semana<br><input checked="" type="radio"/> 2 a 4 veces semana<br><input type="radio"/> 5 a 6 veces semana<br><input type="radio"/> 1 vez al día<br><input type="radio"/> 2 a 3 veces al día<br><input type="radio"/> 5 a 6 veces al día<br><input type="radio"/> más 6 veces al día |

|                       |                                                                                                                                                                                                                                                                                                                                                                                                              |
|-----------------------|--------------------------------------------------------------------------------------------------------------------------------------------------------------------------------------------------------------------------------------------------------------------------------------------------------------------------------------------------------------------------------------------------------------|
| zum natural fruta     | <input type="radio"/> Nunca o menos 1 vez al mes<br><input type="radio"/> 1 a 3 veces mes<br><input type="radio"/> 1 vez semana<br><input checked="" type="radio"/> 2 a 4 veces semana<br><input type="radio"/> 5 a 6 veces semana<br><input type="radio"/> 1 vez al día<br><input type="radio"/> 2 a 3 veces al día<br><input type="radio"/> 5 a 6 veces al día<br><input type="radio"/> más 6 veces al día |
| platano               | <input type="radio"/> Nunca o menos 1 vez al mes<br><input type="radio"/> 1 a 3 veces mes<br><input type="radio"/> 1 vez semana<br><input checked="" type="radio"/> 2 a 4 veces semana<br><input type="radio"/> 5 a 6 veces semana<br><input type="radio"/> 1 vez al día<br><input type="radio"/> 2 a 3 veces al día<br><input type="radio"/> 5 a 6 veces al día<br><input type="radio"/> más 6 veces al día |
| manzana o pera        | <input type="radio"/> Nunca o menos 1 vez al mes<br><input type="radio"/> 1 a 3 veces mes<br><input type="radio"/> 1 vez semana<br><input checked="" type="radio"/> 2 a 4 veces semana<br><input type="radio"/> 5 a 6 veces semana<br><input type="radio"/> 1 vez al día<br><input type="radio"/> 2 a 3 veces al día<br><input type="radio"/> 5 a 6 veces al día<br><input type="radio"/> más 6 veces al día |
| melocotón o nectarina | <input type="radio"/> Nunca o menos 1 vez al mes<br><input checked="" type="radio"/> 1 a 3 veces mes<br><input type="radio"/> 1 vez semana<br><input type="radio"/> 2 a 4 veces semana<br><input type="radio"/> 5 a 6 veces semana<br><input type="radio"/> 1 vez al día<br><input type="radio"/> 2 a 3 veces al día<br><input type="radio"/> 5 a 6 veces al día<br><input type="radio"/> más 6 veces al día |
| sandia o melon        | <input type="radio"/> Nunca o menos 1 vez al mes<br><input type="radio"/> 1 a 3 veces mes<br><input type="radio"/> 1 vez semana<br><input checked="" type="radio"/> 2 a 4 veces semana<br><input type="radio"/> 5 a 6 veces semana<br><input type="radio"/> 1 vez al día<br><input type="radio"/> 2 a 3 veces al día<br><input type="radio"/> 5 a 6 veces al día<br><input type="radio"/> más 6 veces al día |
| uva                   | <input type="radio"/> Nunca o menos 1 vez al mes<br><input type="radio"/> 1 a 3 veces mes<br><input checked="" type="radio"/> 1 vez semana<br><input type="radio"/> 2 a 4 veces semana<br><input type="radio"/> 5 a 6 veces semana<br><input type="radio"/> 1 vez al día<br><input type="radio"/> 2 a 3 veces al día<br><input type="radio"/> 5 a 6 veces al día<br><input type="radio"/> más 6 veces al día |

---

bruna o ciruela

- ☐ Nunca o menos 1 vez al mes  
☐ 1 a 3 veces mes  
☒ 1 vez semana  
☐ 2 a 4 veces semana  
☐ 5 a 6 veces semana  
☐ 1 vez al día  
☐ 2 a 3 veces al día  
☐ 5 a 6 veces al día  
☐ más 6 veces al día

---

kiwi

- ☐ Nunca o menos 1 vez al mes  
☐ 1 a 3 veces mes  
☒ 1 vez semana  
☐ 2 a 4 veces semana  
☐ 5 a 6 veces semana  
☐ 1 vez al día  
☐ 2 a 3 veces al día  
☐ 5 a 6 veces al día  
☐ más 6 veces al día

---

aceituna

- ☐ Nunca o menos 1 vez al mes  
☐ 1 a 3 veces mes  
☐ 1 vez semana  
☒ 2 a 4 veces semana  
☐ 5 a 6 veces semana  
☐ 1 vez al día  
☐ 2 a 3 veces al día  
☐ 5 a 6 veces al día  
☐ más 6 veces al día

---

frutos secos

- ☐ Nunca o menos 1 vez al mes  
☐ 1 a 3 veces mes  
☐ 1 vez semana  
☐ 2 a 4 veces semana  
☒ 5 a 6 veces semana  
☐ 1 vez al día  
☐ 2 a 3 veces al día  
☐ 5 a 6 veces al día  
☐ más 6 veces al día

---

pan blanco

- ☐ Nunca o menos 1 vez al mes  
☐ 1 a 3 veces mes  
☐ 1 vez semana  
☐ 2 a 4 veces semana  
☐ 5 a 6 veces semana  
☒ 1 vez al día  
☐ 2 a 3 veces al día  
☐ 5 a 6 veces al día  
☐ más 6 veces al día

---

pan integral

- ☐ Nunca o menos 1 vez al mes  
☐ 1 a 3 veces mes  
☐ 1 vez semana  
☒ 2 a 4 veces semana  
☐ 5 a 6 veces semana  
☐ 1 vez al día  
☐ 2 a 3 veces al día  
☐ 5 a 6 veces al día  
☐ más 6 veces al día

|                          |                                                                                                                                                                                                                                                                                                                                                                                                              |
|--------------------------|--------------------------------------------------------------------------------------------------------------------------------------------------------------------------------------------------------------------------------------------------------------------------------------------------------------------------------------------------------------------------------------------------------------|
| cereales desayuno        | <input checked="" type="radio"/> Nunca o menos 1 vez al mes<br><input type="radio"/> 1 a 3 veces mes<br><input type="radio"/> 1 vez semana<br><input type="radio"/> 2 a 4 veces semana<br><input type="radio"/> 5 a 6 veces semana<br><input type="radio"/> 1 vez al día<br><input type="radio"/> 2 a 3 veces al día<br><input type="radio"/> 5 a 6 veces al día<br><input type="radio"/> más 6 veces al día |
| patatas fritas           | <input type="radio"/> Nunca o menos 1 vez al mes<br><input type="radio"/> 1 a 3 veces mes<br><input type="radio"/> 1 vez semana<br><input type="radio"/> 2 a 4 veces semana<br><input type="radio"/> 5 a 6 veces semana<br><input type="radio"/> 1 vez al día<br><input type="radio"/> 2 a 3 veces al día<br><input type="radio"/> 5 a 6 veces al día<br><input type="radio"/> más 6 veces al día            |
| patatas cocidas o asadas | <input type="radio"/> Nunca o menos 1 vez al mes<br><input type="radio"/> 1 a 3 veces mes<br><input type="radio"/> 1 vez semana<br><input checked="" type="radio"/> 2 a 4 veces semana<br><input type="radio"/> 5 a 6 veces semana<br><input type="radio"/> 1 vez al día<br><input type="radio"/> 2 a 3 veces al día<br><input type="radio"/> 5 a 6 veces al día<br><input type="radio"/> más 6 veces al día |
| bolsa papas              | <input type="radio"/> Nunca o menos 1 vez al mes<br><input type="radio"/> 1 a 3 veces mes<br><input type="radio"/> 1 vez semana<br><input checked="" type="radio"/> 2 a 4 veces semana<br><input type="radio"/> 5 a 6 veces semana<br><input type="radio"/> 1 vez al día<br><input type="radio"/> 2 a 3 veces al día<br><input type="radio"/> 5 a 6 veces al día<br><input type="radio"/> más 6 veces al día |
| arroz cocinado           | <input type="radio"/> Nunca o menos 1 vez al mes<br><input type="radio"/> 1 a 3 veces mes<br><input checked="" type="radio"/> 1 vez semana<br><input type="radio"/> 2 a 4 veces semana<br><input type="radio"/> 5 a 6 veces semana<br><input type="radio"/> 1 vez al día<br><input type="radio"/> 2 a 3 veces al día<br><input type="radio"/> 5 a 6 veces al día<br><input type="radio"/> más 6 veces al día |
| pasta                    | <input type="radio"/> Nunca o menos 1 vez al mes<br><input type="radio"/> 1 a 3 veces mes<br><input checked="" type="radio"/> 1 vez semana<br><input type="radio"/> 2 a 4 veces semana<br><input type="radio"/> 5 a 6 veces semana<br><input type="radio"/> 1 vez al día<br><input type="radio"/> 2 a 3 veces al día<br><input type="radio"/> 5 a 6 veces al día<br><input type="radio"/> más 6 veces al día |

|                     |                                                                                                                                                                                                                                                                                                                                                                                                              |
|---------------------|--------------------------------------------------------------------------------------------------------------------------------------------------------------------------------------------------------------------------------------------------------------------------------------------------------------------------------------------------------------------------------------------------------------|
| pizza               | <input type="radio"/> Nunca o menos 1 vez al mes<br><input type="radio"/> 1 a 3 veces mes<br><input type="radio"/> 1 vez semana<br><input checked="" type="radio"/> 2 a 4 veces semana<br><input type="radio"/> 5 a 6 veces semana<br><input type="radio"/> 1 vez al día<br><input type="radio"/> 2 a 3 veces al día<br><input type="radio"/> 5 a 6 veces al día<br><input type="radio"/> más 6 veces al día |
| aceite oliva        | <input type="radio"/> Nunca o menos 1 vez al mes<br><input type="radio"/> 1 a 3 veces mes<br><input checked="" type="radio"/> 1 vez semana<br><input type="radio"/> 2 a 4 veces semana<br><input type="radio"/> 5 a 6 veces semana<br><input type="radio"/> 1 vez al día<br><input type="radio"/> 2 a 3 veces al día<br><input type="radio"/> 5 a 6 veces al día<br><input type="radio"/> más 6 veces al día |
| otros aceites       | <input type="radio"/> Nunca o menos 1 vez al mes<br><input type="radio"/> 1 a 3 veces mes<br><input type="radio"/> 1 vez semana<br><input type="radio"/> 2 a 4 veces semana<br><input type="radio"/> 5 a 6 veces semana<br><input type="radio"/> 1 vez al día<br><input type="radio"/> 2 a 3 veces al día<br><input checked="" type="radio"/> 5 a 6 veces al día<br><input type="radio"/> más 6 veces al día |
| margarina           | <input checked="" type="radio"/> Nunca o menos 1 vez al mes<br><input type="radio"/> 1 a 3 veces mes<br><input type="radio"/> 1 vez semana<br><input type="radio"/> 2 a 4 veces semana<br><input type="radio"/> 5 a 6 veces semana<br><input type="radio"/> 1 vez al día<br><input type="radio"/> 2 a 3 veces al día<br><input type="radio"/> 5 a 6 veces al día<br><input type="radio"/> más 6 veces al día |
| mantequilla         | <input type="radio"/> Nunca o menos 1 vez al mes<br><input type="radio"/> 1 a 3 veces mes<br><input type="radio"/> 1 vez semana<br><input type="radio"/> 2 a 4 veces semana<br><input type="radio"/> 5 a 6 veces semana<br><input checked="" type="radio"/> 1 vez al día<br><input type="radio"/> 2 a 3 veces al día<br><input type="radio"/> 5 a 6 veces al día<br><input type="radio"/> más 6 veces al día |
| galletas tipo maria | <input type="radio"/> Nunca o menos 1 vez al mes<br><input type="radio"/> 1 a 3 veces mes<br><input type="radio"/> 1 vez semana<br><input type="radio"/> 2 a 4 veces semana<br><input type="radio"/> 5 a 6 veces semana<br><input type="radio"/> 1 vez al día<br><input checked="" type="radio"/> 2 a 3 veces al día<br><input type="radio"/> 5 a 6 veces al día<br><input type="radio"/> más 6 veces al día |



|                           |                                                                                                                                                                                                                                                                                                                                                                                                              |
|---------------------------|--------------------------------------------------------------------------------------------------------------------------------------------------------------------------------------------------------------------------------------------------------------------------------------------------------------------------------------------------------------------------------------------------------------|
| galletas chocolate        | <input type="radio"/> Nunca o menos 1 vez al mes<br><input type="radio"/> 1 a 3 veces mes<br><input type="radio"/> 1 vez semana<br><input type="radio"/> 2 a 4 veces semana<br><input checked="" type="radio"/> 5 a 6 veces semana<br><input type="radio"/> 1 vez al día<br><input type="radio"/> 2 a 3 veces al día<br><input type="radio"/> 5 a 6 veces al día<br><input type="radio"/> más 6 veces al día |
| bollieria                 | <input type="radio"/> Nunca o menos 1 vez al mes<br><input type="radio"/> 1 a 3 veces mes<br><input type="radio"/> 1 vez semana<br><input checked="" type="radio"/> 2 a 4 veces semana<br><input type="radio"/> 5 a 6 veces semana<br><input type="radio"/> 1 vez al día<br><input type="radio"/> 2 a 3 veces al día<br><input type="radio"/> 5 a 6 veces al día<br><input type="radio"/> más 6 veces al día |
| chocolate o bombones      | <input type="radio"/> Nunca o menos 1 vez al mes<br><input type="radio"/> 1 a 3 veces mes<br><input type="radio"/> 1 vez semana<br><input checked="" type="radio"/> 2 a 4 veces semana<br><input type="radio"/> 5 a 6 veces semana<br><input type="radio"/> 1 vez al día<br><input type="radio"/> 2 a 3 veces al día<br><input type="radio"/> 5 a 6 veces al día<br><input type="radio"/> más 6 veces al día |
| chocolate polvo o colacao | <input type="radio"/> Nunca o menos 1 vez al mes<br><input type="radio"/> 1 a 3 veces mes<br><input checked="" type="radio"/> 1 vez semana<br><input type="radio"/> 2 a 4 veces semana<br><input type="radio"/> 5 a 6 veces semana<br><input type="radio"/> 1 vez al día<br><input type="radio"/> 2 a 3 veces al día<br><input type="radio"/> 5 a 6 veces al día<br><input type="radio"/> más 6 veces al día |
| vino tinto                | <input checked="" type="radio"/> Nunca o menos 1 vez al mes<br><input type="radio"/> 1 a 3 veces mes<br><input type="radio"/> 1 vez semana<br><input type="radio"/> 2 a 4 veces semana<br><input type="radio"/> 5 a 6 veces semana<br><input type="radio"/> 1 vez al día<br><input type="radio"/> 2 a 3 veces al día<br><input type="radio"/> 5 a 6 veces al día<br><input type="radio"/> más 6 veces al día |
| vino blanco               | <input checked="" type="radio"/> Nunca o menos 1 vez al mes<br><input type="radio"/> 1 a 3 veces mes<br><input type="radio"/> 1 vez semana<br><input type="radio"/> 2 a 4 veces semana<br><input type="radio"/> 5 a 6 veces semana<br><input type="radio"/> 1 vez al día<br><input type="radio"/> 2 a 3 veces al día<br><input type="radio"/> 5 a 6 veces al día<br><input type="radio"/> más 6 veces al día |

|                       |                                                                                                                                                                                                                                                                                                                                                                                                              |
|-----------------------|--------------------------------------------------------------------------------------------------------------------------------------------------------------------------------------------------------------------------------------------------------------------------------------------------------------------------------------------------------------------------------------------------------------|
| vino seco o vermut    | <input checked="" type="radio"/> Nunca o menos 1 vez al mes<br><input type="radio"/> 1 a 3 veces mes<br><input type="radio"/> 1 vez semana<br><input type="radio"/> 2 a 4 veces semana<br><input type="radio"/> 5 a 6 veces semana<br><input type="radio"/> 1 vez al día<br><input type="radio"/> 2 a 3 veces al día<br><input type="radio"/> 5 a 6 veces al día<br><input type="radio"/> más 6 veces al día |
| cerveza               | <input checked="" type="radio"/> Nunca o menos 1 vez al mes<br><input type="radio"/> 1 a 3 veces mes<br><input type="radio"/> 1 vez semana<br><input type="radio"/> 2 a 4 veces semana<br><input type="radio"/> 5 a 6 veces semana<br><input type="radio"/> 1 vez al día<br><input type="radio"/> 2 a 3 veces al día<br><input type="radio"/> 5 a 6 veces al día<br><input type="radio"/> más 6 veces al día |
| cerveza sin alcohol   | <input checked="" type="radio"/> Nunca o menos 1 vez al mes<br><input type="radio"/> 1 a 3 veces mes<br><input type="radio"/> 1 vez semana<br><input type="radio"/> 2 a 4 veces semana<br><input type="radio"/> 5 a 6 veces semana<br><input type="radio"/> 1 vez al día<br><input type="radio"/> 2 a 3 veces al día<br><input type="radio"/> 5 a 6 veces al día<br><input type="radio"/> más 6 veces al día |
| licores               | <input checked="" type="radio"/> Nunca o menos 1 vez al mes<br><input type="radio"/> 1 a 3 veces mes<br><input type="radio"/> 1 vez semana<br><input type="radio"/> 2 a 4 veces semana<br><input type="radio"/> 5 a 6 veces semana<br><input type="radio"/> 1 vez al día<br><input type="radio"/> 2 a 3 veces al día<br><input type="radio"/> 5 a 6 veces al día<br><input type="radio"/> más 6 veces al día |
| ginebra o ron o vodka | <input checked="" type="radio"/> Nunca o menos 1 vez al mes<br><input type="radio"/> 1 a 3 veces mes<br><input type="radio"/> 1 vez semana<br><input type="radio"/> 2 a 4 veces semana<br><input type="radio"/> 5 a 6 veces semana<br><input type="radio"/> 1 vez al día<br><input type="radio"/> 2 a 3 veces al día<br><input type="radio"/> 5 a 6 veces al día<br><input type="radio"/> más 6 veces al día |
| refresco normal       | <input type="radio"/> Nunca o menos 1 vez al mes<br><input type="radio"/> 1 a 3 veces mes<br><input checked="" type="radio"/> 1 vez semana<br><input type="radio"/> 2 a 4 veces semana<br><input type="radio"/> 5 a 6 veces semana<br><input type="radio"/> 1 vez al día<br><input type="radio"/> 2 a 3 veces al día<br><input type="radio"/> 5 a 6 veces al día<br><input type="radio"/> más 6 veces al día |

|                          |                                                                                                                                                                                                                                                                                                                                                                                                              |
|--------------------------|--------------------------------------------------------------------------------------------------------------------------------------------------------------------------------------------------------------------------------------------------------------------------------------------------------------------------------------------------------------------------------------------------------------|
| refresco sin azúcar      | <input type="radio"/> Nunca o menos 1 vez al mes<br><input type="radio"/> 1 a 3 veces mes<br><input checked="" type="radio"/> 1 vez semana<br><input type="radio"/> 2 a 4 veces semana<br><input type="radio"/> 5 a 6 veces semana<br><input type="radio"/> 1 vez al día<br><input type="radio"/> 2 a 3 veces al día<br><input type="radio"/> 5 a 6 veces al día<br><input type="radio"/> más 6 veces al día |
| Agua del grifo           | <input checked="" type="radio"/> Nunca o menos 1 vez al mes<br><input type="radio"/> 1 a 3 veces mes<br><input type="radio"/> 1 vez semana<br><input type="radio"/> 2 a 4 veces semana<br><input type="radio"/> 5 a 6 veces semana<br><input type="radio"/> 1 vez al día<br><input type="radio"/> 2 a 3 veces al día<br><input type="radio"/> 5 a 6 veces al día<br><input type="radio"/> más 6 veces al día |
| agua embotellada sin gas | <input type="radio"/> Nunca o menos 1 vez al mes<br><input type="radio"/> 1 a 3 veces mes<br><input type="radio"/> 1 vez semana<br><input type="radio"/> 2 a 4 veces semana<br><input type="radio"/> 5 a 6 veces semana<br><input type="radio"/> 1 vez al día<br><input type="radio"/> 2 a 3 veces al día<br><input type="radio"/> 5 a 6 veces al día<br><input checked="" type="radio"/> más 6 veces al día |
| agua embotellada con gas | <input checked="" type="radio"/> Nunca o menos 1 vez al mes<br><input type="radio"/> 1 a 3 veces mes<br><input type="radio"/> 1 vez semana<br><input type="radio"/> 2 a 4 veces semana<br><input type="radio"/> 5 a 6 veces semana<br><input type="radio"/> 1 vez al día<br><input type="radio"/> 2 a 3 veces al día<br><input type="radio"/> 5 a 6 veces al día<br><input type="radio"/> más 6 veces al día |
| zumو frutas embasado     | <input type="radio"/> Nunca o menos 1 vez al mes<br><input type="radio"/> 1 a 3 veces mes<br><input type="radio"/> 1 vez semana<br><input checked="" type="radio"/> 2 a 4 veces semana<br><input type="radio"/> 5 a 6 veces semana<br><input type="radio"/> 1 vez al día<br><input type="radio"/> 2 a 3 veces al día<br><input type="radio"/> 5 a 6 veces al día<br><input type="radio"/> más 6 veces al día |
| cafe                     | <input type="radio"/> Nunca o menos 1 vez al mes<br><input type="radio"/> 1 a 3 veces mes<br><input type="radio"/> 1 vez semana<br><input type="radio"/> 2 a 4 veces semana<br><input type="radio"/> 5 a 6 veces semana<br><input checked="" type="radio"/> 1 vez al día<br><input type="radio"/> 2 a 3 veces al día<br><input type="radio"/> 5 a 6 veces al día<br><input type="radio"/> más 6 veces al día |

---

|                   |                                                                                                                                                                                                                                                                                                                                                                                                              |
|-------------------|--------------------------------------------------------------------------------------------------------------------------------------------------------------------------------------------------------------------------------------------------------------------------------------------------------------------------------------------------------------------------------------------------------------|
| cafe descafeinado | <input type="radio"/> Nunca o menos 1 vez al mes<br><input checked="" type="radio"/> 1 a 3 veces mes<br><input type="radio"/> 1 vez semana<br><input type="radio"/> 2 a 4 veces semana<br><input type="radio"/> 5 a 6 veces semana<br><input type="radio"/> 1 vez al día<br><input type="radio"/> 2 a 3 veces al día<br><input type="radio"/> 5 a 6 veces al día<br><input type="radio"/> más 6 veces al día |
|-------------------|--------------------------------------------------------------------------------------------------------------------------------------------------------------------------------------------------------------------------------------------------------------------------------------------------------------------------------------------------------------------------------------------------------------|

---

|               |                                                                                                                                                                                                                                                                                                                                                                                                              |
|---------------|--------------------------------------------------------------------------------------------------------------------------------------------------------------------------------------------------------------------------------------------------------------------------------------------------------------------------------------------------------------------------------------------------------------|
| te o infusión | <input checked="" type="radio"/> Nunca o menos 1 vez al mes<br><input type="radio"/> 1 a 3 veces mes<br><input type="radio"/> 1 vez semana<br><input type="radio"/> 2 a 4 veces semana<br><input type="radio"/> 5 a 6 veces semana<br><input type="radio"/> 1 vez al día<br><input type="radio"/> 2 a 3 veces al día<br><input type="radio"/> 5 a 6 veces al día<br><input type="radio"/> más 6 veces al día |
|---------------|--------------------------------------------------------------------------------------------------------------------------------------------------------------------------------------------------------------------------------------------------------------------------------------------------------------------------------------------------------------------------------------------------------------|

---

|                      |                                                                                                                                                                                                                                                                                                                                                                                                              |
|----------------------|--------------------------------------------------------------------------------------------------------------------------------------------------------------------------------------------------------------------------------------------------------------------------------------------------------------------------------------------------------------------------------------------------------------|
| sopa o puré verduras | <input type="radio"/> Nunca o menos 1 vez al mes<br><input type="radio"/> 1 a 3 veces mes<br><input type="radio"/> 1 vez semana<br><input checked="" type="radio"/> 2 a 4 veces semana<br><input type="radio"/> 5 a 6 veces semana<br><input type="radio"/> 1 vez al día<br><input type="radio"/> 2 a 3 veces al día<br><input type="radio"/> 5 a 6 veces al día<br><input type="radio"/> más 6 veces al día |
|----------------------|--------------------------------------------------------------------------------------------------------------------------------------------------------------------------------------------------------------------------------------------------------------------------------------------------------------------------------------------------------------------------------------------------------------|

---

|                       |                                                                                                                                                                                                                                                                                                                                                                                                              |
|-----------------------|--------------------------------------------------------------------------------------------------------------------------------------------------------------------------------------------------------------------------------------------------------------------------------------------------------------------------------------------------------------------------------------------------------------|
| croquetas pollo jamón | <input type="radio"/> Nunca o menos 1 vez al mes<br><input type="radio"/> 1 a 3 veces mes<br><input type="radio"/> 1 vez semana<br><input checked="" type="radio"/> 2 a 4 veces semana<br><input type="radio"/> 5 a 6 veces semana<br><input type="radio"/> 1 vez al día<br><input type="radio"/> 2 a 3 veces al día<br><input type="radio"/> 5 a 6 veces al día<br><input type="radio"/> más 6 veces al día |
|-----------------------|--------------------------------------------------------------------------------------------------------------------------------------------------------------------------------------------------------------------------------------------------------------------------------------------------------------------------------------------------------------------------------------------------------------|

---

|                   |                                                                                                                                                                                                                                                                                                                                                                                                              |
|-------------------|--------------------------------------------------------------------------------------------------------------------------------------------------------------------------------------------------------------------------------------------------------------------------------------------------------------------------------------------------------------------------------------------------------------|
| croquetas pescado | <input type="radio"/> Nunca o menos 1 vez al mes<br><input type="radio"/> 1 a 3 veces mes<br><input checked="" type="radio"/> 1 vez semana<br><input type="radio"/> 2 a 4 veces semana<br><input type="radio"/> 5 a 6 veces semana<br><input type="radio"/> 1 vez al día<br><input type="radio"/> 2 a 3 veces al día<br><input type="radio"/> 5 a 6 veces al día<br><input type="radio"/> más 6 veces al día |
|-------------------|--------------------------------------------------------------------------------------------------------------------------------------------------------------------------------------------------------------------------------------------------------------------------------------------------------------------------------------------------------------------------------------------------------------|

---

|          |                                                                                                                                                                                                                                                                                                                                                                                                              |
|----------|--------------------------------------------------------------------------------------------------------------------------------------------------------------------------------------------------------------------------------------------------------------------------------------------------------------------------------------------------------------------------------------------------------------|
| mayonesa | <input type="radio"/> Nunca o menos 1 vez al mes<br><input type="radio"/> 1 a 3 veces mes<br><input checked="" type="radio"/> 1 vez semana<br><input type="radio"/> 2 a 4 veces semana<br><input type="radio"/> 5 a 6 veces semana<br><input type="radio"/> 1 vez al día<br><input type="radio"/> 2 a 3 veces al día<br><input type="radio"/> 5 a 6 veces al día<br><input type="radio"/> más 6 veces al día |
|----------|--------------------------------------------------------------------------------------------------------------------------------------------------------------------------------------------------------------------------------------------------------------------------------------------------------------------------------------------------------------------------------------------------------------|

---

|                  |                                                                                                                                                                                                                                                                                                                                                                                                              |
|------------------|--------------------------------------------------------------------------------------------------------------------------------------------------------------------------------------------------------------------------------------------------------------------------------------------------------------------------------------------------------------------------------------------------------------|
| salsa tomate     | <input type="radio"/> Nunca o menos 1 vez al mes<br><input type="radio"/> 1 a 3 veces mes<br><input type="radio"/> 1 vez semana<br><input checked="" type="radio"/> 2 a 4 veces semana<br><input type="radio"/> 5 a 6 veces semana<br><input type="radio"/> 1 vez al día<br><input type="radio"/> 2 a 3 veces al día<br><input type="radio"/> 5 a 6 veces al día<br><input type="radio"/> más 6 veces al día |
| ketchup          | <input checked="" type="radio"/> Nunca o menos 1 vez al mes<br><input type="radio"/> 1 a 3 veces mes<br><input type="radio"/> 1 vez semana<br><input type="radio"/> 2 a 4 veces semana<br><input type="radio"/> 5 a 6 veces semana<br><input type="radio"/> 1 vez al día<br><input type="radio"/> 2 a 3 veces al día<br><input type="radio"/> 5 a 6 veces al día<br><input type="radio"/> más 6 veces al día |
| sal              | <input type="radio"/> Nunca o menos 1 vez al mes<br><input type="radio"/> 1 a 3 veces mes<br><input type="radio"/> 1 vez semana<br><input type="radio"/> 2 a 4 veces semana<br><input type="radio"/> 5 a 6 veces semana<br><input type="radio"/> 1 vez al día<br><input checked="" type="radio"/> 2 a 3 veces al día<br><input type="radio"/> 5 a 6 veces al día<br><input type="radio"/> más 6 veces al día |
| ajo              | <input type="radio"/> Nunca o menos 1 vez al mes<br><input type="radio"/> 1 a 3 veces mes<br><input type="radio"/> 1 vez semana<br><input type="radio"/> 2 a 4 veces semana<br><input checked="" type="radio"/> 5 a 6 veces semana<br><input type="radio"/> 1 vez al día<br><input type="radio"/> 2 a 3 veces al día<br><input type="radio"/> 5 a 6 veces al día<br><input type="radio"/> más 6 veces al día |
| mermelada o miel | <input type="radio"/> Nunca o menos 1 vez al mes<br><input type="radio"/> 1 a 3 veces mes<br><input type="radio"/> 1 vez semana<br><input type="radio"/> 2 a 4 veces semana<br><input type="radio"/> 5 a 6 veces semana<br><input checked="" type="radio"/> 1 vez al día<br><input type="radio"/> 2 a 3 veces al día<br><input type="radio"/> 5 a 6 veces al día<br><input type="radio"/> más 6 veces al día |
| azúcar           | <input type="radio"/> Nunca o menos 1 vez al mes<br><input type="radio"/> 1 a 3 veces mes<br><input type="radio"/> 1 vez semana<br><input type="radio"/> 2 a 4 veces semana<br><input type="radio"/> 5 a 6 veces semana<br><input checked="" type="radio"/> 1 vez al día<br><input type="radio"/> 2 a 3 veces al día<br><input type="radio"/> 5 a 6 veces al día<br><input type="radio"/> más 6 veces al día |

|                                       |                                                                                                                                                                                                                                                                                                                                                                                                                                                                                                                               |
|---------------------------------------|-------------------------------------------------------------------------------------------------------------------------------------------------------------------------------------------------------------------------------------------------------------------------------------------------------------------------------------------------------------------------------------------------------------------------------------------------------------------------------------------------------------------------------|
| Otro alimento                         | [*DATA REMOVED*]                                                                                                                                                                                                                                                                                                                                                                                                                                                                                                              |
| suplementos vitamínicos               | <input checked="" type="radio"/> si<br><input type="radio"/> no                                                                                                                                                                                                                                                                                                                                                                                                                                                               |
| suplementos vitamínicos               |                                                                                                                                                                                                                                                                                                                                                                                                                                                                                                                               |
| dieta previa                          | <input type="radio"/> si<br><input checked="" type="radio"/> no                                                                                                                                                                                                                                                                                                                                                                                                                                                               |
| motivo dieta                          | <input checked="" type="radio"/> no dieta<br><input type="radio"/> control peso<br><input type="radio"/> control colesterol<br><input type="radio"/> control diabetes<br><input type="radio"/> problemas estómago<br><input type="radio"/> problemas vesícula o hepáticos<br><input type="radio"/> HTA o cardiopatía<br><input type="radio"/> problemas renales<br><input type="radio"/> alergia alimentaria<br><input type="radio"/> ácido úrico elevado<br><input type="radio"/> vegetariana<br><input type="radio"/> otros |
| cambio alimentos año previo gestación | <input checked="" type="radio"/> si<br><input type="radio"/> no                                                                                                                                                                                                                                                                                                                                                                                                                                                               |
| cambio lácteos                        | <input type="radio"/> eliminado<br><input type="radio"/> disminuido<br><input type="radio"/> igual<br><input checked="" type="radio"/> aumentado<br><input type="radio"/> no sabe                                                                                                                                                                                                                                                                                                                                             |
| cambio huevos                         | <input type="radio"/> eliminado<br><input type="radio"/> disminuido<br><input checked="" type="radio"/> igual<br><input type="radio"/> aumentado<br><input type="radio"/> no sabe                                                                                                                                                                                                                                                                                                                                             |
| cambio carne                          | <input type="radio"/> eliminado<br><input type="radio"/> disminuido<br><input checked="" type="radio"/> igual<br><input type="radio"/> aumentado<br><input type="radio"/> no sabe                                                                                                                                                                                                                                                                                                                                             |
| cambio pescado                        | <input type="radio"/> eliminado<br><input checked="" type="radio"/> disminuido<br><input type="radio"/> igual<br><input type="radio"/> aumentado<br><input type="radio"/> no sabe                                                                                                                                                                                                                                                                                                                                             |
| cambio verduras                       | <input type="radio"/> eliminado<br><input type="radio"/> disminuido<br><input type="radio"/> igual<br><input checked="" type="radio"/> aumentado<br><input type="radio"/> no sabe                                                                                                                                                                                                                                                                                                                                             |

|                            |                                                                                                                                                                                                                        |
|----------------------------|------------------------------------------------------------------------------------------------------------------------------------------------------------------------------------------------------------------------|
| cambio legumbres           | <input type="radio"/> eliminado<br><input type="radio"/> disminuido<br><input type="radio"/> igual<br><input checked="" type="radio"/> aumentado<br><input type="radio"/> no sabe                                      |
| cambio fruta               | <input type="radio"/> eliminado<br><input type="radio"/> disminuido<br><input type="radio"/> igual<br><input checked="" type="radio"/> aumentado<br><input type="radio"/> no sabe                                      |
| cambio pan                 | <input type="radio"/> eliminado<br><input type="radio"/> disminuido<br><input type="radio"/> igual<br><input checked="" type="radio"/> aumentado<br><input type="radio"/> no sabe                                      |
| cambio aceite oliva        | <input type="radio"/> eliminado<br><input type="radio"/> disminuido<br><input checked="" type="radio"/> igual<br><input type="radio"/> aumentado<br><input type="radio"/> no sabe                                      |
| cambio mante o margarina   | <input type="radio"/> eliminado<br><input type="radio"/> disminuido<br><input type="radio"/> igual<br><input checked="" type="radio"/> aumentado<br><input type="radio"/> no sabe                                      |
| cambio azúcar y dulces     | <input type="radio"/> eliminado<br><input type="radio"/> disminuido<br><input type="radio"/> igual<br><input checked="" type="radio"/> aumentado<br><input type="radio"/> no sabe                                      |
| cambio bebidas alcohólicas | <input checked="" type="radio"/> eliminado<br><input type="radio"/> disminuido<br><input type="radio"/> igual<br><input type="radio"/> aumentado<br><input type="radio"/> no sabe                                      |
| frecuencia comidas fritas  | <input type="radio"/> a diario<br><input type="radio"/> 5 a 6 veces semana<br><input type="radio"/> 2 a 4 veces semana<br><input checked="" type="radio"/> 1 vez semana<br><input type="radio"/> menos de 1 vez semana |
| carne                      | <input type="radio"/> no como<br><input type="radio"/> cruda<br><input type="radio"/> poco hecha<br><input type="radio"/> hecha<br><input checked="" type="radio"/> muy hecha                                          |
| grasa visible carne        | <input type="radio"/> quita toda<br><input checked="" type="radio"/> quita mayoría<br><input type="radio"/> quita un poco<br><input type="radio"/> no quita nada                                                       |

|                                |                                                                                                                                                                                                                                               |
|--------------------------------|-----------------------------------------------------------------------------------------------------------------------------------------------------------------------------------------------------------------------------------------------|
| cocina carne                   | <input checked="" type="radio"/> a la plancha<br><input type="radio"/> a la parrilla<br><input type="radio"/> asada<br><input type="radio"/> frita<br><input type="radio"/> guisada                                                           |
| tostado quemado carne          | <input type="radio"/> nunca<br><input type="radio"/> 1 vez mes<br><input type="radio"/> 2 a 3 veces mes<br><input type="radio"/> 1 vez semana<br><input checked="" type="radio"/> 2 a 3 semanas                                               |
| tostado quemado pescado        | <input checked="" type="radio"/> nunca<br><input type="radio"/> 1 vez mes<br><input type="radio"/> 2 a 3 veces mes<br><input type="radio"/> 1 vez semana<br><input type="radio"/> 2 a 3 semanas                                               |
| socarrat paella                | <input checked="" type="radio"/> nunca<br><input type="radio"/> 1 vez mes<br><input type="radio"/> 2 a 3 veces mes<br><input type="radio"/> 1 vez semana<br><input type="radio"/> 2 a 3 semanas                                               |
| grasa o aceite cocinar         | <input type="radio"/> mantequilla<br><input type="radio"/> margarina<br><input type="radio"/> aceite oliva<br><input type="radio"/> aceite oliva virgen extra<br><input type="radio"/> aceite vegetal<br><input type="radio"/> mezcla aceites |
| grasa aceite aliñar            | <input type="radio"/> mantequilla<br><input type="radio"/> margarina<br><input type="radio"/> aceite oliva<br><input type="radio"/> aceite oliva virgen extra<br><input type="radio"/> aceite vegetal<br><input type="radio"/> mezcla aceites |
| grasa aceite freir             | <input type="radio"/> mantequilla<br><input type="radio"/> margarina<br><input type="radio"/> aceite oliva<br><input type="radio"/> aceite oliva virgen extra<br><input type="radio"/> aceite vegetal<br><input type="radio"/> mezcla aceites |
| Ejercicio cuestionario         | <input checked="" type="radio"/> si<br><input type="radio"/> no                                                                                                                                                                               |
| horas de sueño incluido siesta | [*DATA REMOVED*]                                                                                                                                                                                                                              |
| minutos siesta                 | [*DATA REMOVED*]                                                                                                                                                                                                                              |
| horas televisión semana        | [*DATA REMOVED*]                                                                                                                                                                                                                              |



|                                        |                                                                                                                                                                                                                                                                                                                                                                           |
|----------------------------------------|---------------------------------------------------------------------------------------------------------------------------------------------------------------------------------------------------------------------------------------------------------------------------------------------------------------------------------------------------------------------------|
| actividad trabajo                      | <input type="radio"/> casi siempre sentado<br><input checked="" type="radio"/> sentado 50 por cien<br><input type="radio"/> casi siempre de pie, quieto<br><input type="radio"/> casi siempre levantado caminando y llevando pocas cosas<br><input type="radio"/> casi siempre levantado, caminando y llevado muchas cosas<br><input type="radio"/> trabajo manual pesado |
| tiempo caminar o bici al día           | <input type="radio"/> casi nunca<br><input type="radio"/> menos 20min día<br><input type="radio"/> 20 a 40 min día<br><input checked="" type="radio"/> 40 a 60 min día<br><input type="radio"/> 1h o 1h y media día<br><input type="radio"/> más de 1h y media al día                                                                                                     |
| tiempo tareas casa al día              | <input type="radio"/> menos de 1h día<br><input type="radio"/> 1 a 2h día<br><input checked="" type="radio"/> 3 a 4h día<br><input type="radio"/> 5 a 6h día<br><input type="radio"/> 7 a 8h día<br><input type="radio"/> más de 8h día                                                                                                                                   |
| tiempo libre televisión ordenador leer | <input type="radio"/> menos 1h día<br><input type="radio"/> 1h día<br><input type="radio"/> 2h día<br><input type="radio"/> 3h día<br><input checked="" type="radio"/> 4h día<br><input type="radio"/> 5 a 6h día<br><input type="radio"/> mas 6h día                                                                                                                     |
| tiempo libre ejercicio o deporte       | <input type="radio"/> menos 1h semana<br><input type="radio"/> 1h semana<br><input type="radio"/> 2h semana<br><input type="radio"/> 3h semana<br><input type="radio"/> 4 a 5h semana<br><input checked="" type="radio"/> mas 5h semana                                                                                                                                   |
| como se considera                      | <input type="radio"/> sedentaria<br><input type="radio"/> poco activa<br><input checked="" type="radio"/> moderadamente activa<br><input type="radio"/> bastante activa<br><input type="radio"/> muy activa<br><input type="radio"/> no sabe                                                                                                                              |
| FUR                                    | [*DATA REMOVED*]                                                                                                                                                                                                                                                                                                                                                          |
| Semanas gestación 2T                   | _____                                                                                                                                                                                                                                                                                                                                                                     |
| Días gestación 2T                      | _____                                                                                                                                                                                                                                                                                                                                                                     |
| DBP 2T                                 | _____                                                                                                                                                                                                                                                                                                                                                                     |
| CC 2T                                  | _____                                                                                                                                                                                                                                                                                                                                                                     |

|                                    |                                                                                                                                                                                                 |
|------------------------------------|-------------------------------------------------------------------------------------------------------------------------------------------------------------------------------------------------|
| AC 2T                              | <hr/>                                                                                                                                                                                           |
| LF 2T                              | <hr/>                                                                                                                                                                                           |
| PFE 2T (Hadlock)                   | <hr/>                                                                                                                                                                                           |
| Semanas gestación 3T               | <hr/>                                                                                                                                                                                           |
| días 3T                            | <hr/>                                                                                                                                                                                           |
| DBP 3T                             | <hr/>                                                                                                                                                                                           |
| CC 3T                              | <hr/>                                                                                                                                                                                           |
| AC 3T                              | <hr/>                                                                                                                                                                                           |
| LF 3T                              | <hr/>                                                                                                                                                                                           |
| PFE 3T (Hadlock)                   | <hr/>                                                                                                                                                                                           |
| Semanas de gestación final         | [*DATA REMOVED*]                                                                                                                                                                                |
| días gestación final               | [*DATA REMOVED*]                                                                                                                                                                                |
| Localización placenta              | <input checked="" type="radio"/> anterior<br><input type="radio"/> lateral derecha<br><input type="radio"/> lateral izquierda<br><input type="radio"/> posterior<br><input type="radio"/> fondo |
| Presentación longitudinal cefálica | <input type="radio"/> no<br><input checked="" type="radio"/> si                                                                                                                                 |
| Dorso                              | <input type="radio"/> izquierda anterior<br><input type="radio"/> izquierda posterior<br><input type="radio"/> derecha anterior<br><input checked="" type="radio"/> derecha posterior           |
| diámetro biparietal                | [*DATA REMOVED*]                                                                                                                                                                                |
| Circunferencia craneal             | [*DATA REMOVED*]                                                                                                                                                                                |
| Circunferencia abdominal           | [*DATA REMOVED*]                                                                                                                                                                                |

|                                                   |                                                                                                                                               |
|---------------------------------------------------|-----------------------------------------------------------------------------------------------------------------------------------------------|
| Longitud de femur                                 | [*DATA REMOVED*]                                                                                                                              |
| tejido celular subcutáneo a nivel del muslo en mm | [*DATA REMOVED*]                                                                                                                              |
| tejido celular subcutáneo en abdomen en mm        | [*DATA REMOVED*]                                                                                                                              |
| Volumen del muslo en cm3                          | [*DATA REMOVED*]                                                                                                                              |
| Peso fetal estimado según fórmula de Hadlock      | [*DATA REMOVED*]                                                                                                                              |
| Percentil                                         | [*DATA REMOVED*]                                                                                                                              |
| Peso fetal estimado según fórmula de Scioscia     | _____                                                                                                                                         |
| Peso fetal estimado según fórmula de LEE          | _____                                                                                                                                         |
| Tipo de parto                                     | <input type="radio"/> eutocico<br><input checked="" type="radio"/> instrumentado/ventosa<br><input type="radio"/> cesarea                     |
| fecha de nacimiento                               | [*DATA REMOVED*]                                                                                                                              |
| Días entre exploración y nacimiento               | [*DATA REMOVED*]                                                                                                                              |
| Peso RN en g                                      | [*DATA REMOVED*]                                                                                                                              |
| sexo                                              | <input checked="" type="radio"/> mujer<br><input type="radio"/> hombre                                                                        |
| Apgar 1 minuto                                    | [*DATA REMOVED*]                                                                                                                              |
| Apgar 5 minutos                                   | [*DATA REMOVED*]                                                                                                                              |
| Apgar 10 minutos                                  | _____                                                                                                                                         |
| antecedente Covid durante gestación               | <input checked="" type="radio"/> Yes<br><input type="radio"/> No                                                                              |
| Nivel de estudios                                 | <input type="radio"/> ninguno<br><input type="radio"/> primarios<br><input type="radio"/> secundarios<br><input type="radio"/> universitarios |

# Base\_datos\_estimacion\_peso\_fetal

|                                       |                                                                                                                                                                                                                                                                                      |
|---------------------------------------|--------------------------------------------------------------------------------------------------------------------------------------------------------------------------------------------------------------------------------------------------------------------------------------|
| Número de identificación participante | 72                                                                                                                                                                                                                                                                                   |
| CODIGO PARTICIPANTE                   |                                                                                                                                                                                                                                                                                      |
| Edad                                  | [*DATA REMOVED*]                                                                                                                                                                                                                                                                     |
| Gestaciones                           | <input type="radio"/> 1<br><input checked="" type="radio"/> 2<br><input type="radio"/> 3<br><input type="radio"/> mas de 3                                                                                                                                                           |
| partos                                | <input checked="" type="radio"/> 0<br><input type="radio"/> 1<br><input type="radio"/> 2<br><input type="radio"/> 3<br><input type="radio"/> mas de 3                                                                                                                                |
| cesáreas                              | <input checked="" type="radio"/> 0<br><input type="radio"/> 1<br><input type="radio"/> 2<br><input type="radio"/> 3<br><input type="radio"/> mas de 3                                                                                                                                |
| Abortos                               | <input type="radio"/> 0<br><input checked="" type="radio"/> 1<br><input type="radio"/> 2<br><input type="radio"/> 3<br><input type="radio"/> mas de 3                                                                                                                                |
| Tipo de gestacion                     | <input checked="" type="radio"/> espontanea<br><input type="radio"/> IAC inseminación artificial conyuge<br><input type="radio"/> IAD inseminación artificial donante<br><input type="radio"/> FIV Fecundación in Vitro<br><input type="radio"/> Ovodon FIV con donación de ovocitos |
| peso previo a embarazo                | [*DATA REMOVED*]                                                                                                                                                                                                                                                                     |
| Ganancia ponderal embarazo            | [*DATA REMOVED*]                                                                                                                                                                                                                                                                     |
| Talla madre                           | [*DATA REMOVED*]                                                                                                                                                                                                                                                                     |
| IMC previo embarazo                   | 21.773842357381334                                                                                                                                                                                                                                                                   |
| Patología obstétrica                  | <input checked="" type="radio"/> no<br><input type="radio"/> si                                                                                                                                                                                                                      |
| Diabetes pregestacional               | <input checked="" type="radio"/> no<br><input type="radio"/> si                                                                                                                                                                                                                      |
| Diabetes gestacional                  | <input checked="" type="radio"/> no<br><input type="radio"/> si                                                                                                                                                                                                                      |

|                                            |                                                                                                                                                                                      |
|--------------------------------------------|--------------------------------------------------------------------------------------------------------------------------------------------------------------------------------------|
| Diabetes gestacional con insulina          | <input checked="" type="radio"/> no<br><input type="radio"/> si                                                                                                                      |
| Diabetes gestacional con dieta y ejercicio | <input checked="" type="radio"/> no<br><input type="radio"/> si                                                                                                                      |
| Percentil fetos previos                    | <input checked="" type="radio"/> Nada<br><input type="radio"/> percentil menor de 10<br><input type="radio"/> percentil entre 10 y 90<br><input type="radio"/> percentil mayor de 90 |
| Exfumadora                                 | <input checked="" type="radio"/> Nada<br><input type="radio"/> menos de 5 años<br><input type="radio"/> 5 a 10 años<br><input type="radio"/> mayor o igual a 10 años                 |
| Hábito tabáquico                           | <input checked="" type="radio"/> no<br><input type="radio"/> si                                                                                                                      |
| fumadora                                   | [*DATA REMOVED*]                                                                                                                                                                     |
| Consumo otros tóxicos                      | <input checked="" type="radio"/> no<br><input type="radio"/> si                                                                                                                      |
| Hb 1T                                      | [*DATA REMOVED*]                                                                                                                                                                     |
| Htc 1T                                     | [*DATA REMOVED*]                                                                                                                                                                     |
| Hb 2T                                      | [*DATA REMOVED*]                                                                                                                                                                     |
| HTC 2T                                     | [*DATA REMOVED*]                                                                                                                                                                     |
| Hb 3T                                      | [*DATA REMOVED*]                                                                                                                                                                     |
| HTC 3T                                     | [*DATA REMOVED*]                                                                                                                                                                     |
| Suplemento FE oral                         | <input checked="" type="radio"/> si<br><input type="radio"/> no                                                                                                                      |
| Suplemento fe iv                           | <input type="radio"/> si<br><input checked="" type="radio"/> no                                                                                                                      |
| Transfusión                                | <input checked="" type="radio"/> no<br><input type="radio"/> si                                                                                                                      |
| Solicitada Vit D                           | <input checked="" type="radio"/> no<br><input type="radio"/> si                                                                                                                      |
| Deficit vit D                              | <input type="radio"/> no<br><input type="radio"/> si                                                                                                                                 |
| Suplemento vit D                           | <input type="radio"/> si<br><input type="radio"/> no                                                                                                                                 |

|                       |                                                                                                                                                                                                                                                                                                                                                                                                              |
|-----------------------|--------------------------------------------------------------------------------------------------------------------------------------------------------------------------------------------------------------------------------------------------------------------------------------------------------------------------------------------------------------------------------------------------------------|
| Dieta, cuestionario   | <input checked="" type="radio"/> si<br><input type="radio"/> no                                                                                                                                                                                                                                                                                                                                              |
| Leche entera          | <input type="radio"/> Nunca o menos 1 vez al mes<br><input checked="" type="radio"/> 1 a 3 veces mes<br><input type="radio"/> 1 vez semana<br><input type="radio"/> 2 a 4 veces semana<br><input type="radio"/> 5 a 6 veces semana<br><input type="radio"/> 1 vez al día<br><input type="radio"/> 2 a 3 veces al día<br><input type="radio"/> 5 a 6 veces al día<br><input type="radio"/> más 6 veces al día |
| Leche semidesnatada   | <input type="radio"/> Nunca o menos 1 vez al mes<br><input type="radio"/> 1 a 3 veces mes<br><input type="radio"/> 1 vez semana<br><input type="radio"/> 2 a 4 veces semana<br><input checked="" type="radio"/> 5 a 6 veces semana<br><input type="radio"/> 1 vez al día<br><input type="radio"/> 2 a 3 veces al día<br><input type="radio"/> 5 a 6 veces al día<br><input type="radio"/> mas 6 veces al día |
| Leche desnatada       | <input checked="" type="radio"/> Nunca o menos 1 vez al mes<br><input type="radio"/> 1 a 3 veces mes<br><input type="radio"/> 1 vez semana<br><input type="radio"/> 2 a 4 veces semana<br><input type="radio"/> 5 a 6 veces semana<br><input type="radio"/> 1 vez al día<br><input type="radio"/> 2 a 3 veces al día<br><input type="radio"/> 5 a 6 veces al día<br><input type="radio"/> más 6 veces al día |
| Leche condensada      | <input checked="" type="radio"/> Nunca o menos 1 vez al mes<br><input type="radio"/> 1 a 3 veces mes<br><input type="radio"/> 1 vez semana<br><input type="radio"/> 2 a 4 veces semana<br><input type="radio"/> 5 a 6 veces semana<br><input type="radio"/> 1 vez al día<br><input type="radio"/> 2 a 3 veces al día<br><input type="radio"/> 5 a 6 veces al día<br><input type="radio"/> más 6 veces al día |
| nata o crema de leche | <input checked="" type="radio"/> Nunca o menos 1 vez al mes<br><input type="radio"/> 1 a 3 veces mes<br><input type="radio"/> 1 vez semana<br><input type="radio"/> 2 a 4 veces semana<br><input type="radio"/> 5 a 6 veces semana<br><input type="radio"/> 1 vez al día<br><input type="radio"/> 2 a 3 veces al día<br><input type="radio"/> 5 a 6 veces al día<br><input type="radio"/> más 6 veces al día |

---

Yogurt Entero

- ☐ Nunca o menos 1 vez al mes  
☐ 1 a 3 veces mes  
☐ 1 vez semana  
☒ 2 a 4 veces semana  
☐ 5 a 6 veces semana  
☐ 1 vez al día  
☐ 2 a 3 veces al día  
☐ 5 a 6 veces al día  
☐ más 6 veces al día

---

Yogurt desnatado

- ☐ Nunca o menos 1 vez al mes  
☐ 1 a 3 veces mes  
☒ 1 vez semana  
☐ 2 a 4 veces semana  
☐ 5 a 6 veces semana  
☐ 1 vez al día  
☐ 2 a 3 veces al día  
☐ 5 a 6 veces al día  
☐ más 6 veces al día

---

100g requesón o queso blando o queso fresco

- ☐ Nunca o menos 1 vez al mes  
☒ 1 a 3 veces mes  
☐ 1 vez semana  
☐ 2 a 4 veces semana  
☐ 5 a 6 veces semana  
☐ 1 vez al día  
☐ 2 a 3 veces al día  
☐ 5 a 6 veces al día  
☐ más 6 veces al día

---

queso curado o semicurado o cremoso

- ☐ Nunca o menos 1 vez al mes  
☐ 1 a 3 veces mes  
☐ 1 vez semana  
☒ 2 a 4 veces semana  
☐ 5 a 6 veces semana  
☐ 1 vez al día  
☐ 2 a 3 veces al día  
☐ 5 a 6 veces al día  
☐ más 6 veces al día

---

natillas flan pudding

- ☒ Nunca o menos 1 vez al mes  
☐ 1 a 3 veces mes  
☐ 1 vez semana  
☐ 2 a 4 veces semana  
☐ 5 a 6 veces semana  
☐ 1 vez al día  
☐ 2 a 3 veces al día  
☐ 5 a 6 veces al día  
☐ más 6 veces al día

---

Helado

- ☒ Nunca o menos 1 vez al mes  
☐ 1 a 3 veces mes  
☐ 1 vez semana  
☐ 2 a 4 veces semana  
☐ 5 a 6 veces semana  
☐ 1 vez al día  
☐ 2 a 3 veces al día  
☐ 5 a 6 veces al día  
☐ más 6 veces al día

|                                      |                                                                                                                                                                                                                                                                                                                                                                                                              |
|--------------------------------------|--------------------------------------------------------------------------------------------------------------------------------------------------------------------------------------------------------------------------------------------------------------------------------------------------------------------------------------------------------------------------------------------------------------|
| huevo                                | <input type="radio"/> Nunca o menos 1 vez al mes<br><input type="radio"/> 1 a 3 veces mes<br><input type="radio"/> 1 vez semana<br><input checked="" type="radio"/> 2 a 4 veces semana<br><input type="radio"/> 5 a 6 veces semana<br><input type="radio"/> 1 vez al día<br><input type="radio"/> 2 a 3 veces al día<br><input type="radio"/> 5 a 6 veces al día<br><input type="radio"/> más 6 veces al día |
| Pollo con piel                       | <input checked="" type="radio"/> Nunca o menos 1 vez al mes<br><input type="radio"/> 1 a 3 veces mes<br><input type="radio"/> 1 vez semana<br><input type="radio"/> 2 a 4 veces semana<br><input type="radio"/> 5 a 6 veces semana<br><input type="radio"/> 1 vez al día<br><input type="radio"/> 2 a 3 veces al día<br><input type="radio"/> 5 a 6 veces al día<br><input type="radio"/> más 6 veces al día |
| pollo sin piel                       | <input type="radio"/> Nunca o menos 1 vez al mes<br><input type="radio"/> 1 a 3 veces mes<br><input type="radio"/> 1 vez semana<br><input checked="" type="radio"/> 2 a 4 veces semana<br><input type="radio"/> 5 a 6 veces semana<br><input type="radio"/> 1 vez al día<br><input type="radio"/> 2 a 3 veces al día<br><input type="radio"/> 5 a 6 veces al día<br><input type="radio"/> más 6 veces al día |
| Ternera o cerdo o cordero            | <input type="radio"/> Nunca o menos 1 vez al mes<br><input type="radio"/> 1 a 3 veces mes<br><input type="radio"/> 1 vez semana<br><input checked="" type="radio"/> 2 a 4 veces semana<br><input type="radio"/> 5 a 6 veces semana<br><input type="radio"/> 1 vez al día<br><input type="radio"/> 2 a 3 veces al día<br><input type="radio"/> 5 a 6 veces al día<br><input type="radio"/> más 6 veces al día |
| carne caza: Conejo o codorniz o pato | <input type="radio"/> Nunca o menos 1 vez al mes<br><input checked="" type="radio"/> 1 a 3 veces mes<br><input type="radio"/> 1 vez semana<br><input type="radio"/> 2 a 4 veces semana<br><input type="radio"/> 5 a 6 veces semana<br><input type="radio"/> 1 vez al día<br><input type="radio"/> 2 a 3 veces al día<br><input type="radio"/> 5 a 6 veces al día<br><input type="radio"/> más 6 veces al día |
| Hígado de ternera o cerdo o pollo    | <input checked="" type="radio"/> Nunca o menos 1 vez al mes<br><input type="radio"/> 1 a 3 veces mes<br><input type="radio"/> 1 vez semana<br><input type="radio"/> 2 a 4 veces semana<br><input type="radio"/> 5 a 6 veces semana<br><input type="radio"/> 1 vez al día<br><input type="radio"/> 2 a 3 veces al día<br><input type="radio"/> 5 a 6 veces al día<br><input type="radio"/> más 6 veces al día |



|                     |                                                                                                                                                                                                                                                                                                                                                                                                              |
|---------------------|--------------------------------------------------------------------------------------------------------------------------------------------------------------------------------------------------------------------------------------------------------------------------------------------------------------------------------------------------------------------------------------------------------------|
| Vísceras            | <input checked="" type="radio"/> Nunca o menos 1 vez al mes<br><input type="radio"/> 1 a 3 veces mes<br><input type="radio"/> 1 vez semana<br><input type="radio"/> 2 a 4 veces semana<br><input type="radio"/> 5 a 6 veces semana<br><input type="radio"/> 1 vez al día<br><input type="radio"/> 2 a 3 veces al día<br><input type="radio"/> 5 a 6 veces al día<br><input type="radio"/> más 6 veces al día |
| Embutido            | <input type="radio"/> Nunca o menos 1 vez al mes<br><input checked="" type="radio"/> 1 a 3 veces mes<br><input type="radio"/> 1 vez semana<br><input type="radio"/> 2 a 4 veces semana<br><input type="radio"/> 5 a 6 veces semana<br><input type="radio"/> 1 vez al día<br><input type="radio"/> 2 a 3 veces al día<br><input type="radio"/> 5 a 6 veces al día<br><input type="radio"/> más 6 veces al día |
| Salchicha o similar | <input checked="" type="radio"/> Nunca o menos 1 vez al mes<br><input type="radio"/> 1 a 3 veces mes<br><input type="radio"/> 1 vez semana<br><input type="radio"/> 2 a 4 veces semana<br><input type="radio"/> 5 a 6 veces semana<br><input type="radio"/> 1 vez al día<br><input type="radio"/> 2 a 3 veces al día<br><input type="radio"/> 5 a 6 veces al día<br><input type="radio"/> más 6 veces al día |
| Pate o foiegras     | <input checked="" type="radio"/> Nunca o menos 1 vez al mes<br><input type="radio"/> 1 a 3 veces mes<br><input type="radio"/> 1 vez semana<br><input type="radio"/> 2 a 4 veces semana<br><input type="radio"/> 5 a 6 veces semana<br><input type="radio"/> 1 vez al día<br><input type="radio"/> 2 a 3 veces al día<br><input type="radio"/> 5 a 6 veces al día<br><input type="radio"/> más 6 veces al día |
| Hamburguesa         | <input type="radio"/> Nunca o menos 1 vez al mes<br><input type="radio"/> 1 a 3 veces mes<br><input checked="" type="radio"/> 1 vez semana<br><input type="radio"/> 2 a 4 veces semana<br><input type="radio"/> 5 a 6 veces semana<br><input type="radio"/> 1 vez al día<br><input type="radio"/> 2 a 3 veces al día<br><input type="radio"/> 5 a 6 veces al día<br><input type="radio"/> más 6 veces al día |
| tocino o bacon      | <input checked="" type="radio"/> Nunca o menos 1 vez al mes<br><input type="radio"/> 1 a 3 veces mes<br><input type="radio"/> 1 vez semana<br><input type="radio"/> 2 a 4 veces semana<br><input type="radio"/> 5 a 6 veces semana<br><input type="radio"/> 1 vez al día<br><input type="radio"/> 2 a 3 veces al día<br><input type="radio"/> 5 a 6 veces al día<br><input type="radio"/> más 6 veces al día |

---

|               |                                                                                                                                                                                                                                                                                                                                                                                                              |
|---------------|--------------------------------------------------------------------------------------------------------------------------------------------------------------------------------------------------------------------------------------------------------------------------------------------------------------------------------------------------------------------------------------------------------------|
| Pescado frito | <input checked="" type="radio"/> Nunca o menos 1 vez al mes<br><input type="radio"/> 1 a 3 veces mes<br><input type="radio"/> 1 vez semana<br><input type="radio"/> 2 a 4 veces semana<br><input type="radio"/> 5 a 6 veces semana<br><input type="radio"/> 1 vez al día<br><input type="radio"/> 2 a 3 veces al día<br><input type="radio"/> 5 a 6 veces al día<br><input type="radio"/> más 6 veces al día |
|---------------|--------------------------------------------------------------------------------------------------------------------------------------------------------------------------------------------------------------------------------------------------------------------------------------------------------------------------------------------------------------------------------------------------------------|

---

|                        |                                                                                                                                                                                                                                                                                                                                                                                                              |
|------------------------|--------------------------------------------------------------------------------------------------------------------------------------------------------------------------------------------------------------------------------------------------------------------------------------------------------------------------------------------------------------------------------------------------------------|
| pescado hervido blanco | <input type="radio"/> Nunca o menos 1 vez al mes<br><input type="radio"/> 1 a 3 veces mes<br><input checked="" type="radio"/> 1 vez semana<br><input type="radio"/> 2 a 4 veces semana<br><input type="radio"/> 5 a 6 veces semana<br><input type="radio"/> 1 vez al día<br><input type="radio"/> 2 a 3 veces al día<br><input type="radio"/> 5 a 6 veces al día<br><input type="radio"/> más 6 veces al día |
|------------------------|--------------------------------------------------------------------------------------------------------------------------------------------------------------------------------------------------------------------------------------------------------------------------------------------------------------------------------------------------------------------------------------------------------------|

---

|                      |                                                                                                                                                                                                                                                                                                                                                                                                              |
|----------------------|--------------------------------------------------------------------------------------------------------------------------------------------------------------------------------------------------------------------------------------------------------------------------------------------------------------------------------------------------------------------------------------------------------------|
| pescado hervido azul | <input type="radio"/> Nunca o menos 1 vez al mes<br><input type="radio"/> 1 a 3 veces mes<br><input checked="" type="radio"/> 1 vez semana<br><input type="radio"/> 2 a 4 veces semana<br><input type="radio"/> 5 a 6 veces semana<br><input type="radio"/> 1 vez al día<br><input type="radio"/> 2 a 3 veces al día<br><input type="radio"/> 5 a 6 veces al día<br><input type="radio"/> más 6 veces al día |
|----------------------|--------------------------------------------------------------------------------------------------------------------------------------------------------------------------------------------------------------------------------------------------------------------------------------------------------------------------------------------------------------------------------------------------------------|

---

|                    |                                                                                                                                                                                                                                                                                                                                                                                                              |
|--------------------|--------------------------------------------------------------------------------------------------------------------------------------------------------------------------------------------------------------------------------------------------------------------------------------------------------------------------------------------------------------------------------------------------------------|
| otros pescado azul | <input type="radio"/> Nunca o menos 1 vez al mes<br><input type="radio"/> 1 a 3 veces mes<br><input checked="" type="radio"/> 1 vez semana<br><input type="radio"/> 2 a 4 veces semana<br><input type="radio"/> 5 a 6 veces semana<br><input type="radio"/> 1 vez al día<br><input type="radio"/> 2 a 3 veces al día<br><input type="radio"/> 5 a 6 veces al día<br><input type="radio"/> más 6 veces al día |
|--------------------|--------------------------------------------------------------------------------------------------------------------------------------------------------------------------------------------------------------------------------------------------------------------------------------------------------------------------------------------------------------------------------------------------------------|

---

|               |                                                                                                                                                                                                                                                                                                                                                                                                              |
|---------------|--------------------------------------------------------------------------------------------------------------------------------------------------------------------------------------------------------------------------------------------------------------------------------------------------------------------------------------------------------------------------------------------------------------|
| atun conserva | <input type="radio"/> Nunca o menos 1 vez al mes<br><input type="radio"/> 1 a 3 veces mes<br><input type="radio"/> 1 vez semana<br><input checked="" type="radio"/> 2 a 4 veces semana<br><input type="radio"/> 5 a 6 veces semana<br><input type="radio"/> 1 vez al día<br><input type="radio"/> 2 a 3 veces al día<br><input type="radio"/> 5 a 6 veces al día<br><input type="radio"/> más 6 veces al día |
|---------------|--------------------------------------------------------------------------------------------------------------------------------------------------------------------------------------------------------------------------------------------------------------------------------------------------------------------------------------------------------------------------------------------------------------|

---

|                  |                                                                                                                                                                                                                                                                                                                                                                                                              |
|------------------|--------------------------------------------------------------------------------------------------------------------------------------------------------------------------------------------------------------------------------------------------------------------------------------------------------------------------------------------------------------------------------------------------------------|
| sardina conserva | <input checked="" type="radio"/> Nunca o menos 1 vez al mes<br><input type="radio"/> 1 a 3 veces mes<br><input type="radio"/> 1 vez semana<br><input type="radio"/> 2 a 4 veces semana<br><input type="radio"/> 5 a 6 veces semana<br><input type="radio"/> 1 vez al día<br><input type="radio"/> 2 a 3 veces al día<br><input type="radio"/> 5 a 6 veces al día<br><input type="radio"/> más 6 veces al día |
|------------------|--------------------------------------------------------------------------------------------------------------------------------------------------------------------------------------------------------------------------------------------------------------------------------------------------------------------------------------------------------------------------------------------------------------|

|                                         |                                                                                                                                                                                                                                                                                                                                                                                                              |
|-----------------------------------------|--------------------------------------------------------------------------------------------------------------------------------------------------------------------------------------------------------------------------------------------------------------------------------------------------------------------------------------------------------------------------------------------------------------|
| pescado ahumado                         | <input checked="" type="radio"/> Nunca o menos 1 vez al mes<br><input type="radio"/> 1 a 3 veces mes<br><input type="radio"/> 1 vez semana<br><input type="radio"/> 2 a 4 veces semana<br><input type="radio"/> 5 a 6 veces semana<br><input type="radio"/> 1 vez al día<br><input type="radio"/> 2 a 3 veces al día<br><input type="radio"/> 5 a 6 veces al día<br><input type="radio"/> más 6 veces al día |
| almejas o mejillones o ostras unos 100g | <input type="radio"/> Nunca o menos 1 vez al mes<br><input type="radio"/> 1 a 3 veces mes<br><input checked="" type="radio"/> 1 vez semana<br><input type="radio"/> 2 a 4 veces semana<br><input type="radio"/> 5 a 6 veces semana<br><input type="radio"/> 1 vez al día<br><input type="radio"/> 2 a 3 veces al día<br><input type="radio"/> 5 a 6 veces al día<br><input type="radio"/> más 6 veces al día |
| calamar o chipiron o sepia unos 100g    | <input type="radio"/> Nunca o menos 1 vez al mes<br><input type="radio"/> 1 a 3 veces mes<br><input checked="" type="radio"/> 1 vez semana<br><input type="radio"/> 2 a 4 veces semana<br><input type="radio"/> 5 a 6 veces semana<br><input type="radio"/> 1 vez al día<br><input type="radio"/> 2 a 3 veces al día<br><input type="radio"/> 5 a 6 veces al día<br><input type="radio"/> más 6 veces al día |
| marisco unos 100g                       | <input type="radio"/> Nunca o menos 1 vez al mes<br><input type="radio"/> 1 a 3 veces mes<br><input checked="" type="radio"/> 1 vez semana<br><input type="radio"/> 2 a 4 veces semana<br><input type="radio"/> 5 a 6 veces semana<br><input type="radio"/> 1 vez al día<br><input type="radio"/> 2 a 3 veces al día<br><input type="radio"/> 5 a 6 veces al día<br><input type="radio"/> más 6 veces al día |
| Espinacas o acelgas cocinadas           | <input checked="" type="radio"/> Nunca o menos 1 vez al mes<br><input type="radio"/> 1 a 3 veces mes<br><input type="radio"/> 1 vez semana<br><input type="radio"/> 2 a 4 veces semana<br><input type="radio"/> 5 a 6 veces semana<br><input type="radio"/> 1 vez al día<br><input type="radio"/> 2 a 3 veces al día<br><input type="radio"/> 5 a 6 veces al día<br><input type="radio"/> más 6 veces al día |
| Col o coliflor o brocoli cocinado       | <input type="radio"/> Nunca o menos 1 vez al mes<br><input type="radio"/> 1 a 3 veces mes<br><input checked="" type="radio"/> 1 vez semana<br><input type="radio"/> 2 a 4 veces semana<br><input type="radio"/> 5 a 6 veces semana<br><input type="radio"/> 1 vez al día<br><input type="radio"/> 2 a 3 veces al día<br><input type="radio"/> 5 a 6 veces al día<br><input type="radio"/> más 6 veces al día |

---

Lechuga o endivia o escarola

- ☐ Nunca o menos 1 vez al mes  
☐ 1 a 3 veces mes  
☐ 1 vez semana  
☒ 2 a 4 veces semana  
☐ 5 a 6 veces semana  
☐ 1 vez al día  
☐ 2 a 3 veces al día  
☐ 5 a 6 veces al día  
☐ más 6 veces al día

---

tomate ensalada

- ☐ Nunca o menos 1 vez al mes  
☐ 1 a 3 veces mes  
☐ 1 vez semana  
☒ 2 a 4 veces semana  
☐ 5 a 6 veces semana  
☐ 1 vez al día  
☐ 2 a 3 veces al día  
☐ 5 a 6 veces al día  
☐ más 6 veces al día

---

cebolla

- ☐ Nunca o menos 1 vez al mes  
☒ 1 a 3 veces mes  
☐ 1 vez semana  
☐ 2 a 4 veces semana  
☐ 5 a 6 veces semana  
☐ 1 vez al día  
☐ 2 a 3 veces al día  
☐ 5 a 6 veces al día  
☐ más 6 veces al día

---

Zanahoria o calabaza

- ☐ Nunca o menos 1 vez al mes  
☐ 1 a 3 veces mes  
☐ 1 vez semana  
☒ 2 a 4 veces semana  
☐ 5 a 6 veces semana  
☐ 1 vez al día  
☐ 2 a 3 veces al día  
☐ 5 a 6 veces al día  
☐ más 6 veces al día

---

Judías verdes

- ☐ Nunca o menos 1 vez al mes  
☐ 1 a 3 veces mes  
☒ 1 vez semana  
☐ 2 a 4 veces semana  
☐ 5 a 6 veces semana  
☐ 1 vez al día  
☐ 2 a 3 veces al día  
☐ 5 a 6 veces al día  
☐ más 6 veces al día

---

Berenjena o calabacin o pepino

- ☐ Nunca o menos 1 vez al mes  
☐ 1 a 3 veces mes  
☐ 1 vez semana  
☒ 2 a 4 veces semana  
☐ 5 a 6 veces semana  
☐ 1 vez al día  
☐ 2 a 3 veces al día  
☐ 5 a 6 veces al día  
☐ más 6 veces al día

|                       |                                                                                                                                                                                                                                                                                                                                                                                                              |
|-----------------------|--------------------------------------------------------------------------------------------------------------------------------------------------------------------------------------------------------------------------------------------------------------------------------------------------------------------------------------------------------------------------------------------------------------|
| pimiento              | <input type="radio"/> Nunca o menos 1 vez al mes<br><input type="radio"/> 1 a 3 veces mes<br><input checked="" type="radio"/> 1 vez semana<br><input type="radio"/> 2 a 4 veces semana<br><input type="radio"/> 5 a 6 veces semana<br><input type="radio"/> 1 vez al día<br><input type="radio"/> 2 a 3 veces al día<br><input type="radio"/> 5 a 6 veces al día<br><input type="radio"/> más 6 veces al día |
| alcachofa             | <input checked="" type="radio"/> Nunca o menos 1 vez al mes<br><input type="radio"/> 1 a 3 veces mes<br><input type="radio"/> 1 vez semana<br><input type="radio"/> 2 a 4 veces semana<br><input type="radio"/> 5 a 6 veces semana<br><input type="radio"/> 1 vez al día<br><input type="radio"/> 2 a 3 veces al día<br><input type="radio"/> 5 a 6 veces al día<br><input type="radio"/> más 6 veces al día |
| espárragos            | <input checked="" type="radio"/> Nunca o menos 1 vez al mes<br><input type="radio"/> 1 a 3 veces mes<br><input type="radio"/> 1 vez semana<br><input type="radio"/> 2 a 4 veces semana<br><input type="radio"/> 5 a 6 veces semana<br><input type="radio"/> 1 vez al día<br><input type="radio"/> 2 a 3 veces al día<br><input type="radio"/> 5 a 6 veces al día<br><input type="radio"/> más 6 veces al día |
| maíz hervido          | <input checked="" type="radio"/> Nunca o menos 1 vez al mes<br><input type="radio"/> 1 a 3 veces mes<br><input type="radio"/> 1 vez semana<br><input type="radio"/> 2 a 4 veces semana<br><input type="radio"/> 5 a 6 veces semana<br><input type="radio"/> 1 vez al día<br><input type="radio"/> 2 a 3 veces al día<br><input type="radio"/> 5 a 6 veces al día<br><input type="radio"/> más 6 veces al día |
| legumbres             | <input type="radio"/> Nunca o menos 1 vez al mes<br><input type="radio"/> 1 a 3 veces mes<br><input checked="" type="radio"/> 1 vez semana<br><input type="radio"/> 2 a 4 veces semana<br><input type="radio"/> 5 a 6 veces semana<br><input type="radio"/> 1 vez al día<br><input type="radio"/> 2 a 3 veces al día<br><input type="radio"/> 5 a 6 veces al día<br><input type="radio"/> más 6 veces al día |
| naranjas o mandarinas | <input type="radio"/> Nunca o menos 1 vez al mes<br><input type="radio"/> 1 a 3 veces mes<br><input type="radio"/> 1 vez semana<br><input checked="" type="radio"/> 2 a 4 veces semana<br><input type="radio"/> 5 a 6 veces semana<br><input type="radio"/> 1 vez al día<br><input type="radio"/> 2 a 3 veces al día<br><input type="radio"/> 5 a 6 veces al día<br><input type="radio"/> más 6 veces al día |

|                       |                                                                                                                                                                                                                                                                                                                                                                                                              |
|-----------------------|--------------------------------------------------------------------------------------------------------------------------------------------------------------------------------------------------------------------------------------------------------------------------------------------------------------------------------------------------------------------------------------------------------------|
| zum natural fruta     | <input type="radio"/> Nunca o menos 1 vez al mes<br><input checked="" type="radio"/> 1 a 3 veces mes<br><input type="radio"/> 1 vez semana<br><input type="radio"/> 2 a 4 veces semana<br><input type="radio"/> 5 a 6 veces semana<br><input type="radio"/> 1 vez al día<br><input type="radio"/> 2 a 3 veces al día<br><input type="radio"/> 5 a 6 veces al día<br><input type="radio"/> más 6 veces al día |
| platano               | <input type="radio"/> Nunca o menos 1 vez al mes<br><input type="radio"/> 1 a 3 veces mes<br><input type="radio"/> 1 vez semana<br><input checked="" type="radio"/> 2 a 4 veces semana<br><input type="radio"/> 5 a 6 veces semana<br><input type="radio"/> 1 vez al día<br><input type="radio"/> 2 a 3 veces al día<br><input type="radio"/> 5 a 6 veces al día<br><input type="radio"/> más 6 veces al día |
| manzana o pera        | <input type="radio"/> Nunca o menos 1 vez al mes<br><input type="radio"/> 1 a 3 veces mes<br><input checked="" type="radio"/> 1 vez semana<br><input type="radio"/> 2 a 4 veces semana<br><input type="radio"/> 5 a 6 veces semana<br><input type="radio"/> 1 vez al día<br><input type="radio"/> 2 a 3 veces al día<br><input type="radio"/> 5 a 6 veces al día<br><input type="radio"/> más 6 veces al día |
| melocotón o nectarina | <input checked="" type="radio"/> Nunca o menos 1 vez al mes<br><input type="radio"/> 1 a 3 veces mes<br><input type="radio"/> 1 vez semana<br><input type="radio"/> 2 a 4 veces semana<br><input type="radio"/> 5 a 6 veces semana<br><input type="radio"/> 1 vez al día<br><input type="radio"/> 2 a 3 veces al día<br><input type="radio"/> 5 a 6 veces al día<br><input type="radio"/> más 6 veces al día |
| sandia o melon        | <input checked="" type="radio"/> Nunca o menos 1 vez al mes<br><input type="radio"/> 1 a 3 veces mes<br><input type="radio"/> 1 vez semana<br><input type="radio"/> 2 a 4 veces semana<br><input type="radio"/> 5 a 6 veces semana<br><input type="radio"/> 1 vez al día<br><input type="radio"/> 2 a 3 veces al día<br><input type="radio"/> 5 a 6 veces al día<br><input type="radio"/> más 6 veces al día |
| uva                   | <input checked="" type="radio"/> Nunca o menos 1 vez al mes<br><input type="radio"/> 1 a 3 veces mes<br><input type="radio"/> 1 vez semana<br><input type="radio"/> 2 a 4 veces semana<br><input type="radio"/> 5 a 6 veces semana<br><input type="radio"/> 1 vez al día<br><input type="radio"/> 2 a 3 veces al día<br><input type="radio"/> 5 a 6 veces al día<br><input type="radio"/> más 6 veces al día |

|                 |                                                                                                                                                                                                                                                                                                                                                                                                              |
|-----------------|--------------------------------------------------------------------------------------------------------------------------------------------------------------------------------------------------------------------------------------------------------------------------------------------------------------------------------------------------------------------------------------------------------------|
| bruna o ciruela | <input checked="" type="radio"/> Nunca o menos 1 vez al mes<br><input type="radio"/> 1 a 3 veces mes<br><input type="radio"/> 1 vez semana<br><input type="radio"/> 2 a 4 veces semana<br><input type="radio"/> 5 a 6 veces semana<br><input type="radio"/> 1 vez al día<br><input type="radio"/> 2 a 3 veces al día<br><input type="radio"/> 5 a 6 veces al día<br><input type="radio"/> más 6 veces al día |
| kiwi            | <input type="radio"/> Nunca o menos 1 vez al mes<br><input type="radio"/> 1 a 3 veces mes<br><input type="radio"/> 1 vez semana<br><input checked="" type="radio"/> 2 a 4 veces semana<br><input type="radio"/> 5 a 6 veces semana<br><input type="radio"/> 1 vez al día<br><input type="radio"/> 2 a 3 veces al día<br><input type="radio"/> 5 a 6 veces al día<br><input type="radio"/> más 6 veces al día |
| aceituna        | <input type="radio"/> Nunca o menos 1 vez al mes<br><input type="radio"/> 1 a 3 veces mes<br><input checked="" type="radio"/> 1 vez semana<br><input type="radio"/> 2 a 4 veces semana<br><input type="radio"/> 5 a 6 veces semana<br><input type="radio"/> 1 vez al día<br><input type="radio"/> 2 a 3 veces al día<br><input type="radio"/> 5 a 6 veces al día<br><input type="radio"/> más 6 veces al día |
| frutos secos    | <input type="radio"/> Nunca o menos 1 vez al mes<br><input type="radio"/> 1 a 3 veces mes<br><input type="radio"/> 1 vez semana<br><input checked="" type="radio"/> 2 a 4 veces semana<br><input type="radio"/> 5 a 6 veces semana<br><input type="radio"/> 1 vez al día<br><input type="radio"/> 2 a 3 veces al día<br><input type="radio"/> 5 a 6 veces al día<br><input type="radio"/> más 6 veces al día |
| pan blanco      | <input type="radio"/> Nunca o menos 1 vez al mes<br><input type="radio"/> 1 a 3 veces mes<br><input type="radio"/> 1 vez semana<br><input checked="" type="radio"/> 2 a 4 veces semana<br><input type="radio"/> 5 a 6 veces semana<br><input type="radio"/> 1 vez al día<br><input type="radio"/> 2 a 3 veces al día<br><input type="radio"/> 5 a 6 veces al día<br><input type="radio"/> más 6 veces al día |
| pan integral    | <input checked="" type="radio"/> Nunca o menos 1 vez al mes<br><input type="radio"/> 1 a 3 veces mes<br><input type="radio"/> 1 vez semana<br><input type="radio"/> 2 a 4 veces semana<br><input type="radio"/> 5 a 6 veces semana<br><input type="radio"/> 1 vez al día<br><input type="radio"/> 2 a 3 veces al día<br><input type="radio"/> 5 a 6 veces al día<br><input type="radio"/> más 6 veces al día |

|                          |                                                                                                                                                                                                                                                                                                                                                                                                              |
|--------------------------|--------------------------------------------------------------------------------------------------------------------------------------------------------------------------------------------------------------------------------------------------------------------------------------------------------------------------------------------------------------------------------------------------------------|
| cereales desayuno        | <input type="radio"/> Nunca o menos 1 vez al mes<br><input type="radio"/> 1 a 3 veces mes<br><input type="radio"/> 1 vez semana<br><input checked="" type="radio"/> 2 a 4 veces semana<br><input type="radio"/> 5 a 6 veces semana<br><input type="radio"/> 1 vez al día<br><input type="radio"/> 2 a 3 veces al día<br><input type="radio"/> 5 a 6 veces al día<br><input type="radio"/> más 6 veces al día |
| patatas fritas           | <input checked="" type="radio"/> Nunca o menos 1 vez al mes<br><input type="radio"/> 1 a 3 veces mes<br><input type="radio"/> 1 vez semana<br><input type="radio"/> 2 a 4 veces semana<br><input type="radio"/> 5 a 6 veces semana<br><input type="radio"/> 1 vez al día<br><input type="radio"/> 2 a 3 veces al día<br><input type="radio"/> 5 a 6 veces al día<br><input type="radio"/> más 6 veces al día |
| patatas cocidas o asadas | <input type="radio"/> Nunca o menos 1 vez al mes<br><input type="radio"/> 1 a 3 veces mes<br><input checked="" type="radio"/> 1 vez semana<br><input type="radio"/> 2 a 4 veces semana<br><input type="radio"/> 5 a 6 veces semana<br><input type="radio"/> 1 vez al día<br><input type="radio"/> 2 a 3 veces al día<br><input type="radio"/> 5 a 6 veces al día<br><input type="radio"/> más 6 veces al día |
| bolsa papas              | <input checked="" type="radio"/> Nunca o menos 1 vez al mes<br><input type="radio"/> 1 a 3 veces mes<br><input type="radio"/> 1 vez semana<br><input type="radio"/> 2 a 4 veces semana<br><input type="radio"/> 5 a 6 veces semana<br><input type="radio"/> 1 vez al día<br><input type="radio"/> 2 a 3 veces al día<br><input type="radio"/> 5 a 6 veces al día<br><input type="radio"/> más 6 veces al día |
| arroz cocinado           | <input type="radio"/> Nunca o menos 1 vez al mes<br><input type="radio"/> 1 a 3 veces mes<br><input checked="" type="radio"/> 1 vez semana<br><input type="radio"/> 2 a 4 veces semana<br><input type="radio"/> 5 a 6 veces semana<br><input type="radio"/> 1 vez al día<br><input type="radio"/> 2 a 3 veces al día<br><input type="radio"/> 5 a 6 veces al día<br><input type="radio"/> más 6 veces al día |
| pasta                    | <input type="radio"/> Nunca o menos 1 vez al mes<br><input type="radio"/> 1 a 3 veces mes<br><input checked="" type="radio"/> 1 vez semana<br><input type="radio"/> 2 a 4 veces semana<br><input type="radio"/> 5 a 6 veces semana<br><input type="radio"/> 1 vez al día<br><input type="radio"/> 2 a 3 veces al día<br><input type="radio"/> 5 a 6 veces al día<br><input type="radio"/> más 6 veces al día |



|                     |                                                                                                                                                                                                                                                                                                                                                                                                              |
|---------------------|--------------------------------------------------------------------------------------------------------------------------------------------------------------------------------------------------------------------------------------------------------------------------------------------------------------------------------------------------------------------------------------------------------------|
| pizza               | <input type="radio"/> Nunca o menos 1 vez al mes<br><input checked="" type="radio"/> 1 a 3 veces mes<br><input type="radio"/> 1 vez semana<br><input type="radio"/> 2 a 4 veces semana<br><input type="radio"/> 5 a 6 veces semana<br><input type="radio"/> 1 vez al día<br><input type="radio"/> 2 a 3 veces al día<br><input type="radio"/> 5 a 6 veces al día<br><input type="radio"/> más 6 veces al día |
| aceite oliva        | <input type="radio"/> Nunca o menos 1 vez al mes<br><input type="radio"/> 1 a 3 veces mes<br><input type="radio"/> 1 vez semana<br><input checked="" type="radio"/> 2 a 4 veces semana<br><input type="radio"/> 5 a 6 veces semana<br><input type="radio"/> 1 vez al día<br><input type="radio"/> 2 a 3 veces al día<br><input type="radio"/> 5 a 6 veces al día<br><input type="radio"/> más 6 veces al día |
| otros aceites       | <input checked="" type="radio"/> Nunca o menos 1 vez al mes<br><input type="radio"/> 1 a 3 veces mes<br><input type="radio"/> 1 vez semana<br><input type="radio"/> 2 a 4 veces semana<br><input type="radio"/> 5 a 6 veces semana<br><input type="radio"/> 1 vez al día<br><input type="radio"/> 2 a 3 veces al día<br><input type="radio"/> 5 a 6 veces al día<br><input type="radio"/> más 6 veces al día |
| margarina           | <input checked="" type="radio"/> Nunca o menos 1 vez al mes<br><input type="radio"/> 1 a 3 veces mes<br><input type="radio"/> 1 vez semana<br><input type="radio"/> 2 a 4 veces semana<br><input type="radio"/> 5 a 6 veces semana<br><input type="radio"/> 1 vez al día<br><input type="radio"/> 2 a 3 veces al día<br><input type="radio"/> 5 a 6 veces al día<br><input type="radio"/> más 6 veces al día |
| mantequilla         | <input type="radio"/> Nunca o menos 1 vez al mes<br><input checked="" type="radio"/> 1 a 3 veces mes<br><input type="radio"/> 1 vez semana<br><input type="radio"/> 2 a 4 veces semana<br><input type="radio"/> 5 a 6 veces semana<br><input type="radio"/> 1 vez al día<br><input type="radio"/> 2 a 3 veces al día<br><input type="radio"/> 5 a 6 veces al día<br><input type="radio"/> más 6 veces al día |
| galletas tipo maria | <input type="radio"/> Nunca o menos 1 vez al mes<br><input checked="" type="radio"/> 1 a 3 veces mes<br><input type="radio"/> 1 vez semana<br><input type="radio"/> 2 a 4 veces semana<br><input type="radio"/> 5 a 6 veces semana<br><input type="radio"/> 1 vez al día<br><input type="radio"/> 2 a 3 veces al día<br><input type="radio"/> 5 a 6 veces al día<br><input type="radio"/> más 6 veces al día |

|                           |                                                                                                                                                                                                                                                                                                                                                                                                              |
|---------------------------|--------------------------------------------------------------------------------------------------------------------------------------------------------------------------------------------------------------------------------------------------------------------------------------------------------------------------------------------------------------------------------------------------------------|
| galletas chocolate        | <input checked="" type="radio"/> Nunca o menos 1 vez al mes<br><input type="radio"/> 1 a 3 veces mes<br><input type="radio"/> 1 vez semana<br><input type="radio"/> 2 a 4 veces semana<br><input type="radio"/> 5 a 6 veces semana<br><input type="radio"/> 1 vez al día<br><input type="radio"/> 2 a 3 veces al día<br><input type="radio"/> 5 a 6 veces al día<br><input type="radio"/> más 6 veces al día |
| bollieria                 | <input type="radio"/> Nunca o menos 1 vez al mes<br><input checked="" type="radio"/> 1 a 3 veces mes<br><input type="radio"/> 1 vez semana<br><input type="radio"/> 2 a 4 veces semana<br><input type="radio"/> 5 a 6 veces semana<br><input type="radio"/> 1 vez al día<br><input type="radio"/> 2 a 3 veces al día<br><input type="radio"/> 5 a 6 veces al día<br><input type="radio"/> más 6 veces al día |
| chocolate o bombones      | <input type="radio"/> Nunca o menos 1 vez al mes<br><input type="radio"/> 1 a 3 veces mes<br><input type="radio"/> 1 vez semana<br><input checked="" type="radio"/> 2 a 4 veces semana<br><input type="radio"/> 5 a 6 veces semana<br><input type="radio"/> 1 vez al día<br><input type="radio"/> 2 a 3 veces al día<br><input type="radio"/> 5 a 6 veces al día<br><input type="radio"/> más 6 veces al día |
| chocolate polvo o colacao | <input checked="" type="radio"/> Nunca o menos 1 vez al mes<br><input type="radio"/> 1 a 3 veces mes<br><input type="radio"/> 1 vez semana<br><input type="radio"/> 2 a 4 veces semana<br><input type="radio"/> 5 a 6 veces semana<br><input type="radio"/> 1 vez al día<br><input type="radio"/> 2 a 3 veces al día<br><input type="radio"/> 5 a 6 veces al día<br><input type="radio"/> más 6 veces al día |
| vino tinto                | <input checked="" type="radio"/> Nunca o menos 1 vez al mes<br><input type="radio"/> 1 a 3 veces mes<br><input type="radio"/> 1 vez semana<br><input type="radio"/> 2 a 4 veces semana<br><input type="radio"/> 5 a 6 veces semana<br><input type="radio"/> 1 vez al día<br><input type="radio"/> 2 a 3 veces al día<br><input type="radio"/> 5 a 6 veces al día<br><input type="radio"/> más 6 veces al día |
| vino blanco               | <input checked="" type="radio"/> Nunca o menos 1 vez al mes<br><input type="radio"/> 1 a 3 veces mes<br><input type="radio"/> 1 vez semana<br><input type="radio"/> 2 a 4 veces semana<br><input type="radio"/> 5 a 6 veces semana<br><input type="radio"/> 1 vez al día<br><input type="radio"/> 2 a 3 veces al día<br><input type="radio"/> 5 a 6 veces al día<br><input type="radio"/> más 6 veces al día |

|                       |                                                                                                                                                                                                                                                                                                                                                                                                              |
|-----------------------|--------------------------------------------------------------------------------------------------------------------------------------------------------------------------------------------------------------------------------------------------------------------------------------------------------------------------------------------------------------------------------------------------------------|
| vino seco o vermut    | <input checked="" type="radio"/> Nunca o menos 1 vez al mes<br><input type="radio"/> 1 a 3 veces mes<br><input type="radio"/> 1 vez semana<br><input type="radio"/> 2 a 4 veces semana<br><input type="radio"/> 5 a 6 veces semana<br><input type="radio"/> 1 vez al día<br><input type="radio"/> 2 a 3 veces al día<br><input type="radio"/> 5 a 6 veces al día<br><input type="radio"/> más 6 veces al día |
| cerveza               | <input checked="" type="radio"/> Nunca o menos 1 vez al mes<br><input type="radio"/> 1 a 3 veces mes<br><input type="radio"/> 1 vez semana<br><input type="radio"/> 2 a 4 veces semana<br><input type="radio"/> 5 a 6 veces semana<br><input type="radio"/> 1 vez al día<br><input type="radio"/> 2 a 3 veces al día<br><input type="radio"/> 5 a 6 veces al día<br><input type="radio"/> más 6 veces al día |
| cerveza sin alcohol   | <input type="radio"/> Nunca o menos 1 vez al mes<br><input checked="" type="radio"/> 1 a 3 veces mes<br><input type="radio"/> 1 vez semana<br><input type="radio"/> 2 a 4 veces semana<br><input type="radio"/> 5 a 6 veces semana<br><input type="radio"/> 1 vez al día<br><input type="radio"/> 2 a 3 veces al día<br><input type="radio"/> 5 a 6 veces al día<br><input type="radio"/> más 6 veces al día |
| licores               | <input checked="" type="radio"/> Nunca o menos 1 vez al mes<br><input type="radio"/> 1 a 3 veces mes<br><input type="radio"/> 1 vez semana<br><input type="radio"/> 2 a 4 veces semana<br><input type="radio"/> 5 a 6 veces semana<br><input type="radio"/> 1 vez al día<br><input type="radio"/> 2 a 3 veces al día<br><input type="radio"/> 5 a 6 veces al día<br><input type="radio"/> más 6 veces al día |
| ginebra o ron o vodka | <input checked="" type="radio"/> Nunca o menos 1 vez al mes<br><input type="radio"/> 1 a 3 veces mes<br><input type="radio"/> 1 vez semana<br><input type="radio"/> 2 a 4 veces semana<br><input type="radio"/> 5 a 6 veces semana<br><input type="radio"/> 1 vez al día<br><input type="radio"/> 2 a 3 veces al día<br><input type="radio"/> 5 a 6 veces al día<br><input type="radio"/> más 6 veces al día |
| refresco normal       | <input checked="" type="radio"/> Nunca o menos 1 vez al mes<br><input type="radio"/> 1 a 3 veces mes<br><input type="radio"/> 1 vez semana<br><input type="radio"/> 2 a 4 veces semana<br><input type="radio"/> 5 a 6 veces semana<br><input type="radio"/> 1 vez al día<br><input type="radio"/> 2 a 3 veces al día<br><input type="radio"/> 5 a 6 veces al día<br><input type="radio"/> más 6 veces al día |

|                          |                                                                                                                                                                                                                                                                                                                                                                                                              |
|--------------------------|--------------------------------------------------------------------------------------------------------------------------------------------------------------------------------------------------------------------------------------------------------------------------------------------------------------------------------------------------------------------------------------------------------------|
| refresco sin azúcar      | <input checked="" type="radio"/> Nunca o menos 1 vez al mes<br><input type="radio"/> 1 a 3 veces mes<br><input type="radio"/> 1 vez semana<br><input type="radio"/> 2 a 4 veces semana<br><input type="radio"/> 5 a 6 veces semana<br><input type="radio"/> 1 vez al día<br><input type="radio"/> 2 a 3 veces al día<br><input type="radio"/> 5 a 6 veces al día<br><input type="radio"/> más 6 veces al día |
| Agua del grifo           | <input type="radio"/> Nunca o menos 1 vez al mes<br><input type="radio"/> 1 a 3 veces mes<br><input type="radio"/> 1 vez semana<br><input type="radio"/> 2 a 4 veces semana<br><input type="radio"/> 5 a 6 veces semana<br><input type="radio"/> 1 vez al día<br><input type="radio"/> 2 a 3 veces al día<br><input type="radio"/> 5 a 6 veces al día<br><input checked="" type="radio"/> más 6 veces al día |
| agua embotellada sin gas | <input type="radio"/> Nunca o menos 1 vez al mes<br><input checked="" type="radio"/> 1 a 3 veces mes<br><input type="radio"/> 1 vez semana<br><input type="radio"/> 2 a 4 veces semana<br><input type="radio"/> 5 a 6 veces semana<br><input type="radio"/> 1 vez al día<br><input type="radio"/> 2 a 3 veces al día<br><input type="radio"/> 5 a 6 veces al día<br><input type="radio"/> más 6 veces al día |
| agua embotellada con gas | <input type="radio"/> Nunca o menos 1 vez al mes<br><input type="radio"/> 1 a 3 veces mes<br><input checked="" type="radio"/> 1 vez semana<br><input type="radio"/> 2 a 4 veces semana<br><input type="radio"/> 5 a 6 veces semana<br><input type="radio"/> 1 vez al día<br><input type="radio"/> 2 a 3 veces al día<br><input type="radio"/> 5 a 6 veces al día<br><input type="radio"/> más 6 veces al día |
| zumو frutas embasado     | <input type="radio"/> Nunca o menos 1 vez al mes<br><input checked="" type="radio"/> 1 a 3 veces mes<br><input type="radio"/> 1 vez semana<br><input type="radio"/> 2 a 4 veces semana<br><input type="radio"/> 5 a 6 veces semana<br><input type="radio"/> 1 vez al día<br><input type="radio"/> 2 a 3 veces al día<br><input type="radio"/> 5 a 6 veces al día<br><input type="radio"/> más 6 veces al día |
| cafe                     | <input type="radio"/> Nunca o menos 1 vez al mes<br><input checked="" type="radio"/> 1 a 3 veces mes<br><input type="radio"/> 1 vez semana<br><input type="radio"/> 2 a 4 veces semana<br><input type="radio"/> 5 a 6 veces semana<br><input type="radio"/> 1 vez al día<br><input type="radio"/> 2 a 3 veces al día<br><input type="radio"/> 5 a 6 veces al día<br><input type="radio"/> más 6 veces al día |

---

cafe descafeinado

- ☐ Nunca o menos 1 vez al mes  
☐ 1 a 3 veces mes  
☒ 1 vez semana  
☐ 2 a 4 veces semana  
☐ 5 a 6 veces semana  
☐ 1 vez al día  
☐ 2 a 3 veces al día  
☐ 5 a 6 veces al día  
☐ más 6 veces al día

---

te o infusión

- ☐ Nunca o menos 1 vez al mes  
☐ 1 a 3 veces mes  
☒ 1 vez semana  
☐ 2 a 4 veces semana  
☐ 5 a 6 veces semana  
☐ 1 vez al día  
☐ 2 a 3 veces al día  
☐ 5 a 6 veces al día  
☐ más 6 veces al día

---

sopa o puré verduras

- ☐ Nunca o menos 1 vez al mes  
☐ 1 a 3 veces mes  
☐ 1 vez semana  
☒ 2 a 4 veces semana  
☐ 5 a 6 veces semana  
☐ 1 vez al día  
☐ 2 a 3 veces al día  
☐ 5 a 6 veces al día  
☐ más 6 veces al día

---

croquetas pollo jamón

- ☐ Nunca o menos 1 vez al mes  
☒ 1 a 3 veces mes  
☐ 1 vez semana  
☐ 2 a 4 veces semana  
☐ 5 a 6 veces semana  
☐ 1 vez al día  
☐ 2 a 3 veces al día  
☐ 5 a 6 veces al día  
☐ más 6 veces al día

---

croquetas pescado

- ☒ Nunca o menos 1 vez al mes  
☐ 1 a 3 veces mes  
☐ 1 vez semana  
☐ 2 a 4 veces semana  
☐ 5 a 6 veces semana  
☐ 1 vez al día  
☐ 2 a 3 veces al día  
☐ 5 a 6 veces al día  
☐ más 6 veces al día

---

mayonesa

- ☒ Nunca o menos 1 vez al mes  
☐ 1 a 3 veces mes  
☐ 1 vez semana  
☐ 2 a 4 veces semana  
☐ 5 a 6 veces semana  
☐ 1 vez al día  
☐ 2 a 3 veces al día  
☐ 5 a 6 veces al día  
☐ más 6 veces al día

|                  |                                                                                                                                                                                                                                                                                                                                                                                                              |
|------------------|--------------------------------------------------------------------------------------------------------------------------------------------------------------------------------------------------------------------------------------------------------------------------------------------------------------------------------------------------------------------------------------------------------------|
| salsa tomate     | <input type="radio"/> Nunca o menos 1 vez al mes<br><input type="radio"/> 1 a 3 veces mes<br><input checked="" type="radio"/> 1 vez semana<br><input type="radio"/> 2 a 4 veces semana<br><input type="radio"/> 5 a 6 veces semana<br><input type="radio"/> 1 vez al día<br><input type="radio"/> 2 a 3 veces al día<br><input type="radio"/> 5 a 6 veces al día<br><input type="radio"/> más 6 veces al día |
| ketchup          | <input checked="" type="radio"/> Nunca o menos 1 vez al mes<br><input type="radio"/> 1 a 3 veces mes<br><input type="radio"/> 1 vez semana<br><input type="radio"/> 2 a 4 veces semana<br><input type="radio"/> 5 a 6 veces semana<br><input type="radio"/> 1 vez al día<br><input type="radio"/> 2 a 3 veces al día<br><input type="radio"/> 5 a 6 veces al día<br><input type="radio"/> más 6 veces al día |
| sal              | <input type="radio"/> Nunca o menos 1 vez al mes<br><input type="radio"/> 1 a 3 veces mes<br><input type="radio"/> 1 vez semana<br><input type="radio"/> 2 a 4 veces semana<br><input type="radio"/> 5 a 6 veces semana<br><input type="radio"/> 1 vez al día<br><input checked="" type="radio"/> 2 a 3 veces al día<br><input type="radio"/> 5 a 6 veces al día<br><input type="radio"/> más 6 veces al día |
| ajo              | <input type="radio"/> Nunca o menos 1 vez al mes<br><input type="radio"/> 1 a 3 veces mes<br><input checked="" type="radio"/> 1 vez semana<br><input type="radio"/> 2 a 4 veces semana<br><input type="radio"/> 5 a 6 veces semana<br><input type="radio"/> 1 vez al día<br><input type="radio"/> 2 a 3 veces al día<br><input type="radio"/> 5 a 6 veces al día<br><input type="radio"/> más 6 veces al día |
| mermelada o miel | <input type="radio"/> Nunca o menos 1 vez al mes<br><input checked="" type="radio"/> 1 a 3 veces mes<br><input type="radio"/> 1 vez semana<br><input type="radio"/> 2 a 4 veces semana<br><input type="radio"/> 5 a 6 veces semana<br><input type="radio"/> 1 vez al día<br><input type="radio"/> 2 a 3 veces al día<br><input type="radio"/> 5 a 6 veces al día<br><input type="radio"/> más 6 veces al día |
| azúcar           | <input type="radio"/> Nunca o menos 1 vez al mes<br><input checked="" type="radio"/> 1 a 3 veces mes<br><input type="radio"/> 1 vez semana<br><input type="radio"/> 2 a 4 veces semana<br><input type="radio"/> 5 a 6 veces semana<br><input type="radio"/> 1 vez al día<br><input type="radio"/> 2 a 3 veces al día<br><input type="radio"/> 5 a 6 veces al día<br><input type="radio"/> más 6 veces al día |

|                                       |                                                                                                                                                                                                                                                                                                                                                                                                                                                                                                                               |
|---------------------------------------|-------------------------------------------------------------------------------------------------------------------------------------------------------------------------------------------------------------------------------------------------------------------------------------------------------------------------------------------------------------------------------------------------------------------------------------------------------------------------------------------------------------------------------|
| Otro alimento                         |                                                                                                                                                                                                                                                                                                                                                                                                                                                                                                                               |
| suplementos vitamínicos               | <input checked="" type="radio"/> si<br><input type="radio"/> no                                                                                                                                                                                                                                                                                                                                                                                                                                                               |
| suplementos vitamínicos               | [*DATA REMOVED*]                                                                                                                                                                                                                                                                                                                                                                                                                                                                                                              |
| dieta previa                          | <input type="radio"/> si<br><input checked="" type="radio"/> no                                                                                                                                                                                                                                                                                                                                                                                                                                                               |
| motivo dieta                          | <input checked="" type="radio"/> no dieta<br><input type="radio"/> control peso<br><input type="radio"/> control colesterol<br><input type="radio"/> control diabetes<br><input type="radio"/> problemas estómago<br><input type="radio"/> problemas vesícula o hepáticos<br><input type="radio"/> HTA o cardiopatía<br><input type="radio"/> problemas renales<br><input type="radio"/> alergia alimentaria<br><input type="radio"/> ácido úrico elevado<br><input type="radio"/> vegetariana<br><input type="radio"/> otros |
| cambio alimentos año previo gestación | <input type="radio"/> si<br><input checked="" type="radio"/> no                                                                                                                                                                                                                                                                                                                                                                                                                                                               |
| cambio lácteos                        | <input type="radio"/> eliminado<br><input type="radio"/> disminuido<br><input type="radio"/> igual<br><input type="radio"/> aumentado<br><input type="radio"/> no sabe                                                                                                                                                                                                                                                                                                                                                        |
| cambio huevos                         | <input type="radio"/> eliminado<br><input type="radio"/> disminuido<br><input type="radio"/> igual<br><input type="radio"/> aumentado<br><input type="radio"/> no sabe                                                                                                                                                                                                                                                                                                                                                        |
| cambio carne                          | <input type="radio"/> eliminado<br><input type="radio"/> disminuido<br><input type="radio"/> igual<br><input type="radio"/> aumentado<br><input type="radio"/> no sabe                                                                                                                                                                                                                                                                                                                                                        |
| cambio pescado                        | <input type="radio"/> eliminado<br><input type="radio"/> disminuido<br><input type="radio"/> igual<br><input type="radio"/> aumentado<br><input type="radio"/> no sabe                                                                                                                                                                                                                                                                                                                                                        |
| cambio verduras                       | <input type="radio"/> eliminado<br><input type="radio"/> disminuido<br><input type="radio"/> igual<br><input type="radio"/> aumentado<br><input type="radio"/> no sabe                                                                                                                                                                                                                                                                                                                                                        |

|                            |                                                                                                                                                                                                                        |
|----------------------------|------------------------------------------------------------------------------------------------------------------------------------------------------------------------------------------------------------------------|
| cambio legumbres           | <input type="radio"/> eliminado<br><input type="radio"/> disminuido<br><input type="radio"/> igual<br><input type="radio"/> aumentado<br><input type="radio"/> no sabe                                                 |
| cambio fruta               | <input type="radio"/> eliminado<br><input type="radio"/> disminuido<br><input type="radio"/> igual<br><input type="radio"/> aumentado<br><input type="radio"/> no sabe                                                 |
| cambio pan                 | <input type="radio"/> eliminado<br><input type="radio"/> disminuido<br><input type="radio"/> igual<br><input type="radio"/> aumentado<br><input type="radio"/> no sabe                                                 |
| cambio aceite oliva        | <input type="radio"/> eliminado<br><input type="radio"/> disminuido<br><input type="radio"/> igual<br><input type="radio"/> aumentado<br><input type="radio"/> no sabe                                                 |
| cambio mante o margarina   | <input type="radio"/> eliminado<br><input type="radio"/> disminuido<br><input type="radio"/> igual<br><input type="radio"/> aumentado<br><input type="radio"/> no sabe                                                 |
| cambio azúcar y dulces     | <input type="radio"/> eliminado<br><input type="radio"/> disminuido<br><input type="radio"/> igual<br><input type="radio"/> aumentado<br><input type="radio"/> no sabe                                                 |
| cambio bebidas alcohólicas | <input type="radio"/> eliminado<br><input type="radio"/> disminuido<br><input type="radio"/> igual<br><input type="radio"/> aumentado<br><input type="radio"/> no sabe                                                 |
| frecuencia comidas fritas  | <input type="radio"/> a diario<br><input type="radio"/> 5 a 6 veces semana<br><input type="radio"/> 2 a 4 veces semana<br><input type="radio"/> 1 vez semana<br><input checked="" type="radio"/> menos de 1 vez semana |
| carne                      | <input type="radio"/> no como<br><input type="radio"/> cruda<br><input type="radio"/> poco hecha<br><input checked="" type="radio"/> hecha<br><input type="radio"/> muy hecha                                          |
| grasa visible carne        | <input type="radio"/> quita toda<br><input checked="" type="radio"/> quita mayoría<br><input type="radio"/> quita un poco<br><input type="radio"/> no quita nada                                                       |



|                                |                                                                                                                                                                                                                                                          |
|--------------------------------|----------------------------------------------------------------------------------------------------------------------------------------------------------------------------------------------------------------------------------------------------------|
| cocina carne                   | <input checked="" type="radio"/> a la plancha<br><input type="radio"/> a la parrilla<br><input type="radio"/> asada<br><input type="radio"/> frita<br><input type="radio"/> guisada                                                                      |
| tostado quemado carne          | <input type="radio"/> nunca<br><input type="radio"/> 1 vez mes<br><input checked="" type="radio"/> 2 a 3 veces mes<br><input type="radio"/> 1 vez semana<br><input type="radio"/> 2 a 3 semanas                                                          |
| tostado quemado pescado        | <input type="radio"/> nunca<br><input type="radio"/> 1 vez mes<br><input checked="" type="radio"/> 2 a 3 veces mes<br><input type="radio"/> 1 vez semana<br><input type="radio"/> 2 a 3 semanas                                                          |
| socarrat paella                | <input type="radio"/> nunca<br><input type="radio"/> 1 vez mes<br><input checked="" type="radio"/> 2 a 3 veces mes<br><input type="radio"/> 1 vez semana<br><input type="radio"/> 2 a 3 semanas                                                          |
| grasa o aceite cocinar         | <input type="radio"/> mantequilla<br><input type="radio"/> margarina<br><input type="radio"/> aceite oliva<br><input checked="" type="radio"/> aceite oliva virgen extra<br><input type="radio"/> aceite vegetal<br><input type="radio"/> mezcla aceites |
| grasa aceite aliñar            | <input type="radio"/> mantequilla<br><input type="radio"/> margarina<br><input type="radio"/> aceite oliva<br><input checked="" type="radio"/> aceite oliva virgen extra<br><input type="radio"/> aceite vegetal<br><input type="radio"/> mezcla aceites |
| grasa aceite freir             | <input type="radio"/> mantequilla<br><input type="radio"/> margarina<br><input type="radio"/> aceite oliva<br><input type="radio"/> aceite oliva virgen extra<br><input checked="" type="radio"/> aceite vegetal<br><input type="radio"/> mezcla aceites |
| Ejercicio cuestionario         | <input checked="" type="radio"/> si<br><input type="radio"/> no                                                                                                                                                                                          |
| horas de sueño incluido siesta | [*DATA REMOVED*]                                                                                                                                                                                                                                         |
| minutos siesta                 | [*DATA REMOVED*]                                                                                                                                                                                                                                         |
| horas televisión semana        | [*DATA REMOVED*]                                                                                                                                                                                                                                         |

|                                        |                                                                                                                                                                                                                                                                                                                                                                           |
|----------------------------------------|---------------------------------------------------------------------------------------------------------------------------------------------------------------------------------------------------------------------------------------------------------------------------------------------------------------------------------------------------------------------------|
| actividad trabajo                      | <input type="radio"/> casi siempre sentado<br><input checked="" type="radio"/> sentado 50 por cien<br><input type="radio"/> casi siempre de pie, quieto<br><input type="radio"/> casi siempre levantado caminando y llevando pocas cosas<br><input type="radio"/> casi siempre levantado, caminando y llevado muchas cosas<br><input type="radio"/> trabajo manual pesado |
| tiempo caminar o bici al día           | <input type="radio"/> casi nunca<br><input type="radio"/> menos 20min día<br><input type="radio"/> 20 a 40 min día<br><input checked="" type="radio"/> 40 a 60 min día<br><input type="radio"/> 1h o 1h y media día<br><input type="radio"/> más de 1h y media al día                                                                                                     |
| tiempo tareas casa al día              | <input type="radio"/> menos de 1h día<br><input checked="" type="radio"/> 1 a 2h día<br><input type="radio"/> 3 a 4h día<br><input type="radio"/> 5 a 6h día<br><input type="radio"/> 7 a 8h día<br><input type="radio"/> más de 8h día                                                                                                                                   |
| tiempo libre televisión ordenador leer | <input type="radio"/> menos 1h día<br><input type="radio"/> 1h día<br><input type="radio"/> 2h día<br><input checked="" type="radio"/> 3h día<br><input type="radio"/> 4h día<br><input type="radio"/> 5 a 6h día<br><input type="radio"/> mas 6h día                                                                                                                     |
| tiempo libre ejercicio o deporte       | <input type="radio"/> menos 1h semana<br><input type="radio"/> 1h semana<br><input type="radio"/> 2h semana<br><input type="radio"/> 3h semana<br><input checked="" type="radio"/> 4 a 5h semana<br><input type="radio"/> mas 5h semana                                                                                                                                   |
| como se considera                      | <input type="radio"/> sedentaria<br><input type="radio"/> poco activa<br><input checked="" type="radio"/> moderadamente activa<br><input type="radio"/> bastante activa<br><input type="radio"/> muy activa<br><input type="radio"/> no sabe                                                                                                                              |
| FUR                                    | [*DATA REMOVED*]                                                                                                                                                                                                                                                                                                                                                          |
| Semanas gestación 2T                   | [*DATA REMOVED*]                                                                                                                                                                                                                                                                                                                                                          |
| Días gestación 2T                      | [*DATA REMOVED*]                                                                                                                                                                                                                                                                                                                                                          |
| DBP 2T                                 | [*DATA REMOVED*]                                                                                                                                                                                                                                                                                                                                                          |
| CC 2T                                  | [*DATA REMOVED*]                                                                                                                                                                                                                                                                                                                                                          |
| AC 2T                                  | [*DATA REMOVED*]                                                                                                                                                                                                                                                                                                                                                          |

|                                                   |                                                                                                                                                                                                 |
|---------------------------------------------------|-------------------------------------------------------------------------------------------------------------------------------------------------------------------------------------------------|
| LF 2T                                             | [*DATA REMOVED*]                                                                                                                                                                                |
| PFE 2T (Hadlock)                                  | [*DATA REMOVED*]                                                                                                                                                                                |
| Semanas gestación 3T                              | [*DATA REMOVED*]                                                                                                                                                                                |
| días 3T                                           | [*DATA REMOVED*]                                                                                                                                                                                |
| DBP 3T                                            | [*DATA REMOVED*]                                                                                                                                                                                |
| CC 3T                                             | [*DATA REMOVED*]                                                                                                                                                                                |
| AC 3T                                             | [*DATA REMOVED*]                                                                                                                                                                                |
| LF 3T                                             | [*DATA REMOVED*]                                                                                                                                                                                |
| PFE 3T (Hadlock)                                  | [*DATA REMOVED*]                                                                                                                                                                                |
| Semanas de gestación final                        | [*DATA REMOVED*]                                                                                                                                                                                |
| días gestación final                              | [*DATA REMOVED*]                                                                                                                                                                                |
| Localización placenta                             | <input checked="" type="radio"/> anterior<br><input type="radio"/> lateral derecha<br><input type="radio"/> lateral izquierda<br><input type="radio"/> posterior<br><input type="radio"/> fondo |
| Presentación longitudinal cefálica                | <input type="radio"/> no<br><input checked="" type="radio"/> si                                                                                                                                 |
| Dorso                                             | <input checked="" type="radio"/> izquierda anterior<br><input type="radio"/> izquierda posterior<br><input type="radio"/> derecha anterior<br><input type="radio"/> derecha posterior           |
| diámetro biparietal                               | [*DATA REMOVED*]                                                                                                                                                                                |
| Circunferencia craneal                            | [*DATA REMOVED*]                                                                                                                                                                                |
| Circunferencia abdominal                          | [*DATA REMOVED*]                                                                                                                                                                                |
| Longitud de femur                                 | [*DATA REMOVED*]                                                                                                                                                                                |
| tejido celular subcutáneo a nivel del muslo en mm | [*DATA REMOVED*]                                                                                                                                                                                |
| tejido celular subcutáneo en abdomen en mm        | [*DATA REMOVED*]                                                                                                                                                                                |
| Volumen del muslo en cm3                          | [*DATA REMOVED*]                                                                                                                                                                                |
| Peso fetal estimado según fórmula de Hadlock      | [*DATA REMOVED*]                                                                                                                                                                                |

|                                               |                                                                                                                                               |
|-----------------------------------------------|-----------------------------------------------------------------------------------------------------------------------------------------------|
| Percentil                                     | [*DATA REMOVED*]                                                                                                                              |
| Peso fetal estimado según fórmula de Scioscia | <hr/>                                                                                                                                         |
| Peso fetal estimado según fórmula de LEE      | <hr/>                                                                                                                                         |
| Tipo de parto                                 | <input checked="" type="radio"/> eutocico<br><input type="radio"/> instrumentado/ventosa<br><input type="radio"/> cesarea                     |
| fecha de nacimiento                           | [*DATA REMOVED*]                                                                                                                              |
| Días entre exploración y nacimiento           | [*DATA REMOVED*]                                                                                                                              |
| Peso RN en g                                  | [*DATA REMOVED*]                                                                                                                              |
| sexo                                          | <input type="radio"/> mujer<br><input checked="" type="radio"/> hombre                                                                        |
| Apgar 1 minuto                                | [*DATA REMOVED*]                                                                                                                              |
| Apgar 5 minutos                               | [*DATA REMOVED*]                                                                                                                              |
| Apgar 10 minutos                              | <hr/>                                                                                                                                         |
| antecedente Covid durante gestación           | <input type="radio"/> Yes<br><input checked="" type="radio"/> No                                                                              |
| Nivel de estudios                             | <input type="radio"/> ninguno<br><input type="radio"/> primarios<br><input type="radio"/> secundarios<br><input type="radio"/> universitarios |

# Base\_datos\_estimacion\_peso\_fetal

|                                       |                                                                                                                                                                                                                                                                                      |
|---------------------------------------|--------------------------------------------------------------------------------------------------------------------------------------------------------------------------------------------------------------------------------------------------------------------------------------|
| Número de identificación participante | 73                                                                                                                                                                                                                                                                                   |
| CODIGO PARTICIPANTE                   |                                                                                                                                                                                                                                                                                      |
| Edad                                  | [*DATA REMOVED*]                                                                                                                                                                                                                                                                     |
| Gestaciones                           | <input type="radio"/> 1<br><input checked="" type="radio"/> 2<br><input type="radio"/> 3<br><input type="radio"/> mas de 3                                                                                                                                                           |
| partos                                | <input checked="" type="radio"/> 0<br><input type="radio"/> 1<br><input type="radio"/> 2<br><input type="radio"/> 3<br><input type="radio"/> mas de 3                                                                                                                                |
| cesáreas                              | <input type="radio"/> 0<br><input checked="" type="radio"/> 1<br><input type="radio"/> 2<br><input type="radio"/> 3<br><input type="radio"/> mas de 3                                                                                                                                |
| Abortos                               | <input checked="" type="radio"/> 0<br><input type="radio"/> 1<br><input type="radio"/> 2<br><input type="radio"/> 3<br><input type="radio"/> mas de 3                                                                                                                                |
| Tipo de gestacion                     | <input checked="" type="radio"/> espontanea<br><input type="radio"/> IAC inseminación artificial conyuge<br><input type="radio"/> IAD inseminación artificial donante<br><input type="radio"/> FIV Fecundación in Vitro<br><input type="radio"/> Ovodon FIV con donación de ovocitos |
| peso previo a embarazo                | [*DATA REMOVED*]                                                                                                                                                                                                                                                                     |
| Ganancia ponderal embarazo            | [*DATA REMOVED*]                                                                                                                                                                                                                                                                     |
| Talla madre                           | [*DATA REMOVED*]                                                                                                                                                                                                                                                                     |
| IMC previo embarazo                   | 24.034609838166958                                                                                                                                                                                                                                                                   |
| Patología obstétrica                  | <input checked="" type="radio"/> no<br><input type="radio"/> si                                                                                                                                                                                                                      |
| Diabetes pregestacional               | <input checked="" type="radio"/> no<br><input type="radio"/> si                                                                                                                                                                                                                      |
| Diabetes gestacional                  | <input checked="" type="radio"/> no<br><input type="radio"/> si                                                                                                                                                                                                                      |

|                                            |                                                                                                                                                                                      |
|--------------------------------------------|--------------------------------------------------------------------------------------------------------------------------------------------------------------------------------------|
| Diabetes gestacional con insulina          | <input checked="" type="radio"/> no<br><input type="radio"/> si                                                                                                                      |
| Diabetes gestacional con dieta y ejercicio | <input checked="" type="radio"/> no<br><input type="radio"/> si                                                                                                                      |
| Percentil fetos previos                    | <input type="radio"/> Nada<br><input type="radio"/> percentil menor de 10<br><input checked="" type="radio"/> percentil entre 10 y 90<br><input type="radio"/> percentil mayor de 90 |
| Exfumadora                                 | <input type="radio"/> Nada<br><input type="radio"/> menos de 5 años<br><input type="radio"/> 5 a 10 años<br><input checked="" type="radio"/> mayor o igual a 10 años                 |
| Hábito tabáquico                           | <input checked="" type="radio"/> no<br><input type="radio"/> si                                                                                                                      |
| fumadora                                   | [*DATA REMOVED*]                                                                                                                                                                     |
| Consumo otros tóxicos                      | <input checked="" type="radio"/> no<br><input type="radio"/> si                                                                                                                      |
| Hb 1T                                      | [*DATA REMOVED*]                                                                                                                                                                     |
| Htc 1T                                     | [*DATA REMOVED*]                                                                                                                                                                     |
| Hb 2T                                      | [*DATA REMOVED*]                                                                                                                                                                     |
| HTC 2T                                     | [*DATA REMOVED*]                                                                                                                                                                     |
| Hb 3T                                      | [*DATA REMOVED*]                                                                                                                                                                     |
| HTC 3T                                     | [*DATA REMOVED*]                                                                                                                                                                     |
| Suplemento FE oral                         | <input checked="" type="radio"/> si<br><input type="radio"/> no                                                                                                                      |
| Suplemento fe iv                           | <input type="radio"/> si<br><input checked="" type="radio"/> no                                                                                                                      |
| Transfusión                                | <input checked="" type="radio"/> no<br><input type="radio"/> si                                                                                                                      |
| Solicitada Vit D                           | <input checked="" type="radio"/> no<br><input type="radio"/> si                                                                                                                      |
| Deficit vit D                              | <input type="radio"/> no<br><input type="radio"/> si                                                                                                                                 |
| Suplemento vit D                           | <input type="radio"/> si<br><input type="radio"/> no                                                                                                                                 |

|                       |                                                                                                                                                                                                                                                                                                                                                                                                              |
|-----------------------|--------------------------------------------------------------------------------------------------------------------------------------------------------------------------------------------------------------------------------------------------------------------------------------------------------------------------------------------------------------------------------------------------------------|
| Dieta, cuestionario   | <input checked="" type="radio"/> sí<br><input type="radio"/> no                                                                                                                                                                                                                                                                                                                                              |
| Leche entera          | <input checked="" type="radio"/> Nunca o menos 1 vez al mes<br><input type="radio"/> 1 a 3 veces mes<br><input type="radio"/> 1 vez semana<br><input type="radio"/> 2 a 4 veces semana<br><input type="radio"/> 5 a 6 veces semana<br><input type="radio"/> 1 vez al día<br><input type="radio"/> 2 a 3 veces al día<br><input type="radio"/> 5 a 6 veces al día<br><input type="radio"/> más 6 veces al día |
| Leche semidesnatada   | <input type="radio"/> Nunca o menos 1 vez al mes<br><input type="radio"/> 1 a 3 veces mes<br><input type="radio"/> 1 vez semana<br><input type="radio"/> 2 a 4 veces semana<br><input type="radio"/> 5 a 6 veces semana<br><input checked="" type="radio"/> 1 vez al día<br><input type="radio"/> 2 a 3 veces al día<br><input type="radio"/> 5 a 6 veces al día<br><input type="radio"/> mas 6 veces al día |
| Leche desnatada       | <input checked="" type="radio"/> Nunca o menos 1 vez al mes<br><input type="radio"/> 1 a 3 veces mes<br><input type="radio"/> 1 vez semana<br><input type="radio"/> 2 a 4 veces semana<br><input type="radio"/> 5 a 6 veces semana<br><input type="radio"/> 1 vez al día<br><input type="radio"/> 2 a 3 veces al día<br><input type="radio"/> 5 a 6 veces al día<br><input type="radio"/> más 6 veces al día |
| Leche condensada      | <input checked="" type="radio"/> Nunca o menos 1 vez al mes<br><input type="radio"/> 1 a 3 veces mes<br><input type="radio"/> 1 vez semana<br><input type="radio"/> 2 a 4 veces semana<br><input type="radio"/> 5 a 6 veces semana<br><input type="radio"/> 1 vez al día<br><input type="radio"/> 2 a 3 veces al día<br><input type="radio"/> 5 a 6 veces al día<br><input type="radio"/> más 6 veces al día |
| nata o crema de leche | <input type="radio"/> Nunca o menos 1 vez al mes<br><input type="radio"/> 1 a 3 veces mes<br><input checked="" type="radio"/> 1 vez semana<br><input type="radio"/> 2 a 4 veces semana<br><input type="radio"/> 5 a 6 veces semana<br><input type="radio"/> 1 vez al día<br><input type="radio"/> 2 a 3 veces al día<br><input type="radio"/> 5 a 6 veces al día<br><input type="radio"/> más 6 veces al día |

|                                             |                                                                                                                                                                                                                                                                                                                                                                                                              |
|---------------------------------------------|--------------------------------------------------------------------------------------------------------------------------------------------------------------------------------------------------------------------------------------------------------------------------------------------------------------------------------------------------------------------------------------------------------------|
| Yogurt Entero                               | <input checked="" type="radio"/> Nunca o menos 1 vez al mes<br><input type="radio"/> 1 a 3 veces mes<br><input type="radio"/> 1 vez semana<br><input type="radio"/> 2 a 4 veces semana<br><input type="radio"/> 5 a 6 veces semana<br><input type="radio"/> 1 vez al día<br><input type="radio"/> 2 a 3 veces al día<br><input type="radio"/> 5 a 6 veces al día<br><input type="radio"/> más 6 veces al día |
| Yogurt desnatado                            | <input checked="" type="radio"/> Nunca o menos 1 vez al mes<br><input type="radio"/> 1 a 3 veces mes<br><input type="radio"/> 1 vez semana<br><input type="radio"/> 2 a 4 veces semana<br><input type="radio"/> 5 a 6 veces semana<br><input type="radio"/> 1 vez al día<br><input type="radio"/> 2 a 3 veces al día<br><input type="radio"/> 5 a 6 veces al día<br><input type="radio"/> más 6 veces al día |
| 100g requesón o queso blando o queso fresco | <input checked="" type="radio"/> Nunca o menos 1 vez al mes<br><input type="radio"/> 1 a 3 veces mes<br><input type="radio"/> 1 vez semana<br><input type="radio"/> 2 a 4 veces semana<br><input type="radio"/> 5 a 6 veces semana<br><input type="radio"/> 1 vez al día<br><input type="radio"/> 2 a 3 veces al día<br><input type="radio"/> 5 a 6 veces al día<br><input type="radio"/> más 6 veces al día |
| queso curado o semicurado o cremoso         | <input type="radio"/> Nunca o menos 1 vez al mes<br><input type="radio"/> 1 a 3 veces mes<br><input checked="" type="radio"/> 1 vez semana<br><input type="radio"/> 2 a 4 veces semana<br><input type="radio"/> 5 a 6 veces semana<br><input type="radio"/> 1 vez al día<br><input type="radio"/> 2 a 3 veces al día<br><input type="radio"/> 5 a 6 veces al día<br><input type="radio"/> más 6 veces al día |
| natillas flan pudding                       | <input type="radio"/> Nunca o menos 1 vez al mes<br><input checked="" type="radio"/> 1 a 3 veces mes<br><input type="radio"/> 1 vez semana<br><input type="radio"/> 2 a 4 veces semana<br><input type="radio"/> 5 a 6 veces semana<br><input type="radio"/> 1 vez al día<br><input type="radio"/> 2 a 3 veces al día<br><input type="radio"/> 5 a 6 veces al día<br><input type="radio"/> más 6 veces al día |
| Helado                                      | <input checked="" type="radio"/> Nunca o menos 1 vez al mes<br><input type="radio"/> 1 a 3 veces mes<br><input type="radio"/> 1 vez semana<br><input type="radio"/> 2 a 4 veces semana<br><input type="radio"/> 5 a 6 veces semana<br><input type="radio"/> 1 vez al día<br><input type="radio"/> 2 a 3 veces al día<br><input type="radio"/> 5 a 6 veces al día<br><input type="radio"/> más 6 veces al día |



|                                      |                                                                                                                                                                                                                                                                                                                                                                                                              |
|--------------------------------------|--------------------------------------------------------------------------------------------------------------------------------------------------------------------------------------------------------------------------------------------------------------------------------------------------------------------------------------------------------------------------------------------------------------|
| huevo                                | <input type="radio"/> Nunca o menos 1 vez al mes<br><input type="radio"/> 1 a 3 veces mes<br><input checked="" type="radio"/> 1 vez semana<br><input type="radio"/> 2 a 4 veces semana<br><input type="radio"/> 5 a 6 veces semana<br><input type="radio"/> 1 vez al día<br><input type="radio"/> 2 a 3 veces al día<br><input type="radio"/> 5 a 6 veces al día<br><input type="radio"/> más 6 veces al día |
| Pollo con piel                       | <input checked="" type="radio"/> Nunca o menos 1 vez al mes<br><input type="radio"/> 1 a 3 veces mes<br><input type="radio"/> 1 vez semana<br><input type="radio"/> 2 a 4 veces semana<br><input type="radio"/> 5 a 6 veces semana<br><input type="radio"/> 1 vez al día<br><input type="radio"/> 2 a 3 veces al día<br><input type="radio"/> 5 a 6 veces al día<br><input type="radio"/> más 6 veces al día |
| pollo sin piel                       | <input type="radio"/> Nunca o menos 1 vez al mes<br><input type="radio"/> 1 a 3 veces mes<br><input type="radio"/> 1 vez semana<br><input checked="" type="radio"/> 2 a 4 veces semana<br><input type="radio"/> 5 a 6 veces semana<br><input type="radio"/> 1 vez al día<br><input type="radio"/> 2 a 3 veces al día<br><input type="radio"/> 5 a 6 veces al día<br><input type="radio"/> más 6 veces al día |
| Ternera o cerdo o cordero            | <input type="radio"/> Nunca o menos 1 vez al mes<br><input type="radio"/> 1 a 3 veces mes<br><input type="radio"/> 1 vez semana<br><input checked="" type="radio"/> 2 a 4 veces semana<br><input type="radio"/> 5 a 6 veces semana<br><input type="radio"/> 1 vez al día<br><input type="radio"/> 2 a 3 veces al día<br><input type="radio"/> 5 a 6 veces al día<br><input type="radio"/> más 6 veces al día |
| carne caza: Conejo o codorniz o pato | <input checked="" type="radio"/> Nunca o menos 1 vez al mes<br><input type="radio"/> 1 a 3 veces mes<br><input type="radio"/> 1 vez semana<br><input type="radio"/> 2 a 4 veces semana<br><input type="radio"/> 5 a 6 veces semana<br><input type="radio"/> 1 vez al día<br><input type="radio"/> 2 a 3 veces al día<br><input type="radio"/> 5 a 6 veces al día<br><input type="radio"/> más 6 veces al día |
| Hígado de ternera o cerdo o pollo    | <input checked="" type="radio"/> Nunca o menos 1 vez al mes<br><input type="radio"/> 1 a 3 veces mes<br><input type="radio"/> 1 vez semana<br><input type="radio"/> 2 a 4 veces semana<br><input type="radio"/> 5 a 6 veces semana<br><input type="radio"/> 1 vez al día<br><input type="radio"/> 2 a 3 veces al día<br><input type="radio"/> 5 a 6 veces al día<br><input type="radio"/> más 6 veces al día |

|                     |                                                                                                                                                                                                                                                                                                                                                                                                              |
|---------------------|--------------------------------------------------------------------------------------------------------------------------------------------------------------------------------------------------------------------------------------------------------------------------------------------------------------------------------------------------------------------------------------------------------------|
| Vísceras            | <input checked="" type="radio"/> Nunca o menos 1 vez al mes<br><input type="radio"/> 1 a 3 veces mes<br><input type="radio"/> 1 vez semana<br><input type="radio"/> 2 a 4 veces semana<br><input type="radio"/> 5 a 6 veces semana<br><input type="radio"/> 1 vez al día<br><input type="radio"/> 2 a 3 veces al día<br><input type="radio"/> 5 a 6 veces al día<br><input type="radio"/> más 6 veces al día |
| Embutido            | <input checked="" type="radio"/> Nunca o menos 1 vez al mes<br><input type="radio"/> 1 a 3 veces mes<br><input type="radio"/> 1 vez semana<br><input type="radio"/> 2 a 4 veces semana<br><input type="radio"/> 5 a 6 veces semana<br><input type="radio"/> 1 vez al día<br><input type="radio"/> 2 a 3 veces al día<br><input type="radio"/> 5 a 6 veces al día<br><input type="radio"/> más 6 veces al día |
| Salchicha o similar | <input checked="" type="radio"/> Nunca o menos 1 vez al mes<br><input type="radio"/> 1 a 3 veces mes<br><input type="radio"/> 1 vez semana<br><input type="radio"/> 2 a 4 veces semana<br><input type="radio"/> 5 a 6 veces semana<br><input type="radio"/> 1 vez al día<br><input type="radio"/> 2 a 3 veces al día<br><input type="radio"/> 5 a 6 veces al día<br><input type="radio"/> más 6 veces al día |
| Pate o foiegras     | <input checked="" type="radio"/> Nunca o menos 1 vez al mes<br><input type="radio"/> 1 a 3 veces mes<br><input type="radio"/> 1 vez semana<br><input type="radio"/> 2 a 4 veces semana<br><input type="radio"/> 5 a 6 veces semana<br><input type="radio"/> 1 vez al día<br><input type="radio"/> 2 a 3 veces al día<br><input type="radio"/> 5 a 6 veces al día<br><input type="radio"/> más 6 veces al día |
| Hamburguesa         | <input type="radio"/> Nunca o menos 1 vez al mes<br><input type="radio"/> 1 a 3 veces mes<br><input type="radio"/> 1 vez semana<br><input checked="" type="radio"/> 2 a 4 veces semana<br><input type="radio"/> 5 a 6 veces semana<br><input type="radio"/> 1 vez al día<br><input type="radio"/> 2 a 3 veces al día<br><input type="radio"/> 5 a 6 veces al día<br><input type="radio"/> más 6 veces al día |
| tocino o bacon      | <input checked="" type="radio"/> Nunca o menos 1 vez al mes<br><input type="radio"/> 1 a 3 veces mes<br><input type="radio"/> 1 vez semana<br><input type="radio"/> 2 a 4 veces semana<br><input type="radio"/> 5 a 6 veces semana<br><input type="radio"/> 1 vez al día<br><input type="radio"/> 2 a 3 veces al día<br><input type="radio"/> 5 a 6 veces al día<br><input type="radio"/> más 6 veces al día |

|                        |                                                                                                                                                                                                                                                                                                                                                                                                              |
|------------------------|--------------------------------------------------------------------------------------------------------------------------------------------------------------------------------------------------------------------------------------------------------------------------------------------------------------------------------------------------------------------------------------------------------------|
| Pescado frito          | <input checked="" type="radio"/> Nunca o menos 1 vez al mes<br><input type="radio"/> 1 a 3 veces mes<br><input type="radio"/> 1 vez semana<br><input type="radio"/> 2 a 4 veces semana<br><input type="radio"/> 5 a 6 veces semana<br><input type="radio"/> 1 vez al día<br><input type="radio"/> 2 a 3 veces al día<br><input type="radio"/> 5 a 6 veces al día<br><input type="radio"/> más 6 veces al día |
| pescado hervido blanco | <input type="radio"/> Nunca o menos 1 vez al mes<br><input type="radio"/> 1 a 3 veces mes<br><input checked="" type="radio"/> 1 vez semana<br><input type="radio"/> 2 a 4 veces semana<br><input type="radio"/> 5 a 6 veces semana<br><input type="radio"/> 1 vez al día<br><input type="radio"/> 2 a 3 veces al día<br><input type="radio"/> 5 a 6 veces al día<br><input type="radio"/> más 6 veces al día |
| pescado hervido azul   | <input type="radio"/> Nunca o menos 1 vez al mes<br><input type="radio"/> 1 a 3 veces mes<br><input checked="" type="radio"/> 1 vez semana<br><input type="radio"/> 2 a 4 veces semana<br><input type="radio"/> 5 a 6 veces semana<br><input type="radio"/> 1 vez al día<br><input type="radio"/> 2 a 3 veces al día<br><input type="radio"/> 5 a 6 veces al día<br><input type="radio"/> más 6 veces al día |
| otros pescado azul     | <input checked="" type="radio"/> Nunca o menos 1 vez al mes<br><input type="radio"/> 1 a 3 veces mes<br><input type="radio"/> 1 vez semana<br><input type="radio"/> 2 a 4 veces semana<br><input type="radio"/> 5 a 6 veces semana<br><input type="radio"/> 1 vez al día<br><input type="radio"/> 2 a 3 veces al día<br><input type="radio"/> 5 a 6 veces al día<br><input type="radio"/> más 6 veces al día |
| atun conserva          | <input type="radio"/> Nunca o menos 1 vez al mes<br><input type="radio"/> 1 a 3 veces mes<br><input checked="" type="radio"/> 1 vez semana<br><input type="radio"/> 2 a 4 veces semana<br><input type="radio"/> 5 a 6 veces semana<br><input type="radio"/> 1 vez al día<br><input type="radio"/> 2 a 3 veces al día<br><input type="radio"/> 5 a 6 veces al día<br><input type="radio"/> más 6 veces al día |
| sardina conserva       | <input checked="" type="radio"/> Nunca o menos 1 vez al mes<br><input type="radio"/> 1 a 3 veces mes<br><input type="radio"/> 1 vez semana<br><input type="radio"/> 2 a 4 veces semana<br><input type="radio"/> 5 a 6 veces semana<br><input type="radio"/> 1 vez al día<br><input type="radio"/> 2 a 3 veces al día<br><input type="radio"/> 5 a 6 veces al día<br><input type="radio"/> más 6 veces al día |

|                                         |                                                                                                                                                                                                                                                                                                                                                                                                              |
|-----------------------------------------|--------------------------------------------------------------------------------------------------------------------------------------------------------------------------------------------------------------------------------------------------------------------------------------------------------------------------------------------------------------------------------------------------------------|
| pescado ahumado                         | <input checked="" type="radio"/> Nunca o menos 1 vez al mes<br><input type="radio"/> 1 a 3 veces mes<br><input type="radio"/> 1 vez semana<br><input type="radio"/> 2 a 4 veces semana<br><input type="radio"/> 5 a 6 veces semana<br><input type="radio"/> 1 vez al día<br><input type="radio"/> 2 a 3 veces al día<br><input type="radio"/> 5 a 6 veces al día<br><input type="radio"/> más 6 veces al día |
| almejas o mejillones o ostras unos 100g | <input checked="" type="radio"/> Nunca o menos 1 vez al mes<br><input type="radio"/> 1 a 3 veces mes<br><input type="radio"/> 1 vez semana<br><input type="radio"/> 2 a 4 veces semana<br><input type="radio"/> 5 a 6 veces semana<br><input type="radio"/> 1 vez al día<br><input type="radio"/> 2 a 3 veces al día<br><input type="radio"/> 5 a 6 veces al día<br><input type="radio"/> más 6 veces al día |
| calamar o chipiron o sepia unos 100g    | <input type="radio"/> Nunca o menos 1 vez al mes<br><input checked="" type="radio"/> 1 a 3 veces mes<br><input type="radio"/> 1 vez semana<br><input type="radio"/> 2 a 4 veces semana<br><input type="radio"/> 5 a 6 veces semana<br><input type="radio"/> 1 vez al día<br><input type="radio"/> 2 a 3 veces al día<br><input type="radio"/> 5 a 6 veces al día<br><input type="radio"/> más 6 veces al día |
| marisco unos 100g                       | <input checked="" type="radio"/> Nunca o menos 1 vez al mes<br><input type="radio"/> 1 a 3 veces mes<br><input type="radio"/> 1 vez semana<br><input type="radio"/> 2 a 4 veces semana<br><input type="radio"/> 5 a 6 veces semana<br><input type="radio"/> 1 vez al día<br><input type="radio"/> 2 a 3 veces al día<br><input type="radio"/> 5 a 6 veces al día<br><input type="radio"/> más 6 veces al día |
| Espinacas o acelgas cocinadas           | <input type="radio"/> Nunca o menos 1 vez al mes<br><input checked="" type="radio"/> 1 a 3 veces mes<br><input type="radio"/> 1 vez semana<br><input type="radio"/> 2 a 4 veces semana<br><input type="radio"/> 5 a 6 veces semana<br><input type="radio"/> 1 vez al día<br><input type="radio"/> 2 a 3 veces al día<br><input type="radio"/> 5 a 6 veces al día<br><input type="radio"/> más 6 veces al día |
| Col o coliflor o brocoli cocinado       | <input checked="" type="radio"/> Nunca o menos 1 vez al mes<br><input type="radio"/> 1 a 3 veces mes<br><input type="radio"/> 1 vez semana<br><input type="radio"/> 2 a 4 veces semana<br><input type="radio"/> 5 a 6 veces semana<br><input type="radio"/> 1 vez al día<br><input type="radio"/> 2 a 3 veces al día<br><input type="radio"/> 5 a 6 veces al día<br><input type="radio"/> más 6 veces al día |

---

Lechuga o endivia o escarola

- ☐ Nunca o menos 1 vez al mes  
☐ 1 a 3 veces mes  
☐ 1 vez semana  
☒ 2 a 4 veces semana  
☐ 5 a 6 veces semana  
☐ 1 vez al día  
☐ 2 a 3 veces al día  
☐ 5 a 6 veces al día  
☐ más 6 veces al día

---

tomate ensalada

- ☐ Nunca o menos 1 vez al mes  
☐ 1 a 3 veces mes  
☐ 1 vez semana  
☒ 2 a 4 veces semana  
☐ 5 a 6 veces semana  
☐ 1 vez al día  
☐ 2 a 3 veces al día  
☐ 5 a 6 veces al día  
☐ más 6 veces al día

---

cebolla

- ☒ Nunca o menos 1 vez al mes  
☐ 1 a 3 veces mes  
☐ 1 vez semana  
☐ 2 a 4 veces semana  
☐ 5 a 6 veces semana  
☐ 1 vez al día  
☐ 2 a 3 veces al día  
☐ 5 a 6 veces al día  
☐ más 6 veces al día

---

Zanahoria o calabaza

- ☐ Nunca o menos 1 vez al mes  
☐ 1 a 3 veces mes  
☐ 1 vez semana  
☐ 2 a 4 veces semana  
☒ 5 a 6 veces semana  
☐ 1 vez al día  
☐ 2 a 3 veces al día  
☐ 5 a 6 veces al día  
☐ más 6 veces al día

---

Judías verdes

- ☐ Nunca o menos 1 vez al mes  
☐ 1 a 3 veces mes  
☐ 1 vez semana  
☒ 2 a 4 veces semana  
☐ 5 a 6 veces semana  
☐ 1 vez al día  
☐ 2 a 3 veces al día  
☐ 5 a 6 veces al día  
☐ más 6 veces al día

---

Berenjena o calabacin o pepino

- ☐ Nunca o menos 1 vez al mes  
☐ 1 a 3 veces mes  
☐ 1 vez semana  
☒ 2 a 4 veces semana  
☐ 5 a 6 veces semana  
☐ 1 vez al día  
☐ 2 a 3 veces al día  
☐ 5 a 6 veces al día  
☐ más 6 veces al día

|                       |                                                                                                                                                                                                                                                                                                                                                                                                              |
|-----------------------|--------------------------------------------------------------------------------------------------------------------------------------------------------------------------------------------------------------------------------------------------------------------------------------------------------------------------------------------------------------------------------------------------------------|
| pimiento              | <input type="radio"/> Nunca o menos 1 vez al mes<br><input checked="" type="radio"/> 1 a 3 veces mes<br><input type="radio"/> 1 vez semana<br><input type="radio"/> 2 a 4 veces semana<br><input type="radio"/> 5 a 6 veces semana<br><input type="radio"/> 1 vez al día<br><input type="radio"/> 2 a 3 veces al día<br><input type="radio"/> 5 a 6 veces al día<br><input type="radio"/> más 6 veces al día |
| alcachofa             | <input type="radio"/> Nunca o menos 1 vez al mes<br><input type="radio"/> 1 a 3 veces mes<br><input checked="" type="radio"/> 1 vez semana<br><input type="radio"/> 2 a 4 veces semana<br><input type="radio"/> 5 a 6 veces semana<br><input type="radio"/> 1 vez al día<br><input type="radio"/> 2 a 3 veces al día<br><input type="radio"/> 5 a 6 veces al día<br><input type="radio"/> más 6 veces al día |
| espárragos            | <input type="radio"/> Nunca o menos 1 vez al mes<br><input checked="" type="radio"/> 1 a 3 veces mes<br><input type="radio"/> 1 vez semana<br><input type="radio"/> 2 a 4 veces semana<br><input type="radio"/> 5 a 6 veces semana<br><input type="radio"/> 1 vez al día<br><input type="radio"/> 2 a 3 veces al día<br><input type="radio"/> 5 a 6 veces al día<br><input type="radio"/> más 6 veces al día |
| maíz hervido          | <input checked="" type="radio"/> Nunca o menos 1 vez al mes<br><input type="radio"/> 1 a 3 veces mes<br><input type="radio"/> 1 vez semana<br><input type="radio"/> 2 a 4 veces semana<br><input type="radio"/> 5 a 6 veces semana<br><input type="radio"/> 1 vez al día<br><input type="radio"/> 2 a 3 veces al día<br><input type="radio"/> 5 a 6 veces al día<br><input type="radio"/> más 6 veces al día |
| legumbres             | <input type="radio"/> Nunca o menos 1 vez al mes<br><input type="radio"/> 1 a 3 veces mes<br><input checked="" type="radio"/> 1 vez semana<br><input type="radio"/> 2 a 4 veces semana<br><input type="radio"/> 5 a 6 veces semana<br><input type="radio"/> 1 vez al día<br><input type="radio"/> 2 a 3 veces al día<br><input type="radio"/> 5 a 6 veces al día<br><input type="radio"/> más 6 veces al día |
| naranjas o mandarinas | <input type="radio"/> Nunca o menos 1 vez al mes<br><input type="radio"/> 1 a 3 veces mes<br><input type="radio"/> 1 vez semana<br><input checked="" type="radio"/> 2 a 4 veces semana<br><input type="radio"/> 5 a 6 veces semana<br><input type="radio"/> 1 vez al día<br><input type="radio"/> 2 a 3 veces al día<br><input type="radio"/> 5 a 6 veces al día<br><input type="radio"/> más 6 veces al día |

|                       |                                                                                                                                                                                                                                                                                                                                                                                                              |
|-----------------------|--------------------------------------------------------------------------------------------------------------------------------------------------------------------------------------------------------------------------------------------------------------------------------------------------------------------------------------------------------------------------------------------------------------|
| zum natural fruta     | <input type="radio"/> Nunca o menos 1 vez al mes<br><input checked="" type="radio"/> 1 a 3 veces mes<br><input type="radio"/> 1 vez semana<br><input type="radio"/> 2 a 4 veces semana<br><input type="radio"/> 5 a 6 veces semana<br><input type="radio"/> 1 vez al día<br><input type="radio"/> 2 a 3 veces al día<br><input type="radio"/> 5 a 6 veces al día<br><input type="radio"/> más 6 veces al día |
| platano               | <input type="radio"/> Nunca o menos 1 vez al mes<br><input type="radio"/> 1 a 3 veces mes<br><input type="radio"/> 1 vez semana<br><input checked="" type="radio"/> 2 a 4 veces semana<br><input type="radio"/> 5 a 6 veces semana<br><input type="radio"/> 1 vez al día<br><input type="radio"/> 2 a 3 veces al día<br><input type="radio"/> 5 a 6 veces al día<br><input type="radio"/> más 6 veces al día |
| manzana o pera        | <input type="radio"/> Nunca o menos 1 vez al mes<br><input type="radio"/> 1 a 3 veces mes<br><input type="radio"/> 1 vez semana<br><input checked="" type="radio"/> 2 a 4 veces semana<br><input type="radio"/> 5 a 6 veces semana<br><input type="radio"/> 1 vez al día<br><input type="radio"/> 2 a 3 veces al día<br><input type="radio"/> 5 a 6 veces al día<br><input type="radio"/> más 6 veces al día |
| melocotón o nectarina | <input type="radio"/> Nunca o menos 1 vez al mes<br><input type="radio"/> 1 a 3 veces mes<br><input type="radio"/> 1 vez semana<br><input checked="" type="radio"/> 2 a 4 veces semana<br><input type="radio"/> 5 a 6 veces semana<br><input type="radio"/> 1 vez al día<br><input type="radio"/> 2 a 3 veces al día<br><input type="radio"/> 5 a 6 veces al día<br><input type="radio"/> más 6 veces al día |
| sandia o melon        | <input type="radio"/> Nunca o menos 1 vez al mes<br><input type="radio"/> 1 a 3 veces mes<br><input checked="" type="radio"/> 1 vez semana<br><input type="radio"/> 2 a 4 veces semana<br><input type="radio"/> 5 a 6 veces semana<br><input type="radio"/> 1 vez al día<br><input type="radio"/> 2 a 3 veces al día<br><input type="radio"/> 5 a 6 veces al día<br><input type="radio"/> más 6 veces al día |
| uva                   | <input type="radio"/> Nunca o menos 1 vez al mes<br><input type="radio"/> 1 a 3 veces mes<br><input checked="" type="radio"/> 1 vez semana<br><input type="radio"/> 2 a 4 veces semana<br><input type="radio"/> 5 a 6 veces semana<br><input type="radio"/> 1 vez al día<br><input type="radio"/> 2 a 3 veces al día<br><input type="radio"/> 5 a 6 veces al día<br><input type="radio"/> más 6 veces al día |

|                 |                                                                                                                                                                                                                                                                                                                                                                                                              |
|-----------------|--------------------------------------------------------------------------------------------------------------------------------------------------------------------------------------------------------------------------------------------------------------------------------------------------------------------------------------------------------------------------------------------------------------|
| bruna o ciruela | <input type="radio"/> Nunca o menos 1 vez al mes<br><input checked="" type="radio"/> 1 a 3 veces mes<br><input type="radio"/> 1 vez semana<br><input type="radio"/> 2 a 4 veces semana<br><input type="radio"/> 5 a 6 veces semana<br><input type="radio"/> 1 vez al día<br><input type="radio"/> 2 a 3 veces al día<br><input type="radio"/> 5 a 6 veces al día<br><input type="radio"/> más 6 veces al día |
| kiwi            | <input checked="" type="radio"/> Nunca o menos 1 vez al mes<br><input type="radio"/> 1 a 3 veces mes<br><input type="radio"/> 1 vez semana<br><input type="radio"/> 2 a 4 veces semana<br><input type="radio"/> 5 a 6 veces semana<br><input type="radio"/> 1 vez al día<br><input type="radio"/> 2 a 3 veces al día<br><input type="radio"/> 5 a 6 veces al día<br><input type="radio"/> más 6 veces al día |
| aceituna        | <input type="radio"/> Nunca o menos 1 vez al mes<br><input checked="" type="radio"/> 1 a 3 veces mes<br><input type="radio"/> 1 vez semana<br><input type="radio"/> 2 a 4 veces semana<br><input type="radio"/> 5 a 6 veces semana<br><input type="radio"/> 1 vez al día<br><input type="radio"/> 2 a 3 veces al día<br><input type="radio"/> 5 a 6 veces al día<br><input type="radio"/> más 6 veces al día |
| frutos secos    | <input type="radio"/> Nunca o menos 1 vez al mes<br><input type="radio"/> 1 a 3 veces mes<br><input type="radio"/> 1 vez semana<br><input checked="" type="radio"/> 2 a 4 veces semana<br><input type="radio"/> 5 a 6 veces semana<br><input type="radio"/> 1 vez al día<br><input type="radio"/> 2 a 3 veces al día<br><input type="radio"/> 5 a 6 veces al día<br><input type="radio"/> más 6 veces al día |
| pan blanco      | <input type="radio"/> Nunca o menos 1 vez al mes<br><input type="radio"/> 1 a 3 veces mes<br><input type="radio"/> 1 vez semana<br><input checked="" type="radio"/> 2 a 4 veces semana<br><input type="radio"/> 5 a 6 veces semana<br><input type="radio"/> 1 vez al día<br><input type="radio"/> 2 a 3 veces al día<br><input type="radio"/> 5 a 6 veces al día<br><input type="radio"/> más 6 veces al día |
| pan integral    | <input type="radio"/> Nunca o menos 1 vez al mes<br><input checked="" type="radio"/> 1 a 3 veces mes<br><input type="radio"/> 1 vez semana<br><input type="radio"/> 2 a 4 veces semana<br><input type="radio"/> 5 a 6 veces semana<br><input type="radio"/> 1 vez al día<br><input type="radio"/> 2 a 3 veces al día<br><input type="radio"/> 5 a 6 veces al día<br><input type="radio"/> más 6 veces al día |



|                          |                                                                                                                                                                                                                                                                                                                                                                                                              |
|--------------------------|--------------------------------------------------------------------------------------------------------------------------------------------------------------------------------------------------------------------------------------------------------------------------------------------------------------------------------------------------------------------------------------------------------------|
| cereales desayuno        | <input type="radio"/> Nunca o menos 1 vez al mes<br><input checked="" type="radio"/> 1 a 3 veces mes<br><input type="radio"/> 1 vez semana<br><input type="radio"/> 2 a 4 veces semana<br><input type="radio"/> 5 a 6 veces semana<br><input type="radio"/> 1 vez al día<br><input type="radio"/> 2 a 3 veces al día<br><input type="radio"/> 5 a 6 veces al día<br><input type="radio"/> más 6 veces al día |
| patatas fritas           | <input type="radio"/> Nunca o menos 1 vez al mes<br><input type="radio"/> 1 a 3 veces mes<br><input checked="" type="radio"/> 1 vez semana<br><input type="radio"/> 2 a 4 veces semana<br><input type="radio"/> 5 a 6 veces semana<br><input type="radio"/> 1 vez al día<br><input type="radio"/> 2 a 3 veces al día<br><input type="radio"/> 5 a 6 veces al día<br><input type="radio"/> más 6 veces al día |
| patatas cocidas o asadas | <input type="radio"/> Nunca o menos 1 vez al mes<br><input type="radio"/> 1 a 3 veces mes<br><input checked="" type="radio"/> 1 vez semana<br><input type="radio"/> 2 a 4 veces semana<br><input type="radio"/> 5 a 6 veces semana<br><input type="radio"/> 1 vez al día<br><input type="radio"/> 2 a 3 veces al día<br><input type="radio"/> 5 a 6 veces al día<br><input type="radio"/> más 6 veces al día |
| bolsa papas              | <input checked="" type="radio"/> Nunca o menos 1 vez al mes<br><input type="radio"/> 1 a 3 veces mes<br><input type="radio"/> 1 vez semana<br><input type="radio"/> 2 a 4 veces semana<br><input type="radio"/> 5 a 6 veces semana<br><input type="radio"/> 1 vez al día<br><input type="radio"/> 2 a 3 veces al día<br><input type="radio"/> 5 a 6 veces al día<br><input type="radio"/> más 6 veces al día |
| arroz cocinado           | <input type="radio"/> Nunca o menos 1 vez al mes<br><input type="radio"/> 1 a 3 veces mes<br><input checked="" type="radio"/> 1 vez semana<br><input type="radio"/> 2 a 4 veces semana<br><input type="radio"/> 5 a 6 veces semana<br><input type="radio"/> 1 vez al día<br><input type="radio"/> 2 a 3 veces al día<br><input type="radio"/> 5 a 6 veces al día<br><input type="radio"/> más 6 veces al día |
| pasta                    | <input type="radio"/> Nunca o menos 1 vez al mes<br><input type="radio"/> 1 a 3 veces mes<br><input checked="" type="radio"/> 1 vez semana<br><input type="radio"/> 2 a 4 veces semana<br><input type="radio"/> 5 a 6 veces semana<br><input type="radio"/> 1 vez al día<br><input type="radio"/> 2 a 3 veces al día<br><input type="radio"/> 5 a 6 veces al día<br><input type="radio"/> más 6 veces al día |

|                     |                                                                                                                                                                                                                                                                                                                                                                                                              |
|---------------------|--------------------------------------------------------------------------------------------------------------------------------------------------------------------------------------------------------------------------------------------------------------------------------------------------------------------------------------------------------------------------------------------------------------|
| pizza               | <input type="radio"/> Nunca o menos 1 vez al mes<br><input checked="" type="radio"/> 1 a 3 veces mes<br><input type="radio"/> 1 vez semana<br><input type="radio"/> 2 a 4 veces semana<br><input type="radio"/> 5 a 6 veces semana<br><input type="radio"/> 1 vez al día<br><input type="radio"/> 2 a 3 veces al día<br><input type="radio"/> 5 a 6 veces al día<br><input type="radio"/> más 6 veces al día |
| aceite oliva        | <input type="radio"/> Nunca o menos 1 vez al mes<br><input type="radio"/> 1 a 3 veces mes<br><input type="radio"/> 1 vez semana<br><input checked="" type="radio"/> 2 a 4 veces semana<br><input type="radio"/> 5 a 6 veces semana<br><input type="radio"/> 1 vez al día<br><input type="radio"/> 2 a 3 veces al día<br><input type="radio"/> 5 a 6 veces al día<br><input type="radio"/> más 6 veces al día |
| otros aceites       | <input type="radio"/> Nunca o menos 1 vez al mes<br><input checked="" type="radio"/> 1 a 3 veces mes<br><input type="radio"/> 1 vez semana<br><input type="radio"/> 2 a 4 veces semana<br><input type="radio"/> 5 a 6 veces semana<br><input type="radio"/> 1 vez al día<br><input type="radio"/> 2 a 3 veces al día<br><input type="radio"/> 5 a 6 veces al día<br><input type="radio"/> más 6 veces al día |
| margarina           | <input checked="" type="radio"/> Nunca o menos 1 vez al mes<br><input type="radio"/> 1 a 3 veces mes<br><input type="radio"/> 1 vez semana<br><input type="radio"/> 2 a 4 veces semana<br><input type="radio"/> 5 a 6 veces semana<br><input type="radio"/> 1 vez al día<br><input type="radio"/> 2 a 3 veces al día<br><input type="radio"/> 5 a 6 veces al día<br><input type="radio"/> más 6 veces al día |
| mantequilla         | <input checked="" type="radio"/> Nunca o menos 1 vez al mes<br><input type="radio"/> 1 a 3 veces mes<br><input type="radio"/> 1 vez semana<br><input type="radio"/> 2 a 4 veces semana<br><input type="radio"/> 5 a 6 veces semana<br><input type="radio"/> 1 vez al día<br><input type="radio"/> 2 a 3 veces al día<br><input type="radio"/> 5 a 6 veces al día<br><input type="radio"/> más 6 veces al día |
| galletas tipo maria | <input checked="" type="radio"/> Nunca o menos 1 vez al mes<br><input type="radio"/> 1 a 3 veces mes<br><input type="radio"/> 1 vez semana<br><input type="radio"/> 2 a 4 veces semana<br><input type="radio"/> 5 a 6 veces semana<br><input type="radio"/> 1 vez al día<br><input type="radio"/> 2 a 3 veces al día<br><input type="radio"/> 5 a 6 veces al día<br><input type="radio"/> más 6 veces al día |

|                           |                                                                                                                                                                                                                                                                                                                                                                                                              |
|---------------------------|--------------------------------------------------------------------------------------------------------------------------------------------------------------------------------------------------------------------------------------------------------------------------------------------------------------------------------------------------------------------------------------------------------------|
| galletas chocolate        | <input checked="" type="radio"/> Nunca o menos 1 vez al mes<br><input type="radio"/> 1 a 3 veces mes<br><input type="radio"/> 1 vez semana<br><input type="radio"/> 2 a 4 veces semana<br><input type="radio"/> 5 a 6 veces semana<br><input type="radio"/> 1 vez al día<br><input type="radio"/> 2 a 3 veces al día<br><input type="radio"/> 5 a 6 veces al día<br><input type="radio"/> más 6 veces al día |
| bollieria                 | <input type="radio"/> Nunca o menos 1 vez al mes<br><input checked="" type="radio"/> 1 a 3 veces mes<br><input type="radio"/> 1 vez semana<br><input type="radio"/> 2 a 4 veces semana<br><input type="radio"/> 5 a 6 veces semana<br><input type="radio"/> 1 vez al día<br><input type="radio"/> 2 a 3 veces al día<br><input type="radio"/> 5 a 6 veces al día<br><input type="radio"/> más 6 veces al día |
| chocolate o bombones      | <input type="radio"/> Nunca o menos 1 vez al mes<br><input checked="" type="radio"/> 1 a 3 veces mes<br><input type="radio"/> 1 vez semana<br><input type="radio"/> 2 a 4 veces semana<br><input type="radio"/> 5 a 6 veces semana<br><input type="radio"/> 1 vez al día<br><input type="radio"/> 2 a 3 veces al día<br><input type="radio"/> 5 a 6 veces al día<br><input type="radio"/> más 6 veces al día |
| chocolate polvo o colacao | <input checked="" type="radio"/> Nunca o menos 1 vez al mes<br><input type="radio"/> 1 a 3 veces mes<br><input type="radio"/> 1 vez semana<br><input type="radio"/> 2 a 4 veces semana<br><input type="radio"/> 5 a 6 veces semana<br><input type="radio"/> 1 vez al día<br><input type="radio"/> 2 a 3 veces al día<br><input type="radio"/> 5 a 6 veces al día<br><input type="radio"/> más 6 veces al día |
| vino tinto                | <input checked="" type="radio"/> Nunca o menos 1 vez al mes<br><input type="radio"/> 1 a 3 veces mes<br><input type="radio"/> 1 vez semana<br><input type="radio"/> 2 a 4 veces semana<br><input type="radio"/> 5 a 6 veces semana<br><input type="radio"/> 1 vez al día<br><input type="radio"/> 2 a 3 veces al día<br><input type="radio"/> 5 a 6 veces al día<br><input type="radio"/> más 6 veces al día |
| vino blanco               | <input checked="" type="radio"/> Nunca o menos 1 vez al mes<br><input type="radio"/> 1 a 3 veces mes<br><input type="radio"/> 1 vez semana<br><input type="radio"/> 2 a 4 veces semana<br><input type="radio"/> 5 a 6 veces semana<br><input type="radio"/> 1 vez al día<br><input type="radio"/> 2 a 3 veces al día<br><input type="radio"/> 5 a 6 veces al día<br><input type="radio"/> más 6 veces al día |

|                       |                                                                                                                                                                                                                                                                                                                                                                                                              |
|-----------------------|--------------------------------------------------------------------------------------------------------------------------------------------------------------------------------------------------------------------------------------------------------------------------------------------------------------------------------------------------------------------------------------------------------------|
| vino seco o vermut    | <input checked="" type="radio"/> Nunca o menos 1 vez al mes<br><input type="radio"/> 1 a 3 veces mes<br><input type="radio"/> 1 vez semana<br><input type="radio"/> 2 a 4 veces semana<br><input type="radio"/> 5 a 6 veces semana<br><input type="radio"/> 1 vez al día<br><input type="radio"/> 2 a 3 veces al día<br><input type="radio"/> 5 a 6 veces al día<br><input type="radio"/> más 6 veces al día |
| cerveza               | <input checked="" type="radio"/> Nunca o menos 1 vez al mes<br><input type="radio"/> 1 a 3 veces mes<br><input type="radio"/> 1 vez semana<br><input type="radio"/> 2 a 4 veces semana<br><input type="radio"/> 5 a 6 veces semana<br><input type="radio"/> 1 vez al día<br><input type="radio"/> 2 a 3 veces al día<br><input type="radio"/> 5 a 6 veces al día<br><input type="radio"/> más 6 veces al día |
| cerveza sin alcohol   | <input checked="" type="radio"/> Nunca o menos 1 vez al mes<br><input type="radio"/> 1 a 3 veces mes<br><input type="radio"/> 1 vez semana<br><input type="radio"/> 2 a 4 veces semana<br><input type="radio"/> 5 a 6 veces semana<br><input type="radio"/> 1 vez al día<br><input type="radio"/> 2 a 3 veces al día<br><input type="radio"/> 5 a 6 veces al día<br><input type="radio"/> más 6 veces al día |
| licores               | <input checked="" type="radio"/> Nunca o menos 1 vez al mes<br><input type="radio"/> 1 a 3 veces mes<br><input type="radio"/> 1 vez semana<br><input type="radio"/> 2 a 4 veces semana<br><input type="radio"/> 5 a 6 veces semana<br><input type="radio"/> 1 vez al día<br><input type="radio"/> 2 a 3 veces al día<br><input type="radio"/> 5 a 6 veces al día<br><input type="radio"/> más 6 veces al día |
| ginebra o ron o vodka | <input checked="" type="radio"/> Nunca o menos 1 vez al mes<br><input type="radio"/> 1 a 3 veces mes<br><input type="radio"/> 1 vez semana<br><input type="radio"/> 2 a 4 veces semana<br><input type="radio"/> 5 a 6 veces semana<br><input type="radio"/> 1 vez al día<br><input type="radio"/> 2 a 3 veces al día<br><input type="radio"/> 5 a 6 veces al día<br><input type="radio"/> más 6 veces al día |
| refresco normal       | <input checked="" type="radio"/> Nunca o menos 1 vez al mes<br><input type="radio"/> 1 a 3 veces mes<br><input type="radio"/> 1 vez semana<br><input type="radio"/> 2 a 4 veces semana<br><input type="radio"/> 5 a 6 veces semana<br><input type="radio"/> 1 vez al día<br><input type="radio"/> 2 a 3 veces al día<br><input type="radio"/> 5 a 6 veces al día<br><input type="radio"/> más 6 veces al día |

|                           |                                                                                                                                                                                                                                                                                                                                                                                                              |
|---------------------------|--------------------------------------------------------------------------------------------------------------------------------------------------------------------------------------------------------------------------------------------------------------------------------------------------------------------------------------------------------------------------------------------------------------|
| refresco sin azúcar       | <input checked="" type="radio"/> Nunca o menos 1 vez al mes<br><input type="radio"/> 1 a 3 veces mes<br><input type="radio"/> 1 vez semana<br><input type="radio"/> 2 a 4 veces semana<br><input type="radio"/> 5 a 6 veces semana<br><input type="radio"/> 1 vez al día<br><input type="radio"/> 2 a 3 veces al día<br><input type="radio"/> 5 a 6 veces al día<br><input type="radio"/> más 6 veces al día |
| Agua del grifo            | <input checked="" type="radio"/> Nunca o menos 1 vez al mes<br><input type="radio"/> 1 a 3 veces mes<br><input type="radio"/> 1 vez semana<br><input type="radio"/> 2 a 4 veces semana<br><input type="radio"/> 5 a 6 veces semana<br><input type="radio"/> 1 vez al día<br><input type="radio"/> 2 a 3 veces al día<br><input type="radio"/> 5 a 6 veces al día<br><input type="radio"/> más 6 veces al día |
| agua embotellada sin gas  | <input type="radio"/> Nunca o menos 1 vez al mes<br><input type="radio"/> 1 a 3 veces mes<br><input type="radio"/> 1 vez semana<br><input type="radio"/> 2 a 4 veces semana<br><input type="radio"/> 5 a 6 veces semana<br><input type="radio"/> 1 vez al día<br><input type="radio"/> 2 a 3 veces al día<br><input checked="" type="radio"/> 5 a 6 veces al día<br><input type="radio"/> más 6 veces al día |
| agua embotellada con gas  | <input checked="" type="radio"/> Nunca o menos 1 vez al mes<br><input type="radio"/> 1 a 3 veces mes<br><input type="radio"/> 1 vez semana<br><input type="radio"/> 2 a 4 veces semana<br><input type="radio"/> 5 a 6 veces semana<br><input type="radio"/> 1 vez al día<br><input type="radio"/> 2 a 3 veces al día<br><input type="radio"/> 5 a 6 veces al día<br><input type="radio"/> más 6 veces al día |
| zumos frutas embotellados | <input checked="" type="radio"/> Nunca o menos 1 vez al mes<br><input type="radio"/> 1 a 3 veces mes<br><input type="radio"/> 1 vez semana<br><input type="radio"/> 2 a 4 veces semana<br><input type="radio"/> 5 a 6 veces semana<br><input type="radio"/> 1 vez al día<br><input type="radio"/> 2 a 3 veces al día<br><input type="radio"/> 5 a 6 veces al día<br><input type="radio"/> más 6 veces al día |
| café                      | <input type="radio"/> Nunca o menos 1 vez al mes<br><input type="radio"/> 1 a 3 veces mes<br><input type="radio"/> 1 vez semana<br><input checked="" type="radio"/> 2 a 4 veces semana<br><input type="radio"/> 5 a 6 veces semana<br><input type="radio"/> 1 vez al día<br><input type="radio"/> 2 a 3 veces al día<br><input type="radio"/> 5 a 6 veces al día<br><input type="radio"/> más 6 veces al día |

|                       |                                                                                                                                                                                                                                                                                                                                                                                                              |
|-----------------------|--------------------------------------------------------------------------------------------------------------------------------------------------------------------------------------------------------------------------------------------------------------------------------------------------------------------------------------------------------------------------------------------------------------|
| cafe descafeinado     | <input checked="" type="radio"/> Nunca o menos 1 vez al mes<br><input type="radio"/> 1 a 3 veces mes<br><input type="radio"/> 1 vez semana<br><input type="radio"/> 2 a 4 veces semana<br><input type="radio"/> 5 a 6 veces semana<br><input type="radio"/> 1 vez al día<br><input type="radio"/> 2 a 3 veces al día<br><input type="radio"/> 5 a 6 veces al día<br><input type="radio"/> más 6 veces al día |
| te o infusión         | <input checked="" type="radio"/> Nunca o menos 1 vez al mes<br><input type="radio"/> 1 a 3 veces mes<br><input type="radio"/> 1 vez semana<br><input type="radio"/> 2 a 4 veces semana<br><input type="radio"/> 5 a 6 veces semana<br><input type="radio"/> 1 vez al día<br><input type="radio"/> 2 a 3 veces al día<br><input type="radio"/> 5 a 6 veces al día<br><input type="radio"/> más 6 veces al día |
| sopa o puré verduras  | <input type="radio"/> Nunca o menos 1 vez al mes<br><input type="radio"/> 1 a 3 veces mes<br><input type="radio"/> 1 vez semana<br><input checked="" type="radio"/> 2 a 4 veces semana<br><input type="radio"/> 5 a 6 veces semana<br><input type="radio"/> 1 vez al día<br><input type="radio"/> 2 a 3 veces al día<br><input type="radio"/> 5 a 6 veces al día<br><input type="radio"/> más 6 veces al día |
| croquetas pollo jamón | <input type="radio"/> Nunca o menos 1 vez al mes<br><input checked="" type="radio"/> 1 a 3 veces mes<br><input type="radio"/> 1 vez semana<br><input type="radio"/> 2 a 4 veces semana<br><input type="radio"/> 5 a 6 veces semana<br><input type="radio"/> 1 vez al día<br><input type="radio"/> 2 a 3 veces al día<br><input type="radio"/> 5 a 6 veces al día<br><input type="radio"/> más 6 veces al día |
| croquetas pescado     | <input checked="" type="radio"/> Nunca o menos 1 vez al mes<br><input type="radio"/> 1 a 3 veces mes<br><input type="radio"/> 1 vez semana<br><input type="radio"/> 2 a 4 veces semana<br><input type="radio"/> 5 a 6 veces semana<br><input type="radio"/> 1 vez al día<br><input type="radio"/> 2 a 3 veces al día<br><input type="radio"/> 5 a 6 veces al día<br><input type="radio"/> más 6 veces al día |
| mayonesa              | <input checked="" type="radio"/> Nunca o menos 1 vez al mes<br><input type="radio"/> 1 a 3 veces mes<br><input type="radio"/> 1 vez semana<br><input type="radio"/> 2 a 4 veces semana<br><input type="radio"/> 5 a 6 veces semana<br><input type="radio"/> 1 vez al día<br><input type="radio"/> 2 a 3 veces al día<br><input type="radio"/> 5 a 6 veces al día<br><input type="radio"/> más 6 veces al día |

|                  |                                                                                                                                                                                                                                                                                                                                                                                                              |
|------------------|--------------------------------------------------------------------------------------------------------------------------------------------------------------------------------------------------------------------------------------------------------------------------------------------------------------------------------------------------------------------------------------------------------------|
| salsa tomate     | <input type="radio"/> Nunca o menos 1 vez al mes<br><input checked="" type="radio"/> 1 a 3 veces mes<br><input type="radio"/> 1 vez semana<br><input type="radio"/> 2 a 4 veces semana<br><input type="radio"/> 5 a 6 veces semana<br><input type="radio"/> 1 vez al día<br><input type="radio"/> 2 a 3 veces al día<br><input type="radio"/> 5 a 6 veces al día<br><input type="radio"/> más 6 veces al día |
| ketchup          | <input checked="" type="radio"/> Nunca o menos 1 vez al mes<br><input type="radio"/> 1 a 3 veces mes<br><input type="radio"/> 1 vez semana<br><input type="radio"/> 2 a 4 veces semana<br><input type="radio"/> 5 a 6 veces semana<br><input type="radio"/> 1 vez al día<br><input type="radio"/> 2 a 3 veces al día<br><input type="radio"/> 5 a 6 veces al día<br><input type="radio"/> más 6 veces al día |
| sal              | <input type="radio"/> Nunca o menos 1 vez al mes<br><input type="radio"/> 1 a 3 veces mes<br><input checked="" type="radio"/> 1 vez semana<br><input type="radio"/> 2 a 4 veces semana<br><input type="radio"/> 5 a 6 veces semana<br><input type="radio"/> 1 vez al día<br><input type="radio"/> 2 a 3 veces al día<br><input type="radio"/> 5 a 6 veces al día<br><input type="radio"/> más 6 veces al día |
| ajo              | <input checked="" type="radio"/> Nunca o menos 1 vez al mes<br><input type="radio"/> 1 a 3 veces mes<br><input type="radio"/> 1 vez semana<br><input type="radio"/> 2 a 4 veces semana<br><input type="radio"/> 5 a 6 veces semana<br><input type="radio"/> 1 vez al día<br><input type="radio"/> 2 a 3 veces al día<br><input type="radio"/> 5 a 6 veces al día<br><input type="radio"/> más 6 veces al día |
| mermelada o miel | <input checked="" type="radio"/> Nunca o menos 1 vez al mes<br><input type="radio"/> 1 a 3 veces mes<br><input type="radio"/> 1 vez semana<br><input type="radio"/> 2 a 4 veces semana<br><input type="radio"/> 5 a 6 veces semana<br><input type="radio"/> 1 vez al día<br><input type="radio"/> 2 a 3 veces al día<br><input type="radio"/> 5 a 6 veces al día<br><input type="radio"/> más 6 veces al día |
| azúcar           | <input type="radio"/> Nunca o menos 1 vez al mes<br><input type="radio"/> 1 a 3 veces mes<br><input type="radio"/> 1 vez semana<br><input checked="" type="radio"/> 2 a 4 veces semana<br><input type="radio"/> 5 a 6 veces semana<br><input type="radio"/> 1 vez al día<br><input type="radio"/> 2 a 3 veces al día<br><input type="radio"/> 5 a 6 veces al día<br><input type="radio"/> más 6 veces al día |

|                                       |                                                                                                                                                                                                                                                                                                                                                                                                                                                                                                                               |
|---------------------------------------|-------------------------------------------------------------------------------------------------------------------------------------------------------------------------------------------------------------------------------------------------------------------------------------------------------------------------------------------------------------------------------------------------------------------------------------------------------------------------------------------------------------------------------|
| Otro alimento                         | <hr/>                                                                                                                                                                                                                                                                                                                                                                                                                                                                                                                         |
| suplementos vitamínicos               | <input checked="" type="radio"/> si<br><input type="radio"/> no                                                                                                                                                                                                                                                                                                                                                                                                                                                               |
| suplementos vitamínicos               | <hr/>                                                                                                                                                                                                                                                                                                                                                                                                                                                                                                                         |
| dieta previa                          | <input type="radio"/> si<br><input checked="" type="radio"/> no                                                                                                                                                                                                                                                                                                                                                                                                                                                               |
| motivo dieta                          | <input checked="" type="radio"/> no dieta<br><input type="radio"/> control peso<br><input type="radio"/> control colesterol<br><input type="radio"/> control diabetes<br><input type="radio"/> problemas estómago<br><input type="radio"/> problemas vesícula o hepáticos<br><input type="radio"/> HTA o cardiopatía<br><input type="radio"/> problemas renales<br><input type="radio"/> alergia alimentaria<br><input type="radio"/> ácido úrico elevado<br><input type="radio"/> vegetariana<br><input type="radio"/> otros |
| cambio alimentos año previo gestación | <input checked="" type="radio"/> si<br><input type="radio"/> no                                                                                                                                                                                                                                                                                                                                                                                                                                                               |
| cambio lácteos                        | <input type="radio"/> eliminado<br><input type="radio"/> disminuido<br><input checked="" type="radio"/> igual<br><input type="radio"/> aumentado<br><input type="radio"/> no sabe                                                                                                                                                                                                                                                                                                                                             |
| cambio huevos                         | <input type="radio"/> eliminado<br><input type="radio"/> disminuido<br><input checked="" type="radio"/> igual<br><input type="radio"/> aumentado<br><input type="radio"/> no sabe                                                                                                                                                                                                                                                                                                                                             |
| cambio carne                          | <input type="radio"/> eliminado<br><input type="radio"/> disminuido<br><input checked="" type="radio"/> igual<br><input type="radio"/> aumentado<br><input type="radio"/> no sabe                                                                                                                                                                                                                                                                                                                                             |
| cambio pescado                        | <input type="radio"/> eliminado<br><input type="radio"/> disminuido<br><input checked="" type="radio"/> igual<br><input type="radio"/> aumentado<br><input type="radio"/> no sabe                                                                                                                                                                                                                                                                                                                                             |
| cambio verduras                       | <input type="radio"/> eliminado<br><input type="radio"/> disminuido<br><input checked="" type="radio"/> igual<br><input type="radio"/> aumentado<br><input type="radio"/> no sabe                                                                                                                                                                                                                                                                                                                                             |



|                            |                                                                                                                                                                                                                        |
|----------------------------|------------------------------------------------------------------------------------------------------------------------------------------------------------------------------------------------------------------------|
| cambio legumbres           | <input type="radio"/> eliminado<br><input type="radio"/> disminuido<br><input checked="" type="radio"/> igual<br><input type="radio"/> aumentado<br><input type="radio"/> no sabe                                      |
| cambio fruta               | <input type="radio"/> eliminado<br><input type="radio"/> disminuido<br><input checked="" type="radio"/> igual<br><input type="radio"/> aumentado<br><input type="radio"/> no sabe                                      |
| cambio pan                 | <input type="radio"/> eliminado<br><input type="radio"/> disminuido<br><input checked="" type="radio"/> igual<br><input type="radio"/> aumentado<br><input type="radio"/> no sabe                                      |
| cambio aceite oliva        | <input type="radio"/> eliminado<br><input type="radio"/> disminuido<br><input checked="" type="radio"/> igual<br><input type="radio"/> aumentado<br><input type="radio"/> no sabe                                      |
| cambio mante o margarina   | <input type="radio"/> eliminado<br><input type="radio"/> disminuido<br><input checked="" type="radio"/> igual<br><input type="radio"/> aumentado<br><input type="radio"/> no sabe                                      |
| cambio azúcar y dulces     | <input checked="" type="radio"/> eliminado<br><input type="radio"/> disminuido<br><input type="radio"/> igual<br><input type="radio"/> aumentado<br><input type="radio"/> no sabe                                      |
| cambio bebidas alcohólicas | <input checked="" type="radio"/> eliminado<br><input type="radio"/> disminuido<br><input type="radio"/> igual<br><input type="radio"/> aumentado<br><input type="radio"/> no sabe                                      |
| frecuencia comidas fritas  | <input type="radio"/> a diario<br><input type="radio"/> 5 a 6 veces semana<br><input type="radio"/> 2 a 4 veces semana<br><input type="radio"/> 1 vez semana<br><input checked="" type="radio"/> menos de 1 vez semana |
| carne                      | <input type="radio"/> no como<br><input type="radio"/> cruda<br><input type="radio"/> poco hecha<br><input type="radio"/> hecha<br><input checked="" type="radio"/> muy hecha                                          |
| grasa visible carne        | <input checked="" type="radio"/> quita toda<br><input type="radio"/> quita mayoría<br><input type="radio"/> quita un poco<br><input type="radio"/> no quita nada                                                       |

|                                |                                                                                                                                                                                                                                                          |
|--------------------------------|----------------------------------------------------------------------------------------------------------------------------------------------------------------------------------------------------------------------------------------------------------|
| cocina carne                   | <input checked="" type="radio"/> a la plancha<br><input type="radio"/> a la parrilla<br><input type="radio"/> asada<br><input type="radio"/> frita<br><input type="radio"/> guisada                                                                      |
| tostado quemado carne          | <input checked="" type="radio"/> nunca<br><input type="radio"/> 1 vez mes<br><input type="radio"/> 2 a 3 veces mes<br><input type="radio"/> 1 vez semana<br><input type="radio"/> 2 a 3 semanas                                                          |
| tostado quemado pescado        | <input checked="" type="radio"/> nunca<br><input type="radio"/> 1 vez mes<br><input type="radio"/> 2 a 3 veces mes<br><input type="radio"/> 1 vez semana<br><input type="radio"/> 2 a 3 semanas                                                          |
| socarrat paella                | <input checked="" type="radio"/> nunca<br><input type="radio"/> 1 vez mes<br><input type="radio"/> 2 a 3 veces mes<br><input type="radio"/> 1 vez semana<br><input type="radio"/> 2 a 3 semanas                                                          |
| grasa o aceite cocinar         | <input type="radio"/> mantequilla<br><input type="radio"/> margarina<br><input type="radio"/> aceite oliva<br><input checked="" type="radio"/> aceite oliva virgen extra<br><input type="radio"/> aceite vegetal<br><input type="radio"/> mezcla aceites |
| grasa aceite aliñar            | <input type="radio"/> mantequilla<br><input type="radio"/> margarina<br><input type="radio"/> aceite oliva<br><input checked="" type="radio"/> aceite oliva virgen extra<br><input type="radio"/> aceite vegetal<br><input type="radio"/> mezcla aceites |
| grasa aceite freir             | <input type="radio"/> mantequilla<br><input type="radio"/> margarina<br><input type="radio"/> aceite oliva<br><input type="radio"/> aceite oliva virgen extra<br><input type="radio"/> aceite vegetal<br><input type="radio"/> mezcla aceites            |
| Ejercicio cuestionario         | <input type="radio"/> si<br><input type="radio"/> no                                                                                                                                                                                                     |
| horas de sueño incluido siesta | _____                                                                                                                                                                                                                                                    |
| minutos siesta                 | [*DATA REMOVED*]                                                                                                                                                                                                                                         |
| horas televisión semana        | _____                                                                                                                                                                                                                                                    |

|                                        |                                                                                                                                                                                                                                                                                                                                                                |
|----------------------------------------|----------------------------------------------------------------------------------------------------------------------------------------------------------------------------------------------------------------------------------------------------------------------------------------------------------------------------------------------------------------|
| actividad trabajo                      | <input type="radio"/> casi siempre sentado<br><input type="radio"/> sentado 50 por cien<br><input type="radio"/> casi siempre de pie, quieto<br><input type="radio"/> casi siempre levantado caminando y llevando pocas cosas<br><input type="radio"/> casi siempre levantado, caminando y llevado muchas cosas<br><input type="radio"/> trabajo manual pesado |
| tiempo caminar o bici al día           | <input type="radio"/> casi nunca<br><input checked="" type="radio"/> menos 20min día<br><input type="radio"/> 20 a 40 min día<br><input type="radio"/> 40 a 60 min día<br><input type="radio"/> 1h o 1h y media día<br><input type="radio"/> más de 1h y media al día                                                                                          |
| tiempo tareas casa al día              | <input type="radio"/> menos de 1h día<br><input type="radio"/> 1 a 2h día<br><input checked="" type="radio"/> 3 a 4h día<br><input type="radio"/> 5 a 6h día<br><input type="radio"/> 7 a 8h día<br><input type="radio"/> más de 8h día                                                                                                                        |
| tiempo libre televisión ordenador leer | <input type="radio"/> menos 1h día<br><input type="radio"/> 1h día<br><input type="radio"/> 2h día<br><input checked="" type="radio"/> 3h día<br><input type="radio"/> 4h día<br><input type="radio"/> 5 a 6h día<br><input type="radio"/> mas 6h día                                                                                                          |
| tiempo libre ejercicio o deporte       | <input type="radio"/> menos 1h semana<br><input type="radio"/> 1h semana<br><input checked="" type="radio"/> 2h semana<br><input type="radio"/> 3h semana<br><input type="radio"/> 4 a 5h semana<br><input type="radio"/> mas 5h semana                                                                                                                        |
| como se considera                      | <input type="radio"/> sedentaria<br><input type="radio"/> poco activa<br><input checked="" type="radio"/> moderadamente activa<br><input type="radio"/> bastante activa<br><input type="radio"/> muy activa<br><input type="radio"/> no sabe                                                                                                                   |
| FUR                                    | [*DATA REMOVED*]                                                                                                                                                                                                                                                                                                                                               |
| Semanas gestación 2T                   | [*DATA REMOVED*]                                                                                                                                                                                                                                                                                                                                               |
| Días gestación 2T                      | [*DATA REMOVED*]                                                                                                                                                                                                                                                                                                                                               |
| DBP 2T                                 | [*DATA REMOVED*]                                                                                                                                                                                                                                                                                                                                               |
| CC 2T                                  | [*DATA REMOVED*]                                                                                                                                                                                                                                                                                                                                               |
| AC 2T                                  | [*DATA REMOVED*]                                                                                                                                                                                                                                                                                                                                               |

|                                                   |                                                                                                                                                                                                 |
|---------------------------------------------------|-------------------------------------------------------------------------------------------------------------------------------------------------------------------------------------------------|
| LF 2T                                             | [*DATA REMOVED*]                                                                                                                                                                                |
| PFE 2T (Hadlock)                                  | [*DATA REMOVED*]                                                                                                                                                                                |
| Semanas gestación 3T                              | [*DATA REMOVED*]                                                                                                                                                                                |
| días 3T                                           | [*DATA REMOVED*]                                                                                                                                                                                |
| DBP 3T                                            | [*DATA REMOVED*]                                                                                                                                                                                |
| CC 3T                                             | [*DATA REMOVED*]                                                                                                                                                                                |
| AC 3T                                             | [*DATA REMOVED*]                                                                                                                                                                                |
| LF 3T                                             | [*DATA REMOVED*]                                                                                                                                                                                |
| PFE 3T (Hadlock)                                  | [*DATA REMOVED*]                                                                                                                                                                                |
| Semanas de gestación final                        | [*DATA REMOVED*]                                                                                                                                                                                |
| días gestación final                              | [*DATA REMOVED*]                                                                                                                                                                                |
| Localización placenta                             | <input checked="" type="radio"/> anterior<br><input type="radio"/> lateral derecha<br><input type="radio"/> lateral izquierda<br><input type="radio"/> posterior<br><input type="radio"/> fondo |
| Presentación longitudinal cefálica                | <input type="radio"/> no<br><input checked="" type="radio"/> si                                                                                                                                 |
| Dorso                                             | <input type="radio"/> izquierda anterior<br><input type="radio"/> izquierda posterior<br><input checked="" type="radio"/> derecha anterior<br><input type="radio"/> derecha posterior           |
| diámetro biparietal                               | [*DATA REMOVED*]                                                                                                                                                                                |
| Circunferencia craneal                            | [*DATA REMOVED*]                                                                                                                                                                                |
| Circunferencia abdominal                          | [*DATA REMOVED*]                                                                                                                                                                                |
| Longitud de femur                                 | [*DATA REMOVED*]                                                                                                                                                                                |
| tejido celular subcutáneo a nivel del muslo en mm | [*DATA REMOVED*]                                                                                                                                                                                |
| tejido celular subcutáneo en abdomen en mm        | [*DATA REMOVED*]                                                                                                                                                                                |
| Volumen del muslo en cm3                          | [*DATA REMOVED*]                                                                                                                                                                                |
| Peso fetal estimado según fórmula de Hadlock      | [*DATA REMOVED*]                                                                                                                                                                                |

|                                               |                                                                                                                                                          |
|-----------------------------------------------|----------------------------------------------------------------------------------------------------------------------------------------------------------|
| Percentil                                     | [*DATA REMOVED*]                                                                                                                                         |
| Peso fetal estimado según fórmula de Scioscia | <hr/>                                                                                                                                                    |
| Peso fetal estimado según fórmula de LEE      | <hr/>                                                                                                                                                    |
| Tipo de parto                                 | <input checked="" type="radio"/> eutocico<br><input type="radio"/> instrumentado/ventosa<br><input type="radio"/> cesarea                                |
| fecha de nacimiento                           | [*DATA REMOVED*]                                                                                                                                         |
| Días entre exploración y nacimiento           | [*DATA REMOVED*]                                                                                                                                         |
| Peso RN en g                                  | [*DATA REMOVED*]                                                                                                                                         |
| sexo                                          | <input checked="" type="radio"/> mujer<br><input type="radio"/> hombre                                                                                   |
| Apgar 1 minuto                                | [*DATA REMOVED*]                                                                                                                                         |
| Apgar 5 minutos                               | [*DATA REMOVED*]                                                                                                                                         |
| Apgar 10 minutos                              | <hr/>                                                                                                                                                    |
| antecedente Covid durante gestación           | <input type="radio"/> Yes<br><input checked="" type="radio"/> No                                                                                         |
| Nivel de estudios                             | <input type="radio"/> ninguno<br><input type="radio"/> primarios<br><input checked="" type="radio"/> secundarios<br><input type="radio"/> universitarios |

# Base\_datos\_estimacion\_peso\_fetal

|                                       |                                                                                                                                                                                                                                                                                      |
|---------------------------------------|--------------------------------------------------------------------------------------------------------------------------------------------------------------------------------------------------------------------------------------------------------------------------------------|
| Número de identificación participante | 74                                                                                                                                                                                                                                                                                   |
| CODIGO PARTICIPANTE                   |                                                                                                                                                                                                                                                                                      |
| Edad                                  | [*DATA REMOVED*]                                                                                                                                                                                                                                                                     |
| Gestaciones                           | <input type="radio"/> 1<br><input type="radio"/> 2<br><input checked="" type="radio"/> 3<br><input type="radio"/> mas de 3                                                                                                                                                           |
| partos                                | <input checked="" type="radio"/> 0<br><input type="radio"/> 1<br><input type="radio"/> 2<br><input type="radio"/> 3<br><input type="radio"/> mas de 3                                                                                                                                |
| cesáreas                              | <input checked="" type="radio"/> 0<br><input type="radio"/> 1<br><input type="radio"/> 2<br><input type="radio"/> 3<br><input type="radio"/> mas de 3                                                                                                                                |
| Abortos                               | <input type="radio"/> 0<br><input type="radio"/> 1<br><input checked="" type="radio"/> 2<br><input type="radio"/> 3<br><input type="radio"/> mas de 3                                                                                                                                |
| Tipo de gestacion                     | <input checked="" type="radio"/> espontanea<br><input type="radio"/> IAC inseminación artificial conyuge<br><input type="radio"/> IAD inseminación artificial donante<br><input type="radio"/> FIV Fecundación in Vitro<br><input type="radio"/> Ovodon FIV con donación de ovocitos |
| peso previo a embarazo                | [*DATA REMOVED*]                                                                                                                                                                                                                                                                     |
| Ganancia ponderal embarazo            |                                                                                                                                                                                                                                                                                      |
| Talla madre                           | [*DATA REMOVED*]                                                                                                                                                                                                                                                                     |
| IMC previo embarazo                   | 23.795359904818564                                                                                                                                                                                                                                                                   |
| Patología obstétrica                  | <input checked="" type="radio"/> no<br><input type="radio"/> si                                                                                                                                                                                                                      |
| Diabetes pregestacional               | <input checked="" type="radio"/> no<br><input type="radio"/> si                                                                                                                                                                                                                      |
| Diabetes gestacional                  | <input checked="" type="radio"/> no<br><input type="radio"/> si                                                                                                                                                                                                                      |

|                                            |                                                                                                                                                                                      |
|--------------------------------------------|--------------------------------------------------------------------------------------------------------------------------------------------------------------------------------------|
| Diabetes gestacional con insulina          | <input checked="" type="radio"/> no<br><input type="radio"/> si                                                                                                                      |
| Diabetes gestacional con dieta y ejercicio | <input checked="" type="radio"/> no<br><input type="radio"/> si                                                                                                                      |
| Percentil fetos previos                    | <input checked="" type="radio"/> Nada<br><input type="radio"/> percentil menor de 10<br><input type="radio"/> percentil entre 10 y 90<br><input type="radio"/> percentil mayor de 90 |
| Exfumadora                                 | <input checked="" type="radio"/> Nada<br><input type="radio"/> menos de 5 años<br><input type="radio"/> 5 a 10 años<br><input type="radio"/> mayor o igual a 10 años                 |
| Hábito tabáquico                           | <input type="radio"/> no<br><input checked="" type="radio"/> si                                                                                                                      |
| fumadora                                   | [*DATA REMOVED*]                                                                                                                                                                     |
| Consumo otros tóxicos                      | <input checked="" type="radio"/> no<br><input type="radio"/> si                                                                                                                      |
| Hb 1T                                      | [*DATA REMOVED*]                                                                                                                                                                     |
| Htc 1T                                     | [*DATA REMOVED*]                                                                                                                                                                     |
| Hb 2T                                      | [*DATA REMOVED*]                                                                                                                                                                     |
| HTC 2T                                     | [*DATA REMOVED*]                                                                                                                                                                     |
| Hb 3T                                      | [*DATA REMOVED*]                                                                                                                                                                     |
| HTC 3T                                     | [*DATA REMOVED*]                                                                                                                                                                     |
| Suplemento FE oral                         | <input type="radio"/> si<br><input checked="" type="radio"/> no                                                                                                                      |
| Suplemento fe iv                           | <input type="radio"/> si<br><input checked="" type="radio"/> no                                                                                                                      |
| Transfusión                                | <input checked="" type="radio"/> no<br><input type="radio"/> si                                                                                                                      |
| Solicitada Vit D                           | <input checked="" type="radio"/> no<br><input type="radio"/> si                                                                                                                      |
| Deficit vit D                              | <input type="radio"/> no<br><input type="radio"/> si                                                                                                                                 |
| Suplemento vit D                           | <input type="radio"/> si<br><input type="radio"/> no                                                                                                                                 |

|                       |                                                                                                                                                                                                                                                                                                                                                                                                              |
|-----------------------|--------------------------------------------------------------------------------------------------------------------------------------------------------------------------------------------------------------------------------------------------------------------------------------------------------------------------------------------------------------------------------------------------------------|
| Dieta, cuestionario   | <input checked="" type="radio"/> si<br><input type="radio"/> no                                                                                                                                                                                                                                                                                                                                              |
| Leche entera          | <input type="radio"/> Nunca o menos 1 vez al mes<br><input type="radio"/> 1 a 3 veces mes<br><input type="radio"/> 1 vez semana<br><input type="radio"/> 2 a 4 veces semana<br><input type="radio"/> 5 a 6 veces semana<br><input type="radio"/> 1 vez al día<br><input type="radio"/> 2 a 3 veces al día<br><input type="radio"/> 5 a 6 veces al día<br><input type="radio"/> más 6 veces al día            |
| Leche semidesnatada   | <input type="radio"/> Nunca o menos 1 vez al mes<br><input type="radio"/> 1 a 3 veces mes<br><input type="radio"/> 1 vez semana<br><input type="radio"/> 2 a 4 veces semana<br><input type="radio"/> 5 a 6 veces semana<br><input checked="" type="radio"/> 1 vez al día<br><input type="radio"/> 2 a 3 veces al día<br><input type="radio"/> 5 a 6 veces al día<br><input type="radio"/> mas 6 veces al día |
| Leche desnatada       | <input type="radio"/> Nunca o menos 1 vez al mes<br><input type="radio"/> 1 a 3 veces mes<br><input type="radio"/> 1 vez semana<br><input type="radio"/> 2 a 4 veces semana<br><input type="radio"/> 5 a 6 veces semana<br><input type="radio"/> 1 vez al día<br><input type="radio"/> 2 a 3 veces al día<br><input type="radio"/> 5 a 6 veces al día<br><input type="radio"/> más 6 veces al día            |
| Leche condensada      | <input type="radio"/> Nunca o menos 1 vez al mes<br><input type="radio"/> 1 a 3 veces mes<br><input type="radio"/> 1 vez semana<br><input type="radio"/> 2 a 4 veces semana<br><input type="radio"/> 5 a 6 veces semana<br><input type="radio"/> 1 vez al día<br><input type="radio"/> 2 a 3 veces al día<br><input type="radio"/> 5 a 6 veces al día<br><input type="radio"/> más 6 veces al día            |
| nata o crema de leche | <input type="radio"/> Nunca o menos 1 vez al mes<br><input type="radio"/> 1 a 3 veces mes<br><input checked="" type="radio"/> 1 vez semana<br><input type="radio"/> 2 a 4 veces semana<br><input type="radio"/> 5 a 6 veces semana<br><input type="radio"/> 1 vez al día<br><input type="radio"/> 2 a 3 veces al día<br><input type="radio"/> 5 a 6 veces al día<br><input type="radio"/> más 6 veces al día |



|                                             |                                                                                                                                                                                                                                                                                                                                                                                                              |
|---------------------------------------------|--------------------------------------------------------------------------------------------------------------------------------------------------------------------------------------------------------------------------------------------------------------------------------------------------------------------------------------------------------------------------------------------------------------|
| Yogurt Entero                               | <input type="radio"/> Nunca o menos 1 vez al mes<br><input type="radio"/> 1 a 3 veces mes<br><input type="radio"/> 1 vez semana<br><input type="radio"/> 2 a 4 veces semana<br><input type="radio"/> 5 a 6 veces semana<br><input type="radio"/> 1 vez al día<br><input type="radio"/> 2 a 3 veces al día<br><input type="radio"/> 5 a 6 veces al día<br><input type="radio"/> más 6 veces al día            |
| Yogurt desnatado                            | <input type="radio"/> Nunca o menos 1 vez al mes<br><input type="radio"/> 1 a 3 veces mes<br><input type="radio"/> 1 vez semana<br><input type="radio"/> 2 a 4 veces semana<br><input type="radio"/> 5 a 6 veces semana<br><input type="radio"/> 1 vez al día<br><input type="radio"/> 2 a 3 veces al día<br><input type="radio"/> 5 a 6 veces al día<br><input type="radio"/> más 6 veces al día            |
| 100g requesón o queso blando o queso fresco | <input type="radio"/> Nunca o menos 1 vez al mes<br><input type="radio"/> 1 a 3 veces mes<br><input type="radio"/> 1 vez semana<br><input type="radio"/> 2 a 4 veces semana<br><input type="radio"/> 5 a 6 veces semana<br><input type="radio"/> 1 vez al día<br><input type="radio"/> 2 a 3 veces al día<br><input type="radio"/> 5 a 6 veces al día<br><input type="radio"/> más 6 veces al día            |
| queso curado o semicurado o cremoso         | <input type="radio"/> Nunca o menos 1 vez al mes<br><input type="radio"/> 1 a 3 veces mes<br><input type="radio"/> 1 vez semana<br><input type="radio"/> 2 a 4 veces semana<br><input type="radio"/> 5 a 6 veces semana<br><input type="radio"/> 1 vez al día<br><input checked="" type="radio"/> 2 a 3 veces al día<br><input type="radio"/> 5 a 6 veces al día<br><input type="radio"/> más 6 veces al día |
| natillas flan pudding                       | <input type="radio"/> Nunca o menos 1 vez al mes<br><input type="radio"/> 1 a 3 veces mes<br><input type="radio"/> 1 vez semana<br><input type="radio"/> 2 a 4 veces semana<br><input type="radio"/> 5 a 6 veces semana<br><input type="radio"/> 1 vez al día<br><input type="radio"/> 2 a 3 veces al día<br><input type="radio"/> 5 a 6 veces al día<br><input type="radio"/> más 6 veces al día            |
| Helado                                      | <input checked="" type="radio"/> Nunca o menos 1 vez al mes<br><input type="radio"/> 1 a 3 veces mes<br><input type="radio"/> 1 vez semana<br><input type="radio"/> 2 a 4 veces semana<br><input type="radio"/> 5 a 6 veces semana<br><input type="radio"/> 1 vez al día<br><input type="radio"/> 2 a 3 veces al día<br><input type="radio"/> 5 a 6 veces al día<br><input type="radio"/> más 6 veces al día |

|                                      |                                                                                                                                                                                                                                                                                                                                                                                                              |
|--------------------------------------|--------------------------------------------------------------------------------------------------------------------------------------------------------------------------------------------------------------------------------------------------------------------------------------------------------------------------------------------------------------------------------------------------------------|
| huevo                                | <input type="radio"/> Nunca o menos 1 vez al mes<br><input type="radio"/> 1 a 3 veces mes<br><input type="radio"/> 1 vez semana<br><input type="radio"/> 2 a 4 veces semana<br><input type="radio"/> 5 a 6 veces semana<br><input checked="" type="radio"/> 1 vez al día<br><input type="radio"/> 2 a 3 veces al día<br><input type="radio"/> 5 a 6 veces al día<br><input type="radio"/> más 6 veces al día |
| Pollo con piel                       | <input type="radio"/> Nunca o menos 1 vez al mes<br><input type="radio"/> 1 a 3 veces mes<br><input type="radio"/> 1 vez semana<br><input type="radio"/> 2 a 4 veces semana<br><input type="radio"/> 5 a 6 veces semana<br><input type="radio"/> 1 vez al día<br><input type="radio"/> 2 a 3 veces al día<br><input type="radio"/> 5 a 6 veces al día<br><input type="radio"/> más 6 veces al día            |
| pollo sin piel                       | <input type="radio"/> Nunca o menos 1 vez al mes<br><input type="radio"/> 1 a 3 veces mes<br><input checked="" type="radio"/> 1 vez semana<br><input type="radio"/> 2 a 4 veces semana<br><input type="radio"/> 5 a 6 veces semana<br><input type="radio"/> 1 vez al día<br><input type="radio"/> 2 a 3 veces al día<br><input type="radio"/> 5 a 6 veces al día<br><input type="radio"/> más 6 veces al día |
| Ternera o cerdo o cordero            | <input type="radio"/> Nunca o menos 1 vez al mes<br><input type="radio"/> 1 a 3 veces mes<br><input checked="" type="radio"/> 1 vez semana<br><input type="radio"/> 2 a 4 veces semana<br><input type="radio"/> 5 a 6 veces semana<br><input type="radio"/> 1 vez al día<br><input type="radio"/> 2 a 3 veces al día<br><input type="radio"/> 5 a 6 veces al día<br><input type="radio"/> más 6 veces al día |
| carne caza: Conejo o codorniz o pato | <input type="radio"/> Nunca o menos 1 vez al mes<br><input type="radio"/> 1 a 3 veces mes<br><input type="radio"/> 1 vez semana<br><input checked="" type="radio"/> 2 a 4 veces semana<br><input type="radio"/> 5 a 6 veces semana<br><input type="radio"/> 1 vez al día<br><input type="radio"/> 2 a 3 veces al día<br><input type="radio"/> 5 a 6 veces al día<br><input type="radio"/> más 6 veces al día |
| Hígado de ternera o cerdo o pollo    | <input type="radio"/> Nunca o menos 1 vez al mes<br><input type="radio"/> 1 a 3 veces mes<br><input type="radio"/> 1 vez semana<br><input type="radio"/> 2 a 4 veces semana<br><input type="radio"/> 5 a 6 veces semana<br><input type="radio"/> 1 vez al día<br><input type="radio"/> 2 a 3 veces al día<br><input type="radio"/> 5 a 6 veces al día<br><input type="radio"/> más 6 veces al día            |

|                     |                                                                                                                                                                                                                                                                                                                                                                                                              |
|---------------------|--------------------------------------------------------------------------------------------------------------------------------------------------------------------------------------------------------------------------------------------------------------------------------------------------------------------------------------------------------------------------------------------------------------|
| Vísceras            | <input type="radio"/> Nunca o menos 1 vez al mes<br><input type="radio"/> 1 a 3 veces mes<br><input type="radio"/> 1 vez semana<br><input type="radio"/> 2 a 4 veces semana<br><input type="radio"/> 5 a 6 veces semana<br><input type="radio"/> 1 vez al día<br><input type="radio"/> 2 a 3 veces al día<br><input type="radio"/> 5 a 6 veces al día<br><input type="radio"/> más 6 veces al día            |
| Embutido            | <input type="radio"/> Nunca o menos 1 vez al mes<br><input type="radio"/> 1 a 3 veces mes<br><input type="radio"/> 1 vez semana<br><input type="radio"/> 2 a 4 veces semana<br><input type="radio"/> 5 a 6 veces semana<br><input type="radio"/> 1 vez al día<br><input type="radio"/> 2 a 3 veces al día<br><input type="radio"/> 5 a 6 veces al día<br><input type="radio"/> más 6 veces al día            |
| Salchicha o similar | <input type="radio"/> Nunca o menos 1 vez al mes<br><input type="radio"/> 1 a 3 veces mes<br><input checked="" type="radio"/> 1 vez semana<br><input type="radio"/> 2 a 4 veces semana<br><input type="radio"/> 5 a 6 veces semana<br><input type="radio"/> 1 vez al día<br><input type="radio"/> 2 a 3 veces al día<br><input type="radio"/> 5 a 6 veces al día<br><input type="radio"/> más 6 veces al día |
| Pate o foiegras     | <input type="radio"/> Nunca o menos 1 vez al mes<br><input type="radio"/> 1 a 3 veces mes<br><input checked="" type="radio"/> 1 vez semana<br><input type="radio"/> 2 a 4 veces semana<br><input type="radio"/> 5 a 6 veces semana<br><input type="radio"/> 1 vez al día<br><input type="radio"/> 2 a 3 veces al día<br><input type="radio"/> 5 a 6 veces al día<br><input type="radio"/> más 6 veces al día |
| Hamburguesa         | <input type="radio"/> Nunca o menos 1 vez al mes<br><input type="radio"/> 1 a 3 veces mes<br><input checked="" type="radio"/> 1 vez semana<br><input type="radio"/> 2 a 4 veces semana<br><input type="radio"/> 5 a 6 veces semana<br><input type="radio"/> 1 vez al día<br><input type="radio"/> 2 a 3 veces al día<br><input type="radio"/> 5 a 6 veces al día<br><input type="radio"/> más 6 veces al día |
| tocino o bacon      | <input type="radio"/> Nunca o menos 1 vez al mes<br><input type="radio"/> 1 a 3 veces mes<br><input checked="" type="radio"/> 1 vez semana<br><input type="radio"/> 2 a 4 veces semana<br><input type="radio"/> 5 a 6 veces semana<br><input type="radio"/> 1 vez al día<br><input type="radio"/> 2 a 3 veces al día<br><input type="radio"/> 5 a 6 veces al día<br><input type="radio"/> más 6 veces al día |

---

Pescado frito

- ☐ Nunca o menos 1 vez al mes  
☐ 1 a 3 veces mes  
☒ 1 vez semana  
☐ 2 a 4 veces semana  
☐ 5 a 6 veces semana  
☐ 1 vez al día  
☐ 2 a 3 veces al día  
☐ 5 a 6 veces al día  
☐ más 6 veces al día

---

pescado hervido blanco

- ☐ Nunca o menos 1 vez al mes  
☐ 1 a 3 veces mes  
☐ 1 vez semana  
☐ 2 a 4 veces semana  
☐ 5 a 6 veces semana  
☐ 1 vez al día  
☐ 2 a 3 veces al día  
☐ 5 a 6 veces al día  
☐ más 6 veces al día

---

pescado hervido azul

- ☐ Nunca o menos 1 vez al mes  
☐ 1 a 3 veces mes  
☐ 1 vez semana  
☐ 2 a 4 veces semana  
☐ 5 a 6 veces semana  
☐ 1 vez al día  
☐ 2 a 3 veces al día  
☐ 5 a 6 veces al día  
☐ más 6 veces al día

---

otros pescado azul

- ☐ Nunca o menos 1 vez al mes  
☐ 1 a 3 veces mes  
☒ 1 vez semana  
☐ 2 a 4 veces semana  
☐ 5 a 6 veces semana  
☐ 1 vez al día  
☐ 2 a 3 veces al día  
☐ 5 a 6 veces al día  
☐ más 6 veces al día

---

atun conserva

- ☐ Nunca o menos 1 vez al mes  
☐ 1 a 3 veces mes  
☒ 1 vez semana  
☐ 2 a 4 veces semana  
☐ 5 a 6 veces semana  
☐ 1 vez al día  
☐ 2 a 3 veces al día  
☐ 5 a 6 veces al día  
☐ más 6 veces al día

---

sardina conserva

- ☐ Nunca o menos 1 vez al mes  
☐ 1 a 3 veces mes  
☐ 1 vez semana  
☐ 2 a 4 veces semana  
☐ 5 a 6 veces semana  
☐ 1 vez al día  
☐ 2 a 3 veces al día  
☐ 5 a 6 veces al día  
☐ más 6 veces al día

|                                         |                                                                                                                                                                                                                                                                                                                                                                                                              |
|-----------------------------------------|--------------------------------------------------------------------------------------------------------------------------------------------------------------------------------------------------------------------------------------------------------------------------------------------------------------------------------------------------------------------------------------------------------------|
| pescado ahumado                         | <input type="radio"/> Nunca o menos 1 vez al mes<br><input type="radio"/> 1 a 3 veces mes<br><input type="radio"/> 1 vez semana<br><input type="radio"/> 2 a 4 veces semana<br><input type="radio"/> 5 a 6 veces semana<br><input type="radio"/> 1 vez al día<br><input type="radio"/> 2 a 3 veces al día<br><input type="radio"/> 5 a 6 veces al día<br><input type="radio"/> más 6 veces al día            |
| almejas o mejillones o ostras unos 100g | <input type="radio"/> Nunca o menos 1 vez al mes<br><input type="radio"/> 1 a 3 veces mes<br><input checked="" type="radio"/> 1 vez semana<br><input type="radio"/> 2 a 4 veces semana<br><input type="radio"/> 5 a 6 veces semana<br><input type="radio"/> 1 vez al día<br><input type="radio"/> 2 a 3 veces al día<br><input type="radio"/> 5 a 6 veces al día<br><input type="radio"/> más 6 veces al día |
| calamar o chipiron o sepia unos 100g    | <input type="radio"/> Nunca o menos 1 vez al mes<br><input type="radio"/> 1 a 3 veces mes<br><input checked="" type="radio"/> 1 vez semana<br><input type="radio"/> 2 a 4 veces semana<br><input type="radio"/> 5 a 6 veces semana<br><input type="radio"/> 1 vez al día<br><input type="radio"/> 2 a 3 veces al día<br><input type="radio"/> 5 a 6 veces al día<br><input type="radio"/> más 6 veces al día |
| marisco unos 100g                       | <input type="radio"/> Nunca o menos 1 vez al mes<br><input type="radio"/> 1 a 3 veces mes<br><input checked="" type="radio"/> 1 vez semana<br><input type="radio"/> 2 a 4 veces semana<br><input type="radio"/> 5 a 6 veces semana<br><input type="radio"/> 1 vez al día<br><input type="radio"/> 2 a 3 veces al día<br><input type="radio"/> 5 a 6 veces al día<br><input type="radio"/> más 6 veces al día |
| Espinacas o acelgas cocinadas           | <input checked="" type="radio"/> Nunca o menos 1 vez al mes<br><input type="radio"/> 1 a 3 veces mes<br><input type="radio"/> 1 vez semana<br><input type="radio"/> 2 a 4 veces semana<br><input type="radio"/> 5 a 6 veces semana<br><input type="radio"/> 1 vez al día<br><input type="radio"/> 2 a 3 veces al día<br><input type="radio"/> 5 a 6 veces al día<br><input type="radio"/> más 6 veces al día |
| Col o coliflor o brocoli cocinado       | <input type="radio"/> Nunca o menos 1 vez al mes<br><input type="radio"/> 1 a 3 veces mes<br><input checked="" type="radio"/> 1 vez semana<br><input type="radio"/> 2 a 4 veces semana<br><input type="radio"/> 5 a 6 veces semana<br><input type="radio"/> 1 vez al día<br><input type="radio"/> 2 a 3 veces al día<br><input type="radio"/> 5 a 6 veces al día<br><input type="radio"/> más 6 veces al día |

---

Lechuga o endivia o escarola

- ☐ Nunca o menos 1 vez al mes  
☐ 1 a 3 veces mes  
☒ 1 vez semana  
☐ 2 a 4 veces semana  
☐ 5 a 6 veces semana  
☐ 1 vez al día  
☐ 2 a 3 veces al día  
☐ 5 a 6 veces al día  
☐ más 6 veces al día

---

tomate ensalada

- ☐ Nunca o menos 1 vez al mes  
☐ 1 a 3 veces mes  
☐ 1 vez semana  
☒ 2 a 4 veces semana  
☐ 5 a 6 veces semana  
☐ 1 vez al día  
☐ 2 a 3 veces al día  
☐ 5 a 6 veces al día  
☐ más 6 veces al día

---

cebolla

- ☐ Nunca o menos 1 vez al mes  
☐ 1 a 3 veces mes  
☐ 1 vez semana  
☒ 2 a 4 veces semana  
☐ 5 a 6 veces semana  
☐ 1 vez al día  
☐ 2 a 3 veces al día  
☐ 5 a 6 veces al día  
☐ más 6 veces al día

---

Zanahoria o calabaza

- ☐ Nunca o menos 1 vez al mes  
☐ 1 a 3 veces mes  
☐ 1 vez semana  
☐ 2 a 4 veces semana  
☐ 5 a 6 veces semana  
☐ 1 vez al día  
☐ 2 a 3 veces al día  
☐ 5 a 6 veces al día  
☐ más 6 veces al día

---

Judías verdes

- ☐ Nunca o menos 1 vez al mes  
☐ 1 a 3 veces mes  
☐ 1 vez semana  
☐ 2 a 4 veces semana  
☐ 5 a 6 veces semana  
☐ 1 vez al día  
☐ 2 a 3 veces al día  
☐ 5 a 6 veces al día  
☐ más 6 veces al día

---

Berenjena o calabacin o pepino

- ☐ Nunca o menos 1 vez al mes  
☐ 1 a 3 veces mes  
☐ 1 vez semana  
☐ 2 a 4 veces semana  
☐ 5 a 6 veces semana  
☐ 1 vez al día  
☐ 2 a 3 veces al día  
☐ 5 a 6 veces al día  
☐ más 6 veces al día

|                       |                                                                                                                                                                                                                                                                                                                                                                                                              |
|-----------------------|--------------------------------------------------------------------------------------------------------------------------------------------------------------------------------------------------------------------------------------------------------------------------------------------------------------------------------------------------------------------------------------------------------------|
| pimiento              | <input type="radio"/> Nunca o menos 1 vez al mes<br><input type="radio"/> 1 a 3 veces mes<br><input type="radio"/> 1 vez semana<br><input type="radio"/> 2 a 4 veces semana<br><input type="radio"/> 5 a 6 veces semana<br><input type="radio"/> 1 vez al día<br><input type="radio"/> 2 a 3 veces al día<br><input type="radio"/> 5 a 6 veces al día<br><input type="radio"/> más 6 veces al día            |
| alcachofa             | <input type="radio"/> Nunca o menos 1 vez al mes<br><input type="radio"/> 1 a 3 veces mes<br><input checked="" type="radio"/> 1 vez semana<br><input type="radio"/> 2 a 4 veces semana<br><input type="radio"/> 5 a 6 veces semana<br><input type="radio"/> 1 vez al día<br><input type="radio"/> 2 a 3 veces al día<br><input type="radio"/> 5 a 6 veces al día<br><input type="radio"/> más 6 veces al día |
| espárragos            | <input type="radio"/> Nunca o menos 1 vez al mes<br><input type="radio"/> 1 a 3 veces mes<br><input type="radio"/> 1 vez semana<br><input type="radio"/> 2 a 4 veces semana<br><input type="radio"/> 5 a 6 veces semana<br><input type="radio"/> 1 vez al día<br><input type="radio"/> 2 a 3 veces al día<br><input type="radio"/> 5 a 6 veces al día<br><input type="radio"/> más 6 veces al día            |
| maíz hervido          | <input type="radio"/> Nunca o menos 1 vez al mes<br><input type="radio"/> 1 a 3 veces mes<br><input type="radio"/> 1 vez semana<br><input type="radio"/> 2 a 4 veces semana<br><input type="radio"/> 5 a 6 veces semana<br><input type="radio"/> 1 vez al día<br><input type="radio"/> 2 a 3 veces al día<br><input type="radio"/> 5 a 6 veces al día<br><input type="radio"/> más 6 veces al día            |
| legumbres             | <input type="radio"/> Nunca o menos 1 vez al mes<br><input type="radio"/> 1 a 3 veces mes<br><input type="radio"/> 1 vez semana<br><input type="radio"/> 2 a 4 veces semana<br><input type="radio"/> 5 a 6 veces semana<br><input type="radio"/> 1 vez al día<br><input type="radio"/> 2 a 3 veces al día<br><input type="radio"/> 5 a 6 veces al día<br><input type="radio"/> más 6 veces al día            |
| naranjas o mandarinas | <input type="radio"/> Nunca o menos 1 vez al mes<br><input type="radio"/> 1 a 3 veces mes<br><input type="radio"/> 1 vez semana<br><input type="radio"/> 2 a 4 veces semana<br><input type="radio"/> 5 a 6 veces semana<br><input checked="" type="radio"/> 1 vez al día<br><input type="radio"/> 2 a 3 veces al día<br><input type="radio"/> 5 a 6 veces al día<br><input type="radio"/> más 6 veces al día |

---

|                    |                                                                                                                                                                                                                                                                                                                                                                                                              |
|--------------------|--------------------------------------------------------------------------------------------------------------------------------------------------------------------------------------------------------------------------------------------------------------------------------------------------------------------------------------------------------------------------------------------------------------|
| zumو natural fruta | <input type="radio"/> Nunca o menos 1 vez al mes<br><input type="radio"/> 1 a 3 veces mes<br><input type="radio"/> 1 vez semana<br><input type="radio"/> 2 a 4 veces semana<br><input type="radio"/> 5 a 6 veces semana<br><input checked="" type="radio"/> 1 vez al día<br><input type="radio"/> 2 a 3 veces al día<br><input type="radio"/> 5 a 6 veces al día<br><input type="radio"/> más 6 veces al día |
|--------------------|--------------------------------------------------------------------------------------------------------------------------------------------------------------------------------------------------------------------------------------------------------------------------------------------------------------------------------------------------------------------------------------------------------------|

---

|         |                                                                                                                                                                                                                                                                                                                                                                                                              |
|---------|--------------------------------------------------------------------------------------------------------------------------------------------------------------------------------------------------------------------------------------------------------------------------------------------------------------------------------------------------------------------------------------------------------------|
| platano | <input type="radio"/> Nunca o menos 1 vez al mes<br><input type="radio"/> 1 a 3 veces mes<br><input type="radio"/> 1 vez semana<br><input type="radio"/> 2 a 4 veces semana<br><input type="radio"/> 5 a 6 veces semana<br><input checked="" type="radio"/> 1 vez al día<br><input type="radio"/> 2 a 3 veces al día<br><input type="radio"/> 5 a 6 veces al día<br><input type="radio"/> más 6 veces al día |
|---------|--------------------------------------------------------------------------------------------------------------------------------------------------------------------------------------------------------------------------------------------------------------------------------------------------------------------------------------------------------------------------------------------------------------|

---

|                |                                                                                                                                                                                                                                                                                                                                                                                                              |
|----------------|--------------------------------------------------------------------------------------------------------------------------------------------------------------------------------------------------------------------------------------------------------------------------------------------------------------------------------------------------------------------------------------------------------------|
| manzana o pera | <input checked="" type="radio"/> Nunca o menos 1 vez al mes<br><input type="radio"/> 1 a 3 veces mes<br><input type="radio"/> 1 vez semana<br><input type="radio"/> 2 a 4 veces semana<br><input type="radio"/> 5 a 6 veces semana<br><input type="radio"/> 1 vez al día<br><input type="radio"/> 2 a 3 veces al día<br><input type="radio"/> 5 a 6 veces al día<br><input type="radio"/> más 6 veces al día |
|----------------|--------------------------------------------------------------------------------------------------------------------------------------------------------------------------------------------------------------------------------------------------------------------------------------------------------------------------------------------------------------------------------------------------------------|

---

|                       |                                                                                                                                                                                                                                                                                                                                                                                                   |
|-----------------------|---------------------------------------------------------------------------------------------------------------------------------------------------------------------------------------------------------------------------------------------------------------------------------------------------------------------------------------------------------------------------------------------------|
| melocotón o nectarina | <input type="radio"/> Nunca o menos 1 vez al mes<br><input type="radio"/> 1 a 3 veces mes<br><input type="radio"/> 1 vez semana<br><input type="radio"/> 2 a 4 veces semana<br><input type="radio"/> 5 a 6 veces semana<br><input type="radio"/> 1 vez al día<br><input type="radio"/> 2 a 3 veces al día<br><input type="radio"/> 5 a 6 veces al día<br><input type="radio"/> más 6 veces al día |
|-----------------------|---------------------------------------------------------------------------------------------------------------------------------------------------------------------------------------------------------------------------------------------------------------------------------------------------------------------------------------------------------------------------------------------------|

---

|                |                                                                                                                                                                                                                                                                                                                                                                                                   |
|----------------|---------------------------------------------------------------------------------------------------------------------------------------------------------------------------------------------------------------------------------------------------------------------------------------------------------------------------------------------------------------------------------------------------|
| sandia o melon | <input type="radio"/> Nunca o menos 1 vez al mes<br><input type="radio"/> 1 a 3 veces mes<br><input type="radio"/> 1 vez semana<br><input type="radio"/> 2 a 4 veces semana<br><input type="radio"/> 5 a 6 veces semana<br><input type="radio"/> 1 vez al día<br><input type="radio"/> 2 a 3 veces al día<br><input type="radio"/> 5 a 6 veces al día<br><input type="radio"/> más 6 veces al día |
|----------------|---------------------------------------------------------------------------------------------------------------------------------------------------------------------------------------------------------------------------------------------------------------------------------------------------------------------------------------------------------------------------------------------------|

---

|     |                                                                                                                                                                                                                                                                                                                                                                                                   |
|-----|---------------------------------------------------------------------------------------------------------------------------------------------------------------------------------------------------------------------------------------------------------------------------------------------------------------------------------------------------------------------------------------------------|
| uva | <input type="radio"/> Nunca o menos 1 vez al mes<br><input type="radio"/> 1 a 3 veces mes<br><input type="radio"/> 1 vez semana<br><input type="radio"/> 2 a 4 veces semana<br><input type="radio"/> 5 a 6 veces semana<br><input type="radio"/> 1 vez al día<br><input type="radio"/> 2 a 3 veces al día<br><input type="radio"/> 5 a 6 veces al día<br><input type="radio"/> más 6 veces al día |
|-----|---------------------------------------------------------------------------------------------------------------------------------------------------------------------------------------------------------------------------------------------------------------------------------------------------------------------------------------------------------------------------------------------------|

---



---

bruna o ciruela

- ☐ Nunca o menos 1 vez al mes
- ☐ 1 a 3 veces mes
- ☐ 1 vez semana
- ☐ 2 a 4 veces semana
- ☐ 5 a 6 veces semana
- ☐ 1 vez al día
- ☐ 2 a 3 veces al día
- ☐ 5 a 6 veces al día
- ☐ más 6 veces al día

---

kiwi

- ☐ Nunca o menos 1 vez al mes
- ☐ 1 a 3 veces mes
- ☐ 1 vez semana
- ☐ 2 a 4 veces semana
- ☐ 5 a 6 veces semana
- ☐ 1 vez al día
- ☐ 2 a 3 veces al día
- ☐ 5 a 6 veces al día
- ☐ más 6 veces al día

---

aceituna

- ☒ Nunca o menos 1 vez al mes
- ☐ 1 a 3 veces mes
- ☐ 1 vez semana
- ☐ 2 a 4 veces semana
- ☐ 5 a 6 veces semana
- ☐ 1 vez al día
- ☐ 2 a 3 veces al día
- ☐ 5 a 6 veces al día
- ☐ más 6 veces al día

---

frutos secos

- ☒ Nunca o menos 1 vez al mes
- ☐ 1 a 3 veces mes
- ☐ 1 vez semana
- ☐ 2 a 4 veces semana
- ☐ 5 a 6 veces semana
- ☐ 1 vez al día
- ☐ 2 a 3 veces al día
- ☐ 5 a 6 veces al día
- ☐ más 6 veces al día

---

pan blanco

- ☐ Nunca o menos 1 vez al mes
- ☐ 1 a 3 veces mes
- ☐ 1 vez semana
- ☒ 2 a 4 veces semana
- ☐ 5 a 6 veces semana
- ☐ 1 vez al día
- ☐ 2 a 3 veces al día
- ☐ 5 a 6 veces al día
- ☐ más 6 veces al día

---

pan integral

- ☐ Nunca o menos 1 vez al mes
- ☐ 1 a 3 veces mes
- ☐ 1 vez semana
- ☐ 2 a 4 veces semana
- ☐ 5 a 6 veces semana
- ☐ 1 vez al día
- ☐ 2 a 3 veces al día
- ☐ 5 a 6 veces al día
- ☐ más 6 veces al día

---

cereales desayuno

- ☐ Nunca o menos 1 vez al mes  
☐ 1 a 3 veces mes  
☐ 1 vez semana  
☐ 2 a 4 veces semana  
☐ 5 a 6 veces semana  
☒ 1 vez al día  
☐ 2 a 3 veces al día  
☐ 5 a 6 veces al día  
☐ más 6 veces al día

---

patatas fritas

- ☐ Nunca o menos 1 vez al mes  
☒ 1 a 3 veces mes  
☐ 1 vez semana  
☐ 2 a 4 veces semana  
☐ 5 a 6 veces semana  
☐ 1 vez al día  
☐ 2 a 3 veces al día  
☐ 5 a 6 veces al día  
☐ más 6 veces al día

---

patatas cocidas o asadas

- ☐ Nunca o menos 1 vez al mes  
☒ 1 a 3 veces mes  
☐ 1 vez semana  
☐ 2 a 4 veces semana  
☐ 5 a 6 veces semana  
☐ 1 vez al día  
☐ 2 a 3 veces al día  
☐ 5 a 6 veces al día  
☐ más 6 veces al día

---

bolsa papas

- ☐ Nunca o menos 1 vez al mes  
☐ 1 a 3 veces mes  
☐ 1 vez semana  
☒ 2 a 4 veces semana  
☐ 5 a 6 veces semana  
☐ 1 vez al día  
☐ 2 a 3 veces al día  
☐ 5 a 6 veces al día  
☐ más 6 veces al día

---

arroz cocinado

- ☐ Nunca o menos 1 vez al mes  
☐ 1 a 3 veces mes  
☐ 1 vez semana  
☒ 2 a 4 veces semana  
☐ 5 a 6 veces semana  
☐ 1 vez al día  
☐ 2 a 3 veces al día  
☐ 5 a 6 veces al día  
☐ más 6 veces al día

---

pasta

- ☐ Nunca o menos 1 vez al mes  
☐ 1 a 3 veces mes  
☐ 1 vez semana  
☒ 2 a 4 veces semana  
☐ 5 a 6 veces semana  
☐ 1 vez al día  
☐ 2 a 3 veces al día  
☐ 5 a 6 veces al día  
☐ más 6 veces al día

|                     |                                                                                                                                                                                                                                                                                                                                                                                                              |
|---------------------|--------------------------------------------------------------------------------------------------------------------------------------------------------------------------------------------------------------------------------------------------------------------------------------------------------------------------------------------------------------------------------------------------------------|
| pizza               | <input type="radio"/> Nunca o menos 1 vez al mes<br><input type="radio"/> 1 a 3 veces mes<br><input checked="" type="radio"/> 1 vez semana<br><input type="radio"/> 2 a 4 veces semana<br><input type="radio"/> 5 a 6 veces semana<br><input type="radio"/> 1 vez al día<br><input type="radio"/> 2 a 3 veces al día<br><input type="radio"/> 5 a 6 veces al día<br><input type="radio"/> más 6 veces al día |
| aceite oliva        | <input type="radio"/> Nunca o menos 1 vez al mes<br><input type="radio"/> 1 a 3 veces mes<br><input type="radio"/> 1 vez semana<br><input type="radio"/> 2 a 4 veces semana<br><input type="radio"/> 5 a 6 veces semana<br><input type="radio"/> 1 vez al día<br><input type="radio"/> 2 a 3 veces al día<br><input type="radio"/> 5 a 6 veces al día<br><input type="radio"/> más 6 veces al día            |
| otros aceites       | <input type="radio"/> Nunca o menos 1 vez al mes<br><input type="radio"/> 1 a 3 veces mes<br><input type="radio"/> 1 vez semana<br><input type="radio"/> 2 a 4 veces semana<br><input type="radio"/> 5 a 6 veces semana<br><input checked="" type="radio"/> 1 vez al día<br><input type="radio"/> 2 a 3 veces al día<br><input type="radio"/> 5 a 6 veces al día<br><input type="radio"/> más 6 veces al día |
| margarina           | <input type="radio"/> Nunca o menos 1 vez al mes<br><input type="radio"/> 1 a 3 veces mes<br><input type="radio"/> 1 vez semana<br><input type="radio"/> 2 a 4 veces semana<br><input type="radio"/> 5 a 6 veces semana<br><input checked="" type="radio"/> 1 vez al día<br><input type="radio"/> 2 a 3 veces al día<br><input type="radio"/> 5 a 6 veces al día<br><input type="radio"/> más 6 veces al día |
| mantequilla         | <input type="radio"/> Nunca o menos 1 vez al mes<br><input type="radio"/> 1 a 3 veces mes<br><input type="radio"/> 1 vez semana<br><input type="radio"/> 2 a 4 veces semana<br><input type="radio"/> 5 a 6 veces semana<br><input type="radio"/> 1 vez al día<br><input type="radio"/> 2 a 3 veces al día<br><input type="radio"/> 5 a 6 veces al día<br><input type="radio"/> más 6 veces al día            |
| galletas tipo maria | <input type="radio"/> Nunca o menos 1 vez al mes<br><input type="radio"/> 1 a 3 veces mes<br><input checked="" type="radio"/> 1 vez semana<br><input type="radio"/> 2 a 4 veces semana<br><input type="radio"/> 5 a 6 veces semana<br><input type="radio"/> 1 vez al día<br><input type="radio"/> 2 a 3 veces al día<br><input type="radio"/> 5 a 6 veces al día<br><input type="radio"/> más 6 veces al día |

---

galletas chocolate

- ☐ Nunca o menos 1 vez al mes  
☐ 1 a 3 veces mes  
☐ 1 vez semana  
☒ 2 a 4 veces semana  
☐ 5 a 6 veces semana  
☐ 1 vez al día  
☐ 2 a 3 veces al día  
☐ 5 a 6 veces al día  
☐ más 6 veces al día

---

bolleria

- ☐ Nunca o menos 1 vez al mes  
☐ 1 a 3 veces mes  
☐ 1 vez semana  
☒ 2 a 4 veces semana  
☐ 5 a 6 veces semana  
☐ 1 vez al día  
☐ 2 a 3 veces al día  
☐ 5 a 6 veces al día  
☐ más 6 veces al día

---

chocolate o bombones

- ☐ Nunca o menos 1 vez al mes  
☐ 1 a 3 veces mes  
☐ 1 vez semana  
☒ 2 a 4 veces semana  
☐ 5 a 6 veces semana  
☐ 1 vez al día  
☐ 2 a 3 veces al día  
☐ 5 a 6 veces al día  
☐ más 6 veces al día

---

chocolate polvo o colacao

- ☐ Nunca o menos 1 vez al mes  
☐ 1 a 3 veces mes  
☐ 1 vez semana  
☐ 2 a 4 veces semana  
☐ 5 a 6 veces semana  
☒ 1 vez al día  
☐ 2 a 3 veces al día  
☐ 5 a 6 veces al día  
☐ más 6 veces al día

---

vino tinto

- ☐ Nunca o menos 1 vez al mes  
☐ 1 a 3 veces mes  
☐ 1 vez semana  
☐ 2 a 4 veces semana  
☐ 5 a 6 veces semana  
☐ 1 vez al día  
☐ 2 a 3 veces al día  
☐ 5 a 6 veces al día  
☐ más 6 veces al día

---

vino blanco

- ☐ Nunca o menos 1 vez al mes  
☐ 1 a 3 veces mes  
☐ 1 vez semana  
☐ 2 a 4 veces semana  
☐ 5 a 6 veces semana  
☐ 1 vez al día  
☐ 2 a 3 veces al día  
☐ 5 a 6 veces al día  
☐ más 6 veces al día

---

|                    |                                                                                                                                                                                                                                                                                                                                                                                                   |
|--------------------|---------------------------------------------------------------------------------------------------------------------------------------------------------------------------------------------------------------------------------------------------------------------------------------------------------------------------------------------------------------------------------------------------|
| vino seco o vermut | <input type="radio"/> Nunca o menos 1 vez al mes<br><input type="radio"/> 1 a 3 veces mes<br><input type="radio"/> 1 vez semana<br><input type="radio"/> 2 a 4 veces semana<br><input type="radio"/> 5 a 6 veces semana<br><input type="radio"/> 1 vez al día<br><input type="radio"/> 2 a 3 veces al día<br><input type="radio"/> 5 a 6 veces al día<br><input type="radio"/> más 6 veces al día |
|--------------------|---------------------------------------------------------------------------------------------------------------------------------------------------------------------------------------------------------------------------------------------------------------------------------------------------------------------------------------------------------------------------------------------------|

---

|         |                                                                                                                                                                                                                                                                                                                                                                                                   |
|---------|---------------------------------------------------------------------------------------------------------------------------------------------------------------------------------------------------------------------------------------------------------------------------------------------------------------------------------------------------------------------------------------------------|
| cerveza | <input type="radio"/> Nunca o menos 1 vez al mes<br><input type="radio"/> 1 a 3 veces mes<br><input type="radio"/> 1 vez semana<br><input type="radio"/> 2 a 4 veces semana<br><input type="radio"/> 5 a 6 veces semana<br><input type="radio"/> 1 vez al día<br><input type="radio"/> 2 a 3 veces al día<br><input type="radio"/> 5 a 6 veces al día<br><input type="radio"/> más 6 veces al día |
|---------|---------------------------------------------------------------------------------------------------------------------------------------------------------------------------------------------------------------------------------------------------------------------------------------------------------------------------------------------------------------------------------------------------|

---

|                     |                                                                                                                                                                                                                                                                                                                                                                                                   |
|---------------------|---------------------------------------------------------------------------------------------------------------------------------------------------------------------------------------------------------------------------------------------------------------------------------------------------------------------------------------------------------------------------------------------------|
| cerveza sin alcohol | <input type="radio"/> Nunca o menos 1 vez al mes<br><input type="radio"/> 1 a 3 veces mes<br><input type="radio"/> 1 vez semana<br><input type="radio"/> 2 a 4 veces semana<br><input type="radio"/> 5 a 6 veces semana<br><input type="radio"/> 1 vez al día<br><input type="radio"/> 2 a 3 veces al día<br><input type="radio"/> 5 a 6 veces al día<br><input type="radio"/> más 6 veces al día |
|---------------------|---------------------------------------------------------------------------------------------------------------------------------------------------------------------------------------------------------------------------------------------------------------------------------------------------------------------------------------------------------------------------------------------------|

---

|         |                                                                                                                                                                                                                                                                                                                                                                                                   |
|---------|---------------------------------------------------------------------------------------------------------------------------------------------------------------------------------------------------------------------------------------------------------------------------------------------------------------------------------------------------------------------------------------------------|
| licores | <input type="radio"/> Nunca o menos 1 vez al mes<br><input type="radio"/> 1 a 3 veces mes<br><input type="radio"/> 1 vez semana<br><input type="radio"/> 2 a 4 veces semana<br><input type="radio"/> 5 a 6 veces semana<br><input type="radio"/> 1 vez al día<br><input type="radio"/> 2 a 3 veces al día<br><input type="radio"/> 5 a 6 veces al día<br><input type="radio"/> más 6 veces al día |
|---------|---------------------------------------------------------------------------------------------------------------------------------------------------------------------------------------------------------------------------------------------------------------------------------------------------------------------------------------------------------------------------------------------------|

---

|                       |                                                                                                                                                                                                                                                                                                                                                                                                   |
|-----------------------|---------------------------------------------------------------------------------------------------------------------------------------------------------------------------------------------------------------------------------------------------------------------------------------------------------------------------------------------------------------------------------------------------|
| ginebra o ron o vodka | <input type="radio"/> Nunca o menos 1 vez al mes<br><input type="radio"/> 1 a 3 veces mes<br><input type="radio"/> 1 vez semana<br><input type="radio"/> 2 a 4 veces semana<br><input type="radio"/> 5 a 6 veces semana<br><input type="radio"/> 1 vez al día<br><input type="radio"/> 2 a 3 veces al día<br><input type="radio"/> 5 a 6 veces al día<br><input type="radio"/> más 6 veces al día |
|-----------------------|---------------------------------------------------------------------------------------------------------------------------------------------------------------------------------------------------------------------------------------------------------------------------------------------------------------------------------------------------------------------------------------------------|

---

|                 |                                                                                                                                                                                                                                                                                                                                                                                                   |
|-----------------|---------------------------------------------------------------------------------------------------------------------------------------------------------------------------------------------------------------------------------------------------------------------------------------------------------------------------------------------------------------------------------------------------|
| refresco normal | <input type="radio"/> Nunca o menos 1 vez al mes<br><input type="radio"/> 1 a 3 veces mes<br><input type="radio"/> 1 vez semana<br><input type="radio"/> 2 a 4 veces semana<br><input type="radio"/> 5 a 6 veces semana<br><input type="radio"/> 1 vez al día<br><input type="radio"/> 2 a 3 veces al día<br><input type="radio"/> 5 a 6 veces al día<br><input type="radio"/> más 6 veces al día |
|-----------------|---------------------------------------------------------------------------------------------------------------------------------------------------------------------------------------------------------------------------------------------------------------------------------------------------------------------------------------------------------------------------------------------------|

---

---

|                     |                                                                                                                                                                                                                                                                                                                                                                                                   |
|---------------------|---------------------------------------------------------------------------------------------------------------------------------------------------------------------------------------------------------------------------------------------------------------------------------------------------------------------------------------------------------------------------------------------------|
| refresco sin azúcar | <input type="radio"/> Nunca o menos 1 vez al mes<br><input type="radio"/> 1 a 3 veces mes<br><input type="radio"/> 1 vez semana<br><input type="radio"/> 2 a 4 veces semana<br><input type="radio"/> 5 a 6 veces semana<br><input type="radio"/> 1 vez al día<br><input type="radio"/> 2 a 3 veces al día<br><input type="radio"/> 5 a 6 veces al día<br><input type="radio"/> más 6 veces al día |
|---------------------|---------------------------------------------------------------------------------------------------------------------------------------------------------------------------------------------------------------------------------------------------------------------------------------------------------------------------------------------------------------------------------------------------|

---

|                |                                                                                                                                                                                                                                                                                                                                                                                                   |
|----------------|---------------------------------------------------------------------------------------------------------------------------------------------------------------------------------------------------------------------------------------------------------------------------------------------------------------------------------------------------------------------------------------------------|
| Agua del grifo | <input type="radio"/> Nunca o menos 1 vez al mes<br><input type="radio"/> 1 a 3 veces mes<br><input type="radio"/> 1 vez semana<br><input type="radio"/> 2 a 4 veces semana<br><input type="radio"/> 5 a 6 veces semana<br><input type="radio"/> 1 vez al día<br><input type="radio"/> 2 a 3 veces al día<br><input type="radio"/> 5 a 6 veces al día<br><input type="radio"/> más 6 veces al día |
|----------------|---------------------------------------------------------------------------------------------------------------------------------------------------------------------------------------------------------------------------------------------------------------------------------------------------------------------------------------------------------------------------------------------------|

---

|                          |                                                                                                                                                                                                                                                                                                                                                                                                   |
|--------------------------|---------------------------------------------------------------------------------------------------------------------------------------------------------------------------------------------------------------------------------------------------------------------------------------------------------------------------------------------------------------------------------------------------|
| agua embotellada sin gas | <input type="radio"/> Nunca o menos 1 vez al mes<br><input type="radio"/> 1 a 3 veces mes<br><input type="radio"/> 1 vez semana<br><input type="radio"/> 2 a 4 veces semana<br><input type="radio"/> 5 a 6 veces semana<br><input type="radio"/> 1 vez al día<br><input type="radio"/> 2 a 3 veces al día<br><input type="radio"/> 5 a 6 veces al día<br><input type="radio"/> más 6 veces al día |
|--------------------------|---------------------------------------------------------------------------------------------------------------------------------------------------------------------------------------------------------------------------------------------------------------------------------------------------------------------------------------------------------------------------------------------------|

---

|                          |                                                                                                                                                                                                                                                                                                                                                                                                   |
|--------------------------|---------------------------------------------------------------------------------------------------------------------------------------------------------------------------------------------------------------------------------------------------------------------------------------------------------------------------------------------------------------------------------------------------|
| agua embotellada con gas | <input type="radio"/> Nunca o menos 1 vez al mes<br><input type="radio"/> 1 a 3 veces mes<br><input type="radio"/> 1 vez semana<br><input type="radio"/> 2 a 4 veces semana<br><input type="radio"/> 5 a 6 veces semana<br><input type="radio"/> 1 vez al día<br><input type="radio"/> 2 a 3 veces al día<br><input type="radio"/> 5 a 6 veces al día<br><input type="radio"/> más 6 veces al día |
|--------------------------|---------------------------------------------------------------------------------------------------------------------------------------------------------------------------------------------------------------------------------------------------------------------------------------------------------------------------------------------------------------------------------------------------|

---

|                           |                                                                                                                                                                                                                                                                                                                                                                                                   |
|---------------------------|---------------------------------------------------------------------------------------------------------------------------------------------------------------------------------------------------------------------------------------------------------------------------------------------------------------------------------------------------------------------------------------------------|
| zumos frutas embotellados | <input type="radio"/> Nunca o menos 1 vez al mes<br><input type="radio"/> 1 a 3 veces mes<br><input type="radio"/> 1 vez semana<br><input type="radio"/> 2 a 4 veces semana<br><input type="radio"/> 5 a 6 veces semana<br><input type="radio"/> 1 vez al día<br><input type="radio"/> 2 a 3 veces al día<br><input type="radio"/> 5 a 6 veces al día<br><input type="radio"/> más 6 veces al día |
|---------------------------|---------------------------------------------------------------------------------------------------------------------------------------------------------------------------------------------------------------------------------------------------------------------------------------------------------------------------------------------------------------------------------------------------|

---

|      |                                                                                                                                                                                                                                                                                                                                                                                                   |
|------|---------------------------------------------------------------------------------------------------------------------------------------------------------------------------------------------------------------------------------------------------------------------------------------------------------------------------------------------------------------------------------------------------|
| café | <input type="radio"/> Nunca o menos 1 vez al mes<br><input type="radio"/> 1 a 3 veces mes<br><input type="radio"/> 1 vez semana<br><input type="radio"/> 2 a 4 veces semana<br><input type="radio"/> 5 a 6 veces semana<br><input type="radio"/> 1 vez al día<br><input type="radio"/> 2 a 3 veces al día<br><input type="radio"/> 5 a 6 veces al día<br><input type="radio"/> más 6 veces al día |
|------|---------------------------------------------------------------------------------------------------------------------------------------------------------------------------------------------------------------------------------------------------------------------------------------------------------------------------------------------------------------------------------------------------|

---

|                       |                                                                                                                                                                                                                                                                                                                                                                                                              |
|-----------------------|--------------------------------------------------------------------------------------------------------------------------------------------------------------------------------------------------------------------------------------------------------------------------------------------------------------------------------------------------------------------------------------------------------------|
| cafe descafeinado     | <input type="radio"/> Nunca o menos 1 vez al mes<br><input type="radio"/> 1 a 3 veces mes<br><input type="radio"/> 1 vez semana<br><input type="radio"/> 2 a 4 veces semana<br><input type="radio"/> 5 a 6 veces semana<br><input type="radio"/> 1 vez al día<br><input type="radio"/> 2 a 3 veces al día<br><input type="radio"/> 5 a 6 veces al día<br><input type="radio"/> más 6 veces al día            |
| te o infusión         | <input type="radio"/> Nunca o menos 1 vez al mes<br><input type="radio"/> 1 a 3 veces mes<br><input type="radio"/> 1 vez semana<br><input type="radio"/> 2 a 4 veces semana<br><input type="radio"/> 5 a 6 veces semana<br><input type="radio"/> 1 vez al día<br><input type="radio"/> 2 a 3 veces al día<br><input type="radio"/> 5 a 6 veces al día<br><input type="radio"/> más 6 veces al día            |
| sopa o puré verduras  | <input type="radio"/> Nunca o menos 1 vez al mes<br><input type="radio"/> 1 a 3 veces mes<br><input type="radio"/> 1 vez semana<br><input checked="" type="radio"/> 2 a 4 veces semana<br><input type="radio"/> 5 a 6 veces semana<br><input type="radio"/> 1 vez al día<br><input type="radio"/> 2 a 3 veces al día<br><input type="radio"/> 5 a 6 veces al día<br><input type="radio"/> más 6 veces al día |
| croquetas pollo jamón | <input type="radio"/> Nunca o menos 1 vez al mes<br><input type="radio"/> 1 a 3 veces mes<br><input type="radio"/> 1 vez semana<br><input type="radio"/> 2 a 4 veces semana<br><input type="radio"/> 5 a 6 veces semana<br><input type="radio"/> 1 vez al día<br><input type="radio"/> 2 a 3 veces al día<br><input type="radio"/> 5 a 6 veces al día<br><input type="radio"/> más 6 veces al día            |
| croquetas pescado     | <input type="radio"/> Nunca o menos 1 vez al mes<br><input type="radio"/> 1 a 3 veces mes<br><input type="radio"/> 1 vez semana<br><input checked="" type="radio"/> 2 a 4 veces semana<br><input type="radio"/> 5 a 6 veces semana<br><input type="radio"/> 1 vez al día<br><input type="radio"/> 2 a 3 veces al día<br><input type="radio"/> 5 a 6 veces al día<br><input type="radio"/> más 6 veces al día |
| mayonesa              | <input type="radio"/> Nunca o menos 1 vez al mes<br><input type="radio"/> 1 a 3 veces mes<br><input type="radio"/> 1 vez semana<br><input checked="" type="radio"/> 2 a 4 veces semana<br><input type="radio"/> 5 a 6 veces semana<br><input type="radio"/> 1 vez al día<br><input type="radio"/> 2 a 3 veces al día<br><input type="radio"/> 5 a 6 veces al día<br><input type="radio"/> más 6 veces al día |

|                  |                                                                                                                                                                                                                                                                                                                                                                                                              |
|------------------|--------------------------------------------------------------------------------------------------------------------------------------------------------------------------------------------------------------------------------------------------------------------------------------------------------------------------------------------------------------------------------------------------------------|
| salsa tomate     | <input type="radio"/> Nunca o menos 1 vez al mes<br><input type="radio"/> 1 a 3 veces mes<br><input type="radio"/> 1 vez semana<br><input checked="" type="radio"/> 2 a 4 veces semana<br><input type="radio"/> 5 a 6 veces semana<br><input type="radio"/> 1 vez al día<br><input type="radio"/> 2 a 3 veces al día<br><input type="radio"/> 5 a 6 veces al día<br><input type="radio"/> más 6 veces al día |
| ketchup          | <input type="radio"/> Nunca o menos 1 vez al mes<br><input type="radio"/> 1 a 3 veces mes<br><input type="radio"/> 1 vez semana<br><input type="radio"/> 2 a 4 veces semana<br><input checked="" type="radio"/> 5 a 6 veces semana<br><input type="radio"/> 1 vez al día<br><input type="radio"/> 2 a 3 veces al día<br><input type="radio"/> 5 a 6 veces al día<br><input type="radio"/> más 6 veces al día |
| sal              | <input type="radio"/> Nunca o menos 1 vez al mes<br><input type="radio"/> 1 a 3 veces mes<br><input type="radio"/> 1 vez semana<br><input type="radio"/> 2 a 4 veces semana<br><input checked="" type="radio"/> 5 a 6 veces semana<br><input type="radio"/> 1 vez al día<br><input type="radio"/> 2 a 3 veces al día<br><input type="radio"/> 5 a 6 veces al día<br><input type="radio"/> más 6 veces al día |
| ajo              | <input type="radio"/> Nunca o menos 1 vez al mes<br><input type="radio"/> 1 a 3 veces mes<br><input type="radio"/> 1 vez semana<br><input type="radio"/> 2 a 4 veces semana<br><input type="radio"/> 5 a 6 veces semana<br><input type="radio"/> 1 vez al día<br><input type="radio"/> 2 a 3 veces al día<br><input type="radio"/> 5 a 6 veces al día<br><input type="radio"/> más 6 veces al día            |
| mermelada o miel | <input type="radio"/> Nunca o menos 1 vez al mes<br><input type="radio"/> 1 a 3 veces mes<br><input type="radio"/> 1 vez semana<br><input type="radio"/> 2 a 4 veces semana<br><input type="radio"/> 5 a 6 veces semana<br><input type="radio"/> 1 vez al día<br><input type="radio"/> 2 a 3 veces al día<br><input type="radio"/> 5 a 6 veces al día<br><input type="radio"/> más 6 veces al día            |
| azúcar           | <input type="radio"/> Nunca o menos 1 vez al mes<br><input checked="" type="radio"/> 1 a 3 veces mes<br><input type="radio"/> 1 vez semana<br><input type="radio"/> 2 a 4 veces semana<br><input type="radio"/> 5 a 6 veces semana<br><input type="radio"/> 1 vez al día<br><input type="radio"/> 2 a 3 veces al día<br><input type="radio"/> 5 a 6 veces al día<br><input type="radio"/> más 6 veces al día |



|                                       |                                                                                                                                                                                                                                                                                                                                                                                                                                                                                                                               |
|---------------------------------------|-------------------------------------------------------------------------------------------------------------------------------------------------------------------------------------------------------------------------------------------------------------------------------------------------------------------------------------------------------------------------------------------------------------------------------------------------------------------------------------------------------------------------------|
| Otro alimento                         | <hr/>                                                                                                                                                                                                                                                                                                                                                                                                                                                                                                                         |
| suplementos vitamínicos               | <input type="radio"/> si<br><input checked="" type="radio"/> no                                                                                                                                                                                                                                                                                                                                                                                                                                                               |
| suplementos vitamínicos               | <hr/>                                                                                                                                                                                                                                                                                                                                                                                                                                                                                                                         |
| dieta previa                          | <input type="radio"/> si<br><input checked="" type="radio"/> no                                                                                                                                                                                                                                                                                                                                                                                                                                                               |
| motivo dieta                          | <input checked="" type="radio"/> no dieta<br><input type="radio"/> control peso<br><input type="radio"/> control colesterol<br><input type="radio"/> control diabetes<br><input type="radio"/> problemas estómago<br><input type="radio"/> problemas vesícula o hepáticos<br><input type="radio"/> HTA o cardiopatía<br><input type="radio"/> problemas renales<br><input type="radio"/> alergia alimentaria<br><input type="radio"/> ácido úrico elevado<br><input type="radio"/> vegetariana<br><input type="radio"/> otros |
| cambio alimentos año previo gestación | <input type="radio"/> si<br><input checked="" type="radio"/> no                                                                                                                                                                                                                                                                                                                                                                                                                                                               |
| cambio lácteos                        | <input type="radio"/> eliminado<br><input type="radio"/> disminuido<br><input type="radio"/> igual<br><input type="radio"/> aumentado<br><input type="radio"/> no sabe                                                                                                                                                                                                                                                                                                                                                        |
| cambio huevos                         | <input type="radio"/> eliminado<br><input type="radio"/> disminuido<br><input type="radio"/> igual<br><input type="radio"/> aumentado<br><input type="radio"/> no sabe                                                                                                                                                                                                                                                                                                                                                        |
| cambio carne                          | <input type="radio"/> eliminado<br><input type="radio"/> disminuido<br><input type="radio"/> igual<br><input type="radio"/> aumentado<br><input type="radio"/> no sabe                                                                                                                                                                                                                                                                                                                                                        |
| cambio pescado                        | <input type="radio"/> eliminado<br><input type="radio"/> disminuido<br><input type="radio"/> igual<br><input type="radio"/> aumentado<br><input type="radio"/> no sabe                                                                                                                                                                                                                                                                                                                                                        |
| cambio verduras                       | <input type="radio"/> eliminado<br><input type="radio"/> disminuido<br><input type="radio"/> igual<br><input type="radio"/> aumentado<br><input type="radio"/> no sabe                                                                                                                                                                                                                                                                                                                                                        |

|                            |                                                                                                                                                                                                                        |
|----------------------------|------------------------------------------------------------------------------------------------------------------------------------------------------------------------------------------------------------------------|
| cambio legumbres           | <input type="radio"/> eliminado<br><input type="radio"/> disminuido<br><input type="radio"/> igual<br><input type="radio"/> aumentado<br><input type="radio"/> no sabe                                                 |
| cambio fruta               | <input type="radio"/> eliminado<br><input type="radio"/> disminuido<br><input type="radio"/> igual<br><input type="radio"/> aumentado<br><input type="radio"/> no sabe                                                 |
| cambio pan                 | <input type="radio"/> eliminado<br><input type="radio"/> disminuido<br><input type="radio"/> igual<br><input type="radio"/> aumentado<br><input type="radio"/> no sabe                                                 |
| cambio aceite oliva        | <input type="radio"/> eliminado<br><input type="radio"/> disminuido<br><input type="radio"/> igual<br><input type="radio"/> aumentado<br><input type="radio"/> no sabe                                                 |
| cambio mante o margarina   | <input type="radio"/> eliminado<br><input type="radio"/> disminuido<br><input type="radio"/> igual<br><input type="radio"/> aumentado<br><input type="radio"/> no sabe                                                 |
| cambio azúcar y dulces     | <input type="radio"/> eliminado<br><input type="radio"/> disminuido<br><input type="radio"/> igual<br><input type="radio"/> aumentado<br><input type="radio"/> no sabe                                                 |
| cambio bebidas alcohólicas | <input type="radio"/> eliminado<br><input type="radio"/> disminuido<br><input type="radio"/> igual<br><input type="radio"/> aumentado<br><input type="radio"/> no sabe                                                 |
| frecuencia comidas fritas  | <input type="radio"/> a diario<br><input type="radio"/> 5 a 6 veces semana<br><input checked="" type="radio"/> 2 a 4 veces semana<br><input type="radio"/> 1 vez semana<br><input type="radio"/> menos de 1 vez semana |
| carne                      | <input type="radio"/> no como<br><input type="radio"/> cruda<br><input type="radio"/> poco hecha<br><input checked="" type="radio"/> hecha<br><input type="radio"/> muy hecha                                          |
| grasa visible carne        | <input checked="" type="radio"/> quita toda<br><input type="radio"/> quita mayoría<br><input type="radio"/> quita un poco<br><input type="radio"/> no quita nada                                                       |

|                                |                                                                                                                                                                                                                                                          |
|--------------------------------|----------------------------------------------------------------------------------------------------------------------------------------------------------------------------------------------------------------------------------------------------------|
| cocina carne                   | <input type="radio"/> a la plancha<br><input type="radio"/> a la parrilla<br><input type="radio"/> asada<br><input type="radio"/> frita<br><input checked="" type="radio"/> guisada                                                                      |
| tostado quemado carne          | <input checked="" type="radio"/> nunca<br><input type="radio"/> 1 vez mes<br><input type="radio"/> 2 a 3 veces mes<br><input type="radio"/> 1 vez semana<br><input type="radio"/> 2 a 3 semanas                                                          |
| tostado quemado pescado        | <input checked="" type="radio"/> nunca<br><input type="radio"/> 1 vez mes<br><input type="radio"/> 2 a 3 veces mes<br><input type="radio"/> 1 vez semana<br><input type="radio"/> 2 a 3 semanas                                                          |
| socarrat paella                | <input checked="" type="radio"/> nunca<br><input type="radio"/> 1 vez mes<br><input type="radio"/> 2 a 3 veces mes<br><input type="radio"/> 1 vez semana<br><input type="radio"/> 2 a 3 semanas                                                          |
| grasa o aceite cocinar         | <input type="radio"/> mantequilla<br><input type="radio"/> margarina<br><input type="radio"/> aceite oliva<br><input checked="" type="radio"/> aceite oliva virgen extra<br><input type="radio"/> aceite vegetal<br><input type="radio"/> mezcla aceites |
| grasa aceite aliñar            | <input type="radio"/> mantequilla<br><input type="radio"/> margarina<br><input type="radio"/> aceite oliva<br><input checked="" type="radio"/> aceite oliva virgen extra<br><input type="radio"/> aceite vegetal<br><input type="radio"/> mezcla aceites |
| grasa aceite freir             | <input type="radio"/> mantequilla<br><input type="radio"/> margarina<br><input type="radio"/> aceite oliva<br><input checked="" type="radio"/> aceite oliva virgen extra<br><input type="radio"/> aceite vegetal<br><input type="radio"/> mezcla aceites |
| Ejercicio cuestionario         | <input checked="" type="radio"/> si<br><input type="radio"/> no                                                                                                                                                                                          |
| horas de sueño incluido siesta | [*DATA REMOVED*]                                                                                                                                                                                                                                         |
| minutos siesta                 | [*DATA REMOVED*]                                                                                                                                                                                                                                         |
| horas televisión semana        | [*DATA REMOVED*]                                                                                                                                                                                                                                         |

|                                        |                                                                                                                                                                                                                                                                                                                                                                           |
|----------------------------------------|---------------------------------------------------------------------------------------------------------------------------------------------------------------------------------------------------------------------------------------------------------------------------------------------------------------------------------------------------------------------------|
| actividad trabajo                      | <input checked="" type="radio"/> casi siempre sentado<br><input type="radio"/> sentado 50 por cien<br><input type="radio"/> casi siempre de pie, quieto<br><input type="radio"/> casi siempre levantado caminando y llevando pocas cosas<br><input type="radio"/> casi siempre levantado, caminando y llevado muchas cosas<br><input type="radio"/> trabajo manual pesado |
| tiempo caminar o bici al día           | <input type="radio"/> casi nunca<br><input type="radio"/> menos 20min día<br><input type="radio"/> 20 a 40 min día<br><input checked="" type="radio"/> 40 a 60 min día<br><input type="radio"/> 1h o 1h y media día<br><input type="radio"/> más de 1h y media al día                                                                                                     |
| tiempo tareas casa al día              | <input checked="" type="radio"/> menos de 1h día<br><input type="radio"/> 1 a 2h día<br><input type="radio"/> 3 a 4h día<br><input type="radio"/> 5 a 6h día<br><input type="radio"/> 7 a 8h día<br><input type="radio"/> más de 8h día                                                                                                                                   |
| tiempo libre televisión ordenador leer | <input type="radio"/> menos 1h día<br><input type="radio"/> 1h día<br><input type="radio"/> 2h día<br><input checked="" type="radio"/> 3h día<br><input type="radio"/> 4h día<br><input type="radio"/> 5 a 6h día<br><input type="radio"/> mas 6h día                                                                                                                     |
| tiempo libre ejercicio o deporte       | <input type="radio"/> menos 1h semana<br><input type="radio"/> 1h semana<br><input type="radio"/> 2h semana<br><input checked="" type="radio"/> 3h semana<br><input type="radio"/> 4 a 5h semana<br><input type="radio"/> mas 5h semana                                                                                                                                   |
| como se considera                      | <input type="radio"/> sedentaria<br><input type="radio"/> poco activa<br><input checked="" type="radio"/> moderadamente activa<br><input type="radio"/> bastante activa<br><input type="radio"/> muy activa<br><input type="radio"/> no sabe                                                                                                                              |
| FUR                                    | [*DATA REMOVED*]                                                                                                                                                                                                                                                                                                                                                          |
| Semanas gestación 2T                   | [*DATA REMOVED*]                                                                                                                                                                                                                                                                                                                                                          |
| Días gestación 2T                      | [*DATA REMOVED*]                                                                                                                                                                                                                                                                                                                                                          |
| DBP 2T                                 | [*DATA REMOVED*]                                                                                                                                                                                                                                                                                                                                                          |
| CC 2T                                  | [*DATA REMOVED*]                                                                                                                                                                                                                                                                                                                                                          |
| AC 2T                                  | [*DATA REMOVED*]                                                                                                                                                                                                                                                                                                                                                          |

|                                                   |                                                                                                                                                                                                 |
|---------------------------------------------------|-------------------------------------------------------------------------------------------------------------------------------------------------------------------------------------------------|
| LF 2T                                             | [*DATA REMOVED*]                                                                                                                                                                                |
| PFE 2T (Hadlock)                                  | [*DATA REMOVED*]                                                                                                                                                                                |
| Semanas gestación 3T                              | [*DATA REMOVED*]                                                                                                                                                                                |
| días 3T                                           | [*DATA REMOVED*]                                                                                                                                                                                |
| DBP 3T                                            | [*DATA REMOVED*]                                                                                                                                                                                |
| CC 3T                                             | [*DATA REMOVED*]                                                                                                                                                                                |
| AC 3T                                             | [*DATA REMOVED*]                                                                                                                                                                                |
| LF 3T                                             | [*DATA REMOVED*]                                                                                                                                                                                |
| PFE 3T (Hadlock)                                  | [*DATA REMOVED*]                                                                                                                                                                                |
| Semanas de gestación final                        | [*DATA REMOVED*]                                                                                                                                                                                |
| días gestación final                              | [*DATA REMOVED*]                                                                                                                                                                                |
| Localización placenta                             | <input checked="" type="radio"/> anterior<br><input type="radio"/> lateral derecha<br><input type="radio"/> lateral izquierda<br><input type="radio"/> posterior<br><input type="radio"/> fondo |
| Presentación longitudinal cefálica                | <input type="radio"/> no<br><input checked="" type="radio"/> si                                                                                                                                 |
| Dorso                                             | <input type="radio"/> izquierda anterior<br><input checked="" type="radio"/> izquierda posterior<br><input type="radio"/> derecha anterior<br><input type="radio"/> derecha posterior           |
| diámetro biparietal                               | [*DATA REMOVED*]                                                                                                                                                                                |
| Circunferencia craneal                            | [*DATA REMOVED*]                                                                                                                                                                                |
| Circunferencia abdominal                          | [*DATA REMOVED*]                                                                                                                                                                                |
| Longitud de femur                                 | [*DATA REMOVED*]                                                                                                                                                                                |
| tejido celular subcutáneo a nivel del muslo en mm | [*DATA REMOVED*]                                                                                                                                                                                |
| tejido celular subcutáneo en abdomen en mm        | [*DATA REMOVED*]                                                                                                                                                                                |
| Volumen del muslo en cm3                          | [*DATA REMOVED*]                                                                                                                                                                                |
| Peso fetal estimado según fórmula de Hadlock      | [*DATA REMOVED*]                                                                                                                                                                                |

|                                               |                                                                                                                                                          |
|-----------------------------------------------|----------------------------------------------------------------------------------------------------------------------------------------------------------|
| Percentil                                     | [*DATA REMOVED*]                                                                                                                                         |
| Peso fetal estimado según fórmula de Scioscia | <hr/>                                                                                                                                                    |
| Peso fetal estimado según fórmula de LEE      | <hr/>                                                                                                                                                    |
| Tipo de parto                                 | <input checked="" type="radio"/> eutocico<br><input type="radio"/> instrumentado/ventosa<br><input type="radio"/> cesarea                                |
| fecha de nacimiento                           | [*DATA REMOVED*]                                                                                                                                         |
| Días entre exploración y nacimiento           | [*DATA REMOVED*]                                                                                                                                         |
| Peso RN en g                                  | [*DATA REMOVED*]                                                                                                                                         |
| sexo                                          | <input checked="" type="radio"/> mujer<br><input type="radio"/> hombre                                                                                   |
| Apgar 1 minuto                                | [*DATA REMOVED*]                                                                                                                                         |
| Apgar 5 minutos                               | [*DATA REMOVED*]                                                                                                                                         |
| Apgar 10 minutos                              | <hr/>                                                                                                                                                    |
| antecedente Covid durante gestación           | <input type="radio"/> Yes<br><input checked="" type="radio"/> No                                                                                         |
| Nivel de estudios                             | <input type="radio"/> ninguno<br><input type="radio"/> primarios<br><input checked="" type="radio"/> secundarios<br><input type="radio"/> universitarios |

# Base\_datos\_estimacion\_peso\_fetal

|                                       |                                                                                                                                                                                                                                                                                      |
|---------------------------------------|--------------------------------------------------------------------------------------------------------------------------------------------------------------------------------------------------------------------------------------------------------------------------------------|
| Número de identificación participante | 75                                                                                                                                                                                                                                                                                   |
| CODIGO PARTICIPANTE                   |                                                                                                                                                                                                                                                                                      |
| Edad                                  | [*DATA REMOVED*]                                                                                                                                                                                                                                                                     |
| Gestaciones                           | <input type="radio"/> 1<br><input type="radio"/> 2<br><input checked="" type="radio"/> 3<br><input type="radio"/> mas de 3                                                                                                                                                           |
| partos                                | <input type="radio"/> 0<br><input checked="" type="radio"/> 1<br><input type="radio"/> 2<br><input type="radio"/> 3<br><input type="radio"/> mas de 3                                                                                                                                |
| cesáreas                              | <input checked="" type="radio"/> 0<br><input type="radio"/> 1<br><input type="radio"/> 2<br><input type="radio"/> 3<br><input type="radio"/> mas de 3                                                                                                                                |
| Abortos                               | <input type="radio"/> 0<br><input checked="" type="radio"/> 1<br><input type="radio"/> 2<br><input type="radio"/> 3<br><input type="radio"/> mas de 3                                                                                                                                |
| Tipo de gestacion                     | <input checked="" type="radio"/> espontanea<br><input type="radio"/> IAC inseminación artificial conyuge<br><input type="radio"/> IAD inseminación artificial donante<br><input type="radio"/> FIV Fecundación in Vitro<br><input type="radio"/> Ovodon FIV con donación de ovocitos |
| peso previo a embarazo                | [*DATA REMOVED*]                                                                                                                                                                                                                                                                     |
| Ganancia ponderal embarazo            | [*DATA REMOVED*]                                                                                                                                                                                                                                                                     |
| Talla madre                           | [*DATA REMOVED*]                                                                                                                                                                                                                                                                     |
| IMC previo embarazo                   | 26.365603028664147                                                                                                                                                                                                                                                                   |
| Patología obstétrica                  | <input checked="" type="radio"/> no<br><input type="radio"/> si                                                                                                                                                                                                                      |
| Diabetes pregestacional               | <input checked="" type="radio"/> no<br><input type="radio"/> si                                                                                                                                                                                                                      |
| Diabetes gestacional                  | <input checked="" type="radio"/> no<br><input type="radio"/> si                                                                                                                                                                                                                      |

|                                            |                                                                                                                                                                                      |
|--------------------------------------------|--------------------------------------------------------------------------------------------------------------------------------------------------------------------------------------|
| Diabetes gestacional con insulina          | <input checked="" type="radio"/> no<br><input type="radio"/> si                                                                                                                      |
| Diabetes gestacional con dieta y ejercicio | <input checked="" type="radio"/> no<br><input type="radio"/> si                                                                                                                      |
| Percentil fetos previos                    | <input type="radio"/> Nada<br><input type="radio"/> percentil menor de 10<br><input checked="" type="radio"/> percentil entre 10 y 90<br><input type="radio"/> percentil mayor de 90 |
| Exfumadora                                 | <input checked="" type="radio"/> Nada<br><input type="radio"/> menos de 5 años<br><input type="radio"/> 5 a 10 años<br><input type="radio"/> mayor o igual a 10 años                 |
| Hábito tabáquico                           | <input type="radio"/> no<br><input checked="" type="radio"/> si                                                                                                                      |
| fumadora                                   | [*DATA REMOVED*]                                                                                                                                                                     |
| Consumo otros tóxicos                      | <input checked="" type="radio"/> no<br><input type="radio"/> si                                                                                                                      |
| Hb 1T                                      | [*DATA REMOVED*]                                                                                                                                                                     |
| Htc 1T                                     | [*DATA REMOVED*]                                                                                                                                                                     |
| Hb 2T                                      | [*DATA REMOVED*]                                                                                                                                                                     |
| HTC 2T                                     | [*DATA REMOVED*]                                                                                                                                                                     |
| Hb 3T                                      | [*DATA REMOVED*]                                                                                                                                                                     |
| HTC 3T                                     | [*DATA REMOVED*]                                                                                                                                                                     |
| Suplemento FE oral                         | <input checked="" type="radio"/> si<br><input type="radio"/> no                                                                                                                      |
| Suplemento fe iv                           | <input type="radio"/> si<br><input checked="" type="radio"/> no                                                                                                                      |
| Transfusión                                | <input checked="" type="radio"/> no<br><input type="radio"/> si                                                                                                                      |
| Solicitada Vit D                           | <input checked="" type="radio"/> no<br><input type="radio"/> si                                                                                                                      |
| Deficit vit D                              | <input type="radio"/> no<br><input type="radio"/> si                                                                                                                                 |
| Suplemento vit D                           | <input type="radio"/> si<br><input type="radio"/> no                                                                                                                                 |



|                       |                                                                                                                                                                                                                                                                                                                                                                                                              |
|-----------------------|--------------------------------------------------------------------------------------------------------------------------------------------------------------------------------------------------------------------------------------------------------------------------------------------------------------------------------------------------------------------------------------------------------------|
| Dieta, cuestionario   | <input checked="" type="radio"/> sí<br><input type="radio"/> no                                                                                                                                                                                                                                                                                                                                              |
| Leche entera          | <input checked="" type="radio"/> Nunca o menos 1 vez al mes<br><input type="radio"/> 1 a 3 veces mes<br><input type="radio"/> 1 vez semana<br><input type="radio"/> 2 a 4 veces semana<br><input type="radio"/> 5 a 6 veces semana<br><input type="radio"/> 1 vez al día<br><input type="radio"/> 2 a 3 veces al día<br><input type="radio"/> 5 a 6 veces al día<br><input type="radio"/> más 6 veces al día |
| Leche semidesnatada   | <input type="radio"/> Nunca o menos 1 vez al mes<br><input type="radio"/> 1 a 3 veces mes<br><input type="radio"/> 1 vez semana<br><input checked="" type="radio"/> 2 a 4 veces semana<br><input type="radio"/> 5 a 6 veces semana<br><input type="radio"/> 1 vez al día<br><input type="radio"/> 2 a 3 veces al día<br><input type="radio"/> 5 a 6 veces al día<br><input type="radio"/> mas 6 veces al día |
| Leche desnatada       | <input type="radio"/> Nunca o menos 1 vez al mes<br><input type="radio"/> 1 a 3 veces mes<br><input type="radio"/> 1 vez semana<br><input type="radio"/> 2 a 4 veces semana<br><input type="radio"/> 5 a 6 veces semana<br><input type="radio"/> 1 vez al día<br><input type="radio"/> 2 a 3 veces al día<br><input type="radio"/> 5 a 6 veces al día<br><input type="radio"/> más 6 veces al día            |
| Leche condensada      | <input checked="" type="radio"/> Nunca o menos 1 vez al mes<br><input type="radio"/> 1 a 3 veces mes<br><input type="radio"/> 1 vez semana<br><input type="radio"/> 2 a 4 veces semana<br><input type="radio"/> 5 a 6 veces semana<br><input type="radio"/> 1 vez al día<br><input type="radio"/> 2 a 3 veces al día<br><input type="radio"/> 5 a 6 veces al día<br><input type="radio"/> más 6 veces al día |
| nata o crema de leche | <input type="radio"/> Nunca o menos 1 vez al mes<br><input type="radio"/> 1 a 3 veces mes<br><input checked="" type="radio"/> 1 vez semana<br><input type="radio"/> 2 a 4 veces semana<br><input type="radio"/> 5 a 6 veces semana<br><input type="radio"/> 1 vez al día<br><input type="radio"/> 2 a 3 veces al día<br><input type="radio"/> 5 a 6 veces al día<br><input type="radio"/> más 6 veces al día |

|                                             |                                                                                                                                                                                                                                                                                                                                                                                                              |
|---------------------------------------------|--------------------------------------------------------------------------------------------------------------------------------------------------------------------------------------------------------------------------------------------------------------------------------------------------------------------------------------------------------------------------------------------------------------|
| Yogurt Entero                               | <input type="radio"/> Nunca o menos 1 vez al mes<br><input type="radio"/> 1 a 3 veces mes<br><input type="radio"/> 1 vez semana<br><input type="radio"/> 2 a 4 veces semana<br><input type="radio"/> 5 a 6 veces semana<br><input checked="" type="radio"/> 1 vez al día<br><input type="radio"/> 2 a 3 veces al día<br><input type="radio"/> 5 a 6 veces al día<br><input type="radio"/> más 6 veces al día |
| Yogurt desnatado                            | <input type="radio"/> Nunca o menos 1 vez al mes<br><input type="radio"/> 1 a 3 veces mes<br><input type="radio"/> 1 vez semana<br><input type="radio"/> 2 a 4 veces semana<br><input type="radio"/> 5 a 6 veces semana<br><input type="radio"/> 1 vez al día<br><input type="radio"/> 2 a 3 veces al día<br><input type="radio"/> 5 a 6 veces al día<br><input type="radio"/> más 6 veces al día            |
| 100g requesón o queso blando o queso fresco | <input type="radio"/> Nunca o menos 1 vez al mes<br><input type="radio"/> 1 a 3 veces mes<br><input type="radio"/> 1 vez semana<br><input type="radio"/> 2 a 4 veces semana<br><input type="radio"/> 5 a 6 veces semana<br><input type="radio"/> 1 vez al día<br><input type="radio"/> 2 a 3 veces al día<br><input type="radio"/> 5 a 6 veces al día<br><input type="radio"/> más 6 veces al día            |
| queso curado o semicurado o cremoso         | <input checked="" type="radio"/> Nunca o menos 1 vez al mes<br><input type="radio"/> 1 a 3 veces mes<br><input type="radio"/> 1 vez semana<br><input type="radio"/> 2 a 4 veces semana<br><input type="radio"/> 5 a 6 veces semana<br><input type="radio"/> 1 vez al día<br><input type="radio"/> 2 a 3 veces al día<br><input type="radio"/> 5 a 6 veces al día<br><input type="radio"/> más 6 veces al día |
| natillas flan pudding                       | <input type="radio"/> Nunca o menos 1 vez al mes<br><input type="radio"/> 1 a 3 veces mes<br><input type="radio"/> 1 vez semana<br><input checked="" type="radio"/> 2 a 4 veces semana<br><input type="radio"/> 5 a 6 veces semana<br><input type="radio"/> 1 vez al día<br><input type="radio"/> 2 a 3 veces al día<br><input type="radio"/> 5 a 6 veces al día<br><input type="radio"/> más 6 veces al día |
| Helado                                      | <input type="radio"/> Nunca o menos 1 vez al mes<br><input type="radio"/> 1 a 3 veces mes<br><input type="radio"/> 1 vez semana<br><input checked="" type="radio"/> 2 a 4 veces semana<br><input type="radio"/> 5 a 6 veces semana<br><input type="radio"/> 1 vez al día<br><input type="radio"/> 2 a 3 veces al día<br><input type="radio"/> 5 a 6 veces al día<br><input type="radio"/> más 6 veces al día |

|                                      |                                                                                                                                                                                                                                                                                                                                                                                                              |
|--------------------------------------|--------------------------------------------------------------------------------------------------------------------------------------------------------------------------------------------------------------------------------------------------------------------------------------------------------------------------------------------------------------------------------------------------------------|
| huevo                                | <input type="radio"/> Nunca o menos 1 vez al mes<br><input type="radio"/> 1 a 3 veces mes<br><input type="radio"/> 1 vez semana<br><input checked="" type="radio"/> 2 a 4 veces semana<br><input type="radio"/> 5 a 6 veces semana<br><input type="radio"/> 1 vez al día<br><input type="radio"/> 2 a 3 veces al día<br><input type="radio"/> 5 a 6 veces al día<br><input type="radio"/> más 6 veces al día |
| Pollo con piel                       | <input type="radio"/> Nunca o menos 1 vez al mes<br><input type="radio"/> 1 a 3 veces mes<br><input type="radio"/> 1 vez semana<br><input checked="" type="radio"/> 2 a 4 veces semana<br><input type="radio"/> 5 a 6 veces semana<br><input type="radio"/> 1 vez al día<br><input type="radio"/> 2 a 3 veces al día<br><input type="radio"/> 5 a 6 veces al día<br><input type="radio"/> más 6 veces al día |
| pollo sin piel                       | <input type="radio"/> Nunca o menos 1 vez al mes<br><input type="radio"/> 1 a 3 veces mes<br><input type="radio"/> 1 vez semana<br><input checked="" type="radio"/> 2 a 4 veces semana<br><input type="radio"/> 5 a 6 veces semana<br><input type="radio"/> 1 vez al día<br><input type="radio"/> 2 a 3 veces al día<br><input type="radio"/> 5 a 6 veces al día<br><input type="radio"/> más 6 veces al día |
| Ternera o cerdo o cordero            | <input type="radio"/> Nunca o menos 1 vez al mes<br><input type="radio"/> 1 a 3 veces mes<br><input type="radio"/> 1 vez semana<br><input checked="" type="radio"/> 2 a 4 veces semana<br><input type="radio"/> 5 a 6 veces semana<br><input type="radio"/> 1 vez al día<br><input type="radio"/> 2 a 3 veces al día<br><input type="radio"/> 5 a 6 veces al día<br><input type="radio"/> más 6 veces al día |
| carne caza: Conejo o codorniz o pato | <input checked="" type="radio"/> Nunca o menos 1 vez al mes<br><input type="radio"/> 1 a 3 veces mes<br><input type="radio"/> 1 vez semana<br><input type="radio"/> 2 a 4 veces semana<br><input type="radio"/> 5 a 6 veces semana<br><input type="radio"/> 1 vez al día<br><input type="radio"/> 2 a 3 veces al día<br><input type="radio"/> 5 a 6 veces al día<br><input type="radio"/> más 6 veces al día |
| Hígado de ternera o cerdo o pollo    | <input type="radio"/> Nunca o menos 1 vez al mes<br><input checked="" type="radio"/> 1 a 3 veces mes<br><input type="radio"/> 1 vez semana<br><input type="radio"/> 2 a 4 veces semana<br><input type="radio"/> 5 a 6 veces semana<br><input type="radio"/> 1 vez al día<br><input type="radio"/> 2 a 3 veces al día<br><input type="radio"/> 5 a 6 veces al día<br><input type="radio"/> más 6 veces al día |

|                     |                                                                                                                                                                                                                                                                                                                                                                                                              |
|---------------------|--------------------------------------------------------------------------------------------------------------------------------------------------------------------------------------------------------------------------------------------------------------------------------------------------------------------------------------------------------------------------------------------------------------|
| Vísceras            | <input checked="" type="radio"/> Nunca o menos 1 vez al mes<br><input type="radio"/> 1 a 3 veces mes<br><input type="radio"/> 1 vez semana<br><input type="radio"/> 2 a 4 veces semana<br><input type="radio"/> 5 a 6 veces semana<br><input type="radio"/> 1 vez al día<br><input type="radio"/> 2 a 3 veces al día<br><input type="radio"/> 5 a 6 veces al día<br><input type="radio"/> más 6 veces al día |
| Embutido            | <input type="radio"/> Nunca o menos 1 vez al mes<br><input type="radio"/> 1 a 3 veces mes<br><input type="radio"/> 1 vez semana<br><input checked="" type="radio"/> 2 a 4 veces semana<br><input type="radio"/> 5 a 6 veces semana<br><input type="radio"/> 1 vez al día<br><input type="radio"/> 2 a 3 veces al día<br><input type="radio"/> 5 a 6 veces al día<br><input type="radio"/> más 6 veces al día |
| Salchicha o similar | <input type="radio"/> Nunca o menos 1 vez al mes<br><input type="radio"/> 1 a 3 veces mes<br><input type="radio"/> 1 vez semana<br><input checked="" type="radio"/> 2 a 4 veces semana<br><input type="radio"/> 5 a 6 veces semana<br><input type="radio"/> 1 vez al día<br><input type="radio"/> 2 a 3 veces al día<br><input type="radio"/> 5 a 6 veces al día<br><input type="radio"/> más 6 veces al día |
| Pate o foiegras     | <input type="radio"/> Nunca o menos 1 vez al mes<br><input checked="" type="radio"/> 1 a 3 veces mes<br><input type="radio"/> 1 vez semana<br><input type="radio"/> 2 a 4 veces semana<br><input type="radio"/> 5 a 6 veces semana<br><input type="radio"/> 1 vez al día<br><input type="radio"/> 2 a 3 veces al día<br><input type="radio"/> 5 a 6 veces al día<br><input type="radio"/> más 6 veces al día |
| Hamburguesa         | <input type="radio"/> Nunca o menos 1 vez al mes<br><input type="radio"/> 1 a 3 veces mes<br><input type="radio"/> 1 vez semana<br><input checked="" type="radio"/> 2 a 4 veces semana<br><input type="radio"/> 5 a 6 veces semana<br><input type="radio"/> 1 vez al día<br><input type="radio"/> 2 a 3 veces al día<br><input type="radio"/> 5 a 6 veces al día<br><input type="radio"/> más 6 veces al día |
| tocino o bacon      | <input type="radio"/> Nunca o menos 1 vez al mes<br><input type="radio"/> 1 a 3 veces mes<br><input checked="" type="radio"/> 1 vez semana<br><input type="radio"/> 2 a 4 veces semana<br><input type="radio"/> 5 a 6 veces semana<br><input type="radio"/> 1 vez al día<br><input type="radio"/> 2 a 3 veces al día<br><input type="radio"/> 5 a 6 veces al día<br><input type="radio"/> más 6 veces al día |

---

Pescado frito

- ☐ Nunca o menos 1 vez al mes  
☐ 1 a 3 veces mes  
☒ 1 vez semana  
☐ 2 a 4 veces semana  
☐ 5 a 6 veces semana  
☐ 1 vez al día  
☐ 2 a 3 veces al día  
☐ 5 a 6 veces al día  
☐ más 6 veces al día

---

pescado hervido blanco

- ☐ Nunca o menos 1 vez al mes  
☐ 1 a 3 veces mes  
☐ 1 vez semana  
☒ 2 a 4 veces semana  
☐ 5 a 6 veces semana  
☐ 1 vez al día  
☐ 2 a 3 veces al día  
☐ 5 a 6 veces al día  
☐ más 6 veces al día

---

pescado hervido azul

- ☐ Nunca o menos 1 vez al mes  
☐ 1 a 3 veces mes  
☒ 1 vez semana  
☐ 2 a 4 veces semana  
☐ 5 a 6 veces semana  
☐ 1 vez al día  
☐ 2 a 3 veces al día  
☐ 5 a 6 veces al día  
☐ más 6 veces al día

---

otros pescado azul

- ☐ Nunca o menos 1 vez al mes  
☐ 1 a 3 veces mes  
☒ 1 vez semana  
☐ 2 a 4 veces semana  
☐ 5 a 6 veces semana  
☐ 1 vez al día  
☐ 2 a 3 veces al día  
☐ 5 a 6 veces al día  
☐ más 6 veces al día

---

atun conserva

- ☐ Nunca o menos 1 vez al mes  
☐ 1 a 3 veces mes  
☒ 1 vez semana  
☐ 2 a 4 veces semana  
☐ 5 a 6 veces semana  
☐ 1 vez al día  
☐ 2 a 3 veces al día  
☐ 5 a 6 veces al día  
☐ más 6 veces al día

---

sardina conserva

- ☐ Nunca o menos 1 vez al mes  
☒ 1 a 3 veces mes  
☐ 1 vez semana  
☐ 2 a 4 veces semana  
☐ 5 a 6 veces semana  
☐ 1 vez al día  
☐ 2 a 3 veces al día  
☐ 5 a 6 veces al día  
☐ más 6 veces al día

---

pescado ahumado

- ☐ Nunca o menos 1 vez al mes  
☒ 1 a 3 veces mes  
☐ 1 vez semana  
☐ 2 a 4 veces semana  
☐ 5 a 6 veces semana  
☐ 1 vez al día  
☐ 2 a 3 veces al día  
☐ 5 a 6 veces al día  
☐ más 6 veces al día

---

almejas o mejillones o ostras unos 100g

- ☐ Nunca o menos 1 vez al mes  
☐ 1 a 3 veces mes  
☒ 1 vez semana  
☐ 2 a 4 veces semana  
☐ 5 a 6 veces semana  
☐ 1 vez al día  
☐ 2 a 3 veces al día  
☐ 5 a 6 veces al día  
☐ más 6 veces al día

---

calamar o chipiron o sepia unos 100g

- ☐ Nunca o menos 1 vez al mes  
☐ 1 a 3 veces mes  
☒ 1 vez semana  
☐ 2 a 4 veces semana  
☐ 5 a 6 veces semana  
☐ 1 vez al día  
☐ 2 a 3 veces al día  
☐ 5 a 6 veces al día  
☐ más 6 veces al día

---

marisco unos 100g

- ☐ Nunca o menos 1 vez al mes  
☐ 1 a 3 veces mes  
☒ 1 vez semana  
☐ 2 a 4 veces semana  
☐ 5 a 6 veces semana  
☐ 1 vez al día  
☐ 2 a 3 veces al día  
☐ 5 a 6 veces al día  
☐ más 6 veces al día

---

Espinacas o acelgas cocinadas

- ☐ Nunca o menos 1 vez al mes  
☐ 1 a 3 veces mes  
☐ 1 vez semana  
☒ 2 a 4 veces semana  
☐ 5 a 6 veces semana  
☐ 1 vez al día  
☐ 2 a 3 veces al día  
☐ 5 a 6 veces al día  
☐ más 6 veces al día

---

Col o coliflor o brocoli cocinado

- ☐ Nunca o menos 1 vez al mes  
☐ 1 a 3 veces mes  
☐ 1 vez semana  
☒ 2 a 4 veces semana  
☐ 5 a 6 veces semana  
☐ 1 vez al día  
☐ 2 a 3 veces al día  
☐ 5 a 6 veces al día  
☐ más 6 veces al día

---

Lechuga o endivia o escarola

- ☐ Nunca o menos 1 vez al mes  
☐ 1 a 3 veces mes  
☐ 1 vez semana  
☐ 2 a 4 veces semana  
☒ 5 a 6 veces semana  
☐ 1 vez al día  
☐ 2 a 3 veces al día  
☐ 5 a 6 veces al día  
☐ más 6 veces al día

---

tomate ensalada

- ☐ Nunca o menos 1 vez al mes  
☐ 1 a 3 veces mes  
☐ 1 vez semana  
☐ 2 a 4 veces semana  
☒ 5 a 6 veces semana  
☐ 1 vez al día  
☐ 2 a 3 veces al día  
☐ 5 a 6 veces al día  
☐ más 6 veces al día

---

cebolla

- ☐ Nunca o menos 1 vez al mes  
☐ 1 a 3 veces mes  
☐ 1 vez semana  
☐ 2 a 4 veces semana  
☒ 5 a 6 veces semana  
☐ 1 vez al día  
☐ 2 a 3 veces al día  
☐ 5 a 6 veces al día  
☐ más 6 veces al día

---

Zanahoria o calabaza

- ☐ Nunca o menos 1 vez al mes  
☐ 1 a 3 veces mes  
☐ 1 vez semana  
☐ 2 a 4 veces semana  
☒ 5 a 6 veces semana  
☐ 1 vez al día  
☐ 2 a 3 veces al día  
☐ 5 a 6 veces al día  
☐ más 6 veces al día

---

Judías verdes

- ☐ Nunca o menos 1 vez al mes  
☐ 1 a 3 veces mes  
☐ 1 vez semana  
☐ 2 a 4 veces semana  
☒ 5 a 6 veces semana  
☐ 1 vez al día  
☐ 2 a 3 veces al día  
☐ 5 a 6 veces al día  
☐ más 6 veces al día

---

Berenjena o calabacin o pepino

- ☐ Nunca o menos 1 vez al mes  
☐ 1 a 3 veces mes  
☐ 1 vez semana  
☐ 2 a 4 veces semana  
☒ 5 a 6 veces semana  
☐ 1 vez al día  
☐ 2 a 3 veces al día  
☐ 5 a 6 veces al día  
☐ más 6 veces al día

|                       |                                                                                                                                                                                                                                                                                                                                                                                                              |
|-----------------------|--------------------------------------------------------------------------------------------------------------------------------------------------------------------------------------------------------------------------------------------------------------------------------------------------------------------------------------------------------------------------------------------------------------|
| pimiento              | <input type="radio"/> Nunca o menos 1 vez al mes<br><input type="radio"/> 1 a 3 veces mes<br><input type="radio"/> 1 vez semana<br><input type="radio"/> 2 a 4 veces semana<br><input checked="" type="radio"/> 5 a 6 veces semana<br><input type="radio"/> 1 vez al día<br><input type="radio"/> 2 a 3 veces al día<br><input type="radio"/> 5 a 6 veces al día<br><input type="radio"/> más 6 veces al día |
| alcachofa             | <input type="radio"/> Nunca o menos 1 vez al mes<br><input type="radio"/> 1 a 3 veces mes<br><input type="radio"/> 1 vez semana<br><input checked="" type="radio"/> 2 a 4 veces semana<br><input type="radio"/> 5 a 6 veces semana<br><input type="radio"/> 1 vez al día<br><input type="radio"/> 2 a 3 veces al día<br><input type="radio"/> 5 a 6 veces al día<br><input type="radio"/> más 6 veces al día |
| espárragos            | <input type="radio"/> Nunca o menos 1 vez al mes<br><input type="radio"/> 1 a 3 veces mes<br><input type="radio"/> 1 vez semana<br><input checked="" type="radio"/> 2 a 4 veces semana<br><input type="radio"/> 5 a 6 veces semana<br><input type="radio"/> 1 vez al día<br><input type="radio"/> 2 a 3 veces al día<br><input type="radio"/> 5 a 6 veces al día<br><input type="radio"/> más 6 veces al día |
| maíz hervido          | <input type="radio"/> Nunca o menos 1 vez al mes<br><input type="radio"/> 1 a 3 veces mes<br><input type="radio"/> 1 vez semana<br><input checked="" type="radio"/> 2 a 4 veces semana<br><input type="radio"/> 5 a 6 veces semana<br><input type="radio"/> 1 vez al día<br><input type="radio"/> 2 a 3 veces al día<br><input type="radio"/> 5 a 6 veces al día<br><input type="radio"/> más 6 veces al día |
| legumbres             | <input type="radio"/> Nunca o menos 1 vez al mes<br><input type="radio"/> 1 a 3 veces mes<br><input type="radio"/> 1 vez semana<br><input type="radio"/> 2 a 4 veces semana<br><input checked="" type="radio"/> 5 a 6 veces semana<br><input type="radio"/> 1 vez al día<br><input type="radio"/> 2 a 3 veces al día<br><input type="radio"/> 5 a 6 veces al día<br><input type="radio"/> más 6 veces al día |
| naranjas o mandarinas | <input type="radio"/> Nunca o menos 1 vez al mes<br><input type="radio"/> 1 a 3 veces mes<br><input type="radio"/> 1 vez semana<br><input type="radio"/> 2 a 4 veces semana<br><input checked="" type="radio"/> 5 a 6 veces semana<br><input type="radio"/> 1 vez al día<br><input type="radio"/> 2 a 3 veces al día<br><input type="radio"/> 5 a 6 veces al día<br><input type="radio"/> más 6 veces al día |



|                       |                                                                                                                                                                                                                                                                                                                                                                                                              |
|-----------------------|--------------------------------------------------------------------------------------------------------------------------------------------------------------------------------------------------------------------------------------------------------------------------------------------------------------------------------------------------------------------------------------------------------------|
| zum natural fruta     | <input type="radio"/> Nunca o menos 1 vez al mes<br><input type="radio"/> 1 a 3 veces mes<br><input type="radio"/> 1 vez semana<br><input checked="" type="radio"/> 2 a 4 veces semana<br><input type="radio"/> 5 a 6 veces semana<br><input type="radio"/> 1 vez al día<br><input type="radio"/> 2 a 3 veces al día<br><input type="radio"/> 5 a 6 veces al día<br><input type="radio"/> más 6 veces al día |
| platano               | <input type="radio"/> Nunca o menos 1 vez al mes<br><input type="radio"/> 1 a 3 veces mes<br><input type="radio"/> 1 vez semana<br><input checked="" type="radio"/> 2 a 4 veces semana<br><input type="radio"/> 5 a 6 veces semana<br><input type="radio"/> 1 vez al día<br><input type="radio"/> 2 a 3 veces al día<br><input type="radio"/> 5 a 6 veces al día<br><input type="radio"/> más 6 veces al día |
| manzana o pera        | <input type="radio"/> Nunca o menos 1 vez al mes<br><input type="radio"/> 1 a 3 veces mes<br><input type="radio"/> 1 vez semana<br><input type="radio"/> 2 a 4 veces semana<br><input checked="" type="radio"/> 5 a 6 veces semana<br><input type="radio"/> 1 vez al día<br><input type="radio"/> 2 a 3 veces al día<br><input type="radio"/> 5 a 6 veces al día<br><input type="radio"/> más 6 veces al día |
| melocotón o nectarina | <input type="radio"/> Nunca o menos 1 vez al mes<br><input type="radio"/> 1 a 3 veces mes<br><input type="radio"/> 1 vez semana<br><input type="radio"/> 2 a 4 veces semana<br><input type="radio"/> 5 a 6 veces semana<br><input type="radio"/> 1 vez al día<br><input type="radio"/> 2 a 3 veces al día<br><input type="radio"/> 5 a 6 veces al día<br><input type="radio"/> más 6 veces al día            |
| sandia o melon        | <input type="radio"/> Nunca o menos 1 vez al mes<br><input type="radio"/> 1 a 3 veces mes<br><input type="radio"/> 1 vez semana<br><input type="radio"/> 2 a 4 veces semana<br><input checked="" type="radio"/> 5 a 6 veces semana<br><input type="radio"/> 1 vez al día<br><input type="radio"/> 2 a 3 veces al día<br><input type="radio"/> 5 a 6 veces al día<br><input type="radio"/> más 6 veces al día |
| uva                   | <input type="radio"/> Nunca o menos 1 vez al mes<br><input type="radio"/> 1 a 3 veces mes<br><input type="radio"/> 1 vez semana<br><input type="radio"/> 2 a 4 veces semana<br><input checked="" type="radio"/> 5 a 6 veces semana<br><input type="radio"/> 1 vez al día<br><input type="radio"/> 2 a 3 veces al día<br><input type="radio"/> 5 a 6 veces al día<br><input type="radio"/> más 6 veces al día |

---

bruna o ciruela

- ☐ Nunca o menos 1 vez al mes  
☐ 1 a 3 veces mes  
☐ 1 vez semana  
☐ 2 a 4 veces semana  
☒ 5 a 6 veces semana  
☐ 1 vez al día  
☐ 2 a 3 veces al día  
☐ 5 a 6 veces al día  
☐ más 6 veces al día

---

kiwi

- ☐ Nunca o menos 1 vez al mes  
☐ 1 a 3 veces mes  
☐ 1 vez semana  
☐ 2 a 4 veces semana  
☒ 5 a 6 veces semana  
☐ 1 vez al día  
☐ 2 a 3 veces al día  
☐ 5 a 6 veces al día  
☐ más 6 veces al día

---

aceituna

- ☐ Nunca o menos 1 vez al mes  
☐ 1 a 3 veces mes  
☐ 1 vez semana  
☒ 2 a 4 veces semana  
☐ 5 a 6 veces semana  
☐ 1 vez al día  
☐ 2 a 3 veces al día  
☐ 5 a 6 veces al día  
☐ más 6 veces al día

---

frutos secos

- ☐ Nunca o menos 1 vez al mes  
☐ 1 a 3 veces mes  
☐ 1 vez semana  
☒ 2 a 4 veces semana  
☐ 5 a 6 veces semana  
☐ 1 vez al día  
☐ 2 a 3 veces al día  
☐ 5 a 6 veces al día  
☐ más 6 veces al día

---

pan blanco

- ☐ Nunca o menos 1 vez al mes  
☐ 1 a 3 veces mes  
☐ 1 vez semana  
☐ 2 a 4 veces semana  
☐ 5 a 6 veces semana  
☒ 1 vez al día  
☐ 2 a 3 veces al día  
☐ 5 a 6 veces al día  
☐ más 6 veces al día

---

pan integral

- ☐ Nunca o menos 1 vez al mes  
☒ 1 a 3 veces mes  
☐ 1 vez semana  
☐ 2 a 4 veces semana  
☐ 5 a 6 veces semana  
☐ 1 vez al día  
☐ 2 a 3 veces al día  
☐ 5 a 6 veces al día  
☐ más 6 veces al día

|                          |                                                                                                                                                                                                                                                                                                                                                                                                              |
|--------------------------|--------------------------------------------------------------------------------------------------------------------------------------------------------------------------------------------------------------------------------------------------------------------------------------------------------------------------------------------------------------------------------------------------------------|
| cereales desayuno        | <input type="radio"/> Nunca o menos 1 vez al mes<br><input checked="" type="radio"/> 1 a 3 veces mes<br><input type="radio"/> 1 vez semana<br><input type="radio"/> 2 a 4 veces semana<br><input type="radio"/> 5 a 6 veces semana<br><input type="radio"/> 1 vez al día<br><input type="radio"/> 2 a 3 veces al día<br><input type="radio"/> 5 a 6 veces al día<br><input type="radio"/> más 6 veces al día |
| patatas fritas           | <input type="radio"/> Nunca o menos 1 vez al mes<br><input type="radio"/> 1 a 3 veces mes<br><input type="radio"/> 1 vez semana<br><input checked="" type="radio"/> 2 a 4 veces semana<br><input type="radio"/> 5 a 6 veces semana<br><input type="radio"/> 1 vez al día<br><input type="radio"/> 2 a 3 veces al día<br><input type="radio"/> 5 a 6 veces al día<br><input type="radio"/> más 6 veces al día |
| patatas cocidas o asadas | <input type="radio"/> Nunca o menos 1 vez al mes<br><input type="radio"/> 1 a 3 veces mes<br><input type="radio"/> 1 vez semana<br><input checked="" type="radio"/> 2 a 4 veces semana<br><input type="radio"/> 5 a 6 veces semana<br><input type="radio"/> 1 vez al día<br><input type="radio"/> 2 a 3 veces al día<br><input type="radio"/> 5 a 6 veces al día<br><input type="radio"/> más 6 veces al día |
| bolsa papas              | <input type="radio"/> Nunca o menos 1 vez al mes<br><input type="radio"/> 1 a 3 veces mes<br><input type="radio"/> 1 vez semana<br><input checked="" type="radio"/> 2 a 4 veces semana<br><input type="radio"/> 5 a 6 veces semana<br><input type="radio"/> 1 vez al día<br><input type="radio"/> 2 a 3 veces al día<br><input type="radio"/> 5 a 6 veces al día<br><input type="radio"/> más 6 veces al día |
| arroz cocinado           | <input type="radio"/> Nunca o menos 1 vez al mes<br><input type="radio"/> 1 a 3 veces mes<br><input type="radio"/> 1 vez semana<br><input checked="" type="radio"/> 2 a 4 veces semana<br><input type="radio"/> 5 a 6 veces semana<br><input type="radio"/> 1 vez al día<br><input type="radio"/> 2 a 3 veces al día<br><input type="radio"/> 5 a 6 veces al día<br><input type="radio"/> más 6 veces al día |
| pasta                    | <input type="radio"/> Nunca o menos 1 vez al mes<br><input type="radio"/> 1 a 3 veces mes<br><input type="radio"/> 1 vez semana<br><input checked="" type="radio"/> 2 a 4 veces semana<br><input type="radio"/> 5 a 6 veces semana<br><input type="radio"/> 1 vez al día<br><input type="radio"/> 2 a 3 veces al día<br><input type="radio"/> 5 a 6 veces al día<br><input type="radio"/> más 6 veces al día |

|                     |                                                                                                                                                                                                                                                                                                                                                                                                              |
|---------------------|--------------------------------------------------------------------------------------------------------------------------------------------------------------------------------------------------------------------------------------------------------------------------------------------------------------------------------------------------------------------------------------------------------------|
| pizza               | <input type="radio"/> Nunca o menos 1 vez al mes<br><input type="radio"/> 1 a 3 veces mes<br><input type="radio"/> 1 vez semana<br><input checked="" type="radio"/> 2 a 4 veces semana<br><input type="radio"/> 5 a 6 veces semana<br><input type="radio"/> 1 vez al día<br><input type="radio"/> 2 a 3 veces al día<br><input type="radio"/> 5 a 6 veces al día<br><input type="radio"/> más 6 veces al día |
| aceite oliva        | <input type="radio"/> Nunca o menos 1 vez al mes<br><input type="radio"/> 1 a 3 veces mes<br><input type="radio"/> 1 vez semana<br><input type="radio"/> 2 a 4 veces semana<br><input type="radio"/> 5 a 6 veces semana<br><input type="radio"/> 1 vez al día<br><input checked="" type="radio"/> 2 a 3 veces al día<br><input type="radio"/> 5 a 6 veces al día<br><input type="radio"/> más 6 veces al día |
| otros aceites       | <input type="radio"/> Nunca o menos 1 vez al mes<br><input type="radio"/> 1 a 3 veces mes<br><input type="radio"/> 1 vez semana<br><input type="radio"/> 2 a 4 veces semana<br><input type="radio"/> 5 a 6 veces semana<br><input type="radio"/> 1 vez al día<br><input checked="" type="radio"/> 2 a 3 veces al día<br><input type="radio"/> 5 a 6 veces al día<br><input type="radio"/> más 6 veces al día |
| margarina           | <input type="radio"/> Nunca o menos 1 vez al mes<br><input type="radio"/> 1 a 3 veces mes<br><input type="radio"/> 1 vez semana<br><input type="radio"/> 2 a 4 veces semana<br><input checked="" type="radio"/> 5 a 6 veces semana<br><input type="radio"/> 1 vez al día<br><input type="radio"/> 2 a 3 veces al día<br><input type="radio"/> 5 a 6 veces al día<br><input type="radio"/> más 6 veces al día |
| mantequilla         | <input type="radio"/> Nunca o menos 1 vez al mes<br><input type="radio"/> 1 a 3 veces mes<br><input type="radio"/> 1 vez semana<br><input type="radio"/> 2 a 4 veces semana<br><input checked="" type="radio"/> 5 a 6 veces semana<br><input type="radio"/> 1 vez al día<br><input type="radio"/> 2 a 3 veces al día<br><input type="radio"/> 5 a 6 veces al día<br><input type="radio"/> más 6 veces al día |
| galletas tipo maria | <input type="radio"/> Nunca o menos 1 vez al mes<br><input type="radio"/> 1 a 3 veces mes<br><input checked="" type="radio"/> 1 vez semana<br><input type="radio"/> 2 a 4 veces semana<br><input type="radio"/> 5 a 6 veces semana<br><input type="radio"/> 1 vez al día<br><input type="radio"/> 2 a 3 veces al día<br><input type="radio"/> 5 a 6 veces al día<br><input type="radio"/> más 6 veces al día |

|                           |                                                                                                                                                                                                                                                                                                                                                                                                              |
|---------------------------|--------------------------------------------------------------------------------------------------------------------------------------------------------------------------------------------------------------------------------------------------------------------------------------------------------------------------------------------------------------------------------------------------------------|
| galletas chocolate        | <input type="radio"/> Nunca o menos 1 vez al mes<br><input type="radio"/> 1 a 3 veces mes<br><input type="radio"/> 1 vez semana<br><input checked="" type="radio"/> 2 a 4 veces semana<br><input type="radio"/> 5 a 6 veces semana<br><input type="radio"/> 1 vez al día<br><input type="radio"/> 2 a 3 veces al día<br><input type="radio"/> 5 a 6 veces al día<br><input type="radio"/> más 6 veces al día |
| bollieria                 | <input type="radio"/> Nunca o menos 1 vez al mes<br><input type="radio"/> 1 a 3 veces mes<br><input type="radio"/> 1 vez semana<br><input type="radio"/> 2 a 4 veces semana<br><input type="radio"/> 5 a 6 veces semana<br><input checked="" type="radio"/> 1 vez al día<br><input type="radio"/> 2 a 3 veces al día<br><input type="radio"/> 5 a 6 veces al día<br><input type="radio"/> más 6 veces al día |
| chocolate o bombones      | <input type="radio"/> Nunca o menos 1 vez al mes<br><input checked="" type="radio"/> 1 a 3 veces mes<br><input type="radio"/> 1 vez semana<br><input type="radio"/> 2 a 4 veces semana<br><input type="radio"/> 5 a 6 veces semana<br><input type="radio"/> 1 vez al día<br><input type="radio"/> 2 a 3 veces al día<br><input type="radio"/> 5 a 6 veces al día<br><input type="radio"/> más 6 veces al día |
| chocolate polvo o colacao | <input type="radio"/> Nunca o menos 1 vez al mes<br><input type="radio"/> 1 a 3 veces mes<br><input type="radio"/> 1 vez semana<br><input type="radio"/> 2 a 4 veces semana<br><input type="radio"/> 5 a 6 veces semana<br><input checked="" type="radio"/> 1 vez al día<br><input type="radio"/> 2 a 3 veces al día<br><input type="radio"/> 5 a 6 veces al día<br><input type="radio"/> más 6 veces al día |
| vino tinto                | <input checked="" type="radio"/> Nunca o menos 1 vez al mes<br><input type="radio"/> 1 a 3 veces mes<br><input type="radio"/> 1 vez semana<br><input type="radio"/> 2 a 4 veces semana<br><input type="radio"/> 5 a 6 veces semana<br><input type="radio"/> 1 vez al día<br><input type="radio"/> 2 a 3 veces al día<br><input type="radio"/> 5 a 6 veces al día<br><input type="radio"/> más 6 veces al día |
| vino blanco               | <input checked="" type="radio"/> Nunca o menos 1 vez al mes<br><input type="radio"/> 1 a 3 veces mes<br><input type="radio"/> 1 vez semana<br><input type="radio"/> 2 a 4 veces semana<br><input type="radio"/> 5 a 6 veces semana<br><input type="radio"/> 1 vez al día<br><input type="radio"/> 2 a 3 veces al día<br><input type="radio"/> 5 a 6 veces al día<br><input type="radio"/> más 6 veces al día |

|                       |                                                                                                                                                                                                                                                                                                                                                                                                              |
|-----------------------|--------------------------------------------------------------------------------------------------------------------------------------------------------------------------------------------------------------------------------------------------------------------------------------------------------------------------------------------------------------------------------------------------------------|
| vino seco o vermut    | <input checked="" type="radio"/> Nunca o menos 1 vez al mes<br><input type="radio"/> 1 a 3 veces mes<br><input type="radio"/> 1 vez semana<br><input type="radio"/> 2 a 4 veces semana<br><input type="radio"/> 5 a 6 veces semana<br><input type="radio"/> 1 vez al día<br><input type="radio"/> 2 a 3 veces al día<br><input type="radio"/> 5 a 6 veces al día<br><input type="radio"/> más 6 veces al día |
| cerveza               | <input checked="" type="radio"/> Nunca o menos 1 vez al mes<br><input type="radio"/> 1 a 3 veces mes<br><input type="radio"/> 1 vez semana<br><input type="radio"/> 2 a 4 veces semana<br><input type="radio"/> 5 a 6 veces semana<br><input type="radio"/> 1 vez al día<br><input type="radio"/> 2 a 3 veces al día<br><input type="radio"/> 5 a 6 veces al día<br><input type="radio"/> más 6 veces al día |
| cerveza sin alcohol   | <input checked="" type="radio"/> Nunca o menos 1 vez al mes<br><input type="radio"/> 1 a 3 veces mes<br><input type="radio"/> 1 vez semana<br><input type="radio"/> 2 a 4 veces semana<br><input type="radio"/> 5 a 6 veces semana<br><input type="radio"/> 1 vez al día<br><input type="radio"/> 2 a 3 veces al día<br><input type="radio"/> 5 a 6 veces al día<br><input type="radio"/> más 6 veces al día |
| licores               | <input checked="" type="radio"/> Nunca o menos 1 vez al mes<br><input type="radio"/> 1 a 3 veces mes<br><input type="radio"/> 1 vez semana<br><input type="radio"/> 2 a 4 veces semana<br><input type="radio"/> 5 a 6 veces semana<br><input type="radio"/> 1 vez al día<br><input type="radio"/> 2 a 3 veces al día<br><input type="radio"/> 5 a 6 veces al día<br><input type="radio"/> más 6 veces al día |
| ginebra o ron o vodka | <input checked="" type="radio"/> Nunca o menos 1 vez al mes<br><input type="radio"/> 1 a 3 veces mes<br><input type="radio"/> 1 vez semana<br><input type="radio"/> 2 a 4 veces semana<br><input type="radio"/> 5 a 6 veces semana<br><input type="radio"/> 1 vez al día<br><input type="radio"/> 2 a 3 veces al día<br><input type="radio"/> 5 a 6 veces al día<br><input type="radio"/> más 6 veces al día |
| refresco normal       | <input type="radio"/> Nunca o menos 1 vez al mes<br><input type="radio"/> 1 a 3 veces mes<br><input type="radio"/> 1 vez semana<br><input type="radio"/> 2 a 4 veces semana<br><input type="radio"/> 5 a 6 veces semana<br><input checked="" type="radio"/> 1 vez al día<br><input type="radio"/> 2 a 3 veces al día<br><input type="radio"/> 5 a 6 veces al día<br><input type="radio"/> más 6 veces al día |

---

|                     |                                                                                                                                                                                                                                                                                                                                                                                                              |
|---------------------|--------------------------------------------------------------------------------------------------------------------------------------------------------------------------------------------------------------------------------------------------------------------------------------------------------------------------------------------------------------------------------------------------------------|
| refresco sin azúcar | <input type="radio"/> Nunca o menos 1 vez al mes<br><input type="radio"/> 1 a 3 veces mes<br><input type="radio"/> 1 vez semana<br><input type="radio"/> 2 a 4 veces semana<br><input type="radio"/> 5 a 6 veces semana<br><input checked="" type="radio"/> 1 vez al día<br><input type="radio"/> 2 a 3 veces al día<br><input type="radio"/> 5 a 6 veces al día<br><input type="radio"/> más 6 veces al día |
|---------------------|--------------------------------------------------------------------------------------------------------------------------------------------------------------------------------------------------------------------------------------------------------------------------------------------------------------------------------------------------------------------------------------------------------------|

---

|                |                                                                                                                                                                                                                                                                                                                                                                                                              |
|----------------|--------------------------------------------------------------------------------------------------------------------------------------------------------------------------------------------------------------------------------------------------------------------------------------------------------------------------------------------------------------------------------------------------------------|
| Agua del grifo | <input type="radio"/> Nunca o menos 1 vez al mes<br><input checked="" type="radio"/> 1 a 3 veces mes<br><input type="radio"/> 1 vez semana<br><input type="radio"/> 2 a 4 veces semana<br><input type="radio"/> 5 a 6 veces semana<br><input type="radio"/> 1 vez al día<br><input type="radio"/> 2 a 3 veces al día<br><input type="radio"/> 5 a 6 veces al día<br><input type="radio"/> más 6 veces al día |
|----------------|--------------------------------------------------------------------------------------------------------------------------------------------------------------------------------------------------------------------------------------------------------------------------------------------------------------------------------------------------------------------------------------------------------------|

---

|                          |                                                                                                                                                                                                                                                                                                                                                                                                              |
|--------------------------|--------------------------------------------------------------------------------------------------------------------------------------------------------------------------------------------------------------------------------------------------------------------------------------------------------------------------------------------------------------------------------------------------------------|
| agua embotellada sin gas | <input type="radio"/> Nunca o menos 1 vez al mes<br><input type="radio"/> 1 a 3 veces mes<br><input type="radio"/> 1 vez semana<br><input type="radio"/> 2 a 4 veces semana<br><input type="radio"/> 5 a 6 veces semana<br><input type="radio"/> 1 vez al día<br><input type="radio"/> 2 a 3 veces al día<br><input checked="" type="radio"/> 5 a 6 veces al día<br><input type="radio"/> más 6 veces al día |
|--------------------------|--------------------------------------------------------------------------------------------------------------------------------------------------------------------------------------------------------------------------------------------------------------------------------------------------------------------------------------------------------------------------------------------------------------|

---

|                          |                                                                                                                                                                                                                                                                                                                                                                                                              |
|--------------------------|--------------------------------------------------------------------------------------------------------------------------------------------------------------------------------------------------------------------------------------------------------------------------------------------------------------------------------------------------------------------------------------------------------------|
| agua embotellada con gas | <input type="radio"/> Nunca o menos 1 vez al mes<br><input type="radio"/> 1 a 3 veces mes<br><input type="radio"/> 1 vez semana<br><input type="radio"/> 2 a 4 veces semana<br><input type="radio"/> 5 a 6 veces semana<br><input type="radio"/> 1 vez al día<br><input type="radio"/> 2 a 3 veces al día<br><input checked="" type="radio"/> 5 a 6 veces al día<br><input type="radio"/> más 6 veces al día |
|--------------------------|--------------------------------------------------------------------------------------------------------------------------------------------------------------------------------------------------------------------------------------------------------------------------------------------------------------------------------------------------------------------------------------------------------------|

---

|                      |                                                                                                                                                                                                                                                                                                                                                                                                              |
|----------------------|--------------------------------------------------------------------------------------------------------------------------------------------------------------------------------------------------------------------------------------------------------------------------------------------------------------------------------------------------------------------------------------------------------------|
| zumو frutas embasado | <input checked="" type="radio"/> Nunca o menos 1 vez al mes<br><input type="radio"/> 1 a 3 veces mes<br><input type="radio"/> 1 vez semana<br><input type="radio"/> 2 a 4 veces semana<br><input type="radio"/> 5 a 6 veces semana<br><input type="radio"/> 1 vez al día<br><input type="radio"/> 2 a 3 veces al día<br><input type="radio"/> 5 a 6 veces al día<br><input type="radio"/> más 6 veces al día |
|----------------------|--------------------------------------------------------------------------------------------------------------------------------------------------------------------------------------------------------------------------------------------------------------------------------------------------------------------------------------------------------------------------------------------------------------|

---

|      |                                                                                                                                                                                                                                                                                                                                                                                                              |
|------|--------------------------------------------------------------------------------------------------------------------------------------------------------------------------------------------------------------------------------------------------------------------------------------------------------------------------------------------------------------------------------------------------------------|
| cafe | <input type="radio"/> Nunca o menos 1 vez al mes<br><input type="radio"/> 1 a 3 veces mes<br><input type="radio"/> 1 vez semana<br><input type="radio"/> 2 a 4 veces semana<br><input type="radio"/> 5 a 6 veces semana<br><input type="radio"/> 1 vez al día<br><input checked="" type="radio"/> 2 a 3 veces al día<br><input type="radio"/> 5 a 6 veces al día<br><input type="radio"/> más 6 veces al día |
|------|--------------------------------------------------------------------------------------------------------------------------------------------------------------------------------------------------------------------------------------------------------------------------------------------------------------------------------------------------------------------------------------------------------------|

---

---

cafe descafeinado

- ☐ Nunca o menos 1 vez al mes  
☐ 1 a 3 veces mes  
☐ 1 vez semana  
☐ 2 a 4 veces semana  
☐ 5 a 6 veces semana  
☐ 1 vez al día  
☒ 2 a 3 veces al día  
☐ 5 a 6 veces al día  
☐ más 6 veces al día

---

te o infusión

- ☐ Nunca o menos 1 vez al mes  
☐ 1 a 3 veces mes  
☐ 1 vez semana  
☐ 2 a 4 veces semana  
☐ 5 a 6 veces semana  
☐ 1 vez al día  
☒ 2 a 3 veces al día  
☐ 5 a 6 veces al día  
☐ más 6 veces al día

---

sopa o puré verduras

- ☐ Nunca o menos 1 vez al mes  
☐ 1 a 3 veces mes  
☐ 1 vez semana  
☐ 2 a 4 veces semana  
☐ 5 a 6 veces semana  
☒ 1 vez al día  
☐ 2 a 3 veces al día  
☐ 5 a 6 veces al día  
☐ más 6 veces al día

---

croquetas pollo jamón

- ☐ Nunca o menos 1 vez al mes  
☐ 1 a 3 veces mes  
☐ 1 vez semana  
☒ 2 a 4 veces semana  
☐ 5 a 6 veces semana  
☐ 1 vez al día  
☐ 2 a 3 veces al día  
☐ 5 a 6 veces al día  
☐ más 6 veces al día

---

croquetas pescado

- ☐ Nunca o menos 1 vez al mes  
☐ 1 a 3 veces mes  
☒ 1 vez semana  
☐ 2 a 4 veces semana  
☐ 5 a 6 veces semana  
☐ 1 vez al día  
☐ 2 a 3 veces al día  
☐ 5 a 6 veces al día  
☐ más 6 veces al día

---

mayonesa

- ☐ Nunca o menos 1 vez al mes  
☐ 1 a 3 veces mes  
☒ 1 vez semana  
☐ 2 a 4 veces semana  
☐ 5 a 6 veces semana  
☐ 1 vez al día  
☐ 2 a 3 veces al día  
☐ 5 a 6 veces al día  
☐ más 6 veces al día



|                  |                                                                                                                                                                                                                                                                                                                                                                                                              |
|------------------|--------------------------------------------------------------------------------------------------------------------------------------------------------------------------------------------------------------------------------------------------------------------------------------------------------------------------------------------------------------------------------------------------------------|
| salsa tomate     | <input type="radio"/> Nunca o menos 1 vez al mes<br><input type="radio"/> 1 a 3 veces mes<br><input type="radio"/> 1 vez semana<br><input checked="" type="radio"/> 2 a 4 veces semana<br><input type="radio"/> 5 a 6 veces semana<br><input type="radio"/> 1 vez al día<br><input type="radio"/> 2 a 3 veces al día<br><input type="radio"/> 5 a 6 veces al día<br><input type="radio"/> más 6 veces al día |
| ketchup          | <input type="radio"/> Nunca o menos 1 vez al mes<br><input type="radio"/> 1 a 3 veces mes<br><input type="radio"/> 1 vez semana<br><input checked="" type="radio"/> 2 a 4 veces semana<br><input type="radio"/> 5 a 6 veces semana<br><input type="radio"/> 1 vez al día<br><input type="radio"/> 2 a 3 veces al día<br><input type="radio"/> 5 a 6 veces al día<br><input type="radio"/> más 6 veces al día |
| sal              | <input type="radio"/> Nunca o menos 1 vez al mes<br><input checked="" type="radio"/> 1 a 3 veces mes<br><input type="radio"/> 1 vez semana<br><input type="radio"/> 2 a 4 veces semana<br><input type="radio"/> 5 a 6 veces semana<br><input type="radio"/> 1 vez al día<br><input type="radio"/> 2 a 3 veces al día<br><input type="radio"/> 5 a 6 veces al día<br><input type="radio"/> más 6 veces al día |
| ajo              | <input type="radio"/> Nunca o menos 1 vez al mes<br><input type="radio"/> 1 a 3 veces mes<br><input type="radio"/> 1 vez semana<br><input type="radio"/> 2 a 4 veces semana<br><input type="radio"/> 5 a 6 veces semana<br><input type="radio"/> 1 vez al día<br><input type="radio"/> 2 a 3 veces al día<br><input type="radio"/> 5 a 6 veces al día<br><input type="radio"/> más 6 veces al día            |
| mermelada o miel | <input type="radio"/> Nunca o menos 1 vez al mes<br><input type="radio"/> 1 a 3 veces mes<br><input type="radio"/> 1 vez semana<br><input type="radio"/> 2 a 4 veces semana<br><input type="radio"/> 5 a 6 veces semana<br><input checked="" type="radio"/> 1 vez al día<br><input type="radio"/> 2 a 3 veces al día<br><input type="radio"/> 5 a 6 veces al día<br><input type="radio"/> más 6 veces al día |
| azúcar           | <input type="radio"/> Nunca o menos 1 vez al mes<br><input type="radio"/> 1 a 3 veces mes<br><input type="radio"/> 1 vez semana<br><input type="radio"/> 2 a 4 veces semana<br><input type="radio"/> 5 a 6 veces semana<br><input type="radio"/> 1 vez al día<br><input checked="" type="radio"/> 2 a 3 veces al día<br><input type="radio"/> 5 a 6 veces al día<br><input type="radio"/> más 6 veces al día |

|                                       |                                                                                                                                                                                                                                                                                                                                                                                                                                                                                                                               |
|---------------------------------------|-------------------------------------------------------------------------------------------------------------------------------------------------------------------------------------------------------------------------------------------------------------------------------------------------------------------------------------------------------------------------------------------------------------------------------------------------------------------------------------------------------------------------------|
| Otro alimento                         |                                                                                                                                                                                                                                                                                                                                                                                                                                                                                                                               |
| suplementos vitamínicos               | <input type="radio"/> si<br><input checked="" type="radio"/> no                                                                                                                                                                                                                                                                                                                                                                                                                                                               |
| suplementos vitamínicos               |                                                                                                                                                                                                                                                                                                                                                                                                                                                                                                                               |
| dieta previa                          | <input type="radio"/> si<br><input checked="" type="radio"/> no                                                                                                                                                                                                                                                                                                                                                                                                                                                               |
| motivo dieta                          | <input checked="" type="radio"/> no dieta<br><input type="radio"/> control peso<br><input type="radio"/> control colesterol<br><input type="radio"/> control diabetes<br><input type="radio"/> problemas estómago<br><input type="radio"/> problemas vesícula o hepáticos<br><input type="radio"/> HTA o cardiopatía<br><input type="radio"/> problemas renales<br><input type="radio"/> alergia alimentaria<br><input type="radio"/> ácido úrico elevado<br><input type="radio"/> vegetariana<br><input type="radio"/> otros |
| cambio alimentos año previo gestación | <input checked="" type="radio"/> si<br><input type="radio"/> no                                                                                                                                                                                                                                                                                                                                                                                                                                                               |
| cambio lácteos                        | <input type="radio"/> eliminado<br><input checked="" type="radio"/> disminuido<br><input type="radio"/> igual<br><input type="radio"/> aumentado<br><input type="radio"/> no sabe                                                                                                                                                                                                                                                                                                                                             |
| cambio huevos                         | <input type="radio"/> eliminado<br><input checked="" type="radio"/> disminuido<br><input type="radio"/> igual<br><input type="radio"/> aumentado<br><input type="radio"/> no sabe                                                                                                                                                                                                                                                                                                                                             |
| cambio carne                          | <input type="radio"/> eliminado<br><input checked="" type="radio"/> disminuido<br><input type="radio"/> igual<br><input type="radio"/> aumentado<br><input type="radio"/> no sabe                                                                                                                                                                                                                                                                                                                                             |
| cambio pescado                        | <input type="radio"/> eliminado<br><input checked="" type="radio"/> disminuido<br><input type="radio"/> igual<br><input type="radio"/> aumentado<br><input type="radio"/> no sabe                                                                                                                                                                                                                                                                                                                                             |
| cambio verduras                       | <input type="radio"/> eliminado<br><input type="radio"/> disminuido<br><input checked="" type="radio"/> igual<br><input type="radio"/> aumentado<br><input type="radio"/> no sabe                                                                                                                                                                                                                                                                                                                                             |

|                            |                                                                                                                                                                                                                        |
|----------------------------|------------------------------------------------------------------------------------------------------------------------------------------------------------------------------------------------------------------------|
| cambio legumbres           | <input type="radio"/> eliminado<br><input type="radio"/> disminuido<br><input checked="" type="radio"/> igual<br><input type="radio"/> aumentado<br><input type="radio"/> no sabe                                      |
| cambio fruta               | <input type="radio"/> eliminado<br><input type="radio"/> disminuido<br><input checked="" type="radio"/> igual<br><input type="radio"/> aumentado<br><input type="radio"/> no sabe                                      |
| cambio pan                 | <input type="radio"/> eliminado<br><input type="radio"/> disminuido<br><input checked="" type="radio"/> igual<br><input type="radio"/> aumentado<br><input type="radio"/> no sabe                                      |
| cambio aceite oliva        | <input type="radio"/> eliminado<br><input type="radio"/> disminuido<br><input checked="" type="radio"/> igual<br><input type="radio"/> aumentado<br><input type="radio"/> no sabe                                      |
| cambio mante o margarina   | <input type="radio"/> eliminado<br><input type="radio"/> disminuido<br><input checked="" type="radio"/> igual<br><input type="radio"/> aumentado<br><input type="radio"/> no sabe                                      |
| cambio azúcar y dulces     | <input type="radio"/> eliminado<br><input type="radio"/> disminuido<br><input checked="" type="radio"/> igual<br><input type="radio"/> aumentado<br><input type="radio"/> no sabe                                      |
| cambio bebidas alcohólicas | <input type="radio"/> eliminado<br><input type="radio"/> disminuido<br><input checked="" type="radio"/> igual<br><input type="radio"/> aumentado<br><input type="radio"/> no sabe                                      |
| frecuencia comidas fritas  | <input type="radio"/> a diario<br><input type="radio"/> 5 a 6 veces semana<br><input checked="" type="radio"/> 2 a 4 veces semana<br><input type="radio"/> 1 vez semana<br><input type="radio"/> menos de 1 vez semana |
| carne                      | <input type="radio"/> no como<br><input type="radio"/> cruda<br><input type="radio"/> poco hecha<br><input checked="" type="radio"/> hecha<br><input type="radio"/> muy hecha                                          |
| grasa visible carne        | <input type="radio"/> quita toda<br><input checked="" type="radio"/> quita mayoría<br><input type="radio"/> quita un poco<br><input type="radio"/> no quita nada                                                       |

|                                |                                                                                                                                                                                                                                                          |
|--------------------------------|----------------------------------------------------------------------------------------------------------------------------------------------------------------------------------------------------------------------------------------------------------|
| cocina carne                   | <input type="radio"/> a la plancha<br><input checked="" type="radio"/> a la parrilla<br><input type="radio"/> asada<br><input type="radio"/> frita<br><input type="radio"/> guisada                                                                      |
| tostado quemado carne          | <input type="radio"/> nunca<br><input type="radio"/> 1 vez mes<br><input type="radio"/> 2 a 3 veces mes<br><input type="radio"/> 1 vez semana<br><input type="radio"/> 2 a 3 semanas                                                                     |
| tostado quemado pescado        | <input type="radio"/> nunca<br><input type="radio"/> 1 vez mes<br><input type="radio"/> 2 a 3 veces mes<br><input type="radio"/> 1 vez semana<br><input type="radio"/> 2 a 3 semanas                                                                     |
| socarrat paella                | <input checked="" type="radio"/> nunca<br><input type="radio"/> 1 vez mes<br><input type="radio"/> 2 a 3 veces mes<br><input type="radio"/> 1 vez semana<br><input type="radio"/> 2 a 3 semanas                                                          |
| grasa o aceite cocinar         | <input type="radio"/> mantequilla<br><input type="radio"/> margarina<br><input checked="" type="radio"/> aceite oliva<br><input type="radio"/> aceite oliva virgen extra<br><input type="radio"/> aceite vegetal<br><input type="radio"/> mezcla aceites |
| grasa aceite aliñar            | <input type="radio"/> mantequilla<br><input type="radio"/> margarina<br><input type="radio"/> aceite oliva<br><input checked="" type="radio"/> aceite oliva virgen extra<br><input type="radio"/> aceite vegetal<br><input type="radio"/> mezcla aceites |
| grasa aceite freir             | <input type="radio"/> mantequilla<br><input type="radio"/> margarina<br><input type="radio"/> aceite oliva<br><input type="radio"/> aceite oliva virgen extra<br><input checked="" type="radio"/> aceite vegetal<br><input type="radio"/> mezcla aceites |
| Ejercicio cuestionario         | <input checked="" type="radio"/> si<br><input type="radio"/> no                                                                                                                                                                                          |
| horas de sueño incluido siesta | [*DATA REMOVED*]                                                                                                                                                                                                                                         |
| minutos siesta                 | [*DATA REMOVED*]                                                                                                                                                                                                                                         |
| horas televisión semana        |                                                                                                                                                                                                                                                          |

|                                        |                                                                                                                                                                                                                                                                                                                                                                           |
|----------------------------------------|---------------------------------------------------------------------------------------------------------------------------------------------------------------------------------------------------------------------------------------------------------------------------------------------------------------------------------------------------------------------------|
| actividad trabajo                      | <input type="radio"/> casi siempre sentado<br><input type="radio"/> sentado 50 por cien<br><input checked="" type="radio"/> casi siempre de pie, quieto<br><input type="radio"/> casi siempre levantado caminando y llevando pocas cosas<br><input type="radio"/> casi siempre levantado, caminando y llevado muchas cosas<br><input type="radio"/> trabajo manual pesado |
| tiempo caminar o bici al día           | <input type="radio"/> casi nunca<br><input type="radio"/> menos 20min día<br><input type="radio"/> 20 a 40 min día<br><input checked="" type="radio"/> 40 a 60 min día<br><input type="radio"/> 1h o 1h y media día<br><input type="radio"/> más de 1h y media al día                                                                                                     |
| tiempo tareas casa al día              | <input type="radio"/> menos de 1h día<br><input type="radio"/> 1 a 2h día<br><input checked="" type="radio"/> 3 a 4h día<br><input type="radio"/> 5 a 6h día<br><input type="radio"/> 7 a 8h día<br><input type="radio"/> más de 8h día                                                                                                                                   |
| tiempo libre televisión ordenador leer | <input type="radio"/> menos 1h día<br><input type="radio"/> 1h día<br><input type="radio"/> 2h día<br><input checked="" type="radio"/> 3h día<br><input type="radio"/> 4h día<br><input type="radio"/> 5 a 6h día<br><input type="radio"/> mas 6h día                                                                                                                     |
| tiempo libre ejercicio o deporte       | <input type="radio"/> menos 1h semana<br><input type="radio"/> 1h semana<br><input checked="" type="radio"/> 2h semana<br><input type="radio"/> 3h semana<br><input type="radio"/> 4 a 5h semana<br><input type="radio"/> mas 5h semana                                                                                                                                   |
| como se considera                      | <input type="radio"/> sedentaria<br><input type="radio"/> poco activa<br><input type="radio"/> moderadamente activa<br><input checked="" type="radio"/> bastante activa<br><input type="radio"/> muy activa<br><input type="radio"/> no sabe                                                                                                                              |
| FUR                                    | [*DATA REMOVED*]                                                                                                                                                                                                                                                                                                                                                          |
| Semanas gestación 2T                   | [*DATA REMOVED*]                                                                                                                                                                                                                                                                                                                                                          |
| Días gestación 2T                      | [*DATA REMOVED*]                                                                                                                                                                                                                                                                                                                                                          |
| DBP 2T                                 | [*DATA REMOVED*]                                                                                                                                                                                                                                                                                                                                                          |
| CC 2T                                  | [*DATA REMOVED*]                                                                                                                                                                                                                                                                                                                                                          |
| AC 2T                                  | [*DATA REMOVED*]                                                                                                                                                                                                                                                                                                                                                          |

|                                                   |                                                                                                                                                                                                 |
|---------------------------------------------------|-------------------------------------------------------------------------------------------------------------------------------------------------------------------------------------------------|
| LF 2T                                             | [*DATA REMOVED*]                                                                                                                                                                                |
| PFE 2T (Hadlock)                                  | [*DATA REMOVED*]                                                                                                                                                                                |
| Semanas gestación 3T                              | [*DATA REMOVED*]                                                                                                                                                                                |
| días 3T                                           | [*DATA REMOVED*]                                                                                                                                                                                |
| DBP 3T                                            | [*DATA REMOVED*]                                                                                                                                                                                |
| CC 3T                                             | [*DATA REMOVED*]                                                                                                                                                                                |
| AC 3T                                             | [*DATA REMOVED*]                                                                                                                                                                                |
| LF 3T                                             | [*DATA REMOVED*]                                                                                                                                                                                |
| PFE 3T (Hadlock)                                  | [*DATA REMOVED*]                                                                                                                                                                                |
| Semanas de gestación final                        | [*DATA REMOVED*]                                                                                                                                                                                |
| dias gestación final                              | [*DATA REMOVED*]                                                                                                                                                                                |
| Localización placenta                             | <input type="radio"/> anterior<br><input type="radio"/> lateral derecha<br><input type="radio"/> lateral izquierda<br><input type="radio"/> posterior<br><input checked="" type="radio"/> fondo |
| Presentación longitudinal cefálica                | <input type="radio"/> no<br><input checked="" type="radio"/> si                                                                                                                                 |
| Dorso                                             | <input type="radio"/> izquierda anterior<br><input checked="" type="radio"/> izquierda posterior<br><input type="radio"/> derecha anterior<br><input type="radio"/> derecha posterior           |
| diámetro biparietal                               | [*DATA REMOVED*]                                                                                                                                                                                |
| Circunferencia craneal                            | [*DATA REMOVED*]                                                                                                                                                                                |
| Circunferencia abdominal                          | [*DATA REMOVED*]                                                                                                                                                                                |
| Longitud de femur                                 | [*DATA REMOVED*]                                                                                                                                                                                |
| tejido celular subcutáneo a nivel del muslo en mm | [*DATA REMOVED*]                                                                                                                                                                                |
| tejido celular subcutáneo en abdomen en mm        | [*DATA REMOVED*]                                                                                                                                                                                |
| Volumen del muslo en cm3                          | [*DATA REMOVED*]                                                                                                                                                                                |
| Peso fetal estimado según fórmula de Hadlock      | [*DATA REMOVED*]                                                                                                                                                                                |

|                                               |                                                                                                                                                          |
|-----------------------------------------------|----------------------------------------------------------------------------------------------------------------------------------------------------------|
| Percentil                                     | [*DATA REMOVED*]                                                                                                                                         |
| Peso fetal estimado según fórmula de Scioscia | <hr/>                                                                                                                                                    |
| Peso fetal estimado según fórmula de LEE      | <hr/>                                                                                                                                                    |
| Tipo de parto                                 | <input checked="" type="radio"/> eutocico<br><input type="radio"/> instrumentado/ventosa<br><input type="radio"/> cesarea                                |
| fecha de nacimiento                           | [*DATA REMOVED*]                                                                                                                                         |
| Días entre exploración y nacimiento           | [*DATA REMOVED*]                                                                                                                                         |
| Peso RN en g                                  | [*DATA REMOVED*]                                                                                                                                         |
| sexo                                          | <input type="radio"/> mujer<br><input checked="" type="radio"/> hombre                                                                                   |
| Apgar 1 minuto                                | [*DATA REMOVED*]                                                                                                                                         |
| Apgar 5 minutos                               | [*DATA REMOVED*]                                                                                                                                         |
| Apgar 10 minutos                              | <hr/>                                                                                                                                                    |
| antecedente Covid durante gestación           | <input type="radio"/> Yes<br><input checked="" type="radio"/> No                                                                                         |
| Nivel de estudios                             | <input type="radio"/> ninguno<br><input checked="" type="radio"/> primarios<br><input type="radio"/> secundarios<br><input type="radio"/> universitarios |

# Base\_datos\_estimacion\_peso\_fetal

|                                       |                                                                                                                                                                                                                                                                                      |
|---------------------------------------|--------------------------------------------------------------------------------------------------------------------------------------------------------------------------------------------------------------------------------------------------------------------------------------|
| Número de identificación participante | 76                                                                                                                                                                                                                                                                                   |
| CODIGO PARTICIPANTE                   |                                                                                                                                                                                                                                                                                      |
| Edad                                  | [*DATA REMOVED*]                                                                                                                                                                                                                                                                     |
| Gestaciones                           | <input checked="" type="radio"/> 1<br><input type="radio"/> 2<br><input type="radio"/> 3<br><input type="radio"/> mas de 3                                                                                                                                                           |
| partos                                | <input checked="" type="radio"/> 0<br><input type="radio"/> 1<br><input type="radio"/> 2<br><input type="radio"/> 3<br><input type="radio"/> mas de 3                                                                                                                                |
| cesáreas                              | <input checked="" type="radio"/> 0<br><input type="radio"/> 1<br><input type="radio"/> 2<br><input type="radio"/> 3<br><input type="radio"/> mas de 3                                                                                                                                |
| Abortos                               | <input checked="" type="radio"/> 0<br><input type="radio"/> 1<br><input type="radio"/> 2<br><input type="radio"/> 3<br><input type="radio"/> mas de 3                                                                                                                                |
| Tipo de gestacion                     | <input checked="" type="radio"/> espontanea<br><input type="radio"/> IAC inseminación artificial conyuge<br><input type="radio"/> IAD inseminación artificial donante<br><input type="radio"/> FIV Fecundación in Vitro<br><input type="radio"/> Ovodon FIV con donación de ovocitos |
| peso previo a embarazo                | [*DATA REMOVED*]                                                                                                                                                                                                                                                                     |
| Ganancia ponderal embarazo            | [*DATA REMOVED*]                                                                                                                                                                                                                                                                     |
| Talla madre                           | [*DATA REMOVED*]                                                                                                                                                                                                                                                                     |
| IMC previo embarazo                   | 22.589551436050055                                                                                                                                                                                                                                                                   |
| Patología obstétrica                  | <input checked="" type="radio"/> no<br><input type="radio"/> si                                                                                                                                                                                                                      |
| Diabetes pregestacional               | <input checked="" type="radio"/> no<br><input type="radio"/> si                                                                                                                                                                                                                      |
| Diabetes gestacional                  | <input checked="" type="radio"/> no<br><input type="radio"/> si                                                                                                                                                                                                                      |



|                                            |                                                                                                                                                                                      |
|--------------------------------------------|--------------------------------------------------------------------------------------------------------------------------------------------------------------------------------------|
| Diabetes gestacional con insulina          | <input checked="" type="radio"/> no<br><input type="radio"/> si                                                                                                                      |
| Diabetes gestacional con dieta y ejercicio | <input checked="" type="radio"/> no<br><input type="radio"/> si                                                                                                                      |
| Percentil fetos previos                    | <input checked="" type="radio"/> Nada<br><input type="radio"/> percentil menor de 10<br><input type="radio"/> percentil entre 10 y 90<br><input type="radio"/> percentil mayor de 90 |
| Exfumadora                                 | <input checked="" type="radio"/> Nada<br><input type="radio"/> menos de 5 años<br><input type="radio"/> 5 a 10 años<br><input type="radio"/> mayor o igual a 10 años                 |
| Hábito tabáquico                           | <input checked="" type="radio"/> no<br><input type="radio"/> si                                                                                                                      |
| fumadora                                   | [*DATA REMOVED*]                                                                                                                                                                     |
| Consumo otros tóxicos                      | <input checked="" type="radio"/> no<br><input type="radio"/> si                                                                                                                      |
| Hb 1T                                      | _____                                                                                                                                                                                |
| Htc 1T                                     | _____                                                                                                                                                                                |
| Hb 2T                                      | _____                                                                                                                                                                                |
| HTC 2T                                     | _____                                                                                                                                                                                |
| Hb 3T                                      | _____                                                                                                                                                                                |
| HTC 3T                                     | _____                                                                                                                                                                                |
| Suplemento FE oral                         | <input type="radio"/> si<br><input checked="" type="radio"/> no                                                                                                                      |
| Suplemento fe iv                           | <input type="radio"/> si<br><input checked="" type="radio"/> no                                                                                                                      |
| Transfusión                                | <input checked="" type="radio"/> no<br><input type="radio"/> si                                                                                                                      |
| Solicitada Vit D                           | <input checked="" type="radio"/> no<br><input type="radio"/> si                                                                                                                      |

|                       |                                                                                                                                                                                                                                                                                                                                                                                                              |
|-----------------------|--------------------------------------------------------------------------------------------------------------------------------------------------------------------------------------------------------------------------------------------------------------------------------------------------------------------------------------------------------------------------------------------------------------|
| Deficit vit D         | <input type="radio"/> no<br><input type="radio"/> si                                                                                                                                                                                                                                                                                                                                                         |
| Suplemento vit D      | <input type="radio"/> si<br><input type="radio"/> no                                                                                                                                                                                                                                                                                                                                                         |
| Dieta, cuestionario   | <input checked="" type="radio"/> si<br><input type="radio"/> no                                                                                                                                                                                                                                                                                                                                              |
| Leche entera          | <input checked="" type="radio"/> Nunca o menos 1 vez al mes<br><input type="radio"/> 1 a 3 veces mes<br><input type="radio"/> 1 vez semana<br><input type="radio"/> 2 a 4 veces semana<br><input type="radio"/> 5 a 6 veces semana<br><input type="radio"/> 1 vez al día<br><input type="radio"/> 2 a 3 veces al día<br><input type="radio"/> 5 a 6 veces al día<br><input type="radio"/> más 6 veces al día |
| Leche semidesnatada   | <input checked="" type="radio"/> Nunca o menos 1 vez al mes<br><input type="radio"/> 1 a 3 veces mes<br><input type="radio"/> 1 vez semana<br><input type="radio"/> 2 a 4 veces semana<br><input type="radio"/> 5 a 6 veces semana<br><input type="radio"/> 1 vez al día<br><input type="radio"/> 2 a 3 veces al día<br><input type="radio"/> 5 a 6 veces al día<br><input type="radio"/> mas 6 veces al día |
| Leche desnatada       | <input type="radio"/> Nunca o menos 1 vez al mes<br><input type="radio"/> 1 a 3 veces mes<br><input checked="" type="radio"/> 1 vez semana<br><input type="radio"/> 2 a 4 veces semana<br><input type="radio"/> 5 a 6 veces semana<br><input type="radio"/> 1 vez al día<br><input type="radio"/> 2 a 3 veces al día<br><input type="radio"/> 5 a 6 veces al día<br><input type="radio"/> más 6 veces al día |
| Leche condensada      | <input checked="" type="radio"/> Nunca o menos 1 vez al mes<br><input type="radio"/> 1 a 3 veces mes<br><input type="radio"/> 1 vez semana<br><input type="radio"/> 2 a 4 veces semana<br><input type="radio"/> 5 a 6 veces semana<br><input type="radio"/> 1 vez al día<br><input type="radio"/> 2 a 3 veces al día<br><input type="radio"/> 5 a 6 veces al día<br><input type="radio"/> más 6 veces al día |
| nata o crema de leche | <input checked="" type="radio"/> Nunca o menos 1 vez al mes<br><input type="radio"/> 1 a 3 veces mes<br><input type="radio"/> 1 vez semana<br><input type="radio"/> 2 a 4 veces semana<br><input type="radio"/> 5 a 6 veces semana<br><input type="radio"/> 1 vez al día<br><input type="radio"/> 2 a 3 veces al día<br><input type="radio"/> 5 a 6 veces al día<br><input type="radio"/> más 6 veces al día |

---

Yogurt Entero

- ☐ Nunca o menos 1 vez al mes  
☒ 1 a 3 veces mes  
☐ 1 vez semana  
☐ 2 a 4 veces semana  
☐ 5 a 6 veces semana  
☐ 1 vez al día  
☐ 2 a 3 veces al día  
☐ 5 a 6 veces al día  
☐ más 6 veces al día

---

Yogurt desnatado

- ☐ Nunca o menos 1 vez al mes  
☐ 1 a 3 veces mes  
☐ 1 vez semana  
☐ 2 a 4 veces semana  
☐ 5 a 6 veces semana  
☒ 1 vez al día  
☐ 2 a 3 veces al día  
☐ 5 a 6 veces al día  
☐ más 6 veces al día

---

100g requesón o queso blando o queso fresco

- ☐ Nunca o menos 1 vez al mes  
☐ 1 a 3 veces mes  
☐ 1 vez semana  
☐ 2 a 4 veces semana  
☐ 5 a 6 veces semana  
☒ 1 vez al día  
☐ 2 a 3 veces al día  
☐ 5 a 6 veces al día  
☐ más 6 veces al día

---

queso curado o semicurado o cremoso

- ☐ Nunca o menos 1 vez al mes  
☐ 1 a 3 veces mes  
☐ 1 vez semana  
☐ 2 a 4 veces semana  
☐ 5 a 6 veces semana  
☒ 1 vez al día  
☐ 2 a 3 veces al día  
☐ 5 a 6 veces al día  
☐ más 6 veces al día

---

natillas flan pudding

- ☒ Nunca o menos 1 vez al mes  
☐ 1 a 3 veces mes  
☐ 1 vez semana  
☐ 2 a 4 veces semana  
☐ 5 a 6 veces semana  
☐ 1 vez al día  
☐ 2 a 3 veces al día  
☐ 5 a 6 veces al día  
☐ más 6 veces al día

---

Helado

- ☒ Nunca o menos 1 vez al mes  
☐ 1 a 3 veces mes  
☐ 1 vez semana  
☐ 2 a 4 veces semana  
☐ 5 a 6 veces semana  
☐ 1 vez al día  
☐ 2 a 3 veces al día  
☐ 5 a 6 veces al día  
☐ más 6 veces al día

|                                      |                                                                                                                                                                                                                                                                                                                                                                                                              |
|--------------------------------------|--------------------------------------------------------------------------------------------------------------------------------------------------------------------------------------------------------------------------------------------------------------------------------------------------------------------------------------------------------------------------------------------------------------|
| huevo                                | <input type="radio"/> Nunca o menos 1 vez al mes<br><input type="radio"/> 1 a 3 veces mes<br><input type="radio"/> 1 vez semana<br><input checked="" type="radio"/> 2 a 4 veces semana<br><input type="radio"/> 5 a 6 veces semana<br><input type="radio"/> 1 vez al día<br><input type="radio"/> 2 a 3 veces al día<br><input type="radio"/> 5 a 6 veces al día<br><input type="radio"/> más 6 veces al día |
| Pollo con piel                       | <input checked="" type="radio"/> Nunca o menos 1 vez al mes<br><input type="radio"/> 1 a 3 veces mes<br><input type="radio"/> 1 vez semana<br><input type="radio"/> 2 a 4 veces semana<br><input type="radio"/> 5 a 6 veces semana<br><input type="radio"/> 1 vez al día<br><input type="radio"/> 2 a 3 veces al día<br><input type="radio"/> 5 a 6 veces al día<br><input type="radio"/> más 6 veces al día |
| pollo sin piel                       | <input type="radio"/> Nunca o menos 1 vez al mes<br><input type="radio"/> 1 a 3 veces mes<br><input checked="" type="radio"/> 1 vez semana<br><input type="radio"/> 2 a 4 veces semana<br><input type="radio"/> 5 a 6 veces semana<br><input type="radio"/> 1 vez al día<br><input type="radio"/> 2 a 3 veces al día<br><input type="radio"/> 5 a 6 veces al día<br><input type="radio"/> más 6 veces al día |
| Ternera o cerdo o cordero            | <input checked="" type="radio"/> Nunca o menos 1 vez al mes<br><input type="radio"/> 1 a 3 veces mes<br><input type="radio"/> 1 vez semana<br><input type="radio"/> 2 a 4 veces semana<br><input type="radio"/> 5 a 6 veces semana<br><input type="radio"/> 1 vez al día<br><input type="radio"/> 2 a 3 veces al día<br><input type="radio"/> 5 a 6 veces al día<br><input type="radio"/> más 6 veces al día |
| carne caza: Conejo o codorniz o pato | <input type="radio"/> Nunca o menos 1 vez al mes<br><input type="radio"/> 1 a 3 veces mes<br><input checked="" type="radio"/> 1 vez semana<br><input type="radio"/> 2 a 4 veces semana<br><input type="radio"/> 5 a 6 veces semana<br><input type="radio"/> 1 vez al día<br><input type="radio"/> 2 a 3 veces al día<br><input type="radio"/> 5 a 6 veces al día<br><input type="radio"/> más 6 veces al día |
| Hígado de ternera o cerdo o pollo    | <input type="radio"/> Nunca o menos 1 vez al mes<br><input type="radio"/> 1 a 3 veces mes<br><input type="radio"/> 1 vez semana<br><input checked="" type="radio"/> 2 a 4 veces semana<br><input type="radio"/> 5 a 6 veces semana<br><input type="radio"/> 1 vez al día<br><input type="radio"/> 2 a 3 veces al día<br><input type="radio"/> 5 a 6 veces al día<br><input type="radio"/> más 6 veces al día |

|                     |                                                                                                                                                                                                                                                                                                                                                                                                              |
|---------------------|--------------------------------------------------------------------------------------------------------------------------------------------------------------------------------------------------------------------------------------------------------------------------------------------------------------------------------------------------------------------------------------------------------------|
| Vísceras            | <input checked="" type="radio"/> Nunca o menos 1 vez al mes<br><input type="radio"/> 1 a 3 veces mes<br><input type="radio"/> 1 vez semana<br><input type="radio"/> 2 a 4 veces semana<br><input type="radio"/> 5 a 6 veces semana<br><input type="radio"/> 1 vez al día<br><input type="radio"/> 2 a 3 veces al día<br><input type="radio"/> 5 a 6 veces al día<br><input type="radio"/> más 6 veces al día |
| Embutido            | <input checked="" type="radio"/> Nunca o menos 1 vez al mes<br><input type="radio"/> 1 a 3 veces mes<br><input type="radio"/> 1 vez semana<br><input type="radio"/> 2 a 4 veces semana<br><input type="radio"/> 5 a 6 veces semana<br><input type="radio"/> 1 vez al día<br><input type="radio"/> 2 a 3 veces al día<br><input type="radio"/> 5 a 6 veces al día<br><input type="radio"/> más 6 veces al día |
| Salchicha o similar | <input type="radio"/> Nunca o menos 1 vez al mes<br><input checked="" type="radio"/> 1 a 3 veces mes<br><input type="radio"/> 1 vez semana<br><input type="radio"/> 2 a 4 veces semana<br><input type="radio"/> 5 a 6 veces semana<br><input type="radio"/> 1 vez al día<br><input type="radio"/> 2 a 3 veces al día<br><input type="radio"/> 5 a 6 veces al día<br><input type="radio"/> más 6 veces al día |
| Pate o foiegras     | <input checked="" type="radio"/> Nunca o menos 1 vez al mes<br><input type="radio"/> 1 a 3 veces mes<br><input type="radio"/> 1 vez semana<br><input type="radio"/> 2 a 4 veces semana<br><input type="radio"/> 5 a 6 veces semana<br><input type="radio"/> 1 vez al día<br><input type="radio"/> 2 a 3 veces al día<br><input type="radio"/> 5 a 6 veces al día<br><input type="radio"/> más 6 veces al día |
| Hamburguesa         | <input type="radio"/> Nunca o menos 1 vez al mes<br><input checked="" type="radio"/> 1 a 3 veces mes<br><input type="radio"/> 1 vez semana<br><input type="radio"/> 2 a 4 veces semana<br><input type="radio"/> 5 a 6 veces semana<br><input type="radio"/> 1 vez al día<br><input type="radio"/> 2 a 3 veces al día<br><input type="radio"/> 5 a 6 veces al día<br><input type="radio"/> más 6 veces al día |
| tocino o bacon      | <input checked="" type="radio"/> Nunca o menos 1 vez al mes<br><input type="radio"/> 1 a 3 veces mes<br><input type="radio"/> 1 vez semana<br><input type="radio"/> 2 a 4 veces semana<br><input type="radio"/> 5 a 6 veces semana<br><input type="radio"/> 1 vez al día<br><input type="radio"/> 2 a 3 veces al día<br><input type="radio"/> 5 a 6 veces al día<br><input type="radio"/> más 6 veces al día |

---

|               |                                                                                                                                                                                                                                                                                                                                                                                                              |
|---------------|--------------------------------------------------------------------------------------------------------------------------------------------------------------------------------------------------------------------------------------------------------------------------------------------------------------------------------------------------------------------------------------------------------------|
| Pescado frito | <input checked="" type="radio"/> Nunca o menos 1 vez al mes<br><input type="radio"/> 1 a 3 veces mes<br><input type="radio"/> 1 vez semana<br><input type="radio"/> 2 a 4 veces semana<br><input type="radio"/> 5 a 6 veces semana<br><input type="radio"/> 1 vez al día<br><input type="radio"/> 2 a 3 veces al día<br><input type="radio"/> 5 a 6 veces al día<br><input type="radio"/> más 6 veces al día |
|---------------|--------------------------------------------------------------------------------------------------------------------------------------------------------------------------------------------------------------------------------------------------------------------------------------------------------------------------------------------------------------------------------------------------------------|

---

|                        |                                                                                                                                                                                                                                                                                                                                                                                                              |
|------------------------|--------------------------------------------------------------------------------------------------------------------------------------------------------------------------------------------------------------------------------------------------------------------------------------------------------------------------------------------------------------------------------------------------------------|
| pescado hervido blanco | <input type="radio"/> Nunca o menos 1 vez al mes<br><input type="radio"/> 1 a 3 veces mes<br><input checked="" type="radio"/> 1 vez semana<br><input type="radio"/> 2 a 4 veces semana<br><input type="radio"/> 5 a 6 veces semana<br><input type="radio"/> 1 vez al día<br><input type="radio"/> 2 a 3 veces al día<br><input type="radio"/> 5 a 6 veces al día<br><input type="radio"/> más 6 veces al día |
|------------------------|--------------------------------------------------------------------------------------------------------------------------------------------------------------------------------------------------------------------------------------------------------------------------------------------------------------------------------------------------------------------------------------------------------------|

---

|                      |                                                                                                                                                                                                                                                                                                                                                                                                              |
|----------------------|--------------------------------------------------------------------------------------------------------------------------------------------------------------------------------------------------------------------------------------------------------------------------------------------------------------------------------------------------------------------------------------------------------------|
| pescado hervido azul | <input type="radio"/> Nunca o menos 1 vez al mes<br><input checked="" type="radio"/> 1 a 3 veces mes<br><input type="radio"/> 1 vez semana<br><input type="radio"/> 2 a 4 veces semana<br><input type="radio"/> 5 a 6 veces semana<br><input type="radio"/> 1 vez al día<br><input type="radio"/> 2 a 3 veces al día<br><input type="radio"/> 5 a 6 veces al día<br><input type="radio"/> más 6 veces al día |
|----------------------|--------------------------------------------------------------------------------------------------------------------------------------------------------------------------------------------------------------------------------------------------------------------------------------------------------------------------------------------------------------------------------------------------------------|

---

|                    |                                                                                                                                                                                                                                                                                                                                                                                                              |
|--------------------|--------------------------------------------------------------------------------------------------------------------------------------------------------------------------------------------------------------------------------------------------------------------------------------------------------------------------------------------------------------------------------------------------------------|
| otros pescado azul | <input type="radio"/> Nunca o menos 1 vez al mes<br><input checked="" type="radio"/> 1 a 3 veces mes<br><input type="radio"/> 1 vez semana<br><input type="radio"/> 2 a 4 veces semana<br><input type="radio"/> 5 a 6 veces semana<br><input type="radio"/> 1 vez al día<br><input type="radio"/> 2 a 3 veces al día<br><input type="radio"/> 5 a 6 veces al día<br><input type="radio"/> más 6 veces al día |
|--------------------|--------------------------------------------------------------------------------------------------------------------------------------------------------------------------------------------------------------------------------------------------------------------------------------------------------------------------------------------------------------------------------------------------------------|

---

|               |                                                                                                                                                                                                                                                                                                                                                                                                              |
|---------------|--------------------------------------------------------------------------------------------------------------------------------------------------------------------------------------------------------------------------------------------------------------------------------------------------------------------------------------------------------------------------------------------------------------|
| atun conserva | <input checked="" type="radio"/> Nunca o menos 1 vez al mes<br><input type="radio"/> 1 a 3 veces mes<br><input type="radio"/> 1 vez semana<br><input type="radio"/> 2 a 4 veces semana<br><input type="radio"/> 5 a 6 veces semana<br><input type="radio"/> 1 vez al día<br><input type="radio"/> 2 a 3 veces al día<br><input type="radio"/> 5 a 6 veces al día<br><input type="radio"/> más 6 veces al día |
|---------------|--------------------------------------------------------------------------------------------------------------------------------------------------------------------------------------------------------------------------------------------------------------------------------------------------------------------------------------------------------------------------------------------------------------|

---

|                  |                                                                                                                                                                                                                                                                                                                                                                                                              |
|------------------|--------------------------------------------------------------------------------------------------------------------------------------------------------------------------------------------------------------------------------------------------------------------------------------------------------------------------------------------------------------------------------------------------------------|
| sardina conserva | <input checked="" type="radio"/> Nunca o menos 1 vez al mes<br><input type="radio"/> 1 a 3 veces mes<br><input type="radio"/> 1 vez semana<br><input type="radio"/> 2 a 4 veces semana<br><input type="radio"/> 5 a 6 veces semana<br><input type="radio"/> 1 vez al día<br><input type="radio"/> 2 a 3 veces al día<br><input type="radio"/> 5 a 6 veces al día<br><input type="radio"/> más 6 veces al día |
|------------------|--------------------------------------------------------------------------------------------------------------------------------------------------------------------------------------------------------------------------------------------------------------------------------------------------------------------------------------------------------------------------------------------------------------|

---

|                                         |                                                                                                                                                                                                                                                                                                                                                                                                              |
|-----------------------------------------|--------------------------------------------------------------------------------------------------------------------------------------------------------------------------------------------------------------------------------------------------------------------------------------------------------------------------------------------------------------------------------------------------------------|
| pescado ahumado                         | <input checked="" type="radio"/> Nunca o menos 1 vez al mes<br><input type="radio"/> 1 a 3 veces mes<br><input type="radio"/> 1 vez semana<br><input type="radio"/> 2 a 4 veces semana<br><input type="radio"/> 5 a 6 veces semana<br><input type="radio"/> 1 vez al día<br><input type="radio"/> 2 a 3 veces al día<br><input type="radio"/> 5 a 6 veces al día<br><input type="radio"/> más 6 veces al día |
| almejas o mejillones o ostras unos 100g | <input type="radio"/> Nunca o menos 1 vez al mes<br><input checked="" type="radio"/> 1 a 3 veces mes<br><input type="radio"/> 1 vez semana<br><input type="radio"/> 2 a 4 veces semana<br><input type="radio"/> 5 a 6 veces semana<br><input type="radio"/> 1 vez al día<br><input type="radio"/> 2 a 3 veces al día<br><input type="radio"/> 5 a 6 veces al día<br><input type="radio"/> más 6 veces al día |
| calamar o chipiron o sepia unos 100g    | <input type="radio"/> Nunca o menos 1 vez al mes<br><input checked="" type="radio"/> 1 a 3 veces mes<br><input type="radio"/> 1 vez semana<br><input type="radio"/> 2 a 4 veces semana<br><input type="radio"/> 5 a 6 veces semana<br><input type="radio"/> 1 vez al día<br><input type="radio"/> 2 a 3 veces al día<br><input type="radio"/> 5 a 6 veces al día<br><input type="radio"/> más 6 veces al día |
| marisco unos 100g                       | <input type="radio"/> Nunca o menos 1 vez al mes<br><input checked="" type="radio"/> 1 a 3 veces mes<br><input type="radio"/> 1 vez semana<br><input type="radio"/> 2 a 4 veces semana<br><input type="radio"/> 5 a 6 veces semana<br><input type="radio"/> 1 vez al día<br><input type="radio"/> 2 a 3 veces al día<br><input type="radio"/> 5 a 6 veces al día<br><input type="radio"/> más 6 veces al día |
| Espinacas o acelgas cocinadas           | <input type="radio"/> Nunca o menos 1 vez al mes<br><input checked="" type="radio"/> 1 a 3 veces mes<br><input type="radio"/> 1 vez semana<br><input type="radio"/> 2 a 4 veces semana<br><input type="radio"/> 5 a 6 veces semana<br><input type="radio"/> 1 vez al día<br><input type="radio"/> 2 a 3 veces al día<br><input type="radio"/> 5 a 6 veces al día<br><input type="radio"/> más 6 veces al día |
| Col o coliflor o brocoli cocinado       | <input checked="" type="radio"/> Nunca o menos 1 vez al mes<br><input type="radio"/> 1 a 3 veces mes<br><input type="radio"/> 1 vez semana<br><input type="radio"/> 2 a 4 veces semana<br><input type="radio"/> 5 a 6 veces semana<br><input type="radio"/> 1 vez al día<br><input type="radio"/> 2 a 3 veces al día<br><input type="radio"/> 5 a 6 veces al día<br><input type="radio"/> más 6 veces al día |

---

|                              |                                                                                                                                                                                                                                                                                                                                                                                                              |
|------------------------------|--------------------------------------------------------------------------------------------------------------------------------------------------------------------------------------------------------------------------------------------------------------------------------------------------------------------------------------------------------------------------------------------------------------|
| Lechuga o endivia o escarola | <input type="radio"/> Nunca o menos 1 vez al mes<br><input type="radio"/> 1 a 3 veces mes<br><input type="radio"/> 1 vez semana<br><input type="radio"/> 2 a 4 veces semana<br><input type="radio"/> 5 a 6 veces semana<br><input checked="" type="radio"/> 1 vez al día<br><input type="radio"/> 2 a 3 veces al día<br><input type="radio"/> 5 a 6 veces al día<br><input type="radio"/> más 6 veces al día |
|------------------------------|--------------------------------------------------------------------------------------------------------------------------------------------------------------------------------------------------------------------------------------------------------------------------------------------------------------------------------------------------------------------------------------------------------------|

---

|                 |                                                                                                                                                                                                                                                                                                                                                                                                              |
|-----------------|--------------------------------------------------------------------------------------------------------------------------------------------------------------------------------------------------------------------------------------------------------------------------------------------------------------------------------------------------------------------------------------------------------------|
| tomate ensalada | <input type="radio"/> Nunca o menos 1 vez al mes<br><input type="radio"/> 1 a 3 veces mes<br><input type="radio"/> 1 vez semana<br><input checked="" type="radio"/> 2 a 4 veces semana<br><input type="radio"/> 5 a 6 veces semana<br><input type="radio"/> 1 vez al día<br><input type="radio"/> 2 a 3 veces al día<br><input type="radio"/> 5 a 6 veces al día<br><input type="radio"/> más 6 veces al día |
|-----------------|--------------------------------------------------------------------------------------------------------------------------------------------------------------------------------------------------------------------------------------------------------------------------------------------------------------------------------------------------------------------------------------------------------------|

---

|         |                                                                                                                                                                                                                                                                                                                                                                                                              |
|---------|--------------------------------------------------------------------------------------------------------------------------------------------------------------------------------------------------------------------------------------------------------------------------------------------------------------------------------------------------------------------------------------------------------------|
| cebolla | <input checked="" type="radio"/> Nunca o menos 1 vez al mes<br><input type="radio"/> 1 a 3 veces mes<br><input type="radio"/> 1 vez semana<br><input type="radio"/> 2 a 4 veces semana<br><input type="radio"/> 5 a 6 veces semana<br><input type="radio"/> 1 vez al día<br><input type="radio"/> 2 a 3 veces al día<br><input type="radio"/> 5 a 6 veces al día<br><input type="radio"/> más 6 veces al día |
|---------|--------------------------------------------------------------------------------------------------------------------------------------------------------------------------------------------------------------------------------------------------------------------------------------------------------------------------------------------------------------------------------------------------------------|

---

|                      |                                                                                                                                                                                                                                                                                                                                                                                                              |
|----------------------|--------------------------------------------------------------------------------------------------------------------------------------------------------------------------------------------------------------------------------------------------------------------------------------------------------------------------------------------------------------------------------------------------------------|
| Zanahoria o calabaza | <input type="radio"/> Nunca o menos 1 vez al mes<br><input type="radio"/> 1 a 3 veces mes<br><input type="radio"/> 1 vez semana<br><input type="radio"/> 2 a 4 veces semana<br><input type="radio"/> 5 a 6 veces semana<br><input checked="" type="radio"/> 1 vez al día<br><input type="radio"/> 2 a 3 veces al día<br><input type="radio"/> 5 a 6 veces al día<br><input type="radio"/> más 6 veces al día |
|----------------------|--------------------------------------------------------------------------------------------------------------------------------------------------------------------------------------------------------------------------------------------------------------------------------------------------------------------------------------------------------------------------------------------------------------|

---

|               |                                                                                                                                                                                                                                                                                                                                                                                                              |
|---------------|--------------------------------------------------------------------------------------------------------------------------------------------------------------------------------------------------------------------------------------------------------------------------------------------------------------------------------------------------------------------------------------------------------------|
| Judías verdes | <input checked="" type="radio"/> Nunca o menos 1 vez al mes<br><input type="radio"/> 1 a 3 veces mes<br><input type="radio"/> 1 vez semana<br><input type="radio"/> 2 a 4 veces semana<br><input type="radio"/> 5 a 6 veces semana<br><input type="radio"/> 1 vez al día<br><input type="radio"/> 2 a 3 veces al día<br><input type="radio"/> 5 a 6 veces al día<br><input type="radio"/> más 6 veces al día |
|---------------|--------------------------------------------------------------------------------------------------------------------------------------------------------------------------------------------------------------------------------------------------------------------------------------------------------------------------------------------------------------------------------------------------------------|

---

|                                |                                                                                                                                                                                                                                                                                                                                                                                                              |
|--------------------------------|--------------------------------------------------------------------------------------------------------------------------------------------------------------------------------------------------------------------------------------------------------------------------------------------------------------------------------------------------------------------------------------------------------------|
| Berenjena o calabacin o pepino | <input type="radio"/> Nunca o menos 1 vez al mes<br><input type="radio"/> 1 a 3 veces mes<br><input type="radio"/> 1 vez semana<br><input type="radio"/> 2 a 4 veces semana<br><input type="radio"/> 5 a 6 veces semana<br><input checked="" type="radio"/> 1 vez al día<br><input type="radio"/> 2 a 3 veces al día<br><input type="radio"/> 5 a 6 veces al día<br><input type="radio"/> más 6 veces al día |
|--------------------------------|--------------------------------------------------------------------------------------------------------------------------------------------------------------------------------------------------------------------------------------------------------------------------------------------------------------------------------------------------------------------------------------------------------------|

---



|                       |                                                                                                                                                                                                                                                                                                                                                                                                              |
|-----------------------|--------------------------------------------------------------------------------------------------------------------------------------------------------------------------------------------------------------------------------------------------------------------------------------------------------------------------------------------------------------------------------------------------------------|
| pimiento              | <input checked="" type="radio"/> Nunca o menos 1 vez al mes<br><input type="radio"/> 1 a 3 veces mes<br><input type="radio"/> 1 vez semana<br><input type="radio"/> 2 a 4 veces semana<br><input type="radio"/> 5 a 6 veces semana<br><input type="radio"/> 1 vez al día<br><input type="radio"/> 2 a 3 veces al día<br><input type="radio"/> 5 a 6 veces al día<br><input type="radio"/> más 6 veces al día |
| alcachofa             | <input type="radio"/> Nunca o menos 1 vez al mes<br><input type="radio"/> 1 a 3 veces mes<br><input checked="" type="radio"/> 1 vez semana<br><input type="radio"/> 2 a 4 veces semana<br><input type="radio"/> 5 a 6 veces semana<br><input type="radio"/> 1 vez al día<br><input type="radio"/> 2 a 3 veces al día<br><input type="radio"/> 5 a 6 veces al día<br><input type="radio"/> más 6 veces al día |
| espárragos            | <input checked="" type="radio"/> Nunca o menos 1 vez al mes<br><input type="radio"/> 1 a 3 veces mes<br><input type="radio"/> 1 vez semana<br><input type="radio"/> 2 a 4 veces semana<br><input type="radio"/> 5 a 6 veces semana<br><input type="radio"/> 1 vez al día<br><input type="radio"/> 2 a 3 veces al día<br><input type="radio"/> 5 a 6 veces al día<br><input type="radio"/> más 6 veces al día |
| maíz hervido          | <input type="radio"/> Nunca o menos 1 vez al mes<br><input type="radio"/> 1 a 3 veces mes<br><input checked="" type="radio"/> 1 vez semana<br><input type="radio"/> 2 a 4 veces semana<br><input type="radio"/> 5 a 6 veces semana<br><input type="radio"/> 1 vez al día<br><input type="radio"/> 2 a 3 veces al día<br><input type="radio"/> 5 a 6 veces al día<br><input type="radio"/> más 6 veces al día |
| legumbres             | <input type="radio"/> Nunca o menos 1 vez al mes<br><input type="radio"/> 1 a 3 veces mes<br><input type="radio"/> 1 vez semana<br><input checked="" type="radio"/> 2 a 4 veces semana<br><input type="radio"/> 5 a 6 veces semana<br><input type="radio"/> 1 vez al día<br><input type="radio"/> 2 a 3 veces al día<br><input type="radio"/> 5 a 6 veces al día<br><input type="radio"/> más 6 veces al día |
| naranjas o mandarinas | <input type="radio"/> Nunca o menos 1 vez al mes<br><input type="radio"/> 1 a 3 veces mes<br><input type="radio"/> 1 vez semana<br><input checked="" type="radio"/> 2 a 4 veces semana<br><input type="radio"/> 5 a 6 veces semana<br><input type="radio"/> 1 vez al día<br><input type="radio"/> 2 a 3 veces al día<br><input type="radio"/> 5 a 6 veces al día<br><input type="radio"/> más 6 veces al día |

|                       |                                                                                                                                                                                                                                                                                                                                                                                                              |
|-----------------------|--------------------------------------------------------------------------------------------------------------------------------------------------------------------------------------------------------------------------------------------------------------------------------------------------------------------------------------------------------------------------------------------------------------|
| zum natural fruta     | <input type="radio"/> Nunca o menos 1 vez al mes<br><input type="radio"/> 1 a 3 veces mes<br><input type="radio"/> 1 vez semana<br><input type="radio"/> 2 a 4 veces semana<br><input type="radio"/> 5 a 6 veces semana<br><input checked="" type="radio"/> 1 vez al día<br><input type="radio"/> 2 a 3 veces al día<br><input type="radio"/> 5 a 6 veces al día<br><input type="radio"/> más 6 veces al día |
| platano               | <input type="radio"/> Nunca o menos 1 vez al mes<br><input type="radio"/> 1 a 3 veces mes<br><input type="radio"/> 1 vez semana<br><input type="radio"/> 2 a 4 veces semana<br><input type="radio"/> 5 a 6 veces semana<br><input checked="" type="radio"/> 1 vez al día<br><input type="radio"/> 2 a 3 veces al día<br><input type="radio"/> 5 a 6 veces al día<br><input type="radio"/> más 6 veces al día |
| manzana o pera        | <input type="radio"/> Nunca o menos 1 vez al mes<br><input type="radio"/> 1 a 3 veces mes<br><input checked="" type="radio"/> 1 vez semana<br><input type="radio"/> 2 a 4 veces semana<br><input type="radio"/> 5 a 6 veces semana<br><input type="radio"/> 1 vez al día<br><input type="radio"/> 2 a 3 veces al día<br><input type="radio"/> 5 a 6 veces al día<br><input type="radio"/> más 6 veces al día |
| melocotón o nectarina | <input type="radio"/> Nunca o menos 1 vez al mes<br><input type="radio"/> 1 a 3 veces mes<br><input checked="" type="radio"/> 1 vez semana<br><input type="radio"/> 2 a 4 veces semana<br><input type="radio"/> 5 a 6 veces semana<br><input type="radio"/> 1 vez al día<br><input type="radio"/> 2 a 3 veces al día<br><input type="radio"/> 5 a 6 veces al día<br><input type="radio"/> más 6 veces al día |
| sandia o melon        | <input checked="" type="radio"/> Nunca o menos 1 vez al mes<br><input type="radio"/> 1 a 3 veces mes<br><input type="radio"/> 1 vez semana<br><input type="radio"/> 2 a 4 veces semana<br><input type="radio"/> 5 a 6 veces semana<br><input type="radio"/> 1 vez al día<br><input type="radio"/> 2 a 3 veces al día<br><input type="radio"/> 5 a 6 veces al día<br><input type="radio"/> más 6 veces al día |
| uva                   | <input checked="" type="radio"/> Nunca o menos 1 vez al mes<br><input type="radio"/> 1 a 3 veces mes<br><input type="radio"/> 1 vez semana<br><input type="radio"/> 2 a 4 veces semana<br><input type="radio"/> 5 a 6 veces semana<br><input type="radio"/> 1 vez al día<br><input type="radio"/> 2 a 3 veces al día<br><input type="radio"/> 5 a 6 veces al día<br><input type="radio"/> más 6 veces al día |

---

bruna o ciruela

- ☐ Nunca o menos 1 vez al mes  
☐ 1 a 3 veces mes  
☐ 1 vez semana  
☐ 2 a 4 veces semana  
☐ 5 a 6 veces semana  
☒ 1 vez al día  
☐ 2 a 3 veces al día  
☐ 5 a 6 veces al día  
☐ más 6 veces al día

---

kiwi

- ☐ Nunca o menos 1 vez al mes  
☐ 1 a 3 veces mes  
☐ 1 vez semana  
☐ 2 a 4 veces semana  
☐ 5 a 6 veces semana  
☒ 1 vez al día  
☐ 2 a 3 veces al día  
☐ 5 a 6 veces al día  
☐ más 6 veces al día

---

aceituna

- ☐ Nunca o menos 1 vez al mes  
☒ 1 a 3 veces mes  
☐ 1 vez semana  
☐ 2 a 4 veces semana  
☐ 5 a 6 veces semana  
☐ 1 vez al día  
☐ 2 a 3 veces al día  
☐ 5 a 6 veces al día  
☐ más 6 veces al día

---

frutos secos

- ☐ Nunca o menos 1 vez al mes  
☐ 1 a 3 veces mes  
☐ 1 vez semana  
☐ 2 a 4 veces semana  
☐ 5 a 6 veces semana  
☒ 1 vez al día  
☐ 2 a 3 veces al día  
☐ 5 a 6 veces al día  
☐ más 6 veces al día

---

pan blanco

- ☐ Nunca o menos 1 vez al mes  
☒ 1 a 3 veces mes  
☐ 1 vez semana  
☐ 2 a 4 veces semana  
☐ 5 a 6 veces semana  
☐ 1 vez al día  
☐ 2 a 3 veces al día  
☐ 5 a 6 veces al día  
☐ más 6 veces al día

---

pan integral

- ☐ Nunca o menos 1 vez al mes  
☐ 1 a 3 veces mes  
☐ 1 vez semana  
☐ 2 a 4 veces semana  
☐ 5 a 6 veces semana  
☒ 1 vez al día  
☐ 2 a 3 veces al día  
☐ 5 a 6 veces al día  
☐ más 6 veces al día

---

cereales desayuno

- ☐ Nunca o menos 1 vez al mes  
☐ 1 a 3 veces mes  
☐ 1 vez semana  
☐ 2 a 4 veces semana  
☐ 5 a 6 veces semana  
☒ 1 vez al día  
☐ 2 a 3 veces al día  
☐ 5 a 6 veces al día  
☐ más 6 veces al día

---

patatas fritas

- ☒ Nunca o menos 1 vez al mes  
☐ 1 a 3 veces mes  
☐ 1 vez semana  
☐ 2 a 4 veces semana  
☐ 5 a 6 veces semana  
☐ 1 vez al día  
☐ 2 a 3 veces al día  
☐ 5 a 6 veces al día  
☐ más 6 veces al día

---

patatas cocidas o asadas

- ☐ Nunca o menos 1 vez al mes  
☐ 1 a 3 veces mes  
☒ 1 vez semana  
☐ 2 a 4 veces semana  
☐ 5 a 6 veces semana  
☐ 1 vez al día  
☐ 2 a 3 veces al día  
☐ 5 a 6 veces al día  
☐ más 6 veces al día

---

bolsa papas

- ☒ Nunca o menos 1 vez al mes  
☐ 1 a 3 veces mes  
☐ 1 vez semana  
☐ 2 a 4 veces semana  
☐ 5 a 6 veces semana  
☐ 1 vez al día  
☐ 2 a 3 veces al día  
☐ 5 a 6 veces al día  
☐ más 6 veces al día

---

arroz cocinado

- ☐ Nunca o menos 1 vez al mes  
☐ 1 a 3 veces mes  
☐ 1 vez semana  
☒ 2 a 4 veces semana  
☐ 5 a 6 veces semana  
☐ 1 vez al día  
☐ 2 a 3 veces al día  
☐ 5 a 6 veces al día  
☐ más 6 veces al día

---

pasta

- ☐ Nunca o menos 1 vez al mes  
☐ 1 a 3 veces mes  
☐ 1 vez semana  
☒ 2 a 4 veces semana  
☐ 5 a 6 veces semana  
☐ 1 vez al día  
☐ 2 a 3 veces al día  
☐ 5 a 6 veces al día  
☐ más 6 veces al día

|                     |                                                                                                                                                                                                                                                                                                                                                                                                              |
|---------------------|--------------------------------------------------------------------------------------------------------------------------------------------------------------------------------------------------------------------------------------------------------------------------------------------------------------------------------------------------------------------------------------------------------------|
| pizza               | <input type="radio"/> Nunca o menos 1 vez al mes<br><input type="radio"/> 1 a 3 veces mes<br><input checked="" type="radio"/> 1 vez semana<br><input type="radio"/> 2 a 4 veces semana<br><input type="radio"/> 5 a 6 veces semana<br><input type="radio"/> 1 vez al día<br><input type="radio"/> 2 a 3 veces al día<br><input type="radio"/> 5 a 6 veces al día<br><input type="radio"/> más 6 veces al día |
| aceite oliva        | <input type="radio"/> Nunca o menos 1 vez al mes<br><input type="radio"/> 1 a 3 veces mes<br><input type="radio"/> 1 vez semana<br><input type="radio"/> 2 a 4 veces semana<br><input type="radio"/> 5 a 6 veces semana<br><input type="radio"/> 1 vez al día<br><input checked="" type="radio"/> 2 a 3 veces al día<br><input type="radio"/> 5 a 6 veces al día<br><input type="radio"/> más 6 veces al día |
| otros aceites       | <input checked="" type="radio"/> Nunca o menos 1 vez al mes<br><input type="radio"/> 1 a 3 veces mes<br><input type="radio"/> 1 vez semana<br><input type="radio"/> 2 a 4 veces semana<br><input type="radio"/> 5 a 6 veces semana<br><input type="radio"/> 1 vez al día<br><input type="radio"/> 2 a 3 veces al día<br><input type="radio"/> 5 a 6 veces al día<br><input type="radio"/> más 6 veces al día |
| margarina           | <input checked="" type="radio"/> Nunca o menos 1 vez al mes<br><input type="radio"/> 1 a 3 veces mes<br><input type="radio"/> 1 vez semana<br><input type="radio"/> 2 a 4 veces semana<br><input type="radio"/> 5 a 6 veces semana<br><input type="radio"/> 1 vez al día<br><input type="radio"/> 2 a 3 veces al día<br><input type="radio"/> 5 a 6 veces al día<br><input type="radio"/> más 6 veces al día |
| mantequilla         | <input checked="" type="radio"/> Nunca o menos 1 vez al mes<br><input type="radio"/> 1 a 3 veces mes<br><input type="radio"/> 1 vez semana<br><input type="radio"/> 2 a 4 veces semana<br><input type="radio"/> 5 a 6 veces semana<br><input type="radio"/> 1 vez al día<br><input type="radio"/> 2 a 3 veces al día<br><input type="radio"/> 5 a 6 veces al día<br><input type="radio"/> más 6 veces al día |
| galletas tipo maria | <input type="radio"/> Nunca o menos 1 vez al mes<br><input type="radio"/> 1 a 3 veces mes<br><input checked="" type="radio"/> 1 vez semana<br><input type="radio"/> 2 a 4 veces semana<br><input type="radio"/> 5 a 6 veces semana<br><input type="radio"/> 1 vez al día<br><input type="radio"/> 2 a 3 veces al día<br><input type="radio"/> 5 a 6 veces al día<br><input type="radio"/> más 6 veces al día |

|                           |                                                                                                                                                                                                                                                                                                                                                                                                              |
|---------------------------|--------------------------------------------------------------------------------------------------------------------------------------------------------------------------------------------------------------------------------------------------------------------------------------------------------------------------------------------------------------------------------------------------------------|
| galletas chocolate        | <input checked="" type="radio"/> Nunca o menos 1 vez al mes<br><input type="radio"/> 1 a 3 veces mes<br><input type="radio"/> 1 vez semana<br><input type="radio"/> 2 a 4 veces semana<br><input type="radio"/> 5 a 6 veces semana<br><input type="radio"/> 1 vez al día<br><input type="radio"/> 2 a 3 veces al día<br><input type="radio"/> 5 a 6 veces al día<br><input type="radio"/> más 6 veces al día |
| bollieria                 | <input type="radio"/> Nunca o menos 1 vez al mes<br><input type="radio"/> 1 a 3 veces mes<br><input checked="" type="radio"/> 1 vez semana<br><input type="radio"/> 2 a 4 veces semana<br><input type="radio"/> 5 a 6 veces semana<br><input type="radio"/> 1 vez al día<br><input type="radio"/> 2 a 3 veces al día<br><input type="radio"/> 5 a 6 veces al día<br><input type="radio"/> más 6 veces al día |
| chocolate o bombones      | <input type="radio"/> Nunca o menos 1 vez al mes<br><input type="radio"/> 1 a 3 veces mes<br><input checked="" type="radio"/> 1 vez semana<br><input type="radio"/> 2 a 4 veces semana<br><input type="radio"/> 5 a 6 veces semana<br><input type="radio"/> 1 vez al día<br><input type="radio"/> 2 a 3 veces al día<br><input type="radio"/> 5 a 6 veces al día<br><input type="radio"/> más 6 veces al día |
| chocolate polvo o colacao | <input type="radio"/> Nunca o menos 1 vez al mes<br><input type="radio"/> 1 a 3 veces mes<br><input checked="" type="radio"/> 1 vez semana<br><input type="radio"/> 2 a 4 veces semana<br><input type="radio"/> 5 a 6 veces semana<br><input type="radio"/> 1 vez al día<br><input type="radio"/> 2 a 3 veces al día<br><input type="radio"/> 5 a 6 veces al día<br><input type="radio"/> más 6 veces al día |
| vino tinto                | <input checked="" type="radio"/> Nunca o menos 1 vez al mes<br><input type="radio"/> 1 a 3 veces mes<br><input type="radio"/> 1 vez semana<br><input type="radio"/> 2 a 4 veces semana<br><input type="radio"/> 5 a 6 veces semana<br><input type="radio"/> 1 vez al día<br><input type="radio"/> 2 a 3 veces al día<br><input type="radio"/> 5 a 6 veces al día<br><input type="radio"/> más 6 veces al día |
| vino blanco               | <input checked="" type="radio"/> Nunca o menos 1 vez al mes<br><input type="radio"/> 1 a 3 veces mes<br><input type="radio"/> 1 vez semana<br><input type="radio"/> 2 a 4 veces semana<br><input type="radio"/> 5 a 6 veces semana<br><input type="radio"/> 1 vez al día<br><input type="radio"/> 2 a 3 veces al día<br><input type="radio"/> 5 a 6 veces al día<br><input type="radio"/> más 6 veces al día |

|                       |                                                                                                                                                                                                                                                                                                                                                                                                              |
|-----------------------|--------------------------------------------------------------------------------------------------------------------------------------------------------------------------------------------------------------------------------------------------------------------------------------------------------------------------------------------------------------------------------------------------------------|
| vino seco o vermut    | <input checked="" type="radio"/> Nunca o menos 1 vez al mes<br><input type="radio"/> 1 a 3 veces mes<br><input type="radio"/> 1 vez semana<br><input type="radio"/> 2 a 4 veces semana<br><input type="radio"/> 5 a 6 veces semana<br><input type="radio"/> 1 vez al día<br><input type="radio"/> 2 a 3 veces al día<br><input type="radio"/> 5 a 6 veces al día<br><input type="radio"/> más 6 veces al día |
| cerveza               | <input checked="" type="radio"/> Nunca o menos 1 vez al mes<br><input type="radio"/> 1 a 3 veces mes<br><input type="radio"/> 1 vez semana<br><input type="radio"/> 2 a 4 veces semana<br><input type="radio"/> 5 a 6 veces semana<br><input type="radio"/> 1 vez al día<br><input type="radio"/> 2 a 3 veces al día<br><input type="radio"/> 5 a 6 veces al día<br><input type="radio"/> más 6 veces al día |
| cerveza sin alcohol   | <input checked="" type="radio"/> Nunca o menos 1 vez al mes<br><input type="radio"/> 1 a 3 veces mes<br><input type="radio"/> 1 vez semana<br><input type="radio"/> 2 a 4 veces semana<br><input type="radio"/> 5 a 6 veces semana<br><input type="radio"/> 1 vez al día<br><input type="radio"/> 2 a 3 veces al día<br><input type="radio"/> 5 a 6 veces al día<br><input type="radio"/> más 6 veces al día |
| licores               | <input checked="" type="radio"/> Nunca o menos 1 vez al mes<br><input type="radio"/> 1 a 3 veces mes<br><input type="radio"/> 1 vez semana<br><input type="radio"/> 2 a 4 veces semana<br><input type="radio"/> 5 a 6 veces semana<br><input type="radio"/> 1 vez al día<br><input type="radio"/> 2 a 3 veces al día<br><input type="radio"/> 5 a 6 veces al día<br><input type="radio"/> más 6 veces al día |
| ginebra o ron o vodka | <input checked="" type="radio"/> Nunca o menos 1 vez al mes<br><input type="radio"/> 1 a 3 veces mes<br><input type="radio"/> 1 vez semana<br><input type="radio"/> 2 a 4 veces semana<br><input type="radio"/> 5 a 6 veces semana<br><input type="radio"/> 1 vez al día<br><input type="radio"/> 2 a 3 veces al día<br><input type="radio"/> 5 a 6 veces al día<br><input type="radio"/> más 6 veces al día |
| refresco normal       | <input checked="" type="radio"/> Nunca o menos 1 vez al mes<br><input type="radio"/> 1 a 3 veces mes<br><input type="radio"/> 1 vez semana<br><input type="radio"/> 2 a 4 veces semana<br><input type="radio"/> 5 a 6 veces semana<br><input type="radio"/> 1 vez al día<br><input type="radio"/> 2 a 3 veces al día<br><input type="radio"/> 5 a 6 veces al día<br><input type="radio"/> más 6 veces al día |

|                           |                                                                                                                                                                                                                                                                                                                                                                                                              |
|---------------------------|--------------------------------------------------------------------------------------------------------------------------------------------------------------------------------------------------------------------------------------------------------------------------------------------------------------------------------------------------------------------------------------------------------------|
| refresco sin azúcar       | <input checked="" type="radio"/> Nunca o menos 1 vez al mes<br><input type="radio"/> 1 a 3 veces mes<br><input type="radio"/> 1 vez semana<br><input type="radio"/> 2 a 4 veces semana<br><input type="radio"/> 5 a 6 veces semana<br><input type="radio"/> 1 vez al día<br><input type="radio"/> 2 a 3 veces al día<br><input type="radio"/> 5 a 6 veces al día<br><input type="radio"/> más 6 veces al día |
| Agua del grifo            | <input checked="" type="radio"/> Nunca o menos 1 vez al mes<br><input type="radio"/> 1 a 3 veces mes<br><input type="radio"/> 1 vez semana<br><input type="radio"/> 2 a 4 veces semana<br><input type="radio"/> 5 a 6 veces semana<br><input type="radio"/> 1 vez al día<br><input type="radio"/> 2 a 3 veces al día<br><input type="radio"/> 5 a 6 veces al día<br><input type="radio"/> más 6 veces al día |
| agua embotellada sin gas  | <input type="radio"/> Nunca o menos 1 vez al mes<br><input type="radio"/> 1 a 3 veces mes<br><input type="radio"/> 1 vez semana<br><input type="radio"/> 2 a 4 veces semana<br><input type="radio"/> 5 a 6 veces semana<br><input type="radio"/> 1 vez al día<br><input type="radio"/> 2 a 3 veces al día<br><input checked="" type="radio"/> 5 a 6 veces al día<br><input type="radio"/> más 6 veces al día |
| agua embotellada con gas  | <input checked="" type="radio"/> Nunca o menos 1 vez al mes<br><input type="radio"/> 1 a 3 veces mes<br><input type="radio"/> 1 vez semana<br><input type="radio"/> 2 a 4 veces semana<br><input type="radio"/> 5 a 6 veces semana<br><input type="radio"/> 1 vez al día<br><input type="radio"/> 2 a 3 veces al día<br><input type="radio"/> 5 a 6 veces al día<br><input type="radio"/> más 6 veces al día |
| zumos frutas embotellados | <input checked="" type="radio"/> Nunca o menos 1 vez al mes<br><input type="radio"/> 1 a 3 veces mes<br><input type="radio"/> 1 vez semana<br><input type="radio"/> 2 a 4 veces semana<br><input type="radio"/> 5 a 6 veces semana<br><input type="radio"/> 1 vez al día<br><input type="radio"/> 2 a 3 veces al día<br><input type="radio"/> 5 a 6 veces al día<br><input type="radio"/> más 6 veces al día |
| café                      | <input type="radio"/> Nunca o menos 1 vez al mes<br><input type="radio"/> 1 a 3 veces mes<br><input checked="" type="radio"/> 1 vez semana<br><input type="radio"/> 2 a 4 veces semana<br><input type="radio"/> 5 a 6 veces semana<br><input type="radio"/> 1 vez al día<br><input type="radio"/> 2 a 3 veces al día<br><input type="radio"/> 5 a 6 veces al día<br><input type="radio"/> más 6 veces al día |



---

cafe descafeinado

- ☐ Nunca o menos 1 vez al mes  
☐ 1 a 3 veces mes  
☐ 1 vez semana  
☒ 2 a 4 veces semana  
☐ 5 a 6 veces semana  
☐ 1 vez al día  
☐ 2 a 3 veces al día  
☐ 5 a 6 veces al día  
☐ más 6 veces al día

---

te o infusión

- ☐ Nunca o menos 1 vez al mes  
☐ 1 a 3 veces mes  
☐ 1 vez semana  
☐ 2 a 4 veces semana  
☐ 5 a 6 veces semana  
☐ 1 vez al día  
☒ 2 a 3 veces al día  
☐ 5 a 6 veces al día  
☐ más 6 veces al día

---

sopa o puré verduras

- ☐ Nunca o menos 1 vez al mes  
☐ 1 a 3 veces mes  
☒ 1 vez semana  
☐ 2 a 4 veces semana  
☐ 5 a 6 veces semana  
☐ 1 vez al día  
☐ 2 a 3 veces al día  
☐ 5 a 6 veces al día  
☐ más 6 veces al día

---

croquetas pollo jamón

- ☒ Nunca o menos 1 vez al mes  
☐ 1 a 3 veces mes  
☐ 1 vez semana  
☐ 2 a 4 veces semana  
☐ 5 a 6 veces semana  
☐ 1 vez al día  
☐ 2 a 3 veces al día  
☐ 5 a 6 veces al día  
☐ más 6 veces al día

---

croquetas pescado

- ☒ Nunca o menos 1 vez al mes  
☐ 1 a 3 veces mes  
☐ 1 vez semana  
☐ 2 a 4 veces semana  
☐ 5 a 6 veces semana  
☐ 1 vez al día  
☐ 2 a 3 veces al día  
☐ 5 a 6 veces al día  
☐ más 6 veces al día

---

mayonesa

- ☒ Nunca o menos 1 vez al mes  
☐ 1 a 3 veces mes  
☐ 1 vez semana  
☐ 2 a 4 veces semana  
☐ 5 a 6 veces semana  
☐ 1 vez al día  
☐ 2 a 3 veces al día  
☐ 5 a 6 veces al día  
☐ más 6 veces al día

|                  |                                                                                                                                                                                                                                                                                                                                                                                                              |
|------------------|--------------------------------------------------------------------------------------------------------------------------------------------------------------------------------------------------------------------------------------------------------------------------------------------------------------------------------------------------------------------------------------------------------------|
| salsa tomate     | <input checked="" type="radio"/> Nunca o menos 1 vez al mes<br><input type="radio"/> 1 a 3 veces mes<br><input type="radio"/> 1 vez semana<br><input type="radio"/> 2 a 4 veces semana<br><input type="radio"/> 5 a 6 veces semana<br><input type="radio"/> 1 vez al día<br><input type="radio"/> 2 a 3 veces al día<br><input type="radio"/> 5 a 6 veces al día<br><input type="radio"/> más 6 veces al día |
| ketchup          | <input checked="" type="radio"/> Nunca o menos 1 vez al mes<br><input type="radio"/> 1 a 3 veces mes<br><input type="radio"/> 1 vez semana<br><input type="radio"/> 2 a 4 veces semana<br><input type="radio"/> 5 a 6 veces semana<br><input type="radio"/> 1 vez al día<br><input type="radio"/> 2 a 3 veces al día<br><input type="radio"/> 5 a 6 veces al día<br><input type="radio"/> más 6 veces al día |
| sal              | <input checked="" type="radio"/> Nunca o menos 1 vez al mes<br><input type="radio"/> 1 a 3 veces mes<br><input type="radio"/> 1 vez semana<br><input type="radio"/> 2 a 4 veces semana<br><input type="radio"/> 5 a 6 veces semana<br><input type="radio"/> 1 vez al día<br><input type="radio"/> 2 a 3 veces al día<br><input type="radio"/> 5 a 6 veces al día<br><input type="radio"/> más 6 veces al día |
| ajo              | <input type="radio"/> Nunca o menos 1 vez al mes<br><input type="radio"/> 1 a 3 veces mes<br><input type="radio"/> 1 vez semana<br><input checked="" type="radio"/> 2 a 4 veces semana<br><input type="radio"/> 5 a 6 veces semana<br><input type="radio"/> 1 vez al día<br><input type="radio"/> 2 a 3 veces al día<br><input type="radio"/> 5 a 6 veces al día<br><input type="radio"/> más 6 veces al día |
| mermelada o miel | <input type="radio"/> Nunca o menos 1 vez al mes<br><input checked="" type="radio"/> 1 a 3 veces mes<br><input type="radio"/> 1 vez semana<br><input type="radio"/> 2 a 4 veces semana<br><input type="radio"/> 5 a 6 veces semana<br><input type="radio"/> 1 vez al día<br><input type="radio"/> 2 a 3 veces al día<br><input type="radio"/> 5 a 6 veces al día<br><input type="radio"/> más 6 veces al día |
| azúcar           | <input type="radio"/> Nunca o menos 1 vez al mes<br><input type="radio"/> 1 a 3 veces mes<br><input type="radio"/> 1 vez semana<br><input type="radio"/> 2 a 4 veces semana<br><input type="radio"/> 5 a 6 veces semana<br><input checked="" type="radio"/> 1 vez al día<br><input type="radio"/> 2 a 3 veces al día<br><input type="radio"/> 5 a 6 veces al día<br><input type="radio"/> más 6 veces al día |

|                                       |                                                                                                                                                                                                                                                                                                                                                                                                                                                                                                                               |
|---------------------------------------|-------------------------------------------------------------------------------------------------------------------------------------------------------------------------------------------------------------------------------------------------------------------------------------------------------------------------------------------------------------------------------------------------------------------------------------------------------------------------------------------------------------------------------|
| Otro alimento                         | [*DATA REMOVED*]                                                                                                                                                                                                                                                                                                                                                                                                                                                                                                              |
| suplementos vitamínicos               | <input checked="" type="radio"/> si<br><input type="radio"/> no                                                                                                                                                                                                                                                                                                                                                                                                                                                               |
| suplementos vitamínicos               | [*DATA REMOVED*]                                                                                                                                                                                                                                                                                                                                                                                                                                                                                                              |
| dieta previa                          | <input type="radio"/> si<br><input checked="" type="radio"/> no                                                                                                                                                                                                                                                                                                                                                                                                                                                               |
| motivo dieta                          | <input checked="" type="radio"/> no dieta<br><input type="radio"/> control peso<br><input type="radio"/> control colesterol<br><input type="radio"/> control diabetes<br><input type="radio"/> problemas estómago<br><input type="radio"/> problemas vesícula o hepáticos<br><input type="radio"/> HTA o cardiopatía<br><input type="radio"/> problemas renales<br><input type="radio"/> alergia alimentaria<br><input type="radio"/> ácido úrico elevado<br><input type="radio"/> vegetariana<br><input type="radio"/> otros |
| cambio alimentos año previo gestación | <input checked="" type="radio"/> si<br><input type="radio"/> no                                                                                                                                                                                                                                                                                                                                                                                                                                                               |
| cambio lácteos                        | <input type="radio"/> eliminado<br><input type="radio"/> disminuido<br><input type="radio"/> igual<br><input checked="" type="radio"/> aumentado<br><input type="radio"/> no sabe                                                                                                                                                                                                                                                                                                                                             |
| cambio huevos                         | <input type="radio"/> eliminado<br><input type="radio"/> disminuido<br><input checked="" type="radio"/> igual<br><input type="radio"/> aumentado<br><input type="radio"/> no sabe                                                                                                                                                                                                                                                                                                                                             |
| cambio carne                          | <input type="radio"/> eliminado<br><input type="radio"/> disminuido<br><input checked="" type="radio"/> igual<br><input type="radio"/> aumentado<br><input type="radio"/> no sabe                                                                                                                                                                                                                                                                                                                                             |
| cambio pescado                        | <input type="radio"/> eliminado<br><input type="radio"/> disminuido<br><input type="radio"/> igual<br><input checked="" type="radio"/> aumentado<br><input type="radio"/> no sabe                                                                                                                                                                                                                                                                                                                                             |
| cambio verduras                       | <input type="radio"/> eliminado<br><input type="radio"/> disminuido<br><input type="radio"/> igual<br><input checked="" type="radio"/> aumentado<br><input type="radio"/> no sabe                                                                                                                                                                                                                                                                                                                                             |

|                            |                                                                                                                                                                                                                        |
|----------------------------|------------------------------------------------------------------------------------------------------------------------------------------------------------------------------------------------------------------------|
| cambio legumbres           | <input type="radio"/> eliminado<br><input type="radio"/> disminuido<br><input type="radio"/> igual<br><input checked="" type="radio"/> aumentado<br><input type="radio"/> no sabe                                      |
| cambio fruta               | <input type="radio"/> eliminado<br><input type="radio"/> disminuido<br><input type="radio"/> igual<br><input checked="" type="radio"/> aumentado<br><input type="radio"/> no sabe                                      |
| cambio pan                 | <input type="radio"/> eliminado<br><input type="radio"/> disminuido<br><input checked="" type="radio"/> igual<br><input type="radio"/> aumentado<br><input type="radio"/> no sabe                                      |
| cambio aceite oliva        | <input type="radio"/> eliminado<br><input type="radio"/> disminuido<br><input type="radio"/> igual<br><input checked="" type="radio"/> aumentado<br><input type="radio"/> no sabe                                      |
| cambio mante o margarina   | <input type="radio"/> eliminado<br><input checked="" type="radio"/> disminuido<br><input type="radio"/> igual<br><input type="radio"/> aumentado<br><input type="radio"/> no sabe                                      |
| cambio azúcar y dulces     | <input type="radio"/> eliminado<br><input checked="" type="radio"/> disminuido<br><input type="radio"/> igual<br><input type="radio"/> aumentado<br><input type="radio"/> no sabe                                      |
| cambio bebidas alcohólicas | <input checked="" type="radio"/> eliminado<br><input type="radio"/> disminuido<br><input type="radio"/> igual<br><input type="radio"/> aumentado<br><input type="radio"/> no sabe                                      |
| frecuencia comidas fritas  | <input type="radio"/> a diario<br><input type="radio"/> 5 a 6 veces semana<br><input checked="" type="radio"/> 2 a 4 veces semana<br><input type="radio"/> 1 vez semana<br><input type="radio"/> menos de 1 vez semana |
| carne                      | <input type="radio"/> no como<br><input type="radio"/> cruda<br><input type="radio"/> poco hecha<br><input type="radio"/> hecha<br><input checked="" type="radio"/> muy hecha                                          |
| grasa visible carne        | <input checked="" type="radio"/> quita toda<br><input type="radio"/> quita mayoría<br><input type="radio"/> quita un poco<br><input type="radio"/> no quita nada                                                       |

|                                |                                                                                                                                                                                                                                                          |
|--------------------------------|----------------------------------------------------------------------------------------------------------------------------------------------------------------------------------------------------------------------------------------------------------|
| cocina carne                   | <input checked="" type="radio"/> a la plancha<br><input type="radio"/> a la parrilla<br><input type="radio"/> asada<br><input type="radio"/> frita<br><input type="radio"/> guisada                                                                      |
| tostado quemado carne          | <input checked="" type="radio"/> nunca<br><input type="radio"/> 1 vez mes<br><input type="radio"/> 2 a 3 veces mes<br><input type="radio"/> 1 vez semana<br><input type="radio"/> 2 a 3 semanas                                                          |
| tostado quemado pescado        | <input checked="" type="radio"/> nunca<br><input type="radio"/> 1 vez mes<br><input type="radio"/> 2 a 3 veces mes<br><input type="radio"/> 1 vez semana<br><input type="radio"/> 2 a 3 semanas                                                          |
| socarrat paella                | <input type="radio"/> nunca<br><input type="radio"/> 1 vez mes<br><input checked="" type="radio"/> 2 a 3 veces mes<br><input type="radio"/> 1 vez semana<br><input type="radio"/> 2 a 3 semanas                                                          |
| grasa o aceite cocinar         | <input type="radio"/> mantequilla<br><input type="radio"/> margarina<br><input checked="" type="radio"/> aceite oliva<br><input type="radio"/> aceite oliva virgen extra<br><input type="radio"/> aceite vegetal<br><input type="radio"/> mezcla aceites |
| grasa aceite aliñar            | <input type="radio"/> mantequilla<br><input type="radio"/> margarina<br><input type="radio"/> aceite oliva<br><input checked="" type="radio"/> aceite oliva virgen extra<br><input type="radio"/> aceite vegetal<br><input type="radio"/> mezcla aceites |
| grasa aceite freir             | <input type="radio"/> mantequilla<br><input type="radio"/> margarina<br><input checked="" type="radio"/> aceite oliva<br><input type="radio"/> aceite oliva virgen extra<br><input type="radio"/> aceite vegetal<br><input type="radio"/> mezcla aceites |
| Ejercicio cuestionario         | <input checked="" type="radio"/> si<br><input type="radio"/> no                                                                                                                                                                                          |
| horas de sueño incluido siesta | [*DATA REMOVED*]                                                                                                                                                                                                                                         |
| minutos siesta                 | [*DATA REMOVED*]                                                                                                                                                                                                                                         |
| horas televisión semana        | [*DATA REMOVED*]                                                                                                                                                                                                                                         |

|                                        |                                                                                                                                                                                                                                                                                                                                                                           |
|----------------------------------------|---------------------------------------------------------------------------------------------------------------------------------------------------------------------------------------------------------------------------------------------------------------------------------------------------------------------------------------------------------------------------|
| actividad trabajo                      | <input checked="" type="radio"/> casi siempre sentado<br><input type="radio"/> sentado 50 por cien<br><input type="radio"/> casi siempre de pie, quieto<br><input type="radio"/> casi siempre levantado caminando y llevando pocas cosas<br><input type="radio"/> casi siempre levantado, caminando y llevado muchas cosas<br><input type="radio"/> trabajo manual pesado |
| tiempo caminar o bici al día           | <input type="radio"/> casi nunca<br><input type="radio"/> menos 20min día<br><input type="radio"/> 20 a 40 min día<br><input type="radio"/> 40 a 60 min día<br><input checked="" type="radio"/> 1h o 1h y media día<br><input type="radio"/> más de 1h y media al día                                                                                                     |
| tiempo tareas casa al día              | <input type="radio"/> menos de 1h día<br><input checked="" type="radio"/> 1 a 2h día<br><input type="radio"/> 3 a 4h día<br><input type="radio"/> 5 a 6h día<br><input type="radio"/> 7 a 8h día<br><input type="radio"/> más de 8h día                                                                                                                                   |
| tiempo libre televisión ordenador leer | <input type="radio"/> menos 1h día<br><input type="radio"/> 1h día<br><input checked="" type="radio"/> 2h día<br><input type="radio"/> 3h día<br><input type="radio"/> 4h día<br><input type="radio"/> 5 a 6h día<br><input type="radio"/> mas 6h día                                                                                                                     |
| tiempo libre ejercicio o deporte       | <input type="radio"/> menos 1h semana<br><input type="radio"/> 1h semana<br><input type="radio"/> 2h semana<br><input type="radio"/> 3h semana<br><input type="radio"/> 4 a 5h semana<br><input checked="" type="radio"/> mas 5h semana                                                                                                                                   |
| como se considera                      | <input type="radio"/> sedentaria<br><input type="radio"/> poco activa<br><input type="radio"/> moderadamente activa<br><input checked="" type="radio"/> bastante activa<br><input type="radio"/> muy activa<br><input type="radio"/> no sabe                                                                                                                              |
| FUR                                    | [*DATA REMOVED*]                                                                                                                                                                                                                                                                                                                                                          |
| Semanas gestación 2T                   | _____                                                                                                                                                                                                                                                                                                                                                                     |
| Días gestación 2T                      | _____                                                                                                                                                                                                                                                                                                                                                                     |
| DBP 2T                                 | _____                                                                                                                                                                                                                                                                                                                                                                     |
| CC 2T                                  | _____                                                                                                                                                                                                                                                                                                                                                                     |

|                                                   |                                                                                                                                                                                                 |
|---------------------------------------------------|-------------------------------------------------------------------------------------------------------------------------------------------------------------------------------------------------|
| AC 2T                                             |                                                                                                                                                                                                 |
| LF 2T                                             |                                                                                                                                                                                                 |
| PFE 2T (Hadlock)                                  |                                                                                                                                                                                                 |
| Semanas gestación 3T                              | [*DATA REMOVED*]                                                                                                                                                                                |
| días 3T                                           | [*DATA REMOVED*]                                                                                                                                                                                |
| DBP 3T                                            | [*DATA REMOVED*]                                                                                                                                                                                |
| CC 3T                                             | [*DATA REMOVED*]                                                                                                                                                                                |
| AC 3T                                             | [*DATA REMOVED*]                                                                                                                                                                                |
| LF 3T                                             | [*DATA REMOVED*]                                                                                                                                                                                |
| PFE 3T (Hadlock)                                  | [*DATA REMOVED*]                                                                                                                                                                                |
| Semanas de gestación final                        | [*DATA REMOVED*]                                                                                                                                                                                |
| días gestación final                              | [*DATA REMOVED*]                                                                                                                                                                                |
| Localización placenta                             | <input checked="" type="radio"/> anterior<br><input type="radio"/> lateral derecha<br><input type="radio"/> lateral izquierda<br><input type="radio"/> posterior<br><input type="radio"/> fondo |
| Presentación longitudinal cefálica                | <input type="radio"/> no<br><input checked="" type="radio"/> si                                                                                                                                 |
| Dorso                                             | <input type="radio"/> izquierda anterior<br><input checked="" type="radio"/> izquierda posterior<br><input type="radio"/> derecha anterior<br><input type="radio"/> derecha posterior           |
| diámetro biparietal                               | [*DATA REMOVED*]                                                                                                                                                                                |
| Circunferencia craneal                            | [*DATA REMOVED*]                                                                                                                                                                                |
| Circunferencia abdominal                          | [*DATA REMOVED*]                                                                                                                                                                                |
| Longitud de femur                                 | [*DATA REMOVED*]                                                                                                                                                                                |
| tejido celular subcutáneo a nivel del muslo en mm | [*DATA REMOVED*]                                                                                                                                                                                |
| tejido celular subcutáneo en abdomen en mm        | [*DATA REMOVED*]                                                                                                                                                                                |

|                                               |                                                                                                                                                          |
|-----------------------------------------------|----------------------------------------------------------------------------------------------------------------------------------------------------------|
| Volumen del muslo en cm3                      | [*DATA REMOVED*]                                                                                                                                         |
| Peso fetal estimado según fórmula de Hadlock  | [*DATA REMOVED*]                                                                                                                                         |
| Percentil                                     | [*DATA REMOVED*]                                                                                                                                         |
| Peso fetal estimado según fórmula de Scioscia | _____                                                                                                                                                    |
| Peso fetal estimado según fórmula de LEE      | _____                                                                                                                                                    |
| Tipo de parto                                 | <input type="radio"/> eutocico<br><input checked="" type="radio"/> instrumentado/ventosa<br><input type="radio"/> cesarea                                |
| fecha de nacimiento                           | [*DATA REMOVED*]                                                                                                                                         |
| Días entre exploración y nacimiento           | [*DATA REMOVED*]                                                                                                                                         |
| Peso RN en g                                  | [*DATA REMOVED*]                                                                                                                                         |
| sexo                                          | <input type="radio"/> mujer<br><input checked="" type="radio"/> hombre                                                                                   |
| Apgar 1 minuto                                | [*DATA REMOVED*]                                                                                                                                         |
| Apgar 5 minutos                               | [*DATA REMOVED*]                                                                                                                                         |
| Apgar 10 minutos                              | _____                                                                                                                                                    |
| antecedente Covid durante gestación           | <input type="radio"/> Yes<br><input checked="" type="radio"/> No                                                                                         |
| Nivel de estudios                             | <input type="radio"/> ninguno<br><input type="radio"/> primarios<br><input type="radio"/> secundarios<br><input checked="" type="radio"/> universitarios |



# Base\_datos\_estimacion\_peso\_fetal

|                                       |                                                                                                                                                                                                                                                                                      |
|---------------------------------------|--------------------------------------------------------------------------------------------------------------------------------------------------------------------------------------------------------------------------------------------------------------------------------------|
| Número de identificación participante | 77                                                                                                                                                                                                                                                                                   |
| CODIGO PARTICIPANTE                   |                                                                                                                                                                                                                                                                                      |
| Edad                                  | [*DATA REMOVED*]                                                                                                                                                                                                                                                                     |
| Gestaciones                           | <input checked="" type="radio"/> 1<br><input type="radio"/> 2<br><input type="radio"/> 3<br><input type="radio"/> mas de 3                                                                                                                                                           |
| partos                                | <input checked="" type="radio"/> 0<br><input type="radio"/> 1<br><input type="radio"/> 2<br><input type="radio"/> 3<br><input type="radio"/> mas de 3                                                                                                                                |
| cesáreas                              | <input checked="" type="radio"/> 0<br><input type="radio"/> 1<br><input type="radio"/> 2<br><input type="radio"/> 3<br><input type="radio"/> mas de 3                                                                                                                                |
| Abortos                               | <input checked="" type="radio"/> 0<br><input type="radio"/> 1<br><input type="radio"/> 2<br><input type="radio"/> 3<br><input type="radio"/> mas de 3                                                                                                                                |
| Tipo de gestacion                     | <input checked="" type="radio"/> espontanea<br><input type="radio"/> IAC inseminación artificial conyuge<br><input type="radio"/> IAD inseminación artificial donante<br><input type="radio"/> FIV Fecundación in Vitro<br><input type="radio"/> Ovodon FIV con donación de ovocitos |
| peso previo a embarazo                | [*DATA REMOVED*]                                                                                                                                                                                                                                                                     |
| Ganancia ponderal embarazo            | [*DATA REMOVED*]                                                                                                                                                                                                                                                                     |
| Talla madre                           | [*DATA REMOVED*]                                                                                                                                                                                                                                                                     |
| IMC previo embarazo                   | 23.384353741496604                                                                                                                                                                                                                                                                   |
| Patología obstétrica                  | <input checked="" type="radio"/> no<br><input type="radio"/> si                                                                                                                                                                                                                      |
| Diabetes pregestacional               | <input checked="" type="radio"/> no<br><input type="radio"/> si                                                                                                                                                                                                                      |
| Diabetes gestacional                  | <input checked="" type="radio"/> no<br><input type="radio"/> si                                                                                                                                                                                                                      |

|                                            |                                                                                                                                                                                      |
|--------------------------------------------|--------------------------------------------------------------------------------------------------------------------------------------------------------------------------------------|
| Diabetes gestacional con insulina          | <input checked="" type="radio"/> no<br><input type="radio"/> si                                                                                                                      |
| Diabetes gestacional con dieta y ejercicio | <input checked="" type="radio"/> no<br><input type="radio"/> si                                                                                                                      |
| Percentil fetos previos                    | <input checked="" type="radio"/> Nada<br><input type="radio"/> percentil menor de 10<br><input type="radio"/> percentil entre 10 y 90<br><input type="radio"/> percentil mayor de 90 |
| Exfumadora                                 | <input type="radio"/> Nada<br><input checked="" type="radio"/> menos de 5 años<br><input type="radio"/> 5 a 10 años<br><input type="radio"/> mayor o igual a 10 años                 |
| Hábito tabáquico                           | <input checked="" type="radio"/> no<br><input type="radio"/> si                                                                                                                      |
| fumadora                                   | [*DATA REMOVED*]                                                                                                                                                                     |
| Consumo otros tóxicos                      | <input checked="" type="radio"/> no<br><input type="radio"/> si                                                                                                                      |
| Hb 1T                                      | _____                                                                                                                                                                                |
| Htc 1T                                     | _____                                                                                                                                                                                |
| Hb 2T                                      | _____                                                                                                                                                                                |
| HTC 2T                                     | _____                                                                                                                                                                                |
| Hb 3T                                      | _____                                                                                                                                                                                |
| HTC 3T                                     | _____                                                                                                                                                                                |
| Suplemento FE oral                         | <input checked="" type="radio"/> si<br><input type="radio"/> no                                                                                                                      |
| Suplemento fe iv                           | <input type="radio"/> si<br><input checked="" type="radio"/> no                                                                                                                      |
| Transfusión                                | <input checked="" type="radio"/> no<br><input type="radio"/> si                                                                                                                      |
| Solicitada Vit D                           | <input checked="" type="radio"/> no<br><input type="radio"/> si                                                                                                                      |

|                       |                                                                                                                                                                                                                                                                                                                                                                                                              |
|-----------------------|--------------------------------------------------------------------------------------------------------------------------------------------------------------------------------------------------------------------------------------------------------------------------------------------------------------------------------------------------------------------------------------------------------------|
| Deficit vit D         | <input type="radio"/> no<br><input type="radio"/> si                                                                                                                                                                                                                                                                                                                                                         |
| Suplemento vit D      | <input type="radio"/> si<br><input type="radio"/> no                                                                                                                                                                                                                                                                                                                                                         |
| Dieta, cuestionario   | <input checked="" type="radio"/> si<br><input type="radio"/> no                                                                                                                                                                                                                                                                                                                                              |
| Leche entera          | <input checked="" type="radio"/> Nunca o menos 1 vez al mes<br><input type="radio"/> 1 a 3 veces mes<br><input type="radio"/> 1 vez semana<br><input type="radio"/> 2 a 4 veces semana<br><input type="radio"/> 5 a 6 veces semana<br><input type="radio"/> 1 vez al día<br><input type="radio"/> 2 a 3 veces al día<br><input type="radio"/> 5 a 6 veces al día<br><input type="radio"/> más 6 veces al día |
| Leche semidesnatada   | <input type="radio"/> Nunca o menos 1 vez al mes<br><input type="radio"/> 1 a 3 veces mes<br><input checked="" type="radio"/> 1 vez semana<br><input type="radio"/> 2 a 4 veces semana<br><input type="radio"/> 5 a 6 veces semana<br><input type="radio"/> 1 vez al día<br><input type="radio"/> 2 a 3 veces al día<br><input type="radio"/> 5 a 6 veces al día<br><input type="radio"/> mas 6 veces al día |
| Leche desnatada       | <input type="radio"/> Nunca o menos 1 vez al mes<br><input type="radio"/> 1 a 3 veces mes<br><input type="radio"/> 1 vez semana<br><input type="radio"/> 2 a 4 veces semana<br><input type="radio"/> 5 a 6 veces semana<br><input checked="" type="radio"/> 1 vez al día<br><input type="radio"/> 2 a 3 veces al día<br><input type="radio"/> 5 a 6 veces al día<br><input type="radio"/> más 6 veces al día |
| Leche condensada      | <input checked="" type="radio"/> Nunca o menos 1 vez al mes<br><input type="radio"/> 1 a 3 veces mes<br><input type="radio"/> 1 vez semana<br><input type="radio"/> 2 a 4 veces semana<br><input type="radio"/> 5 a 6 veces semana<br><input type="radio"/> 1 vez al día<br><input type="radio"/> 2 a 3 veces al día<br><input type="radio"/> 5 a 6 veces al día<br><input type="radio"/> más 6 veces al día |
| nata o crema de leche | <input checked="" type="radio"/> Nunca o menos 1 vez al mes<br><input type="radio"/> 1 a 3 veces mes<br><input type="radio"/> 1 vez semana<br><input type="radio"/> 2 a 4 veces semana<br><input type="radio"/> 5 a 6 veces semana<br><input type="radio"/> 1 vez al día<br><input type="radio"/> 2 a 3 veces al día<br><input type="radio"/> 5 a 6 veces al día<br><input type="radio"/> más 6 veces al día |

|                                             |                                                                                                                                                                                                                                                                                                                                                                                                              |
|---------------------------------------------|--------------------------------------------------------------------------------------------------------------------------------------------------------------------------------------------------------------------------------------------------------------------------------------------------------------------------------------------------------------------------------------------------------------|
| Yogurt Entero                               | <input checked="" type="radio"/> Nunca o menos 1 vez al mes<br><input type="radio"/> 1 a 3 veces mes<br><input type="radio"/> 1 vez semana<br><input type="radio"/> 2 a 4 veces semana<br><input type="radio"/> 5 a 6 veces semana<br><input type="radio"/> 1 vez al día<br><input type="radio"/> 2 a 3 veces al día<br><input type="radio"/> 5 a 6 veces al día<br><input type="radio"/> más 6 veces al día |
| Yogurt desnatado                            | <input type="radio"/> Nunca o menos 1 vez al mes<br><input type="radio"/> 1 a 3 veces mes<br><input checked="" type="radio"/> 1 vez semana<br><input type="radio"/> 2 a 4 veces semana<br><input type="radio"/> 5 a 6 veces semana<br><input type="radio"/> 1 vez al día<br><input type="radio"/> 2 a 3 veces al día<br><input type="radio"/> 5 a 6 veces al día<br><input type="radio"/> más 6 veces al día |
| 100g requesón o queso blando o queso fresco | <input type="radio"/> Nunca o menos 1 vez al mes<br><input type="radio"/> 1 a 3 veces mes<br><input type="radio"/> 1 vez semana<br><input type="radio"/> 2 a 4 veces semana<br><input type="radio"/> 5 a 6 veces semana<br><input type="radio"/> 1 vez al día<br><input checked="" type="radio"/> 2 a 3 veces al día<br><input type="radio"/> 5 a 6 veces al día<br><input type="radio"/> más 6 veces al día |
| queso curado o semicurado o cremoso         | <input type="radio"/> Nunca o menos 1 vez al mes<br><input type="radio"/> 1 a 3 veces mes<br><input type="radio"/> 1 vez semana<br><input type="radio"/> 2 a 4 veces semana<br><input type="radio"/> 5 a 6 veces semana<br><input checked="" type="radio"/> 1 vez al día<br><input type="radio"/> 2 a 3 veces al día<br><input type="radio"/> 5 a 6 veces al día<br><input type="radio"/> más 6 veces al día |
| natillas flan pudding                       | <input type="radio"/> Nunca o menos 1 vez al mes<br><input checked="" type="radio"/> 1 a 3 veces mes<br><input type="radio"/> 1 vez semana<br><input type="radio"/> 2 a 4 veces semana<br><input type="radio"/> 5 a 6 veces semana<br><input type="radio"/> 1 vez al día<br><input type="radio"/> 2 a 3 veces al día<br><input type="radio"/> 5 a 6 veces al día<br><input type="radio"/> más 6 veces al día |
| Helado                                      | <input type="radio"/> Nunca o menos 1 vez al mes<br><input checked="" type="radio"/> 1 a 3 veces mes<br><input type="radio"/> 1 vez semana<br><input type="radio"/> 2 a 4 veces semana<br><input type="radio"/> 5 a 6 veces semana<br><input type="radio"/> 1 vez al día<br><input type="radio"/> 2 a 3 veces al día<br><input type="radio"/> 5 a 6 veces al día<br><input type="radio"/> más 6 veces al día |

|                                      |                                                                                                                                                                                                                                                                                                                                                                                                              |
|--------------------------------------|--------------------------------------------------------------------------------------------------------------------------------------------------------------------------------------------------------------------------------------------------------------------------------------------------------------------------------------------------------------------------------------------------------------|
| huevo                                | <input type="radio"/> Nunca o menos 1 vez al mes<br><input type="radio"/> 1 a 3 veces mes<br><input checked="" type="radio"/> 1 vez semana<br><input type="radio"/> 2 a 4 veces semana<br><input type="radio"/> 5 a 6 veces semana<br><input type="radio"/> 1 vez al día<br><input type="radio"/> 2 a 3 veces al día<br><input type="radio"/> 5 a 6 veces al día<br><input type="radio"/> más 6 veces al día |
| Pollo con piel                       | <input type="radio"/> Nunca o menos 1 vez al mes<br><input checked="" type="radio"/> 1 a 3 veces mes<br><input type="radio"/> 1 vez semana<br><input type="radio"/> 2 a 4 veces semana<br><input type="radio"/> 5 a 6 veces semana<br><input type="radio"/> 1 vez al día<br><input type="radio"/> 2 a 3 veces al día<br><input type="radio"/> 5 a 6 veces al día<br><input type="radio"/> más 6 veces al día |
| pollo sin piel                       | <input type="radio"/> Nunca o menos 1 vez al mes<br><input checked="" type="radio"/> 1 a 3 veces mes<br><input type="radio"/> 1 vez semana<br><input type="radio"/> 2 a 4 veces semana<br><input type="radio"/> 5 a 6 veces semana<br><input type="radio"/> 1 vez al día<br><input type="radio"/> 2 a 3 veces al día<br><input type="radio"/> 5 a 6 veces al día<br><input type="radio"/> más 6 veces al día |
| Ternera o cerdo o cordero            | <input type="radio"/> Nunca o menos 1 vez al mes<br><input type="radio"/> 1 a 3 veces mes<br><input checked="" type="radio"/> 1 vez semana<br><input type="radio"/> 2 a 4 veces semana<br><input type="radio"/> 5 a 6 veces semana<br><input type="radio"/> 1 vez al día<br><input type="radio"/> 2 a 3 veces al día<br><input type="radio"/> 5 a 6 veces al día<br><input type="radio"/> más 6 veces al día |
| carne caza: Conejo o codorniz o pato | <input type="radio"/> Nunca o menos 1 vez al mes<br><input checked="" type="radio"/> 1 a 3 veces mes<br><input type="radio"/> 1 vez semana<br><input type="radio"/> 2 a 4 veces semana<br><input type="radio"/> 5 a 6 veces semana<br><input type="radio"/> 1 vez al día<br><input type="radio"/> 2 a 3 veces al día<br><input type="radio"/> 5 a 6 veces al día<br><input type="radio"/> más 6 veces al día |
| Hígado de ternera o cerdo o pollo    | <input checked="" type="radio"/> Nunca o menos 1 vez al mes<br><input type="radio"/> 1 a 3 veces mes<br><input type="radio"/> 1 vez semana<br><input type="radio"/> 2 a 4 veces semana<br><input type="radio"/> 5 a 6 veces semana<br><input type="radio"/> 1 vez al día<br><input type="radio"/> 2 a 3 veces al día<br><input type="radio"/> 5 a 6 veces al día<br><input type="radio"/> más 6 veces al día |

|                     |                                                                                                                                                                                                                                                                                                                                                                                                              |
|---------------------|--------------------------------------------------------------------------------------------------------------------------------------------------------------------------------------------------------------------------------------------------------------------------------------------------------------------------------------------------------------------------------------------------------------|
| Vísceras            | <input checked="" type="radio"/> Nunca o menos 1 vez al mes<br><input type="radio"/> 1 a 3 veces mes<br><input type="radio"/> 1 vez semana<br><input type="radio"/> 2 a 4 veces semana<br><input type="radio"/> 5 a 6 veces semana<br><input type="radio"/> 1 vez al día<br><input type="radio"/> 2 a 3 veces al día<br><input type="radio"/> 5 a 6 veces al día<br><input type="radio"/> más 6 veces al día |
| Embutido            | <input checked="" type="radio"/> Nunca o menos 1 vez al mes<br><input type="radio"/> 1 a 3 veces mes<br><input type="radio"/> 1 vez semana<br><input type="radio"/> 2 a 4 veces semana<br><input type="radio"/> 5 a 6 veces semana<br><input type="radio"/> 1 vez al día<br><input type="radio"/> 2 a 3 veces al día<br><input type="radio"/> 5 a 6 veces al día<br><input type="radio"/> más 6 veces al día |
| Salchicha o similar | <input checked="" type="radio"/> Nunca o menos 1 vez al mes<br><input type="radio"/> 1 a 3 veces mes<br><input type="radio"/> 1 vez semana<br><input type="radio"/> 2 a 4 veces semana<br><input type="radio"/> 5 a 6 veces semana<br><input type="radio"/> 1 vez al día<br><input type="radio"/> 2 a 3 veces al día<br><input type="radio"/> 5 a 6 veces al día<br><input type="radio"/> más 6 veces al día |
| Pate o foiegras     | <input checked="" type="radio"/> Nunca o menos 1 vez al mes<br><input type="radio"/> 1 a 3 veces mes<br><input type="radio"/> 1 vez semana<br><input type="radio"/> 2 a 4 veces semana<br><input type="radio"/> 5 a 6 veces semana<br><input type="radio"/> 1 vez al día<br><input type="radio"/> 2 a 3 veces al día<br><input type="radio"/> 5 a 6 veces al día<br><input type="radio"/> más 6 veces al día |
| Hamburguesa         | <input checked="" type="radio"/> Nunca o menos 1 vez al mes<br><input type="radio"/> 1 a 3 veces mes<br><input type="radio"/> 1 vez semana<br><input type="radio"/> 2 a 4 veces semana<br><input type="radio"/> 5 a 6 veces semana<br><input type="radio"/> 1 vez al día<br><input type="radio"/> 2 a 3 veces al día<br><input type="radio"/> 5 a 6 veces al día<br><input type="radio"/> más 6 veces al día |
| tocino o bacon      | <input type="radio"/> Nunca o menos 1 vez al mes<br><input checked="" type="radio"/> 1 a 3 veces mes<br><input type="radio"/> 1 vez semana<br><input type="radio"/> 2 a 4 veces semana<br><input type="radio"/> 5 a 6 veces semana<br><input type="radio"/> 1 vez al día<br><input type="radio"/> 2 a 3 veces al día<br><input type="radio"/> 5 a 6 veces al día<br><input type="radio"/> más 6 veces al día |

---

|               |                                                                                                                                                                                                                                                                                                                                                                                                              |
|---------------|--------------------------------------------------------------------------------------------------------------------------------------------------------------------------------------------------------------------------------------------------------------------------------------------------------------------------------------------------------------------------------------------------------------|
| Pescado frito | <input checked="" type="radio"/> Nunca o menos 1 vez al mes<br><input type="radio"/> 1 a 3 veces mes<br><input type="radio"/> 1 vez semana<br><input type="radio"/> 2 a 4 veces semana<br><input type="radio"/> 5 a 6 veces semana<br><input type="radio"/> 1 vez al día<br><input type="radio"/> 2 a 3 veces al día<br><input type="radio"/> 5 a 6 veces al día<br><input type="radio"/> más 6 veces al día |
|---------------|--------------------------------------------------------------------------------------------------------------------------------------------------------------------------------------------------------------------------------------------------------------------------------------------------------------------------------------------------------------------------------------------------------------|

---

|                        |                                                                                                                                                                                                                                                                                                                                                                                                              |
|------------------------|--------------------------------------------------------------------------------------------------------------------------------------------------------------------------------------------------------------------------------------------------------------------------------------------------------------------------------------------------------------------------------------------------------------|
| pescado hervido blanco | <input type="radio"/> Nunca o menos 1 vez al mes<br><input type="radio"/> 1 a 3 veces mes<br><input checked="" type="radio"/> 1 vez semana<br><input type="radio"/> 2 a 4 veces semana<br><input type="radio"/> 5 a 6 veces semana<br><input type="radio"/> 1 vez al día<br><input type="radio"/> 2 a 3 veces al día<br><input type="radio"/> 5 a 6 veces al día<br><input type="radio"/> más 6 veces al día |
|------------------------|--------------------------------------------------------------------------------------------------------------------------------------------------------------------------------------------------------------------------------------------------------------------------------------------------------------------------------------------------------------------------------------------------------------|

---

|                      |                                                                                                                                                                                                                                                                                                                                                                                                              |
|----------------------|--------------------------------------------------------------------------------------------------------------------------------------------------------------------------------------------------------------------------------------------------------------------------------------------------------------------------------------------------------------------------------------------------------------|
| pescado hervido azul | <input type="radio"/> Nunca o menos 1 vez al mes<br><input checked="" type="radio"/> 1 a 3 veces mes<br><input type="radio"/> 1 vez semana<br><input type="radio"/> 2 a 4 veces semana<br><input type="radio"/> 5 a 6 veces semana<br><input type="radio"/> 1 vez al día<br><input type="radio"/> 2 a 3 veces al día<br><input type="radio"/> 5 a 6 veces al día<br><input type="radio"/> más 6 veces al día |
|----------------------|--------------------------------------------------------------------------------------------------------------------------------------------------------------------------------------------------------------------------------------------------------------------------------------------------------------------------------------------------------------------------------------------------------------|

---

|                    |                                                                                                                                                                                                                                                                                                                                                                                                              |
|--------------------|--------------------------------------------------------------------------------------------------------------------------------------------------------------------------------------------------------------------------------------------------------------------------------------------------------------------------------------------------------------------------------------------------------------|
| otros pescado azul | <input type="radio"/> Nunca o menos 1 vez al mes<br><input type="radio"/> 1 a 3 veces mes<br><input checked="" type="radio"/> 1 vez semana<br><input type="radio"/> 2 a 4 veces semana<br><input type="radio"/> 5 a 6 veces semana<br><input type="radio"/> 1 vez al día<br><input type="radio"/> 2 a 3 veces al día<br><input type="radio"/> 5 a 6 veces al día<br><input type="radio"/> más 6 veces al día |
|--------------------|--------------------------------------------------------------------------------------------------------------------------------------------------------------------------------------------------------------------------------------------------------------------------------------------------------------------------------------------------------------------------------------------------------------|

---

|               |                                                                                                                                                                                                                                                                                                                                                                                                              |
|---------------|--------------------------------------------------------------------------------------------------------------------------------------------------------------------------------------------------------------------------------------------------------------------------------------------------------------------------------------------------------------------------------------------------------------|
| atun conserva | <input type="radio"/> Nunca o menos 1 vez al mes<br><input checked="" type="radio"/> 1 a 3 veces mes<br><input type="radio"/> 1 vez semana<br><input type="radio"/> 2 a 4 veces semana<br><input type="radio"/> 5 a 6 veces semana<br><input type="radio"/> 1 vez al día<br><input type="radio"/> 2 a 3 veces al día<br><input type="radio"/> 5 a 6 veces al día<br><input type="radio"/> más 6 veces al día |
|---------------|--------------------------------------------------------------------------------------------------------------------------------------------------------------------------------------------------------------------------------------------------------------------------------------------------------------------------------------------------------------------------------------------------------------|

---

|                  |                                                                                                                                                                                                                                                                                                                                                                                                              |
|------------------|--------------------------------------------------------------------------------------------------------------------------------------------------------------------------------------------------------------------------------------------------------------------------------------------------------------------------------------------------------------------------------------------------------------|
| sardina conserva | <input checked="" type="radio"/> Nunca o menos 1 vez al mes<br><input type="radio"/> 1 a 3 veces mes<br><input type="radio"/> 1 vez semana<br><input type="radio"/> 2 a 4 veces semana<br><input type="radio"/> 5 a 6 veces semana<br><input type="radio"/> 1 vez al día<br><input type="radio"/> 2 a 3 veces al día<br><input type="radio"/> 5 a 6 veces al día<br><input type="radio"/> más 6 veces al día |
|------------------|--------------------------------------------------------------------------------------------------------------------------------------------------------------------------------------------------------------------------------------------------------------------------------------------------------------------------------------------------------------------------------------------------------------|

---

---

pescado ahumado

- ☐ Nunca o menos 1 vez al mes  
☐ 1 a 3 veces mes  
☐ 1 vez semana  
☐ 2 a 4 veces semana  
☒ 5 a 6 veces semana  
☐ 1 vez al día  
☐ 2 a 3 veces al día  
☐ 5 a 6 veces al día  
☐ más 6 veces al día

---

almejas o mejillones o ostras unos 100g

- ☐ Nunca o menos 1 vez al mes  
☐ 1 a 3 veces mes  
☐ 1 vez semana  
☐ 2 a 4 veces semana  
☒ 5 a 6 veces semana  
☐ 1 vez al día  
☐ 2 a 3 veces al día  
☐ 5 a 6 veces al día  
☐ más 6 veces al día

---

calamar o chipiron o sepia unos 100g

- ☐ Nunca o menos 1 vez al mes  
☒ 1 a 3 veces mes  
☐ 1 vez semana  
☐ 2 a 4 veces semana  
☐ 5 a 6 veces semana  
☐ 1 vez al día  
☐ 2 a 3 veces al día  
☐ 5 a 6 veces al día  
☐ más 6 veces al día

---

marisco unos 100g

- ☐ Nunca o menos 1 vez al mes  
☒ 1 a 3 veces mes  
☐ 1 vez semana  
☐ 2 a 4 veces semana  
☐ 5 a 6 veces semana  
☐ 1 vez al día  
☐ 2 a 3 veces al día  
☐ 5 a 6 veces al día  
☐ más 6 veces al día

---

Espinacas o acelgas cocinadas

- ☐ Nunca o menos 1 vez al mes  
☐ 1 a 3 veces mes  
☒ 1 vez semana  
☐ 2 a 4 veces semana  
☐ 5 a 6 veces semana  
☐ 1 vez al día  
☐ 2 a 3 veces al día  
☐ 5 a 6 veces al día  
☐ más 6 veces al día

---

Col o coliflor o brocoli cocinado

- ☐ Nunca o menos 1 vez al mes  
☐ 1 a 3 veces mes  
☐ 1 vez semana  
☒ 2 a 4 veces semana  
☐ 5 a 6 veces semana  
☐ 1 vez al día  
☐ 2 a 3 veces al día  
☐ 5 a 6 veces al día  
☐ más 6 veces al día



---

Lechuga o endivia o escarola

- ☒ Nunca o menos 1 vez al mes  
☐ 1 a 3 veces mes  
☐ 1 vez semana  
☐ 2 a 4 veces semana  
☐ 5 a 6 veces semana  
☐ 1 vez al día  
☐ 2 a 3 veces al día  
☐ 5 a 6 veces al día  
☐ más 6 veces al día

---

tomate ensalada

- ☐ Nunca o menos 1 vez al mes  
☐ 1 a 3 veces mes  
☐ 1 vez semana  
☐ 2 a 4 veces semana  
☐ 5 a 6 veces semana  
☒ 1 vez al día  
☐ 2 a 3 veces al día  
☐ 5 a 6 veces al día  
☐ más 6 veces al día

---

cebolla

- ☒ Nunca o menos 1 vez al mes  
☐ 1 a 3 veces mes  
☐ 1 vez semana  
☐ 2 a 4 veces semana  
☐ 5 a 6 veces semana  
☐ 1 vez al día  
☐ 2 a 3 veces al día  
☐ 5 a 6 veces al día  
☐ más 6 veces al día

---

Zanahoria o calabaza

- ☐ Nunca o menos 1 vez al mes  
☐ 1 a 3 veces mes  
☐ 1 vez semana  
☐ 2 a 4 veces semana  
☒ 5 a 6 veces semana  
☐ 1 vez al día  
☐ 2 a 3 veces al día  
☐ 5 a 6 veces al día  
☐ más 6 veces al día

---

Judías verdes

- ☐ Nunca o menos 1 vez al mes  
☒ 1 a 3 veces mes  
☐ 1 vez semana  
☐ 2 a 4 veces semana  
☐ 5 a 6 veces semana  
☐ 1 vez al día  
☐ 2 a 3 veces al día  
☐ 5 a 6 veces al día  
☐ más 6 veces al día

---

Berenjena o calabacin o pepino

- ☐ Nunca o menos 1 vez al mes  
☐ 1 a 3 veces mes  
☒ 1 vez semana  
☐ 2 a 4 veces semana  
☐ 5 a 6 veces semana  
☐ 1 vez al día  
☐ 2 a 3 veces al día  
☐ 5 a 6 veces al día  
☐ más 6 veces al día

---

pimiento

- ☐ Nunca o menos 1 vez al mes  
☒ 1 a 3 veces mes  
☐ 1 vez semana  
☐ 2 a 4 veces semana  
☐ 5 a 6 veces semana  
☐ 1 vez al día  
☐ 2 a 3 veces al día  
☐ 5 a 6 veces al día  
☐ más 6 veces al día

---

alcachofa

- ☐ Nunca o menos 1 vez al mes  
☐ 1 a 3 veces mes  
☐ 1 vez semana  
☐ 2 a 4 veces semana  
☒ 5 a 6 veces semana  
☐ 1 vez al día  
☐ 2 a 3 veces al día  
☐ 5 a 6 veces al día  
☐ más 6 veces al día

---

espárragos

- ☐ Nunca o menos 1 vez al mes  
☒ 1 a 3 veces mes  
☐ 1 vez semana  
☐ 2 a 4 veces semana  
☐ 5 a 6 veces semana  
☐ 1 vez al día  
☐ 2 a 3 veces al día  
☐ 5 a 6 veces al día  
☐ más 6 veces al día

---

maíz hervido

- ☐ Nunca o menos 1 vez al mes  
☒ 1 a 3 veces mes  
☐ 1 vez semana  
☐ 2 a 4 veces semana  
☐ 5 a 6 veces semana  
☐ 1 vez al día  
☐ 2 a 3 veces al día  
☐ 5 a 6 veces al día  
☐ más 6 veces al día

---

legumbres

- ☐ Nunca o menos 1 vez al mes  
☐ 1 a 3 veces mes  
☐ 1 vez semana  
☒ 2 a 4 veces semana  
☐ 5 a 6 veces semana  
☐ 1 vez al día  
☐ 2 a 3 veces al día  
☐ 5 a 6 veces al día  
☐ más 6 veces al día

---

naranjas o mandarinas

- ☐ Nunca o menos 1 vez al mes  
☐ 1 a 3 veces mes  
☐ 1 vez semana  
☐ 2 a 4 veces semana  
☐ 5 a 6 veces semana  
☐ 1 vez al día  
☒ 2 a 3 veces al día  
☐ 5 a 6 veces al día  
☐ más 6 veces al día

---

|                    |                                                                                                                                                                                                                                                                                                                                                                                                              |
|--------------------|--------------------------------------------------------------------------------------------------------------------------------------------------------------------------------------------------------------------------------------------------------------------------------------------------------------------------------------------------------------------------------------------------------------|
| zumو natural fruta | <input type="radio"/> Nunca o menos 1 vez al mes<br><input type="radio"/> 1 a 3 veces mes<br><input type="radio"/> 1 vez semana<br><input type="radio"/> 2 a 4 veces semana<br><input checked="" type="radio"/> 5 a 6 veces semana<br><input type="radio"/> 1 vez al día<br><input type="radio"/> 2 a 3 veces al día<br><input type="radio"/> 5 a 6 veces al día<br><input type="radio"/> más 6 veces al día |
|--------------------|--------------------------------------------------------------------------------------------------------------------------------------------------------------------------------------------------------------------------------------------------------------------------------------------------------------------------------------------------------------------------------------------------------------|

---

|         |                                                                                                                                                                                                                                                                                                                                                                                                              |
|---------|--------------------------------------------------------------------------------------------------------------------------------------------------------------------------------------------------------------------------------------------------------------------------------------------------------------------------------------------------------------------------------------------------------------|
| platano | <input checked="" type="radio"/> Nunca o menos 1 vez al mes<br><input type="radio"/> 1 a 3 veces mes<br><input type="radio"/> 1 vez semana<br><input type="radio"/> 2 a 4 veces semana<br><input type="radio"/> 5 a 6 veces semana<br><input type="radio"/> 1 vez al día<br><input type="radio"/> 2 a 3 veces al día<br><input type="radio"/> 5 a 6 veces al día<br><input type="radio"/> más 6 veces al día |
|---------|--------------------------------------------------------------------------------------------------------------------------------------------------------------------------------------------------------------------------------------------------------------------------------------------------------------------------------------------------------------------------------------------------------------|

---

|                |                                                                                                                                                                                                                                                                                                                                                                                                              |
|----------------|--------------------------------------------------------------------------------------------------------------------------------------------------------------------------------------------------------------------------------------------------------------------------------------------------------------------------------------------------------------------------------------------------------------|
| manzana o pera | <input type="radio"/> Nunca o menos 1 vez al mes<br><input type="radio"/> 1 a 3 veces mes<br><input type="radio"/> 1 vez semana<br><input type="radio"/> 2 a 4 veces semana<br><input checked="" type="radio"/> 5 a 6 veces semana<br><input type="radio"/> 1 vez al día<br><input type="radio"/> 2 a 3 veces al día<br><input type="radio"/> 5 a 6 veces al día<br><input type="radio"/> más 6 veces al día |
|----------------|--------------------------------------------------------------------------------------------------------------------------------------------------------------------------------------------------------------------------------------------------------------------------------------------------------------------------------------------------------------------------------------------------------------|

---

|                       |                                                                                                                                                                                                                                                                                                                                                                                                              |
|-----------------------|--------------------------------------------------------------------------------------------------------------------------------------------------------------------------------------------------------------------------------------------------------------------------------------------------------------------------------------------------------------------------------------------------------------|
| melocotón o nectarina | <input type="radio"/> Nunca o menos 1 vez al mes<br><input type="radio"/> 1 a 3 veces mes<br><input type="radio"/> 1 vez semana<br><input checked="" type="radio"/> 2 a 4 veces semana<br><input type="radio"/> 5 a 6 veces semana<br><input type="radio"/> 1 vez al día<br><input type="radio"/> 2 a 3 veces al día<br><input type="radio"/> 5 a 6 veces al día<br><input type="radio"/> más 6 veces al día |
|-----------------------|--------------------------------------------------------------------------------------------------------------------------------------------------------------------------------------------------------------------------------------------------------------------------------------------------------------------------------------------------------------------------------------------------------------|

---

|                |                                                                                                                                                                                                                                                                                                                                                                                                              |
|----------------|--------------------------------------------------------------------------------------------------------------------------------------------------------------------------------------------------------------------------------------------------------------------------------------------------------------------------------------------------------------------------------------------------------------|
| sandia o melon | <input type="radio"/> Nunca o menos 1 vez al mes<br><input checked="" type="radio"/> 1 a 3 veces mes<br><input type="radio"/> 1 vez semana<br><input type="radio"/> 2 a 4 veces semana<br><input type="radio"/> 5 a 6 veces semana<br><input type="radio"/> 1 vez al día<br><input type="radio"/> 2 a 3 veces al día<br><input type="radio"/> 5 a 6 veces al día<br><input type="radio"/> más 6 veces al día |
|----------------|--------------------------------------------------------------------------------------------------------------------------------------------------------------------------------------------------------------------------------------------------------------------------------------------------------------------------------------------------------------------------------------------------------------|

---

|     |                                                                                                                                                                                                                                                                                                                                                                                                              |
|-----|--------------------------------------------------------------------------------------------------------------------------------------------------------------------------------------------------------------------------------------------------------------------------------------------------------------------------------------------------------------------------------------------------------------|
| uva | <input type="radio"/> Nunca o menos 1 vez al mes<br><input type="radio"/> 1 a 3 veces mes<br><input checked="" type="radio"/> 1 vez semana<br><input type="radio"/> 2 a 4 veces semana<br><input type="radio"/> 5 a 6 veces semana<br><input type="radio"/> 1 vez al día<br><input type="radio"/> 2 a 3 veces al día<br><input type="radio"/> 5 a 6 veces al día<br><input type="radio"/> más 6 veces al día |
|-----|--------------------------------------------------------------------------------------------------------------------------------------------------------------------------------------------------------------------------------------------------------------------------------------------------------------------------------------------------------------------------------------------------------------|

---

---

bruna o ciruela

- ☐ Nunca o menos 1 vez al mes  
☐ 1 a 3 veces mes  
☒ 1 vez semana  
☐ 2 a 4 veces semana  
☐ 5 a 6 veces semana  
☐ 1 vez al día  
☐ 2 a 3 veces al día  
☐ 5 a 6 veces al día  
☐ más 6 veces al día

---

kiwi

- ☐ Nunca o menos 1 vez al mes  
☐ 1 a 3 veces mes  
☐ 1 vez semana  
☐ 2 a 4 veces semana  
☐ 5 a 6 veces semana  
☒ 1 vez al día  
☐ 2 a 3 veces al día  
☐ 5 a 6 veces al día  
☐ más 6 veces al día

---

aceituna

- ☐ Nunca o menos 1 vez al mes  
☒ 1 a 3 veces mes  
☐ 1 vez semana  
☐ 2 a 4 veces semana  
☐ 5 a 6 veces semana  
☐ 1 vez al día  
☐ 2 a 3 veces al día  
☐ 5 a 6 veces al día  
☐ más 6 veces al día

---

frutos secos

- ☐ Nunca o menos 1 vez al mes  
☐ 1 a 3 veces mes  
☐ 1 vez semana  
☐ 2 a 4 veces semana  
☐ 5 a 6 veces semana  
☒ 1 vez al día  
☐ 2 a 3 veces al día  
☐ 5 a 6 veces al día  
☐ más 6 veces al día

---

pan blanco

- ☐ Nunca o menos 1 vez al mes  
☐ 1 a 3 veces mes  
☐ 1 vez semana  
☐ 2 a 4 veces semana  
☐ 5 a 6 veces semana  
☒ 1 vez al día  
☐ 2 a 3 veces al día  
☐ 5 a 6 veces al día  
☐ más 6 veces al día

---

pan integral

- ☐ Nunca o menos 1 vez al mes  
☐ 1 a 3 veces mes  
☐ 1 vez semana  
☐ 2 a 4 veces semana  
☐ 5 a 6 veces semana  
☒ 1 vez al día  
☐ 2 a 3 veces al día  
☐ 5 a 6 veces al día  
☐ más 6 veces al día

|                          |                                                                                                                                                                                                                                                                                                                                                                                                              |
|--------------------------|--------------------------------------------------------------------------------------------------------------------------------------------------------------------------------------------------------------------------------------------------------------------------------------------------------------------------------------------------------------------------------------------------------------|
| cereales desayuno        | <input checked="" type="radio"/> Nunca o menos 1 vez al mes<br><input type="radio"/> 1 a 3 veces mes<br><input type="radio"/> 1 vez semana<br><input type="radio"/> 2 a 4 veces semana<br><input type="radio"/> 5 a 6 veces semana<br><input type="radio"/> 1 vez al día<br><input type="radio"/> 2 a 3 veces al día<br><input type="radio"/> 5 a 6 veces al día<br><input type="radio"/> más 6 veces al día |
| patatas fritas           | <input type="radio"/> Nunca o menos 1 vez al mes<br><input checked="" type="radio"/> 1 a 3 veces mes<br><input type="radio"/> 1 vez semana<br><input type="radio"/> 2 a 4 veces semana<br><input type="radio"/> 5 a 6 veces semana<br><input type="radio"/> 1 vez al día<br><input type="radio"/> 2 a 3 veces al día<br><input type="radio"/> 5 a 6 veces al día<br><input type="radio"/> más 6 veces al día |
| patatas cocidas o asadas | <input type="radio"/> Nunca o menos 1 vez al mes<br><input type="radio"/> 1 a 3 veces mes<br><input type="radio"/> 1 vez semana<br><input checked="" type="radio"/> 2 a 4 veces semana<br><input type="radio"/> 5 a 6 veces semana<br><input type="radio"/> 1 vez al día<br><input type="radio"/> 2 a 3 veces al día<br><input type="radio"/> 5 a 6 veces al día<br><input type="radio"/> más 6 veces al día |
| bolsa papas              | <input checked="" type="radio"/> Nunca o menos 1 vez al mes<br><input type="radio"/> 1 a 3 veces mes<br><input type="radio"/> 1 vez semana<br><input type="radio"/> 2 a 4 veces semana<br><input type="radio"/> 5 a 6 veces semana<br><input type="radio"/> 1 vez al día<br><input type="radio"/> 2 a 3 veces al día<br><input type="radio"/> 5 a 6 veces al día<br><input type="radio"/> más 6 veces al día |
| arroz cocinado           | <input type="radio"/> Nunca o menos 1 vez al mes<br><input type="radio"/> 1 a 3 veces mes<br><input checked="" type="radio"/> 1 vez semana<br><input type="radio"/> 2 a 4 veces semana<br><input type="radio"/> 5 a 6 veces semana<br><input type="radio"/> 1 vez al día<br><input type="radio"/> 2 a 3 veces al día<br><input type="radio"/> 5 a 6 veces al día<br><input type="radio"/> más 6 veces al día |
| pasta                    | <input type="radio"/> Nunca o menos 1 vez al mes<br><input type="radio"/> 1 a 3 veces mes<br><input checked="" type="radio"/> 1 vez semana<br><input type="radio"/> 2 a 4 veces semana<br><input type="radio"/> 5 a 6 veces semana<br><input type="radio"/> 1 vez al día<br><input type="radio"/> 2 a 3 veces al día<br><input type="radio"/> 5 a 6 veces al día<br><input type="radio"/> más 6 veces al día |

|                     |                                                                                                                                                                                                                                                                                                                                                                                                              |
|---------------------|--------------------------------------------------------------------------------------------------------------------------------------------------------------------------------------------------------------------------------------------------------------------------------------------------------------------------------------------------------------------------------------------------------------|
| pizza               | <input type="radio"/> Nunca o menos 1 vez al mes<br><input checked="" type="radio"/> 1 a 3 veces mes<br><input type="radio"/> 1 vez semana<br><input type="radio"/> 2 a 4 veces semana<br><input type="radio"/> 5 a 6 veces semana<br><input type="radio"/> 1 vez al día<br><input type="radio"/> 2 a 3 veces al día<br><input type="radio"/> 5 a 6 veces al día<br><input type="radio"/> más 6 veces al día |
| aceite oliva        | <input type="radio"/> Nunca o menos 1 vez al mes<br><input type="radio"/> 1 a 3 veces mes<br><input type="radio"/> 1 vez semana<br><input type="radio"/> 2 a 4 veces semana<br><input type="radio"/> 5 a 6 veces semana<br><input type="radio"/> 1 vez al día<br><input checked="" type="radio"/> 2 a 3 veces al día<br><input type="radio"/> 5 a 6 veces al día<br><input type="radio"/> más 6 veces al día |
| otros aceites       | <input checked="" type="radio"/> Nunca o menos 1 vez al mes<br><input type="radio"/> 1 a 3 veces mes<br><input type="radio"/> 1 vez semana<br><input type="radio"/> 2 a 4 veces semana<br><input type="radio"/> 5 a 6 veces semana<br><input type="radio"/> 1 vez al día<br><input type="radio"/> 2 a 3 veces al día<br><input type="radio"/> 5 a 6 veces al día<br><input type="radio"/> más 6 veces al día |
| margarina           | <input checked="" type="radio"/> Nunca o menos 1 vez al mes<br><input type="radio"/> 1 a 3 veces mes<br><input type="radio"/> 1 vez semana<br><input type="radio"/> 2 a 4 veces semana<br><input type="radio"/> 5 a 6 veces semana<br><input type="radio"/> 1 vez al día<br><input type="radio"/> 2 a 3 veces al día<br><input type="radio"/> 5 a 6 veces al día<br><input type="radio"/> más 6 veces al día |
| mantequilla         | <input checked="" type="radio"/> Nunca o menos 1 vez al mes<br><input type="radio"/> 1 a 3 veces mes<br><input type="radio"/> 1 vez semana<br><input type="radio"/> 2 a 4 veces semana<br><input type="radio"/> 5 a 6 veces semana<br><input type="radio"/> 1 vez al día<br><input type="radio"/> 2 a 3 veces al día<br><input type="radio"/> 5 a 6 veces al día<br><input type="radio"/> más 6 veces al día |
| galletas tipo maria | <input type="radio"/> Nunca o menos 1 vez al mes<br><input checked="" type="radio"/> 1 a 3 veces mes<br><input type="radio"/> 1 vez semana<br><input type="radio"/> 2 a 4 veces semana<br><input type="radio"/> 5 a 6 veces semana<br><input type="radio"/> 1 vez al día<br><input type="radio"/> 2 a 3 veces al día<br><input type="radio"/> 5 a 6 veces al día<br><input type="radio"/> más 6 veces al día |

|                           |                                                                                                                                                                                                                                                                                                                                                                                                              |
|---------------------------|--------------------------------------------------------------------------------------------------------------------------------------------------------------------------------------------------------------------------------------------------------------------------------------------------------------------------------------------------------------------------------------------------------------|
| galletas chocolate        | <input checked="" type="radio"/> Nunca o menos 1 vez al mes<br><input type="radio"/> 1 a 3 veces mes<br><input type="radio"/> 1 vez semana<br><input type="radio"/> 2 a 4 veces semana<br><input type="radio"/> 5 a 6 veces semana<br><input type="radio"/> 1 vez al día<br><input type="radio"/> 2 a 3 veces al día<br><input type="radio"/> 5 a 6 veces al día<br><input type="radio"/> más 6 veces al día |
| bollieria                 | <input type="radio"/> Nunca o menos 1 vez al mes<br><input type="radio"/> 1 a 3 veces mes<br><input checked="" type="radio"/> 1 vez semana<br><input type="radio"/> 2 a 4 veces semana<br><input type="radio"/> 5 a 6 veces semana<br><input type="radio"/> 1 vez al día<br><input type="radio"/> 2 a 3 veces al día<br><input type="radio"/> 5 a 6 veces al día<br><input type="radio"/> más 6 veces al día |
| chocolate o bombones      | <input type="radio"/> Nunca o menos 1 vez al mes<br><input type="radio"/> 1 a 3 veces mes<br><input type="radio"/> 1 vez semana<br><input type="radio"/> 2 a 4 veces semana<br><input type="radio"/> 5 a 6 veces semana<br><input checked="" type="radio"/> 1 vez al día<br><input type="radio"/> 2 a 3 veces al día<br><input type="radio"/> 5 a 6 veces al día<br><input type="radio"/> más 6 veces al día |
| chocolate polvo o colacao | <input type="radio"/> Nunca o menos 1 vez al mes<br><input type="radio"/> 1 a 3 veces mes<br><input type="radio"/> 1 vez semana<br><input type="radio"/> 2 a 4 veces semana<br><input type="radio"/> 5 a 6 veces semana<br><input checked="" type="radio"/> 1 vez al día<br><input type="radio"/> 2 a 3 veces al día<br><input type="radio"/> 5 a 6 veces al día<br><input type="radio"/> más 6 veces al día |
| vino tinto                | <input checked="" type="radio"/> Nunca o menos 1 vez al mes<br><input type="radio"/> 1 a 3 veces mes<br><input type="radio"/> 1 vez semana<br><input type="radio"/> 2 a 4 veces semana<br><input type="radio"/> 5 a 6 veces semana<br><input type="radio"/> 1 vez al día<br><input type="radio"/> 2 a 3 veces al día<br><input type="radio"/> 5 a 6 veces al día<br><input type="radio"/> más 6 veces al día |
| vino blanco               | <input checked="" type="radio"/> Nunca o menos 1 vez al mes<br><input type="radio"/> 1 a 3 veces mes<br><input type="radio"/> 1 vez semana<br><input type="radio"/> 2 a 4 veces semana<br><input type="radio"/> 5 a 6 veces semana<br><input type="radio"/> 1 vez al día<br><input type="radio"/> 2 a 3 veces al día<br><input type="radio"/> 5 a 6 veces al día<br><input type="radio"/> más 6 veces al día |

|                       |                                                                                                                                                                                                                                                                                                                                                                                                              |
|-----------------------|--------------------------------------------------------------------------------------------------------------------------------------------------------------------------------------------------------------------------------------------------------------------------------------------------------------------------------------------------------------------------------------------------------------|
| vino seco o vermut    | <input checked="" type="radio"/> Nunca o menos 1 vez al mes<br><input type="radio"/> 1 a 3 veces mes<br><input type="radio"/> 1 vez semana<br><input type="radio"/> 2 a 4 veces semana<br><input type="radio"/> 5 a 6 veces semana<br><input type="radio"/> 1 vez al día<br><input type="radio"/> 2 a 3 veces al día<br><input type="radio"/> 5 a 6 veces al día<br><input type="radio"/> más 6 veces al día |
| cerveza               | <input checked="" type="radio"/> Nunca o menos 1 vez al mes<br><input type="radio"/> 1 a 3 veces mes<br><input type="radio"/> 1 vez semana<br><input type="radio"/> 2 a 4 veces semana<br><input type="radio"/> 5 a 6 veces semana<br><input type="radio"/> 1 vez al día<br><input type="radio"/> 2 a 3 veces al día<br><input type="radio"/> 5 a 6 veces al día<br><input type="radio"/> más 6 veces al día |
| cerveza sin alcohol   | <input type="radio"/> Nunca o menos 1 vez al mes<br><input checked="" type="radio"/> 1 a 3 veces mes<br><input type="radio"/> 1 vez semana<br><input type="radio"/> 2 a 4 veces semana<br><input type="radio"/> 5 a 6 veces semana<br><input type="radio"/> 1 vez al día<br><input type="radio"/> 2 a 3 veces al día<br><input type="radio"/> 5 a 6 veces al día<br><input type="radio"/> más 6 veces al día |
| licores               | <input checked="" type="radio"/> Nunca o menos 1 vez al mes<br><input type="radio"/> 1 a 3 veces mes<br><input type="radio"/> 1 vez semana<br><input type="radio"/> 2 a 4 veces semana<br><input type="radio"/> 5 a 6 veces semana<br><input type="radio"/> 1 vez al día<br><input type="radio"/> 2 a 3 veces al día<br><input type="radio"/> 5 a 6 veces al día<br><input type="radio"/> más 6 veces al día |
| ginebra o ron o vodka | <input checked="" type="radio"/> Nunca o menos 1 vez al mes<br><input type="radio"/> 1 a 3 veces mes<br><input type="radio"/> 1 vez semana<br><input type="radio"/> 2 a 4 veces semana<br><input type="radio"/> 5 a 6 veces semana<br><input type="radio"/> 1 vez al día<br><input type="radio"/> 2 a 3 veces al día<br><input type="radio"/> 5 a 6 veces al día<br><input type="radio"/> más 6 veces al día |
| refresco normal       | <input checked="" type="radio"/> Nunca o menos 1 vez al mes<br><input type="radio"/> 1 a 3 veces mes<br><input type="radio"/> 1 vez semana<br><input type="radio"/> 2 a 4 veces semana<br><input type="radio"/> 5 a 6 veces semana<br><input type="radio"/> 1 vez al día<br><input type="radio"/> 2 a 3 veces al día<br><input type="radio"/> 5 a 6 veces al día<br><input type="radio"/> más 6 veces al día |



---

|                     |                                                                                                                                                                                                                                                                                                                                                                                                              |
|---------------------|--------------------------------------------------------------------------------------------------------------------------------------------------------------------------------------------------------------------------------------------------------------------------------------------------------------------------------------------------------------------------------------------------------------|
| refresco sin azúcar | <input type="radio"/> Nunca o menos 1 vez al mes<br><input checked="" type="radio"/> 1 a 3 veces mes<br><input type="radio"/> 1 vez semana<br><input type="radio"/> 2 a 4 veces semana<br><input type="radio"/> 5 a 6 veces semana<br><input type="radio"/> 1 vez al día<br><input type="radio"/> 2 a 3 veces al día<br><input type="radio"/> 5 a 6 veces al día<br><input type="radio"/> más 6 veces al día |
|---------------------|--------------------------------------------------------------------------------------------------------------------------------------------------------------------------------------------------------------------------------------------------------------------------------------------------------------------------------------------------------------------------------------------------------------|

---

|                |                                                                                                                                                                                                                                                                                                                                                                                                              |
|----------------|--------------------------------------------------------------------------------------------------------------------------------------------------------------------------------------------------------------------------------------------------------------------------------------------------------------------------------------------------------------------------------------------------------------|
| Agua del grifo | <input checked="" type="radio"/> Nunca o menos 1 vez al mes<br><input type="radio"/> 1 a 3 veces mes<br><input type="radio"/> 1 vez semana<br><input type="radio"/> 2 a 4 veces semana<br><input type="radio"/> 5 a 6 veces semana<br><input type="radio"/> 1 vez al día<br><input type="radio"/> 2 a 3 veces al día<br><input type="radio"/> 5 a 6 veces al día<br><input type="radio"/> más 6 veces al día |
|----------------|--------------------------------------------------------------------------------------------------------------------------------------------------------------------------------------------------------------------------------------------------------------------------------------------------------------------------------------------------------------------------------------------------------------|

---

|                          |                                                                                                                                                                                                                                                                                                                                                                                                              |
|--------------------------|--------------------------------------------------------------------------------------------------------------------------------------------------------------------------------------------------------------------------------------------------------------------------------------------------------------------------------------------------------------------------------------------------------------|
| agua embotellada sin gas | <input type="radio"/> Nunca o menos 1 vez al mes<br><input type="radio"/> 1 a 3 veces mes<br><input type="radio"/> 1 vez semana<br><input type="radio"/> 2 a 4 veces semana<br><input type="radio"/> 5 a 6 veces semana<br><input type="radio"/> 1 vez al día<br><input type="radio"/> 2 a 3 veces al día<br><input type="radio"/> 5 a 6 veces al día<br><input checked="" type="radio"/> más 6 veces al día |
|--------------------------|--------------------------------------------------------------------------------------------------------------------------------------------------------------------------------------------------------------------------------------------------------------------------------------------------------------------------------------------------------------------------------------------------------------|

---

|                          |                                                                                                                                                                                                                                                                                                                                                                                                              |
|--------------------------|--------------------------------------------------------------------------------------------------------------------------------------------------------------------------------------------------------------------------------------------------------------------------------------------------------------------------------------------------------------------------------------------------------------|
| agua embotellada con gas | <input checked="" type="radio"/> Nunca o menos 1 vez al mes<br><input type="radio"/> 1 a 3 veces mes<br><input type="radio"/> 1 vez semana<br><input type="radio"/> 2 a 4 veces semana<br><input type="radio"/> 5 a 6 veces semana<br><input type="radio"/> 1 vez al día<br><input type="radio"/> 2 a 3 veces al día<br><input type="radio"/> 5 a 6 veces al día<br><input type="radio"/> más 6 veces al día |
|--------------------------|--------------------------------------------------------------------------------------------------------------------------------------------------------------------------------------------------------------------------------------------------------------------------------------------------------------------------------------------------------------------------------------------------------------|

---

|                      |                                                                                                                                                                                                                                                                                                                                                                                                              |
|----------------------|--------------------------------------------------------------------------------------------------------------------------------------------------------------------------------------------------------------------------------------------------------------------------------------------------------------------------------------------------------------------------------------------------------------|
| zumو frutas embasado | <input checked="" type="radio"/> Nunca o menos 1 vez al mes<br><input type="radio"/> 1 a 3 veces mes<br><input type="radio"/> 1 vez semana<br><input type="radio"/> 2 a 4 veces semana<br><input type="radio"/> 5 a 6 veces semana<br><input type="radio"/> 1 vez al día<br><input type="radio"/> 2 a 3 veces al día<br><input type="radio"/> 5 a 6 veces al día<br><input type="radio"/> más 6 veces al día |
|----------------------|--------------------------------------------------------------------------------------------------------------------------------------------------------------------------------------------------------------------------------------------------------------------------------------------------------------------------------------------------------------------------------------------------------------|

---

|      |                                                                                                                                                                                                                                                                                                                                                                                                              |
|------|--------------------------------------------------------------------------------------------------------------------------------------------------------------------------------------------------------------------------------------------------------------------------------------------------------------------------------------------------------------------------------------------------------------|
| cafe | <input checked="" type="radio"/> Nunca o menos 1 vez al mes<br><input type="radio"/> 1 a 3 veces mes<br><input type="radio"/> 1 vez semana<br><input type="radio"/> 2 a 4 veces semana<br><input type="radio"/> 5 a 6 veces semana<br><input type="radio"/> 1 vez al día<br><input type="radio"/> 2 a 3 veces al día<br><input type="radio"/> 5 a 6 veces al día<br><input type="radio"/> más 6 veces al día |
|------|--------------------------------------------------------------------------------------------------------------------------------------------------------------------------------------------------------------------------------------------------------------------------------------------------------------------------------------------------------------------------------------------------------------|

---

---

cafe descafeinado

- ☐ Nunca o menos 1 vez al mes  
☐ 1 a 3 veces mes  
☐ 1 vez semana  
☐ 2 a 4 veces semana  
☐ 5 a 6 veces semana  
☒ 1 vez al día  
☐ 2 a 3 veces al día  
☐ 5 a 6 veces al día  
☐ más 6 veces al día

---

te o infusión

- ☐ Nunca o menos 1 vez al mes  
☐ 1 a 3 veces mes  
☐ 1 vez semana  
☐ 2 a 4 veces semana  
☐ 5 a 6 veces semana  
☒ 1 vez al día  
☐ 2 a 3 veces al día  
☐ 5 a 6 veces al día  
☐ más 6 veces al día

---

sopa o puré verduras

- ☐ Nunca o menos 1 vez al mes  
☐ 1 a 3 veces mes  
☐ 1 vez semana  
☒ 2 a 4 veces semana  
☐ 5 a 6 veces semana  
☐ 1 vez al día  
☐ 2 a 3 veces al día  
☐ 5 a 6 veces al día  
☐ más 6 veces al día

---

croquetas pollo jamón

- ☒ Nunca o menos 1 vez al mes  
☐ 1 a 3 veces mes  
☐ 1 vez semana  
☐ 2 a 4 veces semana  
☐ 5 a 6 veces semana  
☐ 1 vez al día  
☐ 2 a 3 veces al día  
☐ 5 a 6 veces al día  
☐ más 6 veces al día

---

croquetas pescado

- ☒ Nunca o menos 1 vez al mes  
☐ 1 a 3 veces mes  
☐ 1 vez semana  
☐ 2 a 4 veces semana  
☐ 5 a 6 veces semana  
☐ 1 vez al día  
☐ 2 a 3 veces al día  
☐ 5 a 6 veces al día  
☐ más 6 veces al día

---

mayonesa

- ☐ Nunca o menos 1 vez al mes  
☐ 1 a 3 veces mes  
☐ 1 vez semana  
☒ 2 a 4 veces semana  
☐ 5 a 6 veces semana  
☐ 1 vez al día  
☐ 2 a 3 veces al día  
☐ 5 a 6 veces al día  
☐ más 6 veces al día

|                  |                                                                                                                                                                                                                                                                                                                                                                                                              |
|------------------|--------------------------------------------------------------------------------------------------------------------------------------------------------------------------------------------------------------------------------------------------------------------------------------------------------------------------------------------------------------------------------------------------------------|
| salsa tomate     | <input type="radio"/> Nunca o menos 1 vez al mes<br><input type="radio"/> 1 a 3 veces mes<br><input checked="" type="radio"/> 1 vez semana<br><input type="radio"/> 2 a 4 veces semana<br><input type="radio"/> 5 a 6 veces semana<br><input type="radio"/> 1 vez al día<br><input type="radio"/> 2 a 3 veces al día<br><input type="radio"/> 5 a 6 veces al día<br><input type="radio"/> más 6 veces al día |
| ketchup          | <input checked="" type="radio"/> Nunca o menos 1 vez al mes<br><input type="radio"/> 1 a 3 veces mes<br><input type="radio"/> 1 vez semana<br><input type="radio"/> 2 a 4 veces semana<br><input type="radio"/> 5 a 6 veces semana<br><input type="radio"/> 1 vez al día<br><input type="radio"/> 2 a 3 veces al día<br><input type="radio"/> 5 a 6 veces al día<br><input type="radio"/> más 6 veces al día |
| sal              | <input checked="" type="radio"/> Nunca o menos 1 vez al mes<br><input type="radio"/> 1 a 3 veces mes<br><input type="radio"/> 1 vez semana<br><input type="radio"/> 2 a 4 veces semana<br><input type="radio"/> 5 a 6 veces semana<br><input type="radio"/> 1 vez al día<br><input type="radio"/> 2 a 3 veces al día<br><input type="radio"/> 5 a 6 veces al día<br><input type="radio"/> más 6 veces al día |
| ajo              | <input type="radio"/> Nunca o menos 1 vez al mes<br><input type="radio"/> 1 a 3 veces mes<br><input type="radio"/> 1 vez semana<br><input type="radio"/> 2 a 4 veces semana<br><input checked="" type="radio"/> 5 a 6 veces semana<br><input type="radio"/> 1 vez al día<br><input type="radio"/> 2 a 3 veces al día<br><input type="radio"/> 5 a 6 veces al día<br><input type="radio"/> más 6 veces al día |
| mermelada o miel | <input type="radio"/> Nunca o menos 1 vez al mes<br><input type="radio"/> 1 a 3 veces mes<br><input type="radio"/> 1 vez semana<br><input type="radio"/> 2 a 4 veces semana<br><input type="radio"/> 5 a 6 veces semana<br><input checked="" type="radio"/> 1 vez al día<br><input type="radio"/> 2 a 3 veces al día<br><input type="radio"/> 5 a 6 veces al día<br><input type="radio"/> más 6 veces al día |
| azúcar           | <input type="radio"/> Nunca o menos 1 vez al mes<br><input type="radio"/> 1 a 3 veces mes<br><input type="radio"/> 1 vez semana<br><input type="radio"/> 2 a 4 veces semana<br><input type="radio"/> 5 a 6 veces semana<br><input checked="" type="radio"/> 1 vez al día<br><input type="radio"/> 2 a 3 veces al día<br><input type="radio"/> 5 a 6 veces al día<br><input type="radio"/> más 6 veces al día |

|                                       |                                                                                                                                                                                                                                                                                                                                                                                                                                                                                                                               |
|---------------------------------------|-------------------------------------------------------------------------------------------------------------------------------------------------------------------------------------------------------------------------------------------------------------------------------------------------------------------------------------------------------------------------------------------------------------------------------------------------------------------------------------------------------------------------------|
| Otro alimento                         |                                                                                                                                                                                                                                                                                                                                                                                                                                                                                                                               |
| suplementos vitamínicos               | <input checked="" type="radio"/> si<br><input type="radio"/> no                                                                                                                                                                                                                                                                                                                                                                                                                                                               |
| suplementos vitamínicos               | [*DATA REMOVED*]                                                                                                                                                                                                                                                                                                                                                                                                                                                                                                              |
| dieta previa                          | <input type="radio"/> si<br><input checked="" type="radio"/> no                                                                                                                                                                                                                                                                                                                                                                                                                                                               |
| motivo dieta                          | <input checked="" type="radio"/> no dieta<br><input type="radio"/> control peso<br><input type="radio"/> control colesterol<br><input type="radio"/> control diabetes<br><input type="radio"/> problemas estómago<br><input type="radio"/> problemas vesícula o hepáticos<br><input type="radio"/> HTA o cardiopatía<br><input type="radio"/> problemas renales<br><input type="radio"/> alergia alimentaria<br><input type="radio"/> ácido úrico elevado<br><input type="radio"/> vegetariana<br><input type="radio"/> otros |
| cambio alimentos año previo gestación | <input checked="" type="radio"/> si<br><input type="radio"/> no                                                                                                                                                                                                                                                                                                                                                                                                                                                               |
| cambio lácteos                        | <input type="radio"/> eliminado<br><input type="radio"/> disminuido<br><input type="radio"/> igual<br><input checked="" type="radio"/> aumentado<br><input type="radio"/> no sabe                                                                                                                                                                                                                                                                                                                                             |
| cambio huevos                         | <input type="radio"/> eliminado<br><input type="radio"/> disminuido<br><input type="radio"/> igual<br><input checked="" type="radio"/> aumentado<br><input type="radio"/> no sabe                                                                                                                                                                                                                                                                                                                                             |
| cambio carne                          | <input type="radio"/> eliminado<br><input type="radio"/> disminuido<br><input checked="" type="radio"/> igual<br><input type="radio"/> aumentado<br><input type="radio"/> no sabe                                                                                                                                                                                                                                                                                                                                             |
| cambio pescado                        | <input type="radio"/> eliminado<br><input type="radio"/> disminuido<br><input checked="" type="radio"/> igual<br><input type="radio"/> aumentado<br><input type="radio"/> no sabe                                                                                                                                                                                                                                                                                                                                             |
| cambio verduras                       | <input type="radio"/> eliminado<br><input type="radio"/> disminuido<br><input type="radio"/> igual<br><input checked="" type="radio"/> aumentado<br><input type="radio"/> no sabe                                                                                                                                                                                                                                                                                                                                             |

|                            |                                                                                                                                                                                                                        |
|----------------------------|------------------------------------------------------------------------------------------------------------------------------------------------------------------------------------------------------------------------|
| cambio legumbres           | <input type="radio"/> eliminado<br><input type="radio"/> disminuido<br><input type="radio"/> igual<br><input checked="" type="radio"/> aumentado<br><input type="radio"/> no sabe                                      |
| cambio fruta               | <input type="radio"/> eliminado<br><input type="radio"/> disminuido<br><input type="radio"/> igual<br><input checked="" type="radio"/> aumentado<br><input type="radio"/> no sabe                                      |
| cambio pan                 | <input type="radio"/> eliminado<br><input checked="" type="radio"/> disminuido<br><input type="radio"/> igual<br><input type="radio"/> aumentado<br><input type="radio"/> no sabe                                      |
| cambio aceite oliva        | <input type="radio"/> eliminado<br><input type="radio"/> disminuido<br><input checked="" type="radio"/> igual<br><input type="radio"/> aumentado<br><input type="radio"/> no sabe                                      |
| cambio mante o margarina   | <input type="radio"/> eliminado<br><input type="radio"/> disminuido<br><input checked="" type="radio"/> igual<br><input type="radio"/> aumentado<br><input type="radio"/> no sabe                                      |
| cambio azúcar y dulces     | <input type="radio"/> eliminado<br><input checked="" type="radio"/> disminuido<br><input type="radio"/> igual<br><input type="radio"/> aumentado<br><input type="radio"/> no sabe                                      |
| cambio bebidas alcohólicas | <input checked="" type="radio"/> eliminado<br><input type="radio"/> disminuido<br><input type="radio"/> igual<br><input type="radio"/> aumentado<br><input type="radio"/> no sabe                                      |
| frecuencia comidas fritas  | <input type="radio"/> a diario<br><input type="radio"/> 5 a 6 veces semana<br><input type="radio"/> 2 a 4 veces semana<br><input type="radio"/> 1 vez semana<br><input checked="" type="radio"/> menos de 1 vez semana |
| carne                      | <input type="radio"/> no como<br><input type="radio"/> cruda<br><input type="radio"/> poco hecha<br><input checked="" type="radio"/> hecha<br><input type="radio"/> muy hecha                                          |
| grasa visible carne        | <input checked="" type="radio"/> quita toda<br><input type="radio"/> quita mayoría<br><input type="radio"/> quita un poco<br><input type="radio"/> no quita nada                                                       |

|                                |                                                                                                                                                                                                                                                          |
|--------------------------------|----------------------------------------------------------------------------------------------------------------------------------------------------------------------------------------------------------------------------------------------------------|
| cocina carne                   | <input checked="" type="radio"/> a la plancha<br><input type="radio"/> a la parrilla<br><input type="radio"/> asada<br><input type="radio"/> frita<br><input type="radio"/> guisada                                                                      |
| tostado quemado carne          | <input type="radio"/> nunca<br><input checked="" type="radio"/> 1 vez mes<br><input type="radio"/> 2 a 3 veces mes<br><input type="radio"/> 1 vez semana<br><input type="radio"/> 2 a 3 semanas                                                          |
| tostado quemado pescado        | <input checked="" type="radio"/> nunca<br><input type="radio"/> 1 vez mes<br><input type="radio"/> 2 a 3 veces mes<br><input type="radio"/> 1 vez semana<br><input type="radio"/> 2 a 3 semanas                                                          |
| socarrat paella                | <input checked="" type="radio"/> nunca<br><input type="radio"/> 1 vez mes<br><input type="radio"/> 2 a 3 veces mes<br><input type="radio"/> 1 vez semana<br><input type="radio"/> 2 a 3 semanas                                                          |
| grasa o aceite cocinar         | <input type="radio"/> mantequilla<br><input type="radio"/> margarina<br><input type="radio"/> aceite oliva<br><input checked="" type="radio"/> aceite oliva virgen extra<br><input type="radio"/> aceite vegetal<br><input type="radio"/> mezcla aceites |
| grasa aceite aliñar            | <input type="radio"/> mantequilla<br><input type="radio"/> margarina<br><input type="radio"/> aceite oliva<br><input checked="" type="radio"/> aceite oliva virgen extra<br><input type="radio"/> aceite vegetal<br><input type="radio"/> mezcla aceites |
| grasa aceite freir             | <input type="radio"/> mantequilla<br><input type="radio"/> margarina<br><input type="radio"/> aceite oliva<br><input checked="" type="radio"/> aceite oliva virgen extra<br><input type="radio"/> aceite vegetal<br><input type="radio"/> mezcla aceites |
| Ejercicio cuestionario         | <input checked="" type="radio"/> si<br><input type="radio"/> no                                                                                                                                                                                          |
| horas de sueño incluido siesta | [*DATA REMOVED*]                                                                                                                                                                                                                                         |
| minutos siesta                 | [*DATA REMOVED*]                                                                                                                                                                                                                                         |
| horas televisión semana        | [*DATA REMOVED*]                                                                                                                                                                                                                                         |

|                                        |                                                                                                                                                                                                                                                                                                                                                                           |
|----------------------------------------|---------------------------------------------------------------------------------------------------------------------------------------------------------------------------------------------------------------------------------------------------------------------------------------------------------------------------------------------------------------------------|
| actividad trabajo                      | <input checked="" type="radio"/> casi siempre sentado<br><input type="radio"/> sentado 50 por cien<br><input type="radio"/> casi siempre de pie, quieto<br><input type="radio"/> casi siempre levantado caminando y llevando pocas cosas<br><input type="radio"/> casi siempre levantado, caminando y llevado muchas cosas<br><input type="radio"/> trabajo manual pesado |
| tiempo caminar o bici al día           | <input type="radio"/> casi nunca<br><input type="radio"/> menos 20min día<br><input type="radio"/> 20 a 40 min día<br><input checked="" type="radio"/> 40 a 60 min día<br><input type="radio"/> 1h o 1h y media día<br><input type="radio"/> más de 1h y media al día                                                                                                     |
| tiempo tareas casa al día              | <input type="radio"/> menos de 1h día<br><input checked="" type="radio"/> 1 a 2h día<br><input type="radio"/> 3 a 4h día<br><input type="radio"/> 5 a 6h día<br><input type="radio"/> 7 a 8h día<br><input type="radio"/> más de 8h día                                                                                                                                   |
| tiempo libre televisión ordenador leer | <input type="radio"/> menos 1h día<br><input type="radio"/> 1h día<br><input type="radio"/> 2h día<br><input type="radio"/> 3h día<br><input checked="" type="radio"/> 4h día<br><input type="radio"/> 5 a 6h día<br><input type="radio"/> mas 6h día                                                                                                                     |
| tiempo libre ejercicio o deporte       | <input type="radio"/> menos 1h semana<br><input type="radio"/> 1h semana<br><input checked="" type="radio"/> 2h semana<br><input type="radio"/> 3h semana<br><input type="radio"/> 4 a 5h semana<br><input type="radio"/> mas 5h semana                                                                                                                                   |
| como se considera                      | <input type="radio"/> sedentaria<br><input checked="" type="radio"/> poco activa<br><input type="radio"/> moderadamente activa<br><input type="radio"/> bastante activa<br><input type="radio"/> muy activa<br><input type="radio"/> no sabe                                                                                                                              |
| FUR                                    | [*DATA REMOVED*]                                                                                                                                                                                                                                                                                                                                                          |
| Semanas gestación 2T                   | _____                                                                                                                                                                                                                                                                                                                                                                     |
| Días gestación 2T                      | _____                                                                                                                                                                                                                                                                                                                                                                     |
| DBP 2T                                 | _____                                                                                                                                                                                                                                                                                                                                                                     |
| CC 2T                                  | _____                                                                                                                                                                                                                                                                                                                                                                     |

|                                                   |                                                                                                                                                                                                 |
|---------------------------------------------------|-------------------------------------------------------------------------------------------------------------------------------------------------------------------------------------------------|
| AC 2T                                             |                                                                                                                                                                                                 |
| LF 2T                                             |                                                                                                                                                                                                 |
| PFE 2T (Hadlock)                                  |                                                                                                                                                                                                 |
| Semanas gestación 3T                              | [*DATA REMOVED*]                                                                                                                                                                                |
| días 3T                                           | [*DATA REMOVED*]                                                                                                                                                                                |
| DBP 3T                                            | [*DATA REMOVED*]                                                                                                                                                                                |
| CC 3T                                             | [*DATA REMOVED*]                                                                                                                                                                                |
| AC 3T                                             | [*DATA REMOVED*]                                                                                                                                                                                |
| LF 3T                                             | [*DATA REMOVED*]                                                                                                                                                                                |
| PFE 3T (Hadlock)                                  | [*DATA REMOVED*]                                                                                                                                                                                |
| Semanas de gestación final                        | [*DATA REMOVED*]                                                                                                                                                                                |
| días gestación final                              | [*DATA REMOVED*]                                                                                                                                                                                |
| Localización placenta                             | <input type="radio"/> anterior<br><input type="radio"/> lateral derecha<br><input type="radio"/> lateral izquierda<br><input checked="" type="radio"/> posterior<br><input type="radio"/> fondo |
| Presentación longitudinal cefálica                | <input type="radio"/> no<br><input checked="" type="radio"/> si                                                                                                                                 |
| Dorso                                             | <input type="radio"/> izquierda anterior<br><input type="radio"/> izquierda posterior<br><input checked="" type="radio"/> derecha anterior<br><input type="radio"/> derecha posterior           |
| diámetro biparietal                               | [*DATA REMOVED*]                                                                                                                                                                                |
| Circunferencia craneal                            | [*DATA REMOVED*]                                                                                                                                                                                |
| Circunferencia abdominal                          | [*DATA REMOVED*]                                                                                                                                                                                |
| Longitud de femur                                 | [*DATA REMOVED*]                                                                                                                                                                                |
| tejido celular subcutáneo a nivel del muslo en mm | [*DATA REMOVED*]                                                                                                                                                                                |
| tejido celular subcutáneo en abdomen en mm        | [*DATA REMOVED*]                                                                                                                                                                                |



|                                               |                                                                                                                                                          |
|-----------------------------------------------|----------------------------------------------------------------------------------------------------------------------------------------------------------|
| Volumen del muslo en cm3                      | [*DATA REMOVED*]                                                                                                                                         |
| Peso fetal estimado según fórmula de Hadlock  | [*DATA REMOVED*]                                                                                                                                         |
| Percentil                                     | [*DATA REMOVED*]                                                                                                                                         |
| Peso fetal estimado según fórmula de Scioscia | _____                                                                                                                                                    |
| Peso fetal estimado según fórmula de LEE      | _____                                                                                                                                                    |
| Tipo de parto                                 | <input checked="" type="radio"/> eutocico<br><input type="radio"/> instrumentado/ventosa<br><input type="radio"/> cesarea                                |
| fecha de nacimiento                           | [*DATA REMOVED*]                                                                                                                                         |
| Días entre exploración y nacimiento           | [*DATA REMOVED*]                                                                                                                                         |
| Peso RN en g                                  | [*DATA REMOVED*]                                                                                                                                         |
| sexo                                          | <input checked="" type="radio"/> mujer<br><input type="radio"/> hombre                                                                                   |
| Apgar 1 minuto                                | [*DATA REMOVED*]                                                                                                                                         |
| Apgar 5 minutos                               | [*DATA REMOVED*]                                                                                                                                         |
| Apgar 10 minutos                              | _____                                                                                                                                                    |
| antecedente Covid durante gestación           | <input type="radio"/> Yes<br><input checked="" type="radio"/> No                                                                                         |
| Nivel de estudios                             | <input type="radio"/> ninguno<br><input type="radio"/> primarios<br><input type="radio"/> secundarios<br><input checked="" type="radio"/> universitarios |

# Base\_datos\_estimacion\_peso\_fetal

|                                       |                                                                                                                                                                                                                                                                                      |
|---------------------------------------|--------------------------------------------------------------------------------------------------------------------------------------------------------------------------------------------------------------------------------------------------------------------------------------|
| Número de identificación participante | 78                                                                                                                                                                                                                                                                                   |
| CODIGO PARTICIPANTE                   |                                                                                                                                                                                                                                                                                      |
| Edad                                  | [*DATA REMOVED*]                                                                                                                                                                                                                                                                     |
| Gestaciones                           | <input type="radio"/> 1<br><input type="radio"/> 2<br><input checked="" type="radio"/> 3<br><input type="radio"/> mas de 3                                                                                                                                                           |
| partos                                | <input type="radio"/> 0<br><input checked="" type="radio"/> 1<br><input type="radio"/> 2<br><input type="radio"/> 3<br><input type="radio"/> mas de 3                                                                                                                                |
| cesáreas                              | <input checked="" type="radio"/> 0<br><input type="radio"/> 1<br><input type="radio"/> 2<br><input type="radio"/> 3<br><input type="radio"/> mas de 3                                                                                                                                |
| Abortos                               | <input type="radio"/> 0<br><input checked="" type="radio"/> 1<br><input type="radio"/> 2<br><input type="radio"/> 3<br><input type="radio"/> mas de 3                                                                                                                                |
| Tipo de gestacion                     | <input checked="" type="radio"/> espontanea<br><input type="radio"/> IAC inseminación artificial conyuge<br><input type="radio"/> IAD inseminación artificial donante<br><input type="radio"/> FIV Fecundación in Vitro<br><input type="radio"/> Ovodon FIV con donación de ovocitos |
| peso previo a embarazo                | [*DATA REMOVED*]                                                                                                                                                                                                                                                                     |
| Ganancia ponderal embarazo            | [*DATA REMOVED*]                                                                                                                                                                                                                                                                     |
| Talla madre                           | [*DATA REMOVED*]                                                                                                                                                                                                                                                                     |
| IMC previo embarazo                   | 32.6530612244898                                                                                                                                                                                                                                                                     |
| Patología obstétrica                  | <input checked="" type="radio"/> no<br><input type="radio"/> si                                                                                                                                                                                                                      |
| Diabetes pregestacional               | <input checked="" type="radio"/> no<br><input type="radio"/> si                                                                                                                                                                                                                      |
| Diabetes gestacional                  | <input checked="" type="radio"/> no<br><input type="radio"/> si                                                                                                                                                                                                                      |

|                                            |                                                                                                                                                                                      |
|--------------------------------------------|--------------------------------------------------------------------------------------------------------------------------------------------------------------------------------------|
| Diabetes gestacional con insulina          | <input checked="" type="radio"/> no<br><input type="radio"/> si                                                                                                                      |
| Diabetes gestacional con dieta y ejercicio | <input checked="" type="radio"/> no<br><input type="radio"/> si                                                                                                                      |
| Percentil fetos previos                    | <input type="radio"/> Nada<br><input type="radio"/> percentil menor de 10<br><input checked="" type="radio"/> percentil entre 10 y 90<br><input type="radio"/> percentil mayor de 90 |
| Exfumadora                                 | <input checked="" type="radio"/> Nada<br><input type="radio"/> menos de 5 años<br><input type="radio"/> 5 a 10 años<br><input type="radio"/> mayor o igual a 10 años                 |
| Hábito tabáquico                           | <input type="radio"/> no<br><input checked="" type="radio"/> si                                                                                                                      |
| fumadora                                   | [*DATA REMOVED*]                                                                                                                                                                     |
| Consumo otros tóxicos                      | <input checked="" type="radio"/> no<br><input type="radio"/> si                                                                                                                      |
| Hb 1T                                      | [*DATA REMOVED*]                                                                                                                                                                     |
| Htc 1T                                     | [*DATA REMOVED*]                                                                                                                                                                     |
| Hb 2T                                      | [*DATA REMOVED*]                                                                                                                                                                     |
| HTC 2T                                     | [*DATA REMOVED*]                                                                                                                                                                     |
| Hb 3T                                      | [*DATA REMOVED*]                                                                                                                                                                     |
| HTC 3T                                     | [*DATA REMOVED*]                                                                                                                                                                     |
| Suplemento FE oral                         | <input type="radio"/> si<br><input checked="" type="radio"/> no                                                                                                                      |
| Suplemento fe iv                           | <input type="radio"/> si<br><input checked="" type="radio"/> no                                                                                                                      |
| Transfusión                                | <input checked="" type="radio"/> no<br><input type="radio"/> si                                                                                                                      |
| Solicitada Vit D                           | <input checked="" type="radio"/> no<br><input type="radio"/> si                                                                                                                      |
| Deficit vit D                              | <input type="radio"/> no<br><input type="radio"/> si                                                                                                                                 |
| Suplemento vit D                           | <input type="radio"/> si<br><input type="radio"/> no                                                                                                                                 |

|                       |                                                                                                                                                                                                                                                                                                                                                                                                              |
|-----------------------|--------------------------------------------------------------------------------------------------------------------------------------------------------------------------------------------------------------------------------------------------------------------------------------------------------------------------------------------------------------------------------------------------------------|
| Dieta, cuestionario   | <input checked="" type="radio"/> si<br><input type="radio"/> no                                                                                                                                                                                                                                                                                                                                              |
| Leche entera          | <input type="radio"/> Nunca o menos 1 vez al mes<br><input type="radio"/> 1 a 3 veces mes<br><input type="radio"/> 1 vez semana<br><input type="radio"/> 2 a 4 veces semana<br><input type="radio"/> 5 a 6 veces semana<br><input type="radio"/> 1 vez al día<br><input checked="" type="radio"/> 2 a 3 veces al día<br><input type="radio"/> 5 a 6 veces al día<br><input type="radio"/> más 6 veces al día |
| Leche semidesnatada   | <input type="radio"/> Nunca o menos 1 vez al mes<br><input type="radio"/> 1 a 3 veces mes<br><input type="radio"/> 1 vez semana<br><input type="radio"/> 2 a 4 veces semana<br><input type="radio"/> 5 a 6 veces semana<br><input type="radio"/> 1 vez al día<br><input checked="" type="radio"/> 2 a 3 veces al día<br><input type="radio"/> 5 a 6 veces al día<br><input type="radio"/> mas 6 veces al día |
| Leche desnatada       | <input type="radio"/> Nunca o menos 1 vez al mes<br><input type="radio"/> 1 a 3 veces mes<br><input type="radio"/> 1 vez semana<br><input type="radio"/> 2 a 4 veces semana<br><input type="radio"/> 5 a 6 veces semana<br><input type="radio"/> 1 vez al día<br><input type="radio"/> 2 a 3 veces al día<br><input type="radio"/> 5 a 6 veces al día<br><input type="radio"/> más 6 veces al día            |
| Leche condensada      | <input type="radio"/> Nunca o menos 1 vez al mes<br><input type="radio"/> 1 a 3 veces mes<br><input type="radio"/> 1 vez semana<br><input type="radio"/> 2 a 4 veces semana<br><input type="radio"/> 5 a 6 veces semana<br><input type="radio"/> 1 vez al día<br><input type="radio"/> 2 a 3 veces al día<br><input type="radio"/> 5 a 6 veces al día<br><input type="radio"/> más 6 veces al día            |
| nata o crema de leche | <input type="radio"/> Nunca o menos 1 vez al mes<br><input type="radio"/> 1 a 3 veces mes<br><input type="radio"/> 1 vez semana<br><input type="radio"/> 2 a 4 veces semana<br><input type="radio"/> 5 a 6 veces semana<br><input type="radio"/> 1 vez al día<br><input type="radio"/> 2 a 3 veces al día<br><input type="radio"/> 5 a 6 veces al día<br><input type="radio"/> más 6 veces al día            |

|                                             |                                                                                                                                                                                                                                                                                                                                                                                                   |
|---------------------------------------------|---------------------------------------------------------------------------------------------------------------------------------------------------------------------------------------------------------------------------------------------------------------------------------------------------------------------------------------------------------------------------------------------------|
| Yogurt Entero                               | <input type="radio"/> Nunca o menos 1 vez al mes<br><input type="radio"/> 1 a 3 veces mes<br><input type="radio"/> 1 vez semana<br><input type="radio"/> 2 a 4 veces semana<br><input type="radio"/> 5 a 6 veces semana<br><input type="radio"/> 1 vez al día<br><input type="radio"/> 2 a 3 veces al día<br><input type="radio"/> 5 a 6 veces al día<br><input type="radio"/> más 6 veces al día |
| Yogurt desnatado                            | <input type="radio"/> Nunca o menos 1 vez al mes<br><input type="radio"/> 1 a 3 veces mes<br><input type="radio"/> 1 vez semana<br><input type="radio"/> 2 a 4 veces semana<br><input type="radio"/> 5 a 6 veces semana<br><input type="radio"/> 1 vez al día<br><input type="radio"/> 2 a 3 veces al día<br><input type="radio"/> 5 a 6 veces al día<br><input type="radio"/> más 6 veces al día |
| 100g requesón o queso blando o queso fresco | <input type="radio"/> Nunca o menos 1 vez al mes<br><input type="radio"/> 1 a 3 veces mes<br><input type="radio"/> 1 vez semana<br><input type="radio"/> 2 a 4 veces semana<br><input type="radio"/> 5 a 6 veces semana<br><input type="radio"/> 1 vez al día<br><input type="radio"/> 2 a 3 veces al día<br><input type="radio"/> 5 a 6 veces al día<br><input type="radio"/> más 6 veces al día |
| queso curado o semicurado o cremoso         | <input type="radio"/> Nunca o menos 1 vez al mes<br><input type="radio"/> 1 a 3 veces mes<br><input type="radio"/> 1 vez semana<br><input type="radio"/> 2 a 4 veces semana<br><input type="radio"/> 5 a 6 veces semana<br><input type="radio"/> 1 vez al día<br><input type="radio"/> 2 a 3 veces al día<br><input type="radio"/> 5 a 6 veces al día<br><input type="radio"/> más 6 veces al día |
| natillas flan pudding                       | <input type="radio"/> Nunca o menos 1 vez al mes<br><input type="radio"/> 1 a 3 veces mes<br><input type="radio"/> 1 vez semana<br><input type="radio"/> 2 a 4 veces semana<br><input type="radio"/> 5 a 6 veces semana<br><input type="radio"/> 1 vez al día<br><input type="radio"/> 2 a 3 veces al día<br><input type="radio"/> 5 a 6 veces al día<br><input type="radio"/> más 6 veces al día |
| Helado                                      | <input type="radio"/> Nunca o menos 1 vez al mes<br><input type="radio"/> 1 a 3 veces mes<br><input type="radio"/> 1 vez semana<br><input type="radio"/> 2 a 4 veces semana<br><input type="radio"/> 5 a 6 veces semana<br><input type="radio"/> 1 vez al día<br><input type="radio"/> 2 a 3 veces al día<br><input type="radio"/> 5 a 6 veces al día<br><input type="radio"/> más 6 veces al día |

|                                      |                                                                                                                                                                                                                                                                                                                                                                                                              |
|--------------------------------------|--------------------------------------------------------------------------------------------------------------------------------------------------------------------------------------------------------------------------------------------------------------------------------------------------------------------------------------------------------------------------------------------------------------|
| huevo                                | <input type="radio"/> Nunca o menos 1 vez al mes<br><input type="radio"/> 1 a 3 veces mes<br><input type="radio"/> 1 vez semana<br><input checked="" type="radio"/> 2 a 4 veces semana<br><input type="radio"/> 5 a 6 veces semana<br><input type="radio"/> 1 vez al día<br><input type="radio"/> 2 a 3 veces al día<br><input type="radio"/> 5 a 6 veces al día<br><input type="radio"/> más 6 veces al día |
| Pollo con piel                       | <input type="radio"/> Nunca o menos 1 vez al mes<br><input type="radio"/> 1 a 3 veces mes<br><input checked="" type="radio"/> 1 vez semana<br><input type="radio"/> 2 a 4 veces semana<br><input type="radio"/> 5 a 6 veces semana<br><input type="radio"/> 1 vez al día<br><input type="radio"/> 2 a 3 veces al día<br><input type="radio"/> 5 a 6 veces al día<br><input type="radio"/> más 6 veces al día |
| pollo sin piel                       | <input type="radio"/> Nunca o menos 1 vez al mes<br><input type="radio"/> 1 a 3 veces mes<br><input checked="" type="radio"/> 1 vez semana<br><input type="radio"/> 2 a 4 veces semana<br><input type="radio"/> 5 a 6 veces semana<br><input type="radio"/> 1 vez al día<br><input type="radio"/> 2 a 3 veces al día<br><input type="radio"/> 5 a 6 veces al día<br><input type="radio"/> más 6 veces al día |
| Ternera o cerdo o cordero            | <input type="radio"/> Nunca o menos 1 vez al mes<br><input type="radio"/> 1 a 3 veces mes<br><input type="radio"/> 1 vez semana<br><input type="radio"/> 2 a 4 veces semana<br><input checked="" type="radio"/> 5 a 6 veces semana<br><input type="radio"/> 1 vez al día<br><input type="radio"/> 2 a 3 veces al día<br><input type="radio"/> 5 a 6 veces al día<br><input type="radio"/> más 6 veces al día |
| carne caza: Conejo o codorniz o pato | <input type="radio"/> Nunca o menos 1 vez al mes<br><input type="radio"/> 1 a 3 veces mes<br><input type="radio"/> 1 vez semana<br><input type="radio"/> 2 a 4 veces semana<br><input type="radio"/> 5 a 6 veces semana<br><input type="radio"/> 1 vez al día<br><input type="radio"/> 2 a 3 veces al día<br><input type="radio"/> 5 a 6 veces al día<br><input type="radio"/> más 6 veces al día            |
| Hígado de ternera o cerdo o pollo    | <input type="radio"/> Nunca o menos 1 vez al mes<br><input type="radio"/> 1 a 3 veces mes<br><input type="radio"/> 1 vez semana<br><input type="radio"/> 2 a 4 veces semana<br><input type="radio"/> 5 a 6 veces semana<br><input type="radio"/> 1 vez al día<br><input type="radio"/> 2 a 3 veces al día<br><input type="radio"/> 5 a 6 veces al día<br><input type="radio"/> más 6 veces al día            |

|                     |                                                                                                                                                                                                                                                                                                                                                                                                              |
|---------------------|--------------------------------------------------------------------------------------------------------------------------------------------------------------------------------------------------------------------------------------------------------------------------------------------------------------------------------------------------------------------------------------------------------------|
| Vísceras            | <input type="radio"/> Nunca o menos 1 vez al mes<br><input type="radio"/> 1 a 3 veces mes<br><input type="radio"/> 1 vez semana<br><input type="radio"/> 2 a 4 veces semana<br><input type="radio"/> 5 a 6 veces semana<br><input type="radio"/> 1 vez al día<br><input type="radio"/> 2 a 3 veces al día<br><input type="radio"/> 5 a 6 veces al día<br><input type="radio"/> más 6 veces al día            |
| Embutido            | <input type="radio"/> Nunca o menos 1 vez al mes<br><input type="radio"/> 1 a 3 veces mes<br><input type="radio"/> 1 vez semana<br><input type="radio"/> 2 a 4 veces semana<br><input type="radio"/> 5 a 6 veces semana<br><input type="radio"/> 1 vez al día<br><input type="radio"/> 2 a 3 veces al día<br><input type="radio"/> 5 a 6 veces al día<br><input type="radio"/> más 6 veces al día            |
| Salchicha o similar | <input type="radio"/> Nunca o menos 1 vez al mes<br><input type="radio"/> 1 a 3 veces mes<br><input type="radio"/> 1 vez semana<br><input type="radio"/> 2 a 4 veces semana<br><input type="radio"/> 5 a 6 veces semana<br><input type="radio"/> 1 vez al día<br><input type="radio"/> 2 a 3 veces al día<br><input type="radio"/> 5 a 6 veces al día<br><input type="radio"/> más 6 veces al día            |
| Pate o foiegras     | <input type="radio"/> Nunca o menos 1 vez al mes<br><input type="radio"/> 1 a 3 veces mes<br><input type="radio"/> 1 vez semana<br><input type="radio"/> 2 a 4 veces semana<br><input type="radio"/> 5 a 6 veces semana<br><input type="radio"/> 1 vez al día<br><input type="radio"/> 2 a 3 veces al día<br><input type="radio"/> 5 a 6 veces al día<br><input type="radio"/> más 6 veces al día            |
| Hamburguesa         | <input type="radio"/> Nunca o menos 1 vez al mes<br><input type="radio"/> 1 a 3 veces mes<br><input checked="" type="radio"/> 1 vez semana<br><input type="radio"/> 2 a 4 veces semana<br><input type="radio"/> 5 a 6 veces semana<br><input type="radio"/> 1 vez al día<br><input type="radio"/> 2 a 3 veces al día<br><input type="radio"/> 5 a 6 veces al día<br><input type="radio"/> más 6 veces al día |
| tocino o bacon      | <input type="radio"/> Nunca o menos 1 vez al mes<br><input type="radio"/> 1 a 3 veces mes<br><input type="radio"/> 1 vez semana<br><input type="radio"/> 2 a 4 veces semana<br><input type="radio"/> 5 a 6 veces semana<br><input type="radio"/> 1 vez al día<br><input type="radio"/> 2 a 3 veces al día<br><input type="radio"/> 5 a 6 veces al día<br><input type="radio"/> más 6 veces al día            |

---

|               |                                                                                                                                                                                                                                                                                                                                                                                                   |
|---------------|---------------------------------------------------------------------------------------------------------------------------------------------------------------------------------------------------------------------------------------------------------------------------------------------------------------------------------------------------------------------------------------------------|
| Pescado frito | <input type="radio"/> Nunca o menos 1 vez al mes<br><input type="radio"/> 1 a 3 veces mes<br><input type="radio"/> 1 vez semana<br><input type="radio"/> 2 a 4 veces semana<br><input type="radio"/> 5 a 6 veces semana<br><input type="radio"/> 1 vez al día<br><input type="radio"/> 2 a 3 veces al día<br><input type="radio"/> 5 a 6 veces al día<br><input type="radio"/> más 6 veces al día |
|---------------|---------------------------------------------------------------------------------------------------------------------------------------------------------------------------------------------------------------------------------------------------------------------------------------------------------------------------------------------------------------------------------------------------|

---

|                        |                                                                                                                                                                                                                                                                                                                                                                                                              |
|------------------------|--------------------------------------------------------------------------------------------------------------------------------------------------------------------------------------------------------------------------------------------------------------------------------------------------------------------------------------------------------------------------------------------------------------|
| pescado hervido blanco | <input type="radio"/> Nunca o menos 1 vez al mes<br><input type="radio"/> 1 a 3 veces mes<br><input checked="" type="radio"/> 1 vez semana<br><input type="radio"/> 2 a 4 veces semana<br><input type="radio"/> 5 a 6 veces semana<br><input type="radio"/> 1 vez al día<br><input type="radio"/> 2 a 3 veces al día<br><input type="radio"/> 5 a 6 veces al día<br><input type="radio"/> más 6 veces al día |
|------------------------|--------------------------------------------------------------------------------------------------------------------------------------------------------------------------------------------------------------------------------------------------------------------------------------------------------------------------------------------------------------------------------------------------------------|

---

|                      |                                                                                                                                                                                                                                                                                                                                                                                                   |
|----------------------|---------------------------------------------------------------------------------------------------------------------------------------------------------------------------------------------------------------------------------------------------------------------------------------------------------------------------------------------------------------------------------------------------|
| pescado hervido azul | <input type="radio"/> Nunca o menos 1 vez al mes<br><input type="radio"/> 1 a 3 veces mes<br><input type="radio"/> 1 vez semana<br><input type="radio"/> 2 a 4 veces semana<br><input type="radio"/> 5 a 6 veces semana<br><input type="radio"/> 1 vez al día<br><input type="radio"/> 2 a 3 veces al día<br><input type="radio"/> 5 a 6 veces al día<br><input type="radio"/> más 6 veces al día |
|----------------------|---------------------------------------------------------------------------------------------------------------------------------------------------------------------------------------------------------------------------------------------------------------------------------------------------------------------------------------------------------------------------------------------------|

---

|                    |                                                                                                                                                                                                                                                                                                                                                                                                   |
|--------------------|---------------------------------------------------------------------------------------------------------------------------------------------------------------------------------------------------------------------------------------------------------------------------------------------------------------------------------------------------------------------------------------------------|
| otros pescado azul | <input type="radio"/> Nunca o menos 1 vez al mes<br><input type="radio"/> 1 a 3 veces mes<br><input type="radio"/> 1 vez semana<br><input type="radio"/> 2 a 4 veces semana<br><input type="radio"/> 5 a 6 veces semana<br><input type="radio"/> 1 vez al día<br><input type="radio"/> 2 a 3 veces al día<br><input type="radio"/> 5 a 6 veces al día<br><input type="radio"/> más 6 veces al día |
|--------------------|---------------------------------------------------------------------------------------------------------------------------------------------------------------------------------------------------------------------------------------------------------------------------------------------------------------------------------------------------------------------------------------------------|

---

|               |                                                                                                                                                                                                                                                                                                                                                                                                              |
|---------------|--------------------------------------------------------------------------------------------------------------------------------------------------------------------------------------------------------------------------------------------------------------------------------------------------------------------------------------------------------------------------------------------------------------|
| atun conserva | <input type="radio"/> Nunca o menos 1 vez al mes<br><input type="radio"/> 1 a 3 veces mes<br><input checked="" type="radio"/> 1 vez semana<br><input type="radio"/> 2 a 4 veces semana<br><input type="radio"/> 5 a 6 veces semana<br><input type="radio"/> 1 vez al día<br><input type="radio"/> 2 a 3 veces al día<br><input type="radio"/> 5 a 6 veces al día<br><input type="radio"/> más 6 veces al día |
|---------------|--------------------------------------------------------------------------------------------------------------------------------------------------------------------------------------------------------------------------------------------------------------------------------------------------------------------------------------------------------------------------------------------------------------|

---

|                  |                                                                                                                                                                                                                                                                                                                                                                                                   |
|------------------|---------------------------------------------------------------------------------------------------------------------------------------------------------------------------------------------------------------------------------------------------------------------------------------------------------------------------------------------------------------------------------------------------|
| sardina conserva | <input type="radio"/> Nunca o menos 1 vez al mes<br><input type="radio"/> 1 a 3 veces mes<br><input type="radio"/> 1 vez semana<br><input type="radio"/> 2 a 4 veces semana<br><input type="radio"/> 5 a 6 veces semana<br><input type="radio"/> 1 vez al día<br><input type="radio"/> 2 a 3 veces al día<br><input type="radio"/> 5 a 6 veces al día<br><input type="radio"/> más 6 veces al día |
|------------------|---------------------------------------------------------------------------------------------------------------------------------------------------------------------------------------------------------------------------------------------------------------------------------------------------------------------------------------------------------------------------------------------------|



---

pescado ahumado

- ☐ Nunca o menos 1 vez al mes  
☐ 1 a 3 veces mes  
☐ 1 vez semana  
☐ 2 a 4 veces semana  
☐ 5 a 6 veces semana  
☐ 1 vez al día  
☐ 2 a 3 veces al día  
☐ 5 a 6 veces al día  
☐ más 6 veces al día

---

almejas o mejillones o ostras unos 100g

- ☐ Nunca o menos 1 vez al mes  
☐ 1 a 3 veces mes  
☒ 1 vez semana  
☐ 2 a 4 veces semana  
☐ 5 a 6 veces semana  
☐ 1 vez al día  
☐ 2 a 3 veces al día  
☐ 5 a 6 veces al día  
☐ más 6 veces al día

---

calamar o chipiron o sepia unos 100g

- ☐ Nunca o menos 1 vez al mes  
☐ 1 a 3 veces mes  
☐ 1 vez semana  
☐ 2 a 4 veces semana  
☐ 5 a 6 veces semana  
☐ 1 vez al día  
☐ 2 a 3 veces al día  
☐ 5 a 6 veces al día  
☐ más 6 veces al día

---

marisco unos 100g

- ☐ Nunca o menos 1 vez al mes  
☐ 1 a 3 veces mes  
☒ 1 vez semana  
☐ 2 a 4 veces semana  
☐ 5 a 6 veces semana  
☐ 1 vez al día  
☐ 2 a 3 veces al día  
☐ 5 a 6 veces al día  
☐ más 6 veces al día

---

Espinacas o acelgas cocinadas

- ☐ Nunca o menos 1 vez al mes  
☐ 1 a 3 veces mes  
☐ 1 vez semana  
☐ 2 a 4 veces semana  
☐ 5 a 6 veces semana  
☐ 1 vez al día  
☐ 2 a 3 veces al día  
☐ 5 a 6 veces al día  
☐ más 6 veces al día

---

Col o coliflor o brocoli cocinado

- ☐ Nunca o menos 1 vez al mes  
☐ 1 a 3 veces mes  
☐ 1 vez semana  
☐ 2 a 4 veces semana  
☐ 5 a 6 veces semana  
☐ 1 vez al día  
☐ 2 a 3 veces al día  
☐ 5 a 6 veces al día  
☐ más 6 veces al día

---

Lechuga o endivia o escarola

- ☐ Nunca o menos 1 vez al mes  
☐ 1 a 3 veces mes  
☐ 1 vez semana  
☒ 2 a 4 veces semana  
☐ 5 a 6 veces semana  
☐ 1 vez al día  
☐ 2 a 3 veces al día  
☐ 5 a 6 veces al día  
☐ más 6 veces al día

---

tomate ensalada

- ☐ Nunca o menos 1 vez al mes  
☐ 1 a 3 veces mes  
☐ 1 vez semana  
☒ 2 a 4 veces semana  
☐ 5 a 6 veces semana  
☐ 1 vez al día  
☐ 2 a 3 veces al día  
☐ 5 a 6 veces al día  
☐ más 6 veces al día

---

cebolla

- ☐ Nunca o menos 1 vez al mes  
☐ 1 a 3 veces mes  
☐ 1 vez semana  
☒ 2 a 4 veces semana  
☐ 5 a 6 veces semana  
☐ 1 vez al día  
☐ 2 a 3 veces al día  
☐ 5 a 6 veces al día  
☐ más 6 veces al día

---

Zanahoria o calabaza

- ☐ Nunca o menos 1 vez al mes  
☐ 1 a 3 veces mes  
☐ 1 vez semana  
☒ 2 a 4 veces semana  
☐ 5 a 6 veces semana  
☐ 1 vez al día  
☐ 2 a 3 veces al día  
☐ 5 a 6 veces al día  
☐ más 6 veces al día

---

Judías verdes

- ☐ Nunca o menos 1 vez al mes  
☐ 1 a 3 veces mes  
☐ 1 vez semana  
☒ 2 a 4 veces semana  
☐ 5 a 6 veces semana  
☐ 1 vez al día  
☐ 2 a 3 veces al día  
☐ 5 a 6 veces al día  
☐ más 6 veces al día

---

Berenjena o calabacin o pepino

- ☐ Nunca o menos 1 vez al mes  
☐ 1 a 3 veces mes  
☐ 1 vez semana  
☒ 2 a 4 veces semana  
☐ 5 a 6 veces semana  
☐ 1 vez al día  
☐ 2 a 3 veces al día  
☐ 5 a 6 veces al día  
☐ más 6 veces al día

|                       |                                                                                                                                                                                                                                                                                                                                                                                                              |
|-----------------------|--------------------------------------------------------------------------------------------------------------------------------------------------------------------------------------------------------------------------------------------------------------------------------------------------------------------------------------------------------------------------------------------------------------|
| pimiento              | <input type="radio"/> Nunca o menos 1 vez al mes<br><input type="radio"/> 1 a 3 veces mes<br><input type="radio"/> 1 vez semana<br><input type="radio"/> 2 a 4 veces semana<br><input type="radio"/> 5 a 6 veces semana<br><input type="radio"/> 1 vez al día<br><input type="radio"/> 2 a 3 veces al día<br><input type="radio"/> 5 a 6 veces al día<br><input type="radio"/> más 6 veces al día            |
| alcachofa             | <input type="radio"/> Nunca o menos 1 vez al mes<br><input type="radio"/> 1 a 3 veces mes<br><input type="radio"/> 1 vez semana<br><input checked="" type="radio"/> 2 a 4 veces semana<br><input type="radio"/> 5 a 6 veces semana<br><input type="radio"/> 1 vez al día<br><input type="radio"/> 2 a 3 veces al día<br><input type="radio"/> 5 a 6 veces al día<br><input type="radio"/> más 6 veces al día |
| espárragos            | <input type="radio"/> Nunca o menos 1 vez al mes<br><input type="radio"/> 1 a 3 veces mes<br><input type="radio"/> 1 vez semana<br><input type="radio"/> 2 a 4 veces semana<br><input type="radio"/> 5 a 6 veces semana<br><input type="radio"/> 1 vez al día<br><input type="radio"/> 2 a 3 veces al día<br><input type="radio"/> 5 a 6 veces al día<br><input type="radio"/> más 6 veces al día            |
| maíz hervido          | <input type="radio"/> Nunca o menos 1 vez al mes<br><input type="radio"/> 1 a 3 veces mes<br><input type="radio"/> 1 vez semana<br><input type="radio"/> 2 a 4 veces semana<br><input type="radio"/> 5 a 6 veces semana<br><input type="radio"/> 1 vez al día<br><input type="radio"/> 2 a 3 veces al día<br><input type="radio"/> 5 a 6 veces al día<br><input type="radio"/> más 6 veces al día            |
| legumbres             | <input type="radio"/> Nunca o menos 1 vez al mes<br><input type="radio"/> 1 a 3 veces mes<br><input checked="" type="radio"/> 1 vez semana<br><input type="radio"/> 2 a 4 veces semana<br><input type="radio"/> 5 a 6 veces semana<br><input type="radio"/> 1 vez al día<br><input type="radio"/> 2 a 3 veces al día<br><input type="radio"/> 5 a 6 veces al día<br><input type="radio"/> más 6 veces al día |
| naranjas o mandarinas | <input type="radio"/> Nunca o menos 1 vez al mes<br><input type="radio"/> 1 a 3 veces mes<br><input type="radio"/> 1 vez semana<br><input type="radio"/> 2 a 4 veces semana<br><input type="radio"/> 5 a 6 veces semana<br><input type="radio"/> 1 vez al día<br><input type="radio"/> 2 a 3 veces al día<br><input type="radio"/> 5 a 6 veces al día<br><input type="radio"/> más 6 veces al día            |

|                       |                                                                                                                                                                                                                                                                                                                                                                                                              |
|-----------------------|--------------------------------------------------------------------------------------------------------------------------------------------------------------------------------------------------------------------------------------------------------------------------------------------------------------------------------------------------------------------------------------------------------------|
| zum natural fruta     | <input type="radio"/> Nunca o menos 1 vez al mes<br><input type="radio"/> 1 a 3 veces mes<br><input type="radio"/> 1 vez semana<br><input type="radio"/> 2 a 4 veces semana<br><input type="radio"/> 5 a 6 veces semana<br><input type="radio"/> 1 vez al día<br><input type="radio"/> 2 a 3 veces al día<br><input type="radio"/> 5 a 6 veces al día<br><input type="radio"/> más 6 veces al día            |
| platano               | <input type="radio"/> Nunca o menos 1 vez al mes<br><input type="radio"/> 1 a 3 veces mes<br><input type="radio"/> 1 vez semana<br><input type="radio"/> 2 a 4 veces semana<br><input checked="" type="radio"/> 5 a 6 veces semana<br><input type="radio"/> 1 vez al día<br><input type="radio"/> 2 a 3 veces al día<br><input type="radio"/> 5 a 6 veces al día<br><input type="radio"/> más 6 veces al día |
| manzana o pera        | <input type="radio"/> Nunca o menos 1 vez al mes<br><input type="radio"/> 1 a 3 veces mes<br><input type="radio"/> 1 vez semana<br><input type="radio"/> 2 a 4 veces semana<br><input type="radio"/> 5 a 6 veces semana<br><input type="radio"/> 1 vez al día<br><input type="radio"/> 2 a 3 veces al día<br><input type="radio"/> 5 a 6 veces al día<br><input type="radio"/> más 6 veces al día            |
| melocotón o nectarina | <input type="radio"/> Nunca o menos 1 vez al mes<br><input type="radio"/> 1 a 3 veces mes<br><input type="radio"/> 1 vez semana<br><input type="radio"/> 2 a 4 veces semana<br><input type="radio"/> 5 a 6 veces semana<br><input type="radio"/> 1 vez al día<br><input type="radio"/> 2 a 3 veces al día<br><input type="radio"/> 5 a 6 veces al día<br><input type="radio"/> más 6 veces al día            |
| sandia o melon        | <input type="radio"/> Nunca o menos 1 vez al mes<br><input type="radio"/> 1 a 3 veces mes<br><input type="radio"/> 1 vez semana<br><input type="radio"/> 2 a 4 veces semana<br><input type="radio"/> 5 a 6 veces semana<br><input type="radio"/> 1 vez al día<br><input type="radio"/> 2 a 3 veces al día<br><input type="radio"/> 5 a 6 veces al día<br><input type="radio"/> más 6 veces al día            |
| uva                   | <input type="radio"/> Nunca o menos 1 vez al mes<br><input type="radio"/> 1 a 3 veces mes<br><input type="radio"/> 1 vez semana<br><input type="radio"/> 2 a 4 veces semana<br><input type="radio"/> 5 a 6 veces semana<br><input type="radio"/> 1 vez al día<br><input type="radio"/> 2 a 3 veces al día<br><input type="radio"/> 5 a 6 veces al día<br><input type="radio"/> más 6 veces al día            |

---

bruna o ciruela

- ☐ Nunca o menos 1 vez al mes
- ☐ 1 a 3 veces mes
- ☐ 1 vez semana
- ☐ 2 a 4 veces semana
- ☐ 5 a 6 veces semana
- ☐ 1 vez al día
- ☐ 2 a 3 veces al día
- ☐ 5 a 6 veces al día
- ☐ más 6 veces al día

---

kiwi

- ☐ Nunca o menos 1 vez al mes
- ☐ 1 a 3 veces mes
- ☐ 1 vez semana
- ☐ 2 a 4 veces semana
- ☐ 5 a 6 veces semana
- ☐ 1 vez al día
- ☐ 2 a 3 veces al día
- ☐ 5 a 6 veces al día
- ☐ más 6 veces al día

---

aceituna

- ☐ Nunca o menos 1 vez al mes
- ☐ 1 a 3 veces mes
- ☐ 1 vez semana
- ☐ 2 a 4 veces semana
- ☐ 5 a 6 veces semana
- ☐ 1 vez al día
- ☐ 2 a 3 veces al día
- ☐ 5 a 6 veces al día
- ☐ más 6 veces al día

---

frutos secos

- ☐ Nunca o menos 1 vez al mes
- ☐ 1 a 3 veces mes
- ☐ 1 vez semana
- ☐ 2 a 4 veces semana
- ☐ 5 a 6 veces semana
- ☐ 1 vez al día
- ☐ 2 a 3 veces al día
- ☐ 5 a 6 veces al día
- ☐ más 6 veces al día

---

pan blanco

- ☐ Nunca o menos 1 vez al mes
- ☐ 1 a 3 veces mes
- ☐ 1 vez semana
- ☐ 2 a 4 veces semana
- ☐ 5 a 6 veces semana
- ☒ 1 vez al día
- ☐ 2 a 3 veces al día
- ☐ 5 a 6 veces al día
- ☐ más 6 veces al día

---

pan integral

- ☐ Nunca o menos 1 vez al mes
- ☐ 1 a 3 veces mes
- ☐ 1 vez semana
- ☐ 2 a 4 veces semana
- ☐ 5 a 6 veces semana
- ☐ 1 vez al día
- ☐ 2 a 3 veces al día
- ☐ 5 a 6 veces al día
- ☐ más 6 veces al día

---

cereales desayuno

- ☐ Nunca o menos 1 vez al mes
- ☐ 1 a 3 veces mes
- ☐ 1 vez semana
- ☐ 2 a 4 veces semana
- ☐ 5 a 6 veces semana
- ☐ 1 vez al día
- ☐ 2 a 3 veces al día
- ☐ 5 a 6 veces al día
- ☐ más 6 veces al día

---

patatas fritas

- ☐ Nunca o menos 1 vez al mes
- ☐ 1 a 3 veces mes
- ☐ 1 vez semana
- ☒ 2 a 4 veces semana
- ☐ 5 a 6 veces semana
- ☐ 1 vez al día
- ☐ 2 a 3 veces al día
- ☐ 5 a 6 veces al día
- ☐ más 6 veces al día

---

patatas cocidas o asadas

- ☐ Nunca o menos 1 vez al mes
- ☐ 1 a 3 veces mes
- ☐ 1 vez semana
- ☒ 2 a 4 veces semana
- ☐ 5 a 6 veces semana
- ☐ 1 vez al día
- ☐ 2 a 3 veces al día
- ☐ 5 a 6 veces al día
- ☐ más 6 veces al día

---

bolsa papas

- ☐ Nunca o menos 1 vez al mes
- ☐ 1 a 3 veces mes
- ☐ 1 vez semana
- ☐ 2 a 4 veces semana
- ☐ 5 a 6 veces semana
- ☐ 1 vez al día
- ☐ 2 a 3 veces al día
- ☐ 5 a 6 veces al día
- ☐ más 6 veces al día

---

arroz cocinado

- ☐ Nunca o menos 1 vez al mes
- ☐ 1 a 3 veces mes
- ☐ 1 vez semana
- ☒ 2 a 4 veces semana
- ☐ 5 a 6 veces semana
- ☐ 1 vez al día
- ☐ 2 a 3 veces al día
- ☐ 5 a 6 veces al día
- ☐ más 6 veces al día

---

pasta

- ☐ Nunca o menos 1 vez al mes
- ☐ 1 a 3 veces mes
- ☐ 1 vez semana
- ☒ 2 a 4 veces semana
- ☐ 5 a 6 veces semana
- ☐ 1 vez al día
- ☐ 2 a 3 veces al día
- ☐ 5 a 6 veces al día
- ☐ más 6 veces al día

|                     |                                                                                                                                                                                                                                                                                                                                                                                                              |
|---------------------|--------------------------------------------------------------------------------------------------------------------------------------------------------------------------------------------------------------------------------------------------------------------------------------------------------------------------------------------------------------------------------------------------------------|
| pizza               | <input type="radio"/> Nunca o menos 1 vez al mes<br><input type="radio"/> 1 a 3 veces mes<br><input checked="" type="radio"/> 1 vez semana<br><input type="radio"/> 2 a 4 veces semana<br><input type="radio"/> 5 a 6 veces semana<br><input type="radio"/> 1 vez al día<br><input type="radio"/> 2 a 3 veces al día<br><input type="radio"/> 5 a 6 veces al día<br><input type="radio"/> más 6 veces al día |
| aceite oliva        | <input type="radio"/> Nunca o menos 1 vez al mes<br><input type="radio"/> 1 a 3 veces mes<br><input type="radio"/> 1 vez semana<br><input type="radio"/> 2 a 4 veces semana<br><input checked="" type="radio"/> 5 a 6 veces semana<br><input type="radio"/> 1 vez al día<br><input type="radio"/> 2 a 3 veces al día<br><input type="radio"/> 5 a 6 veces al día<br><input type="radio"/> más 6 veces al día |
| otros aceites       | <input type="radio"/> Nunca o menos 1 vez al mes<br><input type="radio"/> 1 a 3 veces mes<br><input type="radio"/> 1 vez semana<br><input type="radio"/> 2 a 4 veces semana<br><input type="radio"/> 5 a 6 veces semana<br><input type="radio"/> 1 vez al día<br><input type="radio"/> 2 a 3 veces al día<br><input type="radio"/> 5 a 6 veces al día<br><input type="radio"/> más 6 veces al día            |
| margarina           | <input type="radio"/> Nunca o menos 1 vez al mes<br><input type="radio"/> 1 a 3 veces mes<br><input type="radio"/> 1 vez semana<br><input type="radio"/> 2 a 4 veces semana<br><input type="radio"/> 5 a 6 veces semana<br><input type="radio"/> 1 vez al día<br><input type="radio"/> 2 a 3 veces al día<br><input type="radio"/> 5 a 6 veces al día<br><input type="radio"/> más 6 veces al día            |
| mantequilla         | <input type="radio"/> Nunca o menos 1 vez al mes<br><input type="radio"/> 1 a 3 veces mes<br><input type="radio"/> 1 vez semana<br><input type="radio"/> 2 a 4 veces semana<br><input type="radio"/> 5 a 6 veces semana<br><input type="radio"/> 1 vez al día<br><input type="radio"/> 2 a 3 veces al día<br><input type="radio"/> 5 a 6 veces al día<br><input type="radio"/> más 6 veces al día            |
| galletas tipo maria | <input type="radio"/> Nunca o menos 1 vez al mes<br><input type="radio"/> 1 a 3 veces mes<br><input type="radio"/> 1 vez semana<br><input type="radio"/> 2 a 4 veces semana<br><input type="radio"/> 5 a 6 veces semana<br><input type="radio"/> 1 vez al día<br><input type="radio"/> 2 a 3 veces al día<br><input type="radio"/> 5 a 6 veces al día<br><input type="radio"/> más 6 veces al día            |

---

galletas chocolate

- ☐ Nunca o menos 1 vez al mes
- ☐ 1 a 3 veces mes
- ☐ 1 vez semana
- ☐ 2 a 4 veces semana
- ☐ 5 a 6 veces semana
- ☐ 1 vez al día
- ☐ 2 a 3 veces al día
- ☐ 5 a 6 veces al día
- ☐ más 6 veces al día

---

bolleria

- ☐ Nunca o menos 1 vez al mes
- ☐ 1 a 3 veces mes
- ☐ 1 vez semana
- ☐ 2 a 4 veces semana
- ☐ 5 a 6 veces semana
- ☐ 1 vez al día
- ☐ 2 a 3 veces al día
- ☐ 5 a 6 veces al día
- ☐ más 6 veces al día

---

chocolate o bombones

- ☐ Nunca o menos 1 vez al mes
- ☐ 1 a 3 veces mes
- ☐ 1 vez semana
- ☐ 2 a 4 veces semana
- ☐ 5 a 6 veces semana
- ☐ 1 vez al día
- ☐ 2 a 3 veces al día
- ☐ 5 a 6 veces al día
- ☐ más 6 veces al día

---

chocolate polvo o colacao

- ☐ Nunca o menos 1 vez al mes
- ☐ 1 a 3 veces mes
- ☐ 1 vez semana
- ☐ 2 a 4 veces semana
- ☐ 5 a 6 veces semana
- ☐ 1 vez al día
- ☐ 2 a 3 veces al día
- ☐ 5 a 6 veces al día
- ☐ más 6 veces al día

---

vino tinto

- ☐ Nunca o menos 1 vez al mes
- ☐ 1 a 3 veces mes
- ☐ 1 vez semana
- ☐ 2 a 4 veces semana
- ☐ 5 a 6 veces semana
- ☐ 1 vez al día
- ☐ 2 a 3 veces al día
- ☐ 5 a 6 veces al día
- ☐ más 6 veces al día

---

vino blanco

- ☐ Nunca o menos 1 vez al mes
- ☐ 1 a 3 veces mes
- ☐ 1 vez semana
- ☐ 2 a 4 veces semana
- ☐ 5 a 6 veces semana
- ☐ 1 vez al día
- ☐ 2 a 3 veces al día
- ☐ 5 a 6 veces al día
- ☐ más 6 veces al día



|                       |                                                                                                                                                                                                                                                                                                                                                                                                              |
|-----------------------|--------------------------------------------------------------------------------------------------------------------------------------------------------------------------------------------------------------------------------------------------------------------------------------------------------------------------------------------------------------------------------------------------------------|
| vino seco o vermut    | <input type="radio"/> Nunca o menos 1 vez al mes<br><input type="radio"/> 1 a 3 veces mes<br><input type="radio"/> 1 vez semana<br><input type="radio"/> 2 a 4 veces semana<br><input type="radio"/> 5 a 6 veces semana<br><input type="radio"/> 1 vez al día<br><input type="radio"/> 2 a 3 veces al día<br><input type="radio"/> 5 a 6 veces al día<br><input type="radio"/> más 6 veces al día            |
| cerveza               | <input type="radio"/> Nunca o menos 1 vez al mes<br><input type="radio"/> 1 a 3 veces mes<br><input type="radio"/> 1 vez semana<br><input type="radio"/> 2 a 4 veces semana<br><input type="radio"/> 5 a 6 veces semana<br><input type="radio"/> 1 vez al día<br><input type="radio"/> 2 a 3 veces al día<br><input type="radio"/> 5 a 6 veces al día<br><input type="radio"/> más 6 veces al día            |
| cerveza sin alcohol   | <input type="radio"/> Nunca o menos 1 vez al mes<br><input type="radio"/> 1 a 3 veces mes<br><input type="radio"/> 1 vez semana<br><input type="radio"/> 2 a 4 veces semana<br><input type="radio"/> 5 a 6 veces semana<br><input type="radio"/> 1 vez al día<br><input type="radio"/> 2 a 3 veces al día<br><input type="radio"/> 5 a 6 veces al día<br><input type="radio"/> más 6 veces al día            |
| licores               | <input type="radio"/> Nunca o menos 1 vez al mes<br><input type="radio"/> 1 a 3 veces mes<br><input type="radio"/> 1 vez semana<br><input type="radio"/> 2 a 4 veces semana<br><input type="radio"/> 5 a 6 veces semana<br><input type="radio"/> 1 vez al día<br><input type="radio"/> 2 a 3 veces al día<br><input type="radio"/> 5 a 6 veces al día<br><input type="radio"/> más 6 veces al día            |
| ginebra o ron o vodka | <input type="radio"/> Nunca o menos 1 vez al mes<br><input type="radio"/> 1 a 3 veces mes<br><input type="radio"/> 1 vez semana<br><input type="radio"/> 2 a 4 veces semana<br><input type="radio"/> 5 a 6 veces semana<br><input type="radio"/> 1 vez al día<br><input type="radio"/> 2 a 3 veces al día<br><input type="radio"/> 5 a 6 veces al día<br><input type="radio"/> más 6 veces al día            |
| refresco normal       | <input type="radio"/> Nunca o menos 1 vez al mes<br><input type="radio"/> 1 a 3 veces mes<br><input checked="" type="radio"/> 1 vez semana<br><input type="radio"/> 2 a 4 veces semana<br><input type="radio"/> 5 a 6 veces semana<br><input type="radio"/> 1 vez al día<br><input type="radio"/> 2 a 3 veces al día<br><input type="radio"/> 5 a 6 veces al día<br><input type="radio"/> más 6 veces al día |

---

|                     |                                                                                                                                                                                                                                                                                                                                                                                                              |
|---------------------|--------------------------------------------------------------------------------------------------------------------------------------------------------------------------------------------------------------------------------------------------------------------------------------------------------------------------------------------------------------------------------------------------------------|
| refresco sin azúcar | <input type="radio"/> Nunca o menos 1 vez al mes<br><input type="radio"/> 1 a 3 veces mes<br><input checked="" type="radio"/> 1 vez semana<br><input type="radio"/> 2 a 4 veces semana<br><input type="radio"/> 5 a 6 veces semana<br><input type="radio"/> 1 vez al día<br><input type="radio"/> 2 a 3 veces al día<br><input type="radio"/> 5 a 6 veces al día<br><input type="radio"/> más 6 veces al día |
|---------------------|--------------------------------------------------------------------------------------------------------------------------------------------------------------------------------------------------------------------------------------------------------------------------------------------------------------------------------------------------------------------------------------------------------------|

---

|                |                                                                                                                                                                                                                                                                                                                                                                                                   |
|----------------|---------------------------------------------------------------------------------------------------------------------------------------------------------------------------------------------------------------------------------------------------------------------------------------------------------------------------------------------------------------------------------------------------|
| Agua del grifo | <input type="radio"/> Nunca o menos 1 vez al mes<br><input type="radio"/> 1 a 3 veces mes<br><input type="radio"/> 1 vez semana<br><input type="radio"/> 2 a 4 veces semana<br><input type="radio"/> 5 a 6 veces semana<br><input type="radio"/> 1 vez al día<br><input type="radio"/> 2 a 3 veces al día<br><input type="radio"/> 5 a 6 veces al día<br><input type="radio"/> más 6 veces al día |
|----------------|---------------------------------------------------------------------------------------------------------------------------------------------------------------------------------------------------------------------------------------------------------------------------------------------------------------------------------------------------------------------------------------------------|

---

|                          |                                                                                                                                                                                                                                                                                                                                                                                                              |
|--------------------------|--------------------------------------------------------------------------------------------------------------------------------------------------------------------------------------------------------------------------------------------------------------------------------------------------------------------------------------------------------------------------------------------------------------|
| agua embotellada sin gas | <input type="radio"/> Nunca o menos 1 vez al mes<br><input type="radio"/> 1 a 3 veces mes<br><input type="radio"/> 1 vez semana<br><input type="radio"/> 2 a 4 veces semana<br><input type="radio"/> 5 a 6 veces semana<br><input type="radio"/> 1 vez al día<br><input type="radio"/> 2 a 3 veces al día<br><input type="radio"/> 5 a 6 veces al día<br><input checked="" type="radio"/> más 6 veces al día |
|--------------------------|--------------------------------------------------------------------------------------------------------------------------------------------------------------------------------------------------------------------------------------------------------------------------------------------------------------------------------------------------------------------------------------------------------------|

---

|                          |                                                                                                                                                                                                                                                                                                                                                                                                   |
|--------------------------|---------------------------------------------------------------------------------------------------------------------------------------------------------------------------------------------------------------------------------------------------------------------------------------------------------------------------------------------------------------------------------------------------|
| agua embotellada con gas | <input type="radio"/> Nunca o menos 1 vez al mes<br><input type="radio"/> 1 a 3 veces mes<br><input type="radio"/> 1 vez semana<br><input type="radio"/> 2 a 4 veces semana<br><input type="radio"/> 5 a 6 veces semana<br><input type="radio"/> 1 vez al día<br><input type="radio"/> 2 a 3 veces al día<br><input type="radio"/> 5 a 6 veces al día<br><input type="radio"/> más 6 veces al día |
|--------------------------|---------------------------------------------------------------------------------------------------------------------------------------------------------------------------------------------------------------------------------------------------------------------------------------------------------------------------------------------------------------------------------------------------|

---

|                      |                                                                                                                                                                                                                                                                                                                                                                                                   |
|----------------------|---------------------------------------------------------------------------------------------------------------------------------------------------------------------------------------------------------------------------------------------------------------------------------------------------------------------------------------------------------------------------------------------------|
| zumو frutas embasado | <input type="radio"/> Nunca o menos 1 vez al mes<br><input type="radio"/> 1 a 3 veces mes<br><input type="radio"/> 1 vez semana<br><input type="radio"/> 2 a 4 veces semana<br><input type="radio"/> 5 a 6 veces semana<br><input type="radio"/> 1 vez al día<br><input type="radio"/> 2 a 3 veces al día<br><input type="radio"/> 5 a 6 veces al día<br><input type="radio"/> más 6 veces al día |
|----------------------|---------------------------------------------------------------------------------------------------------------------------------------------------------------------------------------------------------------------------------------------------------------------------------------------------------------------------------------------------------------------------------------------------|

---

|      |                                                                                                                                                                                                                                                                                                                                                                                                              |
|------|--------------------------------------------------------------------------------------------------------------------------------------------------------------------------------------------------------------------------------------------------------------------------------------------------------------------------------------------------------------------------------------------------------------|
| cafe | <input type="radio"/> Nunca o menos 1 vez al mes<br><input type="radio"/> 1 a 3 veces mes<br><input type="radio"/> 1 vez semana<br><input type="radio"/> 2 a 4 veces semana<br><input type="radio"/> 5 a 6 veces semana<br><input checked="" type="radio"/> 1 vez al día<br><input type="radio"/> 2 a 3 veces al día<br><input type="radio"/> 5 a 6 veces al día<br><input type="radio"/> más 6 veces al día |
|------|--------------------------------------------------------------------------------------------------------------------------------------------------------------------------------------------------------------------------------------------------------------------------------------------------------------------------------------------------------------------------------------------------------------|

---

---

cafe descafeinado

- ☐ Nunca o menos 1 vez al mes
- ☐ 1 a 3 veces mes
- ☐ 1 vez semana
- ☐ 2 a 4 veces semana
- ☐ 5 a 6 veces semana
- ☐ 1 vez al día
- ☐ 2 a 3 veces al día
- ☐ 5 a 6 veces al día
- ☐ más 6 veces al día

---

te o infusión

- ☐ Nunca o menos 1 vez al mes
- ☐ 1 a 3 veces mes
- ☐ 1 vez semana
- ☐ 2 a 4 veces semana
- ☐ 5 a 6 veces semana
- ☐ 1 vez al día
- ☐ 2 a 3 veces al día
- ☐ 5 a 6 veces al día
- ☐ más 6 veces al día

---

sopa o puré verduras

- ☐ Nunca o menos 1 vez al mes
- ☐ 1 a 3 veces mes
- ☐ 1 vez semana
- ☐ 2 a 4 veces semana
- ☐ 5 a 6 veces semana
- ☐ 1 vez al día
- ☐ 2 a 3 veces al día
- ☐ 5 a 6 veces al día
- ☐ más 6 veces al día

---

croquetas pollo jamón

- ☐ Nunca o menos 1 vez al mes
- ☐ 1 a 3 veces mes
- ☐ 1 vez semana
- ☐ 2 a 4 veces semana
- ☐ 5 a 6 veces semana
- ☐ 1 vez al día
- ☐ 2 a 3 veces al día
- ☐ 5 a 6 veces al día
- ☐ más 6 veces al día

---

croquetas pescado

- ☐ Nunca o menos 1 vez al mes
- ☐ 1 a 3 veces mes
- ☐ 1 vez semana
- ☐ 2 a 4 veces semana
- ☐ 5 a 6 veces semana
- ☐ 1 vez al día
- ☐ 2 a 3 veces al día
- ☐ 5 a 6 veces al día
- ☐ más 6 veces al día

---

mayonesa

- ☐ Nunca o menos 1 vez al mes
- ☐ 1 a 3 veces mes
- ☐ 1 vez semana
- ☐ 2 a 4 veces semana
- ☐ 5 a 6 veces semana
- ☐ 1 vez al día
- ☐ 2 a 3 veces al día
- ☐ 5 a 6 veces al día
- ☐ más 6 veces al día

---

salsa tomate

- ☐ Nunca o menos 1 vez al mes  
☐ 1 a 3 veces mes  
☐ 1 vez semana  
☒ 2 a 4 veces semana  
☐ 5 a 6 veces semana  
☐ 1 vez al día  
☐ 2 a 3 veces al día  
☐ 5 a 6 veces al día  
☐ más 6 veces al día

---

ketchup

- ☐ Nunca o menos 1 vez al mes  
☐ 1 a 3 veces mes  
☒ 1 vez semana  
☐ 2 a 4 veces semana  
☐ 5 a 6 veces semana  
☐ 1 vez al día  
☐ 2 a 3 veces al día  
☐ 5 a 6 veces al día  
☐ más 6 veces al día

---

sal

- ☐ Nunca o menos 1 vez al mes  
☐ 1 a 3 veces mes  
☐ 1 vez semana  
☐ 2 a 4 veces semana  
☐ 5 a 6 veces semana  
☐ 1 vez al día  
☒ 2 a 3 veces al día  
☐ 5 a 6 veces al día  
☐ más 6 veces al día

---

ajo

- ☐ Nunca o menos 1 vez al mes  
☐ 1 a 3 veces mes  
☐ 1 vez semana  
☐ 2 a 4 veces semana  
☐ 5 a 6 veces semana  
☐ 1 vez al día  
☐ 2 a 3 veces al día  
☐ 5 a 6 veces al día  
☐ más 6 veces al día

---

mermelada o miel

- ☐ Nunca o menos 1 vez al mes  
☐ 1 a 3 veces mes  
☐ 1 vez semana  
☐ 2 a 4 veces semana  
☐ 5 a 6 veces semana  
☐ 1 vez al día  
☐ 2 a 3 veces al día  
☐ 5 a 6 veces al día  
☐ más 6 veces al día

---

azúcar

- ☐ Nunca o menos 1 vez al mes  
☐ 1 a 3 veces mes  
☐ 1 vez semana  
☐ 2 a 4 veces semana  
☐ 5 a 6 veces semana  
☒ 1 vez al día  
☐ 2 a 3 veces al día  
☐ 5 a 6 veces al día  
☐ más 6 veces al día

|                                       |                                                                                                                                                                                                                                                                                                                                                                                                                                                                                                                               |
|---------------------------------------|-------------------------------------------------------------------------------------------------------------------------------------------------------------------------------------------------------------------------------------------------------------------------------------------------------------------------------------------------------------------------------------------------------------------------------------------------------------------------------------------------------------------------------|
| Otro alimento                         |                                                                                                                                                                                                                                                                                                                                                                                                                                                                                                                               |
| suplementos vitamínicos               | <input type="radio"/> si<br><input checked="" type="radio"/> no                                                                                                                                                                                                                                                                                                                                                                                                                                                               |
| suplementos vitamínicos               |                                                                                                                                                                                                                                                                                                                                                                                                                                                                                                                               |
| dieta previa                          | <input type="radio"/> si<br><input checked="" type="radio"/> no                                                                                                                                                                                                                                                                                                                                                                                                                                                               |
| motivo dieta                          | <input checked="" type="radio"/> no dieta<br><input type="radio"/> control peso<br><input type="radio"/> control colesterol<br><input type="radio"/> control diabetes<br><input type="radio"/> problemas estómago<br><input type="radio"/> problemas vesícula o hepáticos<br><input type="radio"/> HTA o cardiopatía<br><input type="radio"/> problemas renales<br><input type="radio"/> alergia alimentaria<br><input type="radio"/> ácido úrico elevado<br><input type="radio"/> vegetariana<br><input type="radio"/> otros |
| cambio alimentos año previo gestación | <input checked="" type="radio"/> si<br><input type="radio"/> no                                                                                                                                                                                                                                                                                                                                                                                                                                                               |
| cambio lácteos                        | <input type="radio"/> eliminado<br><input type="radio"/> disminuido<br><input checked="" type="radio"/> igual<br><input type="radio"/> aumentado<br><input type="radio"/> no sabe                                                                                                                                                                                                                                                                                                                                             |
| cambio huevos                         | <input type="radio"/> eliminado<br><input type="radio"/> disminuido<br><input checked="" type="radio"/> igual<br><input type="radio"/> aumentado<br><input type="radio"/> no sabe                                                                                                                                                                                                                                                                                                                                             |
| cambio carne                          | <input type="radio"/> eliminado<br><input type="radio"/> disminuido<br><input checked="" type="radio"/> igual<br><input type="radio"/> aumentado<br><input type="radio"/> no sabe                                                                                                                                                                                                                                                                                                                                             |
| cambio pescado                        | <input type="radio"/> eliminado<br><input type="radio"/> disminuido<br><input checked="" type="radio"/> igual<br><input type="radio"/> aumentado<br><input type="radio"/> no sabe                                                                                                                                                                                                                                                                                                                                             |
| cambio verduras                       | <input type="radio"/> eliminado<br><input type="radio"/> disminuido<br><input checked="" type="radio"/> igual<br><input type="radio"/> aumentado<br><input type="radio"/> no sabe                                                                                                                                                                                                                                                                                                                                             |

|                            |                                                                                                                                                                                                                        |
|----------------------------|------------------------------------------------------------------------------------------------------------------------------------------------------------------------------------------------------------------------|
| cambio legumbres           | <input type="radio"/> eliminado<br><input type="radio"/> disminuido<br><input checked="" type="radio"/> igual<br><input type="radio"/> aumentado<br><input type="radio"/> no sabe                                      |
| cambio fruta               | <input type="radio"/> eliminado<br><input type="radio"/> disminuido<br><input checked="" type="radio"/> igual<br><input type="radio"/> aumentado<br><input type="radio"/> no sabe                                      |
| cambio pan                 | <input type="radio"/> eliminado<br><input type="radio"/> disminuido<br><input checked="" type="radio"/> igual<br><input type="radio"/> aumentado<br><input type="radio"/> no sabe                                      |
| cambio aceite oliva        | <input type="radio"/> eliminado<br><input type="radio"/> disminuido<br><input checked="" type="radio"/> igual<br><input type="radio"/> aumentado<br><input type="radio"/> no sabe                                      |
| cambio mante o margarina   | <input type="radio"/> eliminado<br><input type="radio"/> disminuido<br><input checked="" type="radio"/> igual<br><input type="radio"/> aumentado<br><input type="radio"/> no sabe                                      |
| cambio azúcar y dulces     | <input type="radio"/> eliminado<br><input type="radio"/> disminuido<br><input checked="" type="radio"/> igual<br><input type="radio"/> aumentado<br><input type="radio"/> no sabe                                      |
| cambio bebidas alcohólicas | <input checked="" type="radio"/> eliminado<br><input type="radio"/> disminuido<br><input type="radio"/> igual<br><input type="radio"/> aumentado<br><input type="radio"/> no sabe                                      |
| frecuencia comidas fritas  | <input type="radio"/> a diario<br><input type="radio"/> 5 a 6 veces semana<br><input type="radio"/> 2 a 4 veces semana<br><input type="radio"/> 1 vez semana<br><input checked="" type="radio"/> menos de 1 vez semana |
| carne                      | <input type="radio"/> no como<br><input type="radio"/> cruda<br><input type="radio"/> poco hecha<br><input type="radio"/> hecha<br><input checked="" type="radio"/> muy hecha                                          |
| grasa visible carne        | <input type="radio"/> quita toda<br><input checked="" type="radio"/> quita mayoría<br><input type="radio"/> quita un poco<br><input type="radio"/> no quita nada                                                       |

|                                |                                                                                                                                                                                                                                               |
|--------------------------------|-----------------------------------------------------------------------------------------------------------------------------------------------------------------------------------------------------------------------------------------------|
| cocina carne                   | <input type="radio"/> a la plancha<br><input type="radio"/> a la parrilla<br><input type="radio"/> asada<br><input type="radio"/> frita<br><input checked="" type="radio"/> guisada                                                           |
| tostado quemado carne          | <input checked="" type="radio"/> nunca<br><input type="radio"/> 1 vez mes<br><input type="radio"/> 2 a 3 veces mes<br><input type="radio"/> 1 vez semana<br><input type="radio"/> 2 a 3 semanas                                               |
| tostado quemado pescado        | <input checked="" type="radio"/> nunca<br><input type="radio"/> 1 vez mes<br><input type="radio"/> 2 a 3 veces mes<br><input type="radio"/> 1 vez semana<br><input type="radio"/> 2 a 3 semanas                                               |
| socarrat paella                | <input type="radio"/> nunca<br><input type="radio"/> 1 vez mes<br><input type="radio"/> 2 a 3 veces mes<br><input type="radio"/> 1 vez semana<br><input type="radio"/> 2 a 3 semanas                                                          |
| grasa o aceite cocinar         | <input type="radio"/> mantequilla<br><input type="radio"/> margarina<br><input type="radio"/> aceite oliva<br><input type="radio"/> aceite oliva virgen extra<br><input type="radio"/> aceite vegetal<br><input type="radio"/> mezcla aceites |
| grasa aceite aliñar            | <input type="radio"/> mantequilla<br><input type="radio"/> margarina<br><input type="radio"/> aceite oliva<br><input type="radio"/> aceite oliva virgen extra<br><input type="radio"/> aceite vegetal<br><input type="radio"/> mezcla aceites |
| grasa aceite freir             | <input type="radio"/> mantequilla<br><input type="radio"/> margarina<br><input type="radio"/> aceite oliva<br><input type="radio"/> aceite oliva virgen extra<br><input type="radio"/> aceite vegetal<br><input type="radio"/> mezcla aceites |
| Ejercicio cuestionario         | <input type="radio"/> si<br><input checked="" type="radio"/> no                                                                                                                                                                               |
| horas de sueño incluido siesta | _____                                                                                                                                                                                                                                         |
| minutos siesta                 | _____                                                                                                                                                                                                                                         |
| horas televisión semana        | _____                                                                                                                                                                                                                                         |

|                                        |                                                                                                                                                                                                                                                                                                                                                                |
|----------------------------------------|----------------------------------------------------------------------------------------------------------------------------------------------------------------------------------------------------------------------------------------------------------------------------------------------------------------------------------------------------------------|
| actividad trabajo                      | <input type="radio"/> casi siempre sentado<br><input type="radio"/> sentado 50 por cien<br><input type="radio"/> casi siempre de pie, quieto<br><input type="radio"/> casi siempre levantado caminando y llevando pocas cosas<br><input type="radio"/> casi siempre levantado, caminando y llevado muchas cosas<br><input type="radio"/> trabajo manual pesado |
| tiempo caminar o bici al día           | <input type="radio"/> casi nunca<br><input type="radio"/> menos 20min día<br><input type="radio"/> 20 a 40 min día<br><input type="radio"/> 40 a 60 min día<br><input type="radio"/> 1h o 1h y media día<br><input type="radio"/> más de 1h y media al día                                                                                                     |
| tiempo tareas casa al día              | <input type="radio"/> menos de 1h día<br><input type="radio"/> 1 a 2h día<br><input type="radio"/> 3 a 4h día<br><input type="radio"/> 5 a 6h día<br><input type="radio"/> 7 a 8h día<br><input type="radio"/> más de 8h día                                                                                                                                   |
| tiempo libre televisión ordenador leer | <input type="radio"/> menos 1h día<br><input type="radio"/> 1h día<br><input type="radio"/> 2h día<br><input type="radio"/> 3h día<br><input type="radio"/> 4h día<br><input type="radio"/> 5 a 6h día<br><input type="radio"/> mas 6h día                                                                                                                     |
| tiempo libre ejercicio o deporte       | <input type="radio"/> menos 1h semana<br><input type="radio"/> 1h semana<br><input type="radio"/> 2h semana<br><input type="radio"/> 3h semana<br><input type="radio"/> 4 a 5h semana<br><input type="radio"/> mas 5h semana                                                                                                                                   |
| como se considera                      | <input type="radio"/> sedentaria<br><input type="radio"/> poco activa<br><input type="radio"/> moderadamente activa<br><input type="radio"/> bastante activa<br><input type="radio"/> muy activa<br><input type="radio"/> no sabe                                                                                                                              |
| FUR                                    | [*DATA REMOVED*]                                                                                                                                                                                                                                                                                                                                               |
| Semanas gestación 2T                   | [*DATA REMOVED*]                                                                                                                                                                                                                                                                                                                                               |
| Días gestación 2T                      | [*DATA REMOVED*]                                                                                                                                                                                                                                                                                                                                               |
| DBP 2T                                 | [*DATA REMOVED*]                                                                                                                                                                                                                                                                                                                                               |
| CC 2T                                  | [*DATA REMOVED*]                                                                                                                                                                                                                                                                                                                                               |
| AC 2T                                  | [*DATA REMOVED*]                                                                                                                                                                                                                                                                                                                                               |



|                                                   |                                                                                                                                                                                                 |
|---------------------------------------------------|-------------------------------------------------------------------------------------------------------------------------------------------------------------------------------------------------|
| LF 2T                                             | [*DATA REMOVED*]                                                                                                                                                                                |
| PFE 2T (Hadlock)                                  | [*DATA REMOVED*]                                                                                                                                                                                |
| Semanas gestación 3T                              | [*DATA REMOVED*]                                                                                                                                                                                |
| días 3T                                           | [*DATA REMOVED*]                                                                                                                                                                                |
| DBP 3T                                            | [*DATA REMOVED*]                                                                                                                                                                                |
| CC 3T                                             | [*DATA REMOVED*]                                                                                                                                                                                |
| AC 3T                                             | [*DATA REMOVED*]                                                                                                                                                                                |
| LF 3T                                             | [*DATA REMOVED*]                                                                                                                                                                                |
| PFE 3T (Hadlock)                                  | [*DATA REMOVED*]                                                                                                                                                                                |
| Semanas de gestación final                        | [*DATA REMOVED*]                                                                                                                                                                                |
| días gestación final                              | [*DATA REMOVED*]                                                                                                                                                                                |
| Localización placenta                             | <input checked="" type="radio"/> anterior<br><input type="radio"/> lateral derecha<br><input type="radio"/> lateral izquierda<br><input type="radio"/> posterior<br><input type="radio"/> fondo |
| Presentación longitudinal cefálica                | <input type="radio"/> no<br><input checked="" type="radio"/> si                                                                                                                                 |
| Dorso                                             | <input checked="" type="radio"/> izquierda anterior<br><input type="radio"/> izquierda posterior<br><input type="radio"/> derecha anterior<br><input type="radio"/> derecha posterior           |
| diámetro biparietal                               | [*DATA REMOVED*]                                                                                                                                                                                |
| Circunferencia craneal                            | [*DATA REMOVED*]                                                                                                                                                                                |
| Circunferencia abdominal                          | [*DATA REMOVED*]                                                                                                                                                                                |
| Longitud de femur                                 | [*DATA REMOVED*]                                                                                                                                                                                |
| tejido celular subcutáneo a nivel del muslo en mm | [*DATA REMOVED*]                                                                                                                                                                                |
| tejido celular subcutáneo en abdomen en mm        | [*DATA REMOVED*]                                                                                                                                                                                |
| Volumen del muslo en cm3                          | [*DATA REMOVED*]                                                                                                                                                                                |
| Peso fetal estimado según fórmula de Hadlock      | [*DATA REMOVED*]                                                                                                                                                                                |

|                                               |                                                                                                                                                          |
|-----------------------------------------------|----------------------------------------------------------------------------------------------------------------------------------------------------------|
| Percentil                                     | [*DATA REMOVED*]                                                                                                                                         |
| Peso fetal estimado según fórmula de Scioscia | <hr/>                                                                                                                                                    |
| Peso fetal estimado según fórmula de LEE      | <hr/>                                                                                                                                                    |
| Tipo de parto                                 | <input checked="" type="radio"/> eutocico<br><input type="radio"/> instrumentado/ventosa<br><input type="radio"/> cesarea                                |
| fecha de nacimiento                           | [*DATA REMOVED*]                                                                                                                                         |
| Días entre exploración y nacimiento           | [*DATA REMOVED*]                                                                                                                                         |
| Peso RN en g                                  | [*DATA REMOVED*]                                                                                                                                         |
| sexo                                          | <input checked="" type="radio"/> mujer<br><input type="radio"/> hombre                                                                                   |
| Apgar 1 minuto                                | [*DATA REMOVED*]                                                                                                                                         |
| Apgar 5 minutos                               | [*DATA REMOVED*]                                                                                                                                         |
| Apgar 10 minutos                              | <hr/>                                                                                                                                                    |
| antecedente Covid durante gestación           | <input type="radio"/> Yes<br><input checked="" type="radio"/> No                                                                                         |
| Nivel de estudios                             | <input type="radio"/> ninguno<br><input type="radio"/> primarios<br><input checked="" type="radio"/> secundarios<br><input type="radio"/> universitarios |

# Base\_datos\_estimacion\_peso\_fetal

|                                       |                                                                                                                                                                                                                                                                                      |
|---------------------------------------|--------------------------------------------------------------------------------------------------------------------------------------------------------------------------------------------------------------------------------------------------------------------------------------|
| Número de identificación participante | 79                                                                                                                                                                                                                                                                                   |
| CODIGO PARTICIPANTE                   |                                                                                                                                                                                                                                                                                      |
| Edad                                  | [*DATA REMOVED*]                                                                                                                                                                                                                                                                     |
| Gestaciones                           | <input checked="" type="radio"/> 1<br><input type="radio"/> 2<br><input type="radio"/> 3<br><input type="radio"/> mas de 3                                                                                                                                                           |
| partos                                | <input checked="" type="radio"/> 0<br><input type="radio"/> 1<br><input type="radio"/> 2<br><input type="radio"/> 3<br><input type="radio"/> mas de 3                                                                                                                                |
| cesáreas                              | <input checked="" type="radio"/> 0<br><input type="radio"/> 1<br><input type="radio"/> 2<br><input type="radio"/> 3<br><input type="radio"/> mas de 3                                                                                                                                |
| Abortos                               | <input checked="" type="radio"/> 0<br><input type="radio"/> 1<br><input type="radio"/> 2<br><input type="radio"/> 3<br><input type="radio"/> mas de 3                                                                                                                                |
| Tipo de gestacion                     | <input checked="" type="radio"/> espontanea<br><input type="radio"/> IAC inseminación artificial conyuge<br><input type="radio"/> IAD inseminación artificial donante<br><input type="radio"/> FIV Fecundación in Vitro<br><input type="radio"/> Ovodon FIV con donación de ovocitos |
| peso previo a embarazo                | [*DATA REMOVED*]                                                                                                                                                                                                                                                                     |
| Ganancia ponderal embarazo            | [*DATA REMOVED*]                                                                                                                                                                                                                                                                     |
| Talla madre                           | [*DATA REMOVED*]                                                                                                                                                                                                                                                                     |
| IMC previo embarazo                   | 20.685150239512268                                                                                                                                                                                                                                                                   |
| Patología obstétrica                  | <input checked="" type="radio"/> no<br><input type="radio"/> si                                                                                                                                                                                                                      |
| Diabetes pregestacional               | <input checked="" type="radio"/> no<br><input type="radio"/> si                                                                                                                                                                                                                      |
| Diabetes gestacional                  | <input checked="" type="radio"/> no<br><input type="radio"/> si                                                                                                                                                                                                                      |

|                                            |                                                                                                                                                                                      |
|--------------------------------------------|--------------------------------------------------------------------------------------------------------------------------------------------------------------------------------------|
| Diabetes gestacional con insulina          | <input checked="" type="radio"/> no<br><input type="radio"/> si                                                                                                                      |
| Diabetes gestacional con dieta y ejercicio | <input checked="" type="radio"/> no<br><input type="radio"/> si                                                                                                                      |
| Percentil fetos previos                    | <input checked="" type="radio"/> Nada<br><input type="radio"/> percentil menor de 10<br><input type="radio"/> percentil entre 10 y 90<br><input type="radio"/> percentil mayor de 90 |
| Exfumadora                                 | <input checked="" type="radio"/> Nada<br><input type="radio"/> menos de 5 años<br><input type="radio"/> 5 a 10 años<br><input type="radio"/> mayor o igual a 10 años                 |
| Hábito tabáquico                           | <input checked="" type="radio"/> no<br><input type="radio"/> si                                                                                                                      |
| fumadora                                   | [*DATA REMOVED*]                                                                                                                                                                     |
| Consumo otros tóxicos                      | <input checked="" type="radio"/> no<br><input type="radio"/> si                                                                                                                      |
| Hb 1T                                      | [*DATA REMOVED*]                                                                                                                                                                     |
| Htc 1T                                     | [*DATA REMOVED*]                                                                                                                                                                     |
| Hb 2T                                      | [*DATA REMOVED*]                                                                                                                                                                     |
| HTC 2T                                     | [*DATA REMOVED*]                                                                                                                                                                     |
| Hb 3T                                      | [*DATA REMOVED*]                                                                                                                                                                     |
| HTC 3T                                     | [*DATA REMOVED*]                                                                                                                                                                     |
| Suplemento FE oral                         | <input type="radio"/> si<br><input checked="" type="radio"/> no                                                                                                                      |
| Suplemento fe iv                           | <input type="radio"/> si<br><input type="radio"/> no                                                                                                                                 |
| Transfusión                                | <input type="radio"/> no<br><input type="radio"/> si                                                                                                                                 |
| Solicitada Vit D                           | <input checked="" type="radio"/> no<br><input type="radio"/> si                                                                                                                      |
| Deficit vit D                              | <input type="radio"/> no<br><input type="radio"/> si                                                                                                                                 |
| Suplemento vit D                           | <input type="radio"/> si<br><input type="radio"/> no                                                                                                                                 |

|                       |                                                                                                                                                                                                                                                                                                                                                                                                              |
|-----------------------|--------------------------------------------------------------------------------------------------------------------------------------------------------------------------------------------------------------------------------------------------------------------------------------------------------------------------------------------------------------------------------------------------------------|
| Dieta, cuestionario   | <input checked="" type="radio"/> sí<br><input type="radio"/> no                                                                                                                                                                                                                                                                                                                                              |
| Leche entera          | <input checked="" type="radio"/> Nunca o menos 1 vez al mes<br><input type="radio"/> 1 a 3 veces mes<br><input type="radio"/> 1 vez semana<br><input type="radio"/> 2 a 4 veces semana<br><input type="radio"/> 5 a 6 veces semana<br><input type="radio"/> 1 vez al día<br><input type="radio"/> 2 a 3 veces al día<br><input type="radio"/> 5 a 6 veces al día<br><input type="radio"/> más 6 veces al día |
| Leche semidesnatada   | <input checked="" type="radio"/> Nunca o menos 1 vez al mes<br><input type="radio"/> 1 a 3 veces mes<br><input type="radio"/> 1 vez semana<br><input type="radio"/> 2 a 4 veces semana<br><input type="radio"/> 5 a 6 veces semana<br><input type="radio"/> 1 vez al día<br><input type="radio"/> 2 a 3 veces al día<br><input type="radio"/> 5 a 6 veces al día<br><input type="radio"/> mas 6 veces al día |
| Leche desnatada       | <input checked="" type="radio"/> Nunca o menos 1 vez al mes<br><input type="radio"/> 1 a 3 veces mes<br><input type="radio"/> 1 vez semana<br><input type="radio"/> 2 a 4 veces semana<br><input type="radio"/> 5 a 6 veces semana<br><input type="radio"/> 1 vez al día<br><input type="radio"/> 2 a 3 veces al día<br><input type="radio"/> 5 a 6 veces al día<br><input type="radio"/> más 6 veces al día |
| Leche condensada      | <input checked="" type="radio"/> Nunca o menos 1 vez al mes<br><input type="radio"/> 1 a 3 veces mes<br><input type="radio"/> 1 vez semana<br><input type="radio"/> 2 a 4 veces semana<br><input type="radio"/> 5 a 6 veces semana<br><input type="radio"/> 1 vez al día<br><input type="radio"/> 2 a 3 veces al día<br><input type="radio"/> 5 a 6 veces al día<br><input type="radio"/> más 6 veces al día |
| nata o crema de leche | <input type="radio"/> Nunca o menos 1 vez al mes<br><input checked="" type="radio"/> 1 a 3 veces mes<br><input type="radio"/> 1 vez semana<br><input type="radio"/> 2 a 4 veces semana<br><input type="radio"/> 5 a 6 veces semana<br><input type="radio"/> 1 vez al día<br><input type="radio"/> 2 a 3 veces al día<br><input type="radio"/> 5 a 6 veces al día<br><input type="radio"/> más 6 veces al día |

|                                             |                                                                                                                                                                                                                                                                                                                                                                                                              |
|---------------------------------------------|--------------------------------------------------------------------------------------------------------------------------------------------------------------------------------------------------------------------------------------------------------------------------------------------------------------------------------------------------------------------------------------------------------------|
| Yogurt Entero                               | <input checked="" type="radio"/> Nunca o menos 1 vez al mes<br><input type="radio"/> 1 a 3 veces mes<br><input type="radio"/> 1 vez semana<br><input type="radio"/> 2 a 4 veces semana<br><input type="radio"/> 5 a 6 veces semana<br><input type="radio"/> 1 vez al día<br><input type="radio"/> 2 a 3 veces al día<br><input type="radio"/> 5 a 6 veces al día<br><input type="radio"/> más 6 veces al día |
| Yogurt desnatado                            | <input type="radio"/> Nunca o menos 1 vez al mes<br><input type="radio"/> 1 a 3 veces mes<br><input type="radio"/> 1 vez semana<br><input checked="" type="radio"/> 2 a 4 veces semana<br><input type="radio"/> 5 a 6 veces semana<br><input type="radio"/> 1 vez al día<br><input type="radio"/> 2 a 3 veces al día<br><input type="radio"/> 5 a 6 veces al día<br><input type="radio"/> más 6 veces al día |
| 100g requesón o queso blando o queso fresco | <input type="radio"/> Nunca o menos 1 vez al mes<br><input checked="" type="radio"/> 1 a 3 veces mes<br><input type="radio"/> 1 vez semana<br><input type="radio"/> 2 a 4 veces semana<br><input type="radio"/> 5 a 6 veces semana<br><input type="radio"/> 1 vez al día<br><input type="radio"/> 2 a 3 veces al día<br><input type="radio"/> 5 a 6 veces al día<br><input type="radio"/> más 6 veces al día |
| queso curado o semicurado o cremoso         | <input type="radio"/> Nunca o menos 1 vez al mes<br><input type="radio"/> 1 a 3 veces mes<br><input type="radio"/> 1 vez semana<br><input checked="" type="radio"/> 2 a 4 veces semana<br><input type="radio"/> 5 a 6 veces semana<br><input type="radio"/> 1 vez al día<br><input type="radio"/> 2 a 3 veces al día<br><input type="radio"/> 5 a 6 veces al día<br><input type="radio"/> más 6 veces al día |
| natillas flan pudding                       | <input type="radio"/> Nunca o menos 1 vez al mes<br><input type="radio"/> 1 a 3 veces mes<br><input type="radio"/> 1 vez semana<br><input type="radio"/> 2 a 4 veces semana<br><input type="radio"/> 5 a 6 veces semana<br><input type="radio"/> 1 vez al día<br><input type="radio"/> 2 a 3 veces al día<br><input type="radio"/> 5 a 6 veces al día<br><input type="radio"/> más 6 veces al día            |
| Helado                                      | <input checked="" type="radio"/> Nunca o menos 1 vez al mes<br><input type="radio"/> 1 a 3 veces mes<br><input type="radio"/> 1 vez semana<br><input type="radio"/> 2 a 4 veces semana<br><input type="radio"/> 5 a 6 veces semana<br><input type="radio"/> 1 vez al día<br><input type="radio"/> 2 a 3 veces al día<br><input type="radio"/> 5 a 6 veces al día<br><input type="radio"/> más 6 veces al día |

|                                      |                                                                                                                                                                                                                                                                                                                                                                                                              |
|--------------------------------------|--------------------------------------------------------------------------------------------------------------------------------------------------------------------------------------------------------------------------------------------------------------------------------------------------------------------------------------------------------------------------------------------------------------|
| huevo                                | <input type="radio"/> Nunca o menos 1 vez al mes<br><input type="radio"/> 1 a 3 veces mes<br><input checked="" type="radio"/> 1 vez semana<br><input type="radio"/> 2 a 4 veces semana<br><input type="radio"/> 5 a 6 veces semana<br><input type="radio"/> 1 vez al día<br><input type="radio"/> 2 a 3 veces al día<br><input type="radio"/> 5 a 6 veces al día<br><input type="radio"/> más 6 veces al día |
| Pollo con piel                       | <input type="radio"/> Nunca o menos 1 vez al mes<br><input type="radio"/> 1 a 3 veces mes<br><input checked="" type="radio"/> 1 vez semana<br><input type="radio"/> 2 a 4 veces semana<br><input type="radio"/> 5 a 6 veces semana<br><input type="radio"/> 1 vez al día<br><input type="radio"/> 2 a 3 veces al día<br><input type="radio"/> 5 a 6 veces al día<br><input type="radio"/> más 6 veces al día |
| pollo sin piel                       | <input type="radio"/> Nunca o menos 1 vez al mes<br><input type="radio"/> 1 a 3 veces mes<br><input checked="" type="radio"/> 1 vez semana<br><input type="radio"/> 2 a 4 veces semana<br><input type="radio"/> 5 a 6 veces semana<br><input type="radio"/> 1 vez al día<br><input type="radio"/> 2 a 3 veces al día<br><input type="radio"/> 5 a 6 veces al día<br><input type="radio"/> más 6 veces al día |
| Ternera o cerdo o cordero            | <input type="radio"/> Nunca o menos 1 vez al mes<br><input type="radio"/> 1 a 3 veces mes<br><input checked="" type="radio"/> 1 vez semana<br><input type="radio"/> 2 a 4 veces semana<br><input type="radio"/> 5 a 6 veces semana<br><input type="radio"/> 1 vez al día<br><input type="radio"/> 2 a 3 veces al día<br><input type="radio"/> 5 a 6 veces al día<br><input type="radio"/> más 6 veces al día |
| carne caza: Conejo o codorniz o pato | <input checked="" type="radio"/> Nunca o menos 1 vez al mes<br><input type="radio"/> 1 a 3 veces mes<br><input type="radio"/> 1 vez semana<br><input type="radio"/> 2 a 4 veces semana<br><input type="radio"/> 5 a 6 veces semana<br><input type="radio"/> 1 vez al día<br><input type="radio"/> 2 a 3 veces al día<br><input type="radio"/> 5 a 6 veces al día<br><input type="radio"/> más 6 veces al día |
| Hígado de ternera o cerdo o pollo    | <input checked="" type="radio"/> Nunca o menos 1 vez al mes<br><input type="radio"/> 1 a 3 veces mes<br><input type="radio"/> 1 vez semana<br><input type="radio"/> 2 a 4 veces semana<br><input type="radio"/> 5 a 6 veces semana<br><input type="radio"/> 1 vez al día<br><input type="radio"/> 2 a 3 veces al día<br><input type="radio"/> 5 a 6 veces al día<br><input type="radio"/> más 6 veces al día |

|                     |                                                                                                                                                                                                                                                                                                                                                                                                              |
|---------------------|--------------------------------------------------------------------------------------------------------------------------------------------------------------------------------------------------------------------------------------------------------------------------------------------------------------------------------------------------------------------------------------------------------------|
| Vísceras            | <input checked="" type="radio"/> Nunca o menos 1 vez al mes<br><input type="radio"/> 1 a 3 veces mes<br><input type="radio"/> 1 vez semana<br><input type="radio"/> 2 a 4 veces semana<br><input type="radio"/> 5 a 6 veces semana<br><input type="radio"/> 1 vez al día<br><input type="radio"/> 2 a 3 veces al día<br><input type="radio"/> 5 a 6 veces al día<br><input type="radio"/> más 6 veces al día |
| Embutido            | <input checked="" type="radio"/> Nunca o menos 1 vez al mes<br><input type="radio"/> 1 a 3 veces mes<br><input type="radio"/> 1 vez semana<br><input type="radio"/> 2 a 4 veces semana<br><input type="radio"/> 5 a 6 veces semana<br><input type="radio"/> 1 vez al día<br><input type="radio"/> 2 a 3 veces al día<br><input type="radio"/> 5 a 6 veces al día<br><input type="radio"/> más 6 veces al día |
| Salchicha o similar | <input type="radio"/> Nunca o menos 1 vez al mes<br><input checked="" type="radio"/> 1 a 3 veces mes<br><input type="radio"/> 1 vez semana<br><input type="radio"/> 2 a 4 veces semana<br><input type="radio"/> 5 a 6 veces semana<br><input type="radio"/> 1 vez al día<br><input type="radio"/> 2 a 3 veces al día<br><input type="radio"/> 5 a 6 veces al día<br><input type="radio"/> más 6 veces al día |
| Pate o foiegras     | <input checked="" type="radio"/> Nunca o menos 1 vez al mes<br><input type="radio"/> 1 a 3 veces mes<br><input type="radio"/> 1 vez semana<br><input type="radio"/> 2 a 4 veces semana<br><input type="radio"/> 5 a 6 veces semana<br><input type="radio"/> 1 vez al día<br><input type="radio"/> 2 a 3 veces al día<br><input type="radio"/> 5 a 6 veces al día<br><input type="radio"/> más 6 veces al día |
| Hamburguesa         | <input type="radio"/> Nunca o menos 1 vez al mes<br><input type="radio"/> 1 a 3 veces mes<br><input checked="" type="radio"/> 1 vez semana<br><input type="radio"/> 2 a 4 veces semana<br><input type="radio"/> 5 a 6 veces semana<br><input type="radio"/> 1 vez al día<br><input type="radio"/> 2 a 3 veces al día<br><input type="radio"/> 5 a 6 veces al día<br><input type="radio"/> más 6 veces al día |
| tocino o bacon      | <input type="radio"/> Nunca o menos 1 vez al mes<br><input checked="" type="radio"/> 1 a 3 veces mes<br><input type="radio"/> 1 vez semana<br><input type="radio"/> 2 a 4 veces semana<br><input type="radio"/> 5 a 6 veces semana<br><input type="radio"/> 1 vez al día<br><input type="radio"/> 2 a 3 veces al día<br><input type="radio"/> 5 a 6 veces al día<br><input type="radio"/> más 6 veces al día |



|                        |                                                                                                                                                                                                                                                                                                                                                                                                              |
|------------------------|--------------------------------------------------------------------------------------------------------------------------------------------------------------------------------------------------------------------------------------------------------------------------------------------------------------------------------------------------------------------------------------------------------------|
| Pescado frito          | <input checked="" type="radio"/> Nunca o menos 1 vez al mes<br><input type="radio"/> 1 a 3 veces mes<br><input type="radio"/> 1 vez semana<br><input type="radio"/> 2 a 4 veces semana<br><input type="radio"/> 5 a 6 veces semana<br><input type="radio"/> 1 vez al día<br><input type="radio"/> 2 a 3 veces al día<br><input type="radio"/> 5 a 6 veces al día<br><input type="radio"/> más 6 veces al día |
| pescado hervido blanco | <input type="radio"/> Nunca o menos 1 vez al mes<br><input type="radio"/> 1 a 3 veces mes<br><input checked="" type="radio"/> 1 vez semana<br><input type="radio"/> 2 a 4 veces semana<br><input type="radio"/> 5 a 6 veces semana<br><input type="radio"/> 1 vez al día<br><input type="radio"/> 2 a 3 veces al día<br><input type="radio"/> 5 a 6 veces al día<br><input type="radio"/> más 6 veces al día |
| pescado hervido azul   | <input type="radio"/> Nunca o menos 1 vez al mes<br><input type="radio"/> 1 a 3 veces mes<br><input checked="" type="radio"/> 1 vez semana<br><input type="radio"/> 2 a 4 veces semana<br><input type="radio"/> 5 a 6 veces semana<br><input type="radio"/> 1 vez al día<br><input type="radio"/> 2 a 3 veces al día<br><input type="radio"/> 5 a 6 veces al día<br><input type="radio"/> más 6 veces al día |
| otros pescado azul     | <input type="radio"/> Nunca o menos 1 vez al mes<br><input type="radio"/> 1 a 3 veces mes<br><input checked="" type="radio"/> 1 vez semana<br><input type="radio"/> 2 a 4 veces semana<br><input type="radio"/> 5 a 6 veces semana<br><input type="radio"/> 1 vez al día<br><input type="radio"/> 2 a 3 veces al día<br><input type="radio"/> 5 a 6 veces al día<br><input type="radio"/> más 6 veces al día |
| atun conserva          | <input type="radio"/> Nunca o menos 1 vez al mes<br><input type="radio"/> 1 a 3 veces mes<br><input checked="" type="radio"/> 1 vez semana<br><input type="radio"/> 2 a 4 veces semana<br><input type="radio"/> 5 a 6 veces semana<br><input type="radio"/> 1 vez al día<br><input type="radio"/> 2 a 3 veces al día<br><input type="radio"/> 5 a 6 veces al día<br><input type="radio"/> más 6 veces al día |
| sardina conserva       | <input checked="" type="radio"/> Nunca o menos 1 vez al mes<br><input type="radio"/> 1 a 3 veces mes<br><input type="radio"/> 1 vez semana<br><input type="radio"/> 2 a 4 veces semana<br><input type="radio"/> 5 a 6 veces semana<br><input type="radio"/> 1 vez al día<br><input type="radio"/> 2 a 3 veces al día<br><input type="radio"/> 5 a 6 veces al día<br><input type="radio"/> más 6 veces al día |

---

pescado ahumado

- ☒ Nunca o menos 1 vez al mes  
☐ 1 a 3 veces mes  
☐ 1 vez semana  
☐ 2 a 4 veces semana  
☐ 5 a 6 veces semana  
☐ 1 vez al día  
☐ 2 a 3 veces al día  
☐ 5 a 6 veces al día  
☐ más 6 veces al día

---

almejas o mejillones o ostras unos 100g

- ☐ Nunca o menos 1 vez al mes  
☒ 1 a 3 veces mes  
☐ 1 vez semana  
☐ 2 a 4 veces semana  
☐ 5 a 6 veces semana  
☐ 1 vez al día  
☐ 2 a 3 veces al día  
☐ 5 a 6 veces al día  
☐ más 6 veces al día

---

calamar o chipiron o sepia unos 100g

- ☐ Nunca o menos 1 vez al mes  
☒ 1 a 3 veces mes  
☐ 1 vez semana  
☐ 2 a 4 veces semana  
☐ 5 a 6 veces semana  
☐ 1 vez al día  
☐ 2 a 3 veces al día  
☐ 5 a 6 veces al día  
☐ más 6 veces al día

---

marisco unos 100g

- ☐ Nunca o menos 1 vez al mes  
☒ 1 a 3 veces mes  
☐ 1 vez semana  
☐ 2 a 4 veces semana  
☐ 5 a 6 veces semana  
☐ 1 vez al día  
☐ 2 a 3 veces al día  
☐ 5 a 6 veces al día  
☐ más 6 veces al día

---

Espinacas o acelgas cocinadas

- ☐ Nunca o menos 1 vez al mes  
☐ 1 a 3 veces mes  
☒ 1 vez semana  
☐ 2 a 4 veces semana  
☐ 5 a 6 veces semana  
☐ 1 vez al día  
☐ 2 a 3 veces al día  
☐ 5 a 6 veces al día  
☐ más 6 veces al día

---

Col o coliflor o brocoli cocinado

- ☐ Nunca o menos 1 vez al mes  
☒ 1 a 3 veces mes  
☐ 1 vez semana  
☐ 2 a 4 veces semana  
☐ 5 a 6 veces semana  
☐ 1 vez al día  
☐ 2 a 3 veces al día  
☐ 5 a 6 veces al día  
☐ más 6 veces al día

---

Lechuga o endivia o escarola

- ☐ Nunca o menos 1 vez al mes  
☐ 1 a 3 veces mes  
☐ 1 vez semana  
☒ 2 a 4 veces semana  
☐ 5 a 6 veces semana  
☐ 1 vez al día  
☐ 2 a 3 veces al día  
☐ 5 a 6 veces al día  
☐ más 6 veces al día

---

tomate ensalada

- ☐ Nunca o menos 1 vez al mes  
☐ 1 a 3 veces mes  
☐ 1 vez semana  
☒ 2 a 4 veces semana  
☐ 5 a 6 veces semana  
☐ 1 vez al día  
☐ 2 a 3 veces al día  
☐ 5 a 6 veces al día  
☐ más 6 veces al día

---

cebolla

- ☐ Nunca o menos 1 vez al mes  
☐ 1 a 3 veces mes  
☐ 1 vez semana  
☒ 2 a 4 veces semana  
☐ 5 a 6 veces semana  
☐ 1 vez al día  
☐ 2 a 3 veces al día  
☐ 5 a 6 veces al día  
☐ más 6 veces al día

---

Zanahoria o calabaza

- ☐ Nunca o menos 1 vez al mes  
☐ 1 a 3 veces mes  
☐ 1 vez semana  
☒ 2 a 4 veces semana  
☐ 5 a 6 veces semana  
☐ 1 vez al día  
☐ 2 a 3 veces al día  
☐ 5 a 6 veces al día  
☐ más 6 veces al día

---

Judías verdes

- ☐ Nunca o menos 1 vez al mes  
☐ 1 a 3 veces mes  
☒ 1 vez semana  
☐ 2 a 4 veces semana  
☐ 5 a 6 veces semana  
☐ 1 vez al día  
☐ 2 a 3 veces al día  
☐ 5 a 6 veces al día  
☐ más 6 veces al día

---

Berenjena o calabacin o pepino

- ☐ Nunca o menos 1 vez al mes  
☐ 1 a 3 veces mes  
☒ 1 vez semana  
☐ 2 a 4 veces semana  
☐ 5 a 6 veces semana  
☐ 1 vez al día  
☐ 2 a 3 veces al día  
☐ 5 a 6 veces al día  
☐ más 6 veces al día

---

|          |                                                                                                                                                                                                                                                                                                                                                                                                              |
|----------|--------------------------------------------------------------------------------------------------------------------------------------------------------------------------------------------------------------------------------------------------------------------------------------------------------------------------------------------------------------------------------------------------------------|
| pimiento | <input type="radio"/> Nunca o menos 1 vez al mes<br><input type="radio"/> 1 a 3 veces mes<br><input type="radio"/> 1 vez semana<br><input checked="" type="radio"/> 2 a 4 veces semana<br><input type="radio"/> 5 a 6 veces semana<br><input type="radio"/> 1 vez al día<br><input type="radio"/> 2 a 3 veces al día<br><input type="radio"/> 5 a 6 veces al día<br><input type="radio"/> más 6 veces al día |
|----------|--------------------------------------------------------------------------------------------------------------------------------------------------------------------------------------------------------------------------------------------------------------------------------------------------------------------------------------------------------------------------------------------------------------|

---

|           |                                                                                                                                                                                                                                                                                                                                                                                                              |
|-----------|--------------------------------------------------------------------------------------------------------------------------------------------------------------------------------------------------------------------------------------------------------------------------------------------------------------------------------------------------------------------------------------------------------------|
| alcachofa | <input type="radio"/> Nunca o menos 1 vez al mes<br><input type="radio"/> 1 a 3 veces mes<br><input checked="" type="radio"/> 1 vez semana<br><input type="radio"/> 2 a 4 veces semana<br><input type="radio"/> 5 a 6 veces semana<br><input type="radio"/> 1 vez al día<br><input type="radio"/> 2 a 3 veces al día<br><input type="radio"/> 5 a 6 veces al día<br><input type="radio"/> más 6 veces al día |
|-----------|--------------------------------------------------------------------------------------------------------------------------------------------------------------------------------------------------------------------------------------------------------------------------------------------------------------------------------------------------------------------------------------------------------------|

---

|            |                                                                                                                                                                                                                                                                                                                                                                                                              |
|------------|--------------------------------------------------------------------------------------------------------------------------------------------------------------------------------------------------------------------------------------------------------------------------------------------------------------------------------------------------------------------------------------------------------------|
| espárragos | <input type="radio"/> Nunca o menos 1 vez al mes<br><input checked="" type="radio"/> 1 a 3 veces mes<br><input type="radio"/> 1 vez semana<br><input type="radio"/> 2 a 4 veces semana<br><input type="radio"/> 5 a 6 veces semana<br><input type="radio"/> 1 vez al día<br><input type="radio"/> 2 a 3 veces al día<br><input type="radio"/> 5 a 6 veces al día<br><input type="radio"/> más 6 veces al día |
|------------|--------------------------------------------------------------------------------------------------------------------------------------------------------------------------------------------------------------------------------------------------------------------------------------------------------------------------------------------------------------------------------------------------------------|

---

|              |                                                                                                                                                                                                                                                                                                                                                                                                              |
|--------------|--------------------------------------------------------------------------------------------------------------------------------------------------------------------------------------------------------------------------------------------------------------------------------------------------------------------------------------------------------------------------------------------------------------|
| maíz hervido | <input type="radio"/> Nunca o menos 1 vez al mes<br><input checked="" type="radio"/> 1 a 3 veces mes<br><input type="radio"/> 1 vez semana<br><input type="radio"/> 2 a 4 veces semana<br><input type="radio"/> 5 a 6 veces semana<br><input type="radio"/> 1 vez al día<br><input type="radio"/> 2 a 3 veces al día<br><input type="radio"/> 5 a 6 veces al día<br><input type="radio"/> más 6 veces al día |
|--------------|--------------------------------------------------------------------------------------------------------------------------------------------------------------------------------------------------------------------------------------------------------------------------------------------------------------------------------------------------------------------------------------------------------------|

---

|           |                                                                                                                                                                                                                                                                                                                                                                                                              |
|-----------|--------------------------------------------------------------------------------------------------------------------------------------------------------------------------------------------------------------------------------------------------------------------------------------------------------------------------------------------------------------------------------------------------------------|
| legumbres | <input type="radio"/> Nunca o menos 1 vez al mes<br><input type="radio"/> 1 a 3 veces mes<br><input checked="" type="radio"/> 1 vez semana<br><input type="radio"/> 2 a 4 veces semana<br><input type="radio"/> 5 a 6 veces semana<br><input type="radio"/> 1 vez al día<br><input type="radio"/> 2 a 3 veces al día<br><input type="radio"/> 5 a 6 veces al día<br><input type="radio"/> más 6 veces al día |
|-----------|--------------------------------------------------------------------------------------------------------------------------------------------------------------------------------------------------------------------------------------------------------------------------------------------------------------------------------------------------------------------------------------------------------------|

---

|                       |                                                                                                                                                                                                                                                                                                                                                                                                              |
|-----------------------|--------------------------------------------------------------------------------------------------------------------------------------------------------------------------------------------------------------------------------------------------------------------------------------------------------------------------------------------------------------------------------------------------------------|
| naranjas o mandarinas | <input type="radio"/> Nunca o menos 1 vez al mes<br><input type="radio"/> 1 a 3 veces mes<br><input checked="" type="radio"/> 1 vez semana<br><input type="radio"/> 2 a 4 veces semana<br><input type="radio"/> 5 a 6 veces semana<br><input type="radio"/> 1 vez al día<br><input type="radio"/> 2 a 3 veces al día<br><input type="radio"/> 5 a 6 veces al día<br><input type="radio"/> más 6 veces al día |
|-----------------------|--------------------------------------------------------------------------------------------------------------------------------------------------------------------------------------------------------------------------------------------------------------------------------------------------------------------------------------------------------------------------------------------------------------|

---

---

|                    |                                                                                                                                                                                                                                                                                                                                                                                                              |
|--------------------|--------------------------------------------------------------------------------------------------------------------------------------------------------------------------------------------------------------------------------------------------------------------------------------------------------------------------------------------------------------------------------------------------------------|
| zumو natural fruta | <input checked="" type="radio"/> Nunca o menos 1 vez al mes<br><input type="radio"/> 1 a 3 veces mes<br><input type="radio"/> 1 vez semana<br><input type="radio"/> 2 a 4 veces semana<br><input type="radio"/> 5 a 6 veces semana<br><input type="radio"/> 1 vez al día<br><input type="radio"/> 2 a 3 veces al día<br><input type="radio"/> 5 a 6 veces al día<br><input type="radio"/> más 6 veces al día |
|--------------------|--------------------------------------------------------------------------------------------------------------------------------------------------------------------------------------------------------------------------------------------------------------------------------------------------------------------------------------------------------------------------------------------------------------|

---

|         |                                                                                                                                                                                                                                                                                                                                                                                                              |
|---------|--------------------------------------------------------------------------------------------------------------------------------------------------------------------------------------------------------------------------------------------------------------------------------------------------------------------------------------------------------------------------------------------------------------|
| platano | <input type="radio"/> Nunca o menos 1 vez al mes<br><input checked="" type="radio"/> 1 a 3 veces mes<br><input type="radio"/> 1 vez semana<br><input type="radio"/> 2 a 4 veces semana<br><input type="radio"/> 5 a 6 veces semana<br><input type="radio"/> 1 vez al día<br><input type="radio"/> 2 a 3 veces al día<br><input type="radio"/> 5 a 6 veces al día<br><input type="radio"/> más 6 veces al día |
|---------|--------------------------------------------------------------------------------------------------------------------------------------------------------------------------------------------------------------------------------------------------------------------------------------------------------------------------------------------------------------------------------------------------------------|

---

|                |                                                                                                                                                                                                                                                                                                                                                                                                              |
|----------------|--------------------------------------------------------------------------------------------------------------------------------------------------------------------------------------------------------------------------------------------------------------------------------------------------------------------------------------------------------------------------------------------------------------|
| manzana o pera | <input type="radio"/> Nunca o menos 1 vez al mes<br><input type="radio"/> 1 a 3 veces mes<br><input type="radio"/> 1 vez semana<br><input checked="" type="radio"/> 2 a 4 veces semana<br><input type="radio"/> 5 a 6 veces semana<br><input type="radio"/> 1 vez al día<br><input type="radio"/> 2 a 3 veces al día<br><input type="radio"/> 5 a 6 veces al día<br><input type="radio"/> más 6 veces al día |
|----------------|--------------------------------------------------------------------------------------------------------------------------------------------------------------------------------------------------------------------------------------------------------------------------------------------------------------------------------------------------------------------------------------------------------------|

---

|                       |                                                                                                                                                                                                                                                                                                                                                                                                              |
|-----------------------|--------------------------------------------------------------------------------------------------------------------------------------------------------------------------------------------------------------------------------------------------------------------------------------------------------------------------------------------------------------------------------------------------------------|
| melocotón o nectarina | <input type="radio"/> Nunca o menos 1 vez al mes<br><input checked="" type="radio"/> 1 a 3 veces mes<br><input type="radio"/> 1 vez semana<br><input type="radio"/> 2 a 4 veces semana<br><input type="radio"/> 5 a 6 veces semana<br><input type="radio"/> 1 vez al día<br><input type="radio"/> 2 a 3 veces al día<br><input type="radio"/> 5 a 6 veces al día<br><input type="radio"/> más 6 veces al día |
|-----------------------|--------------------------------------------------------------------------------------------------------------------------------------------------------------------------------------------------------------------------------------------------------------------------------------------------------------------------------------------------------------------------------------------------------------|

---

|                |                                                                                                                                                                                                                                                                                                                                                                                                              |
|----------------|--------------------------------------------------------------------------------------------------------------------------------------------------------------------------------------------------------------------------------------------------------------------------------------------------------------------------------------------------------------------------------------------------------------|
| sandia o melon | <input checked="" type="radio"/> Nunca o menos 1 vez al mes<br><input type="radio"/> 1 a 3 veces mes<br><input type="radio"/> 1 vez semana<br><input type="radio"/> 2 a 4 veces semana<br><input type="radio"/> 5 a 6 veces semana<br><input type="radio"/> 1 vez al día<br><input type="radio"/> 2 a 3 veces al día<br><input type="radio"/> 5 a 6 veces al día<br><input type="radio"/> más 6 veces al día |
|----------------|--------------------------------------------------------------------------------------------------------------------------------------------------------------------------------------------------------------------------------------------------------------------------------------------------------------------------------------------------------------------------------------------------------------|

---

|     |                                                                                                                                                                                                                                                                                                                                                                                                              |
|-----|--------------------------------------------------------------------------------------------------------------------------------------------------------------------------------------------------------------------------------------------------------------------------------------------------------------------------------------------------------------------------------------------------------------|
| uva | <input checked="" type="radio"/> Nunca o menos 1 vez al mes<br><input type="radio"/> 1 a 3 veces mes<br><input type="radio"/> 1 vez semana<br><input type="radio"/> 2 a 4 veces semana<br><input type="radio"/> 5 a 6 veces semana<br><input type="radio"/> 1 vez al día<br><input type="radio"/> 2 a 3 veces al día<br><input type="radio"/> 5 a 6 veces al día<br><input type="radio"/> más 6 veces al día |
|-----|--------------------------------------------------------------------------------------------------------------------------------------------------------------------------------------------------------------------------------------------------------------------------------------------------------------------------------------------------------------------------------------------------------------|

---

|                 |                                                                                                                                                                                                                                                                                                                                                                                                              |
|-----------------|--------------------------------------------------------------------------------------------------------------------------------------------------------------------------------------------------------------------------------------------------------------------------------------------------------------------------------------------------------------------------------------------------------------|
| bruna o ciruela | <input checked="" type="radio"/> Nunca o menos 1 vez al mes<br><input type="radio"/> 1 a 3 veces mes<br><input type="radio"/> 1 vez semana<br><input type="radio"/> 2 a 4 veces semana<br><input type="radio"/> 5 a 6 veces semana<br><input type="radio"/> 1 vez al día<br><input type="radio"/> 2 a 3 veces al día<br><input type="radio"/> 5 a 6 veces al día<br><input type="radio"/> más 6 veces al día |
| kiwi            | <input type="radio"/> Nunca o menos 1 vez al mes<br><input checked="" type="radio"/> 1 a 3 veces mes<br><input type="radio"/> 1 vez semana<br><input type="radio"/> 2 a 4 veces semana<br><input type="radio"/> 5 a 6 veces semana<br><input type="radio"/> 1 vez al día<br><input type="radio"/> 2 a 3 veces al día<br><input type="radio"/> 5 a 6 veces al día<br><input type="radio"/> más 6 veces al día |
| aceituna        | <input type="radio"/> Nunca o menos 1 vez al mes<br><input checked="" type="radio"/> 1 a 3 veces mes<br><input type="radio"/> 1 vez semana<br><input type="radio"/> 2 a 4 veces semana<br><input type="radio"/> 5 a 6 veces semana<br><input type="radio"/> 1 vez al día<br><input type="radio"/> 2 a 3 veces al día<br><input type="radio"/> 5 a 6 veces al día<br><input type="radio"/> más 6 veces al día |
| frutos secos    | <input type="radio"/> Nunca o menos 1 vez al mes<br><input type="radio"/> 1 a 3 veces mes<br><input checked="" type="radio"/> 1 vez semana<br><input type="radio"/> 2 a 4 veces semana<br><input type="radio"/> 5 a 6 veces semana<br><input type="radio"/> 1 vez al día<br><input type="radio"/> 2 a 3 veces al día<br><input type="radio"/> 5 a 6 veces al día<br><input type="radio"/> más 6 veces al día |
| pan blanco      | <input type="radio"/> Nunca o menos 1 vez al mes<br><input type="radio"/> 1 a 3 veces mes<br><input checked="" type="radio"/> 1 vez semana<br><input type="radio"/> 2 a 4 veces semana<br><input type="radio"/> 5 a 6 veces semana<br><input type="radio"/> 1 vez al día<br><input type="radio"/> 2 a 3 veces al día<br><input type="radio"/> 5 a 6 veces al día<br><input type="radio"/> más 6 veces al día |
| pan integral    | <input type="radio"/> Nunca o menos 1 vez al mes<br><input type="radio"/> 1 a 3 veces mes<br><input type="radio"/> 1 vez semana<br><input type="radio"/> 2 a 4 veces semana<br><input type="radio"/> 5 a 6 veces semana<br><input checked="" type="radio"/> 1 vez al día<br><input type="radio"/> 2 a 3 veces al día<br><input type="radio"/> 5 a 6 veces al día<br><input type="radio"/> más 6 veces al día |

|                          |                                                                                                                                                                                                                                                                                                                                                                                                              |
|--------------------------|--------------------------------------------------------------------------------------------------------------------------------------------------------------------------------------------------------------------------------------------------------------------------------------------------------------------------------------------------------------------------------------------------------------|
| cereales desayuno        | <input type="radio"/> Nunca o menos 1 vez al mes<br><input type="radio"/> 1 a 3 veces mes<br><input type="radio"/> 1 vez semana<br><input type="radio"/> 2 a 4 veces semana<br><input type="radio"/> 5 a 6 veces semana<br><input checked="" type="radio"/> 1 vez al día<br><input type="radio"/> 2 a 3 veces al día<br><input type="radio"/> 5 a 6 veces al día<br><input type="radio"/> más 6 veces al día |
| patatas fritas           | <input checked="" type="radio"/> Nunca o menos 1 vez al mes<br><input type="radio"/> 1 a 3 veces mes<br><input type="radio"/> 1 vez semana<br><input type="radio"/> 2 a 4 veces semana<br><input type="radio"/> 5 a 6 veces semana<br><input type="radio"/> 1 vez al día<br><input type="radio"/> 2 a 3 veces al día<br><input type="radio"/> 5 a 6 veces al día<br><input type="radio"/> más 6 veces al día |
| patatas cocidas o asadas | <input checked="" type="radio"/> Nunca o menos 1 vez al mes<br><input type="radio"/> 1 a 3 veces mes<br><input type="radio"/> 1 vez semana<br><input type="radio"/> 2 a 4 veces semana<br><input type="radio"/> 5 a 6 veces semana<br><input type="radio"/> 1 vez al día<br><input type="radio"/> 2 a 3 veces al día<br><input type="radio"/> 5 a 6 veces al día<br><input type="radio"/> más 6 veces al día |
| bolsa papas              | <input checked="" type="radio"/> Nunca o menos 1 vez al mes<br><input type="radio"/> 1 a 3 veces mes<br><input type="radio"/> 1 vez semana<br><input type="radio"/> 2 a 4 veces semana<br><input type="radio"/> 5 a 6 veces semana<br><input type="radio"/> 1 vez al día<br><input type="radio"/> 2 a 3 veces al día<br><input type="radio"/> 5 a 6 veces al día<br><input type="radio"/> más 6 veces al día |
| arroz cocinado           | <input checked="" type="radio"/> Nunca o menos 1 vez al mes<br><input type="radio"/> 1 a 3 veces mes<br><input type="radio"/> 1 vez semana<br><input type="radio"/> 2 a 4 veces semana<br><input type="radio"/> 5 a 6 veces semana<br><input type="radio"/> 1 vez al día<br><input type="radio"/> 2 a 3 veces al día<br><input type="radio"/> 5 a 6 veces al día<br><input type="radio"/> más 6 veces al día |
| pasta                    | <input checked="" type="radio"/> Nunca o menos 1 vez al mes<br><input type="radio"/> 1 a 3 veces mes<br><input type="radio"/> 1 vez semana<br><input type="radio"/> 2 a 4 veces semana<br><input type="radio"/> 5 a 6 veces semana<br><input type="radio"/> 1 vez al día<br><input type="radio"/> 2 a 3 veces al día<br><input type="radio"/> 5 a 6 veces al día<br><input type="radio"/> más 6 veces al día |

|                     |                                                                                                                                                                                                                                                                                                                                                                                                              |
|---------------------|--------------------------------------------------------------------------------------------------------------------------------------------------------------------------------------------------------------------------------------------------------------------------------------------------------------------------------------------------------------------------------------------------------------|
| pizza               | <input checked="" type="radio"/> Nunca o menos 1 vez al mes<br><input type="radio"/> 1 a 3 veces mes<br><input type="radio"/> 1 vez semana<br><input type="radio"/> 2 a 4 veces semana<br><input type="radio"/> 5 a 6 veces semana<br><input type="radio"/> 1 vez al día<br><input type="radio"/> 2 a 3 veces al día<br><input type="radio"/> 5 a 6 veces al día<br><input type="radio"/> más 6 veces al día |
| aceite oliva        | <input type="radio"/> Nunca o menos 1 vez al mes<br><input type="radio"/> 1 a 3 veces mes<br><input type="radio"/> 1 vez semana<br><input type="radio"/> 2 a 4 veces semana<br><input type="radio"/> 5 a 6 veces semana<br><input type="radio"/> 1 vez al día<br><input type="radio"/> 2 a 3 veces al día<br><input type="radio"/> 5 a 6 veces al día<br><input checked="" type="radio"/> más 6 veces al día |
| otros aceites       | <input checked="" type="radio"/> Nunca o menos 1 vez al mes<br><input type="radio"/> 1 a 3 veces mes<br><input type="radio"/> 1 vez semana<br><input type="radio"/> 2 a 4 veces semana<br><input type="radio"/> 5 a 6 veces semana<br><input type="radio"/> 1 vez al día<br><input type="radio"/> 2 a 3 veces al día<br><input type="radio"/> 5 a 6 veces al día<br><input type="radio"/> más 6 veces al día |
| margarina           | <input checked="" type="radio"/> Nunca o menos 1 vez al mes<br><input type="radio"/> 1 a 3 veces mes<br><input type="radio"/> 1 vez semana<br><input type="radio"/> 2 a 4 veces semana<br><input type="radio"/> 5 a 6 veces semana<br><input type="radio"/> 1 vez al día<br><input type="radio"/> 2 a 3 veces al día<br><input type="radio"/> 5 a 6 veces al día<br><input type="radio"/> más 6 veces al día |
| mantequilla         | <input type="radio"/> Nunca o menos 1 vez al mes<br><input type="radio"/> 1 a 3 veces mes<br><input type="radio"/> 1 vez semana<br><input checked="" type="radio"/> 2 a 4 veces semana<br><input type="radio"/> 5 a 6 veces semana<br><input type="radio"/> 1 vez al día<br><input type="radio"/> 2 a 3 veces al día<br><input type="radio"/> 5 a 6 veces al día<br><input type="radio"/> más 6 veces al día |
| galletas tipo maria | <input type="radio"/> Nunca o menos 1 vez al mes<br><input type="radio"/> 1 a 3 veces mes<br><input type="radio"/> 1 vez semana<br><input checked="" type="radio"/> 2 a 4 veces semana<br><input type="radio"/> 5 a 6 veces semana<br><input type="radio"/> 1 vez al día<br><input type="radio"/> 2 a 3 veces al día<br><input type="radio"/> 5 a 6 veces al día<br><input type="radio"/> más 6 veces al día |



---

galletas chocolate

- ☒ Nunca o menos 1 vez al mes  
☐ 1 a 3 veces mes  
☐ 1 vez semana  
☐ 2 a 4 veces semana  
☐ 5 a 6 veces semana  
☐ 1 vez al día  
☐ 2 a 3 veces al día  
☐ 5 a 6 veces al día  
☐ más 6 veces al día

---

bolleria

- ☐ Nunca o menos 1 vez al mes  
☒ 1 a 3 veces mes  
☐ 1 vez semana  
☐ 2 a 4 veces semana  
☐ 5 a 6 veces semana  
☐ 1 vez al día  
☐ 2 a 3 veces al día  
☐ 5 a 6 veces al día  
☐ más 6 veces al día

---

chocolate o bombones

- ☐ Nunca o menos 1 vez al mes  
☒ 1 a 3 veces mes  
☐ 1 vez semana  
☐ 2 a 4 veces semana  
☐ 5 a 6 veces semana  
☐ 1 vez al día  
☐ 2 a 3 veces al día  
☐ 5 a 6 veces al día  
☐ más 6 veces al día

---

chocolate polvo o colacao

- ☒ Nunca o menos 1 vez al mes  
☐ 1 a 3 veces mes  
☐ 1 vez semana  
☐ 2 a 4 veces semana  
☐ 5 a 6 veces semana  
☐ 1 vez al día  
☐ 2 a 3 veces al día  
☐ 5 a 6 veces al día  
☐ más 6 veces al día

---

vino tinto

- ☐ Nunca o menos 1 vez al mes  
☐ 1 a 3 veces mes  
☐ 1 vez semana  
☒ 2 a 4 veces semana  
☐ 5 a 6 veces semana  
☐ 1 vez al día  
☐ 2 a 3 veces al día  
☐ 5 a 6 veces al día  
☐ más 6 veces al día

---

vino blanco

- ☐ Nunca o menos 1 vez al mes  
☐ 1 a 3 veces mes  
☐ 1 vez semana  
☒ 2 a 4 veces semana  
☐ 5 a 6 veces semana  
☐ 1 vez al día  
☐ 2 a 3 veces al día  
☐ 5 a 6 veces al día  
☐ más 6 veces al día

|                       |                                                                                                                                                                                                                                                                                                                                                                                                              |
|-----------------------|--------------------------------------------------------------------------------------------------------------------------------------------------------------------------------------------------------------------------------------------------------------------------------------------------------------------------------------------------------------------------------------------------------------|
| vino seco o vermut    | <input type="radio"/> Nunca o menos 1 vez al mes<br><input type="radio"/> 1 a 3 veces mes<br><input type="radio"/> 1 vez semana<br><input checked="" type="radio"/> 2 a 4 veces semana<br><input type="radio"/> 5 a 6 veces semana<br><input type="radio"/> 1 vez al día<br><input type="radio"/> 2 a 3 veces al día<br><input type="radio"/> 5 a 6 veces al día<br><input type="radio"/> más 6 veces al día |
| cerveza               | <input type="radio"/> Nunca o menos 1 vez al mes<br><input type="radio"/> 1 a 3 veces mes<br><input type="radio"/> 1 vez semana<br><input checked="" type="radio"/> 2 a 4 veces semana<br><input type="radio"/> 5 a 6 veces semana<br><input type="radio"/> 1 vez al día<br><input type="radio"/> 2 a 3 veces al día<br><input type="radio"/> 5 a 6 veces al día<br><input type="radio"/> más 6 veces al día |
| cerveza sin alcohol   | <input type="radio"/> Nunca o menos 1 vez al mes<br><input type="radio"/> 1 a 3 veces mes<br><input checked="" type="radio"/> 1 vez semana<br><input type="radio"/> 2 a 4 veces semana<br><input type="radio"/> 5 a 6 veces semana<br><input type="radio"/> 1 vez al día<br><input type="radio"/> 2 a 3 veces al día<br><input type="radio"/> 5 a 6 veces al día<br><input type="radio"/> más 6 veces al día |
| licores               | <input checked="" type="radio"/> Nunca o menos 1 vez al mes<br><input type="radio"/> 1 a 3 veces mes<br><input type="radio"/> 1 vez semana<br><input type="radio"/> 2 a 4 veces semana<br><input type="radio"/> 5 a 6 veces semana<br><input type="radio"/> 1 vez al día<br><input type="radio"/> 2 a 3 veces al día<br><input type="radio"/> 5 a 6 veces al día<br><input type="radio"/> más 6 veces al día |
| ginebra o ron o vodka | <input checked="" type="radio"/> Nunca o menos 1 vez al mes<br><input type="radio"/> 1 a 3 veces mes<br><input type="radio"/> 1 vez semana<br><input type="radio"/> 2 a 4 veces semana<br><input type="radio"/> 5 a 6 veces semana<br><input type="radio"/> 1 vez al día<br><input type="radio"/> 2 a 3 veces al día<br><input type="radio"/> 5 a 6 veces al día<br><input type="radio"/> más 6 veces al día |
| refresco normal       | <input type="radio"/> Nunca o menos 1 vez al mes<br><input type="radio"/> 1 a 3 veces mes<br><input checked="" type="radio"/> 1 vez semana<br><input type="radio"/> 2 a 4 veces semana<br><input type="radio"/> 5 a 6 veces semana<br><input type="radio"/> 1 vez al día<br><input type="radio"/> 2 a 3 veces al día<br><input type="radio"/> 5 a 6 veces al día<br><input type="radio"/> más 6 veces al día |

---

|                     |                                                                                                                                                                                                                                                                                                                                                                                                              |
|---------------------|--------------------------------------------------------------------------------------------------------------------------------------------------------------------------------------------------------------------------------------------------------------------------------------------------------------------------------------------------------------------------------------------------------------|
| refresco sin azúcar | <input type="radio"/> Nunca o menos 1 vez al mes<br><input type="radio"/> 1 a 3 veces mes<br><input checked="" type="radio"/> 1 vez semana<br><input type="radio"/> 2 a 4 veces semana<br><input type="radio"/> 5 a 6 veces semana<br><input type="radio"/> 1 vez al día<br><input type="radio"/> 2 a 3 veces al día<br><input type="radio"/> 5 a 6 veces al día<br><input type="radio"/> más 6 veces al día |
|---------------------|--------------------------------------------------------------------------------------------------------------------------------------------------------------------------------------------------------------------------------------------------------------------------------------------------------------------------------------------------------------------------------------------------------------|

---

|                |                                                                                                                                                                                                                                                                                                                                                                                                              |
|----------------|--------------------------------------------------------------------------------------------------------------------------------------------------------------------------------------------------------------------------------------------------------------------------------------------------------------------------------------------------------------------------------------------------------------|
| Agua del grifo | <input checked="" type="radio"/> Nunca o menos 1 vez al mes<br><input type="radio"/> 1 a 3 veces mes<br><input type="radio"/> 1 vez semana<br><input type="radio"/> 2 a 4 veces semana<br><input type="radio"/> 5 a 6 veces semana<br><input type="radio"/> 1 vez al día<br><input type="radio"/> 2 a 3 veces al día<br><input type="radio"/> 5 a 6 veces al día<br><input type="radio"/> más 6 veces al día |
|----------------|--------------------------------------------------------------------------------------------------------------------------------------------------------------------------------------------------------------------------------------------------------------------------------------------------------------------------------------------------------------------------------------------------------------|

---

|                          |                                                                                                                                                                                                                                                                                                                                                                                                              |
|--------------------------|--------------------------------------------------------------------------------------------------------------------------------------------------------------------------------------------------------------------------------------------------------------------------------------------------------------------------------------------------------------------------------------------------------------|
| agua embotellada sin gas | <input type="radio"/> Nunca o menos 1 vez al mes<br><input type="radio"/> 1 a 3 veces mes<br><input type="radio"/> 1 vez semana<br><input type="radio"/> 2 a 4 veces semana<br><input type="radio"/> 5 a 6 veces semana<br><input type="radio"/> 1 vez al día<br><input checked="" type="radio"/> 2 a 3 veces al día<br><input type="radio"/> 5 a 6 veces al día<br><input type="radio"/> más 6 veces al día |
|--------------------------|--------------------------------------------------------------------------------------------------------------------------------------------------------------------------------------------------------------------------------------------------------------------------------------------------------------------------------------------------------------------------------------------------------------|

---

|                          |                                                                                                                                                                                                                                                                                                                                                                                                              |
|--------------------------|--------------------------------------------------------------------------------------------------------------------------------------------------------------------------------------------------------------------------------------------------------------------------------------------------------------------------------------------------------------------------------------------------------------|
| agua embotellada con gas | <input checked="" type="radio"/> Nunca o menos 1 vez al mes<br><input type="radio"/> 1 a 3 veces mes<br><input type="radio"/> 1 vez semana<br><input type="radio"/> 2 a 4 veces semana<br><input type="radio"/> 5 a 6 veces semana<br><input type="radio"/> 1 vez al día<br><input type="radio"/> 2 a 3 veces al día<br><input type="radio"/> 5 a 6 veces al día<br><input type="radio"/> más 6 veces al día |
|--------------------------|--------------------------------------------------------------------------------------------------------------------------------------------------------------------------------------------------------------------------------------------------------------------------------------------------------------------------------------------------------------------------------------------------------------|

---

|                           |                                                                                                                                                                                                                                                                                                                                                                                                              |
|---------------------------|--------------------------------------------------------------------------------------------------------------------------------------------------------------------------------------------------------------------------------------------------------------------------------------------------------------------------------------------------------------------------------------------------------------|
| zumos frutas embotellados | <input type="radio"/> Nunca o menos 1 vez al mes<br><input type="radio"/> 1 a 3 veces mes<br><input type="radio"/> 1 vez semana<br><input type="radio"/> 2 a 4 veces semana<br><input type="radio"/> 5 a 6 veces semana<br><input checked="" type="radio"/> 1 vez al día<br><input type="radio"/> 2 a 3 veces al día<br><input type="radio"/> 5 a 6 veces al día<br><input type="radio"/> más 6 veces al día |
|---------------------------|--------------------------------------------------------------------------------------------------------------------------------------------------------------------------------------------------------------------------------------------------------------------------------------------------------------------------------------------------------------------------------------------------------------|

---

|      |                                                                                                                                                                                                                                                                                                                                                                                                              |
|------|--------------------------------------------------------------------------------------------------------------------------------------------------------------------------------------------------------------------------------------------------------------------------------------------------------------------------------------------------------------------------------------------------------------|
| café | <input checked="" type="radio"/> Nunca o menos 1 vez al mes<br><input type="radio"/> 1 a 3 veces mes<br><input type="radio"/> 1 vez semana<br><input type="radio"/> 2 a 4 veces semana<br><input type="radio"/> 5 a 6 veces semana<br><input type="radio"/> 1 vez al día<br><input type="radio"/> 2 a 3 veces al día<br><input type="radio"/> 5 a 6 veces al día<br><input type="radio"/> más 6 veces al día |
|------|--------------------------------------------------------------------------------------------------------------------------------------------------------------------------------------------------------------------------------------------------------------------------------------------------------------------------------------------------------------------------------------------------------------|

---

|                       |                                                                                                                                                                                                                                                                                                                                                                                                              |
|-----------------------|--------------------------------------------------------------------------------------------------------------------------------------------------------------------------------------------------------------------------------------------------------------------------------------------------------------------------------------------------------------------------------------------------------------|
| cafe descafeinado     | <input checked="" type="radio"/> Nunca o menos 1 vez al mes<br><input type="radio"/> 1 a 3 veces mes<br><input type="radio"/> 1 vez semana<br><input type="radio"/> 2 a 4 veces semana<br><input type="radio"/> 5 a 6 veces semana<br><input type="radio"/> 1 vez al día<br><input type="radio"/> 2 a 3 veces al día<br><input type="radio"/> 5 a 6 veces al día<br><input type="radio"/> más 6 veces al día |
| te o infusión         | <input type="radio"/> Nunca o menos 1 vez al mes<br><input checked="" type="radio"/> 1 a 3 veces mes<br><input type="radio"/> 1 vez semana<br><input type="radio"/> 2 a 4 veces semana<br><input type="radio"/> 5 a 6 veces semana<br><input type="radio"/> 1 vez al día<br><input type="radio"/> 2 a 3 veces al día<br><input type="radio"/> 5 a 6 veces al día<br><input type="radio"/> más 6 veces al día |
| sopa o puré verduras  | <input type="radio"/> Nunca o menos 1 vez al mes<br><input type="radio"/> 1 a 3 veces mes<br><input type="radio"/> 1 vez semana<br><input checked="" type="radio"/> 2 a 4 veces semana<br><input type="radio"/> 5 a 6 veces semana<br><input type="radio"/> 1 vez al día<br><input type="radio"/> 2 a 3 veces al día<br><input type="radio"/> 5 a 6 veces al día<br><input type="radio"/> más 6 veces al día |
| croquetas pollo jamón | <input checked="" type="radio"/> Nunca o menos 1 vez al mes<br><input type="radio"/> 1 a 3 veces mes<br><input type="radio"/> 1 vez semana<br><input type="radio"/> 2 a 4 veces semana<br><input type="radio"/> 5 a 6 veces semana<br><input type="radio"/> 1 vez al día<br><input type="radio"/> 2 a 3 veces al día<br><input type="radio"/> 5 a 6 veces al día<br><input type="radio"/> más 6 veces al día |
| croquetas pescado     | <input checked="" type="radio"/> Nunca o menos 1 vez al mes<br><input type="radio"/> 1 a 3 veces mes<br><input type="radio"/> 1 vez semana<br><input type="radio"/> 2 a 4 veces semana<br><input type="radio"/> 5 a 6 veces semana<br><input type="radio"/> 1 vez al día<br><input type="radio"/> 2 a 3 veces al día<br><input type="radio"/> 5 a 6 veces al día<br><input type="radio"/> más 6 veces al día |
| mayonesa              | <input checked="" type="radio"/> Nunca o menos 1 vez al mes<br><input type="radio"/> 1 a 3 veces mes<br><input type="radio"/> 1 vez semana<br><input type="radio"/> 2 a 4 veces semana<br><input type="radio"/> 5 a 6 veces semana<br><input type="radio"/> 1 vez al día<br><input type="radio"/> 2 a 3 veces al día<br><input type="radio"/> 5 a 6 veces al día<br><input type="radio"/> más 6 veces al día |

|                  |                                                                                                                                                                                                                                                                                                                                                                                                              |
|------------------|--------------------------------------------------------------------------------------------------------------------------------------------------------------------------------------------------------------------------------------------------------------------------------------------------------------------------------------------------------------------------------------------------------------|
| salsa tomate     | <input type="radio"/> Nunca o menos 1 vez al mes<br><input type="radio"/> 1 a 3 veces mes<br><input checked="" type="radio"/> 1 vez semana<br><input type="radio"/> 2 a 4 veces semana<br><input type="radio"/> 5 a 6 veces semana<br><input type="radio"/> 1 vez al día<br><input type="radio"/> 2 a 3 veces al día<br><input type="radio"/> 5 a 6 veces al día<br><input type="radio"/> más 6 veces al día |
| ketchup          | <input type="radio"/> Nunca o menos 1 vez al mes<br><input type="radio"/> 1 a 3 veces mes<br><input checked="" type="radio"/> 1 vez semana<br><input type="radio"/> 2 a 4 veces semana<br><input type="radio"/> 5 a 6 veces semana<br><input type="radio"/> 1 vez al día<br><input type="radio"/> 2 a 3 veces al día<br><input type="radio"/> 5 a 6 veces al día<br><input type="radio"/> más 6 veces al día |
| sal              | <input type="radio"/> Nunca o menos 1 vez al mes<br><input type="radio"/> 1 a 3 veces mes<br><input type="radio"/> 1 vez semana<br><input type="radio"/> 2 a 4 veces semana<br><input type="radio"/> 5 a 6 veces semana<br><input checked="" type="radio"/> 1 vez al día<br><input type="radio"/> 2 a 3 veces al día<br><input type="radio"/> 5 a 6 veces al día<br><input type="radio"/> más 6 veces al día |
| ajo              | <input type="radio"/> Nunca o menos 1 vez al mes<br><input type="radio"/> 1 a 3 veces mes<br><input type="radio"/> 1 vez semana<br><input checked="" type="radio"/> 2 a 4 veces semana<br><input type="radio"/> 5 a 6 veces semana<br><input type="radio"/> 1 vez al día<br><input type="radio"/> 2 a 3 veces al día<br><input type="radio"/> 5 a 6 veces al día<br><input type="radio"/> más 6 veces al día |
| mermelada o miel | <input type="radio"/> Nunca o menos 1 vez al mes<br><input type="radio"/> 1 a 3 veces mes<br><input type="radio"/> 1 vez semana<br><input checked="" type="radio"/> 2 a 4 veces semana<br><input type="radio"/> 5 a 6 veces semana<br><input type="radio"/> 1 vez al día<br><input type="radio"/> 2 a 3 veces al día<br><input type="radio"/> 5 a 6 veces al día<br><input type="radio"/> más 6 veces al día |
| azúcar           | <input type="radio"/> Nunca o menos 1 vez al mes<br><input type="radio"/> 1 a 3 veces mes<br><input type="radio"/> 1 vez semana<br><input checked="" type="radio"/> 2 a 4 veces semana<br><input type="radio"/> 5 a 6 veces semana<br><input type="radio"/> 1 vez al día<br><input type="radio"/> 2 a 3 veces al día<br><input type="radio"/> 5 a 6 veces al día<br><input type="radio"/> más 6 veces al día |

|                                       |                                                                                                                                                                                                                                                                                                                                                                                                                                                                                                                               |
|---------------------------------------|-------------------------------------------------------------------------------------------------------------------------------------------------------------------------------------------------------------------------------------------------------------------------------------------------------------------------------------------------------------------------------------------------------------------------------------------------------------------------------------------------------------------------------|
| Otro alimento                         |                                                                                                                                                                                                                                                                                                                                                                                                                                                                                                                               |
| suplementos vitamínicos               | <input checked="" type="radio"/> si<br><input type="radio"/> no                                                                                                                                                                                                                                                                                                                                                                                                                                                               |
| suplementos vitamínicos               | [*DATA REMOVED*]                                                                                                                                                                                                                                                                                                                                                                                                                                                                                                              |
| dieta previa                          | <input type="radio"/> si<br><input checked="" type="radio"/> no                                                                                                                                                                                                                                                                                                                                                                                                                                                               |
| motivo dieta                          | <input checked="" type="radio"/> no dieta<br><input type="radio"/> control peso<br><input type="radio"/> control colesterol<br><input type="radio"/> control diabetes<br><input type="radio"/> problemas estómago<br><input type="radio"/> problemas vesícula o hepáticos<br><input type="radio"/> HTA o cardiopatía<br><input type="radio"/> problemas renales<br><input type="radio"/> alergia alimentaria<br><input type="radio"/> ácido úrico elevado<br><input type="radio"/> vegetariana<br><input type="radio"/> otros |
| cambio alimentos año previo gestación | <input checked="" type="radio"/> si<br><input type="radio"/> no                                                                                                                                                                                                                                                                                                                                                                                                                                                               |
| cambio lácteos                        | <input type="radio"/> eliminado<br><input type="radio"/> disminuido<br><input type="radio"/> igual<br><input checked="" type="radio"/> aumentado<br><input type="radio"/> no sabe                                                                                                                                                                                                                                                                                                                                             |
| cambio huevos                         | <input type="radio"/> eliminado<br><input type="radio"/> disminuido<br><input checked="" type="radio"/> igual<br><input type="radio"/> aumentado<br><input type="radio"/> no sabe                                                                                                                                                                                                                                                                                                                                             |
| cambio carne                          | <input type="radio"/> eliminado<br><input type="radio"/> disminuido<br><input checked="" type="radio"/> igual<br><input type="radio"/> aumentado<br><input type="radio"/> no sabe                                                                                                                                                                                                                                                                                                                                             |
| cambio pescado                        | <input type="radio"/> eliminado<br><input type="radio"/> disminuido<br><input checked="" type="radio"/> igual<br><input type="radio"/> aumentado<br><input type="radio"/> no sabe                                                                                                                                                                                                                                                                                                                                             |
| cambio verduras                       | <input type="radio"/> eliminado<br><input type="radio"/> disminuido<br><input type="radio"/> igual<br><input checked="" type="radio"/> aumentado<br><input type="radio"/> no sabe                                                                                                                                                                                                                                                                                                                                             |

|                            |                                                                                                                                                                                                                        |
|----------------------------|------------------------------------------------------------------------------------------------------------------------------------------------------------------------------------------------------------------------|
| cambio legumbres           | <input type="radio"/> eliminado<br><input type="radio"/> disminuido<br><input checked="" type="radio"/> igual<br><input type="radio"/> aumentado<br><input type="radio"/> no sabe                                      |
| cambio fruta               | <input type="radio"/> eliminado<br><input type="radio"/> disminuido<br><input type="radio"/> igual<br><input checked="" type="radio"/> aumentado<br><input type="radio"/> no sabe                                      |
| cambio pan                 | <input type="radio"/> eliminado<br><input type="radio"/> disminuido<br><input checked="" type="radio"/> igual<br><input type="radio"/> aumentado<br><input type="radio"/> no sabe                                      |
| cambio aceite oliva        | <input type="radio"/> eliminado<br><input type="radio"/> disminuido<br><input checked="" type="radio"/> igual<br><input type="radio"/> aumentado<br><input type="radio"/> no sabe                                      |
| cambio mante o margarina   | <input type="radio"/> eliminado<br><input type="radio"/> disminuido<br><input type="radio"/> igual<br><input checked="" type="radio"/> aumentado<br><input type="radio"/> no sabe                                      |
| cambio azúcar y dulces     | <input type="radio"/> eliminado<br><input checked="" type="radio"/> disminuido<br><input type="radio"/> igual<br><input type="radio"/> aumentado<br><input type="radio"/> no sabe                                      |
| cambio bebidas alcohólicas | <input checked="" type="radio"/> eliminado<br><input type="radio"/> disminuido<br><input type="radio"/> igual<br><input type="radio"/> aumentado<br><input type="radio"/> no sabe                                      |
| frecuencia comidas fritas  | <input type="radio"/> a diario<br><input type="radio"/> 5 a 6 veces semana<br><input type="radio"/> 2 a 4 veces semana<br><input type="radio"/> 1 vez semana<br><input checked="" type="radio"/> menos de 1 vez semana |
| carne                      | <input type="radio"/> no como<br><input type="radio"/> cruda<br><input type="radio"/> poco hecha<br><input checked="" type="radio"/> hecha<br><input type="radio"/> muy hecha                                          |
| grasa visible carne        | <input type="radio"/> quita toda<br><input type="radio"/> quita mayoría<br><input checked="" type="radio"/> quita un poco<br><input type="radio"/> no quita nada                                                       |

|                                |                                                                                                                                                                                                                                                          |
|--------------------------------|----------------------------------------------------------------------------------------------------------------------------------------------------------------------------------------------------------------------------------------------------------|
| cocina carne                   | <input checked="" type="radio"/> a la plancha<br><input type="radio"/> a la parrilla<br><input type="radio"/> asada<br><input type="radio"/> frita<br><input type="radio"/> guisada                                                                      |
| tostado quemado carne          | <input checked="" type="radio"/> nunca<br><input type="radio"/> 1 vez mes<br><input type="radio"/> 2 a 3 veces mes<br><input type="radio"/> 1 vez semana<br><input type="radio"/> 2 a 3 semanas                                                          |
| tostado quemado pescado        | <input checked="" type="radio"/> nunca<br><input type="radio"/> 1 vez mes<br><input type="radio"/> 2 a 3 veces mes<br><input type="radio"/> 1 vez semana<br><input type="radio"/> 2 a 3 semanas                                                          |
| socarrat paella                | <input type="radio"/> nunca<br><input checked="" type="radio"/> 1 vez mes<br><input type="radio"/> 2 a 3 veces mes<br><input type="radio"/> 1 vez semana<br><input type="radio"/> 2 a 3 semanas                                                          |
| grasa o aceite cocinar         | <input type="radio"/> mantequilla<br><input type="radio"/> margarina<br><input type="radio"/> aceite oliva<br><input checked="" type="radio"/> aceite oliva virgen extra<br><input type="radio"/> aceite vegetal<br><input type="radio"/> mezcla aceites |
| grasa aceite aliñar            | <input type="radio"/> mantequilla<br><input type="radio"/> margarina<br><input type="radio"/> aceite oliva<br><input checked="" type="radio"/> aceite oliva virgen extra<br><input type="radio"/> aceite vegetal<br><input type="radio"/> mezcla aceites |
| grasa aceite freir             | <input type="radio"/> mantequilla<br><input type="radio"/> margarina<br><input type="radio"/> aceite oliva<br><input checked="" type="radio"/> aceite oliva virgen extra<br><input type="radio"/> aceite vegetal<br><input type="radio"/> mezcla aceites |
| Ejercicio cuestionario         | <input checked="" type="radio"/> si<br><input type="radio"/> no                                                                                                                                                                                          |
| horas de sueño incluido siesta | [*DATA REMOVED*]                                                                                                                                                                                                                                         |
| minutos siesta                 | [*DATA REMOVED*]                                                                                                                                                                                                                                         |
| horas televisión semana        | [*DATA REMOVED*]                                                                                                                                                                                                                                         |



|                                        |                                                                                                                                                                                                                                                                                                                                                                           |
|----------------------------------------|---------------------------------------------------------------------------------------------------------------------------------------------------------------------------------------------------------------------------------------------------------------------------------------------------------------------------------------------------------------------------|
| actividad trabajo                      | <input checked="" type="radio"/> casi siempre sentado<br><input type="radio"/> sentado 50 por cien<br><input type="radio"/> casi siempre de pie, quieto<br><input type="radio"/> casi siempre levantado caminando y llevando pocas cosas<br><input type="radio"/> casi siempre levantado, caminando y llevado muchas cosas<br><input type="radio"/> trabajo manual pesado |
| tiempo caminar o bici al día           | <input type="radio"/> casi nunca<br><input type="radio"/> menos 20min día<br><input type="radio"/> 20 a 40 min día<br><input checked="" type="radio"/> 40 a 60 min día<br><input type="radio"/> 1h o 1h y media día<br><input type="radio"/> más de 1h y media al día                                                                                                     |
| tiempo tareas casa al día              | <input type="radio"/> menos de 1h día<br><input type="radio"/> 1 a 2h día<br><input checked="" type="radio"/> 3 a 4h día<br><input type="radio"/> 5 a 6h día<br><input type="radio"/> 7 a 8h día<br><input type="radio"/> más de 8h día                                                                                                                                   |
| tiempo libre televisión ordenador leer | <input type="radio"/> menos 1h día<br><input type="radio"/> 1h día<br><input type="radio"/> 2h día<br><input checked="" type="radio"/> 3h día<br><input type="radio"/> 4h día<br><input type="radio"/> 5 a 6h día<br><input type="radio"/> mas 6h día                                                                                                                     |
| tiempo libre ejercicio o deporte       | <input type="radio"/> menos 1h semana<br><input type="radio"/> 1h semana<br><input type="radio"/> 2h semana<br><input type="radio"/> 3h semana<br><input checked="" type="radio"/> 4 a 5h semana<br><input type="radio"/> mas 5h semana                                                                                                                                   |
| como se considera                      | <input type="radio"/> sedentaria<br><input type="radio"/> poco activa<br><input checked="" type="radio"/> moderadamente activa<br><input type="radio"/> bastante activa<br><input type="radio"/> muy activa<br><input type="radio"/> no sabe                                                                                                                              |
| FUR                                    | [*DATA REMOVED*]                                                                                                                                                                                                                                                                                                                                                          |
| Semanas gestación 2T                   | [*DATA REMOVED*]                                                                                                                                                                                                                                                                                                                                                          |
| Días gestación 2T                      | [*DATA REMOVED*]                                                                                                                                                                                                                                                                                                                                                          |
| DBP 2T                                 | [*DATA REMOVED*]                                                                                                                                                                                                                                                                                                                                                          |
| CC 2T                                  | [*DATA REMOVED*]                                                                                                                                                                                                                                                                                                                                                          |
| AC 2T                                  | [*DATA REMOVED*]                                                                                                                                                                                                                                                                                                                                                          |

|                                                   |                                                                                                                                                                                                 |
|---------------------------------------------------|-------------------------------------------------------------------------------------------------------------------------------------------------------------------------------------------------|
| LF 2T                                             | [*DATA REMOVED*]                                                                                                                                                                                |
| PFE 2T (Hadlock)                                  | [*DATA REMOVED*]                                                                                                                                                                                |
| Semanas gestación 3T                              | [*DATA REMOVED*]                                                                                                                                                                                |
| días 3T                                           | [*DATA REMOVED*]                                                                                                                                                                                |
| DBP 3T                                            | [*DATA REMOVED*]                                                                                                                                                                                |
| CC 3T                                             | [*DATA REMOVED*]                                                                                                                                                                                |
| AC 3T                                             | [*DATA REMOVED*]                                                                                                                                                                                |
| LF 3T                                             | [*DATA REMOVED*]                                                                                                                                                                                |
| PFE 3T (Hadlock)                                  | [*DATA REMOVED*]                                                                                                                                                                                |
| Semanas de gestación final                        | [*DATA REMOVED*]                                                                                                                                                                                |
| días gestación final                              | [*DATA REMOVED*]                                                                                                                                                                                |
| Localización placenta                             | <input checked="" type="radio"/> anterior<br><input type="radio"/> lateral derecha<br><input type="radio"/> lateral izquierda<br><input type="radio"/> posterior<br><input type="radio"/> fondo |
| Presentación longitudinal cefálica                | <input type="radio"/> no<br><input checked="" type="radio"/> si                                                                                                                                 |
| Dorso                                             | <input checked="" type="radio"/> izquierda anterior<br><input type="radio"/> izquierda posterior<br><input type="radio"/> derecha anterior<br><input type="radio"/> derecha posterior           |
| diámetro biparietal                               | [*DATA REMOVED*]                                                                                                                                                                                |
| Circunferencia craneal                            | [*DATA REMOVED*]                                                                                                                                                                                |
| Circunferencia abdominal                          | [*DATA REMOVED*]                                                                                                                                                                                |
| Longitud de femur                                 | [*DATA REMOVED*]                                                                                                                                                                                |
| tejido celular subcutáneo a nivel del muslo en mm | [*DATA REMOVED*]                                                                                                                                                                                |
| tejido celular subcutáneo en abdomen en mm        | [*DATA REMOVED*]                                                                                                                                                                                |
| Volumen del muslo en cm3                          | [*DATA REMOVED*]                                                                                                                                                                                |
| Peso fetal estimado según fórmula de Hadlock      | [*DATA REMOVED*]                                                                                                                                                                                |

|                                               |                                                                                                                                               |
|-----------------------------------------------|-----------------------------------------------------------------------------------------------------------------------------------------------|
| Percentil                                     | [*DATA REMOVED*]                                                                                                                              |
| Peso fetal estimado según fórmula de Scioscia | <hr/>                                                                                                                                         |
| Peso fetal estimado según fórmula de LEE      | <hr/>                                                                                                                                         |
| Tipo de parto                                 | <input checked="" type="radio"/> eutocico<br><input type="radio"/> instrumentado/ventosa<br><input type="radio"/> cesarea                     |
| fecha de nacimiento                           | [*DATA REMOVED*]                                                                                                                              |
| Días entre exploración y nacimiento           | [*DATA REMOVED*]                                                                                                                              |
| Peso RN en g                                  | [*DATA REMOVED*]                                                                                                                              |
| sexo                                          | <input type="radio"/> mujer<br><input checked="" type="radio"/> hombre                                                                        |
| Apgar 1 minuto                                | [*DATA REMOVED*]                                                                                                                              |
| Apgar 5 minutos                               | [*DATA REMOVED*]                                                                                                                              |
| Apgar 10 minutos                              | <hr/>                                                                                                                                         |
| antecedente Covid durante gestación           | <input type="radio"/> Yes<br><input checked="" type="radio"/> No                                                                              |
| Nivel de estudios                             | <input type="radio"/> ninguno<br><input type="radio"/> primarios<br><input type="radio"/> secundarios<br><input type="radio"/> universitarios |

# Base\_datos\_estimacion\_peso\_fetal

|                                       |                                                                                                                                                                                                                                                                                      |
|---------------------------------------|--------------------------------------------------------------------------------------------------------------------------------------------------------------------------------------------------------------------------------------------------------------------------------------|
| Número de identificación participante | 80                                                                                                                                                                                                                                                                                   |
| CODIGO PARTICIPANTE                   |                                                                                                                                                                                                                                                                                      |
| Edad                                  | [*DATA REMOVED*]                                                                                                                                                                                                                                                                     |
| Gestaciones                           | <input type="radio"/> 1<br><input checked="" type="radio"/> 2<br><input type="radio"/> 3<br><input type="radio"/> mas de 3                                                                                                                                                           |
| partos                                | <input type="radio"/> 0<br><input checked="" type="radio"/> 1<br><input type="radio"/> 2<br><input type="radio"/> 3<br><input type="radio"/> mas de 3                                                                                                                                |
| cesáreas                              | <input checked="" type="radio"/> 0<br><input type="radio"/> 1<br><input type="radio"/> 2<br><input type="radio"/> 3<br><input type="radio"/> mas de 3                                                                                                                                |
| Abortos                               | <input checked="" type="radio"/> 0<br><input type="radio"/> 1<br><input type="radio"/> 2<br><input type="radio"/> 3<br><input type="radio"/> mas de 3                                                                                                                                |
| Tipo de gestacion                     | <input checked="" type="radio"/> espontanea<br><input type="radio"/> IAC inseminación artificial conyuge<br><input type="radio"/> IAD inseminación artificial donante<br><input type="radio"/> FIV Fecundación in Vitro<br><input type="radio"/> Ovodon FIV con donación de ovocitos |
| peso previo a embarazo                | [*DATA REMOVED*]                                                                                                                                                                                                                                                                     |
| Ganancia ponderal embarazo            | [*DATA REMOVED*]                                                                                                                                                                                                                                                                     |
| Talla madre                           | [*DATA REMOVED*]                                                                                                                                                                                                                                                                     |
| IMC previo embarazo                   | 25.039918710988534                                                                                                                                                                                                                                                                   |
| Patología obstétrica                  | <input checked="" type="radio"/> no<br><input type="radio"/> si                                                                                                                                                                                                                      |
| Diabetes pregestacional               | <input checked="" type="radio"/> no<br><input type="radio"/> si                                                                                                                                                                                                                      |
| Diabetes gestacional                  | <input checked="" type="radio"/> no<br><input type="radio"/> si                                                                                                                                                                                                                      |

|                                            |                                                                                                                                                                                      |
|--------------------------------------------|--------------------------------------------------------------------------------------------------------------------------------------------------------------------------------------|
| Diabetes gestacional con insulina          | <input checked="" type="radio"/> no<br><input type="radio"/> si                                                                                                                      |
| Diabetes gestacional con dieta y ejercicio | <input checked="" type="radio"/> no<br><input type="radio"/> si                                                                                                                      |
| Percentil fetos previos                    | <input type="radio"/> Nada<br><input type="radio"/> percentil menor de 10<br><input checked="" type="radio"/> percentil entre 10 y 90<br><input type="radio"/> percentil mayor de 90 |
| Exfumadora                                 | <input checked="" type="radio"/> Nada<br><input type="radio"/> menos de 5 años<br><input type="radio"/> 5 a 10 años<br><input type="radio"/> mayor o igual a 10 años                 |
| Hábito tabáquico                           | <input checked="" type="radio"/> no<br><input type="radio"/> si                                                                                                                      |
| fumadora                                   | [*DATA REMOVED*]                                                                                                                                                                     |
| Consumo otros tóxicos                      | <input checked="" type="radio"/> no<br><input type="radio"/> si                                                                                                                      |
| Hb 1T                                      | [*DATA REMOVED*]                                                                                                                                                                     |
| Htc 1T                                     | [*DATA REMOVED*]                                                                                                                                                                     |
| Hb 2T                                      | [*DATA REMOVED*]                                                                                                                                                                     |
| HTC 2T                                     | [*DATA REMOVED*]                                                                                                                                                                     |
| Hb 3T                                      | [*DATA REMOVED*]                                                                                                                                                                     |
| HTC 3T                                     | [*DATA REMOVED*]                                                                                                                                                                     |
| Suplemento FE oral                         | <input checked="" type="radio"/> si<br><input type="radio"/> no                                                                                                                      |
| Suplemento fe iv                           | <input type="radio"/> si<br><input checked="" type="radio"/> no                                                                                                                      |
| Transfusión                                | <input checked="" type="radio"/> no<br><input type="radio"/> si                                                                                                                      |
| Solicitada Vit D                           | <input type="radio"/> no<br><input checked="" type="radio"/> si                                                                                                                      |
| Deficit vit D                              | <input type="radio"/> no<br><input checked="" type="radio"/> si                                                                                                                      |
| Suplemento vit D                           | <input type="radio"/> si<br><input checked="" type="radio"/> no                                                                                                                      |

|                       |                                                                                                                                                                                                                                                                                                                                                                                                              |
|-----------------------|--------------------------------------------------------------------------------------------------------------------------------------------------------------------------------------------------------------------------------------------------------------------------------------------------------------------------------------------------------------------------------------------------------------|
| Dieta, cuestionario   | <input checked="" type="radio"/> sí<br><input type="radio"/> no                                                                                                                                                                                                                                                                                                                                              |
| Leche entera          | <input checked="" type="radio"/> Nunca o menos 1 vez al mes<br><input type="radio"/> 1 a 3 veces mes<br><input type="radio"/> 1 vez semana<br><input type="radio"/> 2 a 4 veces semana<br><input type="radio"/> 5 a 6 veces semana<br><input type="radio"/> 1 vez al día<br><input type="radio"/> 2 a 3 veces al día<br><input type="radio"/> 5 a 6 veces al día<br><input type="radio"/> más 6 veces al día |
| Leche semidesnatada   | <input checked="" type="radio"/> Nunca o menos 1 vez al mes<br><input type="radio"/> 1 a 3 veces mes<br><input type="radio"/> 1 vez semana<br><input type="radio"/> 2 a 4 veces semana<br><input type="radio"/> 5 a 6 veces semana<br><input type="radio"/> 1 vez al día<br><input type="radio"/> 2 a 3 veces al día<br><input type="radio"/> 5 a 6 veces al día<br><input type="radio"/> mas 6 veces al día |
| Leche desnatada       | <input type="radio"/> Nunca o menos 1 vez al mes<br><input type="radio"/> 1 a 3 veces mes<br><input type="radio"/> 1 vez semana<br><input type="radio"/> 2 a 4 veces semana<br><input type="radio"/> 5 a 6 veces semana<br><input type="radio"/> 1 vez al día<br><input checked="" type="radio"/> 2 a 3 veces al día<br><input type="radio"/> 5 a 6 veces al día<br><input type="radio"/> más 6 veces al día |
| Leche condensada      | <input type="radio"/> Nunca o menos 1 vez al mes<br><input checked="" type="radio"/> 1 a 3 veces mes<br><input type="radio"/> 1 vez semana<br><input type="radio"/> 2 a 4 veces semana<br><input type="radio"/> 5 a 6 veces semana<br><input type="radio"/> 1 vez al día<br><input type="radio"/> 2 a 3 veces al día<br><input type="radio"/> 5 a 6 veces al día<br><input type="radio"/> más 6 veces al día |
| nata o crema de leche | <input checked="" type="radio"/> Nunca o menos 1 vez al mes<br><input type="radio"/> 1 a 3 veces mes<br><input type="radio"/> 1 vez semana<br><input type="radio"/> 2 a 4 veces semana<br><input type="radio"/> 5 a 6 veces semana<br><input type="radio"/> 1 vez al día<br><input type="radio"/> 2 a 3 veces al día<br><input type="radio"/> 5 a 6 veces al día<br><input type="radio"/> más 6 veces al día |

---

Yogurt Entero

- ☒ Nunca o menos 1 vez al mes  
☐ 1 a 3 veces mes  
☐ 1 vez semana  
☐ 2 a 4 veces semana  
☐ 5 a 6 veces semana  
☐ 1 vez al día  
☐ 2 a 3 veces al día  
☐ 5 a 6 veces al día  
☐ más 6 veces al día

---

Yogurt desnatado

- ☐ Nunca o menos 1 vez al mes  
☐ 1 a 3 veces mes  
☒ 1 vez semana  
☐ 2 a 4 veces semana  
☐ 5 a 6 veces semana  
☐ 1 vez al día  
☐ 2 a 3 veces al día  
☐ 5 a 6 veces al día  
☐ más 6 veces al día

---

100g requesón o queso blando o queso fresco

- ☐ Nunca o menos 1 vez al mes  
☐ 1 a 3 veces mes  
☐ 1 vez semana  
☒ 2 a 4 veces semana  
☐ 5 a 6 veces semana  
☐ 1 vez al día  
☐ 2 a 3 veces al día  
☐ 5 a 6 veces al día  
☐ más 6 veces al día

---

queso curado o semicurado o cremoso

- ☐ Nunca o menos 1 vez al mes  
☐ 1 a 3 veces mes  
☐ 1 vez semana  
☒ 2 a 4 veces semana  
☐ 5 a 6 veces semana  
☐ 1 vez al día  
☐ 2 a 3 veces al día  
☐ 5 a 6 veces al día  
☐ más 6 veces al día

---

natillas flan pudding

- ☐ Nunca o menos 1 vez al mes  
☒ 1 a 3 veces mes  
☐ 1 vez semana  
☐ 2 a 4 veces semana  
☐ 5 a 6 veces semana  
☐ 1 vez al día  
☐ 2 a 3 veces al día  
☐ 5 a 6 veces al día  
☐ más 6 veces al día

---

Helado

- ☐ Nunca o menos 1 vez al mes  
☒ 1 a 3 veces mes  
☐ 1 vez semana  
☐ 2 a 4 veces semana  
☐ 5 a 6 veces semana  
☐ 1 vez al día  
☐ 2 a 3 veces al día  
☐ 5 a 6 veces al día  
☐ más 6 veces al día

|                                      |                                                                                                                                                                                                                                                                                                                                                                                                              |
|--------------------------------------|--------------------------------------------------------------------------------------------------------------------------------------------------------------------------------------------------------------------------------------------------------------------------------------------------------------------------------------------------------------------------------------------------------------|
| huevo                                | <input type="radio"/> Nunca o menos 1 vez al mes<br><input type="radio"/> 1 a 3 veces mes<br><input type="radio"/> 1 vez semana<br><input checked="" type="radio"/> 2 a 4 veces semana<br><input type="radio"/> 5 a 6 veces semana<br><input type="radio"/> 1 vez al día<br><input type="radio"/> 2 a 3 veces al día<br><input type="radio"/> 5 a 6 veces al día<br><input type="radio"/> más 6 veces al día |
| Pollo con piel                       | <input checked="" type="radio"/> Nunca o menos 1 vez al mes<br><input type="radio"/> 1 a 3 veces mes<br><input type="radio"/> 1 vez semana<br><input type="radio"/> 2 a 4 veces semana<br><input type="radio"/> 5 a 6 veces semana<br><input type="radio"/> 1 vez al día<br><input type="radio"/> 2 a 3 veces al día<br><input type="radio"/> 5 a 6 veces al día<br><input type="radio"/> más 6 veces al día |
| pollo sin piel                       | <input type="radio"/> Nunca o menos 1 vez al mes<br><input type="radio"/> 1 a 3 veces mes<br><input checked="" type="radio"/> 1 vez semana<br><input type="radio"/> 2 a 4 veces semana<br><input type="radio"/> 5 a 6 veces semana<br><input type="radio"/> 1 vez al día<br><input type="radio"/> 2 a 3 veces al día<br><input type="radio"/> 5 a 6 veces al día<br><input type="radio"/> más 6 veces al día |
| Ternera o cerdo o cordero            | <input type="radio"/> Nunca o menos 1 vez al mes<br><input type="radio"/> 1 a 3 veces mes<br><input type="radio"/> 1 vez semana<br><input checked="" type="radio"/> 2 a 4 veces semana<br><input type="radio"/> 5 a 6 veces semana<br><input type="radio"/> 1 vez al día<br><input type="radio"/> 2 a 3 veces al día<br><input type="radio"/> 5 a 6 veces al día<br><input type="radio"/> más 6 veces al día |
| carne caza: Conejo o codorniz o pato | <input checked="" type="radio"/> Nunca o menos 1 vez al mes<br><input type="radio"/> 1 a 3 veces mes<br><input type="radio"/> 1 vez semana<br><input type="radio"/> 2 a 4 veces semana<br><input type="radio"/> 5 a 6 veces semana<br><input type="radio"/> 1 vez al día<br><input type="radio"/> 2 a 3 veces al día<br><input type="radio"/> 5 a 6 veces al día<br><input type="radio"/> más 6 veces al día |
| Hígado de ternera o cerdo o pollo    | <input type="radio"/> Nunca o menos 1 vez al mes<br><input type="radio"/> 1 a 3 veces mes<br><input type="radio"/> 1 vez semana<br><input checked="" type="radio"/> 2 a 4 veces semana<br><input type="radio"/> 5 a 6 veces semana<br><input type="radio"/> 1 vez al día<br><input type="radio"/> 2 a 3 veces al día<br><input type="radio"/> 5 a 6 veces al día<br><input type="radio"/> más 6 veces al día |



|                     |                                                                                                                                                                                                                                                                                                                                                                                                              |
|---------------------|--------------------------------------------------------------------------------------------------------------------------------------------------------------------------------------------------------------------------------------------------------------------------------------------------------------------------------------------------------------------------------------------------------------|
| Vísceras            | <input checked="" type="radio"/> Nunca o menos 1 vez al mes<br><input type="radio"/> 1 a 3 veces mes<br><input type="radio"/> 1 vez semana<br><input type="radio"/> 2 a 4 veces semana<br><input type="radio"/> 5 a 6 veces semana<br><input type="radio"/> 1 vez al día<br><input type="radio"/> 2 a 3 veces al día<br><input type="radio"/> 5 a 6 veces al día<br><input type="radio"/> más 6 veces al día |
| Embutido            | <input type="radio"/> Nunca o menos 1 vez al mes<br><input type="radio"/> 1 a 3 veces mes<br><input type="radio"/> 1 vez semana<br><input checked="" type="radio"/> 2 a 4 veces semana<br><input type="radio"/> 5 a 6 veces semana<br><input type="radio"/> 1 vez al día<br><input type="radio"/> 2 a 3 veces al día<br><input type="radio"/> 5 a 6 veces al día<br><input type="radio"/> más 6 veces al día |
| Salchicha o similar | <input type="radio"/> Nunca o menos 1 vez al mes<br><input type="radio"/> 1 a 3 veces mes<br><input type="radio"/> 1 vez semana<br><input checked="" type="radio"/> 2 a 4 veces semana<br><input type="radio"/> 5 a 6 veces semana<br><input type="radio"/> 1 vez al día<br><input type="radio"/> 2 a 3 veces al día<br><input type="radio"/> 5 a 6 veces al día<br><input type="radio"/> más 6 veces al día |
| Pate o foiegras     | <input type="radio"/> Nunca o menos 1 vez al mes<br><input checked="" type="radio"/> 1 a 3 veces mes<br><input type="radio"/> 1 vez semana<br><input type="radio"/> 2 a 4 veces semana<br><input type="radio"/> 5 a 6 veces semana<br><input type="radio"/> 1 vez al día<br><input type="radio"/> 2 a 3 veces al día<br><input type="radio"/> 5 a 6 veces al día<br><input type="radio"/> más 6 veces al día |
| Hamburguesa         | <input type="radio"/> Nunca o menos 1 vez al mes<br><input type="radio"/> 1 a 3 veces mes<br><input checked="" type="radio"/> 1 vez semana<br><input type="radio"/> 2 a 4 veces semana<br><input type="radio"/> 5 a 6 veces semana<br><input type="radio"/> 1 vez al día<br><input type="radio"/> 2 a 3 veces al día<br><input type="radio"/> 5 a 6 veces al día<br><input type="radio"/> más 6 veces al día |
| tocino o bacon      | <input type="radio"/> Nunca o menos 1 vez al mes<br><input checked="" type="radio"/> 1 a 3 veces mes<br><input type="radio"/> 1 vez semana<br><input type="radio"/> 2 a 4 veces semana<br><input type="radio"/> 5 a 6 veces semana<br><input type="radio"/> 1 vez al día<br><input type="radio"/> 2 a 3 veces al día<br><input type="radio"/> 5 a 6 veces al día<br><input type="radio"/> más 6 veces al día |

---

Pescado frito

- ☐ Nunca o menos 1 vez al mes  
☐ 1 a 3 veces mes  
☐ 1 vez semana  
☒ 2 a 4 veces semana  
☐ 5 a 6 veces semana  
☐ 1 vez al día  
☐ 2 a 3 veces al día  
☐ 5 a 6 veces al día  
☐ más 6 veces al día

---

pescado hervido blanco

- ☐ Nunca o menos 1 vez al mes  
☐ 1 a 3 veces mes  
☐ 1 vez semana  
☒ 2 a 4 veces semana  
☐ 5 a 6 veces semana  
☐ 1 vez al día  
☐ 2 a 3 veces al día  
☐ 5 a 6 veces al día  
☐ más 6 veces al día

---

pescado hervido azul

- ☒ Nunca o menos 1 vez al mes  
☐ 1 a 3 veces mes  
☐ 1 vez semana  
☐ 2 a 4 veces semana  
☐ 5 a 6 veces semana  
☐ 1 vez al día  
☐ 2 a 3 veces al día  
☐ 5 a 6 veces al día  
☐ más 6 veces al día

---

otros pescado azul

- ☐ Nunca o menos 1 vez al mes  
☒ 1 a 3 veces mes  
☐ 1 vez semana  
☐ 2 a 4 veces semana  
☐ 5 a 6 veces semana  
☐ 1 vez al día  
☐ 2 a 3 veces al día  
☐ 5 a 6 veces al día  
☐ más 6 veces al día

---

atun conserva

- ☐ Nunca o menos 1 vez al mes  
☐ 1 a 3 veces mes  
☐ 1 vez semana  
☒ 2 a 4 veces semana  
☐ 5 a 6 veces semana  
☐ 1 vez al día  
☐ 2 a 3 veces al día  
☐ 5 a 6 veces al día  
☐ más 6 veces al día

---

sardina conserva

- ☐ Nunca o menos 1 vez al mes  
☐ 1 a 3 veces mes  
☒ 1 vez semana  
☐ 2 a 4 veces semana  
☐ 5 a 6 veces semana  
☐ 1 vez al día  
☐ 2 a 3 veces al día  
☐ 5 a 6 veces al día  
☐ más 6 veces al día

|                                         |                                                                                                                                                                                                                                                                                                                                                                                                              |
|-----------------------------------------|--------------------------------------------------------------------------------------------------------------------------------------------------------------------------------------------------------------------------------------------------------------------------------------------------------------------------------------------------------------------------------------------------------------|
| pescado ahumado                         | <input type="radio"/> Nunca o menos 1 vez al mes<br><input type="radio"/> 1 a 3 veces mes<br><input checked="" type="radio"/> 1 vez semana<br><input type="radio"/> 2 a 4 veces semana<br><input type="radio"/> 5 a 6 veces semana<br><input type="radio"/> 1 vez al día<br><input type="radio"/> 2 a 3 veces al día<br><input type="radio"/> 5 a 6 veces al día<br><input type="radio"/> más 6 veces al día |
| almejas o mejillones o ostras unos 100g | <input type="radio"/> Nunca o menos 1 vez al mes<br><input type="radio"/> 1 a 3 veces mes<br><input checked="" type="radio"/> 1 vez semana<br><input type="radio"/> 2 a 4 veces semana<br><input type="radio"/> 5 a 6 veces semana<br><input type="radio"/> 1 vez al día<br><input type="radio"/> 2 a 3 veces al día<br><input type="radio"/> 5 a 6 veces al día<br><input type="radio"/> más 6 veces al día |
| calamar o chipiron o sepia unos 100g    | <input type="radio"/> Nunca o menos 1 vez al mes<br><input type="radio"/> 1 a 3 veces mes<br><input checked="" type="radio"/> 1 vez semana<br><input type="radio"/> 2 a 4 veces semana<br><input type="radio"/> 5 a 6 veces semana<br><input type="radio"/> 1 vez al día<br><input type="radio"/> 2 a 3 veces al día<br><input type="radio"/> 5 a 6 veces al día<br><input type="radio"/> más 6 veces al día |
| marisco unos 100g                       | <input type="radio"/> Nunca o menos 1 vez al mes<br><input type="radio"/> 1 a 3 veces mes<br><input checked="" type="radio"/> 1 vez semana<br><input type="radio"/> 2 a 4 veces semana<br><input type="radio"/> 5 a 6 veces semana<br><input type="radio"/> 1 vez al día<br><input type="radio"/> 2 a 3 veces al día<br><input type="radio"/> 5 a 6 veces al día<br><input type="radio"/> más 6 veces al día |
| Espinacas o acelgas cocinadas           | <input type="radio"/> Nunca o menos 1 vez al mes<br><input type="radio"/> 1 a 3 veces mes<br><input checked="" type="radio"/> 1 vez semana<br><input type="radio"/> 2 a 4 veces semana<br><input type="radio"/> 5 a 6 veces semana<br><input type="radio"/> 1 vez al día<br><input type="radio"/> 2 a 3 veces al día<br><input type="radio"/> 5 a 6 veces al día<br><input type="radio"/> más 6 veces al día |
| Col o coliflor o brocoli cocinado       | <input type="radio"/> Nunca o menos 1 vez al mes<br><input checked="" type="radio"/> 1 a 3 veces mes<br><input type="radio"/> 1 vez semana<br><input type="radio"/> 2 a 4 veces semana<br><input type="radio"/> 5 a 6 veces semana<br><input type="radio"/> 1 vez al día<br><input type="radio"/> 2 a 3 veces al día<br><input type="radio"/> 5 a 6 veces al día<br><input type="radio"/> más 6 veces al día |

---

Lechuga o endivia o escarola

- ☐ Nunca o menos 1 vez al mes  
☐ 1 a 3 veces mes  
☐ 1 vez semana  
☒ 2 a 4 veces semana  
☐ 5 a 6 veces semana  
☐ 1 vez al día  
☐ 2 a 3 veces al día  
☐ 5 a 6 veces al día  
☐ más 6 veces al día

---

tomate ensalada

- ☐ Nunca o menos 1 vez al mes  
☐ 1 a 3 veces mes  
☐ 1 vez semana  
☐ 2 a 4 veces semana  
☐ 5 a 6 veces semana  
☒ 1 vez al día  
☐ 2 a 3 veces al día  
☐ 5 a 6 veces al día  
☐ más 6 veces al día

---

cebolla

- ☒ Nunca o menos 1 vez al mes  
☐ 1 a 3 veces mes  
☐ 1 vez semana  
☐ 2 a 4 veces semana  
☐ 5 a 6 veces semana  
☐ 1 vez al día  
☐ 2 a 3 veces al día  
☐ 5 a 6 veces al día  
☐ más 6 veces al día

---

Zanahoria o calabaza

- ☐ Nunca o menos 1 vez al mes  
☐ 1 a 3 veces mes  
☐ 1 vez semana  
☐ 2 a 4 veces semana  
☐ 5 a 6 veces semana  
☒ 1 vez al día  
☐ 2 a 3 veces al día  
☐ 5 a 6 veces al día  
☐ más 6 veces al día

---

Judías verdes

- ☐ Nunca o menos 1 vez al mes  
☐ 1 a 3 veces mes  
☐ 1 vez semana  
☐ 2 a 4 veces semana  
☒ 5 a 6 veces semana  
☐ 1 vez al día  
☐ 2 a 3 veces al día  
☐ 5 a 6 veces al día  
☐ más 6 veces al día

---

Berenjena o calabacin o pepino

- ☐ Nunca o menos 1 vez al mes  
☐ 1 a 3 veces mes  
☐ 1 vez semana  
☒ 2 a 4 veces semana  
☐ 5 a 6 veces semana  
☐ 1 vez al día  
☐ 2 a 3 veces al día  
☐ 5 a 6 veces al día  
☐ más 6 veces al día

|                       |                                                                                                                                                                                                                                                                                                                                                                                                              |
|-----------------------|--------------------------------------------------------------------------------------------------------------------------------------------------------------------------------------------------------------------------------------------------------------------------------------------------------------------------------------------------------------------------------------------------------------|
| pimiento              | <input type="radio"/> Nunca o menos 1 vez al mes<br><input type="radio"/> 1 a 3 veces mes<br><input checked="" type="radio"/> 1 vez semana<br><input type="radio"/> 2 a 4 veces semana<br><input type="radio"/> 5 a 6 veces semana<br><input type="radio"/> 1 vez al día<br><input type="radio"/> 2 a 3 veces al día<br><input type="radio"/> 5 a 6 veces al día<br><input type="radio"/> más 6 veces al día |
| alcachofa             | <input type="radio"/> Nunca o menos 1 vez al mes<br><input type="radio"/> 1 a 3 veces mes<br><input checked="" type="radio"/> 1 vez semana<br><input type="radio"/> 2 a 4 veces semana<br><input type="radio"/> 5 a 6 veces semana<br><input type="radio"/> 1 vez al día<br><input type="radio"/> 2 a 3 veces al día<br><input type="radio"/> 5 a 6 veces al día<br><input type="radio"/> más 6 veces al día |
| espárragos            | <input type="radio"/> Nunca o menos 1 vez al mes<br><input type="radio"/> 1 a 3 veces mes<br><input checked="" type="radio"/> 1 vez semana<br><input type="radio"/> 2 a 4 veces semana<br><input type="radio"/> 5 a 6 veces semana<br><input type="radio"/> 1 vez al día<br><input type="radio"/> 2 a 3 veces al día<br><input type="radio"/> 5 a 6 veces al día<br><input type="radio"/> más 6 veces al día |
| maíz hervido          | <input type="radio"/> Nunca o menos 1 vez al mes<br><input type="radio"/> 1 a 3 veces mes<br><input checked="" type="radio"/> 1 vez semana<br><input type="radio"/> 2 a 4 veces semana<br><input type="radio"/> 5 a 6 veces semana<br><input type="radio"/> 1 vez al día<br><input type="radio"/> 2 a 3 veces al día<br><input type="radio"/> 5 a 6 veces al día<br><input type="radio"/> más 6 veces al día |
| legumbres             | <input type="radio"/> Nunca o menos 1 vez al mes<br><input type="radio"/> 1 a 3 veces mes<br><input checked="" type="radio"/> 1 vez semana<br><input type="radio"/> 2 a 4 veces semana<br><input type="radio"/> 5 a 6 veces semana<br><input type="radio"/> 1 vez al día<br><input type="radio"/> 2 a 3 veces al día<br><input type="radio"/> 5 a 6 veces al día<br><input type="radio"/> más 6 veces al día |
| naranjas o mandarinas | <input type="radio"/> Nunca o menos 1 vez al mes<br><input checked="" type="radio"/> 1 a 3 veces mes<br><input type="radio"/> 1 vez semana<br><input type="radio"/> 2 a 4 veces semana<br><input type="radio"/> 5 a 6 veces semana<br><input type="radio"/> 1 vez al día<br><input type="radio"/> 2 a 3 veces al día<br><input type="radio"/> 5 a 6 veces al día<br><input type="radio"/> más 6 veces al día |

|                       |                                                                                                                                                                                                                                                                                                                                                                                                              |
|-----------------------|--------------------------------------------------------------------------------------------------------------------------------------------------------------------------------------------------------------------------------------------------------------------------------------------------------------------------------------------------------------------------------------------------------------|
| zum natural fruta     | <input checked="" type="radio"/> Nunca o menos 1 vez al mes<br><input type="radio"/> 1 a 3 veces mes<br><input type="radio"/> 1 vez semana<br><input type="radio"/> 2 a 4 veces semana<br><input type="radio"/> 5 a 6 veces semana<br><input type="radio"/> 1 vez al día<br><input type="radio"/> 2 a 3 veces al día<br><input type="radio"/> 5 a 6 veces al día<br><input type="radio"/> más 6 veces al día |
| platano               | <input type="radio"/> Nunca o menos 1 vez al mes<br><input type="radio"/> 1 a 3 veces mes<br><input checked="" type="radio"/> 1 vez semana<br><input type="radio"/> 2 a 4 veces semana<br><input type="radio"/> 5 a 6 veces semana<br><input type="radio"/> 1 vez al día<br><input type="radio"/> 2 a 3 veces al día<br><input type="radio"/> 5 a 6 veces al día<br><input type="radio"/> más 6 veces al día |
| manzana o pera        | <input type="radio"/> Nunca o menos 1 vez al mes<br><input type="radio"/> 1 a 3 veces mes<br><input type="radio"/> 1 vez semana<br><input type="radio"/> 2 a 4 veces semana<br><input type="radio"/> 5 a 6 veces semana<br><input checked="" type="radio"/> 1 vez al día<br><input type="radio"/> 2 a 3 veces al día<br><input type="radio"/> 5 a 6 veces al día<br><input type="radio"/> más 6 veces al día |
| melocotón o nectarina | <input type="radio"/> Nunca o menos 1 vez al mes<br><input type="radio"/> 1 a 3 veces mes<br><input type="radio"/> 1 vez semana<br><input type="radio"/> 2 a 4 veces semana<br><input checked="" type="radio"/> 5 a 6 veces semana<br><input type="radio"/> 1 vez al día<br><input type="radio"/> 2 a 3 veces al día<br><input type="radio"/> 5 a 6 veces al día<br><input type="radio"/> más 6 veces al día |
| sandia o melon        | <input type="radio"/> Nunca o menos 1 vez al mes<br><input type="radio"/> 1 a 3 veces mes<br><input type="radio"/> 1 vez semana<br><input type="radio"/> 2 a 4 veces semana<br><input checked="" type="radio"/> 5 a 6 veces semana<br><input type="radio"/> 1 vez al día<br><input type="radio"/> 2 a 3 veces al día<br><input type="radio"/> 5 a 6 veces al día<br><input type="radio"/> más 6 veces al día |
| uva                   | <input type="radio"/> Nunca o menos 1 vez al mes<br><input type="radio"/> 1 a 3 veces mes<br><input checked="" type="radio"/> 1 vez semana<br><input type="radio"/> 2 a 4 veces semana<br><input type="radio"/> 5 a 6 veces semana<br><input type="radio"/> 1 vez al día<br><input type="radio"/> 2 a 3 veces al día<br><input type="radio"/> 5 a 6 veces al día<br><input type="radio"/> más 6 veces al día |

---

bruna o ciruela

- ☐ Nunca o menos 1 vez al mes  
☒ 1 a 3 veces mes  
☐ 1 vez semana  
☐ 2 a 4 veces semana  
☐ 5 a 6 veces semana  
☐ 1 vez al día  
☐ 2 a 3 veces al día  
☐ 5 a 6 veces al día  
☐ más 6 veces al día

---

kiwi

- ☐ Nunca o menos 1 vez al mes  
☐ 1 a 3 veces mes  
☒ 1 vez semana  
☐ 2 a 4 veces semana  
☐ 5 a 6 veces semana  
☐ 1 vez al día  
☐ 2 a 3 veces al día  
☐ 5 a 6 veces al día  
☐ más 6 veces al día

---

aceituna

- ☐ Nunca o menos 1 vez al mes  
☐ 1 a 3 veces mes  
☒ 1 vez semana  
☐ 2 a 4 veces semana  
☐ 5 a 6 veces semana  
☐ 1 vez al día  
☐ 2 a 3 veces al día  
☐ 5 a 6 veces al día  
☐ más 6 veces al día

---

frutos secos

- ☐ Nunca o menos 1 vez al mes  
☐ 1 a 3 veces mes  
☐ 1 vez semana  
☐ 2 a 4 veces semana  
☐ 5 a 6 veces semana  
☒ 1 vez al día  
☐ 2 a 3 veces al día  
☐ 5 a 6 veces al día  
☐ más 6 veces al día

---

pan blanco

- ☐ Nunca o menos 1 vez al mes  
☐ 1 a 3 veces mes  
☐ 1 vez semana  
☐ 2 a 4 veces semana  
☐ 5 a 6 veces semana  
☒ 1 vez al día  
☐ 2 a 3 veces al día  
☐ 5 a 6 veces al día  
☐ más 6 veces al día

---

pan integral

- ☒ Nunca o menos 1 vez al mes  
☐ 1 a 3 veces mes  
☐ 1 vez semana  
☐ 2 a 4 veces semana  
☐ 5 a 6 veces semana  
☐ 1 vez al día  
☐ 2 a 3 veces al día  
☐ 5 a 6 veces al día  
☐ más 6 veces al día

---

cereales desayuno

- ☒ Nunca o menos 1 vez al mes  
☐ 1 a 3 veces mes  
☐ 1 vez semana  
☐ 2 a 4 veces semana  
☐ 5 a 6 veces semana  
☐ 1 vez al día  
☐ 2 a 3 veces al día  
☐ 5 a 6 veces al día  
☐ más 6 veces al día

---

patatas fritas

- ☒ Nunca o menos 1 vez al mes  
☐ 1 a 3 veces mes  
☐ 1 vez semana  
☐ 2 a 4 veces semana  
☐ 5 a 6 veces semana  
☐ 1 vez al día  
☐ 2 a 3 veces al día  
☐ 5 a 6 veces al día  
☐ más 6 veces al día

---

patatas cocidas o asadas

- ☐ Nunca o menos 1 vez al mes  
☐ 1 a 3 veces mes  
☒ 1 vez semana  
☐ 2 a 4 veces semana  
☐ 5 a 6 veces semana  
☐ 1 vez al día  
☐ 2 a 3 veces al día  
☐ 5 a 6 veces al día  
☐ más 6 veces al día

---

bolsa papas

- ☐ Nunca o menos 1 vez al mes  
☐ 1 a 3 veces mes  
☒ 1 vez semana  
☐ 2 a 4 veces semana  
☐ 5 a 6 veces semana  
☐ 1 vez al día  
☐ 2 a 3 veces al día  
☐ 5 a 6 veces al día  
☐ más 6 veces al día

---

arroz cocinado

- ☐ Nunca o menos 1 vez al mes  
☐ 1 a 3 veces mes  
☒ 1 vez semana  
☐ 2 a 4 veces semana  
☐ 5 a 6 veces semana  
☐ 1 vez al día  
☐ 2 a 3 veces al día  
☐ 5 a 6 veces al día  
☐ más 6 veces al día

---

pasta

- ☐ Nunca o menos 1 vez al mes  
☐ 1 a 3 veces mes  
☒ 1 vez semana  
☐ 2 a 4 veces semana  
☐ 5 a 6 veces semana  
☐ 1 vez al día  
☐ 2 a 3 veces al día  
☐ 5 a 6 veces al día  
☐ más 6 veces al día



|                     |                                                                                                                                                                                                                                                                                                                                                                                                              |
|---------------------|--------------------------------------------------------------------------------------------------------------------------------------------------------------------------------------------------------------------------------------------------------------------------------------------------------------------------------------------------------------------------------------------------------------|
| pizza               | <input type="radio"/> Nunca o menos 1 vez al mes<br><input type="radio"/> 1 a 3 veces mes<br><input checked="" type="radio"/> 1 vez semana<br><input type="radio"/> 2 a 4 veces semana<br><input type="radio"/> 5 a 6 veces semana<br><input type="radio"/> 1 vez al día<br><input type="radio"/> 2 a 3 veces al día<br><input type="radio"/> 5 a 6 veces al día<br><input type="radio"/> más 6 veces al día |
| aceite oliva        | <input type="radio"/> Nunca o menos 1 vez al mes<br><input type="radio"/> 1 a 3 veces mes<br><input type="radio"/> 1 vez semana<br><input type="radio"/> 2 a 4 veces semana<br><input type="radio"/> 5 a 6 veces semana<br><input checked="" type="radio"/> 1 vez al día<br><input type="radio"/> 2 a 3 veces al día<br><input type="radio"/> 5 a 6 veces al día<br><input type="radio"/> más 6 veces al día |
| otros aceites       | <input checked="" type="radio"/> Nunca o menos 1 vez al mes<br><input type="radio"/> 1 a 3 veces mes<br><input type="radio"/> 1 vez semana<br><input type="radio"/> 2 a 4 veces semana<br><input type="radio"/> 5 a 6 veces semana<br><input type="radio"/> 1 vez al día<br><input type="radio"/> 2 a 3 veces al día<br><input type="radio"/> 5 a 6 veces al día<br><input type="radio"/> más 6 veces al día |
| margarina           | <input type="radio"/> Nunca o menos 1 vez al mes<br><input type="radio"/> 1 a 3 veces mes<br><input type="radio"/> 1 vez semana<br><input type="radio"/> 2 a 4 veces semana<br><input type="radio"/> 5 a 6 veces semana<br><input checked="" type="radio"/> 1 vez al día<br><input type="radio"/> 2 a 3 veces al día<br><input type="radio"/> 5 a 6 veces al día<br><input type="radio"/> más 6 veces al día |
| mantequilla         | <input checked="" type="radio"/> Nunca o menos 1 vez al mes<br><input type="radio"/> 1 a 3 veces mes<br><input type="radio"/> 1 vez semana<br><input type="radio"/> 2 a 4 veces semana<br><input type="radio"/> 5 a 6 veces semana<br><input type="radio"/> 1 vez al día<br><input type="radio"/> 2 a 3 veces al día<br><input type="radio"/> 5 a 6 veces al día<br><input type="radio"/> más 6 veces al día |
| galletas tipo maria | <input type="radio"/> Nunca o menos 1 vez al mes<br><input type="radio"/> 1 a 3 veces mes<br><input checked="" type="radio"/> 1 vez semana<br><input type="radio"/> 2 a 4 veces semana<br><input type="radio"/> 5 a 6 veces semana<br><input type="radio"/> 1 vez al día<br><input type="radio"/> 2 a 3 veces al día<br><input type="radio"/> 5 a 6 veces al día<br><input type="radio"/> más 6 veces al día |

---

galletas chocolate

- ☐ Nunca o menos 1 vez al mes  
☐ 1 a 3 veces mes  
☒ 1 vez semana  
☐ 2 a 4 veces semana  
☐ 5 a 6 veces semana  
☐ 1 vez al día  
☐ 2 a 3 veces al día  
☐ 5 a 6 veces al día  
☐ más 6 veces al día

---

bolleria

- ☐ Nunca o menos 1 vez al mes  
☐ 1 a 3 veces mes  
☐ 1 vez semana  
☒ 2 a 4 veces semana  
☐ 5 a 6 veces semana  
☐ 1 vez al día  
☐ 2 a 3 veces al día  
☐ 5 a 6 veces al día  
☐ más 6 veces al día

---

chocolate o bombones

- ☐ Nunca o menos 1 vez al mes  
☐ 1 a 3 veces mes  
☐ 1 vez semana  
☒ 2 a 4 veces semana  
☐ 5 a 6 veces semana  
☐ 1 vez al día  
☐ 2 a 3 veces al día  
☐ 5 a 6 veces al día  
☐ más 6 veces al día

---

chocolate polvo o colacao

- ☐ Nunca o menos 1 vez al mes  
☐ 1 a 3 veces mes  
☐ 1 vez semana  
☐ 2 a 4 veces semana  
☒ 5 a 6 veces semana  
☐ 1 vez al día  
☐ 2 a 3 veces al día  
☐ 5 a 6 veces al día  
☐ más 6 veces al día

---

vino tinto

- ☒ Nunca o menos 1 vez al mes  
☐ 1 a 3 veces mes  
☐ 1 vez semana  
☐ 2 a 4 veces semana  
☐ 5 a 6 veces semana  
☐ 1 vez al día  
☐ 2 a 3 veces al día  
☐ 5 a 6 veces al día  
☐ más 6 veces al día

---

vino blanco

- ☒ Nunca o menos 1 vez al mes  
☐ 1 a 3 veces mes  
☐ 1 vez semana  
☐ 2 a 4 veces semana  
☐ 5 a 6 veces semana  
☐ 1 vez al día  
☐ 2 a 3 veces al día  
☐ 5 a 6 veces al día  
☐ más 6 veces al día

|                       |                                                                                                                                                                                                                                                                                                                                                                                                              |
|-----------------------|--------------------------------------------------------------------------------------------------------------------------------------------------------------------------------------------------------------------------------------------------------------------------------------------------------------------------------------------------------------------------------------------------------------|
| vino seco o vermut    | <input checked="" type="radio"/> Nunca o menos 1 vez al mes<br><input type="radio"/> 1 a 3 veces mes<br><input type="radio"/> 1 vez semana<br><input type="radio"/> 2 a 4 veces semana<br><input type="radio"/> 5 a 6 veces semana<br><input type="radio"/> 1 vez al día<br><input type="radio"/> 2 a 3 veces al día<br><input type="radio"/> 5 a 6 veces al día<br><input type="radio"/> más 6 veces al día |
| cerveza               | <input checked="" type="radio"/> Nunca o menos 1 vez al mes<br><input type="radio"/> 1 a 3 veces mes<br><input type="radio"/> 1 vez semana<br><input type="radio"/> 2 a 4 veces semana<br><input type="radio"/> 5 a 6 veces semana<br><input type="radio"/> 1 vez al día<br><input type="radio"/> 2 a 3 veces al día<br><input type="radio"/> 5 a 6 veces al día<br><input type="radio"/> más 6 veces al día |
| cerveza sin alcohol   | <input checked="" type="radio"/> Nunca o menos 1 vez al mes<br><input type="radio"/> 1 a 3 veces mes<br><input type="radio"/> 1 vez semana<br><input type="radio"/> 2 a 4 veces semana<br><input type="radio"/> 5 a 6 veces semana<br><input type="radio"/> 1 vez al día<br><input type="radio"/> 2 a 3 veces al día<br><input type="radio"/> 5 a 6 veces al día<br><input type="radio"/> más 6 veces al día |
| licores               | <input checked="" type="radio"/> Nunca o menos 1 vez al mes<br><input type="radio"/> 1 a 3 veces mes<br><input type="radio"/> 1 vez semana<br><input type="radio"/> 2 a 4 veces semana<br><input type="radio"/> 5 a 6 veces semana<br><input type="radio"/> 1 vez al día<br><input type="radio"/> 2 a 3 veces al día<br><input type="radio"/> 5 a 6 veces al día<br><input type="radio"/> más 6 veces al día |
| ginebra o ron o vodka | <input checked="" type="radio"/> Nunca o menos 1 vez al mes<br><input type="radio"/> 1 a 3 veces mes<br><input type="radio"/> 1 vez semana<br><input type="radio"/> 2 a 4 veces semana<br><input type="radio"/> 5 a 6 veces semana<br><input type="radio"/> 1 vez al día<br><input type="radio"/> 2 a 3 veces al día<br><input type="radio"/> 5 a 6 veces al día<br><input type="radio"/> más 6 veces al día |
| refresco normal       | <input checked="" type="radio"/> Nunca o menos 1 vez al mes<br><input type="radio"/> 1 a 3 veces mes<br><input type="radio"/> 1 vez semana<br><input type="radio"/> 2 a 4 veces semana<br><input type="radio"/> 5 a 6 veces semana<br><input type="radio"/> 1 vez al día<br><input type="radio"/> 2 a 3 veces al día<br><input type="radio"/> 5 a 6 veces al día<br><input type="radio"/> más 6 veces al día |

|                          |                                                                                                                                                                                                                                                                                                                                                                                                              |
|--------------------------|--------------------------------------------------------------------------------------------------------------------------------------------------------------------------------------------------------------------------------------------------------------------------------------------------------------------------------------------------------------------------------------------------------------|
| refresco sin azúcar      | <input type="radio"/> Nunca o menos 1 vez al mes<br><input type="radio"/> 1 a 3 veces mes<br><input checked="" type="radio"/> 1 vez semana<br><input type="radio"/> 2 a 4 veces semana<br><input type="radio"/> 5 a 6 veces semana<br><input type="radio"/> 1 vez al día<br><input type="radio"/> 2 a 3 veces al día<br><input type="radio"/> 5 a 6 veces al día<br><input type="radio"/> más 6 veces al día |
| Agua del grifo           | <input checked="" type="radio"/> Nunca o menos 1 vez al mes<br><input type="radio"/> 1 a 3 veces mes<br><input type="radio"/> 1 vez semana<br><input type="radio"/> 2 a 4 veces semana<br><input type="radio"/> 5 a 6 veces semana<br><input type="radio"/> 1 vez al día<br><input type="radio"/> 2 a 3 veces al día<br><input type="radio"/> 5 a 6 veces al día<br><input type="radio"/> más 6 veces al día |
| agua embotellada sin gas | <input type="radio"/> Nunca o menos 1 vez al mes<br><input type="radio"/> 1 a 3 veces mes<br><input type="radio"/> 1 vez semana<br><input type="radio"/> 2 a 4 veces semana<br><input type="radio"/> 5 a 6 veces semana<br><input type="radio"/> 1 vez al día<br><input type="radio"/> 2 a 3 veces al día<br><input type="radio"/> 5 a 6 veces al día<br><input checked="" type="radio"/> más 6 veces al día |
| agua embotellada con gas | <input checked="" type="radio"/> Nunca o menos 1 vez al mes<br><input type="radio"/> 1 a 3 veces mes<br><input type="radio"/> 1 vez semana<br><input type="radio"/> 2 a 4 veces semana<br><input type="radio"/> 5 a 6 veces semana<br><input type="radio"/> 1 vez al día<br><input type="radio"/> 2 a 3 veces al día<br><input type="radio"/> 5 a 6 veces al día<br><input type="radio"/> más 6 veces al día |
| zumو frutas embasado     | <input checked="" type="radio"/> Nunca o menos 1 vez al mes<br><input type="radio"/> 1 a 3 veces mes<br><input type="radio"/> 1 vez semana<br><input type="radio"/> 2 a 4 veces semana<br><input type="radio"/> 5 a 6 veces semana<br><input type="radio"/> 1 vez al día<br><input type="radio"/> 2 a 3 veces al día<br><input type="radio"/> 5 a 6 veces al día<br><input type="radio"/> más 6 veces al día |
| cafe                     | <input type="radio"/> Nunca o menos 1 vez al mes<br><input type="radio"/> 1 a 3 veces mes<br><input type="radio"/> 1 vez semana<br><input type="radio"/> 2 a 4 veces semana<br><input type="radio"/> 5 a 6 veces semana<br><input checked="" type="radio"/> 1 vez al día<br><input type="radio"/> 2 a 3 veces al día<br><input type="radio"/> 5 a 6 veces al día<br><input type="radio"/> más 6 veces al día |

|                       |                                                                                                                                                                                                                                                                                                                                                                                                              |
|-----------------------|--------------------------------------------------------------------------------------------------------------------------------------------------------------------------------------------------------------------------------------------------------------------------------------------------------------------------------------------------------------------------------------------------------------|
| cafe descafeinado     | <input checked="" type="radio"/> Nunca o menos 1 vez al mes<br><input type="radio"/> 1 a 3 veces mes<br><input type="radio"/> 1 vez semana<br><input type="radio"/> 2 a 4 veces semana<br><input type="radio"/> 5 a 6 veces semana<br><input type="radio"/> 1 vez al día<br><input type="radio"/> 2 a 3 veces al día<br><input type="radio"/> 5 a 6 veces al día<br><input type="radio"/> más 6 veces al día |
| te o infusión         | <input checked="" type="radio"/> Nunca o menos 1 vez al mes<br><input type="radio"/> 1 a 3 veces mes<br><input type="radio"/> 1 vez semana<br><input type="radio"/> 2 a 4 veces semana<br><input type="radio"/> 5 a 6 veces semana<br><input type="radio"/> 1 vez al día<br><input type="radio"/> 2 a 3 veces al día<br><input type="radio"/> 5 a 6 veces al día<br><input type="radio"/> más 6 veces al día |
| sopa o puré verduras  | <input type="radio"/> Nunca o menos 1 vez al mes<br><input type="radio"/> 1 a 3 veces mes<br><input type="radio"/> 1 vez semana<br><input type="radio"/> 2 a 4 veces semana<br><input checked="" type="radio"/> 5 a 6 veces semana<br><input type="radio"/> 1 vez al día<br><input type="radio"/> 2 a 3 veces al día<br><input type="radio"/> 5 a 6 veces al día<br><input type="radio"/> más 6 veces al día |
| croquetas pollo jamón | <input type="radio"/> Nunca o menos 1 vez al mes<br><input type="radio"/> 1 a 3 veces mes<br><input checked="" type="radio"/> 1 vez semana<br><input type="radio"/> 2 a 4 veces semana<br><input type="radio"/> 5 a 6 veces semana<br><input type="radio"/> 1 vez al día<br><input type="radio"/> 2 a 3 veces al día<br><input type="radio"/> 5 a 6 veces al día<br><input type="radio"/> más 6 veces al día |
| croquetas pescado     | <input type="radio"/> Nunca o menos 1 vez al mes<br><input type="radio"/> 1 a 3 veces mes<br><input checked="" type="radio"/> 1 vez semana<br><input type="radio"/> 2 a 4 veces semana<br><input type="radio"/> 5 a 6 veces semana<br><input type="radio"/> 1 vez al día<br><input type="radio"/> 2 a 3 veces al día<br><input type="radio"/> 5 a 6 veces al día<br><input type="radio"/> más 6 veces al día |
| mayonesa              | <input type="radio"/> Nunca o menos 1 vez al mes<br><input type="radio"/> 1 a 3 veces mes<br><input checked="" type="radio"/> 1 vez semana<br><input type="radio"/> 2 a 4 veces semana<br><input type="radio"/> 5 a 6 veces semana<br><input type="radio"/> 1 vez al día<br><input type="radio"/> 2 a 3 veces al día<br><input type="radio"/> 5 a 6 veces al día<br><input type="radio"/> más 6 veces al día |

|                  |                                                                                                                                                                                                                                                                                                                                                                                                              |
|------------------|--------------------------------------------------------------------------------------------------------------------------------------------------------------------------------------------------------------------------------------------------------------------------------------------------------------------------------------------------------------------------------------------------------------|
| salsa tomate     | <input type="radio"/> Nunca o menos 1 vez al mes<br><input type="radio"/> 1 a 3 veces mes<br><input checked="" type="radio"/> 1 vez semana<br><input type="radio"/> 2 a 4 veces semana<br><input type="radio"/> 5 a 6 veces semana<br><input type="radio"/> 1 vez al día<br><input type="radio"/> 2 a 3 veces al día<br><input type="radio"/> 5 a 6 veces al día<br><input type="radio"/> más 6 veces al día |
| ketchup          | <input checked="" type="radio"/> Nunca o menos 1 vez al mes<br><input type="radio"/> 1 a 3 veces mes<br><input type="radio"/> 1 vez semana<br><input type="radio"/> 2 a 4 veces semana<br><input type="radio"/> 5 a 6 veces semana<br><input type="radio"/> 1 vez al día<br><input type="radio"/> 2 a 3 veces al día<br><input type="radio"/> 5 a 6 veces al día<br><input type="radio"/> más 6 veces al día |
| sal              | <input type="radio"/> Nunca o menos 1 vez al mes<br><input type="radio"/> 1 a 3 veces mes<br><input type="radio"/> 1 vez semana<br><input type="radio"/> 2 a 4 veces semana<br><input type="radio"/> 5 a 6 veces semana<br><input type="radio"/> 1 vez al día<br><input checked="" type="radio"/> 2 a 3 veces al día<br><input type="radio"/> 5 a 6 veces al día<br><input type="radio"/> más 6 veces al día |
| ajo              | <input checked="" type="radio"/> Nunca o menos 1 vez al mes<br><input type="radio"/> 1 a 3 veces mes<br><input type="radio"/> 1 vez semana<br><input type="radio"/> 2 a 4 veces semana<br><input type="radio"/> 5 a 6 veces semana<br><input type="radio"/> 1 vez al día<br><input type="radio"/> 2 a 3 veces al día<br><input type="radio"/> 5 a 6 veces al día<br><input type="radio"/> más 6 veces al día |
| mermelada o miel | <input type="radio"/> Nunca o menos 1 vez al mes<br><input type="radio"/> 1 a 3 veces mes<br><input type="radio"/> 1 vez semana<br><input type="radio"/> 2 a 4 veces semana<br><input type="radio"/> 5 a 6 veces semana<br><input checked="" type="radio"/> 1 vez al día<br><input type="radio"/> 2 a 3 veces al día<br><input type="radio"/> 5 a 6 veces al día<br><input type="radio"/> más 6 veces al día |
| azúcar           | <input type="radio"/> Nunca o menos 1 vez al mes<br><input type="radio"/> 1 a 3 veces mes<br><input checked="" type="radio"/> 1 vez semana<br><input type="radio"/> 2 a 4 veces semana<br><input type="radio"/> 5 a 6 veces semana<br><input type="radio"/> 1 vez al día<br><input type="radio"/> 2 a 3 veces al día<br><input type="radio"/> 5 a 6 veces al día<br><input type="radio"/> más 6 veces al día |

|                                       |                                                                                                                                                                                                                                                                                                                                                                                                                                                                                                                               |
|---------------------------------------|-------------------------------------------------------------------------------------------------------------------------------------------------------------------------------------------------------------------------------------------------------------------------------------------------------------------------------------------------------------------------------------------------------------------------------------------------------------------------------------------------------------------------------|
| Otro alimento                         | [*DATA REMOVED*]                                                                                                                                                                                                                                                                                                                                                                                                                                                                                                              |
| suplementos vitamínicos               | <input checked="" type="radio"/> si<br><input type="radio"/> no                                                                                                                                                                                                                                                                                                                                                                                                                                                               |
| suplementos vitamínicos               |                                                                                                                                                                                                                                                                                                                                                                                                                                                                                                                               |
| dieta previa                          | <input type="radio"/> si<br><input checked="" type="radio"/> no                                                                                                                                                                                                                                                                                                                                                                                                                                                               |
| motivo dieta                          | <input checked="" type="radio"/> no dieta<br><input type="radio"/> control peso<br><input type="radio"/> control colesterol<br><input type="radio"/> control diabetes<br><input type="radio"/> problemas estómago<br><input type="radio"/> problemas vesícula o hepáticos<br><input type="radio"/> HTA o cardiopatía<br><input type="radio"/> problemas renales<br><input type="radio"/> alergia alimentaria<br><input type="radio"/> ácido úrico elevado<br><input type="radio"/> vegetariana<br><input type="radio"/> otros |
| cambio alimentos año previo gestación | <input checked="" type="radio"/> si<br><input type="radio"/> no                                                                                                                                                                                                                                                                                                                                                                                                                                                               |
| cambio lácteos                        | <input type="radio"/> eliminado<br><input type="radio"/> disminuido<br><input type="radio"/> igual<br><input checked="" type="radio"/> aumentado<br><input type="radio"/> no sabe                                                                                                                                                                                                                                                                                                                                             |
| cambio huevos                         | <input type="radio"/> eliminado<br><input type="radio"/> disminuido<br><input checked="" type="radio"/> igual<br><input type="radio"/> aumentado<br><input type="radio"/> no sabe                                                                                                                                                                                                                                                                                                                                             |
| cambio carne                          | <input type="radio"/> eliminado<br><input type="radio"/> disminuido<br><input type="radio"/> igual<br><input checked="" type="radio"/> aumentado<br><input type="radio"/> no sabe                                                                                                                                                                                                                                                                                                                                             |
| cambio pescado                        | <input type="radio"/> eliminado<br><input type="radio"/> disminuido<br><input type="radio"/> igual<br><input checked="" type="radio"/> aumentado<br><input type="radio"/> no sabe                                                                                                                                                                                                                                                                                                                                             |
| cambio verduras                       | <input type="radio"/> eliminado<br><input type="radio"/> disminuido<br><input type="radio"/> igual<br><input checked="" type="radio"/> aumentado<br><input type="radio"/> no sabe                                                                                                                                                                                                                                                                                                                                             |

|                            |                                                                                                                                                                                                                        |
|----------------------------|------------------------------------------------------------------------------------------------------------------------------------------------------------------------------------------------------------------------|
| cambio legumbres           | <input type="radio"/> eliminado<br><input type="radio"/> disminuido<br><input checked="" type="radio"/> igual<br><input type="radio"/> aumentado<br><input type="radio"/> no sabe                                      |
| cambio fruta               | <input type="radio"/> eliminado<br><input type="radio"/> disminuido<br><input type="radio"/> igual<br><input checked="" type="radio"/> aumentado<br><input type="radio"/> no sabe                                      |
| cambio pan                 | <input type="radio"/> eliminado<br><input type="radio"/> disminuido<br><input type="radio"/> igual<br><input checked="" type="radio"/> aumentado<br><input type="radio"/> no sabe                                      |
| cambio aceite oliva        | <input type="radio"/> eliminado<br><input type="radio"/> disminuido<br><input checked="" type="radio"/> igual<br><input type="radio"/> aumentado<br><input type="radio"/> no sabe                                      |
| cambio mante o margarina   | <input type="radio"/> eliminado<br><input type="radio"/> disminuido<br><input checked="" type="radio"/> igual<br><input type="radio"/> aumentado<br><input type="radio"/> no sabe                                      |
| cambio azúcar y dulces     | <input type="radio"/> eliminado<br><input checked="" type="radio"/> disminuido<br><input type="radio"/> igual<br><input type="radio"/> aumentado<br><input type="radio"/> no sabe                                      |
| cambio bebidas alcohólicas | <input checked="" type="radio"/> eliminado<br><input type="radio"/> disminuido<br><input type="radio"/> igual<br><input type="radio"/> aumentado<br><input type="radio"/> no sabe                                      |
| frecuencia comidas fritas  | <input type="radio"/> a diario<br><input type="radio"/> 5 a 6 veces semana<br><input type="radio"/> 2 a 4 veces semana<br><input type="radio"/> 1 vez semana<br><input checked="" type="radio"/> menos de 1 vez semana |
| carne                      | <input type="radio"/> no como<br><input type="radio"/> cruda<br><input type="radio"/> poco hecha<br><input checked="" type="radio"/> hecha<br><input type="radio"/> muy hecha                                          |
| grasa visible carne        | <input checked="" type="radio"/> quita toda<br><input type="radio"/> quita mayoría<br><input type="radio"/> quita un poco<br><input type="radio"/> no quita nada                                                       |



|                                |                                                                                                                                                                                                                                                          |
|--------------------------------|----------------------------------------------------------------------------------------------------------------------------------------------------------------------------------------------------------------------------------------------------------|
| cocina carne                   | <input checked="" type="radio"/> a la plancha<br><input type="radio"/> a la parrilla<br><input type="radio"/> asada<br><input type="radio"/> frita<br><input type="radio"/> guisada                                                                      |
| tostado quemado carne          | <input checked="" type="radio"/> nunca<br><input type="radio"/> 1 vez mes<br><input type="radio"/> 2 a 3 veces mes<br><input type="radio"/> 1 vez semana<br><input type="radio"/> 2 a 3 semanas                                                          |
| tostado quemado pescado        | <input checked="" type="radio"/> nunca<br><input type="radio"/> 1 vez mes<br><input type="radio"/> 2 a 3 veces mes<br><input type="radio"/> 1 vez semana<br><input type="radio"/> 2 a 3 semanas                                                          |
| socarrat paella                | <input checked="" type="radio"/> nunca<br><input type="radio"/> 1 vez mes<br><input type="radio"/> 2 a 3 veces mes<br><input type="radio"/> 1 vez semana<br><input type="radio"/> 2 a 3 semanas                                                          |
| grasa o aceite cocinar         | <input type="radio"/> mantequilla<br><input type="radio"/> margarina<br><input checked="" type="radio"/> aceite oliva<br><input type="radio"/> aceite oliva virgen extra<br><input type="radio"/> aceite vegetal<br><input type="radio"/> mezcla aceites |
| grasa aceite aliñar            | <input type="radio"/> mantequilla<br><input type="radio"/> margarina<br><input checked="" type="radio"/> aceite oliva<br><input type="radio"/> aceite oliva virgen extra<br><input type="radio"/> aceite vegetal<br><input type="radio"/> mezcla aceites |
| grasa aceite freir             | <input type="radio"/> mantequilla<br><input type="radio"/> margarina<br><input checked="" type="radio"/> aceite oliva<br><input type="radio"/> aceite oliva virgen extra<br><input type="radio"/> aceite vegetal<br><input type="radio"/> mezcla aceites |
| Ejercicio cuestionario         | <input checked="" type="radio"/> si<br><input type="radio"/> no                                                                                                                                                                                          |
| horas de sueño incluido siesta | [*DATA REMOVED*]                                                                                                                                                                                                                                         |
| minutos siesta                 | [*DATA REMOVED*]                                                                                                                                                                                                                                         |
| horas televisión semana        | [*DATA REMOVED*]                                                                                                                                                                                                                                         |

|                                        |                                                                                                                                                                                                                                                                                                                                                                           |
|----------------------------------------|---------------------------------------------------------------------------------------------------------------------------------------------------------------------------------------------------------------------------------------------------------------------------------------------------------------------------------------------------------------------------|
| actividad trabajo                      | <input checked="" type="radio"/> casi siempre sentado<br><input type="radio"/> sentado 50 por cien<br><input type="radio"/> casi siempre de pie, quieto<br><input type="radio"/> casi siempre levantado caminando y llevando pocas cosas<br><input type="radio"/> casi siempre levantado, caminando y llevado muchas cosas<br><input type="radio"/> trabajo manual pesado |
| tiempo caminar o bici al día           | <input type="radio"/> casi nunca<br><input checked="" type="radio"/> menos 20min día<br><input type="radio"/> 20 a 40 min día<br><input type="radio"/> 40 a 60 min día<br><input type="radio"/> 1h o 1h y media día<br><input type="radio"/> más de 1h y media al día                                                                                                     |
| tiempo tareas casa al día              | <input type="radio"/> menos de 1h día<br><input type="radio"/> 1 a 2h día<br><input checked="" type="radio"/> 3 a 4h día<br><input type="radio"/> 5 a 6h día<br><input type="radio"/> 7 a 8h día<br><input type="radio"/> más de 8h día                                                                                                                                   |
| tiempo libre televisión ordenador leer | <input type="radio"/> menos 1h día<br><input type="radio"/> 1h día<br><input type="radio"/> 2h día<br><input checked="" type="radio"/> 3h día<br><input type="radio"/> 4h día<br><input type="radio"/> 5 a 6h día<br><input type="radio"/> mas 6h día                                                                                                                     |
| tiempo libre ejercicio o deporte       | <input type="radio"/> menos 1h semana<br><input checked="" type="radio"/> 1h semana<br><input type="radio"/> 2h semana<br><input type="radio"/> 3h semana<br><input type="radio"/> 4 a 5h semana<br><input type="radio"/> mas 5h semana                                                                                                                                   |
| como se considera                      | <input type="radio"/> sedentaria<br><input type="radio"/> poco activa<br><input checked="" type="radio"/> moderadamente activa<br><input type="radio"/> bastante activa<br><input type="radio"/> muy activa<br><input type="radio"/> no sabe                                                                                                                              |
| FUR                                    | [*DATA REMOVED*]                                                                                                                                                                                                                                                                                                                                                          |
| Semanas gestación 2T                   | [*DATA REMOVED*]                                                                                                                                                                                                                                                                                                                                                          |
| Días gestación 2T                      | [*DATA REMOVED*]                                                                                                                                                                                                                                                                                                                                                          |
| DBP 2T                                 | [*DATA REMOVED*]                                                                                                                                                                                                                                                                                                                                                          |
| CC 2T                                  | [*DATA REMOVED*]                                                                                                                                                                                                                                                                                                                                                          |
| AC 2T                                  | [*DATA REMOVED*]                                                                                                                                                                                                                                                                                                                                                          |

|                                                   |                                                                                                                                                                                                 |
|---------------------------------------------------|-------------------------------------------------------------------------------------------------------------------------------------------------------------------------------------------------|
| LF 2T                                             | [*DATA REMOVED*]                                                                                                                                                                                |
| PFE 2T (Hadlock)                                  | [*DATA REMOVED*]                                                                                                                                                                                |
| Semanas gestación 3T                              | [*DATA REMOVED*]                                                                                                                                                                                |
| días 3T                                           | [*DATA REMOVED*]                                                                                                                                                                                |
| DBP 3T                                            | [*DATA REMOVED*]                                                                                                                                                                                |
| CC 3T                                             | [*DATA REMOVED*]                                                                                                                                                                                |
| AC 3T                                             | [*DATA REMOVED*]                                                                                                                                                                                |
| LF 3T                                             | [*DATA REMOVED*]                                                                                                                                                                                |
| PFE 3T (Hadlock)                                  | [*DATA REMOVED*]                                                                                                                                                                                |
| Semanas de gestación final                        | [*DATA REMOVED*]                                                                                                                                                                                |
| días gestación final                              | [*DATA REMOVED*]                                                                                                                                                                                |
| Localización placenta                             | <input checked="" type="radio"/> anterior<br><input type="radio"/> lateral derecha<br><input type="radio"/> lateral izquierda<br><input type="radio"/> posterior<br><input type="radio"/> fondo |
| Presentación longitudinal cefálica                | <input type="radio"/> no<br><input checked="" type="radio"/> si                                                                                                                                 |
| Dorso                                             | <input type="radio"/> izquierda anterior<br><input type="radio"/> izquierda posterior<br><input type="radio"/> derecha anterior<br><input checked="" type="radio"/> derecha posterior           |
| diámetro biparietal                               | [*DATA REMOVED*]                                                                                                                                                                                |
| Circunferencia craneal                            | [*DATA REMOVED*]                                                                                                                                                                                |
| Circunferencia abdominal                          | [*DATA REMOVED*]                                                                                                                                                                                |
| Longitud de femur                                 | [*DATA REMOVED*]                                                                                                                                                                                |
| tejido celular subcutáneo a nivel del muslo en mm | [*DATA REMOVED*]                                                                                                                                                                                |
| tejido celular subcutáneo en abdomen en mm        | [*DATA REMOVED*]                                                                                                                                                                                |
| Volumen del muslo en cm3                          | [*DATA REMOVED*]                                                                                                                                                                                |
| Peso fetal estimado según fórmula de Hadlock      | [*DATA REMOVED*]                                                                                                                                                                                |

|                                               |                                                                                                                                                          |
|-----------------------------------------------|----------------------------------------------------------------------------------------------------------------------------------------------------------|
| Percentil                                     | [*DATA REMOVED*]                                                                                                                                         |
| Peso fetal estimado según fórmula de Scioscia | <hr/>                                                                                                                                                    |
| Peso fetal estimado según fórmula de LEE      | <hr/>                                                                                                                                                    |
| Tipo de parto                                 | <input checked="" type="radio"/> eutocico<br><input type="radio"/> instrumentado/ventosa<br><input type="radio"/> cesarea                                |
| fecha de nacimiento                           | [*DATA REMOVED*]                                                                                                                                         |
| Días entre exploración y nacimiento           | [*DATA REMOVED*]                                                                                                                                         |
| Peso RN en g                                  | [*DATA REMOVED*]                                                                                                                                         |
| sexo                                          | <input type="radio"/> mujer<br><input checked="" type="radio"/> hombre                                                                                   |
| Apgar 1 minuto                                | [*DATA REMOVED*]                                                                                                                                         |
| Apgar 5 minutos                               | [*DATA REMOVED*]                                                                                                                                         |
| Apgar 10 minutos                              | <hr/>                                                                                                                                                    |
| antecedente Covid durante gestación           | <input type="radio"/> Yes<br><input checked="" type="radio"/> No                                                                                         |
| Nivel de estudios                             | <input type="radio"/> ninguno<br><input type="radio"/> primarios<br><input type="radio"/> secundarios<br><input checked="" type="radio"/> universitarios |

# Base\_datos\_estimacion\_peso\_fetal

|                                       |                                                                                                                                                                                                                                                                                      |
|---------------------------------------|--------------------------------------------------------------------------------------------------------------------------------------------------------------------------------------------------------------------------------------------------------------------------------------|
| Número de identificación participante | 81                                                                                                                                                                                                                                                                                   |
| CODIGO PARTICIPANTE                   |                                                                                                                                                                                                                                                                                      |
| Edad                                  | [*DATA REMOVED*]                                                                                                                                                                                                                                                                     |
| Gestaciones                           | <input type="radio"/> 1<br><input checked="" type="radio"/> 2<br><input type="radio"/> 3<br><input type="radio"/> mas de 3                                                                                                                                                           |
| partos                                | <input type="radio"/> 0<br><input checked="" type="radio"/> 1<br><input type="radio"/> 2<br><input type="radio"/> 3<br><input type="radio"/> mas de 3                                                                                                                                |
| cesáreas                              | <input checked="" type="radio"/> 0<br><input type="radio"/> 1<br><input type="radio"/> 2<br><input type="radio"/> 3<br><input type="radio"/> mas de 3                                                                                                                                |
| Abortos                               | <input checked="" type="radio"/> 0<br><input type="radio"/> 1<br><input type="radio"/> 2<br><input type="radio"/> 3<br><input type="radio"/> mas de 3                                                                                                                                |
| Tipo de gestacion                     | <input checked="" type="radio"/> espontanea<br><input type="radio"/> IAC inseminación artificial conyuge<br><input type="radio"/> IAD inseminación artificial donante<br><input type="radio"/> FIV Fecundación in Vitro<br><input type="radio"/> Ovodon FIV con donación de ovocitos |
| peso previo a embarazo                | [*DATA REMOVED*]                                                                                                                                                                                                                                                                     |
| Ganancia ponderal embarazo            |                                                                                                                                                                                                                                                                                      |
| Talla madre                           | [*DATA REMOVED*]                                                                                                                                                                                                                                                                     |
| IMC previo embarazo                   | 20.028841531805796                                                                                                                                                                                                                                                                   |
| Patología obstétrica                  | <input type="radio"/> no<br><input type="radio"/> si                                                                                                                                                                                                                                 |
| Diabetes pregestacional               | <input type="radio"/> no<br><input type="radio"/> si                                                                                                                                                                                                                                 |
| Diabetes gestacional                  | <input type="radio"/> no<br><input type="radio"/> si                                                                                                                                                                                                                                 |

|                                            |                                                                                                                                                                                      |
|--------------------------------------------|--------------------------------------------------------------------------------------------------------------------------------------------------------------------------------------|
| Diabetes gestacional con insulina          | <input type="radio"/> no<br><input type="radio"/> si                                                                                                                                 |
| Diabetes gestacional con dieta y ejercicio | <input type="radio"/> no<br><input type="radio"/> si                                                                                                                                 |
| Percentil fetos previos                    | <input type="radio"/> Nada<br><input type="radio"/> percentil menor de 10<br><input checked="" type="radio"/> percentil entre 10 y 90<br><input type="radio"/> percentil mayor de 90 |
| Exfumadora                                 | <input checked="" type="radio"/> Nada<br><input type="radio"/> menos de 5 años<br><input type="radio"/> 5 a 10 años<br><input type="radio"/> mayor o igual a 10 años                 |
| Hábito tabáquico                           | <input type="radio"/> no<br><input checked="" type="radio"/> si                                                                                                                      |
| fumadora                                   | [*DATA REMOVED*]                                                                                                                                                                     |
| Consumo otros tóxicos                      | <input checked="" type="radio"/> no<br><input type="radio"/> si                                                                                                                      |
| Hb 1T                                      | [*DATA REMOVED*]                                                                                                                                                                     |
| Htc 1T                                     | [*DATA REMOVED*]                                                                                                                                                                     |
| Hb 2T                                      | _____                                                                                                                                                                                |
| HTC 2T                                     | _____                                                                                                                                                                                |
| Hb 3T                                      | [*DATA REMOVED*]                                                                                                                                                                     |
| HTC 3T                                     | [*DATA REMOVED*]                                                                                                                                                                     |
| Suplemento FE oral                         | <input checked="" type="radio"/> si<br><input type="radio"/> no                                                                                                                      |
| Suplemento fe iv                           | <input type="radio"/> si<br><input checked="" type="radio"/> no                                                                                                                      |
| Transfusión                                | <input checked="" type="radio"/> no<br><input type="radio"/> si                                                                                                                      |
| Solicitada Vit D                           | <input checked="" type="radio"/> no<br><input type="radio"/> si                                                                                                                      |
| Deficit vit D                              | <input type="radio"/> no<br><input type="radio"/> si                                                                                                                                 |

|                       |                                                                                                                                                                                                                                                                                                                                                                                                              |
|-----------------------|--------------------------------------------------------------------------------------------------------------------------------------------------------------------------------------------------------------------------------------------------------------------------------------------------------------------------------------------------------------------------------------------------------------|
| Suplemento vit D      | <input type="radio"/> si<br><input type="radio"/> no                                                                                                                                                                                                                                                                                                                                                         |
| Dieta, cuestionario   | <input checked="" type="radio"/> si<br><input type="radio"/> no                                                                                                                                                                                                                                                                                                                                              |
| Leche entera          | <input type="radio"/> Nunca o menos 1 vez al mes<br><input type="radio"/> 1 a 3 veces mes<br><input type="radio"/> 1 vez semana<br><input type="radio"/> 2 a 4 veces semana<br><input type="radio"/> 5 a 6 veces semana<br><input type="radio"/> 1 vez al día<br><input type="radio"/> 2 a 3 veces al día<br><input type="radio"/> 5 a 6 veces al día<br><input type="radio"/> más 6 veces al día            |
| Leche semidesnatada   | <input type="radio"/> Nunca o menos 1 vez al mes<br><input checked="" type="radio"/> 1 a 3 veces mes<br><input type="radio"/> 1 vez semana<br><input type="radio"/> 2 a 4 veces semana<br><input type="radio"/> 5 a 6 veces semana<br><input type="radio"/> 1 vez al día<br><input type="radio"/> 2 a 3 veces al día<br><input type="radio"/> 5 a 6 veces al día<br><input type="radio"/> mas 6 veces al día |
| Leche desnatada       | <input type="radio"/> Nunca o menos 1 vez al mes<br><input type="radio"/> 1 a 3 veces mes<br><input type="radio"/> 1 vez semana<br><input type="radio"/> 2 a 4 veces semana<br><input type="radio"/> 5 a 6 veces semana<br><input type="radio"/> 1 vez al día<br><input type="radio"/> 2 a 3 veces al día<br><input type="radio"/> 5 a 6 veces al día<br><input type="radio"/> más 6 veces al día            |
| Leche condensada      | <input type="radio"/> Nunca o menos 1 vez al mes<br><input type="radio"/> 1 a 3 veces mes<br><input type="radio"/> 1 vez semana<br><input type="radio"/> 2 a 4 veces semana<br><input type="radio"/> 5 a 6 veces semana<br><input type="radio"/> 1 vez al día<br><input type="radio"/> 2 a 3 veces al día<br><input type="radio"/> 5 a 6 veces al día<br><input type="radio"/> más 6 veces al día            |
| nata o crema de leche | <input type="radio"/> Nunca o menos 1 vez al mes<br><input type="radio"/> 1 a 3 veces mes<br><input type="radio"/> 1 vez semana<br><input type="radio"/> 2 a 4 veces semana<br><input type="radio"/> 5 a 6 veces semana<br><input type="radio"/> 1 vez al día<br><input type="radio"/> 2 a 3 veces al día<br><input type="radio"/> 5 a 6 veces al día<br><input type="radio"/> más 6 veces al día            |

---

Yogurt Entero

- ☐ Nunca o menos 1 vez al mes
- ☐ 1 a 3 veces mes
- ☐ 1 vez semana
- ☐ 2 a 4 veces semana
- ☐ 5 a 6 veces semana
- ☐ 1 vez al día
- ☐ 2 a 3 veces al día
- ☐ 5 a 6 veces al día
- ☐ más 6 veces al día

---

Yogurt desnatado

- ☐ Nunca o menos 1 vez al mes
- ☐ 1 a 3 veces mes
- ☐ 1 vez semana
- ☐ 2 a 4 veces semana
- ☐ 5 a 6 veces semana
- ☐ 1 vez al día
- ☐ 2 a 3 veces al día
- ☐ 5 a 6 veces al día
- ☐ más 6 veces al día

---

100g requesón o queso blando o queso fresco

- ☐ Nunca o menos 1 vez al mes
- ☐ 1 a 3 veces mes
- ☒ 1 vez semana
- ☐ 2 a 4 veces semana
- ☐ 5 a 6 veces semana
- ☐ 1 vez al día
- ☐ 2 a 3 veces al día
- ☐ 5 a 6 veces al día
- ☐ más 6 veces al día

---

queso curado o semicurado o cremoso

- ☐ Nunca o menos 1 vez al mes
- ☐ 1 a 3 veces mes
- ☐ 1 vez semana
- ☐ 2 a 4 veces semana
- ☐ 5 a 6 veces semana
- ☐ 1 vez al día
- ☐ 2 a 3 veces al día
- ☐ 5 a 6 veces al día
- ☐ más 6 veces al día

---

natillas flan pudding

- ☐ Nunca o menos 1 vez al mes
- ☐ 1 a 3 veces mes
- ☐ 1 vez semana
- ☐ 2 a 4 veces semana
- ☐ 5 a 6 veces semana
- ☐ 1 vez al día
- ☐ 2 a 3 veces al día
- ☐ 5 a 6 veces al día
- ☐ más 6 veces al día

---

Helado

- ☐ Nunca o menos 1 vez al mes
- ☐ 1 a 3 veces mes
- ☐ 1 vez semana
- ☐ 2 a 4 veces semana
- ☐ 5 a 6 veces semana
- ☒ 1 vez al día
- ☐ 2 a 3 veces al día
- ☐ 5 a 6 veces al día
- ☐ más 6 veces al día



|                                      |                                                                                                                                                                                                                                                                                                                                                                                                              |
|--------------------------------------|--------------------------------------------------------------------------------------------------------------------------------------------------------------------------------------------------------------------------------------------------------------------------------------------------------------------------------------------------------------------------------------------------------------|
| huevo                                | <input type="radio"/> Nunca o menos 1 vez al mes<br><input type="radio"/> 1 a 3 veces mes<br><input checked="" type="radio"/> 1 vez semana<br><input type="radio"/> 2 a 4 veces semana<br><input type="radio"/> 5 a 6 veces semana<br><input type="radio"/> 1 vez al día<br><input type="radio"/> 2 a 3 veces al día<br><input type="radio"/> 5 a 6 veces al día<br><input type="radio"/> más 6 veces al día |
| Pollo con piel                       | <input type="radio"/> Nunca o menos 1 vez al mes<br><input type="radio"/> 1 a 3 veces mes<br><input checked="" type="radio"/> 1 vez semana<br><input type="radio"/> 2 a 4 veces semana<br><input type="radio"/> 5 a 6 veces semana<br><input type="radio"/> 1 vez al día<br><input type="radio"/> 2 a 3 veces al día<br><input type="radio"/> 5 a 6 veces al día<br><input type="radio"/> más 6 veces al día |
| pollo sin piel                       | <input type="radio"/> Nunca o menos 1 vez al mes<br><input type="radio"/> 1 a 3 veces mes<br><input type="radio"/> 1 vez semana<br><input type="radio"/> 2 a 4 veces semana<br><input type="radio"/> 5 a 6 veces semana<br><input type="radio"/> 1 vez al día<br><input type="radio"/> 2 a 3 veces al día<br><input type="radio"/> 5 a 6 veces al día<br><input type="radio"/> más 6 veces al día            |
| Ternera o cerdo o cordero            | <input type="radio"/> Nunca o menos 1 vez al mes<br><input type="radio"/> 1 a 3 veces mes<br><input type="radio"/> 1 vez semana<br><input checked="" type="radio"/> 2 a 4 veces semana<br><input type="radio"/> 5 a 6 veces semana<br><input type="radio"/> 1 vez al día<br><input type="radio"/> 2 a 3 veces al día<br><input type="radio"/> 5 a 6 veces al día<br><input type="radio"/> más 6 veces al día |
| carne caza: Conejo o codorniz o pato | <input type="radio"/> Nunca o menos 1 vez al mes<br><input type="radio"/> 1 a 3 veces mes<br><input type="radio"/> 1 vez semana<br><input type="radio"/> 2 a 4 veces semana<br><input type="radio"/> 5 a 6 veces semana<br><input type="radio"/> 1 vez al día<br><input type="radio"/> 2 a 3 veces al día<br><input type="radio"/> 5 a 6 veces al día<br><input type="radio"/> más 6 veces al día            |
| Hígado de ternera o cerdo o pollo    | <input type="radio"/> Nunca o menos 1 vez al mes<br><input checked="" type="radio"/> 1 a 3 veces mes<br><input type="radio"/> 1 vez semana<br><input type="radio"/> 2 a 4 veces semana<br><input type="radio"/> 5 a 6 veces semana<br><input type="radio"/> 1 vez al día<br><input type="radio"/> 2 a 3 veces al día<br><input type="radio"/> 5 a 6 veces al día<br><input type="radio"/> más 6 veces al día |

|                     |                                                                                                                                                                                                                                                                                                                                                                                                              |
|---------------------|--------------------------------------------------------------------------------------------------------------------------------------------------------------------------------------------------------------------------------------------------------------------------------------------------------------------------------------------------------------------------------------------------------------|
| Vísceras            | <input type="radio"/> Nunca o menos 1 vez al mes<br><input type="radio"/> 1 a 3 veces mes<br><input type="radio"/> 1 vez semana<br><input type="radio"/> 2 a 4 veces semana<br><input type="radio"/> 5 a 6 veces semana<br><input type="radio"/> 1 vez al día<br><input type="radio"/> 2 a 3 veces al día<br><input type="radio"/> 5 a 6 veces al día<br><input type="radio"/> más 6 veces al día            |
| Embutido            | <input checked="" type="radio"/> Nunca o menos 1 vez al mes<br><input type="radio"/> 1 a 3 veces mes<br><input type="radio"/> 1 vez semana<br><input type="radio"/> 2 a 4 veces semana<br><input type="radio"/> 5 a 6 veces semana<br><input type="radio"/> 1 vez al día<br><input type="radio"/> 2 a 3 veces al día<br><input type="radio"/> 5 a 6 veces al día<br><input type="radio"/> más 6 veces al día |
| Salchicha o similar | <input type="radio"/> Nunca o menos 1 vez al mes<br><input type="radio"/> 1 a 3 veces mes<br><input type="radio"/> 1 vez semana<br><input type="radio"/> 2 a 4 veces semana<br><input type="radio"/> 5 a 6 veces semana<br><input type="radio"/> 1 vez al día<br><input type="radio"/> 2 a 3 veces al día<br><input type="radio"/> 5 a 6 veces al día<br><input type="radio"/> más 6 veces al día            |
| Pate o foiegras     | <input type="radio"/> Nunca o menos 1 vez al mes<br><input type="radio"/> 1 a 3 veces mes<br><input type="radio"/> 1 vez semana<br><input type="radio"/> 2 a 4 veces semana<br><input type="radio"/> 5 a 6 veces semana<br><input type="radio"/> 1 vez al día<br><input type="radio"/> 2 a 3 veces al día<br><input type="radio"/> 5 a 6 veces al día<br><input type="radio"/> más 6 veces al día            |
| Hamburguesa         | <input type="radio"/> Nunca o menos 1 vez al mes<br><input type="radio"/> 1 a 3 veces mes<br><input checked="" type="radio"/> 1 vez semana<br><input type="radio"/> 2 a 4 veces semana<br><input type="radio"/> 5 a 6 veces semana<br><input type="radio"/> 1 vez al día<br><input type="radio"/> 2 a 3 veces al día<br><input type="radio"/> 5 a 6 veces al día<br><input type="radio"/> más 6 veces al día |
| tocino o bacon      | <input type="radio"/> Nunca o menos 1 vez al mes<br><input type="radio"/> 1 a 3 veces mes<br><input type="radio"/> 1 vez semana<br><input type="radio"/> 2 a 4 veces semana<br><input type="radio"/> 5 a 6 veces semana<br><input type="radio"/> 1 vez al día<br><input type="radio"/> 2 a 3 veces al día<br><input type="radio"/> 5 a 6 veces al día<br><input type="radio"/> más 6 veces al día            |

---

|               |                                                                                                                                                                                                                                                                                                                                                                                                   |
|---------------|---------------------------------------------------------------------------------------------------------------------------------------------------------------------------------------------------------------------------------------------------------------------------------------------------------------------------------------------------------------------------------------------------|
| Pescado frito | <input type="radio"/> Nunca o menos 1 vez al mes<br><input type="radio"/> 1 a 3 veces mes<br><input type="radio"/> 1 vez semana<br><input type="radio"/> 2 a 4 veces semana<br><input type="radio"/> 5 a 6 veces semana<br><input type="radio"/> 1 vez al día<br><input type="radio"/> 2 a 3 veces al día<br><input type="radio"/> 5 a 6 veces al día<br><input type="radio"/> más 6 veces al día |
|---------------|---------------------------------------------------------------------------------------------------------------------------------------------------------------------------------------------------------------------------------------------------------------------------------------------------------------------------------------------------------------------------------------------------|

---

|                        |                                                                                                                                                                                                                                                                                                                                                                                                              |
|------------------------|--------------------------------------------------------------------------------------------------------------------------------------------------------------------------------------------------------------------------------------------------------------------------------------------------------------------------------------------------------------------------------------------------------------|
| pescado hervido blanco | <input type="radio"/> Nunca o menos 1 vez al mes<br><input checked="" type="radio"/> 1 a 3 veces mes<br><input type="radio"/> 1 vez semana<br><input type="radio"/> 2 a 4 veces semana<br><input type="radio"/> 5 a 6 veces semana<br><input type="radio"/> 1 vez al día<br><input type="radio"/> 2 a 3 veces al día<br><input type="radio"/> 5 a 6 veces al día<br><input type="radio"/> más 6 veces al día |
|------------------------|--------------------------------------------------------------------------------------------------------------------------------------------------------------------------------------------------------------------------------------------------------------------------------------------------------------------------------------------------------------------------------------------------------------|

---

|                      |                                                                                                                                                                                                                                                                                                                                                                                                   |
|----------------------|---------------------------------------------------------------------------------------------------------------------------------------------------------------------------------------------------------------------------------------------------------------------------------------------------------------------------------------------------------------------------------------------------|
| pescado hervido azul | <input type="radio"/> Nunca o menos 1 vez al mes<br><input type="radio"/> 1 a 3 veces mes<br><input type="radio"/> 1 vez semana<br><input type="radio"/> 2 a 4 veces semana<br><input type="radio"/> 5 a 6 veces semana<br><input type="radio"/> 1 vez al día<br><input type="radio"/> 2 a 3 veces al día<br><input type="radio"/> 5 a 6 veces al día<br><input type="radio"/> más 6 veces al día |
|----------------------|---------------------------------------------------------------------------------------------------------------------------------------------------------------------------------------------------------------------------------------------------------------------------------------------------------------------------------------------------------------------------------------------------|

---

|                    |                                                                                                                                                                                                                                                                                                                                                                                                   |
|--------------------|---------------------------------------------------------------------------------------------------------------------------------------------------------------------------------------------------------------------------------------------------------------------------------------------------------------------------------------------------------------------------------------------------|
| otros pescado azul | <input type="radio"/> Nunca o menos 1 vez al mes<br><input type="radio"/> 1 a 3 veces mes<br><input type="radio"/> 1 vez semana<br><input type="radio"/> 2 a 4 veces semana<br><input type="radio"/> 5 a 6 veces semana<br><input type="radio"/> 1 vez al día<br><input type="radio"/> 2 a 3 veces al día<br><input type="radio"/> 5 a 6 veces al día<br><input type="radio"/> más 6 veces al día |
|--------------------|---------------------------------------------------------------------------------------------------------------------------------------------------------------------------------------------------------------------------------------------------------------------------------------------------------------------------------------------------------------------------------------------------|

---

|               |                                                                                                                                                                                                                                                                                                                                                                                                   |
|---------------|---------------------------------------------------------------------------------------------------------------------------------------------------------------------------------------------------------------------------------------------------------------------------------------------------------------------------------------------------------------------------------------------------|
| atun conserva | <input type="radio"/> Nunca o menos 1 vez al mes<br><input type="radio"/> 1 a 3 veces mes<br><input type="radio"/> 1 vez semana<br><input type="radio"/> 2 a 4 veces semana<br><input type="radio"/> 5 a 6 veces semana<br><input type="radio"/> 1 vez al día<br><input type="radio"/> 2 a 3 veces al día<br><input type="radio"/> 5 a 6 veces al día<br><input type="radio"/> más 6 veces al día |
|---------------|---------------------------------------------------------------------------------------------------------------------------------------------------------------------------------------------------------------------------------------------------------------------------------------------------------------------------------------------------------------------------------------------------|

---

|                  |                                                                                                                                                                                                                                                                                                                                                                                                   |
|------------------|---------------------------------------------------------------------------------------------------------------------------------------------------------------------------------------------------------------------------------------------------------------------------------------------------------------------------------------------------------------------------------------------------|
| sardina conserva | <input type="radio"/> Nunca o menos 1 vez al mes<br><input type="radio"/> 1 a 3 veces mes<br><input type="radio"/> 1 vez semana<br><input type="radio"/> 2 a 4 veces semana<br><input type="radio"/> 5 a 6 veces semana<br><input type="radio"/> 1 vez al día<br><input type="radio"/> 2 a 3 veces al día<br><input type="radio"/> 5 a 6 veces al día<br><input type="radio"/> más 6 veces al día |
|------------------|---------------------------------------------------------------------------------------------------------------------------------------------------------------------------------------------------------------------------------------------------------------------------------------------------------------------------------------------------------------------------------------------------|

---

|                                         |                                                                                                                                                                                                                                                                                                                                                                                                   |
|-----------------------------------------|---------------------------------------------------------------------------------------------------------------------------------------------------------------------------------------------------------------------------------------------------------------------------------------------------------------------------------------------------------------------------------------------------|
| pescado ahumado                         | <input type="radio"/> Nunca o menos 1 vez al mes<br><input type="radio"/> 1 a 3 veces mes<br><input type="radio"/> 1 vez semana<br><input type="radio"/> 2 a 4 veces semana<br><input type="radio"/> 5 a 6 veces semana<br><input type="radio"/> 1 vez al día<br><input type="radio"/> 2 a 3 veces al día<br><input type="radio"/> 5 a 6 veces al día<br><input type="radio"/> más 6 veces al día |
| almejas o mejillones o ostras unos 100g | <input type="radio"/> Nunca o menos 1 vez al mes<br><input type="radio"/> 1 a 3 veces mes<br><input type="radio"/> 1 vez semana<br><input type="radio"/> 2 a 4 veces semana<br><input type="radio"/> 5 a 6 veces semana<br><input type="radio"/> 1 vez al día<br><input type="radio"/> 2 a 3 veces al día<br><input type="radio"/> 5 a 6 veces al día<br><input type="radio"/> más 6 veces al día |
| calamar o chipiron o sepia unos 100g    | <input type="radio"/> Nunca o menos 1 vez al mes<br><input type="radio"/> 1 a 3 veces mes<br><input type="radio"/> 1 vez semana<br><input type="radio"/> 2 a 4 veces semana<br><input type="radio"/> 5 a 6 veces semana<br><input type="radio"/> 1 vez al día<br><input type="radio"/> 2 a 3 veces al día<br><input type="radio"/> 5 a 6 veces al día<br><input type="radio"/> más 6 veces al día |
| marisco unos 100g                       | <input type="radio"/> Nunca o menos 1 vez al mes<br><input type="radio"/> 1 a 3 veces mes<br><input type="radio"/> 1 vez semana<br><input type="radio"/> 2 a 4 veces semana<br><input type="radio"/> 5 a 6 veces semana<br><input type="radio"/> 1 vez al día<br><input type="radio"/> 2 a 3 veces al día<br><input type="radio"/> 5 a 6 veces al día<br><input type="radio"/> más 6 veces al día |
| Espinacas o acelgas cocinadas           | <input type="radio"/> Nunca o menos 1 vez al mes<br><input type="radio"/> 1 a 3 veces mes<br><input type="radio"/> 1 vez semana<br><input type="radio"/> 2 a 4 veces semana<br><input type="radio"/> 5 a 6 veces semana<br><input type="radio"/> 1 vez al día<br><input type="radio"/> 2 a 3 veces al día<br><input type="radio"/> 5 a 6 veces al día<br><input type="radio"/> más 6 veces al día |
| Col o coliflor o brocoli cocinado       | <input type="radio"/> Nunca o menos 1 vez al mes<br><input type="radio"/> 1 a 3 veces mes<br><input type="radio"/> 1 vez semana<br><input type="radio"/> 2 a 4 veces semana<br><input type="radio"/> 5 a 6 veces semana<br><input type="radio"/> 1 vez al día<br><input type="radio"/> 2 a 3 veces al día<br><input type="radio"/> 5 a 6 veces al día<br><input type="radio"/> más 6 veces al día |

---

Lechuga o endivia o escarola

- ☐ Nunca o menos 1 vez al mes
- ☐ 1 a 3 veces mes
- ☐ 1 vez semana
- ☐ 2 a 4 veces semana
- ☐ 5 a 6 veces semana
- ☐ 1 vez al día
- ☐ 2 a 3 veces al día
- ☐ 5 a 6 veces al día
- ☐ más 6 veces al día

---

tomate ensalada

- ☐ Nunca o menos 1 vez al mes
- ☐ 1 a 3 veces mes
- ☐ 1 vez semana
- ☐ 2 a 4 veces semana
- ☐ 5 a 6 veces semana
- ☐ 1 vez al día
- ☐ 2 a 3 veces al día
- ☐ 5 a 6 veces al día
- ☐ más 6 veces al día

---

cebolla

- ☐ Nunca o menos 1 vez al mes
- ☐ 1 a 3 veces mes
- ☐ 1 vez semana
- ☐ 2 a 4 veces semana
- ☐ 5 a 6 veces semana
- ☒ 1 vez al día
- ☐ 2 a 3 veces al día
- ☐ 5 a 6 veces al día
- ☐ más 6 veces al día

---

Zanahoria o calabaza

- ☐ Nunca o menos 1 vez al mes
- ☐ 1 a 3 veces mes
- ☐ 1 vez semana
- ☐ 2 a 4 veces semana
- ☐ 5 a 6 veces semana
- ☐ 1 vez al día
- ☐ 2 a 3 veces al día
- ☐ 5 a 6 veces al día
- ☐ más 6 veces al día

---

Judías verdes

- ☐ Nunca o menos 1 vez al mes
- ☐ 1 a 3 veces mes
- ☐ 1 vez semana
- ☐ 2 a 4 veces semana
- ☐ 5 a 6 veces semana
- ☐ 1 vez al día
- ☐ 2 a 3 veces al día
- ☐ 5 a 6 veces al día
- ☐ más 6 veces al día

---

Berenjena o calabacin o pepino

- ☐ Nunca o menos 1 vez al mes
- ☐ 1 a 3 veces mes
- ☐ 1 vez semana
- ☐ 2 a 4 veces semana
- ☐ 5 a 6 veces semana
- ☐ 1 vez al día
- ☐ 2 a 3 veces al día
- ☐ 5 a 6 veces al día
- ☐ más 6 veces al día

|                       |                                                                                                                                                                                                                                                                                                                                                                                                              |
|-----------------------|--------------------------------------------------------------------------------------------------------------------------------------------------------------------------------------------------------------------------------------------------------------------------------------------------------------------------------------------------------------------------------------------------------------|
| pimiento              | <input type="radio"/> Nunca o menos 1 vez al mes<br><input type="radio"/> 1 a 3 veces mes<br><input type="radio"/> 1 vez semana<br><input type="radio"/> 2 a 4 veces semana<br><input type="radio"/> 5 a 6 veces semana<br><input type="radio"/> 1 vez al día<br><input type="radio"/> 2 a 3 veces al día<br><input type="radio"/> 5 a 6 veces al día<br><input type="radio"/> más 6 veces al día            |
| alcachofa             | <input type="radio"/> Nunca o menos 1 vez al mes<br><input checked="" type="radio"/> 1 a 3 veces mes<br><input type="radio"/> 1 vez semana<br><input type="radio"/> 2 a 4 veces semana<br><input type="radio"/> 5 a 6 veces semana<br><input type="radio"/> 1 vez al día<br><input type="radio"/> 2 a 3 veces al día<br><input type="radio"/> 5 a 6 veces al día<br><input type="radio"/> más 6 veces al día |
| espárragos            | <input type="radio"/> Nunca o menos 1 vez al mes<br><input type="radio"/> 1 a 3 veces mes<br><input type="radio"/> 1 vez semana<br><input type="radio"/> 2 a 4 veces semana<br><input type="radio"/> 5 a 6 veces semana<br><input type="radio"/> 1 vez al día<br><input type="radio"/> 2 a 3 veces al día<br><input type="radio"/> 5 a 6 veces al día<br><input type="radio"/> más 6 veces al día            |
| maíz hervido          | <input type="radio"/> Nunca o menos 1 vez al mes<br><input type="radio"/> 1 a 3 veces mes<br><input type="radio"/> 1 vez semana<br><input type="radio"/> 2 a 4 veces semana<br><input type="radio"/> 5 a 6 veces semana<br><input type="radio"/> 1 vez al día<br><input type="radio"/> 2 a 3 veces al día<br><input type="radio"/> 5 a 6 veces al día<br><input type="radio"/> más 6 veces al día            |
| legumbres             | <input type="radio"/> Nunca o menos 1 vez al mes<br><input type="radio"/> 1 a 3 veces mes<br><input type="radio"/> 1 vez semana<br><input type="radio"/> 2 a 4 veces semana<br><input type="radio"/> 5 a 6 veces semana<br><input type="radio"/> 1 vez al día<br><input type="radio"/> 2 a 3 veces al día<br><input type="radio"/> 5 a 6 veces al día<br><input type="radio"/> más 6 veces al día            |
| naranjas o mandarinas | <input type="radio"/> Nunca o menos 1 vez al mes<br><input type="radio"/> 1 a 3 veces mes<br><input type="radio"/> 1 vez semana<br><input type="radio"/> 2 a 4 veces semana<br><input type="radio"/> 5 a 6 veces semana<br><input type="radio"/> 1 vez al día<br><input type="radio"/> 2 a 3 veces al día<br><input type="radio"/> 5 a 6 veces al día<br><input type="radio"/> más 6 veces al día            |

|                       |                                                                                                                                                                                                                                                                                                                                                                                                              |
|-----------------------|--------------------------------------------------------------------------------------------------------------------------------------------------------------------------------------------------------------------------------------------------------------------------------------------------------------------------------------------------------------------------------------------------------------|
| zum natural fruta     | <input type="radio"/> Nunca o menos 1 vez al mes<br><input type="radio"/> 1 a 3 veces mes<br><input type="radio"/> 1 vez semana<br><input type="radio"/> 2 a 4 veces semana<br><input type="radio"/> 5 a 6 veces semana<br><input type="radio"/> 1 vez al día<br><input type="radio"/> 2 a 3 veces al día<br><input type="radio"/> 5 a 6 veces al día<br><input type="radio"/> más 6 veces al día            |
| platano               | <input type="radio"/> Nunca o menos 1 vez al mes<br><input type="radio"/> 1 a 3 veces mes<br><input type="radio"/> 1 vez semana<br><input type="radio"/> 2 a 4 veces semana<br><input type="radio"/> 5 a 6 veces semana<br><input type="radio"/> 1 vez al día<br><input type="radio"/> 2 a 3 veces al día<br><input type="radio"/> 5 a 6 veces al día<br><input type="radio"/> más 6 veces al día            |
| manzana o pera        | <input type="radio"/> Nunca o menos 1 vez al mes<br><input type="radio"/> 1 a 3 veces mes<br><input type="radio"/> 1 vez semana<br><input type="radio"/> 2 a 4 veces semana<br><input type="radio"/> 5 a 6 veces semana<br><input checked="" type="radio"/> 1 vez al día<br><input type="radio"/> 2 a 3 veces al día<br><input type="radio"/> 5 a 6 veces al día<br><input type="radio"/> más 6 veces al día |
| melocotón o nectarina | <input type="radio"/> Nunca o menos 1 vez al mes<br><input type="radio"/> 1 a 3 veces mes<br><input type="radio"/> 1 vez semana<br><input type="radio"/> 2 a 4 veces semana<br><input type="radio"/> 5 a 6 veces semana<br><input type="radio"/> 1 vez al día<br><input type="radio"/> 2 a 3 veces al día<br><input type="radio"/> 5 a 6 veces al día<br><input type="radio"/> más 6 veces al día            |
| sandia o melon        | <input type="radio"/> Nunca o menos 1 vez al mes<br><input type="radio"/> 1 a 3 veces mes<br><input type="radio"/> 1 vez semana<br><input type="radio"/> 2 a 4 veces semana<br><input type="radio"/> 5 a 6 veces semana<br><input type="radio"/> 1 vez al día<br><input type="radio"/> 2 a 3 veces al día<br><input type="radio"/> 5 a 6 veces al día<br><input type="radio"/> más 6 veces al día            |
| uva                   | <input type="radio"/> Nunca o menos 1 vez al mes<br><input type="radio"/> 1 a 3 veces mes<br><input type="radio"/> 1 vez semana<br><input type="radio"/> 2 a 4 veces semana<br><input type="radio"/> 5 a 6 veces semana<br><input type="radio"/> 1 vez al día<br><input type="radio"/> 2 a 3 veces al día<br><input type="radio"/> 5 a 6 veces al día<br><input type="radio"/> más 6 veces al día            |

|                 |                                                                                                                                                                                                                                                                                                                                                                                                   |
|-----------------|---------------------------------------------------------------------------------------------------------------------------------------------------------------------------------------------------------------------------------------------------------------------------------------------------------------------------------------------------------------------------------------------------|
| bruna o ciruela | <input type="radio"/> Nunca o menos 1 vez al mes<br><input type="radio"/> 1 a 3 veces mes<br><input type="radio"/> 1 vez semana<br><input type="radio"/> 2 a 4 veces semana<br><input type="radio"/> 5 a 6 veces semana<br><input type="radio"/> 1 vez al día<br><input type="radio"/> 2 a 3 veces al día<br><input type="radio"/> 5 a 6 veces al día<br><input type="radio"/> más 6 veces al día |
| kiwi            | <input type="radio"/> Nunca o menos 1 vez al mes<br><input type="radio"/> 1 a 3 veces mes<br><input type="radio"/> 1 vez semana<br><input type="radio"/> 2 a 4 veces semana<br><input type="radio"/> 5 a 6 veces semana<br><input type="radio"/> 1 vez al día<br><input type="radio"/> 2 a 3 veces al día<br><input type="radio"/> 5 a 6 veces al día<br><input type="radio"/> más 6 veces al día |
| aceituna        | <input type="radio"/> Nunca o menos 1 vez al mes<br><input type="radio"/> 1 a 3 veces mes<br><input type="radio"/> 1 vez semana<br><input type="radio"/> 2 a 4 veces semana<br><input type="radio"/> 5 a 6 veces semana<br><input type="radio"/> 1 vez al día<br><input type="radio"/> 2 a 3 veces al día<br><input type="radio"/> 5 a 6 veces al día<br><input type="radio"/> más 6 veces al día |
| frutos secos    | <input type="radio"/> Nunca o menos 1 vez al mes<br><input type="radio"/> 1 a 3 veces mes<br><input type="radio"/> 1 vez semana<br><input type="radio"/> 2 a 4 veces semana<br><input type="radio"/> 5 a 6 veces semana<br><input type="radio"/> 1 vez al día<br><input type="radio"/> 2 a 3 veces al día<br><input type="radio"/> 5 a 6 veces al día<br><input type="radio"/> más 6 veces al día |
| pan blanco      | <input type="radio"/> Nunca o menos 1 vez al mes<br><input type="radio"/> 1 a 3 veces mes<br><input type="radio"/> 1 vez semana<br><input type="radio"/> 2 a 4 veces semana<br><input type="radio"/> 5 a 6 veces semana<br><input type="radio"/> 1 vez al día<br><input type="radio"/> 2 a 3 veces al día<br><input type="radio"/> 5 a 6 veces al día<br><input type="radio"/> más 6 veces al día |
| pan integral    | <input type="radio"/> Nunca o menos 1 vez al mes<br><input type="radio"/> 1 a 3 veces mes<br><input type="radio"/> 1 vez semana<br><input type="radio"/> 2 a 4 veces semana<br><input type="radio"/> 5 a 6 veces semana<br><input type="radio"/> 1 vez al día<br><input type="radio"/> 2 a 3 veces al día<br><input type="radio"/> 5 a 6 veces al día<br><input type="radio"/> más 6 veces al día |



|                          |                                                                                                                                                                                                                                                                                                                                                                                                              |
|--------------------------|--------------------------------------------------------------------------------------------------------------------------------------------------------------------------------------------------------------------------------------------------------------------------------------------------------------------------------------------------------------------------------------------------------------|
| cereales desayuno        | <input type="radio"/> Nunca o menos 1 vez al mes<br><input type="radio"/> 1 a 3 veces mes<br><input type="radio"/> 1 vez semana<br><input type="radio"/> 2 a 4 veces semana<br><input type="radio"/> 5 a 6 veces semana<br><input type="radio"/> 1 vez al día<br><input type="radio"/> 2 a 3 veces al día<br><input type="radio"/> 5 a 6 veces al día<br><input type="radio"/> más 6 veces al día            |
| patatas fritas           | <input type="radio"/> Nunca o menos 1 vez al mes<br><input type="radio"/> 1 a 3 veces mes<br><input type="radio"/> 1 vez semana<br><input checked="" type="radio"/> 2 a 4 veces semana<br><input type="radio"/> 5 a 6 veces semana<br><input type="radio"/> 1 vez al día<br><input type="radio"/> 2 a 3 veces al día<br><input type="radio"/> 5 a 6 veces al día<br><input type="radio"/> más 6 veces al día |
| patatas cocidas o asadas | <input type="radio"/> Nunca o menos 1 vez al mes<br><input type="radio"/> 1 a 3 veces mes<br><input type="radio"/> 1 vez semana<br><input type="radio"/> 2 a 4 veces semana<br><input type="radio"/> 5 a 6 veces semana<br><input type="radio"/> 1 vez al día<br><input type="radio"/> 2 a 3 veces al día<br><input type="radio"/> 5 a 6 veces al día<br><input type="radio"/> más 6 veces al día            |
| bolsa papas              | <input type="radio"/> Nunca o menos 1 vez al mes<br><input type="radio"/> 1 a 3 veces mes<br><input type="radio"/> 1 vez semana<br><input type="radio"/> 2 a 4 veces semana<br><input type="radio"/> 5 a 6 veces semana<br><input type="radio"/> 1 vez al día<br><input type="radio"/> 2 a 3 veces al día<br><input type="radio"/> 5 a 6 veces al día<br><input type="radio"/> más 6 veces al día            |
| arroz cocinado           | <input type="radio"/> Nunca o menos 1 vez al mes<br><input type="radio"/> 1 a 3 veces mes<br><input type="radio"/> 1 vez semana<br><input checked="" type="radio"/> 2 a 4 veces semana<br><input type="radio"/> 5 a 6 veces semana<br><input type="radio"/> 1 vez al día<br><input type="radio"/> 2 a 3 veces al día<br><input type="radio"/> 5 a 6 veces al día<br><input type="radio"/> más 6 veces al día |
| pasta                    | <input type="radio"/> Nunca o menos 1 vez al mes<br><input type="radio"/> 1 a 3 veces mes<br><input type="radio"/> 1 vez semana<br><input type="radio"/> 2 a 4 veces semana<br><input type="radio"/> 5 a 6 veces semana<br><input type="radio"/> 1 vez al día<br><input type="radio"/> 2 a 3 veces al día<br><input type="radio"/> 5 a 6 veces al día<br><input type="radio"/> más 6 veces al día            |

|                     |                                                                                                                                                                                                                                                                                                                                                                                                              |
|---------------------|--------------------------------------------------------------------------------------------------------------------------------------------------------------------------------------------------------------------------------------------------------------------------------------------------------------------------------------------------------------------------------------------------------------|
| pizza               | <input type="radio"/> Nunca o menos 1 vez al mes<br><input type="radio"/> 1 a 3 veces mes<br><input checked="" type="radio"/> 1 vez semana<br><input type="radio"/> 2 a 4 veces semana<br><input type="radio"/> 5 a 6 veces semana<br><input type="radio"/> 1 vez al día<br><input type="radio"/> 2 a 3 veces al día<br><input type="radio"/> 5 a 6 veces al día<br><input type="radio"/> más 6 veces al día |
| aceite oliva        | <input type="radio"/> Nunca o menos 1 vez al mes<br><input type="radio"/> 1 a 3 veces mes<br><input type="radio"/> 1 vez semana<br><input type="radio"/> 2 a 4 veces semana<br><input type="radio"/> 5 a 6 veces semana<br><input checked="" type="radio"/> 1 vez al día<br><input type="radio"/> 2 a 3 veces al día<br><input type="radio"/> 5 a 6 veces al día<br><input type="radio"/> más 6 veces al día |
| otros aceites       | <input type="radio"/> Nunca o menos 1 vez al mes<br><input type="radio"/> 1 a 3 veces mes<br><input type="radio"/> 1 vez semana<br><input type="radio"/> 2 a 4 veces semana<br><input type="radio"/> 5 a 6 veces semana<br><input type="radio"/> 1 vez al día<br><input type="radio"/> 2 a 3 veces al día<br><input type="radio"/> 5 a 6 veces al día<br><input type="radio"/> más 6 veces al día            |
| margarina           | <input type="radio"/> Nunca o menos 1 vez al mes<br><input type="radio"/> 1 a 3 veces mes<br><input type="radio"/> 1 vez semana<br><input type="radio"/> 2 a 4 veces semana<br><input type="radio"/> 5 a 6 veces semana<br><input type="radio"/> 1 vez al día<br><input type="radio"/> 2 a 3 veces al día<br><input type="radio"/> 5 a 6 veces al día<br><input type="radio"/> más 6 veces al día            |
| mantequilla         | <input type="radio"/> Nunca o menos 1 vez al mes<br><input type="radio"/> 1 a 3 veces mes<br><input type="radio"/> 1 vez semana<br><input type="radio"/> 2 a 4 veces semana<br><input type="radio"/> 5 a 6 veces semana<br><input type="radio"/> 1 vez al día<br><input type="radio"/> 2 a 3 veces al día<br><input type="radio"/> 5 a 6 veces al día<br><input type="radio"/> más 6 veces al día            |
| galletas tipo maria | <input type="radio"/> Nunca o menos 1 vez al mes<br><input type="radio"/> 1 a 3 veces mes<br><input type="radio"/> 1 vez semana<br><input type="radio"/> 2 a 4 veces semana<br><input type="radio"/> 5 a 6 veces semana<br><input type="radio"/> 1 vez al día<br><input type="radio"/> 2 a 3 veces al día<br><input type="radio"/> 5 a 6 veces al día<br><input type="radio"/> más 6 veces al día            |

|                           |                                                                                                                                                                                                                                                                                                                                                                                                              |
|---------------------------|--------------------------------------------------------------------------------------------------------------------------------------------------------------------------------------------------------------------------------------------------------------------------------------------------------------------------------------------------------------------------------------------------------------|
| galletas chocolate        | <input type="radio"/> Nunca o menos 1 vez al mes<br><input type="radio"/> 1 a 3 veces mes<br><input type="radio"/> 1 vez semana<br><input type="radio"/> 2 a 4 veces semana<br><input type="radio"/> 5 a 6 veces semana<br><input type="radio"/> 1 vez al día<br><input checked="" type="radio"/> 2 a 3 veces al día<br><input type="radio"/> 5 a 6 veces al día<br><input type="radio"/> más 6 veces al día |
| bollieria                 | <input type="radio"/> Nunca o menos 1 vez al mes<br><input type="radio"/> 1 a 3 veces mes<br><input type="radio"/> 1 vez semana<br><input type="radio"/> 2 a 4 veces semana<br><input type="radio"/> 5 a 6 veces semana<br><input type="radio"/> 1 vez al día<br><input type="radio"/> 2 a 3 veces al día<br><input type="radio"/> 5 a 6 veces al día<br><input type="radio"/> más 6 veces al día            |
| chocolate o bombones      | <input type="radio"/> Nunca o menos 1 vez al mes<br><input type="radio"/> 1 a 3 veces mes<br><input type="radio"/> 1 vez semana<br><input type="radio"/> 2 a 4 veces semana<br><input type="radio"/> 5 a 6 veces semana<br><input type="radio"/> 1 vez al día<br><input type="radio"/> 2 a 3 veces al día<br><input type="radio"/> 5 a 6 veces al día<br><input type="radio"/> más 6 veces al día            |
| chocolate polvo o colacao | <input type="radio"/> Nunca o menos 1 vez al mes<br><input type="radio"/> 1 a 3 veces mes<br><input type="radio"/> 1 vez semana<br><input type="radio"/> 2 a 4 veces semana<br><input type="radio"/> 5 a 6 veces semana<br><input type="radio"/> 1 vez al día<br><input type="radio"/> 2 a 3 veces al día<br><input type="radio"/> 5 a 6 veces al día<br><input type="radio"/> más 6 veces al día            |
| vino tinto                | <input type="radio"/> Nunca o menos 1 vez al mes<br><input type="radio"/> 1 a 3 veces mes<br><input type="radio"/> 1 vez semana<br><input type="radio"/> 2 a 4 veces semana<br><input type="radio"/> 5 a 6 veces semana<br><input type="radio"/> 1 vez al día<br><input type="radio"/> 2 a 3 veces al día<br><input type="radio"/> 5 a 6 veces al día<br><input type="radio"/> más 6 veces al día            |
| vino blanco               | <input type="radio"/> Nunca o menos 1 vez al mes<br><input type="radio"/> 1 a 3 veces mes<br><input type="radio"/> 1 vez semana<br><input type="radio"/> 2 a 4 veces semana<br><input type="radio"/> 5 a 6 veces semana<br><input type="radio"/> 1 vez al día<br><input type="radio"/> 2 a 3 veces al día<br><input type="radio"/> 5 a 6 veces al día<br><input type="radio"/> más 6 veces al día            |

|                       |                                                                                                                                                                                                                                                                                                                                                                                                   |
|-----------------------|---------------------------------------------------------------------------------------------------------------------------------------------------------------------------------------------------------------------------------------------------------------------------------------------------------------------------------------------------------------------------------------------------|
| vino seco o vermut    | <input type="radio"/> Nunca o menos 1 vez al mes<br><input type="radio"/> 1 a 3 veces mes<br><input type="radio"/> 1 vez semana<br><input type="radio"/> 2 a 4 veces semana<br><input type="radio"/> 5 a 6 veces semana<br><input type="radio"/> 1 vez al día<br><input type="radio"/> 2 a 3 veces al día<br><input type="radio"/> 5 a 6 veces al día<br><input type="radio"/> más 6 veces al día |
| cerveza               | <input type="radio"/> Nunca o menos 1 vez al mes<br><input type="radio"/> 1 a 3 veces mes<br><input type="radio"/> 1 vez semana<br><input type="radio"/> 2 a 4 veces semana<br><input type="radio"/> 5 a 6 veces semana<br><input type="radio"/> 1 vez al día<br><input type="radio"/> 2 a 3 veces al día<br><input type="radio"/> 5 a 6 veces al día<br><input type="radio"/> más 6 veces al día |
| cerveza sin alcohol   | <input type="radio"/> Nunca o menos 1 vez al mes<br><input type="radio"/> 1 a 3 veces mes<br><input type="radio"/> 1 vez semana<br><input type="radio"/> 2 a 4 veces semana<br><input type="radio"/> 5 a 6 veces semana<br><input type="radio"/> 1 vez al día<br><input type="radio"/> 2 a 3 veces al día<br><input type="radio"/> 5 a 6 veces al día<br><input type="radio"/> más 6 veces al día |
| licores               | <input type="radio"/> Nunca o menos 1 vez al mes<br><input type="radio"/> 1 a 3 veces mes<br><input type="radio"/> 1 vez semana<br><input type="radio"/> 2 a 4 veces semana<br><input type="radio"/> 5 a 6 veces semana<br><input type="radio"/> 1 vez al día<br><input type="radio"/> 2 a 3 veces al día<br><input type="radio"/> 5 a 6 veces al día<br><input type="radio"/> más 6 veces al día |
| ginebra o ron o vodka | <input type="radio"/> Nunca o menos 1 vez al mes<br><input type="radio"/> 1 a 3 veces mes<br><input type="radio"/> 1 vez semana<br><input type="radio"/> 2 a 4 veces semana<br><input type="radio"/> 5 a 6 veces semana<br><input type="radio"/> 1 vez al día<br><input type="radio"/> 2 a 3 veces al día<br><input type="radio"/> 5 a 6 veces al día<br><input type="radio"/> más 6 veces al día |
| refresco normal       | <input type="radio"/> Nunca o menos 1 vez al mes<br><input type="radio"/> 1 a 3 veces mes<br><input type="radio"/> 1 vez semana<br><input type="radio"/> 2 a 4 veces semana<br><input type="radio"/> 5 a 6 veces semana<br><input type="radio"/> 1 vez al día<br><input type="radio"/> 2 a 3 veces al día<br><input type="radio"/> 5 a 6 veces al día<br><input type="radio"/> más 6 veces al día |

|                          |                                                                                                                                                                                                                                                                                                                                                                                                              |
|--------------------------|--------------------------------------------------------------------------------------------------------------------------------------------------------------------------------------------------------------------------------------------------------------------------------------------------------------------------------------------------------------------------------------------------------------|
| refresco sin azúcar      | <input type="radio"/> Nunca o menos 1 vez al mes<br><input type="radio"/> 1 a 3 veces mes<br><input type="radio"/> 1 vez semana<br><input type="radio"/> 2 a 4 veces semana<br><input type="radio"/> 5 a 6 veces semana<br><input type="radio"/> 1 vez al día<br><input type="radio"/> 2 a 3 veces al día<br><input type="radio"/> 5 a 6 veces al día<br><input type="radio"/> más 6 veces al día            |
| Agua del grifo           | <input type="radio"/> Nunca o menos 1 vez al mes<br><input type="radio"/> 1 a 3 veces mes<br><input type="radio"/> 1 vez semana<br><input type="radio"/> 2 a 4 veces semana<br><input type="radio"/> 5 a 6 veces semana<br><input type="radio"/> 1 vez al día<br><input type="radio"/> 2 a 3 veces al día<br><input type="radio"/> 5 a 6 veces al día<br><input type="radio"/> más 6 veces al día            |
| agua embotellada sin gas | <input type="radio"/> Nunca o menos 1 vez al mes<br><input type="radio"/> 1 a 3 veces mes<br><input type="radio"/> 1 vez semana<br><input type="radio"/> 2 a 4 veces semana<br><input type="radio"/> 5 a 6 veces semana<br><input type="radio"/> 1 vez al día<br><input type="radio"/> 2 a 3 veces al día<br><input type="radio"/> 5 a 6 veces al día<br><input checked="" type="radio"/> más 6 veces al día |
| agua embotellada con gas | <input type="radio"/> Nunca o menos 1 vez al mes<br><input type="radio"/> 1 a 3 veces mes<br><input type="radio"/> 1 vez semana<br><input type="radio"/> 2 a 4 veces semana<br><input type="radio"/> 5 a 6 veces semana<br><input type="radio"/> 1 vez al día<br><input type="radio"/> 2 a 3 veces al día<br><input type="radio"/> 5 a 6 veces al día<br><input type="radio"/> más 6 veces al día            |
| zumو frutas embasado     | <input type="radio"/> Nunca o menos 1 vez al mes<br><input type="radio"/> 1 a 3 veces mes<br><input checked="" type="radio"/> 1 vez semana<br><input type="radio"/> 2 a 4 veces semana<br><input type="radio"/> 5 a 6 veces semana<br><input type="radio"/> 1 vez al día<br><input type="radio"/> 2 a 3 veces al día<br><input type="radio"/> 5 a 6 veces al día<br><input type="radio"/> más 6 veces al día |
| cafe                     | <input type="radio"/> Nunca o menos 1 vez al mes<br><input type="radio"/> 1 a 3 veces mes<br><input type="radio"/> 1 vez semana<br><input type="radio"/> 2 a 4 veces semana<br><input type="radio"/> 5 a 6 veces semana<br><input type="radio"/> 1 vez al día<br><input type="radio"/> 2 a 3 veces al día<br><input type="radio"/> 5 a 6 veces al día<br><input type="radio"/> más 6 veces al día            |

|                       |                                                                                                                                                                                                                                                                                                                                                                                                              |
|-----------------------|--------------------------------------------------------------------------------------------------------------------------------------------------------------------------------------------------------------------------------------------------------------------------------------------------------------------------------------------------------------------------------------------------------------|
| cafe descafeinado     | <input type="radio"/> Nunca o menos 1 vez al mes<br><input type="radio"/> 1 a 3 veces mes<br><input type="radio"/> 1 vez semana<br><input type="radio"/> 2 a 4 veces semana<br><input type="radio"/> 5 a 6 veces semana<br><input type="radio"/> 1 vez al día<br><input type="radio"/> 2 a 3 veces al día<br><input type="radio"/> 5 a 6 veces al día<br><input type="radio"/> más 6 veces al día            |
| te o infusión         | <input type="radio"/> Nunca o menos 1 vez al mes<br><input type="radio"/> 1 a 3 veces mes<br><input type="radio"/> 1 vez semana<br><input type="radio"/> 2 a 4 veces semana<br><input type="radio"/> 5 a 6 veces semana<br><input type="radio"/> 1 vez al día<br><input type="radio"/> 2 a 3 veces al día<br><input type="radio"/> 5 a 6 veces al día<br><input type="radio"/> más 6 veces al día            |
| sopa o puré verduras  | <input type="radio"/> Nunca o menos 1 vez al mes<br><input type="radio"/> 1 a 3 veces mes<br><input type="radio"/> 1 vez semana<br><input checked="" type="radio"/> 2 a 4 veces semana<br><input type="radio"/> 5 a 6 veces semana<br><input type="radio"/> 1 vez al día<br><input type="radio"/> 2 a 3 veces al día<br><input type="radio"/> 5 a 6 veces al día<br><input type="radio"/> más 6 veces al día |
| croquetas pollo jamón | <input type="radio"/> Nunca o menos 1 vez al mes<br><input type="radio"/> 1 a 3 veces mes<br><input type="radio"/> 1 vez semana<br><input type="radio"/> 2 a 4 veces semana<br><input type="radio"/> 5 a 6 veces semana<br><input type="radio"/> 1 vez al día<br><input type="radio"/> 2 a 3 veces al día<br><input type="radio"/> 5 a 6 veces al día<br><input type="radio"/> más 6 veces al día            |
| croquetas pescado     | <input type="radio"/> Nunca o menos 1 vez al mes<br><input type="radio"/> 1 a 3 veces mes<br><input type="radio"/> 1 vez semana<br><input type="radio"/> 2 a 4 veces semana<br><input type="radio"/> 5 a 6 veces semana<br><input type="radio"/> 1 vez al día<br><input type="radio"/> 2 a 3 veces al día<br><input type="radio"/> 5 a 6 veces al día<br><input type="radio"/> más 6 veces al día            |
| mayonesa              | <input type="radio"/> Nunca o menos 1 vez al mes<br><input type="radio"/> 1 a 3 veces mes<br><input type="radio"/> 1 vez semana<br><input type="radio"/> 2 a 4 veces semana<br><input type="radio"/> 5 a 6 veces semana<br><input type="radio"/> 1 vez al día<br><input type="radio"/> 2 a 3 veces al día<br><input type="radio"/> 5 a 6 veces al día<br><input type="radio"/> más 6 veces al día            |

|                  |                                                                                                                                                                                                                                                                                                                                                                                                              |
|------------------|--------------------------------------------------------------------------------------------------------------------------------------------------------------------------------------------------------------------------------------------------------------------------------------------------------------------------------------------------------------------------------------------------------------|
| salsa tomate     | <input type="radio"/> Nunca o menos 1 vez al mes<br><input type="radio"/> 1 a 3 veces mes<br><input type="radio"/> 1 vez semana<br><input type="radio"/> 2 a 4 veces semana<br><input type="radio"/> 5 a 6 veces semana<br><input type="radio"/> 1 vez al día<br><input type="radio"/> 2 a 3 veces al día<br><input type="radio"/> 5 a 6 veces al día<br><input type="radio"/> más 6 veces al día            |
| ketchup          | <input type="radio"/> Nunca o menos 1 vez al mes<br><input type="radio"/> 1 a 3 veces mes<br><input type="radio"/> 1 vez semana<br><input type="radio"/> 2 a 4 veces semana<br><input type="radio"/> 5 a 6 veces semana<br><input type="radio"/> 1 vez al día<br><input type="radio"/> 2 a 3 veces al día<br><input type="radio"/> 5 a 6 veces al día<br><input type="radio"/> más 6 veces al día            |
| sal              | <input type="radio"/> Nunca o menos 1 vez al mes<br><input type="radio"/> 1 a 3 veces mes<br><input type="radio"/> 1 vez semana<br><input type="radio"/> 2 a 4 veces semana<br><input type="radio"/> 5 a 6 veces semana<br><input type="radio"/> 1 vez al día<br><input checked="" type="radio"/> 2 a 3 veces al día<br><input type="radio"/> 5 a 6 veces al día<br><input type="radio"/> más 6 veces al día |
| ajo              | <input type="radio"/> Nunca o menos 1 vez al mes<br><input type="radio"/> 1 a 3 veces mes<br><input type="radio"/> 1 vez semana<br><input type="radio"/> 2 a 4 veces semana<br><input type="radio"/> 5 a 6 veces semana<br><input type="radio"/> 1 vez al día<br><input type="radio"/> 2 a 3 veces al día<br><input type="radio"/> 5 a 6 veces al día<br><input type="radio"/> más 6 veces al día            |
| mermelada o miel | <input type="radio"/> Nunca o menos 1 vez al mes<br><input type="radio"/> 1 a 3 veces mes<br><input type="radio"/> 1 vez semana<br><input type="radio"/> 2 a 4 veces semana<br><input type="radio"/> 5 a 6 veces semana<br><input type="radio"/> 1 vez al día<br><input type="radio"/> 2 a 3 veces al día<br><input type="radio"/> 5 a 6 veces al día<br><input type="radio"/> más 6 veces al día            |
| azúcar           | <input type="radio"/> Nunca o menos 1 vez al mes<br><input type="radio"/> 1 a 3 veces mes<br><input type="radio"/> 1 vez semana<br><input type="radio"/> 2 a 4 veces semana<br><input type="radio"/> 5 a 6 veces semana<br><input type="radio"/> 1 vez al día<br><input type="radio"/> 2 a 3 veces al día<br><input type="radio"/> 5 a 6 veces al día<br><input type="radio"/> más 6 veces al día            |

|                                       |                                                                                                                                                                                                                                                                                                                                                                                                                                                                                                                               |
|---------------------------------------|-------------------------------------------------------------------------------------------------------------------------------------------------------------------------------------------------------------------------------------------------------------------------------------------------------------------------------------------------------------------------------------------------------------------------------------------------------------------------------------------------------------------------------|
| Otro alimento                         | <hr/>                                                                                                                                                                                                                                                                                                                                                                                                                                                                                                                         |
| suplementos vitamínicos               | <input checked="" type="radio"/> si<br><input type="radio"/> no                                                                                                                                                                                                                                                                                                                                                                                                                                                               |
| suplementos vitamínicos               | <hr/>                                                                                                                                                                                                                                                                                                                                                                                                                                                                                                                         |
| dieta previa                          | <input type="radio"/> si<br><input checked="" type="radio"/> no                                                                                                                                                                                                                                                                                                                                                                                                                                                               |
| motivo dieta                          | <input checked="" type="radio"/> no dieta<br><input type="radio"/> control peso<br><input type="radio"/> control colesterol<br><input type="radio"/> control diabetes<br><input type="radio"/> problemas estómago<br><input type="radio"/> problemas vesícula o hepáticos<br><input type="radio"/> HTA o cardiopatía<br><input type="radio"/> problemas renales<br><input type="radio"/> alergia alimentaria<br><input type="radio"/> ácido úrico elevado<br><input type="radio"/> vegetariana<br><input type="radio"/> otros |
| cambio alimentos año previo gestación | <input type="radio"/> si<br><input checked="" type="radio"/> no                                                                                                                                                                                                                                                                                                                                                                                                                                                               |
| cambio lácteos                        | <input type="radio"/> eliminado<br><input type="radio"/> disminuido<br><input type="radio"/> igual<br><input type="radio"/> aumentado<br><input type="radio"/> no sabe                                                                                                                                                                                                                                                                                                                                                        |
| cambio huevos                         | <input type="radio"/> eliminado<br><input type="radio"/> disminuido<br><input type="radio"/> igual<br><input type="radio"/> aumentado<br><input type="radio"/> no sabe                                                                                                                                                                                                                                                                                                                                                        |
| cambio carne                          | <input type="radio"/> eliminado<br><input type="radio"/> disminuido<br><input type="radio"/> igual<br><input type="radio"/> aumentado<br><input type="radio"/> no sabe                                                                                                                                                                                                                                                                                                                                                        |
| cambio pescado                        | <input type="radio"/> eliminado<br><input type="radio"/> disminuido<br><input type="radio"/> igual<br><input type="radio"/> aumentado<br><input type="radio"/> no sabe                                                                                                                                                                                                                                                                                                                                                        |
| cambio verduras                       | <input type="radio"/> eliminado<br><input type="radio"/> disminuido<br><input type="radio"/> igual<br><input type="radio"/> aumentado<br><input type="radio"/> no sabe                                                                                                                                                                                                                                                                                                                                                        |



|                            |                                                                                                                                                                                                                        |
|----------------------------|------------------------------------------------------------------------------------------------------------------------------------------------------------------------------------------------------------------------|
| cambio legumbres           | <input type="radio"/> eliminado<br><input type="radio"/> disminuido<br><input type="radio"/> igual<br><input type="radio"/> aumentado<br><input type="radio"/> no sabe                                                 |
| cambio fruta               | <input type="radio"/> eliminado<br><input type="radio"/> disminuido<br><input type="radio"/> igual<br><input type="radio"/> aumentado<br><input type="radio"/> no sabe                                                 |
| cambio pan                 | <input type="radio"/> eliminado<br><input type="radio"/> disminuido<br><input type="radio"/> igual<br><input type="radio"/> aumentado<br><input type="radio"/> no sabe                                                 |
| cambio aceite oliva        | <input type="radio"/> eliminado<br><input type="radio"/> disminuido<br><input type="radio"/> igual<br><input type="radio"/> aumentado<br><input type="radio"/> no sabe                                                 |
| cambio mante o margarina   | <input type="radio"/> eliminado<br><input type="radio"/> disminuido<br><input type="radio"/> igual<br><input type="radio"/> aumentado<br><input type="radio"/> no sabe                                                 |
| cambio azúcar y dulces     | <input type="radio"/> eliminado<br><input type="radio"/> disminuido<br><input type="radio"/> igual<br><input type="radio"/> aumentado<br><input type="radio"/> no sabe                                                 |
| cambio bebidas alcohólicas | <input type="radio"/> eliminado<br><input type="radio"/> disminuido<br><input type="radio"/> igual<br><input type="radio"/> aumentado<br><input type="radio"/> no sabe                                                 |
| frecuencia comidas fritas  | <input type="radio"/> a diario<br><input type="radio"/> 5 a 6 veces semana<br><input type="radio"/> 2 a 4 veces semana<br><input checked="" type="radio"/> 1 vez semana<br><input type="radio"/> menos de 1 vez semana |
| carne                      | <input type="radio"/> no como<br><input type="radio"/> cruda<br><input type="radio"/> poco hecha<br><input checked="" type="radio"/> hecha<br><input type="radio"/> muy hecha                                          |
| grasa visible carne        | <input type="radio"/> quita toda<br><input type="radio"/> quita mayoría<br><input type="radio"/> quita un poco<br><input checked="" type="radio"/> no quita nada                                                       |

|                                |                                                                                                                                                                                                                                                          |
|--------------------------------|----------------------------------------------------------------------------------------------------------------------------------------------------------------------------------------------------------------------------------------------------------|
| cocina carne                   | <input checked="" type="radio"/> a la plancha<br><input type="radio"/> a la parrilla<br><input type="radio"/> asada<br><input type="radio"/> frita<br><input type="radio"/> guisada                                                                      |
| tostado quemado carne          | <input checked="" type="radio"/> nunca<br><input type="radio"/> 1 vez mes<br><input type="radio"/> 2 a 3 veces mes<br><input type="radio"/> 1 vez semana<br><input type="radio"/> 2 a 3 semanas                                                          |
| tostado quemado pescado        | <input checked="" type="radio"/> nunca<br><input type="radio"/> 1 vez mes<br><input type="radio"/> 2 a 3 veces mes<br><input type="radio"/> 1 vez semana<br><input type="radio"/> 2 a 3 semanas                                                          |
| socarrat paella                | <input checked="" type="radio"/> nunca<br><input type="radio"/> 1 vez mes<br><input type="radio"/> 2 a 3 veces mes<br><input type="radio"/> 1 vez semana<br><input type="radio"/> 2 a 3 semanas                                                          |
| grasa o aceite cocinar         | <input type="radio"/> mantequilla<br><input type="radio"/> margarina<br><input type="radio"/> aceite oliva<br><input checked="" type="radio"/> aceite oliva virgen extra<br><input type="radio"/> aceite vegetal<br><input type="radio"/> mezcla aceites |
| grasa aceite aliñar            | <input type="radio"/> mantequilla<br><input type="radio"/> margarina<br><input type="radio"/> aceite oliva<br><input checked="" type="radio"/> aceite oliva virgen extra<br><input type="radio"/> aceite vegetal<br><input type="radio"/> mezcla aceites |
| grasa aceite freir             | <input type="radio"/> mantequilla<br><input type="radio"/> margarina<br><input type="radio"/> aceite oliva<br><input checked="" type="radio"/> aceite oliva virgen extra<br><input type="radio"/> aceite vegetal<br><input type="radio"/> mezcla aceites |
| Ejercicio cuestionario         | <input checked="" type="radio"/> si<br><input type="radio"/> no                                                                                                                                                                                          |
| horas de sueño incluido siesta | [*DATA REMOVED*]                                                                                                                                                                                                                                         |
| minutos siesta                 | [*DATA REMOVED*]                                                                                                                                                                                                                                         |
| horas televisión semana        | [*DATA REMOVED*]                                                                                                                                                                                                                                         |

|                                        |                                                                                                                                                                                                                                                                                                                                                                |
|----------------------------------------|----------------------------------------------------------------------------------------------------------------------------------------------------------------------------------------------------------------------------------------------------------------------------------------------------------------------------------------------------------------|
| actividad trabajo                      | <input type="radio"/> casi siempre sentado<br><input type="radio"/> sentado 50 por cien<br><input type="radio"/> casi siempre de pie, quieto<br><input type="radio"/> casi siempre levantado caminando y llevando pocas cosas<br><input type="radio"/> casi siempre levantado, caminando y llevado muchas cosas<br><input type="radio"/> trabajo manual pesado |
| tiempo caminar o bici al día           | <input type="radio"/> casi nunca<br><input type="radio"/> menos 20min día<br><input type="radio"/> 20 a 40 min día<br><input type="radio"/> 40 a 60 min día<br><input checked="" type="radio"/> 1h o 1h y media día<br><input type="radio"/> más de 1h y media al día                                                                                          |
| tiempo tareas casa al día              | <input type="radio"/> menos de 1h día<br><input type="radio"/> 1 a 2h día<br><input type="radio"/> 3 a 4h día<br><input checked="" type="radio"/> 5 a 6h día<br><input type="radio"/> 7 a 8h día<br><input type="radio"/> más de 8h día                                                                                                                        |
| tiempo libre televisión ordenador leer | <input type="radio"/> menos 1h día<br><input type="radio"/> 1h día<br><input type="radio"/> 2h día<br><input type="radio"/> 3h día<br><input type="radio"/> 4h día<br><input type="radio"/> 5 a 6h día<br><input type="radio"/> mas 6h día                                                                                                                     |
| tiempo libre ejercicio o deporte       | <input type="radio"/> menos 1h semana<br><input type="radio"/> 1h semana<br><input type="radio"/> 2h semana<br><input type="radio"/> 3h semana<br><input type="radio"/> 4 a 5h semana<br><input type="radio"/> mas 5h semana                                                                                                                                   |
| como se considera                      | <input type="radio"/> sedentaria<br><input type="radio"/> poco activa<br><input type="radio"/> moderadamente activa<br><input checked="" type="radio"/> bastante activa<br><input type="radio"/> muy activa<br><input type="radio"/> no sabe                                                                                                                   |
| FUR                                    | [*DATA REMOVED*]                                                                                                                                                                                                                                                                                                                                               |
| Semanas gestación 2T                   | [*DATA REMOVED*]                                                                                                                                                                                                                                                                                                                                               |
| Días gestación 2T                      | [*DATA REMOVED*]                                                                                                                                                                                                                                                                                                                                               |
| DBP 2T                                 | [*DATA REMOVED*]                                                                                                                                                                                                                                                                                                                                               |
| CC 2T                                  | [*DATA REMOVED*]                                                                                                                                                                                                                                                                                                                                               |
| AC 2T                                  | [*DATA REMOVED*]                                                                                                                                                                                                                                                                                                                                               |

|                                                   |                                                                                                                                                                                                 |
|---------------------------------------------------|-------------------------------------------------------------------------------------------------------------------------------------------------------------------------------------------------|
| LF 2T                                             | [*DATA REMOVED*]                                                                                                                                                                                |
| PFE 2T (Hadlock)                                  | [*DATA REMOVED*]                                                                                                                                                                                |
| Semanas gestación 3T                              | [*DATA REMOVED*]                                                                                                                                                                                |
| días 3T                                           | [*DATA REMOVED*]                                                                                                                                                                                |
| DBP 3T                                            | [*DATA REMOVED*]                                                                                                                                                                                |
| CC 3T                                             | [*DATA REMOVED*]                                                                                                                                                                                |
| AC 3T                                             | [*DATA REMOVED*]                                                                                                                                                                                |
| LF 3T                                             | [*DATA REMOVED*]                                                                                                                                                                                |
| PFE 3T (Hadlock)                                  | [*DATA REMOVED*]                                                                                                                                                                                |
| Semanas de gestación final                        | [*DATA REMOVED*]                                                                                                                                                                                |
| días gestación final                              | [*DATA REMOVED*]                                                                                                                                                                                |
| Localización placenta                             | <input type="radio"/> anterior<br><input type="radio"/> lateral derecha<br><input type="radio"/> lateral izquierda<br><input checked="" type="radio"/> posterior<br><input type="radio"/> fondo |
| Presentación longitudinal cefálica                | <input type="radio"/> no<br><input checked="" type="radio"/> si                                                                                                                                 |
| Dorso                                             | <input type="radio"/> izquierda anterior<br><input type="radio"/> izquierda posterior<br><input checked="" type="radio"/> derecha anterior<br><input type="radio"/> derecha posterior           |
| diámetro biparietal                               | [*DATA REMOVED*]                                                                                                                                                                                |
| Circunferencia craneal                            | [*DATA REMOVED*]                                                                                                                                                                                |
| Circunferencia abdominal                          | [*DATA REMOVED*]                                                                                                                                                                                |
| Longitud de femur                                 | [*DATA REMOVED*]                                                                                                                                                                                |
| tejido celular subcutáneo a nivel del muslo en mm | [*DATA REMOVED*]                                                                                                                                                                                |
| tejido celular subcutáneo en abdomen en mm        | [*DATA REMOVED*]                                                                                                                                                                                |
| Volumen del muslo en cm3                          | [*DATA REMOVED*]                                                                                                                                                                                |
| Peso fetal estimado según fórmula de Hadlock      | [*DATA REMOVED*]                                                                                                                                                                                |

|                                               |                                                                                                                                                          |
|-----------------------------------------------|----------------------------------------------------------------------------------------------------------------------------------------------------------|
| Percentil                                     | [*DATA REMOVED*]                                                                                                                                         |
| Peso fetal estimado según fórmula de Scioscia | <hr/>                                                                                                                                                    |
| Peso fetal estimado según fórmula de LEE      | <hr/>                                                                                                                                                    |
| Tipo de parto                                 | <input checked="" type="radio"/> eutocico<br><input type="radio"/> instrumentado/ventosa<br><input type="radio"/> cesarea                                |
| fecha de nacimiento                           | [*DATA REMOVED*]                                                                                                                                         |
| Días entre exploración y nacimiento           | [*DATA REMOVED*]                                                                                                                                         |
| Peso RN en g                                  | [*DATA REMOVED*]                                                                                                                                         |
| sexo                                          | <input type="radio"/> mujer<br><input checked="" type="radio"/> hombre                                                                                   |
| Apgar 1 minuto                                | [*DATA REMOVED*]                                                                                                                                         |
| Apgar 5 minutos                               | [*DATA REMOVED*]                                                                                                                                         |
| Apgar 10 minutos                              | <hr/>                                                                                                                                                    |
| antecedente Covid durante gestación           | <input type="radio"/> Yes<br><input checked="" type="radio"/> No                                                                                         |
| Nivel de estudios                             | <input type="radio"/> ninguno<br><input checked="" type="radio"/> primarios<br><input type="radio"/> secundarios<br><input type="radio"/> universitarios |

# Base\_datos\_estimacion\_peso\_fetal

|                                       |                                                                                                                                                                                                                                                                                      |
|---------------------------------------|--------------------------------------------------------------------------------------------------------------------------------------------------------------------------------------------------------------------------------------------------------------------------------------|
| Número de identificación participante | 82                                                                                                                                                                                                                                                                                   |
| CODIGO PARTICIPANTE                   |                                                                                                                                                                                                                                                                                      |
| Edad                                  | [*DATA REMOVED*]                                                                                                                                                                                                                                                                     |
| Gestaciones                           | <input checked="" type="radio"/> 1<br><input type="radio"/> 2<br><input type="radio"/> 3<br><input type="radio"/> mas de 3                                                                                                                                                           |
| partos                                | <input checked="" type="radio"/> 0<br><input type="radio"/> 1<br><input type="radio"/> 2<br><input type="radio"/> 3<br><input type="radio"/> mas de 3                                                                                                                                |
| cesáreas                              | <input checked="" type="radio"/> 0<br><input type="radio"/> 1<br><input type="radio"/> 2<br><input type="radio"/> 3<br><input type="radio"/> mas de 3                                                                                                                                |
| Abortos                               | <input checked="" type="radio"/> 0<br><input type="radio"/> 1<br><input type="radio"/> 2<br><input type="radio"/> 3<br><input type="radio"/> mas de 3                                                                                                                                |
| Tipo de gestacion                     | <input type="radio"/> espontanea<br><input type="radio"/> IAC inseminación artificial conyuge<br><input type="radio"/> IAD inseminación artificial donante<br><input checked="" type="radio"/> FIV Fecundación in Vitro<br><input type="radio"/> Ovodon FIV con donación de ovocitos |
| peso previo a embarazo                | [*DATA REMOVED*]                                                                                                                                                                                                                                                                     |
| Ganancia ponderal embarazo            |                                                                                                                                                                                                                                                                                      |
| Talla madre                           | [*DATA REMOVED*]                                                                                                                                                                                                                                                                     |
| IMC previo embarazo                   | 28.282828282828287                                                                                                                                                                                                                                                                   |
| Patología obstétrica                  | <input checked="" type="radio"/> no<br><input type="radio"/> si                                                                                                                                                                                                                      |
| Diabetes pregestacional               | <input checked="" type="radio"/> no<br><input type="radio"/> si                                                                                                                                                                                                                      |
| Diabetes gestacional                  | <input checked="" type="radio"/> no<br><input type="radio"/> si                                                                                                                                                                                                                      |

|                                            |                                                                                                                                                                                      |
|--------------------------------------------|--------------------------------------------------------------------------------------------------------------------------------------------------------------------------------------|
| Diabetes gestacional con insulina          | <input checked="" type="radio"/> no<br><input type="radio"/> si                                                                                                                      |
| Diabetes gestacional con dieta y ejercicio | <input checked="" type="radio"/> no<br><input type="radio"/> si                                                                                                                      |
| Percentil fetos previos                    | <input checked="" type="radio"/> Nada<br><input type="radio"/> percentil menor de 10<br><input type="radio"/> percentil entre 10 y 90<br><input type="radio"/> percentil mayor de 90 |
| Exfumadora                                 | <input checked="" type="radio"/> Nada<br><input type="radio"/> menos de 5 años<br><input type="radio"/> 5 a 10 años<br><input type="radio"/> mayor o igual a 10 años                 |
| Hábito tabáquico                           | <input type="radio"/> no<br><input checked="" type="radio"/> si                                                                                                                      |
| fumadora                                   | [*DATA REMOVED*]                                                                                                                                                                     |
| Consumo otros tóxicos                      | <input checked="" type="radio"/> no<br><input type="radio"/> si                                                                                                                      |
| Hb 1T                                      | [*DATA REMOVED*]                                                                                                                                                                     |
| Htc 1T                                     | [*DATA REMOVED*]                                                                                                                                                                     |
| Hb 2T                                      | [*DATA REMOVED*]                                                                                                                                                                     |
| HTC 2T                                     | [*DATA REMOVED*]                                                                                                                                                                     |
| Hb 3T                                      | [*DATA REMOVED*]                                                                                                                                                                     |
| HTC 3T                                     | [*DATA REMOVED*]                                                                                                                                                                     |
| Suplemento FE oral                         | <input type="radio"/> si<br><input checked="" type="radio"/> no                                                                                                                      |
| Suplemento fe iv                           | <input type="radio"/> si<br><input checked="" type="radio"/> no                                                                                                                      |
| Transfusión                                | <input checked="" type="radio"/> no<br><input type="radio"/> si                                                                                                                      |
| Solicitada Vit D                           | <input checked="" type="radio"/> no<br><input type="radio"/> si                                                                                                                      |
| Deficit vit D                              | <input type="radio"/> no<br><input type="radio"/> si                                                                                                                                 |
| Suplemento vit D                           | <input type="radio"/> si<br><input type="radio"/> no                                                                                                                                 |

|                       |                                                                                                                                                                                                                                                                                                                                                                                                              |
|-----------------------|--------------------------------------------------------------------------------------------------------------------------------------------------------------------------------------------------------------------------------------------------------------------------------------------------------------------------------------------------------------------------------------------------------------|
| Dieta, cuestionario   | <input checked="" type="radio"/> si<br><input type="radio"/> no                                                                                                                                                                                                                                                                                                                                              |
| Leche entera          | <input checked="" type="radio"/> Nunca o menos 1 vez al mes<br><input type="radio"/> 1 a 3 veces mes<br><input type="radio"/> 1 vez semana<br><input type="radio"/> 2 a 4 veces semana<br><input type="radio"/> 5 a 6 veces semana<br><input type="radio"/> 1 vez al día<br><input type="radio"/> 2 a 3 veces al día<br><input type="radio"/> 5 a 6 veces al día<br><input type="radio"/> más 6 veces al día |
| Leche semidesnatada   | <input type="radio"/> Nunca o menos 1 vez al mes<br><input type="radio"/> 1 a 3 veces mes<br><input type="radio"/> 1 vez semana<br><input type="radio"/> 2 a 4 veces semana<br><input type="radio"/> 5 a 6 veces semana<br><input type="radio"/> 1 vez al día<br><input checked="" type="radio"/> 2 a 3 veces al día<br><input type="radio"/> 5 a 6 veces al día<br><input type="radio"/> mas 6 veces al día |
| Leche desnatada       | <input checked="" type="radio"/> Nunca o menos 1 vez al mes<br><input type="radio"/> 1 a 3 veces mes<br><input type="radio"/> 1 vez semana<br><input type="radio"/> 2 a 4 veces semana<br><input type="radio"/> 5 a 6 veces semana<br><input type="radio"/> 1 vez al día<br><input type="radio"/> 2 a 3 veces al día<br><input type="radio"/> 5 a 6 veces al día<br><input type="radio"/> más 6 veces al día |
| Leche condensada      | <input checked="" type="radio"/> Nunca o menos 1 vez al mes<br><input type="radio"/> 1 a 3 veces mes<br><input type="radio"/> 1 vez semana<br><input type="radio"/> 2 a 4 veces semana<br><input type="radio"/> 5 a 6 veces semana<br><input type="radio"/> 1 vez al día<br><input type="radio"/> 2 a 3 veces al día<br><input type="radio"/> 5 a 6 veces al día<br><input type="radio"/> más 6 veces al día |
| nata o crema de leche | <input type="radio"/> Nunca o menos 1 vez al mes<br><input checked="" type="radio"/> 1 a 3 veces mes<br><input type="radio"/> 1 vez semana<br><input type="radio"/> 2 a 4 veces semana<br><input type="radio"/> 5 a 6 veces semana<br><input type="radio"/> 1 vez al día<br><input type="radio"/> 2 a 3 veces al día<br><input type="radio"/> 5 a 6 veces al día<br><input type="radio"/> más 6 veces al día |



---

Yogurt Entero

- ☒ Nunca o menos 1 vez al mes  
☐ 1 a 3 veces mes  
☐ 1 vez semana  
☐ 2 a 4 veces semana  
☐ 5 a 6 veces semana  
☐ 1 vez al día  
☐ 2 a 3 veces al día  
☐ 5 a 6 veces al día  
☐ más 6 veces al día

---

Yogurt desnatado

- ☐ Nunca o menos 1 vez al mes  
☒ 1 a 3 veces mes  
☐ 1 vez semana  
☐ 2 a 4 veces semana  
☐ 5 a 6 veces semana  
☐ 1 vez al día  
☐ 2 a 3 veces al día  
☐ 5 a 6 veces al día  
☐ más 6 veces al día

---

100g requesón o queso blando o queso fresco

- ☒ Nunca o menos 1 vez al mes  
☐ 1 a 3 veces mes  
☐ 1 vez semana  
☐ 2 a 4 veces semana  
☐ 5 a 6 veces semana  
☐ 1 vez al día  
☐ 2 a 3 veces al día  
☐ 5 a 6 veces al día  
☐ más 6 veces al día

---

queso curado o semicurado o cremoso

- ☐ Nunca o menos 1 vez al mes  
☐ 1 a 3 veces mes  
☒ 1 vez semana  
☐ 2 a 4 veces semana  
☐ 5 a 6 veces semana  
☐ 1 vez al día  
☐ 2 a 3 veces al día  
☐ 5 a 6 veces al día  
☐ más 6 veces al día

---

natillas flan pudding

- ☐ Nunca o menos 1 vez al mes  
☐ 1 a 3 veces mes  
☒ 1 vez semana  
☐ 2 a 4 veces semana  
☐ 5 a 6 veces semana  
☐ 1 vez al día  
☐ 2 a 3 veces al día  
☐ 5 a 6 veces al día  
☐ más 6 veces al día

---

Helado

- ☒ Nunca o menos 1 vez al mes  
☐ 1 a 3 veces mes  
☐ 1 vez semana  
☐ 2 a 4 veces semana  
☐ 5 a 6 veces semana  
☐ 1 vez al día  
☐ 2 a 3 veces al día  
☐ 5 a 6 veces al día  
☐ más 6 veces al día

|                                      |                                                                                                                                                                                                                                                                                                                                                                                                              |
|--------------------------------------|--------------------------------------------------------------------------------------------------------------------------------------------------------------------------------------------------------------------------------------------------------------------------------------------------------------------------------------------------------------------------------------------------------------|
| huevo                                | <input type="radio"/> Nunca o menos 1 vez al mes<br><input type="radio"/> 1 a 3 veces mes<br><input checked="" type="radio"/> 1 vez semana<br><input type="radio"/> 2 a 4 veces semana<br><input type="radio"/> 5 a 6 veces semana<br><input type="radio"/> 1 vez al día<br><input type="radio"/> 2 a 3 veces al día<br><input type="radio"/> 5 a 6 veces al día<br><input type="radio"/> más 6 veces al día |
| Pollo con piel                       | <input checked="" type="radio"/> Nunca o menos 1 vez al mes<br><input type="radio"/> 1 a 3 veces mes<br><input type="radio"/> 1 vez semana<br><input type="radio"/> 2 a 4 veces semana<br><input type="radio"/> 5 a 6 veces semana<br><input type="radio"/> 1 vez al día<br><input type="radio"/> 2 a 3 veces al día<br><input type="radio"/> 5 a 6 veces al día<br><input type="radio"/> más 6 veces al día |
| pollo sin piel                       | <input type="radio"/> Nunca o menos 1 vez al mes<br><input type="radio"/> 1 a 3 veces mes<br><input type="radio"/> 1 vez semana<br><input type="radio"/> 2 a 4 veces semana<br><input type="radio"/> 5 a 6 veces semana<br><input checked="" type="radio"/> 1 vez al día<br><input type="radio"/> 2 a 3 veces al día<br><input type="radio"/> 5 a 6 veces al día<br><input type="radio"/> más 6 veces al día |
| Ternera o cerdo o cordero            | <input checked="" type="radio"/> Nunca o menos 1 vez al mes<br><input type="radio"/> 1 a 3 veces mes<br><input type="radio"/> 1 vez semana<br><input type="radio"/> 2 a 4 veces semana<br><input type="radio"/> 5 a 6 veces semana<br><input type="radio"/> 1 vez al día<br><input type="radio"/> 2 a 3 veces al día<br><input type="radio"/> 5 a 6 veces al día<br><input type="radio"/> más 6 veces al día |
| carne caza: Conejo o codorniz o pato | <input checked="" type="radio"/> Nunca o menos 1 vez al mes<br><input type="radio"/> 1 a 3 veces mes<br><input type="radio"/> 1 vez semana<br><input type="radio"/> 2 a 4 veces semana<br><input type="radio"/> 5 a 6 veces semana<br><input type="radio"/> 1 vez al día<br><input type="radio"/> 2 a 3 veces al día<br><input type="radio"/> 5 a 6 veces al día<br><input type="radio"/> más 6 veces al día |
| Hígado de ternera o cerdo o pollo    | <input checked="" type="radio"/> Nunca o menos 1 vez al mes<br><input type="radio"/> 1 a 3 veces mes<br><input type="radio"/> 1 vez semana<br><input type="radio"/> 2 a 4 veces semana<br><input type="radio"/> 5 a 6 veces semana<br><input type="radio"/> 1 vez al día<br><input type="radio"/> 2 a 3 veces al día<br><input type="radio"/> 5 a 6 veces al día<br><input type="radio"/> más 6 veces al día |

|                     |                                                                                                                                                                                                                                                                                                                                                                                                              |
|---------------------|--------------------------------------------------------------------------------------------------------------------------------------------------------------------------------------------------------------------------------------------------------------------------------------------------------------------------------------------------------------------------------------------------------------|
| Vísceras            | <input checked="" type="radio"/> Nunca o menos 1 vez al mes<br><input type="radio"/> 1 a 3 veces mes<br><input type="radio"/> 1 vez semana<br><input type="radio"/> 2 a 4 veces semana<br><input type="radio"/> 5 a 6 veces semana<br><input type="radio"/> 1 vez al día<br><input type="radio"/> 2 a 3 veces al día<br><input type="radio"/> 5 a 6 veces al día<br><input type="radio"/> más 6 veces al día |
| Embutido            | <input type="radio"/> Nunca o menos 1 vez al mes<br><input type="radio"/> 1 a 3 veces mes<br><input checked="" type="radio"/> 1 vez semana<br><input type="radio"/> 2 a 4 veces semana<br><input type="radio"/> 5 a 6 veces semana<br><input type="radio"/> 1 vez al día<br><input type="radio"/> 2 a 3 veces al día<br><input type="radio"/> 5 a 6 veces al día<br><input type="radio"/> más 6 veces al día |
| Salchicha o similar | <input type="radio"/> Nunca o menos 1 vez al mes<br><input checked="" type="radio"/> 1 a 3 veces mes<br><input type="radio"/> 1 vez semana<br><input type="radio"/> 2 a 4 veces semana<br><input type="radio"/> 5 a 6 veces semana<br><input type="radio"/> 1 vez al día<br><input type="radio"/> 2 a 3 veces al día<br><input type="radio"/> 5 a 6 veces al día<br><input type="radio"/> más 6 veces al día |
| Pate o foiegras     | <input checked="" type="radio"/> Nunca o menos 1 vez al mes<br><input type="radio"/> 1 a 3 veces mes<br><input type="radio"/> 1 vez semana<br><input type="radio"/> 2 a 4 veces semana<br><input type="radio"/> 5 a 6 veces semana<br><input type="radio"/> 1 vez al día<br><input type="radio"/> 2 a 3 veces al día<br><input type="radio"/> 5 a 6 veces al día<br><input type="radio"/> más 6 veces al día |
| Hamburguesa         | <input type="radio"/> Nunca o menos 1 vez al mes<br><input type="radio"/> 1 a 3 veces mes<br><input type="radio"/> 1 vez semana<br><input type="radio"/> 2 a 4 veces semana<br><input checked="" type="radio"/> 5 a 6 veces semana<br><input type="radio"/> 1 vez al día<br><input type="radio"/> 2 a 3 veces al día<br><input type="radio"/> 5 a 6 veces al día<br><input type="radio"/> más 6 veces al día |
| tocino o bacon      | <input checked="" type="radio"/> Nunca o menos 1 vez al mes<br><input type="radio"/> 1 a 3 veces mes<br><input type="radio"/> 1 vez semana<br><input type="radio"/> 2 a 4 veces semana<br><input type="radio"/> 5 a 6 veces semana<br><input type="radio"/> 1 vez al día<br><input type="radio"/> 2 a 3 veces al día<br><input type="radio"/> 5 a 6 veces al día<br><input type="radio"/> más 6 veces al día |

|                        |                                                                                                                                                                                                                                                                                                                                                                                                              |
|------------------------|--------------------------------------------------------------------------------------------------------------------------------------------------------------------------------------------------------------------------------------------------------------------------------------------------------------------------------------------------------------------------------------------------------------|
| Pescado frito          | <input checked="" type="radio"/> Nunca o menos 1 vez al mes<br><input type="radio"/> 1 a 3 veces mes<br><input type="radio"/> 1 vez semana<br><input type="radio"/> 2 a 4 veces semana<br><input type="radio"/> 5 a 6 veces semana<br><input type="radio"/> 1 vez al día<br><input type="radio"/> 2 a 3 veces al día<br><input type="radio"/> 5 a 6 veces al día<br><input type="radio"/> más 6 veces al día |
| pescado hervido blanco | <input checked="" type="radio"/> Nunca o menos 1 vez al mes<br><input type="radio"/> 1 a 3 veces mes<br><input type="radio"/> 1 vez semana<br><input type="radio"/> 2 a 4 veces semana<br><input type="radio"/> 5 a 6 veces semana<br><input type="radio"/> 1 vez al día<br><input type="radio"/> 2 a 3 veces al día<br><input type="radio"/> 5 a 6 veces al día<br><input type="radio"/> más 6 veces al día |
| pescado hervido azul   | <input checked="" type="radio"/> Nunca o menos 1 vez al mes<br><input type="radio"/> 1 a 3 veces mes<br><input type="radio"/> 1 vez semana<br><input type="radio"/> 2 a 4 veces semana<br><input type="radio"/> 5 a 6 veces semana<br><input type="radio"/> 1 vez al día<br><input type="radio"/> 2 a 3 veces al día<br><input type="radio"/> 5 a 6 veces al día<br><input type="radio"/> más 6 veces al día |
| otros pescado azul     | <input checked="" type="radio"/> Nunca o menos 1 vez al mes<br><input type="radio"/> 1 a 3 veces mes<br><input type="radio"/> 1 vez semana<br><input type="radio"/> 2 a 4 veces semana<br><input type="radio"/> 5 a 6 veces semana<br><input type="radio"/> 1 vez al día<br><input type="radio"/> 2 a 3 veces al día<br><input type="radio"/> 5 a 6 veces al día<br><input type="radio"/> más 6 veces al día |
| atun conserva          | <input type="radio"/> Nunca o menos 1 vez al mes<br><input type="radio"/> 1 a 3 veces mes<br><input checked="" type="radio"/> 1 vez semana<br><input type="radio"/> 2 a 4 veces semana<br><input type="radio"/> 5 a 6 veces semana<br><input type="radio"/> 1 vez al día<br><input type="radio"/> 2 a 3 veces al día<br><input type="radio"/> 5 a 6 veces al día<br><input type="radio"/> más 6 veces al día |
| sardina conserva       | <input checked="" type="radio"/> Nunca o menos 1 vez al mes<br><input type="radio"/> 1 a 3 veces mes<br><input type="radio"/> 1 vez semana<br><input type="radio"/> 2 a 4 veces semana<br><input type="radio"/> 5 a 6 veces semana<br><input type="radio"/> 1 vez al día<br><input type="radio"/> 2 a 3 veces al día<br><input type="radio"/> 5 a 6 veces al día<br><input type="radio"/> más 6 veces al día |

|                                         |                                                                                                                                                                                                                                                                                                                                                                                                              |
|-----------------------------------------|--------------------------------------------------------------------------------------------------------------------------------------------------------------------------------------------------------------------------------------------------------------------------------------------------------------------------------------------------------------------------------------------------------------|
| pescado ahumado                         | <input checked="" type="radio"/> Nunca o menos 1 vez al mes<br><input type="radio"/> 1 a 3 veces mes<br><input type="radio"/> 1 vez semana<br><input type="radio"/> 2 a 4 veces semana<br><input type="radio"/> 5 a 6 veces semana<br><input type="radio"/> 1 vez al día<br><input type="radio"/> 2 a 3 veces al día<br><input type="radio"/> 5 a 6 veces al día<br><input type="radio"/> más 6 veces al día |
| almejas o mejillones o ostras unos 100g | <input type="radio"/> Nunca o menos 1 vez al mes<br><input checked="" type="radio"/> 1 a 3 veces mes<br><input type="radio"/> 1 vez semana<br><input type="radio"/> 2 a 4 veces semana<br><input type="radio"/> 5 a 6 veces semana<br><input type="radio"/> 1 vez al día<br><input type="radio"/> 2 a 3 veces al día<br><input type="radio"/> 5 a 6 veces al día<br><input type="radio"/> más 6 veces al día |
| calamar o chipiron o sepia unos 100g    | <input checked="" type="radio"/> Nunca o menos 1 vez al mes<br><input type="radio"/> 1 a 3 veces mes<br><input type="radio"/> 1 vez semana<br><input type="radio"/> 2 a 4 veces semana<br><input type="radio"/> 5 a 6 veces semana<br><input type="radio"/> 1 vez al día<br><input type="radio"/> 2 a 3 veces al día<br><input type="radio"/> 5 a 6 veces al día<br><input type="radio"/> más 6 veces al día |
| marisco unos 100g                       | <input checked="" type="radio"/> Nunca o menos 1 vez al mes<br><input type="radio"/> 1 a 3 veces mes<br><input type="radio"/> 1 vez semana<br><input type="radio"/> 2 a 4 veces semana<br><input type="radio"/> 5 a 6 veces semana<br><input type="radio"/> 1 vez al día<br><input type="radio"/> 2 a 3 veces al día<br><input type="radio"/> 5 a 6 veces al día<br><input type="radio"/> más 6 veces al día |
| Espinacas o acelgas cocinadas           | <input type="radio"/> Nunca o menos 1 vez al mes<br><input checked="" type="radio"/> 1 a 3 veces mes<br><input type="radio"/> 1 vez semana<br><input type="radio"/> 2 a 4 veces semana<br><input type="radio"/> 5 a 6 veces semana<br><input type="radio"/> 1 vez al día<br><input type="radio"/> 2 a 3 veces al día<br><input type="radio"/> 5 a 6 veces al día<br><input type="radio"/> más 6 veces al día |
| Col o coliflor o brocoli cocinado       | <input checked="" type="radio"/> Nunca o menos 1 vez al mes<br><input type="radio"/> 1 a 3 veces mes<br><input type="radio"/> 1 vez semana<br><input type="radio"/> 2 a 4 veces semana<br><input type="radio"/> 5 a 6 veces semana<br><input type="radio"/> 1 vez al día<br><input type="radio"/> 2 a 3 veces al día<br><input type="radio"/> 5 a 6 veces al día<br><input type="radio"/> más 6 veces al día |

---

Lechuga o endivia o escarola

- ☐ Nunca o menos 1 vez al mes  
☐ 1 a 3 veces mes  
☒ 1 vez semana  
☐ 2 a 4 veces semana  
☐ 5 a 6 veces semana  
☐ 1 vez al día  
☐ 2 a 3 veces al día  
☐ 5 a 6 veces al día  
☐ más 6 veces al día

---

tomate ensalada

- ☐ Nunca o menos 1 vez al mes  
☐ 1 a 3 veces mes  
☐ 1 vez semana  
☐ 2 a 4 veces semana  
☐ 5 a 6 veces semana  
☐ 1 vez al día  
☒ 2 a 3 veces al día  
☐ 5 a 6 veces al día  
☐ más 6 veces al día

---

cebolla

- ☐ Nunca o menos 1 vez al mes  
☐ 1 a 3 veces mes  
☐ 1 vez semana  
☐ 2 a 4 veces semana  
☒ 5 a 6 veces semana  
☐ 1 vez al día  
☐ 2 a 3 veces al día  
☐ 5 a 6 veces al día  
☐ más 6 veces al día

---

Zanahoria o calabaza

- ☐ Nunca o menos 1 vez al mes  
☐ 1 a 3 veces mes  
☐ 1 vez semana  
☒ 2 a 4 veces semana  
☐ 5 a 6 veces semana  
☐ 1 vez al día  
☐ 2 a 3 veces al día  
☐ 5 a 6 veces al día  
☐ más 6 veces al día

---

Judías verdes

- ☐ Nunca o menos 1 vez al mes  
☐ 1 a 3 veces mes  
☒ 1 vez semana  
☐ 2 a 4 veces semana  
☐ 5 a 6 veces semana  
☐ 1 vez al día  
☐ 2 a 3 veces al día  
☐ 5 a 6 veces al día  
☐ más 6 veces al día

---

Berenjena o calabacin o pepino

- ☐ Nunca o menos 1 vez al mes  
☐ 1 a 3 veces mes  
☒ 1 vez semana  
☐ 2 a 4 veces semana  
☐ 5 a 6 veces semana  
☐ 1 vez al día  
☐ 2 a 3 veces al día  
☐ 5 a 6 veces al día  
☐ más 6 veces al día

|                       |                                                                                                                                                                                                                                                                                                                                                                                                              |
|-----------------------|--------------------------------------------------------------------------------------------------------------------------------------------------------------------------------------------------------------------------------------------------------------------------------------------------------------------------------------------------------------------------------------------------------------|
| pimiento              | <input type="radio"/> Nunca o menos 1 vez al mes<br><input checked="" type="radio"/> 1 a 3 veces mes<br><input type="radio"/> 1 vez semana<br><input type="radio"/> 2 a 4 veces semana<br><input type="radio"/> 5 a 6 veces semana<br><input type="radio"/> 1 vez al día<br><input type="radio"/> 2 a 3 veces al día<br><input type="radio"/> 5 a 6 veces al día<br><input type="radio"/> más 6 veces al día |
| alcachofa             | <input checked="" type="radio"/> Nunca o menos 1 vez al mes<br><input type="radio"/> 1 a 3 veces mes<br><input type="radio"/> 1 vez semana<br><input type="radio"/> 2 a 4 veces semana<br><input type="radio"/> 5 a 6 veces semana<br><input type="radio"/> 1 vez al día<br><input type="radio"/> 2 a 3 veces al día<br><input type="radio"/> 5 a 6 veces al día<br><input type="radio"/> más 6 veces al día |
| espárragos            | <input type="radio"/> Nunca o menos 1 vez al mes<br><input type="radio"/> 1 a 3 veces mes<br><input checked="" type="radio"/> 1 vez semana<br><input type="radio"/> 2 a 4 veces semana<br><input type="radio"/> 5 a 6 veces semana<br><input type="radio"/> 1 vez al día<br><input type="radio"/> 2 a 3 veces al día<br><input type="radio"/> 5 a 6 veces al día<br><input type="radio"/> más 6 veces al día |
| maíz hervido          | <input checked="" type="radio"/> Nunca o menos 1 vez al mes<br><input type="radio"/> 1 a 3 veces mes<br><input type="radio"/> 1 vez semana<br><input type="radio"/> 2 a 4 veces semana<br><input type="radio"/> 5 a 6 veces semana<br><input type="radio"/> 1 vez al día<br><input type="radio"/> 2 a 3 veces al día<br><input type="radio"/> 5 a 6 veces al día<br><input type="radio"/> más 6 veces al día |
| legumbres             | <input type="radio"/> Nunca o menos 1 vez al mes<br><input type="radio"/> 1 a 3 veces mes<br><input checked="" type="radio"/> 1 vez semana<br><input type="radio"/> 2 a 4 veces semana<br><input type="radio"/> 5 a 6 veces semana<br><input type="radio"/> 1 vez al día<br><input type="radio"/> 2 a 3 veces al día<br><input type="radio"/> 5 a 6 veces al día<br><input type="radio"/> más 6 veces al día |
| naranjas o mandarinas | <input type="radio"/> Nunca o menos 1 vez al mes<br><input type="radio"/> 1 a 3 veces mes<br><input type="radio"/> 1 vez semana<br><input type="radio"/> 2 a 4 veces semana<br><input type="radio"/> 5 a 6 veces semana<br><input type="radio"/> 1 vez al día<br><input type="radio"/> 2 a 3 veces al día<br><input type="radio"/> 5 a 6 veces al día<br><input checked="" type="radio"/> más 6 veces al día |

|                       |                                                                                                                                                                                                                                                                                                                                                                                                              |
|-----------------------|--------------------------------------------------------------------------------------------------------------------------------------------------------------------------------------------------------------------------------------------------------------------------------------------------------------------------------------------------------------------------------------------------------------|
| zum natural fruta     | <input checked="" type="radio"/> Nunca o menos 1 vez al mes<br><input type="radio"/> 1 a 3 veces mes<br><input type="radio"/> 1 vez semana<br><input type="radio"/> 2 a 4 veces semana<br><input type="radio"/> 5 a 6 veces semana<br><input type="radio"/> 1 vez al día<br><input type="radio"/> 2 a 3 veces al día<br><input type="radio"/> 5 a 6 veces al día<br><input type="radio"/> más 6 veces al día |
| platano               | <input type="radio"/> Nunca o menos 1 vez al mes<br><input checked="" type="radio"/> 1 a 3 veces mes<br><input type="radio"/> 1 vez semana<br><input type="radio"/> 2 a 4 veces semana<br><input type="radio"/> 5 a 6 veces semana<br><input type="radio"/> 1 vez al día<br><input type="radio"/> 2 a 3 veces al día<br><input type="radio"/> 5 a 6 veces al día<br><input type="radio"/> más 6 veces al día |
| manzana o pera        | <input checked="" type="radio"/> Nunca o menos 1 vez al mes<br><input type="radio"/> 1 a 3 veces mes<br><input type="radio"/> 1 vez semana<br><input type="radio"/> 2 a 4 veces semana<br><input type="radio"/> 5 a 6 veces semana<br><input type="radio"/> 1 vez al día<br><input type="radio"/> 2 a 3 veces al día<br><input type="radio"/> 5 a 6 veces al día<br><input type="radio"/> más 6 veces al día |
| melocotón o nectarina | <input checked="" type="radio"/> Nunca o menos 1 vez al mes<br><input type="radio"/> 1 a 3 veces mes<br><input type="radio"/> 1 vez semana<br><input type="radio"/> 2 a 4 veces semana<br><input type="radio"/> 5 a 6 veces semana<br><input type="radio"/> 1 vez al día<br><input type="radio"/> 2 a 3 veces al día<br><input type="radio"/> 5 a 6 veces al día<br><input type="radio"/> más 6 veces al día |
| sandia o melon        | <input type="radio"/> Nunca o menos 1 vez al mes<br><input type="radio"/> 1 a 3 veces mes<br><input type="radio"/> 1 vez semana<br><input type="radio"/> 2 a 4 veces semana<br><input checked="" type="radio"/> 5 a 6 veces semana<br><input type="radio"/> 1 vez al día<br><input type="radio"/> 2 a 3 veces al día<br><input type="radio"/> 5 a 6 veces al día<br><input type="radio"/> más 6 veces al día |
| uva                   | <input checked="" type="radio"/> Nunca o menos 1 vez al mes<br><input type="radio"/> 1 a 3 veces mes<br><input type="radio"/> 1 vez semana<br><input type="radio"/> 2 a 4 veces semana<br><input type="radio"/> 5 a 6 veces semana<br><input type="radio"/> 1 vez al día<br><input type="radio"/> 2 a 3 veces al día<br><input type="radio"/> 5 a 6 veces al día<br><input type="radio"/> más 6 veces al día |



|                 |                                                                                                                                                                                                                                                                                                                                                                                                              |
|-----------------|--------------------------------------------------------------------------------------------------------------------------------------------------------------------------------------------------------------------------------------------------------------------------------------------------------------------------------------------------------------------------------------------------------------|
| bruna o ciruela | <input checked="" type="radio"/> Nunca o menos 1 vez al mes<br><input type="radio"/> 1 a 3 veces mes<br><input type="radio"/> 1 vez semana<br><input type="radio"/> 2 a 4 veces semana<br><input type="radio"/> 5 a 6 veces semana<br><input type="radio"/> 1 vez al día<br><input type="radio"/> 2 a 3 veces al día<br><input type="radio"/> 5 a 6 veces al día<br><input type="radio"/> más 6 veces al día |
| kiwi            | <input type="radio"/> Nunca o menos 1 vez al mes<br><input type="radio"/> 1 a 3 veces mes<br><input type="radio"/> 1 vez semana<br><input checked="" type="radio"/> 2 a 4 veces semana<br><input type="radio"/> 5 a 6 veces semana<br><input type="radio"/> 1 vez al día<br><input type="radio"/> 2 a 3 veces al día<br><input type="radio"/> 5 a 6 veces al día<br><input type="radio"/> más 6 veces al día |
| aceituna        | <input type="radio"/> Nunca o menos 1 vez al mes<br><input type="radio"/> 1 a 3 veces mes<br><input checked="" type="radio"/> 1 vez semana<br><input type="radio"/> 2 a 4 veces semana<br><input type="radio"/> 5 a 6 veces semana<br><input type="radio"/> 1 vez al día<br><input type="radio"/> 2 a 3 veces al día<br><input type="radio"/> 5 a 6 veces al día<br><input type="radio"/> más 6 veces al día |
| frutos secos    | <input type="radio"/> Nunca o menos 1 vez al mes<br><input type="radio"/> 1 a 3 veces mes<br><input checked="" type="radio"/> 1 vez semana<br><input type="radio"/> 2 a 4 veces semana<br><input type="radio"/> 5 a 6 veces semana<br><input type="radio"/> 1 vez al día<br><input type="radio"/> 2 a 3 veces al día<br><input type="radio"/> 5 a 6 veces al día<br><input type="radio"/> más 6 veces al día |
| pan blanco      | <input type="radio"/> Nunca o menos 1 vez al mes<br><input type="radio"/> 1 a 3 veces mes<br><input type="radio"/> 1 vez semana<br><input checked="" type="radio"/> 2 a 4 veces semana<br><input type="radio"/> 5 a 6 veces semana<br><input type="radio"/> 1 vez al día<br><input type="radio"/> 2 a 3 veces al día<br><input type="radio"/> 5 a 6 veces al día<br><input type="radio"/> más 6 veces al día |
| pan integral    | <input type="radio"/> Nunca o menos 1 vez al mes<br><input checked="" type="radio"/> 1 a 3 veces mes<br><input type="radio"/> 1 vez semana<br><input type="radio"/> 2 a 4 veces semana<br><input type="radio"/> 5 a 6 veces semana<br><input type="radio"/> 1 vez al día<br><input type="radio"/> 2 a 3 veces al día<br><input type="radio"/> 5 a 6 veces al día<br><input type="radio"/> más 6 veces al día |

|                          |                                                                                                                                                                                                                                                                                                                                                                                                              |
|--------------------------|--------------------------------------------------------------------------------------------------------------------------------------------------------------------------------------------------------------------------------------------------------------------------------------------------------------------------------------------------------------------------------------------------------------|
| cereales desayuno        | <input checked="" type="radio"/> Nunca o menos 1 vez al mes<br><input type="radio"/> 1 a 3 veces mes<br><input type="radio"/> 1 vez semana<br><input type="radio"/> 2 a 4 veces semana<br><input type="radio"/> 5 a 6 veces semana<br><input type="radio"/> 1 vez al día<br><input type="radio"/> 2 a 3 veces al día<br><input type="radio"/> 5 a 6 veces al día<br><input type="radio"/> más 6 veces al día |
| patatas fritas           | <input type="radio"/> Nunca o menos 1 vez al mes<br><input checked="" type="radio"/> 1 a 3 veces mes<br><input type="radio"/> 1 vez semana<br><input type="radio"/> 2 a 4 veces semana<br><input type="radio"/> 5 a 6 veces semana<br><input type="radio"/> 1 vez al día<br><input type="radio"/> 2 a 3 veces al día<br><input type="radio"/> 5 a 6 veces al día<br><input type="radio"/> más 6 veces al día |
| patatas cocidas o asadas | <input type="radio"/> Nunca o menos 1 vez al mes<br><input type="radio"/> 1 a 3 veces mes<br><input type="radio"/> 1 vez semana<br><input type="radio"/> 2 a 4 veces semana<br><input type="radio"/> 5 a 6 veces semana<br><input checked="" type="radio"/> 1 vez al día<br><input type="radio"/> 2 a 3 veces al día<br><input type="radio"/> 5 a 6 veces al día<br><input type="radio"/> más 6 veces al día |
| bolsa papas              | <input type="radio"/> Nunca o menos 1 vez al mes<br><input type="radio"/> 1 a 3 veces mes<br><input type="radio"/> 1 vez semana<br><input checked="" type="radio"/> 2 a 4 veces semana<br><input type="radio"/> 5 a 6 veces semana<br><input type="radio"/> 1 vez al día<br><input type="radio"/> 2 a 3 veces al día<br><input type="radio"/> 5 a 6 veces al día<br><input type="radio"/> más 6 veces al día |
| arroz cocinado           | <input type="radio"/> Nunca o menos 1 vez al mes<br><input type="radio"/> 1 a 3 veces mes<br><input type="radio"/> 1 vez semana<br><input checked="" type="radio"/> 2 a 4 veces semana<br><input type="radio"/> 5 a 6 veces semana<br><input type="radio"/> 1 vez al día<br><input type="radio"/> 2 a 3 veces al día<br><input type="radio"/> 5 a 6 veces al día<br><input type="radio"/> más 6 veces al día |
| pasta                    | <input type="radio"/> Nunca o menos 1 vez al mes<br><input type="radio"/> 1 a 3 veces mes<br><input checked="" type="radio"/> 1 vez semana<br><input type="radio"/> 2 a 4 veces semana<br><input type="radio"/> 5 a 6 veces semana<br><input type="radio"/> 1 vez al día<br><input type="radio"/> 2 a 3 veces al día<br><input type="radio"/> 5 a 6 veces al día<br><input type="radio"/> más 6 veces al día |

|                     |                                                                                                                                                                                                                                                                                                                                                                                                              |
|---------------------|--------------------------------------------------------------------------------------------------------------------------------------------------------------------------------------------------------------------------------------------------------------------------------------------------------------------------------------------------------------------------------------------------------------|
| pizza               | <input type="radio"/> Nunca o menos 1 vez al mes<br><input type="radio"/> 1 a 3 veces mes<br><input checked="" type="radio"/> 1 vez semana<br><input type="radio"/> 2 a 4 veces semana<br><input type="radio"/> 5 a 6 veces semana<br><input type="radio"/> 1 vez al día<br><input type="radio"/> 2 a 3 veces al día<br><input type="radio"/> 5 a 6 veces al día<br><input type="radio"/> más 6 veces al día |
| aceite oliva        | <input type="radio"/> Nunca o menos 1 vez al mes<br><input type="radio"/> 1 a 3 veces mes<br><input type="radio"/> 1 vez semana<br><input type="radio"/> 2 a 4 veces semana<br><input type="radio"/> 5 a 6 veces semana<br><input type="radio"/> 1 vez al día<br><input type="radio"/> 2 a 3 veces al día<br><input checked="" type="radio"/> 5 a 6 veces al día<br><input type="radio"/> más 6 veces al día |
| otros aceites       | <input type="radio"/> Nunca o menos 1 vez al mes<br><input checked="" type="radio"/> 1 a 3 veces mes<br><input type="radio"/> 1 vez semana<br><input type="radio"/> 2 a 4 veces semana<br><input type="radio"/> 5 a 6 veces semana<br><input type="radio"/> 1 vez al día<br><input type="radio"/> 2 a 3 veces al día<br><input type="radio"/> 5 a 6 veces al día<br><input type="radio"/> más 6 veces al día |
| margarina           | <input checked="" type="radio"/> Nunca o menos 1 vez al mes<br><input type="radio"/> 1 a 3 veces mes<br><input type="radio"/> 1 vez semana<br><input type="radio"/> 2 a 4 veces semana<br><input type="radio"/> 5 a 6 veces semana<br><input type="radio"/> 1 vez al día<br><input type="radio"/> 2 a 3 veces al día<br><input type="radio"/> 5 a 6 veces al día<br><input type="radio"/> más 6 veces al día |
| mantequilla         | <input checked="" type="radio"/> Nunca o menos 1 vez al mes<br><input type="radio"/> 1 a 3 veces mes<br><input type="radio"/> 1 vez semana<br><input type="radio"/> 2 a 4 veces semana<br><input type="radio"/> 5 a 6 veces semana<br><input type="radio"/> 1 vez al día<br><input type="radio"/> 2 a 3 veces al día<br><input type="radio"/> 5 a 6 veces al día<br><input type="radio"/> más 6 veces al día |
| galletas tipo maria | <input type="radio"/> Nunca o menos 1 vez al mes<br><input type="radio"/> 1 a 3 veces mes<br><input type="radio"/> 1 vez semana<br><input type="radio"/> 2 a 4 veces semana<br><input type="radio"/> 5 a 6 veces semana<br><input checked="" type="radio"/> 1 vez al día<br><input type="radio"/> 2 a 3 veces al día<br><input type="radio"/> 5 a 6 veces al día<br><input type="radio"/> más 6 veces al día |

|                           |                                                                                                                                                                                                                                                                                                                                                                                                              |
|---------------------------|--------------------------------------------------------------------------------------------------------------------------------------------------------------------------------------------------------------------------------------------------------------------------------------------------------------------------------------------------------------------------------------------------------------|
| galletas chocolate        | <input type="radio"/> Nunca o menos 1 vez al mes<br><input type="radio"/> 1 a 3 veces mes<br><input type="radio"/> 1 vez semana<br><input type="radio"/> 2 a 4 veces semana<br><input type="radio"/> 5 a 6 veces semana<br><input type="radio"/> 1 vez al día<br><input type="radio"/> 2 a 3 veces al día<br><input type="radio"/> 5 a 6 veces al día<br><input type="radio"/> más 6 veces al día            |
| bollieria                 | <input checked="" type="radio"/> Nunca o menos 1 vez al mes<br><input type="radio"/> 1 a 3 veces mes<br><input type="radio"/> 1 vez semana<br><input type="radio"/> 2 a 4 veces semana<br><input type="radio"/> 5 a 6 veces semana<br><input type="radio"/> 1 vez al día<br><input type="radio"/> 2 a 3 veces al día<br><input type="radio"/> 5 a 6 veces al día<br><input type="radio"/> más 6 veces al día |
| chocolate o bombones      | <input type="radio"/> Nunca o menos 1 vez al mes<br><input type="radio"/> 1 a 3 veces mes<br><input type="radio"/> 1 vez semana<br><input type="radio"/> 2 a 4 veces semana<br><input type="radio"/> 5 a 6 veces semana<br><input checked="" type="radio"/> 1 vez al día<br><input type="radio"/> 2 a 3 veces al día<br><input type="radio"/> 5 a 6 veces al día<br><input type="radio"/> más 6 veces al día |
| chocolate polvo o colacao | <input type="radio"/> Nunca o menos 1 vez al mes<br><input type="radio"/> 1 a 3 veces mes<br><input type="radio"/> 1 vez semana<br><input type="radio"/> 2 a 4 veces semana<br><input type="radio"/> 5 a 6 veces semana<br><input type="radio"/> 1 vez al día<br><input checked="" type="radio"/> 2 a 3 veces al día<br><input type="radio"/> 5 a 6 veces al día<br><input type="radio"/> más 6 veces al día |
| vino tinto                | <input checked="" type="radio"/> Nunca o menos 1 vez al mes<br><input type="radio"/> 1 a 3 veces mes<br><input type="radio"/> 1 vez semana<br><input type="radio"/> 2 a 4 veces semana<br><input type="radio"/> 5 a 6 veces semana<br><input type="radio"/> 1 vez al día<br><input type="radio"/> 2 a 3 veces al día<br><input type="radio"/> 5 a 6 veces al día<br><input type="radio"/> más 6 veces al día |
| vino blanco               | <input checked="" type="radio"/> Nunca o menos 1 vez al mes<br><input type="radio"/> 1 a 3 veces mes<br><input type="radio"/> 1 vez semana<br><input type="radio"/> 2 a 4 veces semana<br><input type="radio"/> 5 a 6 veces semana<br><input type="radio"/> 1 vez al día<br><input type="radio"/> 2 a 3 veces al día<br><input type="radio"/> 5 a 6 veces al día<br><input type="radio"/> más 6 veces al día |

|                       |                                                                                                                                                                                                                                                                                                                                                                                                              |
|-----------------------|--------------------------------------------------------------------------------------------------------------------------------------------------------------------------------------------------------------------------------------------------------------------------------------------------------------------------------------------------------------------------------------------------------------|
| vino seco o vermut    | <input checked="" type="radio"/> Nunca o menos 1 vez al mes<br><input type="radio"/> 1 a 3 veces mes<br><input type="radio"/> 1 vez semana<br><input type="radio"/> 2 a 4 veces semana<br><input type="radio"/> 5 a 6 veces semana<br><input type="radio"/> 1 vez al día<br><input type="radio"/> 2 a 3 veces al día<br><input type="radio"/> 5 a 6 veces al día<br><input type="radio"/> más 6 veces al día |
| cerveza               | <input checked="" type="radio"/> Nunca o menos 1 vez al mes<br><input type="radio"/> 1 a 3 veces mes<br><input type="radio"/> 1 vez semana<br><input type="radio"/> 2 a 4 veces semana<br><input type="radio"/> 5 a 6 veces semana<br><input type="radio"/> 1 vez al día<br><input type="radio"/> 2 a 3 veces al día<br><input type="radio"/> 5 a 6 veces al día<br><input type="radio"/> más 6 veces al día |
| cerveza sin alcohol   | <input checked="" type="radio"/> Nunca o menos 1 vez al mes<br><input type="radio"/> 1 a 3 veces mes<br><input type="radio"/> 1 vez semana<br><input type="radio"/> 2 a 4 veces semana<br><input type="radio"/> 5 a 6 veces semana<br><input type="radio"/> 1 vez al día<br><input type="radio"/> 2 a 3 veces al día<br><input type="radio"/> 5 a 6 veces al día<br><input type="radio"/> más 6 veces al día |
| licores               | <input checked="" type="radio"/> Nunca o menos 1 vez al mes<br><input type="radio"/> 1 a 3 veces mes<br><input type="radio"/> 1 vez semana<br><input type="radio"/> 2 a 4 veces semana<br><input type="radio"/> 5 a 6 veces semana<br><input type="radio"/> 1 vez al día<br><input type="radio"/> 2 a 3 veces al día<br><input type="radio"/> 5 a 6 veces al día<br><input type="radio"/> más 6 veces al día |
| ginebra o ron o vodka | <input checked="" type="radio"/> Nunca o menos 1 vez al mes<br><input type="radio"/> 1 a 3 veces mes<br><input type="radio"/> 1 vez semana<br><input type="radio"/> 2 a 4 veces semana<br><input type="radio"/> 5 a 6 veces semana<br><input type="radio"/> 1 vez al día<br><input type="radio"/> 2 a 3 veces al día<br><input type="radio"/> 5 a 6 veces al día<br><input type="radio"/> más 6 veces al día |
| refresco normal       | <input checked="" type="radio"/> Nunca o menos 1 vez al mes<br><input type="radio"/> 1 a 3 veces mes<br><input type="radio"/> 1 vez semana<br><input type="radio"/> 2 a 4 veces semana<br><input type="radio"/> 5 a 6 veces semana<br><input type="radio"/> 1 vez al día<br><input type="radio"/> 2 a 3 veces al día<br><input type="radio"/> 5 a 6 veces al día<br><input type="radio"/> más 6 veces al día |

|                          |                                                                                                                                                                                                                                                                                                                                                                                                              |
|--------------------------|--------------------------------------------------------------------------------------------------------------------------------------------------------------------------------------------------------------------------------------------------------------------------------------------------------------------------------------------------------------------------------------------------------------|
| refresco sin azúcar      | <input type="radio"/> Nunca o menos 1 vez al mes<br><input type="radio"/> 1 a 3 veces mes<br><input type="radio"/> 1 vez semana<br><input type="radio"/> 2 a 4 veces semana<br><input type="radio"/> 5 a 6 veces semana<br><input type="radio"/> 1 vez al día<br><input type="radio"/> 2 a 3 veces al día<br><input checked="" type="radio"/> 5 a 6 veces al día<br><input type="radio"/> más 6 veces al día |
| Agua del grifo           | <input checked="" type="radio"/> Nunca o menos 1 vez al mes<br><input type="radio"/> 1 a 3 veces mes<br><input type="radio"/> 1 vez semana<br><input type="radio"/> 2 a 4 veces semana<br><input type="radio"/> 5 a 6 veces semana<br><input type="radio"/> 1 vez al día<br><input type="radio"/> 2 a 3 veces al día<br><input type="radio"/> 5 a 6 veces al día<br><input type="radio"/> más 6 veces al día |
| agua embotellada sin gas | <input type="radio"/> Nunca o menos 1 vez al mes<br><input type="radio"/> 1 a 3 veces mes<br><input type="radio"/> 1 vez semana<br><input type="radio"/> 2 a 4 veces semana<br><input type="radio"/> 5 a 6 veces semana<br><input type="radio"/> 1 vez al día<br><input type="radio"/> 2 a 3 veces al día<br><input type="radio"/> 5 a 6 veces al día<br><input checked="" type="radio"/> más 6 veces al día |
| agua embotellada con gas | <input checked="" type="radio"/> Nunca o menos 1 vez al mes<br><input type="radio"/> 1 a 3 veces mes<br><input type="radio"/> 1 vez semana<br><input type="radio"/> 2 a 4 veces semana<br><input type="radio"/> 5 a 6 veces semana<br><input type="radio"/> 1 vez al día<br><input type="radio"/> 2 a 3 veces al día<br><input type="radio"/> 5 a 6 veces al día<br><input type="radio"/> más 6 veces al día |
| zumو frutas embasado     | <input type="radio"/> Nunca o menos 1 vez al mes<br><input type="radio"/> 1 a 3 veces mes<br><input checked="" type="radio"/> 1 vez semana<br><input type="radio"/> 2 a 4 veces semana<br><input type="radio"/> 5 a 6 veces semana<br><input type="radio"/> 1 vez al día<br><input type="radio"/> 2 a 3 veces al día<br><input type="radio"/> 5 a 6 veces al día<br><input type="radio"/> más 6 veces al día |
| cafe                     | <input checked="" type="radio"/> Nunca o menos 1 vez al mes<br><input type="radio"/> 1 a 3 veces mes<br><input type="radio"/> 1 vez semana<br><input type="radio"/> 2 a 4 veces semana<br><input type="radio"/> 5 a 6 veces semana<br><input type="radio"/> 1 vez al día<br><input type="radio"/> 2 a 3 veces al día<br><input type="radio"/> 5 a 6 veces al día<br><input type="radio"/> más 6 veces al día |

|                       |                                                                                                                                                                                                                                                                                                                                                                                                              |
|-----------------------|--------------------------------------------------------------------------------------------------------------------------------------------------------------------------------------------------------------------------------------------------------------------------------------------------------------------------------------------------------------------------------------------------------------|
| cafe descafeinado     | <input checked="" type="radio"/> Nunca o menos 1 vez al mes<br><input type="radio"/> 1 a 3 veces mes<br><input type="radio"/> 1 vez semana<br><input type="radio"/> 2 a 4 veces semana<br><input type="radio"/> 5 a 6 veces semana<br><input type="radio"/> 1 vez al día<br><input type="radio"/> 2 a 3 veces al día<br><input type="radio"/> 5 a 6 veces al día<br><input type="radio"/> más 6 veces al día |
| te o infusión         | <input checked="" type="radio"/> Nunca o menos 1 vez al mes<br><input type="radio"/> 1 a 3 veces mes<br><input type="radio"/> 1 vez semana<br><input type="radio"/> 2 a 4 veces semana<br><input type="radio"/> 5 a 6 veces semana<br><input type="radio"/> 1 vez al día<br><input type="radio"/> 2 a 3 veces al día<br><input type="radio"/> 5 a 6 veces al día<br><input type="radio"/> más 6 veces al día |
| sopa o puré verduras  | <input type="radio"/> Nunca o menos 1 vez al mes<br><input type="radio"/> 1 a 3 veces mes<br><input checked="" type="radio"/> 1 vez semana<br><input type="radio"/> 2 a 4 veces semana<br><input type="radio"/> 5 a 6 veces semana<br><input type="radio"/> 1 vez al día<br><input type="radio"/> 2 a 3 veces al día<br><input type="radio"/> 5 a 6 veces al día<br><input type="radio"/> más 6 veces al día |
| croquetas pollo jamón | <input checked="" type="radio"/> Nunca o menos 1 vez al mes<br><input type="radio"/> 1 a 3 veces mes<br><input type="radio"/> 1 vez semana<br><input type="radio"/> 2 a 4 veces semana<br><input type="radio"/> 5 a 6 veces semana<br><input type="radio"/> 1 vez al día<br><input type="radio"/> 2 a 3 veces al día<br><input type="radio"/> 5 a 6 veces al día<br><input type="radio"/> más 6 veces al día |
| croquetas pescado     | <input checked="" type="radio"/> Nunca o menos 1 vez al mes<br><input type="radio"/> 1 a 3 veces mes<br><input type="radio"/> 1 vez semana<br><input type="radio"/> 2 a 4 veces semana<br><input type="radio"/> 5 a 6 veces semana<br><input type="radio"/> 1 vez al día<br><input type="radio"/> 2 a 3 veces al día<br><input type="radio"/> 5 a 6 veces al día<br><input type="radio"/> más 6 veces al día |
| mayonesa              | <input type="radio"/> Nunca o menos 1 vez al mes<br><input type="radio"/> 1 a 3 veces mes<br><input type="radio"/> 1 vez semana<br><input type="radio"/> 2 a 4 veces semana<br><input type="radio"/> 5 a 6 veces semana<br><input checked="" type="radio"/> 1 vez al día<br><input type="radio"/> 2 a 3 veces al día<br><input type="radio"/> 5 a 6 veces al día<br><input type="radio"/> más 6 veces al día |

|                  |                                                                                                                                                                                                                                                                                                                                                                                                              |
|------------------|--------------------------------------------------------------------------------------------------------------------------------------------------------------------------------------------------------------------------------------------------------------------------------------------------------------------------------------------------------------------------------------------------------------|
| salsa tomate     | <input type="radio"/> Nunca o menos 1 vez al mes<br><input type="radio"/> 1 a 3 veces mes<br><input checked="" type="radio"/> 1 vez semana<br><input type="radio"/> 2 a 4 veces semana<br><input type="radio"/> 5 a 6 veces semana<br><input type="radio"/> 1 vez al día<br><input type="radio"/> 2 a 3 veces al día<br><input type="radio"/> 5 a 6 veces al día<br><input type="radio"/> más 6 veces al día |
| ketchup          | <input type="radio"/> Nunca o menos 1 vez al mes<br><input type="radio"/> 1 a 3 veces mes<br><input checked="" type="radio"/> 1 vez semana<br><input type="radio"/> 2 a 4 veces semana<br><input type="radio"/> 5 a 6 veces semana<br><input type="radio"/> 1 vez al día<br><input type="radio"/> 2 a 3 veces al día<br><input type="radio"/> 5 a 6 veces al día<br><input type="radio"/> más 6 veces al día |
| sal              | <input type="radio"/> Nunca o menos 1 vez al mes<br><input type="radio"/> 1 a 3 veces mes<br><input type="radio"/> 1 vez semana<br><input type="radio"/> 2 a 4 veces semana<br><input type="radio"/> 5 a 6 veces semana<br><input type="radio"/> 1 vez al día<br><input type="radio"/> 2 a 3 veces al día<br><input checked="" type="radio"/> 5 a 6 veces al día<br><input type="radio"/> más 6 veces al día |
| ajo              | <input checked="" type="radio"/> Nunca o menos 1 vez al mes<br><input type="radio"/> 1 a 3 veces mes<br><input type="radio"/> 1 vez semana<br><input type="radio"/> 2 a 4 veces semana<br><input type="radio"/> 5 a 6 veces semana<br><input type="radio"/> 1 vez al día<br><input type="radio"/> 2 a 3 veces al día<br><input type="radio"/> 5 a 6 veces al día<br><input type="radio"/> más 6 veces al día |
| mermelada o miel | <input type="radio"/> Nunca o menos 1 vez al mes<br><input checked="" type="radio"/> 1 a 3 veces mes<br><input type="radio"/> 1 vez semana<br><input type="radio"/> 2 a 4 veces semana<br><input type="radio"/> 5 a 6 veces semana<br><input type="radio"/> 1 vez al día<br><input type="radio"/> 2 a 3 veces al día<br><input type="radio"/> 5 a 6 veces al día<br><input type="radio"/> más 6 veces al día |
| azúcar           | <input checked="" type="radio"/> Nunca o menos 1 vez al mes<br><input type="radio"/> 1 a 3 veces mes<br><input type="radio"/> 1 vez semana<br><input type="radio"/> 2 a 4 veces semana<br><input type="radio"/> 5 a 6 veces semana<br><input type="radio"/> 1 vez al día<br><input type="radio"/> 2 a 3 veces al día<br><input type="radio"/> 5 a 6 veces al día<br><input type="radio"/> más 6 veces al día |



|                                       |                                                                                                                                                                                                                                                                                                                                                                                                                                                                                                                               |
|---------------------------------------|-------------------------------------------------------------------------------------------------------------------------------------------------------------------------------------------------------------------------------------------------------------------------------------------------------------------------------------------------------------------------------------------------------------------------------------------------------------------------------------------------------------------------------|
| Otro alimento                         | <hr/>                                                                                                                                                                                                                                                                                                                                                                                                                                                                                                                         |
| suplementos vitamínicos               | <input type="radio"/> si<br><input checked="" type="radio"/> no                                                                                                                                                                                                                                                                                                                                                                                                                                                               |
| suplementos vitamínicos               | <hr/>                                                                                                                                                                                                                                                                                                                                                                                                                                                                                                                         |
| dieta previa                          | <input type="radio"/> si<br><input checked="" type="radio"/> no                                                                                                                                                                                                                                                                                                                                                                                                                                                               |
| motivo dieta                          | <input checked="" type="radio"/> no dieta<br><input type="radio"/> control peso<br><input type="radio"/> control colesterol<br><input type="radio"/> control diabetes<br><input type="radio"/> problemas estómago<br><input type="radio"/> problemas vesícula o hepáticos<br><input type="radio"/> HTA o cardiopatía<br><input type="radio"/> problemas renales<br><input type="radio"/> alergia alimentaria<br><input type="radio"/> ácido úrico elevado<br><input type="radio"/> vegetariana<br><input type="radio"/> otros |
| cambio alimentos año previo gestación | <input checked="" type="radio"/> si<br><input type="radio"/> no                                                                                                                                                                                                                                                                                                                                                                                                                                                               |
| cambio lácteos                        | <input type="radio"/> eliminado<br><input type="radio"/> disminuido<br><input type="radio"/> igual<br><input checked="" type="radio"/> aumentado<br><input type="radio"/> no sabe                                                                                                                                                                                                                                                                                                                                             |
| cambio huevos                         | <input type="radio"/> eliminado<br><input type="radio"/> disminuido<br><input checked="" type="radio"/> igual<br><input type="radio"/> aumentado<br><input type="radio"/> no sabe                                                                                                                                                                                                                                                                                                                                             |
| cambio carne                          | <input type="radio"/> eliminado<br><input type="radio"/> disminuido<br><input checked="" type="radio"/> igual<br><input type="radio"/> aumentado<br><input type="radio"/> no sabe                                                                                                                                                                                                                                                                                                                                             |
| cambio pescado                        | <input type="radio"/> eliminado<br><input type="radio"/> disminuido<br><input checked="" type="radio"/> igual<br><input type="radio"/> aumentado<br><input type="radio"/> no sabe                                                                                                                                                                                                                                                                                                                                             |
| cambio verduras                       | <input type="radio"/> eliminado<br><input type="radio"/> disminuido<br><input checked="" type="radio"/> igual<br><input type="radio"/> aumentado<br><input type="radio"/> no sabe                                                                                                                                                                                                                                                                                                                                             |

|                            |                                                                                                                                                                                                                        |
|----------------------------|------------------------------------------------------------------------------------------------------------------------------------------------------------------------------------------------------------------------|
| cambio legumbres           | <input type="radio"/> eliminado<br><input type="radio"/> disminuido<br><input checked="" type="radio"/> igual<br><input type="radio"/> aumentado<br><input type="radio"/> no sabe                                      |
| cambio fruta               | <input type="radio"/> eliminado<br><input type="radio"/> disminuido<br><input type="radio"/> igual<br><input checked="" type="radio"/> aumentado<br><input type="radio"/> no sabe                                      |
| cambio pan                 | <input type="radio"/> eliminado<br><input type="radio"/> disminuido<br><input checked="" type="radio"/> igual<br><input type="radio"/> aumentado<br><input type="radio"/> no sabe                                      |
| cambio aceite oliva        | <input type="radio"/> eliminado<br><input type="radio"/> disminuido<br><input checked="" type="radio"/> igual<br><input type="radio"/> aumentado<br><input type="radio"/> no sabe                                      |
| cambio mante o margarina   | <input type="radio"/> eliminado<br><input type="radio"/> disminuido<br><input checked="" type="radio"/> igual<br><input type="radio"/> aumentado<br><input type="radio"/> no sabe                                      |
| cambio azúcar y dulces     | <input type="radio"/> eliminado<br><input type="radio"/> disminuido<br><input type="radio"/> igual<br><input checked="" type="radio"/> aumentado<br><input type="radio"/> no sabe                                      |
| cambio bebidas alcohólicas | <input checked="" type="radio"/> eliminado<br><input type="radio"/> disminuido<br><input type="radio"/> igual<br><input type="radio"/> aumentado<br><input type="radio"/> no sabe                                      |
| frecuencia comidas fritas  | <input type="radio"/> a diario<br><input type="radio"/> 5 a 6 veces semana<br><input type="radio"/> 2 a 4 veces semana<br><input checked="" type="radio"/> 1 vez semana<br><input type="radio"/> menos de 1 vez semana |
| carne                      | <input type="radio"/> no como<br><input type="radio"/> cruda<br><input type="radio"/> poco hecha<br><input type="radio"/> hecha<br><input checked="" type="radio"/> muy hecha                                          |
| grasa visible carne        | <input checked="" type="radio"/> quita toda<br><input type="radio"/> quita mayoría<br><input type="radio"/> quita un poco<br><input type="radio"/> no quita nada                                                       |

|                                |                                                                                                                                                                                                                                                          |
|--------------------------------|----------------------------------------------------------------------------------------------------------------------------------------------------------------------------------------------------------------------------------------------------------|
| cocina carne                   | <input checked="" type="radio"/> a la plancha<br><input type="radio"/> a la parrilla<br><input type="radio"/> asada<br><input type="radio"/> frita<br><input type="radio"/> guisada                                                                      |
| tostado quemado carne          | <input checked="" type="radio"/> nunca<br><input type="radio"/> 1 vez mes<br><input type="radio"/> 2 a 3 veces mes<br><input type="radio"/> 1 vez semana<br><input type="radio"/> 2 a 3 semanas                                                          |
| tostado quemado pescado        | <input checked="" type="radio"/> nunca<br><input type="radio"/> 1 vez mes<br><input type="radio"/> 2 a 3 veces mes<br><input type="radio"/> 1 vez semana<br><input type="radio"/> 2 a 3 semanas                                                          |
| socarrat paella                | <input checked="" type="radio"/> nunca<br><input type="radio"/> 1 vez mes<br><input type="radio"/> 2 a 3 veces mes<br><input type="radio"/> 1 vez semana<br><input type="radio"/> 2 a 3 semanas                                                          |
| grasa o aceite cocinar         | <input type="radio"/> mantequilla<br><input type="radio"/> margarina<br><input type="radio"/> aceite oliva<br><input checked="" type="radio"/> aceite oliva virgen extra<br><input type="radio"/> aceite vegetal<br><input type="radio"/> mezcla aceites |
| grasa aceite aliñar            | <input type="radio"/> mantequilla<br><input type="radio"/> margarina<br><input type="radio"/> aceite oliva<br><input checked="" type="radio"/> aceite oliva virgen extra<br><input type="radio"/> aceite vegetal<br><input type="radio"/> mezcla aceites |
| grasa aceite freir             | <input type="radio"/> mantequilla<br><input type="radio"/> margarina<br><input type="radio"/> aceite oliva<br><input checked="" type="radio"/> aceite oliva virgen extra<br><input type="radio"/> aceite vegetal<br><input type="radio"/> mezcla aceites |
| Ejercicio cuestionario         | <input checked="" type="radio"/> si<br><input type="radio"/> no                                                                                                                                                                                          |
| horas de sueño incluido siesta | [*DATA REMOVED*]                                                                                                                                                                                                                                         |
| minutos siesta                 | [*DATA REMOVED*]                                                                                                                                                                                                                                         |
| horas televisión semana        | [*DATA REMOVED*]                                                                                                                                                                                                                                         |

|                                        |                                                                                                                                                                                                                                                                                                                                                                           |
|----------------------------------------|---------------------------------------------------------------------------------------------------------------------------------------------------------------------------------------------------------------------------------------------------------------------------------------------------------------------------------------------------------------------------|
| actividad trabajo                      | <input type="radio"/> casi siempre sentado<br><input checked="" type="radio"/> sentado 50 por cien<br><input type="radio"/> casi siempre de pie, quieto<br><input type="radio"/> casi siempre levantado caminando y llevando pocas cosas<br><input type="radio"/> casi siempre levantado, caminando y llevado muchas cosas<br><input type="radio"/> trabajo manual pesado |
| tiempo caminar o bici al día           | <input type="radio"/> casi nunca<br><input type="radio"/> menos 20min día<br><input type="radio"/> 20 a 40 min día<br><input checked="" type="radio"/> 40 a 60 min día<br><input type="radio"/> 1h o 1h y media día<br><input type="radio"/> más de 1h y media al día                                                                                                     |
| tiempo tareas casa al día              | <input type="radio"/> menos de 1h día<br><input checked="" type="radio"/> 1 a 2h día<br><input type="radio"/> 3 a 4h día<br><input type="radio"/> 5 a 6h día<br><input type="radio"/> 7 a 8h día<br><input type="radio"/> más de 8h día                                                                                                                                   |
| tiempo libre televisión ordenador leer | <input type="radio"/> menos 1h día<br><input type="radio"/> 1h día<br><input type="radio"/> 2h día<br><input type="radio"/> 3h día<br><input checked="" type="radio"/> 4h día<br><input type="radio"/> 5 a 6h día<br><input type="radio"/> mas 6h día                                                                                                                     |
| tiempo libre ejercicio o deporte       | <input type="radio"/> menos 1h semana<br><input checked="" type="radio"/> 1h semana<br><input type="radio"/> 2h semana<br><input type="radio"/> 3h semana<br><input type="radio"/> 4 a 5h semana<br><input type="radio"/> mas 5h semana                                                                                                                                   |
| como se considera                      | <input type="radio"/> sedentaria<br><input checked="" type="radio"/> poco activa<br><input type="radio"/> moderadamente activa<br><input type="radio"/> bastante activa<br><input type="radio"/> muy activa<br><input type="radio"/> no sabe                                                                                                                              |
| FUR                                    | [*DATA REMOVED*]                                                                                                                                                                                                                                                                                                                                                          |
| Semanas gestación 2T                   | [*DATA REMOVED*]                                                                                                                                                                                                                                                                                                                                                          |
| Días gestación 2T                      | [*DATA REMOVED*]                                                                                                                                                                                                                                                                                                                                                          |
| DBP 2T                                 | [*DATA REMOVED*]                                                                                                                                                                                                                                                                                                                                                          |
| CC 2T                                  | [*DATA REMOVED*]                                                                                                                                                                                                                                                                                                                                                          |
| AC 2T                                  | [*DATA REMOVED*]                                                                                                                                                                                                                                                                                                                                                          |

|                                                   |                                                                                                                                                                                                 |
|---------------------------------------------------|-------------------------------------------------------------------------------------------------------------------------------------------------------------------------------------------------|
| LF 2T                                             | [*DATA REMOVED*]                                                                                                                                                                                |
| PFE 2T (Hadlock)                                  | [*DATA REMOVED*]                                                                                                                                                                                |
| Semanas gestación 3T                              | [*DATA REMOVED*]                                                                                                                                                                                |
| días 3T                                           | [*DATA REMOVED*]                                                                                                                                                                                |
| DBP 3T                                            | [*DATA REMOVED*]                                                                                                                                                                                |
| CC 3T                                             | [*DATA REMOVED*]                                                                                                                                                                                |
| AC 3T                                             | [*DATA REMOVED*]                                                                                                                                                                                |
| LF 3T                                             | [*DATA REMOVED*]                                                                                                                                                                                |
| PFE 3T (Hadlock)                                  | [*DATA REMOVED*]                                                                                                                                                                                |
| Semanas de gestación final                        | [*DATA REMOVED*]                                                                                                                                                                                |
| días gestación final                              | [*DATA REMOVED*]                                                                                                                                                                                |
| Localización placenta                             | <input type="radio"/> anterior<br><input type="radio"/> lateral derecha<br><input type="radio"/> lateral izquierda<br><input type="radio"/> posterior<br><input checked="" type="radio"/> fondo |
| Presentación longitudinal cefálica                | <input type="radio"/> no<br><input checked="" type="radio"/> si                                                                                                                                 |
| Dorso                                             | <input checked="" type="radio"/> izquierda anterior<br><input type="radio"/> izquierda posterior<br><input type="radio"/> derecha anterior<br><input type="radio"/> derecha posterior           |
| diámetro biparietal                               | [*DATA REMOVED*]                                                                                                                                                                                |
| Circunferencia craneal                            | [*DATA REMOVED*]                                                                                                                                                                                |
| Circunferencia abdominal                          | [*DATA REMOVED*]                                                                                                                                                                                |
| Longitud de femur                                 | [*DATA REMOVED*]                                                                                                                                                                                |
| tejido celular subcutáneo a nivel del muslo en mm | [*DATA REMOVED*]                                                                                                                                                                                |
| tejido celular subcutáneo en abdomen en mm        | [*DATA REMOVED*]                                                                                                                                                                                |
| Volumen del muslo en cm3                          | [*DATA REMOVED*]                                                                                                                                                                                |
| Peso fetal estimado según fórmula de Hadlock      | [*DATA REMOVED*]                                                                                                                                                                                |

|                                               |                                                                                                                                                          |
|-----------------------------------------------|----------------------------------------------------------------------------------------------------------------------------------------------------------|
| Percentil                                     | [*DATA REMOVED*]                                                                                                                                         |
| Peso fetal estimado según fórmula de Scioscia | <hr/>                                                                                                                                                    |
| Peso fetal estimado según fórmula de LEE      | <hr/>                                                                                                                                                    |
| Tipo de parto                                 | <input type="radio"/> eutocico<br><input type="radio"/> instrumentado/ventosa<br><input checked="" type="radio"/> cesarea                                |
| fecha de nacimiento                           | [*DATA REMOVED*]                                                                                                                                         |
| Días entre exploración y nacimiento           | [*DATA REMOVED*]                                                                                                                                         |
| Peso RN en g                                  | [*DATA REMOVED*]                                                                                                                                         |
| sexo                                          | <input checked="" type="radio"/> mujer<br><input type="radio"/> hombre                                                                                   |
| Apgar 1 minuto                                | [*DATA REMOVED*]                                                                                                                                         |
| Apgar 5 minutos                               | [*DATA REMOVED*]                                                                                                                                         |
| Apgar 10 minutos                              | <hr/>                                                                                                                                                    |
| antecedente Covid durante gestación           | <input type="radio"/> Yes<br><input checked="" type="radio"/> No                                                                                         |
| Nivel de estudios                             | <input type="radio"/> ninguno<br><input type="radio"/> primarios<br><input checked="" type="radio"/> secundarios<br><input type="radio"/> universitarios |

# Base\_datos\_estimacion\_peso\_fetal

|                                       |                                                                                                                                                                                                                                                                                      |
|---------------------------------------|--------------------------------------------------------------------------------------------------------------------------------------------------------------------------------------------------------------------------------------------------------------------------------------|
| Número de identificación participante | 83                                                                                                                                                                                                                                                                                   |
| CODIGO PARTICIPANTE                   |                                                                                                                                                                                                                                                                                      |
| Edad                                  | [*DATA REMOVED*]                                                                                                                                                                                                                                                                     |
| Gestaciones                           | <input checked="" type="radio"/> 1<br><input type="radio"/> 2<br><input type="radio"/> 3<br><input type="radio"/> mas de 3                                                                                                                                                           |
| partos                                | <input checked="" type="radio"/> 0<br><input type="radio"/> 1<br><input type="radio"/> 2<br><input type="radio"/> 3<br><input type="radio"/> mas de 3                                                                                                                                |
| cesáreas                              | <input checked="" type="radio"/> 0<br><input type="radio"/> 1<br><input type="radio"/> 2<br><input type="radio"/> 3<br><input type="radio"/> mas de 3                                                                                                                                |
| Abortos                               | <input checked="" type="radio"/> 0<br><input type="radio"/> 1<br><input type="radio"/> 2<br><input type="radio"/> 3<br><input type="radio"/> mas de 3                                                                                                                                |
| Tipo de gestacion                     | <input checked="" type="radio"/> espontanea<br><input type="radio"/> IAC inseminación artificial conyuge<br><input type="radio"/> IAD inseminación artificial donante<br><input type="radio"/> FIV Fecundación in Vitro<br><input type="radio"/> Ovodon FIV con donación de ovocitos |
| peso previo a embarazo                | [*DATA REMOVED*]                                                                                                                                                                                                                                                                     |
| Ganancia ponderal embarazo            |                                                                                                                                                                                                                                                                                      |
| Talla madre                           | [*DATA REMOVED*]                                                                                                                                                                                                                                                                     |
| IMC previo embarazo                   | 19.841269841269845                                                                                                                                                                                                                                                                   |
| Patología obstétrica                  | <input checked="" type="radio"/> no<br><input type="radio"/> si                                                                                                                                                                                                                      |
| Diabetes pregestacional               | <input checked="" type="radio"/> no<br><input type="radio"/> si                                                                                                                                                                                                                      |
| Diabetes gestacional                  | <input checked="" type="radio"/> no<br><input type="radio"/> si                                                                                                                                                                                                                      |

|                                            |                                                                                                                                                                                      |
|--------------------------------------------|--------------------------------------------------------------------------------------------------------------------------------------------------------------------------------------|
| Diabetes gestacional con insulina          | <input checked="" type="radio"/> no<br><input type="radio"/> si                                                                                                                      |
| Diabetes gestacional con dieta y ejercicio | <input checked="" type="radio"/> no<br><input type="radio"/> si                                                                                                                      |
| Percentil fetos previos                    | <input checked="" type="radio"/> Nada<br><input type="radio"/> percentil menor de 10<br><input type="radio"/> percentil entre 10 y 90<br><input type="radio"/> percentil mayor de 90 |
| Exfumadora                                 | <input checked="" type="radio"/> Nada<br><input type="radio"/> menos de 5 años<br><input type="radio"/> 5 a 10 años<br><input type="radio"/> mayor o igual a 10 años                 |
| Hábito tabáquico                           | <input checked="" type="radio"/> no<br><input type="radio"/> si                                                                                                                      |
| fumadora                                   | [*DATA REMOVED*]                                                                                                                                                                     |
| Consumo otros tóxicos                      | <input checked="" type="radio"/> no<br><input type="radio"/> si                                                                                                                      |
| Hb 1T                                      | _____                                                                                                                                                                                |
| Htc 1T                                     | _____                                                                                                                                                                                |
| Hb 2T                                      | _____                                                                                                                                                                                |
| HTC 2T                                     | _____                                                                                                                                                                                |
| Hb 3T                                      | _____                                                                                                                                                                                |
| HTC 3T                                     | _____                                                                                                                                                                                |
| Suplemento FE oral                         | <input type="radio"/> si<br><input checked="" type="radio"/> no                                                                                                                      |
| Suplemento fe iv                           | <input type="radio"/> si<br><input checked="" type="radio"/> no                                                                                                                      |
| Transfusión                                | <input checked="" type="radio"/> no<br><input type="radio"/> si                                                                                                                      |
| Solicitada Vit D                           | <input checked="" type="radio"/> no<br><input type="radio"/> si                                                                                                                      |



|                       |                                                                                                                                                                                                                                                                                                                                                                                                              |
|-----------------------|--------------------------------------------------------------------------------------------------------------------------------------------------------------------------------------------------------------------------------------------------------------------------------------------------------------------------------------------------------------------------------------------------------------|
| Deficit vit D         | <input type="radio"/> no<br><input type="radio"/> si                                                                                                                                                                                                                                                                                                                                                         |
| Suplemento vit D      | <input type="radio"/> si<br><input type="radio"/> no                                                                                                                                                                                                                                                                                                                                                         |
| Dieta, cuestionario   | <input checked="" type="radio"/> si<br><input type="radio"/> no                                                                                                                                                                                                                                                                                                                                              |
| Leche entera          | <input checked="" type="radio"/> Nunca o menos 1 vez al mes<br><input type="radio"/> 1 a 3 veces mes<br><input type="radio"/> 1 vez semana<br><input type="radio"/> 2 a 4 veces semana<br><input type="radio"/> 5 a 6 veces semana<br><input type="radio"/> 1 vez al día<br><input type="radio"/> 2 a 3 veces al día<br><input type="radio"/> 5 a 6 veces al día<br><input type="radio"/> más 6 veces al día |
| Leche semidesnatada   | <input checked="" type="radio"/> Nunca o menos 1 vez al mes<br><input type="radio"/> 1 a 3 veces mes<br><input type="radio"/> 1 vez semana<br><input type="radio"/> 2 a 4 veces semana<br><input type="radio"/> 5 a 6 veces semana<br><input type="radio"/> 1 vez al día<br><input type="radio"/> 2 a 3 veces al día<br><input type="radio"/> 5 a 6 veces al día<br><input type="radio"/> mas 6 veces al día |
| Leche desnatada       | <input checked="" type="radio"/> Nunca o menos 1 vez al mes<br><input type="radio"/> 1 a 3 veces mes<br><input type="radio"/> 1 vez semana<br><input type="radio"/> 2 a 4 veces semana<br><input type="radio"/> 5 a 6 veces semana<br><input type="radio"/> 1 vez al día<br><input type="radio"/> 2 a 3 veces al día<br><input type="radio"/> 5 a 6 veces al día<br><input type="radio"/> más 6 veces al día |
| Leche condensada      | <input checked="" type="radio"/> Nunca o menos 1 vez al mes<br><input type="radio"/> 1 a 3 veces mes<br><input type="radio"/> 1 vez semana<br><input type="radio"/> 2 a 4 veces semana<br><input type="radio"/> 5 a 6 veces semana<br><input type="radio"/> 1 vez al día<br><input type="radio"/> 2 a 3 veces al día<br><input type="radio"/> 5 a 6 veces al día<br><input type="radio"/> más 6 veces al día |
| nata o crema de leche | <input checked="" type="radio"/> Nunca o menos 1 vez al mes<br><input type="radio"/> 1 a 3 veces mes<br><input type="radio"/> 1 vez semana<br><input type="radio"/> 2 a 4 veces semana<br><input type="radio"/> 5 a 6 veces semana<br><input type="radio"/> 1 vez al día<br><input type="radio"/> 2 a 3 veces al día<br><input type="radio"/> 5 a 6 veces al día<br><input type="radio"/> más 6 veces al día |

|                                             |                                                                                                                                                                                                                                                                                                                                                                                                              |
|---------------------------------------------|--------------------------------------------------------------------------------------------------------------------------------------------------------------------------------------------------------------------------------------------------------------------------------------------------------------------------------------------------------------------------------------------------------------|
| Yogurt Entero                               | <input checked="" type="radio"/> Nunca o menos 1 vez al mes<br><input type="radio"/> 1 a 3 veces mes<br><input type="radio"/> 1 vez semana<br><input type="radio"/> 2 a 4 veces semana<br><input type="radio"/> 5 a 6 veces semana<br><input type="radio"/> 1 vez al día<br><input type="radio"/> 2 a 3 veces al día<br><input type="radio"/> 5 a 6 veces al día<br><input type="radio"/> más 6 veces al día |
| Yogurt desnatado                            | <input checked="" type="radio"/> Nunca o menos 1 vez al mes<br><input type="radio"/> 1 a 3 veces mes<br><input type="radio"/> 1 vez semana<br><input type="radio"/> 2 a 4 veces semana<br><input type="radio"/> 5 a 6 veces semana<br><input type="radio"/> 1 vez al día<br><input type="radio"/> 2 a 3 veces al día<br><input type="radio"/> 5 a 6 veces al día<br><input type="radio"/> más 6 veces al día |
| 100g requesón o queso blando o queso fresco | <input checked="" type="radio"/> Nunca o menos 1 vez al mes<br><input type="radio"/> 1 a 3 veces mes<br><input type="radio"/> 1 vez semana<br><input type="radio"/> 2 a 4 veces semana<br><input type="radio"/> 5 a 6 veces semana<br><input type="radio"/> 1 vez al día<br><input type="radio"/> 2 a 3 veces al día<br><input type="radio"/> 5 a 6 veces al día<br><input type="radio"/> más 6 veces al día |
| queso curado o semicurado o cremoso         | <input checked="" type="radio"/> Nunca o menos 1 vez al mes<br><input type="radio"/> 1 a 3 veces mes<br><input type="radio"/> 1 vez semana<br><input type="radio"/> 2 a 4 veces semana<br><input type="radio"/> 5 a 6 veces semana<br><input type="radio"/> 1 vez al día<br><input type="radio"/> 2 a 3 veces al día<br><input type="radio"/> 5 a 6 veces al día<br><input type="radio"/> más 6 veces al día |
| natillas flan pudding                       | <input checked="" type="radio"/> Nunca o menos 1 vez al mes<br><input type="radio"/> 1 a 3 veces mes<br><input type="radio"/> 1 vez semana<br><input type="radio"/> 2 a 4 veces semana<br><input type="radio"/> 5 a 6 veces semana<br><input type="radio"/> 1 vez al día<br><input type="radio"/> 2 a 3 veces al día<br><input type="radio"/> 5 a 6 veces al día<br><input type="radio"/> más 6 veces al día |
| Helado                                      | <input type="radio"/> Nunca o menos 1 vez al mes<br><input type="radio"/> 1 a 3 veces mes<br><input type="radio"/> 1 vez semana<br><input type="radio"/> 2 a 4 veces semana<br><input type="radio"/> 5 a 6 veces semana<br><input checked="" type="radio"/> 1 vez al día<br><input type="radio"/> 2 a 3 veces al día<br><input type="radio"/> 5 a 6 veces al día<br><input type="radio"/> más 6 veces al día |

|                                      |                                                                                                                                                                                                                                                                                                                                                                                                              |
|--------------------------------------|--------------------------------------------------------------------------------------------------------------------------------------------------------------------------------------------------------------------------------------------------------------------------------------------------------------------------------------------------------------------------------------------------------------|
| huevo                                | <input type="radio"/> Nunca o menos 1 vez al mes<br><input type="radio"/> 1 a 3 veces mes<br><input checked="" type="radio"/> 1 vez semana<br><input type="radio"/> 2 a 4 veces semana<br><input type="radio"/> 5 a 6 veces semana<br><input type="radio"/> 1 vez al día<br><input type="radio"/> 2 a 3 veces al día<br><input type="radio"/> 5 a 6 veces al día<br><input type="radio"/> más 6 veces al día |
| Pollo con piel                       | <input checked="" type="radio"/> Nunca o menos 1 vez al mes<br><input type="radio"/> 1 a 3 veces mes<br><input type="radio"/> 1 vez semana<br><input type="radio"/> 2 a 4 veces semana<br><input type="radio"/> 5 a 6 veces semana<br><input type="radio"/> 1 vez al día<br><input type="radio"/> 2 a 3 veces al día<br><input type="radio"/> 5 a 6 veces al día<br><input type="radio"/> más 6 veces al día |
| pollo sin piel                       | <input checked="" type="radio"/> Nunca o menos 1 vez al mes<br><input type="radio"/> 1 a 3 veces mes<br><input type="radio"/> 1 vez semana<br><input type="radio"/> 2 a 4 veces semana<br><input type="radio"/> 5 a 6 veces semana<br><input type="radio"/> 1 vez al día<br><input type="radio"/> 2 a 3 veces al día<br><input type="radio"/> 5 a 6 veces al día<br><input type="radio"/> más 6 veces al día |
| Ternera o cerdo o cordero            | <input checked="" type="radio"/> Nunca o menos 1 vez al mes<br><input type="radio"/> 1 a 3 veces mes<br><input type="radio"/> 1 vez semana<br><input type="radio"/> 2 a 4 veces semana<br><input type="radio"/> 5 a 6 veces semana<br><input type="radio"/> 1 vez al día<br><input type="radio"/> 2 a 3 veces al día<br><input type="radio"/> 5 a 6 veces al día<br><input type="radio"/> más 6 veces al día |
| carne caza: Conejo o codorniz o pato | <input checked="" type="radio"/> Nunca o menos 1 vez al mes<br><input type="radio"/> 1 a 3 veces mes<br><input type="radio"/> 1 vez semana<br><input type="radio"/> 2 a 4 veces semana<br><input type="radio"/> 5 a 6 veces semana<br><input type="radio"/> 1 vez al día<br><input type="radio"/> 2 a 3 veces al día<br><input type="radio"/> 5 a 6 veces al día<br><input type="radio"/> más 6 veces al día |
| Hígado de ternera o cerdo o pollo    | <input checked="" type="radio"/> Nunca o menos 1 vez al mes<br><input type="radio"/> 1 a 3 veces mes<br><input type="radio"/> 1 vez semana<br><input type="radio"/> 2 a 4 veces semana<br><input type="radio"/> 5 a 6 veces semana<br><input type="radio"/> 1 vez al día<br><input type="radio"/> 2 a 3 veces al día<br><input type="radio"/> 5 a 6 veces al día<br><input type="radio"/> más 6 veces al día |

|                     |                                                                                                                                                                                                                                                                                                                                                                                                              |
|---------------------|--------------------------------------------------------------------------------------------------------------------------------------------------------------------------------------------------------------------------------------------------------------------------------------------------------------------------------------------------------------------------------------------------------------|
| Vísceras            | <input checked="" type="radio"/> Nunca o menos 1 vez al mes<br><input type="radio"/> 1 a 3 veces mes<br><input type="radio"/> 1 vez semana<br><input type="radio"/> 2 a 4 veces semana<br><input type="radio"/> 5 a 6 veces semana<br><input type="radio"/> 1 vez al día<br><input type="radio"/> 2 a 3 veces al día<br><input type="radio"/> 5 a 6 veces al día<br><input type="radio"/> más 6 veces al día |
| Embutido            | <input checked="" type="radio"/> Nunca o menos 1 vez al mes<br><input type="radio"/> 1 a 3 veces mes<br><input type="radio"/> 1 vez semana<br><input type="radio"/> 2 a 4 veces semana<br><input type="radio"/> 5 a 6 veces semana<br><input type="radio"/> 1 vez al día<br><input type="radio"/> 2 a 3 veces al día<br><input type="radio"/> 5 a 6 veces al día<br><input type="radio"/> más 6 veces al día |
| Salchicha o similar | <input checked="" type="radio"/> Nunca o menos 1 vez al mes<br><input type="radio"/> 1 a 3 veces mes<br><input type="radio"/> 1 vez semana<br><input type="radio"/> 2 a 4 veces semana<br><input type="radio"/> 5 a 6 veces semana<br><input type="radio"/> 1 vez al día<br><input type="radio"/> 2 a 3 veces al día<br><input type="radio"/> 5 a 6 veces al día<br><input type="radio"/> más 6 veces al día |
| Pate o foiegras     | <input checked="" type="radio"/> Nunca o menos 1 vez al mes<br><input type="radio"/> 1 a 3 veces mes<br><input type="radio"/> 1 vez semana<br><input type="radio"/> 2 a 4 veces semana<br><input type="radio"/> 5 a 6 veces semana<br><input type="radio"/> 1 vez al día<br><input type="radio"/> 2 a 3 veces al día<br><input type="radio"/> 5 a 6 veces al día<br><input type="radio"/> más 6 veces al día |
| Hamburguesa         | <input checked="" type="radio"/> Nunca o menos 1 vez al mes<br><input type="radio"/> 1 a 3 veces mes<br><input type="radio"/> 1 vez semana<br><input type="radio"/> 2 a 4 veces semana<br><input type="radio"/> 5 a 6 veces semana<br><input type="radio"/> 1 vez al día<br><input type="radio"/> 2 a 3 veces al día<br><input type="radio"/> 5 a 6 veces al día<br><input type="radio"/> más 6 veces al día |
| tocino o bacon      | <input checked="" type="radio"/> Nunca o menos 1 vez al mes<br><input type="radio"/> 1 a 3 veces mes<br><input type="radio"/> 1 vez semana<br><input type="radio"/> 2 a 4 veces semana<br><input type="radio"/> 5 a 6 veces semana<br><input type="radio"/> 1 vez al día<br><input type="radio"/> 2 a 3 veces al día<br><input type="radio"/> 5 a 6 veces al día<br><input type="radio"/> más 6 veces al día |

---

|               |                                                                                                                                                                                                                                                                                                                                                                                                              |
|---------------|--------------------------------------------------------------------------------------------------------------------------------------------------------------------------------------------------------------------------------------------------------------------------------------------------------------------------------------------------------------------------------------------------------------|
| Pescado frito | <input checked="" type="radio"/> Nunca o menos 1 vez al mes<br><input type="radio"/> 1 a 3 veces mes<br><input type="radio"/> 1 vez semana<br><input type="radio"/> 2 a 4 veces semana<br><input type="radio"/> 5 a 6 veces semana<br><input type="radio"/> 1 vez al día<br><input type="radio"/> 2 a 3 veces al día<br><input type="radio"/> 5 a 6 veces al día<br><input type="radio"/> más 6 veces al día |
|---------------|--------------------------------------------------------------------------------------------------------------------------------------------------------------------------------------------------------------------------------------------------------------------------------------------------------------------------------------------------------------------------------------------------------------|

---

|                        |                                                                                                                                                                                                                                                                                                                                                                                                              |
|------------------------|--------------------------------------------------------------------------------------------------------------------------------------------------------------------------------------------------------------------------------------------------------------------------------------------------------------------------------------------------------------------------------------------------------------|
| pescado hervido blanco | <input checked="" type="radio"/> Nunca o menos 1 vez al mes<br><input type="radio"/> 1 a 3 veces mes<br><input type="radio"/> 1 vez semana<br><input type="radio"/> 2 a 4 veces semana<br><input type="radio"/> 5 a 6 veces semana<br><input type="radio"/> 1 vez al día<br><input type="radio"/> 2 a 3 veces al día<br><input type="radio"/> 5 a 6 veces al día<br><input type="radio"/> más 6 veces al día |
|------------------------|--------------------------------------------------------------------------------------------------------------------------------------------------------------------------------------------------------------------------------------------------------------------------------------------------------------------------------------------------------------------------------------------------------------|

---

|                      |                                                                                                                                                                                                                                                                                                                                                                                                              |
|----------------------|--------------------------------------------------------------------------------------------------------------------------------------------------------------------------------------------------------------------------------------------------------------------------------------------------------------------------------------------------------------------------------------------------------------|
| pescado hervido azul | <input checked="" type="radio"/> Nunca o menos 1 vez al mes<br><input type="radio"/> 1 a 3 veces mes<br><input type="radio"/> 1 vez semana<br><input type="radio"/> 2 a 4 veces semana<br><input type="radio"/> 5 a 6 veces semana<br><input type="radio"/> 1 vez al día<br><input type="radio"/> 2 a 3 veces al día<br><input type="radio"/> 5 a 6 veces al día<br><input type="radio"/> más 6 veces al día |
|----------------------|--------------------------------------------------------------------------------------------------------------------------------------------------------------------------------------------------------------------------------------------------------------------------------------------------------------------------------------------------------------------------------------------------------------|

---

|                    |                                                                                                                                                                                                                                                                                                                                                                                                              |
|--------------------|--------------------------------------------------------------------------------------------------------------------------------------------------------------------------------------------------------------------------------------------------------------------------------------------------------------------------------------------------------------------------------------------------------------|
| otros pescado azul | <input checked="" type="radio"/> Nunca o menos 1 vez al mes<br><input type="radio"/> 1 a 3 veces mes<br><input type="radio"/> 1 vez semana<br><input type="radio"/> 2 a 4 veces semana<br><input type="radio"/> 5 a 6 veces semana<br><input type="radio"/> 1 vez al día<br><input type="radio"/> 2 a 3 veces al día<br><input type="radio"/> 5 a 6 veces al día<br><input type="radio"/> más 6 veces al día |
|--------------------|--------------------------------------------------------------------------------------------------------------------------------------------------------------------------------------------------------------------------------------------------------------------------------------------------------------------------------------------------------------------------------------------------------------|

---

|               |                                                                                                                                                                                                                                                                                                                                                                                                              |
|---------------|--------------------------------------------------------------------------------------------------------------------------------------------------------------------------------------------------------------------------------------------------------------------------------------------------------------------------------------------------------------------------------------------------------------|
| atun conserva | <input type="radio"/> Nunca o menos 1 vez al mes<br><input checked="" type="radio"/> 1 a 3 veces mes<br><input type="radio"/> 1 vez semana<br><input type="radio"/> 2 a 4 veces semana<br><input type="radio"/> 5 a 6 veces semana<br><input type="radio"/> 1 vez al día<br><input type="radio"/> 2 a 3 veces al día<br><input type="radio"/> 5 a 6 veces al día<br><input type="radio"/> más 6 veces al día |
|---------------|--------------------------------------------------------------------------------------------------------------------------------------------------------------------------------------------------------------------------------------------------------------------------------------------------------------------------------------------------------------------------------------------------------------|

---

|                  |                                                                                                                                                                                                                                                                                                                                                                                                              |
|------------------|--------------------------------------------------------------------------------------------------------------------------------------------------------------------------------------------------------------------------------------------------------------------------------------------------------------------------------------------------------------------------------------------------------------|
| sardina conserva | <input checked="" type="radio"/> Nunca o menos 1 vez al mes<br><input type="radio"/> 1 a 3 veces mes<br><input type="radio"/> 1 vez semana<br><input type="radio"/> 2 a 4 veces semana<br><input type="radio"/> 5 a 6 veces semana<br><input type="radio"/> 1 vez al día<br><input type="radio"/> 2 a 3 veces al día<br><input type="radio"/> 5 a 6 veces al día<br><input type="radio"/> más 6 veces al día |
|------------------|--------------------------------------------------------------------------------------------------------------------------------------------------------------------------------------------------------------------------------------------------------------------------------------------------------------------------------------------------------------------------------------------------------------|

---

|                                         |                                                                                                                                                                                                                                                                                                                                                                                                              |
|-----------------------------------------|--------------------------------------------------------------------------------------------------------------------------------------------------------------------------------------------------------------------------------------------------------------------------------------------------------------------------------------------------------------------------------------------------------------|
| pescado ahumado                         | <input checked="" type="radio"/> Nunca o menos 1 vez al mes<br><input type="radio"/> 1 a 3 veces mes<br><input type="radio"/> 1 vez semana<br><input type="radio"/> 2 a 4 veces semana<br><input type="radio"/> 5 a 6 veces semana<br><input type="radio"/> 1 vez al día<br><input type="radio"/> 2 a 3 veces al día<br><input type="radio"/> 5 a 6 veces al día<br><input type="radio"/> más 6 veces al día |
| almejas o mejillones o ostras unos 100g | <input checked="" type="radio"/> Nunca o menos 1 vez al mes<br><input type="radio"/> 1 a 3 veces mes<br><input type="radio"/> 1 vez semana<br><input type="radio"/> 2 a 4 veces semana<br><input type="radio"/> 5 a 6 veces semana<br><input type="radio"/> 1 vez al día<br><input type="radio"/> 2 a 3 veces al día<br><input type="radio"/> 5 a 6 veces al día<br><input type="radio"/> más 6 veces al día |
| calamar o chipiron o sepia unos 100g    | <input type="radio"/> Nunca o menos 1 vez al mes<br><input checked="" type="radio"/> 1 a 3 veces mes<br><input type="radio"/> 1 vez semana<br><input type="radio"/> 2 a 4 veces semana<br><input type="radio"/> 5 a 6 veces semana<br><input type="radio"/> 1 vez al día<br><input type="radio"/> 2 a 3 veces al día<br><input type="radio"/> 5 a 6 veces al día<br><input type="radio"/> más 6 veces al día |
| marisco unos 100g                       | <input checked="" type="radio"/> Nunca o menos 1 vez al mes<br><input type="radio"/> 1 a 3 veces mes<br><input type="radio"/> 1 vez semana<br><input type="radio"/> 2 a 4 veces semana<br><input type="radio"/> 5 a 6 veces semana<br><input type="radio"/> 1 vez al día<br><input type="radio"/> 2 a 3 veces al día<br><input type="radio"/> 5 a 6 veces al día<br><input type="radio"/> más 6 veces al día |
| Espinacas o acelgas cocinadas           | <input type="radio"/> Nunca o menos 1 vez al mes<br><input type="radio"/> 1 a 3 veces mes<br><input type="radio"/> 1 vez semana<br><input checked="" type="radio"/> 2 a 4 veces semana<br><input type="radio"/> 5 a 6 veces semana<br><input type="radio"/> 1 vez al día<br><input type="radio"/> 2 a 3 veces al día<br><input type="radio"/> 5 a 6 veces al día<br><input type="radio"/> más 6 veces al día |
| Col o coliflor o brocoli cocinado       | <input type="radio"/> Nunca o menos 1 vez al mes<br><input checked="" type="radio"/> 1 a 3 veces mes<br><input type="radio"/> 1 vez semana<br><input type="radio"/> 2 a 4 veces semana<br><input type="radio"/> 5 a 6 veces semana<br><input type="radio"/> 1 vez al día<br><input type="radio"/> 2 a 3 veces al día<br><input type="radio"/> 5 a 6 veces al día<br><input type="radio"/> más 6 veces al día |

---

Lechuga o endivia o escarola

- ☐ Nunca o menos 1 vez al mes  
☐ 1 a 3 veces mes  
☐ 1 vez semana  
☒ 2 a 4 veces semana  
☐ 5 a 6 veces semana  
☐ 1 vez al día  
☐ 2 a 3 veces al día  
☐ 5 a 6 veces al día  
☐ más 6 veces al día

---

tomate ensalada

- ☐ Nunca o menos 1 vez al mes  
☐ 1 a 3 veces mes  
☐ 1 vez semana  
☐ 2 a 4 veces semana  
☐ 5 a 6 veces semana  
☒ 1 vez al día  
☐ 2 a 3 veces al día  
☐ 5 a 6 veces al día  
☐ más 6 veces al día

---

cebolla

- ☐ Nunca o menos 1 vez al mes  
☐ 1 a 3 veces mes  
☐ 1 vez semana  
☒ 2 a 4 veces semana  
☐ 5 a 6 veces semana  
☐ 1 vez al día  
☐ 2 a 3 veces al día  
☐ 5 a 6 veces al día  
☐ más 6 veces al día

---

Zanahoria o calabaza

- ☐ Nunca o menos 1 vez al mes  
☐ 1 a 3 veces mes  
☐ 1 vez semana  
☒ 2 a 4 veces semana  
☐ 5 a 6 veces semana  
☐ 1 vez al día  
☐ 2 a 3 veces al día  
☐ 5 a 6 veces al día  
☐ más 6 veces al día

---

Judías verdes

- ☐ Nunca o menos 1 vez al mes  
☒ 1 a 3 veces mes  
☐ 1 vez semana  
☐ 2 a 4 veces semana  
☐ 5 a 6 veces semana  
☐ 1 vez al día  
☐ 2 a 3 veces al día  
☐ 5 a 6 veces al día  
☐ más 6 veces al día

---

Berenjena o calabacin o pepino

- ☐ Nunca o menos 1 vez al mes  
☐ 1 a 3 veces mes  
☐ 1 vez semana  
☒ 2 a 4 veces semana  
☐ 5 a 6 veces semana  
☐ 1 vez al día  
☐ 2 a 3 veces al día  
☐ 5 a 6 veces al día  
☐ más 6 veces al día

---

|          |                                                                                                                                                                                                                                                                                                                                                                                                              |
|----------|--------------------------------------------------------------------------------------------------------------------------------------------------------------------------------------------------------------------------------------------------------------------------------------------------------------------------------------------------------------------------------------------------------------|
| pimiento | <input type="radio"/> Nunca o menos 1 vez al mes<br><input type="radio"/> 1 a 3 veces mes<br><input type="radio"/> 1 vez semana<br><input checked="" type="radio"/> 2 a 4 veces semana<br><input type="radio"/> 5 a 6 veces semana<br><input type="radio"/> 1 vez al día<br><input type="radio"/> 2 a 3 veces al día<br><input type="radio"/> 5 a 6 veces al día<br><input type="radio"/> más 6 veces al día |
|----------|--------------------------------------------------------------------------------------------------------------------------------------------------------------------------------------------------------------------------------------------------------------------------------------------------------------------------------------------------------------------------------------------------------------|

---

|           |                                                                                                                                                                                                                                                                                                                                                                                                              |
|-----------|--------------------------------------------------------------------------------------------------------------------------------------------------------------------------------------------------------------------------------------------------------------------------------------------------------------------------------------------------------------------------------------------------------------|
| alcachofa | <input type="radio"/> Nunca o menos 1 vez al mes<br><input checked="" type="radio"/> 1 a 3 veces mes<br><input type="radio"/> 1 vez semana<br><input type="radio"/> 2 a 4 veces semana<br><input type="radio"/> 5 a 6 veces semana<br><input type="radio"/> 1 vez al día<br><input type="radio"/> 2 a 3 veces al día<br><input type="radio"/> 5 a 6 veces al día<br><input type="radio"/> más 6 veces al día |
|-----------|--------------------------------------------------------------------------------------------------------------------------------------------------------------------------------------------------------------------------------------------------------------------------------------------------------------------------------------------------------------------------------------------------------------|

---

|            |                                                                                                                                                                                                                                                                                                                                                                                                              |
|------------|--------------------------------------------------------------------------------------------------------------------------------------------------------------------------------------------------------------------------------------------------------------------------------------------------------------------------------------------------------------------------------------------------------------|
| espárragos | <input type="radio"/> Nunca o menos 1 vez al mes<br><input checked="" type="radio"/> 1 a 3 veces mes<br><input type="radio"/> 1 vez semana<br><input type="radio"/> 2 a 4 veces semana<br><input type="radio"/> 5 a 6 veces semana<br><input type="radio"/> 1 vez al día<br><input type="radio"/> 2 a 3 veces al día<br><input type="radio"/> 5 a 6 veces al día<br><input type="radio"/> más 6 veces al día |
|------------|--------------------------------------------------------------------------------------------------------------------------------------------------------------------------------------------------------------------------------------------------------------------------------------------------------------------------------------------------------------------------------------------------------------|

---

|              |                                                                                                                                                                                                                                                                                                                                                                                                              |
|--------------|--------------------------------------------------------------------------------------------------------------------------------------------------------------------------------------------------------------------------------------------------------------------------------------------------------------------------------------------------------------------------------------------------------------|
| maíz hervido | <input type="radio"/> Nunca o menos 1 vez al mes<br><input checked="" type="radio"/> 1 a 3 veces mes<br><input type="radio"/> 1 vez semana<br><input type="radio"/> 2 a 4 veces semana<br><input type="radio"/> 5 a 6 veces semana<br><input type="radio"/> 1 vez al día<br><input type="radio"/> 2 a 3 veces al día<br><input type="radio"/> 5 a 6 veces al día<br><input type="radio"/> más 6 veces al día |
|--------------|--------------------------------------------------------------------------------------------------------------------------------------------------------------------------------------------------------------------------------------------------------------------------------------------------------------------------------------------------------------------------------------------------------------|

---

|           |                                                                                                                                                                                                                                                                                                                                                                                                              |
|-----------|--------------------------------------------------------------------------------------------------------------------------------------------------------------------------------------------------------------------------------------------------------------------------------------------------------------------------------------------------------------------------------------------------------------|
| legumbres | <input type="radio"/> Nunca o menos 1 vez al mes<br><input type="radio"/> 1 a 3 veces mes<br><input type="radio"/> 1 vez semana<br><input checked="" type="radio"/> 2 a 4 veces semana<br><input type="radio"/> 5 a 6 veces semana<br><input type="radio"/> 1 vez al día<br><input type="radio"/> 2 a 3 veces al día<br><input type="radio"/> 5 a 6 veces al día<br><input type="radio"/> más 6 veces al día |
|-----------|--------------------------------------------------------------------------------------------------------------------------------------------------------------------------------------------------------------------------------------------------------------------------------------------------------------------------------------------------------------------------------------------------------------|

---

|                       |                                                                                                                                                                                                                                                                                                                                                                                                              |
|-----------------------|--------------------------------------------------------------------------------------------------------------------------------------------------------------------------------------------------------------------------------------------------------------------------------------------------------------------------------------------------------------------------------------------------------------|
| naranjas o mandarinas | <input type="radio"/> Nunca o menos 1 vez al mes<br><input checked="" type="radio"/> 1 a 3 veces mes<br><input type="radio"/> 1 vez semana<br><input type="radio"/> 2 a 4 veces semana<br><input type="radio"/> 5 a 6 veces semana<br><input type="radio"/> 1 vez al día<br><input type="radio"/> 2 a 3 veces al día<br><input type="radio"/> 5 a 6 veces al día<br><input type="radio"/> más 6 veces al día |
|-----------------------|--------------------------------------------------------------------------------------------------------------------------------------------------------------------------------------------------------------------------------------------------------------------------------------------------------------------------------------------------------------------------------------------------------------|

---



|                       |                                                                                                                                                                                                                                                                                                                                                                                                              |
|-----------------------|--------------------------------------------------------------------------------------------------------------------------------------------------------------------------------------------------------------------------------------------------------------------------------------------------------------------------------------------------------------------------------------------------------------|
| zum natural fruta     | <input type="radio"/> Nunca o menos 1 vez al mes<br><input checked="" type="radio"/> 1 a 3 veces mes<br><input type="radio"/> 1 vez semana<br><input type="radio"/> 2 a 4 veces semana<br><input type="radio"/> 5 a 6 veces semana<br><input type="radio"/> 1 vez al día<br><input type="radio"/> 2 a 3 veces al día<br><input type="radio"/> 5 a 6 veces al día<br><input type="radio"/> más 6 veces al día |
| platano               | <input type="radio"/> Nunca o menos 1 vez al mes<br><input type="radio"/> 1 a 3 veces mes<br><input type="radio"/> 1 vez semana<br><input checked="" type="radio"/> 2 a 4 veces semana<br><input type="radio"/> 5 a 6 veces semana<br><input type="radio"/> 1 vez al día<br><input type="radio"/> 2 a 3 veces al día<br><input type="radio"/> 5 a 6 veces al día<br><input type="radio"/> más 6 veces al día |
| manzana o pera        | <input type="radio"/> Nunca o menos 1 vez al mes<br><input type="radio"/> 1 a 3 veces mes<br><input type="radio"/> 1 vez semana<br><input checked="" type="radio"/> 2 a 4 veces semana<br><input type="radio"/> 5 a 6 veces semana<br><input type="radio"/> 1 vez al día<br><input type="radio"/> 2 a 3 veces al día<br><input type="radio"/> 5 a 6 veces al día<br><input type="radio"/> más 6 veces al día |
| melocotón o nectarina | <input type="radio"/> Nunca o menos 1 vez al mes<br><input type="radio"/> 1 a 3 veces mes<br><input type="radio"/> 1 vez semana<br><input type="radio"/> 2 a 4 veces semana<br><input type="radio"/> 5 a 6 veces semana<br><input type="radio"/> 1 vez al día<br><input type="radio"/> 2 a 3 veces al día<br><input type="radio"/> 5 a 6 veces al día<br><input checked="" type="radio"/> más 6 veces al día |
| sandia o melon        | <input type="radio"/> Nunca o menos 1 vez al mes<br><input type="radio"/> 1 a 3 veces mes<br><input type="radio"/> 1 vez semana<br><input type="radio"/> 2 a 4 veces semana<br><input type="radio"/> 5 a 6 veces semana<br><input type="radio"/> 1 vez al día<br><input type="radio"/> 2 a 3 veces al día<br><input type="radio"/> 5 a 6 veces al día<br><input checked="" type="radio"/> más 6 veces al día |
| uva                   | <input type="radio"/> Nunca o menos 1 vez al mes<br><input type="radio"/> 1 a 3 veces mes<br><input type="radio"/> 1 vez semana<br><input checked="" type="radio"/> 2 a 4 veces semana<br><input type="radio"/> 5 a 6 veces semana<br><input type="radio"/> 1 vez al día<br><input type="radio"/> 2 a 3 veces al día<br><input type="radio"/> 5 a 6 veces al día<br><input type="radio"/> más 6 veces al día |

|                 |                                                                                                                                                                                                                                                                                                                                                                                                              |
|-----------------|--------------------------------------------------------------------------------------------------------------------------------------------------------------------------------------------------------------------------------------------------------------------------------------------------------------------------------------------------------------------------------------------------------------|
| bruna o ciruela | <input type="radio"/> Nunca o menos 1 vez al mes<br><input type="radio"/> 1 a 3 veces mes<br><input type="radio"/> 1 vez semana<br><input checked="" type="radio"/> 2 a 4 veces semana<br><input type="radio"/> 5 a 6 veces semana<br><input type="radio"/> 1 vez al día<br><input type="radio"/> 2 a 3 veces al día<br><input type="radio"/> 5 a 6 veces al día<br><input type="radio"/> más 6 veces al día |
| kiwi            | <input type="radio"/> Nunca o menos 1 vez al mes<br><input checked="" type="radio"/> 1 a 3 veces mes<br><input type="radio"/> 1 vez semana<br><input type="radio"/> 2 a 4 veces semana<br><input type="radio"/> 5 a 6 veces semana<br><input type="radio"/> 1 vez al día<br><input type="radio"/> 2 a 3 veces al día<br><input type="radio"/> 5 a 6 veces al día<br><input type="radio"/> más 6 veces al día |
| aceituna        | <input type="radio"/> Nunca o menos 1 vez al mes<br><input type="radio"/> 1 a 3 veces mes<br><input type="radio"/> 1 vez semana<br><input type="radio"/> 2 a 4 veces semana<br><input type="radio"/> 5 a 6 veces semana<br><input checked="" type="radio"/> 1 vez al día<br><input type="radio"/> 2 a 3 veces al día<br><input type="radio"/> 5 a 6 veces al día<br><input type="radio"/> más 6 veces al día |
| frutos secos    | <input type="radio"/> Nunca o menos 1 vez al mes<br><input type="radio"/> 1 a 3 veces mes<br><input type="radio"/> 1 vez semana<br><input type="radio"/> 2 a 4 veces semana<br><input type="radio"/> 5 a 6 veces semana<br><input type="radio"/> 1 vez al día<br><input checked="" type="radio"/> 2 a 3 veces al día<br><input type="radio"/> 5 a 6 veces al día<br><input type="radio"/> más 6 veces al día |
| pan blanco      | <input checked="" type="radio"/> Nunca o menos 1 vez al mes<br><input type="radio"/> 1 a 3 veces mes<br><input type="radio"/> 1 vez semana<br><input type="radio"/> 2 a 4 veces semana<br><input type="radio"/> 5 a 6 veces semana<br><input type="radio"/> 1 vez al día<br><input type="radio"/> 2 a 3 veces al día<br><input type="radio"/> 5 a 6 veces al día<br><input type="radio"/> más 6 veces al día |
| pan integral    | <input type="radio"/> Nunca o menos 1 vez al mes<br><input type="radio"/> 1 a 3 veces mes<br><input type="radio"/> 1 vez semana<br><input type="radio"/> 2 a 4 veces semana<br><input type="radio"/> 5 a 6 veces semana<br><input checked="" type="radio"/> 1 vez al día<br><input type="radio"/> 2 a 3 veces al día<br><input type="radio"/> 5 a 6 veces al día<br><input type="radio"/> más 6 veces al día |

|                          |                                                                                                                                                                                                                                                                                                                                                                                                              |
|--------------------------|--------------------------------------------------------------------------------------------------------------------------------------------------------------------------------------------------------------------------------------------------------------------------------------------------------------------------------------------------------------------------------------------------------------|
| cereales desayuno        | <input checked="" type="radio"/> Nunca o menos 1 vez al mes<br><input type="radio"/> 1 a 3 veces mes<br><input type="radio"/> 1 vez semana<br><input type="radio"/> 2 a 4 veces semana<br><input type="radio"/> 5 a 6 veces semana<br><input type="radio"/> 1 vez al día<br><input type="radio"/> 2 a 3 veces al día<br><input type="radio"/> 5 a 6 veces al día<br><input type="radio"/> más 6 veces al día |
| patatas fritas           | <input type="radio"/> Nunca o menos 1 vez al mes<br><input type="radio"/> 1 a 3 veces mes<br><input checked="" type="radio"/> 1 vez semana<br><input type="radio"/> 2 a 4 veces semana<br><input type="radio"/> 5 a 6 veces semana<br><input type="radio"/> 1 vez al día<br><input type="radio"/> 2 a 3 veces al día<br><input type="radio"/> 5 a 6 veces al día<br><input type="radio"/> más 6 veces al día |
| patatas cocidas o asadas | <input checked="" type="radio"/> Nunca o menos 1 vez al mes<br><input type="radio"/> 1 a 3 veces mes<br><input type="radio"/> 1 vez semana<br><input type="radio"/> 2 a 4 veces semana<br><input type="radio"/> 5 a 6 veces semana<br><input type="radio"/> 1 vez al día<br><input type="radio"/> 2 a 3 veces al día<br><input type="radio"/> 5 a 6 veces al día<br><input type="radio"/> más 6 veces al día |
| bolsa papas              | <input type="radio"/> Nunca o menos 1 vez al mes<br><input checked="" type="radio"/> 1 a 3 veces mes<br><input type="radio"/> 1 vez semana<br><input type="radio"/> 2 a 4 veces semana<br><input type="radio"/> 5 a 6 veces semana<br><input type="radio"/> 1 vez al día<br><input type="radio"/> 2 a 3 veces al día<br><input type="radio"/> 5 a 6 veces al día<br><input type="radio"/> más 6 veces al día |
| arroz cocinado           | <input type="radio"/> Nunca o menos 1 vez al mes<br><input checked="" type="radio"/> 1 a 3 veces mes<br><input type="radio"/> 1 vez semana<br><input type="radio"/> 2 a 4 veces semana<br><input type="radio"/> 5 a 6 veces semana<br><input type="radio"/> 1 vez al día<br><input type="radio"/> 2 a 3 veces al día<br><input type="radio"/> 5 a 6 veces al día<br><input type="radio"/> más 6 veces al día |
| pasta                    | <input type="radio"/> Nunca o menos 1 vez al mes<br><input checked="" type="radio"/> 1 a 3 veces mes<br><input type="radio"/> 1 vez semana<br><input type="radio"/> 2 a 4 veces semana<br><input type="radio"/> 5 a 6 veces semana<br><input type="radio"/> 1 vez al día<br><input type="radio"/> 2 a 3 veces al día<br><input type="radio"/> 5 a 6 veces al día<br><input type="radio"/> más 6 veces al día |

|                     |                                                                                                                                                                                                                                                                                                                                                                                                              |
|---------------------|--------------------------------------------------------------------------------------------------------------------------------------------------------------------------------------------------------------------------------------------------------------------------------------------------------------------------------------------------------------------------------------------------------------|
| pizza               | <input type="radio"/> Nunca o menos 1 vez al mes<br><input type="radio"/> 1 a 3 veces mes<br><input checked="" type="radio"/> 1 vez semana<br><input type="radio"/> 2 a 4 veces semana<br><input type="radio"/> 5 a 6 veces semana<br><input type="radio"/> 1 vez al día<br><input type="radio"/> 2 a 3 veces al día<br><input type="radio"/> 5 a 6 veces al día<br><input type="radio"/> más 6 veces al día |
| aceite oliva        | <input type="radio"/> Nunca o menos 1 vez al mes<br><input type="radio"/> 1 a 3 veces mes<br><input type="radio"/> 1 vez semana<br><input type="radio"/> 2 a 4 veces semana<br><input type="radio"/> 5 a 6 veces semana<br><input checked="" type="radio"/> 1 vez al día<br><input type="radio"/> 2 a 3 veces al día<br><input type="radio"/> 5 a 6 veces al día<br><input type="radio"/> más 6 veces al día |
| otros aceites       | <input checked="" type="radio"/> Nunca o menos 1 vez al mes<br><input type="radio"/> 1 a 3 veces mes<br><input type="radio"/> 1 vez semana<br><input type="radio"/> 2 a 4 veces semana<br><input type="radio"/> 5 a 6 veces semana<br><input type="radio"/> 1 vez al día<br><input type="radio"/> 2 a 3 veces al día<br><input type="radio"/> 5 a 6 veces al día<br><input type="radio"/> más 6 veces al día |
| margarina           | <input checked="" type="radio"/> Nunca o menos 1 vez al mes<br><input type="radio"/> 1 a 3 veces mes<br><input type="radio"/> 1 vez semana<br><input type="radio"/> 2 a 4 veces semana<br><input type="radio"/> 5 a 6 veces semana<br><input type="radio"/> 1 vez al día<br><input type="radio"/> 2 a 3 veces al día<br><input type="radio"/> 5 a 6 veces al día<br><input type="radio"/> más 6 veces al día |
| mantequilla         | <input type="radio"/> Nunca o menos 1 vez al mes<br><input type="radio"/> 1 a 3 veces mes<br><input checked="" type="radio"/> 1 vez semana<br><input type="radio"/> 2 a 4 veces semana<br><input type="radio"/> 5 a 6 veces semana<br><input type="radio"/> 1 vez al día<br><input type="radio"/> 2 a 3 veces al día<br><input type="radio"/> 5 a 6 veces al día<br><input type="radio"/> más 6 veces al día |
| galletas tipo maria | <input type="radio"/> Nunca o menos 1 vez al mes<br><input type="radio"/> 1 a 3 veces mes<br><input type="radio"/> 1 vez semana<br><input type="radio"/> 2 a 4 veces semana<br><input type="radio"/> 5 a 6 veces semana<br><input type="radio"/> 1 vez al día<br><input checked="" type="radio"/> 2 a 3 veces al día<br><input type="radio"/> 5 a 6 veces al día<br><input type="radio"/> más 6 veces al día |

|                           |                                                                                                                                                                                                                                                                                                                                                                                                              |
|---------------------------|--------------------------------------------------------------------------------------------------------------------------------------------------------------------------------------------------------------------------------------------------------------------------------------------------------------------------------------------------------------------------------------------------------------|
| galletas chocolate        | <input type="radio"/> Nunca o menos 1 vez al mes<br><input type="radio"/> 1 a 3 veces mes<br><input type="radio"/> 1 vez semana<br><input type="radio"/> 2 a 4 veces semana<br><input type="radio"/> 5 a 6 veces semana<br><input checked="" type="radio"/> 1 vez al día<br><input type="radio"/> 2 a 3 veces al día<br><input type="radio"/> 5 a 6 veces al día<br><input type="radio"/> más 6 veces al día |
| bollieria                 | <input type="radio"/> Nunca o menos 1 vez al mes<br><input type="radio"/> 1 a 3 veces mes<br><input checked="" type="radio"/> 1 vez semana<br><input type="radio"/> 2 a 4 veces semana<br><input type="radio"/> 5 a 6 veces semana<br><input type="radio"/> 1 vez al día<br><input type="radio"/> 2 a 3 veces al día<br><input type="radio"/> 5 a 6 veces al día<br><input type="radio"/> más 6 veces al día |
| chocolate o bombones      | <input checked="" type="radio"/> Nunca o menos 1 vez al mes<br><input type="radio"/> 1 a 3 veces mes<br><input type="radio"/> 1 vez semana<br><input type="radio"/> 2 a 4 veces semana<br><input type="radio"/> 5 a 6 veces semana<br><input type="radio"/> 1 vez al día<br><input type="radio"/> 2 a 3 veces al día<br><input type="radio"/> 5 a 6 veces al día<br><input type="radio"/> más 6 veces al día |
| chocolate polvo o colacao | <input type="radio"/> Nunca o menos 1 vez al mes<br><input type="radio"/> 1 a 3 veces mes<br><input checked="" type="radio"/> 1 vez semana<br><input type="radio"/> 2 a 4 veces semana<br><input type="radio"/> 5 a 6 veces semana<br><input type="radio"/> 1 vez al día<br><input type="radio"/> 2 a 3 veces al día<br><input type="radio"/> 5 a 6 veces al día<br><input type="radio"/> más 6 veces al día |
| vino tinto                | <input checked="" type="radio"/> Nunca o menos 1 vez al mes<br><input type="radio"/> 1 a 3 veces mes<br><input type="radio"/> 1 vez semana<br><input type="radio"/> 2 a 4 veces semana<br><input type="radio"/> 5 a 6 veces semana<br><input type="radio"/> 1 vez al día<br><input type="radio"/> 2 a 3 veces al día<br><input type="radio"/> 5 a 6 veces al día<br><input type="radio"/> más 6 veces al día |
| vino blanco               | <input checked="" type="radio"/> Nunca o menos 1 vez al mes<br><input type="radio"/> 1 a 3 veces mes<br><input type="radio"/> 1 vez semana<br><input type="radio"/> 2 a 4 veces semana<br><input type="radio"/> 5 a 6 veces semana<br><input type="radio"/> 1 vez al día<br><input type="radio"/> 2 a 3 veces al día<br><input type="radio"/> 5 a 6 veces al día<br><input type="radio"/> más 6 veces al día |

---

|                    |                                                                                                                                                                                                                                                                                                                                                                                                              |
|--------------------|--------------------------------------------------------------------------------------------------------------------------------------------------------------------------------------------------------------------------------------------------------------------------------------------------------------------------------------------------------------------------------------------------------------|
| vino seco o vermut | <input checked="" type="radio"/> Nunca o menos 1 vez al mes<br><input type="radio"/> 1 a 3 veces mes<br><input type="radio"/> 1 vez semana<br><input type="radio"/> 2 a 4 veces semana<br><input type="radio"/> 5 a 6 veces semana<br><input type="radio"/> 1 vez al día<br><input type="radio"/> 2 a 3 veces al día<br><input type="radio"/> 5 a 6 veces al día<br><input type="radio"/> más 6 veces al día |
|--------------------|--------------------------------------------------------------------------------------------------------------------------------------------------------------------------------------------------------------------------------------------------------------------------------------------------------------------------------------------------------------------------------------------------------------|

---

|         |                                                                                                                                                                                                                                                                                                                                                                                                              |
|---------|--------------------------------------------------------------------------------------------------------------------------------------------------------------------------------------------------------------------------------------------------------------------------------------------------------------------------------------------------------------------------------------------------------------|
| cerveza | <input checked="" type="radio"/> Nunca o menos 1 vez al mes<br><input type="radio"/> 1 a 3 veces mes<br><input type="radio"/> 1 vez semana<br><input type="radio"/> 2 a 4 veces semana<br><input type="radio"/> 5 a 6 veces semana<br><input type="radio"/> 1 vez al día<br><input type="radio"/> 2 a 3 veces al día<br><input type="radio"/> 5 a 6 veces al día<br><input type="radio"/> más 6 veces al día |
|---------|--------------------------------------------------------------------------------------------------------------------------------------------------------------------------------------------------------------------------------------------------------------------------------------------------------------------------------------------------------------------------------------------------------------|

---

|                     |                                                                                                                                                                                                                                                                                                                                                                                                              |
|---------------------|--------------------------------------------------------------------------------------------------------------------------------------------------------------------------------------------------------------------------------------------------------------------------------------------------------------------------------------------------------------------------------------------------------------|
| cerveza sin alcohol | <input type="radio"/> Nunca o menos 1 vez al mes<br><input checked="" type="radio"/> 1 a 3 veces mes<br><input type="radio"/> 1 vez semana<br><input type="radio"/> 2 a 4 veces semana<br><input type="radio"/> 5 a 6 veces semana<br><input type="radio"/> 1 vez al día<br><input type="radio"/> 2 a 3 veces al día<br><input type="radio"/> 5 a 6 veces al día<br><input type="radio"/> más 6 veces al día |
|---------------------|--------------------------------------------------------------------------------------------------------------------------------------------------------------------------------------------------------------------------------------------------------------------------------------------------------------------------------------------------------------------------------------------------------------|

---

|         |                                                                                                                                                                                                                                                                                                                                                                                                              |
|---------|--------------------------------------------------------------------------------------------------------------------------------------------------------------------------------------------------------------------------------------------------------------------------------------------------------------------------------------------------------------------------------------------------------------|
| licores | <input checked="" type="radio"/> Nunca o menos 1 vez al mes<br><input type="radio"/> 1 a 3 veces mes<br><input type="radio"/> 1 vez semana<br><input type="radio"/> 2 a 4 veces semana<br><input type="radio"/> 5 a 6 veces semana<br><input type="radio"/> 1 vez al día<br><input type="radio"/> 2 a 3 veces al día<br><input type="radio"/> 5 a 6 veces al día<br><input type="radio"/> más 6 veces al día |
|---------|--------------------------------------------------------------------------------------------------------------------------------------------------------------------------------------------------------------------------------------------------------------------------------------------------------------------------------------------------------------------------------------------------------------|

---

|                       |                                                                                                                                                                                                                                                                                                                                                                                                              |
|-----------------------|--------------------------------------------------------------------------------------------------------------------------------------------------------------------------------------------------------------------------------------------------------------------------------------------------------------------------------------------------------------------------------------------------------------|
| ginebra o ron o vodka | <input checked="" type="radio"/> Nunca o menos 1 vez al mes<br><input type="radio"/> 1 a 3 veces mes<br><input type="radio"/> 1 vez semana<br><input type="radio"/> 2 a 4 veces semana<br><input type="radio"/> 5 a 6 veces semana<br><input type="radio"/> 1 vez al día<br><input type="radio"/> 2 a 3 veces al día<br><input type="radio"/> 5 a 6 veces al día<br><input type="radio"/> más 6 veces al día |
|-----------------------|--------------------------------------------------------------------------------------------------------------------------------------------------------------------------------------------------------------------------------------------------------------------------------------------------------------------------------------------------------------------------------------------------------------|

---

|                 |                                                                                                                                                                                                                                                                                                                                                                                                              |
|-----------------|--------------------------------------------------------------------------------------------------------------------------------------------------------------------------------------------------------------------------------------------------------------------------------------------------------------------------------------------------------------------------------------------------------------|
| refresco normal | <input checked="" type="radio"/> Nunca o menos 1 vez al mes<br><input type="radio"/> 1 a 3 veces mes<br><input type="radio"/> 1 vez semana<br><input type="radio"/> 2 a 4 veces semana<br><input type="radio"/> 5 a 6 veces semana<br><input type="radio"/> 1 vez al día<br><input type="radio"/> 2 a 3 veces al día<br><input type="radio"/> 5 a 6 veces al día<br><input type="radio"/> más 6 veces al día |
|-----------------|--------------------------------------------------------------------------------------------------------------------------------------------------------------------------------------------------------------------------------------------------------------------------------------------------------------------------------------------------------------------------------------------------------------|

---

|                           |                                                                                                                                                                                                                                                                                                                                                                                                              |
|---------------------------|--------------------------------------------------------------------------------------------------------------------------------------------------------------------------------------------------------------------------------------------------------------------------------------------------------------------------------------------------------------------------------------------------------------|
| refresco sin azúcar       | <input checked="" type="radio"/> Nunca o menos 1 vez al mes<br><input type="radio"/> 1 a 3 veces mes<br><input type="radio"/> 1 vez semana<br><input type="radio"/> 2 a 4 veces semana<br><input type="radio"/> 5 a 6 veces semana<br><input type="radio"/> 1 vez al día<br><input type="radio"/> 2 a 3 veces al día<br><input type="radio"/> 5 a 6 veces al día<br><input type="radio"/> más 6 veces al día |
| Agua del grifo            | <input checked="" type="radio"/> Nunca o menos 1 vez al mes<br><input type="radio"/> 1 a 3 veces mes<br><input type="radio"/> 1 vez semana<br><input type="radio"/> 2 a 4 veces semana<br><input type="radio"/> 5 a 6 veces semana<br><input type="radio"/> 1 vez al día<br><input type="radio"/> 2 a 3 veces al día<br><input type="radio"/> 5 a 6 veces al día<br><input type="radio"/> más 6 veces al día |
| agua embotellada sin gas  | <input type="radio"/> Nunca o menos 1 vez al mes<br><input type="radio"/> 1 a 3 veces mes<br><input type="radio"/> 1 vez semana<br><input type="radio"/> 2 a 4 veces semana<br><input type="radio"/> 5 a 6 veces semana<br><input type="radio"/> 1 vez al día<br><input type="radio"/> 2 a 3 veces al día<br><input type="radio"/> 5 a 6 veces al día<br><input checked="" type="radio"/> más 6 veces al día |
| agua embotellada con gas  | <input checked="" type="radio"/> Nunca o menos 1 vez al mes<br><input type="radio"/> 1 a 3 veces mes<br><input type="radio"/> 1 vez semana<br><input type="radio"/> 2 a 4 veces semana<br><input type="radio"/> 5 a 6 veces semana<br><input type="radio"/> 1 vez al día<br><input type="radio"/> 2 a 3 veces al día<br><input type="radio"/> 5 a 6 veces al día<br><input type="radio"/> más 6 veces al día |
| zumos frutas embotellados | <input type="radio"/> Nunca o menos 1 vez al mes<br><input type="radio"/> 1 a 3 veces mes<br><input type="radio"/> 1 vez semana<br><input checked="" type="radio"/> 2 a 4 veces semana<br><input type="radio"/> 5 a 6 veces semana<br><input type="radio"/> 1 vez al día<br><input type="radio"/> 2 a 3 veces al día<br><input type="radio"/> 5 a 6 veces al día<br><input type="radio"/> más 6 veces al día |
| café                      | <input checked="" type="radio"/> Nunca o menos 1 vez al mes<br><input type="radio"/> 1 a 3 veces mes<br><input type="radio"/> 1 vez semana<br><input type="radio"/> 2 a 4 veces semana<br><input type="radio"/> 5 a 6 veces semana<br><input type="radio"/> 1 vez al día<br><input type="radio"/> 2 a 3 veces al día<br><input type="radio"/> 5 a 6 veces al día<br><input type="radio"/> más 6 veces al día |

|                       |                                                                                                                                                                                                                                                                                                                                                                                                              |
|-----------------------|--------------------------------------------------------------------------------------------------------------------------------------------------------------------------------------------------------------------------------------------------------------------------------------------------------------------------------------------------------------------------------------------------------------|
| cafe descafeinado     | <input checked="" type="radio"/> Nunca o menos 1 vez al mes<br><input type="radio"/> 1 a 3 veces mes<br><input type="radio"/> 1 vez semana<br><input type="radio"/> 2 a 4 veces semana<br><input type="radio"/> 5 a 6 veces semana<br><input type="radio"/> 1 vez al día<br><input type="radio"/> 2 a 3 veces al día<br><input type="radio"/> 5 a 6 veces al día<br><input type="radio"/> más 6 veces al día |
| te o infusión         | <input checked="" type="radio"/> Nunca o menos 1 vez al mes<br><input type="radio"/> 1 a 3 veces mes<br><input type="radio"/> 1 vez semana<br><input type="radio"/> 2 a 4 veces semana<br><input type="radio"/> 5 a 6 veces semana<br><input type="radio"/> 1 vez al día<br><input type="radio"/> 2 a 3 veces al día<br><input type="radio"/> 5 a 6 veces al día<br><input type="radio"/> más 6 veces al día |
| sopa o puré verduras  | <input type="radio"/> Nunca o menos 1 vez al mes<br><input type="radio"/> 1 a 3 veces mes<br><input type="radio"/> 1 vez semana<br><input checked="" type="radio"/> 2 a 4 veces semana<br><input type="radio"/> 5 a 6 veces semana<br><input type="radio"/> 1 vez al día<br><input type="radio"/> 2 a 3 veces al día<br><input type="radio"/> 5 a 6 veces al día<br><input type="radio"/> más 6 veces al día |
| croquetas pollo jamón | <input checked="" type="radio"/> Nunca o menos 1 vez al mes<br><input type="radio"/> 1 a 3 veces mes<br><input type="radio"/> 1 vez semana<br><input type="radio"/> 2 a 4 veces semana<br><input type="radio"/> 5 a 6 veces semana<br><input type="radio"/> 1 vez al día<br><input type="radio"/> 2 a 3 veces al día<br><input type="radio"/> 5 a 6 veces al día<br><input type="radio"/> más 6 veces al día |
| croquetas pescado     | <input checked="" type="radio"/> Nunca o menos 1 vez al mes<br><input type="radio"/> 1 a 3 veces mes<br><input type="radio"/> 1 vez semana<br><input type="radio"/> 2 a 4 veces semana<br><input type="radio"/> 5 a 6 veces semana<br><input type="radio"/> 1 vez al día<br><input type="radio"/> 2 a 3 veces al día<br><input type="radio"/> 5 a 6 veces al día<br><input type="radio"/> más 6 veces al día |
| mayonesa              | <input type="radio"/> Nunca o menos 1 vez al mes<br><input checked="" type="radio"/> 1 a 3 veces mes<br><input type="radio"/> 1 vez semana<br><input type="radio"/> 2 a 4 veces semana<br><input type="radio"/> 5 a 6 veces semana<br><input type="radio"/> 1 vez al día<br><input type="radio"/> 2 a 3 veces al día<br><input type="radio"/> 5 a 6 veces al día<br><input type="radio"/> más 6 veces al día |



|                  |                                                                                                                                                                                                                                                                                                                                                                                                              |
|------------------|--------------------------------------------------------------------------------------------------------------------------------------------------------------------------------------------------------------------------------------------------------------------------------------------------------------------------------------------------------------------------------------------------------------|
| salsa tomate     | <input type="radio"/> Nunca o menos 1 vez al mes<br><input type="radio"/> 1 a 3 veces mes<br><input checked="" type="radio"/> 1 vez semana<br><input type="radio"/> 2 a 4 veces semana<br><input type="radio"/> 5 a 6 veces semana<br><input type="radio"/> 1 vez al día<br><input type="radio"/> 2 a 3 veces al día<br><input type="radio"/> 5 a 6 veces al día<br><input type="radio"/> más 6 veces al día |
| ketchup          | <input checked="" type="radio"/> Nunca o menos 1 vez al mes<br><input type="radio"/> 1 a 3 veces mes<br><input type="radio"/> 1 vez semana<br><input type="radio"/> 2 a 4 veces semana<br><input type="radio"/> 5 a 6 veces semana<br><input type="radio"/> 1 vez al día<br><input type="radio"/> 2 a 3 veces al día<br><input type="radio"/> 5 a 6 veces al día<br><input type="radio"/> más 6 veces al día |
| sal              | <input checked="" type="radio"/> Nunca o menos 1 vez al mes<br><input type="radio"/> 1 a 3 veces mes<br><input type="radio"/> 1 vez semana<br><input type="radio"/> 2 a 4 veces semana<br><input type="radio"/> 5 a 6 veces semana<br><input type="radio"/> 1 vez al día<br><input type="radio"/> 2 a 3 veces al día<br><input type="radio"/> 5 a 6 veces al día<br><input type="radio"/> más 6 veces al día |
| ajo              | <input type="radio"/> Nunca o menos 1 vez al mes<br><input type="radio"/> 1 a 3 veces mes<br><input type="radio"/> 1 vez semana<br><input type="radio"/> 2 a 4 veces semana<br><input type="radio"/> 5 a 6 veces semana<br><input checked="" type="radio"/> 1 vez al día<br><input type="radio"/> 2 a 3 veces al día<br><input type="radio"/> 5 a 6 veces al día<br><input type="radio"/> más 6 veces al día |
| mermelada o miel | <input type="radio"/> Nunca o menos 1 vez al mes<br><input type="radio"/> 1 a 3 veces mes<br><input checked="" type="radio"/> 1 vez semana<br><input type="radio"/> 2 a 4 veces semana<br><input type="radio"/> 5 a 6 veces semana<br><input type="radio"/> 1 vez al día<br><input type="radio"/> 2 a 3 veces al día<br><input type="radio"/> 5 a 6 veces al día<br><input type="radio"/> más 6 veces al día |
| azúcar           | <input checked="" type="radio"/> Nunca o menos 1 vez al mes<br><input type="radio"/> 1 a 3 veces mes<br><input type="radio"/> 1 vez semana<br><input type="radio"/> 2 a 4 veces semana<br><input type="radio"/> 5 a 6 veces semana<br><input type="radio"/> 1 vez al día<br><input type="radio"/> 2 a 3 veces al día<br><input type="radio"/> 5 a 6 veces al día<br><input type="radio"/> más 6 veces al día |

|                                       |                                                                                                                                                                                                                                                                                                                                                                                                                                                                                                                               |
|---------------------------------------|-------------------------------------------------------------------------------------------------------------------------------------------------------------------------------------------------------------------------------------------------------------------------------------------------------------------------------------------------------------------------------------------------------------------------------------------------------------------------------------------------------------------------------|
| Otro alimento                         |                                                                                                                                                                                                                                                                                                                                                                                                                                                                                                                               |
| suplementos vitamínicos               | <input checked="" type="radio"/> si<br><input type="radio"/> no                                                                                                                                                                                                                                                                                                                                                                                                                                                               |
| suplementos vitamínicos               | [*DATA REMOVED*]                                                                                                                                                                                                                                                                                                                                                                                                                                                                                                              |
| dieta previa                          | <input checked="" type="radio"/> si<br><input type="radio"/> no                                                                                                                                                                                                                                                                                                                                                                                                                                                               |
| motivo dieta                          | <input type="radio"/> no dieta<br><input type="radio"/> control peso<br><input type="radio"/> control colesterol<br><input type="radio"/> control diabetes<br><input type="radio"/> problemas estómago<br><input type="radio"/> problemas vesícula o hepáticos<br><input type="radio"/> HTA o cardiopatía<br><input type="radio"/> problemas renales<br><input type="radio"/> alergia alimentaria<br><input type="radio"/> ácido úrico elevado<br><input checked="" type="radio"/> vegetariana<br><input type="radio"/> otros |
| cambio alimentos año previo gestación | <input checked="" type="radio"/> si<br><input type="radio"/> no                                                                                                                                                                                                                                                                                                                                                                                                                                                               |
| cambio lácteos                        | <input type="radio"/> eliminado<br><input type="radio"/> disminuido<br><input type="radio"/> igual<br><input checked="" type="radio"/> aumentado<br><input type="radio"/> no sabe                                                                                                                                                                                                                                                                                                                                             |
| cambio huevos                         | <input type="radio"/> eliminado<br><input type="radio"/> disminuido<br><input checked="" type="radio"/> igual<br><input type="radio"/> aumentado<br><input type="radio"/> no sabe                                                                                                                                                                                                                                                                                                                                             |
| cambio carne                          | <input type="radio"/> eliminado<br><input type="radio"/> disminuido<br><input checked="" type="radio"/> igual<br><input type="radio"/> aumentado<br><input type="radio"/> no sabe                                                                                                                                                                                                                                                                                                                                             |
| cambio pescado                        | <input type="radio"/> eliminado<br><input type="radio"/> disminuido<br><input checked="" type="radio"/> igual<br><input type="radio"/> aumentado<br><input type="radio"/> no sabe                                                                                                                                                                                                                                                                                                                                             |
| cambio verduras                       | <input type="radio"/> eliminado<br><input type="radio"/> disminuido<br><input type="radio"/> igual<br><input checked="" type="radio"/> aumentado<br><input type="radio"/> no sabe                                                                                                                                                                                                                                                                                                                                             |

|                            |                                                                                                                                                                                                                        |
|----------------------------|------------------------------------------------------------------------------------------------------------------------------------------------------------------------------------------------------------------------|
| cambio legumbres           | <input type="radio"/> eliminado<br><input type="radio"/> disminuido<br><input type="radio"/> igual<br><input checked="" type="radio"/> aumentado<br><input type="radio"/> no sabe                                      |
| cambio fruta               | <input type="radio"/> eliminado<br><input type="radio"/> disminuido<br><input type="radio"/> igual<br><input checked="" type="radio"/> aumentado<br><input type="radio"/> no sabe                                      |
| cambio pan                 | <input type="radio"/> eliminado<br><input checked="" type="radio"/> disminuido<br><input type="radio"/> igual<br><input type="radio"/> aumentado<br><input type="radio"/> no sabe                                      |
| cambio aceite oliva        | <input type="radio"/> eliminado<br><input type="radio"/> disminuido<br><input checked="" type="radio"/> igual<br><input type="radio"/> aumentado<br><input type="radio"/> no sabe                                      |
| cambio mante o margarina   | <input type="radio"/> eliminado<br><input type="radio"/> disminuido<br><input type="radio"/> igual<br><input checked="" type="radio"/> aumentado<br><input type="radio"/> no sabe                                      |
| cambio azúcar y dulces     | <input type="radio"/> eliminado<br><input type="radio"/> disminuido<br><input type="radio"/> igual<br><input checked="" type="radio"/> aumentado<br><input type="radio"/> no sabe                                      |
| cambio bebidas alcohólicas | <input type="radio"/> eliminado<br><input checked="" type="radio"/> disminuido<br><input type="radio"/> igual<br><input type="radio"/> aumentado<br><input type="radio"/> no sabe                                      |
| frecuencia comidas fritas  | <input type="radio"/> a diario<br><input type="radio"/> 5 a 6 veces semana<br><input type="radio"/> 2 a 4 veces semana<br><input type="radio"/> 1 vez semana<br><input checked="" type="radio"/> menos de 1 vez semana |
| carne                      | <input checked="" type="radio"/> no como<br><input type="radio"/> cruda<br><input type="radio"/> poco hecha<br><input type="radio"/> hecha<br><input type="radio"/> muy hecha                                          |
| grasa visible carne        | <input type="radio"/> quita toda<br><input type="radio"/> quita mayoría<br><input type="radio"/> quita un poco<br><input type="radio"/> no quita nada                                                                  |

|                                |                                                                                                                                                                                                                                                          |
|--------------------------------|----------------------------------------------------------------------------------------------------------------------------------------------------------------------------------------------------------------------------------------------------------|
| cocina carne                   | <input type="radio"/> a la plancha<br><input type="radio"/> a la parrilla<br><input type="radio"/> asada<br><input type="radio"/> frita<br><input type="radio"/> guisada                                                                                 |
| tostado quemado carne          | <input type="radio"/> nunca<br><input type="radio"/> 1 vez mes<br><input type="radio"/> 2 a 3 veces mes<br><input type="radio"/> 1 vez semana<br><input type="radio"/> 2 a 3 semanas                                                                     |
| tostado quemado pescado        | <input checked="" type="radio"/> nunca<br><input type="radio"/> 1 vez mes<br><input type="radio"/> 2 a 3 veces mes<br><input type="radio"/> 1 vez semana<br><input type="radio"/> 2 a 3 semanas                                                          |
| socarrat paella                | <input type="radio"/> nunca<br><input checked="" type="radio"/> 1 vez mes<br><input type="radio"/> 2 a 3 veces mes<br><input type="radio"/> 1 vez semana<br><input type="radio"/> 2 a 3 semanas                                                          |
| grasa o aceite cocinar         | <input type="radio"/> mantequilla<br><input type="radio"/> margarina<br><input type="radio"/> aceite oliva<br><input checked="" type="radio"/> aceite oliva virgen extra<br><input type="radio"/> aceite vegetal<br><input type="radio"/> mezcla aceites |
| grasa aceite aliñar            | <input type="radio"/> mantequilla<br><input type="radio"/> margarina<br><input type="radio"/> aceite oliva<br><input checked="" type="radio"/> aceite oliva virgen extra<br><input type="radio"/> aceite vegetal<br><input type="radio"/> mezcla aceites |
| grasa aceite freir             | <input type="radio"/> mantequilla<br><input type="radio"/> margarina<br><input type="radio"/> aceite oliva<br><input checked="" type="radio"/> aceite oliva virgen extra<br><input type="radio"/> aceite vegetal<br><input type="radio"/> mezcla aceites |
| Ejercicio cuestionario         | <input checked="" type="radio"/> si<br><input type="radio"/> no                                                                                                                                                                                          |
| horas de sueño incluido siesta | [*DATA REMOVED*]                                                                                                                                                                                                                                         |
| minutos siesta                 | [*DATA REMOVED*]                                                                                                                                                                                                                                         |
| horas televisión semana        | [*DATA REMOVED*]                                                                                                                                                                                                                                         |

|                                        |                                                                                                                                                                                                                                                                                                                                                                           |
|----------------------------------------|---------------------------------------------------------------------------------------------------------------------------------------------------------------------------------------------------------------------------------------------------------------------------------------------------------------------------------------------------------------------------|
| actividad trabajo                      | <input type="radio"/> casi siempre sentado<br><input type="radio"/> sentado 50 por cien<br><input checked="" type="radio"/> casi siempre de pie, quieto<br><input type="radio"/> casi siempre levantado caminando y llevando pocas cosas<br><input type="radio"/> casi siempre levantado, caminando y llevado muchas cosas<br><input type="radio"/> trabajo manual pesado |
| tiempo caminar o bici al día           | <input type="radio"/> casi nunca<br><input type="radio"/> menos 20min día<br><input type="radio"/> 20 a 40 min día<br><input type="radio"/> 40 a 60 min día<br><input checked="" type="radio"/> 1h o 1h y media día<br><input type="radio"/> más de 1h y media al día                                                                                                     |
| tiempo tareas casa al día              | <input type="radio"/> menos de 1h día<br><input checked="" type="radio"/> 1 a 2h día<br><input type="radio"/> 3 a 4h día<br><input type="radio"/> 5 a 6h día<br><input type="radio"/> 7 a 8h día<br><input type="radio"/> más de 8h día                                                                                                                                   |
| tiempo libre televisión ordenador leer | <input type="radio"/> menos 1h día<br><input type="radio"/> 1h día<br><input checked="" type="radio"/> 2h día<br><input type="radio"/> 3h día<br><input type="radio"/> 4h día<br><input type="radio"/> 5 a 6h día<br><input type="radio"/> mas 6h día                                                                                                                     |
| tiempo libre ejercicio o deporte       | <input type="radio"/> menos 1h semana<br><input type="radio"/> 1h semana<br><input type="radio"/> 2h semana<br><input type="radio"/> 3h semana<br><input type="radio"/> 4 a 5h semana<br><input checked="" type="radio"/> mas 5h semana                                                                                                                                   |
| como se considera                      | <input type="radio"/> sedentaria<br><input type="radio"/> poco activa<br><input checked="" type="radio"/> moderadamente activa<br><input type="radio"/> bastante activa<br><input type="radio"/> muy activa<br><input type="radio"/> no sabe                                                                                                                              |
| FUR                                    | [*DATA REMOVED*]                                                                                                                                                                                                                                                                                                                                                          |
| Semanas gestación 2T                   | _____                                                                                                                                                                                                                                                                                                                                                                     |
| Días gestación 2T                      | _____                                                                                                                                                                                                                                                                                                                                                                     |
| DBP 2T                                 | _____                                                                                                                                                                                                                                                                                                                                                                     |
| CC 2T                                  | _____                                                                                                                                                                                                                                                                                                                                                                     |

|                                                   |                                                                                                                                                                                                 |
|---------------------------------------------------|-------------------------------------------------------------------------------------------------------------------------------------------------------------------------------------------------|
| AC 2T                                             |                                                                                                                                                                                                 |
| LF 2T                                             |                                                                                                                                                                                                 |
| PFE 2T (Hadlock)                                  |                                                                                                                                                                                                 |
| Semanas gestación 3T                              | [*DATA REMOVED*]                                                                                                                                                                                |
| días 3T                                           | [*DATA REMOVED*]                                                                                                                                                                                |
| DBP 3T                                            | [*DATA REMOVED*]                                                                                                                                                                                |
| CC 3T                                             | [*DATA REMOVED*]                                                                                                                                                                                |
| AC 3T                                             | [*DATA REMOVED*]                                                                                                                                                                                |
| LF 3T                                             | [*DATA REMOVED*]                                                                                                                                                                                |
| PFE 3T (Hadlock)                                  | [*DATA REMOVED*]                                                                                                                                                                                |
| Semanas de gestación final                        | [*DATA REMOVED*]                                                                                                                                                                                |
| días gestación final                              | [*DATA REMOVED*]                                                                                                                                                                                |
| Localización placenta                             | <input type="radio"/> anterior<br><input type="radio"/> lateral derecha<br><input type="radio"/> lateral izquierda<br><input type="radio"/> posterior<br><input checked="" type="radio"/> fondo |
| Presentación longitudinal cefálica                | <input type="radio"/> no<br><input checked="" type="radio"/> si                                                                                                                                 |
| Dorso                                             | <input type="radio"/> izquierda anterior<br><input type="radio"/> izquierda posterior<br><input checked="" type="radio"/> derecha anterior<br><input type="radio"/> derecha posterior           |
| diámetro biparietal                               | [*DATA REMOVED*]                                                                                                                                                                                |
| Circunferencia craneal                            | [*DATA REMOVED*]                                                                                                                                                                                |
| Circunferencia abdominal                          | [*DATA REMOVED*]                                                                                                                                                                                |
| Longitud de femur                                 | [*DATA REMOVED*]                                                                                                                                                                                |
| tejido celular subcutáneo a nivel del muslo en mm | [*DATA REMOVED*]                                                                                                                                                                                |
| tejido celular subcutáneo en abdomen en mm        | [*DATA REMOVED*]                                                                                                                                                                                |

|                                               |                                                                                                                                                          |
|-----------------------------------------------|----------------------------------------------------------------------------------------------------------------------------------------------------------|
| Volumen del muslo en cm3                      | [*DATA REMOVED*]                                                                                                                                         |
| Peso fetal estimado según fórmula de Hadlock  | [*DATA REMOVED*]                                                                                                                                         |
| Percentil                                     | [*DATA REMOVED*]                                                                                                                                         |
| Peso fetal estimado según fórmula de Scioscia | _____                                                                                                                                                    |
| Peso fetal estimado según fórmula de LEE      | _____                                                                                                                                                    |
| Tipo de parto                                 | <input type="radio"/> eutocico<br><input checked="" type="radio"/> instrumentado/ventosa<br><input type="radio"/> cesarea                                |
| fecha de nacimiento                           | [*DATA REMOVED*]                                                                                                                                         |
| Días entre exploración y nacimiento           | [*DATA REMOVED*]                                                                                                                                         |
| Peso RN en g                                  | [*DATA REMOVED*]                                                                                                                                         |
| sexo                                          | <input type="radio"/> mujer<br><input checked="" type="radio"/> hombre                                                                                   |
| Apgar 1 minuto                                | [*DATA REMOVED*]                                                                                                                                         |
| Apgar 5 minutos                               | [*DATA REMOVED*]                                                                                                                                         |
| Apgar 10 minutos                              | _____                                                                                                                                                    |
| antecedente Covid durante gestación           | <input type="radio"/> Yes<br><input checked="" type="radio"/> No                                                                                         |
| Nivel de estudios                             | <input type="radio"/> ninguno<br><input type="radio"/> primarios<br><input checked="" type="radio"/> secundarios<br><input type="radio"/> universitarios |

# Base\_datos\_estimacion\_peso\_fetal

|                                       |                                                                                                                                                                                                                                                                                      |
|---------------------------------------|--------------------------------------------------------------------------------------------------------------------------------------------------------------------------------------------------------------------------------------------------------------------------------------|
| Número de identificación participante | 84                                                                                                                                                                                                                                                                                   |
| CODIGO PARTICIPANTE                   |                                                                                                                                                                                                                                                                                      |
| Edad                                  | [*DATA REMOVED*]                                                                                                                                                                                                                                                                     |
| Gestaciones                           | <input type="radio"/> 1<br><input checked="" type="radio"/> 2<br><input type="radio"/> 3<br><input type="radio"/> mas de 3                                                                                                                                                           |
| partos                                | <input checked="" type="radio"/> 0<br><input type="radio"/> 1<br><input type="radio"/> 2<br><input type="radio"/> 3<br><input type="radio"/> mas de 3                                                                                                                                |
| cesáreas                              | <input checked="" type="radio"/> 0<br><input type="radio"/> 1<br><input type="radio"/> 2<br><input type="radio"/> 3<br><input type="radio"/> mas de 3                                                                                                                                |
| Abortos                               | <input type="radio"/> 0<br><input checked="" type="radio"/> 1<br><input type="radio"/> 2<br><input type="radio"/> 3<br><input type="radio"/> mas de 3                                                                                                                                |
| Tipo de gestacion                     | <input checked="" type="radio"/> espontanea<br><input type="radio"/> IAC inseminación artificial conyuge<br><input type="radio"/> IAD inseminación artificial donante<br><input type="radio"/> FIV Fecundación in Vitro<br><input type="radio"/> Ovodon FIV con donación de ovocitos |
| peso previo a embarazo                | [*DATA REMOVED*]                                                                                                                                                                                                                                                                     |
| Ganancia ponderal embarazo            | [*DATA REMOVED*]                                                                                                                                                                                                                                                                     |
| Talla madre                           | [*DATA REMOVED*]                                                                                                                                                                                                                                                                     |
| IMC previo embarazo                   | 20.796729893506402                                                                                                                                                                                                                                                                   |
| Patología obstétrica                  | <input checked="" type="radio"/> no<br><input type="radio"/> si                                                                                                                                                                                                                      |
| Diabetes pregestacional               | <input checked="" type="radio"/> no<br><input type="radio"/> si                                                                                                                                                                                                                      |
| Diabetes gestacional                  | <input checked="" type="radio"/> no<br><input type="radio"/> si                                                                                                                                                                                                                      |



|                                            |                                                                                                                                                                                      |
|--------------------------------------------|--------------------------------------------------------------------------------------------------------------------------------------------------------------------------------------|
| Diabetes gestacional con insulina          | <input checked="" type="radio"/> no<br><input type="radio"/> si                                                                                                                      |
| Diabetes gestacional con dieta y ejercicio | <input checked="" type="radio"/> no<br><input type="radio"/> si                                                                                                                      |
| Percentil fetos previos                    | <input checked="" type="radio"/> Nada<br><input type="radio"/> percentil menor de 10<br><input type="radio"/> percentil entre 10 y 90<br><input type="radio"/> percentil mayor de 90 |
| Exfumadora                                 | <input checked="" type="radio"/> Nada<br><input type="radio"/> menos de 5 años<br><input type="radio"/> 5 a 10 años<br><input type="radio"/> mayor o igual a 10 años                 |
| Hábito tabáquico                           | <input checked="" type="radio"/> no<br><input type="radio"/> si                                                                                                                      |
| fumadora                                   | [*DATA REMOVED*]                                                                                                                                                                     |
| Consumo otros tóxicos                      | <input checked="" type="radio"/> no<br><input type="radio"/> si                                                                                                                      |
| Hb 1T                                      | _____                                                                                                                                                                                |
| Htc 1T                                     | _____                                                                                                                                                                                |
| Hb 2T                                      | _____                                                                                                                                                                                |
| HTC 2T                                     | _____                                                                                                                                                                                |
| Hb 3T                                      | _____                                                                                                                                                                                |
| HTC 3T                                     | _____                                                                                                                                                                                |
| Suplemento FE oral                         | <input checked="" type="radio"/> si<br><input type="radio"/> no                                                                                                                      |
| Suplemento fe iv                           | <input type="radio"/> si<br><input checked="" type="radio"/> no                                                                                                                      |
| Transfusión                                | <input checked="" type="radio"/> no<br><input type="radio"/> si                                                                                                                      |
| Solicitada Vit D                           | <input checked="" type="radio"/> no<br><input type="radio"/> si                                                                                                                      |

|                       |                                                                                                                                                                                                                                                                                                                                                                                                              |
|-----------------------|--------------------------------------------------------------------------------------------------------------------------------------------------------------------------------------------------------------------------------------------------------------------------------------------------------------------------------------------------------------------------------------------------------------|
| Deficit vit D         | <input type="radio"/> no<br><input type="radio"/> si                                                                                                                                                                                                                                                                                                                                                         |
| Suplemento vit D      | <input type="radio"/> si<br><input type="radio"/> no                                                                                                                                                                                                                                                                                                                                                         |
| Dieta, cuestionario   | <input checked="" type="radio"/> si<br><input type="radio"/> no                                                                                                                                                                                                                                                                                                                                              |
| Leche entera          | <input checked="" type="radio"/> Nunca o menos 1 vez al mes<br><input type="radio"/> 1 a 3 veces mes<br><input type="radio"/> 1 vez semana<br><input type="radio"/> 2 a 4 veces semana<br><input type="radio"/> 5 a 6 veces semana<br><input type="radio"/> 1 vez al día<br><input type="radio"/> 2 a 3 veces al día<br><input type="radio"/> 5 a 6 veces al día<br><input type="radio"/> más 6 veces al día |
| Leche semidesnatada   | <input checked="" type="radio"/> Nunca o menos 1 vez al mes<br><input type="radio"/> 1 a 3 veces mes<br><input type="radio"/> 1 vez semana<br><input type="radio"/> 2 a 4 veces semana<br><input type="radio"/> 5 a 6 veces semana<br><input type="radio"/> 1 vez al día<br><input type="radio"/> 2 a 3 veces al día<br><input type="radio"/> 5 a 6 veces al día<br><input type="radio"/> mas 6 veces al día |
| Leche desnatada       | <input checked="" type="radio"/> Nunca o menos 1 vez al mes<br><input type="radio"/> 1 a 3 veces mes<br><input type="radio"/> 1 vez semana<br><input type="radio"/> 2 a 4 veces semana<br><input type="radio"/> 5 a 6 veces semana<br><input type="radio"/> 1 vez al día<br><input type="radio"/> 2 a 3 veces al día<br><input type="radio"/> 5 a 6 veces al día<br><input type="radio"/> más 6 veces al día |
| Leche condensada      | <input checked="" type="radio"/> Nunca o menos 1 vez al mes<br><input type="radio"/> 1 a 3 veces mes<br><input type="radio"/> 1 vez semana<br><input type="radio"/> 2 a 4 veces semana<br><input type="radio"/> 5 a 6 veces semana<br><input type="radio"/> 1 vez al día<br><input type="radio"/> 2 a 3 veces al día<br><input type="radio"/> 5 a 6 veces al día<br><input type="radio"/> más 6 veces al día |
| nata o crema de leche | <input checked="" type="radio"/> Nunca o menos 1 vez al mes<br><input type="radio"/> 1 a 3 veces mes<br><input type="radio"/> 1 vez semana<br><input type="radio"/> 2 a 4 veces semana<br><input type="radio"/> 5 a 6 veces semana<br><input type="radio"/> 1 vez al día<br><input type="radio"/> 2 a 3 veces al día<br><input type="radio"/> 5 a 6 veces al día<br><input type="radio"/> más 6 veces al día |

|                                             |                                                                                                                                                                                                                                                                                                                                                                                                              |
|---------------------------------------------|--------------------------------------------------------------------------------------------------------------------------------------------------------------------------------------------------------------------------------------------------------------------------------------------------------------------------------------------------------------------------------------------------------------|
| Yogurt Entero                               | <input checked="" type="radio"/> Nunca o menos 1 vez al mes<br><input type="radio"/> 1 a 3 veces mes<br><input type="radio"/> 1 vez semana<br><input type="radio"/> 2 a 4 veces semana<br><input type="radio"/> 5 a 6 veces semana<br><input type="radio"/> 1 vez al día<br><input type="radio"/> 2 a 3 veces al día<br><input type="radio"/> 5 a 6 veces al día<br><input type="radio"/> más 6 veces al día |
| Yogurt desnatado                            | <input checked="" type="radio"/> Nunca o menos 1 vez al mes<br><input type="radio"/> 1 a 3 veces mes<br><input type="radio"/> 1 vez semana<br><input type="radio"/> 2 a 4 veces semana<br><input type="radio"/> 5 a 6 veces semana<br><input type="radio"/> 1 vez al día<br><input type="radio"/> 2 a 3 veces al día<br><input type="radio"/> 5 a 6 veces al día<br><input type="radio"/> más 6 veces al día |
| 100g requesón o queso blando o queso fresco | <input type="radio"/> Nunca o menos 1 vez al mes<br><input checked="" type="radio"/> 1 a 3 veces mes<br><input type="radio"/> 1 vez semana<br><input type="radio"/> 2 a 4 veces semana<br><input type="radio"/> 5 a 6 veces semana<br><input type="radio"/> 1 vez al día<br><input type="radio"/> 2 a 3 veces al día<br><input type="radio"/> 5 a 6 veces al día<br><input type="radio"/> más 6 veces al día |
| queso curado o semicurado o cremoso         | <input type="radio"/> Nunca o menos 1 vez al mes<br><input type="radio"/> 1 a 3 veces mes<br><input type="radio"/> 1 vez semana<br><input checked="" type="radio"/> 2 a 4 veces semana<br><input type="radio"/> 5 a 6 veces semana<br><input type="radio"/> 1 vez al día<br><input type="radio"/> 2 a 3 veces al día<br><input type="radio"/> 5 a 6 veces al día<br><input type="radio"/> más 6 veces al día |
| natillas flan pudding                       | <input checked="" type="radio"/> Nunca o menos 1 vez al mes<br><input type="radio"/> 1 a 3 veces mes<br><input type="radio"/> 1 vez semana<br><input type="radio"/> 2 a 4 veces semana<br><input type="radio"/> 5 a 6 veces semana<br><input type="radio"/> 1 vez al día<br><input type="radio"/> 2 a 3 veces al día<br><input type="radio"/> 5 a 6 veces al día<br><input type="radio"/> más 6 veces al día |
| Helado                                      | <input type="radio"/> Nunca o menos 1 vez al mes<br><input checked="" type="radio"/> 1 a 3 veces mes<br><input type="radio"/> 1 vez semana<br><input type="radio"/> 2 a 4 veces semana<br><input type="radio"/> 5 a 6 veces semana<br><input type="radio"/> 1 vez al día<br><input type="radio"/> 2 a 3 veces al día<br><input type="radio"/> 5 a 6 veces al día<br><input type="radio"/> más 6 veces al día |

|                                      |                                                                                                                                                                                                                                                                                                                                                                                                              |
|--------------------------------------|--------------------------------------------------------------------------------------------------------------------------------------------------------------------------------------------------------------------------------------------------------------------------------------------------------------------------------------------------------------------------------------------------------------|
| huevo                                | <input type="radio"/> Nunca o menos 1 vez al mes<br><input type="radio"/> 1 a 3 veces mes<br><input type="radio"/> 1 vez semana<br><input type="radio"/> 2 a 4 veces semana<br><input type="radio"/> 5 a 6 veces semana<br><input type="radio"/> 1 vez al día<br><input checked="" type="radio"/> 2 a 3 veces al día<br><input type="radio"/> 5 a 6 veces al día<br><input type="radio"/> más 6 veces al día |
| Pollo con piel                       | <input checked="" type="radio"/> Nunca o menos 1 vez al mes<br><input type="radio"/> 1 a 3 veces mes<br><input type="radio"/> 1 vez semana<br><input type="radio"/> 2 a 4 veces semana<br><input type="radio"/> 5 a 6 veces semana<br><input type="radio"/> 1 vez al día<br><input type="radio"/> 2 a 3 veces al día<br><input type="radio"/> 5 a 6 veces al día<br><input type="radio"/> más 6 veces al día |
| pollo sin piel                       | <input type="radio"/> Nunca o menos 1 vez al mes<br><input checked="" type="radio"/> 1 a 3 veces mes<br><input type="radio"/> 1 vez semana<br><input type="radio"/> 2 a 4 veces semana<br><input type="radio"/> 5 a 6 veces semana<br><input type="radio"/> 1 vez al día<br><input type="radio"/> 2 a 3 veces al día<br><input type="radio"/> 5 a 6 veces al día<br><input type="radio"/> más 6 veces al día |
| Ternera o cerdo o cordero            | <input checked="" type="radio"/> Nunca o menos 1 vez al mes<br><input type="radio"/> 1 a 3 veces mes<br><input type="radio"/> 1 vez semana<br><input type="radio"/> 2 a 4 veces semana<br><input type="radio"/> 5 a 6 veces semana<br><input type="radio"/> 1 vez al día<br><input type="radio"/> 2 a 3 veces al día<br><input type="radio"/> 5 a 6 veces al día<br><input type="radio"/> más 6 veces al día |
| carne caza: Conejo o codorniz o pato | <input checked="" type="radio"/> Nunca o menos 1 vez al mes<br><input type="radio"/> 1 a 3 veces mes<br><input type="radio"/> 1 vez semana<br><input type="radio"/> 2 a 4 veces semana<br><input type="radio"/> 5 a 6 veces semana<br><input type="radio"/> 1 vez al día<br><input type="radio"/> 2 a 3 veces al día<br><input type="radio"/> 5 a 6 veces al día<br><input type="radio"/> más 6 veces al día |
| Hígado de ternera o cerdo o pollo    | <input checked="" type="radio"/> Nunca o menos 1 vez al mes<br><input type="radio"/> 1 a 3 veces mes<br><input type="radio"/> 1 vez semana<br><input type="radio"/> 2 a 4 veces semana<br><input type="radio"/> 5 a 6 veces semana<br><input type="radio"/> 1 vez al día<br><input type="radio"/> 2 a 3 veces al día<br><input type="radio"/> 5 a 6 veces al día<br><input type="radio"/> más 6 veces al día |

|                     |                                                                                                                                                                                                                                                                                                                                                                                                              |
|---------------------|--------------------------------------------------------------------------------------------------------------------------------------------------------------------------------------------------------------------------------------------------------------------------------------------------------------------------------------------------------------------------------------------------------------|
| Vísceras            | <input checked="" type="radio"/> Nunca o menos 1 vez al mes<br><input type="radio"/> 1 a 3 veces mes<br><input type="radio"/> 1 vez semana<br><input type="radio"/> 2 a 4 veces semana<br><input type="radio"/> 5 a 6 veces semana<br><input type="radio"/> 1 vez al día<br><input type="radio"/> 2 a 3 veces al día<br><input type="radio"/> 5 a 6 veces al día<br><input type="radio"/> más 6 veces al día |
| Embutido            | <input type="radio"/> Nunca o menos 1 vez al mes<br><input type="radio"/> 1 a 3 veces mes<br><input type="radio"/> 1 vez semana<br><input checked="" type="radio"/> 2 a 4 veces semana<br><input type="radio"/> 5 a 6 veces semana<br><input type="radio"/> 1 vez al día<br><input type="radio"/> 2 a 3 veces al día<br><input type="radio"/> 5 a 6 veces al día<br><input type="radio"/> más 6 veces al día |
| Salchicha o similar | <input checked="" type="radio"/> Nunca o menos 1 vez al mes<br><input type="radio"/> 1 a 3 veces mes<br><input type="radio"/> 1 vez semana<br><input type="radio"/> 2 a 4 veces semana<br><input type="radio"/> 5 a 6 veces semana<br><input type="radio"/> 1 vez al día<br><input type="radio"/> 2 a 3 veces al día<br><input type="radio"/> 5 a 6 veces al día<br><input type="radio"/> más 6 veces al día |
| Pate o foiegras     | <input checked="" type="radio"/> Nunca o menos 1 vez al mes<br><input type="radio"/> 1 a 3 veces mes<br><input type="radio"/> 1 vez semana<br><input type="radio"/> 2 a 4 veces semana<br><input type="radio"/> 5 a 6 veces semana<br><input type="radio"/> 1 vez al día<br><input type="radio"/> 2 a 3 veces al día<br><input type="radio"/> 5 a 6 veces al día<br><input type="radio"/> más 6 veces al día |
| Hamburguesa         | <input checked="" type="radio"/> Nunca o menos 1 vez al mes<br><input type="radio"/> 1 a 3 veces mes<br><input type="radio"/> 1 vez semana<br><input type="radio"/> 2 a 4 veces semana<br><input type="radio"/> 5 a 6 veces semana<br><input type="radio"/> 1 vez al día<br><input type="radio"/> 2 a 3 veces al día<br><input type="radio"/> 5 a 6 veces al día<br><input type="radio"/> más 6 veces al día |
| tocino o bacon      | <input type="radio"/> Nunca o menos 1 vez al mes<br><input checked="" type="radio"/> 1 a 3 veces mes<br><input type="radio"/> 1 vez semana<br><input type="radio"/> 2 a 4 veces semana<br><input type="radio"/> 5 a 6 veces semana<br><input type="radio"/> 1 vez al día<br><input type="radio"/> 2 a 3 veces al día<br><input type="radio"/> 5 a 6 veces al día<br><input type="radio"/> más 6 veces al día |

|                        |                                                                                                                                                                                                                                                                                                                                                                                                              |
|------------------------|--------------------------------------------------------------------------------------------------------------------------------------------------------------------------------------------------------------------------------------------------------------------------------------------------------------------------------------------------------------------------------------------------------------|
| Pescado frito          | <input checked="" type="radio"/> Nunca o menos 1 vez al mes<br><input type="radio"/> 1 a 3 veces mes<br><input type="radio"/> 1 vez semana<br><input type="radio"/> 2 a 4 veces semana<br><input type="radio"/> 5 a 6 veces semana<br><input type="radio"/> 1 vez al día<br><input type="radio"/> 2 a 3 veces al día<br><input type="radio"/> 5 a 6 veces al día<br><input type="radio"/> más 6 veces al día |
| pescado hervido blanco | <input type="radio"/> Nunca o menos 1 vez al mes<br><input type="radio"/> 1 a 3 veces mes<br><input type="radio"/> 1 vez semana<br><input checked="" type="radio"/> 2 a 4 veces semana<br><input type="radio"/> 5 a 6 veces semana<br><input type="radio"/> 1 vez al día<br><input type="radio"/> 2 a 3 veces al día<br><input type="radio"/> 5 a 6 veces al día<br><input type="radio"/> más 6 veces al día |
| pescado hervido azul   | <input type="radio"/> Nunca o menos 1 vez al mes<br><input type="radio"/> 1 a 3 veces mes<br><input type="radio"/> 1 vez semana<br><input checked="" type="radio"/> 2 a 4 veces semana<br><input type="radio"/> 5 a 6 veces semana<br><input type="radio"/> 1 vez al día<br><input type="radio"/> 2 a 3 veces al día<br><input type="radio"/> 5 a 6 veces al día<br><input type="radio"/> más 6 veces al día |
| otros pescado azul     | <input type="radio"/> Nunca o menos 1 vez al mes<br><input checked="" type="radio"/> 1 a 3 veces mes<br><input type="radio"/> 1 vez semana<br><input type="radio"/> 2 a 4 veces semana<br><input type="radio"/> 5 a 6 veces semana<br><input type="radio"/> 1 vez al día<br><input type="radio"/> 2 a 3 veces al día<br><input type="radio"/> 5 a 6 veces al día<br><input type="radio"/> más 6 veces al día |
| atun conserva          | <input type="radio"/> Nunca o menos 1 vez al mes<br><input type="radio"/> 1 a 3 veces mes<br><input type="radio"/> 1 vez semana<br><input checked="" type="radio"/> 2 a 4 veces semana<br><input type="radio"/> 5 a 6 veces semana<br><input type="radio"/> 1 vez al día<br><input type="radio"/> 2 a 3 veces al día<br><input type="radio"/> 5 a 6 veces al día<br><input type="radio"/> más 6 veces al día |
| sardina conserva       | <input checked="" type="radio"/> Nunca o menos 1 vez al mes<br><input type="radio"/> 1 a 3 veces mes<br><input type="radio"/> 1 vez semana<br><input type="radio"/> 2 a 4 veces semana<br><input type="radio"/> 5 a 6 veces semana<br><input type="radio"/> 1 vez al día<br><input type="radio"/> 2 a 3 veces al día<br><input type="radio"/> 5 a 6 veces al día<br><input type="radio"/> más 6 veces al día |

|                                         |                                                                                                                                                                                                                                                                                                                                                                                                              |
|-----------------------------------------|--------------------------------------------------------------------------------------------------------------------------------------------------------------------------------------------------------------------------------------------------------------------------------------------------------------------------------------------------------------------------------------------------------------|
| pescado ahumado                         | <input checked="" type="radio"/> Nunca o menos 1 vez al mes<br><input type="radio"/> 1 a 3 veces mes<br><input type="radio"/> 1 vez semana<br><input type="radio"/> 2 a 4 veces semana<br><input type="radio"/> 5 a 6 veces semana<br><input type="radio"/> 1 vez al día<br><input type="radio"/> 2 a 3 veces al día<br><input type="radio"/> 5 a 6 veces al día<br><input type="radio"/> más 6 veces al día |
| almejas o mejillones o ostras unos 100g | <input checked="" type="radio"/> Nunca o menos 1 vez al mes<br><input type="radio"/> 1 a 3 veces mes<br><input type="radio"/> 1 vez semana<br><input type="radio"/> 2 a 4 veces semana<br><input type="radio"/> 5 a 6 veces semana<br><input type="radio"/> 1 vez al día<br><input type="radio"/> 2 a 3 veces al día<br><input type="radio"/> 5 a 6 veces al día<br><input type="radio"/> más 6 veces al día |
| calamar o chipiron o sepia unos 100g    | <input type="radio"/> Nunca o menos 1 vez al mes<br><input checked="" type="radio"/> 1 a 3 veces mes<br><input type="radio"/> 1 vez semana<br><input type="radio"/> 2 a 4 veces semana<br><input type="radio"/> 5 a 6 veces semana<br><input type="radio"/> 1 vez al día<br><input type="radio"/> 2 a 3 veces al día<br><input type="radio"/> 5 a 6 veces al día<br><input type="radio"/> más 6 veces al día |
| marisco unos 100g                       | <input checked="" type="radio"/> Nunca o menos 1 vez al mes<br><input type="radio"/> 1 a 3 veces mes<br><input type="radio"/> 1 vez semana<br><input type="radio"/> 2 a 4 veces semana<br><input type="radio"/> 5 a 6 veces semana<br><input type="radio"/> 1 vez al día<br><input type="radio"/> 2 a 3 veces al día<br><input type="radio"/> 5 a 6 veces al día<br><input type="radio"/> más 6 veces al día |
| Espinacas o acelgas cocinadas           | <input type="radio"/> Nunca o menos 1 vez al mes<br><input checked="" type="radio"/> 1 a 3 veces mes<br><input type="radio"/> 1 vez semana<br><input type="radio"/> 2 a 4 veces semana<br><input type="radio"/> 5 a 6 veces semana<br><input type="radio"/> 1 vez al día<br><input type="radio"/> 2 a 3 veces al día<br><input type="radio"/> 5 a 6 veces al día<br><input type="radio"/> más 6 veces al día |
| Col o coliflor o brocoli cocinado       | <input type="radio"/> Nunca o menos 1 vez al mes<br><input type="radio"/> 1 a 3 veces mes<br><input type="radio"/> 1 vez semana<br><input type="radio"/> 2 a 4 veces semana<br><input type="radio"/> 5 a 6 veces semana<br><input checked="" type="radio"/> 1 vez al día<br><input type="radio"/> 2 a 3 veces al día<br><input type="radio"/> 5 a 6 veces al día<br><input type="radio"/> más 6 veces al día |

---

Lechuga o endivia o escarola

- ☐ Nunca o menos 1 vez al mes  
☐ 1 a 3 veces mes  
☐ 1 vez semana  
☐ 2 a 4 veces semana  
☐ 5 a 6 veces semana  
☒ 1 vez al día  
☐ 2 a 3 veces al día  
☐ 5 a 6 veces al día  
☐ más 6 veces al día

---

tomate ensalada

- ☐ Nunca o menos 1 vez al mes  
☐ 1 a 3 veces mes  
☐ 1 vez semana  
☐ 2 a 4 veces semana  
☐ 5 a 6 veces semana  
☒ 1 vez al día  
☐ 2 a 3 veces al día  
☐ 5 a 6 veces al día  
☐ más 6 veces al día

---

cebolla

- ☐ Nunca o menos 1 vez al mes  
☐ 1 a 3 veces mes  
☐ 1 vez semana  
☐ 2 a 4 veces semana  
☐ 5 a 6 veces semana  
☒ 1 vez al día  
☐ 2 a 3 veces al día  
☐ 5 a 6 veces al día  
☐ más 6 veces al día

---

Zanahoria o calabaza

- ☐ Nunca o menos 1 vez al mes  
☐ 1 a 3 veces mes  
☐ 1 vez semana  
☐ 2 a 4 veces semana  
☐ 5 a 6 veces semana  
☒ 1 vez al día  
☐ 2 a 3 veces al día  
☐ 5 a 6 veces al día  
☐ más 6 veces al día

---

Judías verdes

- ☐ Nunca o menos 1 vez al mes  
☐ 1 a 3 veces mes  
☐ 1 vez semana  
☐ 2 a 4 veces semana  
☐ 5 a 6 veces semana  
☒ 1 vez al día  
☐ 2 a 3 veces al día  
☐ 5 a 6 veces al día  
☐ más 6 veces al día

---

Berenjena o calabacin o pepino

- ☐ Nunca o menos 1 vez al mes  
☒ 1 a 3 veces mes  
☐ 1 vez semana  
☐ 2 a 4 veces semana  
☐ 5 a 6 veces semana  
☐ 1 vez al día  
☐ 2 a 3 veces al día  
☐ 5 a 6 veces al día  
☐ más 6 veces al día



|                       |                                                                                                                                                                                                                                                                                                                                                                                                              |
|-----------------------|--------------------------------------------------------------------------------------------------------------------------------------------------------------------------------------------------------------------------------------------------------------------------------------------------------------------------------------------------------------------------------------------------------------|
| pimiento              | <input type="radio"/> Nunca o menos 1 vez al mes<br><input checked="" type="radio"/> 1 a 3 veces mes<br><input type="radio"/> 1 vez semana<br><input type="radio"/> 2 a 4 veces semana<br><input type="radio"/> 5 a 6 veces semana<br><input type="radio"/> 1 vez al día<br><input type="radio"/> 2 a 3 veces al día<br><input type="radio"/> 5 a 6 veces al día<br><input type="radio"/> más 6 veces al día |
| alcachofa             | <input type="radio"/> Nunca o menos 1 vez al mes<br><input checked="" type="radio"/> 1 a 3 veces mes<br><input type="radio"/> 1 vez semana<br><input type="radio"/> 2 a 4 veces semana<br><input type="radio"/> 5 a 6 veces semana<br><input type="radio"/> 1 vez al día<br><input type="radio"/> 2 a 3 veces al día<br><input type="radio"/> 5 a 6 veces al día<br><input type="radio"/> más 6 veces al día |
| espárragos            | <input type="radio"/> Nunca o menos 1 vez al mes<br><input checked="" type="radio"/> 1 a 3 veces mes<br><input type="radio"/> 1 vez semana<br><input type="radio"/> 2 a 4 veces semana<br><input type="radio"/> 5 a 6 veces semana<br><input type="radio"/> 1 vez al día<br><input type="radio"/> 2 a 3 veces al día<br><input type="radio"/> 5 a 6 veces al día<br><input type="radio"/> más 6 veces al día |
| maíz hervido          | <input type="radio"/> Nunca o menos 1 vez al mes<br><input checked="" type="radio"/> 1 a 3 veces mes<br><input type="radio"/> 1 vez semana<br><input type="radio"/> 2 a 4 veces semana<br><input type="radio"/> 5 a 6 veces semana<br><input type="radio"/> 1 vez al día<br><input type="radio"/> 2 a 3 veces al día<br><input type="radio"/> 5 a 6 veces al día<br><input type="radio"/> más 6 veces al día |
| legumbres             | <input type="radio"/> Nunca o menos 1 vez al mes<br><input type="radio"/> 1 a 3 veces mes<br><input checked="" type="radio"/> 1 vez semana<br><input type="radio"/> 2 a 4 veces semana<br><input type="radio"/> 5 a 6 veces semana<br><input type="radio"/> 1 vez al día<br><input type="radio"/> 2 a 3 veces al día<br><input type="radio"/> 5 a 6 veces al día<br><input type="radio"/> más 6 veces al día |
| naranjas o mandarinas | <input type="radio"/> Nunca o menos 1 vez al mes<br><input type="radio"/> 1 a 3 veces mes<br><input type="radio"/> 1 vez semana<br><input type="radio"/> 2 a 4 veces semana<br><input type="radio"/> 5 a 6 veces semana<br><input type="radio"/> 1 vez al día<br><input checked="" type="radio"/> 2 a 3 veces al día<br><input type="radio"/> 5 a 6 veces al día<br><input type="radio"/> más 6 veces al día |

|                       |                                                                                                                                                                                                                                                                                                                                                                                                              |
|-----------------------|--------------------------------------------------------------------------------------------------------------------------------------------------------------------------------------------------------------------------------------------------------------------------------------------------------------------------------------------------------------------------------------------------------------|
| zum natural fruta     | <input type="radio"/> Nunca o menos 1 vez al mes<br><input type="radio"/> 1 a 3 veces mes<br><input type="radio"/> 1 vez semana<br><input type="radio"/> 2 a 4 veces semana<br><input type="radio"/> 5 a 6 veces semana<br><input checked="" type="radio"/> 1 vez al día<br><input type="radio"/> 2 a 3 veces al día<br><input type="radio"/> 5 a 6 veces al día<br><input type="radio"/> más 6 veces al día |
| platano               | <input type="radio"/> Nunca o menos 1 vez al mes<br><input type="radio"/> 1 a 3 veces mes<br><input type="radio"/> 1 vez semana<br><input type="radio"/> 2 a 4 veces semana<br><input type="radio"/> 5 a 6 veces semana<br><input checked="" type="radio"/> 1 vez al día<br><input type="radio"/> 2 a 3 veces al día<br><input type="radio"/> 5 a 6 veces al día<br><input type="radio"/> más 6 veces al día |
| manzana o pera        | <input type="radio"/> Nunca o menos 1 vez al mes<br><input type="radio"/> 1 a 3 veces mes<br><input type="radio"/> 1 vez semana<br><input checked="" type="radio"/> 2 a 4 veces semana<br><input type="radio"/> 5 a 6 veces semana<br><input type="radio"/> 1 vez al día<br><input type="radio"/> 2 a 3 veces al día<br><input type="radio"/> 5 a 6 veces al día<br><input type="radio"/> más 6 veces al día |
| melocotón o nectarina | <input checked="" type="radio"/> Nunca o menos 1 vez al mes<br><input type="radio"/> 1 a 3 veces mes<br><input type="radio"/> 1 vez semana<br><input type="radio"/> 2 a 4 veces semana<br><input type="radio"/> 5 a 6 veces semana<br><input type="radio"/> 1 vez al día<br><input type="radio"/> 2 a 3 veces al día<br><input type="radio"/> 5 a 6 veces al día<br><input type="radio"/> más 6 veces al día |
| sandia o melon        | <input checked="" type="radio"/> Nunca o menos 1 vez al mes<br><input type="radio"/> 1 a 3 veces mes<br><input type="radio"/> 1 vez semana<br><input type="radio"/> 2 a 4 veces semana<br><input type="radio"/> 5 a 6 veces semana<br><input type="radio"/> 1 vez al día<br><input type="radio"/> 2 a 3 veces al día<br><input type="radio"/> 5 a 6 veces al día<br><input type="radio"/> más 6 veces al día |
| uva                   | <input type="radio"/> Nunca o menos 1 vez al mes<br><input checked="" type="radio"/> 1 a 3 veces mes<br><input type="radio"/> 1 vez semana<br><input type="radio"/> 2 a 4 veces semana<br><input type="radio"/> 5 a 6 veces semana<br><input type="radio"/> 1 vez al día<br><input type="radio"/> 2 a 3 veces al día<br><input type="radio"/> 5 a 6 veces al día<br><input type="radio"/> más 6 veces al día |

|                 |                                                                                                                                                                                                                                                                                                                                                                                                              |
|-----------------|--------------------------------------------------------------------------------------------------------------------------------------------------------------------------------------------------------------------------------------------------------------------------------------------------------------------------------------------------------------------------------------------------------------|
| bruna o ciruela | <input checked="" type="radio"/> Nunca o menos 1 vez al mes<br><input type="radio"/> 1 a 3 veces mes<br><input type="radio"/> 1 vez semana<br><input type="radio"/> 2 a 4 veces semana<br><input type="radio"/> 5 a 6 veces semana<br><input type="radio"/> 1 vez al día<br><input type="radio"/> 2 a 3 veces al día<br><input type="radio"/> 5 a 6 veces al día<br><input type="radio"/> más 6 veces al día |
| kiwi            | <input type="radio"/> Nunca o menos 1 vez al mes<br><input type="radio"/> 1 a 3 veces mes<br><input type="radio"/> 1 vez semana<br><input checked="" type="radio"/> 2 a 4 veces semana<br><input type="radio"/> 5 a 6 veces semana<br><input type="radio"/> 1 vez al día<br><input type="radio"/> 2 a 3 veces al día<br><input type="radio"/> 5 a 6 veces al día<br><input type="radio"/> más 6 veces al día |
| aceituna        | <input type="radio"/> Nunca o menos 1 vez al mes<br><input checked="" type="radio"/> 1 a 3 veces mes<br><input type="radio"/> 1 vez semana<br><input type="radio"/> 2 a 4 veces semana<br><input type="radio"/> 5 a 6 veces semana<br><input type="radio"/> 1 vez al día<br><input type="radio"/> 2 a 3 veces al día<br><input type="radio"/> 5 a 6 veces al día<br><input type="radio"/> más 6 veces al día |
| frutos secos    | <input type="radio"/> Nunca o menos 1 vez al mes<br><input checked="" type="radio"/> 1 a 3 veces mes<br><input type="radio"/> 1 vez semana<br><input type="radio"/> 2 a 4 veces semana<br><input type="radio"/> 5 a 6 veces semana<br><input type="radio"/> 1 vez al día<br><input type="radio"/> 2 a 3 veces al día<br><input type="radio"/> 5 a 6 veces al día<br><input type="radio"/> más 6 veces al día |
| pan blanco      | <input type="radio"/> Nunca o menos 1 vez al mes<br><input checked="" type="radio"/> 1 a 3 veces mes<br><input type="radio"/> 1 vez semana<br><input type="radio"/> 2 a 4 veces semana<br><input type="radio"/> 5 a 6 veces semana<br><input type="radio"/> 1 vez al día<br><input type="radio"/> 2 a 3 veces al día<br><input type="radio"/> 5 a 6 veces al día<br><input type="radio"/> más 6 veces al día |
| pan integral    | <input type="radio"/> Nunca o menos 1 vez al mes<br><input type="radio"/> 1 a 3 veces mes<br><input type="radio"/> 1 vez semana<br><input type="radio"/> 2 a 4 veces semana<br><input type="radio"/> 5 a 6 veces semana<br><input checked="" type="radio"/> 1 vez al día<br><input type="radio"/> 2 a 3 veces al día<br><input type="radio"/> 5 a 6 veces al día<br><input type="radio"/> más 6 veces al día |

---

cereales desayuno

- ☒ Nunca o menos 1 vez al mes  
☐ 1 a 3 veces mes  
☐ 1 vez semana  
☐ 2 a 4 veces semana  
☐ 5 a 6 veces semana  
☐ 1 vez al día  
☐ 2 a 3 veces al día  
☐ 5 a 6 veces al día  
☐ más 6 veces al día

---

patatas fritas

- ☒ Nunca o menos 1 vez al mes  
☐ 1 a 3 veces mes  
☐ 1 vez semana  
☐ 2 a 4 veces semana  
☐ 5 a 6 veces semana  
☐ 1 vez al día  
☐ 2 a 3 veces al día  
☐ 5 a 6 veces al día  
☐ más 6 veces al día

---

patatas cocidas o asadas

- ☐ Nunca o menos 1 vez al mes  
☐ 1 a 3 veces mes  
☐ 1 vez semana  
☒ 2 a 4 veces semana  
☐ 5 a 6 veces semana  
☐ 1 vez al día  
☐ 2 a 3 veces al día  
☐ 5 a 6 veces al día  
☐ más 6 veces al día

---

bolsa papas

- ☒ Nunca o menos 1 vez al mes  
☐ 1 a 3 veces mes  
☐ 1 vez semana  
☐ 2 a 4 veces semana  
☐ 5 a 6 veces semana  
☐ 1 vez al día  
☐ 2 a 3 veces al día  
☐ 5 a 6 veces al día  
☐ más 6 veces al día

---

arroz cocinado

- ☐ Nunca o menos 1 vez al mes  
☐ 1 a 3 veces mes  
☐ 1 vez semana  
☐ 2 a 4 veces semana  
☒ 5 a 6 veces semana  
☐ 1 vez al día  
☐ 2 a 3 veces al día  
☐ 5 a 6 veces al día  
☐ más 6 veces al día

---

pasta

- ☐ Nunca o menos 1 vez al mes  
☐ 1 a 3 veces mes  
☐ 1 vez semana  
☐ 2 a 4 veces semana  
☒ 5 a 6 veces semana  
☐ 1 vez al día  
☐ 2 a 3 veces al día  
☐ 5 a 6 veces al día  
☐ más 6 veces al día

|                     |                                                                                                                                                                                                                                                                                                                                                                                                              |
|---------------------|--------------------------------------------------------------------------------------------------------------------------------------------------------------------------------------------------------------------------------------------------------------------------------------------------------------------------------------------------------------------------------------------------------------|
| pizza               | <input type="radio"/> Nunca o menos 1 vez al mes<br><input type="radio"/> 1 a 3 veces mes<br><input checked="" type="radio"/> 1 vez semana<br><input type="radio"/> 2 a 4 veces semana<br><input type="radio"/> 5 a 6 veces semana<br><input type="radio"/> 1 vez al día<br><input type="radio"/> 2 a 3 veces al día<br><input type="radio"/> 5 a 6 veces al día<br><input type="radio"/> más 6 veces al día |
| aceite oliva        | <input type="radio"/> Nunca o menos 1 vez al mes<br><input type="radio"/> 1 a 3 veces mes<br><input type="radio"/> 1 vez semana<br><input type="radio"/> 2 a 4 veces semana<br><input type="radio"/> 5 a 6 veces semana<br><input type="radio"/> 1 vez al día<br><input checked="" type="radio"/> 2 a 3 veces al día<br><input type="radio"/> 5 a 6 veces al día<br><input type="radio"/> más 6 veces al día |
| otros aceites       | <input checked="" type="radio"/> Nunca o menos 1 vez al mes<br><input type="radio"/> 1 a 3 veces mes<br><input type="radio"/> 1 vez semana<br><input type="radio"/> 2 a 4 veces semana<br><input type="radio"/> 5 a 6 veces semana<br><input type="radio"/> 1 vez al día<br><input type="radio"/> 2 a 3 veces al día<br><input type="radio"/> 5 a 6 veces al día<br><input type="radio"/> más 6 veces al día |
| margarina           | <input type="radio"/> Nunca o menos 1 vez al mes<br><input type="radio"/> 1 a 3 veces mes<br><input type="radio"/> 1 vez semana<br><input checked="" type="radio"/> 2 a 4 veces semana<br><input type="radio"/> 5 a 6 veces semana<br><input type="radio"/> 1 vez al día<br><input type="radio"/> 2 a 3 veces al día<br><input type="radio"/> 5 a 6 veces al día<br><input type="radio"/> más 6 veces al día |
| mantequilla         | <input checked="" type="radio"/> Nunca o menos 1 vez al mes<br><input type="radio"/> 1 a 3 veces mes<br><input type="radio"/> 1 vez semana<br><input type="radio"/> 2 a 4 veces semana<br><input type="radio"/> 5 a 6 veces semana<br><input type="radio"/> 1 vez al día<br><input type="radio"/> 2 a 3 veces al día<br><input type="radio"/> 5 a 6 veces al día<br><input type="radio"/> más 6 veces al día |
| galletas tipo maria | <input checked="" type="radio"/> Nunca o menos 1 vez al mes<br><input type="radio"/> 1 a 3 veces mes<br><input type="radio"/> 1 vez semana<br><input type="radio"/> 2 a 4 veces semana<br><input type="radio"/> 5 a 6 veces semana<br><input type="radio"/> 1 vez al día<br><input type="radio"/> 2 a 3 veces al día<br><input type="radio"/> 5 a 6 veces al día<br><input type="radio"/> más 6 veces al día |

---

galletas chocolate

- ☒ Nunca o menos 1 vez al mes  
☐ 1 a 3 veces mes  
☐ 1 vez semana  
☐ 2 a 4 veces semana  
☐ 5 a 6 veces semana  
☐ 1 vez al día  
☐ 2 a 3 veces al día  
☐ 5 a 6 veces al día  
☐ más 6 veces al día

---

bolleria

- ☒ Nunca o menos 1 vez al mes  
☐ 1 a 3 veces mes  
☐ 1 vez semana  
☐ 2 a 4 veces semana  
☐ 5 a 6 veces semana  
☐ 1 vez al día  
☐ 2 a 3 veces al día  
☐ 5 a 6 veces al día  
☐ más 6 veces al día

---

chocolate o bombones

- ☐ Nunca o menos 1 vez al mes  
☐ 1 a 3 veces mes  
☐ 1 vez semana  
☐ 2 a 4 veces semana  
☐ 5 a 6 veces semana  
☒ 1 vez al día  
☐ 2 a 3 veces al día  
☐ 5 a 6 veces al día  
☐ más 6 veces al día

---

chocolate polvo o colacao

- ☒ Nunca o menos 1 vez al mes  
☐ 1 a 3 veces mes  
☐ 1 vez semana  
☐ 2 a 4 veces semana  
☐ 5 a 6 veces semana  
☐ 1 vez al día  
☐ 2 a 3 veces al día  
☐ 5 a 6 veces al día  
☐ más 6 veces al día

---

vino tinto

- ☒ Nunca o menos 1 vez al mes  
☐ 1 a 3 veces mes  
☐ 1 vez semana  
☐ 2 a 4 veces semana  
☐ 5 a 6 veces semana  
☐ 1 vez al día  
☐ 2 a 3 veces al día  
☐ 5 a 6 veces al día  
☐ más 6 veces al día

---

vino blanco

- ☒ Nunca o menos 1 vez al mes  
☐ 1 a 3 veces mes  
☐ 1 vez semana  
☐ 2 a 4 veces semana  
☐ 5 a 6 veces semana  
☐ 1 vez al día  
☐ 2 a 3 veces al día  
☐ 5 a 6 veces al día  
☐ más 6 veces al día

|                       |                                                                                                                                                                                                                                                                                                                                                                                                              |
|-----------------------|--------------------------------------------------------------------------------------------------------------------------------------------------------------------------------------------------------------------------------------------------------------------------------------------------------------------------------------------------------------------------------------------------------------|
| vino seco o vermut    | <input checked="" type="radio"/> Nunca o menos 1 vez al mes<br><input type="radio"/> 1 a 3 veces mes<br><input type="radio"/> 1 vez semana<br><input type="radio"/> 2 a 4 veces semana<br><input type="radio"/> 5 a 6 veces semana<br><input type="radio"/> 1 vez al día<br><input type="radio"/> 2 a 3 veces al día<br><input type="radio"/> 5 a 6 veces al día<br><input type="radio"/> más 6 veces al día |
| cerveza               | <input checked="" type="radio"/> Nunca o menos 1 vez al mes<br><input type="radio"/> 1 a 3 veces mes<br><input type="radio"/> 1 vez semana<br><input type="radio"/> 2 a 4 veces semana<br><input type="radio"/> 5 a 6 veces semana<br><input type="radio"/> 1 vez al día<br><input type="radio"/> 2 a 3 veces al día<br><input type="radio"/> 5 a 6 veces al día<br><input type="radio"/> más 6 veces al día |
| cerveza sin alcohol   | <input checked="" type="radio"/> Nunca o menos 1 vez al mes<br><input type="radio"/> 1 a 3 veces mes<br><input type="radio"/> 1 vez semana<br><input type="radio"/> 2 a 4 veces semana<br><input type="radio"/> 5 a 6 veces semana<br><input type="radio"/> 1 vez al día<br><input type="radio"/> 2 a 3 veces al día<br><input type="radio"/> 5 a 6 veces al día<br><input type="radio"/> más 6 veces al día |
| licores               | <input checked="" type="radio"/> Nunca o menos 1 vez al mes<br><input type="radio"/> 1 a 3 veces mes<br><input type="radio"/> 1 vez semana<br><input type="radio"/> 2 a 4 veces semana<br><input type="radio"/> 5 a 6 veces semana<br><input type="radio"/> 1 vez al día<br><input type="radio"/> 2 a 3 veces al día<br><input type="radio"/> 5 a 6 veces al día<br><input type="radio"/> más 6 veces al día |
| ginebra o ron o vodka | <input checked="" type="radio"/> Nunca o menos 1 vez al mes<br><input type="radio"/> 1 a 3 veces mes<br><input type="radio"/> 1 vez semana<br><input type="radio"/> 2 a 4 veces semana<br><input type="radio"/> 5 a 6 veces semana<br><input type="radio"/> 1 vez al día<br><input type="radio"/> 2 a 3 veces al día<br><input type="radio"/> 5 a 6 veces al día<br><input type="radio"/> más 6 veces al día |
| refresco normal       | <input checked="" type="radio"/> Nunca o menos 1 vez al mes<br><input type="radio"/> 1 a 3 veces mes<br><input type="radio"/> 1 vez semana<br><input type="radio"/> 2 a 4 veces semana<br><input type="radio"/> 5 a 6 veces semana<br><input type="radio"/> 1 vez al día<br><input type="radio"/> 2 a 3 veces al día<br><input type="radio"/> 5 a 6 veces al día<br><input type="radio"/> más 6 veces al día |

|                          |                                                                                                                                                                                                                                                                                                                                                                                                              |
|--------------------------|--------------------------------------------------------------------------------------------------------------------------------------------------------------------------------------------------------------------------------------------------------------------------------------------------------------------------------------------------------------------------------------------------------------|
| refresco sin azúcar      | <input checked="" type="radio"/> Nunca o menos 1 vez al mes<br><input type="radio"/> 1 a 3 veces mes<br><input type="radio"/> 1 vez semana<br><input type="radio"/> 2 a 4 veces semana<br><input type="radio"/> 5 a 6 veces semana<br><input type="radio"/> 1 vez al día<br><input type="radio"/> 2 a 3 veces al día<br><input type="radio"/> 5 a 6 veces al día<br><input type="radio"/> más 6 veces al día |
| Agua del grifo           | <input checked="" type="radio"/> Nunca o menos 1 vez al mes<br><input type="radio"/> 1 a 3 veces mes<br><input type="radio"/> 1 vez semana<br><input type="radio"/> 2 a 4 veces semana<br><input type="radio"/> 5 a 6 veces semana<br><input type="radio"/> 1 vez al día<br><input type="radio"/> 2 a 3 veces al día<br><input type="radio"/> 5 a 6 veces al día<br><input type="radio"/> más 6 veces al día |
| agua embotellada sin gas | <input type="radio"/> Nunca o menos 1 vez al mes<br><input type="radio"/> 1 a 3 veces mes<br><input type="radio"/> 1 vez semana<br><input type="radio"/> 2 a 4 veces semana<br><input type="radio"/> 5 a 6 veces semana<br><input type="radio"/> 1 vez al día<br><input type="radio"/> 2 a 3 veces al día<br><input type="radio"/> 5 a 6 veces al día<br><input checked="" type="radio"/> más 6 veces al día |
| agua embotellada con gas | <input type="radio"/> Nunca o menos 1 vez al mes<br><input checked="" type="radio"/> 1 a 3 veces mes<br><input type="radio"/> 1 vez semana<br><input type="radio"/> 2 a 4 veces semana<br><input type="radio"/> 5 a 6 veces semana<br><input type="radio"/> 1 vez al día<br><input type="radio"/> 2 a 3 veces al día<br><input type="radio"/> 5 a 6 veces al día<br><input type="radio"/> más 6 veces al día |
| zumو frutas embasado     | <input checked="" type="radio"/> Nunca o menos 1 vez al mes<br><input type="radio"/> 1 a 3 veces mes<br><input type="radio"/> 1 vez semana<br><input type="radio"/> 2 a 4 veces semana<br><input type="radio"/> 5 a 6 veces semana<br><input type="radio"/> 1 vez al día<br><input type="radio"/> 2 a 3 veces al día<br><input type="radio"/> 5 a 6 veces al día<br><input type="radio"/> más 6 veces al día |
| cafe                     | <input type="radio"/> Nunca o menos 1 vez al mes<br><input type="radio"/> 1 a 3 veces mes<br><input type="radio"/> 1 vez semana<br><input type="radio"/> 2 a 4 veces semana<br><input type="radio"/> 5 a 6 veces semana<br><input checked="" type="radio"/> 1 vez al día<br><input type="radio"/> 2 a 3 veces al día<br><input type="radio"/> 5 a 6 veces al día<br><input type="radio"/> más 6 veces al día |



|                       |                                                                                                                                                                                                                                                                                                                                                                                                              |
|-----------------------|--------------------------------------------------------------------------------------------------------------------------------------------------------------------------------------------------------------------------------------------------------------------------------------------------------------------------------------------------------------------------------------------------------------|
| cafe descafeinado     | <input type="radio"/> Nunca o menos 1 vez al mes<br><input type="radio"/> 1 a 3 veces mes<br><input type="radio"/> 1 vez semana<br><input type="radio"/> 2 a 4 veces semana<br><input type="radio"/> 5 a 6 veces semana<br><input checked="" type="radio"/> 1 vez al día<br><input type="radio"/> 2 a 3 veces al día<br><input type="radio"/> 5 a 6 veces al día<br><input type="radio"/> más 6 veces al día |
| te o infusión         | <input type="radio"/> Nunca o menos 1 vez al mes<br><input type="radio"/> 1 a 3 veces mes<br><input type="radio"/> 1 vez semana<br><input type="radio"/> 2 a 4 veces semana<br><input type="radio"/> 5 a 6 veces semana<br><input checked="" type="radio"/> 1 vez al día<br><input type="radio"/> 2 a 3 veces al día<br><input type="radio"/> 5 a 6 veces al día<br><input type="radio"/> más 6 veces al día |
| sopa o puré verduras  | <input type="radio"/> Nunca o menos 1 vez al mes<br><input type="radio"/> 1 a 3 veces mes<br><input type="radio"/> 1 vez semana<br><input checked="" type="radio"/> 2 a 4 veces semana<br><input type="radio"/> 5 a 6 veces semana<br><input type="radio"/> 1 vez al día<br><input type="radio"/> 2 a 3 veces al día<br><input type="radio"/> 5 a 6 veces al día<br><input type="radio"/> más 6 veces al día |
| croquetas pollo jamón | <input checked="" type="radio"/> Nunca o menos 1 vez al mes<br><input type="radio"/> 1 a 3 veces mes<br><input type="radio"/> 1 vez semana<br><input type="radio"/> 2 a 4 veces semana<br><input type="radio"/> 5 a 6 veces semana<br><input type="radio"/> 1 vez al día<br><input type="radio"/> 2 a 3 veces al día<br><input type="radio"/> 5 a 6 veces al día<br><input type="radio"/> más 6 veces al día |
| croquetas pescado     | <input checked="" type="radio"/> Nunca o menos 1 vez al mes<br><input type="radio"/> 1 a 3 veces mes<br><input type="radio"/> 1 vez semana<br><input type="radio"/> 2 a 4 veces semana<br><input type="radio"/> 5 a 6 veces semana<br><input type="radio"/> 1 vez al día<br><input type="radio"/> 2 a 3 veces al día<br><input type="radio"/> 5 a 6 veces al día<br><input type="radio"/> más 6 veces al día |
| mayonesa              | <input checked="" type="radio"/> Nunca o menos 1 vez al mes<br><input type="radio"/> 1 a 3 veces mes<br><input type="radio"/> 1 vez semana<br><input type="radio"/> 2 a 4 veces semana<br><input type="radio"/> 5 a 6 veces semana<br><input type="radio"/> 1 vez al día<br><input type="radio"/> 2 a 3 veces al día<br><input type="radio"/> 5 a 6 veces al día<br><input type="radio"/> más 6 veces al día |

|                  |                                                                                                                                                                                                                                                                                                                                                                                                              |
|------------------|--------------------------------------------------------------------------------------------------------------------------------------------------------------------------------------------------------------------------------------------------------------------------------------------------------------------------------------------------------------------------------------------------------------|
| salsa tomate     | <input checked="" type="radio"/> Nunca o menos 1 vez al mes<br><input type="radio"/> 1 a 3 veces mes<br><input type="radio"/> 1 vez semana<br><input type="radio"/> 2 a 4 veces semana<br><input type="radio"/> 5 a 6 veces semana<br><input type="radio"/> 1 vez al día<br><input type="radio"/> 2 a 3 veces al día<br><input type="radio"/> 5 a 6 veces al día<br><input type="radio"/> más 6 veces al día |
| ketchup          | <input checked="" type="radio"/> Nunca o menos 1 vez al mes<br><input type="radio"/> 1 a 3 veces mes<br><input type="radio"/> 1 vez semana<br><input type="radio"/> 2 a 4 veces semana<br><input type="radio"/> 5 a 6 veces semana<br><input type="radio"/> 1 vez al día<br><input type="radio"/> 2 a 3 veces al día<br><input type="radio"/> 5 a 6 veces al día<br><input type="radio"/> más 6 veces al día |
| sal              | <input type="radio"/> Nunca o menos 1 vez al mes<br><input type="radio"/> 1 a 3 veces mes<br><input type="radio"/> 1 vez semana<br><input type="radio"/> 2 a 4 veces semana<br><input type="radio"/> 5 a 6 veces semana<br><input checked="" type="radio"/> 1 vez al día<br><input type="radio"/> 2 a 3 veces al día<br><input type="radio"/> 5 a 6 veces al día<br><input type="radio"/> más 6 veces al día |
| ajo              | <input type="radio"/> Nunca o menos 1 vez al mes<br><input type="radio"/> 1 a 3 veces mes<br><input checked="" type="radio"/> 1 vez semana<br><input type="radio"/> 2 a 4 veces semana<br><input type="radio"/> 5 a 6 veces semana<br><input type="radio"/> 1 vez al día<br><input type="radio"/> 2 a 3 veces al día<br><input type="radio"/> 5 a 6 veces al día<br><input type="radio"/> más 6 veces al día |
| mermelada o miel | <input type="radio"/> Nunca o menos 1 vez al mes<br><input type="radio"/> 1 a 3 veces mes<br><input type="radio"/> 1 vez semana<br><input type="radio"/> 2 a 4 veces semana<br><input type="radio"/> 5 a 6 veces semana<br><input checked="" type="radio"/> 1 vez al día<br><input type="radio"/> 2 a 3 veces al día<br><input type="radio"/> 5 a 6 veces al día<br><input type="radio"/> más 6 veces al día |
| azúcar           | <input checked="" type="radio"/> Nunca o menos 1 vez al mes<br><input type="radio"/> 1 a 3 veces mes<br><input type="radio"/> 1 vez semana<br><input type="radio"/> 2 a 4 veces semana<br><input type="radio"/> 5 a 6 veces semana<br><input type="radio"/> 1 vez al día<br><input type="radio"/> 2 a 3 veces al día<br><input type="radio"/> 5 a 6 veces al día<br><input type="radio"/> más 6 veces al día |

|                                       |                                                                                                                                                                                                                                                                                                                                                                                                                                                                                                                               |
|---------------------------------------|-------------------------------------------------------------------------------------------------------------------------------------------------------------------------------------------------------------------------------------------------------------------------------------------------------------------------------------------------------------------------------------------------------------------------------------------------------------------------------------------------------------------------------|
| Otro alimento                         |                                                                                                                                                                                                                                                                                                                                                                                                                                                                                                                               |
| suplementos vitamínicos               | <input checked="" type="radio"/> si<br><input type="radio"/> no                                                                                                                                                                                                                                                                                                                                                                                                                                                               |
| suplementos vitamínicos               | [*DATA REMOVED*]                                                                                                                                                                                                                                                                                                                                                                                                                                                                                                              |
| dieta previa                          | <input type="radio"/> si<br><input checked="" type="radio"/> no                                                                                                                                                                                                                                                                                                                                                                                                                                                               |
| motivo dieta                          | <input checked="" type="radio"/> no dieta<br><input type="radio"/> control peso<br><input type="radio"/> control colesterol<br><input type="radio"/> control diabetes<br><input type="radio"/> problemas estómago<br><input type="radio"/> problemas vesícula o hepáticos<br><input type="radio"/> HTA o cardiopatía<br><input type="radio"/> problemas renales<br><input type="radio"/> alergia alimentaria<br><input type="radio"/> ácido úrico elevado<br><input type="radio"/> vegetariana<br><input type="radio"/> otros |
| cambio alimentos año previo gestación | <input checked="" type="radio"/> si<br><input type="radio"/> no                                                                                                                                                                                                                                                                                                                                                                                                                                                               |
| cambio lácteos                        | <input type="radio"/> eliminado<br><input type="radio"/> disminuido<br><input checked="" type="radio"/> igual<br><input type="radio"/> aumentado<br><input type="radio"/> no sabe                                                                                                                                                                                                                                                                                                                                             |
| cambio huevos                         | <input type="radio"/> eliminado<br><input type="radio"/> disminuido<br><input checked="" type="radio"/> igual<br><input type="radio"/> aumentado<br><input type="radio"/> no sabe                                                                                                                                                                                                                                                                                                                                             |
| cambio carne                          | <input type="radio"/> eliminado<br><input type="radio"/> disminuido<br><input checked="" type="radio"/> igual<br><input type="radio"/> aumentado<br><input type="radio"/> no sabe                                                                                                                                                                                                                                                                                                                                             |
| cambio pescado                        | <input type="radio"/> eliminado<br><input type="radio"/> disminuido<br><input checked="" type="radio"/> igual<br><input type="radio"/> aumentado<br><input type="radio"/> no sabe                                                                                                                                                                                                                                                                                                                                             |
| cambio verduras                       | <input type="radio"/> eliminado<br><input type="radio"/> disminuido<br><input checked="" type="radio"/> igual<br><input type="radio"/> aumentado<br><input type="radio"/> no sabe                                                                                                                                                                                                                                                                                                                                             |

|                            |                                                                                                                                                                                                                        |
|----------------------------|------------------------------------------------------------------------------------------------------------------------------------------------------------------------------------------------------------------------|
| cambio legumbres           | <input type="radio"/> eliminado<br><input type="radio"/> disminuido<br><input checked="" type="radio"/> igual<br><input type="radio"/> aumentado<br><input type="radio"/> no sabe                                      |
| cambio fruta               | <input type="radio"/> eliminado<br><input type="radio"/> disminuido<br><input type="radio"/> igual<br><input checked="" type="radio"/> aumentado<br><input type="radio"/> no sabe                                      |
| cambio pan                 | <input type="radio"/> eliminado<br><input type="radio"/> disminuido<br><input checked="" type="radio"/> igual<br><input type="radio"/> aumentado<br><input type="radio"/> no sabe                                      |
| cambio aceite oliva        | <input type="radio"/> eliminado<br><input type="radio"/> disminuido<br><input checked="" type="radio"/> igual<br><input type="radio"/> aumentado<br><input type="radio"/> no sabe                                      |
| cambio mante o margarina   | <input type="radio"/> eliminado<br><input type="radio"/> disminuido<br><input checked="" type="radio"/> igual<br><input type="radio"/> aumentado<br><input type="radio"/> no sabe                                      |
| cambio azúcar y dulces     | <input type="radio"/> eliminado<br><input type="radio"/> disminuido<br><input checked="" type="radio"/> igual<br><input type="radio"/> aumentado<br><input type="radio"/> no sabe                                      |
| cambio bebidas alcohólicas | <input checked="" type="radio"/> eliminado<br><input type="radio"/> disminuido<br><input type="radio"/> igual<br><input type="radio"/> aumentado<br><input type="radio"/> no sabe                                      |
| frecuencia comidas fritas  | <input type="radio"/> a diario<br><input type="radio"/> 5 a 6 veces semana<br><input type="radio"/> 2 a 4 veces semana<br><input type="radio"/> 1 vez semana<br><input checked="" type="radio"/> menos de 1 vez semana |
| carne                      | <input type="radio"/> no como<br><input type="radio"/> cruda<br><input type="radio"/> poco hecha<br><input type="radio"/> hecha<br><input checked="" type="radio"/> muy hecha                                          |
| grasa visible carne        | <input checked="" type="radio"/> quita toda<br><input type="radio"/> quita mayoría<br><input type="radio"/> quita un poco<br><input type="radio"/> no quita nada                                                       |

|                                |                                                                                                                                                                                                                                                          |
|--------------------------------|----------------------------------------------------------------------------------------------------------------------------------------------------------------------------------------------------------------------------------------------------------|
| cocina carne                   | <input checked="" type="radio"/> a la plancha<br><input type="radio"/> a la parrilla<br><input type="radio"/> asada<br><input type="radio"/> frita<br><input type="radio"/> guisada                                                                      |
| tostado quemado carne          | <input checked="" type="radio"/> nunca<br><input type="radio"/> 1 vez mes<br><input type="radio"/> 2 a 3 veces mes<br><input type="radio"/> 1 vez semana<br><input type="radio"/> 2 a 3 semanas                                                          |
| tostado quemado pescado        | <input checked="" type="radio"/> nunca<br><input type="radio"/> 1 vez mes<br><input type="radio"/> 2 a 3 veces mes<br><input type="radio"/> 1 vez semana<br><input type="radio"/> 2 a 3 semanas                                                          |
| socarrat paella                | <input checked="" type="radio"/> nunca<br><input type="radio"/> 1 vez mes<br><input type="radio"/> 2 a 3 veces mes<br><input type="radio"/> 1 vez semana<br><input type="radio"/> 2 a 3 semanas                                                          |
| grasa o aceite cocinar         | <input type="radio"/> mantequilla<br><input type="radio"/> margarina<br><input checked="" type="radio"/> aceite oliva<br><input type="radio"/> aceite oliva virgen extra<br><input type="radio"/> aceite vegetal<br><input type="radio"/> mezcla aceites |
| grasa aceite aliñar            | <input type="radio"/> mantequilla<br><input type="radio"/> margarina<br><input checked="" type="radio"/> aceite oliva<br><input type="radio"/> aceite oliva virgen extra<br><input type="radio"/> aceite vegetal<br><input type="radio"/> mezcla aceites |
| grasa aceite freir             | <input type="radio"/> mantequilla<br><input type="radio"/> margarina<br><input type="radio"/> aceite oliva<br><input type="radio"/> aceite oliva virgen extra<br><input type="radio"/> aceite vegetal<br><input type="radio"/> mezcla aceites            |
| Ejercicio cuestionario         | <input checked="" type="radio"/> si<br><input type="radio"/> no                                                                                                                                                                                          |
| horas de sueño incluido siesta | [*DATA REMOVED*]                                                                                                                                                                                                                                         |
| minutos siesta                 | [*DATA REMOVED*]                                                                                                                                                                                                                                         |
| horas televisión semana        | [*DATA REMOVED*]                                                                                                                                                                                                                                         |

|                                        |                                                                                                                                                                                                                                                                                                                                                                           |
|----------------------------------------|---------------------------------------------------------------------------------------------------------------------------------------------------------------------------------------------------------------------------------------------------------------------------------------------------------------------------------------------------------------------------|
| actividad trabajo                      | <input checked="" type="radio"/> casi siempre sentado<br><input type="radio"/> sentado 50 por cien<br><input type="radio"/> casi siempre de pie, quieto<br><input type="radio"/> casi siempre levantado caminando y llevando pocas cosas<br><input type="radio"/> casi siempre levantado, caminando y llevado muchas cosas<br><input type="radio"/> trabajo manual pesado |
| tiempo caminar o bici al día           | <input checked="" type="radio"/> casi nunca<br><input type="radio"/> menos 20min día<br><input type="radio"/> 20 a 40 min día<br><input type="radio"/> 40 a 60 min día<br><input type="radio"/> 1h o 1h y media día<br><input type="radio"/> más de 1h y media al día                                                                                                     |
| tiempo tareas casa al día              | <input type="radio"/> menos de 1h día<br><input checked="" type="radio"/> 1 a 2h día<br><input type="radio"/> 3 a 4h día<br><input type="radio"/> 5 a 6h día<br><input type="radio"/> 7 a 8h día<br><input type="radio"/> más de 8h día                                                                                                                                   |
| tiempo libre televisión ordenador leer | <input type="radio"/> menos 1h día<br><input type="radio"/> 1h día<br><input type="radio"/> 2h día<br><input type="radio"/> 3h día<br><input type="radio"/> 4h día<br><input checked="" type="radio"/> 5 a 6h día<br><input type="radio"/> mas 6h día                                                                                                                     |
| tiempo libre ejercicio o deporte       | <input type="radio"/> menos 1h semana<br><input type="radio"/> 1h semana<br><input type="radio"/> 2h semana<br><input checked="" type="radio"/> 3h semana<br><input type="radio"/> 4 a 5h semana<br><input type="radio"/> mas 5h semana                                                                                                                                   |
| como se considera                      | <input type="radio"/> sedentaria<br><input checked="" type="radio"/> poco activa<br><input type="radio"/> moderadamente activa<br><input type="radio"/> bastante activa<br><input type="radio"/> muy activa<br><input type="radio"/> no sabe                                                                                                                              |
| FUR                                    | [*DATA REMOVED*]                                                                                                                                                                                                                                                                                                                                                          |
| Semanas gestación 2T                   | _____                                                                                                                                                                                                                                                                                                                                                                     |
| Días gestación 2T                      | _____                                                                                                                                                                                                                                                                                                                                                                     |
| DBP 2T                                 | _____                                                                                                                                                                                                                                                                                                                                                                     |
| CC 2T                                  | _____                                                                                                                                                                                                                                                                                                                                                                     |

|                                    |                                                                                                                                                                                                 |
|------------------------------------|-------------------------------------------------------------------------------------------------------------------------------------------------------------------------------------------------|
| AC 2T                              | <hr/>                                                                                                                                                                                           |
| LF 2T                              | <hr/>                                                                                                                                                                                           |
| PFE 2T (Hadlock)                   | <hr/>                                                                                                                                                                                           |
| Semanas gestación 3T               | <hr/>                                                                                                                                                                                           |
| días 3T                            | <hr/>                                                                                                                                                                                           |
| DBP 3T                             | <hr/>                                                                                                                                                                                           |
| CC 3T                              | <hr/>                                                                                                                                                                                           |
| AC 3T                              | <hr/>                                                                                                                                                                                           |
| LF 3T                              | <hr/>                                                                                                                                                                                           |
| PFE 3T (Hadlock)                   | <hr/>                                                                                                                                                                                           |
| Semanas de gestación final         | [*DATA REMOVED*]                                                                                                                                                                                |
| días gestación final               | [*DATA REMOVED*]                                                                                                                                                                                |
| Localización placenta              | <input type="radio"/> anterior<br><input type="radio"/> lateral derecha<br><input type="radio"/> lateral izquierda<br><input type="radio"/> posterior<br><input checked="" type="radio"/> fondo |
| Presentación longitudinal cefálica | <input type="radio"/> no<br><input checked="" type="radio"/> si                                                                                                                                 |
| Dorso                              | <input checked="" type="radio"/> izquierda anterior<br><input type="radio"/> izquierda posterior<br><input type="radio"/> derecha anterior<br><input type="radio"/> derecha posterior           |
| diámetro biparietal                | [*DATA REMOVED*]                                                                                                                                                                                |
| Circunferencia craneal             | [*DATA REMOVED*]                                                                                                                                                                                |
| Circunferencia abdominal           | [*DATA REMOVED*]                                                                                                                                                                                |

|                                                   |                                                                                                                                               |
|---------------------------------------------------|-----------------------------------------------------------------------------------------------------------------------------------------------|
| Longitud de femur                                 | [*DATA REMOVED*]                                                                                                                              |
| tejido celular subcutáneo a nivel del muslo en mm | [*DATA REMOVED*]                                                                                                                              |
| tejido celular subcutáneo en abdomen en mm        | [*DATA REMOVED*]                                                                                                                              |
| Volumen del muslo en cm3                          | [*DATA REMOVED*]                                                                                                                              |
| Peso fetal estimado según fórmula de Hadlock      | [*DATA REMOVED*]                                                                                                                              |
| Percentil                                         | [*DATA REMOVED*]                                                                                                                              |
| Peso fetal estimado según fórmula de Scioscia     | <input type="text"/>                                                                                                                          |
| Peso fetal estimado según fórmula de LEE          | <input type="text"/>                                                                                                                          |
| Tipo de parto                                     | <input type="radio"/> eutocico<br><input type="radio"/> instrumentado/ventosa<br><input checked="" type="radio"/> cesarea                     |
| fecha de nacimiento                               | [*DATA REMOVED*]                                                                                                                              |
| Días entre exploración y nacimiento               | [*DATA REMOVED*]                                                                                                                              |
| Peso RN en g                                      | [*DATA REMOVED*]                                                                                                                              |
| sexo                                              | <input type="radio"/> mujer<br><input checked="" type="radio"/> hombre                                                                        |
| Apgar 1 minuto                                    | <input type="text"/>                                                                                                                          |
| Apgar 5 minutos                                   | <input type="text"/>                                                                                                                          |
| Apgar 10 minutos                                  | <input type="text"/>                                                                                                                          |
| antecedente Covid durante gestación               | <input type="radio"/> Yes<br><input checked="" type="radio"/> No                                                                              |
| Nivel de estudios                                 | <input type="radio"/> ninguno<br><input type="radio"/> primarios<br><input type="radio"/> secundarios<br><input type="radio"/> universitarios |



# Base\_datos\_estimacion\_peso\_fetal

|                                       |                                                                                                                                                                                                                                                                                      |
|---------------------------------------|--------------------------------------------------------------------------------------------------------------------------------------------------------------------------------------------------------------------------------------------------------------------------------------|
| Número de identificación participante | 85                                                                                                                                                                                                                                                                                   |
| CODIGO PARTICIPANTE                   |                                                                                                                                                                                                                                                                                      |
| Edad                                  | [*DATA REMOVED*]                                                                                                                                                                                                                                                                     |
| Gestaciones                           | <input type="radio"/> 1<br><input checked="" type="radio"/> 2<br><input type="radio"/> 3<br><input type="radio"/> mas de 3                                                                                                                                                           |
| partos                                | <input checked="" type="radio"/> 0<br><input type="radio"/> 1<br><input type="radio"/> 2<br><input type="radio"/> 3<br><input type="radio"/> mas de 3                                                                                                                                |
| cesáreas                              | <input type="radio"/> 0<br><input type="radio"/> 1<br><input type="radio"/> 2<br><input type="radio"/> 3<br><input checked="" type="radio"/> mas de 3                                                                                                                                |
| Abortos                               | <input type="radio"/> 0<br><input checked="" type="radio"/> 1<br><input type="radio"/> 2<br><input type="radio"/> 3<br><input type="radio"/> mas de 3                                                                                                                                |
| Tipo de gestacion                     | <input checked="" type="radio"/> espontanea<br><input type="radio"/> IAC inseminación artificial conyuge<br><input type="radio"/> IAD inseminación artificial donante<br><input type="radio"/> FIV Fecundación in Vitro<br><input type="radio"/> Ovodon FIV con donación de ovocitos |
| peso previo a embarazo                | [*DATA REMOVED*]                                                                                                                                                                                                                                                                     |
| Ganancia ponderal embarazo            |                                                                                                                                                                                                                                                                                      |
| Talla madre                           | [*DATA REMOVED*]                                                                                                                                                                                                                                                                     |
| IMC previo embarazo                   | 20.88888888888889                                                                                                                                                                                                                                                                    |
| Patología obstétrica                  | <input checked="" type="radio"/> no<br><input type="radio"/> si                                                                                                                                                                                                                      |
| Diabetes pregestacional               | <input checked="" type="radio"/> no<br><input type="radio"/> si                                                                                                                                                                                                                      |
| Diabetes gestacional                  | <input checked="" type="radio"/> no<br><input type="radio"/> si                                                                                                                                                                                                                      |

|                                            |                                                                                                                                                                                      |
|--------------------------------------------|--------------------------------------------------------------------------------------------------------------------------------------------------------------------------------------|
| Diabetes gestacional con insulina          | <input checked="" type="radio"/> no<br><input type="radio"/> si                                                                                                                      |
| Diabetes gestacional con dieta y ejercicio | <input checked="" type="radio"/> no<br><input type="radio"/> si                                                                                                                      |
| Percentil fetos previos                    | <input checked="" type="radio"/> Nada<br><input type="radio"/> percentil menor de 10<br><input type="radio"/> percentil entre 10 y 90<br><input type="radio"/> percentil mayor de 90 |
| Exfumadora                                 | <input checked="" type="radio"/> Nada<br><input type="radio"/> menos de 5 años<br><input type="radio"/> 5 a 10 años<br><input type="radio"/> mayor o igual a 10 años                 |
| Hábito tabáquico                           | <input checked="" type="radio"/> no<br><input type="radio"/> si                                                                                                                      |
| fumadora                                   | [*DATA REMOVED*]                                                                                                                                                                     |
| Consumo otros tóxicos                      | <input checked="" type="radio"/> no<br><input type="radio"/> si                                                                                                                      |
| Hb 1T                                      | [*DATA REMOVED*]                                                                                                                                                                     |
| Htc 1T                                     | [*DATA REMOVED*]                                                                                                                                                                     |
| Hb 2T                                      | [*DATA REMOVED*]                                                                                                                                                                     |
| HTC 2T                                     | [*DATA REMOVED*]                                                                                                                                                                     |
| Hb 3T                                      | [*DATA REMOVED*]                                                                                                                                                                     |
| HTC 3T                                     | [*DATA REMOVED*]                                                                                                                                                                     |
| Suplemento FE oral                         | <input checked="" type="radio"/> si<br><input type="radio"/> no                                                                                                                      |
| Suplemento fe iv                           | <input type="radio"/> si<br><input checked="" type="radio"/> no                                                                                                                      |
| Transfusión                                | <input checked="" type="radio"/> no<br><input type="radio"/> si                                                                                                                      |
| Solicitada Vit D                           | <input checked="" type="radio"/> no<br><input type="radio"/> si                                                                                                                      |
| Deficit vit D                              | <input type="radio"/> no<br><input type="radio"/> si                                                                                                                                 |
| Suplemento vit D                           | <input type="radio"/> si<br><input type="radio"/> no                                                                                                                                 |

|                       |                                                                                                                                                                                                                                                                                                                                                                                                              |
|-----------------------|--------------------------------------------------------------------------------------------------------------------------------------------------------------------------------------------------------------------------------------------------------------------------------------------------------------------------------------------------------------------------------------------------------------|
| Dieta, cuestionario   | <input checked="" type="radio"/> sí<br><input type="radio"/> no                                                                                                                                                                                                                                                                                                                                              |
| Leche entera          | <input type="radio"/> Nunca o menos 1 vez al mes<br><input type="radio"/> 1 a 3 veces mes<br><input type="radio"/> 1 vez semana<br><input type="radio"/> 2 a 4 veces semana<br><input type="radio"/> 5 a 6 veces semana<br><input checked="" type="radio"/> 1 vez al día<br><input type="radio"/> 2 a 3 veces al día<br><input type="radio"/> 5 a 6 veces al día<br><input type="radio"/> más 6 veces al día |
| Leche semidesnatada   | <input type="radio"/> Nunca o menos 1 vez al mes<br><input type="radio"/> 1 a 3 veces mes<br><input type="radio"/> 1 vez semana<br><input type="radio"/> 2 a 4 veces semana<br><input type="radio"/> 5 a 6 veces semana<br><input type="radio"/> 1 vez al día<br><input type="radio"/> 2 a 3 veces al día<br><input type="radio"/> 5 a 6 veces al día<br><input type="radio"/> mas 6 veces al día            |
| Leche desnatada       | <input type="radio"/> Nunca o menos 1 vez al mes<br><input type="radio"/> 1 a 3 veces mes<br><input type="radio"/> 1 vez semana<br><input type="radio"/> 2 a 4 veces semana<br><input type="radio"/> 5 a 6 veces semana<br><input type="radio"/> 1 vez al día<br><input type="radio"/> 2 a 3 veces al día<br><input type="radio"/> 5 a 6 veces al día<br><input type="radio"/> más 6 veces al día            |
| Leche condensada      | <input type="radio"/> Nunca o menos 1 vez al mes<br><input type="radio"/> 1 a 3 veces mes<br><input type="radio"/> 1 vez semana<br><input type="radio"/> 2 a 4 veces semana<br><input type="radio"/> 5 a 6 veces semana<br><input type="radio"/> 1 vez al día<br><input type="radio"/> 2 a 3 veces al día<br><input type="radio"/> 5 a 6 veces al día<br><input type="radio"/> más 6 veces al día            |
| nata o crema de leche | <input type="radio"/> Nunca o menos 1 vez al mes<br><input type="radio"/> 1 a 3 veces mes<br><input type="radio"/> 1 vez semana<br><input type="radio"/> 2 a 4 veces semana<br><input type="radio"/> 5 a 6 veces semana<br><input type="radio"/> 1 vez al día<br><input type="radio"/> 2 a 3 veces al día<br><input type="radio"/> 5 a 6 veces al día<br><input type="radio"/> más 6 veces al día            |

---

Yogurt Entero

- ☐ Nunca o menos 1 vez al mes
- ☐ 1 a 3 veces mes
- ☐ 1 vez semana
- ☐ 2 a 4 veces semana
- ☐ 5 a 6 veces semana
- ☐ 1 vez al día
- ☐ 2 a 3 veces al día
- ☐ 5 a 6 veces al día
- ☐ más 6 veces al día

---

Yogurt desnatado

- ☐ Nunca o menos 1 vez al mes
- ☐ 1 a 3 veces mes
- ☐ 1 vez semana
- ☐ 2 a 4 veces semana
- ☐ 5 a 6 veces semana
- ☐ 1 vez al día
- ☐ 2 a 3 veces al día
- ☐ 5 a 6 veces al día
- ☐ más 6 veces al día

---

100g requesón o queso blando o queso fresco

- ☐ Nunca o menos 1 vez al mes
- ☐ 1 a 3 veces mes
- ☒ 1 vez semana
- ☐ 2 a 4 veces semana
- ☐ 5 a 6 veces semana
- ☐ 1 vez al día
- ☐ 2 a 3 veces al día
- ☐ 5 a 6 veces al día
- ☐ más 6 veces al día

---

queso curado o semicurado o cremoso

- ☐ Nunca o menos 1 vez al mes
- ☐ 1 a 3 veces mes
- ☐ 1 vez semana
- ☐ 2 a 4 veces semana
- ☐ 5 a 6 veces semana
- ☐ 1 vez al día
- ☐ 2 a 3 veces al día
- ☐ 5 a 6 veces al día
- ☐ más 6 veces al día

---

natillas flan pudding

- ☐ Nunca o menos 1 vez al mes
- ☐ 1 a 3 veces mes
- ☐ 1 vez semana
- ☐ 2 a 4 veces semana
- ☐ 5 a 6 veces semana
- ☐ 1 vez al día
- ☐ 2 a 3 veces al día
- ☐ 5 a 6 veces al día
- ☐ más 6 veces al día

---

Helado

- ☐ Nunca o menos 1 vez al mes
- ☐ 1 a 3 veces mes
- ☒ 1 vez semana
- ☐ 2 a 4 veces semana
- ☐ 5 a 6 veces semana
- ☐ 1 vez al día
- ☐ 2 a 3 veces al día
- ☐ 5 a 6 veces al día
- ☐ más 6 veces al día

|                                      |                                                                                                                                                                                                                                                                                                                                                                                                              |
|--------------------------------------|--------------------------------------------------------------------------------------------------------------------------------------------------------------------------------------------------------------------------------------------------------------------------------------------------------------------------------------------------------------------------------------------------------------|
| huevo                                | <input type="radio"/> Nunca o menos 1 vez al mes<br><input type="radio"/> 1 a 3 veces mes<br><input checked="" type="radio"/> 1 vez semana<br><input type="radio"/> 2 a 4 veces semana<br><input type="radio"/> 5 a 6 veces semana<br><input type="radio"/> 1 vez al día<br><input type="radio"/> 2 a 3 veces al día<br><input type="radio"/> 5 a 6 veces al día<br><input type="radio"/> más 6 veces al día |
| Pollo con piel                       | <input type="radio"/> Nunca o menos 1 vez al mes<br><input checked="" type="radio"/> 1 a 3 veces mes<br><input type="radio"/> 1 vez semana<br><input type="radio"/> 2 a 4 veces semana<br><input type="radio"/> 5 a 6 veces semana<br><input type="radio"/> 1 vez al día<br><input type="radio"/> 2 a 3 veces al día<br><input type="radio"/> 5 a 6 veces al día<br><input type="radio"/> más 6 veces al día |
| pollo sin piel                       | <input type="radio"/> Nunca o menos 1 vez al mes<br><input type="radio"/> 1 a 3 veces mes<br><input type="radio"/> 1 vez semana<br><input type="radio"/> 2 a 4 veces semana<br><input type="radio"/> 5 a 6 veces semana<br><input type="radio"/> 1 vez al día<br><input type="radio"/> 2 a 3 veces al día<br><input type="radio"/> 5 a 6 veces al día<br><input type="radio"/> más 6 veces al día            |
| Ternera o cerdo o cordero            | <input type="radio"/> Nunca o menos 1 vez al mes<br><input type="radio"/> 1 a 3 veces mes<br><input checked="" type="radio"/> 1 vez semana<br><input type="radio"/> 2 a 4 veces semana<br><input type="radio"/> 5 a 6 veces semana<br><input type="radio"/> 1 vez al día<br><input type="radio"/> 2 a 3 veces al día<br><input type="radio"/> 5 a 6 veces al día<br><input type="radio"/> más 6 veces al día |
| carne caza: Conejo o codorniz o pato | <input checked="" type="radio"/> Nunca o menos 1 vez al mes<br><input type="radio"/> 1 a 3 veces mes<br><input type="radio"/> 1 vez semana<br><input type="radio"/> 2 a 4 veces semana<br><input type="radio"/> 5 a 6 veces semana<br><input type="radio"/> 1 vez al día<br><input type="radio"/> 2 a 3 veces al día<br><input type="radio"/> 5 a 6 veces al día<br><input type="radio"/> más 6 veces al día |
| Hígado de ternera o cerdo o pollo    | <input type="radio"/> Nunca o menos 1 vez al mes<br><input type="radio"/> 1 a 3 veces mes<br><input checked="" type="radio"/> 1 vez semana<br><input type="radio"/> 2 a 4 veces semana<br><input type="radio"/> 5 a 6 veces semana<br><input type="radio"/> 1 vez al día<br><input type="radio"/> 2 a 3 veces al día<br><input type="radio"/> 5 a 6 veces al día<br><input type="radio"/> más 6 veces al día |

|                     |                                                                                                                                                                                                                                                                                                                                                                                                              |
|---------------------|--------------------------------------------------------------------------------------------------------------------------------------------------------------------------------------------------------------------------------------------------------------------------------------------------------------------------------------------------------------------------------------------------------------|
| Vísceras            | <input checked="" type="radio"/> Nunca o menos 1 vez al mes<br><input type="radio"/> 1 a 3 veces mes<br><input type="radio"/> 1 vez semana<br><input type="radio"/> 2 a 4 veces semana<br><input type="radio"/> 5 a 6 veces semana<br><input type="radio"/> 1 vez al día<br><input type="radio"/> 2 a 3 veces al día<br><input type="radio"/> 5 a 6 veces al día<br><input type="radio"/> más 6 veces al día |
| Embutido            | <input checked="" type="radio"/> Nunca o menos 1 vez al mes<br><input type="radio"/> 1 a 3 veces mes<br><input type="radio"/> 1 vez semana<br><input type="radio"/> 2 a 4 veces semana<br><input type="radio"/> 5 a 6 veces semana<br><input type="radio"/> 1 vez al día<br><input type="radio"/> 2 a 3 veces al día<br><input type="radio"/> 5 a 6 veces al día<br><input type="radio"/> más 6 veces al día |
| Salchicha o similar | <input checked="" type="radio"/> Nunca o menos 1 vez al mes<br><input type="radio"/> 1 a 3 veces mes<br><input type="radio"/> 1 vez semana<br><input type="radio"/> 2 a 4 veces semana<br><input type="radio"/> 5 a 6 veces semana<br><input type="radio"/> 1 vez al día<br><input type="radio"/> 2 a 3 veces al día<br><input type="radio"/> 5 a 6 veces al día<br><input type="radio"/> más 6 veces al día |
| Pate o foiegras     | <input checked="" type="radio"/> Nunca o menos 1 vez al mes<br><input type="radio"/> 1 a 3 veces mes<br><input type="radio"/> 1 vez semana<br><input type="radio"/> 2 a 4 veces semana<br><input type="radio"/> 5 a 6 veces semana<br><input type="radio"/> 1 vez al día<br><input type="radio"/> 2 a 3 veces al día<br><input type="radio"/> 5 a 6 veces al día<br><input type="radio"/> más 6 veces al día |
| Hamburguesa         | <input type="radio"/> Nunca o menos 1 vez al mes<br><input type="radio"/> 1 a 3 veces mes<br><input checked="" type="radio"/> 1 vez semana<br><input type="radio"/> 2 a 4 veces semana<br><input type="radio"/> 5 a 6 veces semana<br><input type="radio"/> 1 vez al día<br><input type="radio"/> 2 a 3 veces al día<br><input type="radio"/> 5 a 6 veces al día<br><input type="radio"/> más 6 veces al día |
| tocino o bacon      | <input checked="" type="radio"/> Nunca o menos 1 vez al mes<br><input type="radio"/> 1 a 3 veces mes<br><input type="radio"/> 1 vez semana<br><input type="radio"/> 2 a 4 veces semana<br><input type="radio"/> 5 a 6 veces semana<br><input type="radio"/> 1 vez al día<br><input type="radio"/> 2 a 3 veces al día<br><input type="radio"/> 5 a 6 veces al día<br><input type="radio"/> más 6 veces al día |

|                        |                                                                                                                                                                                                                                                                                                                                                                                                              |
|------------------------|--------------------------------------------------------------------------------------------------------------------------------------------------------------------------------------------------------------------------------------------------------------------------------------------------------------------------------------------------------------------------------------------------------------|
| Pescado frito          | <input type="radio"/> Nunca o menos 1 vez al mes<br><input type="radio"/> 1 a 3 veces mes<br><input checked="" type="radio"/> 1 vez semana<br><input type="radio"/> 2 a 4 veces semana<br><input type="radio"/> 5 a 6 veces semana<br><input type="radio"/> 1 vez al día<br><input type="radio"/> 2 a 3 veces al día<br><input type="radio"/> 5 a 6 veces al día<br><input type="radio"/> más 6 veces al día |
| pescado hervido blanco | <input type="radio"/> Nunca o menos 1 vez al mes<br><input type="radio"/> 1 a 3 veces mes<br><input checked="" type="radio"/> 1 vez semana<br><input type="radio"/> 2 a 4 veces semana<br><input type="radio"/> 5 a 6 veces semana<br><input type="radio"/> 1 vez al día<br><input type="radio"/> 2 a 3 veces al día<br><input type="radio"/> 5 a 6 veces al día<br><input type="radio"/> más 6 veces al día |
| pescado hervido azul   | <input checked="" type="radio"/> Nunca o menos 1 vez al mes<br><input type="radio"/> 1 a 3 veces mes<br><input type="radio"/> 1 vez semana<br><input type="radio"/> 2 a 4 veces semana<br><input type="radio"/> 5 a 6 veces semana<br><input type="radio"/> 1 vez al día<br><input type="radio"/> 2 a 3 veces al día<br><input type="radio"/> 5 a 6 veces al día<br><input type="radio"/> más 6 veces al día |
| otros pescado azul     | <input checked="" type="radio"/> Nunca o menos 1 vez al mes<br><input type="radio"/> 1 a 3 veces mes<br><input type="radio"/> 1 vez semana<br><input type="radio"/> 2 a 4 veces semana<br><input type="radio"/> 5 a 6 veces semana<br><input type="radio"/> 1 vez al día<br><input type="radio"/> 2 a 3 veces al día<br><input type="radio"/> 5 a 6 veces al día<br><input type="radio"/> más 6 veces al día |
| atun conserva          | <input checked="" type="radio"/> Nunca o menos 1 vez al mes<br><input type="radio"/> 1 a 3 veces mes<br><input type="radio"/> 1 vez semana<br><input type="radio"/> 2 a 4 veces semana<br><input type="radio"/> 5 a 6 veces semana<br><input type="radio"/> 1 vez al día<br><input type="radio"/> 2 a 3 veces al día<br><input type="radio"/> 5 a 6 veces al día<br><input type="radio"/> más 6 veces al día |
| sardina conserva       | <input checked="" type="radio"/> Nunca o menos 1 vez al mes<br><input type="radio"/> 1 a 3 veces mes<br><input type="radio"/> 1 vez semana<br><input type="radio"/> 2 a 4 veces semana<br><input type="radio"/> 5 a 6 veces semana<br><input type="radio"/> 1 vez al día<br><input type="radio"/> 2 a 3 veces al día<br><input type="radio"/> 5 a 6 veces al día<br><input type="radio"/> más 6 veces al día |

|                                         |                                                                                                                                                                                                                                                                                                                                                                                                              |
|-----------------------------------------|--------------------------------------------------------------------------------------------------------------------------------------------------------------------------------------------------------------------------------------------------------------------------------------------------------------------------------------------------------------------------------------------------------------|
| pescado ahumado                         | <input checked="" type="radio"/> Nunca o menos 1 vez al mes<br><input type="radio"/> 1 a 3 veces mes<br><input type="radio"/> 1 vez semana<br><input type="radio"/> 2 a 4 veces semana<br><input type="radio"/> 5 a 6 veces semana<br><input type="radio"/> 1 vez al día<br><input type="radio"/> 2 a 3 veces al día<br><input type="radio"/> 5 a 6 veces al día<br><input type="radio"/> más 6 veces al día |
| almejas o mejillones o ostras unos 100g | <input checked="" type="radio"/> Nunca o menos 1 vez al mes<br><input type="radio"/> 1 a 3 veces mes<br><input type="radio"/> 1 vez semana<br><input type="radio"/> 2 a 4 veces semana<br><input type="radio"/> 5 a 6 veces semana<br><input type="radio"/> 1 vez al día<br><input type="radio"/> 2 a 3 veces al día<br><input type="radio"/> 5 a 6 veces al día<br><input type="radio"/> más 6 veces al día |
| calamar o chipiron o sepia unos 100g    | <input type="radio"/> Nunca o menos 1 vez al mes<br><input type="radio"/> 1 a 3 veces mes<br><input checked="" type="radio"/> 1 vez semana<br><input type="radio"/> 2 a 4 veces semana<br><input type="radio"/> 5 a 6 veces semana<br><input type="radio"/> 1 vez al día<br><input type="radio"/> 2 a 3 veces al día<br><input type="radio"/> 5 a 6 veces al día<br><input type="radio"/> más 6 veces al día |
| marisco unos 100g                       | <input type="radio"/> Nunca o menos 1 vez al mes<br><input type="radio"/> 1 a 3 veces mes<br><input checked="" type="radio"/> 1 vez semana<br><input type="radio"/> 2 a 4 veces semana<br><input type="radio"/> 5 a 6 veces semana<br><input type="radio"/> 1 vez al día<br><input type="radio"/> 2 a 3 veces al día<br><input type="radio"/> 5 a 6 veces al día<br><input type="radio"/> más 6 veces al día |
| Espinacas o acelgas cocinadas           | <input checked="" type="radio"/> Nunca o menos 1 vez al mes<br><input type="radio"/> 1 a 3 veces mes<br><input type="radio"/> 1 vez semana<br><input type="radio"/> 2 a 4 veces semana<br><input type="radio"/> 5 a 6 veces semana<br><input type="radio"/> 1 vez al día<br><input type="radio"/> 2 a 3 veces al día<br><input type="radio"/> 5 a 6 veces al día<br><input type="radio"/> más 6 veces al día |
| Col o coliflor o brocoli cocinado       | <input checked="" type="radio"/> Nunca o menos 1 vez al mes<br><input type="radio"/> 1 a 3 veces mes<br><input type="radio"/> 1 vez semana<br><input type="radio"/> 2 a 4 veces semana<br><input type="radio"/> 5 a 6 veces semana<br><input type="radio"/> 1 vez al día<br><input type="radio"/> 2 a 3 veces al día<br><input type="radio"/> 5 a 6 veces al día<br><input type="radio"/> más 6 veces al día |



---

|                              |                                                                                                                                                                                                                                                                                                                                                                                                              |
|------------------------------|--------------------------------------------------------------------------------------------------------------------------------------------------------------------------------------------------------------------------------------------------------------------------------------------------------------------------------------------------------------------------------------------------------------|
| Lechuga o endivia o escarola | <input type="radio"/> Nunca o menos 1 vez al mes<br><input type="radio"/> 1 a 3 veces mes<br><input checked="" type="radio"/> 1 vez semana<br><input type="radio"/> 2 a 4 veces semana<br><input type="radio"/> 5 a 6 veces semana<br><input type="radio"/> 1 vez al día<br><input type="radio"/> 2 a 3 veces al día<br><input type="radio"/> 5 a 6 veces al día<br><input type="radio"/> más 6 veces al día |
|------------------------------|--------------------------------------------------------------------------------------------------------------------------------------------------------------------------------------------------------------------------------------------------------------------------------------------------------------------------------------------------------------------------------------------------------------|

---

|                 |                                                                                                                                                                                                                                                                                                                                                                                                              |
|-----------------|--------------------------------------------------------------------------------------------------------------------------------------------------------------------------------------------------------------------------------------------------------------------------------------------------------------------------------------------------------------------------------------------------------------|
| tomate ensalada | <input type="radio"/> Nunca o menos 1 vez al mes<br><input type="radio"/> 1 a 3 veces mes<br><input checked="" type="radio"/> 1 vez semana<br><input type="radio"/> 2 a 4 veces semana<br><input type="radio"/> 5 a 6 veces semana<br><input type="radio"/> 1 vez al día<br><input type="radio"/> 2 a 3 veces al día<br><input type="radio"/> 5 a 6 veces al día<br><input type="radio"/> más 6 veces al día |
|-----------------|--------------------------------------------------------------------------------------------------------------------------------------------------------------------------------------------------------------------------------------------------------------------------------------------------------------------------------------------------------------------------------------------------------------|

---

|         |                                                                                                                                                                                                                                                                                                                                                                                                              |
|---------|--------------------------------------------------------------------------------------------------------------------------------------------------------------------------------------------------------------------------------------------------------------------------------------------------------------------------------------------------------------------------------------------------------------|
| cebolla | <input type="radio"/> Nunca o menos 1 vez al mes<br><input type="radio"/> 1 a 3 veces mes<br><input checked="" type="radio"/> 1 vez semana<br><input type="radio"/> 2 a 4 veces semana<br><input type="radio"/> 5 a 6 veces semana<br><input type="radio"/> 1 vez al día<br><input type="radio"/> 2 a 3 veces al día<br><input type="radio"/> 5 a 6 veces al día<br><input type="radio"/> más 6 veces al día |
|---------|--------------------------------------------------------------------------------------------------------------------------------------------------------------------------------------------------------------------------------------------------------------------------------------------------------------------------------------------------------------------------------------------------------------|

---

|                      |                                                                                                                                                                                                                                                                                                                                                                                                              |
|----------------------|--------------------------------------------------------------------------------------------------------------------------------------------------------------------------------------------------------------------------------------------------------------------------------------------------------------------------------------------------------------------------------------------------------------|
| Zanahoria o calabaza | <input checked="" type="radio"/> Nunca o menos 1 vez al mes<br><input type="radio"/> 1 a 3 veces mes<br><input type="radio"/> 1 vez semana<br><input type="radio"/> 2 a 4 veces semana<br><input type="radio"/> 5 a 6 veces semana<br><input type="radio"/> 1 vez al día<br><input type="radio"/> 2 a 3 veces al día<br><input type="radio"/> 5 a 6 veces al día<br><input type="radio"/> más 6 veces al día |
|----------------------|--------------------------------------------------------------------------------------------------------------------------------------------------------------------------------------------------------------------------------------------------------------------------------------------------------------------------------------------------------------------------------------------------------------|

---

|               |                                                                                                                                                                                                                                                                                                                                                                                                              |
|---------------|--------------------------------------------------------------------------------------------------------------------------------------------------------------------------------------------------------------------------------------------------------------------------------------------------------------------------------------------------------------------------------------------------------------|
| Judías verdes | <input checked="" type="radio"/> Nunca o menos 1 vez al mes<br><input type="radio"/> 1 a 3 veces mes<br><input type="radio"/> 1 vez semana<br><input type="radio"/> 2 a 4 veces semana<br><input type="radio"/> 5 a 6 veces semana<br><input type="radio"/> 1 vez al día<br><input type="radio"/> 2 a 3 veces al día<br><input type="radio"/> 5 a 6 veces al día<br><input type="radio"/> más 6 veces al día |
|---------------|--------------------------------------------------------------------------------------------------------------------------------------------------------------------------------------------------------------------------------------------------------------------------------------------------------------------------------------------------------------------------------------------------------------|

---

|                                |                                                                                                                                                                                                                                                                                                                                                                                                              |
|--------------------------------|--------------------------------------------------------------------------------------------------------------------------------------------------------------------------------------------------------------------------------------------------------------------------------------------------------------------------------------------------------------------------------------------------------------|
| Berenjena o calabacin o pepino | <input checked="" type="radio"/> Nunca o menos 1 vez al mes<br><input type="radio"/> 1 a 3 veces mes<br><input type="radio"/> 1 vez semana<br><input type="radio"/> 2 a 4 veces semana<br><input type="radio"/> 5 a 6 veces semana<br><input type="radio"/> 1 vez al día<br><input type="radio"/> 2 a 3 veces al día<br><input type="radio"/> 5 a 6 veces al día<br><input type="radio"/> más 6 veces al día |
|--------------------------------|--------------------------------------------------------------------------------------------------------------------------------------------------------------------------------------------------------------------------------------------------------------------------------------------------------------------------------------------------------------------------------------------------------------|

---

|                       |                                                                                                                                                                                                                                                                                                                                                                                                              |
|-----------------------|--------------------------------------------------------------------------------------------------------------------------------------------------------------------------------------------------------------------------------------------------------------------------------------------------------------------------------------------------------------------------------------------------------------|
| pimiento              | <input checked="" type="radio"/> Nunca o menos 1 vez al mes<br><input type="radio"/> 1 a 3 veces mes<br><input type="radio"/> 1 vez semana<br><input type="radio"/> 2 a 4 veces semana<br><input type="radio"/> 5 a 6 veces semana<br><input type="radio"/> 1 vez al día<br><input type="radio"/> 2 a 3 veces al día<br><input type="radio"/> 5 a 6 veces al día<br><input type="radio"/> más 6 veces al día |
| alcachofa             | <input checked="" type="radio"/> Nunca o menos 1 vez al mes<br><input type="radio"/> 1 a 3 veces mes<br><input type="radio"/> 1 vez semana<br><input type="radio"/> 2 a 4 veces semana<br><input type="radio"/> 5 a 6 veces semana<br><input type="radio"/> 1 vez al día<br><input type="radio"/> 2 a 3 veces al día<br><input type="radio"/> 5 a 6 veces al día<br><input type="radio"/> más 6 veces al día |
| espárragos            | <input checked="" type="radio"/> Nunca o menos 1 vez al mes<br><input type="radio"/> 1 a 3 veces mes<br><input type="radio"/> 1 vez semana<br><input type="radio"/> 2 a 4 veces semana<br><input type="radio"/> 5 a 6 veces semana<br><input type="radio"/> 1 vez al día<br><input type="radio"/> 2 a 3 veces al día<br><input type="radio"/> 5 a 6 veces al día<br><input type="radio"/> más 6 veces al día |
| maíz hervido          | <input checked="" type="radio"/> Nunca o menos 1 vez al mes<br><input type="radio"/> 1 a 3 veces mes<br><input type="radio"/> 1 vez semana<br><input type="radio"/> 2 a 4 veces semana<br><input type="radio"/> 5 a 6 veces semana<br><input type="radio"/> 1 vez al día<br><input type="radio"/> 2 a 3 veces al día<br><input type="radio"/> 5 a 6 veces al día<br><input type="radio"/> más 6 veces al día |
| legumbres             | <input checked="" type="radio"/> Nunca o menos 1 vez al mes<br><input type="radio"/> 1 a 3 veces mes<br><input type="radio"/> 1 vez semana<br><input type="radio"/> 2 a 4 veces semana<br><input type="radio"/> 5 a 6 veces semana<br><input type="radio"/> 1 vez al día<br><input type="radio"/> 2 a 3 veces al día<br><input type="radio"/> 5 a 6 veces al día<br><input type="radio"/> más 6 veces al día |
| naranjas o mandarinas | <input checked="" type="radio"/> Nunca o menos 1 vez al mes<br><input type="radio"/> 1 a 3 veces mes<br><input type="radio"/> 1 vez semana<br><input type="radio"/> 2 a 4 veces semana<br><input type="radio"/> 5 a 6 veces semana<br><input type="radio"/> 1 vez al día<br><input type="radio"/> 2 a 3 veces al día<br><input type="radio"/> 5 a 6 veces al día<br><input type="radio"/> más 6 veces al día |

---

|                    |                                                                                                                                                                                                                                                                                                                                                                                                   |
|--------------------|---------------------------------------------------------------------------------------------------------------------------------------------------------------------------------------------------------------------------------------------------------------------------------------------------------------------------------------------------------------------------------------------------|
| zumو natural fruta | <input type="radio"/> Nunca o menos 1 vez al mes<br><input type="radio"/> 1 a 3 veces mes<br><input type="radio"/> 1 vez semana<br><input type="radio"/> 2 a 4 veces semana<br><input type="radio"/> 5 a 6 veces semana<br><input type="radio"/> 1 vez al día<br><input type="radio"/> 2 a 3 veces al día<br><input type="radio"/> 5 a 6 veces al día<br><input type="radio"/> más 6 veces al día |
|--------------------|---------------------------------------------------------------------------------------------------------------------------------------------------------------------------------------------------------------------------------------------------------------------------------------------------------------------------------------------------------------------------------------------------|

---

|         |                                                                                                                                                                                                                                                                                                                                                                                                              |
|---------|--------------------------------------------------------------------------------------------------------------------------------------------------------------------------------------------------------------------------------------------------------------------------------------------------------------------------------------------------------------------------------------------------------------|
| platano | <input type="radio"/> Nunca o menos 1 vez al mes<br><input type="radio"/> 1 a 3 veces mes<br><input type="radio"/> 1 vez semana<br><input checked="" type="radio"/> 2 a 4 veces semana<br><input type="radio"/> 5 a 6 veces semana<br><input type="radio"/> 1 vez al día<br><input type="radio"/> 2 a 3 veces al día<br><input type="radio"/> 5 a 6 veces al día<br><input type="radio"/> más 6 veces al día |
|---------|--------------------------------------------------------------------------------------------------------------------------------------------------------------------------------------------------------------------------------------------------------------------------------------------------------------------------------------------------------------------------------------------------------------|

---

|                |                                                                                                                                                                                                                                                                                                                                                                                                              |
|----------------|--------------------------------------------------------------------------------------------------------------------------------------------------------------------------------------------------------------------------------------------------------------------------------------------------------------------------------------------------------------------------------------------------------------|
| manzana o pera | <input type="radio"/> Nunca o menos 1 vez al mes<br><input type="radio"/> 1 a 3 veces mes<br><input type="radio"/> 1 vez semana<br><input checked="" type="radio"/> 2 a 4 veces semana<br><input type="radio"/> 5 a 6 veces semana<br><input type="radio"/> 1 vez al día<br><input type="radio"/> 2 a 3 veces al día<br><input type="radio"/> 5 a 6 veces al día<br><input type="radio"/> más 6 veces al día |
|----------------|--------------------------------------------------------------------------------------------------------------------------------------------------------------------------------------------------------------------------------------------------------------------------------------------------------------------------------------------------------------------------------------------------------------|

---

|                       |                                                                                                                                                                                                                                                                                                                                                                                                              |
|-----------------------|--------------------------------------------------------------------------------------------------------------------------------------------------------------------------------------------------------------------------------------------------------------------------------------------------------------------------------------------------------------------------------------------------------------|
| melocotón o nectarina | <input type="radio"/> Nunca o menos 1 vez al mes<br><input type="radio"/> 1 a 3 veces mes<br><input type="radio"/> 1 vez semana<br><input checked="" type="radio"/> 2 a 4 veces semana<br><input type="radio"/> 5 a 6 veces semana<br><input type="radio"/> 1 vez al día<br><input type="radio"/> 2 a 3 veces al día<br><input type="radio"/> 5 a 6 veces al día<br><input type="radio"/> más 6 veces al día |
|-----------------------|--------------------------------------------------------------------------------------------------------------------------------------------------------------------------------------------------------------------------------------------------------------------------------------------------------------------------------------------------------------------------------------------------------------|

---

|                |                                                                                                                                                                                                                                                                                                                                                                                                              |
|----------------|--------------------------------------------------------------------------------------------------------------------------------------------------------------------------------------------------------------------------------------------------------------------------------------------------------------------------------------------------------------------------------------------------------------|
| sandia o melon | <input type="radio"/> Nunca o menos 1 vez al mes<br><input type="radio"/> 1 a 3 veces mes<br><input type="radio"/> 1 vez semana<br><input checked="" type="radio"/> 2 a 4 veces semana<br><input type="radio"/> 5 a 6 veces semana<br><input type="radio"/> 1 vez al día<br><input type="radio"/> 2 a 3 veces al día<br><input type="radio"/> 5 a 6 veces al día<br><input type="radio"/> más 6 veces al día |
|----------------|--------------------------------------------------------------------------------------------------------------------------------------------------------------------------------------------------------------------------------------------------------------------------------------------------------------------------------------------------------------------------------------------------------------|

---

|     |                                                                                                                                                                                                                                                                                                                                                                                                              |
|-----|--------------------------------------------------------------------------------------------------------------------------------------------------------------------------------------------------------------------------------------------------------------------------------------------------------------------------------------------------------------------------------------------------------------|
| uva | <input checked="" type="radio"/> Nunca o menos 1 vez al mes<br><input type="radio"/> 1 a 3 veces mes<br><input type="radio"/> 1 vez semana<br><input type="radio"/> 2 a 4 veces semana<br><input type="radio"/> 5 a 6 veces semana<br><input type="radio"/> 1 vez al día<br><input type="radio"/> 2 a 3 veces al día<br><input type="radio"/> 5 a 6 veces al día<br><input type="radio"/> más 6 veces al día |
|-----|--------------------------------------------------------------------------------------------------------------------------------------------------------------------------------------------------------------------------------------------------------------------------------------------------------------------------------------------------------------------------------------------------------------|

---

|                 |                                                                                                                                                                                                                                                                                                                                                                                                              |
|-----------------|--------------------------------------------------------------------------------------------------------------------------------------------------------------------------------------------------------------------------------------------------------------------------------------------------------------------------------------------------------------------------------------------------------------|
| bruna o ciruela | <input checked="" type="radio"/> Nunca o menos 1 vez al mes<br><input type="radio"/> 1 a 3 veces mes<br><input type="radio"/> 1 vez semana<br><input type="radio"/> 2 a 4 veces semana<br><input type="radio"/> 5 a 6 veces semana<br><input type="radio"/> 1 vez al día<br><input type="radio"/> 2 a 3 veces al día<br><input type="radio"/> 5 a 6 veces al día<br><input type="radio"/> más 6 veces al día |
| kiwi            | <input checked="" type="radio"/> Nunca o menos 1 vez al mes<br><input type="radio"/> 1 a 3 veces mes<br><input type="radio"/> 1 vez semana<br><input type="radio"/> 2 a 4 veces semana<br><input type="radio"/> 5 a 6 veces semana<br><input type="radio"/> 1 vez al día<br><input type="radio"/> 2 a 3 veces al día<br><input type="radio"/> 5 a 6 veces al día<br><input type="radio"/> más 6 veces al día |
| aceituna        | <input type="radio"/> Nunca o menos 1 vez al mes<br><input type="radio"/> 1 a 3 veces mes<br><input checked="" type="radio"/> 1 vez semana<br><input type="radio"/> 2 a 4 veces semana<br><input type="radio"/> 5 a 6 veces semana<br><input type="radio"/> 1 vez al día<br><input type="radio"/> 2 a 3 veces al día<br><input type="radio"/> 5 a 6 veces al día<br><input type="radio"/> más 6 veces al día |
| frutos secos    | <input checked="" type="radio"/> Nunca o menos 1 vez al mes<br><input type="radio"/> 1 a 3 veces mes<br><input type="radio"/> 1 vez semana<br><input type="radio"/> 2 a 4 veces semana<br><input type="radio"/> 5 a 6 veces semana<br><input type="radio"/> 1 vez al día<br><input type="radio"/> 2 a 3 veces al día<br><input type="radio"/> 5 a 6 veces al día<br><input type="radio"/> más 6 veces al día |
| pan blanco      | <input checked="" type="radio"/> Nunca o menos 1 vez al mes<br><input type="radio"/> 1 a 3 veces mes<br><input type="radio"/> 1 vez semana<br><input type="radio"/> 2 a 4 veces semana<br><input type="radio"/> 5 a 6 veces semana<br><input type="radio"/> 1 vez al día<br><input type="radio"/> 2 a 3 veces al día<br><input type="radio"/> 5 a 6 veces al día<br><input type="radio"/> más 6 veces al día |
| pan integral    | <input checked="" type="radio"/> Nunca o menos 1 vez al mes<br><input type="radio"/> 1 a 3 veces mes<br><input type="radio"/> 1 vez semana<br><input type="radio"/> 2 a 4 veces semana<br><input type="radio"/> 5 a 6 veces semana<br><input type="radio"/> 1 vez al día<br><input type="radio"/> 2 a 3 veces al día<br><input type="radio"/> 5 a 6 veces al día<br><input type="radio"/> más 6 veces al día |

|                          |                                                                                                                                                                                                                                                                                                                                                                                                              |
|--------------------------|--------------------------------------------------------------------------------------------------------------------------------------------------------------------------------------------------------------------------------------------------------------------------------------------------------------------------------------------------------------------------------------------------------------|
| cereales desayuno        | <input type="radio"/> Nunca o menos 1 vez al mes<br><input type="radio"/> 1 a 3 veces mes<br><input type="radio"/> 1 vez semana<br><input checked="" type="radio"/> 2 a 4 veces semana<br><input type="radio"/> 5 a 6 veces semana<br><input type="radio"/> 1 vez al día<br><input type="radio"/> 2 a 3 veces al día<br><input type="radio"/> 5 a 6 veces al día<br><input type="radio"/> más 6 veces al día |
| patatas fritas           | <input type="radio"/> Nunca o menos 1 vez al mes<br><input checked="" type="radio"/> 1 a 3 veces mes<br><input type="radio"/> 1 vez semana<br><input type="radio"/> 2 a 4 veces semana<br><input type="radio"/> 5 a 6 veces semana<br><input type="radio"/> 1 vez al día<br><input type="radio"/> 2 a 3 veces al día<br><input type="radio"/> 5 a 6 veces al día<br><input type="radio"/> más 6 veces al día |
| patatas cocidas o asadas | <input type="radio"/> Nunca o menos 1 vez al mes<br><input checked="" type="radio"/> 1 a 3 veces mes<br><input type="radio"/> 1 vez semana<br><input type="radio"/> 2 a 4 veces semana<br><input type="radio"/> 5 a 6 veces semana<br><input type="radio"/> 1 vez al día<br><input type="radio"/> 2 a 3 veces al día<br><input type="radio"/> 5 a 6 veces al día<br><input type="radio"/> más 6 veces al día |
| bolsa papas              | <input checked="" type="radio"/> Nunca o menos 1 vez al mes<br><input type="radio"/> 1 a 3 veces mes<br><input type="radio"/> 1 vez semana<br><input type="radio"/> 2 a 4 veces semana<br><input type="radio"/> 5 a 6 veces semana<br><input type="radio"/> 1 vez al día<br><input type="radio"/> 2 a 3 veces al día<br><input type="radio"/> 5 a 6 veces al día<br><input type="radio"/> más 6 veces al día |
| arroz cocinado           | <input type="radio"/> Nunca o menos 1 vez al mes<br><input type="radio"/> 1 a 3 veces mes<br><input checked="" type="radio"/> 1 vez semana<br><input type="radio"/> 2 a 4 veces semana<br><input type="radio"/> 5 a 6 veces semana<br><input type="radio"/> 1 vez al día<br><input type="radio"/> 2 a 3 veces al día<br><input type="radio"/> 5 a 6 veces al día<br><input type="radio"/> más 6 veces al día |
| pasta                    | <input type="radio"/> Nunca o menos 1 vez al mes<br><input type="radio"/> 1 a 3 veces mes<br><input checked="" type="radio"/> 1 vez semana<br><input type="radio"/> 2 a 4 veces semana<br><input type="radio"/> 5 a 6 veces semana<br><input type="radio"/> 1 vez al día<br><input type="radio"/> 2 a 3 veces al día<br><input type="radio"/> 5 a 6 veces al día<br><input type="radio"/> más 6 veces al día |

|                     |                                                                                                                                                                                                                                                                                                                                                                                                              |
|---------------------|--------------------------------------------------------------------------------------------------------------------------------------------------------------------------------------------------------------------------------------------------------------------------------------------------------------------------------------------------------------------------------------------------------------|
| pizza               | <input checked="" type="radio"/> Nunca o menos 1 vez al mes<br><input type="radio"/> 1 a 3 veces mes<br><input type="radio"/> 1 vez semana<br><input type="radio"/> 2 a 4 veces semana<br><input type="radio"/> 5 a 6 veces semana<br><input type="radio"/> 1 vez al día<br><input type="radio"/> 2 a 3 veces al día<br><input type="radio"/> 5 a 6 veces al día<br><input type="radio"/> más 6 veces al día |
| aceite oliva        | <input type="radio"/> Nunca o menos 1 vez al mes<br><input type="radio"/> 1 a 3 veces mes<br><input type="radio"/> 1 vez semana<br><input checked="" type="radio"/> 2 a 4 veces semana<br><input type="radio"/> 5 a 6 veces semana<br><input type="radio"/> 1 vez al día<br><input type="radio"/> 2 a 3 veces al día<br><input type="radio"/> 5 a 6 veces al día<br><input type="radio"/> más 6 veces al día |
| otros aceites       | <input checked="" type="radio"/> Nunca o menos 1 vez al mes<br><input type="radio"/> 1 a 3 veces mes<br><input type="radio"/> 1 vez semana<br><input type="radio"/> 2 a 4 veces semana<br><input type="radio"/> 5 a 6 veces semana<br><input type="radio"/> 1 vez al día<br><input type="radio"/> 2 a 3 veces al día<br><input type="radio"/> 5 a 6 veces al día<br><input type="radio"/> más 6 veces al día |
| margarina           | <input checked="" type="radio"/> Nunca o menos 1 vez al mes<br><input type="radio"/> 1 a 3 veces mes<br><input type="radio"/> 1 vez semana<br><input type="radio"/> 2 a 4 veces semana<br><input type="radio"/> 5 a 6 veces semana<br><input type="radio"/> 1 vez al día<br><input type="radio"/> 2 a 3 veces al día<br><input type="radio"/> 5 a 6 veces al día<br><input type="radio"/> más 6 veces al día |
| mantequilla         | <input checked="" type="radio"/> Nunca o menos 1 vez al mes<br><input type="radio"/> 1 a 3 veces mes<br><input type="radio"/> 1 vez semana<br><input type="radio"/> 2 a 4 veces semana<br><input type="radio"/> 5 a 6 veces semana<br><input type="radio"/> 1 vez al día<br><input type="radio"/> 2 a 3 veces al día<br><input type="radio"/> 5 a 6 veces al día<br><input type="radio"/> más 6 veces al día |
| galletas tipo maria | <input type="radio"/> Nunca o menos 1 vez al mes<br><input type="radio"/> 1 a 3 veces mes<br><input type="radio"/> 1 vez semana<br><input checked="" type="radio"/> 2 a 4 veces semana<br><input type="radio"/> 5 a 6 veces semana<br><input type="radio"/> 1 vez al día<br><input type="radio"/> 2 a 3 veces al día<br><input type="radio"/> 5 a 6 veces al día<br><input type="radio"/> más 6 veces al día |

|                           |                                                                                                                                                                                                                                                                                                                                                                                                              |
|---------------------------|--------------------------------------------------------------------------------------------------------------------------------------------------------------------------------------------------------------------------------------------------------------------------------------------------------------------------------------------------------------------------------------------------------------|
| galletas chocolate        | <input type="radio"/> Nunca o menos 1 vez al mes<br><input type="radio"/> 1 a 3 veces mes<br><input checked="" type="radio"/> 1 vez semana<br><input type="radio"/> 2 a 4 veces semana<br><input type="radio"/> 5 a 6 veces semana<br><input type="radio"/> 1 vez al día<br><input type="radio"/> 2 a 3 veces al día<br><input type="radio"/> 5 a 6 veces al día<br><input type="radio"/> más 6 veces al día |
| bollieria                 | <input type="radio"/> Nunca o menos 1 vez al mes<br><input type="radio"/> 1 a 3 veces mes<br><input checked="" type="radio"/> 1 vez semana<br><input type="radio"/> 2 a 4 veces semana<br><input type="radio"/> 5 a 6 veces semana<br><input type="radio"/> 1 vez al día<br><input type="radio"/> 2 a 3 veces al día<br><input type="radio"/> 5 a 6 veces al día<br><input type="radio"/> más 6 veces al día |
| chocolate o bombones      | <input checked="" type="radio"/> Nunca o menos 1 vez al mes<br><input type="radio"/> 1 a 3 veces mes<br><input type="radio"/> 1 vez semana<br><input type="radio"/> 2 a 4 veces semana<br><input type="radio"/> 5 a 6 veces semana<br><input type="radio"/> 1 vez al día<br><input type="radio"/> 2 a 3 veces al día<br><input type="radio"/> 5 a 6 veces al día<br><input type="radio"/> más 6 veces al día |
| chocolate polvo o colacao | <input checked="" type="radio"/> Nunca o menos 1 vez al mes<br><input type="radio"/> 1 a 3 veces mes<br><input type="radio"/> 1 vez semana<br><input type="radio"/> 2 a 4 veces semana<br><input type="radio"/> 5 a 6 veces semana<br><input type="radio"/> 1 vez al día<br><input type="radio"/> 2 a 3 veces al día<br><input type="radio"/> 5 a 6 veces al día<br><input type="radio"/> más 6 veces al día |
| vino tinto                | <input checked="" type="radio"/> Nunca o menos 1 vez al mes<br><input type="radio"/> 1 a 3 veces mes<br><input type="radio"/> 1 vez semana<br><input type="radio"/> 2 a 4 veces semana<br><input type="radio"/> 5 a 6 veces semana<br><input type="radio"/> 1 vez al día<br><input type="radio"/> 2 a 3 veces al día<br><input type="radio"/> 5 a 6 veces al día<br><input type="radio"/> más 6 veces al día |
| vino blanco               | <input checked="" type="radio"/> Nunca o menos 1 vez al mes<br><input type="radio"/> 1 a 3 veces mes<br><input type="radio"/> 1 vez semana<br><input type="radio"/> 2 a 4 veces semana<br><input type="radio"/> 5 a 6 veces semana<br><input type="radio"/> 1 vez al día<br><input type="radio"/> 2 a 3 veces al día<br><input type="radio"/> 5 a 6 veces al día<br><input type="radio"/> más 6 veces al día |

|                       |                                                                                                                                                                                                                                                                                                                                                                                                              |
|-----------------------|--------------------------------------------------------------------------------------------------------------------------------------------------------------------------------------------------------------------------------------------------------------------------------------------------------------------------------------------------------------------------------------------------------------|
| vino seco o vermut    | <input checked="" type="radio"/> Nunca o menos 1 vez al mes<br><input type="radio"/> 1 a 3 veces mes<br><input type="radio"/> 1 vez semana<br><input type="radio"/> 2 a 4 veces semana<br><input type="radio"/> 5 a 6 veces semana<br><input type="radio"/> 1 vez al día<br><input type="radio"/> 2 a 3 veces al día<br><input type="radio"/> 5 a 6 veces al día<br><input type="radio"/> más 6 veces al día |
| cerveza               | <input checked="" type="radio"/> Nunca o menos 1 vez al mes<br><input type="radio"/> 1 a 3 veces mes<br><input type="radio"/> 1 vez semana<br><input type="radio"/> 2 a 4 veces semana<br><input type="radio"/> 5 a 6 veces semana<br><input type="radio"/> 1 vez al día<br><input type="radio"/> 2 a 3 veces al día<br><input type="radio"/> 5 a 6 veces al día<br><input type="radio"/> más 6 veces al día |
| cerveza sin alcohol   | <input checked="" type="radio"/> Nunca o menos 1 vez al mes<br><input type="radio"/> 1 a 3 veces mes<br><input type="radio"/> 1 vez semana<br><input type="radio"/> 2 a 4 veces semana<br><input type="radio"/> 5 a 6 veces semana<br><input type="radio"/> 1 vez al día<br><input type="radio"/> 2 a 3 veces al día<br><input type="radio"/> 5 a 6 veces al día<br><input type="radio"/> más 6 veces al día |
| licores               | <input checked="" type="radio"/> Nunca o menos 1 vez al mes<br><input type="radio"/> 1 a 3 veces mes<br><input type="radio"/> 1 vez semana<br><input type="radio"/> 2 a 4 veces semana<br><input type="radio"/> 5 a 6 veces semana<br><input type="radio"/> 1 vez al día<br><input type="radio"/> 2 a 3 veces al día<br><input type="radio"/> 5 a 6 veces al día<br><input type="radio"/> más 6 veces al día |
| ginebra o ron o vodka | <input checked="" type="radio"/> Nunca o menos 1 vez al mes<br><input type="radio"/> 1 a 3 veces mes<br><input type="radio"/> 1 vez semana<br><input type="radio"/> 2 a 4 veces semana<br><input type="radio"/> 5 a 6 veces semana<br><input type="radio"/> 1 vez al día<br><input type="radio"/> 2 a 3 veces al día<br><input type="radio"/> 5 a 6 veces al día<br><input type="radio"/> más 6 veces al día |
| refresco normal       | <input checked="" type="radio"/> Nunca o menos 1 vez al mes<br><input type="radio"/> 1 a 3 veces mes<br><input type="radio"/> 1 vez semana<br><input type="radio"/> 2 a 4 veces semana<br><input type="radio"/> 5 a 6 veces semana<br><input type="radio"/> 1 vez al día<br><input type="radio"/> 2 a 3 veces al día<br><input type="radio"/> 5 a 6 veces al día<br><input type="radio"/> más 6 veces al día |



|                          |                                                                                                                                                                                                                                                                                                                                                                                                              |
|--------------------------|--------------------------------------------------------------------------------------------------------------------------------------------------------------------------------------------------------------------------------------------------------------------------------------------------------------------------------------------------------------------------------------------------------------|
| refresco sin azúcar      | <input checked="" type="radio"/> Nunca o menos 1 vez al mes<br><input type="radio"/> 1 a 3 veces mes<br><input type="radio"/> 1 vez semana<br><input type="radio"/> 2 a 4 veces semana<br><input type="radio"/> 5 a 6 veces semana<br><input type="radio"/> 1 vez al día<br><input type="radio"/> 2 a 3 veces al día<br><input type="radio"/> 5 a 6 veces al día<br><input type="radio"/> más 6 veces al día |
| Agua del grifo           | <input checked="" type="radio"/> Nunca o menos 1 vez al mes<br><input type="radio"/> 1 a 3 veces mes<br><input type="radio"/> 1 vez semana<br><input type="radio"/> 2 a 4 veces semana<br><input type="radio"/> 5 a 6 veces semana<br><input type="radio"/> 1 vez al día<br><input type="radio"/> 2 a 3 veces al día<br><input type="radio"/> 5 a 6 veces al día<br><input type="radio"/> más 6 veces al día |
| agua embotellada sin gas | <input type="radio"/> Nunca o menos 1 vez al mes<br><input type="radio"/> 1 a 3 veces mes<br><input type="radio"/> 1 vez semana<br><input type="radio"/> 2 a 4 veces semana<br><input type="radio"/> 5 a 6 veces semana<br><input type="radio"/> 1 vez al día<br><input type="radio"/> 2 a 3 veces al día<br><input type="radio"/> 5 a 6 veces al día<br><input checked="" type="radio"/> más 6 veces al día |
| agua embotellada con gas | <input checked="" type="radio"/> Nunca o menos 1 vez al mes<br><input type="radio"/> 1 a 3 veces mes<br><input type="radio"/> 1 vez semana<br><input type="radio"/> 2 a 4 veces semana<br><input type="radio"/> 5 a 6 veces semana<br><input type="radio"/> 1 vez al día<br><input type="radio"/> 2 a 3 veces al día<br><input type="radio"/> 5 a 6 veces al día<br><input type="radio"/> más 6 veces al día |
| zumو frutas embasado     | <input type="radio"/> Nunca o menos 1 vez al mes<br><input checked="" type="radio"/> 1 a 3 veces mes<br><input type="radio"/> 1 vez semana<br><input type="radio"/> 2 a 4 veces semana<br><input type="radio"/> 5 a 6 veces semana<br><input type="radio"/> 1 vez al día<br><input type="radio"/> 2 a 3 veces al día<br><input type="radio"/> 5 a 6 veces al día<br><input type="radio"/> más 6 veces al día |
| cafe                     | <input checked="" type="radio"/> Nunca o menos 1 vez al mes<br><input type="radio"/> 1 a 3 veces mes<br><input type="radio"/> 1 vez semana<br><input type="radio"/> 2 a 4 veces semana<br><input type="radio"/> 5 a 6 veces semana<br><input type="radio"/> 1 vez al día<br><input type="radio"/> 2 a 3 veces al día<br><input type="radio"/> 5 a 6 veces al día<br><input type="radio"/> más 6 veces al día |

|                       |                                                                                                                                                                                                                                                                                                                                                                                                              |
|-----------------------|--------------------------------------------------------------------------------------------------------------------------------------------------------------------------------------------------------------------------------------------------------------------------------------------------------------------------------------------------------------------------------------------------------------|
| cafe descafeinado     | <input type="radio"/> Nunca o menos 1 vez al mes<br><input checked="" type="radio"/> 1 a 3 veces mes<br><input type="radio"/> 1 vez semana<br><input type="radio"/> 2 a 4 veces semana<br><input type="radio"/> 5 a 6 veces semana<br><input type="radio"/> 1 vez al día<br><input type="radio"/> 2 a 3 veces al día<br><input type="radio"/> 5 a 6 veces al día<br><input type="radio"/> más 6 veces al día |
| te o infusión         | <input checked="" type="radio"/> Nunca o menos 1 vez al mes<br><input type="radio"/> 1 a 3 veces mes<br><input type="radio"/> 1 vez semana<br><input type="radio"/> 2 a 4 veces semana<br><input type="radio"/> 5 a 6 veces semana<br><input type="radio"/> 1 vez al día<br><input type="radio"/> 2 a 3 veces al día<br><input type="radio"/> 5 a 6 veces al día<br><input type="radio"/> más 6 veces al día |
| sopa o puré verduras  | <input type="radio"/> Nunca o menos 1 vez al mes<br><input type="radio"/> 1 a 3 veces mes<br><input checked="" type="radio"/> 1 vez semana<br><input type="radio"/> 2 a 4 veces semana<br><input type="radio"/> 5 a 6 veces semana<br><input type="radio"/> 1 vez al día<br><input type="radio"/> 2 a 3 veces al día<br><input type="radio"/> 5 a 6 veces al día<br><input type="radio"/> más 6 veces al día |
| croquetas pollo jamón | <input type="radio"/> Nunca o menos 1 vez al mes<br><input checked="" type="radio"/> 1 a 3 veces mes<br><input type="radio"/> 1 vez semana<br><input type="radio"/> 2 a 4 veces semana<br><input type="radio"/> 5 a 6 veces semana<br><input type="radio"/> 1 vez al día<br><input type="radio"/> 2 a 3 veces al día<br><input type="radio"/> 5 a 6 veces al día<br><input type="radio"/> más 6 veces al día |
| croquetas pescado     | <input checked="" type="radio"/> Nunca o menos 1 vez al mes<br><input type="radio"/> 1 a 3 veces mes<br><input type="radio"/> 1 vez semana<br><input type="radio"/> 2 a 4 veces semana<br><input type="radio"/> 5 a 6 veces semana<br><input type="radio"/> 1 vez al día<br><input type="radio"/> 2 a 3 veces al día<br><input type="radio"/> 5 a 6 veces al día<br><input type="radio"/> más 6 veces al día |
| mayonesa              | <input type="radio"/> Nunca o menos 1 vez al mes<br><input checked="" type="radio"/> 1 a 3 veces mes<br><input type="radio"/> 1 vez semana<br><input type="radio"/> 2 a 4 veces semana<br><input type="radio"/> 5 a 6 veces semana<br><input type="radio"/> 1 vez al día<br><input type="radio"/> 2 a 3 veces al día<br><input type="radio"/> 5 a 6 veces al día<br><input type="radio"/> más 6 veces al día |

|                  |                                                                                                                                                                                                                                                                                                                                                                                                              |
|------------------|--------------------------------------------------------------------------------------------------------------------------------------------------------------------------------------------------------------------------------------------------------------------------------------------------------------------------------------------------------------------------------------------------------------|
| salsa tomate     | <input checked="" type="radio"/> Nunca o menos 1 vez al mes<br><input type="radio"/> 1 a 3 veces mes<br><input type="radio"/> 1 vez semana<br><input type="radio"/> 2 a 4 veces semana<br><input type="radio"/> 5 a 6 veces semana<br><input type="radio"/> 1 vez al día<br><input type="radio"/> 2 a 3 veces al día<br><input type="radio"/> 5 a 6 veces al día<br><input type="radio"/> más 6 veces al día |
| ketchup          | <input type="radio"/> Nunca o menos 1 vez al mes<br><input checked="" type="radio"/> 1 a 3 veces mes<br><input type="radio"/> 1 vez semana<br><input type="radio"/> 2 a 4 veces semana<br><input type="radio"/> 5 a 6 veces semana<br><input type="radio"/> 1 vez al día<br><input type="radio"/> 2 a 3 veces al día<br><input type="radio"/> 5 a 6 veces al día<br><input type="radio"/> más 6 veces al día |
| sal              | <input type="radio"/> Nunca o menos 1 vez al mes<br><input type="radio"/> 1 a 3 veces mes<br><input type="radio"/> 1 vez semana<br><input checked="" type="radio"/> 2 a 4 veces semana<br><input type="radio"/> 5 a 6 veces semana<br><input type="radio"/> 1 vez al día<br><input type="radio"/> 2 a 3 veces al día<br><input type="radio"/> 5 a 6 veces al día<br><input type="radio"/> más 6 veces al día |
| ajo              | <input checked="" type="radio"/> Nunca o menos 1 vez al mes<br><input type="radio"/> 1 a 3 veces mes<br><input type="radio"/> 1 vez semana<br><input type="radio"/> 2 a 4 veces semana<br><input type="radio"/> 5 a 6 veces semana<br><input type="radio"/> 1 vez al día<br><input type="radio"/> 2 a 3 veces al día<br><input type="radio"/> 5 a 6 veces al día<br><input type="radio"/> más 6 veces al día |
| mermelada o miel | <input checked="" type="radio"/> Nunca o menos 1 vez al mes<br><input type="radio"/> 1 a 3 veces mes<br><input type="radio"/> 1 vez semana<br><input type="radio"/> 2 a 4 veces semana<br><input type="radio"/> 5 a 6 veces semana<br><input type="radio"/> 1 vez al día<br><input type="radio"/> 2 a 3 veces al día<br><input type="radio"/> 5 a 6 veces al día<br><input type="radio"/> más 6 veces al día |
| azúcar           | <input checked="" type="radio"/> Nunca o menos 1 vez al mes<br><input type="radio"/> 1 a 3 veces mes<br><input type="radio"/> 1 vez semana<br><input type="radio"/> 2 a 4 veces semana<br><input type="radio"/> 5 a 6 veces semana<br><input type="radio"/> 1 vez al día<br><input type="radio"/> 2 a 3 veces al día<br><input type="radio"/> 5 a 6 veces al día<br><input type="radio"/> más 6 veces al día |

|                                       |                                                                                                                                                                                                                                                                                                                                                                                                                                                                                                                               |
|---------------------------------------|-------------------------------------------------------------------------------------------------------------------------------------------------------------------------------------------------------------------------------------------------------------------------------------------------------------------------------------------------------------------------------------------------------------------------------------------------------------------------------------------------------------------------------|
| Otro alimento                         | [*DATA REMOVED*]                                                                                                                                                                                                                                                                                                                                                                                                                                                                                                              |
| suplementos vitamínicos               | <input type="radio"/> si<br><input checked="" type="radio"/> no                                                                                                                                                                                                                                                                                                                                                                                                                                                               |
| suplementos vitamínicos               |                                                                                                                                                                                                                                                                                                                                                                                                                                                                                                                               |
| dieta previa                          | <input type="radio"/> si<br><input checked="" type="radio"/> no                                                                                                                                                                                                                                                                                                                                                                                                                                                               |
| motivo dieta                          | <input checked="" type="radio"/> no dieta<br><input type="radio"/> control peso<br><input type="radio"/> control colesterol<br><input type="radio"/> control diabetes<br><input type="radio"/> problemas estómago<br><input type="radio"/> problemas vesícula o hepáticos<br><input type="radio"/> HTA o cardiopatía<br><input type="radio"/> problemas renales<br><input type="radio"/> alergia alimentaria<br><input type="radio"/> ácido úrico elevado<br><input type="radio"/> vegetariana<br><input type="radio"/> otros |
| cambio alimentos año previo gestación | <input checked="" type="radio"/> si<br><input type="radio"/> no                                                                                                                                                                                                                                                                                                                                                                                                                                                               |
| cambio lácteos                        | <input type="radio"/> eliminado<br><input type="radio"/> disminuido<br><input checked="" type="radio"/> igual<br><input type="radio"/> aumentado<br><input type="radio"/> no sabe                                                                                                                                                                                                                                                                                                                                             |
| cambio huevos                         | <input type="radio"/> eliminado<br><input type="radio"/> disminuido<br><input checked="" type="radio"/> igual<br><input type="radio"/> aumentado<br><input type="radio"/> no sabe                                                                                                                                                                                                                                                                                                                                             |
| cambio carne                          | <input type="radio"/> eliminado<br><input checked="" type="radio"/> disminuido<br><input type="radio"/> igual<br><input type="radio"/> aumentado<br><input type="radio"/> no sabe                                                                                                                                                                                                                                                                                                                                             |
| cambio pescado                        | <input type="radio"/> eliminado<br><input checked="" type="radio"/> disminuido<br><input type="radio"/> igual<br><input type="radio"/> aumentado<br><input type="radio"/> no sabe                                                                                                                                                                                                                                                                                                                                             |
| cambio verduras                       | <input type="radio"/> eliminado<br><input checked="" type="radio"/> disminuido<br><input type="radio"/> igual<br><input type="radio"/> aumentado<br><input type="radio"/> no sabe                                                                                                                                                                                                                                                                                                                                             |

|                            |                                                                                                                                                                                                                        |
|----------------------------|------------------------------------------------------------------------------------------------------------------------------------------------------------------------------------------------------------------------|
| cambio legumbres           | <input type="radio"/> eliminado<br><input checked="" type="radio"/> disminuido<br><input type="radio"/> igual<br><input type="radio"/> aumentado<br><input type="radio"/> no sabe                                      |
| cambio fruta               | <input type="radio"/> eliminado<br><input type="radio"/> disminuido<br><input type="radio"/> igual<br><input checked="" type="radio"/> aumentado<br><input type="radio"/> no sabe                                      |
| cambio pan                 | <input type="radio"/> eliminado<br><input checked="" type="radio"/> disminuido<br><input type="radio"/> igual<br><input type="radio"/> aumentado<br><input type="radio"/> no sabe                                      |
| cambio aceite oliva        | <input type="radio"/> eliminado<br><input checked="" type="radio"/> disminuido<br><input type="radio"/> igual<br><input type="radio"/> aumentado<br><input type="radio"/> no sabe                                      |
| cambio mante o margarina   | <input checked="" type="radio"/> eliminado<br><input type="radio"/> disminuido<br><input type="radio"/> igual<br><input type="radio"/> aumentado<br><input type="radio"/> no sabe                                      |
| cambio azúcar y dulces     | <input type="radio"/> eliminado<br><input type="radio"/> disminuido<br><input type="radio"/> igual<br><input checked="" type="radio"/> aumentado<br><input type="radio"/> no sabe                                      |
| cambio bebidas alcohólicas | <input checked="" type="radio"/> eliminado<br><input type="radio"/> disminuido<br><input type="radio"/> igual<br><input type="radio"/> aumentado<br><input type="radio"/> no sabe                                      |
| frecuencia comidas fritas  | <input type="radio"/> a diario<br><input type="radio"/> 5 a 6 veces semana<br><input type="radio"/> 2 a 4 veces semana<br><input type="radio"/> 1 vez semana<br><input checked="" type="radio"/> menos de 1 vez semana |
| carne                      | <input type="radio"/> no como<br><input type="radio"/> cruda<br><input type="radio"/> poco hecha<br><input type="radio"/> hecha<br><input type="radio"/> muy hecha                                                     |
| grasa visible carne        | <input type="radio"/> quita toda<br><input type="radio"/> quita mayoría<br><input type="radio"/> quita un poco<br><input type="radio"/> no quita nada                                                                  |

|                                |                                                                                                                                                                                                                                               |
|--------------------------------|-----------------------------------------------------------------------------------------------------------------------------------------------------------------------------------------------------------------------------------------------|
| cocina carne                   | <input type="radio"/> a la plancha<br><input type="radio"/> a la parrilla<br><input type="radio"/> asada<br><input type="radio"/> frita<br><input type="radio"/> guisada                                                                      |
| tostado quemado carne          | <input type="radio"/> nunca<br><input type="radio"/> 1 vez mes<br><input type="radio"/> 2 a 3 veces mes<br><input type="radio"/> 1 vez semana<br><input type="radio"/> 2 a 3 semanas                                                          |
| tostado quemado pescado        | <input type="radio"/> nunca<br><input type="radio"/> 1 vez mes<br><input type="radio"/> 2 a 3 veces mes<br><input type="radio"/> 1 vez semana<br><input type="radio"/> 2 a 3 semanas                                                          |
| socarrat paella                | <input type="radio"/> nunca<br><input type="radio"/> 1 vez mes<br><input type="radio"/> 2 a 3 veces mes<br><input type="radio"/> 1 vez semana<br><input type="radio"/> 2 a 3 semanas                                                          |
| grasa o aceite cocinar         | <input type="radio"/> mantequilla<br><input type="radio"/> margarina<br><input type="radio"/> aceite oliva<br><input type="radio"/> aceite oliva virgen extra<br><input type="radio"/> aceite vegetal<br><input type="radio"/> mezcla aceites |
| grasa aceite aliñar            | <input type="radio"/> mantequilla<br><input type="radio"/> margarina<br><input type="radio"/> aceite oliva<br><input type="radio"/> aceite oliva virgen extra<br><input type="radio"/> aceite vegetal<br><input type="radio"/> mezcla aceites |
| grasa aceite freir             | <input type="radio"/> mantequilla<br><input type="radio"/> margarina<br><input type="radio"/> aceite oliva<br><input type="radio"/> aceite oliva virgen extra<br><input type="radio"/> aceite vegetal<br><input type="radio"/> mezcla aceites |
| Ejercicio cuestionario         | <input checked="" type="radio"/> si<br><input type="radio"/> no                                                                                                                                                                               |
| horas de sueño incluido siesta | [*DATA REMOVED*]                                                                                                                                                                                                                              |
| minutos siesta                 | [*DATA REMOVED*]                                                                                                                                                                                                                              |
| horas televisión semana        | [*DATA REMOVED*]                                                                                                                                                                                                                              |

|                                        |                                                                                                                                                                                                                                                                                                                                                                           |
|----------------------------------------|---------------------------------------------------------------------------------------------------------------------------------------------------------------------------------------------------------------------------------------------------------------------------------------------------------------------------------------------------------------------------|
| actividad trabajo                      | <input type="radio"/> casi siempre sentado<br><input checked="" type="radio"/> sentado 50 por cien<br><input type="radio"/> casi siempre de pie, quieto<br><input type="radio"/> casi siempre levantado caminando y llevando pocas cosas<br><input type="radio"/> casi siempre levantado, caminando y llevado muchas cosas<br><input type="radio"/> trabajo manual pesado |
| tiempo caminar o bici al día           | <input type="radio"/> casi nunca<br><input type="radio"/> menos 20min día<br><input checked="" type="radio"/> 20 a 40 min día<br><input type="radio"/> 40 a 60 min día<br><input type="radio"/> 1h o 1h y media día<br><input type="radio"/> más de 1h y media al día                                                                                                     |
| tiempo tareas casa al día              | <input type="radio"/> menos de 1h día<br><input checked="" type="radio"/> 1 a 2h día<br><input type="radio"/> 3 a 4h día<br><input type="radio"/> 5 a 6h día<br><input type="radio"/> 7 a 8h día<br><input type="radio"/> más de 8h día                                                                                                                                   |
| tiempo libre televisión ordenador leer | <input type="radio"/> menos 1h día<br><input type="radio"/> 1h día<br><input type="radio"/> 2h día<br><input checked="" type="radio"/> 3h día<br><input type="radio"/> 4h día<br><input type="radio"/> 5 a 6h día<br><input type="radio"/> mas 6h día                                                                                                                     |
| tiempo libre ejercicio o deporte       | <input type="radio"/> menos 1h semana<br><input type="radio"/> 1h semana<br><input type="radio"/> 2h semana<br><input type="radio"/> 3h semana<br><input checked="" type="radio"/> 4 a 5h semana<br><input type="radio"/> mas 5h semana                                                                                                                                   |
| como se considera                      | <input type="radio"/> sedentaria<br><input type="radio"/> poco activa<br><input checked="" type="radio"/> moderadamente activa<br><input type="radio"/> bastante activa<br><input type="radio"/> muy activa<br><input type="radio"/> no sabe                                                                                                                              |
| FUR                                    | [*DATA REMOVED*]                                                                                                                                                                                                                                                                                                                                                          |
| Semanas gestación 2T                   | [*DATA REMOVED*]                                                                                                                                                                                                                                                                                                                                                          |
| Días gestación 2T                      | [*DATA REMOVED*]                                                                                                                                                                                                                                                                                                                                                          |
| DBP 2T                                 | [*DATA REMOVED*]                                                                                                                                                                                                                                                                                                                                                          |
| CC 2T                                  | [*DATA REMOVED*]                                                                                                                                                                                                                                                                                                                                                          |
| AC 2T                                  | [*DATA REMOVED*]                                                                                                                                                                                                                                                                                                                                                          |

|                                                   |                                                                                                                                                                                                 |
|---------------------------------------------------|-------------------------------------------------------------------------------------------------------------------------------------------------------------------------------------------------|
| LF 2T                                             | [*DATA REMOVED*]                                                                                                                                                                                |
| PFE 2T (Hadlock)                                  | [*DATA REMOVED*]                                                                                                                                                                                |
| Semanas gestación 3T                              | [*DATA REMOVED*]                                                                                                                                                                                |
| días 3T                                           | [*DATA REMOVED*]                                                                                                                                                                                |
| DBP 3T                                            | [*DATA REMOVED*]                                                                                                                                                                                |
| CC 3T                                             | [*DATA REMOVED*]                                                                                                                                                                                |
| AC 3T                                             | [*DATA REMOVED*]                                                                                                                                                                                |
| LF 3T                                             | [*DATA REMOVED*]                                                                                                                                                                                |
| PFE 3T (Hadlock)                                  | [*DATA REMOVED*]                                                                                                                                                                                |
| Semanas de gestación final                        | [*DATA REMOVED*]                                                                                                                                                                                |
| dias gestación final                              | [*DATA REMOVED*]                                                                                                                                                                                |
| Localización placenta                             | <input checked="" type="radio"/> anterior<br><input type="radio"/> lateral derecha<br><input type="radio"/> lateral izquierda<br><input type="radio"/> posterior<br><input type="radio"/> fondo |
| Presentación longitudinal cefálica                | <input type="radio"/> no<br><input checked="" type="radio"/> si                                                                                                                                 |
| Dorso                                             | <input checked="" type="radio"/> izquierda anterior<br><input type="radio"/> izquierda posterior<br><input type="radio"/> derecha anterior<br><input type="radio"/> derecha posterior           |
| diámetro biparietal                               | [*DATA REMOVED*]                                                                                                                                                                                |
| Circunferencia craneal                            | [*DATA REMOVED*]                                                                                                                                                                                |
| Circunferencia abdominal                          | [*DATA REMOVED*]                                                                                                                                                                                |
| Longitud de femur                                 | [*DATA REMOVED*]                                                                                                                                                                                |
| tejido celular subcutáneo a nivel del muslo en mm | [*DATA REMOVED*]                                                                                                                                                                                |
| tejido celular subcutáneo en abdomen en mm        | [*DATA REMOVED*]                                                                                                                                                                                |
| Volumen del muslo en cm3                          | [*DATA REMOVED*]                                                                                                                                                                                |
| Peso fetal estimado según fórmula de Hadlock      | [*DATA REMOVED*]                                                                                                                                                                                |



|                                               |                                                                                                                                                          |
|-----------------------------------------------|----------------------------------------------------------------------------------------------------------------------------------------------------------|
| Percentil                                     | [*DATA REMOVED*]                                                                                                                                         |
| Peso fetal estimado según fórmula de Scioscia | <hr/>                                                                                                                                                    |
| Peso fetal estimado según fórmula de LEE      | <hr/>                                                                                                                                                    |
| Tipo de parto                                 | <input type="radio"/> eutocico<br><input checked="" type="radio"/> instrumentado/ventosa<br><input type="radio"/> cesarea                                |
| fecha de nacimiento                           | [*DATA REMOVED*]                                                                                                                                         |
| Días entre exploración y nacimiento           | [*DATA REMOVED*]                                                                                                                                         |
| Peso RN en g                                  | [*DATA REMOVED*]                                                                                                                                         |
| sexo                                          | <input type="radio"/> mujer<br><input checked="" type="radio"/> hombre                                                                                   |
| Apgar 1 minuto                                | [*DATA REMOVED*]                                                                                                                                         |
| Apgar 5 minutos                               | [*DATA REMOVED*]                                                                                                                                         |
| Apgar 10 minutos                              | <hr/>                                                                                                                                                    |
| antecedente Covid durante gestación           | <input type="radio"/> Yes<br><input checked="" type="radio"/> No                                                                                         |
| Nivel de estudios                             | <input type="radio"/> ninguno<br><input checked="" type="radio"/> primarios<br><input type="radio"/> secundarios<br><input type="radio"/> universitarios |

# Base\_datos\_estimacion\_peso\_fetal

|                                       |                                                                                                                                                                                                                                                                                      |
|---------------------------------------|--------------------------------------------------------------------------------------------------------------------------------------------------------------------------------------------------------------------------------------------------------------------------------------|
| Número de identificación participante | 86                                                                                                                                                                                                                                                                                   |
| CODIGO PARTICIPANTE                   |                                                                                                                                                                                                                                                                                      |
| Edad                                  | [*DATA REMOVED*]                                                                                                                                                                                                                                                                     |
| Gestaciones                           | <input type="radio"/> 1<br><input type="radio"/> 2<br><input type="radio"/> 3<br><input checked="" type="radio"/> mas de 3                                                                                                                                                           |
| partos                                | <input type="radio"/> 0<br><input type="radio"/> 1<br><input checked="" type="radio"/> 2<br><input type="radio"/> 3<br><input type="radio"/> mas de 3                                                                                                                                |
| cesáreas                              | <input checked="" type="radio"/> 0<br><input type="radio"/> 1<br><input type="radio"/> 2<br><input type="radio"/> 3<br><input type="radio"/> mas de 3                                                                                                                                |
| Abortos                               | <input checked="" type="radio"/> 0<br><input type="radio"/> 1<br><input type="radio"/> 2<br><input type="radio"/> 3<br><input type="radio"/> mas de 3                                                                                                                                |
| Tipo de gestacion                     | <input checked="" type="radio"/> espontanea<br><input type="radio"/> IAC inseminación artificial conyuge<br><input type="radio"/> IAD inseminación artificial donante<br><input type="radio"/> FIV Fecundación in Vitro<br><input type="radio"/> Ovodon FIV con donación de ovocitos |
| peso previo a embarazo                | [*DATA REMOVED*]                                                                                                                                                                                                                                                                     |
| Ganancia ponderal embarazo            |                                                                                                                                                                                                                                                                                      |
| Talla madre                           | [*DATA REMOVED*]                                                                                                                                                                                                                                                                     |
| IMC previo embarazo                   | 20.569329660238754                                                                                                                                                                                                                                                                   |
| Patología obstétrica                  | <input checked="" type="radio"/> no<br><input type="radio"/> si                                                                                                                                                                                                                      |
| Diabetes pregestacional               | <input checked="" type="radio"/> no<br><input type="radio"/> si                                                                                                                                                                                                                      |
| Diabetes gestacional                  | <input checked="" type="radio"/> no<br><input type="radio"/> si                                                                                                                                                                                                                      |

|                                            |                                                                                                                                                                                      |
|--------------------------------------------|--------------------------------------------------------------------------------------------------------------------------------------------------------------------------------------|
| Diabetes gestacional con insulina          | <input checked="" type="radio"/> no<br><input type="radio"/> si                                                                                                                      |
| Diabetes gestacional con dieta y ejercicio | <input checked="" type="radio"/> no<br><input type="radio"/> si                                                                                                                      |
| Percentil fetos previos                    | <input type="radio"/> Nada<br><input type="radio"/> percentil menor de 10<br><input type="radio"/> percentil entre 10 y 90<br><input checked="" type="radio"/> percentil mayor de 90 |
| Exfumadora                                 | <input checked="" type="radio"/> Nada<br><input type="radio"/> menos de 5 años<br><input type="radio"/> 5 a 10 años<br><input type="radio"/> mayor o igual a 10 años                 |
| Hábito tabáquico                           | <input checked="" type="radio"/> no<br><input type="radio"/> si                                                                                                                      |
| fumadora                                   | [*DATA REMOVED*]                                                                                                                                                                     |
| Consumo otros tóxicos                      | <input checked="" type="radio"/> no<br><input type="radio"/> si                                                                                                                      |
| Hb 1T                                      | _____                                                                                                                                                                                |
| Htc 1T                                     | _____                                                                                                                                                                                |
| Hb 2T                                      | _____                                                                                                                                                                                |
| HTC 2T                                     | _____                                                                                                                                                                                |
| Hb 3T                                      | _____                                                                                                                                                                                |
| HTC 3T                                     | _____                                                                                                                                                                                |
| Suplemento FE oral                         | <input checked="" type="radio"/> si<br><input type="radio"/> no                                                                                                                      |
| Suplemento fe iv                           | <input type="radio"/> si<br><input type="radio"/> no                                                                                                                                 |
| Transfusión                                | <input type="radio"/> no<br><input type="radio"/> si                                                                                                                                 |
| Solicitada Vit D                           | <input checked="" type="radio"/> no<br><input type="radio"/> si                                                                                                                      |

|                       |                                                                                                                                                                                                                                                                                                                                                                                                              |
|-----------------------|--------------------------------------------------------------------------------------------------------------------------------------------------------------------------------------------------------------------------------------------------------------------------------------------------------------------------------------------------------------------------------------------------------------|
| Deficit vit D         | <input type="radio"/> no<br><input type="radio"/> si                                                                                                                                                                                                                                                                                                                                                         |
| Suplemento vit D      | <input type="radio"/> si<br><input type="radio"/> no                                                                                                                                                                                                                                                                                                                                                         |
| Dieta, cuestionario   | <input checked="" type="radio"/> si<br><input type="radio"/> no                                                                                                                                                                                                                                                                                                                                              |
| Leche entera          | <input type="radio"/> Nunca o menos 1 vez al mes<br><input type="radio"/> 1 a 3 veces mes<br><input type="radio"/> 1 vez semana<br><input type="radio"/> 2 a 4 veces semana<br><input type="radio"/> 5 a 6 veces semana<br><input checked="" type="radio"/> 1 vez al día<br><input type="radio"/> 2 a 3 veces al día<br><input type="radio"/> 5 a 6 veces al día<br><input type="radio"/> más 6 veces al día |
| Leche semidesnatada   | <input checked="" type="radio"/> Nunca o menos 1 vez al mes<br><input type="radio"/> 1 a 3 veces mes<br><input type="radio"/> 1 vez semana<br><input type="radio"/> 2 a 4 veces semana<br><input type="radio"/> 5 a 6 veces semana<br><input type="radio"/> 1 vez al día<br><input type="radio"/> 2 a 3 veces al día<br><input type="radio"/> 5 a 6 veces al día<br><input type="radio"/> mas 6 veces al día |
| Leche desnatada       | <input checked="" type="radio"/> Nunca o menos 1 vez al mes<br><input type="radio"/> 1 a 3 veces mes<br><input type="radio"/> 1 vez semana<br><input type="radio"/> 2 a 4 veces semana<br><input type="radio"/> 5 a 6 veces semana<br><input type="radio"/> 1 vez al día<br><input type="radio"/> 2 a 3 veces al día<br><input type="radio"/> 5 a 6 veces al día<br><input type="radio"/> más 6 veces al día |
| Leche condensada      | <input checked="" type="radio"/> Nunca o menos 1 vez al mes<br><input type="radio"/> 1 a 3 veces mes<br><input type="radio"/> 1 vez semana<br><input type="radio"/> 2 a 4 veces semana<br><input type="radio"/> 5 a 6 veces semana<br><input type="radio"/> 1 vez al día<br><input type="radio"/> 2 a 3 veces al día<br><input type="radio"/> 5 a 6 veces al día<br><input type="radio"/> más 6 veces al día |
| nata o crema de leche | <input checked="" type="radio"/> Nunca o menos 1 vez al mes<br><input type="radio"/> 1 a 3 veces mes<br><input type="radio"/> 1 vez semana<br><input type="radio"/> 2 a 4 veces semana<br><input type="radio"/> 5 a 6 veces semana<br><input type="radio"/> 1 vez al día<br><input type="radio"/> 2 a 3 veces al día<br><input type="radio"/> 5 a 6 veces al día<br><input type="radio"/> más 6 veces al día |

|                                             |                                                                                                                                                                                                                                                                                                                                                                                                              |
|---------------------------------------------|--------------------------------------------------------------------------------------------------------------------------------------------------------------------------------------------------------------------------------------------------------------------------------------------------------------------------------------------------------------------------------------------------------------|
| Yogurt Entero                               | <input type="radio"/> Nunca o menos 1 vez al mes<br><input type="radio"/> 1 a 3 veces mes<br><input type="radio"/> 1 vez semana<br><input type="radio"/> 2 a 4 veces semana<br><input type="radio"/> 5 a 6 veces semana<br><input checked="" type="radio"/> 1 vez al día<br><input type="radio"/> 2 a 3 veces al día<br><input type="radio"/> 5 a 6 veces al día<br><input type="radio"/> más 6 veces al día |
| Yogurt desnatado                            | <input checked="" type="radio"/> Nunca o menos 1 vez al mes<br><input type="radio"/> 1 a 3 veces mes<br><input type="radio"/> 1 vez semana<br><input type="radio"/> 2 a 4 veces semana<br><input type="radio"/> 5 a 6 veces semana<br><input type="radio"/> 1 vez al día<br><input type="radio"/> 2 a 3 veces al día<br><input type="radio"/> 5 a 6 veces al día<br><input type="radio"/> más 6 veces al día |
| 100g requesón o queso blando o queso fresco | <input type="radio"/> Nunca o menos 1 vez al mes<br><input type="radio"/> 1 a 3 veces mes<br><input type="radio"/> 1 vez semana<br><input checked="" type="radio"/> 2 a 4 veces semana<br><input type="radio"/> 5 a 6 veces semana<br><input type="radio"/> 1 vez al día<br><input type="radio"/> 2 a 3 veces al día<br><input type="radio"/> 5 a 6 veces al día<br><input type="radio"/> más 6 veces al día |
| queso curado o semicurado o cremoso         | <input type="radio"/> Nunca o menos 1 vez al mes<br><input type="radio"/> 1 a 3 veces mes<br><input checked="" type="radio"/> 1 vez semana<br><input type="radio"/> 2 a 4 veces semana<br><input type="radio"/> 5 a 6 veces semana<br><input type="radio"/> 1 vez al día<br><input type="radio"/> 2 a 3 veces al día<br><input type="radio"/> 5 a 6 veces al día<br><input type="radio"/> más 6 veces al día |
| natillas flan pudding                       | <input checked="" type="radio"/> Nunca o menos 1 vez al mes<br><input type="radio"/> 1 a 3 veces mes<br><input type="radio"/> 1 vez semana<br><input type="radio"/> 2 a 4 veces semana<br><input type="radio"/> 5 a 6 veces semana<br><input type="radio"/> 1 vez al día<br><input type="radio"/> 2 a 3 veces al día<br><input type="radio"/> 5 a 6 veces al día<br><input type="radio"/> más 6 veces al día |
| Helado                                      | <input type="radio"/> Nunca o menos 1 vez al mes<br><input type="radio"/> 1 a 3 veces mes<br><input checked="" type="radio"/> 1 vez semana<br><input type="radio"/> 2 a 4 veces semana<br><input type="radio"/> 5 a 6 veces semana<br><input type="radio"/> 1 vez al día<br><input type="radio"/> 2 a 3 veces al día<br><input type="radio"/> 5 a 6 veces al día<br><input type="radio"/> más 6 veces al día |

|                                      |                                                                                                                                                                                                                                                                                                                                                                                                              |
|--------------------------------------|--------------------------------------------------------------------------------------------------------------------------------------------------------------------------------------------------------------------------------------------------------------------------------------------------------------------------------------------------------------------------------------------------------------|
| huevo                                | <input type="radio"/> Nunca o menos 1 vez al mes<br><input type="radio"/> 1 a 3 veces mes<br><input type="radio"/> 1 vez semana<br><input type="radio"/> 2 a 4 veces semana<br><input type="radio"/> 5 a 6 veces semana<br><input checked="" type="radio"/> 1 vez al día<br><input type="radio"/> 2 a 3 veces al día<br><input type="radio"/> 5 a 6 veces al día<br><input type="radio"/> más 6 veces al día |
| Pollo con piel                       | <input checked="" type="radio"/> Nunca o menos 1 vez al mes<br><input type="radio"/> 1 a 3 veces mes<br><input type="radio"/> 1 vez semana<br><input type="radio"/> 2 a 4 veces semana<br><input type="radio"/> 5 a 6 veces semana<br><input type="radio"/> 1 vez al día<br><input type="radio"/> 2 a 3 veces al día<br><input type="radio"/> 5 a 6 veces al día<br><input type="radio"/> más 6 veces al día |
| pollo sin piel                       | <input type="radio"/> Nunca o menos 1 vez al mes<br><input checked="" type="radio"/> 1 a 3 veces mes<br><input type="radio"/> 1 vez semana<br><input type="radio"/> 2 a 4 veces semana<br><input type="radio"/> 5 a 6 veces semana<br><input type="radio"/> 1 vez al día<br><input type="radio"/> 2 a 3 veces al día<br><input type="radio"/> 5 a 6 veces al día<br><input type="radio"/> más 6 veces al día |
| Ternera o cerdo o cordero            | <input type="radio"/> Nunca o menos 1 vez al mes<br><input checked="" type="radio"/> 1 a 3 veces mes<br><input type="radio"/> 1 vez semana<br><input type="radio"/> 2 a 4 veces semana<br><input type="radio"/> 5 a 6 veces semana<br><input type="radio"/> 1 vez al día<br><input type="radio"/> 2 a 3 veces al día<br><input type="radio"/> 5 a 6 veces al día<br><input type="radio"/> más 6 veces al día |
| carne caza: Conejo o codorniz o pato | <input checked="" type="radio"/> Nunca o menos 1 vez al mes<br><input type="radio"/> 1 a 3 veces mes<br><input type="radio"/> 1 vez semana<br><input type="radio"/> 2 a 4 veces semana<br><input type="radio"/> 5 a 6 veces semana<br><input type="radio"/> 1 vez al día<br><input type="radio"/> 2 a 3 veces al día<br><input type="radio"/> 5 a 6 veces al día<br><input type="radio"/> más 6 veces al día |
| Hígado de ternera o cerdo o pollo    | <input checked="" type="radio"/> Nunca o menos 1 vez al mes<br><input type="radio"/> 1 a 3 veces mes<br><input type="radio"/> 1 vez semana<br><input type="radio"/> 2 a 4 veces semana<br><input type="radio"/> 5 a 6 veces semana<br><input type="radio"/> 1 vez al día<br><input type="radio"/> 2 a 3 veces al día<br><input type="radio"/> 5 a 6 veces al día<br><input type="radio"/> más 6 veces al día |

|                     |                                                                                                                                                                                                                                                                                                                                                                                                              |
|---------------------|--------------------------------------------------------------------------------------------------------------------------------------------------------------------------------------------------------------------------------------------------------------------------------------------------------------------------------------------------------------------------------------------------------------|
| Vísceras            | <input checked="" type="radio"/> Nunca o menos 1 vez al mes<br><input type="radio"/> 1 a 3 veces mes<br><input type="radio"/> 1 vez semana<br><input type="radio"/> 2 a 4 veces semana<br><input type="radio"/> 5 a 6 veces semana<br><input type="radio"/> 1 vez al día<br><input type="radio"/> 2 a 3 veces al día<br><input type="radio"/> 5 a 6 veces al día<br><input type="radio"/> más 6 veces al día |
| Embutido            | <input type="radio"/> Nunca o menos 1 vez al mes<br><input checked="" type="radio"/> 1 a 3 veces mes<br><input type="radio"/> 1 vez semana<br><input type="radio"/> 2 a 4 veces semana<br><input type="radio"/> 5 a 6 veces semana<br><input type="radio"/> 1 vez al día<br><input type="radio"/> 2 a 3 veces al día<br><input type="radio"/> 5 a 6 veces al día<br><input type="radio"/> más 6 veces al día |
| Salchicha o similar | <input checked="" type="radio"/> Nunca o menos 1 vez al mes<br><input type="radio"/> 1 a 3 veces mes<br><input type="radio"/> 1 vez semana<br><input type="radio"/> 2 a 4 veces semana<br><input type="radio"/> 5 a 6 veces semana<br><input type="radio"/> 1 vez al día<br><input type="radio"/> 2 a 3 veces al día<br><input type="radio"/> 5 a 6 veces al día<br><input type="radio"/> más 6 veces al día |
| Pate o foiegras     | <input checked="" type="radio"/> Nunca o menos 1 vez al mes<br><input type="radio"/> 1 a 3 veces mes<br><input type="radio"/> 1 vez semana<br><input type="radio"/> 2 a 4 veces semana<br><input type="radio"/> 5 a 6 veces semana<br><input type="radio"/> 1 vez al día<br><input type="radio"/> 2 a 3 veces al día<br><input type="radio"/> 5 a 6 veces al día<br><input type="radio"/> más 6 veces al día |
| Hamburguesa         | <input checked="" type="radio"/> Nunca o menos 1 vez al mes<br><input type="radio"/> 1 a 3 veces mes<br><input type="radio"/> 1 vez semana<br><input type="radio"/> 2 a 4 veces semana<br><input type="radio"/> 5 a 6 veces semana<br><input type="radio"/> 1 vez al día<br><input type="radio"/> 2 a 3 veces al día<br><input type="radio"/> 5 a 6 veces al día<br><input type="radio"/> más 6 veces al día |
| tocino o bacon      | <input checked="" type="radio"/> Nunca o menos 1 vez al mes<br><input type="radio"/> 1 a 3 veces mes<br><input type="radio"/> 1 vez semana<br><input type="radio"/> 2 a 4 veces semana<br><input type="radio"/> 5 a 6 veces semana<br><input type="radio"/> 1 vez al día<br><input type="radio"/> 2 a 3 veces al día<br><input type="radio"/> 5 a 6 veces al día<br><input type="radio"/> más 6 veces al día |

|                        |                                                                                                                                                                                                                                                                                                                                                                                                              |
|------------------------|--------------------------------------------------------------------------------------------------------------------------------------------------------------------------------------------------------------------------------------------------------------------------------------------------------------------------------------------------------------------------------------------------------------|
| Pescado frito          | <input type="radio"/> Nunca o menos 1 vez al mes<br><input checked="" type="radio"/> 1 a 3 veces mes<br><input type="radio"/> 1 vez semana<br><input type="radio"/> 2 a 4 veces semana<br><input type="radio"/> 5 a 6 veces semana<br><input type="radio"/> 1 vez al día<br><input type="radio"/> 2 a 3 veces al día<br><input type="radio"/> 5 a 6 veces al día<br><input type="radio"/> más 6 veces al día |
| pescado hervido blanco | <input checked="" type="radio"/> Nunca o menos 1 vez al mes<br><input type="radio"/> 1 a 3 veces mes<br><input type="radio"/> 1 vez semana<br><input type="radio"/> 2 a 4 veces semana<br><input type="radio"/> 5 a 6 veces semana<br><input type="radio"/> 1 vez al día<br><input type="radio"/> 2 a 3 veces al día<br><input type="radio"/> 5 a 6 veces al día<br><input type="radio"/> más 6 veces al día |
| pescado hervido azul   | <input checked="" type="radio"/> Nunca o menos 1 vez al mes<br><input type="radio"/> 1 a 3 veces mes<br><input type="radio"/> 1 vez semana<br><input type="radio"/> 2 a 4 veces semana<br><input type="radio"/> 5 a 6 veces semana<br><input type="radio"/> 1 vez al día<br><input type="radio"/> 2 a 3 veces al día<br><input type="radio"/> 5 a 6 veces al día<br><input type="radio"/> más 6 veces al día |
| otros pescado azul     | <input type="radio"/> Nunca o menos 1 vez al mes<br><input type="radio"/> 1 a 3 veces mes<br><input checked="" type="radio"/> 1 vez semana<br><input type="radio"/> 2 a 4 veces semana<br><input type="radio"/> 5 a 6 veces semana<br><input type="radio"/> 1 vez al día<br><input type="radio"/> 2 a 3 veces al día<br><input type="radio"/> 5 a 6 veces al día<br><input type="radio"/> más 6 veces al día |
| atun conserva          | <input checked="" type="radio"/> Nunca o menos 1 vez al mes<br><input type="radio"/> 1 a 3 veces mes<br><input type="radio"/> 1 vez semana<br><input type="radio"/> 2 a 4 veces semana<br><input type="radio"/> 5 a 6 veces semana<br><input type="radio"/> 1 vez al día<br><input type="radio"/> 2 a 3 veces al día<br><input type="radio"/> 5 a 6 veces al día<br><input type="radio"/> más 6 veces al día |
| sardina conserva       | <input checked="" type="radio"/> Nunca o menos 1 vez al mes<br><input type="radio"/> 1 a 3 veces mes<br><input type="radio"/> 1 vez semana<br><input type="radio"/> 2 a 4 veces semana<br><input type="radio"/> 5 a 6 veces semana<br><input type="radio"/> 1 vez al día<br><input type="radio"/> 2 a 3 veces al día<br><input type="radio"/> 5 a 6 veces al día<br><input type="radio"/> más 6 veces al día |



|                                         |                                                                                                                                                                                                                                                                                                                                                                                                              |
|-----------------------------------------|--------------------------------------------------------------------------------------------------------------------------------------------------------------------------------------------------------------------------------------------------------------------------------------------------------------------------------------------------------------------------------------------------------------|
| pescado ahumado                         | <input checked="" type="radio"/> Nunca o menos 1 vez al mes<br><input type="radio"/> 1 a 3 veces mes<br><input type="radio"/> 1 vez semana<br><input type="radio"/> 2 a 4 veces semana<br><input type="radio"/> 5 a 6 veces semana<br><input type="radio"/> 1 vez al día<br><input type="radio"/> 2 a 3 veces al día<br><input type="radio"/> 5 a 6 veces al día<br><input type="radio"/> más 6 veces al día |
| almejas o mejillones o ostras unos 100g | <input checked="" type="radio"/> Nunca o menos 1 vez al mes<br><input type="radio"/> 1 a 3 veces mes<br><input type="radio"/> 1 vez semana<br><input type="radio"/> 2 a 4 veces semana<br><input type="radio"/> 5 a 6 veces semana<br><input type="radio"/> 1 vez al día<br><input type="radio"/> 2 a 3 veces al día<br><input type="radio"/> 5 a 6 veces al día<br><input type="radio"/> más 6 veces al día |
| calamar o chipiron o sepia unos 100g    | <input checked="" type="radio"/> Nunca o menos 1 vez al mes<br><input type="radio"/> 1 a 3 veces mes<br><input type="radio"/> 1 vez semana<br><input type="radio"/> 2 a 4 veces semana<br><input type="radio"/> 5 a 6 veces semana<br><input type="radio"/> 1 vez al día<br><input type="radio"/> 2 a 3 veces al día<br><input type="radio"/> 5 a 6 veces al día<br><input type="radio"/> más 6 veces al día |
| marisco unos 100g                       | <input checked="" type="radio"/> Nunca o menos 1 vez al mes<br><input type="radio"/> 1 a 3 veces mes<br><input type="radio"/> 1 vez semana<br><input type="radio"/> 2 a 4 veces semana<br><input type="radio"/> 5 a 6 veces semana<br><input type="radio"/> 1 vez al día<br><input type="radio"/> 2 a 3 veces al día<br><input type="radio"/> 5 a 6 veces al día<br><input type="radio"/> más 6 veces al día |
| Espinacas o acelgas cocinadas           | <input checked="" type="radio"/> Nunca o menos 1 vez al mes<br><input type="radio"/> 1 a 3 veces mes<br><input type="radio"/> 1 vez semana<br><input type="radio"/> 2 a 4 veces semana<br><input type="radio"/> 5 a 6 veces semana<br><input type="radio"/> 1 vez al día<br><input type="radio"/> 2 a 3 veces al día<br><input type="radio"/> 5 a 6 veces al día<br><input type="radio"/> más 6 veces al día |
| Col o coliflor o brocoli cocinado       | <input type="radio"/> Nunca o menos 1 vez al mes<br><input type="radio"/> 1 a 3 veces mes<br><input checked="" type="radio"/> 1 vez semana<br><input type="radio"/> 2 a 4 veces semana<br><input type="radio"/> 5 a 6 veces semana<br><input type="radio"/> 1 vez al día<br><input type="radio"/> 2 a 3 veces al día<br><input type="radio"/> 5 a 6 veces al día<br><input type="radio"/> más 6 veces al día |

---

Lechuga o endivia o escarola

- ☐ Nunca o menos 1 vez al mes  
☐ 1 a 3 veces mes  
☒ 1 vez semana  
☐ 2 a 4 veces semana  
☐ 5 a 6 veces semana  
☐ 1 vez al día  
☐ 2 a 3 veces al día  
☐ 5 a 6 veces al día  
☐ más 6 veces al día

---

tomate ensalada

- ☐ Nunca o menos 1 vez al mes  
☐ 1 a 3 veces mes  
☐ 1 vez semana  
☐ 2 a 4 veces semana  
☐ 5 a 6 veces semana  
☒ 1 vez al día  
☐ 2 a 3 veces al día  
☐ 5 a 6 veces al día  
☐ más 6 veces al día

---

cebolla

- ☐ Nunca o menos 1 vez al mes  
☐ 1 a 3 veces mes  
☐ 1 vez semana  
☒ 2 a 4 veces semana  
☐ 5 a 6 veces semana  
☐ 1 vez al día  
☐ 2 a 3 veces al día  
☐ 5 a 6 veces al día  
☐ más 6 veces al día

---

Zanahoria o calabaza

- ☐ Nunca o menos 1 vez al mes  
☐ 1 a 3 veces mes  
☐ 1 vez semana  
☒ 2 a 4 veces semana  
☐ 5 a 6 veces semana  
☐ 1 vez al día  
☐ 2 a 3 veces al día  
☐ 5 a 6 veces al día  
☐ más 6 veces al día

---

Judías verdes

- ☐ Nunca o menos 1 vez al mes  
☐ 1 a 3 veces mes  
☐ 1 vez semana  
☒ 2 a 4 veces semana  
☐ 5 a 6 veces semana  
☐ 1 vez al día  
☐ 2 a 3 veces al día  
☐ 5 a 6 veces al día  
☐ más 6 veces al día

---

Berenjena o calabacin o pepino

- ☐ Nunca o menos 1 vez al mes  
☒ 1 a 3 veces mes  
☐ 1 vez semana  
☐ 2 a 4 veces semana  
☐ 5 a 6 veces semana  
☐ 1 vez al día  
☐ 2 a 3 veces al día  
☐ 5 a 6 veces al día  
☐ más 6 veces al día

|                       |                                                                                                                                                                                                                                                                                                                                                                                                              |
|-----------------------|--------------------------------------------------------------------------------------------------------------------------------------------------------------------------------------------------------------------------------------------------------------------------------------------------------------------------------------------------------------------------------------------------------------|
| pimiento              | <input type="radio"/> Nunca o menos 1 vez al mes<br><input type="radio"/> 1 a 3 veces mes<br><input type="radio"/> 1 vez semana<br><input checked="" type="radio"/> 2 a 4 veces semana<br><input type="radio"/> 5 a 6 veces semana<br><input type="radio"/> 1 vez al día<br><input type="radio"/> 2 a 3 veces al día<br><input type="radio"/> 5 a 6 veces al día<br><input type="radio"/> más 6 veces al día |
| alcachofa             | <input checked="" type="radio"/> Nunca o menos 1 vez al mes<br><input type="radio"/> 1 a 3 veces mes<br><input type="radio"/> 1 vez semana<br><input type="radio"/> 2 a 4 veces semana<br><input type="radio"/> 5 a 6 veces semana<br><input type="radio"/> 1 vez al día<br><input type="radio"/> 2 a 3 veces al día<br><input type="radio"/> 5 a 6 veces al día<br><input type="radio"/> más 6 veces al día |
| espárragos            | <input checked="" type="radio"/> Nunca o menos 1 vez al mes<br><input type="radio"/> 1 a 3 veces mes<br><input type="radio"/> 1 vez semana<br><input type="radio"/> 2 a 4 veces semana<br><input type="radio"/> 5 a 6 veces semana<br><input type="radio"/> 1 vez al día<br><input type="radio"/> 2 a 3 veces al día<br><input type="radio"/> 5 a 6 veces al día<br><input type="radio"/> más 6 veces al día |
| maíz hervido          | <input checked="" type="radio"/> Nunca o menos 1 vez al mes<br><input type="radio"/> 1 a 3 veces mes<br><input type="radio"/> 1 vez semana<br><input type="radio"/> 2 a 4 veces semana<br><input type="radio"/> 5 a 6 veces semana<br><input type="radio"/> 1 vez al día<br><input type="radio"/> 2 a 3 veces al día<br><input type="radio"/> 5 a 6 veces al día<br><input type="radio"/> más 6 veces al día |
| legumbres             | <input type="radio"/> Nunca o menos 1 vez al mes<br><input type="radio"/> 1 a 3 veces mes<br><input type="radio"/> 1 vez semana<br><input type="radio"/> 2 a 4 veces semana<br><input type="radio"/> 5 a 6 veces semana<br><input checked="" type="radio"/> 1 vez al día<br><input type="radio"/> 2 a 3 veces al día<br><input type="radio"/> 5 a 6 veces al día<br><input type="radio"/> más 6 veces al día |
| naranjas o mandarinas | <input checked="" type="radio"/> Nunca o menos 1 vez al mes<br><input type="radio"/> 1 a 3 veces mes<br><input type="radio"/> 1 vez semana<br><input type="radio"/> 2 a 4 veces semana<br><input type="radio"/> 5 a 6 veces semana<br><input type="radio"/> 1 vez al día<br><input type="radio"/> 2 a 3 veces al día<br><input type="radio"/> 5 a 6 veces al día<br><input type="radio"/> más 6 veces al día |

|                       |                                                                                                                                                                                                                                                                                                                                                                                                              |
|-----------------------|--------------------------------------------------------------------------------------------------------------------------------------------------------------------------------------------------------------------------------------------------------------------------------------------------------------------------------------------------------------------------------------------------------------|
| zum natural fruta     | <input checked="" type="radio"/> Nunca o menos 1 vez al mes<br><input type="radio"/> 1 a 3 veces mes<br><input type="radio"/> 1 vez semana<br><input type="radio"/> 2 a 4 veces semana<br><input type="radio"/> 5 a 6 veces semana<br><input type="radio"/> 1 vez al día<br><input type="radio"/> 2 a 3 veces al día<br><input type="radio"/> 5 a 6 veces al día<br><input type="radio"/> más 6 veces al día |
| platano               | <input type="radio"/> Nunca o menos 1 vez al mes<br><input type="radio"/> 1 a 3 veces mes<br><input type="radio"/> 1 vez semana<br><input type="radio"/> 2 a 4 veces semana<br><input type="radio"/> 5 a 6 veces semana<br><input checked="" type="radio"/> 1 vez al día<br><input type="radio"/> 2 a 3 veces al día<br><input type="radio"/> 5 a 6 veces al día<br><input type="radio"/> más 6 veces al día |
| manzana o pera        | <input checked="" type="radio"/> Nunca o menos 1 vez al mes<br><input type="radio"/> 1 a 3 veces mes<br><input type="radio"/> 1 vez semana<br><input type="radio"/> 2 a 4 veces semana<br><input type="radio"/> 5 a 6 veces semana<br><input type="radio"/> 1 vez al día<br><input type="radio"/> 2 a 3 veces al día<br><input type="radio"/> 5 a 6 veces al día<br><input type="radio"/> más 6 veces al día |
| melocotón o nectarina | <input type="radio"/> Nunca o menos 1 vez al mes<br><input type="radio"/> 1 a 3 veces mes<br><input type="radio"/> 1 vez semana<br><input type="radio"/> 2 a 4 veces semana<br><input type="radio"/> 5 a 6 veces semana<br><input checked="" type="radio"/> 1 vez al día<br><input type="radio"/> 2 a 3 veces al día<br><input type="radio"/> 5 a 6 veces al día<br><input type="radio"/> más 6 veces al día |
| sandia o melon        | <input type="radio"/> Nunca o menos 1 vez al mes<br><input type="radio"/> 1 a 3 veces mes<br><input type="radio"/> 1 vez semana<br><input type="radio"/> 2 a 4 veces semana<br><input type="radio"/> 5 a 6 veces semana<br><input type="radio"/> 1 vez al día<br><input checked="" type="radio"/> 2 a 3 veces al día<br><input type="radio"/> 5 a 6 veces al día<br><input type="radio"/> más 6 veces al día |
| uva                   | <input checked="" type="radio"/> Nunca o menos 1 vez al mes<br><input type="radio"/> 1 a 3 veces mes<br><input type="radio"/> 1 vez semana<br><input type="radio"/> 2 a 4 veces semana<br><input type="radio"/> 5 a 6 veces semana<br><input type="radio"/> 1 vez al día<br><input type="radio"/> 2 a 3 veces al día<br><input type="radio"/> 5 a 6 veces al día<br><input type="radio"/> más 6 veces al día |

---

bruna o ciruela

- ☐ Nunca o menos 1 vez al mes  
☐ 1 a 3 veces mes  
☐ 1 vez semana  
☒ 2 a 4 veces semana  
☐ 5 a 6 veces semana  
☐ 1 vez al día  
☐ 2 a 3 veces al día  
☐ 5 a 6 veces al día  
☐ más 6 veces al día

---

kiwi

- ☒ Nunca o menos 1 vez al mes  
☐ 1 a 3 veces mes  
☐ 1 vez semana  
☐ 2 a 4 veces semana  
☐ 5 a 6 veces semana  
☐ 1 vez al día  
☐ 2 a 3 veces al día  
☐ 5 a 6 veces al día  
☐ más 6 veces al día

---

aceituna

- ☐ Nunca o menos 1 vez al mes  
☐ 1 a 3 veces mes  
☐ 1 vez semana  
☒ 2 a 4 veces semana  
☐ 5 a 6 veces semana  
☐ 1 vez al día  
☐ 2 a 3 veces al día  
☐ 5 a 6 veces al día  
☐ más 6 veces al día

---

frutos secos

- ☐ Nunca o menos 1 vez al mes  
☐ 1 a 3 veces mes  
☐ 1 vez semana  
☐ 2 a 4 veces semana  
☐ 5 a 6 veces semana  
☒ 1 vez al día  
☐ 2 a 3 veces al día  
☐ 5 a 6 veces al día  
☐ más 6 veces al día

---

pan blanco

- ☒ Nunca o menos 1 vez al mes  
☐ 1 a 3 veces mes  
☐ 1 vez semana  
☐ 2 a 4 veces semana  
☐ 5 a 6 veces semana  
☐ 1 vez al día  
☐ 2 a 3 veces al día  
☐ 5 a 6 veces al día  
☐ más 6 veces al día

---

pan integral

- ☐ Nunca o menos 1 vez al mes  
☐ 1 a 3 veces mes  
☐ 1 vez semana  
☐ 2 a 4 veces semana  
☐ 5 a 6 veces semana  
☒ 1 vez al día  
☐ 2 a 3 veces al día  
☐ 5 a 6 veces al día  
☐ más 6 veces al día

|                          |                                                                                                                                                                                                                                                                                                                                                                                                              |
|--------------------------|--------------------------------------------------------------------------------------------------------------------------------------------------------------------------------------------------------------------------------------------------------------------------------------------------------------------------------------------------------------------------------------------------------------|
| cereales desayuno        | <input type="radio"/> Nunca o menos 1 vez al mes<br><input type="radio"/> 1 a 3 veces mes<br><input type="radio"/> 1 vez semana<br><input type="radio"/> 2 a 4 veces semana<br><input type="radio"/> 5 a 6 veces semana<br><input checked="" type="radio"/> 1 vez al día<br><input type="radio"/> 2 a 3 veces al día<br><input type="radio"/> 5 a 6 veces al día<br><input type="radio"/> más 6 veces al día |
| patatas fritas           | <input checked="" type="radio"/> Nunca o menos 1 vez al mes<br><input type="radio"/> 1 a 3 veces mes<br><input type="radio"/> 1 vez semana<br><input type="radio"/> 2 a 4 veces semana<br><input type="radio"/> 5 a 6 veces semana<br><input type="radio"/> 1 vez al día<br><input type="radio"/> 2 a 3 veces al día<br><input type="radio"/> 5 a 6 veces al día<br><input type="radio"/> más 6 veces al día |
| patatas cocidas o asadas | <input checked="" type="radio"/> Nunca o menos 1 vez al mes<br><input type="radio"/> 1 a 3 veces mes<br><input type="radio"/> 1 vez semana<br><input type="radio"/> 2 a 4 veces semana<br><input type="radio"/> 5 a 6 veces semana<br><input type="radio"/> 1 vez al día<br><input type="radio"/> 2 a 3 veces al día<br><input type="radio"/> 5 a 6 veces al día<br><input type="radio"/> más 6 veces al día |
| bolsa papas              | <input checked="" type="radio"/> Nunca o menos 1 vez al mes<br><input type="radio"/> 1 a 3 veces mes<br><input type="radio"/> 1 vez semana<br><input type="radio"/> 2 a 4 veces semana<br><input type="radio"/> 5 a 6 veces semana<br><input type="radio"/> 1 vez al día<br><input type="radio"/> 2 a 3 veces al día<br><input type="radio"/> 5 a 6 veces al día<br><input type="radio"/> más 6 veces al día |
| arroz cocinado           | <input type="radio"/> Nunca o menos 1 vez al mes<br><input type="radio"/> 1 a 3 veces mes<br><input checked="" type="radio"/> 1 vez semana<br><input type="radio"/> 2 a 4 veces semana<br><input type="radio"/> 5 a 6 veces semana<br><input type="radio"/> 1 vez al día<br><input type="radio"/> 2 a 3 veces al día<br><input type="radio"/> 5 a 6 veces al día<br><input type="radio"/> más 6 veces al día |
| pasta                    | <input type="radio"/> Nunca o menos 1 vez al mes<br><input type="radio"/> 1 a 3 veces mes<br><input checked="" type="radio"/> 1 vez semana<br><input type="radio"/> 2 a 4 veces semana<br><input type="radio"/> 5 a 6 veces semana<br><input type="radio"/> 1 vez al día<br><input type="radio"/> 2 a 3 veces al día<br><input type="radio"/> 5 a 6 veces al día<br><input type="radio"/> más 6 veces al día |

|                     |                                                                                                                                                                                                                                                                                                                                                                                                              |
|---------------------|--------------------------------------------------------------------------------------------------------------------------------------------------------------------------------------------------------------------------------------------------------------------------------------------------------------------------------------------------------------------------------------------------------------|
| pizza               | <input checked="" type="radio"/> Nunca o menos 1 vez al mes<br><input type="radio"/> 1 a 3 veces mes<br><input type="radio"/> 1 vez semana<br><input type="radio"/> 2 a 4 veces semana<br><input type="radio"/> 5 a 6 veces semana<br><input type="radio"/> 1 vez al día<br><input type="radio"/> 2 a 3 veces al día<br><input type="radio"/> 5 a 6 veces al día<br><input type="radio"/> más 6 veces al día |
| aceite oliva        | <input type="radio"/> Nunca o menos 1 vez al mes<br><input type="radio"/> 1 a 3 veces mes<br><input type="radio"/> 1 vez semana<br><input type="radio"/> 2 a 4 veces semana<br><input type="radio"/> 5 a 6 veces semana<br><input checked="" type="radio"/> 1 vez al día<br><input type="radio"/> 2 a 3 veces al día<br><input type="radio"/> 5 a 6 veces al día<br><input type="radio"/> más 6 veces al día |
| otros aceites       | <input checked="" type="radio"/> Nunca o menos 1 vez al mes<br><input type="radio"/> 1 a 3 veces mes<br><input type="radio"/> 1 vez semana<br><input type="radio"/> 2 a 4 veces semana<br><input type="radio"/> 5 a 6 veces semana<br><input type="radio"/> 1 vez al día<br><input type="radio"/> 2 a 3 veces al día<br><input type="radio"/> 5 a 6 veces al día<br><input type="radio"/> más 6 veces al día |
| margarina           | <input checked="" type="radio"/> Nunca o menos 1 vez al mes<br><input type="radio"/> 1 a 3 veces mes<br><input type="radio"/> 1 vez semana<br><input type="radio"/> 2 a 4 veces semana<br><input type="radio"/> 5 a 6 veces semana<br><input type="radio"/> 1 vez al día<br><input type="radio"/> 2 a 3 veces al día<br><input type="radio"/> 5 a 6 veces al día<br><input type="radio"/> más 6 veces al día |
| mantequilla         | <input checked="" type="radio"/> Nunca o menos 1 vez al mes<br><input type="radio"/> 1 a 3 veces mes<br><input type="radio"/> 1 vez semana<br><input type="radio"/> 2 a 4 veces semana<br><input type="radio"/> 5 a 6 veces semana<br><input type="radio"/> 1 vez al día<br><input type="radio"/> 2 a 3 veces al día<br><input type="radio"/> 5 a 6 veces al día<br><input type="radio"/> más 6 veces al día |
| galletas tipo maria | <input checked="" type="radio"/> Nunca o menos 1 vez al mes<br><input type="radio"/> 1 a 3 veces mes<br><input type="radio"/> 1 vez semana<br><input type="radio"/> 2 a 4 veces semana<br><input type="radio"/> 5 a 6 veces semana<br><input type="radio"/> 1 vez al día<br><input type="radio"/> 2 a 3 veces al día<br><input type="radio"/> 5 a 6 veces al día<br><input type="radio"/> más 6 veces al día |

|                           |                                                                                                                                                                                                                                                                                                                                                                                                              |
|---------------------------|--------------------------------------------------------------------------------------------------------------------------------------------------------------------------------------------------------------------------------------------------------------------------------------------------------------------------------------------------------------------------------------------------------------|
| galletas chocolate        | <input checked="" type="radio"/> Nunca o menos 1 vez al mes<br><input type="radio"/> 1 a 3 veces mes<br><input type="radio"/> 1 vez semana<br><input type="radio"/> 2 a 4 veces semana<br><input type="radio"/> 5 a 6 veces semana<br><input type="radio"/> 1 vez al día<br><input type="radio"/> 2 a 3 veces al día<br><input type="radio"/> 5 a 6 veces al día<br><input type="radio"/> más 6 veces al día |
| bollieria                 | <input type="radio"/> Nunca o menos 1 vez al mes<br><input checked="" type="radio"/> 1 a 3 veces mes<br><input type="radio"/> 1 vez semana<br><input type="radio"/> 2 a 4 veces semana<br><input type="radio"/> 5 a 6 veces semana<br><input type="radio"/> 1 vez al día<br><input type="radio"/> 2 a 3 veces al día<br><input type="radio"/> 5 a 6 veces al día<br><input type="radio"/> más 6 veces al día |
| chocolate o bombones      | <input type="radio"/> Nunca o menos 1 vez al mes<br><input checked="" type="radio"/> 1 a 3 veces mes<br><input type="radio"/> 1 vez semana<br><input type="radio"/> 2 a 4 veces semana<br><input type="radio"/> 5 a 6 veces semana<br><input type="radio"/> 1 vez al día<br><input type="radio"/> 2 a 3 veces al día<br><input type="radio"/> 5 a 6 veces al día<br><input type="radio"/> más 6 veces al día |
| chocolate polvo o colacao | <input type="radio"/> Nunca o menos 1 vez al mes<br><input checked="" type="radio"/> 1 a 3 veces mes<br><input type="radio"/> 1 vez semana<br><input type="radio"/> 2 a 4 veces semana<br><input type="radio"/> 5 a 6 veces semana<br><input type="radio"/> 1 vez al día<br><input type="radio"/> 2 a 3 veces al día<br><input type="radio"/> 5 a 6 veces al día<br><input type="radio"/> más 6 veces al día |
| vino tinto                | <input checked="" type="radio"/> Nunca o menos 1 vez al mes<br><input type="radio"/> 1 a 3 veces mes<br><input type="radio"/> 1 vez semana<br><input type="radio"/> 2 a 4 veces semana<br><input type="radio"/> 5 a 6 veces semana<br><input type="radio"/> 1 vez al día<br><input type="radio"/> 2 a 3 veces al día<br><input type="radio"/> 5 a 6 veces al día<br><input type="radio"/> más 6 veces al día |
| vino blanco               | <input checked="" type="radio"/> Nunca o menos 1 vez al mes<br><input type="radio"/> 1 a 3 veces mes<br><input type="radio"/> 1 vez semana<br><input type="radio"/> 2 a 4 veces semana<br><input type="radio"/> 5 a 6 veces semana<br><input type="radio"/> 1 vez al día<br><input type="radio"/> 2 a 3 veces al día<br><input type="radio"/> 5 a 6 veces al día<br><input type="radio"/> más 6 veces al día |



---

|                    |                                                                                                                                                                                                                                                                                                                                                                                                              |
|--------------------|--------------------------------------------------------------------------------------------------------------------------------------------------------------------------------------------------------------------------------------------------------------------------------------------------------------------------------------------------------------------------------------------------------------|
| vino seco o vermut | <input checked="" type="radio"/> Nunca o menos 1 vez al mes<br><input type="radio"/> 1 a 3 veces mes<br><input type="radio"/> 1 vez semana<br><input type="radio"/> 2 a 4 veces semana<br><input type="radio"/> 5 a 6 veces semana<br><input type="radio"/> 1 vez al día<br><input type="radio"/> 2 a 3 veces al día<br><input type="radio"/> 5 a 6 veces al día<br><input type="radio"/> más 6 veces al día |
|--------------------|--------------------------------------------------------------------------------------------------------------------------------------------------------------------------------------------------------------------------------------------------------------------------------------------------------------------------------------------------------------------------------------------------------------|

---

|         |                                                                                                                                                                                                                                                                                                                                                                                                              |
|---------|--------------------------------------------------------------------------------------------------------------------------------------------------------------------------------------------------------------------------------------------------------------------------------------------------------------------------------------------------------------------------------------------------------------|
| cerveza | <input checked="" type="radio"/> Nunca o menos 1 vez al mes<br><input type="radio"/> 1 a 3 veces mes<br><input type="radio"/> 1 vez semana<br><input type="radio"/> 2 a 4 veces semana<br><input type="radio"/> 5 a 6 veces semana<br><input type="radio"/> 1 vez al día<br><input type="radio"/> 2 a 3 veces al día<br><input type="radio"/> 5 a 6 veces al día<br><input type="radio"/> más 6 veces al día |
|---------|--------------------------------------------------------------------------------------------------------------------------------------------------------------------------------------------------------------------------------------------------------------------------------------------------------------------------------------------------------------------------------------------------------------|

---

|                     |                                                                                                                                                                                                                                                                                                                                                                                                              |
|---------------------|--------------------------------------------------------------------------------------------------------------------------------------------------------------------------------------------------------------------------------------------------------------------------------------------------------------------------------------------------------------------------------------------------------------|
| cerveza sin alcohol | <input checked="" type="radio"/> Nunca o menos 1 vez al mes<br><input type="radio"/> 1 a 3 veces mes<br><input type="radio"/> 1 vez semana<br><input type="radio"/> 2 a 4 veces semana<br><input type="radio"/> 5 a 6 veces semana<br><input type="radio"/> 1 vez al día<br><input type="radio"/> 2 a 3 veces al día<br><input type="radio"/> 5 a 6 veces al día<br><input type="radio"/> más 6 veces al día |
|---------------------|--------------------------------------------------------------------------------------------------------------------------------------------------------------------------------------------------------------------------------------------------------------------------------------------------------------------------------------------------------------------------------------------------------------|

---

|         |                                                                                                                                                                                                                                                                                                                                                                                                              |
|---------|--------------------------------------------------------------------------------------------------------------------------------------------------------------------------------------------------------------------------------------------------------------------------------------------------------------------------------------------------------------------------------------------------------------|
| licores | <input checked="" type="radio"/> Nunca o menos 1 vez al mes<br><input type="radio"/> 1 a 3 veces mes<br><input type="radio"/> 1 vez semana<br><input type="radio"/> 2 a 4 veces semana<br><input type="radio"/> 5 a 6 veces semana<br><input type="radio"/> 1 vez al día<br><input type="radio"/> 2 a 3 veces al día<br><input type="radio"/> 5 a 6 veces al día<br><input type="radio"/> más 6 veces al día |
|---------|--------------------------------------------------------------------------------------------------------------------------------------------------------------------------------------------------------------------------------------------------------------------------------------------------------------------------------------------------------------------------------------------------------------|

---

|                       |                                                                                                                                                                                                                                                                                                                                                                                                              |
|-----------------------|--------------------------------------------------------------------------------------------------------------------------------------------------------------------------------------------------------------------------------------------------------------------------------------------------------------------------------------------------------------------------------------------------------------|
| ginebra o ron o vodka | <input checked="" type="radio"/> Nunca o menos 1 vez al mes<br><input type="radio"/> 1 a 3 veces mes<br><input type="radio"/> 1 vez semana<br><input type="radio"/> 2 a 4 veces semana<br><input type="radio"/> 5 a 6 veces semana<br><input type="radio"/> 1 vez al día<br><input type="radio"/> 2 a 3 veces al día<br><input type="radio"/> 5 a 6 veces al día<br><input type="radio"/> más 6 veces al día |
|-----------------------|--------------------------------------------------------------------------------------------------------------------------------------------------------------------------------------------------------------------------------------------------------------------------------------------------------------------------------------------------------------------------------------------------------------|

---

|                 |                                                                                                                                                                                                                                                                                                                                                                                                              |
|-----------------|--------------------------------------------------------------------------------------------------------------------------------------------------------------------------------------------------------------------------------------------------------------------------------------------------------------------------------------------------------------------------------------------------------------|
| refresco normal | <input checked="" type="radio"/> Nunca o menos 1 vez al mes<br><input type="radio"/> 1 a 3 veces mes<br><input type="radio"/> 1 vez semana<br><input type="radio"/> 2 a 4 veces semana<br><input type="radio"/> 5 a 6 veces semana<br><input type="radio"/> 1 vez al día<br><input type="radio"/> 2 a 3 veces al día<br><input type="radio"/> 5 a 6 veces al día<br><input type="radio"/> más 6 veces al día |
|-----------------|--------------------------------------------------------------------------------------------------------------------------------------------------------------------------------------------------------------------------------------------------------------------------------------------------------------------------------------------------------------------------------------------------------------|

---

|                          |                                                                                                                                                                                                                                                                                                                                                                                                              |
|--------------------------|--------------------------------------------------------------------------------------------------------------------------------------------------------------------------------------------------------------------------------------------------------------------------------------------------------------------------------------------------------------------------------------------------------------|
| refresco sin azúcar      | <input checked="" type="radio"/> Nunca o menos 1 vez al mes<br><input type="radio"/> 1 a 3 veces mes<br><input type="radio"/> 1 vez semana<br><input type="radio"/> 2 a 4 veces semana<br><input type="radio"/> 5 a 6 veces semana<br><input type="radio"/> 1 vez al día<br><input type="radio"/> 2 a 3 veces al día<br><input type="radio"/> 5 a 6 veces al día<br><input type="radio"/> más 6 veces al día |
| Agua del grifo           | <input checked="" type="radio"/> Nunca o menos 1 vez al mes<br><input type="radio"/> 1 a 3 veces mes<br><input type="radio"/> 1 vez semana<br><input type="radio"/> 2 a 4 veces semana<br><input type="radio"/> 5 a 6 veces semana<br><input type="radio"/> 1 vez al día<br><input type="radio"/> 2 a 3 veces al día<br><input type="radio"/> 5 a 6 veces al día<br><input type="radio"/> más 6 veces al día |
| agua embotellada sin gas | <input type="radio"/> Nunca o menos 1 vez al mes<br><input type="radio"/> 1 a 3 veces mes<br><input type="radio"/> 1 vez semana<br><input type="radio"/> 2 a 4 veces semana<br><input type="radio"/> 5 a 6 veces semana<br><input type="radio"/> 1 vez al día<br><input type="radio"/> 2 a 3 veces al día<br><input type="radio"/> 5 a 6 veces al día<br><input checked="" type="radio"/> más 6 veces al día |
| agua embotellada con gas | <input checked="" type="radio"/> Nunca o menos 1 vez al mes<br><input type="radio"/> 1 a 3 veces mes<br><input type="radio"/> 1 vez semana<br><input type="radio"/> 2 a 4 veces semana<br><input type="radio"/> 5 a 6 veces semana<br><input type="radio"/> 1 vez al día<br><input type="radio"/> 2 a 3 veces al día<br><input type="radio"/> 5 a 6 veces al día<br><input type="radio"/> más 6 veces al día |
| zumو frutas embasado     | <input checked="" type="radio"/> Nunca o menos 1 vez al mes<br><input type="radio"/> 1 a 3 veces mes<br><input type="radio"/> 1 vez semana<br><input type="radio"/> 2 a 4 veces semana<br><input type="radio"/> 5 a 6 veces semana<br><input type="radio"/> 1 vez al día<br><input type="radio"/> 2 a 3 veces al día<br><input type="radio"/> 5 a 6 veces al día<br><input type="radio"/> más 6 veces al día |
| cafe                     | <input checked="" type="radio"/> Nunca o menos 1 vez al mes<br><input type="radio"/> 1 a 3 veces mes<br><input type="radio"/> 1 vez semana<br><input type="radio"/> 2 a 4 veces semana<br><input type="radio"/> 5 a 6 veces semana<br><input type="radio"/> 1 vez al día<br><input type="radio"/> 2 a 3 veces al día<br><input type="radio"/> 5 a 6 veces al día<br><input type="radio"/> más 6 veces al día |

|                       |                                                                                                                                                                                                                                                                                                                                                                                                              |
|-----------------------|--------------------------------------------------------------------------------------------------------------------------------------------------------------------------------------------------------------------------------------------------------------------------------------------------------------------------------------------------------------------------------------------------------------|
| cafe descafeinado     | <input checked="" type="radio"/> Nunca o menos 1 vez al mes<br><input type="radio"/> 1 a 3 veces mes<br><input type="radio"/> 1 vez semana<br><input type="radio"/> 2 a 4 veces semana<br><input type="radio"/> 5 a 6 veces semana<br><input type="radio"/> 1 vez al día<br><input type="radio"/> 2 a 3 veces al día<br><input type="radio"/> 5 a 6 veces al día<br><input type="radio"/> más 6 veces al día |
| te o infusión         | <input checked="" type="radio"/> Nunca o menos 1 vez al mes<br><input type="radio"/> 1 a 3 veces mes<br><input type="radio"/> 1 vez semana<br><input type="radio"/> 2 a 4 veces semana<br><input type="radio"/> 5 a 6 veces semana<br><input type="radio"/> 1 vez al día<br><input type="radio"/> 2 a 3 veces al día<br><input type="radio"/> 5 a 6 veces al día<br><input type="radio"/> más 6 veces al día |
| sopa o puré verduras  | <input checked="" type="radio"/> Nunca o menos 1 vez al mes<br><input type="radio"/> 1 a 3 veces mes<br><input type="radio"/> 1 vez semana<br><input type="radio"/> 2 a 4 veces semana<br><input type="radio"/> 5 a 6 veces semana<br><input type="radio"/> 1 vez al día<br><input type="radio"/> 2 a 3 veces al día<br><input type="radio"/> 5 a 6 veces al día<br><input type="radio"/> más 6 veces al día |
| croquetas pollo jamón | <input checked="" type="radio"/> Nunca o menos 1 vez al mes<br><input type="radio"/> 1 a 3 veces mes<br><input type="radio"/> 1 vez semana<br><input type="radio"/> 2 a 4 veces semana<br><input type="radio"/> 5 a 6 veces semana<br><input type="radio"/> 1 vez al día<br><input type="radio"/> 2 a 3 veces al día<br><input type="radio"/> 5 a 6 veces al día<br><input type="radio"/> más 6 veces al día |
| croquetas pescado     | <input checked="" type="radio"/> Nunca o menos 1 vez al mes<br><input type="radio"/> 1 a 3 veces mes<br><input type="radio"/> 1 vez semana<br><input type="radio"/> 2 a 4 veces semana<br><input type="radio"/> 5 a 6 veces semana<br><input type="radio"/> 1 vez al día<br><input type="radio"/> 2 a 3 veces al día<br><input type="radio"/> 5 a 6 veces al día<br><input type="radio"/> más 6 veces al día |
| mayonesa              | <input checked="" type="radio"/> Nunca o menos 1 vez al mes<br><input type="radio"/> 1 a 3 veces mes<br><input type="radio"/> 1 vez semana<br><input type="radio"/> 2 a 4 veces semana<br><input type="radio"/> 5 a 6 veces semana<br><input type="radio"/> 1 vez al día<br><input type="radio"/> 2 a 3 veces al día<br><input type="radio"/> 5 a 6 veces al día<br><input type="radio"/> más 6 veces al día |

---

salsa tomate

- ☒ Nunca o menos 1 vez al mes  
☐ 1 a 3 veces mes  
☐ 1 vez semana  
☐ 2 a 4 veces semana  
☐ 5 a 6 veces semana  
☐ 1 vez al día  
☐ 2 a 3 veces al día  
☐ 5 a 6 veces al día  
☐ más 6 veces al día

---

ketchup

- ☒ Nunca o menos 1 vez al mes  
☐ 1 a 3 veces mes  
☐ 1 vez semana  
☐ 2 a 4 veces semana  
☐ 5 a 6 veces semana  
☐ 1 vez al día  
☐ 2 a 3 veces al día  
☐ 5 a 6 veces al día  
☐ más 6 veces al día

---

sal

- ☒ Nunca o menos 1 vez al mes  
☐ 1 a 3 veces mes  
☐ 1 vez semana  
☐ 2 a 4 veces semana  
☐ 5 a 6 veces semana  
☐ 1 vez al día  
☐ 2 a 3 veces al día  
☐ 5 a 6 veces al día  
☐ más 6 veces al día

---

ajo

- ☒ Nunca o menos 1 vez al mes  
☐ 1 a 3 veces mes  
☐ 1 vez semana  
☐ 2 a 4 veces semana  
☐ 5 a 6 veces semana  
☐ 1 vez al día  
☐ 2 a 3 veces al día  
☐ 5 a 6 veces al día  
☐ más 6 veces al día

---

mermelada o miel

- ☐ Nunca o menos 1 vez al mes  
☒ 1 a 3 veces mes  
☐ 1 vez semana  
☐ 2 a 4 veces semana  
☐ 5 a 6 veces semana  
☐ 1 vez al día  
☐ 2 a 3 veces al día  
☐ 5 a 6 veces al día  
☐ más 6 veces al día

---

azúcar

- ☒ Nunca o menos 1 vez al mes  
☐ 1 a 3 veces mes  
☐ 1 vez semana  
☐ 2 a 4 veces semana  
☐ 5 a 6 veces semana  
☐ 1 vez al día  
☐ 2 a 3 veces al día  
☐ 5 a 6 veces al día  
☐ más 6 veces al día

|                                       |                                                                                                                                                                                                                                                                                                                                                                                                                                                                                                                               |
|---------------------------------------|-------------------------------------------------------------------------------------------------------------------------------------------------------------------------------------------------------------------------------------------------------------------------------------------------------------------------------------------------------------------------------------------------------------------------------------------------------------------------------------------------------------------------------|
| Otro alimento                         | [*DATA REMOVED*]                                                                                                                                                                                                                                                                                                                                                                                                                                                                                                              |
| suplementos vitamínicos               | <input type="radio"/> si<br><input checked="" type="radio"/> no                                                                                                                                                                                                                                                                                                                                                                                                                                                               |
| suplementos vitamínicos               |                                                                                                                                                                                                                                                                                                                                                                                                                                                                                                                               |
| dieta previa                          | <input type="radio"/> si<br><input checked="" type="radio"/> no                                                                                                                                                                                                                                                                                                                                                                                                                                                               |
| motivo dieta                          | <input checked="" type="radio"/> no dieta<br><input type="radio"/> control peso<br><input type="radio"/> control colesterol<br><input type="radio"/> control diabetes<br><input type="radio"/> problemas estómago<br><input type="radio"/> problemas vesícula o hepáticos<br><input type="radio"/> HTA o cardiopatía<br><input type="radio"/> problemas renales<br><input type="radio"/> alergia alimentaria<br><input type="radio"/> ácido úrico elevado<br><input type="radio"/> vegetariana<br><input type="radio"/> otros |
| cambio alimentos año previo gestación | <input type="radio"/> si<br><input checked="" type="radio"/> no                                                                                                                                                                                                                                                                                                                                                                                                                                                               |
| cambio lácteos                        | <input type="radio"/> eliminado<br><input type="radio"/> disminuido<br><input checked="" type="radio"/> igual<br><input type="radio"/> aumentado<br><input type="radio"/> no sabe                                                                                                                                                                                                                                                                                                                                             |
| cambio huevos                         | <input type="radio"/> eliminado<br><input type="radio"/> disminuido<br><input checked="" type="radio"/> igual<br><input type="radio"/> aumentado<br><input type="radio"/> no sabe                                                                                                                                                                                                                                                                                                                                             |
| cambio carne                          | <input type="radio"/> eliminado<br><input type="radio"/> disminuido<br><input checked="" type="radio"/> igual<br><input type="radio"/> aumentado<br><input type="radio"/> no sabe                                                                                                                                                                                                                                                                                                                                             |
| cambio pescado                        | <input type="radio"/> eliminado<br><input type="radio"/> disminuido<br><input checked="" type="radio"/> igual<br><input type="radio"/> aumentado<br><input type="radio"/> no sabe                                                                                                                                                                                                                                                                                                                                             |
| cambio verduras                       | <input type="radio"/> eliminado<br><input type="radio"/> disminuido<br><input checked="" type="radio"/> igual<br><input type="radio"/> aumentado<br><input type="radio"/> no sabe                                                                                                                                                                                                                                                                                                                                             |

|                            |                                                                                                                                                                                                                        |
|----------------------------|------------------------------------------------------------------------------------------------------------------------------------------------------------------------------------------------------------------------|
| cambio legumbres           | <input type="radio"/> eliminado<br><input type="radio"/> disminuido<br><input checked="" type="radio"/> igual<br><input type="radio"/> aumentado<br><input type="radio"/> no sabe                                      |
| cambio fruta               | <input type="radio"/> eliminado<br><input type="radio"/> disminuido<br><input checked="" type="radio"/> igual<br><input type="radio"/> aumentado<br><input type="radio"/> no sabe                                      |
| cambio pan                 | <input type="radio"/> eliminado<br><input type="radio"/> disminuido<br><input checked="" type="radio"/> igual<br><input type="radio"/> aumentado<br><input type="radio"/> no sabe                                      |
| cambio aceite oliva        | <input type="radio"/> eliminado<br><input type="radio"/> disminuido<br><input checked="" type="radio"/> igual<br><input type="radio"/> aumentado<br><input type="radio"/> no sabe                                      |
| cambio mante o margarina   | <input type="radio"/> eliminado<br><input type="radio"/> disminuido<br><input checked="" type="radio"/> igual<br><input type="radio"/> aumentado<br><input type="radio"/> no sabe                                      |
| cambio azúcar y dulces     | <input type="radio"/> eliminado<br><input type="radio"/> disminuido<br><input checked="" type="radio"/> igual<br><input type="radio"/> aumentado<br><input type="radio"/> no sabe                                      |
| cambio bebidas alcohólicas | <input type="radio"/> eliminado<br><input type="radio"/> disminuido<br><input checked="" type="radio"/> igual<br><input type="radio"/> aumentado<br><input type="radio"/> no sabe                                      |
| frecuencia comidas fritas  | <input type="radio"/> a diario<br><input type="radio"/> 5 a 6 veces semana<br><input type="radio"/> 2 a 4 veces semana<br><input checked="" type="radio"/> 1 vez semana<br><input type="radio"/> menos de 1 vez semana |
| carne                      | <input type="radio"/> no como<br><input type="radio"/> cruda<br><input type="radio"/> poco hecha<br><input checked="" type="radio"/> hecha<br><input type="radio"/> muy hecha                                          |
| grasa visible carne        | <input checked="" type="radio"/> quita toda<br><input type="radio"/> quita mayoría<br><input type="radio"/> quita un poco<br><input type="radio"/> no quita nada                                                       |

|                                |                                                                                                                                                                                                                                                          |
|--------------------------------|----------------------------------------------------------------------------------------------------------------------------------------------------------------------------------------------------------------------------------------------------------|
| cocina carne                   | <input checked="" type="radio"/> a la plancha<br><input type="radio"/> a la parrilla<br><input type="radio"/> asada<br><input type="radio"/> frita<br><input type="radio"/> guisada                                                                      |
| tostado quemado carne          | <input checked="" type="radio"/> nunca<br><input type="radio"/> 1 vez mes<br><input type="radio"/> 2 a 3 veces mes<br><input type="radio"/> 1 vez semana<br><input type="radio"/> 2 a 3 semanas                                                          |
| tostado quemado pescado        | <input checked="" type="radio"/> nunca<br><input type="radio"/> 1 vez mes<br><input type="radio"/> 2 a 3 veces mes<br><input type="radio"/> 1 vez semana<br><input type="radio"/> 2 a 3 semanas                                                          |
| socarrat paella                | <input checked="" type="radio"/> nunca<br><input type="radio"/> 1 vez mes<br><input type="radio"/> 2 a 3 veces mes<br><input type="radio"/> 1 vez semana<br><input type="radio"/> 2 a 3 semanas                                                          |
| grasa o aceite cocinar         | <input type="radio"/> mantequilla<br><input type="radio"/> margarina<br><input type="radio"/> aceite oliva<br><input checked="" type="radio"/> aceite oliva virgen extra<br><input type="radio"/> aceite vegetal<br><input type="radio"/> mezcla aceites |
| grasa aceite aliñar            | <input type="radio"/> mantequilla<br><input type="radio"/> margarina<br><input type="radio"/> aceite oliva<br><input checked="" type="radio"/> aceite oliva virgen extra<br><input type="radio"/> aceite vegetal<br><input type="radio"/> mezcla aceites |
| grasa aceite freir             | <input type="radio"/> mantequilla<br><input type="radio"/> margarina<br><input type="radio"/> aceite oliva<br><input type="radio"/> aceite oliva virgen extra<br><input type="radio"/> aceite vegetal<br><input type="radio"/> mezcla aceites            |
| Ejercicio cuestionario         | <input checked="" type="radio"/> si<br><input type="radio"/> no                                                                                                                                                                                          |
| horas de sueño incluido siesta | [*DATA REMOVED*]                                                                                                                                                                                                                                         |
| minutos siesta                 | [*DATA REMOVED*]                                                                                                                                                                                                                                         |
| horas televisión semana        |                                                                                                                                                                                                                                                          |

|                                        |                                                                                                                                                                                                                                                                                                                                                                           |
|----------------------------------------|---------------------------------------------------------------------------------------------------------------------------------------------------------------------------------------------------------------------------------------------------------------------------------------------------------------------------------------------------------------------------|
| actividad trabajo                      | <input checked="" type="radio"/> casi siempre sentado<br><input type="radio"/> sentado 50 por cien<br><input type="radio"/> casi siempre de pie, quieto<br><input type="radio"/> casi siempre levantado caminando y llevando pocas cosas<br><input type="radio"/> casi siempre levantado, caminando y llevado muchas cosas<br><input type="radio"/> trabajo manual pesado |
| tiempo caminar o bici al día           | <input type="radio"/> casi nunca<br><input type="radio"/> menos 20min día<br><input checked="" type="radio"/> 20 a 40 min día<br><input type="radio"/> 40 a 60 min día<br><input type="radio"/> 1h o 1h y media día<br><input type="radio"/> más de 1h y media al día                                                                                                     |
| tiempo tareas casa al día              | <input type="radio"/> menos de 1h día<br><input checked="" type="radio"/> 1 a 2h día<br><input type="radio"/> 3 a 4h día<br><input type="radio"/> 5 a 6h día<br><input type="radio"/> 7 a 8h día<br><input type="radio"/> más de 8h día                                                                                                                                   |
| tiempo libre televisión ordenador leer | <input type="radio"/> menos 1h día<br><input checked="" type="radio"/> 1h día<br><input type="radio"/> 2h día<br><input type="radio"/> 3h día<br><input type="radio"/> 4h día<br><input type="radio"/> 5 a 6h día<br><input type="radio"/> mas 6h día                                                                                                                     |
| tiempo libre ejercicio o deporte       | <input checked="" type="radio"/> menos 1h semana<br><input type="radio"/> 1h semana<br><input type="radio"/> 2h semana<br><input type="radio"/> 3h semana<br><input type="radio"/> 4 a 5h semana<br><input type="radio"/> mas 5h semana                                                                                                                                   |
| como se considera                      | <input type="radio"/> sedentaria<br><input checked="" type="radio"/> poco activa<br><input type="radio"/> moderadamente activa<br><input type="radio"/> bastante activa<br><input type="radio"/> muy activa<br><input type="radio"/> no sabe                                                                                                                              |
| FUR                                    | [*DATA REMOVED*]                                                                                                                                                                                                                                                                                                                                                          |
| Semanas gestación 2T                   | _____                                                                                                                                                                                                                                                                                                                                                                     |
| Días gestación 2T                      | _____                                                                                                                                                                                                                                                                                                                                                                     |
| DBP 2T                                 | _____                                                                                                                                                                                                                                                                                                                                                                     |
| CC 2T                                  | _____                                                                                                                                                                                                                                                                                                                                                                     |



|                                                   |                                                                                                                                                                                                 |
|---------------------------------------------------|-------------------------------------------------------------------------------------------------------------------------------------------------------------------------------------------------|
| AC 2T                                             |                                                                                                                                                                                                 |
| LF 2T                                             |                                                                                                                                                                                                 |
| PFE 2T (Hadlock)                                  |                                                                                                                                                                                                 |
| Semanas gestación 3T                              | [*DATA REMOVED*]                                                                                                                                                                                |
| días 3T                                           | [*DATA REMOVED*]                                                                                                                                                                                |
| DBP 3T                                            | [*DATA REMOVED*]                                                                                                                                                                                |
| CC 3T                                             | [*DATA REMOVED*]                                                                                                                                                                                |
| AC 3T                                             | [*DATA REMOVED*]                                                                                                                                                                                |
| LF 3T                                             | [*DATA REMOVED*]                                                                                                                                                                                |
| PFE 3T (Hadlock)                                  | [*DATA REMOVED*]                                                                                                                                                                                |
| Semanas de gestación final                        | [*DATA REMOVED*]                                                                                                                                                                                |
| días gestación final                              | [*DATA REMOVED*]                                                                                                                                                                                |
| Localización placenta                             | <input checked="" type="radio"/> anterior<br><input type="radio"/> lateral derecha<br><input type="radio"/> lateral izquierda<br><input type="radio"/> posterior<br><input type="radio"/> fondo |
| Presentación longitudinal cefálica                | <input type="radio"/> no<br><input checked="" type="radio"/> si                                                                                                                                 |
| Dorso                                             | <input type="radio"/> izquierda anterior<br><input type="radio"/> izquierda posterior<br><input checked="" type="radio"/> derecha anterior<br><input type="radio"/> derecha posterior           |
| diámetro biparietal                               | [*DATA REMOVED*]                                                                                                                                                                                |
| Circunferencia craneal                            | [*DATA REMOVED*]                                                                                                                                                                                |
| Circunferencia abdominal                          | [*DATA REMOVED*]                                                                                                                                                                                |
| Longitud de femur                                 | [*DATA REMOVED*]                                                                                                                                                                                |
| tejido celular subcutáneo a nivel del muslo en mm | [*DATA REMOVED*]                                                                                                                                                                                |
| tejido celular subcutáneo en abdomen en mm        | [*DATA REMOVED*]                                                                                                                                                                                |

|                                               |                                                                                                                                               |
|-----------------------------------------------|-----------------------------------------------------------------------------------------------------------------------------------------------|
| Volumen del muslo en cm3                      | [*DATA REMOVED*]                                                                                                                              |
| Peso fetal estimado según fórmula de Hadlock  | [*DATA REMOVED*]                                                                                                                              |
| Percentil                                     | [*DATA REMOVED*]                                                                                                                              |
| Peso fetal estimado según fórmula de Scioscia | _____                                                                                                                                         |
| Peso fetal estimado según fórmula de LEE      | _____                                                                                                                                         |
| Tipo de parto                                 | <input checked="" type="radio"/> eutocico<br><input type="radio"/> instrumentado/ventosa<br><input type="radio"/> cesarea                     |
| fecha de nacimiento                           | [*DATA REMOVED*]                                                                                                                              |
| Días entre exploración y nacimiento           | [*DATA REMOVED*]                                                                                                                              |
| Peso RN en g                                  | [*DATA REMOVED*]                                                                                                                              |
| sexo                                          | <input type="radio"/> mujer<br><input checked="" type="radio"/> hombre                                                                        |
| Apgar 1 minuto                                | [*DATA REMOVED*]                                                                                                                              |
| Apgar 5 minutos                               | [*DATA REMOVED*]                                                                                                                              |
| Apgar 10 minutos                              | _____                                                                                                                                         |
| antecedente Covid durante gestación           | <input type="radio"/> Yes<br><input checked="" type="radio"/> No                                                                              |
| Nivel de estudios                             | <input type="radio"/> ninguno<br><input type="radio"/> primarios<br><input type="radio"/> secundarios<br><input type="radio"/> universitarios |

# Base\_datos\_estimacion\_peso\_fetal

|                                       |                                                                                                                                                                                                                                                                                      |
|---------------------------------------|--------------------------------------------------------------------------------------------------------------------------------------------------------------------------------------------------------------------------------------------------------------------------------------|
| Número de identificación participante | 87                                                                                                                                                                                                                                                                                   |
| CODIGO PARTICIPANTE                   |                                                                                                                                                                                                                                                                                      |
| Edad                                  | [*DATA REMOVED*]                                                                                                                                                                                                                                                                     |
| Gestaciones                           | <input type="radio"/> 1<br><input type="radio"/> 2<br><input checked="" type="radio"/> 3<br><input type="radio"/> mas de 3                                                                                                                                                           |
| partos                                | <input type="radio"/> 0<br><input checked="" type="radio"/> 1<br><input type="radio"/> 2<br><input type="radio"/> 3<br><input type="radio"/> mas de 3                                                                                                                                |
| cesáreas                              | <input checked="" type="radio"/> 0<br><input type="radio"/> 1<br><input type="radio"/> 2<br><input type="radio"/> 3<br><input type="radio"/> mas de 3                                                                                                                                |
| Abortos                               | <input checked="" type="radio"/> 0<br><input type="radio"/> 1<br><input type="radio"/> 2<br><input type="radio"/> 3<br><input type="radio"/> mas de 3                                                                                                                                |
| Tipo de gestacion                     | <input checked="" type="radio"/> espontanea<br><input type="radio"/> IAC inseminación artificial conyuge<br><input type="radio"/> IAD inseminación artificial donante<br><input type="radio"/> FIV Fecundación in Vitro<br><input type="radio"/> Ovodon FIV con donación de ovocitos |
| peso previo a embarazo                | [*DATA REMOVED*]                                                                                                                                                                                                                                                                     |
| Ganancia ponderal embarazo            |                                                                                                                                                                                                                                                                                      |
| Talla madre                           | [*DATA REMOVED*]                                                                                                                                                                                                                                                                     |
| IMC previo embarazo                   | 25.461980633463213                                                                                                                                                                                                                                                                   |
| Patología obstétrica                  | <input checked="" type="radio"/> no<br><input type="radio"/> si                                                                                                                                                                                                                      |
| Diabetes pregestacional               | <input checked="" type="radio"/> no<br><input type="radio"/> si                                                                                                                                                                                                                      |
| Diabetes gestacional                  | <input checked="" type="radio"/> no<br><input type="radio"/> si                                                                                                                                                                                                                      |

|                                            |                                                                                                                                                                                      |
|--------------------------------------------|--------------------------------------------------------------------------------------------------------------------------------------------------------------------------------------|
| Diabetes gestacional con insulina          | <input checked="" type="radio"/> no<br><input type="radio"/> si                                                                                                                      |
| Diabetes gestacional con dieta y ejercicio | <input checked="" type="radio"/> no<br><input type="radio"/> si                                                                                                                      |
| Percentil fetos previos                    | <input type="radio"/> Nada<br><input type="radio"/> percentil menor de 10<br><input checked="" type="radio"/> percentil entre 10 y 90<br><input type="radio"/> percentil mayor de 90 |
| Exfumadora                                 | <input checked="" type="radio"/> Nada<br><input type="radio"/> menos de 5 años<br><input type="radio"/> 5 a 10 años<br><input type="radio"/> mayor o igual a 10 años                 |
| Hábito tabáquico                           | <input checked="" type="radio"/> no<br><input type="radio"/> si                                                                                                                      |
| fumadora                                   | [*DATA REMOVED*]                                                                                                                                                                     |
| Consumo otros tóxicos                      | <input checked="" type="radio"/> no<br><input type="radio"/> si                                                                                                                      |
| Hb 1T                                      | [*DATA REMOVED*]                                                                                                                                                                     |
| Htc 1T                                     | [*DATA REMOVED*]                                                                                                                                                                     |
| Hb 2T                                      | [*DATA REMOVED*]                                                                                                                                                                     |
| HTC 2T                                     | [*DATA REMOVED*]                                                                                                                                                                     |
| Hb 3T                                      | [*DATA REMOVED*]                                                                                                                                                                     |
| HTC 3T                                     | [*DATA REMOVED*]                                                                                                                                                                     |
| Suplemento FE oral                         | <input checked="" type="radio"/> si<br><input type="radio"/> no                                                                                                                      |
| Suplemento fe iv                           | <input type="radio"/> si<br><input checked="" type="radio"/> no                                                                                                                      |
| Transfusión                                | <input checked="" type="radio"/> no<br><input type="radio"/> si                                                                                                                      |
| Solicitada Vit D                           | <input checked="" type="radio"/> no<br><input type="radio"/> si                                                                                                                      |
| Deficit vit D                              | <input type="radio"/> no<br><input type="radio"/> si                                                                                                                                 |
| Suplemento vit D                           | <input type="radio"/> si<br><input type="radio"/> no                                                                                                                                 |

|                       |                                                                                                                                                                                                                                                                                                                                                                                                              |
|-----------------------|--------------------------------------------------------------------------------------------------------------------------------------------------------------------------------------------------------------------------------------------------------------------------------------------------------------------------------------------------------------------------------------------------------------|
| Dieta, cuestionario   | <input checked="" type="radio"/> sí<br><input type="radio"/> no                                                                                                                                                                                                                                                                                                                                              |
| Leche entera          | <input checked="" type="radio"/> Nunca o menos 1 vez al mes<br><input type="radio"/> 1 a 3 veces mes<br><input type="radio"/> 1 vez semana<br><input type="radio"/> 2 a 4 veces semana<br><input type="radio"/> 5 a 6 veces semana<br><input type="radio"/> 1 vez al día<br><input type="radio"/> 2 a 3 veces al día<br><input type="radio"/> 5 a 6 veces al día<br><input type="radio"/> más 6 veces al día |
| Leche semidesnatada   | <input checked="" type="radio"/> Nunca o menos 1 vez al mes<br><input type="radio"/> 1 a 3 veces mes<br><input type="radio"/> 1 vez semana<br><input type="radio"/> 2 a 4 veces semana<br><input type="radio"/> 5 a 6 veces semana<br><input type="radio"/> 1 vez al día<br><input type="radio"/> 2 a 3 veces al día<br><input type="radio"/> 5 a 6 veces al día<br><input type="radio"/> mas 6 veces al día |
| Leche desnatada       | <input type="radio"/> Nunca o menos 1 vez al mes<br><input type="radio"/> 1 a 3 veces mes<br><input type="radio"/> 1 vez semana<br><input type="radio"/> 2 a 4 veces semana<br><input type="radio"/> 5 a 6 veces semana<br><input checked="" type="radio"/> 1 vez al día<br><input type="radio"/> 2 a 3 veces al día<br><input type="radio"/> 5 a 6 veces al día<br><input type="radio"/> más 6 veces al día |
| Leche condensada      | <input checked="" type="radio"/> Nunca o menos 1 vez al mes<br><input type="radio"/> 1 a 3 veces mes<br><input type="radio"/> 1 vez semana<br><input type="radio"/> 2 a 4 veces semana<br><input type="radio"/> 5 a 6 veces semana<br><input type="radio"/> 1 vez al día<br><input type="radio"/> 2 a 3 veces al día<br><input type="radio"/> 5 a 6 veces al día<br><input type="radio"/> más 6 veces al día |
| nata o crema de leche | <input checked="" type="radio"/> Nunca o menos 1 vez al mes<br><input type="radio"/> 1 a 3 veces mes<br><input type="radio"/> 1 vez semana<br><input type="radio"/> 2 a 4 veces semana<br><input type="radio"/> 5 a 6 veces semana<br><input type="radio"/> 1 vez al día<br><input type="radio"/> 2 a 3 veces al día<br><input type="radio"/> 5 a 6 veces al día<br><input type="radio"/> más 6 veces al día |

|                                             |                                                                                                                                                                                                                                                                                                                                                                                                              |
|---------------------------------------------|--------------------------------------------------------------------------------------------------------------------------------------------------------------------------------------------------------------------------------------------------------------------------------------------------------------------------------------------------------------------------------------------------------------|
| Yogurt Entero                               | <input checked="" type="radio"/> Nunca o menos 1 vez al mes<br><input type="radio"/> 1 a 3 veces mes<br><input type="radio"/> 1 vez semana<br><input type="radio"/> 2 a 4 veces semana<br><input type="radio"/> 5 a 6 veces semana<br><input type="radio"/> 1 vez al día<br><input type="radio"/> 2 a 3 veces al día<br><input type="radio"/> 5 a 6 veces al día<br><input type="radio"/> más 6 veces al día |
| Yogurt desnatado                            | <input type="radio"/> Nunca o menos 1 vez al mes<br><input type="radio"/> 1 a 3 veces mes<br><input type="radio"/> 1 vez semana<br><input checked="" type="radio"/> 2 a 4 veces semana<br><input type="radio"/> 5 a 6 veces semana<br><input type="radio"/> 1 vez al día<br><input type="radio"/> 2 a 3 veces al día<br><input type="radio"/> 5 a 6 veces al día<br><input type="radio"/> más 6 veces al día |
| 100g requesón o queso blando o queso fresco | <input type="radio"/> Nunca o menos 1 vez al mes<br><input type="radio"/> 1 a 3 veces mes<br><input type="radio"/> 1 vez semana<br><input checked="" type="radio"/> 2 a 4 veces semana<br><input type="radio"/> 5 a 6 veces semana<br><input type="radio"/> 1 vez al día<br><input type="radio"/> 2 a 3 veces al día<br><input type="radio"/> 5 a 6 veces al día<br><input type="radio"/> más 6 veces al día |
| queso curado o semicurado o cremoso         | <input type="radio"/> Nunca o menos 1 vez al mes<br><input type="radio"/> 1 a 3 veces mes<br><input checked="" type="radio"/> 1 vez semana<br><input type="radio"/> 2 a 4 veces semana<br><input type="radio"/> 5 a 6 veces semana<br><input type="radio"/> 1 vez al día<br><input type="radio"/> 2 a 3 veces al día<br><input type="radio"/> 5 a 6 veces al día<br><input type="radio"/> más 6 veces al día |
| natillas flan pudding                       | <input type="radio"/> Nunca o menos 1 vez al mes<br><input type="radio"/> 1 a 3 veces mes<br><input checked="" type="radio"/> 1 vez semana<br><input type="radio"/> 2 a 4 veces semana<br><input type="radio"/> 5 a 6 veces semana<br><input type="radio"/> 1 vez al día<br><input type="radio"/> 2 a 3 veces al día<br><input type="radio"/> 5 a 6 veces al día<br><input type="radio"/> más 6 veces al día |
| Helado                                      | <input type="radio"/> Nunca o menos 1 vez al mes<br><input type="radio"/> 1 a 3 veces mes<br><input type="radio"/> 1 vez semana<br><input checked="" type="radio"/> 2 a 4 veces semana<br><input type="radio"/> 5 a 6 veces semana<br><input type="radio"/> 1 vez al día<br><input type="radio"/> 2 a 3 veces al día<br><input type="radio"/> 5 a 6 veces al día<br><input type="radio"/> más 6 veces al día |

|                                      |                                                                                                                                                                                                                                                                                                                                                                                                              |
|--------------------------------------|--------------------------------------------------------------------------------------------------------------------------------------------------------------------------------------------------------------------------------------------------------------------------------------------------------------------------------------------------------------------------------------------------------------|
| huevo                                | <input checked="" type="radio"/> Nunca o menos 1 vez al mes<br><input type="radio"/> 1 a 3 veces mes<br><input type="radio"/> 1 vez semana<br><input type="radio"/> 2 a 4 veces semana<br><input type="radio"/> 5 a 6 veces semana<br><input type="radio"/> 1 vez al día<br><input type="radio"/> 2 a 3 veces al día<br><input type="radio"/> 5 a 6 veces al día<br><input type="radio"/> más 6 veces al día |
| Pollo con piel                       | <input type="radio"/> Nunca o menos 1 vez al mes<br><input type="radio"/> 1 a 3 veces mes<br><input checked="" type="radio"/> 1 vez semana<br><input type="radio"/> 2 a 4 veces semana<br><input type="radio"/> 5 a 6 veces semana<br><input type="radio"/> 1 vez al día<br><input type="radio"/> 2 a 3 veces al día<br><input type="radio"/> 5 a 6 veces al día<br><input type="radio"/> más 6 veces al día |
| pollo sin piel                       | <input type="radio"/> Nunca o menos 1 vez al mes<br><input type="radio"/> 1 a 3 veces mes<br><input checked="" type="radio"/> 1 vez semana<br><input type="radio"/> 2 a 4 veces semana<br><input type="radio"/> 5 a 6 veces semana<br><input type="radio"/> 1 vez al día<br><input type="radio"/> 2 a 3 veces al día<br><input type="radio"/> 5 a 6 veces al día<br><input type="radio"/> más 6 veces al día |
| Ternera o cerdo o cordero            | <input type="radio"/> Nunca o menos 1 vez al mes<br><input type="radio"/> 1 a 3 veces mes<br><input checked="" type="radio"/> 1 vez semana<br><input type="radio"/> 2 a 4 veces semana<br><input type="radio"/> 5 a 6 veces semana<br><input type="radio"/> 1 vez al día<br><input type="radio"/> 2 a 3 veces al día<br><input type="radio"/> 5 a 6 veces al día<br><input type="radio"/> más 6 veces al día |
| carne caza: Conejo o codorniz o pato | <input checked="" type="radio"/> Nunca o menos 1 vez al mes<br><input type="radio"/> 1 a 3 veces mes<br><input type="radio"/> 1 vez semana<br><input type="radio"/> 2 a 4 veces semana<br><input type="radio"/> 5 a 6 veces semana<br><input type="radio"/> 1 vez al día<br><input type="radio"/> 2 a 3 veces al día<br><input type="radio"/> 5 a 6 veces al día<br><input type="radio"/> más 6 veces al día |
| Hígado de ternera o cerdo o pollo    | <input checked="" type="radio"/> Nunca o menos 1 vez al mes<br><input type="radio"/> 1 a 3 veces mes<br><input type="radio"/> 1 vez semana<br><input type="radio"/> 2 a 4 veces semana<br><input type="radio"/> 5 a 6 veces semana<br><input type="radio"/> 1 vez al día<br><input type="radio"/> 2 a 3 veces al día<br><input type="radio"/> 5 a 6 veces al día<br><input type="radio"/> más 6 veces al día |

|                     |                                                                                                                                                                                                                                                                                                                                                                                                              |
|---------------------|--------------------------------------------------------------------------------------------------------------------------------------------------------------------------------------------------------------------------------------------------------------------------------------------------------------------------------------------------------------------------------------------------------------|
| Vísceras            | <input checked="" type="radio"/> Nunca o menos 1 vez al mes<br><input type="radio"/> 1 a 3 veces mes<br><input type="radio"/> 1 vez semana<br><input type="radio"/> 2 a 4 veces semana<br><input type="radio"/> 5 a 6 veces semana<br><input type="radio"/> 1 vez al día<br><input type="radio"/> 2 a 3 veces al día<br><input type="radio"/> 5 a 6 veces al día<br><input type="radio"/> más 6 veces al día |
| Embutido            | <input checked="" type="radio"/> Nunca o menos 1 vez al mes<br><input type="radio"/> 1 a 3 veces mes<br><input type="radio"/> 1 vez semana<br><input type="radio"/> 2 a 4 veces semana<br><input type="radio"/> 5 a 6 veces semana<br><input type="radio"/> 1 vez al día<br><input type="radio"/> 2 a 3 veces al día<br><input type="radio"/> 5 a 6 veces al día<br><input type="radio"/> más 6 veces al día |
| Salchicha o similar | <input type="radio"/> Nunca o menos 1 vez al mes<br><input checked="" type="radio"/> 1 a 3 veces mes<br><input type="radio"/> 1 vez semana<br><input type="radio"/> 2 a 4 veces semana<br><input type="radio"/> 5 a 6 veces semana<br><input type="radio"/> 1 vez al día<br><input type="radio"/> 2 a 3 veces al día<br><input type="radio"/> 5 a 6 veces al día<br><input type="radio"/> más 6 veces al día |
| Pate o foiegras     | <input checked="" type="radio"/> Nunca o menos 1 vez al mes<br><input type="radio"/> 1 a 3 veces mes<br><input type="radio"/> 1 vez semana<br><input type="radio"/> 2 a 4 veces semana<br><input type="radio"/> 5 a 6 veces semana<br><input type="radio"/> 1 vez al día<br><input type="radio"/> 2 a 3 veces al día<br><input type="radio"/> 5 a 6 veces al día<br><input type="radio"/> más 6 veces al día |
| Hamburguesa         | <input type="radio"/> Nunca o menos 1 vez al mes<br><input type="radio"/> 1 a 3 veces mes<br><input type="radio"/> 1 vez semana<br><input checked="" type="radio"/> 2 a 4 veces semana<br><input type="radio"/> 5 a 6 veces semana<br><input type="radio"/> 1 vez al día<br><input type="radio"/> 2 a 3 veces al día<br><input type="radio"/> 5 a 6 veces al día<br><input type="radio"/> más 6 veces al día |
| tocino o bacon      | <input checked="" type="radio"/> Nunca o menos 1 vez al mes<br><input type="radio"/> 1 a 3 veces mes<br><input type="radio"/> 1 vez semana<br><input type="radio"/> 2 a 4 veces semana<br><input type="radio"/> 5 a 6 veces semana<br><input type="radio"/> 1 vez al día<br><input type="radio"/> 2 a 3 veces al día<br><input type="radio"/> 5 a 6 veces al día<br><input type="radio"/> más 6 veces al día |



---

Pescado frito

- ☐ Nunca o menos 1 vez al mes  
☐ 1 a 3 veces mes  
☐ 1 vez semana  
☒ 2 a 4 veces semana  
☐ 5 a 6 veces semana  
☐ 1 vez al día  
☐ 2 a 3 veces al día  
☐ 5 a 6 veces al día  
☐ más 6 veces al día

---

pescado hervido blanco

- ☐ Nunca o menos 1 vez al mes  
☐ 1 a 3 veces mes  
☒ 1 vez semana  
☐ 2 a 4 veces semana  
☐ 5 a 6 veces semana  
☐ 1 vez al día  
☐ 2 a 3 veces al día  
☐ 5 a 6 veces al día  
☐ más 6 veces al día

---

pescado hervido azul

- ☐ Nunca o menos 1 vez al mes  
☒ 1 a 3 veces mes  
☐ 1 vez semana  
☐ 2 a 4 veces semana  
☐ 5 a 6 veces semana  
☐ 1 vez al día  
☐ 2 a 3 veces al día  
☐ 5 a 6 veces al día  
☐ más 6 veces al día

---

otros pescado azul

- ☒ Nunca o menos 1 vez al mes  
☐ 1 a 3 veces mes  
☐ 1 vez semana  
☐ 2 a 4 veces semana  
☐ 5 a 6 veces semana  
☐ 1 vez al día  
☐ 2 a 3 veces al día  
☐ 5 a 6 veces al día  
☐ más 6 veces al día

---

atun conserva

- ☐ Nunca o menos 1 vez al mes  
☐ 1 a 3 veces mes  
☒ 1 vez semana  
☐ 2 a 4 veces semana  
☐ 5 a 6 veces semana  
☐ 1 vez al día  
☐ 2 a 3 veces al día  
☐ 5 a 6 veces al día  
☐ más 6 veces al día

---

sardina conserva

- ☒ Nunca o menos 1 vez al mes  
☐ 1 a 3 veces mes  
☐ 1 vez semana  
☐ 2 a 4 veces semana  
☐ 5 a 6 veces semana  
☐ 1 vez al día  
☐ 2 a 3 veces al día  
☐ 5 a 6 veces al día  
☐ más 6 veces al día

|                                         |                                                                                                                                                                                                                                                                                                                                                                                                              |
|-----------------------------------------|--------------------------------------------------------------------------------------------------------------------------------------------------------------------------------------------------------------------------------------------------------------------------------------------------------------------------------------------------------------------------------------------------------------|
| pescado ahumado                         | <input checked="" type="radio"/> Nunca o menos 1 vez al mes<br><input type="radio"/> 1 a 3 veces mes<br><input type="radio"/> 1 vez semana<br><input type="radio"/> 2 a 4 veces semana<br><input type="radio"/> 5 a 6 veces semana<br><input type="radio"/> 1 vez al día<br><input type="radio"/> 2 a 3 veces al día<br><input type="radio"/> 5 a 6 veces al día<br><input type="radio"/> más 6 veces al día |
| almejas o mejillones o ostras unos 100g | <input checked="" type="radio"/> Nunca o menos 1 vez al mes<br><input type="radio"/> 1 a 3 veces mes<br><input type="radio"/> 1 vez semana<br><input type="radio"/> 2 a 4 veces semana<br><input type="radio"/> 5 a 6 veces semana<br><input type="radio"/> 1 vez al día<br><input type="radio"/> 2 a 3 veces al día<br><input type="radio"/> 5 a 6 veces al día<br><input type="radio"/> más 6 veces al día |
| calamar o chipiron o sepia unos 100g    | <input type="radio"/> Nunca o menos 1 vez al mes<br><input checked="" type="radio"/> 1 a 3 veces mes<br><input type="radio"/> 1 vez semana<br><input type="radio"/> 2 a 4 veces semana<br><input type="radio"/> 5 a 6 veces semana<br><input type="radio"/> 1 vez al día<br><input type="radio"/> 2 a 3 veces al día<br><input type="radio"/> 5 a 6 veces al día<br><input type="radio"/> más 6 veces al día |
| marisco unos 100g                       | <input type="radio"/> Nunca o menos 1 vez al mes<br><input checked="" type="radio"/> 1 a 3 veces mes<br><input type="radio"/> 1 vez semana<br><input type="radio"/> 2 a 4 veces semana<br><input type="radio"/> 5 a 6 veces semana<br><input type="radio"/> 1 vez al día<br><input type="radio"/> 2 a 3 veces al día<br><input type="radio"/> 5 a 6 veces al día<br><input type="radio"/> más 6 veces al día |
| Espinacas o acelgas cocinadas           | <input type="radio"/> Nunca o menos 1 vez al mes<br><input checked="" type="radio"/> 1 a 3 veces mes<br><input type="radio"/> 1 vez semana<br><input type="radio"/> 2 a 4 veces semana<br><input type="radio"/> 5 a 6 veces semana<br><input type="radio"/> 1 vez al día<br><input type="radio"/> 2 a 3 veces al día<br><input type="radio"/> 5 a 6 veces al día<br><input type="radio"/> más 6 veces al día |
| Col o coliflor o brocoli cocinado       | <input type="radio"/> Nunca o menos 1 vez al mes<br><input checked="" type="radio"/> 1 a 3 veces mes<br><input type="radio"/> 1 vez semana<br><input type="radio"/> 2 a 4 veces semana<br><input type="radio"/> 5 a 6 veces semana<br><input type="radio"/> 1 vez al día<br><input type="radio"/> 2 a 3 veces al día<br><input type="radio"/> 5 a 6 veces al día<br><input type="radio"/> más 6 veces al día |

---

Lechuga o endivia o escarola

- ☐ Nunca o menos 1 vez al mes  
☐ 1 a 3 veces mes  
☐ 1 vez semana  
☒ 2 a 4 veces semana  
☐ 5 a 6 veces semana  
☐ 1 vez al día  
☐ 2 a 3 veces al día  
☐ 5 a 6 veces al día  
☐ más 6 veces al día

---

tomate ensalada

- ☐ Nunca o menos 1 vez al mes  
☐ 1 a 3 veces mes  
☐ 1 vez semana  
☒ 2 a 4 veces semana  
☐ 5 a 6 veces semana  
☐ 1 vez al día  
☐ 2 a 3 veces al día  
☐ 5 a 6 veces al día  
☐ más 6 veces al día

---

cebolla

- ☐ Nunca o menos 1 vez al mes  
☒ 1 a 3 veces mes  
☐ 1 vez semana  
☐ 2 a 4 veces semana  
☐ 5 a 6 veces semana  
☐ 1 vez al día  
☐ 2 a 3 veces al día  
☐ 5 a 6 veces al día  
☐ más 6 veces al día

---

Zanahoria o calabaza

- ☐ Nunca o menos 1 vez al mes  
☒ 1 a 3 veces mes  
☐ 1 vez semana  
☐ 2 a 4 veces semana  
☐ 5 a 6 veces semana  
☐ 1 vez al día  
☐ 2 a 3 veces al día  
☐ 5 a 6 veces al día  
☐ más 6 veces al día

---

Judías verdes

- ☐ Nunca o menos 1 vez al mes  
☒ 1 a 3 veces mes  
☐ 1 vez semana  
☐ 2 a 4 veces semana  
☐ 5 a 6 veces semana  
☐ 1 vez al día  
☐ 2 a 3 veces al día  
☐ 5 a 6 veces al día  
☐ más 6 veces al día

---

Berenjena o calabacin o pepino

- ☐ Nunca o menos 1 vez al mes  
☐ 1 a 3 veces mes  
☐ 1 vez semana  
☒ 2 a 4 veces semana  
☐ 5 a 6 veces semana  
☐ 1 vez al día  
☐ 2 a 3 veces al día  
☐ 5 a 6 veces al día  
☐ más 6 veces al día

|                       |                                                                                                                                                                                                                                                                                                                                                                                                              |
|-----------------------|--------------------------------------------------------------------------------------------------------------------------------------------------------------------------------------------------------------------------------------------------------------------------------------------------------------------------------------------------------------------------------------------------------------|
| pimiento              | <input checked="" type="radio"/> Nunca o menos 1 vez al mes<br><input type="radio"/> 1 a 3 veces mes<br><input type="radio"/> 1 vez semana<br><input type="radio"/> 2 a 4 veces semana<br><input type="radio"/> 5 a 6 veces semana<br><input type="radio"/> 1 vez al día<br><input type="radio"/> 2 a 3 veces al día<br><input type="radio"/> 5 a 6 veces al día<br><input type="radio"/> más 6 veces al día |
| alcachofa             | <input checked="" type="radio"/> Nunca o menos 1 vez al mes<br><input type="radio"/> 1 a 3 veces mes<br><input type="radio"/> 1 vez semana<br><input type="radio"/> 2 a 4 veces semana<br><input type="radio"/> 5 a 6 veces semana<br><input type="radio"/> 1 vez al día<br><input type="radio"/> 2 a 3 veces al día<br><input type="radio"/> 5 a 6 veces al día<br><input type="radio"/> más 6 veces al día |
| espárragos            | <input checked="" type="radio"/> Nunca o menos 1 vez al mes<br><input type="radio"/> 1 a 3 veces mes<br><input type="radio"/> 1 vez semana<br><input type="radio"/> 2 a 4 veces semana<br><input type="radio"/> 5 a 6 veces semana<br><input type="radio"/> 1 vez al día<br><input type="radio"/> 2 a 3 veces al día<br><input type="radio"/> 5 a 6 veces al día<br><input type="radio"/> más 6 veces al día |
| maíz hervido          | <input checked="" type="radio"/> Nunca o menos 1 vez al mes<br><input type="radio"/> 1 a 3 veces mes<br><input type="radio"/> 1 vez semana<br><input type="radio"/> 2 a 4 veces semana<br><input type="radio"/> 5 a 6 veces semana<br><input type="radio"/> 1 vez al día<br><input type="radio"/> 2 a 3 veces al día<br><input type="radio"/> 5 a 6 veces al día<br><input type="radio"/> más 6 veces al día |
| legumbres             | <input type="radio"/> Nunca o menos 1 vez al mes<br><input type="radio"/> 1 a 3 veces mes<br><input type="radio"/> 1 vez semana<br><input checked="" type="radio"/> 2 a 4 veces semana<br><input type="radio"/> 5 a 6 veces semana<br><input type="radio"/> 1 vez al día<br><input type="radio"/> 2 a 3 veces al día<br><input type="radio"/> 5 a 6 veces al día<br><input type="radio"/> más 6 veces al día |
| naranjas o mandarinas | <input type="radio"/> Nunca o menos 1 vez al mes<br><input type="radio"/> 1 a 3 veces mes<br><input type="radio"/> 1 vez semana<br><input checked="" type="radio"/> 2 a 4 veces semana<br><input type="radio"/> 5 a 6 veces semana<br><input type="radio"/> 1 vez al día<br><input type="radio"/> 2 a 3 veces al día<br><input type="radio"/> 5 a 6 veces al día<br><input type="radio"/> más 6 veces al día |

|                       |                                                                                                                                                                                                                                                                                                                                                                                                              |
|-----------------------|--------------------------------------------------------------------------------------------------------------------------------------------------------------------------------------------------------------------------------------------------------------------------------------------------------------------------------------------------------------------------------------------------------------|
| zum natural fruta     | <input type="radio"/> Nunca o menos 1 vez al mes<br><input type="radio"/> 1 a 3 veces mes<br><input checked="" type="radio"/> 1 vez semana<br><input type="radio"/> 2 a 4 veces semana<br><input type="radio"/> 5 a 6 veces semana<br><input type="radio"/> 1 vez al día<br><input type="radio"/> 2 a 3 veces al día<br><input type="radio"/> 5 a 6 veces al día<br><input type="radio"/> más 6 veces al día |
| platano               | <input type="radio"/> Nunca o menos 1 vez al mes<br><input type="radio"/> 1 a 3 veces mes<br><input type="radio"/> 1 vez semana<br><input checked="" type="radio"/> 2 a 4 veces semana<br><input type="radio"/> 5 a 6 veces semana<br><input type="radio"/> 1 vez al día<br><input type="radio"/> 2 a 3 veces al día<br><input type="radio"/> 5 a 6 veces al día<br><input type="radio"/> más 6 veces al día |
| manzana o pera        | <input type="radio"/> Nunca o menos 1 vez al mes<br><input type="radio"/> 1 a 3 veces mes<br><input checked="" type="radio"/> 1 vez semana<br><input type="radio"/> 2 a 4 veces semana<br><input type="radio"/> 5 a 6 veces semana<br><input type="radio"/> 1 vez al día<br><input type="radio"/> 2 a 3 veces al día<br><input type="radio"/> 5 a 6 veces al día<br><input type="radio"/> más 6 veces al día |
| melocotón o nectarina | <input type="radio"/> Nunca o menos 1 vez al mes<br><input type="radio"/> 1 a 3 veces mes<br><input type="radio"/> 1 vez semana<br><input checked="" type="radio"/> 2 a 4 veces semana<br><input type="radio"/> 5 a 6 veces semana<br><input type="radio"/> 1 vez al día<br><input type="radio"/> 2 a 3 veces al día<br><input type="radio"/> 5 a 6 veces al día<br><input type="radio"/> más 6 veces al día |
| sandia o melon        | <input type="radio"/> Nunca o menos 1 vez al mes<br><input type="radio"/> 1 a 3 veces mes<br><input type="radio"/> 1 vez semana<br><input type="radio"/> 2 a 4 veces semana<br><input checked="" type="radio"/> 5 a 6 veces semana<br><input type="radio"/> 1 vez al día<br><input type="radio"/> 2 a 3 veces al día<br><input type="radio"/> 5 a 6 veces al día<br><input type="radio"/> más 6 veces al día |
| uva                   | <input type="radio"/> Nunca o menos 1 vez al mes<br><input type="radio"/> 1 a 3 veces mes<br><input type="radio"/> 1 vez semana<br><input type="radio"/> 2 a 4 veces semana<br><input checked="" type="radio"/> 5 a 6 veces semana<br><input type="radio"/> 1 vez al día<br><input type="radio"/> 2 a 3 veces al día<br><input type="radio"/> 5 a 6 veces al día<br><input type="radio"/> más 6 veces al día |

|                 |                                                                                                                                                                                                                                                                                                                                                                                                              |
|-----------------|--------------------------------------------------------------------------------------------------------------------------------------------------------------------------------------------------------------------------------------------------------------------------------------------------------------------------------------------------------------------------------------------------------------|
| bruna o ciruela | <input checked="" type="radio"/> Nunca o menos 1 vez al mes<br><input type="radio"/> 1 a 3 veces mes<br><input type="radio"/> 1 vez semana<br><input type="radio"/> 2 a 4 veces semana<br><input type="radio"/> 5 a 6 veces semana<br><input type="radio"/> 1 vez al día<br><input type="radio"/> 2 a 3 veces al día<br><input type="radio"/> 5 a 6 veces al día<br><input type="radio"/> más 6 veces al día |
| kiwi            | <input type="radio"/> Nunca o menos 1 vez al mes<br><input type="radio"/> 1 a 3 veces mes<br><input type="radio"/> 1 vez semana<br><input checked="" type="radio"/> 2 a 4 veces semana<br><input type="radio"/> 5 a 6 veces semana<br><input type="radio"/> 1 vez al día<br><input type="radio"/> 2 a 3 veces al día<br><input type="radio"/> 5 a 6 veces al día<br><input type="radio"/> más 6 veces al día |
| aceituna        | <input type="radio"/> Nunca o menos 1 vez al mes<br><input type="radio"/> 1 a 3 veces mes<br><input checked="" type="radio"/> 1 vez semana<br><input type="radio"/> 2 a 4 veces semana<br><input type="radio"/> 5 a 6 veces semana<br><input type="radio"/> 1 vez al día<br><input type="radio"/> 2 a 3 veces al día<br><input type="radio"/> 5 a 6 veces al día<br><input type="radio"/> más 6 veces al día |
| frutos secos    | <input type="radio"/> Nunca o menos 1 vez al mes<br><input type="radio"/> 1 a 3 veces mes<br><input checked="" type="radio"/> 1 vez semana<br><input type="radio"/> 2 a 4 veces semana<br><input type="radio"/> 5 a 6 veces semana<br><input type="radio"/> 1 vez al día<br><input type="radio"/> 2 a 3 veces al día<br><input type="radio"/> 5 a 6 veces al día<br><input type="radio"/> más 6 veces al día |
| pan blanco      | <input type="radio"/> Nunca o menos 1 vez al mes<br><input type="radio"/> 1 a 3 veces mes<br><input type="radio"/> 1 vez semana<br><input checked="" type="radio"/> 2 a 4 veces semana<br><input type="radio"/> 5 a 6 veces semana<br><input type="radio"/> 1 vez al día<br><input type="radio"/> 2 a 3 veces al día<br><input type="radio"/> 5 a 6 veces al día<br><input type="radio"/> más 6 veces al día |
| pan integral    | <input type="radio"/> Nunca o menos 1 vez al mes<br><input type="radio"/> 1 a 3 veces mes<br><input checked="" type="radio"/> 1 vez semana<br><input type="radio"/> 2 a 4 veces semana<br><input type="radio"/> 5 a 6 veces semana<br><input type="radio"/> 1 vez al día<br><input type="radio"/> 2 a 3 veces al día<br><input type="radio"/> 5 a 6 veces al día<br><input type="radio"/> más 6 veces al día |

|                          |                                                                                                                                                                                                                                                                                                                                                                                                              |
|--------------------------|--------------------------------------------------------------------------------------------------------------------------------------------------------------------------------------------------------------------------------------------------------------------------------------------------------------------------------------------------------------------------------------------------------------|
| cereales desayuno        | <input checked="" type="radio"/> Nunca o menos 1 vez al mes<br><input type="radio"/> 1 a 3 veces mes<br><input type="radio"/> 1 vez semana<br><input type="radio"/> 2 a 4 veces semana<br><input type="radio"/> 5 a 6 veces semana<br><input type="radio"/> 1 vez al día<br><input type="radio"/> 2 a 3 veces al día<br><input type="radio"/> 5 a 6 veces al día<br><input type="radio"/> más 6 veces al día |
| patatas fritas           | <input checked="" type="radio"/> Nunca o menos 1 vez al mes<br><input type="radio"/> 1 a 3 veces mes<br><input type="radio"/> 1 vez semana<br><input type="radio"/> 2 a 4 veces semana<br><input type="radio"/> 5 a 6 veces semana<br><input type="radio"/> 1 vez al día<br><input type="radio"/> 2 a 3 veces al día<br><input type="radio"/> 5 a 6 veces al día<br><input type="radio"/> más 6 veces al día |
| patatas cocidas o asadas | <input type="radio"/> Nunca o menos 1 vez al mes<br><input type="radio"/> 1 a 3 veces mes<br><input type="radio"/> 1 vez semana<br><input checked="" type="radio"/> 2 a 4 veces semana<br><input type="radio"/> 5 a 6 veces semana<br><input type="radio"/> 1 vez al día<br><input type="radio"/> 2 a 3 veces al día<br><input type="radio"/> 5 a 6 veces al día<br><input type="radio"/> más 6 veces al día |
| bolsa papas              | <input type="radio"/> Nunca o menos 1 vez al mes<br><input type="radio"/> 1 a 3 veces mes<br><input type="radio"/> 1 vez semana<br><input checked="" type="radio"/> 2 a 4 veces semana<br><input type="radio"/> 5 a 6 veces semana<br><input type="radio"/> 1 vez al día<br><input type="radio"/> 2 a 3 veces al día<br><input type="radio"/> 5 a 6 veces al día<br><input type="radio"/> más 6 veces al día |
| arroz cocinado           | <input type="radio"/> Nunca o menos 1 vez al mes<br><input type="radio"/> 1 a 3 veces mes<br><input checked="" type="radio"/> 1 vez semana<br><input type="radio"/> 2 a 4 veces semana<br><input type="radio"/> 5 a 6 veces semana<br><input type="radio"/> 1 vez al día<br><input type="radio"/> 2 a 3 veces al día<br><input type="radio"/> 5 a 6 veces al día<br><input type="radio"/> más 6 veces al día |
| pasta                    | <input type="radio"/> Nunca o menos 1 vez al mes<br><input type="radio"/> 1 a 3 veces mes<br><input checked="" type="radio"/> 1 vez semana<br><input type="radio"/> 2 a 4 veces semana<br><input type="radio"/> 5 a 6 veces semana<br><input type="radio"/> 1 vez al día<br><input type="radio"/> 2 a 3 veces al día<br><input type="radio"/> 5 a 6 veces al día<br><input type="radio"/> más 6 veces al día |

|                     |                                                                                                                                                                                                                                                                                                                                                                                                              |
|---------------------|--------------------------------------------------------------------------------------------------------------------------------------------------------------------------------------------------------------------------------------------------------------------------------------------------------------------------------------------------------------------------------------------------------------|
| pizza               | <input type="radio"/> Nunca o menos 1 vez al mes<br><input type="radio"/> 1 a 3 veces mes<br><input type="radio"/> 1 vez semana<br><input type="radio"/> 2 a 4 veces semana<br><input type="radio"/> 5 a 6 veces semana<br><input checked="" type="radio"/> 1 vez al día<br><input type="radio"/> 2 a 3 veces al día<br><input type="radio"/> 5 a 6 veces al día<br><input type="radio"/> más 6 veces al día |
| aceite oliva        | <input type="radio"/> Nunca o menos 1 vez al mes<br><input type="radio"/> 1 a 3 veces mes<br><input type="radio"/> 1 vez semana<br><input checked="" type="radio"/> 2 a 4 veces semana<br><input type="radio"/> 5 a 6 veces semana<br><input type="radio"/> 1 vez al día<br><input type="radio"/> 2 a 3 veces al día<br><input type="radio"/> 5 a 6 veces al día<br><input type="radio"/> más 6 veces al día |
| otros aceites       | <input type="radio"/> Nunca o menos 1 vez al mes<br><input type="radio"/> 1 a 3 veces mes<br><input checked="" type="radio"/> 1 vez semana<br><input type="radio"/> 2 a 4 veces semana<br><input type="radio"/> 5 a 6 veces semana<br><input type="radio"/> 1 vez al día<br><input type="radio"/> 2 a 3 veces al día<br><input type="radio"/> 5 a 6 veces al día<br><input type="radio"/> más 6 veces al día |
| margarina           | <input checked="" type="radio"/> Nunca o menos 1 vez al mes<br><input type="radio"/> 1 a 3 veces mes<br><input type="radio"/> 1 vez semana<br><input type="radio"/> 2 a 4 veces semana<br><input type="radio"/> 5 a 6 veces semana<br><input type="radio"/> 1 vez al día<br><input type="radio"/> 2 a 3 veces al día<br><input type="radio"/> 5 a 6 veces al día<br><input type="radio"/> más 6 veces al día |
| mantequilla         | <input checked="" type="radio"/> Nunca o menos 1 vez al mes<br><input type="radio"/> 1 a 3 veces mes<br><input type="radio"/> 1 vez semana<br><input type="radio"/> 2 a 4 veces semana<br><input type="radio"/> 5 a 6 veces semana<br><input type="radio"/> 1 vez al día<br><input type="radio"/> 2 a 3 veces al día<br><input type="radio"/> 5 a 6 veces al día<br><input type="radio"/> más 6 veces al día |
| galletas tipo maria | <input type="radio"/> Nunca o menos 1 vez al mes<br><input type="radio"/> 1 a 3 veces mes<br><input type="radio"/> 1 vez semana<br><input checked="" type="radio"/> 2 a 4 veces semana<br><input type="radio"/> 5 a 6 veces semana<br><input type="radio"/> 1 vez al día<br><input type="radio"/> 2 a 3 veces al día<br><input type="radio"/> 5 a 6 veces al día<br><input type="radio"/> más 6 veces al día |



|                           |                                                                                                                                                                                                                                                                                                                                                                                                              |
|---------------------------|--------------------------------------------------------------------------------------------------------------------------------------------------------------------------------------------------------------------------------------------------------------------------------------------------------------------------------------------------------------------------------------------------------------|
| galletas chocolate        | <input type="radio"/> Nunca o menos 1 vez al mes<br><input type="radio"/> 1 a 3 veces mes<br><input type="radio"/> 1 vez semana<br><input checked="" type="radio"/> 2 a 4 veces semana<br><input type="radio"/> 5 a 6 veces semana<br><input type="radio"/> 1 vez al día<br><input type="radio"/> 2 a 3 veces al día<br><input type="radio"/> 5 a 6 veces al día<br><input type="radio"/> más 6 veces al día |
| bollieria                 | <input type="radio"/> Nunca o menos 1 vez al mes<br><input type="radio"/> 1 a 3 veces mes<br><input checked="" type="radio"/> 1 vez semana<br><input type="radio"/> 2 a 4 veces semana<br><input type="radio"/> 5 a 6 veces semana<br><input type="radio"/> 1 vez al día<br><input type="radio"/> 2 a 3 veces al día<br><input type="radio"/> 5 a 6 veces al día<br><input type="radio"/> más 6 veces al día |
| chocolate o bombones      | <input type="radio"/> Nunca o menos 1 vez al mes<br><input type="radio"/> 1 a 3 veces mes<br><input checked="" type="radio"/> 1 vez semana<br><input type="radio"/> 2 a 4 veces semana<br><input type="radio"/> 5 a 6 veces semana<br><input type="radio"/> 1 vez al día<br><input type="radio"/> 2 a 3 veces al día<br><input type="radio"/> 5 a 6 veces al día<br><input type="radio"/> más 6 veces al día |
| chocolate polvo o colacao | <input type="radio"/> Nunca o menos 1 vez al mes<br><input type="radio"/> 1 a 3 veces mes<br><input type="radio"/> 1 vez semana<br><input type="radio"/> 2 a 4 veces semana<br><input type="radio"/> 5 a 6 veces semana<br><input checked="" type="radio"/> 1 vez al día<br><input type="radio"/> 2 a 3 veces al día<br><input type="radio"/> 5 a 6 veces al día<br><input type="radio"/> más 6 veces al día |
| vino tinto                | <input checked="" type="radio"/> Nunca o menos 1 vez al mes<br><input type="radio"/> 1 a 3 veces mes<br><input type="radio"/> 1 vez semana<br><input type="radio"/> 2 a 4 veces semana<br><input type="radio"/> 5 a 6 veces semana<br><input type="radio"/> 1 vez al día<br><input type="radio"/> 2 a 3 veces al día<br><input type="radio"/> 5 a 6 veces al día<br><input type="radio"/> más 6 veces al día |
| vino blanco               | <input checked="" type="radio"/> Nunca o menos 1 vez al mes<br><input type="radio"/> 1 a 3 veces mes<br><input type="radio"/> 1 vez semana<br><input type="radio"/> 2 a 4 veces semana<br><input type="radio"/> 5 a 6 veces semana<br><input type="radio"/> 1 vez al día<br><input type="radio"/> 2 a 3 veces al día<br><input type="radio"/> 5 a 6 veces al día<br><input type="radio"/> más 6 veces al día |

|                       |                                                                                                                                                                                                                                                                                                                                                                                                              |
|-----------------------|--------------------------------------------------------------------------------------------------------------------------------------------------------------------------------------------------------------------------------------------------------------------------------------------------------------------------------------------------------------------------------------------------------------|
| vino seco o vermut    | <input checked="" type="radio"/> Nunca o menos 1 vez al mes<br><input type="radio"/> 1 a 3 veces mes<br><input type="radio"/> 1 vez semana<br><input type="radio"/> 2 a 4 veces semana<br><input type="radio"/> 5 a 6 veces semana<br><input type="radio"/> 1 vez al día<br><input type="radio"/> 2 a 3 veces al día<br><input type="radio"/> 5 a 6 veces al día<br><input type="radio"/> más 6 veces al día |
| cerveza               | <input checked="" type="radio"/> Nunca o menos 1 vez al mes<br><input type="radio"/> 1 a 3 veces mes<br><input type="radio"/> 1 vez semana<br><input type="radio"/> 2 a 4 veces semana<br><input type="radio"/> 5 a 6 veces semana<br><input type="radio"/> 1 vez al día<br><input type="radio"/> 2 a 3 veces al día<br><input type="radio"/> 5 a 6 veces al día<br><input type="radio"/> más 6 veces al día |
| cerveza sin alcohol   | <input checked="" type="radio"/> Nunca o menos 1 vez al mes<br><input type="radio"/> 1 a 3 veces mes<br><input type="radio"/> 1 vez semana<br><input type="radio"/> 2 a 4 veces semana<br><input type="radio"/> 5 a 6 veces semana<br><input type="radio"/> 1 vez al día<br><input type="radio"/> 2 a 3 veces al día<br><input type="radio"/> 5 a 6 veces al día<br><input type="radio"/> más 6 veces al día |
| licores               | <input checked="" type="radio"/> Nunca o menos 1 vez al mes<br><input type="radio"/> 1 a 3 veces mes<br><input type="radio"/> 1 vez semana<br><input type="radio"/> 2 a 4 veces semana<br><input type="radio"/> 5 a 6 veces semana<br><input type="radio"/> 1 vez al día<br><input type="radio"/> 2 a 3 veces al día<br><input type="radio"/> 5 a 6 veces al día<br><input type="radio"/> más 6 veces al día |
| ginebra o ron o vodka | <input checked="" type="radio"/> Nunca o menos 1 vez al mes<br><input type="radio"/> 1 a 3 veces mes<br><input type="radio"/> 1 vez semana<br><input type="radio"/> 2 a 4 veces semana<br><input type="radio"/> 5 a 6 veces semana<br><input type="radio"/> 1 vez al día<br><input type="radio"/> 2 a 3 veces al día<br><input type="radio"/> 5 a 6 veces al día<br><input type="radio"/> más 6 veces al día |
| refresco normal       | <input type="radio"/> Nunca o menos 1 vez al mes<br><input type="radio"/> 1 a 3 veces mes<br><input checked="" type="radio"/> 1 vez semana<br><input type="radio"/> 2 a 4 veces semana<br><input type="radio"/> 5 a 6 veces semana<br><input type="radio"/> 1 vez al día<br><input type="radio"/> 2 a 3 veces al día<br><input type="radio"/> 5 a 6 veces al día<br><input type="radio"/> más 6 veces al día |

---

|                     |                                                                                                                                                                                                                                                                                                                                                                                                              |
|---------------------|--------------------------------------------------------------------------------------------------------------------------------------------------------------------------------------------------------------------------------------------------------------------------------------------------------------------------------------------------------------------------------------------------------------|
| refresco sin azúcar | <input type="radio"/> Nunca o menos 1 vez al mes<br><input type="radio"/> 1 a 3 veces mes<br><input checked="" type="radio"/> 1 vez semana<br><input type="radio"/> 2 a 4 veces semana<br><input type="radio"/> 5 a 6 veces semana<br><input type="radio"/> 1 vez al día<br><input type="radio"/> 2 a 3 veces al día<br><input type="radio"/> 5 a 6 veces al día<br><input type="radio"/> más 6 veces al día |
|---------------------|--------------------------------------------------------------------------------------------------------------------------------------------------------------------------------------------------------------------------------------------------------------------------------------------------------------------------------------------------------------------------------------------------------------|

---

|                |                                                                                                                                                                                                                                                                                                                                                                                                              |
|----------------|--------------------------------------------------------------------------------------------------------------------------------------------------------------------------------------------------------------------------------------------------------------------------------------------------------------------------------------------------------------------------------------------------------------|
| Agua del grifo | <input checked="" type="radio"/> Nunca o menos 1 vez al mes<br><input type="radio"/> 1 a 3 veces mes<br><input type="radio"/> 1 vez semana<br><input type="radio"/> 2 a 4 veces semana<br><input type="radio"/> 5 a 6 veces semana<br><input type="radio"/> 1 vez al día<br><input type="radio"/> 2 a 3 veces al día<br><input type="radio"/> 5 a 6 veces al día<br><input type="radio"/> más 6 veces al día |
|----------------|--------------------------------------------------------------------------------------------------------------------------------------------------------------------------------------------------------------------------------------------------------------------------------------------------------------------------------------------------------------------------------------------------------------|

---

|                          |                                                                                                                                                                                                                                                                                                                                                                                                              |
|--------------------------|--------------------------------------------------------------------------------------------------------------------------------------------------------------------------------------------------------------------------------------------------------------------------------------------------------------------------------------------------------------------------------------------------------------|
| agua embotellada sin gas | <input type="radio"/> Nunca o menos 1 vez al mes<br><input type="radio"/> 1 a 3 veces mes<br><input type="radio"/> 1 vez semana<br><input type="radio"/> 2 a 4 veces semana<br><input type="radio"/> 5 a 6 veces semana<br><input type="radio"/> 1 vez al día<br><input type="radio"/> 2 a 3 veces al día<br><input type="radio"/> 5 a 6 veces al día<br><input checked="" type="radio"/> más 6 veces al día |
|--------------------------|--------------------------------------------------------------------------------------------------------------------------------------------------------------------------------------------------------------------------------------------------------------------------------------------------------------------------------------------------------------------------------------------------------------|

---

|                          |                                                                                                                                                                                                                                                                                                                                                                                                              |
|--------------------------|--------------------------------------------------------------------------------------------------------------------------------------------------------------------------------------------------------------------------------------------------------------------------------------------------------------------------------------------------------------------------------------------------------------|
| agua embotellada con gas | <input checked="" type="radio"/> Nunca o menos 1 vez al mes<br><input type="radio"/> 1 a 3 veces mes<br><input type="radio"/> 1 vez semana<br><input type="radio"/> 2 a 4 veces semana<br><input type="radio"/> 5 a 6 veces semana<br><input type="radio"/> 1 vez al día<br><input type="radio"/> 2 a 3 veces al día<br><input type="radio"/> 5 a 6 veces al día<br><input type="radio"/> más 6 veces al día |
|--------------------------|--------------------------------------------------------------------------------------------------------------------------------------------------------------------------------------------------------------------------------------------------------------------------------------------------------------------------------------------------------------------------------------------------------------|

---

|                      |                                                                                                                                                                                                                                                                                                                                                                                                              |
|----------------------|--------------------------------------------------------------------------------------------------------------------------------------------------------------------------------------------------------------------------------------------------------------------------------------------------------------------------------------------------------------------------------------------------------------|
| zumو frutas embasado | <input checked="" type="radio"/> Nunca o menos 1 vez al mes<br><input type="radio"/> 1 a 3 veces mes<br><input type="radio"/> 1 vez semana<br><input type="radio"/> 2 a 4 veces semana<br><input type="radio"/> 5 a 6 veces semana<br><input type="radio"/> 1 vez al día<br><input type="radio"/> 2 a 3 veces al día<br><input type="radio"/> 5 a 6 veces al día<br><input type="radio"/> más 6 veces al día |
|----------------------|--------------------------------------------------------------------------------------------------------------------------------------------------------------------------------------------------------------------------------------------------------------------------------------------------------------------------------------------------------------------------------------------------------------|

---

|      |                                                                                                                                                                                                                                                                                                                                                                                                              |
|------|--------------------------------------------------------------------------------------------------------------------------------------------------------------------------------------------------------------------------------------------------------------------------------------------------------------------------------------------------------------------------------------------------------------|
| cafe | <input checked="" type="radio"/> Nunca o menos 1 vez al mes<br><input type="radio"/> 1 a 3 veces mes<br><input type="radio"/> 1 vez semana<br><input type="radio"/> 2 a 4 veces semana<br><input type="radio"/> 5 a 6 veces semana<br><input type="radio"/> 1 vez al día<br><input type="radio"/> 2 a 3 veces al día<br><input type="radio"/> 5 a 6 veces al día<br><input type="radio"/> más 6 veces al día |
|------|--------------------------------------------------------------------------------------------------------------------------------------------------------------------------------------------------------------------------------------------------------------------------------------------------------------------------------------------------------------------------------------------------------------|

---

|                       |                                                                                                                                                                                                                                                                                                                                                                                                              |
|-----------------------|--------------------------------------------------------------------------------------------------------------------------------------------------------------------------------------------------------------------------------------------------------------------------------------------------------------------------------------------------------------------------------------------------------------|
| cafe descafeinado     | <input checked="" type="radio"/> Nunca o menos 1 vez al mes<br><input type="radio"/> 1 a 3 veces mes<br><input type="radio"/> 1 vez semana<br><input type="radio"/> 2 a 4 veces semana<br><input type="radio"/> 5 a 6 veces semana<br><input type="radio"/> 1 vez al día<br><input type="radio"/> 2 a 3 veces al día<br><input type="radio"/> 5 a 6 veces al día<br><input type="radio"/> más 6 veces al día |
| te o infusión         | <input checked="" type="radio"/> Nunca o menos 1 vez al mes<br><input type="radio"/> 1 a 3 veces mes<br><input type="radio"/> 1 vez semana<br><input type="radio"/> 2 a 4 veces semana<br><input type="radio"/> 5 a 6 veces semana<br><input type="radio"/> 1 vez al día<br><input type="radio"/> 2 a 3 veces al día<br><input type="radio"/> 5 a 6 veces al día<br><input type="radio"/> más 6 veces al día |
| sopa o puré verduras  | <input type="radio"/> Nunca o menos 1 vez al mes<br><input type="radio"/> 1 a 3 veces mes<br><input checked="" type="radio"/> 1 vez semana<br><input type="radio"/> 2 a 4 veces semana<br><input type="radio"/> 5 a 6 veces semana<br><input type="radio"/> 1 vez al día<br><input type="radio"/> 2 a 3 veces al día<br><input type="radio"/> 5 a 6 veces al día<br><input type="radio"/> más 6 veces al día |
| croquetas pollo jamón | <input type="radio"/> Nunca o menos 1 vez al mes<br><input checked="" type="radio"/> 1 a 3 veces mes<br><input type="radio"/> 1 vez semana<br><input type="radio"/> 2 a 4 veces semana<br><input type="radio"/> 5 a 6 veces semana<br><input type="radio"/> 1 vez al día<br><input type="radio"/> 2 a 3 veces al día<br><input type="radio"/> 5 a 6 veces al día<br><input type="radio"/> más 6 veces al día |
| croquetas pescado     | <input type="radio"/> Nunca o menos 1 vez al mes<br><input checked="" type="radio"/> 1 a 3 veces mes<br><input type="radio"/> 1 vez semana<br><input type="radio"/> 2 a 4 veces semana<br><input type="radio"/> 5 a 6 veces semana<br><input type="radio"/> 1 vez al día<br><input type="radio"/> 2 a 3 veces al día<br><input type="radio"/> 5 a 6 veces al día<br><input type="radio"/> más 6 veces al día |
| mayonesa              | <input checked="" type="radio"/> Nunca o menos 1 vez al mes<br><input type="radio"/> 1 a 3 veces mes<br><input type="radio"/> 1 vez semana<br><input type="radio"/> 2 a 4 veces semana<br><input type="radio"/> 5 a 6 veces semana<br><input type="radio"/> 1 vez al día<br><input type="radio"/> 2 a 3 veces al día<br><input type="radio"/> 5 a 6 veces al día<br><input type="radio"/> más 6 veces al día |

|                  |                                                                                                                                                                                                                                                                                                                                                                                                              |
|------------------|--------------------------------------------------------------------------------------------------------------------------------------------------------------------------------------------------------------------------------------------------------------------------------------------------------------------------------------------------------------------------------------------------------------|
| salsa tomate     | <input type="radio"/> Nunca o menos 1 vez al mes<br><input checked="" type="radio"/> 1 a 3 veces mes<br><input type="radio"/> 1 vez semana<br><input type="radio"/> 2 a 4 veces semana<br><input type="radio"/> 5 a 6 veces semana<br><input type="radio"/> 1 vez al día<br><input type="radio"/> 2 a 3 veces al día<br><input type="radio"/> 5 a 6 veces al día<br><input type="radio"/> más 6 veces al día |
| ketchup          | <input type="radio"/> Nunca o menos 1 vez al mes<br><input checked="" type="radio"/> 1 a 3 veces mes<br><input type="radio"/> 1 vez semana<br><input type="radio"/> 2 a 4 veces semana<br><input type="radio"/> 5 a 6 veces semana<br><input type="radio"/> 1 vez al día<br><input type="radio"/> 2 a 3 veces al día<br><input type="radio"/> 5 a 6 veces al día<br><input type="radio"/> más 6 veces al día |
| sal              | <input type="radio"/> Nunca o menos 1 vez al mes<br><input type="radio"/> 1 a 3 veces mes<br><input type="radio"/> 1 vez semana<br><input type="radio"/> 2 a 4 veces semana<br><input type="radio"/> 5 a 6 veces semana<br><input checked="" type="radio"/> 1 vez al día<br><input type="radio"/> 2 a 3 veces al día<br><input type="radio"/> 5 a 6 veces al día<br><input type="radio"/> más 6 veces al día |
| ajo              | <input checked="" type="radio"/> Nunca o menos 1 vez al mes<br><input type="radio"/> 1 a 3 veces mes<br><input type="radio"/> 1 vez semana<br><input type="radio"/> 2 a 4 veces semana<br><input type="radio"/> 5 a 6 veces semana<br><input type="radio"/> 1 vez al día<br><input type="radio"/> 2 a 3 veces al día<br><input type="radio"/> 5 a 6 veces al día<br><input type="radio"/> más 6 veces al día |
| mermelada o miel | <input checked="" type="radio"/> Nunca o menos 1 vez al mes<br><input type="radio"/> 1 a 3 veces mes<br><input type="radio"/> 1 vez semana<br><input type="radio"/> 2 a 4 veces semana<br><input type="radio"/> 5 a 6 veces semana<br><input type="radio"/> 1 vez al día<br><input type="radio"/> 2 a 3 veces al día<br><input type="radio"/> 5 a 6 veces al día<br><input type="radio"/> más 6 veces al día |
| azúcar           | <input type="radio"/> Nunca o menos 1 vez al mes<br><input type="radio"/> 1 a 3 veces mes<br><input type="radio"/> 1 vez semana<br><input checked="" type="radio"/> 2 a 4 veces semana<br><input type="radio"/> 5 a 6 veces semana<br><input type="radio"/> 1 vez al día<br><input type="radio"/> 2 a 3 veces al día<br><input type="radio"/> 5 a 6 veces al día<br><input type="radio"/> más 6 veces al día |

|                                       |                                                                                                                                                                                                                                                                                                                                                                                                                                                                                                                    |
|---------------------------------------|--------------------------------------------------------------------------------------------------------------------------------------------------------------------------------------------------------------------------------------------------------------------------------------------------------------------------------------------------------------------------------------------------------------------------------------------------------------------------------------------------------------------|
| Otro alimento                         | <hr/>                                                                                                                                                                                                                                                                                                                                                                                                                                                                                                              |
| suplementos vitamínicos               | <input type="radio"/> si<br><input checked="" type="radio"/> no                                                                                                                                                                                                                                                                                                                                                                                                                                                    |
| suplementos vitamínicos               | <hr/>                                                                                                                                                                                                                                                                                                                                                                                                                                                                                                              |
| dieta previa                          | <input type="radio"/> si<br><input checked="" type="radio"/> no                                                                                                                                                                                                                                                                                                                                                                                                                                                    |
| motivo dieta                          | <input type="radio"/> no dieta<br><input type="radio"/> control peso<br><input type="radio"/> control colesterol<br><input type="radio"/> control diabetes<br><input type="radio"/> problemas estómago<br><input type="radio"/> problemas vesícula o hepáticos<br><input type="radio"/> HTA o cardiopatía<br><input type="radio"/> problemas renales<br><input type="radio"/> alergia alimentaria<br><input type="radio"/> ácido úrico elevado<br><input type="radio"/> vegetariana<br><input type="radio"/> otros |
| cambio alimentos año previo gestación | <input type="radio"/> si<br><input checked="" type="radio"/> no                                                                                                                                                                                                                                                                                                                                                                                                                                                    |
| cambio lácteos                        | <input type="radio"/> eliminado<br><input type="radio"/> disminuido<br><input type="radio"/> igual<br><input type="radio"/> aumentado<br><input type="radio"/> no sabe                                                                                                                                                                                                                                                                                                                                             |
| cambio huevos                         | <input type="radio"/> eliminado<br><input type="radio"/> disminuido<br><input type="radio"/> igual<br><input type="radio"/> aumentado<br><input type="radio"/> no sabe                                                                                                                                                                                                                                                                                                                                             |
| cambio carne                          | <input type="radio"/> eliminado<br><input type="radio"/> disminuido<br><input type="radio"/> igual<br><input type="radio"/> aumentado<br><input type="radio"/> no sabe                                                                                                                                                                                                                                                                                                                                             |
| cambio pescado                        | <input type="radio"/> eliminado<br><input type="radio"/> disminuido<br><input type="radio"/> igual<br><input type="radio"/> aumentado<br><input type="radio"/> no sabe                                                                                                                                                                                                                                                                                                                                             |
| cambio verduras                       | <input type="radio"/> eliminado<br><input type="radio"/> disminuido<br><input type="radio"/> igual<br><input type="radio"/> aumentado<br><input type="radio"/> no sabe                                                                                                                                                                                                                                                                                                                                             |

|                            |                                                                                                                                                                                                                        |
|----------------------------|------------------------------------------------------------------------------------------------------------------------------------------------------------------------------------------------------------------------|
| cambio legumbres           | <input type="radio"/> eliminado<br><input type="radio"/> disminuido<br><input type="radio"/> igual<br><input type="radio"/> aumentado<br><input type="radio"/> no sabe                                                 |
| cambio fruta               | <input type="radio"/> eliminado<br><input type="radio"/> disminuido<br><input type="radio"/> igual<br><input type="radio"/> aumentado<br><input type="radio"/> no sabe                                                 |
| cambio pan                 | <input type="radio"/> eliminado<br><input type="radio"/> disminuido<br><input type="radio"/> igual<br><input type="radio"/> aumentado<br><input type="radio"/> no sabe                                                 |
| cambio aceite oliva        | <input type="radio"/> eliminado<br><input type="radio"/> disminuido<br><input type="radio"/> igual<br><input type="radio"/> aumentado<br><input type="radio"/> no sabe                                                 |
| cambio mante o margarina   | <input type="radio"/> eliminado<br><input type="radio"/> disminuido<br><input type="radio"/> igual<br><input type="radio"/> aumentado<br><input type="radio"/> no sabe                                                 |
| cambio azúcar y dulces     | <input type="radio"/> eliminado<br><input type="radio"/> disminuido<br><input type="radio"/> igual<br><input type="radio"/> aumentado<br><input type="radio"/> no sabe                                                 |
| cambio bebidas alcohólicas | <input type="radio"/> eliminado<br><input type="radio"/> disminuido<br><input type="radio"/> igual<br><input type="radio"/> aumentado<br><input type="radio"/> no sabe                                                 |
| frecuencia comidas fritas  | <input type="radio"/> a diario<br><input type="radio"/> 5 a 6 veces semana<br><input type="radio"/> 2 a 4 veces semana<br><input checked="" type="radio"/> 1 vez semana<br><input type="radio"/> menos de 1 vez semana |
| carne                      | <input type="radio"/> no como<br><input type="radio"/> cruda<br><input type="radio"/> poco hecha<br><input type="radio"/> hecha<br><input checked="" type="radio"/> muy hecha                                          |
| grasa visible carne        | <input checked="" type="radio"/> quita toda<br><input type="radio"/> quita mayoría<br><input type="radio"/> quita un poco<br><input type="radio"/> no quita nada                                                       |

|                                |                                                                                                                                                                                                                                                          |
|--------------------------------|----------------------------------------------------------------------------------------------------------------------------------------------------------------------------------------------------------------------------------------------------------|
| cocina carne                   | <input checked="" type="radio"/> a la plancha<br><input type="radio"/> a la parrilla<br><input type="radio"/> asada<br><input type="radio"/> frita<br><input type="radio"/> guisada                                                                      |
| tostado quemado carne          | <input checked="" type="radio"/> nunca<br><input type="radio"/> 1 vez mes<br><input type="radio"/> 2 a 3 veces mes<br><input type="radio"/> 1 vez semana<br><input type="radio"/> 2 a 3 semanas                                                          |
| tostado quemado pescado        | <input checked="" type="radio"/> nunca<br><input type="radio"/> 1 vez mes<br><input type="radio"/> 2 a 3 veces mes<br><input type="radio"/> 1 vez semana<br><input type="radio"/> 2 a 3 semanas                                                          |
| socarrat paella                | <input checked="" type="radio"/> nunca<br><input type="radio"/> 1 vez mes<br><input type="radio"/> 2 a 3 veces mes<br><input type="radio"/> 1 vez semana<br><input type="radio"/> 2 a 3 semanas                                                          |
| grasa o aceite cocinar         | <input type="radio"/> mantequilla<br><input type="radio"/> margarina<br><input type="radio"/> aceite oliva<br><input checked="" type="radio"/> aceite oliva virgen extra<br><input type="radio"/> aceite vegetal<br><input type="radio"/> mezcla aceites |
| grasa aceite aliñar            | <input type="radio"/> mantequilla<br><input type="radio"/> margarina<br><input type="radio"/> aceite oliva<br><input checked="" type="radio"/> aceite oliva virgen extra<br><input type="radio"/> aceite vegetal<br><input type="radio"/> mezcla aceites |
| grasa aceite freir             | <input type="radio"/> mantequilla<br><input type="radio"/> margarina<br><input type="radio"/> aceite oliva<br><input type="radio"/> aceite oliva virgen extra<br><input checked="" type="radio"/> aceite vegetal<br><input type="radio"/> mezcla aceites |
| Ejercicio cuestionario         | <input checked="" type="radio"/> si<br><input type="radio"/> no                                                                                                                                                                                          |
| horas de sueño incluido siesta | [*DATA REMOVED*]                                                                                                                                                                                                                                         |
| minutos siesta                 | [*DATA REMOVED*]                                                                                                                                                                                                                                         |
| horas televisión semana        | [*DATA REMOVED*]                                                                                                                                                                                                                                         |



|                                        |                                                                                                                                                                                                                                                                                                                                                                |
|----------------------------------------|----------------------------------------------------------------------------------------------------------------------------------------------------------------------------------------------------------------------------------------------------------------------------------------------------------------------------------------------------------------|
| actividad trabajo                      | <input type="radio"/> casi siempre sentado<br><input type="radio"/> sentado 50 por cien<br><input type="radio"/> casi siempre de pie, quieto<br><input type="radio"/> casi siempre levantado caminando y llevando pocas cosas<br><input type="radio"/> casi siempre levantado, caminando y llevado muchas cosas<br><input type="radio"/> trabajo manual pesado |
| tiempo caminar o bici al día           | <input type="radio"/> casi nunca<br><input type="radio"/> menos 20min día<br><input type="radio"/> 20 a 40 min día<br><input type="radio"/> 40 a 60 min día<br><input checked="" type="radio"/> 1h o 1h y media día<br><input type="radio"/> más de 1h y media al día                                                                                          |
| tiempo tareas casa al día              | <input type="radio"/> menos de 1h día<br><input checked="" type="radio"/> 1 a 2h día<br><input type="radio"/> 3 a 4h día<br><input type="radio"/> 5 a 6h día<br><input type="radio"/> 7 a 8h día<br><input type="radio"/> más de 8h día                                                                                                                        |
| tiempo libre televisión ordenador leer | <input type="radio"/> menos 1h día<br><input checked="" type="radio"/> 1h día<br><input type="radio"/> 2h día<br><input type="radio"/> 3h día<br><input type="radio"/> 4h día<br><input type="radio"/> 5 a 6h día<br><input type="radio"/> mas 6h día                                                                                                          |
| tiempo libre ejercicio o deporte       | <input type="radio"/> menos 1h semana<br><input checked="" type="radio"/> 1h semana<br><input type="radio"/> 2h semana<br><input type="radio"/> 3h semana<br><input type="radio"/> 4 a 5h semana<br><input type="radio"/> mas 5h semana                                                                                                                        |
| como se considera                      | <input type="radio"/> sedentaria<br><input type="radio"/> poco activa<br><input checked="" type="radio"/> moderadamente activa<br><input type="radio"/> bastante activa<br><input type="radio"/> muy activa<br><input type="radio"/> no sabe                                                                                                                   |
| FUR                                    | [*DATA REMOVED*]                                                                                                                                                                                                                                                                                                                                               |
| Semanas gestación 2T                   | [*DATA REMOVED*]                                                                                                                                                                                                                                                                                                                                               |
| Días gestación 2T                      | [*DATA REMOVED*]                                                                                                                                                                                                                                                                                                                                               |
| DBP 2T                                 | [*DATA REMOVED*]                                                                                                                                                                                                                                                                                                                                               |
| CC 2T                                  | [*DATA REMOVED*]                                                                                                                                                                                                                                                                                                                                               |
| AC 2T                                  | [*DATA REMOVED*]                                                                                                                                                                                                                                                                                                                                               |

|                                                   |                                                                                                                                                                                                 |
|---------------------------------------------------|-------------------------------------------------------------------------------------------------------------------------------------------------------------------------------------------------|
| LF 2T                                             | [*DATA REMOVED*]                                                                                                                                                                                |
| PFE 2T (Hadlock)                                  | [*DATA REMOVED*]                                                                                                                                                                                |
| Semanas gestación 3T                              | [*DATA REMOVED*]                                                                                                                                                                                |
| días 3T                                           | [*DATA REMOVED*]                                                                                                                                                                                |
| DBP 3T                                            | [*DATA REMOVED*]                                                                                                                                                                                |
| CC 3T                                             | [*DATA REMOVED*]                                                                                                                                                                                |
| AC 3T                                             | [*DATA REMOVED*]                                                                                                                                                                                |
| LF 3T                                             | [*DATA REMOVED*]                                                                                                                                                                                |
| PFE 3T (Hadlock)                                  | [*DATA REMOVED*]                                                                                                                                                                                |
| Semanas de gestación final                        | [*DATA REMOVED*]                                                                                                                                                                                |
| días gestación final                              | [*DATA REMOVED*]                                                                                                                                                                                |
| Localización placenta                             | <input checked="" type="radio"/> anterior<br><input type="radio"/> lateral derecha<br><input type="radio"/> lateral izquierda<br><input type="radio"/> posterior<br><input type="radio"/> fondo |
| Presentación longitudinal cefálica                | <input type="radio"/> no<br><input checked="" type="radio"/> si                                                                                                                                 |
| Dorso                                             | <input checked="" type="radio"/> izquierda anterior<br><input type="radio"/> izquierda posterior<br><input type="radio"/> derecha anterior<br><input type="radio"/> derecha posterior           |
| diámetro biparietal                               | [*DATA REMOVED*]                                                                                                                                                                                |
| Circunferencia craneal                            | [*DATA REMOVED*]                                                                                                                                                                                |
| Circunferencia abdominal                          | [*DATA REMOVED*]                                                                                                                                                                                |
| Longitud de femur                                 | [*DATA REMOVED*]                                                                                                                                                                                |
| tejido celular subcutáneo a nivel del muslo en mm | [*DATA REMOVED*]                                                                                                                                                                                |
| tejido celular subcutáneo en abdomen en mm        | [*DATA REMOVED*]                                                                                                                                                                                |
| Volumen del muslo en cm3                          | [*DATA REMOVED*]                                                                                                                                                                                |
| Peso fetal estimado según fórmula de Hadlock      | [*DATA REMOVED*]                                                                                                                                                                                |

|                                               |                                                                                                                                                          |
|-----------------------------------------------|----------------------------------------------------------------------------------------------------------------------------------------------------------|
| Percentil                                     | [*DATA REMOVED*]                                                                                                                                         |
| Peso fetal estimado según fórmula de Scioscia | <hr/>                                                                                                                                                    |
| Peso fetal estimado según fórmula de LEE      | <hr/>                                                                                                                                                    |
| Tipo de parto                                 | <input type="radio"/> eutocico<br><input type="radio"/> instrumentado/ventosa<br><input checked="" type="radio"/> cesarea                                |
| fecha de nacimiento                           | [*DATA REMOVED*]                                                                                                                                         |
| Días entre exploración y nacimiento           | [*DATA REMOVED*]                                                                                                                                         |
| Peso RN en g                                  | [*DATA REMOVED*]                                                                                                                                         |
| sexo                                          | <input type="radio"/> mujer<br><input checked="" type="radio"/> hombre                                                                                   |
| Apgar 1 minuto                                | [*DATA REMOVED*]                                                                                                                                         |
| Apgar 5 minutos                               | [*DATA REMOVED*]                                                                                                                                         |
| Apgar 10 minutos                              | <hr/>                                                                                                                                                    |
| antecedente Covid durante gestación           | <input type="radio"/> Yes<br><input checked="" type="radio"/> No                                                                                         |
| Nivel de estudios                             | <input type="radio"/> ninguno<br><input type="radio"/> primarios<br><input type="radio"/> secundarios<br><input checked="" type="radio"/> universitarios |

# Base\_datos\_estimacion\_peso\_fetal

|                                       |                                                                                                                                                                                                                                                                                      |
|---------------------------------------|--------------------------------------------------------------------------------------------------------------------------------------------------------------------------------------------------------------------------------------------------------------------------------------|
| Número de identificación participante | 88                                                                                                                                                                                                                                                                                   |
| CODIGO PARTICIPANTE                   |                                                                                                                                                                                                                                                                                      |
| Edad                                  | [*DATA REMOVED*]                                                                                                                                                                                                                                                                     |
| Gestaciones                           | <input type="radio"/> 1<br><input checked="" type="radio"/> 2<br><input type="radio"/> 3<br><input type="radio"/> mas de 3                                                                                                                                                           |
| partos                                | <input type="radio"/> 0<br><input checked="" type="radio"/> 1<br><input type="radio"/> 2<br><input type="radio"/> 3<br><input type="radio"/> mas de 3                                                                                                                                |
| cesáreas                              | <input checked="" type="radio"/> 0<br><input type="radio"/> 1<br><input type="radio"/> 2<br><input type="radio"/> 3<br><input type="radio"/> mas de 3                                                                                                                                |
| Abortos                               | <input checked="" type="radio"/> 0<br><input type="radio"/> 1<br><input type="radio"/> 2<br><input type="radio"/> 3<br><input type="radio"/> mas de 3                                                                                                                                |
| Tipo de gestacion                     | <input checked="" type="radio"/> espontanea<br><input type="radio"/> IAC inseminación artificial conyuge<br><input type="radio"/> IAD inseminación artificial donante<br><input type="radio"/> FIV Fecundación in Vitro<br><input type="radio"/> Ovodon FIV con donación de ovocitos |
| peso previo a embarazo                | [*DATA REMOVED*]                                                                                                                                                                                                                                                                     |
| Ganancia ponderal embarazo            | [*DATA REMOVED*]                                                                                                                                                                                                                                                                     |
| Talla madre                           | [*DATA REMOVED*]                                                                                                                                                                                                                                                                     |
| IMC previo embarazo                   | 32.46753246753247                                                                                                                                                                                                                                                                    |
| Patología obstétrica                  | <input checked="" type="radio"/> no<br><input type="radio"/> si                                                                                                                                                                                                                      |
| Diabetes pregestacional               | <input checked="" type="radio"/> no<br><input type="radio"/> si                                                                                                                                                                                                                      |
| Diabetes gestacional                  | <input checked="" type="radio"/> no<br><input type="radio"/> si                                                                                                                                                                                                                      |

|                                            |                                                                                                                                                                                      |
|--------------------------------------------|--------------------------------------------------------------------------------------------------------------------------------------------------------------------------------------|
| Diabetes gestacional con insulina          | <input checked="" type="radio"/> no<br><input type="radio"/> si                                                                                                                      |
| Diabetes gestacional con dieta y ejercicio | <input checked="" type="radio"/> no<br><input type="radio"/> si                                                                                                                      |
| Percentil fetos previos                    | <input type="radio"/> Nada<br><input type="radio"/> percentil menor de 10<br><input checked="" type="radio"/> percentil entre 10 y 90<br><input type="radio"/> percentil mayor de 90 |
| Exfumadora                                 | <input checked="" type="radio"/> Nada<br><input type="radio"/> menos de 5 años<br><input type="radio"/> 5 a 10 años<br><input type="radio"/> mayor o igual a 10 años                 |
| Hábito tabáquico                           | <input type="radio"/> no<br><input checked="" type="radio"/> si                                                                                                                      |
| fumadora                                   | [*DATA REMOVED*]                                                                                                                                                                     |
| Consumo otros tóxicos                      | <input checked="" type="radio"/> no<br><input type="radio"/> si                                                                                                                      |
| Hb 1T                                      | [*DATA REMOVED*]                                                                                                                                                                     |
| Htc 1T                                     | [*DATA REMOVED*]                                                                                                                                                                     |
| Hb 2T                                      | [*DATA REMOVED*]                                                                                                                                                                     |
| HTC 2T                                     | [*DATA REMOVED*]                                                                                                                                                                     |
| Hb 3T                                      | [*DATA REMOVED*]                                                                                                                                                                     |
| HTC 3T                                     | [*DATA REMOVED*]                                                                                                                                                                     |
| Suplemento FE oral                         | <input checked="" type="radio"/> si<br><input type="radio"/> no                                                                                                                      |
| Suplemento fe iv                           | <input type="radio"/> si<br><input checked="" type="radio"/> no                                                                                                                      |
| Transfusión                                | <input checked="" type="radio"/> no<br><input type="radio"/> si                                                                                                                      |
| Solicitada Vit D                           | <input checked="" type="radio"/> no<br><input type="radio"/> si                                                                                                                      |
| Deficit vit D                              | <input type="radio"/> no<br><input type="radio"/> si                                                                                                                                 |
| Suplemento vit D                           | <input type="radio"/> si<br><input type="radio"/> no                                                                                                                                 |

|                       |                                                                                                                                                                                                                                                                                                                                                                                                              |
|-----------------------|--------------------------------------------------------------------------------------------------------------------------------------------------------------------------------------------------------------------------------------------------------------------------------------------------------------------------------------------------------------------------------------------------------------|
| Dieta, cuestionario   | <input checked="" type="radio"/> sí<br><input type="radio"/> no                                                                                                                                                                                                                                                                                                                                              |
| Leche entera          | <input checked="" type="radio"/> Nunca o menos 1 vez al mes<br><input type="radio"/> 1 a 3 veces mes<br><input type="radio"/> 1 vez semana<br><input type="radio"/> 2 a 4 veces semana<br><input type="radio"/> 5 a 6 veces semana<br><input type="radio"/> 1 vez al día<br><input type="radio"/> 2 a 3 veces al día<br><input type="radio"/> 5 a 6 veces al día<br><input type="radio"/> más 6 veces al día |
| Leche semidesnatada   | <input checked="" type="radio"/> Nunca o menos 1 vez al mes<br><input type="radio"/> 1 a 3 veces mes<br><input type="radio"/> 1 vez semana<br><input type="radio"/> 2 a 4 veces semana<br><input type="radio"/> 5 a 6 veces semana<br><input type="radio"/> 1 vez al día<br><input type="radio"/> 2 a 3 veces al día<br><input type="radio"/> 5 a 6 veces al día<br><input type="radio"/> mas 6 veces al día |
| Leche desnatada       | <input type="radio"/> Nunca o menos 1 vez al mes<br><input type="radio"/> 1 a 3 veces mes<br><input type="radio"/> 1 vez semana<br><input checked="" type="radio"/> 2 a 4 veces semana<br><input type="radio"/> 5 a 6 veces semana<br><input type="radio"/> 1 vez al día<br><input type="radio"/> 2 a 3 veces al día<br><input type="radio"/> 5 a 6 veces al día<br><input type="radio"/> más 6 veces al día |
| Leche condensada      | <input checked="" type="radio"/> Nunca o menos 1 vez al mes<br><input type="radio"/> 1 a 3 veces mes<br><input type="radio"/> 1 vez semana<br><input type="radio"/> 2 a 4 veces semana<br><input type="radio"/> 5 a 6 veces semana<br><input type="radio"/> 1 vez al día<br><input type="radio"/> 2 a 3 veces al día<br><input type="radio"/> 5 a 6 veces al día<br><input type="radio"/> más 6 veces al día |
| nata o crema de leche | <input checked="" type="radio"/> Nunca o menos 1 vez al mes<br><input type="radio"/> 1 a 3 veces mes<br><input type="radio"/> 1 vez semana<br><input type="radio"/> 2 a 4 veces semana<br><input type="radio"/> 5 a 6 veces semana<br><input type="radio"/> 1 vez al día<br><input type="radio"/> 2 a 3 veces al día<br><input type="radio"/> 5 a 6 veces al día<br><input type="radio"/> más 6 veces al día |

---

Yogurt Entero

- ☐ Nunca o menos 1 vez al mes  
☒ 1 a 3 veces mes  
☐ 1 vez semana  
☐ 2 a 4 veces semana  
☐ 5 a 6 veces semana  
☐ 1 vez al día  
☐ 2 a 3 veces al día  
☐ 5 a 6 veces al día  
☐ más 6 veces al día

---

Yogurt desnatado

- ☒ Nunca o menos 1 vez al mes  
☐ 1 a 3 veces mes  
☐ 1 vez semana  
☐ 2 a 4 veces semana  
☐ 5 a 6 veces semana  
☐ 1 vez al día  
☐ 2 a 3 veces al día  
☐ 5 a 6 veces al día  
☐ más 6 veces al día

---

100g requesón o queso blando o queso fresco

- ☐ Nunca o menos 1 vez al mes  
☒ 1 a 3 veces mes  
☐ 1 vez semana  
☐ 2 a 4 veces semana  
☐ 5 a 6 veces semana  
☐ 1 vez al día  
☐ 2 a 3 veces al día  
☐ 5 a 6 veces al día  
☐ más 6 veces al día

---

queso curado o semicurado o cremoso

- ☐ Nunca o menos 1 vez al mes  
☐ 1 a 3 veces mes  
☒ 1 vez semana  
☐ 2 a 4 veces semana  
☐ 5 a 6 veces semana  
☐ 1 vez al día  
☐ 2 a 3 veces al día  
☐ 5 a 6 veces al día  
☐ más 6 veces al día

---

natillas flan pudding

- ☐ Nunca o menos 1 vez al mes  
☒ 1 a 3 veces mes  
☐ 1 vez semana  
☐ 2 a 4 veces semana  
☐ 5 a 6 veces semana  
☐ 1 vez al día  
☐ 2 a 3 veces al día  
☐ 5 a 6 veces al día  
☐ más 6 veces al día

---

Helado

- ☐ Nunca o menos 1 vez al mes  
☒ 1 a 3 veces mes  
☐ 1 vez semana  
☐ 2 a 4 veces semana  
☐ 5 a 6 veces semana  
☐ 1 vez al día  
☐ 2 a 3 veces al día  
☐ 5 a 6 veces al día  
☐ más 6 veces al día

|                                      |                                                                                                                                                                                                                                                                                                                                                                                                              |
|--------------------------------------|--------------------------------------------------------------------------------------------------------------------------------------------------------------------------------------------------------------------------------------------------------------------------------------------------------------------------------------------------------------------------------------------------------------|
| huevo                                | <input type="radio"/> Nunca o menos 1 vez al mes<br><input type="radio"/> 1 a 3 veces mes<br><input checked="" type="radio"/> 1 vez semana<br><input type="radio"/> 2 a 4 veces semana<br><input type="radio"/> 5 a 6 veces semana<br><input type="radio"/> 1 vez al día<br><input type="radio"/> 2 a 3 veces al día<br><input type="radio"/> 5 a 6 veces al día<br><input type="radio"/> más 6 veces al día |
| Pollo con piel                       | <input type="radio"/> Nunca o menos 1 vez al mes<br><input checked="" type="radio"/> 1 a 3 veces mes<br><input type="radio"/> 1 vez semana<br><input type="radio"/> 2 a 4 veces semana<br><input type="radio"/> 5 a 6 veces semana<br><input type="radio"/> 1 vez al día<br><input type="radio"/> 2 a 3 veces al día<br><input type="radio"/> 5 a 6 veces al día<br><input type="radio"/> más 6 veces al día |
| pollo sin piel                       | <input checked="" type="radio"/> Nunca o menos 1 vez al mes<br><input type="radio"/> 1 a 3 veces mes<br><input type="radio"/> 1 vez semana<br><input type="radio"/> 2 a 4 veces semana<br><input type="radio"/> 5 a 6 veces semana<br><input type="radio"/> 1 vez al día<br><input type="radio"/> 2 a 3 veces al día<br><input type="radio"/> 5 a 6 veces al día<br><input type="radio"/> más 6 veces al día |
| Ternera o cerdo o cordero            | <input type="radio"/> Nunca o menos 1 vez al mes<br><input checked="" type="radio"/> 1 a 3 veces mes<br><input type="radio"/> 1 vez semana<br><input type="radio"/> 2 a 4 veces semana<br><input type="radio"/> 5 a 6 veces semana<br><input type="radio"/> 1 vez al día<br><input type="radio"/> 2 a 3 veces al día<br><input type="radio"/> 5 a 6 veces al día<br><input type="radio"/> más 6 veces al día |
| carne caza: Conejo o codorniz o pato | <input checked="" type="radio"/> Nunca o menos 1 vez al mes<br><input type="radio"/> 1 a 3 veces mes<br><input type="radio"/> 1 vez semana<br><input type="radio"/> 2 a 4 veces semana<br><input type="radio"/> 5 a 6 veces semana<br><input type="radio"/> 1 vez al día<br><input type="radio"/> 2 a 3 veces al día<br><input type="radio"/> 5 a 6 veces al día<br><input type="radio"/> más 6 veces al día |
| Hígado de ternera o cerdo o pollo    | <input checked="" type="radio"/> Nunca o menos 1 vez al mes<br><input type="radio"/> 1 a 3 veces mes<br><input type="radio"/> 1 vez semana<br><input type="radio"/> 2 a 4 veces semana<br><input type="radio"/> 5 a 6 veces semana<br><input type="radio"/> 1 vez al día<br><input type="radio"/> 2 a 3 veces al día<br><input type="radio"/> 5 a 6 veces al día<br><input type="radio"/> más 6 veces al día |



|                     |                                                                                                                                                                                                                                                                                                                                                                                                              |
|---------------------|--------------------------------------------------------------------------------------------------------------------------------------------------------------------------------------------------------------------------------------------------------------------------------------------------------------------------------------------------------------------------------------------------------------|
| Vísceras            | <input checked="" type="radio"/> Nunca o menos 1 vez al mes<br><input type="radio"/> 1 a 3 veces mes<br><input type="radio"/> 1 vez semana<br><input type="radio"/> 2 a 4 veces semana<br><input type="radio"/> 5 a 6 veces semana<br><input type="radio"/> 1 vez al día<br><input type="radio"/> 2 a 3 veces al día<br><input type="radio"/> 5 a 6 veces al día<br><input type="radio"/> más 6 veces al día |
| Embutido            | <input checked="" type="radio"/> Nunca o menos 1 vez al mes<br><input type="radio"/> 1 a 3 veces mes<br><input type="radio"/> 1 vez semana<br><input type="radio"/> 2 a 4 veces semana<br><input type="radio"/> 5 a 6 veces semana<br><input type="radio"/> 1 vez al día<br><input type="radio"/> 2 a 3 veces al día<br><input type="radio"/> 5 a 6 veces al día<br><input type="radio"/> más 6 veces al día |
| Salchicha o similar | <input checked="" type="radio"/> Nunca o menos 1 vez al mes<br><input type="radio"/> 1 a 3 veces mes<br><input type="radio"/> 1 vez semana<br><input type="radio"/> 2 a 4 veces semana<br><input type="radio"/> 5 a 6 veces semana<br><input type="radio"/> 1 vez al día<br><input type="radio"/> 2 a 3 veces al día<br><input type="radio"/> 5 a 6 veces al día<br><input type="radio"/> más 6 veces al día |
| Pate o foiegras     | <input type="radio"/> Nunca o menos 1 vez al mes<br><input checked="" type="radio"/> 1 a 3 veces mes<br><input type="radio"/> 1 vez semana<br><input type="radio"/> 2 a 4 veces semana<br><input type="radio"/> 5 a 6 veces semana<br><input type="radio"/> 1 vez al día<br><input type="radio"/> 2 a 3 veces al día<br><input type="radio"/> 5 a 6 veces al día<br><input type="radio"/> más 6 veces al día |
| Hamburguesa         | <input type="radio"/> Nunca o menos 1 vez al mes<br><input checked="" type="radio"/> 1 a 3 veces mes<br><input type="radio"/> 1 vez semana<br><input type="radio"/> 2 a 4 veces semana<br><input type="radio"/> 5 a 6 veces semana<br><input type="radio"/> 1 vez al día<br><input type="radio"/> 2 a 3 veces al día<br><input type="radio"/> 5 a 6 veces al día<br><input type="radio"/> más 6 veces al día |
| tocino o bacon      | <input type="radio"/> Nunca o menos 1 vez al mes<br><input checked="" type="radio"/> 1 a 3 veces mes<br><input type="radio"/> 1 vez semana<br><input type="radio"/> 2 a 4 veces semana<br><input type="radio"/> 5 a 6 veces semana<br><input type="radio"/> 1 vez al día<br><input type="radio"/> 2 a 3 veces al día<br><input type="radio"/> 5 a 6 veces al día<br><input type="radio"/> más 6 veces al día |

---

Pescado frito

- ☐ Nunca o menos 1 vez al mes  
☒ 1 a 3 veces mes  
☐ 1 vez semana  
☐ 2 a 4 veces semana  
☐ 5 a 6 veces semana  
☐ 1 vez al día  
☐ 2 a 3 veces al día  
☐ 5 a 6 veces al día  
☐ más 6 veces al día

---

pescado hervido blanco

- ☐ Nunca o menos 1 vez al mes  
☒ 1 a 3 veces mes  
☐ 1 vez semana  
☐ 2 a 4 veces semana  
☐ 5 a 6 veces semana  
☐ 1 vez al día  
☐ 2 a 3 veces al día  
☐ 5 a 6 veces al día  
☐ más 6 veces al día

---

pescado hervido azul

- ☐ Nunca o menos 1 vez al mes  
☒ 1 a 3 veces mes  
☐ 1 vez semana  
☐ 2 a 4 veces semana  
☐ 5 a 6 veces semana  
☐ 1 vez al día  
☐ 2 a 3 veces al día  
☐ 5 a 6 veces al día  
☐ más 6 veces al día

---

otros pescado azul

- ☐ Nunca o menos 1 vez al mes  
☒ 1 a 3 veces mes  
☐ 1 vez semana  
☐ 2 a 4 veces semana  
☐ 5 a 6 veces semana  
☐ 1 vez al día  
☐ 2 a 3 veces al día  
☐ 5 a 6 veces al día  
☐ más 6 veces al día

---

atun conserva

- ☐ Nunca o menos 1 vez al mes  
☐ 1 a 3 veces mes  
☒ 1 vez semana  
☐ 2 a 4 veces semana  
☐ 5 a 6 veces semana  
☐ 1 vez al día  
☐ 2 a 3 veces al día  
☐ 5 a 6 veces al día  
☐ más 6 veces al día

---

sardina conserva

- ☒ Nunca o menos 1 vez al mes  
☐ 1 a 3 veces mes  
☐ 1 vez semana  
☐ 2 a 4 veces semana  
☐ 5 a 6 veces semana  
☐ 1 vez al día  
☐ 2 a 3 veces al día  
☐ 5 a 6 veces al día  
☐ más 6 veces al día

---

pescado ahumado

- ☐ Nunca o menos 1 vez al mes  
☐ 1 a 3 veces mes  
☒ 1 vez semana  
☐ 2 a 4 veces semana  
☐ 5 a 6 veces semana  
☐ 1 vez al día  
☐ 2 a 3 veces al día  
☐ 5 a 6 veces al día  
☐ más 6 veces al día

---

almejas o mejillones o ostras unos 100g

- ☐ Nunca o menos 1 vez al mes  
☒ 1 a 3 veces mes  
☐ 1 vez semana  
☐ 2 a 4 veces semana  
☐ 5 a 6 veces semana  
☐ 1 vez al día  
☐ 2 a 3 veces al día  
☐ 5 a 6 veces al día  
☐ más 6 veces al día

---

calamar o chipiron o sepia unos 100g

- ☐ Nunca o menos 1 vez al mes  
☒ 1 a 3 veces mes  
☐ 1 vez semana  
☐ 2 a 4 veces semana  
☐ 5 a 6 veces semana  
☐ 1 vez al día  
☐ 2 a 3 veces al día  
☐ 5 a 6 veces al día  
☐ más 6 veces al día

---

marisco unos 100g

- ☐ Nunca o menos 1 vez al mes  
☐ 1 a 3 veces mes  
☒ 1 vez semana  
☐ 2 a 4 veces semana  
☐ 5 a 6 veces semana  
☐ 1 vez al día  
☐ 2 a 3 veces al día  
☐ 5 a 6 veces al día  
☐ más 6 veces al día

---

Espinacas o acelgas cocinadas

- ☒ Nunca o menos 1 vez al mes  
☐ 1 a 3 veces mes  
☐ 1 vez semana  
☐ 2 a 4 veces semana  
☐ 5 a 6 veces semana  
☐ 1 vez al día  
☐ 2 a 3 veces al día  
☐ 5 a 6 veces al día  
☐ más 6 veces al día

---

Col o coliflor o brocoli cocinado

- ☐ Nunca o menos 1 vez al mes  
☐ 1 a 3 veces mes  
☒ 1 vez semana  
☐ 2 a 4 veces semana  
☐ 5 a 6 veces semana  
☐ 1 vez al día  
☐ 2 a 3 veces al día  
☐ 5 a 6 veces al día  
☐ más 6 veces al día

---

Lechuga o endivia o escarola

- ☐ Nunca o menos 1 vez al mes  
☐ 1 a 3 veces mes  
☒ 1 vez semana  
☐ 2 a 4 veces semana  
☐ 5 a 6 veces semana  
☐ 1 vez al día  
☐ 2 a 3 veces al día  
☐ 5 a 6 veces al día  
☐ más 6 veces al día

---

tomate ensalada

- ☐ Nunca o menos 1 vez al mes  
☐ 1 a 3 veces mes  
☒ 1 vez semana  
☐ 2 a 4 veces semana  
☐ 5 a 6 veces semana  
☐ 1 vez al día  
☐ 2 a 3 veces al día  
☐ 5 a 6 veces al día  
☐ más 6 veces al día

---

cebolla

- ☐ Nunca o menos 1 vez al mes  
☐ 1 a 3 veces mes  
☐ 1 vez semana  
☒ 2 a 4 veces semana  
☐ 5 a 6 veces semana  
☐ 1 vez al día  
☐ 2 a 3 veces al día  
☐ 5 a 6 veces al día  
☐ más 6 veces al día

---

Zanahoria o calabaza

- ☒ Nunca o menos 1 vez al mes  
☐ 1 a 3 veces mes  
☐ 1 vez semana  
☐ 2 a 4 veces semana  
☐ 5 a 6 veces semana  
☐ 1 vez al día  
☐ 2 a 3 veces al día  
☐ 5 a 6 veces al día  
☐ más 6 veces al día

---

Judías verdes

- ☐ Nunca o menos 1 vez al mes  
☐ 1 a 3 veces mes  
☒ 1 vez semana  
☐ 2 a 4 veces semana  
☐ 5 a 6 veces semana  
☐ 1 vez al día  
☐ 2 a 3 veces al día  
☐ 5 a 6 veces al día  
☐ más 6 veces al día

---

Berenjena o calabacin o pepino

- ☐ Nunca o menos 1 vez al mes  
☐ 1 a 3 veces mes  
☒ 1 vez semana  
☐ 2 a 4 veces semana  
☐ 5 a 6 veces semana  
☐ 1 vez al día  
☐ 2 a 3 veces al día  
☐ 5 a 6 veces al día  
☐ más 6 veces al día

|                       |                                                                                                                                                                                                                                                                                                                                                                                                              |
|-----------------------|--------------------------------------------------------------------------------------------------------------------------------------------------------------------------------------------------------------------------------------------------------------------------------------------------------------------------------------------------------------------------------------------------------------|
| pimiento              | <input type="radio"/> Nunca o menos 1 vez al mes<br><input type="radio"/> 1 a 3 veces mes<br><input checked="" type="radio"/> 1 vez semana<br><input type="radio"/> 2 a 4 veces semana<br><input type="radio"/> 5 a 6 veces semana<br><input type="radio"/> 1 vez al día<br><input type="radio"/> 2 a 3 veces al día<br><input type="radio"/> 5 a 6 veces al día<br><input type="radio"/> más 6 veces al día |
| alcachofa             | <input checked="" type="radio"/> Nunca o menos 1 vez al mes<br><input type="radio"/> 1 a 3 veces mes<br><input type="radio"/> 1 vez semana<br><input type="radio"/> 2 a 4 veces semana<br><input type="radio"/> 5 a 6 veces semana<br><input type="radio"/> 1 vez al día<br><input type="radio"/> 2 a 3 veces al día<br><input type="radio"/> 5 a 6 veces al día<br><input type="radio"/> más 6 veces al día |
| espárragos            | <input type="radio"/> Nunca o menos 1 vez al mes<br><input type="radio"/> 1 a 3 veces mes<br><input type="radio"/> 1 vez semana<br><input checked="" type="radio"/> 2 a 4 veces semana<br><input type="radio"/> 5 a 6 veces semana<br><input type="radio"/> 1 vez al día<br><input type="radio"/> 2 a 3 veces al día<br><input type="radio"/> 5 a 6 veces al día<br><input type="radio"/> más 6 veces al día |
| maíz hervido          | <input type="radio"/> Nunca o menos 1 vez al mes<br><input checked="" type="radio"/> 1 a 3 veces mes<br><input type="radio"/> 1 vez semana<br><input type="radio"/> 2 a 4 veces semana<br><input type="radio"/> 5 a 6 veces semana<br><input type="radio"/> 1 vez al día<br><input type="radio"/> 2 a 3 veces al día<br><input type="radio"/> 5 a 6 veces al día<br><input type="radio"/> más 6 veces al día |
| legumbres             | <input type="radio"/> Nunca o menos 1 vez al mes<br><input type="radio"/> 1 a 3 veces mes<br><input type="radio"/> 1 vez semana<br><input checked="" type="radio"/> 2 a 4 veces semana<br><input type="radio"/> 5 a 6 veces semana<br><input type="radio"/> 1 vez al día<br><input type="radio"/> 2 a 3 veces al día<br><input type="radio"/> 5 a 6 veces al día<br><input type="radio"/> más 6 veces al día |
| naranjas o mandarinas | <input type="radio"/> Nunca o menos 1 vez al mes<br><input checked="" type="radio"/> 1 a 3 veces mes<br><input type="radio"/> 1 vez semana<br><input type="radio"/> 2 a 4 veces semana<br><input type="radio"/> 5 a 6 veces semana<br><input type="radio"/> 1 vez al día<br><input type="radio"/> 2 a 3 veces al día<br><input type="radio"/> 5 a 6 veces al día<br><input type="radio"/> más 6 veces al día |

|                       |                                                                                                                                                                                                                                                                                                                                                                                                              |
|-----------------------|--------------------------------------------------------------------------------------------------------------------------------------------------------------------------------------------------------------------------------------------------------------------------------------------------------------------------------------------------------------------------------------------------------------|
| zum natural fruta     | <input type="radio"/> Nunca o menos 1 vez al mes<br><input type="radio"/> 1 a 3 veces mes<br><input checked="" type="radio"/> 1 vez semana<br><input type="radio"/> 2 a 4 veces semana<br><input type="radio"/> 5 a 6 veces semana<br><input type="radio"/> 1 vez al día<br><input type="radio"/> 2 a 3 veces al día<br><input type="radio"/> 5 a 6 veces al día<br><input type="radio"/> más 6 veces al día |
| platano               | <input type="radio"/> Nunca o menos 1 vez al mes<br><input type="radio"/> 1 a 3 veces mes<br><input checked="" type="radio"/> 1 vez semana<br><input type="radio"/> 2 a 4 veces semana<br><input type="radio"/> 5 a 6 veces semana<br><input type="radio"/> 1 vez al día<br><input type="radio"/> 2 a 3 veces al día<br><input type="radio"/> 5 a 6 veces al día<br><input type="radio"/> más 6 veces al día |
| manzana o pera        | <input type="radio"/> Nunca o menos 1 vez al mes<br><input checked="" type="radio"/> 1 a 3 veces mes<br><input type="radio"/> 1 vez semana<br><input type="radio"/> 2 a 4 veces semana<br><input type="radio"/> 5 a 6 veces semana<br><input type="radio"/> 1 vez al día<br><input type="radio"/> 2 a 3 veces al día<br><input type="radio"/> 5 a 6 veces al día<br><input type="radio"/> más 6 veces al día |
| melocotón o nectarina | <input type="radio"/> Nunca o menos 1 vez al mes<br><input checked="" type="radio"/> 1 a 3 veces mes<br><input type="radio"/> 1 vez semana<br><input type="radio"/> 2 a 4 veces semana<br><input type="radio"/> 5 a 6 veces semana<br><input type="radio"/> 1 vez al día<br><input type="radio"/> 2 a 3 veces al día<br><input type="radio"/> 5 a 6 veces al día<br><input type="radio"/> más 6 veces al día |
| sandia o melon        | <input type="radio"/> Nunca o menos 1 vez al mes<br><input type="radio"/> 1 a 3 veces mes<br><input type="radio"/> 1 vez semana<br><input checked="" type="radio"/> 2 a 4 veces semana<br><input type="radio"/> 5 a 6 veces semana<br><input type="radio"/> 1 vez al día<br><input type="radio"/> 2 a 3 veces al día<br><input type="radio"/> 5 a 6 veces al día<br><input type="radio"/> más 6 veces al día |
| uva                   | <input checked="" type="radio"/> Nunca o menos 1 vez al mes<br><input type="radio"/> 1 a 3 veces mes<br><input type="radio"/> 1 vez semana<br><input type="radio"/> 2 a 4 veces semana<br><input type="radio"/> 5 a 6 veces semana<br><input type="radio"/> 1 vez al día<br><input type="radio"/> 2 a 3 veces al día<br><input type="radio"/> 5 a 6 veces al día<br><input type="radio"/> más 6 veces al día |

|                 |                                                                                                                                                                                                                                                                                                                                                                                                              |
|-----------------|--------------------------------------------------------------------------------------------------------------------------------------------------------------------------------------------------------------------------------------------------------------------------------------------------------------------------------------------------------------------------------------------------------------|
| bruna o ciruela | <input checked="" type="radio"/> Nunca o menos 1 vez al mes<br><input type="radio"/> 1 a 3 veces mes<br><input type="radio"/> 1 vez semana<br><input type="radio"/> 2 a 4 veces semana<br><input type="radio"/> 5 a 6 veces semana<br><input type="radio"/> 1 vez al día<br><input type="radio"/> 2 a 3 veces al día<br><input type="radio"/> 5 a 6 veces al día<br><input type="radio"/> más 6 veces al día |
| kiwi            | <input checked="" type="radio"/> Nunca o menos 1 vez al mes<br><input type="radio"/> 1 a 3 veces mes<br><input type="radio"/> 1 vez semana<br><input type="radio"/> 2 a 4 veces semana<br><input type="radio"/> 5 a 6 veces semana<br><input type="radio"/> 1 vez al día<br><input type="radio"/> 2 a 3 veces al día<br><input type="radio"/> 5 a 6 veces al día<br><input type="radio"/> más 6 veces al día |
| aceituna        | <input type="radio"/> Nunca o menos 1 vez al mes<br><input type="radio"/> 1 a 3 veces mes<br><input checked="" type="radio"/> 1 vez semana<br><input type="radio"/> 2 a 4 veces semana<br><input type="radio"/> 5 a 6 veces semana<br><input type="radio"/> 1 vez al día<br><input type="radio"/> 2 a 3 veces al día<br><input type="radio"/> 5 a 6 veces al día<br><input type="radio"/> más 6 veces al día |
| frutos secos    | <input type="radio"/> Nunca o menos 1 vez al mes<br><input type="radio"/> 1 a 3 veces mes<br><input type="radio"/> 1 vez semana<br><input checked="" type="radio"/> 2 a 4 veces semana<br><input type="radio"/> 5 a 6 veces semana<br><input type="radio"/> 1 vez al día<br><input type="radio"/> 2 a 3 veces al día<br><input type="radio"/> 5 a 6 veces al día<br><input type="radio"/> más 6 veces al día |
| pan blanco      | <input type="radio"/> Nunca o menos 1 vez al mes<br><input type="radio"/> 1 a 3 veces mes<br><input checked="" type="radio"/> 1 vez semana<br><input type="radio"/> 2 a 4 veces semana<br><input type="radio"/> 5 a 6 veces semana<br><input type="radio"/> 1 vez al día<br><input type="radio"/> 2 a 3 veces al día<br><input type="radio"/> 5 a 6 veces al día<br><input type="radio"/> más 6 veces al día |
| pan integral    | <input type="radio"/> Nunca o menos 1 vez al mes<br><input checked="" type="radio"/> 1 a 3 veces mes<br><input type="radio"/> 1 vez semana<br><input type="radio"/> 2 a 4 veces semana<br><input type="radio"/> 5 a 6 veces semana<br><input type="radio"/> 1 vez al día<br><input type="radio"/> 2 a 3 veces al día<br><input type="radio"/> 5 a 6 veces al día<br><input type="radio"/> más 6 veces al día |

|                          |                                                                                                                                                                                                                                                                                                                                                                                                              |
|--------------------------|--------------------------------------------------------------------------------------------------------------------------------------------------------------------------------------------------------------------------------------------------------------------------------------------------------------------------------------------------------------------------------------------------------------|
| cereales desayuno        | <input checked="" type="radio"/> Nunca o menos 1 vez al mes<br><input type="radio"/> 1 a 3 veces mes<br><input type="radio"/> 1 vez semana<br><input type="radio"/> 2 a 4 veces semana<br><input type="radio"/> 5 a 6 veces semana<br><input type="radio"/> 1 vez al día<br><input type="radio"/> 2 a 3 veces al día<br><input type="radio"/> 5 a 6 veces al día<br><input type="radio"/> más 6 veces al día |
| patatas fritas           | <input type="radio"/> Nunca o menos 1 vez al mes<br><input type="radio"/> 1 a 3 veces mes<br><input checked="" type="radio"/> 1 vez semana<br><input type="radio"/> 2 a 4 veces semana<br><input type="radio"/> 5 a 6 veces semana<br><input type="radio"/> 1 vez al día<br><input type="radio"/> 2 a 3 veces al día<br><input type="radio"/> 5 a 6 veces al día<br><input type="radio"/> más 6 veces al día |
| patatas cocidas o asadas | <input checked="" type="radio"/> Nunca o menos 1 vez al mes<br><input type="radio"/> 1 a 3 veces mes<br><input type="radio"/> 1 vez semana<br><input type="radio"/> 2 a 4 veces semana<br><input type="radio"/> 5 a 6 veces semana<br><input type="radio"/> 1 vez al día<br><input type="radio"/> 2 a 3 veces al día<br><input type="radio"/> 5 a 6 veces al día<br><input type="radio"/> más 6 veces al día |
| bolsa papas              | <input checked="" type="radio"/> Nunca o menos 1 vez al mes<br><input type="radio"/> 1 a 3 veces mes<br><input type="radio"/> 1 vez semana<br><input type="radio"/> 2 a 4 veces semana<br><input type="radio"/> 5 a 6 veces semana<br><input type="radio"/> 1 vez al día<br><input type="radio"/> 2 a 3 veces al día<br><input type="radio"/> 5 a 6 veces al día<br><input type="radio"/> más 6 veces al día |
| arroz cocinado           | <input type="radio"/> Nunca o menos 1 vez al mes<br><input type="radio"/> 1 a 3 veces mes<br><input checked="" type="radio"/> 1 vez semana<br><input type="radio"/> 2 a 4 veces semana<br><input type="radio"/> 5 a 6 veces semana<br><input type="radio"/> 1 vez al día<br><input type="radio"/> 2 a 3 veces al día<br><input type="radio"/> 5 a 6 veces al día<br><input type="radio"/> más 6 veces al día |
| pasta                    | <input type="radio"/> Nunca o menos 1 vez al mes<br><input type="radio"/> 1 a 3 veces mes<br><input checked="" type="radio"/> 1 vez semana<br><input type="radio"/> 2 a 4 veces semana<br><input type="radio"/> 5 a 6 veces semana<br><input type="radio"/> 1 vez al día<br><input type="radio"/> 2 a 3 veces al día<br><input type="radio"/> 5 a 6 veces al día<br><input type="radio"/> más 6 veces al día |



|                     |                                                                                                                                                                                                                                                                                                                                                                                                              |
|---------------------|--------------------------------------------------------------------------------------------------------------------------------------------------------------------------------------------------------------------------------------------------------------------------------------------------------------------------------------------------------------------------------------------------------------|
| pizza               | <input type="radio"/> Nunca o menos 1 vez al mes<br><input type="radio"/> 1 a 3 veces mes<br><input checked="" type="radio"/> 1 vez semana<br><input type="radio"/> 2 a 4 veces semana<br><input type="radio"/> 5 a 6 veces semana<br><input type="radio"/> 1 vez al día<br><input type="radio"/> 2 a 3 veces al día<br><input type="radio"/> 5 a 6 veces al día<br><input type="radio"/> más 6 veces al día |
| aceite oliva        | <input type="radio"/> Nunca o menos 1 vez al mes<br><input type="radio"/> 1 a 3 veces mes<br><input type="radio"/> 1 vez semana<br><input checked="" type="radio"/> 2 a 4 veces semana<br><input type="radio"/> 5 a 6 veces semana<br><input type="radio"/> 1 vez al día<br><input type="radio"/> 2 a 3 veces al día<br><input type="radio"/> 5 a 6 veces al día<br><input type="radio"/> más 6 veces al día |
| otros aceites       | <input type="radio"/> Nunca o menos 1 vez al mes<br><input checked="" type="radio"/> 1 a 3 veces mes<br><input type="radio"/> 1 vez semana<br><input type="radio"/> 2 a 4 veces semana<br><input type="radio"/> 5 a 6 veces semana<br><input type="radio"/> 1 vez al día<br><input type="radio"/> 2 a 3 veces al día<br><input type="radio"/> 5 a 6 veces al día<br><input type="radio"/> más 6 veces al día |
| margarina           | <input checked="" type="radio"/> Nunca o menos 1 vez al mes<br><input type="radio"/> 1 a 3 veces mes<br><input type="radio"/> 1 vez semana<br><input type="radio"/> 2 a 4 veces semana<br><input type="radio"/> 5 a 6 veces semana<br><input type="radio"/> 1 vez al día<br><input type="radio"/> 2 a 3 veces al día<br><input type="radio"/> 5 a 6 veces al día<br><input type="radio"/> más 6 veces al día |
| mantequilla         | <input checked="" type="radio"/> Nunca o menos 1 vez al mes<br><input type="radio"/> 1 a 3 veces mes<br><input type="radio"/> 1 vez semana<br><input type="radio"/> 2 a 4 veces semana<br><input type="radio"/> 5 a 6 veces semana<br><input type="radio"/> 1 vez al día<br><input type="radio"/> 2 a 3 veces al día<br><input type="radio"/> 5 a 6 veces al día<br><input type="radio"/> más 6 veces al día |
| galletas tipo maria | <input type="radio"/> Nunca o menos 1 vez al mes<br><input type="radio"/> 1 a 3 veces mes<br><input checked="" type="radio"/> 1 vez semana<br><input type="radio"/> 2 a 4 veces semana<br><input type="radio"/> 5 a 6 veces semana<br><input type="radio"/> 1 vez al día<br><input type="radio"/> 2 a 3 veces al día<br><input type="radio"/> 5 a 6 veces al día<br><input type="radio"/> más 6 veces al día |

---

galletas chocolate

- ☒ Nunca o menos 1 vez al mes  
☐ 1 a 3 veces mes  
☐ 1 vez semana  
☐ 2 a 4 veces semana  
☐ 5 a 6 veces semana  
☐ 1 vez al día  
☐ 2 a 3 veces al día  
☐ 5 a 6 veces al día  
☐ más 6 veces al día

---

bolleria

- ☐ Nunca o menos 1 vez al mes  
☐ 1 a 3 veces mes  
☐ 1 vez semana  
☒ 2 a 4 veces semana  
☐ 5 a 6 veces semana  
☐ 1 vez al día  
☐ 2 a 3 veces al día  
☐ 5 a 6 veces al día  
☐ más 6 veces al día

---

chocolate o bombones

- ☒ Nunca o menos 1 vez al mes  
☐ 1 a 3 veces mes  
☐ 1 vez semana  
☐ 2 a 4 veces semana  
☐ 5 a 6 veces semana  
☐ 1 vez al día  
☐ 2 a 3 veces al día  
☐ 5 a 6 veces al día  
☐ más 6 veces al día

---

chocolate polvo o colacao

- ☐ Nunca o menos 1 vez al mes  
☐ 1 a 3 veces mes  
☐ 1 vez semana  
☒ 2 a 4 veces semana  
☐ 5 a 6 veces semana  
☐ 1 vez al día  
☐ 2 a 3 veces al día  
☐ 5 a 6 veces al día  
☐ más 6 veces al día

---

vino tinto

- ☒ Nunca o menos 1 vez al mes  
☐ 1 a 3 veces mes  
☐ 1 vez semana  
☐ 2 a 4 veces semana  
☐ 5 a 6 veces semana  
☐ 1 vez al día  
☐ 2 a 3 veces al día  
☐ 5 a 6 veces al día  
☐ más 6 veces al día

---

vino blanco

- ☒ Nunca o menos 1 vez al mes  
☐ 1 a 3 veces mes  
☐ 1 vez semana  
☐ 2 a 4 veces semana  
☐ 5 a 6 veces semana  
☐ 1 vez al día  
☐ 2 a 3 veces al día  
☐ 5 a 6 veces al día  
☐ más 6 veces al día

|                       |                                                                                                                                                                                                                                                                                                                                                                                                              |
|-----------------------|--------------------------------------------------------------------------------------------------------------------------------------------------------------------------------------------------------------------------------------------------------------------------------------------------------------------------------------------------------------------------------------------------------------|
| vino seco o vermut    | <input checked="" type="radio"/> Nunca o menos 1 vez al mes<br><input type="radio"/> 1 a 3 veces mes<br><input type="radio"/> 1 vez semana<br><input type="radio"/> 2 a 4 veces semana<br><input type="radio"/> 5 a 6 veces semana<br><input type="radio"/> 1 vez al día<br><input type="radio"/> 2 a 3 veces al día<br><input type="radio"/> 5 a 6 veces al día<br><input type="radio"/> más 6 veces al día |
| cerveza               | <input checked="" type="radio"/> Nunca o menos 1 vez al mes<br><input type="radio"/> 1 a 3 veces mes<br><input type="radio"/> 1 vez semana<br><input type="radio"/> 2 a 4 veces semana<br><input type="radio"/> 5 a 6 veces semana<br><input type="radio"/> 1 vez al día<br><input type="radio"/> 2 a 3 veces al día<br><input type="radio"/> 5 a 6 veces al día<br><input type="radio"/> más 6 veces al día |
| cerveza sin alcohol   | <input checked="" type="radio"/> Nunca o menos 1 vez al mes<br><input type="radio"/> 1 a 3 veces mes<br><input type="radio"/> 1 vez semana<br><input type="radio"/> 2 a 4 veces semana<br><input type="radio"/> 5 a 6 veces semana<br><input type="radio"/> 1 vez al día<br><input type="radio"/> 2 a 3 veces al día<br><input type="radio"/> 5 a 6 veces al día<br><input type="radio"/> más 6 veces al día |
| licores               | <input checked="" type="radio"/> Nunca o menos 1 vez al mes<br><input type="radio"/> 1 a 3 veces mes<br><input type="radio"/> 1 vez semana<br><input type="radio"/> 2 a 4 veces semana<br><input type="radio"/> 5 a 6 veces semana<br><input type="radio"/> 1 vez al día<br><input type="radio"/> 2 a 3 veces al día<br><input type="radio"/> 5 a 6 veces al día<br><input type="radio"/> más 6 veces al día |
| ginebra o ron o vodka | <input checked="" type="radio"/> Nunca o menos 1 vez al mes<br><input type="radio"/> 1 a 3 veces mes<br><input type="radio"/> 1 vez semana<br><input type="radio"/> 2 a 4 veces semana<br><input type="radio"/> 5 a 6 veces semana<br><input type="radio"/> 1 vez al día<br><input type="radio"/> 2 a 3 veces al día<br><input type="radio"/> 5 a 6 veces al día<br><input type="radio"/> más 6 veces al día |
| refresco normal       | <input type="radio"/> Nunca o menos 1 vez al mes<br><input checked="" type="radio"/> 1 a 3 veces mes<br><input type="radio"/> 1 vez semana<br><input type="radio"/> 2 a 4 veces semana<br><input type="radio"/> 5 a 6 veces semana<br><input type="radio"/> 1 vez al día<br><input type="radio"/> 2 a 3 veces al día<br><input type="radio"/> 5 a 6 veces al día<br><input type="radio"/> más 6 veces al día |

|                              |                                                                                                                                                                                                                                                                                                                                                                                                              |
|------------------------------|--------------------------------------------------------------------------------------------------------------------------------------------------------------------------------------------------------------------------------------------------------------------------------------------------------------------------------------------------------------------------------------------------------------|
| refresco sin azúcar          | <input type="radio"/> Nunca o menos 1 vez al mes<br><input checked="" type="radio"/> 1 a 3 veces mes<br><input type="radio"/> 1 vez semana<br><input type="radio"/> 2 a 4 veces semana<br><input type="radio"/> 5 a 6 veces semana<br><input type="radio"/> 1 vez al día<br><input type="radio"/> 2 a 3 veces al día<br><input type="radio"/> 5 a 6 veces al día<br><input type="radio"/> más 6 veces al día |
| Agua del grifo               | <input checked="" type="radio"/> Nunca o menos 1 vez al mes<br><input type="radio"/> 1 a 3 veces mes<br><input type="radio"/> 1 vez semana<br><input type="radio"/> 2 a 4 veces semana<br><input type="radio"/> 5 a 6 veces semana<br><input type="radio"/> 1 vez al día<br><input type="radio"/> 2 a 3 veces al día<br><input type="radio"/> 5 a 6 veces al día<br><input type="radio"/> más 6 veces al día |
| agua embotellada sin gas     | <input type="radio"/> Nunca o menos 1 vez al mes<br><input type="radio"/> 1 a 3 veces mes<br><input type="radio"/> 1 vez semana<br><input type="radio"/> 2 a 4 veces semana<br><input type="radio"/> 5 a 6 veces semana<br><input type="radio"/> 1 vez al día<br><input type="radio"/> 2 a 3 veces al día<br><input type="radio"/> 5 a 6 veces al día<br><input checked="" type="radio"/> más 6 veces al día |
| agua embotellada con gas     | <input checked="" type="radio"/> Nunca o menos 1 vez al mes<br><input type="radio"/> 1 a 3 veces mes<br><input type="radio"/> 1 vez semana<br><input type="radio"/> 2 a 4 veces semana<br><input type="radio"/> 5 a 6 veces semana<br><input type="radio"/> 1 vez al día<br><input type="radio"/> 2 a 3 veces al día<br><input type="radio"/> 5 a 6 veces al día<br><input type="radio"/> más 6 veces al día |
| zumos de frutas embotellados | <input type="radio"/> Nunca o menos 1 vez al mes<br><input type="radio"/> 1 a 3 veces mes<br><input checked="" type="radio"/> 1 vez semana<br><input type="radio"/> 2 a 4 veces semana<br><input type="radio"/> 5 a 6 veces semana<br><input type="radio"/> 1 vez al día<br><input type="radio"/> 2 a 3 veces al día<br><input type="radio"/> 5 a 6 veces al día<br><input type="radio"/> más 6 veces al día |
| café                         | <input checked="" type="radio"/> Nunca o menos 1 vez al mes<br><input type="radio"/> 1 a 3 veces mes<br><input type="radio"/> 1 vez semana<br><input type="radio"/> 2 a 4 veces semana<br><input type="radio"/> 5 a 6 veces semana<br><input type="radio"/> 1 vez al día<br><input type="radio"/> 2 a 3 veces al día<br><input type="radio"/> 5 a 6 veces al día<br><input type="radio"/> más 6 veces al día |

|                       |                                                                                                                                                                                                                                                                                                                                                                                                              |
|-----------------------|--------------------------------------------------------------------------------------------------------------------------------------------------------------------------------------------------------------------------------------------------------------------------------------------------------------------------------------------------------------------------------------------------------------|
| cafe descafeinado     | <input type="radio"/> Nunca o menos 1 vez al mes<br><input type="radio"/> 1 a 3 veces mes<br><input type="radio"/> 1 vez semana<br><input type="radio"/> 2 a 4 veces semana<br><input type="radio"/> 5 a 6 veces semana<br><input checked="" type="radio"/> 1 vez al día<br><input type="radio"/> 2 a 3 veces al día<br><input type="radio"/> 5 a 6 veces al día<br><input type="radio"/> más 6 veces al día |
| te o infusión         | <input checked="" type="radio"/> Nunca o menos 1 vez al mes<br><input type="radio"/> 1 a 3 veces mes<br><input type="radio"/> 1 vez semana<br><input type="radio"/> 2 a 4 veces semana<br><input type="radio"/> 5 a 6 veces semana<br><input type="radio"/> 1 vez al día<br><input type="radio"/> 2 a 3 veces al día<br><input type="radio"/> 5 a 6 veces al día<br><input type="radio"/> más 6 veces al día |
| sopa o puré verduras  | <input type="radio"/> Nunca o menos 1 vez al mes<br><input type="radio"/> 1 a 3 veces mes<br><input checked="" type="radio"/> 1 vez semana<br><input type="radio"/> 2 a 4 veces semana<br><input type="radio"/> 5 a 6 veces semana<br><input type="radio"/> 1 vez al día<br><input type="radio"/> 2 a 3 veces al día<br><input type="radio"/> 5 a 6 veces al día<br><input type="radio"/> más 6 veces al día |
| croquetas pollo jamón | <input type="radio"/> Nunca o menos 1 vez al mes<br><input type="radio"/> 1 a 3 veces mes<br><input checked="" type="radio"/> 1 vez semana<br><input type="radio"/> 2 a 4 veces semana<br><input type="radio"/> 5 a 6 veces semana<br><input type="radio"/> 1 vez al día<br><input type="radio"/> 2 a 3 veces al día<br><input type="radio"/> 5 a 6 veces al día<br><input type="radio"/> más 6 veces al día |
| croquetas pescado     | <input checked="" type="radio"/> Nunca o menos 1 vez al mes<br><input type="radio"/> 1 a 3 veces mes<br><input type="radio"/> 1 vez semana<br><input type="radio"/> 2 a 4 veces semana<br><input type="radio"/> 5 a 6 veces semana<br><input type="radio"/> 1 vez al día<br><input type="radio"/> 2 a 3 veces al día<br><input type="radio"/> 5 a 6 veces al día<br><input type="radio"/> más 6 veces al día |
| mayonesa              | <input type="radio"/> Nunca o menos 1 vez al mes<br><input type="radio"/> 1 a 3 veces mes<br><input type="radio"/> 1 vez semana<br><input checked="" type="radio"/> 2 a 4 veces semana<br><input type="radio"/> 5 a 6 veces semana<br><input type="radio"/> 1 vez al día<br><input type="radio"/> 2 a 3 veces al día<br><input type="radio"/> 5 a 6 veces al día<br><input type="radio"/> más 6 veces al día |

|                  |                                                                                                                                                                                                                                                                                                                                                                                                              |
|------------------|--------------------------------------------------------------------------------------------------------------------------------------------------------------------------------------------------------------------------------------------------------------------------------------------------------------------------------------------------------------------------------------------------------------|
| salsa tomate     | <input type="radio"/> Nunca o menos 1 vez al mes<br><input type="radio"/> 1 a 3 veces mes<br><input checked="" type="radio"/> 1 vez semana<br><input type="radio"/> 2 a 4 veces semana<br><input type="radio"/> 5 a 6 veces semana<br><input type="radio"/> 1 vez al día<br><input type="radio"/> 2 a 3 veces al día<br><input type="radio"/> 5 a 6 veces al día<br><input type="radio"/> más 6 veces al día |
| ketchup          | <input checked="" type="radio"/> Nunca o menos 1 vez al mes<br><input type="radio"/> 1 a 3 veces mes<br><input type="radio"/> 1 vez semana<br><input type="radio"/> 2 a 4 veces semana<br><input type="radio"/> 5 a 6 veces semana<br><input type="radio"/> 1 vez al día<br><input type="radio"/> 2 a 3 veces al día<br><input type="radio"/> 5 a 6 veces al día<br><input type="radio"/> más 6 veces al día |
| sal              | <input checked="" type="radio"/> Nunca o menos 1 vez al mes<br><input type="radio"/> 1 a 3 veces mes<br><input type="radio"/> 1 vez semana<br><input type="radio"/> 2 a 4 veces semana<br><input type="radio"/> 5 a 6 veces semana<br><input type="radio"/> 1 vez al día<br><input type="radio"/> 2 a 3 veces al día<br><input type="radio"/> 5 a 6 veces al día<br><input type="radio"/> más 6 veces al día |
| ajo              | <input type="radio"/> Nunca o menos 1 vez al mes<br><input type="radio"/> 1 a 3 veces mes<br><input type="radio"/> 1 vez semana<br><input checked="" type="radio"/> 2 a 4 veces semana<br><input type="radio"/> 5 a 6 veces semana<br><input type="radio"/> 1 vez al día<br><input type="radio"/> 2 a 3 veces al día<br><input type="radio"/> 5 a 6 veces al día<br><input type="radio"/> más 6 veces al día |
| mermelada o miel | <input checked="" type="radio"/> Nunca o menos 1 vez al mes<br><input type="radio"/> 1 a 3 veces mes<br><input type="radio"/> 1 vez semana<br><input type="radio"/> 2 a 4 veces semana<br><input type="radio"/> 5 a 6 veces semana<br><input type="radio"/> 1 vez al día<br><input type="radio"/> 2 a 3 veces al día<br><input type="radio"/> 5 a 6 veces al día<br><input type="radio"/> más 6 veces al día |
| azúcar           | <input type="radio"/> Nunca o menos 1 vez al mes<br><input type="radio"/> 1 a 3 veces mes<br><input type="radio"/> 1 vez semana<br><input type="radio"/> 2 a 4 veces semana<br><input type="radio"/> 5 a 6 veces semana<br><input checked="" type="radio"/> 1 vez al día<br><input type="radio"/> 2 a 3 veces al día<br><input type="radio"/> 5 a 6 veces al día<br><input type="radio"/> más 6 veces al día |

|                                       |                                                                                                                                                                                                                                                                                                                                                                                                                                                                                                                               |
|---------------------------------------|-------------------------------------------------------------------------------------------------------------------------------------------------------------------------------------------------------------------------------------------------------------------------------------------------------------------------------------------------------------------------------------------------------------------------------------------------------------------------------------------------------------------------------|
| Otro alimento                         | <hr/>                                                                                                                                                                                                                                                                                                                                                                                                                                                                                                                         |
| suplementos vitamínicos               | <input type="radio"/> si<br><input checked="" type="radio"/> no                                                                                                                                                                                                                                                                                                                                                                                                                                                               |
| suplementos vitamínicos               | <hr/>                                                                                                                                                                                                                                                                                                                                                                                                                                                                                                                         |
| dieta previa                          | <input type="radio"/> si<br><input checked="" type="radio"/> no                                                                                                                                                                                                                                                                                                                                                                                                                                                               |
| motivo dieta                          | <input checked="" type="radio"/> no dieta<br><input type="radio"/> control peso<br><input type="radio"/> control colesterol<br><input type="radio"/> control diabetes<br><input type="radio"/> problemas estómago<br><input type="radio"/> problemas vesícula o hepáticos<br><input type="radio"/> HTA o cardiopatía<br><input type="radio"/> problemas renales<br><input type="radio"/> alergia alimentaria<br><input type="radio"/> ácido úrico elevado<br><input type="radio"/> vegetariana<br><input type="radio"/> otros |
| cambio alimentos año previo gestación | <input type="radio"/> si<br><input checked="" type="radio"/> no                                                                                                                                                                                                                                                                                                                                                                                                                                                               |
| cambio lácteos                        | <input type="radio"/> eliminado<br><input type="radio"/> disminuido<br><input checked="" type="radio"/> igual<br><input type="radio"/> aumentado<br><input type="radio"/> no sabe                                                                                                                                                                                                                                                                                                                                             |
| cambio huevos                         | <input type="radio"/> eliminado<br><input type="radio"/> disminuido<br><input checked="" type="radio"/> igual<br><input type="radio"/> aumentado<br><input type="radio"/> no sabe                                                                                                                                                                                                                                                                                                                                             |
| cambio carne                          | <input type="radio"/> eliminado<br><input type="radio"/> disminuido<br><input checked="" type="radio"/> igual<br><input type="radio"/> aumentado<br><input type="radio"/> no sabe                                                                                                                                                                                                                                                                                                                                             |
| cambio pescado                        | <input type="radio"/> eliminado<br><input type="radio"/> disminuido<br><input checked="" type="radio"/> igual<br><input type="radio"/> aumentado<br><input type="radio"/> no sabe                                                                                                                                                                                                                                                                                                                                             |
| cambio verduras                       | <input type="radio"/> eliminado<br><input type="radio"/> disminuido<br><input checked="" type="radio"/> igual<br><input type="radio"/> aumentado<br><input type="radio"/> no sabe                                                                                                                                                                                                                                                                                                                                             |

|                            |                                                                                                                                                                                                                        |
|----------------------------|------------------------------------------------------------------------------------------------------------------------------------------------------------------------------------------------------------------------|
| cambio legumbres           | <input type="radio"/> eliminado<br><input type="radio"/> disminuido<br><input checked="" type="radio"/> igual<br><input type="radio"/> aumentado<br><input type="radio"/> no sabe                                      |
| cambio fruta               | <input type="radio"/> eliminado<br><input type="radio"/> disminuido<br><input checked="" type="radio"/> igual<br><input type="radio"/> aumentado<br><input type="radio"/> no sabe                                      |
| cambio pan                 | <input type="radio"/> eliminado<br><input checked="" type="radio"/> disminuido<br><input type="radio"/> igual<br><input type="radio"/> aumentado<br><input type="radio"/> no sabe                                      |
| cambio aceite oliva        | <input type="radio"/> eliminado<br><input type="radio"/> disminuido<br><input checked="" type="radio"/> igual<br><input type="radio"/> aumentado<br><input type="radio"/> no sabe                                      |
| cambio mante o margarina   | <input type="radio"/> eliminado<br><input type="radio"/> disminuido<br><input checked="" type="radio"/> igual<br><input type="radio"/> aumentado<br><input type="radio"/> no sabe                                      |
| cambio azúcar y dulces     | <input type="radio"/> eliminado<br><input checked="" type="radio"/> disminuido<br><input type="radio"/> igual<br><input type="radio"/> aumentado<br><input type="radio"/> no sabe                                      |
| cambio bebidas alcohólicas | <input checked="" type="radio"/> eliminado<br><input type="radio"/> disminuido<br><input type="radio"/> igual<br><input type="radio"/> aumentado<br><input type="radio"/> no sabe                                      |
| frecuencia comidas fritas  | <input type="radio"/> a diario<br><input type="radio"/> 5 a 6 veces semana<br><input type="radio"/> 2 a 4 veces semana<br><input checked="" type="radio"/> 1 vez semana<br><input type="radio"/> menos de 1 vez semana |
| carne                      | <input type="radio"/> no como<br><input type="radio"/> cruda<br><input type="radio"/> poco hecha<br><input type="radio"/> hecha<br><input checked="" type="radio"/> muy hecha                                          |
| grasa visible carne        | <input type="radio"/> quita toda<br><input type="radio"/> quita mayoría<br><input checked="" type="radio"/> quita un poco<br><input type="radio"/> no quita nada                                                       |



|                                |                                                                                                                                                                                                                                                          |
|--------------------------------|----------------------------------------------------------------------------------------------------------------------------------------------------------------------------------------------------------------------------------------------------------|
| cocina carne                   | <input checked="" type="radio"/> a la plancha<br><input type="radio"/> a la parrilla<br><input type="radio"/> asada<br><input type="radio"/> frita<br><input type="radio"/> guisada                                                                      |
| tostado quemado carne          | <input checked="" type="radio"/> nunca<br><input type="radio"/> 1 vez mes<br><input type="radio"/> 2 a 3 veces mes<br><input type="radio"/> 1 vez semana<br><input type="radio"/> 2 a 3 semanas                                                          |
| tostado quemado pescado        | <input type="radio"/> nunca<br><input type="radio"/> 1 vez mes<br><input type="radio"/> 2 a 3 veces mes<br><input checked="" type="radio"/> 1 vez semana<br><input type="radio"/> 2 a 3 semanas                                                          |
| socarrat paella                | <input checked="" type="radio"/> nunca<br><input type="radio"/> 1 vez mes<br><input type="radio"/> 2 a 3 veces mes<br><input type="radio"/> 1 vez semana<br><input type="radio"/> 2 a 3 semanas                                                          |
| grasa o aceite cocinar         | <input type="radio"/> mantequilla<br><input type="radio"/> margarina<br><input type="radio"/> aceite oliva<br><input type="radio"/> aceite oliva virgen extra<br><input checked="" type="radio"/> aceite vegetal<br><input type="radio"/> mezcla aceites |
| grasa aceite aliñar            | <input type="radio"/> mantequilla<br><input type="radio"/> margarina<br><input type="radio"/> aceite oliva<br><input checked="" type="radio"/> aceite oliva virgen extra<br><input type="radio"/> aceite vegetal<br><input type="radio"/> mezcla aceites |
| grasa aceite freir             | <input type="radio"/> mantequilla<br><input type="radio"/> margarina<br><input type="radio"/> aceite oliva<br><input type="radio"/> aceite oliva virgen extra<br><input checked="" type="radio"/> aceite vegetal<br><input type="radio"/> mezcla aceites |
| Ejercicio cuestionario         | <input checked="" type="radio"/> si<br><input type="radio"/> no                                                                                                                                                                                          |
| horas de sueño incluido siesta | [*DATA REMOVED*]                                                                                                                                                                                                                                         |
| minutos siesta                 | [*DATA REMOVED*]                                                                                                                                                                                                                                         |
| horas televisión semana        | [*DATA REMOVED*]                                                                                                                                                                                                                                         |

|                                        |                                                                                                                                                                                                                                                                                                                                                                           |
|----------------------------------------|---------------------------------------------------------------------------------------------------------------------------------------------------------------------------------------------------------------------------------------------------------------------------------------------------------------------------------------------------------------------------|
| actividad trabajo                      | <input type="radio"/> casi siempre sentado<br><input type="radio"/> sentado 50 por cien<br><input type="radio"/> casi siempre de pie, quieto<br><input type="radio"/> casi siempre levantado caminando y llevando pocas cosas<br><input checked="" type="radio"/> casi siempre levantado, caminando y llevado muchas cosas<br><input type="radio"/> trabajo manual pesado |
| tiempo caminar o bici al día           | <input checked="" type="radio"/> casi nunca<br><input type="radio"/> menos 20min día<br><input type="radio"/> 20 a 40 min día<br><input type="radio"/> 40 a 60 min día<br><input type="radio"/> 1h o 1h y media día<br><input type="radio"/> más de 1h y media al día                                                                                                     |
| tiempo tareas casa al día              | <input type="radio"/> menos de 1h día<br><input type="radio"/> 1 a 2h día<br><input type="radio"/> 3 a 4h día<br><input checked="" type="radio"/> 5 a 6h día<br><input type="radio"/> 7 a 8h día<br><input type="radio"/> más de 8h día                                                                                                                                   |
| tiempo libre televisión ordenador leer | <input type="radio"/> menos 1h día<br><input type="radio"/> 1h día<br><input checked="" type="radio"/> 2h día<br><input type="radio"/> 3h día<br><input type="radio"/> 4h día<br><input type="radio"/> 5 a 6h día<br><input type="radio"/> mas 6h día                                                                                                                     |
| tiempo libre ejercicio o deporte       | <input type="radio"/> menos 1h semana<br><input checked="" type="radio"/> 1h semana<br><input type="radio"/> 2h semana<br><input type="radio"/> 3h semana<br><input type="radio"/> 4 a 5h semana<br><input type="radio"/> mas 5h semana                                                                                                                                   |
| como se considera                      | <input type="radio"/> sedentaria<br><input type="radio"/> poco activa<br><input type="radio"/> moderadamente activa<br><input checked="" type="radio"/> bastante activa<br><input type="radio"/> muy activa<br><input type="radio"/> no sabe                                                                                                                              |
| FUR                                    | [*DATA REMOVED*]                                                                                                                                                                                                                                                                                                                                                          |
| Semanas gestación 2T                   | [*DATA REMOVED*]                                                                                                                                                                                                                                                                                                                                                          |
| Días gestación 2T                      | [*DATA REMOVED*]                                                                                                                                                                                                                                                                                                                                                          |
| DBP 2T                                 | [*DATA REMOVED*]                                                                                                                                                                                                                                                                                                                                                          |
| CC 2T                                  |                                                                                                                                                                                                                                                                                                                                                                           |
| AC 2T                                  | [*DATA REMOVED*]                                                                                                                                                                                                                                                                                                                                                          |

|                                                   |                                                                                                                                                                                                 |
|---------------------------------------------------|-------------------------------------------------------------------------------------------------------------------------------------------------------------------------------------------------|
| LF 2T                                             | [*DATA REMOVED*]                                                                                                                                                                                |
| PFE 2T (Hadlock)                                  | [*DATA REMOVED*]                                                                                                                                                                                |
| Semanas gestación 3T                              | [*DATA REMOVED*]                                                                                                                                                                                |
| días 3T                                           | [*DATA REMOVED*]                                                                                                                                                                                |
| DBP 3T                                            | [*DATA REMOVED*]                                                                                                                                                                                |
| CC 3T                                             | [*DATA REMOVED*]                                                                                                                                                                                |
| AC 3T                                             | [*DATA REMOVED*]                                                                                                                                                                                |
| LF 3T                                             | [*DATA REMOVED*]                                                                                                                                                                                |
| PFE 3T (Hadlock)                                  | [*DATA REMOVED*]                                                                                                                                                                                |
| Semanas de gestación final                        | [*DATA REMOVED*]                                                                                                                                                                                |
| días gestación final                              | [*DATA REMOVED*]                                                                                                                                                                                |
| Localización placenta                             | <input type="radio"/> anterior<br><input type="radio"/> lateral derecha<br><input type="radio"/> lateral izquierda<br><input checked="" type="radio"/> posterior<br><input type="radio"/> fondo |
| Presentación longitudinal cefálica                | <input type="radio"/> no<br><input checked="" type="radio"/> si                                                                                                                                 |
| Dorso                                             | <input checked="" type="radio"/> izquierda anterior<br><input type="radio"/> izquierda posterior<br><input type="radio"/> derecha anterior<br><input type="radio"/> derecha posterior           |
| diámetro biparietal                               | [*DATA REMOVED*]                                                                                                                                                                                |
| Circunferencia craneal                            | [*DATA REMOVED*]                                                                                                                                                                                |
| Circunferencia abdominal                          | [*DATA REMOVED*]                                                                                                                                                                                |
| Longitud de femur                                 | [*DATA REMOVED*]                                                                                                                                                                                |
| tejido celular subcutáneo a nivel del muslo en mm | [*DATA REMOVED*]                                                                                                                                                                                |
| tejido celular subcutáneo en abdomen en mm        | [*DATA REMOVED*]                                                                                                                                                                                |
| Volumen del muslo en cm3                          | [*DATA REMOVED*]                                                                                                                                                                                |
| Peso fetal estimado según fórmula de Hadlock      | [*DATA REMOVED*]                                                                                                                                                                                |

|                                               |                                                                                                                                                          |
|-----------------------------------------------|----------------------------------------------------------------------------------------------------------------------------------------------------------|
| Percentil                                     | [*DATA REMOVED*]                                                                                                                                         |
| Peso fetal estimado según fórmula de Scioscia | <hr/>                                                                                                                                                    |
| Peso fetal estimado según fórmula de LEE      | <hr/>                                                                                                                                                    |
| Tipo de parto                                 | <input type="radio"/> eutocico<br><input type="radio"/> instrumentado/ventosa<br><input checked="" type="radio"/> cesarea                                |
| fecha de nacimiento                           | [*DATA REMOVED*]                                                                                                                                         |
| Días entre exploración y nacimiento           | [*DATA REMOVED*]                                                                                                                                         |
| Peso RN en g                                  | [*DATA REMOVED*]                                                                                                                                         |
| sexo                                          | <input type="radio"/> mujer<br><input checked="" type="radio"/> hombre                                                                                   |
| Apgar 1 minuto                                | [*DATA REMOVED*]                                                                                                                                         |
| Apgar 5 minutos                               | [*DATA REMOVED*]                                                                                                                                         |
| Apgar 10 minutos                              | <hr/>                                                                                                                                                    |
| antecedente Covid durante gestación           | <input type="radio"/> Yes<br><input checked="" type="radio"/> No                                                                                         |
| Nivel de estudios                             | <input type="radio"/> ninguno<br><input checked="" type="radio"/> primarios<br><input type="radio"/> secundarios<br><input type="radio"/> universitarios |

# Base\_datos\_estimacion\_peso\_fetal

|                                       |                                                                                                                                                                                                                                                                                      |
|---------------------------------------|--------------------------------------------------------------------------------------------------------------------------------------------------------------------------------------------------------------------------------------------------------------------------------------|
| Número de identificación participante | 89                                                                                                                                                                                                                                                                                   |
| CODIGO PARTICIPANTE                   |                                                                                                                                                                                                                                                                                      |
| Edad                                  | [*DATA REMOVED*]                                                                                                                                                                                                                                                                     |
| Gestaciones                           | <input type="radio"/> 1<br><input type="radio"/> 2<br><input checked="" type="radio"/> 3<br><input type="radio"/> mas de 3                                                                                                                                                           |
| partos                                | <input checked="" type="radio"/> 0<br><input type="radio"/> 1<br><input type="radio"/> 2<br><input type="radio"/> 3<br><input type="radio"/> mas de 3                                                                                                                                |
| cesáreas                              | <input type="radio"/> 0<br><input checked="" type="radio"/> 1<br><input type="radio"/> 2<br><input type="radio"/> 3<br><input type="radio"/> mas de 3                                                                                                                                |
| Abortos                               | <input type="radio"/> 0<br><input checked="" type="radio"/> 1<br><input type="radio"/> 2<br><input type="radio"/> 3<br><input type="radio"/> mas de 3                                                                                                                                |
| Tipo de gestacion                     | <input checked="" type="radio"/> espontanea<br><input type="radio"/> IAC inseminación artificial conyuge<br><input type="radio"/> IAD inseminación artificial donante<br><input type="radio"/> FIV Fecundación in Vitro<br><input type="radio"/> Ovodon FIV con donación de ovocitos |
| peso previo a embarazo                | [*DATA REMOVED*]                                                                                                                                                                                                                                                                     |
| Ganancia ponderal embarazo            |                                                                                                                                                                                                                                                                                      |
| Talla madre                           | [*DATA REMOVED*]                                                                                                                                                                                                                                                                     |
| IMC previo embarazo                   | 24.913494809688583                                                                                                                                                                                                                                                                   |
| Patología obstétrica                  | <input checked="" type="radio"/> no<br><input type="radio"/> si                                                                                                                                                                                                                      |
| Diabetes pregestacional               | <input checked="" type="radio"/> no<br><input type="radio"/> si                                                                                                                                                                                                                      |
| Diabetes gestacional                  | <input checked="" type="radio"/> no<br><input type="radio"/> si                                                                                                                                                                                                                      |

|                                            |                                                                                                                                                                                      |
|--------------------------------------------|--------------------------------------------------------------------------------------------------------------------------------------------------------------------------------------|
| Diabetes gestacional con insulina          | <input checked="" type="radio"/> no<br><input type="radio"/> si                                                                                                                      |
| Diabetes gestacional con dieta y ejercicio | <input checked="" type="radio"/> no<br><input type="radio"/> si                                                                                                                      |
| Percentil fetos previos                    | <input type="radio"/> Nada<br><input type="radio"/> percentil menor de 10<br><input checked="" type="radio"/> percentil entre 10 y 90<br><input type="radio"/> percentil mayor de 90 |
| Exfumadora                                 | <input checked="" type="radio"/> Nada<br><input type="radio"/> menos de 5 años<br><input type="radio"/> 5 a 10 años<br><input type="radio"/> mayor o igual a 10 años                 |
| Hábito tabáquico                           | <input checked="" type="radio"/> no<br><input type="radio"/> si                                                                                                                      |
| fumadora                                   | [*DATA REMOVED*]                                                                                                                                                                     |
| Consumo otros tóxicos                      | <input checked="" type="radio"/> no<br><input type="radio"/> si                                                                                                                      |
| Hb 1T                                      | [*DATA REMOVED*]                                                                                                                                                                     |
| Htc 1T                                     | [*DATA REMOVED*]                                                                                                                                                                     |
| Hb 2T                                      | [*DATA REMOVED*]                                                                                                                                                                     |
| HTC 2T                                     | [*DATA REMOVED*]                                                                                                                                                                     |
| Hb 3T                                      | [*DATA REMOVED*]                                                                                                                                                                     |
| HTC 3T                                     | [*DATA REMOVED*]                                                                                                                                                                     |
| Suplemento FE oral                         | <input type="radio"/> si<br><input checked="" type="radio"/> no                                                                                                                      |
| Suplemento fe iv                           | <input type="radio"/> si<br><input checked="" type="radio"/> no                                                                                                                      |
| Transfusión                                | <input checked="" type="radio"/> no<br><input type="radio"/> si                                                                                                                      |
| Solicitada Vit D                           | <input checked="" type="radio"/> no<br><input type="radio"/> si                                                                                                                      |
| Deficit vit D                              | <input type="radio"/> no<br><input type="radio"/> si                                                                                                                                 |
| Suplemento vit D                           | <input type="radio"/> si<br><input type="radio"/> no                                                                                                                                 |

|                       |                                                                                                                                                                                                                                                                                                                                                                                                              |
|-----------------------|--------------------------------------------------------------------------------------------------------------------------------------------------------------------------------------------------------------------------------------------------------------------------------------------------------------------------------------------------------------------------------------------------------------|
| Dieta, cuestionario   | <input checked="" type="radio"/> sí<br><input type="radio"/> no                                                                                                                                                                                                                                                                                                                                              |
| Leche entera          | <input checked="" type="radio"/> Nunca o menos 1 vez al mes<br><input type="radio"/> 1 a 3 veces mes<br><input type="radio"/> 1 vez semana<br><input type="radio"/> 2 a 4 veces semana<br><input type="radio"/> 5 a 6 veces semana<br><input type="radio"/> 1 vez al día<br><input type="radio"/> 2 a 3 veces al día<br><input type="radio"/> 5 a 6 veces al día<br><input type="radio"/> más 6 veces al día |
| Leche semidesnatada   | <input type="radio"/> Nunca o menos 1 vez al mes<br><input type="radio"/> 1 a 3 veces mes<br><input type="radio"/> 1 vez semana<br><input type="radio"/> 2 a 4 veces semana<br><input type="radio"/> 5 a 6 veces semana<br><input checked="" type="radio"/> 1 vez al día<br><input type="radio"/> 2 a 3 veces al día<br><input type="radio"/> 5 a 6 veces al día<br><input type="radio"/> mas 6 veces al día |
| Leche desnatada       | <input checked="" type="radio"/> Nunca o menos 1 vez al mes<br><input type="radio"/> 1 a 3 veces mes<br><input type="radio"/> 1 vez semana<br><input type="radio"/> 2 a 4 veces semana<br><input type="radio"/> 5 a 6 veces semana<br><input type="radio"/> 1 vez al día<br><input type="radio"/> 2 a 3 veces al día<br><input type="radio"/> 5 a 6 veces al día<br><input type="radio"/> más 6 veces al día |
| Leche condensada      | <input checked="" type="radio"/> Nunca o menos 1 vez al mes<br><input type="radio"/> 1 a 3 veces mes<br><input type="radio"/> 1 vez semana<br><input type="radio"/> 2 a 4 veces semana<br><input type="radio"/> 5 a 6 veces semana<br><input type="radio"/> 1 vez al día<br><input type="radio"/> 2 a 3 veces al día<br><input type="radio"/> 5 a 6 veces al día<br><input type="radio"/> más 6 veces al día |
| nata o crema de leche | <input checked="" type="radio"/> Nunca o menos 1 vez al mes<br><input type="radio"/> 1 a 3 veces mes<br><input type="radio"/> 1 vez semana<br><input type="radio"/> 2 a 4 veces semana<br><input type="radio"/> 5 a 6 veces semana<br><input type="radio"/> 1 vez al día<br><input type="radio"/> 2 a 3 veces al día<br><input type="radio"/> 5 a 6 veces al día<br><input type="radio"/> más 6 veces al día |

|                                             |                                                                                                                                                                                                                                                                                                                                                                                                              |
|---------------------------------------------|--------------------------------------------------------------------------------------------------------------------------------------------------------------------------------------------------------------------------------------------------------------------------------------------------------------------------------------------------------------------------------------------------------------|
| Yogurt Entero                               | <input checked="" type="radio"/> Nunca o menos 1 vez al mes<br><input type="radio"/> 1 a 3 veces mes<br><input type="radio"/> 1 vez semana<br><input type="radio"/> 2 a 4 veces semana<br><input type="radio"/> 5 a 6 veces semana<br><input type="radio"/> 1 vez al día<br><input type="radio"/> 2 a 3 veces al día<br><input type="radio"/> 5 a 6 veces al día<br><input type="radio"/> más 6 veces al día |
| Yogurt desnatado                            | <input checked="" type="radio"/> Nunca o menos 1 vez al mes<br><input type="radio"/> 1 a 3 veces mes<br><input type="radio"/> 1 vez semana<br><input type="radio"/> 2 a 4 veces semana<br><input type="radio"/> 5 a 6 veces semana<br><input type="radio"/> 1 vez al día<br><input type="radio"/> 2 a 3 veces al día<br><input type="radio"/> 5 a 6 veces al día<br><input type="radio"/> más 6 veces al día |
| 100g requesón o queso blando o queso fresco | <input type="radio"/> Nunca o menos 1 vez al mes<br><input checked="" type="radio"/> 1 a 3 veces mes<br><input type="radio"/> 1 vez semana<br><input type="radio"/> 2 a 4 veces semana<br><input type="radio"/> 5 a 6 veces semana<br><input type="radio"/> 1 vez al día<br><input type="radio"/> 2 a 3 veces al día<br><input type="radio"/> 5 a 6 veces al día<br><input type="radio"/> más 6 veces al día |
| queso curado o semicurado o cremoso         | <input checked="" type="radio"/> Nunca o menos 1 vez al mes<br><input type="radio"/> 1 a 3 veces mes<br><input type="radio"/> 1 vez semana<br><input type="radio"/> 2 a 4 veces semana<br><input type="radio"/> 5 a 6 veces semana<br><input type="radio"/> 1 vez al día<br><input type="radio"/> 2 a 3 veces al día<br><input type="radio"/> 5 a 6 veces al día<br><input type="radio"/> más 6 veces al día |
| natillas flan pudding                       | <input checked="" type="radio"/> Nunca o menos 1 vez al mes<br><input type="radio"/> 1 a 3 veces mes<br><input type="radio"/> 1 vez semana<br><input type="radio"/> 2 a 4 veces semana<br><input type="radio"/> 5 a 6 veces semana<br><input type="radio"/> 1 vez al día<br><input type="radio"/> 2 a 3 veces al día<br><input type="radio"/> 5 a 6 veces al día<br><input type="radio"/> más 6 veces al día |
| Helado                                      | <input checked="" type="radio"/> Nunca o menos 1 vez al mes<br><input type="radio"/> 1 a 3 veces mes<br><input type="radio"/> 1 vez semana<br><input type="radio"/> 2 a 4 veces semana<br><input type="radio"/> 5 a 6 veces semana<br><input type="radio"/> 1 vez al día<br><input type="radio"/> 2 a 3 veces al día<br><input type="radio"/> 5 a 6 veces al día<br><input type="radio"/> más 6 veces al día |



|                                      |                                                                                                                                                                                                                                                                                                                                                                                                              |
|--------------------------------------|--------------------------------------------------------------------------------------------------------------------------------------------------------------------------------------------------------------------------------------------------------------------------------------------------------------------------------------------------------------------------------------------------------------|
| huevo                                | <input type="radio"/> Nunca o menos 1 vez al mes<br><input type="radio"/> 1 a 3 veces mes<br><input checked="" type="radio"/> 1 vez semana<br><input type="radio"/> 2 a 4 veces semana<br><input type="radio"/> 5 a 6 veces semana<br><input type="radio"/> 1 vez al día<br><input type="radio"/> 2 a 3 veces al día<br><input type="radio"/> 5 a 6 veces al día<br><input type="radio"/> más 6 veces al día |
| Pollo con piel                       | <input checked="" type="radio"/> Nunca o menos 1 vez al mes<br><input type="radio"/> 1 a 3 veces mes<br><input type="radio"/> 1 vez semana<br><input type="radio"/> 2 a 4 veces semana<br><input type="radio"/> 5 a 6 veces semana<br><input type="radio"/> 1 vez al día<br><input type="radio"/> 2 a 3 veces al día<br><input type="radio"/> 5 a 6 veces al día<br><input type="radio"/> más 6 veces al día |
| pollo sin piel                       | <input type="radio"/> Nunca o menos 1 vez al mes<br><input type="radio"/> 1 a 3 veces mes<br><input checked="" type="radio"/> 1 vez semana<br><input type="radio"/> 2 a 4 veces semana<br><input type="radio"/> 5 a 6 veces semana<br><input type="radio"/> 1 vez al día<br><input type="radio"/> 2 a 3 veces al día<br><input type="radio"/> 5 a 6 veces al día<br><input type="radio"/> más 6 veces al día |
| Ternera o cerdo o cordero            | <input type="radio"/> Nunca o menos 1 vez al mes<br><input type="radio"/> 1 a 3 veces mes<br><input checked="" type="radio"/> 1 vez semana<br><input type="radio"/> 2 a 4 veces semana<br><input type="radio"/> 5 a 6 veces semana<br><input type="radio"/> 1 vez al día<br><input type="radio"/> 2 a 3 veces al día<br><input type="radio"/> 5 a 6 veces al día<br><input type="radio"/> más 6 veces al día |
| carne caza: Conejo o codorniz o pato | <input checked="" type="radio"/> Nunca o menos 1 vez al mes<br><input type="radio"/> 1 a 3 veces mes<br><input type="radio"/> 1 vez semana<br><input type="radio"/> 2 a 4 veces semana<br><input type="radio"/> 5 a 6 veces semana<br><input type="radio"/> 1 vez al día<br><input type="radio"/> 2 a 3 veces al día<br><input type="radio"/> 5 a 6 veces al día<br><input type="radio"/> más 6 veces al día |
| Hígado de ternera o cerdo o pollo    | <input checked="" type="radio"/> Nunca o menos 1 vez al mes<br><input type="radio"/> 1 a 3 veces mes<br><input type="radio"/> 1 vez semana<br><input type="radio"/> 2 a 4 veces semana<br><input type="radio"/> 5 a 6 veces semana<br><input type="radio"/> 1 vez al día<br><input type="radio"/> 2 a 3 veces al día<br><input type="radio"/> 5 a 6 veces al día<br><input type="radio"/> más 6 veces al día |

|                     |                                                                                                                                                                                                                                                                                                                                                                                                              |
|---------------------|--------------------------------------------------------------------------------------------------------------------------------------------------------------------------------------------------------------------------------------------------------------------------------------------------------------------------------------------------------------------------------------------------------------|
| Vísceras            | <input checked="" type="radio"/> Nunca o menos 1 vez al mes<br><input type="radio"/> 1 a 3 veces mes<br><input type="radio"/> 1 vez semana<br><input type="radio"/> 2 a 4 veces semana<br><input type="radio"/> 5 a 6 veces semana<br><input type="radio"/> 1 vez al día<br><input type="radio"/> 2 a 3 veces al día<br><input type="radio"/> 5 a 6 veces al día<br><input type="radio"/> más 6 veces al día |
| Embutido            | <input checked="" type="radio"/> Nunca o menos 1 vez al mes<br><input type="radio"/> 1 a 3 veces mes<br><input type="radio"/> 1 vez semana<br><input type="radio"/> 2 a 4 veces semana<br><input type="radio"/> 5 a 6 veces semana<br><input type="radio"/> 1 vez al día<br><input type="radio"/> 2 a 3 veces al día<br><input type="radio"/> 5 a 6 veces al día<br><input type="radio"/> más 6 veces al día |
| Salchicha o similar | <input checked="" type="radio"/> Nunca o menos 1 vez al mes<br><input type="radio"/> 1 a 3 veces mes<br><input type="radio"/> 1 vez semana<br><input type="radio"/> 2 a 4 veces semana<br><input type="radio"/> 5 a 6 veces semana<br><input type="radio"/> 1 vez al día<br><input type="radio"/> 2 a 3 veces al día<br><input type="radio"/> 5 a 6 veces al día<br><input type="radio"/> más 6 veces al día |
| Pate o foiegras     | <input checked="" type="radio"/> Nunca o menos 1 vez al mes<br><input type="radio"/> 1 a 3 veces mes<br><input type="radio"/> 1 vez semana<br><input type="radio"/> 2 a 4 veces semana<br><input type="radio"/> 5 a 6 veces semana<br><input type="radio"/> 1 vez al día<br><input type="radio"/> 2 a 3 veces al día<br><input type="radio"/> 5 a 6 veces al día<br><input type="radio"/> más 6 veces al día |
| Hamburguesa         | <input type="radio"/> Nunca o menos 1 vez al mes<br><input type="radio"/> 1 a 3 veces mes<br><input checked="" type="radio"/> 1 vez semana<br><input type="radio"/> 2 a 4 veces semana<br><input type="radio"/> 5 a 6 veces semana<br><input type="radio"/> 1 vez al día<br><input type="radio"/> 2 a 3 veces al día<br><input type="radio"/> 5 a 6 veces al día<br><input type="radio"/> más 6 veces al día |
| tocino o bacon      | <input checked="" type="radio"/> Nunca o menos 1 vez al mes<br><input type="radio"/> 1 a 3 veces mes<br><input type="radio"/> 1 vez semana<br><input type="radio"/> 2 a 4 veces semana<br><input type="radio"/> 5 a 6 veces semana<br><input type="radio"/> 1 vez al día<br><input type="radio"/> 2 a 3 veces al día<br><input type="radio"/> 5 a 6 veces al día<br><input type="radio"/> más 6 veces al día |

---

|               |                                                                                                                                                                                                                                                                                                                                                                                                              |
|---------------|--------------------------------------------------------------------------------------------------------------------------------------------------------------------------------------------------------------------------------------------------------------------------------------------------------------------------------------------------------------------------------------------------------------|
| Pescado frito | <input checked="" type="radio"/> Nunca o menos 1 vez al mes<br><input type="radio"/> 1 a 3 veces mes<br><input type="radio"/> 1 vez semana<br><input type="radio"/> 2 a 4 veces semana<br><input type="radio"/> 5 a 6 veces semana<br><input type="radio"/> 1 vez al día<br><input type="radio"/> 2 a 3 veces al día<br><input type="radio"/> 5 a 6 veces al día<br><input type="radio"/> más 6 veces al día |
|---------------|--------------------------------------------------------------------------------------------------------------------------------------------------------------------------------------------------------------------------------------------------------------------------------------------------------------------------------------------------------------------------------------------------------------|

---

|                        |                                                                                                                                                                                                                                                                                                                                                                                                              |
|------------------------|--------------------------------------------------------------------------------------------------------------------------------------------------------------------------------------------------------------------------------------------------------------------------------------------------------------------------------------------------------------------------------------------------------------|
| pescado hervido blanco | <input checked="" type="radio"/> Nunca o menos 1 vez al mes<br><input type="radio"/> 1 a 3 veces mes<br><input type="radio"/> 1 vez semana<br><input type="radio"/> 2 a 4 veces semana<br><input type="radio"/> 5 a 6 veces semana<br><input type="radio"/> 1 vez al día<br><input type="radio"/> 2 a 3 veces al día<br><input type="radio"/> 5 a 6 veces al día<br><input type="radio"/> más 6 veces al día |
|------------------------|--------------------------------------------------------------------------------------------------------------------------------------------------------------------------------------------------------------------------------------------------------------------------------------------------------------------------------------------------------------------------------------------------------------|

---

|                      |                                                                                                                                                                                                                                                                                                                                                                                                              |
|----------------------|--------------------------------------------------------------------------------------------------------------------------------------------------------------------------------------------------------------------------------------------------------------------------------------------------------------------------------------------------------------------------------------------------------------|
| pescado hervido azul | <input checked="" type="radio"/> Nunca o menos 1 vez al mes<br><input type="radio"/> 1 a 3 veces mes<br><input type="radio"/> 1 vez semana<br><input type="radio"/> 2 a 4 veces semana<br><input type="radio"/> 5 a 6 veces semana<br><input type="radio"/> 1 vez al día<br><input type="radio"/> 2 a 3 veces al día<br><input type="radio"/> 5 a 6 veces al día<br><input type="radio"/> más 6 veces al día |
|----------------------|--------------------------------------------------------------------------------------------------------------------------------------------------------------------------------------------------------------------------------------------------------------------------------------------------------------------------------------------------------------------------------------------------------------|

---

|                    |                                                                                                                                                                                                                                                                                                                                                                                                              |
|--------------------|--------------------------------------------------------------------------------------------------------------------------------------------------------------------------------------------------------------------------------------------------------------------------------------------------------------------------------------------------------------------------------------------------------------|
| otros pescado azul | <input checked="" type="radio"/> Nunca o menos 1 vez al mes<br><input type="radio"/> 1 a 3 veces mes<br><input type="radio"/> 1 vez semana<br><input type="radio"/> 2 a 4 veces semana<br><input type="radio"/> 5 a 6 veces semana<br><input type="radio"/> 1 vez al día<br><input type="radio"/> 2 a 3 veces al día<br><input type="radio"/> 5 a 6 veces al día<br><input type="radio"/> más 6 veces al día |
|--------------------|--------------------------------------------------------------------------------------------------------------------------------------------------------------------------------------------------------------------------------------------------------------------------------------------------------------------------------------------------------------------------------------------------------------|

---

|               |                                                                                                                                                                                                                                                                                                                                                                                                              |
|---------------|--------------------------------------------------------------------------------------------------------------------------------------------------------------------------------------------------------------------------------------------------------------------------------------------------------------------------------------------------------------------------------------------------------------|
| atun conserva | <input type="radio"/> Nunca o menos 1 vez al mes<br><input type="radio"/> 1 a 3 veces mes<br><input checked="" type="radio"/> 1 vez semana<br><input type="radio"/> 2 a 4 veces semana<br><input type="radio"/> 5 a 6 veces semana<br><input type="radio"/> 1 vez al día<br><input type="radio"/> 2 a 3 veces al día<br><input type="radio"/> 5 a 6 veces al día<br><input type="radio"/> más 6 veces al día |
|---------------|--------------------------------------------------------------------------------------------------------------------------------------------------------------------------------------------------------------------------------------------------------------------------------------------------------------------------------------------------------------------------------------------------------------|

---

|                  |                                                                                                                                                                                                                                                                                                                                                                                                              |
|------------------|--------------------------------------------------------------------------------------------------------------------------------------------------------------------------------------------------------------------------------------------------------------------------------------------------------------------------------------------------------------------------------------------------------------|
| sardina conserva | <input checked="" type="radio"/> Nunca o menos 1 vez al mes<br><input type="radio"/> 1 a 3 veces mes<br><input type="radio"/> 1 vez semana<br><input type="radio"/> 2 a 4 veces semana<br><input type="radio"/> 5 a 6 veces semana<br><input type="radio"/> 1 vez al día<br><input type="radio"/> 2 a 3 veces al día<br><input type="radio"/> 5 a 6 veces al día<br><input type="radio"/> más 6 veces al día |
|------------------|--------------------------------------------------------------------------------------------------------------------------------------------------------------------------------------------------------------------------------------------------------------------------------------------------------------------------------------------------------------------------------------------------------------|

---

|                                         |                                                                                                                                                                                                                                                                                                                                                                                                              |
|-----------------------------------------|--------------------------------------------------------------------------------------------------------------------------------------------------------------------------------------------------------------------------------------------------------------------------------------------------------------------------------------------------------------------------------------------------------------|
| pescado ahumado                         | <input checked="" type="radio"/> Nunca o menos 1 vez al mes<br><input type="radio"/> 1 a 3 veces mes<br><input type="radio"/> 1 vez semana<br><input type="radio"/> 2 a 4 veces semana<br><input type="radio"/> 5 a 6 veces semana<br><input type="radio"/> 1 vez al día<br><input type="radio"/> 2 a 3 veces al día<br><input type="radio"/> 5 a 6 veces al día<br><input type="radio"/> más 6 veces al día |
| almejas o mejillones o ostras unos 100g | <input checked="" type="radio"/> Nunca o menos 1 vez al mes<br><input type="radio"/> 1 a 3 veces mes<br><input type="radio"/> 1 vez semana<br><input type="radio"/> 2 a 4 veces semana<br><input type="radio"/> 5 a 6 veces semana<br><input type="radio"/> 1 vez al día<br><input type="radio"/> 2 a 3 veces al día<br><input type="radio"/> 5 a 6 veces al día<br><input type="radio"/> más 6 veces al día |
| calamar o chipiron o sepia unos 100g    | <input type="radio"/> Nunca o menos 1 vez al mes<br><input type="radio"/> 1 a 3 veces mes<br><input checked="" type="radio"/> 1 vez semana<br><input type="radio"/> 2 a 4 veces semana<br><input type="radio"/> 5 a 6 veces semana<br><input type="radio"/> 1 vez al día<br><input type="radio"/> 2 a 3 veces al día<br><input type="radio"/> 5 a 6 veces al día<br><input type="radio"/> más 6 veces al día |
| marisco unos 100g                       | <input checked="" type="radio"/> Nunca o menos 1 vez al mes<br><input type="radio"/> 1 a 3 veces mes<br><input type="radio"/> 1 vez semana<br><input type="radio"/> 2 a 4 veces semana<br><input type="radio"/> 5 a 6 veces semana<br><input type="radio"/> 1 vez al día<br><input type="radio"/> 2 a 3 veces al día<br><input type="radio"/> 5 a 6 veces al día<br><input type="radio"/> más 6 veces al día |
| Espinacas o acelgas cocinadas           | <input type="radio"/> Nunca o menos 1 vez al mes<br><input type="radio"/> 1 a 3 veces mes<br><input checked="" type="radio"/> 1 vez semana<br><input type="radio"/> 2 a 4 veces semana<br><input type="radio"/> 5 a 6 veces semana<br><input type="radio"/> 1 vez al día<br><input type="radio"/> 2 a 3 veces al día<br><input type="radio"/> 5 a 6 veces al día<br><input type="radio"/> más 6 veces al día |
| Col o coliflor o brocoli cocinado       | <input checked="" type="radio"/> Nunca o menos 1 vez al mes<br><input type="radio"/> 1 a 3 veces mes<br><input type="radio"/> 1 vez semana<br><input type="radio"/> 2 a 4 veces semana<br><input type="radio"/> 5 a 6 veces semana<br><input type="radio"/> 1 vez al día<br><input type="radio"/> 2 a 3 veces al día<br><input type="radio"/> 5 a 6 veces al día<br><input type="radio"/> más 6 veces al día |

---

Lechuga o endivia o escarola

- ☐ Nunca o menos 1 vez al mes  
☐ 1 a 3 veces mes  
☐ 1 vez semana  
☐ 2 a 4 veces semana  
☐ 5 a 6 veces semana  
☒ 1 vez al día  
☐ 2 a 3 veces al día  
☐ 5 a 6 veces al día  
☐ más 6 veces al día

---

tomate ensalada

- ☐ Nunca o menos 1 vez al mes  
☐ 1 a 3 veces mes  
☐ 1 vez semana  
☒ 2 a 4 veces semana  
☐ 5 a 6 veces semana  
☐ 1 vez al día  
☐ 2 a 3 veces al día  
☐ 5 a 6 veces al día  
☐ más 6 veces al día

---

cebolla

- ☐ Nunca o menos 1 vez al mes  
☐ 1 a 3 veces mes  
☐ 1 vez semana  
☒ 2 a 4 veces semana  
☐ 5 a 6 veces semana  
☐ 1 vez al día  
☐ 2 a 3 veces al día  
☐ 5 a 6 veces al día  
☐ más 6 veces al día

---

Zanahoria o calabaza

- ☐ Nunca o menos 1 vez al mes  
☐ 1 a 3 veces mes  
☒ 1 vez semana  
☐ 2 a 4 veces semana  
☐ 5 a 6 veces semana  
☐ 1 vez al día  
☐ 2 a 3 veces al día  
☐ 5 a 6 veces al día  
☐ más 6 veces al día

---

Judías verdes

- ☐ Nunca o menos 1 vez al mes  
☐ 1 a 3 veces mes  
☒ 1 vez semana  
☐ 2 a 4 veces semana  
☐ 5 a 6 veces semana  
☐ 1 vez al día  
☐ 2 a 3 veces al día  
☐ 5 a 6 veces al día  
☐ más 6 veces al día

---

Berenjena o calabacin o pepino

- ☐ Nunca o menos 1 vez al mes  
☐ 1 a 3 veces mes  
☒ 1 vez semana  
☐ 2 a 4 veces semana  
☐ 5 a 6 veces semana  
☐ 1 vez al día  
☐ 2 a 3 veces al día  
☐ 5 a 6 veces al día  
☐ más 6 veces al día

|                       |                                                                                                                                                                                                                                                                                                                                                                                                              |
|-----------------------|--------------------------------------------------------------------------------------------------------------------------------------------------------------------------------------------------------------------------------------------------------------------------------------------------------------------------------------------------------------------------------------------------------------|
| pimiento              | <input type="radio"/> Nunca o menos 1 vez al mes<br><input type="radio"/> 1 a 3 veces mes<br><input type="radio"/> 1 vez semana<br><input type="radio"/> 2 a 4 veces semana<br><input type="radio"/> 5 a 6 veces semana<br><input type="radio"/> 1 vez al día<br><input type="radio"/> 2 a 3 veces al día<br><input type="radio"/> 5 a 6 veces al día<br><input type="radio"/> más 6 veces al día            |
| alcachofa             | <input type="radio"/> Nunca o menos 1 vez al mes<br><input checked="" type="radio"/> 1 a 3 veces mes<br><input type="radio"/> 1 vez semana<br><input type="radio"/> 2 a 4 veces semana<br><input type="radio"/> 5 a 6 veces semana<br><input type="radio"/> 1 vez al día<br><input type="radio"/> 2 a 3 veces al día<br><input type="radio"/> 5 a 6 veces al día<br><input type="radio"/> más 6 veces al día |
| espárragos            | <input checked="" type="radio"/> Nunca o menos 1 vez al mes<br><input type="radio"/> 1 a 3 veces mes<br><input type="radio"/> 1 vez semana<br><input type="radio"/> 2 a 4 veces semana<br><input type="radio"/> 5 a 6 veces semana<br><input type="radio"/> 1 vez al día<br><input type="radio"/> 2 a 3 veces al día<br><input type="radio"/> 5 a 6 veces al día<br><input type="radio"/> más 6 veces al día |
| maíz hervido          | <input checked="" type="radio"/> Nunca o menos 1 vez al mes<br><input type="radio"/> 1 a 3 veces mes<br><input type="radio"/> 1 vez semana<br><input type="radio"/> 2 a 4 veces semana<br><input type="radio"/> 5 a 6 veces semana<br><input type="radio"/> 1 vez al día<br><input type="radio"/> 2 a 3 veces al día<br><input type="radio"/> 5 a 6 veces al día<br><input type="radio"/> más 6 veces al día |
| legumbres             | <input type="radio"/> Nunca o menos 1 vez al mes<br><input type="radio"/> 1 a 3 veces mes<br><input type="radio"/> 1 vez semana<br><input checked="" type="radio"/> 2 a 4 veces semana<br><input type="radio"/> 5 a 6 veces semana<br><input type="radio"/> 1 vez al día<br><input type="radio"/> 2 a 3 veces al día<br><input type="radio"/> 5 a 6 veces al día<br><input type="radio"/> más 6 veces al día |
| naranjas o mandarinas | <input checked="" type="radio"/> Nunca o menos 1 vez al mes<br><input type="radio"/> 1 a 3 veces mes<br><input type="radio"/> 1 vez semana<br><input type="radio"/> 2 a 4 veces semana<br><input type="radio"/> 5 a 6 veces semana<br><input type="radio"/> 1 vez al día<br><input type="radio"/> 2 a 3 veces al día<br><input type="radio"/> 5 a 6 veces al día<br><input type="radio"/> más 6 veces al día |

---

|                    |                                                                                                                                                                                                                                                                                                                                                                                                              |
|--------------------|--------------------------------------------------------------------------------------------------------------------------------------------------------------------------------------------------------------------------------------------------------------------------------------------------------------------------------------------------------------------------------------------------------------|
| zumو natural fruta | <input type="radio"/> Nunca o menos 1 vez al mes<br><input type="radio"/> 1 a 3 veces mes<br><input type="radio"/> 1 vez semana<br><input checked="" type="radio"/> 2 a 4 veces semana<br><input type="radio"/> 5 a 6 veces semana<br><input type="radio"/> 1 vez al día<br><input type="radio"/> 2 a 3 veces al día<br><input type="radio"/> 5 a 6 veces al día<br><input type="radio"/> más 6 veces al día |
|--------------------|--------------------------------------------------------------------------------------------------------------------------------------------------------------------------------------------------------------------------------------------------------------------------------------------------------------------------------------------------------------------------------------------------------------|

---

|         |                                                                                                                                                                                                                                                                                                                                                                                                              |
|---------|--------------------------------------------------------------------------------------------------------------------------------------------------------------------------------------------------------------------------------------------------------------------------------------------------------------------------------------------------------------------------------------------------------------|
| platano | <input type="radio"/> Nunca o menos 1 vez al mes<br><input type="radio"/> 1 a 3 veces mes<br><input checked="" type="radio"/> 1 vez semana<br><input type="radio"/> 2 a 4 veces semana<br><input type="radio"/> 5 a 6 veces semana<br><input type="radio"/> 1 vez al día<br><input type="radio"/> 2 a 3 veces al día<br><input type="radio"/> 5 a 6 veces al día<br><input type="radio"/> más 6 veces al día |
|---------|--------------------------------------------------------------------------------------------------------------------------------------------------------------------------------------------------------------------------------------------------------------------------------------------------------------------------------------------------------------------------------------------------------------|

---

|                |                                                                                                                                                                                                                                                                                                                                                                                                              |
|----------------|--------------------------------------------------------------------------------------------------------------------------------------------------------------------------------------------------------------------------------------------------------------------------------------------------------------------------------------------------------------------------------------------------------------|
| manzana o pera | <input type="radio"/> Nunca o menos 1 vez al mes<br><input type="radio"/> 1 a 3 veces mes<br><input checked="" type="radio"/> 1 vez semana<br><input type="radio"/> 2 a 4 veces semana<br><input type="radio"/> 5 a 6 veces semana<br><input type="radio"/> 1 vez al día<br><input type="radio"/> 2 a 3 veces al día<br><input type="radio"/> 5 a 6 veces al día<br><input type="radio"/> más 6 veces al día |
|----------------|--------------------------------------------------------------------------------------------------------------------------------------------------------------------------------------------------------------------------------------------------------------------------------------------------------------------------------------------------------------------------------------------------------------|

---

|                       |                                                                                                                                                                                                                                                                                                                                                                                                              |
|-----------------------|--------------------------------------------------------------------------------------------------------------------------------------------------------------------------------------------------------------------------------------------------------------------------------------------------------------------------------------------------------------------------------------------------------------|
| melocotón o nectarina | <input checked="" type="radio"/> Nunca o menos 1 vez al mes<br><input type="radio"/> 1 a 3 veces mes<br><input type="radio"/> 1 vez semana<br><input type="radio"/> 2 a 4 veces semana<br><input type="radio"/> 5 a 6 veces semana<br><input type="radio"/> 1 vez al día<br><input type="radio"/> 2 a 3 veces al día<br><input type="radio"/> 5 a 6 veces al día<br><input type="radio"/> más 6 veces al día |
|-----------------------|--------------------------------------------------------------------------------------------------------------------------------------------------------------------------------------------------------------------------------------------------------------------------------------------------------------------------------------------------------------------------------------------------------------|

---

|                |                                                                                                                                                                                                                                                                                                                                                                                                              |
|----------------|--------------------------------------------------------------------------------------------------------------------------------------------------------------------------------------------------------------------------------------------------------------------------------------------------------------------------------------------------------------------------------------------------------------|
| sandia o melon | <input checked="" type="radio"/> Nunca o menos 1 vez al mes<br><input type="radio"/> 1 a 3 veces mes<br><input type="radio"/> 1 vez semana<br><input type="radio"/> 2 a 4 veces semana<br><input type="radio"/> 5 a 6 veces semana<br><input type="radio"/> 1 vez al día<br><input type="radio"/> 2 a 3 veces al día<br><input type="radio"/> 5 a 6 veces al día<br><input type="radio"/> más 6 veces al día |
|----------------|--------------------------------------------------------------------------------------------------------------------------------------------------------------------------------------------------------------------------------------------------------------------------------------------------------------------------------------------------------------------------------------------------------------|

---

|     |                                                                                                                                                                                                                                                                                                                                                                                                              |
|-----|--------------------------------------------------------------------------------------------------------------------------------------------------------------------------------------------------------------------------------------------------------------------------------------------------------------------------------------------------------------------------------------------------------------|
| uva | <input checked="" type="radio"/> Nunca o menos 1 vez al mes<br><input type="radio"/> 1 a 3 veces mes<br><input type="radio"/> 1 vez semana<br><input type="radio"/> 2 a 4 veces semana<br><input type="radio"/> 5 a 6 veces semana<br><input type="radio"/> 1 vez al día<br><input type="radio"/> 2 a 3 veces al día<br><input type="radio"/> 5 a 6 veces al día<br><input type="radio"/> más 6 veces al día |
|-----|--------------------------------------------------------------------------------------------------------------------------------------------------------------------------------------------------------------------------------------------------------------------------------------------------------------------------------------------------------------------------------------------------------------|

---

|                 |                                                                                                                                                                                                                                                                                                                                                                                                              |
|-----------------|--------------------------------------------------------------------------------------------------------------------------------------------------------------------------------------------------------------------------------------------------------------------------------------------------------------------------------------------------------------------------------------------------------------|
| bruna o ciruela | <input checked="" type="radio"/> Nunca o menos 1 vez al mes<br><input type="radio"/> 1 a 3 veces mes<br><input type="radio"/> 1 vez semana<br><input type="radio"/> 2 a 4 veces semana<br><input type="radio"/> 5 a 6 veces semana<br><input type="radio"/> 1 vez al día<br><input type="radio"/> 2 a 3 veces al día<br><input type="radio"/> 5 a 6 veces al día<br><input type="radio"/> más 6 veces al día |
| kiwi            | <input type="radio"/> Nunca o menos 1 vez al mes<br><input checked="" type="radio"/> 1 a 3 veces mes<br><input type="radio"/> 1 vez semana<br><input type="radio"/> 2 a 4 veces semana<br><input type="radio"/> 5 a 6 veces semana<br><input type="radio"/> 1 vez al día<br><input type="radio"/> 2 a 3 veces al día<br><input type="radio"/> 5 a 6 veces al día<br><input type="radio"/> más 6 veces al día |
| aceituna        | <input checked="" type="radio"/> Nunca o menos 1 vez al mes<br><input type="radio"/> 1 a 3 veces mes<br><input type="radio"/> 1 vez semana<br><input type="radio"/> 2 a 4 veces semana<br><input type="radio"/> 5 a 6 veces semana<br><input type="radio"/> 1 vez al día<br><input type="radio"/> 2 a 3 veces al día<br><input type="radio"/> 5 a 6 veces al día<br><input type="radio"/> más 6 veces al día |
| frutos secos    | <input type="radio"/> Nunca o menos 1 vez al mes<br><input checked="" type="radio"/> 1 a 3 veces mes<br><input type="radio"/> 1 vez semana<br><input type="radio"/> 2 a 4 veces semana<br><input type="radio"/> 5 a 6 veces semana<br><input type="radio"/> 1 vez al día<br><input type="radio"/> 2 a 3 veces al día<br><input type="radio"/> 5 a 6 veces al día<br><input type="radio"/> más 6 veces al día |
| pan blanco      | <input type="radio"/> Nunca o menos 1 vez al mes<br><input checked="" type="radio"/> 1 a 3 veces mes<br><input type="radio"/> 1 vez semana<br><input type="radio"/> 2 a 4 veces semana<br><input type="radio"/> 5 a 6 veces semana<br><input type="radio"/> 1 vez al día<br><input type="radio"/> 2 a 3 veces al día<br><input type="radio"/> 5 a 6 veces al día<br><input type="radio"/> más 6 veces al día |
| pan integral    | <input checked="" type="radio"/> Nunca o menos 1 vez al mes<br><input type="radio"/> 1 a 3 veces mes<br><input type="radio"/> 1 vez semana<br><input type="radio"/> 2 a 4 veces semana<br><input type="radio"/> 5 a 6 veces semana<br><input type="radio"/> 1 vez al día<br><input type="radio"/> 2 a 3 veces al día<br><input type="radio"/> 5 a 6 veces al día<br><input type="radio"/> más 6 veces al día |



|                          |                                                                                                                                                                                                                                                                                                                                                                                                              |
|--------------------------|--------------------------------------------------------------------------------------------------------------------------------------------------------------------------------------------------------------------------------------------------------------------------------------------------------------------------------------------------------------------------------------------------------------|
| cereales desayuno        | <input checked="" type="radio"/> Nunca o menos 1 vez al mes<br><input type="radio"/> 1 a 3 veces mes<br><input type="radio"/> 1 vez semana<br><input type="radio"/> 2 a 4 veces semana<br><input type="radio"/> 5 a 6 veces semana<br><input type="radio"/> 1 vez al día<br><input type="radio"/> 2 a 3 veces al día<br><input type="radio"/> 5 a 6 veces al día<br><input type="radio"/> más 6 veces al día |
| patatas fritas           | <input type="radio"/> Nunca o menos 1 vez al mes<br><input type="radio"/> 1 a 3 veces mes<br><input checked="" type="radio"/> 1 vez semana<br><input type="radio"/> 2 a 4 veces semana<br><input type="radio"/> 5 a 6 veces semana<br><input type="radio"/> 1 vez al día<br><input type="radio"/> 2 a 3 veces al día<br><input type="radio"/> 5 a 6 veces al día<br><input type="radio"/> más 6 veces al día |
| patatas cocidas o asadas | <input type="radio"/> Nunca o menos 1 vez al mes<br><input type="radio"/> 1 a 3 veces mes<br><input checked="" type="radio"/> 1 vez semana<br><input type="radio"/> 2 a 4 veces semana<br><input type="radio"/> 5 a 6 veces semana<br><input type="radio"/> 1 vez al día<br><input type="radio"/> 2 a 3 veces al día<br><input type="radio"/> 5 a 6 veces al día<br><input type="radio"/> más 6 veces al día |
| bolsa papas              | <input type="radio"/> Nunca o menos 1 vez al mes<br><input type="radio"/> 1 a 3 veces mes<br><input checked="" type="radio"/> 1 vez semana<br><input type="radio"/> 2 a 4 veces semana<br><input type="radio"/> 5 a 6 veces semana<br><input type="radio"/> 1 vez al día<br><input type="radio"/> 2 a 3 veces al día<br><input type="radio"/> 5 a 6 veces al día<br><input type="radio"/> más 6 veces al día |
| arroz cocinado           | <input type="radio"/> Nunca o menos 1 vez al mes<br><input type="radio"/> 1 a 3 veces mes<br><input checked="" type="radio"/> 1 vez semana<br><input type="radio"/> 2 a 4 veces semana<br><input type="radio"/> 5 a 6 veces semana<br><input type="radio"/> 1 vez al día<br><input type="radio"/> 2 a 3 veces al día<br><input type="radio"/> 5 a 6 veces al día<br><input type="radio"/> más 6 veces al día |
| pasta                    | <input type="radio"/> Nunca o menos 1 vez al mes<br><input type="radio"/> 1 a 3 veces mes<br><input checked="" type="radio"/> 1 vez semana<br><input type="radio"/> 2 a 4 veces semana<br><input type="radio"/> 5 a 6 veces semana<br><input type="radio"/> 1 vez al día<br><input type="radio"/> 2 a 3 veces al día<br><input type="radio"/> 5 a 6 veces al día<br><input type="radio"/> más 6 veces al día |

|                     |                                                                                                                                                                                                                                                                                                                                                                                                              |
|---------------------|--------------------------------------------------------------------------------------------------------------------------------------------------------------------------------------------------------------------------------------------------------------------------------------------------------------------------------------------------------------------------------------------------------------|
| pizza               | <input type="radio"/> Nunca o menos 1 vez al mes<br><input type="radio"/> 1 a 3 veces mes<br><input checked="" type="radio"/> 1 vez semana<br><input type="radio"/> 2 a 4 veces semana<br><input type="radio"/> 5 a 6 veces semana<br><input type="radio"/> 1 vez al día<br><input type="radio"/> 2 a 3 veces al día<br><input type="radio"/> 5 a 6 veces al día<br><input type="radio"/> más 6 veces al día |
| aceite oliva        | <input type="radio"/> Nunca o menos 1 vez al mes<br><input type="radio"/> 1 a 3 veces mes<br><input type="radio"/> 1 vez semana<br><input type="radio"/> 2 a 4 veces semana<br><input type="radio"/> 5 a 6 veces semana<br><input checked="" type="radio"/> 1 vez al día<br><input type="radio"/> 2 a 3 veces al día<br><input type="radio"/> 5 a 6 veces al día<br><input type="radio"/> más 6 veces al día |
| otros aceites       | <input checked="" type="radio"/> Nunca o menos 1 vez al mes<br><input type="radio"/> 1 a 3 veces mes<br><input type="radio"/> 1 vez semana<br><input type="radio"/> 2 a 4 veces semana<br><input type="radio"/> 5 a 6 veces semana<br><input type="radio"/> 1 vez al día<br><input type="radio"/> 2 a 3 veces al día<br><input type="radio"/> 5 a 6 veces al día<br><input type="radio"/> más 6 veces al día |
| margarina           | <input checked="" type="radio"/> Nunca o menos 1 vez al mes<br><input type="radio"/> 1 a 3 veces mes<br><input type="radio"/> 1 vez semana<br><input type="radio"/> 2 a 4 veces semana<br><input type="radio"/> 5 a 6 veces semana<br><input type="radio"/> 1 vez al día<br><input type="radio"/> 2 a 3 veces al día<br><input type="radio"/> 5 a 6 veces al día<br><input type="radio"/> más 6 veces al día |
| mantequilla         | <input checked="" type="radio"/> Nunca o menos 1 vez al mes<br><input type="radio"/> 1 a 3 veces mes<br><input type="radio"/> 1 vez semana<br><input type="radio"/> 2 a 4 veces semana<br><input type="radio"/> 5 a 6 veces semana<br><input type="radio"/> 1 vez al día<br><input type="radio"/> 2 a 3 veces al día<br><input type="radio"/> 5 a 6 veces al día<br><input type="radio"/> más 6 veces al día |
| galletas tipo maria | <input type="radio"/> Nunca o menos 1 vez al mes<br><input type="radio"/> 1 a 3 veces mes<br><input type="radio"/> 1 vez semana<br><input type="radio"/> 2 a 4 veces semana<br><input type="radio"/> 5 a 6 veces semana<br><input checked="" type="radio"/> 1 vez al día<br><input type="radio"/> 2 a 3 veces al día<br><input type="radio"/> 5 a 6 veces al día<br><input type="radio"/> más 6 veces al día |

|                           |                                                                                                                                                                                                                                                                                                                                                                                                              |
|---------------------------|--------------------------------------------------------------------------------------------------------------------------------------------------------------------------------------------------------------------------------------------------------------------------------------------------------------------------------------------------------------------------------------------------------------|
| galletas chocolate        | <input checked="" type="radio"/> Nunca o menos 1 vez al mes<br><input type="radio"/> 1 a 3 veces mes<br><input type="radio"/> 1 vez semana<br><input type="radio"/> 2 a 4 veces semana<br><input type="radio"/> 5 a 6 veces semana<br><input type="radio"/> 1 vez al día<br><input type="radio"/> 2 a 3 veces al día<br><input type="radio"/> 5 a 6 veces al día<br><input type="radio"/> más 6 veces al día |
| bollieria                 | <input checked="" type="radio"/> Nunca o menos 1 vez al mes<br><input type="radio"/> 1 a 3 veces mes<br><input type="radio"/> 1 vez semana<br><input type="radio"/> 2 a 4 veces semana<br><input type="radio"/> 5 a 6 veces semana<br><input type="radio"/> 1 vez al día<br><input type="radio"/> 2 a 3 veces al día<br><input type="radio"/> 5 a 6 veces al día<br><input type="radio"/> más 6 veces al día |
| chocolate o bombones      | <input type="radio"/> Nunca o menos 1 vez al mes<br><input type="radio"/> 1 a 3 veces mes<br><input type="radio"/> 1 vez semana<br><input type="radio"/> 2 a 4 veces semana<br><input type="radio"/> 5 a 6 veces semana<br><input checked="" type="radio"/> 1 vez al día<br><input type="radio"/> 2 a 3 veces al día<br><input type="radio"/> 5 a 6 veces al día<br><input type="radio"/> más 6 veces al día |
| chocolate polvo o colacao | <input type="radio"/> Nunca o menos 1 vez al mes<br><input type="radio"/> 1 a 3 veces mes<br><input type="radio"/> 1 vez semana<br><input type="radio"/> 2 a 4 veces semana<br><input type="radio"/> 5 a 6 veces semana<br><input checked="" type="radio"/> 1 vez al día<br><input type="radio"/> 2 a 3 veces al día<br><input type="radio"/> 5 a 6 veces al día<br><input type="radio"/> más 6 veces al día |
| vino tinto                | <input checked="" type="radio"/> Nunca o menos 1 vez al mes<br><input type="radio"/> 1 a 3 veces mes<br><input type="radio"/> 1 vez semana<br><input type="radio"/> 2 a 4 veces semana<br><input type="radio"/> 5 a 6 veces semana<br><input type="radio"/> 1 vez al día<br><input type="radio"/> 2 a 3 veces al día<br><input type="radio"/> 5 a 6 veces al día<br><input type="radio"/> más 6 veces al día |
| vino blanco               | <input checked="" type="radio"/> Nunca o menos 1 vez al mes<br><input type="radio"/> 1 a 3 veces mes<br><input type="radio"/> 1 vez semana<br><input type="radio"/> 2 a 4 veces semana<br><input type="radio"/> 5 a 6 veces semana<br><input type="radio"/> 1 vez al día<br><input type="radio"/> 2 a 3 veces al día<br><input type="radio"/> 5 a 6 veces al día<br><input type="radio"/> más 6 veces al día |

|                       |                                                                                                                                                                                                                                                                                                                                                                                                              |
|-----------------------|--------------------------------------------------------------------------------------------------------------------------------------------------------------------------------------------------------------------------------------------------------------------------------------------------------------------------------------------------------------------------------------------------------------|
| vino seco o vermut    | <input checked="" type="radio"/> Nunca o menos 1 vez al mes<br><input type="radio"/> 1 a 3 veces mes<br><input type="radio"/> 1 vez semana<br><input type="radio"/> 2 a 4 veces semana<br><input type="radio"/> 5 a 6 veces semana<br><input type="radio"/> 1 vez al día<br><input type="radio"/> 2 a 3 veces al día<br><input type="radio"/> 5 a 6 veces al día<br><input type="radio"/> más 6 veces al día |
| cerveza               | <input checked="" type="radio"/> Nunca o menos 1 vez al mes<br><input type="radio"/> 1 a 3 veces mes<br><input type="radio"/> 1 vez semana<br><input type="radio"/> 2 a 4 veces semana<br><input type="radio"/> 5 a 6 veces semana<br><input type="radio"/> 1 vez al día<br><input type="radio"/> 2 a 3 veces al día<br><input type="radio"/> 5 a 6 veces al día<br><input type="radio"/> más 6 veces al día |
| cerveza sin alcohol   | <input checked="" type="radio"/> Nunca o menos 1 vez al mes<br><input type="radio"/> 1 a 3 veces mes<br><input type="radio"/> 1 vez semana<br><input type="radio"/> 2 a 4 veces semana<br><input type="radio"/> 5 a 6 veces semana<br><input type="radio"/> 1 vez al día<br><input type="radio"/> 2 a 3 veces al día<br><input type="radio"/> 5 a 6 veces al día<br><input type="radio"/> más 6 veces al día |
| licores               | <input checked="" type="radio"/> Nunca o menos 1 vez al mes<br><input type="radio"/> 1 a 3 veces mes<br><input type="radio"/> 1 vez semana<br><input type="radio"/> 2 a 4 veces semana<br><input type="radio"/> 5 a 6 veces semana<br><input type="radio"/> 1 vez al día<br><input type="radio"/> 2 a 3 veces al día<br><input type="radio"/> 5 a 6 veces al día<br><input type="radio"/> más 6 veces al día |
| ginebra o ron o vodka | <input checked="" type="radio"/> Nunca o menos 1 vez al mes<br><input type="radio"/> 1 a 3 veces mes<br><input type="radio"/> 1 vez semana<br><input type="radio"/> 2 a 4 veces semana<br><input type="radio"/> 5 a 6 veces semana<br><input type="radio"/> 1 vez al día<br><input type="radio"/> 2 a 3 veces al día<br><input type="radio"/> 5 a 6 veces al día<br><input type="radio"/> más 6 veces al día |
| refresco normal       | <input checked="" type="radio"/> Nunca o menos 1 vez al mes<br><input type="radio"/> 1 a 3 veces mes<br><input type="radio"/> 1 vez semana<br><input type="radio"/> 2 a 4 veces semana<br><input type="radio"/> 5 a 6 veces semana<br><input type="radio"/> 1 vez al día<br><input type="radio"/> 2 a 3 veces al día<br><input type="radio"/> 5 a 6 veces al día<br><input type="radio"/> más 6 veces al día |

|                          |                                                                                                                                                                                                                                                                                                                                                                                                              |
|--------------------------|--------------------------------------------------------------------------------------------------------------------------------------------------------------------------------------------------------------------------------------------------------------------------------------------------------------------------------------------------------------------------------------------------------------|
| refresco sin azúcar      | <input type="radio"/> Nunca o menos 1 vez al mes<br><input type="radio"/> 1 a 3 veces mes<br><input checked="" type="radio"/> 1 vez semana<br><input type="radio"/> 2 a 4 veces semana<br><input type="radio"/> 5 a 6 veces semana<br><input type="radio"/> 1 vez al día<br><input type="radio"/> 2 a 3 veces al día<br><input type="radio"/> 5 a 6 veces al día<br><input type="radio"/> más 6 veces al día |
| Agua del grifo           | <input checked="" type="radio"/> Nunca o menos 1 vez al mes<br><input type="radio"/> 1 a 3 veces mes<br><input type="radio"/> 1 vez semana<br><input type="radio"/> 2 a 4 veces semana<br><input type="radio"/> 5 a 6 veces semana<br><input type="radio"/> 1 vez al día<br><input type="radio"/> 2 a 3 veces al día<br><input type="radio"/> 5 a 6 veces al día<br><input type="radio"/> más 6 veces al día |
| agua embotellada sin gas | <input type="radio"/> Nunca o menos 1 vez al mes<br><input type="radio"/> 1 a 3 veces mes<br><input type="radio"/> 1 vez semana<br><input type="radio"/> 2 a 4 veces semana<br><input type="radio"/> 5 a 6 veces semana<br><input type="radio"/> 1 vez al día<br><input type="radio"/> 2 a 3 veces al día<br><input type="radio"/> 5 a 6 veces al día<br><input checked="" type="radio"/> más 6 veces al día |
| agua embotellada con gas | <input checked="" type="radio"/> Nunca o menos 1 vez al mes<br><input type="radio"/> 1 a 3 veces mes<br><input type="radio"/> 1 vez semana<br><input type="radio"/> 2 a 4 veces semana<br><input type="radio"/> 5 a 6 veces semana<br><input type="radio"/> 1 vez al día<br><input type="radio"/> 2 a 3 veces al día<br><input type="radio"/> 5 a 6 veces al día<br><input type="radio"/> más 6 veces al día |
| zumو frutas embasado     | <input checked="" type="radio"/> Nunca o menos 1 vez al mes<br><input type="radio"/> 1 a 3 veces mes<br><input type="radio"/> 1 vez semana<br><input type="radio"/> 2 a 4 veces semana<br><input type="radio"/> 5 a 6 veces semana<br><input type="radio"/> 1 vez al día<br><input type="radio"/> 2 a 3 veces al día<br><input type="radio"/> 5 a 6 veces al día<br><input type="radio"/> más 6 veces al día |
| cafe                     | <input checked="" type="radio"/> Nunca o menos 1 vez al mes<br><input type="radio"/> 1 a 3 veces mes<br><input type="radio"/> 1 vez semana<br><input type="radio"/> 2 a 4 veces semana<br><input type="radio"/> 5 a 6 veces semana<br><input type="radio"/> 1 vez al día<br><input type="radio"/> 2 a 3 veces al día<br><input type="radio"/> 5 a 6 veces al día<br><input type="radio"/> más 6 veces al día |

---

|                   |                                                                                                                                                                                                                                                                                                                                                                                                              |
|-------------------|--------------------------------------------------------------------------------------------------------------------------------------------------------------------------------------------------------------------------------------------------------------------------------------------------------------------------------------------------------------------------------------------------------------|
| cafe descafeinado | <input checked="" type="radio"/> Nunca o menos 1 vez al mes<br><input type="radio"/> 1 a 3 veces mes<br><input type="radio"/> 1 vez semana<br><input type="radio"/> 2 a 4 veces semana<br><input type="radio"/> 5 a 6 veces semana<br><input type="radio"/> 1 vez al día<br><input type="radio"/> 2 a 3 veces al día<br><input type="radio"/> 5 a 6 veces al día<br><input type="radio"/> más 6 veces al día |
|-------------------|--------------------------------------------------------------------------------------------------------------------------------------------------------------------------------------------------------------------------------------------------------------------------------------------------------------------------------------------------------------------------------------------------------------|

---

|               |                                                                                                                                                                                                                                                                                                                                                                                                              |
|---------------|--------------------------------------------------------------------------------------------------------------------------------------------------------------------------------------------------------------------------------------------------------------------------------------------------------------------------------------------------------------------------------------------------------------|
| te o infusión | <input checked="" type="radio"/> Nunca o menos 1 vez al mes<br><input type="radio"/> 1 a 3 veces mes<br><input type="radio"/> 1 vez semana<br><input type="radio"/> 2 a 4 veces semana<br><input type="radio"/> 5 a 6 veces semana<br><input type="radio"/> 1 vez al día<br><input type="radio"/> 2 a 3 veces al día<br><input type="radio"/> 5 a 6 veces al día<br><input type="radio"/> más 6 veces al día |
|---------------|--------------------------------------------------------------------------------------------------------------------------------------------------------------------------------------------------------------------------------------------------------------------------------------------------------------------------------------------------------------------------------------------------------------|

---

|                      |                                                                                                                                                                                                                                                                                                                                                                                                              |
|----------------------|--------------------------------------------------------------------------------------------------------------------------------------------------------------------------------------------------------------------------------------------------------------------------------------------------------------------------------------------------------------------------------------------------------------|
| sopa o puré verduras | <input type="radio"/> Nunca o menos 1 vez al mes<br><input type="radio"/> 1 a 3 veces mes<br><input checked="" type="radio"/> 1 vez semana<br><input type="radio"/> 2 a 4 veces semana<br><input type="radio"/> 5 a 6 veces semana<br><input type="radio"/> 1 vez al día<br><input type="radio"/> 2 a 3 veces al día<br><input type="radio"/> 5 a 6 veces al día<br><input type="radio"/> más 6 veces al día |
|----------------------|--------------------------------------------------------------------------------------------------------------------------------------------------------------------------------------------------------------------------------------------------------------------------------------------------------------------------------------------------------------------------------------------------------------|

---

|                       |                                                                                                                                                                                                                                                                                                                                                                                                              |
|-----------------------|--------------------------------------------------------------------------------------------------------------------------------------------------------------------------------------------------------------------------------------------------------------------------------------------------------------------------------------------------------------------------------------------------------------|
| croquetas pollo jamón | <input type="radio"/> Nunca o menos 1 vez al mes<br><input type="radio"/> 1 a 3 veces mes<br><input checked="" type="radio"/> 1 vez semana<br><input type="radio"/> 2 a 4 veces semana<br><input type="radio"/> 5 a 6 veces semana<br><input type="radio"/> 1 vez al día<br><input type="radio"/> 2 a 3 veces al día<br><input type="radio"/> 5 a 6 veces al día<br><input type="radio"/> más 6 veces al día |
|-----------------------|--------------------------------------------------------------------------------------------------------------------------------------------------------------------------------------------------------------------------------------------------------------------------------------------------------------------------------------------------------------------------------------------------------------|

---

|                   |                                                                                                                                                                                                                                                                                                                                                                                                              |
|-------------------|--------------------------------------------------------------------------------------------------------------------------------------------------------------------------------------------------------------------------------------------------------------------------------------------------------------------------------------------------------------------------------------------------------------|
| croquetas pescado | <input checked="" type="radio"/> Nunca o menos 1 vez al mes<br><input type="radio"/> 1 a 3 veces mes<br><input type="radio"/> 1 vez semana<br><input type="radio"/> 2 a 4 veces semana<br><input type="radio"/> 5 a 6 veces semana<br><input type="radio"/> 1 vez al día<br><input type="radio"/> 2 a 3 veces al día<br><input type="radio"/> 5 a 6 veces al día<br><input type="radio"/> más 6 veces al día |
|-------------------|--------------------------------------------------------------------------------------------------------------------------------------------------------------------------------------------------------------------------------------------------------------------------------------------------------------------------------------------------------------------------------------------------------------|

---

|          |                                                                                                                                                                                                                                                                                                                                                                                                              |
|----------|--------------------------------------------------------------------------------------------------------------------------------------------------------------------------------------------------------------------------------------------------------------------------------------------------------------------------------------------------------------------------------------------------------------|
| mayonesa | <input checked="" type="radio"/> Nunca o menos 1 vez al mes<br><input type="radio"/> 1 a 3 veces mes<br><input type="radio"/> 1 vez semana<br><input type="radio"/> 2 a 4 veces semana<br><input type="radio"/> 5 a 6 veces semana<br><input type="radio"/> 1 vez al día<br><input type="radio"/> 2 a 3 veces al día<br><input type="radio"/> 5 a 6 veces al día<br><input type="radio"/> más 6 veces al día |
|----------|--------------------------------------------------------------------------------------------------------------------------------------------------------------------------------------------------------------------------------------------------------------------------------------------------------------------------------------------------------------------------------------------------------------|

---

|                  |                                                                                                                                                                                                                                                                                                                                                                                                              |
|------------------|--------------------------------------------------------------------------------------------------------------------------------------------------------------------------------------------------------------------------------------------------------------------------------------------------------------------------------------------------------------------------------------------------------------|
| salsa tomate     | <input type="radio"/> Nunca o menos 1 vez al mes<br><input type="radio"/> 1 a 3 veces mes<br><input checked="" type="radio"/> 1 vez semana<br><input type="radio"/> 2 a 4 veces semana<br><input type="radio"/> 5 a 6 veces semana<br><input type="radio"/> 1 vez al día<br><input type="radio"/> 2 a 3 veces al día<br><input type="radio"/> 5 a 6 veces al día<br><input type="radio"/> más 6 veces al día |
| ketchup          | <input type="radio"/> Nunca o menos 1 vez al mes<br><input checked="" type="radio"/> 1 a 3 veces mes<br><input type="radio"/> 1 vez semana<br><input type="radio"/> 2 a 4 veces semana<br><input type="radio"/> 5 a 6 veces semana<br><input type="radio"/> 1 vez al día<br><input type="radio"/> 2 a 3 veces al día<br><input type="radio"/> 5 a 6 veces al día<br><input type="radio"/> más 6 veces al día |
| sal              | <input type="radio"/> Nunca o menos 1 vez al mes<br><input type="radio"/> 1 a 3 veces mes<br><input type="radio"/> 1 vez semana<br><input type="radio"/> 2 a 4 veces semana<br><input type="radio"/> 5 a 6 veces semana<br><input checked="" type="radio"/> 1 vez al día<br><input type="radio"/> 2 a 3 veces al día<br><input type="radio"/> 5 a 6 veces al día<br><input type="radio"/> más 6 veces al día |
| ajo              | <input type="radio"/> Nunca o menos 1 vez al mes<br><input type="radio"/> 1 a 3 veces mes<br><input type="radio"/> 1 vez semana<br><input type="radio"/> 2 a 4 veces semana<br><input checked="" type="radio"/> 5 a 6 veces semana<br><input type="radio"/> 1 vez al día<br><input type="radio"/> 2 a 3 veces al día<br><input type="radio"/> 5 a 6 veces al día<br><input type="radio"/> más 6 veces al día |
| mermelada o miel | <input checked="" type="radio"/> Nunca o menos 1 vez al mes<br><input type="radio"/> 1 a 3 veces mes<br><input type="radio"/> 1 vez semana<br><input type="radio"/> 2 a 4 veces semana<br><input type="radio"/> 5 a 6 veces semana<br><input type="radio"/> 1 vez al día<br><input type="radio"/> 2 a 3 veces al día<br><input type="radio"/> 5 a 6 veces al día<br><input type="radio"/> más 6 veces al día |
| azúcar           | <input checked="" type="radio"/> Nunca o menos 1 vez al mes<br><input type="radio"/> 1 a 3 veces mes<br><input type="radio"/> 1 vez semana<br><input type="radio"/> 2 a 4 veces semana<br><input type="radio"/> 5 a 6 veces semana<br><input type="radio"/> 1 vez al día<br><input type="radio"/> 2 a 3 veces al día<br><input type="radio"/> 5 a 6 veces al día<br><input type="radio"/> más 6 veces al día |

|                                       |                                                                                                                                                                                                                                                                                                                                                                                                                                                                                                                               |
|---------------------------------------|-------------------------------------------------------------------------------------------------------------------------------------------------------------------------------------------------------------------------------------------------------------------------------------------------------------------------------------------------------------------------------------------------------------------------------------------------------------------------------------------------------------------------------|
| Otro alimento                         |                                                                                                                                                                                                                                                                                                                                                                                                                                                                                                                               |
| suplementos vitamínicos               | <input checked="" type="radio"/> si<br><input type="radio"/> no                                                                                                                                                                                                                                                                                                                                                                                                                                                               |
| suplementos vitamínicos               | [*DATA REMOVED*]                                                                                                                                                                                                                                                                                                                                                                                                                                                                                                              |
| dieta previa                          | <input type="radio"/> si<br><input checked="" type="radio"/> no                                                                                                                                                                                                                                                                                                                                                                                                                                                               |
| motivo dieta                          | <input checked="" type="radio"/> no dieta<br><input type="radio"/> control peso<br><input type="radio"/> control colesterol<br><input type="radio"/> control diabetes<br><input type="radio"/> problemas estómago<br><input type="radio"/> problemas vesícula o hepáticos<br><input type="radio"/> HTA o cardiopatía<br><input type="radio"/> problemas renales<br><input type="radio"/> alergia alimentaria<br><input type="radio"/> ácido úrico elevado<br><input type="radio"/> vegetariana<br><input type="radio"/> otros |
| cambio alimentos año previo gestación | <input checked="" type="radio"/> si<br><input type="radio"/> no                                                                                                                                                                                                                                                                                                                                                                                                                                                               |
| cambio lácteos                        | <input type="radio"/> eliminado<br><input type="radio"/> disminuido<br><input checked="" type="radio"/> igual<br><input type="radio"/> aumentado<br><input type="radio"/> no sabe                                                                                                                                                                                                                                                                                                                                             |
| cambio huevos                         | <input type="radio"/> eliminado<br><input type="radio"/> disminuido<br><input checked="" type="radio"/> igual<br><input type="radio"/> aumentado<br><input type="radio"/> no sabe                                                                                                                                                                                                                                                                                                                                             |
| cambio carne                          | <input type="radio"/> eliminado<br><input type="radio"/> disminuido<br><input checked="" type="radio"/> igual<br><input type="radio"/> aumentado<br><input type="radio"/> no sabe                                                                                                                                                                                                                                                                                                                                             |
| cambio pescado                        | <input type="radio"/> eliminado<br><input type="radio"/> disminuido<br><input checked="" type="radio"/> igual<br><input type="radio"/> aumentado<br><input type="radio"/> no sabe                                                                                                                                                                                                                                                                                                                                             |
| cambio verduras                       | <input type="radio"/> eliminado<br><input type="radio"/> disminuido<br><input checked="" type="radio"/> igual<br><input type="radio"/> aumentado<br><input type="radio"/> no sabe                                                                                                                                                                                                                                                                                                                                             |



|                            |                                                                                                                                                                                                                        |
|----------------------------|------------------------------------------------------------------------------------------------------------------------------------------------------------------------------------------------------------------------|
| cambio legumbres           | <input type="radio"/> eliminado<br><input type="radio"/> disminuido<br><input checked="" type="radio"/> igual<br><input type="radio"/> aumentado<br><input type="radio"/> no sabe                                      |
| cambio fruta               | <input type="radio"/> eliminado<br><input type="radio"/> disminuido<br><input checked="" type="radio"/> igual<br><input type="radio"/> aumentado<br><input type="radio"/> no sabe                                      |
| cambio pan                 | <input type="radio"/> eliminado<br><input type="radio"/> disminuido<br><input checked="" type="radio"/> igual<br><input type="radio"/> aumentado<br><input type="radio"/> no sabe                                      |
| cambio aceite oliva        | <input type="radio"/> eliminado<br><input type="radio"/> disminuido<br><input checked="" type="radio"/> igual<br><input type="radio"/> aumentado<br><input type="radio"/> no sabe                                      |
| cambio mante o margarina   | <input type="radio"/> eliminado<br><input type="radio"/> disminuido<br><input checked="" type="radio"/> igual<br><input type="radio"/> aumentado<br><input type="radio"/> no sabe                                      |
| cambio azúcar y dulces     | <input type="radio"/> eliminado<br><input type="radio"/> disminuido<br><input checked="" type="radio"/> igual<br><input type="radio"/> aumentado<br><input type="radio"/> no sabe                                      |
| cambio bebidas alcohólicas | <input checked="" type="radio"/> eliminado<br><input type="radio"/> disminuido<br><input type="radio"/> igual<br><input type="radio"/> aumentado<br><input type="radio"/> no sabe                                      |
| frecuencia comidas fritas  | <input type="radio"/> a diario<br><input type="radio"/> 5 a 6 veces semana<br><input type="radio"/> 2 a 4 veces semana<br><input type="radio"/> 1 vez semana<br><input checked="" type="radio"/> menos de 1 vez semana |
| carne                      | <input type="radio"/> no como<br><input type="radio"/> cruda<br><input type="radio"/> poco hecha<br><input checked="" type="radio"/> hecha<br><input type="radio"/> muy hecha                                          |
| grasa visible carne        | <input type="radio"/> quita toda<br><input type="radio"/> quita mayoría<br><input checked="" type="radio"/> quita un poco<br><input type="radio"/> no quita nada                                                       |

|                                |                                                                                                                                                                                                                                                          |
|--------------------------------|----------------------------------------------------------------------------------------------------------------------------------------------------------------------------------------------------------------------------------------------------------|
| cocina carne                   | <input checked="" type="radio"/> a la plancha<br><input type="radio"/> a la parrilla<br><input type="radio"/> asada<br><input type="radio"/> frita<br><input type="radio"/> guisada                                                                      |
| tostado quemado carne          | <input checked="" type="radio"/> nunca<br><input type="radio"/> 1 vez mes<br><input type="radio"/> 2 a 3 veces mes<br><input type="radio"/> 1 vez semana<br><input type="radio"/> 2 a 3 semanas                                                          |
| tostado quemado pescado        | <input checked="" type="radio"/> nunca<br><input type="radio"/> 1 vez mes<br><input type="radio"/> 2 a 3 veces mes<br><input type="radio"/> 1 vez semana<br><input type="radio"/> 2 a 3 semanas                                                          |
| socarrat paella                | <input checked="" type="radio"/> nunca<br><input type="radio"/> 1 vez mes<br><input type="radio"/> 2 a 3 veces mes<br><input type="radio"/> 1 vez semana<br><input type="radio"/> 2 a 3 semanas                                                          |
| grasa o aceite cocinar         | <input type="radio"/> mantequilla<br><input type="radio"/> margarina<br><input type="radio"/> aceite oliva<br><input checked="" type="radio"/> aceite oliva virgen extra<br><input type="radio"/> aceite vegetal<br><input type="radio"/> mezcla aceites |
| grasa aceite aliñar            | <input type="radio"/> mantequilla<br><input type="radio"/> margarina<br><input type="radio"/> aceite oliva<br><input checked="" type="radio"/> aceite oliva virgen extra<br><input type="radio"/> aceite vegetal<br><input type="radio"/> mezcla aceites |
| grasa aceite freir             | <input type="radio"/> mantequilla<br><input type="radio"/> margarina<br><input type="radio"/> aceite oliva<br><input checked="" type="radio"/> aceite oliva virgen extra<br><input type="radio"/> aceite vegetal<br><input type="radio"/> mezcla aceites |
| Ejercicio cuestionario         | <input checked="" type="radio"/> si<br><input type="radio"/> no                                                                                                                                                                                          |
| horas de sueño incluido siesta | [*DATA REMOVED*]                                                                                                                                                                                                                                         |
| minutos siesta                 | [*DATA REMOVED*]                                                                                                                                                                                                                                         |
| horas televisión semana        | [*DATA REMOVED*]                                                                                                                                                                                                                                         |

|                                        |                                                                                                                                                                                                                                                                                                                                                                           |
|----------------------------------------|---------------------------------------------------------------------------------------------------------------------------------------------------------------------------------------------------------------------------------------------------------------------------------------------------------------------------------------------------------------------------|
| actividad trabajo                      | <input type="radio"/> casi siempre sentado<br><input type="radio"/> sentado 50 por cien<br><input type="radio"/> casi siempre de pie, quieto<br><input checked="" type="radio"/> casi siempre levantado caminando y llevando pocas cosas<br><input type="radio"/> casi siempre levantado, caminando y llevado muchas cosas<br><input type="radio"/> trabajo manual pesado |
| tiempo caminar o bici al día           | <input type="radio"/> casi nunca<br><input type="radio"/> menos 20min día<br><input type="radio"/> 20 a 40 min día<br><input type="radio"/> 40 a 60 min día<br><input type="radio"/> 1h o 1h y media día<br><input checked="" type="radio"/> más de 1h y media al día                                                                                                     |
| tiempo tareas casa al día              | <input type="radio"/> menos de 1h día<br><input checked="" type="radio"/> 1 a 2h día<br><input type="radio"/> 3 a 4h día<br><input type="radio"/> 5 a 6h día<br><input type="radio"/> 7 a 8h día<br><input type="radio"/> más de 8h día                                                                                                                                   |
| tiempo libre televisión ordenador leer | <input type="radio"/> menos 1h día<br><input type="radio"/> 1h día<br><input type="radio"/> 2h día<br><input checked="" type="radio"/> 3h día<br><input type="radio"/> 4h día<br><input type="radio"/> 5 a 6h día<br><input type="radio"/> mas 6h día                                                                                                                     |
| tiempo libre ejercicio o deporte       | <input type="radio"/> menos 1h semana<br><input type="radio"/> 1h semana<br><input type="radio"/> 2h semana<br><input checked="" type="radio"/> 3h semana<br><input type="radio"/> 4 a 5h semana<br><input type="radio"/> mas 5h semana                                                                                                                                   |
| como se considera                      | <input type="radio"/> sedentaria<br><input type="radio"/> poco activa<br><input checked="" type="radio"/> moderadamente activa<br><input type="radio"/> bastante activa<br><input type="radio"/> muy activa<br><input type="radio"/> no sabe                                                                                                                              |
| FUR                                    | [*DATA REMOVED*]                                                                                                                                                                                                                                                                                                                                                          |
| Semanas gestación 2T                   | [*DATA REMOVED*]                                                                                                                                                                                                                                                                                                                                                          |
| Días gestación 2T                      | [*DATA REMOVED*]                                                                                                                                                                                                                                                                                                                                                          |
| DBP 2T                                 | [*DATA REMOVED*]                                                                                                                                                                                                                                                                                                                                                          |
| CC 2T                                  | [*DATA REMOVED*]                                                                                                                                                                                                                                                                                                                                                          |
| AC 2T                                  | [*DATA REMOVED*]                                                                                                                                                                                                                                                                                                                                                          |

|                                                   |                                                                                                                                                                                                 |
|---------------------------------------------------|-------------------------------------------------------------------------------------------------------------------------------------------------------------------------------------------------|
| LF 2T                                             | [*DATA REMOVED*]                                                                                                                                                                                |
| PFE 2T (Hadlock)                                  | [*DATA REMOVED*]                                                                                                                                                                                |
| Semanas gestación 3T                              | [*DATA REMOVED*]                                                                                                                                                                                |
| días 3T                                           | [*DATA REMOVED*]                                                                                                                                                                                |
| DBP 3T                                            | [*DATA REMOVED*]                                                                                                                                                                                |
| CC 3T                                             | [*DATA REMOVED*]                                                                                                                                                                                |
| AC 3T                                             | [*DATA REMOVED*]                                                                                                                                                                                |
| LF 3T                                             | [*DATA REMOVED*]                                                                                                                                                                                |
| PFE 3T (Hadlock)                                  | [*DATA REMOVED*]                                                                                                                                                                                |
| Semanas de gestación final                        | [*DATA REMOVED*]                                                                                                                                                                                |
| días gestación final                              | [*DATA REMOVED*]                                                                                                                                                                                |
| Localización placenta                             | <input checked="" type="radio"/> anterior<br><input type="radio"/> lateral derecha<br><input type="radio"/> lateral izquierda<br><input type="radio"/> posterior<br><input type="radio"/> fondo |
| Presentación longitudinal cefálica                | <input type="radio"/> no<br><input checked="" type="radio"/> si                                                                                                                                 |
| Dorso                                             | <input type="radio"/> izquierda anterior<br><input type="radio"/> izquierda posterior<br><input checked="" type="radio"/> derecha anterior<br><input type="radio"/> derecha posterior           |
| diámetro biparietal                               | [*DATA REMOVED*]                                                                                                                                                                                |
| Circunferencia craneal                            | [*DATA REMOVED*]                                                                                                                                                                                |
| Circunferencia abdominal                          | [*DATA REMOVED*]                                                                                                                                                                                |
| Longitud de femur                                 | [*DATA REMOVED*]                                                                                                                                                                                |
| tejido celular subcutáneo a nivel del muslo en mm | [*DATA REMOVED*]                                                                                                                                                                                |
| tejido celular subcutáneo en abdomen en mm        | [*DATA REMOVED*]                                                                                                                                                                                |
| Volumen del muslo en cm3                          | [*DATA REMOVED*]                                                                                                                                                                                |
| Peso fetal estimado según fórmula de Hadlock      | [*DATA REMOVED*]                                                                                                                                                                                |

|                                               |                                                                                                                                                          |
|-----------------------------------------------|----------------------------------------------------------------------------------------------------------------------------------------------------------|
| Percentil                                     | [*DATA REMOVED*]                                                                                                                                         |
| Peso fetal estimado según fórmula de Scioscia | <hr/>                                                                                                                                                    |
| Peso fetal estimado según fórmula de LEE      | <hr/>                                                                                                                                                    |
| Tipo de parto                                 | <input checked="" type="radio"/> eutocico<br><input type="radio"/> instrumentado/ventosa<br><input type="radio"/> cesarea                                |
| fecha de nacimiento                           | [*DATA REMOVED*]                                                                                                                                         |
| Días entre exploración y nacimiento           | [*DATA REMOVED*]                                                                                                                                         |
| Peso RN en g                                  | [*DATA REMOVED*]                                                                                                                                         |
| sexo                                          | <input type="radio"/> mujer<br><input checked="" type="radio"/> hombre                                                                                   |
| Apgar 1 minuto                                | [*DATA REMOVED*]                                                                                                                                         |
| Apgar 5 minutos                               | [*DATA REMOVED*]                                                                                                                                         |
| Apgar 10 minutos                              | <hr/>                                                                                                                                                    |
| antecedente Covid durante gestación           | <input type="radio"/> Yes<br><input checked="" type="radio"/> No                                                                                         |
| Nivel de estudios                             | <input type="radio"/> ninguno<br><input checked="" type="radio"/> primarios<br><input type="radio"/> secundarios<br><input type="radio"/> universitarios |

# Base\_datos\_estimacion\_peso\_fetal

|                                       |                                                                                                                                                                                                                                                                                      |
|---------------------------------------|--------------------------------------------------------------------------------------------------------------------------------------------------------------------------------------------------------------------------------------------------------------------------------------|
| Número de identificación participante | 90                                                                                                                                                                                                                                                                                   |
| CODIGO PARTICIPANTE                   |                                                                                                                                                                                                                                                                                      |
| Edad                                  | [*DATA REMOVED*]                                                                                                                                                                                                                                                                     |
| Gestaciones                           | <input checked="" type="radio"/> 1<br><input type="radio"/> 2<br><input type="radio"/> 3<br><input type="radio"/> mas de 3                                                                                                                                                           |
| partos                                | <input checked="" type="radio"/> 0<br><input type="radio"/> 1<br><input type="radio"/> 2<br><input type="radio"/> 3<br><input type="radio"/> mas de 3                                                                                                                                |
| cesáreas                              | <input checked="" type="radio"/> 0<br><input type="radio"/> 1<br><input type="radio"/> 2<br><input type="radio"/> 3<br><input type="radio"/> mas de 3                                                                                                                                |
| Abortos                               | <input checked="" type="radio"/> 0<br><input type="radio"/> 1<br><input type="radio"/> 2<br><input type="radio"/> 3<br><input type="radio"/> mas de 3                                                                                                                                |
| Tipo de gestacion                     | <input checked="" type="radio"/> espontanea<br><input type="radio"/> IAC inseminación artificial conyuge<br><input type="radio"/> IAD inseminación artificial donante<br><input type="radio"/> FIV Fecundación in Vitro<br><input type="radio"/> Ovodon FIV con donación de ovocitos |
| peso previo a embarazo                | [*DATA REMOVED*]                                                                                                                                                                                                                                                                     |
| Ganancia ponderal embarazo            |                                                                                                                                                                                                                                                                                      |
| Talla madre                           | [*DATA REMOVED*]                                                                                                                                                                                                                                                                     |
| IMC previo embarazo                   | 24.538964901844146                                                                                                                                                                                                                                                                   |
| Patología obstétrica                  | <input checked="" type="radio"/> no<br><input type="radio"/> si                                                                                                                                                                                                                      |
| Diabetes pregestacional               | <input checked="" type="radio"/> no<br><input type="radio"/> si                                                                                                                                                                                                                      |
| Diabetes gestacional                  | <input checked="" type="radio"/> no<br><input type="radio"/> si                                                                                                                                                                                                                      |

|                                            |                                                                                                                                                                                      |
|--------------------------------------------|--------------------------------------------------------------------------------------------------------------------------------------------------------------------------------------|
| Diabetes gestacional con insulina          | <input checked="" type="radio"/> no<br><input type="radio"/> si                                                                                                                      |
| Diabetes gestacional con dieta y ejercicio | <input checked="" type="radio"/> no<br><input type="radio"/> si                                                                                                                      |
| Percentil fetos previos                    | <input checked="" type="radio"/> Nada<br><input type="radio"/> percentil menor de 10<br><input type="radio"/> percentil entre 10 y 90<br><input type="radio"/> percentil mayor de 90 |
| Exfumadora                                 | <input checked="" type="radio"/> Nada<br><input type="radio"/> menos de 5 años<br><input type="radio"/> 5 a 10 años<br><input type="radio"/> mayor o igual a 10 años                 |
| Hábito tabáquico                           | <input checked="" type="radio"/> no<br><input type="radio"/> si                                                                                                                      |
| fumadora                                   | [*DATA REMOVED*]                                                                                                                                                                     |
| Consumo otros tóxicos                      | <input checked="" type="radio"/> no<br><input type="radio"/> si                                                                                                                      |
| Hb 1T                                      | [*DATA REMOVED*]                                                                                                                                                                     |
| Htc 1T                                     | [*DATA REMOVED*]                                                                                                                                                                     |
| Hb 2T                                      | [*DATA REMOVED*]                                                                                                                                                                     |
| HTC 2T                                     | [*DATA REMOVED*]                                                                                                                                                                     |
| Hb 3T                                      | [*DATA REMOVED*]                                                                                                                                                                     |
| HTC 3T                                     | [*DATA REMOVED*]                                                                                                                                                                     |
| Suplemento FE oral                         | <input type="radio"/> si<br><input checked="" type="radio"/> no                                                                                                                      |
| Suplemento fe iv                           | <input type="radio"/> si<br><input checked="" type="radio"/> no                                                                                                                      |
| Transfusión                                | <input checked="" type="radio"/> no<br><input type="radio"/> si                                                                                                                      |
| Solicitada Vit D                           | <input checked="" type="radio"/> no<br><input type="radio"/> si                                                                                                                      |
| Deficit vit D                              | <input type="radio"/> no<br><input type="radio"/> si                                                                                                                                 |
| Suplemento vit D                           | <input type="radio"/> si<br><input type="radio"/> no                                                                                                                                 |

|                       |                                                                                                                                                                                                                                                                                                                                                                                                              |
|-----------------------|--------------------------------------------------------------------------------------------------------------------------------------------------------------------------------------------------------------------------------------------------------------------------------------------------------------------------------------------------------------------------------------------------------------|
| Dieta, cuestionario   | <input checked="" type="radio"/> si<br><input type="radio"/> no                                                                                                                                                                                                                                                                                                                                              |
| Leche entera          | <input checked="" type="radio"/> Nunca o menos 1 vez al mes<br><input type="radio"/> 1 a 3 veces mes<br><input type="radio"/> 1 vez semana<br><input type="radio"/> 2 a 4 veces semana<br><input type="radio"/> 5 a 6 veces semana<br><input type="radio"/> 1 vez al día<br><input type="radio"/> 2 a 3 veces al día<br><input type="radio"/> 5 a 6 veces al día<br><input type="radio"/> más 6 veces al día |
| Leche semidesnatada   | <input type="radio"/> Nunca o menos 1 vez al mes<br><input type="radio"/> 1 a 3 veces mes<br><input type="radio"/> 1 vez semana<br><input type="radio"/> 2 a 4 veces semana<br><input type="radio"/> 5 a 6 veces semana<br><input checked="" type="radio"/> 1 vez al día<br><input type="radio"/> 2 a 3 veces al día<br><input type="radio"/> 5 a 6 veces al día<br><input type="radio"/> mas 6 veces al día |
| Leche desnatada       | <input checked="" type="radio"/> Nunca o menos 1 vez al mes<br><input type="radio"/> 1 a 3 veces mes<br><input type="radio"/> 1 vez semana<br><input type="radio"/> 2 a 4 veces semana<br><input type="radio"/> 5 a 6 veces semana<br><input type="radio"/> 1 vez al día<br><input type="radio"/> 2 a 3 veces al día<br><input type="radio"/> 5 a 6 veces al día<br><input type="radio"/> más 6 veces al día |
| Leche condensada      | <input checked="" type="radio"/> Nunca o menos 1 vez al mes<br><input type="radio"/> 1 a 3 veces mes<br><input type="radio"/> 1 vez semana<br><input type="radio"/> 2 a 4 veces semana<br><input type="radio"/> 5 a 6 veces semana<br><input type="radio"/> 1 vez al día<br><input type="radio"/> 2 a 3 veces al día<br><input type="radio"/> 5 a 6 veces al día<br><input type="radio"/> más 6 veces al día |
| nata o crema de leche | <input checked="" type="radio"/> Nunca o menos 1 vez al mes<br><input type="radio"/> 1 a 3 veces mes<br><input type="radio"/> 1 vez semana<br><input type="radio"/> 2 a 4 veces semana<br><input type="radio"/> 5 a 6 veces semana<br><input type="radio"/> 1 vez al día<br><input type="radio"/> 2 a 3 veces al día<br><input type="radio"/> 5 a 6 veces al día<br><input type="radio"/> más 6 veces al día |



|                                             |                                                                                                                                                                                                                                                                                                                                                                                                              |
|---------------------------------------------|--------------------------------------------------------------------------------------------------------------------------------------------------------------------------------------------------------------------------------------------------------------------------------------------------------------------------------------------------------------------------------------------------------------|
| Yogurt Entero                               | <input checked="" type="radio"/> Nunca o menos 1 vez al mes<br><input type="radio"/> 1 a 3 veces mes<br><input type="radio"/> 1 vez semana<br><input type="radio"/> 2 a 4 veces semana<br><input type="radio"/> 5 a 6 veces semana<br><input type="radio"/> 1 vez al día<br><input type="radio"/> 2 a 3 veces al día<br><input type="radio"/> 5 a 6 veces al día<br><input type="radio"/> más 6 veces al día |
| Yogurt desnatado                            | <input type="radio"/> Nunca o menos 1 vez al mes<br><input type="radio"/> 1 a 3 veces mes<br><input type="radio"/> 1 vez semana<br><input type="radio"/> 2 a 4 veces semana<br><input type="radio"/> 5 a 6 veces semana<br><input checked="" type="radio"/> 1 vez al día<br><input type="radio"/> 2 a 3 veces al día<br><input type="radio"/> 5 a 6 veces al día<br><input type="radio"/> más 6 veces al día |
| 100g requesón o queso blando o queso fresco | <input type="radio"/> Nunca o menos 1 vez al mes<br><input type="radio"/> 1 a 3 veces mes<br><input type="radio"/> 1 vez semana<br><input type="radio"/> 2 a 4 veces semana<br><input type="radio"/> 5 a 6 veces semana<br><input checked="" type="radio"/> 1 vez al día<br><input type="radio"/> 2 a 3 veces al día<br><input type="radio"/> 5 a 6 veces al día<br><input type="radio"/> más 6 veces al día |
| queso curado o semicurado o cremoso         | <input checked="" type="radio"/> Nunca o menos 1 vez al mes<br><input type="radio"/> 1 a 3 veces mes<br><input type="radio"/> 1 vez semana<br><input type="radio"/> 2 a 4 veces semana<br><input type="radio"/> 5 a 6 veces semana<br><input type="radio"/> 1 vez al día<br><input type="radio"/> 2 a 3 veces al día<br><input type="radio"/> 5 a 6 veces al día<br><input type="radio"/> más 6 veces al día |
| natillas flan pudding                       | <input checked="" type="radio"/> Nunca o menos 1 vez al mes<br><input type="radio"/> 1 a 3 veces mes<br><input type="radio"/> 1 vez semana<br><input type="radio"/> 2 a 4 veces semana<br><input type="radio"/> 5 a 6 veces semana<br><input type="radio"/> 1 vez al día<br><input type="radio"/> 2 a 3 veces al día<br><input type="radio"/> 5 a 6 veces al día<br><input type="radio"/> más 6 veces al día |
| Helado                                      | <input type="radio"/> Nunca o menos 1 vez al mes<br><input checked="" type="radio"/> 1 a 3 veces mes<br><input type="radio"/> 1 vez semana<br><input type="radio"/> 2 a 4 veces semana<br><input type="radio"/> 5 a 6 veces semana<br><input type="radio"/> 1 vez al día<br><input type="radio"/> 2 a 3 veces al día<br><input type="radio"/> 5 a 6 veces al día<br><input type="radio"/> más 6 veces al día |

|                                      |                                                                                                                                                                                                                                                                                                                                                                                                              |
|--------------------------------------|--------------------------------------------------------------------------------------------------------------------------------------------------------------------------------------------------------------------------------------------------------------------------------------------------------------------------------------------------------------------------------------------------------------|
| huevo                                | <input type="radio"/> Nunca o menos 1 vez al mes<br><input type="radio"/> 1 a 3 veces mes<br><input type="radio"/> 1 vez semana<br><input checked="" type="radio"/> 2 a 4 veces semana<br><input type="radio"/> 5 a 6 veces semana<br><input type="radio"/> 1 vez al día<br><input type="radio"/> 2 a 3 veces al día<br><input type="radio"/> 5 a 6 veces al día<br><input type="radio"/> más 6 veces al día |
| Pollo con piel                       | <input type="radio"/> Nunca o menos 1 vez al mes<br><input type="radio"/> 1 a 3 veces mes<br><input checked="" type="radio"/> 1 vez semana<br><input type="radio"/> 2 a 4 veces semana<br><input type="radio"/> 5 a 6 veces semana<br><input type="radio"/> 1 vez al día<br><input type="radio"/> 2 a 3 veces al día<br><input type="radio"/> 5 a 6 veces al día<br><input type="radio"/> más 6 veces al día |
| pollo sin piel                       | <input type="radio"/> Nunca o menos 1 vez al mes<br><input type="radio"/> 1 a 3 veces mes<br><input type="radio"/> 1 vez semana<br><input checked="" type="radio"/> 2 a 4 veces semana<br><input type="radio"/> 5 a 6 veces semana<br><input type="radio"/> 1 vez al día<br><input type="radio"/> 2 a 3 veces al día<br><input type="radio"/> 5 a 6 veces al día<br><input type="radio"/> más 6 veces al día |
| Ternera o cerdo o cordero            | <input type="radio"/> Nunca o menos 1 vez al mes<br><input type="radio"/> 1 a 3 veces mes<br><input checked="" type="radio"/> 1 vez semana<br><input type="radio"/> 2 a 4 veces semana<br><input type="radio"/> 5 a 6 veces semana<br><input type="radio"/> 1 vez al día<br><input type="radio"/> 2 a 3 veces al día<br><input type="radio"/> 5 a 6 veces al día<br><input type="radio"/> más 6 veces al día |
| carne caza: Conejo o codorniz o pato | <input type="radio"/> Nunca o menos 1 vez al mes<br><input checked="" type="radio"/> 1 a 3 veces mes<br><input type="radio"/> 1 vez semana<br><input type="radio"/> 2 a 4 veces semana<br><input type="radio"/> 5 a 6 veces semana<br><input type="radio"/> 1 vez al día<br><input type="radio"/> 2 a 3 veces al día<br><input type="radio"/> 5 a 6 veces al día<br><input type="radio"/> más 6 veces al día |
| Hígado de ternera o cerdo o pollo    | <input checked="" type="radio"/> Nunca o menos 1 vez al mes<br><input type="radio"/> 1 a 3 veces mes<br><input type="radio"/> 1 vez semana<br><input type="radio"/> 2 a 4 veces semana<br><input type="radio"/> 5 a 6 veces semana<br><input type="radio"/> 1 vez al día<br><input type="radio"/> 2 a 3 veces al día<br><input type="radio"/> 5 a 6 veces al día<br><input type="radio"/> más 6 veces al día |

|                     |                                                                                                                                                                                                                                                                                                                                                                                                              |
|---------------------|--------------------------------------------------------------------------------------------------------------------------------------------------------------------------------------------------------------------------------------------------------------------------------------------------------------------------------------------------------------------------------------------------------------|
| Vísceras            | <input checked="" type="radio"/> Nunca o menos 1 vez al mes<br><input type="radio"/> 1 a 3 veces mes<br><input type="radio"/> 1 vez semana<br><input type="radio"/> 2 a 4 veces semana<br><input type="radio"/> 5 a 6 veces semana<br><input type="radio"/> 1 vez al día<br><input type="radio"/> 2 a 3 veces al día<br><input type="radio"/> 5 a 6 veces al día<br><input type="radio"/> más 6 veces al día |
| Embutido            | <input checked="" type="radio"/> Nunca o menos 1 vez al mes<br><input type="radio"/> 1 a 3 veces mes<br><input type="radio"/> 1 vez semana<br><input type="radio"/> 2 a 4 veces semana<br><input type="radio"/> 5 a 6 veces semana<br><input type="radio"/> 1 vez al día<br><input type="radio"/> 2 a 3 veces al día<br><input type="radio"/> 5 a 6 veces al día<br><input type="radio"/> más 6 veces al día |
| Salchicha o similar | <input checked="" type="radio"/> Nunca o menos 1 vez al mes<br><input type="radio"/> 1 a 3 veces mes<br><input type="radio"/> 1 vez semana<br><input type="radio"/> 2 a 4 veces semana<br><input type="radio"/> 5 a 6 veces semana<br><input type="radio"/> 1 vez al día<br><input type="radio"/> 2 a 3 veces al día<br><input type="radio"/> 5 a 6 veces al día<br><input type="radio"/> más 6 veces al día |
| Pate o foiegras     | <input checked="" type="radio"/> Nunca o menos 1 vez al mes<br><input type="radio"/> 1 a 3 veces mes<br><input type="radio"/> 1 vez semana<br><input type="radio"/> 2 a 4 veces semana<br><input type="radio"/> 5 a 6 veces semana<br><input type="radio"/> 1 vez al día<br><input type="radio"/> 2 a 3 veces al día<br><input type="radio"/> 5 a 6 veces al día<br><input type="radio"/> más 6 veces al día |
| Hamburguesa         | <input type="radio"/> Nunca o menos 1 vez al mes<br><input type="radio"/> 1 a 3 veces mes<br><input checked="" type="radio"/> 1 vez semana<br><input type="radio"/> 2 a 4 veces semana<br><input type="radio"/> 5 a 6 veces semana<br><input type="radio"/> 1 vez al día<br><input type="radio"/> 2 a 3 veces al día<br><input type="radio"/> 5 a 6 veces al día<br><input type="radio"/> más 6 veces al día |
| tocino o bacon      | <input checked="" type="radio"/> Nunca o menos 1 vez al mes<br><input type="radio"/> 1 a 3 veces mes<br><input type="radio"/> 1 vez semana<br><input type="radio"/> 2 a 4 veces semana<br><input type="radio"/> 5 a 6 veces semana<br><input type="radio"/> 1 vez al día<br><input type="radio"/> 2 a 3 veces al día<br><input type="radio"/> 5 a 6 veces al día<br><input type="radio"/> más 6 veces al día |

|                        |                                                                                                                                                                                                                                                                                                                                                                                                              |
|------------------------|--------------------------------------------------------------------------------------------------------------------------------------------------------------------------------------------------------------------------------------------------------------------------------------------------------------------------------------------------------------------------------------------------------------|
| Pescado frito          | <input checked="" type="radio"/> Nunca o menos 1 vez al mes<br><input type="radio"/> 1 a 3 veces mes<br><input type="radio"/> 1 vez semana<br><input type="radio"/> 2 a 4 veces semana<br><input type="radio"/> 5 a 6 veces semana<br><input type="radio"/> 1 vez al día<br><input type="radio"/> 2 a 3 veces al día<br><input type="radio"/> 5 a 6 veces al día<br><input type="radio"/> más 6 veces al día |
| pescado hervido blanco | <input type="radio"/> Nunca o menos 1 vez al mes<br><input type="radio"/> 1 a 3 veces mes<br><input checked="" type="radio"/> 1 vez semana<br><input type="radio"/> 2 a 4 veces semana<br><input type="radio"/> 5 a 6 veces semana<br><input type="radio"/> 1 vez al día<br><input type="radio"/> 2 a 3 veces al día<br><input type="radio"/> 5 a 6 veces al día<br><input type="radio"/> más 6 veces al día |
| pescado hervido azul   | <input type="radio"/> Nunca o menos 1 vez al mes<br><input checked="" type="radio"/> 1 a 3 veces mes<br><input type="radio"/> 1 vez semana<br><input type="radio"/> 2 a 4 veces semana<br><input type="radio"/> 5 a 6 veces semana<br><input type="radio"/> 1 vez al día<br><input type="radio"/> 2 a 3 veces al día<br><input type="radio"/> 5 a 6 veces al día<br><input type="radio"/> más 6 veces al día |
| otros pescado azul     | <input type="radio"/> Nunca o menos 1 vez al mes<br><input checked="" type="radio"/> 1 a 3 veces mes<br><input type="radio"/> 1 vez semana<br><input type="radio"/> 2 a 4 veces semana<br><input type="radio"/> 5 a 6 veces semana<br><input type="radio"/> 1 vez al día<br><input type="radio"/> 2 a 3 veces al día<br><input type="radio"/> 5 a 6 veces al día<br><input type="radio"/> más 6 veces al día |
| atun conserva          | <input checked="" type="radio"/> Nunca o menos 1 vez al mes<br><input type="radio"/> 1 a 3 veces mes<br><input type="radio"/> 1 vez semana<br><input type="radio"/> 2 a 4 veces semana<br><input type="radio"/> 5 a 6 veces semana<br><input type="radio"/> 1 vez al día<br><input type="radio"/> 2 a 3 veces al día<br><input type="radio"/> 5 a 6 veces al día<br><input type="radio"/> más 6 veces al día |
| sardina conserva       | <input type="radio"/> Nunca o menos 1 vez al mes<br><input checked="" type="radio"/> 1 a 3 veces mes<br><input type="radio"/> 1 vez semana<br><input type="radio"/> 2 a 4 veces semana<br><input type="radio"/> 5 a 6 veces semana<br><input type="radio"/> 1 vez al día<br><input type="radio"/> 2 a 3 veces al día<br><input type="radio"/> 5 a 6 veces al día<br><input type="radio"/> más 6 veces al día |

|                                         |                                                                                                                                                                                                                                                                                                                                                                                                              |
|-----------------------------------------|--------------------------------------------------------------------------------------------------------------------------------------------------------------------------------------------------------------------------------------------------------------------------------------------------------------------------------------------------------------------------------------------------------------|
| pescado ahumado                         | <input checked="" type="radio"/> Nunca o menos 1 vez al mes<br><input type="radio"/> 1 a 3 veces mes<br><input type="radio"/> 1 vez semana<br><input type="radio"/> 2 a 4 veces semana<br><input type="radio"/> 5 a 6 veces semana<br><input type="radio"/> 1 vez al día<br><input type="radio"/> 2 a 3 veces al día<br><input type="radio"/> 5 a 6 veces al día<br><input type="radio"/> más 6 veces al día |
| almejas o mejillones o ostras unos 100g | <input type="radio"/> Nunca o menos 1 vez al mes<br><input checked="" type="radio"/> 1 a 3 veces mes<br><input type="radio"/> 1 vez semana<br><input type="radio"/> 2 a 4 veces semana<br><input type="radio"/> 5 a 6 veces semana<br><input type="radio"/> 1 vez al día<br><input type="radio"/> 2 a 3 veces al día<br><input type="radio"/> 5 a 6 veces al día<br><input type="radio"/> más 6 veces al día |
| calamar o chipiron o sepia unos 100g    | <input type="radio"/> Nunca o menos 1 vez al mes<br><input type="radio"/> 1 a 3 veces mes<br><input checked="" type="radio"/> 1 vez semana<br><input type="radio"/> 2 a 4 veces semana<br><input type="radio"/> 5 a 6 veces semana<br><input type="radio"/> 1 vez al día<br><input type="radio"/> 2 a 3 veces al día<br><input type="radio"/> 5 a 6 veces al día<br><input type="radio"/> más 6 veces al día |
| marisco unos 100g                       | <input type="radio"/> Nunca o menos 1 vez al mes<br><input checked="" type="radio"/> 1 a 3 veces mes<br><input type="radio"/> 1 vez semana<br><input type="radio"/> 2 a 4 veces semana<br><input type="radio"/> 5 a 6 veces semana<br><input type="radio"/> 1 vez al día<br><input type="radio"/> 2 a 3 veces al día<br><input type="radio"/> 5 a 6 veces al día<br><input type="radio"/> más 6 veces al día |
| Espinacas o acelgas cocinadas           | <input checked="" type="radio"/> Nunca o menos 1 vez al mes<br><input type="radio"/> 1 a 3 veces mes<br><input type="radio"/> 1 vez semana<br><input type="radio"/> 2 a 4 veces semana<br><input type="radio"/> 5 a 6 veces semana<br><input type="radio"/> 1 vez al día<br><input type="radio"/> 2 a 3 veces al día<br><input type="radio"/> 5 a 6 veces al día<br><input type="radio"/> más 6 veces al día |
| Col o coliflor o brocoli cocinado       | <input type="radio"/> Nunca o menos 1 vez al mes<br><input checked="" type="radio"/> 1 a 3 veces mes<br><input type="radio"/> 1 vez semana<br><input type="radio"/> 2 a 4 veces semana<br><input type="radio"/> 5 a 6 veces semana<br><input type="radio"/> 1 vez al día<br><input type="radio"/> 2 a 3 veces al día<br><input type="radio"/> 5 a 6 veces al día<br><input type="radio"/> más 6 veces al día |

---

Lechuga o endivia o escarola

- ☐ Nunca o menos 1 vez al mes  
☐ 1 a 3 veces mes  
☐ 1 vez semana  
☐ 2 a 4 veces semana  
☐ 5 a 6 veces semana  
☒ 1 vez al día  
☐ 2 a 3 veces al día  
☐ 5 a 6 veces al día  
☐ más 6 veces al día

---

tomate ensalada

- ☐ Nunca o menos 1 vez al mes  
☐ 1 a 3 veces mes  
☐ 1 vez semana  
☐ 2 a 4 veces semana  
☐ 5 a 6 veces semana  
☒ 1 vez al día  
☐ 2 a 3 veces al día  
☐ 5 a 6 veces al día  
☐ más 6 veces al día

---

cebolla

- ☐ Nunca o menos 1 vez al mes  
☐ 1 a 3 veces mes  
☐ 1 vez semana  
☐ 2 a 4 veces semana  
☐ 5 a 6 veces semana  
☒ 1 vez al día  
☐ 2 a 3 veces al día  
☐ 5 a 6 veces al día  
☐ más 6 veces al día

---

Zanahoria o calabaza

- ☐ Nunca o menos 1 vez al mes  
☐ 1 a 3 veces mes  
☐ 1 vez semana  
☒ 2 a 4 veces semana  
☐ 5 a 6 veces semana  
☐ 1 vez al día  
☐ 2 a 3 veces al día  
☐ 5 a 6 veces al día  
☐ más 6 veces al día

---

Judías verdes

- ☐ Nunca o menos 1 vez al mes  
☐ 1 a 3 veces mes  
☒ 1 vez semana  
☐ 2 a 4 veces semana  
☐ 5 a 6 veces semana  
☐ 1 vez al día  
☐ 2 a 3 veces al día  
☐ 5 a 6 veces al día  
☐ más 6 veces al día

---

Berenjena o calabacin o pepino

- ☐ Nunca o menos 1 vez al mes  
☐ 1 a 3 veces mes  
☐ 1 vez semana  
☒ 2 a 4 veces semana  
☐ 5 a 6 veces semana  
☐ 1 vez al día  
☐ 2 a 3 veces al día  
☐ 5 a 6 veces al día  
☐ más 6 veces al día

|                       |                                                                                                                                                                                                                                                                                                                                                                                                              |
|-----------------------|--------------------------------------------------------------------------------------------------------------------------------------------------------------------------------------------------------------------------------------------------------------------------------------------------------------------------------------------------------------------------------------------------------------|
| pimiento              | <input type="radio"/> Nunca o menos 1 vez al mes<br><input type="radio"/> 1 a 3 veces mes<br><input checked="" type="radio"/> 1 vez semana<br><input type="radio"/> 2 a 4 veces semana<br><input type="radio"/> 5 a 6 veces semana<br><input type="radio"/> 1 vez al día<br><input type="radio"/> 2 a 3 veces al día<br><input type="radio"/> 5 a 6 veces al día<br><input type="radio"/> más 6 veces al día |
| alcachofa             | <input type="radio"/> Nunca o menos 1 vez al mes<br><input type="radio"/> 1 a 3 veces mes<br><input checked="" type="radio"/> 1 vez semana<br><input type="radio"/> 2 a 4 veces semana<br><input type="radio"/> 5 a 6 veces semana<br><input type="radio"/> 1 vez al día<br><input type="radio"/> 2 a 3 veces al día<br><input type="radio"/> 5 a 6 veces al día<br><input type="radio"/> más 6 veces al día |
| espárragos            | <input type="radio"/> Nunca o menos 1 vez al mes<br><input type="radio"/> 1 a 3 veces mes<br><input checked="" type="radio"/> 1 vez semana<br><input type="radio"/> 2 a 4 veces semana<br><input type="radio"/> 5 a 6 veces semana<br><input type="radio"/> 1 vez al día<br><input type="radio"/> 2 a 3 veces al día<br><input type="radio"/> 5 a 6 veces al día<br><input type="radio"/> más 6 veces al día |
| maíz hervido          | <input type="radio"/> Nunca o menos 1 vez al mes<br><input checked="" type="radio"/> 1 a 3 veces mes<br><input type="radio"/> 1 vez semana<br><input type="radio"/> 2 a 4 veces semana<br><input type="radio"/> 5 a 6 veces semana<br><input type="radio"/> 1 vez al día<br><input type="radio"/> 2 a 3 veces al día<br><input type="radio"/> 5 a 6 veces al día<br><input type="radio"/> más 6 veces al día |
| legumbres             | <input type="radio"/> Nunca o menos 1 vez al mes<br><input type="radio"/> 1 a 3 veces mes<br><input type="radio"/> 1 vez semana<br><input checked="" type="radio"/> 2 a 4 veces semana<br><input type="radio"/> 5 a 6 veces semana<br><input type="radio"/> 1 vez al día<br><input type="radio"/> 2 a 3 veces al día<br><input type="radio"/> 5 a 6 veces al día<br><input type="radio"/> más 6 veces al día |
| naranjas o mandarinas | <input type="radio"/> Nunca o menos 1 vez al mes<br><input type="radio"/> 1 a 3 veces mes<br><input type="radio"/> 1 vez semana<br><input type="radio"/> 2 a 4 veces semana<br><input type="radio"/> 5 a 6 veces semana<br><input checked="" type="radio"/> 1 vez al día<br><input type="radio"/> 2 a 3 veces al día<br><input type="radio"/> 5 a 6 veces al día<br><input type="radio"/> más 6 veces al día |

|                       |                                                                                                                                                                                                                                                                                                                                                                                                              |
|-----------------------|--------------------------------------------------------------------------------------------------------------------------------------------------------------------------------------------------------------------------------------------------------------------------------------------------------------------------------------------------------------------------------------------------------------|
| zum natural fruta     | <input checked="" type="radio"/> Nunca o menos 1 vez al mes<br><input type="radio"/> 1 a 3 veces mes<br><input type="radio"/> 1 vez semana<br><input type="radio"/> 2 a 4 veces semana<br><input type="radio"/> 5 a 6 veces semana<br><input type="radio"/> 1 vez al día<br><input type="radio"/> 2 a 3 veces al día<br><input type="radio"/> 5 a 6 veces al día<br><input type="radio"/> más 6 veces al día |
| platano               | <input type="radio"/> Nunca o menos 1 vez al mes<br><input type="radio"/> 1 a 3 veces mes<br><input type="radio"/> 1 vez semana<br><input type="radio"/> 2 a 4 veces semana<br><input type="radio"/> 5 a 6 veces semana<br><input checked="" type="radio"/> 1 vez al día<br><input type="radio"/> 2 a 3 veces al día<br><input type="radio"/> 5 a 6 veces al día<br><input type="radio"/> más 6 veces al día |
| manzana o pera        | <input type="radio"/> Nunca o menos 1 vez al mes<br><input type="radio"/> 1 a 3 veces mes<br><input checked="" type="radio"/> 1 vez semana<br><input type="radio"/> 2 a 4 veces semana<br><input type="radio"/> 5 a 6 veces semana<br><input type="radio"/> 1 vez al día<br><input type="radio"/> 2 a 3 veces al día<br><input type="radio"/> 5 a 6 veces al día<br><input type="radio"/> más 6 veces al día |
| melocotón o nectarina | <input type="radio"/> Nunca o menos 1 vez al mes<br><input type="radio"/> 1 a 3 veces mes<br><input type="radio"/> 1 vez semana<br><input type="radio"/> 2 a 4 veces semana<br><input type="radio"/> 5 a 6 veces semana<br><input checked="" type="radio"/> 1 vez al día<br><input type="radio"/> 2 a 3 veces al día<br><input type="radio"/> 5 a 6 veces al día<br><input type="radio"/> más 6 veces al día |
| sandia o melon        | <input type="radio"/> Nunca o menos 1 vez al mes<br><input type="radio"/> 1 a 3 veces mes<br><input type="radio"/> 1 vez semana<br><input type="radio"/> 2 a 4 veces semana<br><input type="radio"/> 5 a 6 veces semana<br><input checked="" type="radio"/> 1 vez al día<br><input type="radio"/> 2 a 3 veces al día<br><input type="radio"/> 5 a 6 veces al día<br><input type="radio"/> más 6 veces al día |
| uva                   | <input type="radio"/> Nunca o menos 1 vez al mes<br><input type="radio"/> 1 a 3 veces mes<br><input type="radio"/> 1 vez semana<br><input type="radio"/> 2 a 4 veces semana<br><input type="radio"/> 5 a 6 veces semana<br><input checked="" type="radio"/> 1 vez al día<br><input type="radio"/> 2 a 3 veces al día<br><input type="radio"/> 5 a 6 veces al día<br><input type="radio"/> más 6 veces al día |



---

bruna o ciruela

- ☐ Nunca o menos 1 vez al mes  
☐ 1 a 3 veces mes  
☐ 1 vez semana  
☐ 2 a 4 veces semana  
☐ 5 a 6 veces semana  
☒ 1 vez al día  
☐ 2 a 3 veces al día  
☐ 5 a 6 veces al día  
☐ más 6 veces al día

---

kiwi

- ☐ Nunca o menos 1 vez al mes  
☐ 1 a 3 veces mes  
☐ 1 vez semana  
☐ 2 a 4 veces semana  
☐ 5 a 6 veces semana  
☒ 1 vez al día  
☐ 2 a 3 veces al día  
☐ 5 a 6 veces al día  
☐ más 6 veces al día

---

aceituna

- ☐ Nunca o menos 1 vez al mes  
☒ 1 a 3 veces mes  
☐ 1 vez semana  
☐ 2 a 4 veces semana  
☐ 5 a 6 veces semana  
☐ 1 vez al día  
☐ 2 a 3 veces al día  
☐ 5 a 6 veces al día  
☐ más 6 veces al día

---

frutos secos

- ☐ Nunca o menos 1 vez al mes  
☐ 1 a 3 veces mes  
☐ 1 vez semana  
☐ 2 a 4 veces semana  
☐ 5 a 6 veces semana  
☒ 1 vez al día  
☐ 2 a 3 veces al día  
☐ 5 a 6 veces al día  
☐ más 6 veces al día

---

pan blanco

- ☒ Nunca o menos 1 vez al mes  
☐ 1 a 3 veces mes  
☐ 1 vez semana  
☐ 2 a 4 veces semana  
☐ 5 a 6 veces semana  
☐ 1 vez al día  
☐ 2 a 3 veces al día  
☐ 5 a 6 veces al día  
☐ más 6 veces al día

---

pan integral

- ☐ Nunca o menos 1 vez al mes  
☐ 1 a 3 veces mes  
☐ 1 vez semana  
☐ 2 a 4 veces semana  
☐ 5 a 6 veces semana  
☒ 1 vez al día  
☐ 2 a 3 veces al día  
☐ 5 a 6 veces al día  
☐ más 6 veces al día

|                          |                                                                                                                                                                                                                                                                                                                                                                                                              |
|--------------------------|--------------------------------------------------------------------------------------------------------------------------------------------------------------------------------------------------------------------------------------------------------------------------------------------------------------------------------------------------------------------------------------------------------------|
| cereales desayuno        | <input checked="" type="radio"/> Nunca o menos 1 vez al mes<br><input type="radio"/> 1 a 3 veces mes<br><input type="radio"/> 1 vez semana<br><input type="radio"/> 2 a 4 veces semana<br><input type="radio"/> 5 a 6 veces semana<br><input type="radio"/> 1 vez al día<br><input type="radio"/> 2 a 3 veces al día<br><input type="radio"/> 5 a 6 veces al día<br><input type="radio"/> más 6 veces al día |
| patatas fritas           | <input checked="" type="radio"/> Nunca o menos 1 vez al mes<br><input type="radio"/> 1 a 3 veces mes<br><input type="radio"/> 1 vez semana<br><input type="radio"/> 2 a 4 veces semana<br><input type="radio"/> 5 a 6 veces semana<br><input type="radio"/> 1 vez al día<br><input type="radio"/> 2 a 3 veces al día<br><input type="radio"/> 5 a 6 veces al día<br><input type="radio"/> más 6 veces al día |
| patatas cocidas o asadas | <input type="radio"/> Nunca o menos 1 vez al mes<br><input type="radio"/> 1 a 3 veces mes<br><input checked="" type="radio"/> 1 vez semana<br><input type="radio"/> 2 a 4 veces semana<br><input type="radio"/> 5 a 6 veces semana<br><input type="radio"/> 1 vez al día<br><input type="radio"/> 2 a 3 veces al día<br><input type="radio"/> 5 a 6 veces al día<br><input type="radio"/> más 6 veces al día |
| bolsa papas              | <input checked="" type="radio"/> Nunca o menos 1 vez al mes<br><input type="radio"/> 1 a 3 veces mes<br><input type="radio"/> 1 vez semana<br><input type="radio"/> 2 a 4 veces semana<br><input type="radio"/> 5 a 6 veces semana<br><input type="radio"/> 1 vez al día<br><input type="radio"/> 2 a 3 veces al día<br><input type="radio"/> 5 a 6 veces al día<br><input type="radio"/> más 6 veces al día |
| arroz cocinado           | <input type="radio"/> Nunca o menos 1 vez al mes<br><input type="radio"/> 1 a 3 veces mes<br><input checked="" type="radio"/> 1 vez semana<br><input type="radio"/> 2 a 4 veces semana<br><input type="radio"/> 5 a 6 veces semana<br><input type="radio"/> 1 vez al día<br><input type="radio"/> 2 a 3 veces al día<br><input type="radio"/> 5 a 6 veces al día<br><input type="radio"/> más 6 veces al día |
| pasta                    | <input type="radio"/> Nunca o menos 1 vez al mes<br><input type="radio"/> 1 a 3 veces mes<br><input checked="" type="radio"/> 1 vez semana<br><input type="radio"/> 2 a 4 veces semana<br><input type="radio"/> 5 a 6 veces semana<br><input type="radio"/> 1 vez al día<br><input type="radio"/> 2 a 3 veces al día<br><input type="radio"/> 5 a 6 veces al día<br><input type="radio"/> más 6 veces al día |

|                     |                                                                                                                                                                                                                                                                                                                                                                                                              |
|---------------------|--------------------------------------------------------------------------------------------------------------------------------------------------------------------------------------------------------------------------------------------------------------------------------------------------------------------------------------------------------------------------------------------------------------|
| pizza               | <input checked="" type="radio"/> Nunca o menos 1 vez al mes<br><input type="radio"/> 1 a 3 veces mes<br><input type="radio"/> 1 vez semana<br><input type="radio"/> 2 a 4 veces semana<br><input type="radio"/> 5 a 6 veces semana<br><input type="radio"/> 1 vez al día<br><input type="radio"/> 2 a 3 veces al día<br><input type="radio"/> 5 a 6 veces al día<br><input type="radio"/> más 6 veces al día |
| aceite oliva        | <input type="radio"/> Nunca o menos 1 vez al mes<br><input type="radio"/> 1 a 3 veces mes<br><input type="radio"/> 1 vez semana<br><input type="radio"/> 2 a 4 veces semana<br><input type="radio"/> 5 a 6 veces semana<br><input type="radio"/> 1 vez al día<br><input type="radio"/> 2 a 3 veces al día<br><input type="radio"/> 5 a 6 veces al día<br><input checked="" type="radio"/> más 6 veces al día |
| otros aceites       | <input checked="" type="radio"/> Nunca o menos 1 vez al mes<br><input type="radio"/> 1 a 3 veces mes<br><input type="radio"/> 1 vez semana<br><input type="radio"/> 2 a 4 veces semana<br><input type="radio"/> 5 a 6 veces semana<br><input type="radio"/> 1 vez al día<br><input type="radio"/> 2 a 3 veces al día<br><input type="radio"/> 5 a 6 veces al día<br><input type="radio"/> más 6 veces al día |
| margarina           | <input checked="" type="radio"/> Nunca o menos 1 vez al mes<br><input type="radio"/> 1 a 3 veces mes<br><input type="radio"/> 1 vez semana<br><input type="radio"/> 2 a 4 veces semana<br><input type="radio"/> 5 a 6 veces semana<br><input type="radio"/> 1 vez al día<br><input type="radio"/> 2 a 3 veces al día<br><input type="radio"/> 5 a 6 veces al día<br><input type="radio"/> más 6 veces al día |
| mantequilla         | <input checked="" type="radio"/> Nunca o menos 1 vez al mes<br><input type="radio"/> 1 a 3 veces mes<br><input type="radio"/> 1 vez semana<br><input type="radio"/> 2 a 4 veces semana<br><input type="radio"/> 5 a 6 veces semana<br><input type="radio"/> 1 vez al día<br><input type="radio"/> 2 a 3 veces al día<br><input type="radio"/> 5 a 6 veces al día<br><input type="radio"/> más 6 veces al día |
| galletas tipo maria | <input checked="" type="radio"/> Nunca o menos 1 vez al mes<br><input type="radio"/> 1 a 3 veces mes<br><input type="radio"/> 1 vez semana<br><input type="radio"/> 2 a 4 veces semana<br><input type="radio"/> 5 a 6 veces semana<br><input type="radio"/> 1 vez al día<br><input type="radio"/> 2 a 3 veces al día<br><input type="radio"/> 5 a 6 veces al día<br><input type="radio"/> más 6 veces al día |

|                           |                                                                                                                                                                                                                                                                                                                                                                                                              |
|---------------------------|--------------------------------------------------------------------------------------------------------------------------------------------------------------------------------------------------------------------------------------------------------------------------------------------------------------------------------------------------------------------------------------------------------------|
| galletas chocolate        | <input checked="" type="radio"/> Nunca o menos 1 vez al mes<br><input type="radio"/> 1 a 3 veces mes<br><input type="radio"/> 1 vez semana<br><input type="radio"/> 2 a 4 veces semana<br><input type="radio"/> 5 a 6 veces semana<br><input type="radio"/> 1 vez al día<br><input type="radio"/> 2 a 3 veces al día<br><input type="radio"/> 5 a 6 veces al día<br><input type="radio"/> más 6 veces al día |
| bollieria                 | <input checked="" type="radio"/> Nunca o menos 1 vez al mes<br><input type="radio"/> 1 a 3 veces mes<br><input type="radio"/> 1 vez semana<br><input type="radio"/> 2 a 4 veces semana<br><input type="radio"/> 5 a 6 veces semana<br><input type="radio"/> 1 vez al día<br><input type="radio"/> 2 a 3 veces al día<br><input type="radio"/> 5 a 6 veces al día<br><input type="radio"/> más 6 veces al día |
| chocolate o bombones      | <input checked="" type="radio"/> Nunca o menos 1 vez al mes<br><input type="radio"/> 1 a 3 veces mes<br><input type="radio"/> 1 vez semana<br><input type="radio"/> 2 a 4 veces semana<br><input type="radio"/> 5 a 6 veces semana<br><input type="radio"/> 1 vez al día<br><input type="radio"/> 2 a 3 veces al día<br><input type="radio"/> 5 a 6 veces al día<br><input type="radio"/> más 6 veces al día |
| chocolate polvo o colacao | <input checked="" type="radio"/> Nunca o menos 1 vez al mes<br><input type="radio"/> 1 a 3 veces mes<br><input type="radio"/> 1 vez semana<br><input type="radio"/> 2 a 4 veces semana<br><input type="radio"/> 5 a 6 veces semana<br><input type="radio"/> 1 vez al día<br><input type="radio"/> 2 a 3 veces al día<br><input type="radio"/> 5 a 6 veces al día<br><input type="radio"/> más 6 veces al día |
| vino tinto                | <input checked="" type="radio"/> Nunca o menos 1 vez al mes<br><input type="radio"/> 1 a 3 veces mes<br><input type="radio"/> 1 vez semana<br><input type="radio"/> 2 a 4 veces semana<br><input type="radio"/> 5 a 6 veces semana<br><input type="radio"/> 1 vez al día<br><input type="radio"/> 2 a 3 veces al día<br><input type="radio"/> 5 a 6 veces al día<br><input type="radio"/> más 6 veces al día |
| vino blanco               | <input checked="" type="radio"/> Nunca o menos 1 vez al mes<br><input type="radio"/> 1 a 3 veces mes<br><input type="radio"/> 1 vez semana<br><input type="radio"/> 2 a 4 veces semana<br><input type="radio"/> 5 a 6 veces semana<br><input type="radio"/> 1 vez al día<br><input type="radio"/> 2 a 3 veces al día<br><input type="radio"/> 5 a 6 veces al día<br><input type="radio"/> más 6 veces al día |

|                       |                                                                                                                                                                                                                                                                                                                                                                                                              |
|-----------------------|--------------------------------------------------------------------------------------------------------------------------------------------------------------------------------------------------------------------------------------------------------------------------------------------------------------------------------------------------------------------------------------------------------------|
| vino seco o vermut    | <input checked="" type="radio"/> Nunca o menos 1 vez al mes<br><input type="radio"/> 1 a 3 veces mes<br><input type="radio"/> 1 vez semana<br><input type="radio"/> 2 a 4 veces semana<br><input type="radio"/> 5 a 6 veces semana<br><input type="radio"/> 1 vez al día<br><input type="radio"/> 2 a 3 veces al día<br><input type="radio"/> 5 a 6 veces al día<br><input type="radio"/> más 6 veces al día |
| cerveza               | <input checked="" type="radio"/> Nunca o menos 1 vez al mes<br><input type="radio"/> 1 a 3 veces mes<br><input type="radio"/> 1 vez semana<br><input type="radio"/> 2 a 4 veces semana<br><input type="radio"/> 5 a 6 veces semana<br><input type="radio"/> 1 vez al día<br><input type="radio"/> 2 a 3 veces al día<br><input type="radio"/> 5 a 6 veces al día<br><input type="radio"/> más 6 veces al día |
| cerveza sin alcohol   | <input checked="" type="radio"/> Nunca o menos 1 vez al mes<br><input type="radio"/> 1 a 3 veces mes<br><input type="radio"/> 1 vez semana<br><input type="radio"/> 2 a 4 veces semana<br><input type="radio"/> 5 a 6 veces semana<br><input type="radio"/> 1 vez al día<br><input type="radio"/> 2 a 3 veces al día<br><input type="radio"/> 5 a 6 veces al día<br><input type="radio"/> más 6 veces al día |
| licores               | <input checked="" type="radio"/> Nunca o menos 1 vez al mes<br><input type="radio"/> 1 a 3 veces mes<br><input type="radio"/> 1 vez semana<br><input type="radio"/> 2 a 4 veces semana<br><input type="radio"/> 5 a 6 veces semana<br><input type="radio"/> 1 vez al día<br><input type="radio"/> 2 a 3 veces al día<br><input type="radio"/> 5 a 6 veces al día<br><input type="radio"/> más 6 veces al día |
| ginebra o ron o vodka | <input checked="" type="radio"/> Nunca o menos 1 vez al mes<br><input type="radio"/> 1 a 3 veces mes<br><input type="radio"/> 1 vez semana<br><input type="radio"/> 2 a 4 veces semana<br><input type="radio"/> 5 a 6 veces semana<br><input type="radio"/> 1 vez al día<br><input type="radio"/> 2 a 3 veces al día<br><input type="radio"/> 5 a 6 veces al día<br><input type="radio"/> más 6 veces al día |
| refresco normal       | <input checked="" type="radio"/> Nunca o menos 1 vez al mes<br><input type="radio"/> 1 a 3 veces mes<br><input type="radio"/> 1 vez semana<br><input type="radio"/> 2 a 4 veces semana<br><input type="radio"/> 5 a 6 veces semana<br><input type="radio"/> 1 vez al día<br><input type="radio"/> 2 a 3 veces al día<br><input type="radio"/> 5 a 6 veces al día<br><input type="radio"/> más 6 veces al día |

---

refresco sin azúcar

- ☒ Nunca o menos 1 vez al mes  
☐ 1 a 3 veces mes  
☐ 1 vez semana  
☐ 2 a 4 veces semana  
☐ 5 a 6 veces semana  
☐ 1 vez al día  
☐ 2 a 3 veces al día  
☐ 5 a 6 veces al día  
☐ más 6 veces al día

---

Agua del grifo

- ☒ Nunca o menos 1 vez al mes  
☐ 1 a 3 veces mes  
☐ 1 vez semana  
☐ 2 a 4 veces semana  
☐ 5 a 6 veces semana  
☐ 1 vez al día  
☐ 2 a 3 veces al día  
☐ 5 a 6 veces al día  
☐ más 6 veces al día

---

agua embotellada sin gas

- ☐ Nunca o menos 1 vez al mes  
☐ 1 a 3 veces mes  
☐ 1 vez semana  
☐ 2 a 4 veces semana  
☐ 5 a 6 veces semana  
☐ 1 vez al día  
☐ 2 a 3 veces al día  
☐ 5 a 6 veces al día  
☒ más 6 veces al día

---

agua embotellada con gas

- ☒ Nunca o menos 1 vez al mes  
☐ 1 a 3 veces mes  
☐ 1 vez semana  
☐ 2 a 4 veces semana  
☐ 5 a 6 veces semana  
☐ 1 vez al día  
☐ 2 a 3 veces al día  
☐ 5 a 6 veces al día  
☐ más 6 veces al día

---

zumو frutas embasado

- ☒ Nunca o menos 1 vez al mes  
☐ 1 a 3 veces mes  
☐ 1 vez semana  
☐ 2 a 4 veces semana  
☐ 5 a 6 veces semana  
☐ 1 vez al día  
☐ 2 a 3 veces al día  
☐ 5 a 6 veces al día  
☐ más 6 veces al día

---

cafe

- ☐ Nunca o menos 1 vez al mes  
☐ 1 a 3 veces mes  
☐ 1 vez semana  
☐ 2 a 4 veces semana  
☐ 5 a 6 veces semana  
☒ 1 vez al día  
☐ 2 a 3 veces al día  
☐ 5 a 6 veces al día  
☐ más 6 veces al día

|                       |                                                                                                                                                                                                                                                                                                                                                                                                              |
|-----------------------|--------------------------------------------------------------------------------------------------------------------------------------------------------------------------------------------------------------------------------------------------------------------------------------------------------------------------------------------------------------------------------------------------------------|
| cafe descafeinado     | <input checked="" type="radio"/> Nunca o menos 1 vez al mes<br><input type="radio"/> 1 a 3 veces mes<br><input type="radio"/> 1 vez semana<br><input type="radio"/> 2 a 4 veces semana<br><input type="radio"/> 5 a 6 veces semana<br><input type="radio"/> 1 vez al día<br><input type="radio"/> 2 a 3 veces al día<br><input type="radio"/> 5 a 6 veces al día<br><input type="radio"/> más 6 veces al día |
| te o infusión         | <input checked="" type="radio"/> Nunca o menos 1 vez al mes<br><input type="radio"/> 1 a 3 veces mes<br><input type="radio"/> 1 vez semana<br><input type="radio"/> 2 a 4 veces semana<br><input type="radio"/> 5 a 6 veces semana<br><input type="radio"/> 1 vez al día<br><input type="radio"/> 2 a 3 veces al día<br><input type="radio"/> 5 a 6 veces al día<br><input type="radio"/> más 6 veces al día |
| sopa o puré verduras  | <input type="radio"/> Nunca o menos 1 vez al mes<br><input type="radio"/> 1 a 3 veces mes<br><input checked="" type="radio"/> 1 vez semana<br><input type="radio"/> 2 a 4 veces semana<br><input type="radio"/> 5 a 6 veces semana<br><input type="radio"/> 1 vez al día<br><input type="radio"/> 2 a 3 veces al día<br><input type="radio"/> 5 a 6 veces al día<br><input type="radio"/> más 6 veces al día |
| croquetas pollo jamón | <input checked="" type="radio"/> Nunca o menos 1 vez al mes<br><input type="radio"/> 1 a 3 veces mes<br><input type="radio"/> 1 vez semana<br><input type="radio"/> 2 a 4 veces semana<br><input type="radio"/> 5 a 6 veces semana<br><input type="radio"/> 1 vez al día<br><input type="radio"/> 2 a 3 veces al día<br><input type="radio"/> 5 a 6 veces al día<br><input type="radio"/> más 6 veces al día |
| croquetas pescado     | <input checked="" type="radio"/> Nunca o menos 1 vez al mes<br><input type="radio"/> 1 a 3 veces mes<br><input type="radio"/> 1 vez semana<br><input type="radio"/> 2 a 4 veces semana<br><input type="radio"/> 5 a 6 veces semana<br><input type="radio"/> 1 vez al día<br><input type="radio"/> 2 a 3 veces al día<br><input type="radio"/> 5 a 6 veces al día<br><input type="radio"/> más 6 veces al día |
| mayonesa              | <input checked="" type="radio"/> Nunca o menos 1 vez al mes<br><input type="radio"/> 1 a 3 veces mes<br><input type="radio"/> 1 vez semana<br><input type="radio"/> 2 a 4 veces semana<br><input type="radio"/> 5 a 6 veces semana<br><input type="radio"/> 1 vez al día<br><input type="radio"/> 2 a 3 veces al día<br><input type="radio"/> 5 a 6 veces al día<br><input type="radio"/> más 6 veces al día |

---

salsa tomate

- ☒ Nunca o menos 1 vez al mes  
☐ 1 a 3 veces mes  
☐ 1 vez semana  
☐ 2 a 4 veces semana  
☐ 5 a 6 veces semana  
☐ 1 vez al día  
☐ 2 a 3 veces al día  
☐ 5 a 6 veces al día  
☐ más 6 veces al día

---

ketchup

- ☒ Nunca o menos 1 vez al mes  
☐ 1 a 3 veces mes  
☐ 1 vez semana  
☐ 2 a 4 veces semana  
☐ 5 a 6 veces semana  
☐ 1 vez al día  
☐ 2 a 3 veces al día  
☐ 5 a 6 veces al día  
☐ más 6 veces al día

---

sal

- ☒ Nunca o menos 1 vez al mes  
☐ 1 a 3 veces mes  
☐ 1 vez semana  
☐ 2 a 4 veces semana  
☐ 5 a 6 veces semana  
☐ 1 vez al día  
☐ 2 a 3 veces al día  
☐ 5 a 6 veces al día  
☐ más 6 veces al día

---

ajo

- ☐ Nunca o menos 1 vez al mes  
☐ 1 a 3 veces mes  
☐ 1 vez semana  
☒ 2 a 4 veces semana  
☐ 5 a 6 veces semana  
☐ 1 vez al día  
☐ 2 a 3 veces al día  
☐ 5 a 6 veces al día  
☐ más 6 veces al día

---

mermelada o miel

- ☐ Nunca o menos 1 vez al mes  
☐ 1 a 3 veces mes  
☐ 1 vez semana  
☐ 2 a 4 veces semana  
☐ 5 a 6 veces semana  
☒ 1 vez al día  
☐ 2 a 3 veces al día  
☐ 5 a 6 veces al día  
☐ más 6 veces al día

---

azúcar

- ☒ Nunca o menos 1 vez al mes  
☐ 1 a 3 veces mes  
☐ 1 vez semana  
☐ 2 a 4 veces semana  
☐ 5 a 6 veces semana  
☐ 1 vez al día  
☐ 2 a 3 veces al día  
☐ 5 a 6 veces al día  
☐ más 6 veces al día



|                                       |                                                                                                                                                                                                                                                                                                                                                                                                                                                                                                                               |
|---------------------------------------|-------------------------------------------------------------------------------------------------------------------------------------------------------------------------------------------------------------------------------------------------------------------------------------------------------------------------------------------------------------------------------------------------------------------------------------------------------------------------------------------------------------------------------|
| Otro alimento                         | [*DATA REMOVED*]                                                                                                                                                                                                                                                                                                                                                                                                                                                                                                              |
| suplementos vitamínicos               | <input checked="" type="radio"/> si<br><input type="radio"/> no                                                                                                                                                                                                                                                                                                                                                                                                                                                               |
| suplementos vitamínicos               | [*DATA REMOVED*]                                                                                                                                                                                                                                                                                                                                                                                                                                                                                                              |
| dieta previa                          | <input checked="" type="radio"/> si<br><input type="radio"/> no                                                                                                                                                                                                                                                                                                                                                                                                                                                               |
| motivo dieta                          | <input type="radio"/> no dieta<br><input checked="" type="radio"/> control peso<br><input type="radio"/> control colesterol<br><input type="radio"/> control diabetes<br><input type="radio"/> problemas estómago<br><input type="radio"/> problemas vesícula o hepáticos<br><input type="radio"/> HTA o cardiopatía<br><input type="radio"/> problemas renales<br><input type="radio"/> alergia alimentaria<br><input type="radio"/> ácido úrico elevado<br><input type="radio"/> vegetariana<br><input type="radio"/> otros |
| cambio alimentos año previo gestación | <input checked="" type="radio"/> si<br><input type="radio"/> no                                                                                                                                                                                                                                                                                                                                                                                                                                                               |
| cambio lácteos                        | <input type="radio"/> eliminado<br><input type="radio"/> disminuido<br><input checked="" type="radio"/> igual<br><input type="radio"/> aumentado<br><input type="radio"/> no sabe                                                                                                                                                                                                                                                                                                                                             |
| cambio huevos                         | <input type="radio"/> eliminado<br><input type="radio"/> disminuido<br><input checked="" type="radio"/> igual<br><input type="radio"/> aumentado<br><input type="radio"/> no sabe                                                                                                                                                                                                                                                                                                                                             |
| cambio carne                          | <input type="radio"/> eliminado<br><input type="radio"/> disminuido<br><input checked="" type="radio"/> igual<br><input type="radio"/> aumentado<br><input type="radio"/> no sabe                                                                                                                                                                                                                                                                                                                                             |
| cambio pescado                        | <input type="radio"/> eliminado<br><input checked="" type="radio"/> disminuido<br><input type="radio"/> igual<br><input type="radio"/> aumentado<br><input type="radio"/> no sabe                                                                                                                                                                                                                                                                                                                                             |
| cambio verduras                       | <input type="radio"/> eliminado<br><input type="radio"/> disminuido<br><input checked="" type="radio"/> igual<br><input type="radio"/> aumentado<br><input type="radio"/> no sabe                                                                                                                                                                                                                                                                                                                                             |

|                            |                                                                                                                                                                                                                        |
|----------------------------|------------------------------------------------------------------------------------------------------------------------------------------------------------------------------------------------------------------------|
| cambio legumbres           | <input type="radio"/> eliminado<br><input type="radio"/> disminuido<br><input checked="" type="radio"/> igual<br><input type="radio"/> aumentado<br><input type="radio"/> no sabe                                      |
| cambio fruta               | <input type="radio"/> eliminado<br><input type="radio"/> disminuido<br><input checked="" type="radio"/> igual<br><input type="radio"/> aumentado<br><input type="radio"/> no sabe                                      |
| cambio pan                 | <input type="radio"/> eliminado<br><input type="radio"/> disminuido<br><input checked="" type="radio"/> igual<br><input type="radio"/> aumentado<br><input type="radio"/> no sabe                                      |
| cambio aceite oliva        | <input type="radio"/> eliminado<br><input type="radio"/> disminuido<br><input checked="" type="radio"/> igual<br><input type="radio"/> aumentado<br><input type="radio"/> no sabe                                      |
| cambio mante o margarina   | <input type="radio"/> eliminado<br><input type="radio"/> disminuido<br><input checked="" type="radio"/> igual<br><input type="radio"/> aumentado<br><input type="radio"/> no sabe                                      |
| cambio azúcar y dulces     | <input type="radio"/> eliminado<br><input type="radio"/> disminuido<br><input checked="" type="radio"/> igual<br><input type="radio"/> aumentado<br><input type="radio"/> no sabe                                      |
| cambio bebidas alcohólicas | <input checked="" type="radio"/> eliminado<br><input type="radio"/> disminuido<br><input type="radio"/> igual<br><input type="radio"/> aumentado<br><input type="radio"/> no sabe                                      |
| frecuencia comidas fritas  | <input type="radio"/> a diario<br><input type="radio"/> 5 a 6 veces semana<br><input type="radio"/> 2 a 4 veces semana<br><input type="radio"/> 1 vez semana<br><input checked="" type="radio"/> menos de 1 vez semana |
| carne                      | <input type="radio"/> no como<br><input type="radio"/> cruda<br><input type="radio"/> poco hecha<br><input checked="" type="radio"/> hecha<br><input type="radio"/> muy hecha                                          |
| grasa visible carne        | <input type="radio"/> quita toda<br><input checked="" type="radio"/> quita mayoría<br><input type="radio"/> quita un poco<br><input type="radio"/> no quita nada                                                       |

|                                |                                                                                                                                                                                                                                                          |
|--------------------------------|----------------------------------------------------------------------------------------------------------------------------------------------------------------------------------------------------------------------------------------------------------|
| cocina carne                   | <input checked="" type="radio"/> a la plancha<br><input type="radio"/> a la parrilla<br><input type="radio"/> asada<br><input type="radio"/> frita<br><input type="radio"/> guisada                                                                      |
| tostado quemado carne          | <input checked="" type="radio"/> nunca<br><input type="radio"/> 1 vez mes<br><input type="radio"/> 2 a 3 veces mes<br><input type="radio"/> 1 vez semana<br><input type="radio"/> 2 a 3 semanas                                                          |
| tostado quemado pescado        | <input checked="" type="radio"/> nunca<br><input type="radio"/> 1 vez mes<br><input type="radio"/> 2 a 3 veces mes<br><input type="radio"/> 1 vez semana<br><input type="radio"/> 2 a 3 semanas                                                          |
| socarrat paella                | <input checked="" type="radio"/> nunca<br><input type="radio"/> 1 vez mes<br><input type="radio"/> 2 a 3 veces mes<br><input type="radio"/> 1 vez semana<br><input type="radio"/> 2 a 3 semanas                                                          |
| grasa o aceite cocinar         | <input type="radio"/> mantequilla<br><input type="radio"/> margarina<br><input type="radio"/> aceite oliva<br><input checked="" type="radio"/> aceite oliva virgen extra<br><input type="radio"/> aceite vegetal<br><input type="radio"/> mezcla aceites |
| grasa aceite aliñar            | <input type="radio"/> mantequilla<br><input type="radio"/> margarina<br><input type="radio"/> aceite oliva<br><input checked="" type="radio"/> aceite oliva virgen extra<br><input type="radio"/> aceite vegetal<br><input type="radio"/> mezcla aceites |
| grasa aceite freir             | <input type="radio"/> mantequilla<br><input type="radio"/> margarina<br><input type="radio"/> aceite oliva<br><input checked="" type="radio"/> aceite oliva virgen extra<br><input type="radio"/> aceite vegetal<br><input type="radio"/> mezcla aceites |
| Ejercicio cuestionario         | <input checked="" type="radio"/> si<br><input type="radio"/> no                                                                                                                                                                                          |
| horas de sueño incluido siesta | [*DATA REMOVED*]                                                                                                                                                                                                                                         |
| minutos siesta                 | [*DATA REMOVED*]                                                                                                                                                                                                                                         |
| horas televisión semana        | [*DATA REMOVED*]                                                                                                                                                                                                                                         |

|                                        |                                                                                                                                                                                                                                                                                                                                                                           |
|----------------------------------------|---------------------------------------------------------------------------------------------------------------------------------------------------------------------------------------------------------------------------------------------------------------------------------------------------------------------------------------------------------------------------|
| actividad trabajo                      | <input checked="" type="radio"/> casi siempre sentado<br><input type="radio"/> sentado 50 por cien<br><input type="radio"/> casi siempre de pie, quieto<br><input type="radio"/> casi siempre levantado caminando y llevando pocas cosas<br><input type="radio"/> casi siempre levantado, caminando y llevado muchas cosas<br><input type="radio"/> trabajo manual pesado |
| tiempo caminar o bici al día           | <input type="radio"/> casi nunca<br><input type="radio"/> menos 20min día<br><input type="radio"/> 20 a 40 min día<br><input checked="" type="radio"/> 40 a 60 min día<br><input type="radio"/> 1h o 1h y media día<br><input type="radio"/> más de 1h y media al día                                                                                                     |
| tiempo tareas casa al día              | <input checked="" type="radio"/> menos de 1h día<br><input type="radio"/> 1 a 2h día<br><input type="radio"/> 3 a 4h día<br><input type="radio"/> 5 a 6h día<br><input type="radio"/> 7 a 8h día<br><input type="radio"/> más de 8h día                                                                                                                                   |
| tiempo libre televisión ordenador leer | <input type="radio"/> menos 1h día<br><input type="radio"/> 1h día<br><input checked="" type="radio"/> 2h día<br><input type="radio"/> 3h día<br><input type="radio"/> 4h día<br><input type="radio"/> 5 a 6h día<br><input type="radio"/> mas 6h día                                                                                                                     |
| tiempo libre ejercicio o deporte       | <input type="radio"/> menos 1h semana<br><input type="radio"/> 1h semana<br><input type="radio"/> 2h semana<br><input type="radio"/> 3h semana<br><input checked="" type="radio"/> 4 a 5h semana<br><input type="radio"/> mas 5h semana                                                                                                                                   |
| como se considera                      | <input type="radio"/> sedentaria<br><input type="radio"/> poco activa<br><input type="radio"/> moderadamente activa<br><input checked="" type="radio"/> bastante activa<br><input type="radio"/> muy activa<br><input type="radio"/> no sabe                                                                                                                              |
| FUR                                    | [*DATA REMOVED*]                                                                                                                                                                                                                                                                                                                                                          |
| Semanas gestación 2T                   | [*DATA REMOVED*]                                                                                                                                                                                                                                                                                                                                                          |
| Días gestación 2T                      | [*DATA REMOVED*]                                                                                                                                                                                                                                                                                                                                                          |
| DBP 2T                                 | [*DATA REMOVED*]                                                                                                                                                                                                                                                                                                                                                          |
| CC 2T                                  | [*DATA REMOVED*]                                                                                                                                                                                                                                                                                                                                                          |
| AC 2T                                  | [*DATA REMOVED*]                                                                                                                                                                                                                                                                                                                                                          |

|                                                   |                                                                                                                                                                                                 |
|---------------------------------------------------|-------------------------------------------------------------------------------------------------------------------------------------------------------------------------------------------------|
| LF 2T                                             | [*DATA REMOVED*]                                                                                                                                                                                |
| PFE 2T (Hadlock)                                  | [*DATA REMOVED*]                                                                                                                                                                                |
| Semanas gestación 3T                              | [*DATA REMOVED*]                                                                                                                                                                                |
| días 3T                                           | [*DATA REMOVED*]                                                                                                                                                                                |
| DBP 3T                                            | [*DATA REMOVED*]                                                                                                                                                                                |
| CC 3T                                             | [*DATA REMOVED*]                                                                                                                                                                                |
| AC 3T                                             | [*DATA REMOVED*]                                                                                                                                                                                |
| LF 3T                                             | [*DATA REMOVED*]                                                                                                                                                                                |
| PFE 3T (Hadlock)                                  | [*DATA REMOVED*]                                                                                                                                                                                |
| Semanas de gestación final                        | [*DATA REMOVED*]                                                                                                                                                                                |
| días gestación final                              | [*DATA REMOVED*]                                                                                                                                                                                |
| Localización placenta                             | <input type="radio"/> anterior<br><input type="radio"/> lateral derecha<br><input type="radio"/> lateral izquierda<br><input type="radio"/> posterior<br><input checked="" type="radio"/> fondo |
| Presentación longitudinal cefálica                | <input type="radio"/> no<br><input checked="" type="radio"/> si                                                                                                                                 |
| Dorso                                             | <input checked="" type="radio"/> izquierda anterior<br><input type="radio"/> izquierda posterior<br><input type="radio"/> derecha anterior<br><input type="radio"/> derecha posterior           |
| diámetro biparietal                               | [*DATA REMOVED*]                                                                                                                                                                                |
| Circunferencia craneal                            | [*DATA REMOVED*]                                                                                                                                                                                |
| Circunferencia abdominal                          | [*DATA REMOVED*]                                                                                                                                                                                |
| Longitud de femur                                 | [*DATA REMOVED*]                                                                                                                                                                                |
| tejido celular subcutáneo a nivel del muslo en mm | [*DATA REMOVED*]                                                                                                                                                                                |
| tejido celular subcutáneo en abdomen en mm        | [*DATA REMOVED*]                                                                                                                                                                                |
| Volumen del muslo en cm3                          | [*DATA REMOVED*]                                                                                                                                                                                |
| Peso fetal estimado según fórmula de Hadlock      | [*DATA REMOVED*]                                                                                                                                                                                |

|                                               |                                                                                                                                                          |
|-----------------------------------------------|----------------------------------------------------------------------------------------------------------------------------------------------------------|
| Percentil                                     | [*DATA REMOVED*]                                                                                                                                         |
| Peso fetal estimado según fórmula de Scioscia | <hr/>                                                                                                                                                    |
| Peso fetal estimado según fórmula de LEE      | <hr/>                                                                                                                                                    |
| Tipo de parto                                 | <input checked="" type="radio"/> eutocico<br><input type="radio"/> instrumentado/ventosa<br><input type="radio"/> cesarea                                |
| fecha de nacimiento                           | [*DATA REMOVED*]                                                                                                                                         |
| Días entre exploración y nacimiento           | [*DATA REMOVED*]                                                                                                                                         |
| Peso RN en g                                  | [*DATA REMOVED*]                                                                                                                                         |
| sexo                                          | <input type="radio"/> mujer<br><input checked="" type="radio"/> hombre                                                                                   |
| Apgar 1 minuto                                | [*DATA REMOVED*]                                                                                                                                         |
| Apgar 5 minutos                               | [*DATA REMOVED*]                                                                                                                                         |
| Apgar 10 minutos                              | <hr/>                                                                                                                                                    |
| antecedente Covid durante gestación           | <input type="radio"/> Yes<br><input checked="" type="radio"/> No                                                                                         |
| Nivel de estudios                             | <input type="radio"/> ninguno<br><input type="radio"/> primarios<br><input type="radio"/> secundarios<br><input checked="" type="radio"/> universitarios |

# Base\_datos\_estimacion\_peso\_fetal

|                                       |                                                                                                                                                                                                                                                                                      |
|---------------------------------------|--------------------------------------------------------------------------------------------------------------------------------------------------------------------------------------------------------------------------------------------------------------------------------------|
| Número de identificación participante | 91                                                                                                                                                                                                                                                                                   |
| CODIGO PARTICIPANTE                   |                                                                                                                                                                                                                                                                                      |
| Edad                                  | [*DATA REMOVED*]                                                                                                                                                                                                                                                                     |
| Gestaciones                           | <input type="radio"/> 1<br><input type="radio"/> 2<br><input type="radio"/> 3<br><input checked="" type="radio"/> mas de 3                                                                                                                                                           |
| partos                                | <input type="radio"/> 0<br><input checked="" type="radio"/> 1<br><input type="radio"/> 2<br><input type="radio"/> 3<br><input type="radio"/> mas de 3                                                                                                                                |
| cesáreas                              | <input checked="" type="radio"/> 0<br><input type="radio"/> 1<br><input type="radio"/> 2<br><input type="radio"/> 3<br><input type="radio"/> mas de 3                                                                                                                                |
| Abortos                               | <input type="radio"/> 0<br><input type="radio"/> 1<br><input checked="" type="radio"/> 2<br><input type="radio"/> 3<br><input type="radio"/> mas de 3                                                                                                                                |
| Tipo de gestacion                     | <input checked="" type="radio"/> espontanea<br><input type="radio"/> IAC inseminación artificial conyuge<br><input type="radio"/> IAD inseminación artificial donante<br><input type="radio"/> FIV Fecundación in Vitro<br><input type="radio"/> Ovodon FIV con donación de ovocitos |
| peso previo a embarazo                | [*DATA REMOVED*]                                                                                                                                                                                                                                                                     |
| Ganancia ponderal embarazo            |                                                                                                                                                                                                                                                                                      |
| Talla madre                           | [*DATA REMOVED*]                                                                                                                                                                                                                                                                     |
| IMC previo embarazo                   | 18.77834467120182                                                                                                                                                                                                                                                                    |
| Patología obstétrica                  | <input checked="" type="radio"/> no<br><input type="radio"/> si                                                                                                                                                                                                                      |
| Diabetes pregestacional               | <input checked="" type="radio"/> no<br><input type="radio"/> si                                                                                                                                                                                                                      |
| Diabetes gestacional                  | <input checked="" type="radio"/> no<br><input type="radio"/> si                                                                                                                                                                                                                      |

|                                            |                                                                                                                                                                                      |
|--------------------------------------------|--------------------------------------------------------------------------------------------------------------------------------------------------------------------------------------|
| Diabetes gestacional con insulina          | <input checked="" type="radio"/> no<br><input type="radio"/> si                                                                                                                      |
| Diabetes gestacional con dieta y ejercicio | <input checked="" type="radio"/> no<br><input type="radio"/> si                                                                                                                      |
| Percentil fetos previos                    | <input type="radio"/> Nada<br><input type="radio"/> percentil menor de 10<br><input checked="" type="radio"/> percentil entre 10 y 90<br><input type="radio"/> percentil mayor de 90 |
| Exfumadora                                 | <input checked="" type="radio"/> Nada<br><input type="radio"/> menos de 5 años<br><input type="radio"/> 5 a 10 años<br><input type="radio"/> mayor o igual a 10 años                 |
| Hábito tabáquico                           | <input checked="" type="radio"/> no<br><input type="radio"/> si                                                                                                                      |
| fumadora                                   | [*DATA REMOVED*]                                                                                                                                                                     |
| Consumo otros tóxicos                      | <input checked="" type="radio"/> no<br><input type="radio"/> si                                                                                                                      |
| Hb 1T                                      | [*DATA REMOVED*]                                                                                                                                                                     |
| Htc 1T                                     | [*DATA REMOVED*]                                                                                                                                                                     |
| Hb 2T                                      | [*DATA REMOVED*]                                                                                                                                                                     |
| HTC 2T                                     | [*DATA REMOVED*]                                                                                                                                                                     |
| Hb 3T                                      | [*DATA REMOVED*]                                                                                                                                                                     |
| HTC 3T                                     | [*DATA REMOVED*]                                                                                                                                                                     |
| Suplemento FE oral                         | <input type="radio"/> si<br><input checked="" type="radio"/> no                                                                                                                      |
| Suplemento fe iv                           | <input type="radio"/> si<br><input type="radio"/> no                                                                                                                                 |
| Transfusión                                | <input type="radio"/> no<br><input type="radio"/> si                                                                                                                                 |
| Solicitada Vit D                           | <input checked="" type="radio"/> no<br><input type="radio"/> si                                                                                                                      |
| Deficit vit D                              | <input type="radio"/> no<br><input type="radio"/> si                                                                                                                                 |
| Suplemento vit D                           | <input type="radio"/> si<br><input type="radio"/> no                                                                                                                                 |



|                       |                                                                                                                                                                                                                                                                                                                                                                                                              |
|-----------------------|--------------------------------------------------------------------------------------------------------------------------------------------------------------------------------------------------------------------------------------------------------------------------------------------------------------------------------------------------------------------------------------------------------------|
| Dieta, cuestionario   | <input checked="" type="radio"/> si<br><input type="radio"/> no                                                                                                                                                                                                                                                                                                                                              |
| Leche entera          | <input checked="" type="radio"/> Nunca o menos 1 vez al mes<br><input type="radio"/> 1 a 3 veces mes<br><input type="radio"/> 1 vez semana<br><input type="radio"/> 2 a 4 veces semana<br><input type="radio"/> 5 a 6 veces semana<br><input type="radio"/> 1 vez al día<br><input type="radio"/> 2 a 3 veces al día<br><input type="radio"/> 5 a 6 veces al día<br><input type="radio"/> más 6 veces al día |
| Leche semidesnatada   | <input checked="" type="radio"/> Nunca o menos 1 vez al mes<br><input type="radio"/> 1 a 3 veces mes<br><input type="radio"/> 1 vez semana<br><input type="radio"/> 2 a 4 veces semana<br><input type="radio"/> 5 a 6 veces semana<br><input type="radio"/> 1 vez al día<br><input type="radio"/> 2 a 3 veces al día<br><input type="radio"/> 5 a 6 veces al día<br><input type="radio"/> mas 6 veces al día |
| Leche desnatada       | <input checked="" type="radio"/> Nunca o menos 1 vez al mes<br><input type="radio"/> 1 a 3 veces mes<br><input type="radio"/> 1 vez semana<br><input type="radio"/> 2 a 4 veces semana<br><input type="radio"/> 5 a 6 veces semana<br><input type="radio"/> 1 vez al día<br><input type="radio"/> 2 a 3 veces al día<br><input type="radio"/> 5 a 6 veces al día<br><input type="radio"/> más 6 veces al día |
| Leche condensada      | <input checked="" type="radio"/> Nunca o menos 1 vez al mes<br><input type="radio"/> 1 a 3 veces mes<br><input type="radio"/> 1 vez semana<br><input type="radio"/> 2 a 4 veces semana<br><input type="radio"/> 5 a 6 veces semana<br><input type="radio"/> 1 vez al día<br><input type="radio"/> 2 a 3 veces al día<br><input type="radio"/> 5 a 6 veces al día<br><input type="radio"/> más 6 veces al día |
| nata o crema de leche | <input type="radio"/> Nunca o menos 1 vez al mes<br><input checked="" type="radio"/> 1 a 3 veces mes<br><input type="radio"/> 1 vez semana<br><input type="radio"/> 2 a 4 veces semana<br><input type="radio"/> 5 a 6 veces semana<br><input type="radio"/> 1 vez al día<br><input type="radio"/> 2 a 3 veces al día<br><input type="radio"/> 5 a 6 veces al día<br><input type="radio"/> más 6 veces al día |

|                                             |                                                                                                                                                                                                                                                                                                                                                                                                              |
|---------------------------------------------|--------------------------------------------------------------------------------------------------------------------------------------------------------------------------------------------------------------------------------------------------------------------------------------------------------------------------------------------------------------------------------------------------------------|
| Yogurt Entero                               | <input checked="" type="radio"/> Nunca o menos 1 vez al mes<br><input type="radio"/> 1 a 3 veces mes<br><input type="radio"/> 1 vez semana<br><input type="radio"/> 2 a 4 veces semana<br><input type="radio"/> 5 a 6 veces semana<br><input type="radio"/> 1 vez al día<br><input type="radio"/> 2 a 3 veces al día<br><input type="radio"/> 5 a 6 veces al día<br><input type="radio"/> más 6 veces al día |
| Yogurt desnatado                            | <input type="radio"/> Nunca o menos 1 vez al mes<br><input type="radio"/> 1 a 3 veces mes<br><input type="radio"/> 1 vez semana<br><input type="radio"/> 2 a 4 veces semana<br><input checked="" type="radio"/> 5 a 6 veces semana<br><input type="radio"/> 1 vez al día<br><input type="radio"/> 2 a 3 veces al día<br><input type="radio"/> 5 a 6 veces al día<br><input type="radio"/> más 6 veces al día |
| 100g requesón o queso blando o queso fresco | <input type="radio"/> Nunca o menos 1 vez al mes<br><input type="radio"/> 1 a 3 veces mes<br><input checked="" type="radio"/> 1 vez semana<br><input type="radio"/> 2 a 4 veces semana<br><input type="radio"/> 5 a 6 veces semana<br><input type="radio"/> 1 vez al día<br><input type="radio"/> 2 a 3 veces al día<br><input type="radio"/> 5 a 6 veces al día<br><input type="radio"/> más 6 veces al día |
| queso curado o semicurado o cremoso         | <input type="radio"/> Nunca o menos 1 vez al mes<br><input type="radio"/> 1 a 3 veces mes<br><input type="radio"/> 1 vez semana<br><input checked="" type="radio"/> 2 a 4 veces semana<br><input type="radio"/> 5 a 6 veces semana<br><input type="radio"/> 1 vez al día<br><input type="radio"/> 2 a 3 veces al día<br><input type="radio"/> 5 a 6 veces al día<br><input type="radio"/> más 6 veces al día |
| natillas flan pudding                       | <input type="radio"/> Nunca o menos 1 vez al mes<br><input checked="" type="radio"/> 1 a 3 veces mes<br><input type="radio"/> 1 vez semana<br><input type="radio"/> 2 a 4 veces semana<br><input type="radio"/> 5 a 6 veces semana<br><input type="radio"/> 1 vez al día<br><input type="radio"/> 2 a 3 veces al día<br><input type="radio"/> 5 a 6 veces al día<br><input type="radio"/> más 6 veces al día |
| Helado                                      | <input type="radio"/> Nunca o menos 1 vez al mes<br><input type="radio"/> 1 a 3 veces mes<br><input type="radio"/> 1 vez semana<br><input checked="" type="radio"/> 2 a 4 veces semana<br><input type="radio"/> 5 a 6 veces semana<br><input type="radio"/> 1 vez al día<br><input type="radio"/> 2 a 3 veces al día<br><input type="radio"/> 5 a 6 veces al día<br><input type="radio"/> más 6 veces al día |

|                                      |                                                                                                                                                                                                                                                                                                                                                                                                              |
|--------------------------------------|--------------------------------------------------------------------------------------------------------------------------------------------------------------------------------------------------------------------------------------------------------------------------------------------------------------------------------------------------------------------------------------------------------------|
| huevo                                | <input type="radio"/> Nunca o menos 1 vez al mes<br><input type="radio"/> 1 a 3 veces mes<br><input type="radio"/> 1 vez semana<br><input checked="" type="radio"/> 2 a 4 veces semana<br><input type="radio"/> 5 a 6 veces semana<br><input type="radio"/> 1 vez al día<br><input type="radio"/> 2 a 3 veces al día<br><input type="radio"/> 5 a 6 veces al día<br><input type="radio"/> más 6 veces al día |
| Pollo con piel                       | <input type="radio"/> Nunca o menos 1 vez al mes<br><input type="radio"/> 1 a 3 veces mes<br><input type="radio"/> 1 vez semana<br><input type="radio"/> 2 a 4 veces semana<br><input type="radio"/> 5 a 6 veces semana<br><input type="radio"/> 1 vez al día<br><input type="radio"/> 2 a 3 veces al día<br><input type="radio"/> 5 a 6 veces al día<br><input type="radio"/> más 6 veces al día            |
| pollo sin piel                       | <input type="radio"/> Nunca o menos 1 vez al mes<br><input type="radio"/> 1 a 3 veces mes<br><input type="radio"/> 1 vez semana<br><input checked="" type="radio"/> 2 a 4 veces semana<br><input type="radio"/> 5 a 6 veces semana<br><input type="radio"/> 1 vez al día<br><input type="radio"/> 2 a 3 veces al día<br><input type="radio"/> 5 a 6 veces al día<br><input type="radio"/> más 6 veces al día |
| Ternera o cerdo o cordero            | <input type="radio"/> Nunca o menos 1 vez al mes<br><input type="radio"/> 1 a 3 veces mes<br><input checked="" type="radio"/> 1 vez semana<br><input type="radio"/> 2 a 4 veces semana<br><input type="radio"/> 5 a 6 veces semana<br><input type="radio"/> 1 vez al día<br><input type="radio"/> 2 a 3 veces al día<br><input type="radio"/> 5 a 6 veces al día<br><input type="radio"/> más 6 veces al día |
| carne caza: Conejo o codorniz o pato | <input type="radio"/> Nunca o menos 1 vez al mes<br><input checked="" type="radio"/> 1 a 3 veces mes<br><input type="radio"/> 1 vez semana<br><input type="radio"/> 2 a 4 veces semana<br><input type="radio"/> 5 a 6 veces semana<br><input type="radio"/> 1 vez al día<br><input type="radio"/> 2 a 3 veces al día<br><input type="radio"/> 5 a 6 veces al día<br><input type="radio"/> más 6 veces al día |
| Hígado de ternera o cerdo o pollo    | <input type="radio"/> Nunca o menos 1 vez al mes<br><input checked="" type="radio"/> 1 a 3 veces mes<br><input type="radio"/> 1 vez semana<br><input type="radio"/> 2 a 4 veces semana<br><input type="radio"/> 5 a 6 veces semana<br><input type="radio"/> 1 vez al día<br><input type="radio"/> 2 a 3 veces al día<br><input type="radio"/> 5 a 6 veces al día<br><input type="radio"/> más 6 veces al día |

|                     |                                                                                                                                                                                                                                                                                                                                                                                                              |
|---------------------|--------------------------------------------------------------------------------------------------------------------------------------------------------------------------------------------------------------------------------------------------------------------------------------------------------------------------------------------------------------------------------------------------------------|
| Vísceras            | <input checked="" type="radio"/> Nunca o menos 1 vez al mes<br><input type="radio"/> 1 a 3 veces mes<br><input type="radio"/> 1 vez semana<br><input type="radio"/> 2 a 4 veces semana<br><input type="radio"/> 5 a 6 veces semana<br><input type="radio"/> 1 vez al día<br><input type="radio"/> 2 a 3 veces al día<br><input type="radio"/> 5 a 6 veces al día<br><input type="radio"/> más 6 veces al día |
| Embutido            | <input type="radio"/> Nunca o menos 1 vez al mes<br><input type="radio"/> 1 a 3 veces mes<br><input checked="" type="radio"/> 1 vez semana<br><input type="radio"/> 2 a 4 veces semana<br><input type="radio"/> 5 a 6 veces semana<br><input type="radio"/> 1 vez al día<br><input type="radio"/> 2 a 3 veces al día<br><input type="radio"/> 5 a 6 veces al día<br><input type="radio"/> más 6 veces al día |
| Salchicha o similar | <input type="radio"/> Nunca o menos 1 vez al mes<br><input type="radio"/> 1 a 3 veces mes<br><input checked="" type="radio"/> 1 vez semana<br><input type="radio"/> 2 a 4 veces semana<br><input type="radio"/> 5 a 6 veces semana<br><input type="radio"/> 1 vez al día<br><input type="radio"/> 2 a 3 veces al día<br><input type="radio"/> 5 a 6 veces al día<br><input type="radio"/> más 6 veces al día |
| Pate o foiegras     | <input checked="" type="radio"/> Nunca o menos 1 vez al mes<br><input type="radio"/> 1 a 3 veces mes<br><input type="radio"/> 1 vez semana<br><input type="radio"/> 2 a 4 veces semana<br><input type="radio"/> 5 a 6 veces semana<br><input type="radio"/> 1 vez al día<br><input type="radio"/> 2 a 3 veces al día<br><input type="radio"/> 5 a 6 veces al día<br><input type="radio"/> más 6 veces al día |
| Hamburguesa         | <input type="radio"/> Nunca o menos 1 vez al mes<br><input type="radio"/> 1 a 3 veces mes<br><input checked="" type="radio"/> 1 vez semana<br><input type="radio"/> 2 a 4 veces semana<br><input type="radio"/> 5 a 6 veces semana<br><input type="radio"/> 1 vez al día<br><input type="radio"/> 2 a 3 veces al día<br><input type="radio"/> 5 a 6 veces al día<br><input type="radio"/> más 6 veces al día |
| tocino o bacon      | <input type="radio"/> Nunca o menos 1 vez al mes<br><input checked="" type="radio"/> 1 a 3 veces mes<br><input type="radio"/> 1 vez semana<br><input type="radio"/> 2 a 4 veces semana<br><input type="radio"/> 5 a 6 veces semana<br><input type="radio"/> 1 vez al día<br><input type="radio"/> 2 a 3 veces al día<br><input type="radio"/> 5 a 6 veces al día<br><input type="radio"/> más 6 veces al día |

---

Pescado frito

- ☐ Nunca o menos 1 vez al mes  
☒ 1 a 3 veces mes  
☐ 1 vez semana  
☐ 2 a 4 veces semana  
☐ 5 a 6 veces semana  
☐ 1 vez al día  
☐ 2 a 3 veces al día  
☐ 5 a 6 veces al día  
☐ más 6 veces al día

---

pescado hervido blanco

- ☐ Nunca o menos 1 vez al mes  
☐ 1 a 3 veces mes  
☒ 1 vez semana  
☐ 2 a 4 veces semana  
☐ 5 a 6 veces semana  
☐ 1 vez al día  
☐ 2 a 3 veces al día  
☐ 5 a 6 veces al día  
☐ más 6 veces al día

---

pescado hervido azul

- ☐ Nunca o menos 1 vez al mes  
☐ 1 a 3 veces mes  
☒ 1 vez semana  
☐ 2 a 4 veces semana  
☐ 5 a 6 veces semana  
☐ 1 vez al día  
☐ 2 a 3 veces al día  
☐ 5 a 6 veces al día  
☐ más 6 veces al día

---

otros pescado azul

- ☐ Nunca o menos 1 vez al mes  
☐ 1 a 3 veces mes  
☒ 1 vez semana  
☐ 2 a 4 veces semana  
☐ 5 a 6 veces semana  
☐ 1 vez al día  
☐ 2 a 3 veces al día  
☐ 5 a 6 veces al día  
☐ más 6 veces al día

---

atun conserva

- ☐ Nunca o menos 1 vez al mes  
☐ 1 a 3 veces mes  
☒ 1 vez semana  
☐ 2 a 4 veces semana  
☐ 5 a 6 veces semana  
☐ 1 vez al día  
☐ 2 a 3 veces al día  
☐ 5 a 6 veces al día  
☐ más 6 veces al día

---

sardina conserva

- ☒ Nunca o menos 1 vez al mes  
☐ 1 a 3 veces mes  
☐ 1 vez semana  
☐ 2 a 4 veces semana  
☐ 5 a 6 veces semana  
☐ 1 vez al día  
☐ 2 a 3 veces al día  
☐ 5 a 6 veces al día  
☐ más 6 veces al día

|                                         |                                                                                                                                                                                                                                                                                                                                                                                                              |
|-----------------------------------------|--------------------------------------------------------------------------------------------------------------------------------------------------------------------------------------------------------------------------------------------------------------------------------------------------------------------------------------------------------------------------------------------------------------|
| pescado ahumado                         | <input type="radio"/> Nunca o menos 1 vez al mes<br><input checked="" type="radio"/> 1 a 3 veces mes<br><input type="radio"/> 1 vez semana<br><input type="radio"/> 2 a 4 veces semana<br><input type="radio"/> 5 a 6 veces semana<br><input type="radio"/> 1 vez al día<br><input type="radio"/> 2 a 3 veces al día<br><input type="radio"/> 5 a 6 veces al día<br><input type="radio"/> más 6 veces al día |
| almejas o mejillones o ostras unos 100g | <input type="radio"/> Nunca o menos 1 vez al mes<br><input checked="" type="radio"/> 1 a 3 veces mes<br><input type="radio"/> 1 vez semana<br><input type="radio"/> 2 a 4 veces semana<br><input type="radio"/> 5 a 6 veces semana<br><input type="radio"/> 1 vez al día<br><input type="radio"/> 2 a 3 veces al día<br><input type="radio"/> 5 a 6 veces al día<br><input type="radio"/> más 6 veces al día |
| calamar o chipiron o sepia unos 100g    | <input type="radio"/> Nunca o menos 1 vez al mes<br><input checked="" type="radio"/> 1 a 3 veces mes<br><input type="radio"/> 1 vez semana<br><input type="radio"/> 2 a 4 veces semana<br><input type="radio"/> 5 a 6 veces semana<br><input type="radio"/> 1 vez al día<br><input type="radio"/> 2 a 3 veces al día<br><input type="radio"/> 5 a 6 veces al día<br><input type="radio"/> más 6 veces al día |
| marisco unos 100g                       | <input type="radio"/> Nunca o menos 1 vez al mes<br><input checked="" type="radio"/> 1 a 3 veces mes<br><input type="radio"/> 1 vez semana<br><input type="radio"/> 2 a 4 veces semana<br><input type="radio"/> 5 a 6 veces semana<br><input type="radio"/> 1 vez al día<br><input type="radio"/> 2 a 3 veces al día<br><input type="radio"/> 5 a 6 veces al día<br><input type="radio"/> más 6 veces al día |
| Espinacas o acelgas cocinadas           | <input type="radio"/> Nunca o menos 1 vez al mes<br><input checked="" type="radio"/> 1 a 3 veces mes<br><input type="radio"/> 1 vez semana<br><input type="radio"/> 2 a 4 veces semana<br><input type="radio"/> 5 a 6 veces semana<br><input type="radio"/> 1 vez al día<br><input type="radio"/> 2 a 3 veces al día<br><input type="radio"/> 5 a 6 veces al día<br><input type="radio"/> más 6 veces al día |
| Col o coliflor o brocoli cocinado       | <input type="radio"/> Nunca o menos 1 vez al mes<br><input checked="" type="radio"/> 1 a 3 veces mes<br><input type="radio"/> 1 vez semana<br><input type="radio"/> 2 a 4 veces semana<br><input type="radio"/> 5 a 6 veces semana<br><input type="radio"/> 1 vez al día<br><input type="radio"/> 2 a 3 veces al día<br><input type="radio"/> 5 a 6 veces al día<br><input type="radio"/> más 6 veces al día |

---

Lechuga o endivia o escarola

- ☐ Nunca o menos 1 vez al mes  
☐ 1 a 3 veces mes  
☐ 1 vez semana  
☒ 2 a 4 veces semana  
☐ 5 a 6 veces semana  
☐ 1 vez al día  
☐ 2 a 3 veces al día  
☐ 5 a 6 veces al día  
☐ más 6 veces al día

---

tomate ensalada

- ☐ Nunca o menos 1 vez al mes  
☐ 1 a 3 veces mes  
☐ 1 vez semana  
☒ 2 a 4 veces semana  
☐ 5 a 6 veces semana  
☐ 1 vez al día  
☐ 2 a 3 veces al día  
☐ 5 a 6 veces al día  
☐ más 6 veces al día

---

cebolla

- ☐ Nunca o menos 1 vez al mes  
☐ 1 a 3 veces mes  
☐ 1 vez semana  
☒ 2 a 4 veces semana  
☐ 5 a 6 veces semana  
☐ 1 vez al día  
☐ 2 a 3 veces al día  
☐ 5 a 6 veces al día  
☐ más 6 veces al día

---

Zanahoria o calabaza

- ☐ Nunca o menos 1 vez al mes  
☐ 1 a 3 veces mes  
☐ 1 vez semana  
☒ 2 a 4 veces semana  
☐ 5 a 6 veces semana  
☐ 1 vez al día  
☐ 2 a 3 veces al día  
☐ 5 a 6 veces al día  
☐ más 6 veces al día

---

Judías verdes

- ☐ Nunca o menos 1 vez al mes  
☐ 1 a 3 veces mes  
☐ 1 vez semana  
☒ 2 a 4 veces semana  
☐ 5 a 6 veces semana  
☐ 1 vez al día  
☐ 2 a 3 veces al día  
☐ 5 a 6 veces al día  
☐ más 6 veces al día

---

Berenjena o calabacin o pepino

- ☐ Nunca o menos 1 vez al mes  
☐ 1 a 3 veces mes  
☐ 1 vez semana  
☒ 2 a 4 veces semana  
☐ 5 a 6 veces semana  
☐ 1 vez al día  
☐ 2 a 3 veces al día  
☐ 5 a 6 veces al día  
☐ más 6 veces al día

|                       |                                                                                                                                                                                                                                                                                                                                                                                                              |
|-----------------------|--------------------------------------------------------------------------------------------------------------------------------------------------------------------------------------------------------------------------------------------------------------------------------------------------------------------------------------------------------------------------------------------------------------|
| pimiento              | <input type="radio"/> Nunca o menos 1 vez al mes<br><input type="radio"/> 1 a 3 veces mes<br><input type="radio"/> 1 vez semana<br><input checked="" type="radio"/> 2 a 4 veces semana<br><input type="radio"/> 5 a 6 veces semana<br><input type="radio"/> 1 vez al día<br><input type="radio"/> 2 a 3 veces al día<br><input type="radio"/> 5 a 6 veces al día<br><input type="radio"/> más 6 veces al día |
| alcachofa             | <input type="radio"/> Nunca o menos 1 vez al mes<br><input type="radio"/> 1 a 3 veces mes<br><input checked="" type="radio"/> 1 vez semana<br><input type="radio"/> 2 a 4 veces semana<br><input type="radio"/> 5 a 6 veces semana<br><input type="radio"/> 1 vez al día<br><input type="radio"/> 2 a 3 veces al día<br><input type="radio"/> 5 a 6 veces al día<br><input type="radio"/> más 6 veces al día |
| espárragos            | <input type="radio"/> Nunca o menos 1 vez al mes<br><input checked="" type="radio"/> 1 a 3 veces mes<br><input type="radio"/> 1 vez semana<br><input type="radio"/> 2 a 4 veces semana<br><input type="radio"/> 5 a 6 veces semana<br><input type="radio"/> 1 vez al día<br><input type="radio"/> 2 a 3 veces al día<br><input type="radio"/> 5 a 6 veces al día<br><input type="radio"/> más 6 veces al día |
| maíz hervido          | <input type="radio"/> Nunca o menos 1 vez al mes<br><input type="radio"/> 1 a 3 veces mes<br><input checked="" type="radio"/> 1 vez semana<br><input type="radio"/> 2 a 4 veces semana<br><input type="radio"/> 5 a 6 veces semana<br><input type="radio"/> 1 vez al día<br><input type="radio"/> 2 a 3 veces al día<br><input type="radio"/> 5 a 6 veces al día<br><input type="radio"/> más 6 veces al día |
| legumbres             | <input type="radio"/> Nunca o menos 1 vez al mes<br><input type="radio"/> 1 a 3 veces mes<br><input type="radio"/> 1 vez semana<br><input checked="" type="radio"/> 2 a 4 veces semana<br><input type="radio"/> 5 a 6 veces semana<br><input type="radio"/> 1 vez al día<br><input type="radio"/> 2 a 3 veces al día<br><input type="radio"/> 5 a 6 veces al día<br><input type="radio"/> más 6 veces al día |
| naranjas o mandarinas | <input type="radio"/> Nunca o menos 1 vez al mes<br><input type="radio"/> 1 a 3 veces mes<br><input checked="" type="radio"/> 1 vez semana<br><input type="radio"/> 2 a 4 veces semana<br><input type="radio"/> 5 a 6 veces semana<br><input type="radio"/> 1 vez al día<br><input type="radio"/> 2 a 3 veces al día<br><input type="radio"/> 5 a 6 veces al día<br><input type="radio"/> más 6 veces al día |



|                       |                                                                                                                                                                                                                                                                                                                                                                                                              |
|-----------------------|--------------------------------------------------------------------------------------------------------------------------------------------------------------------------------------------------------------------------------------------------------------------------------------------------------------------------------------------------------------------------------------------------------------|
| zum natural fruta     | <input type="radio"/> Nunca o menos 1 vez al mes<br><input checked="" type="radio"/> 1 a 3 veces mes<br><input type="radio"/> 1 vez semana<br><input type="radio"/> 2 a 4 veces semana<br><input type="radio"/> 5 a 6 veces semana<br><input type="radio"/> 1 vez al día<br><input type="radio"/> 2 a 3 veces al día<br><input type="radio"/> 5 a 6 veces al día<br><input type="radio"/> más 6 veces al día |
| platano               | <input type="radio"/> Nunca o menos 1 vez al mes<br><input type="radio"/> 1 a 3 veces mes<br><input type="radio"/> 1 vez semana<br><input type="radio"/> 2 a 4 veces semana<br><input type="radio"/> 5 a 6 veces semana<br><input checked="" type="radio"/> 1 vez al día<br><input type="radio"/> 2 a 3 veces al día<br><input type="radio"/> 5 a 6 veces al día<br><input type="radio"/> más 6 veces al día |
| manzana o pera        | <input type="radio"/> Nunca o menos 1 vez al mes<br><input checked="" type="radio"/> 1 a 3 veces mes<br><input type="radio"/> 1 vez semana<br><input type="radio"/> 2 a 4 veces semana<br><input type="radio"/> 5 a 6 veces semana<br><input type="radio"/> 1 vez al día<br><input type="radio"/> 2 a 3 veces al día<br><input type="radio"/> 5 a 6 veces al día<br><input type="radio"/> más 6 veces al día |
| melocotón o nectarina | <input type="radio"/> Nunca o menos 1 vez al mes<br><input checked="" type="radio"/> 1 a 3 veces mes<br><input type="radio"/> 1 vez semana<br><input type="radio"/> 2 a 4 veces semana<br><input type="radio"/> 5 a 6 veces semana<br><input type="radio"/> 1 vez al día<br><input type="radio"/> 2 a 3 veces al día<br><input type="radio"/> 5 a 6 veces al día<br><input type="radio"/> más 6 veces al día |
| sandia o melon        | <input type="radio"/> Nunca o menos 1 vez al mes<br><input type="radio"/> 1 a 3 veces mes<br><input type="radio"/> 1 vez semana<br><input type="radio"/> 2 a 4 veces semana<br><input type="radio"/> 5 a 6 veces semana<br><input checked="" type="radio"/> 1 vez al día<br><input type="radio"/> 2 a 3 veces al día<br><input type="radio"/> 5 a 6 veces al día<br><input type="radio"/> más 6 veces al día |
| uva                   | <input type="radio"/> Nunca o menos 1 vez al mes<br><input checked="" type="radio"/> 1 a 3 veces mes<br><input type="radio"/> 1 vez semana<br><input type="radio"/> 2 a 4 veces semana<br><input type="radio"/> 5 a 6 veces semana<br><input type="radio"/> 1 vez al día<br><input type="radio"/> 2 a 3 veces al día<br><input type="radio"/> 5 a 6 veces al día<br><input type="radio"/> más 6 veces al día |

|                 |                                                                                                                                                                                                                                                                                                                                                                                                              |
|-----------------|--------------------------------------------------------------------------------------------------------------------------------------------------------------------------------------------------------------------------------------------------------------------------------------------------------------------------------------------------------------------------------------------------------------|
| bruna o ciruela | <input type="radio"/> Nunca o menos 1 vez al mes<br><input checked="" type="radio"/> 1 a 3 veces mes<br><input type="radio"/> 1 vez semana<br><input type="radio"/> 2 a 4 veces semana<br><input type="radio"/> 5 a 6 veces semana<br><input type="radio"/> 1 vez al día<br><input type="radio"/> 2 a 3 veces al día<br><input type="radio"/> 5 a 6 veces al día<br><input type="radio"/> más 6 veces al día |
| kiwi            | <input type="radio"/> Nunca o menos 1 vez al mes<br><input type="radio"/> 1 a 3 veces mes<br><input checked="" type="radio"/> 1 vez semana<br><input type="radio"/> 2 a 4 veces semana<br><input type="radio"/> 5 a 6 veces semana<br><input type="radio"/> 1 vez al día<br><input type="radio"/> 2 a 3 veces al día<br><input type="radio"/> 5 a 6 veces al día<br><input type="radio"/> más 6 veces al día |
| aceituna        | <input type="radio"/> Nunca o menos 1 vez al mes<br><input type="radio"/> 1 a 3 veces mes<br><input type="radio"/> 1 vez semana<br><input checked="" type="radio"/> 2 a 4 veces semana<br><input type="radio"/> 5 a 6 veces semana<br><input type="radio"/> 1 vez al día<br><input type="radio"/> 2 a 3 veces al día<br><input type="radio"/> 5 a 6 veces al día<br><input type="radio"/> más 6 veces al día |
| frutos secos    | <input type="radio"/> Nunca o menos 1 vez al mes<br><input checked="" type="radio"/> 1 a 3 veces mes<br><input type="radio"/> 1 vez semana<br><input type="radio"/> 2 a 4 veces semana<br><input type="radio"/> 5 a 6 veces semana<br><input type="radio"/> 1 vez al día<br><input type="radio"/> 2 a 3 veces al día<br><input type="radio"/> 5 a 6 veces al día<br><input type="radio"/> más 6 veces al día |
| pan blanco      | <input type="radio"/> Nunca o menos 1 vez al mes<br><input type="radio"/> 1 a 3 veces mes<br><input type="radio"/> 1 vez semana<br><input type="radio"/> 2 a 4 veces semana<br><input type="radio"/> 5 a 6 veces semana<br><input checked="" type="radio"/> 1 vez al día<br><input type="radio"/> 2 a 3 veces al día<br><input type="radio"/> 5 a 6 veces al día<br><input type="radio"/> más 6 veces al día |
| pan integral    | <input type="radio"/> Nunca o menos 1 vez al mes<br><input type="radio"/> 1 a 3 veces mes<br><input type="radio"/> 1 vez semana<br><input type="radio"/> 2 a 4 veces semana<br><input type="radio"/> 5 a 6 veces semana<br><input checked="" type="radio"/> 1 vez al día<br><input type="radio"/> 2 a 3 veces al día<br><input type="radio"/> 5 a 6 veces al día<br><input type="radio"/> más 6 veces al día |

---

cereales desayuno

- ☐ Nunca o menos 1 vez al mes  
☒ 1 a 3 veces mes  
☐ 1 vez semana  
☐ 2 a 4 veces semana  
☐ 5 a 6 veces semana  
☐ 1 vez al día  
☐ 2 a 3 veces al día  
☐ 5 a 6 veces al día  
☐ más 6 veces al día

---

patatas fritas

- ☐ Nunca o menos 1 vez al mes  
☒ 1 a 3 veces mes  
☐ 1 vez semana  
☐ 2 a 4 veces semana  
☐ 5 a 6 veces semana  
☐ 1 vez al día  
☐ 2 a 3 veces al día  
☐ 5 a 6 veces al día  
☐ más 6 veces al día

---

patatas cocidas o asadas

- ☐ Nunca o menos 1 vez al mes  
☐ 1 a 3 veces mes  
☒ 1 vez semana  
☐ 2 a 4 veces semana  
☐ 5 a 6 veces semana  
☐ 1 vez al día  
☐ 2 a 3 veces al día  
☐ 5 a 6 veces al día  
☐ más 6 veces al día

---

bolsa papas

- ☐ Nunca o menos 1 vez al mes  
☐ 1 a 3 veces mes  
☒ 1 vez semana  
☐ 2 a 4 veces semana  
☐ 5 a 6 veces semana  
☐ 1 vez al día  
☐ 2 a 3 veces al día  
☐ 5 a 6 veces al día  
☐ más 6 veces al día

---

arroz cocinado

- ☐ Nunca o menos 1 vez al mes  
☐ 1 a 3 veces mes  
☐ 1 vez semana  
☒ 2 a 4 veces semana  
☐ 5 a 6 veces semana  
☐ 1 vez al día  
☐ 2 a 3 veces al día  
☐ 5 a 6 veces al día  
☐ más 6 veces al día

---

pasta

- ☐ Nunca o menos 1 vez al mes  
☐ 1 a 3 veces mes  
☐ 1 vez semana  
☒ 2 a 4 veces semana  
☐ 5 a 6 veces semana  
☐ 1 vez al día  
☐ 2 a 3 veces al día  
☐ 5 a 6 veces al día  
☐ más 6 veces al día

|                     |                                                                                                                                                                                                                                                                                                                                                                                                              |
|---------------------|--------------------------------------------------------------------------------------------------------------------------------------------------------------------------------------------------------------------------------------------------------------------------------------------------------------------------------------------------------------------------------------------------------------|
| pizza               | <input type="radio"/> Nunca o menos 1 vez al mes<br><input type="radio"/> 1 a 3 veces mes<br><input checked="" type="radio"/> 1 vez semana<br><input type="radio"/> 2 a 4 veces semana<br><input type="radio"/> 5 a 6 veces semana<br><input type="radio"/> 1 vez al día<br><input type="radio"/> 2 a 3 veces al día<br><input type="radio"/> 5 a 6 veces al día<br><input type="radio"/> más 6 veces al día |
| aceite oliva        | <input type="radio"/> Nunca o menos 1 vez al mes<br><input type="radio"/> 1 a 3 veces mes<br><input type="radio"/> 1 vez semana<br><input type="radio"/> 2 a 4 veces semana<br><input type="radio"/> 5 a 6 veces semana<br><input type="radio"/> 1 vez al día<br><input checked="" type="radio"/> 2 a 3 veces al día<br><input type="radio"/> 5 a 6 veces al día<br><input type="radio"/> más 6 veces al día |
| otros aceites       | <input type="radio"/> Nunca o menos 1 vez al mes<br><input checked="" type="radio"/> 1 a 3 veces mes<br><input type="radio"/> 1 vez semana<br><input type="radio"/> 2 a 4 veces semana<br><input type="radio"/> 5 a 6 veces semana<br><input type="radio"/> 1 vez al día<br><input type="radio"/> 2 a 3 veces al día<br><input type="radio"/> 5 a 6 veces al día<br><input type="radio"/> más 6 veces al día |
| margarina           | <input type="radio"/> Nunca o menos 1 vez al mes<br><input type="radio"/> 1 a 3 veces mes<br><input checked="" type="radio"/> 1 vez semana<br><input type="radio"/> 2 a 4 veces semana<br><input type="radio"/> 5 a 6 veces semana<br><input type="radio"/> 1 vez al día<br><input type="radio"/> 2 a 3 veces al día<br><input type="radio"/> 5 a 6 veces al día<br><input type="radio"/> más 6 veces al día |
| mantequilla         | <input type="radio"/> Nunca o menos 1 vez al mes<br><input type="radio"/> 1 a 3 veces mes<br><input checked="" type="radio"/> 1 vez semana<br><input type="radio"/> 2 a 4 veces semana<br><input type="radio"/> 5 a 6 veces semana<br><input type="radio"/> 1 vez al día<br><input type="radio"/> 2 a 3 veces al día<br><input type="radio"/> 5 a 6 veces al día<br><input type="radio"/> más 6 veces al día |
| galletas tipo maria | <input type="radio"/> Nunca o menos 1 vez al mes<br><input type="radio"/> 1 a 3 veces mes<br><input type="radio"/> 1 vez semana<br><input checked="" type="radio"/> 2 a 4 veces semana<br><input type="radio"/> 5 a 6 veces semana<br><input type="radio"/> 1 vez al día<br><input type="radio"/> 2 a 3 veces al día<br><input type="radio"/> 5 a 6 veces al día<br><input type="radio"/> más 6 veces al día |

|                           |                                                                                                                                                                                                                                                                                                                                                                                                              |
|---------------------------|--------------------------------------------------------------------------------------------------------------------------------------------------------------------------------------------------------------------------------------------------------------------------------------------------------------------------------------------------------------------------------------------------------------|
| galletas chocolate        | <input type="radio"/> Nunca o menos 1 vez al mes<br><input checked="" type="radio"/> 1 a 3 veces mes<br><input type="radio"/> 1 vez semana<br><input type="radio"/> 2 a 4 veces semana<br><input type="radio"/> 5 a 6 veces semana<br><input type="radio"/> 1 vez al día<br><input type="radio"/> 2 a 3 veces al día<br><input type="radio"/> 5 a 6 veces al día<br><input type="radio"/> más 6 veces al día |
| bollieria                 | <input type="radio"/> Nunca o menos 1 vez al mes<br><input type="radio"/> 1 a 3 veces mes<br><input type="radio"/> 1 vez semana<br><input type="radio"/> 2 a 4 veces semana<br><input checked="" type="radio"/> 5 a 6 veces semana<br><input type="radio"/> 1 vez al día<br><input type="radio"/> 2 a 3 veces al día<br><input type="radio"/> 5 a 6 veces al día<br><input type="radio"/> más 6 veces al día |
| chocolate o bombones      | <input type="radio"/> Nunca o menos 1 vez al mes<br><input checked="" type="radio"/> 1 a 3 veces mes<br><input type="radio"/> 1 vez semana<br><input type="radio"/> 2 a 4 veces semana<br><input type="radio"/> 5 a 6 veces semana<br><input type="radio"/> 1 vez al día<br><input type="radio"/> 2 a 3 veces al día<br><input type="radio"/> 5 a 6 veces al día<br><input type="radio"/> más 6 veces al día |
| chocolate polvo o colacao | <input type="radio"/> Nunca o menos 1 vez al mes<br><input checked="" type="radio"/> 1 a 3 veces mes<br><input type="radio"/> 1 vez semana<br><input type="radio"/> 2 a 4 veces semana<br><input type="radio"/> 5 a 6 veces semana<br><input type="radio"/> 1 vez al día<br><input type="radio"/> 2 a 3 veces al día<br><input type="radio"/> 5 a 6 veces al día<br><input type="radio"/> más 6 veces al día |
| vino tinto                | <input checked="" type="radio"/> Nunca o menos 1 vez al mes<br><input type="radio"/> 1 a 3 veces mes<br><input type="radio"/> 1 vez semana<br><input type="radio"/> 2 a 4 veces semana<br><input type="radio"/> 5 a 6 veces semana<br><input type="radio"/> 1 vez al día<br><input type="radio"/> 2 a 3 veces al día<br><input type="radio"/> 5 a 6 veces al día<br><input type="radio"/> más 6 veces al día |
| vino blanco               | <input checked="" type="radio"/> Nunca o menos 1 vez al mes<br><input type="radio"/> 1 a 3 veces mes<br><input type="radio"/> 1 vez semana<br><input type="radio"/> 2 a 4 veces semana<br><input type="radio"/> 5 a 6 veces semana<br><input type="radio"/> 1 vez al día<br><input type="radio"/> 2 a 3 veces al día<br><input type="radio"/> 5 a 6 veces al día<br><input type="radio"/> más 6 veces al día |

|                       |                                                                                                                                                                                                                                                                                                                                                                                                              |
|-----------------------|--------------------------------------------------------------------------------------------------------------------------------------------------------------------------------------------------------------------------------------------------------------------------------------------------------------------------------------------------------------------------------------------------------------|
| vino seco o vermut    | <input checked="" type="radio"/> Nunca o menos 1 vez al mes<br><input type="radio"/> 1 a 3 veces mes<br><input type="radio"/> 1 vez semana<br><input type="radio"/> 2 a 4 veces semana<br><input type="radio"/> 5 a 6 veces semana<br><input type="radio"/> 1 vez al día<br><input type="radio"/> 2 a 3 veces al día<br><input type="radio"/> 5 a 6 veces al día<br><input type="radio"/> más 6 veces al día |
| cerveza               | <input checked="" type="radio"/> Nunca o menos 1 vez al mes<br><input type="radio"/> 1 a 3 veces mes<br><input type="radio"/> 1 vez semana<br><input type="radio"/> 2 a 4 veces semana<br><input type="radio"/> 5 a 6 veces semana<br><input type="radio"/> 1 vez al día<br><input type="radio"/> 2 a 3 veces al día<br><input type="radio"/> 5 a 6 veces al día<br><input type="radio"/> más 6 veces al día |
| cerveza sin alcohol   | <input type="radio"/> Nunca o menos 1 vez al mes<br><input checked="" type="radio"/> 1 a 3 veces mes<br><input type="radio"/> 1 vez semana<br><input type="radio"/> 2 a 4 veces semana<br><input type="radio"/> 5 a 6 veces semana<br><input type="radio"/> 1 vez al día<br><input type="radio"/> 2 a 3 veces al día<br><input type="radio"/> 5 a 6 veces al día<br><input type="radio"/> más 6 veces al día |
| licores               | <input checked="" type="radio"/> Nunca o menos 1 vez al mes<br><input type="radio"/> 1 a 3 veces mes<br><input type="radio"/> 1 vez semana<br><input type="radio"/> 2 a 4 veces semana<br><input type="radio"/> 5 a 6 veces semana<br><input type="radio"/> 1 vez al día<br><input type="radio"/> 2 a 3 veces al día<br><input type="radio"/> 5 a 6 veces al día<br><input type="radio"/> más 6 veces al día |
| ginebra o ron o vodka | <input checked="" type="radio"/> Nunca o menos 1 vez al mes<br><input type="radio"/> 1 a 3 veces mes<br><input type="radio"/> 1 vez semana<br><input type="radio"/> 2 a 4 veces semana<br><input type="radio"/> 5 a 6 veces semana<br><input type="radio"/> 1 vez al día<br><input type="radio"/> 2 a 3 veces al día<br><input type="radio"/> 5 a 6 veces al día<br><input type="radio"/> más 6 veces al día |
| refresco normal       | <input type="radio"/> Nunca o menos 1 vez al mes<br><input checked="" type="radio"/> 1 a 3 veces mes<br><input type="radio"/> 1 vez semana<br><input type="radio"/> 2 a 4 veces semana<br><input type="radio"/> 5 a 6 veces semana<br><input type="radio"/> 1 vez al día<br><input type="radio"/> 2 a 3 veces al día<br><input type="radio"/> 5 a 6 veces al día<br><input type="radio"/> más 6 veces al día |

|                          |                                                                                                                                                                                                                                                                                                                                                                                                              |
|--------------------------|--------------------------------------------------------------------------------------------------------------------------------------------------------------------------------------------------------------------------------------------------------------------------------------------------------------------------------------------------------------------------------------------------------------|
| refresco sin azúcar      | <input type="radio"/> Nunca o menos 1 vez al mes<br><input checked="" type="radio"/> 1 a 3 veces mes<br><input type="radio"/> 1 vez semana<br><input type="radio"/> 2 a 4 veces semana<br><input type="radio"/> 5 a 6 veces semana<br><input type="radio"/> 1 vez al día<br><input type="radio"/> 2 a 3 veces al día<br><input type="radio"/> 5 a 6 veces al día<br><input type="radio"/> más 6 veces al día |
| Agua del grifo           | <input checked="" type="radio"/> Nunca o menos 1 vez al mes<br><input type="radio"/> 1 a 3 veces mes<br><input type="radio"/> 1 vez semana<br><input type="radio"/> 2 a 4 veces semana<br><input type="radio"/> 5 a 6 veces semana<br><input type="radio"/> 1 vez al día<br><input type="radio"/> 2 a 3 veces al día<br><input type="radio"/> 5 a 6 veces al día<br><input type="radio"/> más 6 veces al día |
| agua embotellada sin gas | <input type="radio"/> Nunca o menos 1 vez al mes<br><input type="radio"/> 1 a 3 veces mes<br><input type="radio"/> 1 vez semana<br><input type="radio"/> 2 a 4 veces semana<br><input type="radio"/> 5 a 6 veces semana<br><input type="radio"/> 1 vez al día<br><input type="radio"/> 2 a 3 veces al día<br><input type="radio"/> 5 a 6 veces al día<br><input checked="" type="radio"/> más 6 veces al día |
| agua embotellada con gas | <input checked="" type="radio"/> Nunca o menos 1 vez al mes<br><input type="radio"/> 1 a 3 veces mes<br><input type="radio"/> 1 vez semana<br><input type="radio"/> 2 a 4 veces semana<br><input type="radio"/> 5 a 6 veces semana<br><input type="radio"/> 1 vez al día<br><input type="radio"/> 2 a 3 veces al día<br><input type="radio"/> 5 a 6 veces al día<br><input type="radio"/> más 6 veces al día |
| zumو frutas embasado     | <input checked="" type="radio"/> Nunca o menos 1 vez al mes<br><input type="radio"/> 1 a 3 veces mes<br><input type="radio"/> 1 vez semana<br><input type="radio"/> 2 a 4 veces semana<br><input type="radio"/> 5 a 6 veces semana<br><input type="radio"/> 1 vez al día<br><input type="radio"/> 2 a 3 veces al día<br><input type="radio"/> 5 a 6 veces al día<br><input type="radio"/> más 6 veces al día |
| cafe                     | <input type="radio"/> Nunca o menos 1 vez al mes<br><input type="radio"/> 1 a 3 veces mes<br><input type="radio"/> 1 vez semana<br><input type="radio"/> 2 a 4 veces semana<br><input type="radio"/> 5 a 6 veces semana<br><input checked="" type="radio"/> 1 vez al día<br><input type="radio"/> 2 a 3 veces al día<br><input type="radio"/> 5 a 6 veces al día<br><input type="radio"/> más 6 veces al día |

|                       |                                                                                                                                                                                                                                                                                                                                                                                                              |
|-----------------------|--------------------------------------------------------------------------------------------------------------------------------------------------------------------------------------------------------------------------------------------------------------------------------------------------------------------------------------------------------------------------------------------------------------|
| cafe descafeinado     | <input type="radio"/> Nunca o menos 1 vez al mes<br><input checked="" type="radio"/> 1 a 3 veces mes<br><input type="radio"/> 1 vez semana<br><input type="radio"/> 2 a 4 veces semana<br><input type="radio"/> 5 a 6 veces semana<br><input type="radio"/> 1 vez al día<br><input type="radio"/> 2 a 3 veces al día<br><input type="radio"/> 5 a 6 veces al día<br><input type="radio"/> más 6 veces al día |
| te o infusión         | <input checked="" type="radio"/> Nunca o menos 1 vez al mes<br><input type="radio"/> 1 a 3 veces mes<br><input type="radio"/> 1 vez semana<br><input type="radio"/> 2 a 4 veces semana<br><input type="radio"/> 5 a 6 veces semana<br><input type="radio"/> 1 vez al día<br><input type="radio"/> 2 a 3 veces al día<br><input type="radio"/> 5 a 6 veces al día<br><input type="radio"/> más 6 veces al día |
| sopa o puré verduras  | <input type="radio"/> Nunca o menos 1 vez al mes<br><input type="radio"/> 1 a 3 veces mes<br><input type="radio"/> 1 vez semana<br><input checked="" type="radio"/> 2 a 4 veces semana<br><input type="radio"/> 5 a 6 veces semana<br><input type="radio"/> 1 vez al día<br><input type="radio"/> 2 a 3 veces al día<br><input type="radio"/> 5 a 6 veces al día<br><input type="radio"/> más 6 veces al día |
| croquetas pollo jamón | <input type="radio"/> Nunca o menos 1 vez al mes<br><input checked="" type="radio"/> 1 a 3 veces mes<br><input type="radio"/> 1 vez semana<br><input type="radio"/> 2 a 4 veces semana<br><input type="radio"/> 5 a 6 veces semana<br><input type="radio"/> 1 vez al día<br><input type="radio"/> 2 a 3 veces al día<br><input type="radio"/> 5 a 6 veces al día<br><input type="radio"/> más 6 veces al día |
| croquetas pescado     | <input checked="" type="radio"/> Nunca o menos 1 vez al mes<br><input type="radio"/> 1 a 3 veces mes<br><input type="radio"/> 1 vez semana<br><input type="radio"/> 2 a 4 veces semana<br><input type="radio"/> 5 a 6 veces semana<br><input type="radio"/> 1 vez al día<br><input type="radio"/> 2 a 3 veces al día<br><input type="radio"/> 5 a 6 veces al día<br><input type="radio"/> más 6 veces al día |
| mayonesa              | <input type="radio"/> Nunca o menos 1 vez al mes<br><input type="radio"/> 1 a 3 veces mes<br><input checked="" type="radio"/> 1 vez semana<br><input type="radio"/> 2 a 4 veces semana<br><input type="radio"/> 5 a 6 veces semana<br><input type="radio"/> 1 vez al día<br><input type="radio"/> 2 a 3 veces al día<br><input type="radio"/> 5 a 6 veces al día<br><input type="radio"/> más 6 veces al día |



|                  |                                                                                                                                                                                                                                                                                                                                                                                                              |
|------------------|--------------------------------------------------------------------------------------------------------------------------------------------------------------------------------------------------------------------------------------------------------------------------------------------------------------------------------------------------------------------------------------------------------------|
| salsa tomate     | <input type="radio"/> Nunca o menos 1 vez al mes<br><input type="radio"/> 1 a 3 veces mes<br><input checked="" type="radio"/> 1 vez semana<br><input type="radio"/> 2 a 4 veces semana<br><input type="radio"/> 5 a 6 veces semana<br><input type="radio"/> 1 vez al día<br><input type="radio"/> 2 a 3 veces al día<br><input type="radio"/> 5 a 6 veces al día<br><input type="radio"/> más 6 veces al día |
| ketchup          | <input type="radio"/> Nunca o menos 1 vez al mes<br><input type="radio"/> 1 a 3 veces mes<br><input checked="" type="radio"/> 1 vez semana<br><input type="radio"/> 2 a 4 veces semana<br><input type="radio"/> 5 a 6 veces semana<br><input type="radio"/> 1 vez al día<br><input type="radio"/> 2 a 3 veces al día<br><input type="radio"/> 5 a 6 veces al día<br><input type="radio"/> más 6 veces al día |
| sal              | <input type="radio"/> Nunca o menos 1 vez al mes<br><input type="radio"/> 1 a 3 veces mes<br><input type="radio"/> 1 vez semana<br><input type="radio"/> 2 a 4 veces semana<br><input type="radio"/> 5 a 6 veces semana<br><input type="radio"/> 1 vez al día<br><input checked="" type="radio"/> 2 a 3 veces al día<br><input type="radio"/> 5 a 6 veces al día<br><input type="radio"/> más 6 veces al día |
| ajo              | <input type="radio"/> Nunca o menos 1 vez al mes<br><input type="radio"/> 1 a 3 veces mes<br><input type="radio"/> 1 vez semana<br><input type="radio"/> 2 a 4 veces semana<br><input checked="" type="radio"/> 5 a 6 veces semana<br><input type="radio"/> 1 vez al día<br><input type="radio"/> 2 a 3 veces al día<br><input type="radio"/> 5 a 6 veces al día<br><input type="radio"/> más 6 veces al día |
| mermelada o miel | <input type="radio"/> Nunca o menos 1 vez al mes<br><input type="radio"/> 1 a 3 veces mes<br><input checked="" type="radio"/> 1 vez semana<br><input type="radio"/> 2 a 4 veces semana<br><input type="radio"/> 5 a 6 veces semana<br><input type="radio"/> 1 vez al día<br><input type="radio"/> 2 a 3 veces al día<br><input type="radio"/> 5 a 6 veces al día<br><input type="radio"/> más 6 veces al día |
| azúcar           | <input checked="" type="radio"/> Nunca o menos 1 vez al mes<br><input type="radio"/> 1 a 3 veces mes<br><input type="radio"/> 1 vez semana<br><input type="radio"/> 2 a 4 veces semana<br><input type="radio"/> 5 a 6 veces semana<br><input type="radio"/> 1 vez al día<br><input type="radio"/> 2 a 3 veces al día<br><input type="radio"/> 5 a 6 veces al día<br><input type="radio"/> más 6 veces al día |

|                                       |                                                                                                                                                                                                                                                                                                                                                                                                                                                                                                                               |
|---------------------------------------|-------------------------------------------------------------------------------------------------------------------------------------------------------------------------------------------------------------------------------------------------------------------------------------------------------------------------------------------------------------------------------------------------------------------------------------------------------------------------------------------------------------------------------|
| Otro alimento                         | [*DATA REMOVED*]                                                                                                                                                                                                                                                                                                                                                                                                                                                                                                              |
| suplementos vitamínicos               | <input checked="" type="radio"/> si<br><input type="radio"/> no                                                                                                                                                                                                                                                                                                                                                                                                                                                               |
| suplementos vitamínicos               | [*DATA REMOVED*]                                                                                                                                                                                                                                                                                                                                                                                                                                                                                                              |
| dieta previa                          | <input type="radio"/> si<br><input checked="" type="radio"/> no                                                                                                                                                                                                                                                                                                                                                                                                                                                               |
| motivo dieta                          | <input checked="" type="radio"/> no dieta<br><input type="radio"/> control peso<br><input type="radio"/> control colesterol<br><input type="radio"/> control diabetes<br><input type="radio"/> problemas estómago<br><input type="radio"/> problemas vesícula o hepáticos<br><input type="radio"/> HTA o cardiopatía<br><input type="radio"/> problemas renales<br><input type="radio"/> alergia alimentaria<br><input type="radio"/> ácido úrico elevado<br><input type="radio"/> vegetariana<br><input type="radio"/> otros |
| cambio alimentos año previo gestación | <input checked="" type="radio"/> si<br><input type="radio"/> no                                                                                                                                                                                                                                                                                                                                                                                                                                                               |
| cambio lácteos                        | <input type="radio"/> eliminado<br><input type="radio"/> disminuido<br><input checked="" type="radio"/> igual<br><input type="radio"/> aumentado<br><input type="radio"/> no sabe                                                                                                                                                                                                                                                                                                                                             |
| cambio huevos                         | <input type="radio"/> eliminado<br><input type="radio"/> disminuido<br><input checked="" type="radio"/> igual<br><input type="radio"/> aumentado<br><input type="radio"/> no sabe                                                                                                                                                                                                                                                                                                                                             |
| cambio carne                          | <input type="radio"/> eliminado<br><input type="radio"/> disminuido<br><input checked="" type="radio"/> igual<br><input type="radio"/> aumentado<br><input type="radio"/> no sabe                                                                                                                                                                                                                                                                                                                                             |
| cambio pescado                        | <input type="radio"/> eliminado<br><input type="radio"/> disminuido<br><input checked="" type="radio"/> igual<br><input type="radio"/> aumentado<br><input type="radio"/> no sabe                                                                                                                                                                                                                                                                                                                                             |
| cambio verduras                       | <input type="radio"/> eliminado<br><input type="radio"/> disminuido<br><input checked="" type="radio"/> igual<br><input type="radio"/> aumentado<br><input type="radio"/> no sabe                                                                                                                                                                                                                                                                                                                                             |

|                            |                                                                                                                                                                                                                        |
|----------------------------|------------------------------------------------------------------------------------------------------------------------------------------------------------------------------------------------------------------------|
| cambio legumbres           | <input type="radio"/> eliminado<br><input type="radio"/> disminuido<br><input checked="" type="radio"/> igual<br><input type="radio"/> aumentado<br><input type="radio"/> no sabe                                      |
| cambio fruta               | <input type="radio"/> eliminado<br><input type="radio"/> disminuido<br><input checked="" type="radio"/> igual<br><input type="radio"/> aumentado<br><input type="radio"/> no sabe                                      |
| cambio pan                 | <input type="radio"/> eliminado<br><input type="radio"/> disminuido<br><input checked="" type="radio"/> igual<br><input type="radio"/> aumentado<br><input type="radio"/> no sabe                                      |
| cambio aceite oliva        | <input type="radio"/> eliminado<br><input type="radio"/> disminuido<br><input checked="" type="radio"/> igual<br><input type="radio"/> aumentado<br><input type="radio"/> no sabe                                      |
| cambio mante o margarina   | <input type="radio"/> eliminado<br><input type="radio"/> disminuido<br><input checked="" type="radio"/> igual<br><input type="radio"/> aumentado<br><input type="radio"/> no sabe                                      |
| cambio azúcar y dulces     | <input type="radio"/> eliminado<br><input type="radio"/> disminuido<br><input type="radio"/> igual<br><input checked="" type="radio"/> aumentado<br><input type="radio"/> no sabe                                      |
| cambio bebidas alcohólicas | <input checked="" type="radio"/> eliminado<br><input type="radio"/> disminuido<br><input type="radio"/> igual<br><input type="radio"/> aumentado<br><input type="radio"/> no sabe                                      |
| frecuencia comidas fritas  | <input type="radio"/> a diario<br><input type="radio"/> 5 a 6 veces semana<br><input type="radio"/> 2 a 4 veces semana<br><input type="radio"/> 1 vez semana<br><input checked="" type="radio"/> menos de 1 vez semana |
| carne                      | <input type="radio"/> no como<br><input type="radio"/> cruda<br><input type="radio"/> poco hecha<br><input checked="" type="radio"/> hecha<br><input type="radio"/> muy hecha                                          |
| grasa visible carne        | <input checked="" type="radio"/> quita toda<br><input type="radio"/> quita mayoría<br><input type="radio"/> quita un poco<br><input type="radio"/> no quita nada                                                       |

|                                |                                                                                                                                                                                                                                                          |
|--------------------------------|----------------------------------------------------------------------------------------------------------------------------------------------------------------------------------------------------------------------------------------------------------|
| cocina carne                   | <input checked="" type="radio"/> a la plancha<br><input type="radio"/> a la parrilla<br><input type="radio"/> asada<br><input type="radio"/> frita<br><input type="radio"/> guisada                                                                      |
| tostado quemado carne          | <input checked="" type="radio"/> nunca<br><input type="radio"/> 1 vez mes<br><input type="radio"/> 2 a 3 veces mes<br><input type="radio"/> 1 vez semana<br><input type="radio"/> 2 a 3 semanas                                                          |
| tostado quemado pescado        | <input checked="" type="radio"/> nunca<br><input type="radio"/> 1 vez mes<br><input type="radio"/> 2 a 3 veces mes<br><input type="radio"/> 1 vez semana<br><input type="radio"/> 2 a 3 semanas                                                          |
| socarrat paella                | <input checked="" type="radio"/> nunca<br><input type="radio"/> 1 vez mes<br><input type="radio"/> 2 a 3 veces mes<br><input type="radio"/> 1 vez semana<br><input type="radio"/> 2 a 3 semanas                                                          |
| grasa o aceite cocinar         | <input type="radio"/> mantequilla<br><input type="radio"/> margarina<br><input type="radio"/> aceite oliva<br><input checked="" type="radio"/> aceite oliva virgen extra<br><input type="radio"/> aceite vegetal<br><input type="radio"/> mezcla aceites |
| grasa aceite aliñar            | <input type="radio"/> mantequilla<br><input type="radio"/> margarina<br><input type="radio"/> aceite oliva<br><input checked="" type="radio"/> aceite oliva virgen extra<br><input type="radio"/> aceite vegetal<br><input type="radio"/> mezcla aceites |
| grasa aceite freir             | <input type="radio"/> mantequilla<br><input type="radio"/> margarina<br><input type="radio"/> aceite oliva<br><input checked="" type="radio"/> aceite oliva virgen extra<br><input type="radio"/> aceite vegetal<br><input type="radio"/> mezcla aceites |
| Ejercicio cuestionario         | <input checked="" type="radio"/> si<br><input type="radio"/> no                                                                                                                                                                                          |
| horas de sueño incluido siesta | [*DATA REMOVED*]                                                                                                                                                                                                                                         |
| minutos siesta                 | [*DATA REMOVED*]                                                                                                                                                                                                                                         |
| horas televisión semana        | [*DATA REMOVED*]                                                                                                                                                                                                                                         |

|                                        |                                                                                                                                                                                                                                                                                                                                                                           |
|----------------------------------------|---------------------------------------------------------------------------------------------------------------------------------------------------------------------------------------------------------------------------------------------------------------------------------------------------------------------------------------------------------------------------|
| actividad trabajo                      | <input checked="" type="radio"/> casi siempre sentado<br><input type="radio"/> sentado 50 por cien<br><input type="radio"/> casi siempre de pie, quieto<br><input type="radio"/> casi siempre levantado caminando y llevando pocas cosas<br><input type="radio"/> casi siempre levantado, caminando y llevado muchas cosas<br><input type="radio"/> trabajo manual pesado |
| tiempo caminar o bici al día           | <input type="radio"/> casi nunca<br><input checked="" type="radio"/> menos 20min día<br><input type="radio"/> 20 a 40 min día<br><input type="radio"/> 40 a 60 min día<br><input type="radio"/> 1h o 1h y media día<br><input type="radio"/> más de 1h y media al día                                                                                                     |
| tiempo tareas casa al día              | <input type="radio"/> menos de 1h día<br><input type="radio"/> 1 a 2h día<br><input checked="" type="radio"/> 3 a 4h día<br><input type="radio"/> 5 a 6h día<br><input type="radio"/> 7 a 8h día<br><input type="radio"/> más de 8h día                                                                                                                                   |
| tiempo libre televisión ordenador leer | <input type="radio"/> menos 1h día<br><input type="radio"/> 1h día<br><input checked="" type="radio"/> 2h día<br><input type="radio"/> 3h día<br><input type="radio"/> 4h día<br><input type="radio"/> 5 a 6h día<br><input type="radio"/> mas 6h día                                                                                                                     |
| tiempo libre ejercicio o deporte       | <input type="radio"/> menos 1h semana<br><input checked="" type="radio"/> 1h semana<br><input type="radio"/> 2h semana<br><input type="radio"/> 3h semana<br><input type="radio"/> 4 a 5h semana<br><input type="radio"/> mas 5h semana                                                                                                                                   |
| como se considera                      | <input type="radio"/> sedentaria<br><input checked="" type="radio"/> poco activa<br><input type="radio"/> moderadamente activa<br><input type="radio"/> bastante activa<br><input type="radio"/> muy activa<br><input type="radio"/> no sabe                                                                                                                              |
| FUR                                    | [*DATA REMOVED*]                                                                                                                                                                                                                                                                                                                                                          |
| Semanas gestación 2T                   | [*DATA REMOVED*]                                                                                                                                                                                                                                                                                                                                                          |
| Días gestación 2T                      | [*DATA REMOVED*]                                                                                                                                                                                                                                                                                                                                                          |
| DBP 2T                                 | [*DATA REMOVED*]                                                                                                                                                                                                                                                                                                                                                          |
| CC 2T                                  | [*DATA REMOVED*]                                                                                                                                                                                                                                                                                                                                                          |
| AC 2T                                  | [*DATA REMOVED*]                                                                                                                                                                                                                                                                                                                                                          |

|                                                   |                                                                                                                                                                                                 |
|---------------------------------------------------|-------------------------------------------------------------------------------------------------------------------------------------------------------------------------------------------------|
| LF 2T                                             | [*DATA REMOVED*]                                                                                                                                                                                |
| PFE 2T (Hadlock)                                  | [*DATA REMOVED*]                                                                                                                                                                                |
| Semanas gestación 3T                              | [*DATA REMOVED*]                                                                                                                                                                                |
| días 3T                                           | [*DATA REMOVED*]                                                                                                                                                                                |
| DBP 3T                                            | [*DATA REMOVED*]                                                                                                                                                                                |
| CC 3T                                             | [*DATA REMOVED*]                                                                                                                                                                                |
| AC 3T                                             | [*DATA REMOVED*]                                                                                                                                                                                |
| LF 3T                                             | [*DATA REMOVED*]                                                                                                                                                                                |
| PFE 3T (Hadlock)                                  | [*DATA REMOVED*]                                                                                                                                                                                |
| Semanas de gestación final                        | [*DATA REMOVED*]                                                                                                                                                                                |
| dias gestación final                              | [*DATA REMOVED*]                                                                                                                                                                                |
| Localización placenta                             | <input type="radio"/> anterior<br><input type="radio"/> lateral derecha<br><input type="radio"/> lateral izquierda<br><input checked="" type="radio"/> posterior<br><input type="radio"/> fondo |
| Presentación longitudinal cefálica                | <input type="radio"/> no<br><input checked="" type="radio"/> si                                                                                                                                 |
| Dorso                                             | <input type="radio"/> izquierda anterior<br><input type="radio"/> izquierda posterior<br><input checked="" type="radio"/> derecha anterior<br><input type="radio"/> derecha posterior           |
| diámetro biparietal                               | [*DATA REMOVED*]                                                                                                                                                                                |
| Circunferencia craneal                            | [*DATA REMOVED*]                                                                                                                                                                                |
| Circunferencia abdominal                          | [*DATA REMOVED*]                                                                                                                                                                                |
| Longitud de femur                                 | [*DATA REMOVED*]                                                                                                                                                                                |
| tejido celular subcutáneo a nivel del muslo en mm | [*DATA REMOVED*]                                                                                                                                                                                |
| tejido celular subcutáneo en abdomen en mm        | [*DATA REMOVED*]                                                                                                                                                                                |
| Volumen del muslo en cm3                          | [*DATA REMOVED*]                                                                                                                                                                                |
| Peso fetal estimado según fórmula de Hadlock      | [*DATA REMOVED*]                                                                                                                                                                                |

|                                               |                                                                                                                                                          |
|-----------------------------------------------|----------------------------------------------------------------------------------------------------------------------------------------------------------|
| Percentil                                     | [*DATA REMOVED*]                                                                                                                                         |
| Peso fetal estimado según fórmula de Scioscia | <hr/>                                                                                                                                                    |
| Peso fetal estimado según fórmula de LEE      | <hr/>                                                                                                                                                    |
| Tipo de parto                                 | <input type="radio"/> eutocico<br><input type="radio"/> instrumentado/ventosa<br><input type="radio"/> cesarea                                           |
| fecha de nacimiento                           | [*DATA REMOVED*]                                                                                                                                         |
| Días entre exploración y nacimiento           | [*DATA REMOVED*]                                                                                                                                         |
| Peso RN en g                                  | [*DATA REMOVED*]                                                                                                                                         |
| sexo                                          | <input checked="" type="radio"/> mujer<br><input type="radio"/> hombre                                                                                   |
| Apgar 1 minuto                                | [*DATA REMOVED*]                                                                                                                                         |
| Apgar 5 minutos                               | [*DATA REMOVED*]                                                                                                                                         |
| Apgar 10 minutos                              | <hr/>                                                                                                                                                    |
| antecedente Covid durante gestación           | <input type="radio"/> Yes<br><input checked="" type="radio"/> No                                                                                         |
| Nivel de estudios                             | <input type="radio"/> ninguno<br><input type="radio"/> primarios<br><input type="radio"/> secundarios<br><input checked="" type="radio"/> universitarios |

## Base\_datos\_estimacion\_peso\_fetal

|                                       |                                                                                                                                                                                                                                                                                      |
|---------------------------------------|--------------------------------------------------------------------------------------------------------------------------------------------------------------------------------------------------------------------------------------------------------------------------------------|
| Número de identificación participante | 92                                                                                                                                                                                                                                                                                   |
| CODIGO PARTICIPANTE                   |                                                                                                                                                                                                                                                                                      |
| Edad                                  | [*DATA REMOVED*]                                                                                                                                                                                                                                                                     |
| Gestaciones                           | <input type="radio"/> 1<br><input checked="" type="radio"/> 2<br><input type="radio"/> 3<br><input type="radio"/> mas de 3                                                                                                                                                           |
| partos                                | <input type="radio"/> 0<br><input checked="" type="radio"/> 1<br><input type="radio"/> 2<br><input type="radio"/> 3<br><input type="radio"/> mas de 3                                                                                                                                |
| cesáreas                              | <input checked="" type="radio"/> 0<br><input type="radio"/> 1<br><input type="radio"/> 2<br><input type="radio"/> 3<br><input type="radio"/> mas de 3                                                                                                                                |
| Abortos                               | <input checked="" type="radio"/> 0<br><input type="radio"/> 1<br><input type="radio"/> 2<br><input type="radio"/> 3<br><input type="radio"/> mas de 3                                                                                                                                |
| Tipo de gestacion                     | <input checked="" type="radio"/> espontanea<br><input type="radio"/> IAC inseminación artificial conyuge<br><input type="radio"/> IAD inseminación artificial donante<br><input type="radio"/> FIV Fecundación in Vitro<br><input type="radio"/> Ovodon FIV con donación de ovocitos |
| peso previo a embarazo                | [*DATA REMOVED*]                                                                                                                                                                                                                                                                     |
| Ganancia ponderal embarazo            |                                                                                                                                                                                                                                                                                      |
| Talla madre                           | [*DATA REMOVED*]                                                                                                                                                                                                                                                                     |
| IMC previo embarazo                   | 21.513858510523864                                                                                                                                                                                                                                                                   |
| Patología obstétrica                  | <input checked="" type="radio"/> no<br><input type="radio"/> si                                                                                                                                                                                                                      |
| Diabetes pregestacional               | <input checked="" type="radio"/> no<br><input type="radio"/> si                                                                                                                                                                                                                      |
| Diabetes gestacional                  | <input checked="" type="radio"/> no<br><input type="radio"/> si                                                                                                                                                                                                                      |



|                                            |                                                                                                                                                                                      |
|--------------------------------------------|--------------------------------------------------------------------------------------------------------------------------------------------------------------------------------------|
| Diabetes gestacional con insulina          | <input checked="" type="radio"/> no<br><input type="radio"/> si                                                                                                                      |
| Diabetes gestacional con dieta y ejercicio | <input checked="" type="radio"/> no<br><input type="radio"/> si                                                                                                                      |
| Percentil fetos previos                    | <input type="radio"/> Nada<br><input checked="" type="radio"/> percentil menor de 10<br><input type="radio"/> percentil entre 10 y 90<br><input type="radio"/> percentil mayor de 90 |
| Exfumadora                                 | <input checked="" type="radio"/> Nada<br><input type="radio"/> menos de 5 años<br><input type="radio"/> 5 a 10 años<br><input type="radio"/> mayor o igual a 10 años                 |
| Hábito tabáquico                           | <input checked="" type="radio"/> no<br><input type="radio"/> si                                                                                                                      |
| fumadora                                   | [*DATA REMOVED*]                                                                                                                                                                     |
| Consumo otros tóxicos                      | <input checked="" type="radio"/> no<br><input type="radio"/> si                                                                                                                      |
| Hb 1T                                      | [*DATA REMOVED*]                                                                                                                                                                     |
| Htc 1T                                     | [*DATA REMOVED*]                                                                                                                                                                     |
| Hb 2T                                      | [*DATA REMOVED*]                                                                                                                                                                     |
| HTC 2T                                     | [*DATA REMOVED*]                                                                                                                                                                     |
| Hb 3T                                      | [*DATA REMOVED*]                                                                                                                                                                     |
| HTC 3T                                     | [*DATA REMOVED*]                                                                                                                                                                     |
| Suplemento FE oral                         | <input type="radio"/> si<br><input checked="" type="radio"/> no                                                                                                                      |
| Suplemento fe iv                           | <input type="radio"/> si<br><input checked="" type="radio"/> no                                                                                                                      |
| Transfusión                                | <input checked="" type="radio"/> no<br><input type="radio"/> si                                                                                                                      |
| Solicitada Vit D                           | <input checked="" type="radio"/> no<br><input type="radio"/> si                                                                                                                      |
| Deficit vit D                              | <input type="radio"/> no<br><input type="radio"/> si                                                                                                                                 |
| Suplemento vit D                           | <input type="radio"/> si<br><input type="radio"/> no                                                                                                                                 |

|                       |                                                                                                                                                                                                                                                                                                                                                                                                              |
|-----------------------|--------------------------------------------------------------------------------------------------------------------------------------------------------------------------------------------------------------------------------------------------------------------------------------------------------------------------------------------------------------------------------------------------------------|
| Dieta, cuestionario   | <input checked="" type="radio"/> sí<br><input type="radio"/> no                                                                                                                                                                                                                                                                                                                                              |
| Leche entera          | <input checked="" type="radio"/> Nunca o menos 1 vez al mes<br><input type="radio"/> 1 a 3 veces mes<br><input type="radio"/> 1 vez semana<br><input type="radio"/> 2 a 4 veces semana<br><input type="radio"/> 5 a 6 veces semana<br><input type="radio"/> 1 vez al día<br><input type="radio"/> 2 a 3 veces al día<br><input type="radio"/> 5 a 6 veces al día<br><input type="radio"/> más 6 veces al día |
| Leche semidesnatada   | <input checked="" type="radio"/> Nunca o menos 1 vez al mes<br><input type="radio"/> 1 a 3 veces mes<br><input type="radio"/> 1 vez semana<br><input type="radio"/> 2 a 4 veces semana<br><input type="radio"/> 5 a 6 veces semana<br><input type="radio"/> 1 vez al día<br><input type="radio"/> 2 a 3 veces al día<br><input type="radio"/> 5 a 6 veces al día<br><input type="radio"/> mas 6 veces al día |
| Leche desnatada       | <input type="radio"/> Nunca o menos 1 vez al mes<br><input type="radio"/> 1 a 3 veces mes<br><input type="radio"/> 1 vez semana<br><input type="radio"/> 2 a 4 veces semana<br><input type="radio"/> 5 a 6 veces semana<br><input checked="" type="radio"/> 1 vez al día<br><input type="radio"/> 2 a 3 veces al día<br><input type="radio"/> 5 a 6 veces al día<br><input type="radio"/> más 6 veces al día |
| Leche condensada      | <input checked="" type="radio"/> Nunca o menos 1 vez al mes<br><input type="radio"/> 1 a 3 veces mes<br><input type="radio"/> 1 vez semana<br><input type="radio"/> 2 a 4 veces semana<br><input type="radio"/> 5 a 6 veces semana<br><input type="radio"/> 1 vez al día<br><input type="radio"/> 2 a 3 veces al día<br><input type="radio"/> 5 a 6 veces al día<br><input type="radio"/> más 6 veces al día |
| nata o crema de leche | <input checked="" type="radio"/> Nunca o menos 1 vez al mes<br><input type="radio"/> 1 a 3 veces mes<br><input type="radio"/> 1 vez semana<br><input type="radio"/> 2 a 4 veces semana<br><input type="radio"/> 5 a 6 veces semana<br><input type="radio"/> 1 vez al día<br><input type="radio"/> 2 a 3 veces al día<br><input type="radio"/> 5 a 6 veces al día<br><input type="radio"/> más 6 veces al día |

---

Yogurt Entero

- ☐ Nunca o menos 1 vez al mes  
☐ 1 a 3 veces mes  
☒ 1 vez semana  
☐ 2 a 4 veces semana  
☐ 5 a 6 veces semana  
☐ 1 vez al día  
☐ 2 a 3 veces al día  
☐ 5 a 6 veces al día  
☐ más 6 veces al día

---

Yogurt desnatado

- ☐ Nunca o menos 1 vez al mes  
☐ 1 a 3 veces mes  
☒ 1 vez semana  
☐ 2 a 4 veces semana  
☐ 5 a 6 veces semana  
☐ 1 vez al día  
☐ 2 a 3 veces al día  
☐ 5 a 6 veces al día  
☐ más 6 veces al día

---

100g requesón o queso blando o queso fresco

- ☒ Nunca o menos 1 vez al mes  
☐ 1 a 3 veces mes  
☐ 1 vez semana  
☐ 2 a 4 veces semana  
☐ 5 a 6 veces semana  
☐ 1 vez al día  
☐ 2 a 3 veces al día  
☐ 5 a 6 veces al día  
☐ más 6 veces al día

---

queso curado o semicurado o cremoso

- ☐ Nunca o menos 1 vez al mes  
☐ 1 a 3 veces mes  
☒ 1 vez semana  
☐ 2 a 4 veces semana  
☐ 5 a 6 veces semana  
☐ 1 vez al día  
☐ 2 a 3 veces al día  
☐ 5 a 6 veces al día  
☐ más 6 veces al día

---

natillas flan pudding

- ☐ Nunca o menos 1 vez al mes  
☒ 1 a 3 veces mes  
☐ 1 vez semana  
☐ 2 a 4 veces semana  
☐ 5 a 6 veces semana  
☐ 1 vez al día  
☐ 2 a 3 veces al día  
☐ 5 a 6 veces al día  
☐ más 6 veces al día

---

Helado

- ☐ Nunca o menos 1 vez al mes  
☒ 1 a 3 veces mes  
☐ 1 vez semana  
☐ 2 a 4 veces semana  
☐ 5 a 6 veces semana  
☐ 1 vez al día  
☐ 2 a 3 veces al día  
☐ 5 a 6 veces al día  
☐ más 6 veces al día

|                                      |                                                                                                                                                                                                                                                                                                                                                                                                              |
|--------------------------------------|--------------------------------------------------------------------------------------------------------------------------------------------------------------------------------------------------------------------------------------------------------------------------------------------------------------------------------------------------------------------------------------------------------------|
| huevo                                | <input type="radio"/> Nunca o menos 1 vez al mes<br><input type="radio"/> 1 a 3 veces mes<br><input type="radio"/> 1 vez semana<br><input checked="" type="radio"/> 2 a 4 veces semana<br><input type="radio"/> 5 a 6 veces semana<br><input type="radio"/> 1 vez al día<br><input type="radio"/> 2 a 3 veces al día<br><input type="radio"/> 5 a 6 veces al día<br><input type="radio"/> más 6 veces al día |
| Pollo con piel                       | <input checked="" type="radio"/> Nunca o menos 1 vez al mes<br><input type="radio"/> 1 a 3 veces mes<br><input type="radio"/> 1 vez semana<br><input type="radio"/> 2 a 4 veces semana<br><input type="radio"/> 5 a 6 veces semana<br><input type="radio"/> 1 vez al día<br><input type="radio"/> 2 a 3 veces al día<br><input type="radio"/> 5 a 6 veces al día<br><input type="radio"/> más 6 veces al día |
| pollo sin piel                       | <input type="radio"/> Nunca o menos 1 vez al mes<br><input type="radio"/> 1 a 3 veces mes<br><input type="radio"/> 1 vez semana<br><input type="radio"/> 2 a 4 veces semana<br><input type="radio"/> 5 a 6 veces semana<br><input checked="" type="radio"/> 1 vez al día<br><input type="radio"/> 2 a 3 veces al día<br><input type="radio"/> 5 a 6 veces al día<br><input type="radio"/> más 6 veces al día |
| Ternera o cerdo o cordero            | <input type="radio"/> Nunca o menos 1 vez al mes<br><input type="radio"/> 1 a 3 veces mes<br><input type="radio"/> 1 vez semana<br><input checked="" type="radio"/> 2 a 4 veces semana<br><input type="radio"/> 5 a 6 veces semana<br><input type="radio"/> 1 vez al día<br><input type="radio"/> 2 a 3 veces al día<br><input type="radio"/> 5 a 6 veces al día<br><input type="radio"/> más 6 veces al día |
| carne caza: Conejo o codorniz o pato | <input checked="" type="radio"/> Nunca o menos 1 vez al mes<br><input type="radio"/> 1 a 3 veces mes<br><input type="radio"/> 1 vez semana<br><input type="radio"/> 2 a 4 veces semana<br><input type="radio"/> 5 a 6 veces semana<br><input type="radio"/> 1 vez al día<br><input type="radio"/> 2 a 3 veces al día<br><input type="radio"/> 5 a 6 veces al día<br><input type="radio"/> más 6 veces al día |
| Hígado de ternera o cerdo o pollo    | <input checked="" type="radio"/> Nunca o menos 1 vez al mes<br><input type="radio"/> 1 a 3 veces mes<br><input type="radio"/> 1 vez semana<br><input type="radio"/> 2 a 4 veces semana<br><input type="radio"/> 5 a 6 veces semana<br><input type="radio"/> 1 vez al día<br><input type="radio"/> 2 a 3 veces al día<br><input type="radio"/> 5 a 6 veces al día<br><input type="radio"/> más 6 veces al día |

|                     |                                                                                                                                                                                                                                                                                                                                                                                                              |
|---------------------|--------------------------------------------------------------------------------------------------------------------------------------------------------------------------------------------------------------------------------------------------------------------------------------------------------------------------------------------------------------------------------------------------------------|
| Vísceras            | <input checked="" type="radio"/> Nunca o menos 1 vez al mes<br><input type="radio"/> 1 a 3 veces mes<br><input type="radio"/> 1 vez semana<br><input type="radio"/> 2 a 4 veces semana<br><input type="radio"/> 5 a 6 veces semana<br><input type="radio"/> 1 vez al día<br><input type="radio"/> 2 a 3 veces al día<br><input type="radio"/> 5 a 6 veces al día<br><input type="radio"/> más 6 veces al día |
| Embutido            | <input checked="" type="radio"/> Nunca o menos 1 vez al mes<br><input type="radio"/> 1 a 3 veces mes<br><input type="radio"/> 1 vez semana<br><input type="radio"/> 2 a 4 veces semana<br><input type="radio"/> 5 a 6 veces semana<br><input type="radio"/> 1 vez al día<br><input type="radio"/> 2 a 3 veces al día<br><input type="radio"/> 5 a 6 veces al día<br><input type="radio"/> más 6 veces al día |
| Salchicha o similar | <input checked="" type="radio"/> Nunca o menos 1 vez al mes<br><input type="radio"/> 1 a 3 veces mes<br><input type="radio"/> 1 vez semana<br><input type="radio"/> 2 a 4 veces semana<br><input type="radio"/> 5 a 6 veces semana<br><input type="radio"/> 1 vez al día<br><input type="radio"/> 2 a 3 veces al día<br><input type="radio"/> 5 a 6 veces al día<br><input type="radio"/> más 6 veces al día |
| Pate o foiegras     | <input checked="" type="radio"/> Nunca o menos 1 vez al mes<br><input type="radio"/> 1 a 3 veces mes<br><input type="radio"/> 1 vez semana<br><input type="radio"/> 2 a 4 veces semana<br><input type="radio"/> 5 a 6 veces semana<br><input type="radio"/> 1 vez al día<br><input type="radio"/> 2 a 3 veces al día<br><input type="radio"/> 5 a 6 veces al día<br><input type="radio"/> más 6 veces al día |
| Hamburguesa         | <input type="radio"/> Nunca o menos 1 vez al mes<br><input type="radio"/> 1 a 3 veces mes<br><input checked="" type="radio"/> 1 vez semana<br><input type="radio"/> 2 a 4 veces semana<br><input type="radio"/> 5 a 6 veces semana<br><input type="radio"/> 1 vez al día<br><input type="radio"/> 2 a 3 veces al día<br><input type="radio"/> 5 a 6 veces al día<br><input type="radio"/> más 6 veces al día |
| tocino o bacon      | <input checked="" type="radio"/> Nunca o menos 1 vez al mes<br><input type="radio"/> 1 a 3 veces mes<br><input type="radio"/> 1 vez semana<br><input type="radio"/> 2 a 4 veces semana<br><input type="radio"/> 5 a 6 veces semana<br><input type="radio"/> 1 vez al día<br><input type="radio"/> 2 a 3 veces al día<br><input type="radio"/> 5 a 6 veces al día<br><input type="radio"/> más 6 veces al día |

---

Pescado frito

- ☐ Nunca o menos 1 vez al mes  
☒ 1 a 3 veces mes  
☐ 1 vez semana  
☐ 2 a 4 veces semana  
☐ 5 a 6 veces semana  
☐ 1 vez al día  
☐ 2 a 3 veces al día  
☐ 5 a 6 veces al día  
☐ más 6 veces al día

---

pescado hervido blanco

- ☐ Nunca o menos 1 vez al mes  
☐ 1 a 3 veces mes  
☒ 1 vez semana  
☐ 2 a 4 veces semana  
☐ 5 a 6 veces semana  
☐ 1 vez al día  
☐ 2 a 3 veces al día  
☐ 5 a 6 veces al día  
☐ más 6 veces al día

---

pescado hervido azul

- ☐ Nunca o menos 1 vez al mes  
☐ 1 a 3 veces mes  
☒ 1 vez semana  
☐ 2 a 4 veces semana  
☐ 5 a 6 veces semana  
☐ 1 vez al día  
☐ 2 a 3 veces al día  
☐ 5 a 6 veces al día  
☐ más 6 veces al día

---

otros pescado azul

- ☐ Nunca o menos 1 vez al mes  
☐ 1 a 3 veces mes  
☒ 1 vez semana  
☐ 2 a 4 veces semana  
☐ 5 a 6 veces semana  
☐ 1 vez al día  
☐ 2 a 3 veces al día  
☐ 5 a 6 veces al día  
☐ más 6 veces al día

---

atun conserva

- ☐ Nunca o menos 1 vez al mes  
☐ 1 a 3 veces mes  
☐ 1 vez semana  
☐ 2 a 4 veces semana  
☐ 5 a 6 veces semana  
☒ 1 vez al día  
☐ 2 a 3 veces al día  
☐ 5 a 6 veces al día  
☐ más 6 veces al día

---

sardina conserva

- ☒ Nunca o menos 1 vez al mes  
☐ 1 a 3 veces mes  
☐ 1 vez semana  
☐ 2 a 4 veces semana  
☐ 5 a 6 veces semana  
☐ 1 vez al día  
☐ 2 a 3 veces al día  
☐ 5 a 6 veces al día  
☐ más 6 veces al día

|                                         |                                                                                                                                                                                                                                                                                                                                                                                                              |
|-----------------------------------------|--------------------------------------------------------------------------------------------------------------------------------------------------------------------------------------------------------------------------------------------------------------------------------------------------------------------------------------------------------------------------------------------------------------|
| pescado ahumado                         | <input checked="" type="radio"/> Nunca o menos 1 vez al mes<br><input type="radio"/> 1 a 3 veces mes<br><input type="radio"/> 1 vez semana<br><input type="radio"/> 2 a 4 veces semana<br><input type="radio"/> 5 a 6 veces semana<br><input type="radio"/> 1 vez al día<br><input type="radio"/> 2 a 3 veces al día<br><input type="radio"/> 5 a 6 veces al día<br><input type="radio"/> más 6 veces al día |
| almejas o mejillones o ostras unos 100g | <input type="radio"/> Nunca o menos 1 vez al mes<br><input type="radio"/> 1 a 3 veces mes<br><input checked="" type="radio"/> 1 vez semana<br><input type="radio"/> 2 a 4 veces semana<br><input type="radio"/> 5 a 6 veces semana<br><input type="radio"/> 1 vez al día<br><input type="radio"/> 2 a 3 veces al día<br><input type="radio"/> 5 a 6 veces al día<br><input type="radio"/> más 6 veces al día |
| calamar o chipiron o sepia unos 100g    | <input type="radio"/> Nunca o menos 1 vez al mes<br><input checked="" type="radio"/> 1 a 3 veces mes<br><input type="radio"/> 1 vez semana<br><input type="radio"/> 2 a 4 veces semana<br><input type="radio"/> 5 a 6 veces semana<br><input type="radio"/> 1 vez al día<br><input type="radio"/> 2 a 3 veces al día<br><input type="radio"/> 5 a 6 veces al día<br><input type="radio"/> más 6 veces al día |
| marisco unos 100g                       | <input type="radio"/> Nunca o menos 1 vez al mes<br><input checked="" type="radio"/> 1 a 3 veces mes<br><input type="radio"/> 1 vez semana<br><input type="radio"/> 2 a 4 veces semana<br><input type="radio"/> 5 a 6 veces semana<br><input type="radio"/> 1 vez al día<br><input type="radio"/> 2 a 3 veces al día<br><input type="radio"/> 5 a 6 veces al día<br><input type="radio"/> más 6 veces al día |
| Espinacas o acelgas cocinadas           | <input type="radio"/> Nunca o menos 1 vez al mes<br><input checked="" type="radio"/> 1 a 3 veces mes<br><input type="radio"/> 1 vez semana<br><input type="radio"/> 2 a 4 veces semana<br><input type="radio"/> 5 a 6 veces semana<br><input type="radio"/> 1 vez al día<br><input type="radio"/> 2 a 3 veces al día<br><input type="radio"/> 5 a 6 veces al día<br><input type="radio"/> más 6 veces al día |
| Col o coliflor o brocoli cocinado       | <input type="radio"/> Nunca o menos 1 vez al mes<br><input type="radio"/> 1 a 3 veces mes<br><input checked="" type="radio"/> 1 vez semana<br><input type="radio"/> 2 a 4 veces semana<br><input type="radio"/> 5 a 6 veces semana<br><input type="radio"/> 1 vez al día<br><input type="radio"/> 2 a 3 veces al día<br><input type="radio"/> 5 a 6 veces al día<br><input type="radio"/> más 6 veces al día |

---

|                              |                                                                                                                                                                                                                                                                                                                                                                                                              |
|------------------------------|--------------------------------------------------------------------------------------------------------------------------------------------------------------------------------------------------------------------------------------------------------------------------------------------------------------------------------------------------------------------------------------------------------------|
| Lechuga o endivia o escarola | <input type="radio"/> Nunca o menos 1 vez al mes<br><input type="radio"/> 1 a 3 veces mes<br><input type="radio"/> 1 vez semana<br><input type="radio"/> 2 a 4 veces semana<br><input type="radio"/> 5 a 6 veces semana<br><input checked="" type="radio"/> 1 vez al día<br><input type="radio"/> 2 a 3 veces al día<br><input type="radio"/> 5 a 6 veces al día<br><input type="radio"/> más 6 veces al día |
|------------------------------|--------------------------------------------------------------------------------------------------------------------------------------------------------------------------------------------------------------------------------------------------------------------------------------------------------------------------------------------------------------------------------------------------------------|

---

|                 |                                                                                                                                                                                                                                                                                                                                                                                                              |
|-----------------|--------------------------------------------------------------------------------------------------------------------------------------------------------------------------------------------------------------------------------------------------------------------------------------------------------------------------------------------------------------------------------------------------------------|
| tomate ensalada | <input type="radio"/> Nunca o menos 1 vez al mes<br><input type="radio"/> 1 a 3 veces mes<br><input type="radio"/> 1 vez semana<br><input type="radio"/> 2 a 4 veces semana<br><input type="radio"/> 5 a 6 veces semana<br><input checked="" type="radio"/> 1 vez al día<br><input type="radio"/> 2 a 3 veces al día<br><input type="radio"/> 5 a 6 veces al día<br><input type="radio"/> más 6 veces al día |
|-----------------|--------------------------------------------------------------------------------------------------------------------------------------------------------------------------------------------------------------------------------------------------------------------------------------------------------------------------------------------------------------------------------------------------------------|

---

|         |                                                                                                                                                                                                                                                                                                                                                                                                              |
|---------|--------------------------------------------------------------------------------------------------------------------------------------------------------------------------------------------------------------------------------------------------------------------------------------------------------------------------------------------------------------------------------------------------------------|
| cebolla | <input type="radio"/> Nunca o menos 1 vez al mes<br><input type="radio"/> 1 a 3 veces mes<br><input checked="" type="radio"/> 1 vez semana<br><input type="radio"/> 2 a 4 veces semana<br><input type="radio"/> 5 a 6 veces semana<br><input type="radio"/> 1 vez al día<br><input type="radio"/> 2 a 3 veces al día<br><input type="radio"/> 5 a 6 veces al día<br><input type="radio"/> más 6 veces al día |
|---------|--------------------------------------------------------------------------------------------------------------------------------------------------------------------------------------------------------------------------------------------------------------------------------------------------------------------------------------------------------------------------------------------------------------|

---

|                      |                                                                                                                                                                                                                                                                                                                                                                                                              |
|----------------------|--------------------------------------------------------------------------------------------------------------------------------------------------------------------------------------------------------------------------------------------------------------------------------------------------------------------------------------------------------------------------------------------------------------|
| Zanahoria o calabaza | <input type="radio"/> Nunca o menos 1 vez al mes<br><input type="radio"/> 1 a 3 veces mes<br><input checked="" type="radio"/> 1 vez semana<br><input type="radio"/> 2 a 4 veces semana<br><input type="radio"/> 5 a 6 veces semana<br><input type="radio"/> 1 vez al día<br><input type="radio"/> 2 a 3 veces al día<br><input type="radio"/> 5 a 6 veces al día<br><input type="radio"/> más 6 veces al día |
|----------------------|--------------------------------------------------------------------------------------------------------------------------------------------------------------------------------------------------------------------------------------------------------------------------------------------------------------------------------------------------------------------------------------------------------------|

---

|               |                                                                                                                                                                                                                                                                                                                                                                                                              |
|---------------|--------------------------------------------------------------------------------------------------------------------------------------------------------------------------------------------------------------------------------------------------------------------------------------------------------------------------------------------------------------------------------------------------------------|
| Judías verdes | <input type="radio"/> Nunca o menos 1 vez al mes<br><input type="radio"/> 1 a 3 veces mes<br><input type="radio"/> 1 vez semana<br><input checked="" type="radio"/> 2 a 4 veces semana<br><input type="radio"/> 5 a 6 veces semana<br><input type="radio"/> 1 vez al día<br><input type="radio"/> 2 a 3 veces al día<br><input type="radio"/> 5 a 6 veces al día<br><input type="radio"/> más 6 veces al día |
|---------------|--------------------------------------------------------------------------------------------------------------------------------------------------------------------------------------------------------------------------------------------------------------------------------------------------------------------------------------------------------------------------------------------------------------|

---

|                                |                                                                                                                                                                                                                                                                                                                                                                                                              |
|--------------------------------|--------------------------------------------------------------------------------------------------------------------------------------------------------------------------------------------------------------------------------------------------------------------------------------------------------------------------------------------------------------------------------------------------------------|
| Berenjena o calabacin o pepino | <input type="radio"/> Nunca o menos 1 vez al mes<br><input type="radio"/> 1 a 3 veces mes<br><input checked="" type="radio"/> 1 vez semana<br><input type="radio"/> 2 a 4 veces semana<br><input type="radio"/> 5 a 6 veces semana<br><input type="radio"/> 1 vez al día<br><input type="radio"/> 2 a 3 veces al día<br><input type="radio"/> 5 a 6 veces al día<br><input type="radio"/> más 6 veces al día |
|--------------------------------|--------------------------------------------------------------------------------------------------------------------------------------------------------------------------------------------------------------------------------------------------------------------------------------------------------------------------------------------------------------------------------------------------------------|

---



|                       |                                                                                                                                                                                                                                                                                                                                                                                                              |
|-----------------------|--------------------------------------------------------------------------------------------------------------------------------------------------------------------------------------------------------------------------------------------------------------------------------------------------------------------------------------------------------------------------------------------------------------|
| pimiento              | <input checked="" type="radio"/> Nunca o menos 1 vez al mes<br><input type="radio"/> 1 a 3 veces mes<br><input type="radio"/> 1 vez semana<br><input type="radio"/> 2 a 4 veces semana<br><input type="radio"/> 5 a 6 veces semana<br><input type="radio"/> 1 vez al día<br><input type="radio"/> 2 a 3 veces al día<br><input type="radio"/> 5 a 6 veces al día<br><input type="radio"/> más 6 veces al día |
| alcachofa             | <input checked="" type="radio"/> Nunca o menos 1 vez al mes<br><input type="radio"/> 1 a 3 veces mes<br><input type="radio"/> 1 vez semana<br><input type="radio"/> 2 a 4 veces semana<br><input type="radio"/> 5 a 6 veces semana<br><input type="radio"/> 1 vez al día<br><input type="radio"/> 2 a 3 veces al día<br><input type="radio"/> 5 a 6 veces al día<br><input type="radio"/> más 6 veces al día |
| espárragos            | <input checked="" type="radio"/> Nunca o menos 1 vez al mes<br><input type="radio"/> 1 a 3 veces mes<br><input type="radio"/> 1 vez semana<br><input type="radio"/> 2 a 4 veces semana<br><input type="radio"/> 5 a 6 veces semana<br><input type="radio"/> 1 vez al día<br><input type="radio"/> 2 a 3 veces al día<br><input type="radio"/> 5 a 6 veces al día<br><input type="radio"/> más 6 veces al día |
| maíz hervido          | <input type="radio"/> Nunca o menos 1 vez al mes<br><input type="radio"/> 1 a 3 veces mes<br><input type="radio"/> 1 vez semana<br><input checked="" type="radio"/> 2 a 4 veces semana<br><input type="radio"/> 5 a 6 veces semana<br><input type="radio"/> 1 vez al día<br><input type="radio"/> 2 a 3 veces al día<br><input type="radio"/> 5 a 6 veces al día<br><input type="radio"/> más 6 veces al día |
| legumbres             | <input type="radio"/> Nunca o menos 1 vez al mes<br><input type="radio"/> 1 a 3 veces mes<br><input checked="" type="radio"/> 1 vez semana<br><input type="radio"/> 2 a 4 veces semana<br><input type="radio"/> 5 a 6 veces semana<br><input type="radio"/> 1 vez al día<br><input type="radio"/> 2 a 3 veces al día<br><input type="radio"/> 5 a 6 veces al día<br><input type="radio"/> más 6 veces al día |
| naranjas o mandarinas | <input checked="" type="radio"/> Nunca o menos 1 vez al mes<br><input type="radio"/> 1 a 3 veces mes<br><input type="radio"/> 1 vez semana<br><input type="radio"/> 2 a 4 veces semana<br><input type="radio"/> 5 a 6 veces semana<br><input type="radio"/> 1 vez al día<br><input type="radio"/> 2 a 3 veces al día<br><input type="radio"/> 5 a 6 veces al día<br><input type="radio"/> más 6 veces al día |

|                       |                                                                                                                                                                                                                                                                                                                                                                                                              |
|-----------------------|--------------------------------------------------------------------------------------------------------------------------------------------------------------------------------------------------------------------------------------------------------------------------------------------------------------------------------------------------------------------------------------------------------------|
| zum natural fruta     | <input checked="" type="radio"/> Nunca o menos 1 vez al mes<br><input type="radio"/> 1 a 3 veces mes<br><input type="radio"/> 1 vez semana<br><input type="radio"/> 2 a 4 veces semana<br><input type="radio"/> 5 a 6 veces semana<br><input type="radio"/> 1 vez al día<br><input type="radio"/> 2 a 3 veces al día<br><input type="radio"/> 5 a 6 veces al día<br><input type="radio"/> más 6 veces al día |
| platano               | <input type="radio"/> Nunca o menos 1 vez al mes<br><input type="radio"/> 1 a 3 veces mes<br><input type="radio"/> 1 vez semana<br><input type="radio"/> 2 a 4 veces semana<br><input type="radio"/> 5 a 6 veces semana<br><input checked="" type="radio"/> 1 vez al día<br><input type="radio"/> 2 a 3 veces al día<br><input type="radio"/> 5 a 6 veces al día<br><input type="radio"/> más 6 veces al día |
| manzana o pera        | <input type="radio"/> Nunca o menos 1 vez al mes<br><input type="radio"/> 1 a 3 veces mes<br><input type="radio"/> 1 vez semana<br><input type="radio"/> 2 a 4 veces semana<br><input type="radio"/> 5 a 6 veces semana<br><input checked="" type="radio"/> 1 vez al día<br><input type="radio"/> 2 a 3 veces al día<br><input type="radio"/> 5 a 6 veces al día<br><input type="radio"/> más 6 veces al día |
| melocotón o nectarina | <input checked="" type="radio"/> Nunca o menos 1 vez al mes<br><input type="radio"/> 1 a 3 veces mes<br><input type="radio"/> 1 vez semana<br><input type="radio"/> 2 a 4 veces semana<br><input type="radio"/> 5 a 6 veces semana<br><input type="radio"/> 1 vez al día<br><input type="radio"/> 2 a 3 veces al día<br><input type="radio"/> 5 a 6 veces al día<br><input type="radio"/> más 6 veces al día |
| sandia o melon        | <input type="radio"/> Nunca o menos 1 vez al mes<br><input type="radio"/> 1 a 3 veces mes<br><input type="radio"/> 1 vez semana<br><input type="radio"/> 2 a 4 veces semana<br><input type="radio"/> 5 a 6 veces semana<br><input checked="" type="radio"/> 1 vez al día<br><input type="radio"/> 2 a 3 veces al día<br><input type="radio"/> 5 a 6 veces al día<br><input type="radio"/> más 6 veces al día |
| uva                   | <input checked="" type="radio"/> Nunca o menos 1 vez al mes<br><input type="radio"/> 1 a 3 veces mes<br><input type="radio"/> 1 vez semana<br><input type="radio"/> 2 a 4 veces semana<br><input type="radio"/> 5 a 6 veces semana<br><input type="radio"/> 1 vez al día<br><input type="radio"/> 2 a 3 veces al día<br><input type="radio"/> 5 a 6 veces al día<br><input type="radio"/> más 6 veces al día |

|                 |                                                                                                                                                                                                                                                                                                                                                                                                              |
|-----------------|--------------------------------------------------------------------------------------------------------------------------------------------------------------------------------------------------------------------------------------------------------------------------------------------------------------------------------------------------------------------------------------------------------------|
| bruna o ciruela | <input type="radio"/> Nunca o menos 1 vez al mes<br><input type="radio"/> 1 a 3 veces mes<br><input checked="" type="radio"/> 1 vez semana<br><input type="radio"/> 2 a 4 veces semana<br><input type="radio"/> 5 a 6 veces semana<br><input type="radio"/> 1 vez al día<br><input type="radio"/> 2 a 3 veces al día<br><input type="radio"/> 5 a 6 veces al día<br><input type="radio"/> más 6 veces al día |
| kiwi            | <input checked="" type="radio"/> Nunca o menos 1 vez al mes<br><input type="radio"/> 1 a 3 veces mes<br><input type="radio"/> 1 vez semana<br><input type="radio"/> 2 a 4 veces semana<br><input type="radio"/> 5 a 6 veces semana<br><input type="radio"/> 1 vez al día<br><input type="radio"/> 2 a 3 veces al día<br><input type="radio"/> 5 a 6 veces al día<br><input type="radio"/> más 6 veces al día |
| aceituna        | <input checked="" type="radio"/> Nunca o menos 1 vez al mes<br><input type="radio"/> 1 a 3 veces mes<br><input type="radio"/> 1 vez semana<br><input type="radio"/> 2 a 4 veces semana<br><input type="radio"/> 5 a 6 veces semana<br><input type="radio"/> 1 vez al día<br><input type="radio"/> 2 a 3 veces al día<br><input type="radio"/> 5 a 6 veces al día<br><input type="radio"/> más 6 veces al día |
| frutos secos    | <input type="radio"/> Nunca o menos 1 vez al mes<br><input checked="" type="radio"/> 1 a 3 veces mes<br><input type="radio"/> 1 vez semana<br><input type="radio"/> 2 a 4 veces semana<br><input type="radio"/> 5 a 6 veces semana<br><input type="radio"/> 1 vez al día<br><input type="radio"/> 2 a 3 veces al día<br><input type="radio"/> 5 a 6 veces al día<br><input type="radio"/> más 6 veces al día |
| pan blanco      | <input type="radio"/> Nunca o menos 1 vez al mes<br><input type="radio"/> 1 a 3 veces mes<br><input type="radio"/> 1 vez semana<br><input type="radio"/> 2 a 4 veces semana<br><input type="radio"/> 5 a 6 veces semana<br><input checked="" type="radio"/> 1 vez al día<br><input type="radio"/> 2 a 3 veces al día<br><input type="radio"/> 5 a 6 veces al día<br><input type="radio"/> más 6 veces al día |
| pan integral    | <input checked="" type="radio"/> Nunca o menos 1 vez al mes<br><input type="radio"/> 1 a 3 veces mes<br><input type="radio"/> 1 vez semana<br><input type="radio"/> 2 a 4 veces semana<br><input type="radio"/> 5 a 6 veces semana<br><input type="radio"/> 1 vez al día<br><input type="radio"/> 2 a 3 veces al día<br><input type="radio"/> 5 a 6 veces al día<br><input type="radio"/> más 6 veces al día |

|                          |                                                                                                                                                                                                                                                                                                                                                                                                              |
|--------------------------|--------------------------------------------------------------------------------------------------------------------------------------------------------------------------------------------------------------------------------------------------------------------------------------------------------------------------------------------------------------------------------------------------------------|
| cereales desayuno        | <input type="radio"/> Nunca o menos 1 vez al mes<br><input type="radio"/> 1 a 3 veces mes<br><input type="radio"/> 1 vez semana<br><input type="radio"/> 2 a 4 veces semana<br><input type="radio"/> 5 a 6 veces semana<br><input checked="" type="radio"/> 1 vez al día<br><input type="radio"/> 2 a 3 veces al día<br><input type="radio"/> 5 a 6 veces al día<br><input type="radio"/> más 6 veces al día |
| patatas fritas           | <input type="radio"/> Nunca o menos 1 vez al mes<br><input type="radio"/> 1 a 3 veces mes<br><input checked="" type="radio"/> 1 vez semana<br><input type="radio"/> 2 a 4 veces semana<br><input type="radio"/> 5 a 6 veces semana<br><input type="radio"/> 1 vez al día<br><input type="radio"/> 2 a 3 veces al día<br><input type="radio"/> 5 a 6 veces al día<br><input type="radio"/> más 6 veces al día |
| patatas cocidas o asadas | <input checked="" type="radio"/> Nunca o menos 1 vez al mes<br><input type="radio"/> 1 a 3 veces mes<br><input type="radio"/> 1 vez semana<br><input type="radio"/> 2 a 4 veces semana<br><input type="radio"/> 5 a 6 veces semana<br><input type="radio"/> 1 vez al día<br><input type="radio"/> 2 a 3 veces al día<br><input type="radio"/> 5 a 6 veces al día<br><input type="radio"/> más 6 veces al día |
| bolsa papas              | <input checked="" type="radio"/> Nunca o menos 1 vez al mes<br><input type="radio"/> 1 a 3 veces mes<br><input type="radio"/> 1 vez semana<br><input type="radio"/> 2 a 4 veces semana<br><input type="radio"/> 5 a 6 veces semana<br><input type="radio"/> 1 vez al día<br><input type="radio"/> 2 a 3 veces al día<br><input type="radio"/> 5 a 6 veces al día<br><input type="radio"/> más 6 veces al día |
| arroz cocinado           | <input type="radio"/> Nunca o menos 1 vez al mes<br><input type="radio"/> 1 a 3 veces mes<br><input checked="" type="radio"/> 1 vez semana<br><input type="radio"/> 2 a 4 veces semana<br><input type="radio"/> 5 a 6 veces semana<br><input type="radio"/> 1 vez al día<br><input type="radio"/> 2 a 3 veces al día<br><input type="radio"/> 5 a 6 veces al día<br><input type="radio"/> más 6 veces al día |
| pasta                    | <input type="radio"/> Nunca o menos 1 vez al mes<br><input type="radio"/> 1 a 3 veces mes<br><input checked="" type="radio"/> 1 vez semana<br><input type="radio"/> 2 a 4 veces semana<br><input type="radio"/> 5 a 6 veces semana<br><input type="radio"/> 1 vez al día<br><input type="radio"/> 2 a 3 veces al día<br><input type="radio"/> 5 a 6 veces al día<br><input type="radio"/> más 6 veces al día |

|                     |                                                                                                                                                                                                                                                                                                                                                                                                              |
|---------------------|--------------------------------------------------------------------------------------------------------------------------------------------------------------------------------------------------------------------------------------------------------------------------------------------------------------------------------------------------------------------------------------------------------------|
| pizza               | <input type="radio"/> Nunca o menos 1 vez al mes<br><input checked="" type="radio"/> 1 a 3 veces mes<br><input type="radio"/> 1 vez semana<br><input type="radio"/> 2 a 4 veces semana<br><input type="radio"/> 5 a 6 veces semana<br><input type="radio"/> 1 vez al día<br><input type="radio"/> 2 a 3 veces al día<br><input type="radio"/> 5 a 6 veces al día<br><input type="radio"/> más 6 veces al día |
| aceite oliva        | <input type="radio"/> Nunca o menos 1 vez al mes<br><input type="radio"/> 1 a 3 veces mes<br><input type="radio"/> 1 vez semana<br><input type="radio"/> 2 a 4 veces semana<br><input type="radio"/> 5 a 6 veces semana<br><input type="radio"/> 1 vez al día<br><input checked="" type="radio"/> 2 a 3 veces al día<br><input type="radio"/> 5 a 6 veces al día<br><input type="radio"/> más 6 veces al día |
| otros aceites       | <input checked="" type="radio"/> Nunca o menos 1 vez al mes<br><input type="radio"/> 1 a 3 veces mes<br><input type="radio"/> 1 vez semana<br><input type="radio"/> 2 a 4 veces semana<br><input type="radio"/> 5 a 6 veces semana<br><input type="radio"/> 1 vez al día<br><input type="radio"/> 2 a 3 veces al día<br><input type="radio"/> 5 a 6 veces al día<br><input type="radio"/> más 6 veces al día |
| margarina           | <input checked="" type="radio"/> Nunca o menos 1 vez al mes<br><input type="radio"/> 1 a 3 veces mes<br><input type="radio"/> 1 vez semana<br><input type="radio"/> 2 a 4 veces semana<br><input type="radio"/> 5 a 6 veces semana<br><input type="radio"/> 1 vez al día<br><input type="radio"/> 2 a 3 veces al día<br><input type="radio"/> 5 a 6 veces al día<br><input type="radio"/> más 6 veces al día |
| mantequilla         | <input checked="" type="radio"/> Nunca o menos 1 vez al mes<br><input type="radio"/> 1 a 3 veces mes<br><input type="radio"/> 1 vez semana<br><input type="radio"/> 2 a 4 veces semana<br><input type="radio"/> 5 a 6 veces semana<br><input type="radio"/> 1 vez al día<br><input type="radio"/> 2 a 3 veces al día<br><input type="radio"/> 5 a 6 veces al día<br><input type="radio"/> más 6 veces al día |
| galletas tipo maria | <input type="radio"/> Nunca o menos 1 vez al mes<br><input checked="" type="radio"/> 1 a 3 veces mes<br><input type="radio"/> 1 vez semana<br><input type="radio"/> 2 a 4 veces semana<br><input type="radio"/> 5 a 6 veces semana<br><input type="radio"/> 1 vez al día<br><input type="radio"/> 2 a 3 veces al día<br><input type="radio"/> 5 a 6 veces al día<br><input type="radio"/> más 6 veces al día |

|                           |                                                                                                                                                                                                                                                                                                                                                                                                              |
|---------------------------|--------------------------------------------------------------------------------------------------------------------------------------------------------------------------------------------------------------------------------------------------------------------------------------------------------------------------------------------------------------------------------------------------------------|
| galletas chocolate        | <input checked="" type="radio"/> Nunca o menos 1 vez al mes<br><input type="radio"/> 1 a 3 veces mes<br><input type="radio"/> 1 vez semana<br><input type="radio"/> 2 a 4 veces semana<br><input type="radio"/> 5 a 6 veces semana<br><input type="radio"/> 1 vez al día<br><input type="radio"/> 2 a 3 veces al día<br><input type="radio"/> 5 a 6 veces al día<br><input type="radio"/> más 6 veces al día |
| bollieria                 | <input type="radio"/> Nunca o menos 1 vez al mes<br><input checked="" type="radio"/> 1 a 3 veces mes<br><input type="radio"/> 1 vez semana<br><input type="radio"/> 2 a 4 veces semana<br><input type="radio"/> 5 a 6 veces semana<br><input type="radio"/> 1 vez al día<br><input type="radio"/> 2 a 3 veces al día<br><input type="radio"/> 5 a 6 veces al día<br><input type="radio"/> más 6 veces al día |
| chocolate o bombones      | <input type="radio"/> Nunca o menos 1 vez al mes<br><input checked="" type="radio"/> 1 a 3 veces mes<br><input type="radio"/> 1 vez semana<br><input type="radio"/> 2 a 4 veces semana<br><input type="radio"/> 5 a 6 veces semana<br><input type="radio"/> 1 vez al día<br><input type="radio"/> 2 a 3 veces al día<br><input type="radio"/> 5 a 6 veces al día<br><input type="radio"/> más 6 veces al día |
| chocolate polvo o colacao | <input checked="" type="radio"/> Nunca o menos 1 vez al mes<br><input type="radio"/> 1 a 3 veces mes<br><input type="radio"/> 1 vez semana<br><input type="radio"/> 2 a 4 veces semana<br><input type="radio"/> 5 a 6 veces semana<br><input type="radio"/> 1 vez al día<br><input type="radio"/> 2 a 3 veces al día<br><input type="radio"/> 5 a 6 veces al día<br><input type="radio"/> más 6 veces al día |
| vino tinto                | <input checked="" type="radio"/> Nunca o menos 1 vez al mes<br><input type="radio"/> 1 a 3 veces mes<br><input type="radio"/> 1 vez semana<br><input type="radio"/> 2 a 4 veces semana<br><input type="radio"/> 5 a 6 veces semana<br><input type="radio"/> 1 vez al día<br><input type="radio"/> 2 a 3 veces al día<br><input type="radio"/> 5 a 6 veces al día<br><input type="radio"/> más 6 veces al día |
| vino blanco               | <input checked="" type="radio"/> Nunca o menos 1 vez al mes<br><input type="radio"/> 1 a 3 veces mes<br><input type="radio"/> 1 vez semana<br><input type="radio"/> 2 a 4 veces semana<br><input type="radio"/> 5 a 6 veces semana<br><input type="radio"/> 1 vez al día<br><input type="radio"/> 2 a 3 veces al día<br><input type="radio"/> 5 a 6 veces al día<br><input type="radio"/> más 6 veces al día |

|                       |                                                                                                                                                                                                                                                                                                                                                                                                              |
|-----------------------|--------------------------------------------------------------------------------------------------------------------------------------------------------------------------------------------------------------------------------------------------------------------------------------------------------------------------------------------------------------------------------------------------------------|
| vino seco o vermut    | <input checked="" type="radio"/> Nunca o menos 1 vez al mes<br><input type="radio"/> 1 a 3 veces mes<br><input type="radio"/> 1 vez semana<br><input type="radio"/> 2 a 4 veces semana<br><input type="radio"/> 5 a 6 veces semana<br><input type="radio"/> 1 vez al día<br><input type="radio"/> 2 a 3 veces al día<br><input type="radio"/> 5 a 6 veces al día<br><input type="radio"/> más 6 veces al día |
| cerveza               | <input checked="" type="radio"/> Nunca o menos 1 vez al mes<br><input type="radio"/> 1 a 3 veces mes<br><input type="radio"/> 1 vez semana<br><input type="radio"/> 2 a 4 veces semana<br><input type="radio"/> 5 a 6 veces semana<br><input type="radio"/> 1 vez al día<br><input type="radio"/> 2 a 3 veces al día<br><input type="radio"/> 5 a 6 veces al día<br><input type="radio"/> más 6 veces al día |
| cerveza sin alcohol   | <input checked="" type="radio"/> Nunca o menos 1 vez al mes<br><input type="radio"/> 1 a 3 veces mes<br><input type="radio"/> 1 vez semana<br><input type="radio"/> 2 a 4 veces semana<br><input type="radio"/> 5 a 6 veces semana<br><input type="radio"/> 1 vez al día<br><input type="radio"/> 2 a 3 veces al día<br><input type="radio"/> 5 a 6 veces al día<br><input type="radio"/> más 6 veces al día |
| licores               | <input checked="" type="radio"/> Nunca o menos 1 vez al mes<br><input type="radio"/> 1 a 3 veces mes<br><input type="radio"/> 1 vez semana<br><input type="radio"/> 2 a 4 veces semana<br><input type="radio"/> 5 a 6 veces semana<br><input type="radio"/> 1 vez al día<br><input type="radio"/> 2 a 3 veces al día<br><input type="radio"/> 5 a 6 veces al día<br><input type="radio"/> más 6 veces al día |
| ginebra o ron o vodka | <input checked="" type="radio"/> Nunca o menos 1 vez al mes<br><input type="radio"/> 1 a 3 veces mes<br><input type="radio"/> 1 vez semana<br><input type="radio"/> 2 a 4 veces semana<br><input type="radio"/> 5 a 6 veces semana<br><input type="radio"/> 1 vez al día<br><input type="radio"/> 2 a 3 veces al día<br><input type="radio"/> 5 a 6 veces al día<br><input type="radio"/> más 6 veces al día |
| refresco normal       | <input checked="" type="radio"/> Nunca o menos 1 vez al mes<br><input type="radio"/> 1 a 3 veces mes<br><input type="radio"/> 1 vez semana<br><input type="radio"/> 2 a 4 veces semana<br><input type="radio"/> 5 a 6 veces semana<br><input type="radio"/> 1 vez al día<br><input type="radio"/> 2 a 3 veces al día<br><input type="radio"/> 5 a 6 veces al día<br><input type="radio"/> más 6 veces al día |

|                          |                                                                                                                                                                                                                                                                                                                                                                                                              |
|--------------------------|--------------------------------------------------------------------------------------------------------------------------------------------------------------------------------------------------------------------------------------------------------------------------------------------------------------------------------------------------------------------------------------------------------------|
| refresco sin azúcar      | <input type="radio"/> Nunca o menos 1 vez al mes<br><input checked="" type="radio"/> 1 a 3 veces mes<br><input type="radio"/> 1 vez semana<br><input type="radio"/> 2 a 4 veces semana<br><input type="radio"/> 5 a 6 veces semana<br><input type="radio"/> 1 vez al día<br><input type="radio"/> 2 a 3 veces al día<br><input type="radio"/> 5 a 6 veces al día<br><input type="radio"/> más 6 veces al día |
| Agua del grifo           | <input checked="" type="radio"/> Nunca o menos 1 vez al mes<br><input type="radio"/> 1 a 3 veces mes<br><input type="radio"/> 1 vez semana<br><input type="radio"/> 2 a 4 veces semana<br><input type="radio"/> 5 a 6 veces semana<br><input type="radio"/> 1 vez al día<br><input type="radio"/> 2 a 3 veces al día<br><input type="radio"/> 5 a 6 veces al día<br><input type="radio"/> más 6 veces al día |
| agua embotellada sin gas | <input type="radio"/> Nunca o menos 1 vez al mes<br><input type="radio"/> 1 a 3 veces mes<br><input type="radio"/> 1 vez semana<br><input type="radio"/> 2 a 4 veces semana<br><input type="radio"/> 5 a 6 veces semana<br><input type="radio"/> 1 vez al día<br><input type="radio"/> 2 a 3 veces al día<br><input type="radio"/> 5 a 6 veces al día<br><input checked="" type="radio"/> más 6 veces al día |
| agua embotellada con gas | <input checked="" type="radio"/> Nunca o menos 1 vez al mes<br><input type="radio"/> 1 a 3 veces mes<br><input type="radio"/> 1 vez semana<br><input type="radio"/> 2 a 4 veces semana<br><input type="radio"/> 5 a 6 veces semana<br><input type="radio"/> 1 vez al día<br><input type="radio"/> 2 a 3 veces al día<br><input type="radio"/> 5 a 6 veces al día<br><input type="radio"/> más 6 veces al día |
| zumو frutas embasado     | <input checked="" type="radio"/> Nunca o menos 1 vez al mes<br><input type="radio"/> 1 a 3 veces mes<br><input type="radio"/> 1 vez semana<br><input type="radio"/> 2 a 4 veces semana<br><input type="radio"/> 5 a 6 veces semana<br><input type="radio"/> 1 vez al día<br><input type="radio"/> 2 a 3 veces al día<br><input type="radio"/> 5 a 6 veces al día<br><input type="radio"/> más 6 veces al día |
| cafe                     | <input checked="" type="radio"/> Nunca o menos 1 vez al mes<br><input type="radio"/> 1 a 3 veces mes<br><input type="radio"/> 1 vez semana<br><input type="radio"/> 2 a 4 veces semana<br><input type="radio"/> 5 a 6 veces semana<br><input type="radio"/> 1 vez al día<br><input type="radio"/> 2 a 3 veces al día<br><input type="radio"/> 5 a 6 veces al día<br><input type="radio"/> más 6 veces al día |



|                       |                                                                                                                                                                                                                                                                                                                                                                                                              |
|-----------------------|--------------------------------------------------------------------------------------------------------------------------------------------------------------------------------------------------------------------------------------------------------------------------------------------------------------------------------------------------------------------------------------------------------------|
| cafe descafeinado     | <input checked="" type="radio"/> Nunca o menos 1 vez al mes<br><input type="radio"/> 1 a 3 veces mes<br><input type="radio"/> 1 vez semana<br><input type="radio"/> 2 a 4 veces semana<br><input type="radio"/> 5 a 6 veces semana<br><input type="radio"/> 1 vez al día<br><input type="radio"/> 2 a 3 veces al día<br><input type="radio"/> 5 a 6 veces al día<br><input type="radio"/> más 6 veces al día |
| te o infusión         | <input checked="" type="radio"/> Nunca o menos 1 vez al mes<br><input type="radio"/> 1 a 3 veces mes<br><input type="radio"/> 1 vez semana<br><input type="radio"/> 2 a 4 veces semana<br><input type="radio"/> 5 a 6 veces semana<br><input type="radio"/> 1 vez al día<br><input type="radio"/> 2 a 3 veces al día<br><input type="radio"/> 5 a 6 veces al día<br><input type="radio"/> más 6 veces al día |
| sopa o puré verduras  | <input type="radio"/> Nunca o menos 1 vez al mes<br><input type="radio"/> 1 a 3 veces mes<br><input type="radio"/> 1 vez semana<br><input checked="" type="radio"/> 2 a 4 veces semana<br><input type="radio"/> 5 a 6 veces semana<br><input type="radio"/> 1 vez al día<br><input type="radio"/> 2 a 3 veces al día<br><input type="radio"/> 5 a 6 veces al día<br><input type="radio"/> más 6 veces al día |
| croquetas pollo jamón | <input type="radio"/> Nunca o menos 1 vez al mes<br><input checked="" type="radio"/> 1 a 3 veces mes<br><input type="radio"/> 1 vez semana<br><input type="radio"/> 2 a 4 veces semana<br><input type="radio"/> 5 a 6 veces semana<br><input type="radio"/> 1 vez al día<br><input type="radio"/> 2 a 3 veces al día<br><input type="radio"/> 5 a 6 veces al día<br><input type="radio"/> más 6 veces al día |
| croquetas pescado     | <input checked="" type="radio"/> Nunca o menos 1 vez al mes<br><input type="radio"/> 1 a 3 veces mes<br><input type="radio"/> 1 vez semana<br><input type="radio"/> 2 a 4 veces semana<br><input type="radio"/> 5 a 6 veces semana<br><input type="radio"/> 1 vez al día<br><input type="radio"/> 2 a 3 veces al día<br><input type="radio"/> 5 a 6 veces al día<br><input type="radio"/> más 6 veces al día |
| mayonesa              | <input type="radio"/> Nunca o menos 1 vez al mes<br><input checked="" type="radio"/> 1 a 3 veces mes<br><input type="radio"/> 1 vez semana<br><input type="radio"/> 2 a 4 veces semana<br><input type="radio"/> 5 a 6 veces semana<br><input type="radio"/> 1 vez al día<br><input type="radio"/> 2 a 3 veces al día<br><input type="radio"/> 5 a 6 veces al día<br><input type="radio"/> más 6 veces al día |

|                  |                                                                                                                                                                                                                                                                                                                                                                                                              |
|------------------|--------------------------------------------------------------------------------------------------------------------------------------------------------------------------------------------------------------------------------------------------------------------------------------------------------------------------------------------------------------------------------------------------------------|
| salsa tomate     | <input type="radio"/> Nunca o menos 1 vez al mes<br><input checked="" type="radio"/> 1 a 3 veces mes<br><input type="radio"/> 1 vez semana<br><input type="radio"/> 2 a 4 veces semana<br><input type="radio"/> 5 a 6 veces semana<br><input type="radio"/> 1 vez al día<br><input type="radio"/> 2 a 3 veces al día<br><input type="radio"/> 5 a 6 veces al día<br><input type="radio"/> más 6 veces al día |
| ketchup          | <input type="radio"/> Nunca o menos 1 vez al mes<br><input checked="" type="radio"/> 1 a 3 veces mes<br><input type="radio"/> 1 vez semana<br><input type="radio"/> 2 a 4 veces semana<br><input type="radio"/> 5 a 6 veces semana<br><input type="radio"/> 1 vez al día<br><input type="radio"/> 2 a 3 veces al día<br><input type="radio"/> 5 a 6 veces al día<br><input type="radio"/> más 6 veces al día |
| sal              | <input type="radio"/> Nunca o menos 1 vez al mes<br><input type="radio"/> 1 a 3 veces mes<br><input type="radio"/> 1 vez semana<br><input type="radio"/> 2 a 4 veces semana<br><input type="radio"/> 5 a 6 veces semana<br><input checked="" type="radio"/> 1 vez al día<br><input type="radio"/> 2 a 3 veces al día<br><input type="radio"/> 5 a 6 veces al día<br><input type="radio"/> más 6 veces al día |
| ajo              | <input checked="" type="radio"/> Nunca o menos 1 vez al mes<br><input type="radio"/> 1 a 3 veces mes<br><input type="radio"/> 1 vez semana<br><input type="radio"/> 2 a 4 veces semana<br><input type="radio"/> 5 a 6 veces semana<br><input type="radio"/> 1 vez al día<br><input type="radio"/> 2 a 3 veces al día<br><input type="radio"/> 5 a 6 veces al día<br><input type="radio"/> más 6 veces al día |
| mermelada o miel | <input checked="" type="radio"/> Nunca o menos 1 vez al mes<br><input type="radio"/> 1 a 3 veces mes<br><input type="radio"/> 1 vez semana<br><input type="radio"/> 2 a 4 veces semana<br><input type="radio"/> 5 a 6 veces semana<br><input type="radio"/> 1 vez al día<br><input type="radio"/> 2 a 3 veces al día<br><input type="radio"/> 5 a 6 veces al día<br><input type="radio"/> más 6 veces al día |
| azúcar           | <input checked="" type="radio"/> Nunca o menos 1 vez al mes<br><input type="radio"/> 1 a 3 veces mes<br><input type="radio"/> 1 vez semana<br><input type="radio"/> 2 a 4 veces semana<br><input type="radio"/> 5 a 6 veces semana<br><input type="radio"/> 1 vez al día<br><input type="radio"/> 2 a 3 veces al día<br><input type="radio"/> 5 a 6 veces al día<br><input type="radio"/> más 6 veces al día |

|                                       |                                                                                                                                                                                                                                                                                                                                                                                                                                                                                                                               |
|---------------------------------------|-------------------------------------------------------------------------------------------------------------------------------------------------------------------------------------------------------------------------------------------------------------------------------------------------------------------------------------------------------------------------------------------------------------------------------------------------------------------------------------------------------------------------------|
| Otro alimento                         | <hr/>                                                                                                                                                                                                                                                                                                                                                                                                                                                                                                                         |
| suplementos vitamínicos               | <input type="radio"/> si<br><input checked="" type="radio"/> no                                                                                                                                                                                                                                                                                                                                                                                                                                                               |
| suplementos vitamínicos               | <hr/>                                                                                                                                                                                                                                                                                                                                                                                                                                                                                                                         |
| dieta previa                          | <input type="radio"/> si<br><input checked="" type="radio"/> no                                                                                                                                                                                                                                                                                                                                                                                                                                                               |
| motivo dieta                          | <input checked="" type="radio"/> no dieta<br><input type="radio"/> control peso<br><input type="radio"/> control colesterol<br><input type="radio"/> control diabetes<br><input type="radio"/> problemas estómago<br><input type="radio"/> problemas vesícula o hepáticos<br><input type="radio"/> HTA o cardiopatía<br><input type="radio"/> problemas renales<br><input type="radio"/> alergia alimentaria<br><input type="radio"/> ácido úrico elevado<br><input type="radio"/> vegetariana<br><input type="radio"/> otros |
| cambio alimentos año previo gestación | <input type="radio"/> si<br><input checked="" type="radio"/> no                                                                                                                                                                                                                                                                                                                                                                                                                                                               |
| cambio lácteos                        | <input type="radio"/> eliminado<br><input type="radio"/> disminuido<br><input type="radio"/> igual<br><input type="radio"/> aumentado<br><input type="radio"/> no sabe                                                                                                                                                                                                                                                                                                                                                        |
| cambio huevos                         | <input type="radio"/> eliminado<br><input type="radio"/> disminuido<br><input type="radio"/> igual<br><input type="radio"/> aumentado<br><input type="radio"/> no sabe                                                                                                                                                                                                                                                                                                                                                        |
| cambio carne                          | <input type="radio"/> eliminado<br><input type="radio"/> disminuido<br><input type="radio"/> igual<br><input type="radio"/> aumentado<br><input type="radio"/> no sabe                                                                                                                                                                                                                                                                                                                                                        |
| cambio pescado                        | <input type="radio"/> eliminado<br><input type="radio"/> disminuido<br><input type="radio"/> igual<br><input type="radio"/> aumentado<br><input type="radio"/> no sabe                                                                                                                                                                                                                                                                                                                                                        |
| cambio verduras                       | <input type="radio"/> eliminado<br><input type="radio"/> disminuido<br><input type="radio"/> igual<br><input type="radio"/> aumentado<br><input type="radio"/> no sabe                                                                                                                                                                                                                                                                                                                                                        |

|                            |                                                                                                                                                                                                             |
|----------------------------|-------------------------------------------------------------------------------------------------------------------------------------------------------------------------------------------------------------|
| cambio legumbres           | <input type="radio"/> eliminado<br><input type="radio"/> disminuido<br><input type="radio"/> igual<br><input type="radio"/> aumentado<br><input type="radio"/> no sabe                                      |
| cambio fruta               | <input type="radio"/> eliminado<br><input type="radio"/> disminuido<br><input type="radio"/> igual<br><input type="radio"/> aumentado<br><input type="radio"/> no sabe                                      |
| cambio pan                 | <input type="radio"/> eliminado<br><input type="radio"/> disminuido<br><input type="radio"/> igual<br><input type="radio"/> aumentado<br><input type="radio"/> no sabe                                      |
| cambio aceite oliva        | <input type="radio"/> eliminado<br><input type="radio"/> disminuido<br><input type="radio"/> igual<br><input type="radio"/> aumentado<br><input type="radio"/> no sabe                                      |
| cambio mante o margarina   | <input type="radio"/> eliminado<br><input type="radio"/> disminuido<br><input type="radio"/> igual<br><input type="radio"/> aumentado<br><input type="radio"/> no sabe                                      |
| cambio azúcar y dulces     | <input type="radio"/> eliminado<br><input type="radio"/> disminuido<br><input type="radio"/> igual<br><input type="radio"/> aumentado<br><input type="radio"/> no sabe                                      |
| cambio bebidas alcohólicas | <input type="radio"/> eliminado<br><input type="radio"/> disminuido<br><input type="radio"/> igual<br><input type="radio"/> aumentado<br><input type="radio"/> no sabe                                      |
| frecuencia comidas fritas  | <input type="radio"/> a diario<br><input type="radio"/> 5 a 6 veces semana<br><input type="radio"/> 2 a 4 veces semana<br><input type="radio"/> 1 vez semana<br><input type="radio"/> menos de 1 vez semana |
| carne                      | <input type="radio"/> no como<br><input type="radio"/> cruda<br><input type="radio"/> poco hecha<br><input type="radio"/> hecha<br><input type="radio"/> muy hecha                                          |
| grasa visible carne        | <input type="radio"/> quita toda<br><input type="radio"/> quita mayoría<br><input type="radio"/> quita un poco<br><input type="radio"/> no quita nada                                                       |

|                                |                                                                                                                                                                                                                                               |
|--------------------------------|-----------------------------------------------------------------------------------------------------------------------------------------------------------------------------------------------------------------------------------------------|
| cocina carne                   | <input type="radio"/> a la plancha<br><input type="radio"/> a la parrilla<br><input type="radio"/> asada<br><input type="radio"/> frita<br><input type="radio"/> guisada                                                                      |
| tostado quemado carne          | <input type="radio"/> nunca<br><input type="radio"/> 1 vez mes<br><input type="radio"/> 2 a 3 veces mes<br><input type="radio"/> 1 vez semana<br><input type="radio"/> 2 a 3 semanas                                                          |
| tostado quemado pescado        | <input type="radio"/> nunca<br><input type="radio"/> 1 vez mes<br><input type="radio"/> 2 a 3 veces mes<br><input type="radio"/> 1 vez semana<br><input type="radio"/> 2 a 3 semanas                                                          |
| socarrat paella                | <input type="radio"/> nunca<br><input type="radio"/> 1 vez mes<br><input type="radio"/> 2 a 3 veces mes<br><input type="radio"/> 1 vez semana<br><input type="radio"/> 2 a 3 semanas                                                          |
| grasa o aceite cocinar         | <input type="radio"/> mantequilla<br><input type="radio"/> margarina<br><input type="radio"/> aceite oliva<br><input type="radio"/> aceite oliva virgen extra<br><input type="radio"/> aceite vegetal<br><input type="radio"/> mezcla aceites |
| grasa aceite aliñar            | <input type="radio"/> mantequilla<br><input type="radio"/> margarina<br><input type="radio"/> aceite oliva<br><input type="radio"/> aceite oliva virgen extra<br><input type="radio"/> aceite vegetal<br><input type="radio"/> mezcla aceites |
| grasa aceite freir             | <input type="radio"/> mantequilla<br><input type="radio"/> margarina<br><input type="radio"/> aceite oliva<br><input type="radio"/> aceite oliva virgen extra<br><input type="radio"/> aceite vegetal<br><input type="radio"/> mezcla aceites |
| Ejercicio cuestionario         | <input type="radio"/> si<br><input checked="" type="radio"/> no                                                                                                                                                                               |
| horas de sueño incluido siesta | _____                                                                                                                                                                                                                                         |
| minutos siesta                 | _____                                                                                                                                                                                                                                         |
| horas televisión semana        | _____                                                                                                                                                                                                                                         |

|                                        |                                                                                                                                                                                                                                                                                                                                                                |
|----------------------------------------|----------------------------------------------------------------------------------------------------------------------------------------------------------------------------------------------------------------------------------------------------------------------------------------------------------------------------------------------------------------|
| actividad trabajo                      | <input type="radio"/> casi siempre sentado<br><input type="radio"/> sentado 50 por cien<br><input type="radio"/> casi siempre de pie, quieto<br><input type="radio"/> casi siempre levantado caminando y llevando pocas cosas<br><input type="radio"/> casi siempre levantado, caminando y llevado muchas cosas<br><input type="radio"/> trabajo manual pesado |
| tiempo caminar o bici al día           | <input type="radio"/> casi nunca<br><input type="radio"/> menos 20min día<br><input type="radio"/> 20 a 40 min día<br><input type="radio"/> 40 a 60 min día<br><input type="radio"/> 1h o 1h y media día<br><input type="radio"/> más de 1h y media al día                                                                                                     |
| tiempo tareas casa al día              | <input type="radio"/> menos de 1h día<br><input type="radio"/> 1 a 2h día<br><input type="radio"/> 3 a 4h día<br><input type="radio"/> 5 a 6h día<br><input type="radio"/> 7 a 8h día<br><input type="radio"/> más de 8h día                                                                                                                                   |
| tiempo libre televisión ordenador leer | <input type="radio"/> menos 1h día<br><input type="radio"/> 1h día<br><input type="radio"/> 2h día<br><input type="radio"/> 3h día<br><input type="radio"/> 4h día<br><input type="radio"/> 5 a 6h día<br><input type="radio"/> mas 6h día                                                                                                                     |
| tiempo libre ejercicio o deporte       | <input type="radio"/> menos 1h semana<br><input type="radio"/> 1h semana<br><input type="radio"/> 2h semana<br><input type="radio"/> 3h semana<br><input type="radio"/> 4 a 5h semana<br><input type="radio"/> mas 5h semana                                                                                                                                   |
| como se considera                      | <input type="radio"/> sedentaria<br><input type="radio"/> poco activa<br><input type="radio"/> moderadamente activa<br><input type="radio"/> bastante activa<br><input type="radio"/> muy activa<br><input type="radio"/> no sabe                                                                                                                              |
| FUR                                    | [*DATA REMOVED*]                                                                                                                                                                                                                                                                                                                                               |
| Semanas gestación 2T                   | [*DATA REMOVED*]                                                                                                                                                                                                                                                                                                                                               |
| Días gestación 2T                      | [*DATA REMOVED*]                                                                                                                                                                                                                                                                                                                                               |
| DBP 2T                                 | [*DATA REMOVED*]                                                                                                                                                                                                                                                                                                                                               |
| CC 2T                                  | [*DATA REMOVED*]                                                                                                                                                                                                                                                                                                                                               |
| AC 2T                                  | [*DATA REMOVED*]                                                                                                                                                                                                                                                                                                                                               |

|                                                   |                                                                                                                                                                                                 |
|---------------------------------------------------|-------------------------------------------------------------------------------------------------------------------------------------------------------------------------------------------------|
| LF 2T                                             | [*DATA REMOVED*]                                                                                                                                                                                |
| PFE 2T (Hadlock)                                  | [*DATA REMOVED*]                                                                                                                                                                                |
| Semanas gestación 3T                              | [*DATA REMOVED*]                                                                                                                                                                                |
| días 3T                                           | [*DATA REMOVED*]                                                                                                                                                                                |
| DBP 3T                                            | [*DATA REMOVED*]                                                                                                                                                                                |
| CC 3T                                             | [*DATA REMOVED*]                                                                                                                                                                                |
| AC 3T                                             | [*DATA REMOVED*]                                                                                                                                                                                |
| LF 3T                                             | [*DATA REMOVED*]                                                                                                                                                                                |
| PFE 3T (Hadlock)                                  | [*DATA REMOVED*]                                                                                                                                                                                |
| Semanas de gestación final                        | [*DATA REMOVED*]                                                                                                                                                                                |
| días gestación final                              | [*DATA REMOVED*]                                                                                                                                                                                |
| Localización placenta                             | <input checked="" type="radio"/> anterior<br><input type="radio"/> lateral derecha<br><input type="radio"/> lateral izquierda<br><input type="radio"/> posterior<br><input type="radio"/> fondo |
| Presentación longitudinal cefálica                | <input type="radio"/> no<br><input checked="" type="radio"/> si                                                                                                                                 |
| Dorso                                             | <input type="radio"/> izquierda anterior<br><input type="radio"/> izquierda posterior<br><input checked="" type="radio"/> derecha anterior<br><input type="radio"/> derecha posterior           |
| diámetro biparietal                               | [*DATA REMOVED*]                                                                                                                                                                                |
| Circunferencia craneal                            | [*DATA REMOVED*]                                                                                                                                                                                |
| Circunferencia abdominal                          | [*DATA REMOVED*]                                                                                                                                                                                |
| Longitud de femur                                 | [*DATA REMOVED*]                                                                                                                                                                                |
| tejido celular subcutáneo a nivel del muslo en mm | [*DATA REMOVED*]                                                                                                                                                                                |
| tejido celular subcutáneo en abdomen en mm        | [*DATA REMOVED*]                                                                                                                                                                                |
| Volumen del muslo en cm3                          | [*DATA REMOVED*]                                                                                                                                                                                |
| Peso fetal estimado según fórmula de Hadlock      | [*DATA REMOVED*]                                                                                                                                                                                |

|                                               |                                                                                                                                                          |
|-----------------------------------------------|----------------------------------------------------------------------------------------------------------------------------------------------------------|
| Percentil                                     | [*DATA REMOVED*]                                                                                                                                         |
| Peso fetal estimado según fórmula de Scioscia | <hr/>                                                                                                                                                    |
| Peso fetal estimado según fórmula de LEE      | <hr/>                                                                                                                                                    |
| Tipo de parto                                 | <input checked="" type="radio"/> eutocico<br><input type="radio"/> instrumentado/ventosa<br><input type="radio"/> cesarea                                |
| fecha de nacimiento                           | [*DATA REMOVED*]                                                                                                                                         |
| Días entre exploración y nacimiento           | [*DATA REMOVED*]                                                                                                                                         |
| Peso RN en g                                  | [*DATA REMOVED*]                                                                                                                                         |
| sexo                                          | <input checked="" type="radio"/> mujer<br><input type="radio"/> hombre                                                                                   |
| Apgar 1 minuto                                | [*DATA REMOVED*]                                                                                                                                         |
| Apgar 5 minutos                               | [*DATA REMOVED*]                                                                                                                                         |
| Apgar 10 minutos                              | <hr/>                                                                                                                                                    |
| antecedente Covid durante gestación           | <input type="radio"/> Yes<br><input checked="" type="radio"/> No                                                                                         |
| Nivel de estudios                             | <input type="radio"/> ninguno<br><input type="radio"/> primarios<br><input checked="" type="radio"/> secundarios<br><input type="radio"/> universitarios |



# Base\_datos\_estimacion\_peso\_fetal

|                                       |                                                                                                                                                                                                                                                                                      |
|---------------------------------------|--------------------------------------------------------------------------------------------------------------------------------------------------------------------------------------------------------------------------------------------------------------------------------------|
| Número de identificación participante | 93                                                                                                                                                                                                                                                                                   |
| CODIGO PARTICIPANTE                   |                                                                                                                                                                                                                                                                                      |
| Edad                                  | [*DATA REMOVED*]                                                                                                                                                                                                                                                                     |
| Gestaciones                           | <input checked="" type="radio"/> 1<br><input type="radio"/> 2<br><input type="radio"/> 3<br><input type="radio"/> mas de 3                                                                                                                                                           |
| partos                                | <input checked="" type="radio"/> 0<br><input type="radio"/> 1<br><input type="radio"/> 2<br><input type="radio"/> 3<br><input type="radio"/> mas de 3                                                                                                                                |
| cesáreas                              | <input checked="" type="radio"/> 0<br><input type="radio"/> 1<br><input type="radio"/> 2<br><input type="radio"/> 3<br><input type="radio"/> mas de 3                                                                                                                                |
| Abortos                               | <input checked="" type="radio"/> 0<br><input type="radio"/> 1<br><input type="radio"/> 2<br><input type="radio"/> 3<br><input type="radio"/> mas de 3                                                                                                                                |
| Tipo de gestacion                     | <input type="radio"/> espontanea<br><input type="radio"/> IAC inseminación artificial conyuge<br><input type="radio"/> IAD inseminación artificial donante<br><input checked="" type="radio"/> FIV Fecundación in Vitro<br><input type="radio"/> Ovodon FIV con donación de ovocitos |
| peso previo a embarazo                | [*DATA REMOVED*]                                                                                                                                                                                                                                                                     |
| Ganancia ponderal embarazo            | [*DATA REMOVED*]                                                                                                                                                                                                                                                                     |
| Talla madre                           | [*DATA REMOVED*]                                                                                                                                                                                                                                                                     |
| IMC previo embarazo                   | 22.8625344752504                                                                                                                                                                                                                                                                     |
| Patología obstétrica                  | <input checked="" type="radio"/> no<br><input type="radio"/> si                                                                                                                                                                                                                      |
| Diabetes pregestacional               | <input checked="" type="radio"/> no<br><input type="radio"/> si                                                                                                                                                                                                                      |
| Diabetes gestacional                  | <input checked="" type="radio"/> no<br><input type="radio"/> si                                                                                                                                                                                                                      |

|                                            |                                                                                                                                                                                      |
|--------------------------------------------|--------------------------------------------------------------------------------------------------------------------------------------------------------------------------------------|
| Diabetes gestacional con insulina          | <input checked="" type="radio"/> no<br><input type="radio"/> si                                                                                                                      |
| Diabetes gestacional con dieta y ejercicio | <input checked="" type="radio"/> no<br><input type="radio"/> si                                                                                                                      |
| Percentil fetos previos                    | <input checked="" type="radio"/> Nada<br><input type="radio"/> percentil menor de 10<br><input type="radio"/> percentil entre 10 y 90<br><input type="radio"/> percentil mayor de 90 |
| Exfumadora                                 | <input checked="" type="radio"/> Nada<br><input type="radio"/> menos de 5 años<br><input type="radio"/> 5 a 10 años<br><input type="radio"/> mayor o igual a 10 años                 |
| Hábito tabáquico                           | <input checked="" type="radio"/> no<br><input type="radio"/> si                                                                                                                      |
| fumadora                                   | [*DATA REMOVED*]                                                                                                                                                                     |
| Consumo otros tóxicos                      | <input checked="" type="radio"/> no<br><input type="radio"/> si                                                                                                                      |
| Hb 1T                                      | [*DATA REMOVED*]                                                                                                                                                                     |
| Htc 1T                                     | [*DATA REMOVED*]                                                                                                                                                                     |
| Hb 2T                                      | [*DATA REMOVED*]                                                                                                                                                                     |
| HTC 2T                                     | [*DATA REMOVED*]                                                                                                                                                                     |
| Hb 3T                                      | [*DATA REMOVED*]                                                                                                                                                                     |
| HTC 3T                                     | [*DATA REMOVED*]                                                                                                                                                                     |
| Suplemento FE oral                         | <input checked="" type="radio"/> si<br><input type="radio"/> no                                                                                                                      |
| Suplemento fe iv                           | <input type="radio"/> si<br><input checked="" type="radio"/> no                                                                                                                      |
| Transfusión                                | <input checked="" type="radio"/> no<br><input type="radio"/> si                                                                                                                      |
| Solicitada Vit D                           | <input checked="" type="radio"/> no<br><input type="radio"/> si                                                                                                                      |
| Deficit vit D                              | <input type="radio"/> no<br><input type="radio"/> si                                                                                                                                 |
| Suplemento vit D                           | <input type="radio"/> si<br><input type="radio"/> no                                                                                                                                 |

|                       |                                                                                                                                                                                                                                                                                                                                                                                                              |
|-----------------------|--------------------------------------------------------------------------------------------------------------------------------------------------------------------------------------------------------------------------------------------------------------------------------------------------------------------------------------------------------------------------------------------------------------|
| Dieta, cuestionario   | <input checked="" type="radio"/> si<br><input type="radio"/> no                                                                                                                                                                                                                                                                                                                                              |
| Leche entera          | <input type="radio"/> Nunca o menos 1 vez al mes<br><input type="radio"/> 1 a 3 veces mes<br><input type="radio"/> 1 vez semana<br><input type="radio"/> 2 a 4 veces semana<br><input type="radio"/> 5 a 6 veces semana<br><input checked="" type="radio"/> 1 vez al día<br><input type="radio"/> 2 a 3 veces al día<br><input type="radio"/> 5 a 6 veces al día<br><input type="radio"/> más 6 veces al día |
| Leche semidesnatada   | <input checked="" type="radio"/> Nunca o menos 1 vez al mes<br><input type="radio"/> 1 a 3 veces mes<br><input type="radio"/> 1 vez semana<br><input type="radio"/> 2 a 4 veces semana<br><input type="radio"/> 5 a 6 veces semana<br><input type="radio"/> 1 vez al día<br><input type="radio"/> 2 a 3 veces al día<br><input type="radio"/> 5 a 6 veces al día<br><input type="radio"/> mas 6 veces al día |
| Leche desnatada       | <input checked="" type="radio"/> Nunca o menos 1 vez al mes<br><input type="radio"/> 1 a 3 veces mes<br><input type="radio"/> 1 vez semana<br><input type="radio"/> 2 a 4 veces semana<br><input type="radio"/> 5 a 6 veces semana<br><input type="radio"/> 1 vez al día<br><input type="radio"/> 2 a 3 veces al día<br><input type="radio"/> 5 a 6 veces al día<br><input type="radio"/> más 6 veces al día |
| Leche condensada      | <input checked="" type="radio"/> Nunca o menos 1 vez al mes<br><input type="radio"/> 1 a 3 veces mes<br><input type="radio"/> 1 vez semana<br><input type="radio"/> 2 a 4 veces semana<br><input type="radio"/> 5 a 6 veces semana<br><input type="radio"/> 1 vez al día<br><input type="radio"/> 2 a 3 veces al día<br><input type="radio"/> 5 a 6 veces al día<br><input type="radio"/> más 6 veces al día |
| nata o crema de leche | <input checked="" type="radio"/> Nunca o menos 1 vez al mes<br><input type="radio"/> 1 a 3 veces mes<br><input type="radio"/> 1 vez semana<br><input type="radio"/> 2 a 4 veces semana<br><input type="radio"/> 5 a 6 veces semana<br><input type="radio"/> 1 vez al día<br><input type="radio"/> 2 a 3 veces al día<br><input type="radio"/> 5 a 6 veces al día<br><input type="radio"/> más 6 veces al día |

|                                             |                                                                                                                                                                                                                                                                                                                                                                                                              |
|---------------------------------------------|--------------------------------------------------------------------------------------------------------------------------------------------------------------------------------------------------------------------------------------------------------------------------------------------------------------------------------------------------------------------------------------------------------------|
| Yogurt Entero                               | <input type="radio"/> Nunca o menos 1 vez al mes<br><input type="radio"/> 1 a 3 veces mes<br><input type="radio"/> 1 vez semana<br><input checked="" type="radio"/> 2 a 4 veces semana<br><input type="radio"/> 5 a 6 veces semana<br><input type="radio"/> 1 vez al día<br><input type="radio"/> 2 a 3 veces al día<br><input type="radio"/> 5 a 6 veces al día<br><input type="radio"/> más 6 veces al día |
| Yogurt desnatado                            | <input checked="" type="radio"/> Nunca o menos 1 vez al mes<br><input type="radio"/> 1 a 3 veces mes<br><input type="radio"/> 1 vez semana<br><input type="radio"/> 2 a 4 veces semana<br><input type="radio"/> 5 a 6 veces semana<br><input type="radio"/> 1 vez al día<br><input type="radio"/> 2 a 3 veces al día<br><input type="radio"/> 5 a 6 veces al día<br><input type="radio"/> más 6 veces al día |
| 100g requesón o queso blando o queso fresco | <input checked="" type="radio"/> Nunca o menos 1 vez al mes<br><input type="radio"/> 1 a 3 veces mes<br><input type="radio"/> 1 vez semana<br><input type="radio"/> 2 a 4 veces semana<br><input type="radio"/> 5 a 6 veces semana<br><input type="radio"/> 1 vez al día<br><input type="radio"/> 2 a 3 veces al día<br><input type="radio"/> 5 a 6 veces al día<br><input type="radio"/> más 6 veces al día |
| queso curado o semicurado o cremoso         | <input type="radio"/> Nunca o menos 1 vez al mes<br><input type="radio"/> 1 a 3 veces mes<br><input type="radio"/> 1 vez semana<br><input type="radio"/> 2 a 4 veces semana<br><input type="radio"/> 5 a 6 veces semana<br><input type="radio"/> 1 vez al día<br><input type="radio"/> 2 a 3 veces al día<br><input checked="" type="radio"/> 5 a 6 veces al día<br><input type="radio"/> más 6 veces al día |
| natillas flan pudding                       | <input checked="" type="radio"/> Nunca o menos 1 vez al mes<br><input type="radio"/> 1 a 3 veces mes<br><input type="radio"/> 1 vez semana<br><input type="radio"/> 2 a 4 veces semana<br><input type="radio"/> 5 a 6 veces semana<br><input type="radio"/> 1 vez al día<br><input type="radio"/> 2 a 3 veces al día<br><input type="radio"/> 5 a 6 veces al día<br><input type="radio"/> más 6 veces al día |
| Helado                                      | <input checked="" type="radio"/> Nunca o menos 1 vez al mes<br><input type="radio"/> 1 a 3 veces mes<br><input type="radio"/> 1 vez semana<br><input type="radio"/> 2 a 4 veces semana<br><input type="radio"/> 5 a 6 veces semana<br><input type="radio"/> 1 vez al día<br><input type="radio"/> 2 a 3 veces al día<br><input type="radio"/> 5 a 6 veces al día<br><input type="radio"/> más 6 veces al día |

|                                      |                                                                                                                                                                                                                                                                                                                                                                                                              |
|--------------------------------------|--------------------------------------------------------------------------------------------------------------------------------------------------------------------------------------------------------------------------------------------------------------------------------------------------------------------------------------------------------------------------------------------------------------|
| huevo                                | <input type="radio"/> Nunca o menos 1 vez al mes<br><input checked="" type="radio"/> 1 a 3 veces mes<br><input type="radio"/> 1 vez semana<br><input type="radio"/> 2 a 4 veces semana<br><input type="radio"/> 5 a 6 veces semana<br><input type="radio"/> 1 vez al día<br><input type="radio"/> 2 a 3 veces al día<br><input type="radio"/> 5 a 6 veces al día<br><input type="radio"/> más 6 veces al día |
| Pollo con piel                       | <input checked="" type="radio"/> Nunca o menos 1 vez al mes<br><input type="radio"/> 1 a 3 veces mes<br><input type="radio"/> 1 vez semana<br><input type="radio"/> 2 a 4 veces semana<br><input type="radio"/> 5 a 6 veces semana<br><input type="radio"/> 1 vez al día<br><input type="radio"/> 2 a 3 veces al día<br><input type="radio"/> 5 a 6 veces al día<br><input type="radio"/> más 6 veces al día |
| pollo sin piel                       | <input type="radio"/> Nunca o menos 1 vez al mes<br><input type="radio"/> 1 a 3 veces mes<br><input type="radio"/> 1 vez semana<br><input checked="" type="radio"/> 2 a 4 veces semana<br><input type="radio"/> 5 a 6 veces semana<br><input type="radio"/> 1 vez al día<br><input type="radio"/> 2 a 3 veces al día<br><input type="radio"/> 5 a 6 veces al día<br><input type="radio"/> más 6 veces al día |
| Ternera o cerdo o cordero            | <input type="radio"/> Nunca o menos 1 vez al mes<br><input type="radio"/> 1 a 3 veces mes<br><input type="radio"/> 1 vez semana<br><input checked="" type="radio"/> 2 a 4 veces semana<br><input type="radio"/> 5 a 6 veces semana<br><input type="radio"/> 1 vez al día<br><input type="radio"/> 2 a 3 veces al día<br><input type="radio"/> 5 a 6 veces al día<br><input type="radio"/> más 6 veces al día |
| carne caza: Conejo o codorniz o pato | <input checked="" type="radio"/> Nunca o menos 1 vez al mes<br><input type="radio"/> 1 a 3 veces mes<br><input type="radio"/> 1 vez semana<br><input type="radio"/> 2 a 4 veces semana<br><input type="radio"/> 5 a 6 veces semana<br><input type="radio"/> 1 vez al día<br><input type="radio"/> 2 a 3 veces al día<br><input type="radio"/> 5 a 6 veces al día<br><input type="radio"/> más 6 veces al día |
| Hígado de ternera o cerdo o pollo    | <input checked="" type="radio"/> Nunca o menos 1 vez al mes<br><input type="radio"/> 1 a 3 veces mes<br><input type="radio"/> 1 vez semana<br><input type="radio"/> 2 a 4 veces semana<br><input type="radio"/> 5 a 6 veces semana<br><input type="radio"/> 1 vez al día<br><input type="radio"/> 2 a 3 veces al día<br><input type="radio"/> 5 a 6 veces al día<br><input type="radio"/> más 6 veces al día |

|                     |                                                                                                                                                                                                                                                                                                                                                                                                              |
|---------------------|--------------------------------------------------------------------------------------------------------------------------------------------------------------------------------------------------------------------------------------------------------------------------------------------------------------------------------------------------------------------------------------------------------------|
| Vísceras            | <input checked="" type="radio"/> Nunca o menos 1 vez al mes<br><input type="radio"/> 1 a 3 veces mes<br><input type="radio"/> 1 vez semana<br><input type="radio"/> 2 a 4 veces semana<br><input type="radio"/> 5 a 6 veces semana<br><input type="radio"/> 1 vez al día<br><input type="radio"/> 2 a 3 veces al día<br><input type="radio"/> 5 a 6 veces al día<br><input type="radio"/> más 6 veces al día |
| Embutido            | <input type="radio"/> Nunca o menos 1 vez al mes<br><input checked="" type="radio"/> 1 a 3 veces mes<br><input type="radio"/> 1 vez semana<br><input type="radio"/> 2 a 4 veces semana<br><input type="radio"/> 5 a 6 veces semana<br><input type="radio"/> 1 vez al día<br><input type="radio"/> 2 a 3 veces al día<br><input type="radio"/> 5 a 6 veces al día<br><input type="radio"/> más 6 veces al día |
| Salchicha o similar | <input checked="" type="radio"/> Nunca o menos 1 vez al mes<br><input type="radio"/> 1 a 3 veces mes<br><input type="radio"/> 1 vez semana<br><input type="radio"/> 2 a 4 veces semana<br><input type="radio"/> 5 a 6 veces semana<br><input type="radio"/> 1 vez al día<br><input type="radio"/> 2 a 3 veces al día<br><input type="radio"/> 5 a 6 veces al día<br><input type="radio"/> más 6 veces al día |
| Pate o foiegras     | <input checked="" type="radio"/> Nunca o menos 1 vez al mes<br><input type="radio"/> 1 a 3 veces mes<br><input type="radio"/> 1 vez semana<br><input type="radio"/> 2 a 4 veces semana<br><input type="radio"/> 5 a 6 veces semana<br><input type="radio"/> 1 vez al día<br><input type="radio"/> 2 a 3 veces al día<br><input type="radio"/> 5 a 6 veces al día<br><input type="radio"/> más 6 veces al día |
| Hamburguesa         | <input type="radio"/> Nunca o menos 1 vez al mes<br><input checked="" type="radio"/> 1 a 3 veces mes<br><input type="radio"/> 1 vez semana<br><input type="radio"/> 2 a 4 veces semana<br><input type="radio"/> 5 a 6 veces semana<br><input type="radio"/> 1 vez al día<br><input type="radio"/> 2 a 3 veces al día<br><input type="radio"/> 5 a 6 veces al día<br><input type="radio"/> más 6 veces al día |
| tocino o bacon      | <input type="radio"/> Nunca o menos 1 vez al mes<br><input type="radio"/> 1 a 3 veces mes<br><input checked="" type="radio"/> 1 vez semana<br><input type="radio"/> 2 a 4 veces semana<br><input type="radio"/> 5 a 6 veces semana<br><input type="radio"/> 1 vez al día<br><input type="radio"/> 2 a 3 veces al día<br><input type="radio"/> 5 a 6 veces al día<br><input type="radio"/> más 6 veces al día |

---

|               |                                                                                                                                                                                                                                                                                                                                                                                                              |
|---------------|--------------------------------------------------------------------------------------------------------------------------------------------------------------------------------------------------------------------------------------------------------------------------------------------------------------------------------------------------------------------------------------------------------------|
| Pescado frito | <input type="radio"/> Nunca o menos 1 vez al mes<br><input type="radio"/> 1 a 3 veces mes<br><input type="radio"/> 1 vez semana<br><input checked="" type="radio"/> 2 a 4 veces semana<br><input type="radio"/> 5 a 6 veces semana<br><input type="radio"/> 1 vez al día<br><input type="radio"/> 2 a 3 veces al día<br><input type="radio"/> 5 a 6 veces al día<br><input type="radio"/> más 6 veces al día |
|---------------|--------------------------------------------------------------------------------------------------------------------------------------------------------------------------------------------------------------------------------------------------------------------------------------------------------------------------------------------------------------------------------------------------------------|

---

|                        |                                                                                                                                                                                                                                                                                                                                                                                                              |
|------------------------|--------------------------------------------------------------------------------------------------------------------------------------------------------------------------------------------------------------------------------------------------------------------------------------------------------------------------------------------------------------------------------------------------------------|
| pescado hervido blanco | <input type="radio"/> Nunca o menos 1 vez al mes<br><input type="radio"/> 1 a 3 veces mes<br><input type="radio"/> 1 vez semana<br><input checked="" type="radio"/> 2 a 4 veces semana<br><input type="radio"/> 5 a 6 veces semana<br><input type="radio"/> 1 vez al día<br><input type="radio"/> 2 a 3 veces al día<br><input type="radio"/> 5 a 6 veces al día<br><input type="radio"/> más 6 veces al día |
|------------------------|--------------------------------------------------------------------------------------------------------------------------------------------------------------------------------------------------------------------------------------------------------------------------------------------------------------------------------------------------------------------------------------------------------------|

---

|                      |                                                                                                                                                                                                                                                                                                                                                                                                              |
|----------------------|--------------------------------------------------------------------------------------------------------------------------------------------------------------------------------------------------------------------------------------------------------------------------------------------------------------------------------------------------------------------------------------------------------------|
| pescado hervido azul | <input checked="" type="radio"/> Nunca o menos 1 vez al mes<br><input type="radio"/> 1 a 3 veces mes<br><input type="radio"/> 1 vez semana<br><input type="radio"/> 2 a 4 veces semana<br><input type="radio"/> 5 a 6 veces semana<br><input type="radio"/> 1 vez al día<br><input type="radio"/> 2 a 3 veces al día<br><input type="radio"/> 5 a 6 veces al día<br><input type="radio"/> más 6 veces al día |
|----------------------|--------------------------------------------------------------------------------------------------------------------------------------------------------------------------------------------------------------------------------------------------------------------------------------------------------------------------------------------------------------------------------------------------------------|

---

|                    |                                                                                                                                                                                                                                                                                                                                                                                                              |
|--------------------|--------------------------------------------------------------------------------------------------------------------------------------------------------------------------------------------------------------------------------------------------------------------------------------------------------------------------------------------------------------------------------------------------------------|
| otros pescado azul | <input checked="" type="radio"/> Nunca o menos 1 vez al mes<br><input type="radio"/> 1 a 3 veces mes<br><input type="radio"/> 1 vez semana<br><input type="radio"/> 2 a 4 veces semana<br><input type="radio"/> 5 a 6 veces semana<br><input type="radio"/> 1 vez al día<br><input type="radio"/> 2 a 3 veces al día<br><input type="radio"/> 5 a 6 veces al día<br><input type="radio"/> más 6 veces al día |
|--------------------|--------------------------------------------------------------------------------------------------------------------------------------------------------------------------------------------------------------------------------------------------------------------------------------------------------------------------------------------------------------------------------------------------------------|

---

|               |                                                                                                                                                                                                                                                                                                                                                                                                              |
|---------------|--------------------------------------------------------------------------------------------------------------------------------------------------------------------------------------------------------------------------------------------------------------------------------------------------------------------------------------------------------------------------------------------------------------|
| atun conserva | <input type="radio"/> Nunca o menos 1 vez al mes<br><input checked="" type="radio"/> 1 a 3 veces mes<br><input type="radio"/> 1 vez semana<br><input type="radio"/> 2 a 4 veces semana<br><input type="radio"/> 5 a 6 veces semana<br><input type="radio"/> 1 vez al día<br><input type="radio"/> 2 a 3 veces al día<br><input type="radio"/> 5 a 6 veces al día<br><input type="radio"/> más 6 veces al día |
|---------------|--------------------------------------------------------------------------------------------------------------------------------------------------------------------------------------------------------------------------------------------------------------------------------------------------------------------------------------------------------------------------------------------------------------|

---

|                  |                                                                                                                                                                                                                                                                                                                                                                                                              |
|------------------|--------------------------------------------------------------------------------------------------------------------------------------------------------------------------------------------------------------------------------------------------------------------------------------------------------------------------------------------------------------------------------------------------------------|
| sardina conserva | <input checked="" type="radio"/> Nunca o menos 1 vez al mes<br><input type="radio"/> 1 a 3 veces mes<br><input type="radio"/> 1 vez semana<br><input type="radio"/> 2 a 4 veces semana<br><input type="radio"/> 5 a 6 veces semana<br><input type="radio"/> 1 vez al día<br><input type="radio"/> 2 a 3 veces al día<br><input type="radio"/> 5 a 6 veces al día<br><input type="radio"/> más 6 veces al día |
|------------------|--------------------------------------------------------------------------------------------------------------------------------------------------------------------------------------------------------------------------------------------------------------------------------------------------------------------------------------------------------------------------------------------------------------|

---

|                                         |                                                                                                                                                                                                                                                                                                                                                                                                              |
|-----------------------------------------|--------------------------------------------------------------------------------------------------------------------------------------------------------------------------------------------------------------------------------------------------------------------------------------------------------------------------------------------------------------------------------------------------------------|
| pescado ahumado                         | <input checked="" type="radio"/> Nunca o menos 1 vez al mes<br><input type="radio"/> 1 a 3 veces mes<br><input type="radio"/> 1 vez semana<br><input type="radio"/> 2 a 4 veces semana<br><input type="radio"/> 5 a 6 veces semana<br><input type="radio"/> 1 vez al día<br><input type="radio"/> 2 a 3 veces al día<br><input type="radio"/> 5 a 6 veces al día<br><input type="radio"/> más 6 veces al día |
| almejas o mejillones o ostras unos 100g | <input type="radio"/> Nunca o menos 1 vez al mes<br><input type="radio"/> 1 a 3 veces mes<br><input checked="" type="radio"/> 1 vez semana<br><input type="radio"/> 2 a 4 veces semana<br><input type="radio"/> 5 a 6 veces semana<br><input type="radio"/> 1 vez al día<br><input type="radio"/> 2 a 3 veces al día<br><input type="radio"/> 5 a 6 veces al día<br><input type="radio"/> más 6 veces al día |
| calamar o chipiron o sepia unos 100g    | <input checked="" type="radio"/> Nunca o menos 1 vez al mes<br><input type="radio"/> 1 a 3 veces mes<br><input type="radio"/> 1 vez semana<br><input type="radio"/> 2 a 4 veces semana<br><input type="radio"/> 5 a 6 veces semana<br><input type="radio"/> 1 vez al día<br><input type="radio"/> 2 a 3 veces al día<br><input type="radio"/> 5 a 6 veces al día<br><input type="radio"/> más 6 veces al día |
| marisco unos 100g                       | <input type="radio"/> Nunca o menos 1 vez al mes<br><input checked="" type="radio"/> 1 a 3 veces mes<br><input type="radio"/> 1 vez semana<br><input type="radio"/> 2 a 4 veces semana<br><input type="radio"/> 5 a 6 veces semana<br><input type="radio"/> 1 vez al día<br><input type="radio"/> 2 a 3 veces al día<br><input type="radio"/> 5 a 6 veces al día<br><input type="radio"/> más 6 veces al día |
| Espinacas o acelgas cocinadas           | <input checked="" type="radio"/> Nunca o menos 1 vez al mes<br><input type="radio"/> 1 a 3 veces mes<br><input type="radio"/> 1 vez semana<br><input type="radio"/> 2 a 4 veces semana<br><input type="radio"/> 5 a 6 veces semana<br><input type="radio"/> 1 vez al día<br><input type="radio"/> 2 a 3 veces al día<br><input type="radio"/> 5 a 6 veces al día<br><input type="radio"/> más 6 veces al día |
| Col o coliflor o brocoli cocinado       | <input type="radio"/> Nunca o menos 1 vez al mes<br><input type="radio"/> 1 a 3 veces mes<br><input type="radio"/> 1 vez semana<br><input checked="" type="radio"/> 2 a 4 veces semana<br><input type="radio"/> 5 a 6 veces semana<br><input type="radio"/> 1 vez al día<br><input type="radio"/> 2 a 3 veces al día<br><input type="radio"/> 5 a 6 veces al día<br><input type="radio"/> más 6 veces al día |



---

|                              |                                                                                                                                                                                                                                                                                                                                                                                                              |
|------------------------------|--------------------------------------------------------------------------------------------------------------------------------------------------------------------------------------------------------------------------------------------------------------------------------------------------------------------------------------------------------------------------------------------------------------|
| Lechuga o endivia o escarola | <input checked="" type="radio"/> Nunca o menos 1 vez al mes<br><input type="radio"/> 1 a 3 veces mes<br><input type="radio"/> 1 vez semana<br><input type="radio"/> 2 a 4 veces semana<br><input type="radio"/> 5 a 6 veces semana<br><input type="radio"/> 1 vez al día<br><input type="radio"/> 2 a 3 veces al día<br><input type="radio"/> 5 a 6 veces al día<br><input type="radio"/> más 6 veces al día |
|------------------------------|--------------------------------------------------------------------------------------------------------------------------------------------------------------------------------------------------------------------------------------------------------------------------------------------------------------------------------------------------------------------------------------------------------------|

---

|                 |                                                                                                                                                                                                                                                                                                                                                                                                              |
|-----------------|--------------------------------------------------------------------------------------------------------------------------------------------------------------------------------------------------------------------------------------------------------------------------------------------------------------------------------------------------------------------------------------------------------------|
| tomate ensalada | <input type="radio"/> Nunca o menos 1 vez al mes<br><input type="radio"/> 1 a 3 veces mes<br><input type="radio"/> 1 vez semana<br><input checked="" type="radio"/> 2 a 4 veces semana<br><input type="radio"/> 5 a 6 veces semana<br><input type="radio"/> 1 vez al día<br><input type="radio"/> 2 a 3 veces al día<br><input type="radio"/> 5 a 6 veces al día<br><input type="radio"/> más 6 veces al día |
|-----------------|--------------------------------------------------------------------------------------------------------------------------------------------------------------------------------------------------------------------------------------------------------------------------------------------------------------------------------------------------------------------------------------------------------------|

---

|         |                                                                                                                                                                                                                                                                                                                                                                                                              |
|---------|--------------------------------------------------------------------------------------------------------------------------------------------------------------------------------------------------------------------------------------------------------------------------------------------------------------------------------------------------------------------------------------------------------------|
| cebolla | <input type="radio"/> Nunca o menos 1 vez al mes<br><input type="radio"/> 1 a 3 veces mes<br><input type="radio"/> 1 vez semana<br><input checked="" type="radio"/> 2 a 4 veces semana<br><input type="radio"/> 5 a 6 veces semana<br><input type="radio"/> 1 vez al día<br><input type="radio"/> 2 a 3 veces al día<br><input type="radio"/> 5 a 6 veces al día<br><input type="radio"/> más 6 veces al día |
|---------|--------------------------------------------------------------------------------------------------------------------------------------------------------------------------------------------------------------------------------------------------------------------------------------------------------------------------------------------------------------------------------------------------------------|

---

|                      |                                                                                                                                                                                                                                                                                                                                                                                                              |
|----------------------|--------------------------------------------------------------------------------------------------------------------------------------------------------------------------------------------------------------------------------------------------------------------------------------------------------------------------------------------------------------------------------------------------------------|
| Zanahoria o calabaza | <input type="radio"/> Nunca o menos 1 vez al mes<br><input type="radio"/> 1 a 3 veces mes<br><input type="radio"/> 1 vez semana<br><input checked="" type="radio"/> 2 a 4 veces semana<br><input type="radio"/> 5 a 6 veces semana<br><input type="radio"/> 1 vez al día<br><input type="radio"/> 2 a 3 veces al día<br><input type="radio"/> 5 a 6 veces al día<br><input type="radio"/> más 6 veces al día |
|----------------------|--------------------------------------------------------------------------------------------------------------------------------------------------------------------------------------------------------------------------------------------------------------------------------------------------------------------------------------------------------------------------------------------------------------|

---

|               |                                                                                                                                                                                                                                                                                                                                                                                                              |
|---------------|--------------------------------------------------------------------------------------------------------------------------------------------------------------------------------------------------------------------------------------------------------------------------------------------------------------------------------------------------------------------------------------------------------------|
| Judías verdes | <input type="radio"/> Nunca o menos 1 vez al mes<br><input type="radio"/> 1 a 3 veces mes<br><input type="radio"/> 1 vez semana<br><input checked="" type="radio"/> 2 a 4 veces semana<br><input type="radio"/> 5 a 6 veces semana<br><input type="radio"/> 1 vez al día<br><input type="radio"/> 2 a 3 veces al día<br><input type="radio"/> 5 a 6 veces al día<br><input type="radio"/> más 6 veces al día |
|---------------|--------------------------------------------------------------------------------------------------------------------------------------------------------------------------------------------------------------------------------------------------------------------------------------------------------------------------------------------------------------------------------------------------------------|

---

|                                |                                                                                                                                                                                                                                                                                                                                                                                                              |
|--------------------------------|--------------------------------------------------------------------------------------------------------------------------------------------------------------------------------------------------------------------------------------------------------------------------------------------------------------------------------------------------------------------------------------------------------------|
| Berenjena o calabacin o pepino | <input type="radio"/> Nunca o menos 1 vez al mes<br><input type="radio"/> 1 a 3 veces mes<br><input checked="" type="radio"/> 1 vez semana<br><input type="radio"/> 2 a 4 veces semana<br><input type="radio"/> 5 a 6 veces semana<br><input type="radio"/> 1 vez al día<br><input type="radio"/> 2 a 3 veces al día<br><input type="radio"/> 5 a 6 veces al día<br><input type="radio"/> más 6 veces al día |
|--------------------------------|--------------------------------------------------------------------------------------------------------------------------------------------------------------------------------------------------------------------------------------------------------------------------------------------------------------------------------------------------------------------------------------------------------------|

---

|                       |                                                                                                                                                                                                                                                                                                                                                                                                              |
|-----------------------|--------------------------------------------------------------------------------------------------------------------------------------------------------------------------------------------------------------------------------------------------------------------------------------------------------------------------------------------------------------------------------------------------------------|
| pimiento              | <input type="radio"/> Nunca o menos 1 vez al mes<br><input type="radio"/> 1 a 3 veces mes<br><input checked="" type="radio"/> 1 vez semana<br><input type="radio"/> 2 a 4 veces semana<br><input type="radio"/> 5 a 6 veces semana<br><input type="radio"/> 1 vez al día<br><input type="radio"/> 2 a 3 veces al día<br><input type="radio"/> 5 a 6 veces al día<br><input type="radio"/> más 6 veces al día |
| alcachofa             | <input type="radio"/> Nunca o menos 1 vez al mes<br><input type="radio"/> 1 a 3 veces mes<br><input type="radio"/> 1 vez semana<br><input checked="" type="radio"/> 2 a 4 veces semana<br><input type="radio"/> 5 a 6 veces semana<br><input type="radio"/> 1 vez al día<br><input type="radio"/> 2 a 3 veces al día<br><input type="radio"/> 5 a 6 veces al día<br><input type="radio"/> más 6 veces al día |
| espárragos            | <input checked="" type="radio"/> Nunca o menos 1 vez al mes<br><input type="radio"/> 1 a 3 veces mes<br><input type="radio"/> 1 vez semana<br><input type="radio"/> 2 a 4 veces semana<br><input type="radio"/> 5 a 6 veces semana<br><input type="radio"/> 1 vez al día<br><input type="radio"/> 2 a 3 veces al día<br><input type="radio"/> 5 a 6 veces al día<br><input type="radio"/> más 6 veces al día |
| maíz hervido          | <input checked="" type="radio"/> Nunca o menos 1 vez al mes<br><input type="radio"/> 1 a 3 veces mes<br><input type="radio"/> 1 vez semana<br><input type="radio"/> 2 a 4 veces semana<br><input type="radio"/> 5 a 6 veces semana<br><input type="radio"/> 1 vez al día<br><input type="radio"/> 2 a 3 veces al día<br><input type="radio"/> 5 a 6 veces al día<br><input type="radio"/> más 6 veces al día |
| legumbres             | <input type="radio"/> Nunca o menos 1 vez al mes<br><input type="radio"/> 1 a 3 veces mes<br><input type="radio"/> 1 vez semana<br><input checked="" type="radio"/> 2 a 4 veces semana<br><input type="radio"/> 5 a 6 veces semana<br><input type="radio"/> 1 vez al día<br><input type="radio"/> 2 a 3 veces al día<br><input type="radio"/> 5 a 6 veces al día<br><input type="radio"/> más 6 veces al día |
| naranjas o mandarinas | <input type="radio"/> Nunca o menos 1 vez al mes<br><input type="radio"/> 1 a 3 veces mes<br><input type="radio"/> 1 vez semana<br><input type="radio"/> 2 a 4 veces semana<br><input type="radio"/> 5 a 6 veces semana<br><input type="radio"/> 1 vez al día<br><input checked="" type="radio"/> 2 a 3 veces al día<br><input type="radio"/> 5 a 6 veces al día<br><input type="radio"/> más 6 veces al día |

|                       |                                                                                                                                                                                                                                                                                                                                                                                                              |
|-----------------------|--------------------------------------------------------------------------------------------------------------------------------------------------------------------------------------------------------------------------------------------------------------------------------------------------------------------------------------------------------------------------------------------------------------|
| zum natural fruta     | <input checked="" type="radio"/> Nunca o menos 1 vez al mes<br><input type="radio"/> 1 a 3 veces mes<br><input type="radio"/> 1 vez semana<br><input type="radio"/> 2 a 4 veces semana<br><input type="radio"/> 5 a 6 veces semana<br><input type="radio"/> 1 vez al día<br><input type="radio"/> 2 a 3 veces al día<br><input type="radio"/> 5 a 6 veces al día<br><input type="radio"/> más 6 veces al día |
| platano               | <input type="radio"/> Nunca o menos 1 vez al mes<br><input type="radio"/> 1 a 3 veces mes<br><input type="radio"/> 1 vez semana<br><input checked="" type="radio"/> 2 a 4 veces semana<br><input type="radio"/> 5 a 6 veces semana<br><input type="radio"/> 1 vez al día<br><input type="radio"/> 2 a 3 veces al día<br><input type="radio"/> 5 a 6 veces al día<br><input type="radio"/> más 6 veces al día |
| manzana o pera        | <input type="radio"/> Nunca o menos 1 vez al mes<br><input type="radio"/> 1 a 3 veces mes<br><input type="radio"/> 1 vez semana<br><input checked="" type="radio"/> 2 a 4 veces semana<br><input type="radio"/> 5 a 6 veces semana<br><input type="radio"/> 1 vez al día<br><input type="radio"/> 2 a 3 veces al día<br><input type="radio"/> 5 a 6 veces al día<br><input type="radio"/> más 6 veces al día |
| melocotón o nectarina | <input checked="" type="radio"/> Nunca o menos 1 vez al mes<br><input type="radio"/> 1 a 3 veces mes<br><input type="radio"/> 1 vez semana<br><input type="radio"/> 2 a 4 veces semana<br><input type="radio"/> 5 a 6 veces semana<br><input type="radio"/> 1 vez al día<br><input type="radio"/> 2 a 3 veces al día<br><input type="radio"/> 5 a 6 veces al día<br><input type="radio"/> más 6 veces al día |
| sandia o melon        | <input checked="" type="radio"/> Nunca o menos 1 vez al mes<br><input type="radio"/> 1 a 3 veces mes<br><input type="radio"/> 1 vez semana<br><input type="radio"/> 2 a 4 veces semana<br><input type="radio"/> 5 a 6 veces semana<br><input type="radio"/> 1 vez al día<br><input type="radio"/> 2 a 3 veces al día<br><input type="radio"/> 5 a 6 veces al día<br><input type="radio"/> más 6 veces al día |
| uva                   | <input checked="" type="radio"/> Nunca o menos 1 vez al mes<br><input type="radio"/> 1 a 3 veces mes<br><input type="radio"/> 1 vez semana<br><input type="radio"/> 2 a 4 veces semana<br><input type="radio"/> 5 a 6 veces semana<br><input type="radio"/> 1 vez al día<br><input type="radio"/> 2 a 3 veces al día<br><input type="radio"/> 5 a 6 veces al día<br><input type="radio"/> más 6 veces al día |

---

bruna o ciruela

- ☐ Nunca o menos 1 vez al mes  
☐ 1 a 3 veces mes  
☐ 1 vez semana  
☒ 2 a 4 veces semana  
☐ 5 a 6 veces semana  
☐ 1 vez al día  
☐ 2 a 3 veces al día  
☐ 5 a 6 veces al día  
☐ más 6 veces al día

---

kiwi

- ☐ Nunca o menos 1 vez al mes  
☐ 1 a 3 veces mes  
☐ 1 vez semana  
☒ 2 a 4 veces semana  
☐ 5 a 6 veces semana  
☐ 1 vez al día  
☐ 2 a 3 veces al día  
☐ 5 a 6 veces al día  
☐ más 6 veces al día

---

aceituna

- ☐ Nunca o menos 1 vez al mes  
☒ 1 a 3 veces mes  
☐ 1 vez semana  
☐ 2 a 4 veces semana  
☐ 5 a 6 veces semana  
☐ 1 vez al día  
☐ 2 a 3 veces al día  
☐ 5 a 6 veces al día  
☐ más 6 veces al día

---

frutos secos

- ☐ Nunca o menos 1 vez al mes  
☐ 1 a 3 veces mes  
☐ 1 vez semana  
☐ 2 a 4 veces semana  
☐ 5 a 6 veces semana  
☒ 1 vez al día  
☐ 2 a 3 veces al día  
☐ 5 a 6 veces al día  
☐ más 6 veces al día

---

pan blanco

- ☐ Nunca o menos 1 vez al mes  
☐ 1 a 3 veces mes  
☒ 1 vez semana  
☐ 2 a 4 veces semana  
☐ 5 a 6 veces semana  
☐ 1 vez al día  
☐ 2 a 3 veces al día  
☐ 5 a 6 veces al día  
☐ más 6 veces al día

---

pan integral

- ☐ Nunca o menos 1 vez al mes  
☐ 1 a 3 veces mes  
☐ 1 vez semana  
☐ 2 a 4 veces semana  
☐ 5 a 6 veces semana  
☐ 1 vez al día  
☒ 2 a 3 veces al día  
☐ 5 a 6 veces al día  
☐ más 6 veces al día

|                          |                                                                                                                                                                                                                                                                                                                                                                                                              |
|--------------------------|--------------------------------------------------------------------------------------------------------------------------------------------------------------------------------------------------------------------------------------------------------------------------------------------------------------------------------------------------------------------------------------------------------------|
| cereales desayuno        | <input type="radio"/> Nunca o menos 1 vez al mes<br><input type="radio"/> 1 a 3 veces mes<br><input type="radio"/> 1 vez semana<br><input type="radio"/> 2 a 4 veces semana<br><input type="radio"/> 5 a 6 veces semana<br><input type="radio"/> 1 vez al día<br><input type="radio"/> 2 a 3 veces al día<br><input checked="" type="radio"/> 5 a 6 veces al día<br><input type="radio"/> más 6 veces al día |
| patatas fritas           | <input type="radio"/> Nunca o menos 1 vez al mes<br><input checked="" type="radio"/> 1 a 3 veces mes<br><input type="radio"/> 1 vez semana<br><input type="radio"/> 2 a 4 veces semana<br><input type="radio"/> 5 a 6 veces semana<br><input type="radio"/> 1 vez al día<br><input type="radio"/> 2 a 3 veces al día<br><input type="radio"/> 5 a 6 veces al día<br><input type="radio"/> más 6 veces al día |
| patatas cocidas o asadas | <input type="radio"/> Nunca o menos 1 vez al mes<br><input type="radio"/> 1 a 3 veces mes<br><input type="radio"/> 1 vez semana<br><input checked="" type="radio"/> 2 a 4 veces semana<br><input type="radio"/> 5 a 6 veces semana<br><input type="radio"/> 1 vez al día<br><input type="radio"/> 2 a 3 veces al día<br><input type="radio"/> 5 a 6 veces al día<br><input type="radio"/> más 6 veces al día |
| bolsa papas              | <input type="radio"/> Nunca o menos 1 vez al mes<br><input checked="" type="radio"/> 1 a 3 veces mes<br><input type="radio"/> 1 vez semana<br><input type="radio"/> 2 a 4 veces semana<br><input type="radio"/> 5 a 6 veces semana<br><input type="radio"/> 1 vez al día<br><input type="radio"/> 2 a 3 veces al día<br><input type="radio"/> 5 a 6 veces al día<br><input type="radio"/> más 6 veces al día |
| arroz cocinado           | <input type="radio"/> Nunca o menos 1 vez al mes<br><input checked="" type="radio"/> 1 a 3 veces mes<br><input type="radio"/> 1 vez semana<br><input type="radio"/> 2 a 4 veces semana<br><input type="radio"/> 5 a 6 veces semana<br><input type="radio"/> 1 vez al día<br><input type="radio"/> 2 a 3 veces al día<br><input type="radio"/> 5 a 6 veces al día<br><input type="radio"/> más 6 veces al día |
| pasta                    | <input type="radio"/> Nunca o menos 1 vez al mes<br><input type="radio"/> 1 a 3 veces mes<br><input type="radio"/> 1 vez semana<br><input checked="" type="radio"/> 2 a 4 veces semana<br><input type="radio"/> 5 a 6 veces semana<br><input type="radio"/> 1 vez al día<br><input type="radio"/> 2 a 3 veces al día<br><input type="radio"/> 5 a 6 veces al día<br><input type="radio"/> más 6 veces al día |

|                     |                                                                                                                                                                                                                                                                                                                                                                                                              |
|---------------------|--------------------------------------------------------------------------------------------------------------------------------------------------------------------------------------------------------------------------------------------------------------------------------------------------------------------------------------------------------------------------------------------------------------|
| pizza               | <input type="radio"/> Nunca o menos 1 vez al mes<br><input type="radio"/> 1 a 3 veces mes<br><input checked="" type="radio"/> 1 vez semana<br><input type="radio"/> 2 a 4 veces semana<br><input type="radio"/> 5 a 6 veces semana<br><input type="radio"/> 1 vez al día<br><input type="radio"/> 2 a 3 veces al día<br><input type="radio"/> 5 a 6 veces al día<br><input type="radio"/> más 6 veces al día |
| aceite oliva        | <input type="radio"/> Nunca o menos 1 vez al mes<br><input type="radio"/> 1 a 3 veces mes<br><input type="radio"/> 1 vez semana<br><input type="radio"/> 2 a 4 veces semana<br><input type="radio"/> 5 a 6 veces semana<br><input checked="" type="radio"/> 1 vez al día<br><input type="radio"/> 2 a 3 veces al día<br><input type="radio"/> 5 a 6 veces al día<br><input type="radio"/> más 6 veces al día |
| otros aceites       | <input checked="" type="radio"/> Nunca o menos 1 vez al mes<br><input type="radio"/> 1 a 3 veces mes<br><input type="radio"/> 1 vez semana<br><input type="radio"/> 2 a 4 veces semana<br><input type="radio"/> 5 a 6 veces semana<br><input type="radio"/> 1 vez al día<br><input type="radio"/> 2 a 3 veces al día<br><input type="radio"/> 5 a 6 veces al día<br><input type="radio"/> más 6 veces al día |
| margarina           | <input checked="" type="radio"/> Nunca o menos 1 vez al mes<br><input type="radio"/> 1 a 3 veces mes<br><input type="radio"/> 1 vez semana<br><input type="radio"/> 2 a 4 veces semana<br><input type="radio"/> 5 a 6 veces semana<br><input type="radio"/> 1 vez al día<br><input type="radio"/> 2 a 3 veces al día<br><input type="radio"/> 5 a 6 veces al día<br><input type="radio"/> más 6 veces al día |
| mantequilla         | <input checked="" type="radio"/> Nunca o menos 1 vez al mes<br><input type="radio"/> 1 a 3 veces mes<br><input type="radio"/> 1 vez semana<br><input type="radio"/> 2 a 4 veces semana<br><input type="radio"/> 5 a 6 veces semana<br><input type="radio"/> 1 vez al día<br><input type="radio"/> 2 a 3 veces al día<br><input type="radio"/> 5 a 6 veces al día<br><input type="radio"/> más 6 veces al día |
| galletas tipo maria | <input type="radio"/> Nunca o menos 1 vez al mes<br><input type="radio"/> 1 a 3 veces mes<br><input checked="" type="radio"/> 1 vez semana<br><input type="radio"/> 2 a 4 veces semana<br><input type="radio"/> 5 a 6 veces semana<br><input type="radio"/> 1 vez al día<br><input type="radio"/> 2 a 3 veces al día<br><input type="radio"/> 5 a 6 veces al día<br><input type="radio"/> más 6 veces al día |

|                           |                                                                                                                                                                                                                                                                                                                                                                                                              |
|---------------------------|--------------------------------------------------------------------------------------------------------------------------------------------------------------------------------------------------------------------------------------------------------------------------------------------------------------------------------------------------------------------------------------------------------------|
| galletas chocolate        | <input type="radio"/> Nunca o menos 1 vez al mes<br><input type="radio"/> 1 a 3 veces mes<br><input checked="" type="radio"/> 1 vez semana<br><input type="radio"/> 2 a 4 veces semana<br><input type="radio"/> 5 a 6 veces semana<br><input type="radio"/> 1 vez al día<br><input type="radio"/> 2 a 3 veces al día<br><input type="radio"/> 5 a 6 veces al día<br><input type="radio"/> más 6 veces al día |
| bollieria                 | <input type="radio"/> Nunca o menos 1 vez al mes<br><input checked="" type="radio"/> 1 a 3 veces mes<br><input type="radio"/> 1 vez semana<br><input type="radio"/> 2 a 4 veces semana<br><input type="radio"/> 5 a 6 veces semana<br><input type="radio"/> 1 vez al día<br><input type="radio"/> 2 a 3 veces al día<br><input type="radio"/> 5 a 6 veces al día<br><input type="radio"/> más 6 veces al día |
| chocolate o bombones      | <input type="radio"/> Nunca o menos 1 vez al mes<br><input checked="" type="radio"/> 1 a 3 veces mes<br><input type="radio"/> 1 vez semana<br><input type="radio"/> 2 a 4 veces semana<br><input type="radio"/> 5 a 6 veces semana<br><input type="radio"/> 1 vez al día<br><input type="radio"/> 2 a 3 veces al día<br><input type="radio"/> 5 a 6 veces al día<br><input type="radio"/> más 6 veces al día |
| chocolate polvo o colacao | <input type="radio"/> Nunca o menos 1 vez al mes<br><input type="radio"/> 1 a 3 veces mes<br><input type="radio"/> 1 vez semana<br><input type="radio"/> 2 a 4 veces semana<br><input checked="" type="radio"/> 5 a 6 veces semana<br><input type="radio"/> 1 vez al día<br><input type="radio"/> 2 a 3 veces al día<br><input type="radio"/> 5 a 6 veces al día<br><input type="radio"/> más 6 veces al día |
| vino tinto                | <input checked="" type="radio"/> Nunca o menos 1 vez al mes<br><input type="radio"/> 1 a 3 veces mes<br><input type="radio"/> 1 vez semana<br><input type="radio"/> 2 a 4 veces semana<br><input type="radio"/> 5 a 6 veces semana<br><input type="radio"/> 1 vez al día<br><input type="radio"/> 2 a 3 veces al día<br><input type="radio"/> 5 a 6 veces al día<br><input type="radio"/> más 6 veces al día |
| vino blanco               | <input checked="" type="radio"/> Nunca o menos 1 vez al mes<br><input type="radio"/> 1 a 3 veces mes<br><input type="radio"/> 1 vez semana<br><input type="radio"/> 2 a 4 veces semana<br><input type="radio"/> 5 a 6 veces semana<br><input type="radio"/> 1 vez al día<br><input type="radio"/> 2 a 3 veces al día<br><input type="radio"/> 5 a 6 veces al día<br><input type="radio"/> más 6 veces al día |

|                       |                                                                                                                                                                                                                                                                                                                                                                                                              |
|-----------------------|--------------------------------------------------------------------------------------------------------------------------------------------------------------------------------------------------------------------------------------------------------------------------------------------------------------------------------------------------------------------------------------------------------------|
| vino seco o vermut    | <input checked="" type="radio"/> Nunca o menos 1 vez al mes<br><input type="radio"/> 1 a 3 veces mes<br><input type="radio"/> 1 vez semana<br><input type="radio"/> 2 a 4 veces semana<br><input type="radio"/> 5 a 6 veces semana<br><input type="radio"/> 1 vez al día<br><input type="radio"/> 2 a 3 veces al día<br><input type="radio"/> 5 a 6 veces al día<br><input type="radio"/> más 6 veces al día |
| cerveza               | <input checked="" type="radio"/> Nunca o menos 1 vez al mes<br><input type="radio"/> 1 a 3 veces mes<br><input type="radio"/> 1 vez semana<br><input type="radio"/> 2 a 4 veces semana<br><input type="radio"/> 5 a 6 veces semana<br><input type="radio"/> 1 vez al día<br><input type="radio"/> 2 a 3 veces al día<br><input type="radio"/> 5 a 6 veces al día<br><input type="radio"/> más 6 veces al día |
| cerveza sin alcohol   | <input checked="" type="radio"/> Nunca o menos 1 vez al mes<br><input type="radio"/> 1 a 3 veces mes<br><input type="radio"/> 1 vez semana<br><input type="radio"/> 2 a 4 veces semana<br><input type="radio"/> 5 a 6 veces semana<br><input type="radio"/> 1 vez al día<br><input type="radio"/> 2 a 3 veces al día<br><input type="radio"/> 5 a 6 veces al día<br><input type="radio"/> más 6 veces al día |
| licores               | <input checked="" type="radio"/> Nunca o menos 1 vez al mes<br><input type="radio"/> 1 a 3 veces mes<br><input type="radio"/> 1 vez semana<br><input type="radio"/> 2 a 4 veces semana<br><input type="radio"/> 5 a 6 veces semana<br><input type="radio"/> 1 vez al día<br><input type="radio"/> 2 a 3 veces al día<br><input type="radio"/> 5 a 6 veces al día<br><input type="radio"/> más 6 veces al día |
| ginebra o ron o vodka | <input checked="" type="radio"/> Nunca o menos 1 vez al mes<br><input type="radio"/> 1 a 3 veces mes<br><input type="radio"/> 1 vez semana<br><input type="radio"/> 2 a 4 veces semana<br><input type="radio"/> 5 a 6 veces semana<br><input type="radio"/> 1 vez al día<br><input type="radio"/> 2 a 3 veces al día<br><input type="radio"/> 5 a 6 veces al día<br><input type="radio"/> más 6 veces al día |
| refresco normal       | <input checked="" type="radio"/> Nunca o menos 1 vez al mes<br><input type="radio"/> 1 a 3 veces mes<br><input type="radio"/> 1 vez semana<br><input type="radio"/> 2 a 4 veces semana<br><input type="radio"/> 5 a 6 veces semana<br><input type="radio"/> 1 vez al día<br><input type="radio"/> 2 a 3 veces al día<br><input type="radio"/> 5 a 6 veces al día<br><input type="radio"/> más 6 veces al día |



|                          |                                                                                                                                                                                                                                                                                                                                                                                                              |
|--------------------------|--------------------------------------------------------------------------------------------------------------------------------------------------------------------------------------------------------------------------------------------------------------------------------------------------------------------------------------------------------------------------------------------------------------|
| refresco sin azúcar      | <input checked="" type="radio"/> Nunca o menos 1 vez al mes<br><input type="radio"/> 1 a 3 veces mes<br><input type="radio"/> 1 vez semana<br><input type="radio"/> 2 a 4 veces semana<br><input type="radio"/> 5 a 6 veces semana<br><input type="radio"/> 1 vez al día<br><input type="radio"/> 2 a 3 veces al día<br><input type="radio"/> 5 a 6 veces al día<br><input type="radio"/> más 6 veces al día |
| Agua del grifo           | <input checked="" type="radio"/> Nunca o menos 1 vez al mes<br><input type="radio"/> 1 a 3 veces mes<br><input type="radio"/> 1 vez semana<br><input type="radio"/> 2 a 4 veces semana<br><input type="radio"/> 5 a 6 veces semana<br><input type="radio"/> 1 vez al día<br><input type="radio"/> 2 a 3 veces al día<br><input type="radio"/> 5 a 6 veces al día<br><input type="radio"/> más 6 veces al día |
| agua embotellada sin gas | <input type="radio"/> Nunca o menos 1 vez al mes<br><input type="radio"/> 1 a 3 veces mes<br><input type="radio"/> 1 vez semana<br><input type="radio"/> 2 a 4 veces semana<br><input type="radio"/> 5 a 6 veces semana<br><input type="radio"/> 1 vez al día<br><input type="radio"/> 2 a 3 veces al día<br><input checked="" type="radio"/> 5 a 6 veces al día<br><input type="radio"/> más 6 veces al día |
| agua embotellada con gas | <input checked="" type="radio"/> Nunca o menos 1 vez al mes<br><input type="radio"/> 1 a 3 veces mes<br><input type="radio"/> 1 vez semana<br><input type="radio"/> 2 a 4 veces semana<br><input type="radio"/> 5 a 6 veces semana<br><input type="radio"/> 1 vez al día<br><input type="radio"/> 2 a 3 veces al día<br><input type="radio"/> 5 a 6 veces al día<br><input type="radio"/> más 6 veces al día |
| zumو frutas embasado     | <input checked="" type="radio"/> Nunca o menos 1 vez al mes<br><input type="radio"/> 1 a 3 veces mes<br><input type="radio"/> 1 vez semana<br><input type="radio"/> 2 a 4 veces semana<br><input type="radio"/> 5 a 6 veces semana<br><input type="radio"/> 1 vez al día<br><input type="radio"/> 2 a 3 veces al día<br><input type="radio"/> 5 a 6 veces al día<br><input type="radio"/> más 6 veces al día |
| cafe                     | <input checked="" type="radio"/> Nunca o menos 1 vez al mes<br><input type="radio"/> 1 a 3 veces mes<br><input type="radio"/> 1 vez semana<br><input type="radio"/> 2 a 4 veces semana<br><input type="radio"/> 5 a 6 veces semana<br><input type="radio"/> 1 vez al día<br><input type="radio"/> 2 a 3 veces al día<br><input type="radio"/> 5 a 6 veces al día<br><input type="radio"/> más 6 veces al día |

|                       |                                                                                                                                                                                                                                                                                                                                                                                                              |
|-----------------------|--------------------------------------------------------------------------------------------------------------------------------------------------------------------------------------------------------------------------------------------------------------------------------------------------------------------------------------------------------------------------------------------------------------|
| cafe descafeinado     | <input checked="" type="radio"/> Nunca o menos 1 vez al mes<br><input type="radio"/> 1 a 3 veces mes<br><input type="radio"/> 1 vez semana<br><input type="radio"/> 2 a 4 veces semana<br><input type="radio"/> 5 a 6 veces semana<br><input type="radio"/> 1 vez al día<br><input type="radio"/> 2 a 3 veces al día<br><input type="radio"/> 5 a 6 veces al día<br><input type="radio"/> más 6 veces al día |
| te o infusión         | <input type="radio"/> Nunca o menos 1 vez al mes<br><input type="radio"/> 1 a 3 veces mes<br><input type="radio"/> 1 vez semana<br><input type="radio"/> 2 a 4 veces semana<br><input checked="" type="radio"/> 5 a 6 veces semana<br><input type="radio"/> 1 vez al día<br><input type="radio"/> 2 a 3 veces al día<br><input type="radio"/> 5 a 6 veces al día<br><input type="radio"/> más 6 veces al día |
| sopa o puré verduras  | <input type="radio"/> Nunca o menos 1 vez al mes<br><input type="radio"/> 1 a 3 veces mes<br><input type="radio"/> 1 vez semana<br><input checked="" type="radio"/> 2 a 4 veces semana<br><input type="radio"/> 5 a 6 veces semana<br><input type="radio"/> 1 vez al día<br><input type="radio"/> 2 a 3 veces al día<br><input type="radio"/> 5 a 6 veces al día<br><input type="radio"/> más 6 veces al día |
| croquetas pollo jamón | <input checked="" type="radio"/> Nunca o menos 1 vez al mes<br><input type="radio"/> 1 a 3 veces mes<br><input type="radio"/> 1 vez semana<br><input type="radio"/> 2 a 4 veces semana<br><input type="radio"/> 5 a 6 veces semana<br><input type="radio"/> 1 vez al día<br><input type="radio"/> 2 a 3 veces al día<br><input type="radio"/> 5 a 6 veces al día<br><input type="radio"/> más 6 veces al día |
| croquetas pescado     | <input type="radio"/> Nunca o menos 1 vez al mes<br><input checked="" type="radio"/> 1 a 3 veces mes<br><input type="radio"/> 1 vez semana<br><input type="radio"/> 2 a 4 veces semana<br><input type="radio"/> 5 a 6 veces semana<br><input type="radio"/> 1 vez al día<br><input type="radio"/> 2 a 3 veces al día<br><input type="radio"/> 5 a 6 veces al día<br><input type="radio"/> más 6 veces al día |
| mayonesa              | <input checked="" type="radio"/> Nunca o menos 1 vez al mes<br><input type="radio"/> 1 a 3 veces mes<br><input type="radio"/> 1 vez semana<br><input type="radio"/> 2 a 4 veces semana<br><input type="radio"/> 5 a 6 veces semana<br><input type="radio"/> 1 vez al día<br><input type="radio"/> 2 a 3 veces al día<br><input type="radio"/> 5 a 6 veces al día<br><input type="radio"/> más 6 veces al día |

|                  |                                                                                                                                                                                                                                                                                                                                                                                                              |
|------------------|--------------------------------------------------------------------------------------------------------------------------------------------------------------------------------------------------------------------------------------------------------------------------------------------------------------------------------------------------------------------------------------------------------------|
| salsa tomate     | <input checked="" type="radio"/> Nunca o menos 1 vez al mes<br><input type="radio"/> 1 a 3 veces mes<br><input type="radio"/> 1 vez semana<br><input type="radio"/> 2 a 4 veces semana<br><input type="radio"/> 5 a 6 veces semana<br><input type="radio"/> 1 vez al día<br><input type="radio"/> 2 a 3 veces al día<br><input type="radio"/> 5 a 6 veces al día<br><input type="radio"/> más 6 veces al día |
| ketchup          | <input checked="" type="radio"/> Nunca o menos 1 vez al mes<br><input type="radio"/> 1 a 3 veces mes<br><input type="radio"/> 1 vez semana<br><input type="radio"/> 2 a 4 veces semana<br><input type="radio"/> 5 a 6 veces semana<br><input type="radio"/> 1 vez al día<br><input type="radio"/> 2 a 3 veces al día<br><input type="radio"/> 5 a 6 veces al día<br><input type="radio"/> más 6 veces al día |
| sal              | <input type="radio"/> Nunca o menos 1 vez al mes<br><input type="radio"/> 1 a 3 veces mes<br><input type="radio"/> 1 vez semana<br><input type="radio"/> 2 a 4 veces semana<br><input type="radio"/> 5 a 6 veces semana<br><input checked="" type="radio"/> 1 vez al día<br><input type="radio"/> 2 a 3 veces al día<br><input type="radio"/> 5 a 6 veces al día<br><input type="radio"/> más 6 veces al día |
| ajo              | <input checked="" type="radio"/> Nunca o menos 1 vez al mes<br><input type="radio"/> 1 a 3 veces mes<br><input type="radio"/> 1 vez semana<br><input type="radio"/> 2 a 4 veces semana<br><input type="radio"/> 5 a 6 veces semana<br><input type="radio"/> 1 vez al día<br><input type="radio"/> 2 a 3 veces al día<br><input type="radio"/> 5 a 6 veces al día<br><input type="radio"/> más 6 veces al día |
| mermelada o miel | <input checked="" type="radio"/> Nunca o menos 1 vez al mes<br><input type="radio"/> 1 a 3 veces mes<br><input type="radio"/> 1 vez semana<br><input type="radio"/> 2 a 4 veces semana<br><input type="radio"/> 5 a 6 veces semana<br><input type="radio"/> 1 vez al día<br><input type="radio"/> 2 a 3 veces al día<br><input type="radio"/> 5 a 6 veces al día<br><input type="radio"/> más 6 veces al día |
| azúcar           | <input type="radio"/> Nunca o menos 1 vez al mes<br><input type="radio"/> 1 a 3 veces mes<br><input checked="" type="radio"/> 1 vez semana<br><input type="radio"/> 2 a 4 veces semana<br><input type="radio"/> 5 a 6 veces semana<br><input type="radio"/> 1 vez al día<br><input type="radio"/> 2 a 3 veces al día<br><input type="radio"/> 5 a 6 veces al día<br><input type="radio"/> más 6 veces al día |

|                                       |                                                                                                                                                                                                                                                                                                                                                                                                                                                                                                                               |
|---------------------------------------|-------------------------------------------------------------------------------------------------------------------------------------------------------------------------------------------------------------------------------------------------------------------------------------------------------------------------------------------------------------------------------------------------------------------------------------------------------------------------------------------------------------------------------|
| Otro alimento                         |                                                                                                                                                                                                                                                                                                                                                                                                                                                                                                                               |
| suplementos vitamínicos               | <input checked="" type="radio"/> si<br><input type="radio"/> no                                                                                                                                                                                                                                                                                                                                                                                                                                                               |
| suplementos vitamínicos               | [*DATA REMOVED*]                                                                                                                                                                                                                                                                                                                                                                                                                                                                                                              |
| dieta previa                          | <input type="radio"/> si<br><input checked="" type="radio"/> no                                                                                                                                                                                                                                                                                                                                                                                                                                                               |
| motivo dieta                          | <input checked="" type="radio"/> no dieta<br><input type="radio"/> control peso<br><input type="radio"/> control colesterol<br><input type="radio"/> control diabetes<br><input type="radio"/> problemas estómago<br><input type="radio"/> problemas vesícula o hepáticos<br><input type="radio"/> HTA o cardiopatía<br><input type="radio"/> problemas renales<br><input type="radio"/> alergia alimentaria<br><input type="radio"/> ácido úrico elevado<br><input type="radio"/> vegetariana<br><input type="radio"/> otros |
| cambio alimentos año previo gestación | <input type="radio"/> si<br><input checked="" type="radio"/> no                                                                                                                                                                                                                                                                                                                                                                                                                                                               |
| cambio lácteos                        | <input type="radio"/> eliminado<br><input type="radio"/> disminuido<br><input type="radio"/> igual<br><input type="radio"/> aumentado<br><input type="radio"/> no sabe                                                                                                                                                                                                                                                                                                                                                        |
| cambio huevos                         | <input type="radio"/> eliminado<br><input type="radio"/> disminuido<br><input type="radio"/> igual<br><input type="radio"/> aumentado<br><input type="radio"/> no sabe                                                                                                                                                                                                                                                                                                                                                        |
| cambio carne                          | <input type="radio"/> eliminado<br><input type="radio"/> disminuido<br><input type="radio"/> igual<br><input type="radio"/> aumentado<br><input type="radio"/> no sabe                                                                                                                                                                                                                                                                                                                                                        |
| cambio pescado                        | <input type="radio"/> eliminado<br><input type="radio"/> disminuido<br><input type="radio"/> igual<br><input type="radio"/> aumentado<br><input type="radio"/> no sabe                                                                                                                                                                                                                                                                                                                                                        |
| cambio verduras                       | <input type="radio"/> eliminado<br><input type="radio"/> disminuido<br><input type="radio"/> igual<br><input type="radio"/> aumentado<br><input type="radio"/> no sabe                                                                                                                                                                                                                                                                                                                                                        |

|                            |                                                                                                                                                                                                                        |
|----------------------------|------------------------------------------------------------------------------------------------------------------------------------------------------------------------------------------------------------------------|
| cambio legumbres           | <input type="radio"/> eliminado<br><input type="radio"/> disminuido<br><input type="radio"/> igual<br><input type="radio"/> aumentado<br><input type="radio"/> no sabe                                                 |
| cambio fruta               | <input type="radio"/> eliminado<br><input type="radio"/> disminuido<br><input type="radio"/> igual<br><input type="radio"/> aumentado<br><input type="radio"/> no sabe                                                 |
| cambio pan                 | <input type="radio"/> eliminado<br><input type="radio"/> disminuido<br><input type="radio"/> igual<br><input type="radio"/> aumentado<br><input type="radio"/> no sabe                                                 |
| cambio aceite oliva        | <input type="radio"/> eliminado<br><input type="radio"/> disminuido<br><input type="radio"/> igual<br><input type="radio"/> aumentado<br><input type="radio"/> no sabe                                                 |
| cambio mante o margarina   | <input type="radio"/> eliminado<br><input type="radio"/> disminuido<br><input type="radio"/> igual<br><input type="radio"/> aumentado<br><input type="radio"/> no sabe                                                 |
| cambio azúcar y dulces     | <input type="radio"/> eliminado<br><input type="radio"/> disminuido<br><input type="radio"/> igual<br><input type="radio"/> aumentado<br><input type="radio"/> no sabe                                                 |
| cambio bebidas alcohólicas | <input type="radio"/> eliminado<br><input type="radio"/> disminuido<br><input type="radio"/> igual<br><input type="radio"/> aumentado<br><input type="radio"/> no sabe                                                 |
| frecuencia comidas fritas  | <input type="radio"/> a diario<br><input type="radio"/> 5 a 6 veces semana<br><input type="radio"/> 2 a 4 veces semana<br><input type="radio"/> 1 vez semana<br><input checked="" type="radio"/> menos de 1 vez semana |
| carne                      | <input type="radio"/> no como<br><input type="radio"/> cruda<br><input type="radio"/> poco hecha<br><input checked="" type="radio"/> hecha<br><input type="radio"/> muy hecha                                          |
| grasa visible carne        | <input checked="" type="radio"/> quita toda<br><input type="radio"/> quita mayoría<br><input type="radio"/> quita un poco<br><input type="radio"/> no quita nada                                                       |

|                                |                                                                                                                                                                                                                                                          |
|--------------------------------|----------------------------------------------------------------------------------------------------------------------------------------------------------------------------------------------------------------------------------------------------------|
| cocina carne                   | <input checked="" type="radio"/> a la plancha<br><input type="radio"/> a la parrilla<br><input type="radio"/> asada<br><input type="radio"/> frita<br><input type="radio"/> guisada                                                                      |
| tostado quemado carne          | <input checked="" type="radio"/> nunca<br><input type="radio"/> 1 vez mes<br><input type="radio"/> 2 a 3 veces mes<br><input type="radio"/> 1 vez semana<br><input type="radio"/> 2 a 3 semanas                                                          |
| tostado quemado pescado        | <input checked="" type="radio"/> nunca<br><input type="radio"/> 1 vez mes<br><input type="radio"/> 2 a 3 veces mes<br><input type="radio"/> 1 vez semana<br><input type="radio"/> 2 a 3 semanas                                                          |
| socarrat paella                | <input checked="" type="radio"/> nunca<br><input type="radio"/> 1 vez mes<br><input type="radio"/> 2 a 3 veces mes<br><input type="radio"/> 1 vez semana<br><input type="radio"/> 2 a 3 semanas                                                          |
| grasa o aceite cocinar         | <input type="radio"/> mantequilla<br><input type="radio"/> margarina<br><input checked="" type="radio"/> aceite oliva<br><input type="radio"/> aceite oliva virgen extra<br><input type="radio"/> aceite vegetal<br><input type="radio"/> mezcla aceites |
| grasa aceite aliñar            | <input type="radio"/> mantequilla<br><input type="radio"/> margarina<br><input checked="" type="radio"/> aceite oliva<br><input type="radio"/> aceite oliva virgen extra<br><input type="radio"/> aceite vegetal<br><input type="radio"/> mezcla aceites |
| grasa aceite freir             | <input type="radio"/> mantequilla<br><input type="radio"/> margarina<br><input checked="" type="radio"/> aceite oliva<br><input type="radio"/> aceite oliva virgen extra<br><input type="radio"/> aceite vegetal<br><input type="radio"/> mezcla aceites |
| Ejercicio cuestionario         | <input checked="" type="radio"/> si<br><input type="radio"/> no                                                                                                                                                                                          |
| horas de sueño incluido siesta | [*DATA REMOVED*]                                                                                                                                                                                                                                         |
| minutos siesta                 | _____                                                                                                                                                                                                                                                    |
| horas televisión semana        | [*DATA REMOVED*]                                                                                                                                                                                                                                         |

|                                        |                                                                                                                                                                                                                                                                                                                                                                           |
|----------------------------------------|---------------------------------------------------------------------------------------------------------------------------------------------------------------------------------------------------------------------------------------------------------------------------------------------------------------------------------------------------------------------------|
| actividad trabajo                      | <input type="radio"/> casi siempre sentado<br><input type="radio"/> sentado 50 por cien<br><input checked="" type="radio"/> casi siempre de pie, quieto<br><input type="radio"/> casi siempre levantado caminando y llevando pocas cosas<br><input type="radio"/> casi siempre levantado, caminando y llevado muchas cosas<br><input type="radio"/> trabajo manual pesado |
| tiempo caminar o bici al día           | <input type="radio"/> casi nunca<br><input type="radio"/> menos 20min día<br><input type="radio"/> 20 a 40 min día<br><input checked="" type="radio"/> 40 a 60 min día<br><input type="radio"/> 1h o 1h y media día<br><input type="radio"/> más de 1h y media al día                                                                                                     |
| tiempo tareas casa al día              | <input type="radio"/> menos de 1h día<br><input type="radio"/> 1 a 2h día<br><input checked="" type="radio"/> 3 a 4h día<br><input type="radio"/> 5 a 6h día<br><input type="radio"/> 7 a 8h día<br><input type="radio"/> más de 8h día                                                                                                                                   |
| tiempo libre televisión ordenador leer | <input type="radio"/> menos 1h día<br><input type="radio"/> 1h día<br><input type="radio"/> 2h día<br><input type="radio"/> 3h día<br><input type="radio"/> 4h día<br><input checked="" type="radio"/> 5 a 6h día<br><input type="radio"/> mas 6h día                                                                                                                     |
| tiempo libre ejercicio o deporte       | <input type="radio"/> menos 1h semana<br><input type="radio"/> 1h semana<br><input type="radio"/> 2h semana<br><input type="radio"/> 3h semana<br><input type="radio"/> 4 a 5h semana<br><input checked="" type="radio"/> mas 5h semana                                                                                                                                   |
| como se considera                      | <input type="radio"/> sedentaria<br><input type="radio"/> poco activa<br><input checked="" type="radio"/> moderadamente activa<br><input type="radio"/> bastante activa<br><input type="radio"/> muy activa<br><input type="radio"/> no sabe                                                                                                                              |
| FUR                                    | [*DATA REMOVED*]                                                                                                                                                                                                                                                                                                                                                          |
| Semanas gestación 2T                   | [*DATA REMOVED*]                                                                                                                                                                                                                                                                                                                                                          |
| Días gestación 2T                      | [*DATA REMOVED*]                                                                                                                                                                                                                                                                                                                                                          |
| DBP 2T                                 | [*DATA REMOVED*]                                                                                                                                                                                                                                                                                                                                                          |
| CC 2T                                  | [*DATA REMOVED*]                                                                                                                                                                                                                                                                                                                                                          |
| AC 2T                                  | [*DATA REMOVED*]                                                                                                                                                                                                                                                                                                                                                          |

|                                                   |                                                                                                                                                                                                 |
|---------------------------------------------------|-------------------------------------------------------------------------------------------------------------------------------------------------------------------------------------------------|
| LF 2T                                             | [*DATA REMOVED*]                                                                                                                                                                                |
| PFE 2T (Hadlock)                                  | [*DATA REMOVED*]                                                                                                                                                                                |
| Semanas gestación 3T                              | [*DATA REMOVED*]                                                                                                                                                                                |
| días 3T                                           | [*DATA REMOVED*]                                                                                                                                                                                |
| DBP 3T                                            | [*DATA REMOVED*]                                                                                                                                                                                |
| CC 3T                                             | [*DATA REMOVED*]                                                                                                                                                                                |
| AC 3T                                             | [*DATA REMOVED*]                                                                                                                                                                                |
| LF 3T                                             | [*DATA REMOVED*]                                                                                                                                                                                |
| PFE 3T (Hadlock)                                  | [*DATA REMOVED*]                                                                                                                                                                                |
| Semanas de gestación final                        | [*DATA REMOVED*]                                                                                                                                                                                |
| días gestación final                              | [*DATA REMOVED*]                                                                                                                                                                                |
| Localización placenta                             | <input checked="" type="radio"/> anterior<br><input type="radio"/> lateral derecha<br><input type="radio"/> lateral izquierda<br><input type="radio"/> posterior<br><input type="radio"/> fondo |
| Presentación longitudinal cefálica                | <input type="radio"/> no<br><input checked="" type="radio"/> si                                                                                                                                 |
| Dorso                                             | <input checked="" type="radio"/> izquierda anterior<br><input type="radio"/> izquierda posterior<br><input type="radio"/> derecha anterior<br><input type="radio"/> derecha posterior           |
| diámetro biparietal                               | [*DATA REMOVED*]                                                                                                                                                                                |
| Circunferencia craneal                            | [*DATA REMOVED*]                                                                                                                                                                                |
| Circunferencia abdominal                          | [*DATA REMOVED*]                                                                                                                                                                                |
| Longitud de femur                                 | [*DATA REMOVED*]                                                                                                                                                                                |
| tejido celular subcutáneo a nivel del muslo en mm | [*DATA REMOVED*]                                                                                                                                                                                |
| tejido celular subcutáneo en abdomen en mm        | [*DATA REMOVED*]                                                                                                                                                                                |
| Volumen del muslo en cm3                          | [*DATA REMOVED*]                                                                                                                                                                                |
| Peso fetal estimado según fórmula de Hadlock      | [*DATA REMOVED*]                                                                                                                                                                                |



|                                               |                                                                                                                                                          |
|-----------------------------------------------|----------------------------------------------------------------------------------------------------------------------------------------------------------|
| Percentil                                     | [*DATA REMOVED*]                                                                                                                                         |
| Peso fetal estimado según fórmula de Scioscia | <hr/>                                                                                                                                                    |
| Peso fetal estimado según fórmula de LEE      | <hr/>                                                                                                                                                    |
| Tipo de parto                                 | <input type="radio"/> eutocico<br><input checked="" type="radio"/> instrumentado/ventosa<br><input type="radio"/> cesarea                                |
| fecha de nacimiento                           | [*DATA REMOVED*]                                                                                                                                         |
| Días entre exploración y nacimiento           | [*DATA REMOVED*]                                                                                                                                         |
| Peso RN en g                                  | [*DATA REMOVED*]                                                                                                                                         |
| sexo                                          | <input type="radio"/> mujer<br><input checked="" type="radio"/> hombre                                                                                   |
| Apgar 1 minuto                                | [*DATA REMOVED*]                                                                                                                                         |
| Apgar 5 minutos                               | [*DATA REMOVED*]                                                                                                                                         |
| Apgar 10 minutos                              | <hr/>                                                                                                                                                    |
| antecedente Covid durante gestación           | <input type="radio"/> Yes<br><input checked="" type="radio"/> No                                                                                         |
| Nivel de estudios                             | <input type="radio"/> ninguno<br><input checked="" type="radio"/> primarios<br><input type="radio"/> secundarios<br><input type="radio"/> universitarios |

# Base\_datos\_estimacion\_peso\_fetal

|                                       |                                                                                                                                                                                                                                                                                      |
|---------------------------------------|--------------------------------------------------------------------------------------------------------------------------------------------------------------------------------------------------------------------------------------------------------------------------------------|
| Número de identificación participante | 94                                                                                                                                                                                                                                                                                   |
| CODIGO PARTICIPANTE                   |                                                                                                                                                                                                                                                                                      |
| Edad                                  | [*DATA REMOVED*]                                                                                                                                                                                                                                                                     |
| Gestaciones                           | <input type="radio"/> 1<br><input type="radio"/> 2<br><input type="radio"/> 3<br><input checked="" type="radio"/> mas de 3                                                                                                                                                           |
| partos                                | <input type="radio"/> 0<br><input type="radio"/> 1<br><input checked="" type="radio"/> 2<br><input type="radio"/> 3<br><input type="radio"/> mas de 3                                                                                                                                |
| cesáreas                              | <input checked="" type="radio"/> 0<br><input type="radio"/> 1<br><input type="radio"/> 2<br><input type="radio"/> 3<br><input type="radio"/> mas de 3                                                                                                                                |
| Abortos                               | <input type="radio"/> 0<br><input type="radio"/> 1<br><input type="radio"/> 2<br><input checked="" type="radio"/> 3<br><input type="radio"/> mas de 3                                                                                                                                |
| Tipo de gestacion                     | <input checked="" type="radio"/> espontanea<br><input type="radio"/> IAC inseminación artificial conyuge<br><input type="radio"/> IAD inseminación artificial donante<br><input type="radio"/> FIV Fecundación in Vitro<br><input type="radio"/> Ovodon FIV con donación de ovocitos |
| peso previo a embarazo                | [*DATA REMOVED*]                                                                                                                                                                                                                                                                     |
| Ganancia ponderal embarazo            | [*DATA REMOVED*]                                                                                                                                                                                                                                                                     |
| Talla madre                           | [*DATA REMOVED*]                                                                                                                                                                                                                                                                     |
| IMC previo embarazo                   | 30.056810675122207                                                                                                                                                                                                                                                                   |
| Patología obstétrica                  | <input checked="" type="radio"/> no<br><input type="radio"/> si                                                                                                                                                                                                                      |
| Diabetes pregestacional               | <input checked="" type="radio"/> no<br><input type="radio"/> si                                                                                                                                                                                                                      |
| Diabetes gestacional                  | <input checked="" type="radio"/> no<br><input type="radio"/> si                                                                                                                                                                                                                      |

|                                            |                                                                                                                                                                                      |
|--------------------------------------------|--------------------------------------------------------------------------------------------------------------------------------------------------------------------------------------|
| Diabetes gestacional con insulina          | <input checked="" type="radio"/> no<br><input type="radio"/> si                                                                                                                      |
| Diabetes gestacional con dieta y ejercicio | <input checked="" type="radio"/> no<br><input type="radio"/> si                                                                                                                      |
| Percentil fetos previos                    | <input type="radio"/> Nada<br><input type="radio"/> percentil menor de 10<br><input type="radio"/> percentil entre 10 y 90<br><input checked="" type="radio"/> percentil mayor de 90 |
| Exfumadora                                 | <input checked="" type="radio"/> Nada<br><input type="radio"/> menos de 5 años<br><input type="radio"/> 5 a 10 años<br><input type="radio"/> mayor o igual a 10 años                 |
| Hábito tabáquico                           | <input checked="" type="radio"/> no<br><input type="radio"/> si                                                                                                                      |
| fumadora                                   | [*DATA REMOVED*]                                                                                                                                                                     |
| Consumo otros tóxicos                      | <input checked="" type="radio"/> no<br><input type="radio"/> si                                                                                                                      |
| Hb 1T                                      | [*DATA REMOVED*]                                                                                                                                                                     |
| Htc 1T                                     | [*DATA REMOVED*]                                                                                                                                                                     |
| Hb 2T                                      | [*DATA REMOVED*]                                                                                                                                                                     |
| HTC 2T                                     | [*DATA REMOVED*]                                                                                                                                                                     |
| Hb 3T                                      | [*DATA REMOVED*]                                                                                                                                                                     |
| HTC 3T                                     | [*DATA REMOVED*]                                                                                                                                                                     |
| Suplemento FE oral                         | <input checked="" type="radio"/> si<br><input type="radio"/> no                                                                                                                      |
| Suplemento fe iv                           | <input type="radio"/> si<br><input checked="" type="radio"/> no                                                                                                                      |
| Transfusión                                | <input checked="" type="radio"/> no<br><input type="radio"/> si                                                                                                                      |
| Solicitada Vit D                           | <input checked="" type="radio"/> no<br><input type="radio"/> si                                                                                                                      |
| Deficit vit D                              | <input type="radio"/> no<br><input type="radio"/> si                                                                                                                                 |
| Suplemento vit D                           | <input type="radio"/> si<br><input type="radio"/> no                                                                                                                                 |

|                       |                                                                                                                                                                                                                                                                                                                                                                                                              |
|-----------------------|--------------------------------------------------------------------------------------------------------------------------------------------------------------------------------------------------------------------------------------------------------------------------------------------------------------------------------------------------------------------------------------------------------------|
| Dieta, cuestionario   | <input checked="" type="radio"/> sí<br><input type="radio"/> no                                                                                                                                                                                                                                                                                                                                              |
| Leche entera          | <input type="radio"/> Nunca o menos 1 vez al mes<br><input type="radio"/> 1 a 3 veces mes<br><input type="radio"/> 1 vez semana<br><input type="radio"/> 2 a 4 veces semana<br><input type="radio"/> 5 a 6 veces semana<br><input type="radio"/> 1 vez al día<br><input checked="" type="radio"/> 2 a 3 veces al día<br><input type="radio"/> 5 a 6 veces al día<br><input type="radio"/> más 6 veces al día |
| Leche semidesnatada   | <input checked="" type="radio"/> Nunca o menos 1 vez al mes<br><input type="radio"/> 1 a 3 veces mes<br><input type="radio"/> 1 vez semana<br><input type="radio"/> 2 a 4 veces semana<br><input type="radio"/> 5 a 6 veces semana<br><input type="radio"/> 1 vez al día<br><input type="radio"/> 2 a 3 veces al día<br><input type="radio"/> 5 a 6 veces al día<br><input type="radio"/> mas 6 veces al día |
| Leche desnatada       | <input checked="" type="radio"/> Nunca o menos 1 vez al mes<br><input type="radio"/> 1 a 3 veces mes<br><input type="radio"/> 1 vez semana<br><input type="radio"/> 2 a 4 veces semana<br><input type="radio"/> 5 a 6 veces semana<br><input type="radio"/> 1 vez al día<br><input type="radio"/> 2 a 3 veces al día<br><input type="radio"/> 5 a 6 veces al día<br><input type="radio"/> más 6 veces al día |
| Leche condensada      | <input checked="" type="radio"/> Nunca o menos 1 vez al mes<br><input type="radio"/> 1 a 3 veces mes<br><input type="radio"/> 1 vez semana<br><input type="radio"/> 2 a 4 veces semana<br><input type="radio"/> 5 a 6 veces semana<br><input type="radio"/> 1 vez al día<br><input type="radio"/> 2 a 3 veces al día<br><input type="radio"/> 5 a 6 veces al día<br><input type="radio"/> más 6 veces al día |
| nata o crema de leche | <input checked="" type="radio"/> Nunca o menos 1 vez al mes<br><input type="radio"/> 1 a 3 veces mes<br><input type="radio"/> 1 vez semana<br><input type="radio"/> 2 a 4 veces semana<br><input type="radio"/> 5 a 6 veces semana<br><input type="radio"/> 1 vez al día<br><input type="radio"/> 2 a 3 veces al día<br><input type="radio"/> 5 a 6 veces al día<br><input type="radio"/> más 6 veces al día |

|                                             |                                                                                                                                                                                                                                                                                                                                                                                                              |
|---------------------------------------------|--------------------------------------------------------------------------------------------------------------------------------------------------------------------------------------------------------------------------------------------------------------------------------------------------------------------------------------------------------------------------------------------------------------|
| Yogurt Entero                               | <input type="radio"/> Nunca o menos 1 vez al mes<br><input type="radio"/> 1 a 3 veces mes<br><input type="radio"/> 1 vez semana<br><input type="radio"/> 2 a 4 veces semana<br><input type="radio"/> 5 a 6 veces semana<br><input type="radio"/> 1 vez al día<br><input checked="" type="radio"/> 2 a 3 veces al día<br><input type="radio"/> 5 a 6 veces al día<br><input type="radio"/> más 6 veces al día |
| Yogurt desnatado                            | <input checked="" type="radio"/> Nunca o menos 1 vez al mes<br><input type="radio"/> 1 a 3 veces mes<br><input type="radio"/> 1 vez semana<br><input type="radio"/> 2 a 4 veces semana<br><input type="radio"/> 5 a 6 veces semana<br><input type="radio"/> 1 vez al día<br><input type="radio"/> 2 a 3 veces al día<br><input type="radio"/> 5 a 6 veces al día<br><input type="radio"/> más 6 veces al día |
| 100g requesón o queso blando o queso fresco | <input type="radio"/> Nunca o menos 1 vez al mes<br><input checked="" type="radio"/> 1 a 3 veces mes<br><input type="radio"/> 1 vez semana<br><input type="radio"/> 2 a 4 veces semana<br><input type="radio"/> 5 a 6 veces semana<br><input type="radio"/> 1 vez al día<br><input type="radio"/> 2 a 3 veces al día<br><input type="radio"/> 5 a 6 veces al día<br><input type="radio"/> más 6 veces al día |
| queso curado o semicurado o cremoso         | <input type="radio"/> Nunca o menos 1 vez al mes<br><input type="radio"/> 1 a 3 veces mes<br><input type="radio"/> 1 vez semana<br><input checked="" type="radio"/> 2 a 4 veces semana<br><input type="radio"/> 5 a 6 veces semana<br><input type="radio"/> 1 vez al día<br><input type="radio"/> 2 a 3 veces al día<br><input type="radio"/> 5 a 6 veces al día<br><input type="radio"/> más 6 veces al día |
| natillas flan pudding                       | <input type="radio"/> Nunca o menos 1 vez al mes<br><input checked="" type="radio"/> 1 a 3 veces mes<br><input type="radio"/> 1 vez semana<br><input type="radio"/> 2 a 4 veces semana<br><input type="radio"/> 5 a 6 veces semana<br><input type="radio"/> 1 vez al día<br><input type="radio"/> 2 a 3 veces al día<br><input type="radio"/> 5 a 6 veces al día<br><input type="radio"/> más 6 veces al día |
| Helado                                      | <input type="radio"/> Nunca o menos 1 vez al mes<br><input checked="" type="radio"/> 1 a 3 veces mes<br><input type="radio"/> 1 vez semana<br><input type="radio"/> 2 a 4 veces semana<br><input type="radio"/> 5 a 6 veces semana<br><input type="radio"/> 1 vez al día<br><input type="radio"/> 2 a 3 veces al día<br><input type="radio"/> 5 a 6 veces al día<br><input type="radio"/> más 6 veces al día |

|                                      |                                                                                                                                                                                                                                                                                                                                                                                                              |
|--------------------------------------|--------------------------------------------------------------------------------------------------------------------------------------------------------------------------------------------------------------------------------------------------------------------------------------------------------------------------------------------------------------------------------------------------------------|
| huevo                                | <input type="radio"/> Nunca o menos 1 vez al mes<br><input type="radio"/> 1 a 3 veces mes<br><input type="radio"/> 1 vez semana<br><input checked="" type="radio"/> 2 a 4 veces semana<br><input type="radio"/> 5 a 6 veces semana<br><input type="radio"/> 1 vez al día<br><input type="radio"/> 2 a 3 veces al día<br><input type="radio"/> 5 a 6 veces al día<br><input type="radio"/> más 6 veces al día |
| Pollo con piel                       | <input type="radio"/> Nunca o menos 1 vez al mes<br><input checked="" type="radio"/> 1 a 3 veces mes<br><input type="radio"/> 1 vez semana<br><input type="radio"/> 2 a 4 veces semana<br><input type="radio"/> 5 a 6 veces semana<br><input type="radio"/> 1 vez al día<br><input type="radio"/> 2 a 3 veces al día<br><input type="radio"/> 5 a 6 veces al día<br><input type="radio"/> más 6 veces al día |
| pollo sin piel                       | <input type="radio"/> Nunca o menos 1 vez al mes<br><input type="radio"/> 1 a 3 veces mes<br><input checked="" type="radio"/> 1 vez semana<br><input type="radio"/> 2 a 4 veces semana<br><input type="radio"/> 5 a 6 veces semana<br><input type="radio"/> 1 vez al día<br><input type="radio"/> 2 a 3 veces al día<br><input type="radio"/> 5 a 6 veces al día<br><input type="radio"/> más 6 veces al día |
| Ternera o cerdo o cordero            | <input type="radio"/> Nunca o menos 1 vez al mes<br><input checked="" type="radio"/> 1 a 3 veces mes<br><input type="radio"/> 1 vez semana<br><input type="radio"/> 2 a 4 veces semana<br><input type="radio"/> 5 a 6 veces semana<br><input type="radio"/> 1 vez al día<br><input type="radio"/> 2 a 3 veces al día<br><input type="radio"/> 5 a 6 veces al día<br><input type="radio"/> más 6 veces al día |
| carne caza: Conejo o codorniz o pato | <input checked="" type="radio"/> Nunca o menos 1 vez al mes<br><input type="radio"/> 1 a 3 veces mes<br><input type="radio"/> 1 vez semana<br><input type="radio"/> 2 a 4 veces semana<br><input type="radio"/> 5 a 6 veces semana<br><input type="radio"/> 1 vez al día<br><input type="radio"/> 2 a 3 veces al día<br><input type="radio"/> 5 a 6 veces al día<br><input type="radio"/> más 6 veces al día |
| Hígado de ternera o cerdo o pollo    | <input checked="" type="radio"/> Nunca o menos 1 vez al mes<br><input type="radio"/> 1 a 3 veces mes<br><input type="radio"/> 1 vez semana<br><input type="radio"/> 2 a 4 veces semana<br><input type="radio"/> 5 a 6 veces semana<br><input type="radio"/> 1 vez al día<br><input type="radio"/> 2 a 3 veces al día<br><input type="radio"/> 5 a 6 veces al día<br><input type="radio"/> más 6 veces al día |

|                     |                                                                                                                                                                                                                                                                                                                                                                                                              |
|---------------------|--------------------------------------------------------------------------------------------------------------------------------------------------------------------------------------------------------------------------------------------------------------------------------------------------------------------------------------------------------------------------------------------------------------|
| Vísceras            | <input checked="" type="radio"/> Nunca o menos 1 vez al mes<br><input type="radio"/> 1 a 3 veces mes<br><input type="radio"/> 1 vez semana<br><input type="radio"/> 2 a 4 veces semana<br><input type="radio"/> 5 a 6 veces semana<br><input type="radio"/> 1 vez al día<br><input type="radio"/> 2 a 3 veces al día<br><input type="radio"/> 5 a 6 veces al día<br><input type="radio"/> más 6 veces al día |
| Embutido            | <input checked="" type="radio"/> Nunca o menos 1 vez al mes<br><input type="radio"/> 1 a 3 veces mes<br><input type="radio"/> 1 vez semana<br><input type="radio"/> 2 a 4 veces semana<br><input type="radio"/> 5 a 6 veces semana<br><input type="radio"/> 1 vez al día<br><input type="radio"/> 2 a 3 veces al día<br><input type="radio"/> 5 a 6 veces al día<br><input type="radio"/> más 6 veces al día |
| Salchicha o similar | <input type="radio"/> Nunca o menos 1 vez al mes<br><input checked="" type="radio"/> 1 a 3 veces mes<br><input type="radio"/> 1 vez semana<br><input type="radio"/> 2 a 4 veces semana<br><input type="radio"/> 5 a 6 veces semana<br><input type="radio"/> 1 vez al día<br><input type="radio"/> 2 a 3 veces al día<br><input type="radio"/> 5 a 6 veces al día<br><input type="radio"/> más 6 veces al día |
| Pate o foiegras     | <input checked="" type="radio"/> Nunca o menos 1 vez al mes<br><input type="radio"/> 1 a 3 veces mes<br><input type="radio"/> 1 vez semana<br><input type="radio"/> 2 a 4 veces semana<br><input type="radio"/> 5 a 6 veces semana<br><input type="radio"/> 1 vez al día<br><input type="radio"/> 2 a 3 veces al día<br><input type="radio"/> 5 a 6 veces al día<br><input type="radio"/> más 6 veces al día |
| Hamburguesa         | <input checked="" type="radio"/> Nunca o menos 1 vez al mes<br><input type="radio"/> 1 a 3 veces mes<br><input type="radio"/> 1 vez semana<br><input type="radio"/> 2 a 4 veces semana<br><input type="radio"/> 5 a 6 veces semana<br><input type="radio"/> 1 vez al día<br><input type="radio"/> 2 a 3 veces al día<br><input type="radio"/> 5 a 6 veces al día<br><input type="radio"/> más 6 veces al día |
| tocino o bacon      | <input checked="" type="radio"/> Nunca o menos 1 vez al mes<br><input type="radio"/> 1 a 3 veces mes<br><input type="radio"/> 1 vez semana<br><input type="radio"/> 2 a 4 veces semana<br><input type="radio"/> 5 a 6 veces semana<br><input type="radio"/> 1 vez al día<br><input type="radio"/> 2 a 3 veces al día<br><input type="radio"/> 5 a 6 veces al día<br><input type="radio"/> más 6 veces al día |

|                        |                                                                                                                                                                                                                                                                                                                                                                                                              |
|------------------------|--------------------------------------------------------------------------------------------------------------------------------------------------------------------------------------------------------------------------------------------------------------------------------------------------------------------------------------------------------------------------------------------------------------|
| Pescado frito          | <input type="radio"/> Nunca o menos 1 vez al mes<br><input type="radio"/> 1 a 3 veces mes<br><input checked="" type="radio"/> 1 vez semana<br><input type="radio"/> 2 a 4 veces semana<br><input type="radio"/> 5 a 6 veces semana<br><input type="radio"/> 1 vez al día<br><input type="radio"/> 2 a 3 veces al día<br><input type="radio"/> 5 a 6 veces al día<br><input type="radio"/> más 6 veces al día |
| pescado hervido blanco | <input type="radio"/> Nunca o menos 1 vez al mes<br><input checked="" type="radio"/> 1 a 3 veces mes<br><input type="radio"/> 1 vez semana<br><input type="radio"/> 2 a 4 veces semana<br><input type="radio"/> 5 a 6 veces semana<br><input type="radio"/> 1 vez al día<br><input type="radio"/> 2 a 3 veces al día<br><input type="radio"/> 5 a 6 veces al día<br><input type="radio"/> más 6 veces al día |
| pescado hervido azul   | <input checked="" type="radio"/> Nunca o menos 1 vez al mes<br><input type="radio"/> 1 a 3 veces mes<br><input type="radio"/> 1 vez semana<br><input type="radio"/> 2 a 4 veces semana<br><input type="radio"/> 5 a 6 veces semana<br><input type="radio"/> 1 vez al día<br><input type="radio"/> 2 a 3 veces al día<br><input type="radio"/> 5 a 6 veces al día<br><input type="radio"/> más 6 veces al día |
| otros pescado azul     | <input checked="" type="radio"/> Nunca o menos 1 vez al mes<br><input type="radio"/> 1 a 3 veces mes<br><input type="radio"/> 1 vez semana<br><input type="radio"/> 2 a 4 veces semana<br><input type="radio"/> 5 a 6 veces semana<br><input type="radio"/> 1 vez al día<br><input type="radio"/> 2 a 3 veces al día<br><input type="radio"/> 5 a 6 veces al día<br><input type="radio"/> más 6 veces al día |
| atun conserva          | <input checked="" type="radio"/> Nunca o menos 1 vez al mes<br><input type="radio"/> 1 a 3 veces mes<br><input type="radio"/> 1 vez semana<br><input type="radio"/> 2 a 4 veces semana<br><input type="radio"/> 5 a 6 veces semana<br><input type="radio"/> 1 vez al día<br><input type="radio"/> 2 a 3 veces al día<br><input type="radio"/> 5 a 6 veces al día<br><input type="radio"/> más 6 veces al día |
| sardina conserva       | <input checked="" type="radio"/> Nunca o menos 1 vez al mes<br><input type="radio"/> 1 a 3 veces mes<br><input type="radio"/> 1 vez semana<br><input type="radio"/> 2 a 4 veces semana<br><input type="radio"/> 5 a 6 veces semana<br><input type="radio"/> 1 vez al día<br><input type="radio"/> 2 a 3 veces al día<br><input type="radio"/> 5 a 6 veces al día<br><input type="radio"/> más 6 veces al día |



|                                         |                                                                                                                                                                                                                                                                                                                                                                                                              |
|-----------------------------------------|--------------------------------------------------------------------------------------------------------------------------------------------------------------------------------------------------------------------------------------------------------------------------------------------------------------------------------------------------------------------------------------------------------------|
| pescado ahumado                         | <input checked="" type="radio"/> Nunca o menos 1 vez al mes<br><input type="radio"/> 1 a 3 veces mes<br><input type="radio"/> 1 vez semana<br><input type="radio"/> 2 a 4 veces semana<br><input type="radio"/> 5 a 6 veces semana<br><input type="radio"/> 1 vez al día<br><input type="radio"/> 2 a 3 veces al día<br><input type="radio"/> 5 a 6 veces al día<br><input type="radio"/> más 6 veces al día |
| almejas o mejillones o ostras unos 100g | <input checked="" type="radio"/> Nunca o menos 1 vez al mes<br><input type="radio"/> 1 a 3 veces mes<br><input type="radio"/> 1 vez semana<br><input type="radio"/> 2 a 4 veces semana<br><input type="radio"/> 5 a 6 veces semana<br><input type="radio"/> 1 vez al día<br><input type="radio"/> 2 a 3 veces al día<br><input type="radio"/> 5 a 6 veces al día<br><input type="radio"/> más 6 veces al día |
| calamar o chipiron o sepia unos 100g    | <input checked="" type="radio"/> Nunca o menos 1 vez al mes<br><input type="radio"/> 1 a 3 veces mes<br><input type="radio"/> 1 vez semana<br><input type="radio"/> 2 a 4 veces semana<br><input type="radio"/> 5 a 6 veces semana<br><input type="radio"/> 1 vez al día<br><input type="radio"/> 2 a 3 veces al día<br><input type="radio"/> 5 a 6 veces al día<br><input type="radio"/> más 6 veces al día |
| marisco unos 100g                       | <input checked="" type="radio"/> Nunca o menos 1 vez al mes<br><input type="radio"/> 1 a 3 veces mes<br><input type="radio"/> 1 vez semana<br><input type="radio"/> 2 a 4 veces semana<br><input type="radio"/> 5 a 6 veces semana<br><input type="radio"/> 1 vez al día<br><input type="radio"/> 2 a 3 veces al día<br><input type="radio"/> 5 a 6 veces al día<br><input type="radio"/> más 6 veces al día |
| Espinacas o acelgas cocinadas           | <input type="radio"/> Nunca o menos 1 vez al mes<br><input checked="" type="radio"/> 1 a 3 veces mes<br><input type="radio"/> 1 vez semana<br><input type="radio"/> 2 a 4 veces semana<br><input type="radio"/> 5 a 6 veces semana<br><input type="radio"/> 1 vez al día<br><input type="radio"/> 2 a 3 veces al día<br><input type="radio"/> 5 a 6 veces al día<br><input type="radio"/> más 6 veces al día |
| Col o coliflor o brocoli cocinado       | <input type="radio"/> Nunca o menos 1 vez al mes<br><input type="radio"/> 1 a 3 veces mes<br><input type="radio"/> 1 vez semana<br><input checked="" type="radio"/> 2 a 4 veces semana<br><input type="radio"/> 5 a 6 veces semana<br><input type="radio"/> 1 vez al día<br><input type="radio"/> 2 a 3 veces al día<br><input type="radio"/> 5 a 6 veces al día<br><input type="radio"/> más 6 veces al día |

---

Lechuga o endivia o escarola

- ☐ Nunca o menos 1 vez al mes  
☐ 1 a 3 veces mes  
☐ 1 vez semana  
☒ 2 a 4 veces semana  
☐ 5 a 6 veces semana  
☐ 1 vez al día  
☐ 2 a 3 veces al día  
☐ 5 a 6 veces al día  
☐ más 6 veces al día

---

tomate ensalada

- ☐ Nunca o menos 1 vez al mes  
☐ 1 a 3 veces mes  
☐ 1 vez semana  
☒ 2 a 4 veces semana  
☐ 5 a 6 veces semana  
☐ 1 vez al día  
☐ 2 a 3 veces al día  
☐ 5 a 6 veces al día  
☐ más 6 veces al día

---

cebolla

- ☐ Nunca o menos 1 vez al mes  
☐ 1 a 3 veces mes  
☐ 1 vez semana  
☒ 2 a 4 veces semana  
☐ 5 a 6 veces semana  
☐ 1 vez al día  
☐ 2 a 3 veces al día  
☐ 5 a 6 veces al día  
☐ más 6 veces al día

---

Zanahoria o calabaza

- ☐ Nunca o menos 1 vez al mes  
☐ 1 a 3 veces mes  
☐ 1 vez semana  
☐ 2 a 4 veces semana  
☒ 5 a 6 veces semana  
☐ 1 vez al día  
☐ 2 a 3 veces al día  
☐ 5 a 6 veces al día  
☐ más 6 veces al día

---

Judías verdes

- ☐ Nunca o menos 1 vez al mes  
☐ 1 a 3 veces mes  
☐ 1 vez semana  
☒ 2 a 4 veces semana  
☐ 5 a 6 veces semana  
☐ 1 vez al día  
☐ 2 a 3 veces al día  
☐ 5 a 6 veces al día  
☐ más 6 veces al día

---

Berenjena o calabacin o pepino

- ☐ Nunca o menos 1 vez al mes  
☐ 1 a 3 veces mes  
☐ 1 vez semana  
☒ 2 a 4 veces semana  
☐ 5 a 6 veces semana  
☐ 1 vez al día  
☐ 2 a 3 veces al día  
☐ 5 a 6 veces al día  
☐ más 6 veces al día

---

|          |                                                                                                                                                                                                                                                                                                                                                                                                              |
|----------|--------------------------------------------------------------------------------------------------------------------------------------------------------------------------------------------------------------------------------------------------------------------------------------------------------------------------------------------------------------------------------------------------------------|
| pimiento | <input type="radio"/> Nunca o menos 1 vez al mes<br><input type="radio"/> 1 a 3 veces mes<br><input type="radio"/> 1 vez semana<br><input checked="" type="radio"/> 2 a 4 veces semana<br><input type="radio"/> 5 a 6 veces semana<br><input type="radio"/> 1 vez al día<br><input type="radio"/> 2 a 3 veces al día<br><input type="radio"/> 5 a 6 veces al día<br><input type="radio"/> más 6 veces al día |
|----------|--------------------------------------------------------------------------------------------------------------------------------------------------------------------------------------------------------------------------------------------------------------------------------------------------------------------------------------------------------------------------------------------------------------|

---

|           |                                                                                                                                                                                                                                                                                                                                                                                                              |
|-----------|--------------------------------------------------------------------------------------------------------------------------------------------------------------------------------------------------------------------------------------------------------------------------------------------------------------------------------------------------------------------------------------------------------------|
| alcachofa | <input type="radio"/> Nunca o menos 1 vez al mes<br><input checked="" type="radio"/> 1 a 3 veces mes<br><input type="radio"/> 1 vez semana<br><input type="radio"/> 2 a 4 veces semana<br><input type="radio"/> 5 a 6 veces semana<br><input type="radio"/> 1 vez al día<br><input type="radio"/> 2 a 3 veces al día<br><input type="radio"/> 5 a 6 veces al día<br><input type="radio"/> más 6 veces al día |
|-----------|--------------------------------------------------------------------------------------------------------------------------------------------------------------------------------------------------------------------------------------------------------------------------------------------------------------------------------------------------------------------------------------------------------------|

---

|            |                                                                                                                                                                                                                                                                                                                                                                                                              |
|------------|--------------------------------------------------------------------------------------------------------------------------------------------------------------------------------------------------------------------------------------------------------------------------------------------------------------------------------------------------------------------------------------------------------------|
| espárragos | <input type="radio"/> Nunca o menos 1 vez al mes<br><input checked="" type="radio"/> 1 a 3 veces mes<br><input type="radio"/> 1 vez semana<br><input type="radio"/> 2 a 4 veces semana<br><input type="radio"/> 5 a 6 veces semana<br><input type="radio"/> 1 vez al día<br><input type="radio"/> 2 a 3 veces al día<br><input type="radio"/> 5 a 6 veces al día<br><input type="radio"/> más 6 veces al día |
|------------|--------------------------------------------------------------------------------------------------------------------------------------------------------------------------------------------------------------------------------------------------------------------------------------------------------------------------------------------------------------------------------------------------------------|

---

|              |                                                                                                                                                                                                                                                                                                                                                                                                              |
|--------------|--------------------------------------------------------------------------------------------------------------------------------------------------------------------------------------------------------------------------------------------------------------------------------------------------------------------------------------------------------------------------------------------------------------|
| maíz hervido | <input checked="" type="radio"/> Nunca o menos 1 vez al mes<br><input type="radio"/> 1 a 3 veces mes<br><input type="radio"/> 1 vez semana<br><input type="radio"/> 2 a 4 veces semana<br><input type="radio"/> 5 a 6 veces semana<br><input type="radio"/> 1 vez al día<br><input type="radio"/> 2 a 3 veces al día<br><input type="radio"/> 5 a 6 veces al día<br><input type="radio"/> más 6 veces al día |
|--------------|--------------------------------------------------------------------------------------------------------------------------------------------------------------------------------------------------------------------------------------------------------------------------------------------------------------------------------------------------------------------------------------------------------------|

---

|           |                                                                                                                                                                                                                                                                                                                                                                                                              |
|-----------|--------------------------------------------------------------------------------------------------------------------------------------------------------------------------------------------------------------------------------------------------------------------------------------------------------------------------------------------------------------------------------------------------------------|
| legumbres | <input type="radio"/> Nunca o menos 1 vez al mes<br><input type="radio"/> 1 a 3 veces mes<br><input type="radio"/> 1 vez semana<br><input checked="" type="radio"/> 2 a 4 veces semana<br><input type="radio"/> 5 a 6 veces semana<br><input type="radio"/> 1 vez al día<br><input type="radio"/> 2 a 3 veces al día<br><input type="radio"/> 5 a 6 veces al día<br><input type="radio"/> más 6 veces al día |
|-----------|--------------------------------------------------------------------------------------------------------------------------------------------------------------------------------------------------------------------------------------------------------------------------------------------------------------------------------------------------------------------------------------------------------------|

---

|                       |                                                                                                                                                                                                                                                                                                                                                                                                              |
|-----------------------|--------------------------------------------------------------------------------------------------------------------------------------------------------------------------------------------------------------------------------------------------------------------------------------------------------------------------------------------------------------------------------------------------------------|
| naranjas o mandarinas | <input type="radio"/> Nunca o menos 1 vez al mes<br><input checked="" type="radio"/> 1 a 3 veces mes<br><input type="radio"/> 1 vez semana<br><input type="radio"/> 2 a 4 veces semana<br><input type="radio"/> 5 a 6 veces semana<br><input type="radio"/> 1 vez al día<br><input type="radio"/> 2 a 3 veces al día<br><input type="radio"/> 5 a 6 veces al día<br><input type="radio"/> más 6 veces al día |
|-----------------------|--------------------------------------------------------------------------------------------------------------------------------------------------------------------------------------------------------------------------------------------------------------------------------------------------------------------------------------------------------------------------------------------------------------|

---

|                       |                                                                                                                                                                                                                                                                                                                                                                                                              |
|-----------------------|--------------------------------------------------------------------------------------------------------------------------------------------------------------------------------------------------------------------------------------------------------------------------------------------------------------------------------------------------------------------------------------------------------------|
| zum natural fruta     | <input type="radio"/> Nunca o menos 1 vez al mes<br><input checked="" type="radio"/> 1 a 3 veces mes<br><input type="radio"/> 1 vez semana<br><input type="radio"/> 2 a 4 veces semana<br><input type="radio"/> 5 a 6 veces semana<br><input type="radio"/> 1 vez al día<br><input type="radio"/> 2 a 3 veces al día<br><input type="radio"/> 5 a 6 veces al día<br><input type="radio"/> más 6 veces al día |
| platano               | <input type="radio"/> Nunca o menos 1 vez al mes<br><input type="radio"/> 1 a 3 veces mes<br><input type="radio"/> 1 vez semana<br><input checked="" type="radio"/> 2 a 4 veces semana<br><input type="radio"/> 5 a 6 veces semana<br><input type="radio"/> 1 vez al día<br><input type="radio"/> 2 a 3 veces al día<br><input type="radio"/> 5 a 6 veces al día<br><input type="radio"/> más 6 veces al día |
| manzana o pera        | <input type="radio"/> Nunca o menos 1 vez al mes<br><input type="radio"/> 1 a 3 veces mes<br><input type="radio"/> 1 vez semana<br><input type="radio"/> 2 a 4 veces semana<br><input checked="" type="radio"/> 5 a 6 veces semana<br><input type="radio"/> 1 vez al día<br><input type="radio"/> 2 a 3 veces al día<br><input type="radio"/> 5 a 6 veces al día<br><input type="radio"/> más 6 veces al día |
| melocotón o nectarina | <input checked="" type="radio"/> Nunca o menos 1 vez al mes<br><input type="radio"/> 1 a 3 veces mes<br><input type="radio"/> 1 vez semana<br><input type="radio"/> 2 a 4 veces semana<br><input type="radio"/> 5 a 6 veces semana<br><input type="radio"/> 1 vez al día<br><input type="radio"/> 2 a 3 veces al día<br><input type="radio"/> 5 a 6 veces al día<br><input type="radio"/> más 6 veces al día |
| sandia o melon        | <input checked="" type="radio"/> Nunca o menos 1 vez al mes<br><input type="radio"/> 1 a 3 veces mes<br><input type="radio"/> 1 vez semana<br><input type="radio"/> 2 a 4 veces semana<br><input type="radio"/> 5 a 6 veces semana<br><input type="radio"/> 1 vez al día<br><input type="radio"/> 2 a 3 veces al día<br><input type="radio"/> 5 a 6 veces al día<br><input type="radio"/> más 6 veces al día |
| uva                   | <input checked="" type="radio"/> Nunca o menos 1 vez al mes<br><input type="radio"/> 1 a 3 veces mes<br><input type="radio"/> 1 vez semana<br><input type="radio"/> 2 a 4 veces semana<br><input type="radio"/> 5 a 6 veces semana<br><input type="radio"/> 1 vez al día<br><input type="radio"/> 2 a 3 veces al día<br><input type="radio"/> 5 a 6 veces al día<br><input type="radio"/> más 6 veces al día |

|                 |                                                                                                                                                                                                                                                                                                                                                                                                              |
|-----------------|--------------------------------------------------------------------------------------------------------------------------------------------------------------------------------------------------------------------------------------------------------------------------------------------------------------------------------------------------------------------------------------------------------------|
| bruna o ciruela | <input checked="" type="radio"/> Nunca o menos 1 vez al mes<br><input type="radio"/> 1 a 3 veces mes<br><input type="radio"/> 1 vez semana<br><input type="radio"/> 2 a 4 veces semana<br><input type="radio"/> 5 a 6 veces semana<br><input type="radio"/> 1 vez al día<br><input type="radio"/> 2 a 3 veces al día<br><input type="radio"/> 5 a 6 veces al día<br><input type="radio"/> más 6 veces al día |
| kiwi            | <input type="radio"/> Nunca o menos 1 vez al mes<br><input type="radio"/> 1 a 3 veces mes<br><input checked="" type="radio"/> 1 vez semana<br><input type="radio"/> 2 a 4 veces semana<br><input type="radio"/> 5 a 6 veces semana<br><input type="radio"/> 1 vez al día<br><input type="radio"/> 2 a 3 veces al día<br><input type="radio"/> 5 a 6 veces al día<br><input type="radio"/> más 6 veces al día |
| aceituna        | <input checked="" type="radio"/> Nunca o menos 1 vez al mes<br><input type="radio"/> 1 a 3 veces mes<br><input type="radio"/> 1 vez semana<br><input type="radio"/> 2 a 4 veces semana<br><input type="radio"/> 5 a 6 veces semana<br><input type="radio"/> 1 vez al día<br><input type="radio"/> 2 a 3 veces al día<br><input type="radio"/> 5 a 6 veces al día<br><input type="radio"/> más 6 veces al día |
| frutos secos    | <input type="radio"/> Nunca o menos 1 vez al mes<br><input type="radio"/> 1 a 3 veces mes<br><input checked="" type="radio"/> 1 vez semana<br><input type="radio"/> 2 a 4 veces semana<br><input type="radio"/> 5 a 6 veces semana<br><input type="radio"/> 1 vez al día<br><input type="radio"/> 2 a 3 veces al día<br><input type="radio"/> 5 a 6 veces al día<br><input type="radio"/> más 6 veces al día |
| pan blanco      | <input type="radio"/> Nunca o menos 1 vez al mes<br><input checked="" type="radio"/> 1 a 3 veces mes<br><input type="radio"/> 1 vez semana<br><input type="radio"/> 2 a 4 veces semana<br><input type="radio"/> 5 a 6 veces semana<br><input type="radio"/> 1 vez al día<br><input type="radio"/> 2 a 3 veces al día<br><input type="radio"/> 5 a 6 veces al día<br><input type="radio"/> más 6 veces al día |
| pan integral    | <input type="radio"/> Nunca o menos 1 vez al mes<br><input type="radio"/> 1 a 3 veces mes<br><input type="radio"/> 1 vez semana<br><input checked="" type="radio"/> 2 a 4 veces semana<br><input type="radio"/> 5 a 6 veces semana<br><input type="radio"/> 1 vez al día<br><input type="radio"/> 2 a 3 veces al día<br><input type="radio"/> 5 a 6 veces al día<br><input type="radio"/> más 6 veces al día |

---

cereales desayuno

- ☐ Nunca o menos 1 vez al mes  
☐ 1 a 3 veces mes  
☒ 1 vez semana  
☐ 2 a 4 veces semana  
☐ 5 a 6 veces semana  
☐ 1 vez al día  
☐ 2 a 3 veces al día  
☐ 5 a 6 veces al día  
☐ más 6 veces al día

---

patatas fritas

- ☐ Nunca o menos 1 vez al mes  
☒ 1 a 3 veces mes  
☐ 1 vez semana  
☐ 2 a 4 veces semana  
☐ 5 a 6 veces semana  
☐ 1 vez al día  
☐ 2 a 3 veces al día  
☐ 5 a 6 veces al día  
☐ más 6 veces al día

---

patatas cocidas o asadas

- ☐ Nunca o menos 1 vez al mes  
☐ 1 a 3 veces mes  
☐ 1 vez semana  
☒ 2 a 4 veces semana  
☐ 5 a 6 veces semana  
☐ 1 vez al día  
☐ 2 a 3 veces al día  
☐ 5 a 6 veces al día  
☐ más 6 veces al día

---

bolsa papas

- ☒ Nunca o menos 1 vez al mes  
☐ 1 a 3 veces mes  
☐ 1 vez semana  
☐ 2 a 4 veces semana  
☐ 5 a 6 veces semana  
☐ 1 vez al día  
☐ 2 a 3 veces al día  
☐ 5 a 6 veces al día  
☐ más 6 veces al día

---

arroz cocinado

- ☐ Nunca o menos 1 vez al mes  
☐ 1 a 3 veces mes  
☒ 1 vez semana  
☐ 2 a 4 veces semana  
☐ 5 a 6 veces semana  
☐ 1 vez al día  
☐ 2 a 3 veces al día  
☐ 5 a 6 veces al día  
☐ más 6 veces al día

---

pasta

- ☐ Nunca o menos 1 vez al mes  
☐ 1 a 3 veces mes  
☐ 1 vez semana  
☒ 2 a 4 veces semana  
☐ 5 a 6 veces semana  
☐ 1 vez al día  
☐ 2 a 3 veces al día  
☐ 5 a 6 veces al día  
☐ más 6 veces al día

|                     |                                                                                                                                                                                                                                                                                                                                                                                                              |
|---------------------|--------------------------------------------------------------------------------------------------------------------------------------------------------------------------------------------------------------------------------------------------------------------------------------------------------------------------------------------------------------------------------------------------------------|
| pizza               | <input type="radio"/> Nunca o menos 1 vez al mes<br><input type="radio"/> 1 a 3 veces mes<br><input checked="" type="radio"/> 1 vez semana<br><input type="radio"/> 2 a 4 veces semana<br><input type="radio"/> 5 a 6 veces semana<br><input type="radio"/> 1 vez al día<br><input type="radio"/> 2 a 3 veces al día<br><input type="radio"/> 5 a 6 veces al día<br><input type="radio"/> más 6 veces al día |
| aceite oliva        | <input type="radio"/> Nunca o menos 1 vez al mes<br><input type="radio"/> 1 a 3 veces mes<br><input type="radio"/> 1 vez semana<br><input checked="" type="radio"/> 2 a 4 veces semana<br><input type="radio"/> 5 a 6 veces semana<br><input type="radio"/> 1 vez al día<br><input type="radio"/> 2 a 3 veces al día<br><input type="radio"/> 5 a 6 veces al día<br><input type="radio"/> más 6 veces al día |
| otros aceites       | <input checked="" type="radio"/> Nunca o menos 1 vez al mes<br><input type="radio"/> 1 a 3 veces mes<br><input type="radio"/> 1 vez semana<br><input type="radio"/> 2 a 4 veces semana<br><input type="radio"/> 5 a 6 veces semana<br><input type="radio"/> 1 vez al día<br><input type="radio"/> 2 a 3 veces al día<br><input type="radio"/> 5 a 6 veces al día<br><input type="radio"/> más 6 veces al día |
| margarina           | <input checked="" type="radio"/> Nunca o menos 1 vez al mes<br><input type="radio"/> 1 a 3 veces mes<br><input type="radio"/> 1 vez semana<br><input type="radio"/> 2 a 4 veces semana<br><input type="radio"/> 5 a 6 veces semana<br><input type="radio"/> 1 vez al día<br><input type="radio"/> 2 a 3 veces al día<br><input type="radio"/> 5 a 6 veces al día<br><input type="radio"/> más 6 veces al día |
| mantequilla         | <input checked="" type="radio"/> Nunca o menos 1 vez al mes<br><input type="radio"/> 1 a 3 veces mes<br><input type="radio"/> 1 vez semana<br><input type="radio"/> 2 a 4 veces semana<br><input type="radio"/> 5 a 6 veces semana<br><input type="radio"/> 1 vez al día<br><input type="radio"/> 2 a 3 veces al día<br><input type="radio"/> 5 a 6 veces al día<br><input type="radio"/> más 6 veces al día |
| galletas tipo maria | <input type="radio"/> Nunca o menos 1 vez al mes<br><input checked="" type="radio"/> 1 a 3 veces mes<br><input type="radio"/> 1 vez semana<br><input type="radio"/> 2 a 4 veces semana<br><input type="radio"/> 5 a 6 veces semana<br><input type="radio"/> 1 vez al día<br><input type="radio"/> 2 a 3 veces al día<br><input type="radio"/> 5 a 6 veces al día<br><input type="radio"/> más 6 veces al día |

|                           |                                                                                                                                                                                                                                                                                                                                                                                                              |
|---------------------------|--------------------------------------------------------------------------------------------------------------------------------------------------------------------------------------------------------------------------------------------------------------------------------------------------------------------------------------------------------------------------------------------------------------|
| galletas chocolate        | <input checked="" type="radio"/> Nunca o menos 1 vez al mes<br><input type="radio"/> 1 a 3 veces mes<br><input type="radio"/> 1 vez semana<br><input type="radio"/> 2 a 4 veces semana<br><input type="radio"/> 5 a 6 veces semana<br><input type="radio"/> 1 vez al día<br><input type="radio"/> 2 a 3 veces al día<br><input type="radio"/> 5 a 6 veces al día<br><input type="radio"/> más 6 veces al día |
| bollieria                 | <input type="radio"/> Nunca o menos 1 vez al mes<br><input type="radio"/> 1 a 3 veces mes<br><input checked="" type="radio"/> 1 vez semana<br><input type="radio"/> 2 a 4 veces semana<br><input type="radio"/> 5 a 6 veces semana<br><input type="radio"/> 1 vez al día<br><input type="radio"/> 2 a 3 veces al día<br><input type="radio"/> 5 a 6 veces al día<br><input type="radio"/> más 6 veces al día |
| chocolate o bombones      | <input type="radio"/> Nunca o menos 1 vez al mes<br><input type="radio"/> 1 a 3 veces mes<br><input checked="" type="radio"/> 1 vez semana<br><input type="radio"/> 2 a 4 veces semana<br><input type="radio"/> 5 a 6 veces semana<br><input type="radio"/> 1 vez al día<br><input type="radio"/> 2 a 3 veces al día<br><input type="radio"/> 5 a 6 veces al día<br><input type="radio"/> más 6 veces al día |
| chocolate polvo o colacao | <input type="radio"/> Nunca o menos 1 vez al mes<br><input type="radio"/> 1 a 3 veces mes<br><input type="radio"/> 1 vez semana<br><input type="radio"/> 2 a 4 veces semana<br><input type="radio"/> 5 a 6 veces semana<br><input checked="" type="radio"/> 1 vez al día<br><input type="radio"/> 2 a 3 veces al día<br><input type="radio"/> 5 a 6 veces al día<br><input type="radio"/> más 6 veces al día |
| vino tinto                | <input checked="" type="radio"/> Nunca o menos 1 vez al mes<br><input type="radio"/> 1 a 3 veces mes<br><input type="radio"/> 1 vez semana<br><input type="radio"/> 2 a 4 veces semana<br><input type="radio"/> 5 a 6 veces semana<br><input type="radio"/> 1 vez al día<br><input type="radio"/> 2 a 3 veces al día<br><input type="radio"/> 5 a 6 veces al día<br><input type="radio"/> más 6 veces al día |
| vino blanco               | <input checked="" type="radio"/> Nunca o menos 1 vez al mes<br><input type="radio"/> 1 a 3 veces mes<br><input type="radio"/> 1 vez semana<br><input type="radio"/> 2 a 4 veces semana<br><input type="radio"/> 5 a 6 veces semana<br><input type="radio"/> 1 vez al día<br><input type="radio"/> 2 a 3 veces al día<br><input type="radio"/> 5 a 6 veces al día<br><input type="radio"/> más 6 veces al día |



|                       |                                                                                                                                                                                                                                                                                                                                                                                                              |
|-----------------------|--------------------------------------------------------------------------------------------------------------------------------------------------------------------------------------------------------------------------------------------------------------------------------------------------------------------------------------------------------------------------------------------------------------|
| vino seco o vermut    | <input checked="" type="radio"/> Nunca o menos 1 vez al mes<br><input type="radio"/> 1 a 3 veces mes<br><input type="radio"/> 1 vez semana<br><input type="radio"/> 2 a 4 veces semana<br><input type="radio"/> 5 a 6 veces semana<br><input type="radio"/> 1 vez al día<br><input type="radio"/> 2 a 3 veces al día<br><input type="radio"/> 5 a 6 veces al día<br><input type="radio"/> más 6 veces al día |
| cerveza               | <input checked="" type="radio"/> Nunca o menos 1 vez al mes<br><input type="radio"/> 1 a 3 veces mes<br><input type="radio"/> 1 vez semana<br><input type="radio"/> 2 a 4 veces semana<br><input type="radio"/> 5 a 6 veces semana<br><input type="radio"/> 1 vez al día<br><input type="radio"/> 2 a 3 veces al día<br><input type="radio"/> 5 a 6 veces al día<br><input type="radio"/> más 6 veces al día |
| cerveza sin alcohol   | <input checked="" type="radio"/> Nunca o menos 1 vez al mes<br><input type="radio"/> 1 a 3 veces mes<br><input type="radio"/> 1 vez semana<br><input type="radio"/> 2 a 4 veces semana<br><input type="radio"/> 5 a 6 veces semana<br><input type="radio"/> 1 vez al día<br><input type="radio"/> 2 a 3 veces al día<br><input type="radio"/> 5 a 6 veces al día<br><input type="radio"/> más 6 veces al día |
| licores               | <input checked="" type="radio"/> Nunca o menos 1 vez al mes<br><input type="radio"/> 1 a 3 veces mes<br><input type="radio"/> 1 vez semana<br><input type="radio"/> 2 a 4 veces semana<br><input type="radio"/> 5 a 6 veces semana<br><input type="radio"/> 1 vez al día<br><input type="radio"/> 2 a 3 veces al día<br><input type="radio"/> 5 a 6 veces al día<br><input type="radio"/> más 6 veces al día |
| ginebra o ron o vodka | <input checked="" type="radio"/> Nunca o menos 1 vez al mes<br><input type="radio"/> 1 a 3 veces mes<br><input type="radio"/> 1 vez semana<br><input type="radio"/> 2 a 4 veces semana<br><input type="radio"/> 5 a 6 veces semana<br><input type="radio"/> 1 vez al día<br><input type="radio"/> 2 a 3 veces al día<br><input type="radio"/> 5 a 6 veces al día<br><input type="radio"/> más 6 veces al día |
| refresco normal       | <input type="radio"/> Nunca o menos 1 vez al mes<br><input checked="" type="radio"/> 1 a 3 veces mes<br><input type="radio"/> 1 vez semana<br><input type="radio"/> 2 a 4 veces semana<br><input type="radio"/> 5 a 6 veces semana<br><input type="radio"/> 1 vez al día<br><input type="radio"/> 2 a 3 veces al día<br><input type="radio"/> 5 a 6 veces al día<br><input type="radio"/> más 6 veces al día |

|                          |                                                                                                                                                                                                                                                                                                                                                                                                              |
|--------------------------|--------------------------------------------------------------------------------------------------------------------------------------------------------------------------------------------------------------------------------------------------------------------------------------------------------------------------------------------------------------------------------------------------------------|
| refresco sin azúcar      | <input type="radio"/> Nunca o menos 1 vez al mes<br><input checked="" type="radio"/> 1 a 3 veces mes<br><input type="radio"/> 1 vez semana<br><input type="radio"/> 2 a 4 veces semana<br><input type="radio"/> 5 a 6 veces semana<br><input type="radio"/> 1 vez al día<br><input type="radio"/> 2 a 3 veces al día<br><input type="radio"/> 5 a 6 veces al día<br><input type="radio"/> más 6 veces al día |
| Agua del grifo           | <input checked="" type="radio"/> Nunca o menos 1 vez al mes<br><input type="radio"/> 1 a 3 veces mes<br><input type="radio"/> 1 vez semana<br><input type="radio"/> 2 a 4 veces semana<br><input type="radio"/> 5 a 6 veces semana<br><input type="radio"/> 1 vez al día<br><input type="radio"/> 2 a 3 veces al día<br><input type="radio"/> 5 a 6 veces al día<br><input type="radio"/> más 6 veces al día |
| agua embotellada sin gas | <input type="radio"/> Nunca o menos 1 vez al mes<br><input type="radio"/> 1 a 3 veces mes<br><input type="radio"/> 1 vez semana<br><input type="radio"/> 2 a 4 veces semana<br><input type="radio"/> 5 a 6 veces semana<br><input type="radio"/> 1 vez al día<br><input type="radio"/> 2 a 3 veces al día<br><input checked="" type="radio"/> 5 a 6 veces al día<br><input type="radio"/> más 6 veces al día |
| agua embotellada con gas | <input checked="" type="radio"/> Nunca o menos 1 vez al mes<br><input type="radio"/> 1 a 3 veces mes<br><input type="radio"/> 1 vez semana<br><input type="radio"/> 2 a 4 veces semana<br><input type="radio"/> 5 a 6 veces semana<br><input type="radio"/> 1 vez al día<br><input type="radio"/> 2 a 3 veces al día<br><input type="radio"/> 5 a 6 veces al día<br><input type="radio"/> más 6 veces al día |
| zumو frutas embasado     | <input type="radio"/> Nunca o menos 1 vez al mes<br><input checked="" type="radio"/> 1 a 3 veces mes<br><input type="radio"/> 1 vez semana<br><input type="radio"/> 2 a 4 veces semana<br><input type="radio"/> 5 a 6 veces semana<br><input type="radio"/> 1 vez al día<br><input type="radio"/> 2 a 3 veces al día<br><input type="radio"/> 5 a 6 veces al día<br><input type="radio"/> más 6 veces al día |
| cafe                     | <input checked="" type="radio"/> Nunca o menos 1 vez al mes<br><input type="radio"/> 1 a 3 veces mes<br><input type="radio"/> 1 vez semana<br><input type="radio"/> 2 a 4 veces semana<br><input type="radio"/> 5 a 6 veces semana<br><input type="radio"/> 1 vez al día<br><input type="radio"/> 2 a 3 veces al día<br><input type="radio"/> 5 a 6 veces al día<br><input type="radio"/> más 6 veces al día |

|                       |                                                                                                                                                                                                                                                                                                                                                                                                              |
|-----------------------|--------------------------------------------------------------------------------------------------------------------------------------------------------------------------------------------------------------------------------------------------------------------------------------------------------------------------------------------------------------------------------------------------------------|
| cafe descafeinado     | <input checked="" type="radio"/> Nunca o menos 1 vez al mes<br><input type="radio"/> 1 a 3 veces mes<br><input type="radio"/> 1 vez semana<br><input type="radio"/> 2 a 4 veces semana<br><input type="radio"/> 5 a 6 veces semana<br><input type="radio"/> 1 vez al día<br><input type="radio"/> 2 a 3 veces al día<br><input type="radio"/> 5 a 6 veces al día<br><input type="radio"/> más 6 veces al día |
| te o infusión         | <input type="radio"/> Nunca o menos 1 vez al mes<br><input type="radio"/> 1 a 3 veces mes<br><input checked="" type="radio"/> 1 vez semana<br><input type="radio"/> 2 a 4 veces semana<br><input type="radio"/> 5 a 6 veces semana<br><input type="radio"/> 1 vez al día<br><input type="radio"/> 2 a 3 veces al día<br><input type="radio"/> 5 a 6 veces al día<br><input type="radio"/> más 6 veces al día |
| sopa o puré verduras  | <input type="radio"/> Nunca o menos 1 vez al mes<br><input type="radio"/> 1 a 3 veces mes<br><input type="radio"/> 1 vez semana<br><input checked="" type="radio"/> 2 a 4 veces semana<br><input type="radio"/> 5 a 6 veces semana<br><input type="radio"/> 1 vez al día<br><input type="radio"/> 2 a 3 veces al día<br><input type="radio"/> 5 a 6 veces al día<br><input type="radio"/> más 6 veces al día |
| croquetas pollo jamón | <input checked="" type="radio"/> Nunca o menos 1 vez al mes<br><input type="radio"/> 1 a 3 veces mes<br><input type="radio"/> 1 vez semana<br><input type="radio"/> 2 a 4 veces semana<br><input type="radio"/> 5 a 6 veces semana<br><input type="radio"/> 1 vez al día<br><input type="radio"/> 2 a 3 veces al día<br><input type="radio"/> 5 a 6 veces al día<br><input type="radio"/> más 6 veces al día |
| croquetas pescado     | <input checked="" type="radio"/> Nunca o menos 1 vez al mes<br><input type="radio"/> 1 a 3 veces mes<br><input type="radio"/> 1 vez semana<br><input type="radio"/> 2 a 4 veces semana<br><input type="radio"/> 5 a 6 veces semana<br><input type="radio"/> 1 vez al día<br><input type="radio"/> 2 a 3 veces al día<br><input type="radio"/> 5 a 6 veces al día<br><input type="radio"/> más 6 veces al día |
| mayonesa              | <input type="radio"/> Nunca o menos 1 vez al mes<br><input checked="" type="radio"/> 1 a 3 veces mes<br><input type="radio"/> 1 vez semana<br><input type="radio"/> 2 a 4 veces semana<br><input type="radio"/> 5 a 6 veces semana<br><input type="radio"/> 1 vez al día<br><input type="radio"/> 2 a 3 veces al día<br><input type="radio"/> 5 a 6 veces al día<br><input type="radio"/> más 6 veces al día |

|                  |                                                                                                                                                                                                                                                                                                                                                                                                              |
|------------------|--------------------------------------------------------------------------------------------------------------------------------------------------------------------------------------------------------------------------------------------------------------------------------------------------------------------------------------------------------------------------------------------------------------|
| salsa tomate     | <input type="radio"/> Nunca o menos 1 vez al mes<br><input checked="" type="radio"/> 1 a 3 veces mes<br><input type="radio"/> 1 vez semana<br><input type="radio"/> 2 a 4 veces semana<br><input type="radio"/> 5 a 6 veces semana<br><input type="radio"/> 1 vez al día<br><input type="radio"/> 2 a 3 veces al día<br><input type="radio"/> 5 a 6 veces al día<br><input type="radio"/> más 6 veces al día |
| ketchup          | <input type="radio"/> Nunca o menos 1 vez al mes<br><input type="radio"/> 1 a 3 veces mes<br><input checked="" type="radio"/> 1 vez semana<br><input type="radio"/> 2 a 4 veces semana<br><input type="radio"/> 5 a 6 veces semana<br><input type="radio"/> 1 vez al día<br><input type="radio"/> 2 a 3 veces al día<br><input type="radio"/> 5 a 6 veces al día<br><input type="radio"/> más 6 veces al día |
| sal              | <input type="radio"/> Nunca o menos 1 vez al mes<br><input type="radio"/> 1 a 3 veces mes<br><input checked="" type="radio"/> 1 vez semana<br><input type="radio"/> 2 a 4 veces semana<br><input type="radio"/> 5 a 6 veces semana<br><input type="radio"/> 1 vez al día<br><input type="radio"/> 2 a 3 veces al día<br><input type="radio"/> 5 a 6 veces al día<br><input type="radio"/> más 6 veces al día |
| ajo              | <input type="radio"/> Nunca o menos 1 vez al mes<br><input type="radio"/> 1 a 3 veces mes<br><input type="radio"/> 1 vez semana<br><input checked="" type="radio"/> 2 a 4 veces semana<br><input type="radio"/> 5 a 6 veces semana<br><input type="radio"/> 1 vez al día<br><input type="radio"/> 2 a 3 veces al día<br><input type="radio"/> 5 a 6 veces al día<br><input type="radio"/> más 6 veces al día |
| mermelada o miel | <input type="radio"/> Nunca o menos 1 vez al mes<br><input type="radio"/> 1 a 3 veces mes<br><input checked="" type="radio"/> 1 vez semana<br><input type="radio"/> 2 a 4 veces semana<br><input type="radio"/> 5 a 6 veces semana<br><input type="radio"/> 1 vez al día<br><input type="radio"/> 2 a 3 veces al día<br><input type="radio"/> 5 a 6 veces al día<br><input type="radio"/> más 6 veces al día |
| azúcar           | <input type="radio"/> Nunca o menos 1 vez al mes<br><input type="radio"/> 1 a 3 veces mes<br><input type="radio"/> 1 vez semana<br><input checked="" type="radio"/> 2 a 4 veces semana<br><input type="radio"/> 5 a 6 veces semana<br><input type="radio"/> 1 vez al día<br><input type="radio"/> 2 a 3 veces al día<br><input type="radio"/> 5 a 6 veces al día<br><input type="radio"/> más 6 veces al día |

|                                       |                                                                                                                                                                                                                                                                                                                                                                                                                                                                                                                    |
|---------------------------------------|--------------------------------------------------------------------------------------------------------------------------------------------------------------------------------------------------------------------------------------------------------------------------------------------------------------------------------------------------------------------------------------------------------------------------------------------------------------------------------------------------------------------|
| Otro alimento                         | <hr/>                                                                                                                                                                                                                                                                                                                                                                                                                                                                                                              |
| suplementos vitamínicos               | <input type="radio"/> si<br><input checked="" type="radio"/> no                                                                                                                                                                                                                                                                                                                                                                                                                                                    |
| suplementos vitamínicos               | <hr/>                                                                                                                                                                                                                                                                                                                                                                                                                                                                                                              |
| dieta previa                          | <input type="radio"/> si<br><input type="radio"/> no                                                                                                                                                                                                                                                                                                                                                                                                                                                               |
| motivo dieta                          | <input type="radio"/> no dieta<br><input type="radio"/> control peso<br><input type="radio"/> control colesterol<br><input type="radio"/> control diabetes<br><input type="radio"/> problemas estómago<br><input type="radio"/> problemas vesícula o hepáticos<br><input type="radio"/> HTA o cardiopatía<br><input type="radio"/> problemas renales<br><input type="radio"/> alergia alimentaria<br><input type="radio"/> ácido úrico elevado<br><input type="radio"/> vegetariana<br><input type="radio"/> otros |
| cambio alimentos año previo gestación | <input type="radio"/> si<br><input type="radio"/> no                                                                                                                                                                                                                                                                                                                                                                                                                                                               |
| cambio lácteos                        | <input type="radio"/> eliminado<br><input type="radio"/> disminuido<br><input type="radio"/> igual<br><input type="radio"/> aumentado<br><input type="radio"/> no sabe                                                                                                                                                                                                                                                                                                                                             |
| cambio huevos                         | <input type="radio"/> eliminado<br><input type="radio"/> disminuido<br><input type="radio"/> igual<br><input type="radio"/> aumentado<br><input type="radio"/> no sabe                                                                                                                                                                                                                                                                                                                                             |
| cambio carne                          | <input type="radio"/> eliminado<br><input type="radio"/> disminuido<br><input type="radio"/> igual<br><input type="radio"/> aumentado<br><input type="radio"/> no sabe                                                                                                                                                                                                                                                                                                                                             |
| cambio pescado                        | <input type="radio"/> eliminado<br><input type="radio"/> disminuido<br><input type="radio"/> igual<br><input type="radio"/> aumentado<br><input type="radio"/> no sabe                                                                                                                                                                                                                                                                                                                                             |
| cambio verduras                       | <input type="radio"/> eliminado<br><input type="radio"/> disminuido<br><input type="radio"/> igual<br><input type="radio"/> aumentado<br><input type="radio"/> no sabe                                                                                                                                                                                                                                                                                                                                             |

|                            |                                                                                                                                                                                                                        |
|----------------------------|------------------------------------------------------------------------------------------------------------------------------------------------------------------------------------------------------------------------|
| cambio legumbres           | <input type="radio"/> eliminado<br><input type="radio"/> disminuido<br><input type="radio"/> igual<br><input type="radio"/> aumentado<br><input type="radio"/> no sabe                                                 |
| cambio fruta               | <input type="radio"/> eliminado<br><input type="radio"/> disminuido<br><input type="radio"/> igual<br><input type="radio"/> aumentado<br><input type="radio"/> no sabe                                                 |
| cambio pan                 | <input type="radio"/> eliminado<br><input type="radio"/> disminuido<br><input type="radio"/> igual<br><input type="radio"/> aumentado<br><input type="radio"/> no sabe                                                 |
| cambio aceite oliva        | <input type="radio"/> eliminado<br><input type="radio"/> disminuido<br><input type="radio"/> igual<br><input type="radio"/> aumentado<br><input type="radio"/> no sabe                                                 |
| cambio mante o margarina   | <input type="radio"/> eliminado<br><input type="radio"/> disminuido<br><input type="radio"/> igual<br><input type="radio"/> aumentado<br><input type="radio"/> no sabe                                                 |
| cambio azúcar y dulces     | <input type="radio"/> eliminado<br><input type="radio"/> disminuido<br><input type="radio"/> igual<br><input type="radio"/> aumentado<br><input type="radio"/> no sabe                                                 |
| cambio bebidas alcohólicas | <input type="radio"/> eliminado<br><input type="radio"/> disminuido<br><input type="radio"/> igual<br><input type="radio"/> aumentado<br><input type="radio"/> no sabe                                                 |
| frecuencia comidas fritas  | <input type="radio"/> a diario<br><input type="radio"/> 5 a 6 veces semana<br><input type="radio"/> 2 a 4 veces semana<br><input type="radio"/> 1 vez semana<br><input checked="" type="radio"/> menos de 1 vez semana |
| carne                      | <input type="radio"/> no como<br><input type="radio"/> cruda<br><input type="radio"/> poco hecha<br><input checked="" type="radio"/> hecha<br><input type="radio"/> muy hecha                                          |
| grasa visible carne        | <input type="radio"/> quita toda<br><input checked="" type="radio"/> quita mayoría<br><input type="radio"/> quita un poco<br><input type="radio"/> no quita nada                                                       |

|                                |                                                                                                                                                                                                                                                          |
|--------------------------------|----------------------------------------------------------------------------------------------------------------------------------------------------------------------------------------------------------------------------------------------------------|
| cocina carne                   | <input checked="" type="radio"/> a la plancha<br><input type="radio"/> a la parrilla<br><input type="radio"/> asada<br><input type="radio"/> frita<br><input type="radio"/> guisada                                                                      |
| tostado quemado carne          | <input checked="" type="radio"/> nunca<br><input type="radio"/> 1 vez mes<br><input type="radio"/> 2 a 3 veces mes<br><input type="radio"/> 1 vez semana<br><input type="radio"/> 2 a 3 semanas                                                          |
| tostado quemado pescado        | <input checked="" type="radio"/> nunca<br><input type="radio"/> 1 vez mes<br><input type="radio"/> 2 a 3 veces mes<br><input type="radio"/> 1 vez semana<br><input type="radio"/> 2 a 3 semanas                                                          |
| socarrat paella                | <input type="radio"/> nunca<br><input type="radio"/> 1 vez mes<br><input checked="" type="radio"/> 2 a 3 veces mes<br><input type="radio"/> 1 vez semana<br><input type="radio"/> 2 a 3 semanas                                                          |
| grasa o aceite cocinar         | <input type="radio"/> mantequilla<br><input type="radio"/> margarina<br><input checked="" type="radio"/> aceite oliva<br><input type="radio"/> aceite oliva virgen extra<br><input type="radio"/> aceite vegetal<br><input type="radio"/> mezcla aceites |
| grasa aceite aliñar            | <input type="radio"/> mantequilla<br><input type="radio"/> margarina<br><input checked="" type="radio"/> aceite oliva<br><input type="radio"/> aceite oliva virgen extra<br><input type="radio"/> aceite vegetal<br><input type="radio"/> mezcla aceites |
| grasa aceite freir             | <input type="radio"/> mantequilla<br><input type="radio"/> margarina<br><input checked="" type="radio"/> aceite oliva<br><input type="radio"/> aceite oliva virgen extra<br><input type="radio"/> aceite vegetal<br><input type="radio"/> mezcla aceites |
| Ejercicio cuestionario         | <input checked="" type="radio"/> si<br><input type="radio"/> no                                                                                                                                                                                          |
| horas de sueño incluido siesta | [*DATA REMOVED*]                                                                                                                                                                                                                                         |
| minutos siesta                 | [*DATA REMOVED*]                                                                                                                                                                                                                                         |
| horas televisión semana        | [*DATA REMOVED*]                                                                                                                                                                                                                                         |

|                                        |                                                                                                                                                                                                                                                                                                                                                                           |
|----------------------------------------|---------------------------------------------------------------------------------------------------------------------------------------------------------------------------------------------------------------------------------------------------------------------------------------------------------------------------------------------------------------------------|
| actividad trabajo                      | <input type="radio"/> casi siempre sentado<br><input type="radio"/> sentado 50 por cien<br><input type="radio"/> casi siempre de pie, quieto<br><input type="radio"/> casi siempre levantado caminando y llevando pocas cosas<br><input checked="" type="radio"/> casi siempre levantado, caminando y llevado muchas cosas<br><input type="radio"/> trabajo manual pesado |
| tiempo caminar o bici al día           | <input type="radio"/> casi nunca<br><input type="radio"/> menos 20min día<br><input type="radio"/> 20 a 40 min día<br><input checked="" type="radio"/> 40 a 60 min día<br><input type="radio"/> 1h o 1h y media día<br><input type="radio"/> más de 1h y media al día                                                                                                     |
| tiempo tareas casa al día              | <input type="radio"/> menos de 1h día<br><input type="radio"/> 1 a 2h día<br><input checked="" type="radio"/> 3 a 4h día<br><input type="radio"/> 5 a 6h día<br><input type="radio"/> 7 a 8h día<br><input type="radio"/> más de 8h día                                                                                                                                   |
| tiempo libre televisión ordenador leer | <input type="radio"/> menos 1h día<br><input checked="" type="radio"/> 1h día<br><input type="radio"/> 2h día<br><input type="radio"/> 3h día<br><input type="radio"/> 4h día<br><input type="radio"/> 5 a 6h día<br><input type="radio"/> mas 6h día                                                                                                                     |
| tiempo libre ejercicio o deporte       | <input type="radio"/> menos 1h semana<br><input type="radio"/> 1h semana<br><input checked="" type="radio"/> 2h semana<br><input type="radio"/> 3h semana<br><input type="radio"/> 4 a 5h semana<br><input type="radio"/> mas 5h semana                                                                                                                                   |
| como se considera                      | <input type="radio"/> sedentaria<br><input checked="" type="radio"/> poco activa<br><input type="radio"/> moderadamente activa<br><input type="radio"/> bastante activa<br><input type="radio"/> muy activa<br><input type="radio"/> no sabe                                                                                                                              |
| FUR                                    | [*DATA REMOVED*]                                                                                                                                                                                                                                                                                                                                                          |
| Semanas gestación 2T                   | [*DATA REMOVED*]                                                                                                                                                                                                                                                                                                                                                          |
| Días gestación 2T                      | [*DATA REMOVED*]                                                                                                                                                                                                                                                                                                                                                          |
| DBP 2T                                 | [*DATA REMOVED*]                                                                                                                                                                                                                                                                                                                                                          |
| CC 2T                                  | [*DATA REMOVED*]                                                                                                                                                                                                                                                                                                                                                          |
| AC 2T                                  | [*DATA REMOVED*]                                                                                                                                                                                                                                                                                                                                                          |



|                                                   |                                                                                                                                                                                                 |
|---------------------------------------------------|-------------------------------------------------------------------------------------------------------------------------------------------------------------------------------------------------|
| LF 2T                                             | [*DATA REMOVED*]                                                                                                                                                                                |
| PFE 2T (Hadlock)                                  | [*DATA REMOVED*]                                                                                                                                                                                |
| Semanas gestación 3T                              | [*DATA REMOVED*]                                                                                                                                                                                |
| días 3T                                           | [*DATA REMOVED*]                                                                                                                                                                                |
| DBP 3T                                            | [*DATA REMOVED*]                                                                                                                                                                                |
| CC 3T                                             | [*DATA REMOVED*]                                                                                                                                                                                |
| AC 3T                                             | [*DATA REMOVED*]                                                                                                                                                                                |
| LF 3T                                             | [*DATA REMOVED*]                                                                                                                                                                                |
| PFE 3T (Hadlock)                                  | [*DATA REMOVED*]                                                                                                                                                                                |
| Semanas de gestación final                        | [*DATA REMOVED*]                                                                                                                                                                                |
| días gestación final                              | [*DATA REMOVED*]                                                                                                                                                                                |
| Localización placenta                             | <input type="radio"/> anterior<br><input type="radio"/> lateral derecha<br><input type="radio"/> lateral izquierda<br><input type="radio"/> posterior<br><input checked="" type="radio"/> fondo |
| Presentación longitudinal cefálica                | <input type="radio"/> no<br><input checked="" type="radio"/> si                                                                                                                                 |
| Dorso                                             | <input type="radio"/> izquierda anterior<br><input checked="" type="radio"/> izquierda posterior<br><input type="radio"/> derecha anterior<br><input type="radio"/> derecha posterior           |
| diámetro biparietal                               | [*DATA REMOVED*]                                                                                                                                                                                |
| Circunferencia craneal                            | [*DATA REMOVED*]                                                                                                                                                                                |
| Circunferencia abdominal                          | [*DATA REMOVED*]                                                                                                                                                                                |
| Longitud de femur                                 | [*DATA REMOVED*]                                                                                                                                                                                |
| tejido celular subcutáneo a nivel del muslo en mm | [*DATA REMOVED*]                                                                                                                                                                                |
| tejido celular subcutáneo en abdomen en mm        | [*DATA REMOVED*]                                                                                                                                                                                |
| Volumen del muslo en cm3                          | [*DATA REMOVED*]                                                                                                                                                                                |
| Peso fetal estimado según fórmula de Hadlock      | [*DATA REMOVED*]                                                                                                                                                                                |

|                                               |                                                                                                                                                          |
|-----------------------------------------------|----------------------------------------------------------------------------------------------------------------------------------------------------------|
| Percentil                                     | [*DATA REMOVED*]                                                                                                                                         |
| Peso fetal estimado según fórmula de Scioscia | <hr/>                                                                                                                                                    |
| Peso fetal estimado según fórmula de LEE      | <hr/>                                                                                                                                                    |
| Tipo de parto                                 | <input checked="" type="radio"/> eutocico<br><input type="radio"/> instrumentado/ventosa<br><input type="radio"/> cesarea                                |
| fecha de nacimiento                           | [*DATA REMOVED*]                                                                                                                                         |
| Días entre exploración y nacimiento           | [*DATA REMOVED*]                                                                                                                                         |
| Peso RN en g                                  | [*DATA REMOVED*]                                                                                                                                         |
| sexo                                          | <input checked="" type="radio"/> mujer<br><input type="radio"/> hombre                                                                                   |
| Apgar 1 minuto                                | [*DATA REMOVED*]                                                                                                                                         |
| Apgar 5 minutos                               | [*DATA REMOVED*]                                                                                                                                         |
| Apgar 10 minutos                              | <hr/>                                                                                                                                                    |
| antecedente Covid durante gestación           | <input type="radio"/> Yes<br><input checked="" type="radio"/> No                                                                                         |
| Nivel de estudios                             | <input type="radio"/> ninguno<br><input type="radio"/> primarios<br><input type="radio"/> secundarios<br><input checked="" type="radio"/> universitarios |

# Base\_datos\_estimacion\_peso\_fetal

|                                       |                                                                                                                                                                                                                                                                                      |
|---------------------------------------|--------------------------------------------------------------------------------------------------------------------------------------------------------------------------------------------------------------------------------------------------------------------------------------|
| Número de identificación participante | 95                                                                                                                                                                                                                                                                                   |
| CODIGO PARTICIPANTE                   |                                                                                                                                                                                                                                                                                      |
| Edad                                  | [*DATA REMOVED*]                                                                                                                                                                                                                                                                     |
| Gestaciones                           | <input type="radio"/> 1<br><input checked="" type="radio"/> 2<br><input type="radio"/> 3<br><input type="radio"/> mas de 3                                                                                                                                                           |
| partos                                | <input checked="" type="radio"/> 0<br><input type="radio"/> 1<br><input type="radio"/> 2<br><input type="radio"/> 3<br><input type="radio"/> mas de 3                                                                                                                                |
| cesáreas                              | <input checked="" type="radio"/> 0<br><input type="radio"/> 1<br><input type="radio"/> 2<br><input type="radio"/> 3<br><input type="radio"/> mas de 3                                                                                                                                |
| Abortos                               | <input type="radio"/> 0<br><input checked="" type="radio"/> 1<br><input type="radio"/> 2<br><input type="radio"/> 3<br><input type="radio"/> mas de 3                                                                                                                                |
| Tipo de gestacion                     | <input checked="" type="radio"/> espontanea<br><input type="radio"/> IAC inseminación artificial conyuge<br><input type="radio"/> IAD inseminación artificial donante<br><input type="radio"/> FIV Fecundación in Vitro<br><input type="radio"/> Ovodon FIV con donación de ovocitos |
| peso previo a embarazo                | [*DATA REMOVED*]                                                                                                                                                                                                                                                                     |
| Ganancia ponderal embarazo            | [*DATA REMOVED*]                                                                                                                                                                                                                                                                     |
| Talla madre                           | [*DATA REMOVED*]                                                                                                                                                                                                                                                                     |
| IMC previo embarazo                   | 28.577960676726104                                                                                                                                                                                                                                                                   |
| Patología obstétrica                  | <input checked="" type="radio"/> no<br><input type="radio"/> si                                                                                                                                                                                                                      |
| Diabetes pregestacional               | <input checked="" type="radio"/> no<br><input type="radio"/> si                                                                                                                                                                                                                      |
| Diabetes gestacional                  | <input checked="" type="radio"/> no<br><input type="radio"/> si                                                                                                                                                                                                                      |

|                                            |                                                                                                                                                                                      |
|--------------------------------------------|--------------------------------------------------------------------------------------------------------------------------------------------------------------------------------------|
| Diabetes gestacional con insulina          | <input checked="" type="radio"/> no<br><input type="radio"/> si                                                                                                                      |
| Diabetes gestacional con dieta y ejercicio | <input checked="" type="radio"/> no<br><input type="radio"/> si                                                                                                                      |
| Percentil fetos previos                    | <input checked="" type="radio"/> Nada<br><input type="radio"/> percentil menor de 10<br><input type="radio"/> percentil entre 10 y 90<br><input type="radio"/> percentil mayor de 90 |
| Exfumadora                                 | <input checked="" type="radio"/> Nada<br><input type="radio"/> menos de 5 años<br><input type="radio"/> 5 a 10 años<br><input type="radio"/> mayor o igual a 10 años                 |
| Hábito tabáquico                           | <input checked="" type="radio"/> no<br><input type="radio"/> si                                                                                                                      |
| fumadora                                   | [*DATA REMOVED*]                                                                                                                                                                     |
| Consumo otros tóxicos                      | <input checked="" type="radio"/> no<br><input type="radio"/> si                                                                                                                      |
| Hb 1T                                      | _____                                                                                                                                                                                |
| Htc 1T                                     | _____                                                                                                                                                                                |
| Hb 2T                                      | _____                                                                                                                                                                                |
| HTC 2T                                     | _____                                                                                                                                                                                |
| Hb 3T                                      | _____                                                                                                                                                                                |
| HTC 3T                                     | _____                                                                                                                                                                                |
| Suplemento FE oral                         | <input checked="" type="radio"/> si<br><input type="radio"/> no                                                                                                                      |
| Suplemento fe iv                           | <input type="radio"/> si<br><input checked="" type="radio"/> no                                                                                                                      |
| Transfusión                                | <input checked="" type="radio"/> no<br><input type="radio"/> si                                                                                                                      |
| Solicitada Vit D                           | <input checked="" type="radio"/> no<br><input type="radio"/> si                                                                                                                      |

|                       |                                                                                                                                                                                                                                                                                                                                                                                                              |
|-----------------------|--------------------------------------------------------------------------------------------------------------------------------------------------------------------------------------------------------------------------------------------------------------------------------------------------------------------------------------------------------------------------------------------------------------|
| Deficit vit D         | <input type="radio"/> no<br><input type="radio"/> si                                                                                                                                                                                                                                                                                                                                                         |
| Suplemento vit D      | <input type="radio"/> si<br><input type="radio"/> no                                                                                                                                                                                                                                                                                                                                                         |
| Dieta, cuestionario   | <input checked="" type="radio"/> si<br><input type="radio"/> no                                                                                                                                                                                                                                                                                                                                              |
| Leche entera          | <input checked="" type="radio"/> Nunca o menos 1 vez al mes<br><input type="radio"/> 1 a 3 veces mes<br><input type="radio"/> 1 vez semana<br><input type="radio"/> 2 a 4 veces semana<br><input type="radio"/> 5 a 6 veces semana<br><input type="radio"/> 1 vez al día<br><input type="radio"/> 2 a 3 veces al día<br><input type="radio"/> 5 a 6 veces al día<br><input type="radio"/> más 6 veces al día |
| Leche semidesnatada   | <input checked="" type="radio"/> Nunca o menos 1 vez al mes<br><input type="radio"/> 1 a 3 veces mes<br><input type="radio"/> 1 vez semana<br><input type="radio"/> 2 a 4 veces semana<br><input type="radio"/> 5 a 6 veces semana<br><input type="radio"/> 1 vez al día<br><input type="radio"/> 2 a 3 veces al día<br><input type="radio"/> 5 a 6 veces al día<br><input type="radio"/> mas 6 veces al día |
| Leche desnatada       | <input checked="" type="radio"/> Nunca o menos 1 vez al mes<br><input type="radio"/> 1 a 3 veces mes<br><input type="radio"/> 1 vez semana<br><input type="radio"/> 2 a 4 veces semana<br><input type="radio"/> 5 a 6 veces semana<br><input type="radio"/> 1 vez al día<br><input type="radio"/> 2 a 3 veces al día<br><input type="radio"/> 5 a 6 veces al día<br><input type="radio"/> más 6 veces al día |
| Leche condensada      | <input checked="" type="radio"/> Nunca o menos 1 vez al mes<br><input type="radio"/> 1 a 3 veces mes<br><input type="radio"/> 1 vez semana<br><input type="radio"/> 2 a 4 veces semana<br><input type="radio"/> 5 a 6 veces semana<br><input type="radio"/> 1 vez al día<br><input type="radio"/> 2 a 3 veces al día<br><input type="radio"/> 5 a 6 veces al día<br><input type="radio"/> más 6 veces al día |
| nata o crema de leche | <input checked="" type="radio"/> Nunca o menos 1 vez al mes<br><input type="radio"/> 1 a 3 veces mes<br><input type="radio"/> 1 vez semana<br><input type="radio"/> 2 a 4 veces semana<br><input type="radio"/> 5 a 6 veces semana<br><input type="radio"/> 1 vez al día<br><input type="radio"/> 2 a 3 veces al día<br><input type="radio"/> 5 a 6 veces al día<br><input type="radio"/> más 6 veces al día |

|                                             |                                                                                                                                                                                                                                                                                                                                                                                                              |
|---------------------------------------------|--------------------------------------------------------------------------------------------------------------------------------------------------------------------------------------------------------------------------------------------------------------------------------------------------------------------------------------------------------------------------------------------------------------|
| Yogurt Entero                               | <input checked="" type="radio"/> Nunca o menos 1 vez al mes<br><input type="radio"/> 1 a 3 veces mes<br><input type="radio"/> 1 vez semana<br><input type="radio"/> 2 a 4 veces semana<br><input type="radio"/> 5 a 6 veces semana<br><input type="radio"/> 1 vez al día<br><input type="radio"/> 2 a 3 veces al día<br><input type="radio"/> 5 a 6 veces al día<br><input type="radio"/> más 6 veces al día |
| Yogurt desnatado                            | <input checked="" type="radio"/> Nunca o menos 1 vez al mes<br><input type="radio"/> 1 a 3 veces mes<br><input type="radio"/> 1 vez semana<br><input type="radio"/> 2 a 4 veces semana<br><input type="radio"/> 5 a 6 veces semana<br><input type="radio"/> 1 vez al día<br><input type="radio"/> 2 a 3 veces al día<br><input type="radio"/> 5 a 6 veces al día<br><input type="radio"/> más 6 veces al día |
| 100g requesón o queso blando o queso fresco | <input checked="" type="radio"/> Nunca o menos 1 vez al mes<br><input type="radio"/> 1 a 3 veces mes<br><input type="radio"/> 1 vez semana<br><input type="radio"/> 2 a 4 veces semana<br><input type="radio"/> 5 a 6 veces semana<br><input type="radio"/> 1 vez al día<br><input type="radio"/> 2 a 3 veces al día<br><input type="radio"/> 5 a 6 veces al día<br><input type="radio"/> más 6 veces al día |
| queso curado o semicurado o cremoso         | <input type="radio"/> Nunca o menos 1 vez al mes<br><input type="radio"/> 1 a 3 veces mes<br><input type="radio"/> 1 vez semana<br><input checked="" type="radio"/> 2 a 4 veces semana<br><input type="radio"/> 5 a 6 veces semana<br><input type="radio"/> 1 vez al día<br><input type="radio"/> 2 a 3 veces al día<br><input type="radio"/> 5 a 6 veces al día<br><input type="radio"/> más 6 veces al día |
| natillas flan pudding                       | <input type="radio"/> Nunca o menos 1 vez al mes<br><input type="radio"/> 1 a 3 veces mes<br><input type="radio"/> 1 vez semana<br><input checked="" type="radio"/> 2 a 4 veces semana<br><input type="radio"/> 5 a 6 veces semana<br><input type="radio"/> 1 vez al día<br><input type="radio"/> 2 a 3 veces al día<br><input type="radio"/> 5 a 6 veces al día<br><input type="radio"/> más 6 veces al día |
| Helado                                      | <input checked="" type="radio"/> Nunca o menos 1 vez al mes<br><input type="radio"/> 1 a 3 veces mes<br><input type="radio"/> 1 vez semana<br><input type="radio"/> 2 a 4 veces semana<br><input type="radio"/> 5 a 6 veces semana<br><input type="radio"/> 1 vez al día<br><input type="radio"/> 2 a 3 veces al día<br><input type="radio"/> 5 a 6 veces al día<br><input type="radio"/> más 6 veces al día |

|                                      |                                                                                                                                                                                                                                                                                                                                                                                                              |
|--------------------------------------|--------------------------------------------------------------------------------------------------------------------------------------------------------------------------------------------------------------------------------------------------------------------------------------------------------------------------------------------------------------------------------------------------------------|
| huevo                                | <input type="radio"/> Nunca o menos 1 vez al mes<br><input type="radio"/> 1 a 3 veces mes<br><input checked="" type="radio"/> 1 vez semana<br><input type="radio"/> 2 a 4 veces semana<br><input type="radio"/> 5 a 6 veces semana<br><input type="radio"/> 1 vez al día<br><input type="radio"/> 2 a 3 veces al día<br><input type="radio"/> 5 a 6 veces al día<br><input type="radio"/> más 6 veces al día |
| Pollo con piel                       | <input checked="" type="radio"/> Nunca o menos 1 vez al mes<br><input type="radio"/> 1 a 3 veces mes<br><input type="radio"/> 1 vez semana<br><input type="radio"/> 2 a 4 veces semana<br><input type="radio"/> 5 a 6 veces semana<br><input type="radio"/> 1 vez al día<br><input type="radio"/> 2 a 3 veces al día<br><input type="radio"/> 5 a 6 veces al día<br><input type="radio"/> más 6 veces al día |
| pollo sin piel                       | <input type="radio"/> Nunca o menos 1 vez al mes<br><input type="radio"/> 1 a 3 veces mes<br><input type="radio"/> 1 vez semana<br><input checked="" type="radio"/> 2 a 4 veces semana<br><input type="radio"/> 5 a 6 veces semana<br><input type="radio"/> 1 vez al día<br><input type="radio"/> 2 a 3 veces al día<br><input type="radio"/> 5 a 6 veces al día<br><input type="radio"/> más 6 veces al día |
| Ternera o cerdo o cordero            | <input type="radio"/> Nunca o menos 1 vez al mes<br><input type="radio"/> 1 a 3 veces mes<br><input checked="" type="radio"/> 1 vez semana<br><input type="radio"/> 2 a 4 veces semana<br><input type="radio"/> 5 a 6 veces semana<br><input type="radio"/> 1 vez al día<br><input type="radio"/> 2 a 3 veces al día<br><input type="radio"/> 5 a 6 veces al día<br><input type="radio"/> más 6 veces al día |
| carne caza: Conejo o codorniz o pato | <input checked="" type="radio"/> Nunca o menos 1 vez al mes<br><input type="radio"/> 1 a 3 veces mes<br><input type="radio"/> 1 vez semana<br><input type="radio"/> 2 a 4 veces semana<br><input type="radio"/> 5 a 6 veces semana<br><input type="radio"/> 1 vez al día<br><input type="radio"/> 2 a 3 veces al día<br><input type="radio"/> 5 a 6 veces al día<br><input type="radio"/> más 6 veces al día |
| Hígado de ternera o cerdo o pollo    | <input checked="" type="radio"/> Nunca o menos 1 vez al mes<br><input type="radio"/> 1 a 3 veces mes<br><input type="radio"/> 1 vez semana<br><input type="radio"/> 2 a 4 veces semana<br><input type="radio"/> 5 a 6 veces semana<br><input type="radio"/> 1 vez al día<br><input type="radio"/> 2 a 3 veces al día<br><input type="radio"/> 5 a 6 veces al día<br><input type="radio"/> más 6 veces al día |

|                     |                                                                                                                                                                                                                                                                                                                                                                                                              |
|---------------------|--------------------------------------------------------------------------------------------------------------------------------------------------------------------------------------------------------------------------------------------------------------------------------------------------------------------------------------------------------------------------------------------------------------|
| Vísceras            | <input checked="" type="radio"/> Nunca o menos 1 vez al mes<br><input type="radio"/> 1 a 3 veces mes<br><input type="radio"/> 1 vez semana<br><input type="radio"/> 2 a 4 veces semana<br><input type="radio"/> 5 a 6 veces semana<br><input type="radio"/> 1 vez al día<br><input type="radio"/> 2 a 3 veces al día<br><input type="radio"/> 5 a 6 veces al día<br><input type="radio"/> más 6 veces al día |
| Embutido            | <input checked="" type="radio"/> Nunca o menos 1 vez al mes<br><input type="radio"/> 1 a 3 veces mes<br><input type="radio"/> 1 vez semana<br><input type="radio"/> 2 a 4 veces semana<br><input type="radio"/> 5 a 6 veces semana<br><input type="radio"/> 1 vez al día<br><input type="radio"/> 2 a 3 veces al día<br><input type="radio"/> 5 a 6 veces al día<br><input type="radio"/> más 6 veces al día |
| Salchicha o similar | <input checked="" type="radio"/> Nunca o menos 1 vez al mes<br><input type="radio"/> 1 a 3 veces mes<br><input type="radio"/> 1 vez semana<br><input type="radio"/> 2 a 4 veces semana<br><input type="radio"/> 5 a 6 veces semana<br><input type="radio"/> 1 vez al día<br><input type="radio"/> 2 a 3 veces al día<br><input type="radio"/> 5 a 6 veces al día<br><input type="radio"/> más 6 veces al día |
| Pate o foiegras     | <input checked="" type="radio"/> Nunca o menos 1 vez al mes<br><input type="radio"/> 1 a 3 veces mes<br><input type="radio"/> 1 vez semana<br><input type="radio"/> 2 a 4 veces semana<br><input type="radio"/> 5 a 6 veces semana<br><input type="radio"/> 1 vez al día<br><input type="radio"/> 2 a 3 veces al día<br><input type="radio"/> 5 a 6 veces al día<br><input type="radio"/> más 6 veces al día |
| Hamburguesa         | <input type="radio"/> Nunca o menos 1 vez al mes<br><input type="radio"/> 1 a 3 veces mes<br><input checked="" type="radio"/> 1 vez semana<br><input type="radio"/> 2 a 4 veces semana<br><input type="radio"/> 5 a 6 veces semana<br><input type="radio"/> 1 vez al día<br><input type="radio"/> 2 a 3 veces al día<br><input type="radio"/> 5 a 6 veces al día<br><input type="radio"/> más 6 veces al día |
| tocino o bacon      | <input checked="" type="radio"/> Nunca o menos 1 vez al mes<br><input type="radio"/> 1 a 3 veces mes<br><input type="radio"/> 1 vez semana<br><input type="radio"/> 2 a 4 veces semana<br><input type="radio"/> 5 a 6 veces semana<br><input type="radio"/> 1 vez al día<br><input type="radio"/> 2 a 3 veces al día<br><input type="radio"/> 5 a 6 veces al día<br><input type="radio"/> más 6 veces al día |



|                        |                                                                                                                                                                                                                                                                                                                                                                                                              |
|------------------------|--------------------------------------------------------------------------------------------------------------------------------------------------------------------------------------------------------------------------------------------------------------------------------------------------------------------------------------------------------------------------------------------------------------|
| Pescado frito          | <input checked="" type="radio"/> Nunca o menos 1 vez al mes<br><input type="radio"/> 1 a 3 veces mes<br><input type="radio"/> 1 vez semana<br><input type="radio"/> 2 a 4 veces semana<br><input type="radio"/> 5 a 6 veces semana<br><input type="radio"/> 1 vez al día<br><input type="radio"/> 2 a 3 veces al día<br><input type="radio"/> 5 a 6 veces al día<br><input type="radio"/> más 6 veces al día |
| pescado hervido blanco | <input type="radio"/> Nunca o menos 1 vez al mes<br><input type="radio"/> 1 a 3 veces mes<br><input checked="" type="radio"/> 1 vez semana<br><input type="radio"/> 2 a 4 veces semana<br><input type="radio"/> 5 a 6 veces semana<br><input type="radio"/> 1 vez al día<br><input type="radio"/> 2 a 3 veces al día<br><input type="radio"/> 5 a 6 veces al día<br><input type="radio"/> más 6 veces al día |
| pescado hervido azul   | <input type="radio"/> Nunca o menos 1 vez al mes<br><input type="radio"/> 1 a 3 veces mes<br><input checked="" type="radio"/> 1 vez semana<br><input type="radio"/> 2 a 4 veces semana<br><input type="radio"/> 5 a 6 veces semana<br><input type="radio"/> 1 vez al día<br><input type="radio"/> 2 a 3 veces al día<br><input type="radio"/> 5 a 6 veces al día<br><input type="radio"/> más 6 veces al día |
| otros pescado azul     | <input type="radio"/> Nunca o menos 1 vez al mes<br><input type="radio"/> 1 a 3 veces mes<br><input checked="" type="radio"/> 1 vez semana<br><input type="radio"/> 2 a 4 veces semana<br><input type="radio"/> 5 a 6 veces semana<br><input type="radio"/> 1 vez al día<br><input type="radio"/> 2 a 3 veces al día<br><input type="radio"/> 5 a 6 veces al día<br><input type="radio"/> más 6 veces al día |
| atun conserva          | <input checked="" type="radio"/> Nunca o menos 1 vez al mes<br><input type="radio"/> 1 a 3 veces mes<br><input type="radio"/> 1 vez semana<br><input type="radio"/> 2 a 4 veces semana<br><input type="radio"/> 5 a 6 veces semana<br><input type="radio"/> 1 vez al día<br><input type="radio"/> 2 a 3 veces al día<br><input type="radio"/> 5 a 6 veces al día<br><input type="radio"/> más 6 veces al día |
| sardina conserva       | <input checked="" type="radio"/> Nunca o menos 1 vez al mes<br><input type="radio"/> 1 a 3 veces mes<br><input type="radio"/> 1 vez semana<br><input type="radio"/> 2 a 4 veces semana<br><input type="radio"/> 5 a 6 veces semana<br><input type="radio"/> 1 vez al día<br><input type="radio"/> 2 a 3 veces al día<br><input type="radio"/> 5 a 6 veces al día<br><input type="radio"/> más 6 veces al día |

|                                         |                                                                                                                                                                                                                                                                                                                                                                                                              |
|-----------------------------------------|--------------------------------------------------------------------------------------------------------------------------------------------------------------------------------------------------------------------------------------------------------------------------------------------------------------------------------------------------------------------------------------------------------------|
| pescado ahumado                         | <input checked="" type="radio"/> Nunca o menos 1 vez al mes<br><input type="radio"/> 1 a 3 veces mes<br><input type="radio"/> 1 vez semana<br><input type="radio"/> 2 a 4 veces semana<br><input type="radio"/> 5 a 6 veces semana<br><input type="radio"/> 1 vez al día<br><input type="radio"/> 2 a 3 veces al día<br><input type="radio"/> 5 a 6 veces al día<br><input type="radio"/> más 6 veces al día |
| almejas o mejillones o ostras unos 100g | <input checked="" type="radio"/> Nunca o menos 1 vez al mes<br><input type="radio"/> 1 a 3 veces mes<br><input type="radio"/> 1 vez semana<br><input type="radio"/> 2 a 4 veces semana<br><input type="radio"/> 5 a 6 veces semana<br><input type="radio"/> 1 vez al día<br><input type="radio"/> 2 a 3 veces al día<br><input type="radio"/> 5 a 6 veces al día<br><input type="radio"/> más 6 veces al día |
| calamar o chipiron o sepia unos 100g    | <input checked="" type="radio"/> Nunca o menos 1 vez al mes<br><input type="radio"/> 1 a 3 veces mes<br><input type="radio"/> 1 vez semana<br><input type="radio"/> 2 a 4 veces semana<br><input type="radio"/> 5 a 6 veces semana<br><input type="radio"/> 1 vez al día<br><input type="radio"/> 2 a 3 veces al día<br><input type="radio"/> 5 a 6 veces al día<br><input type="radio"/> más 6 veces al día |
| marisco unos 100g                       | <input type="radio"/> Nunca o menos 1 vez al mes<br><input checked="" type="radio"/> 1 a 3 veces mes<br><input type="radio"/> 1 vez semana<br><input type="radio"/> 2 a 4 veces semana<br><input type="radio"/> 5 a 6 veces semana<br><input type="radio"/> 1 vez al día<br><input type="radio"/> 2 a 3 veces al día<br><input type="radio"/> 5 a 6 veces al día<br><input type="radio"/> más 6 veces al día |
| Espinacas o acelgas cocinadas           | <input type="radio"/> Nunca o menos 1 vez al mes<br><input type="radio"/> 1 a 3 veces mes<br><input checked="" type="radio"/> 1 vez semana<br><input type="radio"/> 2 a 4 veces semana<br><input type="radio"/> 5 a 6 veces semana<br><input type="radio"/> 1 vez al día<br><input type="radio"/> 2 a 3 veces al día<br><input type="radio"/> 5 a 6 veces al día<br><input type="radio"/> más 6 veces al día |
| Col o coliflor o brocoli cocinado       | <input checked="" type="radio"/> Nunca o menos 1 vez al mes<br><input type="radio"/> 1 a 3 veces mes<br><input type="radio"/> 1 vez semana<br><input type="radio"/> 2 a 4 veces semana<br><input type="radio"/> 5 a 6 veces semana<br><input type="radio"/> 1 vez al día<br><input type="radio"/> 2 a 3 veces al día<br><input type="radio"/> 5 a 6 veces al día<br><input type="radio"/> más 6 veces al día |

|                                |                                                                                                                                                                                                                                                                                                                                                                                                              |
|--------------------------------|--------------------------------------------------------------------------------------------------------------------------------------------------------------------------------------------------------------------------------------------------------------------------------------------------------------------------------------------------------------------------------------------------------------|
| Lechuga o endivia o escarola   | <input checked="" type="radio"/> Nunca o menos 1 vez al mes<br><input type="radio"/> 1 a 3 veces mes<br><input type="radio"/> 1 vez semana<br><input type="radio"/> 2 a 4 veces semana<br><input type="radio"/> 5 a 6 veces semana<br><input type="radio"/> 1 vez al día<br><input type="radio"/> 2 a 3 veces al día<br><input type="radio"/> 5 a 6 veces al día<br><input type="radio"/> más 6 veces al día |
| tomate ensalada                | <input type="radio"/> Nunca o menos 1 vez al mes<br><input type="radio"/> 1 a 3 veces mes<br><input type="radio"/> 1 vez semana<br><input checked="" type="radio"/> 2 a 4 veces semana<br><input type="radio"/> 5 a 6 veces semana<br><input type="radio"/> 1 vez al día<br><input type="radio"/> 2 a 3 veces al día<br><input type="radio"/> 5 a 6 veces al día<br><input type="radio"/> más 6 veces al día |
| cebolla                        | <input checked="" type="radio"/> Nunca o menos 1 vez al mes<br><input type="radio"/> 1 a 3 veces mes<br><input type="radio"/> 1 vez semana<br><input type="radio"/> 2 a 4 veces semana<br><input type="radio"/> 5 a 6 veces semana<br><input type="radio"/> 1 vez al día<br><input type="radio"/> 2 a 3 veces al día<br><input type="radio"/> 5 a 6 veces al día<br><input type="radio"/> más 6 veces al día |
| Zanahoria o calabaza           | <input type="radio"/> Nunca o menos 1 vez al mes<br><input type="radio"/> 1 a 3 veces mes<br><input type="radio"/> 1 vez semana<br><input checked="" type="radio"/> 2 a 4 veces semana<br><input type="radio"/> 5 a 6 veces semana<br><input type="radio"/> 1 vez al día<br><input type="radio"/> 2 a 3 veces al día<br><input type="radio"/> 5 a 6 veces al día<br><input type="radio"/> más 6 veces al día |
| Judías verdes                  | <input type="radio"/> Nunca o menos 1 vez al mes<br><input type="radio"/> 1 a 3 veces mes<br><input checked="" type="radio"/> 1 vez semana<br><input type="radio"/> 2 a 4 veces semana<br><input type="radio"/> 5 a 6 veces semana<br><input type="radio"/> 1 vez al día<br><input type="radio"/> 2 a 3 veces al día<br><input type="radio"/> 5 a 6 veces al día<br><input type="radio"/> más 6 veces al día |
| Berenjena o calabacin o pepino | <input type="radio"/> Nunca o menos 1 vez al mes<br><input checked="" type="radio"/> 1 a 3 veces mes<br><input type="radio"/> 1 vez semana<br><input type="radio"/> 2 a 4 veces semana<br><input type="radio"/> 5 a 6 veces semana<br><input type="radio"/> 1 vez al día<br><input type="radio"/> 2 a 3 veces al día<br><input type="radio"/> 5 a 6 veces al día<br><input type="radio"/> más 6 veces al día |

|                       |                                                                                                                                                                                                                                                                                                                                                                                                              |
|-----------------------|--------------------------------------------------------------------------------------------------------------------------------------------------------------------------------------------------------------------------------------------------------------------------------------------------------------------------------------------------------------------------------------------------------------|
| pimiento              | <input type="radio"/> Nunca o menos 1 vez al mes<br><input type="radio"/> 1 a 3 veces mes<br><input type="radio"/> 1 vez semana<br><input checked="" type="radio"/> 2 a 4 veces semana<br><input type="radio"/> 5 a 6 veces semana<br><input type="radio"/> 1 vez al día<br><input type="radio"/> 2 a 3 veces al día<br><input type="radio"/> 5 a 6 veces al día<br><input type="radio"/> más 6 veces al día |
| alcachofa             | <input checked="" type="radio"/> Nunca o menos 1 vez al mes<br><input type="radio"/> 1 a 3 veces mes<br><input type="radio"/> 1 vez semana<br><input type="radio"/> 2 a 4 veces semana<br><input type="radio"/> 5 a 6 veces semana<br><input type="radio"/> 1 vez al día<br><input type="radio"/> 2 a 3 veces al día<br><input type="radio"/> 5 a 6 veces al día<br><input type="radio"/> más 6 veces al día |
| espárragos            | <input checked="" type="radio"/> Nunca o menos 1 vez al mes<br><input type="radio"/> 1 a 3 veces mes<br><input type="radio"/> 1 vez semana<br><input type="radio"/> 2 a 4 veces semana<br><input type="radio"/> 5 a 6 veces semana<br><input type="radio"/> 1 vez al día<br><input type="radio"/> 2 a 3 veces al día<br><input type="radio"/> 5 a 6 veces al día<br><input type="radio"/> más 6 veces al día |
| maíz hervido          | <input type="radio"/> Nunca o menos 1 vez al mes<br><input type="radio"/> 1 a 3 veces mes<br><input type="radio"/> 1 vez semana<br><input type="radio"/> 2 a 4 veces semana<br><input type="radio"/> 5 a 6 veces semana<br><input type="radio"/> 1 vez al día<br><input type="radio"/> 2 a 3 veces al día<br><input type="radio"/> 5 a 6 veces al día<br><input type="radio"/> más 6 veces al día            |
| legumbres             | <input type="radio"/> Nunca o menos 1 vez al mes<br><input type="radio"/> 1 a 3 veces mes<br><input type="radio"/> 1 vez semana<br><input checked="" type="radio"/> 2 a 4 veces semana<br><input type="radio"/> 5 a 6 veces semana<br><input type="radio"/> 1 vez al día<br><input type="radio"/> 2 a 3 veces al día<br><input type="radio"/> 5 a 6 veces al día<br><input type="radio"/> más 6 veces al día |
| naranjas o mandarinas | <input type="radio"/> Nunca o menos 1 vez al mes<br><input type="radio"/> 1 a 3 veces mes<br><input checked="" type="radio"/> 1 vez semana<br><input type="radio"/> 2 a 4 veces semana<br><input type="radio"/> 5 a 6 veces semana<br><input type="radio"/> 1 vez al día<br><input type="radio"/> 2 a 3 veces al día<br><input type="radio"/> 5 a 6 veces al día<br><input type="radio"/> más 6 veces al día |

|                       |                                                                                                                                                                                                                                                                                                                                                                                                              |
|-----------------------|--------------------------------------------------------------------------------------------------------------------------------------------------------------------------------------------------------------------------------------------------------------------------------------------------------------------------------------------------------------------------------------------------------------|
| zum natural fruta     | <input checked="" type="radio"/> Nunca o menos 1 vez al mes<br><input type="radio"/> 1 a 3 veces mes<br><input type="radio"/> 1 vez semana<br><input type="radio"/> 2 a 4 veces semana<br><input type="radio"/> 5 a 6 veces semana<br><input type="radio"/> 1 vez al día<br><input type="radio"/> 2 a 3 veces al día<br><input type="radio"/> 5 a 6 veces al día<br><input type="radio"/> más 6 veces al día |
| platano               | <input checked="" type="radio"/> Nunca o menos 1 vez al mes<br><input type="radio"/> 1 a 3 veces mes<br><input type="radio"/> 1 vez semana<br><input type="radio"/> 2 a 4 veces semana<br><input type="radio"/> 5 a 6 veces semana<br><input type="radio"/> 1 vez al día<br><input type="radio"/> 2 a 3 veces al día<br><input type="radio"/> 5 a 6 veces al día<br><input type="radio"/> más 6 veces al día |
| manzana o pera        | <input type="radio"/> Nunca o menos 1 vez al mes<br><input type="radio"/> 1 a 3 veces mes<br><input type="radio"/> 1 vez semana<br><input type="radio"/> 2 a 4 veces semana<br><input type="radio"/> 5 a 6 veces semana<br><input checked="" type="radio"/> 1 vez al día<br><input type="radio"/> 2 a 3 veces al día<br><input type="radio"/> 5 a 6 veces al día<br><input type="radio"/> más 6 veces al día |
| melocotón o nectarina | <input type="radio"/> Nunca o menos 1 vez al mes<br><input checked="" type="radio"/> 1 a 3 veces mes<br><input type="radio"/> 1 vez semana<br><input type="radio"/> 2 a 4 veces semana<br><input type="radio"/> 5 a 6 veces semana<br><input type="radio"/> 1 vez al día<br><input type="radio"/> 2 a 3 veces al día<br><input type="radio"/> 5 a 6 veces al día<br><input type="radio"/> más 6 veces al día |
| sandia o melon        | <input type="radio"/> Nunca o menos 1 vez al mes<br><input checked="" type="radio"/> 1 a 3 veces mes<br><input type="radio"/> 1 vez semana<br><input type="radio"/> 2 a 4 veces semana<br><input type="radio"/> 5 a 6 veces semana<br><input type="radio"/> 1 vez al día<br><input type="radio"/> 2 a 3 veces al día<br><input type="radio"/> 5 a 6 veces al día<br><input type="radio"/> más 6 veces al día |
| uva                   | <input type="radio"/> Nunca o menos 1 vez al mes<br><input checked="" type="radio"/> 1 a 3 veces mes<br><input type="radio"/> 1 vez semana<br><input type="radio"/> 2 a 4 veces semana<br><input type="radio"/> 5 a 6 veces semana<br><input type="radio"/> 1 vez al día<br><input type="radio"/> 2 a 3 veces al día<br><input type="radio"/> 5 a 6 veces al día<br><input type="radio"/> más 6 veces al día |

---

bruna o ciruela

- ☐ Nunca o menos 1 vez al mes  
☒ 1 a 3 veces mes  
☐ 1 vez semana  
☐ 2 a 4 veces semana  
☐ 5 a 6 veces semana  
☐ 1 vez al día  
☐ 2 a 3 veces al día  
☐ 5 a 6 veces al día  
☐ más 6 veces al día

---

kiwi

- ☐ Nunca o menos 1 vez al mes  
☒ 1 a 3 veces mes  
☐ 1 vez semana  
☐ 2 a 4 veces semana  
☐ 5 a 6 veces semana  
☐ 1 vez al día  
☐ 2 a 3 veces al día  
☐ 5 a 6 veces al día  
☐ más 6 veces al día

---

aceituna

- ☐ Nunca o menos 1 vez al mes  
☒ 1 a 3 veces mes  
☐ 1 vez semana  
☐ 2 a 4 veces semana  
☐ 5 a 6 veces semana  
☐ 1 vez al día  
☐ 2 a 3 veces al día  
☐ 5 a 6 veces al día  
☐ más 6 veces al día

---

frutos secos

- ☐ Nunca o menos 1 vez al mes  
☐ 1 a 3 veces mes  
☒ 1 vez semana  
☐ 2 a 4 veces semana  
☐ 5 a 6 veces semana  
☐ 1 vez al día  
☐ 2 a 3 veces al día  
☐ 5 a 6 veces al día  
☐ más 6 veces al día

---

pan blanco

- ☒ Nunca o menos 1 vez al mes  
☐ 1 a 3 veces mes  
☐ 1 vez semana  
☐ 2 a 4 veces semana  
☐ 5 a 6 veces semana  
☐ 1 vez al día  
☐ 2 a 3 veces al día  
☐ 5 a 6 veces al día  
☐ más 6 veces al día

---

pan integral

- ☐ Nunca o menos 1 vez al mes  
☐ 1 a 3 veces mes  
☐ 1 vez semana  
☐ 2 a 4 veces semana  
☒ 5 a 6 veces semana  
☐ 1 vez al día  
☐ 2 a 3 veces al día  
☐ 5 a 6 veces al día  
☐ más 6 veces al día

---

cereales desayuno

- ☐ Nunca o menos 1 vez al mes  
☐ 1 a 3 veces mes  
☐ 1 vez semana  
☐ 2 a 4 veces semana  
☐ 5 a 6 veces semana  
☒ 1 vez al día  
☐ 2 a 3 veces al día  
☐ 5 a 6 veces al día  
☐ más 6 veces al día

---

patatas fritas

- ☒ Nunca o menos 1 vez al mes  
☐ 1 a 3 veces mes  
☐ 1 vez semana  
☐ 2 a 4 veces semana  
☐ 5 a 6 veces semana  
☐ 1 vez al día  
☐ 2 a 3 veces al día  
☐ 5 a 6 veces al día  
☐ más 6 veces al día

---

patatas cocidas o asadas

- ☐ Nunca o menos 1 vez al mes  
☐ 1 a 3 veces mes  
☐ 1 vez semana  
☒ 2 a 4 veces semana  
☐ 5 a 6 veces semana  
☐ 1 vez al día  
☐ 2 a 3 veces al día  
☐ 5 a 6 veces al día  
☐ más 6 veces al día

---

bolsa papas

- ☒ Nunca o menos 1 vez al mes  
☐ 1 a 3 veces mes  
☐ 1 vez semana  
☐ 2 a 4 veces semana  
☐ 5 a 6 veces semana  
☐ 1 vez al día  
☐ 2 a 3 veces al día  
☐ 5 a 6 veces al día  
☐ más 6 veces al día

---

arroz cocinado

- ☐ Nunca o menos 1 vez al mes  
☐ 1 a 3 veces mes  
☐ 1 vez semana  
☒ 2 a 4 veces semana  
☐ 5 a 6 veces semana  
☐ 1 vez al día  
☐ 2 a 3 veces al día  
☐ 5 a 6 veces al día  
☐ más 6 veces al día

---

pasta

- ☐ Nunca o menos 1 vez al mes  
☐ 1 a 3 veces mes  
☒ 1 vez semana  
☐ 2 a 4 veces semana  
☐ 5 a 6 veces semana  
☐ 1 vez al día  
☐ 2 a 3 veces al día  
☐ 5 a 6 veces al día  
☐ más 6 veces al día

|                     |                                                                                                                                                                                                                                                                                                                                                                                                              |
|---------------------|--------------------------------------------------------------------------------------------------------------------------------------------------------------------------------------------------------------------------------------------------------------------------------------------------------------------------------------------------------------------------------------------------------------|
| pizza               | <input type="radio"/> Nunca o menos 1 vez al mes<br><input checked="" type="radio"/> 1 a 3 veces mes<br><input type="radio"/> 1 vez semana<br><input type="radio"/> 2 a 4 veces semana<br><input type="radio"/> 5 a 6 veces semana<br><input type="radio"/> 1 vez al día<br><input type="radio"/> 2 a 3 veces al día<br><input type="radio"/> 5 a 6 veces al día<br><input type="radio"/> más 6 veces al día |
| aceite oliva        | <input type="radio"/> Nunca o menos 1 vez al mes<br><input type="radio"/> 1 a 3 veces mes<br><input type="radio"/> 1 vez semana<br><input type="radio"/> 2 a 4 veces semana<br><input checked="" type="radio"/> 5 a 6 veces semana<br><input type="radio"/> 1 vez al día<br><input type="radio"/> 2 a 3 veces al día<br><input type="radio"/> 5 a 6 veces al día<br><input type="radio"/> más 6 veces al día |
| otros aceites       | <input checked="" type="radio"/> Nunca o menos 1 vez al mes<br><input type="radio"/> 1 a 3 veces mes<br><input type="radio"/> 1 vez semana<br><input type="radio"/> 2 a 4 veces semana<br><input type="radio"/> 5 a 6 veces semana<br><input type="radio"/> 1 vez al día<br><input type="radio"/> 2 a 3 veces al día<br><input type="radio"/> 5 a 6 veces al día<br><input type="radio"/> más 6 veces al día |
| margarina           | <input checked="" type="radio"/> Nunca o menos 1 vez al mes<br><input type="radio"/> 1 a 3 veces mes<br><input type="radio"/> 1 vez semana<br><input type="radio"/> 2 a 4 veces semana<br><input type="radio"/> 5 a 6 veces semana<br><input type="radio"/> 1 vez al día<br><input type="radio"/> 2 a 3 veces al día<br><input type="radio"/> 5 a 6 veces al día<br><input type="radio"/> más 6 veces al día |
| mantequilla         | <input checked="" type="radio"/> Nunca o menos 1 vez al mes<br><input type="radio"/> 1 a 3 veces mes<br><input type="radio"/> 1 vez semana<br><input type="radio"/> 2 a 4 veces semana<br><input type="radio"/> 5 a 6 veces semana<br><input type="radio"/> 1 vez al día<br><input type="radio"/> 2 a 3 veces al día<br><input type="radio"/> 5 a 6 veces al día<br><input type="radio"/> más 6 veces al día |
| galletas tipo maria | <input type="radio"/> Nunca o menos 1 vez al mes<br><input checked="" type="radio"/> 1 a 3 veces mes<br><input type="radio"/> 1 vez semana<br><input type="radio"/> 2 a 4 veces semana<br><input type="radio"/> 5 a 6 veces semana<br><input type="radio"/> 1 vez al día<br><input type="radio"/> 2 a 3 veces al día<br><input type="radio"/> 5 a 6 veces al día<br><input type="radio"/> más 6 veces al día |



|                           |                                                                                                                                                                                                                                                                                                                                                                                                              |
|---------------------------|--------------------------------------------------------------------------------------------------------------------------------------------------------------------------------------------------------------------------------------------------------------------------------------------------------------------------------------------------------------------------------------------------------------|
| galletas chocolate        | <input type="radio"/> Nunca o menos 1 vez al mes<br><input checked="" type="radio"/> 1 a 3 veces mes<br><input type="radio"/> 1 vez semana<br><input type="radio"/> 2 a 4 veces semana<br><input type="radio"/> 5 a 6 veces semana<br><input type="radio"/> 1 vez al día<br><input type="radio"/> 2 a 3 veces al día<br><input type="radio"/> 5 a 6 veces al día<br><input type="radio"/> más 6 veces al día |
| bollieria                 | <input type="radio"/> Nunca o menos 1 vez al mes<br><input checked="" type="radio"/> 1 a 3 veces mes<br><input type="radio"/> 1 vez semana<br><input type="radio"/> 2 a 4 veces semana<br><input type="radio"/> 5 a 6 veces semana<br><input type="radio"/> 1 vez al día<br><input type="radio"/> 2 a 3 veces al día<br><input type="radio"/> 5 a 6 veces al día<br><input type="radio"/> más 6 veces al día |
| chocolate o bombones      | <input type="radio"/> Nunca o menos 1 vez al mes<br><input checked="" type="radio"/> 1 a 3 veces mes<br><input type="radio"/> 1 vez semana<br><input type="radio"/> 2 a 4 veces semana<br><input type="radio"/> 5 a 6 veces semana<br><input type="radio"/> 1 vez al día<br><input type="radio"/> 2 a 3 veces al día<br><input type="radio"/> 5 a 6 veces al día<br><input type="radio"/> más 6 veces al día |
| chocolate polvo o colacao | <input checked="" type="radio"/> Nunca o menos 1 vez al mes<br><input type="radio"/> 1 a 3 veces mes<br><input type="radio"/> 1 vez semana<br><input type="radio"/> 2 a 4 veces semana<br><input type="radio"/> 5 a 6 veces semana<br><input type="radio"/> 1 vez al día<br><input type="radio"/> 2 a 3 veces al día<br><input type="radio"/> 5 a 6 veces al día<br><input type="radio"/> más 6 veces al día |
| vino tinto                | <input checked="" type="radio"/> Nunca o menos 1 vez al mes<br><input type="radio"/> 1 a 3 veces mes<br><input type="radio"/> 1 vez semana<br><input type="radio"/> 2 a 4 veces semana<br><input type="radio"/> 5 a 6 veces semana<br><input type="radio"/> 1 vez al día<br><input type="radio"/> 2 a 3 veces al día<br><input type="radio"/> 5 a 6 veces al día<br><input type="radio"/> más 6 veces al día |
| vino blanco               | <input checked="" type="radio"/> Nunca o menos 1 vez al mes<br><input type="radio"/> 1 a 3 veces mes<br><input type="radio"/> 1 vez semana<br><input type="radio"/> 2 a 4 veces semana<br><input type="radio"/> 5 a 6 veces semana<br><input type="radio"/> 1 vez al día<br><input type="radio"/> 2 a 3 veces al día<br><input type="radio"/> 5 a 6 veces al día<br><input type="radio"/> más 6 veces al día |

|                       |                                                                                                                                                                                                                                                                                                                                                                                                              |
|-----------------------|--------------------------------------------------------------------------------------------------------------------------------------------------------------------------------------------------------------------------------------------------------------------------------------------------------------------------------------------------------------------------------------------------------------|
| vino seco o vermut    | <input checked="" type="radio"/> Nunca o menos 1 vez al mes<br><input type="radio"/> 1 a 3 veces mes<br><input type="radio"/> 1 vez semana<br><input type="radio"/> 2 a 4 veces semana<br><input type="radio"/> 5 a 6 veces semana<br><input type="radio"/> 1 vez al día<br><input type="radio"/> 2 a 3 veces al día<br><input type="radio"/> 5 a 6 veces al día<br><input type="radio"/> más 6 veces al día |
| cerveza               | <input checked="" type="radio"/> Nunca o menos 1 vez al mes<br><input type="radio"/> 1 a 3 veces mes<br><input type="radio"/> 1 vez semana<br><input type="radio"/> 2 a 4 veces semana<br><input type="radio"/> 5 a 6 veces semana<br><input type="radio"/> 1 vez al día<br><input type="radio"/> 2 a 3 veces al día<br><input type="radio"/> 5 a 6 veces al día<br><input type="radio"/> más 6 veces al día |
| cerveza sin alcohol   | <input checked="" type="radio"/> Nunca o menos 1 vez al mes<br><input type="radio"/> 1 a 3 veces mes<br><input type="radio"/> 1 vez semana<br><input type="radio"/> 2 a 4 veces semana<br><input type="radio"/> 5 a 6 veces semana<br><input type="radio"/> 1 vez al día<br><input type="radio"/> 2 a 3 veces al día<br><input type="radio"/> 5 a 6 veces al día<br><input type="radio"/> más 6 veces al día |
| licores               | <input checked="" type="radio"/> Nunca o menos 1 vez al mes<br><input type="radio"/> 1 a 3 veces mes<br><input type="radio"/> 1 vez semana<br><input type="radio"/> 2 a 4 veces semana<br><input type="radio"/> 5 a 6 veces semana<br><input type="radio"/> 1 vez al día<br><input type="radio"/> 2 a 3 veces al día<br><input type="radio"/> 5 a 6 veces al día<br><input type="radio"/> más 6 veces al día |
| ginebra o ron o vodka | <input checked="" type="radio"/> Nunca o menos 1 vez al mes<br><input type="radio"/> 1 a 3 veces mes<br><input type="radio"/> 1 vez semana<br><input type="radio"/> 2 a 4 veces semana<br><input type="radio"/> 5 a 6 veces semana<br><input type="radio"/> 1 vez al día<br><input type="radio"/> 2 a 3 veces al día<br><input type="radio"/> 5 a 6 veces al día<br><input type="radio"/> más 6 veces al día |
| refresco normal       | <input checked="" type="radio"/> Nunca o menos 1 vez al mes<br><input type="radio"/> 1 a 3 veces mes<br><input type="radio"/> 1 vez semana<br><input type="radio"/> 2 a 4 veces semana<br><input type="radio"/> 5 a 6 veces semana<br><input type="radio"/> 1 vez al día<br><input type="radio"/> 2 a 3 veces al día<br><input type="radio"/> 5 a 6 veces al día<br><input type="radio"/> más 6 veces al día |

|                          |                                                                                                                                                                                                                                                                                                                                                                                                              |
|--------------------------|--------------------------------------------------------------------------------------------------------------------------------------------------------------------------------------------------------------------------------------------------------------------------------------------------------------------------------------------------------------------------------------------------------------|
| refresco sin azúcar      | <input checked="" type="radio"/> Nunca o menos 1 vez al mes<br><input type="radio"/> 1 a 3 veces mes<br><input type="radio"/> 1 vez semana<br><input type="radio"/> 2 a 4 veces semana<br><input type="radio"/> 5 a 6 veces semana<br><input type="radio"/> 1 vez al día<br><input type="radio"/> 2 a 3 veces al día<br><input type="radio"/> 5 a 6 veces al día<br><input type="radio"/> más 6 veces al día |
| Agua del grifo           | <input checked="" type="radio"/> Nunca o menos 1 vez al mes<br><input type="radio"/> 1 a 3 veces mes<br><input type="radio"/> 1 vez semana<br><input type="radio"/> 2 a 4 veces semana<br><input type="radio"/> 5 a 6 veces semana<br><input type="radio"/> 1 vez al día<br><input type="radio"/> 2 a 3 veces al día<br><input type="radio"/> 5 a 6 veces al día<br><input type="radio"/> más 6 veces al día |
| agua embotellada sin gas | <input checked="" type="radio"/> Nunca o menos 1 vez al mes<br><input type="radio"/> 1 a 3 veces mes<br><input type="radio"/> 1 vez semana<br><input type="radio"/> 2 a 4 veces semana<br><input type="radio"/> 5 a 6 veces semana<br><input type="radio"/> 1 vez al día<br><input type="radio"/> 2 a 3 veces al día<br><input type="radio"/> 5 a 6 veces al día<br><input type="radio"/> más 6 veces al día |
| agua embotellada con gas | <input checked="" type="radio"/> Nunca o menos 1 vez al mes<br><input type="radio"/> 1 a 3 veces mes<br><input type="radio"/> 1 vez semana<br><input type="radio"/> 2 a 4 veces semana<br><input type="radio"/> 5 a 6 veces semana<br><input type="radio"/> 1 vez al día<br><input type="radio"/> 2 a 3 veces al día<br><input type="radio"/> 5 a 6 veces al día<br><input type="radio"/> más 6 veces al día |
| zumو frutas embasado     | <input type="radio"/> Nunca o menos 1 vez al mes<br><input checked="" type="radio"/> 1 a 3 veces mes<br><input type="radio"/> 1 vez semana<br><input type="radio"/> 2 a 4 veces semana<br><input type="radio"/> 5 a 6 veces semana<br><input type="radio"/> 1 vez al día<br><input type="radio"/> 2 a 3 veces al día<br><input type="radio"/> 5 a 6 veces al día<br><input type="radio"/> más 6 veces al día |
| cafe                     | <input checked="" type="radio"/> Nunca o menos 1 vez al mes<br><input type="radio"/> 1 a 3 veces mes<br><input type="radio"/> 1 vez semana<br><input type="radio"/> 2 a 4 veces semana<br><input type="radio"/> 5 a 6 veces semana<br><input type="radio"/> 1 vez al día<br><input type="radio"/> 2 a 3 veces al día<br><input type="radio"/> 5 a 6 veces al día<br><input type="radio"/> más 6 veces al día |

|                       |                                                                                                                                                                                                                                                                                                                                                                                                              |
|-----------------------|--------------------------------------------------------------------------------------------------------------------------------------------------------------------------------------------------------------------------------------------------------------------------------------------------------------------------------------------------------------------------------------------------------------|
| cafe descafeinado     | <input checked="" type="radio"/> Nunca o menos 1 vez al mes<br><input type="radio"/> 1 a 3 veces mes<br><input type="radio"/> 1 vez semana<br><input type="radio"/> 2 a 4 veces semana<br><input type="radio"/> 5 a 6 veces semana<br><input type="radio"/> 1 vez al día<br><input type="radio"/> 2 a 3 veces al día<br><input type="radio"/> 5 a 6 veces al día<br><input type="radio"/> más 6 veces al día |
| te o infusión         | <input type="radio"/> Nunca o menos 1 vez al mes<br><input type="radio"/> 1 a 3 veces mes<br><input type="radio"/> 1 vez semana<br><input type="radio"/> 2 a 4 veces semana<br><input type="radio"/> 5 a 6 veces semana<br><input checked="" type="radio"/> 1 vez al día<br><input type="radio"/> 2 a 3 veces al día<br><input type="radio"/> 5 a 6 veces al día<br><input type="radio"/> más 6 veces al día |
| sopa o puré verduras  | <input checked="" type="radio"/> Nunca o menos 1 vez al mes<br><input type="radio"/> 1 a 3 veces mes<br><input type="radio"/> 1 vez semana<br><input type="radio"/> 2 a 4 veces semana<br><input type="radio"/> 5 a 6 veces semana<br><input type="radio"/> 1 vez al día<br><input type="radio"/> 2 a 3 veces al día<br><input type="radio"/> 5 a 6 veces al día<br><input type="radio"/> más 6 veces al día |
| croquetas pollo jamón | <input checked="" type="radio"/> Nunca o menos 1 vez al mes<br><input type="radio"/> 1 a 3 veces mes<br><input type="radio"/> 1 vez semana<br><input type="radio"/> 2 a 4 veces semana<br><input type="radio"/> 5 a 6 veces semana<br><input type="radio"/> 1 vez al día<br><input type="radio"/> 2 a 3 veces al día<br><input type="radio"/> 5 a 6 veces al día<br><input type="radio"/> más 6 veces al día |
| croquetas pescado     | <input checked="" type="radio"/> Nunca o menos 1 vez al mes<br><input type="radio"/> 1 a 3 veces mes<br><input type="radio"/> 1 vez semana<br><input type="radio"/> 2 a 4 veces semana<br><input type="radio"/> 5 a 6 veces semana<br><input type="radio"/> 1 vez al día<br><input type="radio"/> 2 a 3 veces al día<br><input type="radio"/> 5 a 6 veces al día<br><input type="radio"/> más 6 veces al día |
| mayonesa              | <input checked="" type="radio"/> Nunca o menos 1 vez al mes<br><input type="radio"/> 1 a 3 veces mes<br><input type="radio"/> 1 vez semana<br><input type="radio"/> 2 a 4 veces semana<br><input type="radio"/> 5 a 6 veces semana<br><input type="radio"/> 1 vez al día<br><input type="radio"/> 2 a 3 veces al día<br><input type="radio"/> 5 a 6 veces al día<br><input type="radio"/> más 6 veces al día |

|                  |                                                                                                                                                                                                                                                                                                                                                                                                              |
|------------------|--------------------------------------------------------------------------------------------------------------------------------------------------------------------------------------------------------------------------------------------------------------------------------------------------------------------------------------------------------------------------------------------------------------|
| salsa tomate     | <input checked="" type="radio"/> Nunca o menos 1 vez al mes<br><input type="radio"/> 1 a 3 veces mes<br><input type="radio"/> 1 vez semana<br><input type="radio"/> 2 a 4 veces semana<br><input type="radio"/> 5 a 6 veces semana<br><input type="radio"/> 1 vez al día<br><input type="radio"/> 2 a 3 veces al día<br><input type="radio"/> 5 a 6 veces al día<br><input type="radio"/> más 6 veces al día |
| ketchup          | <input type="radio"/> Nunca o menos 1 vez al mes<br><input type="radio"/> 1 a 3 veces mes<br><input type="radio"/> 1 vez semana<br><input type="radio"/> 2 a 4 veces semana<br><input type="radio"/> 5 a 6 veces semana<br><input type="radio"/> 1 vez al día<br><input type="radio"/> 2 a 3 veces al día<br><input type="radio"/> 5 a 6 veces al día<br><input type="radio"/> más 6 veces al día            |
| sal              | <input checked="" type="radio"/> Nunca o menos 1 vez al mes<br><input type="radio"/> 1 a 3 veces mes<br><input type="radio"/> 1 vez semana<br><input type="radio"/> 2 a 4 veces semana<br><input type="radio"/> 5 a 6 veces semana<br><input type="radio"/> 1 vez al día<br><input type="radio"/> 2 a 3 veces al día<br><input type="radio"/> 5 a 6 veces al día<br><input type="radio"/> más 6 veces al día |
| ajo              | <input type="radio"/> Nunca o menos 1 vez al mes<br><input type="radio"/> 1 a 3 veces mes<br><input type="radio"/> 1 vez semana<br><input checked="" type="radio"/> 2 a 4 veces semana<br><input type="radio"/> 5 a 6 veces semana<br><input type="radio"/> 1 vez al día<br><input type="radio"/> 2 a 3 veces al día<br><input type="radio"/> 5 a 6 veces al día<br><input type="radio"/> más 6 veces al día |
| mermelada o miel | <input checked="" type="radio"/> Nunca o menos 1 vez al mes<br><input type="radio"/> 1 a 3 veces mes<br><input type="radio"/> 1 vez semana<br><input type="radio"/> 2 a 4 veces semana<br><input type="radio"/> 5 a 6 veces semana<br><input type="radio"/> 1 vez al día<br><input type="radio"/> 2 a 3 veces al día<br><input type="radio"/> 5 a 6 veces al día<br><input type="radio"/> más 6 veces al día |
| azúcar           | <input type="radio"/> Nunca o menos 1 vez al mes<br><input type="radio"/> 1 a 3 veces mes<br><input type="radio"/> 1 vez semana<br><input type="radio"/> 2 a 4 veces semana<br><input type="radio"/> 5 a 6 veces semana<br><input type="radio"/> 1 vez al día<br><input checked="" type="radio"/> 2 a 3 veces al día<br><input type="radio"/> 5 a 6 veces al día<br><input type="radio"/> más 6 veces al día |

|                                       |                                                                                                                                                                                                                                                                                                                                                                                                                                                                                                                               |
|---------------------------------------|-------------------------------------------------------------------------------------------------------------------------------------------------------------------------------------------------------------------------------------------------------------------------------------------------------------------------------------------------------------------------------------------------------------------------------------------------------------------------------------------------------------------------------|
| Otro alimento                         | [*DATA REMOVED*]                                                                                                                                                                                                                                                                                                                                                                                                                                                                                                              |
| suplementos vitamínicos               | <input checked="" type="radio"/> si<br><input type="radio"/> no                                                                                                                                                                                                                                                                                                                                                                                                                                                               |
| suplementos vitamínicos               | [*DATA REMOVED*]                                                                                                                                                                                                                                                                                                                                                                                                                                                                                                              |
| dieta previa                          | <input type="radio"/> si<br><input checked="" type="radio"/> no                                                                                                                                                                                                                                                                                                                                                                                                                                                               |
| motivo dieta                          | <input checked="" type="radio"/> no dieta<br><input type="radio"/> control peso<br><input type="radio"/> control colesterol<br><input type="radio"/> control diabetes<br><input type="radio"/> problemas estómago<br><input type="radio"/> problemas vesícula o hepáticos<br><input type="radio"/> HTA o cardiopatía<br><input type="radio"/> problemas renales<br><input type="radio"/> alergia alimentaria<br><input type="radio"/> ácido úrico elevado<br><input type="radio"/> vegetariana<br><input type="radio"/> otros |
| cambio alimentos año previo gestación | <input type="radio"/> si<br><input checked="" type="radio"/> no                                                                                                                                                                                                                                                                                                                                                                                                                                                               |
| cambio lácteos                        | <input type="radio"/> eliminado<br><input type="radio"/> disminuido<br><input type="radio"/> igual<br><input type="radio"/> aumentado<br><input type="radio"/> no sabe                                                                                                                                                                                                                                                                                                                                                        |
| cambio huevos                         | <input type="radio"/> eliminado<br><input type="radio"/> disminuido<br><input type="radio"/> igual<br><input type="radio"/> aumentado<br><input type="radio"/> no sabe                                                                                                                                                                                                                                                                                                                                                        |
| cambio carne                          | <input type="radio"/> eliminado<br><input type="radio"/> disminuido<br><input type="radio"/> igual<br><input type="radio"/> aumentado<br><input type="radio"/> no sabe                                                                                                                                                                                                                                                                                                                                                        |
| cambio pescado                        | <input type="radio"/> eliminado<br><input type="radio"/> disminuido<br><input type="radio"/> igual<br><input type="radio"/> aumentado<br><input type="radio"/> no sabe                                                                                                                                                                                                                                                                                                                                                        |
| cambio verduras                       | <input type="radio"/> eliminado<br><input type="radio"/> disminuido<br><input type="radio"/> igual<br><input type="radio"/> aumentado<br><input type="radio"/> no sabe                                                                                                                                                                                                                                                                                                                                                        |

|                            |                                                                                                                                                                                                                        |
|----------------------------|------------------------------------------------------------------------------------------------------------------------------------------------------------------------------------------------------------------------|
| cambio legumbres           | <input type="radio"/> eliminado<br><input type="radio"/> disminuido<br><input type="radio"/> igual<br><input type="radio"/> aumentado<br><input type="radio"/> no sabe                                                 |
| cambio fruta               | <input type="radio"/> eliminado<br><input type="radio"/> disminuido<br><input type="radio"/> igual<br><input type="radio"/> aumentado<br><input type="radio"/> no sabe                                                 |
| cambio pan                 | <input type="radio"/> eliminado<br><input type="radio"/> disminuido<br><input type="radio"/> igual<br><input type="radio"/> aumentado<br><input type="radio"/> no sabe                                                 |
| cambio aceite oliva        | <input type="radio"/> eliminado<br><input type="radio"/> disminuido<br><input type="radio"/> igual<br><input type="radio"/> aumentado<br><input type="radio"/> no sabe                                                 |
| cambio mante o margarina   | <input type="radio"/> eliminado<br><input type="radio"/> disminuido<br><input type="radio"/> igual<br><input type="radio"/> aumentado<br><input type="radio"/> no sabe                                                 |
| cambio azúcar y dulces     | <input type="radio"/> eliminado<br><input type="radio"/> disminuido<br><input type="radio"/> igual<br><input type="radio"/> aumentado<br><input type="radio"/> no sabe                                                 |
| cambio bebidas alcohólicas | <input type="radio"/> eliminado<br><input type="radio"/> disminuido<br><input type="radio"/> igual<br><input type="radio"/> aumentado<br><input type="radio"/> no sabe                                                 |
| frecuencia comidas fritas  | <input type="radio"/> a diario<br><input type="radio"/> 5 a 6 veces semana<br><input type="radio"/> 2 a 4 veces semana<br><input type="radio"/> 1 vez semana<br><input checked="" type="radio"/> menos de 1 vez semana |
| carne                      | <input type="radio"/> no como<br><input type="radio"/> cruda<br><input type="radio"/> poco hecha<br><input checked="" type="radio"/> hecha<br><input type="radio"/> muy hecha                                          |
| grasa visible carne        | <input type="radio"/> quita toda<br><input checked="" type="radio"/> quita mayoría<br><input type="radio"/> quita un poco<br><input type="radio"/> no quita nada                                                       |

|                                |                                                                                                                                                                                                                                                          |
|--------------------------------|----------------------------------------------------------------------------------------------------------------------------------------------------------------------------------------------------------------------------------------------------------|
| cocina carne                   | <input checked="" type="radio"/> a la plancha<br><input type="radio"/> a la parrilla<br><input type="radio"/> asada<br><input type="radio"/> frita<br><input type="radio"/> guisada                                                                      |
| tostado quemado carne          | <input checked="" type="radio"/> nunca<br><input type="radio"/> 1 vez mes<br><input type="radio"/> 2 a 3 veces mes<br><input type="radio"/> 1 vez semana<br><input type="radio"/> 2 a 3 semanas                                                          |
| tostado quemado pescado        | <input checked="" type="radio"/> nunca<br><input type="radio"/> 1 vez mes<br><input type="radio"/> 2 a 3 veces mes<br><input type="radio"/> 1 vez semana<br><input type="radio"/> 2 a 3 semanas                                                          |
| socarrat paella                | <input checked="" type="radio"/> nunca<br><input type="radio"/> 1 vez mes<br><input type="radio"/> 2 a 3 veces mes<br><input type="radio"/> 1 vez semana<br><input type="radio"/> 2 a 3 semanas                                                          |
| grasa o aceite cocinar         | <input type="radio"/> mantequilla<br><input type="radio"/> margarina<br><input type="radio"/> aceite oliva<br><input checked="" type="radio"/> aceite oliva virgen extra<br><input type="radio"/> aceite vegetal<br><input type="radio"/> mezcla aceites |
| grasa aceite aliñar            | <input type="radio"/> mantequilla<br><input type="radio"/> margarina<br><input type="radio"/> aceite oliva<br><input checked="" type="radio"/> aceite oliva virgen extra<br><input type="radio"/> aceite vegetal<br><input type="radio"/> mezcla aceites |
| grasa aceite freir             | <input type="radio"/> mantequilla<br><input type="radio"/> margarina<br><input type="radio"/> aceite oliva<br><input checked="" type="radio"/> aceite oliva virgen extra<br><input type="radio"/> aceite vegetal<br><input type="radio"/> mezcla aceites |
| Ejercicio cuestionario         | <input checked="" type="radio"/> si<br><input type="radio"/> no                                                                                                                                                                                          |
| horas de sueño incluido siesta | [*DATA REMOVED*]                                                                                                                                                                                                                                         |
| minutos siesta                 | [*DATA REMOVED*]                                                                                                                                                                                                                                         |
| horas televisión semana        | [*DATA REMOVED*]                                                                                                                                                                                                                                         |



|                                        |                                                                                                                                                                                                                                                                                                                                                                           |
|----------------------------------------|---------------------------------------------------------------------------------------------------------------------------------------------------------------------------------------------------------------------------------------------------------------------------------------------------------------------------------------------------------------------------|
| actividad trabajo                      | <input type="radio"/> casi siempre sentado<br><input checked="" type="radio"/> sentado 50 por cien<br><input type="radio"/> casi siempre de pie, quieto<br><input type="radio"/> casi siempre levantado caminando y llevando pocas cosas<br><input type="radio"/> casi siempre levantado, caminando y llevado muchas cosas<br><input type="radio"/> trabajo manual pesado |
| tiempo caminar o bici al día           | <input type="radio"/> casi nunca<br><input type="radio"/> menos 20min día<br><input type="radio"/> 20 a 40 min día<br><input type="radio"/> 40 a 60 min día<br><input checked="" type="radio"/> 1h o 1h y media día<br><input type="radio"/> más de 1h y media al día                                                                                                     |
| tiempo tareas casa al día              | <input type="radio"/> menos de 1h día<br><input checked="" type="radio"/> 1 a 2h día<br><input type="radio"/> 3 a 4h día<br><input type="radio"/> 5 a 6h día<br><input type="radio"/> 7 a 8h día<br><input type="radio"/> más de 8h día                                                                                                                                   |
| tiempo libre televisión ordenador leer | <input checked="" type="radio"/> menos 1h día<br><input type="radio"/> 1h día<br><input type="radio"/> 2h día<br><input type="radio"/> 3h día<br><input type="radio"/> 4h día<br><input type="radio"/> 5 a 6h día<br><input type="radio"/> mas 6h día                                                                                                                     |
| tiempo libre ejercicio o deporte       | <input checked="" type="radio"/> menos 1h semana<br><input type="radio"/> 1h semana<br><input type="radio"/> 2h semana<br><input type="radio"/> 3h semana<br><input type="radio"/> 4 a 5h semana<br><input type="radio"/> mas 5h semana                                                                                                                                   |
| como se considera                      | <input type="radio"/> sedentaria<br><input checked="" type="radio"/> poco activa<br><input type="radio"/> moderadamente activa<br><input type="radio"/> bastante activa<br><input type="radio"/> muy activa<br><input type="radio"/> no sabe                                                                                                                              |
| FUR                                    | [*DATA REMOVED*]                                                                                                                                                                                                                                                                                                                                                          |
| Semanas gestación 2T                   | _____                                                                                                                                                                                                                                                                                                                                                                     |
| Días gestación 2T                      | _____                                                                                                                                                                                                                                                                                                                                                                     |
| DBP 2T                                 | _____                                                                                                                                                                                                                                                                                                                                                                     |
| CC 2T                                  | _____                                                                                                                                                                                                                                                                                                                                                                     |

|                                    |                                                                                                                                                                                                 |
|------------------------------------|-------------------------------------------------------------------------------------------------------------------------------------------------------------------------------------------------|
| AC 2T                              | <hr/>                                                                                                                                                                                           |
| LF 2T                              | <hr/>                                                                                                                                                                                           |
| PFE 2T (Hadlock)                   | <hr/>                                                                                                                                                                                           |
| Semanas gestación 3T               | <hr/>                                                                                                                                                                                           |
| días 3T                            | <hr/>                                                                                                                                                                                           |
| DBP 3T                             | <hr/>                                                                                                                                                                                           |
| CC 3T                              | <hr/>                                                                                                                                                                                           |
| AC 3T                              | <hr/>                                                                                                                                                                                           |
| LF 3T                              | <hr/>                                                                                                                                                                                           |
| PFE 3T (Hadlock)                   | <hr/>                                                                                                                                                                                           |
| Semanas de gestación final         | [*DATA REMOVED*]                                                                                                                                                                                |
| días gestación final               | [*DATA REMOVED*]                                                                                                                                                                                |
| Localización placenta              | <input type="radio"/> anterior<br><input type="radio"/> lateral derecha<br><input type="radio"/> lateral izquierda<br><input checked="" type="radio"/> posterior<br><input type="radio"/> fondo |
| Presentación longitudinal cefálica | <input type="radio"/> no<br><input checked="" type="radio"/> si                                                                                                                                 |
| Dorso                              | <input checked="" type="radio"/> izquierda anterior<br><input type="radio"/> izquierda posterior<br><input type="radio"/> derecha anterior<br><input type="radio"/> derecha posterior           |
| diámetro biparietal                | [*DATA REMOVED*]                                                                                                                                                                                |
| Circunferencia craneal             | [*DATA REMOVED*]                                                                                                                                                                                |
| Circunferencia abdominal           | [*DATA REMOVED*]                                                                                                                                                                                |

|                                                   |                                                                                                                                               |
|---------------------------------------------------|-----------------------------------------------------------------------------------------------------------------------------------------------|
| Longitud de femur                                 | [*DATA REMOVED*]                                                                                                                              |
| tejido celular subcutáneo a nivel del muslo en mm | [*DATA REMOVED*]                                                                                                                              |
| tejido celular subcutáneo en abdomen en mm        | [*DATA REMOVED*]                                                                                                                              |
| Volumen del muslo en cm3                          | [*DATA REMOVED*]                                                                                                                              |
| Peso fetal estimado según fórmula de Hadlock      | [*DATA REMOVED*]                                                                                                                              |
| Percentil                                         | [*DATA REMOVED*]                                                                                                                              |
| Peso fetal estimado según fórmula de Scioscia     | _____                                                                                                                                         |
| Peso fetal estimado según fórmula de LEE          | _____                                                                                                                                         |
| Tipo de parto                                     | <input type="radio"/> eutocico<br><input type="radio"/> instrumentado/ventosa<br><input checked="" type="radio"/> cesarea                     |
| fecha de nacimiento                               | [*DATA REMOVED*]                                                                                                                              |
| Días entre exploración y nacimiento               | [*DATA REMOVED*]                                                                                                                              |
| Peso RN en g                                      | [*DATA REMOVED*]                                                                                                                              |
| sexo                                              | <input type="radio"/> mujer<br><input checked="" type="radio"/> hombre                                                                        |
| Apgar 1 minuto                                    | [*DATA REMOVED*]                                                                                                                              |
| Apgar 5 minutos                                   | [*DATA REMOVED*]                                                                                                                              |
| Apgar 10 minutos                                  | _____                                                                                                                                         |
| antecedente Covid durante gestación               | <input type="radio"/> Yes<br><input checked="" type="radio"/> No                                                                              |
| Nivel de estudios                                 | <input type="radio"/> ninguno<br><input type="radio"/> primarios<br><input type="radio"/> secundarios<br><input type="radio"/> universitarios |

# Base\_datos\_estimacion\_peso\_fetal

|                                       |                                                                                                                                                                                                                                                                                      |
|---------------------------------------|--------------------------------------------------------------------------------------------------------------------------------------------------------------------------------------------------------------------------------------------------------------------------------------|
| Número de identificación participante | 96                                                                                                                                                                                                                                                                                   |
| CODIGO PARTICIPANTE                   |                                                                                                                                                                                                                                                                                      |
| Edad                                  | [*DATA REMOVED*]                                                                                                                                                                                                                                                                     |
| Gestaciones                           | <input type="radio"/> 1<br><input type="radio"/> 2<br><input checked="" type="radio"/> 3<br><input type="radio"/> mas de 3                                                                                                                                                           |
| partos                                | <input type="radio"/> 0<br><input type="radio"/> 1<br><input checked="" type="radio"/> 2<br><input type="radio"/> 3<br><input type="radio"/> mas de 3                                                                                                                                |
| cesáreas                              | <input checked="" type="radio"/> 0<br><input type="radio"/> 1<br><input type="radio"/> 2<br><input type="radio"/> 3<br><input type="radio"/> mas de 3                                                                                                                                |
| Abortos                               | <input type="radio"/> 0<br><input checked="" type="radio"/> 1<br><input type="radio"/> 2<br><input type="radio"/> 3<br><input type="radio"/> mas de 3                                                                                                                                |
| Tipo de gestacion                     | <input checked="" type="radio"/> espontanea<br><input type="radio"/> IAC inseminación artificial conyuge<br><input type="radio"/> IAD inseminación artificial donante<br><input type="radio"/> FIV Fecundación in Vitro<br><input type="radio"/> Ovodon FIV con donación de ovocitos |
| peso previo a embarazo                | [*DATA REMOVED*]                                                                                                                                                                                                                                                                     |
| Ganancia ponderal embarazo            | [*DATA REMOVED*]                                                                                                                                                                                                                                                                     |
| Talla madre                           | [*DATA REMOVED*]                                                                                                                                                                                                                                                                     |
| IMC previo embarazo                   | 21.874999999999996                                                                                                                                                                                                                                                                   |
| Patología obstétrica                  | <input checked="" type="radio"/> no<br><input type="radio"/> si                                                                                                                                                                                                                      |
| Diabetes pregestacional               | <input checked="" type="radio"/> no<br><input type="radio"/> si                                                                                                                                                                                                                      |
| Diabetes gestacional                  | <input checked="" type="radio"/> no<br><input type="radio"/> si                                                                                                                                                                                                                      |

|                                            |                                                                                                                                                                                      |
|--------------------------------------------|--------------------------------------------------------------------------------------------------------------------------------------------------------------------------------------|
| Diabetes gestacional con insulina          | <input checked="" type="radio"/> no<br><input type="radio"/> si                                                                                                                      |
| Diabetes gestacional con dieta y ejercicio | <input checked="" type="radio"/> no<br><input type="radio"/> si                                                                                                                      |
| Percentil fetos previos                    | <input type="radio"/> Nada<br><input type="radio"/> percentil menor de 10<br><input checked="" type="radio"/> percentil entre 10 y 90<br><input type="radio"/> percentil mayor de 90 |
| Exfumadora                                 | <input checked="" type="radio"/> Nada<br><input type="radio"/> menos de 5 años<br><input type="radio"/> 5 a 10 años<br><input type="radio"/> mayor o igual a 10 años                 |
| Hábito tabáquico                           | <input checked="" type="radio"/> no<br><input type="radio"/> si                                                                                                                      |
| fumadora                                   | [*DATA REMOVED*]                                                                                                                                                                     |
| Consumo otros tóxicos                      | <input checked="" type="radio"/> no<br><input type="radio"/> si                                                                                                                      |
| Hb 1T                                      | [*DATA REMOVED*]                                                                                                                                                                     |
| Htc 1T                                     | [*DATA REMOVED*]                                                                                                                                                                     |
| Hb 2T                                      | [*DATA REMOVED*]                                                                                                                                                                     |
| HTC 2T                                     | [*DATA REMOVED*]                                                                                                                                                                     |
| Hb 3T                                      | [*DATA REMOVED*]                                                                                                                                                                     |
| HTC 3T                                     | [*DATA REMOVED*]                                                                                                                                                                     |
| Suplemento FE oral                         | <input type="radio"/> si<br><input checked="" type="radio"/> no                                                                                                                      |
| Suplemento fe iv                           | <input type="radio"/> si<br><input checked="" type="radio"/> no                                                                                                                      |
| Transfusión                                | <input checked="" type="radio"/> no<br><input type="radio"/> si                                                                                                                      |
| Solicitada Vit D                           | <input checked="" type="radio"/> no<br><input type="radio"/> si                                                                                                                      |
| Deficit vit D                              | <input type="radio"/> no<br><input type="radio"/> si                                                                                                                                 |
| Suplemento vit D                           | <input type="radio"/> si<br><input type="radio"/> no                                                                                                                                 |

|                       |                                                                                                                                                                                                                                                                                                                                                                                                              |
|-----------------------|--------------------------------------------------------------------------------------------------------------------------------------------------------------------------------------------------------------------------------------------------------------------------------------------------------------------------------------------------------------------------------------------------------------|
| Dieta, cuestionario   | <input checked="" type="radio"/> sí<br><input type="radio"/> no                                                                                                                                                                                                                                                                                                                                              |
| Leche entera          | <input type="radio"/> Nunca o menos 1 vez al mes<br><input type="radio"/> 1 a 3 veces mes<br><input type="radio"/> 1 vez semana<br><input type="radio"/> 2 a 4 veces semana<br><input type="radio"/> 5 a 6 veces semana<br><input type="radio"/> 1 vez al día<br><input checked="" type="radio"/> 2 a 3 veces al día<br><input type="radio"/> 5 a 6 veces al día<br><input type="radio"/> más 6 veces al día |
| Leche semidesnatada   | <input checked="" type="radio"/> Nunca o menos 1 vez al mes<br><input type="radio"/> 1 a 3 veces mes<br><input type="radio"/> 1 vez semana<br><input type="radio"/> 2 a 4 veces semana<br><input type="radio"/> 5 a 6 veces semana<br><input type="radio"/> 1 vez al día<br><input type="radio"/> 2 a 3 veces al día<br><input type="radio"/> 5 a 6 veces al día<br><input type="radio"/> mas 6 veces al día |
| Leche desnatada       | <input checked="" type="radio"/> Nunca o menos 1 vez al mes<br><input type="radio"/> 1 a 3 veces mes<br><input type="radio"/> 1 vez semana<br><input type="radio"/> 2 a 4 veces semana<br><input type="radio"/> 5 a 6 veces semana<br><input type="radio"/> 1 vez al día<br><input type="radio"/> 2 a 3 veces al día<br><input type="radio"/> 5 a 6 veces al día<br><input type="radio"/> más 6 veces al día |
| Leche condensada      | <input checked="" type="radio"/> Nunca o menos 1 vez al mes<br><input type="radio"/> 1 a 3 veces mes<br><input type="radio"/> 1 vez semana<br><input type="radio"/> 2 a 4 veces semana<br><input type="radio"/> 5 a 6 veces semana<br><input type="radio"/> 1 vez al día<br><input type="radio"/> 2 a 3 veces al día<br><input type="radio"/> 5 a 6 veces al día<br><input type="radio"/> más 6 veces al día |
| nata o crema de leche | <input checked="" type="radio"/> Nunca o menos 1 vez al mes<br><input type="radio"/> 1 a 3 veces mes<br><input type="radio"/> 1 vez semana<br><input type="radio"/> 2 a 4 veces semana<br><input type="radio"/> 5 a 6 veces semana<br><input type="radio"/> 1 vez al día<br><input type="radio"/> 2 a 3 veces al día<br><input type="radio"/> 5 a 6 veces al día<br><input type="radio"/> más 6 veces al día |

|                                             |                                                                                                                                                                                                                                                                                                                                                                                                              |
|---------------------------------------------|--------------------------------------------------------------------------------------------------------------------------------------------------------------------------------------------------------------------------------------------------------------------------------------------------------------------------------------------------------------------------------------------------------------|
| Yogurt Entero                               | <input type="radio"/> Nunca o menos 1 vez al mes<br><input type="radio"/> 1 a 3 veces mes<br><input type="radio"/> 1 vez semana<br><input type="radio"/> 2 a 4 veces semana<br><input type="radio"/> 5 a 6 veces semana<br><input checked="" type="radio"/> 1 vez al día<br><input type="radio"/> 2 a 3 veces al día<br><input type="radio"/> 5 a 6 veces al día<br><input type="radio"/> más 6 veces al día |
| Yogurt desnatado                            | <input checked="" type="radio"/> Nunca o menos 1 vez al mes<br><input type="radio"/> 1 a 3 veces mes<br><input type="radio"/> 1 vez semana<br><input type="radio"/> 2 a 4 veces semana<br><input type="radio"/> 5 a 6 veces semana<br><input type="radio"/> 1 vez al día<br><input type="radio"/> 2 a 3 veces al día<br><input type="radio"/> 5 a 6 veces al día<br><input type="radio"/> más 6 veces al día |
| 100g requesón o queso blando o queso fresco | <input type="radio"/> Nunca o menos 1 vez al mes<br><input checked="" type="radio"/> 1 a 3 veces mes<br><input type="radio"/> 1 vez semana<br><input type="radio"/> 2 a 4 veces semana<br><input type="radio"/> 5 a 6 veces semana<br><input type="radio"/> 1 vez al día<br><input type="radio"/> 2 a 3 veces al día<br><input type="radio"/> 5 a 6 veces al día<br><input type="radio"/> más 6 veces al día |
| queso curado o semicurado o cremoso         | <input type="radio"/> Nunca o menos 1 vez al mes<br><input checked="" type="radio"/> 1 a 3 veces mes<br><input type="radio"/> 1 vez semana<br><input type="radio"/> 2 a 4 veces semana<br><input type="radio"/> 5 a 6 veces semana<br><input type="radio"/> 1 vez al día<br><input type="radio"/> 2 a 3 veces al día<br><input type="radio"/> 5 a 6 veces al día<br><input type="radio"/> más 6 veces al día |
| natillas flan pudding                       | <input type="radio"/> Nunca o menos 1 vez al mes<br><input type="radio"/> 1 a 3 veces mes<br><input type="radio"/> 1 vez semana<br><input type="radio"/> 2 a 4 veces semana<br><input type="radio"/> 5 a 6 veces semana<br><input type="radio"/> 1 vez al día<br><input checked="" type="radio"/> 2 a 3 veces al día<br><input type="radio"/> 5 a 6 veces al día<br><input type="radio"/> más 6 veces al día |
| Helado                                      | <input checked="" type="radio"/> Nunca o menos 1 vez al mes<br><input type="radio"/> 1 a 3 veces mes<br><input type="radio"/> 1 vez semana<br><input type="radio"/> 2 a 4 veces semana<br><input type="radio"/> 5 a 6 veces semana<br><input type="radio"/> 1 vez al día<br><input type="radio"/> 2 a 3 veces al día<br><input type="radio"/> 5 a 6 veces al día<br><input type="radio"/> más 6 veces al día |

|                                      |                                                                                                                                                                                                                                                                                                                                                                                                              |
|--------------------------------------|--------------------------------------------------------------------------------------------------------------------------------------------------------------------------------------------------------------------------------------------------------------------------------------------------------------------------------------------------------------------------------------------------------------|
| huevo                                | <input type="radio"/> Nunca o menos 1 vez al mes<br><input type="radio"/> 1 a 3 veces mes<br><input checked="" type="radio"/> 1 vez semana<br><input type="radio"/> 2 a 4 veces semana<br><input type="radio"/> 5 a 6 veces semana<br><input type="radio"/> 1 vez al día<br><input type="radio"/> 2 a 3 veces al día<br><input type="radio"/> 5 a 6 veces al día<br><input type="radio"/> más 6 veces al día |
| Pollo con piel                       | <input type="radio"/> Nunca o menos 1 vez al mes<br><input type="radio"/> 1 a 3 veces mes<br><input checked="" type="radio"/> 1 vez semana<br><input type="radio"/> 2 a 4 veces semana<br><input type="radio"/> 5 a 6 veces semana<br><input type="radio"/> 1 vez al día<br><input type="radio"/> 2 a 3 veces al día<br><input type="radio"/> 5 a 6 veces al día<br><input type="radio"/> más 6 veces al día |
| pollo sin piel                       | <input type="radio"/> Nunca o menos 1 vez al mes<br><input type="radio"/> 1 a 3 veces mes<br><input checked="" type="radio"/> 1 vez semana<br><input type="radio"/> 2 a 4 veces semana<br><input type="radio"/> 5 a 6 veces semana<br><input type="radio"/> 1 vez al día<br><input type="radio"/> 2 a 3 veces al día<br><input type="radio"/> 5 a 6 veces al día<br><input type="radio"/> más 6 veces al día |
| Ternera o cerdo o cordero            | <input type="radio"/> Nunca o menos 1 vez al mes<br><input type="radio"/> 1 a 3 veces mes<br><input checked="" type="radio"/> 1 vez semana<br><input type="radio"/> 2 a 4 veces semana<br><input type="radio"/> 5 a 6 veces semana<br><input type="radio"/> 1 vez al día<br><input type="radio"/> 2 a 3 veces al día<br><input type="radio"/> 5 a 6 veces al día<br><input type="radio"/> más 6 veces al día |
| carne caza: Conejo o codorniz o pato | <input checked="" type="radio"/> Nunca o menos 1 vez al mes<br><input type="radio"/> 1 a 3 veces mes<br><input type="radio"/> 1 vez semana<br><input type="radio"/> 2 a 4 veces semana<br><input type="radio"/> 5 a 6 veces semana<br><input type="radio"/> 1 vez al día<br><input type="radio"/> 2 a 3 veces al día<br><input type="radio"/> 5 a 6 veces al día<br><input type="radio"/> más 6 veces al día |
| Hígado de ternera o cerdo o pollo    | <input checked="" type="radio"/> Nunca o menos 1 vez al mes<br><input type="radio"/> 1 a 3 veces mes<br><input type="radio"/> 1 vez semana<br><input type="radio"/> 2 a 4 veces semana<br><input type="radio"/> 5 a 6 veces semana<br><input type="radio"/> 1 vez al día<br><input type="radio"/> 2 a 3 veces al día<br><input type="radio"/> 5 a 6 veces al día<br><input type="radio"/> más 6 veces al día |



|                     |                                                                                                                                                                                                                                                                                                                                                                                                              |
|---------------------|--------------------------------------------------------------------------------------------------------------------------------------------------------------------------------------------------------------------------------------------------------------------------------------------------------------------------------------------------------------------------------------------------------------|
| Vísceras            | <input checked="" type="radio"/> Nunca o menos 1 vez al mes<br><input type="radio"/> 1 a 3 veces mes<br><input type="radio"/> 1 vez semana<br><input type="radio"/> 2 a 4 veces semana<br><input type="radio"/> 5 a 6 veces semana<br><input type="radio"/> 1 vez al día<br><input type="radio"/> 2 a 3 veces al día<br><input type="radio"/> 5 a 6 veces al día<br><input type="radio"/> más 6 veces al día |
| Embutido            | <input type="radio"/> Nunca o menos 1 vez al mes<br><input type="radio"/> 1 a 3 veces mes<br><input type="radio"/> 1 vez semana<br><input type="radio"/> 2 a 4 veces semana<br><input type="radio"/> 5 a 6 veces semana<br><input type="radio"/> 1 vez al día<br><input checked="" type="radio"/> 2 a 3 veces al día<br><input type="radio"/> 5 a 6 veces al día<br><input type="radio"/> más 6 veces al día |
| Salchicha o similar | <input type="radio"/> Nunca o menos 1 vez al mes<br><input type="radio"/> 1 a 3 veces mes<br><input checked="" type="radio"/> 1 vez semana<br><input type="radio"/> 2 a 4 veces semana<br><input type="radio"/> 5 a 6 veces semana<br><input type="radio"/> 1 vez al día<br><input type="radio"/> 2 a 3 veces al día<br><input type="radio"/> 5 a 6 veces al día<br><input type="radio"/> más 6 veces al día |
| Pate o foiegras     | <input type="radio"/> Nunca o menos 1 vez al mes<br><input type="radio"/> 1 a 3 veces mes<br><input type="radio"/> 1 vez semana<br><input type="radio"/> 2 a 4 veces semana<br><input type="radio"/> 5 a 6 veces semana<br><input type="radio"/> 1 vez al día<br><input checked="" type="radio"/> 2 a 3 veces al día<br><input type="radio"/> 5 a 6 veces al día<br><input type="radio"/> más 6 veces al día |
| Hamburguesa         | <input type="radio"/> Nunca o menos 1 vez al mes<br><input type="radio"/> 1 a 3 veces mes<br><input checked="" type="radio"/> 1 vez semana<br><input type="radio"/> 2 a 4 veces semana<br><input type="radio"/> 5 a 6 veces semana<br><input type="radio"/> 1 vez al día<br><input type="radio"/> 2 a 3 veces al día<br><input type="radio"/> 5 a 6 veces al día<br><input type="radio"/> más 6 veces al día |
| tocino o bacon      | <input checked="" type="radio"/> Nunca o menos 1 vez al mes<br><input type="radio"/> 1 a 3 veces mes<br><input type="radio"/> 1 vez semana<br><input type="radio"/> 2 a 4 veces semana<br><input type="radio"/> 5 a 6 veces semana<br><input type="radio"/> 1 vez al día<br><input type="radio"/> 2 a 3 veces al día<br><input type="radio"/> 5 a 6 veces al día<br><input type="radio"/> más 6 veces al día |

---

|               |                                                                                                                                                                                                                                                                                                                                                                                                              |
|---------------|--------------------------------------------------------------------------------------------------------------------------------------------------------------------------------------------------------------------------------------------------------------------------------------------------------------------------------------------------------------------------------------------------------------|
| Pescado frito | <input checked="" type="radio"/> Nunca o menos 1 vez al mes<br><input type="radio"/> 1 a 3 veces mes<br><input type="radio"/> 1 vez semana<br><input type="radio"/> 2 a 4 veces semana<br><input type="radio"/> 5 a 6 veces semana<br><input type="radio"/> 1 vez al día<br><input type="radio"/> 2 a 3 veces al día<br><input type="radio"/> 5 a 6 veces al día<br><input type="radio"/> más 6 veces al día |
|---------------|--------------------------------------------------------------------------------------------------------------------------------------------------------------------------------------------------------------------------------------------------------------------------------------------------------------------------------------------------------------------------------------------------------------|

---

|                        |                                                                                                                                                                                                                                                                                                                                                                                                              |
|------------------------|--------------------------------------------------------------------------------------------------------------------------------------------------------------------------------------------------------------------------------------------------------------------------------------------------------------------------------------------------------------------------------------------------------------|
| pescado hervido blanco | <input type="radio"/> Nunca o menos 1 vez al mes<br><input type="radio"/> 1 a 3 veces mes<br><input checked="" type="radio"/> 1 vez semana<br><input type="radio"/> 2 a 4 veces semana<br><input type="radio"/> 5 a 6 veces semana<br><input type="radio"/> 1 vez al día<br><input type="radio"/> 2 a 3 veces al día<br><input type="radio"/> 5 a 6 veces al día<br><input type="radio"/> más 6 veces al día |
|------------------------|--------------------------------------------------------------------------------------------------------------------------------------------------------------------------------------------------------------------------------------------------------------------------------------------------------------------------------------------------------------------------------------------------------------|

---

|                      |                                                                                                                                                                                                                                                                                                                                                                                                              |
|----------------------|--------------------------------------------------------------------------------------------------------------------------------------------------------------------------------------------------------------------------------------------------------------------------------------------------------------------------------------------------------------------------------------------------------------|
| pescado hervido azul | <input type="radio"/> Nunca o menos 1 vez al mes<br><input type="radio"/> 1 a 3 veces mes<br><input checked="" type="radio"/> 1 vez semana<br><input type="radio"/> 2 a 4 veces semana<br><input type="radio"/> 5 a 6 veces semana<br><input type="radio"/> 1 vez al día<br><input type="radio"/> 2 a 3 veces al día<br><input type="radio"/> 5 a 6 veces al día<br><input type="radio"/> más 6 veces al día |
|----------------------|--------------------------------------------------------------------------------------------------------------------------------------------------------------------------------------------------------------------------------------------------------------------------------------------------------------------------------------------------------------------------------------------------------------|

---

|                    |                                                                                                                                                                                                                                                                                                                                                                                                              |
|--------------------|--------------------------------------------------------------------------------------------------------------------------------------------------------------------------------------------------------------------------------------------------------------------------------------------------------------------------------------------------------------------------------------------------------------|
| otros pescado azul | <input checked="" type="radio"/> Nunca o menos 1 vez al mes<br><input type="radio"/> 1 a 3 veces mes<br><input type="radio"/> 1 vez semana<br><input type="radio"/> 2 a 4 veces semana<br><input type="radio"/> 5 a 6 veces semana<br><input type="radio"/> 1 vez al día<br><input type="radio"/> 2 a 3 veces al día<br><input type="radio"/> 5 a 6 veces al día<br><input type="radio"/> más 6 veces al día |
|--------------------|--------------------------------------------------------------------------------------------------------------------------------------------------------------------------------------------------------------------------------------------------------------------------------------------------------------------------------------------------------------------------------------------------------------|

---

|               |                                                                                                                                                                                                                                                                                                                                                                                                              |
|---------------|--------------------------------------------------------------------------------------------------------------------------------------------------------------------------------------------------------------------------------------------------------------------------------------------------------------------------------------------------------------------------------------------------------------|
| atun conserva | <input type="radio"/> Nunca o menos 1 vez al mes<br><input type="radio"/> 1 a 3 veces mes<br><input checked="" type="radio"/> 1 vez semana<br><input type="radio"/> 2 a 4 veces semana<br><input type="radio"/> 5 a 6 veces semana<br><input type="radio"/> 1 vez al día<br><input type="radio"/> 2 a 3 veces al día<br><input type="radio"/> 5 a 6 veces al día<br><input type="radio"/> más 6 veces al día |
|---------------|--------------------------------------------------------------------------------------------------------------------------------------------------------------------------------------------------------------------------------------------------------------------------------------------------------------------------------------------------------------------------------------------------------------|

---

|                  |                                                                                                                                                                                                                                                                                                                                                                                                              |
|------------------|--------------------------------------------------------------------------------------------------------------------------------------------------------------------------------------------------------------------------------------------------------------------------------------------------------------------------------------------------------------------------------------------------------------|
| sardina conserva | <input checked="" type="radio"/> Nunca o menos 1 vez al mes<br><input type="radio"/> 1 a 3 veces mes<br><input type="radio"/> 1 vez semana<br><input type="radio"/> 2 a 4 veces semana<br><input type="radio"/> 5 a 6 veces semana<br><input type="radio"/> 1 vez al día<br><input type="radio"/> 2 a 3 veces al día<br><input type="radio"/> 5 a 6 veces al día<br><input type="radio"/> más 6 veces al día |
|------------------|--------------------------------------------------------------------------------------------------------------------------------------------------------------------------------------------------------------------------------------------------------------------------------------------------------------------------------------------------------------------------------------------------------------|

---

|                                         |                                                                                                                                                                                                                                                                                                                                                                                                              |
|-----------------------------------------|--------------------------------------------------------------------------------------------------------------------------------------------------------------------------------------------------------------------------------------------------------------------------------------------------------------------------------------------------------------------------------------------------------------|
| pescado ahumado                         | <input checked="" type="radio"/> Nunca o menos 1 vez al mes<br><input type="radio"/> 1 a 3 veces mes<br><input type="radio"/> 1 vez semana<br><input type="radio"/> 2 a 4 veces semana<br><input type="radio"/> 5 a 6 veces semana<br><input type="radio"/> 1 vez al día<br><input type="radio"/> 2 a 3 veces al día<br><input type="radio"/> 5 a 6 veces al día<br><input type="radio"/> más 6 veces al día |
| almejas o mejillones o ostras unos 100g | <input type="radio"/> Nunca o menos 1 vez al mes<br><input checked="" type="radio"/> 1 a 3 veces mes<br><input type="radio"/> 1 vez semana<br><input type="radio"/> 2 a 4 veces semana<br><input type="radio"/> 5 a 6 veces semana<br><input type="radio"/> 1 vez al día<br><input type="radio"/> 2 a 3 veces al día<br><input type="radio"/> 5 a 6 veces al día<br><input type="radio"/> más 6 veces al día |
| calamar o chipiron o sepia unos 100g    | <input type="radio"/> Nunca o menos 1 vez al mes<br><input checked="" type="radio"/> 1 a 3 veces mes<br><input type="radio"/> 1 vez semana<br><input type="radio"/> 2 a 4 veces semana<br><input type="radio"/> 5 a 6 veces semana<br><input type="radio"/> 1 vez al día<br><input type="radio"/> 2 a 3 veces al día<br><input type="radio"/> 5 a 6 veces al día<br><input type="radio"/> más 6 veces al día |
| marisco unos 100g                       | <input type="radio"/> Nunca o menos 1 vez al mes<br><input checked="" type="radio"/> 1 a 3 veces mes<br><input type="radio"/> 1 vez semana<br><input type="radio"/> 2 a 4 veces semana<br><input type="radio"/> 5 a 6 veces semana<br><input type="radio"/> 1 vez al día<br><input type="radio"/> 2 a 3 veces al día<br><input type="radio"/> 5 a 6 veces al día<br><input type="radio"/> más 6 veces al día |
| Espinacas o acelgas cocinadas           | <input checked="" type="radio"/> Nunca o menos 1 vez al mes<br><input type="radio"/> 1 a 3 veces mes<br><input type="radio"/> 1 vez semana<br><input type="radio"/> 2 a 4 veces semana<br><input type="radio"/> 5 a 6 veces semana<br><input type="radio"/> 1 vez al día<br><input type="radio"/> 2 a 3 veces al día<br><input type="radio"/> 5 a 6 veces al día<br><input type="radio"/> más 6 veces al día |
| Col o coliflor o brocoli cocinado       | <input type="radio"/> Nunca o menos 1 vez al mes<br><input checked="" type="radio"/> 1 a 3 veces mes<br><input type="radio"/> 1 vez semana<br><input type="radio"/> 2 a 4 veces semana<br><input type="radio"/> 5 a 6 veces semana<br><input type="radio"/> 1 vez al día<br><input type="radio"/> 2 a 3 veces al día<br><input type="radio"/> 5 a 6 veces al día<br><input type="radio"/> más 6 veces al día |

---

Lechuga o endivia o escarola

- ☐ Nunca o menos 1 vez al mes  
☐ 1 a 3 veces mes  
☒ 1 vez semana  
☐ 2 a 4 veces semana  
☐ 5 a 6 veces semana  
☐ 1 vez al día  
☐ 2 a 3 veces al día  
☐ 5 a 6 veces al día  
☐ más 6 veces al día

---

tomate ensalada

- ☐ Nunca o menos 1 vez al mes  
☐ 1 a 3 veces mes  
☐ 1 vez semana  
☐ 2 a 4 veces semana  
☐ 5 a 6 veces semana  
☐ 1 vez al día  
☒ 2 a 3 veces al día  
☐ 5 a 6 veces al día  
☐ más 6 veces al día

---

cebolla

- ☐ Nunca o menos 1 vez al mes  
☐ 1 a 3 veces mes  
☒ 1 vez semana  
☐ 2 a 4 veces semana  
☐ 5 a 6 veces semana  
☐ 1 vez al día  
☐ 2 a 3 veces al día  
☐ 5 a 6 veces al día  
☐ más 6 veces al día

---

Zanahoria o calabaza

- ☐ Nunca o menos 1 vez al mes  
☐ 1 a 3 veces mes  
☒ 1 vez semana  
☐ 2 a 4 veces semana  
☐ 5 a 6 veces semana  
☐ 1 vez al día  
☐ 2 a 3 veces al día  
☐ 5 a 6 veces al día  
☐ más 6 veces al día

---

Judías verdes

- ☒ Nunca o menos 1 vez al mes  
☐ 1 a 3 veces mes  
☐ 1 vez semana  
☐ 2 a 4 veces semana  
☐ 5 a 6 veces semana  
☐ 1 vez al día  
☐ 2 a 3 veces al día  
☐ 5 a 6 veces al día  
☐ más 6 veces al día

---

Berenjena o calabacin o pepino

- ☐ Nunca o menos 1 vez al mes  
☐ 1 a 3 veces mes  
☒ 1 vez semana  
☐ 2 a 4 veces semana  
☐ 5 a 6 veces semana  
☐ 1 vez al día  
☐ 2 a 3 veces al día  
☐ 5 a 6 veces al día  
☐ más 6 veces al día

|                       |                                                                                                                                                                                                                                                                                                                                                                                                              |
|-----------------------|--------------------------------------------------------------------------------------------------------------------------------------------------------------------------------------------------------------------------------------------------------------------------------------------------------------------------------------------------------------------------------------------------------------|
| pimiento              | <input type="radio"/> Nunca o menos 1 vez al mes<br><input checked="" type="radio"/> 1 a 3 veces mes<br><input type="radio"/> 1 vez semana<br><input type="radio"/> 2 a 4 veces semana<br><input type="radio"/> 5 a 6 veces semana<br><input type="radio"/> 1 vez al día<br><input type="radio"/> 2 a 3 veces al día<br><input type="radio"/> 5 a 6 veces al día<br><input type="radio"/> más 6 veces al día |
| alcachofa             | <input type="radio"/> Nunca o menos 1 vez al mes<br><input checked="" type="radio"/> 1 a 3 veces mes<br><input type="radio"/> 1 vez semana<br><input type="radio"/> 2 a 4 veces semana<br><input type="radio"/> 5 a 6 veces semana<br><input type="radio"/> 1 vez al día<br><input type="radio"/> 2 a 3 veces al día<br><input type="radio"/> 5 a 6 veces al día<br><input type="radio"/> más 6 veces al día |
| espárragos            | <input type="radio"/> Nunca o menos 1 vez al mes<br><input checked="" type="radio"/> 1 a 3 veces mes<br><input type="radio"/> 1 vez semana<br><input type="radio"/> 2 a 4 veces semana<br><input type="radio"/> 5 a 6 veces semana<br><input type="radio"/> 1 vez al día<br><input type="radio"/> 2 a 3 veces al día<br><input type="radio"/> 5 a 6 veces al día<br><input type="radio"/> más 6 veces al día |
| maíz hervido          | <input checked="" type="radio"/> Nunca o menos 1 vez al mes<br><input type="radio"/> 1 a 3 veces mes<br><input type="radio"/> 1 vez semana<br><input type="radio"/> 2 a 4 veces semana<br><input type="radio"/> 5 a 6 veces semana<br><input type="radio"/> 1 vez al día<br><input type="radio"/> 2 a 3 veces al día<br><input type="radio"/> 5 a 6 veces al día<br><input type="radio"/> más 6 veces al día |
| legumbres             | <input type="radio"/> Nunca o menos 1 vez al mes<br><input type="radio"/> 1 a 3 veces mes<br><input checked="" type="radio"/> 1 vez semana<br><input type="radio"/> 2 a 4 veces semana<br><input type="radio"/> 5 a 6 veces semana<br><input type="radio"/> 1 vez al día<br><input type="radio"/> 2 a 3 veces al día<br><input type="radio"/> 5 a 6 veces al día<br><input type="radio"/> más 6 veces al día |
| naranjas o mandarinas | <input type="radio"/> Nunca o menos 1 vez al mes<br><input type="radio"/> 1 a 3 veces mes<br><input checked="" type="radio"/> 1 vez semana<br><input type="radio"/> 2 a 4 veces semana<br><input type="radio"/> 5 a 6 veces semana<br><input type="radio"/> 1 vez al día<br><input type="radio"/> 2 a 3 veces al día<br><input type="radio"/> 5 a 6 veces al día<br><input type="radio"/> más 6 veces al día |

|                       |                                                                                                                                                                                                                                                                                                                                                                                                              |
|-----------------------|--------------------------------------------------------------------------------------------------------------------------------------------------------------------------------------------------------------------------------------------------------------------------------------------------------------------------------------------------------------------------------------------------------------|
| zum natural fruta     | <input checked="" type="radio"/> Nunca o menos 1 vez al mes<br><input type="radio"/> 1 a 3 veces mes<br><input type="radio"/> 1 vez semana<br><input type="radio"/> 2 a 4 veces semana<br><input type="radio"/> 5 a 6 veces semana<br><input type="radio"/> 1 vez al día<br><input type="radio"/> 2 a 3 veces al día<br><input type="radio"/> 5 a 6 veces al día<br><input type="radio"/> más 6 veces al día |
| platano               | <input type="radio"/> Nunca o menos 1 vez al mes<br><input type="radio"/> 1 a 3 veces mes<br><input checked="" type="radio"/> 1 vez semana<br><input type="radio"/> 2 a 4 veces semana<br><input type="radio"/> 5 a 6 veces semana<br><input type="radio"/> 1 vez al día<br><input type="radio"/> 2 a 3 veces al día<br><input type="radio"/> 5 a 6 veces al día<br><input type="radio"/> más 6 veces al día |
| manzana o pera        | <input type="radio"/> Nunca o menos 1 vez al mes<br><input type="radio"/> 1 a 3 veces mes<br><input checked="" type="radio"/> 1 vez semana<br><input type="radio"/> 2 a 4 veces semana<br><input type="radio"/> 5 a 6 veces semana<br><input type="radio"/> 1 vez al día<br><input type="radio"/> 2 a 3 veces al día<br><input type="radio"/> 5 a 6 veces al día<br><input type="radio"/> más 6 veces al día |
| melocotón o nectarina | <input type="radio"/> Nunca o menos 1 vez al mes<br><input type="radio"/> 1 a 3 veces mes<br><input checked="" type="radio"/> 1 vez semana<br><input type="radio"/> 2 a 4 veces semana<br><input type="radio"/> 5 a 6 veces semana<br><input type="radio"/> 1 vez al día<br><input type="radio"/> 2 a 3 veces al día<br><input type="radio"/> 5 a 6 veces al día<br><input type="radio"/> más 6 veces al día |
| sandia o melon        | <input type="radio"/> Nunca o menos 1 vez al mes<br><input type="radio"/> 1 a 3 veces mes<br><input checked="" type="radio"/> 1 vez semana<br><input type="radio"/> 2 a 4 veces semana<br><input type="radio"/> 5 a 6 veces semana<br><input type="radio"/> 1 vez al día<br><input type="radio"/> 2 a 3 veces al día<br><input type="radio"/> 5 a 6 veces al día<br><input type="radio"/> más 6 veces al día |
| uva                   | <input checked="" type="radio"/> Nunca o menos 1 vez al mes<br><input type="radio"/> 1 a 3 veces mes<br><input type="radio"/> 1 vez semana<br><input type="radio"/> 2 a 4 veces semana<br><input type="radio"/> 5 a 6 veces semana<br><input type="radio"/> 1 vez al día<br><input type="radio"/> 2 a 3 veces al día<br><input type="radio"/> 5 a 6 veces al día<br><input type="radio"/> más 6 veces al día |

|                 |                                                                                                                                                                                                                                                                                                                                                                                                              |
|-----------------|--------------------------------------------------------------------------------------------------------------------------------------------------------------------------------------------------------------------------------------------------------------------------------------------------------------------------------------------------------------------------------------------------------------|
| bruna o ciruela | <input checked="" type="radio"/> Nunca o menos 1 vez al mes<br><input type="radio"/> 1 a 3 veces mes<br><input type="radio"/> 1 vez semana<br><input type="radio"/> 2 a 4 veces semana<br><input type="radio"/> 5 a 6 veces semana<br><input type="radio"/> 1 vez al día<br><input type="radio"/> 2 a 3 veces al día<br><input type="radio"/> 5 a 6 veces al día<br><input type="radio"/> más 6 veces al día |
| kiwi            | <input type="radio"/> Nunca o menos 1 vez al mes<br><input checked="" type="radio"/> 1 a 3 veces mes<br><input type="radio"/> 1 vez semana<br><input type="radio"/> 2 a 4 veces semana<br><input type="radio"/> 5 a 6 veces semana<br><input type="radio"/> 1 vez al día<br><input type="radio"/> 2 a 3 veces al día<br><input type="radio"/> 5 a 6 veces al día<br><input type="radio"/> más 6 veces al día |
| aceituna        | <input type="radio"/> Nunca o menos 1 vez al mes<br><input checked="" type="radio"/> 1 a 3 veces mes<br><input type="radio"/> 1 vez semana<br><input type="radio"/> 2 a 4 veces semana<br><input type="radio"/> 5 a 6 veces semana<br><input type="radio"/> 1 vez al día<br><input type="radio"/> 2 a 3 veces al día<br><input type="radio"/> 5 a 6 veces al día<br><input type="radio"/> más 6 veces al día |
| frutos secos    | <input type="radio"/> Nunca o menos 1 vez al mes<br><input checked="" type="radio"/> 1 a 3 veces mes<br><input type="radio"/> 1 vez semana<br><input type="radio"/> 2 a 4 veces semana<br><input type="radio"/> 5 a 6 veces semana<br><input type="radio"/> 1 vez al día<br><input type="radio"/> 2 a 3 veces al día<br><input type="radio"/> 5 a 6 veces al día<br><input type="radio"/> más 6 veces al día |
| pan blanco      | <input type="radio"/> Nunca o menos 1 vez al mes<br><input type="radio"/> 1 a 3 veces mes<br><input type="radio"/> 1 vez semana<br><input type="radio"/> 2 a 4 veces semana<br><input type="radio"/> 5 a 6 veces semana<br><input checked="" type="radio"/> 1 vez al día<br><input type="radio"/> 2 a 3 veces al día<br><input type="radio"/> 5 a 6 veces al día<br><input type="radio"/> más 6 veces al día |
| pan integral    | <input checked="" type="radio"/> Nunca o menos 1 vez al mes<br><input type="radio"/> 1 a 3 veces mes<br><input type="radio"/> 1 vez semana<br><input type="radio"/> 2 a 4 veces semana<br><input type="radio"/> 5 a 6 veces semana<br><input type="radio"/> 1 vez al día<br><input type="radio"/> 2 a 3 veces al día<br><input type="radio"/> 5 a 6 veces al día<br><input type="radio"/> más 6 veces al día |

---

cereales desayuno

- ☐ Nunca o menos 1 vez al mes  
☐ 1 a 3 veces mes  
☐ 1 vez semana  
☒ 2 a 4 veces semana  
☐ 5 a 6 veces semana  
☐ 1 vez al día  
☐ 2 a 3 veces al día  
☐ 5 a 6 veces al día  
☐ más 6 veces al día

---

patatas fritas

- ☐ Nunca o menos 1 vez al mes  
☐ 1 a 3 veces mes  
☒ 1 vez semana  
☐ 2 a 4 veces semana  
☐ 5 a 6 veces semana  
☐ 1 vez al día  
☐ 2 a 3 veces al día  
☐ 5 a 6 veces al día  
☐ más 6 veces al día

---

patatas cocidas o asadas

- ☐ Nunca o menos 1 vez al mes  
☐ 1 a 3 veces mes  
☒ 1 vez semana  
☐ 2 a 4 veces semana  
☐ 5 a 6 veces semana  
☐ 1 vez al día  
☐ 2 a 3 veces al día  
☐ 5 a 6 veces al día  
☐ más 6 veces al día

---

bolsa papas

- ☐ Nunca o menos 1 vez al mes  
☐ 1 a 3 veces mes  
☒ 1 vez semana  
☐ 2 a 4 veces semana  
☐ 5 a 6 veces semana  
☐ 1 vez al día  
☐ 2 a 3 veces al día  
☐ 5 a 6 veces al día  
☐ más 6 veces al día

---

arroz cocinado

- ☐ Nunca o menos 1 vez al mes  
☐ 1 a 3 veces mes  
☐ 1 vez semana  
☒ 2 a 4 veces semana  
☐ 5 a 6 veces semana  
☐ 1 vez al día  
☐ 2 a 3 veces al día  
☐ 5 a 6 veces al día  
☐ más 6 veces al día

---

pasta

- ☐ Nunca o menos 1 vez al mes  
☐ 1 a 3 veces mes  
☒ 1 vez semana  
☐ 2 a 4 veces semana  
☐ 5 a 6 veces semana  
☐ 1 vez al día  
☐ 2 a 3 veces al día  
☐ 5 a 6 veces al día  
☐ más 6 veces al día



|                     |                                                                                                                                                                                                                                                                                                                                                                                                              |
|---------------------|--------------------------------------------------------------------------------------------------------------------------------------------------------------------------------------------------------------------------------------------------------------------------------------------------------------------------------------------------------------------------------------------------------------|
| pizza               | <input type="radio"/> Nunca o menos 1 vez al mes<br><input type="radio"/> 1 a 3 veces mes<br><input checked="" type="radio"/> 1 vez semana<br><input type="radio"/> 2 a 4 veces semana<br><input type="radio"/> 5 a 6 veces semana<br><input type="radio"/> 1 vez al día<br><input type="radio"/> 2 a 3 veces al día<br><input type="radio"/> 5 a 6 veces al día<br><input type="radio"/> más 6 veces al día |
| aceite oliva        | <input type="radio"/> Nunca o menos 1 vez al mes<br><input type="radio"/> 1 a 3 veces mes<br><input checked="" type="radio"/> 1 vez semana<br><input type="radio"/> 2 a 4 veces semana<br><input type="radio"/> 5 a 6 veces semana<br><input type="radio"/> 1 vez al día<br><input type="radio"/> 2 a 3 veces al día<br><input type="radio"/> 5 a 6 veces al día<br><input type="radio"/> más 6 veces al día |
| otros aceites       | <input checked="" type="radio"/> Nunca o menos 1 vez al mes<br><input type="radio"/> 1 a 3 veces mes<br><input type="radio"/> 1 vez semana<br><input type="radio"/> 2 a 4 veces semana<br><input type="radio"/> 5 a 6 veces semana<br><input type="radio"/> 1 vez al día<br><input type="radio"/> 2 a 3 veces al día<br><input type="radio"/> 5 a 6 veces al día<br><input type="radio"/> más 6 veces al día |
| margarina           | <input checked="" type="radio"/> Nunca o menos 1 vez al mes<br><input type="radio"/> 1 a 3 veces mes<br><input type="radio"/> 1 vez semana<br><input type="radio"/> 2 a 4 veces semana<br><input type="radio"/> 5 a 6 veces semana<br><input type="radio"/> 1 vez al día<br><input type="radio"/> 2 a 3 veces al día<br><input type="radio"/> 5 a 6 veces al día<br><input type="radio"/> más 6 veces al día |
| mantequilla         | <input checked="" type="radio"/> Nunca o menos 1 vez al mes<br><input type="radio"/> 1 a 3 veces mes<br><input type="radio"/> 1 vez semana<br><input type="radio"/> 2 a 4 veces semana<br><input type="radio"/> 5 a 6 veces semana<br><input type="radio"/> 1 vez al día<br><input type="radio"/> 2 a 3 veces al día<br><input type="radio"/> 5 a 6 veces al día<br><input type="radio"/> más 6 veces al día |
| galletas tipo maria | <input type="radio"/> Nunca o menos 1 vez al mes<br><input type="radio"/> 1 a 3 veces mes<br><input checked="" type="radio"/> 1 vez semana<br><input type="radio"/> 2 a 4 veces semana<br><input type="radio"/> 5 a 6 veces semana<br><input type="radio"/> 1 vez al día<br><input type="radio"/> 2 a 3 veces al día<br><input type="radio"/> 5 a 6 veces al día<br><input type="radio"/> más 6 veces al día |

|                           |                                                                                                                                                                                                                                                                                                                                                                                                              |
|---------------------------|--------------------------------------------------------------------------------------------------------------------------------------------------------------------------------------------------------------------------------------------------------------------------------------------------------------------------------------------------------------------------------------------------------------|
| galletas chocolate        | <input checked="" type="radio"/> Nunca o menos 1 vez al mes<br><input type="radio"/> 1 a 3 veces mes<br><input type="radio"/> 1 vez semana<br><input type="radio"/> 2 a 4 veces semana<br><input type="radio"/> 5 a 6 veces semana<br><input type="radio"/> 1 vez al día<br><input type="radio"/> 2 a 3 veces al día<br><input type="radio"/> 5 a 6 veces al día<br><input type="radio"/> más 6 veces al día |
| bollieria                 | <input type="radio"/> Nunca o menos 1 vez al mes<br><input type="radio"/> 1 a 3 veces mes<br><input checked="" type="radio"/> 1 vez semana<br><input type="radio"/> 2 a 4 veces semana<br><input type="radio"/> 5 a 6 veces semana<br><input type="radio"/> 1 vez al día<br><input type="radio"/> 2 a 3 veces al día<br><input type="radio"/> 5 a 6 veces al día<br><input type="radio"/> más 6 veces al día |
| chocolate o bombones      | <input checked="" type="radio"/> Nunca o menos 1 vez al mes<br><input type="radio"/> 1 a 3 veces mes<br><input type="radio"/> 1 vez semana<br><input type="radio"/> 2 a 4 veces semana<br><input type="radio"/> 5 a 6 veces semana<br><input type="radio"/> 1 vez al día<br><input type="radio"/> 2 a 3 veces al día<br><input type="radio"/> 5 a 6 veces al día<br><input type="radio"/> más 6 veces al día |
| chocolate polvo o colacao | <input type="radio"/> Nunca o menos 1 vez al mes<br><input type="radio"/> 1 a 3 veces mes<br><input type="radio"/> 1 vez semana<br><input type="radio"/> 2 a 4 veces semana<br><input type="radio"/> 5 a 6 veces semana<br><input type="radio"/> 1 vez al día<br><input checked="" type="radio"/> 2 a 3 veces al día<br><input type="radio"/> 5 a 6 veces al día<br><input type="radio"/> más 6 veces al día |
| vino tinto                | <input checked="" type="radio"/> Nunca o menos 1 vez al mes<br><input type="radio"/> 1 a 3 veces mes<br><input type="radio"/> 1 vez semana<br><input type="radio"/> 2 a 4 veces semana<br><input type="radio"/> 5 a 6 veces semana<br><input type="radio"/> 1 vez al día<br><input type="radio"/> 2 a 3 veces al día<br><input type="radio"/> 5 a 6 veces al día<br><input type="radio"/> más 6 veces al día |
| vino blanco               | <input checked="" type="radio"/> Nunca o menos 1 vez al mes<br><input type="radio"/> 1 a 3 veces mes<br><input type="radio"/> 1 vez semana<br><input type="radio"/> 2 a 4 veces semana<br><input type="radio"/> 5 a 6 veces semana<br><input type="radio"/> 1 vez al día<br><input type="radio"/> 2 a 3 veces al día<br><input type="radio"/> 5 a 6 veces al día<br><input type="radio"/> más 6 veces al día |

|                       |                                                                                                                                                                                                                                                                                                                                                                                                              |
|-----------------------|--------------------------------------------------------------------------------------------------------------------------------------------------------------------------------------------------------------------------------------------------------------------------------------------------------------------------------------------------------------------------------------------------------------|
| vino seco o vermut    | <input checked="" type="radio"/> Nunca o menos 1 vez al mes<br><input type="radio"/> 1 a 3 veces mes<br><input type="radio"/> 1 vez semana<br><input type="radio"/> 2 a 4 veces semana<br><input type="radio"/> 5 a 6 veces semana<br><input type="radio"/> 1 vez al día<br><input type="radio"/> 2 a 3 veces al día<br><input type="radio"/> 5 a 6 veces al día<br><input type="radio"/> más 6 veces al día |
| cerveza               | <input checked="" type="radio"/> Nunca o menos 1 vez al mes<br><input type="radio"/> 1 a 3 veces mes<br><input type="radio"/> 1 vez semana<br><input type="radio"/> 2 a 4 veces semana<br><input type="radio"/> 5 a 6 veces semana<br><input type="radio"/> 1 vez al día<br><input type="radio"/> 2 a 3 veces al día<br><input type="radio"/> 5 a 6 veces al día<br><input type="radio"/> más 6 veces al día |
| cerveza sin alcohol   | <input checked="" type="radio"/> Nunca o menos 1 vez al mes<br><input type="radio"/> 1 a 3 veces mes<br><input type="radio"/> 1 vez semana<br><input type="radio"/> 2 a 4 veces semana<br><input type="radio"/> 5 a 6 veces semana<br><input type="radio"/> 1 vez al día<br><input type="radio"/> 2 a 3 veces al día<br><input type="radio"/> 5 a 6 veces al día<br><input type="radio"/> más 6 veces al día |
| licores               | <input checked="" type="radio"/> Nunca o menos 1 vez al mes<br><input type="radio"/> 1 a 3 veces mes<br><input type="radio"/> 1 vez semana<br><input type="radio"/> 2 a 4 veces semana<br><input type="radio"/> 5 a 6 veces semana<br><input type="radio"/> 1 vez al día<br><input type="radio"/> 2 a 3 veces al día<br><input type="radio"/> 5 a 6 veces al día<br><input type="radio"/> más 6 veces al día |
| ginebra o ron o vodka | <input checked="" type="radio"/> Nunca o menos 1 vez al mes<br><input type="radio"/> 1 a 3 veces mes<br><input type="radio"/> 1 vez semana<br><input type="radio"/> 2 a 4 veces semana<br><input type="radio"/> 5 a 6 veces semana<br><input type="radio"/> 1 vez al día<br><input type="radio"/> 2 a 3 veces al día<br><input type="radio"/> 5 a 6 veces al día<br><input type="radio"/> más 6 veces al día |
| refresco normal       | <input type="radio"/> Nunca o menos 1 vez al mes<br><input type="radio"/> 1 a 3 veces mes<br><input checked="" type="radio"/> 1 vez semana<br><input type="radio"/> 2 a 4 veces semana<br><input type="radio"/> 5 a 6 veces semana<br><input type="radio"/> 1 vez al día<br><input type="radio"/> 2 a 3 veces al día<br><input type="radio"/> 5 a 6 veces al día<br><input type="radio"/> más 6 veces al día |

---

|                     |                                                                                                                                                                                                                                                                                                                                                                                                              |
|---------------------|--------------------------------------------------------------------------------------------------------------------------------------------------------------------------------------------------------------------------------------------------------------------------------------------------------------------------------------------------------------------------------------------------------------|
| refresco sin azúcar | <input checked="" type="radio"/> Nunca o menos 1 vez al mes<br><input type="radio"/> 1 a 3 veces mes<br><input type="radio"/> 1 vez semana<br><input type="radio"/> 2 a 4 veces semana<br><input type="radio"/> 5 a 6 veces semana<br><input type="radio"/> 1 vez al día<br><input type="radio"/> 2 a 3 veces al día<br><input type="radio"/> 5 a 6 veces al día<br><input type="radio"/> más 6 veces al día |
|---------------------|--------------------------------------------------------------------------------------------------------------------------------------------------------------------------------------------------------------------------------------------------------------------------------------------------------------------------------------------------------------------------------------------------------------|

---

|                |                                                                                                                                                                                                                                                                                                                                                                                                              |
|----------------|--------------------------------------------------------------------------------------------------------------------------------------------------------------------------------------------------------------------------------------------------------------------------------------------------------------------------------------------------------------------------------------------------------------|
| Agua del grifo | <input checked="" type="radio"/> Nunca o menos 1 vez al mes<br><input type="radio"/> 1 a 3 veces mes<br><input type="radio"/> 1 vez semana<br><input type="radio"/> 2 a 4 veces semana<br><input type="radio"/> 5 a 6 veces semana<br><input type="radio"/> 1 vez al día<br><input type="radio"/> 2 a 3 veces al día<br><input type="radio"/> 5 a 6 veces al día<br><input type="radio"/> más 6 veces al día |
|----------------|--------------------------------------------------------------------------------------------------------------------------------------------------------------------------------------------------------------------------------------------------------------------------------------------------------------------------------------------------------------------------------------------------------------|

---

|                          |                                                                                                                                                                                                                                                                                                                                                                                                              |
|--------------------------|--------------------------------------------------------------------------------------------------------------------------------------------------------------------------------------------------------------------------------------------------------------------------------------------------------------------------------------------------------------------------------------------------------------|
| agua embotellada sin gas | <input type="radio"/> Nunca o menos 1 vez al mes<br><input type="radio"/> 1 a 3 veces mes<br><input type="radio"/> 1 vez semana<br><input type="radio"/> 2 a 4 veces semana<br><input type="radio"/> 5 a 6 veces semana<br><input type="radio"/> 1 vez al día<br><input type="radio"/> 2 a 3 veces al día<br><input type="radio"/> 5 a 6 veces al día<br><input checked="" type="radio"/> más 6 veces al día |
|--------------------------|--------------------------------------------------------------------------------------------------------------------------------------------------------------------------------------------------------------------------------------------------------------------------------------------------------------------------------------------------------------------------------------------------------------|

---

|                          |                                                                                                                                                                                                                                                                                                                                                                                                              |
|--------------------------|--------------------------------------------------------------------------------------------------------------------------------------------------------------------------------------------------------------------------------------------------------------------------------------------------------------------------------------------------------------------------------------------------------------|
| agua embotellada con gas | <input checked="" type="radio"/> Nunca o menos 1 vez al mes<br><input type="radio"/> 1 a 3 veces mes<br><input type="radio"/> 1 vez semana<br><input type="radio"/> 2 a 4 veces semana<br><input type="radio"/> 5 a 6 veces semana<br><input type="radio"/> 1 vez al día<br><input type="radio"/> 2 a 3 veces al día<br><input type="radio"/> 5 a 6 veces al día<br><input type="radio"/> más 6 veces al día |
|--------------------------|--------------------------------------------------------------------------------------------------------------------------------------------------------------------------------------------------------------------------------------------------------------------------------------------------------------------------------------------------------------------------------------------------------------|

---

|                           |                                                                                                                                                                                                                                                                                                                                                                                                              |
|---------------------------|--------------------------------------------------------------------------------------------------------------------------------------------------------------------------------------------------------------------------------------------------------------------------------------------------------------------------------------------------------------------------------------------------------------|
| zumos frutas embotellados | <input type="radio"/> Nunca o menos 1 vez al mes<br><input type="radio"/> 1 a 3 veces mes<br><input type="radio"/> 1 vez semana<br><input type="radio"/> 2 a 4 veces semana<br><input type="radio"/> 5 a 6 veces semana<br><input checked="" type="radio"/> 1 vez al día<br><input type="radio"/> 2 a 3 veces al día<br><input type="radio"/> 5 a 6 veces al día<br><input type="radio"/> más 6 veces al día |
|---------------------------|--------------------------------------------------------------------------------------------------------------------------------------------------------------------------------------------------------------------------------------------------------------------------------------------------------------------------------------------------------------------------------------------------------------|

---

|      |                                                                                                                                                                                                                                                                                                                                                                                                              |
|------|--------------------------------------------------------------------------------------------------------------------------------------------------------------------------------------------------------------------------------------------------------------------------------------------------------------------------------------------------------------------------------------------------------------|
| café | <input checked="" type="radio"/> Nunca o menos 1 vez al mes<br><input type="radio"/> 1 a 3 veces mes<br><input type="radio"/> 1 vez semana<br><input type="radio"/> 2 a 4 veces semana<br><input type="radio"/> 5 a 6 veces semana<br><input type="radio"/> 1 vez al día<br><input type="radio"/> 2 a 3 veces al día<br><input type="radio"/> 5 a 6 veces al día<br><input type="radio"/> más 6 veces al día |
|------|--------------------------------------------------------------------------------------------------------------------------------------------------------------------------------------------------------------------------------------------------------------------------------------------------------------------------------------------------------------------------------------------------------------|

---

|                       |                                                                                                                                                                                                                                                                                                                                                                                                              |
|-----------------------|--------------------------------------------------------------------------------------------------------------------------------------------------------------------------------------------------------------------------------------------------------------------------------------------------------------------------------------------------------------------------------------------------------------|
| cafe descafeinado     | <input checked="" type="radio"/> Nunca o menos 1 vez al mes<br><input type="radio"/> 1 a 3 veces mes<br><input type="radio"/> 1 vez semana<br><input type="radio"/> 2 a 4 veces semana<br><input type="radio"/> 5 a 6 veces semana<br><input type="radio"/> 1 vez al día<br><input type="radio"/> 2 a 3 veces al día<br><input type="radio"/> 5 a 6 veces al día<br><input type="radio"/> más 6 veces al día |
| te o infusión         | <input type="radio"/> Nunca o menos 1 vez al mes<br><input checked="" type="radio"/> 1 a 3 veces mes<br><input type="radio"/> 1 vez semana<br><input type="radio"/> 2 a 4 veces semana<br><input type="radio"/> 5 a 6 veces semana<br><input type="radio"/> 1 vez al día<br><input type="radio"/> 2 a 3 veces al día<br><input type="radio"/> 5 a 6 veces al día<br><input type="radio"/> más 6 veces al día |
| sopa o puré verduras  | <input type="radio"/> Nunca o menos 1 vez al mes<br><input type="radio"/> 1 a 3 veces mes<br><input checked="" type="radio"/> 1 vez semana<br><input type="radio"/> 2 a 4 veces semana<br><input type="radio"/> 5 a 6 veces semana<br><input type="radio"/> 1 vez al día<br><input type="radio"/> 2 a 3 veces al día<br><input type="radio"/> 5 a 6 veces al día<br><input type="radio"/> más 6 veces al día |
| croquetas pollo jamón | <input type="radio"/> Nunca o menos 1 vez al mes<br><input type="radio"/> 1 a 3 veces mes<br><input checked="" type="radio"/> 1 vez semana<br><input type="radio"/> 2 a 4 veces semana<br><input type="radio"/> 5 a 6 veces semana<br><input type="radio"/> 1 vez al día<br><input type="radio"/> 2 a 3 veces al día<br><input type="radio"/> 5 a 6 veces al día<br><input type="radio"/> más 6 veces al día |
| croquetas pescado     | <input checked="" type="radio"/> Nunca o menos 1 vez al mes<br><input type="radio"/> 1 a 3 veces mes<br><input type="radio"/> 1 vez semana<br><input type="radio"/> 2 a 4 veces semana<br><input type="radio"/> 5 a 6 veces semana<br><input type="radio"/> 1 vez al día<br><input type="radio"/> 2 a 3 veces al día<br><input type="radio"/> 5 a 6 veces al día<br><input type="radio"/> más 6 veces al día |
| mayonesa              | <input type="radio"/> Nunca o menos 1 vez al mes<br><input type="radio"/> 1 a 3 veces mes<br><input checked="" type="radio"/> 1 vez semana<br><input type="radio"/> 2 a 4 veces semana<br><input type="radio"/> 5 a 6 veces semana<br><input type="radio"/> 1 vez al día<br><input type="radio"/> 2 a 3 veces al día<br><input type="radio"/> 5 a 6 veces al día<br><input type="radio"/> más 6 veces al día |

---

salsa tomate

- ☐ Nunca o menos 1 vez al mes  
☐ 1 a 3 veces mes  
☒ 1 vez semana  
☐ 2 a 4 veces semana  
☐ 5 a 6 veces semana  
☐ 1 vez al día  
☐ 2 a 3 veces al día  
☐ 5 a 6 veces al día  
☐ más 6 veces al día

---

ketchup

- ☐ Nunca o menos 1 vez al mes  
☒ 1 a 3 veces mes  
☐ 1 vez semana  
☐ 2 a 4 veces semana  
☐ 5 a 6 veces semana  
☐ 1 vez al día  
☐ 2 a 3 veces al día  
☐ 5 a 6 veces al día  
☐ más 6 veces al día

---

sal

- ☒ Nunca o menos 1 vez al mes  
☐ 1 a 3 veces mes  
☐ 1 vez semana  
☐ 2 a 4 veces semana  
☐ 5 a 6 veces semana  
☐ 1 vez al día  
☐ 2 a 3 veces al día  
☐ 5 a 6 veces al día  
☐ más 6 veces al día

---

ajo

- ☒ Nunca o menos 1 vez al mes  
☐ 1 a 3 veces mes  
☐ 1 vez semana  
☐ 2 a 4 veces semana  
☐ 5 a 6 veces semana  
☐ 1 vez al día  
☐ 2 a 3 veces al día  
☐ 5 a 6 veces al día  
☐ más 6 veces al día

---

mermelada o miel

- ☐ Nunca o menos 1 vez al mes  
☐ 1 a 3 veces mes  
☒ 1 vez semana  
☐ 2 a 4 veces semana  
☐ 5 a 6 veces semana  
☐ 1 vez al día  
☐ 2 a 3 veces al día  
☐ 5 a 6 veces al día  
☐ más 6 veces al día

---

azúcar

- ☐ Nunca o menos 1 vez al mes  
☐ 1 a 3 veces mes  
☒ 1 vez semana  
☐ 2 a 4 veces semana  
☐ 5 a 6 veces semana  
☐ 1 vez al día  
☐ 2 a 3 veces al día  
☐ 5 a 6 veces al día  
☐ más 6 veces al día

|                                       |                                                                                                                                                                                                                                                                                                                                                                                                                                                                                                                               |
|---------------------------------------|-------------------------------------------------------------------------------------------------------------------------------------------------------------------------------------------------------------------------------------------------------------------------------------------------------------------------------------------------------------------------------------------------------------------------------------------------------------------------------------------------------------------------------|
| Otro alimento                         | <hr/>                                                                                                                                                                                                                                                                                                                                                                                                                                                                                                                         |
| suplementos vitamínicos               | <input type="radio"/> si<br><input checked="" type="radio"/> no                                                                                                                                                                                                                                                                                                                                                                                                                                                               |
| suplementos vitamínicos               | <hr/>                                                                                                                                                                                                                                                                                                                                                                                                                                                                                                                         |
| dieta previa                          | <input type="radio"/> si<br><input checked="" type="radio"/> no                                                                                                                                                                                                                                                                                                                                                                                                                                                               |
| motivo dieta                          | <input checked="" type="radio"/> no dieta<br><input type="radio"/> control peso<br><input type="radio"/> control colesterol<br><input type="radio"/> control diabetes<br><input type="radio"/> problemas estómago<br><input type="radio"/> problemas vesícula o hepáticos<br><input type="radio"/> HTA o cardiopatía<br><input type="radio"/> problemas renales<br><input type="radio"/> alergia alimentaria<br><input type="radio"/> ácido úrico elevado<br><input type="radio"/> vegetariana<br><input type="radio"/> otros |
| cambio alimentos año previo gestación | <input checked="" type="radio"/> si<br><input type="radio"/> no                                                                                                                                                                                                                                                                                                                                                                                                                                                               |
| cambio lácteos                        | <input type="radio"/> eliminado<br><input type="radio"/> disminuido<br><input checked="" type="radio"/> igual<br><input type="radio"/> aumentado<br><input type="radio"/> no sabe                                                                                                                                                                                                                                                                                                                                             |
| cambio huevos                         | <input type="radio"/> eliminado<br><input type="radio"/> disminuido<br><input checked="" type="radio"/> igual<br><input type="radio"/> aumentado<br><input type="radio"/> no sabe                                                                                                                                                                                                                                                                                                                                             |
| cambio carne                          | <input type="radio"/> eliminado<br><input type="radio"/> disminuido<br><input checked="" type="radio"/> igual<br><input type="radio"/> aumentado<br><input type="radio"/> no sabe                                                                                                                                                                                                                                                                                                                                             |
| cambio pescado                        | <input type="radio"/> eliminado<br><input checked="" type="radio"/> disminuido<br><input type="radio"/> igual<br><input type="radio"/> aumentado<br><input type="radio"/> no sabe                                                                                                                                                                                                                                                                                                                                             |
| cambio verduras                       | <input type="radio"/> eliminado<br><input type="radio"/> disminuido<br><input checked="" type="radio"/> igual<br><input type="radio"/> aumentado<br><input type="radio"/> no sabe                                                                                                                                                                                                                                                                                                                                             |

|                            |                                                                                                                                                                                                                        |
|----------------------------|------------------------------------------------------------------------------------------------------------------------------------------------------------------------------------------------------------------------|
| cambio legumbres           | <input type="radio"/> eliminado<br><input type="radio"/> disminuido<br><input checked="" type="radio"/> igual<br><input type="radio"/> aumentado<br><input type="radio"/> no sabe                                      |
| cambio fruta               | <input type="radio"/> eliminado<br><input type="radio"/> disminuido<br><input checked="" type="radio"/> igual<br><input type="radio"/> aumentado<br><input type="radio"/> no sabe                                      |
| cambio pan                 | <input type="radio"/> eliminado<br><input type="radio"/> disminuido<br><input type="radio"/> igual<br><input checked="" type="radio"/> aumentado<br><input type="radio"/> no sabe                                      |
| cambio aceite oliva        | <input type="radio"/> eliminado<br><input type="radio"/> disminuido<br><input checked="" type="radio"/> igual<br><input type="radio"/> aumentado<br><input type="radio"/> no sabe                                      |
| cambio mante o margarina   | <input type="radio"/> eliminado<br><input checked="" type="radio"/> disminuido<br><input type="radio"/> igual<br><input type="radio"/> aumentado<br><input type="radio"/> no sabe                                      |
| cambio azúcar y dulces     | <input type="radio"/> eliminado<br><input type="radio"/> disminuido<br><input checked="" type="radio"/> igual<br><input type="radio"/> aumentado<br><input type="radio"/> no sabe                                      |
| cambio bebidas alcohólicas | <input checked="" type="radio"/> eliminado<br><input type="radio"/> disminuido<br><input type="radio"/> igual<br><input type="radio"/> aumentado<br><input type="radio"/> no sabe                                      |
| frecuencia comidas fritas  | <input type="radio"/> a diario<br><input type="radio"/> 5 a 6 veces semana<br><input type="radio"/> 2 a 4 veces semana<br><input checked="" type="radio"/> 1 vez semana<br><input type="radio"/> menos de 1 vez semana |
| carne                      | <input type="radio"/> no como<br><input type="radio"/> cruda<br><input type="radio"/> poco hecha<br><input checked="" type="radio"/> hecha<br><input type="radio"/> muy hecha                                          |
| grasa visible carne        | <input type="radio"/> quita toda<br><input checked="" type="radio"/> quita mayoría<br><input type="radio"/> quita un poco<br><input type="radio"/> no quita nada                                                       |



|                                |                                                                                                                                                                                                                                                          |
|--------------------------------|----------------------------------------------------------------------------------------------------------------------------------------------------------------------------------------------------------------------------------------------------------|
| cocina carne                   | <input checked="" type="radio"/> a la plancha<br><input type="radio"/> a la parrilla<br><input type="radio"/> asada<br><input type="radio"/> frita<br><input type="radio"/> guisada                                                                      |
| tostado quemado carne          | <input checked="" type="radio"/> nunca<br><input type="radio"/> 1 vez mes<br><input type="radio"/> 2 a 3 veces mes<br><input type="radio"/> 1 vez semana<br><input type="radio"/> 2 a 3 semanas                                                          |
| tostado quemado pescado        | <input checked="" type="radio"/> nunca<br><input type="radio"/> 1 vez mes<br><input type="radio"/> 2 a 3 veces mes<br><input type="radio"/> 1 vez semana<br><input type="radio"/> 2 a 3 semanas                                                          |
| socarrat paella                | <input checked="" type="radio"/> nunca<br><input type="radio"/> 1 vez mes<br><input type="radio"/> 2 a 3 veces mes<br><input type="radio"/> 1 vez semana<br><input type="radio"/> 2 a 3 semanas                                                          |
| grasa o aceite cocinar         | <input type="radio"/> mantequilla<br><input type="radio"/> margarina<br><input checked="" type="radio"/> aceite oliva<br><input type="radio"/> aceite oliva virgen extra<br><input type="radio"/> aceite vegetal<br><input type="radio"/> mezcla aceites |
| grasa aceite aliñar            | <input type="radio"/> mantequilla<br><input type="radio"/> margarina<br><input checked="" type="radio"/> aceite oliva<br><input type="radio"/> aceite oliva virgen extra<br><input type="radio"/> aceite vegetal<br><input type="radio"/> mezcla aceites |
| grasa aceite freir             | <input type="radio"/> mantequilla<br><input type="radio"/> margarina<br><input checked="" type="radio"/> aceite oliva<br><input type="radio"/> aceite oliva virgen extra<br><input type="radio"/> aceite vegetal<br><input type="radio"/> mezcla aceites |
| Ejercicio cuestionario         | <input type="radio"/> si<br><input type="radio"/> no                                                                                                                                                                                                     |
| horas de sueño incluido siesta | [*DATA REMOVED*]                                                                                                                                                                                                                                         |
| minutos siesta                 | [*DATA REMOVED*]                                                                                                                                                                                                                                         |
| horas televisión semana        | [*DATA REMOVED*]                                                                                                                                                                                                                                         |

|                                        |                                                                                                                                                                                                                                                                                                                                                                           |
|----------------------------------------|---------------------------------------------------------------------------------------------------------------------------------------------------------------------------------------------------------------------------------------------------------------------------------------------------------------------------------------------------------------------------|
| actividad trabajo                      | <input type="radio"/> casi siempre sentado<br><input type="radio"/> sentado 50 por cien<br><input checked="" type="radio"/> casi siempre de pie, quieto<br><input type="radio"/> casi siempre levantado caminando y llevando pocas cosas<br><input type="radio"/> casi siempre levantado, caminando y llevado muchas cosas<br><input type="radio"/> trabajo manual pesado |
| tiempo caminar o bici al día           | <input type="radio"/> casi nunca<br><input type="radio"/> menos 20min día<br><input checked="" type="radio"/> 20 a 40 min día<br><input type="radio"/> 40 a 60 min día<br><input type="radio"/> 1h o 1h y media día<br><input type="radio"/> más de 1h y media al día                                                                                                     |
| tiempo tareas casa al día              | <input type="radio"/> menos de 1h día<br><input type="radio"/> 1 a 2h día<br><input checked="" type="radio"/> 3 a 4h día<br><input type="radio"/> 5 a 6h día<br><input type="radio"/> 7 a 8h día<br><input type="radio"/> más de 8h día                                                                                                                                   |
| tiempo libre televisión ordenador leer | <input type="radio"/> menos 1h día<br><input checked="" type="radio"/> 1h día<br><input type="radio"/> 2h día<br><input type="radio"/> 3h día<br><input type="radio"/> 4h día<br><input type="radio"/> 5 a 6h día<br><input type="radio"/> mas 6h día                                                                                                                     |
| tiempo libre ejercicio o deporte       | <input checked="" type="radio"/> menos 1h semana<br><input type="radio"/> 1h semana<br><input type="radio"/> 2h semana<br><input type="radio"/> 3h semana<br><input type="radio"/> 4 a 5h semana<br><input type="radio"/> mas 5h semana                                                                                                                                   |
| como se considera                      | <input type="radio"/> sedentaria<br><input checked="" type="radio"/> poco activa<br><input type="radio"/> moderadamente activa<br><input type="radio"/> bastante activa<br><input type="radio"/> muy activa<br><input type="radio"/> no sabe                                                                                                                              |
| FUR                                    | [*DATA REMOVED*]                                                                                                                                                                                                                                                                                                                                                          |
| Semanas gestación 2T                   | [*DATA REMOVED*]                                                                                                                                                                                                                                                                                                                                                          |
| Días gestación 2T                      | [*DATA REMOVED*]                                                                                                                                                                                                                                                                                                                                                          |
| DBP 2T                                 | [*DATA REMOVED*]                                                                                                                                                                                                                                                                                                                                                          |
| CC 2T                                  | [*DATA REMOVED*]                                                                                                                                                                                                                                                                                                                                                          |
| AC 2T                                  | [*DATA REMOVED*]                                                                                                                                                                                                                                                                                                                                                          |

|                                                   |                                                                                                                                                                                                 |
|---------------------------------------------------|-------------------------------------------------------------------------------------------------------------------------------------------------------------------------------------------------|
| LF 2T                                             | [*DATA REMOVED*]                                                                                                                                                                                |
| PFE 2T (Hadlock)                                  | [*DATA REMOVED*]                                                                                                                                                                                |
| Semanas gestación 3T                              | [*DATA REMOVED*]                                                                                                                                                                                |
| días 3T                                           | [*DATA REMOVED*]                                                                                                                                                                                |
| DBP 3T                                            | [*DATA REMOVED*]                                                                                                                                                                                |
| CC 3T                                             | [*DATA REMOVED*]                                                                                                                                                                                |
| AC 3T                                             | [*DATA REMOVED*]                                                                                                                                                                                |
| LF 3T                                             | [*DATA REMOVED*]                                                                                                                                                                                |
| PFE 3T (Hadlock)                                  | [*DATA REMOVED*]                                                                                                                                                                                |
| Semanas de gestación final                        | [*DATA REMOVED*]                                                                                                                                                                                |
| días gestación final                              | [*DATA REMOVED*]                                                                                                                                                                                |
| Localización placenta                             | <input type="radio"/> anterior<br><input type="radio"/> lateral derecha<br><input type="radio"/> lateral izquierda<br><input type="radio"/> posterior<br><input checked="" type="radio"/> fondo |
| Presentación longitudinal cefálica                | <input type="radio"/> no<br><input checked="" type="radio"/> si                                                                                                                                 |
| Dorso                                             | <input type="radio"/> izquierda anterior<br><input type="radio"/> izquierda posterior<br><input type="radio"/> derecha anterior<br><input checked="" type="radio"/> derecha posterior           |
| diámetro biparietal                               | [*DATA REMOVED*]                                                                                                                                                                                |
| Circunferencia craneal                            | [*DATA REMOVED*]                                                                                                                                                                                |
| Circunferencia abdominal                          | [*DATA REMOVED*]                                                                                                                                                                                |
| Longitud de femur                                 | [*DATA REMOVED*]                                                                                                                                                                                |
| tejido celular subcutáneo a nivel del muslo en mm | [*DATA REMOVED*]                                                                                                                                                                                |
| tejido celular subcutáneo en abdomen en mm        | [*DATA REMOVED*]                                                                                                                                                                                |
| Volumen del muslo en cm3                          | [*DATA REMOVED*]                                                                                                                                                                                |
| Peso fetal estimado según fórmula de Hadlock      | [*DATA REMOVED*]                                                                                                                                                                                |

|                                               |                                                                                                                                                          |
|-----------------------------------------------|----------------------------------------------------------------------------------------------------------------------------------------------------------|
| Percentil                                     | [*DATA REMOVED*]                                                                                                                                         |
| Peso fetal estimado según fórmula de Scioscia | <hr/>                                                                                                                                                    |
| Peso fetal estimado según fórmula de LEE      | <hr/>                                                                                                                                                    |
| Tipo de parto                                 | <input checked="" type="radio"/> eutocico<br><input type="radio"/> instrumentado/ventosa<br><input type="radio"/> cesarea                                |
| fecha de nacimiento                           | [*DATA REMOVED*]                                                                                                                                         |
| Días entre exploración y nacimiento           | [*DATA REMOVED*]                                                                                                                                         |
| Peso RN en g                                  | [*DATA REMOVED*]                                                                                                                                         |
| sexo                                          | <input type="radio"/> mujer<br><input checked="" type="radio"/> hombre                                                                                   |
| Apgar 1 minuto                                | [*DATA REMOVED*]                                                                                                                                         |
| Apgar 5 minutos                               | [*DATA REMOVED*]                                                                                                                                         |
| Apgar 10 minutos                              | <hr/>                                                                                                                                                    |
| antecedente Covid durante gestación           | <input type="radio"/> Yes<br><input checked="" type="radio"/> No                                                                                         |
| Nivel de estudios                             | <input type="radio"/> ninguno<br><input checked="" type="radio"/> primarios<br><input type="radio"/> secundarios<br><input type="radio"/> universitarios |

# Base\_datos\_estimacion\_peso\_fetal

|                                       |                                                                                                                                                                                                                                                                                      |
|---------------------------------------|--------------------------------------------------------------------------------------------------------------------------------------------------------------------------------------------------------------------------------------------------------------------------------------|
| Número de identificación participante | 97                                                                                                                                                                                                                                                                                   |
| CODIGO PARTICIPANTE                   |                                                                                                                                                                                                                                                                                      |
| Edad                                  | [*DATA REMOVED*]                                                                                                                                                                                                                                                                     |
| Gestaciones                           | <input checked="" type="radio"/> 1<br><input type="radio"/> 2<br><input type="radio"/> 3<br><input type="radio"/> mas de 3                                                                                                                                                           |
| partos                                | <input checked="" type="radio"/> 0<br><input type="radio"/> 1<br><input type="radio"/> 2<br><input type="radio"/> 3<br><input type="radio"/> mas de 3                                                                                                                                |
| cesáreas                              | <input checked="" type="radio"/> 0<br><input type="radio"/> 1<br><input type="radio"/> 2<br><input type="radio"/> 3<br><input type="radio"/> mas de 3                                                                                                                                |
| Abortos                               | <input checked="" type="radio"/> 0<br><input type="radio"/> 1<br><input type="radio"/> 2<br><input type="radio"/> 3<br><input type="radio"/> mas de 3                                                                                                                                |
| Tipo de gestacion                     | <input checked="" type="radio"/> espontanea<br><input type="radio"/> IAC inseminación artificial conyuge<br><input type="radio"/> IAD inseminación artificial donante<br><input type="radio"/> FIV Fecundación in Vitro<br><input type="radio"/> Ovodon FIV con donación de ovocitos |
| peso previo a embarazo                | [*DATA REMOVED*]                                                                                                                                                                                                                                                                     |
| Ganancia ponderal embarazo            | [*DATA REMOVED*]                                                                                                                                                                                                                                                                     |
| Talla madre                           | [*DATA REMOVED*]                                                                                                                                                                                                                                                                     |
| IMC previo embarazo                   | 23.92242299970097                                                                                                                                                                                                                                                                    |
| Patología obstétrica                  | <input checked="" type="radio"/> no<br><input type="radio"/> si                                                                                                                                                                                                                      |
| Diabetes pregestacional               | <input checked="" type="radio"/> no<br><input type="radio"/> si                                                                                                                                                                                                                      |
| Diabetes gestacional                  | <input checked="" type="radio"/> no<br><input type="radio"/> si                                                                                                                                                                                                                      |

|                                            |                                                                                                                                                                                      |
|--------------------------------------------|--------------------------------------------------------------------------------------------------------------------------------------------------------------------------------------|
| Diabetes gestacional con insulina          | <input checked="" type="radio"/> no<br><input type="radio"/> si                                                                                                                      |
| Diabetes gestacional con dieta y ejercicio | <input checked="" type="radio"/> no<br><input type="radio"/> si                                                                                                                      |
| Percentil fetos previos                    | <input checked="" type="radio"/> Nada<br><input type="radio"/> percentil menor de 10<br><input type="radio"/> percentil entre 10 y 90<br><input type="radio"/> percentil mayor de 90 |
| Exfumadora                                 | <input type="radio"/> Nada<br><input checked="" type="radio"/> menos de 5 años<br><input type="radio"/> 5 a 10 años<br><input type="radio"/> mayor o igual a 10 años                 |
| Hábito tabáquico                           | <input checked="" type="radio"/> no<br><input type="radio"/> si                                                                                                                      |
| fumadora                                   | [*DATA REMOVED*]                                                                                                                                                                     |
| Consumo otros tóxicos                      | <input checked="" type="radio"/> no<br><input type="radio"/> si                                                                                                                      |
| Hb 1T                                      | [*DATA REMOVED*]                                                                                                                                                                     |
| Htc 1T                                     | [*DATA REMOVED*]                                                                                                                                                                     |
| Hb 2T                                      | [*DATA REMOVED*]                                                                                                                                                                     |
| HTC 2T                                     | [*DATA REMOVED*]                                                                                                                                                                     |
| Hb 3T                                      | [*DATA REMOVED*]                                                                                                                                                                     |
| HTC 3T                                     | [*DATA REMOVED*]                                                                                                                                                                     |
| Suplemento FE oral                         | <input checked="" type="radio"/> si<br><input type="radio"/> no                                                                                                                      |
| Suplemento fe iv                           | <input type="radio"/> si<br><input checked="" type="radio"/> no                                                                                                                      |
| Transfusión                                | <input checked="" type="radio"/> no<br><input type="radio"/> si                                                                                                                      |
| Solicitada Vit D                           | <input checked="" type="radio"/> no<br><input type="radio"/> si                                                                                                                      |
| Deficit vit D                              | <input type="radio"/> no<br><input type="radio"/> si                                                                                                                                 |
| Suplemento vit D                           | <input type="radio"/> si<br><input type="radio"/> no                                                                                                                                 |

|                       |                                                                                                                                                                                                                                                                                                                                                                                                              |
|-----------------------|--------------------------------------------------------------------------------------------------------------------------------------------------------------------------------------------------------------------------------------------------------------------------------------------------------------------------------------------------------------------------------------------------------------|
| Dieta, cuestionario   | <input checked="" type="radio"/> sí<br><input type="radio"/> no                                                                                                                                                                                                                                                                                                                                              |
| Leche entera          | <input type="radio"/> Nunca o menos 1 vez al mes<br><input checked="" type="radio"/> 1 a 3 veces mes<br><input type="radio"/> 1 vez semana<br><input type="radio"/> 2 a 4 veces semana<br><input type="radio"/> 5 a 6 veces semana<br><input type="radio"/> 1 vez al día<br><input type="radio"/> 2 a 3 veces al día<br><input type="radio"/> 5 a 6 veces al día<br><input type="radio"/> más 6 veces al día |
| Leche semidesnatada   | <input type="radio"/> Nunca o menos 1 vez al mes<br><input type="radio"/> 1 a 3 veces mes<br><input type="radio"/> 1 vez semana<br><input type="radio"/> 2 a 4 veces semana<br><input type="radio"/> 5 a 6 veces semana<br><input checked="" type="radio"/> 1 vez al día<br><input type="radio"/> 2 a 3 veces al día<br><input type="radio"/> 5 a 6 veces al día<br><input type="radio"/> mas 6 veces al día |
| Leche desnatada       | <input checked="" type="radio"/> Nunca o menos 1 vez al mes<br><input type="radio"/> 1 a 3 veces mes<br><input type="radio"/> 1 vez semana<br><input type="radio"/> 2 a 4 veces semana<br><input type="radio"/> 5 a 6 veces semana<br><input type="radio"/> 1 vez al día<br><input type="radio"/> 2 a 3 veces al día<br><input type="radio"/> 5 a 6 veces al día<br><input type="radio"/> más 6 veces al día |
| Leche condensada      | <input checked="" type="radio"/> Nunca o menos 1 vez al mes<br><input type="radio"/> 1 a 3 veces mes<br><input type="radio"/> 1 vez semana<br><input type="radio"/> 2 a 4 veces semana<br><input type="radio"/> 5 a 6 veces semana<br><input type="radio"/> 1 vez al día<br><input type="radio"/> 2 a 3 veces al día<br><input type="radio"/> 5 a 6 veces al día<br><input type="radio"/> más 6 veces al día |
| nata o crema de leche | <input checked="" type="radio"/> Nunca o menos 1 vez al mes<br><input type="radio"/> 1 a 3 veces mes<br><input type="radio"/> 1 vez semana<br><input type="radio"/> 2 a 4 veces semana<br><input type="radio"/> 5 a 6 veces semana<br><input type="radio"/> 1 vez al día<br><input type="radio"/> 2 a 3 veces al día<br><input type="radio"/> 5 a 6 veces al día<br><input type="radio"/> más 6 veces al día |

|                                             |                                                                                                                                                                                                                                                                                                                                                                                                              |
|---------------------------------------------|--------------------------------------------------------------------------------------------------------------------------------------------------------------------------------------------------------------------------------------------------------------------------------------------------------------------------------------------------------------------------------------------------------------|
| Yogurt Entero                               | <input type="radio"/> Nunca o menos 1 vez al mes<br><input type="radio"/> 1 a 3 veces mes<br><input type="radio"/> 1 vez semana<br><input checked="" type="radio"/> 2 a 4 veces semana<br><input type="radio"/> 5 a 6 veces semana<br><input type="radio"/> 1 vez al día<br><input type="radio"/> 2 a 3 veces al día<br><input type="radio"/> 5 a 6 veces al día<br><input type="radio"/> más 6 veces al día |
| Yogurt desnatado                            | <input type="radio"/> Nunca o menos 1 vez al mes<br><input type="radio"/> 1 a 3 veces mes<br><input type="radio"/> 1 vez semana<br><input checked="" type="radio"/> 2 a 4 veces semana<br><input type="radio"/> 5 a 6 veces semana<br><input type="radio"/> 1 vez al día<br><input type="radio"/> 2 a 3 veces al día<br><input type="radio"/> 5 a 6 veces al día<br><input type="radio"/> más 6 veces al día |
| 100g requesón o queso blando o queso fresco | <input checked="" type="radio"/> Nunca o menos 1 vez al mes<br><input type="radio"/> 1 a 3 veces mes<br><input type="radio"/> 1 vez semana<br><input type="radio"/> 2 a 4 veces semana<br><input type="radio"/> 5 a 6 veces semana<br><input type="radio"/> 1 vez al día<br><input type="radio"/> 2 a 3 veces al día<br><input type="radio"/> 5 a 6 veces al día<br><input type="radio"/> más 6 veces al día |
| queso curado o semicurado o cremoso         | <input type="radio"/> Nunca o menos 1 vez al mes<br><input type="radio"/> 1 a 3 veces mes<br><input type="radio"/> 1 vez semana<br><input type="radio"/> 2 a 4 veces semana<br><input checked="" type="radio"/> 5 a 6 veces semana<br><input type="radio"/> 1 vez al día<br><input type="radio"/> 2 a 3 veces al día<br><input type="radio"/> 5 a 6 veces al día<br><input type="radio"/> más 6 veces al día |
| natillas flan pudding                       | <input type="radio"/> Nunca o menos 1 vez al mes<br><input checked="" type="radio"/> 1 a 3 veces mes<br><input type="radio"/> 1 vez semana<br><input type="radio"/> 2 a 4 veces semana<br><input type="radio"/> 5 a 6 veces semana<br><input type="radio"/> 1 vez al día<br><input type="radio"/> 2 a 3 veces al día<br><input type="radio"/> 5 a 6 veces al día<br><input type="radio"/> más 6 veces al día |
| Helado                                      | <input type="radio"/> Nunca o menos 1 vez al mes<br><input checked="" type="radio"/> 1 a 3 veces mes<br><input type="radio"/> 1 vez semana<br><input type="radio"/> 2 a 4 veces semana<br><input type="radio"/> 5 a 6 veces semana<br><input type="radio"/> 1 vez al día<br><input type="radio"/> 2 a 3 veces al día<br><input type="radio"/> 5 a 6 veces al día<br><input type="radio"/> más 6 veces al día |



|                                      |                                                                                                                                                                                                                                                                                                                                                                                                              |
|--------------------------------------|--------------------------------------------------------------------------------------------------------------------------------------------------------------------------------------------------------------------------------------------------------------------------------------------------------------------------------------------------------------------------------------------------------------|
| huevo                                | <input type="radio"/> Nunca o menos 1 vez al mes<br><input type="radio"/> 1 a 3 veces mes<br><input type="radio"/> 1 vez semana<br><input checked="" type="radio"/> 2 a 4 veces semana<br><input type="radio"/> 5 a 6 veces semana<br><input type="radio"/> 1 vez al día<br><input type="radio"/> 2 a 3 veces al día<br><input type="radio"/> 5 a 6 veces al día<br><input type="radio"/> más 6 veces al día |
| Pollo con piel                       | <input checked="" type="radio"/> Nunca o menos 1 vez al mes<br><input type="radio"/> 1 a 3 veces mes<br><input type="radio"/> 1 vez semana<br><input type="radio"/> 2 a 4 veces semana<br><input type="radio"/> 5 a 6 veces semana<br><input type="radio"/> 1 vez al día<br><input type="radio"/> 2 a 3 veces al día<br><input type="radio"/> 5 a 6 veces al día<br><input type="radio"/> más 6 veces al día |
| pollo sin piel                       | <input type="radio"/> Nunca o menos 1 vez al mes<br><input type="radio"/> 1 a 3 veces mes<br><input checked="" type="radio"/> 1 vez semana<br><input type="radio"/> 2 a 4 veces semana<br><input type="radio"/> 5 a 6 veces semana<br><input type="radio"/> 1 vez al día<br><input type="radio"/> 2 a 3 veces al día<br><input type="radio"/> 5 a 6 veces al día<br><input type="radio"/> más 6 veces al día |
| Ternera o cerdo o cordero            | <input type="radio"/> Nunca o menos 1 vez al mes<br><input type="radio"/> 1 a 3 veces mes<br><input type="radio"/> 1 vez semana<br><input checked="" type="radio"/> 2 a 4 veces semana<br><input type="radio"/> 5 a 6 veces semana<br><input type="radio"/> 1 vez al día<br><input type="radio"/> 2 a 3 veces al día<br><input type="radio"/> 5 a 6 veces al día<br><input type="radio"/> más 6 veces al día |
| carne caza: Conejo o codorniz o pato | <input checked="" type="radio"/> Nunca o menos 1 vez al mes<br><input type="radio"/> 1 a 3 veces mes<br><input type="radio"/> 1 vez semana<br><input type="radio"/> 2 a 4 veces semana<br><input type="radio"/> 5 a 6 veces semana<br><input type="radio"/> 1 vez al día<br><input type="radio"/> 2 a 3 veces al día<br><input type="radio"/> 5 a 6 veces al día<br><input type="radio"/> más 6 veces al día |
| Hígado de ternera o cerdo o pollo    | <input checked="" type="radio"/> Nunca o menos 1 vez al mes<br><input type="radio"/> 1 a 3 veces mes<br><input type="radio"/> 1 vez semana<br><input type="radio"/> 2 a 4 veces semana<br><input type="radio"/> 5 a 6 veces semana<br><input type="radio"/> 1 vez al día<br><input type="radio"/> 2 a 3 veces al día<br><input type="radio"/> 5 a 6 veces al día<br><input type="radio"/> más 6 veces al día |

|                     |                                                                                                                                                                                                                                                                                                                                                                                                              |
|---------------------|--------------------------------------------------------------------------------------------------------------------------------------------------------------------------------------------------------------------------------------------------------------------------------------------------------------------------------------------------------------------------------------------------------------|
| Vísceras            | <input checked="" type="radio"/> Nunca o menos 1 vez al mes<br><input type="radio"/> 1 a 3 veces mes<br><input type="radio"/> 1 vez semana<br><input type="radio"/> 2 a 4 veces semana<br><input type="radio"/> 5 a 6 veces semana<br><input type="radio"/> 1 vez al día<br><input type="radio"/> 2 a 3 veces al día<br><input type="radio"/> 5 a 6 veces al día<br><input type="radio"/> más 6 veces al día |
| Embutido            | <input type="radio"/> Nunca o menos 1 vez al mes<br><input type="radio"/> 1 a 3 veces mes<br><input type="radio"/> 1 vez semana<br><input checked="" type="radio"/> 2 a 4 veces semana<br><input type="radio"/> 5 a 6 veces semana<br><input type="radio"/> 1 vez al día<br><input type="radio"/> 2 a 3 veces al día<br><input type="radio"/> 5 a 6 veces al día<br><input type="radio"/> más 6 veces al día |
| Salchicha o similar | <input type="radio"/> Nunca o menos 1 vez al mes<br><input checked="" type="radio"/> 1 a 3 veces mes<br><input type="radio"/> 1 vez semana<br><input type="radio"/> 2 a 4 veces semana<br><input type="radio"/> 5 a 6 veces semana<br><input type="radio"/> 1 vez al día<br><input type="radio"/> 2 a 3 veces al día<br><input type="radio"/> 5 a 6 veces al día<br><input type="radio"/> más 6 veces al día |
| Pate o foiegras     | <input checked="" type="radio"/> Nunca o menos 1 vez al mes<br><input type="radio"/> 1 a 3 veces mes<br><input type="radio"/> 1 vez semana<br><input type="radio"/> 2 a 4 veces semana<br><input type="radio"/> 5 a 6 veces semana<br><input type="radio"/> 1 vez al día<br><input type="radio"/> 2 a 3 veces al día<br><input type="radio"/> 5 a 6 veces al día<br><input type="radio"/> más 6 veces al día |
| Hamburguesa         | <input type="radio"/> Nunca o menos 1 vez al mes<br><input checked="" type="radio"/> 1 a 3 veces mes<br><input type="radio"/> 1 vez semana<br><input type="radio"/> 2 a 4 veces semana<br><input type="radio"/> 5 a 6 veces semana<br><input type="radio"/> 1 vez al día<br><input type="radio"/> 2 a 3 veces al día<br><input type="radio"/> 5 a 6 veces al día<br><input type="radio"/> más 6 veces al día |
| tocino o bacon      | <input type="radio"/> Nunca o menos 1 vez al mes<br><input checked="" type="radio"/> 1 a 3 veces mes<br><input type="radio"/> 1 vez semana<br><input type="radio"/> 2 a 4 veces semana<br><input type="radio"/> 5 a 6 veces semana<br><input type="radio"/> 1 vez al día<br><input type="radio"/> 2 a 3 veces al día<br><input type="radio"/> 5 a 6 veces al día<br><input type="radio"/> más 6 veces al día |

---

Pescado frito

- ☐ Nunca o menos 1 vez al mes  
☒ 1 a 3 veces mes  
☐ 1 vez semana  
☐ 2 a 4 veces semana  
☐ 5 a 6 veces semana  
☐ 1 vez al día  
☐ 2 a 3 veces al día  
☐ 5 a 6 veces al día  
☐ más 6 veces al día

---

pescado hervido blanco

- ☐ Nunca o menos 1 vez al mes  
☐ 1 a 3 veces mes  
☐ 1 vez semana  
☒ 2 a 4 veces semana  
☐ 5 a 6 veces semana  
☐ 1 vez al día  
☐ 2 a 3 veces al día  
☐ 5 a 6 veces al día  
☐ más 6 veces al día

---

pescado hervido azul

- ☐ Nunca o menos 1 vez al mes  
☐ 1 a 3 veces mes  
☐ 1 vez semana  
☒ 2 a 4 veces semana  
☐ 5 a 6 veces semana  
☐ 1 vez al día  
☐ 2 a 3 veces al día  
☐ 5 a 6 veces al día  
☐ más 6 veces al día

---

otros pescado azul

- ☐ Nunca o menos 1 vez al mes  
☒ 1 a 3 veces mes  
☐ 1 vez semana  
☐ 2 a 4 veces semana  
☐ 5 a 6 veces semana  
☐ 1 vez al día  
☐ 2 a 3 veces al día  
☐ 5 a 6 veces al día  
☐ más 6 veces al día

---

atun conserva

- ☐ Nunca o menos 1 vez al mes  
☐ 1 a 3 veces mes  
☒ 1 vez semana  
☐ 2 a 4 veces semana  
☐ 5 a 6 veces semana  
☐ 1 vez al día  
☐ 2 a 3 veces al día  
☐ 5 a 6 veces al día  
☐ más 6 veces al día

---

sardina conserva

- ☒ Nunca o menos 1 vez al mes  
☐ 1 a 3 veces mes  
☐ 1 vez semana  
☐ 2 a 4 veces semana  
☐ 5 a 6 veces semana  
☐ 1 vez al día  
☐ 2 a 3 veces al día  
☐ 5 a 6 veces al día  
☐ más 6 veces al día

|                                         |                                                                                                                                                                                                                                                                                                                                                                                                              |
|-----------------------------------------|--------------------------------------------------------------------------------------------------------------------------------------------------------------------------------------------------------------------------------------------------------------------------------------------------------------------------------------------------------------------------------------------------------------|
| pescado ahumado                         | <input checked="" type="radio"/> Nunca o menos 1 vez al mes<br><input type="radio"/> 1 a 3 veces mes<br><input type="radio"/> 1 vez semana<br><input type="radio"/> 2 a 4 veces semana<br><input type="radio"/> 5 a 6 veces semana<br><input type="radio"/> 1 vez al día<br><input type="radio"/> 2 a 3 veces al día<br><input type="radio"/> 5 a 6 veces al día<br><input type="radio"/> más 6 veces al día |
| almejas o mejillones o ostras unos 100g | <input type="radio"/> Nunca o menos 1 vez al mes<br><input checked="" type="radio"/> 1 a 3 veces mes<br><input type="radio"/> 1 vez semana<br><input type="radio"/> 2 a 4 veces semana<br><input type="radio"/> 5 a 6 veces semana<br><input type="radio"/> 1 vez al día<br><input type="radio"/> 2 a 3 veces al día<br><input type="radio"/> 5 a 6 veces al día<br><input type="radio"/> más 6 veces al día |
| calamar o chipiron o sepia unos 100g    | <input type="radio"/> Nunca o menos 1 vez al mes<br><input checked="" type="radio"/> 1 a 3 veces mes<br><input type="radio"/> 1 vez semana<br><input type="radio"/> 2 a 4 veces semana<br><input type="radio"/> 5 a 6 veces semana<br><input type="radio"/> 1 vez al día<br><input type="radio"/> 2 a 3 veces al día<br><input type="radio"/> 5 a 6 veces al día<br><input type="radio"/> más 6 veces al día |
| marisco unos 100g                       | <input type="radio"/> Nunca o menos 1 vez al mes<br><input checked="" type="radio"/> 1 a 3 veces mes<br><input type="radio"/> 1 vez semana<br><input type="radio"/> 2 a 4 veces semana<br><input type="radio"/> 5 a 6 veces semana<br><input type="radio"/> 1 vez al día<br><input type="radio"/> 2 a 3 veces al día<br><input type="radio"/> 5 a 6 veces al día<br><input type="radio"/> más 6 veces al día |
| Espinacas o acelgas cocinadas           | <input type="radio"/> Nunca o menos 1 vez al mes<br><input checked="" type="radio"/> 1 a 3 veces mes<br><input type="radio"/> 1 vez semana<br><input type="radio"/> 2 a 4 veces semana<br><input type="radio"/> 5 a 6 veces semana<br><input type="radio"/> 1 vez al día<br><input type="radio"/> 2 a 3 veces al día<br><input type="radio"/> 5 a 6 veces al día<br><input type="radio"/> más 6 veces al día |
| Col o coliflor o brocoli cocinado       | <input type="radio"/> Nunca o menos 1 vez al mes<br><input checked="" type="radio"/> 1 a 3 veces mes<br><input type="radio"/> 1 vez semana<br><input type="radio"/> 2 a 4 veces semana<br><input type="radio"/> 5 a 6 veces semana<br><input type="radio"/> 1 vez al día<br><input type="radio"/> 2 a 3 veces al día<br><input type="radio"/> 5 a 6 veces al día<br><input type="radio"/> más 6 veces al día |

---

Lechuga o endivia o escarola

- ☐ Nunca o menos 1 vez al mes  
☐ 1 a 3 veces mes  
☒ 1 vez semana  
☐ 2 a 4 veces semana  
☐ 5 a 6 veces semana  
☐ 1 vez al día  
☐ 2 a 3 veces al día  
☐ 5 a 6 veces al día  
☐ más 6 veces al día

---

tomate ensalada

- ☐ Nunca o menos 1 vez al mes  
☐ 1 a 3 veces mes  
☐ 1 vez semana  
☒ 2 a 4 veces semana  
☐ 5 a 6 veces semana  
☐ 1 vez al día  
☐ 2 a 3 veces al día  
☐ 5 a 6 veces al día  
☐ más 6 veces al día

---

cebolla

- ☐ Nunca o menos 1 vez al mes  
☐ 1 a 3 veces mes  
☐ 1 vez semana  
☒ 2 a 4 veces semana  
☐ 5 a 6 veces semana  
☐ 1 vez al día  
☐ 2 a 3 veces al día  
☐ 5 a 6 veces al día  
☐ más 6 veces al día

---

Zanahoria o calabaza

- ☐ Nunca o menos 1 vez al mes  
☐ 1 a 3 veces mes  
☒ 1 vez semana  
☐ 2 a 4 veces semana  
☐ 5 a 6 veces semana  
☐ 1 vez al día  
☐ 2 a 3 veces al día  
☐ 5 a 6 veces al día  
☐ más 6 veces al día

---

Judías verdes

- ☐ Nunca o menos 1 vez al mes  
☐ 1 a 3 veces mes  
☒ 1 vez semana  
☐ 2 a 4 veces semana  
☐ 5 a 6 veces semana  
☐ 1 vez al día  
☐ 2 a 3 veces al día  
☐ 5 a 6 veces al día  
☐ más 6 veces al día

---

Berenjena o calabacin o pepino

- ☐ Nunca o menos 1 vez al mes  
☐ 1 a 3 veces mes  
☒ 1 vez semana  
☐ 2 a 4 veces semana  
☐ 5 a 6 veces semana  
☐ 1 vez al día  
☐ 2 a 3 veces al día  
☐ 5 a 6 veces al día  
☐ más 6 veces al día

|                       |                                                                                                                                                                                                                                                                                                                                                                                                              |
|-----------------------|--------------------------------------------------------------------------------------------------------------------------------------------------------------------------------------------------------------------------------------------------------------------------------------------------------------------------------------------------------------------------------------------------------------|
| pimiento              | <input type="radio"/> Nunca o menos 1 vez al mes<br><input checked="" type="radio"/> 1 a 3 veces mes<br><input type="radio"/> 1 vez semana<br><input type="radio"/> 2 a 4 veces semana<br><input type="radio"/> 5 a 6 veces semana<br><input type="radio"/> 1 vez al día<br><input type="radio"/> 2 a 3 veces al día<br><input type="radio"/> 5 a 6 veces al día<br><input type="radio"/> más 6 veces al día |
| alcachofa             | <input type="radio"/> Nunca o menos 1 vez al mes<br><input checked="" type="radio"/> 1 a 3 veces mes<br><input type="radio"/> 1 vez semana<br><input type="radio"/> 2 a 4 veces semana<br><input type="radio"/> 5 a 6 veces semana<br><input type="radio"/> 1 vez al día<br><input type="radio"/> 2 a 3 veces al día<br><input type="radio"/> 5 a 6 veces al día<br><input type="radio"/> más 6 veces al día |
| espárragos            | <input type="radio"/> Nunca o menos 1 vez al mes<br><input checked="" type="radio"/> 1 a 3 veces mes<br><input type="radio"/> 1 vez semana<br><input type="radio"/> 2 a 4 veces semana<br><input type="radio"/> 5 a 6 veces semana<br><input type="radio"/> 1 vez al día<br><input type="radio"/> 2 a 3 veces al día<br><input type="radio"/> 5 a 6 veces al día<br><input type="radio"/> más 6 veces al día |
| maíz hervido          | <input type="radio"/> Nunca o menos 1 vez al mes<br><input checked="" type="radio"/> 1 a 3 veces mes<br><input type="radio"/> 1 vez semana<br><input type="radio"/> 2 a 4 veces semana<br><input type="radio"/> 5 a 6 veces semana<br><input type="radio"/> 1 vez al día<br><input type="radio"/> 2 a 3 veces al día<br><input type="radio"/> 5 a 6 veces al día<br><input type="radio"/> más 6 veces al día |
| legumbres             | <input type="radio"/> Nunca o menos 1 vez al mes<br><input checked="" type="radio"/> 1 a 3 veces mes<br><input type="radio"/> 1 vez semana<br><input type="radio"/> 2 a 4 veces semana<br><input type="radio"/> 5 a 6 veces semana<br><input type="radio"/> 1 vez al día<br><input type="radio"/> 2 a 3 veces al día<br><input type="radio"/> 5 a 6 veces al día<br><input type="radio"/> más 6 veces al día |
| naranjas o mandarinas | <input type="radio"/> Nunca o menos 1 vez al mes<br><input type="radio"/> 1 a 3 veces mes<br><input type="radio"/> 1 vez semana<br><input checked="" type="radio"/> 2 a 4 veces semana<br><input type="radio"/> 5 a 6 veces semana<br><input type="radio"/> 1 vez al día<br><input type="radio"/> 2 a 3 veces al día<br><input type="radio"/> 5 a 6 veces al día<br><input type="radio"/> más 6 veces al día |

|                       |                                                                                                                                                                                                                                                                                                                                                                                                              |
|-----------------------|--------------------------------------------------------------------------------------------------------------------------------------------------------------------------------------------------------------------------------------------------------------------------------------------------------------------------------------------------------------------------------------------------------------|
| zum natural fruta     | <input type="radio"/> Nunca o menos 1 vez al mes<br><input checked="" type="radio"/> 1 a 3 veces mes<br><input type="radio"/> 1 vez semana<br><input type="radio"/> 2 a 4 veces semana<br><input type="radio"/> 5 a 6 veces semana<br><input type="radio"/> 1 vez al día<br><input type="radio"/> 2 a 3 veces al día<br><input type="radio"/> 5 a 6 veces al día<br><input type="radio"/> más 6 veces al día |
| platano               | <input type="radio"/> Nunca o menos 1 vez al mes<br><input checked="" type="radio"/> 1 a 3 veces mes<br><input type="radio"/> 1 vez semana<br><input type="radio"/> 2 a 4 veces semana<br><input type="radio"/> 5 a 6 veces semana<br><input type="radio"/> 1 vez al día<br><input type="radio"/> 2 a 3 veces al día<br><input type="radio"/> 5 a 6 veces al día<br><input type="radio"/> más 6 veces al día |
| manzana o pera        | <input checked="" type="radio"/> Nunca o menos 1 vez al mes<br><input type="radio"/> 1 a 3 veces mes<br><input type="radio"/> 1 vez semana<br><input type="radio"/> 2 a 4 veces semana<br><input type="radio"/> 5 a 6 veces semana<br><input type="radio"/> 1 vez al día<br><input type="radio"/> 2 a 3 veces al día<br><input type="radio"/> 5 a 6 veces al día<br><input type="radio"/> más 6 veces al día |
| melocotón o nectarina | <input checked="" type="radio"/> Nunca o menos 1 vez al mes<br><input type="radio"/> 1 a 3 veces mes<br><input type="radio"/> 1 vez semana<br><input type="radio"/> 2 a 4 veces semana<br><input type="radio"/> 5 a 6 veces semana<br><input type="radio"/> 1 vez al día<br><input type="radio"/> 2 a 3 veces al día<br><input type="radio"/> 5 a 6 veces al día<br><input type="radio"/> más 6 veces al día |
| sandia o melon        | <input checked="" type="radio"/> Nunca o menos 1 vez al mes<br><input type="radio"/> 1 a 3 veces mes<br><input type="radio"/> 1 vez semana<br><input type="radio"/> 2 a 4 veces semana<br><input type="radio"/> 5 a 6 veces semana<br><input type="radio"/> 1 vez al día<br><input type="radio"/> 2 a 3 veces al día<br><input type="radio"/> 5 a 6 veces al día<br><input type="radio"/> más 6 veces al día |
| uva                   | <input checked="" type="radio"/> Nunca o menos 1 vez al mes<br><input type="radio"/> 1 a 3 veces mes<br><input type="radio"/> 1 vez semana<br><input type="radio"/> 2 a 4 veces semana<br><input type="radio"/> 5 a 6 veces semana<br><input type="radio"/> 1 vez al día<br><input type="radio"/> 2 a 3 veces al día<br><input type="radio"/> 5 a 6 veces al día<br><input type="radio"/> más 6 veces al día |

|                 |                                                                                                                                                                                                                                                                                                                                                                                                              |
|-----------------|--------------------------------------------------------------------------------------------------------------------------------------------------------------------------------------------------------------------------------------------------------------------------------------------------------------------------------------------------------------------------------------------------------------|
| bruna o ciruela | <input checked="" type="radio"/> Nunca o menos 1 vez al mes<br><input type="radio"/> 1 a 3 veces mes<br><input type="radio"/> 1 vez semana<br><input type="radio"/> 2 a 4 veces semana<br><input type="radio"/> 5 a 6 veces semana<br><input type="radio"/> 1 vez al día<br><input type="radio"/> 2 a 3 veces al día<br><input type="radio"/> 5 a 6 veces al día<br><input type="radio"/> más 6 veces al día |
| kiwi            | <input type="radio"/> Nunca o menos 1 vez al mes<br><input checked="" type="radio"/> 1 a 3 veces mes<br><input type="radio"/> 1 vez semana<br><input type="radio"/> 2 a 4 veces semana<br><input type="radio"/> 5 a 6 veces semana<br><input type="radio"/> 1 vez al día<br><input type="radio"/> 2 a 3 veces al día<br><input type="radio"/> 5 a 6 veces al día<br><input type="radio"/> más 6 veces al día |
| aceituna        | <input type="radio"/> Nunca o menos 1 vez al mes<br><input checked="" type="radio"/> 1 a 3 veces mes<br><input type="radio"/> 1 vez semana<br><input type="radio"/> 2 a 4 veces semana<br><input type="radio"/> 5 a 6 veces semana<br><input type="radio"/> 1 vez al día<br><input type="radio"/> 2 a 3 veces al día<br><input type="radio"/> 5 a 6 veces al día<br><input type="radio"/> más 6 veces al día |
| frutos secos    | <input type="radio"/> Nunca o menos 1 vez al mes<br><input type="radio"/> 1 a 3 veces mes<br><input checked="" type="radio"/> 1 vez semana<br><input type="radio"/> 2 a 4 veces semana<br><input type="radio"/> 5 a 6 veces semana<br><input type="radio"/> 1 vez al día<br><input type="radio"/> 2 a 3 veces al día<br><input type="radio"/> 5 a 6 veces al día<br><input type="radio"/> más 6 veces al día |
| pan blanco      | <input type="radio"/> Nunca o menos 1 vez al mes<br><input type="radio"/> 1 a 3 veces mes<br><input checked="" type="radio"/> 1 vez semana<br><input type="radio"/> 2 a 4 veces semana<br><input type="radio"/> 5 a 6 veces semana<br><input type="radio"/> 1 vez al día<br><input type="radio"/> 2 a 3 veces al día<br><input type="radio"/> 5 a 6 veces al día<br><input type="radio"/> más 6 veces al día |
| pan integral    | <input type="radio"/> Nunca o menos 1 vez al mes<br><input type="radio"/> 1 a 3 veces mes<br><input checked="" type="radio"/> 1 vez semana<br><input type="radio"/> 2 a 4 veces semana<br><input type="radio"/> 5 a 6 veces semana<br><input type="radio"/> 1 vez al día<br><input type="radio"/> 2 a 3 veces al día<br><input type="radio"/> 5 a 6 veces al día<br><input type="radio"/> más 6 veces al día |



---

cereales desayuno

- ☐ Nunca o menos 1 vez al mes  
☒ 1 a 3 veces mes  
☐ 1 vez semana  
☐ 2 a 4 veces semana  
☐ 5 a 6 veces semana  
☐ 1 vez al día  
☐ 2 a 3 veces al día  
☐ 5 a 6 veces al día  
☐ más 6 veces al día

---

patatas fritas

- ☐ Nunca o menos 1 vez al mes  
☐ 1 a 3 veces mes  
☒ 1 vez semana  
☐ 2 a 4 veces semana  
☐ 5 a 6 veces semana  
☐ 1 vez al día  
☐ 2 a 3 veces al día  
☐ 5 a 6 veces al día  
☐ más 6 veces al día

---

patatas cocidas o asadas

- ☐ Nunca o menos 1 vez al mes  
☐ 1 a 3 veces mes  
☐ 1 vez semana  
☒ 2 a 4 veces semana  
☐ 5 a 6 veces semana  
☐ 1 vez al día  
☐ 2 a 3 veces al día  
☐ 5 a 6 veces al día  
☐ más 6 veces al día

---

bolsa papas

- ☐ Nunca o menos 1 vez al mes  
☐ 1 a 3 veces mes  
☐ 1 vez semana  
☒ 2 a 4 veces semana  
☐ 5 a 6 veces semana  
☐ 1 vez al día  
☐ 2 a 3 veces al día  
☐ 5 a 6 veces al día  
☐ más 6 veces al día

---

arroz cocinado

- ☐ Nunca o menos 1 vez al mes  
☐ 1 a 3 veces mes  
☒ 1 vez semana  
☐ 2 a 4 veces semana  
☐ 5 a 6 veces semana  
☐ 1 vez al día  
☐ 2 a 3 veces al día  
☐ 5 a 6 veces al día  
☐ más 6 veces al día

---

pasta

- ☐ Nunca o menos 1 vez al mes  
☐ 1 a 3 veces mes  
☒ 1 vez semana  
☐ 2 a 4 veces semana  
☐ 5 a 6 veces semana  
☐ 1 vez al día  
☐ 2 a 3 veces al día  
☐ 5 a 6 veces al día  
☐ más 6 veces al día

|                     |                                                                                                                                                                                                                                                                                                                                                                                                              |
|---------------------|--------------------------------------------------------------------------------------------------------------------------------------------------------------------------------------------------------------------------------------------------------------------------------------------------------------------------------------------------------------------------------------------------------------|
| pizza               | <input type="radio"/> Nunca o menos 1 vez al mes<br><input checked="" type="radio"/> 1 a 3 veces mes<br><input type="radio"/> 1 vez semana<br><input type="radio"/> 2 a 4 veces semana<br><input type="radio"/> 5 a 6 veces semana<br><input type="radio"/> 1 vez al día<br><input type="radio"/> 2 a 3 veces al día<br><input type="radio"/> 5 a 6 veces al día<br><input type="radio"/> más 6 veces al día |
| aceite oliva        | <input type="radio"/> Nunca o menos 1 vez al mes<br><input type="radio"/> 1 a 3 veces mes<br><input type="radio"/> 1 vez semana<br><input type="radio"/> 2 a 4 veces semana<br><input type="radio"/> 5 a 6 veces semana<br><input type="radio"/> 1 vez al día<br><input checked="" type="radio"/> 2 a 3 veces al día<br><input type="radio"/> 5 a 6 veces al día<br><input type="radio"/> más 6 veces al día |
| otros aceites       | <input checked="" type="radio"/> Nunca o menos 1 vez al mes<br><input type="radio"/> 1 a 3 veces mes<br><input type="radio"/> 1 vez semana<br><input type="radio"/> 2 a 4 veces semana<br><input type="radio"/> 5 a 6 veces semana<br><input type="radio"/> 1 vez al día<br><input type="radio"/> 2 a 3 veces al día<br><input type="radio"/> 5 a 6 veces al día<br><input type="radio"/> más 6 veces al día |
| margarina           | <input type="radio"/> Nunca o menos 1 vez al mes<br><input checked="" type="radio"/> 1 a 3 veces mes<br><input type="radio"/> 1 vez semana<br><input type="radio"/> 2 a 4 veces semana<br><input type="radio"/> 5 a 6 veces semana<br><input type="radio"/> 1 vez al día<br><input type="radio"/> 2 a 3 veces al día<br><input type="radio"/> 5 a 6 veces al día<br><input type="radio"/> más 6 veces al día |
| mantequilla         | <input checked="" type="radio"/> Nunca o menos 1 vez al mes<br><input type="radio"/> 1 a 3 veces mes<br><input type="radio"/> 1 vez semana<br><input type="radio"/> 2 a 4 veces semana<br><input type="radio"/> 5 a 6 veces semana<br><input type="radio"/> 1 vez al día<br><input type="radio"/> 2 a 3 veces al día<br><input type="radio"/> 5 a 6 veces al día<br><input type="radio"/> más 6 veces al día |
| galletas tipo maria | <input type="radio"/> Nunca o menos 1 vez al mes<br><input type="radio"/> 1 a 3 veces mes<br><input type="radio"/> 1 vez semana<br><input type="radio"/> 2 a 4 veces semana<br><input type="radio"/> 5 a 6 veces semana<br><input type="radio"/> 1 vez al día<br><input checked="" type="radio"/> 2 a 3 veces al día<br><input type="radio"/> 5 a 6 veces al día<br><input type="radio"/> más 6 veces al día |

|                           |                                                                                                                                                                                                                                                                                                                                                                                                              |
|---------------------------|--------------------------------------------------------------------------------------------------------------------------------------------------------------------------------------------------------------------------------------------------------------------------------------------------------------------------------------------------------------------------------------------------------------|
| galletas chocolate        | <input type="radio"/> Nunca o menos 1 vez al mes<br><input checked="" type="radio"/> 1 a 3 veces mes<br><input type="radio"/> 1 vez semana<br><input type="radio"/> 2 a 4 veces semana<br><input type="radio"/> 5 a 6 veces semana<br><input type="radio"/> 1 vez al día<br><input type="radio"/> 2 a 3 veces al día<br><input type="radio"/> 5 a 6 veces al día<br><input type="radio"/> más 6 veces al día |
| bollieria                 | <input type="radio"/> Nunca o menos 1 vez al mes<br><input type="radio"/> 1 a 3 veces mes<br><input checked="" type="radio"/> 1 vez semana<br><input type="radio"/> 2 a 4 veces semana<br><input type="radio"/> 5 a 6 veces semana<br><input type="radio"/> 1 vez al día<br><input type="radio"/> 2 a 3 veces al día<br><input type="radio"/> 5 a 6 veces al día<br><input type="radio"/> más 6 veces al día |
| chocolate o bombones      | <input type="radio"/> Nunca o menos 1 vez al mes<br><input type="radio"/> 1 a 3 veces mes<br><input checked="" type="radio"/> 1 vez semana<br><input type="radio"/> 2 a 4 veces semana<br><input type="radio"/> 5 a 6 veces semana<br><input type="radio"/> 1 vez al día<br><input type="radio"/> 2 a 3 veces al día<br><input type="radio"/> 5 a 6 veces al día<br><input type="radio"/> más 6 veces al día |
| chocolate polvo o colacao | <input checked="" type="radio"/> Nunca o menos 1 vez al mes<br><input type="radio"/> 1 a 3 veces mes<br><input type="radio"/> 1 vez semana<br><input type="radio"/> 2 a 4 veces semana<br><input type="radio"/> 5 a 6 veces semana<br><input type="radio"/> 1 vez al día<br><input type="radio"/> 2 a 3 veces al día<br><input type="radio"/> 5 a 6 veces al día<br><input type="radio"/> más 6 veces al día |
| vino tinto                | <input checked="" type="radio"/> Nunca o menos 1 vez al mes<br><input type="radio"/> 1 a 3 veces mes<br><input type="radio"/> 1 vez semana<br><input type="radio"/> 2 a 4 veces semana<br><input type="radio"/> 5 a 6 veces semana<br><input type="radio"/> 1 vez al día<br><input type="radio"/> 2 a 3 veces al día<br><input type="radio"/> 5 a 6 veces al día<br><input type="radio"/> más 6 veces al día |
| vino blanco               | <input checked="" type="radio"/> Nunca o menos 1 vez al mes<br><input type="radio"/> 1 a 3 veces mes<br><input type="radio"/> 1 vez semana<br><input type="radio"/> 2 a 4 veces semana<br><input type="radio"/> 5 a 6 veces semana<br><input type="radio"/> 1 vez al día<br><input type="radio"/> 2 a 3 veces al día<br><input type="radio"/> 5 a 6 veces al día<br><input type="radio"/> más 6 veces al día |

|                       |                                                                                                                                                                                                                                                                                                                                                                                                              |
|-----------------------|--------------------------------------------------------------------------------------------------------------------------------------------------------------------------------------------------------------------------------------------------------------------------------------------------------------------------------------------------------------------------------------------------------------|
| vino seco o vermut    | <input checked="" type="radio"/> Nunca o menos 1 vez al mes<br><input type="radio"/> 1 a 3 veces mes<br><input type="radio"/> 1 vez semana<br><input type="radio"/> 2 a 4 veces semana<br><input type="radio"/> 5 a 6 veces semana<br><input type="radio"/> 1 vez al día<br><input type="radio"/> 2 a 3 veces al día<br><input type="radio"/> 5 a 6 veces al día<br><input type="radio"/> más 6 veces al día |
| cerveza               | <input checked="" type="radio"/> Nunca o menos 1 vez al mes<br><input type="radio"/> 1 a 3 veces mes<br><input type="radio"/> 1 vez semana<br><input type="radio"/> 2 a 4 veces semana<br><input type="radio"/> 5 a 6 veces semana<br><input type="radio"/> 1 vez al día<br><input type="radio"/> 2 a 3 veces al día<br><input type="radio"/> 5 a 6 veces al día<br><input type="radio"/> más 6 veces al día |
| cerveza sin alcohol   | <input type="radio"/> Nunca o menos 1 vez al mes<br><input checked="" type="radio"/> 1 a 3 veces mes<br><input type="radio"/> 1 vez semana<br><input type="radio"/> 2 a 4 veces semana<br><input type="radio"/> 5 a 6 veces semana<br><input type="radio"/> 1 vez al día<br><input type="radio"/> 2 a 3 veces al día<br><input type="radio"/> 5 a 6 veces al día<br><input type="radio"/> más 6 veces al día |
| licores               | <input checked="" type="radio"/> Nunca o menos 1 vez al mes<br><input type="radio"/> 1 a 3 veces mes<br><input type="radio"/> 1 vez semana<br><input type="radio"/> 2 a 4 veces semana<br><input type="radio"/> 5 a 6 veces semana<br><input type="radio"/> 1 vez al día<br><input type="radio"/> 2 a 3 veces al día<br><input type="radio"/> 5 a 6 veces al día<br><input type="radio"/> más 6 veces al día |
| ginebra o ron o vodka | <input checked="" type="radio"/> Nunca o menos 1 vez al mes<br><input type="radio"/> 1 a 3 veces mes<br><input type="radio"/> 1 vez semana<br><input type="radio"/> 2 a 4 veces semana<br><input type="radio"/> 5 a 6 veces semana<br><input type="radio"/> 1 vez al día<br><input type="radio"/> 2 a 3 veces al día<br><input type="radio"/> 5 a 6 veces al día<br><input type="radio"/> más 6 veces al día |
| refresco normal       | <input checked="" type="radio"/> Nunca o menos 1 vez al mes<br><input type="radio"/> 1 a 3 veces mes<br><input type="radio"/> 1 vez semana<br><input type="radio"/> 2 a 4 veces semana<br><input type="radio"/> 5 a 6 veces semana<br><input type="radio"/> 1 vez al día<br><input type="radio"/> 2 a 3 veces al día<br><input type="radio"/> 5 a 6 veces al día<br><input type="radio"/> más 6 veces al día |

---

refresco sin azúcar

- ☐ Nunca o menos 1 vez al mes  
☒ 1 a 3 veces mes  
☐ 1 vez semana  
☐ 2 a 4 veces semana  
☐ 5 a 6 veces semana  
☐ 1 vez al día  
☐ 2 a 3 veces al día  
☐ 5 a 6 veces al día  
☐ más 6 veces al día

---

Agua del grifo

- ☐ Nunca o menos 1 vez al mes  
☒ 1 a 3 veces mes  
☐ 1 vez semana  
☐ 2 a 4 veces semana  
☐ 5 a 6 veces semana  
☐ 1 vez al día  
☐ 2 a 3 veces al día  
☐ 5 a 6 veces al día  
☐ más 6 veces al día

---

agua embotellada sin gas

- ☐ Nunca o menos 1 vez al mes  
☐ 1 a 3 veces mes  
☐ 1 vez semana  
☐ 2 a 4 veces semana  
☐ 5 a 6 veces semana  
☐ 1 vez al día  
☐ 2 a 3 veces al día  
☐ 5 a 6 veces al día  
☒ más 6 veces al día

---

agua embotellada con gas

- ☒ Nunca o menos 1 vez al mes  
☐ 1 a 3 veces mes  
☐ 1 vez semana  
☐ 2 a 4 veces semana  
☐ 5 a 6 veces semana  
☐ 1 vez al día  
☐ 2 a 3 veces al día  
☐ 5 a 6 veces al día  
☐ más 6 veces al día

---

zumو frutas embasado

- ☐ Nunca o menos 1 vez al mes  
☒ 1 a 3 veces mes  
☐ 1 vez semana  
☐ 2 a 4 veces semana  
☐ 5 a 6 veces semana  
☐ 1 vez al día  
☐ 2 a 3 veces al día  
☐ 5 a 6 veces al día  
☐ más 6 veces al día

---

cafe

- ☒ Nunca o menos 1 vez al mes  
☐ 1 a 3 veces mes  
☐ 1 vez semana  
☐ 2 a 4 veces semana  
☐ 5 a 6 veces semana  
☐ 1 vez al día  
☐ 2 a 3 veces al día  
☐ 5 a 6 veces al día  
☐ más 6 veces al día

---

café descafeinado

- ☐ Nunca o menos 1 vez al mes  
☐ 1 a 3 veces mes  
☐ 1 vez semana  
☐ 2 a 4 veces semana  
☐ 5 a 6 veces semana  
☒ 1 vez al día  
☐ 2 a 3 veces al día  
☐ 5 a 6 veces al día  
☐ más 6 veces al día

---

té o infusión

- ☐ Nunca o menos 1 vez al mes  
☐ 1 a 3 veces mes  
☒ 1 vez semana  
☐ 2 a 4 veces semana  
☐ 5 a 6 veces semana  
☐ 1 vez al día  
☐ 2 a 3 veces al día  
☐ 5 a 6 veces al día  
☐ más 6 veces al día

---

sopa o puré verduras

- ☐ Nunca o menos 1 vez al mes  
☒ 1 a 3 veces mes  
☐ 1 vez semana  
☐ 2 a 4 veces semana  
☐ 5 a 6 veces semana  
☐ 1 vez al día  
☐ 2 a 3 veces al día  
☐ 5 a 6 veces al día  
☐ más 6 veces al día

---

croquetas pollo jamón

- ☐ Nunca o menos 1 vez al mes  
☐ 1 a 3 veces mes  
☒ 1 vez semana  
☐ 2 a 4 veces semana  
☐ 5 a 6 veces semana  
☐ 1 vez al día  
☐ 2 a 3 veces al día  
☐ 5 a 6 veces al día  
☐ más 6 veces al día

---

croquetas pescado

- ☐ Nunca o menos 1 vez al mes  
☒ 1 a 3 veces mes  
☐ 1 vez semana  
☐ 2 a 4 veces semana  
☐ 5 a 6 veces semana  
☐ 1 vez al día  
☐ 2 a 3 veces al día  
☐ 5 a 6 veces al día  
☐ más 6 veces al día

---

mayonesa

- ☐ Nunca o menos 1 vez al mes  
☐ 1 a 3 veces mes  
☒ 1 vez semana  
☐ 2 a 4 veces semana  
☐ 5 a 6 veces semana  
☐ 1 vez al día  
☐ 2 a 3 veces al día  
☐ 5 a 6 veces al día  
☐ más 6 veces al día

---

salsa tomate

- ☐ Nunca o menos 1 vez al mes  
☒ 1 a 3 veces mes  
☐ 1 vez semana  
☐ 2 a 4 veces semana  
☐ 5 a 6 veces semana  
☐ 1 vez al día  
☐ 2 a 3 veces al día  
☐ 5 a 6 veces al día  
☐ más 6 veces al día

---

ketchup

- ☐ Nunca o menos 1 vez al mes  
☒ 1 a 3 veces mes  
☐ 1 vez semana  
☐ 2 a 4 veces semana  
☐ 5 a 6 veces semana  
☐ 1 vez al día  
☐ 2 a 3 veces al día  
☐ 5 a 6 veces al día  
☐ más 6 veces al día

---

sal

- ☐ Nunca o menos 1 vez al mes  
☒ 1 a 3 veces mes  
☐ 1 vez semana  
☐ 2 a 4 veces semana  
☐ 5 a 6 veces semana  
☐ 1 vez al día  
☐ 2 a 3 veces al día  
☐ 5 a 6 veces al día  
☐ más 6 veces al día

---

ajo

- ☐ Nunca o menos 1 vez al mes  
☒ 1 a 3 veces mes  
☐ 1 vez semana  
☐ 2 a 4 veces semana  
☐ 5 a 6 veces semana  
☐ 1 vez al día  
☐ 2 a 3 veces al día  
☐ 5 a 6 veces al día  
☐ más 6 veces al día

---

mermelada o miel

- ☐ Nunca o menos 1 vez al mes  
☒ 1 a 3 veces mes  
☐ 1 vez semana  
☐ 2 a 4 veces semana  
☐ 5 a 6 veces semana  
☐ 1 vez al día  
☐ 2 a 3 veces al día  
☐ 5 a 6 veces al día  
☐ más 6 veces al día

---

azúcar

- ☐ Nunca o menos 1 vez al mes  
☐ 1 a 3 veces mes  
☐ 1 vez semana  
☐ 2 a 4 veces semana  
☐ 5 a 6 veces semana  
☐ 1 vez al día  
☒ 2 a 3 veces al día  
☐ 5 a 6 veces al día  
☐ más 6 veces al día

|                                       |                                                                                                                                                                                                                                                                                                                                                                                                                                                                                                                               |
|---------------------------------------|-------------------------------------------------------------------------------------------------------------------------------------------------------------------------------------------------------------------------------------------------------------------------------------------------------------------------------------------------------------------------------------------------------------------------------------------------------------------------------------------------------------------------------|
| Otro alimento                         |                                                                                                                                                                                                                                                                                                                                                                                                                                                                                                                               |
| suplementos vitamínicos               | <input checked="" type="radio"/> si<br><input type="radio"/> no                                                                                                                                                                                                                                                                                                                                                                                                                                                               |
| suplementos vitamínicos               | [*DATA REMOVED*]                                                                                                                                                                                                                                                                                                                                                                                                                                                                                                              |
| dieta previa                          | <input type="radio"/> si<br><input checked="" type="radio"/> no                                                                                                                                                                                                                                                                                                                                                                                                                                                               |
| motivo dieta                          | <input checked="" type="radio"/> no dieta<br><input type="radio"/> control peso<br><input type="radio"/> control colesterol<br><input type="radio"/> control diabetes<br><input type="radio"/> problemas estómago<br><input type="radio"/> problemas vesícula o hepáticos<br><input type="radio"/> HTA o cardiopatía<br><input type="radio"/> problemas renales<br><input type="radio"/> alergia alimentaria<br><input type="radio"/> ácido úrico elevado<br><input type="radio"/> vegetariana<br><input type="radio"/> otros |
| cambio alimentos año previo gestación | <input checked="" type="radio"/> si<br><input type="radio"/> no                                                                                                                                                                                                                                                                                                                                                                                                                                                               |
| cambio lácteos                        | <input type="radio"/> eliminado<br><input type="radio"/> disminuido<br><input checked="" type="radio"/> igual<br><input type="radio"/> aumentado<br><input type="radio"/> no sabe                                                                                                                                                                                                                                                                                                                                             |
| cambio huevos                         | <input type="radio"/> eliminado<br><input type="radio"/> disminuido<br><input checked="" type="radio"/> igual<br><input type="radio"/> aumentado<br><input type="radio"/> no sabe                                                                                                                                                                                                                                                                                                                                             |
| cambio carne                          | <input type="radio"/> eliminado<br><input type="radio"/> disminuido<br><input checked="" type="radio"/> igual<br><input type="radio"/> aumentado<br><input type="radio"/> no sabe                                                                                                                                                                                                                                                                                                                                             |
| cambio pescado                        | <input type="radio"/> eliminado<br><input type="radio"/> disminuido<br><input checked="" type="radio"/> igual<br><input type="radio"/> aumentado<br><input type="radio"/> no sabe                                                                                                                                                                                                                                                                                                                                             |
| cambio verduras                       | <input type="radio"/> eliminado<br><input type="radio"/> disminuido<br><input checked="" type="radio"/> igual<br><input type="radio"/> aumentado<br><input type="radio"/> no sabe                                                                                                                                                                                                                                                                                                                                             |



|                            |                                                                                                                                                                                                                        |
|----------------------------|------------------------------------------------------------------------------------------------------------------------------------------------------------------------------------------------------------------------|
| cambio legumbres           | <input type="radio"/> eliminado<br><input type="radio"/> disminuido<br><input checked="" type="radio"/> igual<br><input type="radio"/> aumentado<br><input type="radio"/> no sabe                                      |
| cambio fruta               | <input type="radio"/> eliminado<br><input type="radio"/> disminuido<br><input checked="" type="radio"/> igual<br><input type="radio"/> aumentado<br><input type="radio"/> no sabe                                      |
| cambio pan                 | <input type="radio"/> eliminado<br><input type="radio"/> disminuido<br><input checked="" type="radio"/> igual<br><input type="radio"/> aumentado<br><input type="radio"/> no sabe                                      |
| cambio aceite oliva        | <input type="radio"/> eliminado<br><input type="radio"/> disminuido<br><input checked="" type="radio"/> igual<br><input type="radio"/> aumentado<br><input type="radio"/> no sabe                                      |
| cambio mante o margarina   | <input type="radio"/> eliminado<br><input type="radio"/> disminuido<br><input checked="" type="radio"/> igual<br><input type="radio"/> aumentado<br><input type="radio"/> no sabe                                      |
| cambio azúcar y dulces     | <input type="radio"/> eliminado<br><input type="radio"/> disminuido<br><input checked="" type="radio"/> igual<br><input type="radio"/> aumentado<br><input type="radio"/> no sabe                                      |
| cambio bebidas alcohólicas | <input checked="" type="radio"/> eliminado<br><input type="radio"/> disminuido<br><input type="radio"/> igual<br><input type="radio"/> aumentado<br><input type="radio"/> no sabe                                      |
| frecuencia comidas fritas  | <input type="radio"/> a diario<br><input type="radio"/> 5 a 6 veces semana<br><input type="radio"/> 2 a 4 veces semana<br><input checked="" type="radio"/> 1 vez semana<br><input type="radio"/> menos de 1 vez semana |
| carne                      | <input type="radio"/> no como<br><input type="radio"/> cruda<br><input type="radio"/> poco hecha<br><input type="radio"/> hecha<br><input checked="" type="radio"/> muy hecha                                          |
| grasa visible carne        | <input type="radio"/> quita toda<br><input checked="" type="radio"/> quita mayoría<br><input type="radio"/> quita un poco<br><input type="radio"/> no quita nada                                                       |

|                                |                                                                                                                                                                                                                                                          |
|--------------------------------|----------------------------------------------------------------------------------------------------------------------------------------------------------------------------------------------------------------------------------------------------------|
| cocina carne                   | <input type="radio"/> a la plancha<br><input type="radio"/> a la parrilla<br><input checked="" type="radio"/> asada<br><input type="radio"/> frita<br><input type="radio"/> guisada                                                                      |
| tostado quemado carne          | <input type="radio"/> nunca<br><input checked="" type="radio"/> 1 vez mes<br><input type="radio"/> 2 a 3 veces mes<br><input type="radio"/> 1 vez semana<br><input type="radio"/> 2 a 3 semanas                                                          |
| tostado quemado pescado        | <input type="radio"/> nunca<br><input checked="" type="radio"/> 1 vez mes<br><input type="radio"/> 2 a 3 veces mes<br><input type="radio"/> 1 vez semana<br><input type="radio"/> 2 a 3 semanas                                                          |
| socarrat paella                | <input checked="" type="radio"/> nunca<br><input type="radio"/> 1 vez mes<br><input type="radio"/> 2 a 3 veces mes<br><input type="radio"/> 1 vez semana<br><input type="radio"/> 2 a 3 semanas                                                          |
| grasa o aceite cocinar         | <input type="radio"/> mantequilla<br><input type="radio"/> margarina<br><input type="radio"/> aceite oliva<br><input checked="" type="radio"/> aceite oliva virgen extra<br><input type="radio"/> aceite vegetal<br><input type="radio"/> mezcla aceites |
| grasa aceite aliñar            | <input type="radio"/> mantequilla<br><input type="radio"/> margarina<br><input type="radio"/> aceite oliva<br><input checked="" type="radio"/> aceite oliva virgen extra<br><input type="radio"/> aceite vegetal<br><input type="radio"/> mezcla aceites |
| grasa aceite freir             | <input type="radio"/> mantequilla<br><input type="radio"/> margarina<br><input type="radio"/> aceite oliva<br><input type="radio"/> aceite oliva virgen extra<br><input checked="" type="radio"/> aceite vegetal<br><input type="radio"/> mezcla aceites |
| Ejercicio cuestionario         | <input checked="" type="radio"/> si<br><input type="radio"/> no                                                                                                                                                                                          |
| horas de sueño incluido siesta | [*DATA REMOVED*]                                                                                                                                                                                                                                         |
| minutos siesta                 | [*DATA REMOVED*]                                                                                                                                                                                                                                         |
| horas televisión semana        | [*DATA REMOVED*]                                                                                                                                                                                                                                         |

|                                        |                                                                                                                                                                                                                                                                                                                                                                           |
|----------------------------------------|---------------------------------------------------------------------------------------------------------------------------------------------------------------------------------------------------------------------------------------------------------------------------------------------------------------------------------------------------------------------------|
| actividad trabajo                      | <input type="radio"/> casi siempre sentado<br><input type="radio"/> sentado 50 por cien<br><input checked="" type="radio"/> casi siempre de pie, quieto<br><input type="radio"/> casi siempre levantado caminando y llevando pocas cosas<br><input type="radio"/> casi siempre levantado, caminando y llevado muchas cosas<br><input type="radio"/> trabajo manual pesado |
| tiempo caminar o bici al día           | <input type="radio"/> casi nunca<br><input type="radio"/> menos 20min día<br><input checked="" type="radio"/> 20 a 40 min día<br><input type="radio"/> 40 a 60 min día<br><input type="radio"/> 1h o 1h y media día<br><input type="radio"/> más de 1h y media al día                                                                                                     |
| tiempo tareas casa al día              | <input type="radio"/> menos de 1h día<br><input checked="" type="radio"/> 1 a 2h día<br><input type="radio"/> 3 a 4h día<br><input type="radio"/> 5 a 6h día<br><input type="radio"/> 7 a 8h día<br><input type="radio"/> más de 8h día                                                                                                                                   |
| tiempo libre televisión ordenador leer | <input type="radio"/> menos 1h día<br><input type="radio"/> 1h día<br><input type="radio"/> 2h día<br><input type="radio"/> 3h día<br><input type="radio"/> 4h día<br><input checked="" type="radio"/> 5 a 6h día<br><input type="radio"/> mas 6h día                                                                                                                     |
| tiempo libre ejercicio o deporte       | <input type="radio"/> menos 1h semana<br><input type="radio"/> 1h semana<br><input checked="" type="radio"/> 2h semana<br><input type="radio"/> 3h semana<br><input type="radio"/> 4 a 5h semana<br><input type="radio"/> mas 5h semana                                                                                                                                   |
| como se considera                      | <input type="radio"/> sedentaria<br><input checked="" type="radio"/> poco activa<br><input type="radio"/> moderadamente activa<br><input type="radio"/> bastante activa<br><input type="radio"/> muy activa<br><input type="radio"/> no sabe                                                                                                                              |
| FUR                                    | [*DATA REMOVED*]                                                                                                                                                                                                                                                                                                                                                          |
| Semanas gestación 2T                   | [*DATA REMOVED*]                                                                                                                                                                                                                                                                                                                                                          |
| Días gestación 2T                      | [*DATA REMOVED*]                                                                                                                                                                                                                                                                                                                                                          |
| DBP 2T                                 | [*DATA REMOVED*]                                                                                                                                                                                                                                                                                                                                                          |
| CC 2T                                  | [*DATA REMOVED*]                                                                                                                                                                                                                                                                                                                                                          |
| AC 2T                                  | [*DATA REMOVED*]                                                                                                                                                                                                                                                                                                                                                          |

|                                                   |                                                                                                                                                                                                 |
|---------------------------------------------------|-------------------------------------------------------------------------------------------------------------------------------------------------------------------------------------------------|
| LF 2T                                             | [*DATA REMOVED*]                                                                                                                                                                                |
| PFE 2T (Hadlock)                                  | [*DATA REMOVED*]                                                                                                                                                                                |
| Semanas gestación 3T                              | [*DATA REMOVED*]                                                                                                                                                                                |
| días 3T                                           | [*DATA REMOVED*]                                                                                                                                                                                |
| DBP 3T                                            | [*DATA REMOVED*]                                                                                                                                                                                |
| CC 3T                                             | [*DATA REMOVED*]                                                                                                                                                                                |
| AC 3T                                             | [*DATA REMOVED*]                                                                                                                                                                                |
| LF 3T                                             | [*DATA REMOVED*]                                                                                                                                                                                |
| PFE 3T (Hadlock)                                  | [*DATA REMOVED*]                                                                                                                                                                                |
| Semanas de gestación final                        | [*DATA REMOVED*]                                                                                                                                                                                |
| días gestación final                              | [*DATA REMOVED*]                                                                                                                                                                                |
| Localización placenta                             | <input checked="" type="radio"/> anterior<br><input type="radio"/> lateral derecha<br><input type="radio"/> lateral izquierda<br><input type="radio"/> posterior<br><input type="radio"/> fondo |
| Presentación longitudinal cefálica                | <input type="radio"/> no<br><input checked="" type="radio"/> si                                                                                                                                 |
| Dorso                                             | <input type="radio"/> izquierda anterior<br><input checked="" type="radio"/> izquierda posterior<br><input type="radio"/> derecha anterior<br><input type="radio"/> derecha posterior           |
| diámetro biparietal                               | [*DATA REMOVED*]                                                                                                                                                                                |
| Circunferencia craneal                            | [*DATA REMOVED*]                                                                                                                                                                                |
| Circunferencia abdominal                          | [*DATA REMOVED*]                                                                                                                                                                                |
| Longitud de femur                                 | [*DATA REMOVED*]                                                                                                                                                                                |
| tejido celular subcutáneo a nivel del muslo en mm | [*DATA REMOVED*]                                                                                                                                                                                |
| tejido celular subcutáneo en abdomen en mm        | [*DATA REMOVED*]                                                                                                                                                                                |
| Volumen del muslo en cm3                          | [*DATA REMOVED*]                                                                                                                                                                                |
| Peso fetal estimado según fórmula de Hadlock      | [*DATA REMOVED*]                                                                                                                                                                                |

|                                               |                                                                                                                                                          |
|-----------------------------------------------|----------------------------------------------------------------------------------------------------------------------------------------------------------|
| Percentil                                     | [*DATA REMOVED*]                                                                                                                                         |
| Peso fetal estimado según fórmula de Scioscia | <hr/>                                                                                                                                                    |
| Peso fetal estimado según fórmula de LEE      | <hr/>                                                                                                                                                    |
| Tipo de parto                                 | <input type="radio"/> eutocico<br><input type="radio"/> instrumentado/ventosa<br><input checked="" type="radio"/> cesarea                                |
| fecha de nacimiento                           | [*DATA REMOVED*]                                                                                                                                         |
| Días entre exploración y nacimiento           | [*DATA REMOVED*]                                                                                                                                         |
| Peso RN en g                                  | [*DATA REMOVED*]                                                                                                                                         |
| sexo                                          | <input checked="" type="radio"/> mujer<br><input type="radio"/> hombre                                                                                   |
| Apgar 1 minuto                                | [*DATA REMOVED*]                                                                                                                                         |
| Apgar 5 minutos                               | [*DATA REMOVED*]                                                                                                                                         |
| Apgar 10 minutos                              | <hr/>                                                                                                                                                    |
| antecedente Covid durante gestación           | <input type="radio"/> Yes<br><input checked="" type="radio"/> No                                                                                         |
| Nivel de estudios                             | <input type="radio"/> ninguno<br><input checked="" type="radio"/> primarios<br><input type="radio"/> secundarios<br><input type="radio"/> universitarios |

# Base\_datos\_estimacion\_peso\_fetal

|                                       |                                                                                                                                                                                                                                                                                      |
|---------------------------------------|--------------------------------------------------------------------------------------------------------------------------------------------------------------------------------------------------------------------------------------------------------------------------------------|
| Número de identificación participante | 98                                                                                                                                                                                                                                                                                   |
| CODIGO PARTICIPANTE                   |                                                                                                                                                                                                                                                                                      |
| Edad                                  | [*DATA REMOVED*]                                                                                                                                                                                                                                                                     |
| Gestaciones                           | <input type="radio"/> 1<br><input type="radio"/> 2<br><input type="radio"/> 3<br><input checked="" type="radio"/> mas de 3                                                                                                                                                           |
| partos                                | <input type="radio"/> 0<br><input checked="" type="radio"/> 1<br><input type="radio"/> 2<br><input type="radio"/> 3<br><input type="radio"/> mas de 3                                                                                                                                |
| cesáreas                              | <input checked="" type="radio"/> 0<br><input type="radio"/> 1<br><input type="radio"/> 2<br><input type="radio"/> 3<br><input type="radio"/> mas de 3                                                                                                                                |
| Abortos                               | <input type="radio"/> 0<br><input checked="" type="radio"/> 1<br><input type="radio"/> 2<br><input type="radio"/> 3<br><input type="radio"/> mas de 3                                                                                                                                |
| Tipo de gestacion                     | <input checked="" type="radio"/> espontanea<br><input type="radio"/> IAC inseminación artificial conyuge<br><input type="radio"/> IAD inseminación artificial donante<br><input type="radio"/> FIV Fecundación in Vitro<br><input type="radio"/> Ovodon FIV con donación de ovocitos |
| peso previo a embarazo                | [*DATA REMOVED*]                                                                                                                                                                                                                                                                     |
| Ganancia ponderal embarazo            | [*DATA REMOVED*]                                                                                                                                                                                                                                                                     |
| Talla madre                           | [*DATA REMOVED*]                                                                                                                                                                                                                                                                     |
| IMC previo embarazo                   | 27.055150884495315                                                                                                                                                                                                                                                                   |
| Patología obstétrica                  | <input checked="" type="radio"/> no<br><input type="radio"/> si                                                                                                                                                                                                                      |
| Diabetes pregestacional               | <input checked="" type="radio"/> no<br><input type="radio"/> si                                                                                                                                                                                                                      |
| Diabetes gestacional                  | <input checked="" type="radio"/> no<br><input type="radio"/> si                                                                                                                                                                                                                      |

|                                            |                                                                                                                                                                                      |
|--------------------------------------------|--------------------------------------------------------------------------------------------------------------------------------------------------------------------------------------|
| Diabetes gestacional con insulina          | <input checked="" type="radio"/> no<br><input type="radio"/> si                                                                                                                      |
| Diabetes gestacional con dieta y ejercicio | <input checked="" type="radio"/> no<br><input type="radio"/> si                                                                                                                      |
| Percentil fetos previos                    | <input type="radio"/> Nada<br><input type="radio"/> percentil menor de 10<br><input checked="" type="radio"/> percentil entre 10 y 90<br><input type="radio"/> percentil mayor de 90 |
| Exfumadora                                 | <input type="radio"/> Nada<br><input checked="" type="radio"/> menos de 5 años<br><input type="radio"/> 5 a 10 años<br><input type="radio"/> mayor o igual a 10 años                 |
| Hábito tabáquico                           | <input checked="" type="radio"/> no<br><input type="radio"/> si                                                                                                                      |
| fumadora                                   | [*DATA REMOVED*]                                                                                                                                                                     |
| Consumo otros tóxicos                      | <input checked="" type="radio"/> no<br><input type="radio"/> si                                                                                                                      |
| Hb 1T                                      | _____                                                                                                                                                                                |
| Htc 1T                                     | _____                                                                                                                                                                                |
| Hb 2T                                      | _____                                                                                                                                                                                |
| HTC 2T                                     | _____                                                                                                                                                                                |
| Hb 3T                                      | _____                                                                                                                                                                                |
| HTC 3T                                     | _____                                                                                                                                                                                |
| Suplemento FE oral                         | <input checked="" type="radio"/> si<br><input type="radio"/> no                                                                                                                      |
| Suplemento fe iv                           | <input type="radio"/> si<br><input checked="" type="radio"/> no                                                                                                                      |
| Transfusión                                | <input checked="" type="radio"/> no<br><input type="radio"/> si                                                                                                                      |
| Solicitada Vit D                           | <input checked="" type="radio"/> no<br><input type="radio"/> si                                                                                                                      |

|                       |                                                                                                                                                                                                                                                                                                                                                                                                              |
|-----------------------|--------------------------------------------------------------------------------------------------------------------------------------------------------------------------------------------------------------------------------------------------------------------------------------------------------------------------------------------------------------------------------------------------------------|
| Deficit vit D         | <input type="radio"/> no<br><input type="radio"/> si                                                                                                                                                                                                                                                                                                                                                         |
| Suplemento vit D      | <input type="radio"/> si<br><input type="radio"/> no                                                                                                                                                                                                                                                                                                                                                         |
| Dieta, cuestionario   | <input checked="" type="radio"/> si<br><input type="radio"/> no                                                                                                                                                                                                                                                                                                                                              |
| Leche entera          | <input type="radio"/> Nunca o menos 1 vez al mes<br><input type="radio"/> 1 a 3 veces mes<br><input type="radio"/> 1 vez semana<br><input type="radio"/> 2 a 4 veces semana<br><input type="radio"/> 5 a 6 veces semana<br><input type="radio"/> 1 vez al día<br><input type="radio"/> 2 a 3 veces al día<br><input type="radio"/> 5 a 6 veces al día<br><input type="radio"/> más 6 veces al día            |
| Leche semidesnatada   | <input type="radio"/> Nunca o menos 1 vez al mes<br><input type="radio"/> 1 a 3 veces mes<br><input type="radio"/> 1 vez semana<br><input type="radio"/> 2 a 4 veces semana<br><input type="radio"/> 5 a 6 veces semana<br><input checked="" type="radio"/> 1 vez al día<br><input type="radio"/> 2 a 3 veces al día<br><input type="radio"/> 5 a 6 veces al día<br><input type="radio"/> mas 6 veces al día |
| Leche desnatada       | <input type="radio"/> Nunca o menos 1 vez al mes<br><input type="radio"/> 1 a 3 veces mes<br><input type="radio"/> 1 vez semana<br><input type="radio"/> 2 a 4 veces semana<br><input type="radio"/> 5 a 6 veces semana<br><input type="radio"/> 1 vez al día<br><input type="radio"/> 2 a 3 veces al día<br><input type="radio"/> 5 a 6 veces al día<br><input type="radio"/> más 6 veces al día            |
| Leche condensada      | <input type="radio"/> Nunca o menos 1 vez al mes<br><input type="radio"/> 1 a 3 veces mes<br><input type="radio"/> 1 vez semana<br><input type="radio"/> 2 a 4 veces semana<br><input type="radio"/> 5 a 6 veces semana<br><input type="radio"/> 1 vez al día<br><input type="radio"/> 2 a 3 veces al día<br><input type="radio"/> 5 a 6 veces al día<br><input type="radio"/> más 6 veces al día            |
| nata o crema de leche | <input type="radio"/> Nunca o menos 1 vez al mes<br><input type="radio"/> 1 a 3 veces mes<br><input type="radio"/> 1 vez semana<br><input type="radio"/> 2 a 4 veces semana<br><input type="radio"/> 5 a 6 veces semana<br><input type="radio"/> 1 vez al día<br><input type="radio"/> 2 a 3 veces al día<br><input type="radio"/> 5 a 6 veces al día<br><input type="radio"/> más 6 veces al día            |



---

Yogurt Entero

- ☐ Nunca o menos 1 vez al mes
- ☐ 1 a 3 veces mes
- ☐ 1 vez semana
- ☐ 2 a 4 veces semana
- ☐ 5 a 6 veces semana
- ☐ 1 vez al día
- ☐ 2 a 3 veces al día
- ☐ 5 a 6 veces al día
- ☐ más 6 veces al día

---

Yogurt desnatado

- ☐ Nunca o menos 1 vez al mes
- ☐ 1 a 3 veces mes
- ☐ 1 vez semana
- ☐ 2 a 4 veces semana
- ☐ 5 a 6 veces semana
- ☐ 1 vez al día
- ☒ 2 a 3 veces al día
- ☐ 5 a 6 veces al día
- ☐ más 6 veces al día

---

100g requesón o queso blando o queso fresco

- ☐ Nunca o menos 1 vez al mes
- ☐ 1 a 3 veces mes
- ☐ 1 vez semana
- ☒ 2 a 4 veces semana
- ☐ 5 a 6 veces semana
- ☐ 1 vez al día
- ☐ 2 a 3 veces al día
- ☐ 5 a 6 veces al día
- ☐ más 6 veces al día

---

queso curado o semicurado o cremoso

- ☐ Nunca o menos 1 vez al mes
- ☒ 1 a 3 veces mes
- ☐ 1 vez semana
- ☐ 2 a 4 veces semana
- ☐ 5 a 6 veces semana
- ☐ 1 vez al día
- ☐ 2 a 3 veces al día
- ☐ 5 a 6 veces al día
- ☐ más 6 veces al día

---

natillas flan pudding

- ☒ Nunca o menos 1 vez al mes
- ☐ 1 a 3 veces mes
- ☐ 1 vez semana
- ☐ 2 a 4 veces semana
- ☐ 5 a 6 veces semana
- ☐ 1 vez al día
- ☐ 2 a 3 veces al día
- ☐ 5 a 6 veces al día
- ☐ más 6 veces al día

---

Helado

- ☒ Nunca o menos 1 vez al mes
- ☐ 1 a 3 veces mes
- ☐ 1 vez semana
- ☐ 2 a 4 veces semana
- ☐ 5 a 6 veces semana
- ☐ 1 vez al día
- ☐ 2 a 3 veces al día
- ☐ 5 a 6 veces al día
- ☐ más 6 veces al día

|                                      |                                                                                                                                                                                                                                                                                                                                                                                                              |
|--------------------------------------|--------------------------------------------------------------------------------------------------------------------------------------------------------------------------------------------------------------------------------------------------------------------------------------------------------------------------------------------------------------------------------------------------------------|
| huevo                                | <input type="radio"/> Nunca o menos 1 vez al mes<br><input type="radio"/> 1 a 3 veces mes<br><input type="radio"/> 1 vez semana<br><input checked="" type="radio"/> 2 a 4 veces semana<br><input type="radio"/> 5 a 6 veces semana<br><input type="radio"/> 1 vez al día<br><input type="radio"/> 2 a 3 veces al día<br><input type="radio"/> 5 a 6 veces al día<br><input type="radio"/> más 6 veces al día |
| Pollo con piel                       | <input type="radio"/> Nunca o menos 1 vez al mes<br><input type="radio"/> 1 a 3 veces mes<br><input type="radio"/> 1 vez semana<br><input type="radio"/> 2 a 4 veces semana<br><input type="radio"/> 5 a 6 veces semana<br><input type="radio"/> 1 vez al día<br><input type="radio"/> 2 a 3 veces al día<br><input type="radio"/> 5 a 6 veces al día<br><input type="radio"/> más 6 veces al día            |
| pollo sin piel                       | <input type="radio"/> Nunca o menos 1 vez al mes<br><input type="radio"/> 1 a 3 veces mes<br><input type="radio"/> 1 vez semana<br><input checked="" type="radio"/> 2 a 4 veces semana<br><input type="radio"/> 5 a 6 veces semana<br><input type="radio"/> 1 vez al día<br><input type="radio"/> 2 a 3 veces al día<br><input type="radio"/> 5 a 6 veces al día<br><input type="radio"/> más 6 veces al día |
| Ternera o cerdo o cordero            | <input type="radio"/> Nunca o menos 1 vez al mes<br><input type="radio"/> 1 a 3 veces mes<br><input type="radio"/> 1 vez semana<br><input checked="" type="radio"/> 2 a 4 veces semana<br><input type="radio"/> 5 a 6 veces semana<br><input type="radio"/> 1 vez al día<br><input type="radio"/> 2 a 3 veces al día<br><input type="radio"/> 5 a 6 veces al día<br><input type="radio"/> más 6 veces al día |
| carne caza: Conejo o codorniz o pato | <input type="radio"/> Nunca o menos 1 vez al mes<br><input type="radio"/> 1 a 3 veces mes<br><input type="radio"/> 1 vez semana<br><input type="radio"/> 2 a 4 veces semana<br><input type="radio"/> 5 a 6 veces semana<br><input type="radio"/> 1 vez al día<br><input type="radio"/> 2 a 3 veces al día<br><input type="radio"/> 5 a 6 veces al día<br><input type="radio"/> más 6 veces al día            |
| Hígado de ternera o cerdo o pollo    | <input type="radio"/> Nunca o menos 1 vez al mes<br><input type="radio"/> 1 a 3 veces mes<br><input type="radio"/> 1 vez semana<br><input type="radio"/> 2 a 4 veces semana<br><input type="radio"/> 5 a 6 veces semana<br><input type="radio"/> 1 vez al día<br><input type="radio"/> 2 a 3 veces al día<br><input type="radio"/> 5 a 6 veces al día<br><input type="radio"/> más 6 veces al día            |

|                     |                                                                                                                                                                                                                                                                                                                                                                                                              |
|---------------------|--------------------------------------------------------------------------------------------------------------------------------------------------------------------------------------------------------------------------------------------------------------------------------------------------------------------------------------------------------------------------------------------------------------|
| Vísceras            | <input type="radio"/> Nunca o menos 1 vez al mes<br><input type="radio"/> 1 a 3 veces mes<br><input type="radio"/> 1 vez semana<br><input type="radio"/> 2 a 4 veces semana<br><input type="radio"/> 5 a 6 veces semana<br><input type="radio"/> 1 vez al día<br><input type="radio"/> 2 a 3 veces al día<br><input type="radio"/> 5 a 6 veces al día<br><input type="radio"/> más 6 veces al día            |
| Embutido            | <input type="radio"/> Nunca o menos 1 vez al mes<br><input type="radio"/> 1 a 3 veces mes<br><input type="radio"/> 1 vez semana<br><input type="radio"/> 2 a 4 veces semana<br><input type="radio"/> 5 a 6 veces semana<br><input checked="" type="radio"/> 1 vez al día<br><input type="radio"/> 2 a 3 veces al día<br><input type="radio"/> 5 a 6 veces al día<br><input type="radio"/> más 6 veces al día |
| Salchicha o similar | <input type="radio"/> Nunca o menos 1 vez al mes<br><input type="radio"/> 1 a 3 veces mes<br><input type="radio"/> 1 vez semana<br><input type="radio"/> 2 a 4 veces semana<br><input type="radio"/> 5 a 6 veces semana<br><input type="radio"/> 1 vez al día<br><input type="radio"/> 2 a 3 veces al día<br><input type="radio"/> 5 a 6 veces al día<br><input type="radio"/> más 6 veces al día            |
| Pate o foiegras     | <input type="radio"/> Nunca o menos 1 vez al mes<br><input type="radio"/> 1 a 3 veces mes<br><input type="radio"/> 1 vez semana<br><input type="radio"/> 2 a 4 veces semana<br><input type="radio"/> 5 a 6 veces semana<br><input type="radio"/> 1 vez al día<br><input type="radio"/> 2 a 3 veces al día<br><input type="radio"/> 5 a 6 veces al día<br><input type="radio"/> más 6 veces al día            |
| Hamburguesa         | <input type="radio"/> Nunca o menos 1 vez al mes<br><input checked="" type="radio"/> 1 a 3 veces mes<br><input type="radio"/> 1 vez semana<br><input type="radio"/> 2 a 4 veces semana<br><input type="radio"/> 5 a 6 veces semana<br><input type="radio"/> 1 vez al día<br><input type="radio"/> 2 a 3 veces al día<br><input type="radio"/> 5 a 6 veces al día<br><input type="radio"/> más 6 veces al día |
| tocino o bacon      | <input type="radio"/> Nunca o menos 1 vez al mes<br><input type="radio"/> 1 a 3 veces mes<br><input type="radio"/> 1 vez semana<br><input type="radio"/> 2 a 4 veces semana<br><input type="radio"/> 5 a 6 veces semana<br><input type="radio"/> 1 vez al día<br><input type="radio"/> 2 a 3 veces al día<br><input type="radio"/> 5 a 6 veces al día<br><input type="radio"/> más 6 veces al día            |

---

|               |                                                                                                                                                                                                                                                                                                                                                                                                   |
|---------------|---------------------------------------------------------------------------------------------------------------------------------------------------------------------------------------------------------------------------------------------------------------------------------------------------------------------------------------------------------------------------------------------------|
| Pescado frito | <input type="radio"/> Nunca o menos 1 vez al mes<br><input type="radio"/> 1 a 3 veces mes<br><input type="radio"/> 1 vez semana<br><input type="radio"/> 2 a 4 veces semana<br><input type="radio"/> 5 a 6 veces semana<br><input type="radio"/> 1 vez al día<br><input type="radio"/> 2 a 3 veces al día<br><input type="radio"/> 5 a 6 veces al día<br><input type="radio"/> más 6 veces al día |
|---------------|---------------------------------------------------------------------------------------------------------------------------------------------------------------------------------------------------------------------------------------------------------------------------------------------------------------------------------------------------------------------------------------------------|

---

|                        |                                                                                                                                                                                                                                                                                                                                                                                                              |
|------------------------|--------------------------------------------------------------------------------------------------------------------------------------------------------------------------------------------------------------------------------------------------------------------------------------------------------------------------------------------------------------------------------------------------------------|
| pescado hervido blanco | <input type="radio"/> Nunca o menos 1 vez al mes<br><input type="radio"/> 1 a 3 veces mes<br><input type="radio"/> 1 vez semana<br><input checked="" type="radio"/> 2 a 4 veces semana<br><input type="radio"/> 5 a 6 veces semana<br><input type="radio"/> 1 vez al día<br><input type="radio"/> 2 a 3 veces al día<br><input type="radio"/> 5 a 6 veces al día<br><input type="radio"/> más 6 veces al día |
|------------------------|--------------------------------------------------------------------------------------------------------------------------------------------------------------------------------------------------------------------------------------------------------------------------------------------------------------------------------------------------------------------------------------------------------------|

---

|                      |                                                                                                                                                                                                                                                                                                                                                                                                              |
|----------------------|--------------------------------------------------------------------------------------------------------------------------------------------------------------------------------------------------------------------------------------------------------------------------------------------------------------------------------------------------------------------------------------------------------------|
| pescado hervido azul | <input type="radio"/> Nunca o menos 1 vez al mes<br><input type="radio"/> 1 a 3 veces mes<br><input type="radio"/> 1 vez semana<br><input checked="" type="radio"/> 2 a 4 veces semana<br><input type="radio"/> 5 a 6 veces semana<br><input type="radio"/> 1 vez al día<br><input type="radio"/> 2 a 3 veces al día<br><input type="radio"/> 5 a 6 veces al día<br><input type="radio"/> más 6 veces al día |
|----------------------|--------------------------------------------------------------------------------------------------------------------------------------------------------------------------------------------------------------------------------------------------------------------------------------------------------------------------------------------------------------------------------------------------------------|

---

|                    |                                                                                                                                                                                                                                                                                                                                                                                                              |
|--------------------|--------------------------------------------------------------------------------------------------------------------------------------------------------------------------------------------------------------------------------------------------------------------------------------------------------------------------------------------------------------------------------------------------------------|
| otros pescado azul | <input type="radio"/> Nunca o menos 1 vez al mes<br><input checked="" type="radio"/> 1 a 3 veces mes<br><input type="radio"/> 1 vez semana<br><input type="radio"/> 2 a 4 veces semana<br><input type="radio"/> 5 a 6 veces semana<br><input type="radio"/> 1 vez al día<br><input type="radio"/> 2 a 3 veces al día<br><input type="radio"/> 5 a 6 veces al día<br><input type="radio"/> más 6 veces al día |
|--------------------|--------------------------------------------------------------------------------------------------------------------------------------------------------------------------------------------------------------------------------------------------------------------------------------------------------------------------------------------------------------------------------------------------------------|

---

|               |                                                                                                                                                                                                                                                                                                                                                                                                              |
|---------------|--------------------------------------------------------------------------------------------------------------------------------------------------------------------------------------------------------------------------------------------------------------------------------------------------------------------------------------------------------------------------------------------------------------|
| atun conserva | <input type="radio"/> Nunca o menos 1 vez al mes<br><input type="radio"/> 1 a 3 veces mes<br><input checked="" type="radio"/> 1 vez semana<br><input type="radio"/> 2 a 4 veces semana<br><input type="radio"/> 5 a 6 veces semana<br><input type="radio"/> 1 vez al día<br><input type="radio"/> 2 a 3 veces al día<br><input type="radio"/> 5 a 6 veces al día<br><input type="radio"/> más 6 veces al día |
|---------------|--------------------------------------------------------------------------------------------------------------------------------------------------------------------------------------------------------------------------------------------------------------------------------------------------------------------------------------------------------------------------------------------------------------|

---

|                  |                                                                                                                                                                                                                                                                                                                                                                                                   |
|------------------|---------------------------------------------------------------------------------------------------------------------------------------------------------------------------------------------------------------------------------------------------------------------------------------------------------------------------------------------------------------------------------------------------|
| sardina conserva | <input type="radio"/> Nunca o menos 1 vez al mes<br><input type="radio"/> 1 a 3 veces mes<br><input type="radio"/> 1 vez semana<br><input type="radio"/> 2 a 4 veces semana<br><input type="radio"/> 5 a 6 veces semana<br><input type="radio"/> 1 vez al día<br><input type="radio"/> 2 a 3 veces al día<br><input type="radio"/> 5 a 6 veces al día<br><input type="radio"/> más 6 veces al día |
|------------------|---------------------------------------------------------------------------------------------------------------------------------------------------------------------------------------------------------------------------------------------------------------------------------------------------------------------------------------------------------------------------------------------------|

---

|                                         |                                                                                                                                                                                                                                                                                                                                                                                                              |
|-----------------------------------------|--------------------------------------------------------------------------------------------------------------------------------------------------------------------------------------------------------------------------------------------------------------------------------------------------------------------------------------------------------------------------------------------------------------|
| pescado ahumado                         | <input type="radio"/> Nunca o menos 1 vez al mes<br><input type="radio"/> 1 a 3 veces mes<br><input type="radio"/> 1 vez semana<br><input type="radio"/> 2 a 4 veces semana<br><input type="radio"/> 5 a 6 veces semana<br><input type="radio"/> 1 vez al día<br><input type="radio"/> 2 a 3 veces al día<br><input type="radio"/> 5 a 6 veces al día<br><input type="radio"/> más 6 veces al día            |
| almejas o mejillones o ostras unos 100g | <input type="radio"/> Nunca o menos 1 vez al mes<br><input type="radio"/> 1 a 3 veces mes<br><input type="radio"/> 1 vez semana<br><input checked="" type="radio"/> 2 a 4 veces semana<br><input type="radio"/> 5 a 6 veces semana<br><input type="radio"/> 1 vez al día<br><input type="radio"/> 2 a 3 veces al día<br><input type="radio"/> 5 a 6 veces al día<br><input type="radio"/> más 6 veces al día |
| calamar o chipiron o sepia unos 100g    | <input type="radio"/> Nunca o menos 1 vez al mes<br><input type="radio"/> 1 a 3 veces mes<br><input type="radio"/> 1 vez semana<br><input type="radio"/> 2 a 4 veces semana<br><input type="radio"/> 5 a 6 veces semana<br><input type="radio"/> 1 vez al día<br><input type="radio"/> 2 a 3 veces al día<br><input type="radio"/> 5 a 6 veces al día<br><input type="radio"/> más 6 veces al día            |
| marisco unos 100g                       | <input checked="" type="radio"/> Nunca o menos 1 vez al mes<br><input type="radio"/> 1 a 3 veces mes<br><input type="radio"/> 1 vez semana<br><input type="radio"/> 2 a 4 veces semana<br><input type="radio"/> 5 a 6 veces semana<br><input type="radio"/> 1 vez al día<br><input type="radio"/> 2 a 3 veces al día<br><input type="radio"/> 5 a 6 veces al día<br><input type="radio"/> más 6 veces al día |
| Espinacas o acelgas cocinadas           | <input type="radio"/> Nunca o menos 1 vez al mes<br><input type="radio"/> 1 a 3 veces mes<br><input type="radio"/> 1 vez semana<br><input checked="" type="radio"/> 2 a 4 veces semana<br><input type="radio"/> 5 a 6 veces semana<br><input type="radio"/> 1 vez al día<br><input type="radio"/> 2 a 3 veces al día<br><input type="radio"/> 5 a 6 veces al día<br><input type="radio"/> más 6 veces al día |
| Col o coliflor o brocoli cocinado       | <input type="radio"/> Nunca o menos 1 vez al mes<br><input type="radio"/> 1 a 3 veces mes<br><input type="radio"/> 1 vez semana<br><input checked="" type="radio"/> 2 a 4 veces semana<br><input type="radio"/> 5 a 6 veces semana<br><input type="radio"/> 1 vez al día<br><input type="radio"/> 2 a 3 veces al día<br><input type="radio"/> 5 a 6 veces al día<br><input type="radio"/> más 6 veces al día |

---

Lechuga o endivia o escarola

- ☐ Nunca o menos 1 vez al mes  
☐ 1 a 3 veces mes  
☐ 1 vez semana  
☐ 2 a 4 veces semana  
☐ 5 a 6 veces semana  
☐ 1 vez al día  
☐ 2 a 3 veces al día  
☐ 5 a 6 veces al día  
☐ más 6 veces al día

---

tomate ensalada

- ☐ Nunca o menos 1 vez al mes  
☐ 1 a 3 veces mes  
☐ 1 vez semana  
☐ 2 a 4 veces semana  
☐ 5 a 6 veces semana  
☒ 1 vez al día  
☐ 2 a 3 veces al día  
☐ 5 a 6 veces al día  
☐ más 6 veces al día

---

cebolla

- ☐ Nunca o menos 1 vez al mes  
☐ 1 a 3 veces mes  
☐ 1 vez semana  
☐ 2 a 4 veces semana  
☐ 5 a 6 veces semana  
☐ 1 vez al día  
☐ 2 a 3 veces al día  
☐ 5 a 6 veces al día  
☐ más 6 veces al día

---

Zanahoria o calabaza

- ☐ Nunca o menos 1 vez al mes  
☐ 1 a 3 veces mes  
☐ 1 vez semana  
☐ 2 a 4 veces semana  
☐ 5 a 6 veces semana  
☒ 1 vez al día  
☐ 2 a 3 veces al día  
☐ 5 a 6 veces al día  
☐ más 6 veces al día

---

Judías verdes

- ☐ Nunca o menos 1 vez al mes  
☐ 1 a 3 veces mes  
☐ 1 vez semana  
☐ 2 a 4 veces semana  
☒ 5 a 6 veces semana  
☐ 1 vez al día  
☐ 2 a 3 veces al día  
☐ 5 a 6 veces al día  
☐ más 6 veces al día

---

Berenjena o calabacin o pepino

- ☐ Nunca o menos 1 vez al mes  
☐ 1 a 3 veces mes  
☐ 1 vez semana  
☐ 2 a 4 veces semana  
☒ 5 a 6 veces semana  
☐ 1 vez al día  
☐ 2 a 3 veces al día  
☐ 5 a 6 veces al día  
☐ más 6 veces al día

---

|          |                                                                                                                                                                                                                                                                                                                                                                                                              |
|----------|--------------------------------------------------------------------------------------------------------------------------------------------------------------------------------------------------------------------------------------------------------------------------------------------------------------------------------------------------------------------------------------------------------------|
| pimiento | <input type="radio"/> Nunca o menos 1 vez al mes<br><input type="radio"/> 1 a 3 veces mes<br><input type="radio"/> 1 vez semana<br><input checked="" type="radio"/> 2 a 4 veces semana<br><input type="radio"/> 5 a 6 veces semana<br><input type="radio"/> 1 vez al día<br><input type="radio"/> 2 a 3 veces al día<br><input type="radio"/> 5 a 6 veces al día<br><input type="radio"/> más 6 veces al día |
|----------|--------------------------------------------------------------------------------------------------------------------------------------------------------------------------------------------------------------------------------------------------------------------------------------------------------------------------------------------------------------------------------------------------------------|

---

|           |                                                                                                                                                                                                                                                                                                                                                                                                              |
|-----------|--------------------------------------------------------------------------------------------------------------------------------------------------------------------------------------------------------------------------------------------------------------------------------------------------------------------------------------------------------------------------------------------------------------|
| alcachofa | <input type="radio"/> Nunca o menos 1 vez al mes<br><input type="radio"/> 1 a 3 veces mes<br><input type="radio"/> 1 vez semana<br><input checked="" type="radio"/> 2 a 4 veces semana<br><input type="radio"/> 5 a 6 veces semana<br><input type="radio"/> 1 vez al día<br><input type="radio"/> 2 a 3 veces al día<br><input type="radio"/> 5 a 6 veces al día<br><input type="radio"/> más 6 veces al día |
|-----------|--------------------------------------------------------------------------------------------------------------------------------------------------------------------------------------------------------------------------------------------------------------------------------------------------------------------------------------------------------------------------------------------------------------|

---

|            |                                                                                                                                                                                                                                                                                                                                                                                                              |
|------------|--------------------------------------------------------------------------------------------------------------------------------------------------------------------------------------------------------------------------------------------------------------------------------------------------------------------------------------------------------------------------------------------------------------|
| espárragos | <input type="radio"/> Nunca o menos 1 vez al mes<br><input type="radio"/> 1 a 3 veces mes<br><input checked="" type="radio"/> 1 vez semana<br><input type="radio"/> 2 a 4 veces semana<br><input type="radio"/> 5 a 6 veces semana<br><input type="radio"/> 1 vez al día<br><input type="radio"/> 2 a 3 veces al día<br><input type="radio"/> 5 a 6 veces al día<br><input type="radio"/> más 6 veces al día |
|------------|--------------------------------------------------------------------------------------------------------------------------------------------------------------------------------------------------------------------------------------------------------------------------------------------------------------------------------------------------------------------------------------------------------------|

---

|              |                                                                                                                                                                                                                                                                                                                                                                                                   |
|--------------|---------------------------------------------------------------------------------------------------------------------------------------------------------------------------------------------------------------------------------------------------------------------------------------------------------------------------------------------------------------------------------------------------|
| maíz hervido | <input type="radio"/> Nunca o menos 1 vez al mes<br><input type="radio"/> 1 a 3 veces mes<br><input type="radio"/> 1 vez semana<br><input type="radio"/> 2 a 4 veces semana<br><input type="radio"/> 5 a 6 veces semana<br><input type="radio"/> 1 vez al día<br><input type="radio"/> 2 a 3 veces al día<br><input type="radio"/> 5 a 6 veces al día<br><input type="radio"/> más 6 veces al día |
|--------------|---------------------------------------------------------------------------------------------------------------------------------------------------------------------------------------------------------------------------------------------------------------------------------------------------------------------------------------------------------------------------------------------------|

---

|           |                                                                                                                                                                                                                                                                                                                                                                                                              |
|-----------|--------------------------------------------------------------------------------------------------------------------------------------------------------------------------------------------------------------------------------------------------------------------------------------------------------------------------------------------------------------------------------------------------------------|
| legumbres | <input type="radio"/> Nunca o menos 1 vez al mes<br><input type="radio"/> 1 a 3 veces mes<br><input type="radio"/> 1 vez semana<br><input checked="" type="radio"/> 2 a 4 veces semana<br><input type="radio"/> 5 a 6 veces semana<br><input type="radio"/> 1 vez al día<br><input type="radio"/> 2 a 3 veces al día<br><input type="radio"/> 5 a 6 veces al día<br><input type="radio"/> más 6 veces al día |
|-----------|--------------------------------------------------------------------------------------------------------------------------------------------------------------------------------------------------------------------------------------------------------------------------------------------------------------------------------------------------------------------------------------------------------------|

---

|                       |                                                                                                                                                                                                                                                                                                                                                                                                              |
|-----------------------|--------------------------------------------------------------------------------------------------------------------------------------------------------------------------------------------------------------------------------------------------------------------------------------------------------------------------------------------------------------------------------------------------------------|
| naranjas o mandarinas | <input type="radio"/> Nunca o menos 1 vez al mes<br><input type="radio"/> 1 a 3 veces mes<br><input type="radio"/> 1 vez semana<br><input type="radio"/> 2 a 4 veces semana<br><input type="radio"/> 5 a 6 veces semana<br><input checked="" type="radio"/> 1 vez al día<br><input type="radio"/> 2 a 3 veces al día<br><input type="radio"/> 5 a 6 veces al día<br><input type="radio"/> más 6 veces al día |
|-----------------------|--------------------------------------------------------------------------------------------------------------------------------------------------------------------------------------------------------------------------------------------------------------------------------------------------------------------------------------------------------------------------------------------------------------|

---

|                       |                                                                                                                                                                                                                                                                                                                                                                                                              |
|-----------------------|--------------------------------------------------------------------------------------------------------------------------------------------------------------------------------------------------------------------------------------------------------------------------------------------------------------------------------------------------------------------------------------------------------------|
| zum natural fruta     | <input type="radio"/> Nunca o menos 1 vez al mes<br><input type="radio"/> 1 a 3 veces mes<br><input type="radio"/> 1 vez semana<br><input type="radio"/> 2 a 4 veces semana<br><input type="radio"/> 5 a 6 veces semana<br><input type="radio"/> 1 vez al día<br><input type="radio"/> 2 a 3 veces al día<br><input type="radio"/> 5 a 6 veces al día<br><input type="radio"/> más 6 veces al día            |
| platano               | <input type="radio"/> Nunca o menos 1 vez al mes<br><input type="radio"/> 1 a 3 veces mes<br><input type="radio"/> 1 vez semana<br><input checked="" type="radio"/> 2 a 4 veces semana<br><input type="radio"/> 5 a 6 veces semana<br><input type="radio"/> 1 vez al día<br><input type="radio"/> 2 a 3 veces al día<br><input type="radio"/> 5 a 6 veces al día<br><input type="radio"/> más 6 veces al día |
| manzana o pera        | <input type="radio"/> Nunca o menos 1 vez al mes<br><input type="radio"/> 1 a 3 veces mes<br><input type="radio"/> 1 vez semana<br><input type="radio"/> 2 a 4 veces semana<br><input type="radio"/> 5 a 6 veces semana<br><input checked="" type="radio"/> 1 vez al día<br><input type="radio"/> 2 a 3 veces al día<br><input type="radio"/> 5 a 6 veces al día<br><input type="radio"/> más 6 veces al día |
| melocotón o nectarina | <input type="radio"/> Nunca o menos 1 vez al mes<br><input type="radio"/> 1 a 3 veces mes<br><input type="radio"/> 1 vez semana<br><input type="radio"/> 2 a 4 veces semana<br><input type="radio"/> 5 a 6 veces semana<br><input type="radio"/> 1 vez al día<br><input type="radio"/> 2 a 3 veces al día<br><input type="radio"/> 5 a 6 veces al día<br><input type="radio"/> más 6 veces al día            |
| sandia o melon        | <input type="radio"/> Nunca o menos 1 vez al mes<br><input type="radio"/> 1 a 3 veces mes<br><input type="radio"/> 1 vez semana<br><input type="radio"/> 2 a 4 veces semana<br><input type="radio"/> 5 a 6 veces semana<br><input type="radio"/> 1 vez al día<br><input type="radio"/> 2 a 3 veces al día<br><input type="radio"/> 5 a 6 veces al día<br><input type="radio"/> más 6 veces al día            |
| uva                   | <input type="radio"/> Nunca o menos 1 vez al mes<br><input type="radio"/> 1 a 3 veces mes<br><input type="radio"/> 1 vez semana<br><input type="radio"/> 2 a 4 veces semana<br><input type="radio"/> 5 a 6 veces semana<br><input type="radio"/> 1 vez al día<br><input type="radio"/> 2 a 3 veces al día<br><input type="radio"/> 5 a 6 veces al día<br><input type="radio"/> más 6 veces al día            |



---

bruna o ciruela

- ☐ Nunca o menos 1 vez al mes  
☐ 1 a 3 veces mes  
☐ 1 vez semana  
☒ 2 a 4 veces semana  
☐ 5 a 6 veces semana  
☐ 1 vez al día  
☐ 2 a 3 veces al día  
☐ 5 a 6 veces al día  
☐ más 6 veces al día

---

kiwi

- ☐ Nunca o menos 1 vez al mes  
☐ 1 a 3 veces mes  
☐ 1 vez semana  
☒ 2 a 4 veces semana  
☐ 5 a 6 veces semana  
☐ 1 vez al día  
☐ 2 a 3 veces al día  
☐ 5 a 6 veces al día  
☐ más 6 veces al día

---

aceituna

- ☐ Nunca o menos 1 vez al mes  
☐ 1 a 3 veces mes  
☐ 1 vez semana  
☐ 2 a 4 veces semana  
☐ 5 a 6 veces semana  
☐ 1 vez al día  
☐ 2 a 3 veces al día  
☐ 5 a 6 veces al día  
☐ más 6 veces al día

---

frutos secos

- ☐ Nunca o menos 1 vez al mes  
☐ 1 a 3 veces mes  
☐ 1 vez semana  
☐ 2 a 4 veces semana  
☐ 5 a 6 veces semana  
☒ 1 vez al día  
☐ 2 a 3 veces al día  
☐ 5 a 6 veces al día  
☐ más 6 veces al día

---

pan blanco

- ☐ Nunca o menos 1 vez al mes  
☐ 1 a 3 veces mes  
☐ 1 vez semana  
☐ 2 a 4 veces semana  
☐ 5 a 6 veces semana  
☒ 1 vez al día  
☐ 2 a 3 veces al día  
☐ 5 a 6 veces al día  
☐ más 6 veces al día

---

pan integral

- ☐ Nunca o menos 1 vez al mes  
☐ 1 a 3 veces mes  
☐ 1 vez semana  
☐ 2 a 4 veces semana  
☐ 5 a 6 veces semana  
☐ 1 vez al día  
☐ 2 a 3 veces al día  
☐ 5 a 6 veces al día  
☐ más 6 veces al día

---

cereales desayuno

- ☐ Nunca o menos 1 vez al mes  
☐ 1 a 3 veces mes  
☐ 1 vez semana  
☒ 2 a 4 veces semana  
☐ 5 a 6 veces semana  
☐ 1 vez al día  
☐ 2 a 3 veces al día  
☐ 5 a 6 veces al día  
☐ más 6 veces al día

---

patatas fritas

- ☐ Nunca o menos 1 vez al mes  
☐ 1 a 3 veces mes  
☐ 1 vez semana  
☐ 2 a 4 veces semana  
☐ 5 a 6 veces semana  
☐ 1 vez al día  
☐ 2 a 3 veces al día  
☐ 5 a 6 veces al día  
☐ más 6 veces al día

---

patatas cocidas o asadas

- ☐ Nunca o menos 1 vez al mes  
☐ 1 a 3 veces mes  
☐ 1 vez semana  
☒ 2 a 4 veces semana  
☐ 5 a 6 veces semana  
☐ 1 vez al día  
☐ 2 a 3 veces al día  
☐ 5 a 6 veces al día  
☐ más 6 veces al día

---

bolsa papas

- ☐ Nunca o menos 1 vez al mes  
☐ 1 a 3 veces mes  
☐ 1 vez semana  
☐ 2 a 4 veces semana  
☐ 5 a 6 veces semana  
☐ 1 vez al día  
☐ 2 a 3 veces al día  
☐ 5 a 6 veces al día  
☐ más 6 veces al día

---

arroz cocinado

- ☐ Nunca o menos 1 vez al mes  
☐ 1 a 3 veces mes  
☐ 1 vez semana  
☒ 2 a 4 veces semana  
☐ 5 a 6 veces semana  
☐ 1 vez al día  
☐ 2 a 3 veces al día  
☐ 5 a 6 veces al día  
☐ más 6 veces al día

---

pasta

- ☐ Nunca o menos 1 vez al mes  
☐ 1 a 3 veces mes  
☒ 1 vez semana  
☐ 2 a 4 veces semana  
☐ 5 a 6 veces semana  
☐ 1 vez al día  
☐ 2 a 3 veces al día  
☐ 5 a 6 veces al día  
☐ más 6 veces al día

|                     |                                                                                                                                                                                                                                                                                                                                                                                                              |
|---------------------|--------------------------------------------------------------------------------------------------------------------------------------------------------------------------------------------------------------------------------------------------------------------------------------------------------------------------------------------------------------------------------------------------------------|
| pizza               | <input type="radio"/> Nunca o menos 1 vez al mes<br><input type="radio"/> 1 a 3 veces mes<br><input type="radio"/> 1 vez semana<br><input type="radio"/> 2 a 4 veces semana<br><input type="radio"/> 5 a 6 veces semana<br><input type="radio"/> 1 vez al día<br><input type="radio"/> 2 a 3 veces al día<br><input type="radio"/> 5 a 6 veces al día<br><input type="radio"/> más 6 veces al día            |
| aceite oliva        | <input type="radio"/> Nunca o menos 1 vez al mes<br><input type="radio"/> 1 a 3 veces mes<br><input type="radio"/> 1 vez semana<br><input type="radio"/> 2 a 4 veces semana<br><input type="radio"/> 5 a 6 veces semana<br><input checked="" type="radio"/> 1 vez al día<br><input type="radio"/> 2 a 3 veces al día<br><input type="radio"/> 5 a 6 veces al día<br><input type="radio"/> más 6 veces al día |
| otros aceites       | <input type="radio"/> Nunca o menos 1 vez al mes<br><input type="radio"/> 1 a 3 veces mes<br><input type="radio"/> 1 vez semana<br><input type="radio"/> 2 a 4 veces semana<br><input type="radio"/> 5 a 6 veces semana<br><input type="radio"/> 1 vez al día<br><input type="radio"/> 2 a 3 veces al día<br><input type="radio"/> 5 a 6 veces al día<br><input type="radio"/> más 6 veces al día            |
| margarina           | <input type="radio"/> Nunca o menos 1 vez al mes<br><input type="radio"/> 1 a 3 veces mes<br><input type="radio"/> 1 vez semana<br><input type="radio"/> 2 a 4 veces semana<br><input type="radio"/> 5 a 6 veces semana<br><input type="radio"/> 1 vez al día<br><input type="radio"/> 2 a 3 veces al día<br><input type="radio"/> 5 a 6 veces al día<br><input type="radio"/> más 6 veces al día            |
| mantequilla         | <input type="radio"/> Nunca o menos 1 vez al mes<br><input type="radio"/> 1 a 3 veces mes<br><input type="radio"/> 1 vez semana<br><input type="radio"/> 2 a 4 veces semana<br><input type="radio"/> 5 a 6 veces semana<br><input type="radio"/> 1 vez al día<br><input type="radio"/> 2 a 3 veces al día<br><input type="radio"/> 5 a 6 veces al día<br><input type="radio"/> más 6 veces al día            |
| galletas tipo maria | <input type="radio"/> Nunca o menos 1 vez al mes<br><input type="radio"/> 1 a 3 veces mes<br><input type="radio"/> 1 vez semana<br><input type="radio"/> 2 a 4 veces semana<br><input type="radio"/> 5 a 6 veces semana<br><input type="radio"/> 1 vez al día<br><input type="radio"/> 2 a 3 veces al día<br><input type="radio"/> 5 a 6 veces al día<br><input type="radio"/> más 6 veces al día            |

|                           |                                                                                                                                                                                                                                                                                                                                                                                                              |
|---------------------------|--------------------------------------------------------------------------------------------------------------------------------------------------------------------------------------------------------------------------------------------------------------------------------------------------------------------------------------------------------------------------------------------------------------|
| galletas chocolate        | <input type="radio"/> Nunca o menos 1 vez al mes<br><input type="radio"/> 1 a 3 veces mes<br><input type="radio"/> 1 vez semana<br><input type="radio"/> 2 a 4 veces semana<br><input type="radio"/> 5 a 6 veces semana<br><input type="radio"/> 1 vez al día<br><input type="radio"/> 2 a 3 veces al día<br><input type="radio"/> 5 a 6 veces al día<br><input type="radio"/> más 6 veces al día            |
| bollieria                 | <input type="radio"/> Nunca o menos 1 vez al mes<br><input type="radio"/> 1 a 3 veces mes<br><input type="radio"/> 1 vez semana<br><input type="radio"/> 2 a 4 veces semana<br><input type="radio"/> 5 a 6 veces semana<br><input type="radio"/> 1 vez al día<br><input type="radio"/> 2 a 3 veces al día<br><input type="radio"/> 5 a 6 veces al día<br><input type="radio"/> más 6 veces al día            |
| chocolate o bombones      | <input type="radio"/> Nunca o menos 1 vez al mes<br><input type="radio"/> 1 a 3 veces mes<br><input type="radio"/> 1 vez semana<br><input type="radio"/> 2 a 4 veces semana<br><input type="radio"/> 5 a 6 veces semana<br><input checked="" type="radio"/> 1 vez al día<br><input type="radio"/> 2 a 3 veces al día<br><input type="radio"/> 5 a 6 veces al día<br><input type="radio"/> más 6 veces al día |
| chocolate polvo o colacao | <input type="radio"/> Nunca o menos 1 vez al mes<br><input type="radio"/> 1 a 3 veces mes<br><input type="radio"/> 1 vez semana<br><input type="radio"/> 2 a 4 veces semana<br><input type="radio"/> 5 a 6 veces semana<br><input type="radio"/> 1 vez al día<br><input type="radio"/> 2 a 3 veces al día<br><input type="radio"/> 5 a 6 veces al día<br><input type="radio"/> más 6 veces al día            |
| vino tinto                | <input type="radio"/> Nunca o menos 1 vez al mes<br><input type="radio"/> 1 a 3 veces mes<br><input type="radio"/> 1 vez semana<br><input type="radio"/> 2 a 4 veces semana<br><input type="radio"/> 5 a 6 veces semana<br><input type="radio"/> 1 vez al día<br><input type="radio"/> 2 a 3 veces al día<br><input type="radio"/> 5 a 6 veces al día<br><input type="radio"/> más 6 veces al día            |
| vino blanco               | <input type="radio"/> Nunca o menos 1 vez al mes<br><input type="radio"/> 1 a 3 veces mes<br><input type="radio"/> 1 vez semana<br><input type="radio"/> 2 a 4 veces semana<br><input type="radio"/> 5 a 6 veces semana<br><input type="radio"/> 1 vez al día<br><input type="radio"/> 2 a 3 veces al día<br><input type="radio"/> 5 a 6 veces al día<br><input type="radio"/> más 6 veces al día            |

|                       |                                                                                                                                                                                                                                                                                                                                                                                                              |
|-----------------------|--------------------------------------------------------------------------------------------------------------------------------------------------------------------------------------------------------------------------------------------------------------------------------------------------------------------------------------------------------------------------------------------------------------|
| vino seco o vermut    | <input type="radio"/> Nunca o menos 1 vez al mes<br><input type="radio"/> 1 a 3 veces mes<br><input type="radio"/> 1 vez semana<br><input type="radio"/> 2 a 4 veces semana<br><input type="radio"/> 5 a 6 veces semana<br><input type="radio"/> 1 vez al día<br><input type="radio"/> 2 a 3 veces al día<br><input type="radio"/> 5 a 6 veces al día<br><input type="radio"/> más 6 veces al día            |
| cerveza               | <input type="radio"/> Nunca o menos 1 vez al mes<br><input type="radio"/> 1 a 3 veces mes<br><input type="radio"/> 1 vez semana<br><input type="radio"/> 2 a 4 veces semana<br><input type="radio"/> 5 a 6 veces semana<br><input type="radio"/> 1 vez al día<br><input type="radio"/> 2 a 3 veces al día<br><input type="radio"/> 5 a 6 veces al día<br><input type="radio"/> más 6 veces al día            |
| cerveza sin alcohol   | <input type="radio"/> Nunca o menos 1 vez al mes<br><input type="radio"/> 1 a 3 veces mes<br><input type="radio"/> 1 vez semana<br><input checked="" type="radio"/> 2 a 4 veces semana<br><input type="radio"/> 5 a 6 veces semana<br><input type="radio"/> 1 vez al día<br><input type="radio"/> 2 a 3 veces al día<br><input type="radio"/> 5 a 6 veces al día<br><input type="radio"/> más 6 veces al día |
| licores               | <input type="radio"/> Nunca o menos 1 vez al mes<br><input type="radio"/> 1 a 3 veces mes<br><input type="radio"/> 1 vez semana<br><input type="radio"/> 2 a 4 veces semana<br><input type="radio"/> 5 a 6 veces semana<br><input type="radio"/> 1 vez al día<br><input type="radio"/> 2 a 3 veces al día<br><input type="radio"/> 5 a 6 veces al día<br><input type="radio"/> más 6 veces al día            |
| ginebra o ron o vodka | <input type="radio"/> Nunca o menos 1 vez al mes<br><input type="radio"/> 1 a 3 veces mes<br><input type="radio"/> 1 vez semana<br><input type="radio"/> 2 a 4 veces semana<br><input type="radio"/> 5 a 6 veces semana<br><input type="radio"/> 1 vez al día<br><input type="radio"/> 2 a 3 veces al día<br><input type="radio"/> 5 a 6 veces al día<br><input type="radio"/> más 6 veces al día            |
| refresco normal       | <input type="radio"/> Nunca o menos 1 vez al mes<br><input type="radio"/> 1 a 3 veces mes<br><input type="radio"/> 1 vez semana<br><input type="radio"/> 2 a 4 veces semana<br><input type="radio"/> 5 a 6 veces semana<br><input type="radio"/> 1 vez al día<br><input type="radio"/> 2 a 3 veces al día<br><input type="radio"/> 5 a 6 veces al día<br><input type="radio"/> más 6 veces al día            |

---

|                     |                                                                                                                                                                                                                                                                                                                                                                                                   |
|---------------------|---------------------------------------------------------------------------------------------------------------------------------------------------------------------------------------------------------------------------------------------------------------------------------------------------------------------------------------------------------------------------------------------------|
| refresco sin azúcar | <input type="radio"/> Nunca o menos 1 vez al mes<br><input type="radio"/> 1 a 3 veces mes<br><input type="radio"/> 1 vez semana<br><input type="radio"/> 2 a 4 veces semana<br><input type="radio"/> 5 a 6 veces semana<br><input type="radio"/> 1 vez al día<br><input type="radio"/> 2 a 3 veces al día<br><input type="radio"/> 5 a 6 veces al día<br><input type="radio"/> más 6 veces al día |
|---------------------|---------------------------------------------------------------------------------------------------------------------------------------------------------------------------------------------------------------------------------------------------------------------------------------------------------------------------------------------------------------------------------------------------|

---

|                |                                                                                                                                                                                                                                                                                                                                                                                                   |
|----------------|---------------------------------------------------------------------------------------------------------------------------------------------------------------------------------------------------------------------------------------------------------------------------------------------------------------------------------------------------------------------------------------------------|
| Agua del grifo | <input type="radio"/> Nunca o menos 1 vez al mes<br><input type="radio"/> 1 a 3 veces mes<br><input type="radio"/> 1 vez semana<br><input type="radio"/> 2 a 4 veces semana<br><input type="radio"/> 5 a 6 veces semana<br><input type="radio"/> 1 vez al día<br><input type="radio"/> 2 a 3 veces al día<br><input type="radio"/> 5 a 6 veces al día<br><input type="radio"/> más 6 veces al día |
|----------------|---------------------------------------------------------------------------------------------------------------------------------------------------------------------------------------------------------------------------------------------------------------------------------------------------------------------------------------------------------------------------------------------------|

---

|                          |                                                                                                                                                                                                                                                                                                                                                                                                              |
|--------------------------|--------------------------------------------------------------------------------------------------------------------------------------------------------------------------------------------------------------------------------------------------------------------------------------------------------------------------------------------------------------------------------------------------------------|
| agua embotellada sin gas | <input type="radio"/> Nunca o menos 1 vez al mes<br><input type="radio"/> 1 a 3 veces mes<br><input type="radio"/> 1 vez semana<br><input type="radio"/> 2 a 4 veces semana<br><input type="radio"/> 5 a 6 veces semana<br><input type="radio"/> 1 vez al día<br><input type="radio"/> 2 a 3 veces al día<br><input type="radio"/> 5 a 6 veces al día<br><input checked="" type="radio"/> más 6 veces al día |
|--------------------------|--------------------------------------------------------------------------------------------------------------------------------------------------------------------------------------------------------------------------------------------------------------------------------------------------------------------------------------------------------------------------------------------------------------|

---

|                          |                                                                                                                                                                                                                                                                                                                                                                                                   |
|--------------------------|---------------------------------------------------------------------------------------------------------------------------------------------------------------------------------------------------------------------------------------------------------------------------------------------------------------------------------------------------------------------------------------------------|
| agua embotellada con gas | <input type="radio"/> Nunca o menos 1 vez al mes<br><input type="radio"/> 1 a 3 veces mes<br><input type="radio"/> 1 vez semana<br><input type="radio"/> 2 a 4 veces semana<br><input type="radio"/> 5 a 6 veces semana<br><input type="radio"/> 1 vez al día<br><input type="radio"/> 2 a 3 veces al día<br><input type="radio"/> 5 a 6 veces al día<br><input type="radio"/> más 6 veces al día |
|--------------------------|---------------------------------------------------------------------------------------------------------------------------------------------------------------------------------------------------------------------------------------------------------------------------------------------------------------------------------------------------------------------------------------------------|

---

|                       |                                                                                                                                                                                                                                                                                                                                                                                                   |
|-----------------------|---------------------------------------------------------------------------------------------------------------------------------------------------------------------------------------------------------------------------------------------------------------------------------------------------------------------------------------------------------------------------------------------------|
| zumos frutas emvasado | <input type="radio"/> Nunca o menos 1 vez al mes<br><input type="radio"/> 1 a 3 veces mes<br><input type="radio"/> 1 vez semana<br><input type="radio"/> 2 a 4 veces semana<br><input type="radio"/> 5 a 6 veces semana<br><input type="radio"/> 1 vez al día<br><input type="radio"/> 2 a 3 veces al día<br><input type="radio"/> 5 a 6 veces al día<br><input type="radio"/> más 6 veces al día |
|-----------------------|---------------------------------------------------------------------------------------------------------------------------------------------------------------------------------------------------------------------------------------------------------------------------------------------------------------------------------------------------------------------------------------------------|

---

|      |                                                                                                                                                                                                                                                                                                                                                                                                              |
|------|--------------------------------------------------------------------------------------------------------------------------------------------------------------------------------------------------------------------------------------------------------------------------------------------------------------------------------------------------------------------------------------------------------------|
| café | <input type="radio"/> Nunca o menos 1 vez al mes<br><input type="radio"/> 1 a 3 veces mes<br><input type="radio"/> 1 vez semana<br><input type="radio"/> 2 a 4 veces semana<br><input type="radio"/> 5 a 6 veces semana<br><input checked="" type="radio"/> 1 vez al día<br><input type="radio"/> 2 a 3 veces al día<br><input type="radio"/> 5 a 6 veces al día<br><input type="radio"/> más 6 veces al día |
|------|--------------------------------------------------------------------------------------------------------------------------------------------------------------------------------------------------------------------------------------------------------------------------------------------------------------------------------------------------------------------------------------------------------------|

---

---

café descafeinado

- ☐ Nunca o menos 1 vez al mes  
☐ 1 a 3 veces mes  
☐ 1 vez semana  
☐ 2 a 4 veces semana  
☐ 5 a 6 veces semana  
☒ 1 vez al día  
☐ 2 a 3 veces al día  
☐ 5 a 6 veces al día  
☐ más 6 veces al día

---

té o infusión

- ☐ Nunca o menos 1 vez al mes  
☐ 1 a 3 veces mes  
☐ 1 vez semana  
☐ 2 a 4 veces semana  
☐ 5 a 6 veces semana  
☐ 1 vez al día  
☐ 2 a 3 veces al día  
☐ 5 a 6 veces al día  
☐ más 6 veces al día

---

sopa o puré verduras

- ☐ Nunca o menos 1 vez al mes  
☐ 1 a 3 veces mes  
☐ 1 vez semana  
☒ 2 a 4 veces semana  
☐ 5 a 6 veces semana  
☐ 1 vez al día  
☐ 2 a 3 veces al día  
☐ 5 a 6 veces al día  
☐ más 6 veces al día

---

croquetas pollo jamón

- ☐ Nunca o menos 1 vez al mes  
☐ 1 a 3 veces mes  
☐ 1 vez semana  
☐ 2 a 4 veces semana  
☐ 5 a 6 veces semana  
☐ 1 vez al día  
☐ 2 a 3 veces al día  
☐ 5 a 6 veces al día  
☐ más 6 veces al día

---

croquetas pescado

- ☐ Nunca o menos 1 vez al mes  
☐ 1 a 3 veces mes  
☐ 1 vez semana  
☐ 2 a 4 veces semana  
☐ 5 a 6 veces semana  
☐ 1 vez al día  
☐ 2 a 3 veces al día  
☐ 5 a 6 veces al día  
☐ más 6 veces al día

---

mayonesa

- ☐ Nunca o menos 1 vez al mes  
☐ 1 a 3 veces mes  
☐ 1 vez semana  
☐ 2 a 4 veces semana  
☐ 5 a 6 veces semana  
☐ 1 vez al día  
☐ 2 a 3 veces al día  
☐ 5 a 6 veces al día  
☐ más 6 veces al día

|                  |                                                                                                                                                                                                                                                                                                                                                                                                              |
|------------------|--------------------------------------------------------------------------------------------------------------------------------------------------------------------------------------------------------------------------------------------------------------------------------------------------------------------------------------------------------------------------------------------------------------|
| salsa tomate     | <input type="radio"/> Nunca o menos 1 vez al mes<br><input type="radio"/> 1 a 3 veces mes<br><input type="radio"/> 1 vez semana<br><input type="radio"/> 2 a 4 veces semana<br><input type="radio"/> 5 a 6 veces semana<br><input type="radio"/> 1 vez al día<br><input type="radio"/> 2 a 3 veces al día<br><input type="radio"/> 5 a 6 veces al día<br><input type="radio"/> más 6 veces al día            |
| ketchup          | <input type="radio"/> Nunca o menos 1 vez al mes<br><input type="radio"/> 1 a 3 veces mes<br><input type="radio"/> 1 vez semana<br><input type="radio"/> 2 a 4 veces semana<br><input type="radio"/> 5 a 6 veces semana<br><input type="radio"/> 1 vez al día<br><input type="radio"/> 2 a 3 veces al día<br><input type="radio"/> 5 a 6 veces al día<br><input type="radio"/> más 6 veces al día            |
| sal              | <input type="radio"/> Nunca o menos 1 vez al mes<br><input type="radio"/> 1 a 3 veces mes<br><input type="radio"/> 1 vez semana<br><input type="radio"/> 2 a 4 veces semana<br><input type="radio"/> 5 a 6 veces semana<br><input checked="" type="radio"/> 1 vez al día<br><input type="radio"/> 2 a 3 veces al día<br><input type="radio"/> 5 a 6 veces al día<br><input type="radio"/> más 6 veces al día |
| ajo              | <input type="radio"/> Nunca o menos 1 vez al mes<br><input type="radio"/> 1 a 3 veces mes<br><input type="radio"/> 1 vez semana<br><input type="radio"/> 2 a 4 veces semana<br><input type="radio"/> 5 a 6 veces semana<br><input type="radio"/> 1 vez al día<br><input type="radio"/> 2 a 3 veces al día<br><input type="radio"/> 5 a 6 veces al día<br><input type="radio"/> más 6 veces al día            |
| mermelada o miel | <input type="radio"/> Nunca o menos 1 vez al mes<br><input type="radio"/> 1 a 3 veces mes<br><input type="radio"/> 1 vez semana<br><input type="radio"/> 2 a 4 veces semana<br><input type="radio"/> 5 a 6 veces semana<br><input type="radio"/> 1 vez al día<br><input type="radio"/> 2 a 3 veces al día<br><input type="radio"/> 5 a 6 veces al día<br><input type="radio"/> más 6 veces al día            |
| azúcar           | <input type="radio"/> Nunca o menos 1 vez al mes<br><input type="radio"/> 1 a 3 veces mes<br><input type="radio"/> 1 vez semana<br><input type="radio"/> 2 a 4 veces semana<br><input type="radio"/> 5 a 6 veces semana<br><input checked="" type="radio"/> 1 vez al día<br><input type="radio"/> 2 a 3 veces al día<br><input type="radio"/> 5 a 6 veces al día<br><input type="radio"/> más 6 veces al día |



|                                       |                                                                                                                                                                                                                                                                                                                                                                                                                                                                                                                               |
|---------------------------------------|-------------------------------------------------------------------------------------------------------------------------------------------------------------------------------------------------------------------------------------------------------------------------------------------------------------------------------------------------------------------------------------------------------------------------------------------------------------------------------------------------------------------------------|
| Otro alimento                         |                                                                                                                                                                                                                                                                                                                                                                                                                                                                                                                               |
| suplementos vitamínicos               | <input checked="" type="radio"/> si<br><input type="radio"/> no                                                                                                                                                                                                                                                                                                                                                                                                                                                               |
| suplementos vitamínicos               | [*DATA REMOVED*]                                                                                                                                                                                                                                                                                                                                                                                                                                                                                                              |
| dieta previa                          | <input checked="" type="radio"/> si<br><input type="radio"/> no                                                                                                                                                                                                                                                                                                                                                                                                                                                               |
| motivo dieta                          | <input type="radio"/> no dieta<br><input type="radio"/> control peso<br><input type="radio"/> control colesterol<br><input type="radio"/> control diabetes<br><input type="radio"/> problemas estómago<br><input type="radio"/> problemas vesícula o hepáticos<br><input type="radio"/> HTA o cardiopatía<br><input type="radio"/> problemas renales<br><input type="radio"/> alergia alimentaria<br><input type="radio"/> ácido úrico elevado<br><input type="radio"/> vegetariana<br><input checked="" type="radio"/> otros |
| cambio alimentos año previo gestación | <input checked="" type="radio"/> si<br><input type="radio"/> no                                                                                                                                                                                                                                                                                                                                                                                                                                                               |
| cambio lácteos                        | <input type="radio"/> eliminado<br><input type="radio"/> disminuido<br><input checked="" type="radio"/> igual<br><input type="radio"/> aumentado<br><input type="radio"/> no sabe                                                                                                                                                                                                                                                                                                                                             |
| cambio huevos                         | <input type="radio"/> eliminado<br><input type="radio"/> disminuido<br><input checked="" type="radio"/> igual<br><input type="radio"/> aumentado<br><input type="radio"/> no sabe                                                                                                                                                                                                                                                                                                                                             |
| cambio carne                          | <input type="radio"/> eliminado<br><input type="radio"/> disminuido<br><input checked="" type="radio"/> igual<br><input type="radio"/> aumentado<br><input type="radio"/> no sabe                                                                                                                                                                                                                                                                                                                                             |
| cambio pescado                        | <input type="radio"/> eliminado<br><input type="radio"/> disminuido<br><input checked="" type="radio"/> igual<br><input type="radio"/> aumentado<br><input type="radio"/> no sabe                                                                                                                                                                                                                                                                                                                                             |
| cambio verduras                       | <input type="radio"/> eliminado<br><input type="radio"/> disminuido<br><input checked="" type="radio"/> igual<br><input type="radio"/> aumentado<br><input type="radio"/> no sabe                                                                                                                                                                                                                                                                                                                                             |

|                            |                                                                                                                                                                                                                        |
|----------------------------|------------------------------------------------------------------------------------------------------------------------------------------------------------------------------------------------------------------------|
| cambio legumbres           | <input type="radio"/> eliminado<br><input type="radio"/> disminuido<br><input checked="" type="radio"/> igual<br><input type="radio"/> aumentado<br><input type="radio"/> no sabe                                      |
| cambio fruta               | <input type="radio"/> eliminado<br><input type="radio"/> disminuido<br><input checked="" type="radio"/> igual<br><input type="radio"/> aumentado<br><input type="radio"/> no sabe                                      |
| cambio pan                 | <input type="radio"/> eliminado<br><input type="radio"/> disminuido<br><input checked="" type="radio"/> igual<br><input type="radio"/> aumentado<br><input type="radio"/> no sabe                                      |
| cambio aceite oliva        | <input type="radio"/> eliminado<br><input type="radio"/> disminuido<br><input checked="" type="radio"/> igual<br><input type="radio"/> aumentado<br><input type="radio"/> no sabe                                      |
| cambio mante o margarina   | <input checked="" type="radio"/> eliminado<br><input type="radio"/> disminuido<br><input type="radio"/> igual<br><input type="radio"/> aumentado<br><input type="radio"/> no sabe                                      |
| cambio azúcar y dulces     | <input type="radio"/> eliminado<br><input checked="" type="radio"/> disminuido<br><input type="radio"/> igual<br><input type="radio"/> aumentado<br><input type="radio"/> no sabe                                      |
| cambio bebidas alcohólicas | <input checked="" type="radio"/> eliminado<br><input type="radio"/> disminuido<br><input type="radio"/> igual<br><input type="radio"/> aumentado<br><input type="radio"/> no sabe                                      |
| frecuencia comidas fritas  | <input type="radio"/> a diario<br><input type="radio"/> 5 a 6 veces semana<br><input type="radio"/> 2 a 4 veces semana<br><input type="radio"/> 1 vez semana<br><input checked="" type="radio"/> menos de 1 vez semana |
| carne                      | <input type="radio"/> no como<br><input type="radio"/> cruda<br><input type="radio"/> poco hecha<br><input checked="" type="radio"/> hecha<br><input type="radio"/> muy hecha                                          |
| grasa visible carne        | <input checked="" type="radio"/> quita toda<br><input type="radio"/> quita mayoría<br><input type="radio"/> quita un poco<br><input type="radio"/> no quita nada                                                       |

|                                |                                                                                                                                                                                                                                                          |
|--------------------------------|----------------------------------------------------------------------------------------------------------------------------------------------------------------------------------------------------------------------------------------------------------|
| cocina carne                   | <input checked="" type="radio"/> a la plancha<br><input type="radio"/> a la parrilla<br><input type="radio"/> asada<br><input type="radio"/> frita<br><input type="radio"/> guisada                                                                      |
| tostado quemado carne          | <input checked="" type="radio"/> nunca<br><input type="radio"/> 1 vez mes<br><input type="radio"/> 2 a 3 veces mes<br><input type="radio"/> 1 vez semana<br><input type="radio"/> 2 a 3 semanas                                                          |
| tostado quemado pescado        | <input checked="" type="radio"/> nunca<br><input type="radio"/> 1 vez mes<br><input type="radio"/> 2 a 3 veces mes<br><input type="radio"/> 1 vez semana<br><input type="radio"/> 2 a 3 semanas                                                          |
| socarrat paella                | <input type="radio"/> nunca<br><input type="radio"/> 1 vez mes<br><input checked="" type="radio"/> 2 a 3 veces mes<br><input type="radio"/> 1 vez semana<br><input type="radio"/> 2 a 3 semanas                                                          |
| grasa o aceite cocinar         | <input type="radio"/> mantequilla<br><input type="radio"/> margarina<br><input type="radio"/> aceite oliva<br><input checked="" type="radio"/> aceite oliva virgen extra<br><input type="radio"/> aceite vegetal<br><input type="radio"/> mezcla aceites |
| grasa aceite aliñar            | <input type="radio"/> mantequilla<br><input type="radio"/> margarina<br><input type="radio"/> aceite oliva<br><input checked="" type="radio"/> aceite oliva virgen extra<br><input type="radio"/> aceite vegetal<br><input type="radio"/> mezcla aceites |
| grasa aceite freir             | <input type="radio"/> mantequilla<br><input type="radio"/> margarina<br><input type="radio"/> aceite oliva<br><input type="radio"/> aceite oliva virgen extra<br><input type="radio"/> aceite vegetal<br><input type="radio"/> mezcla aceites            |
| Ejercicio cuestionario         | <input checked="" type="radio"/> si<br><input type="radio"/> no                                                                                                                                                                                          |
| horas de sueño incluido siesta | [*DATA REMOVED*]                                                                                                                                                                                                                                         |
| minutos siesta                 | [*DATA REMOVED*]                                                                                                                                                                                                                                         |
| horas televisión semana        | [*DATA REMOVED*]                                                                                                                                                                                                                                         |

|                                        |                                                                                                                                                                                                                                                                                                                                                                           |
|----------------------------------------|---------------------------------------------------------------------------------------------------------------------------------------------------------------------------------------------------------------------------------------------------------------------------------------------------------------------------------------------------------------------------|
| actividad trabajo                      | <input type="radio"/> casi siempre sentado<br><input type="radio"/> sentado 50 por cien<br><input type="radio"/> casi siempre de pie, quieto<br><input checked="" type="radio"/> casi siempre levantado caminando y llevando pocas cosas<br><input type="radio"/> casi siempre levantado, caminando y llevado muchas cosas<br><input type="radio"/> trabajo manual pesado |
| tiempo caminar o bici al día           | <input type="radio"/> casi nunca<br><input type="radio"/> menos 20min día<br><input checked="" type="radio"/> 20 a 40 min día<br><input type="radio"/> 40 a 60 min día<br><input type="radio"/> 1h o 1h y media día<br><input type="radio"/> más de 1h y media al día                                                                                                     |
| tiempo tareas casa al día              | <input type="radio"/> menos de 1h día<br><input checked="" type="radio"/> 1 a 2h día<br><input type="radio"/> 3 a 4h día<br><input type="radio"/> 5 a 6h día<br><input type="radio"/> 7 a 8h día<br><input type="radio"/> más de 8h día                                                                                                                                   |
| tiempo libre televisión ordenador leer | <input type="radio"/> menos 1h día<br><input checked="" type="radio"/> 1h día<br><input type="radio"/> 2h día<br><input type="radio"/> 3h día<br><input type="radio"/> 4h día<br><input type="radio"/> 5 a 6h día<br><input type="radio"/> mas 6h día                                                                                                                     |
| tiempo libre ejercicio o deporte       | <input type="radio"/> menos 1h semana<br><input type="radio"/> 1h semana<br><input type="radio"/> 2h semana<br><input checked="" type="radio"/> 3h semana<br><input type="radio"/> 4 a 5h semana<br><input type="radio"/> mas 5h semana                                                                                                                                   |
| como se considera                      | <input type="radio"/> sedentaria<br><input type="radio"/> poco activa<br><input checked="" type="radio"/> moderadamente activa<br><input type="radio"/> bastante activa<br><input type="radio"/> muy activa<br><input type="radio"/> no sabe                                                                                                                              |
| FUR                                    | [*DATA REMOVED*]                                                                                                                                                                                                                                                                                                                                                          |
| Semanas gestación 2T                   | _____                                                                                                                                                                                                                                                                                                                                                                     |
| Días gestación 2T                      | _____                                                                                                                                                                                                                                                                                                                                                                     |
| DBP 2T                                 | _____                                                                                                                                                                                                                                                                                                                                                                     |
| CC 2T                                  | _____                                                                                                                                                                                                                                                                                                                                                                     |

|                                                   |                                                                                                                                                                                                 |
|---------------------------------------------------|-------------------------------------------------------------------------------------------------------------------------------------------------------------------------------------------------|
| AC 2T                                             |                                                                                                                                                                                                 |
| LF 2T                                             |                                                                                                                                                                                                 |
| PFE 2T (Hadlock)                                  |                                                                                                                                                                                                 |
| Semanas gestación 3T                              | [*DATA REMOVED*]                                                                                                                                                                                |
| días 3T                                           | [*DATA REMOVED*]                                                                                                                                                                                |
| DBP 3T                                            | [*DATA REMOVED*]                                                                                                                                                                                |
| CC 3T                                             | [*DATA REMOVED*]                                                                                                                                                                                |
| AC 3T                                             | [*DATA REMOVED*]                                                                                                                                                                                |
| LF 3T                                             | [*DATA REMOVED*]                                                                                                                                                                                |
| PFE 3T (Hadlock)                                  | [*DATA REMOVED*]                                                                                                                                                                                |
| Semanas de gestación final                        | [*DATA REMOVED*]                                                                                                                                                                                |
| días gestación final                              | [*DATA REMOVED*]                                                                                                                                                                                |
| Localización placenta                             | <input type="radio"/> anterior<br><input type="radio"/> lateral derecha<br><input type="radio"/> lateral izquierda<br><input type="radio"/> posterior<br><input checked="" type="radio"/> fondo |
| Presentación longitudinal cefálica                | <input type="radio"/> no<br><input checked="" type="radio"/> si                                                                                                                                 |
| Dorso                                             | <input type="radio"/> izquierda anterior<br><input type="radio"/> izquierda posterior<br><input checked="" type="radio"/> derecha anterior<br><input type="radio"/> derecha posterior           |
| diámetro biparietal                               | [*DATA REMOVED*]                                                                                                                                                                                |
| Circunferencia craneal                            | [*DATA REMOVED*]                                                                                                                                                                                |
| Circunferencia abdominal                          | [*DATA REMOVED*]                                                                                                                                                                                |
| Longitud de femur                                 | [*DATA REMOVED*]                                                                                                                                                                                |
| tejido celular subcutáneo a nivel del muslo en mm | [*DATA REMOVED*]                                                                                                                                                                                |
| tejido celular subcutáneo en abdomen en mm        | [*DATA REMOVED*]                                                                                                                                                                                |

|                                               |                                                                                                                                               |
|-----------------------------------------------|-----------------------------------------------------------------------------------------------------------------------------------------------|
| Volumen del muslo en cm3                      | [*DATA REMOVED*]                                                                                                                              |
| Peso fetal estimado según fórmula de Hadlock  | [*DATA REMOVED*]                                                                                                                              |
| Percentil                                     | [*DATA REMOVED*]                                                                                                                              |
| Peso fetal estimado según fórmula de Scioscia | _____                                                                                                                                         |
| Peso fetal estimado según fórmula de LEE      | _____                                                                                                                                         |
| Tipo de parto                                 | <input checked="" type="radio"/> eutocico<br><input type="radio"/> instrumentado/ventosa<br><input type="radio"/> cesarea                     |
| fecha de nacimiento                           | [*DATA REMOVED*]                                                                                                                              |
| Días entre exploración y nacimiento           | [*DATA REMOVED*]                                                                                                                              |
| Peso RN en g                                  | [*DATA REMOVED*]                                                                                                                              |
| sexo                                          | <input type="radio"/> mujer<br><input checked="" type="radio"/> hombre                                                                        |
| Apgar 1 minuto                                | [*DATA REMOVED*]                                                                                                                              |
| Apgar 5 minutos                               | [*DATA REMOVED*]                                                                                                                              |
| Apgar 10 minutos                              | _____                                                                                                                                         |
| antecedente Covid durante gestación           | <input type="radio"/> Yes<br><input checked="" type="radio"/> No                                                                              |
| Nivel de estudios                             | <input type="radio"/> ninguno<br><input type="radio"/> primarios<br><input type="radio"/> secundarios<br><input type="radio"/> universitarios |

# Base\_datos\_estimacion\_peso\_fetal

|                                       |                                                                                                                                                                                                                                                                           |
|---------------------------------------|---------------------------------------------------------------------------------------------------------------------------------------------------------------------------------------------------------------------------------------------------------------------------|
| Número de identificación participante | 99                                                                                                                                                                                                                                                                        |
| CODIGO PARTICIPANTE                   |                                                                                                                                                                                                                                                                           |
| Edad                                  | [*DATA REMOVED*]                                                                                                                                                                                                                                                          |
| Gestaciones                           | <input checked="" type="radio"/> 1<br><input type="radio"/> 2<br><input type="radio"/> 3<br><input type="radio"/> mas de 3                                                                                                                                                |
| partos                                | <input checked="" type="radio"/> 0<br><input type="radio"/> 1<br><input type="radio"/> 2<br><input type="radio"/> 3<br><input type="radio"/> mas de 3                                                                                                                     |
| cesáreas                              | <input checked="" type="radio"/> 0<br><input type="radio"/> 1<br><input type="radio"/> 2<br><input type="radio"/> 3<br><input type="radio"/> mas de 3                                                                                                                     |
| Abortos                               | <input checked="" type="radio"/> 0<br><input type="radio"/> 1<br><input type="radio"/> 2<br><input type="radio"/> 3<br><input type="radio"/> mas de 3                                                                                                                     |
| Tipo de gestacion                     | <input type="radio"/> espontanea<br><input type="radio"/> IAC inseminación artificial conyuge<br><input type="radio"/> IAD inseminación artificial donante<br><input type="radio"/> FIV Fecundación in Vitro<br><input type="radio"/> Ovodon FIV con donación de ovocitos |
| peso previo a embarazo                | [*DATA REMOVED*]                                                                                                                                                                                                                                                          |
| Ganancia ponderal embarazo            |                                                                                                                                                                                                                                                                           |
| Talla madre                           | [*DATA REMOVED*]                                                                                                                                                                                                                                                          |
| IMC previo embarazo                   | 21.719250114311837                                                                                                                                                                                                                                                        |
| Patología obstétrica                  | <input checked="" type="radio"/> no<br><input type="radio"/> si                                                                                                                                                                                                           |
| Diabetes pregestacional               | <input checked="" type="radio"/> no<br><input type="radio"/> si                                                                                                                                                                                                           |
| Diabetes gestacional                  | <input checked="" type="radio"/> no<br><input type="radio"/> si                                                                                                                                                                                                           |

|                                            |                                                                                                                                                                                      |
|--------------------------------------------|--------------------------------------------------------------------------------------------------------------------------------------------------------------------------------------|
| Diabetes gestacional con insulina          | <input checked="" type="radio"/> no<br><input type="radio"/> si                                                                                                                      |
| Diabetes gestacional con dieta y ejercicio | <input checked="" type="radio"/> no<br><input type="radio"/> si                                                                                                                      |
| Percentil fetos previos                    | <input checked="" type="radio"/> Nada<br><input type="radio"/> percentil menor de 10<br><input type="radio"/> percentil entre 10 y 90<br><input type="radio"/> percentil mayor de 90 |
| Exfumadora                                 | <input checked="" type="radio"/> Nada<br><input type="radio"/> menos de 5 años<br><input type="radio"/> 5 a 10 años<br><input type="radio"/> mayor o igual a 10 años                 |
| Hábito tabáquico                           | <input type="radio"/> no<br><input checked="" type="radio"/> si                                                                                                                      |
| fumadora                                   | [*DATA REMOVED*]                                                                                                                                                                     |
| Consumo otros tóxicos                      | <input checked="" type="radio"/> no<br><input type="radio"/> si                                                                                                                      |
| Hb 1T                                      | [*DATA REMOVED*]                                                                                                                                                                     |
| Htc 1T                                     | [*DATA REMOVED*]                                                                                                                                                                     |
| Hb 2T                                      | [*DATA REMOVED*]                                                                                                                                                                     |
| HTC 2T                                     | [*DATA REMOVED*]                                                                                                                                                                     |
| Hb 3T                                      | [*DATA REMOVED*]                                                                                                                                                                     |
| HTC 3T                                     | [*DATA REMOVED*]                                                                                                                                                                     |
| Suplemento FE oral                         | <input type="radio"/> si<br><input checked="" type="radio"/> no                                                                                                                      |
| Suplemento fe iv                           | <input type="radio"/> si<br><input checked="" type="radio"/> no                                                                                                                      |
| Transfusión                                | <input checked="" type="radio"/> no<br><input type="radio"/> si                                                                                                                      |
| Solicitada Vit D                           | <input checked="" type="radio"/> no<br><input type="radio"/> si                                                                                                                      |
| Deficit vit D                              | <input type="radio"/> no<br><input type="radio"/> si                                                                                                                                 |
| Suplemento vit D                           | <input type="radio"/> si<br><input type="radio"/> no                                                                                                                                 |



|                       |                                                                                                                                                                                                                                                                                                                                                                                                              |
|-----------------------|--------------------------------------------------------------------------------------------------------------------------------------------------------------------------------------------------------------------------------------------------------------------------------------------------------------------------------------------------------------------------------------------------------------|
| Dieta, cuestionario   | <input checked="" type="radio"/> si<br><input type="radio"/> no                                                                                                                                                                                                                                                                                                                                              |
| Leche entera          | <input checked="" type="radio"/> Nunca o menos 1 vez al mes<br><input type="radio"/> 1 a 3 veces mes<br><input type="radio"/> 1 vez semana<br><input type="radio"/> 2 a 4 veces semana<br><input type="radio"/> 5 a 6 veces semana<br><input type="radio"/> 1 vez al día<br><input type="radio"/> 2 a 3 veces al día<br><input type="radio"/> 5 a 6 veces al día<br><input type="radio"/> más 6 veces al día |
| Leche semidesnatada   | <input type="radio"/> Nunca o menos 1 vez al mes<br><input type="radio"/> 1 a 3 veces mes<br><input type="radio"/> 1 vez semana<br><input type="radio"/> 2 a 4 veces semana<br><input type="radio"/> 5 a 6 veces semana<br><input checked="" type="radio"/> 1 vez al día<br><input type="radio"/> 2 a 3 veces al día<br><input type="radio"/> 5 a 6 veces al día<br><input type="radio"/> mas 6 veces al día |
| Leche desnatada       | <input checked="" type="radio"/> Nunca o menos 1 vez al mes<br><input type="radio"/> 1 a 3 veces mes<br><input type="radio"/> 1 vez semana<br><input type="radio"/> 2 a 4 veces semana<br><input type="radio"/> 5 a 6 veces semana<br><input type="radio"/> 1 vez al día<br><input type="radio"/> 2 a 3 veces al día<br><input type="radio"/> 5 a 6 veces al día<br><input type="radio"/> más 6 veces al día |
| Leche condensada      | <input type="radio"/> Nunca o menos 1 vez al mes<br><input type="radio"/> 1 a 3 veces mes<br><input checked="" type="radio"/> 1 vez semana<br><input type="radio"/> 2 a 4 veces semana<br><input type="radio"/> 5 a 6 veces semana<br><input type="radio"/> 1 vez al día<br><input type="radio"/> 2 a 3 veces al día<br><input type="radio"/> 5 a 6 veces al día<br><input type="radio"/> más 6 veces al día |
| nata o crema de leche | <input checked="" type="radio"/> Nunca o menos 1 vez al mes<br><input type="radio"/> 1 a 3 veces mes<br><input type="radio"/> 1 vez semana<br><input type="radio"/> 2 a 4 veces semana<br><input type="radio"/> 5 a 6 veces semana<br><input type="radio"/> 1 vez al día<br><input type="radio"/> 2 a 3 veces al día<br><input type="radio"/> 5 a 6 veces al día<br><input type="radio"/> más 6 veces al día |

|                                             |                                                                                                                                                                                                                                                                                                                                                                                                              |
|---------------------------------------------|--------------------------------------------------------------------------------------------------------------------------------------------------------------------------------------------------------------------------------------------------------------------------------------------------------------------------------------------------------------------------------------------------------------|
| Yogurt Entero                               | <input type="radio"/> Nunca o menos 1 vez al mes<br><input type="radio"/> 1 a 3 veces mes<br><input type="radio"/> 1 vez semana<br><input checked="" type="radio"/> 2 a 4 veces semana<br><input type="radio"/> 5 a 6 veces semana<br><input type="radio"/> 1 vez al día<br><input type="radio"/> 2 a 3 veces al día<br><input type="radio"/> 5 a 6 veces al día<br><input type="radio"/> más 6 veces al día |
| Yogurt desnatado                            | <input checked="" type="radio"/> Nunca o menos 1 vez al mes<br><input type="radio"/> 1 a 3 veces mes<br><input type="radio"/> 1 vez semana<br><input type="radio"/> 2 a 4 veces semana<br><input type="radio"/> 5 a 6 veces semana<br><input type="radio"/> 1 vez al día<br><input type="radio"/> 2 a 3 veces al día<br><input type="radio"/> 5 a 6 veces al día<br><input type="radio"/> más 6 veces al día |
| 100g requesón o queso blando o queso fresco | <input type="radio"/> Nunca o menos 1 vez al mes<br><input checked="" type="radio"/> 1 a 3 veces mes<br><input type="radio"/> 1 vez semana<br><input type="radio"/> 2 a 4 veces semana<br><input type="radio"/> 5 a 6 veces semana<br><input type="radio"/> 1 vez al día<br><input type="radio"/> 2 a 3 veces al día<br><input type="radio"/> 5 a 6 veces al día<br><input type="radio"/> más 6 veces al día |
| queso curado o semicurado o cremoso         | <input type="radio"/> Nunca o menos 1 vez al mes<br><input type="radio"/> 1 a 3 veces mes<br><input type="radio"/> 1 vez semana<br><input checked="" type="radio"/> 2 a 4 veces semana<br><input type="radio"/> 5 a 6 veces semana<br><input type="radio"/> 1 vez al día<br><input type="radio"/> 2 a 3 veces al día<br><input type="radio"/> 5 a 6 veces al día<br><input type="radio"/> más 6 veces al día |
| natillas flan pudding                       | <input type="radio"/> Nunca o menos 1 vez al mes<br><input type="radio"/> 1 a 3 veces mes<br><input type="radio"/> 1 vez semana<br><input type="radio"/> 2 a 4 veces semana<br><input type="radio"/> 5 a 6 veces semana<br><input checked="" type="radio"/> 1 vez al día<br><input type="radio"/> 2 a 3 veces al día<br><input type="radio"/> 5 a 6 veces al día<br><input type="radio"/> más 6 veces al día |
| Helado                                      | <input type="radio"/> Nunca o menos 1 vez al mes<br><input type="radio"/> 1 a 3 veces mes<br><input checked="" type="radio"/> 1 vez semana<br><input type="radio"/> 2 a 4 veces semana<br><input type="radio"/> 5 a 6 veces semana<br><input type="radio"/> 1 vez al día<br><input type="radio"/> 2 a 3 veces al día<br><input type="radio"/> 5 a 6 veces al día<br><input type="radio"/> más 6 veces al día |

|                                      |                                                                                                                                                                                                                                                                                                                                                                                                              |
|--------------------------------------|--------------------------------------------------------------------------------------------------------------------------------------------------------------------------------------------------------------------------------------------------------------------------------------------------------------------------------------------------------------------------------------------------------------|
| huevo                                | <input type="radio"/> Nunca o menos 1 vez al mes<br><input type="radio"/> 1 a 3 veces mes<br><input type="radio"/> 1 vez semana<br><input checked="" type="radio"/> 2 a 4 veces semana<br><input type="radio"/> 5 a 6 veces semana<br><input type="radio"/> 1 vez al día<br><input type="radio"/> 2 a 3 veces al día<br><input type="radio"/> 5 a 6 veces al día<br><input type="radio"/> más 6 veces al día |
| Pollo con piel                       | <input type="radio"/> Nunca o menos 1 vez al mes<br><input type="radio"/> 1 a 3 veces mes<br><input checked="" type="radio"/> 1 vez semana<br><input type="radio"/> 2 a 4 veces semana<br><input type="radio"/> 5 a 6 veces semana<br><input type="radio"/> 1 vez al día<br><input type="radio"/> 2 a 3 veces al día<br><input type="radio"/> 5 a 6 veces al día<br><input type="radio"/> más 6 veces al día |
| pollo sin piel                       | <input type="radio"/> Nunca o menos 1 vez al mes<br><input type="radio"/> 1 a 3 veces mes<br><input checked="" type="radio"/> 1 vez semana<br><input type="radio"/> 2 a 4 veces semana<br><input type="radio"/> 5 a 6 veces semana<br><input type="radio"/> 1 vez al día<br><input type="radio"/> 2 a 3 veces al día<br><input type="radio"/> 5 a 6 veces al día<br><input type="radio"/> más 6 veces al día |
| Ternera o cerdo o cordero            | <input type="radio"/> Nunca o menos 1 vez al mes<br><input type="radio"/> 1 a 3 veces mes<br><input type="radio"/> 1 vez semana<br><input checked="" type="radio"/> 2 a 4 veces semana<br><input type="radio"/> 5 a 6 veces semana<br><input type="radio"/> 1 vez al día<br><input type="radio"/> 2 a 3 veces al día<br><input type="radio"/> 5 a 6 veces al día<br><input type="radio"/> más 6 veces al día |
| carne caza: Conejo o codorniz o pato | <input checked="" type="radio"/> Nunca o menos 1 vez al mes<br><input type="radio"/> 1 a 3 veces mes<br><input type="radio"/> 1 vez semana<br><input type="radio"/> 2 a 4 veces semana<br><input type="radio"/> 5 a 6 veces semana<br><input type="radio"/> 1 vez al día<br><input type="radio"/> 2 a 3 veces al día<br><input type="radio"/> 5 a 6 veces al día<br><input type="radio"/> más 6 veces al día |
| Hígado de ternera o cerdo o pollo    | <input checked="" type="radio"/> Nunca o menos 1 vez al mes<br><input type="radio"/> 1 a 3 veces mes<br><input type="radio"/> 1 vez semana<br><input type="radio"/> 2 a 4 veces semana<br><input type="radio"/> 5 a 6 veces semana<br><input type="radio"/> 1 vez al día<br><input type="radio"/> 2 a 3 veces al día<br><input type="radio"/> 5 a 6 veces al día<br><input type="radio"/> más 6 veces al día |

|                     |                                                                                                                                                                                                                                                                                                                                                                                                              |
|---------------------|--------------------------------------------------------------------------------------------------------------------------------------------------------------------------------------------------------------------------------------------------------------------------------------------------------------------------------------------------------------------------------------------------------------|
| Vísceras            | <input checked="" type="radio"/> Nunca o menos 1 vez al mes<br><input type="radio"/> 1 a 3 veces mes<br><input type="radio"/> 1 vez semana<br><input type="radio"/> 2 a 4 veces semana<br><input type="radio"/> 5 a 6 veces semana<br><input type="radio"/> 1 vez al día<br><input type="radio"/> 2 a 3 veces al día<br><input type="radio"/> 5 a 6 veces al día<br><input type="radio"/> más 6 veces al día |
| Embutido            | <input checked="" type="radio"/> Nunca o menos 1 vez al mes<br><input type="radio"/> 1 a 3 veces mes<br><input type="radio"/> 1 vez semana<br><input type="radio"/> 2 a 4 veces semana<br><input type="radio"/> 5 a 6 veces semana<br><input type="radio"/> 1 vez al día<br><input type="radio"/> 2 a 3 veces al día<br><input type="radio"/> 5 a 6 veces al día<br><input type="radio"/> más 6 veces al día |
| Salchicha o similar | <input checked="" type="radio"/> Nunca o menos 1 vez al mes<br><input type="radio"/> 1 a 3 veces mes<br><input type="radio"/> 1 vez semana<br><input type="radio"/> 2 a 4 veces semana<br><input type="radio"/> 5 a 6 veces semana<br><input type="radio"/> 1 vez al día<br><input type="radio"/> 2 a 3 veces al día<br><input type="radio"/> 5 a 6 veces al día<br><input type="radio"/> más 6 veces al día |
| Pate o foiegras     | <input type="radio"/> Nunca o menos 1 vez al mes<br><input type="radio"/> 1 a 3 veces mes<br><input type="radio"/> 1 vez semana<br><input checked="" type="radio"/> 2 a 4 veces semana<br><input type="radio"/> 5 a 6 veces semana<br><input type="radio"/> 1 vez al día<br><input type="radio"/> 2 a 3 veces al día<br><input type="radio"/> 5 a 6 veces al día<br><input type="radio"/> más 6 veces al día |
| Hamburguesa         | <input checked="" type="radio"/> Nunca o menos 1 vez al mes<br><input type="radio"/> 1 a 3 veces mes<br><input type="radio"/> 1 vez semana<br><input type="radio"/> 2 a 4 veces semana<br><input type="radio"/> 5 a 6 veces semana<br><input type="radio"/> 1 vez al día<br><input type="radio"/> 2 a 3 veces al día<br><input type="radio"/> 5 a 6 veces al día<br><input type="radio"/> más 6 veces al día |
| tocino o bacon      | <input type="radio"/> Nunca o menos 1 vez al mes<br><input type="radio"/> 1 a 3 veces mes<br><input type="radio"/> 1 vez semana<br><input checked="" type="radio"/> 2 a 4 veces semana<br><input type="radio"/> 5 a 6 veces semana<br><input type="radio"/> 1 vez al día<br><input type="radio"/> 2 a 3 veces al día<br><input type="radio"/> 5 a 6 veces al día<br><input type="radio"/> más 6 veces al día |

---

Pescado frito

- ☐ Nunca o menos 1 vez al mes  
☒ 1 a 3 veces mes  
☐ 1 vez semana  
☐ 2 a 4 veces semana  
☐ 5 a 6 veces semana  
☐ 1 vez al día  
☐ 2 a 3 veces al día  
☐ 5 a 6 veces al día  
☐ más 6 veces al día

---

pescado hervido blanco

- ☒ Nunca o menos 1 vez al mes  
☐ 1 a 3 veces mes  
☐ 1 vez semana  
☐ 2 a 4 veces semana  
☐ 5 a 6 veces semana  
☐ 1 vez al día  
☐ 2 a 3 veces al día  
☐ 5 a 6 veces al día  
☐ más 6 veces al día

---

pescado hervido azul

- ☐ Nunca o menos 1 vez al mes  
☐ 1 a 3 veces mes  
☒ 1 vez semana  
☐ 2 a 4 veces semana  
☐ 5 a 6 veces semana  
☐ 1 vez al día  
☐ 2 a 3 veces al día  
☐ 5 a 6 veces al día  
☐ más 6 veces al día

---

otros pescado azul

- ☐ Nunca o menos 1 vez al mes  
☐ 1 a 3 veces mes  
☐ 1 vez semana  
☒ 2 a 4 veces semana  
☐ 5 a 6 veces semana  
☐ 1 vez al día  
☐ 2 a 3 veces al día  
☐ 5 a 6 veces al día  
☐ más 6 veces al día

---

atun conserva

- ☐ Nunca o menos 1 vez al mes  
☐ 1 a 3 veces mes  
☒ 1 vez semana  
☐ 2 a 4 veces semana  
☐ 5 a 6 veces semana  
☐ 1 vez al día  
☐ 2 a 3 veces al día  
☐ 5 a 6 veces al día  
☐ más 6 veces al día

---

sardina conserva

- ☒ Nunca o menos 1 vez al mes  
☐ 1 a 3 veces mes  
☐ 1 vez semana  
☐ 2 a 4 veces semana  
☐ 5 a 6 veces semana  
☐ 1 vez al día  
☐ 2 a 3 veces al día  
☐ 5 a 6 veces al día  
☐ más 6 veces al día

|                                         |                                                                                                                                                                                                                                                                                                                                                                                                              |
|-----------------------------------------|--------------------------------------------------------------------------------------------------------------------------------------------------------------------------------------------------------------------------------------------------------------------------------------------------------------------------------------------------------------------------------------------------------------|
| pescado ahumado                         | <input checked="" type="radio"/> Nunca o menos 1 vez al mes<br><input type="radio"/> 1 a 3 veces mes<br><input type="radio"/> 1 vez semana<br><input type="radio"/> 2 a 4 veces semana<br><input type="radio"/> 5 a 6 veces semana<br><input type="radio"/> 1 vez al día<br><input type="radio"/> 2 a 3 veces al día<br><input type="radio"/> 5 a 6 veces al día<br><input type="radio"/> más 6 veces al día |
| almejas o mejillones o ostras unos 100g | <input checked="" type="radio"/> Nunca o menos 1 vez al mes<br><input type="radio"/> 1 a 3 veces mes<br><input type="radio"/> 1 vez semana<br><input type="radio"/> 2 a 4 veces semana<br><input type="radio"/> 5 a 6 veces semana<br><input type="radio"/> 1 vez al día<br><input type="radio"/> 2 a 3 veces al día<br><input type="radio"/> 5 a 6 veces al día<br><input type="radio"/> más 6 veces al día |
| calamar o chipiron o sepia unos 100g    | <input type="radio"/> Nunca o menos 1 vez al mes<br><input type="radio"/> 1 a 3 veces mes<br><input checked="" type="radio"/> 1 vez semana<br><input type="radio"/> 2 a 4 veces semana<br><input type="radio"/> 5 a 6 veces semana<br><input type="radio"/> 1 vez al día<br><input type="radio"/> 2 a 3 veces al día<br><input type="radio"/> 5 a 6 veces al día<br><input type="radio"/> más 6 veces al día |
| marisco unos 100g                       | <input type="radio"/> Nunca o menos 1 vez al mes<br><input checked="" type="radio"/> 1 a 3 veces mes<br><input type="radio"/> 1 vez semana<br><input type="radio"/> 2 a 4 veces semana<br><input type="radio"/> 5 a 6 veces semana<br><input type="radio"/> 1 vez al día<br><input type="radio"/> 2 a 3 veces al día<br><input type="radio"/> 5 a 6 veces al día<br><input type="radio"/> más 6 veces al día |
| Espinacas o acelgas cocinadas           | <input type="radio"/> Nunca o menos 1 vez al mes<br><input checked="" type="radio"/> 1 a 3 veces mes<br><input type="radio"/> 1 vez semana<br><input type="radio"/> 2 a 4 veces semana<br><input type="radio"/> 5 a 6 veces semana<br><input type="radio"/> 1 vez al día<br><input type="radio"/> 2 a 3 veces al día<br><input type="radio"/> 5 a 6 veces al día<br><input type="radio"/> más 6 veces al día |
| Col o coliflor o brocoli cocinado       | <input type="radio"/> Nunca o menos 1 vez al mes<br><input checked="" type="radio"/> 1 a 3 veces mes<br><input type="radio"/> 1 vez semana<br><input type="radio"/> 2 a 4 veces semana<br><input type="radio"/> 5 a 6 veces semana<br><input type="radio"/> 1 vez al día<br><input type="radio"/> 2 a 3 veces al día<br><input type="radio"/> 5 a 6 veces al día<br><input type="radio"/> más 6 veces al día |

---

Lechuga o endivia o escarola

- ☐ Nunca o menos 1 vez al mes  
☐ 1 a 3 veces mes  
☐ 1 vez semana  
☒ 2 a 4 veces semana  
☐ 5 a 6 veces semana  
☐ 1 vez al día  
☐ 2 a 3 veces al día  
☐ 5 a 6 veces al día  
☐ más 6 veces al día

---

tomate ensalada

- ☐ Nunca o menos 1 vez al mes  
☐ 1 a 3 veces mes  
☐ 1 vez semana  
☒ 2 a 4 veces semana  
☐ 5 a 6 veces semana  
☐ 1 vez al día  
☐ 2 a 3 veces al día  
☐ 5 a 6 veces al día  
☐ más 6 veces al día

---

cebolla

- ☐ Nunca o menos 1 vez al mes  
☐ 1 a 3 veces mes  
☐ 1 vez semana  
☒ 2 a 4 veces semana  
☐ 5 a 6 veces semana  
☐ 1 vez al día  
☐ 2 a 3 veces al día  
☐ 5 a 6 veces al día  
☐ más 6 veces al día

---

Zanahoria o calabaza

- ☐ Nunca o menos 1 vez al mes  
☒ 1 a 3 veces mes  
☐ 1 vez semana  
☐ 2 a 4 veces semana  
☐ 5 a 6 veces semana  
☐ 1 vez al día  
☐ 2 a 3 veces al día  
☐ 5 a 6 veces al día  
☐ más 6 veces al día

---

Judías verdes

- ☐ Nunca o menos 1 vez al mes  
☐ 1 a 3 veces mes  
☒ 1 vez semana  
☐ 2 a 4 veces semana  
☐ 5 a 6 veces semana  
☐ 1 vez al día  
☐ 2 a 3 veces al día  
☐ 5 a 6 veces al día  
☐ más 6 veces al día

---

Berenjena o calabacin o pepino

- ☐ Nunca o menos 1 vez al mes  
☐ 1 a 3 veces mes  
☒ 1 vez semana  
☐ 2 a 4 veces semana  
☐ 5 a 6 veces semana  
☐ 1 vez al día  
☐ 2 a 3 veces al día  
☐ 5 a 6 veces al día  
☐ más 6 veces al día

---

pimiento

- ☐ Nunca o menos 1 vez al mes  
☐ 1 a 3 veces mes  
☒ 1 vez semana  
☐ 2 a 4 veces semana  
☐ 5 a 6 veces semana  
☐ 1 vez al día  
☐ 2 a 3 veces al día  
☐ 5 a 6 veces al día  
☐ más 6 veces al día

---

alcachofa

- ☐ Nunca o menos 1 vez al mes  
☐ 1 a 3 veces mes  
☐ 1 vez semana  
☒ 2 a 4 veces semana  
☐ 5 a 6 veces semana  
☐ 1 vez al día  
☐ 2 a 3 veces al día  
☐ 5 a 6 veces al día  
☐ más 6 veces al día

---

espárragos

- ☒ Nunca o menos 1 vez al mes  
☐ 1 a 3 veces mes  
☐ 1 vez semana  
☐ 2 a 4 veces semana  
☐ 5 a 6 veces semana  
☐ 1 vez al día  
☐ 2 a 3 veces al día  
☐ 5 a 6 veces al día  
☐ más 6 veces al día

---

maíz hervido

- ☒ Nunca o menos 1 vez al mes  
☐ 1 a 3 veces mes  
☐ 1 vez semana  
☐ 2 a 4 veces semana  
☐ 5 a 6 veces semana  
☐ 1 vez al día  
☐ 2 a 3 veces al día  
☐ 5 a 6 veces al día  
☐ más 6 veces al día

---

legumbres

- ☐ Nunca o menos 1 vez al mes  
☐ 1 a 3 veces mes  
☐ 1 vez semana  
☒ 2 a 4 veces semana  
☐ 5 a 6 veces semana  
☐ 1 vez al día  
☐ 2 a 3 veces al día  
☐ 5 a 6 veces al día  
☐ más 6 veces al día

---

naranjas o mandarinas

- ☐ Nunca o menos 1 vez al mes  
☐ 1 a 3 veces mes  
☐ 1 vez semana  
☒ 2 a 4 veces semana  
☐ 5 a 6 veces semana  
☐ 1 vez al día  
☐ 2 a 3 veces al día  
☐ 5 a 6 veces al día  
☐ más 6 veces al día



|                       |                                                                                                                                                                                                                                                                                                                                                                                                              |
|-----------------------|--------------------------------------------------------------------------------------------------------------------------------------------------------------------------------------------------------------------------------------------------------------------------------------------------------------------------------------------------------------------------------------------------------------|
| zum natural fruta     | <input type="radio"/> Nunca o menos 1 vez al mes<br><input type="radio"/> 1 a 3 veces mes<br><input checked="" type="radio"/> 1 vez semana<br><input type="radio"/> 2 a 4 veces semana<br><input type="radio"/> 5 a 6 veces semana<br><input type="radio"/> 1 vez al día<br><input type="radio"/> 2 a 3 veces al día<br><input type="radio"/> 5 a 6 veces al día<br><input type="radio"/> más 6 veces al día |
| platano               | <input type="radio"/> Nunca o menos 1 vez al mes<br><input type="radio"/> 1 a 3 veces mes<br><input checked="" type="radio"/> 1 vez semana<br><input type="radio"/> 2 a 4 veces semana<br><input type="radio"/> 5 a 6 veces semana<br><input type="radio"/> 1 vez al día<br><input type="radio"/> 2 a 3 veces al día<br><input type="radio"/> 5 a 6 veces al día<br><input type="radio"/> más 6 veces al día |
| manzana o pera        | <input type="radio"/> Nunca o menos 1 vez al mes<br><input checked="" type="radio"/> 1 a 3 veces mes<br><input type="radio"/> 1 vez semana<br><input type="radio"/> 2 a 4 veces semana<br><input type="radio"/> 5 a 6 veces semana<br><input type="radio"/> 1 vez al día<br><input type="radio"/> 2 a 3 veces al día<br><input type="radio"/> 5 a 6 veces al día<br><input type="radio"/> más 6 veces al día |
| melocotón o nectarina | <input type="radio"/> Nunca o menos 1 vez al mes<br><input checked="" type="radio"/> 1 a 3 veces mes<br><input type="radio"/> 1 vez semana<br><input type="radio"/> 2 a 4 veces semana<br><input type="radio"/> 5 a 6 veces semana<br><input type="radio"/> 1 vez al día<br><input type="radio"/> 2 a 3 veces al día<br><input type="radio"/> 5 a 6 veces al día<br><input type="radio"/> más 6 veces al día |
| sandia o melon        | <input checked="" type="radio"/> Nunca o menos 1 vez al mes<br><input type="radio"/> 1 a 3 veces mes<br><input type="radio"/> 1 vez semana<br><input type="radio"/> 2 a 4 veces semana<br><input type="radio"/> 5 a 6 veces semana<br><input type="radio"/> 1 vez al día<br><input type="radio"/> 2 a 3 veces al día<br><input type="radio"/> 5 a 6 veces al día<br><input type="radio"/> más 6 veces al día |
| uva                   | <input checked="" type="radio"/> Nunca o menos 1 vez al mes<br><input type="radio"/> 1 a 3 veces mes<br><input type="radio"/> 1 vez semana<br><input type="radio"/> 2 a 4 veces semana<br><input type="radio"/> 5 a 6 veces semana<br><input type="radio"/> 1 vez al día<br><input type="radio"/> 2 a 3 veces al día<br><input type="radio"/> 5 a 6 veces al día<br><input type="radio"/> más 6 veces al día |

|                 |                                                                                                                                                                                                                                                                                                                                                                                                              |
|-----------------|--------------------------------------------------------------------------------------------------------------------------------------------------------------------------------------------------------------------------------------------------------------------------------------------------------------------------------------------------------------------------------------------------------------|
| bruna o ciruela | <input type="radio"/> Nunca o menos 1 vez al mes<br><input checked="" type="radio"/> 1 a 3 veces mes<br><input type="radio"/> 1 vez semana<br><input type="radio"/> 2 a 4 veces semana<br><input type="radio"/> 5 a 6 veces semana<br><input type="radio"/> 1 vez al día<br><input type="radio"/> 2 a 3 veces al día<br><input type="radio"/> 5 a 6 veces al día<br><input type="radio"/> más 6 veces al día |
| kiwi            | <input checked="" type="radio"/> Nunca o menos 1 vez al mes<br><input type="radio"/> 1 a 3 veces mes<br><input type="radio"/> 1 vez semana<br><input type="radio"/> 2 a 4 veces semana<br><input type="radio"/> 5 a 6 veces semana<br><input type="radio"/> 1 vez al día<br><input type="radio"/> 2 a 3 veces al día<br><input type="radio"/> 5 a 6 veces al día<br><input type="radio"/> más 6 veces al día |
| aceituna        | <input type="radio"/> Nunca o menos 1 vez al mes<br><input type="radio"/> 1 a 3 veces mes<br><input type="radio"/> 1 vez semana<br><input type="radio"/> 2 a 4 veces semana<br><input type="radio"/> 5 a 6 veces semana<br><input checked="" type="radio"/> 1 vez al día<br><input type="radio"/> 2 a 3 veces al día<br><input type="radio"/> 5 a 6 veces al día<br><input type="radio"/> más 6 veces al día |
| frutos secos    | <input type="radio"/> Nunca o menos 1 vez al mes<br><input type="radio"/> 1 a 3 veces mes<br><input checked="" type="radio"/> 1 vez semana<br><input type="radio"/> 2 a 4 veces semana<br><input type="radio"/> 5 a 6 veces semana<br><input type="radio"/> 1 vez al día<br><input type="radio"/> 2 a 3 veces al día<br><input type="radio"/> 5 a 6 veces al día<br><input type="radio"/> más 6 veces al día |
| pan blanco      | <input type="radio"/> Nunca o menos 1 vez al mes<br><input type="radio"/> 1 a 3 veces mes<br><input type="radio"/> 1 vez semana<br><input type="radio"/> 2 a 4 veces semana<br><input type="radio"/> 5 a 6 veces semana<br><input type="radio"/> 1 vez al día<br><input checked="" type="radio"/> 2 a 3 veces al día<br><input type="radio"/> 5 a 6 veces al día<br><input type="radio"/> más 6 veces al día |
| pan integral    | <input type="radio"/> Nunca o menos 1 vez al mes<br><input type="radio"/> 1 a 3 veces mes<br><input type="radio"/> 1 vez semana<br><input checked="" type="radio"/> 2 a 4 veces semana<br><input type="radio"/> 5 a 6 veces semana<br><input type="radio"/> 1 vez al día<br><input type="radio"/> 2 a 3 veces al día<br><input type="radio"/> 5 a 6 veces al día<br><input type="radio"/> más 6 veces al día |

|                          |                                                                                                                                                                                                                                                                                                                                                                                                              |
|--------------------------|--------------------------------------------------------------------------------------------------------------------------------------------------------------------------------------------------------------------------------------------------------------------------------------------------------------------------------------------------------------------------------------------------------------|
| cereales desayuno        | <input type="radio"/> Nunca o menos 1 vez al mes<br><input type="radio"/> 1 a 3 veces mes<br><input type="radio"/> 1 vez semana<br><input checked="" type="radio"/> 2 a 4 veces semana<br><input type="radio"/> 5 a 6 veces semana<br><input type="radio"/> 1 vez al día<br><input type="radio"/> 2 a 3 veces al día<br><input type="radio"/> 5 a 6 veces al día<br><input type="radio"/> más 6 veces al día |
| patatas fritas           | <input type="radio"/> Nunca o menos 1 vez al mes<br><input type="radio"/> 1 a 3 veces mes<br><input checked="" type="radio"/> 1 vez semana<br><input type="radio"/> 2 a 4 veces semana<br><input type="radio"/> 5 a 6 veces semana<br><input type="radio"/> 1 vez al día<br><input type="radio"/> 2 a 3 veces al día<br><input type="radio"/> 5 a 6 veces al día<br><input type="radio"/> más 6 veces al día |
| patatas cocidas o asadas | <input type="radio"/> Nunca o menos 1 vez al mes<br><input type="radio"/> 1 a 3 veces mes<br><input checked="" type="radio"/> 1 vez semana<br><input type="radio"/> 2 a 4 veces semana<br><input type="radio"/> 5 a 6 veces semana<br><input type="radio"/> 1 vez al día<br><input type="radio"/> 2 a 3 veces al día<br><input type="radio"/> 5 a 6 veces al día<br><input type="radio"/> más 6 veces al día |
| bolsa papas              | <input type="radio"/> Nunca o menos 1 vez al mes<br><input type="radio"/> 1 a 3 veces mes<br><input type="radio"/> 1 vez semana<br><input type="radio"/> 2 a 4 veces semana<br><input type="radio"/> 5 a 6 veces semana<br><input checked="" type="radio"/> 1 vez al día<br><input type="radio"/> 2 a 3 veces al día<br><input type="radio"/> 5 a 6 veces al día<br><input type="radio"/> más 6 veces al día |
| arroz cocinado           | <input type="radio"/> Nunca o menos 1 vez al mes<br><input type="radio"/> 1 a 3 veces mes<br><input type="radio"/> 1 vez semana<br><input checked="" type="radio"/> 2 a 4 veces semana<br><input type="radio"/> 5 a 6 veces semana<br><input type="radio"/> 1 vez al día<br><input type="radio"/> 2 a 3 veces al día<br><input type="radio"/> 5 a 6 veces al día<br><input type="radio"/> más 6 veces al día |
| pasta                    | <input type="radio"/> Nunca o menos 1 vez al mes<br><input type="radio"/> 1 a 3 veces mes<br><input type="radio"/> 1 vez semana<br><input checked="" type="radio"/> 2 a 4 veces semana<br><input type="radio"/> 5 a 6 veces semana<br><input type="radio"/> 1 vez al día<br><input type="radio"/> 2 a 3 veces al día<br><input type="radio"/> 5 a 6 veces al día<br><input type="radio"/> más 6 veces al día |

|                     |                                                                                                                                                                                                                                                                                                                                                                                                              |
|---------------------|--------------------------------------------------------------------------------------------------------------------------------------------------------------------------------------------------------------------------------------------------------------------------------------------------------------------------------------------------------------------------------------------------------------|
| pizza               | <input type="radio"/> Nunca o menos 1 vez al mes<br><input type="radio"/> 1 a 3 veces mes<br><input type="radio"/> 1 vez semana<br><input checked="" type="radio"/> 2 a 4 veces semana<br><input type="radio"/> 5 a 6 veces semana<br><input type="radio"/> 1 vez al día<br><input type="radio"/> 2 a 3 veces al día<br><input type="radio"/> 5 a 6 veces al día<br><input type="radio"/> más 6 veces al día |
| aceite oliva        | <input type="radio"/> Nunca o menos 1 vez al mes<br><input type="radio"/> 1 a 3 veces mes<br><input type="radio"/> 1 vez semana<br><input type="radio"/> 2 a 4 veces semana<br><input checked="" type="radio"/> 5 a 6 veces semana<br><input type="radio"/> 1 vez al día<br><input type="radio"/> 2 a 3 veces al día<br><input type="radio"/> 5 a 6 veces al día<br><input type="radio"/> más 6 veces al día |
| otros aceites       | <input type="radio"/> Nunca o menos 1 vez al mes<br><input type="radio"/> 1 a 3 veces mes<br><input checked="" type="radio"/> 1 vez semana<br><input type="radio"/> 2 a 4 veces semana<br><input type="radio"/> 5 a 6 veces semana<br><input type="radio"/> 1 vez al día<br><input type="radio"/> 2 a 3 veces al día<br><input type="radio"/> 5 a 6 veces al día<br><input type="radio"/> más 6 veces al día |
| margarina           | <input checked="" type="radio"/> Nunca o menos 1 vez al mes<br><input type="radio"/> 1 a 3 veces mes<br><input type="radio"/> 1 vez semana<br><input type="radio"/> 2 a 4 veces semana<br><input type="radio"/> 5 a 6 veces semana<br><input type="radio"/> 1 vez al día<br><input type="radio"/> 2 a 3 veces al día<br><input type="radio"/> 5 a 6 veces al día<br><input type="radio"/> más 6 veces al día |
| mantequilla         | <input type="radio"/> Nunca o menos 1 vez al mes<br><input checked="" type="radio"/> 1 a 3 veces mes<br><input type="radio"/> 1 vez semana<br><input type="radio"/> 2 a 4 veces semana<br><input type="radio"/> 5 a 6 veces semana<br><input type="radio"/> 1 vez al día<br><input type="radio"/> 2 a 3 veces al día<br><input type="radio"/> 5 a 6 veces al día<br><input type="radio"/> más 6 veces al día |
| galletas tipo maria | <input checked="" type="radio"/> Nunca o menos 1 vez al mes<br><input type="radio"/> 1 a 3 veces mes<br><input type="radio"/> 1 vez semana<br><input type="radio"/> 2 a 4 veces semana<br><input type="radio"/> 5 a 6 veces semana<br><input type="radio"/> 1 vez al día<br><input type="radio"/> 2 a 3 veces al día<br><input type="radio"/> 5 a 6 veces al día<br><input type="radio"/> más 6 veces al día |

|                           |                                                                                                                                                                                                                                                                                                                                                                                                              |
|---------------------------|--------------------------------------------------------------------------------------------------------------------------------------------------------------------------------------------------------------------------------------------------------------------------------------------------------------------------------------------------------------------------------------------------------------|
| galletas chocolate        | <input checked="" type="radio"/> Nunca o menos 1 vez al mes<br><input type="radio"/> 1 a 3 veces mes<br><input type="radio"/> 1 vez semana<br><input type="radio"/> 2 a 4 veces semana<br><input type="radio"/> 5 a 6 veces semana<br><input type="radio"/> 1 vez al día<br><input type="radio"/> 2 a 3 veces al día<br><input type="radio"/> 5 a 6 veces al día<br><input type="radio"/> más 6 veces al día |
| bollieria                 | <input type="radio"/> Nunca o menos 1 vez al mes<br><input type="radio"/> 1 a 3 veces mes<br><input type="radio"/> 1 vez semana<br><input checked="" type="radio"/> 2 a 4 veces semana<br><input type="radio"/> 5 a 6 veces semana<br><input type="radio"/> 1 vez al día<br><input type="radio"/> 2 a 3 veces al día<br><input type="radio"/> 5 a 6 veces al día<br><input type="radio"/> más 6 veces al día |
| chocolate o bombones      | <input type="radio"/> Nunca o menos 1 vez al mes<br><input type="radio"/> 1 a 3 veces mes<br><input checked="" type="radio"/> 1 vez semana<br><input type="radio"/> 2 a 4 veces semana<br><input type="radio"/> 5 a 6 veces semana<br><input type="radio"/> 1 vez al día<br><input type="radio"/> 2 a 3 veces al día<br><input type="radio"/> 5 a 6 veces al día<br><input type="radio"/> más 6 veces al día |
| chocolate polvo o colacao | <input type="radio"/> Nunca o menos 1 vez al mes<br><input type="radio"/> 1 a 3 veces mes<br><input type="radio"/> 1 vez semana<br><input type="radio"/> 2 a 4 veces semana<br><input type="radio"/> 5 a 6 veces semana<br><input checked="" type="radio"/> 1 vez al día<br><input type="radio"/> 2 a 3 veces al día<br><input type="radio"/> 5 a 6 veces al día<br><input type="radio"/> más 6 veces al día |
| vino tinto                | <input checked="" type="radio"/> Nunca o menos 1 vez al mes<br><input type="radio"/> 1 a 3 veces mes<br><input type="radio"/> 1 vez semana<br><input type="radio"/> 2 a 4 veces semana<br><input type="radio"/> 5 a 6 veces semana<br><input type="radio"/> 1 vez al día<br><input type="radio"/> 2 a 3 veces al día<br><input type="radio"/> 5 a 6 veces al día<br><input type="radio"/> más 6 veces al día |
| vino blanco               | <input checked="" type="radio"/> Nunca o menos 1 vez al mes<br><input type="radio"/> 1 a 3 veces mes<br><input type="radio"/> 1 vez semana<br><input type="radio"/> 2 a 4 veces semana<br><input type="radio"/> 5 a 6 veces semana<br><input type="radio"/> 1 vez al día<br><input type="radio"/> 2 a 3 veces al día<br><input type="radio"/> 5 a 6 veces al día<br><input type="radio"/> más 6 veces al día |

|                       |                                                                                                                                                                                                                                                                                                                                                                                                              |
|-----------------------|--------------------------------------------------------------------------------------------------------------------------------------------------------------------------------------------------------------------------------------------------------------------------------------------------------------------------------------------------------------------------------------------------------------|
| vino seco o vermut    | <input checked="" type="radio"/> Nunca o menos 1 vez al mes<br><input type="radio"/> 1 a 3 veces mes<br><input type="radio"/> 1 vez semana<br><input type="radio"/> 2 a 4 veces semana<br><input type="radio"/> 5 a 6 veces semana<br><input type="radio"/> 1 vez al día<br><input type="radio"/> 2 a 3 veces al día<br><input type="radio"/> 5 a 6 veces al día<br><input type="radio"/> más 6 veces al día |
| cerveza               | <input checked="" type="radio"/> Nunca o menos 1 vez al mes<br><input type="radio"/> 1 a 3 veces mes<br><input type="radio"/> 1 vez semana<br><input type="radio"/> 2 a 4 veces semana<br><input type="radio"/> 5 a 6 veces semana<br><input type="radio"/> 1 vez al día<br><input type="radio"/> 2 a 3 veces al día<br><input type="radio"/> 5 a 6 veces al día<br><input type="radio"/> más 6 veces al día |
| cerveza sin alcohol   | <input checked="" type="radio"/> Nunca o menos 1 vez al mes<br><input type="radio"/> 1 a 3 veces mes<br><input type="radio"/> 1 vez semana<br><input type="radio"/> 2 a 4 veces semana<br><input type="radio"/> 5 a 6 veces semana<br><input type="radio"/> 1 vez al día<br><input type="radio"/> 2 a 3 veces al día<br><input type="radio"/> 5 a 6 veces al día<br><input type="radio"/> más 6 veces al día |
| licores               | <input checked="" type="radio"/> Nunca o menos 1 vez al mes<br><input type="radio"/> 1 a 3 veces mes<br><input type="radio"/> 1 vez semana<br><input type="radio"/> 2 a 4 veces semana<br><input type="radio"/> 5 a 6 veces semana<br><input type="radio"/> 1 vez al día<br><input type="radio"/> 2 a 3 veces al día<br><input type="radio"/> 5 a 6 veces al día<br><input type="radio"/> más 6 veces al día |
| ginebra o ron o vodka | <input checked="" type="radio"/> Nunca o menos 1 vez al mes<br><input type="radio"/> 1 a 3 veces mes<br><input type="radio"/> 1 vez semana<br><input type="radio"/> 2 a 4 veces semana<br><input type="radio"/> 5 a 6 veces semana<br><input type="radio"/> 1 vez al día<br><input type="radio"/> 2 a 3 veces al día<br><input type="radio"/> 5 a 6 veces al día<br><input type="radio"/> más 6 veces al día |
| refresco normal       | <input checked="" type="radio"/> Nunca o menos 1 vez al mes<br><input type="radio"/> 1 a 3 veces mes<br><input type="radio"/> 1 vez semana<br><input type="radio"/> 2 a 4 veces semana<br><input type="radio"/> 5 a 6 veces semana<br><input type="radio"/> 1 vez al día<br><input type="radio"/> 2 a 3 veces al día<br><input type="radio"/> 5 a 6 veces al día<br><input type="radio"/> más 6 veces al día |

|                          |                                                                                                                                                                                                                                                                                                                                                                                                              |
|--------------------------|--------------------------------------------------------------------------------------------------------------------------------------------------------------------------------------------------------------------------------------------------------------------------------------------------------------------------------------------------------------------------------------------------------------|
| refresco sin azúcar      | <input checked="" type="radio"/> Nunca o menos 1 vez al mes<br><input type="radio"/> 1 a 3 veces mes<br><input type="radio"/> 1 vez semana<br><input type="radio"/> 2 a 4 veces semana<br><input type="radio"/> 5 a 6 veces semana<br><input type="radio"/> 1 vez al día<br><input type="radio"/> 2 a 3 veces al día<br><input type="radio"/> 5 a 6 veces al día<br><input type="radio"/> más 6 veces al día |
| Agua del grifo           | <input checked="" type="radio"/> Nunca o menos 1 vez al mes<br><input type="radio"/> 1 a 3 veces mes<br><input type="radio"/> 1 vez semana<br><input type="radio"/> 2 a 4 veces semana<br><input type="radio"/> 5 a 6 veces semana<br><input type="radio"/> 1 vez al día<br><input type="radio"/> 2 a 3 veces al día<br><input type="radio"/> 5 a 6 veces al día<br><input type="radio"/> más 6 veces al día |
| agua embotellada sin gas | <input type="radio"/> Nunca o menos 1 vez al mes<br><input type="radio"/> 1 a 3 veces mes<br><input type="radio"/> 1 vez semana<br><input type="radio"/> 2 a 4 veces semana<br><input type="radio"/> 5 a 6 veces semana<br><input type="radio"/> 1 vez al día<br><input type="radio"/> 2 a 3 veces al día<br><input type="radio"/> 5 a 6 veces al día<br><input checked="" type="radio"/> más 6 veces al día |
| agua embotellada con gas | <input checked="" type="radio"/> Nunca o menos 1 vez al mes<br><input type="radio"/> 1 a 3 veces mes<br><input type="radio"/> 1 vez semana<br><input type="radio"/> 2 a 4 veces semana<br><input type="radio"/> 5 a 6 veces semana<br><input type="radio"/> 1 vez al día<br><input type="radio"/> 2 a 3 veces al día<br><input type="radio"/> 5 a 6 veces al día<br><input type="radio"/> más 6 veces al día |
| zumو frutas embasado     | <input type="radio"/> Nunca o menos 1 vez al mes<br><input type="radio"/> 1 a 3 veces mes<br><input type="radio"/> 1 vez semana<br><input checked="" type="radio"/> 2 a 4 veces semana<br><input type="radio"/> 5 a 6 veces semana<br><input type="radio"/> 1 vez al día<br><input type="radio"/> 2 a 3 veces al día<br><input type="radio"/> 5 a 6 veces al día<br><input type="radio"/> más 6 veces al día |
| cafe                     | <input checked="" type="radio"/> Nunca o menos 1 vez al mes<br><input type="radio"/> 1 a 3 veces mes<br><input type="radio"/> 1 vez semana<br><input type="radio"/> 2 a 4 veces semana<br><input type="radio"/> 5 a 6 veces semana<br><input type="radio"/> 1 vez al día<br><input type="radio"/> 2 a 3 veces al día<br><input type="radio"/> 5 a 6 veces al día<br><input type="radio"/> más 6 veces al día |

|                       |                                                                                                                                                                                                                                                                                                                                                                                                              |
|-----------------------|--------------------------------------------------------------------------------------------------------------------------------------------------------------------------------------------------------------------------------------------------------------------------------------------------------------------------------------------------------------------------------------------------------------|
| cafe descafeinado     | <input type="radio"/> Nunca o menos 1 vez al mes<br><input type="radio"/> 1 a 3 veces mes<br><input type="radio"/> 1 vez semana<br><input checked="" type="radio"/> 2 a 4 veces semana<br><input type="radio"/> 5 a 6 veces semana<br><input type="radio"/> 1 vez al día<br><input type="radio"/> 2 a 3 veces al día<br><input type="radio"/> 5 a 6 veces al día<br><input type="radio"/> más 6 veces al día |
| te o infusión         | <input type="radio"/> Nunca o menos 1 vez al mes<br><input type="radio"/> 1 a 3 veces mes<br><input checked="" type="radio"/> 1 vez semana<br><input type="radio"/> 2 a 4 veces semana<br><input type="radio"/> 5 a 6 veces semana<br><input type="radio"/> 1 vez al día<br><input type="radio"/> 2 a 3 veces al día<br><input type="radio"/> 5 a 6 veces al día<br><input type="radio"/> más 6 veces al día |
| sopa o puré verduras  | <input type="radio"/> Nunca o menos 1 vez al mes<br><input type="radio"/> 1 a 3 veces mes<br><input type="radio"/> 1 vez semana<br><input checked="" type="radio"/> 2 a 4 veces semana<br><input type="radio"/> 5 a 6 veces semana<br><input type="radio"/> 1 vez al día<br><input type="radio"/> 2 a 3 veces al día<br><input type="radio"/> 5 a 6 veces al día<br><input type="radio"/> más 6 veces al día |
| croquetas pollo jamón | <input type="radio"/> Nunca o menos 1 vez al mes<br><input checked="" type="radio"/> 1 a 3 veces mes<br><input type="radio"/> 1 vez semana<br><input type="radio"/> 2 a 4 veces semana<br><input type="radio"/> 5 a 6 veces semana<br><input type="radio"/> 1 vez al día<br><input type="radio"/> 2 a 3 veces al día<br><input type="radio"/> 5 a 6 veces al día<br><input type="radio"/> más 6 veces al día |
| croquetas pescado     | <input type="radio"/> Nunca o menos 1 vez al mes<br><input type="radio"/> 1 a 3 veces mes<br><input checked="" type="radio"/> 1 vez semana<br><input type="radio"/> 2 a 4 veces semana<br><input type="radio"/> 5 a 6 veces semana<br><input type="radio"/> 1 vez al día<br><input type="radio"/> 2 a 3 veces al día<br><input type="radio"/> 5 a 6 veces al día<br><input type="radio"/> más 6 veces al día |
| mayonesa              | <input type="radio"/> Nunca o menos 1 vez al mes<br><input type="radio"/> 1 a 3 veces mes<br><input checked="" type="radio"/> 1 vez semana<br><input type="radio"/> 2 a 4 veces semana<br><input type="radio"/> 5 a 6 veces semana<br><input type="radio"/> 1 vez al día<br><input type="radio"/> 2 a 3 veces al día<br><input type="radio"/> 5 a 6 veces al día<br><input type="radio"/> más 6 veces al día |



|                  |                                                                                                                                                                                                                                                                                                                                                                                                              |
|------------------|--------------------------------------------------------------------------------------------------------------------------------------------------------------------------------------------------------------------------------------------------------------------------------------------------------------------------------------------------------------------------------------------------------------|
| salsa tomate     | <input type="radio"/> Nunca o menos 1 vez al mes<br><input type="radio"/> 1 a 3 veces mes<br><input type="radio"/> 1 vez semana<br><input checked="" type="radio"/> 2 a 4 veces semana<br><input type="radio"/> 5 a 6 veces semana<br><input type="radio"/> 1 vez al día<br><input type="radio"/> 2 a 3 veces al día<br><input type="radio"/> 5 a 6 veces al día<br><input type="radio"/> más 6 veces al día |
| ketchup          | <input type="radio"/> Nunca o menos 1 vez al mes<br><input checked="" type="radio"/> 1 a 3 veces mes<br><input type="radio"/> 1 vez semana<br><input type="radio"/> 2 a 4 veces semana<br><input type="radio"/> 5 a 6 veces semana<br><input type="radio"/> 1 vez al día<br><input type="radio"/> 2 a 3 veces al día<br><input type="radio"/> 5 a 6 veces al día<br><input type="radio"/> más 6 veces al día |
| sal              | <input type="radio"/> Nunca o menos 1 vez al mes<br><input type="radio"/> 1 a 3 veces mes<br><input type="radio"/> 1 vez semana<br><input type="radio"/> 2 a 4 veces semana<br><input type="radio"/> 5 a 6 veces semana<br><input checked="" type="radio"/> 1 vez al día<br><input type="radio"/> 2 a 3 veces al día<br><input type="radio"/> 5 a 6 veces al día<br><input type="radio"/> más 6 veces al día |
| ajo              | <input type="radio"/> Nunca o menos 1 vez al mes<br><input type="radio"/> 1 a 3 veces mes<br><input checked="" type="radio"/> 1 vez semana<br><input type="radio"/> 2 a 4 veces semana<br><input type="radio"/> 5 a 6 veces semana<br><input type="radio"/> 1 vez al día<br><input type="radio"/> 2 a 3 veces al día<br><input type="radio"/> 5 a 6 veces al día<br><input type="radio"/> más 6 veces al día |
| mermelada o miel | <input type="radio"/> Nunca o menos 1 vez al mes<br><input type="radio"/> 1 a 3 veces mes<br><input type="radio"/> 1 vez semana<br><input checked="" type="radio"/> 2 a 4 veces semana<br><input type="radio"/> 5 a 6 veces semana<br><input type="radio"/> 1 vez al día<br><input type="radio"/> 2 a 3 veces al día<br><input type="radio"/> 5 a 6 veces al día<br><input type="radio"/> más 6 veces al día |
| azúcar           | <input type="radio"/> Nunca o menos 1 vez al mes<br><input type="radio"/> 1 a 3 veces mes<br><input type="radio"/> 1 vez semana<br><input type="radio"/> 2 a 4 veces semana<br><input checked="" type="radio"/> 5 a 6 veces semana<br><input type="radio"/> 1 vez al día<br><input type="radio"/> 2 a 3 veces al día<br><input type="radio"/> 5 a 6 veces al día<br><input type="radio"/> más 6 veces al día |

|                                       |                                                                                                                                                                                                                                                                                                                                                                                                                                                                                                                               |
|---------------------------------------|-------------------------------------------------------------------------------------------------------------------------------------------------------------------------------------------------------------------------------------------------------------------------------------------------------------------------------------------------------------------------------------------------------------------------------------------------------------------------------------------------------------------------------|
| Otro alimento                         |                                                                                                                                                                                                                                                                                                                                                                                                                                                                                                                               |
| suplementos vitamínicos               | <input type="radio"/> si<br><input checked="" type="radio"/> no                                                                                                                                                                                                                                                                                                                                                                                                                                                               |
| suplementos vitamínicos               |                                                                                                                                                                                                                                                                                                                                                                                                                                                                                                                               |
| dieta previa                          | <input type="radio"/> si<br><input checked="" type="radio"/> no                                                                                                                                                                                                                                                                                                                                                                                                                                                               |
| motivo dieta                          | <input checked="" type="radio"/> no dieta<br><input type="radio"/> control peso<br><input type="radio"/> control colesterol<br><input type="radio"/> control diabetes<br><input type="radio"/> problemas estómago<br><input type="radio"/> problemas vesícula o hepáticos<br><input type="radio"/> HTA o cardiopatía<br><input type="radio"/> problemas renales<br><input type="radio"/> alergia alimentaria<br><input type="radio"/> ácido úrico elevado<br><input type="radio"/> vegetariana<br><input type="radio"/> otros |
| cambio alimentos año previo gestación | <input checked="" type="radio"/> si<br><input type="radio"/> no                                                                                                                                                                                                                                                                                                                                                                                                                                                               |
| cambio lácteos                        | <input type="radio"/> eliminado<br><input type="radio"/> disminuido<br><input checked="" type="radio"/> igual<br><input type="radio"/> aumentado<br><input type="radio"/> no sabe                                                                                                                                                                                                                                                                                                                                             |
| cambio huevos                         | <input type="radio"/> eliminado<br><input type="radio"/> disminuido<br><input checked="" type="radio"/> igual<br><input type="radio"/> aumentado<br><input type="radio"/> no sabe                                                                                                                                                                                                                                                                                                                                             |
| cambio carne                          | <input type="radio"/> eliminado<br><input type="radio"/> disminuido<br><input checked="" type="radio"/> igual<br><input type="radio"/> aumentado<br><input type="radio"/> no sabe                                                                                                                                                                                                                                                                                                                                             |
| cambio pescado                        | <input type="radio"/> eliminado<br><input type="radio"/> disminuido<br><input checked="" type="radio"/> igual<br><input type="radio"/> aumentado<br><input type="radio"/> no sabe                                                                                                                                                                                                                                                                                                                                             |
| cambio verduras                       | <input type="radio"/> eliminado<br><input type="radio"/> disminuido<br><input checked="" type="radio"/> igual<br><input type="radio"/> aumentado<br><input type="radio"/> no sabe                                                                                                                                                                                                                                                                                                                                             |

|                            |                                                                                                                                                                                                                        |
|----------------------------|------------------------------------------------------------------------------------------------------------------------------------------------------------------------------------------------------------------------|
| cambio legumbres           | <input type="radio"/> eliminado<br><input type="radio"/> disminuido<br><input checked="" type="radio"/> igual<br><input type="radio"/> aumentado<br><input type="radio"/> no sabe                                      |
| cambio fruta               | <input type="radio"/> eliminado<br><input type="radio"/> disminuido<br><input checked="" type="radio"/> igual<br><input type="radio"/> aumentado<br><input type="radio"/> no sabe                                      |
| cambio pan                 | <input type="radio"/> eliminado<br><input type="radio"/> disminuido<br><input checked="" type="radio"/> igual<br><input type="radio"/> aumentado<br><input type="radio"/> no sabe                                      |
| cambio aceite oliva        | <input type="radio"/> eliminado<br><input type="radio"/> disminuido<br><input checked="" type="radio"/> igual<br><input type="radio"/> aumentado<br><input type="radio"/> no sabe                                      |
| cambio mante o margarina   | <input type="radio"/> eliminado<br><input type="radio"/> disminuido<br><input checked="" type="radio"/> igual<br><input type="radio"/> aumentado<br><input type="radio"/> no sabe                                      |
| cambio azúcar y dulces     | <input type="radio"/> eliminado<br><input type="radio"/> disminuido<br><input checked="" type="radio"/> igual<br><input type="radio"/> aumentado<br><input type="radio"/> no sabe                                      |
| cambio bebidas alcohólicas | <input checked="" type="radio"/> eliminado<br><input type="radio"/> disminuido<br><input type="radio"/> igual<br><input type="radio"/> aumentado<br><input type="radio"/> no sabe                                      |
| frecuencia comidas fritas  | <input type="radio"/> a diario<br><input checked="" type="radio"/> 5 a 6 veces semana<br><input type="radio"/> 2 a 4 veces semana<br><input type="radio"/> 1 vez semana<br><input type="radio"/> menos de 1 vez semana |
| carne                      | <input type="radio"/> no como<br><input type="radio"/> cruda<br><input type="radio"/> poco hecha<br><input type="radio"/> hecha<br><input checked="" type="radio"/> muy hecha                                          |
| grasa visible carne        | <input type="radio"/> quita toda<br><input checked="" type="radio"/> quita mayoría<br><input type="radio"/> quita un poco<br><input type="radio"/> no quita nada                                                       |

|                                |                                                                                                                                                                                                                                                          |
|--------------------------------|----------------------------------------------------------------------------------------------------------------------------------------------------------------------------------------------------------------------------------------------------------|
| cocina carne                   | <input checked="" type="radio"/> a la plancha<br><input type="radio"/> a la parrilla<br><input type="radio"/> asada<br><input type="radio"/> frita<br><input type="radio"/> guisada                                                                      |
| tostado quemado carne          | <input checked="" type="radio"/> nunca<br><input type="radio"/> 1 vez mes<br><input type="radio"/> 2 a 3 veces mes<br><input type="radio"/> 1 vez semana<br><input type="radio"/> 2 a 3 semanas                                                          |
| tostado quemado pescado        | <input type="radio"/> nunca<br><input checked="" type="radio"/> 1 vez mes<br><input type="radio"/> 2 a 3 veces mes<br><input type="radio"/> 1 vez semana<br><input type="radio"/> 2 a 3 semanas                                                          |
| socarrat paella                | <input checked="" type="radio"/> nunca<br><input type="radio"/> 1 vez mes<br><input type="radio"/> 2 a 3 veces mes<br><input type="radio"/> 1 vez semana<br><input type="radio"/> 2 a 3 semanas                                                          |
| grasa o aceite cocinar         | <input type="radio"/> mantequilla<br><input type="radio"/> margarina<br><input type="radio"/> aceite oliva<br><input checked="" type="radio"/> aceite oliva virgen extra<br><input type="radio"/> aceite vegetal<br><input type="radio"/> mezcla aceites |
| grasa aceite aliñar            | <input type="radio"/> mantequilla<br><input type="radio"/> margarina<br><input type="radio"/> aceite oliva<br><input checked="" type="radio"/> aceite oliva virgen extra<br><input type="radio"/> aceite vegetal<br><input type="radio"/> mezcla aceites |
| grasa aceite freir             | <input type="radio"/> mantequilla<br><input type="radio"/> margarina<br><input type="radio"/> aceite oliva<br><input checked="" type="radio"/> aceite oliva virgen extra<br><input type="radio"/> aceite vegetal<br><input type="radio"/> mezcla aceites |
| Ejercicio cuestionario         | <input type="radio"/> si<br><input type="radio"/> no                                                                                                                                                                                                     |
| horas de sueño incluido siesta | [*DATA REMOVED*]                                                                                                                                                                                                                                         |
| minutos siesta                 | [*DATA REMOVED*]                                                                                                                                                                                                                                         |
| horas televisión semana        | [*DATA REMOVED*]                                                                                                                                                                                                                                         |

|                                        |                                                                                                                                                                                                                                                                                                                                                                           |
|----------------------------------------|---------------------------------------------------------------------------------------------------------------------------------------------------------------------------------------------------------------------------------------------------------------------------------------------------------------------------------------------------------------------------|
| actividad trabajo                      | <input checked="" type="radio"/> casi siempre sentado<br><input type="radio"/> sentado 50 por cien<br><input type="radio"/> casi siempre de pie, quieto<br><input type="radio"/> casi siempre levantado caminando y llevando pocas cosas<br><input type="radio"/> casi siempre levantado, caminando y llevado muchas cosas<br><input type="radio"/> trabajo manual pesado |
| tiempo caminar o bici al día           | <input type="radio"/> casi nunca<br><input type="radio"/> menos 20min día<br><input checked="" type="radio"/> 20 a 40 min día<br><input type="radio"/> 40 a 60 min día<br><input type="radio"/> 1h o 1h y media día<br><input type="radio"/> más de 1h y media al día                                                                                                     |
| tiempo tareas casa al día              | <input type="radio"/> menos de 1h día<br><input checked="" type="radio"/> 1 a 2h día<br><input type="radio"/> 3 a 4h día<br><input type="radio"/> 5 a 6h día<br><input type="radio"/> 7 a 8h día<br><input type="radio"/> más de 8h día                                                                                                                                   |
| tiempo libre televisión ordenador leer | <input type="radio"/> menos 1h día<br><input type="radio"/> 1h día<br><input type="radio"/> 2h día<br><input type="radio"/> 3h día<br><input type="radio"/> 4h día<br><input checked="" type="radio"/> 5 a 6h día<br><input type="radio"/> mas 6h día                                                                                                                     |
| tiempo libre ejercicio o deporte       | <input checked="" type="radio"/> menos 1h semana<br><input type="radio"/> 1h semana<br><input type="radio"/> 2h semana<br><input type="radio"/> 3h semana<br><input type="radio"/> 4 a 5h semana<br><input type="radio"/> mas 5h semana                                                                                                                                   |
| como se considera                      | <input checked="" type="radio"/> sedentaria<br><input type="radio"/> poco activa<br><input type="radio"/> moderadamente activa<br><input type="radio"/> bastante activa<br><input type="radio"/> muy activa<br><input type="radio"/> no sabe                                                                                                                              |
| FUR                                    | [*DATA REMOVED*]                                                                                                                                                                                                                                                                                                                                                          |
| Semanas gestación 2T                   | [*DATA REMOVED*]                                                                                                                                                                                                                                                                                                                                                          |
| Días gestación 2T                      | [*DATA REMOVED*]                                                                                                                                                                                                                                                                                                                                                          |
| DBP 2T                                 | [*DATA REMOVED*]                                                                                                                                                                                                                                                                                                                                                          |
| CC 2T                                  | [*DATA REMOVED*]                                                                                                                                                                                                                                                                                                                                                          |
| AC 2T                                  | [*DATA REMOVED*]                                                                                                                                                                                                                                                                                                                                                          |

|                                                   |                                                                                                                                                                                                 |
|---------------------------------------------------|-------------------------------------------------------------------------------------------------------------------------------------------------------------------------------------------------|
| LF 2T                                             | [*DATA REMOVED*]                                                                                                                                                                                |
| PFE 2T (Hadlock)                                  | [*DATA REMOVED*]                                                                                                                                                                                |
| Semanas gestación 3T                              | [*DATA REMOVED*]                                                                                                                                                                                |
| días 3T                                           | [*DATA REMOVED*]                                                                                                                                                                                |
| DBP 3T                                            | [*DATA REMOVED*]                                                                                                                                                                                |
| CC 3T                                             | [*DATA REMOVED*]                                                                                                                                                                                |
| AC 3T                                             | [*DATA REMOVED*]                                                                                                                                                                                |
| LF 3T                                             | [*DATA REMOVED*]                                                                                                                                                                                |
| PFE 3T (Hadlock)                                  | [*DATA REMOVED*]                                                                                                                                                                                |
| Semanas de gestación final                        | [*DATA REMOVED*]                                                                                                                                                                                |
| días gestación final                              | [*DATA REMOVED*]                                                                                                                                                                                |
| Localización placenta                             | <input checked="" type="radio"/> anterior<br><input type="radio"/> lateral derecha<br><input type="radio"/> lateral izquierda<br><input type="radio"/> posterior<br><input type="radio"/> fondo |
| Presentación longitudinal cefálica                | <input type="radio"/> no<br><input checked="" type="radio"/> si                                                                                                                                 |
| Dorso                                             | <input type="radio"/> izquierda anterior<br><input type="radio"/> izquierda posterior<br><input checked="" type="radio"/> derecha anterior<br><input type="radio"/> derecha posterior           |
| diámetro biparietal                               | [*DATA REMOVED*]                                                                                                                                                                                |
| Circunferencia craneal                            | [*DATA REMOVED*]                                                                                                                                                                                |
| Circunferencia abdominal                          | [*DATA REMOVED*]                                                                                                                                                                                |
| Longitud de femur                                 | [*DATA REMOVED*]                                                                                                                                                                                |
| tejido celular subcutáneo a nivel del muslo en mm | [*DATA REMOVED*]                                                                                                                                                                                |
| tejido celular subcutáneo en abdomen en mm        | [*DATA REMOVED*]                                                                                                                                                                                |
| Volumen del muslo en cm3                          | [*DATA REMOVED*]                                                                                                                                                                                |
| Peso fetal estimado según fórmula de Hadlock      | [*DATA REMOVED*]                                                                                                                                                                                |

|                                               |                                                                                                                                                          |
|-----------------------------------------------|----------------------------------------------------------------------------------------------------------------------------------------------------------|
| Percentil                                     | [*DATA REMOVED*]                                                                                                                                         |
| Peso fetal estimado según fórmula de Scioscia | <hr/>                                                                                                                                                    |
| Peso fetal estimado según fórmula de LEE      | <hr/>                                                                                                                                                    |
| Tipo de parto                                 | <input checked="" type="radio"/> eutocico<br><input type="radio"/> instrumentado/ventosa<br><input type="radio"/> cesarea                                |
| fecha de nacimiento                           | [*DATA REMOVED*]                                                                                                                                         |
| Días entre exploración y nacimiento           | [*DATA REMOVED*]                                                                                                                                         |
| Peso RN en g                                  | [*DATA REMOVED*]                                                                                                                                         |
| sexo                                          | <input checked="" type="radio"/> mujer<br><input type="radio"/> hombre                                                                                   |
| Apgar 1 minuto                                | [*DATA REMOVED*]                                                                                                                                         |
| Apgar 5 minutos                               | [*DATA REMOVED*]                                                                                                                                         |
| Apgar 10 minutos                              | <hr/>                                                                                                                                                    |
| antecedente Covid durante gestación           | <input type="radio"/> Yes<br><input checked="" type="radio"/> No                                                                                         |
| Nivel de estudios                             | <input type="radio"/> ninguno<br><input type="radio"/> primarios<br><input type="radio"/> secundarios<br><input checked="" type="radio"/> universitarios |

# Base\_datos\_estimacion\_peso\_fetal

|                                       |                                                                                                                                                                                                                                                                                      |
|---------------------------------------|--------------------------------------------------------------------------------------------------------------------------------------------------------------------------------------------------------------------------------------------------------------------------------------|
| Número de identificación participante | 100                                                                                                                                                                                                                                                                                  |
| CODIGO PARTICIPANTE                   |                                                                                                                                                                                                                                                                                      |
| Edad                                  | [*DATA REMOVED*]                                                                                                                                                                                                                                                                     |
| Gestaciones                           | <input type="radio"/> 1<br><input type="radio"/> 2<br><input checked="" type="radio"/> 3<br><input type="radio"/> mas de 3                                                                                                                                                           |
| partos                                | <input type="radio"/> 0<br><input checked="" type="radio"/> 1<br><input type="radio"/> 2<br><input type="radio"/> 3<br><input type="radio"/> mas de 3                                                                                                                                |
| cesáreas                              | <input checked="" type="radio"/> 0<br><input type="radio"/> 1<br><input type="radio"/> 2<br><input type="radio"/> 3<br><input type="radio"/> mas de 3                                                                                                                                |
| Abortos                               | <input type="radio"/> 0<br><input checked="" type="radio"/> 1<br><input type="radio"/> 2<br><input type="radio"/> 3<br><input type="radio"/> mas de 3                                                                                                                                |
| Tipo de gestacion                     | <input checked="" type="radio"/> espontanea<br><input type="radio"/> IAC inseminación artificial conyuge<br><input type="radio"/> IAD inseminación artificial donante<br><input type="radio"/> FIV Fecundación in Vitro<br><input type="radio"/> Ovodon FIV con donación de ovocitos |
| peso previo a embarazo                | [*DATA REMOVED*]                                                                                                                                                                                                                                                                     |
| Ganancia ponderal embarazo            |                                                                                                                                                                                                                                                                                      |
| Talla madre                           | [*DATA REMOVED*]                                                                                                                                                                                                                                                                     |
| IMC previo embarazo                   | 19.37919743392696                                                                                                                                                                                                                                                                    |
| Patología obstétrica                  | <input checked="" type="radio"/> no<br><input type="radio"/> si                                                                                                                                                                                                                      |
| Diabetes pregestacional               | <input checked="" type="radio"/> no<br><input type="radio"/> si                                                                                                                                                                                                                      |
| Diabetes gestacional                  | <input checked="" type="radio"/> no<br><input type="radio"/> si                                                                                                                                                                                                                      |



|                                            |                                                                                                                                                                                      |
|--------------------------------------------|--------------------------------------------------------------------------------------------------------------------------------------------------------------------------------------|
| Diabetes gestacional con insulina          | <input checked="" type="radio"/> no<br><input type="radio"/> si                                                                                                                      |
| Diabetes gestacional con dieta y ejercicio | <input checked="" type="radio"/> no<br><input type="radio"/> si                                                                                                                      |
| Percentil fetos previos                    | <input type="radio"/> Nada<br><input type="radio"/> percentil menor de 10<br><input checked="" type="radio"/> percentil entre 10 y 90<br><input type="radio"/> percentil mayor de 90 |
| Exfumadora                                 | <input checked="" type="radio"/> Nada<br><input type="radio"/> menos de 5 años<br><input type="radio"/> 5 a 10 años<br><input type="radio"/> mayor o igual a 10 años                 |
| Hábito tabáquico                           | <input checked="" type="radio"/> no<br><input type="radio"/> si                                                                                                                      |
| fumadora                                   | [*DATA REMOVED*]                                                                                                                                                                     |
| Consumo otros tóxicos                      | <input checked="" type="radio"/> no<br><input type="radio"/> si                                                                                                                      |
| Hb 1T                                      | [*DATA REMOVED*]                                                                                                                                                                     |
| Htc 1T                                     | [*DATA REMOVED*]                                                                                                                                                                     |
| Hb 2T                                      | [*DATA REMOVED*]                                                                                                                                                                     |
| HTC 2T                                     | [*DATA REMOVED*]                                                                                                                                                                     |
| Hb 3T                                      | [*DATA REMOVED*]                                                                                                                                                                     |
| HTC 3T                                     | [*DATA REMOVED*]                                                                                                                                                                     |
| Suplemento FE oral                         | <input type="radio"/> si<br><input checked="" type="radio"/> no                                                                                                                      |
| Suplemento fe iv                           | <input type="radio"/> si<br><input checked="" type="radio"/> no                                                                                                                      |
| Transfusión                                | <input checked="" type="radio"/> no<br><input type="radio"/> si                                                                                                                      |
| Solicitada Vit D                           | <input type="radio"/> no<br><input checked="" type="radio"/> si                                                                                                                      |
| Deficit vit D                              | <input type="radio"/> no<br><input checked="" type="radio"/> si                                                                                                                      |
| Suplemento vit D                           | <input checked="" type="radio"/> si<br><input type="radio"/> no                                                                                                                      |

|                       |                                                                                                                                                                                                                                                                                                                                                                                                              |
|-----------------------|--------------------------------------------------------------------------------------------------------------------------------------------------------------------------------------------------------------------------------------------------------------------------------------------------------------------------------------------------------------------------------------------------------------|
| Dieta, cuestionario   | <input checked="" type="radio"/> si<br><input type="radio"/> no                                                                                                                                                                                                                                                                                                                                              |
| Leche entera          | <input type="radio"/> Nunca o menos 1 vez al mes<br><input checked="" type="radio"/> 1 a 3 veces mes<br><input type="radio"/> 1 vez semana<br><input type="radio"/> 2 a 4 veces semana<br><input type="radio"/> 5 a 6 veces semana<br><input type="radio"/> 1 vez al día<br><input type="radio"/> 2 a 3 veces al día<br><input type="radio"/> 5 a 6 veces al día<br><input type="radio"/> más 6 veces al día |
| Leche semidesnatada   | <input checked="" type="radio"/> Nunca o menos 1 vez al mes<br><input type="radio"/> 1 a 3 veces mes<br><input type="radio"/> 1 vez semana<br><input type="radio"/> 2 a 4 veces semana<br><input type="radio"/> 5 a 6 veces semana<br><input type="radio"/> 1 vez al día<br><input type="radio"/> 2 a 3 veces al día<br><input type="radio"/> 5 a 6 veces al día<br><input type="radio"/> mas 6 veces al día |
| Leche desnatada       | <input checked="" type="radio"/> Nunca o menos 1 vez al mes<br><input type="radio"/> 1 a 3 veces mes<br><input type="radio"/> 1 vez semana<br><input type="radio"/> 2 a 4 veces semana<br><input type="radio"/> 5 a 6 veces semana<br><input type="radio"/> 1 vez al día<br><input type="radio"/> 2 a 3 veces al día<br><input type="radio"/> 5 a 6 veces al día<br><input type="radio"/> más 6 veces al día |
| Leche condensada      | <input checked="" type="radio"/> Nunca o menos 1 vez al mes<br><input type="radio"/> 1 a 3 veces mes<br><input type="radio"/> 1 vez semana<br><input type="radio"/> 2 a 4 veces semana<br><input type="radio"/> 5 a 6 veces semana<br><input type="radio"/> 1 vez al día<br><input type="radio"/> 2 a 3 veces al día<br><input type="radio"/> 5 a 6 veces al día<br><input type="radio"/> más 6 veces al día |
| nata o crema de leche | <input checked="" type="radio"/> Nunca o menos 1 vez al mes<br><input type="radio"/> 1 a 3 veces mes<br><input type="radio"/> 1 vez semana<br><input type="radio"/> 2 a 4 veces semana<br><input type="radio"/> 5 a 6 veces semana<br><input type="radio"/> 1 vez al día<br><input type="radio"/> 2 a 3 veces al día<br><input type="radio"/> 5 a 6 veces al día<br><input type="radio"/> más 6 veces al día |

---

Yogurt Entero

- ☒ Nunca o menos 1 vez al mes  
☐ 1 a 3 veces mes  
☐ 1 vez semana  
☐ 2 a 4 veces semana  
☐ 5 a 6 veces semana  
☐ 1 vez al día  
☐ 2 a 3 veces al día  
☐ 5 a 6 veces al día  
☐ más 6 veces al día

---

Yogurt desnatado

- ☐ Nunca o menos 1 vez al mes  
☐ 1 a 3 veces mes  
☒ 1 vez semana  
☐ 2 a 4 veces semana  
☐ 5 a 6 veces semana  
☐ 1 vez al día  
☐ 2 a 3 veces al día  
☐ 5 a 6 veces al día  
☐ más 6 veces al día

---

100g requesón o queso blando o queso fresco

- ☐ Nunca o menos 1 vez al mes  
☐ 1 a 3 veces mes  
☐ 1 vez semana  
☒ 2 a 4 veces semana  
☐ 5 a 6 veces semana  
☐ 1 vez al día  
☐ 2 a 3 veces al día  
☐ 5 a 6 veces al día  
☐ más 6 veces al día

---

queso curado o semicurado o cremoso

- ☐ Nunca o menos 1 vez al mes  
☐ 1 a 3 veces mes  
☐ 1 vez semana  
☐ 2 a 4 veces semana  
☐ 5 a 6 veces semana  
☒ 1 vez al día  
☐ 2 a 3 veces al día  
☐ 5 a 6 veces al día  
☐ más 6 veces al día

---

natillas flan pudding

- ☒ Nunca o menos 1 vez al mes  
☐ 1 a 3 veces mes  
☐ 1 vez semana  
☐ 2 a 4 veces semana  
☐ 5 a 6 veces semana  
☐ 1 vez al día  
☐ 2 a 3 veces al día  
☐ 5 a 6 veces al día  
☐ más 6 veces al día

---

Helado

- ☒ Nunca o menos 1 vez al mes  
☐ 1 a 3 veces mes  
☐ 1 vez semana  
☐ 2 a 4 veces semana  
☐ 5 a 6 veces semana  
☐ 1 vez al día  
☐ 2 a 3 veces al día  
☐ 5 a 6 veces al día  
☐ más 6 veces al día

|                                      |                                                                                                                                                                                                                                                                                                                                                                                                              |
|--------------------------------------|--------------------------------------------------------------------------------------------------------------------------------------------------------------------------------------------------------------------------------------------------------------------------------------------------------------------------------------------------------------------------------------------------------------|
| huevo                                | <input type="radio"/> Nunca o menos 1 vez al mes<br><input type="radio"/> 1 a 3 veces mes<br><input checked="" type="radio"/> 1 vez semana<br><input type="radio"/> 2 a 4 veces semana<br><input type="radio"/> 5 a 6 veces semana<br><input type="radio"/> 1 vez al día<br><input type="radio"/> 2 a 3 veces al día<br><input type="radio"/> 5 a 6 veces al día<br><input type="radio"/> más 6 veces al día |
| Pollo con piel                       | <input checked="" type="radio"/> Nunca o menos 1 vez al mes<br><input type="radio"/> 1 a 3 veces mes<br><input type="radio"/> 1 vez semana<br><input type="radio"/> 2 a 4 veces semana<br><input type="radio"/> 5 a 6 veces semana<br><input type="radio"/> 1 vez al día<br><input type="radio"/> 2 a 3 veces al día<br><input type="radio"/> 5 a 6 veces al día<br><input type="radio"/> más 6 veces al día |
| pollo sin piel                       | <input type="radio"/> Nunca o menos 1 vez al mes<br><input type="radio"/> 1 a 3 veces mes<br><input checked="" type="radio"/> 1 vez semana<br><input type="radio"/> 2 a 4 veces semana<br><input type="radio"/> 5 a 6 veces semana<br><input type="radio"/> 1 vez al día<br><input type="radio"/> 2 a 3 veces al día<br><input type="radio"/> 5 a 6 veces al día<br><input type="radio"/> más 6 veces al día |
| Ternera o cerdo o cordero            | <input type="radio"/> Nunca o menos 1 vez al mes<br><input checked="" type="radio"/> 1 a 3 veces mes<br><input type="radio"/> 1 vez semana<br><input type="radio"/> 2 a 4 veces semana<br><input type="radio"/> 5 a 6 veces semana<br><input type="radio"/> 1 vez al día<br><input type="radio"/> 2 a 3 veces al día<br><input type="radio"/> 5 a 6 veces al día<br><input type="radio"/> más 6 veces al día |
| carne caza: Conejo o codorniz o pato | <input type="radio"/> Nunca o menos 1 vez al mes<br><input checked="" type="radio"/> 1 a 3 veces mes<br><input type="radio"/> 1 vez semana<br><input type="radio"/> 2 a 4 veces semana<br><input type="radio"/> 5 a 6 veces semana<br><input type="radio"/> 1 vez al día<br><input type="radio"/> 2 a 3 veces al día<br><input type="radio"/> 5 a 6 veces al día<br><input type="radio"/> más 6 veces al día |
| Hígado de ternera o cerdo o pollo    | <input checked="" type="radio"/> Nunca o menos 1 vez al mes<br><input type="radio"/> 1 a 3 veces mes<br><input type="radio"/> 1 vez semana<br><input type="radio"/> 2 a 4 veces semana<br><input type="radio"/> 5 a 6 veces semana<br><input type="radio"/> 1 vez al día<br><input type="radio"/> 2 a 3 veces al día<br><input type="radio"/> 5 a 6 veces al día<br><input type="radio"/> más 6 veces al día |

---

Vísceras

- ☒ Nunca o menos 1 vez al mes  
☐ 1 a 3 veces mes  
☐ 1 vez semana  
☐ 2 a 4 veces semana  
☐ 5 a 6 veces semana  
☐ 1 vez al día  
☐ 2 a 3 veces al día  
☐ 5 a 6 veces al día  
☐ más 6 veces al día

---

Embutido

- ☒ Nunca o menos 1 vez al mes  
☐ 1 a 3 veces mes  
☐ 1 vez semana  
☐ 2 a 4 veces semana  
☐ 5 a 6 veces semana  
☐ 1 vez al día  
☐ 2 a 3 veces al día  
☐ 5 a 6 veces al día  
☐ más 6 veces al día

---

Salchicha o similar

- ☒ Nunca o menos 1 vez al mes  
☐ 1 a 3 veces mes  
☐ 1 vez semana  
☐ 2 a 4 veces semana  
☐ 5 a 6 veces semana  
☐ 1 vez al día  
☐ 2 a 3 veces al día  
☐ 5 a 6 veces al día  
☐ más 6 veces al día

---

Pate o foiegras

- ☒ Nunca o menos 1 vez al mes  
☐ 1 a 3 veces mes  
☐ 1 vez semana  
☐ 2 a 4 veces semana  
☐ 5 a 6 veces semana  
☐ 1 vez al día  
☐ 2 a 3 veces al día  
☐ 5 a 6 veces al día  
☐ más 6 veces al día

---

Hamburguesa

- ☐ Nunca o menos 1 vez al mes  
☒ 1 a 3 veces mes  
☐ 1 vez semana  
☐ 2 a 4 veces semana  
☐ 5 a 6 veces semana  
☐ 1 vez al día  
☐ 2 a 3 veces al día  
☐ 5 a 6 veces al día  
☐ más 6 veces al día

---

tocino o bacon

- ☐ Nunca o menos 1 vez al mes  
☒ 1 a 3 veces mes  
☐ 1 vez semana  
☐ 2 a 4 veces semana  
☐ 5 a 6 veces semana  
☐ 1 vez al día  
☐ 2 a 3 veces al día  
☐ 5 a 6 veces al día  
☐ más 6 veces al día

---

|               |                                                                                                                                                                                                                                                                                                                                                                                                              |
|---------------|--------------------------------------------------------------------------------------------------------------------------------------------------------------------------------------------------------------------------------------------------------------------------------------------------------------------------------------------------------------------------------------------------------------|
| Pescado frito | <input checked="" type="radio"/> Nunca o menos 1 vez al mes<br><input type="radio"/> 1 a 3 veces mes<br><input type="radio"/> 1 vez semana<br><input type="radio"/> 2 a 4 veces semana<br><input type="radio"/> 5 a 6 veces semana<br><input type="radio"/> 1 vez al día<br><input type="radio"/> 2 a 3 veces al día<br><input type="radio"/> 5 a 6 veces al día<br><input type="radio"/> más 6 veces al día |
|---------------|--------------------------------------------------------------------------------------------------------------------------------------------------------------------------------------------------------------------------------------------------------------------------------------------------------------------------------------------------------------------------------------------------------------|

---

|                        |                                                                                                                                                                                                                                                                                                                                                                                                              |
|------------------------|--------------------------------------------------------------------------------------------------------------------------------------------------------------------------------------------------------------------------------------------------------------------------------------------------------------------------------------------------------------------------------------------------------------|
| pescado hervido blanco | <input type="radio"/> Nunca o menos 1 vez al mes<br><input type="radio"/> 1 a 3 veces mes<br><input checked="" type="radio"/> 1 vez semana<br><input type="radio"/> 2 a 4 veces semana<br><input type="radio"/> 5 a 6 veces semana<br><input type="radio"/> 1 vez al día<br><input type="radio"/> 2 a 3 veces al día<br><input type="radio"/> 5 a 6 veces al día<br><input type="radio"/> más 6 veces al día |
|------------------------|--------------------------------------------------------------------------------------------------------------------------------------------------------------------------------------------------------------------------------------------------------------------------------------------------------------------------------------------------------------------------------------------------------------|

---

|                      |                                                                                                                                                                                                                                                                                                                                                                                                              |
|----------------------|--------------------------------------------------------------------------------------------------------------------------------------------------------------------------------------------------------------------------------------------------------------------------------------------------------------------------------------------------------------------------------------------------------------|
| pescado hervido azul | <input checked="" type="radio"/> Nunca o menos 1 vez al mes<br><input type="radio"/> 1 a 3 veces mes<br><input type="radio"/> 1 vez semana<br><input type="radio"/> 2 a 4 veces semana<br><input type="radio"/> 5 a 6 veces semana<br><input type="radio"/> 1 vez al día<br><input type="radio"/> 2 a 3 veces al día<br><input type="radio"/> 5 a 6 veces al día<br><input type="radio"/> más 6 veces al día |
|----------------------|--------------------------------------------------------------------------------------------------------------------------------------------------------------------------------------------------------------------------------------------------------------------------------------------------------------------------------------------------------------------------------------------------------------|

---

|                    |                                                                                                                                                                                                                                                                                                                                                                                                              |
|--------------------|--------------------------------------------------------------------------------------------------------------------------------------------------------------------------------------------------------------------------------------------------------------------------------------------------------------------------------------------------------------------------------------------------------------|
| otros pescado azul | <input checked="" type="radio"/> Nunca o menos 1 vez al mes<br><input type="radio"/> 1 a 3 veces mes<br><input type="radio"/> 1 vez semana<br><input type="radio"/> 2 a 4 veces semana<br><input type="radio"/> 5 a 6 veces semana<br><input type="radio"/> 1 vez al día<br><input type="radio"/> 2 a 3 veces al día<br><input type="radio"/> 5 a 6 veces al día<br><input type="radio"/> más 6 veces al día |
|--------------------|--------------------------------------------------------------------------------------------------------------------------------------------------------------------------------------------------------------------------------------------------------------------------------------------------------------------------------------------------------------------------------------------------------------|

---

|               |                                                                                                                                                                                                                                                                                                                                                                                                              |
|---------------|--------------------------------------------------------------------------------------------------------------------------------------------------------------------------------------------------------------------------------------------------------------------------------------------------------------------------------------------------------------------------------------------------------------|
| atun conserva | <input checked="" type="radio"/> Nunca o menos 1 vez al mes<br><input type="radio"/> 1 a 3 veces mes<br><input type="radio"/> 1 vez semana<br><input type="radio"/> 2 a 4 veces semana<br><input type="radio"/> 5 a 6 veces semana<br><input type="radio"/> 1 vez al día<br><input type="radio"/> 2 a 3 veces al día<br><input type="radio"/> 5 a 6 veces al día<br><input type="radio"/> más 6 veces al día |
|---------------|--------------------------------------------------------------------------------------------------------------------------------------------------------------------------------------------------------------------------------------------------------------------------------------------------------------------------------------------------------------------------------------------------------------|

---

|                  |                                                                                                                                                                                                                                                                                                                                                                                                              |
|------------------|--------------------------------------------------------------------------------------------------------------------------------------------------------------------------------------------------------------------------------------------------------------------------------------------------------------------------------------------------------------------------------------------------------------|
| sardina conserva | <input checked="" type="radio"/> Nunca o menos 1 vez al mes<br><input type="radio"/> 1 a 3 veces mes<br><input type="radio"/> 1 vez semana<br><input type="radio"/> 2 a 4 veces semana<br><input type="radio"/> 5 a 6 veces semana<br><input type="radio"/> 1 vez al día<br><input type="radio"/> 2 a 3 veces al día<br><input type="radio"/> 5 a 6 veces al día<br><input type="radio"/> más 6 veces al día |
|------------------|--------------------------------------------------------------------------------------------------------------------------------------------------------------------------------------------------------------------------------------------------------------------------------------------------------------------------------------------------------------------------------------------------------------|

---

|                                         |                                                                                                                                                                                                                                                                                                                                                                                                              |
|-----------------------------------------|--------------------------------------------------------------------------------------------------------------------------------------------------------------------------------------------------------------------------------------------------------------------------------------------------------------------------------------------------------------------------------------------------------------|
| pescado ahumado                         | <input checked="" type="radio"/> Nunca o menos 1 vez al mes<br><input type="radio"/> 1 a 3 veces mes<br><input type="radio"/> 1 vez semana<br><input type="radio"/> 2 a 4 veces semana<br><input type="radio"/> 5 a 6 veces semana<br><input type="radio"/> 1 vez al día<br><input type="radio"/> 2 a 3 veces al día<br><input type="radio"/> 5 a 6 veces al día<br><input type="radio"/> más 6 veces al día |
| almejas o mejillones o ostras unos 100g | <input checked="" type="radio"/> Nunca o menos 1 vez al mes<br><input type="radio"/> 1 a 3 veces mes<br><input type="radio"/> 1 vez semana<br><input type="radio"/> 2 a 4 veces semana<br><input type="radio"/> 5 a 6 veces semana<br><input type="radio"/> 1 vez al día<br><input type="radio"/> 2 a 3 veces al día<br><input type="radio"/> 5 a 6 veces al día<br><input type="radio"/> más 6 veces al día |
| calamar o chipiron o sepia unos 100g    | <input type="radio"/> Nunca o menos 1 vez al mes<br><input checked="" type="radio"/> 1 a 3 veces mes<br><input type="radio"/> 1 vez semana<br><input type="radio"/> 2 a 4 veces semana<br><input type="radio"/> 5 a 6 veces semana<br><input type="radio"/> 1 vez al día<br><input type="radio"/> 2 a 3 veces al día<br><input type="radio"/> 5 a 6 veces al día<br><input type="radio"/> más 6 veces al día |
| marisco unos 100g                       | <input type="radio"/> Nunca o menos 1 vez al mes<br><input checked="" type="radio"/> 1 a 3 veces mes<br><input type="radio"/> 1 vez semana<br><input type="radio"/> 2 a 4 veces semana<br><input type="radio"/> 5 a 6 veces semana<br><input type="radio"/> 1 vez al día<br><input type="radio"/> 2 a 3 veces al día<br><input type="radio"/> 5 a 6 veces al día<br><input type="radio"/> más 6 veces al día |
| Espinacas o acelgas cocinadas           | <input checked="" type="radio"/> Nunca o menos 1 vez al mes<br><input type="radio"/> 1 a 3 veces mes<br><input type="radio"/> 1 vez semana<br><input type="radio"/> 2 a 4 veces semana<br><input type="radio"/> 5 a 6 veces semana<br><input type="radio"/> 1 vez al día<br><input type="radio"/> 2 a 3 veces al día<br><input type="radio"/> 5 a 6 veces al día<br><input type="radio"/> más 6 veces al día |
| Col o coliflor o brocoli cocinado       | <input type="radio"/> Nunca o menos 1 vez al mes<br><input type="radio"/> 1 a 3 veces mes<br><input type="radio"/> 1 vez semana<br><input checked="" type="radio"/> 2 a 4 veces semana<br><input type="radio"/> 5 a 6 veces semana<br><input type="radio"/> 1 vez al día<br><input type="radio"/> 2 a 3 veces al día<br><input type="radio"/> 5 a 6 veces al día<br><input type="radio"/> más 6 veces al día |

---

Lechuga o endivia o escarola

- ☐ Nunca o menos 1 vez al mes  
☐ 1 a 3 veces mes  
☒ 1 vez semana  
☐ 2 a 4 veces semana  
☐ 5 a 6 veces semana  
☐ 1 vez al día  
☐ 2 a 3 veces al día  
☐ 5 a 6 veces al día  
☐ más 6 veces al día

---

tomate ensalada

- ☐ Nunca o menos 1 vez al mes  
☐ 1 a 3 veces mes  
☐ 1 vez semana  
☐ 2 a 4 veces semana  
☒ 5 a 6 veces semana  
☐ 1 vez al día  
☐ 2 a 3 veces al día  
☐ 5 a 6 veces al día  
☐ más 6 veces al día

---

cebolla

- ☐ Nunca o menos 1 vez al mes  
☐ 1 a 3 veces mes  
☐ 1 vez semana  
☐ 2 a 4 veces semana  
☐ 5 a 6 veces semana  
☒ 1 vez al día  
☐ 2 a 3 veces al día  
☐ 5 a 6 veces al día  
☐ más 6 veces al día

---

Zanahoria o calabaza

- ☐ Nunca o menos 1 vez al mes  
☐ 1 a 3 veces mes  
☐ 1 vez semana  
☐ 2 a 4 veces semana  
☒ 5 a 6 veces semana  
☐ 1 vez al día  
☐ 2 a 3 veces al día  
☐ 5 a 6 veces al día  
☐ más 6 veces al día

---

Judías verdes

- ☐ Nunca o menos 1 vez al mes  
☒ 1 a 3 veces mes  
☐ 1 vez semana  
☐ 2 a 4 veces semana  
☐ 5 a 6 veces semana  
☐ 1 vez al día  
☐ 2 a 3 veces al día  
☐ 5 a 6 veces al día  
☐ más 6 veces al día

---

Berenjena o calabacin o pepino

- ☐ Nunca o menos 1 vez al mes  
☐ 1 a 3 veces mes  
☐ 1 vez semana  
☐ 2 a 4 veces semana  
☒ 5 a 6 veces semana  
☐ 1 vez al día  
☐ 2 a 3 veces al día  
☐ 5 a 6 veces al día  
☐ más 6 veces al día



---

|          |                                                                                                                                                                                                                                                                                                                                                                                                              |
|----------|--------------------------------------------------------------------------------------------------------------------------------------------------------------------------------------------------------------------------------------------------------------------------------------------------------------------------------------------------------------------------------------------------------------|
| pimiento | <input type="radio"/> Nunca o menos 1 vez al mes<br><input type="radio"/> 1 a 3 veces mes<br><input type="radio"/> 1 vez semana<br><input checked="" type="radio"/> 2 a 4 veces semana<br><input type="radio"/> 5 a 6 veces semana<br><input type="radio"/> 1 vez al día<br><input type="radio"/> 2 a 3 veces al día<br><input type="radio"/> 5 a 6 veces al día<br><input type="radio"/> más 6 veces al día |
|----------|--------------------------------------------------------------------------------------------------------------------------------------------------------------------------------------------------------------------------------------------------------------------------------------------------------------------------------------------------------------------------------------------------------------|

---

|           |                                                                                                                                                                                                                                                                                                                                                                                                              |
|-----------|--------------------------------------------------------------------------------------------------------------------------------------------------------------------------------------------------------------------------------------------------------------------------------------------------------------------------------------------------------------------------------------------------------------|
| alcachofa | <input type="radio"/> Nunca o menos 1 vez al mes<br><input type="radio"/> 1 a 3 veces mes<br><input type="radio"/> 1 vez semana<br><input checked="" type="radio"/> 2 a 4 veces semana<br><input type="radio"/> 5 a 6 veces semana<br><input type="radio"/> 1 vez al día<br><input type="radio"/> 2 a 3 veces al día<br><input type="radio"/> 5 a 6 veces al día<br><input type="radio"/> más 6 veces al día |
|-----------|--------------------------------------------------------------------------------------------------------------------------------------------------------------------------------------------------------------------------------------------------------------------------------------------------------------------------------------------------------------------------------------------------------------|

---

|            |                                                                                                                                                                                                                                                                                                                                                                                                              |
|------------|--------------------------------------------------------------------------------------------------------------------------------------------------------------------------------------------------------------------------------------------------------------------------------------------------------------------------------------------------------------------------------------------------------------|
| espárragos | <input type="radio"/> Nunca o menos 1 vez al mes<br><input type="radio"/> 1 a 3 veces mes<br><input type="radio"/> 1 vez semana<br><input checked="" type="radio"/> 2 a 4 veces semana<br><input type="radio"/> 5 a 6 veces semana<br><input type="radio"/> 1 vez al día<br><input type="radio"/> 2 a 3 veces al día<br><input type="radio"/> 5 a 6 veces al día<br><input type="radio"/> más 6 veces al día |
|------------|--------------------------------------------------------------------------------------------------------------------------------------------------------------------------------------------------------------------------------------------------------------------------------------------------------------------------------------------------------------------------------------------------------------|

---

|              |                                                                                                                                                                                                                                                                                                                                                                                                              |
|--------------|--------------------------------------------------------------------------------------------------------------------------------------------------------------------------------------------------------------------------------------------------------------------------------------------------------------------------------------------------------------------------------------------------------------|
| maíz hervido | <input type="radio"/> Nunca o menos 1 vez al mes<br><input type="radio"/> 1 a 3 veces mes<br><input checked="" type="radio"/> 1 vez semana<br><input type="radio"/> 2 a 4 veces semana<br><input type="radio"/> 5 a 6 veces semana<br><input type="radio"/> 1 vez al día<br><input type="radio"/> 2 a 3 veces al día<br><input type="radio"/> 5 a 6 veces al día<br><input type="radio"/> más 6 veces al día |
|--------------|--------------------------------------------------------------------------------------------------------------------------------------------------------------------------------------------------------------------------------------------------------------------------------------------------------------------------------------------------------------------------------------------------------------|

---

|           |                                                                                                                                                                                                                                                                                                                                                                                                              |
|-----------|--------------------------------------------------------------------------------------------------------------------------------------------------------------------------------------------------------------------------------------------------------------------------------------------------------------------------------------------------------------------------------------------------------------|
| legumbres | <input type="radio"/> Nunca o menos 1 vez al mes<br><input type="radio"/> 1 a 3 veces mes<br><input type="radio"/> 1 vez semana<br><input checked="" type="radio"/> 2 a 4 veces semana<br><input type="radio"/> 5 a 6 veces semana<br><input type="radio"/> 1 vez al día<br><input type="radio"/> 2 a 3 veces al día<br><input type="radio"/> 5 a 6 veces al día<br><input type="radio"/> más 6 veces al día |
|-----------|--------------------------------------------------------------------------------------------------------------------------------------------------------------------------------------------------------------------------------------------------------------------------------------------------------------------------------------------------------------------------------------------------------------|

---

|                       |                                                                                                                                                                                                                                                                                                                                                                                                              |
|-----------------------|--------------------------------------------------------------------------------------------------------------------------------------------------------------------------------------------------------------------------------------------------------------------------------------------------------------------------------------------------------------------------------------------------------------|
| naranjas o mandarinas | <input type="radio"/> Nunca o menos 1 vez al mes<br><input type="radio"/> 1 a 3 veces mes<br><input type="radio"/> 1 vez semana<br><input checked="" type="radio"/> 2 a 4 veces semana<br><input type="radio"/> 5 a 6 veces semana<br><input type="radio"/> 1 vez al día<br><input type="radio"/> 2 a 3 veces al día<br><input type="radio"/> 5 a 6 veces al día<br><input type="radio"/> más 6 veces al día |
|-----------------------|--------------------------------------------------------------------------------------------------------------------------------------------------------------------------------------------------------------------------------------------------------------------------------------------------------------------------------------------------------------------------------------------------------------|

---

---

zumo natural fruta

- ☐ Nunca o menos 1 vez al mes  
☐ 1 a 3 veces mes  
☒ 1 vez semana  
☐ 2 a 4 veces semana  
☐ 5 a 6 veces semana  
☐ 1 vez al día  
☐ 2 a 3 veces al día  
☐ 5 a 6 veces al día  
☐ más 6 veces al día

---

platano

- ☐ Nunca o menos 1 vez al mes  
☐ 1 a 3 veces mes  
☐ 1 vez semana  
☒ 2 a 4 veces semana  
☐ 5 a 6 veces semana  
☐ 1 vez al día  
☐ 2 a 3 veces al día  
☐ 5 a 6 veces al día  
☐ más 6 veces al día

---

manzana o pera

- ☐ Nunca o menos 1 vez al mes  
☐ 1 a 3 veces mes  
☐ 1 vez semana  
☒ 2 a 4 veces semana  
☐ 5 a 6 veces semana  
☐ 1 vez al día  
☐ 2 a 3 veces al día  
☐ 5 a 6 veces al día  
☐ más 6 veces al día

---

melocotón o nectarina

- ☒ Nunca o menos 1 vez al mes  
☐ 1 a 3 veces mes  
☐ 1 vez semana  
☐ 2 a 4 veces semana  
☐ 5 a 6 veces semana  
☐ 1 vez al día  
☐ 2 a 3 veces al día  
☐ 5 a 6 veces al día  
☐ más 6 veces al día

---

sandia o melon

- ☐ Nunca o menos 1 vez al mes  
☐ 1 a 3 veces mes  
☐ 1 vez semana  
☒ 2 a 4 veces semana  
☐ 5 a 6 veces semana  
☐ 1 vez al día  
☐ 2 a 3 veces al día  
☐ 5 a 6 veces al día  
☐ más 6 veces al día

---

uva

- ☐ Nunca o menos 1 vez al mes  
☐ 1 a 3 veces mes  
☐ 1 vez semana  
☒ 2 a 4 veces semana  
☐ 5 a 6 veces semana  
☐ 1 vez al día  
☐ 2 a 3 veces al día  
☐ 5 a 6 veces al día  
☐ más 6 veces al día

---

bruna o ciruela

- ☐ Nunca o menos 1 vez al mes  
☐ 1 a 3 veces mes  
☒ 1 vez semana  
☐ 2 a 4 veces semana  
☐ 5 a 6 veces semana  
☐ 1 vez al día  
☐ 2 a 3 veces al día  
☐ 5 a 6 veces al día  
☐ más 6 veces al día

---

kiwi

- ☐ Nunca o menos 1 vez al mes  
☐ 1 a 3 veces mes  
☐ 1 vez semana  
☒ 2 a 4 veces semana  
☐ 5 a 6 veces semana  
☐ 1 vez al día  
☐ 2 a 3 veces al día  
☐ 5 a 6 veces al día  
☐ más 6 veces al día

---

aceituna

- ☒ Nunca o menos 1 vez al mes  
☐ 1 a 3 veces mes  
☐ 1 vez semana  
☐ 2 a 4 veces semana  
☐ 5 a 6 veces semana  
☐ 1 vez al día  
☐ 2 a 3 veces al día  
☐ 5 a 6 veces al día  
☐ más 6 veces al día

---

frutos secos

- ☐ Nunca o menos 1 vez al mes  
☐ 1 a 3 veces mes  
☐ 1 vez semana  
☒ 2 a 4 veces semana  
☐ 5 a 6 veces semana  
☐ 1 vez al día  
☐ 2 a 3 veces al día  
☐ 5 a 6 veces al día  
☐ más 6 veces al día

---

pan blanco

- ☒ Nunca o menos 1 vez al mes  
☐ 1 a 3 veces mes  
☐ 1 vez semana  
☐ 2 a 4 veces semana  
☐ 5 a 6 veces semana  
☐ 1 vez al día  
☐ 2 a 3 veces al día  
☐ 5 a 6 veces al día  
☐ más 6 veces al día

---

pan integral

- ☐ Nunca o menos 1 vez al mes  
☐ 1 a 3 veces mes  
☐ 1 vez semana  
☐ 2 a 4 veces semana  
☒ 5 a 6 veces semana  
☐ 1 vez al día  
☐ 2 a 3 veces al día  
☐ 5 a 6 veces al día  
☐ más 6 veces al día

---

cereales desayuno

- ☐ Nunca o menos 1 vez al mes  
☒ 1 a 3 veces mes  
☐ 1 vez semana  
☐ 2 a 4 veces semana  
☐ 5 a 6 veces semana  
☐ 1 vez al día  
☐ 2 a 3 veces al día  
☐ 5 a 6 veces al día  
☐ más 6 veces al día

---

patatas fritas

- ☒ Nunca o menos 1 vez al mes  
☐ 1 a 3 veces mes  
☐ 1 vez semana  
☐ 2 a 4 veces semana  
☐ 5 a 6 veces semana  
☐ 1 vez al día  
☐ 2 a 3 veces al día  
☐ 5 a 6 veces al día  
☐ más 6 veces al día

---

patatas cocidas o asadas

- ☐ Nunca o menos 1 vez al mes  
☐ 1 a 3 veces mes  
☒ 1 vez semana  
☐ 2 a 4 veces semana  
☐ 5 a 6 veces semana  
☐ 1 vez al día  
☐ 2 a 3 veces al día  
☐ 5 a 6 veces al día  
☐ más 6 veces al día

---

bolsa papas

- ☒ Nunca o menos 1 vez al mes  
☐ 1 a 3 veces mes  
☐ 1 vez semana  
☐ 2 a 4 veces semana  
☐ 5 a 6 veces semana  
☐ 1 vez al día  
☐ 2 a 3 veces al día  
☐ 5 a 6 veces al día  
☐ más 6 veces al día

---

arroz cocinado

- ☐ Nunca o menos 1 vez al mes  
☐ 1 a 3 veces mes  
☐ 1 vez semana  
☒ 2 a 4 veces semana  
☐ 5 a 6 veces semana  
☐ 1 vez al día  
☐ 2 a 3 veces al día  
☐ 5 a 6 veces al día  
☐ más 6 veces al día

---

pasta

- ☐ Nunca o menos 1 vez al mes  
☐ 1 a 3 veces mes  
☒ 1 vez semana  
☐ 2 a 4 veces semana  
☐ 5 a 6 veces semana  
☐ 1 vez al día  
☐ 2 a 3 veces al día  
☐ 5 a 6 veces al día  
☐ más 6 veces al día

|                     |                                                                                                                                                                                                                                                                                                                                                                                                              |
|---------------------|--------------------------------------------------------------------------------------------------------------------------------------------------------------------------------------------------------------------------------------------------------------------------------------------------------------------------------------------------------------------------------------------------------------|
| pizza               | <input type="radio"/> Nunca o menos 1 vez al mes<br><input type="radio"/> 1 a 3 veces mes<br><input checked="" type="radio"/> 1 vez semana<br><input type="radio"/> 2 a 4 veces semana<br><input type="radio"/> 5 a 6 veces semana<br><input type="radio"/> 1 vez al día<br><input type="radio"/> 2 a 3 veces al día<br><input type="radio"/> 5 a 6 veces al día<br><input type="radio"/> más 6 veces al día |
| aceite oliva        | <input type="radio"/> Nunca o menos 1 vez al mes<br><input type="radio"/> 1 a 3 veces mes<br><input type="radio"/> 1 vez semana<br><input type="radio"/> 2 a 4 veces semana<br><input checked="" type="radio"/> 5 a 6 veces semana<br><input type="radio"/> 1 vez al día<br><input type="radio"/> 2 a 3 veces al día<br><input type="radio"/> 5 a 6 veces al día<br><input type="radio"/> más 6 veces al día |
| otros aceites       | <input checked="" type="radio"/> Nunca o menos 1 vez al mes<br><input type="radio"/> 1 a 3 veces mes<br><input type="radio"/> 1 vez semana<br><input type="radio"/> 2 a 4 veces semana<br><input type="radio"/> 5 a 6 veces semana<br><input type="radio"/> 1 vez al día<br><input type="radio"/> 2 a 3 veces al día<br><input type="radio"/> 5 a 6 veces al día<br><input type="radio"/> más 6 veces al día |
| margarina           | <input checked="" type="radio"/> Nunca o menos 1 vez al mes<br><input type="radio"/> 1 a 3 veces mes<br><input type="radio"/> 1 vez semana<br><input type="radio"/> 2 a 4 veces semana<br><input type="radio"/> 5 a 6 veces semana<br><input type="radio"/> 1 vez al día<br><input type="radio"/> 2 a 3 veces al día<br><input type="radio"/> 5 a 6 veces al día<br><input type="radio"/> más 6 veces al día |
| mantequilla         | <input checked="" type="radio"/> Nunca o menos 1 vez al mes<br><input type="radio"/> 1 a 3 veces mes<br><input type="radio"/> 1 vez semana<br><input type="radio"/> 2 a 4 veces semana<br><input type="radio"/> 5 a 6 veces semana<br><input type="radio"/> 1 vez al día<br><input type="radio"/> 2 a 3 veces al día<br><input type="radio"/> 5 a 6 veces al día<br><input type="radio"/> más 6 veces al día |
| galletas tipo maria | <input checked="" type="radio"/> Nunca o menos 1 vez al mes<br><input type="radio"/> 1 a 3 veces mes<br><input type="radio"/> 1 vez semana<br><input type="radio"/> 2 a 4 veces semana<br><input type="radio"/> 5 a 6 veces semana<br><input type="radio"/> 1 vez al día<br><input type="radio"/> 2 a 3 veces al día<br><input type="radio"/> 5 a 6 veces al día<br><input type="radio"/> más 6 veces al día |

|                           |                                                                                                                                                                                                                                                                                                                                                                                                              |
|---------------------------|--------------------------------------------------------------------------------------------------------------------------------------------------------------------------------------------------------------------------------------------------------------------------------------------------------------------------------------------------------------------------------------------------------------|
| galletas chocolate        | <input checked="" type="radio"/> Nunca o menos 1 vez al mes<br><input type="radio"/> 1 a 3 veces mes<br><input type="radio"/> 1 vez semana<br><input type="radio"/> 2 a 4 veces semana<br><input type="radio"/> 5 a 6 veces semana<br><input type="radio"/> 1 vez al día<br><input type="radio"/> 2 a 3 veces al día<br><input type="radio"/> 5 a 6 veces al día<br><input type="radio"/> más 6 veces al día |
| bollieria                 | <input checked="" type="radio"/> Nunca o menos 1 vez al mes<br><input type="radio"/> 1 a 3 veces mes<br><input type="radio"/> 1 vez semana<br><input type="radio"/> 2 a 4 veces semana<br><input type="radio"/> 5 a 6 veces semana<br><input type="radio"/> 1 vez al día<br><input type="radio"/> 2 a 3 veces al día<br><input type="radio"/> 5 a 6 veces al día<br><input type="radio"/> más 6 veces al día |
| chocolate o bombones      | <input checked="" type="radio"/> Nunca o menos 1 vez al mes<br><input type="radio"/> 1 a 3 veces mes<br><input type="radio"/> 1 vez semana<br><input type="radio"/> 2 a 4 veces semana<br><input type="radio"/> 5 a 6 veces semana<br><input type="radio"/> 1 vez al día<br><input type="radio"/> 2 a 3 veces al día<br><input type="radio"/> 5 a 6 veces al día<br><input type="radio"/> más 6 veces al día |
| chocolate polvo o colacao | <input checked="" type="radio"/> Nunca o menos 1 vez al mes<br><input type="radio"/> 1 a 3 veces mes<br><input type="radio"/> 1 vez semana<br><input type="radio"/> 2 a 4 veces semana<br><input type="radio"/> 5 a 6 veces semana<br><input type="radio"/> 1 vez al día<br><input type="radio"/> 2 a 3 veces al día<br><input type="radio"/> 5 a 6 veces al día<br><input type="radio"/> más 6 veces al día |
| vino tinto                | <input checked="" type="radio"/> Nunca o menos 1 vez al mes<br><input type="radio"/> 1 a 3 veces mes<br><input type="radio"/> 1 vez semana<br><input type="radio"/> 2 a 4 veces semana<br><input type="radio"/> 5 a 6 veces semana<br><input type="radio"/> 1 vez al día<br><input type="radio"/> 2 a 3 veces al día<br><input type="radio"/> 5 a 6 veces al día<br><input type="radio"/> más 6 veces al día |
| vino blanco               | <input checked="" type="radio"/> Nunca o menos 1 vez al mes<br><input type="radio"/> 1 a 3 veces mes<br><input type="radio"/> 1 vez semana<br><input type="radio"/> 2 a 4 veces semana<br><input type="radio"/> 5 a 6 veces semana<br><input type="radio"/> 1 vez al día<br><input type="radio"/> 2 a 3 veces al día<br><input type="radio"/> 5 a 6 veces al día<br><input type="radio"/> más 6 veces al día |

|                       |                                                                                                                                                                                                                                                                                                                                                                                                              |
|-----------------------|--------------------------------------------------------------------------------------------------------------------------------------------------------------------------------------------------------------------------------------------------------------------------------------------------------------------------------------------------------------------------------------------------------------|
| vino seco o vermut    | <input checked="" type="radio"/> Nunca o menos 1 vez al mes<br><input type="radio"/> 1 a 3 veces mes<br><input type="radio"/> 1 vez semana<br><input type="radio"/> 2 a 4 veces semana<br><input type="radio"/> 5 a 6 veces semana<br><input type="radio"/> 1 vez al día<br><input type="radio"/> 2 a 3 veces al día<br><input type="radio"/> 5 a 6 veces al día<br><input type="radio"/> más 6 veces al día |
| cerveza               | <input checked="" type="radio"/> Nunca o menos 1 vez al mes<br><input type="radio"/> 1 a 3 veces mes<br><input type="radio"/> 1 vez semana<br><input type="radio"/> 2 a 4 veces semana<br><input type="radio"/> 5 a 6 veces semana<br><input type="radio"/> 1 vez al día<br><input type="radio"/> 2 a 3 veces al día<br><input type="radio"/> 5 a 6 veces al día<br><input type="radio"/> más 6 veces al día |
| cerveza sin alcohol   | <input checked="" type="radio"/> Nunca o menos 1 vez al mes<br><input type="radio"/> 1 a 3 veces mes<br><input type="radio"/> 1 vez semana<br><input type="radio"/> 2 a 4 veces semana<br><input type="radio"/> 5 a 6 veces semana<br><input type="radio"/> 1 vez al día<br><input type="radio"/> 2 a 3 veces al día<br><input type="radio"/> 5 a 6 veces al día<br><input type="radio"/> más 6 veces al día |
| licores               | <input checked="" type="radio"/> Nunca o menos 1 vez al mes<br><input type="radio"/> 1 a 3 veces mes<br><input type="radio"/> 1 vez semana<br><input type="radio"/> 2 a 4 veces semana<br><input type="radio"/> 5 a 6 veces semana<br><input type="radio"/> 1 vez al día<br><input type="radio"/> 2 a 3 veces al día<br><input type="radio"/> 5 a 6 veces al día<br><input type="radio"/> más 6 veces al día |
| ginebra o ron o vodka | <input checked="" type="radio"/> Nunca o menos 1 vez al mes<br><input type="radio"/> 1 a 3 veces mes<br><input type="radio"/> 1 vez semana<br><input type="radio"/> 2 a 4 veces semana<br><input type="radio"/> 5 a 6 veces semana<br><input type="radio"/> 1 vez al día<br><input type="radio"/> 2 a 3 veces al día<br><input type="radio"/> 5 a 6 veces al día<br><input type="radio"/> más 6 veces al día |
| refresco normal       | <input checked="" type="radio"/> Nunca o menos 1 vez al mes<br><input type="radio"/> 1 a 3 veces mes<br><input type="radio"/> 1 vez semana<br><input type="radio"/> 2 a 4 veces semana<br><input type="radio"/> 5 a 6 veces semana<br><input type="radio"/> 1 vez al día<br><input type="radio"/> 2 a 3 veces al día<br><input type="radio"/> 5 a 6 veces al día<br><input type="radio"/> más 6 veces al día |

---

refresco sin azúcar

- ☐ Nunca o menos 1 vez al mes  
☒ 1 a 3 veces mes  
☐ 1 vez semana  
☐ 2 a 4 veces semana  
☐ 5 a 6 veces semana  
☐ 1 vez al día  
☐ 2 a 3 veces al día  
☐ 5 a 6 veces al día  
☐ más 6 veces al día

---

Agua del grifo

- ☒ Nunca o menos 1 vez al mes  
☐ 1 a 3 veces mes  
☐ 1 vez semana  
☐ 2 a 4 veces semana  
☐ 5 a 6 veces semana  
☐ 1 vez al día  
☐ 2 a 3 veces al día  
☐ 5 a 6 veces al día  
☐ más 6 veces al día

---

agua embotellada sin gas

- ☐ Nunca o menos 1 vez al mes  
☐ 1 a 3 veces mes  
☐ 1 vez semana  
☐ 2 a 4 veces semana  
☐ 5 a 6 veces semana  
☐ 1 vez al día  
☐ 2 a 3 veces al día  
☐ 5 a 6 veces al día  
☒ más 6 veces al día

---

agua embotellada con gas

- ☒ Nunca o menos 1 vez al mes  
☐ 1 a 3 veces mes  
☐ 1 vez semana  
☐ 2 a 4 veces semana  
☐ 5 a 6 veces semana  
☐ 1 vez al día  
☐ 2 a 3 veces al día  
☐ 5 a 6 veces al día  
☐ más 6 veces al día

---

zumو frutas embasado

- ☒ Nunca o menos 1 vez al mes  
☐ 1 a 3 veces mes  
☐ 1 vez semana  
☐ 2 a 4 veces semana  
☐ 5 a 6 veces semana  
☐ 1 vez al día  
☐ 2 a 3 veces al día  
☐ 5 a 6 veces al día  
☐ más 6 veces al día

---

cafe

- ☒ Nunca o menos 1 vez al mes  
☐ 1 a 3 veces mes  
☐ 1 vez semana  
☐ 2 a 4 veces semana  
☐ 5 a 6 veces semana  
☐ 1 vez al día  
☐ 2 a 3 veces al día  
☐ 5 a 6 veces al día  
☐ más 6 veces al día



---

cafe descafeinado

- ☒ Nunca o menos 1 vez al mes  
☐ 1 a 3 veces mes  
☐ 1 vez semana  
☐ 2 a 4 veces semana  
☐ 5 a 6 veces semana  
☐ 1 vez al día  
☐ 2 a 3 veces al día  
☐ 5 a 6 veces al día  
☐ más 6 veces al día

---

te o infusión

- ☒ Nunca o menos 1 vez al mes  
☐ 1 a 3 veces mes  
☐ 1 vez semana  
☐ 2 a 4 veces semana  
☐ 5 a 6 veces semana  
☐ 1 vez al día  
☐ 2 a 3 veces al día  
☐ 5 a 6 veces al día  
☐ más 6 veces al día

---

sopa o puré verduras

- ☒ Nunca o menos 1 vez al mes  
☐ 1 a 3 veces mes  
☐ 1 vez semana  
☐ 2 a 4 veces semana  
☐ 5 a 6 veces semana  
☐ 1 vez al día  
☐ 2 a 3 veces al día  
☐ 5 a 6 veces al día  
☐ más 6 veces al día

---

croquetas pollo jamón

- ☐ Nunca o menos 1 vez al mes  
☒ 1 a 3 veces mes  
☐ 1 vez semana  
☐ 2 a 4 veces semana  
☐ 5 a 6 veces semana  
☐ 1 vez al día  
☐ 2 a 3 veces al día  
☐ 5 a 6 veces al día  
☐ más 6 veces al día

---

croquetas pescado

- ☒ Nunca o menos 1 vez al mes  
☐ 1 a 3 veces mes  
☐ 1 vez semana  
☐ 2 a 4 veces semana  
☐ 5 a 6 veces semana  
☐ 1 vez al día  
☐ 2 a 3 veces al día  
☐ 5 a 6 veces al día  
☐ más 6 veces al día

---

mayonesa

- ☐ Nunca o menos 1 vez al mes  
☒ 1 a 3 veces mes  
☐ 1 vez semana  
☐ 2 a 4 veces semana  
☐ 5 a 6 veces semana  
☐ 1 vez al día  
☐ 2 a 3 veces al día  
☐ 5 a 6 veces al día  
☐ más 6 veces al día

---

salsa tomate

- ☐ Nunca o menos 1 vez al mes  
☐ 1 a 3 veces mes  
☒ 1 vez semana  
☐ 2 a 4 veces semana  
☐ 5 a 6 veces semana  
☐ 1 vez al día  
☐ 2 a 3 veces al día  
☐ 5 a 6 veces al día  
☐ más 6 veces al día

---

ketchup

- ☒ Nunca o menos 1 vez al mes  
☐ 1 a 3 veces mes  
☐ 1 vez semana  
☐ 2 a 4 veces semana  
☐ 5 a 6 veces semana  
☐ 1 vez al día  
☐ 2 a 3 veces al día  
☐ 5 a 6 veces al día  
☐ más 6 veces al día

---

sal

- ☒ Nunca o menos 1 vez al mes  
☐ 1 a 3 veces mes  
☐ 1 vez semana  
☐ 2 a 4 veces semana  
☐ 5 a 6 veces semana  
☐ 1 vez al día  
☐ 2 a 3 veces al día  
☐ 5 a 6 veces al día  
☐ más 6 veces al día

---

ajo

- ☐ Nunca o menos 1 vez al mes  
☐ 1 a 3 veces mes  
☐ 1 vez semana  
☒ 2 a 4 veces semana  
☐ 5 a 6 veces semana  
☐ 1 vez al día  
☐ 2 a 3 veces al día  
☐ 5 a 6 veces al día  
☐ más 6 veces al día

---

mermelada o miel

- ☒ Nunca o menos 1 vez al mes  
☐ 1 a 3 veces mes  
☐ 1 vez semana  
☐ 2 a 4 veces semana  
☐ 5 a 6 veces semana  
☐ 1 vez al día  
☐ 2 a 3 veces al día  
☐ 5 a 6 veces al día  
☐ más 6 veces al día

---

azúcar

- ☒ Nunca o menos 1 vez al mes  
☐ 1 a 3 veces mes  
☐ 1 vez semana  
☐ 2 a 4 veces semana  
☐ 5 a 6 veces semana  
☐ 1 vez al día  
☐ 2 a 3 veces al día  
☐ 5 a 6 veces al día  
☐ más 6 veces al día

|                                       |                                                                                                                                                                                                                                                                                                                                                                                                                                                                                                                               |
|---------------------------------------|-------------------------------------------------------------------------------------------------------------------------------------------------------------------------------------------------------------------------------------------------------------------------------------------------------------------------------------------------------------------------------------------------------------------------------------------------------------------------------------------------------------------------------|
| Otro alimento                         | [*DATA REMOVED*]                                                                                                                                                                                                                                                                                                                                                                                                                                                                                                              |
| suplementos vitamínicos               | <input checked="" type="radio"/> si<br><input type="radio"/> no                                                                                                                                                                                                                                                                                                                                                                                                                                                               |
| suplementos vitamínicos               | [*DATA REMOVED*]                                                                                                                                                                                                                                                                                                                                                                                                                                                                                                              |
| dieta previa                          | <input type="radio"/> si<br><input checked="" type="radio"/> no                                                                                                                                                                                                                                                                                                                                                                                                                                                               |
| motivo dieta                          | <input checked="" type="radio"/> no dieta<br><input type="radio"/> control peso<br><input type="radio"/> control colesterol<br><input type="radio"/> control diabetes<br><input type="radio"/> problemas estómago<br><input type="radio"/> problemas vesícula o hepáticos<br><input type="radio"/> HTA o cardiopatía<br><input type="radio"/> problemas renales<br><input type="radio"/> alergia alimentaria<br><input type="radio"/> ácido úrico elevado<br><input type="radio"/> vegetariana<br><input type="radio"/> otros |
| cambio alimentos año previo gestación | <input type="radio"/> si<br><input checked="" type="radio"/> no                                                                                                                                                                                                                                                                                                                                                                                                                                                               |
| cambio lácteos                        | <input type="radio"/> eliminado<br><input type="radio"/> disminuido<br><input checked="" type="radio"/> igual<br><input type="radio"/> aumentado<br><input type="radio"/> no sabe                                                                                                                                                                                                                                                                                                                                             |
| cambio huevos                         | <input type="radio"/> eliminado<br><input type="radio"/> disminuido<br><input checked="" type="radio"/> igual<br><input type="radio"/> aumentado<br><input type="radio"/> no sabe                                                                                                                                                                                                                                                                                                                                             |
| cambio carne                          | <input type="radio"/> eliminado<br><input type="radio"/> disminuido<br><input checked="" type="radio"/> igual<br><input type="radio"/> aumentado<br><input type="radio"/> no sabe                                                                                                                                                                                                                                                                                                                                             |
| cambio pescado                        | <input type="radio"/> eliminado<br><input type="radio"/> disminuido<br><input checked="" type="radio"/> igual<br><input type="radio"/> aumentado<br><input type="radio"/> no sabe                                                                                                                                                                                                                                                                                                                                             |
| cambio verduras                       | <input type="radio"/> eliminado<br><input type="radio"/> disminuido<br><input checked="" type="radio"/> igual<br><input type="radio"/> aumentado<br><input type="radio"/> no sabe                                                                                                                                                                                                                                                                                                                                             |

|                            |                                                                                                                                                                                                                        |
|----------------------------|------------------------------------------------------------------------------------------------------------------------------------------------------------------------------------------------------------------------|
| cambio legumbres           | <input type="radio"/> eliminado<br><input type="radio"/> disminuido<br><input checked="" type="radio"/> igual<br><input type="radio"/> aumentado<br><input type="radio"/> no sabe                                      |
| cambio fruta               | <input type="radio"/> eliminado<br><input type="radio"/> disminuido<br><input checked="" type="radio"/> igual<br><input type="radio"/> aumentado<br><input type="radio"/> no sabe                                      |
| cambio pan                 | <input type="radio"/> eliminado<br><input type="radio"/> disminuido<br><input checked="" type="radio"/> igual<br><input type="radio"/> aumentado<br><input type="radio"/> no sabe                                      |
| cambio aceite oliva        | <input type="radio"/> eliminado<br><input type="radio"/> disminuido<br><input checked="" type="radio"/> igual<br><input type="radio"/> aumentado<br><input type="radio"/> no sabe                                      |
| cambio mante o margarina   | <input type="radio"/> eliminado<br><input type="radio"/> disminuido<br><input checked="" type="radio"/> igual<br><input type="radio"/> aumentado<br><input type="radio"/> no sabe                                      |
| cambio azúcar y dulces     | <input type="radio"/> eliminado<br><input type="radio"/> disminuido<br><input checked="" type="radio"/> igual<br><input type="radio"/> aumentado<br><input type="radio"/> no sabe                                      |
| cambio bebidas alcohólicas | <input type="radio"/> eliminado<br><input type="radio"/> disminuido<br><input checked="" type="radio"/> igual<br><input type="radio"/> aumentado<br><input type="radio"/> no sabe                                      |
| frecuencia comidas fritas  | <input type="radio"/> a diario<br><input type="radio"/> 5 a 6 veces semana<br><input type="radio"/> 2 a 4 veces semana<br><input type="radio"/> 1 vez semana<br><input checked="" type="radio"/> menos de 1 vez semana |
| carne                      | <input type="radio"/> no como<br><input type="radio"/> cruda<br><input type="radio"/> poco hecha<br><input type="radio"/> hecha<br><input checked="" type="radio"/> muy hecha                                          |
| grasa visible carne        | <input checked="" type="radio"/> quita toda<br><input type="radio"/> quita mayoría<br><input type="radio"/> quita un poco<br><input type="radio"/> no quita nada                                                       |

|                                |                                                                                                                                                                                                                                                          |
|--------------------------------|----------------------------------------------------------------------------------------------------------------------------------------------------------------------------------------------------------------------------------------------------------|
| cocina carne                   | <input checked="" type="radio"/> a la plancha<br><input type="radio"/> a la parrilla<br><input type="radio"/> asada<br><input type="radio"/> frita<br><input type="radio"/> guisada                                                                      |
| tostado quemado carne          | <input type="radio"/> nunca<br><input checked="" type="radio"/> 1 vez mes<br><input type="radio"/> 2 a 3 veces mes<br><input type="radio"/> 1 vez semana<br><input type="radio"/> 2 a 3 semanas                                                          |
| tostado quemado pescado        | <input type="radio"/> nunca<br><input type="radio"/> 1 vez mes<br><input type="radio"/> 2 a 3 veces mes<br><input checked="" type="radio"/> 1 vez semana<br><input type="radio"/> 2 a 3 semanas                                                          |
| socarrat paella                | <input type="radio"/> nunca<br><input type="radio"/> 1 vez mes<br><input type="radio"/> 2 a 3 veces mes<br><input checked="" type="radio"/> 1 vez semana<br><input type="radio"/> 2 a 3 semanas                                                          |
| grasa o aceite cocinar         | <input type="radio"/> mantequilla<br><input type="radio"/> margarina<br><input type="radio"/> aceite oliva<br><input checked="" type="radio"/> aceite oliva virgen extra<br><input type="radio"/> aceite vegetal<br><input type="radio"/> mezcla aceites |
| grasa aceite aliñar            | <input type="radio"/> mantequilla<br><input type="radio"/> margarina<br><input type="radio"/> aceite oliva<br><input checked="" type="radio"/> aceite oliva virgen extra<br><input type="radio"/> aceite vegetal<br><input type="radio"/> mezcla aceites |
| grasa aceite freir             | <input type="radio"/> mantequilla<br><input type="radio"/> margarina<br><input type="radio"/> aceite oliva<br><input checked="" type="radio"/> aceite oliva virgen extra<br><input type="radio"/> aceite vegetal<br><input type="radio"/> mezcla aceites |
| Ejercicio cuestionario         | <input checked="" type="radio"/> si<br><input type="radio"/> no                                                                                                                                                                                          |
| horas de sueño incluido siesta | [*DATA REMOVED*]                                                                                                                                                                                                                                         |
| minutos siesta                 | [*DATA REMOVED*]                                                                                                                                                                                                                                         |
| horas televisión semana        | [*DATA REMOVED*]                                                                                                                                                                                                                                         |

|                                        |                                                                                                                                                                                                                                                                                                                                                                           |
|----------------------------------------|---------------------------------------------------------------------------------------------------------------------------------------------------------------------------------------------------------------------------------------------------------------------------------------------------------------------------------------------------------------------------|
| actividad trabajo                      | <input type="radio"/> casi siempre sentado<br><input type="radio"/> sentado 50 por cien<br><input type="radio"/> casi siempre de pie, quieto<br><input checked="" type="radio"/> casi siempre levantado caminando y llevando pocas cosas<br><input type="radio"/> casi siempre levantado, caminando y llevado muchas cosas<br><input type="radio"/> trabajo manual pesado |
| tiempo caminar o bici al día           | <input type="radio"/> casi nunca<br><input type="radio"/> menos 20min día<br><input checked="" type="radio"/> 20 a 40 min día<br><input type="radio"/> 40 a 60 min día<br><input type="radio"/> 1h o 1h y media día<br><input type="radio"/> más de 1h y media al día                                                                                                     |
| tiempo tareas casa al día              | <input type="radio"/> menos de 1h día<br><input type="radio"/> 1 a 2h día<br><input checked="" type="radio"/> 3 a 4h día<br><input type="radio"/> 5 a 6h día<br><input type="radio"/> 7 a 8h día<br><input type="radio"/> más de 8h día                                                                                                                                   |
| tiempo libre televisión ordenador leer | <input type="radio"/> menos 1h día<br><input type="radio"/> 1h día<br><input checked="" type="radio"/> 2h día<br><input type="radio"/> 3h día<br><input type="radio"/> 4h día<br><input type="radio"/> 5 a 6h día<br><input type="radio"/> mas 6h día                                                                                                                     |
| tiempo libre ejercicio o deporte       | <input type="radio"/> menos 1h semana<br><input type="radio"/> 1h semana<br><input type="radio"/> 2h semana<br><input checked="" type="radio"/> 3h semana<br><input type="radio"/> 4 a 5h semana<br><input type="radio"/> mas 5h semana                                                                                                                                   |
| como se considera                      | <input type="radio"/> sedentaria<br><input type="radio"/> poco activa<br><input type="radio"/> moderadamente activa<br><input checked="" type="radio"/> bastante activa<br><input type="radio"/> muy activa<br><input type="radio"/> no sabe                                                                                                                              |
| FUR                                    | [*DATA REMOVED*]                                                                                                                                                                                                                                                                                                                                                          |
| Semanas gestación 2T                   | [*DATA REMOVED*]                                                                                                                                                                                                                                                                                                                                                          |
| Días gestación 2T                      | [*DATA REMOVED*]                                                                                                                                                                                                                                                                                                                                                          |
| DBP 2T                                 | [*DATA REMOVED*]                                                                                                                                                                                                                                                                                                                                                          |
| CC 2T                                  | [*DATA REMOVED*]                                                                                                                                                                                                                                                                                                                                                          |
| AC 2T                                  | [*DATA REMOVED*]                                                                                                                                                                                                                                                                                                                                                          |

|                                                   |                                                                                                                                                                                                 |
|---------------------------------------------------|-------------------------------------------------------------------------------------------------------------------------------------------------------------------------------------------------|
| LF 2T                                             | [*DATA REMOVED*]                                                                                                                                                                                |
| PFE 2T (Hadlock)                                  | [*DATA REMOVED*]                                                                                                                                                                                |
| Semanas gestación 3T                              | [*DATA REMOVED*]                                                                                                                                                                                |
| días 3T                                           | [*DATA REMOVED*]                                                                                                                                                                                |
| DBP 3T                                            | [*DATA REMOVED*]                                                                                                                                                                                |
| CC 3T                                             | [*DATA REMOVED*]                                                                                                                                                                                |
| AC 3T                                             | [*DATA REMOVED*]                                                                                                                                                                                |
| LF 3T                                             | [*DATA REMOVED*]                                                                                                                                                                                |
| PFE 3T (Hadlock)                                  | [*DATA REMOVED*]                                                                                                                                                                                |
| Semanas de gestación final                        | [*DATA REMOVED*]                                                                                                                                                                                |
| días gestación final                              | [*DATA REMOVED*]                                                                                                                                                                                |
| Localización placenta                             | <input type="radio"/> anterior<br><input type="radio"/> lateral derecha<br><input type="radio"/> lateral izquierda<br><input type="radio"/> posterior<br><input checked="" type="radio"/> fondo |
| Presentación longitudinal cefálica                | <input type="radio"/> no<br><input checked="" type="radio"/> si                                                                                                                                 |
| Dorso                                             | <input type="radio"/> izquierda anterior<br><input type="radio"/> izquierda posterior<br><input type="radio"/> derecha anterior<br><input checked="" type="radio"/> derecha posterior           |
| diámetro biparietal                               | [*DATA REMOVED*]                                                                                                                                                                                |
| Circunferencia craneal                            | [*DATA REMOVED*]                                                                                                                                                                                |
| Circunferencia abdominal                          | [*DATA REMOVED*]                                                                                                                                                                                |
| Longitud de femur                                 | [*DATA REMOVED*]                                                                                                                                                                                |
| tejido celular subcutáneo a nivel del muslo en mm | [*DATA REMOVED*]                                                                                                                                                                                |
| tejido celular subcutáneo en abdomen en mm        | [*DATA REMOVED*]                                                                                                                                                                                |
| Volumen del muslo en cm3                          | [*DATA REMOVED*]                                                                                                                                                                                |
| Peso fetal estimado según fórmula de Hadlock      | [*DATA REMOVED*]                                                                                                                                                                                |

|                                               |                                                                                                                                                          |
|-----------------------------------------------|----------------------------------------------------------------------------------------------------------------------------------------------------------|
| Percentil                                     | [*DATA REMOVED*]                                                                                                                                         |
| Peso fetal estimado según fórmula de Scioscia | <hr/>                                                                                                                                                    |
| Peso fetal estimado según fórmula de LEE      | <hr/>                                                                                                                                                    |
| Tipo de parto                                 | <input checked="" type="radio"/> eutocico<br><input type="radio"/> instrumentado/ventosa<br><input type="radio"/> cesarea                                |
| fecha de nacimiento                           | [*DATA REMOVED*]                                                                                                                                         |
| Días entre exploración y nacimiento           | [*DATA REMOVED*]                                                                                                                                         |
| Peso RN en g                                  | [*DATA REMOVED*]                                                                                                                                         |
| sexo                                          | <input checked="" type="radio"/> mujer<br><input type="radio"/> hombre                                                                                   |
| Apgar 1 minuto                                | [*DATA REMOVED*]                                                                                                                                         |
| Apgar 5 minutos                               | [*DATA REMOVED*]                                                                                                                                         |
| Apgar 10 minutos                              | <hr/>                                                                                                                                                    |
| antecedente Covid durante gestación           | <input type="radio"/> Yes<br><input checked="" type="radio"/> No                                                                                         |
| Nivel de estudios                             | <input type="radio"/> ninguno<br><input type="radio"/> primarios<br><input type="radio"/> secundarios<br><input checked="" type="radio"/> universitarios |



# Base\_datos\_estimacion\_peso\_fetal

|                                       |                                                                                                                                                                                                                                                                                      |
|---------------------------------------|--------------------------------------------------------------------------------------------------------------------------------------------------------------------------------------------------------------------------------------------------------------------------------------|
| Número de identificación participante | 101                                                                                                                                                                                                                                                                                  |
| CODIGO PARTICIPANTE                   |                                                                                                                                                                                                                                                                                      |
| Edad                                  | [*DATA REMOVED*]                                                                                                                                                                                                                                                                     |
| Gestaciones                           | <input type="radio"/> 1<br><input checked="" type="radio"/> 2<br><input type="radio"/> 3<br><input type="radio"/> mas de 3                                                                                                                                                           |
| partos                                | <input type="radio"/> 0<br><input checked="" type="radio"/> 1<br><input type="radio"/> 2<br><input type="radio"/> 3<br><input type="radio"/> mas de 3                                                                                                                                |
| cesáreas                              | <input checked="" type="radio"/> 0<br><input type="radio"/> 1<br><input type="radio"/> 2<br><input type="radio"/> 3<br><input type="radio"/> mas de 3                                                                                                                                |
| Abortos                               | <input checked="" type="radio"/> 0<br><input type="radio"/> 1<br><input type="radio"/> 2<br><input type="radio"/> 3<br><input type="radio"/> mas de 3                                                                                                                                |
| Tipo de gestacion                     | <input checked="" type="radio"/> espontanea<br><input type="radio"/> IAC inseminación artificial conyuge<br><input type="radio"/> IAD inseminación artificial donante<br><input type="radio"/> FIV Fecundación in Vitro<br><input type="radio"/> Ovodon FIV con donación de ovocitos |
| peso previo a embarazo                | [*DATA REMOVED*]                                                                                                                                                                                                                                                                     |
| Ganancia ponderal embarazo            | [*DATA REMOVED*]                                                                                                                                                                                                                                                                     |
| Talla madre                           | [*DATA REMOVED*]                                                                                                                                                                                                                                                                     |
| IMC previo embarazo                   | 32.386821189734256                                                                                                                                                                                                                                                                   |
| Patología obstétrica                  | <input checked="" type="radio"/> no<br><input type="radio"/> si                                                                                                                                                                                                                      |
| Diabetes pregestacional               | <input checked="" type="radio"/> no<br><input type="radio"/> si                                                                                                                                                                                                                      |
| Diabetes gestacional                  | <input checked="" type="radio"/> no<br><input type="radio"/> si                                                                                                                                                                                                                      |

|                                            |                                                                                                                                                                                      |
|--------------------------------------------|--------------------------------------------------------------------------------------------------------------------------------------------------------------------------------------|
| Diabetes gestacional con insulina          | <input checked="" type="radio"/> no<br><input type="radio"/> si                                                                                                                      |
| Diabetes gestacional con dieta y ejercicio | <input checked="" type="radio"/> no<br><input type="radio"/> si                                                                                                                      |
| Percentil fetos previos                    | <input type="radio"/> Nada<br><input type="radio"/> percentil menor de 10<br><input checked="" type="radio"/> percentil entre 10 y 90<br><input type="radio"/> percentil mayor de 90 |
| Exfumadora                                 | <input checked="" type="radio"/> Nada<br><input type="radio"/> menos de 5 años<br><input type="radio"/> 5 a 10 años<br><input type="radio"/> mayor o igual a 10 años                 |
| Hábito tabáquico                           | <input checked="" type="radio"/> no<br><input type="radio"/> si                                                                                                                      |
| fumadora                                   | [*DATA REMOVED*]                                                                                                                                                                     |
| Consumo otros tóxicos                      | <input checked="" type="radio"/> no<br><input type="radio"/> si                                                                                                                      |
| Hb 1T                                      | [*DATA REMOVED*]                                                                                                                                                                     |
| Htc 1T                                     | [*DATA REMOVED*]                                                                                                                                                                     |
| Hb 2T                                      | [*DATA REMOVED*]                                                                                                                                                                     |
| HTC 2T                                     | [*DATA REMOVED*]                                                                                                                                                                     |
| Hb 3T                                      | [*DATA REMOVED*]                                                                                                                                                                     |
| HTC 3T                                     | [*DATA REMOVED*]                                                                                                                                                                     |
| Suplemento FE oral                         | <input checked="" type="radio"/> si<br><input type="radio"/> no                                                                                                                      |
| Suplemento fe iv                           | <input type="radio"/> si<br><input checked="" type="radio"/> no                                                                                                                      |
| Transfusión                                | <input checked="" type="radio"/> no<br><input type="radio"/> si                                                                                                                      |
| Solicitada Vit D                           | <input type="radio"/> no<br><input checked="" type="radio"/> si                                                                                                                      |
| Deficit vit D                              | <input type="radio"/> no<br><input checked="" type="radio"/> si                                                                                                                      |
| Suplemento vit D                           | <input checked="" type="radio"/> si<br><input type="radio"/> no                                                                                                                      |

|                       |                                                                                                                                                                                                                                                                                                                                                                                                              |
|-----------------------|--------------------------------------------------------------------------------------------------------------------------------------------------------------------------------------------------------------------------------------------------------------------------------------------------------------------------------------------------------------------------------------------------------------|
| Dieta, cuestionario   | <input checked="" type="radio"/> si<br><input type="radio"/> no                                                                                                                                                                                                                                                                                                                                              |
| Leche entera          | <input checked="" type="radio"/> Nunca o menos 1 vez al mes<br><input type="radio"/> 1 a 3 veces mes<br><input type="radio"/> 1 vez semana<br><input type="radio"/> 2 a 4 veces semana<br><input type="radio"/> 5 a 6 veces semana<br><input type="radio"/> 1 vez al día<br><input type="radio"/> 2 a 3 veces al día<br><input type="radio"/> 5 a 6 veces al día<br><input type="radio"/> más 6 veces al día |
| Leche semidesnatada   | <input checked="" type="radio"/> Nunca o menos 1 vez al mes<br><input type="radio"/> 1 a 3 veces mes<br><input type="radio"/> 1 vez semana<br><input type="radio"/> 2 a 4 veces semana<br><input type="radio"/> 5 a 6 veces semana<br><input type="radio"/> 1 vez al día<br><input type="radio"/> 2 a 3 veces al día<br><input type="radio"/> 5 a 6 veces al día<br><input type="radio"/> mas 6 veces al día |
| Leche desnatada       | <input type="radio"/> Nunca o menos 1 vez al mes<br><input type="radio"/> 1 a 3 veces mes<br><input type="radio"/> 1 vez semana<br><input type="radio"/> 2 a 4 veces semana<br><input type="radio"/> 5 a 6 veces semana<br><input type="radio"/> 1 vez al día<br><input checked="" type="radio"/> 2 a 3 veces al día<br><input type="radio"/> 5 a 6 veces al día<br><input type="radio"/> más 6 veces al día |
| Leche condensada      | <input checked="" type="radio"/> Nunca o menos 1 vez al mes<br><input type="radio"/> 1 a 3 veces mes<br><input type="radio"/> 1 vez semana<br><input type="radio"/> 2 a 4 veces semana<br><input type="radio"/> 5 a 6 veces semana<br><input type="radio"/> 1 vez al día<br><input type="radio"/> 2 a 3 veces al día<br><input type="radio"/> 5 a 6 veces al día<br><input type="radio"/> más 6 veces al día |
| nata o crema de leche | <input checked="" type="radio"/> Nunca o menos 1 vez al mes<br><input type="radio"/> 1 a 3 veces mes<br><input type="radio"/> 1 vez semana<br><input type="radio"/> 2 a 4 veces semana<br><input type="radio"/> 5 a 6 veces semana<br><input type="radio"/> 1 vez al día<br><input type="radio"/> 2 a 3 veces al día<br><input type="radio"/> 5 a 6 veces al día<br><input type="radio"/> más 6 veces al día |

|                                             |                                                                                                                                                                                                                                                                                                                                                                                                              |
|---------------------------------------------|--------------------------------------------------------------------------------------------------------------------------------------------------------------------------------------------------------------------------------------------------------------------------------------------------------------------------------------------------------------------------------------------------------------|
| Yogurt Entero                               | <input checked="" type="radio"/> Nunca o menos 1 vez al mes<br><input type="radio"/> 1 a 3 veces mes<br><input type="radio"/> 1 vez semana<br><input type="radio"/> 2 a 4 veces semana<br><input type="radio"/> 5 a 6 veces semana<br><input type="radio"/> 1 vez al día<br><input type="radio"/> 2 a 3 veces al día<br><input type="radio"/> 5 a 6 veces al día<br><input type="radio"/> más 6 veces al día |
| Yogurt desnatado                            | <input checked="" type="radio"/> Nunca o menos 1 vez al mes<br><input type="radio"/> 1 a 3 veces mes<br><input type="radio"/> 1 vez semana<br><input type="radio"/> 2 a 4 veces semana<br><input type="radio"/> 5 a 6 veces semana<br><input type="radio"/> 1 vez al día<br><input type="radio"/> 2 a 3 veces al día<br><input type="radio"/> 5 a 6 veces al día<br><input type="radio"/> más 6 veces al día |
| 100g requesón o queso blando o queso fresco | <input checked="" type="radio"/> Nunca o menos 1 vez al mes<br><input type="radio"/> 1 a 3 veces mes<br><input type="radio"/> 1 vez semana<br><input type="radio"/> 2 a 4 veces semana<br><input type="radio"/> 5 a 6 veces semana<br><input type="radio"/> 1 vez al día<br><input type="radio"/> 2 a 3 veces al día<br><input type="radio"/> 5 a 6 veces al día<br><input type="radio"/> más 6 veces al día |
| queso curado o semicurado o cremoso         | <input type="radio"/> Nunca o menos 1 vez al mes<br><input type="radio"/> 1 a 3 veces mes<br><input type="radio"/> 1 vez semana<br><input type="radio"/> 2 a 4 veces semana<br><input type="radio"/> 5 a 6 veces semana<br><input checked="" type="radio"/> 1 vez al día<br><input type="radio"/> 2 a 3 veces al día<br><input type="radio"/> 5 a 6 veces al día<br><input type="radio"/> más 6 veces al día |
| natillas flan pudding                       | <input type="radio"/> Nunca o menos 1 vez al mes<br><input type="radio"/> 1 a 3 veces mes<br><input type="radio"/> 1 vez semana<br><input checked="" type="radio"/> 2 a 4 veces semana<br><input type="radio"/> 5 a 6 veces semana<br><input type="radio"/> 1 vez al día<br><input type="radio"/> 2 a 3 veces al día<br><input type="radio"/> 5 a 6 veces al día<br><input type="radio"/> más 6 veces al día |
| Helado                                      | <input type="radio"/> Nunca o menos 1 vez al mes<br><input checked="" type="radio"/> 1 a 3 veces mes<br><input type="radio"/> 1 vez semana<br><input type="radio"/> 2 a 4 veces semana<br><input type="radio"/> 5 a 6 veces semana<br><input type="radio"/> 1 vez al día<br><input type="radio"/> 2 a 3 veces al día<br><input type="radio"/> 5 a 6 veces al día<br><input type="radio"/> más 6 veces al día |

|                                      |                                                                                                                                                                                                                                                                                                                                                                                                              |
|--------------------------------------|--------------------------------------------------------------------------------------------------------------------------------------------------------------------------------------------------------------------------------------------------------------------------------------------------------------------------------------------------------------------------------------------------------------|
| huevo                                | <input type="radio"/> Nunca o menos 1 vez al mes<br><input type="radio"/> 1 a 3 veces mes<br><input type="radio"/> 1 vez semana<br><input type="radio"/> 2 a 4 veces semana<br><input type="radio"/> 5 a 6 veces semana<br><input checked="" type="radio"/> 1 vez al día<br><input type="radio"/> 2 a 3 veces al día<br><input type="radio"/> 5 a 6 veces al día<br><input type="radio"/> más 6 veces al día |
| Pollo con piel                       | <input checked="" type="radio"/> Nunca o menos 1 vez al mes<br><input type="radio"/> 1 a 3 veces mes<br><input type="radio"/> 1 vez semana<br><input type="radio"/> 2 a 4 veces semana<br><input type="radio"/> 5 a 6 veces semana<br><input type="radio"/> 1 vez al día<br><input type="radio"/> 2 a 3 veces al día<br><input type="radio"/> 5 a 6 veces al día<br><input type="radio"/> más 6 veces al día |
| pollo sin piel                       | <input type="radio"/> Nunca o menos 1 vez al mes<br><input type="radio"/> 1 a 3 veces mes<br><input type="radio"/> 1 vez semana<br><input checked="" type="radio"/> 2 a 4 veces semana<br><input type="radio"/> 5 a 6 veces semana<br><input type="radio"/> 1 vez al día<br><input type="radio"/> 2 a 3 veces al día<br><input type="radio"/> 5 a 6 veces al día<br><input type="radio"/> más 6 veces al día |
| Ternera o cerdo o cordero            | <input type="radio"/> Nunca o menos 1 vez al mes<br><input type="radio"/> 1 a 3 veces mes<br><input type="radio"/> 1 vez semana<br><input checked="" type="radio"/> 2 a 4 veces semana<br><input type="radio"/> 5 a 6 veces semana<br><input type="radio"/> 1 vez al día<br><input type="radio"/> 2 a 3 veces al día<br><input type="radio"/> 5 a 6 veces al día<br><input type="radio"/> más 6 veces al día |
| carne caza: Conejo o codorniz o pato | <input type="radio"/> Nunca o menos 1 vez al mes<br><input type="radio"/> 1 a 3 veces mes<br><input checked="" type="radio"/> 1 vez semana<br><input type="radio"/> 2 a 4 veces semana<br><input type="radio"/> 5 a 6 veces semana<br><input type="radio"/> 1 vez al día<br><input type="radio"/> 2 a 3 veces al día<br><input type="radio"/> 5 a 6 veces al día<br><input type="radio"/> más 6 veces al día |
| Hígado de ternera o cerdo o pollo    | <input checked="" type="radio"/> Nunca o menos 1 vez al mes<br><input type="radio"/> 1 a 3 veces mes<br><input type="radio"/> 1 vez semana<br><input type="radio"/> 2 a 4 veces semana<br><input type="radio"/> 5 a 6 veces semana<br><input type="radio"/> 1 vez al día<br><input type="radio"/> 2 a 3 veces al día<br><input type="radio"/> 5 a 6 veces al día<br><input type="radio"/> más 6 veces al día |

---

Vísceras

- ☒ Nunca o menos 1 vez al mes  
☐ 1 a 3 veces mes  
☐ 1 vez semana  
☐ 2 a 4 veces semana  
☐ 5 a 6 veces semana  
☐ 1 vez al día  
☐ 2 a 3 veces al día  
☐ 5 a 6 veces al día  
☐ más 6 veces al día

---

Embutido

- ☐ Nunca o menos 1 vez al mes  
☐ 1 a 3 veces mes  
☐ 1 vez semana  
☒ 2 a 4 veces semana  
☐ 5 a 6 veces semana  
☐ 1 vez al día  
☐ 2 a 3 veces al día  
☐ 5 a 6 veces al día  
☐ más 6 veces al día

---

Salchicha o similar

- ☐ Nunca o menos 1 vez al mes  
☐ 1 a 3 veces mes  
☒ 1 vez semana  
☐ 2 a 4 veces semana  
☐ 5 a 6 veces semana  
☐ 1 vez al día  
☐ 2 a 3 veces al día  
☐ 5 a 6 veces al día  
☐ más 6 veces al día

---

Pate o foiegras

- ☒ Nunca o menos 1 vez al mes  
☐ 1 a 3 veces mes  
☐ 1 vez semana  
☐ 2 a 4 veces semana  
☐ 5 a 6 veces semana  
☐ 1 vez al día  
☐ 2 a 3 veces al día  
☐ 5 a 6 veces al día  
☐ más 6 veces al día

---

Hamburguesa

- ☐ Nunca o menos 1 vez al mes  
☐ 1 a 3 veces mes  
☒ 1 vez semana  
☐ 2 a 4 veces semana  
☐ 5 a 6 veces semana  
☐ 1 vez al día  
☐ 2 a 3 veces al día  
☐ 5 a 6 veces al día  
☐ más 6 veces al día

---

tocino o bacon

- ☐ Nunca o menos 1 vez al mes  
☒ 1 a 3 veces mes  
☐ 1 vez semana  
☐ 2 a 4 veces semana  
☐ 5 a 6 veces semana  
☐ 1 vez al día  
☐ 2 a 3 veces al día  
☐ 5 a 6 veces al día  
☐ más 6 veces al día

---

Pescado frito

- ☐ Nunca o menos 1 vez al mes  
☒ 1 a 3 veces mes  
☐ 1 vez semana  
☐ 2 a 4 veces semana  
☐ 5 a 6 veces semana  
☐ 1 vez al día  
☐ 2 a 3 veces al día  
☐ 5 a 6 veces al día  
☐ más 6 veces al día

---

pescado hervido blanco

- ☐ Nunca o menos 1 vez al mes  
☒ 1 a 3 veces mes  
☐ 1 vez semana  
☐ 2 a 4 veces semana  
☐ 5 a 6 veces semana  
☐ 1 vez al día  
☐ 2 a 3 veces al día  
☐ 5 a 6 veces al día  
☐ más 6 veces al día

---

pescado hervido azul

- ☐ Nunca o menos 1 vez al mes  
☒ 1 a 3 veces mes  
☐ 1 vez semana  
☐ 2 a 4 veces semana  
☐ 5 a 6 veces semana  
☐ 1 vez al día  
☐ 2 a 3 veces al día  
☐ 5 a 6 veces al día  
☐ más 6 veces al día

---

otros pescado azul

- ☐ Nunca o menos 1 vez al mes  
☒ 1 a 3 veces mes  
☐ 1 vez semana  
☐ 2 a 4 veces semana  
☐ 5 a 6 veces semana  
☐ 1 vez al día  
☐ 2 a 3 veces al día  
☐ 5 a 6 veces al día  
☐ más 6 veces al día

---

atun conserva

- ☐ Nunca o menos 1 vez al mes  
☐ 1 a 3 veces mes  
☐ 1 vez semana  
☒ 2 a 4 veces semana  
☐ 5 a 6 veces semana  
☐ 1 vez al día  
☐ 2 a 3 veces al día  
☐ 5 a 6 veces al día  
☐ más 6 veces al día

---

sardina conserva

- ☒ Nunca o menos 1 vez al mes  
☐ 1 a 3 veces mes  
☐ 1 vez semana  
☐ 2 a 4 veces semana  
☐ 5 a 6 veces semana  
☐ 1 vez al día  
☐ 2 a 3 veces al día  
☐ 5 a 6 veces al día  
☐ más 6 veces al día

|                                         |                                                                                                                                                                                                                                                                                                                                                                                                              |
|-----------------------------------------|--------------------------------------------------------------------------------------------------------------------------------------------------------------------------------------------------------------------------------------------------------------------------------------------------------------------------------------------------------------------------------------------------------------|
| pescado ahumado                         | <input checked="" type="radio"/> Nunca o menos 1 vez al mes<br><input type="radio"/> 1 a 3 veces mes<br><input type="radio"/> 1 vez semana<br><input type="radio"/> 2 a 4 veces semana<br><input type="radio"/> 5 a 6 veces semana<br><input type="radio"/> 1 vez al día<br><input type="radio"/> 2 a 3 veces al día<br><input type="radio"/> 5 a 6 veces al día<br><input type="radio"/> más 6 veces al día |
| almejas o mejillones o ostras unos 100g | <input checked="" type="radio"/> Nunca o menos 1 vez al mes<br><input type="radio"/> 1 a 3 veces mes<br><input type="radio"/> 1 vez semana<br><input type="radio"/> 2 a 4 veces semana<br><input type="radio"/> 5 a 6 veces semana<br><input type="radio"/> 1 vez al día<br><input type="radio"/> 2 a 3 veces al día<br><input type="radio"/> 5 a 6 veces al día<br><input type="radio"/> más 6 veces al día |
| calamar o chipiron o sepia unos 100g    | <input type="radio"/> Nunca o menos 1 vez al mes<br><input checked="" type="radio"/> 1 a 3 veces mes<br><input type="radio"/> 1 vez semana<br><input type="radio"/> 2 a 4 veces semana<br><input type="radio"/> 5 a 6 veces semana<br><input type="radio"/> 1 vez al día<br><input type="radio"/> 2 a 3 veces al día<br><input type="radio"/> 5 a 6 veces al día<br><input type="radio"/> más 6 veces al día |
| marisco unos 100g                       | <input type="radio"/> Nunca o menos 1 vez al mes<br><input checked="" type="radio"/> 1 a 3 veces mes<br><input type="radio"/> 1 vez semana<br><input type="radio"/> 2 a 4 veces semana<br><input type="radio"/> 5 a 6 veces semana<br><input type="radio"/> 1 vez al día<br><input type="radio"/> 2 a 3 veces al día<br><input type="radio"/> 5 a 6 veces al día<br><input type="radio"/> más 6 veces al día |
| Espinacas o acelgas cocinadas           | <input checked="" type="radio"/> Nunca o menos 1 vez al mes<br><input type="radio"/> 1 a 3 veces mes<br><input type="radio"/> 1 vez semana<br><input type="radio"/> 2 a 4 veces semana<br><input type="radio"/> 5 a 6 veces semana<br><input type="radio"/> 1 vez al día<br><input type="radio"/> 2 a 3 veces al día<br><input type="radio"/> 5 a 6 veces al día<br><input type="radio"/> más 6 veces al día |
| Col o coliflor o brocoli cocinado       | <input checked="" type="radio"/> Nunca o menos 1 vez al mes<br><input type="radio"/> 1 a 3 veces mes<br><input type="radio"/> 1 vez semana<br><input type="radio"/> 2 a 4 veces semana<br><input type="radio"/> 5 a 6 veces semana<br><input type="radio"/> 1 vez al día<br><input type="radio"/> 2 a 3 veces al día<br><input type="radio"/> 5 a 6 veces al día<br><input type="radio"/> más 6 veces al día |



---

Lechuga o endivia o escarola

- ☐ Nunca o menos 1 vez al mes  
☐ 1 a 3 veces mes  
☐ 1 vez semana  
☒ 2 a 4 veces semana  
☐ 5 a 6 veces semana  
☐ 1 vez al día  
☐ 2 a 3 veces al día  
☐ 5 a 6 veces al día  
☐ más 6 veces al día

---

tomate ensalada

- ☐ Nunca o menos 1 vez al mes  
☐ 1 a 3 veces mes  
☐ 1 vez semana  
☒ 2 a 4 veces semana  
☐ 5 a 6 veces semana  
☐ 1 vez al día  
☐ 2 a 3 veces al día  
☐ 5 a 6 veces al día  
☐ más 6 veces al día

---

cebolla

- ☐ Nunca o menos 1 vez al mes  
☐ 1 a 3 veces mes  
☐ 1 vez semana  
☒ 2 a 4 veces semana  
☐ 5 a 6 veces semana  
☐ 1 vez al día  
☐ 2 a 3 veces al día  
☐ 5 a 6 veces al día  
☐ más 6 veces al día

---

Zanahoria o calabaza

- ☐ Nunca o menos 1 vez al mes  
☐ 1 a 3 veces mes  
☐ 1 vez semana  
☒ 2 a 4 veces semana  
☐ 5 a 6 veces semana  
☐ 1 vez al día  
☐ 2 a 3 veces al día  
☐ 5 a 6 veces al día  
☐ más 6 veces al día

---

Judías verdes

- ☐ Nunca o menos 1 vez al mes  
☐ 1 a 3 veces mes  
☐ 1 vez semana  
☒ 2 a 4 veces semana  
☐ 5 a 6 veces semana  
☐ 1 vez al día  
☐ 2 a 3 veces al día  
☐ 5 a 6 veces al día  
☐ más 6 veces al día

---

Berenjena o calabacin o pepino

- ☐ Nunca o menos 1 vez al mes  
☐ 1 a 3 veces mes  
☐ 1 vez semana  
☒ 2 a 4 veces semana  
☐ 5 a 6 veces semana  
☐ 1 vez al día  
☐ 2 a 3 veces al día  
☐ 5 a 6 veces al día  
☐ más 6 veces al día

|                       |                                                                                                                                                                                                                                                                                                                                                                                                              |
|-----------------------|--------------------------------------------------------------------------------------------------------------------------------------------------------------------------------------------------------------------------------------------------------------------------------------------------------------------------------------------------------------------------------------------------------------|
| pimiento              | <input type="radio"/> Nunca o menos 1 vez al mes<br><input type="radio"/> 1 a 3 veces mes<br><input type="radio"/> 1 vez semana<br><input checked="" type="radio"/> 2 a 4 veces semana<br><input type="radio"/> 5 a 6 veces semana<br><input type="radio"/> 1 vez al día<br><input type="radio"/> 2 a 3 veces al día<br><input type="radio"/> 5 a 6 veces al día<br><input type="radio"/> más 6 veces al día |
| alcachofa             | <input type="radio"/> Nunca o menos 1 vez al mes<br><input type="radio"/> 1 a 3 veces mes<br><input checked="" type="radio"/> 1 vez semana<br><input type="radio"/> 2 a 4 veces semana<br><input type="radio"/> 5 a 6 veces semana<br><input type="radio"/> 1 vez al día<br><input type="radio"/> 2 a 3 veces al día<br><input type="radio"/> 5 a 6 veces al día<br><input type="radio"/> más 6 veces al día |
| espárragos            | <input checked="" type="radio"/> Nunca o menos 1 vez al mes<br><input type="radio"/> 1 a 3 veces mes<br><input type="radio"/> 1 vez semana<br><input type="radio"/> 2 a 4 veces semana<br><input type="radio"/> 5 a 6 veces semana<br><input type="radio"/> 1 vez al día<br><input type="radio"/> 2 a 3 veces al día<br><input type="radio"/> 5 a 6 veces al día<br><input type="radio"/> más 6 veces al día |
| maíz hervido          | <input type="radio"/> Nunca o menos 1 vez al mes<br><input type="radio"/> 1 a 3 veces mes<br><input checked="" type="radio"/> 1 vez semana<br><input type="radio"/> 2 a 4 veces semana<br><input type="radio"/> 5 a 6 veces semana<br><input type="radio"/> 1 vez al día<br><input type="radio"/> 2 a 3 veces al día<br><input type="radio"/> 5 a 6 veces al día<br><input type="radio"/> más 6 veces al día |
| legumbres             | <input type="radio"/> Nunca o menos 1 vez al mes<br><input type="radio"/> 1 a 3 veces mes<br><input checked="" type="radio"/> 1 vez semana<br><input type="radio"/> 2 a 4 veces semana<br><input type="radio"/> 5 a 6 veces semana<br><input type="radio"/> 1 vez al día<br><input type="radio"/> 2 a 3 veces al día<br><input type="radio"/> 5 a 6 veces al día<br><input type="radio"/> más 6 veces al día |
| naranjas o mandarinas | <input checked="" type="radio"/> Nunca o menos 1 vez al mes<br><input type="radio"/> 1 a 3 veces mes<br><input type="radio"/> 1 vez semana<br><input type="radio"/> 2 a 4 veces semana<br><input type="radio"/> 5 a 6 veces semana<br><input type="radio"/> 1 vez al día<br><input type="radio"/> 2 a 3 veces al día<br><input type="radio"/> 5 a 6 veces al día<br><input type="radio"/> más 6 veces al día |

|                       |                                                                                                                                                                                                                                                                                                                                                                                                              |
|-----------------------|--------------------------------------------------------------------------------------------------------------------------------------------------------------------------------------------------------------------------------------------------------------------------------------------------------------------------------------------------------------------------------------------------------------|
| zum natural fruta     | <input checked="" type="radio"/> Nunca o menos 1 vez al mes<br><input type="radio"/> 1 a 3 veces mes<br><input type="radio"/> 1 vez semana<br><input type="radio"/> 2 a 4 veces semana<br><input type="radio"/> 5 a 6 veces semana<br><input type="radio"/> 1 vez al día<br><input type="radio"/> 2 a 3 veces al día<br><input type="radio"/> 5 a 6 veces al día<br><input type="radio"/> más 6 veces al día |
| platano               | <input type="radio"/> Nunca o menos 1 vez al mes<br><input type="radio"/> 1 a 3 veces mes<br><input type="radio"/> 1 vez semana<br><input type="radio"/> 2 a 4 veces semana<br><input type="radio"/> 5 a 6 veces semana<br><input checked="" type="radio"/> 1 vez al día<br><input type="radio"/> 2 a 3 veces al día<br><input type="radio"/> 5 a 6 veces al día<br><input type="radio"/> más 6 veces al día |
| manzana o pera        | <input type="radio"/> Nunca o menos 1 vez al mes<br><input type="radio"/> 1 a 3 veces mes<br><input type="radio"/> 1 vez semana<br><input checked="" type="radio"/> 2 a 4 veces semana<br><input type="radio"/> 5 a 6 veces semana<br><input type="radio"/> 1 vez al día<br><input type="radio"/> 2 a 3 veces al día<br><input type="radio"/> 5 a 6 veces al día<br><input type="radio"/> más 6 veces al día |
| melocotón o nectarina | <input type="radio"/> Nunca o menos 1 vez al mes<br><input type="radio"/> 1 a 3 veces mes<br><input type="radio"/> 1 vez semana<br><input checked="" type="radio"/> 2 a 4 veces semana<br><input type="radio"/> 5 a 6 veces semana<br><input type="radio"/> 1 vez al día<br><input type="radio"/> 2 a 3 veces al día<br><input type="radio"/> 5 a 6 veces al día<br><input type="radio"/> más 6 veces al día |
| sandia o melon        | <input type="radio"/> Nunca o menos 1 vez al mes<br><input type="radio"/> 1 a 3 veces mes<br><input type="radio"/> 1 vez semana<br><input type="radio"/> 2 a 4 veces semana<br><input type="radio"/> 5 a 6 veces semana<br><input checked="" type="radio"/> 1 vez al día<br><input type="radio"/> 2 a 3 veces al día<br><input type="radio"/> 5 a 6 veces al día<br><input type="radio"/> más 6 veces al día |
| uva                   | <input checked="" type="radio"/> Nunca o menos 1 vez al mes<br><input type="radio"/> 1 a 3 veces mes<br><input type="radio"/> 1 vez semana<br><input type="radio"/> 2 a 4 veces semana<br><input type="radio"/> 5 a 6 veces semana<br><input type="radio"/> 1 vez al día<br><input type="radio"/> 2 a 3 veces al día<br><input type="radio"/> 5 a 6 veces al día<br><input type="radio"/> más 6 veces al día |

---

bruna o ciruela

- ☐ Nunca o menos 1 vez al mes  
☐ 1 a 3 veces mes  
☐ 1 vez semana  
☒ 2 a 4 veces semana  
☐ 5 a 6 veces semana  
☐ 1 vez al día  
☐ 2 a 3 veces al día  
☐ 5 a 6 veces al día  
☐ más 6 veces al día

---

kiwi

- ☒ Nunca o menos 1 vez al mes  
☐ 1 a 3 veces mes  
☐ 1 vez semana  
☐ 2 a 4 veces semana  
☐ 5 a 6 veces semana  
☐ 1 vez al día  
☐ 2 a 3 veces al día  
☐ 5 a 6 veces al día  
☐ más 6 veces al día

---

aceituna

- ☐ Nunca o menos 1 vez al mes  
☐ 1 a 3 veces mes  
☐ 1 vez semana  
☒ 2 a 4 veces semana  
☐ 5 a 6 veces semana  
☐ 1 vez al día  
☐ 2 a 3 veces al día  
☐ 5 a 6 veces al día  
☐ más 6 veces al día

---

frutos secos

- ☒ Nunca o menos 1 vez al mes  
☐ 1 a 3 veces mes  
☐ 1 vez semana  
☐ 2 a 4 veces semana  
☐ 5 a 6 veces semana  
☐ 1 vez al día  
☐ 2 a 3 veces al día  
☐ 5 a 6 veces al día  
☐ más 6 veces al día

---

pan blanco

- ☐ Nunca o menos 1 vez al mes  
☐ 1 a 3 veces mes  
☐ 1 vez semana  
☐ 2 a 4 veces semana  
☒ 5 a 6 veces semana  
☐ 1 vez al día  
☐ 2 a 3 veces al día  
☐ 5 a 6 veces al día  
☐ más 6 veces al día

---

pan integral

- ☒ Nunca o menos 1 vez al mes  
☐ 1 a 3 veces mes  
☐ 1 vez semana  
☐ 2 a 4 veces semana  
☐ 5 a 6 veces semana  
☐ 1 vez al día  
☐ 2 a 3 veces al día  
☐ 5 a 6 veces al día  
☐ más 6 veces al día

---

|                   |                                                                                                                                                                                                                                                                                                                                                                                                              |
|-------------------|--------------------------------------------------------------------------------------------------------------------------------------------------------------------------------------------------------------------------------------------------------------------------------------------------------------------------------------------------------------------------------------------------------------|
| cereales desayuno | <input type="radio"/> Nunca o menos 1 vez al mes<br><input type="radio"/> 1 a 3 veces mes<br><input type="radio"/> 1 vez semana<br><input checked="" type="radio"/> 2 a 4 veces semana<br><input type="radio"/> 5 a 6 veces semana<br><input type="radio"/> 1 vez al día<br><input type="radio"/> 2 a 3 veces al día<br><input type="radio"/> 5 a 6 veces al día<br><input type="radio"/> más 6 veces al día |
|-------------------|--------------------------------------------------------------------------------------------------------------------------------------------------------------------------------------------------------------------------------------------------------------------------------------------------------------------------------------------------------------------------------------------------------------|

---

|                |                                                                                                                                                                                                                                                                                                                                                                                                              |
|----------------|--------------------------------------------------------------------------------------------------------------------------------------------------------------------------------------------------------------------------------------------------------------------------------------------------------------------------------------------------------------------------------------------------------------|
| patatas fritas | <input type="radio"/> Nunca o menos 1 vez al mes<br><input type="radio"/> 1 a 3 veces mes<br><input checked="" type="radio"/> 1 vez semana<br><input type="radio"/> 2 a 4 veces semana<br><input type="radio"/> 5 a 6 veces semana<br><input type="radio"/> 1 vez al día<br><input type="radio"/> 2 a 3 veces al día<br><input type="radio"/> 5 a 6 veces al día<br><input type="radio"/> más 6 veces al día |
|----------------|--------------------------------------------------------------------------------------------------------------------------------------------------------------------------------------------------------------------------------------------------------------------------------------------------------------------------------------------------------------------------------------------------------------|

---

|                          |                                                                                                                                                                                                                                                                                                                                                                                                              |
|--------------------------|--------------------------------------------------------------------------------------------------------------------------------------------------------------------------------------------------------------------------------------------------------------------------------------------------------------------------------------------------------------------------------------------------------------|
| patatas cocidas o asadas | <input type="radio"/> Nunca o menos 1 vez al mes<br><input type="radio"/> 1 a 3 veces mes<br><input checked="" type="radio"/> 1 vez semana<br><input type="radio"/> 2 a 4 veces semana<br><input type="radio"/> 5 a 6 veces semana<br><input type="radio"/> 1 vez al día<br><input type="radio"/> 2 a 3 veces al día<br><input type="radio"/> 5 a 6 veces al día<br><input type="radio"/> más 6 veces al día |
|--------------------------|--------------------------------------------------------------------------------------------------------------------------------------------------------------------------------------------------------------------------------------------------------------------------------------------------------------------------------------------------------------------------------------------------------------|

---

|             |                                                                                                                                                                                                                                                                                                                                                                                                              |
|-------------|--------------------------------------------------------------------------------------------------------------------------------------------------------------------------------------------------------------------------------------------------------------------------------------------------------------------------------------------------------------------------------------------------------------|
| bolsa papas | <input type="radio"/> Nunca o menos 1 vez al mes<br><input type="radio"/> 1 a 3 veces mes<br><input checked="" type="radio"/> 1 vez semana<br><input type="radio"/> 2 a 4 veces semana<br><input type="radio"/> 5 a 6 veces semana<br><input type="radio"/> 1 vez al día<br><input type="radio"/> 2 a 3 veces al día<br><input type="radio"/> 5 a 6 veces al día<br><input type="radio"/> más 6 veces al día |
|-------------|--------------------------------------------------------------------------------------------------------------------------------------------------------------------------------------------------------------------------------------------------------------------------------------------------------------------------------------------------------------------------------------------------------------|

---

|                |                                                                                                                                                                                                                                                                                                                                                                                                              |
|----------------|--------------------------------------------------------------------------------------------------------------------------------------------------------------------------------------------------------------------------------------------------------------------------------------------------------------------------------------------------------------------------------------------------------------|
| arroz cocinado | <input type="radio"/> Nunca o menos 1 vez al mes<br><input type="radio"/> 1 a 3 veces mes<br><input type="radio"/> 1 vez semana<br><input checked="" type="radio"/> 2 a 4 veces semana<br><input type="radio"/> 5 a 6 veces semana<br><input type="radio"/> 1 vez al día<br><input type="radio"/> 2 a 3 veces al día<br><input type="radio"/> 5 a 6 veces al día<br><input type="radio"/> más 6 veces al día |
|----------------|--------------------------------------------------------------------------------------------------------------------------------------------------------------------------------------------------------------------------------------------------------------------------------------------------------------------------------------------------------------------------------------------------------------|

---

|       |                                                                                                                                                                                                                                                                                                                                                                                                              |
|-------|--------------------------------------------------------------------------------------------------------------------------------------------------------------------------------------------------------------------------------------------------------------------------------------------------------------------------------------------------------------------------------------------------------------|
| pasta | <input type="radio"/> Nunca o menos 1 vez al mes<br><input type="radio"/> 1 a 3 veces mes<br><input checked="" type="radio"/> 1 vez semana<br><input type="radio"/> 2 a 4 veces semana<br><input type="radio"/> 5 a 6 veces semana<br><input type="radio"/> 1 vez al día<br><input type="radio"/> 2 a 3 veces al día<br><input type="radio"/> 5 a 6 veces al día<br><input type="radio"/> más 6 veces al día |
|-------|--------------------------------------------------------------------------------------------------------------------------------------------------------------------------------------------------------------------------------------------------------------------------------------------------------------------------------------------------------------------------------------------------------------|

---

|                     |                                                                                                                                                                                                                                                                                                                                                                                                              |
|---------------------|--------------------------------------------------------------------------------------------------------------------------------------------------------------------------------------------------------------------------------------------------------------------------------------------------------------------------------------------------------------------------------------------------------------|
| pizza               | <input type="radio"/> Nunca o menos 1 vez al mes<br><input checked="" type="radio"/> 1 a 3 veces mes<br><input type="radio"/> 1 vez semana<br><input type="radio"/> 2 a 4 veces semana<br><input type="radio"/> 5 a 6 veces semana<br><input type="radio"/> 1 vez al día<br><input type="radio"/> 2 a 3 veces al día<br><input type="radio"/> 5 a 6 veces al día<br><input type="radio"/> más 6 veces al día |
| aceite oliva        | <input type="radio"/> Nunca o menos 1 vez al mes<br><input type="radio"/> 1 a 3 veces mes<br><input type="radio"/> 1 vez semana<br><input checked="" type="radio"/> 2 a 4 veces semana<br><input type="radio"/> 5 a 6 veces semana<br><input type="radio"/> 1 vez al día<br><input type="radio"/> 2 a 3 veces al día<br><input type="radio"/> 5 a 6 veces al día<br><input type="radio"/> más 6 veces al día |
| otros aceites       | <input type="radio"/> Nunca o menos 1 vez al mes<br><input checked="" type="radio"/> 1 a 3 veces mes<br><input type="radio"/> 1 vez semana<br><input type="radio"/> 2 a 4 veces semana<br><input type="radio"/> 5 a 6 veces semana<br><input type="radio"/> 1 vez al día<br><input type="radio"/> 2 a 3 veces al día<br><input type="radio"/> 5 a 6 veces al día<br><input type="radio"/> más 6 veces al día |
| margarina           | <input checked="" type="radio"/> Nunca o menos 1 vez al mes<br><input type="radio"/> 1 a 3 veces mes<br><input type="radio"/> 1 vez semana<br><input type="radio"/> 2 a 4 veces semana<br><input type="radio"/> 5 a 6 veces semana<br><input type="radio"/> 1 vez al día<br><input type="radio"/> 2 a 3 veces al día<br><input type="radio"/> 5 a 6 veces al día<br><input type="radio"/> más 6 veces al día |
| mantequilla         | <input type="radio"/> Nunca o menos 1 vez al mes<br><input type="radio"/> 1 a 3 veces mes<br><input type="radio"/> 1 vez semana<br><input checked="" type="radio"/> 2 a 4 veces semana<br><input type="radio"/> 5 a 6 veces semana<br><input type="radio"/> 1 vez al día<br><input type="radio"/> 2 a 3 veces al día<br><input type="radio"/> 5 a 6 veces al día<br><input type="radio"/> más 6 veces al día |
| galletas tipo maria | <input type="radio"/> Nunca o menos 1 vez al mes<br><input type="radio"/> 1 a 3 veces mes<br><input type="radio"/> 1 vez semana<br><input checked="" type="radio"/> 2 a 4 veces semana<br><input type="radio"/> 5 a 6 veces semana<br><input type="radio"/> 1 vez al día<br><input type="radio"/> 2 a 3 veces al día<br><input type="radio"/> 5 a 6 veces al día<br><input type="radio"/> más 6 veces al día |

|                           |                                                                                                                                                                                                                                                                                                                                                                                                              |
|---------------------------|--------------------------------------------------------------------------------------------------------------------------------------------------------------------------------------------------------------------------------------------------------------------------------------------------------------------------------------------------------------------------------------------------------------|
| galletas chocolate        | <input type="radio"/> Nunca o menos 1 vez al mes<br><input type="radio"/> 1 a 3 veces mes<br><input checked="" type="radio"/> 1 vez semana<br><input type="radio"/> 2 a 4 veces semana<br><input type="radio"/> 5 a 6 veces semana<br><input type="radio"/> 1 vez al día<br><input type="radio"/> 2 a 3 veces al día<br><input type="radio"/> 5 a 6 veces al día<br><input type="radio"/> más 6 veces al día |
| bollieria                 | <input type="radio"/> Nunca o menos 1 vez al mes<br><input type="radio"/> 1 a 3 veces mes<br><input checked="" type="radio"/> 1 vez semana<br><input type="radio"/> 2 a 4 veces semana<br><input type="radio"/> 5 a 6 veces semana<br><input type="radio"/> 1 vez al día<br><input type="radio"/> 2 a 3 veces al día<br><input type="radio"/> 5 a 6 veces al día<br><input type="radio"/> más 6 veces al día |
| chocolate o bombones      | <input type="radio"/> Nunca o menos 1 vez al mes<br><input type="radio"/> 1 a 3 veces mes<br><input checked="" type="radio"/> 1 vez semana<br><input type="radio"/> 2 a 4 veces semana<br><input type="radio"/> 5 a 6 veces semana<br><input type="radio"/> 1 vez al día<br><input type="radio"/> 2 a 3 veces al día<br><input type="radio"/> 5 a 6 veces al día<br><input type="radio"/> más 6 veces al día |
| chocolate polvo o colacao | <input type="radio"/> Nunca o menos 1 vez al mes<br><input type="radio"/> 1 a 3 veces mes<br><input checked="" type="radio"/> 1 vez semana<br><input type="radio"/> 2 a 4 veces semana<br><input type="radio"/> 5 a 6 veces semana<br><input type="radio"/> 1 vez al día<br><input type="radio"/> 2 a 3 veces al día<br><input type="radio"/> 5 a 6 veces al día<br><input type="radio"/> más 6 veces al día |
| vino tinto                | <input checked="" type="radio"/> Nunca o menos 1 vez al mes<br><input type="radio"/> 1 a 3 veces mes<br><input type="radio"/> 1 vez semana<br><input type="radio"/> 2 a 4 veces semana<br><input type="radio"/> 5 a 6 veces semana<br><input type="radio"/> 1 vez al día<br><input type="radio"/> 2 a 3 veces al día<br><input type="radio"/> 5 a 6 veces al día<br><input type="radio"/> más 6 veces al día |
| vino blanco               | <input checked="" type="radio"/> Nunca o menos 1 vez al mes<br><input type="radio"/> 1 a 3 veces mes<br><input type="radio"/> 1 vez semana<br><input type="radio"/> 2 a 4 veces semana<br><input type="radio"/> 5 a 6 veces semana<br><input type="radio"/> 1 vez al día<br><input type="radio"/> 2 a 3 veces al día<br><input type="radio"/> 5 a 6 veces al día<br><input type="radio"/> más 6 veces al día |

|                       |                                                                                                                                                                                                                                                                                                                                                                                                              |
|-----------------------|--------------------------------------------------------------------------------------------------------------------------------------------------------------------------------------------------------------------------------------------------------------------------------------------------------------------------------------------------------------------------------------------------------------|
| vino seco o vermut    | <input checked="" type="radio"/> Nunca o menos 1 vez al mes<br><input type="radio"/> 1 a 3 veces mes<br><input type="radio"/> 1 vez semana<br><input type="radio"/> 2 a 4 veces semana<br><input type="radio"/> 5 a 6 veces semana<br><input type="radio"/> 1 vez al día<br><input type="radio"/> 2 a 3 veces al día<br><input type="radio"/> 5 a 6 veces al día<br><input type="radio"/> más 6 veces al día |
| cerveza               | <input checked="" type="radio"/> Nunca o menos 1 vez al mes<br><input type="radio"/> 1 a 3 veces mes<br><input type="radio"/> 1 vez semana<br><input type="radio"/> 2 a 4 veces semana<br><input type="radio"/> 5 a 6 veces semana<br><input type="radio"/> 1 vez al día<br><input type="radio"/> 2 a 3 veces al día<br><input type="radio"/> 5 a 6 veces al día<br><input type="radio"/> más 6 veces al día |
| cerveza sin alcohol   | <input checked="" type="radio"/> Nunca o menos 1 vez al mes<br><input type="radio"/> 1 a 3 veces mes<br><input type="radio"/> 1 vez semana<br><input type="radio"/> 2 a 4 veces semana<br><input type="radio"/> 5 a 6 veces semana<br><input type="radio"/> 1 vez al día<br><input type="radio"/> 2 a 3 veces al día<br><input type="radio"/> 5 a 6 veces al día<br><input type="radio"/> más 6 veces al día |
| licores               | <input checked="" type="radio"/> Nunca o menos 1 vez al mes<br><input type="radio"/> 1 a 3 veces mes<br><input type="radio"/> 1 vez semana<br><input type="radio"/> 2 a 4 veces semana<br><input type="radio"/> 5 a 6 veces semana<br><input type="radio"/> 1 vez al día<br><input type="radio"/> 2 a 3 veces al día<br><input type="radio"/> 5 a 6 veces al día<br><input type="radio"/> más 6 veces al día |
| ginebra o ron o vodka | <input checked="" type="radio"/> Nunca o menos 1 vez al mes<br><input type="radio"/> 1 a 3 veces mes<br><input type="radio"/> 1 vez semana<br><input type="radio"/> 2 a 4 veces semana<br><input type="radio"/> 5 a 6 veces semana<br><input type="radio"/> 1 vez al día<br><input type="radio"/> 2 a 3 veces al día<br><input type="radio"/> 5 a 6 veces al día<br><input type="radio"/> más 6 veces al día |
| refresco normal       | <input type="radio"/> Nunca o menos 1 vez al mes<br><input type="radio"/> 1 a 3 veces mes<br><input type="radio"/> 1 vez semana<br><input checked="" type="radio"/> 2 a 4 veces semana<br><input type="radio"/> 5 a 6 veces semana<br><input type="radio"/> 1 vez al día<br><input type="radio"/> 2 a 3 veces al día<br><input type="radio"/> 5 a 6 veces al día<br><input type="radio"/> más 6 veces al día |



|                          |                                                                                                                                                                                                                                                                                                                                                                                                              |
|--------------------------|--------------------------------------------------------------------------------------------------------------------------------------------------------------------------------------------------------------------------------------------------------------------------------------------------------------------------------------------------------------------------------------------------------------|
| refresco sin azúcar      | <input type="radio"/> Nunca o menos 1 vez al mes<br><input type="radio"/> 1 a 3 veces mes<br><input type="radio"/> 1 vez semana<br><input checked="" type="radio"/> 2 a 4 veces semana<br><input type="radio"/> 5 a 6 veces semana<br><input type="radio"/> 1 vez al día<br><input type="radio"/> 2 a 3 veces al día<br><input type="radio"/> 5 a 6 veces al día<br><input type="radio"/> más 6 veces al día |
| Agua del grifo           | <input checked="" type="radio"/> Nunca o menos 1 vez al mes<br><input type="radio"/> 1 a 3 veces mes<br><input type="radio"/> 1 vez semana<br><input type="radio"/> 2 a 4 veces semana<br><input type="radio"/> 5 a 6 veces semana<br><input type="radio"/> 1 vez al día<br><input type="radio"/> 2 a 3 veces al día<br><input type="radio"/> 5 a 6 veces al día<br><input type="radio"/> más 6 veces al día |
| agua embotellada sin gas | <input type="radio"/> Nunca o menos 1 vez al mes<br><input type="radio"/> 1 a 3 veces mes<br><input type="radio"/> 1 vez semana<br><input type="radio"/> 2 a 4 veces semana<br><input type="radio"/> 5 a 6 veces semana<br><input type="radio"/> 1 vez al día<br><input type="radio"/> 2 a 3 veces al día<br><input type="radio"/> 5 a 6 veces al día<br><input checked="" type="radio"/> más 6 veces al día |
| agua embotellada con gas | <input checked="" type="radio"/> Nunca o menos 1 vez al mes<br><input type="radio"/> 1 a 3 veces mes<br><input type="radio"/> 1 vez semana<br><input type="radio"/> 2 a 4 veces semana<br><input type="radio"/> 5 a 6 veces semana<br><input type="radio"/> 1 vez al día<br><input type="radio"/> 2 a 3 veces al día<br><input type="radio"/> 5 a 6 veces al día<br><input type="radio"/> más 6 veces al día |
| zumو frutas embasado     | <input checked="" type="radio"/> Nunca o menos 1 vez al mes<br><input type="radio"/> 1 a 3 veces mes<br><input type="radio"/> 1 vez semana<br><input type="radio"/> 2 a 4 veces semana<br><input type="radio"/> 5 a 6 veces semana<br><input type="radio"/> 1 vez al día<br><input type="radio"/> 2 a 3 veces al día<br><input type="radio"/> 5 a 6 veces al día<br><input type="radio"/> más 6 veces al día |
| cafe                     | <input type="radio"/> Nunca o menos 1 vez al mes<br><input type="radio"/> 1 a 3 veces mes<br><input type="radio"/> 1 vez semana<br><input type="radio"/> 2 a 4 veces semana<br><input type="radio"/> 5 a 6 veces semana<br><input type="radio"/> 1 vez al día<br><input checked="" type="radio"/> 2 a 3 veces al día<br><input type="radio"/> 5 a 6 veces al día<br><input type="radio"/> más 6 veces al día |

|                       |                                                                                                                                                                                                                                                                                                                                                                                                              |
|-----------------------|--------------------------------------------------------------------------------------------------------------------------------------------------------------------------------------------------------------------------------------------------------------------------------------------------------------------------------------------------------------------------------------------------------------|
| cafe descafeinado     | <input checked="" type="radio"/> Nunca o menos 1 vez al mes<br><input type="radio"/> 1 a 3 veces mes<br><input type="radio"/> 1 vez semana<br><input type="radio"/> 2 a 4 veces semana<br><input type="radio"/> 5 a 6 veces semana<br><input type="radio"/> 1 vez al día<br><input type="radio"/> 2 a 3 veces al día<br><input type="radio"/> 5 a 6 veces al día<br><input type="radio"/> más 6 veces al día |
| te o infusión         | <input checked="" type="radio"/> Nunca o menos 1 vez al mes<br><input type="radio"/> 1 a 3 veces mes<br><input type="radio"/> 1 vez semana<br><input type="radio"/> 2 a 4 veces semana<br><input type="radio"/> 5 a 6 veces semana<br><input type="radio"/> 1 vez al día<br><input type="radio"/> 2 a 3 veces al día<br><input type="radio"/> 5 a 6 veces al día<br><input type="radio"/> más 6 veces al día |
| sopa o puré verduras  | <input type="radio"/> Nunca o menos 1 vez al mes<br><input type="radio"/> 1 a 3 veces mes<br><input type="radio"/> 1 vez semana<br><input checked="" type="radio"/> 2 a 4 veces semana<br><input type="radio"/> 5 a 6 veces semana<br><input type="radio"/> 1 vez al día<br><input type="radio"/> 2 a 3 veces al día<br><input type="radio"/> 5 a 6 veces al día<br><input type="radio"/> más 6 veces al día |
| croquetas pollo jamón | <input type="radio"/> Nunca o menos 1 vez al mes<br><input type="radio"/> 1 a 3 veces mes<br><input checked="" type="radio"/> 1 vez semana<br><input type="radio"/> 2 a 4 veces semana<br><input type="radio"/> 5 a 6 veces semana<br><input type="radio"/> 1 vez al día<br><input type="radio"/> 2 a 3 veces al día<br><input type="radio"/> 5 a 6 veces al día<br><input type="radio"/> más 6 veces al día |
| croquetas pescado     | <input checked="" type="radio"/> Nunca o menos 1 vez al mes<br><input type="radio"/> 1 a 3 veces mes<br><input type="radio"/> 1 vez semana<br><input type="radio"/> 2 a 4 veces semana<br><input type="radio"/> 5 a 6 veces semana<br><input type="radio"/> 1 vez al día<br><input type="radio"/> 2 a 3 veces al día<br><input type="radio"/> 5 a 6 veces al día<br><input type="radio"/> más 6 veces al día |
| mayonesa              | <input type="radio"/> Nunca o menos 1 vez al mes<br><input type="radio"/> 1 a 3 veces mes<br><input type="radio"/> 1 vez semana<br><input checked="" type="radio"/> 2 a 4 veces semana<br><input type="radio"/> 5 a 6 veces semana<br><input type="radio"/> 1 vez al día<br><input type="radio"/> 2 a 3 veces al día<br><input type="radio"/> 5 a 6 veces al día<br><input type="radio"/> más 6 veces al día |

|                  |                                                                                                                                                                                                                                                                                                                                                                                                              |
|------------------|--------------------------------------------------------------------------------------------------------------------------------------------------------------------------------------------------------------------------------------------------------------------------------------------------------------------------------------------------------------------------------------------------------------|
| salsa tomate     | <input type="radio"/> Nunca o menos 1 vez al mes<br><input type="radio"/> 1 a 3 veces mes<br><input type="radio"/> 1 vez semana<br><input checked="" type="radio"/> 2 a 4 veces semana<br><input type="radio"/> 5 a 6 veces semana<br><input type="radio"/> 1 vez al día<br><input type="radio"/> 2 a 3 veces al día<br><input type="radio"/> 5 a 6 veces al día<br><input type="radio"/> más 6 veces al día |
| ketchup          | <input checked="" type="radio"/> Nunca o menos 1 vez al mes<br><input type="radio"/> 1 a 3 veces mes<br><input type="radio"/> 1 vez semana<br><input type="radio"/> 2 a 4 veces semana<br><input type="radio"/> 5 a 6 veces semana<br><input type="radio"/> 1 vez al día<br><input type="radio"/> 2 a 3 veces al día<br><input type="radio"/> 5 a 6 veces al día<br><input type="radio"/> más 6 veces al día |
| sal              | <input type="radio"/> Nunca o menos 1 vez al mes<br><input type="radio"/> 1 a 3 veces mes<br><input type="radio"/> 1 vez semana<br><input type="radio"/> 2 a 4 veces semana<br><input type="radio"/> 5 a 6 veces semana<br><input type="radio"/> 1 vez al día<br><input checked="" type="radio"/> 2 a 3 veces al día<br><input type="radio"/> 5 a 6 veces al día<br><input type="radio"/> más 6 veces al día |
| ajo              | <input type="radio"/> Nunca o menos 1 vez al mes<br><input type="radio"/> 1 a 3 veces mes<br><input checked="" type="radio"/> 1 vez semana<br><input type="radio"/> 2 a 4 veces semana<br><input type="radio"/> 5 a 6 veces semana<br><input type="radio"/> 1 vez al día<br><input type="radio"/> 2 a 3 veces al día<br><input type="radio"/> 5 a 6 veces al día<br><input type="radio"/> más 6 veces al día |
| mermelada o miel | <input type="radio"/> Nunca o menos 1 vez al mes<br><input type="radio"/> 1 a 3 veces mes<br><input type="radio"/> 1 vez semana<br><input checked="" type="radio"/> 2 a 4 veces semana<br><input type="radio"/> 5 a 6 veces semana<br><input type="radio"/> 1 vez al día<br><input type="radio"/> 2 a 3 veces al día<br><input type="radio"/> 5 a 6 veces al día<br><input type="radio"/> más 6 veces al día |
| azúcar           | <input type="radio"/> Nunca o menos 1 vez al mes<br><input type="radio"/> 1 a 3 veces mes<br><input type="radio"/> 1 vez semana<br><input type="radio"/> 2 a 4 veces semana<br><input type="radio"/> 5 a 6 veces semana<br><input checked="" type="radio"/> 1 vez al día<br><input type="radio"/> 2 a 3 veces al día<br><input type="radio"/> 5 a 6 veces al día<br><input type="radio"/> más 6 veces al día |

|                                       |                                                                                                                                                                                                                                                                                                                                                                                                                                                                                                                               |
|---------------------------------------|-------------------------------------------------------------------------------------------------------------------------------------------------------------------------------------------------------------------------------------------------------------------------------------------------------------------------------------------------------------------------------------------------------------------------------------------------------------------------------------------------------------------------------|
| Otro alimento                         | <hr/>                                                                                                                                                                                                                                                                                                                                                                                                                                                                                                                         |
| suplementos vitamínicos               | <input type="radio"/> si<br><input checked="" type="radio"/> no                                                                                                                                                                                                                                                                                                                                                                                                                                                               |
| suplementos vitamínicos               | <hr/>                                                                                                                                                                                                                                                                                                                                                                                                                                                                                                                         |
| dieta previa                          | <input type="radio"/> si<br><input checked="" type="radio"/> no                                                                                                                                                                                                                                                                                                                                                                                                                                                               |
| motivo dieta                          | <input checked="" type="radio"/> no dieta<br><input type="radio"/> control peso<br><input type="radio"/> control colesterol<br><input type="radio"/> control diabetes<br><input type="radio"/> problemas estómago<br><input type="radio"/> problemas vesícula o hepáticos<br><input type="radio"/> HTA o cardiopatía<br><input type="radio"/> problemas renales<br><input type="radio"/> alergia alimentaria<br><input type="radio"/> ácido úrico elevado<br><input type="radio"/> vegetariana<br><input type="radio"/> otros |
| cambio alimentos año previo gestación | <input checked="" type="radio"/> si<br><input type="radio"/> no                                                                                                                                                                                                                                                                                                                                                                                                                                                               |
| cambio lácteos                        | <input type="radio"/> eliminado<br><input type="radio"/> disminuido<br><input checked="" type="radio"/> igual<br><input type="radio"/> aumentado<br><input type="radio"/> no sabe                                                                                                                                                                                                                                                                                                                                             |
| cambio huevos                         | <input type="radio"/> eliminado<br><input type="radio"/> disminuido<br><input checked="" type="radio"/> igual<br><input type="radio"/> aumentado<br><input type="radio"/> no sabe                                                                                                                                                                                                                                                                                                                                             |
| cambio carne                          | <input type="radio"/> eliminado<br><input type="radio"/> disminuido<br><input checked="" type="radio"/> igual<br><input type="radio"/> aumentado<br><input type="radio"/> no sabe                                                                                                                                                                                                                                                                                                                                             |
| cambio pescado                        | <input type="radio"/> eliminado<br><input type="radio"/> disminuido<br><input checked="" type="radio"/> igual<br><input type="radio"/> aumentado<br><input type="radio"/> no sabe                                                                                                                                                                                                                                                                                                                                             |
| cambio verduras                       | <input type="radio"/> eliminado<br><input type="radio"/> disminuido<br><input checked="" type="radio"/> igual<br><input type="radio"/> aumentado<br><input type="radio"/> no sabe                                                                                                                                                                                                                                                                                                                                             |

|                            |                                                                                                                                                                                                                        |
|----------------------------|------------------------------------------------------------------------------------------------------------------------------------------------------------------------------------------------------------------------|
| cambio legumbres           | <input type="radio"/> eliminado<br><input type="radio"/> disminuido<br><input checked="" type="radio"/> igual<br><input type="radio"/> aumentado<br><input type="radio"/> no sabe                                      |
| cambio fruta               | <input type="radio"/> eliminado<br><input type="radio"/> disminuido<br><input checked="" type="radio"/> igual<br><input type="radio"/> aumentado<br><input type="radio"/> no sabe                                      |
| cambio pan                 | <input type="radio"/> eliminado<br><input type="radio"/> disminuido<br><input checked="" type="radio"/> igual<br><input type="radio"/> aumentado<br><input type="radio"/> no sabe                                      |
| cambio aceite oliva        | <input type="radio"/> eliminado<br><input type="radio"/> disminuido<br><input checked="" type="radio"/> igual<br><input type="radio"/> aumentado<br><input type="radio"/> no sabe                                      |
| cambio mante o margarina   | <input type="radio"/> eliminado<br><input type="radio"/> disminuido<br><input checked="" type="radio"/> igual<br><input type="radio"/> aumentado<br><input type="radio"/> no sabe                                      |
| cambio azúcar y dulces     | <input type="radio"/> eliminado<br><input type="radio"/> disminuido<br><input checked="" type="radio"/> igual<br><input type="radio"/> aumentado<br><input type="radio"/> no sabe                                      |
| cambio bebidas alcohólicas | <input checked="" type="radio"/> eliminado<br><input type="radio"/> disminuido<br><input type="radio"/> igual<br><input type="radio"/> aumentado<br><input type="radio"/> no sabe                                      |
| frecuencia comidas fritas  | <input type="radio"/> a diario<br><input type="radio"/> 5 a 6 veces semana<br><input type="radio"/> 2 a 4 veces semana<br><input checked="" type="radio"/> 1 vez semana<br><input type="radio"/> menos de 1 vez semana |
| carne                      | <input type="radio"/> no como<br><input type="radio"/> cruda<br><input type="radio"/> poco hecha<br><input type="radio"/> hecha<br><input checked="" type="radio"/> muy hecha                                          |
| grasa visible carne        | <input checked="" type="radio"/> quita toda<br><input type="radio"/> quita mayoría<br><input type="radio"/> quita un poco<br><input type="radio"/> no quita nada                                                       |

|                                |                                                                                                                                                                                                                                                          |
|--------------------------------|----------------------------------------------------------------------------------------------------------------------------------------------------------------------------------------------------------------------------------------------------------|
| cocina carne                   | <input checked="" type="radio"/> a la plancha<br><input type="radio"/> a la parrilla<br><input type="radio"/> asada<br><input type="radio"/> frita<br><input type="radio"/> guisada                                                                      |
| tostado quemado carne          | <input checked="" type="radio"/> nunca<br><input type="radio"/> 1 vez mes<br><input type="radio"/> 2 a 3 veces mes<br><input type="radio"/> 1 vez semana<br><input type="radio"/> 2 a 3 semanas                                                          |
| tostado quemado pescado        | <input checked="" type="radio"/> nunca<br><input type="radio"/> 1 vez mes<br><input type="radio"/> 2 a 3 veces mes<br><input type="radio"/> 1 vez semana<br><input type="radio"/> 2 a 3 semanas                                                          |
| socarrat paella                | <input type="radio"/> nunca<br><input type="radio"/> 1 vez mes<br><input type="radio"/> 2 a 3 veces mes<br><input checked="" type="radio"/> 1 vez semana<br><input type="radio"/> 2 a 3 semanas                                                          |
| grasa o aceite cocinar         | <input type="radio"/> mantequilla<br><input type="radio"/> margarina<br><input checked="" type="radio"/> aceite oliva<br><input type="radio"/> aceite oliva virgen extra<br><input type="radio"/> aceite vegetal<br><input type="radio"/> mezcla aceites |
| grasa aceite aliñar            | <input type="radio"/> mantequilla<br><input type="radio"/> margarina<br><input type="radio"/> aceite oliva<br><input checked="" type="radio"/> aceite oliva virgen extra<br><input type="radio"/> aceite vegetal<br><input type="radio"/> mezcla aceites |
| grasa aceite freir             | <input type="radio"/> mantequilla<br><input type="radio"/> margarina<br><input checked="" type="radio"/> aceite oliva<br><input type="radio"/> aceite oliva virgen extra<br><input type="radio"/> aceite vegetal<br><input type="radio"/> mezcla aceites |
| Ejercicio cuestionario         | <input checked="" type="radio"/> si<br><input type="radio"/> no                                                                                                                                                                                          |
| horas de sueño incluido siesta | [*DATA REMOVED*]                                                                                                                                                                                                                                         |
| minutos siesta                 | [*DATA REMOVED*]                                                                                                                                                                                                                                         |
| horas televisión semana        | [*DATA REMOVED*]                                                                                                                                                                                                                                         |

|                                        |                                                                                                                                                                                                                                                                                                                                                                           |
|----------------------------------------|---------------------------------------------------------------------------------------------------------------------------------------------------------------------------------------------------------------------------------------------------------------------------------------------------------------------------------------------------------------------------|
| actividad trabajo                      | <input type="radio"/> casi siempre sentado<br><input type="radio"/> sentado 50 por cien<br><input type="radio"/> casi siempre de pie, quieto<br><input checked="" type="radio"/> casi siempre levantado caminando y llevando pocas cosas<br><input type="radio"/> casi siempre levantado, caminando y llevado muchas cosas<br><input type="radio"/> trabajo manual pesado |
| tiempo caminar o bici al día           | <input type="radio"/> casi nunca<br><input type="radio"/> menos 20min día<br><input type="radio"/> 20 a 40 min día<br><input checked="" type="radio"/> 40 a 60 min día<br><input type="radio"/> 1h o 1h y media día<br><input type="radio"/> más de 1h y media al día                                                                                                     |
| tiempo tareas casa al día              | <input type="radio"/> menos de 1h día<br><input type="radio"/> 1 a 2h día<br><input checked="" type="radio"/> 3 a 4h día<br><input type="radio"/> 5 a 6h día<br><input type="radio"/> 7 a 8h día<br><input type="radio"/> más de 8h día                                                                                                                                   |
| tiempo libre televisión ordenador leer | <input type="radio"/> menos 1h día<br><input type="radio"/> 1h día<br><input checked="" type="radio"/> 2h día<br><input type="radio"/> 3h día<br><input type="radio"/> 4h día<br><input type="radio"/> 5 a 6h día<br><input type="radio"/> mas 6h día                                                                                                                     |
| tiempo libre ejercicio o deporte       | <input type="radio"/> menos 1h semana<br><input type="radio"/> 1h semana<br><input type="radio"/> 2h semana<br><input checked="" type="radio"/> 3h semana<br><input type="radio"/> 4 a 5h semana<br><input type="radio"/> mas 5h semana                                                                                                                                   |
| como se considera                      | <input type="radio"/> sedentaria<br><input type="radio"/> poco activa<br><input checked="" type="radio"/> moderadamente activa<br><input type="radio"/> bastante activa<br><input type="radio"/> muy activa<br><input type="radio"/> no sabe                                                                                                                              |
| FUR                                    | [*DATA REMOVED*]                                                                                                                                                                                                                                                                                                                                                          |
| Semanas gestación 2T                   | [*DATA REMOVED*]                                                                                                                                                                                                                                                                                                                                                          |
| Días gestación 2T                      | [*DATA REMOVED*]                                                                                                                                                                                                                                                                                                                                                          |
| DBP 2T                                 | [*DATA REMOVED*]                                                                                                                                                                                                                                                                                                                                                          |
| CC 2T                                  | [*DATA REMOVED*]                                                                                                                                                                                                                                                                                                                                                          |
| AC 2T                                  | [*DATA REMOVED*]                                                                                                                                                                                                                                                                                                                                                          |

|                                                   |                                                                                                                                                                                                 |
|---------------------------------------------------|-------------------------------------------------------------------------------------------------------------------------------------------------------------------------------------------------|
| LF 2T                                             | [*DATA REMOVED*]                                                                                                                                                                                |
| PFE 2T (Hadlock)                                  | [*DATA REMOVED*]                                                                                                                                                                                |
| Semanas gestación 3T                              | [*DATA REMOVED*]                                                                                                                                                                                |
| días 3T                                           | [*DATA REMOVED*]                                                                                                                                                                                |
| DBP 3T                                            | [*DATA REMOVED*]                                                                                                                                                                                |
| CC 3T                                             | [*DATA REMOVED*]                                                                                                                                                                                |
| AC 3T                                             | [*DATA REMOVED*]                                                                                                                                                                                |
| LF 3T                                             | [*DATA REMOVED*]                                                                                                                                                                                |
| PFE 3T (Hadlock)                                  | [*DATA REMOVED*]                                                                                                                                                                                |
| Semanas de gestación final                        | [*DATA REMOVED*]                                                                                                                                                                                |
| días gestación final                              | [*DATA REMOVED*]                                                                                                                                                                                |
| Localización placenta                             | <input checked="" type="radio"/> anterior<br><input type="radio"/> lateral derecha<br><input type="radio"/> lateral izquierda<br><input type="radio"/> posterior<br><input type="radio"/> fondo |
| Presentación longitudinal cefálica                | <input type="radio"/> no<br><input checked="" type="radio"/> si                                                                                                                                 |
| Dorso                                             | <input type="radio"/> izquierda anterior<br><input type="radio"/> izquierda posterior<br><input checked="" type="radio"/> derecha anterior<br><input type="radio"/> derecha posterior           |
| diámetro biparietal                               | [*DATA REMOVED*]                                                                                                                                                                                |
| Circunferencia craneal                            | [*DATA REMOVED*]                                                                                                                                                                                |
| Circunferencia abdominal                          | [*DATA REMOVED*]                                                                                                                                                                                |
| Longitud de femur                                 | [*DATA REMOVED*]                                                                                                                                                                                |
| tejido celular subcutáneo a nivel del muslo en mm | [*DATA REMOVED*]                                                                                                                                                                                |
| tejido celular subcutáneo en abdomen en mm        | [*DATA REMOVED*]                                                                                                                                                                                |
| Volumen del muslo en cm3                          | [*DATA REMOVED*]                                                                                                                                                                                |
| Peso fetal estimado según fórmula de Hadlock      | [*DATA REMOVED*]                                                                                                                                                                                |



|                                               |                                                                                                                                                          |
|-----------------------------------------------|----------------------------------------------------------------------------------------------------------------------------------------------------------|
| Percentil                                     | [*DATA REMOVED*]                                                                                                                                         |
| Peso fetal estimado según fórmula de Scioscia | <hr/>                                                                                                                                                    |
| Peso fetal estimado según fórmula de LEE      | <hr/>                                                                                                                                                    |
| Tipo de parto                                 | <input type="radio"/> eutocico<br><input checked="" type="radio"/> instrumentado/ventosa<br><input type="radio"/> cesarea                                |
| fecha de nacimiento                           | [*DATA REMOVED*]                                                                                                                                         |
| Días entre exploración y nacimiento           | [*DATA REMOVED*]                                                                                                                                         |
| Peso RN en g                                  | [*DATA REMOVED*]                                                                                                                                         |
| sexo                                          | <input type="radio"/> mujer<br><input checked="" type="radio"/> hombre                                                                                   |
| Apgar 1 minuto                                | [*DATA REMOVED*]                                                                                                                                         |
| Apgar 5 minutos                               | [*DATA REMOVED*]                                                                                                                                         |
| Apgar 10 minutos                              | <hr/>                                                                                                                                                    |
| antecedente Covid durante gestación           | <input type="radio"/> Yes<br><input checked="" type="radio"/> No                                                                                         |
| Nivel de estudios                             | <input type="radio"/> ninguno<br><input type="radio"/> primarios<br><input checked="" type="radio"/> secundarios<br><input type="radio"/> universitarios |

# Base\_datos\_estimacion\_peso\_fetal

|                                       |                                                                                                                                                                                                                                                                                      |
|---------------------------------------|--------------------------------------------------------------------------------------------------------------------------------------------------------------------------------------------------------------------------------------------------------------------------------------|
| Número de identificación participante | 102                                                                                                                                                                                                                                                                                  |
| CODIGO PARTICIPANTE                   |                                                                                                                                                                                                                                                                                      |
| Edad                                  | [*DATA REMOVED*]                                                                                                                                                                                                                                                                     |
| Gestaciones                           | <input checked="" type="radio"/> 1<br><input type="radio"/> 2<br><input type="radio"/> 3<br><input type="radio"/> mas de 3                                                                                                                                                           |
| partos                                | <input checked="" type="radio"/> 0<br><input type="radio"/> 1<br><input type="radio"/> 2<br><input type="radio"/> 3<br><input type="radio"/> mas de 3                                                                                                                                |
| cesáreas                              | <input checked="" type="radio"/> 0<br><input type="radio"/> 1<br><input type="radio"/> 2<br><input type="radio"/> 3<br><input type="radio"/> mas de 3                                                                                                                                |
| Abortos                               | <input checked="" type="radio"/> 0<br><input type="radio"/> 1<br><input type="radio"/> 2<br><input type="radio"/> 3<br><input type="radio"/> mas de 3                                                                                                                                |
| Tipo de gestacion                     | <input checked="" type="radio"/> espontanea<br><input type="radio"/> IAC inseminación artificial conyuge<br><input type="radio"/> IAD inseminación artificial donante<br><input type="radio"/> FIV Fecundación in Vitro<br><input type="radio"/> Ovodon FIV con donación de ovocitos |
| peso previo a embarazo                | [*DATA REMOVED*]                                                                                                                                                                                                                                                                     |
| Ganancia ponderal embarazo            | [*DATA REMOVED*]                                                                                                                                                                                                                                                                     |
| Talla madre                           | [*DATA REMOVED*]                                                                                                                                                                                                                                                                     |
| IMC previo embarazo                   | 23.711844630960897                                                                                                                                                                                                                                                                   |
| Patología obstétrica                  | <input checked="" type="radio"/> no<br><input type="radio"/> si                                                                                                                                                                                                                      |
| Diabetes pregestacional               | <input checked="" type="radio"/> no<br><input type="radio"/> si                                                                                                                                                                                                                      |
| Diabetes gestacional                  | <input checked="" type="radio"/> no<br><input type="radio"/> si                                                                                                                                                                                                                      |

|                                            |                                                                                                                                                                                      |
|--------------------------------------------|--------------------------------------------------------------------------------------------------------------------------------------------------------------------------------------|
| Diabetes gestacional con insulina          | <input checked="" type="radio"/> no<br><input type="radio"/> si                                                                                                                      |
| Diabetes gestacional con dieta y ejercicio | <input checked="" type="radio"/> no<br><input type="radio"/> si                                                                                                                      |
| Percentil fetos previos                    | <input checked="" type="radio"/> Nada<br><input type="radio"/> percentil menor de 10<br><input type="radio"/> percentil entre 10 y 90<br><input type="radio"/> percentil mayor de 90 |
| Exfumadora                                 | <input checked="" type="radio"/> Nada<br><input type="radio"/> menos de 5 años<br><input type="radio"/> 5 a 10 años<br><input type="radio"/> mayor o igual a 10 años                 |
| Hábito tabáquico                           | <input checked="" type="radio"/> no<br><input type="radio"/> si                                                                                                                      |
| fumadora                                   | [*DATA REMOVED*]                                                                                                                                                                     |
| Consumo otros tóxicos                      | <input checked="" type="radio"/> no<br><input type="radio"/> si                                                                                                                      |
| Hb 1T                                      | [*DATA REMOVED*]                                                                                                                                                                     |
| Htc 1T                                     | [*DATA REMOVED*]                                                                                                                                                                     |
| Hb 2T                                      | [*DATA REMOVED*]                                                                                                                                                                     |
| HTC 2T                                     | [*DATA REMOVED*]                                                                                                                                                                     |
| Hb 3T                                      | [*DATA REMOVED*]                                                                                                                                                                     |
| HTC 3T                                     | [*DATA REMOVED*]                                                                                                                                                                     |
| Suplemento FE oral                         | <input type="radio"/> si<br><input checked="" type="radio"/> no                                                                                                                      |
| Suplemento fe iv                           | <input type="radio"/> si<br><input checked="" type="radio"/> no                                                                                                                      |
| Transfusión                                | <input type="radio"/> no<br><input type="radio"/> si                                                                                                                                 |
| Solicitada Vit D                           | <input checked="" type="radio"/> no<br><input type="radio"/> si                                                                                                                      |
| Deficit vit D                              | <input type="radio"/> no<br><input type="radio"/> si                                                                                                                                 |
| Suplemento vit D                           | <input type="radio"/> si<br><input type="radio"/> no                                                                                                                                 |

|                       |                                                                                                                                                                                                                                                                                                                                                                                                              |
|-----------------------|--------------------------------------------------------------------------------------------------------------------------------------------------------------------------------------------------------------------------------------------------------------------------------------------------------------------------------------------------------------------------------------------------------------|
| Dieta, cuestionario   | <input checked="" type="radio"/> sí<br><input type="radio"/> no                                                                                                                                                                                                                                                                                                                                              |
| Leche entera          | <input checked="" type="radio"/> Nunca o menos 1 vez al mes<br><input type="radio"/> 1 a 3 veces mes<br><input type="radio"/> 1 vez semana<br><input type="radio"/> 2 a 4 veces semana<br><input type="radio"/> 5 a 6 veces semana<br><input type="radio"/> 1 vez al día<br><input type="radio"/> 2 a 3 veces al día<br><input type="radio"/> 5 a 6 veces al día<br><input type="radio"/> más 6 veces al día |
| Leche semidesnatada   | <input type="radio"/> Nunca o menos 1 vez al mes<br><input type="radio"/> 1 a 3 veces mes<br><input type="radio"/> 1 vez semana<br><input type="radio"/> 2 a 4 veces semana<br><input type="radio"/> 5 a 6 veces semana<br><input type="radio"/> 1 vez al día<br><input checked="" type="radio"/> 2 a 3 veces al día<br><input type="radio"/> 5 a 6 veces al día<br><input type="radio"/> mas 6 veces al día |
| Leche desnatada       | <input checked="" type="radio"/> Nunca o menos 1 vez al mes<br><input type="radio"/> 1 a 3 veces mes<br><input type="radio"/> 1 vez semana<br><input type="radio"/> 2 a 4 veces semana<br><input type="radio"/> 5 a 6 veces semana<br><input type="radio"/> 1 vez al día<br><input type="radio"/> 2 a 3 veces al día<br><input type="radio"/> 5 a 6 veces al día<br><input type="radio"/> más 6 veces al día |
| Leche condensada      | <input checked="" type="radio"/> Nunca o menos 1 vez al mes<br><input type="radio"/> 1 a 3 veces mes<br><input type="radio"/> 1 vez semana<br><input type="radio"/> 2 a 4 veces semana<br><input type="radio"/> 5 a 6 veces semana<br><input type="radio"/> 1 vez al día<br><input type="radio"/> 2 a 3 veces al día<br><input type="radio"/> 5 a 6 veces al día<br><input type="radio"/> más 6 veces al día |
| nata o crema de leche | <input checked="" type="radio"/> Nunca o menos 1 vez al mes<br><input type="radio"/> 1 a 3 veces mes<br><input type="radio"/> 1 vez semana<br><input type="radio"/> 2 a 4 veces semana<br><input type="radio"/> 5 a 6 veces semana<br><input type="radio"/> 1 vez al día<br><input type="radio"/> 2 a 3 veces al día<br><input type="radio"/> 5 a 6 veces al día<br><input type="radio"/> más 6 veces al día |

---

Yogurt Entero

- ☐ Nunca o menos 1 vez al mes  
☐ 1 a 3 veces mes  
☒ 1 vez semana  
☐ 2 a 4 veces semana  
☐ 5 a 6 veces semana  
☐ 1 vez al día  
☐ 2 a 3 veces al día  
☐ 5 a 6 veces al día  
☐ más 6 veces al día

---

Yogurt desnatado

- ☒ Nunca o menos 1 vez al mes  
☐ 1 a 3 veces mes  
☐ 1 vez semana  
☐ 2 a 4 veces semana  
☐ 5 a 6 veces semana  
☐ 1 vez al día  
☐ 2 a 3 veces al día  
☐ 5 a 6 veces al día  
☐ más 6 veces al día

---

100g requesón o queso blando o queso fresco

- ☒ Nunca o menos 1 vez al mes  
☐ 1 a 3 veces mes  
☐ 1 vez semana  
☐ 2 a 4 veces semana  
☐ 5 a 6 veces semana  
☐ 1 vez al día  
☐ 2 a 3 veces al día  
☐ 5 a 6 veces al día  
☐ más 6 veces al día

---

queso curado o semicurado o cremoso

- ☒ Nunca o menos 1 vez al mes  
☐ 1 a 3 veces mes  
☐ 1 vez semana  
☐ 2 a 4 veces semana  
☐ 5 a 6 veces semana  
☐ 1 vez al día  
☐ 2 a 3 veces al día  
☐ 5 a 6 veces al día  
☐ más 6 veces al día

---

natillas flan pudding

- ☐ Nunca o menos 1 vez al mes  
☐ 1 a 3 veces mes  
☐ 1 vez semana  
☒ 2 a 4 veces semana  
☐ 5 a 6 veces semana  
☐ 1 vez al día  
☐ 2 a 3 veces al día  
☐ 5 a 6 veces al día  
☐ más 6 veces al día

---

Helado

- ☐ Nunca o menos 1 vez al mes  
☒ 1 a 3 veces mes  
☐ 1 vez semana  
☐ 2 a 4 veces semana  
☐ 5 a 6 veces semana  
☐ 1 vez al día  
☐ 2 a 3 veces al día  
☐ 5 a 6 veces al día  
☐ más 6 veces al día

|                                      |                                                                                                                                                                                                                                                                                                                                                                                                              |
|--------------------------------------|--------------------------------------------------------------------------------------------------------------------------------------------------------------------------------------------------------------------------------------------------------------------------------------------------------------------------------------------------------------------------------------------------------------|
| huevo                                | <input type="radio"/> Nunca o menos 1 vez al mes<br><input type="radio"/> 1 a 3 veces mes<br><input type="radio"/> 1 vez semana<br><input checked="" type="radio"/> 2 a 4 veces semana<br><input type="radio"/> 5 a 6 veces semana<br><input type="radio"/> 1 vez al día<br><input type="radio"/> 2 a 3 veces al día<br><input type="radio"/> 5 a 6 veces al día<br><input type="radio"/> más 6 veces al día |
| Pollo con piel                       | <input type="radio"/> Nunca o menos 1 vez al mes<br><input checked="" type="radio"/> 1 a 3 veces mes<br><input type="radio"/> 1 vez semana<br><input type="radio"/> 2 a 4 veces semana<br><input type="radio"/> 5 a 6 veces semana<br><input type="radio"/> 1 vez al día<br><input type="radio"/> 2 a 3 veces al día<br><input type="radio"/> 5 a 6 veces al día<br><input type="radio"/> más 6 veces al día |
| pollo sin piel                       | <input type="radio"/> Nunca o menos 1 vez al mes<br><input type="radio"/> 1 a 3 veces mes<br><input checked="" type="radio"/> 1 vez semana<br><input type="radio"/> 2 a 4 veces semana<br><input type="radio"/> 5 a 6 veces semana<br><input type="radio"/> 1 vez al día<br><input type="radio"/> 2 a 3 veces al día<br><input type="radio"/> 5 a 6 veces al día<br><input type="radio"/> más 6 veces al día |
| Ternera o cerdo o cordero            | <input type="radio"/> Nunca o menos 1 vez al mes<br><input type="radio"/> 1 a 3 veces mes<br><input checked="" type="radio"/> 1 vez semana<br><input type="radio"/> 2 a 4 veces semana<br><input type="radio"/> 5 a 6 veces semana<br><input type="radio"/> 1 vez al día<br><input type="radio"/> 2 a 3 veces al día<br><input type="radio"/> 5 a 6 veces al día<br><input type="radio"/> más 6 veces al día |
| carne caza: Conejo o codorniz o pato | <input checked="" type="radio"/> Nunca o menos 1 vez al mes<br><input type="radio"/> 1 a 3 veces mes<br><input type="radio"/> 1 vez semana<br><input type="radio"/> 2 a 4 veces semana<br><input type="radio"/> 5 a 6 veces semana<br><input type="radio"/> 1 vez al día<br><input type="radio"/> 2 a 3 veces al día<br><input type="radio"/> 5 a 6 veces al día<br><input type="radio"/> más 6 veces al día |
| Hígado de ternera o cerdo o pollo    | <input checked="" type="radio"/> Nunca o menos 1 vez al mes<br><input type="radio"/> 1 a 3 veces mes<br><input type="radio"/> 1 vez semana<br><input type="radio"/> 2 a 4 veces semana<br><input type="radio"/> 5 a 6 veces semana<br><input type="radio"/> 1 vez al día<br><input type="radio"/> 2 a 3 veces al día<br><input type="radio"/> 5 a 6 veces al día<br><input type="radio"/> más 6 veces al día |

|                     |                                                                                                                                                                                                                                                                                                                                                                                                              |
|---------------------|--------------------------------------------------------------------------------------------------------------------------------------------------------------------------------------------------------------------------------------------------------------------------------------------------------------------------------------------------------------------------------------------------------------|
| Vísceras            | <input checked="" type="radio"/> Nunca o menos 1 vez al mes<br><input type="radio"/> 1 a 3 veces mes<br><input type="radio"/> 1 vez semana<br><input type="radio"/> 2 a 4 veces semana<br><input type="radio"/> 5 a 6 veces semana<br><input type="radio"/> 1 vez al día<br><input type="radio"/> 2 a 3 veces al día<br><input type="radio"/> 5 a 6 veces al día<br><input type="radio"/> más 6 veces al día |
| Embutido            | <input checked="" type="radio"/> Nunca o menos 1 vez al mes<br><input type="radio"/> 1 a 3 veces mes<br><input type="radio"/> 1 vez semana<br><input type="radio"/> 2 a 4 veces semana<br><input type="radio"/> 5 a 6 veces semana<br><input type="radio"/> 1 vez al día<br><input type="radio"/> 2 a 3 veces al día<br><input type="radio"/> 5 a 6 veces al día<br><input type="radio"/> más 6 veces al día |
| Salchicha o similar | <input checked="" type="radio"/> Nunca o menos 1 vez al mes<br><input type="radio"/> 1 a 3 veces mes<br><input type="radio"/> 1 vez semana<br><input type="radio"/> 2 a 4 veces semana<br><input type="radio"/> 5 a 6 veces semana<br><input type="radio"/> 1 vez al día<br><input type="radio"/> 2 a 3 veces al día<br><input type="radio"/> 5 a 6 veces al día<br><input type="radio"/> más 6 veces al día |
| Pate o foiegras     | <input checked="" type="radio"/> Nunca o menos 1 vez al mes<br><input type="radio"/> 1 a 3 veces mes<br><input type="radio"/> 1 vez semana<br><input type="radio"/> 2 a 4 veces semana<br><input type="radio"/> 5 a 6 veces semana<br><input type="radio"/> 1 vez al día<br><input type="radio"/> 2 a 3 veces al día<br><input type="radio"/> 5 a 6 veces al día<br><input type="radio"/> más 6 veces al día |
| Hamburguesa         | <input type="radio"/> Nunca o menos 1 vez al mes<br><input type="radio"/> 1 a 3 veces mes<br><input checked="" type="radio"/> 1 vez semana<br><input type="radio"/> 2 a 4 veces semana<br><input type="radio"/> 5 a 6 veces semana<br><input type="radio"/> 1 vez al día<br><input type="radio"/> 2 a 3 veces al día<br><input type="radio"/> 5 a 6 veces al día<br><input type="radio"/> más 6 veces al día |
| tocino o bacon      | <input checked="" type="radio"/> Nunca o menos 1 vez al mes<br><input type="radio"/> 1 a 3 veces mes<br><input type="radio"/> 1 vez semana<br><input type="radio"/> 2 a 4 veces semana<br><input type="radio"/> 5 a 6 veces semana<br><input type="radio"/> 1 vez al día<br><input type="radio"/> 2 a 3 veces al día<br><input type="radio"/> 5 a 6 veces al día<br><input type="radio"/> más 6 veces al día |

|                        |                                                                                                                                                                                                                                                                                                                                                                                                              |
|------------------------|--------------------------------------------------------------------------------------------------------------------------------------------------------------------------------------------------------------------------------------------------------------------------------------------------------------------------------------------------------------------------------------------------------------|
| Pescado frito          | <input checked="" type="radio"/> Nunca o menos 1 vez al mes<br><input type="radio"/> 1 a 3 veces mes<br><input type="radio"/> 1 vez semana<br><input type="radio"/> 2 a 4 veces semana<br><input type="radio"/> 5 a 6 veces semana<br><input type="radio"/> 1 vez al día<br><input type="radio"/> 2 a 3 veces al día<br><input type="radio"/> 5 a 6 veces al día<br><input type="radio"/> más 6 veces al día |
| pescado hervido blanco | <input type="radio"/> Nunca o menos 1 vez al mes<br><input type="radio"/> 1 a 3 veces mes<br><input type="radio"/> 1 vez semana<br><input checked="" type="radio"/> 2 a 4 veces semana<br><input type="radio"/> 5 a 6 veces semana<br><input type="radio"/> 1 vez al día<br><input type="radio"/> 2 a 3 veces al día<br><input type="radio"/> 5 a 6 veces al día<br><input type="radio"/> más 6 veces al día |
| pescado hervido azul   | <input checked="" type="radio"/> Nunca o menos 1 vez al mes<br><input type="radio"/> 1 a 3 veces mes<br><input type="radio"/> 1 vez semana<br><input type="radio"/> 2 a 4 veces semana<br><input type="radio"/> 5 a 6 veces semana<br><input type="radio"/> 1 vez al día<br><input type="radio"/> 2 a 3 veces al día<br><input type="radio"/> 5 a 6 veces al día<br><input type="radio"/> más 6 veces al día |
| otros pescado azul     | <input checked="" type="radio"/> Nunca o menos 1 vez al mes<br><input type="radio"/> 1 a 3 veces mes<br><input type="radio"/> 1 vez semana<br><input type="radio"/> 2 a 4 veces semana<br><input type="radio"/> 5 a 6 veces semana<br><input type="radio"/> 1 vez al día<br><input type="radio"/> 2 a 3 veces al día<br><input type="radio"/> 5 a 6 veces al día<br><input type="radio"/> más 6 veces al día |
| atun conserva          | <input type="radio"/> Nunca o menos 1 vez al mes<br><input type="radio"/> 1 a 3 veces mes<br><input type="radio"/> 1 vez semana<br><input checked="" type="radio"/> 2 a 4 veces semana<br><input type="radio"/> 5 a 6 veces semana<br><input type="radio"/> 1 vez al día<br><input type="radio"/> 2 a 3 veces al día<br><input type="radio"/> 5 a 6 veces al día<br><input type="radio"/> más 6 veces al día |
| sardina conserva       | <input checked="" type="radio"/> Nunca o menos 1 vez al mes<br><input type="radio"/> 1 a 3 veces mes<br><input type="radio"/> 1 vez semana<br><input type="radio"/> 2 a 4 veces semana<br><input type="radio"/> 5 a 6 veces semana<br><input type="radio"/> 1 vez al día<br><input type="radio"/> 2 a 3 veces al día<br><input type="radio"/> 5 a 6 veces al día<br><input type="radio"/> más 6 veces al día |



|                                         |                                                                                                                                                                                                                                                                                                                                                                                                              |
|-----------------------------------------|--------------------------------------------------------------------------------------------------------------------------------------------------------------------------------------------------------------------------------------------------------------------------------------------------------------------------------------------------------------------------------------------------------------|
| pescado ahumado                         | <input checked="" type="radio"/> Nunca o menos 1 vez al mes<br><input type="radio"/> 1 a 3 veces mes<br><input type="radio"/> 1 vez semana<br><input type="radio"/> 2 a 4 veces semana<br><input type="radio"/> 5 a 6 veces semana<br><input type="radio"/> 1 vez al día<br><input type="radio"/> 2 a 3 veces al día<br><input type="radio"/> 5 a 6 veces al día<br><input type="radio"/> más 6 veces al día |
| almejas o mejillones o ostras unos 100g | <input type="radio"/> Nunca o menos 1 vez al mes<br><input checked="" type="radio"/> 1 a 3 veces mes<br><input type="radio"/> 1 vez semana<br><input type="radio"/> 2 a 4 veces semana<br><input type="radio"/> 5 a 6 veces semana<br><input type="radio"/> 1 vez al día<br><input type="radio"/> 2 a 3 veces al día<br><input type="radio"/> 5 a 6 veces al día<br><input type="radio"/> más 6 veces al día |
| calamar o chipiron o sepia unos 100g    | <input type="radio"/> Nunca o menos 1 vez al mes<br><input checked="" type="radio"/> 1 a 3 veces mes<br><input type="radio"/> 1 vez semana<br><input type="radio"/> 2 a 4 veces semana<br><input type="radio"/> 5 a 6 veces semana<br><input type="radio"/> 1 vez al día<br><input type="radio"/> 2 a 3 veces al día<br><input type="radio"/> 5 a 6 veces al día<br><input type="radio"/> más 6 veces al día |
| marisco unos 100g                       | <input checked="" type="radio"/> Nunca o menos 1 vez al mes<br><input type="radio"/> 1 a 3 veces mes<br><input type="radio"/> 1 vez semana<br><input type="radio"/> 2 a 4 veces semana<br><input type="radio"/> 5 a 6 veces semana<br><input type="radio"/> 1 vez al día<br><input type="radio"/> 2 a 3 veces al día<br><input type="radio"/> 5 a 6 veces al día<br><input type="radio"/> más 6 veces al día |
| Espinacas o acelgas cocinadas           | <input checked="" type="radio"/> Nunca o menos 1 vez al mes<br><input type="radio"/> 1 a 3 veces mes<br><input type="radio"/> 1 vez semana<br><input type="radio"/> 2 a 4 veces semana<br><input type="radio"/> 5 a 6 veces semana<br><input type="radio"/> 1 vez al día<br><input type="radio"/> 2 a 3 veces al día<br><input type="radio"/> 5 a 6 veces al día<br><input type="radio"/> más 6 veces al día |
| Col o coliflor o brocoli cocinado       | <input checked="" type="radio"/> Nunca o menos 1 vez al mes<br><input type="radio"/> 1 a 3 veces mes<br><input type="radio"/> 1 vez semana<br><input type="radio"/> 2 a 4 veces semana<br><input type="radio"/> 5 a 6 veces semana<br><input type="radio"/> 1 vez al día<br><input type="radio"/> 2 a 3 veces al día<br><input type="radio"/> 5 a 6 veces al día<br><input type="radio"/> más 6 veces al día |

---

Lechuga o endivia o escarola

- ☐ Nunca o menos 1 vez al mes  
☒ 1 a 3 veces mes  
☐ 1 vez semana  
☐ 2 a 4 veces semana  
☐ 5 a 6 veces semana  
☐ 1 vez al día  
☐ 2 a 3 veces al día  
☐ 5 a 6 veces al día  
☐ más 6 veces al día

---

tomate ensalada

- ☐ Nunca o menos 1 vez al mes  
☐ 1 a 3 veces mes  
☒ 1 vez semana  
☐ 2 a 4 veces semana  
☐ 5 a 6 veces semana  
☐ 1 vez al día  
☐ 2 a 3 veces al día  
☐ 5 a 6 veces al día  
☐ más 6 veces al día

---

cebolla

- ☐ Nunca o menos 1 vez al mes  
☐ 1 a 3 veces mes  
☐ 1 vez semana  
☒ 2 a 4 veces semana  
☐ 5 a 6 veces semana  
☐ 1 vez al día  
☐ 2 a 3 veces al día  
☐ 5 a 6 veces al día  
☐ más 6 veces al día

---

Zanahoria o calabaza

- ☐ Nunca o menos 1 vez al mes  
☐ 1 a 3 veces mes  
☒ 1 vez semana  
☐ 2 a 4 veces semana  
☐ 5 a 6 veces semana  
☐ 1 vez al día  
☐ 2 a 3 veces al día  
☐ 5 a 6 veces al día  
☐ más 6 veces al día

---

Judías verdes

- ☒ Nunca o menos 1 vez al mes  
☐ 1 a 3 veces mes  
☐ 1 vez semana  
☐ 2 a 4 veces semana  
☐ 5 a 6 veces semana  
☐ 1 vez al día  
☐ 2 a 3 veces al día  
☐ 5 a 6 veces al día  
☐ más 6 veces al día

---

Berenjena o calabacin o pepino

- ☐ Nunca o menos 1 vez al mes  
☐ 1 a 3 veces mes  
☒ 1 vez semana  
☐ 2 a 4 veces semana  
☐ 5 a 6 veces semana  
☐ 1 vez al día  
☐ 2 a 3 veces al día  
☐ 5 a 6 veces al día  
☐ más 6 veces al día

---

pimiento

- ☐ Nunca o menos 1 vez al mes  
☐ 1 a 3 veces mes  
☒ 1 vez semana  
☐ 2 a 4 veces semana  
☐ 5 a 6 veces semana  
☐ 1 vez al día  
☐ 2 a 3 veces al día  
☐ 5 a 6 veces al día  
☐ más 6 veces al día

---

alcachofa

- ☒ Nunca o menos 1 vez al mes  
☐ 1 a 3 veces mes  
☐ 1 vez semana  
☐ 2 a 4 veces semana  
☐ 5 a 6 veces semana  
☐ 1 vez al día  
☐ 2 a 3 veces al día  
☐ 5 a 6 veces al día  
☐ más 6 veces al día

---

espárragos

- ☒ Nunca o menos 1 vez al mes  
☐ 1 a 3 veces mes  
☐ 1 vez semana  
☐ 2 a 4 veces semana  
☐ 5 a 6 veces semana  
☐ 1 vez al día  
☐ 2 a 3 veces al día  
☐ 5 a 6 veces al día  
☐ más 6 veces al día

---

maíz hervido

- ☐ Nunca o menos 1 vez al mes  
☒ 1 a 3 veces mes  
☐ 1 vez semana  
☐ 2 a 4 veces semana  
☐ 5 a 6 veces semana  
☐ 1 vez al día  
☐ 2 a 3 veces al día  
☐ 5 a 6 veces al día  
☐ más 6 veces al día

---

legumbres

- ☐ Nunca o menos 1 vez al mes  
☐ 1 a 3 veces mes  
☒ 1 vez semana  
☐ 2 a 4 veces semana  
☐ 5 a 6 veces semana  
☐ 1 vez al día  
☐ 2 a 3 veces al día  
☐ 5 a 6 veces al día  
☐ más 6 veces al día

---

naranjas o mandarinas

- ☐ Nunca o menos 1 vez al mes  
☐ 1 a 3 veces mes  
☐ 1 vez semana  
☐ 2 a 4 veces semana  
☒ 5 a 6 veces semana  
☐ 1 vez al día  
☐ 2 a 3 veces al día  
☐ 5 a 6 veces al día  
☐ más 6 veces al día

---

zumو natural fruta

- ☐ Nunca o menos 1 vez al mes  
☐ 1 a 3 veces mes  
☐ 1 vez semana  
☐ 2 a 4 veces semana  
☒ 5 a 6 veces semana  
☐ 1 vez al día  
☐ 2 a 3 veces al día  
☐ 5 a 6 veces al día  
☐ más 6 veces al día

---

platano

- ☐ Nunca o menos 1 vez al mes  
☐ 1 a 3 veces mes  
☒ 1 vez semana  
☐ 2 a 4 veces semana  
☐ 5 a 6 veces semana  
☐ 1 vez al día  
☐ 2 a 3 veces al día  
☐ 5 a 6 veces al día  
☐ más 6 veces al día

---

manzana o pera

- ☐ Nunca o menos 1 vez al mes  
☐ 1 a 3 veces mes  
☐ 1 vez semana  
☐ 2 a 4 veces semana  
☒ 5 a 6 veces semana  
☐ 1 vez al día  
☐ 2 a 3 veces al día  
☐ 5 a 6 veces al día  
☐ más 6 veces al día

---

melocotón o nectarina

- ☐ Nunca o menos 1 vez al mes  
☐ 1 a 3 veces mes  
☒ 1 vez semana  
☐ 2 a 4 veces semana  
☐ 5 a 6 veces semana  
☐ 1 vez al día  
☐ 2 a 3 veces al día  
☐ 5 a 6 veces al día  
☐ más 6 veces al día

---

sandia o melon

- ☐ Nunca o menos 1 vez al mes  
☐ 1 a 3 veces mes  
☒ 1 vez semana  
☐ 2 a 4 veces semana  
☐ 5 a 6 veces semana  
☐ 1 vez al día  
☐ 2 a 3 veces al día  
☐ 5 a 6 veces al día  
☐ más 6 veces al día

---

uva

- ☐ Nunca o menos 1 vez al mes  
☐ 1 a 3 veces mes  
☐ 1 vez semana  
☐ 2 a 4 veces semana  
☐ 5 a 6 veces semana  
☒ 1 vez al día  
☐ 2 a 3 veces al día  
☐ 5 a 6 veces al día  
☐ más 6 veces al día

---

bruna o ciruela

- ☐ Nunca o menos 1 vez al mes  
☐ 1 a 3 veces mes  
☒ 1 vez semana  
☐ 2 a 4 veces semana  
☐ 5 a 6 veces semana  
☐ 1 vez al día  
☐ 2 a 3 veces al día  
☐ 5 a 6 veces al día  
☐ más 6 veces al día

---

kiwi

- ☐ Nunca o menos 1 vez al mes  
☐ 1 a 3 veces mes  
☐ 1 vez semana  
☐ 2 a 4 veces semana  
☒ 5 a 6 veces semana  
☐ 1 vez al día  
☐ 2 a 3 veces al día  
☐ 5 a 6 veces al día  
☐ más 6 veces al día

---

aceituna

- ☐ Nunca o menos 1 vez al mes  
☐ 1 a 3 veces mes  
☐ 1 vez semana  
☒ 2 a 4 veces semana  
☐ 5 a 6 veces semana  
☐ 1 vez al día  
☐ 2 a 3 veces al día  
☐ 5 a 6 veces al día  
☐ más 6 veces al día

---

frutos secos

- ☐ Nunca o menos 1 vez al mes  
☐ 1 a 3 veces mes  
☐ 1 vez semana  
☐ 2 a 4 veces semana  
☒ 5 a 6 veces semana  
☐ 1 vez al día  
☐ 2 a 3 veces al día  
☐ 5 a 6 veces al día  
☐ más 6 veces al día

---

pan blanco

- ☐ Nunca o menos 1 vez al mes  
☐ 1 a 3 veces mes  
☐ 1 vez semana  
☐ 2 a 4 veces semana  
☐ 5 a 6 veces semana  
☐ 1 vez al día  
☐ 2 a 3 veces al día  
☐ 5 a 6 veces al día  
☐ más 6 veces al día

---

pan integral

- ☐ Nunca o menos 1 vez al mes  
☐ 1 a 3 veces mes  
☐ 1 vez semana  
☐ 2 a 4 veces semana  
☐ 5 a 6 veces semana  
☐ 1 vez al día  
☐ 2 a 3 veces al día  
☐ 5 a 6 veces al día  
☐ más 6 veces al día

---

cereales desayuno

- ☐ Nunca o menos 1 vez al mes  
☐ 1 a 3 veces mes  
☐ 1 vez semana  
☒ 2 a 4 veces semana  
☐ 5 a 6 veces semana  
☐ 1 vez al día  
☐ 2 a 3 veces al día  
☐ 5 a 6 veces al día  
☐ más 6 veces al día

---

patatas fritas

- ☐ Nunca o menos 1 vez al mes  
☐ 1 a 3 veces mes  
☐ 1 vez semana  
☒ 2 a 4 veces semana  
☐ 5 a 6 veces semana  
☐ 1 vez al día  
☐ 2 a 3 veces al día  
☐ 5 a 6 veces al día  
☐ más 6 veces al día

---

patatas cocidas o asadas

- ☐ Nunca o menos 1 vez al mes  
☐ 1 a 3 veces mes  
☐ 1 vez semana  
☐ 2 a 4 veces semana  
☐ 5 a 6 veces semana  
☒ 1 vez al día  
☐ 2 a 3 veces al día  
☐ 5 a 6 veces al día  
☐ más 6 veces al día

---

bolsa papas

- ☐ Nunca o menos 1 vez al mes  
☐ 1 a 3 veces mes  
☐ 1 vez semana  
☐ 2 a 4 veces semana  
☐ 5 a 6 veces semana  
☒ 1 vez al día  
☐ 2 a 3 veces al día  
☐ 5 a 6 veces al día  
☐ más 6 veces al día

---

arroz cocinado

- ☐ Nunca o menos 1 vez al mes  
☐ 1 a 3 veces mes  
☒ 1 vez semana  
☐ 2 a 4 veces semana  
☐ 5 a 6 veces semana  
☐ 1 vez al día  
☐ 2 a 3 veces al día  
☐ 5 a 6 veces al día  
☐ más 6 veces al día

---

pasta

- ☐ Nunca o menos 1 vez al mes  
☐ 1 a 3 veces mes  
☐ 1 vez semana  
☒ 2 a 4 veces semana  
☐ 5 a 6 veces semana  
☐ 1 vez al día  
☐ 2 a 3 veces al día  
☐ 5 a 6 veces al día  
☐ más 6 veces al día

|                     |                                                                                                                                                                                                                                                                                                                                                                                                              |
|---------------------|--------------------------------------------------------------------------------------------------------------------------------------------------------------------------------------------------------------------------------------------------------------------------------------------------------------------------------------------------------------------------------------------------------------|
| pizza               | <input type="radio"/> Nunca o menos 1 vez al mes<br><input type="radio"/> 1 a 3 veces mes<br><input checked="" type="radio"/> 1 vez semana<br><input type="radio"/> 2 a 4 veces semana<br><input type="radio"/> 5 a 6 veces semana<br><input type="radio"/> 1 vez al día<br><input type="radio"/> 2 a 3 veces al día<br><input type="radio"/> 5 a 6 veces al día<br><input type="radio"/> más 6 veces al día |
| aceite oliva        | <input type="radio"/> Nunca o menos 1 vez al mes<br><input type="radio"/> 1 a 3 veces mes<br><input type="radio"/> 1 vez semana<br><input checked="" type="radio"/> 2 a 4 veces semana<br><input type="radio"/> 5 a 6 veces semana<br><input type="radio"/> 1 vez al día<br><input type="radio"/> 2 a 3 veces al día<br><input type="radio"/> 5 a 6 veces al día<br><input type="radio"/> más 6 veces al día |
| otros aceites       | <input type="radio"/> Nunca o menos 1 vez al mes<br><input type="radio"/> 1 a 3 veces mes<br><input type="radio"/> 1 vez semana<br><input checked="" type="radio"/> 2 a 4 veces semana<br><input type="radio"/> 5 a 6 veces semana<br><input type="radio"/> 1 vez al día<br><input type="radio"/> 2 a 3 veces al día<br><input type="radio"/> 5 a 6 veces al día<br><input type="radio"/> más 6 veces al día |
| margarina           | <input type="radio"/> Nunca o menos 1 vez al mes<br><input type="radio"/> 1 a 3 veces mes<br><input checked="" type="radio"/> 1 vez semana<br><input type="radio"/> 2 a 4 veces semana<br><input type="radio"/> 5 a 6 veces semana<br><input type="radio"/> 1 vez al día<br><input type="radio"/> 2 a 3 veces al día<br><input type="radio"/> 5 a 6 veces al día<br><input type="radio"/> más 6 veces al día |
| mantequilla         | <input type="radio"/> Nunca o menos 1 vez al mes<br><input type="radio"/> 1 a 3 veces mes<br><input type="radio"/> 1 vez semana<br><input checked="" type="radio"/> 2 a 4 veces semana<br><input type="radio"/> 5 a 6 veces semana<br><input type="radio"/> 1 vez al día<br><input type="radio"/> 2 a 3 veces al día<br><input type="radio"/> 5 a 6 veces al día<br><input type="radio"/> más 6 veces al día |
| galletas tipo maria | <input checked="" type="radio"/> Nunca o menos 1 vez al mes<br><input type="radio"/> 1 a 3 veces mes<br><input type="radio"/> 1 vez semana<br><input type="radio"/> 2 a 4 veces semana<br><input type="radio"/> 5 a 6 veces semana<br><input type="radio"/> 1 vez al día<br><input type="radio"/> 2 a 3 veces al día<br><input type="radio"/> 5 a 6 veces al día<br><input type="radio"/> más 6 veces al día |

---

galletas chocolate

- ☒ Nunca o menos 1 vez al mes  
☐ 1 a 3 veces mes  
☐ 1 vez semana  
☐ 2 a 4 veces semana  
☐ 5 a 6 veces semana  
☐ 1 vez al día  
☐ 2 a 3 veces al día  
☐ 5 a 6 veces al día  
☐ más 6 veces al día

---

bolleria

- ☒ Nunca o menos 1 vez al mes  
☐ 1 a 3 veces mes  
☐ 1 vez semana  
☐ 2 a 4 veces semana  
☐ 5 a 6 veces semana  
☐ 1 vez al día  
☐ 2 a 3 veces al día  
☐ 5 a 6 veces al día  
☐ más 6 veces al día

---

chocolate o bombones

- ☐ Nunca o menos 1 vez al mes  
☐ 1 a 3 veces mes  
☐ 1 vez semana  
☒ 2 a 4 veces semana  
☐ 5 a 6 veces semana  
☐ 1 vez al día  
☐ 2 a 3 veces al día  
☐ 5 a 6 veces al día  
☐ más 6 veces al día

---

chocolate polvo o colacao

- ☐ Nunca o menos 1 vez al mes  
☐ 1 a 3 veces mes  
☐ 1 vez semana  
☒ 2 a 4 veces semana  
☐ 5 a 6 veces semana  
☐ 1 vez al día  
☐ 2 a 3 veces al día  
☐ 5 a 6 veces al día  
☐ más 6 veces al día

---

vino tinto

- ☒ Nunca o menos 1 vez al mes  
☐ 1 a 3 veces mes  
☐ 1 vez semana  
☐ 2 a 4 veces semana  
☐ 5 a 6 veces semana  
☐ 1 vez al día  
☐ 2 a 3 veces al día  
☐ 5 a 6 veces al día  
☐ más 6 veces al día

---

vino blanco

- ☒ Nunca o menos 1 vez al mes  
☐ 1 a 3 veces mes  
☐ 1 vez semana  
☐ 2 a 4 veces semana  
☐ 5 a 6 veces semana  
☐ 1 vez al día  
☐ 2 a 3 veces al día  
☐ 5 a 6 veces al día  
☐ más 6 veces al día



---

|                    |                                                                                                                                                                                                                                                                                                                                                                                                              |
|--------------------|--------------------------------------------------------------------------------------------------------------------------------------------------------------------------------------------------------------------------------------------------------------------------------------------------------------------------------------------------------------------------------------------------------------|
| vino seco o vermut | <input checked="" type="radio"/> Nunca o menos 1 vez al mes<br><input type="radio"/> 1 a 3 veces mes<br><input type="radio"/> 1 vez semana<br><input type="radio"/> 2 a 4 veces semana<br><input type="radio"/> 5 a 6 veces semana<br><input type="radio"/> 1 vez al día<br><input type="radio"/> 2 a 3 veces al día<br><input type="radio"/> 5 a 6 veces al día<br><input type="radio"/> más 6 veces al día |
|--------------------|--------------------------------------------------------------------------------------------------------------------------------------------------------------------------------------------------------------------------------------------------------------------------------------------------------------------------------------------------------------------------------------------------------------|

---

|         |                                                                                                                                                                                                                                                                                                                                                                                                              |
|---------|--------------------------------------------------------------------------------------------------------------------------------------------------------------------------------------------------------------------------------------------------------------------------------------------------------------------------------------------------------------------------------------------------------------|
| cerveza | <input checked="" type="radio"/> Nunca o menos 1 vez al mes<br><input type="radio"/> 1 a 3 veces mes<br><input type="radio"/> 1 vez semana<br><input type="radio"/> 2 a 4 veces semana<br><input type="radio"/> 5 a 6 veces semana<br><input type="radio"/> 1 vez al día<br><input type="radio"/> 2 a 3 veces al día<br><input type="radio"/> 5 a 6 veces al día<br><input type="radio"/> más 6 veces al día |
|---------|--------------------------------------------------------------------------------------------------------------------------------------------------------------------------------------------------------------------------------------------------------------------------------------------------------------------------------------------------------------------------------------------------------------|

---

|                     |                                                                                                                                                                                                                                                                                                                                                                                                              |
|---------------------|--------------------------------------------------------------------------------------------------------------------------------------------------------------------------------------------------------------------------------------------------------------------------------------------------------------------------------------------------------------------------------------------------------------|
| cerveza sin alcohol | <input type="radio"/> Nunca o menos 1 vez al mes<br><input checked="" type="radio"/> 1 a 3 veces mes<br><input type="radio"/> 1 vez semana<br><input type="radio"/> 2 a 4 veces semana<br><input type="radio"/> 5 a 6 veces semana<br><input type="radio"/> 1 vez al día<br><input type="radio"/> 2 a 3 veces al día<br><input type="radio"/> 5 a 6 veces al día<br><input type="radio"/> más 6 veces al día |
|---------------------|--------------------------------------------------------------------------------------------------------------------------------------------------------------------------------------------------------------------------------------------------------------------------------------------------------------------------------------------------------------------------------------------------------------|

---

|         |                                                                                                                                                                                                                                                                                                                                                                                                              |
|---------|--------------------------------------------------------------------------------------------------------------------------------------------------------------------------------------------------------------------------------------------------------------------------------------------------------------------------------------------------------------------------------------------------------------|
| licores | <input checked="" type="radio"/> Nunca o menos 1 vez al mes<br><input type="radio"/> 1 a 3 veces mes<br><input type="radio"/> 1 vez semana<br><input type="radio"/> 2 a 4 veces semana<br><input type="radio"/> 5 a 6 veces semana<br><input type="radio"/> 1 vez al día<br><input type="radio"/> 2 a 3 veces al día<br><input type="radio"/> 5 a 6 veces al día<br><input type="radio"/> más 6 veces al día |
|---------|--------------------------------------------------------------------------------------------------------------------------------------------------------------------------------------------------------------------------------------------------------------------------------------------------------------------------------------------------------------------------------------------------------------|

---

|                       |                                                                                                                                                                                                                                                                                                                                                                                                              |
|-----------------------|--------------------------------------------------------------------------------------------------------------------------------------------------------------------------------------------------------------------------------------------------------------------------------------------------------------------------------------------------------------------------------------------------------------|
| ginebra o ron o vodka | <input checked="" type="radio"/> Nunca o menos 1 vez al mes<br><input type="radio"/> 1 a 3 veces mes<br><input type="radio"/> 1 vez semana<br><input type="radio"/> 2 a 4 veces semana<br><input type="radio"/> 5 a 6 veces semana<br><input type="radio"/> 1 vez al día<br><input type="radio"/> 2 a 3 veces al día<br><input type="radio"/> 5 a 6 veces al día<br><input type="radio"/> más 6 veces al día |
|-----------------------|--------------------------------------------------------------------------------------------------------------------------------------------------------------------------------------------------------------------------------------------------------------------------------------------------------------------------------------------------------------------------------------------------------------|

---

|                 |                                                                                                                                                                                                                                                                                                                                                                                                              |
|-----------------|--------------------------------------------------------------------------------------------------------------------------------------------------------------------------------------------------------------------------------------------------------------------------------------------------------------------------------------------------------------------------------------------------------------|
| refresco normal | <input checked="" type="radio"/> Nunca o menos 1 vez al mes<br><input type="radio"/> 1 a 3 veces mes<br><input type="radio"/> 1 vez semana<br><input type="radio"/> 2 a 4 veces semana<br><input type="radio"/> 5 a 6 veces semana<br><input type="radio"/> 1 vez al día<br><input type="radio"/> 2 a 3 veces al día<br><input type="radio"/> 5 a 6 veces al día<br><input type="radio"/> más 6 veces al día |
|-----------------|--------------------------------------------------------------------------------------------------------------------------------------------------------------------------------------------------------------------------------------------------------------------------------------------------------------------------------------------------------------------------------------------------------------|

---

|                          |                                                                                                                                                                                                                                                                                                                                                                                                              |
|--------------------------|--------------------------------------------------------------------------------------------------------------------------------------------------------------------------------------------------------------------------------------------------------------------------------------------------------------------------------------------------------------------------------------------------------------|
| refresco sin azúcar      | <input type="radio"/> Nunca o menos 1 vez al mes<br><input type="radio"/> 1 a 3 veces mes<br><input type="radio"/> 1 vez semana<br><input checked="" type="radio"/> 2 a 4 veces semana<br><input type="radio"/> 5 a 6 veces semana<br><input type="radio"/> 1 vez al día<br><input type="radio"/> 2 a 3 veces al día<br><input type="radio"/> 5 a 6 veces al día<br><input type="radio"/> más 6 veces al día |
| Agua del grifo           | <input type="radio"/> Nunca o menos 1 vez al mes<br><input checked="" type="radio"/> 1 a 3 veces mes<br><input type="radio"/> 1 vez semana<br><input type="radio"/> 2 a 4 veces semana<br><input type="radio"/> 5 a 6 veces semana<br><input type="radio"/> 1 vez al día<br><input type="radio"/> 2 a 3 veces al día<br><input type="radio"/> 5 a 6 veces al día<br><input type="radio"/> más 6 veces al día |
| agua embotellada sin gas | <input type="radio"/> Nunca o menos 1 vez al mes<br><input type="radio"/> 1 a 3 veces mes<br><input type="radio"/> 1 vez semana<br><input type="radio"/> 2 a 4 veces semana<br><input type="radio"/> 5 a 6 veces semana<br><input type="radio"/> 1 vez al día<br><input type="radio"/> 2 a 3 veces al día<br><input type="radio"/> 5 a 6 veces al día<br><input checked="" type="radio"/> más 6 veces al día |
| agua embotellada con gas | <input checked="" type="radio"/> Nunca o menos 1 vez al mes<br><input type="radio"/> 1 a 3 veces mes<br><input type="radio"/> 1 vez semana<br><input type="radio"/> 2 a 4 veces semana<br><input type="radio"/> 5 a 6 veces semana<br><input type="radio"/> 1 vez al día<br><input type="radio"/> 2 a 3 veces al día<br><input type="radio"/> 5 a 6 veces al día<br><input type="radio"/> más 6 veces al día |
| zumو frutas embasado     | <input type="radio"/> Nunca o menos 1 vez al mes<br><input type="radio"/> 1 a 3 veces mes<br><input type="radio"/> 1 vez semana<br><input type="radio"/> 2 a 4 veces semana<br><input type="radio"/> 5 a 6 veces semana<br><input checked="" type="radio"/> 1 vez al día<br><input type="radio"/> 2 a 3 veces al día<br><input type="radio"/> 5 a 6 veces al día<br><input type="radio"/> más 6 veces al día |
| cafe                     | <input checked="" type="radio"/> Nunca o menos 1 vez al mes<br><input type="radio"/> 1 a 3 veces mes<br><input type="radio"/> 1 vez semana<br><input type="radio"/> 2 a 4 veces semana<br><input type="radio"/> 5 a 6 veces semana<br><input type="radio"/> 1 vez al día<br><input type="radio"/> 2 a 3 veces al día<br><input type="radio"/> 5 a 6 veces al día<br><input type="radio"/> más 6 veces al día |

---

café descafeinado

- ☒ Nunca o menos 1 vez al mes  
☐ 1 a 3 veces mes  
☐ 1 vez semana  
☐ 2 a 4 veces semana  
☐ 5 a 6 veces semana  
☐ 1 vez al día  
☐ 2 a 3 veces al día  
☐ 5 a 6 veces al día  
☐ más 6 veces al día

---

té o infusión

- ☒ Nunca o menos 1 vez al mes  
☐ 1 a 3 veces mes  
☐ 1 vez semana  
☐ 2 a 4 veces semana  
☐ 5 a 6 veces semana  
☐ 1 vez al día  
☐ 2 a 3 veces al día  
☐ 5 a 6 veces al día  
☐ más 6 veces al día

---

sopa o puré verduras

- ☐ Nunca o menos 1 vez al mes  
☐ 1 a 3 veces mes  
☒ 1 vez semana  
☐ 2 a 4 veces semana  
☐ 5 a 6 veces semana  
☐ 1 vez al día  
☐ 2 a 3 veces al día  
☐ 5 a 6 veces al día  
☐ más 6 veces al día

---

croquetas pollo jamón

- ☐ Nunca o menos 1 vez al mes  
☐ 1 a 3 veces mes  
☒ 1 vez semana  
☐ 2 a 4 veces semana  
☐ 5 a 6 veces semana  
☐ 1 vez al día  
☐ 2 a 3 veces al día  
☐ 5 a 6 veces al día  
☐ más 6 veces al día

---

croquetas pescado

- ☒ Nunca o menos 1 vez al mes  
☐ 1 a 3 veces mes  
☐ 1 vez semana  
☐ 2 a 4 veces semana  
☐ 5 a 6 veces semana  
☐ 1 vez al día  
☐ 2 a 3 veces al día  
☐ 5 a 6 veces al día  
☐ más 6 veces al día

---

mayonesa

- ☒ Nunca o menos 1 vez al mes  
☐ 1 a 3 veces mes  
☐ 1 vez semana  
☐ 2 a 4 veces semana  
☐ 5 a 6 veces semana  
☐ 1 vez al día  
☐ 2 a 3 veces al día  
☐ 5 a 6 veces al día  
☐ más 6 veces al día

---

salsa tomate

- ☐ Nunca o menos 1 vez al mes  
☐ 1 a 3 veces mes  
☒ 1 vez semana  
☐ 2 a 4 veces semana  
☐ 5 a 6 veces semana  
☐ 1 vez al día  
☐ 2 a 3 veces al día  
☐ 5 a 6 veces al día  
☐ más 6 veces al día

---

ketchup

- ☐ Nunca o menos 1 vez al mes  
☐ 1 a 3 veces mes  
☒ 1 vez semana  
☐ 2 a 4 veces semana  
☐ 5 a 6 veces semana  
☐ 1 vez al día  
☐ 2 a 3 veces al día  
☐ 5 a 6 veces al día  
☐ más 6 veces al día

---

sal

- ☐ Nunca o menos 1 vez al mes  
☐ 1 a 3 veces mes  
☒ 1 vez semana  
☐ 2 a 4 veces semana  
☐ 5 a 6 veces semana  
☐ 1 vez al día  
☐ 2 a 3 veces al día  
☐ 5 a 6 veces al día  
☐ más 6 veces al día

---

ajo

- ☐ Nunca o menos 1 vez al mes  
☐ 1 a 3 veces mes  
☒ 1 vez semana  
☐ 2 a 4 veces semana  
☐ 5 a 6 veces semana  
☐ 1 vez al día  
☐ 2 a 3 veces al día  
☐ 5 a 6 veces al día  
☐ más 6 veces al día

---

mermelada o miel

- ☒ Nunca o menos 1 vez al mes  
☐ 1 a 3 veces mes  
☐ 1 vez semana  
☐ 2 a 4 veces semana  
☐ 5 a 6 veces semana  
☐ 1 vez al día  
☐ 2 a 3 veces al día  
☐ 5 a 6 veces al día  
☐ más 6 veces al día

---

azúcar

- ☒ Nunca o menos 1 vez al mes  
☐ 1 a 3 veces mes  
☐ 1 vez semana  
☐ 2 a 4 veces semana  
☐ 5 a 6 veces semana  
☐ 1 vez al día  
☐ 2 a 3 veces al día  
☐ 5 a 6 veces al día  
☐ más 6 veces al día

---

Otro alimento

---

---

suplementos vitamínicos

- ☐ si  
☒ no
- 

---

suplementos vitamínicos

---

---

dieta previa

- ☐ si  
☒ no
- 

---

motivo dieta

- ☒ no dieta  
☐ control peso  
☐ control colesterol  
☐ control diabetes  
☐ problemas estómago  
☐ problemas vesícula o hepáticos  
☐ HTA o cardiopatía  
☐ problemas renales  
☐ alergia alimentaria  
☐ ácido úrico elevado  
☐ vegetariana  
☐ otros
- 

---

cambio alimentos año previo gestación

- ☒ si  
☐ no
- 

---

cambio lácteos

- ☐ eliminado  
☐ disminuido  
☐ igual  
☒ aumentado  
☐ no sabe
- 

---

cambio huevos

- ☐ eliminado  
☐ disminuido  
☒ igual  
☐ aumentado  
☐ no sabe
- 

---

cambio carne

- ☐ eliminado  
☐ disminuido  
☒ igual  
☐ aumentado  
☐ no sabe
- 

---

cambio pescado

- ☐ eliminado  
☐ disminuido  
☒ igual  
☐ aumentado  
☐ no sabe
- 

---

cambio verduras

- ☐ eliminado  
☐ disminuido  
☒ igual  
☐ aumentado  
☐ no sabe
-

|                            |                                                                                                                                                                                                                        |
|----------------------------|------------------------------------------------------------------------------------------------------------------------------------------------------------------------------------------------------------------------|
| cambio legumbres           | <input type="radio"/> eliminado<br><input type="radio"/> disminuido<br><input checked="" type="radio"/> igual<br><input type="radio"/> aumentado<br><input type="radio"/> no sabe                                      |
| cambio fruta               | <input type="radio"/> eliminado<br><input type="radio"/> disminuido<br><input type="radio"/> igual<br><input checked="" type="radio"/> aumentado<br><input type="radio"/> no sabe                                      |
| cambio pan                 | <input type="radio"/> eliminado<br><input type="radio"/> disminuido<br><input checked="" type="radio"/> igual<br><input type="radio"/> aumentado<br><input type="radio"/> no sabe                                      |
| cambio aceite oliva        | <input type="radio"/> eliminado<br><input type="radio"/> disminuido<br><input checked="" type="radio"/> igual<br><input type="radio"/> aumentado<br><input type="radio"/> no sabe                                      |
| cambio mante o margarina   | <input type="radio"/> eliminado<br><input checked="" type="radio"/> disminuido<br><input type="radio"/> igual<br><input type="radio"/> aumentado<br><input type="radio"/> no sabe                                      |
| cambio azúcar y dulces     | <input type="radio"/> eliminado<br><input checked="" type="radio"/> disminuido<br><input type="radio"/> igual<br><input type="radio"/> aumentado<br><input type="radio"/> no sabe                                      |
| cambio bebidas alcohólicas | <input checked="" type="radio"/> eliminado<br><input type="radio"/> disminuido<br><input type="radio"/> igual<br><input type="radio"/> aumentado<br><input type="radio"/> no sabe                                      |
| frecuencia comidas fritas  | <input type="radio"/> a diario<br><input type="radio"/> 5 a 6 veces semana<br><input type="radio"/> 2 a 4 veces semana<br><input checked="" type="radio"/> 1 vez semana<br><input type="radio"/> menos de 1 vez semana |
| carne                      | <input type="radio"/> no como<br><input type="radio"/> cruda<br><input type="radio"/> poco hecha<br><input type="radio"/> hecha<br><input checked="" type="radio"/> muy hecha                                          |
| grasa visible carne        | <input checked="" type="radio"/> quita toda<br><input type="radio"/> quita mayoría<br><input type="radio"/> quita un poco<br><input type="radio"/> no quita nada                                                       |

|                                |                                                                                                                                                                                                                                                          |
|--------------------------------|----------------------------------------------------------------------------------------------------------------------------------------------------------------------------------------------------------------------------------------------------------|
| cocina carne                   | <input checked="" type="radio"/> a la plancha<br><input type="radio"/> a la parrilla<br><input type="radio"/> asada<br><input type="radio"/> frita<br><input type="radio"/> guisada                                                                      |
| tostado quemado carne          | <input checked="" type="radio"/> nunca<br><input type="radio"/> 1 vez mes<br><input type="radio"/> 2 a 3 veces mes<br><input type="radio"/> 1 vez semana<br><input type="radio"/> 2 a 3 semanas                                                          |
| tostado quemado pescado        | <input checked="" type="radio"/> nunca<br><input type="radio"/> 1 vez mes<br><input type="radio"/> 2 a 3 veces mes<br><input type="radio"/> 1 vez semana<br><input type="radio"/> 2 a 3 semanas                                                          |
| socarrat paella                | <input checked="" type="radio"/> nunca<br><input type="radio"/> 1 vez mes<br><input type="radio"/> 2 a 3 veces mes<br><input type="radio"/> 1 vez semana<br><input type="radio"/> 2 a 3 semanas                                                          |
| grasa o aceite cocinar         | <input type="radio"/> mantequilla<br><input type="radio"/> margarina<br><input type="radio"/> aceite oliva<br><input checked="" type="radio"/> aceite oliva virgen extra<br><input type="radio"/> aceite vegetal<br><input type="radio"/> mezcla aceites |
| grasa aceite aliñar            | <input type="radio"/> mantequilla<br><input type="radio"/> margarina<br><input checked="" type="radio"/> aceite oliva<br><input type="radio"/> aceite oliva virgen extra<br><input type="radio"/> aceite vegetal<br><input type="radio"/> mezcla aceites |
| grasa aceite freir             | <input type="radio"/> mantequilla<br><input type="radio"/> margarina<br><input checked="" type="radio"/> aceite oliva<br><input type="radio"/> aceite oliva virgen extra<br><input type="radio"/> aceite vegetal<br><input type="radio"/> mezcla aceites |
| Ejercicio cuestionario         | <input checked="" type="radio"/> si<br><input type="radio"/> no                                                                                                                                                                                          |
| horas de sueño incluido siesta | [*DATA REMOVED*]                                                                                                                                                                                                                                         |
| minutos siesta                 | [*DATA REMOVED*]                                                                                                                                                                                                                                         |
| horas televisión semana        | [*DATA REMOVED*]                                                                                                                                                                                                                                         |

|                                        |                                                                                                                                                                                                                                                                                                                                                                           |
|----------------------------------------|---------------------------------------------------------------------------------------------------------------------------------------------------------------------------------------------------------------------------------------------------------------------------------------------------------------------------------------------------------------------------|
| actividad trabajo                      | <input type="radio"/> casi siempre sentado<br><input type="radio"/> sentado 50 por cien<br><input type="radio"/> casi siempre de pie, quieto<br><input checked="" type="radio"/> casi siempre levantado caminando y llevando pocas cosas<br><input type="radio"/> casi siempre levantado, caminando y llevado muchas cosas<br><input type="radio"/> trabajo manual pesado |
| tiempo caminar o bici al día           | <input type="radio"/> casi nunca<br><input type="radio"/> menos 20min día<br><input type="radio"/> 20 a 40 min día<br><input type="radio"/> 40 a 60 min día<br><input checked="" type="radio"/> 1h o 1h y media día<br><input type="radio"/> más de 1h y media al día                                                                                                     |
| tiempo tareas casa al día              | <input type="radio"/> menos de 1h día<br><input checked="" type="radio"/> 1 a 2h día<br><input type="radio"/> 3 a 4h día<br><input type="radio"/> 5 a 6h día<br><input type="radio"/> 7 a 8h día<br><input type="radio"/> más de 8h día                                                                                                                                   |
| tiempo libre televisión ordenador leer | <input type="radio"/> menos 1h día<br><input type="radio"/> 1h día<br><input type="radio"/> 2h día<br><input type="radio"/> 3h día<br><input type="radio"/> 4h día<br><input checked="" type="radio"/> 5 a 6h día<br><input type="radio"/> mas 6h día                                                                                                                     |
| tiempo libre ejercicio o deporte       | <input type="radio"/> menos 1h semana<br><input type="radio"/> 1h semana<br><input type="radio"/> 2h semana<br><input type="radio"/> 3h semana<br><input checked="" type="radio"/> 4 a 5h semana<br><input type="radio"/> mas 5h semana                                                                                                                                   |
| como se considera                      | <input type="radio"/> sedentaria<br><input type="radio"/> poco activa<br><input type="radio"/> moderadamente activa<br><input checked="" type="radio"/> bastante activa<br><input type="radio"/> muy activa<br><input type="radio"/> no sabe                                                                                                                              |
| FUR                                    | [*DATA REMOVED*]                                                                                                                                                                                                                                                                                                                                                          |
| Semanas gestación 2T                   | [*DATA REMOVED*]                                                                                                                                                                                                                                                                                                                                                          |
| Días gestación 2T                      | [*DATA REMOVED*]                                                                                                                                                                                                                                                                                                                                                          |
| DBP 2T                                 | [*DATA REMOVED*]                                                                                                                                                                                                                                                                                                                                                          |
| CC 2T                                  | [*DATA REMOVED*]                                                                                                                                                                                                                                                                                                                                                          |
| AC 2T                                  | [*DATA REMOVED*]                                                                                                                                                                                                                                                                                                                                                          |



|                                                   |                                                                                                                                                                                                 |
|---------------------------------------------------|-------------------------------------------------------------------------------------------------------------------------------------------------------------------------------------------------|
| LF 2T                                             | [*DATA REMOVED*]                                                                                                                                                                                |
| PFE 2T (Hadlock)                                  | [*DATA REMOVED*]                                                                                                                                                                                |
| Semanas gestación 3T                              | [*DATA REMOVED*]                                                                                                                                                                                |
| días 3T                                           | [*DATA REMOVED*]                                                                                                                                                                                |
| DBP 3T                                            | [*DATA REMOVED*]                                                                                                                                                                                |
| CC 3T                                             | [*DATA REMOVED*]                                                                                                                                                                                |
| AC 3T                                             | [*DATA REMOVED*]                                                                                                                                                                                |
| LF 3T                                             | [*DATA REMOVED*]                                                                                                                                                                                |
| PFE 3T (Hadlock)                                  | [*DATA REMOVED*]                                                                                                                                                                                |
| Semanas de gestación final                        | [*DATA REMOVED*]                                                                                                                                                                                |
| días gestación final                              | [*DATA REMOVED*]                                                                                                                                                                                |
| Localización placenta                             | <input type="radio"/> anterior<br><input type="radio"/> lateral derecha<br><input type="radio"/> lateral izquierda<br><input type="radio"/> posterior<br><input checked="" type="radio"/> fondo |
| Presentación longitudinal cefálica                | <input type="radio"/> no<br><input checked="" type="radio"/> si                                                                                                                                 |
| Dorso                                             | <input type="radio"/> izquierda anterior<br><input type="radio"/> izquierda posterior<br><input type="radio"/> derecha anterior<br><input checked="" type="radio"/> derecha posterior           |
| diámetro biparietal                               | [*DATA REMOVED*]                                                                                                                                                                                |
| Circunferencia craneal                            | [*DATA REMOVED*]                                                                                                                                                                                |
| Circunferencia abdominal                          | [*DATA REMOVED*]                                                                                                                                                                                |
| Longitud de femur                                 | [*DATA REMOVED*]                                                                                                                                                                                |
| tejido celular subcutáneo a nivel del muslo en mm | [*DATA REMOVED*]                                                                                                                                                                                |
| tejido celular subcutáneo en abdomen en mm        | [*DATA REMOVED*]                                                                                                                                                                                |
| Volumen del muslo en cm3                          | [*DATA REMOVED*]                                                                                                                                                                                |
| Peso fetal estimado según fórmula de Hadlock      | [*DATA REMOVED*]                                                                                                                                                                                |

|                                               |                                                                                                                                               |
|-----------------------------------------------|-----------------------------------------------------------------------------------------------------------------------------------------------|
| Percentil                                     | [*DATA REMOVED*]                                                                                                                              |
| Peso fetal estimado según fórmula de Scioscia | <hr/>                                                                                                                                         |
| Peso fetal estimado según fórmula de LEE      | <hr/>                                                                                                                                         |
| Tipo de parto                                 | <input checked="" type="radio"/> eutocico<br><input type="radio"/> instrumentado/ventosa<br><input type="radio"/> cesarea                     |
| fecha de nacimiento                           | [*DATA REMOVED*]                                                                                                                              |
| Días entre exploración y nacimiento           | [*DATA REMOVED*]                                                                                                                              |
| Peso RN en g                                  | [*DATA REMOVED*]                                                                                                                              |
| sexo                                          | <input checked="" type="radio"/> mujer<br><input type="radio"/> hombre                                                                        |
| Apgar 1 minuto                                | [*DATA REMOVED*]                                                                                                                              |
| Apgar 5 minutos                               | [*DATA REMOVED*]                                                                                                                              |
| Apgar 10 minutos                              | <hr/>                                                                                                                                         |
| antecedente Covid durante gestación           | <input type="radio"/> Yes<br><input checked="" type="radio"/> No                                                                              |
| Nivel de estudios                             | <input type="radio"/> ninguno<br><input type="radio"/> primarios<br><input type="radio"/> secundarios<br><input type="radio"/> universitarios |

## Base\_datos\_estimacion\_peso\_fetal

|                                       |                                                                                                                                                                                                                                                                                      |
|---------------------------------------|--------------------------------------------------------------------------------------------------------------------------------------------------------------------------------------------------------------------------------------------------------------------------------------|
| Número de identificación participante | 103                                                                                                                                                                                                                                                                                  |
| CODIGO PARTICIPANTE                   |                                                                                                                                                                                                                                                                                      |
| Edad                                  | [*DATA REMOVED*]                                                                                                                                                                                                                                                                     |
| Gestaciones                           | <input type="radio"/> 1<br><input checked="" type="radio"/> 2<br><input type="radio"/> 3<br><input type="radio"/> mas de 3                                                                                                                                                           |
| partos                                | <input checked="" type="radio"/> 0<br><input type="radio"/> 1<br><input type="radio"/> 2<br><input type="radio"/> 3<br><input type="radio"/> mas de 3                                                                                                                                |
| cesáreas                              | <input checked="" type="radio"/> 0<br><input type="radio"/> 1<br><input type="radio"/> 2<br><input type="radio"/> 3<br><input type="radio"/> mas de 3                                                                                                                                |
| Abortos                               | <input type="radio"/> 0<br><input checked="" type="radio"/> 1<br><input type="radio"/> 2<br><input type="radio"/> 3<br><input type="radio"/> mas de 3                                                                                                                                |
| Tipo de gestacion                     | <input checked="" type="radio"/> espontanea<br><input type="radio"/> IAC inseminación artificial conyuge<br><input type="radio"/> IAD inseminación artificial donante<br><input type="radio"/> FIV Fecundación in Vitro<br><input type="radio"/> Ovodon FIV con donación de ovocitos |
| peso previo a embarazo                | [*DATA REMOVED*]                                                                                                                                                                                                                                                                     |
| Ganancia ponderal embarazo            | [*DATA REMOVED*]                                                                                                                                                                                                                                                                     |
| Talla madre                           | [*DATA REMOVED*]                                                                                                                                                                                                                                                                     |
| IMC previo embarazo                   | 24.913494809688583                                                                                                                                                                                                                                                                   |
| Patología obstétrica                  | <input type="radio"/> no<br><input checked="" type="radio"/> si                                                                                                                                                                                                                      |
| Diabetes pregestacional               | <input checked="" type="radio"/> no<br><input type="radio"/> si                                                                                                                                                                                                                      |
| Diabetes gestacional                  | <input type="radio"/> no<br><input checked="" type="radio"/> si                                                                                                                                                                                                                      |

|                                            |                                                                                                                                                                                      |
|--------------------------------------------|--------------------------------------------------------------------------------------------------------------------------------------------------------------------------------------|
| Diabetes gestacional con insulina          | <input checked="" type="radio"/> no<br><input type="radio"/> si                                                                                                                      |
| Diabetes gestacional con dieta y ejercicio | <input type="radio"/> no<br><input checked="" type="radio"/> si                                                                                                                      |
| Percentil fetos previos                    | <input checked="" type="radio"/> Nada<br><input type="radio"/> percentil menor de 10<br><input type="radio"/> percentil entre 10 y 90<br><input type="radio"/> percentil mayor de 90 |
| Exfumadora                                 | <input checked="" type="radio"/> Nada<br><input type="radio"/> menos de 5 años<br><input type="radio"/> 5 a 10 años<br><input type="radio"/> mayor o igual a 10 años                 |
| Hábito tabáquico                           | <input checked="" type="radio"/> no<br><input type="radio"/> si                                                                                                                      |
| fumadora                                   | [*DATA REMOVED*]                                                                                                                                                                     |
| Consumo otros tóxicos                      | <input checked="" type="radio"/> no<br><input type="radio"/> si                                                                                                                      |
| Hb 1T                                      | [*DATA REMOVED*]                                                                                                                                                                     |
| Htc 1T                                     | [*DATA REMOVED*]                                                                                                                                                                     |
| Hb 2T                                      | [*DATA REMOVED*]                                                                                                                                                                     |
| HTC 2T                                     | [*DATA REMOVED*]                                                                                                                                                                     |
| Hb 3T                                      | [*DATA REMOVED*]                                                                                                                                                                     |
| HTC 3T                                     | [*DATA REMOVED*]                                                                                                                                                                     |
| Suplemento FE oral                         | <input checked="" type="radio"/> si<br><input type="radio"/> no                                                                                                                      |
| Suplemento fe iv                           | <input type="radio"/> si<br><input checked="" type="radio"/> no                                                                                                                      |
| Transfusión                                | <input checked="" type="radio"/> no<br><input type="radio"/> si                                                                                                                      |
| Solicitada Vit D                           | <input checked="" type="radio"/> no<br><input type="radio"/> si                                                                                                                      |
| Deficit vit D                              | <input type="radio"/> no<br><input type="radio"/> si                                                                                                                                 |
| Suplemento vit D                           | <input type="radio"/> si<br><input type="radio"/> no                                                                                                                                 |

|                       |                                                                                                                                                                                                                                                                                                                                                                                                              |
|-----------------------|--------------------------------------------------------------------------------------------------------------------------------------------------------------------------------------------------------------------------------------------------------------------------------------------------------------------------------------------------------------------------------------------------------------|
| Dieta, cuestionario   | <input checked="" type="radio"/> sí<br><input type="radio"/> no                                                                                                                                                                                                                                                                                                                                              |
| Leche entera          | <input type="radio"/> Nunca o menos 1 vez al mes<br><input type="radio"/> 1 a 3 veces mes<br><input type="radio"/> 1 vez semana<br><input type="radio"/> 2 a 4 veces semana<br><input type="radio"/> 5 a 6 veces semana<br><input checked="" type="radio"/> 1 vez al día<br><input type="radio"/> 2 a 3 veces al día<br><input type="radio"/> 5 a 6 veces al día<br><input type="radio"/> más 6 veces al día |
| Leche semidesnatada   | <input checked="" type="radio"/> Nunca o menos 1 vez al mes<br><input type="radio"/> 1 a 3 veces mes<br><input type="radio"/> 1 vez semana<br><input type="radio"/> 2 a 4 veces semana<br><input type="radio"/> 5 a 6 veces semana<br><input type="radio"/> 1 vez al día<br><input type="radio"/> 2 a 3 veces al día<br><input type="radio"/> 5 a 6 veces al día<br><input type="radio"/> mas 6 veces al día |
| Leche desnatada       | <input checked="" type="radio"/> Nunca o menos 1 vez al mes<br><input type="radio"/> 1 a 3 veces mes<br><input type="radio"/> 1 vez semana<br><input type="radio"/> 2 a 4 veces semana<br><input type="radio"/> 5 a 6 veces semana<br><input type="radio"/> 1 vez al día<br><input type="radio"/> 2 a 3 veces al día<br><input type="radio"/> 5 a 6 veces al día<br><input type="radio"/> más 6 veces al día |
| Leche condensada      | <input checked="" type="radio"/> Nunca o menos 1 vez al mes<br><input type="radio"/> 1 a 3 veces mes<br><input type="radio"/> 1 vez semana<br><input type="radio"/> 2 a 4 veces semana<br><input type="radio"/> 5 a 6 veces semana<br><input type="radio"/> 1 vez al día<br><input type="radio"/> 2 a 3 veces al día<br><input type="radio"/> 5 a 6 veces al día<br><input type="radio"/> más 6 veces al día |
| nata o crema de leche | <input checked="" type="radio"/> Nunca o menos 1 vez al mes<br><input type="radio"/> 1 a 3 veces mes<br><input type="radio"/> 1 vez semana<br><input type="radio"/> 2 a 4 veces semana<br><input type="radio"/> 5 a 6 veces semana<br><input type="radio"/> 1 vez al día<br><input type="radio"/> 2 a 3 veces al día<br><input type="radio"/> 5 a 6 veces al día<br><input type="radio"/> más 6 veces al día |

|                                             |                                                                                                                                                                                                                                                                                                                                                                                                              |
|---------------------------------------------|--------------------------------------------------------------------------------------------------------------------------------------------------------------------------------------------------------------------------------------------------------------------------------------------------------------------------------------------------------------------------------------------------------------|
| Yogurt Entero                               | <input type="radio"/> Nunca o menos 1 vez al mes<br><input type="radio"/> 1 a 3 veces mes<br><input type="radio"/> 1 vez semana<br><input type="radio"/> 2 a 4 veces semana<br><input type="radio"/> 5 a 6 veces semana<br><input type="radio"/> 1 vez al día<br><input checked="" type="radio"/> 2 a 3 veces al día<br><input type="radio"/> 5 a 6 veces al día<br><input type="radio"/> más 6 veces al día |
| Yogurt desnatado                            | <input type="radio"/> Nunca o menos 1 vez al mes<br><input type="radio"/> 1 a 3 veces mes<br><input type="radio"/> 1 vez semana<br><input type="radio"/> 2 a 4 veces semana<br><input type="radio"/> 5 a 6 veces semana<br><input type="radio"/> 1 vez al día<br><input checked="" type="radio"/> 2 a 3 veces al día<br><input type="radio"/> 5 a 6 veces al día<br><input type="radio"/> más 6 veces al día |
| 100g requesón o queso blando o queso fresco | <input checked="" type="radio"/> Nunca o menos 1 vez al mes<br><input type="radio"/> 1 a 3 veces mes<br><input type="radio"/> 1 vez semana<br><input type="radio"/> 2 a 4 veces semana<br><input type="radio"/> 5 a 6 veces semana<br><input type="radio"/> 1 vez al día<br><input type="radio"/> 2 a 3 veces al día<br><input type="radio"/> 5 a 6 veces al día<br><input type="radio"/> más 6 veces al día |
| queso curado o semicurado o cremoso         | <input type="radio"/> Nunca o menos 1 vez al mes<br><input type="radio"/> 1 a 3 veces mes<br><input type="radio"/> 1 vez semana<br><input type="radio"/> 2 a 4 veces semana<br><input type="radio"/> 5 a 6 veces semana<br><input checked="" type="radio"/> 1 vez al día<br><input type="radio"/> 2 a 3 veces al día<br><input type="radio"/> 5 a 6 veces al día<br><input type="radio"/> más 6 veces al día |
| natillas flan pudding                       | <input type="radio"/> Nunca o menos 1 vez al mes<br><input type="radio"/> 1 a 3 veces mes<br><input checked="" type="radio"/> 1 vez semana<br><input type="radio"/> 2 a 4 veces semana<br><input type="radio"/> 5 a 6 veces semana<br><input type="radio"/> 1 vez al día<br><input type="radio"/> 2 a 3 veces al día<br><input type="radio"/> 5 a 6 veces al día<br><input type="radio"/> más 6 veces al día |
| Helado                                      | <input type="radio"/> Nunca o menos 1 vez al mes<br><input type="radio"/> 1 a 3 veces mes<br><input checked="" type="radio"/> 1 vez semana<br><input type="radio"/> 2 a 4 veces semana<br><input type="radio"/> 5 a 6 veces semana<br><input type="radio"/> 1 vez al día<br><input type="radio"/> 2 a 3 veces al día<br><input type="radio"/> 5 a 6 veces al día<br><input type="radio"/> más 6 veces al día |

|                                      |                                                                                                                                                                                                                                                                                                                                                                                                              |
|--------------------------------------|--------------------------------------------------------------------------------------------------------------------------------------------------------------------------------------------------------------------------------------------------------------------------------------------------------------------------------------------------------------------------------------------------------------|
| huevo                                | <input type="radio"/> Nunca o menos 1 vez al mes<br><input type="radio"/> 1 a 3 veces mes<br><input type="radio"/> 1 vez semana<br><input checked="" type="radio"/> 2 a 4 veces semana<br><input type="radio"/> 5 a 6 veces semana<br><input type="radio"/> 1 vez al día<br><input type="radio"/> 2 a 3 veces al día<br><input type="radio"/> 5 a 6 veces al día<br><input type="radio"/> más 6 veces al día |
| Pollo con piel                       | <input type="radio"/> Nunca o menos 1 vez al mes<br><input type="radio"/> 1 a 3 veces mes<br><input type="radio"/> 1 vez semana<br><input checked="" type="radio"/> 2 a 4 veces semana<br><input type="radio"/> 5 a 6 veces semana<br><input type="radio"/> 1 vez al día<br><input type="radio"/> 2 a 3 veces al día<br><input type="radio"/> 5 a 6 veces al día<br><input type="radio"/> más 6 veces al día |
| pollo sin piel                       | <input checked="" type="radio"/> Nunca o menos 1 vez al mes<br><input type="radio"/> 1 a 3 veces mes<br><input type="radio"/> 1 vez semana<br><input type="radio"/> 2 a 4 veces semana<br><input type="radio"/> 5 a 6 veces semana<br><input type="radio"/> 1 vez al día<br><input type="radio"/> 2 a 3 veces al día<br><input type="radio"/> 5 a 6 veces al día<br><input type="radio"/> más 6 veces al día |
| Ternera o cerdo o cordero            | <input type="radio"/> Nunca o menos 1 vez al mes<br><input type="radio"/> 1 a 3 veces mes<br><input type="radio"/> 1 vez semana<br><input checked="" type="radio"/> 2 a 4 veces semana<br><input type="radio"/> 5 a 6 veces semana<br><input type="radio"/> 1 vez al día<br><input type="radio"/> 2 a 3 veces al día<br><input type="radio"/> 5 a 6 veces al día<br><input type="radio"/> más 6 veces al día |
| carne caza: Conejo o codorniz o pato | <input checked="" type="radio"/> Nunca o menos 1 vez al mes<br><input type="radio"/> 1 a 3 veces mes<br><input type="radio"/> 1 vez semana<br><input type="radio"/> 2 a 4 veces semana<br><input type="radio"/> 5 a 6 veces semana<br><input type="radio"/> 1 vez al día<br><input type="radio"/> 2 a 3 veces al día<br><input type="radio"/> 5 a 6 veces al día<br><input type="radio"/> más 6 veces al día |
| Hígado de ternera o cerdo o pollo    | <input checked="" type="radio"/> Nunca o menos 1 vez al mes<br><input type="radio"/> 1 a 3 veces mes<br><input type="radio"/> 1 vez semana<br><input type="radio"/> 2 a 4 veces semana<br><input type="radio"/> 5 a 6 veces semana<br><input type="radio"/> 1 vez al día<br><input type="radio"/> 2 a 3 veces al día<br><input type="radio"/> 5 a 6 veces al día<br><input type="radio"/> más 6 veces al día |

|                     |                                                                                                                                                                                                                                                                                                                                                                                                              |
|---------------------|--------------------------------------------------------------------------------------------------------------------------------------------------------------------------------------------------------------------------------------------------------------------------------------------------------------------------------------------------------------------------------------------------------------|
| Vísceras            | <input type="radio"/> Nunca o menos 1 vez al mes<br><input checked="" type="radio"/> 1 a 3 veces mes<br><input type="radio"/> 1 vez semana<br><input type="radio"/> 2 a 4 veces semana<br><input type="radio"/> 5 a 6 veces semana<br><input type="radio"/> 1 vez al día<br><input type="radio"/> 2 a 3 veces al día<br><input type="radio"/> 5 a 6 veces al día<br><input type="radio"/> más 6 veces al día |
| Embutido            | <input type="radio"/> Nunca o menos 1 vez al mes<br><input type="radio"/> 1 a 3 veces mes<br><input type="radio"/> 1 vez semana<br><input checked="" type="radio"/> 2 a 4 veces semana<br><input type="radio"/> 5 a 6 veces semana<br><input type="radio"/> 1 vez al día<br><input type="radio"/> 2 a 3 veces al día<br><input type="radio"/> 5 a 6 veces al día<br><input type="radio"/> más 6 veces al día |
| Salchicha o similar | <input type="radio"/> Nunca o menos 1 vez al mes<br><input type="radio"/> 1 a 3 veces mes<br><input checked="" type="radio"/> 1 vez semana<br><input type="radio"/> 2 a 4 veces semana<br><input type="radio"/> 5 a 6 veces semana<br><input type="radio"/> 1 vez al día<br><input type="radio"/> 2 a 3 veces al día<br><input type="radio"/> 5 a 6 veces al día<br><input type="radio"/> más 6 veces al día |
| Pate o foiegras     | <input checked="" type="radio"/> Nunca o menos 1 vez al mes<br><input type="radio"/> 1 a 3 veces mes<br><input type="radio"/> 1 vez semana<br><input type="radio"/> 2 a 4 veces semana<br><input type="radio"/> 5 a 6 veces semana<br><input type="radio"/> 1 vez al día<br><input type="radio"/> 2 a 3 veces al día<br><input type="radio"/> 5 a 6 veces al día<br><input type="radio"/> más 6 veces al día |
| Hamburguesa         | <input type="radio"/> Nunca o menos 1 vez al mes<br><input type="radio"/> 1 a 3 veces mes<br><input type="radio"/> 1 vez semana<br><input checked="" type="radio"/> 2 a 4 veces semana<br><input type="radio"/> 5 a 6 veces semana<br><input type="radio"/> 1 vez al día<br><input type="radio"/> 2 a 3 veces al día<br><input type="radio"/> 5 a 6 veces al día<br><input type="radio"/> más 6 veces al día |
| tocino o bacon      | <input checked="" type="radio"/> Nunca o menos 1 vez al mes<br><input type="radio"/> 1 a 3 veces mes<br><input type="radio"/> 1 vez semana<br><input type="radio"/> 2 a 4 veces semana<br><input type="radio"/> 5 a 6 veces semana<br><input type="radio"/> 1 vez al día<br><input type="radio"/> 2 a 3 veces al día<br><input type="radio"/> 5 a 6 veces al día<br><input type="radio"/> más 6 veces al día |



|                        |                                                                                                                                                                                                                                                                                                                                                                                                              |
|------------------------|--------------------------------------------------------------------------------------------------------------------------------------------------------------------------------------------------------------------------------------------------------------------------------------------------------------------------------------------------------------------------------------------------------------|
| Pescado frito          | <input checked="" type="radio"/> Nunca o menos 1 vez al mes<br><input type="radio"/> 1 a 3 veces mes<br><input type="radio"/> 1 vez semana<br><input type="radio"/> 2 a 4 veces semana<br><input type="radio"/> 5 a 6 veces semana<br><input type="radio"/> 1 vez al día<br><input type="radio"/> 2 a 3 veces al día<br><input type="radio"/> 5 a 6 veces al día<br><input type="radio"/> más 6 veces al día |
| pescado hervido blanco | <input type="radio"/> Nunca o menos 1 vez al mes<br><input type="radio"/> 1 a 3 veces mes<br><input type="radio"/> 1 vez semana<br><input checked="" type="radio"/> 2 a 4 veces semana<br><input type="radio"/> 5 a 6 veces semana<br><input type="radio"/> 1 vez al día<br><input type="radio"/> 2 a 3 veces al día<br><input type="radio"/> 5 a 6 veces al día<br><input type="radio"/> más 6 veces al día |
| pescado hervido azul   | <input checked="" type="radio"/> Nunca o menos 1 vez al mes<br><input type="radio"/> 1 a 3 veces mes<br><input type="radio"/> 1 vez semana<br><input type="radio"/> 2 a 4 veces semana<br><input type="radio"/> 5 a 6 veces semana<br><input type="radio"/> 1 vez al día<br><input type="radio"/> 2 a 3 veces al día<br><input type="radio"/> 5 a 6 veces al día<br><input type="radio"/> más 6 veces al día |
| otros pescado azul     | <input type="radio"/> Nunca o menos 1 vez al mes<br><input checked="" type="radio"/> 1 a 3 veces mes<br><input type="radio"/> 1 vez semana<br><input type="radio"/> 2 a 4 veces semana<br><input type="radio"/> 5 a 6 veces semana<br><input type="radio"/> 1 vez al día<br><input type="radio"/> 2 a 3 veces al día<br><input type="radio"/> 5 a 6 veces al día<br><input type="radio"/> más 6 veces al día |
| atun conserva          | <input type="radio"/> Nunca o menos 1 vez al mes<br><input checked="" type="radio"/> 1 a 3 veces mes<br><input type="radio"/> 1 vez semana<br><input type="radio"/> 2 a 4 veces semana<br><input type="radio"/> 5 a 6 veces semana<br><input type="radio"/> 1 vez al día<br><input type="radio"/> 2 a 3 veces al día<br><input type="radio"/> 5 a 6 veces al día<br><input type="radio"/> más 6 veces al día |
| sardina conserva       | <input type="radio"/> Nunca o menos 1 vez al mes<br><input checked="" type="radio"/> 1 a 3 veces mes<br><input type="radio"/> 1 vez semana<br><input type="radio"/> 2 a 4 veces semana<br><input type="radio"/> 5 a 6 veces semana<br><input type="radio"/> 1 vez al día<br><input type="radio"/> 2 a 3 veces al día<br><input type="radio"/> 5 a 6 veces al día<br><input type="radio"/> más 6 veces al día |

|                                         |                                                                                                                                                                                                                                                                                                                                                                                                              |
|-----------------------------------------|--------------------------------------------------------------------------------------------------------------------------------------------------------------------------------------------------------------------------------------------------------------------------------------------------------------------------------------------------------------------------------------------------------------|
| pescado ahumado                         | <input checked="" type="radio"/> Nunca o menos 1 vez al mes<br><input type="radio"/> 1 a 3 veces mes<br><input type="radio"/> 1 vez semana<br><input type="radio"/> 2 a 4 veces semana<br><input type="radio"/> 5 a 6 veces semana<br><input type="radio"/> 1 vez al día<br><input type="radio"/> 2 a 3 veces al día<br><input type="radio"/> 5 a 6 veces al día<br><input type="radio"/> más 6 veces al día |
| almejas o mejillones o ostras unos 100g | <input checked="" type="radio"/> Nunca o menos 1 vez al mes<br><input type="radio"/> 1 a 3 veces mes<br><input type="radio"/> 1 vez semana<br><input type="radio"/> 2 a 4 veces semana<br><input type="radio"/> 5 a 6 veces semana<br><input type="radio"/> 1 vez al día<br><input type="radio"/> 2 a 3 veces al día<br><input type="radio"/> 5 a 6 veces al día<br><input type="radio"/> más 6 veces al día |
| calamar o chipiron o sepia unos 100g    | <input type="radio"/> Nunca o menos 1 vez al mes<br><input checked="" type="radio"/> 1 a 3 veces mes<br><input type="radio"/> 1 vez semana<br><input type="radio"/> 2 a 4 veces semana<br><input type="radio"/> 5 a 6 veces semana<br><input type="radio"/> 1 vez al día<br><input type="radio"/> 2 a 3 veces al día<br><input type="radio"/> 5 a 6 veces al día<br><input type="radio"/> más 6 veces al día |
| marisco unos 100g                       | <input type="radio"/> Nunca o menos 1 vez al mes<br><input type="radio"/> 1 a 3 veces mes<br><input checked="" type="radio"/> 1 vez semana<br><input type="radio"/> 2 a 4 veces semana<br><input type="radio"/> 5 a 6 veces semana<br><input type="radio"/> 1 vez al día<br><input type="radio"/> 2 a 3 veces al día<br><input type="radio"/> 5 a 6 veces al día<br><input type="radio"/> más 6 veces al día |
| Espinacas o acelgas cocinadas           | <input checked="" type="radio"/> Nunca o menos 1 vez al mes<br><input type="radio"/> 1 a 3 veces mes<br><input type="radio"/> 1 vez semana<br><input type="radio"/> 2 a 4 veces semana<br><input type="radio"/> 5 a 6 veces semana<br><input type="radio"/> 1 vez al día<br><input type="radio"/> 2 a 3 veces al día<br><input type="radio"/> 5 a 6 veces al día<br><input type="radio"/> más 6 veces al día |
| Col o coliflor o brocoli cocinado       | <input checked="" type="radio"/> Nunca o menos 1 vez al mes<br><input type="radio"/> 1 a 3 veces mes<br><input type="radio"/> 1 vez semana<br><input type="radio"/> 2 a 4 veces semana<br><input type="radio"/> 5 a 6 veces semana<br><input type="radio"/> 1 vez al día<br><input type="radio"/> 2 a 3 veces al día<br><input type="radio"/> 5 a 6 veces al día<br><input type="radio"/> más 6 veces al día |

---

Lechuga o endivia o escarola

- ☐ Nunca o menos 1 vez al mes  
☐ 1 a 3 veces mes  
☐ 1 vez semana  
☒ 2 a 4 veces semana  
☐ 5 a 6 veces semana  
☐ 1 vez al día  
☐ 2 a 3 veces al día  
☐ 5 a 6 veces al día  
☐ más 6 veces al día

---

tomate ensalada

- ☐ Nunca o menos 1 vez al mes  
☐ 1 a 3 veces mes  
☐ 1 vez semana  
☒ 2 a 4 veces semana  
☐ 5 a 6 veces semana  
☐ 1 vez al día  
☐ 2 a 3 veces al día  
☐ 5 a 6 veces al día  
☐ más 6 veces al día

---

cebolla

- ☒ Nunca o menos 1 vez al mes  
☐ 1 a 3 veces mes  
☐ 1 vez semana  
☐ 2 a 4 veces semana  
☐ 5 a 6 veces semana  
☐ 1 vez al día  
☐ 2 a 3 veces al día  
☐ 5 a 6 veces al día  
☐ más 6 veces al día

---

Zanahoria o calabaza

- ☒ Nunca o menos 1 vez al mes  
☐ 1 a 3 veces mes  
☐ 1 vez semana  
☐ 2 a 4 veces semana  
☐ 5 a 6 veces semana  
☐ 1 vez al día  
☐ 2 a 3 veces al día  
☐ 5 a 6 veces al día  
☐ más 6 veces al día

---

Judías verdes

- ☐ Nunca o menos 1 vez al mes  
☐ 1 a 3 veces mes  
☐ 1 vez semana  
☒ 2 a 4 veces semana  
☐ 5 a 6 veces semana  
☐ 1 vez al día  
☐ 2 a 3 veces al día  
☐ 5 a 6 veces al día  
☐ más 6 veces al día

---

Berenjena o calabacin o pepino

- ☐ Nunca o menos 1 vez al mes  
☐ 1 a 3 veces mes  
☐ 1 vez semana  
☒ 2 a 4 veces semana  
☐ 5 a 6 veces semana  
☐ 1 vez al día  
☐ 2 a 3 veces al día  
☐ 5 a 6 veces al día  
☐ más 6 veces al día

---

|          |                                                                                                                                                                                                                                                                                                                                                                                                              |
|----------|--------------------------------------------------------------------------------------------------------------------------------------------------------------------------------------------------------------------------------------------------------------------------------------------------------------------------------------------------------------------------------------------------------------|
| pimiento | <input checked="" type="radio"/> Nunca o menos 1 vez al mes<br><input type="radio"/> 1 a 3 veces mes<br><input type="radio"/> 1 vez semana<br><input type="radio"/> 2 a 4 veces semana<br><input type="radio"/> 5 a 6 veces semana<br><input type="radio"/> 1 vez al día<br><input type="radio"/> 2 a 3 veces al día<br><input type="radio"/> 5 a 6 veces al día<br><input type="radio"/> más 6 veces al día |
|----------|--------------------------------------------------------------------------------------------------------------------------------------------------------------------------------------------------------------------------------------------------------------------------------------------------------------------------------------------------------------------------------------------------------------|

---

|           |                                                                                                                                                                                                                                                                                                                                                                                                              |
|-----------|--------------------------------------------------------------------------------------------------------------------------------------------------------------------------------------------------------------------------------------------------------------------------------------------------------------------------------------------------------------------------------------------------------------|
| alcachofa | <input type="radio"/> Nunca o menos 1 vez al mes<br><input type="radio"/> 1 a 3 veces mes<br><input type="radio"/> 1 vez semana<br><input checked="" type="radio"/> 2 a 4 veces semana<br><input type="radio"/> 5 a 6 veces semana<br><input type="radio"/> 1 vez al día<br><input type="radio"/> 2 a 3 veces al día<br><input type="radio"/> 5 a 6 veces al día<br><input type="radio"/> más 6 veces al día |
|-----------|--------------------------------------------------------------------------------------------------------------------------------------------------------------------------------------------------------------------------------------------------------------------------------------------------------------------------------------------------------------------------------------------------------------|

---

|            |                                                                                                                                                                                                                                                                                                                                                                                                              |
|------------|--------------------------------------------------------------------------------------------------------------------------------------------------------------------------------------------------------------------------------------------------------------------------------------------------------------------------------------------------------------------------------------------------------------|
| espárragos | <input type="radio"/> Nunca o menos 1 vez al mes<br><input type="radio"/> 1 a 3 veces mes<br><input type="radio"/> 1 vez semana<br><input checked="" type="radio"/> 2 a 4 veces semana<br><input type="radio"/> 5 a 6 veces semana<br><input type="radio"/> 1 vez al día<br><input type="radio"/> 2 a 3 veces al día<br><input type="radio"/> 5 a 6 veces al día<br><input type="radio"/> más 6 veces al día |
|------------|--------------------------------------------------------------------------------------------------------------------------------------------------------------------------------------------------------------------------------------------------------------------------------------------------------------------------------------------------------------------------------------------------------------|

---

|              |                                                                                                                                                                                                                                                                                                                                                                                                              |
|--------------|--------------------------------------------------------------------------------------------------------------------------------------------------------------------------------------------------------------------------------------------------------------------------------------------------------------------------------------------------------------------------------------------------------------|
| maíz hervido | <input type="radio"/> Nunca o menos 1 vez al mes<br><input type="radio"/> 1 a 3 veces mes<br><input checked="" type="radio"/> 1 vez semana<br><input type="radio"/> 2 a 4 veces semana<br><input type="radio"/> 5 a 6 veces semana<br><input type="radio"/> 1 vez al día<br><input type="radio"/> 2 a 3 veces al día<br><input type="radio"/> 5 a 6 veces al día<br><input type="radio"/> más 6 veces al día |
|--------------|--------------------------------------------------------------------------------------------------------------------------------------------------------------------------------------------------------------------------------------------------------------------------------------------------------------------------------------------------------------------------------------------------------------|

---

|           |                                                                                                                                                                                                                                                                                                                                                                                                              |
|-----------|--------------------------------------------------------------------------------------------------------------------------------------------------------------------------------------------------------------------------------------------------------------------------------------------------------------------------------------------------------------------------------------------------------------|
| legumbres | <input type="radio"/> Nunca o menos 1 vez al mes<br><input type="radio"/> 1 a 3 veces mes<br><input type="radio"/> 1 vez semana<br><input checked="" type="radio"/> 2 a 4 veces semana<br><input type="radio"/> 5 a 6 veces semana<br><input type="radio"/> 1 vez al día<br><input type="radio"/> 2 a 3 veces al día<br><input type="radio"/> 5 a 6 veces al día<br><input type="radio"/> más 6 veces al día |
|-----------|--------------------------------------------------------------------------------------------------------------------------------------------------------------------------------------------------------------------------------------------------------------------------------------------------------------------------------------------------------------------------------------------------------------|

---

|                       |                                                                                                                                                                                                                                                                                                                                                                                                              |
|-----------------------|--------------------------------------------------------------------------------------------------------------------------------------------------------------------------------------------------------------------------------------------------------------------------------------------------------------------------------------------------------------------------------------------------------------|
| naranjas o mandarinas | <input type="radio"/> Nunca o menos 1 vez al mes<br><input type="radio"/> 1 a 3 veces mes<br><input checked="" type="radio"/> 1 vez semana<br><input type="radio"/> 2 a 4 veces semana<br><input type="radio"/> 5 a 6 veces semana<br><input type="radio"/> 1 vez al día<br><input type="radio"/> 2 a 3 veces al día<br><input type="radio"/> 5 a 6 veces al día<br><input type="radio"/> más 6 veces al día |
|-----------------------|--------------------------------------------------------------------------------------------------------------------------------------------------------------------------------------------------------------------------------------------------------------------------------------------------------------------------------------------------------------------------------------------------------------|

---

---

zumو natural fruta

- ☒ Nunca o menos 1 vez al mes  
☐ 1 a 3 veces mes  
☐ 1 vez semana  
☐ 2 a 4 veces semana  
☐ 5 a 6 veces semana  
☐ 1 vez al día  
☐ 2 a 3 veces al día  
☐ 5 a 6 veces al día  
☐ más 6 veces al día

---

platano

- ☐ Nunca o menos 1 vez al mes  
☐ 1 a 3 veces mes  
☒ 1 vez semana  
☐ 2 a 4 veces semana  
☐ 5 a 6 veces semana  
☐ 1 vez al día  
☐ 2 a 3 veces al día  
☐ 5 a 6 veces al día  
☐ más 6 veces al día

---

manzana o pera

- ☐ Nunca o menos 1 vez al mes  
☐ 1 a 3 veces mes  
☐ 1 vez semana  
☒ 2 a 4 veces semana  
☐ 5 a 6 veces semana  
☐ 1 vez al día  
☐ 2 a 3 veces al día  
☐ 5 a 6 veces al día  
☐ más 6 veces al día

---

melocotón o nectarina

- ☐ Nunca o menos 1 vez al mes  
☐ 1 a 3 veces mes  
☐ 1 vez semana  
☒ 2 a 4 veces semana  
☐ 5 a 6 veces semana  
☐ 1 vez al día  
☐ 2 a 3 veces al día  
☐ 5 a 6 veces al día  
☐ más 6 veces al día

---

sandia o melon

- ☐ Nunca o menos 1 vez al mes  
☐ 1 a 3 veces mes  
☐ 1 vez semana  
☒ 2 a 4 veces semana  
☐ 5 a 6 veces semana  
☐ 1 vez al día  
☐ 2 a 3 veces al día  
☐ 5 a 6 veces al día  
☐ más 6 veces al día

---

uva

- ☒ Nunca o menos 1 vez al mes  
☐ 1 a 3 veces mes  
☐ 1 vez semana  
☐ 2 a 4 veces semana  
☐ 5 a 6 veces semana  
☐ 1 vez al día  
☐ 2 a 3 veces al día  
☐ 5 a 6 veces al día  
☐ más 6 veces al día

---

bruna o ciruela

- ☐ Nunca o menos 1 vez al mes  
☐ 1 a 3 veces mes  
☐ 1 vez semana  
☒ 2 a 4 veces semana  
☐ 5 a 6 veces semana  
☐ 1 vez al día  
☐ 2 a 3 veces al día  
☐ 5 a 6 veces al día  
☐ más 6 veces al día

---

kiwi

- ☐ Nunca o menos 1 vez al mes  
☐ 1 a 3 veces mes  
☐ 1 vez semana  
☒ 2 a 4 veces semana  
☐ 5 a 6 veces semana  
☐ 1 vez al día  
☐ 2 a 3 veces al día  
☐ 5 a 6 veces al día  
☐ más 6 veces al día

---

aceituna

- ☐ Nunca o menos 1 vez al mes  
☒ 1 a 3 veces mes  
☐ 1 vez semana  
☐ 2 a 4 veces semana  
☐ 5 a 6 veces semana  
☐ 1 vez al día  
☐ 2 a 3 veces al día  
☐ 5 a 6 veces al día  
☐ más 6 veces al día

---

frutos secos

- ☐ Nunca o menos 1 vez al mes  
☐ 1 a 3 veces mes  
☒ 1 vez semana  
☐ 2 a 4 veces semana  
☐ 5 a 6 veces semana  
☐ 1 vez al día  
☐ 2 a 3 veces al día  
☐ 5 a 6 veces al día  
☐ más 6 veces al día

---

pan blanco

- ☐ Nunca o menos 1 vez al mes  
☐ 1 a 3 veces mes  
☐ 1 vez semana  
☐ 2 a 4 veces semana  
☐ 5 a 6 veces semana  
☒ 1 vez al día  
☐ 2 a 3 veces al día  
☐ 5 a 6 veces al día  
☐ más 6 veces al día

---

pan integral

- ☒ Nunca o menos 1 vez al mes  
☐ 1 a 3 veces mes  
☐ 1 vez semana  
☐ 2 a 4 veces semana  
☐ 5 a 6 veces semana  
☐ 1 vez al día  
☐ 2 a 3 veces al día  
☐ 5 a 6 veces al día  
☐ más 6 veces al día

|                          |                                                                                                                                                                                                                                                                                                                                                                                                              |
|--------------------------|--------------------------------------------------------------------------------------------------------------------------------------------------------------------------------------------------------------------------------------------------------------------------------------------------------------------------------------------------------------------------------------------------------------|
| cereales desayuno        | <input checked="" type="radio"/> Nunca o menos 1 vez al mes<br><input type="radio"/> 1 a 3 veces mes<br><input type="radio"/> 1 vez semana<br><input type="radio"/> 2 a 4 veces semana<br><input type="radio"/> 5 a 6 veces semana<br><input type="radio"/> 1 vez al día<br><input type="radio"/> 2 a 3 veces al día<br><input type="radio"/> 5 a 6 veces al día<br><input type="radio"/> más 6 veces al día |
| patatas fritas           | <input type="radio"/> Nunca o menos 1 vez al mes<br><input checked="" type="radio"/> 1 a 3 veces mes<br><input type="radio"/> 1 vez semana<br><input type="radio"/> 2 a 4 veces semana<br><input type="radio"/> 5 a 6 veces semana<br><input type="radio"/> 1 vez al día<br><input type="radio"/> 2 a 3 veces al día<br><input type="radio"/> 5 a 6 veces al día<br><input type="radio"/> más 6 veces al día |
| patatas cocidas o asadas | <input type="radio"/> Nunca o menos 1 vez al mes<br><input checked="" type="radio"/> 1 a 3 veces mes<br><input type="radio"/> 1 vez semana<br><input type="radio"/> 2 a 4 veces semana<br><input type="radio"/> 5 a 6 veces semana<br><input type="radio"/> 1 vez al día<br><input type="radio"/> 2 a 3 veces al día<br><input type="radio"/> 5 a 6 veces al día<br><input type="radio"/> más 6 veces al día |
| bolsa papas              | <input type="radio"/> Nunca o menos 1 vez al mes<br><input checked="" type="radio"/> 1 a 3 veces mes<br><input type="radio"/> 1 vez semana<br><input type="radio"/> 2 a 4 veces semana<br><input type="radio"/> 5 a 6 veces semana<br><input type="radio"/> 1 vez al día<br><input type="radio"/> 2 a 3 veces al día<br><input type="radio"/> 5 a 6 veces al día<br><input type="radio"/> más 6 veces al día |
| arroz cocinado           | <input type="radio"/> Nunca o menos 1 vez al mes<br><input type="radio"/> 1 a 3 veces mes<br><input checked="" type="radio"/> 1 vez semana<br><input type="radio"/> 2 a 4 veces semana<br><input type="radio"/> 5 a 6 veces semana<br><input type="radio"/> 1 vez al día<br><input type="radio"/> 2 a 3 veces al día<br><input type="radio"/> 5 a 6 veces al día<br><input type="radio"/> más 6 veces al día |
| pasta                    | <input type="radio"/> Nunca o menos 1 vez al mes<br><input type="radio"/> 1 a 3 veces mes<br><input type="radio"/> 1 vez semana<br><input checked="" type="radio"/> 2 a 4 veces semana<br><input type="radio"/> 5 a 6 veces semana<br><input type="radio"/> 1 vez al día<br><input type="radio"/> 2 a 3 veces al día<br><input type="radio"/> 5 a 6 veces al día<br><input type="radio"/> más 6 veces al día |

|                     |                                                                                                                                                                                                                                                                                                                                                                                                              |
|---------------------|--------------------------------------------------------------------------------------------------------------------------------------------------------------------------------------------------------------------------------------------------------------------------------------------------------------------------------------------------------------------------------------------------------------|
| pizza               | <input type="radio"/> Nunca o menos 1 vez al mes<br><input type="radio"/> 1 a 3 veces mes<br><input checked="" type="radio"/> 1 vez semana<br><input type="radio"/> 2 a 4 veces semana<br><input type="radio"/> 5 a 6 veces semana<br><input type="radio"/> 1 vez al día<br><input type="radio"/> 2 a 3 veces al día<br><input type="radio"/> 5 a 6 veces al día<br><input type="radio"/> más 6 veces al día |
| aceite oliva        | <input type="radio"/> Nunca o menos 1 vez al mes<br><input type="radio"/> 1 a 3 veces mes<br><input type="radio"/> 1 vez semana<br><input type="radio"/> 2 a 4 veces semana<br><input type="radio"/> 5 a 6 veces semana<br><input type="radio"/> 1 vez al día<br><input checked="" type="radio"/> 2 a 3 veces al día<br><input type="radio"/> 5 a 6 veces al día<br><input type="radio"/> más 6 veces al día |
| otros aceites       | <input checked="" type="radio"/> Nunca o menos 1 vez al mes<br><input type="radio"/> 1 a 3 veces mes<br><input type="radio"/> 1 vez semana<br><input type="radio"/> 2 a 4 veces semana<br><input type="radio"/> 5 a 6 veces semana<br><input type="radio"/> 1 vez al día<br><input type="radio"/> 2 a 3 veces al día<br><input type="radio"/> 5 a 6 veces al día<br><input type="radio"/> más 6 veces al día |
| margarina           | <input type="radio"/> Nunca o menos 1 vez al mes<br><input checked="" type="radio"/> 1 a 3 veces mes<br><input type="radio"/> 1 vez semana<br><input type="radio"/> 2 a 4 veces semana<br><input type="radio"/> 5 a 6 veces semana<br><input type="radio"/> 1 vez al día<br><input type="radio"/> 2 a 3 veces al día<br><input type="radio"/> 5 a 6 veces al día<br><input type="radio"/> más 6 veces al día |
| mantequilla         | <input type="radio"/> Nunca o menos 1 vez al mes<br><input checked="" type="radio"/> 1 a 3 veces mes<br><input type="radio"/> 1 vez semana<br><input type="radio"/> 2 a 4 veces semana<br><input type="radio"/> 5 a 6 veces semana<br><input type="radio"/> 1 vez al día<br><input type="radio"/> 2 a 3 veces al día<br><input type="radio"/> 5 a 6 veces al día<br><input type="radio"/> más 6 veces al día |
| galletas tipo maria | <input checked="" type="radio"/> Nunca o menos 1 vez al mes<br><input type="radio"/> 1 a 3 veces mes<br><input type="radio"/> 1 vez semana<br><input type="radio"/> 2 a 4 veces semana<br><input type="radio"/> 5 a 6 veces semana<br><input type="radio"/> 1 vez al día<br><input type="radio"/> 2 a 3 veces al día<br><input type="radio"/> 5 a 6 veces al día<br><input type="radio"/> más 6 veces al día |



---

galletas chocolate

- ☐ Nunca o menos 1 vez al mes  
☐ 1 a 3 veces mes  
☒ 1 vez semana  
☐ 2 a 4 veces semana  
☐ 5 a 6 veces semana  
☐ 1 vez al día  
☐ 2 a 3 veces al día  
☐ 5 a 6 veces al día  
☐ más 6 veces al día

---

bolleria

- ☐ Nunca o menos 1 vez al mes  
☐ 1 a 3 veces mes  
☐ 1 vez semana  
☒ 2 a 4 veces semana  
☐ 5 a 6 veces semana  
☐ 1 vez al día  
☐ 2 a 3 veces al día  
☐ 5 a 6 veces al día  
☐ más 6 veces al día

---

chocolate o bombones

- ☐ Nunca o menos 1 vez al mes  
☒ 1 a 3 veces mes  
☐ 1 vez semana  
☐ 2 a 4 veces semana  
☐ 5 a 6 veces semana  
☐ 1 vez al día  
☐ 2 a 3 veces al día  
☐ 5 a 6 veces al día  
☐ más 6 veces al día

---

chocolate polvo o colacao

- ☒ Nunca o menos 1 vez al mes  
☐ 1 a 3 veces mes  
☐ 1 vez semana  
☐ 2 a 4 veces semana  
☐ 5 a 6 veces semana  
☐ 1 vez al día  
☐ 2 a 3 veces al día  
☐ 5 a 6 veces al día  
☐ más 6 veces al día

---

vino tinto

- ☒ Nunca o menos 1 vez al mes  
☐ 1 a 3 veces mes  
☐ 1 vez semana  
☐ 2 a 4 veces semana  
☐ 5 a 6 veces semana  
☐ 1 vez al día  
☐ 2 a 3 veces al día  
☐ 5 a 6 veces al día  
☐ más 6 veces al día

---

vino blanco

- ☒ Nunca o menos 1 vez al mes  
☐ 1 a 3 veces mes  
☐ 1 vez semana  
☐ 2 a 4 veces semana  
☐ 5 a 6 veces semana  
☐ 1 vez al día  
☐ 2 a 3 veces al día  
☐ 5 a 6 veces al día  
☐ más 6 veces al día

|                       |                                                                                                                                                                                                                                                                                                                                                                                                              |
|-----------------------|--------------------------------------------------------------------------------------------------------------------------------------------------------------------------------------------------------------------------------------------------------------------------------------------------------------------------------------------------------------------------------------------------------------|
| vino seco o vermut    | <input checked="" type="radio"/> Nunca o menos 1 vez al mes<br><input type="radio"/> 1 a 3 veces mes<br><input type="radio"/> 1 vez semana<br><input type="radio"/> 2 a 4 veces semana<br><input type="radio"/> 5 a 6 veces semana<br><input type="radio"/> 1 vez al día<br><input type="radio"/> 2 a 3 veces al día<br><input type="radio"/> 5 a 6 veces al día<br><input type="radio"/> más 6 veces al día |
| cerveza               | <input checked="" type="radio"/> Nunca o menos 1 vez al mes<br><input type="radio"/> 1 a 3 veces mes<br><input type="radio"/> 1 vez semana<br><input type="radio"/> 2 a 4 veces semana<br><input type="radio"/> 5 a 6 veces semana<br><input type="radio"/> 1 vez al día<br><input type="radio"/> 2 a 3 veces al día<br><input type="radio"/> 5 a 6 veces al día<br><input type="radio"/> más 6 veces al día |
| cerveza sin alcohol   | <input checked="" type="radio"/> Nunca o menos 1 vez al mes<br><input type="radio"/> 1 a 3 veces mes<br><input type="radio"/> 1 vez semana<br><input type="radio"/> 2 a 4 veces semana<br><input type="radio"/> 5 a 6 veces semana<br><input type="radio"/> 1 vez al día<br><input type="radio"/> 2 a 3 veces al día<br><input type="radio"/> 5 a 6 veces al día<br><input type="radio"/> más 6 veces al día |
| licores               | <input checked="" type="radio"/> Nunca o menos 1 vez al mes<br><input type="radio"/> 1 a 3 veces mes<br><input type="radio"/> 1 vez semana<br><input type="radio"/> 2 a 4 veces semana<br><input type="radio"/> 5 a 6 veces semana<br><input type="radio"/> 1 vez al día<br><input type="radio"/> 2 a 3 veces al día<br><input type="radio"/> 5 a 6 veces al día<br><input type="radio"/> más 6 veces al día |
| ginebra o ron o vodka | <input checked="" type="radio"/> Nunca o menos 1 vez al mes<br><input type="radio"/> 1 a 3 veces mes<br><input type="radio"/> 1 vez semana<br><input type="radio"/> 2 a 4 veces semana<br><input type="radio"/> 5 a 6 veces semana<br><input type="radio"/> 1 vez al día<br><input type="radio"/> 2 a 3 veces al día<br><input type="radio"/> 5 a 6 veces al día<br><input type="radio"/> más 6 veces al día |
| refresco normal       | <input checked="" type="radio"/> Nunca o menos 1 vez al mes<br><input type="radio"/> 1 a 3 veces mes<br><input type="radio"/> 1 vez semana<br><input type="radio"/> 2 a 4 veces semana<br><input type="radio"/> 5 a 6 veces semana<br><input type="radio"/> 1 vez al día<br><input type="radio"/> 2 a 3 veces al día<br><input type="radio"/> 5 a 6 veces al día<br><input type="radio"/> más 6 veces al día |

|                          |                                                                                                                                                                                                                                                                                                                                                                                                              |
|--------------------------|--------------------------------------------------------------------------------------------------------------------------------------------------------------------------------------------------------------------------------------------------------------------------------------------------------------------------------------------------------------------------------------------------------------|
| refresco sin azúcar      | <input checked="" type="radio"/> Nunca o menos 1 vez al mes<br><input type="radio"/> 1 a 3 veces mes<br><input type="radio"/> 1 vez semana<br><input type="radio"/> 2 a 4 veces semana<br><input type="radio"/> 5 a 6 veces semana<br><input type="radio"/> 1 vez al día<br><input type="radio"/> 2 a 3 veces al día<br><input type="radio"/> 5 a 6 veces al día<br><input type="radio"/> más 6 veces al día |
| Agua del grifo           | <input checked="" type="radio"/> Nunca o menos 1 vez al mes<br><input type="radio"/> 1 a 3 veces mes<br><input type="radio"/> 1 vez semana<br><input type="radio"/> 2 a 4 veces semana<br><input type="radio"/> 5 a 6 veces semana<br><input type="radio"/> 1 vez al día<br><input type="radio"/> 2 a 3 veces al día<br><input type="radio"/> 5 a 6 veces al día<br><input type="radio"/> más 6 veces al día |
| agua embotellada sin gas | <input type="radio"/> Nunca o menos 1 vez al mes<br><input type="radio"/> 1 a 3 veces mes<br><input type="radio"/> 1 vez semana<br><input type="radio"/> 2 a 4 veces semana<br><input type="radio"/> 5 a 6 veces semana<br><input type="radio"/> 1 vez al día<br><input type="radio"/> 2 a 3 veces al día<br><input type="radio"/> 5 a 6 veces al día<br><input checked="" type="radio"/> más 6 veces al día |
| agua embotellada con gas | <input checked="" type="radio"/> Nunca o menos 1 vez al mes<br><input type="radio"/> 1 a 3 veces mes<br><input type="radio"/> 1 vez semana<br><input type="radio"/> 2 a 4 veces semana<br><input type="radio"/> 5 a 6 veces semana<br><input type="radio"/> 1 vez al día<br><input type="radio"/> 2 a 3 veces al día<br><input type="radio"/> 5 a 6 veces al día<br><input type="radio"/> más 6 veces al día |
| zumو frutas embasado     | <input checked="" type="radio"/> Nunca o menos 1 vez al mes<br><input type="radio"/> 1 a 3 veces mes<br><input type="radio"/> 1 vez semana<br><input type="radio"/> 2 a 4 veces semana<br><input type="radio"/> 5 a 6 veces semana<br><input type="radio"/> 1 vez al día<br><input type="radio"/> 2 a 3 veces al día<br><input type="radio"/> 5 a 6 veces al día<br><input type="radio"/> más 6 veces al día |
| cafe                     | <input type="radio"/> Nunca o menos 1 vez al mes<br><input type="radio"/> 1 a 3 veces mes<br><input type="radio"/> 1 vez semana<br><input type="radio"/> 2 a 4 veces semana<br><input type="radio"/> 5 a 6 veces semana<br><input checked="" type="radio"/> 1 vez al día<br><input type="radio"/> 2 a 3 veces al día<br><input type="radio"/> 5 a 6 veces al día<br><input type="radio"/> más 6 veces al día |

---

|                   |                                                  |
|-------------------|--------------------------------------------------|
| cafe descafeinado | <input type="radio"/> Nunca o menos 1 vez al mes |
|                   | <input type="radio"/> 1 a 3 veces mes            |
|                   | <input checked="" type="radio"/> 1 vez semana    |
|                   | <input type="radio"/> 2 a 4 veces semana         |
|                   | <input type="radio"/> 5 a 6 veces semana         |
|                   | <input type="radio"/> 1 vez al día               |
|                   | <input type="radio"/> 2 a 3 veces al día         |
|                   | <input type="radio"/> 5 a 6 veces al día         |
|                   | <input type="radio"/> más 6 veces al día         |

---

|               |                                                             |
|---------------|-------------------------------------------------------------|
| te o infusión | <input checked="" type="radio"/> Nunca o menos 1 vez al mes |
|               | <input type="radio"/> 1 a 3 veces mes                       |
|               | <input type="radio"/> 1 vez semana                          |
|               | <input type="radio"/> 2 a 4 veces semana                    |
|               | <input type="radio"/> 5 a 6 veces semana                    |
|               | <input type="radio"/> 1 vez al día                          |
|               | <input type="radio"/> 2 a 3 veces al día                    |
|               | <input type="radio"/> 5 a 6 veces al día                    |
|               | <input type="radio"/> más 6 veces al día                    |

---

|                      |                                                     |
|----------------------|-----------------------------------------------------|
| sopa o puré verduras | <input type="radio"/> Nunca o menos 1 vez al mes    |
|                      | <input type="radio"/> 1 a 3 veces mes               |
|                      | <input type="radio"/> 1 vez semana                  |
|                      | <input checked="" type="radio"/> 2 a 4 veces semana |
|                      | <input type="radio"/> 5 a 6 veces semana            |
|                      | <input type="radio"/> 1 vez al día                  |
|                      | <input type="radio"/> 2 a 3 veces al día            |
|                      | <input type="radio"/> 5 a 6 veces al día            |
|                      | <input type="radio"/> más 6 veces al día            |

---

|                       |                                                  |
|-----------------------|--------------------------------------------------|
| croquetas pollo jamón | <input type="radio"/> Nunca o menos 1 vez al mes |
|                       | <input type="radio"/> 1 a 3 veces mes            |
|                       | <input checked="" type="radio"/> 1 vez semana    |
|                       | <input type="radio"/> 2 a 4 veces semana         |
|                       | <input type="radio"/> 5 a 6 veces semana         |
|                       | <input type="radio"/> 1 vez al día               |
|                       | <input type="radio"/> 2 a 3 veces al día         |
|                       | <input type="radio"/> 5 a 6 veces al día         |
|                       | <input type="radio"/> más 6 veces al día         |

---

|                   |                                                             |
|-------------------|-------------------------------------------------------------|
| croquetas pescado | <input checked="" type="radio"/> Nunca o menos 1 vez al mes |
|                   | <input type="radio"/> 1 a 3 veces mes                       |
|                   | <input type="radio"/> 1 vez semana                          |
|                   | <input type="radio"/> 2 a 4 veces semana                    |
|                   | <input type="radio"/> 5 a 6 veces semana                    |
|                   | <input type="radio"/> 1 vez al día                          |
|                   | <input type="radio"/> 2 a 3 veces al día                    |
|                   | <input type="radio"/> 5 a 6 veces al día                    |
|                   | <input type="radio"/> más 6 veces al día                    |

---

|          |                                                  |
|----------|--------------------------------------------------|
| mayonesa | <input type="radio"/> Nunca o menos 1 vez al mes |
|          | <input checked="" type="radio"/> 1 a 3 veces mes |
|          | <input type="radio"/> 1 vez semana               |
|          | <input type="radio"/> 2 a 4 veces semana         |
|          | <input type="radio"/> 5 a 6 veces semana         |
|          | <input type="radio"/> 1 vez al día               |
|          | <input type="radio"/> 2 a 3 veces al día         |
|          | <input type="radio"/> 5 a 6 veces al día         |
|          | <input type="radio"/> más 6 veces al día         |

---

---

salsa tomate

- ☐ Nunca o menos 1 vez al mes  
☐ 1 a 3 veces mes  
☒ 1 vez semana  
☐ 2 a 4 veces semana  
☐ 5 a 6 veces semana  
☐ 1 vez al día  
☐ 2 a 3 veces al día  
☐ 5 a 6 veces al día  
☐ más 6 veces al día

---

ketchup

- ☒ Nunca o menos 1 vez al mes  
☐ 1 a 3 veces mes  
☐ 1 vez semana  
☐ 2 a 4 veces semana  
☐ 5 a 6 veces semana  
☐ 1 vez al día  
☐ 2 a 3 veces al día  
☐ 5 a 6 veces al día  
☐ más 6 veces al día

---

sal

- ☐ Nunca o menos 1 vez al mes  
☐ 1 a 3 veces mes  
☐ 1 vez semana  
☐ 2 a 4 veces semana  
☐ 5 a 6 veces semana  
☒ 1 vez al día  
☐ 2 a 3 veces al día  
☐ 5 a 6 veces al día  
☐ más 6 veces al día

---

ajo

- ☒ Nunca o menos 1 vez al mes  
☐ 1 a 3 veces mes  
☐ 1 vez semana  
☐ 2 a 4 veces semana  
☐ 5 a 6 veces semana  
☐ 1 vez al día  
☐ 2 a 3 veces al día  
☐ 5 a 6 veces al día  
☐ más 6 veces al día

---

mermelada o miel

- ☐ Nunca o menos 1 vez al mes  
☐ 1 a 3 veces mes  
☒ 1 vez semana  
☐ 2 a 4 veces semana  
☐ 5 a 6 veces semana  
☐ 1 vez al día  
☐ 2 a 3 veces al día  
☐ 5 a 6 veces al día  
☐ más 6 veces al día

---

azúcar

- ☐ Nunca o menos 1 vez al mes  
☐ 1 a 3 veces mes  
☐ 1 vez semana  
☒ 2 a 4 veces semana  
☐ 5 a 6 veces semana  
☐ 1 vez al día  
☐ 2 a 3 veces al día  
☐ 5 a 6 veces al día  
☐ más 6 veces al día

|                                       |                                                                                                                                                                                                                                                                                                                                                                                                                                                                                                                               |
|---------------------------------------|-------------------------------------------------------------------------------------------------------------------------------------------------------------------------------------------------------------------------------------------------------------------------------------------------------------------------------------------------------------------------------------------------------------------------------------------------------------------------------------------------------------------------------|
| Otro alimento                         |                                                                                                                                                                                                                                                                                                                                                                                                                                                                                                                               |
| suplementos vitamínicos               | <input checked="" type="radio"/> si<br><input type="radio"/> no                                                                                                                                                                                                                                                                                                                                                                                                                                                               |
| suplementos vitamínicos               | [*DATA REMOVED*]                                                                                                                                                                                                                                                                                                                                                                                                                                                                                                              |
| dieta previa                          | <input checked="" type="radio"/> si<br><input type="radio"/> no                                                                                                                                                                                                                                                                                                                                                                                                                                                               |
| motivo dieta                          | <input type="radio"/> no dieta<br><input checked="" type="radio"/> control peso<br><input type="radio"/> control colesterol<br><input type="radio"/> control diabetes<br><input type="radio"/> problemas estómago<br><input type="radio"/> problemas vesícula o hepáticos<br><input type="radio"/> HTA o cardiopatía<br><input type="radio"/> problemas renales<br><input type="radio"/> alergia alimentaria<br><input type="radio"/> ácido úrico elevado<br><input type="radio"/> vegetariana<br><input type="radio"/> otros |
| cambio alimentos año previo gestación | <input checked="" type="radio"/> si<br><input type="radio"/> no                                                                                                                                                                                                                                                                                                                                                                                                                                                               |
| cambio lácteos                        | <input type="radio"/> eliminado<br><input type="radio"/> disminuido<br><input type="radio"/> igual<br><input checked="" type="radio"/> aumentado<br><input type="radio"/> no sabe                                                                                                                                                                                                                                                                                                                                             |
| cambio huevos                         | <input type="radio"/> eliminado<br><input type="radio"/> disminuido<br><input checked="" type="radio"/> igual<br><input type="radio"/> aumentado<br><input type="radio"/> no sabe                                                                                                                                                                                                                                                                                                                                             |
| cambio carne                          | <input type="radio"/> eliminado<br><input type="radio"/> disminuido<br><input checked="" type="radio"/> igual<br><input type="radio"/> aumentado<br><input type="radio"/> no sabe                                                                                                                                                                                                                                                                                                                                             |
| cambio pescado                        | <input type="radio"/> eliminado<br><input type="radio"/> disminuido<br><input type="radio"/> igual<br><input checked="" type="radio"/> aumentado<br><input type="radio"/> no sabe                                                                                                                                                                                                                                                                                                                                             |
| cambio verduras                       | <input type="radio"/> eliminado<br><input type="radio"/> disminuido<br><input type="radio"/> igual<br><input checked="" type="radio"/> aumentado<br><input type="radio"/> no sabe                                                                                                                                                                                                                                                                                                                                             |

|                            |                                                                                                                                                                                                                        |
|----------------------------|------------------------------------------------------------------------------------------------------------------------------------------------------------------------------------------------------------------------|
| cambio legumbres           | <input type="radio"/> eliminado<br><input type="radio"/> disminuido<br><input type="radio"/> igual<br><input checked="" type="radio"/> aumentado<br><input type="radio"/> no sabe                                      |
| cambio fruta               | <input type="radio"/> eliminado<br><input type="radio"/> disminuido<br><input type="radio"/> igual<br><input checked="" type="radio"/> aumentado<br><input type="radio"/> no sabe                                      |
| cambio pan                 | <input type="radio"/> eliminado<br><input type="radio"/> disminuido<br><input checked="" type="radio"/> igual<br><input type="radio"/> aumentado<br><input type="radio"/> no sabe                                      |
| cambio aceite oliva        | <input type="radio"/> eliminado<br><input type="radio"/> disminuido<br><input checked="" type="radio"/> igual<br><input type="radio"/> aumentado<br><input type="radio"/> no sabe                                      |
| cambio mante o margarina   | <input type="radio"/> eliminado<br><input type="radio"/> disminuido<br><input checked="" type="radio"/> igual<br><input type="radio"/> aumentado<br><input type="radio"/> no sabe                                      |
| cambio azúcar y dulces     | <input type="radio"/> eliminado<br><input checked="" type="radio"/> disminuido<br><input type="radio"/> igual<br><input type="radio"/> aumentado<br><input type="radio"/> no sabe                                      |
| cambio bebidas alcohólicas | <input checked="" type="radio"/> eliminado<br><input type="radio"/> disminuido<br><input type="radio"/> igual<br><input type="radio"/> aumentado<br><input type="radio"/> no sabe                                      |
| frecuencia comidas fritas  | <input type="radio"/> a diario<br><input type="radio"/> 5 a 6 veces semana<br><input type="radio"/> 2 a 4 veces semana<br><input type="radio"/> 1 vez semana<br><input checked="" type="radio"/> menos de 1 vez semana |
| carne                      | <input type="radio"/> no como<br><input type="radio"/> cruda<br><input checked="" type="radio"/> poco hecha<br><input type="radio"/> hecha<br><input type="radio"/> muy hecha                                          |
| grasa visible carne        | <input type="radio"/> quita toda<br><input type="radio"/> quita mayoría<br><input checked="" type="radio"/> quita un poco<br><input type="radio"/> no quita nada                                                       |

|                                |                                                                                                                                                                                                                                                          |
|--------------------------------|----------------------------------------------------------------------------------------------------------------------------------------------------------------------------------------------------------------------------------------------------------|
| cocina carne                   | <input checked="" type="radio"/> a la plancha<br><input type="radio"/> a la parrilla<br><input type="radio"/> asada<br><input type="radio"/> frita<br><input type="radio"/> guisada                                                                      |
| tostado quemado carne          | <input checked="" type="radio"/> nunca<br><input type="radio"/> 1 vez mes<br><input type="radio"/> 2 a 3 veces mes<br><input type="radio"/> 1 vez semana<br><input type="radio"/> 2 a 3 semanas                                                          |
| tostado quemado pescado        | <input checked="" type="radio"/> nunca<br><input type="radio"/> 1 vez mes<br><input type="radio"/> 2 a 3 veces mes<br><input type="radio"/> 1 vez semana<br><input type="radio"/> 2 a 3 semanas                                                          |
| socarrat paella                | <input checked="" type="radio"/> nunca<br><input type="radio"/> 1 vez mes<br><input type="radio"/> 2 a 3 veces mes<br><input type="radio"/> 1 vez semana<br><input type="radio"/> 2 a 3 semanas                                                          |
| grasa o aceite cocinar         | <input type="radio"/> mantequilla<br><input type="radio"/> margarina<br><input checked="" type="radio"/> aceite oliva<br><input type="radio"/> aceite oliva virgen extra<br><input type="radio"/> aceite vegetal<br><input type="radio"/> mezcla aceites |
| grasa aceite aliñar            | <input type="radio"/> mantequilla<br><input type="radio"/> margarina<br><input checked="" type="radio"/> aceite oliva<br><input type="radio"/> aceite oliva virgen extra<br><input type="radio"/> aceite vegetal<br><input type="radio"/> mezcla aceites |
| grasa aceite freir             | <input type="radio"/> mantequilla<br><input type="radio"/> margarina<br><input checked="" type="radio"/> aceite oliva<br><input type="radio"/> aceite oliva virgen extra<br><input type="radio"/> aceite vegetal<br><input type="radio"/> mezcla aceites |
| Ejercicio cuestionario         | <input checked="" type="radio"/> si<br><input type="radio"/> no                                                                                                                                                                                          |
| horas de sueño incluido siesta | [*DATA REMOVED*]                                                                                                                                                                                                                                         |
| minutos siesta                 | [*DATA REMOVED*]                                                                                                                                                                                                                                         |
| horas televisión semana        | [*DATA REMOVED*]                                                                                                                                                                                                                                         |



|                                        |                                                                                                                                                                                                                                                                                                                                                                           |
|----------------------------------------|---------------------------------------------------------------------------------------------------------------------------------------------------------------------------------------------------------------------------------------------------------------------------------------------------------------------------------------------------------------------------|
| actividad trabajo                      | <input type="radio"/> casi siempre sentado<br><input type="radio"/> sentado 50 por cien<br><input type="radio"/> casi siempre de pie, quieto<br><input checked="" type="radio"/> casi siempre levantado caminando y llevando pocas cosas<br><input type="radio"/> casi siempre levantado, caminando y llevado muchas cosas<br><input type="radio"/> trabajo manual pesado |
| tiempo caminar o bici al día           | <input type="radio"/> casi nunca<br><input type="radio"/> menos 20min día<br><input type="radio"/> 20 a 40 min día<br><input type="radio"/> 40 a 60 min día<br><input checked="" type="radio"/> 1h o 1h y media día<br><input type="radio"/> más de 1h y media al día                                                                                                     |
| tiempo tareas casa al día              | <input type="radio"/> menos de 1h día<br><input checked="" type="radio"/> 1 a 2h día<br><input type="radio"/> 3 a 4h día<br><input type="radio"/> 5 a 6h día<br><input type="radio"/> 7 a 8h día<br><input type="radio"/> más de 8h día                                                                                                                                   |
| tiempo libre televisión ordenador leer | <input type="radio"/> menos 1h día<br><input type="radio"/> 1h día<br><input checked="" type="radio"/> 2h día<br><input type="radio"/> 3h día<br><input type="radio"/> 4h día<br><input type="radio"/> 5 a 6h día<br><input type="radio"/> mas 6h día                                                                                                                     |
| tiempo libre ejercicio o deporte       | <input type="radio"/> menos 1h semana<br><input type="radio"/> 1h semana<br><input checked="" type="radio"/> 2h semana<br><input type="radio"/> 3h semana<br><input type="radio"/> 4 a 5h semana<br><input type="radio"/> mas 5h semana                                                                                                                                   |
| como se considera                      | <input type="radio"/> sedentaria<br><input type="radio"/> poco activa<br><input checked="" type="radio"/> moderadamente activa<br><input type="radio"/> bastante activa<br><input type="radio"/> muy activa<br><input type="radio"/> no sabe                                                                                                                              |
| FUR                                    | [*DATA REMOVED*]                                                                                                                                                                                                                                                                                                                                                          |
| Semanas gestación 2T                   | [*DATA REMOVED*]                                                                                                                                                                                                                                                                                                                                                          |
| Días gestación 2T                      | [*DATA REMOVED*]                                                                                                                                                                                                                                                                                                                                                          |
| DBP 2T                                 | [*DATA REMOVED*]                                                                                                                                                                                                                                                                                                                                                          |
| CC 2T                                  | [*DATA REMOVED*]                                                                                                                                                                                                                                                                                                                                                          |
| AC 2T                                  | [*DATA REMOVED*]                                                                                                                                                                                                                                                                                                                                                          |

|                                                   |                                                                                                                                                                                                 |
|---------------------------------------------------|-------------------------------------------------------------------------------------------------------------------------------------------------------------------------------------------------|
| LF 2T                                             | [*DATA REMOVED*]                                                                                                                                                                                |
| PFE 2T (Hadlock)                                  | [*DATA REMOVED*]                                                                                                                                                                                |
| Semanas gestación 3T                              | [*DATA REMOVED*]                                                                                                                                                                                |
| días 3T                                           | [*DATA REMOVED*]                                                                                                                                                                                |
| DBP 3T                                            | [*DATA REMOVED*]                                                                                                                                                                                |
| CC 3T                                             | [*DATA REMOVED*]                                                                                                                                                                                |
| AC 3T                                             | [*DATA REMOVED*]                                                                                                                                                                                |
| LF 3T                                             | [*DATA REMOVED*]                                                                                                                                                                                |
| PFE 3T (Hadlock)                                  | [*DATA REMOVED*]                                                                                                                                                                                |
| Semanas de gestación final                        | [*DATA REMOVED*]                                                                                                                                                                                |
| días gestación final                              | [*DATA REMOVED*]                                                                                                                                                                                |
| Localización placenta                             | <input type="radio"/> anterior<br><input checked="" type="radio"/> lateral derecha<br><input type="radio"/> lateral izquierda<br><input type="radio"/> posterior<br><input type="radio"/> fondo |
| Presentación longitudinal cefálica                | <input type="radio"/> no<br><input checked="" type="radio"/> si                                                                                                                                 |
| Dorso                                             | <input type="radio"/> izquierda anterior<br><input checked="" type="radio"/> izquierda posterior<br><input type="radio"/> derecha anterior<br><input type="radio"/> derecha posterior           |
| diámetro biparietal                               | [*DATA REMOVED*]                                                                                                                                                                                |
| Circunferencia craneal                            | [*DATA REMOVED*]                                                                                                                                                                                |
| Circunferencia abdominal                          | [*DATA REMOVED*]                                                                                                                                                                                |
| Longitud de femur                                 | [*DATA REMOVED*]                                                                                                                                                                                |
| tejido celular subcutáneo a nivel del muslo en mm | [*DATA REMOVED*]                                                                                                                                                                                |
| tejido celular subcutáneo en abdomen en mm        | [*DATA REMOVED*]                                                                                                                                                                                |
| Volumen del muslo en cm3                          | [*DATA REMOVED*]                                                                                                                                                                                |
| Peso fetal estimado según fórmula de Hadlock      | [*DATA REMOVED*]                                                                                                                                                                                |

|                                               |                                                                                                                                                          |
|-----------------------------------------------|----------------------------------------------------------------------------------------------------------------------------------------------------------|
| Percentil                                     | [*DATA REMOVED*]                                                                                                                                         |
| Peso fetal estimado según fórmula de Scioscia | <hr/>                                                                                                                                                    |
| Peso fetal estimado según fórmula de LEE      | <hr/>                                                                                                                                                    |
| Tipo de parto                                 | <input type="radio"/> eutocico<br><input checked="" type="radio"/> instrumentado/ventosa<br><input type="radio"/> cesarea                                |
| fecha de nacimiento                           | [*DATA REMOVED*]                                                                                                                                         |
| Días entre exploración y nacimiento           | [*DATA REMOVED*]                                                                                                                                         |
| Peso RN en g                                  | [*DATA REMOVED*]                                                                                                                                         |
| sexo                                          | <input type="radio"/> mujer<br><input checked="" type="radio"/> hombre                                                                                   |
| Apgar 1 minuto                                | [*DATA REMOVED*]                                                                                                                                         |
| Apgar 5 minutos                               | [*DATA REMOVED*]                                                                                                                                         |
| Apgar 10 minutos                              | <hr/>                                                                                                                                                    |
| antecedente Covid durante gestación           | <input type="radio"/> Yes<br><input checked="" type="radio"/> No                                                                                         |
| Nivel de estudios                             | <input type="radio"/> ninguno<br><input type="radio"/> primarios<br><input checked="" type="radio"/> secundarios<br><input type="radio"/> universitarios |

# Base\_datos\_estimacion\_peso\_fetal

|                                       |                                                                                                                                                                                                                                                                                      |
|---------------------------------------|--------------------------------------------------------------------------------------------------------------------------------------------------------------------------------------------------------------------------------------------------------------------------------------|
| Número de identificación participante | 104                                                                                                                                                                                                                                                                                  |
| CODIGO PARTICIPANTE                   |                                                                                                                                                                                                                                                                                      |
| Edad                                  | [*DATA REMOVED*]                                                                                                                                                                                                                                                                     |
| Gestaciones                           | <input checked="" type="radio"/> 1<br><input type="radio"/> 2<br><input type="radio"/> 3<br><input type="radio"/> mas de 3                                                                                                                                                           |
| partos                                | <input checked="" type="radio"/> 0<br><input type="radio"/> 1<br><input type="radio"/> 2<br><input type="radio"/> 3<br><input type="radio"/> mas de 3                                                                                                                                |
| cesáreas                              | <input checked="" type="radio"/> 0<br><input type="radio"/> 1<br><input type="radio"/> 2<br><input type="radio"/> 3<br><input type="radio"/> mas de 3                                                                                                                                |
| Abortos                               | <input checked="" type="radio"/> 0<br><input type="radio"/> 1<br><input type="radio"/> 2<br><input type="radio"/> 3<br><input type="radio"/> mas de 3                                                                                                                                |
| Tipo de gestacion                     | <input checked="" type="radio"/> espontanea<br><input type="radio"/> IAC inseminación artificial conyuge<br><input type="radio"/> IAD inseminación artificial donante<br><input type="radio"/> FIV Fecundación in Vitro<br><input type="radio"/> Ovodon FIV con donación de ovocitos |
| peso previo a embarazo                | [*DATA REMOVED*]                                                                                                                                                                                                                                                                     |
| Ganancia ponderal embarazo            | [*DATA REMOVED*]                                                                                                                                                                                                                                                                     |
| Talla madre                           | [*DATA REMOVED*]                                                                                                                                                                                                                                                                     |
| IMC previo embarazo                   | 20.177148524332274                                                                                                                                                                                                                                                                   |
| Patología obstétrica                  | <input checked="" type="radio"/> no<br><input type="radio"/> si                                                                                                                                                                                                                      |
| Diabetes pregestacional               | <input checked="" type="radio"/> no<br><input type="radio"/> si                                                                                                                                                                                                                      |
| Diabetes gestacional                  | <input checked="" type="radio"/> no<br><input type="radio"/> si                                                                                                                                                                                                                      |

|                                            |                                                                                                                                                                                      |
|--------------------------------------------|--------------------------------------------------------------------------------------------------------------------------------------------------------------------------------------|
| Diabetes gestacional con insulina          | <input checked="" type="radio"/> no<br><input type="radio"/> si                                                                                                                      |
| Diabetes gestacional con dieta y ejercicio | <input checked="" type="radio"/> no<br><input type="radio"/> si                                                                                                                      |
| Percentil fetos previos                    | <input checked="" type="radio"/> Nada<br><input type="radio"/> percentil menor de 10<br><input type="radio"/> percentil entre 10 y 90<br><input type="radio"/> percentil mayor de 90 |
| Exfumadora                                 | <input checked="" type="radio"/> Nada<br><input type="radio"/> menos de 5 años<br><input type="radio"/> 5 a 10 años<br><input type="radio"/> mayor o igual a 10 años                 |
| Hábito tabáquico                           | <input checked="" type="radio"/> no<br><input type="radio"/> si                                                                                                                      |
| fumadora                                   | [*DATA REMOVED*]                                                                                                                                                                     |
| Consumo otros tóxicos                      | <input checked="" type="radio"/> no<br><input type="radio"/> si                                                                                                                      |
| Hb 1T                                      | [*DATA REMOVED*]                                                                                                                                                                     |
| Htc 1T                                     | [*DATA REMOVED*]                                                                                                                                                                     |
| Hb 2T                                      | [*DATA REMOVED*]                                                                                                                                                                     |
| HTC 2T                                     | [*DATA REMOVED*]                                                                                                                                                                     |
| Hb 3T                                      | _____                                                                                                                                                                                |
| HTC 3T                                     | _____                                                                                                                                                                                |
| Suplemento FE oral                         | <input checked="" type="radio"/> si<br><input type="radio"/> no                                                                                                                      |
| Suplemento fe iv                           | <input type="radio"/> si<br><input checked="" type="radio"/> no                                                                                                                      |
| Transfusión                                | <input checked="" type="radio"/> no<br><input type="radio"/> si                                                                                                                      |
| Solicitada Vit D                           | <input checked="" type="radio"/> no<br><input type="radio"/> si                                                                                                                      |
| Deficit vit D                              | <input type="radio"/> no<br><input type="radio"/> si                                                                                                                                 |

|                       |                                                                                                                                                                                                                                                                                                                                                                                                              |
|-----------------------|--------------------------------------------------------------------------------------------------------------------------------------------------------------------------------------------------------------------------------------------------------------------------------------------------------------------------------------------------------------------------------------------------------------|
| Suplemento vit D      | <input type="radio"/> si<br><input type="radio"/> no                                                                                                                                                                                                                                                                                                                                                         |
| Dieta, cuestionario   | <input checked="" type="radio"/> si<br><input type="radio"/> no                                                                                                                                                                                                                                                                                                                                              |
| Leche entera          | <input checked="" type="radio"/> Nunca o menos 1 vez al mes<br><input type="radio"/> 1 a 3 veces mes<br><input type="radio"/> 1 vez semana<br><input type="radio"/> 2 a 4 veces semana<br><input type="radio"/> 5 a 6 veces semana<br><input type="radio"/> 1 vez al día<br><input type="radio"/> 2 a 3 veces al día<br><input type="radio"/> 5 a 6 veces al día<br><input type="radio"/> más 6 veces al día |
| Leche semidesnatada   | <input checked="" type="radio"/> Nunca o menos 1 vez al mes<br><input type="radio"/> 1 a 3 veces mes<br><input type="radio"/> 1 vez semana<br><input type="radio"/> 2 a 4 veces semana<br><input type="radio"/> 5 a 6 veces semana<br><input type="radio"/> 1 vez al día<br><input type="radio"/> 2 a 3 veces al día<br><input type="radio"/> 5 a 6 veces al día<br><input type="radio"/> mas 6 veces al día |
| Leche desnatada       | <input type="radio"/> Nunca o menos 1 vez al mes<br><input type="radio"/> 1 a 3 veces mes<br><input type="radio"/> 1 vez semana<br><input type="radio"/> 2 a 4 veces semana<br><input type="radio"/> 5 a 6 veces semana<br><input checked="" type="radio"/> 1 vez al día<br><input type="radio"/> 2 a 3 veces al día<br><input type="radio"/> 5 a 6 veces al día<br><input type="radio"/> más 6 veces al día |
| Leche condensada      | <input checked="" type="radio"/> Nunca o menos 1 vez al mes<br><input type="radio"/> 1 a 3 veces mes<br><input type="radio"/> 1 vez semana<br><input type="radio"/> 2 a 4 veces semana<br><input type="radio"/> 5 a 6 veces semana<br><input type="radio"/> 1 vez al día<br><input type="radio"/> 2 a 3 veces al día<br><input type="radio"/> 5 a 6 veces al día<br><input type="radio"/> más 6 veces al día |
| nata o crema de leche | <input checked="" type="radio"/> Nunca o menos 1 vez al mes<br><input type="radio"/> 1 a 3 veces mes<br><input type="radio"/> 1 vez semana<br><input type="radio"/> 2 a 4 veces semana<br><input type="radio"/> 5 a 6 veces semana<br><input type="radio"/> 1 vez al día<br><input type="radio"/> 2 a 3 veces al día<br><input type="radio"/> 5 a 6 veces al día<br><input type="radio"/> más 6 veces al día |

---

Yogurt Entero

- ☒ Nunca o menos 1 vez al mes  
☐ 1 a 3 veces mes  
☐ 1 vez semana  
☐ 2 a 4 veces semana  
☐ 5 a 6 veces semana  
☐ 1 vez al día  
☐ 2 a 3 veces al día  
☐ 5 a 6 veces al día  
☐ más 6 veces al día

---

Yogurt desnatado

- ☐ Nunca o menos 1 vez al mes  
☐ 1 a 3 veces mes  
☐ 1 vez semana  
☒ 2 a 4 veces semana  
☐ 5 a 6 veces semana  
☐ 1 vez al día  
☐ 2 a 3 veces al día  
☐ 5 a 6 veces al día  
☐ más 6 veces al día

---

100g requesón o queso blando o queso fresco

- ☐ Nunca o menos 1 vez al mes  
☐ 1 a 3 veces mes  
☐ 1 vez semana  
☐ 2 a 4 veces semana  
☐ 5 a 6 veces semana  
☒ 1 vez al día  
☐ 2 a 3 veces al día  
☐ 5 a 6 veces al día  
☐ más 6 veces al día

---

queso curado o semicurado o cremoso

- ☐ Nunca o menos 1 vez al mes  
☐ 1 a 3 veces mes  
☐ 1 vez semana  
☐ 2 a 4 veces semana  
☐ 5 a 6 veces semana  
☒ 1 vez al día  
☐ 2 a 3 veces al día  
☐ 5 a 6 veces al día  
☐ más 6 veces al día

---

natillas flan pudding

- ☒ Nunca o menos 1 vez al mes  
☐ 1 a 3 veces mes  
☐ 1 vez semana  
☐ 2 a 4 veces semana  
☐ 5 a 6 veces semana  
☐ 1 vez al día  
☐ 2 a 3 veces al día  
☐ 5 a 6 veces al día  
☐ más 6 veces al día

---

Helado

- ☒ Nunca o menos 1 vez al mes  
☐ 1 a 3 veces mes  
☐ 1 vez semana  
☐ 2 a 4 veces semana  
☐ 5 a 6 veces semana  
☐ 1 vez al día  
☐ 2 a 3 veces al día  
☐ 5 a 6 veces al día  
☐ más 6 veces al día

|                                      |                                                                                                                                                                                                                                                                                                                                                                                                              |
|--------------------------------------|--------------------------------------------------------------------------------------------------------------------------------------------------------------------------------------------------------------------------------------------------------------------------------------------------------------------------------------------------------------------------------------------------------------|
| huevo                                | <input type="radio"/> Nunca o menos 1 vez al mes<br><input type="radio"/> 1 a 3 veces mes<br><input type="radio"/> 1 vez semana<br><input checked="" type="radio"/> 2 a 4 veces semana<br><input type="radio"/> 5 a 6 veces semana<br><input type="radio"/> 1 vez al día<br><input type="radio"/> 2 a 3 veces al día<br><input type="radio"/> 5 a 6 veces al día<br><input type="radio"/> más 6 veces al día |
| Pollo con piel                       | <input checked="" type="radio"/> Nunca o menos 1 vez al mes<br><input type="radio"/> 1 a 3 veces mes<br><input type="radio"/> 1 vez semana<br><input type="radio"/> 2 a 4 veces semana<br><input type="radio"/> 5 a 6 veces semana<br><input type="radio"/> 1 vez al día<br><input type="radio"/> 2 a 3 veces al día<br><input type="radio"/> 5 a 6 veces al día<br><input type="radio"/> más 6 veces al día |
| pollo sin piel                       | <input checked="" type="radio"/> Nunca o menos 1 vez al mes<br><input type="radio"/> 1 a 3 veces mes<br><input type="radio"/> 1 vez semana<br><input type="radio"/> 2 a 4 veces semana<br><input type="radio"/> 5 a 6 veces semana<br><input type="radio"/> 1 vez al día<br><input type="radio"/> 2 a 3 veces al día<br><input type="radio"/> 5 a 6 veces al día<br><input type="radio"/> más 6 veces al día |
| Ternera o cerdo o cordero            | <input checked="" type="radio"/> Nunca o menos 1 vez al mes<br><input type="radio"/> 1 a 3 veces mes<br><input type="radio"/> 1 vez semana<br><input type="radio"/> 2 a 4 veces semana<br><input type="radio"/> 5 a 6 veces semana<br><input type="radio"/> 1 vez al día<br><input type="radio"/> 2 a 3 veces al día<br><input type="radio"/> 5 a 6 veces al día<br><input type="radio"/> más 6 veces al día |
| carne caza: Conejo o codorniz o pato | <input checked="" type="radio"/> Nunca o menos 1 vez al mes<br><input type="radio"/> 1 a 3 veces mes<br><input type="radio"/> 1 vez semana<br><input type="radio"/> 2 a 4 veces semana<br><input type="radio"/> 5 a 6 veces semana<br><input type="radio"/> 1 vez al día<br><input type="radio"/> 2 a 3 veces al día<br><input type="radio"/> 5 a 6 veces al día<br><input type="radio"/> más 6 veces al día |
| Hígado de ternera o cerdo o pollo    | <input checked="" type="radio"/> Nunca o menos 1 vez al mes<br><input type="radio"/> 1 a 3 veces mes<br><input type="radio"/> 1 vez semana<br><input type="radio"/> 2 a 4 veces semana<br><input type="radio"/> 5 a 6 veces semana<br><input type="radio"/> 1 vez al día<br><input type="radio"/> 2 a 3 veces al día<br><input type="radio"/> 5 a 6 veces al día<br><input type="radio"/> más 6 veces al día |



---

Vísceras

- ☒ Nunca o menos 1 vez al mes  
☐ 1 a 3 veces mes  
☐ 1 vez semana  
☐ 2 a 4 veces semana  
☐ 5 a 6 veces semana  
☐ 1 vez al día  
☐ 2 a 3 veces al día  
☐ 5 a 6 veces al día  
☐ más 6 veces al día

---

Embutido

- ☒ Nunca o menos 1 vez al mes  
☐ 1 a 3 veces mes  
☐ 1 vez semana  
☐ 2 a 4 veces semana  
☐ 5 a 6 veces semana  
☐ 1 vez al día  
☐ 2 a 3 veces al día  
☐ 5 a 6 veces al día  
☐ más 6 veces al día

---

Salchicha o similar

- ☒ Nunca o menos 1 vez al mes  
☐ 1 a 3 veces mes  
☐ 1 vez semana  
☐ 2 a 4 veces semana  
☐ 5 a 6 veces semana  
☐ 1 vez al día  
☐ 2 a 3 veces al día  
☐ 5 a 6 veces al día  
☐ más 6 veces al día

---

Pate o foiegras

- ☒ Nunca o menos 1 vez al mes  
☐ 1 a 3 veces mes  
☐ 1 vez semana  
☐ 2 a 4 veces semana  
☐ 5 a 6 veces semana  
☐ 1 vez al día  
☐ 2 a 3 veces al día  
☐ 5 a 6 veces al día  
☐ más 6 veces al día

---

Hamburguesa

- ☒ Nunca o menos 1 vez al mes  
☐ 1 a 3 veces mes  
☐ 1 vez semana  
☐ 2 a 4 veces semana  
☐ 5 a 6 veces semana  
☐ 1 vez al día  
☐ 2 a 3 veces al día  
☐ 5 a 6 veces al día  
☐ más 6 veces al día

---

tocino o bacon

- ☒ Nunca o menos 1 vez al mes  
☐ 1 a 3 veces mes  
☐ 1 vez semana  
☐ 2 a 4 veces semana  
☐ 5 a 6 veces semana  
☐ 1 vez al día  
☐ 2 a 3 veces al día  
☐ 5 a 6 veces al día  
☐ más 6 veces al día

|                        |                                                                                                                                                                                                                                                                                                                                                                                                              |
|------------------------|--------------------------------------------------------------------------------------------------------------------------------------------------------------------------------------------------------------------------------------------------------------------------------------------------------------------------------------------------------------------------------------------------------------|
| Pescado frito          | <input checked="" type="radio"/> Nunca o menos 1 vez al mes<br><input type="radio"/> 1 a 3 veces mes<br><input type="radio"/> 1 vez semana<br><input type="radio"/> 2 a 4 veces semana<br><input type="radio"/> 5 a 6 veces semana<br><input type="radio"/> 1 vez al día<br><input type="radio"/> 2 a 3 veces al día<br><input type="radio"/> 5 a 6 veces al día<br><input type="radio"/> más 6 veces al día |
| pescado hervido blanco | <input type="radio"/> Nunca o menos 1 vez al mes<br><input type="radio"/> 1 a 3 veces mes<br><input type="radio"/> 1 vez semana<br><input checked="" type="radio"/> 2 a 4 veces semana<br><input type="radio"/> 5 a 6 veces semana<br><input type="radio"/> 1 vez al día<br><input type="radio"/> 2 a 3 veces al día<br><input type="radio"/> 5 a 6 veces al día<br><input type="radio"/> más 6 veces al día |
| pescado hervido azul   | <input type="radio"/> Nunca o menos 1 vez al mes<br><input type="radio"/> 1 a 3 veces mes<br><input checked="" type="radio"/> 1 vez semana<br><input type="radio"/> 2 a 4 veces semana<br><input type="radio"/> 5 a 6 veces semana<br><input type="radio"/> 1 vez al día<br><input type="radio"/> 2 a 3 veces al día<br><input type="radio"/> 5 a 6 veces al día<br><input type="radio"/> más 6 veces al día |
| otros pescado azul     | <input type="radio"/> Nunca o menos 1 vez al mes<br><input type="radio"/> 1 a 3 veces mes<br><input checked="" type="radio"/> 1 vez semana<br><input type="radio"/> 2 a 4 veces semana<br><input type="radio"/> 5 a 6 veces semana<br><input type="radio"/> 1 vez al día<br><input type="radio"/> 2 a 3 veces al día<br><input type="radio"/> 5 a 6 veces al día<br><input type="radio"/> más 6 veces al día |
| atun conserva          | <input type="radio"/> Nunca o menos 1 vez al mes<br><input checked="" type="radio"/> 1 a 3 veces mes<br><input type="radio"/> 1 vez semana<br><input type="radio"/> 2 a 4 veces semana<br><input type="radio"/> 5 a 6 veces semana<br><input type="radio"/> 1 vez al día<br><input type="radio"/> 2 a 3 veces al día<br><input type="radio"/> 5 a 6 veces al día<br><input type="radio"/> más 6 veces al día |
| sardina conserva       | <input checked="" type="radio"/> Nunca o menos 1 vez al mes<br><input type="radio"/> 1 a 3 veces mes<br><input type="radio"/> 1 vez semana<br><input type="radio"/> 2 a 4 veces semana<br><input type="radio"/> 5 a 6 veces semana<br><input type="radio"/> 1 vez al día<br><input type="radio"/> 2 a 3 veces al día<br><input type="radio"/> 5 a 6 veces al día<br><input type="radio"/> más 6 veces al día |

|                                         |                                                                                                                                                                                                                                                                                                                                                                                                              |
|-----------------------------------------|--------------------------------------------------------------------------------------------------------------------------------------------------------------------------------------------------------------------------------------------------------------------------------------------------------------------------------------------------------------------------------------------------------------|
| pescado ahumado                         | <input type="radio"/> Nunca o menos 1 vez al mes<br><input checked="" type="radio"/> 1 a 3 veces mes<br><input type="radio"/> 1 vez semana<br><input type="radio"/> 2 a 4 veces semana<br><input type="radio"/> 5 a 6 veces semana<br><input type="radio"/> 1 vez al día<br><input type="radio"/> 2 a 3 veces al día<br><input type="radio"/> 5 a 6 veces al día<br><input type="radio"/> más 6 veces al día |
| almejas o mejillones o ostras unos 100g | <input type="radio"/> Nunca o menos 1 vez al mes<br><input checked="" type="radio"/> 1 a 3 veces mes<br><input type="radio"/> 1 vez semana<br><input type="radio"/> 2 a 4 veces semana<br><input type="radio"/> 5 a 6 veces semana<br><input type="radio"/> 1 vez al día<br><input type="radio"/> 2 a 3 veces al día<br><input type="radio"/> 5 a 6 veces al día<br><input type="radio"/> más 6 veces al día |
| calamar o chipiron o sepia unos 100g    | <input type="radio"/> Nunca o menos 1 vez al mes<br><input checked="" type="radio"/> 1 a 3 veces mes<br><input type="radio"/> 1 vez semana<br><input type="radio"/> 2 a 4 veces semana<br><input type="radio"/> 5 a 6 veces semana<br><input type="radio"/> 1 vez al día<br><input type="radio"/> 2 a 3 veces al día<br><input type="radio"/> 5 a 6 veces al día<br><input type="radio"/> más 6 veces al día |
| marisco unos 100g                       | <input type="radio"/> Nunca o menos 1 vez al mes<br><input checked="" type="radio"/> 1 a 3 veces mes<br><input type="radio"/> 1 vez semana<br><input type="radio"/> 2 a 4 veces semana<br><input type="radio"/> 5 a 6 veces semana<br><input type="radio"/> 1 vez al día<br><input type="radio"/> 2 a 3 veces al día<br><input type="radio"/> 5 a 6 veces al día<br><input type="radio"/> más 6 veces al día |
| Espinacas o acelgas cocinadas           | <input type="radio"/> Nunca o menos 1 vez al mes<br><input checked="" type="radio"/> 1 a 3 veces mes<br><input type="radio"/> 1 vez semana<br><input type="radio"/> 2 a 4 veces semana<br><input type="radio"/> 5 a 6 veces semana<br><input type="radio"/> 1 vez al día<br><input type="radio"/> 2 a 3 veces al día<br><input type="radio"/> 5 a 6 veces al día<br><input type="radio"/> más 6 veces al día |
| Col o coliflor o brocoli cocinado       | <input type="radio"/> Nunca o menos 1 vez al mes<br><input checked="" type="radio"/> 1 a 3 veces mes<br><input type="radio"/> 1 vez semana<br><input type="radio"/> 2 a 4 veces semana<br><input type="radio"/> 5 a 6 veces semana<br><input type="radio"/> 1 vez al día<br><input type="radio"/> 2 a 3 veces al día<br><input type="radio"/> 5 a 6 veces al día<br><input type="radio"/> más 6 veces al día |

---

Lechuga o endivia o escarola

- ☐ Nunca o menos 1 vez al mes  
☐ 1 a 3 veces mes  
☐ 1 vez semana  
☒ 2 a 4 veces semana  
☐ 5 a 6 veces semana  
☐ 1 vez al día  
☐ 2 a 3 veces al día  
☐ 5 a 6 veces al día  
☐ más 6 veces al día

---

tomate ensalada

- ☐ Nunca o menos 1 vez al mes  
☐ 1 a 3 veces mes  
☐ 1 vez semana  
☒ 2 a 4 veces semana  
☐ 5 a 6 veces semana  
☐ 1 vez al día  
☐ 2 a 3 veces al día  
☐ 5 a 6 veces al día  
☐ más 6 veces al día

---

cebolla

- ☐ Nunca o menos 1 vez al mes  
☐ 1 a 3 veces mes  
☐ 1 vez semana  
☒ 2 a 4 veces semana  
☐ 5 a 6 veces semana  
☐ 1 vez al día  
☐ 2 a 3 veces al día  
☐ 5 a 6 veces al día  
☐ más 6 veces al día

---

Zanahoria o calabaza

- ☐ Nunca o menos 1 vez al mes  
☐ 1 a 3 veces mes  
☐ 1 vez semana  
☒ 2 a 4 veces semana  
☐ 5 a 6 veces semana  
☐ 1 vez al día  
☐ 2 a 3 veces al día  
☐ 5 a 6 veces al día  
☐ más 6 veces al día

---

Judías verdes

- ☐ Nunca o menos 1 vez al mes  
☒ 1 a 3 veces mes  
☐ 1 vez semana  
☐ 2 a 4 veces semana  
☐ 5 a 6 veces semana  
☐ 1 vez al día  
☐ 2 a 3 veces al día  
☐ 5 a 6 veces al día  
☐ más 6 veces al día

---

Berenjena o calabacin o pepino

- ☐ Nunca o menos 1 vez al mes  
☐ 1 a 3 veces mes  
☐ 1 vez semana  
☒ 2 a 4 veces semana  
☐ 5 a 6 veces semana  
☐ 1 vez al día  
☐ 2 a 3 veces al día  
☐ 5 a 6 veces al día  
☐ más 6 veces al día

|                       |                                                                                                                                                                                                                                                                                                                                                                                                              |
|-----------------------|--------------------------------------------------------------------------------------------------------------------------------------------------------------------------------------------------------------------------------------------------------------------------------------------------------------------------------------------------------------------------------------------------------------|
| pimiento              | <input type="radio"/> Nunca o menos 1 vez al mes<br><input type="radio"/> 1 a 3 veces mes<br><input type="radio"/> 1 vez semana<br><input checked="" type="radio"/> 2 a 4 veces semana<br><input type="radio"/> 5 a 6 veces semana<br><input type="radio"/> 1 vez al día<br><input type="radio"/> 2 a 3 veces al día<br><input type="radio"/> 5 a 6 veces al día<br><input type="radio"/> más 6 veces al día |
| alcachofa             | <input type="radio"/> Nunca o menos 1 vez al mes<br><input checked="" type="radio"/> 1 a 3 veces mes<br><input type="radio"/> 1 vez semana<br><input type="radio"/> 2 a 4 veces semana<br><input type="radio"/> 5 a 6 veces semana<br><input type="radio"/> 1 vez al día<br><input type="radio"/> 2 a 3 veces al día<br><input type="radio"/> 5 a 6 veces al día<br><input type="radio"/> más 6 veces al día |
| espárragos            | <input type="radio"/> Nunca o menos 1 vez al mes<br><input checked="" type="radio"/> 1 a 3 veces mes<br><input type="radio"/> 1 vez semana<br><input type="radio"/> 2 a 4 veces semana<br><input type="radio"/> 5 a 6 veces semana<br><input type="radio"/> 1 vez al día<br><input type="radio"/> 2 a 3 veces al día<br><input type="radio"/> 5 a 6 veces al día<br><input type="radio"/> más 6 veces al día |
| maíz hervido          | <input checked="" type="radio"/> Nunca o menos 1 vez al mes<br><input type="radio"/> 1 a 3 veces mes<br><input type="radio"/> 1 vez semana<br><input type="radio"/> 2 a 4 veces semana<br><input type="radio"/> 5 a 6 veces semana<br><input type="radio"/> 1 vez al día<br><input type="radio"/> 2 a 3 veces al día<br><input type="radio"/> 5 a 6 veces al día<br><input type="radio"/> más 6 veces al día |
| legumbres             | <input type="radio"/> Nunca o menos 1 vez al mes<br><input type="radio"/> 1 a 3 veces mes<br><input type="radio"/> 1 vez semana<br><input checked="" type="radio"/> 2 a 4 veces semana<br><input type="radio"/> 5 a 6 veces semana<br><input type="radio"/> 1 vez al día<br><input type="radio"/> 2 a 3 veces al día<br><input type="radio"/> 5 a 6 veces al día<br><input type="radio"/> más 6 veces al día |
| naranjas o mandarinas | <input type="radio"/> Nunca o menos 1 vez al mes<br><input type="radio"/> 1 a 3 veces mes<br><input type="radio"/> 1 vez semana<br><input checked="" type="radio"/> 2 a 4 veces semana<br><input type="radio"/> 5 a 6 veces semana<br><input type="radio"/> 1 vez al día<br><input type="radio"/> 2 a 3 veces al día<br><input type="radio"/> 5 a 6 veces al día<br><input type="radio"/> más 6 veces al día |

---

zumo natural fruta

- ☒ Nunca o menos 1 vez al mes  
☐ 1 a 3 veces mes  
☐ 1 vez semana  
☐ 2 a 4 veces semana  
☐ 5 a 6 veces semana  
☐ 1 vez al día  
☐ 2 a 3 veces al día  
☐ 5 a 6 veces al día  
☐ más 6 veces al día

---

platano

- ☐ Nunca o menos 1 vez al mes  
☒ 1 a 3 veces mes  
☐ 1 vez semana  
☐ 2 a 4 veces semana  
☐ 5 a 6 veces semana  
☐ 1 vez al día  
☐ 2 a 3 veces al día  
☐ 5 a 6 veces al día  
☐ más 6 veces al día

---

manzana o pera

- ☐ Nunca o menos 1 vez al mes  
☐ 1 a 3 veces mes  
☐ 1 vez semana  
☐ 2 a 4 veces semana  
☒ 5 a 6 veces semana  
☐ 1 vez al día  
☐ 2 a 3 veces al día  
☐ 5 a 6 veces al día  
☐ más 6 veces al día

---

melocotón o nectarina

- ☐ Nunca o menos 1 vez al mes  
☒ 1 a 3 veces mes  
☐ 1 vez semana  
☐ 2 a 4 veces semana  
☐ 5 a 6 veces semana  
☐ 1 vez al día  
☐ 2 a 3 veces al día  
☐ 5 a 6 veces al día  
☐ más 6 veces al día

---

sandia o melon

- ☐ Nunca o menos 1 vez al mes  
☐ 1 a 3 veces mes  
☐ 1 vez semana  
☒ 2 a 4 veces semana  
☐ 5 a 6 veces semana  
☐ 1 vez al día  
☐ 2 a 3 veces al día  
☐ 5 a 6 veces al día  
☐ más 6 veces al día

---

uva

- ☐ Nunca o menos 1 vez al mes  
☐ 1 a 3 veces mes  
☐ 1 vez semana  
☒ 2 a 4 veces semana  
☐ 5 a 6 veces semana  
☐ 1 vez al día  
☐ 2 a 3 veces al día  
☐ 5 a 6 veces al día  
☐ más 6 veces al día

|                 |                                                                                                                                                                                                                                                                                                                                                                                                              |
|-----------------|--------------------------------------------------------------------------------------------------------------------------------------------------------------------------------------------------------------------------------------------------------------------------------------------------------------------------------------------------------------------------------------------------------------|
| bruna o ciruela | <input checked="" type="radio"/> Nunca o menos 1 vez al mes<br><input type="radio"/> 1 a 3 veces mes<br><input type="radio"/> 1 vez semana<br><input type="radio"/> 2 a 4 veces semana<br><input type="radio"/> 5 a 6 veces semana<br><input type="radio"/> 1 vez al día<br><input type="radio"/> 2 a 3 veces al día<br><input type="radio"/> 5 a 6 veces al día<br><input type="radio"/> más 6 veces al día |
| kiwi            | <input type="radio"/> Nunca o menos 1 vez al mes<br><input checked="" type="radio"/> 1 a 3 veces mes<br><input type="radio"/> 1 vez semana<br><input type="radio"/> 2 a 4 veces semana<br><input type="radio"/> 5 a 6 veces semana<br><input type="radio"/> 1 vez al día<br><input type="radio"/> 2 a 3 veces al día<br><input type="radio"/> 5 a 6 veces al día<br><input type="radio"/> más 6 veces al día |
| aceituna        | <input checked="" type="radio"/> Nunca o menos 1 vez al mes<br><input type="radio"/> 1 a 3 veces mes<br><input type="radio"/> 1 vez semana<br><input type="radio"/> 2 a 4 veces semana<br><input type="radio"/> 5 a 6 veces semana<br><input type="radio"/> 1 vez al día<br><input type="radio"/> 2 a 3 veces al día<br><input type="radio"/> 5 a 6 veces al día<br><input type="radio"/> más 6 veces al día |
| frutos secos    | <input type="radio"/> Nunca o menos 1 vez al mes<br><input type="radio"/> 1 a 3 veces mes<br><input type="radio"/> 1 vez semana<br><input checked="" type="radio"/> 2 a 4 veces semana<br><input type="radio"/> 5 a 6 veces semana<br><input type="radio"/> 1 vez al día<br><input type="radio"/> 2 a 3 veces al día<br><input type="radio"/> 5 a 6 veces al día<br><input type="radio"/> más 6 veces al día |
| pan blanco      | <input type="radio"/> Nunca o menos 1 vez al mes<br><input type="radio"/> 1 a 3 veces mes<br><input type="radio"/> 1 vez semana<br><input type="radio"/> 2 a 4 veces semana<br><input type="radio"/> 5 a 6 veces semana<br><input checked="" type="radio"/> 1 vez al día<br><input type="radio"/> 2 a 3 veces al día<br><input type="radio"/> 5 a 6 veces al día<br><input type="radio"/> más 6 veces al día |
| pan integral    | <input type="radio"/> Nunca o menos 1 vez al mes<br><input type="radio"/> 1 a 3 veces mes<br><input type="radio"/> 1 vez semana<br><input type="radio"/> 2 a 4 veces semana<br><input type="radio"/> 5 a 6 veces semana<br><input checked="" type="radio"/> 1 vez al día<br><input type="radio"/> 2 a 3 veces al día<br><input type="radio"/> 5 a 6 veces al día<br><input type="radio"/> más 6 veces al día |

---

cereales desayuno

- ☒ Nunca o menos 1 vez al mes  
☐ 1 a 3 veces mes  
☐ 1 vez semana  
☐ 2 a 4 veces semana  
☐ 5 a 6 veces semana  
☐ 1 vez al día  
☐ 2 a 3 veces al día  
☐ 5 a 6 veces al día  
☐ más 6 veces al día

---

patatas fritas

- ☒ Nunca o menos 1 vez al mes  
☐ 1 a 3 veces mes  
☐ 1 vez semana  
☐ 2 a 4 veces semana  
☐ 5 a 6 veces semana  
☐ 1 vez al día  
☐ 2 a 3 veces al día  
☐ 5 a 6 veces al día  
☐ más 6 veces al día

---

patatas cocidas o asadas

- ☐ Nunca o menos 1 vez al mes  
☒ 1 a 3 veces mes  
☐ 1 vez semana  
☐ 2 a 4 veces semana  
☐ 5 a 6 veces semana  
☐ 1 vez al día  
☐ 2 a 3 veces al día  
☐ 5 a 6 veces al día  
☐ más 6 veces al día

---

bolsa papas

- ☐ Nunca o menos 1 vez al mes  
☐ 1 a 3 veces mes  
☒ 1 vez semana  
☐ 2 a 4 veces semana  
☐ 5 a 6 veces semana  
☐ 1 vez al día  
☐ 2 a 3 veces al día  
☐ 5 a 6 veces al día  
☐ más 6 veces al día

---

arroz cocinado

- ☐ Nunca o menos 1 vez al mes  
☐ 1 a 3 veces mes  
☒ 1 vez semana  
☐ 2 a 4 veces semana  
☐ 5 a 6 veces semana  
☐ 1 vez al día  
☐ 2 a 3 veces al día  
☐ 5 a 6 veces al día  
☐ más 6 veces al día

---

pasta

- ☐ Nunca o menos 1 vez al mes  
☐ 1 a 3 veces mes  
☒ 1 vez semana  
☐ 2 a 4 veces semana  
☐ 5 a 6 veces semana  
☐ 1 vez al día  
☐ 2 a 3 veces al día  
☐ 5 a 6 veces al día  
☐ más 6 veces al día



|                     |                                                                                                                                                                                                                                                                                                                                                                                                              |
|---------------------|--------------------------------------------------------------------------------------------------------------------------------------------------------------------------------------------------------------------------------------------------------------------------------------------------------------------------------------------------------------------------------------------------------------|
| pizza               | <input type="radio"/> Nunca o menos 1 vez al mes<br><input checked="" type="radio"/> 1 a 3 veces mes<br><input type="radio"/> 1 vez semana<br><input type="radio"/> 2 a 4 veces semana<br><input type="radio"/> 5 a 6 veces semana<br><input type="radio"/> 1 vez al día<br><input type="radio"/> 2 a 3 veces al día<br><input type="radio"/> 5 a 6 veces al día<br><input type="radio"/> más 6 veces al día |
| aceite oliva        | <input type="radio"/> Nunca o menos 1 vez al mes<br><input type="radio"/> 1 a 3 veces mes<br><input type="radio"/> 1 vez semana<br><input type="radio"/> 2 a 4 veces semana<br><input type="radio"/> 5 a 6 veces semana<br><input type="radio"/> 1 vez al día<br><input checked="" type="radio"/> 2 a 3 veces al día<br><input type="radio"/> 5 a 6 veces al día<br><input type="radio"/> más 6 veces al día |
| otros aceites       | <input checked="" type="radio"/> Nunca o menos 1 vez al mes<br><input type="radio"/> 1 a 3 veces mes<br><input type="radio"/> 1 vez semana<br><input type="radio"/> 2 a 4 veces semana<br><input type="radio"/> 5 a 6 veces semana<br><input type="radio"/> 1 vez al día<br><input type="radio"/> 2 a 3 veces al día<br><input type="radio"/> 5 a 6 veces al día<br><input type="radio"/> más 6 veces al día |
| margarina           | <input checked="" type="radio"/> Nunca o menos 1 vez al mes<br><input type="radio"/> 1 a 3 veces mes<br><input type="radio"/> 1 vez semana<br><input type="radio"/> 2 a 4 veces semana<br><input type="radio"/> 5 a 6 veces semana<br><input type="radio"/> 1 vez al día<br><input type="radio"/> 2 a 3 veces al día<br><input type="radio"/> 5 a 6 veces al día<br><input type="radio"/> más 6 veces al día |
| mantequilla         | <input type="radio"/> Nunca o menos 1 vez al mes<br><input type="radio"/> 1 a 3 veces mes<br><input type="radio"/> 1 vez semana<br><input checked="" type="radio"/> 2 a 4 veces semana<br><input type="radio"/> 5 a 6 veces semana<br><input type="radio"/> 1 vez al día<br><input type="radio"/> 2 a 3 veces al día<br><input type="radio"/> 5 a 6 veces al día<br><input type="radio"/> más 6 veces al día |
| galletas tipo maria | <input type="radio"/> Nunca o menos 1 vez al mes<br><input checked="" type="radio"/> 1 a 3 veces mes<br><input type="radio"/> 1 vez semana<br><input type="radio"/> 2 a 4 veces semana<br><input type="radio"/> 5 a 6 veces semana<br><input type="radio"/> 1 vez al día<br><input type="radio"/> 2 a 3 veces al día<br><input type="radio"/> 5 a 6 veces al día<br><input type="radio"/> más 6 veces al día |

|                           |                                                                                                                                                                                                                                                                                                                                                                                                              |
|---------------------------|--------------------------------------------------------------------------------------------------------------------------------------------------------------------------------------------------------------------------------------------------------------------------------------------------------------------------------------------------------------------------------------------------------------|
| galletas chocolate        | <input type="radio"/> Nunca o menos 1 vez al mes<br><input checked="" type="radio"/> 1 a 3 veces mes<br><input type="radio"/> 1 vez semana<br><input type="radio"/> 2 a 4 veces semana<br><input type="radio"/> 5 a 6 veces semana<br><input type="radio"/> 1 vez al día<br><input type="radio"/> 2 a 3 veces al día<br><input type="radio"/> 5 a 6 veces al día<br><input type="radio"/> más 6 veces al día |
| bollieria                 | <input type="radio"/> Nunca o menos 1 vez al mes<br><input type="radio"/> 1 a 3 veces mes<br><input checked="" type="radio"/> 1 vez semana<br><input type="radio"/> 2 a 4 veces semana<br><input type="radio"/> 5 a 6 veces semana<br><input type="radio"/> 1 vez al día<br><input type="radio"/> 2 a 3 veces al día<br><input type="radio"/> 5 a 6 veces al día<br><input type="radio"/> más 6 veces al día |
| chocolate o bombones      | <input type="radio"/> Nunca o menos 1 vez al mes<br><input type="radio"/> 1 a 3 veces mes<br><input type="radio"/> 1 vez semana<br><input checked="" type="radio"/> 2 a 4 veces semana<br><input type="radio"/> 5 a 6 veces semana<br><input type="radio"/> 1 vez al día<br><input type="radio"/> 2 a 3 veces al día<br><input type="radio"/> 5 a 6 veces al día<br><input type="radio"/> más 6 veces al día |
| chocolate polvo o colacao | <input checked="" type="radio"/> Nunca o menos 1 vez al mes<br><input type="radio"/> 1 a 3 veces mes<br><input type="radio"/> 1 vez semana<br><input type="radio"/> 2 a 4 veces semana<br><input type="radio"/> 5 a 6 veces semana<br><input type="radio"/> 1 vez al día<br><input type="radio"/> 2 a 3 veces al día<br><input type="radio"/> 5 a 6 veces al día<br><input type="radio"/> más 6 veces al día |
| vino tinto                | <input checked="" type="radio"/> Nunca o menos 1 vez al mes<br><input type="radio"/> 1 a 3 veces mes<br><input type="radio"/> 1 vez semana<br><input type="radio"/> 2 a 4 veces semana<br><input type="radio"/> 5 a 6 veces semana<br><input type="radio"/> 1 vez al día<br><input type="radio"/> 2 a 3 veces al día<br><input type="radio"/> 5 a 6 veces al día<br><input type="radio"/> más 6 veces al día |
| vino blanco               | <input checked="" type="radio"/> Nunca o menos 1 vez al mes<br><input type="radio"/> 1 a 3 veces mes<br><input type="radio"/> 1 vez semana<br><input type="radio"/> 2 a 4 veces semana<br><input type="radio"/> 5 a 6 veces semana<br><input type="radio"/> 1 vez al día<br><input type="radio"/> 2 a 3 veces al día<br><input type="radio"/> 5 a 6 veces al día<br><input type="radio"/> más 6 veces al día |

---

|                    |                                                                                                                                                                                                                                                                                                                                                                                                              |
|--------------------|--------------------------------------------------------------------------------------------------------------------------------------------------------------------------------------------------------------------------------------------------------------------------------------------------------------------------------------------------------------------------------------------------------------|
| vino seco o vermut | <input checked="" type="radio"/> Nunca o menos 1 vez al mes<br><input type="radio"/> 1 a 3 veces mes<br><input type="radio"/> 1 vez semana<br><input type="radio"/> 2 a 4 veces semana<br><input type="radio"/> 5 a 6 veces semana<br><input type="radio"/> 1 vez al día<br><input type="radio"/> 2 a 3 veces al día<br><input type="radio"/> 5 a 6 veces al día<br><input type="radio"/> más 6 veces al día |
|--------------------|--------------------------------------------------------------------------------------------------------------------------------------------------------------------------------------------------------------------------------------------------------------------------------------------------------------------------------------------------------------------------------------------------------------|

---

|         |                                                                                                                                                                                                                                                                                                                                                                                                              |
|---------|--------------------------------------------------------------------------------------------------------------------------------------------------------------------------------------------------------------------------------------------------------------------------------------------------------------------------------------------------------------------------------------------------------------|
| cerveza | <input checked="" type="radio"/> Nunca o menos 1 vez al mes<br><input type="radio"/> 1 a 3 veces mes<br><input type="radio"/> 1 vez semana<br><input type="radio"/> 2 a 4 veces semana<br><input type="radio"/> 5 a 6 veces semana<br><input type="radio"/> 1 vez al día<br><input type="radio"/> 2 a 3 veces al día<br><input type="radio"/> 5 a 6 veces al día<br><input type="radio"/> más 6 veces al día |
|---------|--------------------------------------------------------------------------------------------------------------------------------------------------------------------------------------------------------------------------------------------------------------------------------------------------------------------------------------------------------------------------------------------------------------|

---

|                     |                                                                                                                                                                                                                                                                                                                                                                                                              |
|---------------------|--------------------------------------------------------------------------------------------------------------------------------------------------------------------------------------------------------------------------------------------------------------------------------------------------------------------------------------------------------------------------------------------------------------|
| cerveza sin alcohol | <input type="radio"/> Nunca o menos 1 vez al mes<br><input checked="" type="radio"/> 1 a 3 veces mes<br><input type="radio"/> 1 vez semana<br><input type="radio"/> 2 a 4 veces semana<br><input type="radio"/> 5 a 6 veces semana<br><input type="radio"/> 1 vez al día<br><input type="radio"/> 2 a 3 veces al día<br><input type="radio"/> 5 a 6 veces al día<br><input type="radio"/> más 6 veces al día |
|---------------------|--------------------------------------------------------------------------------------------------------------------------------------------------------------------------------------------------------------------------------------------------------------------------------------------------------------------------------------------------------------------------------------------------------------|

---

|         |                                                                                                                                                                                                                                                                                                                                                                                                              |
|---------|--------------------------------------------------------------------------------------------------------------------------------------------------------------------------------------------------------------------------------------------------------------------------------------------------------------------------------------------------------------------------------------------------------------|
| licores | <input checked="" type="radio"/> Nunca o menos 1 vez al mes<br><input type="radio"/> 1 a 3 veces mes<br><input type="radio"/> 1 vez semana<br><input type="radio"/> 2 a 4 veces semana<br><input type="radio"/> 5 a 6 veces semana<br><input type="radio"/> 1 vez al día<br><input type="radio"/> 2 a 3 veces al día<br><input type="radio"/> 5 a 6 veces al día<br><input type="radio"/> más 6 veces al día |
|---------|--------------------------------------------------------------------------------------------------------------------------------------------------------------------------------------------------------------------------------------------------------------------------------------------------------------------------------------------------------------------------------------------------------------|

---

|                       |                                                                                                                                                                                                                                                                                                                                                                                                              |
|-----------------------|--------------------------------------------------------------------------------------------------------------------------------------------------------------------------------------------------------------------------------------------------------------------------------------------------------------------------------------------------------------------------------------------------------------|
| ginebra o ron o vodka | <input checked="" type="radio"/> Nunca o menos 1 vez al mes<br><input type="radio"/> 1 a 3 veces mes<br><input type="radio"/> 1 vez semana<br><input type="radio"/> 2 a 4 veces semana<br><input type="radio"/> 5 a 6 veces semana<br><input type="radio"/> 1 vez al día<br><input type="radio"/> 2 a 3 veces al día<br><input type="radio"/> 5 a 6 veces al día<br><input type="radio"/> más 6 veces al día |
|-----------------------|--------------------------------------------------------------------------------------------------------------------------------------------------------------------------------------------------------------------------------------------------------------------------------------------------------------------------------------------------------------------------------------------------------------|

---

|                 |                                                                                                                                                                                                                                                                                                                                                                                                              |
|-----------------|--------------------------------------------------------------------------------------------------------------------------------------------------------------------------------------------------------------------------------------------------------------------------------------------------------------------------------------------------------------------------------------------------------------|
| refresco normal | <input checked="" type="radio"/> Nunca o menos 1 vez al mes<br><input type="radio"/> 1 a 3 veces mes<br><input type="radio"/> 1 vez semana<br><input type="radio"/> 2 a 4 veces semana<br><input type="radio"/> 5 a 6 veces semana<br><input type="radio"/> 1 vez al día<br><input type="radio"/> 2 a 3 veces al día<br><input type="radio"/> 5 a 6 veces al día<br><input type="radio"/> más 6 veces al día |
|-----------------|--------------------------------------------------------------------------------------------------------------------------------------------------------------------------------------------------------------------------------------------------------------------------------------------------------------------------------------------------------------------------------------------------------------|

---

---

refresco sin azúcar

- ☒ Nunca o menos 1 vez al mes  
☐ 1 a 3 veces mes  
☐ 1 vez semana  
☐ 2 a 4 veces semana  
☐ 5 a 6 veces semana  
☐ 1 vez al día  
☐ 2 a 3 veces al día  
☐ 5 a 6 veces al día  
☐ más 6 veces al día

---

Agua del grifo

- ☒ Nunca o menos 1 vez al mes  
☐ 1 a 3 veces mes  
☐ 1 vez semana  
☐ 2 a 4 veces semana  
☐ 5 a 6 veces semana  
☐ 1 vez al día  
☐ 2 a 3 veces al día  
☐ 5 a 6 veces al día  
☐ más 6 veces al día

---

agua embotellada sin gas

- ☐ Nunca o menos 1 vez al mes  
☐ 1 a 3 veces mes  
☐ 1 vez semana  
☐ 2 a 4 veces semana  
☐ 5 a 6 veces semana  
☐ 1 vez al día  
☐ 2 a 3 veces al día  
☐ 5 a 6 veces al día  
☒ más 6 veces al día

---

agua embotellada con gas

- ☒ Nunca o menos 1 vez al mes  
☐ 1 a 3 veces mes  
☐ 1 vez semana  
☐ 2 a 4 veces semana  
☐ 5 a 6 veces semana  
☐ 1 vez al día  
☐ 2 a 3 veces al día  
☐ 5 a 6 veces al día  
☐ más 6 veces al día

---

zumو frutas embasado

- ☒ Nunca o menos 1 vez al mes  
☐ 1 a 3 veces mes  
☐ 1 vez semana  
☐ 2 a 4 veces semana  
☐ 5 a 6 veces semana  
☐ 1 vez al día  
☐ 2 a 3 veces al día  
☐ 5 a 6 veces al día  
☐ más 6 veces al día

---

cafe

- ☐ Nunca o menos 1 vez al mes  
☐ 1 a 3 veces mes  
☐ 1 vez semana  
☐ 2 a 4 veces semana  
☐ 5 a 6 veces semana  
☒ 1 vez al día  
☐ 2 a 3 veces al día  
☐ 5 a 6 veces al día  
☐ más 6 veces al día

---

cafe descafeinado

- ☒ Nunca o menos 1 vez al mes  
☐ 1 a 3 veces mes  
☐ 1 vez semana  
☐ 2 a 4 veces semana  
☐ 5 a 6 veces semana  
☐ 1 vez al día  
☐ 2 a 3 veces al día  
☐ 5 a 6 veces al día  
☐ más 6 veces al día

---

te o infusión

- ☐ Nunca o menos 1 vez al mes  
☐ 1 a 3 veces mes  
☐ 1 vez semana  
☐ 2 a 4 veces semana  
☐ 5 a 6 veces semana  
☐ 1 vez al día  
☒ 2 a 3 veces al día  
☐ 5 a 6 veces al día  
☐ más 6 veces al día

---

sopa o puré verduras

- ☐ Nunca o menos 1 vez al mes  
☐ 1 a 3 veces mes  
☐ 1 vez semana  
☒ 2 a 4 veces semana  
☐ 5 a 6 veces semana  
☐ 1 vez al día  
☐ 2 a 3 veces al día  
☐ 5 a 6 veces al día  
☐ más 6 veces al día

---

croquetas pollo jamón

- ☒ Nunca o menos 1 vez al mes  
☐ 1 a 3 veces mes  
☐ 1 vez semana  
☐ 2 a 4 veces semana  
☐ 5 a 6 veces semana  
☐ 1 vez al día  
☐ 2 a 3 veces al día  
☐ 5 a 6 veces al día  
☐ más 6 veces al día

---

croquetas pescado

- ☒ Nunca o menos 1 vez al mes  
☐ 1 a 3 veces mes  
☐ 1 vez semana  
☐ 2 a 4 veces semana  
☐ 5 a 6 veces semana  
☐ 1 vez al día  
☐ 2 a 3 veces al día  
☐ 5 a 6 veces al día  
☐ más 6 veces al día

---

mayonesa

- ☒ Nunca o menos 1 vez al mes  
☐ 1 a 3 veces mes  
☐ 1 vez semana  
☐ 2 a 4 veces semana  
☐ 5 a 6 veces semana  
☐ 1 vez al día  
☐ 2 a 3 veces al día  
☐ 5 a 6 veces al día  
☐ más 6 veces al día

salsa tomate

- ☐ Nunca o menos 1 vez al mes  
☒ 1 a 3 veces mes  
☐ 1 vez semana  
☐ 2 a 4 veces semana  
☐ 5 a 6 veces semana  
☐ 1 vez al día  
☐ 2 a 3 veces al día  
☐ 5 a 6 veces al día  
☐ más 6 veces al día

ketchup

- ☐ Nunca o menos 1 vez al mes  
☒ 1 a 3 veces mes  
☐ 1 vez semana  
☐ 2 a 4 veces semana  
☐ 5 a 6 veces semana  
☐ 1 vez al día  
☐ 2 a 3 veces al día  
☐ 5 a 6 veces al día  
☐ más 6 veces al día

sal

- ☐ Nunca o menos 1 vez al mes  
☐ 1 a 3 veces mes  
☐ 1 vez semana  
☐ 2 a 4 veces semana  
☐ 5 a 6 veces semana  
☐ 1 vez al día  
☒ 2 a 3 veces al día  
☐ 5 a 6 veces al día  
☐ más 6 veces al día

ajo

- ☐ Nunca o menos 1 vez al mes  
☐ 1 a 3 veces mes  
☐ 1 vez semana  
☐ 2 a 4 veces semana  
☒ 5 a 6 veces semana  
☐ 1 vez al día  
☐ 2 a 3 veces al día  
☐ 5 a 6 veces al día  
☐ más 6 veces al día

mermelada o miel

- ☐ Nunca o menos 1 vez al mes  
☐ 1 a 3 veces mes  
☐ 1 vez semana  
☒ 2 a 4 veces semana  
☐ 5 a 6 veces semana  
☐ 1 vez al día  
☐ 2 a 3 veces al día  
☐ 5 a 6 veces al día  
☐ más 6 veces al día

azúcar

- ☒ Nunca o menos 1 vez al mes  
☐ 1 a 3 veces mes  
☐ 1 vez semana  
☐ 2 a 4 veces semana  
☐ 5 a 6 veces semana  
☐ 1 vez al día  
☐ 2 a 3 veces al día  
☐ 5 a 6 veces al día  
☐ más 6 veces al día

|                                       |                                                                                                                                                                                                                                                                                                                                                                                                                                                                                                                               |
|---------------------------------------|-------------------------------------------------------------------------------------------------------------------------------------------------------------------------------------------------------------------------------------------------------------------------------------------------------------------------------------------------------------------------------------------------------------------------------------------------------------------------------------------------------------------------------|
| Otro alimento                         |                                                                                                                                                                                                                                                                                                                                                                                                                                                                                                                               |
| suplementos vitamínicos               | <input checked="" type="radio"/> si<br><input type="radio"/> no                                                                                                                                                                                                                                                                                                                                                                                                                                                               |
| suplementos vitamínicos               | [*DATA REMOVED*]                                                                                                                                                                                                                                                                                                                                                                                                                                                                                                              |
| dieta previa                          | <input checked="" type="radio"/> si<br><input type="radio"/> no                                                                                                                                                                                                                                                                                                                                                                                                                                                               |
| motivo dieta                          | <input checked="" type="radio"/> no dieta<br><input type="radio"/> control peso<br><input type="radio"/> control colesterol<br><input type="radio"/> control diabetes<br><input type="radio"/> problemas estómago<br><input type="radio"/> problemas vesícula o hepáticos<br><input type="radio"/> HTA o cardiopatía<br><input type="radio"/> problemas renales<br><input type="radio"/> alergia alimentaria<br><input type="radio"/> ácido úrico elevado<br><input type="radio"/> vegetariana<br><input type="radio"/> otros |
| cambio alimentos año previo gestación | <input checked="" type="radio"/> si<br><input type="radio"/> no                                                                                                                                                                                                                                                                                                                                                                                                                                                               |
| cambio lácteos                        | <input type="radio"/> eliminado<br><input type="radio"/> disminuido<br><input checked="" type="radio"/> igual<br><input type="radio"/> aumentado<br><input type="radio"/> no sabe                                                                                                                                                                                                                                                                                                                                             |
| cambio huevos                         | <input type="radio"/> eliminado<br><input type="radio"/> disminuido<br><input checked="" type="radio"/> igual<br><input type="radio"/> aumentado<br><input type="radio"/> no sabe                                                                                                                                                                                                                                                                                                                                             |
| cambio carne                          | <input type="radio"/> eliminado<br><input type="radio"/> disminuido<br><input checked="" type="radio"/> igual<br><input type="radio"/> aumentado<br><input type="radio"/> no sabe                                                                                                                                                                                                                                                                                                                                             |
| cambio pescado                        | <input type="radio"/> eliminado<br><input type="radio"/> disminuido<br><input checked="" type="radio"/> igual<br><input type="radio"/> aumentado<br><input type="radio"/> no sabe                                                                                                                                                                                                                                                                                                                                             |
| cambio verduras                       | <input type="radio"/> eliminado<br><input type="radio"/> disminuido<br><input checked="" type="radio"/> igual<br><input type="radio"/> aumentado<br><input type="radio"/> no sabe                                                                                                                                                                                                                                                                                                                                             |

|                            |                                                                                                                                                                                                                        |
|----------------------------|------------------------------------------------------------------------------------------------------------------------------------------------------------------------------------------------------------------------|
| cambio legumbres           | <input type="radio"/> eliminado<br><input type="radio"/> disminuido<br><input checked="" type="radio"/> igual<br><input type="radio"/> aumentado<br><input type="radio"/> no sabe                                      |
| cambio fruta               | <input type="radio"/> eliminado<br><input type="radio"/> disminuido<br><input checked="" type="radio"/> igual<br><input type="radio"/> aumentado<br><input type="radio"/> no sabe                                      |
| cambio pan                 | <input type="radio"/> eliminado<br><input type="radio"/> disminuido<br><input checked="" type="radio"/> igual<br><input type="radio"/> aumentado<br><input type="radio"/> no sabe                                      |
| cambio aceite oliva        | <input type="radio"/> eliminado<br><input type="radio"/> disminuido<br><input checked="" type="radio"/> igual<br><input type="radio"/> aumentado<br><input type="radio"/> no sabe                                      |
| cambio mante o margarina   | <input type="radio"/> eliminado<br><input type="radio"/> disminuido<br><input checked="" type="radio"/> igual<br><input type="radio"/> aumentado<br><input type="radio"/> no sabe                                      |
| cambio azúcar y dulces     | <input type="radio"/> eliminado<br><input type="radio"/> disminuido<br><input checked="" type="radio"/> igual<br><input type="radio"/> aumentado<br><input type="radio"/> no sabe                                      |
| cambio bebidas alcohólicas | <input checked="" type="radio"/> eliminado<br><input type="radio"/> disminuido<br><input type="radio"/> igual<br><input type="radio"/> aumentado<br><input type="radio"/> no sabe                                      |
| frecuencia comidas fritas  | <input type="radio"/> a diario<br><input type="radio"/> 5 a 6 veces semana<br><input type="radio"/> 2 a 4 veces semana<br><input type="radio"/> 1 vez semana<br><input checked="" type="radio"/> menos de 1 vez semana |
| carne                      | <input checked="" type="radio"/> no como<br><input type="radio"/> cruda<br><input type="radio"/> poco hecha<br><input type="radio"/> hecha<br><input type="radio"/> muy hecha                                          |
| grasa visible carne        | <input type="radio"/> quita toda<br><input type="radio"/> quita mayoría<br><input type="radio"/> quita un poco<br><input type="radio"/> no quita nada                                                                  |



|                                |                                                                                                                                                                                                                                                          |
|--------------------------------|----------------------------------------------------------------------------------------------------------------------------------------------------------------------------------------------------------------------------------------------------------|
| cocina carne                   | <input type="radio"/> a la plancha<br><input type="radio"/> a la parrilla<br><input type="radio"/> asada<br><input type="radio"/> frita<br><input type="radio"/> guisada                                                                                 |
| tostado quemado carne          | <input type="radio"/> nunca<br><input type="radio"/> 1 vez mes<br><input type="radio"/> 2 a 3 veces mes<br><input type="radio"/> 1 vez semana<br><input type="radio"/> 2 a 3 semanas                                                                     |
| tostado quemado pescado        | <input type="radio"/> nunca<br><input type="radio"/> 1 vez mes<br><input checked="" type="radio"/> 2 a 3 veces mes<br><input type="radio"/> 1 vez semana<br><input type="radio"/> 2 a 3 semanas                                                          |
| socarrat paella                | <input type="radio"/> nunca<br><input type="radio"/> 1 vez mes<br><input checked="" type="radio"/> 2 a 3 veces mes<br><input type="radio"/> 1 vez semana<br><input type="radio"/> 2 a 3 semanas                                                          |
| grasa o aceite cocinar         | <input type="radio"/> mantequilla<br><input type="radio"/> margarina<br><input type="radio"/> aceite oliva<br><input checked="" type="radio"/> aceite oliva virgen extra<br><input type="radio"/> aceite vegetal<br><input type="radio"/> mezcla aceites |
| grasa aceite aliñar            | <input type="radio"/> mantequilla<br><input type="radio"/> margarina<br><input type="radio"/> aceite oliva<br><input checked="" type="radio"/> aceite oliva virgen extra<br><input type="radio"/> aceite vegetal<br><input type="radio"/> mezcla aceites |
| grasa aceite freir             | <input type="radio"/> mantequilla<br><input type="radio"/> margarina<br><input type="radio"/> aceite oliva<br><input checked="" type="radio"/> aceite oliva virgen extra<br><input type="radio"/> aceite vegetal<br><input type="radio"/> mezcla aceites |
| Ejercicio cuestionario         | <input checked="" type="radio"/> si<br><input type="radio"/> no                                                                                                                                                                                          |
| horas de sueño incluido siesta | [*DATA REMOVED*]                                                                                                                                                                                                                                         |
| minutos siesta                 | [*DATA REMOVED*]                                                                                                                                                                                                                                         |
| horas televisión semana        | [*DATA REMOVED*]                                                                                                                                                                                                                                         |

|                                        |                                                                                                                                                                                                                                                                                                                                                                           |
|----------------------------------------|---------------------------------------------------------------------------------------------------------------------------------------------------------------------------------------------------------------------------------------------------------------------------------------------------------------------------------------------------------------------------|
| actividad trabajo                      | <input type="radio"/> casi siempre sentado<br><input type="radio"/> sentado 50 por cien<br><input checked="" type="radio"/> casi siempre de pie, quieto<br><input type="radio"/> casi siempre levantado caminando y llevando pocas cosas<br><input type="radio"/> casi siempre levantado, caminando y llevado muchas cosas<br><input type="radio"/> trabajo manual pesado |
| tiempo caminar o bici al día           | <input type="radio"/> casi nunca<br><input type="radio"/> menos 20min día<br><input type="radio"/> 20 a 40 min día<br><input type="radio"/> 40 a 60 min día<br><input checked="" type="radio"/> 1h o 1h y media día<br><input type="radio"/> más de 1h y media al día                                                                                                     |
| tiempo tareas casa al día              | <input type="radio"/> menos de 1h día<br><input checked="" type="radio"/> 1 a 2h día<br><input type="radio"/> 3 a 4h día<br><input type="radio"/> 5 a 6h día<br><input type="radio"/> 7 a 8h día<br><input type="radio"/> más de 8h día                                                                                                                                   |
| tiempo libre televisión ordenador leer | <input type="radio"/> menos 1h día<br><input checked="" type="radio"/> 1h día<br><input type="radio"/> 2h día<br><input type="radio"/> 3h día<br><input type="radio"/> 4h día<br><input type="radio"/> 5 a 6h día<br><input type="radio"/> mas 6h día                                                                                                                     |
| tiempo libre ejercicio o deporte       | <input type="radio"/> menos 1h semana<br><input type="radio"/> 1h semana<br><input type="radio"/> 2h semana<br><input type="radio"/> 3h semana<br><input checked="" type="radio"/> 4 a 5h semana<br><input type="radio"/> mas 5h semana                                                                                                                                   |
| como se considera                      | <input type="radio"/> sedentaria<br><input type="radio"/> poco activa<br><input checked="" type="radio"/> moderadamente activa<br><input type="radio"/> bastante activa<br><input type="radio"/> muy activa<br><input type="radio"/> no sabe                                                                                                                              |
| FUR                                    | [*DATA REMOVED*]                                                                                                                                                                                                                                                                                                                                                          |
| Semanas gestación 2T                   | [*DATA REMOVED*]                                                                                                                                                                                                                                                                                                                                                          |
| Días gestación 2T                      | [*DATA REMOVED*]                                                                                                                                                                                                                                                                                                                                                          |
| DBP 2T                                 | [*DATA REMOVED*]                                                                                                                                                                                                                                                                                                                                                          |
| CC 2T                                  | [*DATA REMOVED*]                                                                                                                                                                                                                                                                                                                                                          |
| AC 2T                                  | [*DATA REMOVED*]                                                                                                                                                                                                                                                                                                                                                          |

|                                                   |                                                                                                                                                                                                 |
|---------------------------------------------------|-------------------------------------------------------------------------------------------------------------------------------------------------------------------------------------------------|
| LF 2T                                             | [*DATA REMOVED*]                                                                                                                                                                                |
| PFE 2T (Hadlock)                                  | [*DATA REMOVED*]                                                                                                                                                                                |
| Semanas gestación 3T                              | [*DATA REMOVED*]                                                                                                                                                                                |
| días 3T                                           | [*DATA REMOVED*]                                                                                                                                                                                |
| DBP 3T                                            | [*DATA REMOVED*]                                                                                                                                                                                |
| CC 3T                                             | [*DATA REMOVED*]                                                                                                                                                                                |
| AC 3T                                             | [*DATA REMOVED*]                                                                                                                                                                                |
| LF 3T                                             | [*DATA REMOVED*]                                                                                                                                                                                |
| PFE 3T (Hadlock)                                  | [*DATA REMOVED*]                                                                                                                                                                                |
| Semanas de gestación final                        | [*DATA REMOVED*]                                                                                                                                                                                |
| días gestación final                              | [*DATA REMOVED*]                                                                                                                                                                                |
| Localización placenta                             | <input type="radio"/> anterior<br><input type="radio"/> lateral derecha<br><input type="radio"/> lateral izquierda<br><input type="radio"/> posterior<br><input checked="" type="radio"/> fondo |
| Presentación longitudinal cefálica                | <input type="radio"/> no<br><input checked="" type="radio"/> si                                                                                                                                 |
| Dorso                                             | <input type="radio"/> izquierda anterior<br><input type="radio"/> izquierda posterior<br><input checked="" type="radio"/> derecha anterior<br><input type="radio"/> derecha posterior           |
| diámetro biparietal                               | [*DATA REMOVED*]                                                                                                                                                                                |
| Circunferencia craneal                            | [*DATA REMOVED*]                                                                                                                                                                                |
| Circunferencia abdominal                          | [*DATA REMOVED*]                                                                                                                                                                                |
| Longitud de femur                                 | [*DATA REMOVED*]                                                                                                                                                                                |
| tejido celular subcutáneo a nivel del muslo en mm | [*DATA REMOVED*]                                                                                                                                                                                |
| tejido celular subcutáneo en abdomen en mm        | [*DATA REMOVED*]                                                                                                                                                                                |
| Volumen del muslo en cm3                          | [*DATA REMOVED*]                                                                                                                                                                                |
| Peso fetal estimado según fórmula de Hadlock      | [*DATA REMOVED*]                                                                                                                                                                                |

|                                               |                                                                                                                                                          |
|-----------------------------------------------|----------------------------------------------------------------------------------------------------------------------------------------------------------|
| Percentil                                     | [*DATA REMOVED*]                                                                                                                                         |
| Peso fetal estimado según fórmula de Scioscia | <hr/>                                                                                                                                                    |
| Peso fetal estimado según fórmula de LEE      | <hr/>                                                                                                                                                    |
| Tipo de parto                                 | <input checked="" type="radio"/> eutocico<br><input type="radio"/> instrumentado/ventosa<br><input type="radio"/> cesarea                                |
| fecha de nacimiento                           | [*DATA REMOVED*]                                                                                                                                         |
| Días entre exploración y nacimiento           | [*DATA REMOVED*]                                                                                                                                         |
| Peso RN en g                                  | [*DATA REMOVED*]                                                                                                                                         |
| sexo                                          | <input checked="" type="radio"/> mujer<br><input type="radio"/> hombre                                                                                   |
| Apgar 1 minuto                                | [*DATA REMOVED*]                                                                                                                                         |
| Apgar 5 minutos                               | [*DATA REMOVED*]                                                                                                                                         |
| Apgar 10 minutos                              | <hr/>                                                                                                                                                    |
| antecedente Covid durante gestación           | <input type="radio"/> Yes<br><input checked="" type="radio"/> No                                                                                         |
| Nivel de estudios                             | <input type="radio"/> ninguno<br><input type="radio"/> primarios<br><input type="radio"/> secundarios<br><input checked="" type="radio"/> universitarios |

## Base\_datos\_estimacion\_peso\_fetal

|                                       |                                                                                                                                                                                                                                                                                      |
|---------------------------------------|--------------------------------------------------------------------------------------------------------------------------------------------------------------------------------------------------------------------------------------------------------------------------------------|
| Número de identificación participante | 105                                                                                                                                                                                                                                                                                  |
| CODIGO PARTICIPANTE                   |                                                                                                                                                                                                                                                                                      |
| Edad                                  | [*DATA REMOVED*]                                                                                                                                                                                                                                                                     |
| Gestaciones                           | <input type="radio"/> 1<br><input checked="" type="radio"/> 2<br><input type="radio"/> 3<br><input type="radio"/> mas de 3                                                                                                                                                           |
| partos                                | <input checked="" type="radio"/> 0<br><input type="radio"/> 1<br><input type="radio"/> 2<br><input type="radio"/> 3<br><input type="radio"/> mas de 3                                                                                                                                |
| cesáreas                              | <input checked="" type="radio"/> 0<br><input type="radio"/> 1<br><input type="radio"/> 2<br><input type="radio"/> 3<br><input type="radio"/> mas de 3                                                                                                                                |
| Abortos                               | <input type="radio"/> 0<br><input checked="" type="radio"/> 1<br><input type="radio"/> 2<br><input type="radio"/> 3<br><input type="radio"/> mas de 3                                                                                                                                |
| Tipo de gestacion                     | <input checked="" type="radio"/> espontanea<br><input type="radio"/> IAC inseminación artificial conyuge<br><input type="radio"/> IAD inseminación artificial donante<br><input type="radio"/> FIV Fecundación in Vitro<br><input type="radio"/> Ovodon FIV con donación de ovocitos |
| peso previo a embarazo                | [*DATA REMOVED*]                                                                                                                                                                                                                                                                     |
| Ganancia ponderal embarazo            | [*DATA REMOVED*]                                                                                                                                                                                                                                                                     |
| Talla madre                           | [*DATA REMOVED*]                                                                                                                                                                                                                                                                     |
| IMC previo embarazo                   | 21.230572023714146                                                                                                                                                                                                                                                                   |
| Patología obstétrica                  | <input checked="" type="radio"/> no<br><input type="radio"/> si                                                                                                                                                                                                                      |
| Diabetes pregestacional               | <input checked="" type="radio"/> no<br><input type="radio"/> si                                                                                                                                                                                                                      |
| Diabetes gestacional                  | <input checked="" type="radio"/> no<br><input type="radio"/> si                                                                                                                                                                                                                      |

|                                            |                                                                                                                                                                                      |
|--------------------------------------------|--------------------------------------------------------------------------------------------------------------------------------------------------------------------------------------|
| Diabetes gestacional con insulina          | <input checked="" type="radio"/> no<br><input type="radio"/> si                                                                                                                      |
| Diabetes gestacional con dieta y ejercicio | <input checked="" type="radio"/> no<br><input type="radio"/> si                                                                                                                      |
| Percentil fetos previos                    | <input checked="" type="radio"/> Nada<br><input type="radio"/> percentil menor de 10<br><input type="radio"/> percentil entre 10 y 90<br><input type="radio"/> percentil mayor de 90 |
| Exfumadora                                 | <input type="radio"/> Nada<br><input checked="" type="radio"/> menos de 5 años<br><input type="radio"/> 5 a 10 años<br><input type="radio"/> mayor o igual a 10 años                 |
| Hábito tabáquico                           | <input checked="" type="radio"/> no<br><input type="radio"/> si                                                                                                                      |
| fumadora                                   | [*DATA REMOVED*]                                                                                                                                                                     |
| Consumo otros tóxicos                      | <input checked="" type="radio"/> no<br><input type="radio"/> si                                                                                                                      |
| Hb 1T                                      | [*DATA REMOVED*]                                                                                                                                                                     |
| Htc 1T                                     | [*DATA REMOVED*]                                                                                                                                                                     |
| Hb 2T                                      | [*DATA REMOVED*]                                                                                                                                                                     |
| HTC 2T                                     | [*DATA REMOVED*]                                                                                                                                                                     |
| Hb 3T                                      | [*DATA REMOVED*]                                                                                                                                                                     |
| HTC 3T                                     | [*DATA REMOVED*]                                                                                                                                                                     |
| Suplemento FE oral                         | <input checked="" type="radio"/> si<br><input type="radio"/> no                                                                                                                      |
| Suplemento fe iv                           | <input type="radio"/> si<br><input checked="" type="radio"/> no                                                                                                                      |
| Transfusión                                | <input checked="" type="radio"/> no<br><input type="radio"/> si                                                                                                                      |
| Solicitada Vit D                           | <input type="radio"/> no<br><input checked="" type="radio"/> si                                                                                                                      |
| Deficit vit D                              | <input type="radio"/> no<br><input checked="" type="radio"/> si                                                                                                                      |
| Suplemento vit D                           | <input checked="" type="radio"/> si<br><input type="radio"/> no                                                                                                                      |

|                       |                                                                                                                                                                                                                                                                                                                                                                                                              |
|-----------------------|--------------------------------------------------------------------------------------------------------------------------------------------------------------------------------------------------------------------------------------------------------------------------------------------------------------------------------------------------------------------------------------------------------------|
| Dieta, cuestionario   | <input checked="" type="radio"/> sí<br><input type="radio"/> no                                                                                                                                                                                                                                                                                                                                              |
| Leche entera          | <input checked="" type="radio"/> Nunca o menos 1 vez al mes<br><input type="radio"/> 1 a 3 veces mes<br><input type="radio"/> 1 vez semana<br><input type="radio"/> 2 a 4 veces semana<br><input type="radio"/> 5 a 6 veces semana<br><input type="radio"/> 1 vez al día<br><input type="radio"/> 2 a 3 veces al día<br><input type="radio"/> 5 a 6 veces al día<br><input type="radio"/> más 6 veces al día |
| Leche semidesnatada   | <input type="radio"/> Nunca o menos 1 vez al mes<br><input type="radio"/> 1 a 3 veces mes<br><input type="radio"/> 1 vez semana<br><input type="radio"/> 2 a 4 veces semana<br><input type="radio"/> 5 a 6 veces semana<br><input type="radio"/> 1 vez al día<br><input type="radio"/> 2 a 3 veces al día<br><input type="radio"/> 5 a 6 veces al día<br><input type="radio"/> mas 6 veces al día            |
| Leche desnatada       | <input type="radio"/> Nunca o menos 1 vez al mes<br><input type="radio"/> 1 a 3 veces mes<br><input type="radio"/> 1 vez semana<br><input type="radio"/> 2 a 4 veces semana<br><input type="radio"/> 5 a 6 veces semana<br><input type="radio"/> 1 vez al día<br><input checked="" type="radio"/> 2 a 3 veces al día<br><input type="radio"/> 5 a 6 veces al día<br><input type="radio"/> más 6 veces al día |
| Leche condensada      | <input checked="" type="radio"/> Nunca o menos 1 vez al mes<br><input type="radio"/> 1 a 3 veces mes<br><input type="radio"/> 1 vez semana<br><input type="radio"/> 2 a 4 veces semana<br><input type="radio"/> 5 a 6 veces semana<br><input type="radio"/> 1 vez al día<br><input type="radio"/> 2 a 3 veces al día<br><input type="radio"/> 5 a 6 veces al día<br><input type="radio"/> más 6 veces al día |
| nata o crema de leche | <input checked="" type="radio"/> Nunca o menos 1 vez al mes<br><input type="radio"/> 1 a 3 veces mes<br><input type="radio"/> 1 vez semana<br><input type="radio"/> 2 a 4 veces semana<br><input type="radio"/> 5 a 6 veces semana<br><input type="radio"/> 1 vez al día<br><input type="radio"/> 2 a 3 veces al día<br><input type="radio"/> 5 a 6 veces al día<br><input type="radio"/> más 6 veces al día |

|                                             |                                                                                                                                                                                                                                                                                                                                                                                                              |
|---------------------------------------------|--------------------------------------------------------------------------------------------------------------------------------------------------------------------------------------------------------------------------------------------------------------------------------------------------------------------------------------------------------------------------------------------------------------|
| Yogurt Entero                               | <input type="radio"/> Nunca o menos 1 vez al mes<br><input type="radio"/> 1 a 3 veces mes<br><input type="radio"/> 1 vez semana<br><input type="radio"/> 2 a 4 veces semana<br><input type="radio"/> 5 a 6 veces semana<br><input type="radio"/> 1 vez al día<br><input checked="" type="radio"/> 2 a 3 veces al día<br><input type="radio"/> 5 a 6 veces al día<br><input type="radio"/> más 6 veces al día |
| Yogurt desnatado                            | <input checked="" type="radio"/> Nunca o menos 1 vez al mes<br><input type="radio"/> 1 a 3 veces mes<br><input type="radio"/> 1 vez semana<br><input type="radio"/> 2 a 4 veces semana<br><input type="radio"/> 5 a 6 veces semana<br><input type="radio"/> 1 vez al día<br><input type="radio"/> 2 a 3 veces al día<br><input type="radio"/> 5 a 6 veces al día<br><input type="radio"/> más 6 veces al día |
| 100g requesón o queso blando o queso fresco | <input type="radio"/> Nunca o menos 1 vez al mes<br><input type="radio"/> 1 a 3 veces mes<br><input type="radio"/> 1 vez semana<br><input type="radio"/> 2 a 4 veces semana<br><input type="radio"/> 5 a 6 veces semana<br><input type="radio"/> 1 vez al día<br><input checked="" type="radio"/> 2 a 3 veces al día<br><input type="radio"/> 5 a 6 veces al día<br><input type="radio"/> más 6 veces al día |
| queso curado o semicurado o cremoso         | <input type="radio"/> Nunca o menos 1 vez al mes<br><input type="radio"/> 1 a 3 veces mes<br><input type="radio"/> 1 vez semana<br><input type="radio"/> 2 a 4 veces semana<br><input type="radio"/> 5 a 6 veces semana<br><input type="radio"/> 1 vez al día<br><input checked="" type="radio"/> 2 a 3 veces al día<br><input type="radio"/> 5 a 6 veces al día<br><input type="radio"/> más 6 veces al día |
| natillas flan pudding                       | <input checked="" type="radio"/> Nunca o menos 1 vez al mes<br><input type="radio"/> 1 a 3 veces mes<br><input type="radio"/> 1 vez semana<br><input type="radio"/> 2 a 4 veces semana<br><input type="radio"/> 5 a 6 veces semana<br><input type="radio"/> 1 vez al día<br><input type="radio"/> 2 a 3 veces al día<br><input type="radio"/> 5 a 6 veces al día<br><input type="radio"/> más 6 veces al día |
| Helado                                      | <input type="radio"/> Nunca o menos 1 vez al mes<br><input type="radio"/> 1 a 3 veces mes<br><input checked="" type="radio"/> 1 vez semana<br><input type="radio"/> 2 a 4 veces semana<br><input type="radio"/> 5 a 6 veces semana<br><input type="radio"/> 1 vez al día<br><input type="radio"/> 2 a 3 veces al día<br><input type="radio"/> 5 a 6 veces al día<br><input type="radio"/> más 6 veces al día |



|                                      |                                                                                                                                                                                                                                                                                                                                                                                                              |
|--------------------------------------|--------------------------------------------------------------------------------------------------------------------------------------------------------------------------------------------------------------------------------------------------------------------------------------------------------------------------------------------------------------------------------------------------------------|
| huevo                                | <input type="radio"/> Nunca o menos 1 vez al mes<br><input type="radio"/> 1 a 3 veces mes<br><input type="radio"/> 1 vez semana<br><input checked="" type="radio"/> 2 a 4 veces semana<br><input type="radio"/> 5 a 6 veces semana<br><input type="radio"/> 1 vez al día<br><input type="radio"/> 2 a 3 veces al día<br><input type="radio"/> 5 a 6 veces al día<br><input type="radio"/> más 6 veces al día |
| Pollo con piel                       | <input checked="" type="radio"/> Nunca o menos 1 vez al mes<br><input type="radio"/> 1 a 3 veces mes<br><input type="radio"/> 1 vez semana<br><input type="radio"/> 2 a 4 veces semana<br><input type="radio"/> 5 a 6 veces semana<br><input type="radio"/> 1 vez al día<br><input type="radio"/> 2 a 3 veces al día<br><input type="radio"/> 5 a 6 veces al día<br><input type="radio"/> más 6 veces al día |
| pollo sin piel                       | <input type="radio"/> Nunca o menos 1 vez al mes<br><input type="radio"/> 1 a 3 veces mes<br><input checked="" type="radio"/> 1 vez semana<br><input type="radio"/> 2 a 4 veces semana<br><input type="radio"/> 5 a 6 veces semana<br><input type="radio"/> 1 vez al día<br><input type="radio"/> 2 a 3 veces al día<br><input type="radio"/> 5 a 6 veces al día<br><input type="radio"/> más 6 veces al día |
| Ternera o cerdo o cordero            | <input type="radio"/> Nunca o menos 1 vez al mes<br><input type="radio"/> 1 a 3 veces mes<br><input checked="" type="radio"/> 1 vez semana<br><input type="radio"/> 2 a 4 veces semana<br><input type="radio"/> 5 a 6 veces semana<br><input type="radio"/> 1 vez al día<br><input type="radio"/> 2 a 3 veces al día<br><input type="radio"/> 5 a 6 veces al día<br><input type="radio"/> más 6 veces al día |
| carne caza: Conejo o codorniz o pato | <input checked="" type="radio"/> Nunca o menos 1 vez al mes<br><input type="radio"/> 1 a 3 veces mes<br><input type="radio"/> 1 vez semana<br><input type="radio"/> 2 a 4 veces semana<br><input type="radio"/> 5 a 6 veces semana<br><input type="radio"/> 1 vez al día<br><input type="radio"/> 2 a 3 veces al día<br><input type="radio"/> 5 a 6 veces al día<br><input type="radio"/> más 6 veces al día |
| Hígado de ternera o cerdo o pollo    | <input checked="" type="radio"/> Nunca o menos 1 vez al mes<br><input type="radio"/> 1 a 3 veces mes<br><input type="radio"/> 1 vez semana<br><input type="radio"/> 2 a 4 veces semana<br><input type="radio"/> 5 a 6 veces semana<br><input type="radio"/> 1 vez al día<br><input type="radio"/> 2 a 3 veces al día<br><input type="radio"/> 5 a 6 veces al día<br><input type="radio"/> más 6 veces al día |

|                     |                                                                                                                                                                                                                                                                                                                                                                                                              |
|---------------------|--------------------------------------------------------------------------------------------------------------------------------------------------------------------------------------------------------------------------------------------------------------------------------------------------------------------------------------------------------------------------------------------------------------|
| Vísceras            | <input checked="" type="radio"/> Nunca o menos 1 vez al mes<br><input type="radio"/> 1 a 3 veces mes<br><input type="radio"/> 1 vez semana<br><input type="radio"/> 2 a 4 veces semana<br><input type="radio"/> 5 a 6 veces semana<br><input type="radio"/> 1 vez al día<br><input type="radio"/> 2 a 3 veces al día<br><input type="radio"/> 5 a 6 veces al día<br><input type="radio"/> más 6 veces al día |
| Embutido            | <input type="radio"/> Nunca o menos 1 vez al mes<br><input type="radio"/> 1 a 3 veces mes<br><input checked="" type="radio"/> 1 vez semana<br><input type="radio"/> 2 a 4 veces semana<br><input type="radio"/> 5 a 6 veces semana<br><input type="radio"/> 1 vez al día<br><input type="radio"/> 2 a 3 veces al día<br><input type="radio"/> 5 a 6 veces al día<br><input type="radio"/> más 6 veces al día |
| Salchicha o similar | <input checked="" type="radio"/> Nunca o menos 1 vez al mes<br><input type="radio"/> 1 a 3 veces mes<br><input type="radio"/> 1 vez semana<br><input type="radio"/> 2 a 4 veces semana<br><input type="radio"/> 5 a 6 veces semana<br><input type="radio"/> 1 vez al día<br><input type="radio"/> 2 a 3 veces al día<br><input type="radio"/> 5 a 6 veces al día<br><input type="radio"/> más 6 veces al día |
| Pate o foiegras     | <input type="radio"/> Nunca o menos 1 vez al mes<br><input checked="" type="radio"/> 1 a 3 veces mes<br><input type="radio"/> 1 vez semana<br><input type="radio"/> 2 a 4 veces semana<br><input type="radio"/> 5 a 6 veces semana<br><input type="radio"/> 1 vez al día<br><input type="radio"/> 2 a 3 veces al día<br><input type="radio"/> 5 a 6 veces al día<br><input type="radio"/> más 6 veces al día |
| Hamburguesa         | <input type="radio"/> Nunca o menos 1 vez al mes<br><input checked="" type="radio"/> 1 a 3 veces mes<br><input type="radio"/> 1 vez semana<br><input type="radio"/> 2 a 4 veces semana<br><input type="radio"/> 5 a 6 veces semana<br><input type="radio"/> 1 vez al día<br><input type="radio"/> 2 a 3 veces al día<br><input type="radio"/> 5 a 6 veces al día<br><input type="radio"/> más 6 veces al día |
| tocino o bacon      | <input checked="" type="radio"/> Nunca o menos 1 vez al mes<br><input type="radio"/> 1 a 3 veces mes<br><input type="radio"/> 1 vez semana<br><input type="radio"/> 2 a 4 veces semana<br><input type="radio"/> 5 a 6 veces semana<br><input type="radio"/> 1 vez al día<br><input type="radio"/> 2 a 3 veces al día<br><input type="radio"/> 5 a 6 veces al día<br><input type="radio"/> más 6 veces al día |

---

Pescado frito

- ☒ Nunca o menos 1 vez al mes  
☐ 1 a 3 veces mes  
☐ 1 vez semana  
☐ 2 a 4 veces semana  
☐ 5 a 6 veces semana  
☐ 1 vez al día  
☐ 2 a 3 veces al día  
☐ 5 a 6 veces al día  
☐ más 6 veces al día

---

pescado hervido blanco

- ☐ Nunca o menos 1 vez al mes  
☐ 1 a 3 veces mes  
☒ 1 vez semana  
☐ 2 a 4 veces semana  
☐ 5 a 6 veces semana  
☐ 1 vez al día  
☐ 2 a 3 veces al día  
☐ 5 a 6 veces al día  
☐ más 6 veces al día

---

pescado hervido azul

- ☐ Nunca o menos 1 vez al mes  
☐ 1 a 3 veces mes  
☐ 1 vez semana  
☒ 2 a 4 veces semana  
☐ 5 a 6 veces semana  
☐ 1 vez al día  
☐ 2 a 3 veces al día  
☐ 5 a 6 veces al día  
☐ más 6 veces al día

---

otros pescado azul

- ☒ Nunca o menos 1 vez al mes  
☐ 1 a 3 veces mes  
☐ 1 vez semana  
☐ 2 a 4 veces semana  
☐ 5 a 6 veces semana  
☐ 1 vez al día  
☐ 2 a 3 veces al día  
☐ 5 a 6 veces al día  
☐ más 6 veces al día

---

atun conserva

- ☐ Nunca o menos 1 vez al mes  
☐ 1 a 3 veces mes  
☐ 1 vez semana  
☒ 2 a 4 veces semana  
☐ 5 a 6 veces semana  
☐ 1 vez al día  
☐ 2 a 3 veces al día  
☐ 5 a 6 veces al día  
☐ más 6 veces al día

---

sardina conserva

- ☒ Nunca o menos 1 vez al mes  
☐ 1 a 3 veces mes  
☐ 1 vez semana  
☐ 2 a 4 veces semana  
☐ 5 a 6 veces semana  
☐ 1 vez al día  
☐ 2 a 3 veces al día  
☐ 5 a 6 veces al día  
☐ más 6 veces al día

|                                         |                                                                                                                                                                                                                                                                                                                                                                                                              |
|-----------------------------------------|--------------------------------------------------------------------------------------------------------------------------------------------------------------------------------------------------------------------------------------------------------------------------------------------------------------------------------------------------------------------------------------------------------------|
| pescado ahumado                         | <input checked="" type="radio"/> Nunca o menos 1 vez al mes<br><input type="radio"/> 1 a 3 veces mes<br><input type="radio"/> 1 vez semana<br><input type="radio"/> 2 a 4 veces semana<br><input type="radio"/> 5 a 6 veces semana<br><input type="radio"/> 1 vez al día<br><input type="radio"/> 2 a 3 veces al día<br><input type="radio"/> 5 a 6 veces al día<br><input type="radio"/> más 6 veces al día |
| almejas o mejillones o ostras unos 100g | <input type="radio"/> Nunca o menos 1 vez al mes<br><input checked="" type="radio"/> 1 a 3 veces mes<br><input type="radio"/> 1 vez semana<br><input type="radio"/> 2 a 4 veces semana<br><input type="radio"/> 5 a 6 veces semana<br><input type="radio"/> 1 vez al día<br><input type="radio"/> 2 a 3 veces al día<br><input type="radio"/> 5 a 6 veces al día<br><input type="radio"/> más 6 veces al día |
| calamar o chipiron o sepia unos 100g    | <input type="radio"/> Nunca o menos 1 vez al mes<br><input checked="" type="radio"/> 1 a 3 veces mes<br><input type="radio"/> 1 vez semana<br><input type="radio"/> 2 a 4 veces semana<br><input type="radio"/> 5 a 6 veces semana<br><input type="radio"/> 1 vez al día<br><input type="radio"/> 2 a 3 veces al día<br><input type="radio"/> 5 a 6 veces al día<br><input type="radio"/> más 6 veces al día |
| marisco unos 100g                       | <input checked="" type="radio"/> Nunca o menos 1 vez al mes<br><input type="radio"/> 1 a 3 veces mes<br><input type="radio"/> 1 vez semana<br><input type="radio"/> 2 a 4 veces semana<br><input type="radio"/> 5 a 6 veces semana<br><input type="radio"/> 1 vez al día<br><input type="radio"/> 2 a 3 veces al día<br><input type="radio"/> 5 a 6 veces al día<br><input type="radio"/> más 6 veces al día |
| Espinacas o acelgas cocinadas           | <input type="radio"/> Nunca o menos 1 vez al mes<br><input type="radio"/> 1 a 3 veces mes<br><input checked="" type="radio"/> 1 vez semana<br><input type="radio"/> 2 a 4 veces semana<br><input type="radio"/> 5 a 6 veces semana<br><input type="radio"/> 1 vez al día<br><input type="radio"/> 2 a 3 veces al día<br><input type="radio"/> 5 a 6 veces al día<br><input type="radio"/> más 6 veces al día |
| Col o coliflor o brocoli cocinado       | <input type="radio"/> Nunca o menos 1 vez al mes<br><input type="radio"/> 1 a 3 veces mes<br><input checked="" type="radio"/> 1 vez semana<br><input type="radio"/> 2 a 4 veces semana<br><input type="radio"/> 5 a 6 veces semana<br><input type="radio"/> 1 vez al día<br><input type="radio"/> 2 a 3 veces al día<br><input type="radio"/> 5 a 6 veces al día<br><input type="radio"/> más 6 veces al día |

---

Lechuga o endivia o escarola

- ☐ Nunca o menos 1 vez al mes  
☐ 1 a 3 veces mes  
☐ 1 vez semana  
☒ 2 a 4 veces semana  
☐ 5 a 6 veces semana  
☐ 1 vez al día  
☐ 2 a 3 veces al día  
☐ 5 a 6 veces al día  
☐ más 6 veces al día

---

tomate ensalada

- ☐ Nunca o menos 1 vez al mes  
☐ 1 a 3 veces mes  
☐ 1 vez semana  
☒ 2 a 4 veces semana  
☐ 5 a 6 veces semana  
☐ 1 vez al día  
☐ 2 a 3 veces al día  
☐ 5 a 6 veces al día  
☐ más 6 veces al día

---

cebolla

- ☐ Nunca o menos 1 vez al mes  
☒ 1 a 3 veces mes  
☐ 1 vez semana  
☐ 2 a 4 veces semana  
☐ 5 a 6 veces semana  
☐ 1 vez al día  
☐ 2 a 3 veces al día  
☐ 5 a 6 veces al día  
☐ más 6 veces al día

---

Zanahoria o calabaza

- ☐ Nunca o menos 1 vez al mes  
☐ 1 a 3 veces mes  
☐ 1 vez semana  
☒ 2 a 4 veces semana  
☐ 5 a 6 veces semana  
☐ 1 vez al día  
☐ 2 a 3 veces al día  
☐ 5 a 6 veces al día  
☐ más 6 veces al día

---

Judías verdes

- ☐ Nunca o menos 1 vez al mes  
☐ 1 a 3 veces mes  
☒ 1 vez semana  
☐ 2 a 4 veces semana  
☐ 5 a 6 veces semana  
☐ 1 vez al día  
☐ 2 a 3 veces al día  
☐ 5 a 6 veces al día  
☐ más 6 veces al día

---

Berenjena o calabacin o pepino

- ☐ Nunca o menos 1 vez al mes  
☒ 1 a 3 veces mes  
☐ 1 vez semana  
☐ 2 a 4 veces semana  
☐ 5 a 6 veces semana  
☐ 1 vez al día  
☐ 2 a 3 veces al día  
☐ 5 a 6 veces al día  
☐ más 6 veces al día

---

|          |                                                                                                                                                                                                                                                                                                                                                                                                              |
|----------|--------------------------------------------------------------------------------------------------------------------------------------------------------------------------------------------------------------------------------------------------------------------------------------------------------------------------------------------------------------------------------------------------------------|
| pimiento | <input type="radio"/> Nunca o menos 1 vez al mes<br><input checked="" type="radio"/> 1 a 3 veces mes<br><input type="radio"/> 1 vez semana<br><input type="radio"/> 2 a 4 veces semana<br><input type="radio"/> 5 a 6 veces semana<br><input type="radio"/> 1 vez al día<br><input type="radio"/> 2 a 3 veces al día<br><input type="radio"/> 5 a 6 veces al día<br><input type="radio"/> más 6 veces al día |
|----------|--------------------------------------------------------------------------------------------------------------------------------------------------------------------------------------------------------------------------------------------------------------------------------------------------------------------------------------------------------------------------------------------------------------|

---

|           |                                                                                                                                                                                                                                                                                                                                                                                                              |
|-----------|--------------------------------------------------------------------------------------------------------------------------------------------------------------------------------------------------------------------------------------------------------------------------------------------------------------------------------------------------------------------------------------------------------------|
| alcachofa | <input type="radio"/> Nunca o menos 1 vez al mes<br><input checked="" type="radio"/> 1 a 3 veces mes<br><input type="radio"/> 1 vez semana<br><input type="radio"/> 2 a 4 veces semana<br><input type="radio"/> 5 a 6 veces semana<br><input type="radio"/> 1 vez al día<br><input type="radio"/> 2 a 3 veces al día<br><input type="radio"/> 5 a 6 veces al día<br><input type="radio"/> más 6 veces al día |
|-----------|--------------------------------------------------------------------------------------------------------------------------------------------------------------------------------------------------------------------------------------------------------------------------------------------------------------------------------------------------------------------------------------------------------------|

---

|            |                                                                                                                                                                                                                                                                                                                                                                                                              |
|------------|--------------------------------------------------------------------------------------------------------------------------------------------------------------------------------------------------------------------------------------------------------------------------------------------------------------------------------------------------------------------------------------------------------------|
| espárragos | <input type="radio"/> Nunca o menos 1 vez al mes<br><input type="radio"/> 1 a 3 veces mes<br><input checked="" type="radio"/> 1 vez semana<br><input type="radio"/> 2 a 4 veces semana<br><input type="radio"/> 5 a 6 veces semana<br><input type="radio"/> 1 vez al día<br><input type="radio"/> 2 a 3 veces al día<br><input type="radio"/> 5 a 6 veces al día<br><input type="radio"/> más 6 veces al día |
|------------|--------------------------------------------------------------------------------------------------------------------------------------------------------------------------------------------------------------------------------------------------------------------------------------------------------------------------------------------------------------------------------------------------------------|

---

|              |                                                                                                                                                                                                                                                                                                                                                                                                              |
|--------------|--------------------------------------------------------------------------------------------------------------------------------------------------------------------------------------------------------------------------------------------------------------------------------------------------------------------------------------------------------------------------------------------------------------|
| maíz hervido | <input type="radio"/> Nunca o menos 1 vez al mes<br><input type="radio"/> 1 a 3 veces mes<br><input checked="" type="radio"/> 1 vez semana<br><input type="radio"/> 2 a 4 veces semana<br><input type="radio"/> 5 a 6 veces semana<br><input type="radio"/> 1 vez al día<br><input type="radio"/> 2 a 3 veces al día<br><input type="radio"/> 5 a 6 veces al día<br><input type="radio"/> más 6 veces al día |
|--------------|--------------------------------------------------------------------------------------------------------------------------------------------------------------------------------------------------------------------------------------------------------------------------------------------------------------------------------------------------------------------------------------------------------------|

---

|           |                                                                                                                                                                                                                                                                                                                                                                                                              |
|-----------|--------------------------------------------------------------------------------------------------------------------------------------------------------------------------------------------------------------------------------------------------------------------------------------------------------------------------------------------------------------------------------------------------------------|
| legumbres | <input type="radio"/> Nunca o menos 1 vez al mes<br><input type="radio"/> 1 a 3 veces mes<br><input checked="" type="radio"/> 1 vez semana<br><input type="radio"/> 2 a 4 veces semana<br><input type="radio"/> 5 a 6 veces semana<br><input type="radio"/> 1 vez al día<br><input type="radio"/> 2 a 3 veces al día<br><input type="radio"/> 5 a 6 veces al día<br><input type="radio"/> más 6 veces al día |
|-----------|--------------------------------------------------------------------------------------------------------------------------------------------------------------------------------------------------------------------------------------------------------------------------------------------------------------------------------------------------------------------------------------------------------------|

---

|                       |                                                                                                                                                                                                                                                                                                                                                                                                              |
|-----------------------|--------------------------------------------------------------------------------------------------------------------------------------------------------------------------------------------------------------------------------------------------------------------------------------------------------------------------------------------------------------------------------------------------------------|
| naranjas o mandarinas | <input checked="" type="radio"/> Nunca o menos 1 vez al mes<br><input type="radio"/> 1 a 3 veces mes<br><input type="radio"/> 1 vez semana<br><input type="radio"/> 2 a 4 veces semana<br><input type="radio"/> 5 a 6 veces semana<br><input type="radio"/> 1 vez al día<br><input type="radio"/> 2 a 3 veces al día<br><input type="radio"/> 5 a 6 veces al día<br><input type="radio"/> más 6 veces al día |
|-----------------------|--------------------------------------------------------------------------------------------------------------------------------------------------------------------------------------------------------------------------------------------------------------------------------------------------------------------------------------------------------------------------------------------------------------|

---

|                       |                                                                                                                                                                                                                                                                                                                                                                                                              |
|-----------------------|--------------------------------------------------------------------------------------------------------------------------------------------------------------------------------------------------------------------------------------------------------------------------------------------------------------------------------------------------------------------------------------------------------------|
| zum natural fruta     | <input checked="" type="radio"/> Nunca o menos 1 vez al mes<br><input type="radio"/> 1 a 3 veces mes<br><input type="radio"/> 1 vez semana<br><input type="radio"/> 2 a 4 veces semana<br><input type="radio"/> 5 a 6 veces semana<br><input type="radio"/> 1 vez al día<br><input type="radio"/> 2 a 3 veces al día<br><input type="radio"/> 5 a 6 veces al día<br><input type="radio"/> más 6 veces al día |
| platano               | <input type="radio"/> Nunca o menos 1 vez al mes<br><input checked="" type="radio"/> 1 a 3 veces mes<br><input type="radio"/> 1 vez semana<br><input type="radio"/> 2 a 4 veces semana<br><input type="radio"/> 5 a 6 veces semana<br><input type="radio"/> 1 vez al día<br><input type="radio"/> 2 a 3 veces al día<br><input type="radio"/> 5 a 6 veces al día<br><input type="radio"/> más 6 veces al día |
| manzana o pera        | <input type="radio"/> Nunca o menos 1 vez al mes<br><input checked="" type="radio"/> 1 a 3 veces mes<br><input type="radio"/> 1 vez semana<br><input type="radio"/> 2 a 4 veces semana<br><input type="radio"/> 5 a 6 veces semana<br><input type="radio"/> 1 vez al día<br><input type="radio"/> 2 a 3 veces al día<br><input type="radio"/> 5 a 6 veces al día<br><input type="radio"/> más 6 veces al día |
| melocotón o nectarina | <input checked="" type="radio"/> Nunca o menos 1 vez al mes<br><input type="radio"/> 1 a 3 veces mes<br><input type="radio"/> 1 vez semana<br><input type="radio"/> 2 a 4 veces semana<br><input type="radio"/> 5 a 6 veces semana<br><input type="radio"/> 1 vez al día<br><input type="radio"/> 2 a 3 veces al día<br><input type="radio"/> 5 a 6 veces al día<br><input type="radio"/> más 6 veces al día |
| sandia o melon        | <input type="radio"/> Nunca o menos 1 vez al mes<br><input type="radio"/> 1 a 3 veces mes<br><input type="radio"/> 1 vez semana<br><input type="radio"/> 2 a 4 veces semana<br><input checked="" type="radio"/> 5 a 6 veces semana<br><input type="radio"/> 1 vez al día<br><input type="radio"/> 2 a 3 veces al día<br><input type="radio"/> 5 a 6 veces al día<br><input type="radio"/> más 6 veces al día |
| uva                   | <input checked="" type="radio"/> Nunca o menos 1 vez al mes<br><input type="radio"/> 1 a 3 veces mes<br><input type="radio"/> 1 vez semana<br><input type="radio"/> 2 a 4 veces semana<br><input type="radio"/> 5 a 6 veces semana<br><input type="radio"/> 1 vez al día<br><input type="radio"/> 2 a 3 veces al día<br><input type="radio"/> 5 a 6 veces al día<br><input type="radio"/> más 6 veces al día |

---

bruna o ciruela

- ☒ Nunca o menos 1 vez al mes  
☐ 1 a 3 veces mes  
☐ 1 vez semana  
☐ 2 a 4 veces semana  
☐ 5 a 6 veces semana  
☐ 1 vez al día  
☐ 2 a 3 veces al día  
☐ 5 a 6 veces al día  
☐ más 6 veces al día

---

kiwi

- ☐ Nunca o menos 1 vez al mes  
☒ 1 a 3 veces mes  
☐ 1 vez semana  
☐ 2 a 4 veces semana  
☐ 5 a 6 veces semana  
☐ 1 vez al día  
☐ 2 a 3 veces al día  
☐ 5 a 6 veces al día  
☐ más 6 veces al día

---

aceituna

- ☐ Nunca o menos 1 vez al mes  
☒ 1 a 3 veces mes  
☐ 1 vez semana  
☐ 2 a 4 veces semana  
☐ 5 a 6 veces semana  
☐ 1 vez al día  
☐ 2 a 3 veces al día  
☐ 5 a 6 veces al día  
☐ más 6 veces al día

---

frutos secos

- ☐ Nunca o menos 1 vez al mes  
☐ 1 a 3 veces mes  
☐ 1 vez semana  
☒ 2 a 4 veces semana  
☐ 5 a 6 veces semana  
☐ 1 vez al día  
☐ 2 a 3 veces al día  
☐ 5 a 6 veces al día  
☐ más 6 veces al día

---

pan blanco

- ☐ Nunca o menos 1 vez al mes  
☐ 1 a 3 veces mes  
☐ 1 vez semana  
☐ 2 a 4 veces semana  
☒ 5 a 6 veces semana  
☐ 1 vez al día  
☐ 2 a 3 veces al día  
☐ 5 a 6 veces al día  
☐ más 6 veces al día

---

pan integral

- ☐ Nunca o menos 1 vez al mes  
☐ 1 a 3 veces mes  
☐ 1 vez semana  
☒ 2 a 4 veces semana  
☐ 5 a 6 veces semana  
☐ 1 vez al día  
☐ 2 a 3 veces al día  
☐ 5 a 6 veces al día  
☐ más 6 veces al día



---

cereales desayuno

- ☐ Nunca o menos 1 vez al mes
- ☐ 1 a 3 veces mes
- ☐ 1 vez semana
- ☒ 2 a 4 veces semana
- ☐ 5 a 6 veces semana
- ☐ 1 vez al día
- ☐ 2 a 3 veces al día
- ☐ 5 a 6 veces al día
- ☐ más 6 veces al día

---

patatas fritas

- ☐ Nunca o menos 1 vez al mes
- ☐ 1 a 3 veces mes
- ☒ 1 vez semana
- ☐ 2 a 4 veces semana
- ☐ 5 a 6 veces semana
- ☐ 1 vez al día
- ☐ 2 a 3 veces al día
- ☐ 5 a 6 veces al día
- ☐ más 6 veces al día

---

patatas cocidas o asadas

- ☐ Nunca o menos 1 vez al mes
- ☐ 1 a 3 veces mes
- ☐ 1 vez semana
- ☒ 2 a 4 veces semana
- ☐ 5 a 6 veces semana
- ☐ 1 vez al día
- ☐ 2 a 3 veces al día
- ☐ 5 a 6 veces al día
- ☐ más 6 veces al día

---

bolsa papas

- ☐ Nunca o menos 1 vez al mes
- ☐ 1 a 3 veces mes
- ☒ 1 vez semana
- ☐ 2 a 4 veces semana
- ☐ 5 a 6 veces semana
- ☐ 1 vez al día
- ☐ 2 a 3 veces al día
- ☐ 5 a 6 veces al día
- ☐ más 6 veces al día

---

arroz cocinado

- ☐ Nunca o menos 1 vez al mes
- ☐ 1 a 3 veces mes
- ☒ 1 vez semana
- ☐ 2 a 4 veces semana
- ☐ 5 a 6 veces semana
- ☐ 1 vez al día
- ☐ 2 a 3 veces al día
- ☐ 5 a 6 veces al día
- ☐ más 6 veces al día

---

pasta

- ☐ Nunca o menos 1 vez al mes
- ☐ 1 a 3 veces mes
- ☒ 1 vez semana
- ☐ 2 a 4 veces semana
- ☐ 5 a 6 veces semana
- ☐ 1 vez al día
- ☐ 2 a 3 veces al día
- ☐ 5 a 6 veces al día
- ☐ más 6 veces al día

|                     |                                                                                                                                                                                                                                                                                                                                                                                                              |
|---------------------|--------------------------------------------------------------------------------------------------------------------------------------------------------------------------------------------------------------------------------------------------------------------------------------------------------------------------------------------------------------------------------------------------------------|
| pizza               | <input type="radio"/> Nunca o menos 1 vez al mes<br><input type="radio"/> 1 a 3 veces mes<br><input checked="" type="radio"/> 1 vez semana<br><input type="radio"/> 2 a 4 veces semana<br><input type="radio"/> 5 a 6 veces semana<br><input type="radio"/> 1 vez al día<br><input type="radio"/> 2 a 3 veces al día<br><input type="radio"/> 5 a 6 veces al día<br><input type="radio"/> más 6 veces al día |
| aceite oliva        | <input type="radio"/> Nunca o menos 1 vez al mes<br><input type="radio"/> 1 a 3 veces mes<br><input type="radio"/> 1 vez semana<br><input type="radio"/> 2 a 4 veces semana<br><input type="radio"/> 5 a 6 veces semana<br><input checked="" type="radio"/> 1 vez al día<br><input type="radio"/> 2 a 3 veces al día<br><input type="radio"/> 5 a 6 veces al día<br><input type="radio"/> más 6 veces al día |
| otros aceites       | <input checked="" type="radio"/> Nunca o menos 1 vez al mes<br><input type="radio"/> 1 a 3 veces mes<br><input type="radio"/> 1 vez semana<br><input type="radio"/> 2 a 4 veces semana<br><input type="radio"/> 5 a 6 veces semana<br><input type="radio"/> 1 vez al día<br><input type="radio"/> 2 a 3 veces al día<br><input type="radio"/> 5 a 6 veces al día<br><input type="radio"/> más 6 veces al día |
| margarina           | <input checked="" type="radio"/> Nunca o menos 1 vez al mes<br><input type="radio"/> 1 a 3 veces mes<br><input type="radio"/> 1 vez semana<br><input type="radio"/> 2 a 4 veces semana<br><input type="radio"/> 5 a 6 veces semana<br><input type="radio"/> 1 vez al día<br><input type="radio"/> 2 a 3 veces al día<br><input type="radio"/> 5 a 6 veces al día<br><input type="radio"/> más 6 veces al día |
| mantequilla         | <input type="radio"/> Nunca o menos 1 vez al mes<br><input type="radio"/> 1 a 3 veces mes<br><input type="radio"/> 1 vez semana<br><input checked="" type="radio"/> 2 a 4 veces semana<br><input type="radio"/> 5 a 6 veces semana<br><input type="radio"/> 1 vez al día<br><input type="radio"/> 2 a 3 veces al día<br><input type="radio"/> 5 a 6 veces al día<br><input type="radio"/> más 6 veces al día |
| galletas tipo maria | <input type="radio"/> Nunca o menos 1 vez al mes<br><input type="radio"/> 1 a 3 veces mes<br><input type="radio"/> 1 vez semana<br><input type="radio"/> 2 a 4 veces semana<br><input type="radio"/> 5 a 6 veces semana<br><input type="radio"/> 1 vez al día<br><input checked="" type="radio"/> 2 a 3 veces al día<br><input type="radio"/> 5 a 6 veces al día<br><input type="radio"/> más 6 veces al día |

---

galletas chocolate

- ☐ Nunca o menos 1 vez al mes  
☐ 1 a 3 veces mes  
☐ 1 vez semana  
☐ 2 a 4 veces semana  
☐ 5 a 6 veces semana  
☒ 1 vez al día  
☐ 2 a 3 veces al día  
☐ 5 a 6 veces al día  
☐ más 6 veces al día

---

bolleria

- ☒ Nunca o menos 1 vez al mes  
☐ 1 a 3 veces mes  
☐ 1 vez semana  
☐ 2 a 4 veces semana  
☐ 5 a 6 veces semana  
☐ 1 vez al día  
☐ 2 a 3 veces al día  
☐ 5 a 6 veces al día  
☐ más 6 veces al día

---

chocolate o bombones

- ☒ Nunca o menos 1 vez al mes  
☐ 1 a 3 veces mes  
☐ 1 vez semana  
☐ 2 a 4 veces semana  
☐ 5 a 6 veces semana  
☐ 1 vez al día  
☐ 2 a 3 veces al día  
☐ 5 a 6 veces al día  
☐ más 6 veces al día

---

chocolate polvo o colacao

- ☐ Nunca o menos 1 vez al mes  
☐ 1 a 3 veces mes  
☒ 1 vez semana  
☐ 2 a 4 veces semana  
☐ 5 a 6 veces semana  
☐ 1 vez al día  
☐ 2 a 3 veces al día  
☐ 5 a 6 veces al día  
☐ más 6 veces al día

---

vino tinto

- ☒ Nunca o menos 1 vez al mes  
☐ 1 a 3 veces mes  
☐ 1 vez semana  
☐ 2 a 4 veces semana  
☐ 5 a 6 veces semana  
☐ 1 vez al día  
☐ 2 a 3 veces al día  
☐ 5 a 6 veces al día  
☐ más 6 veces al día

---

vino blanco

- ☒ Nunca o menos 1 vez al mes  
☐ 1 a 3 veces mes  
☐ 1 vez semana  
☐ 2 a 4 veces semana  
☐ 5 a 6 veces semana  
☐ 1 vez al día  
☐ 2 a 3 veces al día  
☐ 5 a 6 veces al día  
☐ más 6 veces al día

---

|                    |                                                                                                                                                                                                                                                                                                                                                                                                              |
|--------------------|--------------------------------------------------------------------------------------------------------------------------------------------------------------------------------------------------------------------------------------------------------------------------------------------------------------------------------------------------------------------------------------------------------------|
| vino seco o vermut | <input checked="" type="radio"/> Nunca o menos 1 vez al mes<br><input type="radio"/> 1 a 3 veces mes<br><input type="radio"/> 1 vez semana<br><input type="radio"/> 2 a 4 veces semana<br><input type="radio"/> 5 a 6 veces semana<br><input type="radio"/> 1 vez al día<br><input type="radio"/> 2 a 3 veces al día<br><input type="radio"/> 5 a 6 veces al día<br><input type="radio"/> más 6 veces al día |
|--------------------|--------------------------------------------------------------------------------------------------------------------------------------------------------------------------------------------------------------------------------------------------------------------------------------------------------------------------------------------------------------------------------------------------------------|

---

|         |                                                                                                                                                                                                                                                                                                                                                                                                              |
|---------|--------------------------------------------------------------------------------------------------------------------------------------------------------------------------------------------------------------------------------------------------------------------------------------------------------------------------------------------------------------------------------------------------------------|
| cerveza | <input checked="" type="radio"/> Nunca o menos 1 vez al mes<br><input type="radio"/> 1 a 3 veces mes<br><input type="radio"/> 1 vez semana<br><input type="radio"/> 2 a 4 veces semana<br><input type="radio"/> 5 a 6 veces semana<br><input type="radio"/> 1 vez al día<br><input type="radio"/> 2 a 3 veces al día<br><input type="radio"/> 5 a 6 veces al día<br><input type="radio"/> más 6 veces al día |
|---------|--------------------------------------------------------------------------------------------------------------------------------------------------------------------------------------------------------------------------------------------------------------------------------------------------------------------------------------------------------------------------------------------------------------|

---

|                     |                                                                                                                                                                                                                                                                                                                                                                                                              |
|---------------------|--------------------------------------------------------------------------------------------------------------------------------------------------------------------------------------------------------------------------------------------------------------------------------------------------------------------------------------------------------------------------------------------------------------|
| cerveza sin alcohol | <input checked="" type="radio"/> Nunca o menos 1 vez al mes<br><input type="radio"/> 1 a 3 veces mes<br><input type="radio"/> 1 vez semana<br><input type="radio"/> 2 a 4 veces semana<br><input type="radio"/> 5 a 6 veces semana<br><input type="radio"/> 1 vez al día<br><input type="radio"/> 2 a 3 veces al día<br><input type="radio"/> 5 a 6 veces al día<br><input type="radio"/> más 6 veces al día |
|---------------------|--------------------------------------------------------------------------------------------------------------------------------------------------------------------------------------------------------------------------------------------------------------------------------------------------------------------------------------------------------------------------------------------------------------|

---

|         |                                                                                                                                                                                                                                                                                                                                                                                                              |
|---------|--------------------------------------------------------------------------------------------------------------------------------------------------------------------------------------------------------------------------------------------------------------------------------------------------------------------------------------------------------------------------------------------------------------|
| licores | <input checked="" type="radio"/> Nunca o menos 1 vez al mes<br><input type="radio"/> 1 a 3 veces mes<br><input type="radio"/> 1 vez semana<br><input type="radio"/> 2 a 4 veces semana<br><input type="radio"/> 5 a 6 veces semana<br><input type="radio"/> 1 vez al día<br><input type="radio"/> 2 a 3 veces al día<br><input type="radio"/> 5 a 6 veces al día<br><input type="radio"/> más 6 veces al día |
|---------|--------------------------------------------------------------------------------------------------------------------------------------------------------------------------------------------------------------------------------------------------------------------------------------------------------------------------------------------------------------------------------------------------------------|

---

|                       |                                                                                                                                                                                                                                                                                                                                                                                                              |
|-----------------------|--------------------------------------------------------------------------------------------------------------------------------------------------------------------------------------------------------------------------------------------------------------------------------------------------------------------------------------------------------------------------------------------------------------|
| ginebra o ron o vodka | <input checked="" type="radio"/> Nunca o menos 1 vez al mes<br><input type="radio"/> 1 a 3 veces mes<br><input type="radio"/> 1 vez semana<br><input type="radio"/> 2 a 4 veces semana<br><input type="radio"/> 5 a 6 veces semana<br><input type="radio"/> 1 vez al día<br><input type="radio"/> 2 a 3 veces al día<br><input type="radio"/> 5 a 6 veces al día<br><input type="radio"/> más 6 veces al día |
|-----------------------|--------------------------------------------------------------------------------------------------------------------------------------------------------------------------------------------------------------------------------------------------------------------------------------------------------------------------------------------------------------------------------------------------------------|

---

|                 |                                                                                                                                                                                                                                                                                                                                                                                                              |
|-----------------|--------------------------------------------------------------------------------------------------------------------------------------------------------------------------------------------------------------------------------------------------------------------------------------------------------------------------------------------------------------------------------------------------------------|
| refresco normal | <input checked="" type="radio"/> Nunca o menos 1 vez al mes<br><input type="radio"/> 1 a 3 veces mes<br><input type="radio"/> 1 vez semana<br><input type="radio"/> 2 a 4 veces semana<br><input type="radio"/> 5 a 6 veces semana<br><input type="radio"/> 1 vez al día<br><input type="radio"/> 2 a 3 veces al día<br><input type="radio"/> 5 a 6 veces al día<br><input type="radio"/> más 6 veces al día |
|-----------------|--------------------------------------------------------------------------------------------------------------------------------------------------------------------------------------------------------------------------------------------------------------------------------------------------------------------------------------------------------------------------------------------------------------|

---

---

refresco sin azúcar

- ☐ Nunca o menos 1 vez al mes  
☐ 1 a 3 veces mes  
☐ 1 vez semana  
☒ 2 a 4 veces semana  
☐ 5 a 6 veces semana  
☐ 1 vez al día  
☐ 2 a 3 veces al día  
☐ 5 a 6 veces al día  
☐ más 6 veces al día

---

Agua del grifo

- ☒ Nunca o menos 1 vez al mes  
☐ 1 a 3 veces mes  
☐ 1 vez semana  
☐ 2 a 4 veces semana  
☐ 5 a 6 veces semana  
☐ 1 vez al día  
☐ 2 a 3 veces al día  
☐ 5 a 6 veces al día  
☐ más 6 veces al día

---

agua embotellada sin gas

- ☐ Nunca o menos 1 vez al mes  
☐ 1 a 3 veces mes  
☐ 1 vez semana  
☐ 2 a 4 veces semana  
☐ 5 a 6 veces semana  
☐ 1 vez al día  
☐ 2 a 3 veces al día  
☐ 5 a 6 veces al día  
☒ más 6 veces al día

---

agua embotellada con gas

- ☒ Nunca o menos 1 vez al mes  
☐ 1 a 3 veces mes  
☐ 1 vez semana  
☐ 2 a 4 veces semana  
☐ 5 a 6 veces semana  
☐ 1 vez al día  
☐ 2 a 3 veces al día  
☐ 5 a 6 veces al día  
☐ más 6 veces al día

---

zumو frutas embasado

- ☒ Nunca o menos 1 vez al mes  
☐ 1 a 3 veces mes  
☐ 1 vez semana  
☐ 2 a 4 veces semana  
☐ 5 a 6 veces semana  
☐ 1 vez al día  
☐ 2 a 3 veces al día  
☐ 5 a 6 veces al día  
☐ más 6 veces al día

---

cafe

- ☐ Nunca o menos 1 vez al mes  
☐ 1 a 3 veces mes  
☐ 1 vez semana  
☐ 2 a 4 veces semana  
☐ 5 a 6 veces semana  
☒ 1 vez al día  
☐ 2 a 3 veces al día  
☐ 5 a 6 veces al día  
☐ más 6 veces al día

---

cafe descafeinado

- ☐ Nunca o menos 1 vez al mes  
☐ 1 a 3 veces mes  
☐ 1 vez semana  
☐ 2 a 4 veces semana  
☐ 5 a 6 veces semana  
☒ 1 vez al día  
☐ 2 a 3 veces al día  
☐ 5 a 6 veces al día  
☐ más 6 veces al día

---

te o infusión

- ☒ Nunca o menos 1 vez al mes  
☐ 1 a 3 veces mes  
☐ 1 vez semana  
☐ 2 a 4 veces semana  
☐ 5 a 6 veces semana  
☐ 1 vez al día  
☐ 2 a 3 veces al día  
☐ 5 a 6 veces al día  
☐ más 6 veces al día

---

sopa o puré verduras

- ☐ Nunca o menos 1 vez al mes  
☒ 1 a 3 veces mes  
☐ 1 vez semana  
☐ 2 a 4 veces semana  
☐ 5 a 6 veces semana  
☐ 1 vez al día  
☐ 2 a 3 veces al día  
☐ 5 a 6 veces al día  
☐ más 6 veces al día

---

croquetas pollo jamón

- ☒ Nunca o menos 1 vez al mes  
☐ 1 a 3 veces mes  
☐ 1 vez semana  
☐ 2 a 4 veces semana  
☐ 5 a 6 veces semana  
☐ 1 vez al día  
☐ 2 a 3 veces al día  
☐ 5 a 6 veces al día  
☐ más 6 veces al día

---

croquetas pescado

- ☒ Nunca o menos 1 vez al mes  
☐ 1 a 3 veces mes  
☐ 1 vez semana  
☐ 2 a 4 veces semana  
☐ 5 a 6 veces semana  
☐ 1 vez al día  
☐ 2 a 3 veces al día  
☐ 5 a 6 veces al día  
☐ más 6 veces al día

---

mayonesa

- ☐ Nunca o menos 1 vez al mes  
☒ 1 a 3 veces mes  
☐ 1 vez semana  
☐ 2 a 4 veces semana  
☐ 5 a 6 veces semana  
☐ 1 vez al día  
☐ 2 a 3 veces al día  
☐ 5 a 6 veces al día  
☐ más 6 veces al día

|                  |                                                                                                                                                                                                                                                                                                                                                                                                              |
|------------------|--------------------------------------------------------------------------------------------------------------------------------------------------------------------------------------------------------------------------------------------------------------------------------------------------------------------------------------------------------------------------------------------------------------|
| salsa tomate     | <input type="radio"/> Nunca o menos 1 vez al mes<br><input checked="" type="radio"/> 1 a 3 veces mes<br><input type="radio"/> 1 vez semana<br><input type="radio"/> 2 a 4 veces semana<br><input type="radio"/> 5 a 6 veces semana<br><input type="radio"/> 1 vez al día<br><input type="radio"/> 2 a 3 veces al día<br><input type="radio"/> 5 a 6 veces al día<br><input type="radio"/> más 6 veces al día |
| ketchup          | <input type="radio"/> Nunca o menos 1 vez al mes<br><input checked="" type="radio"/> 1 a 3 veces mes<br><input type="radio"/> 1 vez semana<br><input type="radio"/> 2 a 4 veces semana<br><input type="radio"/> 5 a 6 veces semana<br><input type="radio"/> 1 vez al día<br><input type="radio"/> 2 a 3 veces al día<br><input type="radio"/> 5 a 6 veces al día<br><input type="radio"/> más 6 veces al día |
| sal              | <input type="radio"/> Nunca o menos 1 vez al mes<br><input type="radio"/> 1 a 3 veces mes<br><input type="radio"/> 1 vez semana<br><input checked="" type="radio"/> 2 a 4 veces semana<br><input type="radio"/> 5 a 6 veces semana<br><input type="radio"/> 1 vez al día<br><input type="radio"/> 2 a 3 veces al día<br><input type="radio"/> 5 a 6 veces al día<br><input type="radio"/> más 6 veces al día |
| ajo              | <input type="radio"/> Nunca o menos 1 vez al mes<br><input type="radio"/> 1 a 3 veces mes<br><input checked="" type="radio"/> 1 vez semana<br><input type="radio"/> 2 a 4 veces semana<br><input type="radio"/> 5 a 6 veces semana<br><input type="radio"/> 1 vez al día<br><input type="radio"/> 2 a 3 veces al día<br><input type="radio"/> 5 a 6 veces al día<br><input type="radio"/> más 6 veces al día |
| mermelada o miel | <input type="radio"/> Nunca o menos 1 vez al mes<br><input type="radio"/> 1 a 3 veces mes<br><input type="radio"/> 1 vez semana<br><input checked="" type="radio"/> 2 a 4 veces semana<br><input type="radio"/> 5 a 6 veces semana<br><input type="radio"/> 1 vez al día<br><input type="radio"/> 2 a 3 veces al día<br><input type="radio"/> 5 a 6 veces al día<br><input type="radio"/> más 6 veces al día |
| azúcar           | <input type="radio"/> Nunca o menos 1 vez al mes<br><input type="radio"/> 1 a 3 veces mes<br><input checked="" type="radio"/> 1 vez semana<br><input type="radio"/> 2 a 4 veces semana<br><input type="radio"/> 5 a 6 veces semana<br><input type="radio"/> 1 vez al día<br><input type="radio"/> 2 a 3 veces al día<br><input type="radio"/> 5 a 6 veces al día<br><input type="radio"/> más 6 veces al día |

|                                       |                                                                                                                                                                                                                                                                                                                                                                                                                                                                                                                               |
|---------------------------------------|-------------------------------------------------------------------------------------------------------------------------------------------------------------------------------------------------------------------------------------------------------------------------------------------------------------------------------------------------------------------------------------------------------------------------------------------------------------------------------------------------------------------------------|
| Otro alimento                         | <hr/>                                                                                                                                                                                                                                                                                                                                                                                                                                                                                                                         |
| suplementos vitamínicos               | <input type="radio"/> si<br><input checked="" type="radio"/> no                                                                                                                                                                                                                                                                                                                                                                                                                                                               |
| suplementos vitamínicos               | <hr/>                                                                                                                                                                                                                                                                                                                                                                                                                                                                                                                         |
| dieta previa                          | <input type="radio"/> si<br><input checked="" type="radio"/> no                                                                                                                                                                                                                                                                                                                                                                                                                                                               |
| motivo dieta                          | <input checked="" type="radio"/> no dieta<br><input type="radio"/> control peso<br><input type="radio"/> control colesterol<br><input type="radio"/> control diabetes<br><input type="radio"/> problemas estómago<br><input type="radio"/> problemas vesícula o hepáticos<br><input type="radio"/> HTA o cardiopatía<br><input type="radio"/> problemas renales<br><input type="radio"/> alergia alimentaria<br><input type="radio"/> ácido úrico elevado<br><input type="radio"/> vegetariana<br><input type="radio"/> otros |
| cambio alimentos año previo gestación | <input type="radio"/> si<br><input checked="" type="radio"/> no                                                                                                                                                                                                                                                                                                                                                                                                                                                               |
| cambio lácteos                        | <input type="radio"/> eliminado<br><input type="radio"/> disminuido<br><input checked="" type="radio"/> igual<br><input type="radio"/> aumentado<br><input type="radio"/> no sabe                                                                                                                                                                                                                                                                                                                                             |
| cambio huevos                         | <input type="radio"/> eliminado<br><input type="radio"/> disminuido<br><input checked="" type="radio"/> igual<br><input type="radio"/> aumentado<br><input type="radio"/> no sabe                                                                                                                                                                                                                                                                                                                                             |
| cambio carne                          | <input type="radio"/> eliminado<br><input type="radio"/> disminuido<br><input checked="" type="radio"/> igual<br><input type="radio"/> aumentado<br><input type="radio"/> no sabe                                                                                                                                                                                                                                                                                                                                             |
| cambio pescado                        | <input type="radio"/> eliminado<br><input type="radio"/> disminuido<br><input checked="" type="radio"/> igual<br><input type="radio"/> aumentado<br><input type="radio"/> no sabe                                                                                                                                                                                                                                                                                                                                             |
| cambio verduras                       | <input type="radio"/> eliminado<br><input type="radio"/> disminuido<br><input checked="" type="radio"/> igual<br><input type="radio"/> aumentado<br><input type="radio"/> no sabe                                                                                                                                                                                                                                                                                                                                             |



|                            |                                                                                                                                                                                                                        |
|----------------------------|------------------------------------------------------------------------------------------------------------------------------------------------------------------------------------------------------------------------|
| cambio legumbres           | <input type="radio"/> eliminado<br><input type="radio"/> disminuido<br><input checked="" type="radio"/> igual<br><input type="radio"/> aumentado<br><input type="radio"/> no sabe                                      |
| cambio fruta               | <input type="radio"/> eliminado<br><input type="radio"/> disminuido<br><input checked="" type="radio"/> igual<br><input type="radio"/> aumentado<br><input type="radio"/> no sabe                                      |
| cambio pan                 | <input type="radio"/> eliminado<br><input type="radio"/> disminuido<br><input checked="" type="radio"/> igual<br><input type="radio"/> aumentado<br><input type="radio"/> no sabe                                      |
| cambio aceite oliva        | <input type="radio"/> eliminado<br><input type="radio"/> disminuido<br><input checked="" type="radio"/> igual<br><input type="radio"/> aumentado<br><input type="radio"/> no sabe                                      |
| cambio mante o margarina   | <input type="radio"/> eliminado<br><input type="radio"/> disminuido<br><input checked="" type="radio"/> igual<br><input type="radio"/> aumentado<br><input type="radio"/> no sabe                                      |
| cambio azúcar y dulces     | <input type="radio"/> eliminado<br><input type="radio"/> disminuido<br><input checked="" type="radio"/> igual<br><input type="radio"/> aumentado<br><input type="radio"/> no sabe                                      |
| cambio bebidas alcohólicas | <input type="radio"/> eliminado<br><input type="radio"/> disminuido<br><input checked="" type="radio"/> igual<br><input type="radio"/> aumentado<br><input type="radio"/> no sabe                                      |
| frecuencia comidas fritas  | <input type="radio"/> a diario<br><input type="radio"/> 5 a 6 veces semana<br><input type="radio"/> 2 a 4 veces semana<br><input type="radio"/> 1 vez semana<br><input checked="" type="radio"/> menos de 1 vez semana |
| carne                      | <input type="radio"/> no como<br><input type="radio"/> cruda<br><input type="radio"/> poco hecha<br><input checked="" type="radio"/> hecha<br><input type="radio"/> muy hecha                                          |
| grasa visible carne        | <input checked="" type="radio"/> quita toda<br><input type="radio"/> quita mayoría<br><input type="radio"/> quita un poco<br><input type="radio"/> no quita nada                                                       |

|                                |                                                                                                                                                                                                                                                          |
|--------------------------------|----------------------------------------------------------------------------------------------------------------------------------------------------------------------------------------------------------------------------------------------------------|
| cocina carne                   | <input checked="" type="radio"/> a la plancha<br><input type="radio"/> a la parrilla<br><input type="radio"/> asada<br><input type="radio"/> frita<br><input type="radio"/> guisada                                                                      |
| tostado quemado carne          | <input checked="" type="radio"/> nunca<br><input type="radio"/> 1 vez mes<br><input type="radio"/> 2 a 3 veces mes<br><input type="radio"/> 1 vez semana<br><input type="radio"/> 2 a 3 semanas                                                          |
| tostado quemado pescado        | <input checked="" type="radio"/> nunca<br><input type="radio"/> 1 vez mes<br><input type="radio"/> 2 a 3 veces mes<br><input type="radio"/> 1 vez semana<br><input type="radio"/> 2 a 3 semanas                                                          |
| socarrat paella                | <input checked="" type="radio"/> nunca<br><input type="radio"/> 1 vez mes<br><input type="radio"/> 2 a 3 veces mes<br><input type="radio"/> 1 vez semana<br><input type="radio"/> 2 a 3 semanas                                                          |
| grasa o aceite cocinar         | <input type="radio"/> mantequilla<br><input type="radio"/> margarina<br><input type="radio"/> aceite oliva<br><input checked="" type="radio"/> aceite oliva virgen extra<br><input type="radio"/> aceite vegetal<br><input type="radio"/> mezcla aceites |
| grasa aceite aliñar            | <input type="radio"/> mantequilla<br><input type="radio"/> margarina<br><input type="radio"/> aceite oliva<br><input type="radio"/> aceite oliva virgen extra<br><input type="radio"/> aceite vegetal<br><input type="radio"/> mezcla aceites            |
| grasa aceite freir             | <input type="radio"/> mantequilla<br><input type="radio"/> margarina<br><input type="radio"/> aceite oliva<br><input type="radio"/> aceite oliva virgen extra<br><input type="radio"/> aceite vegetal<br><input type="radio"/> mezcla aceites            |
| Ejercicio cuestionario         | <input checked="" type="radio"/> si<br><input type="radio"/> no                                                                                                                                                                                          |
| horas de sueño incluido siesta | [*DATA REMOVED*]                                                                                                                                                                                                                                         |
| minutos siesta                 | [*DATA REMOVED*]                                                                                                                                                                                                                                         |
| horas televisión semana        | [*DATA REMOVED*]                                                                                                                                                                                                                                         |

|                                        |                                                                                                                                                                                                                                                                                                                                                                           |
|----------------------------------------|---------------------------------------------------------------------------------------------------------------------------------------------------------------------------------------------------------------------------------------------------------------------------------------------------------------------------------------------------------------------------|
| actividad trabajo                      | <input type="radio"/> casi siempre sentado<br><input type="radio"/> sentado 50 por cien<br><input checked="" type="radio"/> casi siempre de pie, quieto<br><input type="radio"/> casi siempre levantado caminando y llevando pocas cosas<br><input type="radio"/> casi siempre levantado, caminando y llevado muchas cosas<br><input type="radio"/> trabajo manual pesado |
| tiempo caminar o bici al día           | <input type="radio"/> casi nunca<br><input type="radio"/> menos 20min día<br><input type="radio"/> 20 a 40 min día<br><input type="radio"/> 40 a 60 min día<br><input type="radio"/> 1h o 1h y media día<br><input checked="" type="radio"/> más de 1h y media al día                                                                                                     |
| tiempo tareas casa al día              | <input type="radio"/> menos de 1h día<br><input checked="" type="radio"/> 1 a 2h día<br><input type="radio"/> 3 a 4h día<br><input type="radio"/> 5 a 6h día<br><input type="radio"/> 7 a 8h día<br><input type="radio"/> más de 8h día                                                                                                                                   |
| tiempo libre televisión ordenador leer | <input type="radio"/> menos 1h día<br><input type="radio"/> 1h día<br><input checked="" type="radio"/> 2h día<br><input type="radio"/> 3h día<br><input type="radio"/> 4h día<br><input type="radio"/> 5 a 6h día<br><input type="radio"/> mas 6h día                                                                                                                     |
| tiempo libre ejercicio o deporte       | <input type="radio"/> menos 1h semana<br><input type="radio"/> 1h semana<br><input type="radio"/> 2h semana<br><input type="radio"/> 3h semana<br><input checked="" type="radio"/> 4 a 5h semana<br><input type="radio"/> mas 5h semana                                                                                                                                   |
| como se considera                      | <input type="radio"/> sedentaria<br><input type="radio"/> poco activa<br><input type="radio"/> moderadamente activa<br><input type="radio"/> bastante activa<br><input checked="" type="radio"/> muy activa<br><input type="radio"/> no sabe                                                                                                                              |
| FUR                                    | [*DATA REMOVED*]                                                                                                                                                                                                                                                                                                                                                          |
| Semanas gestación 2T                   | [*DATA REMOVED*]                                                                                                                                                                                                                                                                                                                                                          |
| Días gestación 2T                      | [*DATA REMOVED*]                                                                                                                                                                                                                                                                                                                                                          |
| DBP 2T                                 | [*DATA REMOVED*]                                                                                                                                                                                                                                                                                                                                                          |
| CC 2T                                  | [*DATA REMOVED*]                                                                                                                                                                                                                                                                                                                                                          |
| AC 2T                                  | [*DATA REMOVED*]                                                                                                                                                                                                                                                                                                                                                          |

|                                                   |                                                                                                                                                                                                 |
|---------------------------------------------------|-------------------------------------------------------------------------------------------------------------------------------------------------------------------------------------------------|
| LF 2T                                             | [*DATA REMOVED*]                                                                                                                                                                                |
| PFE 2T (Hadlock)                                  | [*DATA REMOVED*]                                                                                                                                                                                |
| Semanas gestación 3T                              | [*DATA REMOVED*]                                                                                                                                                                                |
| días 3T                                           | [*DATA REMOVED*]                                                                                                                                                                                |
| DBP 3T                                            | [*DATA REMOVED*]                                                                                                                                                                                |
| CC 3T                                             | [*DATA REMOVED*]                                                                                                                                                                                |
| AC 3T                                             | [*DATA REMOVED*]                                                                                                                                                                                |
| LF 3T                                             | [*DATA REMOVED*]                                                                                                                                                                                |
| PFE 3T (Hadlock)                                  | [*DATA REMOVED*]                                                                                                                                                                                |
| Semanas de gestación final                        | [*DATA REMOVED*]                                                                                                                                                                                |
| días gestación final                              | [*DATA REMOVED*]                                                                                                                                                                                |
| Localización placenta                             | <input type="radio"/> anterior<br><input type="radio"/> lateral derecha<br><input type="radio"/> lateral izquierda<br><input type="radio"/> posterior<br><input checked="" type="radio"/> fondo |
| Presentación longitudinal cefálica                | <input type="radio"/> no<br><input checked="" type="radio"/> si                                                                                                                                 |
| Dorso                                             | <input checked="" type="radio"/> izquierda anterior<br><input type="radio"/> izquierda posterior<br><input type="radio"/> derecha anterior<br><input type="radio"/> derecha posterior           |
| diámetro biparietal                               | [*DATA REMOVED*]                                                                                                                                                                                |
| Circunferencia craneal                            | [*DATA REMOVED*]                                                                                                                                                                                |
| Circunferencia abdominal                          | [*DATA REMOVED*]                                                                                                                                                                                |
| Longitud de femur                                 | [*DATA REMOVED*]                                                                                                                                                                                |
| tejido celular subcutáneo a nivel del muslo en mm | [*DATA REMOVED*]                                                                                                                                                                                |
| tejido celular subcutáneo en abdomen en mm        | [*DATA REMOVED*]                                                                                                                                                                                |
| Volumen del muslo en cm3                          | [*DATA REMOVED*]                                                                                                                                                                                |
| Peso fetal estimado según fórmula de Hadlock      | [*DATA REMOVED*]                                                                                                                                                                                |

|                                               |                                                                                                                                                          |
|-----------------------------------------------|----------------------------------------------------------------------------------------------------------------------------------------------------------|
| Percentil                                     | [*DATA REMOVED*]                                                                                                                                         |
| Peso fetal estimado según fórmula de Scioscia | <hr/>                                                                                                                                                    |
| Peso fetal estimado según fórmula de LEE      | <hr/>                                                                                                                                                    |
| Tipo de parto                                 | <input checked="" type="radio"/> eutocico<br><input type="radio"/> instrumentado/ventosa<br><input type="radio"/> cesarea                                |
| fecha de nacimiento                           | [*DATA REMOVED*]                                                                                                                                         |
| Días entre exploración y nacimiento           | [*DATA REMOVED*]                                                                                                                                         |
| Peso RN en g                                  | [*DATA REMOVED*]                                                                                                                                         |
| sexo                                          | <input type="radio"/> mujer<br><input checked="" type="radio"/> hombre                                                                                   |
| Apgar 1 minuto                                | [*DATA REMOVED*]                                                                                                                                         |
| Apgar 5 minutos                               | [*DATA REMOVED*]                                                                                                                                         |
| Apgar 10 minutos                              | <hr/>                                                                                                                                                    |
| antecedente Covid durante gestación           | <input type="radio"/> Yes<br><input checked="" type="radio"/> No                                                                                         |
| Nivel de estudios                             | <input type="radio"/> ninguno<br><input type="radio"/> primarios<br><input type="radio"/> secundarios<br><input checked="" type="radio"/> universitarios |

# Base\_datos\_estimacion\_peso\_fetal

|                                       |                                                                                                                                                                                                                                                                                      |
|---------------------------------------|--------------------------------------------------------------------------------------------------------------------------------------------------------------------------------------------------------------------------------------------------------------------------------------|
| Número de identificación participante | 106                                                                                                                                                                                                                                                                                  |
| CODIGO PARTICIPANTE                   |                                                                                                                                                                                                                                                                                      |
| Edad                                  | [*DATA REMOVED*]                                                                                                                                                                                                                                                                     |
| Gestaciones                           | <input type="radio"/> 1<br><input checked="" type="radio"/> 2<br><input type="radio"/> 3<br><input type="radio"/> mas de 3                                                                                                                                                           |
| partos                                | <input type="radio"/> 0<br><input checked="" type="radio"/> 1<br><input type="radio"/> 2<br><input type="radio"/> 3<br><input type="radio"/> mas de 3                                                                                                                                |
| cesáreas                              | <input checked="" type="radio"/> 0<br><input type="radio"/> 1<br><input type="radio"/> 2<br><input type="radio"/> 3<br><input type="radio"/> mas de 3                                                                                                                                |
| Abortos                               | <input checked="" type="radio"/> 0<br><input type="radio"/> 1<br><input type="radio"/> 2<br><input type="radio"/> 3<br><input type="radio"/> mas de 3                                                                                                                                |
| Tipo de gestacion                     | <input checked="" type="radio"/> espontanea<br><input type="radio"/> IAC inseminación artificial conyuge<br><input type="radio"/> IAD inseminación artificial donante<br><input type="radio"/> FIV Fecundación in Vitro<br><input type="radio"/> Ovodon FIV con donación de ovocitos |
| peso previo a embarazo                | [*DATA REMOVED*]                                                                                                                                                                                                                                                                     |
| Ganancia ponderal embarazo            | [*DATA REMOVED*]                                                                                                                                                                                                                                                                     |
| Talla madre                           | [*DATA REMOVED*]                                                                                                                                                                                                                                                                     |
| IMC previo embarazo                   | 24.508945765204302                                                                                                                                                                                                                                                                   |
| Patología obstétrica                  | <input checked="" type="radio"/> no<br><input type="radio"/> si                                                                                                                                                                                                                      |
| Diabetes pregestacional               | <input checked="" type="radio"/> no<br><input type="radio"/> si                                                                                                                                                                                                                      |
| Diabetes gestacional                  | <input checked="" type="radio"/> no<br><input type="radio"/> si                                                                                                                                                                                                                      |

|                                            |                                                                                                                                                                                      |
|--------------------------------------------|--------------------------------------------------------------------------------------------------------------------------------------------------------------------------------------|
| Diabetes gestacional con insulina          | <input checked="" type="radio"/> no<br><input type="radio"/> si                                                                                                                      |
| Diabetes gestacional con dieta y ejercicio | <input checked="" type="radio"/> no<br><input type="radio"/> si                                                                                                                      |
| Percentil fetos previos                    | <input type="radio"/> Nada<br><input type="radio"/> percentil menor de 10<br><input checked="" type="radio"/> percentil entre 10 y 90<br><input type="radio"/> percentil mayor de 90 |
| Exfumadora                                 | <input checked="" type="radio"/> Nada<br><input type="radio"/> menos de 5 años<br><input type="radio"/> 5 a 10 años<br><input type="radio"/> mayor o igual a 10 años                 |
| Hábito tabáquico                           | <input checked="" type="radio"/> no<br><input type="radio"/> si                                                                                                                      |
| fumadora                                   | [*DATA REMOVED*]                                                                                                                                                                     |
| Consumo otros tóxicos                      | <input checked="" type="radio"/> no<br><input type="radio"/> si                                                                                                                      |
| Hb 1T                                      | [*DATA REMOVED*]                                                                                                                                                                     |
| Htc 1T                                     | [*DATA REMOVED*]                                                                                                                                                                     |
| Hb 2T                                      | [*DATA REMOVED*]                                                                                                                                                                     |
| HTC 2T                                     | [*DATA REMOVED*]                                                                                                                                                                     |
| Hb 3T                                      | [*DATA REMOVED*]                                                                                                                                                                     |
| HTC 3T                                     | [*DATA REMOVED*]                                                                                                                                                                     |
| Suplemento FE oral                         | <input checked="" type="radio"/> si<br><input type="radio"/> no                                                                                                                      |
| Suplemento fe iv                           | <input type="radio"/> si<br><input checked="" type="radio"/> no                                                                                                                      |
| Transfusión                                | <input checked="" type="radio"/> no<br><input type="radio"/> si                                                                                                                      |
| Solicitada Vit D                           | <input type="radio"/> no<br><input checked="" type="radio"/> si                                                                                                                      |
| Deficit vit D                              | <input type="radio"/> no<br><input checked="" type="radio"/> si                                                                                                                      |
| Suplemento vit D                           | <input checked="" type="radio"/> si<br><input type="radio"/> no                                                                                                                      |

|                       |                                                                                                                                                                                                                                                                                                                                                                                                              |
|-----------------------|--------------------------------------------------------------------------------------------------------------------------------------------------------------------------------------------------------------------------------------------------------------------------------------------------------------------------------------------------------------------------------------------------------------|
| Dieta, cuestionario   | <input checked="" type="radio"/> si<br><input type="radio"/> no                                                                                                                                                                                                                                                                                                                                              |
| Leche entera          | <input checked="" type="radio"/> Nunca o menos 1 vez al mes<br><input type="radio"/> 1 a 3 veces mes<br><input type="radio"/> 1 vez semana<br><input type="radio"/> 2 a 4 veces semana<br><input type="radio"/> 5 a 6 veces semana<br><input type="radio"/> 1 vez al día<br><input type="radio"/> 2 a 3 veces al día<br><input type="radio"/> 5 a 6 veces al día<br><input type="radio"/> más 6 veces al día |
| Leche semidesnatada   | <input type="radio"/> Nunca o menos 1 vez al mes<br><input type="radio"/> 1 a 3 veces mes<br><input type="radio"/> 1 vez semana<br><input type="radio"/> 2 a 4 veces semana<br><input type="radio"/> 5 a 6 veces semana<br><input checked="" type="radio"/> 1 vez al día<br><input type="radio"/> 2 a 3 veces al día<br><input type="radio"/> 5 a 6 veces al día<br><input type="radio"/> mas 6 veces al día |
| Leche desnatada       | <input checked="" type="radio"/> Nunca o menos 1 vez al mes<br><input type="radio"/> 1 a 3 veces mes<br><input type="radio"/> 1 vez semana<br><input type="radio"/> 2 a 4 veces semana<br><input type="radio"/> 5 a 6 veces semana<br><input type="radio"/> 1 vez al día<br><input type="radio"/> 2 a 3 veces al día<br><input type="radio"/> 5 a 6 veces al día<br><input type="radio"/> más 6 veces al día |
| Leche condensada      | <input checked="" type="radio"/> Nunca o menos 1 vez al mes<br><input type="radio"/> 1 a 3 veces mes<br><input type="radio"/> 1 vez semana<br><input type="radio"/> 2 a 4 veces semana<br><input type="radio"/> 5 a 6 veces semana<br><input type="radio"/> 1 vez al día<br><input type="radio"/> 2 a 3 veces al día<br><input type="radio"/> 5 a 6 veces al día<br><input type="radio"/> más 6 veces al día |
| nata o crema de leche | <input checked="" type="radio"/> Nunca o menos 1 vez al mes<br><input type="radio"/> 1 a 3 veces mes<br><input type="radio"/> 1 vez semana<br><input type="radio"/> 2 a 4 veces semana<br><input type="radio"/> 5 a 6 veces semana<br><input type="radio"/> 1 vez al día<br><input type="radio"/> 2 a 3 veces al día<br><input type="radio"/> 5 a 6 veces al día<br><input type="radio"/> más 6 veces al día |



|                                             |                                                                                                                                                                                                                                                                                                                                                                                                              |
|---------------------------------------------|--------------------------------------------------------------------------------------------------------------------------------------------------------------------------------------------------------------------------------------------------------------------------------------------------------------------------------------------------------------------------------------------------------------|
| Yogurt Entero                               | <input checked="" type="radio"/> Nunca o menos 1 vez al mes<br><input type="radio"/> 1 a 3 veces mes<br><input type="radio"/> 1 vez semana<br><input type="radio"/> 2 a 4 veces semana<br><input type="radio"/> 5 a 6 veces semana<br><input type="radio"/> 1 vez al día<br><input type="radio"/> 2 a 3 veces al día<br><input type="radio"/> 5 a 6 veces al día<br><input type="radio"/> más 6 veces al día |
| Yogurt desnatado                            | <input type="radio"/> Nunca o menos 1 vez al mes<br><input type="radio"/> 1 a 3 veces mes<br><input type="radio"/> 1 vez semana<br><input checked="" type="radio"/> 2 a 4 veces semana<br><input type="radio"/> 5 a 6 veces semana<br><input type="radio"/> 1 vez al día<br><input type="radio"/> 2 a 3 veces al día<br><input type="radio"/> 5 a 6 veces al día<br><input type="radio"/> más 6 veces al día |
| 100g requesón o queso blando o queso fresco | <input type="radio"/> Nunca o menos 1 vez al mes<br><input type="radio"/> 1 a 3 veces mes<br><input checked="" type="radio"/> 1 vez semana<br><input type="radio"/> 2 a 4 veces semana<br><input type="radio"/> 5 a 6 veces semana<br><input type="radio"/> 1 vez al día<br><input type="radio"/> 2 a 3 veces al día<br><input type="radio"/> 5 a 6 veces al día<br><input type="radio"/> más 6 veces al día |
| queso curado o semicurado o cremoso         | <input type="radio"/> Nunca o menos 1 vez al mes<br><input type="radio"/> 1 a 3 veces mes<br><input type="radio"/> 1 vez semana<br><input checked="" type="radio"/> 2 a 4 veces semana<br><input type="radio"/> 5 a 6 veces semana<br><input type="radio"/> 1 vez al día<br><input type="radio"/> 2 a 3 veces al día<br><input type="radio"/> 5 a 6 veces al día<br><input type="radio"/> más 6 veces al día |
| natillas flan pudding                       | <input type="radio"/> Nunca o menos 1 vez al mes<br><input checked="" type="radio"/> 1 a 3 veces mes<br><input type="radio"/> 1 vez semana<br><input type="radio"/> 2 a 4 veces semana<br><input type="radio"/> 5 a 6 veces semana<br><input type="radio"/> 1 vez al día<br><input type="radio"/> 2 a 3 veces al día<br><input type="radio"/> 5 a 6 veces al día<br><input type="radio"/> más 6 veces al día |
| Helado                                      | <input checked="" type="radio"/> Nunca o menos 1 vez al mes<br><input type="radio"/> 1 a 3 veces mes<br><input type="radio"/> 1 vez semana<br><input type="radio"/> 2 a 4 veces semana<br><input type="radio"/> 5 a 6 veces semana<br><input type="radio"/> 1 vez al día<br><input type="radio"/> 2 a 3 veces al día<br><input type="radio"/> 5 a 6 veces al día<br><input type="radio"/> más 6 veces al día |

|                                      |                                                                                                                                                                                                                                                                                                                                                                                                              |
|--------------------------------------|--------------------------------------------------------------------------------------------------------------------------------------------------------------------------------------------------------------------------------------------------------------------------------------------------------------------------------------------------------------------------------------------------------------|
| huevo                                | <input type="radio"/> Nunca o menos 1 vez al mes<br><input type="radio"/> 1 a 3 veces mes<br><input type="radio"/> 1 vez semana<br><input checked="" type="radio"/> 2 a 4 veces semana<br><input type="radio"/> 5 a 6 veces semana<br><input type="radio"/> 1 vez al día<br><input type="radio"/> 2 a 3 veces al día<br><input type="radio"/> 5 a 6 veces al día<br><input type="radio"/> más 6 veces al día |
| Pollo con piel                       | <input checked="" type="radio"/> Nunca o menos 1 vez al mes<br><input type="radio"/> 1 a 3 veces mes<br><input type="radio"/> 1 vez semana<br><input type="radio"/> 2 a 4 veces semana<br><input type="radio"/> 5 a 6 veces semana<br><input type="radio"/> 1 vez al día<br><input type="radio"/> 2 a 3 veces al día<br><input type="radio"/> 5 a 6 veces al día<br><input type="radio"/> más 6 veces al día |
| pollo sin piel                       | <input type="radio"/> Nunca o menos 1 vez al mes<br><input type="radio"/> 1 a 3 veces mes<br><input checked="" type="radio"/> 1 vez semana<br><input type="radio"/> 2 a 4 veces semana<br><input type="radio"/> 5 a 6 veces semana<br><input type="radio"/> 1 vez al día<br><input type="radio"/> 2 a 3 veces al día<br><input type="radio"/> 5 a 6 veces al día<br><input type="radio"/> más 6 veces al día |
| Ternera o cerdo o cordero            | <input type="radio"/> Nunca o menos 1 vez al mes<br><input checked="" type="radio"/> 1 a 3 veces mes<br><input type="radio"/> 1 vez semana<br><input type="radio"/> 2 a 4 veces semana<br><input type="radio"/> 5 a 6 veces semana<br><input type="radio"/> 1 vez al día<br><input type="radio"/> 2 a 3 veces al día<br><input type="radio"/> 5 a 6 veces al día<br><input type="radio"/> más 6 veces al día |
| carne caza: Conejo o codorniz o pato | <input checked="" type="radio"/> Nunca o menos 1 vez al mes<br><input type="radio"/> 1 a 3 veces mes<br><input type="radio"/> 1 vez semana<br><input type="radio"/> 2 a 4 veces semana<br><input type="radio"/> 5 a 6 veces semana<br><input type="radio"/> 1 vez al día<br><input type="radio"/> 2 a 3 veces al día<br><input type="radio"/> 5 a 6 veces al día<br><input type="radio"/> más 6 veces al día |
| Hígado de ternera o cerdo o pollo    | <input checked="" type="radio"/> Nunca o menos 1 vez al mes<br><input type="radio"/> 1 a 3 veces mes<br><input type="radio"/> 1 vez semana<br><input type="radio"/> 2 a 4 veces semana<br><input type="radio"/> 5 a 6 veces semana<br><input type="radio"/> 1 vez al día<br><input type="radio"/> 2 a 3 veces al día<br><input type="radio"/> 5 a 6 veces al día<br><input type="radio"/> más 6 veces al día |

|                     |                                                                                                                                                                                                                                                                                                                                                                                                              |
|---------------------|--------------------------------------------------------------------------------------------------------------------------------------------------------------------------------------------------------------------------------------------------------------------------------------------------------------------------------------------------------------------------------------------------------------|
| Vísceras            | <input checked="" type="radio"/> Nunca o menos 1 vez al mes<br><input type="radio"/> 1 a 3 veces mes<br><input type="radio"/> 1 vez semana<br><input type="radio"/> 2 a 4 veces semana<br><input type="radio"/> 5 a 6 veces semana<br><input type="radio"/> 1 vez al día<br><input type="radio"/> 2 a 3 veces al día<br><input type="radio"/> 5 a 6 veces al día<br><input type="radio"/> más 6 veces al día |
| Embutido            | <input checked="" type="radio"/> Nunca o menos 1 vez al mes<br><input type="radio"/> 1 a 3 veces mes<br><input type="radio"/> 1 vez semana<br><input type="radio"/> 2 a 4 veces semana<br><input type="radio"/> 5 a 6 veces semana<br><input type="radio"/> 1 vez al día<br><input type="radio"/> 2 a 3 veces al día<br><input type="radio"/> 5 a 6 veces al día<br><input type="radio"/> más 6 veces al día |
| Salchicha o similar | <input checked="" type="radio"/> Nunca o menos 1 vez al mes<br><input type="radio"/> 1 a 3 veces mes<br><input type="radio"/> 1 vez semana<br><input type="radio"/> 2 a 4 veces semana<br><input type="radio"/> 5 a 6 veces semana<br><input type="radio"/> 1 vez al día<br><input type="radio"/> 2 a 3 veces al día<br><input type="radio"/> 5 a 6 veces al día<br><input type="radio"/> más 6 veces al día |
| Pate o foiegras     | <input checked="" type="radio"/> Nunca o menos 1 vez al mes<br><input type="radio"/> 1 a 3 veces mes<br><input type="radio"/> 1 vez semana<br><input type="radio"/> 2 a 4 veces semana<br><input type="radio"/> 5 a 6 veces semana<br><input type="radio"/> 1 vez al día<br><input type="radio"/> 2 a 3 veces al día<br><input type="radio"/> 5 a 6 veces al día<br><input type="radio"/> más 6 veces al día |
| Hamburguesa         | <input type="radio"/> Nunca o menos 1 vez al mes<br><input type="radio"/> 1 a 3 veces mes<br><input checked="" type="radio"/> 1 vez semana<br><input type="radio"/> 2 a 4 veces semana<br><input type="radio"/> 5 a 6 veces semana<br><input type="radio"/> 1 vez al día<br><input type="radio"/> 2 a 3 veces al día<br><input type="radio"/> 5 a 6 veces al día<br><input type="radio"/> más 6 veces al día |
| tocino o bacon      | <input type="radio"/> Nunca o menos 1 vez al mes<br><input checked="" type="radio"/> 1 a 3 veces mes<br><input type="radio"/> 1 vez semana<br><input type="radio"/> 2 a 4 veces semana<br><input type="radio"/> 5 a 6 veces semana<br><input type="radio"/> 1 vez al día<br><input type="radio"/> 2 a 3 veces al día<br><input type="radio"/> 5 a 6 veces al día<br><input type="radio"/> más 6 veces al día |

|                        |                                                                                                                                                                                                                                                                                                                                                                                                              |
|------------------------|--------------------------------------------------------------------------------------------------------------------------------------------------------------------------------------------------------------------------------------------------------------------------------------------------------------------------------------------------------------------------------------------------------------|
| Pescado frito          | <input checked="" type="radio"/> Nunca o menos 1 vez al mes<br><input type="radio"/> 1 a 3 veces mes<br><input type="radio"/> 1 vez semana<br><input type="radio"/> 2 a 4 veces semana<br><input type="radio"/> 5 a 6 veces semana<br><input type="radio"/> 1 vez al día<br><input type="radio"/> 2 a 3 veces al día<br><input type="radio"/> 5 a 6 veces al día<br><input type="radio"/> más 6 veces al día |
| pescado hervido blanco | <input type="radio"/> Nunca o menos 1 vez al mes<br><input checked="" type="radio"/> 1 a 3 veces mes<br><input type="radio"/> 1 vez semana<br><input type="radio"/> 2 a 4 veces semana<br><input type="radio"/> 5 a 6 veces semana<br><input type="radio"/> 1 vez al día<br><input type="radio"/> 2 a 3 veces al día<br><input type="radio"/> 5 a 6 veces al día<br><input type="radio"/> más 6 veces al día |
| pescado hervido azul   | <input type="radio"/> Nunca o menos 1 vez al mes<br><input checked="" type="radio"/> 1 a 3 veces mes<br><input type="radio"/> 1 vez semana<br><input type="radio"/> 2 a 4 veces semana<br><input type="radio"/> 5 a 6 veces semana<br><input type="radio"/> 1 vez al día<br><input type="radio"/> 2 a 3 veces al día<br><input type="radio"/> 5 a 6 veces al día<br><input type="radio"/> más 6 veces al día |
| otros pescado azul     | <input checked="" type="radio"/> Nunca o menos 1 vez al mes<br><input type="radio"/> 1 a 3 veces mes<br><input type="radio"/> 1 vez semana<br><input type="radio"/> 2 a 4 veces semana<br><input type="radio"/> 5 a 6 veces semana<br><input type="radio"/> 1 vez al día<br><input type="radio"/> 2 a 3 veces al día<br><input type="radio"/> 5 a 6 veces al día<br><input type="radio"/> más 6 veces al día |
| atun conserva          | <input type="radio"/> Nunca o menos 1 vez al mes<br><input checked="" type="radio"/> 1 a 3 veces mes<br><input type="radio"/> 1 vez semana<br><input type="radio"/> 2 a 4 veces semana<br><input type="radio"/> 5 a 6 veces semana<br><input type="radio"/> 1 vez al día<br><input type="radio"/> 2 a 3 veces al día<br><input type="radio"/> 5 a 6 veces al día<br><input type="radio"/> más 6 veces al día |
| sardina conserva       | <input checked="" type="radio"/> Nunca o menos 1 vez al mes<br><input type="radio"/> 1 a 3 veces mes<br><input type="radio"/> 1 vez semana<br><input type="radio"/> 2 a 4 veces semana<br><input type="radio"/> 5 a 6 veces semana<br><input type="radio"/> 1 vez al día<br><input type="radio"/> 2 a 3 veces al día<br><input type="radio"/> 5 a 6 veces al día<br><input type="radio"/> más 6 veces al día |

|                                         |                                                                                                                                                                                                                                                                                                                                                                                                              |
|-----------------------------------------|--------------------------------------------------------------------------------------------------------------------------------------------------------------------------------------------------------------------------------------------------------------------------------------------------------------------------------------------------------------------------------------------------------------|
| pescado ahumado                         | <input checked="" type="radio"/> Nunca o menos 1 vez al mes<br><input type="radio"/> 1 a 3 veces mes<br><input type="radio"/> 1 vez semana<br><input type="radio"/> 2 a 4 veces semana<br><input type="radio"/> 5 a 6 veces semana<br><input type="radio"/> 1 vez al día<br><input type="radio"/> 2 a 3 veces al día<br><input type="radio"/> 5 a 6 veces al día<br><input type="radio"/> más 6 veces al día |
| almejas o mejillones o ostras unos 100g | <input type="radio"/> Nunca o menos 1 vez al mes<br><input checked="" type="radio"/> 1 a 3 veces mes<br><input type="radio"/> 1 vez semana<br><input type="radio"/> 2 a 4 veces semana<br><input type="radio"/> 5 a 6 veces semana<br><input type="radio"/> 1 vez al día<br><input type="radio"/> 2 a 3 veces al día<br><input type="radio"/> 5 a 6 veces al día<br><input type="radio"/> más 6 veces al día |
| calamar o chipiron o sepia unos 100g    | <input type="radio"/> Nunca o menos 1 vez al mes<br><input checked="" type="radio"/> 1 a 3 veces mes<br><input type="radio"/> 1 vez semana<br><input type="radio"/> 2 a 4 veces semana<br><input type="radio"/> 5 a 6 veces semana<br><input type="radio"/> 1 vez al día<br><input type="radio"/> 2 a 3 veces al día<br><input type="radio"/> 5 a 6 veces al día<br><input type="radio"/> más 6 veces al día |
| marisco unos 100g                       | <input type="radio"/> Nunca o menos 1 vez al mes<br><input checked="" type="radio"/> 1 a 3 veces mes<br><input type="radio"/> 1 vez semana<br><input type="radio"/> 2 a 4 veces semana<br><input type="radio"/> 5 a 6 veces semana<br><input type="radio"/> 1 vez al día<br><input type="radio"/> 2 a 3 veces al día<br><input type="radio"/> 5 a 6 veces al día<br><input type="radio"/> más 6 veces al día |
| Espinacas o acelgas cocinadas           | <input type="radio"/> Nunca o menos 1 vez al mes<br><input checked="" type="radio"/> 1 a 3 veces mes<br><input type="radio"/> 1 vez semana<br><input type="radio"/> 2 a 4 veces semana<br><input type="radio"/> 5 a 6 veces semana<br><input type="radio"/> 1 vez al día<br><input type="radio"/> 2 a 3 veces al día<br><input type="radio"/> 5 a 6 veces al día<br><input type="radio"/> más 6 veces al día |
| Col o coliflor o brocoli cocinado       | <input type="radio"/> Nunca o menos 1 vez al mes<br><input checked="" type="radio"/> 1 a 3 veces mes<br><input type="radio"/> 1 vez semana<br><input type="radio"/> 2 a 4 veces semana<br><input type="radio"/> 5 a 6 veces semana<br><input type="radio"/> 1 vez al día<br><input type="radio"/> 2 a 3 veces al día<br><input type="radio"/> 5 a 6 veces al día<br><input type="radio"/> más 6 veces al día |

---

Lechuga o endivia o escarola

- ☐ Nunca o menos 1 vez al mes  
☒ 1 a 3 veces mes  
☐ 1 vez semana  
☐ 2 a 4 veces semana  
☐ 5 a 6 veces semana  
☐ 1 vez al día  
☐ 2 a 3 veces al día  
☐ 5 a 6 veces al día  
☐ más 6 veces al día

---

tomate ensalada

- ☐ Nunca o menos 1 vez al mes  
☒ 1 a 3 veces mes  
☐ 1 vez semana  
☐ 2 a 4 veces semana  
☐ 5 a 6 veces semana  
☐ 1 vez al día  
☐ 2 a 3 veces al día  
☐ 5 a 6 veces al día  
☐ más 6 veces al día

---

cebolla

- ☐ Nunca o menos 1 vez al mes  
☒ 1 a 3 veces mes  
☐ 1 vez semana  
☐ 2 a 4 veces semana  
☐ 5 a 6 veces semana  
☐ 1 vez al día  
☐ 2 a 3 veces al día  
☐ 5 a 6 veces al día  
☐ más 6 veces al día

---

Zanahoria o calabaza

- ☐ Nunca o menos 1 vez al mes  
☐ 1 a 3 veces mes  
☒ 1 vez semana  
☐ 2 a 4 veces semana  
☐ 5 a 6 veces semana  
☐ 1 vez al día  
☐ 2 a 3 veces al día  
☐ 5 a 6 veces al día  
☐ más 6 veces al día

---

Judías verdes

- ☐ Nunca o menos 1 vez al mes  
☐ 1 a 3 veces mes  
☒ 1 vez semana  
☐ 2 a 4 veces semana  
☐ 5 a 6 veces semana  
☐ 1 vez al día  
☐ 2 a 3 veces al día  
☐ 5 a 6 veces al día  
☐ más 6 veces al día

---

Berenjena o calabacin o pepino

- ☐ Nunca o menos 1 vez al mes  
☐ 1 a 3 veces mes  
☒ 1 vez semana  
☐ 2 a 4 veces semana  
☐ 5 a 6 veces semana  
☐ 1 vez al día  
☐ 2 a 3 veces al día  
☐ 5 a 6 veces al día  
☐ más 6 veces al día

---

|          |                                                                                                                                                                                                                                                                                                                                                                                                              |
|----------|--------------------------------------------------------------------------------------------------------------------------------------------------------------------------------------------------------------------------------------------------------------------------------------------------------------------------------------------------------------------------------------------------------------|
| pimiento | <input type="radio"/> Nunca o menos 1 vez al mes<br><input type="radio"/> 1 a 3 veces mes<br><input checked="" type="radio"/> 1 vez semana<br><input type="radio"/> 2 a 4 veces semana<br><input type="radio"/> 5 a 6 veces semana<br><input type="radio"/> 1 vez al día<br><input type="radio"/> 2 a 3 veces al día<br><input type="radio"/> 5 a 6 veces al día<br><input type="radio"/> más 6 veces al día |
|----------|--------------------------------------------------------------------------------------------------------------------------------------------------------------------------------------------------------------------------------------------------------------------------------------------------------------------------------------------------------------------------------------------------------------|

---

|           |                                                                                                                                                                                                                                                                                                                                                                                                              |
|-----------|--------------------------------------------------------------------------------------------------------------------------------------------------------------------------------------------------------------------------------------------------------------------------------------------------------------------------------------------------------------------------------------------------------------|
| alcachofa | <input type="radio"/> Nunca o menos 1 vez al mes<br><input type="radio"/> 1 a 3 veces mes<br><input checked="" type="radio"/> 1 vez semana<br><input type="radio"/> 2 a 4 veces semana<br><input type="radio"/> 5 a 6 veces semana<br><input type="radio"/> 1 vez al día<br><input type="radio"/> 2 a 3 veces al día<br><input type="radio"/> 5 a 6 veces al día<br><input type="radio"/> más 6 veces al día |
|-----------|--------------------------------------------------------------------------------------------------------------------------------------------------------------------------------------------------------------------------------------------------------------------------------------------------------------------------------------------------------------------------------------------------------------|

---

|            |                                                                                                                                                                                                                                                                                                                                                                                                              |
|------------|--------------------------------------------------------------------------------------------------------------------------------------------------------------------------------------------------------------------------------------------------------------------------------------------------------------------------------------------------------------------------------------------------------------|
| espárragos | <input checked="" type="radio"/> Nunca o menos 1 vez al mes<br><input type="radio"/> 1 a 3 veces mes<br><input type="radio"/> 1 vez semana<br><input type="radio"/> 2 a 4 veces semana<br><input type="radio"/> 5 a 6 veces semana<br><input type="radio"/> 1 vez al día<br><input type="radio"/> 2 a 3 veces al día<br><input type="radio"/> 5 a 6 veces al día<br><input type="radio"/> más 6 veces al día |
|------------|--------------------------------------------------------------------------------------------------------------------------------------------------------------------------------------------------------------------------------------------------------------------------------------------------------------------------------------------------------------------------------------------------------------|

---

|              |                                                                                                                                                                                                                                                                                                                                                                                                              |
|--------------|--------------------------------------------------------------------------------------------------------------------------------------------------------------------------------------------------------------------------------------------------------------------------------------------------------------------------------------------------------------------------------------------------------------|
| maíz hervido | <input checked="" type="radio"/> Nunca o menos 1 vez al mes<br><input type="radio"/> 1 a 3 veces mes<br><input type="radio"/> 1 vez semana<br><input type="radio"/> 2 a 4 veces semana<br><input type="radio"/> 5 a 6 veces semana<br><input type="radio"/> 1 vez al día<br><input type="radio"/> 2 a 3 veces al día<br><input type="radio"/> 5 a 6 veces al día<br><input type="radio"/> más 6 veces al día |
|--------------|--------------------------------------------------------------------------------------------------------------------------------------------------------------------------------------------------------------------------------------------------------------------------------------------------------------------------------------------------------------------------------------------------------------|

---

|           |                                                                                                                                                                                                                                                                                                                                                                                                              |
|-----------|--------------------------------------------------------------------------------------------------------------------------------------------------------------------------------------------------------------------------------------------------------------------------------------------------------------------------------------------------------------------------------------------------------------|
| legumbres | <input type="radio"/> Nunca o menos 1 vez al mes<br><input type="radio"/> 1 a 3 veces mes<br><input type="radio"/> 1 vez semana<br><input checked="" type="radio"/> 2 a 4 veces semana<br><input type="radio"/> 5 a 6 veces semana<br><input type="radio"/> 1 vez al día<br><input type="radio"/> 2 a 3 veces al día<br><input type="radio"/> 5 a 6 veces al día<br><input type="radio"/> más 6 veces al día |
|-----------|--------------------------------------------------------------------------------------------------------------------------------------------------------------------------------------------------------------------------------------------------------------------------------------------------------------------------------------------------------------------------------------------------------------|

---

|                       |                                                                                                                                                                                                                                                                                                                                                                                                              |
|-----------------------|--------------------------------------------------------------------------------------------------------------------------------------------------------------------------------------------------------------------------------------------------------------------------------------------------------------------------------------------------------------------------------------------------------------|
| naranjas o mandarinas | <input type="radio"/> Nunca o menos 1 vez al mes<br><input type="radio"/> 1 a 3 veces mes<br><input type="radio"/> 1 vez semana<br><input type="radio"/> 2 a 4 veces semana<br><input type="radio"/> 5 a 6 veces semana<br><input checked="" type="radio"/> 1 vez al día<br><input type="radio"/> 2 a 3 veces al día<br><input type="radio"/> 5 a 6 veces al día<br><input type="radio"/> más 6 veces al día |
|-----------------------|--------------------------------------------------------------------------------------------------------------------------------------------------------------------------------------------------------------------------------------------------------------------------------------------------------------------------------------------------------------------------------------------------------------|

---

---

zumو natural fruta

- ☐ Nunca o menos 1 vez al mes  
☐ 1 a 3 veces mes  
☐ 1 vez semana  
☒ 2 a 4 veces semana  
☐ 5 a 6 veces semana  
☐ 1 vez al día  
☐ 2 a 3 veces al día  
☐ 5 a 6 veces al día  
☐ más 6 veces al día

---

platano

- ☐ Nunca o menos 1 vez al mes  
☒ 1 a 3 veces mes  
☐ 1 vez semana  
☐ 2 a 4 veces semana  
☐ 5 a 6 veces semana  
☐ 1 vez al día  
☐ 2 a 3 veces al día  
☐ 5 a 6 veces al día  
☐ más 6 veces al día

---

manzana o pera

- ☐ Nunca o menos 1 vez al mes  
☒ 1 a 3 veces mes  
☐ 1 vez semana  
☐ 2 a 4 veces semana  
☐ 5 a 6 veces semana  
☐ 1 vez al día  
☐ 2 a 3 veces al día  
☐ 5 a 6 veces al día  
☐ más 6 veces al día

---

melocotón o nectarina

- ☐ Nunca o menos 1 vez al mes  
☐ 1 a 3 veces mes  
☐ 1 vez semana  
☐ 2 a 4 veces semana  
☐ 5 a 6 veces semana  
☒ 1 vez al día  
☐ 2 a 3 veces al día  
☐ 5 a 6 veces al día  
☐ más 6 veces al día

---

sandia o melon

- ☐ Nunca o menos 1 vez al mes  
☐ 1 a 3 veces mes  
☐ 1 vez semana  
☐ 2 a 4 veces semana  
☐ 5 a 6 veces semana  
☒ 1 vez al día  
☐ 2 a 3 veces al día  
☐ 5 a 6 veces al día  
☐ más 6 veces al día

---

uva

- ☒ Nunca o menos 1 vez al mes  
☐ 1 a 3 veces mes  
☐ 1 vez semana  
☐ 2 a 4 veces semana  
☐ 5 a 6 veces semana  
☐ 1 vez al día  
☐ 2 a 3 veces al día  
☐ 5 a 6 veces al día  
☐ más 6 veces al día



---

bruna o ciruela

- ☒ Nunca o menos 1 vez al mes  
☐ 1 a 3 veces mes  
☐ 1 vez semana  
☐ 2 a 4 veces semana  
☐ 5 a 6 veces semana  
☐ 1 vez al día  
☐ 2 a 3 veces al día  
☐ 5 a 6 veces al día  
☐ más 6 veces al día

---

kiwi

- ☐ Nunca o menos 1 vez al mes  
☐ 1 a 3 veces mes  
☐ 1 vez semana  
☐ 2 a 4 veces semana  
☐ 5 a 6 veces semana  
☒ 1 vez al día  
☐ 2 a 3 veces al día  
☐ 5 a 6 veces al día  
☐ más 6 veces al día

---

aceituna

- ☐ Nunca o menos 1 vez al mes  
☒ 1 a 3 veces mes  
☐ 1 vez semana  
☐ 2 a 4 veces semana  
☐ 5 a 6 veces semana  
☐ 1 vez al día  
☐ 2 a 3 veces al día  
☐ 5 a 6 veces al día  
☐ más 6 veces al día

---

frutos secos

- ☐ Nunca o menos 1 vez al mes  
☒ 1 a 3 veces mes  
☐ 1 vez semana  
☐ 2 a 4 veces semana  
☐ 5 a 6 veces semana  
☐ 1 vez al día  
☐ 2 a 3 veces al día  
☐ 5 a 6 veces al día  
☐ más 6 veces al día

---

pan blanco

- ☐ Nunca o menos 1 vez al mes  
☐ 1 a 3 veces mes  
☒ 1 vez semana  
☐ 2 a 4 veces semana  
☐ 5 a 6 veces semana  
☐ 1 vez al día  
☐ 2 a 3 veces al día  
☐ 5 a 6 veces al día  
☐ más 6 veces al día

---

pan integral

- ☐ Nunca o menos 1 vez al mes  
☐ 1 a 3 veces mes  
☒ 1 vez semana  
☐ 2 a 4 veces semana  
☐ 5 a 6 veces semana  
☐ 1 vez al día  
☐ 2 a 3 veces al día  
☐ 5 a 6 veces al día  
☐ más 6 veces al día

|                          |                                                                                                                                                                                                                                                                                                                                                                                                              |
|--------------------------|--------------------------------------------------------------------------------------------------------------------------------------------------------------------------------------------------------------------------------------------------------------------------------------------------------------------------------------------------------------------------------------------------------------|
| cereales desayuno        | <input checked="" type="radio"/> Nunca o menos 1 vez al mes<br><input type="radio"/> 1 a 3 veces mes<br><input type="radio"/> 1 vez semana<br><input type="radio"/> 2 a 4 veces semana<br><input type="radio"/> 5 a 6 veces semana<br><input type="radio"/> 1 vez al día<br><input type="radio"/> 2 a 3 veces al día<br><input type="radio"/> 5 a 6 veces al día<br><input type="radio"/> más 6 veces al día |
| patatas fritas           | <input type="radio"/> Nunca o menos 1 vez al mes<br><input type="radio"/> 1 a 3 veces mes<br><input checked="" type="radio"/> 1 vez semana<br><input type="radio"/> 2 a 4 veces semana<br><input type="radio"/> 5 a 6 veces semana<br><input type="radio"/> 1 vez al día<br><input type="radio"/> 2 a 3 veces al día<br><input type="radio"/> 5 a 6 veces al día<br><input type="radio"/> más 6 veces al día |
| patatas cocidas o asadas | <input checked="" type="radio"/> Nunca o menos 1 vez al mes<br><input type="radio"/> 1 a 3 veces mes<br><input type="radio"/> 1 vez semana<br><input type="radio"/> 2 a 4 veces semana<br><input type="radio"/> 5 a 6 veces semana<br><input type="radio"/> 1 vez al día<br><input type="radio"/> 2 a 3 veces al día<br><input type="radio"/> 5 a 6 veces al día<br><input type="radio"/> más 6 veces al día |
| bolsa papas              | <input checked="" type="radio"/> Nunca o menos 1 vez al mes<br><input type="radio"/> 1 a 3 veces mes<br><input type="radio"/> 1 vez semana<br><input type="radio"/> 2 a 4 veces semana<br><input type="radio"/> 5 a 6 veces semana<br><input type="radio"/> 1 vez al día<br><input type="radio"/> 2 a 3 veces al día<br><input type="radio"/> 5 a 6 veces al día<br><input type="radio"/> más 6 veces al día |
| arroz cocinado           | <input type="radio"/> Nunca o menos 1 vez al mes<br><input type="radio"/> 1 a 3 veces mes<br><input checked="" type="radio"/> 1 vez semana<br><input type="radio"/> 2 a 4 veces semana<br><input type="radio"/> 5 a 6 veces semana<br><input type="radio"/> 1 vez al día<br><input type="radio"/> 2 a 3 veces al día<br><input type="radio"/> 5 a 6 veces al día<br><input type="radio"/> más 6 veces al día |
| pasta                    | <input type="radio"/> Nunca o menos 1 vez al mes<br><input type="radio"/> 1 a 3 veces mes<br><input checked="" type="radio"/> 1 vez semana<br><input type="radio"/> 2 a 4 veces semana<br><input type="radio"/> 5 a 6 veces semana<br><input type="radio"/> 1 vez al día<br><input type="radio"/> 2 a 3 veces al día<br><input type="radio"/> 5 a 6 veces al día<br><input type="radio"/> más 6 veces al día |

|                     |                                                                                                                                                                                                                                                                                                                                                                                                              |
|---------------------|--------------------------------------------------------------------------------------------------------------------------------------------------------------------------------------------------------------------------------------------------------------------------------------------------------------------------------------------------------------------------------------------------------------|
| pizza               | <input checked="" type="radio"/> Nunca o menos 1 vez al mes<br><input type="radio"/> 1 a 3 veces mes<br><input type="radio"/> 1 vez semana<br><input type="radio"/> 2 a 4 veces semana<br><input type="radio"/> 5 a 6 veces semana<br><input type="radio"/> 1 vez al día<br><input type="radio"/> 2 a 3 veces al día<br><input type="radio"/> 5 a 6 veces al día<br><input type="radio"/> más 6 veces al día |
| aceite oliva        | <input type="radio"/> Nunca o menos 1 vez al mes<br><input type="radio"/> 1 a 3 veces mes<br><input type="radio"/> 1 vez semana<br><input type="radio"/> 2 a 4 veces semana<br><input type="radio"/> 5 a 6 veces semana<br><input checked="" type="radio"/> 1 vez al día<br><input type="radio"/> 2 a 3 veces al día<br><input type="radio"/> 5 a 6 veces al día<br><input type="radio"/> más 6 veces al día |
| otros aceites       | <input checked="" type="radio"/> Nunca o menos 1 vez al mes<br><input type="radio"/> 1 a 3 veces mes<br><input type="radio"/> 1 vez semana<br><input type="radio"/> 2 a 4 veces semana<br><input type="radio"/> 5 a 6 veces semana<br><input type="radio"/> 1 vez al día<br><input type="radio"/> 2 a 3 veces al día<br><input type="radio"/> 5 a 6 veces al día<br><input type="radio"/> más 6 veces al día |
| margarina           | <input checked="" type="radio"/> Nunca o menos 1 vez al mes<br><input type="radio"/> 1 a 3 veces mes<br><input type="radio"/> 1 vez semana<br><input type="radio"/> 2 a 4 veces semana<br><input type="radio"/> 5 a 6 veces semana<br><input type="radio"/> 1 vez al día<br><input type="radio"/> 2 a 3 veces al día<br><input type="radio"/> 5 a 6 veces al día<br><input type="radio"/> más 6 veces al día |
| mantequilla         | <input type="radio"/> Nunca o menos 1 vez al mes<br><input checked="" type="radio"/> 1 a 3 veces mes<br><input type="radio"/> 1 vez semana<br><input type="radio"/> 2 a 4 veces semana<br><input type="radio"/> 5 a 6 veces semana<br><input type="radio"/> 1 vez al día<br><input type="radio"/> 2 a 3 veces al día<br><input type="radio"/> 5 a 6 veces al día<br><input type="radio"/> más 6 veces al día |
| galletas tipo maria | <input checked="" type="radio"/> Nunca o menos 1 vez al mes<br><input type="radio"/> 1 a 3 veces mes<br><input type="radio"/> 1 vez semana<br><input type="radio"/> 2 a 4 veces semana<br><input type="radio"/> 5 a 6 veces semana<br><input type="radio"/> 1 vez al día<br><input type="radio"/> 2 a 3 veces al día<br><input type="radio"/> 5 a 6 veces al día<br><input type="radio"/> más 6 veces al día |

---

galletas chocolate

- ☐ Nunca o menos 1 vez al mes  
☒ 1 a 3 veces mes  
☐ 1 vez semana  
☐ 2 a 4 veces semana  
☐ 5 a 6 veces semana  
☐ 1 vez al día  
☐ 2 a 3 veces al día  
☐ 5 a 6 veces al día  
☐ más 6 veces al día

---

bolleria

- ☐ Nunca o menos 1 vez al mes  
☒ 1 a 3 veces mes  
☐ 1 vez semana  
☐ 2 a 4 veces semana  
☐ 5 a 6 veces semana  
☐ 1 vez al día  
☐ 2 a 3 veces al día  
☐ 5 a 6 veces al día  
☐ más 6 veces al día

---

chocolate o bombones

- ☐ Nunca o menos 1 vez al mes  
☒ 1 a 3 veces mes  
☐ 1 vez semana  
☐ 2 a 4 veces semana  
☐ 5 a 6 veces semana  
☐ 1 vez al día  
☐ 2 a 3 veces al día  
☐ 5 a 6 veces al día  
☐ más 6 veces al día

---

chocolate polvo o colacao

- ☐ Nunca o menos 1 vez al mes  
☐ 1 a 3 veces mes  
☐ 1 vez semana  
☐ 2 a 4 veces semana  
☐ 5 a 6 veces semana  
☒ 1 vez al día  
☐ 2 a 3 veces al día  
☐ 5 a 6 veces al día  
☐ más 6 veces al día

---

vino tinto

- ☒ Nunca o menos 1 vez al mes  
☐ 1 a 3 veces mes  
☐ 1 vez semana  
☐ 2 a 4 veces semana  
☐ 5 a 6 veces semana  
☐ 1 vez al día  
☐ 2 a 3 veces al día  
☐ 5 a 6 veces al día  
☐ más 6 veces al día

---

vino blanco

- ☒ Nunca o menos 1 vez al mes  
☐ 1 a 3 veces mes  
☐ 1 vez semana  
☐ 2 a 4 veces semana  
☐ 5 a 6 veces semana  
☐ 1 vez al día  
☐ 2 a 3 veces al día  
☐ 5 a 6 veces al día  
☐ más 6 veces al día

|                       |                                                                                                                                                                                                                                                                                                                                                                                                              |
|-----------------------|--------------------------------------------------------------------------------------------------------------------------------------------------------------------------------------------------------------------------------------------------------------------------------------------------------------------------------------------------------------------------------------------------------------|
| vino seco o vermut    | <input checked="" type="radio"/> Nunca o menos 1 vez al mes<br><input type="radio"/> 1 a 3 veces mes<br><input type="radio"/> 1 vez semana<br><input type="radio"/> 2 a 4 veces semana<br><input type="radio"/> 5 a 6 veces semana<br><input type="radio"/> 1 vez al día<br><input type="radio"/> 2 a 3 veces al día<br><input type="radio"/> 5 a 6 veces al día<br><input type="radio"/> más 6 veces al día |
| cerveza               | <input checked="" type="radio"/> Nunca o menos 1 vez al mes<br><input type="radio"/> 1 a 3 veces mes<br><input type="radio"/> 1 vez semana<br><input type="radio"/> 2 a 4 veces semana<br><input type="radio"/> 5 a 6 veces semana<br><input type="radio"/> 1 vez al día<br><input type="radio"/> 2 a 3 veces al día<br><input type="radio"/> 5 a 6 veces al día<br><input type="radio"/> más 6 veces al día |
| cerveza sin alcohol   | <input checked="" type="radio"/> Nunca o menos 1 vez al mes<br><input type="radio"/> 1 a 3 veces mes<br><input type="radio"/> 1 vez semana<br><input type="radio"/> 2 a 4 veces semana<br><input type="radio"/> 5 a 6 veces semana<br><input type="radio"/> 1 vez al día<br><input type="radio"/> 2 a 3 veces al día<br><input type="radio"/> 5 a 6 veces al día<br><input type="radio"/> más 6 veces al día |
| licores               | <input checked="" type="radio"/> Nunca o menos 1 vez al mes<br><input type="radio"/> 1 a 3 veces mes<br><input type="radio"/> 1 vez semana<br><input type="radio"/> 2 a 4 veces semana<br><input type="radio"/> 5 a 6 veces semana<br><input type="radio"/> 1 vez al día<br><input type="radio"/> 2 a 3 veces al día<br><input type="radio"/> 5 a 6 veces al día<br><input type="radio"/> más 6 veces al día |
| ginebra o ron o vodka | <input checked="" type="radio"/> Nunca o menos 1 vez al mes<br><input type="radio"/> 1 a 3 veces mes<br><input type="radio"/> 1 vez semana<br><input type="radio"/> 2 a 4 veces semana<br><input type="radio"/> 5 a 6 veces semana<br><input type="radio"/> 1 vez al día<br><input type="radio"/> 2 a 3 veces al día<br><input type="radio"/> 5 a 6 veces al día<br><input type="radio"/> más 6 veces al día |
| refresco normal       | <input checked="" type="radio"/> Nunca o menos 1 vez al mes<br><input type="radio"/> 1 a 3 veces mes<br><input type="radio"/> 1 vez semana<br><input type="radio"/> 2 a 4 veces semana<br><input type="radio"/> 5 a 6 veces semana<br><input type="radio"/> 1 vez al día<br><input type="radio"/> 2 a 3 veces al día<br><input type="radio"/> 5 a 6 veces al día<br><input type="radio"/> más 6 veces al día |

---

refresco sin azúcar

- ☒ Nunca o menos 1 vez al mes  
☐ 1 a 3 veces mes  
☐ 1 vez semana  
☐ 2 a 4 veces semana  
☐ 5 a 6 veces semana  
☐ 1 vez al día  
☐ 2 a 3 veces al día  
☐ 5 a 6 veces al día  
☐ más 6 veces al día

---

Agua del grifo

- ☒ Nunca o menos 1 vez al mes  
☐ 1 a 3 veces mes  
☐ 1 vez semana  
☐ 2 a 4 veces semana  
☐ 5 a 6 veces semana  
☐ 1 vez al día  
☐ 2 a 3 veces al día  
☐ 5 a 6 veces al día  
☐ más 6 veces al día

---

agua embotellada sin gas

- ☐ Nunca o menos 1 vez al mes  
☐ 1 a 3 veces mes  
☐ 1 vez semana  
☐ 2 a 4 veces semana  
☐ 5 a 6 veces semana  
☐ 1 vez al día  
☐ 2 a 3 veces al día  
☐ 5 a 6 veces al día  
☒ más 6 veces al día

---

agua embotellada con gas

- ☒ Nunca o menos 1 vez al mes  
☐ 1 a 3 veces mes  
☐ 1 vez semana  
☐ 2 a 4 veces semana  
☐ 5 a 6 veces semana  
☐ 1 vez al día  
☐ 2 a 3 veces al día  
☐ 5 a 6 veces al día  
☐ más 6 veces al día

---

zumو frutas embasado

- ☒ Nunca o menos 1 vez al mes  
☐ 1 a 3 veces mes  
☐ 1 vez semana  
☐ 2 a 4 veces semana  
☐ 5 a 6 veces semana  
☐ 1 vez al día  
☐ 2 a 3 veces al día  
☐ 5 a 6 veces al día  
☐ más 6 veces al día

---

cafe

- ☒ Nunca o menos 1 vez al mes  
☐ 1 a 3 veces mes  
☐ 1 vez semana  
☐ 2 a 4 veces semana  
☐ 5 a 6 veces semana  
☐ 1 vez al día  
☐ 2 a 3 veces al día  
☐ 5 a 6 veces al día  
☐ más 6 veces al día

---

cafe descafeinado

- ☒ Nunca o menos 1 vez al mes  
☐ 1 a 3 veces mes  
☐ 1 vez semana  
☐ 2 a 4 veces semana  
☐ 5 a 6 veces semana  
☐ 1 vez al día  
☐ 2 a 3 veces al día  
☐ 5 a 6 veces al día  
☐ más 6 veces al día

---

te o infusión

- ☒ Nunca o menos 1 vez al mes  
☐ 1 a 3 veces mes  
☐ 1 vez semana  
☐ 2 a 4 veces semana  
☐ 5 a 6 veces semana  
☐ 1 vez al día  
☐ 2 a 3 veces al día  
☐ 5 a 6 veces al día  
☐ más 6 veces al día

---

sopa o puré verduras

- ☐ Nunca o menos 1 vez al mes  
☐ 1 a 3 veces mes  
☒ 1 vez semana  
☐ 2 a 4 veces semana  
☐ 5 a 6 veces semana  
☐ 1 vez al día  
☐ 2 a 3 veces al día  
☐ 5 a 6 veces al día  
☐ más 6 veces al día

---

croquetas pollo jamón

- ☐ Nunca o menos 1 vez al mes  
☒ 1 a 3 veces mes  
☐ 1 vez semana  
☐ 2 a 4 veces semana  
☐ 5 a 6 veces semana  
☐ 1 vez al día  
☐ 2 a 3 veces al día  
☐ 5 a 6 veces al día  
☐ más 6 veces al día

---

croquetas pescado

- ☒ Nunca o menos 1 vez al mes  
☐ 1 a 3 veces mes  
☐ 1 vez semana  
☐ 2 a 4 veces semana  
☐ 5 a 6 veces semana  
☐ 1 vez al día  
☐ 2 a 3 veces al día  
☐ 5 a 6 veces al día  
☐ más 6 veces al día

---

mayonesa

- ☒ Nunca o menos 1 vez al mes  
☐ 1 a 3 veces mes  
☐ 1 vez semana  
☐ 2 a 4 veces semana  
☐ 5 a 6 veces semana  
☐ 1 vez al día  
☐ 2 a 3 veces al día  
☐ 5 a 6 veces al día  
☐ más 6 veces al día

---

salsa tomate

- ☒ Nunca o menos 1 vez al mes  
☐ 1 a 3 veces mes  
☐ 1 vez semana  
☐ 2 a 4 veces semana  
☐ 5 a 6 veces semana  
☐ 1 vez al día  
☐ 2 a 3 veces al día  
☐ 5 a 6 veces al día  
☐ más 6 veces al día

---

ketchup

- ☒ Nunca o menos 1 vez al mes  
☐ 1 a 3 veces mes  
☐ 1 vez semana  
☐ 2 a 4 veces semana  
☐ 5 a 6 veces semana  
☐ 1 vez al día  
☐ 2 a 3 veces al día  
☐ 5 a 6 veces al día  
☐ más 6 veces al día

---

sal

- ☒ Nunca o menos 1 vez al mes  
☐ 1 a 3 veces mes  
☐ 1 vez semana  
☐ 2 a 4 veces semana  
☐ 5 a 6 veces semana  
☐ 1 vez al día  
☐ 2 a 3 veces al día  
☐ 5 a 6 veces al día  
☐ más 6 veces al día

---

ajo

- ☒ Nunca o menos 1 vez al mes  
☐ 1 a 3 veces mes  
☐ 1 vez semana  
☐ 2 a 4 veces semana  
☐ 5 a 6 veces semana  
☐ 1 vez al día  
☐ 2 a 3 veces al día  
☐ 5 a 6 veces al día  
☐ más 6 veces al día

---

mermelada o miel

- ☒ Nunca o menos 1 vez al mes  
☐ 1 a 3 veces mes  
☐ 1 vez semana  
☐ 2 a 4 veces semana  
☐ 5 a 6 veces semana  
☐ 1 vez al día  
☐ 2 a 3 veces al día  
☐ 5 a 6 veces al día  
☐ más 6 veces al día

---

azúcar

- ☒ Nunca o menos 1 vez al mes  
☐ 1 a 3 veces mes  
☐ 1 vez semana  
☐ 2 a 4 veces semana  
☐ 5 a 6 veces semana  
☐ 1 vez al día  
☐ 2 a 3 veces al día  
☐ 5 a 6 veces al día  
☐ más 6 veces al día



|                                       |                                                                                                                                                                                                                                                                                                                                                                                                                                                                                                                               |
|---------------------------------------|-------------------------------------------------------------------------------------------------------------------------------------------------------------------------------------------------------------------------------------------------------------------------------------------------------------------------------------------------------------------------------------------------------------------------------------------------------------------------------------------------------------------------------|
| Otro alimento                         |                                                                                                                                                                                                                                                                                                                                                                                                                                                                                                                               |
| suplementos vitamínicos               | <input checked="" type="radio"/> si<br><input type="radio"/> no                                                                                                                                                                                                                                                                                                                                                                                                                                                               |
| suplementos vitamínicos               | [*DATA REMOVED*]                                                                                                                                                                                                                                                                                                                                                                                                                                                                                                              |
| dieta previa                          | <input type="radio"/> si<br><input checked="" type="radio"/> no                                                                                                                                                                                                                                                                                                                                                                                                                                                               |
| motivo dieta                          | <input checked="" type="radio"/> no dieta<br><input type="radio"/> control peso<br><input type="radio"/> control colesterol<br><input type="radio"/> control diabetes<br><input type="radio"/> problemas estómago<br><input type="radio"/> problemas vesícula o hepáticos<br><input type="radio"/> HTA o cardiopatía<br><input type="radio"/> problemas renales<br><input type="radio"/> alergia alimentaria<br><input type="radio"/> ácido úrico elevado<br><input type="radio"/> vegetariana<br><input type="radio"/> otros |
| cambio alimentos año previo gestación | <input type="radio"/> si<br><input checked="" type="radio"/> no                                                                                                                                                                                                                                                                                                                                                                                                                                                               |
| cambio lácteos                        | <input type="radio"/> eliminado<br><input type="radio"/> disminuido<br><input checked="" type="radio"/> igual<br><input type="radio"/> aumentado<br><input type="radio"/> no sabe                                                                                                                                                                                                                                                                                                                                             |
| cambio huevos                         | <input type="radio"/> eliminado<br><input type="radio"/> disminuido<br><input checked="" type="radio"/> igual<br><input type="radio"/> aumentado<br><input type="radio"/> no sabe                                                                                                                                                                                                                                                                                                                                             |
| cambio carne                          | <input type="radio"/> eliminado<br><input type="radio"/> disminuido<br><input checked="" type="radio"/> igual<br><input type="radio"/> aumentado<br><input type="radio"/> no sabe                                                                                                                                                                                                                                                                                                                                             |
| cambio pescado                        | <input type="radio"/> eliminado<br><input type="radio"/> disminuido<br><input checked="" type="radio"/> igual<br><input type="radio"/> aumentado<br><input type="radio"/> no sabe                                                                                                                                                                                                                                                                                                                                             |
| cambio verduras                       | <input type="radio"/> eliminado<br><input type="radio"/> disminuido<br><input checked="" type="radio"/> igual<br><input type="radio"/> aumentado<br><input type="radio"/> no sabe                                                                                                                                                                                                                                                                                                                                             |

|                            |                                                                                                                                                                                                                        |
|----------------------------|------------------------------------------------------------------------------------------------------------------------------------------------------------------------------------------------------------------------|
| cambio legumbres           | <input type="radio"/> eliminado<br><input type="radio"/> disminuido<br><input checked="" type="radio"/> igual<br><input type="radio"/> aumentado<br><input type="radio"/> no sabe                                      |
| cambio fruta               | <input type="radio"/> eliminado<br><input type="radio"/> disminuido<br><input checked="" type="radio"/> igual<br><input type="radio"/> aumentado<br><input type="radio"/> no sabe                                      |
| cambio pan                 | <input type="radio"/> eliminado<br><input type="radio"/> disminuido<br><input checked="" type="radio"/> igual<br><input type="radio"/> aumentado<br><input type="radio"/> no sabe                                      |
| cambio aceite oliva        | <input type="radio"/> eliminado<br><input type="radio"/> disminuido<br><input checked="" type="radio"/> igual<br><input type="radio"/> aumentado<br><input type="radio"/> no sabe                                      |
| cambio mante o margarina   | <input type="radio"/> eliminado<br><input type="radio"/> disminuido<br><input checked="" type="radio"/> igual<br><input type="radio"/> aumentado<br><input type="radio"/> no sabe                                      |
| cambio azúcar y dulces     | <input type="radio"/> eliminado<br><input type="radio"/> disminuido<br><input checked="" type="radio"/> igual<br><input type="radio"/> aumentado<br><input type="radio"/> no sabe                                      |
| cambio bebidas alcohólicas | <input type="radio"/> eliminado<br><input type="radio"/> disminuido<br><input checked="" type="radio"/> igual<br><input type="radio"/> aumentado<br><input type="radio"/> no sabe                                      |
| frecuencia comidas fritas  | <input type="radio"/> a diario<br><input type="radio"/> 5 a 6 veces semana<br><input type="radio"/> 2 a 4 veces semana<br><input type="radio"/> 1 vez semana<br><input checked="" type="radio"/> menos de 1 vez semana |
| carne                      | <input type="radio"/> no como<br><input type="radio"/> cruda<br><input type="radio"/> poco hecha<br><input type="radio"/> hecha<br><input checked="" type="radio"/> muy hecha                                          |
| grasa visible carne        | <input checked="" type="radio"/> quita toda<br><input type="radio"/> quita mayoría<br><input type="radio"/> quita un poco<br><input type="radio"/> no quita nada                                                       |

|                                |                                                                                                                                                                                                                                                          |
|--------------------------------|----------------------------------------------------------------------------------------------------------------------------------------------------------------------------------------------------------------------------------------------------------|
| cocina carne                   | <input checked="" type="radio"/> a la plancha<br><input type="radio"/> a la parrilla<br><input type="radio"/> asada<br><input type="radio"/> frita<br><input type="radio"/> guisada                                                                      |
| tostado quemado carne          | <input checked="" type="radio"/> nunca<br><input type="radio"/> 1 vez mes<br><input type="radio"/> 2 a 3 veces mes<br><input type="radio"/> 1 vez semana<br><input type="radio"/> 2 a 3 semanas                                                          |
| tostado quemado pescado        | <input checked="" type="radio"/> nunca<br><input type="radio"/> 1 vez mes<br><input type="radio"/> 2 a 3 veces mes<br><input type="radio"/> 1 vez semana<br><input type="radio"/> 2 a 3 semanas                                                          |
| socarrat paella                | <input type="radio"/> nunca<br><input checked="" type="radio"/> 1 vez mes<br><input type="radio"/> 2 a 3 veces mes<br><input type="radio"/> 1 vez semana<br><input type="radio"/> 2 a 3 semanas                                                          |
| grasa o aceite cocinar         | <input type="radio"/> mantequilla<br><input type="radio"/> margarina<br><input checked="" type="radio"/> aceite oliva<br><input type="radio"/> aceite oliva virgen extra<br><input type="radio"/> aceite vegetal<br><input type="radio"/> mezcla aceites |
| grasa aceite aliñar            | <input type="radio"/> mantequilla<br><input type="radio"/> margarina<br><input checked="" type="radio"/> aceite oliva<br><input type="radio"/> aceite oliva virgen extra<br><input type="radio"/> aceite vegetal<br><input type="radio"/> mezcla aceites |
| grasa aceite freir             | <input type="radio"/> mantequilla<br><input type="radio"/> margarina<br><input checked="" type="radio"/> aceite oliva<br><input type="radio"/> aceite oliva virgen extra<br><input type="radio"/> aceite vegetal<br><input type="radio"/> mezcla aceites |
| Ejercicio cuestionario         | <input checked="" type="radio"/> si<br><input type="radio"/> no                                                                                                                                                                                          |
| horas de sueño incluido siesta | [*DATA REMOVED*]                                                                                                                                                                                                                                         |
| minutos siesta                 | [*DATA REMOVED*]                                                                                                                                                                                                                                         |
| horas televisión semana        | [*DATA REMOVED*]                                                                                                                                                                                                                                         |

|                                        |                                                                                                                                                                                                                                                                                                                                                                           |
|----------------------------------------|---------------------------------------------------------------------------------------------------------------------------------------------------------------------------------------------------------------------------------------------------------------------------------------------------------------------------------------------------------------------------|
| actividad trabajo                      | <input checked="" type="radio"/> casi siempre sentado<br><input type="radio"/> sentado 50 por cien<br><input type="radio"/> casi siempre de pie, quieto<br><input type="radio"/> casi siempre levantado caminando y llevando pocas cosas<br><input type="radio"/> casi siempre levantado, caminando y llevado muchas cosas<br><input type="radio"/> trabajo manual pesado |
| tiempo caminar o bici al día           | <input type="radio"/> casi nunca<br><input checked="" type="radio"/> menos 20min día<br><input type="radio"/> 20 a 40 min día<br><input type="radio"/> 40 a 60 min día<br><input type="radio"/> 1h o 1h y media día<br><input type="radio"/> más de 1h y media al día                                                                                                     |
| tiempo tareas casa al día              | <input type="radio"/> menos de 1h día<br><input checked="" type="radio"/> 1 a 2h día<br><input type="radio"/> 3 a 4h día<br><input type="radio"/> 5 a 6h día<br><input type="radio"/> 7 a 8h día<br><input type="radio"/> más de 8h día                                                                                                                                   |
| tiempo libre televisión ordenador leer | <input checked="" type="radio"/> menos 1h día<br><input type="radio"/> 1h día<br><input type="radio"/> 2h día<br><input type="radio"/> 3h día<br><input type="radio"/> 4h día<br><input type="radio"/> 5 a 6h día<br><input type="radio"/> mas 6h día                                                                                                                     |
| tiempo libre ejercicio o deporte       | <input type="radio"/> menos 1h semana<br><input checked="" type="radio"/> 1h semana<br><input type="radio"/> 2h semana<br><input type="radio"/> 3h semana<br><input type="radio"/> 4 a 5h semana<br><input type="radio"/> mas 5h semana                                                                                                                                   |
| como se considera                      | <input type="radio"/> sedentaria<br><input checked="" type="radio"/> poco activa<br><input type="radio"/> moderadamente activa<br><input type="radio"/> bastante activa<br><input type="radio"/> muy activa<br><input type="radio"/> no sabe                                                                                                                              |
| FUR                                    | [*DATA REMOVED*]                                                                                                                                                                                                                                                                                                                                                          |
| Semanas gestación 2T                   | [*DATA REMOVED*]                                                                                                                                                                                                                                                                                                                                                          |
| Días gestación 2T                      | [*DATA REMOVED*]                                                                                                                                                                                                                                                                                                                                                          |
| DBP 2T                                 | [*DATA REMOVED*]                                                                                                                                                                                                                                                                                                                                                          |
| CC 2T                                  | [*DATA REMOVED*]                                                                                                                                                                                                                                                                                                                                                          |
| AC 2T                                  | [*DATA REMOVED*]                                                                                                                                                                                                                                                                                                                                                          |

|                                                   |                                                                                                                                                                                                 |
|---------------------------------------------------|-------------------------------------------------------------------------------------------------------------------------------------------------------------------------------------------------|
| LF 2T                                             | [*DATA REMOVED*]                                                                                                                                                                                |
| PFE 2T (Hadlock)                                  | [*DATA REMOVED*]                                                                                                                                                                                |
| Semanas gestación 3T                              | [*DATA REMOVED*]                                                                                                                                                                                |
| días 3T                                           | [*DATA REMOVED*]                                                                                                                                                                                |
| DBP 3T                                            | [*DATA REMOVED*]                                                                                                                                                                                |
| CC 3T                                             | [*DATA REMOVED*]                                                                                                                                                                                |
| AC 3T                                             | [*DATA REMOVED*]                                                                                                                                                                                |
| LF 3T                                             | [*DATA REMOVED*]                                                                                                                                                                                |
| PFE 3T (Hadlock)                                  | [*DATA REMOVED*]                                                                                                                                                                                |
| Semanas de gestación final                        | [*DATA REMOVED*]                                                                                                                                                                                |
| días gestación final                              | [*DATA REMOVED*]                                                                                                                                                                                |
| Localización placenta                             | <input type="radio"/> anterior<br><input type="radio"/> lateral derecha<br><input type="radio"/> lateral izquierda<br><input checked="" type="radio"/> posterior<br><input type="radio"/> fondo |
| Presentación longitudinal cefálica                | <input type="radio"/> no<br><input checked="" type="radio"/> si                                                                                                                                 |
| Dorso                                             | <input type="radio"/> izquierda anterior<br><input type="radio"/> izquierda posterior<br><input checked="" type="radio"/> derecha anterior<br><input type="radio"/> derecha posterior           |
| diámetro biparietal                               | [*DATA REMOVED*]                                                                                                                                                                                |
| Circunferencia craneal                            | [*DATA REMOVED*]                                                                                                                                                                                |
| Circunferencia abdominal                          | [*DATA REMOVED*]                                                                                                                                                                                |
| Longitud de femur                                 | [*DATA REMOVED*]                                                                                                                                                                                |
| tejido celular subcutáneo a nivel del muslo en mm | [*DATA REMOVED*]                                                                                                                                                                                |
| tejido celular subcutáneo en abdomen en mm        | [*DATA REMOVED*]                                                                                                                                                                                |
| Volumen del muslo en cm3                          | [*DATA REMOVED*]                                                                                                                                                                                |
| Peso fetal estimado según fórmula de Hadlock      | [*DATA REMOVED*]                                                                                                                                                                                |

|                                               |                                                                                                                                                          |
|-----------------------------------------------|----------------------------------------------------------------------------------------------------------------------------------------------------------|
| Percentil                                     | [*DATA REMOVED*]                                                                                                                                         |
| Peso fetal estimado según fórmula de Scioscia | <hr/>                                                                                                                                                    |
| Peso fetal estimado según fórmula de LEE      | <hr/>                                                                                                                                                    |
| Tipo de parto                                 | <input checked="" type="radio"/> eutocico<br><input type="radio"/> instrumentado/ventosa<br><input type="radio"/> cesarea                                |
| fecha de nacimiento                           | [*DATA REMOVED*]                                                                                                                                         |
| Días entre exploración y nacimiento           | [*DATA REMOVED*]                                                                                                                                         |
| Peso RN en g                                  | [*DATA REMOVED*]                                                                                                                                         |
| sexo                                          | <input type="radio"/> mujer<br><input checked="" type="radio"/> hombre                                                                                   |
| Apgar 1 minuto                                | [*DATA REMOVED*]                                                                                                                                         |
| Apgar 5 minutos                               | [*DATA REMOVED*]                                                                                                                                         |
| Apgar 10 minutos                              | <hr/>                                                                                                                                                    |
| antecedente Covid durante gestación           | <input type="radio"/> Yes<br><input checked="" type="radio"/> No                                                                                         |
| Nivel de estudios                             | <input type="radio"/> ninguno<br><input type="radio"/> primarios<br><input type="radio"/> secundarios<br><input checked="" type="radio"/> universitarios |

## Base\_datos\_estimacion\_peso\_fetal

|                                       |                                                                                                                                                                                                                                                                                      |
|---------------------------------------|--------------------------------------------------------------------------------------------------------------------------------------------------------------------------------------------------------------------------------------------------------------------------------------|
| Número de identificación participante | 107                                                                                                                                                                                                                                                                                  |
| CODIGO PARTICIPANTE                   |                                                                                                                                                                                                                                                                                      |
| Edad                                  | [*DATA REMOVED*]                                                                                                                                                                                                                                                                     |
| Gestaciones                           | <input type="radio"/> 1<br><input type="radio"/> 2<br><input type="radio"/> 3<br><input checked="" type="radio"/> mas de 3                                                                                                                                                           |
| partos                                | <input type="radio"/> 0<br><input type="radio"/> 1<br><input checked="" type="radio"/> 2<br><input type="radio"/> 3<br><input type="radio"/> mas de 3                                                                                                                                |
| cesáreas                              | <input checked="" type="radio"/> 0<br><input type="radio"/> 1<br><input type="radio"/> 2<br><input type="radio"/> 3<br><input type="radio"/> mas de 3                                                                                                                                |
| Abortos                               | <input type="radio"/> 0<br><input checked="" type="radio"/> 1<br><input type="radio"/> 2<br><input type="radio"/> 3<br><input type="radio"/> mas de 3                                                                                                                                |
| Tipo de gestacion                     | <input checked="" type="radio"/> espontanea<br><input type="radio"/> IAC inseminación artificial conyuge<br><input type="radio"/> IAD inseminación artificial donante<br><input type="radio"/> FIV Fecundación in Vitro<br><input type="radio"/> Ovodon FIV con donación de ovocitos |
| peso previo a embarazo                | [*DATA REMOVED*]                                                                                                                                                                                                                                                                     |
| Ganancia ponderal embarazo            |                                                                                                                                                                                                                                                                                      |
| Talla madre                           | [*DATA REMOVED*]                                                                                                                                                                                                                                                                     |
| IMC previo embarazo                   | 21.887076365377382                                                                                                                                                                                                                                                                   |
| Patología obstétrica                  | <input checked="" type="radio"/> no<br><input type="radio"/> si                                                                                                                                                                                                                      |
| Diabetes pregestacional               | <input checked="" type="radio"/> no<br><input type="radio"/> si                                                                                                                                                                                                                      |
| Diabetes gestacional                  | <input checked="" type="radio"/> no<br><input type="radio"/> si                                                                                                                                                                                                                      |

|                                            |                                                                                                                                                                                      |
|--------------------------------------------|--------------------------------------------------------------------------------------------------------------------------------------------------------------------------------------|
| Diabetes gestacional con insulina          | <input checked="" type="radio"/> no<br><input type="radio"/> si                                                                                                                      |
| Diabetes gestacional con dieta y ejercicio | <input checked="" type="radio"/> no<br><input type="radio"/> si                                                                                                                      |
| Percentil fetos previos                    | <input type="radio"/> Nada<br><input type="radio"/> percentil menor de 10<br><input type="radio"/> percentil entre 10 y 90<br><input checked="" type="radio"/> percentil mayor de 90 |
| Exfumadora                                 | <input checked="" type="radio"/> Nada<br><input type="radio"/> menos de 5 años<br><input type="radio"/> 5 a 10 años<br><input type="radio"/> mayor o igual a 10 años                 |
| Hábito tabáquico                           | <input checked="" type="radio"/> no<br><input type="radio"/> si                                                                                                                      |
| fumadora                                   | [*DATA REMOVED*]                                                                                                                                                                     |
| Consumo otros tóxicos                      | <input checked="" type="radio"/> no<br><input type="radio"/> si                                                                                                                      |
| Hb 1T                                      | [*DATA REMOVED*]                                                                                                                                                                     |
| Htc 1T                                     | [*DATA REMOVED*]                                                                                                                                                                     |
| Hb 2T                                      | [*DATA REMOVED*]                                                                                                                                                                     |
| HTC 2T                                     | [*DATA REMOVED*]                                                                                                                                                                     |
| Hb 3T                                      | [*DATA REMOVED*]                                                                                                                                                                     |
| HTC 3T                                     | [*DATA REMOVED*]                                                                                                                                                                     |
| Suplemento FE oral                         | <input checked="" type="radio"/> si<br><input type="radio"/> no                                                                                                                      |
| Suplemento fe iv                           | <input type="radio"/> si<br><input checked="" type="radio"/> no                                                                                                                      |
| Transfusión                                | <input checked="" type="radio"/> no<br><input type="radio"/> si                                                                                                                      |
| Solicitada Vit D                           | <input checked="" type="radio"/> no<br><input type="radio"/> si                                                                                                                      |
| Deficit vit D                              | <input checked="" type="radio"/> no<br><input type="radio"/> si                                                                                                                      |
| Suplemento vit D                           | <input type="radio"/> si<br><input type="radio"/> no                                                                                                                                 |



|                       |                                                                                                                                                                                                                                                                                                                                                                                                              |
|-----------------------|--------------------------------------------------------------------------------------------------------------------------------------------------------------------------------------------------------------------------------------------------------------------------------------------------------------------------------------------------------------------------------------------------------------|
| Dieta, cuestionario   | <input checked="" type="radio"/> sí<br><input type="radio"/> no                                                                                                                                                                                                                                                                                                                                              |
| Leche entera          | <input checked="" type="radio"/> Nunca o menos 1 vez al mes<br><input type="radio"/> 1 a 3 veces mes<br><input type="radio"/> 1 vez semana<br><input type="radio"/> 2 a 4 veces semana<br><input type="radio"/> 5 a 6 veces semana<br><input type="radio"/> 1 vez al día<br><input type="radio"/> 2 a 3 veces al día<br><input type="radio"/> 5 a 6 veces al día<br><input type="radio"/> más 6 veces al día |
| Leche semidesnatada   | <input checked="" type="radio"/> Nunca o menos 1 vez al mes<br><input type="radio"/> 1 a 3 veces mes<br><input type="radio"/> 1 vez semana<br><input type="radio"/> 2 a 4 veces semana<br><input type="radio"/> 5 a 6 veces semana<br><input type="radio"/> 1 vez al día<br><input type="radio"/> 2 a 3 veces al día<br><input type="radio"/> 5 a 6 veces al día<br><input type="radio"/> mas 6 veces al día |
| Leche desnatada       | <input type="radio"/> Nunca o menos 1 vez al mes<br><input type="radio"/> 1 a 3 veces mes<br><input type="radio"/> 1 vez semana<br><input type="radio"/> 2 a 4 veces semana<br><input type="radio"/> 5 a 6 veces semana<br><input checked="" type="radio"/> 1 vez al día<br><input type="radio"/> 2 a 3 veces al día<br><input type="radio"/> 5 a 6 veces al día<br><input type="radio"/> más 6 veces al día |
| Leche condensada      | <input checked="" type="radio"/> Nunca o menos 1 vez al mes<br><input type="radio"/> 1 a 3 veces mes<br><input type="radio"/> 1 vez semana<br><input type="radio"/> 2 a 4 veces semana<br><input type="radio"/> 5 a 6 veces semana<br><input type="radio"/> 1 vez al día<br><input type="radio"/> 2 a 3 veces al día<br><input type="radio"/> 5 a 6 veces al día<br><input type="radio"/> más 6 veces al día |
| nata o crema de leche | <input checked="" type="radio"/> Nunca o menos 1 vez al mes<br><input type="radio"/> 1 a 3 veces mes<br><input type="radio"/> 1 vez semana<br><input type="radio"/> 2 a 4 veces semana<br><input type="radio"/> 5 a 6 veces semana<br><input type="radio"/> 1 vez al día<br><input type="radio"/> 2 a 3 veces al día<br><input type="radio"/> 5 a 6 veces al día<br><input type="radio"/> más 6 veces al día |

|                                             |                                                                                                                                                                                                                                                                                                                                                                                                              |
|---------------------------------------------|--------------------------------------------------------------------------------------------------------------------------------------------------------------------------------------------------------------------------------------------------------------------------------------------------------------------------------------------------------------------------------------------------------------|
| Yogurt Entero                               | <input type="radio"/> Nunca o menos 1 vez al mes<br><input type="radio"/> 1 a 3 veces mes<br><input checked="" type="radio"/> 1 vez semana<br><input type="radio"/> 2 a 4 veces semana<br><input type="radio"/> 5 a 6 veces semana<br><input type="radio"/> 1 vez al día<br><input type="radio"/> 2 a 3 veces al día<br><input type="radio"/> 5 a 6 veces al día<br><input type="radio"/> más 6 veces al día |
| Yogurt desnatado                            | <input type="radio"/> Nunca o menos 1 vez al mes<br><input type="radio"/> 1 a 3 veces mes<br><input checked="" type="radio"/> 1 vez semana<br><input type="radio"/> 2 a 4 veces semana<br><input type="radio"/> 5 a 6 veces semana<br><input type="radio"/> 1 vez al día<br><input type="radio"/> 2 a 3 veces al día<br><input type="radio"/> 5 a 6 veces al día<br><input type="radio"/> más 6 veces al día |
| 100g requesón o queso blando o queso fresco | <input type="radio"/> Nunca o menos 1 vez al mes<br><input type="radio"/> 1 a 3 veces mes<br><input type="radio"/> 1 vez semana<br><input checked="" type="radio"/> 2 a 4 veces semana<br><input type="radio"/> 5 a 6 veces semana<br><input type="radio"/> 1 vez al día<br><input type="radio"/> 2 a 3 veces al día<br><input type="radio"/> 5 a 6 veces al día<br><input type="radio"/> más 6 veces al día |
| queso curado o semicurado o cremoso         | <input type="radio"/> Nunca o menos 1 vez al mes<br><input type="radio"/> 1 a 3 veces mes<br><input type="radio"/> 1 vez semana<br><input type="radio"/> 2 a 4 veces semana<br><input checked="" type="radio"/> 5 a 6 veces semana<br><input type="radio"/> 1 vez al día<br><input type="radio"/> 2 a 3 veces al día<br><input type="radio"/> 5 a 6 veces al día<br><input type="radio"/> más 6 veces al día |
| natillas flan pudding                       | <input type="radio"/> Nunca o menos 1 vez al mes<br><input checked="" type="radio"/> 1 a 3 veces mes<br><input type="radio"/> 1 vez semana<br><input type="radio"/> 2 a 4 veces semana<br><input type="radio"/> 5 a 6 veces semana<br><input type="radio"/> 1 vez al día<br><input type="radio"/> 2 a 3 veces al día<br><input type="radio"/> 5 a 6 veces al día<br><input type="radio"/> más 6 veces al día |
| Helado                                      | <input type="radio"/> Nunca o menos 1 vez al mes<br><input type="radio"/> 1 a 3 veces mes<br><input type="radio"/> 1 vez semana<br><input checked="" type="radio"/> 2 a 4 veces semana<br><input type="radio"/> 5 a 6 veces semana<br><input type="radio"/> 1 vez al día<br><input type="radio"/> 2 a 3 veces al día<br><input type="radio"/> 5 a 6 veces al día<br><input type="radio"/> más 6 veces al día |

|                                      |                                                                                                                                                                                                                                                                                                                                                                                                              |
|--------------------------------------|--------------------------------------------------------------------------------------------------------------------------------------------------------------------------------------------------------------------------------------------------------------------------------------------------------------------------------------------------------------------------------------------------------------|
| huevo                                | <input type="radio"/> Nunca o menos 1 vez al mes<br><input type="radio"/> 1 a 3 veces mes<br><input type="radio"/> 1 vez semana<br><input checked="" type="radio"/> 2 a 4 veces semana<br><input type="radio"/> 5 a 6 veces semana<br><input type="radio"/> 1 vez al día<br><input type="radio"/> 2 a 3 veces al día<br><input type="radio"/> 5 a 6 veces al día<br><input type="radio"/> más 6 veces al día |
| Pollo con piel                       | <input type="radio"/> Nunca o menos 1 vez al mes<br><input type="radio"/> 1 a 3 veces mes<br><input type="radio"/> 1 vez semana<br><input checked="" type="radio"/> 2 a 4 veces semana<br><input type="radio"/> 5 a 6 veces semana<br><input type="radio"/> 1 vez al día<br><input type="radio"/> 2 a 3 veces al día<br><input type="radio"/> 5 a 6 veces al día<br><input type="radio"/> más 6 veces al día |
| pollo sin piel                       | <input type="radio"/> Nunca o menos 1 vez al mes<br><input type="radio"/> 1 a 3 veces mes<br><input type="radio"/> 1 vez semana<br><input checked="" type="radio"/> 2 a 4 veces semana<br><input type="radio"/> 5 a 6 veces semana<br><input type="radio"/> 1 vez al día<br><input type="radio"/> 2 a 3 veces al día<br><input type="radio"/> 5 a 6 veces al día<br><input type="radio"/> más 6 veces al día |
| Ternera o cerdo o cordero            | <input type="radio"/> Nunca o menos 1 vez al mes<br><input type="radio"/> 1 a 3 veces mes<br><input checked="" type="radio"/> 1 vez semana<br><input type="radio"/> 2 a 4 veces semana<br><input type="radio"/> 5 a 6 veces semana<br><input type="radio"/> 1 vez al día<br><input type="radio"/> 2 a 3 veces al día<br><input type="radio"/> 5 a 6 veces al día<br><input type="radio"/> más 6 veces al día |
| carne caza: Conejo o codorniz o pato | <input type="radio"/> Nunca o menos 1 vez al mes<br><input type="radio"/> 1 a 3 veces mes<br><input checked="" type="radio"/> 1 vez semana<br><input type="radio"/> 2 a 4 veces semana<br><input type="radio"/> 5 a 6 veces semana<br><input type="radio"/> 1 vez al día<br><input type="radio"/> 2 a 3 veces al día<br><input type="radio"/> 5 a 6 veces al día<br><input type="radio"/> más 6 veces al día |
| Hígado de ternera o cerdo o pollo    | <input checked="" type="radio"/> Nunca o menos 1 vez al mes<br><input type="radio"/> 1 a 3 veces mes<br><input type="radio"/> 1 vez semana<br><input type="radio"/> 2 a 4 veces semana<br><input type="radio"/> 5 a 6 veces semana<br><input type="radio"/> 1 vez al día<br><input type="radio"/> 2 a 3 veces al día<br><input type="radio"/> 5 a 6 veces al día<br><input type="radio"/> más 6 veces al día |

|                     |                                                                                                                                                                                                                                                                                                                                                                                                              |
|---------------------|--------------------------------------------------------------------------------------------------------------------------------------------------------------------------------------------------------------------------------------------------------------------------------------------------------------------------------------------------------------------------------------------------------------|
| Vísceras            | <input checked="" type="radio"/> Nunca o menos 1 vez al mes<br><input type="radio"/> 1 a 3 veces mes<br><input type="radio"/> 1 vez semana<br><input type="radio"/> 2 a 4 veces semana<br><input type="radio"/> 5 a 6 veces semana<br><input type="radio"/> 1 vez al día<br><input type="radio"/> 2 a 3 veces al día<br><input type="radio"/> 5 a 6 veces al día<br><input type="radio"/> más 6 veces al día |
| Embutido            | <input checked="" type="radio"/> Nunca o menos 1 vez al mes<br><input type="radio"/> 1 a 3 veces mes<br><input type="radio"/> 1 vez semana<br><input type="radio"/> 2 a 4 veces semana<br><input type="radio"/> 5 a 6 veces semana<br><input type="radio"/> 1 vez al día<br><input type="radio"/> 2 a 3 veces al día<br><input type="radio"/> 5 a 6 veces al día<br><input type="radio"/> más 6 veces al día |
| Salchicha o similar | <input checked="" type="radio"/> Nunca o menos 1 vez al mes<br><input type="radio"/> 1 a 3 veces mes<br><input type="radio"/> 1 vez semana<br><input type="radio"/> 2 a 4 veces semana<br><input type="radio"/> 5 a 6 veces semana<br><input type="radio"/> 1 vez al día<br><input type="radio"/> 2 a 3 veces al día<br><input type="radio"/> 5 a 6 veces al día<br><input type="radio"/> más 6 veces al día |
| Pate o foiegras     | <input type="radio"/> Nunca o menos 1 vez al mes<br><input type="radio"/> 1 a 3 veces mes<br><input checked="" type="radio"/> 1 vez semana<br><input type="radio"/> 2 a 4 veces semana<br><input type="radio"/> 5 a 6 veces semana<br><input type="radio"/> 1 vez al día<br><input type="radio"/> 2 a 3 veces al día<br><input type="radio"/> 5 a 6 veces al día<br><input type="radio"/> más 6 veces al día |
| Hamburguesa         | <input type="radio"/> Nunca o menos 1 vez al mes<br><input type="radio"/> 1 a 3 veces mes<br><input checked="" type="radio"/> 1 vez semana<br><input type="radio"/> 2 a 4 veces semana<br><input type="radio"/> 5 a 6 veces semana<br><input type="radio"/> 1 vez al día<br><input type="radio"/> 2 a 3 veces al día<br><input type="radio"/> 5 a 6 veces al día<br><input type="radio"/> más 6 veces al día |
| tocino o bacon      | <input type="radio"/> Nunca o menos 1 vez al mes<br><input checked="" type="radio"/> 1 a 3 veces mes<br><input type="radio"/> 1 vez semana<br><input type="radio"/> 2 a 4 veces semana<br><input type="radio"/> 5 a 6 veces semana<br><input type="radio"/> 1 vez al día<br><input type="radio"/> 2 a 3 veces al día<br><input type="radio"/> 5 a 6 veces al día<br><input type="radio"/> más 6 veces al día |

---

Pescado frito

- ☐ Nunca o menos 1 vez al mes  
☒ 1 a 3 veces mes  
☐ 1 vez semana  
☐ 2 a 4 veces semana  
☐ 5 a 6 veces semana  
☐ 1 vez al día  
☐ 2 a 3 veces al día  
☐ 5 a 6 veces al día  
☐ más 6 veces al día

---

pescado hervido blanco

- ☐ Nunca o menos 1 vez al mes  
☐ 1 a 3 veces mes  
☒ 1 vez semana  
☐ 2 a 4 veces semana  
☐ 5 a 6 veces semana  
☐ 1 vez al día  
☐ 2 a 3 veces al día  
☐ 5 a 6 veces al día  
☐ más 6 veces al día

---

pescado hervido azul

- ☒ Nunca o menos 1 vez al mes  
☐ 1 a 3 veces mes  
☐ 1 vez semana  
☐ 2 a 4 veces semana  
☐ 5 a 6 veces semana  
☐ 1 vez al día  
☐ 2 a 3 veces al día  
☐ 5 a 6 veces al día  
☐ más 6 veces al día

---

otros pescado azul

- ☐ Nunca o menos 1 vez al mes  
☒ 1 a 3 veces mes  
☐ 1 vez semana  
☐ 2 a 4 veces semana  
☐ 5 a 6 veces semana  
☐ 1 vez al día  
☐ 2 a 3 veces al día  
☐ 5 a 6 veces al día  
☐ más 6 veces al día

---

atun conserva

- ☐ Nunca o menos 1 vez al mes  
☐ 1 a 3 veces mes  
☒ 1 vez semana  
☐ 2 a 4 veces semana  
☐ 5 a 6 veces semana  
☐ 1 vez al día  
☐ 2 a 3 veces al día  
☐ 5 a 6 veces al día  
☐ más 6 veces al día

---

sardina conserva

- ☒ Nunca o menos 1 vez al mes  
☐ 1 a 3 veces mes  
☐ 1 vez semana  
☐ 2 a 4 veces semana  
☐ 5 a 6 veces semana  
☐ 1 vez al día  
☐ 2 a 3 veces al día  
☐ 5 a 6 veces al día  
☐ más 6 veces al día

|                                         |                                                                                                                                                                                                                                                                                                                                                                                                              |
|-----------------------------------------|--------------------------------------------------------------------------------------------------------------------------------------------------------------------------------------------------------------------------------------------------------------------------------------------------------------------------------------------------------------------------------------------------------------|
| pescado ahumado                         | <input checked="" type="radio"/> Nunca o menos 1 vez al mes<br><input type="radio"/> 1 a 3 veces mes<br><input type="radio"/> 1 vez semana<br><input type="radio"/> 2 a 4 veces semana<br><input type="radio"/> 5 a 6 veces semana<br><input type="radio"/> 1 vez al día<br><input type="radio"/> 2 a 3 veces al día<br><input type="radio"/> 5 a 6 veces al día<br><input type="radio"/> más 6 veces al día |
| almejas o mejillones o ostras unos 100g | <input type="radio"/> Nunca o menos 1 vez al mes<br><input checked="" type="radio"/> 1 a 3 veces mes<br><input type="radio"/> 1 vez semana<br><input type="radio"/> 2 a 4 veces semana<br><input type="radio"/> 5 a 6 veces semana<br><input type="radio"/> 1 vez al día<br><input type="radio"/> 2 a 3 veces al día<br><input type="radio"/> 5 a 6 veces al día<br><input type="radio"/> más 6 veces al día |
| calamar o chipiron o sepia unos 100g    | <input type="radio"/> Nunca o menos 1 vez al mes<br><input checked="" type="radio"/> 1 a 3 veces mes<br><input type="radio"/> 1 vez semana<br><input type="radio"/> 2 a 4 veces semana<br><input type="radio"/> 5 a 6 veces semana<br><input type="radio"/> 1 vez al día<br><input type="radio"/> 2 a 3 veces al día<br><input type="radio"/> 5 a 6 veces al día<br><input type="radio"/> más 6 veces al día |
| marisco unos 100g                       | <input type="radio"/> Nunca o menos 1 vez al mes<br><input checked="" type="radio"/> 1 a 3 veces mes<br><input type="radio"/> 1 vez semana<br><input type="radio"/> 2 a 4 veces semana<br><input type="radio"/> 5 a 6 veces semana<br><input type="radio"/> 1 vez al día<br><input type="radio"/> 2 a 3 veces al día<br><input type="radio"/> 5 a 6 veces al día<br><input type="radio"/> más 6 veces al día |
| Espinacas o acelgas cocinadas           | <input type="radio"/> Nunca o menos 1 vez al mes<br><input type="radio"/> 1 a 3 veces mes<br><input checked="" type="radio"/> 1 vez semana<br><input type="radio"/> 2 a 4 veces semana<br><input type="radio"/> 5 a 6 veces semana<br><input type="radio"/> 1 vez al día<br><input type="radio"/> 2 a 3 veces al día<br><input type="radio"/> 5 a 6 veces al día<br><input type="radio"/> más 6 veces al día |
| Col o coliflor o brocoli cocinado       | <input type="radio"/> Nunca o menos 1 vez al mes<br><input type="radio"/> 1 a 3 veces mes<br><input checked="" type="radio"/> 1 vez semana<br><input type="radio"/> 2 a 4 veces semana<br><input type="radio"/> 5 a 6 veces semana<br><input type="radio"/> 1 vez al día<br><input type="radio"/> 2 a 3 veces al día<br><input type="radio"/> 5 a 6 veces al día<br><input type="radio"/> más 6 veces al día |

---

Lechuga o endivia o escarola

- ☐ Nunca o menos 1 vez al mes  
☐ 1 a 3 veces mes  
☐ 1 vez semana  
☒ 2 a 4 veces semana  
☐ 5 a 6 veces semana  
☐ 1 vez al día  
☐ 2 a 3 veces al día  
☐ 5 a 6 veces al día  
☐ más 6 veces al día

---

tomate ensalada

- ☐ Nunca o menos 1 vez al mes  
☐ 1 a 3 veces mes  
☐ 1 vez semana  
☐ 2 a 4 veces semana  
☒ 5 a 6 veces semana  
☐ 1 vez al día  
☐ 2 a 3 veces al día  
☐ 5 a 6 veces al día  
☐ más 6 veces al día

---

cebolla

- ☐ Nunca o menos 1 vez al mes  
☐ 1 a 3 veces mes  
☐ 1 vez semana  
☒ 2 a 4 veces semana  
☐ 5 a 6 veces semana  
☐ 1 vez al día  
☐ 2 a 3 veces al día  
☐ 5 a 6 veces al día  
☐ más 6 veces al día

---

Zanahoria o calabaza

- ☐ Nunca o menos 1 vez al mes  
☐ 1 a 3 veces mes  
☐ 1 vez semana  
☐ 2 a 4 veces semana  
☒ 5 a 6 veces semana  
☐ 1 vez al día  
☐ 2 a 3 veces al día  
☐ 5 a 6 veces al día  
☐ más 6 veces al día

---

Judías verdes

- ☐ Nunca o menos 1 vez al mes  
☐ 1 a 3 veces mes  
☐ 1 vez semana  
☒ 2 a 4 veces semana  
☐ 5 a 6 veces semana  
☐ 1 vez al día  
☐ 2 a 3 veces al día  
☐ 5 a 6 veces al día  
☐ más 6 veces al día

---

Berenjena o calabacin o pepino

- ☐ Nunca o menos 1 vez al mes  
☐ 1 a 3 veces mes  
☒ 1 vez semana  
☐ 2 a 4 veces semana  
☐ 5 a 6 veces semana  
☐ 1 vez al día  
☐ 2 a 3 veces al día  
☐ 5 a 6 veces al día  
☐ más 6 veces al día

---

pimiento

- ☐ Nunca o menos 1 vez al mes  
☐ 1 a 3 veces mes  
☒ 1 vez semana  
☐ 2 a 4 veces semana  
☐ 5 a 6 veces semana  
☐ 1 vez al día  
☐ 2 a 3 veces al día  
☐ 5 a 6 veces al día  
☐ más 6 veces al día

---

alcachofa

- ☐ Nunca o menos 1 vez al mes  
☐ 1 a 3 veces mes  
☒ 1 vez semana  
☐ 2 a 4 veces semana  
☐ 5 a 6 veces semana  
☐ 1 vez al día  
☐ 2 a 3 veces al día  
☐ 5 a 6 veces al día  
☐ más 6 veces al día

---

espárragos

- ☐ Nunca o menos 1 vez al mes  
☒ 1 a 3 veces mes  
☐ 1 vez semana  
☐ 2 a 4 veces semana  
☐ 5 a 6 veces semana  
☐ 1 vez al día  
☐ 2 a 3 veces al día  
☐ 5 a 6 veces al día  
☐ más 6 veces al día

---

maíz hervido

- ☐ Nunca o menos 1 vez al mes  
☐ 1 a 3 veces mes  
☐ 1 vez semana  
☒ 2 a 4 veces semana  
☐ 5 a 6 veces semana  
☐ 1 vez al día  
☐ 2 a 3 veces al día  
☐ 5 a 6 veces al día  
☐ más 6 veces al día

---

legumbres

- ☐ Nunca o menos 1 vez al mes  
☐ 1 a 3 veces mes  
☒ 1 vez semana  
☐ 2 a 4 veces semana  
☐ 5 a 6 veces semana  
☐ 1 vez al día  
☐ 2 a 3 veces al día  
☐ 5 a 6 veces al día  
☐ más 6 veces al día

---

naranjas o mandarinas

- ☐ Nunca o menos 1 vez al mes  
☒ 1 a 3 veces mes  
☐ 1 vez semana  
☐ 2 a 4 veces semana  
☐ 5 a 6 veces semana  
☐ 1 vez al día  
☐ 2 a 3 veces al día  
☐ 5 a 6 veces al día  
☐ más 6 veces al día



---

zumو natural fruta

- ☐ Nunca o menos 1 vez al mes  
☒ 1 a 3 veces mes  
☐ 1 vez semana  
☐ 2 a 4 veces semana  
☐ 5 a 6 veces semana  
☐ 1 vez al día  
☐ 2 a 3 veces al día  
☐ 5 a 6 veces al día  
☐ más 6 veces al día

---

platano

- ☐ Nunca o menos 1 vez al mes  
☐ 1 a 3 veces mes  
☐ 1 vez semana  
☒ 2 a 4 veces semana  
☐ 5 a 6 veces semana  
☐ 1 vez al día  
☐ 2 a 3 veces al día  
☐ 5 a 6 veces al día  
☐ más 6 veces al día

---

manzana o pera

- ☐ Nunca o menos 1 vez al mes  
☐ 1 a 3 veces mes  
☐ 1 vez semana  
☒ 2 a 4 veces semana  
☐ 5 a 6 veces semana  
☐ 1 vez al día  
☐ 2 a 3 veces al día  
☐ 5 a 6 veces al día  
☐ más 6 veces al día

---

melocotón o nectarina

- ☐ Nunca o menos 1 vez al mes  
☐ 1 a 3 veces mes  
☐ 1 vez semana  
☒ 2 a 4 veces semana  
☐ 5 a 6 veces semana  
☐ 1 vez al día  
☐ 2 a 3 veces al día  
☐ 5 a 6 veces al día  
☐ más 6 veces al día

---

sandia o melon

- ☐ Nunca o menos 1 vez al mes  
☐ 1 a 3 veces mes  
☐ 1 vez semana  
☐ 2 a 4 veces semana  
☐ 5 a 6 veces semana  
☐ 1 vez al día  
☐ 2 a 3 veces al día  
☒ 5 a 6 veces al día  
☐ más 6 veces al día

---

uva

- ☒ Nunca o menos 1 vez al mes  
☐ 1 a 3 veces mes  
☐ 1 vez semana  
☐ 2 a 4 veces semana  
☐ 5 a 6 veces semana  
☐ 1 vez al día  
☐ 2 a 3 veces al día  
☐ 5 a 6 veces al día  
☐ más 6 veces al día

---

bruna o ciruela

- ☐ Nunca o menos 1 vez al mes  
☐ 1 a 3 veces mes  
☐ 1 vez semana  
☐ 2 a 4 veces semana  
☒ 5 a 6 veces semana  
☐ 1 vez al día  
☐ 2 a 3 veces al día  
☐ 5 a 6 veces al día  
☐ más 6 veces al día

---

kiwi

- ☐ Nunca o menos 1 vez al mes  
☐ 1 a 3 veces mes  
☒ 1 vez semana  
☐ 2 a 4 veces semana  
☐ 5 a 6 veces semana  
☐ 1 vez al día  
☐ 2 a 3 veces al día  
☐ 5 a 6 veces al día  
☐ más 6 veces al día

---

aceituna

- ☐ Nunca o menos 1 vez al mes  
☐ 1 a 3 veces mes  
☒ 1 vez semana  
☐ 2 a 4 veces semana  
☐ 5 a 6 veces semana  
☐ 1 vez al día  
☐ 2 a 3 veces al día  
☐ 5 a 6 veces al día  
☐ más 6 veces al día

---

frutos secos

- ☐ Nunca o menos 1 vez al mes  
☐ 1 a 3 veces mes  
☐ 1 vez semana  
☒ 2 a 4 veces semana  
☐ 5 a 6 veces semana  
☐ 1 vez al día  
☐ 2 a 3 veces al día  
☐ 5 a 6 veces al día  
☐ más 6 veces al día

---

pan blanco

- ☐ Nunca o menos 1 vez al mes  
☐ 1 a 3 veces mes  
☐ 1 vez semana  
☐ 2 a 4 veces semana  
☐ 5 a 6 veces semana  
☐ 1 vez al día  
☒ 2 a 3 veces al día  
☐ 5 a 6 veces al día  
☐ más 6 veces al día

---

pan integral

- ☐ Nunca o menos 1 vez al mes  
☐ 1 a 3 veces mes  
☐ 1 vez semana  
☐ 2 a 4 veces semana  
☐ 5 a 6 veces semana  
☒ 1 vez al día  
☐ 2 a 3 veces al día  
☐ 5 a 6 veces al día  
☐ más 6 veces al día

---

cereales desayuno

- ☐ Nunca o menos 1 vez al mes  
☒ 1 a 3 veces mes  
☐ 1 vez semana  
☐ 2 a 4 veces semana  
☐ 5 a 6 veces semana  
☐ 1 vez al día  
☐ 2 a 3 veces al día  
☐ 5 a 6 veces al día  
☐ más 6 veces al día

---

patatas fritas

- ☐ Nunca o menos 1 vez al mes  
☐ 1 a 3 veces mes  
☒ 1 vez semana  
☐ 2 a 4 veces semana  
☐ 5 a 6 veces semana  
☐ 1 vez al día  
☐ 2 a 3 veces al día  
☐ 5 a 6 veces al día  
☐ más 6 veces al día

---

patatas cocidas o asadas

- ☐ Nunca o menos 1 vez al mes  
☐ 1 a 3 veces mes  
☐ 1 vez semana  
☒ 2 a 4 veces semana  
☐ 5 a 6 veces semana  
☐ 1 vez al día  
☐ 2 a 3 veces al día  
☐ 5 a 6 veces al día  
☐ más 6 veces al día

---

bolsa papas

- ☐ Nunca o menos 1 vez al mes  
☐ 1 a 3 veces mes  
☒ 1 vez semana  
☐ 2 a 4 veces semana  
☐ 5 a 6 veces semana  
☐ 1 vez al día  
☐ 2 a 3 veces al día  
☐ 5 a 6 veces al día  
☐ más 6 veces al día

---

arroz cocinado

- ☐ Nunca o menos 1 vez al mes  
☐ 1 a 3 veces mes  
☐ 1 vez semana  
☒ 2 a 4 veces semana  
☐ 5 a 6 veces semana  
☐ 1 vez al día  
☐ 2 a 3 veces al día  
☐ 5 a 6 veces al día  
☐ más 6 veces al día

---

pasta

- ☐ Nunca o menos 1 vez al mes  
☐ 1 a 3 veces mes  
☒ 1 vez semana  
☐ 2 a 4 veces semana  
☐ 5 a 6 veces semana  
☐ 1 vez al día  
☐ 2 a 3 veces al día  
☐ 5 a 6 veces al día  
☐ más 6 veces al día

|                     |                                                                                                                                                                                                                                                                                                                                                                                                              |
|---------------------|--------------------------------------------------------------------------------------------------------------------------------------------------------------------------------------------------------------------------------------------------------------------------------------------------------------------------------------------------------------------------------------------------------------|
| pizza               | <input type="radio"/> Nunca o menos 1 vez al mes<br><input type="radio"/> 1 a 3 veces mes<br><input checked="" type="radio"/> 1 vez semana<br><input type="radio"/> 2 a 4 veces semana<br><input type="radio"/> 5 a 6 veces semana<br><input type="radio"/> 1 vez al día<br><input type="radio"/> 2 a 3 veces al día<br><input type="radio"/> 5 a 6 veces al día<br><input type="radio"/> más 6 veces al día |
| aceite oliva        | <input type="radio"/> Nunca o menos 1 vez al mes<br><input type="radio"/> 1 a 3 veces mes<br><input type="radio"/> 1 vez semana<br><input type="radio"/> 2 a 4 veces semana<br><input type="radio"/> 5 a 6 veces semana<br><input checked="" type="radio"/> 1 vez al día<br><input type="radio"/> 2 a 3 veces al día<br><input type="radio"/> 5 a 6 veces al día<br><input type="radio"/> más 6 veces al día |
| otros aceites       | <input type="radio"/> Nunca o menos 1 vez al mes<br><input checked="" type="radio"/> 1 a 3 veces mes<br><input type="radio"/> 1 vez semana<br><input type="radio"/> 2 a 4 veces semana<br><input type="radio"/> 5 a 6 veces semana<br><input type="radio"/> 1 vez al día<br><input type="radio"/> 2 a 3 veces al día<br><input type="radio"/> 5 a 6 veces al día<br><input type="radio"/> más 6 veces al día |
| margarina           | <input type="radio"/> Nunca o menos 1 vez al mes<br><input type="radio"/> 1 a 3 veces mes<br><input type="radio"/> 1 vez semana<br><input type="radio"/> 2 a 4 veces semana<br><input type="radio"/> 5 a 6 veces semana<br><input checked="" type="radio"/> 1 vez al día<br><input type="radio"/> 2 a 3 veces al día<br><input type="radio"/> 5 a 6 veces al día<br><input type="radio"/> más 6 veces al día |
| mantequilla         | <input checked="" type="radio"/> Nunca o menos 1 vez al mes<br><input type="radio"/> 1 a 3 veces mes<br><input type="radio"/> 1 vez semana<br><input type="radio"/> 2 a 4 veces semana<br><input type="radio"/> 5 a 6 veces semana<br><input type="radio"/> 1 vez al día<br><input type="radio"/> 2 a 3 veces al día<br><input type="radio"/> 5 a 6 veces al día<br><input type="radio"/> más 6 veces al día |
| galletas tipo maria | <input checked="" type="radio"/> Nunca o menos 1 vez al mes<br><input type="radio"/> 1 a 3 veces mes<br><input type="radio"/> 1 vez semana<br><input type="radio"/> 2 a 4 veces semana<br><input type="radio"/> 5 a 6 veces semana<br><input type="radio"/> 1 vez al día<br><input type="radio"/> 2 a 3 veces al día<br><input type="radio"/> 5 a 6 veces al día<br><input type="radio"/> más 6 veces al día |

---

galletas chocolate

- ☐ Nunca o menos 1 vez al mes  
☐ 1 a 3 veces mes  
☒ 1 vez semana  
☐ 2 a 4 veces semana  
☐ 5 a 6 veces semana  
☐ 1 vez al día  
☐ 2 a 3 veces al día  
☐ 5 a 6 veces al día  
☐ más 6 veces al día

---

bolleria

- ☐ Nunca o menos 1 vez al mes  
☒ 1 a 3 veces mes  
☐ 1 vez semana  
☐ 2 a 4 veces semana  
☐ 5 a 6 veces semana  
☐ 1 vez al día  
☐ 2 a 3 veces al día  
☐ 5 a 6 veces al día  
☐ más 6 veces al día

---

chocolate o bombones

- ☐ Nunca o menos 1 vez al mes  
☒ 1 a 3 veces mes  
☐ 1 vez semana  
☐ 2 a 4 veces semana  
☐ 5 a 6 veces semana  
☐ 1 vez al día  
☐ 2 a 3 veces al día  
☐ 5 a 6 veces al día  
☐ más 6 veces al día

---

chocolate polvo o colacao

- ☐ Nunca o menos 1 vez al mes  
☒ 1 a 3 veces mes  
☐ 1 vez semana  
☐ 2 a 4 veces semana  
☐ 5 a 6 veces semana  
☐ 1 vez al día  
☐ 2 a 3 veces al día  
☐ 5 a 6 veces al día  
☐ más 6 veces al día

---

vino tinto

- ☐ Nunca o menos 1 vez al mes  
☒ 1 a 3 veces mes  
☐ 1 vez semana  
☐ 2 a 4 veces semana  
☐ 5 a 6 veces semana  
☐ 1 vez al día  
☐ 2 a 3 veces al día  
☐ 5 a 6 veces al día  
☐ más 6 veces al día

---

vino blanco

- ☐ Nunca o menos 1 vez al mes  
☐ 1 a 3 veces mes  
☐ 1 vez semana  
☐ 2 a 4 veces semana  
☐ 5 a 6 veces semana  
☒ 1 vez al día  
☐ 2 a 3 veces al día  
☐ 5 a 6 veces al día  
☐ más 6 veces al día

|                       |                                                                                                                                                                                                                                                                                                                                                                                                              |
|-----------------------|--------------------------------------------------------------------------------------------------------------------------------------------------------------------------------------------------------------------------------------------------------------------------------------------------------------------------------------------------------------------------------------------------------------|
| vino seco o vermut    | <input checked="" type="radio"/> Nunca o menos 1 vez al mes<br><input type="radio"/> 1 a 3 veces mes<br><input type="radio"/> 1 vez semana<br><input type="radio"/> 2 a 4 veces semana<br><input type="radio"/> 5 a 6 veces semana<br><input type="radio"/> 1 vez al día<br><input type="radio"/> 2 a 3 veces al día<br><input type="radio"/> 5 a 6 veces al día<br><input type="radio"/> más 6 veces al día |
| cerveza               | <input checked="" type="radio"/> Nunca o menos 1 vez al mes<br><input type="radio"/> 1 a 3 veces mes<br><input type="radio"/> 1 vez semana<br><input type="radio"/> 2 a 4 veces semana<br><input type="radio"/> 5 a 6 veces semana<br><input type="radio"/> 1 vez al día<br><input type="radio"/> 2 a 3 veces al día<br><input type="radio"/> 5 a 6 veces al día<br><input type="radio"/> más 6 veces al día |
| cerveza sin alcohol   | <input checked="" type="radio"/> Nunca o menos 1 vez al mes<br><input type="radio"/> 1 a 3 veces mes<br><input type="radio"/> 1 vez semana<br><input type="radio"/> 2 a 4 veces semana<br><input type="radio"/> 5 a 6 veces semana<br><input type="radio"/> 1 vez al día<br><input type="radio"/> 2 a 3 veces al día<br><input type="radio"/> 5 a 6 veces al día<br><input type="radio"/> más 6 veces al día |
| licores               | <input checked="" type="radio"/> Nunca o menos 1 vez al mes<br><input type="radio"/> 1 a 3 veces mes<br><input type="radio"/> 1 vez semana<br><input type="radio"/> 2 a 4 veces semana<br><input type="radio"/> 5 a 6 veces semana<br><input type="radio"/> 1 vez al día<br><input type="radio"/> 2 a 3 veces al día<br><input type="radio"/> 5 a 6 veces al día<br><input type="radio"/> más 6 veces al día |
| ginebra o ron o vodka | <input checked="" type="radio"/> Nunca o menos 1 vez al mes<br><input type="radio"/> 1 a 3 veces mes<br><input type="radio"/> 1 vez semana<br><input type="radio"/> 2 a 4 veces semana<br><input type="radio"/> 5 a 6 veces semana<br><input type="radio"/> 1 vez al día<br><input type="radio"/> 2 a 3 veces al día<br><input type="radio"/> 5 a 6 veces al día<br><input type="radio"/> más 6 veces al día |
| refresco normal       | <input type="radio"/> Nunca o menos 1 vez al mes<br><input type="radio"/> 1 a 3 veces mes<br><input checked="" type="radio"/> 1 vez semana<br><input type="radio"/> 2 a 4 veces semana<br><input type="radio"/> 5 a 6 veces semana<br><input type="radio"/> 1 vez al día<br><input type="radio"/> 2 a 3 veces al día<br><input type="radio"/> 5 a 6 veces al día<br><input type="radio"/> más 6 veces al día |

|                          |                                                                                                                                                                                                                                                                                                                                                                                                              |
|--------------------------|--------------------------------------------------------------------------------------------------------------------------------------------------------------------------------------------------------------------------------------------------------------------------------------------------------------------------------------------------------------------------------------------------------------|
| refresco sin azúcar      | <input type="radio"/> Nunca o menos 1 vez al mes<br><input type="radio"/> 1 a 3 veces mes<br><input checked="" type="radio"/> 1 vez semana<br><input type="radio"/> 2 a 4 veces semana<br><input type="radio"/> 5 a 6 veces semana<br><input type="radio"/> 1 vez al día<br><input type="radio"/> 2 a 3 veces al día<br><input type="radio"/> 5 a 6 veces al día<br><input type="radio"/> más 6 veces al día |
| Agua del grifo           | <input checked="" type="radio"/> Nunca o menos 1 vez al mes<br><input type="radio"/> 1 a 3 veces mes<br><input type="radio"/> 1 vez semana<br><input type="radio"/> 2 a 4 veces semana<br><input type="radio"/> 5 a 6 veces semana<br><input type="radio"/> 1 vez al día<br><input type="radio"/> 2 a 3 veces al día<br><input type="radio"/> 5 a 6 veces al día<br><input type="radio"/> más 6 veces al día |
| agua embotellada sin gas | <input type="radio"/> Nunca o menos 1 vez al mes<br><input type="radio"/> 1 a 3 veces mes<br><input type="radio"/> 1 vez semana<br><input type="radio"/> 2 a 4 veces semana<br><input type="radio"/> 5 a 6 veces semana<br><input type="radio"/> 1 vez al día<br><input type="radio"/> 2 a 3 veces al día<br><input type="radio"/> 5 a 6 veces al día<br><input checked="" type="radio"/> más 6 veces al día |
| agua embotellada con gas | <input checked="" type="radio"/> Nunca o menos 1 vez al mes<br><input type="radio"/> 1 a 3 veces mes<br><input type="radio"/> 1 vez semana<br><input type="radio"/> 2 a 4 veces semana<br><input type="radio"/> 5 a 6 veces semana<br><input type="radio"/> 1 vez al día<br><input type="radio"/> 2 a 3 veces al día<br><input type="radio"/> 5 a 6 veces al día<br><input type="radio"/> más 6 veces al día |
| zumos frutas emvasado    | <input checked="" type="radio"/> Nunca o menos 1 vez al mes<br><input type="radio"/> 1 a 3 veces mes<br><input type="radio"/> 1 vez semana<br><input type="radio"/> 2 a 4 veces semana<br><input type="radio"/> 5 a 6 veces semana<br><input type="radio"/> 1 vez al día<br><input type="radio"/> 2 a 3 veces al día<br><input type="radio"/> 5 a 6 veces al día<br><input type="radio"/> más 6 veces al día |
| café                     | <input checked="" type="radio"/> Nunca o menos 1 vez al mes<br><input type="radio"/> 1 a 3 veces mes<br><input type="radio"/> 1 vez semana<br><input type="radio"/> 2 a 4 veces semana<br><input type="radio"/> 5 a 6 veces semana<br><input type="radio"/> 1 vez al día<br><input type="radio"/> 2 a 3 veces al día<br><input type="radio"/> 5 a 6 veces al día<br><input type="radio"/> más 6 veces al día |

---

cafe descafeinado

- ☐ Nunca o menos 1 vez al mes  
☐ 1 a 3 veces mes  
☒ 1 vez semana  
☐ 2 a 4 veces semana  
☐ 5 a 6 veces semana  
☐ 1 vez al día  
☐ 2 a 3 veces al día  
☐ 5 a 6 veces al día  
☐ más 6 veces al día

---

te o infusión

- ☒ Nunca o menos 1 vez al mes  
☐ 1 a 3 veces mes  
☐ 1 vez semana  
☐ 2 a 4 veces semana  
☐ 5 a 6 veces semana  
☐ 1 vez al día  
☐ 2 a 3 veces al día  
☐ 5 a 6 veces al día  
☐ más 6 veces al día

---

sopa o puré verduras

- ☐ Nunca o menos 1 vez al mes  
☐ 1 a 3 veces mes  
☒ 1 vez semana  
☐ 2 a 4 veces semana  
☐ 5 a 6 veces semana  
☐ 1 vez al día  
☐ 2 a 3 veces al día  
☐ 5 a 6 veces al día  
☐ más 6 veces al día

---

croquetas pollo jamón

- ☐ Nunca o menos 1 vez al mes  
☒ 1 a 3 veces mes  
☐ 1 vez semana  
☐ 2 a 4 veces semana  
☐ 5 a 6 veces semana  
☐ 1 vez al día  
☐ 2 a 3 veces al día  
☐ 5 a 6 veces al día  
☐ más 6 veces al día

---

croquetas pescado

- ☒ Nunca o menos 1 vez al mes  
☐ 1 a 3 veces mes  
☐ 1 vez semana  
☐ 2 a 4 veces semana  
☐ 5 a 6 veces semana  
☐ 1 vez al día  
☐ 2 a 3 veces al día  
☐ 5 a 6 veces al día  
☐ más 6 veces al día

---

mayonesa

- ☒ Nunca o menos 1 vez al mes  
☐ 1 a 3 veces mes  
☐ 1 vez semana  
☐ 2 a 4 veces semana  
☐ 5 a 6 veces semana  
☐ 1 vez al día  
☐ 2 a 3 veces al día  
☐ 5 a 6 veces al día  
☐ más 6 veces al día



|                  |                                                                                                                                                                                                                                                                                                                                                                                                              |
|------------------|--------------------------------------------------------------------------------------------------------------------------------------------------------------------------------------------------------------------------------------------------------------------------------------------------------------------------------------------------------------------------------------------------------------|
| salsa tomate     | <input checked="" type="radio"/> Nunca o menos 1 vez al mes<br><input type="radio"/> 1 a 3 veces mes<br><input type="radio"/> 1 vez semana<br><input type="radio"/> 2 a 4 veces semana<br><input type="radio"/> 5 a 6 veces semana<br><input type="radio"/> 1 vez al día<br><input type="radio"/> 2 a 3 veces al día<br><input type="radio"/> 5 a 6 veces al día<br><input type="radio"/> más 6 veces al día |
| ketchup          | <input type="radio"/> Nunca o menos 1 vez al mes<br><input checked="" type="radio"/> 1 a 3 veces mes<br><input type="radio"/> 1 vez semana<br><input type="radio"/> 2 a 4 veces semana<br><input type="radio"/> 5 a 6 veces semana<br><input type="radio"/> 1 vez al día<br><input type="radio"/> 2 a 3 veces al día<br><input type="radio"/> 5 a 6 veces al día<br><input type="radio"/> más 6 veces al día |
| sal              | <input type="radio"/> Nunca o menos 1 vez al mes<br><input type="radio"/> 1 a 3 veces mes<br><input checked="" type="radio"/> 1 vez semana<br><input type="radio"/> 2 a 4 veces semana<br><input type="radio"/> 5 a 6 veces semana<br><input type="radio"/> 1 vez al día<br><input type="radio"/> 2 a 3 veces al día<br><input type="radio"/> 5 a 6 veces al día<br><input type="radio"/> más 6 veces al día |
| ajo              | <input type="radio"/> Nunca o menos 1 vez al mes<br><input type="radio"/> 1 a 3 veces mes<br><input type="radio"/> 1 vez semana<br><input checked="" type="radio"/> 2 a 4 veces semana<br><input type="radio"/> 5 a 6 veces semana<br><input type="radio"/> 1 vez al día<br><input type="radio"/> 2 a 3 veces al día<br><input type="radio"/> 5 a 6 veces al día<br><input type="radio"/> más 6 veces al día |
| mermelada o miel | <input type="radio"/> Nunca o menos 1 vez al mes<br><input checked="" type="radio"/> 1 a 3 veces mes<br><input type="radio"/> 1 vez semana<br><input type="radio"/> 2 a 4 veces semana<br><input type="radio"/> 5 a 6 veces semana<br><input type="radio"/> 1 vez al día<br><input type="radio"/> 2 a 3 veces al día<br><input type="radio"/> 5 a 6 veces al día<br><input type="radio"/> más 6 veces al día |
| azúcar           | <input type="radio"/> Nunca o menos 1 vez al mes<br><input type="radio"/> 1 a 3 veces mes<br><input checked="" type="radio"/> 1 vez semana<br><input type="radio"/> 2 a 4 veces semana<br><input type="radio"/> 5 a 6 veces semana<br><input type="radio"/> 1 vez al día<br><input type="radio"/> 2 a 3 veces al día<br><input type="radio"/> 5 a 6 veces al día<br><input type="radio"/> más 6 veces al día |

|                                       |                                                                                                                                                                                                                                                                                                                                                                                                                                                                                                                               |
|---------------------------------------|-------------------------------------------------------------------------------------------------------------------------------------------------------------------------------------------------------------------------------------------------------------------------------------------------------------------------------------------------------------------------------------------------------------------------------------------------------------------------------------------------------------------------------|
| Otro alimento                         | <hr/>                                                                                                                                                                                                                                                                                                                                                                                                                                                                                                                         |
| suplementos vitamínicos               | <input checked="" type="radio"/> si<br><input type="radio"/> no                                                                                                                                                                                                                                                                                                                                                                                                                                                               |
| suplementos vitamínicos               | <hr/>                                                                                                                                                                                                                                                                                                                                                                                                                                                                                                                         |
| dieta previa                          | <input type="radio"/> si<br><input checked="" type="radio"/> no                                                                                                                                                                                                                                                                                                                                                                                                                                                               |
| motivo dieta                          | <input checked="" type="radio"/> no dieta<br><input type="radio"/> control peso<br><input type="radio"/> control colesterol<br><input type="radio"/> control diabetes<br><input type="radio"/> problemas estómago<br><input type="radio"/> problemas vesícula o hepáticos<br><input type="radio"/> HTA o cardiopatía<br><input type="radio"/> problemas renales<br><input type="radio"/> alergia alimentaria<br><input type="radio"/> ácido úrico elevado<br><input type="radio"/> vegetariana<br><input type="radio"/> otros |
| cambio alimentos año previo gestación | <input type="radio"/> si<br><input checked="" type="radio"/> no                                                                                                                                                                                                                                                                                                                                                                                                                                                               |
| cambio lácteos                        | <input type="radio"/> eliminado<br><input type="radio"/> disminuido<br><input type="radio"/> igual<br><input type="radio"/> aumentado<br><input type="radio"/> no sabe                                                                                                                                                                                                                                                                                                                                                        |
| cambio huevos                         | <input type="radio"/> eliminado<br><input type="radio"/> disminuido<br><input type="radio"/> igual<br><input type="radio"/> aumentado<br><input type="radio"/> no sabe                                                                                                                                                                                                                                                                                                                                                        |
| cambio carne                          | <input type="radio"/> eliminado<br><input type="radio"/> disminuido<br><input type="radio"/> igual<br><input type="radio"/> aumentado<br><input type="radio"/> no sabe                                                                                                                                                                                                                                                                                                                                                        |
| cambio pescado                        | <input type="radio"/> eliminado<br><input type="radio"/> disminuido<br><input type="radio"/> igual<br><input type="radio"/> aumentado<br><input type="radio"/> no sabe                                                                                                                                                                                                                                                                                                                                                        |
| cambio verduras                       | <input type="radio"/> eliminado<br><input type="radio"/> disminuido<br><input type="radio"/> igual<br><input type="radio"/> aumentado<br><input type="radio"/> no sabe                                                                                                                                                                                                                                                                                                                                                        |

|                            |                                                                                                                                                                                                                        |
|----------------------------|------------------------------------------------------------------------------------------------------------------------------------------------------------------------------------------------------------------------|
| cambio legumbres           | <input type="radio"/> eliminado<br><input type="radio"/> disminuido<br><input type="radio"/> igual<br><input type="radio"/> aumentado<br><input type="radio"/> no sabe                                                 |
| cambio fruta               | <input type="radio"/> eliminado<br><input type="radio"/> disminuido<br><input type="radio"/> igual<br><input type="radio"/> aumentado<br><input type="radio"/> no sabe                                                 |
| cambio pan                 | <input type="radio"/> eliminado<br><input type="radio"/> disminuido<br><input type="radio"/> igual<br><input type="radio"/> aumentado<br><input type="radio"/> no sabe                                                 |
| cambio aceite oliva        | <input type="radio"/> eliminado<br><input type="radio"/> disminuido<br><input type="radio"/> igual<br><input type="radio"/> aumentado<br><input type="radio"/> no sabe                                                 |
| cambio mante o margarina   | <input type="radio"/> eliminado<br><input type="radio"/> disminuido<br><input type="radio"/> igual<br><input type="radio"/> aumentado<br><input type="radio"/> no sabe                                                 |
| cambio azúcar y dulces     | <input type="radio"/> eliminado<br><input type="radio"/> disminuido<br><input type="radio"/> igual<br><input type="radio"/> aumentado<br><input type="radio"/> no sabe                                                 |
| cambio bebidas alcohólicas | <input type="radio"/> eliminado<br><input type="radio"/> disminuido<br><input type="radio"/> igual<br><input type="radio"/> aumentado<br><input type="radio"/> no sabe                                                 |
| frecuencia comidas fritas  | <input type="radio"/> a diario<br><input type="radio"/> 5 a 6 veces semana<br><input type="radio"/> 2 a 4 veces semana<br><input checked="" type="radio"/> 1 vez semana<br><input type="radio"/> menos de 1 vez semana |
| carne                      | <input type="radio"/> no como<br><input type="radio"/> cruda<br><input type="radio"/> poco hecha<br><input checked="" type="radio"/> hecha<br><input type="radio"/> muy hecha                                          |
| grasa visible carne        | <input checked="" type="radio"/> quita toda<br><input type="radio"/> quita mayoría<br><input type="radio"/> quita un poco<br><input type="radio"/> no quita nada                                                       |

|                                |                                                                                                                                                                                                                                                          |
|--------------------------------|----------------------------------------------------------------------------------------------------------------------------------------------------------------------------------------------------------------------------------------------------------|
| cocina carne                   | <input checked="" type="radio"/> a la plancha<br><input type="radio"/> a la parrilla<br><input type="radio"/> asada<br><input type="radio"/> frita<br><input type="radio"/> guisada                                                                      |
| tostado quemado carne          | <input type="radio"/> nunca<br><input checked="" type="radio"/> 1 vez mes<br><input type="radio"/> 2 a 3 veces mes<br><input type="radio"/> 1 vez semana<br><input type="radio"/> 2 a 3 semanas                                                          |
| tostado quemado pescado        | <input type="radio"/> nunca<br><input checked="" type="radio"/> 1 vez mes<br><input type="radio"/> 2 a 3 veces mes<br><input type="radio"/> 1 vez semana<br><input type="radio"/> 2 a 3 semanas                                                          |
| socarrat paella                | <input type="radio"/> nunca<br><input type="radio"/> 1 vez mes<br><input type="radio"/> 2 a 3 veces mes<br><input checked="" type="radio"/> 1 vez semana<br><input type="radio"/> 2 a 3 semanas                                                          |
| grasa o aceite cocinar         | <input type="radio"/> mantequilla<br><input type="radio"/> margarina<br><input type="radio"/> aceite oliva<br><input checked="" type="radio"/> aceite oliva virgen extra<br><input type="radio"/> aceite vegetal<br><input type="radio"/> mezcla aceites |
| grasa aceite aliñar            | <input type="radio"/> mantequilla<br><input type="radio"/> margarina<br><input type="radio"/> aceite oliva<br><input checked="" type="radio"/> aceite oliva virgen extra<br><input type="radio"/> aceite vegetal<br><input type="radio"/> mezcla aceites |
| grasa aceite freir             | <input type="radio"/> mantequilla<br><input type="radio"/> margarina<br><input type="radio"/> aceite oliva<br><input checked="" type="radio"/> aceite oliva virgen extra<br><input type="radio"/> aceite vegetal<br><input type="radio"/> mezcla aceites |
| Ejercicio cuestionario         | <input checked="" type="radio"/> si<br><input type="radio"/> no                                                                                                                                                                                          |
| horas de sueño incluido siesta | [*DATA REMOVED*]                                                                                                                                                                                                                                         |
| minutos siesta                 | [*DATA REMOVED*]                                                                                                                                                                                                                                         |
| horas televisión semana        | [*DATA REMOVED*]                                                                                                                                                                                                                                         |

|                                        |                                                                                                                                                                                                                                                                                                                                                                           |
|----------------------------------------|---------------------------------------------------------------------------------------------------------------------------------------------------------------------------------------------------------------------------------------------------------------------------------------------------------------------------------------------------------------------------|
| actividad trabajo                      | <input checked="" type="radio"/> casi siempre sentado<br><input type="radio"/> sentado 50 por cien<br><input type="radio"/> casi siempre de pie, quieto<br><input type="radio"/> casi siempre levantado caminando y llevando pocas cosas<br><input type="radio"/> casi siempre levantado, caminando y llevado muchas cosas<br><input type="radio"/> trabajo manual pesado |
| tiempo caminar o bici al día           | <input checked="" type="radio"/> casi nunca<br><input type="radio"/> menos 20min día<br><input type="radio"/> 20 a 40 min día<br><input type="radio"/> 40 a 60 min día<br><input type="radio"/> 1h o 1h y media día<br><input type="radio"/> más de 1h y media al día                                                                                                     |
| tiempo tareas casa al día              | <input type="radio"/> menos de 1h día<br><input checked="" type="radio"/> 1 a 2h día<br><input type="radio"/> 3 a 4h día<br><input type="radio"/> 5 a 6h día<br><input type="radio"/> 7 a 8h día<br><input type="radio"/> más de 8h día                                                                                                                                   |
| tiempo libre televisión ordenador leer | <input checked="" type="radio"/> menos 1h día<br><input type="radio"/> 1h día<br><input type="radio"/> 2h día<br><input type="radio"/> 3h día<br><input type="radio"/> 4h día<br><input type="radio"/> 5 a 6h día<br><input type="radio"/> mas 6h día                                                                                                                     |
| tiempo libre ejercicio o deporte       | <input checked="" type="radio"/> menos 1h semana<br><input type="radio"/> 1h semana<br><input type="radio"/> 2h semana<br><input type="radio"/> 3h semana<br><input type="radio"/> 4 a 5h semana<br><input type="radio"/> mas 5h semana                                                                                                                                   |
| como se considera                      | <input type="radio"/> sedentaria<br><input checked="" type="radio"/> poco activa<br><input type="radio"/> moderadamente activa<br><input type="radio"/> bastante activa<br><input type="radio"/> muy activa<br><input type="radio"/> no sabe                                                                                                                              |
| FUR                                    | [*DATA REMOVED*]                                                                                                                                                                                                                                                                                                                                                          |
| Semanas gestación 2T                   | [*DATA REMOVED*]                                                                                                                                                                                                                                                                                                                                                          |
| Días gestación 2T                      | [*DATA REMOVED*]                                                                                                                                                                                                                                                                                                                                                          |
| DBP 2T                                 | [*DATA REMOVED*]                                                                                                                                                                                                                                                                                                                                                          |
| CC 2T                                  | [*DATA REMOVED*]                                                                                                                                                                                                                                                                                                                                                          |
| AC 2T                                  | [*DATA REMOVED*]                                                                                                                                                                                                                                                                                                                                                          |

|                                                   |                                                                                                                                                                                       |
|---------------------------------------------------|---------------------------------------------------------------------------------------------------------------------------------------------------------------------------------------|
| LF 2T                                             | [*DATA REMOVED*]                                                                                                                                                                      |
| PFE 2T (Hadlock)                                  | [*DATA REMOVED*]                                                                                                                                                                      |
| Semanas gestación 3T                              | [*DATA REMOVED*]                                                                                                                                                                      |
| días 3T                                           | [*DATA REMOVED*]                                                                                                                                                                      |
| DBP 3T                                            | [*DATA REMOVED*]                                                                                                                                                                      |
| CC 3T                                             | [*DATA REMOVED*]                                                                                                                                                                      |
| AC 3T                                             | [*DATA REMOVED*]                                                                                                                                                                      |
| LF 3T                                             | [*DATA REMOVED*]                                                                                                                                                                      |
| PFE 3T (Hadlock)                                  | [*DATA REMOVED*]                                                                                                                                                                      |
| Semanas de gestación final                        | [*DATA REMOVED*]                                                                                                                                                                      |
| días gestación final                              | [*DATA REMOVED*]                                                                                                                                                                      |
| Localización placenta                             | <input type="radio"/> anterior<br><input type="radio"/> lateral derecha<br><input type="radio"/> lateral izquierda<br><input type="radio"/> posterior<br><input type="radio"/> fondo  |
| Presentación longitudinal cefálica                | <input type="radio"/> no<br><input checked="" type="radio"/> si                                                                                                                       |
| Dorso                                             | <input type="radio"/> izquierda anterior<br><input type="radio"/> izquierda posterior<br><input type="radio"/> derecha anterior<br><input checked="" type="radio"/> derecha posterior |
| diámetro biparietal                               | [*DATA REMOVED*]                                                                                                                                                                      |
| Circunferencia craneal                            | [*DATA REMOVED*]                                                                                                                                                                      |
| Circunferencia abdominal                          | [*DATA REMOVED*]                                                                                                                                                                      |
| Longitud de femur                                 | [*DATA REMOVED*]                                                                                                                                                                      |
| tejido celular subcutáneo a nivel del muslo en mm | [*DATA REMOVED*]                                                                                                                                                                      |
| tejido celular subcutáneo en abdomen en mm        | [*DATA REMOVED*]                                                                                                                                                                      |
| Volumen del muslo en cm3                          | [*DATA REMOVED*]                                                                                                                                                                      |
| Peso fetal estimado según fórmula de Hadlock      | [*DATA REMOVED*]                                                                                                                                                                      |

|                                               |                                                                                                                                                          |
|-----------------------------------------------|----------------------------------------------------------------------------------------------------------------------------------------------------------|
| Percentil                                     | [*DATA REMOVED*]                                                                                                                                         |
| Peso fetal estimado según fórmula de Scioscia | <hr/>                                                                                                                                                    |
| Peso fetal estimado según fórmula de LEE      | <hr/>                                                                                                                                                    |
| Tipo de parto                                 | <input checked="" type="radio"/> eutocico<br><input type="radio"/> instrumentado/ventosa<br><input type="radio"/> cesarea                                |
| fecha de nacimiento                           | [*DATA REMOVED*]                                                                                                                                         |
| Días entre exploración y nacimiento           | [*DATA REMOVED*]                                                                                                                                         |
| Peso RN en g                                  | [*DATA REMOVED*]                                                                                                                                         |
| sexo                                          | <input checked="" type="radio"/> mujer<br><input type="radio"/> hombre                                                                                   |
| Apgar 1 minuto                                | [*DATA REMOVED*]                                                                                                                                         |
| Apgar 5 minutos                               | [*DATA REMOVED*]                                                                                                                                         |
| Apgar 10 minutos                              | <hr/>                                                                                                                                                    |
| antecedente Covid durante gestación           | <input type="radio"/> Yes<br><input checked="" type="radio"/> No                                                                                         |
| Nivel de estudios                             | <input type="radio"/> ninguno<br><input type="radio"/> primarios<br><input checked="" type="radio"/> secundarios<br><input type="radio"/> universitarios |

## Base\_datos\_estimacion\_peso\_fetal

|                                       |                                                                                                                                                                                                                                                                                      |
|---------------------------------------|--------------------------------------------------------------------------------------------------------------------------------------------------------------------------------------------------------------------------------------------------------------------------------------|
| Número de identificación participante | 108                                                                                                                                                                                                                                                                                  |
| CODIGO PARTICIPANTE                   |                                                                                                                                                                                                                                                                                      |
| Edad                                  | [*DATA REMOVED*]                                                                                                                                                                                                                                                                     |
| Gestaciones                           | <input checked="" type="radio"/> 1<br><input type="radio"/> 2<br><input type="radio"/> 3<br><input type="radio"/> mas de 3                                                                                                                                                           |
| partos                                | <input checked="" type="radio"/> 0<br><input type="radio"/> 1<br><input type="radio"/> 2<br><input type="radio"/> 3<br><input type="radio"/> mas de 3                                                                                                                                |
| cesáreas                              | <input checked="" type="radio"/> 0<br><input type="radio"/> 1<br><input type="radio"/> 2<br><input type="radio"/> 3<br><input type="radio"/> mas de 3                                                                                                                                |
| Abortos                               | <input checked="" type="radio"/> 0<br><input type="radio"/> 1<br><input type="radio"/> 2<br><input type="radio"/> 3<br><input type="radio"/> mas de 3                                                                                                                                |
| Tipo de gestacion                     | <input checked="" type="radio"/> espontanea<br><input type="radio"/> IAC inseminación artificial conyuge<br><input type="radio"/> IAD inseminación artificial donante<br><input type="radio"/> FIV Fecundación in Vitro<br><input type="radio"/> Ovodon FIV con donación de ovocitos |
| peso previo a embarazo                | [*DATA REMOVED*]                                                                                                                                                                                                                                                                     |
| Ganancia ponderal embarazo            | [*DATA REMOVED*]                                                                                                                                                                                                                                                                     |
| Talla madre                           | [*DATA REMOVED*]                                                                                                                                                                                                                                                                     |
| IMC previo embarazo                   | 34.06360930832945                                                                                                                                                                                                                                                                    |
| Patología obstétrica                  | <input type="radio"/> no<br><input checked="" type="radio"/> si                                                                                                                                                                                                                      |
| Diabetes pregestacional               | <input checked="" type="radio"/> no<br><input type="radio"/> si                                                                                                                                                                                                                      |
| Diabetes gestacional                  | <input type="radio"/> no<br><input checked="" type="radio"/> si                                                                                                                                                                                                                      |



|                                            |                                                                                                                                                                                      |
|--------------------------------------------|--------------------------------------------------------------------------------------------------------------------------------------------------------------------------------------|
| Diabetes gestacional con insulina          | <input checked="" type="radio"/> no<br><input type="radio"/> si                                                                                                                      |
| Diabetes gestacional con dieta y ejercicio | <input type="radio"/> no<br><input checked="" type="radio"/> si                                                                                                                      |
| Percentil fetos previos                    | <input checked="" type="radio"/> Nada<br><input type="radio"/> percentil menor de 10<br><input type="radio"/> percentil entre 10 y 90<br><input type="radio"/> percentil mayor de 90 |
| Exfumadora                                 | <input checked="" type="radio"/> Nada<br><input type="radio"/> menos de 5 años<br><input type="radio"/> 5 a 10 años<br><input type="radio"/> mayor o igual a 10 años                 |
| Hábito tabáquico                           | <input type="radio"/> no<br><input checked="" type="radio"/> si                                                                                                                      |
| fumadora                                   | [*DATA REMOVED*]                                                                                                                                                                     |
| Consumo otros tóxicos                      | <input checked="" type="radio"/> no<br><input type="radio"/> si                                                                                                                      |
| Hb 1T                                      | [*DATA REMOVED*]                                                                                                                                                                     |
| Htc 1T                                     | [*DATA REMOVED*]                                                                                                                                                                     |
| Hb 2T                                      | [*DATA REMOVED*]                                                                                                                                                                     |
| HTC 2T                                     | [*DATA REMOVED*]                                                                                                                                                                     |
| Hb 3T                                      | [*DATA REMOVED*]                                                                                                                                                                     |
| HTC 3T                                     | [*DATA REMOVED*]                                                                                                                                                                     |
| Suplemento FE oral                         | <input type="radio"/> si<br><input checked="" type="radio"/> no                                                                                                                      |
| Suplemento fe iv                           | <input type="radio"/> si<br><input checked="" type="radio"/> no                                                                                                                      |
| Transfusión                                | <input checked="" type="radio"/> no<br><input type="radio"/> si                                                                                                                      |
| Solicitada Vit D                           | <input checked="" type="radio"/> no<br><input type="radio"/> si                                                                                                                      |
| Deficit vit D                              | <input type="radio"/> no<br><input type="radio"/> si                                                                                                                                 |
| Suplemento vit D                           | <input type="radio"/> si<br><input type="radio"/> no                                                                                                                                 |

|                       |                                                                                                                                                                                                                                                                                                                                                                                                              |
|-----------------------|--------------------------------------------------------------------------------------------------------------------------------------------------------------------------------------------------------------------------------------------------------------------------------------------------------------------------------------------------------------------------------------------------------------|
| Dieta, cuestionario   | <input checked="" type="radio"/> sí<br><input type="radio"/> no                                                                                                                                                                                                                                                                                                                                              |
| Leche entera          | <input checked="" type="radio"/> Nunca o menos 1 vez al mes<br><input type="radio"/> 1 a 3 veces mes<br><input type="radio"/> 1 vez semana<br><input type="radio"/> 2 a 4 veces semana<br><input type="radio"/> 5 a 6 veces semana<br><input type="radio"/> 1 vez al día<br><input type="radio"/> 2 a 3 veces al día<br><input type="radio"/> 5 a 6 veces al día<br><input type="radio"/> más 6 veces al día |
| Leche semidesnatada   | <input type="radio"/> Nunca o menos 1 vez al mes<br><input type="radio"/> 1 a 3 veces mes<br><input type="radio"/> 1 vez semana<br><input type="radio"/> 2 a 4 veces semana<br><input type="radio"/> 5 a 6 veces semana<br><input type="radio"/> 1 vez al día<br><input checked="" type="radio"/> 2 a 3 veces al día<br><input type="radio"/> 5 a 6 veces al día<br><input type="radio"/> mas 6 veces al día |
| Leche desnatada       | <input checked="" type="radio"/> Nunca o menos 1 vez al mes<br><input type="radio"/> 1 a 3 veces mes<br><input type="radio"/> 1 vez semana<br><input type="radio"/> 2 a 4 veces semana<br><input type="radio"/> 5 a 6 veces semana<br><input type="radio"/> 1 vez al día<br><input type="radio"/> 2 a 3 veces al día<br><input type="radio"/> 5 a 6 veces al día<br><input type="radio"/> más 6 veces al día |
| Leche condensada      | <input checked="" type="radio"/> Nunca o menos 1 vez al mes<br><input type="radio"/> 1 a 3 veces mes<br><input type="radio"/> 1 vez semana<br><input type="radio"/> 2 a 4 veces semana<br><input type="radio"/> 5 a 6 veces semana<br><input type="radio"/> 1 vez al día<br><input type="radio"/> 2 a 3 veces al día<br><input type="radio"/> 5 a 6 veces al día<br><input type="radio"/> más 6 veces al día |
| nata o crema de leche | <input checked="" type="radio"/> Nunca o menos 1 vez al mes<br><input type="radio"/> 1 a 3 veces mes<br><input type="radio"/> 1 vez semana<br><input type="radio"/> 2 a 4 veces semana<br><input type="radio"/> 5 a 6 veces semana<br><input type="radio"/> 1 vez al día<br><input type="radio"/> 2 a 3 veces al día<br><input type="radio"/> 5 a 6 veces al día<br><input type="radio"/> más 6 veces al día |

|                                             |                                                                                                                                                                                                                                                                                                                                                                                                              |
|---------------------------------------------|--------------------------------------------------------------------------------------------------------------------------------------------------------------------------------------------------------------------------------------------------------------------------------------------------------------------------------------------------------------------------------------------------------------|
| Yogurt Entero                               | <input checked="" type="radio"/> Nunca o menos 1 vez al mes<br><input type="radio"/> 1 a 3 veces mes<br><input type="radio"/> 1 vez semana<br><input type="radio"/> 2 a 4 veces semana<br><input type="radio"/> 5 a 6 veces semana<br><input type="radio"/> 1 vez al día<br><input type="radio"/> 2 a 3 veces al día<br><input type="radio"/> 5 a 6 veces al día<br><input type="radio"/> más 6 veces al día |
| Yogurt desnatado                            | <input type="radio"/> Nunca o menos 1 vez al mes<br><input type="radio"/> 1 a 3 veces mes<br><input type="radio"/> 1 vez semana<br><input type="radio"/> 2 a 4 veces semana<br><input type="radio"/> 5 a 6 veces semana<br><input checked="" type="radio"/> 1 vez al día<br><input type="radio"/> 2 a 3 veces al día<br><input type="radio"/> 5 a 6 veces al día<br><input type="radio"/> más 6 veces al día |
| 100g requesón o queso blando o queso fresco | <input type="radio"/> Nunca o menos 1 vez al mes<br><input type="radio"/> 1 a 3 veces mes<br><input type="radio"/> 1 vez semana<br><input type="radio"/> 2 a 4 veces semana<br><input checked="" type="radio"/> 5 a 6 veces semana<br><input type="radio"/> 1 vez al día<br><input type="radio"/> 2 a 3 veces al día<br><input type="radio"/> 5 a 6 veces al día<br><input type="radio"/> más 6 veces al día |
| queso curado o semicurado o cremoso         | <input type="radio"/> Nunca o menos 1 vez al mes<br><input type="radio"/> 1 a 3 veces mes<br><input checked="" type="radio"/> 1 vez semana<br><input type="radio"/> 2 a 4 veces semana<br><input type="radio"/> 5 a 6 veces semana<br><input type="radio"/> 1 vez al día<br><input type="radio"/> 2 a 3 veces al día<br><input type="radio"/> 5 a 6 veces al día<br><input type="radio"/> más 6 veces al día |
| natillas flan pudding                       | <input checked="" type="radio"/> Nunca o menos 1 vez al mes<br><input type="radio"/> 1 a 3 veces mes<br><input type="radio"/> 1 vez semana<br><input type="radio"/> 2 a 4 veces semana<br><input type="radio"/> 5 a 6 veces semana<br><input type="radio"/> 1 vez al día<br><input type="radio"/> 2 a 3 veces al día<br><input type="radio"/> 5 a 6 veces al día<br><input type="radio"/> más 6 veces al día |
| Helado                                      | <input checked="" type="radio"/> Nunca o menos 1 vez al mes<br><input type="radio"/> 1 a 3 veces mes<br><input type="radio"/> 1 vez semana<br><input type="radio"/> 2 a 4 veces semana<br><input type="radio"/> 5 a 6 veces semana<br><input type="radio"/> 1 vez al día<br><input type="radio"/> 2 a 3 veces al día<br><input type="radio"/> 5 a 6 veces al día<br><input type="radio"/> más 6 veces al día |

|                                      |                                                                                                                                                                                                                                                                                                                                                                                                              |
|--------------------------------------|--------------------------------------------------------------------------------------------------------------------------------------------------------------------------------------------------------------------------------------------------------------------------------------------------------------------------------------------------------------------------------------------------------------|
| huevo                                | <input type="radio"/> Nunca o menos 1 vez al mes<br><input type="radio"/> 1 a 3 veces mes<br><input checked="" type="radio"/> 1 vez semana<br><input type="radio"/> 2 a 4 veces semana<br><input type="radio"/> 5 a 6 veces semana<br><input type="radio"/> 1 vez al día<br><input type="radio"/> 2 a 3 veces al día<br><input type="radio"/> 5 a 6 veces al día<br><input type="radio"/> más 6 veces al día |
| Pollo con piel                       | <input checked="" type="radio"/> Nunca o menos 1 vez al mes<br><input type="radio"/> 1 a 3 veces mes<br><input type="radio"/> 1 vez semana<br><input type="radio"/> 2 a 4 veces semana<br><input type="radio"/> 5 a 6 veces semana<br><input type="radio"/> 1 vez al día<br><input type="radio"/> 2 a 3 veces al día<br><input type="radio"/> 5 a 6 veces al día<br><input type="radio"/> más 6 veces al día |
| pollo sin piel                       | <input type="radio"/> Nunca o menos 1 vez al mes<br><input type="radio"/> 1 a 3 veces mes<br><input type="radio"/> 1 vez semana<br><input type="radio"/> 2 a 4 veces semana<br><input checked="" type="radio"/> 5 a 6 veces semana<br><input type="radio"/> 1 vez al día<br><input type="radio"/> 2 a 3 veces al día<br><input type="radio"/> 5 a 6 veces al día<br><input type="radio"/> más 6 veces al día |
| Ternera o cerdo o cordero            | <input type="radio"/> Nunca o menos 1 vez al mes<br><input type="radio"/> 1 a 3 veces mes<br><input type="radio"/> 1 vez semana<br><input type="radio"/> 2 a 4 veces semana<br><input checked="" type="radio"/> 5 a 6 veces semana<br><input type="radio"/> 1 vez al día<br><input type="radio"/> 2 a 3 veces al día<br><input type="radio"/> 5 a 6 veces al día<br><input type="radio"/> más 6 veces al día |
| carne caza: Conejo o codorniz o pato | <input checked="" type="radio"/> Nunca o menos 1 vez al mes<br><input type="radio"/> 1 a 3 veces mes<br><input type="radio"/> 1 vez semana<br><input type="radio"/> 2 a 4 veces semana<br><input type="radio"/> 5 a 6 veces semana<br><input type="radio"/> 1 vez al día<br><input type="radio"/> 2 a 3 veces al día<br><input type="radio"/> 5 a 6 veces al día<br><input type="radio"/> más 6 veces al día |
| Hígado de ternera o cerdo o pollo    | <input checked="" type="radio"/> Nunca o menos 1 vez al mes<br><input type="radio"/> 1 a 3 veces mes<br><input type="radio"/> 1 vez semana<br><input type="radio"/> 2 a 4 veces semana<br><input type="radio"/> 5 a 6 veces semana<br><input type="radio"/> 1 vez al día<br><input type="radio"/> 2 a 3 veces al día<br><input type="radio"/> 5 a 6 veces al día<br><input type="radio"/> más 6 veces al día |

|                     |                                                                                                                                                                                                                                                                                                                                                                                                              |
|---------------------|--------------------------------------------------------------------------------------------------------------------------------------------------------------------------------------------------------------------------------------------------------------------------------------------------------------------------------------------------------------------------------------------------------------|
| Vísceras            | <input checked="" type="radio"/> Nunca o menos 1 vez al mes<br><input type="radio"/> 1 a 3 veces mes<br><input type="radio"/> 1 vez semana<br><input type="radio"/> 2 a 4 veces semana<br><input type="radio"/> 5 a 6 veces semana<br><input type="radio"/> 1 vez al día<br><input type="radio"/> 2 a 3 veces al día<br><input type="radio"/> 5 a 6 veces al día<br><input type="radio"/> más 6 veces al día |
| Embutido            | <input type="radio"/> Nunca o menos 1 vez al mes<br><input checked="" type="radio"/> 1 a 3 veces mes<br><input type="radio"/> 1 vez semana<br><input type="radio"/> 2 a 4 veces semana<br><input type="radio"/> 5 a 6 veces semana<br><input type="radio"/> 1 vez al día<br><input type="radio"/> 2 a 3 veces al día<br><input type="radio"/> 5 a 6 veces al día<br><input type="radio"/> más 6 veces al día |
| Salchicha o similar | <input checked="" type="radio"/> Nunca o menos 1 vez al mes<br><input type="radio"/> 1 a 3 veces mes<br><input type="radio"/> 1 vez semana<br><input type="radio"/> 2 a 4 veces semana<br><input type="radio"/> 5 a 6 veces semana<br><input type="radio"/> 1 vez al día<br><input type="radio"/> 2 a 3 veces al día<br><input type="radio"/> 5 a 6 veces al día<br><input type="radio"/> más 6 veces al día |
| Pate o foiegras     | <input checked="" type="radio"/> Nunca o menos 1 vez al mes<br><input type="radio"/> 1 a 3 veces mes<br><input type="radio"/> 1 vez semana<br><input type="radio"/> 2 a 4 veces semana<br><input type="radio"/> 5 a 6 veces semana<br><input type="radio"/> 1 vez al día<br><input type="radio"/> 2 a 3 veces al día<br><input type="radio"/> 5 a 6 veces al día<br><input type="radio"/> más 6 veces al día |
| Hamburguesa         | <input type="radio"/> Nunca o menos 1 vez al mes<br><input type="radio"/> 1 a 3 veces mes<br><input checked="" type="radio"/> 1 vez semana<br><input type="radio"/> 2 a 4 veces semana<br><input type="radio"/> 5 a 6 veces semana<br><input type="radio"/> 1 vez al día<br><input type="radio"/> 2 a 3 veces al día<br><input type="radio"/> 5 a 6 veces al día<br><input type="radio"/> más 6 veces al día |
| tocino o bacon      | <input checked="" type="radio"/> Nunca o menos 1 vez al mes<br><input type="radio"/> 1 a 3 veces mes<br><input type="radio"/> 1 vez semana<br><input type="radio"/> 2 a 4 veces semana<br><input type="radio"/> 5 a 6 veces semana<br><input type="radio"/> 1 vez al día<br><input type="radio"/> 2 a 3 veces al día<br><input type="radio"/> 5 a 6 veces al día<br><input type="radio"/> más 6 veces al día |

---

Pescado frito

- ☐ Nunca o menos 1 vez al mes  
☐ 1 a 3 veces mes  
☐ 1 vez semana  
☒ 2 a 4 veces semana  
☐ 5 a 6 veces semana  
☐ 1 vez al día  
☐ 2 a 3 veces al día  
☐ 5 a 6 veces al día  
☐ más 6 veces al día

---

pescado hervido blanco

- ☐ Nunca o menos 1 vez al mes  
☐ 1 a 3 veces mes  
☐ 1 vez semana  
☒ 2 a 4 veces semana  
☐ 5 a 6 veces semana  
☐ 1 vez al día  
☐ 2 a 3 veces al día  
☐ 5 a 6 veces al día  
☐ más 6 veces al día

---

pescado hervido azul

- ☐ Nunca o menos 1 vez al mes  
☐ 1 a 3 veces mes  
☒ 1 vez semana  
☐ 2 a 4 veces semana  
☐ 5 a 6 veces semana  
☐ 1 vez al día  
☐ 2 a 3 veces al día  
☐ 5 a 6 veces al día  
☐ más 6 veces al día

---

otros pescado azul

- ☐ Nunca o menos 1 vez al mes  
☐ 1 a 3 veces mes  
☒ 1 vez semana  
☐ 2 a 4 veces semana  
☐ 5 a 6 veces semana  
☐ 1 vez al día  
☐ 2 a 3 veces al día  
☐ 5 a 6 veces al día  
☐ más 6 veces al día

---

atun conserva

- ☐ Nunca o menos 1 vez al mes  
☐ 1 a 3 veces mes  
☒ 1 vez semana  
☐ 2 a 4 veces semana  
☐ 5 a 6 veces semana  
☐ 1 vez al día  
☐ 2 a 3 veces al día  
☐ 5 a 6 veces al día  
☐ más 6 veces al día

---

sardina conserva

- ☒ Nunca o menos 1 vez al mes  
☐ 1 a 3 veces mes  
☐ 1 vez semana  
☐ 2 a 4 veces semana  
☐ 5 a 6 veces semana  
☐ 1 vez al día  
☐ 2 a 3 veces al día  
☐ 5 a 6 veces al día  
☐ más 6 veces al día

|                                         |                                                                                                                                                                                                                                                                                                                                                                                                              |
|-----------------------------------------|--------------------------------------------------------------------------------------------------------------------------------------------------------------------------------------------------------------------------------------------------------------------------------------------------------------------------------------------------------------------------------------------------------------|
| pescado ahumado                         | <input checked="" type="radio"/> Nunca o menos 1 vez al mes<br><input type="radio"/> 1 a 3 veces mes<br><input type="radio"/> 1 vez semana<br><input type="radio"/> 2 a 4 veces semana<br><input type="radio"/> 5 a 6 veces semana<br><input type="radio"/> 1 vez al día<br><input type="radio"/> 2 a 3 veces al día<br><input type="radio"/> 5 a 6 veces al día<br><input type="radio"/> más 6 veces al día |
| almejas o mejillones o ostras unos 100g | <input type="radio"/> Nunca o menos 1 vez al mes<br><input checked="" type="radio"/> 1 a 3 veces mes<br><input type="radio"/> 1 vez semana<br><input type="radio"/> 2 a 4 veces semana<br><input type="radio"/> 5 a 6 veces semana<br><input type="radio"/> 1 vez al día<br><input type="radio"/> 2 a 3 veces al día<br><input type="radio"/> 5 a 6 veces al día<br><input type="radio"/> más 6 veces al día |
| calamar o chipiron o sepia unos 100g    | <input type="radio"/> Nunca o menos 1 vez al mes<br><input checked="" type="radio"/> 1 a 3 veces mes<br><input type="radio"/> 1 vez semana<br><input type="radio"/> 2 a 4 veces semana<br><input type="radio"/> 5 a 6 veces semana<br><input type="radio"/> 1 vez al día<br><input type="radio"/> 2 a 3 veces al día<br><input type="radio"/> 5 a 6 veces al día<br><input type="radio"/> más 6 veces al día |
| marisco unos 100g                       | <input type="radio"/> Nunca o menos 1 vez al mes<br><input checked="" type="radio"/> 1 a 3 veces mes<br><input type="radio"/> 1 vez semana<br><input type="radio"/> 2 a 4 veces semana<br><input type="radio"/> 5 a 6 veces semana<br><input type="radio"/> 1 vez al día<br><input type="radio"/> 2 a 3 veces al día<br><input type="radio"/> 5 a 6 veces al día<br><input type="radio"/> más 6 veces al día |
| Espinacas o acelgas cocinadas           | <input type="radio"/> Nunca o menos 1 vez al mes<br><input checked="" type="radio"/> 1 a 3 veces mes<br><input type="radio"/> 1 vez semana<br><input type="radio"/> 2 a 4 veces semana<br><input type="radio"/> 5 a 6 veces semana<br><input type="radio"/> 1 vez al día<br><input type="radio"/> 2 a 3 veces al día<br><input type="radio"/> 5 a 6 veces al día<br><input type="radio"/> más 6 veces al día |
| Col o coliflor o brocoli cocinado       | <input type="radio"/> Nunca o menos 1 vez al mes<br><input checked="" type="radio"/> 1 a 3 veces mes<br><input type="radio"/> 1 vez semana<br><input type="radio"/> 2 a 4 veces semana<br><input type="radio"/> 5 a 6 veces semana<br><input type="radio"/> 1 vez al día<br><input type="radio"/> 2 a 3 veces al día<br><input type="radio"/> 5 a 6 veces al día<br><input type="radio"/> más 6 veces al día |

---

Lechuga o endivia o escarola

- ☐ Nunca o menos 1 vez al mes  
☐ 1 a 3 veces mes  
☐ 1 vez semana  
☒ 2 a 4 veces semana  
☐ 5 a 6 veces semana  
☐ 1 vez al día  
☐ 2 a 3 veces al día  
☐ 5 a 6 veces al día  
☐ más 6 veces al día

---

tomate ensalada

- ☐ Nunca o menos 1 vez al mes  
☐ 1 a 3 veces mes  
☐ 1 vez semana  
☒ 2 a 4 veces semana  
☐ 5 a 6 veces semana  
☐ 1 vez al día  
☐ 2 a 3 veces al día  
☐ 5 a 6 veces al día  
☐ más 6 veces al día

---

cebolla

- ☐ Nunca o menos 1 vez al mes  
☐ 1 a 3 veces mes  
☐ 1 vez semana  
☐ 2 a 4 veces semana  
☒ 5 a 6 veces semana  
☐ 1 vez al día  
☐ 2 a 3 veces al día  
☐ 5 a 6 veces al día  
☐ más 6 veces al día

---

Zanahoria o calabaza

- ☐ Nunca o menos 1 vez al mes  
☐ 1 a 3 veces mes  
☐ 1 vez semana  
☐ 2 a 4 veces semana  
☒ 5 a 6 veces semana  
☐ 1 vez al día  
☐ 2 a 3 veces al día  
☐ 5 a 6 veces al día  
☐ más 6 veces al día

---

Judías verdes

- ☐ Nunca o menos 1 vez al mes  
☐ 1 a 3 veces mes  
☐ 1 vez semana  
☐ 2 a 4 veces semana  
☒ 5 a 6 veces semana  
☐ 1 vez al día  
☐ 2 a 3 veces al día  
☐ 5 a 6 veces al día  
☐ más 6 veces al día

---

Berenjena o calabacin o pepino

- ☐ Nunca o menos 1 vez al mes  
☐ 1 a 3 veces mes  
☐ 1 vez semana  
☐ 2 a 4 veces semana  
☒ 5 a 6 veces semana  
☐ 1 vez al día  
☐ 2 a 3 veces al día  
☐ 5 a 6 veces al día  
☐ más 6 veces al día



---

|          |                                                                                                                                                                                                                                                                                                                                                                                                              |
|----------|--------------------------------------------------------------------------------------------------------------------------------------------------------------------------------------------------------------------------------------------------------------------------------------------------------------------------------------------------------------------------------------------------------------|
| pimiento | <input type="radio"/> Nunca o menos 1 vez al mes<br><input type="radio"/> 1 a 3 veces mes<br><input type="radio"/> 1 vez semana<br><input checked="" type="radio"/> 2 a 4 veces semana<br><input type="radio"/> 5 a 6 veces semana<br><input type="radio"/> 1 vez al día<br><input type="radio"/> 2 a 3 veces al día<br><input type="radio"/> 5 a 6 veces al día<br><input type="radio"/> más 6 veces al día |
|----------|--------------------------------------------------------------------------------------------------------------------------------------------------------------------------------------------------------------------------------------------------------------------------------------------------------------------------------------------------------------------------------------------------------------|

---

|           |                                                                                                                                                                                                                                                                                                                                                                                                              |
|-----------|--------------------------------------------------------------------------------------------------------------------------------------------------------------------------------------------------------------------------------------------------------------------------------------------------------------------------------------------------------------------------------------------------------------|
| alcachofa | <input type="radio"/> Nunca o menos 1 vez al mes<br><input type="radio"/> 1 a 3 veces mes<br><input type="radio"/> 1 vez semana<br><input checked="" type="radio"/> 2 a 4 veces semana<br><input type="radio"/> 5 a 6 veces semana<br><input type="radio"/> 1 vez al día<br><input type="radio"/> 2 a 3 veces al día<br><input type="radio"/> 5 a 6 veces al día<br><input type="radio"/> más 6 veces al día |
|-----------|--------------------------------------------------------------------------------------------------------------------------------------------------------------------------------------------------------------------------------------------------------------------------------------------------------------------------------------------------------------------------------------------------------------|

---

|            |                                                                                                                                                                                                                                                                                                                                                                                                              |
|------------|--------------------------------------------------------------------------------------------------------------------------------------------------------------------------------------------------------------------------------------------------------------------------------------------------------------------------------------------------------------------------------------------------------------|
| espárragos | <input type="radio"/> Nunca o menos 1 vez al mes<br><input type="radio"/> 1 a 3 veces mes<br><input type="radio"/> 1 vez semana<br><input checked="" type="radio"/> 2 a 4 veces semana<br><input type="radio"/> 5 a 6 veces semana<br><input type="radio"/> 1 vez al día<br><input type="radio"/> 2 a 3 veces al día<br><input type="radio"/> 5 a 6 veces al día<br><input type="radio"/> más 6 veces al día |
|------------|--------------------------------------------------------------------------------------------------------------------------------------------------------------------------------------------------------------------------------------------------------------------------------------------------------------------------------------------------------------------------------------------------------------|

---

|              |                                                                                                                                                                                                                                                                                                                                                                                                              |
|--------------|--------------------------------------------------------------------------------------------------------------------------------------------------------------------------------------------------------------------------------------------------------------------------------------------------------------------------------------------------------------------------------------------------------------|
| maíz hervido | <input checked="" type="radio"/> Nunca o menos 1 vez al mes<br><input type="radio"/> 1 a 3 veces mes<br><input type="radio"/> 1 vez semana<br><input type="radio"/> 2 a 4 veces semana<br><input type="radio"/> 5 a 6 veces semana<br><input type="radio"/> 1 vez al día<br><input type="radio"/> 2 a 3 veces al día<br><input type="radio"/> 5 a 6 veces al día<br><input type="radio"/> más 6 veces al día |
|--------------|--------------------------------------------------------------------------------------------------------------------------------------------------------------------------------------------------------------------------------------------------------------------------------------------------------------------------------------------------------------------------------------------------------------|

---

|           |                                                                                                                                                                                                                                                                                                                                                                                                              |
|-----------|--------------------------------------------------------------------------------------------------------------------------------------------------------------------------------------------------------------------------------------------------------------------------------------------------------------------------------------------------------------------------------------------------------------|
| legumbres | <input type="radio"/> Nunca o menos 1 vez al mes<br><input type="radio"/> 1 a 3 veces mes<br><input checked="" type="radio"/> 1 vez semana<br><input type="radio"/> 2 a 4 veces semana<br><input type="radio"/> 5 a 6 veces semana<br><input type="radio"/> 1 vez al día<br><input type="radio"/> 2 a 3 veces al día<br><input type="radio"/> 5 a 6 veces al día<br><input type="radio"/> más 6 veces al día |
|-----------|--------------------------------------------------------------------------------------------------------------------------------------------------------------------------------------------------------------------------------------------------------------------------------------------------------------------------------------------------------------------------------------------------------------|

---

|                       |                                                                                                                                                                                                                                                                                                                                                                                                              |
|-----------------------|--------------------------------------------------------------------------------------------------------------------------------------------------------------------------------------------------------------------------------------------------------------------------------------------------------------------------------------------------------------------------------------------------------------|
| naranjas o mandarinas | <input type="radio"/> Nunca o menos 1 vez al mes<br><input checked="" type="radio"/> 1 a 3 veces mes<br><input type="radio"/> 1 vez semana<br><input type="radio"/> 2 a 4 veces semana<br><input type="radio"/> 5 a 6 veces semana<br><input type="radio"/> 1 vez al día<br><input type="radio"/> 2 a 3 veces al día<br><input type="radio"/> 5 a 6 veces al día<br><input type="radio"/> más 6 veces al día |
|-----------------------|--------------------------------------------------------------------------------------------------------------------------------------------------------------------------------------------------------------------------------------------------------------------------------------------------------------------------------------------------------------------------------------------------------------|

---

|                       |                                                                                                                                                                                                                                                                                                                                                                                                              |
|-----------------------|--------------------------------------------------------------------------------------------------------------------------------------------------------------------------------------------------------------------------------------------------------------------------------------------------------------------------------------------------------------------------------------------------------------|
| zum natural fruta     | <input checked="" type="radio"/> Nunca o menos 1 vez al mes<br><input type="radio"/> 1 a 3 veces mes<br><input type="radio"/> 1 vez semana<br><input type="radio"/> 2 a 4 veces semana<br><input type="radio"/> 5 a 6 veces semana<br><input type="radio"/> 1 vez al día<br><input type="radio"/> 2 a 3 veces al día<br><input type="radio"/> 5 a 6 veces al día<br><input type="radio"/> más 6 veces al día |
| platano               | <input type="radio"/> Nunca o menos 1 vez al mes<br><input checked="" type="radio"/> 1 a 3 veces mes<br><input type="radio"/> 1 vez semana<br><input type="radio"/> 2 a 4 veces semana<br><input type="radio"/> 5 a 6 veces semana<br><input type="radio"/> 1 vez al día<br><input type="radio"/> 2 a 3 veces al día<br><input type="radio"/> 5 a 6 veces al día<br><input type="radio"/> más 6 veces al día |
| manzana o pera        | <input type="radio"/> Nunca o menos 1 vez al mes<br><input type="radio"/> 1 a 3 veces mes<br><input type="radio"/> 1 vez semana<br><input checked="" type="radio"/> 2 a 4 veces semana<br><input type="radio"/> 5 a 6 veces semana<br><input type="radio"/> 1 vez al día<br><input type="radio"/> 2 a 3 veces al día<br><input type="radio"/> 5 a 6 veces al día<br><input type="radio"/> más 6 veces al día |
| melocotón o nectarina | <input type="radio"/> Nunca o menos 1 vez al mes<br><input type="radio"/> 1 a 3 veces mes<br><input type="radio"/> 1 vez semana<br><input checked="" type="radio"/> 2 a 4 veces semana<br><input type="radio"/> 5 a 6 veces semana<br><input type="radio"/> 1 vez al día<br><input type="radio"/> 2 a 3 veces al día<br><input type="radio"/> 5 a 6 veces al día<br><input type="radio"/> más 6 veces al día |
| sandia o melon        | <input type="radio"/> Nunca o menos 1 vez al mes<br><input type="radio"/> 1 a 3 veces mes<br><input type="radio"/> 1 vez semana<br><input checked="" type="radio"/> 2 a 4 veces semana<br><input type="radio"/> 5 a 6 veces semana<br><input type="radio"/> 1 vez al día<br><input type="radio"/> 2 a 3 veces al día<br><input type="radio"/> 5 a 6 veces al día<br><input type="radio"/> más 6 veces al día |
| uva                   | <input type="radio"/> Nunca o menos 1 vez al mes<br><input type="radio"/> 1 a 3 veces mes<br><input checked="" type="radio"/> 1 vez semana<br><input type="radio"/> 2 a 4 veces semana<br><input type="radio"/> 5 a 6 veces semana<br><input type="radio"/> 1 vez al día<br><input type="radio"/> 2 a 3 veces al día<br><input type="radio"/> 5 a 6 veces al día<br><input type="radio"/> más 6 veces al día |

---

bruna o ciruela

- ☐ Nunca o menos 1 vez al mes  
☐ 1 a 3 veces mes  
☐ 1 vez semana  
☒ 2 a 4 veces semana  
☐ 5 a 6 veces semana  
☐ 1 vez al día  
☐ 2 a 3 veces al día  
☐ 5 a 6 veces al día  
☐ más 6 veces al día

---

kiwi

- ☐ Nunca o menos 1 vez al mes  
☐ 1 a 3 veces mes  
☐ 1 vez semana  
☐ 2 a 4 veces semana  
☒ 5 a 6 veces semana  
☐ 1 vez al día  
☐ 2 a 3 veces al día  
☐ 5 a 6 veces al día  
☐ más 6 veces al día

---

aceituna

- ☐ Nunca o menos 1 vez al mes  
☒ 1 a 3 veces mes  
☐ 1 vez semana  
☐ 2 a 4 veces semana  
☐ 5 a 6 veces semana  
☐ 1 vez al día  
☐ 2 a 3 veces al día  
☐ 5 a 6 veces al día  
☐ más 6 veces al día

---

frutos secos

- ☐ Nunca o menos 1 vez al mes  
☒ 1 a 3 veces mes  
☐ 1 vez semana  
☐ 2 a 4 veces semana  
☐ 5 a 6 veces semana  
☐ 1 vez al día  
☐ 2 a 3 veces al día  
☐ 5 a 6 veces al día  
☐ más 6 veces al día

---

pan blanco

- ☐ Nunca o menos 1 vez al mes  
☐ 1 a 3 veces mes  
☐ 1 vez semana  
☒ 2 a 4 veces semana  
☐ 5 a 6 veces semana  
☐ 1 vez al día  
☐ 2 a 3 veces al día  
☐ 5 a 6 veces al día  
☐ más 6 veces al día

---

pan integral

- ☐ Nunca o menos 1 vez al mes  
☐ 1 a 3 veces mes  
☐ 1 vez semana  
☒ 2 a 4 veces semana  
☐ 5 a 6 veces semana  
☐ 1 vez al día  
☐ 2 a 3 veces al día  
☐ 5 a 6 veces al día  
☐ más 6 veces al día

---

cereales desayuno

- ☒ Nunca o menos 1 vez al mes  
☐ 1 a 3 veces mes  
☐ 1 vez semana  
☐ 2 a 4 veces semana  
☐ 5 a 6 veces semana  
☐ 1 vez al día  
☐ 2 a 3 veces al día  
☐ 5 a 6 veces al día  
☐ más 6 veces al día

---

patatas fritas

- ☐ Nunca o menos 1 vez al mes  
☒ 1 a 3 veces mes  
☐ 1 vez semana  
☐ 2 a 4 veces semana  
☐ 5 a 6 veces semana  
☐ 1 vez al día  
☐ 2 a 3 veces al día  
☐ 5 a 6 veces al día  
☐ más 6 veces al día

---

patatas cocidas o asadas

- ☐ Nunca o menos 1 vez al mes  
☐ 1 a 3 veces mes  
☐ 1 vez semana  
☐ 2 a 4 veces semana  
☒ 5 a 6 veces semana  
☐ 1 vez al día  
☐ 2 a 3 veces al día  
☐ 5 a 6 veces al día  
☐ más 6 veces al día

---

bolsa papas

- ☐ Nunca o menos 1 vez al mes  
☒ 1 a 3 veces mes  
☐ 1 vez semana  
☐ 2 a 4 veces semana  
☐ 5 a 6 veces semana  
☐ 1 vez al día  
☐ 2 a 3 veces al día  
☐ 5 a 6 veces al día  
☐ más 6 veces al día

---

arroz cocinado

- ☐ Nunca o menos 1 vez al mes  
☐ 1 a 3 veces mes  
☒ 1 vez semana  
☐ 2 a 4 veces semana  
☐ 5 a 6 veces semana  
☐ 1 vez al día  
☐ 2 a 3 veces al día  
☐ 5 a 6 veces al día  
☐ más 6 veces al día

---

pasta

- ☐ Nunca o menos 1 vez al mes  
☐ 1 a 3 veces mes  
☒ 1 vez semana  
☐ 2 a 4 veces semana  
☐ 5 a 6 veces semana  
☐ 1 vez al día  
☐ 2 a 3 veces al día  
☐ 5 a 6 veces al día  
☐ más 6 veces al día

|                     |                                                                                                                                                                                                                                                                                                                                                                                                              |
|---------------------|--------------------------------------------------------------------------------------------------------------------------------------------------------------------------------------------------------------------------------------------------------------------------------------------------------------------------------------------------------------------------------------------------------------|
| pizza               | <input type="radio"/> Nunca o menos 1 vez al mes<br><input checked="" type="radio"/> 1 a 3 veces mes<br><input type="radio"/> 1 vez semana<br><input type="radio"/> 2 a 4 veces semana<br><input type="radio"/> 5 a 6 veces semana<br><input type="radio"/> 1 vez al día<br><input type="radio"/> 2 a 3 veces al día<br><input type="radio"/> 5 a 6 veces al día<br><input type="radio"/> más 6 veces al día |
| aceite oliva        | <input type="radio"/> Nunca o menos 1 vez al mes<br><input type="radio"/> 1 a 3 veces mes<br><input type="radio"/> 1 vez semana<br><input type="radio"/> 2 a 4 veces semana<br><input type="radio"/> 5 a 6 veces semana<br><input checked="" type="radio"/> 1 vez al día<br><input type="radio"/> 2 a 3 veces al día<br><input type="radio"/> 5 a 6 veces al día<br><input type="radio"/> más 6 veces al día |
| otros aceites       | <input checked="" type="radio"/> Nunca o menos 1 vez al mes<br><input type="radio"/> 1 a 3 veces mes<br><input type="radio"/> 1 vez semana<br><input type="radio"/> 2 a 4 veces semana<br><input type="radio"/> 5 a 6 veces semana<br><input type="radio"/> 1 vez al día<br><input type="radio"/> 2 a 3 veces al día<br><input type="radio"/> 5 a 6 veces al día<br><input type="radio"/> más 6 veces al día |
| margarina           | <input checked="" type="radio"/> Nunca o menos 1 vez al mes<br><input type="radio"/> 1 a 3 veces mes<br><input type="radio"/> 1 vez semana<br><input type="radio"/> 2 a 4 veces semana<br><input type="radio"/> 5 a 6 veces semana<br><input type="radio"/> 1 vez al día<br><input type="radio"/> 2 a 3 veces al día<br><input type="radio"/> 5 a 6 veces al día<br><input type="radio"/> más 6 veces al día |
| mantequilla         | <input type="radio"/> Nunca o menos 1 vez al mes<br><input type="radio"/> 1 a 3 veces mes<br><input type="radio"/> 1 vez semana<br><input type="radio"/> 2 a 4 veces semana<br><input type="radio"/> 5 a 6 veces semana<br><input checked="" type="radio"/> 1 vez al día<br><input type="radio"/> 2 a 3 veces al día<br><input type="radio"/> 5 a 6 veces al día<br><input type="radio"/> más 6 veces al día |
| galletas tipo maria | <input checked="" type="radio"/> Nunca o menos 1 vez al mes<br><input type="radio"/> 1 a 3 veces mes<br><input type="radio"/> 1 vez semana<br><input type="radio"/> 2 a 4 veces semana<br><input type="radio"/> 5 a 6 veces semana<br><input type="radio"/> 1 vez al día<br><input type="radio"/> 2 a 3 veces al día<br><input type="radio"/> 5 a 6 veces al día<br><input type="radio"/> más 6 veces al día |

---

galletas chocolate

- ☒ Nunca o menos 1 vez al mes  
☐ 1 a 3 veces mes  
☐ 1 vez semana  
☐ 2 a 4 veces semana  
☐ 5 a 6 veces semana  
☐ 1 vez al día  
☐ 2 a 3 veces al día  
☐ 5 a 6 veces al día  
☐ más 6 veces al día

---

bolleria

- ☒ Nunca o menos 1 vez al mes  
☐ 1 a 3 veces mes  
☐ 1 vez semana  
☐ 2 a 4 veces semana  
☐ 5 a 6 veces semana  
☐ 1 vez al día  
☐ 2 a 3 veces al día  
☐ 5 a 6 veces al día  
☐ más 6 veces al día

---

chocolate o bombones

- ☐ Nunca o menos 1 vez al mes  
☐ 1 a 3 veces mes  
☒ 1 vez semana  
☐ 2 a 4 veces semana  
☐ 5 a 6 veces semana  
☐ 1 vez al día  
☐ 2 a 3 veces al día  
☐ 5 a 6 veces al día  
☐ más 6 veces al día

---

chocolate polvo o colacao

- ☐ Nunca o menos 1 vez al mes  
☐ 1 a 3 veces mes  
☒ 1 vez semana  
☐ 2 a 4 veces semana  
☐ 5 a 6 veces semana  
☐ 1 vez al día  
☐ 2 a 3 veces al día  
☐ 5 a 6 veces al día  
☐ más 6 veces al día

---

vino tinto

- ☒ Nunca o menos 1 vez al mes  
☐ 1 a 3 veces mes  
☐ 1 vez semana  
☐ 2 a 4 veces semana  
☐ 5 a 6 veces semana  
☐ 1 vez al día  
☐ 2 a 3 veces al día  
☐ 5 a 6 veces al día  
☐ más 6 veces al día

---

vino blanco

- ☒ Nunca o menos 1 vez al mes  
☐ 1 a 3 veces mes  
☐ 1 vez semana  
☐ 2 a 4 veces semana  
☐ 5 a 6 veces semana  
☐ 1 vez al día  
☐ 2 a 3 veces al día  
☐ 5 a 6 veces al día  
☐ más 6 veces al día

|                       |                                                                                                                                                                                                                                                                                                                                                                                                              |
|-----------------------|--------------------------------------------------------------------------------------------------------------------------------------------------------------------------------------------------------------------------------------------------------------------------------------------------------------------------------------------------------------------------------------------------------------|
| vino seco o vermut    | <input checked="" type="radio"/> Nunca o menos 1 vez al mes<br><input type="radio"/> 1 a 3 veces mes<br><input type="radio"/> 1 vez semana<br><input type="radio"/> 2 a 4 veces semana<br><input type="radio"/> 5 a 6 veces semana<br><input type="radio"/> 1 vez al día<br><input type="radio"/> 2 a 3 veces al día<br><input type="radio"/> 5 a 6 veces al día<br><input type="radio"/> más 6 veces al día |
| cerveza               | <input checked="" type="radio"/> Nunca o menos 1 vez al mes<br><input type="radio"/> 1 a 3 veces mes<br><input type="radio"/> 1 vez semana<br><input type="radio"/> 2 a 4 veces semana<br><input type="radio"/> 5 a 6 veces semana<br><input type="radio"/> 1 vez al día<br><input type="radio"/> 2 a 3 veces al día<br><input type="radio"/> 5 a 6 veces al día<br><input type="radio"/> más 6 veces al día |
| cerveza sin alcohol   | <input checked="" type="radio"/> Nunca o menos 1 vez al mes<br><input type="radio"/> 1 a 3 veces mes<br><input type="radio"/> 1 vez semana<br><input type="radio"/> 2 a 4 veces semana<br><input type="radio"/> 5 a 6 veces semana<br><input type="radio"/> 1 vez al día<br><input type="radio"/> 2 a 3 veces al día<br><input type="radio"/> 5 a 6 veces al día<br><input type="radio"/> más 6 veces al día |
| licores               | <input checked="" type="radio"/> Nunca o menos 1 vez al mes<br><input type="radio"/> 1 a 3 veces mes<br><input type="radio"/> 1 vez semana<br><input type="radio"/> 2 a 4 veces semana<br><input type="radio"/> 5 a 6 veces semana<br><input type="radio"/> 1 vez al día<br><input type="radio"/> 2 a 3 veces al día<br><input type="radio"/> 5 a 6 veces al día<br><input type="radio"/> más 6 veces al día |
| ginebra o ron o vodka | <input checked="" type="radio"/> Nunca o menos 1 vez al mes<br><input type="radio"/> 1 a 3 veces mes<br><input type="radio"/> 1 vez semana<br><input type="radio"/> 2 a 4 veces semana<br><input type="radio"/> 5 a 6 veces semana<br><input type="radio"/> 1 vez al día<br><input type="radio"/> 2 a 3 veces al día<br><input type="radio"/> 5 a 6 veces al día<br><input type="radio"/> más 6 veces al día |
| refresco normal       | <input checked="" type="radio"/> Nunca o menos 1 vez al mes<br><input type="radio"/> 1 a 3 veces mes<br><input type="radio"/> 1 vez semana<br><input type="radio"/> 2 a 4 veces semana<br><input type="radio"/> 5 a 6 veces semana<br><input type="radio"/> 1 vez al día<br><input type="radio"/> 2 a 3 veces al día<br><input type="radio"/> 5 a 6 veces al día<br><input type="radio"/> más 6 veces al día |

|                          |                                                                                                                                                                                                                                                                                                                                                                                                              |
|--------------------------|--------------------------------------------------------------------------------------------------------------------------------------------------------------------------------------------------------------------------------------------------------------------------------------------------------------------------------------------------------------------------------------------------------------|
| refresco sin azúcar      | <input type="radio"/> Nunca o menos 1 vez al mes<br><input type="radio"/> 1 a 3 veces mes<br><input checked="" type="radio"/> 1 vez semana<br><input type="radio"/> 2 a 4 veces semana<br><input type="radio"/> 5 a 6 veces semana<br><input type="radio"/> 1 vez al día<br><input type="radio"/> 2 a 3 veces al día<br><input type="radio"/> 5 a 6 veces al día<br><input type="radio"/> más 6 veces al día |
| Agua del grifo           | <input checked="" type="radio"/> Nunca o menos 1 vez al mes<br><input type="radio"/> 1 a 3 veces mes<br><input type="radio"/> 1 vez semana<br><input type="radio"/> 2 a 4 veces semana<br><input type="radio"/> 5 a 6 veces semana<br><input type="radio"/> 1 vez al día<br><input type="radio"/> 2 a 3 veces al día<br><input type="radio"/> 5 a 6 veces al día<br><input type="radio"/> más 6 veces al día |
| agua embotellada sin gas | <input type="radio"/> Nunca o menos 1 vez al mes<br><input type="radio"/> 1 a 3 veces mes<br><input type="radio"/> 1 vez semana<br><input type="radio"/> 2 a 4 veces semana<br><input type="radio"/> 5 a 6 veces semana<br><input type="radio"/> 1 vez al día<br><input checked="" type="radio"/> 2 a 3 veces al día<br><input type="radio"/> 5 a 6 veces al día<br><input type="radio"/> más 6 veces al día |
| agua embotellada con gas | <input checked="" type="radio"/> Nunca o menos 1 vez al mes<br><input type="radio"/> 1 a 3 veces mes<br><input type="radio"/> 1 vez semana<br><input type="radio"/> 2 a 4 veces semana<br><input type="radio"/> 5 a 6 veces semana<br><input type="radio"/> 1 vez al día<br><input type="radio"/> 2 a 3 veces al día<br><input type="radio"/> 5 a 6 veces al día<br><input type="radio"/> más 6 veces al día |
| zumو frutas embasado     | <input type="radio"/> Nunca o menos 1 vez al mes<br><input type="radio"/> 1 a 3 veces mes<br><input type="radio"/> 1 vez semana<br><input type="radio"/> 2 a 4 veces semana<br><input type="radio"/> 5 a 6 veces semana<br><input checked="" type="radio"/> 1 vez al día<br><input type="radio"/> 2 a 3 veces al día<br><input type="radio"/> 5 a 6 veces al día<br><input type="radio"/> más 6 veces al día |
| cafe                     | <input checked="" type="radio"/> Nunca o menos 1 vez al mes<br><input type="radio"/> 1 a 3 veces mes<br><input type="radio"/> 1 vez semana<br><input type="radio"/> 2 a 4 veces semana<br><input type="radio"/> 5 a 6 veces semana<br><input type="radio"/> 1 vez al día<br><input type="radio"/> 2 a 3 veces al día<br><input type="radio"/> 5 a 6 veces al día<br><input type="radio"/> más 6 veces al día |



---

cafe descafeinado

- ☐ Nunca o menos 1 vez al mes  
☐ 1 a 3 veces mes  
☒ 1 vez semana  
☐ 2 a 4 veces semana  
☐ 5 a 6 veces semana  
☐ 1 vez al día  
☐ 2 a 3 veces al día  
☐ 5 a 6 veces al día  
☐ más 6 veces al día

---

te o infusión

- ☐ Nunca o menos 1 vez al mes  
☐ 1 a 3 veces mes  
☐ 1 vez semana  
☐ 2 a 4 veces semana  
☐ 5 a 6 veces semana  
☒ 1 vez al día  
☐ 2 a 3 veces al día  
☐ 5 a 6 veces al día  
☐ más 6 veces al día

---

sopa o puré verduras

- ☐ Nunca o menos 1 vez al mes  
☐ 1 a 3 veces mes  
☐ 1 vez semana  
☐ 2 a 4 veces semana  
☒ 5 a 6 veces semana  
☐ 1 vez al día  
☐ 2 a 3 veces al día  
☐ 5 a 6 veces al día  
☐ más 6 veces al día

---

croquetas pollo jamón

- ☐ Nunca o menos 1 vez al mes  
☒ 1 a 3 veces mes  
☐ 1 vez semana  
☐ 2 a 4 veces semana  
☐ 5 a 6 veces semana  
☐ 1 vez al día  
☐ 2 a 3 veces al día  
☐ 5 a 6 veces al día  
☐ más 6 veces al día

---

croquetas pescado

- ☐ Nunca o menos 1 vez al mes  
☒ 1 a 3 veces mes  
☐ 1 vez semana  
☐ 2 a 4 veces semana  
☐ 5 a 6 veces semana  
☐ 1 vez al día  
☐ 2 a 3 veces al día  
☐ 5 a 6 veces al día  
☐ más 6 veces al día

---

mayonesa

- ☐ Nunca o menos 1 vez al mes  
☒ 1 a 3 veces mes  
☐ 1 vez semana  
☐ 2 a 4 veces semana  
☐ 5 a 6 veces semana  
☐ 1 vez al día  
☐ 2 a 3 veces al día  
☐ 5 a 6 veces al día  
☐ más 6 veces al día

|                  |                                                                                                                                                                                                                                                                                                                                                                                                              |
|------------------|--------------------------------------------------------------------------------------------------------------------------------------------------------------------------------------------------------------------------------------------------------------------------------------------------------------------------------------------------------------------------------------------------------------|
| salsa tomate     | <input type="radio"/> Nunca o menos 1 vez al mes<br><input checked="" type="radio"/> 1 a 3 veces mes<br><input type="radio"/> 1 vez semana<br><input type="radio"/> 2 a 4 veces semana<br><input type="radio"/> 5 a 6 veces semana<br><input type="radio"/> 1 vez al día<br><input type="radio"/> 2 a 3 veces al día<br><input type="radio"/> 5 a 6 veces al día<br><input type="radio"/> más 6 veces al día |
| ketchup          | <input type="radio"/> Nunca o menos 1 vez al mes<br><input checked="" type="radio"/> 1 a 3 veces mes<br><input type="radio"/> 1 vez semana<br><input type="radio"/> 2 a 4 veces semana<br><input type="radio"/> 5 a 6 veces semana<br><input type="radio"/> 1 vez al día<br><input type="radio"/> 2 a 3 veces al día<br><input type="radio"/> 5 a 6 veces al día<br><input type="radio"/> más 6 veces al día |
| sal              | <input checked="" type="radio"/> Nunca o menos 1 vez al mes<br><input type="radio"/> 1 a 3 veces mes<br><input type="radio"/> 1 vez semana<br><input type="radio"/> 2 a 4 veces semana<br><input type="radio"/> 5 a 6 veces semana<br><input type="radio"/> 1 vez al día<br><input type="radio"/> 2 a 3 veces al día<br><input type="radio"/> 5 a 6 veces al día<br><input type="radio"/> más 6 veces al día |
| ajo              | <input checked="" type="radio"/> Nunca o menos 1 vez al mes<br><input type="radio"/> 1 a 3 veces mes<br><input type="radio"/> 1 vez semana<br><input type="radio"/> 2 a 4 veces semana<br><input type="radio"/> 5 a 6 veces semana<br><input type="radio"/> 1 vez al día<br><input type="radio"/> 2 a 3 veces al día<br><input type="radio"/> 5 a 6 veces al día<br><input type="radio"/> más 6 veces al día |
| mermelada o miel | <input type="radio"/> Nunca o menos 1 vez al mes<br><input type="radio"/> 1 a 3 veces mes<br><input checked="" type="radio"/> 1 vez semana<br><input type="radio"/> 2 a 4 veces semana<br><input type="radio"/> 5 a 6 veces semana<br><input type="radio"/> 1 vez al día<br><input type="radio"/> 2 a 3 veces al día<br><input type="radio"/> 5 a 6 veces al día<br><input type="radio"/> más 6 veces al día |
| azúcar           | <input type="radio"/> Nunca o menos 1 vez al mes<br><input checked="" type="radio"/> 1 a 3 veces mes<br><input type="radio"/> 1 vez semana<br><input type="radio"/> 2 a 4 veces semana<br><input type="radio"/> 5 a 6 veces semana<br><input type="radio"/> 1 vez al día<br><input type="radio"/> 2 a 3 veces al día<br><input type="radio"/> 5 a 6 veces al día<br><input type="radio"/> más 6 veces al día |

---

Otro alimento

---

suplementos vitamínicos

- ☐ si  
☒ no

---

suplementos vitamínicos

---

dieta previa

- ☒ si  
☐ no

motivo dieta

- ☐ no dieta  
☐ control peso  
☐ control colesterol  
☒ control diabetes  
☐ problemas estómago  
☐ problemas vesícula o hepáticos  
☐ HTA o cardiopatía  
☐ problemas renales  
☐ alergia alimentaria  
☐ ácido úrico elevado  
☐ vegetariana  
☐ otros

---

cambio alimentos año previo gestación

- ☒ si  
☐ no

---

cambio lácteos

- ☐ eliminado  
☐ disminuido  
☒ igual  
☐ aumentado  
☐ no sabe

---

cambio huevos

- ☐ eliminado  
☒ disminuido  
☐ igual  
☐ aumentado  
☐ no sabe

---

cambio carne

- ☐ eliminado  
☐ disminuido  
☒ igual  
☐ aumentado  
☐ no sabe

---

cambio pescado

- ☐ eliminado  
☐ disminuido  
☒ igual  
☐ aumentado  
☐ no sabe

---

cambio verduras

- ☐ eliminado  
☐ disminuido  
☒ igual  
☐ aumentado  
☐ no sabe

|                            |                                                                                                                                                                                                                        |
|----------------------------|------------------------------------------------------------------------------------------------------------------------------------------------------------------------------------------------------------------------|
| cambio legumbres           | <input type="radio"/> eliminado<br><input checked="" type="radio"/> disminuido<br><input type="radio"/> igual<br><input type="radio"/> aumentado<br><input type="radio"/> no sabe                                      |
| cambio fruta               | <input type="radio"/> eliminado<br><input type="radio"/> disminuido<br><input checked="" type="radio"/> igual<br><input type="radio"/> aumentado<br><input type="radio"/> no sabe                                      |
| cambio pan                 | <input type="radio"/> eliminado<br><input checked="" type="radio"/> disminuido<br><input type="radio"/> igual<br><input type="radio"/> aumentado<br><input type="radio"/> no sabe                                      |
| cambio aceite oliva        | <input type="radio"/> eliminado<br><input checked="" type="radio"/> disminuido<br><input type="radio"/> igual<br><input type="radio"/> aumentado<br><input type="radio"/> no sabe                                      |
| cambio mante o margarina   | <input type="radio"/> eliminado<br><input checked="" type="radio"/> disminuido<br><input type="radio"/> igual<br><input type="radio"/> aumentado<br><input type="radio"/> no sabe                                      |
| cambio azúcar y dulces     | <input checked="" type="radio"/> eliminado<br><input type="radio"/> disminuido<br><input type="radio"/> igual<br><input type="radio"/> aumentado<br><input type="radio"/> no sabe                                      |
| cambio bebidas alcohólicas | <input checked="" type="radio"/> eliminado<br><input type="radio"/> disminuido<br><input type="radio"/> igual<br><input type="radio"/> aumentado<br><input type="radio"/> no sabe                                      |
| frecuencia comidas fritas  | <input type="radio"/> a diario<br><input type="radio"/> 5 a 6 veces semana<br><input type="radio"/> 2 a 4 veces semana<br><input type="radio"/> 1 vez semana<br><input checked="" type="radio"/> menos de 1 vez semana |
| carne                      | <input type="radio"/> no como<br><input type="radio"/> cruda<br><input type="radio"/> poco hecha<br><input checked="" type="radio"/> hecha<br><input type="radio"/> muy hecha                                          |
| grasa visible carne        | <input type="radio"/> quita toda<br><input checked="" type="radio"/> quita mayoría<br><input type="radio"/> quita un poco<br><input type="radio"/> no quita nada                                                       |

|                                |                                                                                                                                                                                                                                                          |
|--------------------------------|----------------------------------------------------------------------------------------------------------------------------------------------------------------------------------------------------------------------------------------------------------|
| cocina carne                   | <input type="radio"/> a la plancha<br><input type="radio"/> a la parrilla<br><input checked="" type="radio"/> asada<br><input type="radio"/> frita<br><input type="radio"/> guisada                                                                      |
| tostado quemado carne          | <input type="radio"/> nunca<br><input type="radio"/> 1 vez mes<br><input type="radio"/> 2 a 3 veces mes<br><input type="radio"/> 1 vez semana<br><input checked="" type="radio"/> 2 a 3 semanas                                                          |
| tostado quemado pescado        | <input checked="" type="radio"/> nunca<br><input type="radio"/> 1 vez mes<br><input type="radio"/> 2 a 3 veces mes<br><input type="radio"/> 1 vez semana<br><input type="radio"/> 2 a 3 semanas                                                          |
| socarrat paella                | <input checked="" type="radio"/> nunca<br><input type="radio"/> 1 vez mes<br><input type="radio"/> 2 a 3 veces mes<br><input type="radio"/> 1 vez semana<br><input type="radio"/> 2 a 3 semanas                                                          |
| grasa o aceite cocinar         | <input type="radio"/> mantequilla<br><input type="radio"/> margarina<br><input type="radio"/> aceite oliva<br><input checked="" type="radio"/> aceite oliva virgen extra<br><input type="radio"/> aceite vegetal<br><input type="radio"/> mezcla aceites |
| grasa aceite aliñar            | <input type="radio"/> mantequilla<br><input type="radio"/> margarina<br><input type="radio"/> aceite oliva<br><input checked="" type="radio"/> aceite oliva virgen extra<br><input type="radio"/> aceite vegetal<br><input type="radio"/> mezcla aceites |
| grasa aceite freir             | <input type="radio"/> mantequilla<br><input type="radio"/> margarina<br><input type="radio"/> aceite oliva<br><input type="radio"/> aceite oliva virgen extra<br><input type="radio"/> aceite vegetal<br><input type="radio"/> mezcla aceites            |
| Ejercicio cuestionario         | <input checked="" type="radio"/> si<br><input type="radio"/> no                                                                                                                                                                                          |
| horas de sueño incluido siesta | [*DATA REMOVED*]                                                                                                                                                                                                                                         |
| minutos siesta                 | [*DATA REMOVED*]                                                                                                                                                                                                                                         |
| horas televisión semana        | [*DATA REMOVED*]                                                                                                                                                                                                                                         |

|                                        |                                                                                                                                                                                                                                                                                                                                                                           |
|----------------------------------------|---------------------------------------------------------------------------------------------------------------------------------------------------------------------------------------------------------------------------------------------------------------------------------------------------------------------------------------------------------------------------|
| actividad trabajo                      | <input type="radio"/> casi siempre sentado<br><input type="radio"/> sentado 50 por cien<br><input type="radio"/> casi siempre de pie, quieto<br><input checked="" type="radio"/> casi siempre levantado caminando y llevando pocas cosas<br><input type="radio"/> casi siempre levantado, caminando y llevado muchas cosas<br><input type="radio"/> trabajo manual pesado |
| tiempo caminar o bici al día           | <input type="radio"/> casi nunca<br><input type="radio"/> menos 20min día<br><input checked="" type="radio"/> 20 a 40 min día<br><input type="radio"/> 40 a 60 min día<br><input type="radio"/> 1h o 1h y media día<br><input type="radio"/> más de 1h y media al día                                                                                                     |
| tiempo tareas casa al día              | <input type="radio"/> menos de 1h día<br><input checked="" type="radio"/> 1 a 2h día<br><input type="radio"/> 3 a 4h día<br><input type="radio"/> 5 a 6h día<br><input type="radio"/> 7 a 8h día<br><input type="radio"/> más de 8h día                                                                                                                                   |
| tiempo libre televisión ordenador leer | <input type="radio"/> menos 1h día<br><input checked="" type="radio"/> 1h día<br><input type="radio"/> 2h día<br><input type="radio"/> 3h día<br><input type="radio"/> 4h día<br><input type="radio"/> 5 a 6h día<br><input type="radio"/> mas 6h día                                                                                                                     |
| tiempo libre ejercicio o deporte       | <input type="radio"/> menos 1h semana<br><input checked="" type="radio"/> 1h semana<br><input type="radio"/> 2h semana<br><input type="radio"/> 3h semana<br><input type="radio"/> 4 a 5h semana<br><input type="radio"/> mas 5h semana                                                                                                                                   |
| como se considera                      | <input type="radio"/> sedentaria<br><input type="radio"/> poco activa<br><input checked="" type="radio"/> moderadamente activa<br><input type="radio"/> bastante activa<br><input type="radio"/> muy activa<br><input type="radio"/> no sabe                                                                                                                              |
| FUR                                    | [*DATA REMOVED*]                                                                                                                                                                                                                                                                                                                                                          |
| Semanas gestación 2T                   | [*DATA REMOVED*]                                                                                                                                                                                                                                                                                                                                                          |
| Días gestación 2T                      | [*DATA REMOVED*]                                                                                                                                                                                                                                                                                                                                                          |
| DBP 2T                                 | [*DATA REMOVED*]                                                                                                                                                                                                                                                                                                                                                          |
| CC 2T                                  | [*DATA REMOVED*]                                                                                                                                                                                                                                                                                                                                                          |
| AC 2T                                  | [*DATA REMOVED*]                                                                                                                                                                                                                                                                                                                                                          |

|                                                   |                                                                                                                                                                                                 |
|---------------------------------------------------|-------------------------------------------------------------------------------------------------------------------------------------------------------------------------------------------------|
| LF 2T                                             | [*DATA REMOVED*]                                                                                                                                                                                |
| PFE 2T (Hadlock)                                  | [*DATA REMOVED*]                                                                                                                                                                                |
| Semanas gestación 3T                              | [*DATA REMOVED*]                                                                                                                                                                                |
| días 3T                                           | [*DATA REMOVED*]                                                                                                                                                                                |
| DBP 3T                                            | [*DATA REMOVED*]                                                                                                                                                                                |
| CC 3T                                             | [*DATA REMOVED*]                                                                                                                                                                                |
| AC 3T                                             | [*DATA REMOVED*]                                                                                                                                                                                |
| LF 3T                                             | [*DATA REMOVED*]                                                                                                                                                                                |
| PFE 3T (Hadlock)                                  | [*DATA REMOVED*]                                                                                                                                                                                |
| Semanas de gestación final                        | [*DATA REMOVED*]                                                                                                                                                                                |
| días gestación final                              | [*DATA REMOVED*]                                                                                                                                                                                |
| Localización placenta                             | <input checked="" type="radio"/> anterior<br><input type="radio"/> lateral derecha<br><input type="radio"/> lateral izquierda<br><input type="radio"/> posterior<br><input type="radio"/> fondo |
| Presentación longitudinal cefálica                | <input type="radio"/> no<br><input checked="" type="radio"/> si                                                                                                                                 |
| Dorso                                             | <input type="radio"/> izquierda anterior<br><input type="radio"/> izquierda posterior<br><input checked="" type="radio"/> derecha anterior<br><input type="radio"/> derecha posterior           |
| diámetro biparietal                               | [*DATA REMOVED*]                                                                                                                                                                                |
| Circunferencia craneal                            | [*DATA REMOVED*]                                                                                                                                                                                |
| Circunferencia abdominal                          | [*DATA REMOVED*]                                                                                                                                                                                |
| Longitud de femur                                 | [*DATA REMOVED*]                                                                                                                                                                                |
| tejido celular subcutáneo a nivel del muslo en mm | [*DATA REMOVED*]                                                                                                                                                                                |
| tejido celular subcutáneo en abdomen en mm        | [*DATA REMOVED*]                                                                                                                                                                                |
| Volumen del muslo en cm3                          | [*DATA REMOVED*]                                                                                                                                                                                |
| Peso fetal estimado según fórmula de Hadlock      | [*DATA REMOVED*]                                                                                                                                                                                |

|                                               |                                                                                                                                                          |
|-----------------------------------------------|----------------------------------------------------------------------------------------------------------------------------------------------------------|
| Percentil                                     | [*DATA REMOVED*]                                                                                                                                         |
| Peso fetal estimado según fórmula de Scioscia | <hr/>                                                                                                                                                    |
| Peso fetal estimado según fórmula de LEE      | <hr/>                                                                                                                                                    |
| Tipo de parto                                 | <input checked="" type="radio"/> eutocico<br><input type="radio"/> instrumentado/ventosa<br><input type="radio"/> cesarea                                |
| fecha de nacimiento                           | [*DATA REMOVED*]                                                                                                                                         |
| Días entre exploración y nacimiento           | [*DATA REMOVED*]                                                                                                                                         |
| Peso RN en g                                  | [*DATA REMOVED*]                                                                                                                                         |
| sexo                                          | <input type="radio"/> mujer<br><input checked="" type="radio"/> hombre                                                                                   |
| Apgar 1 minuto                                | [*DATA REMOVED*]                                                                                                                                         |
| Apgar 5 minutos                               | [*DATA REMOVED*]                                                                                                                                         |
| Apgar 10 minutos                              | <hr/>                                                                                                                                                    |
| antecedente Covid durante gestación           | <input type="radio"/> Yes<br><input checked="" type="radio"/> No                                                                                         |
| Nivel de estudios                             | <input type="radio"/> ninguno<br><input type="radio"/> primarios<br><input checked="" type="radio"/> secundarios<br><input type="radio"/> universitarios |



# Base\_datos\_estimacion\_peso\_fetal

|                                       |                                                                                                                                                                                                                                                                                      |
|---------------------------------------|--------------------------------------------------------------------------------------------------------------------------------------------------------------------------------------------------------------------------------------------------------------------------------------|
| Número de identificación participante | 109                                                                                                                                                                                                                                                                                  |
| CODIGO PARTICIPANTE                   |                                                                                                                                                                                                                                                                                      |
| Edad                                  | [*DATA REMOVED*]                                                                                                                                                                                                                                                                     |
| Gestaciones                           | <input checked="" type="radio"/> 1<br><input type="radio"/> 2<br><input type="radio"/> 3<br><input type="radio"/> mas de 3                                                                                                                                                           |
| partos                                | <input checked="" type="radio"/> 0<br><input type="radio"/> 1<br><input type="radio"/> 2<br><input type="radio"/> 3<br><input type="radio"/> mas de 3                                                                                                                                |
| cesáreas                              | <input checked="" type="radio"/> 0<br><input type="radio"/> 1<br><input type="radio"/> 2<br><input type="radio"/> 3<br><input type="radio"/> mas de 3                                                                                                                                |
| Abortos                               | <input checked="" type="radio"/> 0<br><input type="radio"/> 1<br><input type="radio"/> 2<br><input type="radio"/> 3<br><input type="radio"/> mas de 3                                                                                                                                |
| Tipo de gestacion                     | <input checked="" type="radio"/> espontanea<br><input type="radio"/> IAC inseminación artificial conyuge<br><input type="radio"/> IAD inseminación artificial donante<br><input type="radio"/> FIV Fecundación in Vitro<br><input type="radio"/> Ovodon FIV con donación de ovocitos |
| peso previo a embarazo                | [*DATA REMOVED*]                                                                                                                                                                                                                                                                     |
| Ganancia ponderal embarazo            |                                                                                                                                                                                                                                                                                      |
| Talla madre                           | [*DATA REMOVED*]                                                                                                                                                                                                                                                                     |
| IMC previo embarazo                   | 28.763971071663377                                                                                                                                                                                                                                                                   |
| Patología obstétrica                  | <input checked="" type="radio"/> no<br><input type="radio"/> si                                                                                                                                                                                                                      |
| Diabetes pregestacional               | <input checked="" type="radio"/> no<br><input type="radio"/> si                                                                                                                                                                                                                      |
| Diabetes gestacional                  | <input checked="" type="radio"/> no<br><input type="radio"/> si                                                                                                                                                                                                                      |

|                                            |                                                                                                                                                                                      |
|--------------------------------------------|--------------------------------------------------------------------------------------------------------------------------------------------------------------------------------------|
| Diabetes gestacional con insulina          | <input checked="" type="radio"/> no<br><input type="radio"/> si                                                                                                                      |
| Diabetes gestacional con dieta y ejercicio | <input checked="" type="radio"/> no<br><input type="radio"/> si                                                                                                                      |
| Percentil fetos previos                    | <input checked="" type="radio"/> Nada<br><input type="radio"/> percentil menor de 10<br><input type="radio"/> percentil entre 10 y 90<br><input type="radio"/> percentil mayor de 90 |
| Exfumadora                                 | <input checked="" type="radio"/> Nada<br><input type="radio"/> menos de 5 años<br><input type="radio"/> 5 a 10 años<br><input type="radio"/> mayor o igual a 10 años                 |
| Hábito tabáquico                           | <input type="radio"/> no<br><input checked="" type="radio"/> si                                                                                                                      |
| fumadora                                   | [*DATA REMOVED*]                                                                                                                                                                     |
| Consumo otros tóxicos                      | <input checked="" type="radio"/> no<br><input type="radio"/> si                                                                                                                      |
| Hb 1T                                      | [*DATA REMOVED*]                                                                                                                                                                     |
| Htc 1T                                     | [*DATA REMOVED*]                                                                                                                                                                     |
| Hb 2T                                      | [*DATA REMOVED*]                                                                                                                                                                     |
| HTC 2T                                     | [*DATA REMOVED*]                                                                                                                                                                     |
| Hb 3T                                      | [*DATA REMOVED*]                                                                                                                                                                     |
| HTC 3T                                     | [*DATA REMOVED*]                                                                                                                                                                     |
| Suplemento FE oral                         | <input type="radio"/> si<br><input checked="" type="radio"/> no                                                                                                                      |
| Suplemento fe iv                           | <input type="radio"/> si<br><input checked="" type="radio"/> no                                                                                                                      |
| Transfusión                                | <input checked="" type="radio"/> no<br><input type="radio"/> si                                                                                                                      |
| Solicitada Vit D                           | <input checked="" type="radio"/> no<br><input type="radio"/> si                                                                                                                      |
| Deficit vit D                              | <input type="radio"/> no<br><input type="radio"/> si                                                                                                                                 |
| Suplemento vit D                           | <input type="radio"/> si<br><input type="radio"/> no                                                                                                                                 |

|                       |                                                                                                                                                                                                                                                                                                                                                                                                              |
|-----------------------|--------------------------------------------------------------------------------------------------------------------------------------------------------------------------------------------------------------------------------------------------------------------------------------------------------------------------------------------------------------------------------------------------------------|
| Dieta, cuestionario   | <input checked="" type="radio"/> sí<br><input type="radio"/> no                                                                                                                                                                                                                                                                                                                                              |
| Leche entera          | <input checked="" type="radio"/> Nunca o menos 1 vez al mes<br><input type="radio"/> 1 a 3 veces mes<br><input type="radio"/> 1 vez semana<br><input type="radio"/> 2 a 4 veces semana<br><input type="radio"/> 5 a 6 veces semana<br><input type="radio"/> 1 vez al día<br><input type="radio"/> 2 a 3 veces al día<br><input type="radio"/> 5 a 6 veces al día<br><input type="radio"/> más 6 veces al día |
| Leche semidesnatada   | <input type="radio"/> Nunca o menos 1 vez al mes<br><input type="radio"/> 1 a 3 veces mes<br><input type="radio"/> 1 vez semana<br><input type="radio"/> 2 a 4 veces semana<br><input type="radio"/> 5 a 6 veces semana<br><input checked="" type="radio"/> 1 vez al día<br><input type="radio"/> 2 a 3 veces al día<br><input type="radio"/> 5 a 6 veces al día<br><input type="radio"/> mas 6 veces al día |
| Leche desnatada       | <input checked="" type="radio"/> Nunca o menos 1 vez al mes<br><input type="radio"/> 1 a 3 veces mes<br><input type="radio"/> 1 vez semana<br><input type="radio"/> 2 a 4 veces semana<br><input type="radio"/> 5 a 6 veces semana<br><input type="radio"/> 1 vez al día<br><input type="radio"/> 2 a 3 veces al día<br><input type="radio"/> 5 a 6 veces al día<br><input type="radio"/> más 6 veces al día |
| Leche condensada      | <input checked="" type="radio"/> Nunca o menos 1 vez al mes<br><input type="radio"/> 1 a 3 veces mes<br><input type="radio"/> 1 vez semana<br><input type="radio"/> 2 a 4 veces semana<br><input type="radio"/> 5 a 6 veces semana<br><input type="radio"/> 1 vez al día<br><input type="radio"/> 2 a 3 veces al día<br><input type="radio"/> 5 a 6 veces al día<br><input type="radio"/> más 6 veces al día |
| nata o crema de leche | <input checked="" type="radio"/> Nunca o menos 1 vez al mes<br><input type="radio"/> 1 a 3 veces mes<br><input type="radio"/> 1 vez semana<br><input type="radio"/> 2 a 4 veces semana<br><input type="radio"/> 5 a 6 veces semana<br><input type="radio"/> 1 vez al día<br><input type="radio"/> 2 a 3 veces al día<br><input type="radio"/> 5 a 6 veces al día<br><input type="radio"/> más 6 veces al día |

---

Yogurt Entero

- ☒ Nunca o menos 1 vez al mes  
☐ 1 a 3 veces mes  
☐ 1 vez semana  
☐ 2 a 4 veces semana  
☐ 5 a 6 veces semana  
☐ 1 vez al día  
☐ 2 a 3 veces al día  
☐ 5 a 6 veces al día  
☐ más 6 veces al día

---

Yogurt desnatado

- ☒ Nunca o menos 1 vez al mes  
☐ 1 a 3 veces mes  
☐ 1 vez semana  
☐ 2 a 4 veces semana  
☐ 5 a 6 veces semana  
☐ 1 vez al día  
☐ 2 a 3 veces al día  
☐ 5 a 6 veces al día  
☐ más 6 veces al día

---

100g requesón o queso blando o queso fresco

- ☒ Nunca o menos 1 vez al mes  
☐ 1 a 3 veces mes  
☐ 1 vez semana  
☐ 2 a 4 veces semana  
☐ 5 a 6 veces semana  
☐ 1 vez al día  
☐ 2 a 3 veces al día  
☐ 5 a 6 veces al día  
☐ más 6 veces al día

---

queso curado o semicurado o cremoso

- ☒ Nunca o menos 1 vez al mes  
☐ 1 a 3 veces mes  
☐ 1 vez semana  
☐ 2 a 4 veces semana  
☐ 5 a 6 veces semana  
☐ 1 vez al día  
☐ 2 a 3 veces al día  
☐ 5 a 6 veces al día  
☐ más 6 veces al día

---

natillas flan pudding

- ☐ Nunca o menos 1 vez al mes  
☒ 1 a 3 veces mes  
☐ 1 vez semana  
☐ 2 a 4 veces semana  
☐ 5 a 6 veces semana  
☐ 1 vez al día  
☐ 2 a 3 veces al día  
☐ 5 a 6 veces al día  
☐ más 6 veces al día

---

Helado

- ☐ Nunca o menos 1 vez al mes  
☒ 1 a 3 veces mes  
☐ 1 vez semana  
☐ 2 a 4 veces semana  
☐ 5 a 6 veces semana  
☐ 1 vez al día  
☐ 2 a 3 veces al día  
☐ 5 a 6 veces al día  
☐ más 6 veces al día

|                                      |                                                                                                                                                                                                                                                                                                                                                                                                              |
|--------------------------------------|--------------------------------------------------------------------------------------------------------------------------------------------------------------------------------------------------------------------------------------------------------------------------------------------------------------------------------------------------------------------------------------------------------------|
| huevo                                | <input type="radio"/> Nunca o menos 1 vez al mes<br><input type="radio"/> 1 a 3 veces mes<br><input type="radio"/> 1 vez semana<br><input checked="" type="radio"/> 2 a 4 veces semana<br><input type="radio"/> 5 a 6 veces semana<br><input type="radio"/> 1 vez al día<br><input type="radio"/> 2 a 3 veces al día<br><input type="radio"/> 5 a 6 veces al día<br><input type="radio"/> más 6 veces al día |
| Pollo con piel                       | <input type="radio"/> Nunca o menos 1 vez al mes<br><input type="radio"/> 1 a 3 veces mes<br><input type="radio"/> 1 vez semana<br><input checked="" type="radio"/> 2 a 4 veces semana<br><input type="radio"/> 5 a 6 veces semana<br><input type="radio"/> 1 vez al día<br><input type="radio"/> 2 a 3 veces al día<br><input type="radio"/> 5 a 6 veces al día<br><input type="radio"/> más 6 veces al día |
| pollo sin piel                       | <input checked="" type="radio"/> Nunca o menos 1 vez al mes<br><input type="radio"/> 1 a 3 veces mes<br><input type="radio"/> 1 vez semana<br><input type="radio"/> 2 a 4 veces semana<br><input type="radio"/> 5 a 6 veces semana<br><input type="radio"/> 1 vez al día<br><input type="radio"/> 2 a 3 veces al día<br><input type="radio"/> 5 a 6 veces al día<br><input type="radio"/> más 6 veces al día |
| Ternera o cerdo o cordero            | <input type="radio"/> Nunca o menos 1 vez al mes<br><input type="radio"/> 1 a 3 veces mes<br><input type="radio"/> 1 vez semana<br><input checked="" type="radio"/> 2 a 4 veces semana<br><input type="radio"/> 5 a 6 veces semana<br><input type="radio"/> 1 vez al día<br><input type="radio"/> 2 a 3 veces al día<br><input type="radio"/> 5 a 6 veces al día<br><input type="radio"/> más 6 veces al día |
| carne caza: Conejo o codorniz o pato | <input checked="" type="radio"/> Nunca o menos 1 vez al mes<br><input type="radio"/> 1 a 3 veces mes<br><input type="radio"/> 1 vez semana<br><input type="radio"/> 2 a 4 veces semana<br><input type="radio"/> 5 a 6 veces semana<br><input type="radio"/> 1 vez al día<br><input type="radio"/> 2 a 3 veces al día<br><input type="radio"/> 5 a 6 veces al día<br><input type="radio"/> más 6 veces al día |
| Hígado de ternera o cerdo o pollo    | <input checked="" type="radio"/> Nunca o menos 1 vez al mes<br><input type="radio"/> 1 a 3 veces mes<br><input type="radio"/> 1 vez semana<br><input type="radio"/> 2 a 4 veces semana<br><input type="radio"/> 5 a 6 veces semana<br><input type="radio"/> 1 vez al día<br><input type="radio"/> 2 a 3 veces al día<br><input type="radio"/> 5 a 6 veces al día<br><input type="radio"/> más 6 veces al día |

|                     |                                                                                                                                                                                                                                                                                                                                                                                                              |
|---------------------|--------------------------------------------------------------------------------------------------------------------------------------------------------------------------------------------------------------------------------------------------------------------------------------------------------------------------------------------------------------------------------------------------------------|
| Vísceras            | <input checked="" type="radio"/> Nunca o menos 1 vez al mes<br><input type="radio"/> 1 a 3 veces mes<br><input type="radio"/> 1 vez semana<br><input type="radio"/> 2 a 4 veces semana<br><input type="radio"/> 5 a 6 veces semana<br><input type="radio"/> 1 vez al día<br><input type="radio"/> 2 a 3 veces al día<br><input type="radio"/> 5 a 6 veces al día<br><input type="radio"/> más 6 veces al día |
| Embutido            | <input checked="" type="radio"/> Nunca o menos 1 vez al mes<br><input type="radio"/> 1 a 3 veces mes<br><input type="radio"/> 1 vez semana<br><input type="radio"/> 2 a 4 veces semana<br><input type="radio"/> 5 a 6 veces semana<br><input type="radio"/> 1 vez al día<br><input type="radio"/> 2 a 3 veces al día<br><input type="radio"/> 5 a 6 veces al día<br><input type="radio"/> más 6 veces al día |
| Salchicha o similar | <input type="radio"/> Nunca o menos 1 vez al mes<br><input checked="" type="radio"/> 1 a 3 veces mes<br><input type="radio"/> 1 vez semana<br><input type="radio"/> 2 a 4 veces semana<br><input type="radio"/> 5 a 6 veces semana<br><input type="radio"/> 1 vez al día<br><input type="radio"/> 2 a 3 veces al día<br><input type="radio"/> 5 a 6 veces al día<br><input type="radio"/> más 6 veces al día |
| Pate o foiegras     | <input checked="" type="radio"/> Nunca o menos 1 vez al mes<br><input type="radio"/> 1 a 3 veces mes<br><input type="radio"/> 1 vez semana<br><input type="radio"/> 2 a 4 veces semana<br><input type="radio"/> 5 a 6 veces semana<br><input type="radio"/> 1 vez al día<br><input type="radio"/> 2 a 3 veces al día<br><input type="radio"/> 5 a 6 veces al día<br><input type="radio"/> más 6 veces al día |
| Hamburguesa         | <input type="radio"/> Nunca o menos 1 vez al mes<br><input checked="" type="radio"/> 1 a 3 veces mes<br><input type="radio"/> 1 vez semana<br><input type="radio"/> 2 a 4 veces semana<br><input type="radio"/> 5 a 6 veces semana<br><input type="radio"/> 1 vez al día<br><input type="radio"/> 2 a 3 veces al día<br><input type="radio"/> 5 a 6 veces al día<br><input type="radio"/> más 6 veces al día |
| tocino o bacon      | <input checked="" type="radio"/> Nunca o menos 1 vez al mes<br><input type="radio"/> 1 a 3 veces mes<br><input type="radio"/> 1 vez semana<br><input type="radio"/> 2 a 4 veces semana<br><input type="radio"/> 5 a 6 veces semana<br><input type="radio"/> 1 vez al día<br><input type="radio"/> 2 a 3 veces al día<br><input type="radio"/> 5 a 6 veces al día<br><input type="radio"/> más 6 veces al día |

---

Pescado frito

- ☐ Nunca o menos 1 vez al mes  
☒ 1 a 3 veces mes  
☐ 1 vez semana  
☐ 2 a 4 veces semana  
☐ 5 a 6 veces semana  
☐ 1 vez al día  
☐ 2 a 3 veces al día  
☐ 5 a 6 veces al día  
☐ más 6 veces al día

---

pescado hervido blanco

- ☐ Nunca o menos 1 vez al mes  
☒ 1 a 3 veces mes  
☐ 1 vez semana  
☐ 2 a 4 veces semana  
☐ 5 a 6 veces semana  
☐ 1 vez al día  
☐ 2 a 3 veces al día  
☐ 5 a 6 veces al día  
☐ más 6 veces al día

---

pescado hervido azul

- ☒ Nunca o menos 1 vez al mes  
☐ 1 a 3 veces mes  
☐ 1 vez semana  
☐ 2 a 4 veces semana  
☐ 5 a 6 veces semana  
☐ 1 vez al día  
☐ 2 a 3 veces al día  
☐ 5 a 6 veces al día  
☐ más 6 veces al día

---

otros pescado azul

- ☐ Nunca o menos 1 vez al mes  
☒ 1 a 3 veces mes  
☐ 1 vez semana  
☐ 2 a 4 veces semana  
☐ 5 a 6 veces semana  
☐ 1 vez al día  
☐ 2 a 3 veces al día  
☐ 5 a 6 veces al día  
☐ más 6 veces al día

---

atun conserva

- ☐ Nunca o menos 1 vez al mes  
☒ 1 a 3 veces mes  
☐ 1 vez semana  
☐ 2 a 4 veces semana  
☐ 5 a 6 veces semana  
☐ 1 vez al día  
☐ 2 a 3 veces al día  
☐ 5 a 6 veces al día  
☐ más 6 veces al día

---

sardina conserva

- ☒ Nunca o menos 1 vez al mes  
☐ 1 a 3 veces mes  
☐ 1 vez semana  
☐ 2 a 4 veces semana  
☐ 5 a 6 veces semana  
☐ 1 vez al día  
☐ 2 a 3 veces al día  
☐ 5 a 6 veces al día  
☐ más 6 veces al día

|                                         |                                                                                                                                                                                                                                                                                                                                                                                                              |
|-----------------------------------------|--------------------------------------------------------------------------------------------------------------------------------------------------------------------------------------------------------------------------------------------------------------------------------------------------------------------------------------------------------------------------------------------------------------|
| pescado ahumado                         | <input checked="" type="radio"/> Nunca o menos 1 vez al mes<br><input type="radio"/> 1 a 3 veces mes<br><input type="radio"/> 1 vez semana<br><input type="radio"/> 2 a 4 veces semana<br><input type="radio"/> 5 a 6 veces semana<br><input type="radio"/> 1 vez al día<br><input type="radio"/> 2 a 3 veces al día<br><input type="radio"/> 5 a 6 veces al día<br><input type="radio"/> más 6 veces al día |
| almejas o mejillones o ostras unos 100g | <input checked="" type="radio"/> Nunca o menos 1 vez al mes<br><input type="radio"/> 1 a 3 veces mes<br><input type="radio"/> 1 vez semana<br><input type="radio"/> 2 a 4 veces semana<br><input type="radio"/> 5 a 6 veces semana<br><input type="radio"/> 1 vez al día<br><input type="radio"/> 2 a 3 veces al día<br><input type="radio"/> 5 a 6 veces al día<br><input type="radio"/> más 6 veces al día |
| calamar o chipiron o sepia unos 100g    | <input type="radio"/> Nunca o menos 1 vez al mes<br><input checked="" type="radio"/> 1 a 3 veces mes<br><input type="radio"/> 1 vez semana<br><input type="radio"/> 2 a 4 veces semana<br><input type="radio"/> 5 a 6 veces semana<br><input type="radio"/> 1 vez al día<br><input type="radio"/> 2 a 3 veces al día<br><input type="radio"/> 5 a 6 veces al día<br><input type="radio"/> más 6 veces al día |
| marisco unos 100g                       | <input type="radio"/> Nunca o menos 1 vez al mes<br><input checked="" type="radio"/> 1 a 3 veces mes<br><input type="radio"/> 1 vez semana<br><input type="radio"/> 2 a 4 veces semana<br><input type="radio"/> 5 a 6 veces semana<br><input type="radio"/> 1 vez al día<br><input type="radio"/> 2 a 3 veces al día<br><input type="radio"/> 5 a 6 veces al día<br><input type="radio"/> más 6 veces al día |
| Espinacas o acelgas cocinadas           | <input checked="" type="radio"/> Nunca o menos 1 vez al mes<br><input type="radio"/> 1 a 3 veces mes<br><input type="radio"/> 1 vez semana<br><input type="radio"/> 2 a 4 veces semana<br><input type="radio"/> 5 a 6 veces semana<br><input type="radio"/> 1 vez al día<br><input type="radio"/> 2 a 3 veces al día<br><input type="radio"/> 5 a 6 veces al día<br><input type="radio"/> más 6 veces al día |
| Col o coliflor o brocoli cocinado       | <input checked="" type="radio"/> Nunca o menos 1 vez al mes<br><input type="radio"/> 1 a 3 veces mes<br><input type="radio"/> 1 vez semana<br><input type="radio"/> 2 a 4 veces semana<br><input type="radio"/> 5 a 6 veces semana<br><input type="radio"/> 1 vez al día<br><input type="radio"/> 2 a 3 veces al día<br><input type="radio"/> 5 a 6 veces al día<br><input type="radio"/> más 6 veces al día |



---

Lechuga o endivia o escarola

- ☒ Nunca o menos 1 vez al mes  
☐ 1 a 3 veces mes  
☐ 1 vez semana  
☐ 2 a 4 veces semana  
☐ 5 a 6 veces semana  
☐ 1 vez al día  
☐ 2 a 3 veces al día  
☐ 5 a 6 veces al día  
☐ más 6 veces al día

---

tomate ensalada

- ☐ Nunca o menos 1 vez al mes  
☒ 1 a 3 veces mes  
☐ 1 vez semana  
☐ 2 a 4 veces semana  
☐ 5 a 6 veces semana  
☐ 1 vez al día  
☐ 2 a 3 veces al día  
☐ 5 a 6 veces al día  
☐ más 6 veces al día

---

cebolla

- ☒ Nunca o menos 1 vez al mes  
☐ 1 a 3 veces mes  
☐ 1 vez semana  
☐ 2 a 4 veces semana  
☐ 5 a 6 veces semana  
☐ 1 vez al día  
☐ 2 a 3 veces al día  
☐ 5 a 6 veces al día  
☐ más 6 veces al día

---

Zanahoria o calabaza

- ☒ Nunca o menos 1 vez al mes  
☐ 1 a 3 veces mes  
☐ 1 vez semana  
☐ 2 a 4 veces semana  
☐ 5 a 6 veces semana  
☐ 1 vez al día  
☐ 2 a 3 veces al día  
☐ 5 a 6 veces al día  
☐ más 6 veces al día

---

Judías verdes

- ☒ Nunca o menos 1 vez al mes  
☐ 1 a 3 veces mes  
☐ 1 vez semana  
☐ 2 a 4 veces semana  
☐ 5 a 6 veces semana  
☐ 1 vez al día  
☐ 2 a 3 veces al día  
☐ 5 a 6 veces al día  
☐ más 6 veces al día

---

Berenjena o calabacin o pepino

- ☒ Nunca o menos 1 vez al mes  
☐ 1 a 3 veces mes  
☐ 1 vez semana  
☐ 2 a 4 veces semana  
☐ 5 a 6 veces semana  
☐ 1 vez al día  
☐ 2 a 3 veces al día  
☐ 5 a 6 veces al día  
☐ más 6 veces al día

|                       |                                                                                                                                                                                                                                                                                                                                                                                                              |
|-----------------------|--------------------------------------------------------------------------------------------------------------------------------------------------------------------------------------------------------------------------------------------------------------------------------------------------------------------------------------------------------------------------------------------------------------|
| pimiento              | <input checked="" type="radio"/> Nunca o menos 1 vez al mes<br><input type="radio"/> 1 a 3 veces mes<br><input type="radio"/> 1 vez semana<br><input type="radio"/> 2 a 4 veces semana<br><input type="radio"/> 5 a 6 veces semana<br><input type="radio"/> 1 vez al día<br><input type="radio"/> 2 a 3 veces al día<br><input type="radio"/> 5 a 6 veces al día<br><input type="radio"/> más 6 veces al día |
| alcachofa             | <input type="radio"/> Nunca o menos 1 vez al mes<br><input checked="" type="radio"/> 1 a 3 veces mes<br><input type="radio"/> 1 vez semana<br><input type="radio"/> 2 a 4 veces semana<br><input type="radio"/> 5 a 6 veces semana<br><input type="radio"/> 1 vez al día<br><input type="radio"/> 2 a 3 veces al día<br><input type="radio"/> 5 a 6 veces al día<br><input type="radio"/> más 6 veces al día |
| espárragos            | <input checked="" type="radio"/> Nunca o menos 1 vez al mes<br><input type="radio"/> 1 a 3 veces mes<br><input type="radio"/> 1 vez semana<br><input type="radio"/> 2 a 4 veces semana<br><input type="radio"/> 5 a 6 veces semana<br><input type="radio"/> 1 vez al día<br><input type="radio"/> 2 a 3 veces al día<br><input type="radio"/> 5 a 6 veces al día<br><input type="radio"/> más 6 veces al día |
| maíz hervido          | <input checked="" type="radio"/> Nunca o menos 1 vez al mes<br><input type="radio"/> 1 a 3 veces mes<br><input type="radio"/> 1 vez semana<br><input type="radio"/> 2 a 4 veces semana<br><input type="radio"/> 5 a 6 veces semana<br><input type="radio"/> 1 vez al día<br><input type="radio"/> 2 a 3 veces al día<br><input type="radio"/> 5 a 6 veces al día<br><input type="radio"/> más 6 veces al día |
| legumbres             | <input type="radio"/> Nunca o menos 1 vez al mes<br><input type="radio"/> 1 a 3 veces mes<br><input checked="" type="radio"/> 1 vez semana<br><input type="radio"/> 2 a 4 veces semana<br><input type="radio"/> 5 a 6 veces semana<br><input type="radio"/> 1 vez al día<br><input type="radio"/> 2 a 3 veces al día<br><input type="radio"/> 5 a 6 veces al día<br><input type="radio"/> más 6 veces al día |
| naranjas o mandarinas | <input checked="" type="radio"/> Nunca o menos 1 vez al mes<br><input type="radio"/> 1 a 3 veces mes<br><input type="radio"/> 1 vez semana<br><input type="radio"/> 2 a 4 veces semana<br><input type="radio"/> 5 a 6 veces semana<br><input type="radio"/> 1 vez al día<br><input type="radio"/> 2 a 3 veces al día<br><input type="radio"/> 5 a 6 veces al día<br><input type="radio"/> más 6 veces al día |

---

zum natural fruta

- ☒ Nunca o menos 1 vez al mes  
☐ 1 a 3 veces mes  
☐ 1 vez semana  
☐ 2 a 4 veces semana  
☐ 5 a 6 veces semana  
☐ 1 vez al día  
☐ 2 a 3 veces al día  
☐ 5 a 6 veces al día  
☐ más 6 veces al día

---

platano

- ☒ Nunca o menos 1 vez al mes  
☐ 1 a 3 veces mes  
☐ 1 vez semana  
☐ 2 a 4 veces semana  
☐ 5 a 6 veces semana  
☐ 1 vez al día  
☐ 2 a 3 veces al día  
☐ 5 a 6 veces al día  
☐ más 6 veces al día

---

manzana o pera

- ☒ Nunca o menos 1 vez al mes  
☐ 1 a 3 veces mes  
☐ 1 vez semana  
☐ 2 a 4 veces semana  
☐ 5 a 6 veces semana  
☐ 1 vez al día  
☐ 2 a 3 veces al día  
☐ 5 a 6 veces al día  
☐ más 6 veces al día

---

melocotón o nectarina

- ☐ Nunca o menos 1 vez al mes  
☒ 1 a 3 veces mes  
☐ 1 vez semana  
☐ 2 a 4 veces semana  
☐ 5 a 6 veces semana  
☐ 1 vez al día  
☐ 2 a 3 veces al día  
☐ 5 a 6 veces al día  
☐ más 6 veces al día

---

sandia o melon

- ☐ Nunca o menos 1 vez al mes  
☒ 1 a 3 veces mes  
☐ 1 vez semana  
☐ 2 a 4 veces semana  
☐ 5 a 6 veces semana  
☐ 1 vez al día  
☐ 2 a 3 veces al día  
☐ 5 a 6 veces al día  
☐ más 6 veces al día

---

uva

- ☒ Nunca o menos 1 vez al mes  
☐ 1 a 3 veces mes  
☐ 1 vez semana  
☐ 2 a 4 veces semana  
☐ 5 a 6 veces semana  
☐ 1 vez al día  
☐ 2 a 3 veces al día  
☐ 5 a 6 veces al día  
☐ más 6 veces al día

---

bruna o ciruela

- ☒ Nunca o menos 1 vez al mes  
☐ 1 a 3 veces mes  
☐ 1 vez semana  
☐ 2 a 4 veces semana  
☐ 5 a 6 veces semana  
☐ 1 vez al día  
☐ 2 a 3 veces al día  
☐ 5 a 6 veces al día  
☐ más 6 veces al día

---

kiwi

- ☒ Nunca o menos 1 vez al mes  
☐ 1 a 3 veces mes  
☐ 1 vez semana  
☐ 2 a 4 veces semana  
☐ 5 a 6 veces semana  
☐ 1 vez al día  
☐ 2 a 3 veces al día  
☐ 5 a 6 veces al día  
☐ más 6 veces al día

---

aceituna

- ☐ Nunca o menos 1 vez al mes  
☒ 1 a 3 veces mes  
☐ 1 vez semana  
☐ 2 a 4 veces semana  
☐ 5 a 6 veces semana  
☐ 1 vez al día  
☐ 2 a 3 veces al día  
☐ 5 a 6 veces al día  
☐ más 6 veces al día

---

frutos secos

- ☐ Nunca o menos 1 vez al mes  
☒ 1 a 3 veces mes  
☐ 1 vez semana  
☐ 2 a 4 veces semana  
☐ 5 a 6 veces semana  
☐ 1 vez al día  
☐ 2 a 3 veces al día  
☐ 5 a 6 veces al día  
☐ más 6 veces al día

---

pan blanco

- ☐ Nunca o menos 1 vez al mes  
☐ 1 a 3 veces mes  
☐ 1 vez semana  
☐ 2 a 4 veces semana  
☐ 5 a 6 veces semana  
☒ 1 vez al día  
☐ 2 a 3 veces al día  
☐ 5 a 6 veces al día  
☐ más 6 veces al día

---

pan integral

- ☒ Nunca o menos 1 vez al mes  
☐ 1 a 3 veces mes  
☐ 1 vez semana  
☐ 2 a 4 veces semana  
☐ 5 a 6 veces semana  
☐ 1 vez al día  
☐ 2 a 3 veces al día  
☐ 5 a 6 veces al día  
☐ más 6 veces al día

|                          |                                                                                                                                                                                                                                                                                                                                                                                                              |
|--------------------------|--------------------------------------------------------------------------------------------------------------------------------------------------------------------------------------------------------------------------------------------------------------------------------------------------------------------------------------------------------------------------------------------------------------|
| cereales desayuno        | <input checked="" type="radio"/> Nunca o menos 1 vez al mes<br><input type="radio"/> 1 a 3 veces mes<br><input type="radio"/> 1 vez semana<br><input type="radio"/> 2 a 4 veces semana<br><input type="radio"/> 5 a 6 veces semana<br><input type="radio"/> 1 vez al día<br><input type="radio"/> 2 a 3 veces al día<br><input type="radio"/> 5 a 6 veces al día<br><input type="radio"/> más 6 veces al día |
| patatas fritas           | <input type="radio"/> Nunca o menos 1 vez al mes<br><input type="radio"/> 1 a 3 veces mes<br><input checked="" type="radio"/> 1 vez semana<br><input type="radio"/> 2 a 4 veces semana<br><input type="radio"/> 5 a 6 veces semana<br><input type="radio"/> 1 vez al día<br><input type="radio"/> 2 a 3 veces al día<br><input type="radio"/> 5 a 6 veces al día<br><input type="radio"/> más 6 veces al día |
| patatas cocidas o asadas | <input type="radio"/> Nunca o menos 1 vez al mes<br><input type="radio"/> 1 a 3 veces mes<br><input type="radio"/> 1 vez semana<br><input checked="" type="radio"/> 2 a 4 veces semana<br><input type="radio"/> 5 a 6 veces semana<br><input type="radio"/> 1 vez al día<br><input type="radio"/> 2 a 3 veces al día<br><input type="radio"/> 5 a 6 veces al día<br><input type="radio"/> más 6 veces al día |
| bolsa papas              | <input type="radio"/> Nunca o menos 1 vez al mes<br><input checked="" type="radio"/> 1 a 3 veces mes<br><input type="radio"/> 1 vez semana<br><input type="radio"/> 2 a 4 veces semana<br><input type="radio"/> 5 a 6 veces semana<br><input type="radio"/> 1 vez al día<br><input type="radio"/> 2 a 3 veces al día<br><input type="radio"/> 5 a 6 veces al día<br><input type="radio"/> más 6 veces al día |
| arroz cocinado           | <input type="radio"/> Nunca o menos 1 vez al mes<br><input type="radio"/> 1 a 3 veces mes<br><input type="radio"/> 1 vez semana<br><input checked="" type="radio"/> 2 a 4 veces semana<br><input type="radio"/> 5 a 6 veces semana<br><input type="radio"/> 1 vez al día<br><input type="radio"/> 2 a 3 veces al día<br><input type="radio"/> 5 a 6 veces al día<br><input type="radio"/> más 6 veces al día |
| pasta                    | <input type="radio"/> Nunca o menos 1 vez al mes<br><input type="radio"/> 1 a 3 veces mes<br><input type="radio"/> 1 vez semana<br><input checked="" type="radio"/> 2 a 4 veces semana<br><input type="radio"/> 5 a 6 veces semana<br><input type="radio"/> 1 vez al día<br><input type="radio"/> 2 a 3 veces al día<br><input type="radio"/> 5 a 6 veces al día<br><input type="radio"/> más 6 veces al día |

|                     |                                                                                                                                                                                                                                                                                                                                                                                                              |
|---------------------|--------------------------------------------------------------------------------------------------------------------------------------------------------------------------------------------------------------------------------------------------------------------------------------------------------------------------------------------------------------------------------------------------------------|
| pizza               | <input type="radio"/> Nunca o menos 1 vez al mes<br><input checked="" type="radio"/> 1 a 3 veces mes<br><input type="radio"/> 1 vez semana<br><input type="radio"/> 2 a 4 veces semana<br><input type="radio"/> 5 a 6 veces semana<br><input type="radio"/> 1 vez al día<br><input type="radio"/> 2 a 3 veces al día<br><input type="radio"/> 5 a 6 veces al día<br><input type="radio"/> más 6 veces al día |
| aceite oliva        | <input type="radio"/> Nunca o menos 1 vez al mes<br><input type="radio"/> 1 a 3 veces mes<br><input type="radio"/> 1 vez semana<br><input type="radio"/> 2 a 4 veces semana<br><input type="radio"/> 5 a 6 veces semana<br><input checked="" type="radio"/> 1 vez al día<br><input type="radio"/> 2 a 3 veces al día<br><input type="radio"/> 5 a 6 veces al día<br><input type="radio"/> más 6 veces al día |
| otros aceites       | <input checked="" type="radio"/> Nunca o menos 1 vez al mes<br><input type="radio"/> 1 a 3 veces mes<br><input type="radio"/> 1 vez semana<br><input type="radio"/> 2 a 4 veces semana<br><input type="radio"/> 5 a 6 veces semana<br><input type="radio"/> 1 vez al día<br><input type="radio"/> 2 a 3 veces al día<br><input type="radio"/> 5 a 6 veces al día<br><input type="radio"/> más 6 veces al día |
| margarina           | <input checked="" type="radio"/> Nunca o menos 1 vez al mes<br><input type="radio"/> 1 a 3 veces mes<br><input type="radio"/> 1 vez semana<br><input type="radio"/> 2 a 4 veces semana<br><input type="radio"/> 5 a 6 veces semana<br><input type="radio"/> 1 vez al día<br><input type="radio"/> 2 a 3 veces al día<br><input type="radio"/> 5 a 6 veces al día<br><input type="radio"/> más 6 veces al día |
| mantequilla         | <input checked="" type="radio"/> Nunca o menos 1 vez al mes<br><input type="radio"/> 1 a 3 veces mes<br><input type="radio"/> 1 vez semana<br><input type="radio"/> 2 a 4 veces semana<br><input type="radio"/> 5 a 6 veces semana<br><input type="radio"/> 1 vez al día<br><input type="radio"/> 2 a 3 veces al día<br><input type="radio"/> 5 a 6 veces al día<br><input type="radio"/> más 6 veces al día |
| galletas tipo maria | <input checked="" type="radio"/> Nunca o menos 1 vez al mes<br><input type="radio"/> 1 a 3 veces mes<br><input type="radio"/> 1 vez semana<br><input type="radio"/> 2 a 4 veces semana<br><input type="radio"/> 5 a 6 veces semana<br><input type="radio"/> 1 vez al día<br><input type="radio"/> 2 a 3 veces al día<br><input type="radio"/> 5 a 6 veces al día<br><input type="radio"/> más 6 veces al día |

---

galletas chocolate

- ☒ Nunca o menos 1 vez al mes  
☐ 1 a 3 veces mes  
☐ 1 vez semana  
☐ 2 a 4 veces semana  
☐ 5 a 6 veces semana  
☐ 1 vez al día  
☐ 2 a 3 veces al día  
☐ 5 a 6 veces al día  
☐ más 6 veces al día

---

bolleria

- ☒ Nunca o menos 1 vez al mes  
☐ 1 a 3 veces mes  
☐ 1 vez semana  
☐ 2 a 4 veces semana  
☐ 5 a 6 veces semana  
☐ 1 vez al día  
☐ 2 a 3 veces al día  
☐ 5 a 6 veces al día  
☐ más 6 veces al día

---

chocolate o bombones

- ☐ Nunca o menos 1 vez al mes  
☐ 1 a 3 veces mes  
☐ 1 vez semana  
☐ 2 a 4 veces semana  
☐ 5 a 6 veces semana  
☒ 1 vez al día  
☐ 2 a 3 veces al día  
☐ 5 a 6 veces al día  
☐ más 6 veces al día

---

chocolate polvo o colacao

- ☐ Nunca o menos 1 vez al mes  
☒ 1 a 3 veces mes  
☐ 1 vez semana  
☐ 2 a 4 veces semana  
☐ 5 a 6 veces semana  
☐ 1 vez al día  
☐ 2 a 3 veces al día  
☐ 5 a 6 veces al día  
☐ más 6 veces al día

---

vino tinto

- ☒ Nunca o menos 1 vez al mes  
☐ 1 a 3 veces mes  
☐ 1 vez semana  
☐ 2 a 4 veces semana  
☐ 5 a 6 veces semana  
☐ 1 vez al día  
☐ 2 a 3 veces al día  
☐ 5 a 6 veces al día  
☐ más 6 veces al día

---

vino blanco

- ☒ Nunca o menos 1 vez al mes  
☐ 1 a 3 veces mes  
☐ 1 vez semana  
☐ 2 a 4 veces semana  
☐ 5 a 6 veces semana  
☐ 1 vez al día  
☐ 2 a 3 veces al día  
☐ 5 a 6 veces al día  
☐ más 6 veces al día

---

|                    |                                                                                                                                                                                                                                                                                                                                                                                                              |
|--------------------|--------------------------------------------------------------------------------------------------------------------------------------------------------------------------------------------------------------------------------------------------------------------------------------------------------------------------------------------------------------------------------------------------------------|
| vino seco o vermut | <input checked="" type="radio"/> Nunca o menos 1 vez al mes<br><input type="radio"/> 1 a 3 veces mes<br><input type="radio"/> 1 vez semana<br><input type="radio"/> 2 a 4 veces semana<br><input type="radio"/> 5 a 6 veces semana<br><input type="radio"/> 1 vez al día<br><input type="radio"/> 2 a 3 veces al día<br><input type="radio"/> 5 a 6 veces al día<br><input type="radio"/> más 6 veces al día |
|--------------------|--------------------------------------------------------------------------------------------------------------------------------------------------------------------------------------------------------------------------------------------------------------------------------------------------------------------------------------------------------------------------------------------------------------|

---

|         |                                                                                                                                                                                                                                                                                                                                                                                                              |
|---------|--------------------------------------------------------------------------------------------------------------------------------------------------------------------------------------------------------------------------------------------------------------------------------------------------------------------------------------------------------------------------------------------------------------|
| cerveza | <input checked="" type="radio"/> Nunca o menos 1 vez al mes<br><input type="radio"/> 1 a 3 veces mes<br><input type="radio"/> 1 vez semana<br><input type="radio"/> 2 a 4 veces semana<br><input type="radio"/> 5 a 6 veces semana<br><input type="radio"/> 1 vez al día<br><input type="radio"/> 2 a 3 veces al día<br><input type="radio"/> 5 a 6 veces al día<br><input type="radio"/> más 6 veces al día |
|---------|--------------------------------------------------------------------------------------------------------------------------------------------------------------------------------------------------------------------------------------------------------------------------------------------------------------------------------------------------------------------------------------------------------------|

---

|                     |                                                                                                                                                                                                                                                                                                                                                                                                              |
|---------------------|--------------------------------------------------------------------------------------------------------------------------------------------------------------------------------------------------------------------------------------------------------------------------------------------------------------------------------------------------------------------------------------------------------------|
| cerveza sin alcohol | <input checked="" type="radio"/> Nunca o menos 1 vez al mes<br><input type="radio"/> 1 a 3 veces mes<br><input type="radio"/> 1 vez semana<br><input type="radio"/> 2 a 4 veces semana<br><input type="radio"/> 5 a 6 veces semana<br><input type="radio"/> 1 vez al día<br><input type="radio"/> 2 a 3 veces al día<br><input type="radio"/> 5 a 6 veces al día<br><input type="radio"/> más 6 veces al día |
|---------------------|--------------------------------------------------------------------------------------------------------------------------------------------------------------------------------------------------------------------------------------------------------------------------------------------------------------------------------------------------------------------------------------------------------------|

---

|         |                                                                                                                                                                                                                                                                                                                                                                                                              |
|---------|--------------------------------------------------------------------------------------------------------------------------------------------------------------------------------------------------------------------------------------------------------------------------------------------------------------------------------------------------------------------------------------------------------------|
| licores | <input checked="" type="radio"/> Nunca o menos 1 vez al mes<br><input type="radio"/> 1 a 3 veces mes<br><input type="radio"/> 1 vez semana<br><input type="radio"/> 2 a 4 veces semana<br><input type="radio"/> 5 a 6 veces semana<br><input type="radio"/> 1 vez al día<br><input type="radio"/> 2 a 3 veces al día<br><input type="radio"/> 5 a 6 veces al día<br><input type="radio"/> más 6 veces al día |
|---------|--------------------------------------------------------------------------------------------------------------------------------------------------------------------------------------------------------------------------------------------------------------------------------------------------------------------------------------------------------------------------------------------------------------|

---

|                       |                                                                                                                                                                                                                                                                                                                                                                                                              |
|-----------------------|--------------------------------------------------------------------------------------------------------------------------------------------------------------------------------------------------------------------------------------------------------------------------------------------------------------------------------------------------------------------------------------------------------------|
| ginebra o ron o vodka | <input checked="" type="radio"/> Nunca o menos 1 vez al mes<br><input type="radio"/> 1 a 3 veces mes<br><input type="radio"/> 1 vez semana<br><input type="radio"/> 2 a 4 veces semana<br><input type="radio"/> 5 a 6 veces semana<br><input type="radio"/> 1 vez al día<br><input type="radio"/> 2 a 3 veces al día<br><input type="radio"/> 5 a 6 veces al día<br><input type="radio"/> más 6 veces al día |
|-----------------------|--------------------------------------------------------------------------------------------------------------------------------------------------------------------------------------------------------------------------------------------------------------------------------------------------------------------------------------------------------------------------------------------------------------|

---

|                 |                                                                                                                                                                                                                                                                                                                                                                                                              |
|-----------------|--------------------------------------------------------------------------------------------------------------------------------------------------------------------------------------------------------------------------------------------------------------------------------------------------------------------------------------------------------------------------------------------------------------|
| refresco normal | <input checked="" type="radio"/> Nunca o menos 1 vez al mes<br><input type="radio"/> 1 a 3 veces mes<br><input type="radio"/> 1 vez semana<br><input type="radio"/> 2 a 4 veces semana<br><input type="radio"/> 5 a 6 veces semana<br><input type="radio"/> 1 vez al día<br><input type="radio"/> 2 a 3 veces al día<br><input type="radio"/> 5 a 6 veces al día<br><input type="radio"/> más 6 veces al día |
|-----------------|--------------------------------------------------------------------------------------------------------------------------------------------------------------------------------------------------------------------------------------------------------------------------------------------------------------------------------------------------------------------------------------------------------------|

---



---

refresco sin azúcar

- ☐ Nunca o menos 1 vez al mes  
☐ 1 a 3 veces mes  
☐ 1 vez semana  
☒ 2 a 4 veces semana  
☐ 5 a 6 veces semana  
☐ 1 vez al día  
☐ 2 a 3 veces al día  
☐ 5 a 6 veces al día  
☐ más 6 veces al día

---

Agua del grifo

- ☐ Nunca o menos 1 vez al mes  
☐ 1 a 3 veces mes  
☒ 1 vez semana  
☐ 2 a 4 veces semana  
☐ 5 a 6 veces semana  
☐ 1 vez al día  
☐ 2 a 3 veces al día  
☐ 5 a 6 veces al día  
☐ más 6 veces al día

---

agua embotellada sin gas

- ☐ Nunca o menos 1 vez al mes  
☐ 1 a 3 veces mes  
☐ 1 vez semana  
☐ 2 a 4 veces semana  
☐ 5 a 6 veces semana  
☐ 1 vez al día  
☐ 2 a 3 veces al día  
☐ 5 a 6 veces al día  
☒ más 6 veces al día

---

agua embotellada con gas

- ☒ Nunca o menos 1 vez al mes  
☐ 1 a 3 veces mes  
☐ 1 vez semana  
☐ 2 a 4 veces semana  
☐ 5 a 6 veces semana  
☐ 1 vez al día  
☐ 2 a 3 veces al día  
☐ 5 a 6 veces al día  
☐ más 6 veces al día

---

zumو frutas embasado

- ☐ Nunca o menos 1 vez al mes  
☒ 1 a 3 veces mes  
☐ 1 vez semana  
☐ 2 a 4 veces semana  
☐ 5 a 6 veces semana  
☐ 1 vez al día  
☐ 2 a 3 veces al día  
☐ 5 a 6 veces al día  
☐ más 6 veces al día

---

cafe

- ☒ Nunca o menos 1 vez al mes  
☐ 1 a 3 veces mes  
☐ 1 vez semana  
☐ 2 a 4 veces semana  
☐ 5 a 6 veces semana  
☐ 1 vez al día  
☐ 2 a 3 veces al día  
☐ 5 a 6 veces al día  
☐ más 6 veces al día

---

cafe descafeinado

- ☐ Nunca o menos 1 vez al mes  
☐ 1 a 3 veces mes  
☐ 1 vez semana  
☐ 2 a 4 veces semana  
☐ 5 a 6 veces semana  
☒ 1 vez al día  
☐ 2 a 3 veces al día  
☐ 5 a 6 veces al día  
☐ más 6 veces al día

---

te o infusión

- ☒ Nunca o menos 1 vez al mes  
☐ 1 a 3 veces mes  
☐ 1 vez semana  
☐ 2 a 4 veces semana  
☐ 5 a 6 veces semana  
☐ 1 vez al día  
☐ 2 a 3 veces al día  
☐ 5 a 6 veces al día  
☐ más 6 veces al día

---

sopa o puré verduras

- ☐ Nunca o menos 1 vez al mes  
☐ 1 a 3 veces mes  
☐ 1 vez semana  
☒ 2 a 4 veces semana  
☐ 5 a 6 veces semana  
☐ 1 vez al día  
☐ 2 a 3 veces al día  
☐ 5 a 6 veces al día  
☐ más 6 veces al día

---

croquetas pollo jamón

- ☒ Nunca o menos 1 vez al mes  
☐ 1 a 3 veces mes  
☐ 1 vez semana  
☐ 2 a 4 veces semana  
☐ 5 a 6 veces semana  
☐ 1 vez al día  
☐ 2 a 3 veces al día  
☐ 5 a 6 veces al día  
☐ más 6 veces al día

---

croquetas pescado

- ☒ Nunca o menos 1 vez al mes  
☐ 1 a 3 veces mes  
☐ 1 vez semana  
☐ 2 a 4 veces semana  
☐ 5 a 6 veces semana  
☐ 1 vez al día  
☐ 2 a 3 veces al día  
☐ 5 a 6 veces al día  
☐ más 6 veces al día

---

mayonesa

- ☐ Nunca o menos 1 vez al mes  
☒ 1 a 3 veces mes  
☐ 1 vez semana  
☐ 2 a 4 veces semana  
☐ 5 a 6 veces semana  
☐ 1 vez al día  
☐ 2 a 3 veces al día  
☐ 5 a 6 veces al día  
☐ más 6 veces al día

|                  |                                                                                                                                                                                                                                                                                                                                                                                                              |
|------------------|--------------------------------------------------------------------------------------------------------------------------------------------------------------------------------------------------------------------------------------------------------------------------------------------------------------------------------------------------------------------------------------------------------------|
| salsa tomate     | <input type="radio"/> Nunca o menos 1 vez al mes<br><input checked="" type="radio"/> 1 a 3 veces mes<br><input type="radio"/> 1 vez semana<br><input type="radio"/> 2 a 4 veces semana<br><input type="radio"/> 5 a 6 veces semana<br><input type="radio"/> 1 vez al día<br><input type="radio"/> 2 a 3 veces al día<br><input type="radio"/> 5 a 6 veces al día<br><input type="radio"/> más 6 veces al día |
| ketchup          | <input type="radio"/> Nunca o menos 1 vez al mes<br><input checked="" type="radio"/> 1 a 3 veces mes<br><input type="radio"/> 1 vez semana<br><input type="radio"/> 2 a 4 veces semana<br><input type="radio"/> 5 a 6 veces semana<br><input type="radio"/> 1 vez al día<br><input type="radio"/> 2 a 3 veces al día<br><input type="radio"/> 5 a 6 veces al día<br><input type="radio"/> más 6 veces al día |
| sal              | <input type="radio"/> Nunca o menos 1 vez al mes<br><input type="radio"/> 1 a 3 veces mes<br><input type="radio"/> 1 vez semana<br><input type="radio"/> 2 a 4 veces semana<br><input type="radio"/> 5 a 6 veces semana<br><input checked="" type="radio"/> 1 vez al día<br><input type="radio"/> 2 a 3 veces al día<br><input type="radio"/> 5 a 6 veces al día<br><input type="radio"/> más 6 veces al día |
| ajo              | <input type="radio"/> Nunca o menos 1 vez al mes<br><input checked="" type="radio"/> 1 a 3 veces mes<br><input type="radio"/> 1 vez semana<br><input type="radio"/> 2 a 4 veces semana<br><input type="radio"/> 5 a 6 veces semana<br><input type="radio"/> 1 vez al día<br><input type="radio"/> 2 a 3 veces al día<br><input type="radio"/> 5 a 6 veces al día<br><input type="radio"/> más 6 veces al día |
| mermelada o miel | <input checked="" type="radio"/> Nunca o menos 1 vez al mes<br><input type="radio"/> 1 a 3 veces mes<br><input type="radio"/> 1 vez semana<br><input type="radio"/> 2 a 4 veces semana<br><input type="radio"/> 5 a 6 veces semana<br><input type="radio"/> 1 vez al día<br><input type="radio"/> 2 a 3 veces al día<br><input type="radio"/> 5 a 6 veces al día<br><input type="radio"/> más 6 veces al día |
| azúcar           | <input type="radio"/> Nunca o menos 1 vez al mes<br><input type="radio"/> 1 a 3 veces mes<br><input type="radio"/> 1 vez semana<br><input type="radio"/> 2 a 4 veces semana<br><input type="radio"/> 5 a 6 veces semana<br><input checked="" type="radio"/> 1 vez al día<br><input type="radio"/> 2 a 3 veces al día<br><input type="radio"/> 5 a 6 veces al día<br><input type="radio"/> más 6 veces al día |

|                                       |                                                                                                                                                                                                                                                                                                                                                                                                                                                                                                                               |
|---------------------------------------|-------------------------------------------------------------------------------------------------------------------------------------------------------------------------------------------------------------------------------------------------------------------------------------------------------------------------------------------------------------------------------------------------------------------------------------------------------------------------------------------------------------------------------|
| Otro alimento                         |                                                                                                                                                                                                                                                                                                                                                                                                                                                                                                                               |
| suplementos vitamínicos               | <input checked="" type="radio"/> si<br><input type="radio"/> no                                                                                                                                                                                                                                                                                                                                                                                                                                                               |
| suplementos vitamínicos               | [*DATA REMOVED*]                                                                                                                                                                                                                                                                                                                                                                                                                                                                                                              |
| dieta previa                          | <input type="radio"/> si<br><input checked="" type="radio"/> no                                                                                                                                                                                                                                                                                                                                                                                                                                                               |
| motivo dieta                          | <input checked="" type="radio"/> no dieta<br><input type="radio"/> control peso<br><input type="radio"/> control colesterol<br><input type="radio"/> control diabetes<br><input type="radio"/> problemas estómago<br><input type="radio"/> problemas vesícula o hepáticos<br><input type="radio"/> HTA o cardiopatía<br><input type="radio"/> problemas renales<br><input type="radio"/> alergia alimentaria<br><input type="radio"/> ácido úrico elevado<br><input type="radio"/> vegetariana<br><input type="radio"/> otros |
| cambio alimentos año previo gestación | <input checked="" type="radio"/> si<br><input type="radio"/> no                                                                                                                                                                                                                                                                                                                                                                                                                                                               |
| cambio lácteos                        | <input type="radio"/> eliminado<br><input type="radio"/> disminuido<br><input checked="" type="radio"/> igual<br><input type="radio"/> aumentado<br><input type="radio"/> no sabe                                                                                                                                                                                                                                                                                                                                             |
| cambio huevos                         | <input type="radio"/> eliminado<br><input type="radio"/> disminuido<br><input checked="" type="radio"/> igual<br><input type="radio"/> aumentado<br><input type="radio"/> no sabe                                                                                                                                                                                                                                                                                                                                             |
| cambio carne                          | <input type="radio"/> eliminado<br><input type="radio"/> disminuido<br><input checked="" type="radio"/> igual<br><input type="radio"/> aumentado<br><input type="radio"/> no sabe                                                                                                                                                                                                                                                                                                                                             |
| cambio pescado                        | <input type="radio"/> eliminado<br><input type="radio"/> disminuido<br><input checked="" type="radio"/> igual<br><input type="radio"/> aumentado<br><input type="radio"/> no sabe                                                                                                                                                                                                                                                                                                                                             |
| cambio verduras                       | <input type="radio"/> eliminado<br><input type="radio"/> disminuido<br><input checked="" type="radio"/> igual<br><input type="radio"/> aumentado<br><input type="radio"/> no sabe                                                                                                                                                                                                                                                                                                                                             |

|                            |                                                                                                                                                                                                                        |
|----------------------------|------------------------------------------------------------------------------------------------------------------------------------------------------------------------------------------------------------------------|
| cambio legumbres           | <input type="radio"/> eliminado<br><input type="radio"/> disminuido<br><input checked="" type="radio"/> igual<br><input type="radio"/> aumentado<br><input type="radio"/> no sabe                                      |
| cambio fruta               | <input type="radio"/> eliminado<br><input type="radio"/> disminuido<br><input checked="" type="radio"/> igual<br><input type="radio"/> aumentado<br><input type="radio"/> no sabe                                      |
| cambio pan                 | <input type="radio"/> eliminado<br><input type="radio"/> disminuido<br><input checked="" type="radio"/> igual<br><input type="radio"/> aumentado<br><input type="radio"/> no sabe                                      |
| cambio aceite oliva        | <input type="radio"/> eliminado<br><input type="radio"/> disminuido<br><input checked="" type="radio"/> igual<br><input type="radio"/> aumentado<br><input type="radio"/> no sabe                                      |
| cambio mante o margarina   | <input type="radio"/> eliminado<br><input type="radio"/> disminuido<br><input checked="" type="radio"/> igual<br><input type="radio"/> aumentado<br><input type="radio"/> no sabe                                      |
| cambio azúcar y dulces     | <input type="radio"/> eliminado<br><input type="radio"/> disminuido<br><input checked="" type="radio"/> igual<br><input type="radio"/> aumentado<br><input type="radio"/> no sabe                                      |
| cambio bebidas alcohólicas | <input checked="" type="radio"/> eliminado<br><input type="radio"/> disminuido<br><input type="radio"/> igual<br><input type="radio"/> aumentado<br><input type="radio"/> no sabe                                      |
| frecuencia comidas fritas  | <input type="radio"/> a diario<br><input type="radio"/> 5 a 6 veces semana<br><input type="radio"/> 2 a 4 veces semana<br><input type="radio"/> 1 vez semana<br><input checked="" type="radio"/> menos de 1 vez semana |
| carne                      | <input type="radio"/> no como<br><input type="radio"/> cruda<br><input type="radio"/> poco hecha<br><input checked="" type="radio"/> hecha<br><input type="radio"/> muy hecha                                          |
| grasa visible carne        | <input type="radio"/> quita toda<br><input checked="" type="radio"/> quita mayoría<br><input type="radio"/> quita un poco<br><input type="radio"/> no quita nada                                                       |

|                                |                                                                                                                                                                                                                                                          |
|--------------------------------|----------------------------------------------------------------------------------------------------------------------------------------------------------------------------------------------------------------------------------------------------------|
| cocina carne                   | <input type="radio"/> a la plancha<br><input type="radio"/> a la parrilla<br><input checked="" type="radio"/> asada<br><input type="radio"/> frita<br><input type="radio"/> guisada                                                                      |
| tostado quemado carne          | <input checked="" type="radio"/> nunca<br><input type="radio"/> 1 vez mes<br><input type="radio"/> 2 a 3 veces mes<br><input type="radio"/> 1 vez semana<br><input type="radio"/> 2 a 3 semanas                                                          |
| tostado quemado pescado        | <input checked="" type="radio"/> nunca<br><input type="radio"/> 1 vez mes<br><input type="radio"/> 2 a 3 veces mes<br><input type="radio"/> 1 vez semana<br><input type="radio"/> 2 a 3 semanas                                                          |
| socarrat paella                | <input checked="" type="radio"/> nunca<br><input type="radio"/> 1 vez mes<br><input type="radio"/> 2 a 3 veces mes<br><input type="radio"/> 1 vez semana<br><input type="radio"/> 2 a 3 semanas                                                          |
| grasa o aceite cocinar         | <input type="radio"/> mantequilla<br><input type="radio"/> margarina<br><input checked="" type="radio"/> aceite oliva<br><input type="radio"/> aceite oliva virgen extra<br><input type="radio"/> aceite vegetal<br><input type="radio"/> mezcla aceites |
| grasa aceite aliñar            | <input type="radio"/> mantequilla<br><input type="radio"/> margarina<br><input type="radio"/> aceite oliva<br><input checked="" type="radio"/> aceite oliva virgen extra<br><input type="radio"/> aceite vegetal<br><input type="radio"/> mezcla aceites |
| grasa aceite freir             | <input type="radio"/> mantequilla<br><input type="radio"/> margarina<br><input checked="" type="radio"/> aceite oliva<br><input type="radio"/> aceite oliva virgen extra<br><input type="radio"/> aceite vegetal<br><input type="radio"/> mezcla aceites |
| Ejercicio cuestionario         | <input checked="" type="radio"/> si<br><input type="radio"/> no                                                                                                                                                                                          |
| horas de sueño incluido siesta | [*DATA REMOVED*]                                                                                                                                                                                                                                         |
| minutos siesta                 | [*DATA REMOVED*]                                                                                                                                                                                                                                         |
| horas televisión semana        | [*DATA REMOVED*]                                                                                                                                                                                                                                         |

|                                        |                                                                                                                                                                                                                                                                                                                                                                           |
|----------------------------------------|---------------------------------------------------------------------------------------------------------------------------------------------------------------------------------------------------------------------------------------------------------------------------------------------------------------------------------------------------------------------------|
| actividad trabajo                      | <input type="radio"/> casi siempre sentado<br><input type="radio"/> sentado 50 por cien<br><input type="radio"/> casi siempre de pie, quieto<br><input type="radio"/> casi siempre levantado caminando y llevando pocas cosas<br><input checked="" type="radio"/> casi siempre levantado, caminando y llevado muchas cosas<br><input type="radio"/> trabajo manual pesado |
| tiempo caminar o bici al día           | <input type="radio"/> casi nunca<br><input type="radio"/> menos 20min día<br><input checked="" type="radio"/> 20 a 40 min día<br><input type="radio"/> 40 a 60 min día<br><input type="radio"/> 1h o 1h y media día<br><input type="radio"/> más de 1h y media al día                                                                                                     |
| tiempo tareas casa al día              | <input type="radio"/> menos de 1h día<br><input checked="" type="radio"/> 1 a 2h día<br><input type="radio"/> 3 a 4h día<br><input type="radio"/> 5 a 6h día<br><input type="radio"/> 7 a 8h día<br><input type="radio"/> más de 8h día                                                                                                                                   |
| tiempo libre televisión ordenador leer | <input type="radio"/> menos 1h día<br><input type="radio"/> 1h día<br><input checked="" type="radio"/> 2h día<br><input type="radio"/> 3h día<br><input type="radio"/> 4h día<br><input type="radio"/> 5 a 6h día<br><input type="radio"/> mas 6h día                                                                                                                     |
| tiempo libre ejercicio o deporte       | <input type="radio"/> menos 1h semana<br><input checked="" type="radio"/> 1h semana<br><input type="radio"/> 2h semana<br><input type="radio"/> 3h semana<br><input type="radio"/> 4 a 5h semana<br><input type="radio"/> mas 5h semana                                                                                                                                   |
| como se considera                      | <input type="radio"/> sedentaria<br><input checked="" type="radio"/> poco activa<br><input type="radio"/> moderadamente activa<br><input type="radio"/> bastante activa<br><input type="radio"/> muy activa<br><input type="radio"/> no sabe                                                                                                                              |
| FUR                                    | [*DATA REMOVED*]                                                                                                                                                                                                                                                                                                                                                          |
| Semanas gestación 2T                   | [*DATA REMOVED*]                                                                                                                                                                                                                                                                                                                                                          |
| Días gestación 2T                      | [*DATA REMOVED*]                                                                                                                                                                                                                                                                                                                                                          |
| DBP 2T                                 | [*DATA REMOVED*]                                                                                                                                                                                                                                                                                                                                                          |
| CC 2T                                  | [*DATA REMOVED*]                                                                                                                                                                                                                                                                                                                                                          |
| AC 2T                                  | [*DATA REMOVED*]                                                                                                                                                                                                                                                                                                                                                          |

|                                                   |                                                                                                                                                                                                 |
|---------------------------------------------------|-------------------------------------------------------------------------------------------------------------------------------------------------------------------------------------------------|
| LF 2T                                             | [*DATA REMOVED*]                                                                                                                                                                                |
| PFE 2T (Hadlock)                                  | [*DATA REMOVED*]                                                                                                                                                                                |
| Semanas gestación 3T                              | [*DATA REMOVED*]                                                                                                                                                                                |
| días 3T                                           | [*DATA REMOVED*]                                                                                                                                                                                |
| DBP 3T                                            | [*DATA REMOVED*]                                                                                                                                                                                |
| CC 3T                                             | [*DATA REMOVED*]                                                                                                                                                                                |
| AC 3T                                             | [*DATA REMOVED*]                                                                                                                                                                                |
| LF 3T                                             | [*DATA REMOVED*]                                                                                                                                                                                |
| PFE 3T (Hadlock)                                  | [*DATA REMOVED*]                                                                                                                                                                                |
| Semanas de gestación final                        | [*DATA REMOVED*]                                                                                                                                                                                |
| días gestación final                              | [*DATA REMOVED*]                                                                                                                                                                                |
| Localización placenta                             | <input checked="" type="radio"/> anterior<br><input type="radio"/> lateral derecha<br><input type="radio"/> lateral izquierda<br><input type="radio"/> posterior<br><input type="radio"/> fondo |
| Presentación longitudinal cefálica                | <input type="radio"/> no<br><input checked="" type="radio"/> si                                                                                                                                 |
| Dorso                                             | <input type="radio"/> izquierda anterior<br><input checked="" type="radio"/> izquierda posterior<br><input type="radio"/> derecha anterior<br><input type="radio"/> derecha posterior           |
| diámetro biparietal                               | [*DATA REMOVED*]                                                                                                                                                                                |
| Circunferencia craneal                            | [*DATA REMOVED*]                                                                                                                                                                                |
| Circunferencia abdominal                          | [*DATA REMOVED*]                                                                                                                                                                                |
| Longitud de femur                                 | [*DATA REMOVED*]                                                                                                                                                                                |
| tejido celular subcutáneo a nivel del muslo en mm | [*DATA REMOVED*]                                                                                                                                                                                |
| tejido celular subcutáneo en abdomen en mm        | [*DATA REMOVED*]                                                                                                                                                                                |
| Volumen del muslo en cm3                          | [*DATA REMOVED*]                                                                                                                                                                                |
| Peso fetal estimado según fórmula de Hadlock      | [*DATA REMOVED*]                                                                                                                                                                                |



|                                               |                                                                                                                                                          |
|-----------------------------------------------|----------------------------------------------------------------------------------------------------------------------------------------------------------|
| Percentil                                     | [*DATA REMOVED*]                                                                                                                                         |
| Peso fetal estimado según fórmula de Scioscia | <hr/>                                                                                                                                                    |
| Peso fetal estimado según fórmula de LEE      | <hr/>                                                                                                                                                    |
| Tipo de parto                                 | <input checked="" type="radio"/> eutocico<br><input type="radio"/> instrumentado/ventosa<br><input type="radio"/> cesarea                                |
| fecha de nacimiento                           | [*DATA REMOVED*]                                                                                                                                         |
| Días entre exploración y nacimiento           | [*DATA REMOVED*]                                                                                                                                         |
| Peso RN en g                                  | [*DATA REMOVED*]                                                                                                                                         |
| sexo                                          | <input checked="" type="radio"/> mujer<br><input type="radio"/> hombre                                                                                   |
| Apgar 1 minuto                                | [*DATA REMOVED*]                                                                                                                                         |
| Apgar 5 minutos                               | [*DATA REMOVED*]                                                                                                                                         |
| Apgar 10 minutos                              | <hr/>                                                                                                                                                    |
| antecedente Covid durante gestación           | <input type="radio"/> Yes<br><input checked="" type="radio"/> No                                                                                         |
| Nivel de estudios                             | <input type="radio"/> ninguno<br><input type="radio"/> primarios<br><input checked="" type="radio"/> secundarios<br><input type="radio"/> universitarios |

# Base\_datos\_estimacion\_peso\_fetal

|                                       |                                                                                                                                                                                                                                                                                      |
|---------------------------------------|--------------------------------------------------------------------------------------------------------------------------------------------------------------------------------------------------------------------------------------------------------------------------------------|
| Número de identificación participante | 110                                                                                                                                                                                                                                                                                  |
| CODIGO PARTICIPANTE                   |                                                                                                                                                                                                                                                                                      |
| Edad                                  | [*DATA REMOVED*]                                                                                                                                                                                                                                                                     |
| Gestaciones                           | <input type="radio"/> 1<br><input checked="" type="radio"/> 2<br><input type="radio"/> 3<br><input type="radio"/> mas de 3                                                                                                                                                           |
| partos                                | <input type="radio"/> 0<br><input checked="" type="radio"/> 1<br><input type="radio"/> 2<br><input type="radio"/> 3<br><input type="radio"/> mas de 3                                                                                                                                |
| cesáreas                              | <input checked="" type="radio"/> 0<br><input type="radio"/> 1<br><input type="radio"/> 2<br><input type="radio"/> 3<br><input type="radio"/> mas de 3                                                                                                                                |
| Abortos                               | <input checked="" type="radio"/> 0<br><input type="radio"/> 1<br><input type="radio"/> 2<br><input type="radio"/> 3<br><input type="radio"/> mas de 3                                                                                                                                |
| Tipo de gestacion                     | <input checked="" type="radio"/> espontanea<br><input type="radio"/> IAC inseminación artificial conyuge<br><input type="radio"/> IAD inseminación artificial donante<br><input type="radio"/> FIV Fecundación in Vitro<br><input type="radio"/> Ovodon FIV con donación de ovocitos |
| peso previo a embarazo                | [*DATA REMOVED*]                                                                                                                                                                                                                                                                     |
| Ganancia ponderal embarazo            | [*DATA REMOVED*]                                                                                                                                                                                                                                                                     |
| Talla madre                           | [*DATA REMOVED*]                                                                                                                                                                                                                                                                     |
| IMC previo embarazo                   | 19.675166853130666                                                                                                                                                                                                                                                                   |
| Patología obstétrica                  | <input checked="" type="radio"/> no<br><input type="radio"/> si                                                                                                                                                                                                                      |
| Diabetes pregestacional               | <input checked="" type="radio"/> no<br><input type="radio"/> si                                                                                                                                                                                                                      |
| Diabetes gestacional                  | <input checked="" type="radio"/> no<br><input type="radio"/> si                                                                                                                                                                                                                      |

|                                            |                                                                                                                                                                                      |
|--------------------------------------------|--------------------------------------------------------------------------------------------------------------------------------------------------------------------------------------|
| Diabetes gestacional con insulina          | <input checked="" type="radio"/> no<br><input type="radio"/> si                                                                                                                      |
| Diabetes gestacional con dieta y ejercicio | <input checked="" type="radio"/> no<br><input type="radio"/> si                                                                                                                      |
| Percentil fetos previos                    | <input type="radio"/> Nada<br><input type="radio"/> percentil menor de 10<br><input checked="" type="radio"/> percentil entre 10 y 90<br><input type="radio"/> percentil mayor de 90 |
| Exfumadora                                 | <input checked="" type="radio"/> Nada<br><input type="radio"/> menos de 5 años<br><input type="radio"/> 5 a 10 años<br><input type="radio"/> mayor o igual a 10 años                 |
| Hábito tabáquico                           | <input checked="" type="radio"/> no<br><input type="radio"/> si                                                                                                                      |
| fumadora                                   | [*DATA REMOVED*]                                                                                                                                                                     |
| Consumo otros tóxicos                      | <input checked="" type="radio"/> no<br><input type="radio"/> si                                                                                                                      |
| Hb 1T                                      | _____                                                                                                                                                                                |
| Htc 1T                                     | _____                                                                                                                                                                                |
| Hb 2T                                      | _____                                                                                                                                                                                |
| HTC 2T                                     | _____                                                                                                                                                                                |
| Hb 3T                                      | _____                                                                                                                                                                                |
| HTC 3T                                     | _____                                                                                                                                                                                |
| Suplemento FE oral                         | <input checked="" type="radio"/> si<br><input type="radio"/> no                                                                                                                      |
| Suplemento fe iv                           | <input type="radio"/> si<br><input checked="" type="radio"/> no                                                                                                                      |
| Transfusión                                | <input checked="" type="radio"/> no<br><input type="radio"/> si                                                                                                                      |
| Solicitada Vit D                           | <input checked="" type="radio"/> no<br><input type="radio"/> si                                                                                                                      |

|                       |                                                                                                                                                                                                                                                                                                                                                                                                              |
|-----------------------|--------------------------------------------------------------------------------------------------------------------------------------------------------------------------------------------------------------------------------------------------------------------------------------------------------------------------------------------------------------------------------------------------------------|
| Deficit vit D         | <input type="radio"/> no<br><input type="radio"/> si                                                                                                                                                                                                                                                                                                                                                         |
| Suplemento vit D      | <input type="radio"/> si<br><input type="radio"/> no                                                                                                                                                                                                                                                                                                                                                         |
| Dieta, cuestionario   | <input checked="" type="radio"/> si<br><input type="radio"/> no                                                                                                                                                                                                                                                                                                                                              |
| Leche entera          | <input checked="" type="radio"/> Nunca o menos 1 vez al mes<br><input type="radio"/> 1 a 3 veces mes<br><input type="radio"/> 1 vez semana<br><input type="radio"/> 2 a 4 veces semana<br><input type="radio"/> 5 a 6 veces semana<br><input type="radio"/> 1 vez al día<br><input type="radio"/> 2 a 3 veces al día<br><input type="radio"/> 5 a 6 veces al día<br><input type="radio"/> más 6 veces al día |
| Leche semidesnatada   | <input checked="" type="radio"/> Nunca o menos 1 vez al mes<br><input type="radio"/> 1 a 3 veces mes<br><input type="radio"/> 1 vez semana<br><input type="radio"/> 2 a 4 veces semana<br><input type="radio"/> 5 a 6 veces semana<br><input type="radio"/> 1 vez al día<br><input type="radio"/> 2 a 3 veces al día<br><input type="radio"/> 5 a 6 veces al día<br><input type="radio"/> mas 6 veces al día |
| Leche desnatada       | <input type="radio"/> Nunca o menos 1 vez al mes<br><input type="radio"/> 1 a 3 veces mes<br><input type="radio"/> 1 vez semana<br><input type="radio"/> 2 a 4 veces semana<br><input type="radio"/> 5 a 6 veces semana<br><input checked="" type="radio"/> 1 vez al día<br><input type="radio"/> 2 a 3 veces al día<br><input type="radio"/> 5 a 6 veces al día<br><input type="radio"/> más 6 veces al día |
| Leche condensada      | <input checked="" type="radio"/> Nunca o menos 1 vez al mes<br><input type="radio"/> 1 a 3 veces mes<br><input type="radio"/> 1 vez semana<br><input type="radio"/> 2 a 4 veces semana<br><input type="radio"/> 5 a 6 veces semana<br><input type="radio"/> 1 vez al día<br><input type="radio"/> 2 a 3 veces al día<br><input type="radio"/> 5 a 6 veces al día<br><input type="radio"/> más 6 veces al día |
| nata o crema de leche | <input checked="" type="radio"/> Nunca o menos 1 vez al mes<br><input type="radio"/> 1 a 3 veces mes<br><input type="radio"/> 1 vez semana<br><input type="radio"/> 2 a 4 veces semana<br><input type="radio"/> 5 a 6 veces semana<br><input type="radio"/> 1 vez al día<br><input type="radio"/> 2 a 3 veces al día<br><input type="radio"/> 5 a 6 veces al día<br><input type="radio"/> más 6 veces al día |

---

Yogurt Entero

- ☒ Nunca o menos 1 vez al mes  
☐ 1 a 3 veces mes  
☐ 1 vez semana  
☐ 2 a 4 veces semana  
☐ 5 a 6 veces semana  
☐ 1 vez al día  
☐ 2 a 3 veces al día  
☐ 5 a 6 veces al día  
☐ más 6 veces al día

---

Yogurt desnatado

- ☒ Nunca o menos 1 vez al mes  
☐ 1 a 3 veces mes  
☐ 1 vez semana  
☐ 2 a 4 veces semana  
☐ 5 a 6 veces semana  
☐ 1 vez al día  
☐ 2 a 3 veces al día  
☐ 5 a 6 veces al día  
☐ más 6 veces al día

---

100g requesón o queso blando o queso fresco

- ☐ Nunca o menos 1 vez al mes  
☒ 1 a 3 veces mes  
☐ 1 vez semana  
☐ 2 a 4 veces semana  
☐ 5 a 6 veces semana  
☐ 1 vez al día  
☐ 2 a 3 veces al día  
☐ 5 a 6 veces al día  
☐ más 6 veces al día

---

queso curado o semicurado o cremoso

- ☒ Nunca o menos 1 vez al mes  
☐ 1 a 3 veces mes  
☐ 1 vez semana  
☐ 2 a 4 veces semana  
☐ 5 a 6 veces semana  
☐ 1 vez al día  
☐ 2 a 3 veces al día  
☐ 5 a 6 veces al día  
☐ más 6 veces al día

---

natillas flan pudding

- ☒ Nunca o menos 1 vez al mes  
☐ 1 a 3 veces mes  
☐ 1 vez semana  
☐ 2 a 4 veces semana  
☐ 5 a 6 veces semana  
☐ 1 vez al día  
☐ 2 a 3 veces al día  
☐ 5 a 6 veces al día  
☐ más 6 veces al día

---

Helado

- ☐ Nunca o menos 1 vez al mes  
☐ 1 a 3 veces mes  
☒ 1 vez semana  
☐ 2 a 4 veces semana  
☐ 5 a 6 veces semana  
☐ 1 vez al día  
☐ 2 a 3 veces al día  
☐ 5 a 6 veces al día  
☐ más 6 veces al día

|                                      |                                                                                                                                                                                                                                                                                                                                                                                                              |
|--------------------------------------|--------------------------------------------------------------------------------------------------------------------------------------------------------------------------------------------------------------------------------------------------------------------------------------------------------------------------------------------------------------------------------------------------------------|
| huevo                                | <input type="radio"/> Nunca o menos 1 vez al mes<br><input type="radio"/> 1 a 3 veces mes<br><input type="radio"/> 1 vez semana<br><input checked="" type="radio"/> 2 a 4 veces semana<br><input type="radio"/> 5 a 6 veces semana<br><input type="radio"/> 1 vez al día<br><input type="radio"/> 2 a 3 veces al día<br><input type="radio"/> 5 a 6 veces al día<br><input type="radio"/> más 6 veces al día |
| Pollo con piel                       | <input type="radio"/> Nunca o menos 1 vez al mes<br><input type="radio"/> 1 a 3 veces mes<br><input type="radio"/> 1 vez semana<br><input checked="" type="radio"/> 2 a 4 veces semana<br><input type="radio"/> 5 a 6 veces semana<br><input type="radio"/> 1 vez al día<br><input type="radio"/> 2 a 3 veces al día<br><input type="radio"/> 5 a 6 veces al día<br><input type="radio"/> más 6 veces al día |
| pollo sin piel                       | <input type="radio"/> Nunca o menos 1 vez al mes<br><input type="radio"/> 1 a 3 veces mes<br><input type="radio"/> 1 vez semana<br><input checked="" type="radio"/> 2 a 4 veces semana<br><input type="radio"/> 5 a 6 veces semana<br><input type="radio"/> 1 vez al día<br><input type="radio"/> 2 a 3 veces al día<br><input type="radio"/> 5 a 6 veces al día<br><input type="radio"/> más 6 veces al día |
| Ternera o cerdo o cordero            | <input type="radio"/> Nunca o menos 1 vez al mes<br><input checked="" type="radio"/> 1 a 3 veces mes<br><input type="radio"/> 1 vez semana<br><input type="radio"/> 2 a 4 veces semana<br><input type="radio"/> 5 a 6 veces semana<br><input type="radio"/> 1 vez al día<br><input type="radio"/> 2 a 3 veces al día<br><input type="radio"/> 5 a 6 veces al día<br><input type="radio"/> más 6 veces al día |
| carne caza: Conejo o codorniz o pato | <input checked="" type="radio"/> Nunca o menos 1 vez al mes<br><input type="radio"/> 1 a 3 veces mes<br><input type="radio"/> 1 vez semana<br><input type="radio"/> 2 a 4 veces semana<br><input type="radio"/> 5 a 6 veces semana<br><input type="radio"/> 1 vez al día<br><input type="radio"/> 2 a 3 veces al día<br><input type="radio"/> 5 a 6 veces al día<br><input type="radio"/> más 6 veces al día |
| Hígado de ternera o cerdo o pollo    | <input checked="" type="radio"/> Nunca o menos 1 vez al mes<br><input type="radio"/> 1 a 3 veces mes<br><input type="radio"/> 1 vez semana<br><input type="radio"/> 2 a 4 veces semana<br><input type="radio"/> 5 a 6 veces semana<br><input type="radio"/> 1 vez al día<br><input type="radio"/> 2 a 3 veces al día<br><input type="radio"/> 5 a 6 veces al día<br><input type="radio"/> más 6 veces al día |

|                     |                                                                                                                                                                                                                                                                                                                                                                                                              |
|---------------------|--------------------------------------------------------------------------------------------------------------------------------------------------------------------------------------------------------------------------------------------------------------------------------------------------------------------------------------------------------------------------------------------------------------|
| Vísceras            | <input checked="" type="radio"/> Nunca o menos 1 vez al mes<br><input type="radio"/> 1 a 3 veces mes<br><input type="radio"/> 1 vez semana<br><input type="radio"/> 2 a 4 veces semana<br><input type="radio"/> 5 a 6 veces semana<br><input type="radio"/> 1 vez al día<br><input type="radio"/> 2 a 3 veces al día<br><input type="radio"/> 5 a 6 veces al día<br><input type="radio"/> más 6 veces al día |
| Embutido            | <input type="radio"/> Nunca o menos 1 vez al mes<br><input checked="" type="radio"/> 1 a 3 veces mes<br><input type="radio"/> 1 vez semana<br><input type="radio"/> 2 a 4 veces semana<br><input type="radio"/> 5 a 6 veces semana<br><input type="radio"/> 1 vez al día<br><input type="radio"/> 2 a 3 veces al día<br><input type="radio"/> 5 a 6 veces al día<br><input type="radio"/> más 6 veces al día |
| Salchicha o similar | <input checked="" type="radio"/> Nunca o menos 1 vez al mes<br><input type="radio"/> 1 a 3 veces mes<br><input type="radio"/> 1 vez semana<br><input type="radio"/> 2 a 4 veces semana<br><input type="radio"/> 5 a 6 veces semana<br><input type="radio"/> 1 vez al día<br><input type="radio"/> 2 a 3 veces al día<br><input type="radio"/> 5 a 6 veces al día<br><input type="radio"/> más 6 veces al día |
| Pate o foiegras     | <input checked="" type="radio"/> Nunca o menos 1 vez al mes<br><input type="radio"/> 1 a 3 veces mes<br><input type="radio"/> 1 vez semana<br><input type="radio"/> 2 a 4 veces semana<br><input type="radio"/> 5 a 6 veces semana<br><input type="radio"/> 1 vez al día<br><input type="radio"/> 2 a 3 veces al día<br><input type="radio"/> 5 a 6 veces al día<br><input type="radio"/> más 6 veces al día |
| Hamburguesa         | <input type="radio"/> Nunca o menos 1 vez al mes<br><input type="radio"/> 1 a 3 veces mes<br><input checked="" type="radio"/> 1 vez semana<br><input type="radio"/> 2 a 4 veces semana<br><input type="radio"/> 5 a 6 veces semana<br><input type="radio"/> 1 vez al día<br><input type="radio"/> 2 a 3 veces al día<br><input type="radio"/> 5 a 6 veces al día<br><input type="radio"/> más 6 veces al día |
| tocino o bacon      | <input checked="" type="radio"/> Nunca o menos 1 vez al mes<br><input type="radio"/> 1 a 3 veces mes<br><input type="radio"/> 1 vez semana<br><input type="radio"/> 2 a 4 veces semana<br><input type="radio"/> 5 a 6 veces semana<br><input type="radio"/> 1 vez al día<br><input type="radio"/> 2 a 3 veces al día<br><input type="radio"/> 5 a 6 veces al día<br><input type="radio"/> más 6 veces al día |

---

Pescado frito

- ☒ Nunca o menos 1 vez al mes  
☐ 1 a 3 veces mes  
☐ 1 vez semana  
☐ 2 a 4 veces semana  
☐ 5 a 6 veces semana  
☐ 1 vez al día  
☐ 2 a 3 veces al día  
☐ 5 a 6 veces al día  
☐ más 6 veces al día

---

pescado hervido blanco

- ☐ Nunca o menos 1 vez al mes  
☐ 1 a 3 veces mes  
☒ 1 vez semana  
☐ 2 a 4 veces semana  
☐ 5 a 6 veces semana  
☐ 1 vez al día  
☐ 2 a 3 veces al día  
☐ 5 a 6 veces al día  
☐ más 6 veces al día

---

pescado hervido azul

- ☐ Nunca o menos 1 vez al mes  
☐ 1 a 3 veces mes  
☒ 1 vez semana  
☐ 2 a 4 veces semana  
☐ 5 a 6 veces semana  
☐ 1 vez al día  
☐ 2 a 3 veces al día  
☐ 5 a 6 veces al día  
☐ más 6 veces al día

---

otros pescado azul

- ☐ Nunca o menos 1 vez al mes  
☐ 1 a 3 veces mes  
☒ 1 vez semana  
☐ 2 a 4 veces semana  
☐ 5 a 6 veces semana  
☐ 1 vez al día  
☐ 2 a 3 veces al día  
☐ 5 a 6 veces al día  
☐ más 6 veces al día

---

atun conserva

- ☐ Nunca o menos 1 vez al mes  
☒ 1 a 3 veces mes  
☐ 1 vez semana  
☐ 2 a 4 veces semana  
☐ 5 a 6 veces semana  
☐ 1 vez al día  
☐ 2 a 3 veces al día  
☐ 5 a 6 veces al día  
☐ más 6 veces al día

---

sardina conserva

- ☐ Nunca o menos 1 vez al mes  
☒ 1 a 3 veces mes  
☐ 1 vez semana  
☐ 2 a 4 veces semana  
☐ 5 a 6 veces semana  
☐ 1 vez al día  
☐ 2 a 3 veces al día  
☐ 5 a 6 veces al día  
☐ más 6 veces al día



|                                         |                                                                                                                                                                                                                                                                                                                                                                                                              |
|-----------------------------------------|--------------------------------------------------------------------------------------------------------------------------------------------------------------------------------------------------------------------------------------------------------------------------------------------------------------------------------------------------------------------------------------------------------------|
| pescado ahumado                         | <input type="radio"/> Nunca o menos 1 vez al mes<br><input type="radio"/> 1 a 3 veces mes<br><input checked="" type="radio"/> 1 vez semana<br><input type="radio"/> 2 a 4 veces semana<br><input type="radio"/> 5 a 6 veces semana<br><input type="radio"/> 1 vez al día<br><input type="radio"/> 2 a 3 veces al día<br><input type="radio"/> 5 a 6 veces al día<br><input type="radio"/> más 6 veces al día |
| almejas o mejillones o ostras unos 100g | <input checked="" type="radio"/> Nunca o menos 1 vez al mes<br><input type="radio"/> 1 a 3 veces mes<br><input type="radio"/> 1 vez semana<br><input type="radio"/> 2 a 4 veces semana<br><input type="radio"/> 5 a 6 veces semana<br><input type="radio"/> 1 vez al día<br><input type="radio"/> 2 a 3 veces al día<br><input type="radio"/> 5 a 6 veces al día<br><input type="radio"/> más 6 veces al día |
| calamar o chipiron o sepia unos 100g    | <input type="radio"/> Nunca o menos 1 vez al mes<br><input type="radio"/> 1 a 3 veces mes<br><input checked="" type="radio"/> 1 vez semana<br><input type="radio"/> 2 a 4 veces semana<br><input type="radio"/> 5 a 6 veces semana<br><input type="radio"/> 1 vez al día<br><input type="radio"/> 2 a 3 veces al día<br><input type="radio"/> 5 a 6 veces al día<br><input type="radio"/> más 6 veces al día |
| marisco unos 100g                       | <input type="radio"/> Nunca o menos 1 vez al mes<br><input checked="" type="radio"/> 1 a 3 veces mes<br><input type="radio"/> 1 vez semana<br><input type="radio"/> 2 a 4 veces semana<br><input type="radio"/> 5 a 6 veces semana<br><input type="radio"/> 1 vez al día<br><input type="radio"/> 2 a 3 veces al día<br><input type="radio"/> 5 a 6 veces al día<br><input type="radio"/> más 6 veces al día |
| Espinacas o acelgas cocinadas           | <input type="radio"/> Nunca o menos 1 vez al mes<br><input type="radio"/> 1 a 3 veces mes<br><input checked="" type="radio"/> 1 vez semana<br><input type="radio"/> 2 a 4 veces semana<br><input type="radio"/> 5 a 6 veces semana<br><input type="radio"/> 1 vez al día<br><input type="radio"/> 2 a 3 veces al día<br><input type="radio"/> 5 a 6 veces al día<br><input type="radio"/> más 6 veces al día |
| Col o coliflor o brocoli cocinado       | <input type="radio"/> Nunca o menos 1 vez al mes<br><input type="radio"/> 1 a 3 veces mes<br><input checked="" type="radio"/> 1 vez semana<br><input type="radio"/> 2 a 4 veces semana<br><input type="radio"/> 5 a 6 veces semana<br><input type="radio"/> 1 vez al día<br><input type="radio"/> 2 a 3 veces al día<br><input type="radio"/> 5 a 6 veces al día<br><input type="radio"/> más 6 veces al día |

---

Lechuga o endivia o escarola

- ☐ Nunca o menos 1 vez al mes  
☐ 1 a 3 veces mes  
☒ 1 vez semana  
☐ 2 a 4 veces semana  
☐ 5 a 6 veces semana  
☐ 1 vez al día  
☐ 2 a 3 veces al día  
☐ 5 a 6 veces al día  
☐ más 6 veces al día

---

tomate ensalada

- ☐ Nunca o menos 1 vez al mes  
☐ 1 a 3 veces mes  
☒ 1 vez semana  
☐ 2 a 4 veces semana  
☐ 5 a 6 veces semana  
☐ 1 vez al día  
☐ 2 a 3 veces al día  
☐ 5 a 6 veces al día  
☐ más 6 veces al día

---

cebolla

- ☐ Nunca o menos 1 vez al mes  
☐ 1 a 3 veces mes  
☒ 1 vez semana  
☐ 2 a 4 veces semana  
☐ 5 a 6 veces semana  
☐ 1 vez al día  
☐ 2 a 3 veces al día  
☐ 5 a 6 veces al día  
☐ más 6 veces al día

---

Zanahoria o calabaza

- ☐ Nunca o menos 1 vez al mes  
☐ 1 a 3 veces mes  
☐ 1 vez semana  
☒ 2 a 4 veces semana  
☐ 5 a 6 veces semana  
☐ 1 vez al día  
☐ 2 a 3 veces al día  
☐ 5 a 6 veces al día  
☐ más 6 veces al día

---

Judías verdes

- ☐ Nunca o menos 1 vez al mes  
☐ 1 a 3 veces mes  
☐ 1 vez semana  
☒ 2 a 4 veces semana  
☐ 5 a 6 veces semana  
☐ 1 vez al día  
☐ 2 a 3 veces al día  
☐ 5 a 6 veces al día  
☐ más 6 veces al día

---

Berenjena o calabacin o pepino

- ☐ Nunca o menos 1 vez al mes  
☐ 1 a 3 veces mes  
☐ 1 vez semana  
☒ 2 a 4 veces semana  
☐ 5 a 6 veces semana  
☐ 1 vez al día  
☐ 2 a 3 veces al día  
☐ 5 a 6 veces al día  
☐ más 6 veces al día

---

|          |                                                                                                                                                                                                                                                                                                                                                                                                              |
|----------|--------------------------------------------------------------------------------------------------------------------------------------------------------------------------------------------------------------------------------------------------------------------------------------------------------------------------------------------------------------------------------------------------------------|
| pimiento | <input type="radio"/> Nunca o menos 1 vez al mes<br><input type="radio"/> 1 a 3 veces mes<br><input type="radio"/> 1 vez semana<br><input checked="" type="radio"/> 2 a 4 veces semana<br><input type="radio"/> 5 a 6 veces semana<br><input type="radio"/> 1 vez al día<br><input type="radio"/> 2 a 3 veces al día<br><input type="radio"/> 5 a 6 veces al día<br><input type="radio"/> más 6 veces al día |
|----------|--------------------------------------------------------------------------------------------------------------------------------------------------------------------------------------------------------------------------------------------------------------------------------------------------------------------------------------------------------------------------------------------------------------|

---

|           |                                                                                                                                                                                                                                                                                                                                                                                                              |
|-----------|--------------------------------------------------------------------------------------------------------------------------------------------------------------------------------------------------------------------------------------------------------------------------------------------------------------------------------------------------------------------------------------------------------------|
| alcachofa | <input type="radio"/> Nunca o menos 1 vez al mes<br><input type="radio"/> 1 a 3 veces mes<br><input checked="" type="radio"/> 1 vez semana<br><input type="radio"/> 2 a 4 veces semana<br><input type="radio"/> 5 a 6 veces semana<br><input type="radio"/> 1 vez al día<br><input type="radio"/> 2 a 3 veces al día<br><input type="radio"/> 5 a 6 veces al día<br><input type="radio"/> más 6 veces al día |
|-----------|--------------------------------------------------------------------------------------------------------------------------------------------------------------------------------------------------------------------------------------------------------------------------------------------------------------------------------------------------------------------------------------------------------------|

---

|            |                                                                                                                                                                                                                                                                                                                                                                                                              |
|------------|--------------------------------------------------------------------------------------------------------------------------------------------------------------------------------------------------------------------------------------------------------------------------------------------------------------------------------------------------------------------------------------------------------------|
| espárragos | <input type="radio"/> Nunca o menos 1 vez al mes<br><input type="radio"/> 1 a 3 veces mes<br><input type="radio"/> 1 vez semana<br><input checked="" type="radio"/> 2 a 4 veces semana<br><input type="radio"/> 5 a 6 veces semana<br><input type="radio"/> 1 vez al día<br><input type="radio"/> 2 a 3 veces al día<br><input type="radio"/> 5 a 6 veces al día<br><input type="radio"/> más 6 veces al día |
|------------|--------------------------------------------------------------------------------------------------------------------------------------------------------------------------------------------------------------------------------------------------------------------------------------------------------------------------------------------------------------------------------------------------------------|

---

|              |                                                                                                                                                                                                                                                                                                                                                                                                              |
|--------------|--------------------------------------------------------------------------------------------------------------------------------------------------------------------------------------------------------------------------------------------------------------------------------------------------------------------------------------------------------------------------------------------------------------|
| maíz hervido | <input type="radio"/> Nunca o menos 1 vez al mes<br><input type="radio"/> 1 a 3 veces mes<br><input checked="" type="radio"/> 1 vez semana<br><input type="radio"/> 2 a 4 veces semana<br><input type="radio"/> 5 a 6 veces semana<br><input type="radio"/> 1 vez al día<br><input type="radio"/> 2 a 3 veces al día<br><input type="radio"/> 5 a 6 veces al día<br><input type="radio"/> más 6 veces al día |
|--------------|--------------------------------------------------------------------------------------------------------------------------------------------------------------------------------------------------------------------------------------------------------------------------------------------------------------------------------------------------------------------------------------------------------------|

---

|           |                                                                                                                                                                                                                                                                                                                                                                                                              |
|-----------|--------------------------------------------------------------------------------------------------------------------------------------------------------------------------------------------------------------------------------------------------------------------------------------------------------------------------------------------------------------------------------------------------------------|
| legumbres | <input type="radio"/> Nunca o menos 1 vez al mes<br><input type="radio"/> 1 a 3 veces mes<br><input checked="" type="radio"/> 1 vez semana<br><input type="radio"/> 2 a 4 veces semana<br><input type="radio"/> 5 a 6 veces semana<br><input type="radio"/> 1 vez al día<br><input type="radio"/> 2 a 3 veces al día<br><input type="radio"/> 5 a 6 veces al día<br><input type="radio"/> más 6 veces al día |
|-----------|--------------------------------------------------------------------------------------------------------------------------------------------------------------------------------------------------------------------------------------------------------------------------------------------------------------------------------------------------------------------------------------------------------------|

---

|                       |                                                                                                                                                                                                                                                                                                                                                                                                              |
|-----------------------|--------------------------------------------------------------------------------------------------------------------------------------------------------------------------------------------------------------------------------------------------------------------------------------------------------------------------------------------------------------------------------------------------------------|
| naranjas o mandarinas | <input type="radio"/> Nunca o menos 1 vez al mes<br><input type="radio"/> 1 a 3 veces mes<br><input type="radio"/> 1 vez semana<br><input type="radio"/> 2 a 4 veces semana<br><input checked="" type="radio"/> 5 a 6 veces semana<br><input type="radio"/> 1 vez al día<br><input type="radio"/> 2 a 3 veces al día<br><input type="radio"/> 5 a 6 veces al día<br><input type="radio"/> más 6 veces al día |
|-----------------------|--------------------------------------------------------------------------------------------------------------------------------------------------------------------------------------------------------------------------------------------------------------------------------------------------------------------------------------------------------------------------------------------------------------|

---

---

zum natural fruta

- ☐ Nunca o menos 1 vez al mes  
☐ 1 a 3 veces mes  
☒ 1 vez semana  
☐ 2 a 4 veces semana  
☐ 5 a 6 veces semana  
☐ 1 vez al día  
☐ 2 a 3 veces al día  
☐ 5 a 6 veces al día  
☐ más 6 veces al día

---

platano

- ☐ Nunca o menos 1 vez al mes  
☐ 1 a 3 veces mes  
☐ 1 vez semana  
☒ 2 a 4 veces semana  
☐ 5 a 6 veces semana  
☐ 1 vez al día  
☐ 2 a 3 veces al día  
☐ 5 a 6 veces al día  
☐ más 6 veces al día

---

manzana o pera

- ☐ Nunca o menos 1 vez al mes  
☒ 1 a 3 veces mes  
☐ 1 vez semana  
☐ 2 a 4 veces semana  
☐ 5 a 6 veces semana  
☐ 1 vez al día  
☐ 2 a 3 veces al día  
☐ 5 a 6 veces al día  
☐ más 6 veces al día

---

melocotón o nectarina

- ☐ Nunca o menos 1 vez al mes  
☐ 1 a 3 veces mes  
☒ 1 vez semana  
☐ 2 a 4 veces semana  
☐ 5 a 6 veces semana  
☐ 1 vez al día  
☐ 2 a 3 veces al día  
☐ 5 a 6 veces al día  
☐ más 6 veces al día

---

sandia o melon

- ☐ Nunca o menos 1 vez al mes  
☐ 1 a 3 veces mes  
☐ 1 vez semana  
☐ 2 a 4 veces semana  
☐ 5 a 6 veces semana  
☐ 1 vez al día  
☒ 2 a 3 veces al día  
☐ 5 a 6 veces al día  
☐ más 6 veces al día

---

uva

- ☐ Nunca o menos 1 vez al mes  
☐ 1 a 3 veces mes  
☐ 1 vez semana  
☒ 2 a 4 veces semana  
☐ 5 a 6 veces semana  
☐ 1 vez al día  
☐ 2 a 3 veces al día  
☐ 5 a 6 veces al día  
☐ más 6 veces al día

---

bruna o ciruela

- ☒ Nunca o menos 1 vez al mes  
☐ 1 a 3 veces mes  
☐ 1 vez semana  
☐ 2 a 4 veces semana  
☐ 5 a 6 veces semana  
☐ 1 vez al día  
☐ 2 a 3 veces al día  
☐ 5 a 6 veces al día  
☐ más 6 veces al día

---

kiwi

- ☒ Nunca o menos 1 vez al mes  
☐ 1 a 3 veces mes  
☐ 1 vez semana  
☐ 2 a 4 veces semana  
☐ 5 a 6 veces semana  
☐ 1 vez al día  
☐ 2 a 3 veces al día  
☐ 5 a 6 veces al día  
☐ más 6 veces al día

---

aceituna

- ☐ Nunca o menos 1 vez al mes  
☒ 1 a 3 veces mes  
☐ 1 vez semana  
☐ 2 a 4 veces semana  
☐ 5 a 6 veces semana  
☐ 1 vez al día  
☐ 2 a 3 veces al día  
☐ 5 a 6 veces al día  
☐ más 6 veces al día

---

frutos secos

- ☐ Nunca o menos 1 vez al mes  
☐ 1 a 3 veces mes  
☒ 1 vez semana  
☐ 2 a 4 veces semana  
☐ 5 a 6 veces semana  
☐ 1 vez al día  
☐ 2 a 3 veces al día  
☐ 5 a 6 veces al día  
☐ más 6 veces al día

---

pan blanco

- ☐ Nunca o menos 1 vez al mes  
☐ 1 a 3 veces mes  
☐ 1 vez semana  
☒ 2 a 4 veces semana  
☐ 5 a 6 veces semana  
☐ 1 vez al día  
☐ 2 a 3 veces al día  
☐ 5 a 6 veces al día  
☐ más 6 veces al día

---

pan integral

- ☐ Nunca o menos 1 vez al mes  
☐ 1 a 3 veces mes  
☐ 1 vez semana  
☐ 2 a 4 veces semana  
☐ 5 a 6 veces semana  
☒ 1 vez al día  
☐ 2 a 3 veces al día  
☐ 5 a 6 veces al día  
☐ más 6 veces al día

|                          |                                                                                                                                                                                                                                                                                                                                                                                                              |
|--------------------------|--------------------------------------------------------------------------------------------------------------------------------------------------------------------------------------------------------------------------------------------------------------------------------------------------------------------------------------------------------------------------------------------------------------|
| cereales desayuno        | <input checked="" type="radio"/> Nunca o menos 1 vez al mes<br><input type="radio"/> 1 a 3 veces mes<br><input type="radio"/> 1 vez semana<br><input type="radio"/> 2 a 4 veces semana<br><input type="radio"/> 5 a 6 veces semana<br><input type="radio"/> 1 vez al día<br><input type="radio"/> 2 a 3 veces al día<br><input type="radio"/> 5 a 6 veces al día<br><input type="radio"/> más 6 veces al día |
| patatas fritas           | <input type="radio"/> Nunca o menos 1 vez al mes<br><input checked="" type="radio"/> 1 a 3 veces mes<br><input type="radio"/> 1 vez semana<br><input type="radio"/> 2 a 4 veces semana<br><input type="radio"/> 5 a 6 veces semana<br><input type="radio"/> 1 vez al día<br><input type="radio"/> 2 a 3 veces al día<br><input type="radio"/> 5 a 6 veces al día<br><input type="radio"/> más 6 veces al día |
| patatas cocidas o asadas | <input type="radio"/> Nunca o menos 1 vez al mes<br><input checked="" type="radio"/> 1 a 3 veces mes<br><input type="radio"/> 1 vez semana<br><input type="radio"/> 2 a 4 veces semana<br><input type="radio"/> 5 a 6 veces semana<br><input type="radio"/> 1 vez al día<br><input type="radio"/> 2 a 3 veces al día<br><input type="radio"/> 5 a 6 veces al día<br><input type="radio"/> más 6 veces al día |
| bolsa papas              | <input type="radio"/> Nunca o menos 1 vez al mes<br><input checked="" type="radio"/> 1 a 3 veces mes<br><input type="radio"/> 1 vez semana<br><input type="radio"/> 2 a 4 veces semana<br><input type="radio"/> 5 a 6 veces semana<br><input type="radio"/> 1 vez al día<br><input type="radio"/> 2 a 3 veces al día<br><input type="radio"/> 5 a 6 veces al día<br><input type="radio"/> más 6 veces al día |
| arroz cocinado           | <input type="radio"/> Nunca o menos 1 vez al mes<br><input type="radio"/> 1 a 3 veces mes<br><input checked="" type="radio"/> 1 vez semana<br><input type="radio"/> 2 a 4 veces semana<br><input type="radio"/> 5 a 6 veces semana<br><input type="radio"/> 1 vez al día<br><input type="radio"/> 2 a 3 veces al día<br><input type="radio"/> 5 a 6 veces al día<br><input type="radio"/> más 6 veces al día |
| pasta                    | <input type="radio"/> Nunca o menos 1 vez al mes<br><input type="radio"/> 1 a 3 veces mes<br><input checked="" type="radio"/> 1 vez semana<br><input type="radio"/> 2 a 4 veces semana<br><input type="radio"/> 5 a 6 veces semana<br><input type="radio"/> 1 vez al día<br><input type="radio"/> 2 a 3 veces al día<br><input type="radio"/> 5 a 6 veces al día<br><input type="radio"/> más 6 veces al día |

|                     |                                                                                                                                                                                                                                                                                                                                                                                                              |
|---------------------|--------------------------------------------------------------------------------------------------------------------------------------------------------------------------------------------------------------------------------------------------------------------------------------------------------------------------------------------------------------------------------------------------------------|
| pizza               | <input type="radio"/> Nunca o menos 1 vez al mes<br><input type="radio"/> 1 a 3 veces mes<br><input checked="" type="radio"/> 1 vez semana<br><input type="radio"/> 2 a 4 veces semana<br><input type="radio"/> 5 a 6 veces semana<br><input type="radio"/> 1 vez al día<br><input type="radio"/> 2 a 3 veces al día<br><input type="radio"/> 5 a 6 veces al día<br><input type="radio"/> más 6 veces al día |
| aceite oliva        | <input type="radio"/> Nunca o menos 1 vez al mes<br><input type="radio"/> 1 a 3 veces mes<br><input type="radio"/> 1 vez semana<br><input type="radio"/> 2 a 4 veces semana<br><input type="radio"/> 5 a 6 veces semana<br><input checked="" type="radio"/> 1 vez al día<br><input type="radio"/> 2 a 3 veces al día<br><input type="radio"/> 5 a 6 veces al día<br><input type="radio"/> más 6 veces al día |
| otros aceites       | <input checked="" type="radio"/> Nunca o menos 1 vez al mes<br><input type="radio"/> 1 a 3 veces mes<br><input type="radio"/> 1 vez semana<br><input type="radio"/> 2 a 4 veces semana<br><input type="radio"/> 5 a 6 veces semana<br><input type="radio"/> 1 vez al día<br><input type="radio"/> 2 a 3 veces al día<br><input type="radio"/> 5 a 6 veces al día<br><input type="radio"/> más 6 veces al día |
| margarina           | <input checked="" type="radio"/> Nunca o menos 1 vez al mes<br><input type="radio"/> 1 a 3 veces mes<br><input type="radio"/> 1 vez semana<br><input type="radio"/> 2 a 4 veces semana<br><input type="radio"/> 5 a 6 veces semana<br><input type="radio"/> 1 vez al día<br><input type="radio"/> 2 a 3 veces al día<br><input type="radio"/> 5 a 6 veces al día<br><input type="radio"/> más 6 veces al día |
| mantequilla         | <input checked="" type="radio"/> Nunca o menos 1 vez al mes<br><input type="radio"/> 1 a 3 veces mes<br><input type="radio"/> 1 vez semana<br><input type="radio"/> 2 a 4 veces semana<br><input type="radio"/> 5 a 6 veces semana<br><input type="radio"/> 1 vez al día<br><input type="radio"/> 2 a 3 veces al día<br><input type="radio"/> 5 a 6 veces al día<br><input type="radio"/> más 6 veces al día |
| galletas tipo maria | <input checked="" type="radio"/> Nunca o menos 1 vez al mes<br><input type="radio"/> 1 a 3 veces mes<br><input type="radio"/> 1 vez semana<br><input type="radio"/> 2 a 4 veces semana<br><input type="radio"/> 5 a 6 veces semana<br><input type="radio"/> 1 vez al día<br><input type="radio"/> 2 a 3 veces al día<br><input type="radio"/> 5 a 6 veces al día<br><input type="radio"/> más 6 veces al día |

---

galletas chocolate

- ☒ Nunca o menos 1 vez al mes  
☐ 1 a 3 veces mes  
☐ 1 vez semana  
☐ 2 a 4 veces semana  
☐ 5 a 6 veces semana  
☐ 1 vez al día  
☐ 2 a 3 veces al día  
☐ 5 a 6 veces al día  
☐ más 6 veces al día

---

bolleria

- ☐ Nunca o menos 1 vez al mes  
☒ 1 a 3 veces mes  
☐ 1 vez semana  
☐ 2 a 4 veces semana  
☐ 5 a 6 veces semana  
☐ 1 vez al día  
☐ 2 a 3 veces al día  
☐ 5 a 6 veces al día  
☐ más 6 veces al día

---

chocolate o bombones

- ☒ Nunca o menos 1 vez al mes  
☐ 1 a 3 veces mes  
☐ 1 vez semana  
☐ 2 a 4 veces semana  
☐ 5 a 6 veces semana  
☐ 1 vez al día  
☐ 2 a 3 veces al día  
☐ 5 a 6 veces al día  
☐ más 6 veces al día

---

chocolate polvo o colacao

- ☐ Nunca o menos 1 vez al mes  
☐ 1 a 3 veces mes  
☐ 1 vez semana  
☐ 2 a 4 veces semana  
☒ 5 a 6 veces semana  
☐ 1 vez al día  
☐ 2 a 3 veces al día  
☐ 5 a 6 veces al día  
☐ más 6 veces al día

---

vino tinto

- ☒ Nunca o menos 1 vez al mes  
☐ 1 a 3 veces mes  
☐ 1 vez semana  
☐ 2 a 4 veces semana  
☐ 5 a 6 veces semana  
☐ 1 vez al día  
☐ 2 a 3 veces al día  
☐ 5 a 6 veces al día  
☐ más 6 veces al día

---

vino blanco

- ☒ Nunca o menos 1 vez al mes  
☐ 1 a 3 veces mes  
☐ 1 vez semana  
☐ 2 a 4 veces semana  
☐ 5 a 6 veces semana  
☐ 1 vez al día  
☐ 2 a 3 veces al día  
☐ 5 a 6 veces al día  
☐ más 6 veces al día



---

|                    |                                                                                                                                                                                                                                                                                                                                                                                                              |
|--------------------|--------------------------------------------------------------------------------------------------------------------------------------------------------------------------------------------------------------------------------------------------------------------------------------------------------------------------------------------------------------------------------------------------------------|
| vino seco o vermut | <input checked="" type="radio"/> Nunca o menos 1 vez al mes<br><input type="radio"/> 1 a 3 veces mes<br><input type="radio"/> 1 vez semana<br><input type="radio"/> 2 a 4 veces semana<br><input type="radio"/> 5 a 6 veces semana<br><input type="radio"/> 1 vez al día<br><input type="radio"/> 2 a 3 veces al día<br><input type="radio"/> 5 a 6 veces al día<br><input type="radio"/> más 6 veces al día |
|--------------------|--------------------------------------------------------------------------------------------------------------------------------------------------------------------------------------------------------------------------------------------------------------------------------------------------------------------------------------------------------------------------------------------------------------|

---

|         |                                                                                                                                                                                                                                                                                                                                                                                                              |
|---------|--------------------------------------------------------------------------------------------------------------------------------------------------------------------------------------------------------------------------------------------------------------------------------------------------------------------------------------------------------------------------------------------------------------|
| cerveza | <input checked="" type="radio"/> Nunca o menos 1 vez al mes<br><input type="radio"/> 1 a 3 veces mes<br><input type="radio"/> 1 vez semana<br><input type="radio"/> 2 a 4 veces semana<br><input type="radio"/> 5 a 6 veces semana<br><input type="radio"/> 1 vez al día<br><input type="radio"/> 2 a 3 veces al día<br><input type="radio"/> 5 a 6 veces al día<br><input type="radio"/> más 6 veces al día |
|---------|--------------------------------------------------------------------------------------------------------------------------------------------------------------------------------------------------------------------------------------------------------------------------------------------------------------------------------------------------------------------------------------------------------------|

---

|                     |                                                                                                                                                                                                                                                                                                                                                                                                              |
|---------------------|--------------------------------------------------------------------------------------------------------------------------------------------------------------------------------------------------------------------------------------------------------------------------------------------------------------------------------------------------------------------------------------------------------------|
| cerveza sin alcohol | <input checked="" type="radio"/> Nunca o menos 1 vez al mes<br><input type="radio"/> 1 a 3 veces mes<br><input type="radio"/> 1 vez semana<br><input type="radio"/> 2 a 4 veces semana<br><input type="radio"/> 5 a 6 veces semana<br><input type="radio"/> 1 vez al día<br><input type="radio"/> 2 a 3 veces al día<br><input type="radio"/> 5 a 6 veces al día<br><input type="radio"/> más 6 veces al día |
|---------------------|--------------------------------------------------------------------------------------------------------------------------------------------------------------------------------------------------------------------------------------------------------------------------------------------------------------------------------------------------------------------------------------------------------------|

---

|         |                                                                                                                                                                                                                                                                                                                                                                                                              |
|---------|--------------------------------------------------------------------------------------------------------------------------------------------------------------------------------------------------------------------------------------------------------------------------------------------------------------------------------------------------------------------------------------------------------------|
| licores | <input checked="" type="radio"/> Nunca o menos 1 vez al mes<br><input type="radio"/> 1 a 3 veces mes<br><input type="radio"/> 1 vez semana<br><input type="radio"/> 2 a 4 veces semana<br><input type="radio"/> 5 a 6 veces semana<br><input type="radio"/> 1 vez al día<br><input type="radio"/> 2 a 3 veces al día<br><input type="radio"/> 5 a 6 veces al día<br><input type="radio"/> más 6 veces al día |
|---------|--------------------------------------------------------------------------------------------------------------------------------------------------------------------------------------------------------------------------------------------------------------------------------------------------------------------------------------------------------------------------------------------------------------|

---

|                       |                                                                                                                                                                                                                                                                                                                                                                                                              |
|-----------------------|--------------------------------------------------------------------------------------------------------------------------------------------------------------------------------------------------------------------------------------------------------------------------------------------------------------------------------------------------------------------------------------------------------------|
| ginebra o ron o vodka | <input checked="" type="radio"/> Nunca o menos 1 vez al mes<br><input type="radio"/> 1 a 3 veces mes<br><input type="radio"/> 1 vez semana<br><input type="radio"/> 2 a 4 veces semana<br><input type="radio"/> 5 a 6 veces semana<br><input type="radio"/> 1 vez al día<br><input type="radio"/> 2 a 3 veces al día<br><input type="radio"/> 5 a 6 veces al día<br><input type="radio"/> más 6 veces al día |
|-----------------------|--------------------------------------------------------------------------------------------------------------------------------------------------------------------------------------------------------------------------------------------------------------------------------------------------------------------------------------------------------------------------------------------------------------|

---

|                 |                                                                                                                                                                                                                                                                                                                                                                                                              |
|-----------------|--------------------------------------------------------------------------------------------------------------------------------------------------------------------------------------------------------------------------------------------------------------------------------------------------------------------------------------------------------------------------------------------------------------|
| refresco normal | <input type="radio"/> Nunca o menos 1 vez al mes<br><input checked="" type="radio"/> 1 a 3 veces mes<br><input type="radio"/> 1 vez semana<br><input type="radio"/> 2 a 4 veces semana<br><input type="radio"/> 5 a 6 veces semana<br><input type="radio"/> 1 vez al día<br><input type="radio"/> 2 a 3 veces al día<br><input type="radio"/> 5 a 6 veces al día<br><input type="radio"/> más 6 veces al día |
|-----------------|--------------------------------------------------------------------------------------------------------------------------------------------------------------------------------------------------------------------------------------------------------------------------------------------------------------------------------------------------------------------------------------------------------------|

---

---

refresco sin azúcar

- ☐ Nunca o menos 1 vez al mes  
☒ 1 a 3 veces mes  
☐ 1 vez semana  
☐ 2 a 4 veces semana  
☐ 5 a 6 veces semana  
☐ 1 vez al día  
☐ 2 a 3 veces al día  
☐ 5 a 6 veces al día  
☐ más 6 veces al día

---

Agua del grifo

- ☒ Nunca o menos 1 vez al mes  
☐ 1 a 3 veces mes  
☐ 1 vez semana  
☐ 2 a 4 veces semana  
☐ 5 a 6 veces semana  
☐ 1 vez al día  
☐ 2 a 3 veces al día  
☐ 5 a 6 veces al día  
☐ más 6 veces al día

---

agua embotellada sin gas

- ☐ Nunca o menos 1 vez al mes  
☐ 1 a 3 veces mes  
☐ 1 vez semana  
☐ 2 a 4 veces semana  
☐ 5 a 6 veces semana  
☐ 1 vez al día  
☐ 2 a 3 veces al día  
☐ 5 a 6 veces al día  
☒ más 6 veces al día

---

agua embotellada con gas

- ☐ Nunca o menos 1 vez al mes  
☐ 1 a 3 veces mes  
☐ 1 vez semana  
☐ 2 a 4 veces semana  
☐ 5 a 6 veces semana  
☐ 1 vez al día  
☐ 2 a 3 veces al día  
☐ 5 a 6 veces al día  
☐ más 6 veces al día

---

zumو frutas embasado

- ☐ Nunca o menos 1 vez al mes  
☒ 1 a 3 veces mes  
☐ 1 vez semana  
☐ 2 a 4 veces semana  
☐ 5 a 6 veces semana  
☐ 1 vez al día  
☐ 2 a 3 veces al día  
☐ 5 a 6 veces al día  
☐ más 6 veces al día

---

cafe

- ☐ Nunca o menos 1 vez al mes  
☐ 1 a 3 veces mes  
☐ 1 vez semana  
☐ 2 a 4 veces semana  
☐ 5 a 6 veces semana  
☒ 1 vez al día  
☐ 2 a 3 veces al día  
☐ 5 a 6 veces al día  
☐ más 6 veces al día

---

cafe descafeinado

- ☐ Nunca o menos 1 vez al mes  
☐ 1 a 3 veces mes  
☐ 1 vez semana  
☐ 2 a 4 veces semana  
☐ 5 a 6 veces semana  
☒ 1 vez al día  
☐ 2 a 3 veces al día  
☐ 5 a 6 veces al día  
☐ más 6 veces al día

---

te o infusión

- ☐ Nunca o menos 1 vez al mes  
☒ 1 a 3 veces mes  
☐ 1 vez semana  
☐ 2 a 4 veces semana  
☐ 5 a 6 veces semana  
☐ 1 vez al día  
☐ 2 a 3 veces al día  
☐ 5 a 6 veces al día  
☐ más 6 veces al día

---

sopa o puré verduras

- ☐ Nunca o menos 1 vez al mes  
☐ 1 a 3 veces mes  
☒ 1 vez semana  
☐ 2 a 4 veces semana  
☐ 5 a 6 veces semana  
☐ 1 vez al día  
☐ 2 a 3 veces al día  
☐ 5 a 6 veces al día  
☐ más 6 veces al día

---

croquetas pollo jamón

- ☐ Nunca o menos 1 vez al mes  
☒ 1 a 3 veces mes  
☐ 1 vez semana  
☐ 2 a 4 veces semana  
☐ 5 a 6 veces semana  
☐ 1 vez al día  
☐ 2 a 3 veces al día  
☐ 5 a 6 veces al día  
☐ más 6 veces al día

---

croquetas pescado

- ☐ Nunca o menos 1 vez al mes  
☒ 1 a 3 veces mes  
☐ 1 vez semana  
☐ 2 a 4 veces semana  
☐ 5 a 6 veces semana  
☐ 1 vez al día  
☐ 2 a 3 veces al día  
☐ 5 a 6 veces al día  
☐ más 6 veces al día

---

mayonesa

- ☐ Nunca o menos 1 vez al mes  
☐ 1 a 3 veces mes  
☒ 1 vez semana  
☐ 2 a 4 veces semana  
☐ 5 a 6 veces semana  
☐ 1 vez al día  
☐ 2 a 3 veces al día  
☐ 5 a 6 veces al día  
☐ más 6 veces al día

|                  |                                                                                                                                                                                                                                                                                                                                                                                                              |
|------------------|--------------------------------------------------------------------------------------------------------------------------------------------------------------------------------------------------------------------------------------------------------------------------------------------------------------------------------------------------------------------------------------------------------------|
| salsa tomate     | <input type="radio"/> Nunca o menos 1 vez al mes<br><input type="radio"/> 1 a 3 veces mes<br><input type="radio"/> 1 vez semana<br><input checked="" type="radio"/> 2 a 4 veces semana<br><input type="radio"/> 5 a 6 veces semana<br><input type="radio"/> 1 vez al día<br><input type="radio"/> 2 a 3 veces al día<br><input type="radio"/> 5 a 6 veces al día<br><input type="radio"/> más 6 veces al día |
| ketchup          | <input type="radio"/> Nunca o menos 1 vez al mes<br><input type="radio"/> 1 a 3 veces mes<br><input checked="" type="radio"/> 1 vez semana<br><input type="radio"/> 2 a 4 veces semana<br><input type="radio"/> 5 a 6 veces semana<br><input type="radio"/> 1 vez al día<br><input type="radio"/> 2 a 3 veces al día<br><input type="radio"/> 5 a 6 veces al día<br><input type="radio"/> más 6 veces al día |
| sal              | <input checked="" type="radio"/> Nunca o menos 1 vez al mes<br><input type="radio"/> 1 a 3 veces mes<br><input type="radio"/> 1 vez semana<br><input type="radio"/> 2 a 4 veces semana<br><input type="radio"/> 5 a 6 veces semana<br><input type="radio"/> 1 vez al día<br><input type="radio"/> 2 a 3 veces al día<br><input type="radio"/> 5 a 6 veces al día<br><input type="radio"/> más 6 veces al día |
| ajo              | <input checked="" type="radio"/> Nunca o menos 1 vez al mes<br><input type="radio"/> 1 a 3 veces mes<br><input type="radio"/> 1 vez semana<br><input type="radio"/> 2 a 4 veces semana<br><input type="radio"/> 5 a 6 veces semana<br><input type="radio"/> 1 vez al día<br><input type="radio"/> 2 a 3 veces al día<br><input type="radio"/> 5 a 6 veces al día<br><input type="radio"/> más 6 veces al día |
| mermelada o miel | <input checked="" type="radio"/> Nunca o menos 1 vez al mes<br><input type="radio"/> 1 a 3 veces mes<br><input type="radio"/> 1 vez semana<br><input type="radio"/> 2 a 4 veces semana<br><input type="radio"/> 5 a 6 veces semana<br><input type="radio"/> 1 vez al día<br><input type="radio"/> 2 a 3 veces al día<br><input type="radio"/> 5 a 6 veces al día<br><input type="radio"/> más 6 veces al día |
| azúcar           | <input checked="" type="radio"/> Nunca o menos 1 vez al mes<br><input type="radio"/> 1 a 3 veces mes<br><input type="radio"/> 1 vez semana<br><input type="radio"/> 2 a 4 veces semana<br><input type="radio"/> 5 a 6 veces semana<br><input type="radio"/> 1 vez al día<br><input type="radio"/> 2 a 3 veces al día<br><input type="radio"/> 5 a 6 veces al día<br><input type="radio"/> más 6 veces al día |

|                                       |                                                                                                                                                                                                                                                                                                                                                                                                                                                                                                                               |
|---------------------------------------|-------------------------------------------------------------------------------------------------------------------------------------------------------------------------------------------------------------------------------------------------------------------------------------------------------------------------------------------------------------------------------------------------------------------------------------------------------------------------------------------------------------------------------|
| Otro alimento                         | [*DATA REMOVED*]                                                                                                                                                                                                                                                                                                                                                                                                                                                                                                              |
| suplementos vitamínicos               | <input type="radio"/> si<br><input checked="" type="radio"/> no                                                                                                                                                                                                                                                                                                                                                                                                                                                               |
| suplementos vitamínicos               |                                                                                                                                                                                                                                                                                                                                                                                                                                                                                                                               |
| dieta previa                          | <input type="radio"/> si<br><input checked="" type="radio"/> no                                                                                                                                                                                                                                                                                                                                                                                                                                                               |
| motivo dieta                          | <input checked="" type="radio"/> no dieta<br><input type="radio"/> control peso<br><input type="radio"/> control colesterol<br><input type="radio"/> control diabetes<br><input type="radio"/> problemas estómago<br><input type="radio"/> problemas vesícula o hepáticos<br><input type="radio"/> HTA o cardiopatía<br><input type="radio"/> problemas renales<br><input type="radio"/> alergia alimentaria<br><input type="radio"/> ácido úrico elevado<br><input type="radio"/> vegetariana<br><input type="radio"/> otros |
| cambio alimentos año previo gestación | <input type="radio"/> si<br><input checked="" type="radio"/> no                                                                                                                                                                                                                                                                                                                                                                                                                                                               |
| cambio lácteos                        | <input type="radio"/> eliminado<br><input type="radio"/> disminuido<br><input type="radio"/> igual<br><input type="radio"/> aumentado<br><input type="radio"/> no sabe                                                                                                                                                                                                                                                                                                                                                        |
| cambio huevos                         | <input type="radio"/> eliminado<br><input type="radio"/> disminuido<br><input type="radio"/> igual<br><input type="radio"/> aumentado<br><input type="radio"/> no sabe                                                                                                                                                                                                                                                                                                                                                        |
| cambio carne                          | <input type="radio"/> eliminado<br><input type="radio"/> disminuido<br><input type="radio"/> igual<br><input type="radio"/> aumentado<br><input type="radio"/> no sabe                                                                                                                                                                                                                                                                                                                                                        |
| cambio pescado                        | <input type="radio"/> eliminado<br><input type="radio"/> disminuido<br><input type="radio"/> igual<br><input type="radio"/> aumentado<br><input type="radio"/> no sabe                                                                                                                                                                                                                                                                                                                                                        |
| cambio verduras                       | <input type="radio"/> eliminado<br><input type="radio"/> disminuido<br><input type="radio"/> igual<br><input type="radio"/> aumentado<br><input type="radio"/> no sabe                                                                                                                                                                                                                                                                                                                                                        |

|                            |                                                                                                                                                                                                                        |
|----------------------------|------------------------------------------------------------------------------------------------------------------------------------------------------------------------------------------------------------------------|
| cambio legumbres           | <input type="radio"/> eliminado<br><input type="radio"/> disminuido<br><input type="radio"/> igual<br><input type="radio"/> aumentado<br><input type="radio"/> no sabe                                                 |
| cambio fruta               | <input type="radio"/> eliminado<br><input type="radio"/> disminuido<br><input type="radio"/> igual<br><input type="radio"/> aumentado<br><input type="radio"/> no sabe                                                 |
| cambio pan                 | <input type="radio"/> eliminado<br><input type="radio"/> disminuido<br><input type="radio"/> igual<br><input type="radio"/> aumentado<br><input type="radio"/> no sabe                                                 |
| cambio aceite oliva        | <input type="radio"/> eliminado<br><input type="radio"/> disminuido<br><input type="radio"/> igual<br><input type="radio"/> aumentado<br><input type="radio"/> no sabe                                                 |
| cambio mante o margarina   | <input type="radio"/> eliminado<br><input type="radio"/> disminuido<br><input type="radio"/> igual<br><input type="radio"/> aumentado<br><input type="radio"/> no sabe                                                 |
| cambio azúcar y dulces     | <input type="radio"/> eliminado<br><input type="radio"/> disminuido<br><input type="radio"/> igual<br><input type="radio"/> aumentado<br><input type="radio"/> no sabe                                                 |
| cambio bebidas alcohólicas | <input type="radio"/> eliminado<br><input type="radio"/> disminuido<br><input type="radio"/> igual<br><input type="radio"/> aumentado<br><input type="radio"/> no sabe                                                 |
| frecuencia comidas fritas  | <input type="radio"/> a diario<br><input type="radio"/> 5 a 6 veces semana<br><input type="radio"/> 2 a 4 veces semana<br><input type="radio"/> 1 vez semana<br><input checked="" type="radio"/> menos de 1 vez semana |
| carne                      | <input type="radio"/> no como<br><input type="radio"/> cruda<br><input type="radio"/> poco hecha<br><input checked="" type="radio"/> hecha<br><input type="radio"/> muy hecha                                          |
| grasa visible carne        | <input type="radio"/> quita toda<br><input type="radio"/> quita mayoría<br><input checked="" type="radio"/> quita un poco<br><input type="radio"/> no quita nada                                                       |

|                                |                                                                                                                                                                                                                                                          |
|--------------------------------|----------------------------------------------------------------------------------------------------------------------------------------------------------------------------------------------------------------------------------------------------------|
| cocina carne                   | <input type="radio"/> a la plancha<br><input type="radio"/> a la parrilla<br><input checked="" type="radio"/> asada<br><input type="radio"/> frita<br><input type="radio"/> guisada                                                                      |
| tostado quemado carne          | <input type="radio"/> nunca<br><input type="radio"/> 1 vez mes<br><input type="radio"/> 2 a 3 veces mes<br><input checked="" type="radio"/> 1 vez semana<br><input type="radio"/> 2 a 3 semanas                                                          |
| tostado quemado pescado        | <input type="radio"/> nunca<br><input type="radio"/> 1 vez mes<br><input checked="" type="radio"/> 2 a 3 veces mes<br><input type="radio"/> 1 vez semana<br><input type="radio"/> 2 a 3 semanas                                                          |
| socarrat paella                | <input checked="" type="radio"/> nunca<br><input type="radio"/> 1 vez mes<br><input type="radio"/> 2 a 3 veces mes<br><input type="radio"/> 1 vez semana<br><input type="radio"/> 2 a 3 semanas                                                          |
| grasa o aceite cocinar         | <input type="radio"/> mantequilla<br><input type="radio"/> margarina<br><input checked="" type="radio"/> aceite oliva<br><input type="radio"/> aceite oliva virgen extra<br><input type="radio"/> aceite vegetal<br><input type="radio"/> mezcla aceites |
| grasa aceite aliñar            | <input type="radio"/> mantequilla<br><input type="radio"/> margarina<br><input checked="" type="radio"/> aceite oliva<br><input type="radio"/> aceite oliva virgen extra<br><input type="radio"/> aceite vegetal<br><input type="radio"/> mezcla aceites |
| grasa aceite freir             | <input type="radio"/> mantequilla<br><input type="radio"/> margarina<br><input checked="" type="radio"/> aceite oliva<br><input type="radio"/> aceite oliva virgen extra<br><input type="radio"/> aceite vegetal<br><input type="radio"/> mezcla aceites |
| Ejercicio cuestionario         | <input checked="" type="radio"/> si<br><input type="radio"/> no                                                                                                                                                                                          |
| horas de sueño incluido siesta | [*DATA REMOVED*]                                                                                                                                                                                                                                         |
| minutos siesta                 | [*DATA REMOVED*]                                                                                                                                                                                                                                         |
| horas televisión semana        | [*DATA REMOVED*]                                                                                                                                                                                                                                         |

|                                        |                                                                                                                                                                                                                                                                                                                                                                           |
|----------------------------------------|---------------------------------------------------------------------------------------------------------------------------------------------------------------------------------------------------------------------------------------------------------------------------------------------------------------------------------------------------------------------------|
| actividad trabajo                      | <input type="radio"/> casi siempre sentado<br><input checked="" type="radio"/> sentado 50 por cien<br><input type="radio"/> casi siempre de pie, quieto<br><input type="radio"/> casi siempre levantado caminando y llevando pocas cosas<br><input type="radio"/> casi siempre levantado, caminando y llevado muchas cosas<br><input type="radio"/> trabajo manual pesado |
| tiempo caminar o bici al día           | <input checked="" type="radio"/> casi nunca<br><input type="radio"/> menos 20min día<br><input type="radio"/> 20 a 40 min día<br><input type="radio"/> 40 a 60 min día<br><input type="radio"/> 1h o 1h y media día<br><input type="radio"/> más de 1h y media al día                                                                                                     |
| tiempo tareas casa al día              | <input type="radio"/> menos de 1h día<br><input checked="" type="radio"/> 1 a 2h día<br><input type="radio"/> 3 a 4h día<br><input type="radio"/> 5 a 6h día<br><input type="radio"/> 7 a 8h día<br><input type="radio"/> más de 8h día                                                                                                                                   |
| tiempo libre televisión ordenador leer | <input type="radio"/> menos 1h día<br><input checked="" type="radio"/> 1h día<br><input type="radio"/> 2h día<br><input type="radio"/> 3h día<br><input type="radio"/> 4h día<br><input type="radio"/> 5 a 6h día<br><input type="radio"/> mas 6h día                                                                                                                     |
| tiempo libre ejercicio o deporte       | <input checked="" type="radio"/> menos 1h semana<br><input type="radio"/> 1h semana<br><input type="radio"/> 2h semana<br><input type="radio"/> 3h semana<br><input type="radio"/> 4 a 5h semana<br><input type="radio"/> mas 5h semana                                                                                                                                   |
| como se considera                      | <input type="radio"/> sedentaria<br><input type="radio"/> poco activa<br><input checked="" type="radio"/> moderadamente activa<br><input type="radio"/> bastante activa<br><input type="radio"/> muy activa<br><input type="radio"/> no sabe                                                                                                                              |
| FUR                                    | [*DATA REMOVED*]                                                                                                                                                                                                                                                                                                                                                          |
| Semanas gestación 2T                   | _____                                                                                                                                                                                                                                                                                                                                                                     |
| Días gestación 2T                      | _____                                                                                                                                                                                                                                                                                                                                                                     |
| DBP 2T                                 | _____                                                                                                                                                                                                                                                                                                                                                                     |
| CC 2T                                  | _____                                                                                                                                                                                                                                                                                                                                                                     |



|                                                   |                                                                                                                                                                                                 |
|---------------------------------------------------|-------------------------------------------------------------------------------------------------------------------------------------------------------------------------------------------------|
| AC 2T                                             |                                                                                                                                                                                                 |
| LF 2T                                             |                                                                                                                                                                                                 |
| PFE 2T (Hadlock)                                  |                                                                                                                                                                                                 |
| Semanas gestación 3T                              | [*DATA REMOVED*]                                                                                                                                                                                |
| días 3T                                           | [*DATA REMOVED*]                                                                                                                                                                                |
| DBP 3T                                            | [*DATA REMOVED*]                                                                                                                                                                                |
| CC 3T                                             | [*DATA REMOVED*]                                                                                                                                                                                |
| AC 3T                                             | [*DATA REMOVED*]                                                                                                                                                                                |
| LF 3T                                             | [*DATA REMOVED*]                                                                                                                                                                                |
| PFE 3T (Hadlock)                                  | [*DATA REMOVED*]                                                                                                                                                                                |
| Semanas de gestación final                        | [*DATA REMOVED*]                                                                                                                                                                                |
| días gestación final                              | [*DATA REMOVED*]                                                                                                                                                                                |
| Localización placenta                             | <input checked="" type="radio"/> anterior<br><input type="radio"/> lateral derecha<br><input type="radio"/> lateral izquierda<br><input type="radio"/> posterior<br><input type="radio"/> fondo |
| Presentación longitudinal cefálica                | <input type="radio"/> no<br><input checked="" type="radio"/> si                                                                                                                                 |
| Dorso                                             | <input checked="" type="radio"/> izquierda anterior<br><input type="radio"/> izquierda posterior<br><input type="radio"/> derecha anterior<br><input type="radio"/> derecha posterior           |
| diámetro biparietal                               | [*DATA REMOVED*]                                                                                                                                                                                |
| Circunferencia craneal                            | [*DATA REMOVED*]                                                                                                                                                                                |
| Circunferencia abdominal                          | [*DATA REMOVED*]                                                                                                                                                                                |
| Longitud de femur                                 | [*DATA REMOVED*]                                                                                                                                                                                |
| tejido celular subcutáneo a nivel del muslo en mm | [*DATA REMOVED*]                                                                                                                                                                                |
| tejido celular subcutáneo en abdomen en mm        | [*DATA REMOVED*]                                                                                                                                                                                |

|                                               |                                                                                                                                               |
|-----------------------------------------------|-----------------------------------------------------------------------------------------------------------------------------------------------|
| Volumen del muslo en cm3                      | [*DATA REMOVED*]                                                                                                                              |
| Peso fetal estimado según fórmula de Hadlock  | [*DATA REMOVED*]                                                                                                                              |
| Percentil                                     | [*DATA REMOVED*]                                                                                                                              |
| Peso fetal estimado según fórmula de Scioscia | _____                                                                                                                                         |
| Peso fetal estimado según fórmula de LEE      | _____                                                                                                                                         |
| Tipo de parto                                 | <input checked="" type="radio"/> eutocico<br><input type="radio"/> instrumentado/ventosa<br><input type="radio"/> cesarea                     |
| fecha de nacimiento                           | [*DATA REMOVED*]                                                                                                                              |
| Días entre exploración y nacimiento           | [*DATA REMOVED*]                                                                                                                              |
| Peso RN en g                                  | [*DATA REMOVED*]                                                                                                                              |
| sexo                                          | <input type="radio"/> mujer<br><input checked="" type="radio"/> hombre                                                                        |
| Apgar 1 minuto                                | [*DATA REMOVED*]                                                                                                                              |
| Apgar 5 minutos                               | [*DATA REMOVED*]                                                                                                                              |
| Apgar 10 minutos                              | _____                                                                                                                                         |
| antecedente Covid durante gestación           | <input type="radio"/> Yes<br><input checked="" type="radio"/> No                                                                              |
| Nivel de estudios                             | <input type="radio"/> ninguno<br><input type="radio"/> primarios<br><input type="radio"/> secundarios<br><input type="radio"/> universitarios |

## Base\_datos\_estimacion\_peso\_fetal

|                                       |                                                                                                                                                                                                                                                                                      |
|---------------------------------------|--------------------------------------------------------------------------------------------------------------------------------------------------------------------------------------------------------------------------------------------------------------------------------------|
| Número de identificación participante | 111                                                                                                                                                                                                                                                                                  |
| CODIGO PARTICIPANTE                   |                                                                                                                                                                                                                                                                                      |
| Edad                                  | [*DATA REMOVED*]                                                                                                                                                                                                                                                                     |
| Gestaciones                           | <input checked="" type="radio"/> 1<br><input type="radio"/> 2<br><input type="radio"/> 3<br><input type="radio"/> mas de 3                                                                                                                                                           |
| partos                                | <input checked="" type="radio"/> 0<br><input type="radio"/> 1<br><input type="radio"/> 2<br><input type="radio"/> 3<br><input type="radio"/> mas de 3                                                                                                                                |
| cesáreas                              | <input checked="" type="radio"/> 0<br><input type="radio"/> 1<br><input type="radio"/> 2<br><input type="radio"/> 3<br><input type="radio"/> mas de 3                                                                                                                                |
| Abortos                               | <input checked="" type="radio"/> 0<br><input type="radio"/> 1<br><input type="radio"/> 2<br><input type="radio"/> 3<br><input type="radio"/> mas de 3                                                                                                                                |
| Tipo de gestacion                     | <input checked="" type="radio"/> espontanea<br><input type="radio"/> IAC inseminación artificial conyuge<br><input type="radio"/> IAD inseminación artificial donante<br><input type="radio"/> FIV Fecundación in Vitro<br><input type="radio"/> Ovodon FIV con donación de ovocitos |
| peso previo a embarazo                | [*DATA REMOVED*]                                                                                                                                                                                                                                                                     |
| Ganancia ponderal embarazo            | [*DATA REMOVED*]                                                                                                                                                                                                                                                                     |
| Talla madre                           | [*DATA REMOVED*]                                                                                                                                                                                                                                                                     |
| IMC previo embarazo                   | 21.258503401360546                                                                                                                                                                                                                                                                   |
| Patología obstétrica                  | <input checked="" type="radio"/> no<br><input type="radio"/> si                                                                                                                                                                                                                      |
| Diabetes pregestacional               | <input checked="" type="radio"/> no<br><input type="radio"/> si                                                                                                                                                                                                                      |
| Diabetes gestacional                  | <input checked="" type="radio"/> no<br><input type="radio"/> si                                                                                                                                                                                                                      |

|                                            |                                                                                                                                                                                      |
|--------------------------------------------|--------------------------------------------------------------------------------------------------------------------------------------------------------------------------------------|
| Diabetes gestacional con insulina          | <input checked="" type="radio"/> no<br><input type="radio"/> si                                                                                                                      |
| Diabetes gestacional con dieta y ejercicio | <input checked="" type="radio"/> no<br><input type="radio"/> si                                                                                                                      |
| Percentil fetos previos                    | <input checked="" type="radio"/> Nada<br><input type="radio"/> percentil menor de 10<br><input type="radio"/> percentil entre 10 y 90<br><input type="radio"/> percentil mayor de 90 |
| Exfumadora                                 | <input checked="" type="radio"/> Nada<br><input type="radio"/> menos de 5 años<br><input type="radio"/> 5 a 10 años<br><input type="radio"/> mayor o igual a 10 años                 |
| Hábito tabáquico                           | <input checked="" type="radio"/> no<br><input type="radio"/> si                                                                                                                      |
| fumadora                                   | [*DATA REMOVED*]                                                                                                                                                                     |
| Consumo otros tóxicos                      | <input checked="" type="radio"/> no<br><input type="radio"/> si                                                                                                                      |
| Hb 1T                                      | _____                                                                                                                                                                                |
| Htc 1T                                     | _____                                                                                                                                                                                |
| Hb 2T                                      | _____                                                                                                                                                                                |
| HTC 2T                                     | _____                                                                                                                                                                                |
| Hb 3T                                      | _____                                                                                                                                                                                |
| HTC 3T                                     | _____                                                                                                                                                                                |
| Suplemento FE oral                         | <input type="radio"/> si<br><input checked="" type="radio"/> no                                                                                                                      |
| Suplemento fe iv                           | <input type="radio"/> si<br><input checked="" type="radio"/> no                                                                                                                      |
| Transfusión                                | <input checked="" type="radio"/> no<br><input type="radio"/> si                                                                                                                      |
| Solicitada Vit D                           | <input checked="" type="radio"/> no<br><input type="radio"/> si                                                                                                                      |

|                       |                                                                                                                                                                                                                                                                                                                                                                                                              |
|-----------------------|--------------------------------------------------------------------------------------------------------------------------------------------------------------------------------------------------------------------------------------------------------------------------------------------------------------------------------------------------------------------------------------------------------------|
| Deficit vit D         | <input type="radio"/> no<br><input type="radio"/> si                                                                                                                                                                                                                                                                                                                                                         |
| Suplemento vit D      | <input type="radio"/> si<br><input type="radio"/> no                                                                                                                                                                                                                                                                                                                                                         |
| Dieta, cuestionario   | <input checked="" type="radio"/> si<br><input type="radio"/> no                                                                                                                                                                                                                                                                                                                                              |
| Leche entera          | <input checked="" type="radio"/> Nunca o menos 1 vez al mes<br><input type="radio"/> 1 a 3 veces mes<br><input type="radio"/> 1 vez semana<br><input type="radio"/> 2 a 4 veces semana<br><input type="radio"/> 5 a 6 veces semana<br><input type="radio"/> 1 vez al día<br><input type="radio"/> 2 a 3 veces al día<br><input type="radio"/> 5 a 6 veces al día<br><input type="radio"/> más 6 veces al día |
| Leche semidesnatada   | <input type="radio"/> Nunca o menos 1 vez al mes<br><input type="radio"/> 1 a 3 veces mes<br><input type="radio"/> 1 vez semana<br><input type="radio"/> 2 a 4 veces semana<br><input type="radio"/> 5 a 6 veces semana<br><input checked="" type="radio"/> 1 vez al día<br><input type="radio"/> 2 a 3 veces al día<br><input type="radio"/> 5 a 6 veces al día<br><input type="radio"/> mas 6 veces al día |
| Leche desnatada       | <input checked="" type="radio"/> Nunca o menos 1 vez al mes<br><input type="radio"/> 1 a 3 veces mes<br><input type="radio"/> 1 vez semana<br><input type="radio"/> 2 a 4 veces semana<br><input type="radio"/> 5 a 6 veces semana<br><input type="radio"/> 1 vez al día<br><input type="radio"/> 2 a 3 veces al día<br><input type="radio"/> 5 a 6 veces al día<br><input type="radio"/> más 6 veces al día |
| Leche condensada      | <input checked="" type="radio"/> Nunca o menos 1 vez al mes<br><input type="radio"/> 1 a 3 veces mes<br><input type="radio"/> 1 vez semana<br><input type="radio"/> 2 a 4 veces semana<br><input type="radio"/> 5 a 6 veces semana<br><input type="radio"/> 1 vez al día<br><input type="radio"/> 2 a 3 veces al día<br><input type="radio"/> 5 a 6 veces al día<br><input type="radio"/> más 6 veces al día |
| nata o crema de leche | <input type="radio"/> Nunca o menos 1 vez al mes<br><input type="radio"/> 1 a 3 veces mes<br><input checked="" type="radio"/> 1 vez semana<br><input type="radio"/> 2 a 4 veces semana<br><input type="radio"/> 5 a 6 veces semana<br><input type="radio"/> 1 vez al día<br><input type="radio"/> 2 a 3 veces al día<br><input type="radio"/> 5 a 6 veces al día<br><input type="radio"/> más 6 veces al día |

|                                             |                                                                                                                                                                                                                                                                                                                                                                                                              |
|---------------------------------------------|--------------------------------------------------------------------------------------------------------------------------------------------------------------------------------------------------------------------------------------------------------------------------------------------------------------------------------------------------------------------------------------------------------------|
| Yogurt Entero                               | <input checked="" type="radio"/> Nunca o menos 1 vez al mes<br><input type="radio"/> 1 a 3 veces mes<br><input type="radio"/> 1 vez semana<br><input type="radio"/> 2 a 4 veces semana<br><input type="radio"/> 5 a 6 veces semana<br><input type="radio"/> 1 vez al día<br><input type="radio"/> 2 a 3 veces al día<br><input type="radio"/> 5 a 6 veces al día<br><input type="radio"/> más 6 veces al día |
| Yogurt desnatado                            | <input type="radio"/> Nunca o menos 1 vez al mes<br><input checked="" type="radio"/> 1 a 3 veces mes<br><input type="radio"/> 1 vez semana<br><input type="radio"/> 2 a 4 veces semana<br><input type="radio"/> 5 a 6 veces semana<br><input type="radio"/> 1 vez al día<br><input type="radio"/> 2 a 3 veces al día<br><input type="radio"/> 5 a 6 veces al día<br><input type="radio"/> más 6 veces al día |
| 100g requesón o queso blando o queso fresco | <input checked="" type="radio"/> Nunca o menos 1 vez al mes<br><input type="radio"/> 1 a 3 veces mes<br><input type="radio"/> 1 vez semana<br><input type="radio"/> 2 a 4 veces semana<br><input type="radio"/> 5 a 6 veces semana<br><input type="radio"/> 1 vez al día<br><input type="radio"/> 2 a 3 veces al día<br><input type="radio"/> 5 a 6 veces al día<br><input type="radio"/> más 6 veces al día |
| queso curado o semicurado o cremoso         | <input type="radio"/> Nunca o menos 1 vez al mes<br><input type="radio"/> 1 a 3 veces mes<br><input type="radio"/> 1 vez semana<br><input checked="" type="radio"/> 2 a 4 veces semana<br><input type="radio"/> 5 a 6 veces semana<br><input type="radio"/> 1 vez al día<br><input type="radio"/> 2 a 3 veces al día<br><input type="radio"/> 5 a 6 veces al día<br><input type="radio"/> más 6 veces al día |
| natillas flan pudding                       | <input checked="" type="radio"/> Nunca o menos 1 vez al mes<br><input type="radio"/> 1 a 3 veces mes<br><input type="radio"/> 1 vez semana<br><input type="radio"/> 2 a 4 veces semana<br><input type="radio"/> 5 a 6 veces semana<br><input type="radio"/> 1 vez al día<br><input type="radio"/> 2 a 3 veces al día<br><input type="radio"/> 5 a 6 veces al día<br><input type="radio"/> más 6 veces al día |
| Helado                                      | <input checked="" type="radio"/> Nunca o menos 1 vez al mes<br><input type="radio"/> 1 a 3 veces mes<br><input type="radio"/> 1 vez semana<br><input type="radio"/> 2 a 4 veces semana<br><input type="radio"/> 5 a 6 veces semana<br><input type="radio"/> 1 vez al día<br><input type="radio"/> 2 a 3 veces al día<br><input type="radio"/> 5 a 6 veces al día<br><input type="radio"/> más 6 veces al día |

|                                      |                                                                                                                                                                                                                                                                                                                                                                                                              |
|--------------------------------------|--------------------------------------------------------------------------------------------------------------------------------------------------------------------------------------------------------------------------------------------------------------------------------------------------------------------------------------------------------------------------------------------------------------|
| huevo                                | <input type="radio"/> Nunca o menos 1 vez al mes<br><input type="radio"/> 1 a 3 veces mes<br><input type="radio"/> 1 vez semana<br><input checked="" type="radio"/> 2 a 4 veces semana<br><input type="radio"/> 5 a 6 veces semana<br><input type="radio"/> 1 vez al día<br><input type="radio"/> 2 a 3 veces al día<br><input type="radio"/> 5 a 6 veces al día<br><input type="radio"/> más 6 veces al día |
| Pollo con piel                       | <input checked="" type="radio"/> Nunca o menos 1 vez al mes<br><input type="radio"/> 1 a 3 veces mes<br><input type="radio"/> 1 vez semana<br><input type="radio"/> 2 a 4 veces semana<br><input type="radio"/> 5 a 6 veces semana<br><input type="radio"/> 1 vez al día<br><input type="radio"/> 2 a 3 veces al día<br><input type="radio"/> 5 a 6 veces al día<br><input type="radio"/> más 6 veces al día |
| pollo sin piel                       | <input type="radio"/> Nunca o menos 1 vez al mes<br><input type="radio"/> 1 a 3 veces mes<br><input checked="" type="radio"/> 1 vez semana<br><input type="radio"/> 2 a 4 veces semana<br><input type="radio"/> 5 a 6 veces semana<br><input type="radio"/> 1 vez al día<br><input type="radio"/> 2 a 3 veces al día<br><input type="radio"/> 5 a 6 veces al día<br><input type="radio"/> más 6 veces al día |
| Ternera o cerdo o cordero            | <input type="radio"/> Nunca o menos 1 vez al mes<br><input checked="" type="radio"/> 1 a 3 veces mes<br><input type="radio"/> 1 vez semana<br><input type="radio"/> 2 a 4 veces semana<br><input type="radio"/> 5 a 6 veces semana<br><input type="radio"/> 1 vez al día<br><input type="radio"/> 2 a 3 veces al día<br><input type="radio"/> 5 a 6 veces al día<br><input type="radio"/> más 6 veces al día |
| carne caza: Conejo o codorniz o pato | <input checked="" type="radio"/> Nunca o menos 1 vez al mes<br><input type="radio"/> 1 a 3 veces mes<br><input type="radio"/> 1 vez semana<br><input type="radio"/> 2 a 4 veces semana<br><input type="radio"/> 5 a 6 veces semana<br><input type="radio"/> 1 vez al día<br><input type="radio"/> 2 a 3 veces al día<br><input type="radio"/> 5 a 6 veces al día<br><input type="radio"/> más 6 veces al día |
| Hígado de ternera o cerdo o pollo    | <input checked="" type="radio"/> Nunca o menos 1 vez al mes<br><input type="radio"/> 1 a 3 veces mes<br><input type="radio"/> 1 vez semana<br><input type="radio"/> 2 a 4 veces semana<br><input type="radio"/> 5 a 6 veces semana<br><input type="radio"/> 1 vez al día<br><input type="radio"/> 2 a 3 veces al día<br><input type="radio"/> 5 a 6 veces al día<br><input type="radio"/> más 6 veces al día |

---

Vísceras

- ☒ Nunca o menos 1 vez al mes  
☐ 1 a 3 veces mes  
☐ 1 vez semana  
☐ 2 a 4 veces semana  
☐ 5 a 6 veces semana  
☐ 1 vez al día  
☐ 2 a 3 veces al día  
☐ 5 a 6 veces al día  
☐ más 6 veces al día

---

Embutido

- ☒ Nunca o menos 1 vez al mes  
☐ 1 a 3 veces mes  
☐ 1 vez semana  
☐ 2 a 4 veces semana  
☐ 5 a 6 veces semana  
☐ 1 vez al día  
☐ 2 a 3 veces al día  
☐ 5 a 6 veces al día  
☐ más 6 veces al día

---

Salchicha o similar

- ☒ Nunca o menos 1 vez al mes  
☐ 1 a 3 veces mes  
☐ 1 vez semana  
☐ 2 a 4 veces semana  
☐ 5 a 6 veces semana  
☐ 1 vez al día  
☐ 2 a 3 veces al día  
☐ 5 a 6 veces al día  
☐ más 6 veces al día

---

Pate o foiegras

- ☒ Nunca o menos 1 vez al mes  
☐ 1 a 3 veces mes  
☐ 1 vez semana  
☐ 2 a 4 veces semana  
☐ 5 a 6 veces semana  
☐ 1 vez al día  
☐ 2 a 3 veces al día  
☐ 5 a 6 veces al día  
☐ más 6 veces al día

---

Hamburguesa

- ☐ Nunca o menos 1 vez al mes  
☒ 1 a 3 veces mes  
☐ 1 vez semana  
☐ 2 a 4 veces semana  
☐ 5 a 6 veces semana  
☐ 1 vez al día  
☐ 2 a 3 veces al día  
☐ 5 a 6 veces al día  
☐ más 6 veces al día

---

tocino o bacon

- ☒ Nunca o menos 1 vez al mes  
☐ 1 a 3 veces mes  
☐ 1 vez semana  
☐ 2 a 4 veces semana  
☐ 5 a 6 veces semana  
☐ 1 vez al día  
☐ 2 a 3 veces al día  
☐ 5 a 6 veces al día  
☐ más 6 veces al día



---

Pescado frito

- ☐ Nunca o menos 1 vez al mes  
☒ 1 a 3 veces mes  
☐ 1 vez semana  
☐ 2 a 4 veces semana  
☐ 5 a 6 veces semana  
☐ 1 vez al día  
☐ 2 a 3 veces al día  
☐ 5 a 6 veces al día  
☐ más 6 veces al día

---

pescado hervido blanco

- ☒ Nunca o menos 1 vez al mes  
☐ 1 a 3 veces mes  
☐ 1 vez semana  
☐ 2 a 4 veces semana  
☐ 5 a 6 veces semana  
☐ 1 vez al día  
☐ 2 a 3 veces al día  
☐ 5 a 6 veces al día  
☐ más 6 veces al día

---

pescado hervido azul

- ☒ Nunca o menos 1 vez al mes  
☐ 1 a 3 veces mes  
☐ 1 vez semana  
☐ 2 a 4 veces semana  
☐ 5 a 6 veces semana  
☐ 1 vez al día  
☐ 2 a 3 veces al día  
☐ 5 a 6 veces al día  
☐ más 6 veces al día

---

otros pescado azul

- ☐ Nunca o menos 1 vez al mes  
☒ 1 a 3 veces mes  
☐ 1 vez semana  
☐ 2 a 4 veces semana  
☐ 5 a 6 veces semana  
☐ 1 vez al día  
☐ 2 a 3 veces al día  
☐ 5 a 6 veces al día  
☐ más 6 veces al día

---

atun conserva

- ☐ Nunca o menos 1 vez al mes  
☐ 1 a 3 veces mes  
☒ 1 vez semana  
☐ 2 a 4 veces semana  
☐ 5 a 6 veces semana  
☐ 1 vez al día  
☐ 2 a 3 veces al día  
☐ 5 a 6 veces al día  
☐ más 6 veces al día

---

sardina conserva

- ☒ Nunca o menos 1 vez al mes  
☐ 1 a 3 veces mes  
☐ 1 vez semana  
☐ 2 a 4 veces semana  
☐ 5 a 6 veces semana  
☐ 1 vez al día  
☐ 2 a 3 veces al día  
☐ 5 a 6 veces al día  
☐ más 6 veces al día

|                                         |                                                                                                                                                                                                                                                                                                                                                                                                              |
|-----------------------------------------|--------------------------------------------------------------------------------------------------------------------------------------------------------------------------------------------------------------------------------------------------------------------------------------------------------------------------------------------------------------------------------------------------------------|
| pescado ahumado                         | <input checked="" type="radio"/> Nunca o menos 1 vez al mes<br><input type="radio"/> 1 a 3 veces mes<br><input type="radio"/> 1 vez semana<br><input type="radio"/> 2 a 4 veces semana<br><input type="radio"/> 5 a 6 veces semana<br><input type="radio"/> 1 vez al día<br><input type="radio"/> 2 a 3 veces al día<br><input type="radio"/> 5 a 6 veces al día<br><input type="radio"/> más 6 veces al día |
| almejas o mejillones o ostras unos 100g | <input checked="" type="radio"/> Nunca o menos 1 vez al mes<br><input type="radio"/> 1 a 3 veces mes<br><input type="radio"/> 1 vez semana<br><input type="radio"/> 2 a 4 veces semana<br><input type="radio"/> 5 a 6 veces semana<br><input type="radio"/> 1 vez al día<br><input type="radio"/> 2 a 3 veces al día<br><input type="radio"/> 5 a 6 veces al día<br><input type="radio"/> más 6 veces al día |
| calamar o chipiron o sepia unos 100g    | <input type="radio"/> Nunca o menos 1 vez al mes<br><input checked="" type="radio"/> 1 a 3 veces mes<br><input type="radio"/> 1 vez semana<br><input type="radio"/> 2 a 4 veces semana<br><input type="radio"/> 5 a 6 veces semana<br><input type="radio"/> 1 vez al día<br><input type="radio"/> 2 a 3 veces al día<br><input type="radio"/> 5 a 6 veces al día<br><input type="radio"/> más 6 veces al día |
| marisco unos 100g                       | <input checked="" type="radio"/> Nunca o menos 1 vez al mes<br><input type="radio"/> 1 a 3 veces mes<br><input type="radio"/> 1 vez semana<br><input type="radio"/> 2 a 4 veces semana<br><input type="radio"/> 5 a 6 veces semana<br><input type="radio"/> 1 vez al día<br><input type="radio"/> 2 a 3 veces al día<br><input type="radio"/> 5 a 6 veces al día<br><input type="radio"/> más 6 veces al día |
| Espinacas o acelgas cocinadas           | <input type="radio"/> Nunca o menos 1 vez al mes<br><input checked="" type="radio"/> 1 a 3 veces mes<br><input type="radio"/> 1 vez semana<br><input type="radio"/> 2 a 4 veces semana<br><input type="radio"/> 5 a 6 veces semana<br><input type="radio"/> 1 vez al día<br><input type="radio"/> 2 a 3 veces al día<br><input type="radio"/> 5 a 6 veces al día<br><input type="radio"/> más 6 veces al día |
| Col o coliflor o brocoli cocinado       | <input checked="" type="radio"/> Nunca o menos 1 vez al mes<br><input type="radio"/> 1 a 3 veces mes<br><input type="radio"/> 1 vez semana<br><input type="radio"/> 2 a 4 veces semana<br><input type="radio"/> 5 a 6 veces semana<br><input type="radio"/> 1 vez al día<br><input type="radio"/> 2 a 3 veces al día<br><input type="radio"/> 5 a 6 veces al día<br><input type="radio"/> más 6 veces al día |

---

Lechuga o endivia o escarola

- ☐ Nunca o menos 1 vez al mes  
☐ 1 a 3 veces mes  
☐ 1 vez semana  
☐ 2 a 4 veces semana  
☒ 5 a 6 veces semana  
☐ 1 vez al día  
☐ 2 a 3 veces al día  
☐ 5 a 6 veces al día  
☐ más 6 veces al día

---

tomate ensalada

- ☐ Nunca o menos 1 vez al mes  
☐ 1 a 3 veces mes  
☐ 1 vez semana  
☐ 2 a 4 veces semana  
☒ 5 a 6 veces semana  
☐ 1 vez al día  
☐ 2 a 3 veces al día  
☐ 5 a 6 veces al día  
☐ más 6 veces al día

---

cebolla

- ☐ Nunca o menos 1 vez al mes  
☐ 1 a 3 veces mes  
☐ 1 vez semana  
☒ 2 a 4 veces semana  
☐ 5 a 6 veces semana  
☐ 1 vez al día  
☐ 2 a 3 veces al día  
☐ 5 a 6 veces al día  
☐ más 6 veces al día

---

Zanahoria o calabaza

- ☐ Nunca o menos 1 vez al mes  
☐ 1 a 3 veces mes  
☐ 1 vez semana  
☒ 2 a 4 veces semana  
☐ 5 a 6 veces semana  
☐ 1 vez al día  
☐ 2 a 3 veces al día  
☐ 5 a 6 veces al día  
☐ más 6 veces al día

---

Judías verdes

- ☒ Nunca o menos 1 vez al mes  
☐ 1 a 3 veces mes  
☐ 1 vez semana  
☐ 2 a 4 veces semana  
☐ 5 a 6 veces semana  
☐ 1 vez al día  
☐ 2 a 3 veces al día  
☐ 5 a 6 veces al día  
☐ más 6 veces al día

---

Berenjena o calabacin o pepino

- ☐ Nunca o menos 1 vez al mes  
☐ 1 a 3 veces mes  
☐ 1 vez semana  
☒ 2 a 4 veces semana  
☐ 5 a 6 veces semana  
☐ 1 vez al día  
☐ 2 a 3 veces al día  
☐ 5 a 6 veces al día  
☐ más 6 veces al día

---

|          |                                                                                                                                                                                                                                                                                                                                                                                                              |
|----------|--------------------------------------------------------------------------------------------------------------------------------------------------------------------------------------------------------------------------------------------------------------------------------------------------------------------------------------------------------------------------------------------------------------|
| pimiento | <input type="radio"/> Nunca o menos 1 vez al mes<br><input type="radio"/> 1 a 3 veces mes<br><input type="radio"/> 1 vez semana<br><input checked="" type="radio"/> 2 a 4 veces semana<br><input type="radio"/> 5 a 6 veces semana<br><input type="radio"/> 1 vez al día<br><input type="radio"/> 2 a 3 veces al día<br><input type="radio"/> 5 a 6 veces al día<br><input type="radio"/> más 6 veces al día |
|----------|--------------------------------------------------------------------------------------------------------------------------------------------------------------------------------------------------------------------------------------------------------------------------------------------------------------------------------------------------------------------------------------------------------------|

---

|           |                                                                                                                                                                                                                                                                                                                                                                                                              |
|-----------|--------------------------------------------------------------------------------------------------------------------------------------------------------------------------------------------------------------------------------------------------------------------------------------------------------------------------------------------------------------------------------------------------------------|
| alcachofa | <input checked="" type="radio"/> Nunca o menos 1 vez al mes<br><input type="radio"/> 1 a 3 veces mes<br><input type="radio"/> 1 vez semana<br><input type="radio"/> 2 a 4 veces semana<br><input type="radio"/> 5 a 6 veces semana<br><input type="radio"/> 1 vez al día<br><input type="radio"/> 2 a 3 veces al día<br><input type="radio"/> 5 a 6 veces al día<br><input type="radio"/> más 6 veces al día |
|-----------|--------------------------------------------------------------------------------------------------------------------------------------------------------------------------------------------------------------------------------------------------------------------------------------------------------------------------------------------------------------------------------------------------------------|

---

|            |                                                                                                                                                                                                                                                                                                                                                                                                              |
|------------|--------------------------------------------------------------------------------------------------------------------------------------------------------------------------------------------------------------------------------------------------------------------------------------------------------------------------------------------------------------------------------------------------------------|
| espárragos | <input checked="" type="radio"/> Nunca o menos 1 vez al mes<br><input type="radio"/> 1 a 3 veces mes<br><input type="radio"/> 1 vez semana<br><input type="radio"/> 2 a 4 veces semana<br><input type="radio"/> 5 a 6 veces semana<br><input type="radio"/> 1 vez al día<br><input type="radio"/> 2 a 3 veces al día<br><input type="radio"/> 5 a 6 veces al día<br><input type="radio"/> más 6 veces al día |
|------------|--------------------------------------------------------------------------------------------------------------------------------------------------------------------------------------------------------------------------------------------------------------------------------------------------------------------------------------------------------------------------------------------------------------|

---

|              |                                                                                                                                                                                                                                                                                                                                                                                                              |
|--------------|--------------------------------------------------------------------------------------------------------------------------------------------------------------------------------------------------------------------------------------------------------------------------------------------------------------------------------------------------------------------------------------------------------------|
| maíz hervido | <input type="radio"/> Nunca o menos 1 vez al mes<br><input checked="" type="radio"/> 1 a 3 veces mes<br><input type="radio"/> 1 vez semana<br><input type="radio"/> 2 a 4 veces semana<br><input type="radio"/> 5 a 6 veces semana<br><input type="radio"/> 1 vez al día<br><input type="radio"/> 2 a 3 veces al día<br><input type="radio"/> 5 a 6 veces al día<br><input type="radio"/> más 6 veces al día |
|--------------|--------------------------------------------------------------------------------------------------------------------------------------------------------------------------------------------------------------------------------------------------------------------------------------------------------------------------------------------------------------------------------------------------------------|

---

|           |                                                                                                                                                                                                                                                                                                                                                                                                              |
|-----------|--------------------------------------------------------------------------------------------------------------------------------------------------------------------------------------------------------------------------------------------------------------------------------------------------------------------------------------------------------------------------------------------------------------|
| legumbres | <input type="radio"/> Nunca o menos 1 vez al mes<br><input type="radio"/> 1 a 3 veces mes<br><input checked="" type="radio"/> 1 vez semana<br><input type="radio"/> 2 a 4 veces semana<br><input type="radio"/> 5 a 6 veces semana<br><input type="radio"/> 1 vez al día<br><input type="radio"/> 2 a 3 veces al día<br><input type="radio"/> 5 a 6 veces al día<br><input type="radio"/> más 6 veces al día |
|-----------|--------------------------------------------------------------------------------------------------------------------------------------------------------------------------------------------------------------------------------------------------------------------------------------------------------------------------------------------------------------------------------------------------------------|

---

|                       |                                                                                                                                                                                                                                                                                                                                                                                                              |
|-----------------------|--------------------------------------------------------------------------------------------------------------------------------------------------------------------------------------------------------------------------------------------------------------------------------------------------------------------------------------------------------------------------------------------------------------|
| naranjas o mandarinas | <input type="radio"/> Nunca o menos 1 vez al mes<br><input type="radio"/> 1 a 3 veces mes<br><input type="radio"/> 1 vez semana<br><input type="radio"/> 2 a 4 veces semana<br><input checked="" type="radio"/> 5 a 6 veces semana<br><input type="radio"/> 1 vez al día<br><input type="radio"/> 2 a 3 veces al día<br><input type="radio"/> 5 a 6 veces al día<br><input type="radio"/> más 6 veces al día |
|-----------------------|--------------------------------------------------------------------------------------------------------------------------------------------------------------------------------------------------------------------------------------------------------------------------------------------------------------------------------------------------------------------------------------------------------------|

---

---

|                    |                                                                                                                                                                                                                                                                                                                                                                                                              |
|--------------------|--------------------------------------------------------------------------------------------------------------------------------------------------------------------------------------------------------------------------------------------------------------------------------------------------------------------------------------------------------------------------------------------------------------|
| zumو natural fruta | <input checked="" type="radio"/> Nunca o menos 1 vez al mes<br><input type="radio"/> 1 a 3 veces mes<br><input type="radio"/> 1 vez semana<br><input type="radio"/> 2 a 4 veces semana<br><input type="radio"/> 5 a 6 veces semana<br><input type="radio"/> 1 vez al día<br><input type="radio"/> 2 a 3 veces al día<br><input type="radio"/> 5 a 6 veces al día<br><input type="radio"/> más 6 veces al día |
|--------------------|--------------------------------------------------------------------------------------------------------------------------------------------------------------------------------------------------------------------------------------------------------------------------------------------------------------------------------------------------------------------------------------------------------------|

---

|         |                                                                                                                                                                                                                                                                                                                                                                                                              |
|---------|--------------------------------------------------------------------------------------------------------------------------------------------------------------------------------------------------------------------------------------------------------------------------------------------------------------------------------------------------------------------------------------------------------------|
| platano | <input type="radio"/> Nunca o menos 1 vez al mes<br><input checked="" type="radio"/> 1 a 3 veces mes<br><input type="radio"/> 1 vez semana<br><input type="radio"/> 2 a 4 veces semana<br><input type="radio"/> 5 a 6 veces semana<br><input type="radio"/> 1 vez al día<br><input type="radio"/> 2 a 3 veces al día<br><input type="radio"/> 5 a 6 veces al día<br><input type="radio"/> más 6 veces al día |
|---------|--------------------------------------------------------------------------------------------------------------------------------------------------------------------------------------------------------------------------------------------------------------------------------------------------------------------------------------------------------------------------------------------------------------|

---

|                |                                                                                                                                                                                                                                                                                                                                                                                                              |
|----------------|--------------------------------------------------------------------------------------------------------------------------------------------------------------------------------------------------------------------------------------------------------------------------------------------------------------------------------------------------------------------------------------------------------------|
| manzana o pera | <input checked="" type="radio"/> Nunca o menos 1 vez al mes<br><input type="radio"/> 1 a 3 veces mes<br><input type="radio"/> 1 vez semana<br><input type="radio"/> 2 a 4 veces semana<br><input type="radio"/> 5 a 6 veces semana<br><input type="radio"/> 1 vez al día<br><input type="radio"/> 2 a 3 veces al día<br><input type="radio"/> 5 a 6 veces al día<br><input type="radio"/> más 6 veces al día |
|----------------|--------------------------------------------------------------------------------------------------------------------------------------------------------------------------------------------------------------------------------------------------------------------------------------------------------------------------------------------------------------------------------------------------------------|

---

|                       |                                                                                                                                                                                                                                                                                                                                                                                                              |
|-----------------------|--------------------------------------------------------------------------------------------------------------------------------------------------------------------------------------------------------------------------------------------------------------------------------------------------------------------------------------------------------------------------------------------------------------|
| melocotón o nectarina | <input checked="" type="radio"/> Nunca o menos 1 vez al mes<br><input type="radio"/> 1 a 3 veces mes<br><input type="radio"/> 1 vez semana<br><input type="radio"/> 2 a 4 veces semana<br><input type="radio"/> 5 a 6 veces semana<br><input type="radio"/> 1 vez al día<br><input type="radio"/> 2 a 3 veces al día<br><input type="radio"/> 5 a 6 veces al día<br><input type="radio"/> más 6 veces al día |
|-----------------------|--------------------------------------------------------------------------------------------------------------------------------------------------------------------------------------------------------------------------------------------------------------------------------------------------------------------------------------------------------------------------------------------------------------|

---

|                |                                                                                                                                                                                                                                                                                                                                                                                                              |
|----------------|--------------------------------------------------------------------------------------------------------------------------------------------------------------------------------------------------------------------------------------------------------------------------------------------------------------------------------------------------------------------------------------------------------------|
| sandia o melon | <input checked="" type="radio"/> Nunca o menos 1 vez al mes<br><input type="radio"/> 1 a 3 veces mes<br><input type="radio"/> 1 vez semana<br><input type="radio"/> 2 a 4 veces semana<br><input type="radio"/> 5 a 6 veces semana<br><input type="radio"/> 1 vez al día<br><input type="radio"/> 2 a 3 veces al día<br><input type="radio"/> 5 a 6 veces al día<br><input type="radio"/> más 6 veces al día |
|----------------|--------------------------------------------------------------------------------------------------------------------------------------------------------------------------------------------------------------------------------------------------------------------------------------------------------------------------------------------------------------------------------------------------------------|

---

|     |                                                                                                                                                                                                                                                                                                                                                                                                              |
|-----|--------------------------------------------------------------------------------------------------------------------------------------------------------------------------------------------------------------------------------------------------------------------------------------------------------------------------------------------------------------------------------------------------------------|
| uva | <input checked="" type="radio"/> Nunca o menos 1 vez al mes<br><input type="radio"/> 1 a 3 veces mes<br><input type="radio"/> 1 vez semana<br><input type="radio"/> 2 a 4 veces semana<br><input type="radio"/> 5 a 6 veces semana<br><input type="radio"/> 1 vez al día<br><input type="radio"/> 2 a 3 veces al día<br><input type="radio"/> 5 a 6 veces al día<br><input type="radio"/> más 6 veces al día |
|-----|--------------------------------------------------------------------------------------------------------------------------------------------------------------------------------------------------------------------------------------------------------------------------------------------------------------------------------------------------------------------------------------------------------------|

---

---

bruna o ciruela

- ☒ Nunca o menos 1 vez al mes  
☐ 1 a 3 veces mes  
☐ 1 vez semana  
☐ 2 a 4 veces semana  
☐ 5 a 6 veces semana  
☐ 1 vez al día  
☐ 2 a 3 veces al día  
☐ 5 a 6 veces al día  
☐ más 6 veces al día

---

kiwi

- ☐ Nunca o menos 1 vez al mes  
☒ 1 a 3 veces mes  
☐ 1 vez semana  
☐ 2 a 4 veces semana  
☐ 5 a 6 veces semana  
☐ 1 vez al día  
☐ 2 a 3 veces al día  
☐ 5 a 6 veces al día  
☐ más 6 veces al día

---

aceituna

- ☐ Nunca o menos 1 vez al mes  
☒ 1 a 3 veces mes  
☐ 1 vez semana  
☐ 2 a 4 veces semana  
☐ 5 a 6 veces semana  
☐ 1 vez al día  
☐ 2 a 3 veces al día  
☐ 5 a 6 veces al día  
☐ más 6 veces al día

---

frutos secos

- ☐ Nunca o menos 1 vez al mes  
☐ 1 a 3 veces mes  
☒ 1 vez semana  
☐ 2 a 4 veces semana  
☐ 5 a 6 veces semana  
☐ 1 vez al día  
☐ 2 a 3 veces al día  
☐ 5 a 6 veces al día  
☐ más 6 veces al día

---

pan blanco

- ☐ Nunca o menos 1 vez al mes  
☐ 1 a 3 veces mes  
☐ 1 vez semana  
☐ 2 a 4 veces semana  
☐ 5 a 6 veces semana  
☐ 1 vez al día  
☒ 2 a 3 veces al día  
☐ 5 a 6 veces al día  
☐ más 6 veces al día

---

pan integral

- ☒ Nunca o menos 1 vez al mes  
☐ 1 a 3 veces mes  
☐ 1 vez semana  
☐ 2 a 4 veces semana  
☐ 5 a 6 veces semana  
☐ 1 vez al día  
☐ 2 a 3 veces al día  
☐ 5 a 6 veces al día  
☐ más 6 veces al día

|                          |                                                                                                                                                                                                                                                                                                                                                                                                              |
|--------------------------|--------------------------------------------------------------------------------------------------------------------------------------------------------------------------------------------------------------------------------------------------------------------------------------------------------------------------------------------------------------------------------------------------------------|
| cereales desayuno        | <input checked="" type="radio"/> Nunca o menos 1 vez al mes<br><input type="radio"/> 1 a 3 veces mes<br><input type="radio"/> 1 vez semana<br><input type="radio"/> 2 a 4 veces semana<br><input type="radio"/> 5 a 6 veces semana<br><input type="radio"/> 1 vez al día<br><input type="radio"/> 2 a 3 veces al día<br><input type="radio"/> 5 a 6 veces al día<br><input type="radio"/> más 6 veces al día |
| patatas fritas           | <input type="radio"/> Nunca o menos 1 vez al mes<br><input checked="" type="radio"/> 1 a 3 veces mes<br><input type="radio"/> 1 vez semana<br><input type="radio"/> 2 a 4 veces semana<br><input type="radio"/> 5 a 6 veces semana<br><input type="radio"/> 1 vez al día<br><input type="radio"/> 2 a 3 veces al día<br><input type="radio"/> 5 a 6 veces al día<br><input type="radio"/> más 6 veces al día |
| patatas cocidas o asadas | <input type="radio"/> Nunca o menos 1 vez al mes<br><input type="radio"/> 1 a 3 veces mes<br><input checked="" type="radio"/> 1 vez semana<br><input type="radio"/> 2 a 4 veces semana<br><input type="radio"/> 5 a 6 veces semana<br><input type="radio"/> 1 vez al día<br><input type="radio"/> 2 a 3 veces al día<br><input type="radio"/> 5 a 6 veces al día<br><input type="radio"/> más 6 veces al día |
| bolsa papas              | <input type="radio"/> Nunca o menos 1 vez al mes<br><input type="radio"/> 1 a 3 veces mes<br><input checked="" type="radio"/> 1 vez semana<br><input type="radio"/> 2 a 4 veces semana<br><input type="radio"/> 5 a 6 veces semana<br><input type="radio"/> 1 vez al día<br><input type="radio"/> 2 a 3 veces al día<br><input type="radio"/> 5 a 6 veces al día<br><input type="radio"/> más 6 veces al día |
| arroz cocinado           | <input type="radio"/> Nunca o menos 1 vez al mes<br><input type="radio"/> 1 a 3 veces mes<br><input type="radio"/> 1 vez semana<br><input checked="" type="radio"/> 2 a 4 veces semana<br><input type="radio"/> 5 a 6 veces semana<br><input type="radio"/> 1 vez al día<br><input type="radio"/> 2 a 3 veces al día<br><input type="radio"/> 5 a 6 veces al día<br><input type="radio"/> más 6 veces al día |
| pasta                    | <input type="radio"/> Nunca o menos 1 vez al mes<br><input type="radio"/> 1 a 3 veces mes<br><input type="radio"/> 1 vez semana<br><input checked="" type="radio"/> 2 a 4 veces semana<br><input type="radio"/> 5 a 6 veces semana<br><input type="radio"/> 1 vez al día<br><input type="radio"/> 2 a 3 veces al día<br><input type="radio"/> 5 a 6 veces al día<br><input type="radio"/> más 6 veces al día |

|                     |                                                                                                                                                                                                                                                                                                                                                                                                              |
|---------------------|--------------------------------------------------------------------------------------------------------------------------------------------------------------------------------------------------------------------------------------------------------------------------------------------------------------------------------------------------------------------------------------------------------------|
| pizza               | <input type="radio"/> Nunca o menos 1 vez al mes<br><input checked="" type="radio"/> 1 a 3 veces mes<br><input type="radio"/> 1 vez semana<br><input type="radio"/> 2 a 4 veces semana<br><input type="radio"/> 5 a 6 veces semana<br><input type="radio"/> 1 vez al día<br><input type="radio"/> 2 a 3 veces al día<br><input type="radio"/> 5 a 6 veces al día<br><input type="radio"/> más 6 veces al día |
| aceite oliva        | <input type="radio"/> Nunca o menos 1 vez al mes<br><input type="radio"/> 1 a 3 veces mes<br><input type="radio"/> 1 vez semana<br><input checked="" type="radio"/> 2 a 4 veces semana<br><input type="radio"/> 5 a 6 veces semana<br><input type="radio"/> 1 vez al día<br><input type="radio"/> 2 a 3 veces al día<br><input type="radio"/> 5 a 6 veces al día<br><input type="radio"/> más 6 veces al día |
| otros aceites       | <input checked="" type="radio"/> Nunca o menos 1 vez al mes<br><input type="radio"/> 1 a 3 veces mes<br><input type="radio"/> 1 vez semana<br><input type="radio"/> 2 a 4 veces semana<br><input type="radio"/> 5 a 6 veces semana<br><input type="radio"/> 1 vez al día<br><input type="radio"/> 2 a 3 veces al día<br><input type="radio"/> 5 a 6 veces al día<br><input type="radio"/> más 6 veces al día |
| margarina           | <input checked="" type="radio"/> Nunca o menos 1 vez al mes<br><input type="radio"/> 1 a 3 veces mes<br><input type="radio"/> 1 vez semana<br><input type="radio"/> 2 a 4 veces semana<br><input type="radio"/> 5 a 6 veces semana<br><input type="radio"/> 1 vez al día<br><input type="radio"/> 2 a 3 veces al día<br><input type="radio"/> 5 a 6 veces al día<br><input type="radio"/> más 6 veces al día |
| mantequilla         | <input type="radio"/> Nunca o menos 1 vez al mes<br><input type="radio"/> 1 a 3 veces mes<br><input checked="" type="radio"/> 1 vez semana<br><input type="radio"/> 2 a 4 veces semana<br><input type="radio"/> 5 a 6 veces semana<br><input type="radio"/> 1 vez al día<br><input type="radio"/> 2 a 3 veces al día<br><input type="radio"/> 5 a 6 veces al día<br><input type="radio"/> más 6 veces al día |
| galletas tipo maria | <input type="radio"/> Nunca o menos 1 vez al mes<br><input type="radio"/> 1 a 3 veces mes<br><input type="radio"/> 1 vez semana<br><input type="radio"/> 2 a 4 veces semana<br><input type="radio"/> 5 a 6 veces semana<br><input type="radio"/> 1 vez al día<br><input type="radio"/> 2 a 3 veces al día<br><input checked="" type="radio"/> 5 a 6 veces al día<br><input type="radio"/> más 6 veces al día |



|                           |                                                                                                                                                                                                                                                                                                                                                                                                              |
|---------------------------|--------------------------------------------------------------------------------------------------------------------------------------------------------------------------------------------------------------------------------------------------------------------------------------------------------------------------------------------------------------------------------------------------------------|
| galletas chocolate        | <input checked="" type="radio"/> Nunca o menos 1 vez al mes<br><input type="radio"/> 1 a 3 veces mes<br><input type="radio"/> 1 vez semana<br><input type="radio"/> 2 a 4 veces semana<br><input type="radio"/> 5 a 6 veces semana<br><input type="radio"/> 1 vez al día<br><input type="radio"/> 2 a 3 veces al día<br><input type="radio"/> 5 a 6 veces al día<br><input type="radio"/> más 6 veces al día |
| bollieria                 | <input type="radio"/> Nunca o menos 1 vez al mes<br><input type="radio"/> 1 a 3 veces mes<br><input type="radio"/> 1 vez semana<br><input type="radio"/> 2 a 4 veces semana<br><input checked="" type="radio"/> 5 a 6 veces semana<br><input type="radio"/> 1 vez al día<br><input type="radio"/> 2 a 3 veces al día<br><input type="radio"/> 5 a 6 veces al día<br><input type="radio"/> más 6 veces al día |
| chocolate o bombones      | <input type="radio"/> Nunca o menos 1 vez al mes<br><input checked="" type="radio"/> 1 a 3 veces mes<br><input type="radio"/> 1 vez semana<br><input type="radio"/> 2 a 4 veces semana<br><input type="radio"/> 5 a 6 veces semana<br><input type="radio"/> 1 vez al día<br><input type="radio"/> 2 a 3 veces al día<br><input type="radio"/> 5 a 6 veces al día<br><input type="radio"/> más 6 veces al día |
| chocolate polvo o colacao | <input checked="" type="radio"/> Nunca o menos 1 vez al mes<br><input type="radio"/> 1 a 3 veces mes<br><input type="radio"/> 1 vez semana<br><input type="radio"/> 2 a 4 veces semana<br><input type="radio"/> 5 a 6 veces semana<br><input type="radio"/> 1 vez al día<br><input type="radio"/> 2 a 3 veces al día<br><input type="radio"/> 5 a 6 veces al día<br><input type="radio"/> más 6 veces al día |
| vino tinto                | <input checked="" type="radio"/> Nunca o menos 1 vez al mes<br><input type="radio"/> 1 a 3 veces mes<br><input type="radio"/> 1 vez semana<br><input type="radio"/> 2 a 4 veces semana<br><input type="radio"/> 5 a 6 veces semana<br><input type="radio"/> 1 vez al día<br><input type="radio"/> 2 a 3 veces al día<br><input type="radio"/> 5 a 6 veces al día<br><input type="radio"/> más 6 veces al día |
| vino blanco               | <input checked="" type="radio"/> Nunca o menos 1 vez al mes<br><input type="radio"/> 1 a 3 veces mes<br><input type="radio"/> 1 vez semana<br><input type="radio"/> 2 a 4 veces semana<br><input type="radio"/> 5 a 6 veces semana<br><input type="radio"/> 1 vez al día<br><input type="radio"/> 2 a 3 veces al día<br><input type="radio"/> 5 a 6 veces al día<br><input type="radio"/> más 6 veces al día |

---

|                    |                                                                                                                                                                                                                                                                                                                                                                                                              |
|--------------------|--------------------------------------------------------------------------------------------------------------------------------------------------------------------------------------------------------------------------------------------------------------------------------------------------------------------------------------------------------------------------------------------------------------|
| vino seco o vermut | <input checked="" type="radio"/> Nunca o menos 1 vez al mes<br><input type="radio"/> 1 a 3 veces mes<br><input type="radio"/> 1 vez semana<br><input type="radio"/> 2 a 4 veces semana<br><input type="radio"/> 5 a 6 veces semana<br><input type="radio"/> 1 vez al día<br><input type="radio"/> 2 a 3 veces al día<br><input type="radio"/> 5 a 6 veces al día<br><input type="radio"/> más 6 veces al día |
|--------------------|--------------------------------------------------------------------------------------------------------------------------------------------------------------------------------------------------------------------------------------------------------------------------------------------------------------------------------------------------------------------------------------------------------------|

---

|         |                                                                                                                                                                                                                                                                                                                                                                                                              |
|---------|--------------------------------------------------------------------------------------------------------------------------------------------------------------------------------------------------------------------------------------------------------------------------------------------------------------------------------------------------------------------------------------------------------------|
| cerveza | <input checked="" type="radio"/> Nunca o menos 1 vez al mes<br><input type="radio"/> 1 a 3 veces mes<br><input type="radio"/> 1 vez semana<br><input type="radio"/> 2 a 4 veces semana<br><input type="radio"/> 5 a 6 veces semana<br><input type="radio"/> 1 vez al día<br><input type="radio"/> 2 a 3 veces al día<br><input type="radio"/> 5 a 6 veces al día<br><input type="radio"/> más 6 veces al día |
|---------|--------------------------------------------------------------------------------------------------------------------------------------------------------------------------------------------------------------------------------------------------------------------------------------------------------------------------------------------------------------------------------------------------------------|

---

|                     |                                                                                                                                                                                                                                                                                                                                                                                                              |
|---------------------|--------------------------------------------------------------------------------------------------------------------------------------------------------------------------------------------------------------------------------------------------------------------------------------------------------------------------------------------------------------------------------------------------------------|
| cerveza sin alcohol | <input checked="" type="radio"/> Nunca o menos 1 vez al mes<br><input type="radio"/> 1 a 3 veces mes<br><input type="radio"/> 1 vez semana<br><input type="radio"/> 2 a 4 veces semana<br><input type="radio"/> 5 a 6 veces semana<br><input type="radio"/> 1 vez al día<br><input type="radio"/> 2 a 3 veces al día<br><input type="radio"/> 5 a 6 veces al día<br><input type="radio"/> más 6 veces al día |
|---------------------|--------------------------------------------------------------------------------------------------------------------------------------------------------------------------------------------------------------------------------------------------------------------------------------------------------------------------------------------------------------------------------------------------------------|

---

|         |                                                                                                                                                                                                                                                                                                                                                                                                              |
|---------|--------------------------------------------------------------------------------------------------------------------------------------------------------------------------------------------------------------------------------------------------------------------------------------------------------------------------------------------------------------------------------------------------------------|
| licores | <input checked="" type="radio"/> Nunca o menos 1 vez al mes<br><input type="radio"/> 1 a 3 veces mes<br><input type="radio"/> 1 vez semana<br><input type="radio"/> 2 a 4 veces semana<br><input type="radio"/> 5 a 6 veces semana<br><input type="radio"/> 1 vez al día<br><input type="radio"/> 2 a 3 veces al día<br><input type="radio"/> 5 a 6 veces al día<br><input type="radio"/> más 6 veces al día |
|---------|--------------------------------------------------------------------------------------------------------------------------------------------------------------------------------------------------------------------------------------------------------------------------------------------------------------------------------------------------------------------------------------------------------------|

---

|                       |                                                                                                                                                                                                                                                                                                                                                                                                              |
|-----------------------|--------------------------------------------------------------------------------------------------------------------------------------------------------------------------------------------------------------------------------------------------------------------------------------------------------------------------------------------------------------------------------------------------------------|
| ginebra o ron o vodka | <input checked="" type="radio"/> Nunca o menos 1 vez al mes<br><input type="radio"/> 1 a 3 veces mes<br><input type="radio"/> 1 vez semana<br><input type="radio"/> 2 a 4 veces semana<br><input type="radio"/> 5 a 6 veces semana<br><input type="radio"/> 1 vez al día<br><input type="radio"/> 2 a 3 veces al día<br><input type="radio"/> 5 a 6 veces al día<br><input type="radio"/> más 6 veces al día |
|-----------------------|--------------------------------------------------------------------------------------------------------------------------------------------------------------------------------------------------------------------------------------------------------------------------------------------------------------------------------------------------------------------------------------------------------------|

---

|                 |                                                                                                                                                                                                                                                                                                                                                                                                              |
|-----------------|--------------------------------------------------------------------------------------------------------------------------------------------------------------------------------------------------------------------------------------------------------------------------------------------------------------------------------------------------------------------------------------------------------------|
| refresco normal | <input type="radio"/> Nunca o menos 1 vez al mes<br><input checked="" type="radio"/> 1 a 3 veces mes<br><input type="radio"/> 1 vez semana<br><input type="radio"/> 2 a 4 veces semana<br><input type="radio"/> 5 a 6 veces semana<br><input type="radio"/> 1 vez al día<br><input type="radio"/> 2 a 3 veces al día<br><input type="radio"/> 5 a 6 veces al día<br><input type="radio"/> más 6 veces al día |
|-----------------|--------------------------------------------------------------------------------------------------------------------------------------------------------------------------------------------------------------------------------------------------------------------------------------------------------------------------------------------------------------------------------------------------------------|

---

|                           |                                                                                                                                                                                                                                                                                                                                                                                                              |
|---------------------------|--------------------------------------------------------------------------------------------------------------------------------------------------------------------------------------------------------------------------------------------------------------------------------------------------------------------------------------------------------------------------------------------------------------|
| refresco sin azúcar       | <input checked="" type="radio"/> Nunca o menos 1 vez al mes<br><input type="radio"/> 1 a 3 veces mes<br><input type="radio"/> 1 vez semana<br><input type="radio"/> 2 a 4 veces semana<br><input type="radio"/> 5 a 6 veces semana<br><input type="radio"/> 1 vez al día<br><input type="radio"/> 2 a 3 veces al día<br><input type="radio"/> 5 a 6 veces al día<br><input type="radio"/> más 6 veces al día |
| Agua del grifo            | <input checked="" type="radio"/> Nunca o menos 1 vez al mes<br><input type="radio"/> 1 a 3 veces mes<br><input type="radio"/> 1 vez semana<br><input type="radio"/> 2 a 4 veces semana<br><input type="radio"/> 5 a 6 veces semana<br><input type="radio"/> 1 vez al día<br><input type="radio"/> 2 a 3 veces al día<br><input type="radio"/> 5 a 6 veces al día<br><input type="radio"/> más 6 veces al día |
| agua embotellada sin gas  | <input type="radio"/> Nunca o menos 1 vez al mes<br><input type="radio"/> 1 a 3 veces mes<br><input type="radio"/> 1 vez semana<br><input type="radio"/> 2 a 4 veces semana<br><input type="radio"/> 5 a 6 veces semana<br><input type="radio"/> 1 vez al día<br><input type="radio"/> 2 a 3 veces al día<br><input type="radio"/> 5 a 6 veces al día<br><input checked="" type="radio"/> más 6 veces al día |
| agua embotellada con gas  | <input checked="" type="radio"/> Nunca o menos 1 vez al mes<br><input type="radio"/> 1 a 3 veces mes<br><input type="radio"/> 1 vez semana<br><input type="radio"/> 2 a 4 veces semana<br><input type="radio"/> 5 a 6 veces semana<br><input type="radio"/> 1 vez al día<br><input type="radio"/> 2 a 3 veces al día<br><input type="radio"/> 5 a 6 veces al día<br><input type="radio"/> más 6 veces al día |
| zumos frutas embotellados | <input type="radio"/> Nunca o menos 1 vez al mes<br><input type="radio"/> 1 a 3 veces mes<br><input checked="" type="radio"/> 1 vez semana<br><input type="radio"/> 2 a 4 veces semana<br><input type="radio"/> 5 a 6 veces semana<br><input type="radio"/> 1 vez al día<br><input type="radio"/> 2 a 3 veces al día<br><input type="radio"/> 5 a 6 veces al día<br><input type="radio"/> más 6 veces al día |
| café                      | <input checked="" type="radio"/> Nunca o menos 1 vez al mes<br><input type="radio"/> 1 a 3 veces mes<br><input type="radio"/> 1 vez semana<br><input type="radio"/> 2 a 4 veces semana<br><input type="radio"/> 5 a 6 veces semana<br><input type="radio"/> 1 vez al día<br><input type="radio"/> 2 a 3 veces al día<br><input type="radio"/> 5 a 6 veces al día<br><input type="radio"/> más 6 veces al día |

|                       |                                                                                                                                                                                                                                                                                                                                                                                                              |
|-----------------------|--------------------------------------------------------------------------------------------------------------------------------------------------------------------------------------------------------------------------------------------------------------------------------------------------------------------------------------------------------------------------------------------------------------|
| cafe descafeinado     | <input checked="" type="radio"/> Nunca o menos 1 vez al mes<br><input type="radio"/> 1 a 3 veces mes<br><input type="radio"/> 1 vez semana<br><input type="radio"/> 2 a 4 veces semana<br><input type="radio"/> 5 a 6 veces semana<br><input type="radio"/> 1 vez al día<br><input type="radio"/> 2 a 3 veces al día<br><input type="radio"/> 5 a 6 veces al día<br><input type="radio"/> más 6 veces al día |
| te o infusión         | <input checked="" type="radio"/> Nunca o menos 1 vez al mes<br><input type="radio"/> 1 a 3 veces mes<br><input type="radio"/> 1 vez semana<br><input type="radio"/> 2 a 4 veces semana<br><input type="radio"/> 5 a 6 veces semana<br><input type="radio"/> 1 vez al día<br><input type="radio"/> 2 a 3 veces al día<br><input type="radio"/> 5 a 6 veces al día<br><input type="radio"/> más 6 veces al día |
| sopa o puré verduras  | <input type="radio"/> Nunca o menos 1 vez al mes<br><input type="radio"/> 1 a 3 veces mes<br><input checked="" type="radio"/> 1 vez semana<br><input type="radio"/> 2 a 4 veces semana<br><input type="radio"/> 5 a 6 veces semana<br><input type="radio"/> 1 vez al día<br><input type="radio"/> 2 a 3 veces al día<br><input type="radio"/> 5 a 6 veces al día<br><input type="radio"/> más 6 veces al día |
| croquetas pollo jamón | <input type="radio"/> Nunca o menos 1 vez al mes<br><input type="radio"/> 1 a 3 veces mes<br><input checked="" type="radio"/> 1 vez semana<br><input type="radio"/> 2 a 4 veces semana<br><input type="radio"/> 5 a 6 veces semana<br><input type="radio"/> 1 vez al día<br><input type="radio"/> 2 a 3 veces al día<br><input type="radio"/> 5 a 6 veces al día<br><input type="radio"/> más 6 veces al día |
| croquetas pescado     | <input checked="" type="radio"/> Nunca o menos 1 vez al mes<br><input type="radio"/> 1 a 3 veces mes<br><input type="radio"/> 1 vez semana<br><input type="radio"/> 2 a 4 veces semana<br><input type="radio"/> 5 a 6 veces semana<br><input type="radio"/> 1 vez al día<br><input type="radio"/> 2 a 3 veces al día<br><input type="radio"/> 5 a 6 veces al día<br><input type="radio"/> más 6 veces al día |
| mayonesa              | <input type="radio"/> Nunca o menos 1 vez al mes<br><input type="radio"/> 1 a 3 veces mes<br><input checked="" type="radio"/> 1 vez semana<br><input type="radio"/> 2 a 4 veces semana<br><input type="radio"/> 5 a 6 veces semana<br><input type="radio"/> 1 vez al día<br><input type="radio"/> 2 a 3 veces al día<br><input type="radio"/> 5 a 6 veces al día<br><input type="radio"/> más 6 veces al día |

---

salsa tomate

- ☐ Nunca o menos 1 vez al mes  
☐ 1 a 3 veces mes  
☒ 1 vez semana  
☐ 2 a 4 veces semana  
☐ 5 a 6 veces semana  
☐ 1 vez al día  
☐ 2 a 3 veces al día  
☐ 5 a 6 veces al día  
☐ más 6 veces al día

---

ketchup

- ☒ Nunca o menos 1 vez al mes  
☐ 1 a 3 veces mes  
☐ 1 vez semana  
☐ 2 a 4 veces semana  
☐ 5 a 6 veces semana  
☐ 1 vez al día  
☐ 2 a 3 veces al día  
☐ 5 a 6 veces al día  
☐ más 6 veces al día

---

sal

- ☐ Nunca o menos 1 vez al mes  
☐ 1 a 3 veces mes  
☐ 1 vez semana  
☒ 2 a 4 veces semana  
☐ 5 a 6 veces semana  
☐ 1 vez al día  
☐ 2 a 3 veces al día  
☐ 5 a 6 veces al día  
☐ más 6 veces al día

---

ajo

- ☐ Nunca o menos 1 vez al mes  
☐ 1 a 3 veces mes  
☐ 1 vez semana  
☐ 2 a 4 veces semana  
☐ 5 a 6 veces semana  
☒ 1 vez al día  
☐ 2 a 3 veces al día  
☐ 5 a 6 veces al día  
☐ más 6 veces al día

---

mermelada o miel

- ☒ Nunca o menos 1 vez al mes  
☐ 1 a 3 veces mes  
☐ 1 vez semana  
☐ 2 a 4 veces semana  
☐ 5 a 6 veces semana  
☐ 1 vez al día  
☐ 2 a 3 veces al día  
☐ 5 a 6 veces al día  
☐ más 6 veces al día

---

azúcar

- ☒ Nunca o menos 1 vez al mes  
☐ 1 a 3 veces mes  
☐ 1 vez semana  
☐ 2 a 4 veces semana  
☐ 5 a 6 veces semana  
☐ 1 vez al día  
☐ 2 a 3 veces al día  
☐ 5 a 6 veces al día  
☐ más 6 veces al día

|                                       |                                                                                                                                                                                                                                                                                                                                                                                                                                                                                                                               |
|---------------------------------------|-------------------------------------------------------------------------------------------------------------------------------------------------------------------------------------------------------------------------------------------------------------------------------------------------------------------------------------------------------------------------------------------------------------------------------------------------------------------------------------------------------------------------------|
| Otro alimento                         | [*DATA REMOVED*]                                                                                                                                                                                                                                                                                                                                                                                                                                                                                                              |
| suplementos vitamínicos               | <input type="radio"/> si<br><input checked="" type="radio"/> no                                                                                                                                                                                                                                                                                                                                                                                                                                                               |
| suplementos vitamínicos               |                                                                                                                                                                                                                                                                                                                                                                                                                                                                                                                               |
| dieta previa                          | <input type="radio"/> si<br><input checked="" type="radio"/> no                                                                                                                                                                                                                                                                                                                                                                                                                                                               |
| motivo dieta                          | <input checked="" type="radio"/> no dieta<br><input type="radio"/> control peso<br><input type="radio"/> control colesterol<br><input type="radio"/> control diabetes<br><input type="radio"/> problemas estómago<br><input type="radio"/> problemas vesícula o hepáticos<br><input type="radio"/> HTA o cardiopatía<br><input type="radio"/> problemas renales<br><input type="radio"/> alergia alimentaria<br><input type="radio"/> ácido úrico elevado<br><input type="radio"/> vegetariana<br><input type="radio"/> otros |
| cambio alimentos año previo gestación | <input checked="" type="radio"/> si<br><input type="radio"/> no                                                                                                                                                                                                                                                                                                                                                                                                                                                               |
| cambio lácteos                        | <input type="radio"/> eliminado<br><input type="radio"/> disminuido<br><input checked="" type="radio"/> igual<br><input type="radio"/> aumentado<br><input type="radio"/> no sabe                                                                                                                                                                                                                                                                                                                                             |
| cambio huevos                         | <input type="radio"/> eliminado<br><input type="radio"/> disminuido<br><input checked="" type="radio"/> igual<br><input type="radio"/> aumentado<br><input type="radio"/> no sabe                                                                                                                                                                                                                                                                                                                                             |
| cambio carne                          | <input type="radio"/> eliminado<br><input type="radio"/> disminuido<br><input checked="" type="radio"/> igual<br><input type="radio"/> aumentado<br><input type="radio"/> no sabe                                                                                                                                                                                                                                                                                                                                             |
| cambio pescado                        | <input type="radio"/> eliminado<br><input checked="" type="radio"/> disminuido<br><input type="radio"/> igual<br><input type="radio"/> aumentado<br><input type="radio"/> no sabe                                                                                                                                                                                                                                                                                                                                             |
| cambio verduras                       | <input type="radio"/> eliminado<br><input type="radio"/> disminuido<br><input checked="" type="radio"/> igual<br><input type="radio"/> aumentado<br><input type="radio"/> no sabe                                                                                                                                                                                                                                                                                                                                             |

|                            |                                                                                                                                                                                                                        |
|----------------------------|------------------------------------------------------------------------------------------------------------------------------------------------------------------------------------------------------------------------|
| cambio legumbres           | <input type="radio"/> eliminado<br><input type="radio"/> disminuido<br><input checked="" type="radio"/> igual<br><input type="radio"/> aumentado<br><input type="radio"/> no sabe                                      |
| cambio fruta               | <input type="radio"/> eliminado<br><input type="radio"/> disminuido<br><input checked="" type="radio"/> igual<br><input type="radio"/> aumentado<br><input type="radio"/> no sabe                                      |
| cambio pan                 | <input type="radio"/> eliminado<br><input type="radio"/> disminuido<br><input checked="" type="radio"/> igual<br><input type="radio"/> aumentado<br><input type="radio"/> no sabe                                      |
| cambio aceite oliva        | <input type="radio"/> eliminado<br><input type="radio"/> disminuido<br><input checked="" type="radio"/> igual<br><input type="radio"/> aumentado<br><input type="radio"/> no sabe                                      |
| cambio mante o margarina   | <input type="radio"/> eliminado<br><input type="radio"/> disminuido<br><input checked="" type="radio"/> igual<br><input type="radio"/> aumentado<br><input type="radio"/> no sabe                                      |
| cambio azúcar y dulces     | <input type="radio"/> eliminado<br><input checked="" type="radio"/> disminuido<br><input type="radio"/> igual<br><input type="radio"/> aumentado<br><input type="radio"/> no sabe                                      |
| cambio bebidas alcohólicas | <input checked="" type="radio"/> eliminado<br><input type="radio"/> disminuido<br><input type="radio"/> igual<br><input type="radio"/> aumentado<br><input type="radio"/> no sabe                                      |
| frecuencia comidas fritas  | <input type="radio"/> a diario<br><input type="radio"/> 5 a 6 veces semana<br><input checked="" type="radio"/> 2 a 4 veces semana<br><input type="radio"/> 1 vez semana<br><input type="radio"/> menos de 1 vez semana |
| carne                      | <input type="radio"/> no como<br><input type="radio"/> cruda<br><input type="radio"/> poco hecha<br><input type="radio"/> hecha<br><input checked="" type="radio"/> muy hecha                                          |
| grasa visible carne        | <input checked="" type="radio"/> quita toda<br><input type="radio"/> quita mayoría<br><input type="radio"/> quita un poco<br><input type="radio"/> no quita nada                                                       |

|                                |                                                                                                                                                                                                                                                          |
|--------------------------------|----------------------------------------------------------------------------------------------------------------------------------------------------------------------------------------------------------------------------------------------------------|
| cocina carne                   | <input checked="" type="radio"/> a la plancha<br><input type="radio"/> a la parrilla<br><input type="radio"/> asada<br><input type="radio"/> frita<br><input type="radio"/> guisada                                                                      |
| tostado quemado carne          | <input checked="" type="radio"/> nunca<br><input type="radio"/> 1 vez mes<br><input type="radio"/> 2 a 3 veces mes<br><input type="radio"/> 1 vez semana<br><input type="radio"/> 2 a 3 semanas                                                          |
| tostado quemado pescado        | <input checked="" type="radio"/> nunca<br><input type="radio"/> 1 vez mes<br><input type="radio"/> 2 a 3 veces mes<br><input type="radio"/> 1 vez semana<br><input type="radio"/> 2 a 3 semanas                                                          |
| socarrat paella                | <input checked="" type="radio"/> nunca<br><input type="radio"/> 1 vez mes<br><input type="radio"/> 2 a 3 veces mes<br><input type="radio"/> 1 vez semana<br><input type="radio"/> 2 a 3 semanas                                                          |
| grasa o aceite cocinar         | <input type="radio"/> mantequilla<br><input type="radio"/> margarina<br><input type="radio"/> aceite oliva<br><input checked="" type="radio"/> aceite oliva virgen extra<br><input type="radio"/> aceite vegetal<br><input type="radio"/> mezcla aceites |
| grasa aceite aliñar            | <input type="radio"/> mantequilla<br><input type="radio"/> margarina<br><input checked="" type="radio"/> aceite oliva<br><input type="radio"/> aceite oliva virgen extra<br><input type="radio"/> aceite vegetal<br><input type="radio"/> mezcla aceites |
| grasa aceite freir             | <input type="radio"/> mantequilla<br><input type="radio"/> margarina<br><input checked="" type="radio"/> aceite oliva<br><input type="radio"/> aceite oliva virgen extra<br><input type="radio"/> aceite vegetal<br><input type="radio"/> mezcla aceites |
| Ejercicio cuestionario         | <input checked="" type="radio"/> si<br><input type="radio"/> no                                                                                                                                                                                          |
| horas de sueño incluido siesta | [*DATA REMOVED*]                                                                                                                                                                                                                                         |
| minutos siesta                 | [*DATA REMOVED*]                                                                                                                                                                                                                                         |
| horas televisión semana        | [*DATA REMOVED*]                                                                                                                                                                                                                                         |



|                                        |                                                                                                                                                                                                                                                                                                                                                                           |
|----------------------------------------|---------------------------------------------------------------------------------------------------------------------------------------------------------------------------------------------------------------------------------------------------------------------------------------------------------------------------------------------------------------------------|
| actividad trabajo                      | <input type="radio"/> casi siempre sentado<br><input type="radio"/> sentado 50 por cien<br><input type="radio"/> casi siempre de pie, quieto<br><input checked="" type="radio"/> casi siempre levantado caminando y llevando pocas cosas<br><input type="radio"/> casi siempre levantado, caminando y llevado muchas cosas<br><input type="radio"/> trabajo manual pesado |
| tiempo caminar o bici al día           | <input type="radio"/> casi nunca<br><input type="radio"/> menos 20min día<br><input type="radio"/> 20 a 40 min día<br><input type="radio"/> 40 a 60 min día<br><input checked="" type="radio"/> 1h o 1h y media día<br><input type="radio"/> más de 1h y media al día                                                                                                     |
| tiempo tareas casa al día              | <input type="radio"/> menos de 1h día<br><input type="radio"/> 1 a 2h día<br><input checked="" type="radio"/> 3 a 4h día<br><input type="radio"/> 5 a 6h día<br><input type="radio"/> 7 a 8h día<br><input type="radio"/> más de 8h día                                                                                                                                   |
| tiempo libre televisión ordenador leer | <input type="radio"/> menos 1h día<br><input type="radio"/> 1h día<br><input type="radio"/> 2h día<br><input type="radio"/> 3h día<br><input checked="" type="radio"/> 4h día<br><input type="radio"/> 5 a 6h día<br><input type="radio"/> mas 6h día                                                                                                                     |
| tiempo libre ejercicio o deporte       | <input type="radio"/> menos 1h semana<br><input type="radio"/> 1h semana<br><input type="radio"/> 2h semana<br><input type="radio"/> 3h semana<br><input type="radio"/> 4 a 5h semana<br><input checked="" type="radio"/> mas 5h semana                                                                                                                                   |
| como se considera                      | <input type="radio"/> sedentaria<br><input type="radio"/> poco activa<br><input checked="" type="radio"/> moderadamente activa<br><input type="radio"/> bastante activa<br><input type="radio"/> muy activa<br><input type="radio"/> no sabe                                                                                                                              |
| FUR                                    | [*DATA REMOVED*]                                                                                                                                                                                                                                                                                                                                                          |
| Semanas gestación 2T                   | _____                                                                                                                                                                                                                                                                                                                                                                     |
| Días gestación 2T                      | _____                                                                                                                                                                                                                                                                                                                                                                     |
| DBP 2T                                 | _____                                                                                                                                                                                                                                                                                                                                                                     |
| CC 2T                                  | _____                                                                                                                                                                                                                                                                                                                                                                     |

|                                                   |                                                                                                                                                                                                 |
|---------------------------------------------------|-------------------------------------------------------------------------------------------------------------------------------------------------------------------------------------------------|
| AC 2T                                             |                                                                                                                                                                                                 |
| LF 2T                                             |                                                                                                                                                                                                 |
| PFE 2T (Hadlock)                                  |                                                                                                                                                                                                 |
| Semanas gestación 3T                              | [*DATA REMOVED*]                                                                                                                                                                                |
| días 3T                                           | [*DATA REMOVED*]                                                                                                                                                                                |
| DBP 3T                                            | [*DATA REMOVED*]                                                                                                                                                                                |
| CC 3T                                             | [*DATA REMOVED*]                                                                                                                                                                                |
| AC 3T                                             | [*DATA REMOVED*]                                                                                                                                                                                |
| LF 3T                                             | [*DATA REMOVED*]                                                                                                                                                                                |
| PFE 3T (Hadlock)                                  | [*DATA REMOVED*]                                                                                                                                                                                |
| Semanas de gestación final                        | [*DATA REMOVED*]                                                                                                                                                                                |
| días gestación final                              | [*DATA REMOVED*]                                                                                                                                                                                |
| Localización placenta                             | <input checked="" type="radio"/> anterior<br><input type="radio"/> lateral derecha<br><input type="radio"/> lateral izquierda<br><input type="radio"/> posterior<br><input type="radio"/> fondo |
| Presentación longitudinal cefálica                | <input type="radio"/> no<br><input checked="" type="radio"/> si                                                                                                                                 |
| Dorso                                             | <input type="radio"/> izquierda anterior<br><input checked="" type="radio"/> izquierda posterior<br><input type="radio"/> derecha anterior<br><input type="radio"/> derecha posterior           |
| diámetro biparietal                               | [*DATA REMOVED*]                                                                                                                                                                                |
| Circunferencia craneal                            | [*DATA REMOVED*]                                                                                                                                                                                |
| Circunferencia abdominal                          | [*DATA REMOVED*]                                                                                                                                                                                |
| Longitud de femur                                 | [*DATA REMOVED*]                                                                                                                                                                                |
| tejido celular subcutáneo a nivel del muslo en mm | [*DATA REMOVED*]                                                                                                                                                                                |
| tejido celular subcutáneo en abdomen en mm        | [*DATA REMOVED*]                                                                                                                                                                                |

|                                               |                                                                                                                                                          |
|-----------------------------------------------|----------------------------------------------------------------------------------------------------------------------------------------------------------|
| Volumen del muslo en cm3                      | [*DATA REMOVED*]                                                                                                                                         |
| Peso fetal estimado según fórmula de Hadlock  | [*DATA REMOVED*]                                                                                                                                         |
| Percentil                                     | [*DATA REMOVED*]                                                                                                                                         |
| Peso fetal estimado según fórmula de Scioscia | _____                                                                                                                                                    |
| Peso fetal estimado según fórmula de LEE      | _____                                                                                                                                                    |
| Tipo de parto                                 | <input checked="" type="radio"/> eutocico<br><input type="radio"/> instrumentado/ventosa<br><input type="radio"/> cesarea                                |
| fecha de nacimiento                           | [*DATA REMOVED*]                                                                                                                                         |
| Días entre exploración y nacimiento           | [*DATA REMOVED*]                                                                                                                                         |
| Peso RN en g                                  | [*DATA REMOVED*]                                                                                                                                         |
| sexo                                          | <input checked="" type="radio"/> mujer<br><input type="radio"/> hombre                                                                                   |
| Apgar 1 minuto                                | [*DATA REMOVED*]                                                                                                                                         |
| Apgar 5 minutos                               | [*DATA REMOVED*]                                                                                                                                         |
| Apgar 10 minutos                              | _____                                                                                                                                                    |
| antecedente Covid durante gestación           | <input type="radio"/> Yes<br><input checked="" type="radio"/> No                                                                                         |
| Nivel de estudios                             | <input type="radio"/> ninguno<br><input type="radio"/> primarios<br><input checked="" type="radio"/> secundarios<br><input type="radio"/> universitarios |

# Base\_datos\_estimacion\_peso\_fetal

|                                       |                                                                                                                                                                                                                                                                                      |
|---------------------------------------|--------------------------------------------------------------------------------------------------------------------------------------------------------------------------------------------------------------------------------------------------------------------------------------|
| Número de identificación participante | 112                                                                                                                                                                                                                                                                                  |
| CODIGO PARTICIPANTE                   |                                                                                                                                                                                                                                                                                      |
| Edad                                  | [*DATA REMOVED*]                                                                                                                                                                                                                                                                     |
| Gestaciones                           | <input type="radio"/> 1<br><input checked="" type="radio"/> 2<br><input type="radio"/> 3<br><input type="radio"/> mas de 3                                                                                                                                                           |
| partos                                | <input type="radio"/> 0<br><input checked="" type="radio"/> 1<br><input type="radio"/> 2<br><input type="radio"/> 3<br><input type="radio"/> mas de 3                                                                                                                                |
| cesáreas                              | <input checked="" type="radio"/> 0<br><input type="radio"/> 1<br><input type="radio"/> 2<br><input type="radio"/> 3<br><input type="radio"/> mas de 3                                                                                                                                |
| Abortos                               | <input checked="" type="radio"/> 0<br><input type="radio"/> 1<br><input type="radio"/> 2<br><input type="radio"/> 3<br><input type="radio"/> mas de 3                                                                                                                                |
| Tipo de gestacion                     | <input type="radio"/> espontanea<br><input type="radio"/> IAC inseminación artificial conyuge<br><input type="radio"/> IAD inseminación artificial donante<br><input checked="" type="radio"/> FIV Fecundación in Vitro<br><input type="radio"/> Ovodon FIV con donación de ovocitos |
| peso previo a embarazo                | [*DATA REMOVED*]                                                                                                                                                                                                                                                                     |
| Ganancia ponderal embarazo            | [*DATA REMOVED*]                                                                                                                                                                                                                                                                     |
| Talla madre                           | [*DATA REMOVED*]                                                                                                                                                                                                                                                                     |
| IMC previo embarazo                   | 18.870663376397157                                                                                                                                                                                                                                                                   |
| Patología obstétrica                  | <input checked="" type="radio"/> no<br><input type="radio"/> si                                                                                                                                                                                                                      |
| Diabetes pregestacional               | <input checked="" type="radio"/> no<br><input type="radio"/> si                                                                                                                                                                                                                      |
| Diabetes gestacional                  | <input checked="" type="radio"/> no<br><input type="radio"/> si                                                                                                                                                                                                                      |

|                                            |                                                                                                                                                                                      |
|--------------------------------------------|--------------------------------------------------------------------------------------------------------------------------------------------------------------------------------------|
| Diabetes gestacional con insulina          | <input checked="" type="radio"/> no<br><input type="radio"/> si                                                                                                                      |
| Diabetes gestacional con dieta y ejercicio | <input checked="" type="radio"/> no<br><input type="radio"/> si                                                                                                                      |
| Percentil fetos previos                    | <input type="radio"/> Nada<br><input type="radio"/> percentil menor de 10<br><input checked="" type="radio"/> percentil entre 10 y 90<br><input type="radio"/> percentil mayor de 90 |
| Exfumadora                                 | <input checked="" type="radio"/> Nada<br><input type="radio"/> menos de 5 años<br><input type="radio"/> 5 a 10 años<br><input type="radio"/> mayor o igual a 10 años                 |
| Hábito tabáquico                           | <input checked="" type="radio"/> no<br><input type="radio"/> si                                                                                                                      |
| fumadora                                   | [*DATA REMOVED*]                                                                                                                                                                     |
| Consumo otros tóxicos                      | <input checked="" type="radio"/> no<br><input type="radio"/> si                                                                                                                      |
| Hb 1T                                      | [*DATA REMOVED*]                                                                                                                                                                     |
| Htc 1T                                     | [*DATA REMOVED*]                                                                                                                                                                     |
| Hb 2T                                      | [*DATA REMOVED*]                                                                                                                                                                     |
| HTC 2T                                     | [*DATA REMOVED*]                                                                                                                                                                     |
| Hb 3T                                      | _____                                                                                                                                                                                |
| HTC 3T                                     | _____                                                                                                                                                                                |
| Suplemento FE oral                         | <input checked="" type="radio"/> si<br><input type="radio"/> no                                                                                                                      |
| Suplemento fe iv                           | <input checked="" type="radio"/> si<br><input type="radio"/> no                                                                                                                      |
| Transfusión                                | <input checked="" type="radio"/> no<br><input type="radio"/> si                                                                                                                      |
| Solicitada Vit D                           | <input type="radio"/> no<br><input checked="" type="radio"/> si                                                                                                                      |
| Deficit vit D                              | <input type="radio"/> no<br><input checked="" type="radio"/> si                                                                                                                      |

|                       |                                                                                                                                                                                                                                                                                                                                                                                                              |
|-----------------------|--------------------------------------------------------------------------------------------------------------------------------------------------------------------------------------------------------------------------------------------------------------------------------------------------------------------------------------------------------------------------------------------------------------|
| Suplemento vit D      | <input checked="" type="radio"/> si<br><input type="radio"/> no                                                                                                                                                                                                                                                                                                                                              |
| Dieta, cuestionario   | <input checked="" type="radio"/> si<br><input type="radio"/> no                                                                                                                                                                                                                                                                                                                                              |
| Leche entera          | <input checked="" type="radio"/> Nunca o menos 1 vez al mes<br><input type="radio"/> 1 a 3 veces mes<br><input type="radio"/> 1 vez semana<br><input type="radio"/> 2 a 4 veces semana<br><input type="radio"/> 5 a 6 veces semana<br><input type="radio"/> 1 vez al día<br><input type="radio"/> 2 a 3 veces al día<br><input type="radio"/> 5 a 6 veces al día<br><input type="radio"/> más 6 veces al día |
| Leche semidesnatada   | <input type="radio"/> Nunca o menos 1 vez al mes<br><input type="radio"/> 1 a 3 veces mes<br><input type="radio"/> 1 vez semana<br><input type="radio"/> 2 a 4 veces semana<br><input type="radio"/> 5 a 6 veces semana<br><input checked="" type="radio"/> 1 vez al día<br><input type="radio"/> 2 a 3 veces al día<br><input type="radio"/> 5 a 6 veces al día<br><input type="radio"/> mas 6 veces al día |
| Leche desnatada       | <input checked="" type="radio"/> Nunca o menos 1 vez al mes<br><input type="radio"/> 1 a 3 veces mes<br><input type="radio"/> 1 vez semana<br><input type="radio"/> 2 a 4 veces semana<br><input type="radio"/> 5 a 6 veces semana<br><input type="radio"/> 1 vez al día<br><input type="radio"/> 2 a 3 veces al día<br><input type="radio"/> 5 a 6 veces al día<br><input type="radio"/> más 6 veces al día |
| Leche condensada      | <input checked="" type="radio"/> Nunca o menos 1 vez al mes<br><input type="radio"/> 1 a 3 veces mes<br><input type="radio"/> 1 vez semana<br><input type="radio"/> 2 a 4 veces semana<br><input type="radio"/> 5 a 6 veces semana<br><input type="radio"/> 1 vez al día<br><input type="radio"/> 2 a 3 veces al día<br><input type="radio"/> 5 a 6 veces al día<br><input type="radio"/> más 6 veces al día |
| nata o crema de leche | <input checked="" type="radio"/> Nunca o menos 1 vez al mes<br><input type="radio"/> 1 a 3 veces mes<br><input type="radio"/> 1 vez semana<br><input type="radio"/> 2 a 4 veces semana<br><input type="radio"/> 5 a 6 veces semana<br><input type="radio"/> 1 vez al día<br><input type="radio"/> 2 a 3 veces al día<br><input type="radio"/> 5 a 6 veces al día<br><input type="radio"/> más 6 veces al día |

---

Yogurt Entero

- ☐ Nunca o menos 1 vez al mes  
☐ 1 a 3 veces mes  
☐ 1 vez semana  
☒ 2 a 4 veces semana  
☐ 5 a 6 veces semana  
☐ 1 vez al día  
☐ 2 a 3 veces al día  
☐ 5 a 6 veces al día  
☐ más 6 veces al día

---

Yogurt desnatado

- ☐ Nunca o menos 1 vez al mes  
☐ 1 a 3 veces mes  
☒ 1 vez semana  
☐ 2 a 4 veces semana  
☐ 5 a 6 veces semana  
☐ 1 vez al día  
☐ 2 a 3 veces al día  
☐ 5 a 6 veces al día  
☐ más 6 veces al día

---

100g requesón o queso blando o queso fresco

- ☐ Nunca o menos 1 vez al mes  
☐ 1 a 3 veces mes  
☒ 1 vez semana  
☐ 2 a 4 veces semana  
☐ 5 a 6 veces semana  
☐ 1 vez al día  
☐ 2 a 3 veces al día  
☐ 5 a 6 veces al día  
☐ más 6 veces al día

---

queso curado o semicurado o cremoso

- ☐ Nunca o menos 1 vez al mes  
☐ 1 a 3 veces mes  
☐ 1 vez semana  
☒ 2 a 4 veces semana  
☐ 5 a 6 veces semana  
☐ 1 vez al día  
☐ 2 a 3 veces al día  
☐ 5 a 6 veces al día  
☐ más 6 veces al día

---

natillas flan pudding

- ☒ Nunca o menos 1 vez al mes  
☐ 1 a 3 veces mes  
☐ 1 vez semana  
☐ 2 a 4 veces semana  
☐ 5 a 6 veces semana  
☐ 1 vez al día  
☐ 2 a 3 veces al día  
☐ 5 a 6 veces al día  
☐ más 6 veces al día

---

Helado

- ☒ Nunca o menos 1 vez al mes  
☐ 1 a 3 veces mes  
☐ 1 vez semana  
☐ 2 a 4 veces semana  
☐ 5 a 6 veces semana  
☐ 1 vez al día  
☐ 2 a 3 veces al día  
☐ 5 a 6 veces al día  
☐ más 6 veces al día

|                                      |                                                                                                                                                                                                                                                                                                                                                                                                              |
|--------------------------------------|--------------------------------------------------------------------------------------------------------------------------------------------------------------------------------------------------------------------------------------------------------------------------------------------------------------------------------------------------------------------------------------------------------------|
| huevo                                | <input type="radio"/> Nunca o menos 1 vez al mes<br><input type="radio"/> 1 a 3 veces mes<br><input type="radio"/> 1 vez semana<br><input checked="" type="radio"/> 2 a 4 veces semana<br><input type="radio"/> 5 a 6 veces semana<br><input type="radio"/> 1 vez al día<br><input type="radio"/> 2 a 3 veces al día<br><input type="radio"/> 5 a 6 veces al día<br><input type="radio"/> más 6 veces al día |
| Pollo con piel                       | <input type="radio"/> Nunca o menos 1 vez al mes<br><input checked="" type="radio"/> 1 a 3 veces mes<br><input type="radio"/> 1 vez semana<br><input type="radio"/> 2 a 4 veces semana<br><input type="radio"/> 5 a 6 veces semana<br><input type="radio"/> 1 vez al día<br><input type="radio"/> 2 a 3 veces al día<br><input type="radio"/> 5 a 6 veces al día<br><input type="radio"/> más 6 veces al día |
| pollo sin piel                       | <input type="radio"/> Nunca o menos 1 vez al mes<br><input type="radio"/> 1 a 3 veces mes<br><input type="radio"/> 1 vez semana<br><input checked="" type="radio"/> 2 a 4 veces semana<br><input type="radio"/> 5 a 6 veces semana<br><input type="radio"/> 1 vez al día<br><input type="radio"/> 2 a 3 veces al día<br><input type="radio"/> 5 a 6 veces al día<br><input type="radio"/> más 6 veces al día |
| Ternera o cerdo o cordero            | <input type="radio"/> Nunca o menos 1 vez al mes<br><input type="radio"/> 1 a 3 veces mes<br><input checked="" type="radio"/> 1 vez semana<br><input type="radio"/> 2 a 4 veces semana<br><input type="radio"/> 5 a 6 veces semana<br><input type="radio"/> 1 vez al día<br><input type="radio"/> 2 a 3 veces al día<br><input type="radio"/> 5 a 6 veces al día<br><input type="radio"/> más 6 veces al día |
| carne caza: Conejo o codorniz o pato | <input checked="" type="radio"/> Nunca o menos 1 vez al mes<br><input type="radio"/> 1 a 3 veces mes<br><input type="radio"/> 1 vez semana<br><input type="radio"/> 2 a 4 veces semana<br><input type="radio"/> 5 a 6 veces semana<br><input type="radio"/> 1 vez al día<br><input type="radio"/> 2 a 3 veces al día<br><input type="radio"/> 5 a 6 veces al día<br><input type="radio"/> más 6 veces al día |
| Hígado de ternera o cerdo o pollo    | <input checked="" type="radio"/> Nunca o menos 1 vez al mes<br><input type="radio"/> 1 a 3 veces mes<br><input type="radio"/> 1 vez semana<br><input type="radio"/> 2 a 4 veces semana<br><input type="radio"/> 5 a 6 veces semana<br><input type="radio"/> 1 vez al día<br><input type="radio"/> 2 a 3 veces al día<br><input type="radio"/> 5 a 6 veces al día<br><input type="radio"/> más 6 veces al día |



|                     |                                                                                                                                                                                                                                                                                                                                                                                                              |
|---------------------|--------------------------------------------------------------------------------------------------------------------------------------------------------------------------------------------------------------------------------------------------------------------------------------------------------------------------------------------------------------------------------------------------------------|
| Vísceras            | <input checked="" type="radio"/> Nunca o menos 1 vez al mes<br><input type="radio"/> 1 a 3 veces mes<br><input type="radio"/> 1 vez semana<br><input type="radio"/> 2 a 4 veces semana<br><input type="radio"/> 5 a 6 veces semana<br><input type="radio"/> 1 vez al día<br><input type="radio"/> 2 a 3 veces al día<br><input type="radio"/> 5 a 6 veces al día<br><input type="radio"/> más 6 veces al día |
| Embutido            | <input type="radio"/> Nunca o menos 1 vez al mes<br><input type="radio"/> 1 a 3 veces mes<br><input checked="" type="radio"/> 1 vez semana<br><input type="radio"/> 2 a 4 veces semana<br><input type="radio"/> 5 a 6 veces semana<br><input type="radio"/> 1 vez al día<br><input type="radio"/> 2 a 3 veces al día<br><input type="radio"/> 5 a 6 veces al día<br><input type="radio"/> más 6 veces al día |
| Salchicha o similar | <input type="radio"/> Nunca o menos 1 vez al mes<br><input checked="" type="radio"/> 1 a 3 veces mes<br><input type="radio"/> 1 vez semana<br><input type="radio"/> 2 a 4 veces semana<br><input type="radio"/> 5 a 6 veces semana<br><input type="radio"/> 1 vez al día<br><input type="radio"/> 2 a 3 veces al día<br><input type="radio"/> 5 a 6 veces al día<br><input type="radio"/> más 6 veces al día |
| Pate o foiegras     | <input checked="" type="radio"/> Nunca o menos 1 vez al mes<br><input type="radio"/> 1 a 3 veces mes<br><input type="radio"/> 1 vez semana<br><input type="radio"/> 2 a 4 veces semana<br><input type="radio"/> 5 a 6 veces semana<br><input type="radio"/> 1 vez al día<br><input type="radio"/> 2 a 3 veces al día<br><input type="radio"/> 5 a 6 veces al día<br><input type="radio"/> más 6 veces al día |
| Hamburguesa         | <input type="radio"/> Nunca o menos 1 vez al mes<br><input checked="" type="radio"/> 1 a 3 veces mes<br><input type="radio"/> 1 vez semana<br><input type="radio"/> 2 a 4 veces semana<br><input type="radio"/> 5 a 6 veces semana<br><input type="radio"/> 1 vez al día<br><input type="radio"/> 2 a 3 veces al día<br><input type="radio"/> 5 a 6 veces al día<br><input type="radio"/> más 6 veces al día |
| tocino o bacon      | <input checked="" type="radio"/> Nunca o menos 1 vez al mes<br><input type="radio"/> 1 a 3 veces mes<br><input type="radio"/> 1 vez semana<br><input type="radio"/> 2 a 4 veces semana<br><input type="radio"/> 5 a 6 veces semana<br><input type="radio"/> 1 vez al día<br><input type="radio"/> 2 a 3 veces al día<br><input type="radio"/> 5 a 6 veces al día<br><input type="radio"/> más 6 veces al día |

|                        |                                                                                                                                                                                                                                                                                                                                                                                                              |
|------------------------|--------------------------------------------------------------------------------------------------------------------------------------------------------------------------------------------------------------------------------------------------------------------------------------------------------------------------------------------------------------------------------------------------------------|
| Pescado frito          | <input type="radio"/> Nunca o menos 1 vez al mes<br><input checked="" type="radio"/> 1 a 3 veces mes<br><input type="radio"/> 1 vez semana<br><input type="radio"/> 2 a 4 veces semana<br><input type="radio"/> 5 a 6 veces semana<br><input type="radio"/> 1 vez al día<br><input type="radio"/> 2 a 3 veces al día<br><input type="radio"/> 5 a 6 veces al día<br><input type="radio"/> más 6 veces al día |
| pescado hervido blanco | <input type="radio"/> Nunca o menos 1 vez al mes<br><input type="radio"/> 1 a 3 veces mes<br><input type="radio"/> 1 vez semana<br><input checked="" type="radio"/> 2 a 4 veces semana<br><input type="radio"/> 5 a 6 veces semana<br><input type="radio"/> 1 vez al día<br><input type="radio"/> 2 a 3 veces al día<br><input type="radio"/> 5 a 6 veces al día<br><input type="radio"/> más 6 veces al día |
| pescado hervido azul   | <input type="radio"/> Nunca o menos 1 vez al mes<br><input type="radio"/> 1 a 3 veces mes<br><input checked="" type="radio"/> 1 vez semana<br><input type="radio"/> 2 a 4 veces semana<br><input type="radio"/> 5 a 6 veces semana<br><input type="radio"/> 1 vez al día<br><input type="radio"/> 2 a 3 veces al día<br><input type="radio"/> 5 a 6 veces al día<br><input type="radio"/> más 6 veces al día |
| otros pescado azul     | <input type="radio"/> Nunca o menos 1 vez al mes<br><input checked="" type="radio"/> 1 a 3 veces mes<br><input type="radio"/> 1 vez semana<br><input type="radio"/> 2 a 4 veces semana<br><input type="radio"/> 5 a 6 veces semana<br><input type="radio"/> 1 vez al día<br><input type="radio"/> 2 a 3 veces al día<br><input type="radio"/> 5 a 6 veces al día<br><input type="radio"/> más 6 veces al día |
| atun conserva          | <input type="radio"/> Nunca o menos 1 vez al mes<br><input type="radio"/> 1 a 3 veces mes<br><input checked="" type="radio"/> 1 vez semana<br><input type="radio"/> 2 a 4 veces semana<br><input type="radio"/> 5 a 6 veces semana<br><input type="radio"/> 1 vez al día<br><input type="radio"/> 2 a 3 veces al día<br><input type="radio"/> 5 a 6 veces al día<br><input type="radio"/> más 6 veces al día |
| sardina conserva       | <input checked="" type="radio"/> Nunca o menos 1 vez al mes<br><input type="radio"/> 1 a 3 veces mes<br><input type="radio"/> 1 vez semana<br><input type="radio"/> 2 a 4 veces semana<br><input type="radio"/> 5 a 6 veces semana<br><input type="radio"/> 1 vez al día<br><input type="radio"/> 2 a 3 veces al día<br><input type="radio"/> 5 a 6 veces al día<br><input type="radio"/> más 6 veces al día |

|                                         |                                                                                                                                                                                                                                                                                                                                                                                                              |
|-----------------------------------------|--------------------------------------------------------------------------------------------------------------------------------------------------------------------------------------------------------------------------------------------------------------------------------------------------------------------------------------------------------------------------------------------------------------|
| pescado ahumado                         | <input checked="" type="radio"/> Nunca o menos 1 vez al mes<br><input type="radio"/> 1 a 3 veces mes<br><input type="radio"/> 1 vez semana<br><input type="radio"/> 2 a 4 veces semana<br><input type="radio"/> 5 a 6 veces semana<br><input type="radio"/> 1 vez al día<br><input type="radio"/> 2 a 3 veces al día<br><input type="radio"/> 5 a 6 veces al día<br><input type="radio"/> más 6 veces al día |
| almejas o mejillones o ostras unos 100g | <input type="radio"/> Nunca o menos 1 vez al mes<br><input checked="" type="radio"/> 1 a 3 veces mes<br><input type="radio"/> 1 vez semana<br><input type="radio"/> 2 a 4 veces semana<br><input type="radio"/> 5 a 6 veces semana<br><input type="radio"/> 1 vez al día<br><input type="radio"/> 2 a 3 veces al día<br><input type="radio"/> 5 a 6 veces al día<br><input type="radio"/> más 6 veces al día |
| calamar o chipiron o sepia unos 100g    | <input type="radio"/> Nunca o menos 1 vez al mes<br><input checked="" type="radio"/> 1 a 3 veces mes<br><input type="radio"/> 1 vez semana<br><input type="radio"/> 2 a 4 veces semana<br><input type="radio"/> 5 a 6 veces semana<br><input type="radio"/> 1 vez al día<br><input type="radio"/> 2 a 3 veces al día<br><input type="radio"/> 5 a 6 veces al día<br><input type="radio"/> más 6 veces al día |
| marisco unos 100g                       | <input type="radio"/> Nunca o menos 1 vez al mes<br><input checked="" type="radio"/> 1 a 3 veces mes<br><input type="radio"/> 1 vez semana<br><input type="radio"/> 2 a 4 veces semana<br><input type="radio"/> 5 a 6 veces semana<br><input type="radio"/> 1 vez al día<br><input type="radio"/> 2 a 3 veces al día<br><input type="radio"/> 5 a 6 veces al día<br><input type="radio"/> más 6 veces al día |
| Espinacas o acelgas cocinadas           | <input type="radio"/> Nunca o menos 1 vez al mes<br><input checked="" type="radio"/> 1 a 3 veces mes<br><input type="radio"/> 1 vez semana<br><input type="radio"/> 2 a 4 veces semana<br><input type="radio"/> 5 a 6 veces semana<br><input type="radio"/> 1 vez al día<br><input type="radio"/> 2 a 3 veces al día<br><input type="radio"/> 5 a 6 veces al día<br><input type="radio"/> más 6 veces al día |
| Col o coliflor o brocoli cocinado       | <input type="radio"/> Nunca o menos 1 vez al mes<br><input type="radio"/> 1 a 3 veces mes<br><input type="radio"/> 1 vez semana<br><input checked="" type="radio"/> 2 a 4 veces semana<br><input type="radio"/> 5 a 6 veces semana<br><input type="radio"/> 1 vez al día<br><input type="radio"/> 2 a 3 veces al día<br><input type="radio"/> 5 a 6 veces al día<br><input type="radio"/> más 6 veces al día |

---

Lechuga o endivia o escarola

- ☒ Nunca o menos 1 vez al mes  
☐ 1 a 3 veces mes  
☐ 1 vez semana  
☐ 2 a 4 veces semana  
☐ 5 a 6 veces semana  
☐ 1 vez al día  
☐ 2 a 3 veces al día  
☐ 5 a 6 veces al día  
☐ más 6 veces al día

---

tomate ensalada

- ☐ Nunca o menos 1 vez al mes  
☐ 1 a 3 veces mes  
☐ 1 vez semana  
☐ 2 a 4 veces semana  
☒ 5 a 6 veces semana  
☐ 1 vez al día  
☐ 2 a 3 veces al día  
☐ 5 a 6 veces al día  
☐ más 6 veces al día

---

cebolla

- ☐ Nunca o menos 1 vez al mes  
☐ 1 a 3 veces mes  
☐ 1 vez semana  
☐ 2 a 4 veces semana  
☐ 5 a 6 veces semana  
☒ 1 vez al día  
☐ 2 a 3 veces al día  
☐ 5 a 6 veces al día  
☐ más 6 veces al día

---

Zanahoria o calabaza

- ☐ Nunca o menos 1 vez al mes  
☐ 1 a 3 veces mes  
☐ 1 vez semana  
☐ 2 a 4 veces semana  
☐ 5 a 6 veces semana  
☒ 1 vez al día  
☐ 2 a 3 veces al día  
☐ 5 a 6 veces al día  
☐ más 6 veces al día

---

Judías verdes

- ☐ Nunca o menos 1 vez al mes  
☐ 1 a 3 veces mes  
☒ 1 vez semana  
☐ 2 a 4 veces semana  
☐ 5 a 6 veces semana  
☐ 1 vez al día  
☐ 2 a 3 veces al día  
☐ 5 a 6 veces al día  
☐ más 6 veces al día

---

Berenjena o calabacin o pepino

- ☐ Nunca o menos 1 vez al mes  
☐ 1 a 3 veces mes  
☐ 1 vez semana  
☒ 2 a 4 veces semana  
☐ 5 a 6 veces semana  
☐ 1 vez al día  
☐ 2 a 3 veces al día  
☐ 5 a 6 veces al día  
☐ más 6 veces al día

|                       |                                                                                                                                                                                                                                                                                                                                                                                                              |
|-----------------------|--------------------------------------------------------------------------------------------------------------------------------------------------------------------------------------------------------------------------------------------------------------------------------------------------------------------------------------------------------------------------------------------------------------|
| pimiento              | <input type="radio"/> Nunca o menos 1 vez al mes<br><input type="radio"/> 1 a 3 veces mes<br><input checked="" type="radio"/> 1 vez semana<br><input type="radio"/> 2 a 4 veces semana<br><input type="radio"/> 5 a 6 veces semana<br><input type="radio"/> 1 vez al día<br><input type="radio"/> 2 a 3 veces al día<br><input type="radio"/> 5 a 6 veces al día<br><input type="radio"/> más 6 veces al día |
| alcachofa             | <input type="radio"/> Nunca o menos 1 vez al mes<br><input checked="" type="radio"/> 1 a 3 veces mes<br><input type="radio"/> 1 vez semana<br><input type="radio"/> 2 a 4 veces semana<br><input type="radio"/> 5 a 6 veces semana<br><input type="radio"/> 1 vez al día<br><input type="radio"/> 2 a 3 veces al día<br><input type="radio"/> 5 a 6 veces al día<br><input type="radio"/> más 6 veces al día |
| espárragos            | <input type="radio"/> Nunca o menos 1 vez al mes<br><input checked="" type="radio"/> 1 a 3 veces mes<br><input type="radio"/> 1 vez semana<br><input type="radio"/> 2 a 4 veces semana<br><input type="radio"/> 5 a 6 veces semana<br><input type="radio"/> 1 vez al día<br><input type="radio"/> 2 a 3 veces al día<br><input type="radio"/> 5 a 6 veces al día<br><input type="radio"/> más 6 veces al día |
| maíz hervido          | <input type="radio"/> Nunca o menos 1 vez al mes<br><input checked="" type="radio"/> 1 a 3 veces mes<br><input type="radio"/> 1 vez semana<br><input type="radio"/> 2 a 4 veces semana<br><input type="radio"/> 5 a 6 veces semana<br><input type="radio"/> 1 vez al día<br><input type="radio"/> 2 a 3 veces al día<br><input type="radio"/> 5 a 6 veces al día<br><input type="radio"/> más 6 veces al día |
| legumbres             | <input type="radio"/> Nunca o menos 1 vez al mes<br><input type="radio"/> 1 a 3 veces mes<br><input checked="" type="radio"/> 1 vez semana<br><input type="radio"/> 2 a 4 veces semana<br><input type="radio"/> 5 a 6 veces semana<br><input type="radio"/> 1 vez al día<br><input type="radio"/> 2 a 3 veces al día<br><input type="radio"/> 5 a 6 veces al día<br><input type="radio"/> más 6 veces al día |
| naranjas o mandarinas | <input type="radio"/> Nunca o menos 1 vez al mes<br><input type="radio"/> 1 a 3 veces mes<br><input type="radio"/> 1 vez semana<br><input type="radio"/> 2 a 4 veces semana<br><input type="radio"/> 5 a 6 veces semana<br><input type="radio"/> 1 vez al día<br><input checked="" type="radio"/> 2 a 3 veces al día<br><input type="radio"/> 5 a 6 veces al día<br><input type="radio"/> más 6 veces al día |

---

zum natural fruta

- ☐ Nunca o menos 1 vez al mes  
☒ 1 a 3 veces mes  
☐ 1 vez semana  
☐ 2 a 4 veces semana  
☐ 5 a 6 veces semana  
☐ 1 vez al día  
☐ 2 a 3 veces al día  
☐ 5 a 6 veces al día  
☐ más 6 veces al día

---

platano

- ☐ Nunca o menos 1 vez al mes  
☐ 1 a 3 veces mes  
☐ 1 vez semana  
☒ 2 a 4 veces semana  
☐ 5 a 6 veces semana  
☐ 1 vez al día  
☐ 2 a 3 veces al día  
☐ 5 a 6 veces al día  
☐ más 6 veces al día

---

manzana o pera

- ☐ Nunca o menos 1 vez al mes  
☐ 1 a 3 veces mes  
☐ 1 vez semana  
☒ 2 a 4 veces semana  
☐ 5 a 6 veces semana  
☐ 1 vez al día  
☐ 2 a 3 veces al día  
☐ 5 a 6 veces al día  
☐ más 6 veces al día

---

melocotón o nectarina

- ☐ Nunca o menos 1 vez al mes  
☐ 1 a 3 veces mes  
☐ 1 vez semana  
☒ 2 a 4 veces semana  
☐ 5 a 6 veces semana  
☐ 1 vez al día  
☐ 2 a 3 veces al día  
☐ 5 a 6 veces al día  
☐ más 6 veces al día

---

sandia o melon

- ☐ Nunca o menos 1 vez al mes  
☐ 1 a 3 veces mes  
☐ 1 vez semana  
☒ 2 a 4 veces semana  
☐ 5 a 6 veces semana  
☐ 1 vez al día  
☐ 2 a 3 veces al día  
☐ 5 a 6 veces al día  
☐ más 6 veces al día

---

uva

- ☐ Nunca o menos 1 vez al mes  
☐ 1 a 3 veces mes  
☐ 1 vez semana  
☒ 2 a 4 veces semana  
☐ 5 a 6 veces semana  
☐ 1 vez al día  
☐ 2 a 3 veces al día  
☐ 5 a 6 veces al día  
☐ más 6 veces al día

---

bruna o ciruela

- ☐ Nunca o menos 1 vez al mes  
☐ 1 a 3 veces mes  
☒ 1 vez semana  
☐ 2 a 4 veces semana  
☐ 5 a 6 veces semana  
☐ 1 vez al día  
☐ 2 a 3 veces al día  
☐ 5 a 6 veces al día  
☐ más 6 veces al día

---

kiwi

- ☒ Nunca o menos 1 vez al mes  
☐ 1 a 3 veces mes  
☐ 1 vez semana  
☐ 2 a 4 veces semana  
☐ 5 a 6 veces semana  
☐ 1 vez al día  
☐ 2 a 3 veces al día  
☐ 5 a 6 veces al día  
☐ más 6 veces al día

---

aceituna

- ☐ Nunca o menos 1 vez al mes  
☐ 1 a 3 veces mes  
☒ 1 vez semana  
☐ 2 a 4 veces semana  
☐ 5 a 6 veces semana  
☐ 1 vez al día  
☐ 2 a 3 veces al día  
☐ 5 a 6 veces al día  
☐ más 6 veces al día

---

frutos secos

- ☐ Nunca o menos 1 vez al mes  
☐ 1 a 3 veces mes  
☐ 1 vez semana  
☐ 2 a 4 veces semana  
☐ 5 a 6 veces semana  
☐ 1 vez al día  
☐ 2 a 3 veces al día  
☐ 5 a 6 veces al día  
☒ más 6 veces al día

---

pan blanco

- ☐ Nunca o menos 1 vez al mes  
☐ 1 a 3 veces mes  
☐ 1 vez semana  
☒ 2 a 4 veces semana  
☐ 5 a 6 veces semana  
☐ 1 vez al día  
☐ 2 a 3 veces al día  
☐ 5 a 6 veces al día  
☐ más 6 veces al día

---

pan integral

- ☐ Nunca o menos 1 vez al mes  
☐ 1 a 3 veces mes  
☐ 1 vez semana  
☒ 2 a 4 veces semana  
☐ 5 a 6 veces semana  
☐ 1 vez al día  
☐ 2 a 3 veces al día  
☐ 5 a 6 veces al día  
☐ más 6 veces al día

---

cereales desayuno

- ☐ Nunca o menos 1 vez al mes  
☐ 1 a 3 veces mes  
☐ 1 vez semana  
☐ 2 a 4 veces semana  
☐ 5 a 6 veces semana  
☐ 1 vez al día  
☐ 2 a 3 veces al día  
☐ 5 a 6 veces al día  
☒ más 6 veces al día

---

patatas fritas

- ☐ Nunca o menos 1 vez al mes  
☐ 1 a 3 veces mes  
☒ 1 vez semana  
☐ 2 a 4 veces semana  
☐ 5 a 6 veces semana  
☐ 1 vez al día  
☐ 2 a 3 veces al día  
☐ 5 a 6 veces al día  
☐ más 6 veces al día

---

patatas cocidas o asadas

- ☐ Nunca o menos 1 vez al mes  
☐ 1 a 3 veces mes  
☐ 1 vez semana  
☒ 2 a 4 veces semana  
☐ 5 a 6 veces semana  
☐ 1 vez al día  
☐ 2 a 3 veces al día  
☐ 5 a 6 veces al día  
☐ más 6 veces al día

---

bolsa papas

- ☐ Nunca o menos 1 vez al mes  
☒ 1 a 3 veces mes  
☐ 1 vez semana  
☐ 2 a 4 veces semana  
☐ 5 a 6 veces semana  
☐ 1 vez al día  
☐ 2 a 3 veces al día  
☐ 5 a 6 veces al día  
☐ más 6 veces al día

---

arroz cocinado

- ☐ Nunca o menos 1 vez al mes  
☐ 1 a 3 veces mes  
☐ 1 vez semana  
☒ 2 a 4 veces semana  
☐ 5 a 6 veces semana  
☐ 1 vez al día  
☐ 2 a 3 veces al día  
☐ 5 a 6 veces al día  
☐ más 6 veces al día

---

pasta

- ☐ Nunca o menos 1 vez al mes  
☒ 1 a 3 veces mes  
☐ 1 vez semana  
☐ 2 a 4 veces semana  
☐ 5 a 6 veces semana  
☐ 1 vez al día  
☐ 2 a 3 veces al día  
☐ 5 a 6 veces al día  
☐ más 6 veces al día



|                     |                                                                                                                                                                                                                                                                                                                                                                                                              |
|---------------------|--------------------------------------------------------------------------------------------------------------------------------------------------------------------------------------------------------------------------------------------------------------------------------------------------------------------------------------------------------------------------------------------------------------|
| pizza               | <input type="radio"/> Nunca o menos 1 vez al mes<br><input checked="" type="radio"/> 1 a 3 veces mes<br><input type="radio"/> 1 vez semana<br><input type="radio"/> 2 a 4 veces semana<br><input type="radio"/> 5 a 6 veces semana<br><input type="radio"/> 1 vez al día<br><input type="radio"/> 2 a 3 veces al día<br><input type="radio"/> 5 a 6 veces al día<br><input type="radio"/> más 6 veces al día |
| aceite oliva        | <input type="radio"/> Nunca o menos 1 vez al mes<br><input type="radio"/> 1 a 3 veces mes<br><input type="radio"/> 1 vez semana<br><input checked="" type="radio"/> 2 a 4 veces semana<br><input type="radio"/> 5 a 6 veces semana<br><input type="radio"/> 1 vez al día<br><input type="radio"/> 2 a 3 veces al día<br><input type="radio"/> 5 a 6 veces al día<br><input type="radio"/> más 6 veces al día |
| otros aceites       | <input checked="" type="radio"/> Nunca o menos 1 vez al mes<br><input type="radio"/> 1 a 3 veces mes<br><input type="radio"/> 1 vez semana<br><input type="radio"/> 2 a 4 veces semana<br><input type="radio"/> 5 a 6 veces semana<br><input type="radio"/> 1 vez al día<br><input type="radio"/> 2 a 3 veces al día<br><input type="radio"/> 5 a 6 veces al día<br><input type="radio"/> más 6 veces al día |
| margarina           | <input checked="" type="radio"/> Nunca o menos 1 vez al mes<br><input type="radio"/> 1 a 3 veces mes<br><input type="radio"/> 1 vez semana<br><input type="radio"/> 2 a 4 veces semana<br><input type="radio"/> 5 a 6 veces semana<br><input type="radio"/> 1 vez al día<br><input type="radio"/> 2 a 3 veces al día<br><input type="radio"/> 5 a 6 veces al día<br><input type="radio"/> más 6 veces al día |
| mantequilla         | <input checked="" type="radio"/> Nunca o menos 1 vez al mes<br><input type="radio"/> 1 a 3 veces mes<br><input type="radio"/> 1 vez semana<br><input type="radio"/> 2 a 4 veces semana<br><input type="radio"/> 5 a 6 veces semana<br><input type="radio"/> 1 vez al día<br><input type="radio"/> 2 a 3 veces al día<br><input type="radio"/> 5 a 6 veces al día<br><input type="radio"/> más 6 veces al día |
| galletas tipo maria | <input checked="" type="radio"/> Nunca o menos 1 vez al mes<br><input type="radio"/> 1 a 3 veces mes<br><input type="radio"/> 1 vez semana<br><input type="radio"/> 2 a 4 veces semana<br><input type="radio"/> 5 a 6 veces semana<br><input type="radio"/> 1 vez al día<br><input type="radio"/> 2 a 3 veces al día<br><input type="radio"/> 5 a 6 veces al día<br><input type="radio"/> más 6 veces al día |

---

galletas chocolate

- ☒ Nunca o menos 1 vez al mes  
☐ 1 a 3 veces mes  
☐ 1 vez semana  
☐ 2 a 4 veces semana  
☐ 5 a 6 veces semana  
☐ 1 vez al día  
☐ 2 a 3 veces al día  
☐ 5 a 6 veces al día  
☐ más 6 veces al día

---

bolleria

- ☒ Nunca o menos 1 vez al mes  
☐ 1 a 3 veces mes  
☐ 1 vez semana  
☐ 2 a 4 veces semana  
☐ 5 a 6 veces semana  
☐ 1 vez al día  
☐ 2 a 3 veces al día  
☐ 5 a 6 veces al día  
☐ más 6 veces al día

---

chocolate o bombones

- ☒ Nunca o menos 1 vez al mes  
☐ 1 a 3 veces mes  
☐ 1 vez semana  
☐ 2 a 4 veces semana  
☐ 5 a 6 veces semana  
☐ 1 vez al día  
☐ 2 a 3 veces al día  
☐ 5 a 6 veces al día  
☐ más 6 veces al día

---

chocolate polvo o colacao

- ☒ Nunca o menos 1 vez al mes  
☐ 1 a 3 veces mes  
☐ 1 vez semana  
☐ 2 a 4 veces semana  
☐ 5 a 6 veces semana  
☐ 1 vez al día  
☐ 2 a 3 veces al día  
☐ 5 a 6 veces al día  
☐ más 6 veces al día

---

vino tinto

- ☒ Nunca o menos 1 vez al mes  
☐ 1 a 3 veces mes  
☐ 1 vez semana  
☐ 2 a 4 veces semana  
☐ 5 a 6 veces semana  
☐ 1 vez al día  
☐ 2 a 3 veces al día  
☐ 5 a 6 veces al día  
☐ más 6 veces al día

---

vino blanco

- ☒ Nunca o menos 1 vez al mes  
☐ 1 a 3 veces mes  
☐ 1 vez semana  
☐ 2 a 4 veces semana  
☐ 5 a 6 veces semana  
☐ 1 vez al día  
☐ 2 a 3 veces al día  
☐ 5 a 6 veces al día  
☐ más 6 veces al día

---

|                    |                                                                                                                                                                                                                                                                                                                                                                                                              |
|--------------------|--------------------------------------------------------------------------------------------------------------------------------------------------------------------------------------------------------------------------------------------------------------------------------------------------------------------------------------------------------------------------------------------------------------|
| vino seco o vermut | <input checked="" type="radio"/> Nunca o menos 1 vez al mes<br><input type="radio"/> 1 a 3 veces mes<br><input type="radio"/> 1 vez semana<br><input type="radio"/> 2 a 4 veces semana<br><input type="radio"/> 5 a 6 veces semana<br><input type="radio"/> 1 vez al día<br><input type="radio"/> 2 a 3 veces al día<br><input type="radio"/> 5 a 6 veces al día<br><input type="radio"/> más 6 veces al día |
|--------------------|--------------------------------------------------------------------------------------------------------------------------------------------------------------------------------------------------------------------------------------------------------------------------------------------------------------------------------------------------------------------------------------------------------------|

---

|         |                                                                                                                                                                                                                                                                                                                                                                                                              |
|---------|--------------------------------------------------------------------------------------------------------------------------------------------------------------------------------------------------------------------------------------------------------------------------------------------------------------------------------------------------------------------------------------------------------------|
| cerveza | <input checked="" type="radio"/> Nunca o menos 1 vez al mes<br><input type="radio"/> 1 a 3 veces mes<br><input type="radio"/> 1 vez semana<br><input type="radio"/> 2 a 4 veces semana<br><input type="radio"/> 5 a 6 veces semana<br><input type="radio"/> 1 vez al día<br><input type="radio"/> 2 a 3 veces al día<br><input type="radio"/> 5 a 6 veces al día<br><input type="radio"/> más 6 veces al día |
|---------|--------------------------------------------------------------------------------------------------------------------------------------------------------------------------------------------------------------------------------------------------------------------------------------------------------------------------------------------------------------------------------------------------------------|

---

|                     |                                                                                                                                                                                                                                                                                                                                                                                                              |
|---------------------|--------------------------------------------------------------------------------------------------------------------------------------------------------------------------------------------------------------------------------------------------------------------------------------------------------------------------------------------------------------------------------------------------------------|
| cerveza sin alcohol | <input type="radio"/> Nunca o menos 1 vez al mes<br><input checked="" type="radio"/> 1 a 3 veces mes<br><input type="radio"/> 1 vez semana<br><input type="radio"/> 2 a 4 veces semana<br><input type="radio"/> 5 a 6 veces semana<br><input type="radio"/> 1 vez al día<br><input type="radio"/> 2 a 3 veces al día<br><input type="radio"/> 5 a 6 veces al día<br><input type="radio"/> más 6 veces al día |
|---------------------|--------------------------------------------------------------------------------------------------------------------------------------------------------------------------------------------------------------------------------------------------------------------------------------------------------------------------------------------------------------------------------------------------------------|

---

|         |                                                                                                                                                                                                                                                                                                                                                                                                              |
|---------|--------------------------------------------------------------------------------------------------------------------------------------------------------------------------------------------------------------------------------------------------------------------------------------------------------------------------------------------------------------------------------------------------------------|
| licores | <input checked="" type="radio"/> Nunca o menos 1 vez al mes<br><input type="radio"/> 1 a 3 veces mes<br><input type="radio"/> 1 vez semana<br><input type="radio"/> 2 a 4 veces semana<br><input type="radio"/> 5 a 6 veces semana<br><input type="radio"/> 1 vez al día<br><input type="radio"/> 2 a 3 veces al día<br><input type="radio"/> 5 a 6 veces al día<br><input type="radio"/> más 6 veces al día |
|---------|--------------------------------------------------------------------------------------------------------------------------------------------------------------------------------------------------------------------------------------------------------------------------------------------------------------------------------------------------------------------------------------------------------------|

---

|                       |                                                                                                                                                                                                                                                                                                                                                                                                              |
|-----------------------|--------------------------------------------------------------------------------------------------------------------------------------------------------------------------------------------------------------------------------------------------------------------------------------------------------------------------------------------------------------------------------------------------------------|
| ginebra o ron o vodka | <input checked="" type="radio"/> Nunca o menos 1 vez al mes<br><input type="radio"/> 1 a 3 veces mes<br><input type="radio"/> 1 vez semana<br><input type="radio"/> 2 a 4 veces semana<br><input type="radio"/> 5 a 6 veces semana<br><input type="radio"/> 1 vez al día<br><input type="radio"/> 2 a 3 veces al día<br><input type="radio"/> 5 a 6 veces al día<br><input type="radio"/> más 6 veces al día |
|-----------------------|--------------------------------------------------------------------------------------------------------------------------------------------------------------------------------------------------------------------------------------------------------------------------------------------------------------------------------------------------------------------------------------------------------------|

---

|                 |                                                                                                                                                                                                                                                                                                                                                                                                              |
|-----------------|--------------------------------------------------------------------------------------------------------------------------------------------------------------------------------------------------------------------------------------------------------------------------------------------------------------------------------------------------------------------------------------------------------------|
| refresco normal | <input checked="" type="radio"/> Nunca o menos 1 vez al mes<br><input type="radio"/> 1 a 3 veces mes<br><input type="radio"/> 1 vez semana<br><input type="radio"/> 2 a 4 veces semana<br><input type="radio"/> 5 a 6 veces semana<br><input type="radio"/> 1 vez al día<br><input type="radio"/> 2 a 3 veces al día<br><input type="radio"/> 5 a 6 veces al día<br><input type="radio"/> más 6 veces al día |
|-----------------|--------------------------------------------------------------------------------------------------------------------------------------------------------------------------------------------------------------------------------------------------------------------------------------------------------------------------------------------------------------------------------------------------------------|

---

---

refresco sin azúcar

- ☐ Nunca o menos 1 vez al mes  
☒ 1 a 3 veces mes  
☐ 1 vez semana  
☐ 2 a 4 veces semana  
☐ 5 a 6 veces semana  
☐ 1 vez al día  
☐ 2 a 3 veces al día  
☐ 5 a 6 veces al día  
☐ más 6 veces al día

---

Agua del grifo

- ☒ Nunca o menos 1 vez al mes  
☐ 1 a 3 veces mes  
☐ 1 vez semana  
☐ 2 a 4 veces semana  
☐ 5 a 6 veces semana  
☐ 1 vez al día  
☐ 2 a 3 veces al día  
☐ 5 a 6 veces al día  
☐ más 6 veces al día

---

agua embotellada sin gas

- ☐ Nunca o menos 1 vez al mes  
☐ 1 a 3 veces mes  
☐ 1 vez semana  
☐ 2 a 4 veces semana  
☐ 5 a 6 veces semana  
☐ 1 vez al día  
☐ 2 a 3 veces al día  
☐ 5 a 6 veces al día  
☒ más 6 veces al día

---

agua embotellada con gas

- ☒ Nunca o menos 1 vez al mes  
☐ 1 a 3 veces mes  
☐ 1 vez semana  
☐ 2 a 4 veces semana  
☐ 5 a 6 veces semana  
☐ 1 vez al día  
☐ 2 a 3 veces al día  
☐ 5 a 6 veces al día  
☐ más 6 veces al día

---

zumو frutas embasado

- ☐ Nunca o menos 1 vez al mes  
☐ 1 a 3 veces mes  
☐ 1 vez semana  
☒ 2 a 4 veces semana  
☐ 5 a 6 veces semana  
☐ 1 vez al día  
☐ 2 a 3 veces al día  
☐ 5 a 6 veces al día  
☐ más 6 veces al día

---

cafe

- ☐ Nunca o menos 1 vez al mes  
☐ 1 a 3 veces mes  
☐ 1 vez semana  
☐ 2 a 4 veces semana  
☐ 5 a 6 veces semana  
☒ 1 vez al día  
☐ 2 a 3 veces al día  
☐ 5 a 6 veces al día  
☐ más 6 veces al día

|                       |                                                                                                                                                                                                                                                                                                                                                                                                              |
|-----------------------|--------------------------------------------------------------------------------------------------------------------------------------------------------------------------------------------------------------------------------------------------------------------------------------------------------------------------------------------------------------------------------------------------------------|
| cafe descafeinado     | <input type="radio"/> Nunca o menos 1 vez al mes<br><input type="radio"/> 1 a 3 veces mes<br><input checked="" type="radio"/> 1 vez semana<br><input type="radio"/> 2 a 4 veces semana<br><input type="radio"/> 5 a 6 veces semana<br><input type="radio"/> 1 vez al día<br><input type="radio"/> 2 a 3 veces al día<br><input type="radio"/> 5 a 6 veces al día<br><input type="radio"/> más 6 veces al día |
| te o infusión         | <input type="radio"/> Nunca o menos 1 vez al mes<br><input checked="" type="radio"/> 1 a 3 veces mes<br><input type="radio"/> 1 vez semana<br><input type="radio"/> 2 a 4 veces semana<br><input type="radio"/> 5 a 6 veces semana<br><input type="radio"/> 1 vez al día<br><input type="radio"/> 2 a 3 veces al día<br><input type="radio"/> 5 a 6 veces al día<br><input type="radio"/> más 6 veces al día |
| sopa o puré verduras  | <input type="radio"/> Nunca o menos 1 vez al mes<br><input type="radio"/> 1 a 3 veces mes<br><input checked="" type="radio"/> 1 vez semana<br><input type="radio"/> 2 a 4 veces semana<br><input type="radio"/> 5 a 6 veces semana<br><input type="radio"/> 1 vez al día<br><input type="radio"/> 2 a 3 veces al día<br><input type="radio"/> 5 a 6 veces al día<br><input type="radio"/> más 6 veces al día |
| croquetas pollo jamón | <input checked="" type="radio"/> Nunca o menos 1 vez al mes<br><input type="radio"/> 1 a 3 veces mes<br><input type="radio"/> 1 vez semana<br><input type="radio"/> 2 a 4 veces semana<br><input type="radio"/> 5 a 6 veces semana<br><input type="radio"/> 1 vez al día<br><input type="radio"/> 2 a 3 veces al día<br><input type="radio"/> 5 a 6 veces al día<br><input type="radio"/> más 6 veces al día |
| croquetas pescado     | <input checked="" type="radio"/> Nunca o menos 1 vez al mes<br><input type="radio"/> 1 a 3 veces mes<br><input type="radio"/> 1 vez semana<br><input type="radio"/> 2 a 4 veces semana<br><input type="radio"/> 5 a 6 veces semana<br><input type="radio"/> 1 vez al día<br><input type="radio"/> 2 a 3 veces al día<br><input type="radio"/> 5 a 6 veces al día<br><input type="radio"/> más 6 veces al día |
| mayonesa              | <input checked="" type="radio"/> Nunca o menos 1 vez al mes<br><input type="radio"/> 1 a 3 veces mes<br><input type="radio"/> 1 vez semana<br><input type="radio"/> 2 a 4 veces semana<br><input type="radio"/> 5 a 6 veces semana<br><input type="radio"/> 1 vez al día<br><input type="radio"/> 2 a 3 veces al día<br><input type="radio"/> 5 a 6 veces al día<br><input type="radio"/> más 6 veces al día |

|                  |                                                                                                                                                                                                                                                                                                                                                                                                              |
|------------------|--------------------------------------------------------------------------------------------------------------------------------------------------------------------------------------------------------------------------------------------------------------------------------------------------------------------------------------------------------------------------------------------------------------|
| salsa tomate     | <input type="radio"/> Nunca o menos 1 vez al mes<br><input checked="" type="radio"/> 1 a 3 veces mes<br><input type="radio"/> 1 vez semana<br><input type="radio"/> 2 a 4 veces semana<br><input type="radio"/> 5 a 6 veces semana<br><input type="radio"/> 1 vez al día<br><input type="radio"/> 2 a 3 veces al día<br><input type="radio"/> 5 a 6 veces al día<br><input type="radio"/> más 6 veces al día |
| ketchup          | <input checked="" type="radio"/> Nunca o menos 1 vez al mes<br><input type="radio"/> 1 a 3 veces mes<br><input type="radio"/> 1 vez semana<br><input type="radio"/> 2 a 4 veces semana<br><input type="radio"/> 5 a 6 veces semana<br><input type="radio"/> 1 vez al día<br><input type="radio"/> 2 a 3 veces al día<br><input type="radio"/> 5 a 6 veces al día<br><input type="radio"/> más 6 veces al día |
| sal              | <input checked="" type="radio"/> Nunca o menos 1 vez al mes<br><input type="radio"/> 1 a 3 veces mes<br><input type="radio"/> 1 vez semana<br><input type="radio"/> 2 a 4 veces semana<br><input type="radio"/> 5 a 6 veces semana<br><input type="radio"/> 1 vez al día<br><input type="radio"/> 2 a 3 veces al día<br><input type="radio"/> 5 a 6 veces al día<br><input type="radio"/> más 6 veces al día |
| ajo              | <input type="radio"/> Nunca o menos 1 vez al mes<br><input checked="" type="radio"/> 1 a 3 veces mes<br><input type="radio"/> 1 vez semana<br><input type="radio"/> 2 a 4 veces semana<br><input type="radio"/> 5 a 6 veces semana<br><input type="radio"/> 1 vez al día<br><input type="radio"/> 2 a 3 veces al día<br><input type="radio"/> 5 a 6 veces al día<br><input type="radio"/> más 6 veces al día |
| mermelada o miel | <input type="radio"/> Nunca o menos 1 vez al mes<br><input type="radio"/> 1 a 3 veces mes<br><input checked="" type="radio"/> 1 vez semana<br><input type="radio"/> 2 a 4 veces semana<br><input type="radio"/> 5 a 6 veces semana<br><input type="radio"/> 1 vez al día<br><input type="radio"/> 2 a 3 veces al día<br><input type="radio"/> 5 a 6 veces al día<br><input type="radio"/> más 6 veces al día |
| azúcar           | <input checked="" type="radio"/> Nunca o menos 1 vez al mes<br><input type="radio"/> 1 a 3 veces mes<br><input type="radio"/> 1 vez semana<br><input type="radio"/> 2 a 4 veces semana<br><input type="radio"/> 5 a 6 veces semana<br><input type="radio"/> 1 vez al día<br><input type="radio"/> 2 a 3 veces al día<br><input type="radio"/> 5 a 6 veces al día<br><input type="radio"/> más 6 veces al día |

|                                       |                                                                                                                                                                                                                                                                                                                                                                                                                                                                                                                               |
|---------------------------------------|-------------------------------------------------------------------------------------------------------------------------------------------------------------------------------------------------------------------------------------------------------------------------------------------------------------------------------------------------------------------------------------------------------------------------------------------------------------------------------------------------------------------------------|
| Otro alimento                         | <hr/>                                                                                                                                                                                                                                                                                                                                                                                                                                                                                                                         |
| suplementos vitamínicos               | <input type="radio"/> si<br><input checked="" type="radio"/> no                                                                                                                                                                                                                                                                                                                                                                                                                                                               |
| suplementos vitamínicos               | <hr/>                                                                                                                                                                                                                                                                                                                                                                                                                                                                                                                         |
| dieta previa                          | <input type="radio"/> si<br><input checked="" type="radio"/> no                                                                                                                                                                                                                                                                                                                                                                                                                                                               |
| motivo dieta                          | <input checked="" type="radio"/> no dieta<br><input type="radio"/> control peso<br><input type="radio"/> control colesterol<br><input type="radio"/> control diabetes<br><input type="radio"/> problemas estómago<br><input type="radio"/> problemas vesícula o hepáticos<br><input type="radio"/> HTA o cardiopatía<br><input type="radio"/> problemas renales<br><input type="radio"/> alergia alimentaria<br><input type="radio"/> ácido úrico elevado<br><input type="radio"/> vegetariana<br><input type="radio"/> otros |
| cambio alimentos año previo gestación | <input type="radio"/> si<br><input checked="" type="radio"/> no                                                                                                                                                                                                                                                                                                                                                                                                                                                               |
| cambio lácteos                        | <input type="radio"/> eliminado<br><input type="radio"/> disminuido<br><input type="radio"/> igual<br><input type="radio"/> aumentado<br><input type="radio"/> no sabe                                                                                                                                                                                                                                                                                                                                                        |
| cambio huevos                         | <input type="radio"/> eliminado<br><input type="radio"/> disminuido<br><input type="radio"/> igual<br><input type="radio"/> aumentado<br><input type="radio"/> no sabe                                                                                                                                                                                                                                                                                                                                                        |
| cambio carne                          | <input type="radio"/> eliminado<br><input type="radio"/> disminuido<br><input type="radio"/> igual<br><input type="radio"/> aumentado<br><input type="radio"/> no sabe                                                                                                                                                                                                                                                                                                                                                        |
| cambio pescado                        | <input type="radio"/> eliminado<br><input type="radio"/> disminuido<br><input type="radio"/> igual<br><input type="radio"/> aumentado<br><input type="radio"/> no sabe                                                                                                                                                                                                                                                                                                                                                        |
| cambio verduras                       | <input type="radio"/> eliminado<br><input type="radio"/> disminuido<br><input type="radio"/> igual<br><input type="radio"/> aumentado<br><input type="radio"/> no sabe                                                                                                                                                                                                                                                                                                                                                        |

|                            |                                                                                                                                                                                                                        |
|----------------------------|------------------------------------------------------------------------------------------------------------------------------------------------------------------------------------------------------------------------|
| cambio legumbres           | <input type="radio"/> eliminado<br><input type="radio"/> disminuido<br><input type="radio"/> igual<br><input type="radio"/> aumentado<br><input type="radio"/> no sabe                                                 |
| cambio fruta               | <input type="radio"/> eliminado<br><input type="radio"/> disminuido<br><input type="radio"/> igual<br><input type="radio"/> aumentado<br><input type="radio"/> no sabe                                                 |
| cambio pan                 | <input type="radio"/> eliminado<br><input type="radio"/> disminuido<br><input type="radio"/> igual<br><input type="radio"/> aumentado<br><input type="radio"/> no sabe                                                 |
| cambio aceite oliva        | <input type="radio"/> eliminado<br><input type="radio"/> disminuido<br><input type="radio"/> igual<br><input type="radio"/> aumentado<br><input type="radio"/> no sabe                                                 |
| cambio mante o margarina   | <input type="radio"/> eliminado<br><input type="radio"/> disminuido<br><input type="radio"/> igual<br><input type="radio"/> aumentado<br><input type="radio"/> no sabe                                                 |
| cambio azúcar y dulces     | <input type="radio"/> eliminado<br><input type="radio"/> disminuido<br><input type="radio"/> igual<br><input type="radio"/> aumentado<br><input type="radio"/> no sabe                                                 |
| cambio bebidas alcohólicas | <input type="radio"/> eliminado<br><input type="radio"/> disminuido<br><input type="radio"/> igual<br><input type="radio"/> aumentado<br><input type="radio"/> no sabe                                                 |
| frecuencia comidas fritas  | <input type="radio"/> a diario<br><input type="radio"/> 5 a 6 veces semana<br><input type="radio"/> 2 a 4 veces semana<br><input checked="" type="radio"/> 1 vez semana<br><input type="radio"/> menos de 1 vez semana |
| carne                      | <input type="radio"/> no como<br><input type="radio"/> cruda<br><input type="radio"/> poco hecha<br><input type="radio"/> hecha<br><input checked="" type="radio"/> muy hecha                                          |
| grasa visible carne        | <input checked="" type="radio"/> quita toda<br><input type="radio"/> quita mayoría<br><input type="radio"/> quita un poco<br><input type="radio"/> no quita nada                                                       |



|                                |                                                                                                                                                                                                                                                          |
|--------------------------------|----------------------------------------------------------------------------------------------------------------------------------------------------------------------------------------------------------------------------------------------------------|
| cocina carne                   | <input checked="" type="radio"/> a la plancha<br><input type="radio"/> a la parrilla<br><input type="radio"/> asada<br><input type="radio"/> frita<br><input type="radio"/> guisada                                                                      |
| tostado quemado carne          | <input checked="" type="radio"/> nunca<br><input type="radio"/> 1 vez mes<br><input type="radio"/> 2 a 3 veces mes<br><input type="radio"/> 1 vez semana<br><input type="radio"/> 2 a 3 semanas                                                          |
| tostado quemado pescado        | <input checked="" type="radio"/> nunca<br><input type="radio"/> 1 vez mes<br><input type="radio"/> 2 a 3 veces mes<br><input type="radio"/> 1 vez semana<br><input type="radio"/> 2 a 3 semanas                                                          |
| socarrat paella                | <input checked="" type="radio"/> nunca<br><input type="radio"/> 1 vez mes<br><input type="radio"/> 2 a 3 veces mes<br><input type="radio"/> 1 vez semana<br><input type="radio"/> 2 a 3 semanas                                                          |
| grasa o aceite cocinar         | <input type="radio"/> mantequilla<br><input type="radio"/> margarina<br><input checked="" type="radio"/> aceite oliva<br><input type="radio"/> aceite oliva virgen extra<br><input type="radio"/> aceite vegetal<br><input type="radio"/> mezcla aceites |
| grasa aceite aliñar            | <input type="radio"/> mantequilla<br><input type="radio"/> margarina<br><input checked="" type="radio"/> aceite oliva<br><input type="radio"/> aceite oliva virgen extra<br><input type="radio"/> aceite vegetal<br><input type="radio"/> mezcla aceites |
| grasa aceite freir             | <input type="radio"/> mantequilla<br><input type="radio"/> margarina<br><input checked="" type="radio"/> aceite oliva<br><input type="radio"/> aceite oliva virgen extra<br><input type="radio"/> aceite vegetal<br><input type="radio"/> mezcla aceites |
| Ejercicio cuestionario         | <input checked="" type="radio"/> si<br><input type="radio"/> no                                                                                                                                                                                          |
| horas de sueño incluido siesta | [*DATA REMOVED*]                                                                                                                                                                                                                                         |
| minutos siesta                 | [*DATA REMOVED*]                                                                                                                                                                                                                                         |
| horas televisión semana        | [*DATA REMOVED*]                                                                                                                                                                                                                                         |

|                                        |                                                                                                                                                                                                                                                                                                                                                                           |
|----------------------------------------|---------------------------------------------------------------------------------------------------------------------------------------------------------------------------------------------------------------------------------------------------------------------------------------------------------------------------------------------------------------------------|
| actividad trabajo                      | <input type="radio"/> casi siempre sentado<br><input checked="" type="radio"/> sentado 50 por cien<br><input type="radio"/> casi siempre de pie, quieto<br><input type="radio"/> casi siempre levantado caminando y llevando pocas cosas<br><input type="radio"/> casi siempre levantado, caminando y llevado muchas cosas<br><input type="radio"/> trabajo manual pesado |
| tiempo caminar o bici al día           | <input type="radio"/> casi nunca<br><input type="radio"/> menos 20min día<br><input type="radio"/> 20 a 40 min día<br><input type="radio"/> 40 a 60 min día<br><input checked="" type="radio"/> 1h o 1h y media día<br><input type="radio"/> más de 1h y media al día                                                                                                     |
| tiempo tareas casa al día              | <input type="radio"/> menos de 1h día<br><input checked="" type="radio"/> 1 a 2h día<br><input type="radio"/> 3 a 4h día<br><input type="radio"/> 5 a 6h día<br><input type="radio"/> 7 a 8h día<br><input type="radio"/> más de 8h día                                                                                                                                   |
| tiempo libre televisión ordenador leer | <input checked="" type="radio"/> menos 1h día<br><input type="radio"/> 1h día<br><input type="radio"/> 2h día<br><input type="radio"/> 3h día<br><input type="radio"/> 4h día<br><input type="radio"/> 5 a 6h día<br><input type="radio"/> mas 6h día                                                                                                                     |
| tiempo libre ejercicio o deporte       | <input type="radio"/> menos 1h semana<br><input type="radio"/> 1h semana<br><input checked="" type="radio"/> 2h semana<br><input type="radio"/> 3h semana<br><input type="radio"/> 4 a 5h semana<br><input type="radio"/> mas 5h semana                                                                                                                                   |
| como se considera                      | <input type="radio"/> sedentaria<br><input type="radio"/> poco activa<br><input checked="" type="radio"/> moderadamente activa<br><input type="radio"/> bastante activa<br><input type="radio"/> muy activa<br><input type="radio"/> no sabe                                                                                                                              |
| FUR                                    | [*DATA REMOVED*]                                                                                                                                                                                                                                                                                                                                                          |
| Semanas gestación 2T                   | [*DATA REMOVED*]                                                                                                                                                                                                                                                                                                                                                          |
| Días gestación 2T                      | [*DATA REMOVED*]                                                                                                                                                                                                                                                                                                                                                          |
| DBP 2T                                 | [*DATA REMOVED*]                                                                                                                                                                                                                                                                                                                                                          |
| CC 2T                                  | [*DATA REMOVED*]                                                                                                                                                                                                                                                                                                                                                          |
| AC 2T                                  | [*DATA REMOVED*]                                                                                                                                                                                                                                                                                                                                                          |

|                                                   |                                                                                                                                                                                                 |
|---------------------------------------------------|-------------------------------------------------------------------------------------------------------------------------------------------------------------------------------------------------|
| LF 2T                                             | [*DATA REMOVED*]                                                                                                                                                                                |
| PFE 2T (Hadlock)                                  | [*DATA REMOVED*]                                                                                                                                                                                |
| Semanas gestación 3T                              | [*DATA REMOVED*]                                                                                                                                                                                |
| días 3T                                           | [*DATA REMOVED*]                                                                                                                                                                                |
| DBP 3T                                            | [*DATA REMOVED*]                                                                                                                                                                                |
| CC 3T                                             | [*DATA REMOVED*]                                                                                                                                                                                |
| AC 3T                                             | [*DATA REMOVED*]                                                                                                                                                                                |
| LF 3T                                             | [*DATA REMOVED*]                                                                                                                                                                                |
| PFE 3T (Hadlock)                                  | [*DATA REMOVED*]                                                                                                                                                                                |
| Semanas de gestación final                        | [*DATA REMOVED*]                                                                                                                                                                                |
| días gestación final                              | [*DATA REMOVED*]                                                                                                                                                                                |
| Localización placenta                             | <input type="radio"/> anterior<br><input checked="" type="radio"/> lateral derecha<br><input type="radio"/> lateral izquierda<br><input type="radio"/> posterior<br><input type="radio"/> fondo |
| Presentación longitudinal cefálica                | <input type="radio"/> no<br><input checked="" type="radio"/> si                                                                                                                                 |
| Dorso                                             | <input type="radio"/> izquierda anterior<br><input type="radio"/> izquierda posterior<br><input checked="" type="radio"/> derecha anterior<br><input type="radio"/> derecha posterior           |
| diámetro biparietal                               | [*DATA REMOVED*]                                                                                                                                                                                |
| Circunferencia craneal                            | [*DATA REMOVED*]                                                                                                                                                                                |
| Circunferencia abdominal                          | [*DATA REMOVED*]                                                                                                                                                                                |
| Longitud de femur                                 | [*DATA REMOVED*]                                                                                                                                                                                |
| tejido celular subcutáneo a nivel del muslo en mm | [*DATA REMOVED*]                                                                                                                                                                                |
| tejido celular subcutáneo en abdomen en mm        | [*DATA REMOVED*]                                                                                                                                                                                |
| Volumen del muslo en cm3                          | [*DATA REMOVED*]                                                                                                                                                                                |
| Peso fetal estimado según fórmula de Hadlock      | [*DATA REMOVED*]                                                                                                                                                                                |

|                                               |                                                                                                                                                          |
|-----------------------------------------------|----------------------------------------------------------------------------------------------------------------------------------------------------------|
| Percentil                                     | [*DATA REMOVED*]                                                                                                                                         |
| Peso fetal estimado según fórmula de Scioscia | <hr/>                                                                                                                                                    |
| Peso fetal estimado según fórmula de LEE      | <hr/>                                                                                                                                                    |
| Tipo de parto                                 | <input checked="" type="radio"/> eutocico<br><input type="radio"/> instrumentado/ventosa<br><input type="radio"/> cesarea                                |
| fecha de nacimiento                           | [*DATA REMOVED*]                                                                                                                                         |
| Días entre exploración y nacimiento           | [*DATA REMOVED*]                                                                                                                                         |
| Peso RN en g                                  | [*DATA REMOVED*]                                                                                                                                         |
| sexo                                          | <input checked="" type="radio"/> mujer<br><input type="radio"/> hombre                                                                                   |
| Apgar 1 minuto                                | [*DATA REMOVED*]                                                                                                                                         |
| Apgar 5 minutos                               | [*DATA REMOVED*]                                                                                                                                         |
| Apgar 10 minutos                              | <hr/>                                                                                                                                                    |
| antecedente Covid durante gestación           | <input type="radio"/> Yes<br><input checked="" type="radio"/> No                                                                                         |
| Nivel de estudios                             | <input type="radio"/> ninguno<br><input type="radio"/> primarios<br><input type="radio"/> secundarios<br><input checked="" type="radio"/> universitarios |

# Base\_datos\_estimacion\_peso\_fetal

|                                       |                                                                                                                                                                                                                                                                                      |
|---------------------------------------|--------------------------------------------------------------------------------------------------------------------------------------------------------------------------------------------------------------------------------------------------------------------------------------|
| Número de identificación participante | 113                                                                                                                                                                                                                                                                                  |
| CODIGO PARTICIPANTE                   |                                                                                                                                                                                                                                                                                      |
| Edad                                  | [*DATA REMOVED*]                                                                                                                                                                                                                                                                     |
| Gestaciones                           | <input checked="" type="radio"/> 1<br><input type="radio"/> 2<br><input type="radio"/> 3<br><input type="radio"/> mas de 3                                                                                                                                                           |
| partos                                | <input checked="" type="radio"/> 0<br><input type="radio"/> 1<br><input type="radio"/> 2<br><input type="radio"/> 3<br><input type="radio"/> mas de 3                                                                                                                                |
| cesáreas                              | <input checked="" type="radio"/> 0<br><input type="radio"/> 1<br><input type="radio"/> 2<br><input type="radio"/> 3<br><input type="radio"/> mas de 3                                                                                                                                |
| Abortos                               | <input checked="" type="radio"/> 0<br><input type="radio"/> 1<br><input type="radio"/> 2<br><input type="radio"/> 3<br><input type="radio"/> mas de 3                                                                                                                                |
| Tipo de gestacion                     | <input type="radio"/> espontanea<br><input type="radio"/> IAC inseminación artificial conyuge<br><input type="radio"/> IAD inseminación artificial donante<br><input checked="" type="radio"/> FIV Fecundación in Vitro<br><input type="radio"/> Ovodon FIV con donación de ovocitos |
| peso previo a embarazo                | [*DATA REMOVED*]                                                                                                                                                                                                                                                                     |
| Ganancia ponderal embarazo            |                                                                                                                                                                                                                                                                                      |
| Talla madre                           | [*DATA REMOVED*]                                                                                                                                                                                                                                                                     |
| IMC previo embarazo                   | 22.321428571428577                                                                                                                                                                                                                                                                   |
| Patología obstétrica                  | <input checked="" type="radio"/> no<br><input type="radio"/> si                                                                                                                                                                                                                      |
| Diabetes pregestacional               | <input checked="" type="radio"/> no<br><input type="radio"/> si                                                                                                                                                                                                                      |
| Diabetes gestacional                  | <input checked="" type="radio"/> no<br><input type="radio"/> si                                                                                                                                                                                                                      |

|                                            |                                                                                                                                                                                      |
|--------------------------------------------|--------------------------------------------------------------------------------------------------------------------------------------------------------------------------------------|
| Diabetes gestacional con insulina          | <input checked="" type="radio"/> no<br><input type="radio"/> si                                                                                                                      |
| Diabetes gestacional con dieta y ejercicio | <input checked="" type="radio"/> no<br><input type="radio"/> si                                                                                                                      |
| Percentil fetos previos                    | <input checked="" type="radio"/> Nada<br><input type="radio"/> percentil menor de 10<br><input type="radio"/> percentil entre 10 y 90<br><input type="radio"/> percentil mayor de 90 |
| Exfumadora                                 | <input checked="" type="radio"/> Nada<br><input type="radio"/> menos de 5 años<br><input type="radio"/> 5 a 10 años<br><input type="radio"/> mayor o igual a 10 años                 |
| Hábito tabáquico                           | <input checked="" type="radio"/> no<br><input type="radio"/> si                                                                                                                      |
| fumadora                                   | [*DATA REMOVED*]                                                                                                                                                                     |
| Consumo otros tóxicos                      | <input checked="" type="radio"/> no<br><input type="radio"/> si                                                                                                                      |
| Hb 1T                                      | [*DATA REMOVED*]                                                                                                                                                                     |
| Htc 1T                                     | [*DATA REMOVED*]                                                                                                                                                                     |
| Hb 2T                                      | [*DATA REMOVED*]                                                                                                                                                                     |
| HTC 2T                                     | [*DATA REMOVED*]                                                                                                                                                                     |
| Hb 3T                                      | [*DATA REMOVED*]                                                                                                                                                                     |
| HTC 3T                                     | [*DATA REMOVED*]                                                                                                                                                                     |
| Suplemento FE oral                         | <input type="radio"/> si<br><input checked="" type="radio"/> no                                                                                                                      |
| Suplemento fe iv                           | <input type="radio"/> si<br><input checked="" type="radio"/> no                                                                                                                      |
| Transfusión                                | <input checked="" type="radio"/> no<br><input type="radio"/> si                                                                                                                      |
| Solicitada Vit D                           | <input type="radio"/> no<br><input checked="" type="radio"/> si                                                                                                                      |
| Deficit vit D                              | <input type="radio"/> no<br><input checked="" type="radio"/> si                                                                                                                      |
| Suplemento vit D                           | <input checked="" type="radio"/> si<br><input type="radio"/> no                                                                                                                      |

|                       |                                                                                                                                                                                                                                                                                                                                                                                                              |
|-----------------------|--------------------------------------------------------------------------------------------------------------------------------------------------------------------------------------------------------------------------------------------------------------------------------------------------------------------------------------------------------------------------------------------------------------|
| Dieta, cuestionario   | <input checked="" type="radio"/> sí<br><input type="radio"/> no                                                                                                                                                                                                                                                                                                                                              |
| Leche entera          | <input checked="" type="radio"/> Nunca o menos 1 vez al mes<br><input type="radio"/> 1 a 3 veces mes<br><input type="radio"/> 1 vez semana<br><input type="radio"/> 2 a 4 veces semana<br><input type="radio"/> 5 a 6 veces semana<br><input type="radio"/> 1 vez al día<br><input type="radio"/> 2 a 3 veces al día<br><input type="radio"/> 5 a 6 veces al día<br><input type="radio"/> más 6 veces al día |
| Leche semidesnatada   | <input checked="" type="radio"/> Nunca o menos 1 vez al mes<br><input type="radio"/> 1 a 3 veces mes<br><input type="radio"/> 1 vez semana<br><input type="radio"/> 2 a 4 veces semana<br><input type="radio"/> 5 a 6 veces semana<br><input type="radio"/> 1 vez al día<br><input type="radio"/> 2 a 3 veces al día<br><input type="radio"/> 5 a 6 veces al día<br><input type="radio"/> mas 6 veces al día |
| Leche desnatada       | <input type="radio"/> Nunca o menos 1 vez al mes<br><input type="radio"/> 1 a 3 veces mes<br><input type="radio"/> 1 vez semana<br><input type="radio"/> 2 a 4 veces semana<br><input type="radio"/> 5 a 6 veces semana<br><input checked="" type="radio"/> 1 vez al día<br><input type="radio"/> 2 a 3 veces al día<br><input type="radio"/> 5 a 6 veces al día<br><input type="radio"/> más 6 veces al día |
| Leche condensada      | <input checked="" type="radio"/> Nunca o menos 1 vez al mes<br><input type="radio"/> 1 a 3 veces mes<br><input type="radio"/> 1 vez semana<br><input type="radio"/> 2 a 4 veces semana<br><input type="radio"/> 5 a 6 veces semana<br><input type="radio"/> 1 vez al día<br><input type="radio"/> 2 a 3 veces al día<br><input type="radio"/> 5 a 6 veces al día<br><input type="radio"/> más 6 veces al día |
| nata o crema de leche | <input checked="" type="radio"/> Nunca o menos 1 vez al mes<br><input type="radio"/> 1 a 3 veces mes<br><input type="radio"/> 1 vez semana<br><input type="radio"/> 2 a 4 veces semana<br><input type="radio"/> 5 a 6 veces semana<br><input type="radio"/> 1 vez al día<br><input type="radio"/> 2 a 3 veces al día<br><input type="radio"/> 5 a 6 veces al día<br><input type="radio"/> más 6 veces al día |

|                                             |                                                                                                                                                                                                                                                                                                                                                                                                              |
|---------------------------------------------|--------------------------------------------------------------------------------------------------------------------------------------------------------------------------------------------------------------------------------------------------------------------------------------------------------------------------------------------------------------------------------------------------------------|
| Yogurt Entero                               | <input checked="" type="radio"/> Nunca o menos 1 vez al mes<br><input type="radio"/> 1 a 3 veces mes<br><input type="radio"/> 1 vez semana<br><input type="radio"/> 2 a 4 veces semana<br><input type="radio"/> 5 a 6 veces semana<br><input type="radio"/> 1 vez al día<br><input type="radio"/> 2 a 3 veces al día<br><input type="radio"/> 5 a 6 veces al día<br><input type="radio"/> más 6 veces al día |
| Yogurt desnatado                            | <input type="radio"/> Nunca o menos 1 vez al mes<br><input type="radio"/> 1 a 3 veces mes<br><input checked="" type="radio"/> 1 vez semana<br><input type="radio"/> 2 a 4 veces semana<br><input type="radio"/> 5 a 6 veces semana<br><input type="radio"/> 1 vez al día<br><input type="radio"/> 2 a 3 veces al día<br><input type="radio"/> 5 a 6 veces al día<br><input type="radio"/> más 6 veces al día |
| 100g requesón o queso blando o queso fresco | <input type="radio"/> Nunca o menos 1 vez al mes<br><input type="radio"/> 1 a 3 veces mes<br><input checked="" type="radio"/> 1 vez semana<br><input type="radio"/> 2 a 4 veces semana<br><input type="radio"/> 5 a 6 veces semana<br><input type="radio"/> 1 vez al día<br><input type="radio"/> 2 a 3 veces al día<br><input type="radio"/> 5 a 6 veces al día<br><input type="radio"/> más 6 veces al día |
| queso curado o semicurado o cremoso         | <input type="radio"/> Nunca o menos 1 vez al mes<br><input type="radio"/> 1 a 3 veces mes<br><input checked="" type="radio"/> 1 vez semana<br><input type="radio"/> 2 a 4 veces semana<br><input type="radio"/> 5 a 6 veces semana<br><input type="radio"/> 1 vez al día<br><input type="radio"/> 2 a 3 veces al día<br><input type="radio"/> 5 a 6 veces al día<br><input type="radio"/> más 6 veces al día |
| natillas flan pudding                       | <input checked="" type="radio"/> Nunca o menos 1 vez al mes<br><input type="radio"/> 1 a 3 veces mes<br><input type="radio"/> 1 vez semana<br><input type="radio"/> 2 a 4 veces semana<br><input type="radio"/> 5 a 6 veces semana<br><input type="radio"/> 1 vez al día<br><input type="radio"/> 2 a 3 veces al día<br><input type="radio"/> 5 a 6 veces al día<br><input type="radio"/> más 6 veces al día |
| Helado                                      | <input type="radio"/> Nunca o menos 1 vez al mes<br><input type="radio"/> 1 a 3 veces mes<br><input checked="" type="radio"/> 1 vez semana<br><input type="radio"/> 2 a 4 veces semana<br><input type="radio"/> 5 a 6 veces semana<br><input type="radio"/> 1 vez al día<br><input type="radio"/> 2 a 3 veces al día<br><input type="radio"/> 5 a 6 veces al día<br><input type="radio"/> más 6 veces al día |



|                                      |                                                                                                                                                                                                                                                                                                                                                                                                              |
|--------------------------------------|--------------------------------------------------------------------------------------------------------------------------------------------------------------------------------------------------------------------------------------------------------------------------------------------------------------------------------------------------------------------------------------------------------------|
| huevo                                | <input type="radio"/> Nunca o menos 1 vez al mes<br><input type="radio"/> 1 a 3 veces mes<br><input checked="" type="radio"/> 1 vez semana<br><input type="radio"/> 2 a 4 veces semana<br><input type="radio"/> 5 a 6 veces semana<br><input type="radio"/> 1 vez al día<br><input type="radio"/> 2 a 3 veces al día<br><input type="radio"/> 5 a 6 veces al día<br><input type="radio"/> más 6 veces al día |
| Pollo con piel                       | <input checked="" type="radio"/> Nunca o menos 1 vez al mes<br><input type="radio"/> 1 a 3 veces mes<br><input type="radio"/> 1 vez semana<br><input type="radio"/> 2 a 4 veces semana<br><input type="radio"/> 5 a 6 veces semana<br><input type="radio"/> 1 vez al día<br><input type="radio"/> 2 a 3 veces al día<br><input type="radio"/> 5 a 6 veces al día<br><input type="radio"/> más 6 veces al día |
| pollo sin piel                       | <input type="radio"/> Nunca o menos 1 vez al mes<br><input checked="" type="radio"/> 1 a 3 veces mes<br><input type="radio"/> 1 vez semana<br><input type="radio"/> 2 a 4 veces semana<br><input type="radio"/> 5 a 6 veces semana<br><input type="radio"/> 1 vez al día<br><input type="radio"/> 2 a 3 veces al día<br><input type="radio"/> 5 a 6 veces al día<br><input type="radio"/> más 6 veces al día |
| Ternera o cerdo o cordero            | <input type="radio"/> Nunca o menos 1 vez al mes<br><input type="radio"/> 1 a 3 veces mes<br><input checked="" type="radio"/> 1 vez semana<br><input type="radio"/> 2 a 4 veces semana<br><input type="radio"/> 5 a 6 veces semana<br><input type="radio"/> 1 vez al día<br><input type="radio"/> 2 a 3 veces al día<br><input type="radio"/> 5 a 6 veces al día<br><input type="radio"/> más 6 veces al día |
| carne caza: Conejo o codorniz o pato | <input checked="" type="radio"/> Nunca o menos 1 vez al mes<br><input type="radio"/> 1 a 3 veces mes<br><input type="radio"/> 1 vez semana<br><input type="radio"/> 2 a 4 veces semana<br><input type="radio"/> 5 a 6 veces semana<br><input type="radio"/> 1 vez al día<br><input type="radio"/> 2 a 3 veces al día<br><input type="radio"/> 5 a 6 veces al día<br><input type="radio"/> más 6 veces al día |
| Hígado de ternera o cerdo o pollo    | <input checked="" type="radio"/> Nunca o menos 1 vez al mes<br><input type="radio"/> 1 a 3 veces mes<br><input type="radio"/> 1 vez semana<br><input type="radio"/> 2 a 4 veces semana<br><input type="radio"/> 5 a 6 veces semana<br><input type="radio"/> 1 vez al día<br><input type="radio"/> 2 a 3 veces al día<br><input type="radio"/> 5 a 6 veces al día<br><input type="radio"/> más 6 veces al día |

|                     |                                                                                                                                                                                                                                                                                                                                                                                                              |
|---------------------|--------------------------------------------------------------------------------------------------------------------------------------------------------------------------------------------------------------------------------------------------------------------------------------------------------------------------------------------------------------------------------------------------------------|
| Vísceras            | <input checked="" type="radio"/> Nunca o menos 1 vez al mes<br><input type="radio"/> 1 a 3 veces mes<br><input type="radio"/> 1 vez semana<br><input type="radio"/> 2 a 4 veces semana<br><input type="radio"/> 5 a 6 veces semana<br><input type="radio"/> 1 vez al día<br><input type="radio"/> 2 a 3 veces al día<br><input type="radio"/> 5 a 6 veces al día<br><input type="radio"/> más 6 veces al día |
| Embutido            | <input checked="" type="radio"/> Nunca o menos 1 vez al mes<br><input type="radio"/> 1 a 3 veces mes<br><input type="radio"/> 1 vez semana<br><input type="radio"/> 2 a 4 veces semana<br><input type="radio"/> 5 a 6 veces semana<br><input type="radio"/> 1 vez al día<br><input type="radio"/> 2 a 3 veces al día<br><input type="radio"/> 5 a 6 veces al día<br><input type="radio"/> más 6 veces al día |
| Salchicha o similar | <input type="radio"/> Nunca o menos 1 vez al mes<br><input checked="" type="radio"/> 1 a 3 veces mes<br><input type="radio"/> 1 vez semana<br><input type="radio"/> 2 a 4 veces semana<br><input type="radio"/> 5 a 6 veces semana<br><input type="radio"/> 1 vez al día<br><input type="radio"/> 2 a 3 veces al día<br><input type="radio"/> 5 a 6 veces al día<br><input type="radio"/> más 6 veces al día |
| Pate o foiegras     | <input checked="" type="radio"/> Nunca o menos 1 vez al mes<br><input type="radio"/> 1 a 3 veces mes<br><input type="radio"/> 1 vez semana<br><input type="radio"/> 2 a 4 veces semana<br><input type="radio"/> 5 a 6 veces semana<br><input type="radio"/> 1 vez al día<br><input type="radio"/> 2 a 3 veces al día<br><input type="radio"/> 5 a 6 veces al día<br><input type="radio"/> más 6 veces al día |
| Hamburguesa         | <input type="radio"/> Nunca o menos 1 vez al mes<br><input checked="" type="radio"/> 1 a 3 veces mes<br><input type="radio"/> 1 vez semana<br><input type="radio"/> 2 a 4 veces semana<br><input type="radio"/> 5 a 6 veces semana<br><input type="radio"/> 1 vez al día<br><input type="radio"/> 2 a 3 veces al día<br><input type="radio"/> 5 a 6 veces al día<br><input type="radio"/> más 6 veces al día |
| tocino o bacon      | <input checked="" type="radio"/> Nunca o menos 1 vez al mes<br><input type="radio"/> 1 a 3 veces mes<br><input type="radio"/> 1 vez semana<br><input type="radio"/> 2 a 4 veces semana<br><input type="radio"/> 5 a 6 veces semana<br><input type="radio"/> 1 vez al día<br><input type="radio"/> 2 a 3 veces al día<br><input type="radio"/> 5 a 6 veces al día<br><input type="radio"/> más 6 veces al día |

---

|               |                                                                                                                                                                                                                                                                                                                                                                                                              |
|---------------|--------------------------------------------------------------------------------------------------------------------------------------------------------------------------------------------------------------------------------------------------------------------------------------------------------------------------------------------------------------------------------------------------------------|
| Pescado frito | <input type="radio"/> Nunca o menos 1 vez al mes<br><input checked="" type="radio"/> 1 a 3 veces mes<br><input type="radio"/> 1 vez semana<br><input type="radio"/> 2 a 4 veces semana<br><input type="radio"/> 5 a 6 veces semana<br><input type="radio"/> 1 vez al día<br><input type="radio"/> 2 a 3 veces al día<br><input type="radio"/> 5 a 6 veces al día<br><input type="radio"/> más 6 veces al día |
|---------------|--------------------------------------------------------------------------------------------------------------------------------------------------------------------------------------------------------------------------------------------------------------------------------------------------------------------------------------------------------------------------------------------------------------|

---

|                        |                                                                                                                                                                                                                                                                                                                                                                                                              |
|------------------------|--------------------------------------------------------------------------------------------------------------------------------------------------------------------------------------------------------------------------------------------------------------------------------------------------------------------------------------------------------------------------------------------------------------|
| pescado hervido blanco | <input type="radio"/> Nunca o menos 1 vez al mes<br><input type="radio"/> 1 a 3 veces mes<br><input checked="" type="radio"/> 1 vez semana<br><input type="radio"/> 2 a 4 veces semana<br><input type="radio"/> 5 a 6 veces semana<br><input type="radio"/> 1 vez al día<br><input type="radio"/> 2 a 3 veces al día<br><input type="radio"/> 5 a 6 veces al día<br><input type="radio"/> más 6 veces al día |
|------------------------|--------------------------------------------------------------------------------------------------------------------------------------------------------------------------------------------------------------------------------------------------------------------------------------------------------------------------------------------------------------------------------------------------------------|

---

|                      |                                                                                                                                                                                                                                                                                                                                                                                                              |
|----------------------|--------------------------------------------------------------------------------------------------------------------------------------------------------------------------------------------------------------------------------------------------------------------------------------------------------------------------------------------------------------------------------------------------------------|
| pescado hervido azul | <input checked="" type="radio"/> Nunca o menos 1 vez al mes<br><input type="radio"/> 1 a 3 veces mes<br><input type="radio"/> 1 vez semana<br><input type="radio"/> 2 a 4 veces semana<br><input type="radio"/> 5 a 6 veces semana<br><input type="radio"/> 1 vez al día<br><input type="radio"/> 2 a 3 veces al día<br><input type="radio"/> 5 a 6 veces al día<br><input type="radio"/> más 6 veces al día |
|----------------------|--------------------------------------------------------------------------------------------------------------------------------------------------------------------------------------------------------------------------------------------------------------------------------------------------------------------------------------------------------------------------------------------------------------|

---

|                    |                                                                                                                                                                                                                                                                                                                                                                                                              |
|--------------------|--------------------------------------------------------------------------------------------------------------------------------------------------------------------------------------------------------------------------------------------------------------------------------------------------------------------------------------------------------------------------------------------------------------|
| otros pescado azul | <input checked="" type="radio"/> Nunca o menos 1 vez al mes<br><input type="radio"/> 1 a 3 veces mes<br><input type="radio"/> 1 vez semana<br><input type="radio"/> 2 a 4 veces semana<br><input type="radio"/> 5 a 6 veces semana<br><input type="radio"/> 1 vez al día<br><input type="radio"/> 2 a 3 veces al día<br><input type="radio"/> 5 a 6 veces al día<br><input type="radio"/> más 6 veces al día |
|--------------------|--------------------------------------------------------------------------------------------------------------------------------------------------------------------------------------------------------------------------------------------------------------------------------------------------------------------------------------------------------------------------------------------------------------|

---

|               |                                                                                                                                                                                                                                                                                                                                                                                                              |
|---------------|--------------------------------------------------------------------------------------------------------------------------------------------------------------------------------------------------------------------------------------------------------------------------------------------------------------------------------------------------------------------------------------------------------------|
| atun conserva | <input checked="" type="radio"/> Nunca o menos 1 vez al mes<br><input type="radio"/> 1 a 3 veces mes<br><input type="radio"/> 1 vez semana<br><input type="radio"/> 2 a 4 veces semana<br><input type="radio"/> 5 a 6 veces semana<br><input type="radio"/> 1 vez al día<br><input type="radio"/> 2 a 3 veces al día<br><input type="radio"/> 5 a 6 veces al día<br><input type="radio"/> más 6 veces al día |
|---------------|--------------------------------------------------------------------------------------------------------------------------------------------------------------------------------------------------------------------------------------------------------------------------------------------------------------------------------------------------------------------------------------------------------------|

---

|                  |                                                                                                                                                                                                                                                                                                                                                                                                              |
|------------------|--------------------------------------------------------------------------------------------------------------------------------------------------------------------------------------------------------------------------------------------------------------------------------------------------------------------------------------------------------------------------------------------------------------|
| sardina conserva | <input checked="" type="radio"/> Nunca o menos 1 vez al mes<br><input type="radio"/> 1 a 3 veces mes<br><input type="radio"/> 1 vez semana<br><input type="radio"/> 2 a 4 veces semana<br><input type="radio"/> 5 a 6 veces semana<br><input type="radio"/> 1 vez al día<br><input type="radio"/> 2 a 3 veces al día<br><input type="radio"/> 5 a 6 veces al día<br><input type="radio"/> más 6 veces al día |
|------------------|--------------------------------------------------------------------------------------------------------------------------------------------------------------------------------------------------------------------------------------------------------------------------------------------------------------------------------------------------------------------------------------------------------------|

---

|                                         |                                                                                                                                                                                                                                                                                                                                                                                                              |
|-----------------------------------------|--------------------------------------------------------------------------------------------------------------------------------------------------------------------------------------------------------------------------------------------------------------------------------------------------------------------------------------------------------------------------------------------------------------|
| pescado ahumado                         | <input checked="" type="radio"/> Nunca o menos 1 vez al mes<br><input type="radio"/> 1 a 3 veces mes<br><input type="radio"/> 1 vez semana<br><input type="radio"/> 2 a 4 veces semana<br><input type="radio"/> 5 a 6 veces semana<br><input type="radio"/> 1 vez al día<br><input type="radio"/> 2 a 3 veces al día<br><input type="radio"/> 5 a 6 veces al día<br><input type="radio"/> más 6 veces al día |
| almejas o mejillones o ostras unos 100g | <input type="radio"/> Nunca o menos 1 vez al mes<br><input checked="" type="radio"/> 1 a 3 veces mes<br><input type="radio"/> 1 vez semana<br><input type="radio"/> 2 a 4 veces semana<br><input type="radio"/> 5 a 6 veces semana<br><input type="radio"/> 1 vez al día<br><input type="radio"/> 2 a 3 veces al día<br><input type="radio"/> 5 a 6 veces al día<br><input type="radio"/> más 6 veces al día |
| calamar o chipiron o sepia unos 100g    | <input type="radio"/> Nunca o menos 1 vez al mes<br><input checked="" type="radio"/> 1 a 3 veces mes<br><input type="radio"/> 1 vez semana<br><input type="radio"/> 2 a 4 veces semana<br><input type="radio"/> 5 a 6 veces semana<br><input type="radio"/> 1 vez al día<br><input type="radio"/> 2 a 3 veces al día<br><input type="radio"/> 5 a 6 veces al día<br><input type="radio"/> más 6 veces al día |
| marisco unos 100g                       | <input checked="" type="radio"/> Nunca o menos 1 vez al mes<br><input type="radio"/> 1 a 3 veces mes<br><input type="radio"/> 1 vez semana<br><input type="radio"/> 2 a 4 veces semana<br><input type="radio"/> 5 a 6 veces semana<br><input type="radio"/> 1 vez al día<br><input type="radio"/> 2 a 3 veces al día<br><input type="radio"/> 5 a 6 veces al día<br><input type="radio"/> más 6 veces al día |
| Espinacas o acelgas cocinadas           | <input type="radio"/> Nunca o menos 1 vez al mes<br><input checked="" type="radio"/> 1 a 3 veces mes<br><input type="radio"/> 1 vez semana<br><input type="radio"/> 2 a 4 veces semana<br><input type="radio"/> 5 a 6 veces semana<br><input type="radio"/> 1 vez al día<br><input type="radio"/> 2 a 3 veces al día<br><input type="radio"/> 5 a 6 veces al día<br><input type="radio"/> más 6 veces al día |
| Col o coliflor o brocoli cocinado       | <input type="radio"/> Nunca o menos 1 vez al mes<br><input type="radio"/> 1 a 3 veces mes<br><input type="radio"/> 1 vez semana<br><input type="radio"/> 2 a 4 veces semana<br><input type="radio"/> 5 a 6 veces semana<br><input checked="" type="radio"/> 1 vez al día<br><input type="radio"/> 2 a 3 veces al día<br><input type="radio"/> 5 a 6 veces al día<br><input type="radio"/> más 6 veces al día |

---

Lechuga o endivia o escarola

- ☒ Nunca o menos 1 vez al mes  
☐ 1 a 3 veces mes  
☐ 1 vez semana  
☐ 2 a 4 veces semana  
☐ 5 a 6 veces semana  
☐ 1 vez al día  
☐ 2 a 3 veces al día  
☐ 5 a 6 veces al día  
☐ más 6 veces al día

---

tomate ensalada

- ☐ Nunca o menos 1 vez al mes  
☐ 1 a 3 veces mes  
☒ 1 vez semana  
☐ 2 a 4 veces semana  
☐ 5 a 6 veces semana  
☐ 1 vez al día  
☐ 2 a 3 veces al día  
☐ 5 a 6 veces al día  
☐ más 6 veces al día

---

cebolla

- ☐ Nunca o menos 1 vez al mes  
☐ 1 a 3 veces mes  
☒ 1 vez semana  
☐ 2 a 4 veces semana  
☐ 5 a 6 veces semana  
☐ 1 vez al día  
☐ 2 a 3 veces al día  
☐ 5 a 6 veces al día  
☐ más 6 veces al día

---

Zanahoria o calabaza

- ☒ Nunca o menos 1 vez al mes  
☐ 1 a 3 veces mes  
☐ 1 vez semana  
☐ 2 a 4 veces semana  
☐ 5 a 6 veces semana  
☐ 1 vez al día  
☐ 2 a 3 veces al día  
☐ 5 a 6 veces al día  
☐ más 6 veces al día

---

Judías verdes

- ☐ Nunca o menos 1 vez al mes  
☐ 1 a 3 veces mes  
☒ 1 vez semana  
☐ 2 a 4 veces semana  
☐ 5 a 6 veces semana  
☐ 1 vez al día  
☐ 2 a 3 veces al día  
☐ 5 a 6 veces al día  
☐ más 6 veces al día

---

Berenjena o calabacín o pepino

- ☐ Nunca o menos 1 vez al mes  
☐ 1 a 3 veces mes  
☐ 1 vez semana  
☐ 2 a 4 veces semana  
☐ 5 a 6 veces semana  
☒ 1 vez al día  
☐ 2 a 3 veces al día  
☐ 5 a 6 veces al día  
☐ más 6 veces al día

---

|          |                                                                                                                                                                                                                                                                                                                                                                                                              |
|----------|--------------------------------------------------------------------------------------------------------------------------------------------------------------------------------------------------------------------------------------------------------------------------------------------------------------------------------------------------------------------------------------------------------------|
| pimiento | <input type="radio"/> Nunca o menos 1 vez al mes<br><input type="radio"/> 1 a 3 veces mes<br><input checked="" type="radio"/> 1 vez semana<br><input type="radio"/> 2 a 4 veces semana<br><input type="radio"/> 5 a 6 veces semana<br><input type="radio"/> 1 vez al día<br><input type="radio"/> 2 a 3 veces al día<br><input type="radio"/> 5 a 6 veces al día<br><input type="radio"/> más 6 veces al día |
|----------|--------------------------------------------------------------------------------------------------------------------------------------------------------------------------------------------------------------------------------------------------------------------------------------------------------------------------------------------------------------------------------------------------------------|

---

|           |                                                                                                                                                                                                                                                                                                                                                                                                              |
|-----------|--------------------------------------------------------------------------------------------------------------------------------------------------------------------------------------------------------------------------------------------------------------------------------------------------------------------------------------------------------------------------------------------------------------|
| alcachofa | <input type="radio"/> Nunca o menos 1 vez al mes<br><input type="radio"/> 1 a 3 veces mes<br><input checked="" type="radio"/> 1 vez semana<br><input type="radio"/> 2 a 4 veces semana<br><input type="radio"/> 5 a 6 veces semana<br><input type="radio"/> 1 vez al día<br><input type="radio"/> 2 a 3 veces al día<br><input type="radio"/> 5 a 6 veces al día<br><input type="radio"/> más 6 veces al día |
|-----------|--------------------------------------------------------------------------------------------------------------------------------------------------------------------------------------------------------------------------------------------------------------------------------------------------------------------------------------------------------------------------------------------------------------|

---

|            |                                                                                                                                                                                                                                                                                                                                                                                                              |
|------------|--------------------------------------------------------------------------------------------------------------------------------------------------------------------------------------------------------------------------------------------------------------------------------------------------------------------------------------------------------------------------------------------------------------|
| espárragos | <input checked="" type="radio"/> Nunca o menos 1 vez al mes<br><input type="radio"/> 1 a 3 veces mes<br><input type="radio"/> 1 vez semana<br><input type="radio"/> 2 a 4 veces semana<br><input type="radio"/> 5 a 6 veces semana<br><input type="radio"/> 1 vez al día<br><input type="radio"/> 2 a 3 veces al día<br><input type="radio"/> 5 a 6 veces al día<br><input type="radio"/> más 6 veces al día |
|------------|--------------------------------------------------------------------------------------------------------------------------------------------------------------------------------------------------------------------------------------------------------------------------------------------------------------------------------------------------------------------------------------------------------------|

---

|              |                                                                                                                                                                                                                                                                                                                                                                                                              |
|--------------|--------------------------------------------------------------------------------------------------------------------------------------------------------------------------------------------------------------------------------------------------------------------------------------------------------------------------------------------------------------------------------------------------------------|
| maíz hervido | <input type="radio"/> Nunca o menos 1 vez al mes<br><input type="radio"/> 1 a 3 veces mes<br><input checked="" type="radio"/> 1 vez semana<br><input type="radio"/> 2 a 4 veces semana<br><input type="radio"/> 5 a 6 veces semana<br><input type="radio"/> 1 vez al día<br><input type="radio"/> 2 a 3 veces al día<br><input type="radio"/> 5 a 6 veces al día<br><input type="radio"/> más 6 veces al día |
|--------------|--------------------------------------------------------------------------------------------------------------------------------------------------------------------------------------------------------------------------------------------------------------------------------------------------------------------------------------------------------------------------------------------------------------|

---

|           |                                                                                                                                                                                                                                                                                                                                                                                                              |
|-----------|--------------------------------------------------------------------------------------------------------------------------------------------------------------------------------------------------------------------------------------------------------------------------------------------------------------------------------------------------------------------------------------------------------------|
| legumbres | <input type="radio"/> Nunca o menos 1 vez al mes<br><input type="radio"/> 1 a 3 veces mes<br><input type="radio"/> 1 vez semana<br><input checked="" type="radio"/> 2 a 4 veces semana<br><input type="radio"/> 5 a 6 veces semana<br><input type="radio"/> 1 vez al día<br><input type="radio"/> 2 a 3 veces al día<br><input type="radio"/> 5 a 6 veces al día<br><input type="radio"/> más 6 veces al día |
|-----------|--------------------------------------------------------------------------------------------------------------------------------------------------------------------------------------------------------------------------------------------------------------------------------------------------------------------------------------------------------------------------------------------------------------|

---

|                       |                                                                                                                                                                                                                                                                                                                                                                                                              |
|-----------------------|--------------------------------------------------------------------------------------------------------------------------------------------------------------------------------------------------------------------------------------------------------------------------------------------------------------------------------------------------------------------------------------------------------------|
| naranjas o mandarinas | <input type="radio"/> Nunca o menos 1 vez al mes<br><input type="radio"/> 1 a 3 veces mes<br><input type="radio"/> 1 vez semana<br><input type="radio"/> 2 a 4 veces semana<br><input checked="" type="radio"/> 5 a 6 veces semana<br><input type="radio"/> 1 vez al día<br><input type="radio"/> 2 a 3 veces al día<br><input type="radio"/> 5 a 6 veces al día<br><input type="radio"/> más 6 veces al día |
|-----------------------|--------------------------------------------------------------------------------------------------------------------------------------------------------------------------------------------------------------------------------------------------------------------------------------------------------------------------------------------------------------------------------------------------------------|

---

---

zum natural fruta

- ☐ Nunca o menos 1 vez al mes  
☐ 1 a 3 veces mes  
☐ 1 vez semana  
☐ 2 a 4 veces semana  
☒ 5 a 6 veces semana  
☐ 1 vez al día  
☐ 2 a 3 veces al día  
☐ 5 a 6 veces al día  
☐ más 6 veces al día

---

platano

- ☒ Nunca o menos 1 vez al mes  
☐ 1 a 3 veces mes  
☐ 1 vez semana  
☐ 2 a 4 veces semana  
☐ 5 a 6 veces semana  
☐ 1 vez al día  
☐ 2 a 3 veces al día  
☐ 5 a 6 veces al día  
☐ más 6 veces al día

---

manzana o pera

- ☐ Nunca o menos 1 vez al mes  
☐ 1 a 3 veces mes  
☐ 1 vez semana  
☐ 2 a 4 veces semana  
☒ 5 a 6 veces semana  
☐ 1 vez al día  
☐ 2 a 3 veces al día  
☐ 5 a 6 veces al día  
☐ más 6 veces al día

---

melocotón o nectarina

- ☐ Nunca o menos 1 vez al mes  
☐ 1 a 3 veces mes  
☐ 1 vez semana  
☐ 2 a 4 veces semana  
☒ 5 a 6 veces semana  
☐ 1 vez al día  
☐ 2 a 3 veces al día  
☐ 5 a 6 veces al día  
☐ más 6 veces al día

---

sandia o melon

- ☐ Nunca o menos 1 vez al mes  
☐ 1 a 3 veces mes  
☐ 1 vez semana  
☐ 2 a 4 veces semana  
☒ 5 a 6 veces semana  
☐ 1 vez al día  
☐ 2 a 3 veces al día  
☐ 5 a 6 veces al día  
☐ más 6 veces al día

---

uva

- ☐ Nunca o menos 1 vez al mes  
☐ 1 a 3 veces mes  
☒ 1 vez semana  
☐ 2 a 4 veces semana  
☐ 5 a 6 veces semana  
☐ 1 vez al día  
☐ 2 a 3 veces al día  
☐ 5 a 6 veces al día  
☐ más 6 veces al día

|                 |                                                                                                                                                                                                                                                                                                                                                                                                              |
|-----------------|--------------------------------------------------------------------------------------------------------------------------------------------------------------------------------------------------------------------------------------------------------------------------------------------------------------------------------------------------------------------------------------------------------------|
| bruna o ciruela | <input checked="" type="radio"/> Nunca o menos 1 vez al mes<br><input type="radio"/> 1 a 3 veces mes<br><input type="radio"/> 1 vez semana<br><input type="radio"/> 2 a 4 veces semana<br><input type="radio"/> 5 a 6 veces semana<br><input type="radio"/> 1 vez al día<br><input type="radio"/> 2 a 3 veces al día<br><input type="radio"/> 5 a 6 veces al día<br><input type="radio"/> más 6 veces al día |
| kiwi            | <input type="radio"/> Nunca o menos 1 vez al mes<br><input type="radio"/> 1 a 3 veces mes<br><input type="radio"/> 1 vez semana<br><input checked="" type="radio"/> 2 a 4 veces semana<br><input type="radio"/> 5 a 6 veces semana<br><input type="radio"/> 1 vez al día<br><input type="radio"/> 2 a 3 veces al día<br><input type="radio"/> 5 a 6 veces al día<br><input type="radio"/> más 6 veces al día |
| aceituna        | <input checked="" type="radio"/> Nunca o menos 1 vez al mes<br><input type="radio"/> 1 a 3 veces mes<br><input type="radio"/> 1 vez semana<br><input type="radio"/> 2 a 4 veces semana<br><input type="radio"/> 5 a 6 veces semana<br><input type="radio"/> 1 vez al día<br><input type="radio"/> 2 a 3 veces al día<br><input type="radio"/> 5 a 6 veces al día<br><input type="radio"/> más 6 veces al día |
| frutos secos    | <input type="radio"/> Nunca o menos 1 vez al mes<br><input checked="" type="radio"/> 1 a 3 veces mes<br><input type="radio"/> 1 vez semana<br><input type="radio"/> 2 a 4 veces semana<br><input type="radio"/> 5 a 6 veces semana<br><input type="radio"/> 1 vez al día<br><input type="radio"/> 2 a 3 veces al día<br><input type="radio"/> 5 a 6 veces al día<br><input type="radio"/> más 6 veces al día |
| pan blanco      | <input type="radio"/> Nunca o menos 1 vez al mes<br><input type="radio"/> 1 a 3 veces mes<br><input checked="" type="radio"/> 1 vez semana<br><input type="radio"/> 2 a 4 veces semana<br><input type="radio"/> 5 a 6 veces semana<br><input type="radio"/> 1 vez al día<br><input type="radio"/> 2 a 3 veces al día<br><input type="radio"/> 5 a 6 veces al día<br><input type="radio"/> más 6 veces al día |
| pan integral    | <input type="radio"/> Nunca o menos 1 vez al mes<br><input checked="" type="radio"/> 1 a 3 veces mes<br><input type="radio"/> 1 vez semana<br><input type="radio"/> 2 a 4 veces semana<br><input type="radio"/> 5 a 6 veces semana<br><input type="radio"/> 1 vez al día<br><input type="radio"/> 2 a 3 veces al día<br><input type="radio"/> 5 a 6 veces al día<br><input type="radio"/> más 6 veces al día |



---

cereales desayuno

- ☐ Nunca o menos 1 vez al mes  
☐ 1 a 3 veces mes  
☒ 1 vez semana  
☐ 2 a 4 veces semana  
☐ 5 a 6 veces semana  
☐ 1 vez al día  
☐ 2 a 3 veces al día  
☐ 5 a 6 veces al día  
☐ más 6 veces al día

---

patatas fritas

- ☐ Nunca o menos 1 vez al mes  
☒ 1 a 3 veces mes  
☐ 1 vez semana  
☐ 2 a 4 veces semana  
☐ 5 a 6 veces semana  
☐ 1 vez al día  
☐ 2 a 3 veces al día  
☐ 5 a 6 veces al día  
☐ más 6 veces al día

---

patatas cocidas o asadas

- ☐ Nunca o menos 1 vez al mes  
☐ 1 a 3 veces mes  
☐ 1 vez semana  
☒ 2 a 4 veces semana  
☐ 5 a 6 veces semana  
☐ 1 vez al día  
☐ 2 a 3 veces al día  
☐ 5 a 6 veces al día  
☐ más 6 veces al día

---

bolsa papas

- ☐ Nunca o menos 1 vez al mes  
☐ 1 a 3 veces mes  
☒ 1 vez semana  
☐ 2 a 4 veces semana  
☐ 5 a 6 veces semana  
☐ 1 vez al día  
☐ 2 a 3 veces al día  
☐ 5 a 6 veces al día  
☐ más 6 veces al día

---

arroz cocinado

- ☐ Nunca o menos 1 vez al mes  
☐ 1 a 3 veces mes  
☒ 1 vez semana  
☐ 2 a 4 veces semana  
☐ 5 a 6 veces semana  
☐ 1 vez al día  
☐ 2 a 3 veces al día  
☐ 5 a 6 veces al día  
☐ más 6 veces al día

---

pasta

- ☐ Nunca o menos 1 vez al mes  
☐ 1 a 3 veces mes  
☐ 1 vez semana  
☒ 2 a 4 veces semana  
☐ 5 a 6 veces semana  
☐ 1 vez al día  
☐ 2 a 3 veces al día  
☐ 5 a 6 veces al día  
☐ más 6 veces al día

|                     |                                                                                                                                                                                                                                                                                                                                                                                                              |
|---------------------|--------------------------------------------------------------------------------------------------------------------------------------------------------------------------------------------------------------------------------------------------------------------------------------------------------------------------------------------------------------------------------------------------------------|
| pizza               | <input type="radio"/> Nunca o menos 1 vez al mes<br><input type="radio"/> 1 a 3 veces mes<br><input checked="" type="radio"/> 1 vez semana<br><input type="radio"/> 2 a 4 veces semana<br><input type="radio"/> 5 a 6 veces semana<br><input type="radio"/> 1 vez al día<br><input type="radio"/> 2 a 3 veces al día<br><input type="radio"/> 5 a 6 veces al día<br><input type="radio"/> más 6 veces al día |
| aceite oliva        | <input type="radio"/> Nunca o menos 1 vez al mes<br><input type="radio"/> 1 a 3 veces mes<br><input type="radio"/> 1 vez semana<br><input type="radio"/> 2 a 4 veces semana<br><input type="radio"/> 5 a 6 veces semana<br><input checked="" type="radio"/> 1 vez al día<br><input type="radio"/> 2 a 3 veces al día<br><input type="radio"/> 5 a 6 veces al día<br><input type="radio"/> más 6 veces al día |
| otros aceites       | <input type="radio"/> Nunca o menos 1 vez al mes<br><input type="radio"/> 1 a 3 veces mes<br><input type="radio"/> 1 vez semana<br><input checked="" type="radio"/> 2 a 4 veces semana<br><input type="radio"/> 5 a 6 veces semana<br><input type="radio"/> 1 vez al día<br><input type="radio"/> 2 a 3 veces al día<br><input type="radio"/> 5 a 6 veces al día<br><input type="radio"/> más 6 veces al día |
| margarina           | <input type="radio"/> Nunca o menos 1 vez al mes<br><input type="radio"/> 1 a 3 veces mes<br><input type="radio"/> 1 vez semana<br><input type="radio"/> 2 a 4 veces semana<br><input type="radio"/> 5 a 6 veces semana<br><input checked="" type="radio"/> 1 vez al día<br><input type="radio"/> 2 a 3 veces al día<br><input type="radio"/> 5 a 6 veces al día<br><input type="radio"/> más 6 veces al día |
| mantequilla         | <input checked="" type="radio"/> Nunca o menos 1 vez al mes<br><input type="radio"/> 1 a 3 veces mes<br><input type="radio"/> 1 vez semana<br><input type="radio"/> 2 a 4 veces semana<br><input type="radio"/> 5 a 6 veces semana<br><input type="radio"/> 1 vez al día<br><input type="radio"/> 2 a 3 veces al día<br><input type="radio"/> 5 a 6 veces al día<br><input type="radio"/> más 6 veces al día |
| galletas tipo maria | <input type="radio"/> Nunca o menos 1 vez al mes<br><input checked="" type="radio"/> 1 a 3 veces mes<br><input type="radio"/> 1 vez semana<br><input type="radio"/> 2 a 4 veces semana<br><input type="radio"/> 5 a 6 veces semana<br><input type="radio"/> 1 vez al día<br><input type="radio"/> 2 a 3 veces al día<br><input type="radio"/> 5 a 6 veces al día<br><input type="radio"/> más 6 veces al día |

---

galletas chocolate

- ☐ Nunca o menos 1 vez al mes  
☒ 1 a 3 veces mes  
☐ 1 vez semana  
☐ 2 a 4 veces semana  
☐ 5 a 6 veces semana  
☐ 1 vez al día  
☐ 2 a 3 veces al día  
☐ 5 a 6 veces al día  
☐ más 6 veces al día

---

bolleria

- ☐ Nunca o menos 1 vez al mes  
☒ 1 a 3 veces mes  
☐ 1 vez semana  
☐ 2 a 4 veces semana  
☐ 5 a 6 veces semana  
☐ 1 vez al día  
☐ 2 a 3 veces al día  
☐ 5 a 6 veces al día  
☐ más 6 veces al día

---

chocolate o bombones

- ☐ Nunca o menos 1 vez al mes  
☒ 1 a 3 veces mes  
☐ 1 vez semana  
☐ 2 a 4 veces semana  
☐ 5 a 6 veces semana  
☐ 1 vez al día  
☐ 2 a 3 veces al día  
☐ 5 a 6 veces al día  
☐ más 6 veces al día

---

chocolate polvo o colacao

- ☐ Nunca o menos 1 vez al mes  
☒ 1 a 3 veces mes  
☐ 1 vez semana  
☐ 2 a 4 veces semana  
☐ 5 a 6 veces semana  
☐ 1 vez al día  
☐ 2 a 3 veces al día  
☐ 5 a 6 veces al día  
☐ más 6 veces al día

---

vino tinto

- ☒ Nunca o menos 1 vez al mes  
☐ 1 a 3 veces mes  
☐ 1 vez semana  
☐ 2 a 4 veces semana  
☐ 5 a 6 veces semana  
☐ 1 vez al día  
☐ 2 a 3 veces al día  
☐ 5 a 6 veces al día  
☐ más 6 veces al día

---

vino blanco

- ☒ Nunca o menos 1 vez al mes  
☐ 1 a 3 veces mes  
☐ 1 vez semana  
☐ 2 a 4 veces semana  
☐ 5 a 6 veces semana  
☐ 1 vez al día  
☐ 2 a 3 veces al día  
☐ 5 a 6 veces al día  
☐ más 6 veces al día

|                       |                                                                                                                                                                                                                                                                                                                                                                                                              |
|-----------------------|--------------------------------------------------------------------------------------------------------------------------------------------------------------------------------------------------------------------------------------------------------------------------------------------------------------------------------------------------------------------------------------------------------------|
| vino seco o vermut    | <input checked="" type="radio"/> Nunca o menos 1 vez al mes<br><input type="radio"/> 1 a 3 veces mes<br><input type="radio"/> 1 vez semana<br><input type="radio"/> 2 a 4 veces semana<br><input type="radio"/> 5 a 6 veces semana<br><input type="radio"/> 1 vez al día<br><input type="radio"/> 2 a 3 veces al día<br><input type="radio"/> 5 a 6 veces al día<br><input type="radio"/> más 6 veces al día |
| cerveza               | <input checked="" type="radio"/> Nunca o menos 1 vez al mes<br><input type="radio"/> 1 a 3 veces mes<br><input type="radio"/> 1 vez semana<br><input type="radio"/> 2 a 4 veces semana<br><input type="radio"/> 5 a 6 veces semana<br><input type="radio"/> 1 vez al día<br><input type="radio"/> 2 a 3 veces al día<br><input type="radio"/> 5 a 6 veces al día<br><input type="radio"/> más 6 veces al día |
| cerveza sin alcohol   | <input checked="" type="radio"/> Nunca o menos 1 vez al mes<br><input type="radio"/> 1 a 3 veces mes<br><input type="radio"/> 1 vez semana<br><input type="radio"/> 2 a 4 veces semana<br><input type="radio"/> 5 a 6 veces semana<br><input type="radio"/> 1 vez al día<br><input type="radio"/> 2 a 3 veces al día<br><input type="radio"/> 5 a 6 veces al día<br><input type="radio"/> más 6 veces al día |
| licores               | <input checked="" type="radio"/> Nunca o menos 1 vez al mes<br><input type="radio"/> 1 a 3 veces mes<br><input type="radio"/> 1 vez semana<br><input type="radio"/> 2 a 4 veces semana<br><input type="radio"/> 5 a 6 veces semana<br><input type="radio"/> 1 vez al día<br><input type="radio"/> 2 a 3 veces al día<br><input type="radio"/> 5 a 6 veces al día<br><input type="radio"/> más 6 veces al día |
| ginebra o ron o vodka | <input checked="" type="radio"/> Nunca o menos 1 vez al mes<br><input type="radio"/> 1 a 3 veces mes<br><input type="radio"/> 1 vez semana<br><input type="radio"/> 2 a 4 veces semana<br><input type="radio"/> 5 a 6 veces semana<br><input type="radio"/> 1 vez al día<br><input type="radio"/> 2 a 3 veces al día<br><input type="radio"/> 5 a 6 veces al día<br><input type="radio"/> más 6 veces al día |
| refresco normal       | <input type="radio"/> Nunca o menos 1 vez al mes<br><input checked="" type="radio"/> 1 a 3 veces mes<br><input type="radio"/> 1 vez semana<br><input type="radio"/> 2 a 4 veces semana<br><input type="radio"/> 5 a 6 veces semana<br><input type="radio"/> 1 vez al día<br><input type="radio"/> 2 a 3 veces al día<br><input type="radio"/> 5 a 6 veces al día<br><input type="radio"/> más 6 veces al día |

---

refresco sin azúcar

- ☐ Nunca o menos 1 vez al mes  
☒ 1 a 3 veces mes  
☐ 1 vez semana  
☐ 2 a 4 veces semana  
☐ 5 a 6 veces semana  
☐ 1 vez al día  
☐ 2 a 3 veces al día  
☐ 5 a 6 veces al día  
☐ más 6 veces al día

---

Agua del grifo

- ☐ Nunca o menos 1 vez al mes  
☐ 1 a 3 veces mes  
☐ 1 vez semana  
☐ 2 a 4 veces semana  
☐ 5 a 6 veces semana  
☒ 1 vez al día  
☐ 2 a 3 veces al día  
☐ 5 a 6 veces al día  
☐ más 6 veces al día

---

agua embotellada sin gas

- ☐ Nunca o menos 1 vez al mes  
☐ 1 a 3 veces mes  
☐ 1 vez semana  
☐ 2 a 4 veces semana  
☐ 5 a 6 veces semana  
☐ 1 vez al día  
☐ 2 a 3 veces al día  
☒ 5 a 6 veces al día  
☐ más 6 veces al día

---

agua embotellada con gas

- ☒ Nunca o menos 1 vez al mes  
☐ 1 a 3 veces mes  
☐ 1 vez semana  
☐ 2 a 4 veces semana  
☐ 5 a 6 veces semana  
☐ 1 vez al día  
☐ 2 a 3 veces al día  
☐ 5 a 6 veces al día  
☐ más 6 veces al día

---

zumو frutas embasado

- ☒ Nunca o menos 1 vez al mes  
☐ 1 a 3 veces mes  
☐ 1 vez semana  
☐ 2 a 4 veces semana  
☐ 5 a 6 veces semana  
☐ 1 vez al día  
☐ 2 a 3 veces al día  
☐ 5 a 6 veces al día  
☐ más 6 veces al día

---

cafe

- ☒ Nunca o menos 1 vez al mes  
☐ 1 a 3 veces mes  
☐ 1 vez semana  
☐ 2 a 4 veces semana  
☐ 5 a 6 veces semana  
☐ 1 vez al día  
☐ 2 a 3 veces al día  
☐ 5 a 6 veces al día  
☐ más 6 veces al día

---

cafe descafeinado

- ☐ Nunca o menos 1 vez al mes  
☐ 1 a 3 veces mes  
☐ 1 vez semana  
☐ 2 a 4 veces semana  
☐ 5 a 6 veces semana  
☒ 1 vez al día  
☐ 2 a 3 veces al día  
☐ 5 a 6 veces al día  
☐ más 6 veces al día

---

te o infusión

- ☒ Nunca o menos 1 vez al mes  
☐ 1 a 3 veces mes  
☐ 1 vez semana  
☐ 2 a 4 veces semana  
☐ 5 a 6 veces semana  
☐ 1 vez al día  
☐ 2 a 3 veces al día  
☐ 5 a 6 veces al día  
☐ más 6 veces al día

---

sopa o puré verduras

- ☐ Nunca o menos 1 vez al mes  
☐ 1 a 3 veces mes  
☐ 1 vez semana  
☐ 2 a 4 veces semana  
☐ 5 a 6 veces semana  
☒ 1 vez al día  
☐ 2 a 3 veces al día  
☐ 5 a 6 veces al día  
☐ más 6 veces al día

---

croquetas pollo jamón

- ☐ Nunca o menos 1 vez al mes  
☒ 1 a 3 veces mes  
☐ 1 vez semana  
☐ 2 a 4 veces semana  
☐ 5 a 6 veces semana  
☐ 1 vez al día  
☐ 2 a 3 veces al día  
☐ 5 a 6 veces al día  
☐ más 6 veces al día

---

croquetas pescado

- ☐ Nunca o menos 1 vez al mes  
☒ 1 a 3 veces mes  
☐ 1 vez semana  
☐ 2 a 4 veces semana  
☐ 5 a 6 veces semana  
☐ 1 vez al día  
☐ 2 a 3 veces al día  
☐ 5 a 6 veces al día  
☐ más 6 veces al día

---

mayonesa

- ☐ Nunca o menos 1 vez al mes  
☐ 1 a 3 veces mes  
☒ 1 vez semana  
☐ 2 a 4 veces semana  
☐ 5 a 6 veces semana  
☐ 1 vez al día  
☐ 2 a 3 veces al día  
☐ 5 a 6 veces al día  
☐ más 6 veces al día

|                  |                                                                                                                                                                                                                                                                                                                                                                                                              |
|------------------|--------------------------------------------------------------------------------------------------------------------------------------------------------------------------------------------------------------------------------------------------------------------------------------------------------------------------------------------------------------------------------------------------------------|
| salsa tomate     | <input checked="" type="radio"/> Nunca o menos 1 vez al mes<br><input type="radio"/> 1 a 3 veces mes<br><input type="radio"/> 1 vez semana<br><input type="radio"/> 2 a 4 veces semana<br><input type="radio"/> 5 a 6 veces semana<br><input type="radio"/> 1 vez al día<br><input type="radio"/> 2 a 3 veces al día<br><input type="radio"/> 5 a 6 veces al día<br><input type="radio"/> más 6 veces al día |
| ketchup          | <input checked="" type="radio"/> Nunca o menos 1 vez al mes<br><input type="radio"/> 1 a 3 veces mes<br><input type="radio"/> 1 vez semana<br><input type="radio"/> 2 a 4 veces semana<br><input type="radio"/> 5 a 6 veces semana<br><input type="radio"/> 1 vez al día<br><input type="radio"/> 2 a 3 veces al día<br><input type="radio"/> 5 a 6 veces al día<br><input type="radio"/> más 6 veces al día |
| sal              | <input type="radio"/> Nunca o menos 1 vez al mes<br><input type="radio"/> 1 a 3 veces mes<br><input type="radio"/> 1 vez semana<br><input type="radio"/> 2 a 4 veces semana<br><input type="radio"/> 5 a 6 veces semana<br><input checked="" type="radio"/> 1 vez al día<br><input type="radio"/> 2 a 3 veces al día<br><input type="radio"/> 5 a 6 veces al día<br><input type="radio"/> más 6 veces al día |
| ajo              | <input checked="" type="radio"/> Nunca o menos 1 vez al mes<br><input type="radio"/> 1 a 3 veces mes<br><input type="radio"/> 1 vez semana<br><input type="radio"/> 2 a 4 veces semana<br><input type="radio"/> 5 a 6 veces semana<br><input type="radio"/> 1 vez al día<br><input type="radio"/> 2 a 3 veces al día<br><input type="radio"/> 5 a 6 veces al día<br><input type="radio"/> más 6 veces al día |
| mermelada o miel | <input type="radio"/> Nunca o menos 1 vez al mes<br><input type="radio"/> 1 a 3 veces mes<br><input type="radio"/> 1 vez semana<br><input type="radio"/> 2 a 4 veces semana<br><input type="radio"/> 5 a 6 veces semana<br><input checked="" type="radio"/> 1 vez al día<br><input type="radio"/> 2 a 3 veces al día<br><input type="radio"/> 5 a 6 veces al día<br><input type="radio"/> más 6 veces al día |
| azúcar           | <input type="radio"/> Nunca o menos 1 vez al mes<br><input type="radio"/> 1 a 3 veces mes<br><input type="radio"/> 1 vez semana<br><input type="radio"/> 2 a 4 veces semana<br><input type="radio"/> 5 a 6 veces semana<br><input checked="" type="radio"/> 1 vez al día<br><input type="radio"/> 2 a 3 veces al día<br><input type="radio"/> 5 a 6 veces al día<br><input type="radio"/> más 6 veces al día |

---

Otro alimento

---

---

suplementos vitamínicos

- ☐ si  
☒ no
- 

---

suplementos vitamínicos

---

---

dieta previa

- ☐ si  
☒ no
- 

---

motivo dieta

- ☒ no dieta  
☐ control peso  
☐ control colesterol  
☐ control diabetes  
☐ problemas estómago  
☐ problemas vesícula o hepáticos  
☐ HTA o cardiopatía  
☐ problemas renales  
☐ alergia alimentaria  
☐ ácido úrico elevado  
☐ vegetariana  
☐ otros
- 

---

cambio alimentos año previo gestación

- ☒ si  
☐ no
- 

---

cambio lácteos

- ☐ eliminado  
☐ disminuido  
☒ igual  
☐ aumentado  
☐ no sabe
- 

---

cambio huevos

- ☐ eliminado  
☐ disminuido  
☒ igual  
☐ aumentado  
☐ no sabe
- 

---

cambio carne

- ☒ eliminado  
☐ disminuido  
☐ igual  
☐ aumentado  
☐ no sabe
- 

---

cambio pescado

- ☐ eliminado  
☐ disminuido  
☒ igual  
☐ aumentado  
☐ no sabe
- 

---

cambio verduras

- ☐ eliminado  
☐ disminuido  
☐ igual  
☒ aumentado  
☐ no sabe
-



|                            |                                                                                                                                                                                                                        |
|----------------------------|------------------------------------------------------------------------------------------------------------------------------------------------------------------------------------------------------------------------|
| cambio legumbres           | <input type="radio"/> eliminado<br><input type="radio"/> disminuido<br><input checked="" type="radio"/> igual<br><input type="radio"/> aumentado<br><input type="radio"/> no sabe                                      |
| cambio fruta               | <input type="radio"/> eliminado<br><input type="radio"/> disminuido<br><input type="radio"/> igual<br><input checked="" type="radio"/> aumentado<br><input type="radio"/> no sabe                                      |
| cambio pan                 | <input type="radio"/> eliminado<br><input type="radio"/> disminuido<br><input checked="" type="radio"/> igual<br><input type="radio"/> aumentado<br><input type="radio"/> no sabe                                      |
| cambio aceite oliva        | <input type="radio"/> eliminado<br><input type="radio"/> disminuido<br><input checked="" type="radio"/> igual<br><input type="radio"/> aumentado<br><input type="radio"/> no sabe                                      |
| cambio mante o margarina   | <input type="radio"/> eliminado<br><input checked="" type="radio"/> disminuido<br><input type="radio"/> igual<br><input type="radio"/> aumentado<br><input type="radio"/> no sabe                                      |
| cambio azúcar y dulces     | <input type="radio"/> eliminado<br><input checked="" type="radio"/> disminuido<br><input type="radio"/> igual<br><input type="radio"/> aumentado<br><input type="radio"/> no sabe                                      |
| cambio bebidas alcohólicas | <input checked="" type="radio"/> eliminado<br><input type="radio"/> disminuido<br><input type="radio"/> igual<br><input type="radio"/> aumentado<br><input type="radio"/> no sabe                                      |
| frecuencia comidas fritas  | <input type="radio"/> a diario<br><input type="radio"/> 5 a 6 veces semana<br><input type="radio"/> 2 a 4 veces semana<br><input checked="" type="radio"/> 1 vez semana<br><input type="radio"/> menos de 1 vez semana |
| carne                      | <input type="radio"/> no como<br><input type="radio"/> cruda<br><input type="radio"/> poco hecha<br><input checked="" type="radio"/> hecha<br><input type="radio"/> muy hecha                                          |
| grasa visible carne        | <input type="radio"/> quita toda<br><input checked="" type="radio"/> quita mayoría<br><input type="radio"/> quita un poco<br><input type="radio"/> no quita nada                                                       |

|                                |                                                                                                                                                                                                                                                          |
|--------------------------------|----------------------------------------------------------------------------------------------------------------------------------------------------------------------------------------------------------------------------------------------------------|
| cocina carne                   | <input checked="" type="radio"/> a la plancha<br><input type="radio"/> a la parrilla<br><input type="radio"/> asada<br><input type="radio"/> frita<br><input type="radio"/> guisada                                                                      |
| tostado quemado carne          | <input checked="" type="radio"/> nunca<br><input type="radio"/> 1 vez mes<br><input type="radio"/> 2 a 3 veces mes<br><input type="radio"/> 1 vez semana<br><input type="radio"/> 2 a 3 semanas                                                          |
| tostado quemado pescado        | <input checked="" type="radio"/> nunca<br><input type="radio"/> 1 vez mes<br><input type="radio"/> 2 a 3 veces mes<br><input type="radio"/> 1 vez semana<br><input type="radio"/> 2 a 3 semanas                                                          |
| socarrat paella                | <input checked="" type="radio"/> nunca<br><input type="radio"/> 1 vez mes<br><input type="radio"/> 2 a 3 veces mes<br><input type="radio"/> 1 vez semana<br><input type="radio"/> 2 a 3 semanas                                                          |
| grasa o aceite cocinar         | <input type="radio"/> mantequilla<br><input type="radio"/> margarina<br><input checked="" type="radio"/> aceite oliva<br><input type="radio"/> aceite oliva virgen extra<br><input type="radio"/> aceite vegetal<br><input type="radio"/> mezcla aceites |
| grasa aceite aliñar            | <input type="radio"/> mantequilla<br><input type="radio"/> margarina<br><input type="radio"/> aceite oliva<br><input checked="" type="radio"/> aceite oliva virgen extra<br><input type="radio"/> aceite vegetal<br><input type="radio"/> mezcla aceites |
| grasa aceite freir             | <input type="radio"/> mantequilla<br><input type="radio"/> margarina<br><input type="radio"/> aceite oliva<br><input checked="" type="radio"/> aceite oliva virgen extra<br><input type="radio"/> aceite vegetal<br><input type="radio"/> mezcla aceites |
| Ejercicio cuestionario         | <input checked="" type="radio"/> si<br><input type="radio"/> no                                                                                                                                                                                          |
| horas de sueño incluido siesta | [*DATA REMOVED*]                                                                                                                                                                                                                                         |
| minutos siesta                 | [*DATA REMOVED*]                                                                                                                                                                                                                                         |
| horas televisión semana        | [*DATA REMOVED*]                                                                                                                                                                                                                                         |

|                                        |                                                                                                                                                                                                                                                                                                                                                                           |
|----------------------------------------|---------------------------------------------------------------------------------------------------------------------------------------------------------------------------------------------------------------------------------------------------------------------------------------------------------------------------------------------------------------------------|
| actividad trabajo                      | <input type="radio"/> casi siempre sentado<br><input type="radio"/> sentado 50 por cien<br><input type="radio"/> casi siempre de pie, quieto<br><input type="radio"/> casi siempre levantado caminando y llevando pocas cosas<br><input checked="" type="radio"/> casi siempre levantado, caminando y llevado muchas cosas<br><input type="radio"/> trabajo manual pesado |
| tiempo caminar o bici al día           | <input type="radio"/> casi nunca<br><input type="radio"/> menos 20min día<br><input type="radio"/> 20 a 40 min día<br><input type="radio"/> 40 a 60 min día<br><input checked="" type="radio"/> 1h o 1h y media día<br><input type="radio"/> más de 1h y media al día                                                                                                     |
| tiempo tareas casa al día              | <input type="radio"/> menos de 1h día<br><input checked="" type="radio"/> 1 a 2h día<br><input type="radio"/> 3 a 4h día<br><input type="radio"/> 5 a 6h día<br><input type="radio"/> 7 a 8h día<br><input type="radio"/> más de 8h día                                                                                                                                   |
| tiempo libre televisión ordenador leer | <input type="radio"/> menos 1h día<br><input type="radio"/> 1h día<br><input checked="" type="radio"/> 2h día<br><input type="radio"/> 3h día<br><input type="radio"/> 4h día<br><input type="radio"/> 5 a 6h día<br><input type="radio"/> mas 6h día                                                                                                                     |
| tiempo libre ejercicio o deporte       | <input type="radio"/> menos 1h semana<br><input type="radio"/> 1h semana<br><input type="radio"/> 2h semana<br><input checked="" type="radio"/> 3h semana<br><input type="radio"/> 4 a 5h semana<br><input type="radio"/> mas 5h semana                                                                                                                                   |
| como se considera                      | <input type="radio"/> sedentaria<br><input type="radio"/> poco activa<br><input type="radio"/> moderadamente activa<br><input checked="" type="radio"/> bastante activa<br><input type="radio"/> muy activa<br><input type="radio"/> no sabe                                                                                                                              |
| FUR                                    | [*DATA REMOVED*]                                                                                                                                                                                                                                                                                                                                                          |
| Semanas gestación 2T                   | [*DATA REMOVED*]                                                                                                                                                                                                                                                                                                                                                          |
| Días gestación 2T                      | [*DATA REMOVED*]                                                                                                                                                                                                                                                                                                                                                          |
| DBP 2T                                 | [*DATA REMOVED*]                                                                                                                                                                                                                                                                                                                                                          |
| CC 2T                                  | [*DATA REMOVED*]                                                                                                                                                                                                                                                                                                                                                          |
| AC 2T                                  | [*DATA REMOVED*]                                                                                                                                                                                                                                                                                                                                                          |

|                                                   |                                                                                                                                                                                                 |
|---------------------------------------------------|-------------------------------------------------------------------------------------------------------------------------------------------------------------------------------------------------|
| LF 2T                                             | [*DATA REMOVED*]                                                                                                                                                                                |
| PFE 2T (Hadlock)                                  | [*DATA REMOVED*]                                                                                                                                                                                |
| Semanas gestación 3T                              | [*DATA REMOVED*]                                                                                                                                                                                |
| días 3T                                           | [*DATA REMOVED*]                                                                                                                                                                                |
| DBP 3T                                            | [*DATA REMOVED*]                                                                                                                                                                                |
| CC 3T                                             | [*DATA REMOVED*]                                                                                                                                                                                |
| AC 3T                                             | [*DATA REMOVED*]                                                                                                                                                                                |
| LF 3T                                             | [*DATA REMOVED*]                                                                                                                                                                                |
| PFE 3T (Hadlock)                                  | [*DATA REMOVED*]                                                                                                                                                                                |
| Semanas de gestación final                        | [*DATA REMOVED*]                                                                                                                                                                                |
| días gestación final                              | [*DATA REMOVED*]                                                                                                                                                                                |
| Localización placenta                             | <input checked="" type="radio"/> anterior<br><input type="radio"/> lateral derecha<br><input type="radio"/> lateral izquierda<br><input type="radio"/> posterior<br><input type="radio"/> fondo |
| Presentación longitudinal cefálica                | <input type="radio"/> no<br><input checked="" type="radio"/> si                                                                                                                                 |
| Dorso                                             | <input checked="" type="radio"/> izquierda anterior<br><input type="radio"/> izquierda posterior<br><input type="radio"/> derecha anterior<br><input type="radio"/> derecha posterior           |
| diámetro biparietal                               | [*DATA REMOVED*]                                                                                                                                                                                |
| Circunferencia craneal                            | [*DATA REMOVED*]                                                                                                                                                                                |
| Circunferencia abdominal                          | [*DATA REMOVED*]                                                                                                                                                                                |
| Longitud de femur                                 | [*DATA REMOVED*]                                                                                                                                                                                |
| tejido celular subcutáneo a nivel del muslo en mm | [*DATA REMOVED*]                                                                                                                                                                                |
| tejido celular subcutáneo en abdomen en mm        | [*DATA REMOVED*]                                                                                                                                                                                |
| Volumen del muslo en cm3                          | [*DATA REMOVED*]                                                                                                                                                                                |
| Peso fetal estimado según fórmula de Hadlock      | [*DATA REMOVED*]                                                                                                                                                                                |

|                                               |                                                                                                                                                          |
|-----------------------------------------------|----------------------------------------------------------------------------------------------------------------------------------------------------------|
| Percentil                                     | [*DATA REMOVED*]                                                                                                                                         |
| Peso fetal estimado según fórmula de Scioscia | <hr/>                                                                                                                                                    |
| Peso fetal estimado según fórmula de LEE      | <hr/>                                                                                                                                                    |
| Tipo de parto                                 | <input type="radio"/> eutocico<br><input type="radio"/> instrumentado/ventosa<br><input checked="" type="radio"/> cesarea                                |
| fecha de nacimiento                           | [*DATA REMOVED*]                                                                                                                                         |
| Días entre exploración y nacimiento           | [*DATA REMOVED*]                                                                                                                                         |
| Peso RN en g                                  | [*DATA REMOVED*]                                                                                                                                         |
| sexo                                          | <input type="radio"/> mujer<br><input checked="" type="radio"/> hombre                                                                                   |
| Apgar 1 minuto                                | [*DATA REMOVED*]                                                                                                                                         |
| Apgar 5 minutos                               | [*DATA REMOVED*]                                                                                                                                         |
| Apgar 10 minutos                              | <hr/>                                                                                                                                                    |
| antecedente Covid durante gestación           | <input type="radio"/> Yes<br><input checked="" type="radio"/> No                                                                                         |
| Nivel de estudios                             | <input type="radio"/> ninguno<br><input type="radio"/> primarios<br><input checked="" type="radio"/> secundarios<br><input type="radio"/> universitarios |

# Base\_datos\_estimacion\_peso\_fetal

|                                       |                                                                                                                                                                                                                                                                                      |
|---------------------------------------|--------------------------------------------------------------------------------------------------------------------------------------------------------------------------------------------------------------------------------------------------------------------------------------|
| Número de identificación participante | 114                                                                                                                                                                                                                                                                                  |
| CODIGO PARTICIPANTE                   |                                                                                                                                                                                                                                                                                      |
| Edad                                  | [*DATA REMOVED*]                                                                                                                                                                                                                                                                     |
| Gestaciones                           | <input type="radio"/> 1<br><input checked="" type="radio"/> 2<br><input type="radio"/> 3<br><input type="radio"/> mas de 3                                                                                                                                                           |
| partos                                | <input type="radio"/> 0<br><input checked="" type="radio"/> 1<br><input type="radio"/> 2<br><input type="radio"/> 3<br><input type="radio"/> mas de 3                                                                                                                                |
| cesáreas                              | <input checked="" type="radio"/> 0<br><input type="radio"/> 1<br><input type="radio"/> 2<br><input type="radio"/> 3<br><input type="radio"/> mas de 3                                                                                                                                |
| Abortos                               | <input checked="" type="radio"/> 0<br><input type="radio"/> 1<br><input type="radio"/> 2<br><input type="radio"/> 3<br><input type="radio"/> mas de 3                                                                                                                                |
| Tipo de gestacion                     | <input checked="" type="radio"/> espontanea<br><input type="radio"/> IAC inseminación artificial conyuge<br><input type="radio"/> IAD inseminación artificial donante<br><input type="radio"/> FIV Fecundación in Vitro<br><input type="radio"/> Ovodon FIV con donación de ovocitos |
| peso previo a embarazo                | [*DATA REMOVED*]                                                                                                                                                                                                                                                                     |
| Ganancia ponderal embarazo            |                                                                                                                                                                                                                                                                                      |
| Talla madre                           | [*DATA REMOVED*]                                                                                                                                                                                                                                                                     |
| IMC previo embarazo                   | 23.738662131519277                                                                                                                                                                                                                                                                   |
| Patología obstétrica                  | <input checked="" type="radio"/> no<br><input type="radio"/> si                                                                                                                                                                                                                      |
| Diabetes pregestacional               | <input checked="" type="radio"/> no<br><input type="radio"/> si                                                                                                                                                                                                                      |
| Diabetes gestacional                  | <input checked="" type="radio"/> no<br><input type="radio"/> si                                                                                                                                                                                                                      |

|                                            |                                                                                                                                                                                      |
|--------------------------------------------|--------------------------------------------------------------------------------------------------------------------------------------------------------------------------------------|
| Diabetes gestacional con insulina          | <input checked="" type="radio"/> no<br><input type="radio"/> si                                                                                                                      |
| Diabetes gestacional con dieta y ejercicio | <input checked="" type="radio"/> no<br><input type="radio"/> si                                                                                                                      |
| Percentil fetos previos                    | <input type="radio"/> Nada<br><input type="radio"/> percentil menor de 10<br><input checked="" type="radio"/> percentil entre 10 y 90<br><input type="radio"/> percentil mayor de 90 |
| Exfumadora                                 | <input checked="" type="radio"/> Nada<br><input type="radio"/> menos de 5 años<br><input type="radio"/> 5 a 10 años<br><input type="radio"/> mayor o igual a 10 años                 |
| Hábito tabáquico                           | <input checked="" type="radio"/> no<br><input type="radio"/> si                                                                                                                      |
| fumadora                                   | [*DATA REMOVED*]                                                                                                                                                                     |
| Consumo otros tóxicos                      | <input checked="" type="radio"/> no<br><input type="radio"/> si                                                                                                                      |
| Hb 1T                                      | [*DATA REMOVED*]                                                                                                                                                                     |
| Htc 1T                                     | [*DATA REMOVED*]                                                                                                                                                                     |
| Hb 2T                                      | [*DATA REMOVED*]                                                                                                                                                                     |
| HTC 2T                                     | [*DATA REMOVED*]                                                                                                                                                                     |
| Hb 3T                                      | [*DATA REMOVED*]                                                                                                                                                                     |
| HTC 3T                                     | [*DATA REMOVED*]                                                                                                                                                                     |
| Suplemento FE oral                         | <input checked="" type="radio"/> si<br><input type="radio"/> no                                                                                                                      |
| Suplemento fe iv                           | <input type="radio"/> si<br><input checked="" type="radio"/> no                                                                                                                      |
| Transfusión                                | <input checked="" type="radio"/> no<br><input type="radio"/> si                                                                                                                      |
| Solicitada Vit D                           | <input checked="" type="radio"/> no<br><input type="radio"/> si                                                                                                                      |
| Deficit vit D                              | <input type="radio"/> no<br><input type="radio"/> si                                                                                                                                 |
| Suplemento vit D                           | <input type="radio"/> si<br><input type="radio"/> no                                                                                                                                 |

|                       |                                                                                                                                                                                                                                                                                                                                                                                                              |
|-----------------------|--------------------------------------------------------------------------------------------------------------------------------------------------------------------------------------------------------------------------------------------------------------------------------------------------------------------------------------------------------------------------------------------------------------|
| Dieta, cuestionario   | <input checked="" type="radio"/> sí<br><input type="radio"/> no                                                                                                                                                                                                                                                                                                                                              |
| Leche entera          | <input type="radio"/> Nunca o menos 1 vez al mes<br><input type="radio"/> 1 a 3 veces mes<br><input checked="" type="radio"/> 1 vez semana<br><input type="radio"/> 2 a 4 veces semana<br><input type="radio"/> 5 a 6 veces semana<br><input type="radio"/> 1 vez al día<br><input type="radio"/> 2 a 3 veces al día<br><input type="radio"/> 5 a 6 veces al día<br><input type="radio"/> más 6 veces al día |
| Leche semidesnatada   | <input type="radio"/> Nunca o menos 1 vez al mes<br><input type="radio"/> 1 a 3 veces mes<br><input type="radio"/> 1 vez semana<br><input type="radio"/> 2 a 4 veces semana<br><input type="radio"/> 5 a 6 veces semana<br><input type="radio"/> 1 vez al día<br><input type="radio"/> 2 a 3 veces al día<br><input type="radio"/> 5 a 6 veces al día<br><input type="radio"/> mas 6 veces al día            |
| Leche desnatada       | <input type="radio"/> Nunca o menos 1 vez al mes<br><input type="radio"/> 1 a 3 veces mes<br><input type="radio"/> 1 vez semana<br><input type="radio"/> 2 a 4 veces semana<br><input type="radio"/> 5 a 6 veces semana<br><input type="radio"/> 1 vez al día<br><input type="radio"/> 2 a 3 veces al día<br><input type="radio"/> 5 a 6 veces al día<br><input type="radio"/> más 6 veces al día            |
| Leche condensada      | <input type="radio"/> Nunca o menos 1 vez al mes<br><input type="radio"/> 1 a 3 veces mes<br><input type="radio"/> 1 vez semana<br><input type="radio"/> 2 a 4 veces semana<br><input type="radio"/> 5 a 6 veces semana<br><input type="radio"/> 1 vez al día<br><input type="radio"/> 2 a 3 veces al día<br><input type="radio"/> 5 a 6 veces al día<br><input type="radio"/> más 6 veces al día            |
| nata o crema de leche | <input type="radio"/> Nunca o menos 1 vez al mes<br><input type="radio"/> 1 a 3 veces mes<br><input type="radio"/> 1 vez semana<br><input checked="" type="radio"/> 2 a 4 veces semana<br><input type="radio"/> 5 a 6 veces semana<br><input type="radio"/> 1 vez al día<br><input type="radio"/> 2 a 3 veces al día<br><input type="radio"/> 5 a 6 veces al día<br><input type="radio"/> más 6 veces al día |



|                                             |                                                                                                                                                                                                                                                                                                                                                                                                              |
|---------------------------------------------|--------------------------------------------------------------------------------------------------------------------------------------------------------------------------------------------------------------------------------------------------------------------------------------------------------------------------------------------------------------------------------------------------------------|
| Yogurt Entero                               | <input type="radio"/> Nunca o menos 1 vez al mes<br><input type="radio"/> 1 a 3 veces mes<br><input type="radio"/> 1 vez semana<br><input type="radio"/> 2 a 4 veces semana<br><input type="radio"/> 5 a 6 veces semana<br><input type="radio"/> 1 vez al día<br><input type="radio"/> 2 a 3 veces al día<br><input type="radio"/> 5 a 6 veces al día<br><input type="radio"/> más 6 veces al día            |
| Yogurt desnatado                            | <input type="radio"/> Nunca o menos 1 vez al mes<br><input type="radio"/> 1 a 3 veces mes<br><input type="radio"/> 1 vez semana<br><input type="radio"/> 2 a 4 veces semana<br><input type="radio"/> 5 a 6 veces semana<br><input type="radio"/> 1 vez al día<br><input type="radio"/> 2 a 3 veces al día<br><input type="radio"/> 5 a 6 veces al día<br><input type="radio"/> más 6 veces al día            |
| 100g requesón o queso blando o queso fresco | <input type="radio"/> Nunca o menos 1 vez al mes<br><input type="radio"/> 1 a 3 veces mes<br><input type="radio"/> 1 vez semana<br><input checked="" type="radio"/> 2 a 4 veces semana<br><input type="radio"/> 5 a 6 veces semana<br><input type="radio"/> 1 vez al día<br><input type="radio"/> 2 a 3 veces al día<br><input type="radio"/> 5 a 6 veces al día<br><input type="radio"/> más 6 veces al día |
| queso curado o semicurado o cremoso         | <input type="radio"/> Nunca o menos 1 vez al mes<br><input type="radio"/> 1 a 3 veces mes<br><input type="radio"/> 1 vez semana<br><input type="radio"/> 2 a 4 veces semana<br><input type="radio"/> 5 a 6 veces semana<br><input type="radio"/> 1 vez al día<br><input type="radio"/> 2 a 3 veces al día<br><input type="radio"/> 5 a 6 veces al día<br><input type="radio"/> más 6 veces al día            |
| natillas flan pudding                       | <input type="radio"/> Nunca o menos 1 vez al mes<br><input type="radio"/> 1 a 3 veces mes<br><input type="radio"/> 1 vez semana<br><input type="radio"/> 2 a 4 veces semana<br><input type="radio"/> 5 a 6 veces semana<br><input type="radio"/> 1 vez al día<br><input type="radio"/> 2 a 3 veces al día<br><input type="radio"/> 5 a 6 veces al día<br><input type="radio"/> más 6 veces al día            |
| Helado                                      | <input type="radio"/> Nunca o menos 1 vez al mes<br><input type="radio"/> 1 a 3 veces mes<br><input type="radio"/> 1 vez semana<br><input type="radio"/> 2 a 4 veces semana<br><input type="radio"/> 5 a 6 veces semana<br><input type="radio"/> 1 vez al día<br><input type="radio"/> 2 a 3 veces al día<br><input type="radio"/> 5 a 6 veces al día<br><input type="radio"/> más 6 veces al día            |

|                                      |                                                                                                                                                                                                                                                                                                                                                                                                              |
|--------------------------------------|--------------------------------------------------------------------------------------------------------------------------------------------------------------------------------------------------------------------------------------------------------------------------------------------------------------------------------------------------------------------------------------------------------------|
| huevo                                | <input type="radio"/> Nunca o menos 1 vez al mes<br><input type="radio"/> 1 a 3 veces mes<br><input type="radio"/> 1 vez semana<br><input type="radio"/> 2 a 4 veces semana<br><input checked="" type="radio"/> 5 a 6 veces semana<br><input type="radio"/> 1 vez al día<br><input type="radio"/> 2 a 3 veces al día<br><input type="radio"/> 5 a 6 veces al día<br><input type="radio"/> más 6 veces al día |
| Pollo con piel                       | <input checked="" type="radio"/> Nunca o menos 1 vez al mes<br><input type="radio"/> 1 a 3 veces mes<br><input type="radio"/> 1 vez semana<br><input type="radio"/> 2 a 4 veces semana<br><input type="radio"/> 5 a 6 veces semana<br><input type="radio"/> 1 vez al día<br><input type="radio"/> 2 a 3 veces al día<br><input type="radio"/> 5 a 6 veces al día<br><input type="radio"/> más 6 veces al día |
| pollo sin piel                       | <input type="radio"/> Nunca o menos 1 vez al mes<br><input type="radio"/> 1 a 3 veces mes<br><input type="radio"/> 1 vez semana<br><input checked="" type="radio"/> 2 a 4 veces semana<br><input type="radio"/> 5 a 6 veces semana<br><input type="radio"/> 1 vez al día<br><input type="radio"/> 2 a 3 veces al día<br><input type="radio"/> 5 a 6 veces al día<br><input type="radio"/> más 6 veces al día |
| Ternera o cerdo o cordero            | <input type="radio"/> Nunca o menos 1 vez al mes<br><input type="radio"/> 1 a 3 veces mes<br><input checked="" type="radio"/> 1 vez semana<br><input type="radio"/> 2 a 4 veces semana<br><input type="radio"/> 5 a 6 veces semana<br><input type="radio"/> 1 vez al día<br><input type="radio"/> 2 a 3 veces al día<br><input type="radio"/> 5 a 6 veces al día<br><input type="radio"/> más 6 veces al día |
| carne caza: Conejo o codorniz o pato | <input checked="" type="radio"/> Nunca o menos 1 vez al mes<br><input type="radio"/> 1 a 3 veces mes<br><input type="radio"/> 1 vez semana<br><input type="radio"/> 2 a 4 veces semana<br><input type="radio"/> 5 a 6 veces semana<br><input type="radio"/> 1 vez al día<br><input type="radio"/> 2 a 3 veces al día<br><input type="radio"/> 5 a 6 veces al día<br><input type="radio"/> más 6 veces al día |
| Hígado de ternera o cerdo o pollo    | <input checked="" type="radio"/> Nunca o menos 1 vez al mes<br><input type="radio"/> 1 a 3 veces mes<br><input type="radio"/> 1 vez semana<br><input type="radio"/> 2 a 4 veces semana<br><input type="radio"/> 5 a 6 veces semana<br><input type="radio"/> 1 vez al día<br><input type="radio"/> 2 a 3 veces al día<br><input type="radio"/> 5 a 6 veces al día<br><input type="radio"/> más 6 veces al día |

|                     |                                                                                                                                                                                                                                                                                                                                                                                                              |
|---------------------|--------------------------------------------------------------------------------------------------------------------------------------------------------------------------------------------------------------------------------------------------------------------------------------------------------------------------------------------------------------------------------------------------------------|
| Vísceras            | <input checked="" type="radio"/> Nunca o menos 1 vez al mes<br><input type="radio"/> 1 a 3 veces mes<br><input type="radio"/> 1 vez semana<br><input type="radio"/> 2 a 4 veces semana<br><input type="radio"/> 5 a 6 veces semana<br><input type="radio"/> 1 vez al día<br><input type="radio"/> 2 a 3 veces al día<br><input type="radio"/> 5 a 6 veces al día<br><input type="radio"/> más 6 veces al día |
| Embutido            | <input checked="" type="radio"/> Nunca o menos 1 vez al mes<br><input type="radio"/> 1 a 3 veces mes<br><input type="radio"/> 1 vez semana<br><input type="radio"/> 2 a 4 veces semana<br><input type="radio"/> 5 a 6 veces semana<br><input type="radio"/> 1 vez al día<br><input type="radio"/> 2 a 3 veces al día<br><input type="radio"/> 5 a 6 veces al día<br><input type="radio"/> más 6 veces al día |
| Salchicha o similar | <input checked="" type="radio"/> Nunca o menos 1 vez al mes<br><input type="radio"/> 1 a 3 veces mes<br><input type="radio"/> 1 vez semana<br><input type="radio"/> 2 a 4 veces semana<br><input type="radio"/> 5 a 6 veces semana<br><input type="radio"/> 1 vez al día<br><input type="radio"/> 2 a 3 veces al día<br><input type="radio"/> 5 a 6 veces al día<br><input type="radio"/> más 6 veces al día |
| Pate o foiegras     | <input checked="" type="radio"/> Nunca o menos 1 vez al mes<br><input type="radio"/> 1 a 3 veces mes<br><input type="radio"/> 1 vez semana<br><input type="radio"/> 2 a 4 veces semana<br><input type="radio"/> 5 a 6 veces semana<br><input type="radio"/> 1 vez al día<br><input type="radio"/> 2 a 3 veces al día<br><input type="radio"/> 5 a 6 veces al día<br><input type="radio"/> más 6 veces al día |
| Hamburguesa         | <input type="radio"/> Nunca o menos 1 vez al mes<br><input type="radio"/> 1 a 3 veces mes<br><input checked="" type="radio"/> 1 vez semana<br><input type="radio"/> 2 a 4 veces semana<br><input type="radio"/> 5 a 6 veces semana<br><input type="radio"/> 1 vez al día<br><input type="radio"/> 2 a 3 veces al día<br><input type="radio"/> 5 a 6 veces al día<br><input type="radio"/> más 6 veces al día |
| tocino o bacon      | <input checked="" type="radio"/> Nunca o menos 1 vez al mes<br><input type="radio"/> 1 a 3 veces mes<br><input type="radio"/> 1 vez semana<br><input type="radio"/> 2 a 4 veces semana<br><input type="radio"/> 5 a 6 veces semana<br><input type="radio"/> 1 vez al día<br><input type="radio"/> 2 a 3 veces al día<br><input type="radio"/> 5 a 6 veces al día<br><input type="radio"/> más 6 veces al día |

---

Pescado frito

- ☒ Nunca o menos 1 vez al mes  
☐ 1 a 3 veces mes  
☐ 1 vez semana  
☐ 2 a 4 veces semana  
☐ 5 a 6 veces semana  
☐ 1 vez al día  
☐ 2 a 3 veces al día  
☐ 5 a 6 veces al día  
☐ más 6 veces al día

---

pescado hervido blanco

- ☐ Nunca o menos 1 vez al mes  
☐ 1 a 3 veces mes  
☐ 1 vez semana  
☒ 2 a 4 veces semana  
☐ 5 a 6 veces semana  
☐ 1 vez al día  
☐ 2 a 3 veces al día  
☐ 5 a 6 veces al día  
☐ más 6 veces al día

---

pescado hervido azul

- ☐ Nunca o menos 1 vez al mes  
☐ 1 a 3 veces mes  
☐ 1 vez semana  
☒ 2 a 4 veces semana  
☐ 5 a 6 veces semana  
☐ 1 vez al día  
☐ 2 a 3 veces al día  
☐ 5 a 6 veces al día  
☐ más 6 veces al día

---

otros pescado azul

- ☐ Nunca o menos 1 vez al mes  
☐ 1 a 3 veces mes  
☐ 1 vez semana  
☒ 2 a 4 veces semana  
☐ 5 a 6 veces semana  
☐ 1 vez al día  
☐ 2 a 3 veces al día  
☐ 5 a 6 veces al día  
☐ más 6 veces al día

---

atun conserva

- ☐ Nunca o menos 1 vez al mes  
☒ 1 a 3 veces mes  
☐ 1 vez semana  
☐ 2 a 4 veces semana  
☐ 5 a 6 veces semana  
☐ 1 vez al día  
☐ 2 a 3 veces al día  
☐ 5 a 6 veces al día  
☐ más 6 veces al día

---

sardina conserva

- ☒ Nunca o menos 1 vez al mes  
☐ 1 a 3 veces mes  
☐ 1 vez semana  
☐ 2 a 4 veces semana  
☐ 5 a 6 veces semana  
☐ 1 vez al día  
☐ 2 a 3 veces al día  
☐ 5 a 6 veces al día  
☐ más 6 veces al día

|                                         |                                                                                                                                                                                                                                                                                                                                                                                                              |
|-----------------------------------------|--------------------------------------------------------------------------------------------------------------------------------------------------------------------------------------------------------------------------------------------------------------------------------------------------------------------------------------------------------------------------------------------------------------|
| pescado ahumado                         | <input checked="" type="radio"/> Nunca o menos 1 vez al mes<br><input type="radio"/> 1 a 3 veces mes<br><input type="radio"/> 1 vez semana<br><input type="radio"/> 2 a 4 veces semana<br><input type="radio"/> 5 a 6 veces semana<br><input type="radio"/> 1 vez al día<br><input type="radio"/> 2 a 3 veces al día<br><input type="radio"/> 5 a 6 veces al día<br><input type="radio"/> más 6 veces al día |
| almejas o mejillones o ostras unos 100g | <input checked="" type="radio"/> Nunca o menos 1 vez al mes<br><input type="radio"/> 1 a 3 veces mes<br><input type="radio"/> 1 vez semana<br><input type="radio"/> 2 a 4 veces semana<br><input type="radio"/> 5 a 6 veces semana<br><input type="radio"/> 1 vez al día<br><input type="radio"/> 2 a 3 veces al día<br><input type="radio"/> 5 a 6 veces al día<br><input type="radio"/> más 6 veces al día |
| calamar o chipiron o sepia unos 100g    | <input checked="" type="radio"/> Nunca o menos 1 vez al mes<br><input type="radio"/> 1 a 3 veces mes<br><input type="radio"/> 1 vez semana<br><input type="radio"/> 2 a 4 veces semana<br><input type="radio"/> 5 a 6 veces semana<br><input type="radio"/> 1 vez al día<br><input type="radio"/> 2 a 3 veces al día<br><input type="radio"/> 5 a 6 veces al día<br><input type="radio"/> más 6 veces al día |
| marisco unos 100g                       | <input checked="" type="radio"/> Nunca o menos 1 vez al mes<br><input type="radio"/> 1 a 3 veces mes<br><input type="radio"/> 1 vez semana<br><input type="radio"/> 2 a 4 veces semana<br><input type="radio"/> 5 a 6 veces semana<br><input type="radio"/> 1 vez al día<br><input type="radio"/> 2 a 3 veces al día<br><input type="radio"/> 5 a 6 veces al día<br><input type="radio"/> más 6 veces al día |
| Espinacas o acelgas cocinadas           | <input type="radio"/> Nunca o menos 1 vez al mes<br><input type="radio"/> 1 a 3 veces mes<br><input type="radio"/> 1 vez semana<br><input checked="" type="radio"/> 2 a 4 veces semana<br><input type="radio"/> 5 a 6 veces semana<br><input type="radio"/> 1 vez al día<br><input type="radio"/> 2 a 3 veces al día<br><input type="radio"/> 5 a 6 veces al día<br><input type="radio"/> más 6 veces al día |
| Col o coliflor o brocoli cocinado       | <input type="radio"/> Nunca o menos 1 vez al mes<br><input type="radio"/> 1 a 3 veces mes<br><input type="radio"/> 1 vez semana<br><input checked="" type="radio"/> 2 a 4 veces semana<br><input type="radio"/> 5 a 6 veces semana<br><input type="radio"/> 1 vez al día<br><input type="radio"/> 2 a 3 veces al día<br><input type="radio"/> 5 a 6 veces al día<br><input type="radio"/> más 6 veces al día |

---

Lechuga o endivia o escarola

- ☐ Nunca o menos 1 vez al mes  
☐ 1 a 3 veces mes  
☐ 1 vez semana  
☐ 2 a 4 veces semana  
☐ 5 a 6 veces semana  
☐ 1 vez al día  
☒ 2 a 3 veces al día  
☐ 5 a 6 veces al día  
☐ más 6 veces al día

---

tomate ensalada

- ☐ Nunca o menos 1 vez al mes  
☐ 1 a 3 veces mes  
☐ 1 vez semana  
☐ 2 a 4 veces semana  
☐ 5 a 6 veces semana  
☐ 1 vez al día  
☒ 2 a 3 veces al día  
☐ 5 a 6 veces al día  
☐ más 6 veces al día

---

cebolla

- ☒ Nunca o menos 1 vez al mes  
☐ 1 a 3 veces mes  
☐ 1 vez semana  
☐ 2 a 4 veces semana  
☐ 5 a 6 veces semana  
☐ 1 vez al día  
☐ 2 a 3 veces al día  
☐ 5 a 6 veces al día  
☐ más 6 veces al día

---

Zanahoria o calabaza

- ☐ Nunca o menos 1 vez al mes  
☐ 1 a 3 veces mes  
☐ 1 vez semana  
☒ 2 a 4 veces semana  
☐ 5 a 6 veces semana  
☐ 1 vez al día  
☐ 2 a 3 veces al día  
☐ 5 a 6 veces al día  
☐ más 6 veces al día

---

Judías verdes

- ☐ Nunca o menos 1 vez al mes  
☐ 1 a 3 veces mes  
☐ 1 vez semana  
☒ 2 a 4 veces semana  
☐ 5 a 6 veces semana  
☐ 1 vez al día  
☐ 2 a 3 veces al día  
☐ 5 a 6 veces al día  
☐ más 6 veces al día

---

Berenjena o calabacin o pepino

- ☐ Nunca o menos 1 vez al mes  
☐ 1 a 3 veces mes  
☐ 1 vez semana  
☐ 2 a 4 veces semana  
☐ 5 a 6 veces semana  
☐ 1 vez al día  
☒ 2 a 3 veces al día  
☐ 5 a 6 veces al día  
☐ más 6 veces al día

---

|          |                                                                                                                                                                                                                                                                                                                                                                                                              |
|----------|--------------------------------------------------------------------------------------------------------------------------------------------------------------------------------------------------------------------------------------------------------------------------------------------------------------------------------------------------------------------------------------------------------------|
| pimiento | <input checked="" type="radio"/> Nunca o menos 1 vez al mes<br><input type="radio"/> 1 a 3 veces mes<br><input type="radio"/> 1 vez semana<br><input type="radio"/> 2 a 4 veces semana<br><input type="radio"/> 5 a 6 veces semana<br><input type="radio"/> 1 vez al día<br><input type="radio"/> 2 a 3 veces al día<br><input type="radio"/> 5 a 6 veces al día<br><input type="radio"/> más 6 veces al día |
|----------|--------------------------------------------------------------------------------------------------------------------------------------------------------------------------------------------------------------------------------------------------------------------------------------------------------------------------------------------------------------------------------------------------------------|

---

|           |                                                                                                                                                                                                                                                                                                                                                                                                              |
|-----------|--------------------------------------------------------------------------------------------------------------------------------------------------------------------------------------------------------------------------------------------------------------------------------------------------------------------------------------------------------------------------------------------------------------|
| alcachofa | <input type="radio"/> Nunca o menos 1 vez al mes<br><input type="radio"/> 1 a 3 veces mes<br><input type="radio"/> 1 vez semana<br><input checked="" type="radio"/> 2 a 4 veces semana<br><input type="radio"/> 5 a 6 veces semana<br><input type="radio"/> 1 vez al día<br><input type="radio"/> 2 a 3 veces al día<br><input type="radio"/> 5 a 6 veces al día<br><input type="radio"/> más 6 veces al día |
|-----------|--------------------------------------------------------------------------------------------------------------------------------------------------------------------------------------------------------------------------------------------------------------------------------------------------------------------------------------------------------------------------------------------------------------|

---

|            |                                                                                                                                                                                                                                                                                                                                                                                                              |
|------------|--------------------------------------------------------------------------------------------------------------------------------------------------------------------------------------------------------------------------------------------------------------------------------------------------------------------------------------------------------------------------------------------------------------|
| espárragos | <input checked="" type="radio"/> Nunca o menos 1 vez al mes<br><input type="radio"/> 1 a 3 veces mes<br><input type="radio"/> 1 vez semana<br><input type="radio"/> 2 a 4 veces semana<br><input type="radio"/> 5 a 6 veces semana<br><input type="radio"/> 1 vez al día<br><input type="radio"/> 2 a 3 veces al día<br><input type="radio"/> 5 a 6 veces al día<br><input type="radio"/> más 6 veces al día |
|------------|--------------------------------------------------------------------------------------------------------------------------------------------------------------------------------------------------------------------------------------------------------------------------------------------------------------------------------------------------------------------------------------------------------------|

---

|              |                                                                                                                                                                                                                                                                                                                                                                                                              |
|--------------|--------------------------------------------------------------------------------------------------------------------------------------------------------------------------------------------------------------------------------------------------------------------------------------------------------------------------------------------------------------------------------------------------------------|
| maíz hervido | <input checked="" type="radio"/> Nunca o menos 1 vez al mes<br><input type="radio"/> 1 a 3 veces mes<br><input type="radio"/> 1 vez semana<br><input type="radio"/> 2 a 4 veces semana<br><input type="radio"/> 5 a 6 veces semana<br><input type="radio"/> 1 vez al día<br><input type="radio"/> 2 a 3 veces al día<br><input type="radio"/> 5 a 6 veces al día<br><input type="radio"/> más 6 veces al día |
|--------------|--------------------------------------------------------------------------------------------------------------------------------------------------------------------------------------------------------------------------------------------------------------------------------------------------------------------------------------------------------------------------------------------------------------|

---

|           |                                                                                                                                                                                                                                                                                                                                                                                                              |
|-----------|--------------------------------------------------------------------------------------------------------------------------------------------------------------------------------------------------------------------------------------------------------------------------------------------------------------------------------------------------------------------------------------------------------------|
| legumbres | <input type="radio"/> Nunca o menos 1 vez al mes<br><input type="radio"/> 1 a 3 veces mes<br><input type="radio"/> 1 vez semana<br><input checked="" type="radio"/> 2 a 4 veces semana<br><input type="radio"/> 5 a 6 veces semana<br><input type="radio"/> 1 vez al día<br><input type="radio"/> 2 a 3 veces al día<br><input type="radio"/> 5 a 6 veces al día<br><input type="radio"/> más 6 veces al día |
|-----------|--------------------------------------------------------------------------------------------------------------------------------------------------------------------------------------------------------------------------------------------------------------------------------------------------------------------------------------------------------------------------------------------------------------|

---

|                       |                                                                                                                                                                                                                                                                                                                                                                                                              |
|-----------------------|--------------------------------------------------------------------------------------------------------------------------------------------------------------------------------------------------------------------------------------------------------------------------------------------------------------------------------------------------------------------------------------------------------------|
| naranjas o mandarinas | <input type="radio"/> Nunca o menos 1 vez al mes<br><input type="radio"/> 1 a 3 veces mes<br><input type="radio"/> 1 vez semana<br><input checked="" type="radio"/> 2 a 4 veces semana<br><input type="radio"/> 5 a 6 veces semana<br><input type="radio"/> 1 vez al día<br><input type="radio"/> 2 a 3 veces al día<br><input type="radio"/> 5 a 6 veces al día<br><input type="radio"/> más 6 veces al día |
|-----------------------|--------------------------------------------------------------------------------------------------------------------------------------------------------------------------------------------------------------------------------------------------------------------------------------------------------------------------------------------------------------------------------------------------------------|

---

---

zumو natural fruta

- ☒ Nunca o menos 1 vez al mes  
☐ 1 a 3 veces mes  
☐ 1 vez semana  
☐ 2 a 4 veces semana  
☐ 5 a 6 veces semana  
☐ 1 vez al día  
☐ 2 a 3 veces al día  
☐ 5 a 6 veces al día  
☐ más 6 veces al día

---

platano

- ☐ Nunca o menos 1 vez al mes  
☐ 1 a 3 veces mes  
☐ 1 vez semana  
☒ 2 a 4 veces semana  
☐ 5 a 6 veces semana  
☐ 1 vez al día  
☐ 2 a 3 veces al día  
☐ 5 a 6 veces al día  
☐ más 6 veces al día

---

manzana o pera

- ☒ Nunca o menos 1 vez al mes  
☐ 1 a 3 veces mes  
☐ 1 vez semana  
☐ 2 a 4 veces semana  
☐ 5 a 6 veces semana  
☐ 1 vez al día  
☐ 2 a 3 veces al día  
☐ 5 a 6 veces al día  
☐ más 6 veces al día

---

melocotón o nectarina

- ☒ Nunca o menos 1 vez al mes  
☐ 1 a 3 veces mes  
☐ 1 vez semana  
☐ 2 a 4 veces semana  
☐ 5 a 6 veces semana  
☐ 1 vez al día  
☐ 2 a 3 veces al día  
☐ 5 a 6 veces al día  
☐ más 6 veces al día

---

sandia o melon

- ☒ Nunca o menos 1 vez al mes  
☐ 1 a 3 veces mes  
☐ 1 vez semana  
☐ 2 a 4 veces semana  
☐ 5 a 6 veces semana  
☐ 1 vez al día  
☐ 2 a 3 veces al día  
☐ 5 a 6 veces al día  
☐ más 6 veces al día

---

uva

- ☒ Nunca o menos 1 vez al mes  
☐ 1 a 3 veces mes  
☐ 1 vez semana  
☐ 2 a 4 veces semana  
☐ 5 a 6 veces semana  
☐ 1 vez al día  
☐ 2 a 3 veces al día  
☐ 5 a 6 veces al día  
☐ más 6 veces al día



---

bruna o ciruela

- ☐ Nunca o menos 1 vez al mes  
☐ 1 a 3 veces mes  
☐ 1 vez semana  
☒ 2 a 4 veces semana  
☐ 5 a 6 veces semana  
☐ 1 vez al día  
☐ 2 a 3 veces al día  
☐ 5 a 6 veces al día  
☐ más 6 veces al día

---

kiwi

- ☐ Nunca o menos 1 vez al mes  
☐ 1 a 3 veces mes  
☐ 1 vez semana  
☐ 2 a 4 veces semana  
☒ 5 a 6 veces semana  
☐ 1 vez al día  
☐ 2 a 3 veces al día  
☐ 5 a 6 veces al día  
☐ más 6 veces al día

---

aceituna

- ☒ Nunca o menos 1 vez al mes  
☐ 1 a 3 veces mes  
☐ 1 vez semana  
☐ 2 a 4 veces semana  
☐ 5 a 6 veces semana  
☐ 1 vez al día  
☐ 2 a 3 veces al día  
☐ 5 a 6 veces al día  
☐ más 6 veces al día

---

frutos secos

- ☐ Nunca o menos 1 vez al mes  
☐ 1 a 3 veces mes  
☐ 1 vez semana  
☒ 2 a 4 veces semana  
☐ 5 a 6 veces semana  
☐ 1 vez al día  
☐ 2 a 3 veces al día  
☐ 5 a 6 veces al día  
☐ más 6 veces al día

---

pan blanco

- ☐ Nunca o menos 1 vez al mes  
☐ 1 a 3 veces mes  
☒ 1 vez semana  
☐ 2 a 4 veces semana  
☐ 5 a 6 veces semana  
☐ 1 vez al día  
☐ 2 a 3 veces al día  
☐ 5 a 6 veces al día  
☐ más 6 veces al día

---

pan integral

- ☐ Nunca o menos 1 vez al mes  
☐ 1 a 3 veces mes  
☐ 1 vez semana  
☒ 2 a 4 veces semana  
☐ 5 a 6 veces semana  
☐ 1 vez al día  
☐ 2 a 3 veces al día  
☐ 5 a 6 veces al día  
☐ más 6 veces al día

|                          |                                                                                                                                                                                                                                                                                                                                                                                                              |
|--------------------------|--------------------------------------------------------------------------------------------------------------------------------------------------------------------------------------------------------------------------------------------------------------------------------------------------------------------------------------------------------------------------------------------------------------|
| cereales desayuno        | <input checked="" type="radio"/> Nunca o menos 1 vez al mes<br><input type="radio"/> 1 a 3 veces mes<br><input type="radio"/> 1 vez semana<br><input type="radio"/> 2 a 4 veces semana<br><input type="radio"/> 5 a 6 veces semana<br><input type="radio"/> 1 vez al día<br><input type="radio"/> 2 a 3 veces al día<br><input type="radio"/> 5 a 6 veces al día<br><input type="radio"/> más 6 veces al día |
| patatas fritas           | <input checked="" type="radio"/> Nunca o menos 1 vez al mes<br><input type="radio"/> 1 a 3 veces mes<br><input type="radio"/> 1 vez semana<br><input type="radio"/> 2 a 4 veces semana<br><input type="radio"/> 5 a 6 veces semana<br><input type="radio"/> 1 vez al día<br><input type="radio"/> 2 a 3 veces al día<br><input type="radio"/> 5 a 6 veces al día<br><input type="radio"/> más 6 veces al día |
| patatas cocidas o asadas | <input type="radio"/> Nunca o menos 1 vez al mes<br><input type="radio"/> 1 a 3 veces mes<br><input type="radio"/> 1 vez semana<br><input checked="" type="radio"/> 2 a 4 veces semana<br><input type="radio"/> 5 a 6 veces semana<br><input type="radio"/> 1 vez al día<br><input type="radio"/> 2 a 3 veces al día<br><input type="radio"/> 5 a 6 veces al día<br><input type="radio"/> más 6 veces al día |
| bolsa papas              | <input checked="" type="radio"/> Nunca o menos 1 vez al mes<br><input type="radio"/> 1 a 3 veces mes<br><input type="radio"/> 1 vez semana<br><input type="radio"/> 2 a 4 veces semana<br><input type="radio"/> 5 a 6 veces semana<br><input type="radio"/> 1 vez al día<br><input type="radio"/> 2 a 3 veces al día<br><input type="radio"/> 5 a 6 veces al día<br><input type="radio"/> más 6 veces al día |
| arroz cocinado           | <input type="radio"/> Nunca o menos 1 vez al mes<br><input type="radio"/> 1 a 3 veces mes<br><input type="radio"/> 1 vez semana<br><input checked="" type="radio"/> 2 a 4 veces semana<br><input type="radio"/> 5 a 6 veces semana<br><input type="radio"/> 1 vez al día<br><input type="radio"/> 2 a 3 veces al día<br><input type="radio"/> 5 a 6 veces al día<br><input type="radio"/> más 6 veces al día |
| pasta                    | <input type="radio"/> Nunca o menos 1 vez al mes<br><input type="radio"/> 1 a 3 veces mes<br><input type="radio"/> 1 vez semana<br><input checked="" type="radio"/> 2 a 4 veces semana<br><input type="radio"/> 5 a 6 veces semana<br><input type="radio"/> 1 vez al día<br><input type="radio"/> 2 a 3 veces al día<br><input type="radio"/> 5 a 6 veces al día<br><input type="radio"/> más 6 veces al día |

|                     |                                                                                                                                                                                                                                                                                                                                                                                                              |
|---------------------|--------------------------------------------------------------------------------------------------------------------------------------------------------------------------------------------------------------------------------------------------------------------------------------------------------------------------------------------------------------------------------------------------------------|
| pizza               | <input checked="" type="radio"/> Nunca o menos 1 vez al mes<br><input type="radio"/> 1 a 3 veces mes<br><input type="radio"/> 1 vez semana<br><input type="radio"/> 2 a 4 veces semana<br><input type="radio"/> 5 a 6 veces semana<br><input type="radio"/> 1 vez al día<br><input type="radio"/> 2 a 3 veces al día<br><input type="radio"/> 5 a 6 veces al día<br><input type="radio"/> más 6 veces al día |
| aceite oliva        | <input type="radio"/> Nunca o menos 1 vez al mes<br><input type="radio"/> 1 a 3 veces mes<br><input type="radio"/> 1 vez semana<br><input type="radio"/> 2 a 4 veces semana<br><input type="radio"/> 5 a 6 veces semana<br><input type="radio"/> 1 vez al día<br><input checked="" type="radio"/> 2 a 3 veces al día<br><input type="radio"/> 5 a 6 veces al día<br><input type="radio"/> más 6 veces al día |
| otros aceites       | <input checked="" type="radio"/> Nunca o menos 1 vez al mes<br><input type="radio"/> 1 a 3 veces mes<br><input type="radio"/> 1 vez semana<br><input type="radio"/> 2 a 4 veces semana<br><input type="radio"/> 5 a 6 veces semana<br><input type="radio"/> 1 vez al día<br><input type="radio"/> 2 a 3 veces al día<br><input type="radio"/> 5 a 6 veces al día<br><input type="radio"/> más 6 veces al día |
| margarina           | <input checked="" type="radio"/> Nunca o menos 1 vez al mes<br><input type="radio"/> 1 a 3 veces mes<br><input type="radio"/> 1 vez semana<br><input type="radio"/> 2 a 4 veces semana<br><input type="radio"/> 5 a 6 veces semana<br><input type="radio"/> 1 vez al día<br><input type="radio"/> 2 a 3 veces al día<br><input type="radio"/> 5 a 6 veces al día<br><input type="radio"/> más 6 veces al día |
| mantequilla         | <input checked="" type="radio"/> Nunca o menos 1 vez al mes<br><input type="radio"/> 1 a 3 veces mes<br><input type="radio"/> 1 vez semana<br><input type="radio"/> 2 a 4 veces semana<br><input type="radio"/> 5 a 6 veces semana<br><input type="radio"/> 1 vez al día<br><input type="radio"/> 2 a 3 veces al día<br><input type="radio"/> 5 a 6 veces al día<br><input type="radio"/> más 6 veces al día |
| galletas tipo maria | <input checked="" type="radio"/> Nunca o menos 1 vez al mes<br><input type="radio"/> 1 a 3 veces mes<br><input type="radio"/> 1 vez semana<br><input type="radio"/> 2 a 4 veces semana<br><input type="radio"/> 5 a 6 veces semana<br><input type="radio"/> 1 vez al día<br><input type="radio"/> 2 a 3 veces al día<br><input type="radio"/> 5 a 6 veces al día<br><input type="radio"/> más 6 veces al día |

---

galletas chocolate

- ☐ Nunca o menos 1 vez al mes  
☐ 1 a 3 veces mes  
☐ 1 vez semana  
☒ 2 a 4 veces semana  
☐ 5 a 6 veces semana  
☐ 1 vez al día  
☐ 2 a 3 veces al día  
☐ 5 a 6 veces al día  
☐ más 6 veces al día

---

bolleria

- ☐ Nunca o menos 1 vez al mes  
☐ 1 a 3 veces mes  
☐ 1 vez semana  
☒ 2 a 4 veces semana  
☐ 5 a 6 veces semana  
☐ 1 vez al día  
☐ 2 a 3 veces al día  
☐ 5 a 6 veces al día  
☐ más 6 veces al día

---

chocolate o bombones

- ☐ Nunca o menos 1 vez al mes  
☐ 1 a 3 veces mes  
☐ 1 vez semana  
☒ 2 a 4 veces semana  
☐ 5 a 6 veces semana  
☐ 1 vez al día  
☐ 2 a 3 veces al día  
☐ 5 a 6 veces al día  
☐ más 6 veces al día

---

chocolate polvo o colacao

- ☒ Nunca o menos 1 vez al mes  
☐ 1 a 3 veces mes  
☐ 1 vez semana  
☐ 2 a 4 veces semana  
☐ 5 a 6 veces semana  
☐ 1 vez al día  
☐ 2 a 3 veces al día  
☐ 5 a 6 veces al día  
☐ más 6 veces al día

---

vino tinto

- ☒ Nunca o menos 1 vez al mes  
☐ 1 a 3 veces mes  
☐ 1 vez semana  
☐ 2 a 4 veces semana  
☐ 5 a 6 veces semana  
☐ 1 vez al día  
☐ 2 a 3 veces al día  
☐ 5 a 6 veces al día  
☐ más 6 veces al día

---

vino blanco

- ☒ Nunca o menos 1 vez al mes  
☐ 1 a 3 veces mes  
☐ 1 vez semana  
☐ 2 a 4 veces semana  
☐ 5 a 6 veces semana  
☐ 1 vez al día  
☐ 2 a 3 veces al día  
☐ 5 a 6 veces al día  
☐ más 6 veces al día

|                       |                                                                                                                                                                                                                                                                                                                                                                                                              |
|-----------------------|--------------------------------------------------------------------------------------------------------------------------------------------------------------------------------------------------------------------------------------------------------------------------------------------------------------------------------------------------------------------------------------------------------------|
| vino seco o vermut    | <input checked="" type="radio"/> Nunca o menos 1 vez al mes<br><input type="radio"/> 1 a 3 veces mes<br><input type="radio"/> 1 vez semana<br><input type="radio"/> 2 a 4 veces semana<br><input type="radio"/> 5 a 6 veces semana<br><input type="radio"/> 1 vez al día<br><input type="radio"/> 2 a 3 veces al día<br><input type="radio"/> 5 a 6 veces al día<br><input type="radio"/> más 6 veces al día |
| cerveza               | <input checked="" type="radio"/> Nunca o menos 1 vez al mes<br><input type="radio"/> 1 a 3 veces mes<br><input type="radio"/> 1 vez semana<br><input type="radio"/> 2 a 4 veces semana<br><input type="radio"/> 5 a 6 veces semana<br><input type="radio"/> 1 vez al día<br><input type="radio"/> 2 a 3 veces al día<br><input type="radio"/> 5 a 6 veces al día<br><input type="radio"/> más 6 veces al día |
| cerveza sin alcohol   | <input type="radio"/> Nunca o menos 1 vez al mes<br><input type="radio"/> 1 a 3 veces mes<br><input checked="" type="radio"/> 1 vez semana<br><input type="radio"/> 2 a 4 veces semana<br><input type="radio"/> 5 a 6 veces semana<br><input type="radio"/> 1 vez al día<br><input type="radio"/> 2 a 3 veces al día<br><input type="radio"/> 5 a 6 veces al día<br><input type="radio"/> más 6 veces al día |
| licores               | <input checked="" type="radio"/> Nunca o menos 1 vez al mes<br><input type="radio"/> 1 a 3 veces mes<br><input type="radio"/> 1 vez semana<br><input type="radio"/> 2 a 4 veces semana<br><input type="radio"/> 5 a 6 veces semana<br><input type="radio"/> 1 vez al día<br><input type="radio"/> 2 a 3 veces al día<br><input type="radio"/> 5 a 6 veces al día<br><input type="radio"/> más 6 veces al día |
| ginebra o ron o vodka | <input checked="" type="radio"/> Nunca o menos 1 vez al mes<br><input type="radio"/> 1 a 3 veces mes<br><input type="radio"/> 1 vez semana<br><input type="radio"/> 2 a 4 veces semana<br><input type="radio"/> 5 a 6 veces semana<br><input type="radio"/> 1 vez al día<br><input type="radio"/> 2 a 3 veces al día<br><input type="radio"/> 5 a 6 veces al día<br><input type="radio"/> más 6 veces al día |
| refresco normal       | <input checked="" type="radio"/> Nunca o menos 1 vez al mes<br><input type="radio"/> 1 a 3 veces mes<br><input type="radio"/> 1 vez semana<br><input type="radio"/> 2 a 4 veces semana<br><input type="radio"/> 5 a 6 veces semana<br><input type="radio"/> 1 vez al día<br><input type="radio"/> 2 a 3 veces al día<br><input type="radio"/> 5 a 6 veces al día<br><input type="radio"/> más 6 veces al día |

---

refresco sin azúcar

- ☒ Nunca o menos 1 vez al mes  
☐ 1 a 3 veces mes  
☐ 1 vez semana  
☐ 2 a 4 veces semana  
☐ 5 a 6 veces semana  
☐ 1 vez al día  
☐ 2 a 3 veces al día  
☐ 5 a 6 veces al día  
☐ más 6 veces al día

---

Agua del grifo

- ☒ Nunca o menos 1 vez al mes  
☐ 1 a 3 veces mes  
☐ 1 vez semana  
☐ 2 a 4 veces semana  
☐ 5 a 6 veces semana  
☐ 1 vez al día  
☐ 2 a 3 veces al día  
☐ 5 a 6 veces al día  
☐ más 6 veces al día

---

agua embotellada sin gas

- ☐ Nunca o menos 1 vez al mes  
☐ 1 a 3 veces mes  
☐ 1 vez semana  
☐ 2 a 4 veces semana  
☐ 5 a 6 veces semana  
☐ 1 vez al día  
☐ 2 a 3 veces al día  
☐ 5 a 6 veces al día  
☒ más 6 veces al día

---

agua embotellada con gas

- ☒ Nunca o menos 1 vez al mes  
☐ 1 a 3 veces mes  
☐ 1 vez semana  
☐ 2 a 4 veces semana  
☐ 5 a 6 veces semana  
☐ 1 vez al día  
☐ 2 a 3 veces al día  
☐ 5 a 6 veces al día  
☐ más 6 veces al día

---

zumو frutas embasado

- ☒ Nunca o menos 1 vez al mes  
☐ 1 a 3 veces mes  
☐ 1 vez semana  
☐ 2 a 4 veces semana  
☐ 5 a 6 veces semana  
☐ 1 vez al día  
☐ 2 a 3 veces al día  
☐ 5 a 6 veces al día  
☐ más 6 veces al día

---

cafe

- ☒ Nunca o menos 1 vez al mes  
☐ 1 a 3 veces mes  
☐ 1 vez semana  
☐ 2 a 4 veces semana  
☐ 5 a 6 veces semana  
☐ 1 vez al día  
☐ 2 a 3 veces al día  
☐ 5 a 6 veces al día  
☐ más 6 veces al día

|                       |                                                                                                                                                                                                                                                                                                                                                                                                              |
|-----------------------|--------------------------------------------------------------------------------------------------------------------------------------------------------------------------------------------------------------------------------------------------------------------------------------------------------------------------------------------------------------------------------------------------------------|
| cafe descafeinado     | <input checked="" type="radio"/> Nunca o menos 1 vez al mes<br><input type="radio"/> 1 a 3 veces mes<br><input type="radio"/> 1 vez semana<br><input type="radio"/> 2 a 4 veces semana<br><input type="radio"/> 5 a 6 veces semana<br><input type="radio"/> 1 vez al día<br><input type="radio"/> 2 a 3 veces al día<br><input type="radio"/> 5 a 6 veces al día<br><input type="radio"/> más 6 veces al día |
| te o infusión         | <input type="radio"/> Nunca o menos 1 vez al mes<br><input type="radio"/> 1 a 3 veces mes<br><input type="radio"/> 1 vez semana<br><input type="radio"/> 2 a 4 veces semana<br><input type="radio"/> 5 a 6 veces semana<br><input checked="" type="radio"/> 1 vez al día<br><input type="radio"/> 2 a 3 veces al día<br><input type="radio"/> 5 a 6 veces al día<br><input type="radio"/> más 6 veces al día |
| sopa o puré verduras  | <input type="radio"/> Nunca o menos 1 vez al mes<br><input type="radio"/> 1 a 3 veces mes<br><input type="radio"/> 1 vez semana<br><input checked="" type="radio"/> 2 a 4 veces semana<br><input type="radio"/> 5 a 6 veces semana<br><input type="radio"/> 1 vez al día<br><input type="radio"/> 2 a 3 veces al día<br><input type="radio"/> 5 a 6 veces al día<br><input type="radio"/> más 6 veces al día |
| croquetas pollo jamón | <input type="radio"/> Nunca o menos 1 vez al mes<br><input type="radio"/> 1 a 3 veces mes<br><input checked="" type="radio"/> 1 vez semana<br><input type="radio"/> 2 a 4 veces semana<br><input type="radio"/> 5 a 6 veces semana<br><input type="radio"/> 1 vez al día<br><input type="radio"/> 2 a 3 veces al día<br><input type="radio"/> 5 a 6 veces al día<br><input type="radio"/> más 6 veces al día |
| croquetas pescado     | <input checked="" type="radio"/> Nunca o menos 1 vez al mes<br><input type="radio"/> 1 a 3 veces mes<br><input type="radio"/> 1 vez semana<br><input type="radio"/> 2 a 4 veces semana<br><input type="radio"/> 5 a 6 veces semana<br><input type="radio"/> 1 vez al día<br><input type="radio"/> 2 a 3 veces al día<br><input type="radio"/> 5 a 6 veces al día<br><input type="radio"/> más 6 veces al día |
| mayonesa              | <input checked="" type="radio"/> Nunca o menos 1 vez al mes<br><input type="radio"/> 1 a 3 veces mes<br><input type="radio"/> 1 vez semana<br><input type="radio"/> 2 a 4 veces semana<br><input type="radio"/> 5 a 6 veces semana<br><input type="radio"/> 1 vez al día<br><input type="radio"/> 2 a 3 veces al día<br><input type="radio"/> 5 a 6 veces al día<br><input type="radio"/> más 6 veces al día |

|                  |                                                                                                                                                                                                                                                                                                                                                                                                              |
|------------------|--------------------------------------------------------------------------------------------------------------------------------------------------------------------------------------------------------------------------------------------------------------------------------------------------------------------------------------------------------------------------------------------------------------|
| salsa tomate     | <input type="radio"/> Nunca o menos 1 vez al mes<br><input type="radio"/> 1 a 3 veces mes<br><input checked="" type="radio"/> 1 vez semana<br><input type="radio"/> 2 a 4 veces semana<br><input type="radio"/> 5 a 6 veces semana<br><input type="radio"/> 1 vez al día<br><input type="radio"/> 2 a 3 veces al día<br><input type="radio"/> 5 a 6 veces al día<br><input type="radio"/> más 6 veces al día |
| ketchup          | <input checked="" type="radio"/> Nunca o menos 1 vez al mes<br><input type="radio"/> 1 a 3 veces mes<br><input type="radio"/> 1 vez semana<br><input type="radio"/> 2 a 4 veces semana<br><input type="radio"/> 5 a 6 veces semana<br><input type="radio"/> 1 vez al día<br><input type="radio"/> 2 a 3 veces al día<br><input type="radio"/> 5 a 6 veces al día<br><input type="radio"/> más 6 veces al día |
| sal              | <input type="radio"/> Nunca o menos 1 vez al mes<br><input type="radio"/> 1 a 3 veces mes<br><input type="radio"/> 1 vez semana<br><input type="radio"/> 2 a 4 veces semana<br><input type="radio"/> 5 a 6 veces semana<br><input type="radio"/> 1 vez al día<br><input checked="" type="radio"/> 2 a 3 veces al día<br><input type="radio"/> 5 a 6 veces al día<br><input type="radio"/> más 6 veces al día |
| ajo              | <input checked="" type="radio"/> Nunca o menos 1 vez al mes<br><input type="radio"/> 1 a 3 veces mes<br><input type="radio"/> 1 vez semana<br><input type="radio"/> 2 a 4 veces semana<br><input type="radio"/> 5 a 6 veces semana<br><input type="radio"/> 1 vez al día<br><input type="radio"/> 2 a 3 veces al día<br><input type="radio"/> 5 a 6 veces al día<br><input type="radio"/> más 6 veces al día |
| mermelada o miel | <input checked="" type="radio"/> Nunca o menos 1 vez al mes<br><input type="radio"/> 1 a 3 veces mes<br><input type="radio"/> 1 vez semana<br><input type="radio"/> 2 a 4 veces semana<br><input type="radio"/> 5 a 6 veces semana<br><input type="radio"/> 1 vez al día<br><input type="radio"/> 2 a 3 veces al día<br><input type="radio"/> 5 a 6 veces al día<br><input type="radio"/> más 6 veces al día |
| azúcar           | <input checked="" type="radio"/> Nunca o menos 1 vez al mes<br><input type="radio"/> 1 a 3 veces mes<br><input type="radio"/> 1 vez semana<br><input type="radio"/> 2 a 4 veces semana<br><input type="radio"/> 5 a 6 veces semana<br><input type="radio"/> 1 vez al día<br><input type="radio"/> 2 a 3 veces al día<br><input type="radio"/> 5 a 6 veces al día<br><input type="radio"/> más 6 veces al día |



---

Otro alimento

---

suplementos vitamínicos

- ☐ si  
☒ no

suplementos vitamínicos

---

dieta previa

- ☐ si  
☒ no

motivo dieta

- ☒ no dieta  
☐ control peso  
☐ control colesterol  
☐ control diabetes  
☐ problemas estómago  
☐ problemas vesícula o hepáticos  
☐ HTA o cardiopatía  
☐ problemas renales  
☐ alergia alimentaria  
☐ ácido úrico elevado  
☐ vegetariana  
☐ otros

cambio alimentos año previo gestación

- ☒ si  
☐ no

cambio lácteos

- ☐ eliminado  
☐ disminuido  
☒ igual  
☐ aumentado  
☐ no sabe

cambio huevos

- ☐ eliminado  
☐ disminuido  
☒ igual  
☐ aumentado  
☐ no sabe

cambio carne

- ☐ eliminado  
☒ disminuido  
☐ igual  
☐ aumentado  
☐ no sabe

cambio pescado

- ☐ eliminado  
☐ disminuido  
☒ igual  
☐ aumentado  
☐ no sabe

cambio verduras

- ☐ eliminado  
☐ disminuido  
☒ igual  
☐ aumentado  
☐ no sabe

|                            |                                                                                                                                                                                                                        |
|----------------------------|------------------------------------------------------------------------------------------------------------------------------------------------------------------------------------------------------------------------|
| cambio legumbres           | <input type="radio"/> eliminado<br><input type="radio"/> disminuido<br><input checked="" type="radio"/> igual<br><input type="radio"/> aumentado<br><input type="radio"/> no sabe                                      |
| cambio fruta               | <input type="radio"/> eliminado<br><input type="radio"/> disminuido<br><input checked="" type="radio"/> igual<br><input type="radio"/> aumentado<br><input type="radio"/> no sabe                                      |
| cambio pan                 | <input type="radio"/> eliminado<br><input checked="" type="radio"/> disminuido<br><input type="radio"/> igual<br><input type="radio"/> aumentado<br><input type="radio"/> no sabe                                      |
| cambio aceite oliva        | <input type="radio"/> eliminado<br><input type="radio"/> disminuido<br><input checked="" type="radio"/> igual<br><input type="radio"/> aumentado<br><input type="radio"/> no sabe                                      |
| cambio mante o margarina   | <input checked="" type="radio"/> eliminado<br><input type="radio"/> disminuido<br><input type="radio"/> igual<br><input type="radio"/> aumentado<br><input type="radio"/> no sabe                                      |
| cambio azúcar y dulces     | <input type="radio"/> eliminado<br><input checked="" type="radio"/> disminuido<br><input type="radio"/> igual<br><input type="radio"/> aumentado<br><input type="radio"/> no sabe                                      |
| cambio bebidas alcohólicas | <input checked="" type="radio"/> eliminado<br><input type="radio"/> disminuido<br><input type="radio"/> igual<br><input type="radio"/> aumentado<br><input type="radio"/> no sabe                                      |
| frecuencia comidas fritas  | <input type="radio"/> a diario<br><input type="radio"/> 5 a 6 veces semana<br><input type="radio"/> 2 a 4 veces semana<br><input type="radio"/> 1 vez semana<br><input checked="" type="radio"/> menos de 1 vez semana |
| carne                      | <input type="radio"/> no como<br><input type="radio"/> cruda<br><input type="radio"/> poco hecha<br><input type="radio"/> hecha<br><input checked="" type="radio"/> muy hecha                                          |
| grasa visible carne        | <input checked="" type="radio"/> quita toda<br><input type="radio"/> quita mayoría<br><input type="radio"/> quita un poco<br><input type="radio"/> no quita nada                                                       |

|                                |                                                                                                                                                                                                                                                          |
|--------------------------------|----------------------------------------------------------------------------------------------------------------------------------------------------------------------------------------------------------------------------------------------------------|
| cocina carne                   | <input type="radio"/> a la plancha<br><input type="radio"/> a la parrilla<br><input checked="" type="radio"/> asada<br><input type="radio"/> frita<br><input type="radio"/> guisada                                                                      |
| tostado quemado carne          | <input type="radio"/> nunca<br><input type="radio"/> 1 vez mes<br><input type="radio"/> 2 a 3 veces mes<br><input checked="" type="radio"/> 1 vez semana<br><input type="radio"/> 2 a 3 semanas                                                          |
| tostado quemado pescado        | <input checked="" type="radio"/> nunca<br><input type="radio"/> 1 vez mes<br><input type="radio"/> 2 a 3 veces mes<br><input type="radio"/> 1 vez semana<br><input type="radio"/> 2 a 3 semanas                                                          |
| socarrat paella                | <input checked="" type="radio"/> nunca<br><input type="radio"/> 1 vez mes<br><input type="radio"/> 2 a 3 veces mes<br><input type="radio"/> 1 vez semana<br><input type="radio"/> 2 a 3 semanas                                                          |
| grasa o aceite cocinar         | <input type="radio"/> mantequilla<br><input type="radio"/> margarina<br><input type="radio"/> aceite oliva<br><input checked="" type="radio"/> aceite oliva virgen extra<br><input type="radio"/> aceite vegetal<br><input type="radio"/> mezcla aceites |
| grasa aceite aliñar            | <input type="radio"/> mantequilla<br><input type="radio"/> margarina<br><input type="radio"/> aceite oliva<br><input checked="" type="radio"/> aceite oliva virgen extra<br><input type="radio"/> aceite vegetal<br><input type="radio"/> mezcla aceites |
| grasa aceite freir             | <input type="radio"/> mantequilla<br><input type="radio"/> margarina<br><input type="radio"/> aceite oliva<br><input checked="" type="radio"/> aceite oliva virgen extra<br><input type="radio"/> aceite vegetal<br><input type="radio"/> mezcla aceites |
| Ejercicio cuestionario         | <input checked="" type="radio"/> si<br><input type="radio"/> no                                                                                                                                                                                          |
| horas de sueño incluido siesta | [*DATA REMOVED*]                                                                                                                                                                                                                                         |
| minutos siesta                 | [*DATA REMOVED*]                                                                                                                                                                                                                                         |
| horas televisión semana        | [*DATA REMOVED*]                                                                                                                                                                                                                                         |

|                                        |                                                                                                                                                                                                                                                                                                                                                                           |
|----------------------------------------|---------------------------------------------------------------------------------------------------------------------------------------------------------------------------------------------------------------------------------------------------------------------------------------------------------------------------------------------------------------------------|
| actividad trabajo                      | <input checked="" type="radio"/> casi siempre sentado<br><input type="radio"/> sentado 50 por cien<br><input type="radio"/> casi siempre de pie, quieto<br><input type="radio"/> casi siempre levantado caminando y llevando pocas cosas<br><input type="radio"/> casi siempre levantado, caminando y llevado muchas cosas<br><input type="radio"/> trabajo manual pesado |
| tiempo caminar o bici al día           | <input type="radio"/> casi nunca<br><input type="radio"/> menos 20min día<br><input checked="" type="radio"/> 20 a 40 min día<br><input type="radio"/> 40 a 60 min día<br><input type="radio"/> 1h o 1h y media día<br><input type="radio"/> más de 1h y media al día                                                                                                     |
| tiempo tareas casa al día              | <input type="radio"/> menos de 1h día<br><input checked="" type="radio"/> 1 a 2h día<br><input type="radio"/> 3 a 4h día<br><input type="radio"/> 5 a 6h día<br><input type="radio"/> 7 a 8h día<br><input type="radio"/> más de 8h día                                                                                                                                   |
| tiempo libre televisión ordenador leer | <input type="radio"/> menos 1h día<br><input type="radio"/> 1h día<br><input type="radio"/> 2h día<br><input checked="" type="radio"/> 3h día<br><input type="radio"/> 4h día<br><input type="radio"/> 5 a 6h día<br><input type="radio"/> mas 6h día                                                                                                                     |
| tiempo libre ejercicio o deporte       | <input type="radio"/> menos 1h semana<br><input type="radio"/> 1h semana<br><input type="radio"/> 2h semana<br><input type="radio"/> 3h semana<br><input type="radio"/> 4 a 5h semana<br><input checked="" type="radio"/> mas 5h semana                                                                                                                                   |
| como se considera                      | <input type="radio"/> sedentaria<br><input type="radio"/> poco activa<br><input type="radio"/> moderadamente activa<br><input type="radio"/> bastante activa<br><input checked="" type="radio"/> muy activa<br><input type="radio"/> no sabe                                                                                                                              |
| FUR                                    | [*DATA REMOVED*]                                                                                                                                                                                                                                                                                                                                                          |
| Semanas gestación 2T                   | [*DATA REMOVED*]                                                                                                                                                                                                                                                                                                                                                          |
| Días gestación 2T                      | [*DATA REMOVED*]                                                                                                                                                                                                                                                                                                                                                          |
| DBP 2T                                 | [*DATA REMOVED*]                                                                                                                                                                                                                                                                                                                                                          |
| CC 2T                                  | [*DATA REMOVED*]                                                                                                                                                                                                                                                                                                                                                          |
| AC 2T                                  | [*DATA REMOVED*]                                                                                                                                                                                                                                                                                                                                                          |

|                                                   |                                                                                                                                                                                                 |
|---------------------------------------------------|-------------------------------------------------------------------------------------------------------------------------------------------------------------------------------------------------|
| LF 2T                                             | [*DATA REMOVED*]                                                                                                                                                                                |
| PFE 2T (Hadlock)                                  | [*DATA REMOVED*]                                                                                                                                                                                |
| Semanas gestación 3T                              | [*DATA REMOVED*]                                                                                                                                                                                |
| días 3T                                           | [*DATA REMOVED*]                                                                                                                                                                                |
| DBP 3T                                            | [*DATA REMOVED*]                                                                                                                                                                                |
| CC 3T                                             | [*DATA REMOVED*]                                                                                                                                                                                |
| AC 3T                                             | [*DATA REMOVED*]                                                                                                                                                                                |
| LF 3T                                             | [*DATA REMOVED*]                                                                                                                                                                                |
| PFE 3T (Hadlock)                                  | [*DATA REMOVED*]                                                                                                                                                                                |
| Semanas de gestación final                        | [*DATA REMOVED*]                                                                                                                                                                                |
| días gestación final                              | [*DATA REMOVED*]                                                                                                                                                                                |
| Localización placenta                             | <input type="radio"/> anterior<br><input checked="" type="radio"/> lateral derecha<br><input type="radio"/> lateral izquierda<br><input type="radio"/> posterior<br><input type="radio"/> fondo |
| Presentación longitudinal cefálica                | <input type="radio"/> no<br><input checked="" type="radio"/> si                                                                                                                                 |
| Dorso                                             | <input checked="" type="radio"/> izquierda anterior<br><input type="radio"/> izquierda posterior<br><input type="radio"/> derecha anterior<br><input type="radio"/> derecha posterior           |
| diámetro biparietal                               | [*DATA REMOVED*]                                                                                                                                                                                |
| Circunferencia craneal                            | [*DATA REMOVED*]                                                                                                                                                                                |
| Circunferencia abdominal                          | [*DATA REMOVED*]                                                                                                                                                                                |
| Longitud de femur                                 | [*DATA REMOVED*]                                                                                                                                                                                |
| tejido celular subcutáneo a nivel del muslo en mm | [*DATA REMOVED*]                                                                                                                                                                                |
| tejido celular subcutáneo en abdomen en mm        | [*DATA REMOVED*]                                                                                                                                                                                |
| Volumen del muslo en cm3                          | [*DATA REMOVED*]                                                                                                                                                                                |
| Peso fetal estimado según fórmula de Hadlock      | [*DATA REMOVED*]                                                                                                                                                                                |

|                                               |                                                                                                                                                          |
|-----------------------------------------------|----------------------------------------------------------------------------------------------------------------------------------------------------------|
| Percentil                                     | [*DATA REMOVED*]                                                                                                                                         |
| Peso fetal estimado según fórmula de Scioscia | <hr/>                                                                                                                                                    |
| Peso fetal estimado según fórmula de LEE      | <hr/>                                                                                                                                                    |
| Tipo de parto                                 | <input type="radio"/> eutocico<br><input type="radio"/> instrumentado/ventosa<br><input checked="" type="radio"/> cesarea                                |
| fecha de nacimiento                           | [*DATA REMOVED*]                                                                                                                                         |
| Días entre exploración y nacimiento           | [*DATA REMOVED*]                                                                                                                                         |
| Peso RN en g                                  | [*DATA REMOVED*]                                                                                                                                         |
| sexo                                          | <input type="radio"/> mujer<br><input checked="" type="radio"/> hombre                                                                                   |
| Apgar 1 minuto                                | [*DATA REMOVED*]                                                                                                                                         |
| Apgar 5 minutos                               | [*DATA REMOVED*]                                                                                                                                         |
| Apgar 10 minutos                              | <hr/>                                                                                                                                                    |
| antecedente Covid durante gestación           | <input type="radio"/> Yes<br><input checked="" type="radio"/> No                                                                                         |
| Nivel de estudios                             | <input type="radio"/> ninguno<br><input type="radio"/> primarios<br><input checked="" type="radio"/> secundarios<br><input type="radio"/> universitarios |

## Base\_datos\_estimacion\_peso\_fetal

|                                       |                                                                                                                                                                                                                                                                                      |
|---------------------------------------|--------------------------------------------------------------------------------------------------------------------------------------------------------------------------------------------------------------------------------------------------------------------------------------|
| Número de identificación participante | 115                                                                                                                                                                                                                                                                                  |
| CODIGO PARTICIPANTE                   |                                                                                                                                                                                                                                                                                      |
| Edad                                  | [*DATA REMOVED*]                                                                                                                                                                                                                                                                     |
| Gestaciones                           | <input type="radio"/> 1<br><input type="radio"/> 2<br><input checked="" type="radio"/> 3<br><input type="radio"/> mas de 3                                                                                                                                                           |
| partos                                | <input checked="" type="radio"/> 0<br><input type="radio"/> 1<br><input type="radio"/> 2<br><input type="radio"/> 3<br><input type="radio"/> mas de 3                                                                                                                                |
| cesáreas                              | <input type="radio"/> 0<br><input type="radio"/> 1<br><input checked="" type="radio"/> 2<br><input type="radio"/> 3<br><input type="radio"/> mas de 3                                                                                                                                |
| Abortos                               | <input checked="" type="radio"/> 0<br><input type="radio"/> 1<br><input type="radio"/> 2<br><input type="radio"/> 3<br><input type="radio"/> mas de 3                                                                                                                                |
| Tipo de gestacion                     | <input checked="" type="radio"/> espontanea<br><input type="radio"/> IAC inseminación artificial conyuge<br><input type="radio"/> IAD inseminación artificial donante<br><input type="radio"/> FIV Fecundación in Vitro<br><input type="radio"/> Ovodon FIV con donación de ovocitos |
| peso previo a embarazo                | [*DATA REMOVED*]                                                                                                                                                                                                                                                                     |
| Ganancia ponderal embarazo            | [*DATA REMOVED*]                                                                                                                                                                                                                                                                     |
| Talla madre                           | [*DATA REMOVED*]                                                                                                                                                                                                                                                                     |
| IMC previo embarazo                   | 32.45567771512029                                                                                                                                                                                                                                                                    |
| Patología obstétrica                  | <input type="radio"/> no<br><input checked="" type="radio"/> si                                                                                                                                                                                                                      |
| Diabetes pregestacional               | <input checked="" type="radio"/> no<br><input type="radio"/> si                                                                                                                                                                                                                      |
| Diabetes gestacional                  | <input type="radio"/> no<br><input checked="" type="radio"/> si                                                                                                                                                                                                                      |

|                                            |                                                                                                                                                                                      |
|--------------------------------------------|--------------------------------------------------------------------------------------------------------------------------------------------------------------------------------------|
| Diabetes gestacional con insulina          | <input checked="" type="radio"/> no<br><input type="radio"/> si                                                                                                                      |
| Diabetes gestacional con dieta y ejercicio | <input type="radio"/> no<br><input checked="" type="radio"/> si                                                                                                                      |
| Percentil fetos previos                    | <input type="radio"/> Nada<br><input checked="" type="radio"/> percentil menor de 10<br><input type="radio"/> percentil entre 10 y 90<br><input type="radio"/> percentil mayor de 90 |
| Exfumadora                                 | <input checked="" type="radio"/> Nada<br><input type="radio"/> menos de 5 años<br><input type="radio"/> 5 a 10 años<br><input type="radio"/> mayor o igual a 10 años                 |
| Hábito tabáquico                           | <input checked="" type="radio"/> no<br><input type="radio"/> si                                                                                                                      |
| fumadora                                   | [*DATA REMOVED*]                                                                                                                                                                     |
| Consumo otros tóxicos                      | <input checked="" type="radio"/> no<br><input type="radio"/> si                                                                                                                      |
| Hb 1T                                      | [*DATA REMOVED*]                                                                                                                                                                     |
| Htc 1T                                     | [*DATA REMOVED*]                                                                                                                                                                     |
| Hb 2T                                      | [*DATA REMOVED*]                                                                                                                                                                     |
| HTC 2T                                     | [*DATA REMOVED*]                                                                                                                                                                     |
| Hb 3T                                      | [*DATA REMOVED*]                                                                                                                                                                     |
| HTC 3T                                     | [*DATA REMOVED*]                                                                                                                                                                     |
| Suplemento FE oral                         | <input type="radio"/> si<br><input checked="" type="radio"/> no                                                                                                                      |
| Suplemento fe iv                           | <input type="radio"/> si<br><input checked="" type="radio"/> no                                                                                                                      |
| Transfusión                                | <input checked="" type="radio"/> no<br><input type="radio"/> si                                                                                                                      |
| Solicitada Vit D                           | <input checked="" type="radio"/> no<br><input type="radio"/> si                                                                                                                      |
| Deficit vit D                              | <input type="radio"/> no<br><input type="radio"/> si                                                                                                                                 |
| Suplemento vit D                           | <input type="radio"/> si<br><input type="radio"/> no                                                                                                                                 |



|                       |                                                                                                                                                                                                                                                                                                                                                                                                              |
|-----------------------|--------------------------------------------------------------------------------------------------------------------------------------------------------------------------------------------------------------------------------------------------------------------------------------------------------------------------------------------------------------------------------------------------------------|
| Dieta, cuestionario   | <input checked="" type="radio"/> si<br><input type="radio"/> no                                                                                                                                                                                                                                                                                                                                              |
| Leche entera          | <input checked="" type="radio"/> Nunca o menos 1 vez al mes<br><input type="radio"/> 1 a 3 veces mes<br><input type="radio"/> 1 vez semana<br><input type="radio"/> 2 a 4 veces semana<br><input type="radio"/> 5 a 6 veces semana<br><input type="radio"/> 1 vez al día<br><input type="radio"/> 2 a 3 veces al día<br><input type="radio"/> 5 a 6 veces al día<br><input type="radio"/> más 6 veces al día |
| Leche semidesnatada   | <input type="radio"/> Nunca o menos 1 vez al mes<br><input type="radio"/> 1 a 3 veces mes<br><input type="radio"/> 1 vez semana<br><input type="radio"/> 2 a 4 veces semana<br><input type="radio"/> 5 a 6 veces semana<br><input checked="" type="radio"/> 1 vez al día<br><input type="radio"/> 2 a 3 veces al día<br><input type="radio"/> 5 a 6 veces al día<br><input type="radio"/> mas 6 veces al día |
| Leche desnatada       | <input checked="" type="radio"/> Nunca o menos 1 vez al mes<br><input type="radio"/> 1 a 3 veces mes<br><input type="radio"/> 1 vez semana<br><input type="radio"/> 2 a 4 veces semana<br><input type="radio"/> 5 a 6 veces semana<br><input type="radio"/> 1 vez al día<br><input type="radio"/> 2 a 3 veces al día<br><input type="radio"/> 5 a 6 veces al día<br><input type="radio"/> más 6 veces al día |
| Leche condensada      | <input checked="" type="radio"/> Nunca o menos 1 vez al mes<br><input type="radio"/> 1 a 3 veces mes<br><input type="radio"/> 1 vez semana<br><input type="radio"/> 2 a 4 veces semana<br><input type="radio"/> 5 a 6 veces semana<br><input type="radio"/> 1 vez al día<br><input type="radio"/> 2 a 3 veces al día<br><input type="radio"/> 5 a 6 veces al día<br><input type="radio"/> más 6 veces al día |
| nata o crema de leche | <input checked="" type="radio"/> Nunca o menos 1 vez al mes<br><input type="radio"/> 1 a 3 veces mes<br><input type="radio"/> 1 vez semana<br><input type="radio"/> 2 a 4 veces semana<br><input type="radio"/> 5 a 6 veces semana<br><input type="radio"/> 1 vez al día<br><input type="radio"/> 2 a 3 veces al día<br><input type="radio"/> 5 a 6 veces al día<br><input type="radio"/> más 6 veces al día |

---

Yogurt Entero

- ☒ Nunca o menos 1 vez al mes  
☐ 1 a 3 veces mes  
☐ 1 vez semana  
☐ 2 a 4 veces semana  
☐ 5 a 6 veces semana  
☐ 1 vez al día  
☐ 2 a 3 veces al día  
☐ 5 a 6 veces al día  
☐ más 6 veces al día

---

Yogurt desnatado

- ☒ Nunca o menos 1 vez al mes  
☐ 1 a 3 veces mes  
☐ 1 vez semana  
☐ 2 a 4 veces semana  
☐ 5 a 6 veces semana  
☐ 1 vez al día  
☐ 2 a 3 veces al día  
☐ 5 a 6 veces al día  
☐ más 6 veces al día

---

100g requesón o queso blando o queso fresco

- ☒ Nunca o menos 1 vez al mes  
☐ 1 a 3 veces mes  
☐ 1 vez semana  
☐ 2 a 4 veces semana  
☐ 5 a 6 veces semana  
☐ 1 vez al día  
☐ 2 a 3 veces al día  
☐ 5 a 6 veces al día  
☐ más 6 veces al día

---

queso curado o semicurado o cremoso

- ☐ Nunca o menos 1 vez al mes  
☒ 1 a 3 veces mes  
☐ 1 vez semana  
☐ 2 a 4 veces semana  
☐ 5 a 6 veces semana  
☐ 1 vez al día  
☐ 2 a 3 veces al día  
☐ 5 a 6 veces al día  
☐ más 6 veces al día

---

natillas flan pudding

- ☐ Nunca o menos 1 vez al mes  
☒ 1 a 3 veces mes  
☐ 1 vez semana  
☐ 2 a 4 veces semana  
☐ 5 a 6 veces semana  
☐ 1 vez al día  
☐ 2 a 3 veces al día  
☐ 5 a 6 veces al día  
☐ más 6 veces al día

---

Helado

- ☒ Nunca o menos 1 vez al mes  
☐ 1 a 3 veces mes  
☐ 1 vez semana  
☐ 2 a 4 veces semana  
☐ 5 a 6 veces semana  
☐ 1 vez al día  
☐ 2 a 3 veces al día  
☐ 5 a 6 veces al día  
☐ más 6 veces al día

|                                      |                                                                                                                                                                                                                                                                                                                                                                                                              |
|--------------------------------------|--------------------------------------------------------------------------------------------------------------------------------------------------------------------------------------------------------------------------------------------------------------------------------------------------------------------------------------------------------------------------------------------------------------|
| huevo                                | <input type="radio"/> Nunca o menos 1 vez al mes<br><input type="radio"/> 1 a 3 veces mes<br><input type="radio"/> 1 vez semana<br><input checked="" type="radio"/> 2 a 4 veces semana<br><input type="radio"/> 5 a 6 veces semana<br><input type="radio"/> 1 vez al día<br><input type="radio"/> 2 a 3 veces al día<br><input type="radio"/> 5 a 6 veces al día<br><input type="radio"/> más 6 veces al día |
| Pollo con piel                       | <input type="radio"/> Nunca o menos 1 vez al mes<br><input checked="" type="radio"/> 1 a 3 veces mes<br><input type="radio"/> 1 vez semana<br><input type="radio"/> 2 a 4 veces semana<br><input type="radio"/> 5 a 6 veces semana<br><input type="radio"/> 1 vez al día<br><input type="radio"/> 2 a 3 veces al día<br><input type="radio"/> 5 a 6 veces al día<br><input type="radio"/> más 6 veces al día |
| pollo sin piel                       | <input type="radio"/> Nunca o menos 1 vez al mes<br><input type="radio"/> 1 a 3 veces mes<br><input checked="" type="radio"/> 1 vez semana<br><input type="radio"/> 2 a 4 veces semana<br><input type="radio"/> 5 a 6 veces semana<br><input type="radio"/> 1 vez al día<br><input type="radio"/> 2 a 3 veces al día<br><input type="radio"/> 5 a 6 veces al día<br><input type="radio"/> más 6 veces al día |
| Ternera o cerdo o cordero            | <input type="radio"/> Nunca o menos 1 vez al mes<br><input type="radio"/> 1 a 3 veces mes<br><input type="radio"/> 1 vez semana<br><input checked="" type="radio"/> 2 a 4 veces semana<br><input type="radio"/> 5 a 6 veces semana<br><input type="radio"/> 1 vez al día<br><input type="radio"/> 2 a 3 veces al día<br><input type="radio"/> 5 a 6 veces al día<br><input type="radio"/> más 6 veces al día |
| carne caza: Conejo o codorniz o pato | <input type="radio"/> Nunca o menos 1 vez al mes<br><input checked="" type="radio"/> 1 a 3 veces mes<br><input type="radio"/> 1 vez semana<br><input type="radio"/> 2 a 4 veces semana<br><input type="radio"/> 5 a 6 veces semana<br><input type="radio"/> 1 vez al día<br><input type="radio"/> 2 a 3 veces al día<br><input type="radio"/> 5 a 6 veces al día<br><input type="radio"/> más 6 veces al día |
| Hígado de ternera o cerdo o pollo    | <input checked="" type="radio"/> Nunca o menos 1 vez al mes<br><input type="radio"/> 1 a 3 veces mes<br><input type="radio"/> 1 vez semana<br><input type="radio"/> 2 a 4 veces semana<br><input type="radio"/> 5 a 6 veces semana<br><input type="radio"/> 1 vez al día<br><input type="radio"/> 2 a 3 veces al día<br><input type="radio"/> 5 a 6 veces al día<br><input type="radio"/> más 6 veces al día |

---

Vísceras

- ☒ Nunca o menos 1 vez al mes  
☐ 1 a 3 veces mes  
☐ 1 vez semana  
☐ 2 a 4 veces semana  
☐ 5 a 6 veces semana  
☐ 1 vez al día  
☐ 2 a 3 veces al día  
☐ 5 a 6 veces al día  
☐ más 6 veces al día

---

Embutido

- ☐ Nunca o menos 1 vez al mes  
☐ 1 a 3 veces mes  
☒ 1 vez semana  
☐ 2 a 4 veces semana  
☐ 5 a 6 veces semana  
☐ 1 vez al día  
☐ 2 a 3 veces al día  
☐ 5 a 6 veces al día  
☐ más 6 veces al día

---

Salchicha o similar

- ☐ Nunca o menos 1 vez al mes  
☒ 1 a 3 veces mes  
☐ 1 vez semana  
☐ 2 a 4 veces semana  
☐ 5 a 6 veces semana  
☐ 1 vez al día  
☐ 2 a 3 veces al día  
☐ 5 a 6 veces al día  
☐ más 6 veces al día

---

Pate o foiegras

- ☒ Nunca o menos 1 vez al mes  
☐ 1 a 3 veces mes  
☐ 1 vez semana  
☐ 2 a 4 veces semana  
☐ 5 a 6 veces semana  
☐ 1 vez al día  
☐ 2 a 3 veces al día  
☐ 5 a 6 veces al día  
☐ más 6 veces al día

---

Hamburguesa

- ☐ Nunca o menos 1 vez al mes  
☐ 1 a 3 veces mes  
☒ 1 vez semana  
☐ 2 a 4 veces semana  
☐ 5 a 6 veces semana  
☐ 1 vez al día  
☐ 2 a 3 veces al día  
☐ 5 a 6 veces al día  
☐ más 6 veces al día

---

tocino o bacon

- ☐ Nunca o menos 1 vez al mes  
☐ 1 a 3 veces mes  
☒ 1 vez semana  
☐ 2 a 4 veces semana  
☐ 5 a 6 veces semana  
☐ 1 vez al día  
☐ 2 a 3 veces al día  
☐ 5 a 6 veces al día  
☐ más 6 veces al día

---

Pescado frito

- ☐ Nunca o menos 1 vez al mes  
☒ 1 a 3 veces mes  
☐ 1 vez semana  
☐ 2 a 4 veces semana  
☐ 5 a 6 veces semana  
☐ 1 vez al día  
☐ 2 a 3 veces al día  
☐ 5 a 6 veces al día  
☐ más 6 veces al día

---

pescado hervido blanco

- ☐ Nunca o menos 1 vez al mes  
☒ 1 a 3 veces mes  
☐ 1 vez semana  
☐ 2 a 4 veces semana  
☐ 5 a 6 veces semana  
☐ 1 vez al día  
☐ 2 a 3 veces al día  
☐ 5 a 6 veces al día  
☐ más 6 veces al día

---

pescado hervido azul

- ☐ Nunca o menos 1 vez al mes  
☒ 1 a 3 veces mes  
☐ 1 vez semana  
☐ 2 a 4 veces semana  
☐ 5 a 6 veces semana  
☐ 1 vez al día  
☐ 2 a 3 veces al día  
☐ 5 a 6 veces al día  
☐ más 6 veces al día

---

otros pescado azul

- ☒ Nunca o menos 1 vez al mes  
☐ 1 a 3 veces mes  
☐ 1 vez semana  
☐ 2 a 4 veces semana  
☐ 5 a 6 veces semana  
☐ 1 vez al día  
☐ 2 a 3 veces al día  
☐ 5 a 6 veces al día  
☐ más 6 veces al día

---

atun conserva

- ☐ Nunca o menos 1 vez al mes  
☐ 1 a 3 veces mes  
☒ 1 vez semana  
☐ 2 a 4 veces semana  
☐ 5 a 6 veces semana  
☐ 1 vez al día  
☐ 2 a 3 veces al día  
☐ 5 a 6 veces al día  
☐ más 6 veces al día

---

sardina conserva

- ☒ Nunca o menos 1 vez al mes  
☐ 1 a 3 veces mes  
☐ 1 vez semana  
☐ 2 a 4 veces semana  
☐ 5 a 6 veces semana  
☐ 1 vez al día  
☐ 2 a 3 veces al día  
☐ 5 a 6 veces al día  
☐ más 6 veces al día

|                                         |                                                                                                                                                                                                                                                                                                                                                                                                              |
|-----------------------------------------|--------------------------------------------------------------------------------------------------------------------------------------------------------------------------------------------------------------------------------------------------------------------------------------------------------------------------------------------------------------------------------------------------------------|
| pescado ahumado                         | <input checked="" type="radio"/> Nunca o menos 1 vez al mes<br><input type="radio"/> 1 a 3 veces mes<br><input type="radio"/> 1 vez semana<br><input type="radio"/> 2 a 4 veces semana<br><input type="radio"/> 5 a 6 veces semana<br><input type="radio"/> 1 vez al día<br><input type="radio"/> 2 a 3 veces al día<br><input type="radio"/> 5 a 6 veces al día<br><input type="radio"/> más 6 veces al día |
| almejas o mejillones o ostras unos 100g | <input type="radio"/> Nunca o menos 1 vez al mes<br><input checked="" type="radio"/> 1 a 3 veces mes<br><input type="radio"/> 1 vez semana<br><input type="radio"/> 2 a 4 veces semana<br><input type="radio"/> 5 a 6 veces semana<br><input type="radio"/> 1 vez al día<br><input type="radio"/> 2 a 3 veces al día<br><input type="radio"/> 5 a 6 veces al día<br><input type="radio"/> más 6 veces al día |
| calamar o chipiron o sepia unos 100g    | <input type="radio"/> Nunca o menos 1 vez al mes<br><input checked="" type="radio"/> 1 a 3 veces mes<br><input type="radio"/> 1 vez semana<br><input type="radio"/> 2 a 4 veces semana<br><input type="radio"/> 5 a 6 veces semana<br><input type="radio"/> 1 vez al día<br><input type="radio"/> 2 a 3 veces al día<br><input type="radio"/> 5 a 6 veces al día<br><input type="radio"/> más 6 veces al día |
| marisco unos 100g                       | <input type="radio"/> Nunca o menos 1 vez al mes<br><input type="radio"/> 1 a 3 veces mes<br><input checked="" type="radio"/> 1 vez semana<br><input type="radio"/> 2 a 4 veces semana<br><input type="radio"/> 5 a 6 veces semana<br><input type="radio"/> 1 vez al día<br><input type="radio"/> 2 a 3 veces al día<br><input type="radio"/> 5 a 6 veces al día<br><input type="radio"/> más 6 veces al día |
| Espinacas o acelgas cocinadas           | <input type="radio"/> Nunca o menos 1 vez al mes<br><input checked="" type="radio"/> 1 a 3 veces mes<br><input type="radio"/> 1 vez semana<br><input type="radio"/> 2 a 4 veces semana<br><input type="radio"/> 5 a 6 veces semana<br><input type="radio"/> 1 vez al día<br><input type="radio"/> 2 a 3 veces al día<br><input type="radio"/> 5 a 6 veces al día<br><input type="radio"/> más 6 veces al día |
| Col o coliflor o brocoli cocinado       | <input type="radio"/> Nunca o menos 1 vez al mes<br><input type="radio"/> 1 a 3 veces mes<br><input checked="" type="radio"/> 1 vez semana<br><input type="radio"/> 2 a 4 veces semana<br><input type="radio"/> 5 a 6 veces semana<br><input type="radio"/> 1 vez al día<br><input type="radio"/> 2 a 3 veces al día<br><input type="radio"/> 5 a 6 veces al día<br><input type="radio"/> más 6 veces al día |

---

Lechuga o endivia o escarola

- ☐ Nunca o menos 1 vez al mes  
☐ 1 a 3 veces mes  
☐ 1 vez semana  
☐ 2 a 4 veces semana  
☐ 5 a 6 veces semana  
☒ 1 vez al día  
☐ 2 a 3 veces al día  
☐ 5 a 6 veces al día  
☐ más 6 veces al día

---

tomate ensalada

- ☐ Nunca o menos 1 vez al mes  
☐ 1 a 3 veces mes  
☐ 1 vez semana  
☐ 2 a 4 veces semana  
☐ 5 a 6 veces semana  
☒ 1 vez al día  
☐ 2 a 3 veces al día  
☐ 5 a 6 veces al día  
☐ más 6 veces al día

---

cebolla

- ☐ Nunca o menos 1 vez al mes  
☐ 1 a 3 veces mes  
☐ 1 vez semana  
☐ 2 a 4 veces semana  
☒ 5 a 6 veces semana  
☐ 1 vez al día  
☐ 2 a 3 veces al día  
☐ 5 a 6 veces al día  
☐ más 6 veces al día

---

Zanahoria o calabaza

- ☐ Nunca o menos 1 vez al mes  
☐ 1 a 3 veces mes  
☐ 1 vez semana  
☐ 2 a 4 veces semana  
☒ 5 a 6 veces semana  
☐ 1 vez al día  
☐ 2 a 3 veces al día  
☐ 5 a 6 veces al día  
☐ más 6 veces al día

---

Judías verdes

- ☐ Nunca o menos 1 vez al mes  
☐ 1 a 3 veces mes  
☐ 1 vez semana  
☐ 2 a 4 veces semana  
☒ 5 a 6 veces semana  
☐ 1 vez al día  
☐ 2 a 3 veces al día  
☐ 5 a 6 veces al día  
☐ más 6 veces al día

---

Berenjena o calabacin o pepino

- ☐ Nunca o menos 1 vez al mes  
☐ 1 a 3 veces mes  
☐ 1 vez semana  
☐ 2 a 4 veces semana  
☒ 5 a 6 veces semana  
☐ 1 vez al día  
☐ 2 a 3 veces al día  
☐ 5 a 6 veces al día  
☐ más 6 veces al día

---

|          |                                                                                                                                                                                                                                                                                                                                                                                                              |
|----------|--------------------------------------------------------------------------------------------------------------------------------------------------------------------------------------------------------------------------------------------------------------------------------------------------------------------------------------------------------------------------------------------------------------|
| pimiento | <input type="radio"/> Nunca o menos 1 vez al mes<br><input type="radio"/> 1 a 3 veces mes<br><input type="radio"/> 1 vez semana<br><input checked="" type="radio"/> 2 a 4 veces semana<br><input type="radio"/> 5 a 6 veces semana<br><input type="radio"/> 1 vez al día<br><input type="radio"/> 2 a 3 veces al día<br><input type="radio"/> 5 a 6 veces al día<br><input type="radio"/> más 6 veces al día |
|----------|--------------------------------------------------------------------------------------------------------------------------------------------------------------------------------------------------------------------------------------------------------------------------------------------------------------------------------------------------------------------------------------------------------------|

---

|           |                                                                                                                                                                                                                                                                                                                                                                                                              |
|-----------|--------------------------------------------------------------------------------------------------------------------------------------------------------------------------------------------------------------------------------------------------------------------------------------------------------------------------------------------------------------------------------------------------------------|
| alcachofa | <input type="radio"/> Nunca o menos 1 vez al mes<br><input type="radio"/> 1 a 3 veces mes<br><input type="radio"/> 1 vez semana<br><input checked="" type="radio"/> 2 a 4 veces semana<br><input type="radio"/> 5 a 6 veces semana<br><input type="radio"/> 1 vez al día<br><input type="radio"/> 2 a 3 veces al día<br><input type="radio"/> 5 a 6 veces al día<br><input type="radio"/> más 6 veces al día |
|-----------|--------------------------------------------------------------------------------------------------------------------------------------------------------------------------------------------------------------------------------------------------------------------------------------------------------------------------------------------------------------------------------------------------------------|

---

|            |                                                                                                                                                                                                                                                                                                                                                                                                              |
|------------|--------------------------------------------------------------------------------------------------------------------------------------------------------------------------------------------------------------------------------------------------------------------------------------------------------------------------------------------------------------------------------------------------------------|
| espárragos | <input type="radio"/> Nunca o menos 1 vez al mes<br><input type="radio"/> 1 a 3 veces mes<br><input checked="" type="radio"/> 1 vez semana<br><input type="radio"/> 2 a 4 veces semana<br><input type="radio"/> 5 a 6 veces semana<br><input type="radio"/> 1 vez al día<br><input type="radio"/> 2 a 3 veces al día<br><input type="radio"/> 5 a 6 veces al día<br><input type="radio"/> más 6 veces al día |
|------------|--------------------------------------------------------------------------------------------------------------------------------------------------------------------------------------------------------------------------------------------------------------------------------------------------------------------------------------------------------------------------------------------------------------|

---

|              |                                                                                                                                                                                                                                                                                                                                                                                                              |
|--------------|--------------------------------------------------------------------------------------------------------------------------------------------------------------------------------------------------------------------------------------------------------------------------------------------------------------------------------------------------------------------------------------------------------------|
| maíz hervido | <input checked="" type="radio"/> Nunca o menos 1 vez al mes<br><input type="radio"/> 1 a 3 veces mes<br><input type="radio"/> 1 vez semana<br><input type="radio"/> 2 a 4 veces semana<br><input type="radio"/> 5 a 6 veces semana<br><input type="radio"/> 1 vez al día<br><input type="radio"/> 2 a 3 veces al día<br><input type="radio"/> 5 a 6 veces al día<br><input type="radio"/> más 6 veces al día |
|--------------|--------------------------------------------------------------------------------------------------------------------------------------------------------------------------------------------------------------------------------------------------------------------------------------------------------------------------------------------------------------------------------------------------------------|

---

|           |                                                                                                                                                                                                                                                                                                                                                                                                              |
|-----------|--------------------------------------------------------------------------------------------------------------------------------------------------------------------------------------------------------------------------------------------------------------------------------------------------------------------------------------------------------------------------------------------------------------|
| legumbres | <input type="radio"/> Nunca o menos 1 vez al mes<br><input type="radio"/> 1 a 3 veces mes<br><input type="radio"/> 1 vez semana<br><input checked="" type="radio"/> 2 a 4 veces semana<br><input type="radio"/> 5 a 6 veces semana<br><input type="radio"/> 1 vez al día<br><input type="radio"/> 2 a 3 veces al día<br><input type="radio"/> 5 a 6 veces al día<br><input type="radio"/> más 6 veces al día |
|-----------|--------------------------------------------------------------------------------------------------------------------------------------------------------------------------------------------------------------------------------------------------------------------------------------------------------------------------------------------------------------------------------------------------------------|

---

|                       |                                                                                                                                                                                                                                                                                                                                                                                                              |
|-----------------------|--------------------------------------------------------------------------------------------------------------------------------------------------------------------------------------------------------------------------------------------------------------------------------------------------------------------------------------------------------------------------------------------------------------|
| naranjas o mandarinas | <input type="radio"/> Nunca o menos 1 vez al mes<br><input type="radio"/> 1 a 3 veces mes<br><input type="radio"/> 1 vez semana<br><input checked="" type="radio"/> 2 a 4 veces semana<br><input type="radio"/> 5 a 6 veces semana<br><input type="radio"/> 1 vez al día<br><input type="radio"/> 2 a 3 veces al día<br><input type="radio"/> 5 a 6 veces al día<br><input type="radio"/> más 6 veces al día |
|-----------------------|--------------------------------------------------------------------------------------------------------------------------------------------------------------------------------------------------------------------------------------------------------------------------------------------------------------------------------------------------------------------------------------------------------------|

---



---

|                   |                                                  |
|-------------------|--------------------------------------------------|
| zum natural fruta | <input type="radio"/> Nunca o menos 1 vez al mes |
|                   | <input checked="" type="radio"/> 1 a 3 veces mes |
|                   | <input type="radio"/> 1 vez semana               |
|                   | <input type="radio"/> 2 a 4 veces semana         |
|                   | <input type="radio"/> 5 a 6 veces semana         |
|                   | <input type="radio"/> 1 vez al día               |
|                   | <input type="radio"/> 2 a 3 veces al día         |
|                   | <input type="radio"/> 5 a 6 veces al día         |
|                   | <input type="radio"/> más 6 veces al día         |

---

|         |                                                  |
|---------|--------------------------------------------------|
| platano | <input type="radio"/> Nunca o menos 1 vez al mes |
|         | <input type="radio"/> 1 a 3 veces mes            |
|         | <input checked="" type="radio"/> 1 vez semana    |
|         | <input type="radio"/> 2 a 4 veces semana         |
|         | <input type="radio"/> 5 a 6 veces semana         |
|         | <input type="radio"/> 1 vez al día               |
|         | <input type="radio"/> 2 a 3 veces al día         |
|         | <input type="radio"/> 5 a 6 veces al día         |
|         | <input type="radio"/> más 6 veces al día         |

---

|                |                                                     |
|----------------|-----------------------------------------------------|
| manzana o pera | <input type="radio"/> Nunca o menos 1 vez al mes    |
|                | <input type="radio"/> 1 a 3 veces mes               |
|                | <input type="radio"/> 1 vez semana                  |
|                | <input checked="" type="radio"/> 2 a 4 veces semana |
|                | <input type="radio"/> 5 a 6 veces semana            |
|                | <input type="radio"/> 1 vez al día                  |
|                | <input type="radio"/> 2 a 3 veces al día            |
|                | <input type="radio"/> 5 a 6 veces al día            |
|                | <input type="radio"/> más 6 veces al día            |

---

|                       |                                                     |
|-----------------------|-----------------------------------------------------|
| melocotón o nectarina | <input type="radio"/> Nunca o menos 1 vez al mes    |
|                       | <input type="radio"/> 1 a 3 veces mes               |
|                       | <input type="radio"/> 1 vez semana                  |
|                       | <input checked="" type="radio"/> 2 a 4 veces semana |
|                       | <input type="radio"/> 5 a 6 veces semana            |
|                       | <input type="radio"/> 1 vez al día                  |
|                       | <input type="radio"/> 2 a 3 veces al día            |
|                       | <input type="radio"/> 5 a 6 veces al día            |
|                       | <input type="radio"/> más 6 veces al día            |

---

|                |                                                  |
|----------------|--------------------------------------------------|
| sandia o melon | <input type="radio"/> Nunca o menos 1 vez al mes |
|                | <input type="radio"/> 1 a 3 veces mes            |
|                | <input type="radio"/> 1 vez semana               |
|                | <input type="radio"/> 2 a 4 veces semana         |
|                | <input type="radio"/> 5 a 6 veces semana         |
|                | <input checked="" type="radio"/> 1 vez al día    |
|                | <input type="radio"/> 2 a 3 veces al día         |
|                | <input type="radio"/> 5 a 6 veces al día         |
|                | <input type="radio"/> más 6 veces al día         |

---

|     |                                                  |
|-----|--------------------------------------------------|
| uva | <input type="radio"/> Nunca o menos 1 vez al mes |
|     | <input checked="" type="radio"/> 1 a 3 veces mes |
|     | <input type="radio"/> 1 vez semana               |
|     | <input type="radio"/> 2 a 4 veces semana         |
|     | <input type="radio"/> 5 a 6 veces semana         |
|     | <input type="radio"/> 1 vez al día               |
|     | <input type="radio"/> 2 a 3 veces al día         |
|     | <input type="radio"/> 5 a 6 veces al día         |
|     | <input type="radio"/> más 6 veces al día         |

---

---

bruna o ciruela

- ☐ Nunca o menos 1 vez al mes  
☐ 1 a 3 veces mes  
☐ 1 vez semana  
☒ 2 a 4 veces semana  
☐ 5 a 6 veces semana  
☐ 1 vez al día  
☐ 2 a 3 veces al día  
☐ 5 a 6 veces al día  
☐ más 6 veces al día

---

kiwi

- ☐ Nunca o menos 1 vez al mes  
☐ 1 a 3 veces mes  
☐ 1 vez semana  
☒ 2 a 4 veces semana  
☐ 5 a 6 veces semana  
☐ 1 vez al día  
☐ 2 a 3 veces al día  
☐ 5 a 6 veces al día  
☐ más 6 veces al día

---

aceituna

- ☐ Nunca o menos 1 vez al mes  
☒ 1 a 3 veces mes  
☐ 1 vez semana  
☐ 2 a 4 veces semana  
☐ 5 a 6 veces semana  
☐ 1 vez al día  
☐ 2 a 3 veces al día  
☐ 5 a 6 veces al día  
☐ más 6 veces al día

---

frutos secos

- ☐ Nunca o menos 1 vez al mes  
☐ 1 a 3 veces mes  
☒ 1 vez semana  
☐ 2 a 4 veces semana  
☐ 5 a 6 veces semana  
☐ 1 vez al día  
☐ 2 a 3 veces al día  
☐ 5 a 6 veces al día  
☐ más 6 veces al día

---

pan blanco

- ☐ Nunca o menos 1 vez al mes  
☐ 1 a 3 veces mes  
☐ 1 vez semana  
☐ 2 a 4 veces semana  
☐ 5 a 6 veces semana  
☒ 1 vez al día  
☐ 2 a 3 veces al día  
☐ 5 a 6 veces al día  
☐ más 6 veces al día

---

pan integral

- ☐ Nunca o menos 1 vez al mes  
☐ 1 a 3 veces mes  
☐ 1 vez semana  
☐ 2 a 4 veces semana  
☐ 5 a 6 veces semana  
☒ 1 vez al día  
☐ 2 a 3 veces al día  
☐ 5 a 6 veces al día  
☐ más 6 veces al día

|                          |                                                                                                                                                                                                                                                                                                                                                                                                              |
|--------------------------|--------------------------------------------------------------------------------------------------------------------------------------------------------------------------------------------------------------------------------------------------------------------------------------------------------------------------------------------------------------------------------------------------------------|
| cereales desayuno        | <input checked="" type="radio"/> Nunca o menos 1 vez al mes<br><input type="radio"/> 1 a 3 veces mes<br><input type="radio"/> 1 vez semana<br><input type="radio"/> 2 a 4 veces semana<br><input type="radio"/> 5 a 6 veces semana<br><input type="radio"/> 1 vez al día<br><input type="radio"/> 2 a 3 veces al día<br><input type="radio"/> 5 a 6 veces al día<br><input type="radio"/> más 6 veces al día |
| patatas fritas           | <input type="radio"/> Nunca o menos 1 vez al mes<br><input type="radio"/> 1 a 3 veces mes<br><input checked="" type="radio"/> 1 vez semana<br><input type="radio"/> 2 a 4 veces semana<br><input type="radio"/> 5 a 6 veces semana<br><input type="radio"/> 1 vez al día<br><input type="radio"/> 2 a 3 veces al día<br><input type="radio"/> 5 a 6 veces al día<br><input type="radio"/> más 6 veces al día |
| patatas cocidas o asadas | <input type="radio"/> Nunca o menos 1 vez al mes<br><input type="radio"/> 1 a 3 veces mes<br><input checked="" type="radio"/> 1 vez semana<br><input type="radio"/> 2 a 4 veces semana<br><input type="radio"/> 5 a 6 veces semana<br><input type="radio"/> 1 vez al día<br><input type="radio"/> 2 a 3 veces al día<br><input type="radio"/> 5 a 6 veces al día<br><input type="radio"/> más 6 veces al día |
| bolsa papas              | <input type="radio"/> Nunca o menos 1 vez al mes<br><input type="radio"/> 1 a 3 veces mes<br><input type="radio"/> 1 vez semana<br><input checked="" type="radio"/> 2 a 4 veces semana<br><input type="radio"/> 5 a 6 veces semana<br><input type="radio"/> 1 vez al día<br><input type="radio"/> 2 a 3 veces al día<br><input type="radio"/> 5 a 6 veces al día<br><input type="radio"/> más 6 veces al día |
| arroz cocinado           | <input type="radio"/> Nunca o menos 1 vez al mes<br><input type="radio"/> 1 a 3 veces mes<br><input type="radio"/> 1 vez semana<br><input checked="" type="radio"/> 2 a 4 veces semana<br><input type="radio"/> 5 a 6 veces semana<br><input type="radio"/> 1 vez al día<br><input type="radio"/> 2 a 3 veces al día<br><input type="radio"/> 5 a 6 veces al día<br><input type="radio"/> más 6 veces al día |
| pasta                    | <input type="radio"/> Nunca o menos 1 vez al mes<br><input type="radio"/> 1 a 3 veces mes<br><input type="radio"/> 1 vez semana<br><input type="radio"/> 2 a 4 veces semana<br><input type="radio"/> 5 a 6 veces semana<br><input type="radio"/> 1 vez al día<br><input type="radio"/> 2 a 3 veces al día<br><input type="radio"/> 5 a 6 veces al día<br><input type="radio"/> más 6 veces al día            |

|                     |                                                                                                                                                                                                                                                                                                                                                                                                              |
|---------------------|--------------------------------------------------------------------------------------------------------------------------------------------------------------------------------------------------------------------------------------------------------------------------------------------------------------------------------------------------------------------------------------------------------------|
| pizza               | <input type="radio"/> Nunca o menos 1 vez al mes<br><input checked="" type="radio"/> 1 a 3 veces mes<br><input type="radio"/> 1 vez semana<br><input type="radio"/> 2 a 4 veces semana<br><input type="radio"/> 5 a 6 veces semana<br><input type="radio"/> 1 vez al día<br><input type="radio"/> 2 a 3 veces al día<br><input type="radio"/> 5 a 6 veces al día<br><input type="radio"/> más 6 veces al día |
| aceite oliva        | <input type="radio"/> Nunca o menos 1 vez al mes<br><input type="radio"/> 1 a 3 veces mes<br><input type="radio"/> 1 vez semana<br><input type="radio"/> 2 a 4 veces semana<br><input checked="" type="radio"/> 5 a 6 veces semana<br><input type="radio"/> 1 vez al día<br><input type="radio"/> 2 a 3 veces al día<br><input type="radio"/> 5 a 6 veces al día<br><input type="radio"/> más 6 veces al día |
| otros aceites       | <input checked="" type="radio"/> Nunca o menos 1 vez al mes<br><input type="radio"/> 1 a 3 veces mes<br><input type="radio"/> 1 vez semana<br><input type="radio"/> 2 a 4 veces semana<br><input type="radio"/> 5 a 6 veces semana<br><input type="radio"/> 1 vez al día<br><input type="radio"/> 2 a 3 veces al día<br><input type="radio"/> 5 a 6 veces al día<br><input type="radio"/> más 6 veces al día |
| margarina           | <input checked="" type="radio"/> Nunca o menos 1 vez al mes<br><input type="radio"/> 1 a 3 veces mes<br><input type="radio"/> 1 vez semana<br><input type="radio"/> 2 a 4 veces semana<br><input type="radio"/> 5 a 6 veces semana<br><input type="radio"/> 1 vez al día<br><input type="radio"/> 2 a 3 veces al día<br><input type="radio"/> 5 a 6 veces al día<br><input type="radio"/> más 6 veces al día |
| mantequilla         | <input checked="" type="radio"/> Nunca o menos 1 vez al mes<br><input type="radio"/> 1 a 3 veces mes<br><input type="radio"/> 1 vez semana<br><input type="radio"/> 2 a 4 veces semana<br><input type="radio"/> 5 a 6 veces semana<br><input type="radio"/> 1 vez al día<br><input type="radio"/> 2 a 3 veces al día<br><input type="radio"/> 5 a 6 veces al día<br><input type="radio"/> más 6 veces al día |
| galletas tipo maria | <input checked="" type="radio"/> Nunca o menos 1 vez al mes<br><input type="radio"/> 1 a 3 veces mes<br><input type="radio"/> 1 vez semana<br><input type="radio"/> 2 a 4 veces semana<br><input type="radio"/> 5 a 6 veces semana<br><input type="radio"/> 1 vez al día<br><input type="radio"/> 2 a 3 veces al día<br><input type="radio"/> 5 a 6 veces al día<br><input type="radio"/> más 6 veces al día |

---

galletas chocolate

- ☒ Nunca o menos 1 vez al mes  
☐ 1 a 3 veces mes  
☐ 1 vez semana  
☐ 2 a 4 veces semana  
☐ 5 a 6 veces semana  
☐ 1 vez al día  
☐ 2 a 3 veces al día  
☐ 5 a 6 veces al día  
☐ más 6 veces al día

---

bolleria

- ☒ Nunca o menos 1 vez al mes  
☐ 1 a 3 veces mes  
☐ 1 vez semana  
☐ 2 a 4 veces semana  
☐ 5 a 6 veces semana  
☐ 1 vez al día  
☐ 2 a 3 veces al día  
☐ 5 a 6 veces al día  
☐ más 6 veces al día

---

chocolate o bombones

- ☒ Nunca o menos 1 vez al mes  
☐ 1 a 3 veces mes  
☐ 1 vez semana  
☐ 2 a 4 veces semana  
☐ 5 a 6 veces semana  
☐ 1 vez al día  
☐ 2 a 3 veces al día  
☐ 5 a 6 veces al día  
☐ más 6 veces al día

---

chocolate polvo o colacao

- ☒ Nunca o menos 1 vez al mes  
☐ 1 a 3 veces mes  
☐ 1 vez semana  
☐ 2 a 4 veces semana  
☐ 5 a 6 veces semana  
☐ 1 vez al día  
☐ 2 a 3 veces al día  
☐ 5 a 6 veces al día  
☐ más 6 veces al día

---

vino tinto

- ☒ Nunca o menos 1 vez al mes  
☐ 1 a 3 veces mes  
☐ 1 vez semana  
☐ 2 a 4 veces semana  
☐ 5 a 6 veces semana  
☐ 1 vez al día  
☐ 2 a 3 veces al día  
☐ 5 a 6 veces al día  
☐ más 6 veces al día

---

vino blanco

- ☒ Nunca o menos 1 vez al mes  
☐ 1 a 3 veces mes  
☐ 1 vez semana  
☐ 2 a 4 veces semana  
☐ 5 a 6 veces semana  
☐ 1 vez al día  
☐ 2 a 3 veces al día  
☐ 5 a 6 veces al día  
☐ más 6 veces al día

---

|                    |                                                                                                                                                                                                                                                                                                                                                                                                              |
|--------------------|--------------------------------------------------------------------------------------------------------------------------------------------------------------------------------------------------------------------------------------------------------------------------------------------------------------------------------------------------------------------------------------------------------------|
| vino seco o vermut | <input checked="" type="radio"/> Nunca o menos 1 vez al mes<br><input type="radio"/> 1 a 3 veces mes<br><input type="radio"/> 1 vez semana<br><input type="radio"/> 2 a 4 veces semana<br><input type="radio"/> 5 a 6 veces semana<br><input type="radio"/> 1 vez al día<br><input type="radio"/> 2 a 3 veces al día<br><input type="radio"/> 5 a 6 veces al día<br><input type="radio"/> más 6 veces al día |
|--------------------|--------------------------------------------------------------------------------------------------------------------------------------------------------------------------------------------------------------------------------------------------------------------------------------------------------------------------------------------------------------------------------------------------------------|

---

|         |                                                                                                                                                                                                                                                                                                                                                                                                              |
|---------|--------------------------------------------------------------------------------------------------------------------------------------------------------------------------------------------------------------------------------------------------------------------------------------------------------------------------------------------------------------------------------------------------------------|
| cerveza | <input checked="" type="radio"/> Nunca o menos 1 vez al mes<br><input type="radio"/> 1 a 3 veces mes<br><input type="radio"/> 1 vez semana<br><input type="radio"/> 2 a 4 veces semana<br><input type="radio"/> 5 a 6 veces semana<br><input type="radio"/> 1 vez al día<br><input type="radio"/> 2 a 3 veces al día<br><input type="radio"/> 5 a 6 veces al día<br><input type="radio"/> más 6 veces al día |
|---------|--------------------------------------------------------------------------------------------------------------------------------------------------------------------------------------------------------------------------------------------------------------------------------------------------------------------------------------------------------------------------------------------------------------|

---

|                     |                                                                                                                                                                                                                                                                                                                                                                                                              |
|---------------------|--------------------------------------------------------------------------------------------------------------------------------------------------------------------------------------------------------------------------------------------------------------------------------------------------------------------------------------------------------------------------------------------------------------|
| cerveza sin alcohol | <input checked="" type="radio"/> Nunca o menos 1 vez al mes<br><input type="radio"/> 1 a 3 veces mes<br><input type="radio"/> 1 vez semana<br><input type="radio"/> 2 a 4 veces semana<br><input type="radio"/> 5 a 6 veces semana<br><input type="radio"/> 1 vez al día<br><input type="radio"/> 2 a 3 veces al día<br><input type="radio"/> 5 a 6 veces al día<br><input type="radio"/> más 6 veces al día |
|---------------------|--------------------------------------------------------------------------------------------------------------------------------------------------------------------------------------------------------------------------------------------------------------------------------------------------------------------------------------------------------------------------------------------------------------|

---

|         |                                                                                                                                                                                                                                                                                                                                                                                                              |
|---------|--------------------------------------------------------------------------------------------------------------------------------------------------------------------------------------------------------------------------------------------------------------------------------------------------------------------------------------------------------------------------------------------------------------|
| licores | <input checked="" type="radio"/> Nunca o menos 1 vez al mes<br><input type="radio"/> 1 a 3 veces mes<br><input type="radio"/> 1 vez semana<br><input type="radio"/> 2 a 4 veces semana<br><input type="radio"/> 5 a 6 veces semana<br><input type="radio"/> 1 vez al día<br><input type="radio"/> 2 a 3 veces al día<br><input type="radio"/> 5 a 6 veces al día<br><input type="radio"/> más 6 veces al día |
|---------|--------------------------------------------------------------------------------------------------------------------------------------------------------------------------------------------------------------------------------------------------------------------------------------------------------------------------------------------------------------------------------------------------------------|

---

|                       |                                                                                                                                                                                                                                                                                                                                                                                                              |
|-----------------------|--------------------------------------------------------------------------------------------------------------------------------------------------------------------------------------------------------------------------------------------------------------------------------------------------------------------------------------------------------------------------------------------------------------|
| ginebra o ron o vodka | <input checked="" type="radio"/> Nunca o menos 1 vez al mes<br><input type="radio"/> 1 a 3 veces mes<br><input type="radio"/> 1 vez semana<br><input type="radio"/> 2 a 4 veces semana<br><input type="radio"/> 5 a 6 veces semana<br><input type="radio"/> 1 vez al día<br><input type="radio"/> 2 a 3 veces al día<br><input type="radio"/> 5 a 6 veces al día<br><input type="radio"/> más 6 veces al día |
|-----------------------|--------------------------------------------------------------------------------------------------------------------------------------------------------------------------------------------------------------------------------------------------------------------------------------------------------------------------------------------------------------------------------------------------------------|

---

|                 |                                                                                                                                                                                                                                                                                                                                                                                                              |
|-----------------|--------------------------------------------------------------------------------------------------------------------------------------------------------------------------------------------------------------------------------------------------------------------------------------------------------------------------------------------------------------------------------------------------------------|
| refresco normal | <input checked="" type="radio"/> Nunca o menos 1 vez al mes<br><input type="radio"/> 1 a 3 veces mes<br><input type="radio"/> 1 vez semana<br><input type="radio"/> 2 a 4 veces semana<br><input type="radio"/> 5 a 6 veces semana<br><input type="radio"/> 1 vez al día<br><input type="radio"/> 2 a 3 veces al día<br><input type="radio"/> 5 a 6 veces al día<br><input type="radio"/> más 6 veces al día |
|-----------------|--------------------------------------------------------------------------------------------------------------------------------------------------------------------------------------------------------------------------------------------------------------------------------------------------------------------------------------------------------------------------------------------------------------|

---

|                          |                                                                                                                                                                                                                                                                                                                                                                                                              |
|--------------------------|--------------------------------------------------------------------------------------------------------------------------------------------------------------------------------------------------------------------------------------------------------------------------------------------------------------------------------------------------------------------------------------------------------------|
| refresco sin azúcar      | <input checked="" type="radio"/> Nunca o menos 1 vez al mes<br><input type="radio"/> 1 a 3 veces mes<br><input type="radio"/> 1 vez semana<br><input type="radio"/> 2 a 4 veces semana<br><input type="radio"/> 5 a 6 veces semana<br><input type="radio"/> 1 vez al día<br><input type="radio"/> 2 a 3 veces al día<br><input type="radio"/> 5 a 6 veces al día<br><input type="radio"/> más 6 veces al día |
| Agua del grifo           | <input checked="" type="radio"/> Nunca o menos 1 vez al mes<br><input type="radio"/> 1 a 3 veces mes<br><input type="radio"/> 1 vez semana<br><input type="radio"/> 2 a 4 veces semana<br><input type="radio"/> 5 a 6 veces semana<br><input type="radio"/> 1 vez al día<br><input type="radio"/> 2 a 3 veces al día<br><input type="radio"/> 5 a 6 veces al día<br><input type="radio"/> más 6 veces al día |
| agua embotellada sin gas | <input type="radio"/> Nunca o menos 1 vez al mes<br><input type="radio"/> 1 a 3 veces mes<br><input type="radio"/> 1 vez semana<br><input type="radio"/> 2 a 4 veces semana<br><input type="radio"/> 5 a 6 veces semana<br><input type="radio"/> 1 vez al día<br><input type="radio"/> 2 a 3 veces al día<br><input type="radio"/> 5 a 6 veces al día<br><input checked="" type="radio"/> más 6 veces al día |
| agua embotellada con gas | <input checked="" type="radio"/> Nunca o menos 1 vez al mes<br><input type="radio"/> 1 a 3 veces mes<br><input type="radio"/> 1 vez semana<br><input type="radio"/> 2 a 4 veces semana<br><input type="radio"/> 5 a 6 veces semana<br><input type="radio"/> 1 vez al día<br><input type="radio"/> 2 a 3 veces al día<br><input type="radio"/> 5 a 6 veces al día<br><input type="radio"/> más 6 veces al día |
| zumو frutas embasado     | <input checked="" type="radio"/> Nunca o menos 1 vez al mes<br><input type="radio"/> 1 a 3 veces mes<br><input type="radio"/> 1 vez semana<br><input type="radio"/> 2 a 4 veces semana<br><input type="radio"/> 5 a 6 veces semana<br><input type="radio"/> 1 vez al día<br><input type="radio"/> 2 a 3 veces al día<br><input type="radio"/> 5 a 6 veces al día<br><input type="radio"/> más 6 veces al día |
| cafe                     | <input checked="" type="radio"/> Nunca o menos 1 vez al mes<br><input type="radio"/> 1 a 3 veces mes<br><input type="radio"/> 1 vez semana<br><input type="radio"/> 2 a 4 veces semana<br><input type="radio"/> 5 a 6 veces semana<br><input type="radio"/> 1 vez al día<br><input type="radio"/> 2 a 3 veces al día<br><input type="radio"/> 5 a 6 veces al día<br><input type="radio"/> más 6 veces al día |

|                       |                                                                                                                                                                                                                                                                                                                                                                                                              |
|-----------------------|--------------------------------------------------------------------------------------------------------------------------------------------------------------------------------------------------------------------------------------------------------------------------------------------------------------------------------------------------------------------------------------------------------------|
| cafe descafeinado     | <input type="radio"/> Nunca o menos 1 vez al mes<br><input type="radio"/> 1 a 3 veces mes<br><input type="radio"/> 1 vez semana<br><input type="radio"/> 2 a 4 veces semana<br><input type="radio"/> 5 a 6 veces semana<br><input checked="" type="radio"/> 1 vez al día<br><input type="radio"/> 2 a 3 veces al día<br><input type="radio"/> 5 a 6 veces al día<br><input type="radio"/> más 6 veces al día |
| te o infusión         | <input checked="" type="radio"/> Nunca o menos 1 vez al mes<br><input type="radio"/> 1 a 3 veces mes<br><input type="radio"/> 1 vez semana<br><input type="radio"/> 2 a 4 veces semana<br><input type="radio"/> 5 a 6 veces semana<br><input type="radio"/> 1 vez al día<br><input type="radio"/> 2 a 3 veces al día<br><input type="radio"/> 5 a 6 veces al día<br><input type="radio"/> más 6 veces al día |
| sopa o puré verduras  | <input type="radio"/> Nunca o menos 1 vez al mes<br><input type="radio"/> 1 a 3 veces mes<br><input checked="" type="radio"/> 1 vez semana<br><input type="radio"/> 2 a 4 veces semana<br><input type="radio"/> 5 a 6 veces semana<br><input type="radio"/> 1 vez al día<br><input type="radio"/> 2 a 3 veces al día<br><input type="radio"/> 5 a 6 veces al día<br><input type="radio"/> más 6 veces al día |
| croquetas pollo jamón | <input type="radio"/> Nunca o menos 1 vez al mes<br><input checked="" type="radio"/> 1 a 3 veces mes<br><input type="radio"/> 1 vez semana<br><input type="radio"/> 2 a 4 veces semana<br><input type="radio"/> 5 a 6 veces semana<br><input type="radio"/> 1 vez al día<br><input type="radio"/> 2 a 3 veces al día<br><input type="radio"/> 5 a 6 veces al día<br><input type="radio"/> más 6 veces al día |
| croquetas pescado     | <input checked="" type="radio"/> Nunca o menos 1 vez al mes<br><input type="radio"/> 1 a 3 veces mes<br><input type="radio"/> 1 vez semana<br><input type="radio"/> 2 a 4 veces semana<br><input type="radio"/> 5 a 6 veces semana<br><input type="radio"/> 1 vez al día<br><input type="radio"/> 2 a 3 veces al día<br><input type="radio"/> 5 a 6 veces al día<br><input type="radio"/> más 6 veces al día |
| mayonesa              | <input checked="" type="radio"/> Nunca o menos 1 vez al mes<br><input type="radio"/> 1 a 3 veces mes<br><input type="radio"/> 1 vez semana<br><input type="radio"/> 2 a 4 veces semana<br><input type="radio"/> 5 a 6 veces semana<br><input type="radio"/> 1 vez al día<br><input type="radio"/> 2 a 3 veces al día<br><input type="radio"/> 5 a 6 veces al día<br><input type="radio"/> más 6 veces al día |



|                  |                                                                                                                                                                                                                                                                                                                                                                                                              |
|------------------|--------------------------------------------------------------------------------------------------------------------------------------------------------------------------------------------------------------------------------------------------------------------------------------------------------------------------------------------------------------------------------------------------------------|
| salsa tomate     | <input type="radio"/> Nunca o menos 1 vez al mes<br><input type="radio"/> 1 a 3 veces mes<br><input checked="" type="radio"/> 1 vez semana<br><input type="radio"/> 2 a 4 veces semana<br><input type="radio"/> 5 a 6 veces semana<br><input type="radio"/> 1 vez al día<br><input type="radio"/> 2 a 3 veces al día<br><input type="radio"/> 5 a 6 veces al día<br><input type="radio"/> más 6 veces al día |
| ketchup          | <input checked="" type="radio"/> Nunca o menos 1 vez al mes<br><input type="radio"/> 1 a 3 veces mes<br><input type="radio"/> 1 vez semana<br><input type="radio"/> 2 a 4 veces semana<br><input type="radio"/> 5 a 6 veces semana<br><input type="radio"/> 1 vez al día<br><input type="radio"/> 2 a 3 veces al día<br><input type="radio"/> 5 a 6 veces al día<br><input type="radio"/> más 6 veces al día |
| sal              | <input checked="" type="radio"/> Nunca o menos 1 vez al mes<br><input type="radio"/> 1 a 3 veces mes<br><input type="radio"/> 1 vez semana<br><input type="radio"/> 2 a 4 veces semana<br><input type="radio"/> 5 a 6 veces semana<br><input type="radio"/> 1 vez al día<br><input type="radio"/> 2 a 3 veces al día<br><input type="radio"/> 5 a 6 veces al día<br><input type="radio"/> más 6 veces al día |
| ajo              | <input type="radio"/> Nunca o menos 1 vez al mes<br><input type="radio"/> 1 a 3 veces mes<br><input type="radio"/> 1 vez semana<br><input checked="" type="radio"/> 2 a 4 veces semana<br><input type="radio"/> 5 a 6 veces semana<br><input type="radio"/> 1 vez al día<br><input type="radio"/> 2 a 3 veces al día<br><input type="radio"/> 5 a 6 veces al día<br><input type="radio"/> más 6 veces al día |
| mermelada o miel | <input checked="" type="radio"/> Nunca o menos 1 vez al mes<br><input type="radio"/> 1 a 3 veces mes<br><input type="radio"/> 1 vez semana<br><input type="radio"/> 2 a 4 veces semana<br><input type="radio"/> 5 a 6 veces semana<br><input type="radio"/> 1 vez al día<br><input type="radio"/> 2 a 3 veces al día<br><input type="radio"/> 5 a 6 veces al día<br><input type="radio"/> más 6 veces al día |
| azúcar           | <input checked="" type="radio"/> Nunca o menos 1 vez al mes<br><input type="radio"/> 1 a 3 veces mes<br><input type="radio"/> 1 vez semana<br><input type="radio"/> 2 a 4 veces semana<br><input type="radio"/> 5 a 6 veces semana<br><input type="radio"/> 1 vez al día<br><input type="radio"/> 2 a 3 veces al día<br><input type="radio"/> 5 a 6 veces al día<br><input type="radio"/> más 6 veces al día |

---

Otro alimento

---

suplementos vitamínicos

- ☐ si  
☒ no

---

suplementos vitamínicos

---

dieta previa

- ☒ si  
☐ no

motivo dieta

- ☐ no dieta  
☐ control peso  
☐ control colesterol  
☒ control diabetes  
☐ problemas estómago  
☐ problemas vesícula o hepáticos  
☐ HTA o cardiopatía  
☐ problemas renales  
☐ alergia alimentaria  
☐ ácido úrico elevado  
☐ vegetariana  
☐ otros

---

cambio alimentos año previo gestación

---

- ☒ si  
☐ no

cambio lácteos

- ☐ eliminado  
☐ disminuido  
☒ igual  
☐ aumentado  
☐ no sabe

---

cambio huevos

---

- ☐ eliminado  
☐ disminuido  
☒ igual  
☐ aumentado  
☐ no sabe

cambio carne

- ☐ eliminado  
☐ disminuido  
☒ igual  
☐ aumentado  
☐ no sabe

---

cambio pescado

---

- ☐ eliminado  
☐ disminuido  
☒ igual  
☐ aumentado  
☐ no sabe

cambio verduras

- ☐ eliminado  
☐ disminuido  
☒ igual  
☐ aumentado  
☐ no sabe

|                            |                                                                                                                                                                                                                        |
|----------------------------|------------------------------------------------------------------------------------------------------------------------------------------------------------------------------------------------------------------------|
| cambio legumbres           | <input type="radio"/> eliminado<br><input type="radio"/> disminuido<br><input checked="" type="radio"/> igual<br><input type="radio"/> aumentado<br><input type="radio"/> no sabe                                      |
| cambio fruta               | <input type="radio"/> eliminado<br><input type="radio"/> disminuido<br><input checked="" type="radio"/> igual<br><input type="radio"/> aumentado<br><input type="radio"/> no sabe                                      |
| cambio pan                 | <input type="radio"/> eliminado<br><input type="radio"/> disminuido<br><input checked="" type="radio"/> igual<br><input type="radio"/> aumentado<br><input type="radio"/> no sabe                                      |
| cambio aceite oliva        | <input type="radio"/> eliminado<br><input type="radio"/> disminuido<br><input checked="" type="radio"/> igual<br><input type="radio"/> aumentado<br><input type="radio"/> no sabe                                      |
| cambio mante o margarina   | <input type="radio"/> eliminado<br><input type="radio"/> disminuido<br><input checked="" type="radio"/> igual<br><input type="radio"/> aumentado<br><input type="radio"/> no sabe                                      |
| cambio azúcar y dulces     | <input checked="" type="radio"/> eliminado<br><input type="radio"/> disminuido<br><input type="radio"/> igual<br><input type="radio"/> aumentado<br><input type="radio"/> no sabe                                      |
| cambio bebidas alcohólicas | <input checked="" type="radio"/> eliminado<br><input type="radio"/> disminuido<br><input type="radio"/> igual<br><input type="radio"/> aumentado<br><input type="radio"/> no sabe                                      |
| frecuencia comidas fritas  | <input type="radio"/> a diario<br><input type="radio"/> 5 a 6 veces semana<br><input type="radio"/> 2 a 4 veces semana<br><input checked="" type="radio"/> 1 vez semana<br><input type="radio"/> menos de 1 vez semana |
| carne                      | <input type="radio"/> no como<br><input type="radio"/> cruda<br><input type="radio"/> poco hecha<br><input checked="" type="radio"/> hecha<br><input type="radio"/> muy hecha                                          |
| grasa visible carne        | <input checked="" type="radio"/> quita toda<br><input type="radio"/> quita mayoría<br><input type="radio"/> quita un poco<br><input type="radio"/> no quita nada                                                       |

|                                |                                                                                                                                                                                                                                                          |
|--------------------------------|----------------------------------------------------------------------------------------------------------------------------------------------------------------------------------------------------------------------------------------------------------|
| cocina carne                   | <input checked="" type="radio"/> a la plancha<br><input type="radio"/> a la parrilla<br><input type="radio"/> asada<br><input type="radio"/> frita<br><input type="radio"/> guisada                                                                      |
| tostado quemado carne          | <input checked="" type="radio"/> nunca<br><input type="radio"/> 1 vez mes<br><input type="radio"/> 2 a 3 veces mes<br><input type="radio"/> 1 vez semana<br><input type="radio"/> 2 a 3 semanas                                                          |
| tostado quemado pescado        | <input checked="" type="radio"/> nunca<br><input type="radio"/> 1 vez mes<br><input type="radio"/> 2 a 3 veces mes<br><input type="radio"/> 1 vez semana<br><input type="radio"/> 2 a 3 semanas                                                          |
| socarrat paella                | <input checked="" type="radio"/> nunca<br><input type="radio"/> 1 vez mes<br><input type="radio"/> 2 a 3 veces mes<br><input type="radio"/> 1 vez semana<br><input type="radio"/> 2 a 3 semanas                                                          |
| grasa o aceite cocinar         | <input type="radio"/> mantequilla<br><input type="radio"/> margarina<br><input type="radio"/> aceite oliva<br><input checked="" type="radio"/> aceite oliva virgen extra<br><input type="radio"/> aceite vegetal<br><input type="radio"/> mezcla aceites |
| grasa aceite aliñar            | <input type="radio"/> mantequilla<br><input type="radio"/> margarina<br><input type="radio"/> aceite oliva<br><input checked="" type="radio"/> aceite oliva virgen extra<br><input type="radio"/> aceite vegetal<br><input type="radio"/> mezcla aceites |
| grasa aceite freir             | <input type="radio"/> mantequilla<br><input type="radio"/> margarina<br><input type="radio"/> aceite oliva<br><input checked="" type="radio"/> aceite oliva virgen extra<br><input type="radio"/> aceite vegetal<br><input type="radio"/> mezcla aceites |
| Ejercicio cuestionario         | <input checked="" type="radio"/> si<br><input type="radio"/> no                                                                                                                                                                                          |
| horas de sueño incluido siesta | [*DATA REMOVED*]                                                                                                                                                                                                                                         |
| minutos siesta                 | [*DATA REMOVED*]                                                                                                                                                                                                                                         |
| horas televisión semana        | [*DATA REMOVED*]                                                                                                                                                                                                                                         |

|                                        |                                                                                                                                                                                                                                                                                                                                                                           |
|----------------------------------------|---------------------------------------------------------------------------------------------------------------------------------------------------------------------------------------------------------------------------------------------------------------------------------------------------------------------------------------------------------------------------|
| actividad trabajo                      | <input type="radio"/> casi siempre sentado<br><input type="radio"/> sentado 50 por cien<br><input type="radio"/> casi siempre de pie, quieto<br><input type="radio"/> casi siempre levantado caminando y llevando pocas cosas<br><input checked="" type="radio"/> casi siempre levantado, caminando y llevado muchas cosas<br><input type="radio"/> trabajo manual pesado |
| tiempo caminar o bici al día           | <input type="radio"/> casi nunca<br><input type="radio"/> menos 20min día<br><input checked="" type="radio"/> 20 a 40 min día<br><input type="radio"/> 40 a 60 min día<br><input type="radio"/> 1h o 1h y media día<br><input type="radio"/> más de 1h y media al día                                                                                                     |
| tiempo tareas casa al día              | <input type="radio"/> menos de 1h día<br><input type="radio"/> 1 a 2h día<br><input checked="" type="radio"/> 3 a 4h día<br><input type="radio"/> 5 a 6h día<br><input type="radio"/> 7 a 8h día<br><input type="radio"/> más de 8h día                                                                                                                                   |
| tiempo libre televisión ordenador leer | <input type="radio"/> menos 1h día<br><input type="radio"/> 1h día<br><input checked="" type="radio"/> 2h día<br><input type="radio"/> 3h día<br><input type="radio"/> 4h día<br><input type="radio"/> 5 a 6h día<br><input type="radio"/> mas 6h día                                                                                                                     |
| tiempo libre ejercicio o deporte       | <input checked="" type="radio"/> menos 1h semana<br><input type="radio"/> 1h semana<br><input type="radio"/> 2h semana<br><input type="radio"/> 3h semana<br><input type="radio"/> 4 a 5h semana<br><input type="radio"/> mas 5h semana                                                                                                                                   |
| como se considera                      | <input type="radio"/> sedentaria<br><input type="radio"/> poco activa<br><input checked="" type="radio"/> moderadamente activa<br><input type="radio"/> bastante activa<br><input type="radio"/> muy activa<br><input type="radio"/> no sabe                                                                                                                              |
| FUR                                    | [*DATA REMOVED*]                                                                                                                                                                                                                                                                                                                                                          |
| Semanas gestación 2T                   | [*DATA REMOVED*]                                                                                                                                                                                                                                                                                                                                                          |
| Días gestación 2T                      | [*DATA REMOVED*]                                                                                                                                                                                                                                                                                                                                                          |
| DBP 2T                                 | [*DATA REMOVED*]                                                                                                                                                                                                                                                                                                                                                          |
| CC 2T                                  | [*DATA REMOVED*]                                                                                                                                                                                                                                                                                                                                                          |
| AC 2T                                  | [*DATA REMOVED*]                                                                                                                                                                                                                                                                                                                                                          |

|                                                   |                                                                                                                                                                                                 |
|---------------------------------------------------|-------------------------------------------------------------------------------------------------------------------------------------------------------------------------------------------------|
| LF 2T                                             | [*DATA REMOVED*]                                                                                                                                                                                |
| PFE 2T (Hadlock)                                  | [*DATA REMOVED*]                                                                                                                                                                                |
| Semanas gestación 3T                              | [*DATA REMOVED*]                                                                                                                                                                                |
| días 3T                                           | [*DATA REMOVED*]                                                                                                                                                                                |
| DBP 3T                                            | [*DATA REMOVED*]                                                                                                                                                                                |
| CC 3T                                             | [*DATA REMOVED*]                                                                                                                                                                                |
| AC 3T                                             | [*DATA REMOVED*]                                                                                                                                                                                |
| LF 3T                                             | [*DATA REMOVED*]                                                                                                                                                                                |
| PFE 3T (Hadlock)                                  | [*DATA REMOVED*]                                                                                                                                                                                |
| Semanas de gestación final                        | [*DATA REMOVED*]                                                                                                                                                                                |
| días gestación final                              | [*DATA REMOVED*]                                                                                                                                                                                |
| Localización placenta                             | <input checked="" type="radio"/> anterior<br><input type="radio"/> lateral derecha<br><input type="radio"/> lateral izquierda<br><input type="radio"/> posterior<br><input type="radio"/> fondo |
| Presentación longitudinal cefálica                | <input type="radio"/> no<br><input checked="" type="radio"/> si                                                                                                                                 |
| Dorso                                             | <input checked="" type="radio"/> izquierda anterior<br><input type="radio"/> izquierda posterior<br><input type="radio"/> derecha anterior<br><input type="radio"/> derecha posterior           |
| diámetro biparietal                               | [*DATA REMOVED*]                                                                                                                                                                                |
| Circunferencia craneal                            | [*DATA REMOVED*]                                                                                                                                                                                |
| Circunferencia abdominal                          | [*DATA REMOVED*]                                                                                                                                                                                |
| Longitud de femur                                 | [*DATA REMOVED*]                                                                                                                                                                                |
| tejido celular subcutáneo a nivel del muslo en mm | [*DATA REMOVED*]                                                                                                                                                                                |
| tejido celular subcutáneo en abdomen en mm        | [*DATA REMOVED*]                                                                                                                                                                                |
| Volumen del muslo en cm3                          | [*DATA REMOVED*]                                                                                                                                                                                |
| Peso fetal estimado según fórmula de Hadlock      | [*DATA REMOVED*]                                                                                                                                                                                |

|                                               |                                                                                                                                                          |
|-----------------------------------------------|----------------------------------------------------------------------------------------------------------------------------------------------------------|
| Percentil                                     | [*DATA REMOVED*]                                                                                                                                         |
| Peso fetal estimado según fórmula de Scioscia | <hr/>                                                                                                                                                    |
| Peso fetal estimado según fórmula de LEE      | <hr/>                                                                                                                                                    |
| Tipo de parto                                 | <input type="radio"/> eutocico<br><input type="radio"/> instrumentado/ventosa<br><input checked="" type="radio"/> cesarea                                |
| fecha de nacimiento                           | [*DATA REMOVED*]                                                                                                                                         |
| Días entre exploración y nacimiento           | [*DATA REMOVED*]                                                                                                                                         |
| Peso RN en g                                  | [*DATA REMOVED*]                                                                                                                                         |
| sexo                                          | <input checked="" type="radio"/> mujer<br><input type="radio"/> hombre                                                                                   |
| Apgar 1 minuto                                | [*DATA REMOVED*]                                                                                                                                         |
| Apgar 5 minutos                               | [*DATA REMOVED*]                                                                                                                                         |
| Apgar 10 minutos                              | <hr/>                                                                                                                                                    |
| antecedente Covid durante gestación           | <input type="radio"/> Yes<br><input checked="" type="radio"/> No                                                                                         |
| Nivel de estudios                             | <input type="radio"/> ninguno<br><input type="radio"/> primarios<br><input checked="" type="radio"/> secundarios<br><input type="radio"/> universitarios |

# Base\_datos\_estimacion\_peso\_fetal

|                                       |                                                                                                                                                                                                                                                                                      |
|---------------------------------------|--------------------------------------------------------------------------------------------------------------------------------------------------------------------------------------------------------------------------------------------------------------------------------------|
| Número de identificación participante | 116                                                                                                                                                                                                                                                                                  |
| CODIGO PARTICIPANTE                   |                                                                                                                                                                                                                                                                                      |
| Edad                                  | [*DATA REMOVED*]                                                                                                                                                                                                                                                                     |
| Gestaciones                           | <input type="radio"/> 1<br><input type="radio"/> 2<br><input checked="" type="radio"/> 3<br><input type="radio"/> mas de 3                                                                                                                                                           |
| partos                                | <input checked="" type="radio"/> 0<br><input type="radio"/> 1<br><input type="radio"/> 2<br><input type="radio"/> 3<br><input type="radio"/> mas de 3                                                                                                                                |
| cesáreas                              | <input checked="" type="radio"/> 0<br><input type="radio"/> 1<br><input type="radio"/> 2<br><input type="radio"/> 3<br><input type="radio"/> mas de 3                                                                                                                                |
| Abortos                               | <input type="radio"/> 0<br><input type="radio"/> 1<br><input checked="" type="radio"/> 2<br><input type="radio"/> 3<br><input type="radio"/> mas de 3                                                                                                                                |
| Tipo de gestacion                     | <input checked="" type="radio"/> espontanea<br><input type="radio"/> IAC inseminación artificial conyuge<br><input type="radio"/> IAD inseminación artificial donante<br><input type="radio"/> FIV Fecundación in Vitro<br><input type="radio"/> Ovodon FIV con donación de ovocitos |
| peso previo a embarazo                | [*DATA REMOVED*]                                                                                                                                                                                                                                                                     |
| Ganancia ponderal embarazo            | [*DATA REMOVED*]                                                                                                                                                                                                                                                                     |
| Talla madre                           | [*DATA REMOVED*]                                                                                                                                                                                                                                                                     |
| IMC previo embarazo                   | 39.14336256539576                                                                                                                                                                                                                                                                    |
| Patología obstétrica                  | <input checked="" type="radio"/> no<br><input type="radio"/> si                                                                                                                                                                                                                      |
| Diabetes pregestacional               | <input checked="" type="radio"/> no<br><input type="radio"/> si                                                                                                                                                                                                                      |
| Diabetes gestacional                  | <input checked="" type="radio"/> no<br><input type="radio"/> si                                                                                                                                                                                                                      |



|                                            |                                                                                                                                                                                      |
|--------------------------------------------|--------------------------------------------------------------------------------------------------------------------------------------------------------------------------------------|
| Diabetes gestacional con insulina          | <input checked="" type="radio"/> no<br><input type="radio"/> si                                                                                                                      |
| Diabetes gestacional con dieta y ejercicio | <input checked="" type="radio"/> no<br><input type="radio"/> si                                                                                                                      |
| Percentil fetos previos                    | <input checked="" type="radio"/> Nada<br><input type="radio"/> percentil menor de 10<br><input type="radio"/> percentil entre 10 y 90<br><input type="radio"/> percentil mayor de 90 |
| Exfumadora                                 | <input checked="" type="radio"/> Nada<br><input type="radio"/> menos de 5 años<br><input type="radio"/> 5 a 10 años<br><input type="radio"/> mayor o igual a 10 años                 |
| Hábito tabáquico                           | <input checked="" type="radio"/> no<br><input type="radio"/> si                                                                                                                      |
| fumadora                                   | [*DATA REMOVED*]                                                                                                                                                                     |
| Consumo otros tóxicos                      | <input checked="" type="radio"/> no<br><input type="radio"/> si                                                                                                                      |
| Hb 1T                                      | [*DATA REMOVED*]                                                                                                                                                                     |
| Htc 1T                                     | [*DATA REMOVED*]                                                                                                                                                                     |
| Hb 2T                                      | [*DATA REMOVED*]                                                                                                                                                                     |
| HTC 2T                                     | [*DATA REMOVED*]                                                                                                                                                                     |
| Hb 3T                                      | [*DATA REMOVED*]                                                                                                                                                                     |
| HTC 3T                                     | [*DATA REMOVED*]                                                                                                                                                                     |
| Suplemento FE oral                         | <input checked="" type="radio"/> si<br><input type="radio"/> no                                                                                                                      |
| Suplemento fe iv                           | <input type="radio"/> si<br><input checked="" type="radio"/> no                                                                                                                      |
| Transfusión                                | <input checked="" type="radio"/> no<br><input type="radio"/> si                                                                                                                      |
| Solicitada Vit D                           | <input type="radio"/> no<br><input checked="" type="radio"/> si                                                                                                                      |
| Deficit vit D                              | <input type="radio"/> no<br><input checked="" type="radio"/> si                                                                                                                      |
| Suplemento vit D                           | <input checked="" type="radio"/> si<br><input type="radio"/> no                                                                                                                      |

|                       |                                                                                                                                                                                                                                                                                                                                                                                                              |
|-----------------------|--------------------------------------------------------------------------------------------------------------------------------------------------------------------------------------------------------------------------------------------------------------------------------------------------------------------------------------------------------------------------------------------------------------|
| Dieta, cuestionario   | <input checked="" type="radio"/> sí<br><input type="radio"/> no                                                                                                                                                                                                                                                                                                                                              |
| Leche entera          | <input checked="" type="radio"/> Nunca o menos 1 vez al mes<br><input type="radio"/> 1 a 3 veces mes<br><input type="radio"/> 1 vez semana<br><input type="radio"/> 2 a 4 veces semana<br><input type="radio"/> 5 a 6 veces semana<br><input type="radio"/> 1 vez al día<br><input type="radio"/> 2 a 3 veces al día<br><input type="radio"/> 5 a 6 veces al día<br><input type="radio"/> más 6 veces al día |
| Leche semidesnatada   | <input checked="" type="radio"/> Nunca o menos 1 vez al mes<br><input type="radio"/> 1 a 3 veces mes<br><input type="radio"/> 1 vez semana<br><input type="radio"/> 2 a 4 veces semana<br><input type="radio"/> 5 a 6 veces semana<br><input type="radio"/> 1 vez al día<br><input type="radio"/> 2 a 3 veces al día<br><input type="radio"/> 5 a 6 veces al día<br><input type="radio"/> mas 6 veces al día |
| Leche desnatada       | <input type="radio"/> Nunca o menos 1 vez al mes<br><input type="radio"/> 1 a 3 veces mes<br><input checked="" type="radio"/> 1 vez semana<br><input type="radio"/> 2 a 4 veces semana<br><input type="radio"/> 5 a 6 veces semana<br><input type="radio"/> 1 vez al día<br><input type="radio"/> 2 a 3 veces al día<br><input type="radio"/> 5 a 6 veces al día<br><input type="radio"/> más 6 veces al día |
| Leche condensada      | <input checked="" type="radio"/> Nunca o menos 1 vez al mes<br><input type="radio"/> 1 a 3 veces mes<br><input type="radio"/> 1 vez semana<br><input type="radio"/> 2 a 4 veces semana<br><input type="radio"/> 5 a 6 veces semana<br><input type="radio"/> 1 vez al día<br><input type="radio"/> 2 a 3 veces al día<br><input type="radio"/> 5 a 6 veces al día<br><input type="radio"/> más 6 veces al día |
| nata o crema de leche | <input checked="" type="radio"/> Nunca o menos 1 vez al mes<br><input type="radio"/> 1 a 3 veces mes<br><input type="radio"/> 1 vez semana<br><input type="radio"/> 2 a 4 veces semana<br><input type="radio"/> 5 a 6 veces semana<br><input type="radio"/> 1 vez al día<br><input type="radio"/> 2 a 3 veces al día<br><input type="radio"/> 5 a 6 veces al día<br><input type="radio"/> más 6 veces al día |

---

Yogurt Entero

- ☒ Nunca o menos 1 vez al mes  
☐ 1 a 3 veces mes  
☐ 1 vez semana  
☐ 2 a 4 veces semana  
☐ 5 a 6 veces semana  
☐ 1 vez al día  
☐ 2 a 3 veces al día  
☐ 5 a 6 veces al día  
☐ más 6 veces al día

---

Yogurt desnatado

- ☐ Nunca o menos 1 vez al mes  
☒ 1 a 3 veces mes  
☐ 1 vez semana  
☐ 2 a 4 veces semana  
☐ 5 a 6 veces semana  
☐ 1 vez al día  
☐ 2 a 3 veces al día  
☐ 5 a 6 veces al día  
☐ más 6 veces al día

---

100g requesón o queso blando o queso fresco

- ☐ Nunca o menos 1 vez al mes  
☐ 1 a 3 veces mes  
☐ 1 vez semana  
☐ 2 a 4 veces semana  
☐ 5 a 6 veces semana  
☒ 1 vez al día  
☐ 2 a 3 veces al día  
☐ 5 a 6 veces al día  
☐ más 6 veces al día

---

queso curado o semicurado o cremoso

- ☐ Nunca o menos 1 vez al mes  
☐ 1 a 3 veces mes  
☐ 1 vez semana  
☐ 2 a 4 veces semana  
☐ 5 a 6 veces semana  
☒ 1 vez al día  
☐ 2 a 3 veces al día  
☐ 5 a 6 veces al día  
☐ más 6 veces al día

---

natillas flan pudding

- ☒ Nunca o menos 1 vez al mes  
☐ 1 a 3 veces mes  
☐ 1 vez semana  
☐ 2 a 4 veces semana  
☐ 5 a 6 veces semana  
☐ 1 vez al día  
☐ 2 a 3 veces al día  
☐ 5 a 6 veces al día  
☐ más 6 veces al día

---

Helado

- ☐ Nunca o menos 1 vez al mes  
☒ 1 a 3 veces mes  
☐ 1 vez semana  
☐ 2 a 4 veces semana  
☐ 5 a 6 veces semana  
☐ 1 vez al día  
☐ 2 a 3 veces al día  
☐ 5 a 6 veces al día  
☐ más 6 veces al día

|                                      |                                                                                                                                                                                                                                                                                                                                                                                                              |
|--------------------------------------|--------------------------------------------------------------------------------------------------------------------------------------------------------------------------------------------------------------------------------------------------------------------------------------------------------------------------------------------------------------------------------------------------------------|
| huevo                                | <input type="radio"/> Nunca o menos 1 vez al mes<br><input type="radio"/> 1 a 3 veces mes<br><input type="radio"/> 1 vez semana<br><input type="radio"/> 2 a 4 veces semana<br><input type="radio"/> 5 a 6 veces semana<br><input checked="" type="radio"/> 1 vez al día<br><input type="radio"/> 2 a 3 veces al día<br><input type="radio"/> 5 a 6 veces al día<br><input type="radio"/> más 6 veces al día |
| Pollo con piel                       | <input checked="" type="radio"/> Nunca o menos 1 vez al mes<br><input type="radio"/> 1 a 3 veces mes<br><input type="radio"/> 1 vez semana<br><input type="radio"/> 2 a 4 veces semana<br><input type="radio"/> 5 a 6 veces semana<br><input type="radio"/> 1 vez al día<br><input type="radio"/> 2 a 3 veces al día<br><input type="radio"/> 5 a 6 veces al día<br><input type="radio"/> más 6 veces al día |
| pollo sin piel                       | <input type="radio"/> Nunca o menos 1 vez al mes<br><input type="radio"/> 1 a 3 veces mes<br><input type="radio"/> 1 vez semana<br><input checked="" type="radio"/> 2 a 4 veces semana<br><input type="radio"/> 5 a 6 veces semana<br><input type="radio"/> 1 vez al día<br><input type="radio"/> 2 a 3 veces al día<br><input type="radio"/> 5 a 6 veces al día<br><input type="radio"/> más 6 veces al día |
| Ternera o cerdo o cordero            | <input type="radio"/> Nunca o menos 1 vez al mes<br><input type="radio"/> 1 a 3 veces mes<br><input type="radio"/> 1 vez semana<br><input checked="" type="radio"/> 2 a 4 veces semana<br><input type="radio"/> 5 a 6 veces semana<br><input type="radio"/> 1 vez al día<br><input type="radio"/> 2 a 3 veces al día<br><input type="radio"/> 5 a 6 veces al día<br><input type="radio"/> más 6 veces al día |
| carne caza: Conejo o codorniz o pato | <input checked="" type="radio"/> Nunca o menos 1 vez al mes<br><input type="radio"/> 1 a 3 veces mes<br><input type="radio"/> 1 vez semana<br><input type="radio"/> 2 a 4 veces semana<br><input type="radio"/> 5 a 6 veces semana<br><input type="radio"/> 1 vez al día<br><input type="radio"/> 2 a 3 veces al día<br><input type="radio"/> 5 a 6 veces al día<br><input type="radio"/> más 6 veces al día |
| Hígado de ternera o cerdo o pollo    | <input checked="" type="radio"/> Nunca o menos 1 vez al mes<br><input type="radio"/> 1 a 3 veces mes<br><input type="radio"/> 1 vez semana<br><input type="radio"/> 2 a 4 veces semana<br><input type="radio"/> 5 a 6 veces semana<br><input type="radio"/> 1 vez al día<br><input type="radio"/> 2 a 3 veces al día<br><input type="radio"/> 5 a 6 veces al día<br><input type="radio"/> más 6 veces al día |

|                     |                                                                                                                                                                                                                                                                                                                                                                                                              |
|---------------------|--------------------------------------------------------------------------------------------------------------------------------------------------------------------------------------------------------------------------------------------------------------------------------------------------------------------------------------------------------------------------------------------------------------|
| Vísceras            | <input checked="" type="radio"/> Nunca o menos 1 vez al mes<br><input type="radio"/> 1 a 3 veces mes<br><input type="radio"/> 1 vez semana<br><input type="radio"/> 2 a 4 veces semana<br><input type="radio"/> 5 a 6 veces semana<br><input type="radio"/> 1 vez al día<br><input type="radio"/> 2 a 3 veces al día<br><input type="radio"/> 5 a 6 veces al día<br><input type="radio"/> más 6 veces al día |
| Embutido            | <input type="radio"/> Nunca o menos 1 vez al mes<br><input type="radio"/> 1 a 3 veces mes<br><input type="radio"/> 1 vez semana<br><input checked="" type="radio"/> 2 a 4 veces semana<br><input type="radio"/> 5 a 6 veces semana<br><input type="radio"/> 1 vez al día<br><input type="radio"/> 2 a 3 veces al día<br><input type="radio"/> 5 a 6 veces al día<br><input type="radio"/> más 6 veces al día |
| Salchicha o similar | <input checked="" type="radio"/> Nunca o menos 1 vez al mes<br><input type="radio"/> 1 a 3 veces mes<br><input type="radio"/> 1 vez semana<br><input type="radio"/> 2 a 4 veces semana<br><input type="radio"/> 5 a 6 veces semana<br><input type="radio"/> 1 vez al día<br><input type="radio"/> 2 a 3 veces al día<br><input type="radio"/> 5 a 6 veces al día<br><input type="radio"/> más 6 veces al día |
| Pate o foiegras     | <input checked="" type="radio"/> Nunca o menos 1 vez al mes<br><input type="radio"/> 1 a 3 veces mes<br><input type="radio"/> 1 vez semana<br><input type="radio"/> 2 a 4 veces semana<br><input type="radio"/> 5 a 6 veces semana<br><input type="radio"/> 1 vez al día<br><input type="radio"/> 2 a 3 veces al día<br><input type="radio"/> 5 a 6 veces al día<br><input type="radio"/> más 6 veces al día |
| Hamburguesa         | <input type="radio"/> Nunca o menos 1 vez al mes<br><input type="radio"/> 1 a 3 veces mes<br><input type="radio"/> 1 vez semana<br><input checked="" type="radio"/> 2 a 4 veces semana<br><input type="radio"/> 5 a 6 veces semana<br><input type="radio"/> 1 vez al día<br><input type="radio"/> 2 a 3 veces al día<br><input type="radio"/> 5 a 6 veces al día<br><input type="radio"/> más 6 veces al día |
| tocino o bacon      | <input type="radio"/> Nunca o menos 1 vez al mes<br><input checked="" type="radio"/> 1 a 3 veces mes<br><input type="radio"/> 1 vez semana<br><input type="radio"/> 2 a 4 veces semana<br><input type="radio"/> 5 a 6 veces semana<br><input type="radio"/> 1 vez al día<br><input type="radio"/> 2 a 3 veces al día<br><input type="radio"/> 5 a 6 veces al día<br><input type="radio"/> más 6 veces al día |

|                        |                                                                                                                                                                                                                                                                                                                                                                                                              |
|------------------------|--------------------------------------------------------------------------------------------------------------------------------------------------------------------------------------------------------------------------------------------------------------------------------------------------------------------------------------------------------------------------------------------------------------|
| Pescado frito          | <input type="radio"/> Nunca o menos 1 vez al mes<br><input type="radio"/> 1 a 3 veces mes<br><input type="radio"/> 1 vez semana<br><input checked="" type="radio"/> 2 a 4 veces semana<br><input type="radio"/> 5 a 6 veces semana<br><input type="radio"/> 1 vez al día<br><input type="radio"/> 2 a 3 veces al día<br><input type="radio"/> 5 a 6 veces al día<br><input type="radio"/> más 6 veces al día |
| pescado hervido blanco | <input checked="" type="radio"/> Nunca o menos 1 vez al mes<br><input type="radio"/> 1 a 3 veces mes<br><input type="radio"/> 1 vez semana<br><input type="radio"/> 2 a 4 veces semana<br><input type="radio"/> 5 a 6 veces semana<br><input type="radio"/> 1 vez al día<br><input type="radio"/> 2 a 3 veces al día<br><input type="radio"/> 5 a 6 veces al día<br><input type="radio"/> más 6 veces al día |
| pescado hervido azul   | <input checked="" type="radio"/> Nunca o menos 1 vez al mes<br><input type="radio"/> 1 a 3 veces mes<br><input type="radio"/> 1 vez semana<br><input type="radio"/> 2 a 4 veces semana<br><input type="radio"/> 5 a 6 veces semana<br><input type="radio"/> 1 vez al día<br><input type="radio"/> 2 a 3 veces al día<br><input type="radio"/> 5 a 6 veces al día<br><input type="radio"/> más 6 veces al día |
| otros pescado azul     | <input checked="" type="radio"/> Nunca o menos 1 vez al mes<br><input type="radio"/> 1 a 3 veces mes<br><input type="radio"/> 1 vez semana<br><input type="radio"/> 2 a 4 veces semana<br><input type="radio"/> 5 a 6 veces semana<br><input type="radio"/> 1 vez al día<br><input type="radio"/> 2 a 3 veces al día<br><input type="radio"/> 5 a 6 veces al día<br><input type="radio"/> más 6 veces al día |
| atun conserva          | <input type="radio"/> Nunca o menos 1 vez al mes<br><input type="radio"/> 1 a 3 veces mes<br><input type="radio"/> 1 vez semana<br><input checked="" type="radio"/> 2 a 4 veces semana<br><input type="radio"/> 5 a 6 veces semana<br><input type="radio"/> 1 vez al día<br><input type="radio"/> 2 a 3 veces al día<br><input type="radio"/> 5 a 6 veces al día<br><input type="radio"/> más 6 veces al día |
| sardina conserva       | <input checked="" type="radio"/> Nunca o menos 1 vez al mes<br><input type="radio"/> 1 a 3 veces mes<br><input type="radio"/> 1 vez semana<br><input type="radio"/> 2 a 4 veces semana<br><input type="radio"/> 5 a 6 veces semana<br><input type="radio"/> 1 vez al día<br><input type="radio"/> 2 a 3 veces al día<br><input type="radio"/> 5 a 6 veces al día<br><input type="radio"/> más 6 veces al día |

|                                         |                                                                                                                                                                                                                                                                                                                                                                                                              |
|-----------------------------------------|--------------------------------------------------------------------------------------------------------------------------------------------------------------------------------------------------------------------------------------------------------------------------------------------------------------------------------------------------------------------------------------------------------------|
| pescado ahumado                         | <input checked="" type="radio"/> Nunca o menos 1 vez al mes<br><input type="radio"/> 1 a 3 veces mes<br><input type="radio"/> 1 vez semana<br><input type="radio"/> 2 a 4 veces semana<br><input type="radio"/> 5 a 6 veces semana<br><input type="radio"/> 1 vez al día<br><input type="radio"/> 2 a 3 veces al día<br><input type="radio"/> 5 a 6 veces al día<br><input type="radio"/> más 6 veces al día |
| almejas o mejillones o ostras unos 100g | <input type="radio"/> Nunca o menos 1 vez al mes<br><input checked="" type="radio"/> 1 a 3 veces mes<br><input type="radio"/> 1 vez semana<br><input type="radio"/> 2 a 4 veces semana<br><input type="radio"/> 5 a 6 veces semana<br><input type="radio"/> 1 vez al día<br><input type="radio"/> 2 a 3 veces al día<br><input type="radio"/> 5 a 6 veces al día<br><input type="radio"/> más 6 veces al día |
| calamar o chipiron o sepia unos 100g    | <input type="radio"/> Nunca o menos 1 vez al mes<br><input checked="" type="radio"/> 1 a 3 veces mes<br><input type="radio"/> 1 vez semana<br><input type="radio"/> 2 a 4 veces semana<br><input type="radio"/> 5 a 6 veces semana<br><input type="radio"/> 1 vez al día<br><input type="radio"/> 2 a 3 veces al día<br><input type="radio"/> 5 a 6 veces al día<br><input type="radio"/> más 6 veces al día |
| marisco unos 100g                       | <input type="radio"/> Nunca o menos 1 vez al mes<br><input checked="" type="radio"/> 1 a 3 veces mes<br><input type="radio"/> 1 vez semana<br><input type="radio"/> 2 a 4 veces semana<br><input type="radio"/> 5 a 6 veces semana<br><input type="radio"/> 1 vez al día<br><input type="radio"/> 2 a 3 veces al día<br><input type="radio"/> 5 a 6 veces al día<br><input type="radio"/> más 6 veces al día |
| Espinacas o acelgas cocinadas           | <input type="radio"/> Nunca o menos 1 vez al mes<br><input checked="" type="radio"/> 1 a 3 veces mes<br><input type="radio"/> 1 vez semana<br><input type="radio"/> 2 a 4 veces semana<br><input type="radio"/> 5 a 6 veces semana<br><input type="radio"/> 1 vez al día<br><input type="radio"/> 2 a 3 veces al día<br><input type="radio"/> 5 a 6 veces al día<br><input type="radio"/> más 6 veces al día |
| Col o coliflor o brocoli cocinado       | <input checked="" type="radio"/> Nunca o menos 1 vez al mes<br><input type="radio"/> 1 a 3 veces mes<br><input type="radio"/> 1 vez semana<br><input type="radio"/> 2 a 4 veces semana<br><input type="radio"/> 5 a 6 veces semana<br><input type="radio"/> 1 vez al día<br><input type="radio"/> 2 a 3 veces al día<br><input type="radio"/> 5 a 6 veces al día<br><input type="radio"/> más 6 veces al día |

---

Lechuga o endivia o escarola

- ☐ Nunca o menos 1 vez al mes  
☐ 1 a 3 veces mes  
☐ 1 vez semana  
☒ 2 a 4 veces semana  
☐ 5 a 6 veces semana  
☐ 1 vez al día  
☐ 2 a 3 veces al día  
☐ 5 a 6 veces al día  
☐ más 6 veces al día

---

tomate ensalada

- ☐ Nunca o menos 1 vez al mes  
☐ 1 a 3 veces mes  
☐ 1 vez semana  
☐ 2 a 4 veces semana  
☒ 5 a 6 veces semana  
☐ 1 vez al día  
☐ 2 a 3 veces al día  
☐ 5 a 6 veces al día  
☐ más 6 veces al día

---

cebolla

- ☐ Nunca o menos 1 vez al mes  
☐ 1 a 3 veces mes  
☐ 1 vez semana  
☐ 2 a 4 veces semana  
☒ 5 a 6 veces semana  
☐ 1 vez al día  
☐ 2 a 3 veces al día  
☐ 5 a 6 veces al día  
☐ más 6 veces al día

---

Zanahoria o calabaza

- ☐ Nunca o menos 1 vez al mes  
☐ 1 a 3 veces mes  
☐ 1 vez semana  
☐ 2 a 4 veces semana  
☒ 5 a 6 veces semana  
☐ 1 vez al día  
☐ 2 a 3 veces al día  
☐ 5 a 6 veces al día  
☐ más 6 veces al día

---

Judías verdes

- ☒ Nunca o menos 1 vez al mes  
☐ 1 a 3 veces mes  
☐ 1 vez semana  
☐ 2 a 4 veces semana  
☐ 5 a 6 veces semana  
☐ 1 vez al día  
☐ 2 a 3 veces al día  
☐ 5 a 6 veces al día  
☐ más 6 veces al día

---

Berenjena o calabacin o pepino

- ☐ Nunca o menos 1 vez al mes  
☐ 1 a 3 veces mes  
☒ 1 vez semana  
☐ 2 a 4 veces semana  
☐ 5 a 6 veces semana  
☐ 1 vez al día  
☐ 2 a 3 veces al día  
☐ 5 a 6 veces al día  
☐ más 6 veces al día



|                       |                                                                                                                                                                                                                                                                                                                                                                                                              |
|-----------------------|--------------------------------------------------------------------------------------------------------------------------------------------------------------------------------------------------------------------------------------------------------------------------------------------------------------------------------------------------------------------------------------------------------------|
| pimiento              | <input type="radio"/> Nunca o menos 1 vez al mes<br><input type="radio"/> 1 a 3 veces mes<br><input checked="" type="radio"/> 1 vez semana<br><input type="radio"/> 2 a 4 veces semana<br><input type="radio"/> 5 a 6 veces semana<br><input type="radio"/> 1 vez al día<br><input type="radio"/> 2 a 3 veces al día<br><input type="radio"/> 5 a 6 veces al día<br><input type="radio"/> más 6 veces al día |
| alcachofa             | <input checked="" type="radio"/> Nunca o menos 1 vez al mes<br><input type="radio"/> 1 a 3 veces mes<br><input type="radio"/> 1 vez semana<br><input type="radio"/> 2 a 4 veces semana<br><input type="radio"/> 5 a 6 veces semana<br><input type="radio"/> 1 vez al día<br><input type="radio"/> 2 a 3 veces al día<br><input type="radio"/> 5 a 6 veces al día<br><input type="radio"/> más 6 veces al día |
| espárragos            | <input checked="" type="radio"/> Nunca o menos 1 vez al mes<br><input type="radio"/> 1 a 3 veces mes<br><input type="radio"/> 1 vez semana<br><input type="radio"/> 2 a 4 veces semana<br><input type="radio"/> 5 a 6 veces semana<br><input type="radio"/> 1 vez al día<br><input type="radio"/> 2 a 3 veces al día<br><input type="radio"/> 5 a 6 veces al día<br><input type="radio"/> más 6 veces al día |
| maíz hervido          | <input checked="" type="radio"/> Nunca o menos 1 vez al mes<br><input type="radio"/> 1 a 3 veces mes<br><input type="radio"/> 1 vez semana<br><input type="radio"/> 2 a 4 veces semana<br><input type="radio"/> 5 a 6 veces semana<br><input type="radio"/> 1 vez al día<br><input type="radio"/> 2 a 3 veces al día<br><input type="radio"/> 5 a 6 veces al día<br><input type="radio"/> más 6 veces al día |
| legumbres             | <input type="radio"/> Nunca o menos 1 vez al mes<br><input type="radio"/> 1 a 3 veces mes<br><input type="radio"/> 1 vez semana<br><input checked="" type="radio"/> 2 a 4 veces semana<br><input type="radio"/> 5 a 6 veces semana<br><input type="radio"/> 1 vez al día<br><input type="radio"/> 2 a 3 veces al día<br><input type="radio"/> 5 a 6 veces al día<br><input type="radio"/> más 6 veces al día |
| naranjas o mandarinas | <input type="radio"/> Nunca o menos 1 vez al mes<br><input checked="" type="radio"/> 1 a 3 veces mes<br><input type="radio"/> 1 vez semana<br><input type="radio"/> 2 a 4 veces semana<br><input type="radio"/> 5 a 6 veces semana<br><input type="radio"/> 1 vez al día<br><input type="radio"/> 2 a 3 veces al día<br><input type="radio"/> 5 a 6 veces al día<br><input type="radio"/> más 6 veces al día |

---

zumو natural fruta

- ☐ Nunca o menos 1 vez al mes  
☒ 1 a 3 veces mes  
☐ 1 vez semana  
☐ 2 a 4 veces semana  
☐ 5 a 6 veces semana  
☐ 1 vez al día  
☐ 2 a 3 veces al día  
☐ 5 a 6 veces al día  
☐ más 6 veces al día

---

platano

- ☐ Nunca o menos 1 vez al mes  
☐ 1 a 3 veces mes  
☐ 1 vez semana  
☐ 2 a 4 veces semana  
☐ 5 a 6 veces semana  
☐ 1 vez al día  
☒ 2 a 3 veces al día  
☐ 5 a 6 veces al día  
☐ más 6 veces al día

---

manzana o pera

- ☐ Nunca o menos 1 vez al mes  
☐ 1 a 3 veces mes  
☒ 1 vez semana  
☐ 2 a 4 veces semana  
☐ 5 a 6 veces semana  
☐ 1 vez al día  
☐ 2 a 3 veces al día  
☐ 5 a 6 veces al día  
☐ más 6 veces al día

---

melocotón o nectarina

- ☒ Nunca o menos 1 vez al mes  
☐ 1 a 3 veces mes  
☐ 1 vez semana  
☐ 2 a 4 veces semana  
☐ 5 a 6 veces semana  
☐ 1 vez al día  
☐ 2 a 3 veces al día  
☐ 5 a 6 veces al día  
☐ más 6 veces al día

---

sandia o melon

- ☐ Nunca o menos 1 vez al mes  
☒ 1 a 3 veces mes  
☐ 1 vez semana  
☐ 2 a 4 veces semana  
☐ 5 a 6 veces semana  
☐ 1 vez al día  
☐ 2 a 3 veces al día  
☐ 5 a 6 veces al día  
☐ más 6 veces al día

---

uva

- ☒ Nunca o menos 1 vez al mes  
☐ 1 a 3 veces mes  
☐ 1 vez semana  
☐ 2 a 4 veces semana  
☐ 5 a 6 veces semana  
☐ 1 vez al día  
☐ 2 a 3 veces al día  
☐ 5 a 6 veces al día  
☐ más 6 veces al día

---

bruna o ciruela

- ☒ Nunca o menos 1 vez al mes  
☐ 1 a 3 veces mes  
☐ 1 vez semana  
☐ 2 a 4 veces semana  
☐ 5 a 6 veces semana  
☐ 1 vez al día  
☐ 2 a 3 veces al día  
☐ 5 a 6 veces al día  
☐ más 6 veces al día

---

kiwi

- ☒ Nunca o menos 1 vez al mes  
☐ 1 a 3 veces mes  
☐ 1 vez semana  
☐ 2 a 4 veces semana  
☐ 5 a 6 veces semana  
☐ 1 vez al día  
☐ 2 a 3 veces al día  
☐ 5 a 6 veces al día  
☐ más 6 veces al día

---

aceituna

- ☒ Nunca o menos 1 vez al mes  
☐ 1 a 3 veces mes  
☐ 1 vez semana  
☐ 2 a 4 veces semana  
☐ 5 a 6 veces semana  
☐ 1 vez al día  
☐ 2 a 3 veces al día  
☐ 5 a 6 veces al día  
☐ más 6 veces al día

---

frutos secos

- ☐ Nunca o menos 1 vez al mes  
☐ 1 a 3 veces mes  
☐ 1 vez semana  
☐ 2 a 4 veces semana  
☐ 5 a 6 veces semana  
☐ 1 vez al día  
☒ 2 a 3 veces al día  
☐ 5 a 6 veces al día  
☐ más 6 veces al día

---

pan blanco

- ☐ Nunca o menos 1 vez al mes  
☐ 1 a 3 veces mes  
☐ 1 vez semana  
☐ 2 a 4 veces semana  
☐ 5 a 6 veces semana  
☐ 1 vez al día  
☒ 2 a 3 veces al día  
☐ 5 a 6 veces al día  
☐ más 6 veces al día

---

pan integral

- ☐ Nunca o menos 1 vez al mes  
☐ 1 a 3 veces mes  
☐ 1 vez semana  
☐ 2 a 4 veces semana  
☐ 5 a 6 veces semana  
☐ 1 vez al día  
☐ 2 a 3 veces al día  
☐ 5 a 6 veces al día  
☐ más 6 veces al día

---

cereales desayuno

- ☐ Nunca o menos 1 vez al mes  
☐ 1 a 3 veces mes  
☐ 1 vez semana  
☒ 2 a 4 veces semana  
☐ 5 a 6 veces semana  
☐ 1 vez al día  
☐ 2 a 3 veces al día  
☐ 5 a 6 veces al día  
☐ más 6 veces al día

---

patatas fritas

- ☐ Nunca o menos 1 vez al mes  
☒ 1 a 3 veces mes  
☐ 1 vez semana  
☐ 2 a 4 veces semana  
☐ 5 a 6 veces semana  
☐ 1 vez al día  
☐ 2 a 3 veces al día  
☐ 5 a 6 veces al día  
☐ más 6 veces al día

---

patatas cocidas o asadas

- ☐ Nunca o menos 1 vez al mes  
☐ 1 a 3 veces mes  
☐ 1 vez semana  
☐ 2 a 4 veces semana  
☒ 5 a 6 veces semana  
☐ 1 vez al día  
☐ 2 a 3 veces al día  
☐ 5 a 6 veces al día  
☐ más 6 veces al día

---

bolsa papas

- ☐ Nunca o menos 1 vez al mes  
☒ 1 a 3 veces mes  
☐ 1 vez semana  
☐ 2 a 4 veces semana  
☐ 5 a 6 veces semana  
☐ 1 vez al día  
☐ 2 a 3 veces al día  
☐ 5 a 6 veces al día  
☐ más 6 veces al día

---

arroz cocinado

- ☐ Nunca o menos 1 vez al mes  
☐ 1 a 3 veces mes  
☒ 1 vez semana  
☐ 2 a 4 veces semana  
☐ 5 a 6 veces semana  
☐ 1 vez al día  
☐ 2 a 3 veces al día  
☐ 5 a 6 veces al día  
☐ más 6 veces al día

---

pasta

- ☐ Nunca o menos 1 vez al mes  
☐ 1 a 3 veces mes  
☐ 1 vez semana  
☒ 2 a 4 veces semana  
☐ 5 a 6 veces semana  
☐ 1 vez al día  
☐ 2 a 3 veces al día  
☐ 5 a 6 veces al día  
☐ más 6 veces al día

|                     |                                                                                                                                                                                                                                                                                                                                                                                                              |
|---------------------|--------------------------------------------------------------------------------------------------------------------------------------------------------------------------------------------------------------------------------------------------------------------------------------------------------------------------------------------------------------------------------------------------------------|
| pizza               | <input type="radio"/> Nunca o menos 1 vez al mes<br><input type="radio"/> 1 a 3 veces mes<br><input checked="" type="radio"/> 1 vez semana<br><input type="radio"/> 2 a 4 veces semana<br><input type="radio"/> 5 a 6 veces semana<br><input type="radio"/> 1 vez al día<br><input type="radio"/> 2 a 3 veces al día<br><input type="radio"/> 5 a 6 veces al día<br><input type="radio"/> más 6 veces al día |
| aceite oliva        | <input type="radio"/> Nunca o menos 1 vez al mes<br><input type="radio"/> 1 a 3 veces mes<br><input type="radio"/> 1 vez semana<br><input type="radio"/> 2 a 4 veces semana<br><input type="radio"/> 5 a 6 veces semana<br><input type="radio"/> 1 vez al día<br><input type="radio"/> 2 a 3 veces al día<br><input checked="" type="radio"/> 5 a 6 veces al día<br><input type="radio"/> más 6 veces al día |
| otros aceites       | <input checked="" type="radio"/> Nunca o menos 1 vez al mes<br><input type="radio"/> 1 a 3 veces mes<br><input type="radio"/> 1 vez semana<br><input type="radio"/> 2 a 4 veces semana<br><input type="radio"/> 5 a 6 veces semana<br><input type="radio"/> 1 vez al día<br><input type="radio"/> 2 a 3 veces al día<br><input type="radio"/> 5 a 6 veces al día<br><input type="radio"/> más 6 veces al día |
| margarina           | <input type="radio"/> Nunca o menos 1 vez al mes<br><input type="radio"/> 1 a 3 veces mes<br><input type="radio"/> 1 vez semana<br><input checked="" type="radio"/> 2 a 4 veces semana<br><input type="radio"/> 5 a 6 veces semana<br><input type="radio"/> 1 vez al día<br><input type="radio"/> 2 a 3 veces al día<br><input type="radio"/> 5 a 6 veces al día<br><input type="radio"/> más 6 veces al día |
| mantequilla         | <input checked="" type="radio"/> Nunca o menos 1 vez al mes<br><input type="radio"/> 1 a 3 veces mes<br><input type="radio"/> 1 vez semana<br><input type="radio"/> 2 a 4 veces semana<br><input type="radio"/> 5 a 6 veces semana<br><input type="radio"/> 1 vez al día<br><input type="radio"/> 2 a 3 veces al día<br><input type="radio"/> 5 a 6 veces al día<br><input type="radio"/> más 6 veces al día |
| galletas tipo maria | <input type="radio"/> Nunca o menos 1 vez al mes<br><input type="radio"/> 1 a 3 veces mes<br><input checked="" type="radio"/> 1 vez semana<br><input type="radio"/> 2 a 4 veces semana<br><input type="radio"/> 5 a 6 veces semana<br><input type="radio"/> 1 vez al día<br><input type="radio"/> 2 a 3 veces al día<br><input type="radio"/> 5 a 6 veces al día<br><input type="radio"/> más 6 veces al día |

|                           |                                                                                                                                                                                                                                                                                                                                                                                                              |
|---------------------------|--------------------------------------------------------------------------------------------------------------------------------------------------------------------------------------------------------------------------------------------------------------------------------------------------------------------------------------------------------------------------------------------------------------|
| galletas chocolate        | <input checked="" type="radio"/> Nunca o menos 1 vez al mes<br><input type="radio"/> 1 a 3 veces mes<br><input type="radio"/> 1 vez semana<br><input type="radio"/> 2 a 4 veces semana<br><input type="radio"/> 5 a 6 veces semana<br><input type="radio"/> 1 vez al día<br><input type="radio"/> 2 a 3 veces al día<br><input type="radio"/> 5 a 6 veces al día<br><input type="radio"/> más 6 veces al día |
| bollieria                 | <input type="radio"/> Nunca o menos 1 vez al mes<br><input type="radio"/> 1 a 3 veces mes<br><input type="radio"/> 1 vez semana<br><input type="radio"/> 2 a 4 veces semana<br><input type="radio"/> 5 a 6 veces semana<br><input checked="" type="radio"/> 1 vez al día<br><input type="radio"/> 2 a 3 veces al día<br><input type="radio"/> 5 a 6 veces al día<br><input type="radio"/> más 6 veces al día |
| chocolate o bombones      | <input type="radio"/> Nunca o menos 1 vez al mes<br><input type="radio"/> 1 a 3 veces mes<br><input type="radio"/> 1 vez semana<br><input type="radio"/> 2 a 4 veces semana<br><input type="radio"/> 5 a 6 veces semana<br><input type="radio"/> 1 vez al día<br><input type="radio"/> 2 a 3 veces al día<br><input type="radio"/> 5 a 6 veces al día<br><input type="radio"/> más 6 veces al día            |
| chocolate polvo o colacao | <input type="radio"/> Nunca o menos 1 vez al mes<br><input type="radio"/> 1 a 3 veces mes<br><input checked="" type="radio"/> 1 vez semana<br><input type="radio"/> 2 a 4 veces semana<br><input type="radio"/> 5 a 6 veces semana<br><input type="radio"/> 1 vez al día<br><input type="radio"/> 2 a 3 veces al día<br><input type="radio"/> 5 a 6 veces al día<br><input type="radio"/> más 6 veces al día |
| vino tinto                | <input checked="" type="radio"/> Nunca o menos 1 vez al mes<br><input type="radio"/> 1 a 3 veces mes<br><input type="radio"/> 1 vez semana<br><input type="radio"/> 2 a 4 veces semana<br><input type="radio"/> 5 a 6 veces semana<br><input type="radio"/> 1 vez al día<br><input type="radio"/> 2 a 3 veces al día<br><input type="radio"/> 5 a 6 veces al día<br><input type="radio"/> más 6 veces al día |
| vino blanco               | <input checked="" type="radio"/> Nunca o menos 1 vez al mes<br><input type="radio"/> 1 a 3 veces mes<br><input type="radio"/> 1 vez semana<br><input type="radio"/> 2 a 4 veces semana<br><input type="radio"/> 5 a 6 veces semana<br><input type="radio"/> 1 vez al día<br><input type="radio"/> 2 a 3 veces al día<br><input type="radio"/> 5 a 6 veces al día<br><input type="radio"/> más 6 veces al día |

---

|                    |                                                                                                                                                                                                                                                                                                                                                                                                              |
|--------------------|--------------------------------------------------------------------------------------------------------------------------------------------------------------------------------------------------------------------------------------------------------------------------------------------------------------------------------------------------------------------------------------------------------------|
| vino seco o vermut | <input checked="" type="radio"/> Nunca o menos 1 vez al mes<br><input type="radio"/> 1 a 3 veces mes<br><input type="radio"/> 1 vez semana<br><input type="radio"/> 2 a 4 veces semana<br><input type="radio"/> 5 a 6 veces semana<br><input type="radio"/> 1 vez al día<br><input type="radio"/> 2 a 3 veces al día<br><input type="radio"/> 5 a 6 veces al día<br><input type="radio"/> más 6 veces al día |
|--------------------|--------------------------------------------------------------------------------------------------------------------------------------------------------------------------------------------------------------------------------------------------------------------------------------------------------------------------------------------------------------------------------------------------------------|

---

|         |                                                                                                                                                                                                                                                                                                                                                                                                              |
|---------|--------------------------------------------------------------------------------------------------------------------------------------------------------------------------------------------------------------------------------------------------------------------------------------------------------------------------------------------------------------------------------------------------------------|
| cerveza | <input checked="" type="radio"/> Nunca o menos 1 vez al mes<br><input type="radio"/> 1 a 3 veces mes<br><input type="radio"/> 1 vez semana<br><input type="radio"/> 2 a 4 veces semana<br><input type="radio"/> 5 a 6 veces semana<br><input type="radio"/> 1 vez al día<br><input type="radio"/> 2 a 3 veces al día<br><input type="radio"/> 5 a 6 veces al día<br><input type="radio"/> más 6 veces al día |
|---------|--------------------------------------------------------------------------------------------------------------------------------------------------------------------------------------------------------------------------------------------------------------------------------------------------------------------------------------------------------------------------------------------------------------|

---

|                     |                                                                                                                                                                                                                                                                                                                                                                                                              |
|---------------------|--------------------------------------------------------------------------------------------------------------------------------------------------------------------------------------------------------------------------------------------------------------------------------------------------------------------------------------------------------------------------------------------------------------|
| cerveza sin alcohol | <input type="radio"/> Nunca o menos 1 vez al mes<br><input checked="" type="radio"/> 1 a 3 veces mes<br><input type="radio"/> 1 vez semana<br><input type="radio"/> 2 a 4 veces semana<br><input type="radio"/> 5 a 6 veces semana<br><input type="radio"/> 1 vez al día<br><input type="radio"/> 2 a 3 veces al día<br><input type="radio"/> 5 a 6 veces al día<br><input type="radio"/> más 6 veces al día |
|---------------------|--------------------------------------------------------------------------------------------------------------------------------------------------------------------------------------------------------------------------------------------------------------------------------------------------------------------------------------------------------------------------------------------------------------|

---

|         |                                                                                                                                                                                                                                                                                                                                                                                                              |
|---------|--------------------------------------------------------------------------------------------------------------------------------------------------------------------------------------------------------------------------------------------------------------------------------------------------------------------------------------------------------------------------------------------------------------|
| licores | <input checked="" type="radio"/> Nunca o menos 1 vez al mes<br><input type="radio"/> 1 a 3 veces mes<br><input type="radio"/> 1 vez semana<br><input type="radio"/> 2 a 4 veces semana<br><input type="radio"/> 5 a 6 veces semana<br><input type="radio"/> 1 vez al día<br><input type="radio"/> 2 a 3 veces al día<br><input type="radio"/> 5 a 6 veces al día<br><input type="radio"/> más 6 veces al día |
|---------|--------------------------------------------------------------------------------------------------------------------------------------------------------------------------------------------------------------------------------------------------------------------------------------------------------------------------------------------------------------------------------------------------------------|

---

|                       |                                                                                                                                                                                                                                                                                                                                                                                                              |
|-----------------------|--------------------------------------------------------------------------------------------------------------------------------------------------------------------------------------------------------------------------------------------------------------------------------------------------------------------------------------------------------------------------------------------------------------|
| ginebra o ron o vodka | <input checked="" type="radio"/> Nunca o menos 1 vez al mes<br><input type="radio"/> 1 a 3 veces mes<br><input type="radio"/> 1 vez semana<br><input type="radio"/> 2 a 4 veces semana<br><input type="radio"/> 5 a 6 veces semana<br><input type="radio"/> 1 vez al día<br><input type="radio"/> 2 a 3 veces al día<br><input type="radio"/> 5 a 6 veces al día<br><input type="radio"/> más 6 veces al día |
|-----------------------|--------------------------------------------------------------------------------------------------------------------------------------------------------------------------------------------------------------------------------------------------------------------------------------------------------------------------------------------------------------------------------------------------------------|

---

|                 |                                                                                                                                                                                                                                                                                                                                                                                                              |
|-----------------|--------------------------------------------------------------------------------------------------------------------------------------------------------------------------------------------------------------------------------------------------------------------------------------------------------------------------------------------------------------------------------------------------------------|
| refresco normal | <input type="radio"/> Nunca o menos 1 vez al mes<br><input checked="" type="radio"/> 1 a 3 veces mes<br><input type="radio"/> 1 vez semana<br><input type="radio"/> 2 a 4 veces semana<br><input type="radio"/> 5 a 6 veces semana<br><input type="radio"/> 1 vez al día<br><input type="radio"/> 2 a 3 veces al día<br><input type="radio"/> 5 a 6 veces al día<br><input type="radio"/> más 6 veces al día |
|-----------------|--------------------------------------------------------------------------------------------------------------------------------------------------------------------------------------------------------------------------------------------------------------------------------------------------------------------------------------------------------------------------------------------------------------|

---

---

refresco sin azúcar

- ☐ Nunca o menos 1 vez al mes  
☒ 1 a 3 veces mes  
☐ 1 vez semana  
☐ 2 a 4 veces semana  
☐ 5 a 6 veces semana  
☐ 1 vez al día  
☐ 2 a 3 veces al día  
☐ 5 a 6 veces al día  
☐ más 6 veces al día

---

Agua del grifo

- ☐ Nunca o menos 1 vez al mes  
☐ 1 a 3 veces mes  
☐ 1 vez semana  
☐ 2 a 4 veces semana  
☐ 5 a 6 veces semana  
☐ 1 vez al día  
☐ 2 a 3 veces al día  
☐ 5 a 6 veces al día  
☒ más 6 veces al día

---

agua embotellada sin gas

- ☐ Nunca o menos 1 vez al mes  
☐ 1 a 3 veces mes  
☐ 1 vez semana  
☐ 2 a 4 veces semana  
☐ 5 a 6 veces semana  
☐ 1 vez al día  
☐ 2 a 3 veces al día  
☐ 5 a 6 veces al día  
☒ más 6 veces al día

---

agua embotellada con gas

- ☐ Nunca o menos 1 vez al mes  
☐ 1 a 3 veces mes  
☐ 1 vez semana  
☐ 2 a 4 veces semana  
☐ 5 a 6 veces semana  
☒ 1 vez al día  
☐ 2 a 3 veces al día  
☐ 5 a 6 veces al día  
☐ más 6 veces al día

---

zumو frutas embasado

- ☒ Nunca o menos 1 vez al mes  
☐ 1 a 3 veces mes  
☐ 1 vez semana  
☐ 2 a 4 veces semana  
☐ 5 a 6 veces semana  
☐ 1 vez al día  
☐ 2 a 3 veces al día  
☐ 5 a 6 veces al día  
☐ más 6 veces al día

---

cafe

- ☒ Nunca o menos 1 vez al mes  
☐ 1 a 3 veces mes  
☐ 1 vez semana  
☐ 2 a 4 veces semana  
☐ 5 a 6 veces semana  
☐ 1 vez al día  
☐ 2 a 3 veces al día  
☐ 5 a 6 veces al día  
☐ más 6 veces al día



|                       |                                                                                                                                                                                                                                                                                                                                                                                                              |
|-----------------------|--------------------------------------------------------------------------------------------------------------------------------------------------------------------------------------------------------------------------------------------------------------------------------------------------------------------------------------------------------------------------------------------------------------|
| cafe descafeinado     | <input type="radio"/> Nunca o menos 1 vez al mes<br><input checked="" type="radio"/> 1 a 3 veces mes<br><input type="radio"/> 1 vez semana<br><input type="radio"/> 2 a 4 veces semana<br><input type="radio"/> 5 a 6 veces semana<br><input type="radio"/> 1 vez al día<br><input type="radio"/> 2 a 3 veces al día<br><input type="radio"/> 5 a 6 veces al día<br><input type="radio"/> más 6 veces al día |
| te o infusión         | <input type="radio"/> Nunca o menos 1 vez al mes<br><input checked="" type="radio"/> 1 a 3 veces mes<br><input type="radio"/> 1 vez semana<br><input type="radio"/> 2 a 4 veces semana<br><input type="radio"/> 5 a 6 veces semana<br><input type="radio"/> 1 vez al día<br><input type="radio"/> 2 a 3 veces al día<br><input type="radio"/> 5 a 6 veces al día<br><input type="radio"/> más 6 veces al día |
| sopa o puré verduras  | <input type="radio"/> Nunca o menos 1 vez al mes<br><input checked="" type="radio"/> 1 a 3 veces mes<br><input type="radio"/> 1 vez semana<br><input type="radio"/> 2 a 4 veces semana<br><input type="radio"/> 5 a 6 veces semana<br><input type="radio"/> 1 vez al día<br><input type="radio"/> 2 a 3 veces al día<br><input type="radio"/> 5 a 6 veces al día<br><input type="radio"/> más 6 veces al día |
| croquetas pollo jamón | <input checked="" type="radio"/> Nunca o menos 1 vez al mes<br><input type="radio"/> 1 a 3 veces mes<br><input type="radio"/> 1 vez semana<br><input type="radio"/> 2 a 4 veces semana<br><input type="radio"/> 5 a 6 veces semana<br><input type="radio"/> 1 vez al día<br><input type="radio"/> 2 a 3 veces al día<br><input type="radio"/> 5 a 6 veces al día<br><input type="radio"/> más 6 veces al día |
| croquetas pescado     | <input type="radio"/> Nunca o menos 1 vez al mes<br><input type="radio"/> 1 a 3 veces mes<br><input checked="" type="radio"/> 1 vez semana<br><input type="radio"/> 2 a 4 veces semana<br><input type="radio"/> 5 a 6 veces semana<br><input type="radio"/> 1 vez al día<br><input type="radio"/> 2 a 3 veces al día<br><input type="radio"/> 5 a 6 veces al día<br><input type="radio"/> más 6 veces al día |
| mayonesa              | <input type="radio"/> Nunca o menos 1 vez al mes<br><input type="radio"/> 1 a 3 veces mes<br><input type="radio"/> 1 vez semana<br><input checked="" type="radio"/> 2 a 4 veces semana<br><input type="radio"/> 5 a 6 veces semana<br><input type="radio"/> 1 vez al día<br><input type="radio"/> 2 a 3 veces al día<br><input type="radio"/> 5 a 6 veces al día<br><input type="radio"/> más 6 veces al día |

salsa tomate

- ☒ Nunca o menos 1 vez al mes  
☐ 1 a 3 veces mes  
☐ 1 vez semana  
☐ 2 a 4 veces semana  
☐ 5 a 6 veces semana  
☐ 1 vez al día  
☐ 2 a 3 veces al día  
☐ 5 a 6 veces al día  
☐ más 6 veces al día

ketchup

- ☒ Nunca o menos 1 vez al mes  
☐ 1 a 3 veces mes  
☐ 1 vez semana  
☐ 2 a 4 veces semana  
☐ 5 a 6 veces semana  
☐ 1 vez al día  
☐ 2 a 3 veces al día  
☐ 5 a 6 veces al día  
☐ más 6 veces al día

sal

- ☒ Nunca o menos 1 vez al mes  
☐ 1 a 3 veces mes  
☐ 1 vez semana  
☐ 2 a 4 veces semana  
☐ 5 a 6 veces semana  
☐ 1 vez al día  
☐ 2 a 3 veces al día  
☐ 5 a 6 veces al día  
☐ más 6 veces al día

ajo

- ☒ Nunca o menos 1 vez al mes  
☐ 1 a 3 veces mes  
☐ 1 vez semana  
☐ 2 a 4 veces semana  
☐ 5 a 6 veces semana  
☐ 1 vez al día  
☐ 2 a 3 veces al día  
☐ 5 a 6 veces al día  
☐ más 6 veces al día

mermelada o miel

- ☐ Nunca o menos 1 vez al mes  
☒ 1 a 3 veces mes  
☐ 1 vez semana  
☐ 2 a 4 veces semana  
☐ 5 a 6 veces semana  
☐ 1 vez al día  
☐ 2 a 3 veces al día  
☐ 5 a 6 veces al día  
☐ más 6 veces al día

azúcar

- ☒ Nunca o menos 1 vez al mes  
☐ 1 a 3 veces mes  
☐ 1 vez semana  
☐ 2 a 4 veces semana  
☐ 5 a 6 veces semana  
☐ 1 vez al día  
☐ 2 a 3 veces al día  
☐ 5 a 6 veces al día  
☐ más 6 veces al día

---

Otro alimento

---

suplementos vitamínicos

- ☐ si  
☒ no

suplementos vitamínicos

---

dieta previa

- ☐ si  
☒ no

motivo dieta

- ☒ no dieta  
☐ control peso  
☐ control colesterol  
☐ control diabetes  
☐ problemas estómago  
☐ problemas vesícula o hepáticos  
☐ HTA o cardiopatía  
☐ problemas renales  
☐ alergia alimentaria  
☐ ácido úrico elevado  
☐ vegetariana  
☐ otros

cambio alimentos año previo gestación

- ☒ si  
☐ no

cambio lácteos

- ☐ eliminado  
☒ disminuido  
☐ igual  
☐ aumentado  
☐ no sabe

cambio huevos

- ☐ eliminado  
☒ disminuido  
☐ igual  
☐ aumentado  
☐ no sabe

cambio carne

- ☐ eliminado  
☐ disminuido  
☐ igual  
☒ aumentado  
☐ no sabe

cambio pescado

- ☐ eliminado  
☐ disminuido  
☐ igual  
☒ aumentado  
☐ no sabe

cambio verduras

- ☐ eliminado  
☐ disminuido  
☐ igual  
☒ aumentado  
☐ no sabe

|                            |                                                                                                                                                                                                                        |
|----------------------------|------------------------------------------------------------------------------------------------------------------------------------------------------------------------------------------------------------------------|
| cambio legumbres           | <input type="radio"/> eliminado<br><input type="radio"/> disminuido<br><input type="radio"/> igual<br><input checked="" type="radio"/> aumentado<br><input type="radio"/> no sabe                                      |
| cambio fruta               | <input type="radio"/> eliminado<br><input type="radio"/> disminuido<br><input checked="" type="radio"/> igual<br><input type="radio"/> aumentado<br><input type="radio"/> no sabe                                      |
| cambio pan                 | <input type="radio"/> eliminado<br><input type="radio"/> disminuido<br><input checked="" type="radio"/> igual<br><input type="radio"/> aumentado<br><input type="radio"/> no sabe                                      |
| cambio aceite oliva        | <input type="radio"/> eliminado<br><input type="radio"/> disminuido<br><input checked="" type="radio"/> igual<br><input type="radio"/> aumentado<br><input type="radio"/> no sabe                                      |
| cambio mante o margarina   | <input type="radio"/> eliminado<br><input type="radio"/> disminuido<br><input checked="" type="radio"/> igual<br><input type="radio"/> aumentado<br><input type="radio"/> no sabe                                      |
| cambio azúcar y dulces     | <input type="radio"/> eliminado<br><input checked="" type="radio"/> disminuido<br><input type="radio"/> igual<br><input type="radio"/> aumentado<br><input type="radio"/> no sabe                                      |
| cambio bebidas alcohólicas | <input checked="" type="radio"/> eliminado<br><input type="radio"/> disminuido<br><input type="radio"/> igual<br><input type="radio"/> aumentado<br><input type="radio"/> no sabe                                      |
| frecuencia comidas fritas  | <input type="radio"/> a diario<br><input type="radio"/> 5 a 6 veces semana<br><input type="radio"/> 2 a 4 veces semana<br><input checked="" type="radio"/> 1 vez semana<br><input type="radio"/> menos de 1 vez semana |
| carne                      | <input type="radio"/> no como<br><input type="radio"/> cruda<br><input type="radio"/> poco hecha<br><input checked="" type="radio"/> hecha<br><input type="radio"/> muy hecha                                          |
| grasa visible carne        | <input checked="" type="radio"/> quita toda<br><input type="radio"/> quita mayoría<br><input type="radio"/> quita un poco<br><input type="radio"/> no quita nada                                                       |

|                                |                                                                                                                                                                                                                                                          |
|--------------------------------|----------------------------------------------------------------------------------------------------------------------------------------------------------------------------------------------------------------------------------------------------------|
| cocina carne                   | <input checked="" type="radio"/> a la plancha<br><input type="radio"/> a la parrilla<br><input type="radio"/> asada<br><input type="radio"/> frita<br><input type="radio"/> guisada                                                                      |
| tostado quemado carne          | <input checked="" type="radio"/> nunca<br><input type="radio"/> 1 vez mes<br><input type="radio"/> 2 a 3 veces mes<br><input type="radio"/> 1 vez semana<br><input type="radio"/> 2 a 3 semanas                                                          |
| tostado quemado pescado        | <input checked="" type="radio"/> nunca<br><input type="radio"/> 1 vez mes<br><input type="radio"/> 2 a 3 veces mes<br><input type="radio"/> 1 vez semana<br><input type="radio"/> 2 a 3 semanas                                                          |
| socarrat paella                | <input type="radio"/> nunca<br><input checked="" type="radio"/> 1 vez mes<br><input type="radio"/> 2 a 3 veces mes<br><input type="radio"/> 1 vez semana<br><input type="radio"/> 2 a 3 semanas                                                          |
| grasa o aceite cocinar         | <input type="radio"/> mantequilla<br><input type="radio"/> margarina<br><input type="radio"/> aceite oliva<br><input checked="" type="radio"/> aceite oliva virgen extra<br><input type="radio"/> aceite vegetal<br><input type="radio"/> mezcla aceites |
| grasa aceite aliñar            | <input type="radio"/> mantequilla<br><input type="radio"/> margarina<br><input type="radio"/> aceite oliva<br><input checked="" type="radio"/> aceite oliva virgen extra<br><input type="radio"/> aceite vegetal<br><input type="radio"/> mezcla aceites |
| grasa aceite freir             | <input type="radio"/> mantequilla<br><input type="radio"/> margarina<br><input type="radio"/> aceite oliva<br><input checked="" type="radio"/> aceite oliva virgen extra<br><input type="radio"/> aceite vegetal<br><input type="radio"/> mezcla aceites |
| Ejercicio cuestionario         | <input checked="" type="radio"/> si<br><input type="radio"/> no                                                                                                                                                                                          |
| horas de sueño incluido siesta | [*DATA REMOVED*]                                                                                                                                                                                                                                         |
| minutos siesta                 | [*DATA REMOVED*]                                                                                                                                                                                                                                         |
| horas televisión semana        |                                                                                                                                                                                                                                                          |

|                                        |                                                                                                                                                                                                                                                                                                                                                                           |
|----------------------------------------|---------------------------------------------------------------------------------------------------------------------------------------------------------------------------------------------------------------------------------------------------------------------------------------------------------------------------------------------------------------------------|
| actividad trabajo                      | <input type="radio"/> casi siempre sentado<br><input type="radio"/> sentado 50 por cien<br><input type="radio"/> casi siempre de pie, quieto<br><input checked="" type="radio"/> casi siempre levantado caminando y llevando pocas cosas<br><input type="radio"/> casi siempre levantado, caminando y llevado muchas cosas<br><input type="radio"/> trabajo manual pesado |
| tiempo caminar o bici al día           | <input checked="" type="radio"/> casi nunca<br><input type="radio"/> menos 20min día<br><input type="radio"/> 20 a 40 min día<br><input type="radio"/> 40 a 60 min día<br><input type="radio"/> 1h o 1h y media día<br><input type="radio"/> más de 1h y media al día                                                                                                     |
| tiempo tareas casa al día              | <input type="radio"/> menos de 1h día<br><input checked="" type="radio"/> 1 a 2h día<br><input type="radio"/> 3 a 4h día<br><input type="radio"/> 5 a 6h día<br><input type="radio"/> 7 a 8h día<br><input type="radio"/> más de 8h día                                                                                                                                   |
| tiempo libre televisión ordenador leer | <input type="radio"/> menos 1h día<br><input type="radio"/> 1h día<br><input type="radio"/> 2h día<br><input checked="" type="radio"/> 3h día<br><input type="radio"/> 4h día<br><input type="radio"/> 5 a 6h día<br><input type="radio"/> mas 6h día                                                                                                                     |
| tiempo libre ejercicio o deporte       | <input checked="" type="radio"/> menos 1h semana<br><input type="radio"/> 1h semana<br><input type="radio"/> 2h semana<br><input type="radio"/> 3h semana<br><input type="radio"/> 4 a 5h semana<br><input type="radio"/> mas 5h semana                                                                                                                                   |
| como se considera                      | <input type="radio"/> sedentaria<br><input type="radio"/> poco activa<br><input checked="" type="radio"/> moderadamente activa<br><input type="radio"/> bastante activa<br><input type="radio"/> muy activa<br><input type="radio"/> no sabe                                                                                                                              |
| FUR                                    | [*DATA REMOVED*]                                                                                                                                                                                                                                                                                                                                                          |
| Semanas gestación 2T                   | [*DATA REMOVED*]                                                                                                                                                                                                                                                                                                                                                          |
| Días gestación 2T                      | [*DATA REMOVED*]                                                                                                                                                                                                                                                                                                                                                          |
| DBP 2T                                 | [*DATA REMOVED*]                                                                                                                                                                                                                                                                                                                                                          |
| CC 2T                                  | [*DATA REMOVED*]                                                                                                                                                                                                                                                                                                                                                          |
| AC 2T                                  | [*DATA REMOVED*]                                                                                                                                                                                                                                                                                                                                                          |

|                                                   |                                                                                                                                                                                                 |
|---------------------------------------------------|-------------------------------------------------------------------------------------------------------------------------------------------------------------------------------------------------|
| LF 2T                                             | [*DATA REMOVED*]                                                                                                                                                                                |
| PFE 2T (Hadlock)                                  | [*DATA REMOVED*]                                                                                                                                                                                |
| Semanas gestación 3T                              | [*DATA REMOVED*]                                                                                                                                                                                |
| días 3T                                           | [*DATA REMOVED*]                                                                                                                                                                                |
| DBP 3T                                            | [*DATA REMOVED*]                                                                                                                                                                                |
| CC 3T                                             | [*DATA REMOVED*]                                                                                                                                                                                |
| AC 3T                                             | [*DATA REMOVED*]                                                                                                                                                                                |
| LF 3T                                             | [*DATA REMOVED*]                                                                                                                                                                                |
| PFE 3T (Hadlock)                                  | [*DATA REMOVED*]                                                                                                                                                                                |
| Semanas de gestación final                        | [*DATA REMOVED*]                                                                                                                                                                                |
| días gestación final                              | [*DATA REMOVED*]                                                                                                                                                                                |
| Localización placenta                             | <input type="radio"/> anterior<br><input type="radio"/> lateral derecha<br><input type="radio"/> lateral izquierda<br><input checked="" type="radio"/> posterior<br><input type="radio"/> fondo |
| Presentación longitudinal cefálica                | <input type="radio"/> no<br><input checked="" type="radio"/> si                                                                                                                                 |
| Dorso                                             | <input type="radio"/> izquierda anterior<br><input type="radio"/> izquierda posterior<br><input type="radio"/> derecha anterior<br><input checked="" type="radio"/> derecha posterior           |
| diámetro biparietal                               | [*DATA REMOVED*]                                                                                                                                                                                |
| Circunferencia craneal                            | [*DATA REMOVED*]                                                                                                                                                                                |
| Circunferencia abdominal                          | [*DATA REMOVED*]                                                                                                                                                                                |
| Longitud de femur                                 | [*DATA REMOVED*]                                                                                                                                                                                |
| tejido celular subcutáneo a nivel del muslo en mm | [*DATA REMOVED*]                                                                                                                                                                                |
| tejido celular subcutáneo en abdomen en mm        | [*DATA REMOVED*]                                                                                                                                                                                |
| Volumen del muslo en cm3                          | [*DATA REMOVED*]                                                                                                                                                                                |
| Peso fetal estimado según fórmula de Hadlock      | [*DATA REMOVED*]                                                                                                                                                                                |

|                                               |                                                                                                                                                          |
|-----------------------------------------------|----------------------------------------------------------------------------------------------------------------------------------------------------------|
| Percentil                                     | [*DATA REMOVED*]                                                                                                                                         |
| Peso fetal estimado según fórmula de Scioscia | <hr/>                                                                                                                                                    |
| Peso fetal estimado según fórmula de LEE      | <hr/>                                                                                                                                                    |
| Tipo de parto                                 | <input checked="" type="radio"/> eutocico<br><input type="radio"/> instrumentado/ventosa<br><input type="radio"/> cesarea                                |
| fecha de nacimiento                           | [*DATA REMOVED*]                                                                                                                                         |
| Días entre exploración y nacimiento           | [*DATA REMOVED*]                                                                                                                                         |
| Peso RN en g                                  | [*DATA REMOVED*]                                                                                                                                         |
| sexo                                          | <input type="radio"/> mujer<br><input checked="" type="radio"/> hombre                                                                                   |
| Apgar 1 minuto                                | [*DATA REMOVED*]                                                                                                                                         |
| Apgar 5 minutos                               | [*DATA REMOVED*]                                                                                                                                         |
| Apgar 10 minutos                              | <hr/>                                                                                                                                                    |
| antecedente Covid durante gestación           | <input type="radio"/> Yes<br><input checked="" type="radio"/> No                                                                                         |
| Nivel de estudios                             | <input type="radio"/> ninguno<br><input type="radio"/> primarios<br><input checked="" type="radio"/> secundarios<br><input type="radio"/> universitarios |



# Base\_datos\_estimacion\_peso\_fetal

|                                       |                                                                                                                                                                                                                                                                                      |
|---------------------------------------|--------------------------------------------------------------------------------------------------------------------------------------------------------------------------------------------------------------------------------------------------------------------------------------|
| Número de identificación participante | 117                                                                                                                                                                                                                                                                                  |
| CODIGO PARTICIPANTE                   |                                                                                                                                                                                                                                                                                      |
| Edad                                  | [*DATA REMOVED*]                                                                                                                                                                                                                                                                     |
| Gestaciones                           | <input type="radio"/> 1<br><input checked="" type="radio"/> 2<br><input type="radio"/> 3<br><input type="radio"/> mas de 3                                                                                                                                                           |
| partos                                | <input type="radio"/> 0<br><input checked="" type="radio"/> 1<br><input type="radio"/> 2<br><input type="radio"/> 3<br><input type="radio"/> mas de 3                                                                                                                                |
| cesáreas                              | <input checked="" type="radio"/> 0<br><input type="radio"/> 1<br><input type="radio"/> 2<br><input type="radio"/> 3<br><input type="radio"/> mas de 3                                                                                                                                |
| Abortos                               | <input checked="" type="radio"/> 0<br><input type="radio"/> 1<br><input type="radio"/> 2<br><input type="radio"/> 3<br><input type="radio"/> mas de 3                                                                                                                                |
| Tipo de gestacion                     | <input type="radio"/> espontanea<br><input type="radio"/> IAC inseminación artificial conyuge<br><input type="radio"/> IAD inseminación artificial donante<br><input checked="" type="radio"/> FIV Fecundación in Vitro<br><input type="radio"/> Ovodon FIV con donación de ovocitos |
| peso previo a embarazo                | [*DATA REMOVED*]                                                                                                                                                                                                                                                                     |
| Ganancia ponderal embarazo            | [*DATA REMOVED*]                                                                                                                                                                                                                                                                     |
| Talla madre                           | [*DATA REMOVED*]                                                                                                                                                                                                                                                                     |
| IMC previo embarazo                   | 33.564013840830455                                                                                                                                                                                                                                                                   |
| Patología obstétrica                  | <input checked="" type="radio"/> no<br><input type="radio"/> si                                                                                                                                                                                                                      |
| Diabetes pregestacional               | <input checked="" type="radio"/> no<br><input type="radio"/> si                                                                                                                                                                                                                      |
| Diabetes gestacional                  | <input checked="" type="radio"/> no<br><input type="radio"/> si                                                                                                                                                                                                                      |

|                                            |                                                                                                                                                                                      |
|--------------------------------------------|--------------------------------------------------------------------------------------------------------------------------------------------------------------------------------------|
| Diabetes gestacional con insulina          | <input checked="" type="radio"/> no<br><input type="radio"/> si                                                                                                                      |
| Diabetes gestacional con dieta y ejercicio | <input checked="" type="radio"/> no<br><input type="radio"/> si                                                                                                                      |
| Percentil fetos previos                    | <input type="radio"/> Nada<br><input type="radio"/> percentil menor de 10<br><input checked="" type="radio"/> percentil entre 10 y 90<br><input type="radio"/> percentil mayor de 90 |
| Exfumadora                                 | <input checked="" type="radio"/> Nada<br><input type="radio"/> menos de 5 años<br><input type="radio"/> 5 a 10 años<br><input type="radio"/> mayor o igual a 10 años                 |
| Hábito tabáquico                           | <input checked="" type="radio"/> no<br><input type="radio"/> si                                                                                                                      |
| fumadora                                   | [*DATA REMOVED*]                                                                                                                                                                     |
| Consumo otros tóxicos                      | <input checked="" type="radio"/> no<br><input type="radio"/> si                                                                                                                      |
| Hb 1T                                      | [*DATA REMOVED*]                                                                                                                                                                     |
| Htc 1T                                     | [*DATA REMOVED*]                                                                                                                                                                     |
| Hb 2T                                      | [*DATA REMOVED*]                                                                                                                                                                     |
| HTC 2T                                     | [*DATA REMOVED*]                                                                                                                                                                     |
| Hb 3T                                      | _____                                                                                                                                                                                |
| HTC 3T                                     | _____                                                                                                                                                                                |
| Suplemento FE oral                         | <input checked="" type="radio"/> si<br><input type="radio"/> no                                                                                                                      |
| Suplemento fe iv                           | <input type="radio"/> si<br><input checked="" type="radio"/> no                                                                                                                      |
| Transfusión                                | <input checked="" type="radio"/> no<br><input type="radio"/> si                                                                                                                      |
| Solicitada Vit D                           | <input checked="" type="radio"/> no<br><input type="radio"/> si                                                                                                                      |
| Deficit vit D                              | <input type="radio"/> no<br><input type="radio"/> si                                                                                                                                 |

|                       |                                                                                                                                                                                                                                                                                                                                                                                                              |
|-----------------------|--------------------------------------------------------------------------------------------------------------------------------------------------------------------------------------------------------------------------------------------------------------------------------------------------------------------------------------------------------------------------------------------------------------|
| Suplemento vit D      | <input type="radio"/> si<br><input type="radio"/> no                                                                                                                                                                                                                                                                                                                                                         |
| Dieta, cuestionario   | <input checked="" type="radio"/> si<br><input type="radio"/> no                                                                                                                                                                                                                                                                                                                                              |
| Leche entera          | <input checked="" type="radio"/> Nunca o menos 1 vez al mes<br><input type="radio"/> 1 a 3 veces mes<br><input type="radio"/> 1 vez semana<br><input type="radio"/> 2 a 4 veces semana<br><input type="radio"/> 5 a 6 veces semana<br><input type="radio"/> 1 vez al día<br><input type="radio"/> 2 a 3 veces al día<br><input type="radio"/> 5 a 6 veces al día<br><input type="radio"/> más 6 veces al día |
| Leche semidesnatada   | <input type="radio"/> Nunca o menos 1 vez al mes<br><input checked="" type="radio"/> 1 a 3 veces mes<br><input type="radio"/> 1 vez semana<br><input type="radio"/> 2 a 4 veces semana<br><input type="radio"/> 5 a 6 veces semana<br><input type="radio"/> 1 vez al día<br><input type="radio"/> 2 a 3 veces al día<br><input type="radio"/> 5 a 6 veces al día<br><input type="radio"/> mas 6 veces al día |
| Leche desnatada       | <input checked="" type="radio"/> Nunca o menos 1 vez al mes<br><input type="radio"/> 1 a 3 veces mes<br><input type="radio"/> 1 vez semana<br><input type="radio"/> 2 a 4 veces semana<br><input type="radio"/> 5 a 6 veces semana<br><input type="radio"/> 1 vez al día<br><input type="radio"/> 2 a 3 veces al día<br><input type="radio"/> 5 a 6 veces al día<br><input type="radio"/> más 6 veces al día |
| Leche condensada      | <input checked="" type="radio"/> Nunca o menos 1 vez al mes<br><input type="radio"/> 1 a 3 veces mes<br><input type="radio"/> 1 vez semana<br><input type="radio"/> 2 a 4 veces semana<br><input type="radio"/> 5 a 6 veces semana<br><input type="radio"/> 1 vez al día<br><input type="radio"/> 2 a 3 veces al día<br><input type="radio"/> 5 a 6 veces al día<br><input type="radio"/> más 6 veces al día |
| nata o crema de leche | <input checked="" type="radio"/> Nunca o menos 1 vez al mes<br><input type="radio"/> 1 a 3 veces mes<br><input type="radio"/> 1 vez semana<br><input type="radio"/> 2 a 4 veces semana<br><input type="radio"/> 5 a 6 veces semana<br><input type="radio"/> 1 vez al día<br><input type="radio"/> 2 a 3 veces al día<br><input type="radio"/> 5 a 6 veces al día<br><input type="radio"/> más 6 veces al día |

---

Yogurt Entero

- ☐ Nunca o menos 1 vez al mes  
☐ 1 a 3 veces mes  
☐ 1 vez semana  
☒ 2 a 4 veces semana  
☐ 5 a 6 veces semana  
☐ 1 vez al día  
☐ 2 a 3 veces al día  
☐ 5 a 6 veces al día  
☐ más 6 veces al día

---

Yogurt desnatado

- ☒ Nunca o menos 1 vez al mes  
☐ 1 a 3 veces mes  
☐ 1 vez semana  
☐ 2 a 4 veces semana  
☐ 5 a 6 veces semana  
☐ 1 vez al día  
☐ 2 a 3 veces al día  
☐ 5 a 6 veces al día  
☐ más 6 veces al día

---

100g requesón o queso blando o queso fresco

- ☐ Nunca o menos 1 vez al mes  
☐ 1 a 3 veces mes  
☐ 1 vez semana  
☐ 2 a 4 veces semana  
☐ 5 a 6 veces semana  
☒ 1 vez al día  
☐ 2 a 3 veces al día  
☐ 5 a 6 veces al día  
☐ más 6 veces al día

---

queso curado o semicurado o cremoso

- ☐ Nunca o menos 1 vez al mes  
☐ 1 a 3 veces mes  
☐ 1 vez semana  
☐ 2 a 4 veces semana  
☐ 5 a 6 veces semana  
☒ 1 vez al día  
☐ 2 a 3 veces al día  
☐ 5 a 6 veces al día  
☐ más 6 veces al día

---

natillas flan pudding

- ☐ Nunca o menos 1 vez al mes  
☒ 1 a 3 veces mes  
☐ 1 vez semana  
☐ 2 a 4 veces semana  
☐ 5 a 6 veces semana  
☐ 1 vez al día  
☐ 2 a 3 veces al día  
☐ 5 a 6 veces al día  
☐ más 6 veces al día

---

Helado

- ☐ Nunca o menos 1 vez al mes  
☒ 1 a 3 veces mes  
☐ 1 vez semana  
☐ 2 a 4 veces semana  
☐ 5 a 6 veces semana  
☐ 1 vez al día  
☐ 2 a 3 veces al día  
☐ 5 a 6 veces al día  
☐ más 6 veces al día

|                                      |                                                                                                                                                                                                                                                                                                                                                                                                              |
|--------------------------------------|--------------------------------------------------------------------------------------------------------------------------------------------------------------------------------------------------------------------------------------------------------------------------------------------------------------------------------------------------------------------------------------------------------------|
| huevo                                | <input type="radio"/> Nunca o menos 1 vez al mes<br><input type="radio"/> 1 a 3 veces mes<br><input type="radio"/> 1 vez semana<br><input checked="" type="radio"/> 2 a 4 veces semana<br><input type="radio"/> 5 a 6 veces semana<br><input type="radio"/> 1 vez al día<br><input type="radio"/> 2 a 3 veces al día<br><input type="radio"/> 5 a 6 veces al día<br><input type="radio"/> más 6 veces al día |
| Pollo con piel                       | <input checked="" type="radio"/> Nunca o menos 1 vez al mes<br><input type="radio"/> 1 a 3 veces mes<br><input type="radio"/> 1 vez semana<br><input type="radio"/> 2 a 4 veces semana<br><input type="radio"/> 5 a 6 veces semana<br><input type="radio"/> 1 vez al día<br><input type="radio"/> 2 a 3 veces al día<br><input type="radio"/> 5 a 6 veces al día<br><input type="radio"/> más 6 veces al día |
| pollo sin piel                       | <input type="radio"/> Nunca o menos 1 vez al mes<br><input checked="" type="radio"/> 1 a 3 veces mes<br><input type="radio"/> 1 vez semana<br><input type="radio"/> 2 a 4 veces semana<br><input type="radio"/> 5 a 6 veces semana<br><input type="radio"/> 1 vez al día<br><input type="radio"/> 2 a 3 veces al día<br><input type="radio"/> 5 a 6 veces al día<br><input type="radio"/> más 6 veces al día |
| Ternera o cerdo o cordero            | <input checked="" type="radio"/> Nunca o menos 1 vez al mes<br><input type="radio"/> 1 a 3 veces mes<br><input type="radio"/> 1 vez semana<br><input type="radio"/> 2 a 4 veces semana<br><input type="radio"/> 5 a 6 veces semana<br><input type="radio"/> 1 vez al día<br><input type="radio"/> 2 a 3 veces al día<br><input type="radio"/> 5 a 6 veces al día<br><input type="radio"/> más 6 veces al día |
| carne caza: Conejo o codorniz o pato | <input checked="" type="radio"/> Nunca o menos 1 vez al mes<br><input type="radio"/> 1 a 3 veces mes<br><input type="radio"/> 1 vez semana<br><input type="radio"/> 2 a 4 veces semana<br><input type="radio"/> 5 a 6 veces semana<br><input type="radio"/> 1 vez al día<br><input type="radio"/> 2 a 3 veces al día<br><input type="radio"/> 5 a 6 veces al día<br><input type="radio"/> más 6 veces al día |
| Hígado de ternera o cerdo o pollo    | <input checked="" type="radio"/> Nunca o menos 1 vez al mes<br><input type="radio"/> 1 a 3 veces mes<br><input type="radio"/> 1 vez semana<br><input type="radio"/> 2 a 4 veces semana<br><input type="radio"/> 5 a 6 veces semana<br><input type="radio"/> 1 vez al día<br><input type="radio"/> 2 a 3 veces al día<br><input type="radio"/> 5 a 6 veces al día<br><input type="radio"/> más 6 veces al día |

|                     |                                                                                                                                                                                                                                                                                                                                                                                                              |
|---------------------|--------------------------------------------------------------------------------------------------------------------------------------------------------------------------------------------------------------------------------------------------------------------------------------------------------------------------------------------------------------------------------------------------------------|
| Vísceras            | <input checked="" type="radio"/> Nunca o menos 1 vez al mes<br><input type="radio"/> 1 a 3 veces mes<br><input type="radio"/> 1 vez semana<br><input type="radio"/> 2 a 4 veces semana<br><input type="radio"/> 5 a 6 veces semana<br><input type="radio"/> 1 vez al día<br><input type="radio"/> 2 a 3 veces al día<br><input type="radio"/> 5 a 6 veces al día<br><input type="radio"/> más 6 veces al día |
| Embutido            | <input type="radio"/> Nunca o menos 1 vez al mes<br><input checked="" type="radio"/> 1 a 3 veces mes<br><input type="radio"/> 1 vez semana<br><input type="radio"/> 2 a 4 veces semana<br><input type="radio"/> 5 a 6 veces semana<br><input type="radio"/> 1 vez al día<br><input type="radio"/> 2 a 3 veces al día<br><input type="radio"/> 5 a 6 veces al día<br><input type="radio"/> más 6 veces al día |
| Salchicha o similar | <input type="radio"/> Nunca o menos 1 vez al mes<br><input checked="" type="radio"/> 1 a 3 veces mes<br><input type="radio"/> 1 vez semana<br><input type="radio"/> 2 a 4 veces semana<br><input type="radio"/> 5 a 6 veces semana<br><input type="radio"/> 1 vez al día<br><input type="radio"/> 2 a 3 veces al día<br><input type="radio"/> 5 a 6 veces al día<br><input type="radio"/> más 6 veces al día |
| Pate o foiegras     | <input checked="" type="radio"/> Nunca o menos 1 vez al mes<br><input type="radio"/> 1 a 3 veces mes<br><input type="radio"/> 1 vez semana<br><input type="radio"/> 2 a 4 veces semana<br><input type="radio"/> 5 a 6 veces semana<br><input type="radio"/> 1 vez al día<br><input type="radio"/> 2 a 3 veces al día<br><input type="radio"/> 5 a 6 veces al día<br><input type="radio"/> más 6 veces al día |
| Hamburguesa         | <input type="radio"/> Nunca o menos 1 vez al mes<br><input type="radio"/> 1 a 3 veces mes<br><input checked="" type="radio"/> 1 vez semana<br><input type="radio"/> 2 a 4 veces semana<br><input type="radio"/> 5 a 6 veces semana<br><input type="radio"/> 1 vez al día<br><input type="radio"/> 2 a 3 veces al día<br><input type="radio"/> 5 a 6 veces al día<br><input type="radio"/> más 6 veces al día |
| tocino o bacon      | <input checked="" type="radio"/> Nunca o menos 1 vez al mes<br><input type="radio"/> 1 a 3 veces mes<br><input type="radio"/> 1 vez semana<br><input type="radio"/> 2 a 4 veces semana<br><input type="radio"/> 5 a 6 veces semana<br><input type="radio"/> 1 vez al día<br><input type="radio"/> 2 a 3 veces al día<br><input type="radio"/> 5 a 6 veces al día<br><input type="radio"/> más 6 veces al día |

---

Pescado frito

- ☒ Nunca o menos 1 vez al mes  
☐ 1 a 3 veces mes  
☐ 1 vez semana  
☐ 2 a 4 veces semana  
☐ 5 a 6 veces semana  
☐ 1 vez al día  
☐ 2 a 3 veces al día  
☐ 5 a 6 veces al día  
☐ más 6 veces al día

---

pescado hervido blanco

- ☐ Nunca o menos 1 vez al mes  
☒ 1 a 3 veces mes  
☐ 1 vez semana  
☐ 2 a 4 veces semana  
☐ 5 a 6 veces semana  
☐ 1 vez al día  
☐ 2 a 3 veces al día  
☐ 5 a 6 veces al día  
☐ más 6 veces al día

---

pescado hervido azul

- ☒ Nunca o menos 1 vez al mes  
☐ 1 a 3 veces mes  
☐ 1 vez semana  
☐ 2 a 4 veces semana  
☐ 5 a 6 veces semana  
☐ 1 vez al día  
☐ 2 a 3 veces al día  
☐ 5 a 6 veces al día  
☐ más 6 veces al día

---

otros pescado azul

- ☒ Nunca o menos 1 vez al mes  
☐ 1 a 3 veces mes  
☐ 1 vez semana  
☐ 2 a 4 veces semana  
☐ 5 a 6 veces semana  
☐ 1 vez al día  
☐ 2 a 3 veces al día  
☐ 5 a 6 veces al día  
☐ más 6 veces al día

---

atun conserva

- ☐ Nunca o menos 1 vez al mes  
☐ 1 a 3 veces mes  
☐ 1 vez semana  
☒ 2 a 4 veces semana  
☐ 5 a 6 veces semana  
☐ 1 vez al día  
☐ 2 a 3 veces al día  
☐ 5 a 6 veces al día  
☐ más 6 veces al día

---

sardina conserva

- ☒ Nunca o menos 1 vez al mes  
☐ 1 a 3 veces mes  
☐ 1 vez semana  
☐ 2 a 4 veces semana  
☐ 5 a 6 veces semana  
☐ 1 vez al día  
☐ 2 a 3 veces al día  
☐ 5 a 6 veces al día  
☐ más 6 veces al día

|                                         |                                                                                                                                                                                                                                                                                                                                                                                                              |
|-----------------------------------------|--------------------------------------------------------------------------------------------------------------------------------------------------------------------------------------------------------------------------------------------------------------------------------------------------------------------------------------------------------------------------------------------------------------|
| pescado ahumado                         | <input checked="" type="radio"/> Nunca o menos 1 vez al mes<br><input type="radio"/> 1 a 3 veces mes<br><input type="radio"/> 1 vez semana<br><input type="radio"/> 2 a 4 veces semana<br><input type="radio"/> 5 a 6 veces semana<br><input type="radio"/> 1 vez al día<br><input type="radio"/> 2 a 3 veces al día<br><input type="radio"/> 5 a 6 veces al día<br><input type="radio"/> más 6 veces al día |
| almejas o mejillones o ostras unos 100g | <input checked="" type="radio"/> Nunca o menos 1 vez al mes<br><input type="radio"/> 1 a 3 veces mes<br><input type="radio"/> 1 vez semana<br><input type="radio"/> 2 a 4 veces semana<br><input type="radio"/> 5 a 6 veces semana<br><input type="radio"/> 1 vez al día<br><input type="radio"/> 2 a 3 veces al día<br><input type="radio"/> 5 a 6 veces al día<br><input type="radio"/> más 6 veces al día |
| calamar o chipiron o sepia unos 100g    | <input checked="" type="radio"/> Nunca o menos 1 vez al mes<br><input type="radio"/> 1 a 3 veces mes<br><input type="radio"/> 1 vez semana<br><input type="radio"/> 2 a 4 veces semana<br><input type="radio"/> 5 a 6 veces semana<br><input type="radio"/> 1 vez al día<br><input type="radio"/> 2 a 3 veces al día<br><input type="radio"/> 5 a 6 veces al día<br><input type="radio"/> más 6 veces al día |
| marisco unos 100g                       | <input checked="" type="radio"/> Nunca o menos 1 vez al mes<br><input type="radio"/> 1 a 3 veces mes<br><input type="radio"/> 1 vez semana<br><input type="radio"/> 2 a 4 veces semana<br><input type="radio"/> 5 a 6 veces semana<br><input type="radio"/> 1 vez al día<br><input type="radio"/> 2 a 3 veces al día<br><input type="radio"/> 5 a 6 veces al día<br><input type="radio"/> más 6 veces al día |
| Espinacas o acelgas cocinadas           | <input checked="" type="radio"/> Nunca o menos 1 vez al mes<br><input type="radio"/> 1 a 3 veces mes<br><input type="radio"/> 1 vez semana<br><input type="radio"/> 2 a 4 veces semana<br><input type="radio"/> 5 a 6 veces semana<br><input type="radio"/> 1 vez al día<br><input type="radio"/> 2 a 3 veces al día<br><input type="radio"/> 5 a 6 veces al día<br><input type="radio"/> más 6 veces al día |
| Col o coliflor o brocoli cocinado       | <input type="radio"/> Nunca o menos 1 vez al mes<br><input type="radio"/> 1 a 3 veces mes<br><input checked="" type="radio"/> 1 vez semana<br><input type="radio"/> 2 a 4 veces semana<br><input type="radio"/> 5 a 6 veces semana<br><input type="radio"/> 1 vez al día<br><input type="radio"/> 2 a 3 veces al día<br><input type="radio"/> 5 a 6 veces al día<br><input type="radio"/> más 6 veces al día |



|                                |                                                                                                                                                                                                                                                                                                                                                                                                              |
|--------------------------------|--------------------------------------------------------------------------------------------------------------------------------------------------------------------------------------------------------------------------------------------------------------------------------------------------------------------------------------------------------------------------------------------------------------|
| Lechuga o endivia o escarola   | <input checked="" type="radio"/> Nunca o menos 1 vez al mes<br><input type="radio"/> 1 a 3 veces mes<br><input type="radio"/> 1 vez semana<br><input type="radio"/> 2 a 4 veces semana<br><input type="radio"/> 5 a 6 veces semana<br><input type="radio"/> 1 vez al día<br><input type="radio"/> 2 a 3 veces al día<br><input type="radio"/> 5 a 6 veces al día<br><input type="radio"/> más 6 veces al día |
| tomate ensalada                | <input type="radio"/> Nunca o menos 1 vez al mes<br><input type="radio"/> 1 a 3 veces mes<br><input type="radio"/> 1 vez semana<br><input type="radio"/> 2 a 4 veces semana<br><input type="radio"/> 5 a 6 veces semana<br><input checked="" type="radio"/> 1 vez al día<br><input type="radio"/> 2 a 3 veces al día<br><input type="radio"/> 5 a 6 veces al día<br><input type="radio"/> más 6 veces al día |
| cebolla                        | <input checked="" type="radio"/> Nunca o menos 1 vez al mes<br><input type="radio"/> 1 a 3 veces mes<br><input type="radio"/> 1 vez semana<br><input type="radio"/> 2 a 4 veces semana<br><input type="radio"/> 5 a 6 veces semana<br><input type="radio"/> 1 vez al día<br><input type="radio"/> 2 a 3 veces al día<br><input type="radio"/> 5 a 6 veces al día<br><input type="radio"/> más 6 veces al día |
| Zanahoria o calabaza           | <input type="radio"/> Nunca o menos 1 vez al mes<br><input type="radio"/> 1 a 3 veces mes<br><input checked="" type="radio"/> 1 vez semana<br><input type="radio"/> 2 a 4 veces semana<br><input type="radio"/> 5 a 6 veces semana<br><input type="radio"/> 1 vez al día<br><input type="radio"/> 2 a 3 veces al día<br><input type="radio"/> 5 a 6 veces al día<br><input type="radio"/> más 6 veces al día |
| Judías verdes                  | <input checked="" type="radio"/> Nunca o menos 1 vez al mes<br><input type="radio"/> 1 a 3 veces mes<br><input type="radio"/> 1 vez semana<br><input type="radio"/> 2 a 4 veces semana<br><input type="radio"/> 5 a 6 veces semana<br><input type="radio"/> 1 vez al día<br><input type="radio"/> 2 a 3 veces al día<br><input type="radio"/> 5 a 6 veces al día<br><input type="radio"/> más 6 veces al día |
| Berenjena o calabacin o pepino | <input type="radio"/> Nunca o menos 1 vez al mes<br><input type="radio"/> 1 a 3 veces mes<br><input type="radio"/> 1 vez semana<br><input type="radio"/> 2 a 4 veces semana<br><input type="radio"/> 5 a 6 veces semana<br><input type="radio"/> 1 vez al día<br><input checked="" type="radio"/> 2 a 3 veces al día<br><input type="radio"/> 5 a 6 veces al día<br><input type="radio"/> más 6 veces al día |

---

|          |                                                                                                                                                                                                                                                                                                                                                                                                              |
|----------|--------------------------------------------------------------------------------------------------------------------------------------------------------------------------------------------------------------------------------------------------------------------------------------------------------------------------------------------------------------------------------------------------------------|
| pimiento | <input type="radio"/> Nunca o menos 1 vez al mes<br><input type="radio"/> 1 a 3 veces mes<br><input checked="" type="radio"/> 1 vez semana<br><input type="radio"/> 2 a 4 veces semana<br><input type="radio"/> 5 a 6 veces semana<br><input type="radio"/> 1 vez al día<br><input type="radio"/> 2 a 3 veces al día<br><input type="radio"/> 5 a 6 veces al día<br><input type="radio"/> más 6 veces al día |
|----------|--------------------------------------------------------------------------------------------------------------------------------------------------------------------------------------------------------------------------------------------------------------------------------------------------------------------------------------------------------------------------------------------------------------|

---

|           |                                                                                                                                                                                                                                                                                                                                                                                                              |
|-----------|--------------------------------------------------------------------------------------------------------------------------------------------------------------------------------------------------------------------------------------------------------------------------------------------------------------------------------------------------------------------------------------------------------------|
| alcachofa | <input checked="" type="radio"/> Nunca o menos 1 vez al mes<br><input type="radio"/> 1 a 3 veces mes<br><input type="radio"/> 1 vez semana<br><input type="radio"/> 2 a 4 veces semana<br><input type="radio"/> 5 a 6 veces semana<br><input type="radio"/> 1 vez al día<br><input type="radio"/> 2 a 3 veces al día<br><input type="radio"/> 5 a 6 veces al día<br><input type="radio"/> más 6 veces al día |
|-----------|--------------------------------------------------------------------------------------------------------------------------------------------------------------------------------------------------------------------------------------------------------------------------------------------------------------------------------------------------------------------------------------------------------------|

---

|            |                                                                                                                                                                                                                                                                                                                                                                                                              |
|------------|--------------------------------------------------------------------------------------------------------------------------------------------------------------------------------------------------------------------------------------------------------------------------------------------------------------------------------------------------------------------------------------------------------------|
| espárragos | <input checked="" type="radio"/> Nunca o menos 1 vez al mes<br><input type="radio"/> 1 a 3 veces mes<br><input type="radio"/> 1 vez semana<br><input type="radio"/> 2 a 4 veces semana<br><input type="radio"/> 5 a 6 veces semana<br><input type="radio"/> 1 vez al día<br><input type="radio"/> 2 a 3 veces al día<br><input type="radio"/> 5 a 6 veces al día<br><input type="radio"/> más 6 veces al día |
|------------|--------------------------------------------------------------------------------------------------------------------------------------------------------------------------------------------------------------------------------------------------------------------------------------------------------------------------------------------------------------------------------------------------------------|

---

|              |                                                                                                                                                                                                                                                                                                                                                                                                              |
|--------------|--------------------------------------------------------------------------------------------------------------------------------------------------------------------------------------------------------------------------------------------------------------------------------------------------------------------------------------------------------------------------------------------------------------|
| maíz hervido | <input checked="" type="radio"/> Nunca o menos 1 vez al mes<br><input type="radio"/> 1 a 3 veces mes<br><input type="radio"/> 1 vez semana<br><input type="radio"/> 2 a 4 veces semana<br><input type="radio"/> 5 a 6 veces semana<br><input type="radio"/> 1 vez al día<br><input type="radio"/> 2 a 3 veces al día<br><input type="radio"/> 5 a 6 veces al día<br><input type="radio"/> más 6 veces al día |
|--------------|--------------------------------------------------------------------------------------------------------------------------------------------------------------------------------------------------------------------------------------------------------------------------------------------------------------------------------------------------------------------------------------------------------------|

---

|           |                                                                                                                                                                                                                                                                                                                                                                                                              |
|-----------|--------------------------------------------------------------------------------------------------------------------------------------------------------------------------------------------------------------------------------------------------------------------------------------------------------------------------------------------------------------------------------------------------------------|
| legumbres | <input type="radio"/> Nunca o menos 1 vez al mes<br><input type="radio"/> 1 a 3 veces mes<br><input type="radio"/> 1 vez semana<br><input checked="" type="radio"/> 2 a 4 veces semana<br><input type="radio"/> 5 a 6 veces semana<br><input type="radio"/> 1 vez al día<br><input type="radio"/> 2 a 3 veces al día<br><input type="radio"/> 5 a 6 veces al día<br><input type="radio"/> más 6 veces al día |
|-----------|--------------------------------------------------------------------------------------------------------------------------------------------------------------------------------------------------------------------------------------------------------------------------------------------------------------------------------------------------------------------------------------------------------------|

---

|                       |                                                                                                                                                                                                                                                                                                                                                                                                              |
|-----------------------|--------------------------------------------------------------------------------------------------------------------------------------------------------------------------------------------------------------------------------------------------------------------------------------------------------------------------------------------------------------------------------------------------------------|
| naranjas o mandarinas | <input type="radio"/> Nunca o menos 1 vez al mes<br><input type="radio"/> 1 a 3 veces mes<br><input type="radio"/> 1 vez semana<br><input type="radio"/> 2 a 4 veces semana<br><input type="radio"/> 5 a 6 veces semana<br><input checked="" type="radio"/> 1 vez al día<br><input type="radio"/> 2 a 3 veces al día<br><input type="radio"/> 5 a 6 veces al día<br><input type="radio"/> más 6 veces al día |
|-----------------------|--------------------------------------------------------------------------------------------------------------------------------------------------------------------------------------------------------------------------------------------------------------------------------------------------------------------------------------------------------------------------------------------------------------|

---

---

zum natural fruta

- ☒ Nunca o menos 1 vez al mes  
☐ 1 a 3 veces mes  
☐ 1 vez semana  
☐ 2 a 4 veces semana  
☐ 5 a 6 veces semana  
☐ 1 vez al día  
☐ 2 a 3 veces al día  
☐ 5 a 6 veces al día  
☐ más 6 veces al día

---

platano

- ☐ Nunca o menos 1 vez al mes  
☐ 1 a 3 veces mes  
☒ 1 vez semana  
☐ 2 a 4 veces semana  
☐ 5 a 6 veces semana  
☐ 1 vez al día  
☐ 2 a 3 veces al día  
☐ 5 a 6 veces al día  
☐ más 6 veces al día

---

manzana o pera

- ☐ Nunca o menos 1 vez al mes  
☐ 1 a 3 veces mes  
☐ 1 vez semana  
☐ 2 a 4 veces semana  
☐ 5 a 6 veces semana  
☒ 1 vez al día  
☐ 2 a 3 veces al día  
☐ 5 a 6 veces al día  
☐ más 6 veces al día

---

melocotón o nectarina

- ☐ Nunca o menos 1 vez al mes  
☐ 1 a 3 veces mes  
☐ 1 vez semana  
☐ 2 a 4 veces semana  
☐ 5 a 6 veces semana  
☒ 1 vez al día  
☐ 2 a 3 veces al día  
☐ 5 a 6 veces al día  
☐ más 6 veces al día

---

sandia o melon

- ☒ Nunca o menos 1 vez al mes  
☐ 1 a 3 veces mes  
☐ 1 vez semana  
☐ 2 a 4 veces semana  
☐ 5 a 6 veces semana  
☐ 1 vez al día  
☐ 2 a 3 veces al día  
☐ 5 a 6 veces al día  
☐ más 6 veces al día

---

uva

- ☒ Nunca o menos 1 vez al mes  
☐ 1 a 3 veces mes  
☐ 1 vez semana  
☐ 2 a 4 veces semana  
☐ 5 a 6 veces semana  
☐ 1 vez al día  
☐ 2 a 3 veces al día  
☐ 5 a 6 veces al día  
☐ más 6 veces al día

---

bruna o ciruela

- ☒ Nunca o menos 1 vez al mes  
☐ 1 a 3 veces mes  
☐ 1 vez semana  
☐ 2 a 4 veces semana  
☐ 5 a 6 veces semana  
☐ 1 vez al día  
☐ 2 a 3 veces al día  
☐ 5 a 6 veces al día  
☐ más 6 veces al día

---

kiwi

- ☒ Nunca o menos 1 vez al mes  
☐ 1 a 3 veces mes  
☐ 1 vez semana  
☐ 2 a 4 veces semana  
☐ 5 a 6 veces semana  
☐ 1 vez al día  
☐ 2 a 3 veces al día  
☐ 5 a 6 veces al día  
☐ más 6 veces al día

---

aceituna

- ☐ Nunca o menos 1 vez al mes  
☐ 1 a 3 veces mes  
☒ 1 vez semana  
☐ 2 a 4 veces semana  
☐ 5 a 6 veces semana  
☐ 1 vez al día  
☐ 2 a 3 veces al día  
☐ 5 a 6 veces al día  
☐ más 6 veces al día

---

frutos secos

- ☐ Nunca o menos 1 vez al mes  
☐ 1 a 3 veces mes  
☐ 1 vez semana  
☐ 2 a 4 veces semana  
☐ 5 a 6 veces semana  
☒ 1 vez al día  
☐ 2 a 3 veces al día  
☐ 5 a 6 veces al día  
☐ más 6 veces al día

---

pan blanco

- ☒ Nunca o menos 1 vez al mes  
☐ 1 a 3 veces mes  
☐ 1 vez semana  
☐ 2 a 4 veces semana  
☐ 5 a 6 veces semana  
☐ 1 vez al día  
☐ 2 a 3 veces al día  
☐ 5 a 6 veces al día  
☐ más 6 veces al día

---

pan integral

- ☐ Nunca o menos 1 vez al mes  
☐ 1 a 3 veces mes  
☐ 1 vez semana  
☐ 2 a 4 veces semana  
☐ 5 a 6 veces semana  
☒ 1 vez al día  
☐ 2 a 3 veces al día  
☐ 5 a 6 veces al día  
☐ más 6 veces al día

---

|                   |                                                                                                                                                                                                                                                                                                                                                                                                   |
|-------------------|---------------------------------------------------------------------------------------------------------------------------------------------------------------------------------------------------------------------------------------------------------------------------------------------------------------------------------------------------------------------------------------------------|
| cereales desayuno | <input type="radio"/> Nunca o menos 1 vez al mes<br><input type="radio"/> 1 a 3 veces mes<br><input type="radio"/> 1 vez semana<br><input type="radio"/> 2 a 4 veces semana<br><input type="radio"/> 5 a 6 veces semana<br><input type="radio"/> 1 vez al día<br><input type="radio"/> 2 a 3 veces al día<br><input type="radio"/> 5 a 6 veces al día<br><input type="radio"/> más 6 veces al día |
|-------------------|---------------------------------------------------------------------------------------------------------------------------------------------------------------------------------------------------------------------------------------------------------------------------------------------------------------------------------------------------------------------------------------------------|

---

|                |                                                                                                                                                                                                                                                                                                                                                                                                              |
|----------------|--------------------------------------------------------------------------------------------------------------------------------------------------------------------------------------------------------------------------------------------------------------------------------------------------------------------------------------------------------------------------------------------------------------|
| patatas fritas | <input checked="" type="radio"/> Nunca o menos 1 vez al mes<br><input type="radio"/> 1 a 3 veces mes<br><input type="radio"/> 1 vez semana<br><input type="radio"/> 2 a 4 veces semana<br><input type="radio"/> 5 a 6 veces semana<br><input type="radio"/> 1 vez al día<br><input type="radio"/> 2 a 3 veces al día<br><input type="radio"/> 5 a 6 veces al día<br><input type="radio"/> más 6 veces al día |
|----------------|--------------------------------------------------------------------------------------------------------------------------------------------------------------------------------------------------------------------------------------------------------------------------------------------------------------------------------------------------------------------------------------------------------------|

---

|                          |                                                                                                                                                                                                                                                                                                                                                                                                              |
|--------------------------|--------------------------------------------------------------------------------------------------------------------------------------------------------------------------------------------------------------------------------------------------------------------------------------------------------------------------------------------------------------------------------------------------------------|
| patatas cocidas o asadas | <input type="radio"/> Nunca o menos 1 vez al mes<br><input type="radio"/> 1 a 3 veces mes<br><input checked="" type="radio"/> 1 vez semana<br><input type="radio"/> 2 a 4 veces semana<br><input type="radio"/> 5 a 6 veces semana<br><input type="radio"/> 1 vez al día<br><input type="radio"/> 2 a 3 veces al día<br><input type="radio"/> 5 a 6 veces al día<br><input type="radio"/> más 6 veces al día |
|--------------------------|--------------------------------------------------------------------------------------------------------------------------------------------------------------------------------------------------------------------------------------------------------------------------------------------------------------------------------------------------------------------------------------------------------------|

---

|             |                                                                                                                                                                                                                                                                                                                                                                                                              |
|-------------|--------------------------------------------------------------------------------------------------------------------------------------------------------------------------------------------------------------------------------------------------------------------------------------------------------------------------------------------------------------------------------------------------------------|
| bolsa papas | <input checked="" type="radio"/> Nunca o menos 1 vez al mes<br><input type="radio"/> 1 a 3 veces mes<br><input type="radio"/> 1 vez semana<br><input type="radio"/> 2 a 4 veces semana<br><input type="radio"/> 5 a 6 veces semana<br><input type="radio"/> 1 vez al día<br><input type="radio"/> 2 a 3 veces al día<br><input type="radio"/> 5 a 6 veces al día<br><input type="radio"/> más 6 veces al día |
|-------------|--------------------------------------------------------------------------------------------------------------------------------------------------------------------------------------------------------------------------------------------------------------------------------------------------------------------------------------------------------------------------------------------------------------|

---

|                |                                                                                                                                                                                                                                                                                                                                                                                                              |
|----------------|--------------------------------------------------------------------------------------------------------------------------------------------------------------------------------------------------------------------------------------------------------------------------------------------------------------------------------------------------------------------------------------------------------------|
| arroz cocinado | <input type="radio"/> Nunca o menos 1 vez al mes<br><input type="radio"/> 1 a 3 veces mes<br><input type="radio"/> 1 vez semana<br><input checked="" type="radio"/> 2 a 4 veces semana<br><input type="radio"/> 5 a 6 veces semana<br><input type="radio"/> 1 vez al día<br><input type="radio"/> 2 a 3 veces al día<br><input type="radio"/> 5 a 6 veces al día<br><input type="radio"/> más 6 veces al día |
|----------------|--------------------------------------------------------------------------------------------------------------------------------------------------------------------------------------------------------------------------------------------------------------------------------------------------------------------------------------------------------------------------------------------------------------|

---

|       |                                                                                                                                                                                                                                                                                                                                                                                                              |
|-------|--------------------------------------------------------------------------------------------------------------------------------------------------------------------------------------------------------------------------------------------------------------------------------------------------------------------------------------------------------------------------------------------------------------|
| pasta | <input type="radio"/> Nunca o menos 1 vez al mes<br><input type="radio"/> 1 a 3 veces mes<br><input type="radio"/> 1 vez semana<br><input checked="" type="radio"/> 2 a 4 veces semana<br><input type="radio"/> 5 a 6 veces semana<br><input type="radio"/> 1 vez al día<br><input type="radio"/> 2 a 3 veces al día<br><input type="radio"/> 5 a 6 veces al día<br><input type="radio"/> más 6 veces al día |
|-------|--------------------------------------------------------------------------------------------------------------------------------------------------------------------------------------------------------------------------------------------------------------------------------------------------------------------------------------------------------------------------------------------------------------|

---

|                     |                                                                                                                                                                                                                                                                                                                                                                                                              |
|---------------------|--------------------------------------------------------------------------------------------------------------------------------------------------------------------------------------------------------------------------------------------------------------------------------------------------------------------------------------------------------------------------------------------------------------|
| pizza               | <input type="radio"/> Nunca o menos 1 vez al mes<br><input checked="" type="radio"/> 1 a 3 veces mes<br><input type="radio"/> 1 vez semana<br><input type="radio"/> 2 a 4 veces semana<br><input type="radio"/> 5 a 6 veces semana<br><input type="radio"/> 1 vez al día<br><input type="radio"/> 2 a 3 veces al día<br><input type="radio"/> 5 a 6 veces al día<br><input type="radio"/> más 6 veces al día |
| aceite oliva        | <input type="radio"/> Nunca o menos 1 vez al mes<br><input type="radio"/> 1 a 3 veces mes<br><input type="radio"/> 1 vez semana<br><input checked="" type="radio"/> 2 a 4 veces semana<br><input type="radio"/> 5 a 6 veces semana<br><input type="radio"/> 1 vez al día<br><input type="radio"/> 2 a 3 veces al día<br><input type="radio"/> 5 a 6 veces al día<br><input type="radio"/> más 6 veces al día |
| otros aceites       | <input checked="" type="radio"/> Nunca o menos 1 vez al mes<br><input type="radio"/> 1 a 3 veces mes<br><input type="radio"/> 1 vez semana<br><input type="radio"/> 2 a 4 veces semana<br><input type="radio"/> 5 a 6 veces semana<br><input type="radio"/> 1 vez al día<br><input type="radio"/> 2 a 3 veces al día<br><input type="radio"/> 5 a 6 veces al día<br><input type="radio"/> más 6 veces al día |
| margarina           | <input checked="" type="radio"/> Nunca o menos 1 vez al mes<br><input type="radio"/> 1 a 3 veces mes<br><input type="radio"/> 1 vez semana<br><input type="radio"/> 2 a 4 veces semana<br><input type="radio"/> 5 a 6 veces semana<br><input type="radio"/> 1 vez al día<br><input type="radio"/> 2 a 3 veces al día<br><input type="radio"/> 5 a 6 veces al día<br><input type="radio"/> más 6 veces al día |
| mantequilla         | <input checked="" type="radio"/> Nunca o menos 1 vez al mes<br><input type="radio"/> 1 a 3 veces mes<br><input type="radio"/> 1 vez semana<br><input type="radio"/> 2 a 4 veces semana<br><input type="radio"/> 5 a 6 veces semana<br><input type="radio"/> 1 vez al día<br><input type="radio"/> 2 a 3 veces al día<br><input type="radio"/> 5 a 6 veces al día<br><input type="radio"/> más 6 veces al día |
| galletas tipo maria | <input checked="" type="radio"/> Nunca o menos 1 vez al mes<br><input type="radio"/> 1 a 3 veces mes<br><input type="radio"/> 1 vez semana<br><input type="radio"/> 2 a 4 veces semana<br><input type="radio"/> 5 a 6 veces semana<br><input type="radio"/> 1 vez al día<br><input type="radio"/> 2 a 3 veces al día<br><input type="radio"/> 5 a 6 veces al día<br><input type="radio"/> más 6 veces al día |

---

galletas chocolate

- ☐ Nunca o menos 1 vez al mes  
☒ 1 a 3 veces mes  
☐ 1 vez semana  
☐ 2 a 4 veces semana  
☐ 5 a 6 veces semana  
☐ 1 vez al día  
☐ 2 a 3 veces al día  
☐ 5 a 6 veces al día  
☐ más 6 veces al día

---

bolleria

- ☐ Nunca o menos 1 vez al mes  
☒ 1 a 3 veces mes  
☐ 1 vez semana  
☐ 2 a 4 veces semana  
☐ 5 a 6 veces semana  
☐ 1 vez al día  
☐ 2 a 3 veces al día  
☐ 5 a 6 veces al día  
☐ más 6 veces al día

---

chocolate o bombones

- ☐ Nunca o menos 1 vez al mes  
☐ 1 a 3 veces mes  
☒ 1 vez semana  
☐ 2 a 4 veces semana  
☐ 5 a 6 veces semana  
☐ 1 vez al día  
☐ 2 a 3 veces al día  
☐ 5 a 6 veces al día  
☐ más 6 veces al día

---

chocolate polvo o colacao

- ☐ Nunca o menos 1 vez al mes  
☒ 1 a 3 veces mes  
☐ 1 vez semana  
☐ 2 a 4 veces semana  
☐ 5 a 6 veces semana  
☐ 1 vez al día  
☐ 2 a 3 veces al día  
☐ 5 a 6 veces al día  
☐ más 6 veces al día

---

vino tinto

- ☒ Nunca o menos 1 vez al mes  
☐ 1 a 3 veces mes  
☐ 1 vez semana  
☐ 2 a 4 veces semana  
☐ 5 a 6 veces semana  
☐ 1 vez al día  
☐ 2 a 3 veces al día  
☐ 5 a 6 veces al día  
☐ más 6 veces al día

---

vino blanco

- ☒ Nunca o menos 1 vez al mes  
☐ 1 a 3 veces mes  
☐ 1 vez semana  
☐ 2 a 4 veces semana  
☐ 5 a 6 veces semana  
☐ 1 vez al día  
☐ 2 a 3 veces al día  
☐ 5 a 6 veces al día  
☐ más 6 veces al día

|                       |                                                                                                                                                                                                                                                                                                                                                                                                              |
|-----------------------|--------------------------------------------------------------------------------------------------------------------------------------------------------------------------------------------------------------------------------------------------------------------------------------------------------------------------------------------------------------------------------------------------------------|
| vino seco o vermut    | <input checked="" type="radio"/> Nunca o menos 1 vez al mes<br><input type="radio"/> 1 a 3 veces mes<br><input type="radio"/> 1 vez semana<br><input type="radio"/> 2 a 4 veces semana<br><input type="radio"/> 5 a 6 veces semana<br><input type="radio"/> 1 vez al día<br><input type="radio"/> 2 a 3 veces al día<br><input type="radio"/> 5 a 6 veces al día<br><input type="radio"/> más 6 veces al día |
| cerveza               | <input checked="" type="radio"/> Nunca o menos 1 vez al mes<br><input type="radio"/> 1 a 3 veces mes<br><input type="radio"/> 1 vez semana<br><input type="radio"/> 2 a 4 veces semana<br><input type="radio"/> 5 a 6 veces semana<br><input type="radio"/> 1 vez al día<br><input type="radio"/> 2 a 3 veces al día<br><input type="radio"/> 5 a 6 veces al día<br><input type="radio"/> más 6 veces al día |
| cerveza sin alcohol   | <input checked="" type="radio"/> Nunca o menos 1 vez al mes<br><input type="radio"/> 1 a 3 veces mes<br><input type="radio"/> 1 vez semana<br><input type="radio"/> 2 a 4 veces semana<br><input type="radio"/> 5 a 6 veces semana<br><input type="radio"/> 1 vez al día<br><input type="radio"/> 2 a 3 veces al día<br><input type="radio"/> 5 a 6 veces al día<br><input type="radio"/> más 6 veces al día |
| licores               | <input checked="" type="radio"/> Nunca o menos 1 vez al mes<br><input type="radio"/> 1 a 3 veces mes<br><input type="radio"/> 1 vez semana<br><input type="radio"/> 2 a 4 veces semana<br><input type="radio"/> 5 a 6 veces semana<br><input type="radio"/> 1 vez al día<br><input type="radio"/> 2 a 3 veces al día<br><input type="radio"/> 5 a 6 veces al día<br><input type="radio"/> más 6 veces al día |
| ginebra o ron o vodka | <input checked="" type="radio"/> Nunca o menos 1 vez al mes<br><input type="radio"/> 1 a 3 veces mes<br><input type="radio"/> 1 vez semana<br><input type="radio"/> 2 a 4 veces semana<br><input type="radio"/> 5 a 6 veces semana<br><input type="radio"/> 1 vez al día<br><input type="radio"/> 2 a 3 veces al día<br><input type="radio"/> 5 a 6 veces al día<br><input type="radio"/> más 6 veces al día |
| refresco normal       | <input checked="" type="radio"/> Nunca o menos 1 vez al mes<br><input type="radio"/> 1 a 3 veces mes<br><input type="radio"/> 1 vez semana<br><input type="radio"/> 2 a 4 veces semana<br><input type="radio"/> 5 a 6 veces semana<br><input type="radio"/> 1 vez al día<br><input type="radio"/> 2 a 3 veces al día<br><input type="radio"/> 5 a 6 veces al día<br><input type="radio"/> más 6 veces al día |



|                           |                                                                                                                                                                                                                                                                                                                                                                                                              |
|---------------------------|--------------------------------------------------------------------------------------------------------------------------------------------------------------------------------------------------------------------------------------------------------------------------------------------------------------------------------------------------------------------------------------------------------------|
| refresco sin azúcar       | <input type="radio"/> Nunca o menos 1 vez al mes<br><input checked="" type="radio"/> 1 a 3 veces mes<br><input type="radio"/> 1 vez semana<br><input type="radio"/> 2 a 4 veces semana<br><input type="radio"/> 5 a 6 veces semana<br><input type="radio"/> 1 vez al día<br><input type="radio"/> 2 a 3 veces al día<br><input type="radio"/> 5 a 6 veces al día<br><input type="radio"/> más 6 veces al día |
| Agua del grifo            | <input checked="" type="radio"/> Nunca o menos 1 vez al mes<br><input type="radio"/> 1 a 3 veces mes<br><input type="radio"/> 1 vez semana<br><input type="radio"/> 2 a 4 veces semana<br><input type="radio"/> 5 a 6 veces semana<br><input type="radio"/> 1 vez al día<br><input type="radio"/> 2 a 3 veces al día<br><input type="radio"/> 5 a 6 veces al día<br><input type="radio"/> más 6 veces al día |
| agua embotellada sin gas  | <input type="radio"/> Nunca o menos 1 vez al mes<br><input type="radio"/> 1 a 3 veces mes<br><input type="radio"/> 1 vez semana<br><input type="radio"/> 2 a 4 veces semana<br><input type="radio"/> 5 a 6 veces semana<br><input type="radio"/> 1 vez al día<br><input type="radio"/> 2 a 3 veces al día<br><input type="radio"/> 5 a 6 veces al día<br><input checked="" type="radio"/> más 6 veces al día |
| agua embotellada con gas  | <input checked="" type="radio"/> Nunca o menos 1 vez al mes<br><input type="radio"/> 1 a 3 veces mes<br><input type="radio"/> 1 vez semana<br><input type="radio"/> 2 a 4 veces semana<br><input type="radio"/> 5 a 6 veces semana<br><input type="radio"/> 1 vez al día<br><input type="radio"/> 2 a 3 veces al día<br><input type="radio"/> 5 a 6 veces al día<br><input type="radio"/> más 6 veces al día |
| zumos frutas embotellados | <input checked="" type="radio"/> Nunca o menos 1 vez al mes<br><input type="radio"/> 1 a 3 veces mes<br><input type="radio"/> 1 vez semana<br><input type="radio"/> 2 a 4 veces semana<br><input type="radio"/> 5 a 6 veces semana<br><input type="radio"/> 1 vez al día<br><input type="radio"/> 2 a 3 veces al día<br><input type="radio"/> 5 a 6 veces al día<br><input type="radio"/> más 6 veces al día |
| café                      | <input checked="" type="radio"/> Nunca o menos 1 vez al mes<br><input type="radio"/> 1 a 3 veces mes<br><input type="radio"/> 1 vez semana<br><input type="radio"/> 2 a 4 veces semana<br><input type="radio"/> 5 a 6 veces semana<br><input type="radio"/> 1 vez al día<br><input type="radio"/> 2 a 3 veces al día<br><input type="radio"/> 5 a 6 veces al día<br><input type="radio"/> más 6 veces al día |

|                       |                                                                                                                                                                                                                                                                                                                                                                                                              |
|-----------------------|--------------------------------------------------------------------------------------------------------------------------------------------------------------------------------------------------------------------------------------------------------------------------------------------------------------------------------------------------------------------------------------------------------------|
| cafe descafeinado     | <input checked="" type="radio"/> Nunca o menos 1 vez al mes<br><input type="radio"/> 1 a 3 veces mes<br><input type="radio"/> 1 vez semana<br><input type="radio"/> 2 a 4 veces semana<br><input type="radio"/> 5 a 6 veces semana<br><input type="radio"/> 1 vez al día<br><input type="radio"/> 2 a 3 veces al día<br><input type="radio"/> 5 a 6 veces al día<br><input type="radio"/> más 6 veces al día |
| te o infusión         | <input checked="" type="radio"/> Nunca o menos 1 vez al mes<br><input type="radio"/> 1 a 3 veces mes<br><input type="radio"/> 1 vez semana<br><input type="radio"/> 2 a 4 veces semana<br><input type="radio"/> 5 a 6 veces semana<br><input type="radio"/> 1 vez al día<br><input type="radio"/> 2 a 3 veces al día<br><input type="radio"/> 5 a 6 veces al día<br><input type="radio"/> más 6 veces al día |
| sopa o puré verduras  | <input type="radio"/> Nunca o menos 1 vez al mes<br><input type="radio"/> 1 a 3 veces mes<br><input checked="" type="radio"/> 1 vez semana<br><input type="radio"/> 2 a 4 veces semana<br><input type="radio"/> 5 a 6 veces semana<br><input type="radio"/> 1 vez al día<br><input type="radio"/> 2 a 3 veces al día<br><input type="radio"/> 5 a 6 veces al día<br><input type="radio"/> más 6 veces al día |
| croquetas pollo jamón | <input checked="" type="radio"/> Nunca o menos 1 vez al mes<br><input type="radio"/> 1 a 3 veces mes<br><input type="radio"/> 1 vez semana<br><input type="radio"/> 2 a 4 veces semana<br><input type="radio"/> 5 a 6 veces semana<br><input type="radio"/> 1 vez al día<br><input type="radio"/> 2 a 3 veces al día<br><input type="radio"/> 5 a 6 veces al día<br><input type="radio"/> más 6 veces al día |
| croquetas pescado     | <input checked="" type="radio"/> Nunca o menos 1 vez al mes<br><input type="radio"/> 1 a 3 veces mes<br><input type="radio"/> 1 vez semana<br><input type="radio"/> 2 a 4 veces semana<br><input type="radio"/> 5 a 6 veces semana<br><input type="radio"/> 1 vez al día<br><input type="radio"/> 2 a 3 veces al día<br><input type="radio"/> 5 a 6 veces al día<br><input type="radio"/> más 6 veces al día |
| mayonesa              | <input checked="" type="radio"/> Nunca o menos 1 vez al mes<br><input type="radio"/> 1 a 3 veces mes<br><input type="radio"/> 1 vez semana<br><input type="radio"/> 2 a 4 veces semana<br><input type="radio"/> 5 a 6 veces semana<br><input type="radio"/> 1 vez al día<br><input type="radio"/> 2 a 3 veces al día<br><input type="radio"/> 5 a 6 veces al día<br><input type="radio"/> más 6 veces al día |

---

salsa tomate

- ☐ Nunca o menos 1 vez al mes  
☐ 1 a 3 veces mes  
☐ 1 vez semana  
☒ 2 a 4 veces semana  
☐ 5 a 6 veces semana  
☐ 1 vez al día  
☐ 2 a 3 veces al día  
☐ 5 a 6 veces al día  
☐ más 6 veces al día

---

ketchup

- ☒ Nunca o menos 1 vez al mes  
☐ 1 a 3 veces mes  
☐ 1 vez semana  
☐ 2 a 4 veces semana  
☐ 5 a 6 veces semana  
☐ 1 vez al día  
☐ 2 a 3 veces al día  
☐ 5 a 6 veces al día  
☐ más 6 veces al día

---

sal

- ☒ Nunca o menos 1 vez al mes  
☐ 1 a 3 veces mes  
☐ 1 vez semana  
☐ 2 a 4 veces semana  
☐ 5 a 6 veces semana  
☐ 1 vez al día  
☐ 2 a 3 veces al día  
☐ 5 a 6 veces al día  
☐ más 6 veces al día

---

ajo

- ☐ Nunca o menos 1 vez al mes  
☐ 1 a 3 veces mes  
☐ 1 vez semana  
☒ 2 a 4 veces semana  
☐ 5 a 6 veces semana  
☐ 1 vez al día  
☐ 2 a 3 veces al día  
☐ 5 a 6 veces al día  
☐ más 6 veces al día

---

mermelada o miel

- ☒ Nunca o menos 1 vez al mes  
☐ 1 a 3 veces mes  
☐ 1 vez semana  
☐ 2 a 4 veces semana  
☐ 5 a 6 veces semana  
☐ 1 vez al día  
☐ 2 a 3 veces al día  
☐ 5 a 6 veces al día  
☐ más 6 veces al día

---

azúcar

- ☒ Nunca o menos 1 vez al mes  
☐ 1 a 3 veces mes  
☐ 1 vez semana  
☐ 2 a 4 veces semana  
☐ 5 a 6 veces semana  
☐ 1 vez al día  
☐ 2 a 3 veces al día  
☐ 5 a 6 veces al día  
☐ más 6 veces al día

|                                       |                                                                                                                                                                                                                                                                                                                                                                                                                                                                                                                               |
|---------------------------------------|-------------------------------------------------------------------------------------------------------------------------------------------------------------------------------------------------------------------------------------------------------------------------------------------------------------------------------------------------------------------------------------------------------------------------------------------------------------------------------------------------------------------------------|
| Otro alimento                         |                                                                                                                                                                                                                                                                                                                                                                                                                                                                                                                               |
| suplementos vitamínicos               | <input checked="" type="radio"/> si<br><input type="radio"/> no                                                                                                                                                                                                                                                                                                                                                                                                                                                               |
| suplementos vitamínicos               | [*DATA REMOVED*]                                                                                                                                                                                                                                                                                                                                                                                                                                                                                                              |
| dieta previa                          | <input type="radio"/> si<br><input checked="" type="radio"/> no                                                                                                                                                                                                                                                                                                                                                                                                                                                               |
| motivo dieta                          | <input checked="" type="radio"/> no dieta<br><input type="radio"/> control peso<br><input type="radio"/> control colesterol<br><input type="radio"/> control diabetes<br><input type="radio"/> problemas estómago<br><input type="radio"/> problemas vesícula o hepáticos<br><input type="radio"/> HTA o cardiopatía<br><input type="radio"/> problemas renales<br><input type="radio"/> alergia alimentaria<br><input type="radio"/> ácido úrico elevado<br><input type="radio"/> vegetariana<br><input type="radio"/> otros |
| cambio alimentos año previo gestación | <input checked="" type="radio"/> si<br><input type="radio"/> no                                                                                                                                                                                                                                                                                                                                                                                                                                                               |
| cambio lácteos                        | <input type="radio"/> eliminado<br><input type="radio"/> disminuido<br><input checked="" type="radio"/> igual<br><input type="radio"/> aumentado<br><input type="radio"/> no sabe                                                                                                                                                                                                                                                                                                                                             |
| cambio huevos                         | <input type="radio"/> eliminado<br><input type="radio"/> disminuido<br><input checked="" type="radio"/> igual<br><input type="radio"/> aumentado<br><input type="radio"/> no sabe                                                                                                                                                                                                                                                                                                                                             |
| cambio carne                          | <input type="radio"/> eliminado<br><input type="radio"/> disminuido<br><input checked="" type="radio"/> igual<br><input type="radio"/> aumentado<br><input type="radio"/> no sabe                                                                                                                                                                                                                                                                                                                                             |
| cambio pescado                        | <input type="radio"/> eliminado<br><input type="radio"/> disminuido<br><input checked="" type="radio"/> igual<br><input type="radio"/> aumentado<br><input type="radio"/> no sabe                                                                                                                                                                                                                                                                                                                                             |
| cambio verduras                       | <input type="radio"/> eliminado<br><input type="radio"/> disminuido<br><input checked="" type="radio"/> igual<br><input type="radio"/> aumentado<br><input type="radio"/> no sabe                                                                                                                                                                                                                                                                                                                                             |

|                            |                                                                                                                                                                                                                        |
|----------------------------|------------------------------------------------------------------------------------------------------------------------------------------------------------------------------------------------------------------------|
| cambio legumbres           | <input type="radio"/> eliminado<br><input type="radio"/> disminuido<br><input checked="" type="radio"/> igual<br><input type="radio"/> aumentado<br><input type="radio"/> no sabe                                      |
| cambio fruta               | <input type="radio"/> eliminado<br><input type="radio"/> disminuido<br><input checked="" type="radio"/> igual<br><input type="radio"/> aumentado<br><input type="radio"/> no sabe                                      |
| cambio pan                 | <input type="radio"/> eliminado<br><input type="radio"/> disminuido<br><input checked="" type="radio"/> igual<br><input type="radio"/> aumentado<br><input type="radio"/> no sabe                                      |
| cambio aceite oliva        | <input type="radio"/> eliminado<br><input type="radio"/> disminuido<br><input checked="" type="radio"/> igual<br><input type="radio"/> aumentado<br><input type="radio"/> no sabe                                      |
| cambio mante o margarina   | <input type="radio"/> eliminado<br><input type="radio"/> disminuido<br><input checked="" type="radio"/> igual<br><input type="radio"/> aumentado<br><input type="radio"/> no sabe                                      |
| cambio azúcar y dulces     | <input checked="" type="radio"/> eliminado<br><input type="radio"/> disminuido<br><input type="radio"/> igual<br><input type="radio"/> aumentado<br><input type="radio"/> no sabe                                      |
| cambio bebidas alcohólicas | <input checked="" type="radio"/> eliminado<br><input type="radio"/> disminuido<br><input type="radio"/> igual<br><input type="radio"/> aumentado<br><input type="radio"/> no sabe                                      |
| frecuencia comidas fritas  | <input type="radio"/> a diario<br><input type="radio"/> 5 a 6 veces semana<br><input type="radio"/> 2 a 4 veces semana<br><input type="radio"/> 1 vez semana<br><input checked="" type="radio"/> menos de 1 vez semana |
| carne                      | <input type="radio"/> no como<br><input type="radio"/> cruda<br><input type="radio"/> poco hecha<br><input type="radio"/> hecha<br><input checked="" type="radio"/> muy hecha                                          |
| grasa visible carne        | <input type="radio"/> quita toda<br><input checked="" type="radio"/> quita mayoría<br><input type="radio"/> quita un poco<br><input type="radio"/> no quita nada                                                       |

|                                |                                                                                                                                                                                                                                                          |
|--------------------------------|----------------------------------------------------------------------------------------------------------------------------------------------------------------------------------------------------------------------------------------------------------|
| cocina carne                   | <input checked="" type="radio"/> a la plancha<br><input type="radio"/> a la parrilla<br><input type="radio"/> asada<br><input type="radio"/> frita<br><input type="radio"/> guisada                                                                      |
| tostado quemado carne          | <input checked="" type="radio"/> nunca<br><input type="radio"/> 1 vez mes<br><input type="radio"/> 2 a 3 veces mes<br><input type="radio"/> 1 vez semana<br><input type="radio"/> 2 a 3 semanas                                                          |
| tostado quemado pescado        | <input checked="" type="radio"/> nunca<br><input type="radio"/> 1 vez mes<br><input type="radio"/> 2 a 3 veces mes<br><input type="radio"/> 1 vez semana<br><input type="radio"/> 2 a 3 semanas                                                          |
| socarrat paella                | <input checked="" type="radio"/> nunca<br><input type="radio"/> 1 vez mes<br><input type="radio"/> 2 a 3 veces mes<br><input type="radio"/> 1 vez semana<br><input type="radio"/> 2 a 3 semanas                                                          |
| grasa o aceite cocinar         | <input type="radio"/> mantequilla<br><input type="radio"/> margarina<br><input checked="" type="radio"/> aceite oliva<br><input type="radio"/> aceite oliva virgen extra<br><input type="radio"/> aceite vegetal<br><input type="radio"/> mezcla aceites |
| grasa aceite aliñar            | <input type="radio"/> mantequilla<br><input type="radio"/> margarina<br><input checked="" type="radio"/> aceite oliva<br><input type="radio"/> aceite oliva virgen extra<br><input type="radio"/> aceite vegetal<br><input type="radio"/> mezcla aceites |
| grasa aceite freir             | <input type="radio"/> mantequilla<br><input type="radio"/> margarina<br><input checked="" type="radio"/> aceite oliva<br><input type="radio"/> aceite oliva virgen extra<br><input type="radio"/> aceite vegetal<br><input type="radio"/> mezcla aceites |
| Ejercicio cuestionario         | <input checked="" type="radio"/> si<br><input type="radio"/> no                                                                                                                                                                                          |
| horas de sueño incluido siesta | [*DATA REMOVED*]                                                                                                                                                                                                                                         |
| minutos siesta                 | [*DATA REMOVED*]                                                                                                                                                                                                                                         |
| horas televisión semana        | [*DATA REMOVED*]                                                                                                                                                                                                                                         |

|                                        |                                                                                                                                                                                                                                                                                                                                                                           |
|----------------------------------------|---------------------------------------------------------------------------------------------------------------------------------------------------------------------------------------------------------------------------------------------------------------------------------------------------------------------------------------------------------------------------|
| actividad trabajo                      | <input type="radio"/> casi siempre sentado<br><input type="radio"/> sentado 50 por cien<br><input type="radio"/> casi siempre de pie, quieto<br><input checked="" type="radio"/> casi siempre levantado caminando y llevando pocas cosas<br><input type="radio"/> casi siempre levantado, caminando y llevado muchas cosas<br><input type="radio"/> trabajo manual pesado |
| tiempo caminar o bici al día           | <input type="radio"/> casi nunca<br><input type="radio"/> menos 20min día<br><input type="radio"/> 20 a 40 min día<br><input type="radio"/> 40 a 60 min día<br><input checked="" type="radio"/> 1h o 1h y media día<br><input type="radio"/> más de 1h y media al día                                                                                                     |
| tiempo tareas casa al día              | <input type="radio"/> menos de 1h día<br><input checked="" type="radio"/> 1 a 2h día<br><input type="radio"/> 3 a 4h día<br><input type="radio"/> 5 a 6h día<br><input type="radio"/> 7 a 8h día<br><input type="radio"/> más de 8h día                                                                                                                                   |
| tiempo libre televisión ordenador leer | <input type="radio"/> menos 1h día<br><input checked="" type="radio"/> 1h día<br><input type="radio"/> 2h día<br><input type="radio"/> 3h día<br><input type="radio"/> 4h día<br><input type="radio"/> 5 a 6h día<br><input type="radio"/> mas 6h día                                                                                                                     |
| tiempo libre ejercicio o deporte       | <input type="radio"/> menos 1h semana<br><input type="radio"/> 1h semana<br><input type="radio"/> 2h semana<br><input type="radio"/> 3h semana<br><input checked="" type="radio"/> 4 a 5h semana<br><input type="radio"/> mas 5h semana                                                                                                                                   |
| como se considera                      | <input type="radio"/> sedentaria<br><input type="radio"/> poco activa<br><input checked="" type="radio"/> moderadamente activa<br><input type="radio"/> bastante activa<br><input type="radio"/> muy activa<br><input type="radio"/> no sabe                                                                                                                              |
| FUR                                    | [*DATA REMOVED*]                                                                                                                                                                                                                                                                                                                                                          |
| Semanas gestación 2T                   | _____                                                                                                                                                                                                                                                                                                                                                                     |
| Días gestación 2T                      | _____                                                                                                                                                                                                                                                                                                                                                                     |
| DBP 2T                                 | _____                                                                                                                                                                                                                                                                                                                                                                     |
| CC 2T                                  | _____                                                                                                                                                                                                                                                                                                                                                                     |

|                                                   |                                                                                                                                                                                                 |
|---------------------------------------------------|-------------------------------------------------------------------------------------------------------------------------------------------------------------------------------------------------|
| AC 2T                                             |                                                                                                                                                                                                 |
| LF 2T                                             |                                                                                                                                                                                                 |
| PFE 2T (Hadlock)                                  |                                                                                                                                                                                                 |
| Semanas gestación 3T                              | [*DATA REMOVED*]                                                                                                                                                                                |
| días 3T                                           | [*DATA REMOVED*]                                                                                                                                                                                |
| DBP 3T                                            | [*DATA REMOVED*]                                                                                                                                                                                |
| CC 3T                                             | [*DATA REMOVED*]                                                                                                                                                                                |
| AC 3T                                             | [*DATA REMOVED*]                                                                                                                                                                                |
| LF 3T                                             | [*DATA REMOVED*]                                                                                                                                                                                |
| PFE 3T (Hadlock)                                  | [*DATA REMOVED*]                                                                                                                                                                                |
| Semanas de gestación final                        | [*DATA REMOVED*]                                                                                                                                                                                |
| días gestación final                              | [*DATA REMOVED*]                                                                                                                                                                                |
| Localización placenta                             | <input checked="" type="radio"/> anterior<br><input type="radio"/> lateral derecha<br><input type="radio"/> lateral izquierda<br><input type="radio"/> posterior<br><input type="radio"/> fondo |
| Presentación longitudinal cefálica                | <input type="radio"/> no<br><input checked="" type="radio"/> si                                                                                                                                 |
| Dorso                                             | <input type="radio"/> izquierda anterior<br><input type="radio"/> izquierda posterior<br><input type="radio"/> derecha anterior<br><input checked="" type="radio"/> derecha posterior           |
| diámetro biparietal                               | [*DATA REMOVED*]                                                                                                                                                                                |
| Circunferencia craneal                            | [*DATA REMOVED*]                                                                                                                                                                                |
| Circunferencia abdominal                          | [*DATA REMOVED*]                                                                                                                                                                                |
| Longitud de femur                                 | [*DATA REMOVED*]                                                                                                                                                                                |
| tejido celular subcutáneo a nivel del muslo en mm | [*DATA REMOVED*]                                                                                                                                                                                |
| tejido celular subcutáneo en abdomen en mm        | [*DATA REMOVED*]                                                                                                                                                                                |



|                                               |                                                                                                                                               |
|-----------------------------------------------|-----------------------------------------------------------------------------------------------------------------------------------------------|
| Volumen del muslo en cm3                      | [*DATA REMOVED*]                                                                                                                              |
| Peso fetal estimado según fórmula de Hadlock  | [*DATA REMOVED*]                                                                                                                              |
| Percentil                                     | [*DATA REMOVED*]                                                                                                                              |
| Peso fetal estimado según fórmula de Scioscia | _____                                                                                                                                         |
| Peso fetal estimado según fórmula de LEE      | _____                                                                                                                                         |
| Tipo de parto                                 | <input checked="" type="radio"/> eutocico<br><input type="radio"/> instrumentado/ventosa<br><input type="radio"/> cesarea                     |
| fecha de nacimiento                           | [*DATA REMOVED*]                                                                                                                              |
| Días entre exploración y nacimiento           | [*DATA REMOVED*]                                                                                                                              |
| Peso RN en g                                  | [*DATA REMOVED*]                                                                                                                              |
| sexo                                          | <input checked="" type="radio"/> mujer<br><input type="radio"/> hombre                                                                        |
| Apgar 1 minuto                                | [*DATA REMOVED*]                                                                                                                              |
| Apgar 5 minutos                               | [*DATA REMOVED*]                                                                                                                              |
| Apgar 10 minutos                              | _____                                                                                                                                         |
| antecedente Covid durante gestación           | <input type="radio"/> Yes<br><input checked="" type="radio"/> No                                                                              |
| Nivel de estudios                             | <input type="radio"/> ninguno<br><input type="radio"/> primarios<br><input type="radio"/> secundarios<br><input type="radio"/> universitarios |

# Base\_datos\_estimacion\_peso\_fetal

|                                       |                                                                                                                                                                                                                                                                                      |
|---------------------------------------|--------------------------------------------------------------------------------------------------------------------------------------------------------------------------------------------------------------------------------------------------------------------------------------|
| Número de identificación participante | 118                                                                                                                                                                                                                                                                                  |
| CODIGO PARTICIPANTE                   |                                                                                                                                                                                                                                                                                      |
| Edad                                  | [*DATA REMOVED*]                                                                                                                                                                                                                                                                     |
| Gestaciones                           | <input checked="" type="radio"/> 1<br><input type="radio"/> 2<br><input type="radio"/> 3<br><input type="radio"/> mas de 3                                                                                                                                                           |
| partos                                | <input checked="" type="radio"/> 0<br><input type="radio"/> 1<br><input type="radio"/> 2<br><input type="radio"/> 3<br><input type="radio"/> mas de 3                                                                                                                                |
| cesáreas                              | <input checked="" type="radio"/> 0<br><input type="radio"/> 1<br><input type="radio"/> 2<br><input type="radio"/> 3<br><input type="radio"/> mas de 3                                                                                                                                |
| Abortos                               | <input checked="" type="radio"/> 0<br><input type="radio"/> 1<br><input type="radio"/> 2<br><input type="radio"/> 3<br><input type="radio"/> mas de 3                                                                                                                                |
| Tipo de gestacion                     | <input checked="" type="radio"/> espontanea<br><input type="radio"/> IAC inseminación artificial conyuge<br><input type="radio"/> IAD inseminación artificial donante<br><input type="radio"/> FIV Fecundación in Vitro<br><input type="radio"/> Ovodon FIV con donación de ovocitos |
| peso previo a embarazo                | [*DATA REMOVED*]                                                                                                                                                                                                                                                                     |
| Ganancia ponderal embarazo            | [*DATA REMOVED*]                                                                                                                                                                                                                                                                     |
| Talla madre                           | [*DATA REMOVED*]                                                                                                                                                                                                                                                                     |
| IMC previo embarazo                   | 27.776706145596233                                                                                                                                                                                                                                                                   |
| Patología obstétrica                  | <input checked="" type="radio"/> no<br><input type="radio"/> si                                                                                                                                                                                                                      |
| Diabetes pregestacional               | <input checked="" type="radio"/> no<br><input type="radio"/> si                                                                                                                                                                                                                      |
| Diabetes gestacional                  | <input checked="" type="radio"/> no<br><input type="radio"/> si                                                                                                                                                                                                                      |

|                                            |                                                                                                                                                                                      |
|--------------------------------------------|--------------------------------------------------------------------------------------------------------------------------------------------------------------------------------------|
| Diabetes gestacional con insulina          | <input checked="" type="radio"/> no<br><input type="radio"/> si                                                                                                                      |
| Diabetes gestacional con dieta y ejercicio | <input checked="" type="radio"/> no<br><input type="radio"/> si                                                                                                                      |
| Percentil fetos previos                    | <input checked="" type="radio"/> Nada<br><input type="radio"/> percentil menor de 10<br><input type="radio"/> percentil entre 10 y 90<br><input type="radio"/> percentil mayor de 90 |
| Exfumadora                                 | <input type="radio"/> Nada<br><input checked="" type="radio"/> menos de 5 años<br><input type="radio"/> 5 a 10 años<br><input type="radio"/> mayor o igual a 10 años                 |
| Hábito tabáquico                           | <input checked="" type="radio"/> no<br><input type="radio"/> si                                                                                                                      |
| fumadora                                   | [*DATA REMOVED*]                                                                                                                                                                     |
| Consumo otros tóxicos                      | <input checked="" type="radio"/> no<br><input type="radio"/> si                                                                                                                      |
| Hb 1T                                      | _____                                                                                                                                                                                |
| Htc 1T                                     | _____                                                                                                                                                                                |
| Hb 2T                                      | [*DATA REMOVED*]                                                                                                                                                                     |
| HTC 2T                                     | [*DATA REMOVED*]                                                                                                                                                                     |
| Hb 3T                                      | [*DATA REMOVED*]                                                                                                                                                                     |
| HTC 3T                                     | [*DATA REMOVED*]                                                                                                                                                                     |
| Suplemento FE oral                         | <input checked="" type="radio"/> si<br><input type="radio"/> no                                                                                                                      |
| Suplemento fe iv                           | <input type="radio"/> si<br><input checked="" type="radio"/> no                                                                                                                      |
| Transfusión                                | <input checked="" type="radio"/> no<br><input type="radio"/> si                                                                                                                      |
| Solicitada Vit D                           | <input checked="" type="radio"/> no<br><input type="radio"/> si                                                                                                                      |
| Deficit vit D                              | <input type="radio"/> no<br><input type="radio"/> si                                                                                                                                 |

|                       |                                                                                                                                                                                                                                                                                                                                                                                                              |
|-----------------------|--------------------------------------------------------------------------------------------------------------------------------------------------------------------------------------------------------------------------------------------------------------------------------------------------------------------------------------------------------------------------------------------------------------|
| Suplemento vit D      | <input type="radio"/> si<br><input type="radio"/> no                                                                                                                                                                                                                                                                                                                                                         |
| Dieta, cuestionario   | <input checked="" type="radio"/> si<br><input type="radio"/> no                                                                                                                                                                                                                                                                                                                                              |
| Leche entera          | <input checked="" type="radio"/> Nunca o menos 1 vez al mes<br><input type="radio"/> 1 a 3 veces mes<br><input type="radio"/> 1 vez semana<br><input type="radio"/> 2 a 4 veces semana<br><input type="radio"/> 5 a 6 veces semana<br><input type="radio"/> 1 vez al día<br><input type="radio"/> 2 a 3 veces al día<br><input type="radio"/> 5 a 6 veces al día<br><input type="radio"/> más 6 veces al día |
| Leche semidesnatada   | <input checked="" type="radio"/> Nunca o menos 1 vez al mes<br><input type="radio"/> 1 a 3 veces mes<br><input type="radio"/> 1 vez semana<br><input type="radio"/> 2 a 4 veces semana<br><input type="radio"/> 5 a 6 veces semana<br><input type="radio"/> 1 vez al día<br><input type="radio"/> 2 a 3 veces al día<br><input type="radio"/> 5 a 6 veces al día<br><input type="radio"/> mas 6 veces al día |
| Leche desnatada       | <input checked="" type="radio"/> Nunca o menos 1 vez al mes<br><input type="radio"/> 1 a 3 veces mes<br><input type="radio"/> 1 vez semana<br><input type="radio"/> 2 a 4 veces semana<br><input type="radio"/> 5 a 6 veces semana<br><input type="radio"/> 1 vez al día<br><input type="radio"/> 2 a 3 veces al día<br><input type="radio"/> 5 a 6 veces al día<br><input type="radio"/> más 6 veces al día |
| Leche condensada      | <input checked="" type="radio"/> Nunca o menos 1 vez al mes<br><input type="radio"/> 1 a 3 veces mes<br><input type="radio"/> 1 vez semana<br><input type="radio"/> 2 a 4 veces semana<br><input type="radio"/> 5 a 6 veces semana<br><input type="radio"/> 1 vez al día<br><input type="radio"/> 2 a 3 veces al día<br><input type="radio"/> 5 a 6 veces al día<br><input type="radio"/> más 6 veces al día |
| nata o crema de leche | <input checked="" type="radio"/> Nunca o menos 1 vez al mes<br><input type="radio"/> 1 a 3 veces mes<br><input type="radio"/> 1 vez semana<br><input type="radio"/> 2 a 4 veces semana<br><input type="radio"/> 5 a 6 veces semana<br><input type="radio"/> 1 vez al día<br><input type="radio"/> 2 a 3 veces al día<br><input type="radio"/> 5 a 6 veces al día<br><input type="radio"/> más 6 veces al día |

---

Yogurt Entero

- ☐ Nunca o menos 1 vez al mes  
☒ 1 a 3 veces mes  
☐ 1 vez semana  
☐ 2 a 4 veces semana  
☐ 5 a 6 veces semana  
☐ 1 vez al día  
☐ 2 a 3 veces al día  
☐ 5 a 6 veces al día  
☐ más 6 veces al día

---

Yogurt desnatado

- ☒ Nunca o menos 1 vez al mes  
☐ 1 a 3 veces mes  
☐ 1 vez semana  
☐ 2 a 4 veces semana  
☐ 5 a 6 veces semana  
☐ 1 vez al día  
☐ 2 a 3 veces al día  
☐ 5 a 6 veces al día  
☐ más 6 veces al día

---

100g requesón o queso blando o queso fresco

- ☐ Nunca o menos 1 vez al mes  
☐ 1 a 3 veces mes  
☐ 1 vez semana  
☒ 2 a 4 veces semana  
☐ 5 a 6 veces semana  
☐ 1 vez al día  
☐ 2 a 3 veces al día  
☐ 5 a 6 veces al día  
☐ más 6 veces al día

---

queso curado o semicurado o cremoso

- ☐ Nunca o menos 1 vez al mes  
☐ 1 a 3 veces mes  
☐ 1 vez semana  
☐ 2 a 4 veces semana  
☒ 5 a 6 veces semana  
☐ 1 vez al día  
☐ 2 a 3 veces al día  
☐ 5 a 6 veces al día  
☐ más 6 veces al día

---

natillas flan pudding

- ☒ Nunca o menos 1 vez al mes  
☐ 1 a 3 veces mes  
☐ 1 vez semana  
☐ 2 a 4 veces semana  
☐ 5 a 6 veces semana  
☐ 1 vez al día  
☐ 2 a 3 veces al día  
☐ 5 a 6 veces al día  
☐ más 6 veces al día

---

Helado

- ☐ Nunca o menos 1 vez al mes  
☒ 1 a 3 veces mes  
☐ 1 vez semana  
☐ 2 a 4 veces semana  
☐ 5 a 6 veces semana  
☐ 1 vez al día  
☐ 2 a 3 veces al día  
☐ 5 a 6 veces al día  
☐ más 6 veces al día

|                                      |                                                                                                                                                                                                                                                                                                                                                                                                              |
|--------------------------------------|--------------------------------------------------------------------------------------------------------------------------------------------------------------------------------------------------------------------------------------------------------------------------------------------------------------------------------------------------------------------------------------------------------------|
| huevo                                | <input type="radio"/> Nunca o menos 1 vez al mes<br><input type="radio"/> 1 a 3 veces mes<br><input type="radio"/> 1 vez semana<br><input checked="" type="radio"/> 2 a 4 veces semana<br><input type="radio"/> 5 a 6 veces semana<br><input type="radio"/> 1 vez al día<br><input type="radio"/> 2 a 3 veces al día<br><input type="radio"/> 5 a 6 veces al día<br><input type="radio"/> más 6 veces al día |
| Pollo con piel                       | <input checked="" type="radio"/> Nunca o menos 1 vez al mes<br><input type="radio"/> 1 a 3 veces mes<br><input type="radio"/> 1 vez semana<br><input type="radio"/> 2 a 4 veces semana<br><input type="radio"/> 5 a 6 veces semana<br><input type="radio"/> 1 vez al día<br><input type="radio"/> 2 a 3 veces al día<br><input type="radio"/> 5 a 6 veces al día<br><input type="radio"/> más 6 veces al día |
| pollo sin piel                       | <input type="radio"/> Nunca o menos 1 vez al mes<br><input type="radio"/> 1 a 3 veces mes<br><input checked="" type="radio"/> 1 vez semana<br><input type="radio"/> 2 a 4 veces semana<br><input type="radio"/> 5 a 6 veces semana<br><input type="radio"/> 1 vez al día<br><input type="radio"/> 2 a 3 veces al día<br><input type="radio"/> 5 a 6 veces al día<br><input type="radio"/> más 6 veces al día |
| Ternera o cerdo o cordero            | <input type="radio"/> Nunca o menos 1 vez al mes<br><input checked="" type="radio"/> 1 a 3 veces mes<br><input type="radio"/> 1 vez semana<br><input type="radio"/> 2 a 4 veces semana<br><input type="radio"/> 5 a 6 veces semana<br><input type="radio"/> 1 vez al día<br><input type="radio"/> 2 a 3 veces al día<br><input type="radio"/> 5 a 6 veces al día<br><input type="radio"/> más 6 veces al día |
| carne caza: Conejo o codorniz o pato | <input checked="" type="radio"/> Nunca o menos 1 vez al mes<br><input type="radio"/> 1 a 3 veces mes<br><input type="radio"/> 1 vez semana<br><input type="radio"/> 2 a 4 veces semana<br><input type="radio"/> 5 a 6 veces semana<br><input type="radio"/> 1 vez al día<br><input type="radio"/> 2 a 3 veces al día<br><input type="radio"/> 5 a 6 veces al día<br><input type="radio"/> más 6 veces al día |
| Hígado de ternera o cerdo o pollo    | <input checked="" type="radio"/> Nunca o menos 1 vez al mes<br><input type="radio"/> 1 a 3 veces mes<br><input type="radio"/> 1 vez semana<br><input type="radio"/> 2 a 4 veces semana<br><input type="radio"/> 5 a 6 veces semana<br><input type="radio"/> 1 vez al día<br><input type="radio"/> 2 a 3 veces al día<br><input type="radio"/> 5 a 6 veces al día<br><input type="radio"/> más 6 veces al día |

---

Vísceras

- ☒ Nunca o menos 1 vez al mes  
☐ 1 a 3 veces mes  
☐ 1 vez semana  
☐ 2 a 4 veces semana  
☐ 5 a 6 veces semana  
☐ 1 vez al día  
☐ 2 a 3 veces al día  
☐ 5 a 6 veces al día  
☐ más 6 veces al día

---

Embutido

- ☒ Nunca o menos 1 vez al mes  
☐ 1 a 3 veces mes  
☐ 1 vez semana  
☐ 2 a 4 veces semana  
☐ 5 a 6 veces semana  
☐ 1 vez al día  
☐ 2 a 3 veces al día  
☐ 5 a 6 veces al día  
☐ más 6 veces al día

---

Salchicha o similar

- ☒ Nunca o menos 1 vez al mes  
☐ 1 a 3 veces mes  
☐ 1 vez semana  
☐ 2 a 4 veces semana  
☐ 5 a 6 veces semana  
☐ 1 vez al día  
☐ 2 a 3 veces al día  
☐ 5 a 6 veces al día  
☐ más 6 veces al día

---

Pate o foiegras

- ☒ Nunca o menos 1 vez al mes  
☐ 1 a 3 veces mes  
☐ 1 vez semana  
☐ 2 a 4 veces semana  
☐ 5 a 6 veces semana  
☐ 1 vez al día  
☐ 2 a 3 veces al día  
☐ 5 a 6 veces al día  
☐ más 6 veces al día

---

Hamburguesa

- ☐ Nunca o menos 1 vez al mes  
☐ 1 a 3 veces mes  
☒ 1 vez semana  
☐ 2 a 4 veces semana  
☐ 5 a 6 veces semana  
☐ 1 vez al día  
☐ 2 a 3 veces al día  
☐ 5 a 6 veces al día  
☐ más 6 veces al día

---

tocino o bacon

- ☒ Nunca o menos 1 vez al mes  
☐ 1 a 3 veces mes  
☐ 1 vez semana  
☐ 2 a 4 veces semana  
☐ 5 a 6 veces semana  
☐ 1 vez al día  
☐ 2 a 3 veces al día  
☐ 5 a 6 veces al día  
☐ más 6 veces al día

---

Pescado frito

- ☐ Nunca o menos 1 vez al mes  
☒ 1 a 3 veces mes  
☐ 1 vez semana  
☐ 2 a 4 veces semana  
☐ 5 a 6 veces semana  
☐ 1 vez al día  
☐ 2 a 3 veces al día  
☐ 5 a 6 veces al día  
☐ más 6 veces al día

---

pescado hervido blanco

- ☐ Nunca o menos 1 vez al mes  
☐ 1 a 3 veces mes  
☒ 1 vez semana  
☐ 2 a 4 veces semana  
☐ 5 a 6 veces semana  
☐ 1 vez al día  
☐ 2 a 3 veces al día  
☐ 5 a 6 veces al día  
☐ más 6 veces al día

---

pescado hervido azul

- ☒ Nunca o menos 1 vez al mes  
☐ 1 a 3 veces mes  
☐ 1 vez semana  
☐ 2 a 4 veces semana  
☐ 5 a 6 veces semana  
☐ 1 vez al día  
☐ 2 a 3 veces al día  
☐ 5 a 6 veces al día  
☐ más 6 veces al día

---

otros pescado azul

- ☐ Nunca o menos 1 vez al mes  
☐ 1 a 3 veces mes  
☒ 1 vez semana  
☐ 2 a 4 veces semana  
☐ 5 a 6 veces semana  
☐ 1 vez al día  
☐ 2 a 3 veces al día  
☐ 5 a 6 veces al día  
☐ más 6 veces al día

---

atun conserva

- ☐ Nunca o menos 1 vez al mes  
☒ 1 a 3 veces mes  
☐ 1 vez semana  
☐ 2 a 4 veces semana  
☐ 5 a 6 veces semana  
☐ 1 vez al día  
☐ 2 a 3 veces al día  
☐ 5 a 6 veces al día  
☐ más 6 veces al día

---

sardina conserva

- ☐ Nunca o menos 1 vez al mes  
☒ 1 a 3 veces mes  
☐ 1 vez semana  
☐ 2 a 4 veces semana  
☐ 5 a 6 veces semana  
☐ 1 vez al día  
☐ 2 a 3 veces al día  
☐ 5 a 6 veces al día  
☐ más 6 veces al día



|                                         |                                                                                                                                                                                                                                                                                                                                                                                                              |
|-----------------------------------------|--------------------------------------------------------------------------------------------------------------------------------------------------------------------------------------------------------------------------------------------------------------------------------------------------------------------------------------------------------------------------------------------------------------|
| pescado ahumado                         | <input type="radio"/> Nunca o menos 1 vez al mes<br><input checked="" type="radio"/> 1 a 3 veces mes<br><input type="radio"/> 1 vez semana<br><input type="radio"/> 2 a 4 veces semana<br><input type="radio"/> 5 a 6 veces semana<br><input type="radio"/> 1 vez al día<br><input type="radio"/> 2 a 3 veces al día<br><input type="radio"/> 5 a 6 veces al día<br><input type="radio"/> más 6 veces al día |
| almejas o mejillones o ostras unos 100g | <input type="radio"/> Nunca o menos 1 vez al mes<br><input checked="" type="radio"/> 1 a 3 veces mes<br><input type="radio"/> 1 vez semana<br><input type="radio"/> 2 a 4 veces semana<br><input type="radio"/> 5 a 6 veces semana<br><input type="radio"/> 1 vez al día<br><input type="radio"/> 2 a 3 veces al día<br><input type="radio"/> 5 a 6 veces al día<br><input type="radio"/> más 6 veces al día |
| calamar o chipiron o sepia unos 100g    | <input type="radio"/> Nunca o menos 1 vez al mes<br><input type="radio"/> 1 a 3 veces mes<br><input checked="" type="radio"/> 1 vez semana<br><input type="radio"/> 2 a 4 veces semana<br><input type="radio"/> 5 a 6 veces semana<br><input type="radio"/> 1 vez al día<br><input type="radio"/> 2 a 3 veces al día<br><input type="radio"/> 5 a 6 veces al día<br><input type="radio"/> más 6 veces al día |
| marisco unos 100g                       | <input checked="" type="radio"/> Nunca o menos 1 vez al mes<br><input type="radio"/> 1 a 3 veces mes<br><input type="radio"/> 1 vez semana<br><input type="radio"/> 2 a 4 veces semana<br><input type="radio"/> 5 a 6 veces semana<br><input type="radio"/> 1 vez al día<br><input type="radio"/> 2 a 3 veces al día<br><input type="radio"/> 5 a 6 veces al día<br><input type="radio"/> más 6 veces al día |
| Espinacas o acelgas cocinadas           | <input type="radio"/> Nunca o menos 1 vez al mes<br><input type="radio"/> 1 a 3 veces mes<br><input checked="" type="radio"/> 1 vez semana<br><input type="radio"/> 2 a 4 veces semana<br><input type="radio"/> 5 a 6 veces semana<br><input type="radio"/> 1 vez al día<br><input type="radio"/> 2 a 3 veces al día<br><input type="radio"/> 5 a 6 veces al día<br><input type="radio"/> más 6 veces al día |
| Col o coliflor o brocoli cocinado       | <input checked="" type="radio"/> Nunca o menos 1 vez al mes<br><input type="radio"/> 1 a 3 veces mes<br><input type="radio"/> 1 vez semana<br><input type="radio"/> 2 a 4 veces semana<br><input type="radio"/> 5 a 6 veces semana<br><input type="radio"/> 1 vez al día<br><input type="radio"/> 2 a 3 veces al día<br><input type="radio"/> 5 a 6 veces al día<br><input type="radio"/> más 6 veces al día |

---

Lechuga o endivia o escarola

- ☐ Nunca o menos 1 vez al mes  
☐ 1 a 3 veces mes  
☐ 1 vez semana  
☐ 2 a 4 veces semana  
☒ 5 a 6 veces semana  
☐ 1 vez al día  
☐ 2 a 3 veces al día  
☐ 5 a 6 veces al día  
☐ más 6 veces al día

---

tomate ensalada

- ☐ Nunca o menos 1 vez al mes  
☐ 1 a 3 veces mes  
☐ 1 vez semana  
☐ 2 a 4 veces semana  
☐ 5 a 6 veces semana  
☒ 1 vez al día  
☐ 2 a 3 veces al día  
☐ 5 a 6 veces al día  
☐ más 6 veces al día

---

cebolla

- ☐ Nunca o menos 1 vez al mes  
☐ 1 a 3 veces mes  
☐ 1 vez semana  
☐ 2 a 4 veces semana  
☒ 5 a 6 veces semana  
☐ 1 vez al día  
☐ 2 a 3 veces al día  
☐ 5 a 6 veces al día  
☐ más 6 veces al día

---

Zanahoria o calabaza

- ☐ Nunca o menos 1 vez al mes  
☐ 1 a 3 veces mes  
☐ 1 vez semana  
☒ 2 a 4 veces semana  
☐ 5 a 6 veces semana  
☐ 1 vez al día  
☐ 2 a 3 veces al día  
☐ 5 a 6 veces al día  
☐ más 6 veces al día

---

Judías verdes

- ☐ Nunca o menos 1 vez al mes  
☐ 1 a 3 veces mes  
☒ 1 vez semana  
☐ 2 a 4 veces semana  
☐ 5 a 6 veces semana  
☐ 1 vez al día  
☐ 2 a 3 veces al día  
☐ 5 a 6 veces al día  
☐ más 6 veces al día

---

Berenjena o calabacin o pepino

- ☐ Nunca o menos 1 vez al mes  
☐ 1 a 3 veces mes  
☐ 1 vez semana  
☒ 2 a 4 veces semana  
☐ 5 a 6 veces semana  
☐ 1 vez al día  
☐ 2 a 3 veces al día  
☐ 5 a 6 veces al día  
☐ más 6 veces al día

---

|          |                                                                                                                                                                                                                                                                                                                                                                                                              |
|----------|--------------------------------------------------------------------------------------------------------------------------------------------------------------------------------------------------------------------------------------------------------------------------------------------------------------------------------------------------------------------------------------------------------------|
| pimiento | <input type="radio"/> Nunca o menos 1 vez al mes<br><input type="radio"/> 1 a 3 veces mes<br><input checked="" type="radio"/> 1 vez semana<br><input type="radio"/> 2 a 4 veces semana<br><input type="radio"/> 5 a 6 veces semana<br><input type="radio"/> 1 vez al día<br><input type="radio"/> 2 a 3 veces al día<br><input type="radio"/> 5 a 6 veces al día<br><input type="radio"/> más 6 veces al día |
|----------|--------------------------------------------------------------------------------------------------------------------------------------------------------------------------------------------------------------------------------------------------------------------------------------------------------------------------------------------------------------------------------------------------------------|

---

|           |                                                                                                                                                                                                                                                                                                                                                                                                              |
|-----------|--------------------------------------------------------------------------------------------------------------------------------------------------------------------------------------------------------------------------------------------------------------------------------------------------------------------------------------------------------------------------------------------------------------|
| alcachofa | <input type="radio"/> Nunca o menos 1 vez al mes<br><input type="radio"/> 1 a 3 veces mes<br><input checked="" type="radio"/> 1 vez semana<br><input type="radio"/> 2 a 4 veces semana<br><input type="radio"/> 5 a 6 veces semana<br><input type="radio"/> 1 vez al día<br><input type="radio"/> 2 a 3 veces al día<br><input type="radio"/> 5 a 6 veces al día<br><input type="radio"/> más 6 veces al día |
|-----------|--------------------------------------------------------------------------------------------------------------------------------------------------------------------------------------------------------------------------------------------------------------------------------------------------------------------------------------------------------------------------------------------------------------|

---

|            |                                                                                                                                                                                                                                                                                                                                                                                                              |
|------------|--------------------------------------------------------------------------------------------------------------------------------------------------------------------------------------------------------------------------------------------------------------------------------------------------------------------------------------------------------------------------------------------------------------|
| espárragos | <input type="radio"/> Nunca o menos 1 vez al mes<br><input checked="" type="radio"/> 1 a 3 veces mes<br><input type="radio"/> 1 vez semana<br><input type="radio"/> 2 a 4 veces semana<br><input type="radio"/> 5 a 6 veces semana<br><input type="radio"/> 1 vez al día<br><input type="radio"/> 2 a 3 veces al día<br><input type="radio"/> 5 a 6 veces al día<br><input type="radio"/> más 6 veces al día |
|------------|--------------------------------------------------------------------------------------------------------------------------------------------------------------------------------------------------------------------------------------------------------------------------------------------------------------------------------------------------------------------------------------------------------------|

---

|              |                                                                                                                                                                                                                                                                                                                                                                                                              |
|--------------|--------------------------------------------------------------------------------------------------------------------------------------------------------------------------------------------------------------------------------------------------------------------------------------------------------------------------------------------------------------------------------------------------------------|
| maíz hervido | <input type="radio"/> Nunca o menos 1 vez al mes<br><input checked="" type="radio"/> 1 a 3 veces mes<br><input type="radio"/> 1 vez semana<br><input type="radio"/> 2 a 4 veces semana<br><input type="radio"/> 5 a 6 veces semana<br><input type="radio"/> 1 vez al día<br><input type="radio"/> 2 a 3 veces al día<br><input type="radio"/> 5 a 6 veces al día<br><input type="radio"/> más 6 veces al día |
|--------------|--------------------------------------------------------------------------------------------------------------------------------------------------------------------------------------------------------------------------------------------------------------------------------------------------------------------------------------------------------------------------------------------------------------|

---

|           |                                                                                                                                                                                                                                                                                                                                                                                                              |
|-----------|--------------------------------------------------------------------------------------------------------------------------------------------------------------------------------------------------------------------------------------------------------------------------------------------------------------------------------------------------------------------------------------------------------------|
| legumbres | <input type="radio"/> Nunca o menos 1 vez al mes<br><input type="radio"/> 1 a 3 veces mes<br><input type="radio"/> 1 vez semana<br><input checked="" type="radio"/> 2 a 4 veces semana<br><input type="radio"/> 5 a 6 veces semana<br><input type="radio"/> 1 vez al día<br><input type="radio"/> 2 a 3 veces al día<br><input type="radio"/> 5 a 6 veces al día<br><input type="radio"/> más 6 veces al día |
|-----------|--------------------------------------------------------------------------------------------------------------------------------------------------------------------------------------------------------------------------------------------------------------------------------------------------------------------------------------------------------------------------------------------------------------|

---

|                       |                                                                                                                                                                                                                                                                                                                                                                                                              |
|-----------------------|--------------------------------------------------------------------------------------------------------------------------------------------------------------------------------------------------------------------------------------------------------------------------------------------------------------------------------------------------------------------------------------------------------------|
| naranjas o mandarinas | <input type="radio"/> Nunca o menos 1 vez al mes<br><input type="radio"/> 1 a 3 veces mes<br><input type="radio"/> 1 vez semana<br><input checked="" type="radio"/> 2 a 4 veces semana<br><input type="radio"/> 5 a 6 veces semana<br><input type="radio"/> 1 vez al día<br><input type="radio"/> 2 a 3 veces al día<br><input type="radio"/> 5 a 6 veces al día<br><input type="radio"/> más 6 veces al día |
|-----------------------|--------------------------------------------------------------------------------------------------------------------------------------------------------------------------------------------------------------------------------------------------------------------------------------------------------------------------------------------------------------------------------------------------------------|

---

|                       |                                                                                                                                                                                                                                                                                                                                                                                                              |
|-----------------------|--------------------------------------------------------------------------------------------------------------------------------------------------------------------------------------------------------------------------------------------------------------------------------------------------------------------------------------------------------------------------------------------------------------|
| zum natural fruta     | <input type="radio"/> Nunca o menos 1 vez al mes<br><input type="radio"/> 1 a 3 veces mes<br><input type="radio"/> 1 vez semana<br><input checked="" type="radio"/> 2 a 4 veces semana<br><input type="radio"/> 5 a 6 veces semana<br><input type="radio"/> 1 vez al día<br><input type="radio"/> 2 a 3 veces al día<br><input type="radio"/> 5 a 6 veces al día<br><input type="radio"/> más 6 veces al día |
| platano               | <input type="radio"/> Nunca o menos 1 vez al mes<br><input type="radio"/> 1 a 3 veces mes<br><input type="radio"/> 1 vez semana<br><input type="radio"/> 2 a 4 veces semana<br><input checked="" type="radio"/> 5 a 6 veces semana<br><input type="radio"/> 1 vez al día<br><input type="radio"/> 2 a 3 veces al día<br><input type="radio"/> 5 a 6 veces al día<br><input type="radio"/> más 6 veces al día |
| manzana o pera        | <input type="radio"/> Nunca o menos 1 vez al mes<br><input checked="" type="radio"/> 1 a 3 veces mes<br><input type="radio"/> 1 vez semana<br><input type="radio"/> 2 a 4 veces semana<br><input type="radio"/> 5 a 6 veces semana<br><input type="radio"/> 1 vez al día<br><input type="radio"/> 2 a 3 veces al día<br><input type="radio"/> 5 a 6 veces al día<br><input type="radio"/> más 6 veces al día |
| melocotón o nectarina | <input type="radio"/> Nunca o menos 1 vez al mes<br><input checked="" type="radio"/> 1 a 3 veces mes<br><input type="radio"/> 1 vez semana<br><input type="radio"/> 2 a 4 veces semana<br><input type="radio"/> 5 a 6 veces semana<br><input type="radio"/> 1 vez al día<br><input type="radio"/> 2 a 3 veces al día<br><input type="radio"/> 5 a 6 veces al día<br><input type="radio"/> más 6 veces al día |
| sandia o melon        | <input checked="" type="radio"/> Nunca o menos 1 vez al mes<br><input type="radio"/> 1 a 3 veces mes<br><input type="radio"/> 1 vez semana<br><input type="radio"/> 2 a 4 veces semana<br><input type="radio"/> 5 a 6 veces semana<br><input type="radio"/> 1 vez al día<br><input type="radio"/> 2 a 3 veces al día<br><input type="radio"/> 5 a 6 veces al día<br><input type="radio"/> más 6 veces al día |
| uva                   | <input checked="" type="radio"/> Nunca o menos 1 vez al mes<br><input type="radio"/> 1 a 3 veces mes<br><input type="radio"/> 1 vez semana<br><input type="radio"/> 2 a 4 veces semana<br><input type="radio"/> 5 a 6 veces semana<br><input type="radio"/> 1 vez al día<br><input type="radio"/> 2 a 3 veces al día<br><input type="radio"/> 5 a 6 veces al día<br><input type="radio"/> más 6 veces al día |

|                 |                                                                                                                                                                                                                                                                                                                                                                                                              |
|-----------------|--------------------------------------------------------------------------------------------------------------------------------------------------------------------------------------------------------------------------------------------------------------------------------------------------------------------------------------------------------------------------------------------------------------|
| bruna o ciruela | <input checked="" type="radio"/> Nunca o menos 1 vez al mes<br><input type="radio"/> 1 a 3 veces mes<br><input type="radio"/> 1 vez semana<br><input type="radio"/> 2 a 4 veces semana<br><input type="radio"/> 5 a 6 veces semana<br><input type="radio"/> 1 vez al día<br><input type="radio"/> 2 a 3 veces al día<br><input type="radio"/> 5 a 6 veces al día<br><input type="radio"/> más 6 veces al día |
| kiwi            | <input type="radio"/> Nunca o menos 1 vez al mes<br><input type="radio"/> 1 a 3 veces mes<br><input type="radio"/> 1 vez semana<br><input checked="" type="radio"/> 2 a 4 veces semana<br><input type="radio"/> 5 a 6 veces semana<br><input type="radio"/> 1 vez al día<br><input type="radio"/> 2 a 3 veces al día<br><input type="radio"/> 5 a 6 veces al día<br><input type="radio"/> más 6 veces al día |
| aceituna        | <input type="radio"/> Nunca o menos 1 vez al mes<br><input type="radio"/> 1 a 3 veces mes<br><input type="radio"/> 1 vez semana<br><input type="radio"/> 2 a 4 veces semana<br><input type="radio"/> 5 a 6 veces semana<br><input checked="" type="radio"/> 1 vez al día<br><input type="radio"/> 2 a 3 veces al día<br><input type="radio"/> 5 a 6 veces al día<br><input type="radio"/> más 6 veces al día |
| frutos secos    | <input type="radio"/> Nunca o menos 1 vez al mes<br><input type="radio"/> 1 a 3 veces mes<br><input type="radio"/> 1 vez semana<br><input type="radio"/> 2 a 4 veces semana<br><input type="radio"/> 5 a 6 veces semana<br><input type="radio"/> 1 vez al día<br><input checked="" type="radio"/> 2 a 3 veces al día<br><input type="radio"/> 5 a 6 veces al día<br><input type="radio"/> más 6 veces al día |
| pan blanco      | <input type="radio"/> Nunca o menos 1 vez al mes<br><input checked="" type="radio"/> 1 a 3 veces mes<br><input type="radio"/> 1 vez semana<br><input type="radio"/> 2 a 4 veces semana<br><input type="radio"/> 5 a 6 veces semana<br><input type="radio"/> 1 vez al día<br><input type="radio"/> 2 a 3 veces al día<br><input type="radio"/> 5 a 6 veces al día<br><input type="radio"/> más 6 veces al día |
| pan integral    | <input type="radio"/> Nunca o menos 1 vez al mes<br><input type="radio"/> 1 a 3 veces mes<br><input type="radio"/> 1 vez semana<br><input type="radio"/> 2 a 4 veces semana<br><input type="radio"/> 5 a 6 veces semana<br><input checked="" type="radio"/> 1 vez al día<br><input type="radio"/> 2 a 3 veces al día<br><input type="radio"/> 5 a 6 veces al día<br><input type="radio"/> más 6 veces al día |

|                          |                                                                                                                                                                                                                                                                                                                                                                                                              |
|--------------------------|--------------------------------------------------------------------------------------------------------------------------------------------------------------------------------------------------------------------------------------------------------------------------------------------------------------------------------------------------------------------------------------------------------------|
| cereales desayuno        | <input checked="" type="radio"/> Nunca o menos 1 vez al mes<br><input type="radio"/> 1 a 3 veces mes<br><input type="radio"/> 1 vez semana<br><input type="radio"/> 2 a 4 veces semana<br><input type="radio"/> 5 a 6 veces semana<br><input type="radio"/> 1 vez al día<br><input type="radio"/> 2 a 3 veces al día<br><input type="radio"/> 5 a 6 veces al día<br><input type="radio"/> más 6 veces al día |
| patatas fritas           | <input type="radio"/> Nunca o menos 1 vez al mes<br><input checked="" type="radio"/> 1 a 3 veces mes<br><input type="radio"/> 1 vez semana<br><input type="radio"/> 2 a 4 veces semana<br><input type="radio"/> 5 a 6 veces semana<br><input type="radio"/> 1 vez al día<br><input type="radio"/> 2 a 3 veces al día<br><input type="radio"/> 5 a 6 veces al día<br><input type="radio"/> más 6 veces al día |
| patatas cocidas o asadas | <input type="radio"/> Nunca o menos 1 vez al mes<br><input type="radio"/> 1 a 3 veces mes<br><input type="radio"/> 1 vez semana<br><input checked="" type="radio"/> 2 a 4 veces semana<br><input type="radio"/> 5 a 6 veces semana<br><input type="radio"/> 1 vez al día<br><input type="radio"/> 2 a 3 veces al día<br><input type="radio"/> 5 a 6 veces al día<br><input type="radio"/> más 6 veces al día |
| bolsa papas              | <input type="radio"/> Nunca o menos 1 vez al mes<br><input checked="" type="radio"/> 1 a 3 veces mes<br><input type="radio"/> 1 vez semana<br><input type="radio"/> 2 a 4 veces semana<br><input type="radio"/> 5 a 6 veces semana<br><input type="radio"/> 1 vez al día<br><input type="radio"/> 2 a 3 veces al día<br><input type="radio"/> 5 a 6 veces al día<br><input type="radio"/> más 6 veces al día |
| arroz cocinado           | <input type="radio"/> Nunca o menos 1 vez al mes<br><input type="radio"/> 1 a 3 veces mes<br><input checked="" type="radio"/> 1 vez semana<br><input type="radio"/> 2 a 4 veces semana<br><input type="radio"/> 5 a 6 veces semana<br><input type="radio"/> 1 vez al día<br><input type="radio"/> 2 a 3 veces al día<br><input type="radio"/> 5 a 6 veces al día<br><input type="radio"/> más 6 veces al día |
| pasta                    | <input type="radio"/> Nunca o menos 1 vez al mes<br><input type="radio"/> 1 a 3 veces mes<br><input checked="" type="radio"/> 1 vez semana<br><input type="radio"/> 2 a 4 veces semana<br><input type="radio"/> 5 a 6 veces semana<br><input type="radio"/> 1 vez al día<br><input type="radio"/> 2 a 3 veces al día<br><input type="radio"/> 5 a 6 veces al día<br><input type="radio"/> más 6 veces al día |

|                     |                                                                                                                                                                                                                                                                                                                                                                                                              |
|---------------------|--------------------------------------------------------------------------------------------------------------------------------------------------------------------------------------------------------------------------------------------------------------------------------------------------------------------------------------------------------------------------------------------------------------|
| pizza               | <input type="radio"/> Nunca o menos 1 vez al mes<br><input type="radio"/> 1 a 3 veces mes<br><input checked="" type="radio"/> 1 vez semana<br><input type="radio"/> 2 a 4 veces semana<br><input type="radio"/> 5 a 6 veces semana<br><input type="radio"/> 1 vez al día<br><input type="radio"/> 2 a 3 veces al día<br><input type="radio"/> 5 a 6 veces al día<br><input type="radio"/> más 6 veces al día |
| aceite oliva        | <input type="radio"/> Nunca o menos 1 vez al mes<br><input type="radio"/> 1 a 3 veces mes<br><input type="radio"/> 1 vez semana<br><input type="radio"/> 2 a 4 veces semana<br><input type="radio"/> 5 a 6 veces semana<br><input type="radio"/> 1 vez al día<br><input checked="" type="radio"/> 2 a 3 veces al día<br><input type="radio"/> 5 a 6 veces al día<br><input type="radio"/> más 6 veces al día |
| otros aceites       | <input type="radio"/> Nunca o menos 1 vez al mes<br><input type="radio"/> 1 a 3 veces mes<br><input type="radio"/> 1 vez semana<br><input checked="" type="radio"/> 2 a 4 veces semana<br><input type="radio"/> 5 a 6 veces semana<br><input type="radio"/> 1 vez al día<br><input type="radio"/> 2 a 3 veces al día<br><input type="radio"/> 5 a 6 veces al día<br><input type="radio"/> más 6 veces al día |
| margarina           | <input checked="" type="radio"/> Nunca o menos 1 vez al mes<br><input type="radio"/> 1 a 3 veces mes<br><input type="radio"/> 1 vez semana<br><input type="radio"/> 2 a 4 veces semana<br><input type="radio"/> 5 a 6 veces semana<br><input type="radio"/> 1 vez al día<br><input type="radio"/> 2 a 3 veces al día<br><input type="radio"/> 5 a 6 veces al día<br><input type="radio"/> más 6 veces al día |
| mantequilla         | <input type="radio"/> Nunca o menos 1 vez al mes<br><input type="radio"/> 1 a 3 veces mes<br><input checked="" type="radio"/> 1 vez semana<br><input type="radio"/> 2 a 4 veces semana<br><input type="radio"/> 5 a 6 veces semana<br><input type="radio"/> 1 vez al día<br><input type="radio"/> 2 a 3 veces al día<br><input type="radio"/> 5 a 6 veces al día<br><input type="radio"/> más 6 veces al día |
| galletas tipo maria | <input checked="" type="radio"/> Nunca o menos 1 vez al mes<br><input type="radio"/> 1 a 3 veces mes<br><input type="radio"/> 1 vez semana<br><input type="radio"/> 2 a 4 veces semana<br><input type="radio"/> 5 a 6 veces semana<br><input type="radio"/> 1 vez al día<br><input type="radio"/> 2 a 3 veces al día<br><input type="radio"/> 5 a 6 veces al día<br><input type="radio"/> más 6 veces al día |

---

galletas chocolate

- ☐ Nunca o menos 1 vez al mes  
☒ 1 a 3 veces mes  
☐ 1 vez semana  
☐ 2 a 4 veces semana  
☐ 5 a 6 veces semana  
☐ 1 vez al día  
☐ 2 a 3 veces al día  
☐ 5 a 6 veces al día  
☐ más 6 veces al día

---

bolleria

- ☐ Nunca o menos 1 vez al mes  
☐ 1 a 3 veces mes  
☐ 1 vez semana  
☒ 2 a 4 veces semana  
☐ 5 a 6 veces semana  
☐ 1 vez al día  
☐ 2 a 3 veces al día  
☐ 5 a 6 veces al día  
☐ más 6 veces al día

---

chocolate o bombones

- ☐ Nunca o menos 1 vez al mes  
☐ 1 a 3 veces mes  
☐ 1 vez semana  
☐ 2 a 4 veces semana  
☒ 5 a 6 veces semana  
☐ 1 vez al día  
☐ 2 a 3 veces al día  
☐ 5 a 6 veces al día  
☐ más 6 veces al día

---

chocolate polvo o colacao

- ☐ Nunca o menos 1 vez al mes  
☐ 1 a 3 veces mes  
☐ 1 vez semana  
☒ 2 a 4 veces semana  
☐ 5 a 6 veces semana  
☐ 1 vez al día  
☐ 2 a 3 veces al día  
☐ 5 a 6 veces al día  
☐ más 6 veces al día

---

vino tinto

- ☒ Nunca o menos 1 vez al mes  
☐ 1 a 3 veces mes  
☐ 1 vez semana  
☐ 2 a 4 veces semana  
☐ 5 a 6 veces semana  
☐ 1 vez al día  
☐ 2 a 3 veces al día  
☐ 5 a 6 veces al día  
☐ más 6 veces al día

---

vino blanco

- ☒ Nunca o menos 1 vez al mes  
☐ 1 a 3 veces mes  
☐ 1 vez semana  
☐ 2 a 4 veces semana  
☐ 5 a 6 veces semana  
☐ 1 vez al día  
☐ 2 a 3 veces al día  
☐ 5 a 6 veces al día  
☐ más 6 veces al día



---

|                    |                                                                                                                                                                                                                                                                                                                                                                                                              |
|--------------------|--------------------------------------------------------------------------------------------------------------------------------------------------------------------------------------------------------------------------------------------------------------------------------------------------------------------------------------------------------------------------------------------------------------|
| vino seco o vermut | <input checked="" type="radio"/> Nunca o menos 1 vez al mes<br><input type="radio"/> 1 a 3 veces mes<br><input type="radio"/> 1 vez semana<br><input type="radio"/> 2 a 4 veces semana<br><input type="radio"/> 5 a 6 veces semana<br><input type="radio"/> 1 vez al día<br><input type="radio"/> 2 a 3 veces al día<br><input type="radio"/> 5 a 6 veces al día<br><input type="radio"/> más 6 veces al día |
|--------------------|--------------------------------------------------------------------------------------------------------------------------------------------------------------------------------------------------------------------------------------------------------------------------------------------------------------------------------------------------------------------------------------------------------------|

---

|         |                                                                                                                                                                                                                                                                                                                                                                                                              |
|---------|--------------------------------------------------------------------------------------------------------------------------------------------------------------------------------------------------------------------------------------------------------------------------------------------------------------------------------------------------------------------------------------------------------------|
| cerveza | <input checked="" type="radio"/> Nunca o menos 1 vez al mes<br><input type="radio"/> 1 a 3 veces mes<br><input type="radio"/> 1 vez semana<br><input type="radio"/> 2 a 4 veces semana<br><input type="radio"/> 5 a 6 veces semana<br><input type="radio"/> 1 vez al día<br><input type="radio"/> 2 a 3 veces al día<br><input type="radio"/> 5 a 6 veces al día<br><input type="radio"/> más 6 veces al día |
|---------|--------------------------------------------------------------------------------------------------------------------------------------------------------------------------------------------------------------------------------------------------------------------------------------------------------------------------------------------------------------------------------------------------------------|

---

|                     |                                                                                                                                                                                                                                                                                                                                                                                                              |
|---------------------|--------------------------------------------------------------------------------------------------------------------------------------------------------------------------------------------------------------------------------------------------------------------------------------------------------------------------------------------------------------------------------------------------------------|
| cerveza sin alcohol | <input type="radio"/> Nunca o menos 1 vez al mes<br><input type="radio"/> 1 a 3 veces mes<br><input checked="" type="radio"/> 1 vez semana<br><input type="radio"/> 2 a 4 veces semana<br><input type="radio"/> 5 a 6 veces semana<br><input type="radio"/> 1 vez al día<br><input type="radio"/> 2 a 3 veces al día<br><input type="radio"/> 5 a 6 veces al día<br><input type="radio"/> más 6 veces al día |
|---------------------|--------------------------------------------------------------------------------------------------------------------------------------------------------------------------------------------------------------------------------------------------------------------------------------------------------------------------------------------------------------------------------------------------------------|

---

|         |                                                                                                                                                                                                                                                                                                                                                                                                              |
|---------|--------------------------------------------------------------------------------------------------------------------------------------------------------------------------------------------------------------------------------------------------------------------------------------------------------------------------------------------------------------------------------------------------------------|
| licores | <input checked="" type="radio"/> Nunca o menos 1 vez al mes<br><input type="radio"/> 1 a 3 veces mes<br><input type="radio"/> 1 vez semana<br><input type="radio"/> 2 a 4 veces semana<br><input type="radio"/> 5 a 6 veces semana<br><input type="radio"/> 1 vez al día<br><input type="radio"/> 2 a 3 veces al día<br><input type="radio"/> 5 a 6 veces al día<br><input type="radio"/> más 6 veces al día |
|---------|--------------------------------------------------------------------------------------------------------------------------------------------------------------------------------------------------------------------------------------------------------------------------------------------------------------------------------------------------------------------------------------------------------------|

---

|                       |                                                                                                                                                                                                                                                                                                                                                                                                              |
|-----------------------|--------------------------------------------------------------------------------------------------------------------------------------------------------------------------------------------------------------------------------------------------------------------------------------------------------------------------------------------------------------------------------------------------------------|
| ginebra o ron o vodka | <input checked="" type="radio"/> Nunca o menos 1 vez al mes<br><input type="radio"/> 1 a 3 veces mes<br><input type="radio"/> 1 vez semana<br><input type="radio"/> 2 a 4 veces semana<br><input type="radio"/> 5 a 6 veces semana<br><input type="radio"/> 1 vez al día<br><input type="radio"/> 2 a 3 veces al día<br><input type="radio"/> 5 a 6 veces al día<br><input type="radio"/> más 6 veces al día |
|-----------------------|--------------------------------------------------------------------------------------------------------------------------------------------------------------------------------------------------------------------------------------------------------------------------------------------------------------------------------------------------------------------------------------------------------------|

---

|                 |                                                                                                                                                                                                                                                                                                                                                                                                              |
|-----------------|--------------------------------------------------------------------------------------------------------------------------------------------------------------------------------------------------------------------------------------------------------------------------------------------------------------------------------------------------------------------------------------------------------------|
| refresco normal | <input type="radio"/> Nunca o menos 1 vez al mes<br><input type="radio"/> 1 a 3 veces mes<br><input checked="" type="radio"/> 1 vez semana<br><input type="radio"/> 2 a 4 veces semana<br><input type="radio"/> 5 a 6 veces semana<br><input type="radio"/> 1 vez al día<br><input type="radio"/> 2 a 3 veces al día<br><input type="radio"/> 5 a 6 veces al día<br><input type="radio"/> más 6 veces al día |
|-----------------|--------------------------------------------------------------------------------------------------------------------------------------------------------------------------------------------------------------------------------------------------------------------------------------------------------------------------------------------------------------------------------------------------------------|

---

---

refresco sin azúcar

- ☒ Nunca o menos 1 vez al mes  
☐ 1 a 3 veces mes  
☐ 1 vez semana  
☐ 2 a 4 veces semana  
☐ 5 a 6 veces semana  
☐ 1 vez al día  
☐ 2 a 3 veces al día  
☐ 5 a 6 veces al día  
☐ más 6 veces al día

---

Agua del grifo

- ☒ Nunca o menos 1 vez al mes  
☐ 1 a 3 veces mes  
☐ 1 vez semana  
☐ 2 a 4 veces semana  
☐ 5 a 6 veces semana  
☐ 1 vez al día  
☐ 2 a 3 veces al día  
☐ 5 a 6 veces al día  
☐ más 6 veces al día

---

agua embotellada sin gas

- ☐ Nunca o menos 1 vez al mes  
☐ 1 a 3 veces mes  
☐ 1 vez semana  
☐ 2 a 4 veces semana  
☐ 5 a 6 veces semana  
☐ 1 vez al día  
☐ 2 a 3 veces al día  
☒ 5 a 6 veces al día  
☐ más 6 veces al día

---

agua embotellada con gas

- ☒ Nunca o menos 1 vez al mes  
☐ 1 a 3 veces mes  
☐ 1 vez semana  
☐ 2 a 4 veces semana  
☐ 5 a 6 veces semana  
☐ 1 vez al día  
☐ 2 a 3 veces al día  
☐ 5 a 6 veces al día  
☐ más 6 veces al día

---

zumو frutas embasado

- ☒ Nunca o menos 1 vez al mes  
☐ 1 a 3 veces mes  
☐ 1 vez semana  
☐ 2 a 4 veces semana  
☐ 5 a 6 veces semana  
☐ 1 vez al día  
☐ 2 a 3 veces al día  
☐ 5 a 6 veces al día  
☐ más 6 veces al día

---

cafe

- ☐ Nunca o menos 1 vez al mes  
☐ 1 a 3 veces mes  
☒ 1 vez semana  
☐ 2 a 4 veces semana  
☐ 5 a 6 veces semana  
☐ 1 vez al día  
☐ 2 a 3 veces al día  
☐ 5 a 6 veces al día  
☐ más 6 veces al día

---

cafe descafeinado

- ☐ Nunca o menos 1 vez al mes  
☐ 1 a 3 veces mes  
☒ 1 vez semana  
☐ 2 a 4 veces semana  
☐ 5 a 6 veces semana  
☐ 1 vez al día  
☐ 2 a 3 veces al día  
☐ 5 a 6 veces al día  
☐ más 6 veces al día

---

te o infusión

- ☒ Nunca o menos 1 vez al mes  
☐ 1 a 3 veces mes  
☐ 1 vez semana  
☐ 2 a 4 veces semana  
☐ 5 a 6 veces semana  
☐ 1 vez al día  
☐ 2 a 3 veces al día  
☐ 5 a 6 veces al día  
☐ más 6 veces al día

---

sopa o puré verduras

- ☐ Nunca o menos 1 vez al mes  
☐ 1 a 3 veces mes  
☒ 1 vez semana  
☐ 2 a 4 veces semana  
☐ 5 a 6 veces semana  
☐ 1 vez al día  
☐ 2 a 3 veces al día  
☐ 5 a 6 veces al día  
☐ más 6 veces al día

---

croquetas pollo jamón

- ☐ Nunca o menos 1 vez al mes  
☒ 1 a 3 veces mes  
☐ 1 vez semana  
☐ 2 a 4 veces semana  
☐ 5 a 6 veces semana  
☐ 1 vez al día  
☐ 2 a 3 veces al día  
☐ 5 a 6 veces al día  
☐ más 6 veces al día

---

croquetas pescado

- ☐ Nunca o menos 1 vez al mes  
☒ 1 a 3 veces mes  
☐ 1 vez semana  
☐ 2 a 4 veces semana  
☐ 5 a 6 veces semana  
☐ 1 vez al día  
☐ 2 a 3 veces al día  
☐ 5 a 6 veces al día  
☐ más 6 veces al día

---

mayonesa

- ☐ Nunca o menos 1 vez al mes  
☐ 1 a 3 veces mes  
☐ 1 vez semana  
☒ 2 a 4 veces semana  
☐ 5 a 6 veces semana  
☐ 1 vez al día  
☐ 2 a 3 veces al día  
☐ 5 a 6 veces al día  
☐ más 6 veces al día

---

salsa tomate

- ☐ Nunca o menos 1 vez al mes  
☐ 1 a 3 veces mes  
☒ 1 vez semana  
☐ 2 a 4 veces semana  
☐ 5 a 6 veces semana  
☐ 1 vez al día  
☐ 2 a 3 veces al día  
☐ 5 a 6 veces al día  
☐ más 6 veces al día

---

ketchup

- ☒ Nunca o menos 1 vez al mes  
☐ 1 a 3 veces mes  
☐ 1 vez semana  
☐ 2 a 4 veces semana  
☐ 5 a 6 veces semana  
☐ 1 vez al día  
☐ 2 a 3 veces al día  
☐ 5 a 6 veces al día  
☐ más 6 veces al día

---

sal

- ☐ Nunca o menos 1 vez al mes  
☐ 1 a 3 veces mes  
☒ 1 vez semana  
☐ 2 a 4 veces semana  
☐ 5 a 6 veces semana  
☐ 1 vez al día  
☐ 2 a 3 veces al día  
☐ 5 a 6 veces al día  
☐ más 6 veces al día

---

ajo

- ☐ Nunca o menos 1 vez al mes  
☒ 1 a 3 veces mes  
☐ 1 vez semana  
☐ 2 a 4 veces semana  
☐ 5 a 6 veces semana  
☐ 1 vez al día  
☐ 2 a 3 veces al día  
☐ 5 a 6 veces al día  
☐ más 6 veces al día

---

mermelada o miel

- ☐ Nunca o menos 1 vez al mes  
☐ 1 a 3 veces mes  
☐ 1 vez semana  
☒ 2 a 4 veces semana  
☐ 5 a 6 veces semana  
☐ 1 vez al día  
☐ 2 a 3 veces al día  
☐ 5 a 6 veces al día  
☐ más 6 veces al día

---

azúcar

- ☐ Nunca o menos 1 vez al mes  
☐ 1 a 3 veces mes  
☐ 1 vez semana  
☒ 2 a 4 veces semana  
☐ 5 a 6 veces semana  
☐ 1 vez al día  
☐ 2 a 3 veces al día  
☐ 5 a 6 veces al día  
☐ más 6 veces al día

|                                       |                                                                                                                                                                                                                                                                                                                                                                                                                                                                                                                               |
|---------------------------------------|-------------------------------------------------------------------------------------------------------------------------------------------------------------------------------------------------------------------------------------------------------------------------------------------------------------------------------------------------------------------------------------------------------------------------------------------------------------------------------------------------------------------------------|
| Otro alimento                         | [*DATA REMOVED*]                                                                                                                                                                                                                                                                                                                                                                                                                                                                                                              |
| suplementos vitamínicos               | <input checked="" type="radio"/> si<br><input type="radio"/> no                                                                                                                                                                                                                                                                                                                                                                                                                                                               |
| suplementos vitamínicos               | [*DATA REMOVED*]                                                                                                                                                                                                                                                                                                                                                                                                                                                                                                              |
| dieta previa                          | <input type="radio"/> si<br><input checked="" type="radio"/> no                                                                                                                                                                                                                                                                                                                                                                                                                                                               |
| motivo dieta                          | <input checked="" type="radio"/> no dieta<br><input type="radio"/> control peso<br><input type="radio"/> control colesterol<br><input type="radio"/> control diabetes<br><input type="radio"/> problemas estómago<br><input type="radio"/> problemas vesícula o hepáticos<br><input type="radio"/> HTA o cardiopatía<br><input type="radio"/> problemas renales<br><input type="radio"/> alergia alimentaria<br><input type="radio"/> ácido úrico elevado<br><input type="radio"/> vegetariana<br><input type="radio"/> otros |
| cambio alimentos año previo gestación | <input checked="" type="radio"/> si<br><input type="radio"/> no                                                                                                                                                                                                                                                                                                                                                                                                                                                               |
| cambio lácteos                        | <input type="radio"/> eliminado<br><input type="radio"/> disminuido<br><input checked="" type="radio"/> igual<br><input type="radio"/> aumentado<br><input type="radio"/> no sabe                                                                                                                                                                                                                                                                                                                                             |
| cambio huevos                         | <input type="radio"/> eliminado<br><input type="radio"/> disminuido<br><input checked="" type="radio"/> igual<br><input type="radio"/> aumentado<br><input type="radio"/> no sabe                                                                                                                                                                                                                                                                                                                                             |
| cambio carne                          | <input type="radio"/> eliminado<br><input type="radio"/> disminuido<br><input checked="" type="radio"/> igual<br><input type="radio"/> aumentado<br><input type="radio"/> no sabe                                                                                                                                                                                                                                                                                                                                             |
| cambio pescado                        | <input type="radio"/> eliminado<br><input type="radio"/> disminuido<br><input checked="" type="radio"/> igual<br><input type="radio"/> aumentado<br><input type="radio"/> no sabe                                                                                                                                                                                                                                                                                                                                             |
| cambio verduras                       | <input type="radio"/> eliminado<br><input type="radio"/> disminuido<br><input checked="" type="radio"/> igual<br><input type="radio"/> aumentado<br><input type="radio"/> no sabe                                                                                                                                                                                                                                                                                                                                             |

|                            |                                                                                                                                                                                                                        |
|----------------------------|------------------------------------------------------------------------------------------------------------------------------------------------------------------------------------------------------------------------|
| cambio legumbres           | <input type="radio"/> eliminado<br><input type="radio"/> disminuido<br><input checked="" type="radio"/> igual<br><input type="radio"/> aumentado<br><input type="radio"/> no sabe                                      |
| cambio fruta               | <input type="radio"/> eliminado<br><input type="radio"/> disminuido<br><input checked="" type="radio"/> igual<br><input type="radio"/> aumentado<br><input type="radio"/> no sabe                                      |
| cambio pan                 | <input type="radio"/> eliminado<br><input type="radio"/> disminuido<br><input checked="" type="radio"/> igual<br><input type="radio"/> aumentado<br><input type="radio"/> no sabe                                      |
| cambio aceite oliva        | <input type="radio"/> eliminado<br><input type="radio"/> disminuido<br><input checked="" type="radio"/> igual<br><input type="radio"/> aumentado<br><input type="radio"/> no sabe                                      |
| cambio mante o margarina   | <input type="radio"/> eliminado<br><input type="radio"/> disminuido<br><input checked="" type="radio"/> igual<br><input type="radio"/> aumentado<br><input type="radio"/> no sabe                                      |
| cambio azúcar y dulces     | <input type="radio"/> eliminado<br><input type="radio"/> disminuido<br><input checked="" type="radio"/> igual<br><input type="radio"/> aumentado<br><input type="radio"/> no sabe                                      |
| cambio bebidas alcohólicas | <input checked="" type="radio"/> eliminado<br><input type="radio"/> disminuido<br><input type="radio"/> igual<br><input type="radio"/> aumentado<br><input type="radio"/> no sabe                                      |
| frecuencia comidas fritas  | <input type="radio"/> a diario<br><input type="radio"/> 5 a 6 veces semana<br><input type="radio"/> 2 a 4 veces semana<br><input checked="" type="radio"/> 1 vez semana<br><input type="radio"/> menos de 1 vez semana |
| carne                      | <input type="radio"/> no como<br><input type="radio"/> cruda<br><input type="radio"/> poco hecha<br><input checked="" type="radio"/> hecha<br><input type="radio"/> muy hecha                                          |
| grasa visible carne        | <input type="radio"/> quita toda<br><input type="radio"/> quita mayoría<br><input type="radio"/> quita un poco<br><input checked="" type="radio"/> no quita nada                                                       |

|                                |                                                                                                                                                                                                                                                          |
|--------------------------------|----------------------------------------------------------------------------------------------------------------------------------------------------------------------------------------------------------------------------------------------------------|
| cocina carne                   | <input checked="" type="radio"/> a la plancha<br><input type="radio"/> a la parrilla<br><input type="radio"/> asada<br><input type="radio"/> frita<br><input type="radio"/> guisada                                                                      |
| tostado quemado carne          | <input checked="" type="radio"/> nunca<br><input type="radio"/> 1 vez mes<br><input type="radio"/> 2 a 3 veces mes<br><input type="radio"/> 1 vez semana<br><input type="radio"/> 2 a 3 semanas                                                          |
| tostado quemado pescado        | <input checked="" type="radio"/> nunca<br><input type="radio"/> 1 vez mes<br><input type="radio"/> 2 a 3 veces mes<br><input type="radio"/> 1 vez semana<br><input type="radio"/> 2 a 3 semanas                                                          |
| socarrat paella                | <input checked="" type="radio"/> nunca<br><input type="radio"/> 1 vez mes<br><input type="radio"/> 2 a 3 veces mes<br><input type="radio"/> 1 vez semana<br><input type="radio"/> 2 a 3 semanas                                                          |
| grasa o aceite cocinar         | <input type="radio"/> mantequilla<br><input type="radio"/> margarina<br><input type="radio"/> aceite oliva<br><input checked="" type="radio"/> aceite oliva virgen extra<br><input type="radio"/> aceite vegetal<br><input type="radio"/> mezcla aceites |
| grasa aceite aliñar            | <input type="radio"/> mantequilla<br><input type="radio"/> margarina<br><input type="radio"/> aceite oliva<br><input checked="" type="radio"/> aceite oliva virgen extra<br><input type="radio"/> aceite vegetal<br><input type="radio"/> mezcla aceites |
| grasa aceite freir             | <input type="radio"/> mantequilla<br><input type="radio"/> margarina<br><input type="radio"/> aceite oliva<br><input checked="" type="radio"/> aceite oliva virgen extra<br><input type="radio"/> aceite vegetal<br><input type="radio"/> mezcla aceites |
| Ejercicio cuestionario         | <input checked="" type="radio"/> si<br><input type="radio"/> no                                                                                                                                                                                          |
| horas de sueño incluido siesta | [*DATA REMOVED*]                                                                                                                                                                                                                                         |
| minutos siesta                 | [*DATA REMOVED*]                                                                                                                                                                                                                                         |
| horas televisión semana        | [*DATA REMOVED*]                                                                                                                                                                                                                                         |

|                                        |                                                                                                                                                                                                                                                                                                                                                                           |
|----------------------------------------|---------------------------------------------------------------------------------------------------------------------------------------------------------------------------------------------------------------------------------------------------------------------------------------------------------------------------------------------------------------------------|
| actividad trabajo                      | <input checked="" type="radio"/> casi siempre sentado<br><input type="radio"/> sentado 50 por cien<br><input type="radio"/> casi siempre de pie, quieto<br><input type="radio"/> casi siempre levantado caminando y llevando pocas cosas<br><input type="radio"/> casi siempre levantado, caminando y llevado muchas cosas<br><input type="radio"/> trabajo manual pesado |
| tiempo caminar o bici al día           | <input type="radio"/> casi nunca<br><input type="radio"/> menos 20min día<br><input type="radio"/> 20 a 40 min día<br><input checked="" type="radio"/> 40 a 60 min día<br><input type="radio"/> 1h o 1h y media día<br><input type="radio"/> más de 1h y media al día                                                                                                     |
| tiempo tareas casa al día              | <input type="radio"/> menos de 1h día<br><input checked="" type="radio"/> 1 a 2h día<br><input type="radio"/> 3 a 4h día<br><input type="radio"/> 5 a 6h día<br><input type="radio"/> 7 a 8h día<br><input type="radio"/> más de 8h día                                                                                                                                   |
| tiempo libre televisión ordenador leer | <input type="radio"/> menos 1h día<br><input type="radio"/> 1h día<br><input type="radio"/> 2h día<br><input checked="" type="radio"/> 3h día<br><input type="radio"/> 4h día<br><input type="radio"/> 5 a 6h día<br><input type="radio"/> mas 6h día                                                                                                                     |
| tiempo libre ejercicio o deporte       | <input type="radio"/> menos 1h semana<br><input type="radio"/> 1h semana<br><input checked="" type="radio"/> 2h semana<br><input type="radio"/> 3h semana<br><input type="radio"/> 4 a 5h semana<br><input type="radio"/> mas 5h semana                                                                                                                                   |
| como se considera                      | <input type="radio"/> sedentaria<br><input type="radio"/> poco activa<br><input checked="" type="radio"/> moderadamente activa<br><input type="radio"/> bastante activa<br><input type="radio"/> muy activa<br><input type="radio"/> no sabe                                                                                                                              |
| FUR                                    | [*DATA REMOVED*]                                                                                                                                                                                                                                                                                                                                                          |
| Semanas gestación 2T                   | [*DATA REMOVED*]                                                                                                                                                                                                                                                                                                                                                          |
| Días gestación 2T                      | [*DATA REMOVED*]                                                                                                                                                                                                                                                                                                                                                          |
| DBP 2T                                 | [*DATA REMOVED*]                                                                                                                                                                                                                                                                                                                                                          |
| CC 2T                                  | [*DATA REMOVED*]                                                                                                                                                                                                                                                                                                                                                          |
| AC 2T                                  | [*DATA REMOVED*]                                                                                                                                                                                                                                                                                                                                                          |



|                                                   |                                                                                                                                                                                                 |
|---------------------------------------------------|-------------------------------------------------------------------------------------------------------------------------------------------------------------------------------------------------|
| LF 2T                                             | [*DATA REMOVED*]                                                                                                                                                                                |
| PFE 2T (Hadlock)                                  | [*DATA REMOVED*]                                                                                                                                                                                |
| Semanas gestación 3T                              | [*DATA REMOVED*]                                                                                                                                                                                |
| días 3T                                           | [*DATA REMOVED*]                                                                                                                                                                                |
| DBP 3T                                            | [*DATA REMOVED*]                                                                                                                                                                                |
| CC 3T                                             | [*DATA REMOVED*]                                                                                                                                                                                |
| AC 3T                                             | [*DATA REMOVED*]                                                                                                                                                                                |
| LF 3T                                             | [*DATA REMOVED*]                                                                                                                                                                                |
| PFE 3T (Hadlock)                                  | [*DATA REMOVED*]                                                                                                                                                                                |
| Semanas de gestación final                        | [*DATA REMOVED*]                                                                                                                                                                                |
| días gestación final                              | [*DATA REMOVED*]                                                                                                                                                                                |
| Localización placenta                             | <input type="radio"/> anterior<br><input type="radio"/> lateral derecha<br><input type="radio"/> lateral izquierda<br><input checked="" type="radio"/> posterior<br><input type="radio"/> fondo |
| Presentación longitudinal cefálica                | <input type="radio"/> no<br><input checked="" type="radio"/> si                                                                                                                                 |
| Dorso                                             | <input type="radio"/> izquierda anterior<br><input type="radio"/> izquierda posterior<br><input type="radio"/> derecha anterior<br><input checked="" type="radio"/> derecha posterior           |
| diámetro biparietal                               | [*DATA REMOVED*]                                                                                                                                                                                |
| Circunferencia craneal                            | [*DATA REMOVED*]                                                                                                                                                                                |
| Circunferencia abdominal                          | [*DATA REMOVED*]                                                                                                                                                                                |
| Longitud de femur                                 | [*DATA REMOVED*]                                                                                                                                                                                |
| tejido celular subcutáneo a nivel del muslo en mm | [*DATA REMOVED*]                                                                                                                                                                                |
| tejido celular subcutáneo en abdomen en mm        | [*DATA REMOVED*]                                                                                                                                                                                |
| Volumen del muslo en cm3                          | [*DATA REMOVED*]                                                                                                                                                                                |
| Peso fetal estimado según fórmula de Hadlock      | [*DATA REMOVED*]                                                                                                                                                                                |

|                                               |                                                                                                                                                          |
|-----------------------------------------------|----------------------------------------------------------------------------------------------------------------------------------------------------------|
| Percentil                                     | [*DATA REMOVED*]                                                                                                                                         |
| Peso fetal estimado según fórmula de Scioscia | <hr/>                                                                                                                                                    |
| Peso fetal estimado según fórmula de LEE      | <hr/>                                                                                                                                                    |
| Tipo de parto                                 | <input type="radio"/> eutocico<br><input type="radio"/> instrumentado/ventosa<br><input checked="" type="radio"/> cesarea                                |
| fecha de nacimiento                           | [*DATA REMOVED*]                                                                                                                                         |
| Días entre exploración y nacimiento           | [*DATA REMOVED*]                                                                                                                                         |
| Peso RN en g                                  | [*DATA REMOVED*]                                                                                                                                         |
| sexo                                          | <input checked="" type="radio"/> mujer<br><input type="radio"/> hombre                                                                                   |
| Apgar 1 minuto                                | [*DATA REMOVED*]                                                                                                                                         |
| Apgar 5 minutos                               | [*DATA REMOVED*]                                                                                                                                         |
| Apgar 10 minutos                              | <hr/>                                                                                                                                                    |
| antecedente Covid durante gestación           | <input type="radio"/> Yes<br><input checked="" type="radio"/> No                                                                                         |
| Nivel de estudios                             | <input type="radio"/> ninguno<br><input type="radio"/> primarios<br><input type="radio"/> secundarios<br><input checked="" type="radio"/> universitarios |

# Base\_datos\_estimacion\_peso\_fetal

|                                       |                                                                                                                                                                                                                                                                                      |
|---------------------------------------|--------------------------------------------------------------------------------------------------------------------------------------------------------------------------------------------------------------------------------------------------------------------------------------|
| Número de identificación participante | 119                                                                                                                                                                                                                                                                                  |
| CODIGO PARTICIPANTE                   |                                                                                                                                                                                                                                                                                      |
| Edad                                  | [*DATA REMOVED*]                                                                                                                                                                                                                                                                     |
| Gestaciones                           | <input type="radio"/> 1<br><input checked="" type="radio"/> 2<br><input type="radio"/> 3<br><input type="radio"/> mas de 3                                                                                                                                                           |
| partos                                | <input checked="" type="radio"/> 0<br><input type="radio"/> 1<br><input type="radio"/> 2<br><input type="radio"/> 3<br><input type="radio"/> mas de 3                                                                                                                                |
| cesáreas                              | <input checked="" type="radio"/> 0<br><input type="radio"/> 1<br><input type="radio"/> 2<br><input type="radio"/> 3<br><input type="radio"/> mas de 3                                                                                                                                |
| Abortos                               | <input type="radio"/> 0<br><input checked="" type="radio"/> 1<br><input type="radio"/> 2<br><input type="radio"/> 3<br><input type="radio"/> mas de 3                                                                                                                                |
| Tipo de gestacion                     | <input checked="" type="radio"/> espontanea<br><input type="radio"/> IAC inseminación artificial conyuge<br><input type="radio"/> IAD inseminación artificial donante<br><input type="radio"/> FIV Fecundación in Vitro<br><input type="radio"/> Ovodon FIV con donación de ovocitos |
| peso previo a embarazo                | [*DATA REMOVED*]                                                                                                                                                                                                                                                                     |
| Ganancia ponderal embarazo            |                                                                                                                                                                                                                                                                                      |
| Talla madre                           | [*DATA REMOVED*]                                                                                                                                                                                                                                                                     |
| IMC previo embarazo                   | 20.832529609197174                                                                                                                                                                                                                                                                   |
| Patología obstétrica                  | <input checked="" type="radio"/> no<br><input type="radio"/> si                                                                                                                                                                                                                      |
| Diabetes pregestacional               | <input checked="" type="radio"/> no<br><input type="radio"/> si                                                                                                                                                                                                                      |
| Diabetes gestacional                  | <input checked="" type="radio"/> no<br><input type="radio"/> si                                                                                                                                                                                                                      |

|                                            |                                                                                                                                                                                      |
|--------------------------------------------|--------------------------------------------------------------------------------------------------------------------------------------------------------------------------------------|
| Diabetes gestacional con insulina          | <input checked="" type="radio"/> no<br><input type="radio"/> si                                                                                                                      |
| Diabetes gestacional con dieta y ejercicio | <input checked="" type="radio"/> no<br><input type="radio"/> si                                                                                                                      |
| Percentil fetos previos                    | <input checked="" type="radio"/> Nada<br><input type="radio"/> percentil menor de 10<br><input type="radio"/> percentil entre 10 y 90<br><input type="radio"/> percentil mayor de 90 |
| Exfumadora                                 | <input checked="" type="radio"/> Nada<br><input type="radio"/> menos de 5 años<br><input type="radio"/> 5 a 10 años<br><input type="radio"/> mayor o igual a 10 años                 |
| Hábito tabáquico                           | <input checked="" type="radio"/> no<br><input type="radio"/> si                                                                                                                      |
| fumadora                                   | [*DATA REMOVED*]                                                                                                                                                                     |
| Consumo otros tóxicos                      | <input checked="" type="radio"/> no<br><input type="radio"/> si                                                                                                                      |
| Hb 1T                                      | _____                                                                                                                                                                                |
| Htc 1T                                     | _____                                                                                                                                                                                |
| Hb 2T                                      | _____                                                                                                                                                                                |
| HTC 2T                                     | _____                                                                                                                                                                                |
| Hb 3T                                      | _____                                                                                                                                                                                |
| HTC 3T                                     | _____                                                                                                                                                                                |
| Suplemento FE oral                         | <input checked="" type="radio"/> si<br><input type="radio"/> no                                                                                                                      |
| Suplemento fe iv                           | <input type="radio"/> si<br><input checked="" type="radio"/> no                                                                                                                      |
| Transfusión                                | <input checked="" type="radio"/> no<br><input type="radio"/> si                                                                                                                      |
| Solicitada Vit D                           | <input checked="" type="radio"/> no<br><input type="radio"/> si                                                                                                                      |

|                       |                                                                                                                                                                                                                                                                                                                                                                                                              |
|-----------------------|--------------------------------------------------------------------------------------------------------------------------------------------------------------------------------------------------------------------------------------------------------------------------------------------------------------------------------------------------------------------------------------------------------------|
| Deficit vit D         | <input type="radio"/> no<br><input type="radio"/> si                                                                                                                                                                                                                                                                                                                                                         |
| Suplemento vit D      | <input type="radio"/> si<br><input type="radio"/> no                                                                                                                                                                                                                                                                                                                                                         |
| Dieta, cuestionario   | <input checked="" type="radio"/> si<br><input type="radio"/> no                                                                                                                                                                                                                                                                                                                                              |
| Leche entera          | <input checked="" type="radio"/> Nunca o menos 1 vez al mes<br><input type="radio"/> 1 a 3 veces mes<br><input type="radio"/> 1 vez semana<br><input type="radio"/> 2 a 4 veces semana<br><input type="radio"/> 5 a 6 veces semana<br><input type="radio"/> 1 vez al día<br><input type="radio"/> 2 a 3 veces al día<br><input type="radio"/> 5 a 6 veces al día<br><input type="radio"/> más 6 veces al día |
| Leche semidesnatada   | <input checked="" type="radio"/> Nunca o menos 1 vez al mes<br><input type="radio"/> 1 a 3 veces mes<br><input type="radio"/> 1 vez semana<br><input type="radio"/> 2 a 4 veces semana<br><input type="radio"/> 5 a 6 veces semana<br><input type="radio"/> 1 vez al día<br><input type="radio"/> 2 a 3 veces al día<br><input type="radio"/> 5 a 6 veces al día<br><input type="radio"/> mas 6 veces al día |
| Leche desnatada       | <input checked="" type="radio"/> Nunca o menos 1 vez al mes<br><input type="radio"/> 1 a 3 veces mes<br><input type="radio"/> 1 vez semana<br><input type="radio"/> 2 a 4 veces semana<br><input type="radio"/> 5 a 6 veces semana<br><input type="radio"/> 1 vez al día<br><input type="radio"/> 2 a 3 veces al día<br><input type="radio"/> 5 a 6 veces al día<br><input type="radio"/> más 6 veces al día |
| Leche condensada      | <input checked="" type="radio"/> Nunca o menos 1 vez al mes<br><input type="radio"/> 1 a 3 veces mes<br><input type="radio"/> 1 vez semana<br><input type="radio"/> 2 a 4 veces semana<br><input type="radio"/> 5 a 6 veces semana<br><input type="radio"/> 1 vez al día<br><input type="radio"/> 2 a 3 veces al día<br><input type="radio"/> 5 a 6 veces al día<br><input type="radio"/> más 6 veces al día |
| nata o crema de leche | <input checked="" type="radio"/> Nunca o menos 1 vez al mes<br><input type="radio"/> 1 a 3 veces mes<br><input type="radio"/> 1 vez semana<br><input type="radio"/> 2 a 4 veces semana<br><input type="radio"/> 5 a 6 veces semana<br><input type="radio"/> 1 vez al día<br><input type="radio"/> 2 a 3 veces al día<br><input type="radio"/> 5 a 6 veces al día<br><input type="radio"/> más 6 veces al día |

---

Yogurt Entero

- ☒ Nunca o menos 1 vez al mes  
☐ 1 a 3 veces mes  
☐ 1 vez semana  
☐ 2 a 4 veces semana  
☐ 5 a 6 veces semana  
☐ 1 vez al día  
☐ 2 a 3 veces al día  
☐ 5 a 6 veces al día  
☐ más 6 veces al día

---

Yogurt desnatado

- ☒ Nunca o menos 1 vez al mes  
☐ 1 a 3 veces mes  
☐ 1 vez semana  
☐ 2 a 4 veces semana  
☐ 5 a 6 veces semana  
☐ 1 vez al día  
☐ 2 a 3 veces al día  
☐ 5 a 6 veces al día  
☐ más 6 veces al día

---

100g requesón o queso blando o queso fresco

- ☒ Nunca o menos 1 vez al mes  
☐ 1 a 3 veces mes  
☐ 1 vez semana  
☐ 2 a 4 veces semana  
☐ 5 a 6 veces semana  
☐ 1 vez al día  
☐ 2 a 3 veces al día  
☐ 5 a 6 veces al día  
☐ más 6 veces al día

---

queso curado o semicurado o cremoso

- ☐ Nunca o menos 1 vez al mes  
☐ 1 a 3 veces mes  
☐ 1 vez semana  
☒ 2 a 4 veces semana  
☐ 5 a 6 veces semana  
☐ 1 vez al día  
☐ 2 a 3 veces al día  
☐ 5 a 6 veces al día  
☐ más 6 veces al día

---

natillas flan pudding

- ☒ Nunca o menos 1 vez al mes  
☐ 1 a 3 veces mes  
☐ 1 vez semana  
☐ 2 a 4 veces semana  
☐ 5 a 6 veces semana  
☐ 1 vez al día  
☐ 2 a 3 veces al día  
☐ 5 a 6 veces al día  
☐ más 6 veces al día

---

Helado

- ☐ Nunca o menos 1 vez al mes  
☒ 1 a 3 veces mes  
☐ 1 vez semana  
☐ 2 a 4 veces semana  
☐ 5 a 6 veces semana  
☐ 1 vez al día  
☐ 2 a 3 veces al día  
☐ 5 a 6 veces al día  
☐ más 6 veces al día

|                                      |                                                                                                                                                                                                                                                                                                                                                                                                              |
|--------------------------------------|--------------------------------------------------------------------------------------------------------------------------------------------------------------------------------------------------------------------------------------------------------------------------------------------------------------------------------------------------------------------------------------------------------------|
| huevo                                | <input type="radio"/> Nunca o menos 1 vez al mes<br><input type="radio"/> 1 a 3 veces mes<br><input type="radio"/> 1 vez semana<br><input checked="" type="radio"/> 2 a 4 veces semana<br><input type="radio"/> 5 a 6 veces semana<br><input type="radio"/> 1 vez al día<br><input type="radio"/> 2 a 3 veces al día<br><input type="radio"/> 5 a 6 veces al día<br><input type="radio"/> más 6 veces al día |
| Pollo con piel                       | <input type="radio"/> Nunca o menos 1 vez al mes<br><input type="radio"/> 1 a 3 veces mes<br><input type="radio"/> 1 vez semana<br><input checked="" type="radio"/> 2 a 4 veces semana<br><input type="radio"/> 5 a 6 veces semana<br><input type="radio"/> 1 vez al día<br><input type="radio"/> 2 a 3 veces al día<br><input type="radio"/> 5 a 6 veces al día<br><input type="radio"/> más 6 veces al día |
| pollo sin piel                       | <input type="radio"/> Nunca o menos 1 vez al mes<br><input type="radio"/> 1 a 3 veces mes<br><input checked="" type="radio"/> 1 vez semana<br><input type="radio"/> 2 a 4 veces semana<br><input type="radio"/> 5 a 6 veces semana<br><input type="radio"/> 1 vez al día<br><input type="radio"/> 2 a 3 veces al día<br><input type="radio"/> 5 a 6 veces al día<br><input type="radio"/> más 6 veces al día |
| Ternera o cerdo o cordero            | <input type="radio"/> Nunca o menos 1 vez al mes<br><input type="radio"/> 1 a 3 veces mes<br><input type="radio"/> 1 vez semana<br><input checked="" type="radio"/> 2 a 4 veces semana<br><input type="radio"/> 5 a 6 veces semana<br><input type="radio"/> 1 vez al día<br><input type="radio"/> 2 a 3 veces al día<br><input type="radio"/> 5 a 6 veces al día<br><input type="radio"/> más 6 veces al día |
| carne caza: Conejo o codorniz o pato | <input checked="" type="radio"/> Nunca o menos 1 vez al mes<br><input type="radio"/> 1 a 3 veces mes<br><input type="radio"/> 1 vez semana<br><input type="radio"/> 2 a 4 veces semana<br><input type="radio"/> 5 a 6 veces semana<br><input type="radio"/> 1 vez al día<br><input type="radio"/> 2 a 3 veces al día<br><input type="radio"/> 5 a 6 veces al día<br><input type="radio"/> más 6 veces al día |
| Hígado de ternera o cerdo o pollo    | <input checked="" type="radio"/> Nunca o menos 1 vez al mes<br><input type="radio"/> 1 a 3 veces mes<br><input type="radio"/> 1 vez semana<br><input type="radio"/> 2 a 4 veces semana<br><input type="radio"/> 5 a 6 veces semana<br><input type="radio"/> 1 vez al día<br><input type="radio"/> 2 a 3 veces al día<br><input type="radio"/> 5 a 6 veces al día<br><input type="radio"/> más 6 veces al día |

---

Vísceras

- ☒ Nunca o menos 1 vez al mes  
☐ 1 a 3 veces mes  
☐ 1 vez semana  
☐ 2 a 4 veces semana  
☐ 5 a 6 veces semana  
☐ 1 vez al día  
☐ 2 a 3 veces al día  
☐ 5 a 6 veces al día  
☐ más 6 veces al día

---

Embutido

- ☐ Nunca o menos 1 vez al mes  
☐ 1 a 3 veces mes  
☐ 1 vez semana  
☒ 2 a 4 veces semana  
☐ 5 a 6 veces semana  
☐ 1 vez al día  
☐ 2 a 3 veces al día  
☐ 5 a 6 veces al día  
☐ más 6 veces al día

---

Salchicha o similar

- ☐ Nunca o menos 1 vez al mes  
☒ 1 a 3 veces mes  
☐ 1 vez semana  
☐ 2 a 4 veces semana  
☐ 5 a 6 veces semana  
☐ 1 vez al día  
☐ 2 a 3 veces al día  
☐ 5 a 6 veces al día  
☐ más 6 veces al día

---

Pate o foiegras

- ☒ Nunca o menos 1 vez al mes  
☐ 1 a 3 veces mes  
☐ 1 vez semana  
☐ 2 a 4 veces semana  
☐ 5 a 6 veces semana  
☐ 1 vez al día  
☐ 2 a 3 veces al día  
☐ 5 a 6 veces al día  
☐ más 6 veces al día

---

Hamburguesa

- ☒ Nunca o menos 1 vez al mes  
☐ 1 a 3 veces mes  
☐ 1 vez semana  
☐ 2 a 4 veces semana  
☐ 5 a 6 veces semana  
☐ 1 vez al día  
☐ 2 a 3 veces al día  
☐ 5 a 6 veces al día  
☐ más 6 veces al día

---

tocino o bacon

- ☒ Nunca o menos 1 vez al mes  
☐ 1 a 3 veces mes  
☐ 1 vez semana  
☐ 2 a 4 veces semana  
☐ 5 a 6 veces semana  
☐ 1 vez al día  
☐ 2 a 3 veces al día  
☐ 5 a 6 veces al día  
☐ más 6 veces al día



---

Pescado frito

- ☒ Nunca o menos 1 vez al mes  
☐ 1 a 3 veces mes  
☐ 1 vez semana  
☐ 2 a 4 veces semana  
☐ 5 a 6 veces semana  
☐ 1 vez al día  
☐ 2 a 3 veces al día  
☐ 5 a 6 veces al día  
☐ más 6 veces al día

---

pescado hervido blanco

- ☒ Nunca o menos 1 vez al mes  
☐ 1 a 3 veces mes  
☐ 1 vez semana  
☐ 2 a 4 veces semana  
☐ 5 a 6 veces semana  
☐ 1 vez al día  
☐ 2 a 3 veces al día  
☐ 5 a 6 veces al día  
☐ más 6 veces al día

---

pescado hervido azul

- ☒ Nunca o menos 1 vez al mes  
☐ 1 a 3 veces mes  
☐ 1 vez semana  
☐ 2 a 4 veces semana  
☐ 5 a 6 veces semana  
☐ 1 vez al día  
☐ 2 a 3 veces al día  
☐ 5 a 6 veces al día  
☐ más 6 veces al día

---

otros pescado azul

- ☐ Nunca o menos 1 vez al mes  
☒ 1 a 3 veces mes  
☐ 1 vez semana  
☐ 2 a 4 veces semana  
☐ 5 a 6 veces semana  
☐ 1 vez al día  
☐ 2 a 3 veces al día  
☐ 5 a 6 veces al día  
☐ más 6 veces al día

---

atun conserva

- ☐ Nunca o menos 1 vez al mes  
☐ 1 a 3 veces mes  
☐ 1 vez semana  
☐ 2 a 4 veces semana  
☒ 5 a 6 veces semana  
☐ 1 vez al día  
☐ 2 a 3 veces al día  
☐ 5 a 6 veces al día  
☐ más 6 veces al día

---

sardina conserva

- ☐ Nunca o menos 1 vez al mes  
☒ 1 a 3 veces mes  
☐ 1 vez semana  
☐ 2 a 4 veces semana  
☐ 5 a 6 veces semana  
☐ 1 vez al día  
☐ 2 a 3 veces al día  
☐ 5 a 6 veces al día  
☐ más 6 veces al día

|                                         |                                                                                                                                                                                                                                                                                                                                                                                                              |
|-----------------------------------------|--------------------------------------------------------------------------------------------------------------------------------------------------------------------------------------------------------------------------------------------------------------------------------------------------------------------------------------------------------------------------------------------------------------|
| pescado ahumado                         | <input checked="" type="radio"/> Nunca o menos 1 vez al mes<br><input type="radio"/> 1 a 3 veces mes<br><input type="radio"/> 1 vez semana<br><input type="radio"/> 2 a 4 veces semana<br><input type="radio"/> 5 a 6 veces semana<br><input type="radio"/> 1 vez al día<br><input type="radio"/> 2 a 3 veces al día<br><input type="radio"/> 5 a 6 veces al día<br><input type="radio"/> más 6 veces al día |
| almejas o mejillones o ostras unos 100g | <input checked="" type="radio"/> Nunca o menos 1 vez al mes<br><input type="radio"/> 1 a 3 veces mes<br><input type="radio"/> 1 vez semana<br><input type="radio"/> 2 a 4 veces semana<br><input type="radio"/> 5 a 6 veces semana<br><input type="radio"/> 1 vez al día<br><input type="radio"/> 2 a 3 veces al día<br><input type="radio"/> 5 a 6 veces al día<br><input type="radio"/> más 6 veces al día |
| calamar o chipiron o sepia unos 100g    | <input checked="" type="radio"/> Nunca o menos 1 vez al mes<br><input type="radio"/> 1 a 3 veces mes<br><input type="radio"/> 1 vez semana<br><input type="radio"/> 2 a 4 veces semana<br><input type="radio"/> 5 a 6 veces semana<br><input type="radio"/> 1 vez al día<br><input type="radio"/> 2 a 3 veces al día<br><input type="radio"/> 5 a 6 veces al día<br><input type="radio"/> más 6 veces al día |
| marisco unos 100g                       | <input checked="" type="radio"/> Nunca o menos 1 vez al mes<br><input type="radio"/> 1 a 3 veces mes<br><input type="radio"/> 1 vez semana<br><input type="radio"/> 2 a 4 veces semana<br><input type="radio"/> 5 a 6 veces semana<br><input type="radio"/> 1 vez al día<br><input type="radio"/> 2 a 3 veces al día<br><input type="radio"/> 5 a 6 veces al día<br><input type="radio"/> más 6 veces al día |
| Espinacas o acelgas cocinadas           | <input type="radio"/> Nunca o menos 1 vez al mes<br><input type="radio"/> 1 a 3 veces mes<br><input type="radio"/> 1 vez semana<br><input checked="" type="radio"/> 2 a 4 veces semana<br><input type="radio"/> 5 a 6 veces semana<br><input type="radio"/> 1 vez al día<br><input type="radio"/> 2 a 3 veces al día<br><input type="radio"/> 5 a 6 veces al día<br><input type="radio"/> más 6 veces al día |
| Col o coliflor o brocoli cocinado       | <input type="radio"/> Nunca o menos 1 vez al mes<br><input type="radio"/> 1 a 3 veces mes<br><input type="radio"/> 1 vez semana<br><input checked="" type="radio"/> 2 a 4 veces semana<br><input type="radio"/> 5 a 6 veces semana<br><input type="radio"/> 1 vez al día<br><input type="radio"/> 2 a 3 veces al día<br><input type="radio"/> 5 a 6 veces al día<br><input type="radio"/> más 6 veces al día |

---

Lechuga o endivia o escarola

- ☐ Nunca o menos 1 vez al mes  
☐ 1 a 3 veces mes  
☐ 1 vez semana  
☒ 2 a 4 veces semana  
☐ 5 a 6 veces semana  
☐ 1 vez al día  
☐ 2 a 3 veces al día  
☐ 5 a 6 veces al día  
☐ más 6 veces al día

---

tomate ensalada

- ☐ Nunca o menos 1 vez al mes  
☐ 1 a 3 veces mes  
☐ 1 vez semana  
☒ 2 a 4 veces semana  
☐ 5 a 6 veces semana  
☐ 1 vez al día  
☐ 2 a 3 veces al día  
☐ 5 a 6 veces al día  
☐ más 6 veces al día

---

cebolla

- ☐ Nunca o menos 1 vez al mes  
☐ 1 a 3 veces mes  
☐ 1 vez semana  
☒ 2 a 4 veces semana  
☐ 5 a 6 veces semana  
☐ 1 vez al día  
☐ 2 a 3 veces al día  
☐ 5 a 6 veces al día  
☐ más 6 veces al día

---

Zanahoria o calabaza

- ☐ Nunca o menos 1 vez al mes  
☐ 1 a 3 veces mes  
☐ 1 vez semana  
☒ 2 a 4 veces semana  
☐ 5 a 6 veces semana  
☐ 1 vez al día  
☐ 2 a 3 veces al día  
☐ 5 a 6 veces al día  
☐ más 6 veces al día

---

Judías verdes

- ☐ Nunca o menos 1 vez al mes  
☐ 1 a 3 veces mes  
☐ 1 vez semana  
☒ 2 a 4 veces semana  
☐ 5 a 6 veces semana  
☐ 1 vez al día  
☐ 2 a 3 veces al día  
☐ 5 a 6 veces al día  
☐ más 6 veces al día

---

Berenjena o calabacin o pepino

- ☐ Nunca o menos 1 vez al mes  
☐ 1 a 3 veces mes  
☒ 1 vez semana  
☐ 2 a 4 veces semana  
☐ 5 a 6 veces semana  
☐ 1 vez al día  
☐ 2 a 3 veces al día  
☐ 5 a 6 veces al día  
☐ más 6 veces al día

---

|          |                                                                                                                                                                                                                                                                                                                                                                                                              |
|----------|--------------------------------------------------------------------------------------------------------------------------------------------------------------------------------------------------------------------------------------------------------------------------------------------------------------------------------------------------------------------------------------------------------------|
| pimiento | <input type="radio"/> Nunca o menos 1 vez al mes<br><input type="radio"/> 1 a 3 veces mes<br><input checked="" type="radio"/> 1 vez semana<br><input type="radio"/> 2 a 4 veces semana<br><input type="radio"/> 5 a 6 veces semana<br><input type="radio"/> 1 vez al día<br><input type="radio"/> 2 a 3 veces al día<br><input type="radio"/> 5 a 6 veces al día<br><input type="radio"/> más 6 veces al día |
|----------|--------------------------------------------------------------------------------------------------------------------------------------------------------------------------------------------------------------------------------------------------------------------------------------------------------------------------------------------------------------------------------------------------------------|

---

|           |                                                                                                                                                                                                                                                                                                                                                                                                              |
|-----------|--------------------------------------------------------------------------------------------------------------------------------------------------------------------------------------------------------------------------------------------------------------------------------------------------------------------------------------------------------------------------------------------------------------|
| alcachofa | <input type="radio"/> Nunca o menos 1 vez al mes<br><input type="radio"/> 1 a 3 veces mes<br><input checked="" type="radio"/> 1 vez semana<br><input type="radio"/> 2 a 4 veces semana<br><input type="radio"/> 5 a 6 veces semana<br><input type="radio"/> 1 vez al día<br><input type="radio"/> 2 a 3 veces al día<br><input type="radio"/> 5 a 6 veces al día<br><input type="radio"/> más 6 veces al día |
|-----------|--------------------------------------------------------------------------------------------------------------------------------------------------------------------------------------------------------------------------------------------------------------------------------------------------------------------------------------------------------------------------------------------------------------|

---

|            |                                                                                                                                                                                                                                                                                                                                                                                                              |
|------------|--------------------------------------------------------------------------------------------------------------------------------------------------------------------------------------------------------------------------------------------------------------------------------------------------------------------------------------------------------------------------------------------------------------|
| espárragos | <input type="radio"/> Nunca o menos 1 vez al mes<br><input type="radio"/> 1 a 3 veces mes<br><input type="radio"/> 1 vez semana<br><input checked="" type="radio"/> 2 a 4 veces semana<br><input type="radio"/> 5 a 6 veces semana<br><input type="radio"/> 1 vez al día<br><input type="radio"/> 2 a 3 veces al día<br><input type="radio"/> 5 a 6 veces al día<br><input type="radio"/> más 6 veces al día |
|------------|--------------------------------------------------------------------------------------------------------------------------------------------------------------------------------------------------------------------------------------------------------------------------------------------------------------------------------------------------------------------------------------------------------------|

---

|              |                                                                                                                                                                                                                                                                                                                                                                                                              |
|--------------|--------------------------------------------------------------------------------------------------------------------------------------------------------------------------------------------------------------------------------------------------------------------------------------------------------------------------------------------------------------------------------------------------------------|
| maíz hervido | <input type="radio"/> Nunca o menos 1 vez al mes<br><input type="radio"/> 1 a 3 veces mes<br><input type="radio"/> 1 vez semana<br><input checked="" type="radio"/> 2 a 4 veces semana<br><input type="radio"/> 5 a 6 veces semana<br><input type="radio"/> 1 vez al día<br><input type="radio"/> 2 a 3 veces al día<br><input type="radio"/> 5 a 6 veces al día<br><input type="radio"/> más 6 veces al día |
|--------------|--------------------------------------------------------------------------------------------------------------------------------------------------------------------------------------------------------------------------------------------------------------------------------------------------------------------------------------------------------------------------------------------------------------|

---

|           |                                                                                                                                                                                                                                                                                                                                                                                                              |
|-----------|--------------------------------------------------------------------------------------------------------------------------------------------------------------------------------------------------------------------------------------------------------------------------------------------------------------------------------------------------------------------------------------------------------------|
| legumbres | <input type="radio"/> Nunca o menos 1 vez al mes<br><input type="radio"/> 1 a 3 veces mes<br><input type="radio"/> 1 vez semana<br><input checked="" type="radio"/> 2 a 4 veces semana<br><input type="radio"/> 5 a 6 veces semana<br><input type="radio"/> 1 vez al día<br><input type="radio"/> 2 a 3 veces al día<br><input type="radio"/> 5 a 6 veces al día<br><input type="radio"/> más 6 veces al día |
|-----------|--------------------------------------------------------------------------------------------------------------------------------------------------------------------------------------------------------------------------------------------------------------------------------------------------------------------------------------------------------------------------------------------------------------|

---

|                       |                                                                                                                                                                                                                                                                                                                                                                                                              |
|-----------------------|--------------------------------------------------------------------------------------------------------------------------------------------------------------------------------------------------------------------------------------------------------------------------------------------------------------------------------------------------------------------------------------------------------------|
| naranjas o mandarinas | <input type="radio"/> Nunca o menos 1 vez al mes<br><input type="radio"/> 1 a 3 veces mes<br><input checked="" type="radio"/> 1 vez semana<br><input type="radio"/> 2 a 4 veces semana<br><input type="radio"/> 5 a 6 veces semana<br><input type="radio"/> 1 vez al día<br><input type="radio"/> 2 a 3 veces al día<br><input type="radio"/> 5 a 6 veces al día<br><input type="radio"/> más 6 veces al día |
|-----------------------|--------------------------------------------------------------------------------------------------------------------------------------------------------------------------------------------------------------------------------------------------------------------------------------------------------------------------------------------------------------------------------------------------------------|

---

---

zumو natural fruta

- ☐ Nunca o menos 1 vez al mes  
☐ 1 a 3 veces mes  
☐ 1 vez semana  
☐ 2 a 4 veces semana  
☐ 5 a 6 veces semana  
☒ 1 vez al día  
☐ 2 a 3 veces al día  
☐ 5 a 6 veces al día  
☐ más 6 veces al día

---

platano

- ☐ Nunca o menos 1 vez al mes  
☐ 1 a 3 veces mes  
☐ 1 vez semana  
☐ 2 a 4 veces semana  
☐ 5 a 6 veces semana  
☒ 1 vez al día  
☐ 2 a 3 veces al día  
☐ 5 a 6 veces al día  
☐ más 6 veces al día

---

manzana o pera

- ☐ Nunca o menos 1 vez al mes  
☐ 1 a 3 veces mes  
☐ 1 vez semana  
☐ 2 a 4 veces semana  
☐ 5 a 6 veces semana  
☒ 1 vez al día  
☐ 2 a 3 veces al día  
☐ 5 a 6 veces al día  
☐ más 6 veces al día

---

melocotón o nectarina

- ☒ Nunca o menos 1 vez al mes  
☐ 1 a 3 veces mes  
☐ 1 vez semana  
☐ 2 a 4 veces semana  
☐ 5 a 6 veces semana  
☐ 1 vez al día  
☐ 2 a 3 veces al día  
☐ 5 a 6 veces al día  
☐ más 6 veces al día

---

sandia o melon

- ☒ Nunca o menos 1 vez al mes  
☐ 1 a 3 veces mes  
☐ 1 vez semana  
☐ 2 a 4 veces semana  
☐ 5 a 6 veces semana  
☐ 1 vez al día  
☐ 2 a 3 veces al día  
☐ 5 a 6 veces al día  
☐ más 6 veces al día

---

uva

- ☒ Nunca o menos 1 vez al mes  
☐ 1 a 3 veces mes  
☐ 1 vez semana  
☐ 2 a 4 veces semana  
☐ 5 a 6 veces semana  
☐ 1 vez al día  
☐ 2 a 3 veces al día  
☐ 5 a 6 veces al día  
☐ más 6 veces al día

---

bruna o ciruela

- ☒ Nunca o menos 1 vez al mes  
☐ 1 a 3 veces mes  
☐ 1 vez semana  
☐ 2 a 4 veces semana  
☐ 5 a 6 veces semana  
☐ 1 vez al día  
☐ 2 a 3 veces al día  
☐ 5 a 6 veces al día  
☐ más 6 veces al día

---

kiwi

- ☐ Nunca o menos 1 vez al mes  
☐ 1 a 3 veces mes  
☐ 1 vez semana  
☐ 2 a 4 veces semana  
☐ 5 a 6 veces semana  
☒ 1 vez al día  
☐ 2 a 3 veces al día  
☐ 5 a 6 veces al día  
☐ más 6 veces al día

---

aceituna

- ☐ Nunca o menos 1 vez al mes  
☐ 1 a 3 veces mes  
☐ 1 vez semana  
☐ 2 a 4 veces semana  
☒ 5 a 6 veces semana  
☐ 1 vez al día  
☐ 2 a 3 veces al día  
☐ 5 a 6 veces al día  
☐ más 6 veces al día

---

frutos secos

- ☐ Nunca o menos 1 vez al mes  
☐ 1 a 3 veces mes  
☐ 1 vez semana  
☐ 2 a 4 veces semana  
☐ 5 a 6 veces semana  
☒ 1 vez al día  
☐ 2 a 3 veces al día  
☐ 5 a 6 veces al día  
☐ más 6 veces al día

---

pan blanco

- ☐ Nunca o menos 1 vez al mes  
☐ 1 a 3 veces mes  
☐ 1 vez semana  
☐ 2 a 4 veces semana  
☐ 5 a 6 veces semana  
☒ 1 vez al día  
☐ 2 a 3 veces al día  
☐ 5 a 6 veces al día  
☐ más 6 veces al día

---

pan integral

- ☐ Nunca o menos 1 vez al mes  
☒ 1 a 3 veces mes  
☐ 1 vez semana  
☐ 2 a 4 veces semana  
☐ 5 a 6 veces semana  
☐ 1 vez al día  
☐ 2 a 3 veces al día  
☐ 5 a 6 veces al día  
☐ más 6 veces al día

---

|                   |                                                                                                                                                                                                                                                                                                                                                                                                              |
|-------------------|--------------------------------------------------------------------------------------------------------------------------------------------------------------------------------------------------------------------------------------------------------------------------------------------------------------------------------------------------------------------------------------------------------------|
| cereales desayuno | <input type="radio"/> Nunca o menos 1 vez al mes<br><input type="radio"/> 1 a 3 veces mes<br><input type="radio"/> 1 vez semana<br><input type="radio"/> 2 a 4 veces semana<br><input type="radio"/> 5 a 6 veces semana<br><input checked="" type="radio"/> 1 vez al día<br><input type="radio"/> 2 a 3 veces al día<br><input type="radio"/> 5 a 6 veces al día<br><input type="radio"/> más 6 veces al día |
|-------------------|--------------------------------------------------------------------------------------------------------------------------------------------------------------------------------------------------------------------------------------------------------------------------------------------------------------------------------------------------------------------------------------------------------------|

---

|                |                                                                                                                                                                                                                                                                                                                                                                                                              |
|----------------|--------------------------------------------------------------------------------------------------------------------------------------------------------------------------------------------------------------------------------------------------------------------------------------------------------------------------------------------------------------------------------------------------------------|
| patatas fritas | <input type="radio"/> Nunca o menos 1 vez al mes<br><input type="radio"/> 1 a 3 veces mes<br><input type="radio"/> 1 vez semana<br><input checked="" type="radio"/> 2 a 4 veces semana<br><input type="radio"/> 5 a 6 veces semana<br><input type="radio"/> 1 vez al día<br><input type="radio"/> 2 a 3 veces al día<br><input type="radio"/> 5 a 6 veces al día<br><input type="radio"/> más 6 veces al día |
|----------------|--------------------------------------------------------------------------------------------------------------------------------------------------------------------------------------------------------------------------------------------------------------------------------------------------------------------------------------------------------------------------------------------------------------|

---

|                          |                                                                                                                                                                                                                                                                                                                                                                                                              |
|--------------------------|--------------------------------------------------------------------------------------------------------------------------------------------------------------------------------------------------------------------------------------------------------------------------------------------------------------------------------------------------------------------------------------------------------------|
| patatas cocidas o asadas | <input type="radio"/> Nunca o menos 1 vez al mes<br><input type="radio"/> 1 a 3 veces mes<br><input checked="" type="radio"/> 1 vez semana<br><input type="radio"/> 2 a 4 veces semana<br><input type="radio"/> 5 a 6 veces semana<br><input type="radio"/> 1 vez al día<br><input type="radio"/> 2 a 3 veces al día<br><input type="radio"/> 5 a 6 veces al día<br><input type="radio"/> más 6 veces al día |
|--------------------------|--------------------------------------------------------------------------------------------------------------------------------------------------------------------------------------------------------------------------------------------------------------------------------------------------------------------------------------------------------------------------------------------------------------|

---

|             |                                                                                                                                                                                                                                                                                                                                                                                                              |
|-------------|--------------------------------------------------------------------------------------------------------------------------------------------------------------------------------------------------------------------------------------------------------------------------------------------------------------------------------------------------------------------------------------------------------------|
| bolsa papas | <input type="radio"/> Nunca o menos 1 vez al mes<br><input checked="" type="radio"/> 1 a 3 veces mes<br><input type="radio"/> 1 vez semana<br><input type="radio"/> 2 a 4 veces semana<br><input type="radio"/> 5 a 6 veces semana<br><input type="radio"/> 1 vez al día<br><input type="radio"/> 2 a 3 veces al día<br><input type="radio"/> 5 a 6 veces al día<br><input type="radio"/> más 6 veces al día |
|-------------|--------------------------------------------------------------------------------------------------------------------------------------------------------------------------------------------------------------------------------------------------------------------------------------------------------------------------------------------------------------------------------------------------------------|

---

|                |                                                                                                                                                                                                                                                                                                                                                                                                              |
|----------------|--------------------------------------------------------------------------------------------------------------------------------------------------------------------------------------------------------------------------------------------------------------------------------------------------------------------------------------------------------------------------------------------------------------|
| arroz cocinado | <input type="radio"/> Nunca o menos 1 vez al mes<br><input type="radio"/> 1 a 3 veces mes<br><input checked="" type="radio"/> 1 vez semana<br><input type="radio"/> 2 a 4 veces semana<br><input type="radio"/> 5 a 6 veces semana<br><input type="radio"/> 1 vez al día<br><input type="radio"/> 2 a 3 veces al día<br><input type="radio"/> 5 a 6 veces al día<br><input type="radio"/> más 6 veces al día |
|----------------|--------------------------------------------------------------------------------------------------------------------------------------------------------------------------------------------------------------------------------------------------------------------------------------------------------------------------------------------------------------------------------------------------------------|

---

|       |                                                                                                                                                                                                                                                                                                                                                                                                              |
|-------|--------------------------------------------------------------------------------------------------------------------------------------------------------------------------------------------------------------------------------------------------------------------------------------------------------------------------------------------------------------------------------------------------------------|
| pasta | <input type="radio"/> Nunca o menos 1 vez al mes<br><input type="radio"/> 1 a 3 veces mes<br><input type="radio"/> 1 vez semana<br><input checked="" type="radio"/> 2 a 4 veces semana<br><input type="radio"/> 5 a 6 veces semana<br><input type="radio"/> 1 vez al día<br><input type="radio"/> 2 a 3 veces al día<br><input type="radio"/> 5 a 6 veces al día<br><input type="radio"/> más 6 veces al día |
|-------|--------------------------------------------------------------------------------------------------------------------------------------------------------------------------------------------------------------------------------------------------------------------------------------------------------------------------------------------------------------------------------------------------------------|

---

|                     |                                                                                                                                                                                                                                                                                                                                                                                                              |
|---------------------|--------------------------------------------------------------------------------------------------------------------------------------------------------------------------------------------------------------------------------------------------------------------------------------------------------------------------------------------------------------------------------------------------------------|
| pizza               | <input type="radio"/> Nunca o menos 1 vez al mes<br><input type="radio"/> 1 a 3 veces mes<br><input type="radio"/> 1 vez semana<br><input checked="" type="radio"/> 2 a 4 veces semana<br><input type="radio"/> 5 a 6 veces semana<br><input type="radio"/> 1 vez al día<br><input type="radio"/> 2 a 3 veces al día<br><input type="radio"/> 5 a 6 veces al día<br><input type="radio"/> más 6 veces al día |
| aceite oliva        | <input type="radio"/> Nunca o menos 1 vez al mes<br><input type="radio"/> 1 a 3 veces mes<br><input type="radio"/> 1 vez semana<br><input type="radio"/> 2 a 4 veces semana<br><input type="radio"/> 5 a 6 veces semana<br><input type="radio"/> 1 vez al día<br><input checked="" type="radio"/> 2 a 3 veces al día<br><input type="radio"/> 5 a 6 veces al día<br><input type="radio"/> más 6 veces al día |
| otros aceites       | <input checked="" type="radio"/> Nunca o menos 1 vez al mes<br><input type="radio"/> 1 a 3 veces mes<br><input type="radio"/> 1 vez semana<br><input type="radio"/> 2 a 4 veces semana<br><input type="radio"/> 5 a 6 veces semana<br><input type="radio"/> 1 vez al día<br><input type="radio"/> 2 a 3 veces al día<br><input type="radio"/> 5 a 6 veces al día<br><input type="radio"/> más 6 veces al día |
| margarina           | <input checked="" type="radio"/> Nunca o menos 1 vez al mes<br><input type="radio"/> 1 a 3 veces mes<br><input type="radio"/> 1 vez semana<br><input type="radio"/> 2 a 4 veces semana<br><input type="radio"/> 5 a 6 veces semana<br><input type="radio"/> 1 vez al día<br><input type="radio"/> 2 a 3 veces al día<br><input type="radio"/> 5 a 6 veces al día<br><input type="radio"/> más 6 veces al día |
| mantequilla         | <input type="radio"/> Nunca o menos 1 vez al mes<br><input type="radio"/> 1 a 3 veces mes<br><input checked="" type="radio"/> 1 vez semana<br><input type="radio"/> 2 a 4 veces semana<br><input type="radio"/> 5 a 6 veces semana<br><input type="radio"/> 1 vez al día<br><input type="radio"/> 2 a 3 veces al día<br><input type="radio"/> 5 a 6 veces al día<br><input type="radio"/> más 6 veces al día |
| galletas tipo maria | <input type="radio"/> Nunca o menos 1 vez al mes<br><input type="radio"/> 1 a 3 veces mes<br><input type="radio"/> 1 vez semana<br><input checked="" type="radio"/> 2 a 4 veces semana<br><input type="radio"/> 5 a 6 veces semana<br><input type="radio"/> 1 vez al día<br><input type="radio"/> 2 a 3 veces al día<br><input type="radio"/> 5 a 6 veces al día<br><input type="radio"/> más 6 veces al día |



---

galletas chocolate

- ☐ Nunca o menos 1 vez al mes  
☐ 1 a 3 veces mes  
☐ 1 vez semana  
☒ 2 a 4 veces semana  
☐ 5 a 6 veces semana  
☐ 1 vez al día  
☐ 2 a 3 veces al día  
☐ 5 a 6 veces al día  
☐ más 6 veces al día

---

bolleria

- ☐ Nunca o menos 1 vez al mes  
☐ 1 a 3 veces mes  
☒ 1 vez semana  
☐ 2 a 4 veces semana  
☐ 5 a 6 veces semana  
☐ 1 vez al día  
☐ 2 a 3 veces al día  
☐ 5 a 6 veces al día  
☐ más 6 veces al día

---

chocolate o bombones

- ☐ Nunca o menos 1 vez al mes  
☐ 1 a 3 veces mes  
☐ 1 vez semana  
☐ 2 a 4 veces semana  
☐ 5 a 6 veces semana  
☒ 1 vez al día  
☐ 2 a 3 veces al día  
☐ 5 a 6 veces al día  
☐ más 6 veces al día

---

chocolate polvo o colacao

- ☒ Nunca o menos 1 vez al mes  
☐ 1 a 3 veces mes  
☐ 1 vez semana  
☐ 2 a 4 veces semana  
☐ 5 a 6 veces semana  
☐ 1 vez al día  
☐ 2 a 3 veces al día  
☐ 5 a 6 veces al día  
☐ más 6 veces al día

---

vino tinto

- ☒ Nunca o menos 1 vez al mes  
☐ 1 a 3 veces mes  
☐ 1 vez semana  
☐ 2 a 4 veces semana  
☐ 5 a 6 veces semana  
☐ 1 vez al día  
☐ 2 a 3 veces al día  
☐ 5 a 6 veces al día  
☐ más 6 veces al día

---

vino blanco

- ☒ Nunca o menos 1 vez al mes  
☐ 1 a 3 veces mes  
☐ 1 vez semana  
☐ 2 a 4 veces semana  
☐ 5 a 6 veces semana  
☐ 1 vez al día  
☐ 2 a 3 veces al día  
☐ 5 a 6 veces al día  
☐ más 6 veces al día

---

|                    |                                                                                                                                                                                                                                                                                                                                                                                                              |
|--------------------|--------------------------------------------------------------------------------------------------------------------------------------------------------------------------------------------------------------------------------------------------------------------------------------------------------------------------------------------------------------------------------------------------------------|
| vino seco o vermut | <input checked="" type="radio"/> Nunca o menos 1 vez al mes<br><input type="radio"/> 1 a 3 veces mes<br><input type="radio"/> 1 vez semana<br><input type="radio"/> 2 a 4 veces semana<br><input type="radio"/> 5 a 6 veces semana<br><input type="radio"/> 1 vez al día<br><input type="radio"/> 2 a 3 veces al día<br><input type="radio"/> 5 a 6 veces al día<br><input type="radio"/> más 6 veces al día |
|--------------------|--------------------------------------------------------------------------------------------------------------------------------------------------------------------------------------------------------------------------------------------------------------------------------------------------------------------------------------------------------------------------------------------------------------|

---

|         |                                                                                                                                                                                                                                                                                                                                                                                                              |
|---------|--------------------------------------------------------------------------------------------------------------------------------------------------------------------------------------------------------------------------------------------------------------------------------------------------------------------------------------------------------------------------------------------------------------|
| cerveza | <input checked="" type="radio"/> Nunca o menos 1 vez al mes<br><input type="radio"/> 1 a 3 veces mes<br><input type="radio"/> 1 vez semana<br><input type="radio"/> 2 a 4 veces semana<br><input type="radio"/> 5 a 6 veces semana<br><input type="radio"/> 1 vez al día<br><input type="radio"/> 2 a 3 veces al día<br><input type="radio"/> 5 a 6 veces al día<br><input type="radio"/> más 6 veces al día |
|---------|--------------------------------------------------------------------------------------------------------------------------------------------------------------------------------------------------------------------------------------------------------------------------------------------------------------------------------------------------------------------------------------------------------------|

---

|                     |                                                                                                                                                                                                                                                                                                                                                                                                              |
|---------------------|--------------------------------------------------------------------------------------------------------------------------------------------------------------------------------------------------------------------------------------------------------------------------------------------------------------------------------------------------------------------------------------------------------------|
| cerveza sin alcohol | <input type="radio"/> Nunca o menos 1 vez al mes<br><input type="radio"/> 1 a 3 veces mes<br><input type="radio"/> 1 vez semana<br><input checked="" type="radio"/> 2 a 4 veces semana<br><input type="radio"/> 5 a 6 veces semana<br><input type="radio"/> 1 vez al día<br><input type="radio"/> 2 a 3 veces al día<br><input type="radio"/> 5 a 6 veces al día<br><input type="radio"/> más 6 veces al día |
|---------------------|--------------------------------------------------------------------------------------------------------------------------------------------------------------------------------------------------------------------------------------------------------------------------------------------------------------------------------------------------------------------------------------------------------------|

---

|         |                                                                                                                                                                                                                                                                                                                                                                                                              |
|---------|--------------------------------------------------------------------------------------------------------------------------------------------------------------------------------------------------------------------------------------------------------------------------------------------------------------------------------------------------------------------------------------------------------------|
| licores | <input checked="" type="radio"/> Nunca o menos 1 vez al mes<br><input type="radio"/> 1 a 3 veces mes<br><input type="radio"/> 1 vez semana<br><input type="radio"/> 2 a 4 veces semana<br><input type="radio"/> 5 a 6 veces semana<br><input type="radio"/> 1 vez al día<br><input type="radio"/> 2 a 3 veces al día<br><input type="radio"/> 5 a 6 veces al día<br><input type="radio"/> más 6 veces al día |
|---------|--------------------------------------------------------------------------------------------------------------------------------------------------------------------------------------------------------------------------------------------------------------------------------------------------------------------------------------------------------------------------------------------------------------|

---

|                       |                                                                                                                                                                                                                                                                                                                                                                                                              |
|-----------------------|--------------------------------------------------------------------------------------------------------------------------------------------------------------------------------------------------------------------------------------------------------------------------------------------------------------------------------------------------------------------------------------------------------------|
| ginebra o ron o vodka | <input checked="" type="radio"/> Nunca o menos 1 vez al mes<br><input type="radio"/> 1 a 3 veces mes<br><input type="radio"/> 1 vez semana<br><input type="radio"/> 2 a 4 veces semana<br><input type="radio"/> 5 a 6 veces semana<br><input type="radio"/> 1 vez al día<br><input type="radio"/> 2 a 3 veces al día<br><input type="radio"/> 5 a 6 veces al día<br><input type="radio"/> más 6 veces al día |
|-----------------------|--------------------------------------------------------------------------------------------------------------------------------------------------------------------------------------------------------------------------------------------------------------------------------------------------------------------------------------------------------------------------------------------------------------|

---

|                 |                                                                                                                                                                                                                                                                                                                                                                                                              |
|-----------------|--------------------------------------------------------------------------------------------------------------------------------------------------------------------------------------------------------------------------------------------------------------------------------------------------------------------------------------------------------------------------------------------------------------|
| refresco normal | <input checked="" type="radio"/> Nunca o menos 1 vez al mes<br><input type="radio"/> 1 a 3 veces mes<br><input type="radio"/> 1 vez semana<br><input type="radio"/> 2 a 4 veces semana<br><input type="radio"/> 5 a 6 veces semana<br><input type="radio"/> 1 vez al día<br><input type="radio"/> 2 a 3 veces al día<br><input type="radio"/> 5 a 6 veces al día<br><input type="radio"/> más 6 veces al día |
|-----------------|--------------------------------------------------------------------------------------------------------------------------------------------------------------------------------------------------------------------------------------------------------------------------------------------------------------------------------------------------------------------------------------------------------------|

---

---

refresco sin azúcar

- ☐ Nunca o menos 1 vez al mes  
☒ 1 a 3 veces mes  
☐ 1 vez semana  
☐ 2 a 4 veces semana  
☐ 5 a 6 veces semana  
☐ 1 vez al día  
☐ 2 a 3 veces al día  
☐ 5 a 6 veces al día  
☐ más 6 veces al día

---

Agua del grifo

- ☒ Nunca o menos 1 vez al mes  
☐ 1 a 3 veces mes  
☐ 1 vez semana  
☐ 2 a 4 veces semana  
☐ 5 a 6 veces semana  
☐ 1 vez al día  
☐ 2 a 3 veces al día  
☐ 5 a 6 veces al día  
☐ más 6 veces al día

---

agua embotellada sin gas

- ☐ Nunca o menos 1 vez al mes  
☐ 1 a 3 veces mes  
☐ 1 vez semana  
☐ 2 a 4 veces semana  
☐ 5 a 6 veces semana  
☐ 1 vez al día  
☐ 2 a 3 veces al día  
☒ 5 a 6 veces al día  
☐ más 6 veces al día

---

agua embotellada con gas

- ☒ Nunca o menos 1 vez al mes  
☐ 1 a 3 veces mes  
☐ 1 vez semana  
☐ 2 a 4 veces semana  
☐ 5 a 6 veces semana  
☐ 1 vez al día  
☐ 2 a 3 veces al día  
☐ 5 a 6 veces al día  
☐ más 6 veces al día

---

zumو frutas embasado

- ☒ Nunca o menos 1 vez al mes  
☐ 1 a 3 veces mes  
☐ 1 vez semana  
☐ 2 a 4 veces semana  
☐ 5 a 6 veces semana  
☐ 1 vez al día  
☐ 2 a 3 veces al día  
☐ 5 a 6 veces al día  
☐ más 6 veces al día

---

cafe

- ☒ Nunca o menos 1 vez al mes  
☐ 1 a 3 veces mes  
☐ 1 vez semana  
☐ 2 a 4 veces semana  
☐ 5 a 6 veces semana  
☐ 1 vez al día  
☐ 2 a 3 veces al día  
☐ 5 a 6 veces al día  
☐ más 6 veces al día

---

cafe descafeinado

- ☐ Nunca o menos 1 vez al mes  
☐ 1 a 3 veces mes  
☐ 1 vez semana  
☒ 2 a 4 veces semana  
☐ 5 a 6 veces semana  
☐ 1 vez al día  
☐ 2 a 3 veces al día  
☐ 5 a 6 veces al día  
☐ más 6 veces al día

---

te o infusión

- ☒ Nunca o menos 1 vez al mes  
☐ 1 a 3 veces mes  
☐ 1 vez semana  
☐ 2 a 4 veces semana  
☐ 5 a 6 veces semana  
☐ 1 vez al día  
☐ 2 a 3 veces al día  
☐ 5 a 6 veces al día  
☐ más 6 veces al día

---

sopa o puré verduras

- ☐ Nunca o menos 1 vez al mes  
☐ 1 a 3 veces mes  
☐ 1 vez semana  
☐ 2 a 4 veces semana  
☐ 5 a 6 veces semana  
☒ 1 vez al día  
☐ 2 a 3 veces al día  
☐ 5 a 6 veces al día  
☐ más 6 veces al día

---

croquetas pollo jamón

- ☐ Nunca o menos 1 vez al mes  
☒ 1 a 3 veces mes  
☐ 1 vez semana  
☐ 2 a 4 veces semana  
☐ 5 a 6 veces semana  
☐ 1 vez al día  
☐ 2 a 3 veces al día  
☐ 5 a 6 veces al día  
☐ más 6 veces al día

---

croquetas pescado

- ☒ Nunca o menos 1 vez al mes  
☐ 1 a 3 veces mes  
☐ 1 vez semana  
☐ 2 a 4 veces semana  
☐ 5 a 6 veces semana  
☐ 1 vez al día  
☐ 2 a 3 veces al día  
☐ 5 a 6 veces al día  
☐ más 6 veces al día

---

mayonesa

- ☐ Nunca o menos 1 vez al mes  
☐ 1 a 3 veces mes  
☐ 1 vez semana  
☒ 2 a 4 veces semana  
☐ 5 a 6 veces semana  
☐ 1 vez al día  
☐ 2 a 3 veces al día  
☐ 5 a 6 veces al día  
☐ más 6 veces al día

---

salsa tomate

- ☐ Nunca o menos 1 vez al mes  
☐ 1 a 3 veces mes  
☐ 1 vez semana  
☒ 2 a 4 veces semana  
☐ 5 a 6 veces semana  
☐ 1 vez al día  
☐ 2 a 3 veces al día  
☐ 5 a 6 veces al día  
☐ más 6 veces al día

---

ketchup

- ☒ Nunca o menos 1 vez al mes  
☐ 1 a 3 veces mes  
☐ 1 vez semana  
☐ 2 a 4 veces semana  
☐ 5 a 6 veces semana  
☐ 1 vez al día  
☐ 2 a 3 veces al día  
☐ 5 a 6 veces al día  
☐ más 6 veces al día

---

sal

- ☒ Nunca o menos 1 vez al mes  
☐ 1 a 3 veces mes  
☐ 1 vez semana  
☐ 2 a 4 veces semana  
☐ 5 a 6 veces semana  
☐ 1 vez al día  
☐ 2 a 3 veces al día  
☐ 5 a 6 veces al día  
☐ más 6 veces al día

---

ajo

- ☐ Nunca o menos 1 vez al mes  
☐ 1 a 3 veces mes  
☐ 1 vez semana  
☐ 2 a 4 veces semana  
☐ 5 a 6 veces semana  
☒ 1 vez al día  
☐ 2 a 3 veces al día  
☐ 5 a 6 veces al día  
☐ más 6 veces al día

---

mermelada o miel

- ☒ Nunca o menos 1 vez al mes  
☐ 1 a 3 veces mes  
☐ 1 vez semana  
☐ 2 a 4 veces semana  
☐ 5 a 6 veces semana  
☐ 1 vez al día  
☐ 2 a 3 veces al día  
☐ 5 a 6 veces al día  
☐ más 6 veces al día

---

azúcar

- ☒ Nunca o menos 1 vez al mes  
☐ 1 a 3 veces mes  
☐ 1 vez semana  
☐ 2 a 4 veces semana  
☐ 5 a 6 veces semana  
☐ 1 vez al día  
☐ 2 a 3 veces al día  
☐ 5 a 6 veces al día  
☐ más 6 veces al día

|                                       |                                                                                                                                                                                                                                                                                                                                                                                                                                                                                                                               |
|---------------------------------------|-------------------------------------------------------------------------------------------------------------------------------------------------------------------------------------------------------------------------------------------------------------------------------------------------------------------------------------------------------------------------------------------------------------------------------------------------------------------------------------------------------------------------------|
| Otro alimento                         | [*DATA REMOVED*]                                                                                                                                                                                                                                                                                                                                                                                                                                                                                                              |
| suplementos vitamínicos               | <input type="radio"/> si<br><input checked="" type="radio"/> no                                                                                                                                                                                                                                                                                                                                                                                                                                                               |
| suplementos vitamínicos               |                                                                                                                                                                                                                                                                                                                                                                                                                                                                                                                               |
| dieta previa                          | <input type="radio"/> si<br><input checked="" type="radio"/> no                                                                                                                                                                                                                                                                                                                                                                                                                                                               |
| motivo dieta                          | <input checked="" type="radio"/> no dieta<br><input type="radio"/> control peso<br><input type="radio"/> control colesterol<br><input type="radio"/> control diabetes<br><input type="radio"/> problemas estómago<br><input type="radio"/> problemas vesícula o hepáticos<br><input type="radio"/> HTA o cardiopatía<br><input type="radio"/> problemas renales<br><input type="radio"/> alergia alimentaria<br><input type="radio"/> ácido úrico elevado<br><input type="radio"/> vegetariana<br><input type="radio"/> otros |
| cambio alimentos año previo gestación | <input checked="" type="radio"/> si<br><input type="radio"/> no                                                                                                                                                                                                                                                                                                                                                                                                                                                               |
| cambio lácteos                        | <input type="radio"/> eliminado<br><input type="radio"/> disminuido<br><input type="radio"/> igual<br><input type="radio"/> aumentado<br><input type="radio"/> no sabe                                                                                                                                                                                                                                                                                                                                                        |
| cambio huevos                         | <input type="radio"/> eliminado<br><input type="radio"/> disminuido<br><input type="radio"/> igual<br><input type="radio"/> aumentado<br><input type="radio"/> no sabe                                                                                                                                                                                                                                                                                                                                                        |
| cambio carne                          | <input type="radio"/> eliminado<br><input type="radio"/> disminuido<br><input type="radio"/> igual<br><input checked="" type="radio"/> aumentado<br><input type="radio"/> no sabe                                                                                                                                                                                                                                                                                                                                             |
| cambio pescado                        | <input type="radio"/> eliminado<br><input type="radio"/> disminuido<br><input type="radio"/> igual<br><input type="radio"/> aumentado<br><input type="radio"/> no sabe                                                                                                                                                                                                                                                                                                                                                        |
| cambio verduras                       | <input type="radio"/> eliminado<br><input type="radio"/> disminuido<br><input type="radio"/> igual<br><input type="radio"/> aumentado<br><input type="radio"/> no sabe                                                                                                                                                                                                                                                                                                                                                        |

|                            |                                                                                                                                                                                                                        |
|----------------------------|------------------------------------------------------------------------------------------------------------------------------------------------------------------------------------------------------------------------|
| cambio legumbres           | <input type="radio"/> eliminado<br><input type="radio"/> disminuido<br><input type="radio"/> igual<br><input type="radio"/> aumentado<br><input type="radio"/> no sabe                                                 |
| cambio fruta               | <input type="radio"/> eliminado<br><input type="radio"/> disminuido<br><input type="radio"/> igual<br><input type="radio"/> aumentado<br><input type="radio"/> no sabe                                                 |
| cambio pan                 | <input type="radio"/> eliminado<br><input type="radio"/> disminuido<br><input type="radio"/> igual<br><input type="radio"/> aumentado<br><input type="radio"/> no sabe                                                 |
| cambio aceite oliva        | <input type="radio"/> eliminado<br><input type="radio"/> disminuido<br><input type="radio"/> igual<br><input type="radio"/> aumentado<br><input type="radio"/> no sabe                                                 |
| cambio mante o margarina   | <input type="radio"/> eliminado<br><input type="radio"/> disminuido<br><input type="radio"/> igual<br><input type="radio"/> aumentado<br><input type="radio"/> no sabe                                                 |
| cambio azúcar y dulces     | <input type="radio"/> eliminado<br><input type="radio"/> disminuido<br><input type="radio"/> igual<br><input type="radio"/> aumentado<br><input type="radio"/> no sabe                                                 |
| cambio bebidas alcohólicas | <input type="radio"/> eliminado<br><input type="radio"/> disminuido<br><input type="radio"/> igual<br><input type="radio"/> aumentado<br><input type="radio"/> no sabe                                                 |
| frecuencia comidas fritas  | <input type="radio"/> a diario<br><input type="radio"/> 5 a 6 veces semana<br><input type="radio"/> 2 a 4 veces semana<br><input checked="" type="radio"/> 1 vez semana<br><input type="radio"/> menos de 1 vez semana |
| carne                      | <input type="radio"/> no como<br><input type="radio"/> cruda<br><input type="radio"/> poco hecha<br><input type="radio"/> hecha<br><input checked="" type="radio"/> muy hecha                                          |
| grasa visible carne        | <input checked="" type="radio"/> quita toda<br><input type="radio"/> quita mayoría<br><input type="radio"/> quita un poco<br><input type="radio"/> no quita nada                                                       |

|                                |                                                                                                                                                                                                                                                          |
|--------------------------------|----------------------------------------------------------------------------------------------------------------------------------------------------------------------------------------------------------------------------------------------------------|
| cocina carne                   | <input checked="" type="radio"/> a la plancha<br><input type="radio"/> a la parrilla<br><input type="radio"/> asada<br><input type="radio"/> frita<br><input type="radio"/> guisada                                                                      |
| tostado quemado carne          | <input checked="" type="radio"/> nunca<br><input type="radio"/> 1 vez mes<br><input type="radio"/> 2 a 3 veces mes<br><input type="radio"/> 1 vez semana<br><input type="radio"/> 2 a 3 semanas                                                          |
| tostado quemado pescado        | <input checked="" type="radio"/> nunca<br><input type="radio"/> 1 vez mes<br><input type="radio"/> 2 a 3 veces mes<br><input type="radio"/> 1 vez semana<br><input type="radio"/> 2 a 3 semanas                                                          |
| socarrat paella                | <input type="radio"/> nunca<br><input type="radio"/> 1 vez mes<br><input type="radio"/> 2 a 3 veces mes<br><input checked="" type="radio"/> 1 vez semana<br><input type="radio"/> 2 a 3 semanas                                                          |
| grasa o aceite cocinar         | <input type="radio"/> mantequilla<br><input type="radio"/> margarina<br><input checked="" type="radio"/> aceite oliva<br><input type="radio"/> aceite oliva virgen extra<br><input type="radio"/> aceite vegetal<br><input type="radio"/> mezcla aceites |
| grasa aceite aliñar            | <input type="radio"/> mantequilla<br><input type="radio"/> margarina<br><input checked="" type="radio"/> aceite oliva<br><input type="radio"/> aceite oliva virgen extra<br><input type="radio"/> aceite vegetal<br><input type="radio"/> mezcla aceites |
| grasa aceite freir             | <input type="radio"/> mantequilla<br><input type="radio"/> margarina<br><input checked="" type="radio"/> aceite oliva<br><input type="radio"/> aceite oliva virgen extra<br><input type="radio"/> aceite vegetal<br><input type="radio"/> mezcla aceites |
| Ejercicio cuestionario         | <input checked="" type="radio"/> si<br><input type="radio"/> no                                                                                                                                                                                          |
| horas de sueño incluido siesta | [*DATA REMOVED*]                                                                                                                                                                                                                                         |
| minutos siesta                 | [*DATA REMOVED*]                                                                                                                                                                                                                                         |
| horas televisión semana        |                                                                                                                                                                                                                                                          |



|                                        |                                                                                                                                                                                                                                                                                                                                                                           |
|----------------------------------------|---------------------------------------------------------------------------------------------------------------------------------------------------------------------------------------------------------------------------------------------------------------------------------------------------------------------------------------------------------------------------|
| actividad trabajo                      | <input type="radio"/> casi siempre sentado<br><input type="radio"/> sentado 50 por cien<br><input type="radio"/> casi siempre de pie, quieto<br><input checked="" type="radio"/> casi siempre levantado caminando y llevando pocas cosas<br><input type="radio"/> casi siempre levantado, caminando y llevado muchas cosas<br><input type="radio"/> trabajo manual pesado |
| tiempo caminar o bici al día           | <input type="radio"/> casi nunca<br><input type="radio"/> menos 20min día<br><input type="radio"/> 20 a 40 min día<br><input type="radio"/> 40 a 60 min día<br><input type="radio"/> 1h o 1h y media día<br><input checked="" type="radio"/> más de 1h y media al día                                                                                                     |
| tiempo tareas casa al día              | <input type="radio"/> menos de 1h día<br><input checked="" type="radio"/> 1 a 2h día<br><input type="radio"/> 3 a 4h día<br><input type="radio"/> 5 a 6h día<br><input type="radio"/> 7 a 8h día<br><input type="radio"/> más de 8h día                                                                                                                                   |
| tiempo libre televisión ordenador leer | <input type="radio"/> menos 1h día<br><input type="radio"/> 1h día<br><input checked="" type="radio"/> 2h día<br><input type="radio"/> 3h día<br><input type="radio"/> 4h día<br><input type="radio"/> 5 a 6h día<br><input type="radio"/> mas 6h día                                                                                                                     |
| tiempo libre ejercicio o deporte       | <input type="radio"/> menos 1h semana<br><input type="radio"/> 1h semana<br><input type="radio"/> 2h semana<br><input type="radio"/> 3h semana<br><input type="radio"/> 4 a 5h semana<br><input checked="" type="radio"/> mas 5h semana                                                                                                                                   |
| como se considera                      | <input type="radio"/> sedentaria<br><input type="radio"/> poco activa<br><input type="radio"/> moderadamente activa<br><input checked="" type="radio"/> bastante activa<br><input type="radio"/> muy activa<br><input type="radio"/> no sabe                                                                                                                              |
| FUR                                    | [*DATA REMOVED*]                                                                                                                                                                                                                                                                                                                                                          |
| Semanas gestación 2T                   | _____                                                                                                                                                                                                                                                                                                                                                                     |
| Días gestación 2T                      | _____                                                                                                                                                                                                                                                                                                                                                                     |
| DBP 2T                                 | _____                                                                                                                                                                                                                                                                                                                                                                     |
| CC 2T                                  | _____                                                                                                                                                                                                                                                                                                                                                                     |

|                                                   |                                                                                                                                                                                                 |
|---------------------------------------------------|-------------------------------------------------------------------------------------------------------------------------------------------------------------------------------------------------|
| AC 2T                                             |                                                                                                                                                                                                 |
| LF 2T                                             |                                                                                                                                                                                                 |
| PFE 2T (Hadlock)                                  |                                                                                                                                                                                                 |
| Semanas gestación 3T                              | [*DATA REMOVED*]                                                                                                                                                                                |
| días 3T                                           | [*DATA REMOVED*]                                                                                                                                                                                |
| DBP 3T                                            | [*DATA REMOVED*]                                                                                                                                                                                |
| CC 3T                                             | [*DATA REMOVED*]                                                                                                                                                                                |
| AC 3T                                             | [*DATA REMOVED*]                                                                                                                                                                                |
| LF 3T                                             | [*DATA REMOVED*]                                                                                                                                                                                |
| PFE 3T (Hadlock)                                  | [*DATA REMOVED*]                                                                                                                                                                                |
| Semanas de gestación final                        | [*DATA REMOVED*]                                                                                                                                                                                |
| días gestación final                              | [*DATA REMOVED*]                                                                                                                                                                                |
| Localización placenta                             | <input type="radio"/> anterior<br><input type="radio"/> lateral derecha<br><input type="radio"/> lateral izquierda<br><input type="radio"/> posterior<br><input checked="" type="radio"/> fondo |
| Presentación longitudinal cefálica                | <input type="radio"/> no<br><input checked="" type="radio"/> si                                                                                                                                 |
| Dorso                                             | <input type="radio"/> izquierda anterior<br><input type="radio"/> izquierda posterior<br><input checked="" type="radio"/> derecha anterior<br><input type="radio"/> derecha posterior           |
| diámetro biparietal                               | [*DATA REMOVED*]                                                                                                                                                                                |
| Circunferencia craneal                            | [*DATA REMOVED*]                                                                                                                                                                                |
| Circunferencia abdominal                          | [*DATA REMOVED*]                                                                                                                                                                                |
| Longitud de femur                                 | [*DATA REMOVED*]                                                                                                                                                                                |
| tejido celular subcutáneo a nivel del muslo en mm | [*DATA REMOVED*]                                                                                                                                                                                |
| tejido celular subcutáneo en abdomen en mm        | [*DATA REMOVED*]                                                                                                                                                                                |

|                                               |                                                                                                                                               |
|-----------------------------------------------|-----------------------------------------------------------------------------------------------------------------------------------------------|
| Volumen del muslo en cm3                      | [*DATA REMOVED*]                                                                                                                              |
| Peso fetal estimado según fórmula de Hadlock  | [*DATA REMOVED*]                                                                                                                              |
| Percentil                                     | [*DATA REMOVED*]                                                                                                                              |
| Peso fetal estimado según fórmula de Scioscia | _____                                                                                                                                         |
| Peso fetal estimado según fórmula de LEE      | _____                                                                                                                                         |
| Tipo de parto                                 | <input type="radio"/> eutocico<br><input type="radio"/> instrumentado/ventosa<br><input checked="" type="radio"/> cesarea                     |
| fecha de nacimiento                           | [*DATA REMOVED*]                                                                                                                              |
| Días entre exploración y nacimiento           | [*DATA REMOVED*]                                                                                                                              |
| Peso RN en g                                  | [*DATA REMOVED*]                                                                                                                              |
| sexo                                          | <input checked="" type="radio"/> mujer<br><input type="radio"/> hombre                                                                        |
| Apgar 1 minuto                                | [*DATA REMOVED*]                                                                                                                              |
| Apgar 5 minutos                               | [*DATA REMOVED*]                                                                                                                              |
| Apgar 10 minutos                              | _____                                                                                                                                         |
| antecedente Covid durante gestación           | <input type="radio"/> Yes<br><input checked="" type="radio"/> No                                                                              |
| Nivel de estudios                             | <input type="radio"/> ninguno<br><input type="radio"/> primarios<br><input type="radio"/> secundarios<br><input type="radio"/> universitarios |

# Base\_datos\_estimacion\_peso\_fetal

|                                       |                                                                                                                                                                                                                                                                                      |
|---------------------------------------|--------------------------------------------------------------------------------------------------------------------------------------------------------------------------------------------------------------------------------------------------------------------------------------|
| Número de identificación participante | 120                                                                                                                                                                                                                                                                                  |
| CODIGO PARTICIPANTE                   |                                                                                                                                                                                                                                                                                      |
| Edad                                  | [*DATA REMOVED*]                                                                                                                                                                                                                                                                     |
| Gestaciones                           | <input type="radio"/> 1<br><input checked="" type="radio"/> 2<br><input type="radio"/> 3<br><input type="radio"/> mas de 3                                                                                                                                                           |
| partos                                | <input type="radio"/> 0<br><input checked="" type="radio"/> 1<br><input type="radio"/> 2<br><input type="radio"/> 3<br><input type="radio"/> mas de 3                                                                                                                                |
| cesáreas                              | <input checked="" type="radio"/> 0<br><input type="radio"/> 1<br><input type="radio"/> 2<br><input type="radio"/> 3<br><input type="radio"/> mas de 3                                                                                                                                |
| Abortos                               | <input checked="" type="radio"/> 0<br><input type="radio"/> 1<br><input type="radio"/> 2<br><input type="radio"/> 3<br><input type="radio"/> mas de 3                                                                                                                                |
| Tipo de gestacion                     | <input checked="" type="radio"/> espontanea<br><input type="radio"/> IAC inseminación artificial conyuge<br><input type="radio"/> IAD inseminación artificial donante<br><input type="radio"/> FIV Fecundación in Vitro<br><input type="radio"/> Ovodon FIV con donación de ovocitos |
| peso previo a embarazo                | [*DATA REMOVED*]                                                                                                                                                                                                                                                                     |
| Ganancia ponderal embarazo            | [*DATA REMOVED*]                                                                                                                                                                                                                                                                     |
| Talla madre                           | [*DATA REMOVED*]                                                                                                                                                                                                                                                                     |
| IMC previo embarazo                   | 23.725286160249738                                                                                                                                                                                                                                                                   |
| Patología obstétrica                  | <input checked="" type="radio"/> no<br><input type="radio"/> si                                                                                                                                                                                                                      |
| Diabetes pregestacional               | <input checked="" type="radio"/> no<br><input type="radio"/> si                                                                                                                                                                                                                      |
| Diabetes gestacional                  | <input checked="" type="radio"/> no<br><input type="radio"/> si                                                                                                                                                                                                                      |

|                                            |                                                                                                                                                                                      |
|--------------------------------------------|--------------------------------------------------------------------------------------------------------------------------------------------------------------------------------------|
| Diabetes gestacional con insulina          | <input checked="" type="radio"/> no<br><input type="radio"/> si                                                                                                                      |
| Diabetes gestacional con dieta y ejercicio | <input checked="" type="radio"/> no<br><input type="radio"/> si                                                                                                                      |
| Percentil fetos previos                    | <input type="radio"/> Nada<br><input type="radio"/> percentil menor de 10<br><input checked="" type="radio"/> percentil entre 10 y 90<br><input type="radio"/> percentil mayor de 90 |
| Exfumadora                                 | <input checked="" type="radio"/> Nada<br><input type="radio"/> menos de 5 años<br><input type="radio"/> 5 a 10 años<br><input type="radio"/> mayor o igual a 10 años                 |
| Hábito tabáquico                           | <input checked="" type="radio"/> no<br><input type="radio"/> si                                                                                                                      |
| fumadora                                   | [*DATA REMOVED*]                                                                                                                                                                     |
| Consumo otros tóxicos                      | <input checked="" type="radio"/> no<br><input type="radio"/> si                                                                                                                      |
| Hb 1T                                      | [*DATA REMOVED*]                                                                                                                                                                     |
| Htc 1T                                     | [*DATA REMOVED*]                                                                                                                                                                     |
| Hb 2T                                      | [*DATA REMOVED*]                                                                                                                                                                     |
| HTC 2T                                     | [*DATA REMOVED*]                                                                                                                                                                     |
| Hb 3T                                      | [*DATA REMOVED*]                                                                                                                                                                     |
| HTC 3T                                     | [*DATA REMOVED*]                                                                                                                                                                     |
| Suplemento FE oral                         | <input checked="" type="radio"/> si<br><input type="radio"/> no                                                                                                                      |
| Suplemento fe iv                           | <input type="radio"/> si<br><input checked="" type="radio"/> no                                                                                                                      |
| Transfusión                                | <input checked="" type="radio"/> no<br><input type="radio"/> si                                                                                                                      |
| Solicitada Vit D                           | <input checked="" type="radio"/> no<br><input type="radio"/> si                                                                                                                      |
| Deficit vit D                              | <input type="radio"/> no<br><input type="radio"/> si                                                                                                                                 |
| Suplemento vit D                           | <input type="radio"/> si<br><input type="radio"/> no                                                                                                                                 |

|                       |                                                                                                                                                                                                                                                                                                                                                                                                              |
|-----------------------|--------------------------------------------------------------------------------------------------------------------------------------------------------------------------------------------------------------------------------------------------------------------------------------------------------------------------------------------------------------------------------------------------------------|
| Dieta, cuestionario   | <input checked="" type="radio"/> sí<br><input type="radio"/> no                                                                                                                                                                                                                                                                                                                                              |
| Leche entera          | <input checked="" type="radio"/> Nunca o menos 1 vez al mes<br><input type="radio"/> 1 a 3 veces mes<br><input type="radio"/> 1 vez semana<br><input type="radio"/> 2 a 4 veces semana<br><input type="radio"/> 5 a 6 veces semana<br><input type="radio"/> 1 vez al día<br><input type="radio"/> 2 a 3 veces al día<br><input type="radio"/> 5 a 6 veces al día<br><input type="radio"/> más 6 veces al día |
| Leche semidesnatada   | <input type="radio"/> Nunca o menos 1 vez al mes<br><input type="radio"/> 1 a 3 veces mes<br><input type="radio"/> 1 vez semana<br><input checked="" type="radio"/> 2 a 4 veces semana<br><input type="radio"/> 5 a 6 veces semana<br><input type="radio"/> 1 vez al día<br><input type="radio"/> 2 a 3 veces al día<br><input type="radio"/> 5 a 6 veces al día<br><input type="radio"/> mas 6 veces al día |
| Leche desnatada       | <input checked="" type="radio"/> Nunca o menos 1 vez al mes<br><input type="radio"/> 1 a 3 veces mes<br><input type="radio"/> 1 vez semana<br><input type="radio"/> 2 a 4 veces semana<br><input type="radio"/> 5 a 6 veces semana<br><input type="radio"/> 1 vez al día<br><input type="radio"/> 2 a 3 veces al día<br><input type="radio"/> 5 a 6 veces al día<br><input type="radio"/> más 6 veces al día |
| Leche condensada      | <input checked="" type="radio"/> Nunca o menos 1 vez al mes<br><input type="radio"/> 1 a 3 veces mes<br><input type="radio"/> 1 vez semana<br><input type="radio"/> 2 a 4 veces semana<br><input type="radio"/> 5 a 6 veces semana<br><input type="radio"/> 1 vez al día<br><input type="radio"/> 2 a 3 veces al día<br><input type="radio"/> 5 a 6 veces al día<br><input type="radio"/> más 6 veces al día |
| nata o crema de leche | <input checked="" type="radio"/> Nunca o menos 1 vez al mes<br><input type="radio"/> 1 a 3 veces mes<br><input type="radio"/> 1 vez semana<br><input type="radio"/> 2 a 4 veces semana<br><input type="radio"/> 5 a 6 veces semana<br><input type="radio"/> 1 vez al día<br><input type="radio"/> 2 a 3 veces al día<br><input type="radio"/> 5 a 6 veces al día<br><input type="radio"/> más 6 veces al día |

---

Yogurt Entero

- ☒ Nunca o menos 1 vez al mes  
☐ 1 a 3 veces mes  
☐ 1 vez semana  
☐ 2 a 4 veces semana  
☐ 5 a 6 veces semana  
☐ 1 vez al día  
☐ 2 a 3 veces al día  
☐ 5 a 6 veces al día  
☐ más 6 veces al día

---

Yogurt desnatado

- ☒ Nunca o menos 1 vez al mes  
☐ 1 a 3 veces mes  
☐ 1 vez semana  
☐ 2 a 4 veces semana  
☐ 5 a 6 veces semana  
☐ 1 vez al día  
☐ 2 a 3 veces al día  
☐ 5 a 6 veces al día  
☐ más 6 veces al día

---

100g requesón o queso blando o queso fresco

- ☐ Nunca o menos 1 vez al mes  
☒ 1 a 3 veces mes  
☐ 1 vez semana  
☐ 2 a 4 veces semana  
☐ 5 a 6 veces semana  
☐ 1 vez al día  
☐ 2 a 3 veces al día  
☐ 5 a 6 veces al día  
☐ más 6 veces al día

---

queso curado o semicurado o cremoso

- ☐ Nunca o menos 1 vez al mes  
☐ 1 a 3 veces mes  
☐ 1 vez semana  
☐ 2 a 4 veces semana  
☐ 5 a 6 veces semana  
☐ 1 vez al día  
☐ 2 a 3 veces al día  
☐ 5 a 6 veces al día  
☐ más 6 veces al día

---

natillas flan pudding

- ☒ Nunca o menos 1 vez al mes  
☐ 1 a 3 veces mes  
☐ 1 vez semana  
☐ 2 a 4 veces semana  
☐ 5 a 6 veces semana  
☐ 1 vez al día  
☐ 2 a 3 veces al día  
☐ 5 a 6 veces al día  
☐ más 6 veces al día

---

Helado

- ☐ Nunca o menos 1 vez al mes  
☐ 1 a 3 veces mes  
☒ 1 vez semana  
☐ 2 a 4 veces semana  
☐ 5 a 6 veces semana  
☐ 1 vez al día  
☐ 2 a 3 veces al día  
☐ 5 a 6 veces al día  
☐ más 6 veces al día

|                                      |                                                                                                                                                                                                                                                                                                                                                                                                              |
|--------------------------------------|--------------------------------------------------------------------------------------------------------------------------------------------------------------------------------------------------------------------------------------------------------------------------------------------------------------------------------------------------------------------------------------------------------------|
| huevo                                | <input type="radio"/> Nunca o menos 1 vez al mes<br><input type="radio"/> 1 a 3 veces mes<br><input type="radio"/> 1 vez semana<br><input checked="" type="radio"/> 2 a 4 veces semana<br><input type="radio"/> 5 a 6 veces semana<br><input type="radio"/> 1 vez al día<br><input type="radio"/> 2 a 3 veces al día<br><input type="radio"/> 5 a 6 veces al día<br><input type="radio"/> más 6 veces al día |
| Pollo con piel                       | <input type="radio"/> Nunca o menos 1 vez al mes<br><input checked="" type="radio"/> 1 a 3 veces mes<br><input type="radio"/> 1 vez semana<br><input type="radio"/> 2 a 4 veces semana<br><input type="radio"/> 5 a 6 veces semana<br><input type="radio"/> 1 vez al día<br><input type="radio"/> 2 a 3 veces al día<br><input type="radio"/> 5 a 6 veces al día<br><input type="radio"/> más 6 veces al día |
| pollo sin piel                       | <input type="radio"/> Nunca o menos 1 vez al mes<br><input type="radio"/> 1 a 3 veces mes<br><input checked="" type="radio"/> 1 vez semana<br><input type="radio"/> 2 a 4 veces semana<br><input type="radio"/> 5 a 6 veces semana<br><input type="radio"/> 1 vez al día<br><input type="radio"/> 2 a 3 veces al día<br><input type="radio"/> 5 a 6 veces al día<br><input type="radio"/> más 6 veces al día |
| Ternera o cerdo o cordero            | <input type="radio"/> Nunca o menos 1 vez al mes<br><input type="radio"/> 1 a 3 veces mes<br><input checked="" type="radio"/> 1 vez semana<br><input type="radio"/> 2 a 4 veces semana<br><input type="radio"/> 5 a 6 veces semana<br><input type="radio"/> 1 vez al día<br><input type="radio"/> 2 a 3 veces al día<br><input type="radio"/> 5 a 6 veces al día<br><input type="radio"/> más 6 veces al día |
| carne caza: Conejo o codorniz o pato | <input checked="" type="radio"/> Nunca o menos 1 vez al mes<br><input type="radio"/> 1 a 3 veces mes<br><input type="radio"/> 1 vez semana<br><input type="radio"/> 2 a 4 veces semana<br><input type="radio"/> 5 a 6 veces semana<br><input type="radio"/> 1 vez al día<br><input type="radio"/> 2 a 3 veces al día<br><input type="radio"/> 5 a 6 veces al día<br><input type="radio"/> más 6 veces al día |
| Hígado de ternera o cerdo o pollo    | <input checked="" type="radio"/> Nunca o menos 1 vez al mes<br><input type="radio"/> 1 a 3 veces mes<br><input type="radio"/> 1 vez semana<br><input type="radio"/> 2 a 4 veces semana<br><input type="radio"/> 5 a 6 veces semana<br><input type="radio"/> 1 vez al día<br><input type="radio"/> 2 a 3 veces al día<br><input type="radio"/> 5 a 6 veces al día<br><input type="radio"/> más 6 veces al día |



---

Vísceras

- ☒ Nunca o menos 1 vez al mes  
☐ 1 a 3 veces mes  
☐ 1 vez semana  
☐ 2 a 4 veces semana  
☐ 5 a 6 veces semana  
☐ 1 vez al día  
☐ 2 a 3 veces al día  
☐ 5 a 6 veces al día  
☐ más 6 veces al día

---

Embutido

- ☒ Nunca o menos 1 vez al mes  
☐ 1 a 3 veces mes  
☐ 1 vez semana  
☐ 2 a 4 veces semana  
☐ 5 a 6 veces semana  
☐ 1 vez al día  
☐ 2 a 3 veces al día  
☐ 5 a 6 veces al día  
☐ más 6 veces al día

---

Salchicha o similar

- ☒ Nunca o menos 1 vez al mes  
☐ 1 a 3 veces mes  
☐ 1 vez semana  
☐ 2 a 4 veces semana  
☐ 5 a 6 veces semana  
☐ 1 vez al día  
☐ 2 a 3 veces al día  
☐ 5 a 6 veces al día  
☐ más 6 veces al día

---

Pate o foiegras

- ☒ Nunca o menos 1 vez al mes  
☐ 1 a 3 veces mes  
☐ 1 vez semana  
☐ 2 a 4 veces semana  
☐ 5 a 6 veces semana  
☐ 1 vez al día  
☐ 2 a 3 veces al día  
☐ 5 a 6 veces al día  
☐ más 6 veces al día

---

Hamburguesa

- ☐ Nunca o menos 1 vez al mes  
☐ 1 a 3 veces mes  
☒ 1 vez semana  
☐ 2 a 4 veces semana  
☐ 5 a 6 veces semana  
☐ 1 vez al día  
☐ 2 a 3 veces al día  
☐ 5 a 6 veces al día  
☐ más 6 veces al día

---

tocino o bacon

- ☒ Nunca o menos 1 vez al mes  
☐ 1 a 3 veces mes  
☐ 1 vez semana  
☐ 2 a 4 veces semana  
☐ 5 a 6 veces semana  
☐ 1 vez al día  
☐ 2 a 3 veces al día  
☐ 5 a 6 veces al día  
☐ más 6 veces al día

---

|               |                                                                                                                                                                                                                                                                                                                                                                                                              |
|---------------|--------------------------------------------------------------------------------------------------------------------------------------------------------------------------------------------------------------------------------------------------------------------------------------------------------------------------------------------------------------------------------------------------------------|
| Pescado frito | <input checked="" type="radio"/> Nunca o menos 1 vez al mes<br><input type="radio"/> 1 a 3 veces mes<br><input type="radio"/> 1 vez semana<br><input type="radio"/> 2 a 4 veces semana<br><input type="radio"/> 5 a 6 veces semana<br><input type="radio"/> 1 vez al día<br><input type="radio"/> 2 a 3 veces al día<br><input type="radio"/> 5 a 6 veces al día<br><input type="radio"/> más 6 veces al día |
|---------------|--------------------------------------------------------------------------------------------------------------------------------------------------------------------------------------------------------------------------------------------------------------------------------------------------------------------------------------------------------------------------------------------------------------|

---

|                        |                                                                                                                                                                                                                                                                                                                                                                                                              |
|------------------------|--------------------------------------------------------------------------------------------------------------------------------------------------------------------------------------------------------------------------------------------------------------------------------------------------------------------------------------------------------------------------------------------------------------|
| pescado hervido blanco | <input type="radio"/> Nunca o menos 1 vez al mes<br><input type="radio"/> 1 a 3 veces mes<br><input checked="" type="radio"/> 1 vez semana<br><input type="radio"/> 2 a 4 veces semana<br><input type="radio"/> 5 a 6 veces semana<br><input type="radio"/> 1 vez al día<br><input type="radio"/> 2 a 3 veces al día<br><input type="radio"/> 5 a 6 veces al día<br><input type="radio"/> más 6 veces al día |
|------------------------|--------------------------------------------------------------------------------------------------------------------------------------------------------------------------------------------------------------------------------------------------------------------------------------------------------------------------------------------------------------------------------------------------------------|

---

|                      |                                                                                                                                                                                                                                                                                                                                                                                                              |
|----------------------|--------------------------------------------------------------------------------------------------------------------------------------------------------------------------------------------------------------------------------------------------------------------------------------------------------------------------------------------------------------------------------------------------------------|
| pescado hervido azul | <input type="radio"/> Nunca o menos 1 vez al mes<br><input type="radio"/> 1 a 3 veces mes<br><input checked="" type="radio"/> 1 vez semana<br><input type="radio"/> 2 a 4 veces semana<br><input type="radio"/> 5 a 6 veces semana<br><input type="radio"/> 1 vez al día<br><input type="radio"/> 2 a 3 veces al día<br><input type="radio"/> 5 a 6 veces al día<br><input type="radio"/> más 6 veces al día |
|----------------------|--------------------------------------------------------------------------------------------------------------------------------------------------------------------------------------------------------------------------------------------------------------------------------------------------------------------------------------------------------------------------------------------------------------|

---

|                    |                                                                                                                                                                                                                                                                                                                                                                                                              |
|--------------------|--------------------------------------------------------------------------------------------------------------------------------------------------------------------------------------------------------------------------------------------------------------------------------------------------------------------------------------------------------------------------------------------------------------|
| otros pescado azul | <input type="radio"/> Nunca o menos 1 vez al mes<br><input checked="" type="radio"/> 1 a 3 veces mes<br><input type="radio"/> 1 vez semana<br><input type="radio"/> 2 a 4 veces semana<br><input type="radio"/> 5 a 6 veces semana<br><input type="radio"/> 1 vez al día<br><input type="radio"/> 2 a 3 veces al día<br><input type="radio"/> 5 a 6 veces al día<br><input type="radio"/> más 6 veces al día |
|--------------------|--------------------------------------------------------------------------------------------------------------------------------------------------------------------------------------------------------------------------------------------------------------------------------------------------------------------------------------------------------------------------------------------------------------|

---

|               |                                                                                                                                                                                                                                                                                                                                                                                                              |
|---------------|--------------------------------------------------------------------------------------------------------------------------------------------------------------------------------------------------------------------------------------------------------------------------------------------------------------------------------------------------------------------------------------------------------------|
| atun conserva | <input type="radio"/> Nunca o menos 1 vez al mes<br><input type="radio"/> 1 a 3 veces mes<br><input checked="" type="radio"/> 1 vez semana<br><input type="radio"/> 2 a 4 veces semana<br><input type="radio"/> 5 a 6 veces semana<br><input type="radio"/> 1 vez al día<br><input type="radio"/> 2 a 3 veces al día<br><input type="radio"/> 5 a 6 veces al día<br><input type="radio"/> más 6 veces al día |
|---------------|--------------------------------------------------------------------------------------------------------------------------------------------------------------------------------------------------------------------------------------------------------------------------------------------------------------------------------------------------------------------------------------------------------------|

---

|                  |                                                                                                                                                                                                                                                                                                                                                                                                              |
|------------------|--------------------------------------------------------------------------------------------------------------------------------------------------------------------------------------------------------------------------------------------------------------------------------------------------------------------------------------------------------------------------------------------------------------|
| sardina conserva | <input checked="" type="radio"/> Nunca o menos 1 vez al mes<br><input type="radio"/> 1 a 3 veces mes<br><input type="radio"/> 1 vez semana<br><input type="radio"/> 2 a 4 veces semana<br><input type="radio"/> 5 a 6 veces semana<br><input type="radio"/> 1 vez al día<br><input type="radio"/> 2 a 3 veces al día<br><input type="radio"/> 5 a 6 veces al día<br><input type="radio"/> más 6 veces al día |
|------------------|--------------------------------------------------------------------------------------------------------------------------------------------------------------------------------------------------------------------------------------------------------------------------------------------------------------------------------------------------------------------------------------------------------------|

---

|                                         |                                                                                                                                                                                                                                                                                                                                                                                                              |
|-----------------------------------------|--------------------------------------------------------------------------------------------------------------------------------------------------------------------------------------------------------------------------------------------------------------------------------------------------------------------------------------------------------------------------------------------------------------|
| pescado ahumado                         | <input type="radio"/> Nunca o menos 1 vez al mes<br><input type="radio"/> 1 a 3 veces mes<br><input checked="" type="radio"/> 1 vez semana<br><input type="radio"/> 2 a 4 veces semana<br><input type="radio"/> 5 a 6 veces semana<br><input type="radio"/> 1 vez al día<br><input type="radio"/> 2 a 3 veces al día<br><input type="radio"/> 5 a 6 veces al día<br><input type="radio"/> más 6 veces al día |
| almejas o mejillones o ostras unos 100g | <input checked="" type="radio"/> Nunca o menos 1 vez al mes<br><input type="radio"/> 1 a 3 veces mes<br><input type="radio"/> 1 vez semana<br><input type="radio"/> 2 a 4 veces semana<br><input type="radio"/> 5 a 6 veces semana<br><input type="radio"/> 1 vez al día<br><input type="radio"/> 2 a 3 veces al día<br><input type="radio"/> 5 a 6 veces al día<br><input type="radio"/> más 6 veces al día |
| calamar o chipiron o sepia unos 100g    | <input type="radio"/> Nunca o menos 1 vez al mes<br><input type="radio"/> 1 a 3 veces mes<br><input checked="" type="radio"/> 1 vez semana<br><input type="radio"/> 2 a 4 veces semana<br><input type="radio"/> 5 a 6 veces semana<br><input type="radio"/> 1 vez al día<br><input type="radio"/> 2 a 3 veces al día<br><input type="radio"/> 5 a 6 veces al día<br><input type="radio"/> más 6 veces al día |
| marisco unos 100g                       | <input checked="" type="radio"/> Nunca o menos 1 vez al mes<br><input type="radio"/> 1 a 3 veces mes<br><input type="radio"/> 1 vez semana<br><input type="radio"/> 2 a 4 veces semana<br><input type="radio"/> 5 a 6 veces semana<br><input type="radio"/> 1 vez al día<br><input type="radio"/> 2 a 3 veces al día<br><input type="radio"/> 5 a 6 veces al día<br><input type="radio"/> más 6 veces al día |
| Espinacas o acelgas cocinadas           | <input type="radio"/> Nunca o menos 1 vez al mes<br><input type="radio"/> 1 a 3 veces mes<br><input type="radio"/> 1 vez semana<br><input checked="" type="radio"/> 2 a 4 veces semana<br><input type="radio"/> 5 a 6 veces semana<br><input type="radio"/> 1 vez al día<br><input type="radio"/> 2 a 3 veces al día<br><input type="radio"/> 5 a 6 veces al día<br><input type="radio"/> más 6 veces al día |
| Col o coliflor o brocoli cocinado       | <input type="radio"/> Nunca o menos 1 vez al mes<br><input type="radio"/> 1 a 3 veces mes<br><input checked="" type="radio"/> 1 vez semana<br><input type="radio"/> 2 a 4 veces semana<br><input type="radio"/> 5 a 6 veces semana<br><input type="radio"/> 1 vez al día<br><input type="radio"/> 2 a 3 veces al día<br><input type="radio"/> 5 a 6 veces al día<br><input type="radio"/> más 6 veces al día |

---

Lechuga o endivia o escarola

- ☐ Nunca o menos 1 vez al mes  
☐ 1 a 3 veces mes  
☐ 1 vez semana  
☒ 2 a 4 veces semana  
☐ 5 a 6 veces semana  
☐ 1 vez al día  
☐ 2 a 3 veces al día  
☐ 5 a 6 veces al día  
☐ más 6 veces al día

---

tomate ensalada

- ☐ Nunca o menos 1 vez al mes  
☐ 1 a 3 veces mes  
☐ 1 vez semana  
☒ 2 a 4 veces semana  
☐ 5 a 6 veces semana  
☐ 1 vez al día  
☐ 2 a 3 veces al día  
☐ 5 a 6 veces al día  
☐ más 6 veces al día

---

cebolla

- ☐ Nunca o menos 1 vez al mes  
☐ 1 a 3 veces mes  
☐ 1 vez semana  
☒ 2 a 4 veces semana  
☐ 5 a 6 veces semana  
☐ 1 vez al día  
☐ 2 a 3 veces al día  
☐ 5 a 6 veces al día  
☐ más 6 veces al día

---

Zanahoria o calabaza

- ☐ Nunca o menos 1 vez al mes  
☐ 1 a 3 veces mes  
☐ 1 vez semana  
☒ 2 a 4 veces semana  
☐ 5 a 6 veces semana  
☐ 1 vez al día  
☐ 2 a 3 veces al día  
☐ 5 a 6 veces al día  
☐ más 6 veces al día

---

Judías verdes

- ☐ Nunca o menos 1 vez al mes  
☐ 1 a 3 veces mes  
☐ 1 vez semana  
☒ 2 a 4 veces semana  
☐ 5 a 6 veces semana  
☐ 1 vez al día  
☐ 2 a 3 veces al día  
☐ 5 a 6 veces al día  
☐ más 6 veces al día

---

Berenjena o calabacin o pepino

- ☐ Nunca o menos 1 vez al mes  
☐ 1 a 3 veces mes  
☐ 1 vez semana  
☒ 2 a 4 veces semana  
☐ 5 a 6 veces semana  
☐ 1 vez al día  
☐ 2 a 3 veces al día  
☐ 5 a 6 veces al día  
☐ más 6 veces al día

|                       |                                                                                                                                                                                                                                                                                                                                                                                                              |
|-----------------------|--------------------------------------------------------------------------------------------------------------------------------------------------------------------------------------------------------------------------------------------------------------------------------------------------------------------------------------------------------------------------------------------------------------|
| pimiento              | <input type="radio"/> Nunca o menos 1 vez al mes<br><input type="radio"/> 1 a 3 veces mes<br><input checked="" type="radio"/> 1 vez semana<br><input type="radio"/> 2 a 4 veces semana<br><input type="radio"/> 5 a 6 veces semana<br><input type="radio"/> 1 vez al día<br><input type="radio"/> 2 a 3 veces al día<br><input type="radio"/> 5 a 6 veces al día<br><input type="radio"/> más 6 veces al día |
| alcachofa             | <input type="radio"/> Nunca o menos 1 vez al mes<br><input type="radio"/> 1 a 3 veces mes<br><input checked="" type="radio"/> 1 vez semana<br><input type="radio"/> 2 a 4 veces semana<br><input type="radio"/> 5 a 6 veces semana<br><input type="radio"/> 1 vez al día<br><input type="radio"/> 2 a 3 veces al día<br><input type="radio"/> 5 a 6 veces al día<br><input type="radio"/> más 6 veces al día |
| espárragos            | <input checked="" type="radio"/> Nunca o menos 1 vez al mes<br><input type="radio"/> 1 a 3 veces mes<br><input type="radio"/> 1 vez semana<br><input type="radio"/> 2 a 4 veces semana<br><input type="radio"/> 5 a 6 veces semana<br><input type="radio"/> 1 vez al día<br><input type="radio"/> 2 a 3 veces al día<br><input type="radio"/> 5 a 6 veces al día<br><input type="radio"/> más 6 veces al día |
| maíz hervido          | <input type="radio"/> Nunca o menos 1 vez al mes<br><input checked="" type="radio"/> 1 a 3 veces mes<br><input type="radio"/> 1 vez semana<br><input type="radio"/> 2 a 4 veces semana<br><input type="radio"/> 5 a 6 veces semana<br><input type="radio"/> 1 vez al día<br><input type="radio"/> 2 a 3 veces al día<br><input type="radio"/> 5 a 6 veces al día<br><input type="radio"/> más 6 veces al día |
| legumbres             | <input type="radio"/> Nunca o menos 1 vez al mes<br><input type="radio"/> 1 a 3 veces mes<br><input type="radio"/> 1 vez semana<br><input checked="" type="radio"/> 2 a 4 veces semana<br><input type="radio"/> 5 a 6 veces semana<br><input type="radio"/> 1 vez al día<br><input type="radio"/> 2 a 3 veces al día<br><input type="radio"/> 5 a 6 veces al día<br><input type="radio"/> más 6 veces al día |
| naranjas o mandarinas | <input checked="" type="radio"/> Nunca o menos 1 vez al mes<br><input type="radio"/> 1 a 3 veces mes<br><input type="radio"/> 1 vez semana<br><input type="radio"/> 2 a 4 veces semana<br><input type="radio"/> 5 a 6 veces semana<br><input type="radio"/> 1 vez al día<br><input type="radio"/> 2 a 3 veces al día<br><input type="radio"/> 5 a 6 veces al día<br><input type="radio"/> más 6 veces al día |

---

zumو natural fruta

- ☐ Nunca o menos 1 vez al mes  
☒ 1 a 3 veces mes  
☐ 1 vez semana  
☐ 2 a 4 veces semana  
☐ 5 a 6 veces semana  
☐ 1 vez al día  
☐ 2 a 3 veces al día  
☐ 5 a 6 veces al día  
☐ más 6 veces al día

---

platano

- ☐ Nunca o menos 1 vez al mes  
☐ 1 a 3 veces mes  
☒ 1 vez semana  
☐ 2 a 4 veces semana  
☐ 5 a 6 veces semana  
☐ 1 vez al día  
☐ 2 a 3 veces al día  
☐ 5 a 6 veces al día  
☐ más 6 veces al día

---

manzana o pera

- ☐ Nunca o menos 1 vez al mes  
☐ 1 a 3 veces mes  
☒ 1 vez semana  
☐ 2 a 4 veces semana  
☐ 5 a 6 veces semana  
☐ 1 vez al día  
☐ 2 a 3 veces al día  
☐ 5 a 6 veces al día  
☐ más 6 veces al día

---

melocotón o nectarina

- ☐ Nunca o menos 1 vez al mes  
☐ 1 a 3 veces mes  
☒ 1 vez semana  
☐ 2 a 4 veces semana  
☐ 5 a 6 veces semana  
☐ 1 vez al día  
☐ 2 a 3 veces al día  
☐ 5 a 6 veces al día  
☐ más 6 veces al día

---

sandia o melon

- ☐ Nunca o menos 1 vez al mes  
☒ 1 a 3 veces mes  
☐ 1 vez semana  
☐ 2 a 4 veces semana  
☐ 5 a 6 veces semana  
☐ 1 vez al día  
☐ 2 a 3 veces al día  
☐ 5 a 6 veces al día  
☐ más 6 veces al día

---

uva

- ☐ Nunca o menos 1 vez al mes  
☐ 1 a 3 veces mes  
☒ 1 vez semana  
☐ 2 a 4 veces semana  
☐ 5 a 6 veces semana  
☐ 1 vez al día  
☐ 2 a 3 veces al día  
☐ 5 a 6 veces al día  
☐ más 6 veces al día

---

bruna o ciruela

- ☐ Nunca o menos 1 vez al mes  
☒ 1 a 3 veces mes  
☐ 1 vez semana  
☐ 2 a 4 veces semana  
☐ 5 a 6 veces semana  
☐ 1 vez al día  
☐ 2 a 3 veces al día  
☐ 5 a 6 veces al día  
☐ más 6 veces al día

---

kiwi

- ☒ Nunca o menos 1 vez al mes  
☐ 1 a 3 veces mes  
☐ 1 vez semana  
☐ 2 a 4 veces semana  
☐ 5 a 6 veces semana  
☐ 1 vez al día  
☐ 2 a 3 veces al día  
☐ 5 a 6 veces al día  
☐ más 6 veces al día

---

aceituna

- ☒ Nunca o menos 1 vez al mes  
☐ 1 a 3 veces mes  
☐ 1 vez semana  
☐ 2 a 4 veces semana  
☐ 5 a 6 veces semana  
☐ 1 vez al día  
☐ 2 a 3 veces al día  
☐ 5 a 6 veces al día  
☐ más 6 veces al día

---

frutos secos

- ☐ Nunca o menos 1 vez al mes  
☐ 1 a 3 veces mes  
☒ 1 vez semana  
☐ 2 a 4 veces semana  
☐ 5 a 6 veces semana  
☐ 1 vez al día  
☐ 2 a 3 veces al día  
☐ 5 a 6 veces al día  
☐ más 6 veces al día

---

pan blanco

- ☐ Nunca o menos 1 vez al mes  
☒ 1 a 3 veces mes  
☐ 1 vez semana  
☐ 2 a 4 veces semana  
☐ 5 a 6 veces semana  
☐ 1 vez al día  
☐ 2 a 3 veces al día  
☐ 5 a 6 veces al día  
☐ más 6 veces al día

---

pan integral

- ☒ Nunca o menos 1 vez al mes  
☐ 1 a 3 veces mes  
☐ 1 vez semana  
☐ 2 a 4 veces semana  
☐ 5 a 6 veces semana  
☐ 1 vez al día  
☐ 2 a 3 veces al día  
☐ 5 a 6 veces al día  
☐ más 6 veces al día

---

cereales desayuno

- ☒ Nunca o menos 1 vez al mes  
☐ 1 a 3 veces mes  
☐ 1 vez semana  
☐ 2 a 4 veces semana  
☐ 5 a 6 veces semana  
☐ 1 vez al día  
☐ 2 a 3 veces al día  
☐ 5 a 6 veces al día  
☐ más 6 veces al día

---

patatas fritas

- ☒ Nunca o menos 1 vez al mes  
☐ 1 a 3 veces mes  
☐ 1 vez semana  
☐ 2 a 4 veces semana  
☐ 5 a 6 veces semana  
☐ 1 vez al día  
☐ 2 a 3 veces al día  
☐ 5 a 6 veces al día  
☐ más 6 veces al día

---

patatas cocidas o asadas

- ☐ Nunca o menos 1 vez al mes  
☒ 1 a 3 veces mes  
☐ 1 vez semana  
☐ 2 a 4 veces semana  
☐ 5 a 6 veces semana  
☐ 1 vez al día  
☐ 2 a 3 veces al día  
☐ 5 a 6 veces al día  
☐ más 6 veces al día

---

bolsa papas

- ☒ Nunca o menos 1 vez al mes  
☐ 1 a 3 veces mes  
☐ 1 vez semana  
☐ 2 a 4 veces semana  
☐ 5 a 6 veces semana  
☐ 1 vez al día  
☐ 2 a 3 veces al día  
☐ 5 a 6 veces al día  
☐ más 6 veces al día

---

arroz cocinado

- ☐ Nunca o menos 1 vez al mes  
☐ 1 a 3 veces mes  
☒ 1 vez semana  
☐ 2 a 4 veces semana  
☐ 5 a 6 veces semana  
☐ 1 vez al día  
☐ 2 a 3 veces al día  
☐ 5 a 6 veces al día  
☐ más 6 veces al día

---

pasta

- ☐ Nunca o menos 1 vez al mes  
☐ 1 a 3 veces mes  
☐ 1 vez semana  
☒ 2 a 4 veces semana  
☐ 5 a 6 veces semana  
☐ 1 vez al día  
☐ 2 a 3 veces al día  
☐ 5 a 6 veces al día  
☐ más 6 veces al día



|                     |                                                                                                                                                                                                                                                                                                                                                                                                              |
|---------------------|--------------------------------------------------------------------------------------------------------------------------------------------------------------------------------------------------------------------------------------------------------------------------------------------------------------------------------------------------------------------------------------------------------------|
| pizza               | <input type="radio"/> Nunca o menos 1 vez al mes<br><input checked="" type="radio"/> 1 a 3 veces mes<br><input type="radio"/> 1 vez semana<br><input type="radio"/> 2 a 4 veces semana<br><input type="radio"/> 5 a 6 veces semana<br><input type="radio"/> 1 vez al día<br><input type="radio"/> 2 a 3 veces al día<br><input type="radio"/> 5 a 6 veces al día<br><input type="radio"/> más 6 veces al día |
| aceite oliva        | <input type="radio"/> Nunca o menos 1 vez al mes<br><input type="radio"/> 1 a 3 veces mes<br><input type="radio"/> 1 vez semana<br><input checked="" type="radio"/> 2 a 4 veces semana<br><input type="radio"/> 5 a 6 veces semana<br><input type="radio"/> 1 vez al día<br><input type="radio"/> 2 a 3 veces al día<br><input type="radio"/> 5 a 6 veces al día<br><input type="radio"/> más 6 veces al día |
| otros aceites       | <input type="radio"/> Nunca o menos 1 vez al mes<br><input checked="" type="radio"/> 1 a 3 veces mes<br><input type="radio"/> 1 vez semana<br><input type="radio"/> 2 a 4 veces semana<br><input type="radio"/> 5 a 6 veces semana<br><input type="radio"/> 1 vez al día<br><input type="radio"/> 2 a 3 veces al día<br><input type="radio"/> 5 a 6 veces al día<br><input type="radio"/> más 6 veces al día |
| margarina           | <input checked="" type="radio"/> Nunca o menos 1 vez al mes<br><input type="radio"/> 1 a 3 veces mes<br><input type="radio"/> 1 vez semana<br><input type="radio"/> 2 a 4 veces semana<br><input type="radio"/> 5 a 6 veces semana<br><input type="radio"/> 1 vez al día<br><input type="radio"/> 2 a 3 veces al día<br><input type="radio"/> 5 a 6 veces al día<br><input type="radio"/> más 6 veces al día |
| mantequilla         | <input checked="" type="radio"/> Nunca o menos 1 vez al mes<br><input type="radio"/> 1 a 3 veces mes<br><input type="radio"/> 1 vez semana<br><input type="radio"/> 2 a 4 veces semana<br><input type="radio"/> 5 a 6 veces semana<br><input type="radio"/> 1 vez al día<br><input type="radio"/> 2 a 3 veces al día<br><input type="radio"/> 5 a 6 veces al día<br><input type="radio"/> más 6 veces al día |
| galletas tipo maria | <input type="radio"/> Nunca o menos 1 vez al mes<br><input type="radio"/> 1 a 3 veces mes<br><input checked="" type="radio"/> 1 vez semana<br><input type="radio"/> 2 a 4 veces semana<br><input type="radio"/> 5 a 6 veces semana<br><input type="radio"/> 1 vez al día<br><input type="radio"/> 2 a 3 veces al día<br><input type="radio"/> 5 a 6 veces al día<br><input type="radio"/> más 6 veces al día |

---

galletas chocolate

- ☐ Nunca o menos 1 vez al mes  
☒ 1 a 3 veces mes  
☐ 1 vez semana  
☐ 2 a 4 veces semana  
☐ 5 a 6 veces semana  
☐ 1 vez al día  
☐ 2 a 3 veces al día  
☐ 5 a 6 veces al día  
☐ más 6 veces al día

---

bolleria

- ☐ Nunca o menos 1 vez al mes  
☒ 1 a 3 veces mes  
☐ 1 vez semana  
☐ 2 a 4 veces semana  
☐ 5 a 6 veces semana  
☐ 1 vez al día  
☐ 2 a 3 veces al día  
☐ 5 a 6 veces al día  
☐ más 6 veces al día

---

chocolate o bombones

- ☐ Nunca o menos 1 vez al mes  
☒ 1 a 3 veces mes  
☐ 1 vez semana  
☐ 2 a 4 veces semana  
☐ 5 a 6 veces semana  
☐ 1 vez al día  
☐ 2 a 3 veces al día  
☐ 5 a 6 veces al día  
☐ más 6 veces al día

---

chocolate polvo o colacao

- ☒ Nunca o menos 1 vez al mes  
☐ 1 a 3 veces mes  
☐ 1 vez semana  
☐ 2 a 4 veces semana  
☐ 5 a 6 veces semana  
☐ 1 vez al día  
☐ 2 a 3 veces al día  
☐ 5 a 6 veces al día  
☐ más 6 veces al día

---

vino tinto

- ☒ Nunca o menos 1 vez al mes  
☐ 1 a 3 veces mes  
☐ 1 vez semana  
☐ 2 a 4 veces semana  
☐ 5 a 6 veces semana  
☐ 1 vez al día  
☐ 2 a 3 veces al día  
☐ 5 a 6 veces al día  
☐ más 6 veces al día

---

vino blanco

- ☒ Nunca o menos 1 vez al mes  
☐ 1 a 3 veces mes  
☐ 1 vez semana  
☐ 2 a 4 veces semana  
☐ 5 a 6 veces semana  
☐ 1 vez al día  
☐ 2 a 3 veces al día  
☐ 5 a 6 veces al día  
☐ más 6 veces al día

---

|                    |                                                                                                                                                                                                                                                                                                                                                                                                              |
|--------------------|--------------------------------------------------------------------------------------------------------------------------------------------------------------------------------------------------------------------------------------------------------------------------------------------------------------------------------------------------------------------------------------------------------------|
| vino seco o vermut | <input checked="" type="radio"/> Nunca o menos 1 vez al mes<br><input type="radio"/> 1 a 3 veces mes<br><input type="radio"/> 1 vez semana<br><input type="radio"/> 2 a 4 veces semana<br><input type="radio"/> 5 a 6 veces semana<br><input type="radio"/> 1 vez al día<br><input type="radio"/> 2 a 3 veces al día<br><input type="radio"/> 5 a 6 veces al día<br><input type="radio"/> más 6 veces al día |
|--------------------|--------------------------------------------------------------------------------------------------------------------------------------------------------------------------------------------------------------------------------------------------------------------------------------------------------------------------------------------------------------------------------------------------------------|

---

|         |                                                                                                                                                                                                                                                                                                                                                                                                              |
|---------|--------------------------------------------------------------------------------------------------------------------------------------------------------------------------------------------------------------------------------------------------------------------------------------------------------------------------------------------------------------------------------------------------------------|
| cerveza | <input checked="" type="radio"/> Nunca o menos 1 vez al mes<br><input type="radio"/> 1 a 3 veces mes<br><input type="radio"/> 1 vez semana<br><input type="radio"/> 2 a 4 veces semana<br><input type="radio"/> 5 a 6 veces semana<br><input type="radio"/> 1 vez al día<br><input type="radio"/> 2 a 3 veces al día<br><input type="radio"/> 5 a 6 veces al día<br><input type="radio"/> más 6 veces al día |
|---------|--------------------------------------------------------------------------------------------------------------------------------------------------------------------------------------------------------------------------------------------------------------------------------------------------------------------------------------------------------------------------------------------------------------|

---

|                     |                                                                                                                                                                                                                                                                                                                                                                                                              |
|---------------------|--------------------------------------------------------------------------------------------------------------------------------------------------------------------------------------------------------------------------------------------------------------------------------------------------------------------------------------------------------------------------------------------------------------|
| cerveza sin alcohol | <input type="radio"/> Nunca o menos 1 vez al mes<br><input type="radio"/> 1 a 3 veces mes<br><input type="radio"/> 1 vez semana<br><input checked="" type="radio"/> 2 a 4 veces semana<br><input type="radio"/> 5 a 6 veces semana<br><input type="radio"/> 1 vez al día<br><input type="radio"/> 2 a 3 veces al día<br><input type="radio"/> 5 a 6 veces al día<br><input type="radio"/> más 6 veces al día |
|---------------------|--------------------------------------------------------------------------------------------------------------------------------------------------------------------------------------------------------------------------------------------------------------------------------------------------------------------------------------------------------------------------------------------------------------|

---

|         |                                                                                                                                                                                                                                                                                                                                                                                                              |
|---------|--------------------------------------------------------------------------------------------------------------------------------------------------------------------------------------------------------------------------------------------------------------------------------------------------------------------------------------------------------------------------------------------------------------|
| licores | <input checked="" type="radio"/> Nunca o menos 1 vez al mes<br><input type="radio"/> 1 a 3 veces mes<br><input type="radio"/> 1 vez semana<br><input type="radio"/> 2 a 4 veces semana<br><input type="radio"/> 5 a 6 veces semana<br><input type="radio"/> 1 vez al día<br><input type="radio"/> 2 a 3 veces al día<br><input type="radio"/> 5 a 6 veces al día<br><input type="radio"/> más 6 veces al día |
|---------|--------------------------------------------------------------------------------------------------------------------------------------------------------------------------------------------------------------------------------------------------------------------------------------------------------------------------------------------------------------------------------------------------------------|

---

|                       |                                                                                                                                                                                                                                                                                                                                                                                                              |
|-----------------------|--------------------------------------------------------------------------------------------------------------------------------------------------------------------------------------------------------------------------------------------------------------------------------------------------------------------------------------------------------------------------------------------------------------|
| ginebra o ron o vodka | <input checked="" type="radio"/> Nunca o menos 1 vez al mes<br><input type="radio"/> 1 a 3 veces mes<br><input type="radio"/> 1 vez semana<br><input type="radio"/> 2 a 4 veces semana<br><input type="radio"/> 5 a 6 veces semana<br><input type="radio"/> 1 vez al día<br><input type="radio"/> 2 a 3 veces al día<br><input type="radio"/> 5 a 6 veces al día<br><input type="radio"/> más 6 veces al día |
|-----------------------|--------------------------------------------------------------------------------------------------------------------------------------------------------------------------------------------------------------------------------------------------------------------------------------------------------------------------------------------------------------------------------------------------------------|

---

|                 |                                                                                                                                                                                                                                                                                                                                                                                                              |
|-----------------|--------------------------------------------------------------------------------------------------------------------------------------------------------------------------------------------------------------------------------------------------------------------------------------------------------------------------------------------------------------------------------------------------------------|
| refresco normal | <input checked="" type="radio"/> Nunca o menos 1 vez al mes<br><input type="radio"/> 1 a 3 veces mes<br><input type="radio"/> 1 vez semana<br><input type="radio"/> 2 a 4 veces semana<br><input type="radio"/> 5 a 6 veces semana<br><input type="radio"/> 1 vez al día<br><input type="radio"/> 2 a 3 veces al día<br><input type="radio"/> 5 a 6 veces al día<br><input type="radio"/> más 6 veces al día |
|-----------------|--------------------------------------------------------------------------------------------------------------------------------------------------------------------------------------------------------------------------------------------------------------------------------------------------------------------------------------------------------------------------------------------------------------|

---

|                          |                                                                                                                                                                                                                                                                                                                                                                                                              |
|--------------------------|--------------------------------------------------------------------------------------------------------------------------------------------------------------------------------------------------------------------------------------------------------------------------------------------------------------------------------------------------------------------------------------------------------------|
| refresco sin azúcar      | <input checked="" type="radio"/> Nunca o menos 1 vez al mes<br><input type="radio"/> 1 a 3 veces mes<br><input type="radio"/> 1 vez semana<br><input type="radio"/> 2 a 4 veces semana<br><input type="radio"/> 5 a 6 veces semana<br><input type="radio"/> 1 vez al día<br><input type="radio"/> 2 a 3 veces al día<br><input type="radio"/> 5 a 6 veces al día<br><input type="radio"/> más 6 veces al día |
| Agua del grifo           | <input checked="" type="radio"/> Nunca o menos 1 vez al mes<br><input type="radio"/> 1 a 3 veces mes<br><input type="radio"/> 1 vez semana<br><input type="radio"/> 2 a 4 veces semana<br><input type="radio"/> 5 a 6 veces semana<br><input type="radio"/> 1 vez al día<br><input type="radio"/> 2 a 3 veces al día<br><input type="radio"/> 5 a 6 veces al día<br><input type="radio"/> más 6 veces al día |
| agua embotellada sin gas | <input type="radio"/> Nunca o menos 1 vez al mes<br><input type="radio"/> 1 a 3 veces mes<br><input type="radio"/> 1 vez semana<br><input type="radio"/> 2 a 4 veces semana<br><input type="radio"/> 5 a 6 veces semana<br><input type="radio"/> 1 vez al día<br><input type="radio"/> 2 a 3 veces al día<br><input type="radio"/> 5 a 6 veces al día<br><input checked="" type="radio"/> más 6 veces al día |
| agua embotellada con gas | <input checked="" type="radio"/> Nunca o menos 1 vez al mes<br><input type="radio"/> 1 a 3 veces mes<br><input type="radio"/> 1 vez semana<br><input type="radio"/> 2 a 4 veces semana<br><input type="radio"/> 5 a 6 veces semana<br><input type="radio"/> 1 vez al día<br><input type="radio"/> 2 a 3 veces al día<br><input type="radio"/> 5 a 6 veces al día<br><input type="radio"/> más 6 veces al día |
| zumو frutas embasado     | <input type="radio"/> Nunca o menos 1 vez al mes<br><input checked="" type="radio"/> 1 a 3 veces mes<br><input type="radio"/> 1 vez semana<br><input type="radio"/> 2 a 4 veces semana<br><input type="radio"/> 5 a 6 veces semana<br><input type="radio"/> 1 vez al día<br><input type="radio"/> 2 a 3 veces al día<br><input type="radio"/> 5 a 6 veces al día<br><input type="radio"/> más 6 veces al día |
| cafe                     | <input checked="" type="radio"/> Nunca o menos 1 vez al mes<br><input type="radio"/> 1 a 3 veces mes<br><input type="radio"/> 1 vez semana<br><input type="radio"/> 2 a 4 veces semana<br><input type="radio"/> 5 a 6 veces semana<br><input type="radio"/> 1 vez al día<br><input type="radio"/> 2 a 3 veces al día<br><input type="radio"/> 5 a 6 veces al día<br><input type="radio"/> más 6 veces al día |

---

cafe descafeinado

- ☐ Nunca o menos 1 vez al mes  
☐ 1 a 3 veces mes  
☐ 1 vez semana  
☒ 2 a 4 veces semana  
☐ 5 a 6 veces semana  
☐ 1 vez al día  
☐ 2 a 3 veces al día  
☐ 5 a 6 veces al día  
☐ más 6 veces al día

---

te o infusión

- ☒ Nunca o menos 1 vez al mes  
☐ 1 a 3 veces mes  
☐ 1 vez semana  
☐ 2 a 4 veces semana  
☐ 5 a 6 veces semana  
☐ 1 vez al día  
☐ 2 a 3 veces al día  
☐ 5 a 6 veces al día  
☐ más 6 veces al día

---

sopa o puré verduras

- ☐ Nunca o menos 1 vez al mes  
☐ 1 a 3 veces mes  
☐ 1 vez semana  
☒ 2 a 4 veces semana  
☐ 5 a 6 veces semana  
☐ 1 vez al día  
☐ 2 a 3 veces al día  
☐ 5 a 6 veces al día  
☐ más 6 veces al día

---

croquetas pollo jamón

- ☐ Nunca o menos 1 vez al mes  
☐ 1 a 3 veces mes  
☒ 1 vez semana  
☐ 2 a 4 veces semana  
☐ 5 a 6 veces semana  
☐ 1 vez al día  
☐ 2 a 3 veces al día  
☐ 5 a 6 veces al día  
☐ más 6 veces al día

---

croquetas pescado

- ☐ Nunca o menos 1 vez al mes  
☒ 1 a 3 veces mes  
☐ 1 vez semana  
☐ 2 a 4 veces semana  
☐ 5 a 6 veces semana  
☐ 1 vez al día  
☐ 2 a 3 veces al día  
☐ 5 a 6 veces al día  
☐ más 6 veces al día

---

mayonesa

- ☐ Nunca o menos 1 vez al mes  
☐ 1 a 3 veces mes  
☒ 1 vez semana  
☐ 2 a 4 veces semana  
☐ 5 a 6 veces semana  
☐ 1 vez al día  
☐ 2 a 3 veces al día  
☐ 5 a 6 veces al día  
☐ más 6 veces al día

|                  |                                                                                                                                                                                                                                                                                                                                                                                                              |
|------------------|--------------------------------------------------------------------------------------------------------------------------------------------------------------------------------------------------------------------------------------------------------------------------------------------------------------------------------------------------------------------------------------------------------------|
| salsa tomate     | <input type="radio"/> Nunca o menos 1 vez al mes<br><input type="radio"/> 1 a 3 veces mes<br><input checked="" type="radio"/> 1 vez semana<br><input type="radio"/> 2 a 4 veces semana<br><input type="radio"/> 5 a 6 veces semana<br><input type="radio"/> 1 vez al día<br><input type="radio"/> 2 a 3 veces al día<br><input type="radio"/> 5 a 6 veces al día<br><input type="radio"/> más 6 veces al día |
| ketchup          | <input checked="" type="radio"/> Nunca o menos 1 vez al mes<br><input type="radio"/> 1 a 3 veces mes<br><input type="radio"/> 1 vez semana<br><input type="radio"/> 2 a 4 veces semana<br><input type="radio"/> 5 a 6 veces semana<br><input type="radio"/> 1 vez al día<br><input type="radio"/> 2 a 3 veces al día<br><input type="radio"/> 5 a 6 veces al día<br><input type="radio"/> más 6 veces al día |
| sal              | <input checked="" type="radio"/> Nunca o menos 1 vez al mes<br><input type="radio"/> 1 a 3 veces mes<br><input type="radio"/> 1 vez semana<br><input type="radio"/> 2 a 4 veces semana<br><input type="radio"/> 5 a 6 veces semana<br><input type="radio"/> 1 vez al día<br><input type="radio"/> 2 a 3 veces al día<br><input type="radio"/> 5 a 6 veces al día<br><input type="radio"/> más 6 veces al día |
| ajo              | <input type="radio"/> Nunca o menos 1 vez al mes<br><input checked="" type="radio"/> 1 a 3 veces mes<br><input type="radio"/> 1 vez semana<br><input type="radio"/> 2 a 4 veces semana<br><input type="radio"/> 5 a 6 veces semana<br><input type="radio"/> 1 vez al día<br><input type="radio"/> 2 a 3 veces al día<br><input type="radio"/> 5 a 6 veces al día<br><input type="radio"/> más 6 veces al día |
| mermelada o miel | <input type="radio"/> Nunca o menos 1 vez al mes<br><input checked="" type="radio"/> 1 a 3 veces mes<br><input type="radio"/> 1 vez semana<br><input type="radio"/> 2 a 4 veces semana<br><input type="radio"/> 5 a 6 veces semana<br><input type="radio"/> 1 vez al día<br><input type="radio"/> 2 a 3 veces al día<br><input type="radio"/> 5 a 6 veces al día<br><input type="radio"/> más 6 veces al día |
| azúcar           | <input type="radio"/> Nunca o menos 1 vez al mes<br><input checked="" type="radio"/> 1 a 3 veces mes<br><input type="radio"/> 1 vez semana<br><input type="radio"/> 2 a 4 veces semana<br><input type="radio"/> 5 a 6 veces semana<br><input type="radio"/> 1 vez al día<br><input type="radio"/> 2 a 3 veces al día<br><input type="radio"/> 5 a 6 veces al día<br><input type="radio"/> más 6 veces al día |

|                                       |                                                                                                                                                                                                                                                                                                                                                                                                                                                                                                                               |
|---------------------------------------|-------------------------------------------------------------------------------------------------------------------------------------------------------------------------------------------------------------------------------------------------------------------------------------------------------------------------------------------------------------------------------------------------------------------------------------------------------------------------------------------------------------------------------|
| Otro alimento                         |                                                                                                                                                                                                                                                                                                                                                                                                                                                                                                                               |
| suplementos vitamínicos               | <input checked="" type="radio"/> si<br><input type="radio"/> no                                                                                                                                                                                                                                                                                                                                                                                                                                                               |
| suplementos vitamínicos               | [*DATA REMOVED*]                                                                                                                                                                                                                                                                                                                                                                                                                                                                                                              |
| dieta previa                          | <input type="radio"/> si<br><input checked="" type="radio"/> no                                                                                                                                                                                                                                                                                                                                                                                                                                                               |
| motivo dieta                          | <input checked="" type="radio"/> no dieta<br><input type="radio"/> control peso<br><input type="radio"/> control colesterol<br><input type="radio"/> control diabetes<br><input type="radio"/> problemas estómago<br><input type="radio"/> problemas vesícula o hepáticos<br><input type="radio"/> HTA o cardiopatía<br><input type="radio"/> problemas renales<br><input type="radio"/> alergia alimentaria<br><input type="radio"/> ácido úrico elevado<br><input type="radio"/> vegetariana<br><input type="radio"/> otros |
| cambio alimentos año previo gestación | <input checked="" type="radio"/> si<br><input type="radio"/> no                                                                                                                                                                                                                                                                                                                                                                                                                                                               |
| cambio lácteos                        | <input type="radio"/> eliminado<br><input type="radio"/> disminuido<br><input checked="" type="radio"/> igual<br><input type="radio"/> aumentado<br><input type="radio"/> no sabe                                                                                                                                                                                                                                                                                                                                             |
| cambio huevos                         | <input type="radio"/> eliminado<br><input type="radio"/> disminuido<br><input checked="" type="radio"/> igual<br><input type="radio"/> aumentado<br><input type="radio"/> no sabe                                                                                                                                                                                                                                                                                                                                             |
| cambio carne                          | <input type="radio"/> eliminado<br><input type="radio"/> disminuido<br><input checked="" type="radio"/> igual<br><input type="radio"/> aumentado<br><input type="radio"/> no sabe                                                                                                                                                                                                                                                                                                                                             |
| cambio pescado                        | <input type="radio"/> eliminado<br><input type="radio"/> disminuido<br><input checked="" type="radio"/> igual<br><input type="radio"/> aumentado<br><input type="radio"/> no sabe                                                                                                                                                                                                                                                                                                                                             |
| cambio verduras                       | <input type="radio"/> eliminado<br><input type="radio"/> disminuido<br><input checked="" type="radio"/> igual<br><input type="radio"/> aumentado<br><input type="radio"/> no sabe                                                                                                                                                                                                                                                                                                                                             |

|                            |                                                                                                                                                                                                                        |
|----------------------------|------------------------------------------------------------------------------------------------------------------------------------------------------------------------------------------------------------------------|
| cambio legumbres           | <input type="radio"/> eliminado<br><input type="radio"/> disminuido<br><input checked="" type="radio"/> igual<br><input type="radio"/> aumentado<br><input type="radio"/> no sabe                                      |
| cambio fruta               | <input type="radio"/> eliminado<br><input type="radio"/> disminuido<br><input checked="" type="radio"/> igual<br><input type="radio"/> aumentado<br><input type="radio"/> no sabe                                      |
| cambio pan                 | <input type="radio"/> eliminado<br><input type="radio"/> disminuido<br><input type="radio"/> igual<br><input checked="" type="radio"/> aumentado<br><input type="radio"/> no sabe                                      |
| cambio aceite oliva        | <input type="radio"/> eliminado<br><input type="radio"/> disminuido<br><input checked="" type="radio"/> igual<br><input type="radio"/> aumentado<br><input type="radio"/> no sabe                                      |
| cambio mante o margarina   | <input type="radio"/> eliminado<br><input checked="" type="radio"/> disminuido<br><input type="radio"/> igual<br><input type="radio"/> aumentado<br><input type="radio"/> no sabe                                      |
| cambio azúcar y dulces     | <input type="radio"/> eliminado<br><input checked="" type="radio"/> disminuido<br><input type="radio"/> igual<br><input type="radio"/> aumentado<br><input type="radio"/> no sabe                                      |
| cambio bebidas alcohólicas | <input checked="" type="radio"/> eliminado<br><input type="radio"/> disminuido<br><input type="radio"/> igual<br><input type="radio"/> aumentado<br><input type="radio"/> no sabe                                      |
| frecuencia comidas fritas  | <input type="radio"/> a diario<br><input type="radio"/> 5 a 6 veces semana<br><input type="radio"/> 2 a 4 veces semana<br><input type="radio"/> 1 vez semana<br><input checked="" type="radio"/> menos de 1 vez semana |
| carne                      | <input type="radio"/> no como<br><input type="radio"/> cruda<br><input type="radio"/> poco hecha<br><input type="radio"/> hecha<br><input checked="" type="radio"/> muy hecha                                          |
| grasa visible carne        | <input type="radio"/> quita toda<br><input checked="" type="radio"/> quita mayoría<br><input type="radio"/> quita un poco<br><input type="radio"/> no quita nada                                                       |



|                                |                                                                                                                                                                                                                                                          |
|--------------------------------|----------------------------------------------------------------------------------------------------------------------------------------------------------------------------------------------------------------------------------------------------------|
| cocina carne                   | <input checked="" type="radio"/> a la plancha<br><input type="radio"/> a la parrilla<br><input type="radio"/> asada<br><input type="radio"/> frita<br><input type="radio"/> guisada                                                                      |
| tostado quemado carne          | <input checked="" type="radio"/> nunca<br><input type="radio"/> 1 vez mes<br><input type="radio"/> 2 a 3 veces mes<br><input type="radio"/> 1 vez semana<br><input type="radio"/> 2 a 3 semanas                                                          |
| tostado quemado pescado        | <input checked="" type="radio"/> nunca<br><input type="radio"/> 1 vez mes<br><input type="radio"/> 2 a 3 veces mes<br><input type="radio"/> 1 vez semana<br><input type="radio"/> 2 a 3 semanas                                                          |
| socarrat paella                | <input checked="" type="radio"/> nunca<br><input type="radio"/> 1 vez mes<br><input type="radio"/> 2 a 3 veces mes<br><input type="radio"/> 1 vez semana<br><input type="radio"/> 2 a 3 semanas                                                          |
| grasa o aceite cocinar         | <input type="radio"/> mantequilla<br><input type="radio"/> margarina<br><input type="radio"/> aceite oliva<br><input checked="" type="radio"/> aceite oliva virgen extra<br><input type="radio"/> aceite vegetal<br><input type="radio"/> mezcla aceites |
| grasa aceite aliñar            | <input type="radio"/> mantequilla<br><input type="radio"/> margarina<br><input checked="" type="radio"/> aceite oliva<br><input type="radio"/> aceite oliva virgen extra<br><input type="radio"/> aceite vegetal<br><input type="radio"/> mezcla aceites |
| grasa aceite freir             | <input type="radio"/> mantequilla<br><input type="radio"/> margarina<br><input type="radio"/> aceite oliva<br><input checked="" type="radio"/> aceite oliva virgen extra<br><input type="radio"/> aceite vegetal<br><input type="radio"/> mezcla aceites |
| Ejercicio cuestionario         | <input checked="" type="radio"/> si<br><input type="radio"/> no                                                                                                                                                                                          |
| horas de sueño incluido siesta | [*DATA REMOVED*]                                                                                                                                                                                                                                         |
| minutos siesta                 | [*DATA REMOVED*]                                                                                                                                                                                                                                         |
| horas televisión semana        |                                                                                                                                                                                                                                                          |

|                                        |                                                                                                                                                                                                                                                                                                                                                                           |
|----------------------------------------|---------------------------------------------------------------------------------------------------------------------------------------------------------------------------------------------------------------------------------------------------------------------------------------------------------------------------------------------------------------------------|
| actividad trabajo                      | <input type="radio"/> casi siempre sentado<br><input type="radio"/> sentado 50 por cien<br><input type="radio"/> casi siempre de pie, quieto<br><input checked="" type="radio"/> casi siempre levantado caminando y llevando pocas cosas<br><input type="radio"/> casi siempre levantado, caminando y llevado muchas cosas<br><input type="radio"/> trabajo manual pesado |
| tiempo caminar o bici al día           | <input type="radio"/> casi nunca<br><input type="radio"/> menos 20min día<br><input checked="" type="radio"/> 20 a 40 min día<br><input type="radio"/> 40 a 60 min día<br><input type="radio"/> 1h o 1h y media día<br><input type="radio"/> más de 1h y media al día                                                                                                     |
| tiempo tareas casa al día              | <input type="radio"/> menos de 1h día<br><input checked="" type="radio"/> 1 a 2h día<br><input type="radio"/> 3 a 4h día<br><input type="radio"/> 5 a 6h día<br><input type="radio"/> 7 a 8h día<br><input type="radio"/> más de 8h día                                                                                                                                   |
| tiempo libre televisión ordenador leer | <input type="radio"/> menos 1h día<br><input type="radio"/> 1h día<br><input checked="" type="radio"/> 2h día<br><input type="radio"/> 3h día<br><input type="radio"/> 4h día<br><input type="radio"/> 5 a 6h día<br><input type="radio"/> mas 6h día                                                                                                                     |
| tiempo libre ejercicio o deporte       | <input type="radio"/> menos 1h semana<br><input type="radio"/> 1h semana<br><input checked="" type="radio"/> 2h semana<br><input type="radio"/> 3h semana<br><input type="radio"/> 4 a 5h semana<br><input type="radio"/> mas 5h semana                                                                                                                                   |
| como se considera                      | <input type="radio"/> sedentaria<br><input type="radio"/> poco activa<br><input type="radio"/> moderadamente activa<br><input checked="" type="radio"/> bastante activa<br><input type="radio"/> muy activa<br><input type="radio"/> no sabe                                                                                                                              |
| FUR                                    | [*DATA REMOVED*]                                                                                                                                                                                                                                                                                                                                                          |
| Semanas gestación 2T                   | [*DATA REMOVED*]                                                                                                                                                                                                                                                                                                                                                          |
| Días gestación 2T                      | [*DATA REMOVED*]                                                                                                                                                                                                                                                                                                                                                          |
| DBP 2T                                 | [*DATA REMOVED*]                                                                                                                                                                                                                                                                                                                                                          |
| CC 2T                                  | [*DATA REMOVED*]                                                                                                                                                                                                                                                                                                                                                          |
| AC 2T                                  | [*DATA REMOVED*]                                                                                                                                                                                                                                                                                                                                                          |

|                                                   |                                                                                                                                                                                                 |
|---------------------------------------------------|-------------------------------------------------------------------------------------------------------------------------------------------------------------------------------------------------|
| LF 2T                                             | [*DATA REMOVED*]                                                                                                                                                                                |
| PFE 2T (Hadlock)                                  | [*DATA REMOVED*]                                                                                                                                                                                |
| Semanas gestación 3T                              | [*DATA REMOVED*]                                                                                                                                                                                |
| días 3T                                           | [*DATA REMOVED*]                                                                                                                                                                                |
| DBP 3T                                            | [*DATA REMOVED*]                                                                                                                                                                                |
| CC 3T                                             | [*DATA REMOVED*]                                                                                                                                                                                |
| AC 3T                                             | [*DATA REMOVED*]                                                                                                                                                                                |
| LF 3T                                             | [*DATA REMOVED*]                                                                                                                                                                                |
| PFE 3T (Hadlock)                                  | [*DATA REMOVED*]                                                                                                                                                                                |
| Semanas de gestación final                        | [*DATA REMOVED*]                                                                                                                                                                                |
| días gestación final                              | [*DATA REMOVED*]                                                                                                                                                                                |
| Localización placenta                             | <input type="radio"/> anterior<br><input type="radio"/> lateral derecha<br><input type="radio"/> lateral izquierda<br><input checked="" type="radio"/> posterior<br><input type="radio"/> fondo |
| Presentación longitudinal cefálica                | <input type="radio"/> no<br><input checked="" type="radio"/> si                                                                                                                                 |
| Dorso                                             | <input checked="" type="radio"/> izquierda anterior<br><input type="radio"/> izquierda posterior<br><input type="radio"/> derecha anterior<br><input type="radio"/> derecha posterior           |
| diámetro biparietal                               | [*DATA REMOVED*]                                                                                                                                                                                |
| Circunferencia craneal                            | [*DATA REMOVED*]                                                                                                                                                                                |
| Circunferencia abdominal                          | [*DATA REMOVED*]                                                                                                                                                                                |
| Longitud de femur                                 | [*DATA REMOVED*]                                                                                                                                                                                |
| tejido celular subcutáneo a nivel del muslo en mm | [*DATA REMOVED*]                                                                                                                                                                                |
| tejido celular subcutáneo en abdomen en mm        | [*DATA REMOVED*]                                                                                                                                                                                |
| Volumen del muslo en cm3                          | [*DATA REMOVED*]                                                                                                                                                                                |
| Peso fetal estimado según fórmula de Hadlock      | [*DATA REMOVED*]                                                                                                                                                                                |

|                                               |                                                                                                                                                          |
|-----------------------------------------------|----------------------------------------------------------------------------------------------------------------------------------------------------------|
| Percentil                                     | [*DATA REMOVED*]                                                                                                                                         |
| Peso fetal estimado según fórmula de Scioscia | <hr/>                                                                                                                                                    |
| Peso fetal estimado según fórmula de LEE      | <hr/>                                                                                                                                                    |
| Tipo de parto                                 | <input checked="" type="radio"/> eutocico<br><input type="radio"/> instrumentado/ventosa<br><input type="radio"/> cesarea                                |
| fecha de nacimiento                           | [*DATA REMOVED*]                                                                                                                                         |
| Días entre exploración y nacimiento           | [*DATA REMOVED*]                                                                                                                                         |
| Peso RN en g                                  | [*DATA REMOVED*]                                                                                                                                         |
| sexo                                          | <input type="radio"/> mujer<br><input checked="" type="radio"/> hombre                                                                                   |
| Apgar 1 minuto                                | [*DATA REMOVED*]                                                                                                                                         |
| Apgar 5 minutos                               | [*DATA REMOVED*]                                                                                                                                         |
| Apgar 10 minutos                              | <hr/>                                                                                                                                                    |
| antecedente Covid durante gestación           | <input type="radio"/> Yes<br><input checked="" type="radio"/> No                                                                                         |
| Nivel de estudios                             | <input type="radio"/> ninguno<br><input type="radio"/> primarios<br><input checked="" type="radio"/> secundarios<br><input type="radio"/> universitarios |

# Base\_datos\_estimacion\_peso\_fetal

|                                       |                                                                                                                                                                                                                                                                                      |
|---------------------------------------|--------------------------------------------------------------------------------------------------------------------------------------------------------------------------------------------------------------------------------------------------------------------------------------|
| Número de identificación participante | 121                                                                                                                                                                                                                                                                                  |
| CODIGO PARTICIPANTE                   |                                                                                                                                                                                                                                                                                      |
| Edad                                  | [*DATA REMOVED*]                                                                                                                                                                                                                                                                     |
| Gestaciones                           | <input checked="" type="radio"/> 1<br><input type="radio"/> 2<br><input type="radio"/> 3<br><input type="radio"/> mas de 3                                                                                                                                                           |
| partos                                | <input checked="" type="radio"/> 0<br><input type="radio"/> 1<br><input type="radio"/> 2<br><input type="radio"/> 3<br><input type="radio"/> mas de 3                                                                                                                                |
| cesáreas                              | <input checked="" type="radio"/> 0<br><input type="radio"/> 1<br><input type="radio"/> 2<br><input type="radio"/> 3<br><input type="radio"/> mas de 3                                                                                                                                |
| Abortos                               | <input checked="" type="radio"/> 0<br><input type="radio"/> 1<br><input type="radio"/> 2<br><input type="radio"/> 3<br><input type="radio"/> mas de 3                                                                                                                                |
| Tipo de gestacion                     | <input checked="" type="radio"/> espontanea<br><input type="radio"/> IAC inseminación artificial conyuge<br><input type="radio"/> IAD inseminación artificial donante<br><input type="radio"/> FIV Fecundación in Vitro<br><input type="radio"/> Ovodon FIV con donación de ovocitos |
| peso previo a embarazo                | [*DATA REMOVED*]                                                                                                                                                                                                                                                                     |
| Ganancia ponderal embarazo            | [*DATA REMOVED*]                                                                                                                                                                                                                                                                     |
| Talla madre                           | [*DATA REMOVED*]                                                                                                                                                                                                                                                                     |
| IMC previo embarazo                   | 31.20256367009614                                                                                                                                                                                                                                                                    |
| Patología obstétrica                  | <input checked="" type="radio"/> no<br><input type="radio"/> si                                                                                                                                                                                                                      |
| Diabetes pregestacional               | <input checked="" type="radio"/> no<br><input type="radio"/> si                                                                                                                                                                                                                      |
| Diabetes gestacional                  | <input checked="" type="radio"/> no<br><input type="radio"/> si                                                                                                                                                                                                                      |

|                                            |                                                                                                                                                                                      |
|--------------------------------------------|--------------------------------------------------------------------------------------------------------------------------------------------------------------------------------------|
| Diabetes gestacional con insulina          | <input checked="" type="radio"/> no<br><input type="radio"/> si                                                                                                                      |
| Diabetes gestacional con dieta y ejercicio | <input checked="" type="radio"/> no<br><input type="radio"/> si                                                                                                                      |
| Percentil fetos previos                    | <input checked="" type="radio"/> Nada<br><input type="radio"/> percentil menor de 10<br><input type="radio"/> percentil entre 10 y 90<br><input type="radio"/> percentil mayor de 90 |
| Exfumadora                                 | <input checked="" type="radio"/> Nada<br><input type="radio"/> menos de 5 años<br><input type="radio"/> 5 a 10 años<br><input type="radio"/> mayor o igual a 10 años                 |
| Hábito tabáquico                           | <input checked="" type="radio"/> no<br><input type="radio"/> si                                                                                                                      |
| fumadora                                   | [*DATA REMOVED*]                                                                                                                                                                     |
| Consumo otros tóxicos                      | <input checked="" type="radio"/> no<br><input type="radio"/> si                                                                                                                      |
| Hb 1T                                      | [*DATA REMOVED*]                                                                                                                                                                     |
| Htc 1T                                     | [*DATA REMOVED*]                                                                                                                                                                     |
| Hb 2T                                      | [*DATA REMOVED*]                                                                                                                                                                     |
| HTC 2T                                     | [*DATA REMOVED*]                                                                                                                                                                     |
| Hb 3T                                      | [*DATA REMOVED*]                                                                                                                                                                     |
| HTC 3T                                     | [*DATA REMOVED*]                                                                                                                                                                     |
| Suplemento FE oral                         | <input type="radio"/> si<br><input checked="" type="radio"/> no                                                                                                                      |
| Suplemento fe iv                           | <input type="radio"/> si<br><input checked="" type="radio"/> no                                                                                                                      |
| Transfusión                                | <input checked="" type="radio"/> no<br><input type="radio"/> si                                                                                                                      |
| Solicitada Vit D                           | <input checked="" type="radio"/> no<br><input type="radio"/> si                                                                                                                      |
| Deficit vit D                              | <input type="radio"/> no<br><input type="radio"/> si                                                                                                                                 |
| Suplemento vit D                           | <input type="radio"/> si<br><input type="radio"/> no                                                                                                                                 |

|                       |                                                                                                                                                                                                                                                                                                                                                                                                              |
|-----------------------|--------------------------------------------------------------------------------------------------------------------------------------------------------------------------------------------------------------------------------------------------------------------------------------------------------------------------------------------------------------------------------------------------------------|
| Dieta, cuestionario   | <input checked="" type="radio"/> sí<br><input type="radio"/> no                                                                                                                                                                                                                                                                                                                                              |
| Leche entera          | <input checked="" type="radio"/> Nunca o menos 1 vez al mes<br><input type="radio"/> 1 a 3 veces mes<br><input type="radio"/> 1 vez semana<br><input type="radio"/> 2 a 4 veces semana<br><input type="radio"/> 5 a 6 veces semana<br><input type="radio"/> 1 vez al día<br><input type="radio"/> 2 a 3 veces al día<br><input type="radio"/> 5 a 6 veces al día<br><input type="radio"/> más 6 veces al día |
| Leche semidesnatada   | <input checked="" type="radio"/> Nunca o menos 1 vez al mes<br><input type="radio"/> 1 a 3 veces mes<br><input type="radio"/> 1 vez semana<br><input type="radio"/> 2 a 4 veces semana<br><input type="radio"/> 5 a 6 veces semana<br><input type="radio"/> 1 vez al día<br><input type="radio"/> 2 a 3 veces al día<br><input type="radio"/> 5 a 6 veces al día<br><input type="radio"/> mas 6 veces al día |
| Leche desnatada       | <input type="radio"/> Nunca o menos 1 vez al mes<br><input type="radio"/> 1 a 3 veces mes<br><input type="radio"/> 1 vez semana<br><input type="radio"/> 2 a 4 veces semana<br><input type="radio"/> 5 a 6 veces semana<br><input checked="" type="radio"/> 1 vez al día<br><input type="radio"/> 2 a 3 veces al día<br><input type="radio"/> 5 a 6 veces al día<br><input type="radio"/> más 6 veces al día |
| Leche condensada      | <input checked="" type="radio"/> Nunca o menos 1 vez al mes<br><input type="radio"/> 1 a 3 veces mes<br><input type="radio"/> 1 vez semana<br><input type="radio"/> 2 a 4 veces semana<br><input type="radio"/> 5 a 6 veces semana<br><input type="radio"/> 1 vez al día<br><input type="radio"/> 2 a 3 veces al día<br><input type="radio"/> 5 a 6 veces al día<br><input type="radio"/> más 6 veces al día |
| nata o crema de leche | <input type="radio"/> Nunca o menos 1 vez al mes<br><input type="radio"/> 1 a 3 veces mes<br><input checked="" type="radio"/> 1 vez semana<br><input type="radio"/> 2 a 4 veces semana<br><input type="radio"/> 5 a 6 veces semana<br><input type="radio"/> 1 vez al día<br><input type="radio"/> 2 a 3 veces al día<br><input type="radio"/> 5 a 6 veces al día<br><input type="radio"/> más 6 veces al día |

|                                             |                                                                                                                                                                                                                                                                                                                                                                                                              |
|---------------------------------------------|--------------------------------------------------------------------------------------------------------------------------------------------------------------------------------------------------------------------------------------------------------------------------------------------------------------------------------------------------------------------------------------------------------------|
| Yogurt Entero                               | <input type="radio"/> Nunca o menos 1 vez al mes<br><input checked="" type="radio"/> 1 a 3 veces mes<br><input type="radio"/> 1 vez semana<br><input type="radio"/> 2 a 4 veces semana<br><input type="radio"/> 5 a 6 veces semana<br><input type="radio"/> 1 vez al día<br><input type="radio"/> 2 a 3 veces al día<br><input type="radio"/> 5 a 6 veces al día<br><input type="radio"/> más 6 veces al día |
| Yogurt desnatado                            | <input type="radio"/> Nunca o menos 1 vez al mes<br><input type="radio"/> 1 a 3 veces mes<br><input checked="" type="radio"/> 1 vez semana<br><input type="radio"/> 2 a 4 veces semana<br><input type="radio"/> 5 a 6 veces semana<br><input type="radio"/> 1 vez al día<br><input type="radio"/> 2 a 3 veces al día<br><input type="radio"/> 5 a 6 veces al día<br><input type="radio"/> más 6 veces al día |
| 100g requesón o queso blando o queso fresco | <input checked="" type="radio"/> Nunca o menos 1 vez al mes<br><input type="radio"/> 1 a 3 veces mes<br><input type="radio"/> 1 vez semana<br><input type="radio"/> 2 a 4 veces semana<br><input type="radio"/> 5 a 6 veces semana<br><input type="radio"/> 1 vez al día<br><input type="radio"/> 2 a 3 veces al día<br><input type="radio"/> 5 a 6 veces al día<br><input type="radio"/> más 6 veces al día |
| queso curado o semicurado o cremoso         | <input type="radio"/> Nunca o menos 1 vez al mes<br><input type="radio"/> 1 a 3 veces mes<br><input type="radio"/> 1 vez semana<br><input checked="" type="radio"/> 2 a 4 veces semana<br><input type="radio"/> 5 a 6 veces semana<br><input type="radio"/> 1 vez al día<br><input type="radio"/> 2 a 3 veces al día<br><input type="radio"/> 5 a 6 veces al día<br><input type="radio"/> más 6 veces al día |
| natillas flan pudding                       | <input type="radio"/> Nunca o menos 1 vez al mes<br><input checked="" type="radio"/> 1 a 3 veces mes<br><input type="radio"/> 1 vez semana<br><input type="radio"/> 2 a 4 veces semana<br><input type="radio"/> 5 a 6 veces semana<br><input type="radio"/> 1 vez al día<br><input type="radio"/> 2 a 3 veces al día<br><input type="radio"/> 5 a 6 veces al día<br><input type="radio"/> más 6 veces al día |
| Helado                                      | <input type="radio"/> Nunca o menos 1 vez al mes<br><input type="radio"/> 1 a 3 veces mes<br><input type="radio"/> 1 vez semana<br><input type="radio"/> 2 a 4 veces semana<br><input checked="" type="radio"/> 5 a 6 veces semana<br><input type="radio"/> 1 vez al día<br><input type="radio"/> 2 a 3 veces al día<br><input type="radio"/> 5 a 6 veces al día<br><input type="radio"/> más 6 veces al día |



|                                      |                                                                                                                                                                                                                                                                                                                                                                                                              |
|--------------------------------------|--------------------------------------------------------------------------------------------------------------------------------------------------------------------------------------------------------------------------------------------------------------------------------------------------------------------------------------------------------------------------------------------------------------|
| huevo                                | <input type="radio"/> Nunca o menos 1 vez al mes<br><input type="radio"/> 1 a 3 veces mes<br><input type="radio"/> 1 vez semana<br><input checked="" type="radio"/> 2 a 4 veces semana<br><input type="radio"/> 5 a 6 veces semana<br><input type="radio"/> 1 vez al día<br><input type="radio"/> 2 a 3 veces al día<br><input type="radio"/> 5 a 6 veces al día<br><input type="radio"/> más 6 veces al día |
| Pollo con piel                       | <input type="radio"/> Nunca o menos 1 vez al mes<br><input type="radio"/> 1 a 3 veces mes<br><input checked="" type="radio"/> 1 vez semana<br><input type="radio"/> 2 a 4 veces semana<br><input type="radio"/> 5 a 6 veces semana<br><input type="radio"/> 1 vez al día<br><input type="radio"/> 2 a 3 veces al día<br><input type="radio"/> 5 a 6 veces al día<br><input type="radio"/> más 6 veces al día |
| pollo sin piel                       | <input type="radio"/> Nunca o menos 1 vez al mes<br><input checked="" type="radio"/> 1 a 3 veces mes<br><input type="radio"/> 1 vez semana<br><input type="radio"/> 2 a 4 veces semana<br><input type="radio"/> 5 a 6 veces semana<br><input type="radio"/> 1 vez al día<br><input type="radio"/> 2 a 3 veces al día<br><input type="radio"/> 5 a 6 veces al día<br><input type="radio"/> más 6 veces al día |
| Ternera o cerdo o cordero            | <input type="radio"/> Nunca o menos 1 vez al mes<br><input type="radio"/> 1 a 3 veces mes<br><input checked="" type="radio"/> 1 vez semana<br><input type="radio"/> 2 a 4 veces semana<br><input type="radio"/> 5 a 6 veces semana<br><input type="radio"/> 1 vez al día<br><input type="radio"/> 2 a 3 veces al día<br><input type="radio"/> 5 a 6 veces al día<br><input type="radio"/> más 6 veces al día |
| carne caza: Conejo o codorniz o pato | <input checked="" type="radio"/> Nunca o menos 1 vez al mes<br><input type="radio"/> 1 a 3 veces mes<br><input type="radio"/> 1 vez semana<br><input type="radio"/> 2 a 4 veces semana<br><input type="radio"/> 5 a 6 veces semana<br><input type="radio"/> 1 vez al día<br><input type="radio"/> 2 a 3 veces al día<br><input type="radio"/> 5 a 6 veces al día<br><input type="radio"/> más 6 veces al día |
| Hígado de ternera o cerdo o pollo    | <input checked="" type="radio"/> Nunca o menos 1 vez al mes<br><input type="radio"/> 1 a 3 veces mes<br><input type="radio"/> 1 vez semana<br><input type="radio"/> 2 a 4 veces semana<br><input type="radio"/> 5 a 6 veces semana<br><input type="radio"/> 1 vez al día<br><input type="radio"/> 2 a 3 veces al día<br><input type="radio"/> 5 a 6 veces al día<br><input type="radio"/> más 6 veces al día |

|                     |                                                                                                                                                                                                                                                                                                                                                                                                              |
|---------------------|--------------------------------------------------------------------------------------------------------------------------------------------------------------------------------------------------------------------------------------------------------------------------------------------------------------------------------------------------------------------------------------------------------------|
| Vísceras            | <input checked="" type="radio"/> Nunca o menos 1 vez al mes<br><input type="radio"/> 1 a 3 veces mes<br><input type="radio"/> 1 vez semana<br><input type="radio"/> 2 a 4 veces semana<br><input type="radio"/> 5 a 6 veces semana<br><input type="radio"/> 1 vez al día<br><input type="radio"/> 2 a 3 veces al día<br><input type="radio"/> 5 a 6 veces al día<br><input type="radio"/> más 6 veces al día |
| Embutido            | <input type="radio"/> Nunca o menos 1 vez al mes<br><input type="radio"/> 1 a 3 veces mes<br><input type="radio"/> 1 vez semana<br><input checked="" type="radio"/> 2 a 4 veces semana<br><input type="radio"/> 5 a 6 veces semana<br><input type="radio"/> 1 vez al día<br><input type="radio"/> 2 a 3 veces al día<br><input type="radio"/> 5 a 6 veces al día<br><input type="radio"/> más 6 veces al día |
| Salchicha o similar | <input type="radio"/> Nunca o menos 1 vez al mes<br><input checked="" type="radio"/> 1 a 3 veces mes<br><input type="radio"/> 1 vez semana<br><input type="radio"/> 2 a 4 veces semana<br><input type="radio"/> 5 a 6 veces semana<br><input type="radio"/> 1 vez al día<br><input type="radio"/> 2 a 3 veces al día<br><input type="radio"/> 5 a 6 veces al día<br><input type="radio"/> más 6 veces al día |
| Pate o foiegras     | <input checked="" type="radio"/> Nunca o menos 1 vez al mes<br><input type="radio"/> 1 a 3 veces mes<br><input type="radio"/> 1 vez semana<br><input type="radio"/> 2 a 4 veces semana<br><input type="radio"/> 5 a 6 veces semana<br><input type="radio"/> 1 vez al día<br><input type="radio"/> 2 a 3 veces al día<br><input type="radio"/> 5 a 6 veces al día<br><input type="radio"/> más 6 veces al día |
| Hamburguesa         | <input type="radio"/> Nunca o menos 1 vez al mes<br><input type="radio"/> 1 a 3 veces mes<br><input checked="" type="radio"/> 1 vez semana<br><input type="radio"/> 2 a 4 veces semana<br><input type="radio"/> 5 a 6 veces semana<br><input type="radio"/> 1 vez al día<br><input type="radio"/> 2 a 3 veces al día<br><input type="radio"/> 5 a 6 veces al día<br><input type="radio"/> más 6 veces al día |
| tocino o bacon      | <input type="radio"/> Nunca o menos 1 vez al mes<br><input type="radio"/> 1 a 3 veces mes<br><input checked="" type="radio"/> 1 vez semana<br><input type="radio"/> 2 a 4 veces semana<br><input type="radio"/> 5 a 6 veces semana<br><input type="radio"/> 1 vez al día<br><input type="radio"/> 2 a 3 veces al día<br><input type="radio"/> 5 a 6 veces al día<br><input type="radio"/> más 6 veces al día |

---

Pescado frito

- ☐ Nunca o menos 1 vez al mes  
☒ 1 a 3 veces mes  
☐ 1 vez semana  
☐ 2 a 4 veces semana  
☐ 5 a 6 veces semana  
☐ 1 vez al día  
☐ 2 a 3 veces al día  
☐ 5 a 6 veces al día  
☐ más 6 veces al día

---

pescado hervido blanco

- ☒ Nunca o menos 1 vez al mes  
☐ 1 a 3 veces mes  
☐ 1 vez semana  
☐ 2 a 4 veces semana  
☐ 5 a 6 veces semana  
☐ 1 vez al día  
☐ 2 a 3 veces al día  
☐ 5 a 6 veces al día  
☐ más 6 veces al día

---

pescado hervido azul

- ☐ Nunca o menos 1 vez al mes  
☐ 1 a 3 veces mes  
☐ 1 vez semana  
☒ 2 a 4 veces semana  
☐ 5 a 6 veces semana  
☐ 1 vez al día  
☐ 2 a 3 veces al día  
☐ 5 a 6 veces al día  
☐ más 6 veces al día

---

otros pescado azul

- ☒ Nunca o menos 1 vez al mes  
☐ 1 a 3 veces mes  
☐ 1 vez semana  
☐ 2 a 4 veces semana  
☐ 5 a 6 veces semana  
☐ 1 vez al día  
☐ 2 a 3 veces al día  
☐ 5 a 6 veces al día  
☐ más 6 veces al día

---

atun conserva

- ☐ Nunca o menos 1 vez al mes  
☐ 1 a 3 veces mes  
☐ 1 vez semana  
☒ 2 a 4 veces semana  
☐ 5 a 6 veces semana  
☐ 1 vez al día  
☐ 2 a 3 veces al día  
☐ 5 a 6 veces al día  
☐ más 6 veces al día

---

sardina conserva

- ☒ Nunca o menos 1 vez al mes  
☐ 1 a 3 veces mes  
☐ 1 vez semana  
☐ 2 a 4 veces semana  
☐ 5 a 6 veces semana  
☐ 1 vez al día  
☐ 2 a 3 veces al día  
☐ 5 a 6 veces al día  
☐ más 6 veces al día

|                                         |                                                                                                                                                                                                                                                                                                                                                                                                              |
|-----------------------------------------|--------------------------------------------------------------------------------------------------------------------------------------------------------------------------------------------------------------------------------------------------------------------------------------------------------------------------------------------------------------------------------------------------------------|
| pescado ahumado                         | <input checked="" type="radio"/> Nunca o menos 1 vez al mes<br><input type="radio"/> 1 a 3 veces mes<br><input type="radio"/> 1 vez semana<br><input type="radio"/> 2 a 4 veces semana<br><input type="radio"/> 5 a 6 veces semana<br><input type="radio"/> 1 vez al día<br><input type="radio"/> 2 a 3 veces al día<br><input type="radio"/> 5 a 6 veces al día<br><input type="radio"/> más 6 veces al día |
| almejas o mejillones o ostras unos 100g | <input type="radio"/> Nunca o menos 1 vez al mes<br><input checked="" type="radio"/> 1 a 3 veces mes<br><input type="radio"/> 1 vez semana<br><input type="radio"/> 2 a 4 veces semana<br><input type="radio"/> 5 a 6 veces semana<br><input type="radio"/> 1 vez al día<br><input type="radio"/> 2 a 3 veces al día<br><input type="radio"/> 5 a 6 veces al día<br><input type="radio"/> más 6 veces al día |
| calamar o chipiron o sepia unos 100g    | <input type="radio"/> Nunca o menos 1 vez al mes<br><input checked="" type="radio"/> 1 a 3 veces mes<br><input type="radio"/> 1 vez semana<br><input type="radio"/> 2 a 4 veces semana<br><input type="radio"/> 5 a 6 veces semana<br><input type="radio"/> 1 vez al día<br><input type="radio"/> 2 a 3 veces al día<br><input type="radio"/> 5 a 6 veces al día<br><input type="radio"/> más 6 veces al día |
| marisco unos 100g                       | <input type="radio"/> Nunca o menos 1 vez al mes<br><input checked="" type="radio"/> 1 a 3 veces mes<br><input type="radio"/> 1 vez semana<br><input type="radio"/> 2 a 4 veces semana<br><input type="radio"/> 5 a 6 veces semana<br><input type="radio"/> 1 vez al día<br><input type="radio"/> 2 a 3 veces al día<br><input type="radio"/> 5 a 6 veces al día<br><input type="radio"/> más 6 veces al día |
| Espinacas o acelgas cocinadas           | <input checked="" type="radio"/> Nunca o menos 1 vez al mes<br><input type="radio"/> 1 a 3 veces mes<br><input type="radio"/> 1 vez semana<br><input type="radio"/> 2 a 4 veces semana<br><input type="radio"/> 5 a 6 veces semana<br><input type="radio"/> 1 vez al día<br><input type="radio"/> 2 a 3 veces al día<br><input type="radio"/> 5 a 6 veces al día<br><input type="radio"/> más 6 veces al día |
| Col o coliflor o brocoli cocinado       | <input type="radio"/> Nunca o menos 1 vez al mes<br><input type="radio"/> 1 a 3 veces mes<br><input type="radio"/> 1 vez semana<br><input checked="" type="radio"/> 2 a 4 veces semana<br><input type="radio"/> 5 a 6 veces semana<br><input type="radio"/> 1 vez al día<br><input type="radio"/> 2 a 3 veces al día<br><input type="radio"/> 5 a 6 veces al día<br><input type="radio"/> más 6 veces al día |

---

Lechuga o endivia o escarola

- ☐ Nunca o menos 1 vez al mes  
☐ 1 a 3 veces mes  
☒ 1 vez semana  
☐ 2 a 4 veces semana  
☐ 5 a 6 veces semana  
☐ 1 vez al día  
☐ 2 a 3 veces al día  
☐ 5 a 6 veces al día  
☐ más 6 veces al día

---

tomate ensalada

- ☐ Nunca o menos 1 vez al mes  
☐ 1 a 3 veces mes  
☒ 1 vez semana  
☐ 2 a 4 veces semana  
☐ 5 a 6 veces semana  
☐ 1 vez al día  
☐ 2 a 3 veces al día  
☐ 5 a 6 veces al día  
☐ más 6 veces al día

---

cebolla

- ☐ Nunca o menos 1 vez al mes  
☐ 1 a 3 veces mes  
☐ 1 vez semana  
☒ 2 a 4 veces semana  
☐ 5 a 6 veces semana  
☐ 1 vez al día  
☐ 2 a 3 veces al día  
☐ 5 a 6 veces al día  
☐ más 6 veces al día

---

Zanahoria o calabaza

- ☐ Nunca o menos 1 vez al mes  
☐ 1 a 3 veces mes  
☒ 1 vez semana  
☐ 2 a 4 veces semana  
☐ 5 a 6 veces semana  
☐ 1 vez al día  
☐ 2 a 3 veces al día  
☐ 5 a 6 veces al día  
☐ más 6 veces al día

---

Judías verdes

- ☐ Nunca o menos 1 vez al mes  
☐ 1 a 3 veces mes  
☒ 1 vez semana  
☐ 2 a 4 veces semana  
☐ 5 a 6 veces semana  
☐ 1 vez al día  
☐ 2 a 3 veces al día  
☐ 5 a 6 veces al día  
☐ más 6 veces al día

---

Berenjena o calabacin o pepino

- ☐ Nunca o menos 1 vez al mes  
☒ 1 a 3 veces mes  
☐ 1 vez semana  
☐ 2 a 4 veces semana  
☐ 5 a 6 veces semana  
☐ 1 vez al día  
☐ 2 a 3 veces al día  
☐ 5 a 6 veces al día  
☐ más 6 veces al día

---

|          |                                                                                                                                                                                                                                                                                                                                                                                                              |
|----------|--------------------------------------------------------------------------------------------------------------------------------------------------------------------------------------------------------------------------------------------------------------------------------------------------------------------------------------------------------------------------------------------------------------|
| pimiento | <input type="radio"/> Nunca o menos 1 vez al mes<br><input checked="" type="radio"/> 1 a 3 veces mes<br><input type="radio"/> 1 vez semana<br><input type="radio"/> 2 a 4 veces semana<br><input type="radio"/> 5 a 6 veces semana<br><input type="radio"/> 1 vez al día<br><input type="radio"/> 2 a 3 veces al día<br><input type="radio"/> 5 a 6 veces al día<br><input type="radio"/> más 6 veces al día |
|----------|--------------------------------------------------------------------------------------------------------------------------------------------------------------------------------------------------------------------------------------------------------------------------------------------------------------------------------------------------------------------------------------------------------------|

---

|           |                                                                                                                                                                                                                                                                                                                                                                                                              |
|-----------|--------------------------------------------------------------------------------------------------------------------------------------------------------------------------------------------------------------------------------------------------------------------------------------------------------------------------------------------------------------------------------------------------------------|
| alcachofa | <input type="radio"/> Nunca o menos 1 vez al mes<br><input checked="" type="radio"/> 1 a 3 veces mes<br><input type="radio"/> 1 vez semana<br><input type="radio"/> 2 a 4 veces semana<br><input type="radio"/> 5 a 6 veces semana<br><input type="radio"/> 1 vez al día<br><input type="radio"/> 2 a 3 veces al día<br><input type="radio"/> 5 a 6 veces al día<br><input type="radio"/> más 6 veces al día |
|-----------|--------------------------------------------------------------------------------------------------------------------------------------------------------------------------------------------------------------------------------------------------------------------------------------------------------------------------------------------------------------------------------------------------------------|

---

|            |                                                                                                                                                                                                                                                                                                                                                                                                              |
|------------|--------------------------------------------------------------------------------------------------------------------------------------------------------------------------------------------------------------------------------------------------------------------------------------------------------------------------------------------------------------------------------------------------------------|
| espárragos | <input type="radio"/> Nunca o menos 1 vez al mes<br><input checked="" type="radio"/> 1 a 3 veces mes<br><input type="radio"/> 1 vez semana<br><input type="radio"/> 2 a 4 veces semana<br><input type="radio"/> 5 a 6 veces semana<br><input type="radio"/> 1 vez al día<br><input type="radio"/> 2 a 3 veces al día<br><input type="radio"/> 5 a 6 veces al día<br><input type="radio"/> más 6 veces al día |
|------------|--------------------------------------------------------------------------------------------------------------------------------------------------------------------------------------------------------------------------------------------------------------------------------------------------------------------------------------------------------------------------------------------------------------|

---

|              |                                                                                                                                                                                                                                                                                                                                                                                                              |
|--------------|--------------------------------------------------------------------------------------------------------------------------------------------------------------------------------------------------------------------------------------------------------------------------------------------------------------------------------------------------------------------------------------------------------------|
| maíz hervido | <input checked="" type="radio"/> Nunca o menos 1 vez al mes<br><input type="radio"/> 1 a 3 veces mes<br><input type="radio"/> 1 vez semana<br><input type="radio"/> 2 a 4 veces semana<br><input type="radio"/> 5 a 6 veces semana<br><input type="radio"/> 1 vez al día<br><input type="radio"/> 2 a 3 veces al día<br><input type="radio"/> 5 a 6 veces al día<br><input type="radio"/> más 6 veces al día |
|--------------|--------------------------------------------------------------------------------------------------------------------------------------------------------------------------------------------------------------------------------------------------------------------------------------------------------------------------------------------------------------------------------------------------------------|

---

|           |                                                                                                                                                                                                                                                                                                                                                                                                              |
|-----------|--------------------------------------------------------------------------------------------------------------------------------------------------------------------------------------------------------------------------------------------------------------------------------------------------------------------------------------------------------------------------------------------------------------|
| legumbres | <input type="radio"/> Nunca o menos 1 vez al mes<br><input type="radio"/> 1 a 3 veces mes<br><input checked="" type="radio"/> 1 vez semana<br><input type="radio"/> 2 a 4 veces semana<br><input type="radio"/> 5 a 6 veces semana<br><input type="radio"/> 1 vez al día<br><input type="radio"/> 2 a 3 veces al día<br><input type="radio"/> 5 a 6 veces al día<br><input type="radio"/> más 6 veces al día |
|-----------|--------------------------------------------------------------------------------------------------------------------------------------------------------------------------------------------------------------------------------------------------------------------------------------------------------------------------------------------------------------------------------------------------------------|

---

|                       |                                                                                                                                                                                                                                                                                                                                                                                                              |
|-----------------------|--------------------------------------------------------------------------------------------------------------------------------------------------------------------------------------------------------------------------------------------------------------------------------------------------------------------------------------------------------------------------------------------------------------|
| naranjas o mandarinas | <input type="radio"/> Nunca o menos 1 vez al mes<br><input checked="" type="radio"/> 1 a 3 veces mes<br><input type="radio"/> 1 vez semana<br><input type="radio"/> 2 a 4 veces semana<br><input type="radio"/> 5 a 6 veces semana<br><input type="radio"/> 1 vez al día<br><input type="radio"/> 2 a 3 veces al día<br><input type="radio"/> 5 a 6 veces al día<br><input type="radio"/> más 6 veces al día |
|-----------------------|--------------------------------------------------------------------------------------------------------------------------------------------------------------------------------------------------------------------------------------------------------------------------------------------------------------------------------------------------------------------------------------------------------------|

---

|                       |                                                                                                                                                                                                                                                                                                                                                                                                              |
|-----------------------|--------------------------------------------------------------------------------------------------------------------------------------------------------------------------------------------------------------------------------------------------------------------------------------------------------------------------------------------------------------------------------------------------------------|
| zum natural fruta     | <input checked="" type="radio"/> Nunca o menos 1 vez al mes<br><input type="radio"/> 1 a 3 veces mes<br><input type="radio"/> 1 vez semana<br><input type="radio"/> 2 a 4 veces semana<br><input type="radio"/> 5 a 6 veces semana<br><input type="radio"/> 1 vez al día<br><input type="radio"/> 2 a 3 veces al día<br><input type="radio"/> 5 a 6 veces al día<br><input type="radio"/> más 6 veces al día |
| platano               | <input type="radio"/> Nunca o menos 1 vez al mes<br><input checked="" type="radio"/> 1 a 3 veces mes<br><input type="radio"/> 1 vez semana<br><input type="radio"/> 2 a 4 veces semana<br><input type="radio"/> 5 a 6 veces semana<br><input type="radio"/> 1 vez al día<br><input type="radio"/> 2 a 3 veces al día<br><input type="radio"/> 5 a 6 veces al día<br><input type="radio"/> más 6 veces al día |
| manzana o pera        | <input checked="" type="radio"/> Nunca o menos 1 vez al mes<br><input type="radio"/> 1 a 3 veces mes<br><input type="radio"/> 1 vez semana<br><input type="radio"/> 2 a 4 veces semana<br><input type="radio"/> 5 a 6 veces semana<br><input type="radio"/> 1 vez al día<br><input type="radio"/> 2 a 3 veces al día<br><input type="radio"/> 5 a 6 veces al día<br><input type="radio"/> más 6 veces al día |
| melocotón o nectarina | <input type="radio"/> Nunca o menos 1 vez al mes<br><input checked="" type="radio"/> 1 a 3 veces mes<br><input type="radio"/> 1 vez semana<br><input type="radio"/> 2 a 4 veces semana<br><input type="radio"/> 5 a 6 veces semana<br><input type="radio"/> 1 vez al día<br><input type="radio"/> 2 a 3 veces al día<br><input type="radio"/> 5 a 6 veces al día<br><input type="radio"/> más 6 veces al día |
| sandia o melon        | <input type="radio"/> Nunca o menos 1 vez al mes<br><input type="radio"/> 1 a 3 veces mes<br><input type="radio"/> 1 vez semana<br><input checked="" type="radio"/> 2 a 4 veces semana<br><input type="radio"/> 5 a 6 veces semana<br><input type="radio"/> 1 vez al día<br><input type="radio"/> 2 a 3 veces al día<br><input type="radio"/> 5 a 6 veces al día<br><input type="radio"/> más 6 veces al día |
| uva                   | <input type="radio"/> Nunca o menos 1 vez al mes<br><input checked="" type="radio"/> 1 a 3 veces mes<br><input type="radio"/> 1 vez semana<br><input type="radio"/> 2 a 4 veces semana<br><input type="radio"/> 5 a 6 veces semana<br><input type="radio"/> 1 vez al día<br><input type="radio"/> 2 a 3 veces al día<br><input type="radio"/> 5 a 6 veces al día<br><input type="radio"/> más 6 veces al día |

---

bruna o ciruela

- ☐ Nunca o menos 1 vez al mes  
☒ 1 a 3 veces mes  
☐ 1 vez semana  
☐ 2 a 4 veces semana  
☐ 5 a 6 veces semana  
☐ 1 vez al día  
☐ 2 a 3 veces al día  
☐ 5 a 6 veces al día  
☐ más 6 veces al día

---

kiwi

- ☒ Nunca o menos 1 vez al mes  
☐ 1 a 3 veces mes  
☐ 1 vez semana  
☐ 2 a 4 veces semana  
☐ 5 a 6 veces semana  
☐ 1 vez al día  
☐ 2 a 3 veces al día  
☐ 5 a 6 veces al día  
☐ más 6 veces al día

---

aceituna

- ☐ Nunca o menos 1 vez al mes  
☐ 1 a 3 veces mes  
☒ 1 vez semana  
☐ 2 a 4 veces semana  
☐ 5 a 6 veces semana  
☐ 1 vez al día  
☐ 2 a 3 veces al día  
☐ 5 a 6 veces al día  
☐ más 6 veces al día

---

frutos secos

- ☐ Nunca o menos 1 vez al mes  
☒ 1 a 3 veces mes  
☐ 1 vez semana  
☐ 2 a 4 veces semana  
☐ 5 a 6 veces semana  
☐ 1 vez al día  
☐ 2 a 3 veces al día  
☐ 5 a 6 veces al día  
☐ más 6 veces al día

---

pan blanco

- ☐ Nunca o menos 1 vez al mes  
☐ 1 a 3 veces mes  
☐ 1 vez semana  
☒ 2 a 4 veces semana  
☐ 5 a 6 veces semana  
☐ 1 vez al día  
☐ 2 a 3 veces al día  
☐ 5 a 6 veces al día  
☐ más 6 veces al día

---

pan integral

- ☐ Nunca o menos 1 vez al mes  
☐ 1 a 3 veces mes  
☒ 1 vez semana  
☐ 2 a 4 veces semana  
☐ 5 a 6 veces semana  
☐ 1 vez al día  
☐ 2 a 3 veces al día  
☐ 5 a 6 veces al día  
☐ más 6 veces al día



---

|                   |                                                                                                                                                                                                                                                                                                                                                                                                              |
|-------------------|--------------------------------------------------------------------------------------------------------------------------------------------------------------------------------------------------------------------------------------------------------------------------------------------------------------------------------------------------------------------------------------------------------------|
| cereales desayuno | <input type="radio"/> Nunca o menos 1 vez al mes<br><input type="radio"/> 1 a 3 veces mes<br><input type="radio"/> 1 vez semana<br><input type="radio"/> 2 a 4 veces semana<br><input type="radio"/> 5 a 6 veces semana<br><input checked="" type="radio"/> 1 vez al día<br><input type="radio"/> 2 a 3 veces al día<br><input type="radio"/> 5 a 6 veces al día<br><input type="radio"/> más 6 veces al día |
|-------------------|--------------------------------------------------------------------------------------------------------------------------------------------------------------------------------------------------------------------------------------------------------------------------------------------------------------------------------------------------------------------------------------------------------------|

---

|                |                                                                                                                                                                                                                                                                                                                                                                                                              |
|----------------|--------------------------------------------------------------------------------------------------------------------------------------------------------------------------------------------------------------------------------------------------------------------------------------------------------------------------------------------------------------------------------------------------------------|
| patatas fritas | <input type="radio"/> Nunca o menos 1 vez al mes<br><input type="radio"/> 1 a 3 veces mes<br><input checked="" type="radio"/> 1 vez semana<br><input type="radio"/> 2 a 4 veces semana<br><input type="radio"/> 5 a 6 veces semana<br><input type="radio"/> 1 vez al día<br><input type="radio"/> 2 a 3 veces al día<br><input type="radio"/> 5 a 6 veces al día<br><input type="radio"/> más 6 veces al día |
|----------------|--------------------------------------------------------------------------------------------------------------------------------------------------------------------------------------------------------------------------------------------------------------------------------------------------------------------------------------------------------------------------------------------------------------|

---

|                          |                                                                                                                                                                                                                                                                                                                                                                                                              |
|--------------------------|--------------------------------------------------------------------------------------------------------------------------------------------------------------------------------------------------------------------------------------------------------------------------------------------------------------------------------------------------------------------------------------------------------------|
| patatas cocidas o asadas | <input type="radio"/> Nunca o menos 1 vez al mes<br><input type="radio"/> 1 a 3 veces mes<br><input checked="" type="radio"/> 1 vez semana<br><input type="radio"/> 2 a 4 veces semana<br><input type="radio"/> 5 a 6 veces semana<br><input type="radio"/> 1 vez al día<br><input type="radio"/> 2 a 3 veces al día<br><input type="radio"/> 5 a 6 veces al día<br><input type="radio"/> más 6 veces al día |
|--------------------------|--------------------------------------------------------------------------------------------------------------------------------------------------------------------------------------------------------------------------------------------------------------------------------------------------------------------------------------------------------------------------------------------------------------|

---

|             |                                                                                                                                                                                                                                                                                                                                                                                                              |
|-------------|--------------------------------------------------------------------------------------------------------------------------------------------------------------------------------------------------------------------------------------------------------------------------------------------------------------------------------------------------------------------------------------------------------------|
| bolsa papas | <input type="radio"/> Nunca o menos 1 vez al mes<br><input type="radio"/> 1 a 3 veces mes<br><input checked="" type="radio"/> 1 vez semana<br><input type="radio"/> 2 a 4 veces semana<br><input type="radio"/> 5 a 6 veces semana<br><input type="radio"/> 1 vez al día<br><input type="radio"/> 2 a 3 veces al día<br><input type="radio"/> 5 a 6 veces al día<br><input type="radio"/> más 6 veces al día |
|-------------|--------------------------------------------------------------------------------------------------------------------------------------------------------------------------------------------------------------------------------------------------------------------------------------------------------------------------------------------------------------------------------------------------------------|

---

|                |                                                                                                                                                                                                                                                                                                                                                                                                              |
|----------------|--------------------------------------------------------------------------------------------------------------------------------------------------------------------------------------------------------------------------------------------------------------------------------------------------------------------------------------------------------------------------------------------------------------|
| arroz cocinado | <input type="radio"/> Nunca o menos 1 vez al mes<br><input type="radio"/> 1 a 3 veces mes<br><input type="radio"/> 1 vez semana<br><input checked="" type="radio"/> 2 a 4 veces semana<br><input type="radio"/> 5 a 6 veces semana<br><input type="radio"/> 1 vez al día<br><input type="radio"/> 2 a 3 veces al día<br><input type="radio"/> 5 a 6 veces al día<br><input type="radio"/> más 6 veces al día |
|----------------|--------------------------------------------------------------------------------------------------------------------------------------------------------------------------------------------------------------------------------------------------------------------------------------------------------------------------------------------------------------------------------------------------------------|

---

|       |                                                                                                                                                                                                                                                                                                                                                                                                              |
|-------|--------------------------------------------------------------------------------------------------------------------------------------------------------------------------------------------------------------------------------------------------------------------------------------------------------------------------------------------------------------------------------------------------------------|
| pasta | <input type="radio"/> Nunca o menos 1 vez al mes<br><input type="radio"/> 1 a 3 veces mes<br><input type="radio"/> 1 vez semana<br><input checked="" type="radio"/> 2 a 4 veces semana<br><input type="radio"/> 5 a 6 veces semana<br><input type="radio"/> 1 vez al día<br><input type="radio"/> 2 a 3 veces al día<br><input type="radio"/> 5 a 6 veces al día<br><input type="radio"/> más 6 veces al día |
|-------|--------------------------------------------------------------------------------------------------------------------------------------------------------------------------------------------------------------------------------------------------------------------------------------------------------------------------------------------------------------------------------------------------------------|

---

|                     |                                                                                                                                                                                                                                                                                                                                                                                                              |
|---------------------|--------------------------------------------------------------------------------------------------------------------------------------------------------------------------------------------------------------------------------------------------------------------------------------------------------------------------------------------------------------------------------------------------------------|
| pizza               | <input type="radio"/> Nunca o menos 1 vez al mes<br><input type="radio"/> 1 a 3 veces mes<br><input checked="" type="radio"/> 1 vez semana<br><input type="radio"/> 2 a 4 veces semana<br><input type="radio"/> 5 a 6 veces semana<br><input type="radio"/> 1 vez al día<br><input type="radio"/> 2 a 3 veces al día<br><input type="radio"/> 5 a 6 veces al día<br><input type="radio"/> más 6 veces al día |
| aceite oliva        | <input type="radio"/> Nunca o menos 1 vez al mes<br><input type="radio"/> 1 a 3 veces mes<br><input type="radio"/> 1 vez semana<br><input checked="" type="radio"/> 2 a 4 veces semana<br><input type="radio"/> 5 a 6 veces semana<br><input type="radio"/> 1 vez al día<br><input type="radio"/> 2 a 3 veces al día<br><input type="radio"/> 5 a 6 veces al día<br><input type="radio"/> más 6 veces al día |
| otros aceites       | <input checked="" type="radio"/> Nunca o menos 1 vez al mes<br><input type="radio"/> 1 a 3 veces mes<br><input type="radio"/> 1 vez semana<br><input type="radio"/> 2 a 4 veces semana<br><input type="radio"/> 5 a 6 veces semana<br><input type="radio"/> 1 vez al día<br><input type="radio"/> 2 a 3 veces al día<br><input type="radio"/> 5 a 6 veces al día<br><input type="radio"/> más 6 veces al día |
| margarina           | <input type="radio"/> Nunca o menos 1 vez al mes<br><input type="radio"/> 1 a 3 veces mes<br><input checked="" type="radio"/> 1 vez semana<br><input type="radio"/> 2 a 4 veces semana<br><input type="radio"/> 5 a 6 veces semana<br><input type="radio"/> 1 vez al día<br><input type="radio"/> 2 a 3 veces al día<br><input type="radio"/> 5 a 6 veces al día<br><input type="radio"/> más 6 veces al día |
| mantequilla         | <input checked="" type="radio"/> Nunca o menos 1 vez al mes<br><input type="radio"/> 1 a 3 veces mes<br><input type="radio"/> 1 vez semana<br><input type="radio"/> 2 a 4 veces semana<br><input type="radio"/> 5 a 6 veces semana<br><input type="radio"/> 1 vez al día<br><input type="radio"/> 2 a 3 veces al día<br><input type="radio"/> 5 a 6 veces al día<br><input type="radio"/> más 6 veces al día |
| galletas tipo maria | <input checked="" type="radio"/> Nunca o menos 1 vez al mes<br><input type="radio"/> 1 a 3 veces mes<br><input type="radio"/> 1 vez semana<br><input type="radio"/> 2 a 4 veces semana<br><input type="radio"/> 5 a 6 veces semana<br><input type="radio"/> 1 vez al día<br><input type="radio"/> 2 a 3 veces al día<br><input type="radio"/> 5 a 6 veces al día<br><input type="radio"/> más 6 veces al día |

---

galletas chocolate

- ☐ Nunca o menos 1 vez al mes  
☒ 1 a 3 veces mes  
☐ 1 vez semana  
☐ 2 a 4 veces semana  
☐ 5 a 6 veces semana  
☐ 1 vez al día  
☐ 2 a 3 veces al día  
☐ 5 a 6 veces al día  
☐ más 6 veces al día

---

bolleria

- ☐ Nunca o menos 1 vez al mes  
☐ 1 a 3 veces mes  
☒ 1 vez semana  
☐ 2 a 4 veces semana  
☐ 5 a 6 veces semana  
☐ 1 vez al día  
☐ 2 a 3 veces al día  
☐ 5 a 6 veces al día  
☐ más 6 veces al día

---

chocolate o bombones

- ☐ Nunca o menos 1 vez al mes  
☒ 1 a 3 veces mes  
☐ 1 vez semana  
☐ 2 a 4 veces semana  
☐ 5 a 6 veces semana  
☐ 1 vez al día  
☐ 2 a 3 veces al día  
☐ 5 a 6 veces al día  
☐ más 6 veces al día

---

chocolate polvo o colacao

- ☐ Nunca o menos 1 vez al mes  
☐ 1 a 3 veces mes  
☒ 1 vez semana  
☐ 2 a 4 veces semana  
☐ 5 a 6 veces semana  
☐ 1 vez al día  
☐ 2 a 3 veces al día  
☐ 5 a 6 veces al día  
☐ más 6 veces al día

---

vino tinto

- ☒ Nunca o menos 1 vez al mes  
☐ 1 a 3 veces mes  
☐ 1 vez semana  
☐ 2 a 4 veces semana  
☐ 5 a 6 veces semana  
☐ 1 vez al día  
☐ 2 a 3 veces al día  
☐ 5 a 6 veces al día  
☐ más 6 veces al día

---

vino blanco

- ☐ Nunca o menos 1 vez al mes  
☒ 1 a 3 veces mes  
☐ 1 vez semana  
☐ 2 a 4 veces semana  
☐ 5 a 6 veces semana  
☐ 1 vez al día  
☐ 2 a 3 veces al día  
☐ 5 a 6 veces al día  
☐ más 6 veces al día

---

|                    |                                                                                                                                                                                                                                                                                                                                                                                                              |
|--------------------|--------------------------------------------------------------------------------------------------------------------------------------------------------------------------------------------------------------------------------------------------------------------------------------------------------------------------------------------------------------------------------------------------------------|
| vino seco o vermut | <input checked="" type="radio"/> Nunca o menos 1 vez al mes<br><input type="radio"/> 1 a 3 veces mes<br><input type="radio"/> 1 vez semana<br><input type="radio"/> 2 a 4 veces semana<br><input type="radio"/> 5 a 6 veces semana<br><input type="radio"/> 1 vez al día<br><input type="radio"/> 2 a 3 veces al día<br><input type="radio"/> 5 a 6 veces al día<br><input type="radio"/> más 6 veces al día |
|--------------------|--------------------------------------------------------------------------------------------------------------------------------------------------------------------------------------------------------------------------------------------------------------------------------------------------------------------------------------------------------------------------------------------------------------|

---

|         |                                                                                                                                                                                                                                                                                                                                                                                                              |
|---------|--------------------------------------------------------------------------------------------------------------------------------------------------------------------------------------------------------------------------------------------------------------------------------------------------------------------------------------------------------------------------------------------------------------|
| cerveza | <input checked="" type="radio"/> Nunca o menos 1 vez al mes<br><input type="radio"/> 1 a 3 veces mes<br><input type="radio"/> 1 vez semana<br><input type="radio"/> 2 a 4 veces semana<br><input type="radio"/> 5 a 6 veces semana<br><input type="radio"/> 1 vez al día<br><input type="radio"/> 2 a 3 veces al día<br><input type="radio"/> 5 a 6 veces al día<br><input type="radio"/> más 6 veces al día |
|---------|--------------------------------------------------------------------------------------------------------------------------------------------------------------------------------------------------------------------------------------------------------------------------------------------------------------------------------------------------------------------------------------------------------------|

---

|                     |                                                                                                                                                                                                                                                                                                                                                                                                              |
|---------------------|--------------------------------------------------------------------------------------------------------------------------------------------------------------------------------------------------------------------------------------------------------------------------------------------------------------------------------------------------------------------------------------------------------------|
| cerveza sin alcohol | <input type="radio"/> Nunca o menos 1 vez al mes<br><input checked="" type="radio"/> 1 a 3 veces mes<br><input type="radio"/> 1 vez semana<br><input type="radio"/> 2 a 4 veces semana<br><input type="radio"/> 5 a 6 veces semana<br><input type="radio"/> 1 vez al día<br><input type="radio"/> 2 a 3 veces al día<br><input type="radio"/> 5 a 6 veces al día<br><input type="radio"/> más 6 veces al día |
|---------------------|--------------------------------------------------------------------------------------------------------------------------------------------------------------------------------------------------------------------------------------------------------------------------------------------------------------------------------------------------------------------------------------------------------------|

---

|         |                                                                                                                                                                                                                                                                                                                                                                                                              |
|---------|--------------------------------------------------------------------------------------------------------------------------------------------------------------------------------------------------------------------------------------------------------------------------------------------------------------------------------------------------------------------------------------------------------------|
| licores | <input checked="" type="radio"/> Nunca o menos 1 vez al mes<br><input type="radio"/> 1 a 3 veces mes<br><input type="radio"/> 1 vez semana<br><input type="radio"/> 2 a 4 veces semana<br><input type="radio"/> 5 a 6 veces semana<br><input type="radio"/> 1 vez al día<br><input type="radio"/> 2 a 3 veces al día<br><input type="radio"/> 5 a 6 veces al día<br><input type="radio"/> más 6 veces al día |
|---------|--------------------------------------------------------------------------------------------------------------------------------------------------------------------------------------------------------------------------------------------------------------------------------------------------------------------------------------------------------------------------------------------------------------|

---

|                       |                                                                                                                                                                                                                                                                                                                                                                                                              |
|-----------------------|--------------------------------------------------------------------------------------------------------------------------------------------------------------------------------------------------------------------------------------------------------------------------------------------------------------------------------------------------------------------------------------------------------------|
| ginebra o ron o vodka | <input checked="" type="radio"/> Nunca o menos 1 vez al mes<br><input type="radio"/> 1 a 3 veces mes<br><input type="radio"/> 1 vez semana<br><input type="radio"/> 2 a 4 veces semana<br><input type="radio"/> 5 a 6 veces semana<br><input type="radio"/> 1 vez al día<br><input type="radio"/> 2 a 3 veces al día<br><input type="radio"/> 5 a 6 veces al día<br><input type="radio"/> más 6 veces al día |
|-----------------------|--------------------------------------------------------------------------------------------------------------------------------------------------------------------------------------------------------------------------------------------------------------------------------------------------------------------------------------------------------------------------------------------------------------|

---

|                 |                                                                                                                                                                                                                                                                                                                                                                                                              |
|-----------------|--------------------------------------------------------------------------------------------------------------------------------------------------------------------------------------------------------------------------------------------------------------------------------------------------------------------------------------------------------------------------------------------------------------|
| refresco normal | <input type="radio"/> Nunca o menos 1 vez al mes<br><input type="radio"/> 1 a 3 veces mes<br><input checked="" type="radio"/> 1 vez semana<br><input type="radio"/> 2 a 4 veces semana<br><input type="radio"/> 5 a 6 veces semana<br><input type="radio"/> 1 vez al día<br><input type="radio"/> 2 a 3 veces al día<br><input type="radio"/> 5 a 6 veces al día<br><input type="radio"/> más 6 veces al día |
|-----------------|--------------------------------------------------------------------------------------------------------------------------------------------------------------------------------------------------------------------------------------------------------------------------------------------------------------------------------------------------------------------------------------------------------------|

---

|                          |                                                                                                                                                                                                                                                                                                                                                                                                              |
|--------------------------|--------------------------------------------------------------------------------------------------------------------------------------------------------------------------------------------------------------------------------------------------------------------------------------------------------------------------------------------------------------------------------------------------------------|
| refresco sin azúcar      | <input type="radio"/> Nunca o menos 1 vez al mes<br><input type="radio"/> 1 a 3 veces mes<br><input checked="" type="radio"/> 1 vez semana<br><input type="radio"/> 2 a 4 veces semana<br><input type="radio"/> 5 a 6 veces semana<br><input type="radio"/> 1 vez al día<br><input type="radio"/> 2 a 3 veces al día<br><input type="radio"/> 5 a 6 veces al día<br><input type="radio"/> más 6 veces al día |
| Agua del grifo           | <input checked="" type="radio"/> Nunca o menos 1 vez al mes<br><input type="radio"/> 1 a 3 veces mes<br><input type="radio"/> 1 vez semana<br><input type="radio"/> 2 a 4 veces semana<br><input type="radio"/> 5 a 6 veces semana<br><input type="radio"/> 1 vez al día<br><input type="radio"/> 2 a 3 veces al día<br><input type="radio"/> 5 a 6 veces al día<br><input type="radio"/> más 6 veces al día |
| agua embotellada sin gas | <input type="radio"/> Nunca o menos 1 vez al mes<br><input type="radio"/> 1 a 3 veces mes<br><input type="radio"/> 1 vez semana<br><input type="radio"/> 2 a 4 veces semana<br><input type="radio"/> 5 a 6 veces semana<br><input type="radio"/> 1 vez al día<br><input type="radio"/> 2 a 3 veces al día<br><input type="radio"/> 5 a 6 veces al día<br><input checked="" type="radio"/> más 6 veces al día |
| agua embotellada con gas | <input checked="" type="radio"/> Nunca o menos 1 vez al mes<br><input type="radio"/> 1 a 3 veces mes<br><input type="radio"/> 1 vez semana<br><input type="radio"/> 2 a 4 veces semana<br><input type="radio"/> 5 a 6 veces semana<br><input type="radio"/> 1 vez al día<br><input type="radio"/> 2 a 3 veces al día<br><input type="radio"/> 5 a 6 veces al día<br><input type="radio"/> más 6 veces al día |
| zumو frutas embasado     | <input type="radio"/> Nunca o menos 1 vez al mes<br><input checked="" type="radio"/> 1 a 3 veces mes<br><input type="radio"/> 1 vez semana<br><input type="radio"/> 2 a 4 veces semana<br><input type="radio"/> 5 a 6 veces semana<br><input type="radio"/> 1 vez al día<br><input type="radio"/> 2 a 3 veces al día<br><input type="radio"/> 5 a 6 veces al día<br><input type="radio"/> más 6 veces al día |
| cafe                     | <input type="radio"/> Nunca o menos 1 vez al mes<br><input checked="" type="radio"/> 1 a 3 veces mes<br><input type="radio"/> 1 vez semana<br><input type="radio"/> 2 a 4 veces semana<br><input type="radio"/> 5 a 6 veces semana<br><input type="radio"/> 1 vez al día<br><input type="radio"/> 2 a 3 veces al día<br><input type="radio"/> 5 a 6 veces al día<br><input type="radio"/> más 6 veces al día |

|                       |                                                                                                                                                                                                                                                                                                                                                                                                              |
|-----------------------|--------------------------------------------------------------------------------------------------------------------------------------------------------------------------------------------------------------------------------------------------------------------------------------------------------------------------------------------------------------------------------------------------------------|
| cafe descafeinado     | <input type="radio"/> Nunca o menos 1 vez al mes<br><input type="radio"/> 1 a 3 veces mes<br><input type="radio"/> 1 vez semana<br><input type="radio"/> 2 a 4 veces semana<br><input type="radio"/> 5 a 6 veces semana<br><input checked="" type="radio"/> 1 vez al día<br><input type="radio"/> 2 a 3 veces al día<br><input type="radio"/> 5 a 6 veces al día<br><input type="radio"/> más 6 veces al día |
| te o infusión         | <input type="radio"/> Nunca o menos 1 vez al mes<br><input type="radio"/> 1 a 3 veces mes<br><input checked="" type="radio"/> 1 vez semana<br><input type="radio"/> 2 a 4 veces semana<br><input type="radio"/> 5 a 6 veces semana<br><input type="radio"/> 1 vez al día<br><input type="radio"/> 2 a 3 veces al día<br><input type="radio"/> 5 a 6 veces al día<br><input type="radio"/> más 6 veces al día |
| sopa o puré verduras  | <input type="radio"/> Nunca o menos 1 vez al mes<br><input type="radio"/> 1 a 3 veces mes<br><input checked="" type="radio"/> 1 vez semana<br><input type="radio"/> 2 a 4 veces semana<br><input type="radio"/> 5 a 6 veces semana<br><input type="radio"/> 1 vez al día<br><input type="radio"/> 2 a 3 veces al día<br><input type="radio"/> 5 a 6 veces al día<br><input type="radio"/> más 6 veces al día |
| croquetas pollo jamón | <input type="radio"/> Nunca o menos 1 vez al mes<br><input type="radio"/> 1 a 3 veces mes<br><input checked="" type="radio"/> 1 vez semana<br><input type="radio"/> 2 a 4 veces semana<br><input type="radio"/> 5 a 6 veces semana<br><input type="radio"/> 1 vez al día<br><input type="radio"/> 2 a 3 veces al día<br><input type="radio"/> 5 a 6 veces al día<br><input type="radio"/> más 6 veces al día |
| croquetas pescado     | <input checked="" type="radio"/> Nunca o menos 1 vez al mes<br><input type="radio"/> 1 a 3 veces mes<br><input type="radio"/> 1 vez semana<br><input type="radio"/> 2 a 4 veces semana<br><input type="radio"/> 5 a 6 veces semana<br><input type="radio"/> 1 vez al día<br><input type="radio"/> 2 a 3 veces al día<br><input type="radio"/> 5 a 6 veces al día<br><input type="radio"/> más 6 veces al día |
| mayonesa              | <input type="radio"/> Nunca o menos 1 vez al mes<br><input type="radio"/> 1 a 3 veces mes<br><input checked="" type="radio"/> 1 vez semana<br><input type="radio"/> 2 a 4 veces semana<br><input type="radio"/> 5 a 6 veces semana<br><input type="radio"/> 1 vez al día<br><input type="radio"/> 2 a 3 veces al día<br><input type="radio"/> 5 a 6 veces al día<br><input type="radio"/> más 6 veces al día |

---

salsa tomate

- ☐ Nunca o menos 1 vez al mes  
☐ 1 a 3 veces mes  
☒ 1 vez semana  
☐ 2 a 4 veces semana  
☐ 5 a 6 veces semana  
☐ 1 vez al día  
☐ 2 a 3 veces al día  
☐ 5 a 6 veces al día  
☐ más 6 veces al día

---

ketchup

- ☒ Nunca o menos 1 vez al mes  
☐ 1 a 3 veces mes  
☐ 1 vez semana  
☐ 2 a 4 veces semana  
☐ 5 a 6 veces semana  
☐ 1 vez al día  
☐ 2 a 3 veces al día  
☐ 5 a 6 veces al día  
☐ más 6 veces al día

---

sal

- ☐ Nunca o menos 1 vez al mes  
☐ 1 a 3 veces mes  
☐ 1 vez semana  
☒ 2 a 4 veces semana  
☐ 5 a 6 veces semana  
☐ 1 vez al día  
☐ 2 a 3 veces al día  
☐ 5 a 6 veces al día  
☐ más 6 veces al día

---

ajo

- ☐ Nunca o menos 1 vez al mes  
☐ 1 a 3 veces mes  
☐ 1 vez semana  
☒ 2 a 4 veces semana  
☐ 5 a 6 veces semana  
☐ 1 vez al día  
☐ 2 a 3 veces al día  
☐ 5 a 6 veces al día  
☐ más 6 veces al día

---

mermelada o miel

- ☐ Nunca o menos 1 vez al mes  
☐ 1 a 3 veces mes  
☒ 1 vez semana  
☐ 2 a 4 veces semana  
☐ 5 a 6 veces semana  
☐ 1 vez al día  
☐ 2 a 3 veces al día  
☐ 5 a 6 veces al día  
☐ más 6 veces al día

---

azúcar

- ☐ Nunca o menos 1 vez al mes  
☐ 1 a 3 veces mes  
☐ 1 vez semana  
☐ 2 a 4 veces semana  
☐ 5 a 6 veces semana  
☒ 1 vez al día  
☐ 2 a 3 veces al día  
☐ 5 a 6 veces al día  
☐ más 6 veces al día

|                                       |                                                                                                                                                                                                                                                                                                                                                                                                                                                                                                                               |
|---------------------------------------|-------------------------------------------------------------------------------------------------------------------------------------------------------------------------------------------------------------------------------------------------------------------------------------------------------------------------------------------------------------------------------------------------------------------------------------------------------------------------------------------------------------------------------|
| Otro alimento                         |                                                                                                                                                                                                                                                                                                                                                                                                                                                                                                                               |
| suplementos vitamínicos               | <input checked="" type="radio"/> si<br><input type="radio"/> no                                                                                                                                                                                                                                                                                                                                                                                                                                                               |
| suplementos vitamínicos               | [*DATA REMOVED*]                                                                                                                                                                                                                                                                                                                                                                                                                                                                                                              |
| dieta previa                          | <input type="radio"/> si<br><input checked="" type="radio"/> no                                                                                                                                                                                                                                                                                                                                                                                                                                                               |
| motivo dieta                          | <input checked="" type="radio"/> no dieta<br><input type="radio"/> control peso<br><input type="radio"/> control colesterol<br><input type="radio"/> control diabetes<br><input type="radio"/> problemas estómago<br><input type="radio"/> problemas vesícula o hepáticos<br><input type="radio"/> HTA o cardiopatía<br><input type="radio"/> problemas renales<br><input type="radio"/> alergia alimentaria<br><input type="radio"/> ácido úrico elevado<br><input type="radio"/> vegetariana<br><input type="radio"/> otros |
| cambio alimentos año previo gestación | <input type="radio"/> si<br><input checked="" type="radio"/> no                                                                                                                                                                                                                                                                                                                                                                                                                                                               |
| cambio lácteos                        | <input type="radio"/> eliminado<br><input type="radio"/> disminuido<br><input type="radio"/> igual<br><input type="radio"/> aumentado<br><input type="radio"/> no sabe                                                                                                                                                                                                                                                                                                                                                        |
| cambio huevos                         | <input type="radio"/> eliminado<br><input type="radio"/> disminuido<br><input type="radio"/> igual<br><input type="radio"/> aumentado<br><input type="radio"/> no sabe                                                                                                                                                                                                                                                                                                                                                        |
| cambio carne                          | <input type="radio"/> eliminado<br><input type="radio"/> disminuido<br><input type="radio"/> igual<br><input type="radio"/> aumentado<br><input type="radio"/> no sabe                                                                                                                                                                                                                                                                                                                                                        |
| cambio pescado                        | <input type="radio"/> eliminado<br><input type="radio"/> disminuido<br><input type="radio"/> igual<br><input type="radio"/> aumentado<br><input type="radio"/> no sabe                                                                                                                                                                                                                                                                                                                                                        |
| cambio verduras                       | <input type="radio"/> eliminado<br><input type="radio"/> disminuido<br><input type="radio"/> igual<br><input type="radio"/> aumentado<br><input type="radio"/> no sabe                                                                                                                                                                                                                                                                                                                                                        |



|                            |                                                                                                                                                                                                                        |
|----------------------------|------------------------------------------------------------------------------------------------------------------------------------------------------------------------------------------------------------------------|
| cambio legumbres           | <input type="radio"/> eliminado<br><input type="radio"/> disminuido<br><input type="radio"/> igual<br><input type="radio"/> aumentado<br><input type="radio"/> no sabe                                                 |
| cambio fruta               | <input type="radio"/> eliminado<br><input type="radio"/> disminuido<br><input type="radio"/> igual<br><input type="radio"/> aumentado<br><input type="radio"/> no sabe                                                 |
| cambio pan                 | <input type="radio"/> eliminado<br><input type="radio"/> disminuido<br><input type="radio"/> igual<br><input type="radio"/> aumentado<br><input type="radio"/> no sabe                                                 |
| cambio aceite oliva        | <input type="radio"/> eliminado<br><input type="radio"/> disminuido<br><input type="radio"/> igual<br><input type="radio"/> aumentado<br><input type="radio"/> no sabe                                                 |
| cambio mante o margarina   | <input type="radio"/> eliminado<br><input type="radio"/> disminuido<br><input type="radio"/> igual<br><input type="radio"/> aumentado<br><input type="radio"/> no sabe                                                 |
| cambio azúcar y dulces     | <input type="radio"/> eliminado<br><input type="radio"/> disminuido<br><input type="radio"/> igual<br><input type="radio"/> aumentado<br><input type="radio"/> no sabe                                                 |
| cambio bebidas alcohólicas | <input type="radio"/> eliminado<br><input type="radio"/> disminuido<br><input type="radio"/> igual<br><input type="radio"/> aumentado<br><input type="radio"/> no sabe                                                 |
| frecuencia comidas fritas  | <input type="radio"/> a diario<br><input type="radio"/> 5 a 6 veces semana<br><input type="radio"/> 2 a 4 veces semana<br><input checked="" type="radio"/> 1 vez semana<br><input type="radio"/> menos de 1 vez semana |
| carne                      | <input type="radio"/> no como<br><input type="radio"/> cruda<br><input type="radio"/> poco hecha<br><input checked="" type="radio"/> hecha<br><input type="radio"/> muy hecha                                          |
| grasa visible carne        | <input checked="" type="radio"/> quita toda<br><input type="radio"/> quita mayoría<br><input type="radio"/> quita un poco<br><input type="radio"/> no quita nada                                                       |

|                                |                                                                                                                                                                                                                                                          |
|--------------------------------|----------------------------------------------------------------------------------------------------------------------------------------------------------------------------------------------------------------------------------------------------------|
| cocina carne                   | <input checked="" type="radio"/> a la plancha<br><input type="radio"/> a la parrilla<br><input type="radio"/> asada<br><input type="radio"/> frita<br><input type="radio"/> guisada                                                                      |
| tostado quemado carne          | <input type="radio"/> nunca<br><input type="radio"/> 1 vez mes<br><input type="radio"/> 2 a 3 veces mes<br><input type="radio"/> 1 vez semana<br><input type="radio"/> 2 a 3 semanas                                                                     |
| tostado quemado pescado        | <input type="radio"/> nunca<br><input type="radio"/> 1 vez mes<br><input checked="" type="radio"/> 2 a 3 veces mes<br><input type="radio"/> 1 vez semana<br><input type="radio"/> 2 a 3 semanas                                                          |
| socarrat paella                | <input type="radio"/> nunca<br><input checked="" type="radio"/> 1 vez mes<br><input type="radio"/> 2 a 3 veces mes<br><input type="radio"/> 1 vez semana<br><input type="radio"/> 2 a 3 semanas                                                          |
| grasa o aceite cocinar         | <input type="radio"/> mantequilla<br><input type="radio"/> margarina<br><input type="radio"/> aceite oliva<br><input checked="" type="radio"/> aceite oliva virgen extra<br><input type="radio"/> aceite vegetal<br><input type="radio"/> mezcla aceites |
| grasa aceite aliñar            | <input type="radio"/> mantequilla<br><input type="radio"/> margarina<br><input type="radio"/> aceite oliva<br><input checked="" type="radio"/> aceite oliva virgen extra<br><input type="radio"/> aceite vegetal<br><input type="radio"/> mezcla aceites |
| grasa aceite freir             | <input type="radio"/> mantequilla<br><input type="radio"/> margarina<br><input type="radio"/> aceite oliva<br><input checked="" type="radio"/> aceite oliva virgen extra<br><input type="radio"/> aceite vegetal<br><input type="radio"/> mezcla aceites |
| Ejercicio cuestionario         | <input checked="" type="radio"/> si<br><input type="radio"/> no                                                                                                                                                                                          |
| horas de sueño incluido siesta | [*DATA REMOVED*]                                                                                                                                                                                                                                         |
| minutos siesta                 | [*DATA REMOVED*]                                                                                                                                                                                                                                         |
| horas televisión semana        | [*DATA REMOVED*]                                                                                                                                                                                                                                         |

|                                        |                                                                                                                                                                                                                                                                                                                                                                           |
|----------------------------------------|---------------------------------------------------------------------------------------------------------------------------------------------------------------------------------------------------------------------------------------------------------------------------------------------------------------------------------------------------------------------------|
| actividad trabajo                      | <input checked="" type="radio"/> casi siempre sentado<br><input type="radio"/> sentado 50 por cien<br><input type="radio"/> casi siempre de pie, quieto<br><input type="radio"/> casi siempre levantado caminando y llevando pocas cosas<br><input type="radio"/> casi siempre levantado, caminando y llevado muchas cosas<br><input type="radio"/> trabajo manual pesado |
| tiempo caminar o bici al día           | <input type="radio"/> casi nunca<br><input type="radio"/> menos 20min día<br><input type="radio"/> 20 a 40 min día<br><input checked="" type="radio"/> 40 a 60 min día<br><input type="radio"/> 1h o 1h y media día<br><input type="radio"/> más de 1h y media al día                                                                                                     |
| tiempo tareas casa al día              | <input type="radio"/> menos de 1h día<br><input checked="" type="radio"/> 1 a 2h día<br><input type="radio"/> 3 a 4h día<br><input type="radio"/> 5 a 6h día<br><input type="radio"/> 7 a 8h día<br><input type="radio"/> más de 8h día                                                                                                                                   |
| tiempo libre televisión ordenador leer | <input type="radio"/> menos 1h día<br><input checked="" type="radio"/> 1h día<br><input type="radio"/> 2h día<br><input type="radio"/> 3h día<br><input type="radio"/> 4h día<br><input type="radio"/> 5 a 6h día<br><input type="radio"/> mas 6h día                                                                                                                     |
| tiempo libre ejercicio o deporte       | <input type="radio"/> menos 1h semana<br><input type="radio"/> 1h semana<br><input type="radio"/> 2h semana<br><input type="radio"/> 3h semana<br><input type="radio"/> 4 a 5h semana<br><input checked="" type="radio"/> mas 5h semana                                                                                                                                   |
| como se considera                      | <input type="radio"/> sedentaria<br><input type="radio"/> poco activa<br><input checked="" type="radio"/> moderadamente activa<br><input type="radio"/> bastante activa<br><input type="radio"/> muy activa<br><input type="radio"/> no sabe                                                                                                                              |
| FUR                                    | [*DATA REMOVED*]                                                                                                                                                                                                                                                                                                                                                          |
| Semanas gestación 2T                   | [*DATA REMOVED*]                                                                                                                                                                                                                                                                                                                                                          |
| Días gestación 2T                      | [*DATA REMOVED*]                                                                                                                                                                                                                                                                                                                                                          |
| DBP 2T                                 | [*DATA REMOVED*]                                                                                                                                                                                                                                                                                                                                                          |
| CC 2T                                  | [*DATA REMOVED*]                                                                                                                                                                                                                                                                                                                                                          |
| AC 2T                                  | [*DATA REMOVED*]                                                                                                                                                                                                                                                                                                                                                          |

|                                                   |                                                                                                                                                                                                 |
|---------------------------------------------------|-------------------------------------------------------------------------------------------------------------------------------------------------------------------------------------------------|
| LF 2T                                             | [*DATA REMOVED*]                                                                                                                                                                                |
| PFE 2T (Hadlock)                                  | [*DATA REMOVED*]                                                                                                                                                                                |
| Semanas gestación 3T                              | [*DATA REMOVED*]                                                                                                                                                                                |
| días 3T                                           | [*DATA REMOVED*]                                                                                                                                                                                |
| DBP 3T                                            | [*DATA REMOVED*]                                                                                                                                                                                |
| CC 3T                                             | [*DATA REMOVED*]                                                                                                                                                                                |
| AC 3T                                             | [*DATA REMOVED*]                                                                                                                                                                                |
| LF 3T                                             | [*DATA REMOVED*]                                                                                                                                                                                |
| PFE 3T (Hadlock)                                  | [*DATA REMOVED*]                                                                                                                                                                                |
| Semanas de gestación final                        | [*DATA REMOVED*]                                                                                                                                                                                |
| dias gestación final                              | [*DATA REMOVED*]                                                                                                                                                                                |
| Localización placenta                             | <input type="radio"/> anterior<br><input type="radio"/> lateral derecha<br><input type="radio"/> lateral izquierda<br><input type="radio"/> posterior<br><input checked="" type="radio"/> fondo |
| Presentación longitudinal cefálica                | <input type="radio"/> no<br><input checked="" type="radio"/> si                                                                                                                                 |
| Dorso                                             | <input checked="" type="radio"/> izquierda anterior<br><input type="radio"/> izquierda posterior<br><input type="radio"/> derecha anterior<br><input type="radio"/> derecha posterior           |
| diámetro biparietal                               | [*DATA REMOVED*]                                                                                                                                                                                |
| Circunferencia craneal                            | [*DATA REMOVED*]                                                                                                                                                                                |
| Circunferencia abdominal                          | [*DATA REMOVED*]                                                                                                                                                                                |
| Longitud de femur                                 | [*DATA REMOVED*]                                                                                                                                                                                |
| tejido celular subcutáneo a nivel del muslo en mm | [*DATA REMOVED*]                                                                                                                                                                                |
| tejido celular subcutáneo en abdomen en mm        | [*DATA REMOVED*]                                                                                                                                                                                |
| Volumen del muslo en cm3                          | [*DATA REMOVED*]                                                                                                                                                                                |
| Peso fetal estimado según fórmula de Hadlock      | [*DATA REMOVED*]                                                                                                                                                                                |

|                                               |                                                                                                                                                          |
|-----------------------------------------------|----------------------------------------------------------------------------------------------------------------------------------------------------------|
| Percentil                                     | [*DATA REMOVED*]                                                                                                                                         |
| Peso fetal estimado según fórmula de Scioscia | <hr/>                                                                                                                                                    |
| Peso fetal estimado según fórmula de LEE      | <hr/>                                                                                                                                                    |
| Tipo de parto                                 | <input type="radio"/> eutocico<br><input checked="" type="radio"/> instrumentado/ventosa<br><input type="radio"/> cesarea                                |
| fecha de nacimiento                           | [*DATA REMOVED*]                                                                                                                                         |
| Días entre exploración y nacimiento           | [*DATA REMOVED*]                                                                                                                                         |
| Peso RN en g                                  | [*DATA REMOVED*]                                                                                                                                         |
| sexo                                          | <input checked="" type="radio"/> mujer<br><input type="radio"/> hombre                                                                                   |
| Apgar 1 minuto                                | [*DATA REMOVED*]                                                                                                                                         |
| Apgar 5 minutos                               | [*DATA REMOVED*]                                                                                                                                         |
| Apgar 10 minutos                              | <hr/>                                                                                                                                                    |
| antecedente Covid durante gestación           | <input type="radio"/> Yes<br><input checked="" type="radio"/> No                                                                                         |
| Nivel de estudios                             | <input type="radio"/> ninguno<br><input type="radio"/> primarios<br><input checked="" type="radio"/> secundarios<br><input type="radio"/> universitarios |

# Base\_datos\_estimacion\_peso\_fetal

|                                       |                                                                                                                                                                                                                                                                                      |
|---------------------------------------|--------------------------------------------------------------------------------------------------------------------------------------------------------------------------------------------------------------------------------------------------------------------------------------|
| Número de identificación participante | 122                                                                                                                                                                                                                                                                                  |
| CODIGO PARTICIPANTE                   |                                                                                                                                                                                                                                                                                      |
| Edad                                  | [*DATA REMOVED*]                                                                                                                                                                                                                                                                     |
| Gestaciones                           | <input checked="" type="radio"/> 1<br><input type="radio"/> 2<br><input type="radio"/> 3<br><input type="radio"/> mas de 3                                                                                                                                                           |
| partos                                | <input checked="" type="radio"/> 0<br><input type="radio"/> 1<br><input type="radio"/> 2<br><input type="radio"/> 3<br><input type="radio"/> mas de 3                                                                                                                                |
| cesáreas                              | <input checked="" type="radio"/> 0<br><input type="radio"/> 1<br><input type="radio"/> 2<br><input type="radio"/> 3<br><input type="radio"/> mas de 3                                                                                                                                |
| Abortos                               | <input checked="" type="radio"/> 0<br><input type="radio"/> 1<br><input type="radio"/> 2<br><input type="radio"/> 3<br><input type="radio"/> mas de 3                                                                                                                                |
| Tipo de gestacion                     | <input checked="" type="radio"/> espontanea<br><input type="radio"/> IAC inseminación artificial conyuge<br><input type="radio"/> IAD inseminación artificial donante<br><input type="radio"/> FIV Fecundación in Vitro<br><input type="radio"/> Ovodon FIV con donación de ovocitos |
| peso previo a embarazo                | [*DATA REMOVED*]                                                                                                                                                                                                                                                                     |
| Ganancia ponderal embarazo            | [*DATA REMOVED*]                                                                                                                                                                                                                                                                     |
| Talla madre                           | [*DATA REMOVED*]                                                                                                                                                                                                                                                                     |
| IMC previo embarazo                   | 31.231409875074366                                                                                                                                                                                                                                                                   |
| Patología obstétrica                  | <input checked="" type="radio"/> no<br><input type="radio"/> si                                                                                                                                                                                                                      |
| Diabetes pregestacional               | <input checked="" type="radio"/> no<br><input type="radio"/> si                                                                                                                                                                                                                      |
| Diabetes gestacional                  | <input checked="" type="radio"/> no<br><input type="radio"/> si                                                                                                                                                                                                                      |

|                                            |                                                                                                                                                                                      |
|--------------------------------------------|--------------------------------------------------------------------------------------------------------------------------------------------------------------------------------------|
| Diabetes gestacional con insulina          | <input checked="" type="radio"/> no<br><input type="radio"/> si                                                                                                                      |
| Diabetes gestacional con dieta y ejercicio | <input checked="" type="radio"/> no<br><input type="radio"/> si                                                                                                                      |
| Percentil fetos previos                    | <input checked="" type="radio"/> Nada<br><input type="radio"/> percentil menor de 10<br><input type="radio"/> percentil entre 10 y 90<br><input type="radio"/> percentil mayor de 90 |
| Exfumadora                                 | <input checked="" type="radio"/> Nada<br><input type="radio"/> menos de 5 años<br><input type="radio"/> 5 a 10 años<br><input type="radio"/> mayor o igual a 10 años                 |
| Hábito tabáquico                           | <input checked="" type="radio"/> no<br><input type="radio"/> si                                                                                                                      |
| fumadora                                   | [*DATA REMOVED*]                                                                                                                                                                     |
| Consumo otros tóxicos                      | <input checked="" type="radio"/> no<br><input type="radio"/> si                                                                                                                      |
| Hb 1T                                      | _____                                                                                                                                                                                |
| Htc 1T                                     | _____                                                                                                                                                                                |
| Hb 2T                                      | _____                                                                                                                                                                                |
| HTC 2T                                     | _____                                                                                                                                                                                |
| Hb 3T                                      | _____                                                                                                                                                                                |
| HTC 3T                                     | _____                                                                                                                                                                                |
| Suplemento FE oral                         | <input checked="" type="radio"/> si<br><input type="radio"/> no                                                                                                                      |
| Suplemento fe iv                           | <input type="radio"/> si<br><input checked="" type="radio"/> no                                                                                                                      |
| Transfusión                                | <input checked="" type="radio"/> no<br><input type="radio"/> si                                                                                                                      |
| Solicitada Vit D                           | <input checked="" type="radio"/> no<br><input type="radio"/> si                                                                                                                      |

|                       |                                                                                                                                                                                                                                                                                                                                                                                                              |
|-----------------------|--------------------------------------------------------------------------------------------------------------------------------------------------------------------------------------------------------------------------------------------------------------------------------------------------------------------------------------------------------------------------------------------------------------|
| Deficit vit D         | <input type="radio"/> no<br><input type="radio"/> si                                                                                                                                                                                                                                                                                                                                                         |
| Suplemento vit D      | <input type="radio"/> si<br><input type="radio"/> no                                                                                                                                                                                                                                                                                                                                                         |
| Dieta, cuestionario   | <input checked="" type="radio"/> si<br><input type="radio"/> no                                                                                                                                                                                                                                                                                                                                              |
| Leche entera          | <input checked="" type="radio"/> Nunca o menos 1 vez al mes<br><input type="radio"/> 1 a 3 veces mes<br><input type="radio"/> 1 vez semana<br><input type="radio"/> 2 a 4 veces semana<br><input type="radio"/> 5 a 6 veces semana<br><input type="radio"/> 1 vez al día<br><input type="radio"/> 2 a 3 veces al día<br><input type="radio"/> 5 a 6 veces al día<br><input type="radio"/> más 6 veces al día |
| Leche semidesnatada   | <input type="radio"/> Nunca o menos 1 vez al mes<br><input type="radio"/> 1 a 3 veces mes<br><input type="radio"/> 1 vez semana<br><input checked="" type="radio"/> 2 a 4 veces semana<br><input type="radio"/> 5 a 6 veces semana<br><input type="radio"/> 1 vez al día<br><input type="radio"/> 2 a 3 veces al día<br><input type="radio"/> 5 a 6 veces al día<br><input type="radio"/> mas 6 veces al día |
| Leche desnatada       | <input checked="" type="radio"/> Nunca o menos 1 vez al mes<br><input type="radio"/> 1 a 3 veces mes<br><input type="radio"/> 1 vez semana<br><input type="radio"/> 2 a 4 veces semana<br><input type="radio"/> 5 a 6 veces semana<br><input type="radio"/> 1 vez al día<br><input type="radio"/> 2 a 3 veces al día<br><input type="radio"/> 5 a 6 veces al día<br><input type="radio"/> más 6 veces al día |
| Leche condensada      | <input checked="" type="radio"/> Nunca o menos 1 vez al mes<br><input type="radio"/> 1 a 3 veces mes<br><input type="radio"/> 1 vez semana<br><input type="radio"/> 2 a 4 veces semana<br><input type="radio"/> 5 a 6 veces semana<br><input type="radio"/> 1 vez al día<br><input type="radio"/> 2 a 3 veces al día<br><input type="radio"/> 5 a 6 veces al día<br><input type="radio"/> más 6 veces al día |
| nata o crema de leche | <input checked="" type="radio"/> Nunca o menos 1 vez al mes<br><input type="radio"/> 1 a 3 veces mes<br><input type="radio"/> 1 vez semana<br><input type="radio"/> 2 a 4 veces semana<br><input type="radio"/> 5 a 6 veces semana<br><input type="radio"/> 1 vez al día<br><input type="radio"/> 2 a 3 veces al día<br><input type="radio"/> 5 a 6 veces al día<br><input type="radio"/> más 6 veces al día |



|                                             |                                                                                                                                                                                                                                                                                                                                                                                                              |
|---------------------------------------------|--------------------------------------------------------------------------------------------------------------------------------------------------------------------------------------------------------------------------------------------------------------------------------------------------------------------------------------------------------------------------------------------------------------|
| Yogurt Entero                               | <input checked="" type="radio"/> Nunca o menos 1 vez al mes<br><input type="radio"/> 1 a 3 veces mes<br><input type="radio"/> 1 vez semana<br><input type="radio"/> 2 a 4 veces semana<br><input type="radio"/> 5 a 6 veces semana<br><input type="radio"/> 1 vez al día<br><input type="radio"/> 2 a 3 veces al día<br><input type="radio"/> 5 a 6 veces al día<br><input type="radio"/> más 6 veces al día |
| Yogurt desnatado                            | <input type="radio"/> Nunca o menos 1 vez al mes<br><input type="radio"/> 1 a 3 veces mes<br><input type="radio"/> 1 vez semana<br><input checked="" type="radio"/> 2 a 4 veces semana<br><input type="radio"/> 5 a 6 veces semana<br><input type="radio"/> 1 vez al día<br><input type="radio"/> 2 a 3 veces al día<br><input type="radio"/> 5 a 6 veces al día<br><input type="radio"/> más 6 veces al día |
| 100g requesón o queso blando o queso fresco | <input type="radio"/> Nunca o menos 1 vez al mes<br><input checked="" type="radio"/> 1 a 3 veces mes<br><input type="radio"/> 1 vez semana<br><input type="radio"/> 2 a 4 veces semana<br><input type="radio"/> 5 a 6 veces semana<br><input type="radio"/> 1 vez al día<br><input type="radio"/> 2 a 3 veces al día<br><input type="radio"/> 5 a 6 veces al día<br><input type="radio"/> más 6 veces al día |
| queso curado o semicurado o cremoso         | <input type="radio"/> Nunca o menos 1 vez al mes<br><input type="radio"/> 1 a 3 veces mes<br><input type="radio"/> 1 vez semana<br><input checked="" type="radio"/> 2 a 4 veces semana<br><input type="radio"/> 5 a 6 veces semana<br><input type="radio"/> 1 vez al día<br><input type="radio"/> 2 a 3 veces al día<br><input type="radio"/> 5 a 6 veces al día<br><input type="radio"/> más 6 veces al día |
| natillas flan pudding                       | <input checked="" type="radio"/> Nunca o menos 1 vez al mes<br><input type="radio"/> 1 a 3 veces mes<br><input type="radio"/> 1 vez semana<br><input type="radio"/> 2 a 4 veces semana<br><input type="radio"/> 5 a 6 veces semana<br><input type="radio"/> 1 vez al día<br><input type="radio"/> 2 a 3 veces al día<br><input type="radio"/> 5 a 6 veces al día<br><input type="radio"/> más 6 veces al día |
| Helado                                      | <input type="radio"/> Nunca o menos 1 vez al mes<br><input type="radio"/> 1 a 3 veces mes<br><input checked="" type="radio"/> 1 vez semana<br><input type="radio"/> 2 a 4 veces semana<br><input type="radio"/> 5 a 6 veces semana<br><input type="radio"/> 1 vez al día<br><input type="radio"/> 2 a 3 veces al día<br><input type="radio"/> 5 a 6 veces al día<br><input type="radio"/> más 6 veces al día |

|                                      |                                                                                                                                                                                                                                                                                                                                                                                                              |
|--------------------------------------|--------------------------------------------------------------------------------------------------------------------------------------------------------------------------------------------------------------------------------------------------------------------------------------------------------------------------------------------------------------------------------------------------------------|
| huevo                                | <input type="radio"/> Nunca o menos 1 vez al mes<br><input type="radio"/> 1 a 3 veces mes<br><input type="radio"/> 1 vez semana<br><input checked="" type="radio"/> 2 a 4 veces semana<br><input type="radio"/> 5 a 6 veces semana<br><input type="radio"/> 1 vez al día<br><input type="radio"/> 2 a 3 veces al día<br><input type="radio"/> 5 a 6 veces al día<br><input type="radio"/> más 6 veces al día |
| Pollo con piel                       | <input checked="" type="radio"/> Nunca o menos 1 vez al mes<br><input type="radio"/> 1 a 3 veces mes<br><input type="radio"/> 1 vez semana<br><input type="radio"/> 2 a 4 veces semana<br><input type="radio"/> 5 a 6 veces semana<br><input type="radio"/> 1 vez al día<br><input type="radio"/> 2 a 3 veces al día<br><input type="radio"/> 5 a 6 veces al día<br><input type="radio"/> más 6 veces al día |
| pollo sin piel                       | <input type="radio"/> Nunca o menos 1 vez al mes<br><input type="radio"/> 1 a 3 veces mes<br><input type="radio"/> 1 vez semana<br><input checked="" type="radio"/> 2 a 4 veces semana<br><input type="radio"/> 5 a 6 veces semana<br><input type="radio"/> 1 vez al día<br><input type="radio"/> 2 a 3 veces al día<br><input type="radio"/> 5 a 6 veces al día<br><input type="radio"/> más 6 veces al día |
| Ternera o cerdo o cordero            | <input type="radio"/> Nunca o menos 1 vez al mes<br><input type="radio"/> 1 a 3 veces mes<br><input checked="" type="radio"/> 1 vez semana<br><input type="radio"/> 2 a 4 veces semana<br><input type="radio"/> 5 a 6 veces semana<br><input type="radio"/> 1 vez al día<br><input type="radio"/> 2 a 3 veces al día<br><input type="radio"/> 5 a 6 veces al día<br><input type="radio"/> más 6 veces al día |
| carne caza: Conejo o codorniz o pato | <input checked="" type="radio"/> Nunca o menos 1 vez al mes<br><input type="radio"/> 1 a 3 veces mes<br><input type="radio"/> 1 vez semana<br><input type="radio"/> 2 a 4 veces semana<br><input type="radio"/> 5 a 6 veces semana<br><input type="radio"/> 1 vez al día<br><input type="radio"/> 2 a 3 veces al día<br><input type="radio"/> 5 a 6 veces al día<br><input type="radio"/> más 6 veces al día |
| Hígado de ternera o cerdo o pollo    | <input checked="" type="radio"/> Nunca o menos 1 vez al mes<br><input type="radio"/> 1 a 3 veces mes<br><input type="radio"/> 1 vez semana<br><input type="radio"/> 2 a 4 veces semana<br><input type="radio"/> 5 a 6 veces semana<br><input type="radio"/> 1 vez al día<br><input type="radio"/> 2 a 3 veces al día<br><input type="radio"/> 5 a 6 veces al día<br><input type="radio"/> más 6 veces al día |

---

Vísceras

- ☒ Nunca o menos 1 vez al mes  
☐ 1 a 3 veces mes  
☐ 1 vez semana  
☐ 2 a 4 veces semana  
☐ 5 a 6 veces semana  
☐ 1 vez al día  
☐ 2 a 3 veces al día  
☐ 5 a 6 veces al día  
☐ más 6 veces al día

---

Embutido

- ☐ Nunca o menos 1 vez al mes  
☐ 1 a 3 veces mes  
☐ 1 vez semana  
☒ 2 a 4 veces semana  
☐ 5 a 6 veces semana  
☐ 1 vez al día  
☐ 2 a 3 veces al día  
☐ 5 a 6 veces al día  
☐ más 6 veces al día

---

Salchicha o similar

- ☒ Nunca o menos 1 vez al mes  
☐ 1 a 3 veces mes  
☐ 1 vez semana  
☐ 2 a 4 veces semana  
☐ 5 a 6 veces semana  
☐ 1 vez al día  
☐ 2 a 3 veces al día  
☐ 5 a 6 veces al día  
☐ más 6 veces al día

---

Pate o foiegras

- ☒ Nunca o menos 1 vez al mes  
☐ 1 a 3 veces mes  
☐ 1 vez semana  
☐ 2 a 4 veces semana  
☐ 5 a 6 veces semana  
☐ 1 vez al día  
☐ 2 a 3 veces al día  
☐ 5 a 6 veces al día  
☐ más 6 veces al día

---

Hamburguesa

- ☐ Nunca o menos 1 vez al mes  
☐ 1 a 3 veces mes  
☒ 1 vez semana  
☐ 2 a 4 veces semana  
☐ 5 a 6 veces semana  
☐ 1 vez al día  
☐ 2 a 3 veces al día  
☐ 5 a 6 veces al día  
☐ más 6 veces al día

---

tocino o bacon

- ☐ Nunca o menos 1 vez al mes  
☐ 1 a 3 veces mes  
☒ 1 vez semana  
☐ 2 a 4 veces semana  
☐ 5 a 6 veces semana  
☐ 1 vez al día  
☐ 2 a 3 veces al día  
☐ 5 a 6 veces al día  
☐ más 6 veces al día

---

Pescado frito

- ☐ Nunca o menos 1 vez al mes  
☒ 1 a 3 veces mes  
☐ 1 vez semana  
☐ 2 a 4 veces semana  
☐ 5 a 6 veces semana  
☐ 1 vez al día  
☐ 2 a 3 veces al día  
☐ 5 a 6 veces al día  
☐ más 6 veces al día

---

pescado hervido blanco

- ☐ Nunca o menos 1 vez al mes  
☐ 1 a 3 veces mes  
☒ 1 vez semana  
☐ 2 a 4 veces semana  
☐ 5 a 6 veces semana  
☐ 1 vez al día  
☐ 2 a 3 veces al día  
☐ 5 a 6 veces al día  
☐ más 6 veces al día

---

pescado hervido azul

- ☐ Nunca o menos 1 vez al mes  
☐ 1 a 3 veces mes  
☒ 1 vez semana  
☐ 2 a 4 veces semana  
☐ 5 a 6 veces semana  
☐ 1 vez al día  
☐ 2 a 3 veces al día  
☐ 5 a 6 veces al día  
☐ más 6 veces al día

---

otros pescado azul

- ☐ Nunca o menos 1 vez al mes  
☐ 1 a 3 veces mes  
☒ 1 vez semana  
☐ 2 a 4 veces semana  
☐ 5 a 6 veces semana  
☐ 1 vez al día  
☐ 2 a 3 veces al día  
☐ 5 a 6 veces al día  
☐ más 6 veces al día

---

atun conserva

- ☐ Nunca o menos 1 vez al mes  
☐ 1 a 3 veces mes  
☐ 1 vez semana  
☒ 2 a 4 veces semana  
☐ 5 a 6 veces semana  
☐ 1 vez al día  
☐ 2 a 3 veces al día  
☐ 5 a 6 veces al día  
☐ más 6 veces al día

---

sardina conserva

- ☒ Nunca o menos 1 vez al mes  
☐ 1 a 3 veces mes  
☐ 1 vez semana  
☐ 2 a 4 veces semana  
☐ 5 a 6 veces semana  
☐ 1 vez al día  
☐ 2 a 3 veces al día  
☐ 5 a 6 veces al día  
☐ más 6 veces al día

|                                         |                                                                                                                                                                                                                                                                                                                                                                                                              |
|-----------------------------------------|--------------------------------------------------------------------------------------------------------------------------------------------------------------------------------------------------------------------------------------------------------------------------------------------------------------------------------------------------------------------------------------------------------------|
| pescado ahumado                         | <input checked="" type="radio"/> Nunca o menos 1 vez al mes<br><input type="radio"/> 1 a 3 veces mes<br><input type="radio"/> 1 vez semana<br><input type="radio"/> 2 a 4 veces semana<br><input type="radio"/> 5 a 6 veces semana<br><input type="radio"/> 1 vez al día<br><input type="radio"/> 2 a 3 veces al día<br><input type="radio"/> 5 a 6 veces al día<br><input type="radio"/> más 6 veces al día |
| almejas o mejillones o ostras unos 100g | <input checked="" type="radio"/> Nunca o menos 1 vez al mes<br><input type="radio"/> 1 a 3 veces mes<br><input type="radio"/> 1 vez semana<br><input type="radio"/> 2 a 4 veces semana<br><input type="radio"/> 5 a 6 veces semana<br><input type="radio"/> 1 vez al día<br><input type="radio"/> 2 a 3 veces al día<br><input type="radio"/> 5 a 6 veces al día<br><input type="radio"/> más 6 veces al día |
| calamar o chipiron o sepia unos 100g    | <input type="radio"/> Nunca o menos 1 vez al mes<br><input checked="" type="radio"/> 1 a 3 veces mes<br><input type="radio"/> 1 vez semana<br><input type="radio"/> 2 a 4 veces semana<br><input type="radio"/> 5 a 6 veces semana<br><input type="radio"/> 1 vez al día<br><input type="radio"/> 2 a 3 veces al día<br><input type="radio"/> 5 a 6 veces al día<br><input type="radio"/> más 6 veces al día |
| marisco unos 100g                       | <input type="radio"/> Nunca o menos 1 vez al mes<br><input checked="" type="radio"/> 1 a 3 veces mes<br><input type="radio"/> 1 vez semana<br><input type="radio"/> 2 a 4 veces semana<br><input type="radio"/> 5 a 6 veces semana<br><input type="radio"/> 1 vez al día<br><input type="radio"/> 2 a 3 veces al día<br><input type="radio"/> 5 a 6 veces al día<br><input type="radio"/> más 6 veces al día |
| Espinacas o acelgas cocinadas           | <input type="radio"/> Nunca o menos 1 vez al mes<br><input checked="" type="radio"/> 1 a 3 veces mes<br><input type="radio"/> 1 vez semana<br><input type="radio"/> 2 a 4 veces semana<br><input type="radio"/> 5 a 6 veces semana<br><input type="radio"/> 1 vez al día<br><input type="radio"/> 2 a 3 veces al día<br><input type="radio"/> 5 a 6 veces al día<br><input type="radio"/> más 6 veces al día |
| Col o coliflor o brocoli cocinado       | <input type="radio"/> Nunca o menos 1 vez al mes<br><input checked="" type="radio"/> 1 a 3 veces mes<br><input type="radio"/> 1 vez semana<br><input type="radio"/> 2 a 4 veces semana<br><input type="radio"/> 5 a 6 veces semana<br><input type="radio"/> 1 vez al día<br><input type="radio"/> 2 a 3 veces al día<br><input type="radio"/> 5 a 6 veces al día<br><input type="radio"/> más 6 veces al día |

---

Lechuga o endivia o escarola

- ☐ Nunca o menos 1 vez al mes  
☐ 1 a 3 veces mes  
☐ 1 vez semana  
☐ 2 a 4 veces semana  
☒ 5 a 6 veces semana  
☐ 1 vez al día  
☐ 2 a 3 veces al día  
☐ 5 a 6 veces al día  
☐ más 6 veces al día

---

tomate ensalada

- ☐ Nunca o menos 1 vez al mes  
☐ 1 a 3 veces mes  
☐ 1 vez semana  
☐ 2 a 4 veces semana  
☐ 5 a 6 veces semana  
☒ 1 vez al día  
☐ 2 a 3 veces al día  
☐ 5 a 6 veces al día  
☐ más 6 veces al día

---

cebolla

- ☐ Nunca o menos 1 vez al mes  
☐ 1 a 3 veces mes  
☐ 1 vez semana  
☐ 2 a 4 veces semana  
☐ 5 a 6 veces semana  
☒ 1 vez al día  
☐ 2 a 3 veces al día  
☐ 5 a 6 veces al día  
☐ más 6 veces al día

---

Zanahoria o calabaza

- ☐ Nunca o menos 1 vez al mes  
☐ 1 a 3 veces mes  
☐ 1 vez semana  
☒ 2 a 4 veces semana  
☐ 5 a 6 veces semana  
☐ 1 vez al día  
☐ 2 a 3 veces al día  
☐ 5 a 6 veces al día  
☐ más 6 veces al día

---

Judías verdes

- ☐ Nunca o menos 1 vez al mes  
☐ 1 a 3 veces mes  
☒ 1 vez semana  
☐ 2 a 4 veces semana  
☐ 5 a 6 veces semana  
☐ 1 vez al día  
☐ 2 a 3 veces al día  
☐ 5 a 6 veces al día  
☐ más 6 veces al día

---

Berenjena o calabacin o pepino

- ☐ Nunca o menos 1 vez al mes  
☐ 1 a 3 veces mes  
☐ 1 vez semana  
☐ 2 a 4 veces semana  
☐ 5 a 6 veces semana  
☒ 1 vez al día  
☐ 2 a 3 veces al día  
☐ 5 a 6 veces al día  
☐ más 6 veces al día

---

|          |                                                                                                                                                                                                                                                                                                                                                                                                              |
|----------|--------------------------------------------------------------------------------------------------------------------------------------------------------------------------------------------------------------------------------------------------------------------------------------------------------------------------------------------------------------------------------------------------------------|
| pimiento | <input type="radio"/> Nunca o menos 1 vez al mes<br><input type="radio"/> 1 a 3 veces mes<br><input type="radio"/> 1 vez semana<br><input checked="" type="radio"/> 2 a 4 veces semana<br><input type="radio"/> 5 a 6 veces semana<br><input type="radio"/> 1 vez al día<br><input type="radio"/> 2 a 3 veces al día<br><input type="radio"/> 5 a 6 veces al día<br><input type="radio"/> más 6 veces al día |
|----------|--------------------------------------------------------------------------------------------------------------------------------------------------------------------------------------------------------------------------------------------------------------------------------------------------------------------------------------------------------------------------------------------------------------|

---

|           |                                                                                                                                                                                                                                                                                                                                                                                                              |
|-----------|--------------------------------------------------------------------------------------------------------------------------------------------------------------------------------------------------------------------------------------------------------------------------------------------------------------------------------------------------------------------------------------------------------------|
| alcachofa | <input type="radio"/> Nunca o menos 1 vez al mes<br><input checked="" type="radio"/> 1 a 3 veces mes<br><input type="radio"/> 1 vez semana<br><input type="radio"/> 2 a 4 veces semana<br><input type="radio"/> 5 a 6 veces semana<br><input type="radio"/> 1 vez al día<br><input type="radio"/> 2 a 3 veces al día<br><input type="radio"/> 5 a 6 veces al día<br><input type="radio"/> más 6 veces al día |
|-----------|--------------------------------------------------------------------------------------------------------------------------------------------------------------------------------------------------------------------------------------------------------------------------------------------------------------------------------------------------------------------------------------------------------------|

---

|            |                                                                                                                                                                                                                                                                                                                                                                                                              |
|------------|--------------------------------------------------------------------------------------------------------------------------------------------------------------------------------------------------------------------------------------------------------------------------------------------------------------------------------------------------------------------------------------------------------------|
| espárragos | <input type="radio"/> Nunca o menos 1 vez al mes<br><input checked="" type="radio"/> 1 a 3 veces mes<br><input type="radio"/> 1 vez semana<br><input type="radio"/> 2 a 4 veces semana<br><input type="radio"/> 5 a 6 veces semana<br><input type="radio"/> 1 vez al día<br><input type="radio"/> 2 a 3 veces al día<br><input type="radio"/> 5 a 6 veces al día<br><input type="radio"/> más 6 veces al día |
|------------|--------------------------------------------------------------------------------------------------------------------------------------------------------------------------------------------------------------------------------------------------------------------------------------------------------------------------------------------------------------------------------------------------------------|

---

|              |                                                                                                                                                                                                                                                                                                                                                                                                              |
|--------------|--------------------------------------------------------------------------------------------------------------------------------------------------------------------------------------------------------------------------------------------------------------------------------------------------------------------------------------------------------------------------------------------------------------|
| maíz hervido | <input type="radio"/> Nunca o menos 1 vez al mes<br><input type="radio"/> 1 a 3 veces mes<br><input type="radio"/> 1 vez semana<br><input checked="" type="radio"/> 2 a 4 veces semana<br><input type="radio"/> 5 a 6 veces semana<br><input type="radio"/> 1 vez al día<br><input type="radio"/> 2 a 3 veces al día<br><input type="radio"/> 5 a 6 veces al día<br><input type="radio"/> más 6 veces al día |
|--------------|--------------------------------------------------------------------------------------------------------------------------------------------------------------------------------------------------------------------------------------------------------------------------------------------------------------------------------------------------------------------------------------------------------------|

---

|           |                                                                                                                                                                                                                                                                                                                                                                                                              |
|-----------|--------------------------------------------------------------------------------------------------------------------------------------------------------------------------------------------------------------------------------------------------------------------------------------------------------------------------------------------------------------------------------------------------------------|
| legumbres | <input type="radio"/> Nunca o menos 1 vez al mes<br><input type="radio"/> 1 a 3 veces mes<br><input checked="" type="radio"/> 1 vez semana<br><input type="radio"/> 2 a 4 veces semana<br><input type="radio"/> 5 a 6 veces semana<br><input type="radio"/> 1 vez al día<br><input type="radio"/> 2 a 3 veces al día<br><input type="radio"/> 5 a 6 veces al día<br><input type="radio"/> más 6 veces al día |
|-----------|--------------------------------------------------------------------------------------------------------------------------------------------------------------------------------------------------------------------------------------------------------------------------------------------------------------------------------------------------------------------------------------------------------------|

---

|                       |                                                                                                                                                                                                                                                                                                                                                                                                              |
|-----------------------|--------------------------------------------------------------------------------------------------------------------------------------------------------------------------------------------------------------------------------------------------------------------------------------------------------------------------------------------------------------------------------------------------------------|
| naranjas o mandarinas | <input type="radio"/> Nunca o menos 1 vez al mes<br><input type="radio"/> 1 a 3 veces mes<br><input type="radio"/> 1 vez semana<br><input checked="" type="radio"/> 2 a 4 veces semana<br><input type="radio"/> 5 a 6 veces semana<br><input type="radio"/> 1 vez al día<br><input type="radio"/> 2 a 3 veces al día<br><input type="radio"/> 5 a 6 veces al día<br><input type="radio"/> más 6 veces al día |
|-----------------------|--------------------------------------------------------------------------------------------------------------------------------------------------------------------------------------------------------------------------------------------------------------------------------------------------------------------------------------------------------------------------------------------------------------|

---

|                       |                                                                                                                                                                                                                                                                                                                                                                                                              |
|-----------------------|--------------------------------------------------------------------------------------------------------------------------------------------------------------------------------------------------------------------------------------------------------------------------------------------------------------------------------------------------------------------------------------------------------------|
| zum natural fruta     | <input checked="" type="radio"/> Nunca o menos 1 vez al mes<br><input type="radio"/> 1 a 3 veces mes<br><input type="radio"/> 1 vez semana<br><input type="radio"/> 2 a 4 veces semana<br><input type="radio"/> 5 a 6 veces semana<br><input type="radio"/> 1 vez al día<br><input type="radio"/> 2 a 3 veces al día<br><input type="radio"/> 5 a 6 veces al día<br><input type="radio"/> más 6 veces al día |
| platano               | <input type="radio"/> Nunca o menos 1 vez al mes<br><input type="radio"/> 1 a 3 veces mes<br><input type="radio"/> 1 vez semana<br><input checked="" type="radio"/> 2 a 4 veces semana<br><input type="radio"/> 5 a 6 veces semana<br><input type="radio"/> 1 vez al día<br><input type="radio"/> 2 a 3 veces al día<br><input type="radio"/> 5 a 6 veces al día<br><input type="radio"/> más 6 veces al día |
| manzana o pera        | <input type="radio"/> Nunca o menos 1 vez al mes<br><input type="radio"/> 1 a 3 veces mes<br><input type="radio"/> 1 vez semana<br><input checked="" type="radio"/> 2 a 4 veces semana<br><input type="radio"/> 5 a 6 veces semana<br><input type="radio"/> 1 vez al día<br><input type="radio"/> 2 a 3 veces al día<br><input type="radio"/> 5 a 6 veces al día<br><input type="radio"/> más 6 veces al día |
| melocotón o nectarina | <input type="radio"/> Nunca o menos 1 vez al mes<br><input type="radio"/> 1 a 3 veces mes<br><input type="radio"/> 1 vez semana<br><input checked="" type="radio"/> 2 a 4 veces semana<br><input type="radio"/> 5 a 6 veces semana<br><input type="radio"/> 1 vez al día<br><input type="radio"/> 2 a 3 veces al día<br><input type="radio"/> 5 a 6 veces al día<br><input type="radio"/> más 6 veces al día |
| sandia o melon        | <input type="radio"/> Nunca o menos 1 vez al mes<br><input type="radio"/> 1 a 3 veces mes<br><input type="radio"/> 1 vez semana<br><input type="radio"/> 2 a 4 veces semana<br><input checked="" type="radio"/> 5 a 6 veces semana<br><input type="radio"/> 1 vez al día<br><input type="radio"/> 2 a 3 veces al día<br><input type="radio"/> 5 a 6 veces al día<br><input type="radio"/> más 6 veces al día |
| uva                   | <input type="radio"/> Nunca o menos 1 vez al mes<br><input type="radio"/> 1 a 3 veces mes<br><input type="radio"/> 1 vez semana<br><input checked="" type="radio"/> 2 a 4 veces semana<br><input type="radio"/> 5 a 6 veces semana<br><input type="radio"/> 1 vez al día<br><input type="radio"/> 2 a 3 veces al día<br><input type="radio"/> 5 a 6 veces al día<br><input type="radio"/> más 6 veces al día |



---

bruna o ciruela

- ☒ Nunca o menos 1 vez al mes  
☐ 1 a 3 veces mes  
☐ 1 vez semana  
☐ 2 a 4 veces semana  
☐ 5 a 6 veces semana  
☐ 1 vez al día  
☐ 2 a 3 veces al día  
☐ 5 a 6 veces al día  
☐ más 6 veces al día

---

kiwi

- ☒ Nunca o menos 1 vez al mes  
☐ 1 a 3 veces mes  
☐ 1 vez semana  
☐ 2 a 4 veces semana  
☐ 5 a 6 veces semana  
☐ 1 vez al día  
☐ 2 a 3 veces al día  
☐ 5 a 6 veces al día  
☐ más 6 veces al día

---

aceituna

- ☐ Nunca o menos 1 vez al mes  
☒ 1 a 3 veces mes  
☐ 1 vez semana  
☐ 2 a 4 veces semana  
☐ 5 a 6 veces semana  
☐ 1 vez al día  
☐ 2 a 3 veces al día  
☐ 5 a 6 veces al día  
☐ más 6 veces al día

---

frutos secos

- ☐ Nunca o menos 1 vez al mes  
☒ 1 a 3 veces mes  
☐ 1 vez semana  
☐ 2 a 4 veces semana  
☐ 5 a 6 veces semana  
☐ 1 vez al día  
☐ 2 a 3 veces al día  
☐ 5 a 6 veces al día  
☐ más 6 veces al día

---

pan blanco

- ☐ Nunca o menos 1 vez al mes  
☐ 1 a 3 veces mes  
☐ 1 vez semana  
☐ 2 a 4 veces semana  
☐ 5 a 6 veces semana  
☒ 1 vez al día  
☐ 2 a 3 veces al día  
☐ 5 a 6 veces al día  
☐ más 6 veces al día

---

pan integral

- ☒ Nunca o menos 1 vez al mes  
☐ 1 a 3 veces mes  
☐ 1 vez semana  
☐ 2 a 4 veces semana  
☐ 5 a 6 veces semana  
☐ 1 vez al día  
☐ 2 a 3 veces al día  
☐ 5 a 6 veces al día  
☐ más 6 veces al día

|                          |                                                                                                                                                                                                                                                                                                                                                                                                              |
|--------------------------|--------------------------------------------------------------------------------------------------------------------------------------------------------------------------------------------------------------------------------------------------------------------------------------------------------------------------------------------------------------------------------------------------------------|
| cereales desayuno        | <input checked="" type="radio"/> Nunca o menos 1 vez al mes<br><input type="radio"/> 1 a 3 veces mes<br><input type="radio"/> 1 vez semana<br><input type="radio"/> 2 a 4 veces semana<br><input type="radio"/> 5 a 6 veces semana<br><input type="radio"/> 1 vez al día<br><input type="radio"/> 2 a 3 veces al día<br><input type="radio"/> 5 a 6 veces al día<br><input type="radio"/> más 6 veces al día |
| patatas fritas           | <input type="radio"/> Nunca o menos 1 vez al mes<br><input checked="" type="radio"/> 1 a 3 veces mes<br><input type="radio"/> 1 vez semana<br><input type="radio"/> 2 a 4 veces semana<br><input type="radio"/> 5 a 6 veces semana<br><input type="radio"/> 1 vez al día<br><input type="radio"/> 2 a 3 veces al día<br><input type="radio"/> 5 a 6 veces al día<br><input type="radio"/> más 6 veces al día |
| patatas cocidas o asadas | <input type="radio"/> Nunca o menos 1 vez al mes<br><input type="radio"/> 1 a 3 veces mes<br><input type="radio"/> 1 vez semana<br><input checked="" type="radio"/> 2 a 4 veces semana<br><input type="radio"/> 5 a 6 veces semana<br><input type="radio"/> 1 vez al día<br><input type="radio"/> 2 a 3 veces al día<br><input type="radio"/> 5 a 6 veces al día<br><input type="radio"/> más 6 veces al día |
| bolsa papas              | <input type="radio"/> Nunca o menos 1 vez al mes<br><input type="radio"/> 1 a 3 veces mes<br><input checked="" type="radio"/> 1 vez semana<br><input type="radio"/> 2 a 4 veces semana<br><input type="radio"/> 5 a 6 veces semana<br><input type="radio"/> 1 vez al día<br><input type="radio"/> 2 a 3 veces al día<br><input type="radio"/> 5 a 6 veces al día<br><input type="radio"/> más 6 veces al día |
| arroz cocinado           | <input type="radio"/> Nunca o menos 1 vez al mes<br><input type="radio"/> 1 a 3 veces mes<br><input checked="" type="radio"/> 1 vez semana<br><input type="radio"/> 2 a 4 veces semana<br><input type="radio"/> 5 a 6 veces semana<br><input type="radio"/> 1 vez al día<br><input type="radio"/> 2 a 3 veces al día<br><input type="radio"/> 5 a 6 veces al día<br><input type="radio"/> más 6 veces al día |
| pasta                    | <input type="radio"/> Nunca o menos 1 vez al mes<br><input type="radio"/> 1 a 3 veces mes<br><input checked="" type="radio"/> 1 vez semana<br><input type="radio"/> 2 a 4 veces semana<br><input type="radio"/> 5 a 6 veces semana<br><input type="radio"/> 1 vez al día<br><input type="radio"/> 2 a 3 veces al día<br><input type="radio"/> 5 a 6 veces al día<br><input type="radio"/> más 6 veces al día |

|                     |                                                                                                                                                                                                                                                                                                                                                                                                              |
|---------------------|--------------------------------------------------------------------------------------------------------------------------------------------------------------------------------------------------------------------------------------------------------------------------------------------------------------------------------------------------------------------------------------------------------------|
| pizza               | <input type="radio"/> Nunca o menos 1 vez al mes<br><input type="radio"/> 1 a 3 veces mes<br><input checked="" type="radio"/> 1 vez semana<br><input type="radio"/> 2 a 4 veces semana<br><input type="radio"/> 5 a 6 veces semana<br><input type="radio"/> 1 vez al día<br><input type="radio"/> 2 a 3 veces al día<br><input type="radio"/> 5 a 6 veces al día<br><input type="radio"/> más 6 veces al día |
| aceite oliva        | <input type="radio"/> Nunca o menos 1 vez al mes<br><input type="radio"/> 1 a 3 veces mes<br><input type="radio"/> 1 vez semana<br><input type="radio"/> 2 a 4 veces semana<br><input type="radio"/> 5 a 6 veces semana<br><input checked="" type="radio"/> 1 vez al día<br><input type="radio"/> 2 a 3 veces al día<br><input type="radio"/> 5 a 6 veces al día<br><input type="radio"/> más 6 veces al día |
| otros aceites       | <input checked="" type="radio"/> Nunca o menos 1 vez al mes<br><input type="radio"/> 1 a 3 veces mes<br><input type="radio"/> 1 vez semana<br><input type="radio"/> 2 a 4 veces semana<br><input type="radio"/> 5 a 6 veces semana<br><input type="radio"/> 1 vez al día<br><input type="radio"/> 2 a 3 veces al día<br><input type="radio"/> 5 a 6 veces al día<br><input type="radio"/> más 6 veces al día |
| margarina           | <input type="radio"/> Nunca o menos 1 vez al mes<br><input type="radio"/> 1 a 3 veces mes<br><input checked="" type="radio"/> 1 vez semana<br><input type="radio"/> 2 a 4 veces semana<br><input type="radio"/> 5 a 6 veces semana<br><input type="radio"/> 1 vez al día<br><input type="radio"/> 2 a 3 veces al día<br><input type="radio"/> 5 a 6 veces al día<br><input type="radio"/> más 6 veces al día |
| mantequilla         | <input checked="" type="radio"/> Nunca o menos 1 vez al mes<br><input type="radio"/> 1 a 3 veces mes<br><input type="radio"/> 1 vez semana<br><input type="radio"/> 2 a 4 veces semana<br><input type="radio"/> 5 a 6 veces semana<br><input type="radio"/> 1 vez al día<br><input type="radio"/> 2 a 3 veces al día<br><input type="radio"/> 5 a 6 veces al día<br><input type="radio"/> más 6 veces al día |
| galletas tipo maria | <input type="radio"/> Nunca o menos 1 vez al mes<br><input type="radio"/> 1 a 3 veces mes<br><input type="radio"/> 1 vez semana<br><input checked="" type="radio"/> 2 a 4 veces semana<br><input type="radio"/> 5 a 6 veces semana<br><input type="radio"/> 1 vez al día<br><input type="radio"/> 2 a 3 veces al día<br><input type="radio"/> 5 a 6 veces al día<br><input type="radio"/> más 6 veces al día |

---

galletas chocolate

- ☒ Nunca o menos 1 vez al mes  
☐ 1 a 3 veces mes  
☐ 1 vez semana  
☐ 2 a 4 veces semana  
☐ 5 a 6 veces semana  
☐ 1 vez al día  
☐ 2 a 3 veces al día  
☐ 5 a 6 veces al día  
☐ más 6 veces al día

---

bolleria

- ☐ Nunca o menos 1 vez al mes  
☐ 1 a 3 veces mes  
☒ 1 vez semana  
☐ 2 a 4 veces semana  
☐ 5 a 6 veces semana  
☐ 1 vez al día  
☐ 2 a 3 veces al día  
☐ 5 a 6 veces al día  
☐ más 6 veces al día

---

chocolate o bombones

- ☐ Nunca o menos 1 vez al mes  
☐ 1 a 3 veces mes  
☐ 1 vez semana  
☒ 2 a 4 veces semana  
☐ 5 a 6 veces semana  
☐ 1 vez al día  
☐ 2 a 3 veces al día  
☐ 5 a 6 veces al día  
☐ más 6 veces al día

---

chocolate polvo o colacao

- ☐ Nunca o menos 1 vez al mes  
☐ 1 a 3 veces mes  
☐ 1 vez semana  
☒ 2 a 4 veces semana  
☐ 5 a 6 veces semana  
☐ 1 vez al día  
☐ 2 a 3 veces al día  
☐ 5 a 6 veces al día  
☐ más 6 veces al día

---

vino tinto

- ☒ Nunca o menos 1 vez al mes  
☐ 1 a 3 veces mes  
☐ 1 vez semana  
☐ 2 a 4 veces semana  
☐ 5 a 6 veces semana  
☐ 1 vez al día  
☐ 2 a 3 veces al día  
☐ 5 a 6 veces al día  
☐ más 6 veces al día

---

vino blanco

- ☒ Nunca o menos 1 vez al mes  
☐ 1 a 3 veces mes  
☐ 1 vez semana  
☐ 2 a 4 veces semana  
☐ 5 a 6 veces semana  
☐ 1 vez al día  
☐ 2 a 3 veces al día  
☐ 5 a 6 veces al día  
☐ más 6 veces al día

---

|                    |                                                                                                                                                                                                                                                                                                                                                                                                              |
|--------------------|--------------------------------------------------------------------------------------------------------------------------------------------------------------------------------------------------------------------------------------------------------------------------------------------------------------------------------------------------------------------------------------------------------------|
| vino seco o vermut | <input checked="" type="radio"/> Nunca o menos 1 vez al mes<br><input type="radio"/> 1 a 3 veces mes<br><input type="radio"/> 1 vez semana<br><input type="radio"/> 2 a 4 veces semana<br><input type="radio"/> 5 a 6 veces semana<br><input type="radio"/> 1 vez al día<br><input type="radio"/> 2 a 3 veces al día<br><input type="radio"/> 5 a 6 veces al día<br><input type="radio"/> más 6 veces al día |
|--------------------|--------------------------------------------------------------------------------------------------------------------------------------------------------------------------------------------------------------------------------------------------------------------------------------------------------------------------------------------------------------------------------------------------------------|

---

|         |                                                                                                                                                                                                                                                                                                                                                                                                              |
|---------|--------------------------------------------------------------------------------------------------------------------------------------------------------------------------------------------------------------------------------------------------------------------------------------------------------------------------------------------------------------------------------------------------------------|
| cerveza | <input checked="" type="radio"/> Nunca o menos 1 vez al mes<br><input type="radio"/> 1 a 3 veces mes<br><input type="radio"/> 1 vez semana<br><input type="radio"/> 2 a 4 veces semana<br><input type="radio"/> 5 a 6 veces semana<br><input type="radio"/> 1 vez al día<br><input type="radio"/> 2 a 3 veces al día<br><input type="radio"/> 5 a 6 veces al día<br><input type="radio"/> más 6 veces al día |
|---------|--------------------------------------------------------------------------------------------------------------------------------------------------------------------------------------------------------------------------------------------------------------------------------------------------------------------------------------------------------------------------------------------------------------|

---

|                     |                                                                                                                                                                                                                                                                                                                                                                                                              |
|---------------------|--------------------------------------------------------------------------------------------------------------------------------------------------------------------------------------------------------------------------------------------------------------------------------------------------------------------------------------------------------------------------------------------------------------|
| cerveza sin alcohol | <input checked="" type="radio"/> Nunca o menos 1 vez al mes<br><input type="radio"/> 1 a 3 veces mes<br><input type="radio"/> 1 vez semana<br><input type="radio"/> 2 a 4 veces semana<br><input type="radio"/> 5 a 6 veces semana<br><input type="radio"/> 1 vez al día<br><input type="radio"/> 2 a 3 veces al día<br><input type="radio"/> 5 a 6 veces al día<br><input type="radio"/> más 6 veces al día |
|---------------------|--------------------------------------------------------------------------------------------------------------------------------------------------------------------------------------------------------------------------------------------------------------------------------------------------------------------------------------------------------------------------------------------------------------|

---

|         |                                                                                                                                                                                                                                                                                                                                                                                                              |
|---------|--------------------------------------------------------------------------------------------------------------------------------------------------------------------------------------------------------------------------------------------------------------------------------------------------------------------------------------------------------------------------------------------------------------|
| licores | <input checked="" type="radio"/> Nunca o menos 1 vez al mes<br><input type="radio"/> 1 a 3 veces mes<br><input type="radio"/> 1 vez semana<br><input type="radio"/> 2 a 4 veces semana<br><input type="radio"/> 5 a 6 veces semana<br><input type="radio"/> 1 vez al día<br><input type="radio"/> 2 a 3 veces al día<br><input type="radio"/> 5 a 6 veces al día<br><input type="radio"/> más 6 veces al día |
|---------|--------------------------------------------------------------------------------------------------------------------------------------------------------------------------------------------------------------------------------------------------------------------------------------------------------------------------------------------------------------------------------------------------------------|

---

|                       |                                                                                                                                                                                                                                                                                                                                                                                                              |
|-----------------------|--------------------------------------------------------------------------------------------------------------------------------------------------------------------------------------------------------------------------------------------------------------------------------------------------------------------------------------------------------------------------------------------------------------|
| ginebra o ron o vodka | <input checked="" type="radio"/> Nunca o menos 1 vez al mes<br><input type="radio"/> 1 a 3 veces mes<br><input type="radio"/> 1 vez semana<br><input type="radio"/> 2 a 4 veces semana<br><input type="radio"/> 5 a 6 veces semana<br><input type="radio"/> 1 vez al día<br><input type="radio"/> 2 a 3 veces al día<br><input type="radio"/> 5 a 6 veces al día<br><input type="radio"/> más 6 veces al día |
|-----------------------|--------------------------------------------------------------------------------------------------------------------------------------------------------------------------------------------------------------------------------------------------------------------------------------------------------------------------------------------------------------------------------------------------------------|

---

|                 |                                                                                                                                                                                                                                                                                                                                                                                                              |
|-----------------|--------------------------------------------------------------------------------------------------------------------------------------------------------------------------------------------------------------------------------------------------------------------------------------------------------------------------------------------------------------------------------------------------------------|
| refresco normal | <input checked="" type="radio"/> Nunca o menos 1 vez al mes<br><input type="radio"/> 1 a 3 veces mes<br><input type="radio"/> 1 vez semana<br><input type="radio"/> 2 a 4 veces semana<br><input type="radio"/> 5 a 6 veces semana<br><input type="radio"/> 1 vez al día<br><input type="radio"/> 2 a 3 veces al día<br><input type="radio"/> 5 a 6 veces al día<br><input type="radio"/> más 6 veces al día |
|-----------------|--------------------------------------------------------------------------------------------------------------------------------------------------------------------------------------------------------------------------------------------------------------------------------------------------------------------------------------------------------------------------------------------------------------|

---

|                          |                                                                                                                                                                                                                                                                                                                                                                                                              |
|--------------------------|--------------------------------------------------------------------------------------------------------------------------------------------------------------------------------------------------------------------------------------------------------------------------------------------------------------------------------------------------------------------------------------------------------------|
| refresco sin azúcar      | <input type="radio"/> Nunca o menos 1 vez al mes<br><input type="radio"/> 1 a 3 veces mes<br><input checked="" type="radio"/> 1 vez semana<br><input type="radio"/> 2 a 4 veces semana<br><input type="radio"/> 5 a 6 veces semana<br><input type="radio"/> 1 vez al día<br><input type="radio"/> 2 a 3 veces al día<br><input type="radio"/> 5 a 6 veces al día<br><input type="radio"/> más 6 veces al día |
| Agua del grifo           | <input checked="" type="radio"/> Nunca o menos 1 vez al mes<br><input type="radio"/> 1 a 3 veces mes<br><input type="radio"/> 1 vez semana<br><input type="radio"/> 2 a 4 veces semana<br><input type="radio"/> 5 a 6 veces semana<br><input type="radio"/> 1 vez al día<br><input type="radio"/> 2 a 3 veces al día<br><input type="radio"/> 5 a 6 veces al día<br><input type="radio"/> más 6 veces al día |
| agua embotellada sin gas | <input type="radio"/> Nunca o menos 1 vez al mes<br><input type="radio"/> 1 a 3 veces mes<br><input type="radio"/> 1 vez semana<br><input type="radio"/> 2 a 4 veces semana<br><input type="radio"/> 5 a 6 veces semana<br><input type="radio"/> 1 vez al día<br><input type="radio"/> 2 a 3 veces al día<br><input checked="" type="radio"/> 5 a 6 veces al día<br><input type="radio"/> más 6 veces al día |
| agua embotellada con gas | <input type="radio"/> Nunca o menos 1 vez al mes<br><input type="radio"/> 1 a 3 veces mes<br><input type="radio"/> 1 vez semana<br><input type="radio"/> 2 a 4 veces semana<br><input type="radio"/> 5 a 6 veces semana<br><input type="radio"/> 1 vez al día<br><input type="radio"/> 2 a 3 veces al día<br><input type="radio"/> 5 a 6 veces al día<br><input type="radio"/> más 6 veces al día            |
| zumو frutas embasado     | <input checked="" type="radio"/> Nunca o menos 1 vez al mes<br><input type="radio"/> 1 a 3 veces mes<br><input type="radio"/> 1 vez semana<br><input type="radio"/> 2 a 4 veces semana<br><input type="radio"/> 5 a 6 veces semana<br><input type="radio"/> 1 vez al día<br><input type="radio"/> 2 a 3 veces al día<br><input type="radio"/> 5 a 6 veces al día<br><input type="radio"/> más 6 veces al día |
| cafe                     | <input checked="" type="radio"/> Nunca o menos 1 vez al mes<br><input type="radio"/> 1 a 3 veces mes<br><input type="radio"/> 1 vez semana<br><input type="radio"/> 2 a 4 veces semana<br><input type="radio"/> 5 a 6 veces semana<br><input type="radio"/> 1 vez al día<br><input type="radio"/> 2 a 3 veces al día<br><input type="radio"/> 5 a 6 veces al día<br><input type="radio"/> más 6 veces al día |

---

cafe descafeinado

- ☐ Nunca o menos 1 vez al mes  
☒ 1 a 3 veces mes  
☐ 1 vez semana  
☐ 2 a 4 veces semana  
☐ 5 a 6 veces semana  
☐ 1 vez al día  
☐ 2 a 3 veces al día  
☐ 5 a 6 veces al día  
☐ más 6 veces al día

---

te o infusión

- ☐ Nunca o menos 1 vez al mes  
☐ 1 a 3 veces mes  
☐ 1 vez semana  
☒ 2 a 4 veces semana  
☐ 5 a 6 veces semana  
☐ 1 vez al día  
☐ 2 a 3 veces al día  
☐ 5 a 6 veces al día  
☐ más 6 veces al día

---

sopa o puré verduras

- ☐ Nunca o menos 1 vez al mes  
☐ 1 a 3 veces mes  
☐ 1 vez semana  
☒ 2 a 4 veces semana  
☐ 5 a 6 veces semana  
☐ 1 vez al día  
☐ 2 a 3 veces al día  
☐ 5 a 6 veces al día  
☐ más 6 veces al día

---

croquetas pollo jamón

- ☐ Nunca o menos 1 vez al mes  
☐ 1 a 3 veces mes  
☒ 1 vez semana  
☐ 2 a 4 veces semana  
☐ 5 a 6 veces semana  
☐ 1 vez al día  
☐ 2 a 3 veces al día  
☐ 5 a 6 veces al día  
☐ más 6 veces al día

---

croquetas pescado

- ☐ Nunca o menos 1 vez al mes  
☐ 1 a 3 veces mes  
☒ 1 vez semana  
☐ 2 a 4 veces semana  
☐ 5 a 6 veces semana  
☐ 1 vez al día  
☐ 2 a 3 veces al día  
☐ 5 a 6 veces al día  
☐ más 6 veces al día

---

mayonesa

- ☐ Nunca o menos 1 vez al mes  
☐ 1 a 3 veces mes  
☒ 1 vez semana  
☐ 2 a 4 veces semana  
☐ 5 a 6 veces semana  
☐ 1 vez al día  
☐ 2 a 3 veces al día  
☐ 5 a 6 veces al día  
☐ más 6 veces al día

|                  |                                                                                                                                                                                                                                                                                                                                                                                                              |
|------------------|--------------------------------------------------------------------------------------------------------------------------------------------------------------------------------------------------------------------------------------------------------------------------------------------------------------------------------------------------------------------------------------------------------------|
| salsa tomate     | <input type="radio"/> Nunca o menos 1 vez al mes<br><input type="radio"/> 1 a 3 veces mes<br><input type="radio"/> 1 vez semana<br><input checked="" type="radio"/> 2 a 4 veces semana<br><input type="radio"/> 5 a 6 veces semana<br><input type="radio"/> 1 vez al día<br><input type="radio"/> 2 a 3 veces al día<br><input type="radio"/> 5 a 6 veces al día<br><input type="radio"/> más 6 veces al día |
| ketchup          | <input checked="" type="radio"/> Nunca o menos 1 vez al mes<br><input type="radio"/> 1 a 3 veces mes<br><input type="radio"/> 1 vez semana<br><input type="radio"/> 2 a 4 veces semana<br><input type="radio"/> 5 a 6 veces semana<br><input type="radio"/> 1 vez al día<br><input type="radio"/> 2 a 3 veces al día<br><input type="radio"/> 5 a 6 veces al día<br><input type="radio"/> más 6 veces al día |
| sal              | <input type="radio"/> Nunca o menos 1 vez al mes<br><input checked="" type="radio"/> 1 a 3 veces mes<br><input type="radio"/> 1 vez semana<br><input type="radio"/> 2 a 4 veces semana<br><input type="radio"/> 5 a 6 veces semana<br><input type="radio"/> 1 vez al día<br><input type="radio"/> 2 a 3 veces al día<br><input type="radio"/> 5 a 6 veces al día<br><input type="radio"/> más 6 veces al día |
| ajo              | <input type="radio"/> Nunca o menos 1 vez al mes<br><input type="radio"/> 1 a 3 veces mes<br><input type="radio"/> 1 vez semana<br><input checked="" type="radio"/> 2 a 4 veces semana<br><input type="radio"/> 5 a 6 veces semana<br><input type="radio"/> 1 vez al día<br><input type="radio"/> 2 a 3 veces al día<br><input type="radio"/> 5 a 6 veces al día<br><input type="radio"/> más 6 veces al día |
| mermelada o miel | <input type="radio"/> Nunca o menos 1 vez al mes<br><input type="radio"/> 1 a 3 veces mes<br><input type="radio"/> 1 vez semana<br><input checked="" type="radio"/> 2 a 4 veces semana<br><input type="radio"/> 5 a 6 veces semana<br><input type="radio"/> 1 vez al día<br><input type="radio"/> 2 a 3 veces al día<br><input type="radio"/> 5 a 6 veces al día<br><input type="radio"/> más 6 veces al día |
| azúcar           | <input type="radio"/> Nunca o menos 1 vez al mes<br><input type="radio"/> 1 a 3 veces mes<br><input checked="" type="radio"/> 1 vez semana<br><input type="radio"/> 2 a 4 veces semana<br><input type="radio"/> 5 a 6 veces semana<br><input type="radio"/> 1 vez al día<br><input type="radio"/> 2 a 3 veces al día<br><input type="radio"/> 5 a 6 veces al día<br><input type="radio"/> más 6 veces al día |



|                                       |                                                                                                                                                                                                                                                                                                                                                                                                                                                                                                                               |
|---------------------------------------|-------------------------------------------------------------------------------------------------------------------------------------------------------------------------------------------------------------------------------------------------------------------------------------------------------------------------------------------------------------------------------------------------------------------------------------------------------------------------------------------------------------------------------|
| Otro alimento                         | <hr/>                                                                                                                                                                                                                                                                                                                                                                                                                                                                                                                         |
| suplementos vitamínicos               | <input type="radio"/> si<br><input checked="" type="radio"/> no                                                                                                                                                                                                                                                                                                                                                                                                                                                               |
| suplementos vitamínicos               | <hr/>                                                                                                                                                                                                                                                                                                                                                                                                                                                                                                                         |
| dieta previa                          | <input type="radio"/> si<br><input checked="" type="radio"/> no                                                                                                                                                                                                                                                                                                                                                                                                                                                               |
| motivo dieta                          | <input checked="" type="radio"/> no dieta<br><input type="radio"/> control peso<br><input type="radio"/> control colesterol<br><input type="radio"/> control diabetes<br><input type="radio"/> problemas estómago<br><input type="radio"/> problemas vesícula o hepáticos<br><input type="radio"/> HTA o cardiopatía<br><input type="radio"/> problemas renales<br><input type="radio"/> alergia alimentaria<br><input type="radio"/> ácido úrico elevado<br><input type="radio"/> vegetariana<br><input type="radio"/> otros |
| cambio alimentos año previo gestación | <input checked="" type="radio"/> si<br><input type="radio"/> no                                                                                                                                                                                                                                                                                                                                                                                                                                                               |
| cambio lácteos                        | <input type="radio"/> eliminado<br><input type="radio"/> disminuido<br><input checked="" type="radio"/> igual<br><input type="radio"/> aumentado<br><input type="radio"/> no sabe                                                                                                                                                                                                                                                                                                                                             |
| cambio huevos                         | <input type="radio"/> eliminado<br><input type="radio"/> disminuido<br><input checked="" type="radio"/> igual<br><input type="radio"/> aumentado<br><input type="radio"/> no sabe                                                                                                                                                                                                                                                                                                                                             |
| cambio carne                          | <input type="radio"/> eliminado<br><input type="radio"/> disminuido<br><input checked="" type="radio"/> igual<br><input type="radio"/> aumentado<br><input type="radio"/> no sabe                                                                                                                                                                                                                                                                                                                                             |
| cambio pescado                        | <input type="radio"/> eliminado<br><input type="radio"/> disminuido<br><input checked="" type="radio"/> igual<br><input type="radio"/> aumentado<br><input type="radio"/> no sabe                                                                                                                                                                                                                                                                                                                                             |
| cambio verduras                       | <input type="radio"/> eliminado<br><input type="radio"/> disminuido<br><input checked="" type="radio"/> igual<br><input type="radio"/> aumentado<br><input type="radio"/> no sabe                                                                                                                                                                                                                                                                                                                                             |

|                            |                                                                                                                                                                                                                        |
|----------------------------|------------------------------------------------------------------------------------------------------------------------------------------------------------------------------------------------------------------------|
| cambio legumbres           | <input type="radio"/> eliminado<br><input type="radio"/> disminuido<br><input checked="" type="radio"/> igual<br><input type="radio"/> aumentado<br><input type="radio"/> no sabe                                      |
| cambio fruta               | <input type="radio"/> eliminado<br><input type="radio"/> disminuido<br><input checked="" type="radio"/> igual<br><input type="radio"/> aumentado<br><input type="radio"/> no sabe                                      |
| cambio pan                 | <input type="radio"/> eliminado<br><input type="radio"/> disminuido<br><input checked="" type="radio"/> igual<br><input type="radio"/> aumentado<br><input type="radio"/> no sabe                                      |
| cambio aceite oliva        | <input type="radio"/> eliminado<br><input type="radio"/> disminuido<br><input checked="" type="radio"/> igual<br><input type="radio"/> aumentado<br><input type="radio"/> no sabe                                      |
| cambio mante o margarina   | <input type="radio"/> eliminado<br><input type="radio"/> disminuido<br><input checked="" type="radio"/> igual<br><input type="radio"/> aumentado<br><input type="radio"/> no sabe                                      |
| cambio azúcar y dulces     | <input type="radio"/> eliminado<br><input type="radio"/> disminuido<br><input type="radio"/> igual<br><input type="radio"/> aumentado<br><input checked="" type="radio"/> no sabe                                      |
| cambio bebidas alcohólicas | <input checked="" type="radio"/> eliminado<br><input type="radio"/> disminuido<br><input type="radio"/> igual<br><input type="radio"/> aumentado<br><input type="radio"/> no sabe                                      |
| frecuencia comidas fritas  | <input type="radio"/> a diario<br><input type="radio"/> 5 a 6 veces semana<br><input type="radio"/> 2 a 4 veces semana<br><input checked="" type="radio"/> 1 vez semana<br><input type="radio"/> menos de 1 vez semana |
| carne                      | <input type="radio"/> no como<br><input type="radio"/> cruda<br><input type="radio"/> poco hecha<br><input checked="" type="radio"/> hecha<br><input type="radio"/> muy hecha                                          |
| grasa visible carne        | <input type="radio"/> quita toda<br><input checked="" type="radio"/> quita mayoría<br><input type="radio"/> quita un poco<br><input type="radio"/> no quita nada                                                       |

|                                |                                                                                                                                                                                                                                                          |
|--------------------------------|----------------------------------------------------------------------------------------------------------------------------------------------------------------------------------------------------------------------------------------------------------|
| cocina carne                   | <input checked="" type="radio"/> a la plancha<br><input type="radio"/> a la parrilla<br><input type="radio"/> asada<br><input type="radio"/> frita<br><input type="radio"/> guisada                                                                      |
| tostado quemado carne          | <input checked="" type="radio"/> nunca<br><input type="radio"/> 1 vez mes<br><input type="radio"/> 2 a 3 veces mes<br><input type="radio"/> 1 vez semana<br><input type="radio"/> 2 a 3 semanas                                                          |
| tostado quemado pescado        | <input checked="" type="radio"/> nunca<br><input type="radio"/> 1 vez mes<br><input type="radio"/> 2 a 3 veces mes<br><input type="radio"/> 1 vez semana<br><input type="radio"/> 2 a 3 semanas                                                          |
| socarrat paella                | <input checked="" type="radio"/> nunca<br><input type="radio"/> 1 vez mes<br><input type="radio"/> 2 a 3 veces mes<br><input type="radio"/> 1 vez semana<br><input type="radio"/> 2 a 3 semanas                                                          |
| grasa o aceite cocinar         | <input type="radio"/> mantequilla<br><input type="radio"/> margarina<br><input type="radio"/> aceite oliva<br><input checked="" type="radio"/> aceite oliva virgen extra<br><input type="radio"/> aceite vegetal<br><input type="radio"/> mezcla aceites |
| grasa aceite aliñar            | <input type="radio"/> mantequilla<br><input type="radio"/> margarina<br><input type="radio"/> aceite oliva<br><input checked="" type="radio"/> aceite oliva virgen extra<br><input type="radio"/> aceite vegetal<br><input type="radio"/> mezcla aceites |
| grasa aceite freir             | <input type="radio"/> mantequilla<br><input type="radio"/> margarina<br><input type="radio"/> aceite oliva<br><input checked="" type="radio"/> aceite oliva virgen extra<br><input type="radio"/> aceite vegetal<br><input type="radio"/> mezcla aceites |
| Ejercicio cuestionario         | <input checked="" type="radio"/> si<br><input type="radio"/> no                                                                                                                                                                                          |
| horas de sueño incluido siesta | [*DATA REMOVED*]                                                                                                                                                                                                                                         |
| minutos siesta                 | [*DATA REMOVED*]                                                                                                                                                                                                                                         |
| horas televisión semana        | [*DATA REMOVED*]                                                                                                                                                                                                                                         |

|                                        |                                                                                                                                                                                                                                                                                                                                                                           |
|----------------------------------------|---------------------------------------------------------------------------------------------------------------------------------------------------------------------------------------------------------------------------------------------------------------------------------------------------------------------------------------------------------------------------|
| actividad trabajo                      | <input type="radio"/> casi siempre sentado<br><input checked="" type="radio"/> sentado 50 por cien<br><input type="radio"/> casi siempre de pie, quieto<br><input type="radio"/> casi siempre levantado caminando y llevando pocas cosas<br><input type="radio"/> casi siempre levantado, caminando y llevado muchas cosas<br><input type="radio"/> trabajo manual pesado |
| tiempo caminar o bici al día           | <input type="radio"/> casi nunca<br><input checked="" type="radio"/> menos 20min día<br><input type="radio"/> 20 a 40 min día<br><input type="radio"/> 40 a 60 min día<br><input type="radio"/> 1h o 1h y media día<br><input type="radio"/> más de 1h y media al día                                                                                                     |
| tiempo tareas casa al día              | <input type="radio"/> menos de 1h día<br><input checked="" type="radio"/> 1 a 2h día<br><input type="radio"/> 3 a 4h día<br><input type="radio"/> 5 a 6h día<br><input type="radio"/> 7 a 8h día<br><input type="radio"/> más de 8h día                                                                                                                                   |
| tiempo libre televisión ordenador leer | <input type="radio"/> menos 1h día<br><input type="radio"/> 1h día<br><input type="radio"/> 2h día<br><input checked="" type="radio"/> 3h día<br><input type="radio"/> 4h día<br><input type="radio"/> 5 a 6h día<br><input type="radio"/> mas 6h día                                                                                                                     |
| tiempo libre ejercicio o deporte       | <input type="radio"/> menos 1h semana<br><input type="radio"/> 1h semana<br><input checked="" type="radio"/> 2h semana<br><input type="radio"/> 3h semana<br><input type="radio"/> 4 a 5h semana<br><input type="radio"/> mas 5h semana                                                                                                                                   |
| como se considera                      | <input type="radio"/> sedentaria<br><input checked="" type="radio"/> poco activa<br><input type="radio"/> moderadamente activa<br><input type="radio"/> bastante activa<br><input type="radio"/> muy activa<br><input type="radio"/> no sabe                                                                                                                              |
| FUR                                    | [*DATA REMOVED*]                                                                                                                                                                                                                                                                                                                                                          |
| Semanas gestación 2T                   | _____                                                                                                                                                                                                                                                                                                                                                                     |
| Días gestación 2T                      | _____                                                                                                                                                                                                                                                                                                                                                                     |
| DBP 2T                                 | _____                                                                                                                                                                                                                                                                                                                                                                     |
| CC 2T                                  | _____                                                                                                                                                                                                                                                                                                                                                                     |

|                                                   |                                                                                                                                                                                                 |
|---------------------------------------------------|-------------------------------------------------------------------------------------------------------------------------------------------------------------------------------------------------|
| AC 2T                                             |                                                                                                                                                                                                 |
| LF 2T                                             |                                                                                                                                                                                                 |
| PFE 2T (Hadlock)                                  |                                                                                                                                                                                                 |
| Semanas gestación 3T                              | [*DATA REMOVED*]                                                                                                                                                                                |
| días 3T                                           | [*DATA REMOVED*]                                                                                                                                                                                |
| DBP 3T                                            | [*DATA REMOVED*]                                                                                                                                                                                |
| CC 3T                                             | [*DATA REMOVED*]                                                                                                                                                                                |
| AC 3T                                             | [*DATA REMOVED*]                                                                                                                                                                                |
| LF 3T                                             | [*DATA REMOVED*]                                                                                                                                                                                |
| PFE 3T (Hadlock)                                  | [*DATA REMOVED*]                                                                                                                                                                                |
| Semanas de gestación final                        | [*DATA REMOVED*]                                                                                                                                                                                |
| días gestación final                              | [*DATA REMOVED*]                                                                                                                                                                                |
| Localización placenta                             | <input type="radio"/> anterior<br><input type="radio"/> lateral derecha<br><input type="radio"/> lateral izquierda<br><input type="radio"/> posterior<br><input checked="" type="radio"/> fondo |
| Presentación longitudinal cefálica                | <input type="radio"/> no<br><input checked="" type="radio"/> si                                                                                                                                 |
| Dorso                                             | <input checked="" type="radio"/> izquierda anterior<br><input type="radio"/> izquierda posterior<br><input type="radio"/> derecha anterior<br><input type="radio"/> derecha posterior           |
| diámetro biparietal                               | [*DATA REMOVED*]                                                                                                                                                                                |
| Circunferencia craneal                            | [*DATA REMOVED*]                                                                                                                                                                                |
| Circunferencia abdominal                          | [*DATA REMOVED*]                                                                                                                                                                                |
| Longitud de femur                                 | [*DATA REMOVED*]                                                                                                                                                                                |
| tejido celular subcutáneo a nivel del muslo en mm | [*DATA REMOVED*]                                                                                                                                                                                |
| tejido celular subcutáneo en abdomen en mm        | [*DATA REMOVED*]                                                                                                                                                                                |

|                                               |                                                                                                                                               |
|-----------------------------------------------|-----------------------------------------------------------------------------------------------------------------------------------------------|
| Volumen del muslo en cm3                      | [*DATA REMOVED*]                                                                                                                              |
| Peso fetal estimado según fórmula de Hadlock  | [*DATA REMOVED*]                                                                                                                              |
| Percentil                                     | [*DATA REMOVED*]                                                                                                                              |
| Peso fetal estimado según fórmula de Scioscia | _____                                                                                                                                         |
| Peso fetal estimado según fórmula de LEE      | _____                                                                                                                                         |
| Tipo de parto                                 | <input checked="" type="radio"/> eutocico<br><input type="radio"/> instrumentado/ventosa<br><input type="radio"/> cesarea                     |
| fecha de nacimiento                           | [*DATA REMOVED*]                                                                                                                              |
| Días entre exploración y nacimiento           | [*DATA REMOVED*]                                                                                                                              |
| Peso RN en g                                  | [*DATA REMOVED*]                                                                                                                              |
| sexo                                          | <input checked="" type="radio"/> mujer<br><input type="radio"/> hombre                                                                        |
| Apgar 1 minuto                                | [*DATA REMOVED*]                                                                                                                              |
| Apgar 5 minutos                               | [*DATA REMOVED*]                                                                                                                              |
| Apgar 10 minutos                              | _____                                                                                                                                         |
| antecedente Covid durante gestación           | <input type="radio"/> Yes<br><input checked="" type="radio"/> No                                                                              |
| Nivel de estudios                             | <input type="radio"/> ninguno<br><input type="radio"/> primarios<br><input type="radio"/> secundarios<br><input type="radio"/> universitarios |

# Base\_datos\_estimacion\_peso\_fetal

|                                       |                                                                                                                                                                                                                                                                                      |
|---------------------------------------|--------------------------------------------------------------------------------------------------------------------------------------------------------------------------------------------------------------------------------------------------------------------------------------|
| Número de identificación participante | 123                                                                                                                                                                                                                                                                                  |
| CODIGO PARTICIPANTE                   |                                                                                                                                                                                                                                                                                      |
| Edad                                  | [*DATA REMOVED*]                                                                                                                                                                                                                                                                     |
| Gestaciones                           | <input checked="" type="radio"/> 1<br><input type="radio"/> 2<br><input type="radio"/> 3<br><input type="radio"/> mas de 3                                                                                                                                                           |
| partos                                | <input checked="" type="radio"/> 0<br><input type="radio"/> 1<br><input type="radio"/> 2<br><input type="radio"/> 3<br><input type="radio"/> mas de 3                                                                                                                                |
| cesáreas                              | <input checked="" type="radio"/> 0<br><input type="radio"/> 1<br><input type="radio"/> 2<br><input type="radio"/> 3<br><input type="radio"/> mas de 3                                                                                                                                |
| Abortos                               | <input checked="" type="radio"/> 0<br><input type="radio"/> 1<br><input type="radio"/> 2<br><input type="radio"/> 3<br><input type="radio"/> mas de 3                                                                                                                                |
| Tipo de gestacion                     | <input checked="" type="radio"/> espontanea<br><input type="radio"/> IAC inseminación artificial conyuge<br><input type="radio"/> IAD inseminación artificial donante<br><input type="radio"/> FIV Fecundación in Vitro<br><input type="radio"/> Ovodon FIV con donación de ovocitos |
| peso previo a embarazo                | [*DATA REMOVED*]                                                                                                                                                                                                                                                                     |
| Ganancia ponderal embarazo            | [*DATA REMOVED*]                                                                                                                                                                                                                                                                     |
| Talla madre                           | [*DATA REMOVED*]                                                                                                                                                                                                                                                                     |
| IMC previo embarazo                   | 18.749999999999996                                                                                                                                                                                                                                                                   |
| Patología obstétrica                  | <input checked="" type="radio"/> no<br><input type="radio"/> si                                                                                                                                                                                                                      |
| Diabetes pregestacional               | <input checked="" type="radio"/> no<br><input type="radio"/> si                                                                                                                                                                                                                      |
| Diabetes gestacional                  | <input checked="" type="radio"/> no<br><input type="radio"/> si                                                                                                                                                                                                                      |

|                                            |                                                                                                                                                                                      |
|--------------------------------------------|--------------------------------------------------------------------------------------------------------------------------------------------------------------------------------------|
| Diabetes gestacional con insulina          | <input checked="" type="radio"/> no<br><input type="radio"/> si                                                                                                                      |
| Diabetes gestacional con dieta y ejercicio | <input checked="" type="radio"/> no<br><input type="radio"/> si                                                                                                                      |
| Percentil fetos previos                    | <input checked="" type="radio"/> Nada<br><input type="radio"/> percentil menor de 10<br><input type="radio"/> percentil entre 10 y 90<br><input type="radio"/> percentil mayor de 90 |
| Exfumadora                                 | <input checked="" type="radio"/> Nada<br><input type="radio"/> menos de 5 años<br><input type="radio"/> 5 a 10 años<br><input type="radio"/> mayor o igual a 10 años                 |
| Hábito tabáquico                           | <input checked="" type="radio"/> no<br><input type="radio"/> si                                                                                                                      |
| fumadora                                   | [*DATA REMOVED*]                                                                                                                                                                     |
| Consumo otros tóxicos                      | <input checked="" type="radio"/> no<br><input type="radio"/> si                                                                                                                      |
| Hb 1T                                      | _____                                                                                                                                                                                |
| Htc 1T                                     | _____                                                                                                                                                                                |
| Hb 2T                                      | _____                                                                                                                                                                                |
| HTC 2T                                     | _____                                                                                                                                                                                |
| Hb 3T                                      | _____                                                                                                                                                                                |
| HTC 3T                                     | _____                                                                                                                                                                                |
| Suplemento FE oral                         | <input checked="" type="radio"/> si<br><input type="radio"/> no                                                                                                                      |
| Suplemento fe iv                           | <input type="radio"/> si<br><input checked="" type="radio"/> no                                                                                                                      |
| Transfusión                                | <input checked="" type="radio"/> no<br><input type="radio"/> si                                                                                                                      |
| Solicitada Vit D                           | <input checked="" type="radio"/> no<br><input type="radio"/> si                                                                                                                      |



|                       |                                                                                                                                                                                                                                                                                                                                                                                                              |
|-----------------------|--------------------------------------------------------------------------------------------------------------------------------------------------------------------------------------------------------------------------------------------------------------------------------------------------------------------------------------------------------------------------------------------------------------|
| Deficit vit D         | <input type="radio"/> no<br><input type="radio"/> si                                                                                                                                                                                                                                                                                                                                                         |
| Suplemento vit D      | <input type="radio"/> si<br><input type="radio"/> no                                                                                                                                                                                                                                                                                                                                                         |
| Dieta, cuestionario   | <input checked="" type="radio"/> si<br><input type="radio"/> no                                                                                                                                                                                                                                                                                                                                              |
| Leche entera          | <input checked="" type="radio"/> Nunca o menos 1 vez al mes<br><input type="radio"/> 1 a 3 veces mes<br><input type="radio"/> 1 vez semana<br><input type="radio"/> 2 a 4 veces semana<br><input type="radio"/> 5 a 6 veces semana<br><input type="radio"/> 1 vez al día<br><input type="radio"/> 2 a 3 veces al día<br><input type="radio"/> 5 a 6 veces al día<br><input type="radio"/> más 6 veces al día |
| Leche semidesnatada   | <input checked="" type="radio"/> Nunca o menos 1 vez al mes<br><input type="radio"/> 1 a 3 veces mes<br><input type="radio"/> 1 vez semana<br><input type="radio"/> 2 a 4 veces semana<br><input type="radio"/> 5 a 6 veces semana<br><input type="radio"/> 1 vez al día<br><input type="radio"/> 2 a 3 veces al día<br><input type="radio"/> 5 a 6 veces al día<br><input type="radio"/> mas 6 veces al día |
| Leche desnatada       | <input checked="" type="radio"/> Nunca o menos 1 vez al mes<br><input type="radio"/> 1 a 3 veces mes<br><input type="radio"/> 1 vez semana<br><input type="radio"/> 2 a 4 veces semana<br><input type="radio"/> 5 a 6 veces semana<br><input type="radio"/> 1 vez al día<br><input type="radio"/> 2 a 3 veces al día<br><input type="radio"/> 5 a 6 veces al día<br><input type="radio"/> más 6 veces al día |
| Leche condensada      | <input checked="" type="radio"/> Nunca o menos 1 vez al mes<br><input type="radio"/> 1 a 3 veces mes<br><input type="radio"/> 1 vez semana<br><input type="radio"/> 2 a 4 veces semana<br><input type="radio"/> 5 a 6 veces semana<br><input type="radio"/> 1 vez al día<br><input type="radio"/> 2 a 3 veces al día<br><input type="radio"/> 5 a 6 veces al día<br><input type="radio"/> más 6 veces al día |
| nata o crema de leche | <input checked="" type="radio"/> Nunca o menos 1 vez al mes<br><input type="radio"/> 1 a 3 veces mes<br><input type="radio"/> 1 vez semana<br><input type="radio"/> 2 a 4 veces semana<br><input type="radio"/> 5 a 6 veces semana<br><input type="radio"/> 1 vez al día<br><input type="radio"/> 2 a 3 veces al día<br><input type="radio"/> 5 a 6 veces al día<br><input type="radio"/> más 6 veces al día |

---

Yogurt Entero

- ☐ Nunca o menos 1 vez al mes  
☐ 1 a 3 veces mes  
☐ 1 vez semana  
☐ 2 a 4 veces semana  
☐ 5 a 6 veces semana  
☒ 1 vez al día  
☐ 2 a 3 veces al día  
☐ 5 a 6 veces al día  
☐ más 6 veces al día

---

Yogurt desnatado

- ☐ Nunca o menos 1 vez al mes  
☐ 1 a 3 veces mes  
☐ 1 vez semana  
☐ 2 a 4 veces semana  
☐ 5 a 6 veces semana  
☒ 1 vez al día  
☐ 2 a 3 veces al día  
☐ 5 a 6 veces al día  
☐ más 6 veces al día

---

100g requesón o queso blando o queso fresco

- ☒ Nunca o menos 1 vez al mes  
☐ 1 a 3 veces mes  
☐ 1 vez semana  
☐ 2 a 4 veces semana  
☐ 5 a 6 veces semana  
☐ 1 vez al día  
☐ 2 a 3 veces al día  
☐ 5 a 6 veces al día  
☐ más 6 veces al día

---

queso curado o semicurado o cremoso

- ☒ Nunca o menos 1 vez al mes  
☐ 1 a 3 veces mes  
☐ 1 vez semana  
☐ 2 a 4 veces semana  
☐ 5 a 6 veces semana  
☐ 1 vez al día  
☐ 2 a 3 veces al día  
☐ 5 a 6 veces al día  
☐ más 6 veces al día

---

natillas flan pudding

- ☐ Nunca o menos 1 vez al mes  
☐ 1 a 3 veces mes  
☒ 1 vez semana  
☐ 2 a 4 veces semana  
☐ 5 a 6 veces semana  
☐ 1 vez al día  
☐ 2 a 3 veces al día  
☐ 5 a 6 veces al día  
☐ más 6 veces al día

---

Helado

- ☐ Nunca o menos 1 vez al mes  
☐ 1 a 3 veces mes  
☐ 1 vez semana  
☒ 2 a 4 veces semana  
☐ 5 a 6 veces semana  
☐ 1 vez al día  
☐ 2 a 3 veces al día  
☐ 5 a 6 veces al día  
☐ más 6 veces al día

|                                      |                                                                                                                                                                                                                                                                                                                                                                                                              |
|--------------------------------------|--------------------------------------------------------------------------------------------------------------------------------------------------------------------------------------------------------------------------------------------------------------------------------------------------------------------------------------------------------------------------------------------------------------|
| huevo                                | <input type="radio"/> Nunca o menos 1 vez al mes<br><input type="radio"/> 1 a 3 veces mes<br><input type="radio"/> 1 vez semana<br><input checked="" type="radio"/> 2 a 4 veces semana<br><input type="radio"/> 5 a 6 veces semana<br><input type="radio"/> 1 vez al día<br><input type="radio"/> 2 a 3 veces al día<br><input type="radio"/> 5 a 6 veces al día<br><input type="radio"/> más 6 veces al día |
| Pollo con piel                       | <input checked="" type="radio"/> Nunca o menos 1 vez al mes<br><input type="radio"/> 1 a 3 veces mes<br><input type="radio"/> 1 vez semana<br><input type="radio"/> 2 a 4 veces semana<br><input type="radio"/> 5 a 6 veces semana<br><input type="radio"/> 1 vez al día<br><input type="radio"/> 2 a 3 veces al día<br><input type="radio"/> 5 a 6 veces al día<br><input type="radio"/> más 6 veces al día |
| pollo sin piel                       | <input checked="" type="radio"/> Nunca o menos 1 vez al mes<br><input type="radio"/> 1 a 3 veces mes<br><input type="radio"/> 1 vez semana<br><input type="radio"/> 2 a 4 veces semana<br><input type="radio"/> 5 a 6 veces semana<br><input type="radio"/> 1 vez al día<br><input type="radio"/> 2 a 3 veces al día<br><input type="radio"/> 5 a 6 veces al día<br><input type="radio"/> más 6 veces al día |
| Ternera o cerdo o cordero            | <input checked="" type="radio"/> Nunca o menos 1 vez al mes<br><input type="radio"/> 1 a 3 veces mes<br><input type="radio"/> 1 vez semana<br><input type="radio"/> 2 a 4 veces semana<br><input type="radio"/> 5 a 6 veces semana<br><input type="radio"/> 1 vez al día<br><input type="radio"/> 2 a 3 veces al día<br><input type="radio"/> 5 a 6 veces al día<br><input type="radio"/> más 6 veces al día |
| carne caza: Conejo o codorniz o pato | <input checked="" type="radio"/> Nunca o menos 1 vez al mes<br><input type="radio"/> 1 a 3 veces mes<br><input type="radio"/> 1 vez semana<br><input type="radio"/> 2 a 4 veces semana<br><input type="radio"/> 5 a 6 veces semana<br><input type="radio"/> 1 vez al día<br><input type="radio"/> 2 a 3 veces al día<br><input type="radio"/> 5 a 6 veces al día<br><input type="radio"/> más 6 veces al día |
| Hígado de ternera o cerdo o pollo    | <input checked="" type="radio"/> Nunca o menos 1 vez al mes<br><input type="radio"/> 1 a 3 veces mes<br><input type="radio"/> 1 vez semana<br><input type="radio"/> 2 a 4 veces semana<br><input type="radio"/> 5 a 6 veces semana<br><input type="radio"/> 1 vez al día<br><input type="radio"/> 2 a 3 veces al día<br><input type="radio"/> 5 a 6 veces al día<br><input type="radio"/> más 6 veces al día |

|                     |                                                                                                                                                                                                                                                                                                                                                                                                              |
|---------------------|--------------------------------------------------------------------------------------------------------------------------------------------------------------------------------------------------------------------------------------------------------------------------------------------------------------------------------------------------------------------------------------------------------------|
| Vísceras            | <input checked="" type="radio"/> Nunca o menos 1 vez al mes<br><input type="radio"/> 1 a 3 veces mes<br><input type="radio"/> 1 vez semana<br><input type="radio"/> 2 a 4 veces semana<br><input type="radio"/> 5 a 6 veces semana<br><input type="radio"/> 1 vez al día<br><input type="radio"/> 2 a 3 veces al día<br><input type="radio"/> 5 a 6 veces al día<br><input type="radio"/> más 6 veces al día |
| Embutido            | <input checked="" type="radio"/> Nunca o menos 1 vez al mes<br><input type="radio"/> 1 a 3 veces mes<br><input type="radio"/> 1 vez semana<br><input type="radio"/> 2 a 4 veces semana<br><input type="radio"/> 5 a 6 veces semana<br><input type="radio"/> 1 vez al día<br><input type="radio"/> 2 a 3 veces al día<br><input type="radio"/> 5 a 6 veces al día<br><input type="radio"/> más 6 veces al día |
| Salchicha o similar | <input checked="" type="radio"/> Nunca o menos 1 vez al mes<br><input type="radio"/> 1 a 3 veces mes<br><input type="radio"/> 1 vez semana<br><input type="radio"/> 2 a 4 veces semana<br><input type="radio"/> 5 a 6 veces semana<br><input type="radio"/> 1 vez al día<br><input type="radio"/> 2 a 3 veces al día<br><input type="radio"/> 5 a 6 veces al día<br><input type="radio"/> más 6 veces al día |
| Pate o foiegras     | <input checked="" type="radio"/> Nunca o menos 1 vez al mes<br><input type="radio"/> 1 a 3 veces mes<br><input type="radio"/> 1 vez semana<br><input type="radio"/> 2 a 4 veces semana<br><input type="radio"/> 5 a 6 veces semana<br><input type="radio"/> 1 vez al día<br><input type="radio"/> 2 a 3 veces al día<br><input type="radio"/> 5 a 6 veces al día<br><input type="radio"/> más 6 veces al día |
| Hamburguesa         | <input checked="" type="radio"/> Nunca o menos 1 vez al mes<br><input type="radio"/> 1 a 3 veces mes<br><input type="radio"/> 1 vez semana<br><input type="radio"/> 2 a 4 veces semana<br><input type="radio"/> 5 a 6 veces semana<br><input type="radio"/> 1 vez al día<br><input type="radio"/> 2 a 3 veces al día<br><input type="radio"/> 5 a 6 veces al día<br><input type="radio"/> más 6 veces al día |
| tocino o bacon      | <input checked="" type="radio"/> Nunca o menos 1 vez al mes<br><input type="radio"/> 1 a 3 veces mes<br><input type="radio"/> 1 vez semana<br><input type="radio"/> 2 a 4 veces semana<br><input type="radio"/> 5 a 6 veces semana<br><input type="radio"/> 1 vez al día<br><input type="radio"/> 2 a 3 veces al día<br><input type="radio"/> 5 a 6 veces al día<br><input type="radio"/> más 6 veces al día |

---

Pescado frito

- ☒ Nunca o menos 1 vez al mes  
☐ 1 a 3 veces mes  
☐ 1 vez semana  
☐ 2 a 4 veces semana  
☐ 5 a 6 veces semana  
☐ 1 vez al día  
☐ 2 a 3 veces al día  
☐ 5 a 6 veces al día  
☐ más 6 veces al día

---

pescado hervido blanco

- ☒ Nunca o menos 1 vez al mes  
☐ 1 a 3 veces mes  
☐ 1 vez semana  
☐ 2 a 4 veces semana  
☐ 5 a 6 veces semana  
☐ 1 vez al día  
☐ 2 a 3 veces al día  
☐ 5 a 6 veces al día  
☐ más 6 veces al día

---

pescado hervido azul

- ☐ Nunca o menos 1 vez al mes  
☐ 1 a 3 veces mes  
☒ 1 vez semana  
☐ 2 a 4 veces semana  
☐ 5 a 6 veces semana  
☐ 1 vez al día  
☐ 2 a 3 veces al día  
☐ 5 a 6 veces al día  
☐ más 6 veces al día

---

otros pescado azul

- ☒ Nunca o menos 1 vez al mes  
☐ 1 a 3 veces mes  
☐ 1 vez semana  
☐ 2 a 4 veces semana  
☐ 5 a 6 veces semana  
☐ 1 vez al día  
☐ 2 a 3 veces al día  
☐ 5 a 6 veces al día  
☐ más 6 veces al día

---

atun conserva

- ☒ Nunca o menos 1 vez al mes  
☐ 1 a 3 veces mes  
☐ 1 vez semana  
☐ 2 a 4 veces semana  
☐ 5 a 6 veces semana  
☐ 1 vez al día  
☐ 2 a 3 veces al día  
☐ 5 a 6 veces al día  
☐ más 6 veces al día

---

sardina conserva

- ☒ Nunca o menos 1 vez al mes  
☐ 1 a 3 veces mes  
☐ 1 vez semana  
☐ 2 a 4 veces semana  
☐ 5 a 6 veces semana  
☐ 1 vez al día  
☐ 2 a 3 veces al día  
☐ 5 a 6 veces al día  
☐ más 6 veces al día

|                                         |                                                                                                                                                                                                                                                                                                                                                                                                              |
|-----------------------------------------|--------------------------------------------------------------------------------------------------------------------------------------------------------------------------------------------------------------------------------------------------------------------------------------------------------------------------------------------------------------------------------------------------------------|
| pescado ahumado                         | <input type="radio"/> Nunca o menos 1 vez al mes<br><input checked="" type="radio"/> 1 a 3 veces mes<br><input type="radio"/> 1 vez semana<br><input type="radio"/> 2 a 4 veces semana<br><input type="radio"/> 5 a 6 veces semana<br><input type="radio"/> 1 vez al día<br><input type="radio"/> 2 a 3 veces al día<br><input type="radio"/> 5 a 6 veces al día<br><input type="radio"/> más 6 veces al día |
| almejas o mejillones o ostras unos 100g | <input checked="" type="radio"/> Nunca o menos 1 vez al mes<br><input type="radio"/> 1 a 3 veces mes<br><input type="radio"/> 1 vez semana<br><input type="radio"/> 2 a 4 veces semana<br><input type="radio"/> 5 a 6 veces semana<br><input type="radio"/> 1 vez al día<br><input type="radio"/> 2 a 3 veces al día<br><input type="radio"/> 5 a 6 veces al día<br><input type="radio"/> más 6 veces al día |
| calamar o chipiron o sepia unos 100g    | <input type="radio"/> Nunca o menos 1 vez al mes<br><input type="radio"/> 1 a 3 veces mes<br><input checked="" type="radio"/> 1 vez semana<br><input type="radio"/> 2 a 4 veces semana<br><input type="radio"/> 5 a 6 veces semana<br><input type="radio"/> 1 vez al día<br><input type="radio"/> 2 a 3 veces al día<br><input type="radio"/> 5 a 6 veces al día<br><input type="radio"/> más 6 veces al día |
| marisco unos 100g                       | <input type="radio"/> Nunca o menos 1 vez al mes<br><input checked="" type="radio"/> 1 a 3 veces mes<br><input type="radio"/> 1 vez semana<br><input type="radio"/> 2 a 4 veces semana<br><input type="radio"/> 5 a 6 veces semana<br><input type="radio"/> 1 vez al día<br><input type="radio"/> 2 a 3 veces al día<br><input type="radio"/> 5 a 6 veces al día<br><input type="radio"/> más 6 veces al día |
| Espinacas o acelgas cocinadas           | <input type="radio"/> Nunca o menos 1 vez al mes<br><input checked="" type="radio"/> 1 a 3 veces mes<br><input type="radio"/> 1 vez semana<br><input type="radio"/> 2 a 4 veces semana<br><input type="radio"/> 5 a 6 veces semana<br><input type="radio"/> 1 vez al día<br><input type="radio"/> 2 a 3 veces al día<br><input type="radio"/> 5 a 6 veces al día<br><input type="radio"/> más 6 veces al día |
| Col o coliflor o brocoli cocinado       | <input type="radio"/> Nunca o menos 1 vez al mes<br><input type="radio"/> 1 a 3 veces mes<br><input type="radio"/> 1 vez semana<br><input type="radio"/> 2 a 4 veces semana<br><input checked="" type="radio"/> 5 a 6 veces semana<br><input type="radio"/> 1 vez al día<br><input type="radio"/> 2 a 3 veces al día<br><input type="radio"/> 5 a 6 veces al día<br><input type="radio"/> más 6 veces al día |

---

Lechuga o endivia o escarola

- ☐ Nunca o menos 1 vez al mes  
☐ 1 a 3 veces mes  
☐ 1 vez semana  
☐ 2 a 4 veces semana  
☐ 5 a 6 veces semana  
☒ 1 vez al día  
☐ 2 a 3 veces al día  
☐ 5 a 6 veces al día  
☐ más 6 veces al día

---

tomate ensalada

- ☐ Nunca o menos 1 vez al mes  
☐ 1 a 3 veces mes  
☐ 1 vez semana  
☐ 2 a 4 veces semana  
☒ 5 a 6 veces semana  
☐ 1 vez al día  
☐ 2 a 3 veces al día  
☐ 5 a 6 veces al día  
☐ más 6 veces al día

---

cebolla

- ☐ Nunca o menos 1 vez al mes  
☐ 1 a 3 veces mes  
☐ 1 vez semana  
☒ 2 a 4 veces semana  
☐ 5 a 6 veces semana  
☐ 1 vez al día  
☐ 2 a 3 veces al día  
☐ 5 a 6 veces al día  
☐ más 6 veces al día

---

Zanahoria o calabaza

- ☐ Nunca o menos 1 vez al mes  
☐ 1 a 3 veces mes  
☒ 1 vez semana  
☐ 2 a 4 veces semana  
☐ 5 a 6 veces semana  
☐ 1 vez al día  
☐ 2 a 3 veces al día  
☐ 5 a 6 veces al día  
☐ más 6 veces al día

---

Judías verdes

- ☐ Nunca o menos 1 vez al mes  
☐ 1 a 3 veces mes  
☐ 1 vez semana  
☐ 2 a 4 veces semana  
☒ 5 a 6 veces semana  
☐ 1 vez al día  
☐ 2 a 3 veces al día  
☐ 5 a 6 veces al día  
☐ más 6 veces al día

---

Berenjena o calabacin o pepino

- ☐ Nunca o menos 1 vez al mes  
☐ 1 a 3 veces mes  
☐ 1 vez semana  
☐ 2 a 4 veces semana  
☒ 5 a 6 veces semana  
☐ 1 vez al día  
☐ 2 a 3 veces al día  
☐ 5 a 6 veces al día  
☐ más 6 veces al día

|                       |                                                                                                                                                                                                                                                                                                                                                                                                              |
|-----------------------|--------------------------------------------------------------------------------------------------------------------------------------------------------------------------------------------------------------------------------------------------------------------------------------------------------------------------------------------------------------------------------------------------------------|
| pimiento              | <input type="radio"/> Nunca o menos 1 vez al mes<br><input type="radio"/> 1 a 3 veces mes<br><input type="radio"/> 1 vez semana<br><input checked="" type="radio"/> 2 a 4 veces semana<br><input type="radio"/> 5 a 6 veces semana<br><input type="radio"/> 1 vez al día<br><input type="radio"/> 2 a 3 veces al día<br><input type="radio"/> 5 a 6 veces al día<br><input type="radio"/> más 6 veces al día |
| alcachofa             | <input type="radio"/> Nunca o menos 1 vez al mes<br><input type="radio"/> 1 a 3 veces mes<br><input checked="" type="radio"/> 1 vez semana<br><input type="radio"/> 2 a 4 veces semana<br><input type="radio"/> 5 a 6 veces semana<br><input type="radio"/> 1 vez al día<br><input type="radio"/> 2 a 3 veces al día<br><input type="radio"/> 5 a 6 veces al día<br><input type="radio"/> más 6 veces al día |
| espárragos            | <input checked="" type="radio"/> Nunca o menos 1 vez al mes<br><input type="radio"/> 1 a 3 veces mes<br><input type="radio"/> 1 vez semana<br><input type="radio"/> 2 a 4 veces semana<br><input type="radio"/> 5 a 6 veces semana<br><input type="radio"/> 1 vez al día<br><input type="radio"/> 2 a 3 veces al día<br><input type="radio"/> 5 a 6 veces al día<br><input type="radio"/> más 6 veces al día |
| maíz hervido          | <input type="radio"/> Nunca o menos 1 vez al mes<br><input type="radio"/> 1 a 3 veces mes<br><input type="radio"/> 1 vez semana<br><input checked="" type="radio"/> 2 a 4 veces semana<br><input type="radio"/> 5 a 6 veces semana<br><input type="radio"/> 1 vez al día<br><input type="radio"/> 2 a 3 veces al día<br><input type="radio"/> 5 a 6 veces al día<br><input type="radio"/> más 6 veces al día |
| legumbres             | <input type="radio"/> Nunca o menos 1 vez al mes<br><input type="radio"/> 1 a 3 veces mes<br><input type="radio"/> 1 vez semana<br><input type="radio"/> 2 a 4 veces semana<br><input type="radio"/> 5 a 6 veces semana<br><input checked="" type="radio"/> 1 vez al día<br><input type="radio"/> 2 a 3 veces al día<br><input type="radio"/> 5 a 6 veces al día<br><input type="radio"/> más 6 veces al día |
| naranjas o mandarinas | <input checked="" type="radio"/> Nunca o menos 1 vez al mes<br><input type="radio"/> 1 a 3 veces mes<br><input type="radio"/> 1 vez semana<br><input type="radio"/> 2 a 4 veces semana<br><input type="radio"/> 5 a 6 veces semana<br><input type="radio"/> 1 vez al día<br><input type="radio"/> 2 a 3 veces al día<br><input type="radio"/> 5 a 6 veces al día<br><input type="radio"/> más 6 veces al día |



---

zumو natural fruta

- ☐ Nunca o menos 1 vez al mes  
☐ 1 a 3 veces mes  
☐ 1 vez semana  
☐ 2 a 4 veces semana  
☐ 5 a 6 veces semana  
☒ 1 vez al día  
☐ 2 a 3 veces al día  
☐ 5 a 6 veces al día  
☐ más 6 veces al día

---

platano

- ☐ Nunca o menos 1 vez al mes  
☐ 1 a 3 veces mes  
☐ 1 vez semana  
☐ 2 a 4 veces semana  
☐ 5 a 6 veces semana  
☒ 1 vez al día  
☐ 2 a 3 veces al día  
☐ 5 a 6 veces al día  
☐ más 6 veces al día

---

manzana o pera

- ☒ Nunca o menos 1 vez al mes  
☐ 1 a 3 veces mes  
☐ 1 vez semana  
☐ 2 a 4 veces semana  
☐ 5 a 6 veces semana  
☐ 1 vez al día  
☐ 2 a 3 veces al día  
☐ 5 a 6 veces al día  
☐ más 6 veces al día

---

melocotón o nectarina

- ☐ Nunca o menos 1 vez al mes  
☐ 1 a 3 veces mes  
☐ 1 vez semana  
☐ 2 a 4 veces semana  
☐ 5 a 6 veces semana  
☒ 1 vez al día  
☐ 2 a 3 veces al día  
☐ 5 a 6 veces al día  
☐ más 6 veces al día

---

sandia o melon

- ☐ Nunca o menos 1 vez al mes  
☐ 1 a 3 veces mes  
☐ 1 vez semana  
☐ 2 a 4 veces semana  
☒ 5 a 6 veces semana  
☐ 1 vez al día  
☐ 2 a 3 veces al día  
☐ 5 a 6 veces al día  
☐ más 6 veces al día

---

uva

- ☐ Nunca o menos 1 vez al mes  
☐ 1 a 3 veces mes  
☐ 1 vez semana  
☐ 2 a 4 veces semana  
☒ 5 a 6 veces semana  
☐ 1 vez al día  
☐ 2 a 3 veces al día  
☐ 5 a 6 veces al día  
☐ más 6 veces al día

---

bruna o ciruela

- ☐ Nunca o menos 1 vez al mes  
☐ 1 a 3 veces mes  
☐ 1 vez semana  
☐ 2 a 4 veces semana  
☒ 5 a 6 veces semana  
☐ 1 vez al día  
☐ 2 a 3 veces al día  
☐ 5 a 6 veces al día  
☐ más 6 veces al día

---

kiwi

- ☐ Nunca o menos 1 vez al mes  
☐ 1 a 3 veces mes  
☐ 1 vez semana  
☐ 2 a 4 veces semana  
☒ 5 a 6 veces semana  
☐ 1 vez al día  
☐ 2 a 3 veces al día  
☐ 5 a 6 veces al día  
☐ más 6 veces al día

---

aceituna

- ☐ Nunca o menos 1 vez al mes  
☐ 1 a 3 veces mes  
☐ 1 vez semana  
☐ 2 a 4 veces semana  
☐ 5 a 6 veces semana  
☒ 1 vez al día  
☐ 2 a 3 veces al día  
☐ 5 a 6 veces al día  
☐ más 6 veces al día

---

frutos secos

- ☐ Nunca o menos 1 vez al mes  
☐ 1 a 3 veces mes  
☐ 1 vez semana  
☐ 2 a 4 veces semana  
☒ 5 a 6 veces semana  
☐ 1 vez al día  
☐ 2 a 3 veces al día  
☐ 5 a 6 veces al día  
☐ más 6 veces al día

---

pan blanco

- ☐ Nunca o menos 1 vez al mes  
☐ 1 a 3 veces mes  
☐ 1 vez semana  
☐ 2 a 4 veces semana  
☐ 5 a 6 veces semana  
☐ 1 vez al día  
☒ 2 a 3 veces al día  
☐ 5 a 6 veces al día  
☐ más 6 veces al día

---

pan integral

- ☐ Nunca o menos 1 vez al mes  
☐ 1 a 3 veces mes  
☐ 1 vez semana  
☐ 2 a 4 veces semana  
☐ 5 a 6 veces semana  
☒ 1 vez al día  
☐ 2 a 3 veces al día  
☐ 5 a 6 veces al día  
☐ más 6 veces al día

---

cereales desayuno

- ☐ Nunca o menos 1 vez al mes  
☐ 1 a 3 veces mes  
☐ 1 vez semana  
☐ 2 a 4 veces semana  
☐ 5 a 6 veces semana  
☒ 1 vez al día  
☐ 2 a 3 veces al día  
☐ 5 a 6 veces al día  
☐ más 6 veces al día

---

patatas fritas

- ☐ Nunca o menos 1 vez al mes  
☒ 1 a 3 veces mes  
☐ 1 vez semana  
☐ 2 a 4 veces semana  
☐ 5 a 6 veces semana  
☐ 1 vez al día  
☐ 2 a 3 veces al día  
☐ 5 a 6 veces al día  
☐ más 6 veces al día

---

patatas cocidas o asadas

- ☐ Nunca o menos 1 vez al mes  
☐ 1 a 3 veces mes  
☒ 1 vez semana  
☐ 2 a 4 veces semana  
☐ 5 a 6 veces semana  
☐ 1 vez al día  
☐ 2 a 3 veces al día  
☐ 5 a 6 veces al día  
☐ más 6 veces al día

---

bolsa papas

- ☐ Nunca o menos 1 vez al mes  
☐ 1 a 3 veces mes  
☐ 1 vez semana  
☒ 2 a 4 veces semana  
☐ 5 a 6 veces semana  
☐ 1 vez al día  
☐ 2 a 3 veces al día  
☐ 5 a 6 veces al día  
☐ más 6 veces al día

---

arroz cocinado

- ☐ Nunca o menos 1 vez al mes  
☐ 1 a 3 veces mes  
☐ 1 vez semana  
☒ 2 a 4 veces semana  
☐ 5 a 6 veces semana  
☐ 1 vez al día  
☐ 2 a 3 veces al día  
☐ 5 a 6 veces al día  
☐ más 6 veces al día

---

pasta

- ☐ Nunca o menos 1 vez al mes  
☐ 1 a 3 veces mes  
☐ 1 vez semana  
☒ 2 a 4 veces semana  
☐ 5 a 6 veces semana  
☐ 1 vez al día  
☐ 2 a 3 veces al día  
☐ 5 a 6 veces al día  
☐ más 6 veces al día

|                     |                                                                                                                                                                                                                                                                                                                                                                                                              |
|---------------------|--------------------------------------------------------------------------------------------------------------------------------------------------------------------------------------------------------------------------------------------------------------------------------------------------------------------------------------------------------------------------------------------------------------|
| pizza               | <input type="radio"/> Nunca o menos 1 vez al mes<br><input type="radio"/> 1 a 3 veces mes<br><input checked="" type="radio"/> 1 vez semana<br><input type="radio"/> 2 a 4 veces semana<br><input type="radio"/> 5 a 6 veces semana<br><input type="radio"/> 1 vez al día<br><input type="radio"/> 2 a 3 veces al día<br><input type="radio"/> 5 a 6 veces al día<br><input type="radio"/> más 6 veces al día |
| aceite oliva        | <input type="radio"/> Nunca o menos 1 vez al mes<br><input type="radio"/> 1 a 3 veces mes<br><input type="radio"/> 1 vez semana<br><input type="radio"/> 2 a 4 veces semana<br><input type="radio"/> 5 a 6 veces semana<br><input type="radio"/> 1 vez al día<br><input checked="" type="radio"/> 2 a 3 veces al día<br><input type="radio"/> 5 a 6 veces al día<br><input type="radio"/> más 6 veces al día |
| otros aceites       | <input type="radio"/> Nunca o menos 1 vez al mes<br><input type="radio"/> 1 a 3 veces mes<br><input type="radio"/> 1 vez semana<br><input type="radio"/> 2 a 4 veces semana<br><input checked="" type="radio"/> 5 a 6 veces semana<br><input type="radio"/> 1 vez al día<br><input type="radio"/> 2 a 3 veces al día<br><input type="radio"/> 5 a 6 veces al día<br><input type="radio"/> más 6 veces al día |
| margarina           | <input checked="" type="radio"/> Nunca o menos 1 vez al mes<br><input type="radio"/> 1 a 3 veces mes<br><input type="radio"/> 1 vez semana<br><input type="radio"/> 2 a 4 veces semana<br><input type="radio"/> 5 a 6 veces semana<br><input type="radio"/> 1 vez al día<br><input type="radio"/> 2 a 3 veces al día<br><input type="radio"/> 5 a 6 veces al día<br><input type="radio"/> más 6 veces al día |
| mantequilla         | <input checked="" type="radio"/> Nunca o menos 1 vez al mes<br><input type="radio"/> 1 a 3 veces mes<br><input type="radio"/> 1 vez semana<br><input type="radio"/> 2 a 4 veces semana<br><input type="radio"/> 5 a 6 veces semana<br><input type="radio"/> 1 vez al día<br><input type="radio"/> 2 a 3 veces al día<br><input type="radio"/> 5 a 6 veces al día<br><input type="radio"/> más 6 veces al día |
| galletas tipo maria | <input checked="" type="radio"/> Nunca o menos 1 vez al mes<br><input type="radio"/> 1 a 3 veces mes<br><input type="radio"/> 1 vez semana<br><input type="radio"/> 2 a 4 veces semana<br><input type="radio"/> 5 a 6 veces semana<br><input type="radio"/> 1 vez al día<br><input type="radio"/> 2 a 3 veces al día<br><input type="radio"/> 5 a 6 veces al día<br><input type="radio"/> más 6 veces al día |

|                           |                                                                                                                                                                                                                                                                                                                                                                                                              |
|---------------------------|--------------------------------------------------------------------------------------------------------------------------------------------------------------------------------------------------------------------------------------------------------------------------------------------------------------------------------------------------------------------------------------------------------------|
| galletas chocolate        | <input checked="" type="radio"/> Nunca o menos 1 vez al mes<br><input type="radio"/> 1 a 3 veces mes<br><input type="radio"/> 1 vez semana<br><input type="radio"/> 2 a 4 veces semana<br><input type="radio"/> 5 a 6 veces semana<br><input type="radio"/> 1 vez al día<br><input type="radio"/> 2 a 3 veces al día<br><input type="radio"/> 5 a 6 veces al día<br><input type="radio"/> más 6 veces al día |
| bollieria                 | <input type="radio"/> Nunca o menos 1 vez al mes<br><input checked="" type="radio"/> 1 a 3 veces mes<br><input type="radio"/> 1 vez semana<br><input type="radio"/> 2 a 4 veces semana<br><input type="radio"/> 5 a 6 veces semana<br><input type="radio"/> 1 vez al día<br><input type="radio"/> 2 a 3 veces al día<br><input type="radio"/> 5 a 6 veces al día<br><input type="radio"/> más 6 veces al día |
| chocolate o bombones      | <input type="radio"/> Nunca o menos 1 vez al mes<br><input checked="" type="radio"/> 1 a 3 veces mes<br><input type="radio"/> 1 vez semana<br><input type="radio"/> 2 a 4 veces semana<br><input type="radio"/> 5 a 6 veces semana<br><input type="radio"/> 1 vez al día<br><input type="radio"/> 2 a 3 veces al día<br><input type="radio"/> 5 a 6 veces al día<br><input type="radio"/> más 6 veces al día |
| chocolate polvo o colacao | <input type="radio"/> Nunca o menos 1 vez al mes<br><input checked="" type="radio"/> 1 a 3 veces mes<br><input type="radio"/> 1 vez semana<br><input type="radio"/> 2 a 4 veces semana<br><input type="radio"/> 5 a 6 veces semana<br><input type="radio"/> 1 vez al día<br><input type="radio"/> 2 a 3 veces al día<br><input type="radio"/> 5 a 6 veces al día<br><input type="radio"/> más 6 veces al día |
| vino tinto                | <input checked="" type="radio"/> Nunca o menos 1 vez al mes<br><input type="radio"/> 1 a 3 veces mes<br><input type="radio"/> 1 vez semana<br><input type="radio"/> 2 a 4 veces semana<br><input type="radio"/> 5 a 6 veces semana<br><input type="radio"/> 1 vez al día<br><input type="radio"/> 2 a 3 veces al día<br><input type="radio"/> 5 a 6 veces al día<br><input type="radio"/> más 6 veces al día |
| vino blanco               | <input checked="" type="radio"/> Nunca o menos 1 vez al mes<br><input type="radio"/> 1 a 3 veces mes<br><input type="radio"/> 1 vez semana<br><input type="radio"/> 2 a 4 veces semana<br><input type="radio"/> 5 a 6 veces semana<br><input type="radio"/> 1 vez al día<br><input type="radio"/> 2 a 3 veces al día<br><input type="radio"/> 5 a 6 veces al día<br><input type="radio"/> más 6 veces al día |

---

|                    |                                                                                                                                                                                                                                                                                                                                                                                                              |
|--------------------|--------------------------------------------------------------------------------------------------------------------------------------------------------------------------------------------------------------------------------------------------------------------------------------------------------------------------------------------------------------------------------------------------------------|
| vino seco o vermut | <input checked="" type="radio"/> Nunca o menos 1 vez al mes<br><input type="radio"/> 1 a 3 veces mes<br><input type="radio"/> 1 vez semana<br><input type="radio"/> 2 a 4 veces semana<br><input type="radio"/> 5 a 6 veces semana<br><input type="radio"/> 1 vez al día<br><input type="radio"/> 2 a 3 veces al día<br><input type="radio"/> 5 a 6 veces al día<br><input type="radio"/> más 6 veces al día |
|--------------------|--------------------------------------------------------------------------------------------------------------------------------------------------------------------------------------------------------------------------------------------------------------------------------------------------------------------------------------------------------------------------------------------------------------|

---

|         |                                                                                                                                                                                                                                                                                                                                                                                                              |
|---------|--------------------------------------------------------------------------------------------------------------------------------------------------------------------------------------------------------------------------------------------------------------------------------------------------------------------------------------------------------------------------------------------------------------|
| cerveza | <input checked="" type="radio"/> Nunca o menos 1 vez al mes<br><input type="radio"/> 1 a 3 veces mes<br><input type="radio"/> 1 vez semana<br><input type="radio"/> 2 a 4 veces semana<br><input type="radio"/> 5 a 6 veces semana<br><input type="radio"/> 1 vez al día<br><input type="radio"/> 2 a 3 veces al día<br><input type="radio"/> 5 a 6 veces al día<br><input type="radio"/> más 6 veces al día |
|---------|--------------------------------------------------------------------------------------------------------------------------------------------------------------------------------------------------------------------------------------------------------------------------------------------------------------------------------------------------------------------------------------------------------------|

---

|                     |                                                                                                                                                                                                                                                                                                                                                                                                              |
|---------------------|--------------------------------------------------------------------------------------------------------------------------------------------------------------------------------------------------------------------------------------------------------------------------------------------------------------------------------------------------------------------------------------------------------------|
| cerveza sin alcohol | <input checked="" type="radio"/> Nunca o menos 1 vez al mes<br><input type="radio"/> 1 a 3 veces mes<br><input type="radio"/> 1 vez semana<br><input type="radio"/> 2 a 4 veces semana<br><input type="radio"/> 5 a 6 veces semana<br><input type="radio"/> 1 vez al día<br><input type="radio"/> 2 a 3 veces al día<br><input type="radio"/> 5 a 6 veces al día<br><input type="radio"/> más 6 veces al día |
|---------------------|--------------------------------------------------------------------------------------------------------------------------------------------------------------------------------------------------------------------------------------------------------------------------------------------------------------------------------------------------------------------------------------------------------------|

---

|         |                                                                                                                                                                                                                                                                                                                                                                                                              |
|---------|--------------------------------------------------------------------------------------------------------------------------------------------------------------------------------------------------------------------------------------------------------------------------------------------------------------------------------------------------------------------------------------------------------------|
| licores | <input checked="" type="radio"/> Nunca o menos 1 vez al mes<br><input type="radio"/> 1 a 3 veces mes<br><input type="radio"/> 1 vez semana<br><input type="radio"/> 2 a 4 veces semana<br><input type="radio"/> 5 a 6 veces semana<br><input type="radio"/> 1 vez al día<br><input type="radio"/> 2 a 3 veces al día<br><input type="radio"/> 5 a 6 veces al día<br><input type="radio"/> más 6 veces al día |
|---------|--------------------------------------------------------------------------------------------------------------------------------------------------------------------------------------------------------------------------------------------------------------------------------------------------------------------------------------------------------------------------------------------------------------|

---

|                       |                                                                                                                                                                                                                                                                                                                                                                                                              |
|-----------------------|--------------------------------------------------------------------------------------------------------------------------------------------------------------------------------------------------------------------------------------------------------------------------------------------------------------------------------------------------------------------------------------------------------------|
| ginebra o ron o vodka | <input checked="" type="radio"/> Nunca o menos 1 vez al mes<br><input type="radio"/> 1 a 3 veces mes<br><input type="radio"/> 1 vez semana<br><input type="radio"/> 2 a 4 veces semana<br><input type="radio"/> 5 a 6 veces semana<br><input type="radio"/> 1 vez al día<br><input type="radio"/> 2 a 3 veces al día<br><input type="radio"/> 5 a 6 veces al día<br><input type="radio"/> más 6 veces al día |
|-----------------------|--------------------------------------------------------------------------------------------------------------------------------------------------------------------------------------------------------------------------------------------------------------------------------------------------------------------------------------------------------------------------------------------------------------|

---

|                 |                                                                                                                                                                                                                                                                                                                                                                                                              |
|-----------------|--------------------------------------------------------------------------------------------------------------------------------------------------------------------------------------------------------------------------------------------------------------------------------------------------------------------------------------------------------------------------------------------------------------|
| refresco normal | <input checked="" type="radio"/> Nunca o menos 1 vez al mes<br><input type="radio"/> 1 a 3 veces mes<br><input type="radio"/> 1 vez semana<br><input type="radio"/> 2 a 4 veces semana<br><input type="radio"/> 5 a 6 veces semana<br><input type="radio"/> 1 vez al día<br><input type="radio"/> 2 a 3 veces al día<br><input type="radio"/> 5 a 6 veces al día<br><input type="radio"/> más 6 veces al día |
|-----------------|--------------------------------------------------------------------------------------------------------------------------------------------------------------------------------------------------------------------------------------------------------------------------------------------------------------------------------------------------------------------------------------------------------------|

---

|                          |                                                                                                                                                                                                                                                                                                                                                                                                              |
|--------------------------|--------------------------------------------------------------------------------------------------------------------------------------------------------------------------------------------------------------------------------------------------------------------------------------------------------------------------------------------------------------------------------------------------------------|
| refresco sin azúcar      | <input checked="" type="radio"/> Nunca o menos 1 vez al mes<br><input type="radio"/> 1 a 3 veces mes<br><input type="radio"/> 1 vez semana<br><input type="radio"/> 2 a 4 veces semana<br><input type="radio"/> 5 a 6 veces semana<br><input type="radio"/> 1 vez al día<br><input type="radio"/> 2 a 3 veces al día<br><input type="radio"/> 5 a 6 veces al día<br><input type="radio"/> más 6 veces al día |
| Agua del grifo           | <input checked="" type="radio"/> Nunca o menos 1 vez al mes<br><input type="radio"/> 1 a 3 veces mes<br><input type="radio"/> 1 vez semana<br><input type="radio"/> 2 a 4 veces semana<br><input type="radio"/> 5 a 6 veces semana<br><input type="radio"/> 1 vez al día<br><input type="radio"/> 2 a 3 veces al día<br><input type="radio"/> 5 a 6 veces al día<br><input type="radio"/> más 6 veces al día |
| agua embotellada sin gas | <input type="radio"/> Nunca o menos 1 vez al mes<br><input type="radio"/> 1 a 3 veces mes<br><input type="radio"/> 1 vez semana<br><input type="radio"/> 2 a 4 veces semana<br><input type="radio"/> 5 a 6 veces semana<br><input type="radio"/> 1 vez al día<br><input type="radio"/> 2 a 3 veces al día<br><input type="radio"/> 5 a 6 veces al día<br><input checked="" type="radio"/> más 6 veces al día |
| agua embotellada con gas | <input checked="" type="radio"/> Nunca o menos 1 vez al mes<br><input type="radio"/> 1 a 3 veces mes<br><input type="radio"/> 1 vez semana<br><input type="radio"/> 2 a 4 veces semana<br><input type="radio"/> 5 a 6 veces semana<br><input type="radio"/> 1 vez al día<br><input type="radio"/> 2 a 3 veces al día<br><input type="radio"/> 5 a 6 veces al día<br><input type="radio"/> más 6 veces al día |
| zumو frutas embasado     | <input type="radio"/> Nunca o menos 1 vez al mes<br><input type="radio"/> 1 a 3 veces mes<br><input type="radio"/> 1 vez semana<br><input checked="" type="radio"/> 2 a 4 veces semana<br><input type="radio"/> 5 a 6 veces semana<br><input type="radio"/> 1 vez al día<br><input type="radio"/> 2 a 3 veces al día<br><input type="radio"/> 5 a 6 veces al día<br><input type="radio"/> más 6 veces al día |
| cafe                     | <input checked="" type="radio"/> Nunca o menos 1 vez al mes<br><input type="radio"/> 1 a 3 veces mes<br><input type="radio"/> 1 vez semana<br><input type="radio"/> 2 a 4 veces semana<br><input type="radio"/> 5 a 6 veces semana<br><input type="radio"/> 1 vez al día<br><input type="radio"/> 2 a 3 veces al día<br><input type="radio"/> 5 a 6 veces al día<br><input type="radio"/> más 6 veces al día |

---

cafe descafeinado

- ☒ Nunca o menos 1 vez al mes  
☐ 1 a 3 veces mes  
☐ 1 vez semana  
☐ 2 a 4 veces semana  
☐ 5 a 6 veces semana  
☐ 1 vez al día  
☐ 2 a 3 veces al día  
☐ 5 a 6 veces al día  
☐ más 6 veces al día

---

te o infusión

- ☒ Nunca o menos 1 vez al mes  
☐ 1 a 3 veces mes  
☐ 1 vez semana  
☐ 2 a 4 veces semana  
☐ 5 a 6 veces semana  
☐ 1 vez al día  
☐ 2 a 3 veces al día  
☐ 5 a 6 veces al día  
☐ más 6 veces al día

---

sopa o puré verduras

- ☐ Nunca o menos 1 vez al mes  
☐ 1 a 3 veces mes  
☐ 1 vez semana  
☒ 2 a 4 veces semana  
☐ 5 a 6 veces semana  
☐ 1 vez al día  
☐ 2 a 3 veces al día  
☐ 5 a 6 veces al día  
☐ más 6 veces al día

---

croquetas pollo jamón

- ☒ Nunca o menos 1 vez al mes  
☐ 1 a 3 veces mes  
☐ 1 vez semana  
☐ 2 a 4 veces semana  
☐ 5 a 6 veces semana  
☐ 1 vez al día  
☐ 2 a 3 veces al día  
☐ 5 a 6 veces al día  
☐ más 6 veces al día

---

croquetas pescado

- ☒ Nunca o menos 1 vez al mes  
☐ 1 a 3 veces mes  
☐ 1 vez semana  
☐ 2 a 4 veces semana  
☐ 5 a 6 veces semana  
☐ 1 vez al día  
☐ 2 a 3 veces al día  
☐ 5 a 6 veces al día  
☐ más 6 veces al día

---

mayonesa

- ☐ Nunca o menos 1 vez al mes  
☐ 1 a 3 veces mes  
☒ 1 vez semana  
☐ 2 a 4 veces semana  
☐ 5 a 6 veces semana  
☐ 1 vez al día  
☐ 2 a 3 veces al día  
☐ 5 a 6 veces al día  
☐ más 6 veces al día



---

salsa tomate

- ☐ Nunca o menos 1 vez al mes  
☐ 1 a 3 veces mes  
☐ 1 vez semana  
☒ 2 a 4 veces semana  
☐ 5 a 6 veces semana  
☐ 1 vez al día  
☐ 2 a 3 veces al día  
☐ 5 a 6 veces al día  
☐ más 6 veces al día

---

ketchup

- ☐ Nunca o menos 1 vez al mes  
☐ 1 a 3 veces mes  
☐ 1 vez semana  
☒ 2 a 4 veces semana  
☐ 5 a 6 veces semana  
☐ 1 vez al día  
☐ 2 a 3 veces al día  
☐ 5 a 6 veces al día  
☐ más 6 veces al día

---

sal

- ☐ Nunca o menos 1 vez al mes  
☐ 1 a 3 veces mes  
☒ 1 vez semana  
☐ 2 a 4 veces semana  
☐ 5 a 6 veces semana  
☐ 1 vez al día  
☐ 2 a 3 veces al día  
☐ 5 a 6 veces al día  
☐ más 6 veces al día

---

ajo

- ☐ Nunca o menos 1 vez al mes  
☒ 1 a 3 veces mes  
☐ 1 vez semana  
☐ 2 a 4 veces semana  
☐ 5 a 6 veces semana  
☐ 1 vez al día  
☐ 2 a 3 veces al día  
☐ 5 a 6 veces al día  
☐ más 6 veces al día

---

mermelada o miel

- ☐ Nunca o menos 1 vez al mes  
☐ 1 a 3 veces mes  
☒ 1 vez semana  
☐ 2 a 4 veces semana  
☐ 5 a 6 veces semana  
☐ 1 vez al día  
☐ 2 a 3 veces al día  
☐ 5 a 6 veces al día  
☐ más 6 veces al día

---

azúcar

- ☐ Nunca o menos 1 vez al mes  
☒ 1 a 3 veces mes  
☐ 1 vez semana  
☐ 2 a 4 veces semana  
☐ 5 a 6 veces semana  
☐ 1 vez al día  
☐ 2 a 3 veces al día  
☐ 5 a 6 veces al día  
☐ más 6 veces al día

|                                       |                                                                                                                                                                                                                                                                                                                                                                                                                                                                                                                               |
|---------------------------------------|-------------------------------------------------------------------------------------------------------------------------------------------------------------------------------------------------------------------------------------------------------------------------------------------------------------------------------------------------------------------------------------------------------------------------------------------------------------------------------------------------------------------------------|
| Otro alimento                         |                                                                                                                                                                                                                                                                                                                                                                                                                                                                                                                               |
| suplementos vitamínicos               | <input checked="" type="radio"/> si<br><input type="radio"/> no                                                                                                                                                                                                                                                                                                                                                                                                                                                               |
| suplementos vitamínicos               | [*DATA REMOVED*]                                                                                                                                                                                                                                                                                                                                                                                                                                                                                                              |
| dieta previa                          | <input checked="" type="radio"/> si<br><input type="radio"/> no                                                                                                                                                                                                                                                                                                                                                                                                                                                               |
| motivo dieta                          | <input type="radio"/> no dieta<br><input type="radio"/> control peso<br><input type="radio"/> control colesterol<br><input type="radio"/> control diabetes<br><input type="radio"/> problemas estómago<br><input type="radio"/> problemas vesícula o hepáticos<br><input type="radio"/> HTA o cardiopatía<br><input type="radio"/> problemas renales<br><input type="radio"/> alergia alimentaria<br><input type="radio"/> ácido úrico elevado<br><input checked="" type="radio"/> vegetariana<br><input type="radio"/> otros |
| cambio alimentos año previo gestación | <input type="radio"/> si<br><input checked="" type="radio"/> no                                                                                                                                                                                                                                                                                                                                                                                                                                                               |
| cambio lácteos                        | <input type="radio"/> eliminado<br><input type="radio"/> disminuido<br><input type="radio"/> igual<br><input type="radio"/> aumentado<br><input type="radio"/> no sabe                                                                                                                                                                                                                                                                                                                                                        |
| cambio huevos                         | <input type="radio"/> eliminado<br><input type="radio"/> disminuido<br><input type="radio"/> igual<br><input type="radio"/> aumentado<br><input type="radio"/> no sabe                                                                                                                                                                                                                                                                                                                                                        |
| cambio carne                          | <input type="radio"/> eliminado<br><input type="radio"/> disminuido<br><input type="radio"/> igual<br><input type="radio"/> aumentado<br><input type="radio"/> no sabe                                                                                                                                                                                                                                                                                                                                                        |
| cambio pescado                        | <input type="radio"/> eliminado<br><input type="radio"/> disminuido<br><input type="radio"/> igual<br><input type="radio"/> aumentado<br><input type="radio"/> no sabe                                                                                                                                                                                                                                                                                                                                                        |
| cambio verduras                       | <input type="radio"/> eliminado<br><input type="radio"/> disminuido<br><input type="radio"/> igual<br><input type="radio"/> aumentado<br><input type="radio"/> no sabe                                                                                                                                                                                                                                                                                                                                                        |

|                            |                                                                                                                                                                                                                        |
|----------------------------|------------------------------------------------------------------------------------------------------------------------------------------------------------------------------------------------------------------------|
| cambio legumbres           | <input type="radio"/> eliminado<br><input type="radio"/> disminuido<br><input type="radio"/> igual<br><input type="radio"/> aumentado<br><input type="radio"/> no sabe                                                 |
| cambio fruta               | <input type="radio"/> eliminado<br><input type="radio"/> disminuido<br><input type="radio"/> igual<br><input type="radio"/> aumentado<br><input type="radio"/> no sabe                                                 |
| cambio pan                 | <input type="radio"/> eliminado<br><input type="radio"/> disminuido<br><input type="radio"/> igual<br><input type="radio"/> aumentado<br><input type="radio"/> no sabe                                                 |
| cambio aceite oliva        | <input type="radio"/> eliminado<br><input type="radio"/> disminuido<br><input type="radio"/> igual<br><input type="radio"/> aumentado<br><input type="radio"/> no sabe                                                 |
| cambio mante o margarina   | <input type="radio"/> eliminado<br><input type="radio"/> disminuido<br><input type="radio"/> igual<br><input type="radio"/> aumentado<br><input type="radio"/> no sabe                                                 |
| cambio azúcar y dulces     | <input type="radio"/> eliminado<br><input type="radio"/> disminuido<br><input type="radio"/> igual<br><input type="radio"/> aumentado<br><input type="radio"/> no sabe                                                 |
| cambio bebidas alcohólicas | <input type="radio"/> eliminado<br><input type="radio"/> disminuido<br><input type="radio"/> igual<br><input type="radio"/> aumentado<br><input type="radio"/> no sabe                                                 |
| frecuencia comidas fritas  | <input type="radio"/> a diario<br><input type="radio"/> 5 a 6 veces semana<br><input type="radio"/> 2 a 4 veces semana<br><input type="radio"/> 1 vez semana<br><input checked="" type="radio"/> menos de 1 vez semana |
| carne                      | <input checked="" type="radio"/> no como<br><input type="radio"/> cruda<br><input type="radio"/> poco hecha<br><input type="radio"/> hecha<br><input type="radio"/> muy hecha                                          |
| grasa visible carne        | <input type="radio"/> quita toda<br><input type="radio"/> quita mayoría<br><input type="radio"/> quita un poco<br><input type="radio"/> no quita nada                                                                  |

|                                |                                                                                                                                                                                                                                                          |
|--------------------------------|----------------------------------------------------------------------------------------------------------------------------------------------------------------------------------------------------------------------------------------------------------|
| cocina carne                   | <input type="radio"/> a la plancha<br><input type="radio"/> a la parrilla<br><input type="radio"/> asada<br><input type="radio"/> frita<br><input type="radio"/> guisada                                                                                 |
| tostado quemado carne          | <input type="radio"/> nunca<br><input type="radio"/> 1 vez mes<br><input type="radio"/> 2 a 3 veces mes<br><input type="radio"/> 1 vez semana<br><input type="radio"/> 2 a 3 semanas                                                                     |
| tostado quemado pescado        | <input checked="" type="radio"/> nunca<br><input type="radio"/> 1 vez mes<br><input type="radio"/> 2 a 3 veces mes<br><input type="radio"/> 1 vez semana<br><input type="radio"/> 2 a 3 semanas                                                          |
| socarrat paella                | <input checked="" type="radio"/> nunca<br><input type="radio"/> 1 vez mes<br><input type="radio"/> 2 a 3 veces mes<br><input type="radio"/> 1 vez semana<br><input type="radio"/> 2 a 3 semanas                                                          |
| grasa o aceite cocinar         | <input type="radio"/> mantequilla<br><input type="radio"/> margarina<br><input checked="" type="radio"/> aceite oliva<br><input type="radio"/> aceite oliva virgen extra<br><input type="radio"/> aceite vegetal<br><input type="radio"/> mezcla aceites |
| grasa aceite aliñar            | <input type="radio"/> mantequilla<br><input type="radio"/> margarina<br><input type="radio"/> aceite oliva<br><input checked="" type="radio"/> aceite oliva virgen extra<br><input type="radio"/> aceite vegetal<br><input type="radio"/> mezcla aceites |
| grasa aceite freir             | <input type="radio"/> mantequilla<br><input type="radio"/> margarina<br><input checked="" type="radio"/> aceite oliva<br><input type="radio"/> aceite oliva virgen extra<br><input type="radio"/> aceite vegetal<br><input type="radio"/> mezcla aceites |
| Ejercicio cuestionario         | <input checked="" type="radio"/> si<br><input type="radio"/> no                                                                                                                                                                                          |
| horas de sueño incluido siesta | [*DATA REMOVED*]                                                                                                                                                                                                                                         |
| minutos siesta                 | [*DATA REMOVED*]                                                                                                                                                                                                                                         |
| horas televisión semana        | [*DATA REMOVED*]                                                                                                                                                                                                                                         |

|                                        |                                                                                                                                                                                                                                                                                                                                                                           |
|----------------------------------------|---------------------------------------------------------------------------------------------------------------------------------------------------------------------------------------------------------------------------------------------------------------------------------------------------------------------------------------------------------------------------|
| actividad trabajo                      | <input type="radio"/> casi siempre sentado<br><input checked="" type="radio"/> sentado 50 por cien<br><input type="radio"/> casi siempre de pie, quieto<br><input type="radio"/> casi siempre levantado caminando y llevando pocas cosas<br><input type="radio"/> casi siempre levantado, caminando y llevado muchas cosas<br><input type="radio"/> trabajo manual pesado |
| tiempo caminar o bici al día           | <input type="radio"/> casi nunca<br><input type="radio"/> menos 20min día<br><input checked="" type="radio"/> 20 a 40 min día<br><input type="radio"/> 40 a 60 min día<br><input type="radio"/> 1h o 1h y media día<br><input type="radio"/> más de 1h y media al día                                                                                                     |
| tiempo tareas casa al día              | <input type="radio"/> menos de 1h día<br><input checked="" type="radio"/> 1 a 2h día<br><input type="radio"/> 3 a 4h día<br><input type="radio"/> 5 a 6h día<br><input type="radio"/> 7 a 8h día<br><input type="radio"/> más de 8h día                                                                                                                                   |
| tiempo libre televisión ordenador leer | <input type="radio"/> menos 1h día<br><input checked="" type="radio"/> 1h día<br><input type="radio"/> 2h día<br><input type="radio"/> 3h día<br><input type="radio"/> 4h día<br><input type="radio"/> 5 a 6h día<br><input type="radio"/> mas 6h día                                                                                                                     |
| tiempo libre ejercicio o deporte       | <input type="radio"/> menos 1h semana<br><input type="radio"/> 1h semana<br><input checked="" type="radio"/> 2h semana<br><input type="radio"/> 3h semana<br><input type="radio"/> 4 a 5h semana<br><input type="radio"/> mas 5h semana                                                                                                                                   |
| como se considera                      | <input checked="" type="radio"/> sedentaria<br><input type="radio"/> poco activa<br><input type="radio"/> moderadamente activa<br><input type="radio"/> bastante activa<br><input type="radio"/> muy activa<br><input type="radio"/> no sabe                                                                                                                              |
| FUR                                    | [*DATA REMOVED*]                                                                                                                                                                                                                                                                                                                                                          |
| Semanas gestación 2T                   | _____                                                                                                                                                                                                                                                                                                                                                                     |
| Días gestación 2T                      | _____                                                                                                                                                                                                                                                                                                                                                                     |
| DBP 2T                                 | _____                                                                                                                                                                                                                                                                                                                                                                     |
| CC 2T                                  | _____                                                                                                                                                                                                                                                                                                                                                                     |

|                                                   |                                                                                                                                                                                                 |
|---------------------------------------------------|-------------------------------------------------------------------------------------------------------------------------------------------------------------------------------------------------|
| AC 2T                                             |                                                                                                                                                                                                 |
| LF 2T                                             |                                                                                                                                                                                                 |
| PFE 2T (Hadlock)                                  |                                                                                                                                                                                                 |
| Semanas gestación 3T                              | [*DATA REMOVED*]                                                                                                                                                                                |
| días 3T                                           | [*DATA REMOVED*]                                                                                                                                                                                |
| DBP 3T                                            | [*DATA REMOVED*]                                                                                                                                                                                |
| CC 3T                                             | [*DATA REMOVED*]                                                                                                                                                                                |
| AC 3T                                             | [*DATA REMOVED*]                                                                                                                                                                                |
| LF 3T                                             | [*DATA REMOVED*]                                                                                                                                                                                |
| PFE 3T (Hadlock)                                  | [*DATA REMOVED*]                                                                                                                                                                                |
| Semanas de gestación final                        | [*DATA REMOVED*]                                                                                                                                                                                |
| días gestación final                              | [*DATA REMOVED*]                                                                                                                                                                                |
| Localización placenta                             | <input type="radio"/> anterior<br><input type="radio"/> lateral derecha<br><input type="radio"/> lateral izquierda<br><input type="radio"/> posterior<br><input checked="" type="radio"/> fondo |
| Presentación longitudinal cefálica                | <input type="radio"/> no<br><input checked="" type="radio"/> si                                                                                                                                 |
| Dorso                                             | <input checked="" type="radio"/> izquierda anterior<br><input type="radio"/> izquierda posterior<br><input type="radio"/> derecha anterior<br><input type="radio"/> derecha posterior           |
| diámetro biparietal                               | [*DATA REMOVED*]                                                                                                                                                                                |
| Circunferencia craneal                            | [*DATA REMOVED*]                                                                                                                                                                                |
| Circunferencia abdominal                          | [*DATA REMOVED*]                                                                                                                                                                                |
| Longitud de femur                                 | [*DATA REMOVED*]                                                                                                                                                                                |
| tejido celular subcutáneo a nivel del muslo en mm | [*DATA REMOVED*]                                                                                                                                                                                |
| tejido celular subcutáneo en abdomen en mm        | [*DATA REMOVED*]                                                                                                                                                                                |

|                                               |                                                                                                                                                          |
|-----------------------------------------------|----------------------------------------------------------------------------------------------------------------------------------------------------------|
| Volumen del muslo en cm3                      | [*DATA REMOVED*]                                                                                                                                         |
| Peso fetal estimado según fórmula de Hadlock  | [*DATA REMOVED*]                                                                                                                                         |
| Percentil                                     | [*DATA REMOVED*]                                                                                                                                         |
| Peso fetal estimado según fórmula de Scioscia | _____                                                                                                                                                    |
| Peso fetal estimado según fórmula de LEE      | _____                                                                                                                                                    |
| Tipo de parto                                 | <input checked="" type="radio"/> eutocico<br><input type="radio"/> instrumentado/ventosa<br><input type="radio"/> cesarea                                |
| fecha de nacimiento                           | [*DATA REMOVED*]                                                                                                                                         |
| Días entre exploración y nacimiento           | [*DATA REMOVED*]                                                                                                                                         |
| Peso RN en g                                  | [*DATA REMOVED*]                                                                                                                                         |
| sexo                                          | <input checked="" type="radio"/> mujer<br><input type="radio"/> hombre                                                                                   |
| Apgar 1 minuto                                | [*DATA REMOVED*]                                                                                                                                         |
| Apgar 5 minutos                               | [*DATA REMOVED*]                                                                                                                                         |
| Apgar 10 minutos                              | _____                                                                                                                                                    |
| antecedente Covid durante gestación           | <input type="radio"/> Yes<br><input checked="" type="radio"/> No                                                                                         |
| Nivel de estudios                             | <input type="radio"/> ninguno<br><input type="radio"/> primarios<br><input type="radio"/> secundarios<br><input checked="" type="radio"/> universitarios |

# Base\_datos\_estimacion\_peso\_fetal

|                                       |                                                                                                                                                                                                                                                                                      |
|---------------------------------------|--------------------------------------------------------------------------------------------------------------------------------------------------------------------------------------------------------------------------------------------------------------------------------------|
| Número de identificación participante | 124                                                                                                                                                                                                                                                                                  |
| CODIGO PARTICIPANTE                   |                                                                                                                                                                                                                                                                                      |
| Edad                                  | [*DATA REMOVED*]                                                                                                                                                                                                                                                                     |
| Gestaciones                           | <input type="radio"/> 1<br><input checked="" type="radio"/> 2<br><input type="radio"/> 3<br><input type="radio"/> mas de 3                                                                                                                                                           |
| partos                                | <input checked="" type="radio"/> 0<br><input type="radio"/> 1<br><input type="radio"/> 2<br><input type="radio"/> 3<br><input type="radio"/> mas de 3                                                                                                                                |
| cesáreas                              | <input checked="" type="radio"/> 0<br><input type="radio"/> 1<br><input type="radio"/> 2<br><input type="radio"/> 3<br><input type="radio"/> mas de 3                                                                                                                                |
| Abortos                               | <input type="radio"/> 0<br><input checked="" type="radio"/> 1<br><input type="radio"/> 2<br><input type="radio"/> 3<br><input type="radio"/> mas de 3                                                                                                                                |
| Tipo de gestacion                     | <input checked="" type="radio"/> espontanea<br><input type="radio"/> IAC inseminación artificial conyuge<br><input type="radio"/> IAD inseminación artificial donante<br><input type="radio"/> FIV Fecundación in Vitro<br><input type="radio"/> Ovodon FIV con donación de ovocitos |
| peso previo a embarazo                | [*DATA REMOVED*]                                                                                                                                                                                                                                                                     |
| Ganancia ponderal embarazo            | [*DATA REMOVED*]                                                                                                                                                                                                                                                                     |
| Talla madre                           | [*DATA REMOVED*]                                                                                                                                                                                                                                                                     |
| IMC previo embarazo                   | 32.36854981369265                                                                                                                                                                                                                                                                    |
| Patología obstétrica                  | <input checked="" type="radio"/> no<br><input type="radio"/> si                                                                                                                                                                                                                      |
| Diabetes pregestacional               | <input checked="" type="radio"/> no<br><input type="radio"/> si                                                                                                                                                                                                                      |
| Diabetes gestacional                  | <input checked="" type="radio"/> no<br><input type="radio"/> si                                                                                                                                                                                                                      |



|                                            |                                                                                                                                                                                      |
|--------------------------------------------|--------------------------------------------------------------------------------------------------------------------------------------------------------------------------------------|
| Diabetes gestacional con insulina          | <input checked="" type="radio"/> no<br><input type="radio"/> si                                                                                                                      |
| Diabetes gestacional con dieta y ejercicio | <input checked="" type="radio"/> no<br><input type="radio"/> si                                                                                                                      |
| Percentil fetos previos                    | <input checked="" type="radio"/> Nada<br><input type="radio"/> percentil menor de 10<br><input type="radio"/> percentil entre 10 y 90<br><input type="radio"/> percentil mayor de 90 |
| Exfumadora                                 | <input checked="" type="radio"/> Nada<br><input type="radio"/> menos de 5 años<br><input type="radio"/> 5 a 10 años<br><input type="radio"/> mayor o igual a 10 años                 |
| Hábito tabáquico                           | <input type="radio"/> no<br><input checked="" type="radio"/> si                                                                                                                      |
| fumadora                                   | [*DATA REMOVED*]                                                                                                                                                                     |
| Consumo otros tóxicos                      | <input checked="" type="radio"/> no<br><input type="radio"/> si                                                                                                                      |
| Hb 1T                                      | [*DATA REMOVED*]                                                                                                                                                                     |
| Htc 1T                                     | [*DATA REMOVED*]                                                                                                                                                                     |
| Hb 2T                                      | [*DATA REMOVED*]                                                                                                                                                                     |
| HTC 2T                                     | [*DATA REMOVED*]                                                                                                                                                                     |
| Hb 3T                                      | [*DATA REMOVED*]                                                                                                                                                                     |
| HTC 3T                                     | [*DATA REMOVED*]                                                                                                                                                                     |
| Suplemento FE oral                         | <input type="radio"/> si<br><input checked="" type="radio"/> no                                                                                                                      |
| Suplemento fe iv                           | <input type="radio"/> si<br><input checked="" type="radio"/> no                                                                                                                      |
| Transfusión                                | <input checked="" type="radio"/> no<br><input type="radio"/> si                                                                                                                      |
| Solicitada Vit D                           | <input checked="" type="radio"/> no<br><input type="radio"/> si                                                                                                                      |
| Deficit vit D                              | <input type="radio"/> no<br><input type="radio"/> si                                                                                                                                 |
| Suplemento vit D                           | <input type="radio"/> si<br><input type="radio"/> no                                                                                                                                 |

|                       |                                                                                                                                                                                                                                                                                                                                                                                                              |
|-----------------------|--------------------------------------------------------------------------------------------------------------------------------------------------------------------------------------------------------------------------------------------------------------------------------------------------------------------------------------------------------------------------------------------------------------|
| Dieta, cuestionario   | <input checked="" type="radio"/> si<br><input type="radio"/> no                                                                                                                                                                                                                                                                                                                                              |
| Leche entera          | <input type="radio"/> Nunca o menos 1 vez al mes<br><input type="radio"/> 1 a 3 veces mes<br><input type="radio"/> 1 vez semana<br><input checked="" type="radio"/> 2 a 4 veces semana<br><input type="radio"/> 5 a 6 veces semana<br><input type="radio"/> 1 vez al día<br><input type="radio"/> 2 a 3 veces al día<br><input type="radio"/> 5 a 6 veces al día<br><input type="radio"/> más 6 veces al día |
| Leche semidesnatada   | <input checked="" type="radio"/> Nunca o menos 1 vez al mes<br><input type="radio"/> 1 a 3 veces mes<br><input type="radio"/> 1 vez semana<br><input type="radio"/> 2 a 4 veces semana<br><input type="radio"/> 5 a 6 veces semana<br><input type="radio"/> 1 vez al día<br><input type="radio"/> 2 a 3 veces al día<br><input type="radio"/> 5 a 6 veces al día<br><input type="radio"/> mas 6 veces al día |
| Leche desnatada       | <input checked="" type="radio"/> Nunca o menos 1 vez al mes<br><input type="radio"/> 1 a 3 veces mes<br><input type="radio"/> 1 vez semana<br><input type="radio"/> 2 a 4 veces semana<br><input type="radio"/> 5 a 6 veces semana<br><input type="radio"/> 1 vez al día<br><input type="radio"/> 2 a 3 veces al día<br><input type="radio"/> 5 a 6 veces al día<br><input type="radio"/> más 6 veces al día |
| Leche condensada      | <input checked="" type="radio"/> Nunca o menos 1 vez al mes<br><input type="radio"/> 1 a 3 veces mes<br><input type="radio"/> 1 vez semana<br><input type="radio"/> 2 a 4 veces semana<br><input type="radio"/> 5 a 6 veces semana<br><input type="radio"/> 1 vez al día<br><input type="radio"/> 2 a 3 veces al día<br><input type="radio"/> 5 a 6 veces al día<br><input type="radio"/> más 6 veces al día |
| nata o crema de leche | <input checked="" type="radio"/> Nunca o menos 1 vez al mes<br><input type="radio"/> 1 a 3 veces mes<br><input type="radio"/> 1 vez semana<br><input type="radio"/> 2 a 4 veces semana<br><input type="radio"/> 5 a 6 veces semana<br><input type="radio"/> 1 vez al día<br><input type="radio"/> 2 a 3 veces al día<br><input type="radio"/> 5 a 6 veces al día<br><input type="radio"/> más 6 veces al día |

---

Yogurt Entero

- ☐ Nunca o menos 1 vez al mes  
☐ 1 a 3 veces mes  
☒ 1 vez semana  
☐ 2 a 4 veces semana  
☐ 5 a 6 veces semana  
☐ 1 vez al día  
☐ 2 a 3 veces al día  
☐ 5 a 6 veces al día  
☐ más 6 veces al día

---

Yogurt desnatado

- ☒ Nunca o menos 1 vez al mes  
☐ 1 a 3 veces mes  
☐ 1 vez semana  
☐ 2 a 4 veces semana  
☐ 5 a 6 veces semana  
☐ 1 vez al día  
☐ 2 a 3 veces al día  
☐ 5 a 6 veces al día  
☐ más 6 veces al día

---

100g requesón o queso blando o queso fresco

- ☐ Nunca o menos 1 vez al mes  
☐ 1 a 3 veces mes  
☐ 1 vez semana  
☒ 2 a 4 veces semana  
☐ 5 a 6 veces semana  
☐ 1 vez al día  
☐ 2 a 3 veces al día  
☐ 5 a 6 veces al día  
☐ más 6 veces al día

---

queso curado o semicurado o cremoso

- ☐ Nunca o menos 1 vez al mes  
☐ 1 a 3 veces mes  
☐ 1 vez semana  
☐ 2 a 4 veces semana  
☐ 5 a 6 veces semana  
☒ 1 vez al día  
☐ 2 a 3 veces al día  
☐ 5 a 6 veces al día  
☐ más 6 veces al día

---

natillas flan pudding

- ☐ Nunca o menos 1 vez al mes  
☒ 1 a 3 veces mes  
☐ 1 vez semana  
☐ 2 a 4 veces semana  
☐ 5 a 6 veces semana  
☐ 1 vez al día  
☐ 2 a 3 veces al día  
☐ 5 a 6 veces al día  
☐ más 6 veces al día

---

Helado

- ☐ Nunca o menos 1 vez al mes  
☐ 1 a 3 veces mes  
☐ 1 vez semana  
☐ 2 a 4 veces semana  
☒ 5 a 6 veces semana  
☐ 1 vez al día  
☐ 2 a 3 veces al día  
☐ 5 a 6 veces al día  
☐ más 6 veces al día

|                                      |                                                                                                                                                                                                                                                                                                                                                                                                              |
|--------------------------------------|--------------------------------------------------------------------------------------------------------------------------------------------------------------------------------------------------------------------------------------------------------------------------------------------------------------------------------------------------------------------------------------------------------------|
| huevo                                | <input type="radio"/> Nunca o menos 1 vez al mes<br><input type="radio"/> 1 a 3 veces mes<br><input type="radio"/> 1 vez semana<br><input checked="" type="radio"/> 2 a 4 veces semana<br><input type="radio"/> 5 a 6 veces semana<br><input type="radio"/> 1 vez al día<br><input type="radio"/> 2 a 3 veces al día<br><input type="radio"/> 5 a 6 veces al día<br><input type="radio"/> más 6 veces al día |
| Pollo con piel                       | <input type="radio"/> Nunca o menos 1 vez al mes<br><input type="radio"/> 1 a 3 veces mes<br><input checked="" type="radio"/> 1 vez semana<br><input type="radio"/> 2 a 4 veces semana<br><input type="radio"/> 5 a 6 veces semana<br><input type="radio"/> 1 vez al día<br><input type="radio"/> 2 a 3 veces al día<br><input type="radio"/> 5 a 6 veces al día<br><input type="radio"/> más 6 veces al día |
| pollo sin piel                       | <input checked="" type="radio"/> Nunca o menos 1 vez al mes<br><input type="radio"/> 1 a 3 veces mes<br><input type="radio"/> 1 vez semana<br><input type="radio"/> 2 a 4 veces semana<br><input type="radio"/> 5 a 6 veces semana<br><input type="radio"/> 1 vez al día<br><input type="radio"/> 2 a 3 veces al día<br><input type="radio"/> 5 a 6 veces al día<br><input type="radio"/> más 6 veces al día |
| Ternera o cerdo o cordero            | <input type="radio"/> Nunca o menos 1 vez al mes<br><input type="radio"/> 1 a 3 veces mes<br><input type="radio"/> 1 vez semana<br><input checked="" type="radio"/> 2 a 4 veces semana<br><input type="radio"/> 5 a 6 veces semana<br><input type="radio"/> 1 vez al día<br><input type="radio"/> 2 a 3 veces al día<br><input type="radio"/> 5 a 6 veces al día<br><input type="radio"/> más 6 veces al día |
| carne caza: Conejo o codorniz o pato | <input type="radio"/> Nunca o menos 1 vez al mes<br><input type="radio"/> 1 a 3 veces mes<br><input checked="" type="radio"/> 1 vez semana<br><input type="radio"/> 2 a 4 veces semana<br><input type="radio"/> 5 a 6 veces semana<br><input type="radio"/> 1 vez al día<br><input type="radio"/> 2 a 3 veces al día<br><input type="radio"/> 5 a 6 veces al día<br><input type="radio"/> más 6 veces al día |
| Hígado de ternera o cerdo o pollo    | <input type="radio"/> Nunca o menos 1 vez al mes<br><input type="radio"/> 1 a 3 veces mes<br><input checked="" type="radio"/> 1 vez semana<br><input type="radio"/> 2 a 4 veces semana<br><input type="radio"/> 5 a 6 veces semana<br><input type="radio"/> 1 vez al día<br><input type="radio"/> 2 a 3 veces al día<br><input type="radio"/> 5 a 6 veces al día<br><input type="radio"/> más 6 veces al día |

---

Vísceras

- ☒ Nunca o menos 1 vez al mes  
☐ 1 a 3 veces mes  
☐ 1 vez semana  
☐ 2 a 4 veces semana  
☐ 5 a 6 veces semana  
☐ 1 vez al día  
☐ 2 a 3 veces al día  
☐ 5 a 6 veces al día  
☐ más 6 veces al día

---

Embutido

- ☒ Nunca o menos 1 vez al mes  
☐ 1 a 3 veces mes  
☐ 1 vez semana  
☐ 2 a 4 veces semana  
☐ 5 a 6 veces semana  
☐ 1 vez al día  
☐ 2 a 3 veces al día  
☐ 5 a 6 veces al día  
☐ más 6 veces al día

---

Salchicha o similar

- ☒ Nunca o menos 1 vez al mes  
☐ 1 a 3 veces mes  
☐ 1 vez semana  
☐ 2 a 4 veces semana  
☐ 5 a 6 veces semana  
☐ 1 vez al día  
☐ 2 a 3 veces al día  
☐ 5 a 6 veces al día  
☐ más 6 veces al día

---

Pate o foiegras

- ☒ Nunca o menos 1 vez al mes  
☐ 1 a 3 veces mes  
☐ 1 vez semana  
☐ 2 a 4 veces semana  
☐ 5 a 6 veces semana  
☐ 1 vez al día  
☐ 2 a 3 veces al día  
☐ 5 a 6 veces al día  
☐ más 6 veces al día

---

Hamburguesa

- ☐ Nunca o menos 1 vez al mes  
☒ 1 a 3 veces mes  
☐ 1 vez semana  
☐ 2 a 4 veces semana  
☐ 5 a 6 veces semana  
☐ 1 vez al día  
☐ 2 a 3 veces al día  
☐ 5 a 6 veces al día  
☐ más 6 veces al día

---

tocino o bacon

- ☐ Nunca o menos 1 vez al mes  
☒ 1 a 3 veces mes  
☐ 1 vez semana  
☐ 2 a 4 veces semana  
☐ 5 a 6 veces semana  
☐ 1 vez al día  
☐ 2 a 3 veces al día  
☐ 5 a 6 veces al día  
☐ más 6 veces al día

---

Pescado frito

- ☐ Nunca o menos 1 vez al mes  
☒ 1 a 3 veces mes  
☐ 1 vez semana  
☐ 2 a 4 veces semana  
☐ 5 a 6 veces semana  
☐ 1 vez al día  
☐ 2 a 3 veces al día  
☐ 5 a 6 veces al día  
☐ más 6 veces al día

---

pescado hervido blanco

- ☐ Nunca o menos 1 vez al mes  
☐ 1 a 3 veces mes  
☒ 1 vez semana  
☐ 2 a 4 veces semana  
☐ 5 a 6 veces semana  
☐ 1 vez al día  
☐ 2 a 3 veces al día  
☐ 5 a 6 veces al día  
☐ más 6 veces al día

---

pescado hervido azul

- ☐ Nunca o menos 1 vez al mes  
☒ 1 a 3 veces mes  
☐ 1 vez semana  
☐ 2 a 4 veces semana  
☐ 5 a 6 veces semana  
☐ 1 vez al día  
☐ 2 a 3 veces al día  
☐ 5 a 6 veces al día  
☐ más 6 veces al día

---

otros pescado azul

- ☒ Nunca o menos 1 vez al mes  
☐ 1 a 3 veces mes  
☐ 1 vez semana  
☐ 2 a 4 veces semana  
☐ 5 a 6 veces semana  
☐ 1 vez al día  
☐ 2 a 3 veces al día  
☐ 5 a 6 veces al día  
☐ más 6 veces al día

---

atun conserva

- ☐ Nunca o menos 1 vez al mes  
☐ 1 a 3 veces mes  
☐ 1 vez semana  
☒ 2 a 4 veces semana  
☐ 5 a 6 veces semana  
☐ 1 vez al día  
☐ 2 a 3 veces al día  
☐ 5 a 6 veces al día  
☐ más 6 veces al día

---

sardina conserva

- ☒ Nunca o menos 1 vez al mes  
☐ 1 a 3 veces mes  
☐ 1 vez semana  
☐ 2 a 4 veces semana  
☐ 5 a 6 veces semana  
☐ 1 vez al día  
☐ 2 a 3 veces al día  
☐ 5 a 6 veces al día  
☐ más 6 veces al día

|                                         |                                                                                                                                                                                                                                                                                                                                                                                                              |
|-----------------------------------------|--------------------------------------------------------------------------------------------------------------------------------------------------------------------------------------------------------------------------------------------------------------------------------------------------------------------------------------------------------------------------------------------------------------|
| pescado ahumado                         | <input checked="" type="radio"/> Nunca o menos 1 vez al mes<br><input type="radio"/> 1 a 3 veces mes<br><input type="radio"/> 1 vez semana<br><input type="radio"/> 2 a 4 veces semana<br><input type="radio"/> 5 a 6 veces semana<br><input type="radio"/> 1 vez al día<br><input type="radio"/> 2 a 3 veces al día<br><input type="radio"/> 5 a 6 veces al día<br><input type="radio"/> más 6 veces al día |
| almejas o mejillones o ostras unos 100g | <input type="radio"/> Nunca o menos 1 vez al mes<br><input checked="" type="radio"/> 1 a 3 veces mes<br><input type="radio"/> 1 vez semana<br><input type="radio"/> 2 a 4 veces semana<br><input type="radio"/> 5 a 6 veces semana<br><input type="radio"/> 1 vez al día<br><input type="radio"/> 2 a 3 veces al día<br><input type="radio"/> 5 a 6 veces al día<br><input type="radio"/> más 6 veces al día |
| calamar o chipiron o sepia unos 100g    | <input type="radio"/> Nunca o menos 1 vez al mes<br><input type="radio"/> 1 a 3 veces mes<br><input checked="" type="radio"/> 1 vez semana<br><input type="radio"/> 2 a 4 veces semana<br><input type="radio"/> 5 a 6 veces semana<br><input type="radio"/> 1 vez al día<br><input type="radio"/> 2 a 3 veces al día<br><input type="radio"/> 5 a 6 veces al día<br><input type="radio"/> más 6 veces al día |
| marisco unos 100g                       | <input type="radio"/> Nunca o menos 1 vez al mes<br><input checked="" type="radio"/> 1 a 3 veces mes<br><input type="radio"/> 1 vez semana<br><input type="radio"/> 2 a 4 veces semana<br><input type="radio"/> 5 a 6 veces semana<br><input type="radio"/> 1 vez al día<br><input type="radio"/> 2 a 3 veces al día<br><input type="radio"/> 5 a 6 veces al día<br><input type="radio"/> más 6 veces al día |
| Espinacas o acelgas cocinadas           | <input type="radio"/> Nunca o menos 1 vez al mes<br><input checked="" type="radio"/> 1 a 3 veces mes<br><input type="radio"/> 1 vez semana<br><input type="radio"/> 2 a 4 veces semana<br><input type="radio"/> 5 a 6 veces semana<br><input type="radio"/> 1 vez al día<br><input type="radio"/> 2 a 3 veces al día<br><input type="radio"/> 5 a 6 veces al día<br><input type="radio"/> más 6 veces al día |
| Col o coliflor o brocoli cocinado       | <input type="radio"/> Nunca o menos 1 vez al mes<br><input checked="" type="radio"/> 1 a 3 veces mes<br><input type="radio"/> 1 vez semana<br><input type="radio"/> 2 a 4 veces semana<br><input type="radio"/> 5 a 6 veces semana<br><input type="radio"/> 1 vez al día<br><input type="radio"/> 2 a 3 veces al día<br><input type="radio"/> 5 a 6 veces al día<br><input type="radio"/> más 6 veces al día |

---

Lechuga o endivia o escarola

- ☐ Nunca o menos 1 vez al mes  
☐ 1 a 3 veces mes  
☒ 1 vez semana  
☐ 2 a 4 veces semana  
☐ 5 a 6 veces semana  
☐ 1 vez al día  
☐ 2 a 3 veces al día  
☐ 5 a 6 veces al día  
☐ más 6 veces al día

---

tomate ensalada

- ☐ Nunca o menos 1 vez al mes  
☐ 1 a 3 veces mes  
☒ 1 vez semana  
☐ 2 a 4 veces semana  
☐ 5 a 6 veces semana  
☐ 1 vez al día  
☐ 2 a 3 veces al día  
☐ 5 a 6 veces al día  
☐ más 6 veces al día

---

cebolla

- ☐ Nunca o menos 1 vez al mes  
☐ 1 a 3 veces mes  
☐ 1 vez semana  
☒ 2 a 4 veces semana  
☐ 5 a 6 veces semana  
☐ 1 vez al día  
☐ 2 a 3 veces al día  
☐ 5 a 6 veces al día  
☐ más 6 veces al día

---

Zanahoria o calabaza

- ☒ Nunca o menos 1 vez al mes  
☐ 1 a 3 veces mes  
☐ 1 vez semana  
☐ 2 a 4 veces semana  
☐ 5 a 6 veces semana  
☐ 1 vez al día  
☐ 2 a 3 veces al día  
☐ 5 a 6 veces al día  
☐ más 6 veces al día

---

Judías verdes

- ☒ Nunca o menos 1 vez al mes  
☐ 1 a 3 veces mes  
☐ 1 vez semana  
☐ 2 a 4 veces semana  
☐ 5 a 6 veces semana  
☐ 1 vez al día  
☐ 2 a 3 veces al día  
☐ 5 a 6 veces al día  
☐ más 6 veces al día

---

Berenjena o calabacin o pepino

- ☒ Nunca o menos 1 vez al mes  
☐ 1 a 3 veces mes  
☐ 1 vez semana  
☐ 2 a 4 veces semana  
☐ 5 a 6 veces semana  
☐ 1 vez al día  
☐ 2 a 3 veces al día  
☐ 5 a 6 veces al día  
☐ más 6 veces al día



---

|          |                                                                                                                                                                                                                                                                                                                                                                                                              |
|----------|--------------------------------------------------------------------------------------------------------------------------------------------------------------------------------------------------------------------------------------------------------------------------------------------------------------------------------------------------------------------------------------------------------------|
| pimiento | <input checked="" type="radio"/> Nunca o menos 1 vez al mes<br><input type="radio"/> 1 a 3 veces mes<br><input type="radio"/> 1 vez semana<br><input type="radio"/> 2 a 4 veces semana<br><input type="radio"/> 5 a 6 veces semana<br><input type="radio"/> 1 vez al día<br><input type="radio"/> 2 a 3 veces al día<br><input type="radio"/> 5 a 6 veces al día<br><input type="radio"/> más 6 veces al día |
|----------|--------------------------------------------------------------------------------------------------------------------------------------------------------------------------------------------------------------------------------------------------------------------------------------------------------------------------------------------------------------------------------------------------------------|

---

|           |                                                                                                                                                                                                                                                                                                                                                                                                              |
|-----------|--------------------------------------------------------------------------------------------------------------------------------------------------------------------------------------------------------------------------------------------------------------------------------------------------------------------------------------------------------------------------------------------------------------|
| alcachofa | <input checked="" type="radio"/> Nunca o menos 1 vez al mes<br><input type="radio"/> 1 a 3 veces mes<br><input type="radio"/> 1 vez semana<br><input type="radio"/> 2 a 4 veces semana<br><input type="radio"/> 5 a 6 veces semana<br><input type="radio"/> 1 vez al día<br><input type="radio"/> 2 a 3 veces al día<br><input type="radio"/> 5 a 6 veces al día<br><input type="radio"/> más 6 veces al día |
|-----------|--------------------------------------------------------------------------------------------------------------------------------------------------------------------------------------------------------------------------------------------------------------------------------------------------------------------------------------------------------------------------------------------------------------|

---

|            |                                                                                                                                                                                                                                                                                                                                                                                                              |
|------------|--------------------------------------------------------------------------------------------------------------------------------------------------------------------------------------------------------------------------------------------------------------------------------------------------------------------------------------------------------------------------------------------------------------|
| espárragos | <input checked="" type="radio"/> Nunca o menos 1 vez al mes<br><input type="radio"/> 1 a 3 veces mes<br><input type="radio"/> 1 vez semana<br><input type="radio"/> 2 a 4 veces semana<br><input type="radio"/> 5 a 6 veces semana<br><input type="radio"/> 1 vez al día<br><input type="radio"/> 2 a 3 veces al día<br><input type="radio"/> 5 a 6 veces al día<br><input type="radio"/> más 6 veces al día |
|------------|--------------------------------------------------------------------------------------------------------------------------------------------------------------------------------------------------------------------------------------------------------------------------------------------------------------------------------------------------------------------------------------------------------------|

---

|              |                                                                                                                                                                                                                                                                                                                                                                                                              |
|--------------|--------------------------------------------------------------------------------------------------------------------------------------------------------------------------------------------------------------------------------------------------------------------------------------------------------------------------------------------------------------------------------------------------------------|
| maíz hervido | <input checked="" type="radio"/> Nunca o menos 1 vez al mes<br><input type="radio"/> 1 a 3 veces mes<br><input type="radio"/> 1 vez semana<br><input type="radio"/> 2 a 4 veces semana<br><input type="radio"/> 5 a 6 veces semana<br><input type="radio"/> 1 vez al día<br><input type="radio"/> 2 a 3 veces al día<br><input type="radio"/> 5 a 6 veces al día<br><input type="radio"/> más 6 veces al día |
|--------------|--------------------------------------------------------------------------------------------------------------------------------------------------------------------------------------------------------------------------------------------------------------------------------------------------------------------------------------------------------------------------------------------------------------|

---

|           |                                                                                                                                                                                                                                                                                                                                                                                                              |
|-----------|--------------------------------------------------------------------------------------------------------------------------------------------------------------------------------------------------------------------------------------------------------------------------------------------------------------------------------------------------------------------------------------------------------------|
| legumbres | <input type="radio"/> Nunca o menos 1 vez al mes<br><input type="radio"/> 1 a 3 veces mes<br><input type="radio"/> 1 vez semana<br><input checked="" type="radio"/> 2 a 4 veces semana<br><input type="radio"/> 5 a 6 veces semana<br><input type="radio"/> 1 vez al día<br><input type="radio"/> 2 a 3 veces al día<br><input type="radio"/> 5 a 6 veces al día<br><input type="radio"/> más 6 veces al día |
|-----------|--------------------------------------------------------------------------------------------------------------------------------------------------------------------------------------------------------------------------------------------------------------------------------------------------------------------------------------------------------------------------------------------------------------|

---

|                       |                                                                                                                                                                                                                                                                                                                                                                                                              |
|-----------------------|--------------------------------------------------------------------------------------------------------------------------------------------------------------------------------------------------------------------------------------------------------------------------------------------------------------------------------------------------------------------------------------------------------------|
| naranjas o mandarinas | <input type="radio"/> Nunca o menos 1 vez al mes<br><input type="radio"/> 1 a 3 veces mes<br><input checked="" type="radio"/> 1 vez semana<br><input type="radio"/> 2 a 4 veces semana<br><input type="radio"/> 5 a 6 veces semana<br><input type="radio"/> 1 vez al día<br><input type="radio"/> 2 a 3 veces al día<br><input type="radio"/> 5 a 6 veces al día<br><input type="radio"/> más 6 veces al día |
|-----------------------|--------------------------------------------------------------------------------------------------------------------------------------------------------------------------------------------------------------------------------------------------------------------------------------------------------------------------------------------------------------------------------------------------------------|

---

---

zum natural fruta

- ☒ Nunca o menos 1 vez al mes  
☐ 1 a 3 veces mes  
☐ 1 vez semana  
☐ 2 a 4 veces semana  
☐ 5 a 6 veces semana  
☐ 1 vez al día  
☐ 2 a 3 veces al día  
☐ 5 a 6 veces al día  
☐ más 6 veces al día

---

platano

- ☒ Nunca o menos 1 vez al mes  
☐ 1 a 3 veces mes  
☐ 1 vez semana  
☐ 2 a 4 veces semana  
☐ 5 a 6 veces semana  
☐ 1 vez al día  
☐ 2 a 3 veces al día  
☐ 5 a 6 veces al día  
☐ más 6 veces al día

---

manzana o pera

- ☒ Nunca o menos 1 vez al mes  
☐ 1 a 3 veces mes  
☐ 1 vez semana  
☐ 2 a 4 veces semana  
☐ 5 a 6 veces semana  
☐ 1 vez al día  
☐ 2 a 3 veces al día  
☐ 5 a 6 veces al día  
☐ más 6 veces al día

---

melocotón o nectarina

- ☐ Nunca o menos 1 vez al mes  
☐ 1 a 3 veces mes  
☐ 1 vez semana  
☒ 2 a 4 veces semana  
☐ 5 a 6 veces semana  
☐ 1 vez al día  
☐ 2 a 3 veces al día  
☐ 5 a 6 veces al día  
☐ más 6 veces al día

---

sandia o melon

- ☐ Nunca o menos 1 vez al mes  
☐ 1 a 3 veces mes  
☐ 1 vez semana  
☐ 2 a 4 veces semana  
☐ 5 a 6 veces semana  
☐ 1 vez al día  
☒ 2 a 3 veces al día  
☐ 5 a 6 veces al día  
☐ más 6 veces al día

---

uva

- ☒ Nunca o menos 1 vez al mes  
☐ 1 a 3 veces mes  
☐ 1 vez semana  
☐ 2 a 4 veces semana  
☐ 5 a 6 veces semana  
☐ 1 vez al día  
☐ 2 a 3 veces al día  
☐ 5 a 6 veces al día  
☐ más 6 veces al día

---

bruna o ciruela

- ☒ Nunca o menos 1 vez al mes  
☐ 1 a 3 veces mes  
☐ 1 vez semana  
☐ 2 a 4 veces semana  
☐ 5 a 6 veces semana  
☐ 1 vez al día  
☐ 2 a 3 veces al día  
☐ 5 a 6 veces al día  
☐ más 6 veces al día

---

kiwi

- ☒ Nunca o menos 1 vez al mes  
☐ 1 a 3 veces mes  
☐ 1 vez semana  
☐ 2 a 4 veces semana  
☐ 5 a 6 veces semana  
☐ 1 vez al día  
☐ 2 a 3 veces al día  
☐ 5 a 6 veces al día  
☐ más 6 veces al día

---

aceituna

- ☐ Nunca o menos 1 vez al mes  
☒ 1 a 3 veces mes  
☐ 1 vez semana  
☐ 2 a 4 veces semana  
☐ 5 a 6 veces semana  
☐ 1 vez al día  
☐ 2 a 3 veces al día  
☐ 5 a 6 veces al día  
☐ más 6 veces al día

---

frutos secos

- ☐ Nunca o menos 1 vez al mes  
☐ 1 a 3 veces mes  
☒ 1 vez semana  
☐ 2 a 4 veces semana  
☐ 5 a 6 veces semana  
☐ 1 vez al día  
☐ 2 a 3 veces al día  
☐ 5 a 6 veces al día  
☐ más 6 veces al día

---

pan blanco

- ☐ Nunca o menos 1 vez al mes  
☐ 1 a 3 veces mes  
☐ 1 vez semana  
☒ 2 a 4 veces semana  
☐ 5 a 6 veces semana  
☐ 1 vez al día  
☐ 2 a 3 veces al día  
☐ 5 a 6 veces al día  
☐ más 6 veces al día

---

pan integral

- ☒ Nunca o menos 1 vez al mes  
☐ 1 a 3 veces mes  
☐ 1 vez semana  
☐ 2 a 4 veces semana  
☐ 5 a 6 veces semana  
☐ 1 vez al día  
☐ 2 a 3 veces al día  
☐ 5 a 6 veces al día  
☐ más 6 veces al día

|                          |                                                                                                                                                                                                                                                                                                                                                                                                              |
|--------------------------|--------------------------------------------------------------------------------------------------------------------------------------------------------------------------------------------------------------------------------------------------------------------------------------------------------------------------------------------------------------------------------------------------------------|
| cereales desayuno        | <input checked="" type="radio"/> Nunca o menos 1 vez al mes<br><input type="radio"/> 1 a 3 veces mes<br><input type="radio"/> 1 vez semana<br><input type="radio"/> 2 a 4 veces semana<br><input type="radio"/> 5 a 6 veces semana<br><input type="radio"/> 1 vez al día<br><input type="radio"/> 2 a 3 veces al día<br><input type="radio"/> 5 a 6 veces al día<br><input type="radio"/> más 6 veces al día |
| patatas fritas           | <input type="radio"/> Nunca o menos 1 vez al mes<br><input type="radio"/> 1 a 3 veces mes<br><input type="radio"/> 1 vez semana<br><input checked="" type="radio"/> 2 a 4 veces semana<br><input type="radio"/> 5 a 6 veces semana<br><input type="radio"/> 1 vez al día<br><input type="radio"/> 2 a 3 veces al día<br><input type="radio"/> 5 a 6 veces al día<br><input type="radio"/> más 6 veces al día |
| patatas cocidas o asadas | <input type="radio"/> Nunca o menos 1 vez al mes<br><input type="radio"/> 1 a 3 veces mes<br><input checked="" type="radio"/> 1 vez semana<br><input type="radio"/> 2 a 4 veces semana<br><input type="radio"/> 5 a 6 veces semana<br><input type="radio"/> 1 vez al día<br><input type="radio"/> 2 a 3 veces al día<br><input type="radio"/> 5 a 6 veces al día<br><input type="radio"/> más 6 veces al día |
| bolsa papas              | <input type="radio"/> Nunca o menos 1 vez al mes<br><input checked="" type="radio"/> 1 a 3 veces mes<br><input type="radio"/> 1 vez semana<br><input type="radio"/> 2 a 4 veces semana<br><input type="radio"/> 5 a 6 veces semana<br><input type="radio"/> 1 vez al día<br><input type="radio"/> 2 a 3 veces al día<br><input type="radio"/> 5 a 6 veces al día<br><input type="radio"/> más 6 veces al día |
| arroz cocinado           | <input type="radio"/> Nunca o menos 1 vez al mes<br><input type="radio"/> 1 a 3 veces mes<br><input type="radio"/> 1 vez semana<br><input checked="" type="radio"/> 2 a 4 veces semana<br><input type="radio"/> 5 a 6 veces semana<br><input type="radio"/> 1 vez al día<br><input type="radio"/> 2 a 3 veces al día<br><input type="radio"/> 5 a 6 veces al día<br><input type="radio"/> más 6 veces al día |
| pasta                    | <input type="radio"/> Nunca o menos 1 vez al mes<br><input type="radio"/> 1 a 3 veces mes<br><input checked="" type="radio"/> 1 vez semana<br><input type="radio"/> 2 a 4 veces semana<br><input type="radio"/> 5 a 6 veces semana<br><input type="radio"/> 1 vez al día<br><input type="radio"/> 2 a 3 veces al día<br><input type="radio"/> 5 a 6 veces al día<br><input type="radio"/> más 6 veces al día |

|                     |                                                                                                                                                                                                                                                                                                                                                                                                              |
|---------------------|--------------------------------------------------------------------------------------------------------------------------------------------------------------------------------------------------------------------------------------------------------------------------------------------------------------------------------------------------------------------------------------------------------------|
| pizza               | <input type="radio"/> Nunca o menos 1 vez al mes<br><input checked="" type="radio"/> 1 a 3 veces mes<br><input type="radio"/> 1 vez semana<br><input type="radio"/> 2 a 4 veces semana<br><input type="radio"/> 5 a 6 veces semana<br><input type="radio"/> 1 vez al día<br><input type="radio"/> 2 a 3 veces al día<br><input type="radio"/> 5 a 6 veces al día<br><input type="radio"/> más 6 veces al día |
| aceite oliva        | <input type="radio"/> Nunca o menos 1 vez al mes<br><input type="radio"/> 1 a 3 veces mes<br><input type="radio"/> 1 vez semana<br><input checked="" type="radio"/> 2 a 4 veces semana<br><input type="radio"/> 5 a 6 veces semana<br><input type="radio"/> 1 vez al día<br><input type="radio"/> 2 a 3 veces al día<br><input type="radio"/> 5 a 6 veces al día<br><input type="radio"/> más 6 veces al día |
| otros aceites       | <input type="radio"/> Nunca o menos 1 vez al mes<br><input type="radio"/> 1 a 3 veces mes<br><input checked="" type="radio"/> 1 vez semana<br><input type="radio"/> 2 a 4 veces semana<br><input type="radio"/> 5 a 6 veces semana<br><input type="radio"/> 1 vez al día<br><input type="radio"/> 2 a 3 veces al día<br><input type="radio"/> 5 a 6 veces al día<br><input type="radio"/> más 6 veces al día |
| margarina           | <input type="radio"/> Nunca o menos 1 vez al mes<br><input type="radio"/> 1 a 3 veces mes<br><input checked="" type="radio"/> 1 vez semana<br><input type="radio"/> 2 a 4 veces semana<br><input type="radio"/> 5 a 6 veces semana<br><input type="radio"/> 1 vez al día<br><input type="radio"/> 2 a 3 veces al día<br><input type="radio"/> 5 a 6 veces al día<br><input type="radio"/> más 6 veces al día |
| mantequilla         | <input checked="" type="radio"/> Nunca o menos 1 vez al mes<br><input type="radio"/> 1 a 3 veces mes<br><input type="radio"/> 1 vez semana<br><input type="radio"/> 2 a 4 veces semana<br><input type="radio"/> 5 a 6 veces semana<br><input type="radio"/> 1 vez al día<br><input type="radio"/> 2 a 3 veces al día<br><input type="radio"/> 5 a 6 veces al día<br><input type="radio"/> más 6 veces al día |
| galletas tipo maria | <input checked="" type="radio"/> Nunca o menos 1 vez al mes<br><input type="radio"/> 1 a 3 veces mes<br><input type="radio"/> 1 vez semana<br><input type="radio"/> 2 a 4 veces semana<br><input type="radio"/> 5 a 6 veces semana<br><input type="radio"/> 1 vez al día<br><input type="radio"/> 2 a 3 veces al día<br><input type="radio"/> 5 a 6 veces al día<br><input type="radio"/> más 6 veces al día |

---

galletas chocolate

- ☐ Nunca o menos 1 vez al mes  
☐ 1 a 3 veces mes  
☐ 1 vez semana  
☒ 2 a 4 veces semana  
☐ 5 a 6 veces semana  
☐ 1 vez al día  
☐ 2 a 3 veces al día  
☐ 5 a 6 veces al día  
☐ más 6 veces al día

---

bolleria

- ☐ Nunca o menos 1 vez al mes  
☐ 1 a 3 veces mes  
☒ 1 vez semana  
☐ 2 a 4 veces semana  
☐ 5 a 6 veces semana  
☐ 1 vez al día  
☐ 2 a 3 veces al día  
☐ 5 a 6 veces al día  
☐ más 6 veces al día

---

chocolate o bombones

- ☐ Nunca o menos 1 vez al mes  
☐ 1 a 3 veces mes  
☐ 1 vez semana  
☒ 2 a 4 veces semana  
☐ 5 a 6 veces semana  
☐ 1 vez al día  
☐ 2 a 3 veces al día  
☐ 5 a 6 veces al día  
☐ más 6 veces al día

---

chocolate polvo o colacao

- ☐ Nunca o menos 1 vez al mes  
☐ 1 a 3 veces mes  
☐ 1 vez semana  
☒ 2 a 4 veces semana  
☐ 5 a 6 veces semana  
☐ 1 vez al día  
☐ 2 a 3 veces al día  
☐ 5 a 6 veces al día  
☐ más 6 veces al día

---

vino tinto

- ☒ Nunca o menos 1 vez al mes  
☐ 1 a 3 veces mes  
☐ 1 vez semana  
☐ 2 a 4 veces semana  
☐ 5 a 6 veces semana  
☐ 1 vez al día  
☐ 2 a 3 veces al día  
☐ 5 a 6 veces al día  
☐ más 6 veces al día

---

vino blanco

- ☒ Nunca o menos 1 vez al mes  
☐ 1 a 3 veces mes  
☐ 1 vez semana  
☐ 2 a 4 veces semana  
☐ 5 a 6 veces semana  
☐ 1 vez al día  
☐ 2 a 3 veces al día  
☐ 5 a 6 veces al día  
☐ más 6 veces al día

---

|                    |                                                                                                                                                                                                                                                                                                                                                                                                              |
|--------------------|--------------------------------------------------------------------------------------------------------------------------------------------------------------------------------------------------------------------------------------------------------------------------------------------------------------------------------------------------------------------------------------------------------------|
| vino seco o vermut | <input checked="" type="radio"/> Nunca o menos 1 vez al mes<br><input type="radio"/> 1 a 3 veces mes<br><input type="radio"/> 1 vez semana<br><input type="radio"/> 2 a 4 veces semana<br><input type="radio"/> 5 a 6 veces semana<br><input type="radio"/> 1 vez al día<br><input type="radio"/> 2 a 3 veces al día<br><input type="radio"/> 5 a 6 veces al día<br><input type="radio"/> más 6 veces al día |
|--------------------|--------------------------------------------------------------------------------------------------------------------------------------------------------------------------------------------------------------------------------------------------------------------------------------------------------------------------------------------------------------------------------------------------------------|

---

|         |                                                                                                                                                                                                                                                                                                                                                                                                              |
|---------|--------------------------------------------------------------------------------------------------------------------------------------------------------------------------------------------------------------------------------------------------------------------------------------------------------------------------------------------------------------------------------------------------------------|
| cerveza | <input checked="" type="radio"/> Nunca o menos 1 vez al mes<br><input type="radio"/> 1 a 3 veces mes<br><input type="radio"/> 1 vez semana<br><input type="radio"/> 2 a 4 veces semana<br><input type="radio"/> 5 a 6 veces semana<br><input type="radio"/> 1 vez al día<br><input type="radio"/> 2 a 3 veces al día<br><input type="radio"/> 5 a 6 veces al día<br><input type="radio"/> más 6 veces al día |
|---------|--------------------------------------------------------------------------------------------------------------------------------------------------------------------------------------------------------------------------------------------------------------------------------------------------------------------------------------------------------------------------------------------------------------|

---

|                     |                                                                                                                                                                                                                                                                                                                                                                                                              |
|---------------------|--------------------------------------------------------------------------------------------------------------------------------------------------------------------------------------------------------------------------------------------------------------------------------------------------------------------------------------------------------------------------------------------------------------|
| cerveza sin alcohol | <input type="radio"/> Nunca o menos 1 vez al mes<br><input checked="" type="radio"/> 1 a 3 veces mes<br><input type="radio"/> 1 vez semana<br><input type="radio"/> 2 a 4 veces semana<br><input type="radio"/> 5 a 6 veces semana<br><input type="radio"/> 1 vez al día<br><input type="radio"/> 2 a 3 veces al día<br><input type="radio"/> 5 a 6 veces al día<br><input type="radio"/> más 6 veces al día |
|---------------------|--------------------------------------------------------------------------------------------------------------------------------------------------------------------------------------------------------------------------------------------------------------------------------------------------------------------------------------------------------------------------------------------------------------|

---

|         |                                                                                                                                                                                                                                                                                                                                                                                                              |
|---------|--------------------------------------------------------------------------------------------------------------------------------------------------------------------------------------------------------------------------------------------------------------------------------------------------------------------------------------------------------------------------------------------------------------|
| licores | <input checked="" type="radio"/> Nunca o menos 1 vez al mes<br><input type="radio"/> 1 a 3 veces mes<br><input type="radio"/> 1 vez semana<br><input type="radio"/> 2 a 4 veces semana<br><input type="radio"/> 5 a 6 veces semana<br><input type="radio"/> 1 vez al día<br><input type="radio"/> 2 a 3 veces al día<br><input type="radio"/> 5 a 6 veces al día<br><input type="radio"/> más 6 veces al día |
|---------|--------------------------------------------------------------------------------------------------------------------------------------------------------------------------------------------------------------------------------------------------------------------------------------------------------------------------------------------------------------------------------------------------------------|

---

|                       |                                                                                                                                                                                                                                                                                                                                                                                                              |
|-----------------------|--------------------------------------------------------------------------------------------------------------------------------------------------------------------------------------------------------------------------------------------------------------------------------------------------------------------------------------------------------------------------------------------------------------|
| ginebra o ron o vodka | <input checked="" type="radio"/> Nunca o menos 1 vez al mes<br><input type="radio"/> 1 a 3 veces mes<br><input type="radio"/> 1 vez semana<br><input type="radio"/> 2 a 4 veces semana<br><input type="radio"/> 5 a 6 veces semana<br><input type="radio"/> 1 vez al día<br><input type="radio"/> 2 a 3 veces al día<br><input type="radio"/> 5 a 6 veces al día<br><input type="radio"/> más 6 veces al día |
|-----------------------|--------------------------------------------------------------------------------------------------------------------------------------------------------------------------------------------------------------------------------------------------------------------------------------------------------------------------------------------------------------------------------------------------------------|

---

|                 |                                                                                                                                                                                                                                                                                                                                                                                                              |
|-----------------|--------------------------------------------------------------------------------------------------------------------------------------------------------------------------------------------------------------------------------------------------------------------------------------------------------------------------------------------------------------------------------------------------------------|
| refresco normal | <input type="radio"/> Nunca o menos 1 vez al mes<br><input type="radio"/> 1 a 3 veces mes<br><input type="radio"/> 1 vez semana<br><input checked="" type="radio"/> 2 a 4 veces semana<br><input type="radio"/> 5 a 6 veces semana<br><input type="radio"/> 1 vez al día<br><input type="radio"/> 2 a 3 veces al día<br><input type="radio"/> 5 a 6 veces al día<br><input type="radio"/> más 6 veces al día |
|-----------------|--------------------------------------------------------------------------------------------------------------------------------------------------------------------------------------------------------------------------------------------------------------------------------------------------------------------------------------------------------------------------------------------------------------|

---

|                          |                                                                                                                                                                                                                                                                                                                                                                                                              |
|--------------------------|--------------------------------------------------------------------------------------------------------------------------------------------------------------------------------------------------------------------------------------------------------------------------------------------------------------------------------------------------------------------------------------------------------------|
| refresco sin azúcar      | <input checked="" type="radio"/> Nunca o menos 1 vez al mes<br><input type="radio"/> 1 a 3 veces mes<br><input type="radio"/> 1 vez semana<br><input type="radio"/> 2 a 4 veces semana<br><input type="radio"/> 5 a 6 veces semana<br><input type="radio"/> 1 vez al día<br><input type="radio"/> 2 a 3 veces al día<br><input type="radio"/> 5 a 6 veces al día<br><input type="radio"/> más 6 veces al día |
| Agua del grifo           | <input checked="" type="radio"/> Nunca o menos 1 vez al mes<br><input type="radio"/> 1 a 3 veces mes<br><input type="radio"/> 1 vez semana<br><input type="radio"/> 2 a 4 veces semana<br><input type="radio"/> 5 a 6 veces semana<br><input type="radio"/> 1 vez al día<br><input type="radio"/> 2 a 3 veces al día<br><input type="radio"/> 5 a 6 veces al día<br><input type="radio"/> más 6 veces al día |
| agua embotellada sin gas | <input type="radio"/> Nunca o menos 1 vez al mes<br><input type="radio"/> 1 a 3 veces mes<br><input type="radio"/> 1 vez semana<br><input type="radio"/> 2 a 4 veces semana<br><input type="radio"/> 5 a 6 veces semana<br><input type="radio"/> 1 vez al día<br><input type="radio"/> 2 a 3 veces al día<br><input type="radio"/> 5 a 6 veces al día<br><input checked="" type="radio"/> más 6 veces al día |
| agua embotellada con gas | <input checked="" type="radio"/> Nunca o menos 1 vez al mes<br><input type="radio"/> 1 a 3 veces mes<br><input type="radio"/> 1 vez semana<br><input type="radio"/> 2 a 4 veces semana<br><input type="radio"/> 5 a 6 veces semana<br><input type="radio"/> 1 vez al día<br><input type="radio"/> 2 a 3 veces al día<br><input type="radio"/> 5 a 6 veces al día<br><input type="radio"/> más 6 veces al día |
| zumو frutas embasado     | <input checked="" type="radio"/> Nunca o menos 1 vez al mes<br><input type="radio"/> 1 a 3 veces mes<br><input type="radio"/> 1 vez semana<br><input type="radio"/> 2 a 4 veces semana<br><input type="radio"/> 5 a 6 veces semana<br><input type="radio"/> 1 vez al día<br><input type="radio"/> 2 a 3 veces al día<br><input type="radio"/> 5 a 6 veces al día<br><input type="radio"/> más 6 veces al día |
| cafe                     | <input type="radio"/> Nunca o menos 1 vez al mes<br><input type="radio"/> 1 a 3 veces mes<br><input type="radio"/> 1 vez semana<br><input checked="" type="radio"/> 2 a 4 veces semana<br><input type="radio"/> 5 a 6 veces semana<br><input type="radio"/> 1 vez al día<br><input type="radio"/> 2 a 3 veces al día<br><input type="radio"/> 5 a 6 veces al día<br><input type="radio"/> más 6 veces al día |



|                       |                                                                                                                                                                                                                                                                                                                                                                                                              |
|-----------------------|--------------------------------------------------------------------------------------------------------------------------------------------------------------------------------------------------------------------------------------------------------------------------------------------------------------------------------------------------------------------------------------------------------------|
| cafe descafeinado     | <input checked="" type="radio"/> Nunca o menos 1 vez al mes<br><input type="radio"/> 1 a 3 veces mes<br><input type="radio"/> 1 vez semana<br><input type="radio"/> 2 a 4 veces semana<br><input type="radio"/> 5 a 6 veces semana<br><input type="radio"/> 1 vez al día<br><input type="radio"/> 2 a 3 veces al día<br><input type="radio"/> 5 a 6 veces al día<br><input type="radio"/> más 6 veces al día |
| te o infusión         | <input checked="" type="radio"/> Nunca o menos 1 vez al mes<br><input type="radio"/> 1 a 3 veces mes<br><input type="radio"/> 1 vez semana<br><input type="radio"/> 2 a 4 veces semana<br><input type="radio"/> 5 a 6 veces semana<br><input type="radio"/> 1 vez al día<br><input type="radio"/> 2 a 3 veces al día<br><input type="radio"/> 5 a 6 veces al día<br><input type="radio"/> más 6 veces al día |
| sopa o puré verduras  | <input type="radio"/> Nunca o menos 1 vez al mes<br><input checked="" type="radio"/> 1 a 3 veces mes<br><input type="radio"/> 1 vez semana<br><input type="radio"/> 2 a 4 veces semana<br><input type="radio"/> 5 a 6 veces semana<br><input type="radio"/> 1 vez al día<br><input type="radio"/> 2 a 3 veces al día<br><input type="radio"/> 5 a 6 veces al día<br><input type="radio"/> más 6 veces al día |
| croquetas pollo jamón | <input type="radio"/> Nunca o menos 1 vez al mes<br><input checked="" type="radio"/> 1 a 3 veces mes<br><input type="radio"/> 1 vez semana<br><input type="radio"/> 2 a 4 veces semana<br><input type="radio"/> 5 a 6 veces semana<br><input type="radio"/> 1 vez al día<br><input type="radio"/> 2 a 3 veces al día<br><input type="radio"/> 5 a 6 veces al día<br><input type="radio"/> más 6 veces al día |
| croquetas pescado     | <input checked="" type="radio"/> Nunca o menos 1 vez al mes<br><input type="radio"/> 1 a 3 veces mes<br><input type="radio"/> 1 vez semana<br><input type="radio"/> 2 a 4 veces semana<br><input type="radio"/> 5 a 6 veces semana<br><input type="radio"/> 1 vez al día<br><input type="radio"/> 2 a 3 veces al día<br><input type="radio"/> 5 a 6 veces al día<br><input type="radio"/> más 6 veces al día |
| mayonesa              | <input type="radio"/> Nunca o menos 1 vez al mes<br><input type="radio"/> 1 a 3 veces mes<br><input type="radio"/> 1 vez semana<br><input checked="" type="radio"/> 2 a 4 veces semana<br><input type="radio"/> 5 a 6 veces semana<br><input type="radio"/> 1 vez al día<br><input type="radio"/> 2 a 3 veces al día<br><input type="radio"/> 5 a 6 veces al día<br><input type="radio"/> más 6 veces al día |

|                  |                                                                                                                                                                                                                                                                                                                                                                                                              |
|------------------|--------------------------------------------------------------------------------------------------------------------------------------------------------------------------------------------------------------------------------------------------------------------------------------------------------------------------------------------------------------------------------------------------------------|
| salsa tomate     | <input type="radio"/> Nunca o menos 1 vez al mes<br><input type="radio"/> 1 a 3 veces mes<br><input type="radio"/> 1 vez semana<br><input checked="" type="radio"/> 2 a 4 veces semana<br><input type="radio"/> 5 a 6 veces semana<br><input type="radio"/> 1 vez al día<br><input type="radio"/> 2 a 3 veces al día<br><input type="radio"/> 5 a 6 veces al día<br><input type="radio"/> más 6 veces al día |
| ketchup          | <input checked="" type="radio"/> Nunca o menos 1 vez al mes<br><input type="radio"/> 1 a 3 veces mes<br><input type="radio"/> 1 vez semana<br><input type="radio"/> 2 a 4 veces semana<br><input type="radio"/> 5 a 6 veces semana<br><input type="radio"/> 1 vez al día<br><input type="radio"/> 2 a 3 veces al día<br><input type="radio"/> 5 a 6 veces al día<br><input type="radio"/> más 6 veces al día |
| sal              | <input type="radio"/> Nunca o menos 1 vez al mes<br><input type="radio"/> 1 a 3 veces mes<br><input type="radio"/> 1 vez semana<br><input checked="" type="radio"/> 2 a 4 veces semana<br><input type="radio"/> 5 a 6 veces semana<br><input type="radio"/> 1 vez al día<br><input type="radio"/> 2 a 3 veces al día<br><input type="radio"/> 5 a 6 veces al día<br><input type="radio"/> más 6 veces al día |
| ajo              | <input type="radio"/> Nunca o menos 1 vez al mes<br><input type="radio"/> 1 a 3 veces mes<br><input checked="" type="radio"/> 1 vez semana<br><input type="radio"/> 2 a 4 veces semana<br><input type="radio"/> 5 a 6 veces semana<br><input type="radio"/> 1 vez al día<br><input type="radio"/> 2 a 3 veces al día<br><input type="radio"/> 5 a 6 veces al día<br><input type="radio"/> más 6 veces al día |
| mermelada o miel | <input checked="" type="radio"/> Nunca o menos 1 vez al mes<br><input type="radio"/> 1 a 3 veces mes<br><input type="radio"/> 1 vez semana<br><input type="radio"/> 2 a 4 veces semana<br><input type="radio"/> 5 a 6 veces semana<br><input type="radio"/> 1 vez al día<br><input type="radio"/> 2 a 3 veces al día<br><input type="radio"/> 5 a 6 veces al día<br><input type="radio"/> más 6 veces al día |
| azúcar           | <input type="radio"/> Nunca o menos 1 vez al mes<br><input type="radio"/> 1 a 3 veces mes<br><input checked="" type="radio"/> 1 vez semana<br><input type="radio"/> 2 a 4 veces semana<br><input type="radio"/> 5 a 6 veces semana<br><input type="radio"/> 1 vez al día<br><input type="radio"/> 2 a 3 veces al día<br><input type="radio"/> 5 a 6 veces al día<br><input type="radio"/> más 6 veces al día |

|                                       |                                                                                                                                                                                                                                                                                                                                                                                                                                                                                                                               |
|---------------------------------------|-------------------------------------------------------------------------------------------------------------------------------------------------------------------------------------------------------------------------------------------------------------------------------------------------------------------------------------------------------------------------------------------------------------------------------------------------------------------------------------------------------------------------------|
| Otro alimento                         |                                                                                                                                                                                                                                                                                                                                                                                                                                                                                                                               |
| suplementos vitamínicos               | <input checked="" type="radio"/> si<br><input type="radio"/> no                                                                                                                                                                                                                                                                                                                                                                                                                                                               |
| suplementos vitamínicos               | [*DATA REMOVED*]                                                                                                                                                                                                                                                                                                                                                                                                                                                                                                              |
| dieta previa                          | <input type="radio"/> si<br><input checked="" type="radio"/> no                                                                                                                                                                                                                                                                                                                                                                                                                                                               |
| motivo dieta                          | <input checked="" type="radio"/> no dieta<br><input type="radio"/> control peso<br><input type="radio"/> control colesterol<br><input type="radio"/> control diabetes<br><input type="radio"/> problemas estómago<br><input type="radio"/> problemas vesícula o hepáticos<br><input type="radio"/> HTA o cardiopatía<br><input type="radio"/> problemas renales<br><input type="radio"/> alergia alimentaria<br><input type="radio"/> ácido úrico elevado<br><input type="radio"/> vegetariana<br><input type="radio"/> otros |
| cambio alimentos año previo gestación | <input type="radio"/> si<br><input checked="" type="radio"/> no                                                                                                                                                                                                                                                                                                                                                                                                                                                               |
| cambio lácteos                        | <input type="radio"/> eliminado<br><input type="radio"/> disminuido<br><input checked="" type="radio"/> igual<br><input type="radio"/> aumentado<br><input type="radio"/> no sabe                                                                                                                                                                                                                                                                                                                                             |
| cambio huevos                         | <input type="radio"/> eliminado<br><input type="radio"/> disminuido<br><input checked="" type="radio"/> igual<br><input type="radio"/> aumentado<br><input type="radio"/> no sabe                                                                                                                                                                                                                                                                                                                                             |
| cambio carne                          | <input type="radio"/> eliminado<br><input type="radio"/> disminuido<br><input checked="" type="radio"/> igual<br><input type="radio"/> aumentado<br><input type="radio"/> no sabe                                                                                                                                                                                                                                                                                                                                             |
| cambio pescado                        | <input type="radio"/> eliminado<br><input type="radio"/> disminuido<br><input checked="" type="radio"/> igual<br><input type="radio"/> aumentado<br><input type="radio"/> no sabe                                                                                                                                                                                                                                                                                                                                             |
| cambio verduras                       | <input type="radio"/> eliminado<br><input type="radio"/> disminuido<br><input checked="" type="radio"/> igual<br><input type="radio"/> aumentado<br><input type="radio"/> no sabe                                                                                                                                                                                                                                                                                                                                             |

|                            |                                                                                                                                                                                                                        |
|----------------------------|------------------------------------------------------------------------------------------------------------------------------------------------------------------------------------------------------------------------|
| cambio legumbres           | <input type="radio"/> eliminado<br><input type="radio"/> disminuido<br><input checked="" type="radio"/> igual<br><input type="radio"/> aumentado<br><input type="radio"/> no sabe                                      |
| cambio fruta               | <input type="radio"/> eliminado<br><input type="radio"/> disminuido<br><input checked="" type="radio"/> igual<br><input type="radio"/> aumentado<br><input type="radio"/> no sabe                                      |
| cambio pan                 | <input type="radio"/> eliminado<br><input type="radio"/> disminuido<br><input checked="" type="radio"/> igual<br><input type="radio"/> aumentado<br><input type="radio"/> no sabe                                      |
| cambio aceite oliva        | <input type="radio"/> eliminado<br><input type="radio"/> disminuido<br><input checked="" type="radio"/> igual<br><input type="radio"/> aumentado<br><input type="radio"/> no sabe                                      |
| cambio mante o margarina   | <input type="radio"/> eliminado<br><input type="radio"/> disminuido<br><input checked="" type="radio"/> igual<br><input type="radio"/> aumentado<br><input type="radio"/> no sabe                                      |
| cambio azúcar y dulces     | <input type="radio"/> eliminado<br><input type="radio"/> disminuido<br><input checked="" type="radio"/> igual<br><input type="radio"/> aumentado<br><input type="radio"/> no sabe                                      |
| cambio bebidas alcohólicas | <input type="radio"/> eliminado<br><input type="radio"/> disminuido<br><input checked="" type="radio"/> igual<br><input type="radio"/> aumentado<br><input type="radio"/> no sabe                                      |
| frecuencia comidas fritas  | <input type="radio"/> a diario<br><input type="radio"/> 5 a 6 veces semana<br><input type="radio"/> 2 a 4 veces semana<br><input checked="" type="radio"/> 1 vez semana<br><input type="radio"/> menos de 1 vez semana |
| carne                      | <input type="radio"/> no como<br><input type="radio"/> cruda<br><input type="radio"/> poco hecha<br><input checked="" type="radio"/> hecha<br><input type="radio"/> muy hecha                                          |
| grasa visible carne        | <input type="radio"/> quita toda<br><input checked="" type="radio"/> quita mayoría<br><input type="radio"/> quita un poco<br><input type="radio"/> no quita nada                                                       |

|                                |                                                                                                                                                                                                                                                          |
|--------------------------------|----------------------------------------------------------------------------------------------------------------------------------------------------------------------------------------------------------------------------------------------------------|
| cocina carne                   | <input type="radio"/> a la plancha<br><input checked="" type="radio"/> a la parrilla<br><input type="radio"/> asada<br><input type="radio"/> frita<br><input type="radio"/> guisada                                                                      |
| tostado quemado carne          | <input type="radio"/> nunca<br><input checked="" type="radio"/> 1 vez mes<br><input type="radio"/> 2 a 3 veces mes<br><input type="radio"/> 1 vez semana<br><input type="radio"/> 2 a 3 semanas                                                          |
| tostado quemado pescado        | <input type="radio"/> nunca<br><input checked="" type="radio"/> 1 vez mes<br><input type="radio"/> 2 a 3 veces mes<br><input type="radio"/> 1 vez semana<br><input type="radio"/> 2 a 3 semanas                                                          |
| socarrat paella                | <input type="radio"/> nunca<br><input type="radio"/> 1 vez mes<br><input type="radio"/> 2 a 3 veces mes<br><input checked="" type="radio"/> 1 vez semana<br><input type="radio"/> 2 a 3 semanas                                                          |
| grasa o aceite cocinar         | <input type="radio"/> mantequilla<br><input type="radio"/> margarina<br><input checked="" type="radio"/> aceite oliva<br><input type="radio"/> aceite oliva virgen extra<br><input type="radio"/> aceite vegetal<br><input type="radio"/> mezcla aceites |
| grasa aceite aliñar            | <input type="radio"/> mantequilla<br><input type="radio"/> margarina<br><input checked="" type="radio"/> aceite oliva<br><input type="radio"/> aceite oliva virgen extra<br><input type="radio"/> aceite vegetal<br><input type="radio"/> mezcla aceites |
| grasa aceite freir             | <input type="radio"/> mantequilla<br><input type="radio"/> margarina<br><input type="radio"/> aceite oliva<br><input type="radio"/> aceite oliva virgen extra<br><input checked="" type="radio"/> aceite vegetal<br><input type="radio"/> mezcla aceites |
| Ejercicio cuestionario         | <input checked="" type="radio"/> si<br><input type="radio"/> no                                                                                                                                                                                          |
| horas de sueño incluido siesta | [*DATA REMOVED*]                                                                                                                                                                                                                                         |
| minutos siesta                 | [*DATA REMOVED*]                                                                                                                                                                                                                                         |
| horas televisión semana        | [*DATA REMOVED*]                                                                                                                                                                                                                                         |

|                                        |                                                                                                                                                                                                                                                                                                                                                                           |
|----------------------------------------|---------------------------------------------------------------------------------------------------------------------------------------------------------------------------------------------------------------------------------------------------------------------------------------------------------------------------------------------------------------------------|
| actividad trabajo                      | <input type="radio"/> casi siempre sentado<br><input type="radio"/> sentado 50 por cien<br><input type="radio"/> casi siempre de pie, quieto<br><input checked="" type="radio"/> casi siempre levantado caminando y llevando pocas cosas<br><input type="radio"/> casi siempre levantado, caminando y llevado muchas cosas<br><input type="radio"/> trabajo manual pesado |
| tiempo caminar o bici al día           | <input type="radio"/> casi nunca<br><input type="radio"/> menos 20min día<br><input type="radio"/> 20 a 40 min día<br><input checked="" type="radio"/> 40 a 60 min día<br><input type="radio"/> 1h o 1h y media día<br><input type="radio"/> más de 1h y media al día                                                                                                     |
| tiempo tareas casa al día              | <input type="radio"/> menos de 1h día<br><input type="radio"/> 1 a 2h día<br><input checked="" type="radio"/> 3 a 4h día<br><input type="radio"/> 5 a 6h día<br><input type="radio"/> 7 a 8h día<br><input type="radio"/> más de 8h día                                                                                                                                   |
| tiempo libre televisión ordenador leer | <input type="radio"/> menos 1h día<br><input type="radio"/> 1h día<br><input type="radio"/> 2h día<br><input type="radio"/> 3h día<br><input checked="" type="radio"/> 4h día<br><input type="radio"/> 5 a 6h día<br><input type="radio"/> mas 6h día                                                                                                                     |
| tiempo libre ejercicio o deporte       | <input type="radio"/> menos 1h semana<br><input type="radio"/> 1h semana<br><input type="radio"/> 2h semana<br><input type="radio"/> 3h semana<br><input type="radio"/> 4 a 5h semana<br><input checked="" type="radio"/> mas 5h semana                                                                                                                                   |
| como se considera                      | <input type="radio"/> sedentaria<br><input type="radio"/> poco activa<br><input type="radio"/> moderadamente activa<br><input checked="" type="radio"/> bastante activa<br><input type="radio"/> muy activa<br><input type="radio"/> no sabe                                                                                                                              |
| FUR                                    | [*DATA REMOVED*]                                                                                                                                                                                                                                                                                                                                                          |
| Semanas gestación 2T                   | [*DATA REMOVED*]                                                                                                                                                                                                                                                                                                                                                          |
| Días gestación 2T                      | [*DATA REMOVED*]                                                                                                                                                                                                                                                                                                                                                          |
| DBP 2T                                 | [*DATA REMOVED*]                                                                                                                                                                                                                                                                                                                                                          |
| CC 2T                                  | [*DATA REMOVED*]                                                                                                                                                                                                                                                                                                                                                          |
| AC 2T                                  | [*DATA REMOVED*]                                                                                                                                                                                                                                                                                                                                                          |

|                                                   |                                                                                                                                                                                                 |
|---------------------------------------------------|-------------------------------------------------------------------------------------------------------------------------------------------------------------------------------------------------|
| LF 2T                                             | [*DATA REMOVED*]                                                                                                                                                                                |
| PFE 2T (Hadlock)                                  | [*DATA REMOVED*]                                                                                                                                                                                |
| Semanas gestación 3T                              | [*DATA REMOVED*]                                                                                                                                                                                |
| días 3T                                           | [*DATA REMOVED*]                                                                                                                                                                                |
| DBP 3T                                            | [*DATA REMOVED*]                                                                                                                                                                                |
| CC 3T                                             | [*DATA REMOVED*]                                                                                                                                                                                |
| AC 3T                                             | [*DATA REMOVED*]                                                                                                                                                                                |
| LF 3T                                             | [*DATA REMOVED*]                                                                                                                                                                                |
| PFE 3T (Hadlock)                                  | [*DATA REMOVED*]                                                                                                                                                                                |
| Semanas de gestación final                        | [*DATA REMOVED*]                                                                                                                                                                                |
| días gestación final                              | [*DATA REMOVED*]                                                                                                                                                                                |
| Localización placenta                             | <input type="radio"/> anterior<br><input checked="" type="radio"/> lateral derecha<br><input type="radio"/> lateral izquierda<br><input type="radio"/> posterior<br><input type="radio"/> fondo |
| Presentación longitudinal cefálica                | <input type="radio"/> no<br><input checked="" type="radio"/> si                                                                                                                                 |
| Dorso                                             | <input type="radio"/> izquierda anterior<br><input type="radio"/> izquierda posterior<br><input checked="" type="radio"/> derecha anterior<br><input type="radio"/> derecha posterior           |
| diámetro biparietal                               | [*DATA REMOVED*]                                                                                                                                                                                |
| Circunferencia craneal                            | [*DATA REMOVED*]                                                                                                                                                                                |
| Circunferencia abdominal                          | [*DATA REMOVED*]                                                                                                                                                                                |
| Longitud de femur                                 | [*DATA REMOVED*]                                                                                                                                                                                |
| tejido celular subcutáneo a nivel del muslo en mm | [*DATA REMOVED*]                                                                                                                                                                                |
| tejido celular subcutáneo en abdomen en mm        | [*DATA REMOVED*]                                                                                                                                                                                |
| Volumen del muslo en cm3                          | [*DATA REMOVED*]                                                                                                                                                                                |
| Peso fetal estimado según fórmula de Hadlock      | [*DATA REMOVED*]                                                                                                                                                                                |

|                                               |                                                                                                                                                          |
|-----------------------------------------------|----------------------------------------------------------------------------------------------------------------------------------------------------------|
| Percentil                                     | [*DATA REMOVED*]                                                                                                                                         |
| Peso fetal estimado según fórmula de Scioscia | <hr/>                                                                                                                                                    |
| Peso fetal estimado según fórmula de LEE      | <hr/>                                                                                                                                                    |
| Tipo de parto                                 | <input checked="" type="radio"/> eutocico<br><input type="radio"/> instrumentado/ventosa<br><input type="radio"/> cesarea                                |
| fecha de nacimiento                           | [*DATA REMOVED*]                                                                                                                                         |
| Días entre exploración y nacimiento           | [*DATA REMOVED*]                                                                                                                                         |
| Peso RN en g                                  | [*DATA REMOVED*]                                                                                                                                         |
| sexo                                          | <input type="radio"/> mujer<br><input checked="" type="radio"/> hombre                                                                                   |
| Apgar 1 minuto                                | [*DATA REMOVED*]                                                                                                                                         |
| Apgar 5 minutos                               | [*DATA REMOVED*]                                                                                                                                         |
| Apgar 10 minutos                              | <hr/>                                                                                                                                                    |
| antecedente Covid durante gestación           | <input type="radio"/> Yes<br><input checked="" type="radio"/> No                                                                                         |
| Nivel de estudios                             | <input type="radio"/> ninguno<br><input checked="" type="radio"/> primarios<br><input type="radio"/> secundarios<br><input type="radio"/> universitarios |



# Base\_datos\_estimacion\_peso\_fetal

|                                       |                                                                                                                                                                                                                                                                                      |
|---------------------------------------|--------------------------------------------------------------------------------------------------------------------------------------------------------------------------------------------------------------------------------------------------------------------------------------|
| Número de identificación participante | 125                                                                                                                                                                                                                                                                                  |
| CODIGO PARTICIPANTE                   |                                                                                                                                                                                                                                                                                      |
| Edad                                  | [*DATA REMOVED*]                                                                                                                                                                                                                                                                     |
| Gestaciones                           | <input type="radio"/> 1<br><input checked="" type="radio"/> 2<br><input type="radio"/> 3<br><input type="radio"/> mas de 3                                                                                                                                                           |
| partos                                | <input type="radio"/> 0<br><input checked="" type="radio"/> 1<br><input type="radio"/> 2<br><input type="radio"/> 3<br><input type="radio"/> mas de 3                                                                                                                                |
| cesáreas                              | <input checked="" type="radio"/> 0<br><input type="radio"/> 1<br><input type="radio"/> 2<br><input type="radio"/> 3<br><input type="radio"/> mas de 3                                                                                                                                |
| Abortos                               | <input checked="" type="radio"/> 0<br><input type="radio"/> 1<br><input type="radio"/> 2<br><input type="radio"/> 3<br><input type="radio"/> mas de 3                                                                                                                                |
| Tipo de gestacion                     | <input checked="" type="radio"/> espontanea<br><input type="radio"/> IAC inseminación artificial conyuge<br><input type="radio"/> IAD inseminación artificial donante<br><input type="radio"/> FIV Fecundación in Vitro<br><input type="radio"/> Ovodon FIV con donación de ovocitos |
| peso previo a embarazo                | [*DATA REMOVED*]                                                                                                                                                                                                                                                                     |
| Ganancia ponderal embarazo            | [*DATA REMOVED*]                                                                                                                                                                                                                                                                     |
| Talla madre                           | [*DATA REMOVED*]                                                                                                                                                                                                                                                                     |
| IMC previo embarazo                   | 23.337684427040067                                                                                                                                                                                                                                                                   |
| Patología obstétrica                  | <input checked="" type="radio"/> no<br><input type="radio"/> si                                                                                                                                                                                                                      |
| Diabetes pregestacional               | <input checked="" type="radio"/> no<br><input type="radio"/> si                                                                                                                                                                                                                      |
| Diabetes gestacional                  | <input checked="" type="radio"/> no<br><input type="radio"/> si                                                                                                                                                                                                                      |

|                                            |                                                                                                                                                                                      |
|--------------------------------------------|--------------------------------------------------------------------------------------------------------------------------------------------------------------------------------------|
| Diabetes gestacional con insulina          | <input checked="" type="radio"/> no<br><input type="radio"/> si                                                                                                                      |
| Diabetes gestacional con dieta y ejercicio | <input checked="" type="radio"/> no<br><input type="radio"/> si                                                                                                                      |
| Percentil fetos previos                    | <input type="radio"/> Nada<br><input checked="" type="radio"/> percentil menor de 10<br><input type="radio"/> percentil entre 10 y 90<br><input type="radio"/> percentil mayor de 90 |
| Exfumadora                                 | <input type="radio"/> Nada<br><input checked="" type="radio"/> menos de 5 años<br><input type="radio"/> 5 a 10 años<br><input type="radio"/> mayor o igual a 10 años                 |
| Hábito tabáquico                           | <input checked="" type="radio"/> no<br><input type="radio"/> si                                                                                                                      |
| fumadora                                   | [*DATA REMOVED*]                                                                                                                                                                     |
| Consumo otros tóxicos                      | <input checked="" type="radio"/> no<br><input type="radio"/> si                                                                                                                      |
| Hb 1T                                      | [*DATA REMOVED*]                                                                                                                                                                     |
| Htc 1T                                     | [*DATA REMOVED*]                                                                                                                                                                     |
| Hb 2T                                      | [*DATA REMOVED*]                                                                                                                                                                     |
| HTC 2T                                     | [*DATA REMOVED*]                                                                                                                                                                     |
| Hb 3T                                      | [*DATA REMOVED*]                                                                                                                                                                     |
| HTC 3T                                     | [*DATA REMOVED*]                                                                                                                                                                     |
| Suplemento FE oral                         | <input checked="" type="radio"/> si<br><input type="radio"/> no                                                                                                                      |
| Suplemento fe iv                           | <input type="radio"/> si<br><input checked="" type="radio"/> no                                                                                                                      |
| Transfusión                                | <input checked="" type="radio"/> no<br><input type="radio"/> si                                                                                                                      |
| Solicitada Vit D                           | <input type="radio"/> no<br><input checked="" type="radio"/> si                                                                                                                      |
| Deficit vit D                              | <input type="radio"/> no<br><input checked="" type="radio"/> si                                                                                                                      |
| Suplemento vit D                           | <input checked="" type="radio"/> si<br><input type="radio"/> no                                                                                                                      |

|                       |                                                                                                                                                                                                                                                                                                                                                                                                              |
|-----------------------|--------------------------------------------------------------------------------------------------------------------------------------------------------------------------------------------------------------------------------------------------------------------------------------------------------------------------------------------------------------------------------------------------------------|
| Dieta, cuestionario   | <input checked="" type="radio"/> si<br><input type="radio"/> no                                                                                                                                                                                                                                                                                                                                              |
| Leche entera          | <input type="radio"/> Nunca o menos 1 vez al mes<br><input type="radio"/> 1 a 3 veces mes<br><input type="radio"/> 1 vez semana<br><input type="radio"/> 2 a 4 veces semana<br><input type="radio"/> 5 a 6 veces semana<br><input type="radio"/> 1 vez al día<br><input checked="" type="radio"/> 2 a 3 veces al día<br><input type="radio"/> 5 a 6 veces al día<br><input type="radio"/> más 6 veces al día |
| Leche semidesnatada   | <input checked="" type="radio"/> Nunca o menos 1 vez al mes<br><input type="radio"/> 1 a 3 veces mes<br><input type="radio"/> 1 vez semana<br><input type="radio"/> 2 a 4 veces semana<br><input type="radio"/> 5 a 6 veces semana<br><input type="radio"/> 1 vez al día<br><input type="radio"/> 2 a 3 veces al día<br><input type="radio"/> 5 a 6 veces al día<br><input type="radio"/> mas 6 veces al día |
| Leche desnatada       | <input checked="" type="radio"/> Nunca o menos 1 vez al mes<br><input type="radio"/> 1 a 3 veces mes<br><input type="radio"/> 1 vez semana<br><input type="radio"/> 2 a 4 veces semana<br><input type="radio"/> 5 a 6 veces semana<br><input type="radio"/> 1 vez al día<br><input type="radio"/> 2 a 3 veces al día<br><input type="radio"/> 5 a 6 veces al día<br><input type="radio"/> más 6 veces al día |
| Leche condensada      | <input checked="" type="radio"/> Nunca o menos 1 vez al mes<br><input type="radio"/> 1 a 3 veces mes<br><input type="radio"/> 1 vez semana<br><input type="radio"/> 2 a 4 veces semana<br><input type="radio"/> 5 a 6 veces semana<br><input type="radio"/> 1 vez al día<br><input type="radio"/> 2 a 3 veces al día<br><input type="radio"/> 5 a 6 veces al día<br><input type="radio"/> más 6 veces al día |
| nata o crema de leche | <input type="radio"/> Nunca o menos 1 vez al mes<br><input type="radio"/> 1 a 3 veces mes<br><input type="radio"/> 1 vez semana<br><input checked="" type="radio"/> 2 a 4 veces semana<br><input type="radio"/> 5 a 6 veces semana<br><input type="radio"/> 1 vez al día<br><input type="radio"/> 2 a 3 veces al día<br><input type="radio"/> 5 a 6 veces al día<br><input type="radio"/> más 6 veces al día |

---

Yogurt Entero

- ☒ Nunca o menos 1 vez al mes  
☐ 1 a 3 veces mes  
☐ 1 vez semana  
☐ 2 a 4 veces semana  
☐ 5 a 6 veces semana  
☐ 1 vez al día  
☐ 2 a 3 veces al día  
☐ 5 a 6 veces al día  
☐ más 6 veces al día

---

Yogurt desnatado

- ☒ Nunca o menos 1 vez al mes  
☐ 1 a 3 veces mes  
☐ 1 vez semana  
☐ 2 a 4 veces semana  
☐ 5 a 6 veces semana  
☐ 1 vez al día  
☐ 2 a 3 veces al día  
☐ 5 a 6 veces al día  
☐ más 6 veces al día

---

100g requesón o queso blando o queso fresco

- ☐ Nunca o menos 1 vez al mes  
☒ 1 a 3 veces mes  
☐ 1 vez semana  
☐ 2 a 4 veces semana  
☐ 5 a 6 veces semana  
☐ 1 vez al día  
☐ 2 a 3 veces al día  
☐ 5 a 6 veces al día  
☐ más 6 veces al día

---

queso curado o semicurado o cremoso

- ☐ Nunca o menos 1 vez al mes  
☒ 1 a 3 veces mes  
☐ 1 vez semana  
☐ 2 a 4 veces semana  
☐ 5 a 6 veces semana  
☐ 1 vez al día  
☐ 2 a 3 veces al día  
☐ 5 a 6 veces al día  
☐ más 6 veces al día

---

natillas flan pudding

- ☐ Nunca o menos 1 vez al mes  
☒ 1 a 3 veces mes  
☐ 1 vez semana  
☐ 2 a 4 veces semana  
☐ 5 a 6 veces semana  
☐ 1 vez al día  
☐ 2 a 3 veces al día  
☐ 5 a 6 veces al día  
☐ más 6 veces al día

---

Helado

- ☐ Nunca o menos 1 vez al mes  
☐ 1 a 3 veces mes  
☐ 1 vez semana  
☐ 2 a 4 veces semana  
☐ 5 a 6 veces semana  
☒ 1 vez al día  
☐ 2 a 3 veces al día  
☐ 5 a 6 veces al día  
☐ más 6 veces al día

|                                      |                                                                                                                                                                                                                                                                                                                                                                                                              |
|--------------------------------------|--------------------------------------------------------------------------------------------------------------------------------------------------------------------------------------------------------------------------------------------------------------------------------------------------------------------------------------------------------------------------------------------------------------|
| huevo                                | <input type="radio"/> Nunca o menos 1 vez al mes<br><input type="radio"/> 1 a 3 veces mes<br><input type="radio"/> 1 vez semana<br><input type="radio"/> 2 a 4 veces semana<br><input type="radio"/> 5 a 6 veces semana<br><input checked="" type="radio"/> 1 vez al día<br><input type="radio"/> 2 a 3 veces al día<br><input type="radio"/> 5 a 6 veces al día<br><input type="radio"/> más 6 veces al día |
| Pollo con piel                       | <input type="radio"/> Nunca o menos 1 vez al mes<br><input type="radio"/> 1 a 3 veces mes<br><input checked="" type="radio"/> 1 vez semana<br><input type="radio"/> 2 a 4 veces semana<br><input type="radio"/> 5 a 6 veces semana<br><input type="radio"/> 1 vez al día<br><input type="radio"/> 2 a 3 veces al día<br><input type="radio"/> 5 a 6 veces al día<br><input type="radio"/> más 6 veces al día |
| pollo sin piel                       | <input type="radio"/> Nunca o menos 1 vez al mes<br><input checked="" type="radio"/> 1 a 3 veces mes<br><input type="radio"/> 1 vez semana<br><input type="radio"/> 2 a 4 veces semana<br><input type="radio"/> 5 a 6 veces semana<br><input type="radio"/> 1 vez al día<br><input type="radio"/> 2 a 3 veces al día<br><input type="radio"/> 5 a 6 veces al día<br><input type="radio"/> más 6 veces al día |
| Ternera o cerdo o cordero            | <input type="radio"/> Nunca o menos 1 vez al mes<br><input type="radio"/> 1 a 3 veces mes<br><input type="radio"/> 1 vez semana<br><input type="radio"/> 2 a 4 veces semana<br><input type="radio"/> 5 a 6 veces semana<br><input checked="" type="radio"/> 1 vez al día<br><input type="radio"/> 2 a 3 veces al día<br><input type="radio"/> 5 a 6 veces al día<br><input type="radio"/> más 6 veces al día |
| carne caza: Conejo o codorniz o pato | <input type="radio"/> Nunca o menos 1 vez al mes<br><input type="radio"/> 1 a 3 veces mes<br><input type="radio"/> 1 vez semana<br><input type="radio"/> 2 a 4 veces semana<br><input type="radio"/> 5 a 6 veces semana<br><input checked="" type="radio"/> 1 vez al día<br><input type="radio"/> 2 a 3 veces al día<br><input type="radio"/> 5 a 6 veces al día<br><input type="radio"/> más 6 veces al día |
| Hígado de ternera o cerdo o pollo    | <input type="radio"/> Nunca o menos 1 vez al mes<br><input checked="" type="radio"/> 1 a 3 veces mes<br><input type="radio"/> 1 vez semana<br><input type="radio"/> 2 a 4 veces semana<br><input type="radio"/> 5 a 6 veces semana<br><input type="radio"/> 1 vez al día<br><input type="radio"/> 2 a 3 veces al día<br><input type="radio"/> 5 a 6 veces al día<br><input type="radio"/> más 6 veces al día |

---

Vísceras

- ☒ Nunca o menos 1 vez al mes  
☐ 1 a 3 veces mes  
☐ 1 vez semana  
☐ 2 a 4 veces semana  
☐ 5 a 6 veces semana  
☐ 1 vez al día  
☐ 2 a 3 veces al día  
☐ 5 a 6 veces al día  
☐ más 6 veces al día

---

Embutido

- ☒ Nunca o menos 1 vez al mes  
☐ 1 a 3 veces mes  
☐ 1 vez semana  
☐ 2 a 4 veces semana  
☐ 5 a 6 veces semana  
☐ 1 vez al día  
☐ 2 a 3 veces al día  
☐ 5 a 6 veces al día  
☐ más 6 veces al día

---

Salchicha o similar

- ☒ Nunca o menos 1 vez al mes  
☐ 1 a 3 veces mes  
☐ 1 vez semana  
☐ 2 a 4 veces semana  
☐ 5 a 6 veces semana  
☐ 1 vez al día  
☐ 2 a 3 veces al día  
☐ 5 a 6 veces al día  
☐ más 6 veces al día

---

Pate o foiegras

- ☒ Nunca o menos 1 vez al mes  
☐ 1 a 3 veces mes  
☐ 1 vez semana  
☐ 2 a 4 veces semana  
☐ 5 a 6 veces semana  
☐ 1 vez al día  
☐ 2 a 3 veces al día  
☐ 5 a 6 veces al día  
☐ más 6 veces al día

---

Hamburguesa

- ☐ Nunca o menos 1 vez al mes  
☐ 1 a 3 veces mes  
☒ 1 vez semana  
☐ 2 a 4 veces semana  
☐ 5 a 6 veces semana  
☐ 1 vez al día  
☐ 2 a 3 veces al día  
☐ 5 a 6 veces al día  
☐ más 6 veces al día

---

tocino o bacon

- ☐ Nunca o menos 1 vez al mes  
☒ 1 a 3 veces mes  
☐ 1 vez semana  
☐ 2 a 4 veces semana  
☐ 5 a 6 veces semana  
☐ 1 vez al día  
☐ 2 a 3 veces al día  
☐ 5 a 6 veces al día  
☐ más 6 veces al día

---

Pescado frito

- ☐ Nunca o menos 1 vez al mes  
☒ 1 a 3 veces mes  
☐ 1 vez semana  
☐ 2 a 4 veces semana  
☐ 5 a 6 veces semana  
☐ 1 vez al día  
☐ 2 a 3 veces al día  
☐ 5 a 6 veces al día  
☐ más 6 veces al día

---

pescado hervido blanco

- ☐ Nunca o menos 1 vez al mes  
☒ 1 a 3 veces mes  
☐ 1 vez semana  
☐ 2 a 4 veces semana  
☐ 5 a 6 veces semana  
☐ 1 vez al día  
☐ 2 a 3 veces al día  
☐ 5 a 6 veces al día  
☐ más 6 veces al día

---

pescado hervido azul

- ☒ Nunca o menos 1 vez al mes  
☐ 1 a 3 veces mes  
☐ 1 vez semana  
☐ 2 a 4 veces semana  
☐ 5 a 6 veces semana  
☐ 1 vez al día  
☐ 2 a 3 veces al día  
☐ 5 a 6 veces al día  
☐ más 6 veces al día

---

otros pescado azul

- ☐ Nunca o menos 1 vez al mes  
☒ 1 a 3 veces mes  
☐ 1 vez semana  
☐ 2 a 4 veces semana  
☐ 5 a 6 veces semana  
☐ 1 vez al día  
☐ 2 a 3 veces al día  
☐ 5 a 6 veces al día  
☐ más 6 veces al día

---

atun conserva

- ☐ Nunca o menos 1 vez al mes  
☒ 1 a 3 veces mes  
☐ 1 vez semana  
☐ 2 a 4 veces semana  
☐ 5 a 6 veces semana  
☐ 1 vez al día  
☐ 2 a 3 veces al día  
☐ 5 a 6 veces al día  
☐ más 6 veces al día

---

sardina conserva

- ☒ Nunca o menos 1 vez al mes  
☐ 1 a 3 veces mes  
☐ 1 vez semana  
☐ 2 a 4 veces semana  
☐ 5 a 6 veces semana  
☐ 1 vez al día  
☐ 2 a 3 veces al día  
☐ 5 a 6 veces al día  
☐ más 6 veces al día

---

pescado ahumado

- ☐ Nunca o menos 1 vez al mes  
☒ 1 a 3 veces mes  
☐ 1 vez semana  
☐ 2 a 4 veces semana  
☐ 5 a 6 veces semana  
☐ 1 vez al día  
☐ 2 a 3 veces al día  
☐ 5 a 6 veces al día  
☐ más 6 veces al día

---

almejas o mejillones o ostras unos 100g

- ☐ Nunca o menos 1 vez al mes  
☒ 1 a 3 veces mes  
☐ 1 vez semana  
☐ 2 a 4 veces semana  
☐ 5 a 6 veces semana  
☐ 1 vez al día  
☐ 2 a 3 veces al día  
☐ 5 a 6 veces al día  
☐ más 6 veces al día

---

calamar o chipiron o sepia unos 100g

- ☐ Nunca o menos 1 vez al mes  
☒ 1 a 3 veces mes  
☐ 1 vez semana  
☐ 2 a 4 veces semana  
☐ 5 a 6 veces semana  
☐ 1 vez al día  
☐ 2 a 3 veces al día  
☐ 5 a 6 veces al día  
☐ más 6 veces al día

---

marisco unos 100g

- ☐ Nunca o menos 1 vez al mes  
☒ 1 a 3 veces mes  
☐ 1 vez semana  
☐ 2 a 4 veces semana  
☐ 5 a 6 veces semana  
☐ 1 vez al día  
☐ 2 a 3 veces al día  
☐ 5 a 6 veces al día  
☐ más 6 veces al día

---

Espinacas o acelgas cocinadas

- ☐ Nunca o menos 1 vez al mes  
☒ 1 a 3 veces mes  
☐ 1 vez semana  
☐ 2 a 4 veces semana  
☐ 5 a 6 veces semana  
☐ 1 vez al día  
☐ 2 a 3 veces al día  
☐ 5 a 6 veces al día  
☐ más 6 veces al día

---

Col o coliflor o brocoli cocinado

- ☐ Nunca o menos 1 vez al mes  
☒ 1 a 3 veces mes  
☐ 1 vez semana  
☐ 2 a 4 veces semana  
☐ 5 a 6 veces semana  
☐ 1 vez al día  
☐ 2 a 3 veces al día  
☐ 5 a 6 veces al día  
☐ más 6 veces al día



---

|                              |                                                                                                                                                                                                                                                                                                                                                                                                              |
|------------------------------|--------------------------------------------------------------------------------------------------------------------------------------------------------------------------------------------------------------------------------------------------------------------------------------------------------------------------------------------------------------------------------------------------------------|
| Lechuga o endivia o escarola | <input type="radio"/> Nunca o menos 1 vez al mes<br><input checked="" type="radio"/> 1 a 3 veces mes<br><input type="radio"/> 1 vez semana<br><input type="radio"/> 2 a 4 veces semana<br><input type="radio"/> 5 a 6 veces semana<br><input type="radio"/> 1 vez al día<br><input type="radio"/> 2 a 3 veces al día<br><input type="radio"/> 5 a 6 veces al día<br><input type="radio"/> más 6 veces al día |
|------------------------------|--------------------------------------------------------------------------------------------------------------------------------------------------------------------------------------------------------------------------------------------------------------------------------------------------------------------------------------------------------------------------------------------------------------|

---

|                 |                                                                                                                                                                                                                                                                                                                                                                                                              |
|-----------------|--------------------------------------------------------------------------------------------------------------------------------------------------------------------------------------------------------------------------------------------------------------------------------------------------------------------------------------------------------------------------------------------------------------|
| tomate ensalada | <input type="radio"/> Nunca o menos 1 vez al mes<br><input type="radio"/> 1 a 3 veces mes<br><input type="radio"/> 1 vez semana<br><input type="radio"/> 2 a 4 veces semana<br><input type="radio"/> 5 a 6 veces semana<br><input checked="" type="radio"/> 1 vez al día<br><input type="radio"/> 2 a 3 veces al día<br><input type="radio"/> 5 a 6 veces al día<br><input type="radio"/> más 6 veces al día |
|-----------------|--------------------------------------------------------------------------------------------------------------------------------------------------------------------------------------------------------------------------------------------------------------------------------------------------------------------------------------------------------------------------------------------------------------|

---

|         |                                                                                                                                                                                                                                                                                                                                                                                                              |
|---------|--------------------------------------------------------------------------------------------------------------------------------------------------------------------------------------------------------------------------------------------------------------------------------------------------------------------------------------------------------------------------------------------------------------|
| cebolla | <input type="radio"/> Nunca o menos 1 vez al mes<br><input type="radio"/> 1 a 3 veces mes<br><input type="radio"/> 1 vez semana<br><input type="radio"/> 2 a 4 veces semana<br><input type="radio"/> 5 a 6 veces semana<br><input checked="" type="radio"/> 1 vez al día<br><input type="radio"/> 2 a 3 veces al día<br><input type="radio"/> 5 a 6 veces al día<br><input type="radio"/> más 6 veces al día |
|---------|--------------------------------------------------------------------------------------------------------------------------------------------------------------------------------------------------------------------------------------------------------------------------------------------------------------------------------------------------------------------------------------------------------------|

---

|                      |                                                                                                                                                                                                                                                                                                                                                                                                              |
|----------------------|--------------------------------------------------------------------------------------------------------------------------------------------------------------------------------------------------------------------------------------------------------------------------------------------------------------------------------------------------------------------------------------------------------------|
| Zanahoria o calabaza | <input type="radio"/> Nunca o menos 1 vez al mes<br><input checked="" type="radio"/> 1 a 3 veces mes<br><input type="radio"/> 1 vez semana<br><input type="radio"/> 2 a 4 veces semana<br><input type="radio"/> 5 a 6 veces semana<br><input type="radio"/> 1 vez al día<br><input type="radio"/> 2 a 3 veces al día<br><input type="radio"/> 5 a 6 veces al día<br><input type="radio"/> más 6 veces al día |
|----------------------|--------------------------------------------------------------------------------------------------------------------------------------------------------------------------------------------------------------------------------------------------------------------------------------------------------------------------------------------------------------------------------------------------------------|

---

|               |                                                                                                                                                                                                                                                                                                                                                                                                              |
|---------------|--------------------------------------------------------------------------------------------------------------------------------------------------------------------------------------------------------------------------------------------------------------------------------------------------------------------------------------------------------------------------------------------------------------|
| Judías verdes | <input type="radio"/> Nunca o menos 1 vez al mes<br><input checked="" type="radio"/> 1 a 3 veces mes<br><input type="radio"/> 1 vez semana<br><input type="radio"/> 2 a 4 veces semana<br><input type="radio"/> 5 a 6 veces semana<br><input type="radio"/> 1 vez al día<br><input type="radio"/> 2 a 3 veces al día<br><input type="radio"/> 5 a 6 veces al día<br><input type="radio"/> más 6 veces al día |
|---------------|--------------------------------------------------------------------------------------------------------------------------------------------------------------------------------------------------------------------------------------------------------------------------------------------------------------------------------------------------------------------------------------------------------------|

---

|                                |                                                                                                                                                                                                                                                                                                                                                                                                              |
|--------------------------------|--------------------------------------------------------------------------------------------------------------------------------------------------------------------------------------------------------------------------------------------------------------------------------------------------------------------------------------------------------------------------------------------------------------|
| Berenjena o calabacin o pepino | <input type="radio"/> Nunca o menos 1 vez al mes<br><input checked="" type="radio"/> 1 a 3 veces mes<br><input type="radio"/> 1 vez semana<br><input type="radio"/> 2 a 4 veces semana<br><input type="radio"/> 5 a 6 veces semana<br><input type="radio"/> 1 vez al día<br><input type="radio"/> 2 a 3 veces al día<br><input type="radio"/> 5 a 6 veces al día<br><input type="radio"/> más 6 veces al día |
|--------------------------------|--------------------------------------------------------------------------------------------------------------------------------------------------------------------------------------------------------------------------------------------------------------------------------------------------------------------------------------------------------------------------------------------------------------|

---

---

pimiento

- ☐ Nunca o menos 1 vez al mes  
☐ 1 a 3 veces mes  
☒ 1 vez semana  
☐ 2 a 4 veces semana  
☐ 5 a 6 veces semana  
☐ 1 vez al día  
☐ 2 a 3 veces al día  
☐ 5 a 6 veces al día  
☐ más 6 veces al día

---

alcachofa

- ☐ Nunca o menos 1 vez al mes  
☒ 1 a 3 veces mes  
☐ 1 vez semana  
☐ 2 a 4 veces semana  
☐ 5 a 6 veces semana  
☐ 1 vez al día  
☐ 2 a 3 veces al día  
☐ 5 a 6 veces al día  
☐ más 6 veces al día

---

espárragos

- ☐ Nunca o menos 1 vez al mes  
☒ 1 a 3 veces mes  
☐ 1 vez semana  
☐ 2 a 4 veces semana  
☐ 5 a 6 veces semana  
☐ 1 vez al día  
☐ 2 a 3 veces al día  
☐ 5 a 6 veces al día  
☐ más 6 veces al día

---

maíz hervido

- ☐ Nunca o menos 1 vez al mes  
☒ 1 a 3 veces mes  
☐ 1 vez semana  
☐ 2 a 4 veces semana  
☐ 5 a 6 veces semana  
☐ 1 vez al día  
☐ 2 a 3 veces al día  
☐ 5 a 6 veces al día  
☐ más 6 veces al día

---

legumbres

- ☐ Nunca o menos 1 vez al mes  
☐ 1 a 3 veces mes  
☒ 1 vez semana  
☐ 2 a 4 veces semana  
☐ 5 a 6 veces semana  
☐ 1 vez al día  
☐ 2 a 3 veces al día  
☐ 5 a 6 veces al día  
☐ más 6 veces al día

---

naranjas o mandarinas

- ☐ Nunca o menos 1 vez al mes  
☐ 1 a 3 veces mes  
☒ 1 vez semana  
☐ 2 a 4 veces semana  
☐ 5 a 6 veces semana  
☐ 1 vez al día  
☐ 2 a 3 veces al día  
☐ 5 a 6 veces al día  
☐ más 6 veces al día

---

zum natural fruta

- ☐ Nunca o menos 1 vez al mes  
☒ 1 a 3 veces mes  
☐ 1 vez semana  
☐ 2 a 4 veces semana  
☐ 5 a 6 veces semana  
☐ 1 vez al día  
☐ 2 a 3 veces al día  
☐ 5 a 6 veces al día  
☐ más 6 veces al día

---

platano

- ☐ Nunca o menos 1 vez al mes  
☒ 1 a 3 veces mes  
☐ 1 vez semana  
☐ 2 a 4 veces semana  
☐ 5 a 6 veces semana  
☐ 1 vez al día  
☐ 2 a 3 veces al día  
☐ 5 a 6 veces al día  
☐ más 6 veces al día

---

manzana o pera

- ☐ Nunca o menos 1 vez al mes  
☒ 1 a 3 veces mes  
☐ 1 vez semana  
☐ 2 a 4 veces semana  
☐ 5 a 6 veces semana  
☐ 1 vez al día  
☐ 2 a 3 veces al día  
☐ 5 a 6 veces al día  
☐ más 6 veces al día

---

melocotón o nectarina

- ☐ Nunca o menos 1 vez al mes  
☐ 1 a 3 veces mes  
☐ 1 vez semana  
☐ 2 a 4 veces semana  
☐ 5 a 6 veces semana  
☒ 1 vez al día  
☐ 2 a 3 veces al día  
☐ 5 a 6 veces al día  
☐ más 6 veces al día

---

sandia o melon

- ☐ Nunca o menos 1 vez al mes  
☐ 1 a 3 veces mes  
☐ 1 vez semana  
☐ 2 a 4 veces semana  
☐ 5 a 6 veces semana  
☒ 1 vez al día  
☐ 2 a 3 veces al día  
☐ 5 a 6 veces al día  
☐ más 6 veces al día

---

uva

- ☐ Nunca o menos 1 vez al mes  
☐ 1 a 3 veces mes  
☐ 1 vez semana  
☐ 2 a 4 veces semana  
☐ 5 a 6 veces semana  
☒ 1 vez al día  
☐ 2 a 3 veces al día  
☐ 5 a 6 veces al día  
☐ más 6 veces al día

---

bruna o ciruela

- ☐ Nunca o menos 1 vez al mes  
☐ 1 a 3 veces mes  
☐ 1 vez semana  
☐ 2 a 4 veces semana  
☐ 5 a 6 veces semana  
☒ 1 vez al día  
☐ 2 a 3 veces al día  
☐ 5 a 6 veces al día  
☐ más 6 veces al día

---

kiwi

- ☐ Nunca o menos 1 vez al mes  
☐ 1 a 3 veces mes  
☒ 1 vez semana  
☐ 2 a 4 veces semana  
☐ 5 a 6 veces semana  
☐ 1 vez al día  
☐ 2 a 3 veces al día  
☐ 5 a 6 veces al día  
☐ más 6 veces al día

---

aceituna

- ☐ Nunca o menos 1 vez al mes  
☐ 1 a 3 veces mes  
☐ 1 vez semana  
☐ 2 a 4 veces semana  
☐ 5 a 6 veces semana  
☒ 1 vez al día  
☐ 2 a 3 veces al día  
☐ 5 a 6 veces al día  
☐ más 6 veces al día

---

frutos secos

- ☐ Nunca o menos 1 vez al mes  
☐ 1 a 3 veces mes  
☐ 1 vez semana  
☐ 2 a 4 veces semana  
☐ 5 a 6 veces semana  
☒ 1 vez al día  
☐ 2 a 3 veces al día  
☐ 5 a 6 veces al día  
☐ más 6 veces al día

---

pan blanco

- ☐ Nunca o menos 1 vez al mes  
☐ 1 a 3 veces mes  
☐ 1 vez semana  
☐ 2 a 4 veces semana  
☐ 5 a 6 veces semana  
☒ 1 vez al día  
☐ 2 a 3 veces al día  
☐ 5 a 6 veces al día  
☐ más 6 veces al día

---

pan integral

- ☒ Nunca o menos 1 vez al mes  
☐ 1 a 3 veces mes  
☐ 1 vez semana  
☐ 2 a 4 veces semana  
☐ 5 a 6 veces semana  
☐ 1 vez al día  
☐ 2 a 3 veces al día  
☐ 5 a 6 veces al día  
☐ más 6 veces al día

|                          |                                                                                                                                                                                                                                                                                                                                                                                                              |
|--------------------------|--------------------------------------------------------------------------------------------------------------------------------------------------------------------------------------------------------------------------------------------------------------------------------------------------------------------------------------------------------------------------------------------------------------|
| cereales desayuno        | <input checked="" type="radio"/> Nunca o menos 1 vez al mes<br><input type="radio"/> 1 a 3 veces mes<br><input type="radio"/> 1 vez semana<br><input type="radio"/> 2 a 4 veces semana<br><input type="radio"/> 5 a 6 veces semana<br><input type="radio"/> 1 vez al día<br><input type="radio"/> 2 a 3 veces al día<br><input type="radio"/> 5 a 6 veces al día<br><input type="radio"/> más 6 veces al día |
| patatas fritas           | <input type="radio"/> Nunca o menos 1 vez al mes<br><input type="radio"/> 1 a 3 veces mes<br><input type="radio"/> 1 vez semana<br><input type="radio"/> 2 a 4 veces semana<br><input type="radio"/> 5 a 6 veces semana<br><input checked="" type="radio"/> 1 vez al día<br><input type="radio"/> 2 a 3 veces al día<br><input type="radio"/> 5 a 6 veces al día<br><input type="radio"/> más 6 veces al día |
| patatas cocidas o asadas | <input type="radio"/> Nunca o menos 1 vez al mes<br><input type="radio"/> 1 a 3 veces mes<br><input type="radio"/> 1 vez semana<br><input type="radio"/> 2 a 4 veces semana<br><input type="radio"/> 5 a 6 veces semana<br><input checked="" type="radio"/> 1 vez al día<br><input type="radio"/> 2 a 3 veces al día<br><input type="radio"/> 5 a 6 veces al día<br><input type="radio"/> más 6 veces al día |
| bolsa papas              | <input type="radio"/> Nunca o menos 1 vez al mes<br><input type="radio"/> 1 a 3 veces mes<br><input checked="" type="radio"/> 1 vez semana<br><input type="radio"/> 2 a 4 veces semana<br><input type="radio"/> 5 a 6 veces semana<br><input type="radio"/> 1 vez al día<br><input type="radio"/> 2 a 3 veces al día<br><input type="radio"/> 5 a 6 veces al día<br><input type="radio"/> más 6 veces al día |
| arroz cocinado           | <input type="radio"/> Nunca o menos 1 vez al mes<br><input type="radio"/> 1 a 3 veces mes<br><input checked="" type="radio"/> 1 vez semana<br><input type="radio"/> 2 a 4 veces semana<br><input type="radio"/> 5 a 6 veces semana<br><input type="radio"/> 1 vez al día<br><input type="radio"/> 2 a 3 veces al día<br><input type="radio"/> 5 a 6 veces al día<br><input type="radio"/> más 6 veces al día |
| pasta                    | <input type="radio"/> Nunca o menos 1 vez al mes<br><input type="radio"/> 1 a 3 veces mes<br><input type="radio"/> 1 vez semana<br><input type="radio"/> 2 a 4 veces semana<br><input type="radio"/> 5 a 6 veces semana<br><input checked="" type="radio"/> 1 vez al día<br><input type="radio"/> 2 a 3 veces al día<br><input type="radio"/> 5 a 6 veces al día<br><input type="radio"/> más 6 veces al día |

|                     |                                                                                                                                                                                                                                                                                                                                                                                                              |
|---------------------|--------------------------------------------------------------------------------------------------------------------------------------------------------------------------------------------------------------------------------------------------------------------------------------------------------------------------------------------------------------------------------------------------------------|
| pizza               | <input type="radio"/> Nunca o menos 1 vez al mes<br><input type="radio"/> 1 a 3 veces mes<br><input checked="" type="radio"/> 1 vez semana<br><input type="radio"/> 2 a 4 veces semana<br><input type="radio"/> 5 a 6 veces semana<br><input type="radio"/> 1 vez al día<br><input type="radio"/> 2 a 3 veces al día<br><input type="radio"/> 5 a 6 veces al día<br><input type="radio"/> más 6 veces al día |
| aceite oliva        | <input type="radio"/> Nunca o menos 1 vez al mes<br><input type="radio"/> 1 a 3 veces mes<br><input type="radio"/> 1 vez semana<br><input type="radio"/> 2 a 4 veces semana<br><input type="radio"/> 5 a 6 veces semana<br><input checked="" type="radio"/> 1 vez al día<br><input type="radio"/> 2 a 3 veces al día<br><input type="radio"/> 5 a 6 veces al día<br><input type="radio"/> más 6 veces al día |
| otros aceites       | <input type="radio"/> Nunca o menos 1 vez al mes<br><input type="radio"/> 1 a 3 veces mes<br><input checked="" type="radio"/> 1 vez semana<br><input type="radio"/> 2 a 4 veces semana<br><input type="radio"/> 5 a 6 veces semana<br><input type="radio"/> 1 vez al día<br><input type="radio"/> 2 a 3 veces al día<br><input type="radio"/> 5 a 6 veces al día<br><input type="radio"/> más 6 veces al día |
| margarina           | <input checked="" type="radio"/> Nunca o menos 1 vez al mes<br><input type="radio"/> 1 a 3 veces mes<br><input type="radio"/> 1 vez semana<br><input type="radio"/> 2 a 4 veces semana<br><input type="radio"/> 5 a 6 veces semana<br><input type="radio"/> 1 vez al día<br><input type="radio"/> 2 a 3 veces al día<br><input type="radio"/> 5 a 6 veces al día<br><input type="radio"/> más 6 veces al día |
| mantequilla         | <input type="radio"/> Nunca o menos 1 vez al mes<br><input type="radio"/> 1 a 3 veces mes<br><input type="radio"/> 1 vez semana<br><input type="radio"/> 2 a 4 veces semana<br><input type="radio"/> 5 a 6 veces semana<br><input checked="" type="radio"/> 1 vez al día<br><input type="radio"/> 2 a 3 veces al día<br><input type="radio"/> 5 a 6 veces al día<br><input type="radio"/> más 6 veces al día |
| galletas tipo maria | <input checked="" type="radio"/> Nunca o menos 1 vez al mes<br><input type="radio"/> 1 a 3 veces mes<br><input type="radio"/> 1 vez semana<br><input type="radio"/> 2 a 4 veces semana<br><input type="radio"/> 5 a 6 veces semana<br><input type="radio"/> 1 vez al día<br><input type="radio"/> 2 a 3 veces al día<br><input type="radio"/> 5 a 6 veces al día<br><input type="radio"/> más 6 veces al día |

|                           |                                                                                                                                                                                                                                                                                                                                                                                                              |
|---------------------------|--------------------------------------------------------------------------------------------------------------------------------------------------------------------------------------------------------------------------------------------------------------------------------------------------------------------------------------------------------------------------------------------------------------|
| galletas chocolate        | <input type="radio"/> Nunca o menos 1 vez al mes<br><input type="radio"/> 1 a 3 veces mes<br><input type="radio"/> 1 vez semana<br><input type="radio"/> 2 a 4 veces semana<br><input type="radio"/> 5 a 6 veces semana<br><input checked="" type="radio"/> 1 vez al día<br><input type="radio"/> 2 a 3 veces al día<br><input type="radio"/> 5 a 6 veces al día<br><input type="radio"/> más 6 veces al día |
| bollieria                 | <input type="radio"/> Nunca o menos 1 vez al mes<br><input type="radio"/> 1 a 3 veces mes<br><input checked="" type="radio"/> 1 vez semana<br><input type="radio"/> 2 a 4 veces semana<br><input type="radio"/> 5 a 6 veces semana<br><input type="radio"/> 1 vez al día<br><input type="radio"/> 2 a 3 veces al día<br><input type="radio"/> 5 a 6 veces al día<br><input type="radio"/> más 6 veces al día |
| chocolate o bombones      | <input type="radio"/> Nunca o menos 1 vez al mes<br><input type="radio"/> 1 a 3 veces mes<br><input checked="" type="radio"/> 1 vez semana<br><input type="radio"/> 2 a 4 veces semana<br><input type="radio"/> 5 a 6 veces semana<br><input type="radio"/> 1 vez al día<br><input type="radio"/> 2 a 3 veces al día<br><input type="radio"/> 5 a 6 veces al día<br><input type="radio"/> más 6 veces al día |
| chocolate polvo o colacao | <input type="radio"/> Nunca o menos 1 vez al mes<br><input type="radio"/> 1 a 3 veces mes<br><input checked="" type="radio"/> 1 vez semana<br><input type="radio"/> 2 a 4 veces semana<br><input type="radio"/> 5 a 6 veces semana<br><input type="radio"/> 1 vez al día<br><input type="radio"/> 2 a 3 veces al día<br><input type="radio"/> 5 a 6 veces al día<br><input type="radio"/> más 6 veces al día |
| vino tinto                | <input checked="" type="radio"/> Nunca o menos 1 vez al mes<br><input type="radio"/> 1 a 3 veces mes<br><input type="radio"/> 1 vez semana<br><input type="radio"/> 2 a 4 veces semana<br><input type="radio"/> 5 a 6 veces semana<br><input type="radio"/> 1 vez al día<br><input type="radio"/> 2 a 3 veces al día<br><input type="radio"/> 5 a 6 veces al día<br><input type="radio"/> más 6 veces al día |
| vino blanco               | <input checked="" type="radio"/> Nunca o menos 1 vez al mes<br><input type="radio"/> 1 a 3 veces mes<br><input type="radio"/> 1 vez semana<br><input type="radio"/> 2 a 4 veces semana<br><input type="radio"/> 5 a 6 veces semana<br><input type="radio"/> 1 vez al día<br><input type="radio"/> 2 a 3 veces al día<br><input type="radio"/> 5 a 6 veces al día<br><input type="radio"/> más 6 veces al día |

|                       |                                                                                                                                                                                                                                                                                                                                                                                                              |
|-----------------------|--------------------------------------------------------------------------------------------------------------------------------------------------------------------------------------------------------------------------------------------------------------------------------------------------------------------------------------------------------------------------------------------------------------|
| vino seco o vermut    | <input checked="" type="radio"/> Nunca o menos 1 vez al mes<br><input type="radio"/> 1 a 3 veces mes<br><input type="radio"/> 1 vez semana<br><input type="radio"/> 2 a 4 veces semana<br><input type="radio"/> 5 a 6 veces semana<br><input type="radio"/> 1 vez al día<br><input type="radio"/> 2 a 3 veces al día<br><input type="radio"/> 5 a 6 veces al día<br><input type="radio"/> más 6 veces al día |
| cerveza               | <input checked="" type="radio"/> Nunca o menos 1 vez al mes<br><input type="radio"/> 1 a 3 veces mes<br><input type="radio"/> 1 vez semana<br><input type="radio"/> 2 a 4 veces semana<br><input type="radio"/> 5 a 6 veces semana<br><input type="radio"/> 1 vez al día<br><input type="radio"/> 2 a 3 veces al día<br><input type="radio"/> 5 a 6 veces al día<br><input type="radio"/> más 6 veces al día |
| cerveza sin alcohol   | <input type="radio"/> Nunca o menos 1 vez al mes<br><input type="radio"/> 1 a 3 veces mes<br><input checked="" type="radio"/> 1 vez semana<br><input type="radio"/> 2 a 4 veces semana<br><input type="radio"/> 5 a 6 veces semana<br><input type="radio"/> 1 vez al día<br><input type="radio"/> 2 a 3 veces al día<br><input type="radio"/> 5 a 6 veces al día<br><input type="radio"/> más 6 veces al día |
| licores               | <input checked="" type="radio"/> Nunca o menos 1 vez al mes<br><input type="radio"/> 1 a 3 veces mes<br><input type="radio"/> 1 vez semana<br><input type="radio"/> 2 a 4 veces semana<br><input type="radio"/> 5 a 6 veces semana<br><input type="radio"/> 1 vez al día<br><input type="radio"/> 2 a 3 veces al día<br><input type="radio"/> 5 a 6 veces al día<br><input type="radio"/> más 6 veces al día |
| ginebra o ron o vodka | <input checked="" type="radio"/> Nunca o menos 1 vez al mes<br><input type="radio"/> 1 a 3 veces mes<br><input type="radio"/> 1 vez semana<br><input type="radio"/> 2 a 4 veces semana<br><input type="radio"/> 5 a 6 veces semana<br><input type="radio"/> 1 vez al día<br><input type="radio"/> 2 a 3 veces al día<br><input type="radio"/> 5 a 6 veces al día<br><input type="radio"/> más 6 veces al día |
| refresco normal       | <input type="radio"/> Nunca o menos 1 vez al mes<br><input type="radio"/> 1 a 3 veces mes<br><input type="radio"/> 1 vez semana<br><input type="radio"/> 2 a 4 veces semana<br><input type="radio"/> 5 a 6 veces semana<br><input checked="" type="radio"/> 1 vez al día<br><input type="radio"/> 2 a 3 veces al día<br><input type="radio"/> 5 a 6 veces al día<br><input type="radio"/> más 6 veces al día |



|                          |                                                                                                                                                                                                                                                                                                                                                                                                              |
|--------------------------|--------------------------------------------------------------------------------------------------------------------------------------------------------------------------------------------------------------------------------------------------------------------------------------------------------------------------------------------------------------------------------------------------------------|
| refresco sin azúcar      | <input checked="" type="radio"/> Nunca o menos 1 vez al mes<br><input type="radio"/> 1 a 3 veces mes<br><input type="radio"/> 1 vez semana<br><input type="radio"/> 2 a 4 veces semana<br><input type="radio"/> 5 a 6 veces semana<br><input type="radio"/> 1 vez al día<br><input type="radio"/> 2 a 3 veces al día<br><input type="radio"/> 5 a 6 veces al día<br><input type="radio"/> más 6 veces al día |
| Agua del grifo           | <input checked="" type="radio"/> Nunca o menos 1 vez al mes<br><input type="radio"/> 1 a 3 veces mes<br><input type="radio"/> 1 vez semana<br><input type="radio"/> 2 a 4 veces semana<br><input type="radio"/> 5 a 6 veces semana<br><input type="radio"/> 1 vez al día<br><input type="radio"/> 2 a 3 veces al día<br><input type="radio"/> 5 a 6 veces al día<br><input type="radio"/> más 6 veces al día |
| agua embotellada sin gas | <input type="radio"/> Nunca o menos 1 vez al mes<br><input type="radio"/> 1 a 3 veces mes<br><input type="radio"/> 1 vez semana<br><input type="radio"/> 2 a 4 veces semana<br><input type="radio"/> 5 a 6 veces semana<br><input type="radio"/> 1 vez al día<br><input checked="" type="radio"/> 2 a 3 veces al día<br><input type="radio"/> 5 a 6 veces al día<br><input type="radio"/> más 6 veces al día |
| agua embotellada con gas | <input checked="" type="radio"/> Nunca o menos 1 vez al mes<br><input type="radio"/> 1 a 3 veces mes<br><input type="radio"/> 1 vez semana<br><input type="radio"/> 2 a 4 veces semana<br><input type="radio"/> 5 a 6 veces semana<br><input type="radio"/> 1 vez al día<br><input type="radio"/> 2 a 3 veces al día<br><input type="radio"/> 5 a 6 veces al día<br><input type="radio"/> más 6 veces al día |
| zumو frutas embasado     | <input type="radio"/> Nunca o menos 1 vez al mes<br><input type="radio"/> 1 a 3 veces mes<br><input type="radio"/> 1 vez semana<br><input type="radio"/> 2 a 4 veces semana<br><input type="radio"/> 5 a 6 veces semana<br><input checked="" type="radio"/> 1 vez al día<br><input type="radio"/> 2 a 3 veces al día<br><input type="radio"/> 5 a 6 veces al día<br><input type="radio"/> más 6 veces al día |
| cafe                     | <input type="radio"/> Nunca o menos 1 vez al mes<br><input type="radio"/> 1 a 3 veces mes<br><input type="radio"/> 1 vez semana<br><input type="radio"/> 2 a 4 veces semana<br><input type="radio"/> 5 a 6 veces semana<br><input checked="" type="radio"/> 1 vez al día<br><input type="radio"/> 2 a 3 veces al día<br><input type="radio"/> 5 a 6 veces al día<br><input type="radio"/> más 6 veces al día |

---

cafe descafeinado

- ☐ Nunca o menos 1 vez al mes  
☐ 1 a 3 veces mes  
☒ 1 vez semana  
☐ 2 a 4 veces semana  
☐ 5 a 6 veces semana  
☐ 1 vez al día  
☐ 2 a 3 veces al día  
☐ 5 a 6 veces al día  
☐ más 6 veces al día

---

te o infusión

- ☐ Nunca o menos 1 vez al mes  
☐ 1 a 3 veces mes  
☒ 1 vez semana  
☐ 2 a 4 veces semana  
☐ 5 a 6 veces semana  
☐ 1 vez al día  
☐ 2 a 3 veces al día  
☐ 5 a 6 veces al día  
☐ más 6 veces al día

---

sopa o puré verduras

- ☐ Nunca o menos 1 vez al mes  
☐ 1 a 3 veces mes  
☒ 1 vez semana  
☐ 2 a 4 veces semana  
☐ 5 a 6 veces semana  
☐ 1 vez al día  
☐ 2 a 3 veces al día  
☐ 5 a 6 veces al día  
☐ más 6 veces al día

---

croquetas pollo jamón

- ☐ Nunca o menos 1 vez al mes  
☐ 1 a 3 veces mes  
☒ 1 vez semana  
☐ 2 a 4 veces semana  
☐ 5 a 6 veces semana  
☐ 1 vez al día  
☐ 2 a 3 veces al día  
☐ 5 a 6 veces al día  
☐ más 6 veces al día

---

croquetas pescado

- ☐ Nunca o menos 1 vez al mes  
☐ 1 a 3 veces mes  
☒ 1 vez semana  
☐ 2 a 4 veces semana  
☐ 5 a 6 veces semana  
☐ 1 vez al día  
☐ 2 a 3 veces al día  
☐ 5 a 6 veces al día  
☐ más 6 veces al día

---

mayonesa

- ☐ Nunca o menos 1 vez al mes  
☐ 1 a 3 veces mes  
☒ 1 vez semana  
☐ 2 a 4 veces semana  
☐ 5 a 6 veces semana  
☐ 1 vez al día  
☐ 2 a 3 veces al día  
☐ 5 a 6 veces al día  
☐ más 6 veces al día

---

salsa tomate

- ☐ Nunca o menos 1 vez al mes  
☐ 1 a 3 veces mes  
☒ 1 vez semana  
☐ 2 a 4 veces semana  
☐ 5 a 6 veces semana  
☐ 1 vez al día  
☐ 2 a 3 veces al día  
☐ 5 a 6 veces al día  
☐ más 6 veces al día

---

ketchup

- ☒ Nunca o menos 1 vez al mes  
☐ 1 a 3 veces mes  
☐ 1 vez semana  
☐ 2 a 4 veces semana  
☐ 5 a 6 veces semana  
☐ 1 vez al día  
☐ 2 a 3 veces al día  
☐ 5 a 6 veces al día  
☐ más 6 veces al día

---

sal

- ☐ Nunca o menos 1 vez al mes  
☐ 1 a 3 veces mes  
☐ 1 vez semana  
☐ 2 a 4 veces semana  
☐ 5 a 6 veces semana  
☒ 1 vez al día  
☐ 2 a 3 veces al día  
☐ 5 a 6 veces al día  
☐ más 6 veces al día

---

ajo

- ☐ Nunca o menos 1 vez al mes  
☐ 1 a 3 veces mes  
☐ 1 vez semana  
☐ 2 a 4 veces semana  
☐ 5 a 6 veces semana  
☒ 1 vez al día  
☐ 2 a 3 veces al día  
☐ 5 a 6 veces al día  
☐ más 6 veces al día

---

mermelada o miel

- ☐ Nunca o menos 1 vez al mes  
☐ 1 a 3 veces mes  
☐ 1 vez semana  
☐ 2 a 4 veces semana  
☐ 5 a 6 veces semana  
☒ 1 vez al día  
☐ 2 a 3 veces al día  
☐ 5 a 6 veces al día  
☐ más 6 veces al día

---

azúcar

- ☒ Nunca o menos 1 vez al mes  
☐ 1 a 3 veces mes  
☐ 1 vez semana  
☐ 2 a 4 veces semana  
☐ 5 a 6 veces semana  
☐ 1 vez al día  
☐ 2 a 3 veces al día  
☐ 5 a 6 veces al día  
☐ más 6 veces al día

---

Otro alimento

---

suplementos vitamínicos

- ☐ si  
☒ no

---

suplementos vitamínicos

---

dieta previa

- ☐ si  
☒ no

motivo dieta

- ☒ no dieta  
☐ control peso  
☐ control colesterol  
☐ control diabetes  
☐ problemas estómago  
☐ problemas vesícula o hepáticos  
☐ HTA o cardiopatía  
☐ problemas renales  
☐ alergia alimentaria  
☐ ácido úrico elevado  
☐ vegetariana  
☐ otros

---

cambio alimentos año previo gestación

---

- ☐ si  
☒ no

cambio lácteos

- ☐ eliminado  
☐ disminuido  
☒ igual  
☐ aumentado  
☐ no sabe

---

cambio huevos

---

- ☐ eliminado  
☐ disminuido  
☒ igual  
☐ aumentado  
☐ no sabe

cambio carne

- ☐ eliminado  
☐ disminuido  
☒ igual  
☐ aumentado  
☐ no sabe

---

cambio pescado

---

- ☐ eliminado  
☐ disminuido  
☒ igual  
☐ aumentado  
☐ no sabe

cambio verduras

- ☐ eliminado  
☐ disminuido  
☒ igual  
☐ aumentado  
☐ no sabe

|                            |                                                                                                                                                                                                                        |
|----------------------------|------------------------------------------------------------------------------------------------------------------------------------------------------------------------------------------------------------------------|
| cambio legumbres           | <input type="radio"/> eliminado<br><input type="radio"/> disminuido<br><input checked="" type="radio"/> igual<br><input type="radio"/> aumentado<br><input type="radio"/> no sabe                                      |
| cambio fruta               | <input type="radio"/> eliminado<br><input type="radio"/> disminuido<br><input checked="" type="radio"/> igual<br><input type="radio"/> aumentado<br><input type="radio"/> no sabe                                      |
| cambio pan                 | <input type="radio"/> eliminado<br><input type="radio"/> disminuido<br><input checked="" type="radio"/> igual<br><input type="radio"/> aumentado<br><input type="radio"/> no sabe                                      |
| cambio aceite oliva        | <input type="radio"/> eliminado<br><input type="radio"/> disminuido<br><input checked="" type="radio"/> igual<br><input type="radio"/> aumentado<br><input type="radio"/> no sabe                                      |
| cambio mante o margarina   | <input type="radio"/> eliminado<br><input type="radio"/> disminuido<br><input checked="" type="radio"/> igual<br><input type="radio"/> aumentado<br><input type="radio"/> no sabe                                      |
| cambio azúcar y dulces     | <input type="radio"/> eliminado<br><input type="radio"/> disminuido<br><input checked="" type="radio"/> igual<br><input type="radio"/> aumentado<br><input type="radio"/> no sabe                                      |
| cambio bebidas alcohólicas | <input type="radio"/> eliminado<br><input type="radio"/> disminuido<br><input checked="" type="radio"/> igual<br><input type="radio"/> aumentado<br><input type="radio"/> no sabe                                      |
| frecuencia comidas fritas  | <input type="radio"/> a diario<br><input type="radio"/> 5 a 6 veces semana<br><input type="radio"/> 2 a 4 veces semana<br><input checked="" type="radio"/> 1 vez semana<br><input type="radio"/> menos de 1 vez semana |
| carne                      | <input type="radio"/> no como<br><input type="radio"/> cruda<br><input type="radio"/> poco hecha<br><input type="radio"/> hecha<br><input checked="" type="radio"/> muy hecha                                          |
| grasa visible carne        | <input type="radio"/> quita toda<br><input type="radio"/> quita mayoría<br><input type="radio"/> quita un poco<br><input checked="" type="radio"/> no quita nada                                                       |

|                                |                                                                                                                                                                                                                                                          |
|--------------------------------|----------------------------------------------------------------------------------------------------------------------------------------------------------------------------------------------------------------------------------------------------------|
| cocina carne                   | <input checked="" type="radio"/> a la plancha<br><input type="radio"/> a la parrilla<br><input type="radio"/> asada<br><input type="radio"/> frita<br><input type="radio"/> guisada                                                                      |
| tostado quemado carne          | <input checked="" type="radio"/> nunca<br><input type="radio"/> 1 vez mes<br><input type="radio"/> 2 a 3 veces mes<br><input type="radio"/> 1 vez semana<br><input type="radio"/> 2 a 3 semanas                                                          |
| tostado quemado pescado        | <input checked="" type="radio"/> nunca<br><input type="radio"/> 1 vez mes<br><input type="radio"/> 2 a 3 veces mes<br><input type="radio"/> 1 vez semana<br><input type="radio"/> 2 a 3 semanas                                                          |
| socarrat paella                | <input checked="" type="radio"/> nunca<br><input type="radio"/> 1 vez mes<br><input type="radio"/> 2 a 3 veces mes<br><input type="radio"/> 1 vez semana<br><input type="radio"/> 2 a 3 semanas                                                          |
| grasa o aceite cocinar         | <input type="radio"/> mantequilla<br><input type="radio"/> margarina<br><input checked="" type="radio"/> aceite oliva<br><input type="radio"/> aceite oliva virgen extra<br><input type="radio"/> aceite vegetal<br><input type="radio"/> mezcla aceites |
| grasa aceite aliñar            | <input type="radio"/> mantequilla<br><input type="radio"/> margarina<br><input checked="" type="radio"/> aceite oliva<br><input type="radio"/> aceite oliva virgen extra<br><input type="radio"/> aceite vegetal<br><input type="radio"/> mezcla aceites |
| grasa aceite freir             | <input type="radio"/> mantequilla<br><input type="radio"/> margarina<br><input checked="" type="radio"/> aceite oliva<br><input type="radio"/> aceite oliva virgen extra<br><input type="radio"/> aceite vegetal<br><input type="radio"/> mezcla aceites |
| Ejercicio cuestionario         | <input checked="" type="radio"/> si<br><input type="radio"/> no                                                                                                                                                                                          |
| horas de sueño incluido siesta | [*DATA REMOVED*]                                                                                                                                                                                                                                         |
| minutos siesta                 | [*DATA REMOVED*]                                                                                                                                                                                                                                         |
| horas televisión semana        | [*DATA REMOVED*]                                                                                                                                                                                                                                         |

|                                        |                                                                                                                                                                                                                                                                                                                                                                           |
|----------------------------------------|---------------------------------------------------------------------------------------------------------------------------------------------------------------------------------------------------------------------------------------------------------------------------------------------------------------------------------------------------------------------------|
| actividad trabajo                      | <input type="radio"/> casi siempre sentado<br><input type="radio"/> sentado 50 por cien<br><input type="radio"/> casi siempre de pie, quieto<br><input checked="" type="radio"/> casi siempre levantado caminando y llevando pocas cosas<br><input type="radio"/> casi siempre levantado, caminando y llevado muchas cosas<br><input type="radio"/> trabajo manual pesado |
| tiempo caminar o bici al día           | <input type="radio"/> casi nunca<br><input type="radio"/> menos 20min día<br><input type="radio"/> 20 a 40 min día<br><input type="radio"/> 40 a 60 min día<br><input type="radio"/> 1h o 1h y media día<br><input checked="" type="radio"/> más de 1h y media al día                                                                                                     |
| tiempo tareas casa al día              | <input type="radio"/> menos de 1h día<br><input checked="" type="radio"/> 1 a 2h día<br><input type="radio"/> 3 a 4h día<br><input type="radio"/> 5 a 6h día<br><input type="radio"/> 7 a 8h día<br><input type="radio"/> más de 8h día                                                                                                                                   |
| tiempo libre televisión ordenador leer | <input type="radio"/> menos 1h día<br><input type="radio"/> 1h día<br><input checked="" type="radio"/> 2h día<br><input type="radio"/> 3h día<br><input type="radio"/> 4h día<br><input type="radio"/> 5 a 6h día<br><input type="radio"/> mas 6h día                                                                                                                     |
| tiempo libre ejercicio o deporte       | <input type="radio"/> menos 1h semana<br><input checked="" type="radio"/> 1h semana<br><input type="radio"/> 2h semana<br><input type="radio"/> 3h semana<br><input type="radio"/> 4 a 5h semana<br><input type="radio"/> mas 5h semana                                                                                                                                   |
| como se considera                      | <input type="radio"/> sedentaria<br><input type="radio"/> poco activa<br><input checked="" type="radio"/> moderadamente activa<br><input type="radio"/> bastante activa<br><input type="radio"/> muy activa<br><input type="radio"/> no sabe                                                                                                                              |
| FUR                                    | [*DATA REMOVED*]                                                                                                                                                                                                                                                                                                                                                          |
| Semanas gestación 2T                   | [*DATA REMOVED*]                                                                                                                                                                                                                                                                                                                                                          |
| Días gestación 2T                      | [*DATA REMOVED*]                                                                                                                                                                                                                                                                                                                                                          |
| DBP 2T                                 | [*DATA REMOVED*]                                                                                                                                                                                                                                                                                                                                                          |
| CC 2T                                  | [*DATA REMOVED*]                                                                                                                                                                                                                                                                                                                                                          |
| AC 2T                                  | [*DATA REMOVED*]                                                                                                                                                                                                                                                                                                                                                          |

|                                                   |                                                                                                                                                                                                 |
|---------------------------------------------------|-------------------------------------------------------------------------------------------------------------------------------------------------------------------------------------------------|
| LF 2T                                             | [*DATA REMOVED*]                                                                                                                                                                                |
| PFE 2T (Hadlock)                                  | [*DATA REMOVED*]                                                                                                                                                                                |
| Semanas gestación 3T                              | [*DATA REMOVED*]                                                                                                                                                                                |
| días 3T                                           | [*DATA REMOVED*]                                                                                                                                                                                |
| DBP 3T                                            | [*DATA REMOVED*]                                                                                                                                                                                |
| CC 3T                                             | [*DATA REMOVED*]                                                                                                                                                                                |
| AC 3T                                             | [*DATA REMOVED*]                                                                                                                                                                                |
| LF 3T                                             | [*DATA REMOVED*]                                                                                                                                                                                |
| PFE 3T (Hadlock)                                  | [*DATA REMOVED*]                                                                                                                                                                                |
| Semanas de gestación final                        | [*DATA REMOVED*]                                                                                                                                                                                |
| días gestación final                              | [*DATA REMOVED*]                                                                                                                                                                                |
| Localización placenta                             | <input checked="" type="radio"/> anterior<br><input type="radio"/> lateral derecha<br><input type="radio"/> lateral izquierda<br><input type="radio"/> posterior<br><input type="radio"/> fondo |
| Presentación longitudinal cefálica                | <input type="radio"/> no<br><input checked="" type="radio"/> si                                                                                                                                 |
| Dorso                                             | <input checked="" type="radio"/> izquierda anterior<br><input type="radio"/> izquierda posterior<br><input type="radio"/> derecha anterior<br><input type="radio"/> derecha posterior           |
| diámetro biparietal                               | [*DATA REMOVED*]                                                                                                                                                                                |
| Circunferencia craneal                            | [*DATA REMOVED*]                                                                                                                                                                                |
| Circunferencia abdominal                          | [*DATA REMOVED*]                                                                                                                                                                                |
| Longitud de femur                                 | [*DATA REMOVED*]                                                                                                                                                                                |
| tejido celular subcutáneo a nivel del muslo en mm | _____                                                                                                                                                                                           |
| tejido celular subcutáneo en abdomen en mm        | _____                                                                                                                                                                                           |
| Volumen del muslo en cm3                          | [*DATA REMOVED*]                                                                                                                                                                                |
| Peso fetal estimado según fórmula de Hadlock      | [*DATA REMOVED*]                                                                                                                                                                                |



|                                               |                                                                                                                                                          |
|-----------------------------------------------|----------------------------------------------------------------------------------------------------------------------------------------------------------|
| Percentil                                     | [*DATA REMOVED*]                                                                                                                                         |
| Peso fetal estimado según fórmula de Scioscia | <hr/>                                                                                                                                                    |
| Peso fetal estimado según fórmula de LEE      | <hr/>                                                                                                                                                    |
| Tipo de parto                                 | <input type="radio"/> eutocico<br><input type="radio"/> instrumentado/ventosa<br><input type="radio"/> cesarea                                           |
| fecha de nacimiento                           | [*DATA REMOVED*]                                                                                                                                         |
| Días entre exploración y nacimiento           | [*DATA REMOVED*]                                                                                                                                         |
| Peso RN en g                                  | [*DATA REMOVED*]                                                                                                                                         |
| sexo                                          | <input checked="" type="radio"/> mujer<br><input type="radio"/> hombre                                                                                   |
| Apgar 1 minuto                                | [*DATA REMOVED*]                                                                                                                                         |
| Apgar 5 minutos                               | [*DATA REMOVED*]                                                                                                                                         |
| Apgar 10 minutos                              | <hr/>                                                                                                                                                    |
| antecedente Covid durante gestación           | <input type="radio"/> Yes<br><input checked="" type="radio"/> No                                                                                         |
| Nivel de estudios                             | <input type="radio"/> ninguno<br><input type="radio"/> primarios<br><input checked="" type="radio"/> secundarios<br><input type="radio"/> universitarios |

# Base\_datos\_estimacion\_peso\_fetal

|                                       |                                                                                                                                                                                                                                                                                      |
|---------------------------------------|--------------------------------------------------------------------------------------------------------------------------------------------------------------------------------------------------------------------------------------------------------------------------------------|
| Número de identificación participante | 126                                                                                                                                                                                                                                                                                  |
| CODIGO PARTICIPANTE                   |                                                                                                                                                                                                                                                                                      |
| Edad                                  | [*DATA REMOVED*]                                                                                                                                                                                                                                                                     |
| Gestaciones                           | <input type="radio"/> 1<br><input checked="" type="radio"/> 2<br><input type="radio"/> 3<br><input type="radio"/> mas de 3                                                                                                                                                           |
| partos                                | <input checked="" type="radio"/> 0<br><input type="radio"/> 1<br><input type="radio"/> 2<br><input type="radio"/> 3<br><input type="radio"/> mas de 3                                                                                                                                |
| cesáreas                              | <input checked="" type="radio"/> 0<br><input type="radio"/> 1<br><input type="radio"/> 2<br><input type="radio"/> 3<br><input type="radio"/> mas de 3                                                                                                                                |
| Abortos                               | <input type="radio"/> 0<br><input checked="" type="radio"/> 1<br><input type="radio"/> 2<br><input type="radio"/> 3<br><input type="radio"/> mas de 3                                                                                                                                |
| Tipo de gestacion                     | <input checked="" type="radio"/> espontanea<br><input type="radio"/> IAC inseminación artificial conyuge<br><input type="radio"/> IAD inseminación artificial donante<br><input type="radio"/> FIV Fecundación in Vitro<br><input type="radio"/> Ovodon FIV con donación de ovocitos |
| peso previo a embarazo                | [*DATA REMOVED*]                                                                                                                                                                                                                                                                     |
| Ganancia ponderal embarazo            |                                                                                                                                                                                                                                                                                      |
| Talla madre                           | [*DATA REMOVED*]                                                                                                                                                                                                                                                                     |
| IMC previo embarazo                   | 28.73174689021093                                                                                                                                                                                                                                                                    |
| Patología obstétrica                  | <input checked="" type="radio"/> no<br><input type="radio"/> si                                                                                                                                                                                                                      |
| Diabetes pregestacional               | <input checked="" type="radio"/> no<br><input type="radio"/> si                                                                                                                                                                                                                      |
| Diabetes gestacional                  | <input checked="" type="radio"/> no<br><input type="radio"/> si                                                                                                                                                                                                                      |

|                                            |                                                                                                                                                                                      |
|--------------------------------------------|--------------------------------------------------------------------------------------------------------------------------------------------------------------------------------------|
| Diabetes gestacional con insulina          | <input checked="" type="radio"/> no<br><input type="radio"/> si                                                                                                                      |
| Diabetes gestacional con dieta y ejercicio | <input checked="" type="radio"/> no<br><input type="radio"/> si                                                                                                                      |
| Percentil fetos previos                    | <input checked="" type="radio"/> Nada<br><input type="radio"/> percentil menor de 10<br><input type="radio"/> percentil entre 10 y 90<br><input type="radio"/> percentil mayor de 90 |
| Exfumadora                                 | <input checked="" type="radio"/> Nada<br><input type="radio"/> menos de 5 años<br><input type="radio"/> 5 a 10 años<br><input type="radio"/> mayor o igual a 10 años                 |
| Hábito tabáquico                           | <input checked="" type="radio"/> no<br><input type="radio"/> si                                                                                                                      |
| fumadora                                   | [*DATA REMOVED*]                                                                                                                                                                     |
| Consumo otros tóxicos                      | <input checked="" type="radio"/> no<br><input type="radio"/> si                                                                                                                      |
| Hb 1T                                      | [*DATA REMOVED*]                                                                                                                                                                     |
| Htc 1T                                     | [*DATA REMOVED*]                                                                                                                                                                     |
| Hb 2T                                      | [*DATA REMOVED*]                                                                                                                                                                     |
| HTC 2T                                     | [*DATA REMOVED*]                                                                                                                                                                     |
| Hb 3T                                      | [*DATA REMOVED*]                                                                                                                                                                     |
| HTC 3T                                     | [*DATA REMOVED*]                                                                                                                                                                     |
| Suplemento FE oral                         | <input checked="" type="radio"/> si<br><input type="radio"/> no                                                                                                                      |
| Suplemento fe iv                           | <input type="radio"/> si<br><input checked="" type="radio"/> no                                                                                                                      |
| Transfusión                                | <input checked="" type="radio"/> no<br><input type="radio"/> si                                                                                                                      |
| Solicitada Vit D                           | <input checked="" type="radio"/> no<br><input type="radio"/> si                                                                                                                      |
| Deficit vit D                              | <input type="radio"/> no<br><input type="radio"/> si                                                                                                                                 |
| Suplemento vit D                           | <input type="radio"/> si<br><input type="radio"/> no                                                                                                                                 |

|                       |                                                                                                                                                                                                                                                                                                                                                                                                              |
|-----------------------|--------------------------------------------------------------------------------------------------------------------------------------------------------------------------------------------------------------------------------------------------------------------------------------------------------------------------------------------------------------------------------------------------------------|
| Dieta, cuestionario   | <input checked="" type="radio"/> sí<br><input type="radio"/> no                                                                                                                                                                                                                                                                                                                                              |
| Leche entera          | <input checked="" type="radio"/> Nunca o menos 1 vez al mes<br><input type="radio"/> 1 a 3 veces mes<br><input type="radio"/> 1 vez semana<br><input type="radio"/> 2 a 4 veces semana<br><input type="radio"/> 5 a 6 veces semana<br><input type="radio"/> 1 vez al día<br><input type="radio"/> 2 a 3 veces al día<br><input type="radio"/> 5 a 6 veces al día<br><input type="radio"/> más 6 veces al día |
| Leche semidesnatada   | <input type="radio"/> Nunca o menos 1 vez al mes<br><input type="radio"/> 1 a 3 veces mes<br><input type="radio"/> 1 vez semana<br><input type="radio"/> 2 a 4 veces semana<br><input type="radio"/> 5 a 6 veces semana<br><input checked="" type="radio"/> 1 vez al día<br><input type="radio"/> 2 a 3 veces al día<br><input type="radio"/> 5 a 6 veces al día<br><input type="radio"/> mas 6 veces al día |
| Leche desnatada       | <input checked="" type="radio"/> Nunca o menos 1 vez al mes<br><input type="radio"/> 1 a 3 veces mes<br><input type="radio"/> 1 vez semana<br><input type="radio"/> 2 a 4 veces semana<br><input type="radio"/> 5 a 6 veces semana<br><input type="radio"/> 1 vez al día<br><input type="radio"/> 2 a 3 veces al día<br><input type="radio"/> 5 a 6 veces al día<br><input type="radio"/> más 6 veces al día |
| Leche condensada      | <input checked="" type="radio"/> Nunca o menos 1 vez al mes<br><input type="radio"/> 1 a 3 veces mes<br><input type="radio"/> 1 vez semana<br><input type="radio"/> 2 a 4 veces semana<br><input type="radio"/> 5 a 6 veces semana<br><input type="radio"/> 1 vez al día<br><input type="radio"/> 2 a 3 veces al día<br><input type="radio"/> 5 a 6 veces al día<br><input type="radio"/> más 6 veces al día |
| nata o crema de leche | <input checked="" type="radio"/> Nunca o menos 1 vez al mes<br><input type="radio"/> 1 a 3 veces mes<br><input type="radio"/> 1 vez semana<br><input type="radio"/> 2 a 4 veces semana<br><input type="radio"/> 5 a 6 veces semana<br><input type="radio"/> 1 vez al día<br><input type="radio"/> 2 a 3 veces al día<br><input type="radio"/> 5 a 6 veces al día<br><input type="radio"/> más 6 veces al día |

---

Yogurt Entero

- ☒ Nunca o menos 1 vez al mes  
☐ 1 a 3 veces mes  
☐ 1 vez semana  
☐ 2 a 4 veces semana  
☐ 5 a 6 veces semana  
☐ 1 vez al día  
☐ 2 a 3 veces al día  
☐ 5 a 6 veces al día  
☐ más 6 veces al día

---

Yogurt desnatado

- ☒ Nunca o menos 1 vez al mes  
☐ 1 a 3 veces mes  
☐ 1 vez semana  
☐ 2 a 4 veces semana  
☐ 5 a 6 veces semana  
☐ 1 vez al día  
☐ 2 a 3 veces al día  
☐ 5 a 6 veces al día  
☐ más 6 veces al día

---

100g requesón o queso blando o queso fresco

- ☒ Nunca o menos 1 vez al mes  
☐ 1 a 3 veces mes  
☐ 1 vez semana  
☐ 2 a 4 veces semana  
☐ 5 a 6 veces semana  
☐ 1 vez al día  
☐ 2 a 3 veces al día  
☐ 5 a 6 veces al día  
☐ más 6 veces al día

---

queso curado o semicurado o cremoso

- ☒ Nunca o menos 1 vez al mes  
☐ 1 a 3 veces mes  
☐ 1 vez semana  
☐ 2 a 4 veces semana  
☐ 5 a 6 veces semana  
☐ 1 vez al día  
☐ 2 a 3 veces al día  
☐ 5 a 6 veces al día  
☐ más 6 veces al día

---

natillas flan pudding

- ☐ Nunca o menos 1 vez al mes  
☒ 1 a 3 veces mes  
☐ 1 vez semana  
☐ 2 a 4 veces semana  
☐ 5 a 6 veces semana  
☐ 1 vez al día  
☐ 2 a 3 veces al día  
☐ 5 a 6 veces al día  
☐ más 6 veces al día

---

Helado

- ☐ Nunca o menos 1 vez al mes  
☐ 1 a 3 veces mes  
☒ 1 vez semana  
☐ 2 a 4 veces semana  
☐ 5 a 6 veces semana  
☐ 1 vez al día  
☐ 2 a 3 veces al día  
☐ 5 a 6 veces al día  
☐ más 6 veces al día

|                                      |                                                                                                                                                                                                                                                                                                                                                                                                              |
|--------------------------------------|--------------------------------------------------------------------------------------------------------------------------------------------------------------------------------------------------------------------------------------------------------------------------------------------------------------------------------------------------------------------------------------------------------------|
| huevo                                | <input type="radio"/> Nunca o menos 1 vez al mes<br><input type="radio"/> 1 a 3 veces mes<br><input type="radio"/> 1 vez semana<br><input checked="" type="radio"/> 2 a 4 veces semana<br><input type="radio"/> 5 a 6 veces semana<br><input type="radio"/> 1 vez al día<br><input type="radio"/> 2 a 3 veces al día<br><input type="radio"/> 5 a 6 veces al día<br><input type="radio"/> más 6 veces al día |
| Pollo con piel                       | <input checked="" type="radio"/> Nunca o menos 1 vez al mes<br><input type="radio"/> 1 a 3 veces mes<br><input type="radio"/> 1 vez semana<br><input type="radio"/> 2 a 4 veces semana<br><input type="radio"/> 5 a 6 veces semana<br><input type="radio"/> 1 vez al día<br><input type="radio"/> 2 a 3 veces al día<br><input type="radio"/> 5 a 6 veces al día<br><input type="radio"/> más 6 veces al día |
| pollo sin piel                       | <input type="radio"/> Nunca o menos 1 vez al mes<br><input type="radio"/> 1 a 3 veces mes<br><input checked="" type="radio"/> 1 vez semana<br><input type="radio"/> 2 a 4 veces semana<br><input type="radio"/> 5 a 6 veces semana<br><input type="radio"/> 1 vez al día<br><input type="radio"/> 2 a 3 veces al día<br><input type="radio"/> 5 a 6 veces al día<br><input type="radio"/> más 6 veces al día |
| Ternera o cerdo o cordero            | <input type="radio"/> Nunca o menos 1 vez al mes<br><input type="radio"/> 1 a 3 veces mes<br><input checked="" type="radio"/> 1 vez semana<br><input type="radio"/> 2 a 4 veces semana<br><input type="radio"/> 5 a 6 veces semana<br><input type="radio"/> 1 vez al día<br><input type="radio"/> 2 a 3 veces al día<br><input type="radio"/> 5 a 6 veces al día<br><input type="radio"/> más 6 veces al día |
| carne caza: Conejo o codorniz o pato | <input checked="" type="radio"/> Nunca o menos 1 vez al mes<br><input type="radio"/> 1 a 3 veces mes<br><input type="radio"/> 1 vez semana<br><input type="radio"/> 2 a 4 veces semana<br><input type="radio"/> 5 a 6 veces semana<br><input type="radio"/> 1 vez al día<br><input type="radio"/> 2 a 3 veces al día<br><input type="radio"/> 5 a 6 veces al día<br><input type="radio"/> más 6 veces al día |
| Hígado de ternera o cerdo o pollo    | <input type="radio"/> Nunca o menos 1 vez al mes<br><input checked="" type="radio"/> 1 a 3 veces mes<br><input type="radio"/> 1 vez semana<br><input type="radio"/> 2 a 4 veces semana<br><input type="radio"/> 5 a 6 veces semana<br><input type="radio"/> 1 vez al día<br><input type="radio"/> 2 a 3 veces al día<br><input type="radio"/> 5 a 6 veces al día<br><input type="radio"/> más 6 veces al día |

|                     |                                                                                                                                                                                                                                                                                                                                                                                                              |
|---------------------|--------------------------------------------------------------------------------------------------------------------------------------------------------------------------------------------------------------------------------------------------------------------------------------------------------------------------------------------------------------------------------------------------------------|
| Vísceras            | <input checked="" type="radio"/> Nunca o menos 1 vez al mes<br><input type="radio"/> 1 a 3 veces mes<br><input type="radio"/> 1 vez semana<br><input type="radio"/> 2 a 4 veces semana<br><input type="radio"/> 5 a 6 veces semana<br><input type="radio"/> 1 vez al día<br><input type="radio"/> 2 a 3 veces al día<br><input type="radio"/> 5 a 6 veces al día<br><input type="radio"/> más 6 veces al día |
| Embutido            | <input checked="" type="radio"/> Nunca o menos 1 vez al mes<br><input type="radio"/> 1 a 3 veces mes<br><input type="radio"/> 1 vez semana<br><input type="radio"/> 2 a 4 veces semana<br><input type="radio"/> 5 a 6 veces semana<br><input type="radio"/> 1 vez al día<br><input type="radio"/> 2 a 3 veces al día<br><input type="radio"/> 5 a 6 veces al día<br><input type="radio"/> más 6 veces al día |
| Salchicha o similar | <input type="radio"/> Nunca o menos 1 vez al mes<br><input checked="" type="radio"/> 1 a 3 veces mes<br><input type="radio"/> 1 vez semana<br><input type="radio"/> 2 a 4 veces semana<br><input type="radio"/> 5 a 6 veces semana<br><input type="radio"/> 1 vez al día<br><input type="radio"/> 2 a 3 veces al día<br><input type="radio"/> 5 a 6 veces al día<br><input type="radio"/> más 6 veces al día |
| Pate o foiegras     | <input checked="" type="radio"/> Nunca o menos 1 vez al mes<br><input type="radio"/> 1 a 3 veces mes<br><input type="radio"/> 1 vez semana<br><input type="radio"/> 2 a 4 veces semana<br><input type="radio"/> 5 a 6 veces semana<br><input type="radio"/> 1 vez al día<br><input type="radio"/> 2 a 3 veces al día<br><input type="radio"/> 5 a 6 veces al día<br><input type="radio"/> más 6 veces al día |
| Hamburguesa         | <input type="radio"/> Nunca o menos 1 vez al mes<br><input type="radio"/> 1 a 3 veces mes<br><input checked="" type="radio"/> 1 vez semana<br><input type="radio"/> 2 a 4 veces semana<br><input type="radio"/> 5 a 6 veces semana<br><input type="radio"/> 1 vez al día<br><input type="radio"/> 2 a 3 veces al día<br><input type="radio"/> 5 a 6 veces al día<br><input type="radio"/> más 6 veces al día |
| tocino o bacon      | <input type="radio"/> Nunca o menos 1 vez al mes<br><input checked="" type="radio"/> 1 a 3 veces mes<br><input type="radio"/> 1 vez semana<br><input type="radio"/> 2 a 4 veces semana<br><input type="radio"/> 5 a 6 veces semana<br><input type="radio"/> 1 vez al día<br><input type="radio"/> 2 a 3 veces al día<br><input type="radio"/> 5 a 6 veces al día<br><input type="radio"/> más 6 veces al día |

---

Pescado frito

- ☒ Nunca o menos 1 vez al mes  
☐ 1 a 3 veces mes  
☐ 1 vez semana  
☐ 2 a 4 veces semana  
☐ 5 a 6 veces semana  
☐ 1 vez al día  
☐ 2 a 3 veces al día  
☐ 5 a 6 veces al día  
☐ más 6 veces al día

---

pescado hervido blanco

- ☐ Nunca o menos 1 vez al mes  
☒ 1 a 3 veces mes  
☐ 1 vez semana  
☐ 2 a 4 veces semana  
☐ 5 a 6 veces semana  
☐ 1 vez al día  
☐ 2 a 3 veces al día  
☐ 5 a 6 veces al día  
☐ más 6 veces al día

---

pescado hervido azul

- ☐ Nunca o menos 1 vez al mes  
☒ 1 a 3 veces mes  
☐ 1 vez semana  
☐ 2 a 4 veces semana  
☐ 5 a 6 veces semana  
☐ 1 vez al día  
☐ 2 a 3 veces al día  
☐ 5 a 6 veces al día  
☐ más 6 veces al día

---

otros pescado azul

- ☒ Nunca o menos 1 vez al mes  
☐ 1 a 3 veces mes  
☐ 1 vez semana  
☐ 2 a 4 veces semana  
☐ 5 a 6 veces semana  
☐ 1 vez al día  
☐ 2 a 3 veces al día  
☐ 5 a 6 veces al día  
☐ más 6 veces al día

---

atun conserva

- ☐ Nunca o menos 1 vez al mes  
☒ 1 a 3 veces mes  
☐ 1 vez semana  
☐ 2 a 4 veces semana  
☐ 5 a 6 veces semana  
☐ 1 vez al día  
☐ 2 a 3 veces al día  
☐ 5 a 6 veces al día  
☐ más 6 veces al día

---

sardina conserva

- ☒ Nunca o menos 1 vez al mes  
☐ 1 a 3 veces mes  
☐ 1 vez semana  
☐ 2 a 4 veces semana  
☐ 5 a 6 veces semana  
☐ 1 vez al día  
☐ 2 a 3 veces al día  
☐ 5 a 6 veces al día  
☐ más 6 veces al día



|                                         |                                                                                                                                                                                                                                                                                                                                                                                                              |
|-----------------------------------------|--------------------------------------------------------------------------------------------------------------------------------------------------------------------------------------------------------------------------------------------------------------------------------------------------------------------------------------------------------------------------------------------------------------|
| pescado ahumado                         | <input type="radio"/> Nunca o menos 1 vez al mes<br><input checked="" type="radio"/> 1 a 3 veces mes<br><input type="radio"/> 1 vez semana<br><input type="radio"/> 2 a 4 veces semana<br><input type="radio"/> 5 a 6 veces semana<br><input type="radio"/> 1 vez al día<br><input type="radio"/> 2 a 3 veces al día<br><input type="radio"/> 5 a 6 veces al día<br><input type="radio"/> más 6 veces al día |
| almejas o mejillones o ostras unos 100g | <input type="radio"/> Nunca o menos 1 vez al mes<br><input checked="" type="radio"/> 1 a 3 veces mes<br><input type="radio"/> 1 vez semana<br><input type="radio"/> 2 a 4 veces semana<br><input type="radio"/> 5 a 6 veces semana<br><input type="radio"/> 1 vez al día<br><input type="radio"/> 2 a 3 veces al día<br><input type="radio"/> 5 a 6 veces al día<br><input type="radio"/> más 6 veces al día |
| calamar o chipiron o sepia unos 100g    | <input type="radio"/> Nunca o menos 1 vez al mes<br><input checked="" type="radio"/> 1 a 3 veces mes<br><input type="radio"/> 1 vez semana<br><input type="radio"/> 2 a 4 veces semana<br><input type="radio"/> 5 a 6 veces semana<br><input type="radio"/> 1 vez al día<br><input type="radio"/> 2 a 3 veces al día<br><input type="radio"/> 5 a 6 veces al día<br><input type="radio"/> más 6 veces al día |
| marisco unos 100g                       | <input type="radio"/> Nunca o menos 1 vez al mes<br><input checked="" type="radio"/> 1 a 3 veces mes<br><input type="radio"/> 1 vez semana<br><input type="radio"/> 2 a 4 veces semana<br><input type="radio"/> 5 a 6 veces semana<br><input type="radio"/> 1 vez al día<br><input type="radio"/> 2 a 3 veces al día<br><input type="radio"/> 5 a 6 veces al día<br><input type="radio"/> más 6 veces al día |
| Espinacas o acelgas cocinadas           | <input checked="" type="radio"/> Nunca o menos 1 vez al mes<br><input type="radio"/> 1 a 3 veces mes<br><input type="radio"/> 1 vez semana<br><input type="radio"/> 2 a 4 veces semana<br><input type="radio"/> 5 a 6 veces semana<br><input type="radio"/> 1 vez al día<br><input type="radio"/> 2 a 3 veces al día<br><input type="radio"/> 5 a 6 veces al día<br><input type="radio"/> más 6 veces al día |
| Col o coliflor o brocoli cocinado       | <input checked="" type="radio"/> Nunca o menos 1 vez al mes<br><input type="radio"/> 1 a 3 veces mes<br><input type="radio"/> 1 vez semana<br><input type="radio"/> 2 a 4 veces semana<br><input type="radio"/> 5 a 6 veces semana<br><input type="radio"/> 1 vez al día<br><input type="radio"/> 2 a 3 veces al día<br><input type="radio"/> 5 a 6 veces al día<br><input type="radio"/> más 6 veces al día |

|                                |                                                                                                                                                                                                                                                                                                                                                                                                              |
|--------------------------------|--------------------------------------------------------------------------------------------------------------------------------------------------------------------------------------------------------------------------------------------------------------------------------------------------------------------------------------------------------------------------------------------------------------|
| Lechuga o endivia o escarola   | <input type="radio"/> Nunca o menos 1 vez al mes<br><input checked="" type="radio"/> 1 a 3 veces mes<br><input type="radio"/> 1 vez semana<br><input type="radio"/> 2 a 4 veces semana<br><input type="radio"/> 5 a 6 veces semana<br><input type="radio"/> 1 vez al día<br><input type="radio"/> 2 a 3 veces al día<br><input type="radio"/> 5 a 6 veces al día<br><input type="radio"/> más 6 veces al día |
| tomate ensalada                | <input checked="" type="radio"/> Nunca o menos 1 vez al mes<br><input type="radio"/> 1 a 3 veces mes<br><input type="radio"/> 1 vez semana<br><input type="radio"/> 2 a 4 veces semana<br><input type="radio"/> 5 a 6 veces semana<br><input type="radio"/> 1 vez al día<br><input type="radio"/> 2 a 3 veces al día<br><input type="radio"/> 5 a 6 veces al día<br><input type="radio"/> más 6 veces al día |
| cebolla                        | <input checked="" type="radio"/> Nunca o menos 1 vez al mes<br><input type="radio"/> 1 a 3 veces mes<br><input type="radio"/> 1 vez semana<br><input type="radio"/> 2 a 4 veces semana<br><input type="radio"/> 5 a 6 veces semana<br><input type="radio"/> 1 vez al día<br><input type="radio"/> 2 a 3 veces al día<br><input type="radio"/> 5 a 6 veces al día<br><input type="radio"/> más 6 veces al día |
| Zanahoria o calabaza           | <input checked="" type="radio"/> Nunca o menos 1 vez al mes<br><input type="radio"/> 1 a 3 veces mes<br><input type="radio"/> 1 vez semana<br><input type="radio"/> 2 a 4 veces semana<br><input type="radio"/> 5 a 6 veces semana<br><input type="radio"/> 1 vez al día<br><input type="radio"/> 2 a 3 veces al día<br><input type="radio"/> 5 a 6 veces al día<br><input type="radio"/> más 6 veces al día |
| Judías verdes                  | <input type="radio"/> Nunca o menos 1 vez al mes<br><input checked="" type="radio"/> 1 a 3 veces mes<br><input type="radio"/> 1 vez semana<br><input type="radio"/> 2 a 4 veces semana<br><input type="radio"/> 5 a 6 veces semana<br><input type="radio"/> 1 vez al día<br><input type="radio"/> 2 a 3 veces al día<br><input type="radio"/> 5 a 6 veces al día<br><input type="radio"/> más 6 veces al día |
| Berenjena o calabacin o pepino | <input type="radio"/> Nunca o menos 1 vez al mes<br><input type="radio"/> 1 a 3 veces mes<br><input checked="" type="radio"/> 1 vez semana<br><input type="radio"/> 2 a 4 veces semana<br><input type="radio"/> 5 a 6 veces semana<br><input type="radio"/> 1 vez al día<br><input type="radio"/> 2 a 3 veces al día<br><input type="radio"/> 5 a 6 veces al día<br><input type="radio"/> más 6 veces al día |

---

|          |                                                                                                                                                                                                                                                                                                                                                                                                              |
|----------|--------------------------------------------------------------------------------------------------------------------------------------------------------------------------------------------------------------------------------------------------------------------------------------------------------------------------------------------------------------------------------------------------------------|
| pimiento | <input type="radio"/> Nunca o menos 1 vez al mes<br><input type="radio"/> 1 a 3 veces mes<br><input checked="" type="radio"/> 1 vez semana<br><input type="radio"/> 2 a 4 veces semana<br><input type="radio"/> 5 a 6 veces semana<br><input type="radio"/> 1 vez al día<br><input type="radio"/> 2 a 3 veces al día<br><input type="radio"/> 5 a 6 veces al día<br><input type="radio"/> más 6 veces al día |
|----------|--------------------------------------------------------------------------------------------------------------------------------------------------------------------------------------------------------------------------------------------------------------------------------------------------------------------------------------------------------------------------------------------------------------|

---

|           |                                                                                                                                                                                                                                                                                                                                                                                                              |
|-----------|--------------------------------------------------------------------------------------------------------------------------------------------------------------------------------------------------------------------------------------------------------------------------------------------------------------------------------------------------------------------------------------------------------------|
| alcachofa | <input type="radio"/> Nunca o menos 1 vez al mes<br><input type="radio"/> 1 a 3 veces mes<br><input checked="" type="radio"/> 1 vez semana<br><input type="radio"/> 2 a 4 veces semana<br><input type="radio"/> 5 a 6 veces semana<br><input type="radio"/> 1 vez al día<br><input type="radio"/> 2 a 3 veces al día<br><input type="radio"/> 5 a 6 veces al día<br><input type="radio"/> más 6 veces al día |
|-----------|--------------------------------------------------------------------------------------------------------------------------------------------------------------------------------------------------------------------------------------------------------------------------------------------------------------------------------------------------------------------------------------------------------------|

---

|            |                                                                                                                                                                                                                                                                                                                                                                                                              |
|------------|--------------------------------------------------------------------------------------------------------------------------------------------------------------------------------------------------------------------------------------------------------------------------------------------------------------------------------------------------------------------------------------------------------------|
| espárragos | <input checked="" type="radio"/> Nunca o menos 1 vez al mes<br><input type="radio"/> 1 a 3 veces mes<br><input type="radio"/> 1 vez semana<br><input type="radio"/> 2 a 4 veces semana<br><input type="radio"/> 5 a 6 veces semana<br><input type="radio"/> 1 vez al día<br><input type="radio"/> 2 a 3 veces al día<br><input type="radio"/> 5 a 6 veces al día<br><input type="radio"/> más 6 veces al día |
|------------|--------------------------------------------------------------------------------------------------------------------------------------------------------------------------------------------------------------------------------------------------------------------------------------------------------------------------------------------------------------------------------------------------------------|

---

|              |                                                                                                                                                                                                                                                                                                                                                                                                              |
|--------------|--------------------------------------------------------------------------------------------------------------------------------------------------------------------------------------------------------------------------------------------------------------------------------------------------------------------------------------------------------------------------------------------------------------|
| maíz hervido | <input checked="" type="radio"/> Nunca o menos 1 vez al mes<br><input type="radio"/> 1 a 3 veces mes<br><input type="radio"/> 1 vez semana<br><input type="radio"/> 2 a 4 veces semana<br><input type="radio"/> 5 a 6 veces semana<br><input type="radio"/> 1 vez al día<br><input type="radio"/> 2 a 3 veces al día<br><input type="radio"/> 5 a 6 veces al día<br><input type="radio"/> más 6 veces al día |
|--------------|--------------------------------------------------------------------------------------------------------------------------------------------------------------------------------------------------------------------------------------------------------------------------------------------------------------------------------------------------------------------------------------------------------------|

---

|           |                                                                                                                                                                                                                                                                                                                                                                                                              |
|-----------|--------------------------------------------------------------------------------------------------------------------------------------------------------------------------------------------------------------------------------------------------------------------------------------------------------------------------------------------------------------------------------------------------------------|
| legumbres | <input type="radio"/> Nunca o menos 1 vez al mes<br><input type="radio"/> 1 a 3 veces mes<br><input checked="" type="radio"/> 1 vez semana<br><input type="radio"/> 2 a 4 veces semana<br><input type="radio"/> 5 a 6 veces semana<br><input type="radio"/> 1 vez al día<br><input type="radio"/> 2 a 3 veces al día<br><input type="radio"/> 5 a 6 veces al día<br><input type="radio"/> más 6 veces al día |
|-----------|--------------------------------------------------------------------------------------------------------------------------------------------------------------------------------------------------------------------------------------------------------------------------------------------------------------------------------------------------------------------------------------------------------------|

---

|                       |                                                                                                                                                                                                                                                                                                                                                                                                              |
|-----------------------|--------------------------------------------------------------------------------------------------------------------------------------------------------------------------------------------------------------------------------------------------------------------------------------------------------------------------------------------------------------------------------------------------------------|
| naranjas o mandarinas | <input type="radio"/> Nunca o menos 1 vez al mes<br><input type="radio"/> 1 a 3 veces mes<br><input type="radio"/> 1 vez semana<br><input checked="" type="radio"/> 2 a 4 veces semana<br><input type="radio"/> 5 a 6 veces semana<br><input type="radio"/> 1 vez al día<br><input type="radio"/> 2 a 3 veces al día<br><input type="radio"/> 5 a 6 veces al día<br><input type="radio"/> más 6 veces al día |
|-----------------------|--------------------------------------------------------------------------------------------------------------------------------------------------------------------------------------------------------------------------------------------------------------------------------------------------------------------------------------------------------------------------------------------------------------|

---

---

zumو natural fruta

- ☐ Nunca o menos 1 vez al mes  
☐ 1 a 3 veces mes  
☒ 1 vez semana  
☐ 2 a 4 veces semana  
☐ 5 a 6 veces semana  
☐ 1 vez al día  
☐ 2 a 3 veces al día  
☐ 5 a 6 veces al día  
☐ más 6 veces al día

---

platano

- ☐ Nunca o menos 1 vez al mes  
☐ 1 a 3 veces mes  
☐ 1 vez semana  
☒ 2 a 4 veces semana  
☐ 5 a 6 veces semana  
☐ 1 vez al día  
☐ 2 a 3 veces al día  
☐ 5 a 6 veces al día  
☐ más 6 veces al día

---

manzana o pera

- ☒ Nunca o menos 1 vez al mes  
☐ 1 a 3 veces mes  
☐ 1 vez semana  
☐ 2 a 4 veces semana  
☐ 5 a 6 veces semana  
☐ 1 vez al día  
☐ 2 a 3 veces al día  
☐ 5 a 6 veces al día  
☐ más 6 veces al día

---

melocotón o nectarina

- ☒ Nunca o menos 1 vez al mes  
☐ 1 a 3 veces mes  
☐ 1 vez semana  
☐ 2 a 4 veces semana  
☐ 5 a 6 veces semana  
☐ 1 vez al día  
☐ 2 a 3 veces al día  
☐ 5 a 6 veces al día  
☐ más 6 veces al día

---

sandia o melon

- ☐ Nunca o menos 1 vez al mes  
☐ 1 a 3 veces mes  
☐ 1 vez semana  
☒ 2 a 4 veces semana  
☐ 5 a 6 veces semana  
☐ 1 vez al día  
☐ 2 a 3 veces al día  
☐ 5 a 6 veces al día  
☐ más 6 veces al día

---

uva

- ☒ Nunca o menos 1 vez al mes  
☐ 1 a 3 veces mes  
☐ 1 vez semana  
☐ 2 a 4 veces semana  
☐ 5 a 6 veces semana  
☐ 1 vez al día  
☐ 2 a 3 veces al día  
☐ 5 a 6 veces al día  
☐ más 6 veces al día

---

bruna o ciruela

- ☒ Nunca o menos 1 vez al mes  
☐ 1 a 3 veces mes  
☐ 1 vez semana  
☐ 2 a 4 veces semana  
☐ 5 a 6 veces semana  
☐ 1 vez al día  
☐ 2 a 3 veces al día  
☐ 5 a 6 veces al día  
☐ más 6 veces al día

---

kiwi

- ☒ Nunca o menos 1 vez al mes  
☐ 1 a 3 veces mes  
☐ 1 vez semana  
☐ 2 a 4 veces semana  
☐ 5 a 6 veces semana  
☐ 1 vez al día  
☐ 2 a 3 veces al día  
☐ 5 a 6 veces al día  
☐ más 6 veces al día

---

aceituna

- ☐ Nunca o menos 1 vez al mes  
☒ 1 a 3 veces mes  
☐ 1 vez semana  
☐ 2 a 4 veces semana  
☐ 5 a 6 veces semana  
☐ 1 vez al día  
☐ 2 a 3 veces al día  
☐ 5 a 6 veces al día  
☐ más 6 veces al día

---

frutos secos

- ☐ Nunca o menos 1 vez al mes  
☐ 1 a 3 veces mes  
☐ 1 vez semana  
☒ 2 a 4 veces semana  
☐ 5 a 6 veces semana  
☐ 1 vez al día  
☐ 2 a 3 veces al día  
☐ 5 a 6 veces al día  
☐ más 6 veces al día

---

pan blanco

- ☐ Nunca o menos 1 vez al mes  
☐ 1 a 3 veces mes  
☒ 1 vez semana  
☐ 2 a 4 veces semana  
☐ 5 a 6 veces semana  
☐ 1 vez al día  
☐ 2 a 3 veces al día  
☐ 5 a 6 veces al día  
☐ más 6 veces al día

---

pan integral

- ☒ Nunca o menos 1 vez al mes  
☐ 1 a 3 veces mes  
☐ 1 vez semana  
☐ 2 a 4 veces semana  
☐ 5 a 6 veces semana  
☐ 1 vez al día  
☐ 2 a 3 veces al día  
☐ 5 a 6 veces al día  
☐ más 6 veces al día

---

|                   |                                                                                                                                                                                                                                                                                                                                                                                                              |
|-------------------|--------------------------------------------------------------------------------------------------------------------------------------------------------------------------------------------------------------------------------------------------------------------------------------------------------------------------------------------------------------------------------------------------------------|
| cereales desayuno | <input type="radio"/> Nunca o menos 1 vez al mes<br><input type="radio"/> 1 a 3 veces mes<br><input type="radio"/> 1 vez semana<br><input checked="" type="radio"/> 2 a 4 veces semana<br><input type="radio"/> 5 a 6 veces semana<br><input type="radio"/> 1 vez al día<br><input type="radio"/> 2 a 3 veces al día<br><input type="radio"/> 5 a 6 veces al día<br><input type="radio"/> más 6 veces al día |
|-------------------|--------------------------------------------------------------------------------------------------------------------------------------------------------------------------------------------------------------------------------------------------------------------------------------------------------------------------------------------------------------------------------------------------------------|

---

|                |                                                                                                                                                                                                                                                                                                                                                                                                              |
|----------------|--------------------------------------------------------------------------------------------------------------------------------------------------------------------------------------------------------------------------------------------------------------------------------------------------------------------------------------------------------------------------------------------------------------|
| patatas fritas | <input type="radio"/> Nunca o menos 1 vez al mes<br><input type="radio"/> 1 a 3 veces mes<br><input checked="" type="radio"/> 1 vez semana<br><input type="radio"/> 2 a 4 veces semana<br><input type="radio"/> 5 a 6 veces semana<br><input type="radio"/> 1 vez al día<br><input type="radio"/> 2 a 3 veces al día<br><input type="radio"/> 5 a 6 veces al día<br><input type="radio"/> más 6 veces al día |
|----------------|--------------------------------------------------------------------------------------------------------------------------------------------------------------------------------------------------------------------------------------------------------------------------------------------------------------------------------------------------------------------------------------------------------------|

---

|                          |                                                                                                                                                                                                                                                                                                                                                                                                              |
|--------------------------|--------------------------------------------------------------------------------------------------------------------------------------------------------------------------------------------------------------------------------------------------------------------------------------------------------------------------------------------------------------------------------------------------------------|
| patatas cocidas o asadas | <input type="radio"/> Nunca o menos 1 vez al mes<br><input type="radio"/> 1 a 3 veces mes<br><input checked="" type="radio"/> 1 vez semana<br><input type="radio"/> 2 a 4 veces semana<br><input type="radio"/> 5 a 6 veces semana<br><input type="radio"/> 1 vez al día<br><input type="radio"/> 2 a 3 veces al día<br><input type="radio"/> 5 a 6 veces al día<br><input type="radio"/> más 6 veces al día |
|--------------------------|--------------------------------------------------------------------------------------------------------------------------------------------------------------------------------------------------------------------------------------------------------------------------------------------------------------------------------------------------------------------------------------------------------------|

---

|             |                                                                                                                                                                                                                                                                                                                                                                                                              |
|-------------|--------------------------------------------------------------------------------------------------------------------------------------------------------------------------------------------------------------------------------------------------------------------------------------------------------------------------------------------------------------------------------------------------------------|
| bolsa papas | <input checked="" type="radio"/> Nunca o menos 1 vez al mes<br><input type="radio"/> 1 a 3 veces mes<br><input type="radio"/> 1 vez semana<br><input type="radio"/> 2 a 4 veces semana<br><input type="radio"/> 5 a 6 veces semana<br><input type="radio"/> 1 vez al día<br><input type="radio"/> 2 a 3 veces al día<br><input type="radio"/> 5 a 6 veces al día<br><input type="radio"/> más 6 veces al día |
|-------------|--------------------------------------------------------------------------------------------------------------------------------------------------------------------------------------------------------------------------------------------------------------------------------------------------------------------------------------------------------------------------------------------------------------|

---

|                |                                                                                                                                                                                                                                                                                                                                                                                                              |
|----------------|--------------------------------------------------------------------------------------------------------------------------------------------------------------------------------------------------------------------------------------------------------------------------------------------------------------------------------------------------------------------------------------------------------------|
| arroz cocinado | <input type="radio"/> Nunca o menos 1 vez al mes<br><input type="radio"/> 1 a 3 veces mes<br><input type="radio"/> 1 vez semana<br><input checked="" type="radio"/> 2 a 4 veces semana<br><input type="radio"/> 5 a 6 veces semana<br><input type="radio"/> 1 vez al día<br><input type="radio"/> 2 a 3 veces al día<br><input type="radio"/> 5 a 6 veces al día<br><input type="radio"/> más 6 veces al día |
|----------------|--------------------------------------------------------------------------------------------------------------------------------------------------------------------------------------------------------------------------------------------------------------------------------------------------------------------------------------------------------------------------------------------------------------|

---

|       |                                                                                                                                                                                                                                                                                                                                                                                                              |
|-------|--------------------------------------------------------------------------------------------------------------------------------------------------------------------------------------------------------------------------------------------------------------------------------------------------------------------------------------------------------------------------------------------------------------|
| pasta | <input type="radio"/> Nunca o menos 1 vez al mes<br><input type="radio"/> 1 a 3 veces mes<br><input type="radio"/> 1 vez semana<br><input checked="" type="radio"/> 2 a 4 veces semana<br><input type="radio"/> 5 a 6 veces semana<br><input type="radio"/> 1 vez al día<br><input type="radio"/> 2 a 3 veces al día<br><input type="radio"/> 5 a 6 veces al día<br><input type="radio"/> más 6 veces al día |
|-------|--------------------------------------------------------------------------------------------------------------------------------------------------------------------------------------------------------------------------------------------------------------------------------------------------------------------------------------------------------------------------------------------------------------|

---

|                     |                                                                                                                                                                                                                                                                                                                                                                                                              |
|---------------------|--------------------------------------------------------------------------------------------------------------------------------------------------------------------------------------------------------------------------------------------------------------------------------------------------------------------------------------------------------------------------------------------------------------|
| pizza               | <input type="radio"/> Nunca o menos 1 vez al mes<br><input type="radio"/> 1 a 3 veces mes<br><input checked="" type="radio"/> 1 vez semana<br><input type="radio"/> 2 a 4 veces semana<br><input type="radio"/> 5 a 6 veces semana<br><input type="radio"/> 1 vez al día<br><input type="radio"/> 2 a 3 veces al día<br><input type="radio"/> 5 a 6 veces al día<br><input type="radio"/> más 6 veces al día |
| aceite oliva        | <input checked="" type="radio"/> Nunca o menos 1 vez al mes<br><input type="radio"/> 1 a 3 veces mes<br><input type="radio"/> 1 vez semana<br><input type="radio"/> 2 a 4 veces semana<br><input type="radio"/> 5 a 6 veces semana<br><input type="radio"/> 1 vez al día<br><input type="radio"/> 2 a 3 veces al día<br><input type="radio"/> 5 a 6 veces al día<br><input type="radio"/> más 6 veces al día |
| otros aceites       | <input checked="" type="radio"/> Nunca o menos 1 vez al mes<br><input type="radio"/> 1 a 3 veces mes<br><input type="radio"/> 1 vez semana<br><input type="radio"/> 2 a 4 veces semana<br><input type="radio"/> 5 a 6 veces semana<br><input type="radio"/> 1 vez al día<br><input type="radio"/> 2 a 3 veces al día<br><input type="radio"/> 5 a 6 veces al día<br><input type="radio"/> más 6 veces al día |
| margarina           | <input checked="" type="radio"/> Nunca o menos 1 vez al mes<br><input type="radio"/> 1 a 3 veces mes<br><input type="radio"/> 1 vez semana<br><input type="radio"/> 2 a 4 veces semana<br><input type="radio"/> 5 a 6 veces semana<br><input type="radio"/> 1 vez al día<br><input type="radio"/> 2 a 3 veces al día<br><input type="radio"/> 5 a 6 veces al día<br><input type="radio"/> más 6 veces al día |
| mantequilla         | <input checked="" type="radio"/> Nunca o menos 1 vez al mes<br><input type="radio"/> 1 a 3 veces mes<br><input type="radio"/> 1 vez semana<br><input type="radio"/> 2 a 4 veces semana<br><input type="radio"/> 5 a 6 veces semana<br><input type="radio"/> 1 vez al día<br><input type="radio"/> 2 a 3 veces al día<br><input type="radio"/> 5 a 6 veces al día<br><input type="radio"/> más 6 veces al día |
| galletas tipo maria | <input type="radio"/> Nunca o menos 1 vez al mes<br><input type="radio"/> 1 a 3 veces mes<br><input checked="" type="radio"/> 1 vez semana<br><input type="radio"/> 2 a 4 veces semana<br><input type="radio"/> 5 a 6 veces semana<br><input type="radio"/> 1 vez al día<br><input type="radio"/> 2 a 3 veces al día<br><input type="radio"/> 5 a 6 veces al día<br><input type="radio"/> más 6 veces al día |

|                           |                                                                                                                                                                                                                                                                                                                                                                                                              |
|---------------------------|--------------------------------------------------------------------------------------------------------------------------------------------------------------------------------------------------------------------------------------------------------------------------------------------------------------------------------------------------------------------------------------------------------------|
| galletas chocolate        | <input type="radio"/> Nunca o menos 1 vez al mes<br><input type="radio"/> 1 a 3 veces mes<br><input checked="" type="radio"/> 1 vez semana<br><input type="radio"/> 2 a 4 veces semana<br><input type="radio"/> 5 a 6 veces semana<br><input type="radio"/> 1 vez al día<br><input type="radio"/> 2 a 3 veces al día<br><input type="radio"/> 5 a 6 veces al día<br><input type="radio"/> más 6 veces al día |
| bollieria                 | <input type="radio"/> Nunca o menos 1 vez al mes<br><input type="radio"/> 1 a 3 veces mes<br><input checked="" type="radio"/> 1 vez semana<br><input type="radio"/> 2 a 4 veces semana<br><input type="radio"/> 5 a 6 veces semana<br><input type="radio"/> 1 vez al día<br><input type="radio"/> 2 a 3 veces al día<br><input type="radio"/> 5 a 6 veces al día<br><input type="radio"/> más 6 veces al día |
| chocolate o bombones      | <input type="radio"/> Nunca o menos 1 vez al mes<br><input type="radio"/> 1 a 3 veces mes<br><input checked="" type="radio"/> 1 vez semana<br><input type="radio"/> 2 a 4 veces semana<br><input type="radio"/> 5 a 6 veces semana<br><input type="radio"/> 1 vez al día<br><input type="radio"/> 2 a 3 veces al día<br><input type="radio"/> 5 a 6 veces al día<br><input type="radio"/> más 6 veces al día |
| chocolate polvo o colacao | <input type="radio"/> Nunca o menos 1 vez al mes<br><input type="radio"/> 1 a 3 veces mes<br><input type="radio"/> 1 vez semana<br><input checked="" type="radio"/> 2 a 4 veces semana<br><input type="radio"/> 5 a 6 veces semana<br><input type="radio"/> 1 vez al día<br><input type="radio"/> 2 a 3 veces al día<br><input type="radio"/> 5 a 6 veces al día<br><input type="radio"/> más 6 veces al día |
| vino tinto                | <input checked="" type="radio"/> Nunca o menos 1 vez al mes<br><input type="radio"/> 1 a 3 veces mes<br><input type="radio"/> 1 vez semana<br><input type="radio"/> 2 a 4 veces semana<br><input type="radio"/> 5 a 6 veces semana<br><input type="radio"/> 1 vez al día<br><input type="radio"/> 2 a 3 veces al día<br><input type="radio"/> 5 a 6 veces al día<br><input type="radio"/> más 6 veces al día |
| vino blanco               | <input checked="" type="radio"/> Nunca o menos 1 vez al mes<br><input type="radio"/> 1 a 3 veces mes<br><input type="radio"/> 1 vez semana<br><input type="radio"/> 2 a 4 veces semana<br><input type="radio"/> 5 a 6 veces semana<br><input type="radio"/> 1 vez al día<br><input type="radio"/> 2 a 3 veces al día<br><input type="radio"/> 5 a 6 veces al día<br><input type="radio"/> más 6 veces al día |



|                       |                                                                                                                                                                                                                                                                                                                                                                                                              |
|-----------------------|--------------------------------------------------------------------------------------------------------------------------------------------------------------------------------------------------------------------------------------------------------------------------------------------------------------------------------------------------------------------------------------------------------------|
| vino seco o vermut    | <input checked="" type="radio"/> Nunca o menos 1 vez al mes<br><input type="radio"/> 1 a 3 veces mes<br><input type="radio"/> 1 vez semana<br><input type="radio"/> 2 a 4 veces semana<br><input type="radio"/> 5 a 6 veces semana<br><input type="radio"/> 1 vez al día<br><input type="radio"/> 2 a 3 veces al día<br><input type="radio"/> 5 a 6 veces al día<br><input type="radio"/> más 6 veces al día |
| cerveza               | <input checked="" type="radio"/> Nunca o menos 1 vez al mes<br><input type="radio"/> 1 a 3 veces mes<br><input type="radio"/> 1 vez semana<br><input type="radio"/> 2 a 4 veces semana<br><input type="radio"/> 5 a 6 veces semana<br><input type="radio"/> 1 vez al día<br><input type="radio"/> 2 a 3 veces al día<br><input type="radio"/> 5 a 6 veces al día<br><input type="radio"/> más 6 veces al día |
| cerveza sin alcohol   | <input checked="" type="radio"/> Nunca o menos 1 vez al mes<br><input type="radio"/> 1 a 3 veces mes<br><input type="radio"/> 1 vez semana<br><input type="radio"/> 2 a 4 veces semana<br><input type="radio"/> 5 a 6 veces semana<br><input type="radio"/> 1 vez al día<br><input type="radio"/> 2 a 3 veces al día<br><input type="radio"/> 5 a 6 veces al día<br><input type="radio"/> más 6 veces al día |
| licores               | <input checked="" type="radio"/> Nunca o menos 1 vez al mes<br><input type="radio"/> 1 a 3 veces mes<br><input type="radio"/> 1 vez semana<br><input type="radio"/> 2 a 4 veces semana<br><input type="radio"/> 5 a 6 veces semana<br><input type="radio"/> 1 vez al día<br><input type="radio"/> 2 a 3 veces al día<br><input type="radio"/> 5 a 6 veces al día<br><input type="radio"/> más 6 veces al día |
| ginebra o ron o vodka | <input checked="" type="radio"/> Nunca o menos 1 vez al mes<br><input type="radio"/> 1 a 3 veces mes<br><input type="radio"/> 1 vez semana<br><input type="radio"/> 2 a 4 veces semana<br><input type="radio"/> 5 a 6 veces semana<br><input type="radio"/> 1 vez al día<br><input type="radio"/> 2 a 3 veces al día<br><input type="radio"/> 5 a 6 veces al día<br><input type="radio"/> más 6 veces al día |
| refresco normal       | <input type="radio"/> Nunca o menos 1 vez al mes<br><input checked="" type="radio"/> 1 a 3 veces mes<br><input type="radio"/> 1 vez semana<br><input type="radio"/> 2 a 4 veces semana<br><input type="radio"/> 5 a 6 veces semana<br><input type="radio"/> 1 vez al día<br><input type="radio"/> 2 a 3 veces al día<br><input type="radio"/> 5 a 6 veces al día<br><input type="radio"/> más 6 veces al día |

|                          |                                                                                                                                                                                                                                                                                                                                                                                                              |
|--------------------------|--------------------------------------------------------------------------------------------------------------------------------------------------------------------------------------------------------------------------------------------------------------------------------------------------------------------------------------------------------------------------------------------------------------|
| refresco sin azúcar      | <input checked="" type="radio"/> Nunca o menos 1 vez al mes<br><input type="radio"/> 1 a 3 veces mes<br><input type="radio"/> 1 vez semana<br><input type="radio"/> 2 a 4 veces semana<br><input type="radio"/> 5 a 6 veces semana<br><input type="radio"/> 1 vez al día<br><input type="radio"/> 2 a 3 veces al día<br><input type="radio"/> 5 a 6 veces al día<br><input type="radio"/> más 6 veces al día |
| Agua del grifo           | <input checked="" type="radio"/> Nunca o menos 1 vez al mes<br><input type="radio"/> 1 a 3 veces mes<br><input type="radio"/> 1 vez semana<br><input type="radio"/> 2 a 4 veces semana<br><input type="radio"/> 5 a 6 veces semana<br><input type="radio"/> 1 vez al día<br><input type="radio"/> 2 a 3 veces al día<br><input type="radio"/> 5 a 6 veces al día<br><input type="radio"/> más 6 veces al día |
| agua embotellada sin gas | <input type="radio"/> Nunca o menos 1 vez al mes<br><input type="radio"/> 1 a 3 veces mes<br><input type="radio"/> 1 vez semana<br><input type="radio"/> 2 a 4 veces semana<br><input type="radio"/> 5 a 6 veces semana<br><input checked="" type="radio"/> 1 vez al día<br><input type="radio"/> 2 a 3 veces al día<br><input type="radio"/> 5 a 6 veces al día<br><input type="radio"/> más 6 veces al día |
| agua embotellada con gas | <input checked="" type="radio"/> Nunca o menos 1 vez al mes<br><input type="radio"/> 1 a 3 veces mes<br><input type="radio"/> 1 vez semana<br><input type="radio"/> 2 a 4 veces semana<br><input type="radio"/> 5 a 6 veces semana<br><input type="radio"/> 1 vez al día<br><input type="radio"/> 2 a 3 veces al día<br><input type="radio"/> 5 a 6 veces al día<br><input type="radio"/> más 6 veces al día |
| zumو frutas embasado     | <input type="radio"/> Nunca o menos 1 vez al mes<br><input checked="" type="radio"/> 1 a 3 veces mes<br><input type="radio"/> 1 vez semana<br><input type="radio"/> 2 a 4 veces semana<br><input type="radio"/> 5 a 6 veces semana<br><input type="radio"/> 1 vez al día<br><input type="radio"/> 2 a 3 veces al día<br><input type="radio"/> 5 a 6 veces al día<br><input type="radio"/> más 6 veces al día |
| cafe                     | <input type="radio"/> Nunca o menos 1 vez al mes<br><input checked="" type="radio"/> 1 a 3 veces mes<br><input type="radio"/> 1 vez semana<br><input type="radio"/> 2 a 4 veces semana<br><input type="radio"/> 5 a 6 veces semana<br><input type="radio"/> 1 vez al día<br><input type="radio"/> 2 a 3 veces al día<br><input type="radio"/> 5 a 6 veces al día<br><input type="radio"/> más 6 veces al día |

---

cafe descafeinado

- ☒ Nunca o menos 1 vez al mes  
☐ 1 a 3 veces mes  
☐ 1 vez semana  
☐ 2 a 4 veces semana  
☐ 5 a 6 veces semana  
☐ 1 vez al día  
☐ 2 a 3 veces al día  
☐ 5 a 6 veces al día  
☐ más 6 veces al día

---

te o infusión

- ☐ Nunca o menos 1 vez al mes  
☐ 1 a 3 veces mes  
☒ 1 vez semana  
☐ 2 a 4 veces semana  
☐ 5 a 6 veces semana  
☐ 1 vez al día  
☐ 2 a 3 veces al día  
☐ 5 a 6 veces al día  
☐ más 6 veces al día

---

sopa o puré verduras

- ☐ Nunca o menos 1 vez al mes  
☐ 1 a 3 veces mes  
☒ 1 vez semana  
☐ 2 a 4 veces semana  
☐ 5 a 6 veces semana  
☐ 1 vez al día  
☐ 2 a 3 veces al día  
☐ 5 a 6 veces al día  
☐ más 6 veces al día

---

croquetas pollo jamón

- ☐ Nunca o menos 1 vez al mes  
☒ 1 a 3 veces mes  
☐ 1 vez semana  
☐ 2 a 4 veces semana  
☐ 5 a 6 veces semana  
☐ 1 vez al día  
☐ 2 a 3 veces al día  
☐ 5 a 6 veces al día  
☐ más 6 veces al día

---

croquetas pescado

- ☒ Nunca o menos 1 vez al mes  
☐ 1 a 3 veces mes  
☐ 1 vez semana  
☐ 2 a 4 veces semana  
☐ 5 a 6 veces semana  
☐ 1 vez al día  
☐ 2 a 3 veces al día  
☐ 5 a 6 veces al día  
☐ más 6 veces al día

---

mayonesa

- ☐ Nunca o menos 1 vez al mes  
☒ 1 a 3 veces mes  
☐ 1 vez semana  
☐ 2 a 4 veces semana  
☐ 5 a 6 veces semana  
☐ 1 vez al día  
☐ 2 a 3 veces al día  
☐ 5 a 6 veces al día  
☐ más 6 veces al día

---

salsa tomate

- ☐ Nunca o menos 1 vez al mes  
☒ 1 a 3 veces mes  
☐ 1 vez semana  
☐ 2 a 4 veces semana  
☐ 5 a 6 veces semana  
☐ 1 vez al día  
☐ 2 a 3 veces al día  
☐ 5 a 6 veces al día  
☐ más 6 veces al día

---

ketchup

- ☐ Nunca o menos 1 vez al mes  
☒ 1 a 3 veces mes  
☐ 1 vez semana  
☐ 2 a 4 veces semana  
☐ 5 a 6 veces semana  
☐ 1 vez al día  
☐ 2 a 3 veces al día  
☐ 5 a 6 veces al día  
☐ más 6 veces al día

---

sal

- ☒ Nunca o menos 1 vez al mes  
☐ 1 a 3 veces mes  
☐ 1 vez semana  
☐ 2 a 4 veces semana  
☐ 5 a 6 veces semana  
☐ 1 vez al día  
☐ 2 a 3 veces al día  
☐ 5 a 6 veces al día  
☐ más 6 veces al día

---

ajo

- ☒ Nunca o menos 1 vez al mes  
☐ 1 a 3 veces mes  
☐ 1 vez semana  
☐ 2 a 4 veces semana  
☐ 5 a 6 veces semana  
☐ 1 vez al día  
☐ 2 a 3 veces al día  
☐ 5 a 6 veces al día  
☐ más 6 veces al día

---

mermelada o miel

- ☐ Nunca o menos 1 vez al mes  
☐ 1 a 3 veces mes  
☒ 1 vez semana  
☐ 2 a 4 veces semana  
☐ 5 a 6 veces semana  
☐ 1 vez al día  
☐ 2 a 3 veces al día  
☐ 5 a 6 veces al día  
☐ más 6 veces al día

---

azúcar

- ☐ Nunca o menos 1 vez al mes  
☐ 1 a 3 veces mes  
☐ 1 vez semana  
☐ 2 a 4 veces semana  
☐ 5 a 6 veces semana  
☐ 1 vez al día  
☐ 2 a 3 veces al día  
☐ 5 a 6 veces al día  
☐ más 6 veces al día

|                                       |                                                                                                                                                                                                                                                                                                                                                                                                                                                                                                                               |
|---------------------------------------|-------------------------------------------------------------------------------------------------------------------------------------------------------------------------------------------------------------------------------------------------------------------------------------------------------------------------------------------------------------------------------------------------------------------------------------------------------------------------------------------------------------------------------|
| Otro alimento                         |                                                                                                                                                                                                                                                                                                                                                                                                                                                                                                                               |
| suplementos vitamínicos               | <input checked="" type="radio"/> si<br><input type="radio"/> no                                                                                                                                                                                                                                                                                                                                                                                                                                                               |
| suplementos vitamínicos               | [*DATA REMOVED*]                                                                                                                                                                                                                                                                                                                                                                                                                                                                                                              |
| dieta previa                          | <input type="radio"/> si<br><input checked="" type="radio"/> no                                                                                                                                                                                                                                                                                                                                                                                                                                                               |
| motivo dieta                          | <input checked="" type="radio"/> no dieta<br><input type="radio"/> control peso<br><input type="radio"/> control colesterol<br><input type="radio"/> control diabetes<br><input type="radio"/> problemas estómago<br><input type="radio"/> problemas vesícula o hepáticos<br><input type="radio"/> HTA o cardiopatía<br><input type="radio"/> problemas renales<br><input type="radio"/> alergia alimentaria<br><input type="radio"/> ácido úrico elevado<br><input type="radio"/> vegetariana<br><input type="radio"/> otros |
| cambio alimentos año previo gestación | <input type="radio"/> si<br><input checked="" type="radio"/> no                                                                                                                                                                                                                                                                                                                                                                                                                                                               |
| cambio lácteos                        | <input type="radio"/> eliminado<br><input type="radio"/> disminuido<br><input checked="" type="radio"/> igual<br><input type="radio"/> aumentado<br><input type="radio"/> no sabe                                                                                                                                                                                                                                                                                                                                             |
| cambio huevos                         | <input type="radio"/> eliminado<br><input type="radio"/> disminuido<br><input checked="" type="radio"/> igual<br><input type="radio"/> aumentado<br><input type="radio"/> no sabe                                                                                                                                                                                                                                                                                                                                             |
| cambio carne                          | <input type="radio"/> eliminado<br><input type="radio"/> disminuido<br><input checked="" type="radio"/> igual<br><input type="radio"/> aumentado<br><input type="radio"/> no sabe                                                                                                                                                                                                                                                                                                                                             |
| cambio pescado                        | <input type="radio"/> eliminado<br><input type="radio"/> disminuido<br><input checked="" type="radio"/> igual<br><input type="radio"/> aumentado<br><input type="radio"/> no sabe                                                                                                                                                                                                                                                                                                                                             |
| cambio verduras                       | <input type="radio"/> eliminado<br><input type="radio"/> disminuido<br><input checked="" type="radio"/> igual<br><input type="radio"/> aumentado<br><input type="radio"/> no sabe                                                                                                                                                                                                                                                                                                                                             |

|                            |                                                                                                                                                                                                                        |
|----------------------------|------------------------------------------------------------------------------------------------------------------------------------------------------------------------------------------------------------------------|
| cambio legumbres           | <input type="radio"/> eliminado<br><input type="radio"/> disminuido<br><input checked="" type="radio"/> igual<br><input type="radio"/> aumentado<br><input type="radio"/> no sabe                                      |
| cambio fruta               | <input type="radio"/> eliminado<br><input type="radio"/> disminuido<br><input checked="" type="radio"/> igual<br><input type="radio"/> aumentado<br><input type="radio"/> no sabe                                      |
| cambio pan                 | <input type="radio"/> eliminado<br><input type="radio"/> disminuido<br><input checked="" type="radio"/> igual<br><input type="radio"/> aumentado<br><input type="radio"/> no sabe                                      |
| cambio aceite oliva        | <input type="radio"/> eliminado<br><input type="radio"/> disminuido<br><input checked="" type="radio"/> igual<br><input type="radio"/> aumentado<br><input type="radio"/> no sabe                                      |
| cambio mante o margarina   | <input type="radio"/> eliminado<br><input type="radio"/> disminuido<br><input checked="" type="radio"/> igual<br><input type="radio"/> aumentado<br><input type="radio"/> no sabe                                      |
| cambio azúcar y dulces     | <input type="radio"/> eliminado<br><input type="radio"/> disminuido<br><input checked="" type="radio"/> igual<br><input type="radio"/> aumentado<br><input type="radio"/> no sabe                                      |
| cambio bebidas alcohólicas | <input type="radio"/> eliminado<br><input type="radio"/> disminuido<br><input checked="" type="radio"/> igual<br><input type="radio"/> aumentado<br><input type="radio"/> no sabe                                      |
| frecuencia comidas fritas  | <input type="radio"/> a diario<br><input type="radio"/> 5 a 6 veces semana<br><input type="radio"/> 2 a 4 veces semana<br><input checked="" type="radio"/> 1 vez semana<br><input type="radio"/> menos de 1 vez semana |
| carne                      | <input type="radio"/> no como<br><input type="radio"/> cruda<br><input type="radio"/> poco hecha<br><input type="radio"/> hecha<br><input checked="" type="radio"/> muy hecha                                          |
| grasa visible carne        | <input type="radio"/> quita toda<br><input checked="" type="radio"/> quita mayoría<br><input type="radio"/> quita un poco<br><input type="radio"/> no quita nada                                                       |

|                                |                                                                                                                                                                                                                                                          |
|--------------------------------|----------------------------------------------------------------------------------------------------------------------------------------------------------------------------------------------------------------------------------------------------------|
| cocina carne                   | <input checked="" type="radio"/> a la plancha<br><input type="radio"/> a la parrilla<br><input type="radio"/> asada<br><input type="radio"/> frita<br><input type="radio"/> guisada                                                                      |
| tostado quemado carne          | <input type="radio"/> nunca<br><input type="radio"/> 1 vez mes<br><input type="radio"/> 2 a 3 veces mes<br><input checked="" type="radio"/> 1 vez semana<br><input type="radio"/> 2 a 3 semanas                                                          |
| tostado quemado pescado        | <input checked="" type="radio"/> nunca<br><input type="radio"/> 1 vez mes<br><input type="radio"/> 2 a 3 veces mes<br><input type="radio"/> 1 vez semana<br><input type="radio"/> 2 a 3 semanas                                                          |
| socarrat paella                | <input checked="" type="radio"/> nunca<br><input type="radio"/> 1 vez mes<br><input type="radio"/> 2 a 3 veces mes<br><input type="radio"/> 1 vez semana<br><input type="radio"/> 2 a 3 semanas                                                          |
| grasa o aceite cocinar         | <input type="radio"/> mantequilla<br><input type="radio"/> margarina<br><input type="radio"/> aceite oliva<br><input checked="" type="radio"/> aceite oliva virgen extra<br><input type="radio"/> aceite vegetal<br><input type="radio"/> mezcla aceites |
| grasa aceite aliñar            | <input type="radio"/> mantequilla<br><input type="radio"/> margarina<br><input type="radio"/> aceite oliva<br><input checked="" type="radio"/> aceite oliva virgen extra<br><input type="radio"/> aceite vegetal<br><input type="radio"/> mezcla aceites |
| grasa aceite freir             | <input type="radio"/> mantequilla<br><input type="radio"/> margarina<br><input type="radio"/> aceite oliva<br><input checked="" type="radio"/> aceite oliva virgen extra<br><input type="radio"/> aceite vegetal<br><input type="radio"/> mezcla aceites |
| Ejercicio cuestionario         | <input checked="" type="radio"/> si<br><input type="radio"/> no                                                                                                                                                                                          |
| horas de sueño incluido siesta | [*DATA REMOVED*]                                                                                                                                                                                                                                         |
| minutos siesta                 | [*DATA REMOVED*]                                                                                                                                                                                                                                         |
| horas televisión semana        | [*DATA REMOVED*]                                                                                                                                                                                                                                         |

|                                        |                                                                                                                                                                                                                                                                                                                                                                           |
|----------------------------------------|---------------------------------------------------------------------------------------------------------------------------------------------------------------------------------------------------------------------------------------------------------------------------------------------------------------------------------------------------------------------------|
| actividad trabajo                      | <input type="radio"/> casi siempre sentado<br><input type="radio"/> sentado 50 por cien<br><input type="radio"/> casi siempre de pie, quieto<br><input checked="" type="radio"/> casi siempre levantado caminando y llevando pocas cosas<br><input type="radio"/> casi siempre levantado, caminando y llevado muchas cosas<br><input type="radio"/> trabajo manual pesado |
| tiempo caminar o bici al día           | <input type="radio"/> casi nunca<br><input type="radio"/> menos 20min día<br><input checked="" type="radio"/> 20 a 40 min día<br><input type="radio"/> 40 a 60 min día<br><input type="radio"/> 1h o 1h y media día<br><input type="radio"/> más de 1h y media al día                                                                                                     |
| tiempo tareas casa al día              | <input type="radio"/> menos de 1h día<br><input checked="" type="radio"/> 1 a 2h día<br><input type="radio"/> 3 a 4h día<br><input type="radio"/> 5 a 6h día<br><input type="radio"/> 7 a 8h día<br><input type="radio"/> más de 8h día                                                                                                                                   |
| tiempo libre televisión ordenador leer | <input type="radio"/> menos 1h día<br><input type="radio"/> 1h día<br><input checked="" type="radio"/> 2h día<br><input type="radio"/> 3h día<br><input type="radio"/> 4h día<br><input type="radio"/> 5 a 6h día<br><input type="radio"/> mas 6h día                                                                                                                     |
| tiempo libre ejercicio o deporte       | <input type="radio"/> menos 1h semana<br><input type="radio"/> 1h semana<br><input type="radio"/> 2h semana<br><input checked="" type="radio"/> 3h semana<br><input type="radio"/> 4 a 5h semana<br><input type="radio"/> mas 5h semana                                                                                                                                   |
| como se considera                      | <input type="radio"/> sedentaria<br><input checked="" type="radio"/> poco activa<br><input type="radio"/> moderadamente activa<br><input type="radio"/> bastante activa<br><input type="radio"/> muy activa<br><input type="radio"/> no sabe                                                                                                                              |
| FUR                                    | [*DATA REMOVED*]                                                                                                                                                                                                                                                                                                                                                          |
| Semanas gestación 2T                   | [*DATA REMOVED*]                                                                                                                                                                                                                                                                                                                                                          |
| Días gestación 2T                      | [*DATA REMOVED*]                                                                                                                                                                                                                                                                                                                                                          |
| DBP 2T                                 | [*DATA REMOVED*]                                                                                                                                                                                                                                                                                                                                                          |
| CC 2T                                  | [*DATA REMOVED*]                                                                                                                                                                                                                                                                                                                                                          |
| AC 2T                                  | [*DATA REMOVED*]                                                                                                                                                                                                                                                                                                                                                          |



|                                                   |                                                                                                                                                                                       |
|---------------------------------------------------|---------------------------------------------------------------------------------------------------------------------------------------------------------------------------------------|
| LF 2T                                             | [*DATA REMOVED*]                                                                                                                                                                      |
| PFE 2T (Hadlock)                                  | [*DATA REMOVED*]                                                                                                                                                                      |
| Semanas gestación 3T                              | [*DATA REMOVED*]                                                                                                                                                                      |
| días 3T                                           | [*DATA REMOVED*]                                                                                                                                                                      |
| DBP 3T                                            | [*DATA REMOVED*]                                                                                                                                                                      |
| CC 3T                                             | [*DATA REMOVED*]                                                                                                                                                                      |
| AC 3T                                             | [*DATA REMOVED*]                                                                                                                                                                      |
| LF 3T                                             | [*DATA REMOVED*]                                                                                                                                                                      |
| PFE 3T (Hadlock)                                  | [*DATA REMOVED*]                                                                                                                                                                      |
| Semanas de gestación final                        | [*DATA REMOVED*]                                                                                                                                                                      |
| días gestación final                              | [*DATA REMOVED*]                                                                                                                                                                      |
| Localización placenta                             | <input type="radio"/> anterior<br><input type="radio"/> lateral derecha<br><input type="radio"/> lateral izquierda<br><input type="radio"/> posterior<br><input type="radio"/> fondo  |
| Presentación longitudinal cefálica                | <input type="radio"/> no<br><input checked="" type="radio"/> si                                                                                                                       |
| Dorso                                             | <input type="radio"/> izquierda anterior<br><input checked="" type="radio"/> izquierda posterior<br><input type="radio"/> derecha anterior<br><input type="radio"/> derecha posterior |
| diámetro biparietal                               | [*DATA REMOVED*]                                                                                                                                                                      |
| Circunferencia craneal                            | [*DATA REMOVED*]                                                                                                                                                                      |
| Circunferencia abdominal                          | [*DATA REMOVED*]                                                                                                                                                                      |
| Longitud de femur                                 | [*DATA REMOVED*]                                                                                                                                                                      |
| tejido celular subcutáneo a nivel del muslo en mm | _____                                                                                                                                                                                 |
| tejido celular subcutáneo en abdomen en mm        | [*DATA REMOVED*]                                                                                                                                                                      |
| Volumen del muslo en cm3                          | [*DATA REMOVED*]                                                                                                                                                                      |
| Peso fetal estimado según fórmula de Hadlock      | [*DATA REMOVED*]                                                                                                                                                                      |

|                                               |                                                                                                                                                          |
|-----------------------------------------------|----------------------------------------------------------------------------------------------------------------------------------------------------------|
| Percentil                                     | [*DATA REMOVED*]                                                                                                                                         |
| Peso fetal estimado según fórmula de Scioscia | <hr/>                                                                                                                                                    |
| Peso fetal estimado según fórmula de LEE      | <hr/>                                                                                                                                                    |
| Tipo de parto                                 | <input checked="" type="radio"/> eutocico<br><input type="radio"/> instrumentado/ventosa<br><input type="radio"/> cesarea                                |
| fecha de nacimiento                           | [*DATA REMOVED*]                                                                                                                                         |
| Días entre exploración y nacimiento           | [*DATA REMOVED*]                                                                                                                                         |
| Peso RN en g                                  | [*DATA REMOVED*]                                                                                                                                         |
| sexo                                          | <input checked="" type="radio"/> mujer<br><input type="radio"/> hombre                                                                                   |
| Apgar 1 minuto                                | [*DATA REMOVED*]                                                                                                                                         |
| Apgar 5 minutos                               | [*DATA REMOVED*]                                                                                                                                         |
| Apgar 10 minutos                              | <hr/>                                                                                                                                                    |
| antecedente Covid durante gestación           | <input type="radio"/> Yes<br><input checked="" type="radio"/> No                                                                                         |
| Nivel de estudios                             | <input type="radio"/> ninguno<br><input type="radio"/> primarios<br><input checked="" type="radio"/> secundarios<br><input type="radio"/> universitarios |

## Base\_datos\_estimacion\_peso\_fetal

|                                       |                                                                                                                                                                                                                                                                                      |
|---------------------------------------|--------------------------------------------------------------------------------------------------------------------------------------------------------------------------------------------------------------------------------------------------------------------------------------|
| Número de identificación participante | 127                                                                                                                                                                                                                                                                                  |
| CODIGO PARTICIPANTE                   |                                                                                                                                                                                                                                                                                      |
| Edad                                  | [*DATA REMOVED*]                                                                                                                                                                                                                                                                     |
| Gestaciones                           | <input checked="" type="radio"/> 1<br><input type="radio"/> 2<br><input type="radio"/> 3<br><input type="radio"/> mas de 3                                                                                                                                                           |
| partos                                | <input checked="" type="radio"/> 0<br><input type="radio"/> 1<br><input type="radio"/> 2<br><input type="radio"/> 3<br><input type="radio"/> mas de 3                                                                                                                                |
| cesáreas                              | <input checked="" type="radio"/> 0<br><input type="radio"/> 1<br><input type="radio"/> 2<br><input type="radio"/> 3<br><input type="radio"/> mas de 3                                                                                                                                |
| Abortos                               | <input checked="" type="radio"/> 0<br><input type="radio"/> 1<br><input type="radio"/> 2<br><input type="radio"/> 3<br><input type="radio"/> mas de 3                                                                                                                                |
| Tipo de gestacion                     | <input checked="" type="radio"/> espontanea<br><input type="radio"/> IAC inseminación artificial conyuge<br><input type="radio"/> IAD inseminación artificial donante<br><input type="radio"/> FIV Fecundación in Vitro<br><input type="radio"/> Ovodon FIV con donación de ovocitos |
| peso previo a embarazo                |                                                                                                                                                                                                                                                                                      |
| Ganancia ponderal embarazo            |                                                                                                                                                                                                                                                                                      |
| Talla madre                           |                                                                                                                                                                                                                                                                                      |
| IMC previo embarazo                   |                                                                                                                                                                                                                                                                                      |
| Patología obstétrica                  | <input checked="" type="radio"/> no<br><input type="radio"/> si                                                                                                                                                                                                                      |
| Diabetes pregestacional               | <input checked="" type="radio"/> no<br><input type="radio"/> si                                                                                                                                                                                                                      |

|                                            |                                                                                                                                                                                      |
|--------------------------------------------|--------------------------------------------------------------------------------------------------------------------------------------------------------------------------------------|
| Diabetes gestacional                       | <input checked="" type="radio"/> no<br><input type="radio"/> si                                                                                                                      |
| Diabetes gestacional con insulina          | <input checked="" type="radio"/> no<br><input type="radio"/> si                                                                                                                      |
| Diabetes gestacional con dieta y ejercicio | <input checked="" type="radio"/> no<br><input type="radio"/> si                                                                                                                      |
| Percentil fetos previos                    | <input checked="" type="radio"/> Nada<br><input type="radio"/> percentil menor de 10<br><input type="radio"/> percentil entre 10 y 90<br><input type="radio"/> percentil mayor de 90 |
| Exfumadora                                 | <input checked="" type="radio"/> Nada<br><input type="radio"/> menos de 5 años<br><input type="radio"/> 5 a 10 años<br><input type="radio"/> mayor o igual a 10 años                 |
| Hábito tabáquico                           | <input type="radio"/> no<br><input checked="" type="radio"/> si                                                                                                                      |
| fumadora                                   | [*DATA REMOVED*]                                                                                                                                                                     |
| Consumo otros tóxicos                      | <input checked="" type="radio"/> no<br><input type="radio"/> si                                                                                                                      |
| Hb 1T                                      | [*DATA REMOVED*]                                                                                                                                                                     |
| Htc 1T                                     | [*DATA REMOVED*]                                                                                                                                                                     |
| Hb 2T                                      | [*DATA REMOVED*]                                                                                                                                                                     |
| HTC 2T                                     | [*DATA REMOVED*]                                                                                                                                                                     |
| Hb 3T                                      | [*DATA REMOVED*]                                                                                                                                                                     |
| HTC 3T                                     | [*DATA REMOVED*]                                                                                                                                                                     |
| Suplemento FE oral                         | <input type="radio"/> si<br><input checked="" type="radio"/> no                                                                                                                      |
| Suplemento fe iv                           | <input type="radio"/> si<br><input checked="" type="radio"/> no                                                                                                                      |
| Transfusión                                | <input checked="" type="radio"/> no<br><input type="radio"/> si                                                                                                                      |
| Solicitada Vit D                           | <input checked="" type="radio"/> no<br><input type="radio"/> si                                                                                                                      |
| Deficit vit D                              | <input type="radio"/> no<br><input type="radio"/> si                                                                                                                                 |

|                       |                                                                                                                                                                                                                                                                                                                                                                                                              |
|-----------------------|--------------------------------------------------------------------------------------------------------------------------------------------------------------------------------------------------------------------------------------------------------------------------------------------------------------------------------------------------------------------------------------------------------------|
| Suplemento vit D      | <input type="radio"/> si<br><input type="radio"/> no                                                                                                                                                                                                                                                                                                                                                         |
| Dieta, cuestionario   | <input checked="" type="radio"/> si<br><input type="radio"/> no                                                                                                                                                                                                                                                                                                                                              |
| Leche entera          | <input type="radio"/> Nunca o menos 1 vez al mes<br><input type="radio"/> 1 a 3 veces mes<br><input type="radio"/> 1 vez semana<br><input type="radio"/> 2 a 4 veces semana<br><input type="radio"/> 5 a 6 veces semana<br><input checked="" type="radio"/> 1 vez al día<br><input type="radio"/> 2 a 3 veces al día<br><input type="radio"/> 5 a 6 veces al día<br><input type="radio"/> más 6 veces al día |
| Leche semidesnatada   | <input type="radio"/> Nunca o menos 1 vez al mes<br><input type="radio"/> 1 a 3 veces mes<br><input type="radio"/> 1 vez semana<br><input type="radio"/> 2 a 4 veces semana<br><input type="radio"/> 5 a 6 veces semana<br><input type="radio"/> 1 vez al día<br><input type="radio"/> 2 a 3 veces al día<br><input type="radio"/> 5 a 6 veces al día<br><input type="radio"/> mas 6 veces al día            |
| Leche desnatada       | <input type="radio"/> Nunca o menos 1 vez al mes<br><input type="radio"/> 1 a 3 veces mes<br><input type="radio"/> 1 vez semana<br><input type="radio"/> 2 a 4 veces semana<br><input type="radio"/> 5 a 6 veces semana<br><input type="radio"/> 1 vez al día<br><input type="radio"/> 2 a 3 veces al día<br><input type="radio"/> 5 a 6 veces al día<br><input type="radio"/> más 6 veces al día            |
| Leche condensada      | <input type="radio"/> Nunca o menos 1 vez al mes<br><input type="radio"/> 1 a 3 veces mes<br><input type="radio"/> 1 vez semana<br><input type="radio"/> 2 a 4 veces semana<br><input type="radio"/> 5 a 6 veces semana<br><input type="radio"/> 1 vez al día<br><input type="radio"/> 2 a 3 veces al día<br><input type="radio"/> 5 a 6 veces al día<br><input type="radio"/> más 6 veces al día            |
| nata o crema de leche | <input type="radio"/> Nunca o menos 1 vez al mes<br><input type="radio"/> 1 a 3 veces mes<br><input type="radio"/> 1 vez semana<br><input checked="" type="radio"/> 2 a 4 veces semana<br><input type="radio"/> 5 a 6 veces semana<br><input type="radio"/> 1 vez al día<br><input type="radio"/> 2 a 3 veces al día<br><input type="radio"/> 5 a 6 veces al día<br><input type="radio"/> más 6 veces al día |

---

Yogurt Entero

- ☐ Nunca o menos 1 vez al mes  
☐ 1 a 3 veces mes  
☐ 1 vez semana  
☒ 2 a 4 veces semana  
☐ 5 a 6 veces semana  
☐ 1 vez al día  
☐ 2 a 3 veces al día  
☐ 5 a 6 veces al día  
☐ más 6 veces al día

---

Yogurt desnatado

- ☒ Nunca o menos 1 vez al mes  
☐ 1 a 3 veces mes  
☐ 1 vez semana  
☐ 2 a 4 veces semana  
☐ 5 a 6 veces semana  
☐ 1 vez al día  
☐ 2 a 3 veces al día  
☐ 5 a 6 veces al día  
☐ más 6 veces al día

---

100g requesón o queso blando o queso fresco

- ☒ Nunca o menos 1 vez al mes  
☐ 1 a 3 veces mes  
☐ 1 vez semana  
☐ 2 a 4 veces semana  
☐ 5 a 6 veces semana  
☐ 1 vez al día  
☐ 2 a 3 veces al día  
☐ 5 a 6 veces al día  
☐ más 6 veces al día

---

queso curado o semicurado o cremoso

- ☒ Nunca o menos 1 vez al mes  
☐ 1 a 3 veces mes  
☐ 1 vez semana  
☐ 2 a 4 veces semana  
☐ 5 a 6 veces semana  
☐ 1 vez al día  
☐ 2 a 3 veces al día  
☐ 5 a 6 veces al día  
☐ más 6 veces al día

---

natillas flan pudding

- ☒ Nunca o menos 1 vez al mes  
☐ 1 a 3 veces mes  
☐ 1 vez semana  
☐ 2 a 4 veces semana  
☐ 5 a 6 veces semana  
☐ 1 vez al día  
☐ 2 a 3 veces al día  
☐ 5 a 6 veces al día  
☐ más 6 veces al día

---

Helado

- ☐ Nunca o menos 1 vez al mes  
☐ 1 a 3 veces mes  
☐ 1 vez semana  
☐ 2 a 4 veces semana  
☐ 5 a 6 veces semana  
☐ 1 vez al día  
☐ 2 a 3 veces al día  
☒ 5 a 6 veces al día  
☐ más 6 veces al día

|                                      |                                                                                                                                                                                                                                                                                                                                                                                                              |
|--------------------------------------|--------------------------------------------------------------------------------------------------------------------------------------------------------------------------------------------------------------------------------------------------------------------------------------------------------------------------------------------------------------------------------------------------------------|
| huevo                                | <input type="radio"/> Nunca o menos 1 vez al mes<br><input type="radio"/> 1 a 3 veces mes<br><input checked="" type="radio"/> 1 vez semana<br><input type="radio"/> 2 a 4 veces semana<br><input type="radio"/> 5 a 6 veces semana<br><input type="radio"/> 1 vez al día<br><input type="radio"/> 2 a 3 veces al día<br><input type="radio"/> 5 a 6 veces al día<br><input type="radio"/> más 6 veces al día |
| Pollo con piel                       | <input type="radio"/> Nunca o menos 1 vez al mes<br><input type="radio"/> 1 a 3 veces mes<br><input type="radio"/> 1 vez semana<br><input checked="" type="radio"/> 2 a 4 veces semana<br><input type="radio"/> 5 a 6 veces semana<br><input type="radio"/> 1 vez al día<br><input type="radio"/> 2 a 3 veces al día<br><input type="radio"/> 5 a 6 veces al día<br><input type="radio"/> más 6 veces al día |
| pollo sin piel                       | <input type="radio"/> Nunca o menos 1 vez al mes<br><input type="radio"/> 1 a 3 veces mes<br><input type="radio"/> 1 vez semana<br><input type="radio"/> 2 a 4 veces semana<br><input type="radio"/> 5 a 6 veces semana<br><input type="radio"/> 1 vez al día<br><input type="radio"/> 2 a 3 veces al día<br><input type="radio"/> 5 a 6 veces al día<br><input type="radio"/> más 6 veces al día            |
| Ternera o cerdo o cordero            | <input type="radio"/> Nunca o menos 1 vez al mes<br><input type="radio"/> 1 a 3 veces mes<br><input checked="" type="radio"/> 1 vez semana<br><input type="radio"/> 2 a 4 veces semana<br><input type="radio"/> 5 a 6 veces semana<br><input type="radio"/> 1 vez al día<br><input type="radio"/> 2 a 3 veces al día<br><input type="radio"/> 5 a 6 veces al día<br><input type="radio"/> más 6 veces al día |
| carne caza: Conejo o codorniz o pato | <input checked="" type="radio"/> Nunca o menos 1 vez al mes<br><input type="radio"/> 1 a 3 veces mes<br><input type="radio"/> 1 vez semana<br><input type="radio"/> 2 a 4 veces semana<br><input type="radio"/> 5 a 6 veces semana<br><input type="radio"/> 1 vez al día<br><input type="radio"/> 2 a 3 veces al día<br><input type="radio"/> 5 a 6 veces al día<br><input type="radio"/> más 6 veces al día |
| Hígado de ternera o cerdo o pollo    | <input type="radio"/> Nunca o menos 1 vez al mes<br><input type="radio"/> 1 a 3 veces mes<br><input type="radio"/> 1 vez semana<br><input type="radio"/> 2 a 4 veces semana<br><input type="radio"/> 5 a 6 veces semana<br><input type="radio"/> 1 vez al día<br><input type="radio"/> 2 a 3 veces al día<br><input type="radio"/> 5 a 6 veces al día<br><input type="radio"/> más 6 veces al día            |

|                     |                                                                                                                                                                                                                                                                                                                                                                                                              |
|---------------------|--------------------------------------------------------------------------------------------------------------------------------------------------------------------------------------------------------------------------------------------------------------------------------------------------------------------------------------------------------------------------------------------------------------|
| Vísceras            | <input type="radio"/> Nunca o menos 1 vez al mes<br><input type="radio"/> 1 a 3 veces mes<br><input type="radio"/> 1 vez semana<br><input type="radio"/> 2 a 4 veces semana<br><input type="radio"/> 5 a 6 veces semana<br><input type="radio"/> 1 vez al día<br><input type="radio"/> 2 a 3 veces al día<br><input type="radio"/> 5 a 6 veces al día<br><input type="radio"/> más 6 veces al día            |
| Embutido            | <input checked="" type="radio"/> Nunca o menos 1 vez al mes<br><input type="radio"/> 1 a 3 veces mes<br><input type="radio"/> 1 vez semana<br><input type="radio"/> 2 a 4 veces semana<br><input type="radio"/> 5 a 6 veces semana<br><input type="radio"/> 1 vez al día<br><input type="radio"/> 2 a 3 veces al día<br><input type="radio"/> 5 a 6 veces al día<br><input type="radio"/> más 6 veces al día |
| Salchicha o similar | <input checked="" type="radio"/> Nunca o menos 1 vez al mes<br><input type="radio"/> 1 a 3 veces mes<br><input type="radio"/> 1 vez semana<br><input type="radio"/> 2 a 4 veces semana<br><input type="radio"/> 5 a 6 veces semana<br><input type="radio"/> 1 vez al día<br><input type="radio"/> 2 a 3 veces al día<br><input type="radio"/> 5 a 6 veces al día<br><input type="radio"/> más 6 veces al día |
| Pate o foiegras     | <input checked="" type="radio"/> Nunca o menos 1 vez al mes<br><input type="radio"/> 1 a 3 veces mes<br><input type="radio"/> 1 vez semana<br><input type="radio"/> 2 a 4 veces semana<br><input type="radio"/> 5 a 6 veces semana<br><input type="radio"/> 1 vez al día<br><input type="radio"/> 2 a 3 veces al día<br><input type="radio"/> 5 a 6 veces al día<br><input type="radio"/> más 6 veces al día |
| Hamburguesa         | <input type="radio"/> Nunca o menos 1 vez al mes<br><input type="radio"/> 1 a 3 veces mes<br><input checked="" type="radio"/> 1 vez semana<br><input type="radio"/> 2 a 4 veces semana<br><input type="radio"/> 5 a 6 veces semana<br><input type="radio"/> 1 vez al día<br><input type="radio"/> 2 a 3 veces al día<br><input type="radio"/> 5 a 6 veces al día<br><input type="radio"/> más 6 veces al día |
| tocino o bacon      | <input checked="" type="radio"/> Nunca o menos 1 vez al mes<br><input type="radio"/> 1 a 3 veces mes<br><input type="radio"/> 1 vez semana<br><input type="radio"/> 2 a 4 veces semana<br><input type="radio"/> 5 a 6 veces semana<br><input type="radio"/> 1 vez al día<br><input type="radio"/> 2 a 3 veces al día<br><input type="radio"/> 5 a 6 veces al día<br><input type="radio"/> más 6 veces al día |



---

Pescado frito

- ☒ Nunca o menos 1 vez al mes  
☐ 1 a 3 veces mes  
☐ 1 vez semana  
☐ 2 a 4 veces semana  
☐ 5 a 6 veces semana  
☐ 1 vez al día  
☐ 2 a 3 veces al día  
☐ 5 a 6 veces al día  
☐ más 6 veces al día

---

pescado hervido blanco

- ☐ Nunca o menos 1 vez al mes  
☒ 1 a 3 veces mes  
☐ 1 vez semana  
☐ 2 a 4 veces semana  
☐ 5 a 6 veces semana  
☐ 1 vez al día  
☐ 2 a 3 veces al día  
☐ 5 a 6 veces al día  
☐ más 6 veces al día

---

pescado hervido azul

- ☒ Nunca o menos 1 vez al mes  
☐ 1 a 3 veces mes  
☐ 1 vez semana  
☐ 2 a 4 veces semana  
☐ 5 a 6 veces semana  
☐ 1 vez al día  
☐ 2 a 3 veces al día  
☐ 5 a 6 veces al día  
☐ más 6 veces al día

---

otros pescado azul

- ☒ Nunca o menos 1 vez al mes  
☐ 1 a 3 veces mes  
☐ 1 vez semana  
☐ 2 a 4 veces semana  
☐ 5 a 6 veces semana  
☐ 1 vez al día  
☐ 2 a 3 veces al día  
☐ 5 a 6 veces al día  
☐ más 6 veces al día

---

atun conserva

- ☐ Nunca o menos 1 vez al mes  
☐ 1 a 3 veces mes  
☒ 1 vez semana  
☐ 2 a 4 veces semana  
☐ 5 a 6 veces semana  
☐ 1 vez al día  
☐ 2 a 3 veces al día  
☐ 5 a 6 veces al día  
☐ más 6 veces al día

---

sardina conserva

- ☒ Nunca o menos 1 vez al mes  
☐ 1 a 3 veces mes  
☐ 1 vez semana  
☐ 2 a 4 veces semana  
☐ 5 a 6 veces semana  
☐ 1 vez al día  
☐ 2 a 3 veces al día  
☐ 5 a 6 veces al día  
☐ más 6 veces al día

|                                         |                                                                                                                                                                                                                                                                                                                                                                                                              |
|-----------------------------------------|--------------------------------------------------------------------------------------------------------------------------------------------------------------------------------------------------------------------------------------------------------------------------------------------------------------------------------------------------------------------------------------------------------------|
| pescado ahumado                         | <input checked="" type="radio"/> Nunca o menos 1 vez al mes<br><input type="radio"/> 1 a 3 veces mes<br><input type="radio"/> 1 vez semana<br><input type="radio"/> 2 a 4 veces semana<br><input type="radio"/> 5 a 6 veces semana<br><input type="radio"/> 1 vez al día<br><input type="radio"/> 2 a 3 veces al día<br><input type="radio"/> 5 a 6 veces al día<br><input type="radio"/> más 6 veces al día |
| almejas o mejillones o ostras unos 100g | <input checked="" type="radio"/> Nunca o menos 1 vez al mes<br><input type="radio"/> 1 a 3 veces mes<br><input type="radio"/> 1 vez semana<br><input type="radio"/> 2 a 4 veces semana<br><input type="radio"/> 5 a 6 veces semana<br><input type="radio"/> 1 vez al día<br><input type="radio"/> 2 a 3 veces al día<br><input type="radio"/> 5 a 6 veces al día<br><input type="radio"/> más 6 veces al día |
| calamar o chipiron o sepia unos 100g    | <input checked="" type="radio"/> Nunca o menos 1 vez al mes<br><input type="radio"/> 1 a 3 veces mes<br><input type="radio"/> 1 vez semana<br><input type="radio"/> 2 a 4 veces semana<br><input type="radio"/> 5 a 6 veces semana<br><input type="radio"/> 1 vez al día<br><input type="radio"/> 2 a 3 veces al día<br><input type="radio"/> 5 a 6 veces al día<br><input type="radio"/> más 6 veces al día |
| marisco unos 100g                       | <input checked="" type="radio"/> Nunca o menos 1 vez al mes<br><input type="radio"/> 1 a 3 veces mes<br><input type="radio"/> 1 vez semana<br><input type="radio"/> 2 a 4 veces semana<br><input type="radio"/> 5 a 6 veces semana<br><input type="radio"/> 1 vez al día<br><input type="radio"/> 2 a 3 veces al día<br><input type="radio"/> 5 a 6 veces al día<br><input type="radio"/> más 6 veces al día |
| Espinacas o acelgas cocinadas           | <input type="radio"/> Nunca o menos 1 vez al mes<br><input type="radio"/> 1 a 3 veces mes<br><input checked="" type="radio"/> 1 vez semana<br><input type="radio"/> 2 a 4 veces semana<br><input type="radio"/> 5 a 6 veces semana<br><input type="radio"/> 1 vez al día<br><input type="radio"/> 2 a 3 veces al día<br><input type="radio"/> 5 a 6 veces al día<br><input type="radio"/> más 6 veces al día |
| Col o coliflor o brocoli cocinado       | <input checked="" type="radio"/> Nunca o menos 1 vez al mes<br><input type="radio"/> 1 a 3 veces mes<br><input type="radio"/> 1 vez semana<br><input type="radio"/> 2 a 4 veces semana<br><input type="radio"/> 5 a 6 veces semana<br><input type="radio"/> 1 vez al día<br><input type="radio"/> 2 a 3 veces al día<br><input type="radio"/> 5 a 6 veces al día<br><input type="radio"/> más 6 veces al día |

---

Lechuga o endivia o escarola

- ☐ Nunca o menos 1 vez al mes  
☐ 1 a 3 veces mes  
☒ 1 vez semana  
☐ 2 a 4 veces semana  
☐ 5 a 6 veces semana  
☐ 1 vez al día  
☐ 2 a 3 veces al día  
☐ 5 a 6 veces al día  
☐ más 6 veces al día

---

tomate ensalada

- ☒ Nunca o menos 1 vez al mes  
☐ 1 a 3 veces mes  
☐ 1 vez semana  
☐ 2 a 4 veces semana  
☐ 5 a 6 veces semana  
☐ 1 vez al día  
☐ 2 a 3 veces al día  
☐ 5 a 6 veces al día  
☐ más 6 veces al día

---

cebolla

- ☒ Nunca o menos 1 vez al mes  
☐ 1 a 3 veces mes  
☐ 1 vez semana  
☐ 2 a 4 veces semana  
☐ 5 a 6 veces semana  
☐ 1 vez al día  
☐ 2 a 3 veces al día  
☐ 5 a 6 veces al día  
☐ más 6 veces al día

---

Zanahoria o calabaza

- ☒ Nunca o menos 1 vez al mes  
☐ 1 a 3 veces mes  
☐ 1 vez semana  
☐ 2 a 4 veces semana  
☐ 5 a 6 veces semana  
☐ 1 vez al día  
☐ 2 a 3 veces al día  
☐ 5 a 6 veces al día  
☐ más 6 veces al día

---

Judías verdes

- ☒ Nunca o menos 1 vez al mes  
☐ 1 a 3 veces mes  
☐ 1 vez semana  
☐ 2 a 4 veces semana  
☐ 5 a 6 veces semana  
☐ 1 vez al día  
☐ 2 a 3 veces al día  
☐ 5 a 6 veces al día  
☐ más 6 veces al día

---

Berenjena o calabacin o pepino

- ☒ Nunca o menos 1 vez al mes  
☐ 1 a 3 veces mes  
☐ 1 vez semana  
☐ 2 a 4 veces semana  
☐ 5 a 6 veces semana  
☐ 1 vez al día  
☐ 2 a 3 veces al día  
☐ 5 a 6 veces al día  
☐ más 6 veces al día

|                       |                                                                                                                                                                                                                                                                                                                                                                                                              |
|-----------------------|--------------------------------------------------------------------------------------------------------------------------------------------------------------------------------------------------------------------------------------------------------------------------------------------------------------------------------------------------------------------------------------------------------------|
| pimiento              | <input checked="" type="radio"/> Nunca o menos 1 vez al mes<br><input type="radio"/> 1 a 3 veces mes<br><input type="radio"/> 1 vez semana<br><input type="radio"/> 2 a 4 veces semana<br><input type="radio"/> 5 a 6 veces semana<br><input type="radio"/> 1 vez al día<br><input type="radio"/> 2 a 3 veces al día<br><input type="radio"/> 5 a 6 veces al día<br><input type="radio"/> más 6 veces al día |
| alcachofa             | <input checked="" type="radio"/> Nunca o menos 1 vez al mes<br><input type="radio"/> 1 a 3 veces mes<br><input type="radio"/> 1 vez semana<br><input type="radio"/> 2 a 4 veces semana<br><input type="radio"/> 5 a 6 veces semana<br><input type="radio"/> 1 vez al día<br><input type="radio"/> 2 a 3 veces al día<br><input type="radio"/> 5 a 6 veces al día<br><input type="radio"/> más 6 veces al día |
| espárragos            | <input checked="" type="radio"/> Nunca o menos 1 vez al mes<br><input type="radio"/> 1 a 3 veces mes<br><input type="radio"/> 1 vez semana<br><input type="radio"/> 2 a 4 veces semana<br><input type="radio"/> 5 a 6 veces semana<br><input type="radio"/> 1 vez al día<br><input type="radio"/> 2 a 3 veces al día<br><input type="radio"/> 5 a 6 veces al día<br><input type="radio"/> más 6 veces al día |
| maíz hervido          | <input checked="" type="radio"/> Nunca o menos 1 vez al mes<br><input type="radio"/> 1 a 3 veces mes<br><input type="radio"/> 1 vez semana<br><input type="radio"/> 2 a 4 veces semana<br><input type="radio"/> 5 a 6 veces semana<br><input type="radio"/> 1 vez al día<br><input type="radio"/> 2 a 3 veces al día<br><input type="radio"/> 5 a 6 veces al día<br><input type="radio"/> más 6 veces al día |
| legumbres             | <input type="radio"/> Nunca o menos 1 vez al mes<br><input type="radio"/> 1 a 3 veces mes<br><input checked="" type="radio"/> 1 vez semana<br><input type="radio"/> 2 a 4 veces semana<br><input type="radio"/> 5 a 6 veces semana<br><input type="radio"/> 1 vez al día<br><input type="radio"/> 2 a 3 veces al día<br><input type="radio"/> 5 a 6 veces al día<br><input type="radio"/> más 6 veces al día |
| naranjas o mandarinas | <input checked="" type="radio"/> Nunca o menos 1 vez al mes<br><input type="radio"/> 1 a 3 veces mes<br><input type="radio"/> 1 vez semana<br><input type="radio"/> 2 a 4 veces semana<br><input type="radio"/> 5 a 6 veces semana<br><input type="radio"/> 1 vez al día<br><input type="radio"/> 2 a 3 veces al día<br><input type="radio"/> 5 a 6 veces al día<br><input type="radio"/> más 6 veces al día |

|                       |                                                                                                                                                                                                                                                                                                                                                                                                              |
|-----------------------|--------------------------------------------------------------------------------------------------------------------------------------------------------------------------------------------------------------------------------------------------------------------------------------------------------------------------------------------------------------------------------------------------------------|
| zum natural fruta     | <input checked="" type="radio"/> Nunca o menos 1 vez al mes<br><input type="radio"/> 1 a 3 veces mes<br><input type="radio"/> 1 vez semana<br><input type="radio"/> 2 a 4 veces semana<br><input type="radio"/> 5 a 6 veces semana<br><input type="radio"/> 1 vez al día<br><input type="radio"/> 2 a 3 veces al día<br><input type="radio"/> 5 a 6 veces al día<br><input type="radio"/> más 6 veces al día |
| platano               | <input type="radio"/> Nunca o menos 1 vez al mes<br><input type="radio"/> 1 a 3 veces mes<br><input checked="" type="radio"/> 1 vez semana<br><input type="radio"/> 2 a 4 veces semana<br><input type="radio"/> 5 a 6 veces semana<br><input type="radio"/> 1 vez al día<br><input type="radio"/> 2 a 3 veces al día<br><input type="radio"/> 5 a 6 veces al día<br><input type="radio"/> más 6 veces al día |
| manzana o pera        | <input checked="" type="radio"/> Nunca o menos 1 vez al mes<br><input type="radio"/> 1 a 3 veces mes<br><input type="radio"/> 1 vez semana<br><input type="radio"/> 2 a 4 veces semana<br><input type="radio"/> 5 a 6 veces semana<br><input type="radio"/> 1 vez al día<br><input type="radio"/> 2 a 3 veces al día<br><input type="radio"/> 5 a 6 veces al día<br><input type="radio"/> más 6 veces al día |
| melocotón o nectarina | <input type="radio"/> Nunca o menos 1 vez al mes<br><input checked="" type="radio"/> 1 a 3 veces mes<br><input type="radio"/> 1 vez semana<br><input type="radio"/> 2 a 4 veces semana<br><input type="radio"/> 5 a 6 veces semana<br><input type="radio"/> 1 vez al día<br><input type="radio"/> 2 a 3 veces al día<br><input type="radio"/> 5 a 6 veces al día<br><input type="radio"/> más 6 veces al día |
| sandia o melon        | <input checked="" type="radio"/> Nunca o menos 1 vez al mes<br><input type="radio"/> 1 a 3 veces mes<br><input type="radio"/> 1 vez semana<br><input type="radio"/> 2 a 4 veces semana<br><input type="radio"/> 5 a 6 veces semana<br><input type="radio"/> 1 vez al día<br><input type="radio"/> 2 a 3 veces al día<br><input type="radio"/> 5 a 6 veces al día<br><input type="radio"/> más 6 veces al día |
| uva                   | <input checked="" type="radio"/> Nunca o menos 1 vez al mes<br><input type="radio"/> 1 a 3 veces mes<br><input type="radio"/> 1 vez semana<br><input type="radio"/> 2 a 4 veces semana<br><input type="radio"/> 5 a 6 veces semana<br><input type="radio"/> 1 vez al día<br><input type="radio"/> 2 a 3 veces al día<br><input type="radio"/> 5 a 6 veces al día<br><input type="radio"/> más 6 veces al día |

---

bruna o ciruela

- ☐ Nunca o menos 1 vez al mes  
☒ 1 a 3 veces mes  
☐ 1 vez semana  
☐ 2 a 4 veces semana  
☐ 5 a 6 veces semana  
☐ 1 vez al día  
☐ 2 a 3 veces al día  
☐ 5 a 6 veces al día  
☐ más 6 veces al día

---

kiwi

- ☐ Nunca o menos 1 vez al mes  
☒ 1 a 3 veces mes  
☐ 1 vez semana  
☐ 2 a 4 veces semana  
☐ 5 a 6 veces semana  
☐ 1 vez al día  
☐ 2 a 3 veces al día  
☐ 5 a 6 veces al día  
☐ más 6 veces al día

---

aceituna

- ☐ Nunca o menos 1 vez al mes  
☐ 1 a 3 veces mes  
☒ 1 vez semana  
☐ 2 a 4 veces semana  
☐ 5 a 6 veces semana  
☐ 1 vez al día  
☐ 2 a 3 veces al día  
☐ 5 a 6 veces al día  
☐ más 6 veces al día

---

frutos secos

- ☐ Nunca o menos 1 vez al mes  
☐ 1 a 3 veces mes  
☐ 1 vez semana  
☒ 2 a 4 veces semana  
☐ 5 a 6 veces semana  
☐ 1 vez al día  
☐ 2 a 3 veces al día  
☐ 5 a 6 veces al día  
☐ más 6 veces al día

---

pan blanco

- ☐ Nunca o menos 1 vez al mes  
☐ 1 a 3 veces mes  
☐ 1 vez semana  
☐ 2 a 4 veces semana  
☐ 5 a 6 veces semana  
☒ 1 vez al día  
☐ 2 a 3 veces al día  
☐ 5 a 6 veces al día  
☐ más 6 veces al día

---

pan integral

- ☐ Nunca o menos 1 vez al mes  
☐ 1 a 3 veces mes  
☐ 1 vez semana  
☐ 2 a 4 veces semana  
☐ 5 a 6 veces semana  
☒ 1 vez al día  
☐ 2 a 3 veces al día  
☐ 5 a 6 veces al día  
☐ más 6 veces al día

|                          |                                                                                                                                                                                                                                                                                                                                                                                                              |
|--------------------------|--------------------------------------------------------------------------------------------------------------------------------------------------------------------------------------------------------------------------------------------------------------------------------------------------------------------------------------------------------------------------------------------------------------|
| cereales desayuno        | <input type="radio"/> Nunca o menos 1 vez al mes<br><input type="radio"/> 1 a 3 veces mes<br><input checked="" type="radio"/> 1 vez semana<br><input type="radio"/> 2 a 4 veces semana<br><input type="radio"/> 5 a 6 veces semana<br><input type="radio"/> 1 vez al día<br><input type="radio"/> 2 a 3 veces al día<br><input type="radio"/> 5 a 6 veces al día<br><input type="radio"/> más 6 veces al día |
| patatas fritas           | <input type="radio"/> Nunca o menos 1 vez al mes<br><input type="radio"/> 1 a 3 veces mes<br><input checked="" type="radio"/> 1 vez semana<br><input type="radio"/> 2 a 4 veces semana<br><input type="radio"/> 5 a 6 veces semana<br><input type="radio"/> 1 vez al día<br><input type="radio"/> 2 a 3 veces al día<br><input type="radio"/> 5 a 6 veces al día<br><input type="radio"/> más 6 veces al día |
| patatas cocidas o asadas | <input type="radio"/> Nunca o menos 1 vez al mes<br><input type="radio"/> 1 a 3 veces mes<br><input checked="" type="radio"/> 1 vez semana<br><input type="radio"/> 2 a 4 veces semana<br><input type="radio"/> 5 a 6 veces semana<br><input type="radio"/> 1 vez al día<br><input type="radio"/> 2 a 3 veces al día<br><input type="radio"/> 5 a 6 veces al día<br><input type="radio"/> más 6 veces al día |
| bolsa papas              | <input type="radio"/> Nunca o menos 1 vez al mes<br><input type="radio"/> 1 a 3 veces mes<br><input checked="" type="radio"/> 1 vez semana<br><input type="radio"/> 2 a 4 veces semana<br><input type="radio"/> 5 a 6 veces semana<br><input type="radio"/> 1 vez al día<br><input type="radio"/> 2 a 3 veces al día<br><input type="radio"/> 5 a 6 veces al día<br><input type="radio"/> más 6 veces al día |
| arroz cocinado           | <input type="radio"/> Nunca o menos 1 vez al mes<br><input type="radio"/> 1 a 3 veces mes<br><input type="radio"/> 1 vez semana<br><input checked="" type="radio"/> 2 a 4 veces semana<br><input type="radio"/> 5 a 6 veces semana<br><input type="radio"/> 1 vez al día<br><input type="radio"/> 2 a 3 veces al día<br><input type="radio"/> 5 a 6 veces al día<br><input type="radio"/> más 6 veces al día |
| pasta                    | <input type="radio"/> Nunca o menos 1 vez al mes<br><input type="radio"/> 1 a 3 veces mes<br><input type="radio"/> 1 vez semana<br><input checked="" type="radio"/> 2 a 4 veces semana<br><input type="radio"/> 5 a 6 veces semana<br><input type="radio"/> 1 vez al día<br><input type="radio"/> 2 a 3 veces al día<br><input type="radio"/> 5 a 6 veces al día<br><input type="radio"/> más 6 veces al día |

|                     |                                                                                                                                                                                                                                                                                                                                                                                                              |
|---------------------|--------------------------------------------------------------------------------------------------------------------------------------------------------------------------------------------------------------------------------------------------------------------------------------------------------------------------------------------------------------------------------------------------------------|
| pizza               | <input type="radio"/> Nunca o menos 1 vez al mes<br><input type="radio"/> 1 a 3 veces mes<br><input checked="" type="radio"/> 1 vez semana<br><input type="radio"/> 2 a 4 veces semana<br><input type="radio"/> 5 a 6 veces semana<br><input type="radio"/> 1 vez al día<br><input type="radio"/> 2 a 3 veces al día<br><input type="radio"/> 5 a 6 veces al día<br><input type="radio"/> más 6 veces al día |
| aceite oliva        | <input type="radio"/> Nunca o menos 1 vez al mes<br><input type="radio"/> 1 a 3 veces mes<br><input type="radio"/> 1 vez semana<br><input checked="" type="radio"/> 2 a 4 veces semana<br><input type="radio"/> 5 a 6 veces semana<br><input type="radio"/> 1 vez al día<br><input type="radio"/> 2 a 3 veces al día<br><input type="radio"/> 5 a 6 veces al día<br><input type="radio"/> más 6 veces al día |
| otros aceites       | <input checked="" type="radio"/> Nunca o menos 1 vez al mes<br><input type="radio"/> 1 a 3 veces mes<br><input type="radio"/> 1 vez semana<br><input type="radio"/> 2 a 4 veces semana<br><input type="radio"/> 5 a 6 veces semana<br><input type="radio"/> 1 vez al día<br><input type="radio"/> 2 a 3 veces al día<br><input type="radio"/> 5 a 6 veces al día<br><input type="radio"/> más 6 veces al día |
| margarina           | <input checked="" type="radio"/> Nunca o menos 1 vez al mes<br><input type="radio"/> 1 a 3 veces mes<br><input type="radio"/> 1 vez semana<br><input type="radio"/> 2 a 4 veces semana<br><input type="radio"/> 5 a 6 veces semana<br><input type="radio"/> 1 vez al día<br><input type="radio"/> 2 a 3 veces al día<br><input type="radio"/> 5 a 6 veces al día<br><input type="radio"/> más 6 veces al día |
| mantequilla         | <input checked="" type="radio"/> Nunca o menos 1 vez al mes<br><input type="radio"/> 1 a 3 veces mes<br><input type="radio"/> 1 vez semana<br><input type="radio"/> 2 a 4 veces semana<br><input type="radio"/> 5 a 6 veces semana<br><input type="radio"/> 1 vez al día<br><input type="radio"/> 2 a 3 veces al día<br><input type="radio"/> 5 a 6 veces al día<br><input type="radio"/> más 6 veces al día |
| galletas tipo maria | <input type="radio"/> Nunca o menos 1 vez al mes<br><input type="radio"/> 1 a 3 veces mes<br><input type="radio"/> 1 vez semana<br><input type="radio"/> 2 a 4 veces semana<br><input type="radio"/> 5 a 6 veces semana<br><input checked="" type="radio"/> 1 vez al día<br><input type="radio"/> 2 a 3 veces al día<br><input type="radio"/> 5 a 6 veces al día<br><input type="radio"/> más 6 veces al día |



|                           |                                                                                                                                                                                                                                                                                                                                                                                                              |
|---------------------------|--------------------------------------------------------------------------------------------------------------------------------------------------------------------------------------------------------------------------------------------------------------------------------------------------------------------------------------------------------------------------------------------------------------|
| galletas chocolate        | <input checked="" type="radio"/> Nunca o menos 1 vez al mes<br><input type="radio"/> 1 a 3 veces mes<br><input type="radio"/> 1 vez semana<br><input type="radio"/> 2 a 4 veces semana<br><input type="radio"/> 5 a 6 veces semana<br><input type="radio"/> 1 vez al día<br><input type="radio"/> 2 a 3 veces al día<br><input type="radio"/> 5 a 6 veces al día<br><input type="radio"/> más 6 veces al día |
| bollieria                 | <input type="radio"/> Nunca o menos 1 vez al mes<br><input type="radio"/> 1 a 3 veces mes<br><input type="radio"/> 1 vez semana<br><input checked="" type="radio"/> 2 a 4 veces semana<br><input type="radio"/> 5 a 6 veces semana<br><input type="radio"/> 1 vez al día<br><input type="radio"/> 2 a 3 veces al día<br><input type="radio"/> 5 a 6 veces al día<br><input type="radio"/> más 6 veces al día |
| chocolate o bombones      | <input type="radio"/> Nunca o menos 1 vez al mes<br><input type="radio"/> 1 a 3 veces mes<br><input type="radio"/> 1 vez semana<br><input type="radio"/> 2 a 4 veces semana<br><input type="radio"/> 5 a 6 veces semana<br><input type="radio"/> 1 vez al día<br><input type="radio"/> 2 a 3 veces al día<br><input type="radio"/> 5 a 6 veces al día<br><input type="radio"/> más 6 veces al día            |
| chocolate polvo o colacao | <input type="radio"/> Nunca o menos 1 vez al mes<br><input type="radio"/> 1 a 3 veces mes<br><input checked="" type="radio"/> 1 vez semana<br><input type="radio"/> 2 a 4 veces semana<br><input type="radio"/> 5 a 6 veces semana<br><input type="radio"/> 1 vez al día<br><input type="radio"/> 2 a 3 veces al día<br><input type="radio"/> 5 a 6 veces al día<br><input type="radio"/> más 6 veces al día |
| vino tinto                | <input checked="" type="radio"/> Nunca o menos 1 vez al mes<br><input type="radio"/> 1 a 3 veces mes<br><input type="radio"/> 1 vez semana<br><input type="radio"/> 2 a 4 veces semana<br><input type="radio"/> 5 a 6 veces semana<br><input type="radio"/> 1 vez al día<br><input type="radio"/> 2 a 3 veces al día<br><input type="radio"/> 5 a 6 veces al día<br><input type="radio"/> más 6 veces al día |
| vino blanco               | <input checked="" type="radio"/> Nunca o menos 1 vez al mes<br><input type="radio"/> 1 a 3 veces mes<br><input type="radio"/> 1 vez semana<br><input type="radio"/> 2 a 4 veces semana<br><input type="radio"/> 5 a 6 veces semana<br><input type="radio"/> 1 vez al día<br><input type="radio"/> 2 a 3 veces al día<br><input type="radio"/> 5 a 6 veces al día<br><input type="radio"/> más 6 veces al día |

|                       |                                                                                                                                                                                                                                                                                                                                                                                                              |
|-----------------------|--------------------------------------------------------------------------------------------------------------------------------------------------------------------------------------------------------------------------------------------------------------------------------------------------------------------------------------------------------------------------------------------------------------|
| vino seco o vermut    | <input checked="" type="radio"/> Nunca o menos 1 vez al mes<br><input type="radio"/> 1 a 3 veces mes<br><input type="radio"/> 1 vez semana<br><input type="radio"/> 2 a 4 veces semana<br><input type="radio"/> 5 a 6 veces semana<br><input type="radio"/> 1 vez al día<br><input type="radio"/> 2 a 3 veces al día<br><input type="radio"/> 5 a 6 veces al día<br><input type="radio"/> más 6 veces al día |
| cerveza               | <input checked="" type="radio"/> Nunca o menos 1 vez al mes<br><input type="radio"/> 1 a 3 veces mes<br><input type="radio"/> 1 vez semana<br><input type="radio"/> 2 a 4 veces semana<br><input type="radio"/> 5 a 6 veces semana<br><input type="radio"/> 1 vez al día<br><input type="radio"/> 2 a 3 veces al día<br><input type="radio"/> 5 a 6 veces al día<br><input type="radio"/> más 6 veces al día |
| cerveza sin alcohol   | <input checked="" type="radio"/> Nunca o menos 1 vez al mes<br><input type="radio"/> 1 a 3 veces mes<br><input type="radio"/> 1 vez semana<br><input type="radio"/> 2 a 4 veces semana<br><input type="radio"/> 5 a 6 veces semana<br><input type="radio"/> 1 vez al día<br><input type="radio"/> 2 a 3 veces al día<br><input type="radio"/> 5 a 6 veces al día<br><input type="radio"/> más 6 veces al día |
| licores               | <input checked="" type="radio"/> Nunca o menos 1 vez al mes<br><input type="radio"/> 1 a 3 veces mes<br><input type="radio"/> 1 vez semana<br><input type="radio"/> 2 a 4 veces semana<br><input type="radio"/> 5 a 6 veces semana<br><input type="radio"/> 1 vez al día<br><input type="radio"/> 2 a 3 veces al día<br><input type="radio"/> 5 a 6 veces al día<br><input type="radio"/> más 6 veces al día |
| ginebra o ron o vodka | <input checked="" type="radio"/> Nunca o menos 1 vez al mes<br><input type="radio"/> 1 a 3 veces mes<br><input type="radio"/> 1 vez semana<br><input type="radio"/> 2 a 4 veces semana<br><input type="radio"/> 5 a 6 veces semana<br><input type="radio"/> 1 vez al día<br><input type="radio"/> 2 a 3 veces al día<br><input type="radio"/> 5 a 6 veces al día<br><input type="radio"/> más 6 veces al día |
| refresco normal       | <input type="radio"/> Nunca o menos 1 vez al mes<br><input type="radio"/> 1 a 3 veces mes<br><input checked="" type="radio"/> 1 vez semana<br><input type="radio"/> 2 a 4 veces semana<br><input type="radio"/> 5 a 6 veces semana<br><input type="radio"/> 1 vez al día<br><input type="radio"/> 2 a 3 veces al día<br><input type="radio"/> 5 a 6 veces al día<br><input type="radio"/> más 6 veces al día |

---

refresco sin azúcar

- ☐ Nunca o menos 1 vez al mes  
☐ 1 a 3 veces mes  
☐ 1 vez semana  
☒ 2 a 4 veces semana  
☐ 5 a 6 veces semana  
☐ 1 vez al día  
☐ 2 a 3 veces al día  
☐ 5 a 6 veces al día  
☐ más 6 veces al día

---

Agua del grifo

- ☒ Nunca o menos 1 vez al mes  
☐ 1 a 3 veces mes  
☐ 1 vez semana  
☐ 2 a 4 veces semana  
☐ 5 a 6 veces semana  
☐ 1 vez al día  
☐ 2 a 3 veces al día  
☐ 5 a 6 veces al día  
☐ más 6 veces al día

---

agua embotellada sin gas

- ☐ Nunca o menos 1 vez al mes  
☐ 1 a 3 veces mes  
☐ 1 vez semana  
☐ 2 a 4 veces semana  
☐ 5 a 6 veces semana  
☐ 1 vez al día  
☐ 2 a 3 veces al día  
☐ 5 a 6 veces al día  
☒ más 6 veces al día

---

agua embotellada con gas

- ☐ Nunca o menos 1 vez al mes  
☐ 1 a 3 veces mes  
☐ 1 vez semana  
☐ 2 a 4 veces semana  
☐ 5 a 6 veces semana  
☐ 1 vez al día  
☒ 2 a 3 veces al día  
☐ 5 a 6 veces al día  
☐ más 6 veces al día

---

zumو frutas embasado

- ☐ Nunca o menos 1 vez al mes  
☐ 1 a 3 veces mes  
☐ 1 vez semana  
☐ 2 a 4 veces semana  
☐ 5 a 6 veces semana  
☐ 1 vez al día  
☐ 2 a 3 veces al día  
☐ 5 a 6 veces al día  
☐ más 6 veces al día

---

cafe

- ☐ Nunca o menos 1 vez al mes  
☐ 1 a 3 veces mes  
☐ 1 vez semana  
☐ 2 a 4 veces semana  
☐ 5 a 6 veces semana  
☒ 1 vez al día  
☐ 2 a 3 veces al día  
☐ 5 a 6 veces al día  
☐ más 6 veces al día

---

cafe descafeinado

- ☐ Nunca o menos 1 vez al mes  
☐ 1 a 3 veces mes  
☐ 1 vez semana  
☐ 2 a 4 veces semana  
☐ 5 a 6 veces semana  
☒ 1 vez al día  
☐ 2 a 3 veces al día  
☐ 5 a 6 veces al día  
☐ más 6 veces al día

---

te o infusión

- ☒ Nunca o menos 1 vez al mes  
☐ 1 a 3 veces mes  
☐ 1 vez semana  
☐ 2 a 4 veces semana  
☐ 5 a 6 veces semana  
☐ 1 vez al día  
☐ 2 a 3 veces al día  
☐ 5 a 6 veces al día  
☐ más 6 veces al día

---

sopa o puré verduras

- ☒ Nunca o menos 1 vez al mes  
☐ 1 a 3 veces mes  
☐ 1 vez semana  
☐ 2 a 4 veces semana  
☐ 5 a 6 veces semana  
☐ 1 vez al día  
☐ 2 a 3 veces al día  
☐ 5 a 6 veces al día  
☐ más 6 veces al día

---

croquetas pollo jamón

- ☐ Nunca o menos 1 vez al mes  
☐ 1 a 3 veces mes  
☒ 1 vez semana  
☐ 2 a 4 veces semana  
☐ 5 a 6 veces semana  
☐ 1 vez al día  
☐ 2 a 3 veces al día  
☐ 5 a 6 veces al día  
☐ más 6 veces al día

---

croquetas pescado

- ☐ Nunca o menos 1 vez al mes  
☐ 1 a 3 veces mes  
☐ 1 vez semana  
☐ 2 a 4 veces semana  
☐ 5 a 6 veces semana  
☐ 1 vez al día  
☐ 2 a 3 veces al día  
☐ 5 a 6 veces al día  
☐ más 6 veces al día

---

mayonesa

- ☐ Nunca o menos 1 vez al mes  
☐ 1 a 3 veces mes  
☐ 1 vez semana  
☒ 2 a 4 veces semana  
☐ 5 a 6 veces semana  
☐ 1 vez al día  
☐ 2 a 3 veces al día  
☐ 5 a 6 veces al día  
☐ más 6 veces al día

|                  |                                                                                                                                                                                                                                                                                                                                                                                                              |
|------------------|--------------------------------------------------------------------------------------------------------------------------------------------------------------------------------------------------------------------------------------------------------------------------------------------------------------------------------------------------------------------------------------------------------------|
| salsa tomate     | <input type="radio"/> Nunca o menos 1 vez al mes<br><input type="radio"/> 1 a 3 veces mes<br><input type="radio"/> 1 vez semana<br><input checked="" type="radio"/> 2 a 4 veces semana<br><input type="radio"/> 5 a 6 veces semana<br><input type="radio"/> 1 vez al día<br><input type="radio"/> 2 a 3 veces al día<br><input type="radio"/> 5 a 6 veces al día<br><input type="radio"/> más 6 veces al día |
| ketchup          | <input type="radio"/> Nunca o menos 1 vez al mes<br><input checked="" type="radio"/> 1 a 3 veces mes<br><input type="radio"/> 1 vez semana<br><input type="radio"/> 2 a 4 veces semana<br><input type="radio"/> 5 a 6 veces semana<br><input type="radio"/> 1 vez al día<br><input type="radio"/> 2 a 3 veces al día<br><input type="radio"/> 5 a 6 veces al día<br><input type="radio"/> más 6 veces al día |
| sal              | <input type="radio"/> Nunca o menos 1 vez al mes<br><input type="radio"/> 1 a 3 veces mes<br><input type="radio"/> 1 vez semana<br><input type="radio"/> 2 a 4 veces semana<br><input type="radio"/> 5 a 6 veces semana<br><input checked="" type="radio"/> 1 vez al día<br><input type="radio"/> 2 a 3 veces al día<br><input type="radio"/> 5 a 6 veces al día<br><input type="radio"/> más 6 veces al día |
| ajo              | <input type="radio"/> Nunca o menos 1 vez al mes<br><input type="radio"/> 1 a 3 veces mes<br><input type="radio"/> 1 vez semana<br><input checked="" type="radio"/> 2 a 4 veces semana<br><input type="radio"/> 5 a 6 veces semana<br><input type="radio"/> 1 vez al día<br><input type="radio"/> 2 a 3 veces al día<br><input type="radio"/> 5 a 6 veces al día<br><input type="radio"/> más 6 veces al día |
| mermelada o miel | <input checked="" type="radio"/> Nunca o menos 1 vez al mes<br><input type="radio"/> 1 a 3 veces mes<br><input type="radio"/> 1 vez semana<br><input type="radio"/> 2 a 4 veces semana<br><input type="radio"/> 5 a 6 veces semana<br><input type="radio"/> 1 vez al día<br><input type="radio"/> 2 a 3 veces al día<br><input type="radio"/> 5 a 6 veces al día<br><input type="radio"/> más 6 veces al día |
| azúcar           | <input type="radio"/> Nunca o menos 1 vez al mes<br><input type="radio"/> 1 a 3 veces mes<br><input type="radio"/> 1 vez semana<br><input type="radio"/> 2 a 4 veces semana<br><input type="radio"/> 5 a 6 veces semana<br><input type="radio"/> 1 vez al día<br><input checked="" type="radio"/> 2 a 3 veces al día<br><input type="radio"/> 5 a 6 veces al día<br><input type="radio"/> más 6 veces al día |

---

Otro alimento

---

suplementos vitamínicos

- ☐ si  
☒ no

suplementos vitamínicos

---

dieta previa

- ☐ si  
☒ no

motivo dieta

- ☒ no dieta  
☐ control peso  
☐ control colesterol  
☐ control diabetes  
☐ problemas estómago  
☐ problemas vesícula o hepáticos  
☐ HTA o cardiopatía  
☐ problemas renales  
☐ alergia alimentaria  
☐ ácido úrico elevado  
☐ vegetariana  
☐ otros

cambio alimentos año previo gestación

- ☒ si  
☐ no

cambio lácteos

- ☐ eliminado  
☐ disminuido  
☐ igual  
☐ aumentado  
☐ no sabe

cambio huevos

- ☐ eliminado  
☐ disminuido  
☐ igual  
☐ aumentado  
☐ no sabe

cambio carne

- ☐ eliminado  
☐ disminuido  
☐ igual  
☐ aumentado  
☐ no sabe

cambio pescado

- ☐ eliminado  
☐ disminuido  
☐ igual  
☐ aumentado  
☐ no sabe

cambio verduras

- ☐ eliminado  
☐ disminuido  
☐ igual  
☐ aumentado  
☐ no sabe

|                            |                                                                                                                                                                                                                        |
|----------------------------|------------------------------------------------------------------------------------------------------------------------------------------------------------------------------------------------------------------------|
| cambio legumbres           | <input type="radio"/> eliminado<br><input type="radio"/> disminuido<br><input type="radio"/> igual<br><input type="radio"/> aumentado<br><input type="radio"/> no sabe                                                 |
| cambio fruta               | <input type="radio"/> eliminado<br><input type="radio"/> disminuido<br><input type="radio"/> igual<br><input type="radio"/> aumentado<br><input type="radio"/> no sabe                                                 |
| cambio pan                 | <input type="radio"/> eliminado<br><input type="radio"/> disminuido<br><input type="radio"/> igual<br><input type="radio"/> aumentado<br><input type="radio"/> no sabe                                                 |
| cambio aceite oliva        | <input type="radio"/> eliminado<br><input type="radio"/> disminuido<br><input type="radio"/> igual<br><input type="radio"/> aumentado<br><input type="radio"/> no sabe                                                 |
| cambio mante o margarina   | <input checked="" type="radio"/> eliminado<br><input type="radio"/> disminuido<br><input type="radio"/> igual<br><input type="radio"/> aumentado<br><input type="radio"/> no sabe                                      |
| cambio azúcar y dulces     | <input type="radio"/> eliminado<br><input type="radio"/> disminuido<br><input type="radio"/> igual<br><input type="radio"/> aumentado<br><input type="radio"/> no sabe                                                 |
| cambio bebidas alcohólicas | <input checked="" type="radio"/> eliminado<br><input type="radio"/> disminuido<br><input type="radio"/> igual<br><input type="radio"/> aumentado<br><input type="radio"/> no sabe                                      |
| frecuencia comidas fritas  | <input type="radio"/> a diario<br><input type="radio"/> 5 a 6 veces semana<br><input type="radio"/> 2 a 4 veces semana<br><input checked="" type="radio"/> 1 vez semana<br><input type="radio"/> menos de 1 vez semana |
| carne                      | <input type="radio"/> no como<br><input type="radio"/> cruda<br><input type="radio"/> poco hecha<br><input type="radio"/> hecha<br><input checked="" type="radio"/> muy hecha                                          |
| grasa visible carne        | <input checked="" type="radio"/> quita toda<br><input type="radio"/> quita mayoría<br><input type="radio"/> quita un poco<br><input type="radio"/> no quita nada                                                       |

|                                |                                                                                                                                                                                                                                                          |
|--------------------------------|----------------------------------------------------------------------------------------------------------------------------------------------------------------------------------------------------------------------------------------------------------|
| cocina carne                   | <input checked="" type="radio"/> a la plancha<br><input type="radio"/> a la parrilla<br><input type="radio"/> asada<br><input type="radio"/> frita<br><input type="radio"/> guisada                                                                      |
| tostado quemado carne          | <input checked="" type="radio"/> nunca<br><input type="radio"/> 1 vez mes<br><input type="radio"/> 2 a 3 veces mes<br><input type="radio"/> 1 vez semana<br><input type="radio"/> 2 a 3 semanas                                                          |
| tostado quemado pescado        | <input checked="" type="radio"/> nunca<br><input type="radio"/> 1 vez mes<br><input type="radio"/> 2 a 3 veces mes<br><input type="radio"/> 1 vez semana<br><input type="radio"/> 2 a 3 semanas                                                          |
| socarrat paella                | <input checked="" type="radio"/> nunca<br><input type="radio"/> 1 vez mes<br><input type="radio"/> 2 a 3 veces mes<br><input type="radio"/> 1 vez semana<br><input type="radio"/> 2 a 3 semanas                                                          |
| grasa o aceite cocinar         | <input type="radio"/> mantequilla<br><input type="radio"/> margarina<br><input checked="" type="radio"/> aceite oliva<br><input type="radio"/> aceite oliva virgen extra<br><input type="radio"/> aceite vegetal<br><input type="radio"/> mezcla aceites |
| grasa aceite aliñar            | <input type="radio"/> mantequilla<br><input type="radio"/> margarina<br><input type="radio"/> aceite oliva<br><input type="radio"/> aceite oliva virgen extra<br><input type="radio"/> aceite vegetal<br><input checked="" type="radio"/> mezcla aceites |
| grasa aceite freir             | <input type="radio"/> mantequilla<br><input type="radio"/> margarina<br><input type="radio"/> aceite oliva<br><input type="radio"/> aceite oliva virgen extra<br><input type="radio"/> aceite vegetal<br><input checked="" type="radio"/> mezcla aceites |
| Ejercicio cuestionario         | <input checked="" type="radio"/> si<br><input type="radio"/> no                                                                                                                                                                                          |
| horas de sueño incluido siesta | [*DATA REMOVED*]                                                                                                                                                                                                                                         |
| minutos siesta                 | _____                                                                                                                                                                                                                                                    |
| horas televisión semana        | _____                                                                                                                                                                                                                                                    |



|                                        |                                                                                                                                                                                                                                                                                                                                                                |
|----------------------------------------|----------------------------------------------------------------------------------------------------------------------------------------------------------------------------------------------------------------------------------------------------------------------------------------------------------------------------------------------------------------|
| actividad trabajo                      | <input type="radio"/> casi siempre sentado<br><input type="radio"/> sentado 50 por cien<br><input type="radio"/> casi siempre de pie, quieto<br><input type="radio"/> casi siempre levantado caminando y llevando pocas cosas<br><input type="radio"/> casi siempre levantado, caminando y llevado muchas cosas<br><input type="radio"/> trabajo manual pesado |
| tiempo caminar o bici al día           | <input type="radio"/> casi nunca<br><input type="radio"/> menos 20min día<br><input checked="" type="radio"/> 20 a 40 min día<br><input type="radio"/> 40 a 60 min día<br><input type="radio"/> 1h o 1h y media día<br><input type="radio"/> más de 1h y media al día                                                                                          |
| tiempo tareas casa al día              | <input type="radio"/> menos de 1h día<br><input type="radio"/> 1 a 2h día<br><input checked="" type="radio"/> 3 a 4h día<br><input type="radio"/> 5 a 6h día<br><input type="radio"/> 7 a 8h día<br><input type="radio"/> más de 8h día                                                                                                                        |
| tiempo libre televisión ordenador leer | <input type="radio"/> menos 1h día<br><input type="radio"/> 1h día<br><input checked="" type="radio"/> 2h día<br><input type="radio"/> 3h día<br><input type="radio"/> 4h día<br><input type="radio"/> 5 a 6h día<br><input type="radio"/> mas 6h día                                                                                                          |
| tiempo libre ejercicio o deporte       | <input type="radio"/> menos 1h semana<br><input checked="" type="radio"/> 1h semana<br><input type="radio"/> 2h semana<br><input type="radio"/> 3h semana<br><input type="radio"/> 4 a 5h semana<br><input type="radio"/> mas 5h semana                                                                                                                        |
| como se considera                      | <input type="radio"/> sedentaria<br><input type="radio"/> poco activa<br><input checked="" type="radio"/> moderadamente activa<br><input type="radio"/> bastante activa<br><input type="radio"/> muy activa<br><input type="radio"/> no sabe                                                                                                                   |
| FUR                                    | [*DATA REMOVED*]                                                                                                                                                                                                                                                                                                                                               |
| Semanas gestación 2T                   | [*DATA REMOVED*]                                                                                                                                                                                                                                                                                                                                               |
| Días gestación 2T                      | [*DATA REMOVED*]                                                                                                                                                                                                                                                                                                                                               |
| DBP 2T                                 | [*DATA REMOVED*]                                                                                                                                                                                                                                                                                                                                               |
| CC 2T                                  | [*DATA REMOVED*]                                                                                                                                                                                                                                                                                                                                               |
| AC 2T                                  | [*DATA REMOVED*]                                                                                                                                                                                                                                                                                                                                               |

|                                                   |                                                                                                                                                                                       |
|---------------------------------------------------|---------------------------------------------------------------------------------------------------------------------------------------------------------------------------------------|
| LF 2T                                             | [*DATA REMOVED*]                                                                                                                                                                      |
| PFE 2T (Hadlock)                                  | [*DATA REMOVED*]                                                                                                                                                                      |
| Semanas gestación 3T                              | [*DATA REMOVED*]                                                                                                                                                                      |
| días 3T                                           | [*DATA REMOVED*]                                                                                                                                                                      |
| DBP 3T                                            | [*DATA REMOVED*]                                                                                                                                                                      |
| CC 3T                                             | [*DATA REMOVED*]                                                                                                                                                                      |
| AC 3T                                             | [*DATA REMOVED*]                                                                                                                                                                      |
| LF 3T                                             | [*DATA REMOVED*]                                                                                                                                                                      |
| PFE 3T (Hadlock)                                  | [*DATA REMOVED*]                                                                                                                                                                      |
| Semanas de gestación final                        | [*DATA REMOVED*]                                                                                                                                                                      |
| días gestación final                              | [*DATA REMOVED*]                                                                                                                                                                      |
| Localización placenta                             | <input type="radio"/> anterior<br><input type="radio"/> lateral derecha<br><input type="radio"/> lateral izquierda<br><input type="radio"/> posterior<br><input type="radio"/> fondo  |
| Presentación longitudinal cefálica                | <input type="radio"/> no<br><input checked="" type="radio"/> si                                                                                                                       |
| Dorso                                             | <input type="radio"/> izquierda anterior<br><input type="radio"/> izquierda posterior<br><input checked="" type="radio"/> derecha anterior<br><input type="radio"/> derecha posterior |
| diámetro biparietal                               | [*DATA REMOVED*]                                                                                                                                                                      |
| Circunferencia craneal                            | [*DATA REMOVED*]                                                                                                                                                                      |
| Circunferencia abdominal                          | [*DATA REMOVED*]                                                                                                                                                                      |
| Longitud de femur                                 | [*DATA REMOVED*]                                                                                                                                                                      |
| tejido celular subcutáneo a nivel del muslo en mm | [*DATA REMOVED*]                                                                                                                                                                      |
| tejido celular subcutáneo en abdomen en mm        | [*DATA REMOVED*]                                                                                                                                                                      |
| Volumen del muslo en cm3                          | [*DATA REMOVED*]                                                                                                                                                                      |
| Peso fetal estimado según fórmula de Hadlock      | [*DATA REMOVED*]                                                                                                                                                                      |

|                                               |                                                                                                                                                          |
|-----------------------------------------------|----------------------------------------------------------------------------------------------------------------------------------------------------------|
| Percentil                                     | [*DATA REMOVED*]                                                                                                                                         |
| Peso fetal estimado según fórmula de Scioscia | <hr/>                                                                                                                                                    |
| Peso fetal estimado según fórmula de LEE      | <hr/>                                                                                                                                                    |
| Tipo de parto                                 | <input type="radio"/> eutocico<br><input type="radio"/> instrumentado/ventosa<br><input checked="" type="radio"/> cesarea                                |
| fecha de nacimiento                           | [*DATA REMOVED*]                                                                                                                                         |
| Días entre exploración y nacimiento           | [*DATA REMOVED*]                                                                                                                                         |
| Peso RN en g                                  | [*DATA REMOVED*]                                                                                                                                         |
| sexo                                          | <input type="radio"/> mujer<br><input checked="" type="radio"/> hombre                                                                                   |
| Apgar 1 minuto                                | [*DATA REMOVED*]                                                                                                                                         |
| Apgar 5 minutos                               | [*DATA REMOVED*]                                                                                                                                         |
| Apgar 10 minutos                              | <hr/>                                                                                                                                                    |
| antecedente Covid durante gestación           | <input type="radio"/> Yes<br><input checked="" type="radio"/> No                                                                                         |
| Nivel de estudios                             | <input type="radio"/> ninguno<br><input type="radio"/> primarios<br><input checked="" type="radio"/> secundarios<br><input type="radio"/> universitarios |

# Base\_datos\_estimacion\_peso\_fetal

|                                       |                                                                                                                                                                                                                                                                           |
|---------------------------------------|---------------------------------------------------------------------------------------------------------------------------------------------------------------------------------------------------------------------------------------------------------------------------|
| Número de identificación participante | 128                                                                                                                                                                                                                                                                       |
| CODIGO PARTICIPANTE                   |                                                                                                                                                                                                                                                                           |
| Edad                                  | [*DATA REMOVED*]                                                                                                                                                                                                                                                          |
| Gestaciones                           | <input type="radio"/> 1<br><input checked="" type="radio"/> 2<br><input type="radio"/> 3<br><input type="radio"/> mas de 3                                                                                                                                                |
| partos                                | <input checked="" type="radio"/> 0<br><input type="radio"/> 1<br><input type="radio"/> 2<br><input type="radio"/> 3<br><input type="radio"/> mas de 3                                                                                                                     |
| cesáreas                              | <input checked="" type="radio"/> 0<br><input type="radio"/> 1<br><input type="radio"/> 2<br><input type="radio"/> 3<br><input type="radio"/> mas de 3                                                                                                                     |
| Abortos                               | <input type="radio"/> 0<br><input checked="" type="radio"/> 1<br><input type="radio"/> 2<br><input type="radio"/> 3<br><input type="radio"/> mas de 3                                                                                                                     |
| Tipo de gestacion                     | <input type="radio"/> espontanea<br><input type="radio"/> IAC inseminación artificial conyuge<br><input type="radio"/> IAD inseminación artificial donante<br><input type="radio"/> FIV Fecundación in Vitro<br><input type="radio"/> Ovodon FIV con donación de ovocitos |
| peso previo a embarazo                | [*DATA REMOVED*]                                                                                                                                                                                                                                                          |
| Ganancia ponderal embarazo            |                                                                                                                                                                                                                                                                           |
| Talla madre                           | [*DATA REMOVED*]                                                                                                                                                                                                                                                          |
| IMC previo embarazo                   | 22.679952409280194                                                                                                                                                                                                                                                        |
| Patología obstétrica                  | <input checked="" type="radio"/> no<br><input type="radio"/> si                                                                                                                                                                                                           |
| Diabetes pregestacional               | <input checked="" type="radio"/> no<br><input type="radio"/> si                                                                                                                                                                                                           |
| Diabetes gestacional                  | <input checked="" type="radio"/> no<br><input type="radio"/> si                                                                                                                                                                                                           |

|                                            |                                                                                                                                                                                      |
|--------------------------------------------|--------------------------------------------------------------------------------------------------------------------------------------------------------------------------------------|
| Diabetes gestacional con insulina          | <input checked="" type="radio"/> no<br><input type="radio"/> si                                                                                                                      |
| Diabetes gestacional con dieta y ejercicio | <input checked="" type="radio"/> no<br><input type="radio"/> si                                                                                                                      |
| Percentil fetos previos                    | <input checked="" type="radio"/> Nada<br><input type="radio"/> percentil menor de 10<br><input type="radio"/> percentil entre 10 y 90<br><input type="radio"/> percentil mayor de 90 |
| Exfumadora                                 | <input checked="" type="radio"/> Nada<br><input type="radio"/> menos de 5 años<br><input type="radio"/> 5 a 10 años<br><input type="radio"/> mayor o igual a 10 años                 |
| Hábito tabáquico                           | <input checked="" type="radio"/> no<br><input type="radio"/> si                                                                                                                      |
| fumadora                                   | [*DATA REMOVED*]                                                                                                                                                                     |
| Consumo otros tóxicos                      | <input checked="" type="radio"/> no<br><input type="radio"/> si                                                                                                                      |
| Hb 1T                                      | _____                                                                                                                                                                                |
| Htc 1T                                     | _____                                                                                                                                                                                |
| Hb 2T                                      | _____                                                                                                                                                                                |
| HTC 2T                                     | _____                                                                                                                                                                                |
| Hb 3T                                      | _____                                                                                                                                                                                |
| HTC 3T                                     | _____                                                                                                                                                                                |
| Suplemento FE oral                         | <input type="radio"/> si<br><input type="radio"/> no                                                                                                                                 |
| Suplemento fe iv                           | <input type="radio"/> si<br><input type="radio"/> no                                                                                                                                 |
| Transfusión                                | <input type="radio"/> no<br><input type="radio"/> si                                                                                                                                 |
| Solicitada Vit D                           | <input type="radio"/> no<br><input type="radio"/> si                                                                                                                                 |

|                       |                                                                                                                                                                                                                                                                                                                                                                                                              |
|-----------------------|--------------------------------------------------------------------------------------------------------------------------------------------------------------------------------------------------------------------------------------------------------------------------------------------------------------------------------------------------------------------------------------------------------------|
| Deficit vit D         | <input type="radio"/> no<br><input type="radio"/> si                                                                                                                                                                                                                                                                                                                                                         |
| Suplemento vit D      | <input type="radio"/> si<br><input type="radio"/> no                                                                                                                                                                                                                                                                                                                                                         |
| Dieta, cuestionario   | <input checked="" type="radio"/> si<br><input type="radio"/> no                                                                                                                                                                                                                                                                                                                                              |
| Leche entera          | <input type="radio"/> Nunca o menos 1 vez al mes<br><input type="radio"/> 1 a 3 veces mes<br><input checked="" type="radio"/> 1 vez semana<br><input type="radio"/> 2 a 4 veces semana<br><input type="radio"/> 5 a 6 veces semana<br><input type="radio"/> 1 vez al día<br><input type="radio"/> 2 a 3 veces al día<br><input type="radio"/> 5 a 6 veces al día<br><input type="radio"/> más 6 veces al día |
| Leche semidesnatada   | <input checked="" type="radio"/> Nunca o menos 1 vez al mes<br><input type="radio"/> 1 a 3 veces mes<br><input type="radio"/> 1 vez semana<br><input type="radio"/> 2 a 4 veces semana<br><input type="radio"/> 5 a 6 veces semana<br><input type="radio"/> 1 vez al día<br><input type="radio"/> 2 a 3 veces al día<br><input type="radio"/> 5 a 6 veces al día<br><input type="radio"/> mas 6 veces al día |
| Leche desnatada       | <input checked="" type="radio"/> Nunca o menos 1 vez al mes<br><input type="radio"/> 1 a 3 veces mes<br><input type="radio"/> 1 vez semana<br><input type="radio"/> 2 a 4 veces semana<br><input type="radio"/> 5 a 6 veces semana<br><input type="radio"/> 1 vez al día<br><input type="radio"/> 2 a 3 veces al día<br><input type="radio"/> 5 a 6 veces al día<br><input type="radio"/> más 6 veces al día |
| Leche condensada      | <input checked="" type="radio"/> Nunca o menos 1 vez al mes<br><input type="radio"/> 1 a 3 veces mes<br><input type="radio"/> 1 vez semana<br><input type="radio"/> 2 a 4 veces semana<br><input type="radio"/> 5 a 6 veces semana<br><input type="radio"/> 1 vez al día<br><input type="radio"/> 2 a 3 veces al día<br><input type="radio"/> 5 a 6 veces al día<br><input type="radio"/> más 6 veces al día |
| nata o crema de leche | <input type="radio"/> Nunca o menos 1 vez al mes<br><input type="radio"/> 1 a 3 veces mes<br><input checked="" type="radio"/> 1 vez semana<br><input type="radio"/> 2 a 4 veces semana<br><input type="radio"/> 5 a 6 veces semana<br><input type="radio"/> 1 vez al día<br><input type="radio"/> 2 a 3 veces al día<br><input type="radio"/> 5 a 6 veces al día<br><input type="radio"/> más 6 veces al día |

---

Yogurt Entero

- ☐ Nunca o menos 1 vez al mes  
☐ 1 a 3 veces mes  
☐ 1 vez semana  
☒ 2 a 4 veces semana  
☐ 5 a 6 veces semana  
☐ 1 vez al día  
☐ 2 a 3 veces al día  
☐ 5 a 6 veces al día  
☐ más 6 veces al día

---

Yogurt desnatado

- ☒ Nunca o menos 1 vez al mes  
☐ 1 a 3 veces mes  
☐ 1 vez semana  
☐ 2 a 4 veces semana  
☐ 5 a 6 veces semana  
☐ 1 vez al día  
☐ 2 a 3 veces al día  
☐ 5 a 6 veces al día  
☐ más 6 veces al día

---

100g requesón o queso blando o queso fresco

- ☐ Nunca o menos 1 vez al mes  
☐ 1 a 3 veces mes  
☐ 1 vez semana  
☒ 2 a 4 veces semana  
☐ 5 a 6 veces semana  
☐ 1 vez al día  
☐ 2 a 3 veces al día  
☐ 5 a 6 veces al día  
☐ más 6 veces al día

---

queso curado o semicurado o cremoso

- ☒ Nunca o menos 1 vez al mes  
☐ 1 a 3 veces mes  
☐ 1 vez semana  
☐ 2 a 4 veces semana  
☐ 5 a 6 veces semana  
☐ 1 vez al día  
☐ 2 a 3 veces al día  
☐ 5 a 6 veces al día  
☐ más 6 veces al día

---

natillas flan pudding

- ☒ Nunca o menos 1 vez al mes  
☐ 1 a 3 veces mes  
☐ 1 vez semana  
☐ 2 a 4 veces semana  
☐ 5 a 6 veces semana  
☐ 1 vez al día  
☐ 2 a 3 veces al día  
☐ 5 a 6 veces al día  
☐ más 6 veces al día

---

Helado

- ☐ Nunca o menos 1 vez al mes  
☐ 1 a 3 veces mes  
☐ 1 vez semana  
☐ 2 a 4 veces semana  
☒ 5 a 6 veces semana  
☐ 1 vez al día  
☐ 2 a 3 veces al día  
☐ 5 a 6 veces al día  
☐ más 6 veces al día

|                                      |                                                                                                                                                                                                                                                                                                                                                                                                              |
|--------------------------------------|--------------------------------------------------------------------------------------------------------------------------------------------------------------------------------------------------------------------------------------------------------------------------------------------------------------------------------------------------------------------------------------------------------------|
| huevo                                | <input type="radio"/> Nunca o menos 1 vez al mes<br><input type="radio"/> 1 a 3 veces mes<br><input checked="" type="radio"/> 1 vez semana<br><input type="radio"/> 2 a 4 veces semana<br><input type="radio"/> 5 a 6 veces semana<br><input type="radio"/> 1 vez al día<br><input type="radio"/> 2 a 3 veces al día<br><input type="radio"/> 5 a 6 veces al día<br><input type="radio"/> más 6 veces al día |
| Pollo con piel                       | <input checked="" type="radio"/> Nunca o menos 1 vez al mes<br><input type="radio"/> 1 a 3 veces mes<br><input type="radio"/> 1 vez semana<br><input type="radio"/> 2 a 4 veces semana<br><input type="radio"/> 5 a 6 veces semana<br><input type="radio"/> 1 vez al día<br><input type="radio"/> 2 a 3 veces al día<br><input type="radio"/> 5 a 6 veces al día<br><input type="radio"/> más 6 veces al día |
| pollo sin piel                       | <input type="radio"/> Nunca o menos 1 vez al mes<br><input type="radio"/> 1 a 3 veces mes<br><input type="radio"/> 1 vez semana<br><input checked="" type="radio"/> 2 a 4 veces semana<br><input type="radio"/> 5 a 6 veces semana<br><input type="radio"/> 1 vez al día<br><input type="radio"/> 2 a 3 veces al día<br><input type="radio"/> 5 a 6 veces al día<br><input type="radio"/> más 6 veces al día |
| Ternera o cerdo o cordero            | <input checked="" type="radio"/> Nunca o menos 1 vez al mes<br><input type="radio"/> 1 a 3 veces mes<br><input type="radio"/> 1 vez semana<br><input type="radio"/> 2 a 4 veces semana<br><input type="radio"/> 5 a 6 veces semana<br><input type="radio"/> 1 vez al día<br><input type="radio"/> 2 a 3 veces al día<br><input type="radio"/> 5 a 6 veces al día<br><input type="radio"/> más 6 veces al día |
| carne caza: Conejo o codorniz o pato | <input checked="" type="radio"/> Nunca o menos 1 vez al mes<br><input type="radio"/> 1 a 3 veces mes<br><input type="radio"/> 1 vez semana<br><input type="radio"/> 2 a 4 veces semana<br><input type="radio"/> 5 a 6 veces semana<br><input type="radio"/> 1 vez al día<br><input type="radio"/> 2 a 3 veces al día<br><input type="radio"/> 5 a 6 veces al día<br><input type="radio"/> más 6 veces al día |
| Hígado de ternera o cerdo o pollo    | <input checked="" type="radio"/> Nunca o menos 1 vez al mes<br><input type="radio"/> 1 a 3 veces mes<br><input type="radio"/> 1 vez semana<br><input type="radio"/> 2 a 4 veces semana<br><input type="radio"/> 5 a 6 veces semana<br><input type="radio"/> 1 vez al día<br><input type="radio"/> 2 a 3 veces al día<br><input type="radio"/> 5 a 6 veces al día<br><input type="radio"/> más 6 veces al día |



---

Vísceras

- ☒ Nunca o menos 1 vez al mes  
☐ 1 a 3 veces mes  
☐ 1 vez semana  
☐ 2 a 4 veces semana  
☐ 5 a 6 veces semana  
☐ 1 vez al día  
☐ 2 a 3 veces al día  
☐ 5 a 6 veces al día  
☐ más 6 veces al día

---

Embutido

- ☐ Nunca o menos 1 vez al mes  
☒ 1 a 3 veces mes  
☐ 1 vez semana  
☐ 2 a 4 veces semana  
☐ 5 a 6 veces semana  
☐ 1 vez al día  
☐ 2 a 3 veces al día  
☐ 5 a 6 veces al día  
☐ más 6 veces al día

---

Salchicha o similar

- ☒ Nunca o menos 1 vez al mes  
☐ 1 a 3 veces mes  
☐ 1 vez semana  
☐ 2 a 4 veces semana  
☐ 5 a 6 veces semana  
☐ 1 vez al día  
☐ 2 a 3 veces al día  
☐ 5 a 6 veces al día  
☐ más 6 veces al día

---

Pate o foiegras

- ☐ Nunca o menos 1 vez al mes  
☐ 1 a 3 veces mes  
☐ 1 vez semana  
☒ 2 a 4 veces semana  
☐ 5 a 6 veces semana  
☐ 1 vez al día  
☐ 2 a 3 veces al día  
☐ 5 a 6 veces al día  
☐ más 6 veces al día

---

Hamburguesa

- ☐ Nunca o menos 1 vez al mes  
☐ 1 a 3 veces mes  
☒ 1 vez semana  
☐ 2 a 4 veces semana  
☐ 5 a 6 veces semana  
☐ 1 vez al día  
☐ 2 a 3 veces al día  
☐ 5 a 6 veces al día  
☐ más 6 veces al día

---

tocino o bacon

- ☐ Nunca o menos 1 vez al mes  
☐ 1 a 3 veces mes  
☒ 1 vez semana  
☐ 2 a 4 veces semana  
☐ 5 a 6 veces semana  
☐ 1 vez al día  
☐ 2 a 3 veces al día  
☐ 5 a 6 veces al día  
☐ más 6 veces al día

|                        |                                                                                                                                                                                                                                                                                                                                                                                                              |
|------------------------|--------------------------------------------------------------------------------------------------------------------------------------------------------------------------------------------------------------------------------------------------------------------------------------------------------------------------------------------------------------------------------------------------------------|
| Pescado frito          | <input checked="" type="radio"/> Nunca o menos 1 vez al mes<br><input type="radio"/> 1 a 3 veces mes<br><input type="radio"/> 1 vez semana<br><input type="radio"/> 2 a 4 veces semana<br><input type="radio"/> 5 a 6 veces semana<br><input type="radio"/> 1 vez al día<br><input type="radio"/> 2 a 3 veces al día<br><input type="radio"/> 5 a 6 veces al día<br><input type="radio"/> más 6 veces al día |
| pescado hervido blanco | <input type="radio"/> Nunca o menos 1 vez al mes<br><input type="radio"/> 1 a 3 veces mes<br><input type="radio"/> 1 vez semana<br><input checked="" type="radio"/> 2 a 4 veces semana<br><input type="radio"/> 5 a 6 veces semana<br><input type="radio"/> 1 vez al día<br><input type="radio"/> 2 a 3 veces al día<br><input type="radio"/> 5 a 6 veces al día<br><input type="radio"/> más 6 veces al día |
| pescado hervido azul   | <input type="radio"/> Nunca o menos 1 vez al mes<br><input type="radio"/> 1 a 3 veces mes<br><input type="radio"/> 1 vez semana<br><input type="radio"/> 2 a 4 veces semana<br><input checked="" type="radio"/> 5 a 6 veces semana<br><input type="radio"/> 1 vez al día<br><input type="radio"/> 2 a 3 veces al día<br><input type="radio"/> 5 a 6 veces al día<br><input type="radio"/> más 6 veces al día |
| otros pescado azul     | <input type="radio"/> Nunca o menos 1 vez al mes<br><input type="radio"/> 1 a 3 veces mes<br><input checked="" type="radio"/> 1 vez semana<br><input type="radio"/> 2 a 4 veces semana<br><input type="radio"/> 5 a 6 veces semana<br><input type="radio"/> 1 vez al día<br><input type="radio"/> 2 a 3 veces al día<br><input type="radio"/> 5 a 6 veces al día<br><input type="radio"/> más 6 veces al día |
| atun conserva          | <input type="radio"/> Nunca o menos 1 vez al mes<br><input type="radio"/> 1 a 3 veces mes<br><input checked="" type="radio"/> 1 vez semana<br><input type="radio"/> 2 a 4 veces semana<br><input type="radio"/> 5 a 6 veces semana<br><input type="radio"/> 1 vez al día<br><input type="radio"/> 2 a 3 veces al día<br><input type="radio"/> 5 a 6 veces al día<br><input type="radio"/> más 6 veces al día |
| sardina conserva       | <input type="radio"/> Nunca o menos 1 vez al mes<br><input type="radio"/> 1 a 3 veces mes<br><input checked="" type="radio"/> 1 vez semana<br><input type="radio"/> 2 a 4 veces semana<br><input type="radio"/> 5 a 6 veces semana<br><input type="radio"/> 1 vez al día<br><input type="radio"/> 2 a 3 veces al día<br><input type="radio"/> 5 a 6 veces al día<br><input type="radio"/> más 6 veces al día |

|                                         |                                                                                                                                                                                                                                                                                                                                                                                                              |
|-----------------------------------------|--------------------------------------------------------------------------------------------------------------------------------------------------------------------------------------------------------------------------------------------------------------------------------------------------------------------------------------------------------------------------------------------------------------|
| pescado ahumado                         | <input type="radio"/> Nunca o menos 1 vez al mes<br><input checked="" type="radio"/> 1 a 3 veces mes<br><input type="radio"/> 1 vez semana<br><input type="radio"/> 2 a 4 veces semana<br><input type="radio"/> 5 a 6 veces semana<br><input type="radio"/> 1 vez al día<br><input type="radio"/> 2 a 3 veces al día<br><input type="radio"/> 5 a 6 veces al día<br><input type="radio"/> más 6 veces al día |
| almejas o mejillones o ostras unos 100g | <input type="radio"/> Nunca o menos 1 vez al mes<br><input checked="" type="radio"/> 1 a 3 veces mes<br><input type="radio"/> 1 vez semana<br><input type="radio"/> 2 a 4 veces semana<br><input type="radio"/> 5 a 6 veces semana<br><input type="radio"/> 1 vez al día<br><input type="radio"/> 2 a 3 veces al día<br><input type="radio"/> 5 a 6 veces al día<br><input type="radio"/> más 6 veces al día |
| calamar o chipiron o sepia unos 100g    | <input type="radio"/> Nunca o menos 1 vez al mes<br><input type="radio"/> 1 a 3 veces mes<br><input checked="" type="radio"/> 1 vez semana<br><input type="radio"/> 2 a 4 veces semana<br><input type="radio"/> 5 a 6 veces semana<br><input type="radio"/> 1 vez al día<br><input type="radio"/> 2 a 3 veces al día<br><input type="radio"/> 5 a 6 veces al día<br><input type="radio"/> más 6 veces al día |
| marisco unos 100g                       | <input type="radio"/> Nunca o menos 1 vez al mes<br><input checked="" type="radio"/> 1 a 3 veces mes<br><input type="radio"/> 1 vez semana<br><input type="radio"/> 2 a 4 veces semana<br><input type="radio"/> 5 a 6 veces semana<br><input type="radio"/> 1 vez al día<br><input type="radio"/> 2 a 3 veces al día<br><input type="radio"/> 5 a 6 veces al día<br><input type="radio"/> más 6 veces al día |
| Espinacas o acelgas cocinadas           | <input type="radio"/> Nunca o menos 1 vez al mes<br><input type="radio"/> 1 a 3 veces mes<br><input type="radio"/> 1 vez semana<br><input checked="" type="radio"/> 2 a 4 veces semana<br><input type="radio"/> 5 a 6 veces semana<br><input type="radio"/> 1 vez al día<br><input type="radio"/> 2 a 3 veces al día<br><input type="radio"/> 5 a 6 veces al día<br><input type="radio"/> más 6 veces al día |
| Col o coliflor o brocoli cocinado       | <input type="radio"/> Nunca o menos 1 vez al mes<br><input type="radio"/> 1 a 3 veces mes<br><input type="radio"/> 1 vez semana<br><input checked="" type="radio"/> 2 a 4 veces semana<br><input type="radio"/> 5 a 6 veces semana<br><input type="radio"/> 1 vez al día<br><input type="radio"/> 2 a 3 veces al día<br><input type="radio"/> 5 a 6 veces al día<br><input type="radio"/> más 6 veces al día |

---

|                              |                                                                                                                                                                                                                                                                                                                                                                                                              |
|------------------------------|--------------------------------------------------------------------------------------------------------------------------------------------------------------------------------------------------------------------------------------------------------------------------------------------------------------------------------------------------------------------------------------------------------------|
| Lechuga o endivia o escarola | <input type="radio"/> Nunca o menos 1 vez al mes<br><input type="radio"/> 1 a 3 veces mes<br><input type="radio"/> 1 vez semana<br><input type="radio"/> 2 a 4 veces semana<br><input checked="" type="radio"/> 5 a 6 veces semana<br><input type="radio"/> 1 vez al día<br><input type="radio"/> 2 a 3 veces al día<br><input type="radio"/> 5 a 6 veces al día<br><input type="radio"/> más 6 veces al día |
|------------------------------|--------------------------------------------------------------------------------------------------------------------------------------------------------------------------------------------------------------------------------------------------------------------------------------------------------------------------------------------------------------------------------------------------------------|

---

|                 |                                                                                                                                                                                                                                                                                                                                                                                                              |
|-----------------|--------------------------------------------------------------------------------------------------------------------------------------------------------------------------------------------------------------------------------------------------------------------------------------------------------------------------------------------------------------------------------------------------------------|
| tomate ensalada | <input type="radio"/> Nunca o menos 1 vez al mes<br><input type="radio"/> 1 a 3 veces mes<br><input type="radio"/> 1 vez semana<br><input type="radio"/> 2 a 4 veces semana<br><input checked="" type="radio"/> 5 a 6 veces semana<br><input type="radio"/> 1 vez al día<br><input type="radio"/> 2 a 3 veces al día<br><input type="radio"/> 5 a 6 veces al día<br><input type="radio"/> más 6 veces al día |
|-----------------|--------------------------------------------------------------------------------------------------------------------------------------------------------------------------------------------------------------------------------------------------------------------------------------------------------------------------------------------------------------------------------------------------------------|

---

|         |                                                                                                                                                                                                                                                                                                                                                                                                              |
|---------|--------------------------------------------------------------------------------------------------------------------------------------------------------------------------------------------------------------------------------------------------------------------------------------------------------------------------------------------------------------------------------------------------------------|
| cebolla | <input type="radio"/> Nunca o menos 1 vez al mes<br><input type="radio"/> 1 a 3 veces mes<br><input type="radio"/> 1 vez semana<br><input type="radio"/> 2 a 4 veces semana<br><input checked="" type="radio"/> 5 a 6 veces semana<br><input type="radio"/> 1 vez al día<br><input type="radio"/> 2 a 3 veces al día<br><input type="radio"/> 5 a 6 veces al día<br><input type="radio"/> más 6 veces al día |
|---------|--------------------------------------------------------------------------------------------------------------------------------------------------------------------------------------------------------------------------------------------------------------------------------------------------------------------------------------------------------------------------------------------------------------|

---

|                      |                                                                                                                                                                                                                                                                                                                                                                                                              |
|----------------------|--------------------------------------------------------------------------------------------------------------------------------------------------------------------------------------------------------------------------------------------------------------------------------------------------------------------------------------------------------------------------------------------------------------|
| Zanahoria o calabaza | <input type="radio"/> Nunca o menos 1 vez al mes<br><input type="radio"/> 1 a 3 veces mes<br><input type="radio"/> 1 vez semana<br><input checked="" type="radio"/> 2 a 4 veces semana<br><input type="radio"/> 5 a 6 veces semana<br><input type="radio"/> 1 vez al día<br><input type="radio"/> 2 a 3 veces al día<br><input type="radio"/> 5 a 6 veces al día<br><input type="radio"/> más 6 veces al día |
|----------------------|--------------------------------------------------------------------------------------------------------------------------------------------------------------------------------------------------------------------------------------------------------------------------------------------------------------------------------------------------------------------------------------------------------------|

---

|               |                                                                                                                                                                                                                                                                                                                                                                                                              |
|---------------|--------------------------------------------------------------------------------------------------------------------------------------------------------------------------------------------------------------------------------------------------------------------------------------------------------------------------------------------------------------------------------------------------------------|
| Judías verdes | <input type="radio"/> Nunca o menos 1 vez al mes<br><input type="radio"/> 1 a 3 veces mes<br><input checked="" type="radio"/> 1 vez semana<br><input type="radio"/> 2 a 4 veces semana<br><input type="radio"/> 5 a 6 veces semana<br><input type="radio"/> 1 vez al día<br><input type="radio"/> 2 a 3 veces al día<br><input type="radio"/> 5 a 6 veces al día<br><input type="radio"/> más 6 veces al día |
|---------------|--------------------------------------------------------------------------------------------------------------------------------------------------------------------------------------------------------------------------------------------------------------------------------------------------------------------------------------------------------------------------------------------------------------|

---

|                                |                                                                                                                                                                                                                                                                                                                                                                                                              |
|--------------------------------|--------------------------------------------------------------------------------------------------------------------------------------------------------------------------------------------------------------------------------------------------------------------------------------------------------------------------------------------------------------------------------------------------------------|
| Berenjena o calabacin o pepino | <input type="radio"/> Nunca o menos 1 vez al mes<br><input type="radio"/> 1 a 3 veces mes<br><input type="radio"/> 1 vez semana<br><input checked="" type="radio"/> 2 a 4 veces semana<br><input type="radio"/> 5 a 6 veces semana<br><input type="radio"/> 1 vez al día<br><input type="radio"/> 2 a 3 veces al día<br><input type="radio"/> 5 a 6 veces al día<br><input type="radio"/> más 6 veces al día |
|--------------------------------|--------------------------------------------------------------------------------------------------------------------------------------------------------------------------------------------------------------------------------------------------------------------------------------------------------------------------------------------------------------------------------------------------------------|

---

---

|          |                                                                                                                                                                                                                                                                                                                                                                                                              |
|----------|--------------------------------------------------------------------------------------------------------------------------------------------------------------------------------------------------------------------------------------------------------------------------------------------------------------------------------------------------------------------------------------------------------------|
| pimiento | <input type="radio"/> Nunca o menos 1 vez al mes<br><input checked="" type="radio"/> 1 a 3 veces mes<br><input type="radio"/> 1 vez semana<br><input type="radio"/> 2 a 4 veces semana<br><input type="radio"/> 5 a 6 veces semana<br><input type="radio"/> 1 vez al día<br><input type="radio"/> 2 a 3 veces al día<br><input type="radio"/> 5 a 6 veces al día<br><input type="radio"/> más 6 veces al día |
|----------|--------------------------------------------------------------------------------------------------------------------------------------------------------------------------------------------------------------------------------------------------------------------------------------------------------------------------------------------------------------------------------------------------------------|

---

|           |                                                                                                                                                                                                                                                                                                                                                                                                              |
|-----------|--------------------------------------------------------------------------------------------------------------------------------------------------------------------------------------------------------------------------------------------------------------------------------------------------------------------------------------------------------------------------------------------------------------|
| alcachofa | <input type="radio"/> Nunca o menos 1 vez al mes<br><input type="radio"/> 1 a 3 veces mes<br><input checked="" type="radio"/> 1 vez semana<br><input type="radio"/> 2 a 4 veces semana<br><input type="radio"/> 5 a 6 veces semana<br><input type="radio"/> 1 vez al día<br><input type="radio"/> 2 a 3 veces al día<br><input type="radio"/> 5 a 6 veces al día<br><input type="radio"/> más 6 veces al día |
|-----------|--------------------------------------------------------------------------------------------------------------------------------------------------------------------------------------------------------------------------------------------------------------------------------------------------------------------------------------------------------------------------------------------------------------|

---

|            |                                                                                                                                                                                                                                                                                                                                                                                                              |
|------------|--------------------------------------------------------------------------------------------------------------------------------------------------------------------------------------------------------------------------------------------------------------------------------------------------------------------------------------------------------------------------------------------------------------|
| espárragos | <input type="radio"/> Nunca o menos 1 vez al mes<br><input type="radio"/> 1 a 3 veces mes<br><input checked="" type="radio"/> 1 vez semana<br><input type="radio"/> 2 a 4 veces semana<br><input type="radio"/> 5 a 6 veces semana<br><input type="radio"/> 1 vez al día<br><input type="radio"/> 2 a 3 veces al día<br><input type="radio"/> 5 a 6 veces al día<br><input type="radio"/> más 6 veces al día |
|------------|--------------------------------------------------------------------------------------------------------------------------------------------------------------------------------------------------------------------------------------------------------------------------------------------------------------------------------------------------------------------------------------------------------------|

---

|              |                                                                                                                                                                                                                                                                                                                                                                                                              |
|--------------|--------------------------------------------------------------------------------------------------------------------------------------------------------------------------------------------------------------------------------------------------------------------------------------------------------------------------------------------------------------------------------------------------------------|
| maíz hervido | <input checked="" type="radio"/> Nunca o menos 1 vez al mes<br><input type="radio"/> 1 a 3 veces mes<br><input type="radio"/> 1 vez semana<br><input type="radio"/> 2 a 4 veces semana<br><input type="radio"/> 5 a 6 veces semana<br><input type="radio"/> 1 vez al día<br><input type="radio"/> 2 a 3 veces al día<br><input type="radio"/> 5 a 6 veces al día<br><input type="radio"/> más 6 veces al día |
|--------------|--------------------------------------------------------------------------------------------------------------------------------------------------------------------------------------------------------------------------------------------------------------------------------------------------------------------------------------------------------------------------------------------------------------|

---

|           |                                                                                                                                                                                                                                                                                                                                                                                                              |
|-----------|--------------------------------------------------------------------------------------------------------------------------------------------------------------------------------------------------------------------------------------------------------------------------------------------------------------------------------------------------------------------------------------------------------------|
| legumbres | <input type="radio"/> Nunca o menos 1 vez al mes<br><input checked="" type="radio"/> 1 a 3 veces mes<br><input type="radio"/> 1 vez semana<br><input type="radio"/> 2 a 4 veces semana<br><input type="radio"/> 5 a 6 veces semana<br><input type="radio"/> 1 vez al día<br><input type="radio"/> 2 a 3 veces al día<br><input type="radio"/> 5 a 6 veces al día<br><input type="radio"/> más 6 veces al día |
|-----------|--------------------------------------------------------------------------------------------------------------------------------------------------------------------------------------------------------------------------------------------------------------------------------------------------------------------------------------------------------------------------------------------------------------|

---

|                       |                                                                                                                                                                                                                                                                                                                                                                                                              |
|-----------------------|--------------------------------------------------------------------------------------------------------------------------------------------------------------------------------------------------------------------------------------------------------------------------------------------------------------------------------------------------------------------------------------------------------------|
| naranjas o mandarinas | <input checked="" type="radio"/> Nunca o menos 1 vez al mes<br><input type="radio"/> 1 a 3 veces mes<br><input type="radio"/> 1 vez semana<br><input type="radio"/> 2 a 4 veces semana<br><input type="radio"/> 5 a 6 veces semana<br><input type="radio"/> 1 vez al día<br><input type="radio"/> 2 a 3 veces al día<br><input type="radio"/> 5 a 6 veces al día<br><input type="radio"/> más 6 veces al día |
|-----------------------|--------------------------------------------------------------------------------------------------------------------------------------------------------------------------------------------------------------------------------------------------------------------------------------------------------------------------------------------------------------------------------------------------------------|

---

---

zumo natural fruta

- ☒ Nunca o menos 1 vez al mes  
☐ 1 a 3 veces mes  
☐ 1 vez semana  
☐ 2 a 4 veces semana  
☐ 5 a 6 veces semana  
☐ 1 vez al día  
☐ 2 a 3 veces al día  
☐ 5 a 6 veces al día  
☐ más 6 veces al día

---

platano

- ☒ Nunca o menos 1 vez al mes  
☐ 1 a 3 veces mes  
☐ 1 vez semana  
☐ 2 a 4 veces semana  
☐ 5 a 6 veces semana  
☐ 1 vez al día  
☐ 2 a 3 veces al día  
☐ 5 a 6 veces al día  
☐ más 6 veces al día

---

manzana o pera

- ☐ Nunca o menos 1 vez al mes  
☐ 1 a 3 veces mes  
☐ 1 vez semana  
☒ 2 a 4 veces semana  
☐ 5 a 6 veces semana  
☐ 1 vez al día  
☐ 2 a 3 veces al día  
☐ 5 a 6 veces al día  
☐ más 6 veces al día

---

melocotón o nectarina

- ☐ Nunca o menos 1 vez al mes  
☐ 1 a 3 veces mes  
☐ 1 vez semana  
☒ 2 a 4 veces semana  
☐ 5 a 6 veces semana  
☐ 1 vez al día  
☐ 2 a 3 veces al día  
☐ 5 a 6 veces al día  
☐ más 6 veces al día

---

sandia o melon

- ☐ Nunca o menos 1 vez al mes  
☐ 1 a 3 veces mes  
☐ 1 vez semana  
☒ 2 a 4 veces semana  
☐ 5 a 6 veces semana  
☐ 1 vez al día  
☐ 2 a 3 veces al día  
☐ 5 a 6 veces al día  
☐ más 6 veces al día

---

uva

- ☐ Nunca o menos 1 vez al mes  
☒ 1 a 3 veces mes  
☐ 1 vez semana  
☐ 2 a 4 veces semana  
☐ 5 a 6 veces semana  
☐ 1 vez al día  
☐ 2 a 3 veces al día  
☐ 5 a 6 veces al día  
☐ más 6 veces al día

---

bruna o ciruela

- ☒ Nunca o menos 1 vez al mes  
☐ 1 a 3 veces mes  
☐ 1 vez semana  
☐ 2 a 4 veces semana  
☐ 5 a 6 veces semana  
☐ 1 vez al día  
☐ 2 a 3 veces al día  
☐ 5 a 6 veces al día  
☐ más 6 veces al día

---

kiwi

- ☒ Nunca o menos 1 vez al mes  
☐ 1 a 3 veces mes  
☐ 1 vez semana  
☐ 2 a 4 veces semana  
☐ 5 a 6 veces semana  
☐ 1 vez al día  
☐ 2 a 3 veces al día  
☐ 5 a 6 veces al día  
☐ más 6 veces al día

---

aceituna

- ☐ Nunca o menos 1 vez al mes  
☐ 1 a 3 veces mes  
☒ 1 vez semana  
☐ 2 a 4 veces semana  
☐ 5 a 6 veces semana  
☐ 1 vez al día  
☐ 2 a 3 veces al día  
☐ 5 a 6 veces al día  
☐ más 6 veces al día

---

frutos secos

- ☐ Nunca o menos 1 vez al mes  
☐ 1 a 3 veces mes  
☐ 1 vez semana  
☐ 2 a 4 veces semana  
☐ 5 a 6 veces semana  
☒ 1 vez al día  
☐ 2 a 3 veces al día  
☐ 5 a 6 veces al día  
☐ más 6 veces al día

---

pan blanco

- ☒ Nunca o menos 1 vez al mes  
☐ 1 a 3 veces mes  
☐ 1 vez semana  
☐ 2 a 4 veces semana  
☐ 5 a 6 veces semana  
☐ 1 vez al día  
☐ 2 a 3 veces al día  
☐ 5 a 6 veces al día  
☐ más 6 veces al día

---

pan integral

- ☒ Nunca o menos 1 vez al mes  
☐ 1 a 3 veces mes  
☐ 1 vez semana  
☐ 2 a 4 veces semana  
☐ 5 a 6 veces semana  
☐ 1 vez al día  
☐ 2 a 3 veces al día  
☐ 5 a 6 veces al día  
☐ más 6 veces al día

---

|                   |                                                                                                                                                                                                                                                                                                                                                                                                              |
|-------------------|--------------------------------------------------------------------------------------------------------------------------------------------------------------------------------------------------------------------------------------------------------------------------------------------------------------------------------------------------------------------------------------------------------------|
| cereales desayuno | <input checked="" type="radio"/> Nunca o menos 1 vez al mes<br><input type="radio"/> 1 a 3 veces mes<br><input type="radio"/> 1 vez semana<br><input type="radio"/> 2 a 4 veces semana<br><input type="radio"/> 5 a 6 veces semana<br><input type="radio"/> 1 vez al día<br><input type="radio"/> 2 a 3 veces al día<br><input type="radio"/> 5 a 6 veces al día<br><input type="radio"/> más 6 veces al día |
|-------------------|--------------------------------------------------------------------------------------------------------------------------------------------------------------------------------------------------------------------------------------------------------------------------------------------------------------------------------------------------------------------------------------------------------------|

---

|                |                                                                                                                                                                                                                                                                                                                                                                                                              |
|----------------|--------------------------------------------------------------------------------------------------------------------------------------------------------------------------------------------------------------------------------------------------------------------------------------------------------------------------------------------------------------------------------------------------------------|
| patatas fritas | <input checked="" type="radio"/> Nunca o menos 1 vez al mes<br><input type="radio"/> 1 a 3 veces mes<br><input type="radio"/> 1 vez semana<br><input type="radio"/> 2 a 4 veces semana<br><input type="radio"/> 5 a 6 veces semana<br><input type="radio"/> 1 vez al día<br><input type="radio"/> 2 a 3 veces al día<br><input type="radio"/> 5 a 6 veces al día<br><input type="radio"/> más 6 veces al día |
|----------------|--------------------------------------------------------------------------------------------------------------------------------------------------------------------------------------------------------------------------------------------------------------------------------------------------------------------------------------------------------------------------------------------------------------|

---

|                          |                                                                                                                                                                                                                                                                                                                                                                                                              |
|--------------------------|--------------------------------------------------------------------------------------------------------------------------------------------------------------------------------------------------------------------------------------------------------------------------------------------------------------------------------------------------------------------------------------------------------------|
| patatas cocidas o asadas | <input checked="" type="radio"/> Nunca o menos 1 vez al mes<br><input type="radio"/> 1 a 3 veces mes<br><input type="radio"/> 1 vez semana<br><input type="radio"/> 2 a 4 veces semana<br><input type="radio"/> 5 a 6 veces semana<br><input type="radio"/> 1 vez al día<br><input type="radio"/> 2 a 3 veces al día<br><input type="radio"/> 5 a 6 veces al día<br><input type="radio"/> más 6 veces al día |
|--------------------------|--------------------------------------------------------------------------------------------------------------------------------------------------------------------------------------------------------------------------------------------------------------------------------------------------------------------------------------------------------------------------------------------------------------|

---

|             |                                                                                                                                                                                                                                                                                                                                                                                                              |
|-------------|--------------------------------------------------------------------------------------------------------------------------------------------------------------------------------------------------------------------------------------------------------------------------------------------------------------------------------------------------------------------------------------------------------------|
| bolsa papas | <input checked="" type="radio"/> Nunca o menos 1 vez al mes<br><input type="radio"/> 1 a 3 veces mes<br><input type="radio"/> 1 vez semana<br><input type="radio"/> 2 a 4 veces semana<br><input type="radio"/> 5 a 6 veces semana<br><input type="radio"/> 1 vez al día<br><input type="radio"/> 2 a 3 veces al día<br><input type="radio"/> 5 a 6 veces al día<br><input type="radio"/> más 6 veces al día |
|-------------|--------------------------------------------------------------------------------------------------------------------------------------------------------------------------------------------------------------------------------------------------------------------------------------------------------------------------------------------------------------------------------------------------------------|

---

|                |                                                                                                                                                                                                                                                                                                                                                                                                              |
|----------------|--------------------------------------------------------------------------------------------------------------------------------------------------------------------------------------------------------------------------------------------------------------------------------------------------------------------------------------------------------------------------------------------------------------|
| arroz cocinado | <input type="radio"/> Nunca o menos 1 vez al mes<br><input type="radio"/> 1 a 3 veces mes<br><input checked="" type="radio"/> 1 vez semana<br><input type="radio"/> 2 a 4 veces semana<br><input type="radio"/> 5 a 6 veces semana<br><input type="radio"/> 1 vez al día<br><input type="radio"/> 2 a 3 veces al día<br><input type="radio"/> 5 a 6 veces al día<br><input type="radio"/> más 6 veces al día |
|----------------|--------------------------------------------------------------------------------------------------------------------------------------------------------------------------------------------------------------------------------------------------------------------------------------------------------------------------------------------------------------------------------------------------------------|

---

|       |                                                                                                                                                                                                                                                                                                                                                                                                              |
|-------|--------------------------------------------------------------------------------------------------------------------------------------------------------------------------------------------------------------------------------------------------------------------------------------------------------------------------------------------------------------------------------------------------------------|
| pasta | <input checked="" type="radio"/> Nunca o menos 1 vez al mes<br><input type="radio"/> 1 a 3 veces mes<br><input type="radio"/> 1 vez semana<br><input type="radio"/> 2 a 4 veces semana<br><input type="radio"/> 5 a 6 veces semana<br><input type="radio"/> 1 vez al día<br><input type="radio"/> 2 a 3 veces al día<br><input type="radio"/> 5 a 6 veces al día<br><input type="radio"/> más 6 veces al día |
|-------|--------------------------------------------------------------------------------------------------------------------------------------------------------------------------------------------------------------------------------------------------------------------------------------------------------------------------------------------------------------------------------------------------------------|



|                     |                                                                                                                                                                                                                                                                                                                                                                                                              |
|---------------------|--------------------------------------------------------------------------------------------------------------------------------------------------------------------------------------------------------------------------------------------------------------------------------------------------------------------------------------------------------------------------------------------------------------|
| pizza               | <input checked="" type="radio"/> Nunca o menos 1 vez al mes<br><input type="radio"/> 1 a 3 veces mes<br><input type="radio"/> 1 vez semana<br><input type="radio"/> 2 a 4 veces semana<br><input type="radio"/> 5 a 6 veces semana<br><input type="radio"/> 1 vez al día<br><input type="radio"/> 2 a 3 veces al día<br><input type="radio"/> 5 a 6 veces al día<br><input type="radio"/> más 6 veces al día |
| aceite oliva        | <input type="radio"/> Nunca o menos 1 vez al mes<br><input type="radio"/> 1 a 3 veces mes<br><input type="radio"/> 1 vez semana<br><input type="radio"/> 2 a 4 veces semana<br><input type="radio"/> 5 a 6 veces semana<br><input checked="" type="radio"/> 1 vez al día<br><input type="radio"/> 2 a 3 veces al día<br><input type="radio"/> 5 a 6 veces al día<br><input type="radio"/> más 6 veces al día |
| otros aceites       | <input checked="" type="radio"/> Nunca o menos 1 vez al mes<br><input type="radio"/> 1 a 3 veces mes<br><input type="radio"/> 1 vez semana<br><input type="radio"/> 2 a 4 veces semana<br><input type="radio"/> 5 a 6 veces semana<br><input type="radio"/> 1 vez al día<br><input type="radio"/> 2 a 3 veces al día<br><input type="radio"/> 5 a 6 veces al día<br><input type="radio"/> más 6 veces al día |
| margarina           | <input checked="" type="radio"/> Nunca o menos 1 vez al mes<br><input type="radio"/> 1 a 3 veces mes<br><input type="radio"/> 1 vez semana<br><input type="radio"/> 2 a 4 veces semana<br><input type="radio"/> 5 a 6 veces semana<br><input type="radio"/> 1 vez al día<br><input type="radio"/> 2 a 3 veces al día<br><input type="radio"/> 5 a 6 veces al día<br><input type="radio"/> más 6 veces al día |
| mantequilla         | <input type="radio"/> Nunca o menos 1 vez al mes<br><input type="radio"/> 1 a 3 veces mes<br><input checked="" type="radio"/> 1 vez semana<br><input type="radio"/> 2 a 4 veces semana<br><input type="radio"/> 5 a 6 veces semana<br><input type="radio"/> 1 vez al día<br><input type="radio"/> 2 a 3 veces al día<br><input type="radio"/> 5 a 6 veces al día<br><input type="radio"/> más 6 veces al día |
| galletas tipo maria | <input checked="" type="radio"/> Nunca o menos 1 vez al mes<br><input type="radio"/> 1 a 3 veces mes<br><input type="radio"/> 1 vez semana<br><input type="radio"/> 2 a 4 veces semana<br><input type="radio"/> 5 a 6 veces semana<br><input type="radio"/> 1 vez al día<br><input type="radio"/> 2 a 3 veces al día<br><input type="radio"/> 5 a 6 veces al día<br><input type="radio"/> más 6 veces al día |

---

galletas chocolate

- ☒ Nunca o menos 1 vez al mes  
☐ 1 a 3 veces mes  
☐ 1 vez semana  
☐ 2 a 4 veces semana  
☐ 5 a 6 veces semana  
☐ 1 vez al día  
☐ 2 a 3 veces al día  
☐ 5 a 6 veces al día  
☐ más 6 veces al día

---

bolleria

- ☒ Nunca o menos 1 vez al mes  
☐ 1 a 3 veces mes  
☐ 1 vez semana  
☐ 2 a 4 veces semana  
☐ 5 a 6 veces semana  
☐ 1 vez al día  
☐ 2 a 3 veces al día  
☐ 5 a 6 veces al día  
☐ más 6 veces al día

---

chocolate o bombones

- ☒ Nunca o menos 1 vez al mes  
☐ 1 a 3 veces mes  
☐ 1 vez semana  
☐ 2 a 4 veces semana  
☐ 5 a 6 veces semana  
☐ 1 vez al día  
☐ 2 a 3 veces al día  
☐ 5 a 6 veces al día  
☐ más 6 veces al día

---

chocolate polvo o colacao

- ☒ Nunca o menos 1 vez al mes  
☐ 1 a 3 veces mes  
☐ 1 vez semana  
☐ 2 a 4 veces semana  
☐ 5 a 6 veces semana  
☐ 1 vez al día  
☐ 2 a 3 veces al día  
☐ 5 a 6 veces al día  
☐ más 6 veces al día

---

vino tinto

- ☒ Nunca o menos 1 vez al mes  
☐ 1 a 3 veces mes  
☐ 1 vez semana  
☐ 2 a 4 veces semana  
☐ 5 a 6 veces semana  
☐ 1 vez al día  
☐ 2 a 3 veces al día  
☐ 5 a 6 veces al día  
☐ más 6 veces al día

---

vino blanco

- ☒ Nunca o menos 1 vez al mes  
☐ 1 a 3 veces mes  
☐ 1 vez semana  
☐ 2 a 4 veces semana  
☐ 5 a 6 veces semana  
☐ 1 vez al día  
☐ 2 a 3 veces al día  
☐ 5 a 6 veces al día  
☐ más 6 veces al día

---

|                    |                                                                                                                                                                                                                                                                                                                                                                                                              |
|--------------------|--------------------------------------------------------------------------------------------------------------------------------------------------------------------------------------------------------------------------------------------------------------------------------------------------------------------------------------------------------------------------------------------------------------|
| vino seco o vermut | <input checked="" type="radio"/> Nunca o menos 1 vez al mes<br><input type="radio"/> 1 a 3 veces mes<br><input type="radio"/> 1 vez semana<br><input type="radio"/> 2 a 4 veces semana<br><input type="radio"/> 5 a 6 veces semana<br><input type="radio"/> 1 vez al día<br><input type="radio"/> 2 a 3 veces al día<br><input type="radio"/> 5 a 6 veces al día<br><input type="radio"/> más 6 veces al día |
|--------------------|--------------------------------------------------------------------------------------------------------------------------------------------------------------------------------------------------------------------------------------------------------------------------------------------------------------------------------------------------------------------------------------------------------------|

---

|         |                                                                                                                                                                                                                                                                                                                                                                                                              |
|---------|--------------------------------------------------------------------------------------------------------------------------------------------------------------------------------------------------------------------------------------------------------------------------------------------------------------------------------------------------------------------------------------------------------------|
| cerveza | <input checked="" type="radio"/> Nunca o menos 1 vez al mes<br><input type="radio"/> 1 a 3 veces mes<br><input type="radio"/> 1 vez semana<br><input type="radio"/> 2 a 4 veces semana<br><input type="radio"/> 5 a 6 veces semana<br><input type="radio"/> 1 vez al día<br><input type="radio"/> 2 a 3 veces al día<br><input type="radio"/> 5 a 6 veces al día<br><input type="radio"/> más 6 veces al día |
|---------|--------------------------------------------------------------------------------------------------------------------------------------------------------------------------------------------------------------------------------------------------------------------------------------------------------------------------------------------------------------------------------------------------------------|

---

|                     |                                                                                                                                                                                                                                                                                                                                                                                                              |
|---------------------|--------------------------------------------------------------------------------------------------------------------------------------------------------------------------------------------------------------------------------------------------------------------------------------------------------------------------------------------------------------------------------------------------------------|
| cerveza sin alcohol | <input checked="" type="radio"/> Nunca o menos 1 vez al mes<br><input type="radio"/> 1 a 3 veces mes<br><input type="radio"/> 1 vez semana<br><input type="radio"/> 2 a 4 veces semana<br><input type="radio"/> 5 a 6 veces semana<br><input type="radio"/> 1 vez al día<br><input type="radio"/> 2 a 3 veces al día<br><input type="radio"/> 5 a 6 veces al día<br><input type="radio"/> más 6 veces al día |
|---------------------|--------------------------------------------------------------------------------------------------------------------------------------------------------------------------------------------------------------------------------------------------------------------------------------------------------------------------------------------------------------------------------------------------------------|

---

|         |                                                                                                                                                                                                                                                                                                                                                                                                              |
|---------|--------------------------------------------------------------------------------------------------------------------------------------------------------------------------------------------------------------------------------------------------------------------------------------------------------------------------------------------------------------------------------------------------------------|
| licores | <input checked="" type="radio"/> Nunca o menos 1 vez al mes<br><input type="radio"/> 1 a 3 veces mes<br><input type="radio"/> 1 vez semana<br><input type="radio"/> 2 a 4 veces semana<br><input type="radio"/> 5 a 6 veces semana<br><input type="radio"/> 1 vez al día<br><input type="radio"/> 2 a 3 veces al día<br><input type="radio"/> 5 a 6 veces al día<br><input type="radio"/> más 6 veces al día |
|---------|--------------------------------------------------------------------------------------------------------------------------------------------------------------------------------------------------------------------------------------------------------------------------------------------------------------------------------------------------------------------------------------------------------------|

---

|                       |                                                                                                                                                                                                                                                                                                                                                                                                              |
|-----------------------|--------------------------------------------------------------------------------------------------------------------------------------------------------------------------------------------------------------------------------------------------------------------------------------------------------------------------------------------------------------------------------------------------------------|
| ginebra o ron o vodka | <input checked="" type="radio"/> Nunca o menos 1 vez al mes<br><input type="radio"/> 1 a 3 veces mes<br><input type="radio"/> 1 vez semana<br><input type="radio"/> 2 a 4 veces semana<br><input type="radio"/> 5 a 6 veces semana<br><input type="radio"/> 1 vez al día<br><input type="radio"/> 2 a 3 veces al día<br><input type="radio"/> 5 a 6 veces al día<br><input type="radio"/> más 6 veces al día |
|-----------------------|--------------------------------------------------------------------------------------------------------------------------------------------------------------------------------------------------------------------------------------------------------------------------------------------------------------------------------------------------------------------------------------------------------------|

---

|                 |                                                                                                                                                                                                                                                                                                                                                                                                              |
|-----------------|--------------------------------------------------------------------------------------------------------------------------------------------------------------------------------------------------------------------------------------------------------------------------------------------------------------------------------------------------------------------------------------------------------------|
| refresco normal | <input checked="" type="radio"/> Nunca o menos 1 vez al mes<br><input type="radio"/> 1 a 3 veces mes<br><input type="radio"/> 1 vez semana<br><input type="radio"/> 2 a 4 veces semana<br><input type="radio"/> 5 a 6 veces semana<br><input type="radio"/> 1 vez al día<br><input type="radio"/> 2 a 3 veces al día<br><input type="radio"/> 5 a 6 veces al día<br><input type="radio"/> más 6 veces al día |
|-----------------|--------------------------------------------------------------------------------------------------------------------------------------------------------------------------------------------------------------------------------------------------------------------------------------------------------------------------------------------------------------------------------------------------------------|

---

|                           |                                                                                                                                                                                                                                                                                                                                                                                                              |
|---------------------------|--------------------------------------------------------------------------------------------------------------------------------------------------------------------------------------------------------------------------------------------------------------------------------------------------------------------------------------------------------------------------------------------------------------|
| refresco sin azúcar       | <input checked="" type="radio"/> Nunca o menos 1 vez al mes<br><input type="radio"/> 1 a 3 veces mes<br><input type="radio"/> 1 vez semana<br><input type="radio"/> 2 a 4 veces semana<br><input type="radio"/> 5 a 6 veces semana<br><input type="radio"/> 1 vez al día<br><input type="radio"/> 2 a 3 veces al día<br><input type="radio"/> 5 a 6 veces al día<br><input type="radio"/> más 6 veces al día |
| Agua del grifo            | <input type="radio"/> Nunca o menos 1 vez al mes<br><input type="radio"/> 1 a 3 veces mes<br><input type="radio"/> 1 vez semana<br><input type="radio"/> 2 a 4 veces semana<br><input type="radio"/> 5 a 6 veces semana<br><input type="radio"/> 1 vez al día<br><input type="radio"/> 2 a 3 veces al día<br><input type="radio"/> 5 a 6 veces al día<br><input checked="" type="radio"/> más 6 veces al día |
| agua embotellada sin gas  | <input checked="" type="radio"/> Nunca o menos 1 vez al mes<br><input type="radio"/> 1 a 3 veces mes<br><input type="radio"/> 1 vez semana<br><input type="radio"/> 2 a 4 veces semana<br><input type="radio"/> 5 a 6 veces semana<br><input type="radio"/> 1 vez al día<br><input type="radio"/> 2 a 3 veces al día<br><input type="radio"/> 5 a 6 veces al día<br><input type="radio"/> más 6 veces al día |
| agua embotellada con gas  | <input checked="" type="radio"/> Nunca o menos 1 vez al mes<br><input type="radio"/> 1 a 3 veces mes<br><input type="radio"/> 1 vez semana<br><input type="radio"/> 2 a 4 veces semana<br><input type="radio"/> 5 a 6 veces semana<br><input type="radio"/> 1 vez al día<br><input type="radio"/> 2 a 3 veces al día<br><input type="radio"/> 5 a 6 veces al día<br><input type="radio"/> más 6 veces al día |
| zumos frutas embotellados | <input type="radio"/> Nunca o menos 1 vez al mes<br><input type="radio"/> 1 a 3 veces mes<br><input type="radio"/> 1 vez semana<br><input type="radio"/> 2 a 4 veces semana<br><input type="radio"/> 5 a 6 veces semana<br><input checked="" type="radio"/> 1 vez al día<br><input type="radio"/> 2 a 3 veces al día<br><input type="radio"/> 5 a 6 veces al día<br><input type="radio"/> más 6 veces al día |
| café                      | <input checked="" type="radio"/> Nunca o menos 1 vez al mes<br><input type="radio"/> 1 a 3 veces mes<br><input type="radio"/> 1 vez semana<br><input type="radio"/> 2 a 4 veces semana<br><input type="radio"/> 5 a 6 veces semana<br><input type="radio"/> 1 vez al día<br><input type="radio"/> 2 a 3 veces al día<br><input type="radio"/> 5 a 6 veces al día<br><input type="radio"/> más 6 veces al día |

|                       |                                                                                                                                                                                                                                                                                                                                                                                                              |
|-----------------------|--------------------------------------------------------------------------------------------------------------------------------------------------------------------------------------------------------------------------------------------------------------------------------------------------------------------------------------------------------------------------------------------------------------|
| cafe descafeinado     | <input checked="" type="radio"/> Nunca o menos 1 vez al mes<br><input type="radio"/> 1 a 3 veces mes<br><input type="radio"/> 1 vez semana<br><input type="radio"/> 2 a 4 veces semana<br><input type="radio"/> 5 a 6 veces semana<br><input type="radio"/> 1 vez al día<br><input type="radio"/> 2 a 3 veces al día<br><input type="radio"/> 5 a 6 veces al día<br><input type="radio"/> más 6 veces al día |
| te o infusión         | <input type="radio"/> Nunca o menos 1 vez al mes<br><input type="radio"/> 1 a 3 veces mes<br><input type="radio"/> 1 vez semana<br><input checked="" type="radio"/> 2 a 4 veces semana<br><input type="radio"/> 5 a 6 veces semana<br><input type="radio"/> 1 vez al día<br><input type="radio"/> 2 a 3 veces al día<br><input type="radio"/> 5 a 6 veces al día<br><input type="radio"/> más 6 veces al día |
| sopa o puré verduras  | <input checked="" type="radio"/> Nunca o menos 1 vez al mes<br><input type="radio"/> 1 a 3 veces mes<br><input type="radio"/> 1 vez semana<br><input type="radio"/> 2 a 4 veces semana<br><input type="radio"/> 5 a 6 veces semana<br><input type="radio"/> 1 vez al día<br><input type="radio"/> 2 a 3 veces al día<br><input type="radio"/> 5 a 6 veces al día<br><input type="radio"/> más 6 veces al día |
| croquetas pollo jamón | <input checked="" type="radio"/> Nunca o menos 1 vez al mes<br><input type="radio"/> 1 a 3 veces mes<br><input type="radio"/> 1 vez semana<br><input type="radio"/> 2 a 4 veces semana<br><input type="radio"/> 5 a 6 veces semana<br><input type="radio"/> 1 vez al día<br><input type="radio"/> 2 a 3 veces al día<br><input type="radio"/> 5 a 6 veces al día<br><input type="radio"/> más 6 veces al día |
| croquetas pescado     | <input type="radio"/> Nunca o menos 1 vez al mes<br><input type="radio"/> 1 a 3 veces mes<br><input type="radio"/> 1 vez semana<br><input checked="" type="radio"/> 2 a 4 veces semana<br><input type="radio"/> 5 a 6 veces semana<br><input type="radio"/> 1 vez al día<br><input type="radio"/> 2 a 3 veces al día<br><input type="radio"/> 5 a 6 veces al día<br><input type="radio"/> más 6 veces al día |
| mayonesa              | <input checked="" type="radio"/> Nunca o menos 1 vez al mes<br><input type="radio"/> 1 a 3 veces mes<br><input type="radio"/> 1 vez semana<br><input type="radio"/> 2 a 4 veces semana<br><input type="radio"/> 5 a 6 veces semana<br><input type="radio"/> 1 vez al día<br><input type="radio"/> 2 a 3 veces al día<br><input type="radio"/> 5 a 6 veces al día<br><input type="radio"/> más 6 veces al día |

---

salsa tomate

- ☒ Nunca o menos 1 vez al mes  
☐ 1 a 3 veces mes  
☐ 1 vez semana  
☐ 2 a 4 veces semana  
☐ 5 a 6 veces semana  
☐ 1 vez al día  
☐ 2 a 3 veces al día  
☐ 5 a 6 veces al día  
☐ más 6 veces al día

---

ketchup

- ☐ Nunca o menos 1 vez al mes  
☐ 1 a 3 veces mes  
☐ 1 vez semana  
☐ 2 a 4 veces semana  
☐ 5 a 6 veces semana  
☒ 1 vez al día  
☐ 2 a 3 veces al día  
☐ 5 a 6 veces al día  
☐ más 6 veces al día

---

sal

- ☐ Nunca o menos 1 vez al mes  
☐ 1 a 3 veces mes  
☐ 1 vez semana  
☐ 2 a 4 veces semana  
☐ 5 a 6 veces semana  
☐ 1 vez al día  
☒ 2 a 3 veces al día  
☐ 5 a 6 veces al día  
☐ más 6 veces al día

---

ajo

- ☐ Nunca o menos 1 vez al mes  
☐ 1 a 3 veces mes  
☐ 1 vez semana  
☐ 2 a 4 veces semana  
☐ 5 a 6 veces semana  
☐ 1 vez al día  
☒ 2 a 3 veces al día  
☐ 5 a 6 veces al día  
☐ más 6 veces al día

---

mermelada o miel

- ☐ Nunca o menos 1 vez al mes  
☒ 1 a 3 veces mes  
☐ 1 vez semana  
☐ 2 a 4 veces semana  
☐ 5 a 6 veces semana  
☐ 1 vez al día  
☐ 2 a 3 veces al día  
☐ 5 a 6 veces al día  
☐ más 6 veces al día

---

azúcar

- ☒ Nunca o menos 1 vez al mes  
☐ 1 a 3 veces mes  
☐ 1 vez semana  
☐ 2 a 4 veces semana  
☐ 5 a 6 veces semana  
☐ 1 vez al día  
☐ 2 a 3 veces al día  
☐ 5 a 6 veces al día  
☐ más 6 veces al día

---

Otro alimento

---

---

suplementos vitamínicos

- ☒ si  
☐ no
- 

---

suplementos vitamínicos

---

---

dieta previa

- ☒ si  
☐ no
- 

---

motivo dieta

- ☐ no dieta  
☐ control peso  
☐ control colesterol  
☐ control diabetes  
☐ problemas estómago  
☐ problemas vesícula o hepáticos  
☐ HTA o cardiopatía  
☐ problemas renales  
☐ alergia alimentaria  
☐ ácido úrico elevado  
☐ vegetariana  
☒ otros
- 

---

cambio alimentos año previo gestación

- ☒ si  
☐ no
- 

---

cambio lácteos

- ☐ eliminado  
☐ disminuido  
☒ igual  
☐ aumentado  
☐ no sabe
- 

---

cambio huevos

- ☐ eliminado  
☐ disminuido  
☒ igual  
☐ aumentado  
☐ no sabe
- 

---

cambio carne

- ☐ eliminado  
☐ disminuido  
☒ igual  
☐ aumentado  
☐ no sabe
- 

---

cambio pescado

- ☐ eliminado  
☐ disminuido  
☒ igual  
☐ aumentado  
☐ no sabe
- 

---

cambio verduras

- ☐ eliminado  
☐ disminuido  
☒ igual  
☐ aumentado  
☐ no sabe
-

|                            |                                                                                                                                                                                                                        |
|----------------------------|------------------------------------------------------------------------------------------------------------------------------------------------------------------------------------------------------------------------|
| cambio legumbres           | <input type="radio"/> eliminado<br><input checked="" type="radio"/> disminuido<br><input type="radio"/> igual<br><input type="radio"/> aumentado<br><input type="radio"/> no sabe                                      |
| cambio fruta               | <input type="radio"/> eliminado<br><input type="radio"/> disminuido<br><input checked="" type="radio"/> igual<br><input type="radio"/> aumentado<br><input type="radio"/> no sabe                                      |
| cambio pan                 | <input checked="" type="radio"/> eliminado<br><input type="radio"/> disminuido<br><input type="radio"/> igual<br><input type="radio"/> aumentado<br><input type="radio"/> no sabe                                      |
| cambio aceite oliva        | <input type="radio"/> eliminado<br><input type="radio"/> disminuido<br><input checked="" type="radio"/> igual<br><input type="radio"/> aumentado<br><input type="radio"/> no sabe                                      |
| cambio mante o margarina   | <input type="radio"/> eliminado<br><input type="radio"/> disminuido<br><input checked="" type="radio"/> igual<br><input type="radio"/> aumentado<br><input type="radio"/> no sabe                                      |
| cambio azúcar y dulces     | <input checked="" type="radio"/> eliminado<br><input type="radio"/> disminuido<br><input type="radio"/> igual<br><input type="radio"/> aumentado<br><input type="radio"/> no sabe                                      |
| cambio bebidas alcohólicas | <input checked="" type="radio"/> eliminado<br><input type="radio"/> disminuido<br><input type="radio"/> igual<br><input type="radio"/> aumentado<br><input type="radio"/> no sabe                                      |
| frecuencia comidas fritas  | <input type="radio"/> a diario<br><input type="radio"/> 5 a 6 veces semana<br><input type="radio"/> 2 a 4 veces semana<br><input checked="" type="radio"/> 1 vez semana<br><input type="radio"/> menos de 1 vez semana |
| carne                      | <input type="radio"/> no como<br><input type="radio"/> cruda<br><input type="radio"/> poco hecha<br><input checked="" type="radio"/> hecha<br><input type="radio"/> muy hecha                                          |
| grasa visible carne        | <input type="radio"/> quita toda<br><input type="radio"/> quita mayoría<br><input type="radio"/> quita un poco<br><input checked="" type="radio"/> no quita nada                                                       |



|                                |                                                                                                                                                                                                                                                          |
|--------------------------------|----------------------------------------------------------------------------------------------------------------------------------------------------------------------------------------------------------------------------------------------------------|
| cocina carne                   | <input checked="" type="radio"/> a la plancha<br><input type="radio"/> a la parrilla<br><input type="radio"/> asada<br><input type="radio"/> frita<br><input type="radio"/> guisada                                                                      |
| tostado quemado carne          | <input checked="" type="radio"/> nunca<br><input type="radio"/> 1 vez mes<br><input type="radio"/> 2 a 3 veces mes<br><input type="radio"/> 1 vez semana<br><input type="radio"/> 2 a 3 semanas                                                          |
| tostado quemado pescado        | <input type="radio"/> nunca<br><input type="radio"/> 1 vez mes<br><input checked="" type="radio"/> 2 a 3 veces mes<br><input type="radio"/> 1 vez semana<br><input type="radio"/> 2 a 3 semanas                                                          |
| socarrat paella                | <input checked="" type="radio"/> nunca<br><input type="radio"/> 1 vez mes<br><input type="radio"/> 2 a 3 veces mes<br><input type="radio"/> 1 vez semana<br><input type="radio"/> 2 a 3 semanas                                                          |
| grasa o aceite cocinar         | <input type="radio"/> mantequilla<br><input type="radio"/> margarina<br><input type="radio"/> aceite oliva<br><input checked="" type="radio"/> aceite oliva virgen extra<br><input type="radio"/> aceite vegetal<br><input type="radio"/> mezcla aceites |
| grasa aceite aliñar            | <input type="radio"/> mantequilla<br><input type="radio"/> margarina<br><input type="radio"/> aceite oliva<br><input checked="" type="radio"/> aceite oliva virgen extra<br><input type="radio"/> aceite vegetal<br><input type="radio"/> mezcla aceites |
| grasa aceite freir             | <input type="radio"/> mantequilla<br><input type="radio"/> margarina<br><input type="radio"/> aceite oliva<br><input checked="" type="radio"/> aceite oliva virgen extra<br><input type="radio"/> aceite vegetal<br><input type="radio"/> mezcla aceites |
| Ejercicio cuestionario         | <input checked="" type="radio"/> si<br><input type="radio"/> no                                                                                                                                                                                          |
| horas de sueño incluido siesta | [*DATA REMOVED*]                                                                                                                                                                                                                                         |
| minutos siesta                 | _____                                                                                                                                                                                                                                                    |
| horas televisión semana        | _____                                                                                                                                                                                                                                                    |

|                                        |                                                                                                                                                                                                                                                                                                                                                                           |
|----------------------------------------|---------------------------------------------------------------------------------------------------------------------------------------------------------------------------------------------------------------------------------------------------------------------------------------------------------------------------------------------------------------------------|
| actividad trabajo                      | <input type="radio"/> casi siempre sentado<br><input type="radio"/> sentado 50 por cien<br><input type="radio"/> casi siempre de pie, quieto<br><input checked="" type="radio"/> casi siempre levantado caminando y llevando pocas cosas<br><input type="radio"/> casi siempre levantado, caminando y llevado muchas cosas<br><input type="radio"/> trabajo manual pesado |
| tiempo caminar o bici al día           | <input type="radio"/> casi nunca<br><input type="radio"/> menos 20min día<br><input type="radio"/> 20 a 40 min día<br><input checked="" type="radio"/> 40 a 60 min día<br><input type="radio"/> 1h o 1h y media día<br><input type="radio"/> más de 1h y media al día                                                                                                     |
| tiempo tareas casa al día              | <input type="radio"/> menos de 1h día<br><input checked="" type="radio"/> 1 a 2h día<br><input type="radio"/> 3 a 4h día<br><input type="radio"/> 5 a 6h día<br><input type="radio"/> 7 a 8h día<br><input type="radio"/> más de 8h día                                                                                                                                   |
| tiempo libre televisión ordenador leer | <input type="radio"/> menos 1h día<br><input checked="" type="radio"/> 1h día<br><input type="radio"/> 2h día<br><input type="radio"/> 3h día<br><input type="radio"/> 4h día<br><input type="radio"/> 5 a 6h día<br><input type="radio"/> mas 6h día                                                                                                                     |
| tiempo libre ejercicio o deporte       | <input type="radio"/> menos 1h semana<br><input type="radio"/> 1h semana<br><input type="radio"/> 2h semana<br><input type="radio"/> 3h semana<br><input checked="" type="radio"/> 4 a 5h semana<br><input type="radio"/> mas 5h semana                                                                                                                                   |
| como se considera                      | <input type="radio"/> sedentaria<br><input type="radio"/> poco activa<br><input type="radio"/> moderadamente activa<br><input checked="" type="radio"/> bastante activa<br><input type="radio"/> muy activa<br><input type="radio"/> no sabe                                                                                                                              |
| FUR                                    | [*DATA REMOVED*]                                                                                                                                                                                                                                                                                                                                                          |
| Semanas gestación 2T                   | _____                                                                                                                                                                                                                                                                                                                                                                     |
| Días gestación 2T                      | _____                                                                                                                                                                                                                                                                                                                                                                     |
| DBP 2T                                 | _____                                                                                                                                                                                                                                                                                                                                                                     |
| CC 2T                                  | _____                                                                                                                                                                                                                                                                                                                                                                     |

|                                    |                                                                                                                                                                                                 |
|------------------------------------|-------------------------------------------------------------------------------------------------------------------------------------------------------------------------------------------------|
| AC 2T                              | <hr/>                                                                                                                                                                                           |
| LF 2T                              | <hr/>                                                                                                                                                                                           |
| PFE 2T (Hadlock)                   | <hr/>                                                                                                                                                                                           |
| Semanas gestación 3T               | <hr/>                                                                                                                                                                                           |
| días 3T                            | <hr/>                                                                                                                                                                                           |
| DBP 3T                             | <hr/>                                                                                                                                                                                           |
| CC 3T                              | <hr/>                                                                                                                                                                                           |
| AC 3T                              | <hr/>                                                                                                                                                                                           |
| LF 3T                              | <hr/>                                                                                                                                                                                           |
| PFE 3T (Hadlock)                   | <hr/>                                                                                                                                                                                           |
| Semanas de gestación final         | [*DATA REMOVED*]                                                                                                                                                                                |
| días gestación final               | [*DATA REMOVED*]                                                                                                                                                                                |
| Localización placenta              | <input type="radio"/> anterior<br><input type="radio"/> lateral derecha<br><input type="radio"/> lateral izquierda<br><input type="radio"/> posterior<br><input checked="" type="radio"/> fondo |
| Presentación longitudinal cefálica | <input type="radio"/> no<br><input checked="" type="radio"/> si                                                                                                                                 |
| Dorso                              | <input checked="" type="radio"/> izquierda anterior<br><input type="radio"/> izquierda posterior<br><input type="radio"/> derecha anterior<br><input type="radio"/> derecha posterior           |
| diámetro biparietal                | [*DATA REMOVED*]                                                                                                                                                                                |
| Circunferencia craneal             | [*DATA REMOVED*]                                                                                                                                                                                |
| Circunferencia abdominal           | [*DATA REMOVED*]                                                                                                                                                                                |

|                                                   |                                                                                                                                               |
|---------------------------------------------------|-----------------------------------------------------------------------------------------------------------------------------------------------|
| Longitud de femur                                 | [*DATA REMOVED*]                                                                                                                              |
| tejido celular subcutáneo a nivel del muslo en mm | [*DATA REMOVED*]                                                                                                                              |
| tejido celular subcutáneo en abdomen en mm        | [*DATA REMOVED*]                                                                                                                              |
| Volumen del muslo en cm3                          | [*DATA REMOVED*]                                                                                                                              |
| Peso fetal estimado según fórmula de Hadlock      | [*DATA REMOVED*]                                                                                                                              |
| Percentil                                         | [*DATA REMOVED*]                                                                                                                              |
| Peso fetal estimado según fórmula de Scioscia     | _____                                                                                                                                         |
| Peso fetal estimado según fórmula de LEE          | _____                                                                                                                                         |
| Tipo de parto                                     | <input type="radio"/> eutocico<br><input type="radio"/> instrumentado/ventosa<br><input checked="" type="radio"/> cesarea                     |
| fecha de nacimiento                               | [*DATA REMOVED*]                                                                                                                              |
| Días entre exploración y nacimiento               | [*DATA REMOVED*]                                                                                                                              |
| Peso RN en g                                      | [*DATA REMOVED*]                                                                                                                              |
| sexo                                              | <input type="radio"/> mujer<br><input checked="" type="radio"/> hombre                                                                        |
| Apgar 1 minuto                                    | [*DATA REMOVED*]                                                                                                                              |
| Apgar 5 minutos                                   | [*DATA REMOVED*]                                                                                                                              |
| Apgar 10 minutos                                  | _____                                                                                                                                         |
| antecedente Covid durante gestación               | <input type="radio"/> Yes<br><input checked="" type="radio"/> No                                                                              |
| Nivel de estudios                                 | <input type="radio"/> ninguno<br><input type="radio"/> primarios<br><input type="radio"/> secundarios<br><input type="radio"/> universitarios |

## Base\_datos\_estimacion\_peso\_fetal

|                                       |                                                                                                                                                                                                                                                                                      |
|---------------------------------------|--------------------------------------------------------------------------------------------------------------------------------------------------------------------------------------------------------------------------------------------------------------------------------------|
| Número de identificación participante | 129                                                                                                                                                                                                                                                                                  |
| CODIGO PARTICIPANTE                   |                                                                                                                                                                                                                                                                                      |
| Edad                                  | [*DATA REMOVED*]                                                                                                                                                                                                                                                                     |
| Gestaciones                           | <input type="radio"/> 1<br><input type="radio"/> 2<br><input type="radio"/> 3<br><input checked="" type="radio"/> mas de 3                                                                                                                                                           |
| partos                                | <input checked="" type="radio"/> 0<br><input type="radio"/> 1<br><input type="radio"/> 2<br><input type="radio"/> 3<br><input type="radio"/> mas de 3                                                                                                                                |
| cesáreas                              | <input checked="" type="radio"/> 0<br><input type="radio"/> 1<br><input type="radio"/> 2<br><input type="radio"/> 3<br><input type="radio"/> mas de 3                                                                                                                                |
| Abortos                               | <input type="radio"/> 0<br><input type="radio"/> 1<br><input type="radio"/> 2<br><input checked="" type="radio"/> 3<br><input type="radio"/> mas de 3                                                                                                                                |
| Tipo de gestacion                     | <input type="radio"/> espontanea<br><input type="radio"/> IAC inseminación artificial conyuge<br><input type="radio"/> IAD inseminación artificial donante<br><input checked="" type="radio"/> FIV Fecundación in Vitro<br><input type="radio"/> Ovodon FIV con donación de ovocitos |
| peso previo a embarazo                |                                                                                                                                                                                                                                                                                      |
| Ganancia ponderal embarazo            |                                                                                                                                                                                                                                                                                      |
| Talla madre                           |                                                                                                                                                                                                                                                                                      |
| IMC previo embarazo                   |                                                                                                                                                                                                                                                                                      |
| Patología obstétrica                  | <input checked="" type="radio"/> no<br><input type="radio"/> si                                                                                                                                                                                                                      |
| Diabetes pregestacional               | <input checked="" type="radio"/> no<br><input type="radio"/> si                                                                                                                                                                                                                      |

|                                            |                                                                                                                                                                                      |
|--------------------------------------------|--------------------------------------------------------------------------------------------------------------------------------------------------------------------------------------|
| Diabetes gestacional                       | <input checked="" type="radio"/> no<br><input type="radio"/> si                                                                                                                      |
| Diabetes gestacional con insulina          | <input checked="" type="radio"/> no<br><input type="radio"/> si                                                                                                                      |
| Diabetes gestacional con dieta y ejercicio | <input checked="" type="radio"/> no<br><input type="radio"/> si                                                                                                                      |
| Percentil fetos previos                    | <input checked="" type="radio"/> Nada<br><input type="radio"/> percentil menor de 10<br><input type="radio"/> percentil entre 10 y 90<br><input type="radio"/> percentil mayor de 90 |
| Exfumadora                                 | <input checked="" type="radio"/> Nada<br><input type="radio"/> menos de 5 años<br><input type="radio"/> 5 a 10 años<br><input type="radio"/> mayor o igual a 10 años                 |
| Hábito tabáquico                           | <input checked="" type="radio"/> no<br><input type="radio"/> si                                                                                                                      |
| fumadora                                   | [*DATA REMOVED*]                                                                                                                                                                     |
| Consumo otros tóxicos                      | <input checked="" type="radio"/> no<br><input type="radio"/> si                                                                                                                      |
| Hb 1T                                      | _____                                                                                                                                                                                |
| Htc 1T                                     | _____                                                                                                                                                                                |
| Hb 2T                                      | _____                                                                                                                                                                                |
| HTC 2T                                     | _____                                                                                                                                                                                |
| Hb 3T                                      | _____                                                                                                                                                                                |
| HTC 3T                                     | _____                                                                                                                                                                                |
| Suplemento FE oral                         | <input type="radio"/> si<br><input type="radio"/> no                                                                                                                                 |
| Suplemento fe iv                           | <input type="radio"/> si<br><input type="radio"/> no                                                                                                                                 |
| Transfusión                                | <input type="radio"/> no<br><input type="radio"/> si                                                                                                                                 |

|                     |                                                                                                                                                                                                                                                                                                                                                                                                              |
|---------------------|--------------------------------------------------------------------------------------------------------------------------------------------------------------------------------------------------------------------------------------------------------------------------------------------------------------------------------------------------------------------------------------------------------------|
| Solicitada Vit D    | <input type="radio"/> no<br><input checked="" type="radio"/> si                                                                                                                                                                                                                                                                                                                                              |
| Deficit vit D       | <input type="radio"/> no<br><input checked="" type="radio"/> si                                                                                                                                                                                                                                                                                                                                              |
| Suplemento vit D    | <input checked="" type="radio"/> si<br><input type="radio"/> no                                                                                                                                                                                                                                                                                                                                              |
| Dieta, cuestionario | <input checked="" type="radio"/> si<br><input type="radio"/> no                                                                                                                                                                                                                                                                                                                                              |
| Leche entera        | <input type="radio"/> Nunca o menos 1 vez al mes<br><input checked="" type="radio"/> 1 a 3 veces mes<br><input type="radio"/> 1 vez semana<br><input type="radio"/> 2 a 4 veces semana<br><input type="radio"/> 5 a 6 veces semana<br><input type="radio"/> 1 vez al día<br><input type="radio"/> 2 a 3 veces al día<br><input type="radio"/> 5 a 6 veces al día<br><input type="radio"/> más 6 veces al día |
| Leche semidesnatada | <input type="radio"/> Nunca o menos 1 vez al mes<br><input type="radio"/> 1 a 3 veces mes<br><input type="radio"/> 1 vez semana<br><input checked="" type="radio"/> 2 a 4 veces semana<br><input type="radio"/> 5 a 6 veces semana<br><input type="radio"/> 1 vez al día<br><input type="radio"/> 2 a 3 veces al día<br><input type="radio"/> 5 a 6 veces al día<br><input type="radio"/> mas 6 veces al día |
| Leche desnatada     | <input checked="" type="radio"/> Nunca o menos 1 vez al mes<br><input type="radio"/> 1 a 3 veces mes<br><input type="radio"/> 1 vez semana<br><input type="radio"/> 2 a 4 veces semana<br><input type="radio"/> 5 a 6 veces semana<br><input type="radio"/> 1 vez al día<br><input type="radio"/> 2 a 3 veces al día<br><input type="radio"/> 5 a 6 veces al día<br><input type="radio"/> más 6 veces al día |
| Leche condensada    | <input checked="" type="radio"/> Nunca o menos 1 vez al mes<br><input type="radio"/> 1 a 3 veces mes<br><input type="radio"/> 1 vez semana<br><input type="radio"/> 2 a 4 veces semana<br><input type="radio"/> 5 a 6 veces semana<br><input type="radio"/> 1 vez al día<br><input type="radio"/> 2 a 3 veces al día<br><input type="radio"/> 5 a 6 veces al día<br><input type="radio"/> más 6 veces al día |

---

nata o crema de leche

- ☒ Nunca o menos 1 vez al mes  
☐ 1 a 3 veces mes  
☐ 1 vez semana  
☐ 2 a 4 veces semana  
☐ 5 a 6 veces semana  
☐ 1 vez al día  
☐ 2 a 3 veces al día  
☐ 5 a 6 veces al día  
☐ más 6 veces al día

---

Yogurt Entero

- ☐ Nunca o menos 1 vez al mes  
☒ 1 a 3 veces mes  
☐ 1 vez semana  
☐ 2 a 4 veces semana  
☐ 5 a 6 veces semana  
☐ 1 vez al día  
☐ 2 a 3 veces al día  
☐ 5 a 6 veces al día  
☐ más 6 veces al día

---

Yogurt desnatado

- ☒ Nunca o menos 1 vez al mes  
☐ 1 a 3 veces mes  
☐ 1 vez semana  
☐ 2 a 4 veces semana  
☐ 5 a 6 veces semana  
☐ 1 vez al día  
☐ 2 a 3 veces al día  
☐ 5 a 6 veces al día  
☐ más 6 veces al día

---

100g requesón o queso blando o queso fresco

- ☐ Nunca o menos 1 vez al mes  
☒ 1 a 3 veces mes  
☐ 1 vez semana  
☐ 2 a 4 veces semana  
☐ 5 a 6 veces semana  
☐ 1 vez al día  
☐ 2 a 3 veces al día  
☐ 5 a 6 veces al día  
☐ más 6 veces al día

---

queso curado o semicurado o cremoso

- ☐ Nunca o menos 1 vez al mes  
☐ 1 a 3 veces mes  
☐ 1 vez semana  
☐ 2 a 4 veces semana  
☐ 5 a 6 veces semana  
☐ 1 vez al día  
☐ 2 a 3 veces al día  
☐ 5 a 6 veces al día  
☐ más 6 veces al día

---

natillas flan pudding

- ☐ Nunca o menos 1 vez al mes  
☐ 1 a 3 veces mes  
☒ 1 vez semana  
☐ 2 a 4 veces semana  
☐ 5 a 6 veces semana  
☐ 1 vez al día  
☐ 2 a 3 veces al día  
☐ 5 a 6 veces al día  
☐ más 6 veces al día



|                                      |                                                                                                                                                                                                                                                                                                                                                                                                              |
|--------------------------------------|--------------------------------------------------------------------------------------------------------------------------------------------------------------------------------------------------------------------------------------------------------------------------------------------------------------------------------------------------------------------------------------------------------------|
| Helado                               | <input type="radio"/> Nunca o menos 1 vez al mes<br><input type="radio"/> 1 a 3 veces mes<br><input type="radio"/> 1 vez semana<br><input checked="" type="radio"/> 2 a 4 veces semana<br><input type="radio"/> 5 a 6 veces semana<br><input type="radio"/> 1 vez al día<br><input type="radio"/> 2 a 3 veces al día<br><input type="radio"/> 5 a 6 veces al día<br><input type="radio"/> más 6 veces al día |
| huevo                                | <input type="radio"/> Nunca o menos 1 vez al mes<br><input type="radio"/> 1 a 3 veces mes<br><input checked="" type="radio"/> 1 vez semana<br><input type="radio"/> 2 a 4 veces semana<br><input type="radio"/> 5 a 6 veces semana<br><input type="radio"/> 1 vez al día<br><input type="radio"/> 2 a 3 veces al día<br><input type="radio"/> 5 a 6 veces al día<br><input type="radio"/> más 6 veces al día |
| Pollo con piel                       | <input type="radio"/> Nunca o menos 1 vez al mes<br><input type="radio"/> 1 a 3 veces mes<br><input checked="" type="radio"/> 1 vez semana<br><input type="radio"/> 2 a 4 veces semana<br><input type="radio"/> 5 a 6 veces semana<br><input type="radio"/> 1 vez al día<br><input type="radio"/> 2 a 3 veces al día<br><input type="radio"/> 5 a 6 veces al día<br><input type="radio"/> más 6 veces al día |
| pollo sin piel                       | <input type="radio"/> Nunca o menos 1 vez al mes<br><input checked="" type="radio"/> 1 a 3 veces mes<br><input type="radio"/> 1 vez semana<br><input type="radio"/> 2 a 4 veces semana<br><input type="radio"/> 5 a 6 veces semana<br><input type="radio"/> 1 vez al día<br><input type="radio"/> 2 a 3 veces al día<br><input type="radio"/> 5 a 6 veces al día<br><input type="radio"/> más 6 veces al día |
| Ternera o cerdo o cordero            | <input type="radio"/> Nunca o menos 1 vez al mes<br><input checked="" type="radio"/> 1 a 3 veces mes<br><input type="radio"/> 1 vez semana<br><input type="radio"/> 2 a 4 veces semana<br><input type="radio"/> 5 a 6 veces semana<br><input type="radio"/> 1 vez al día<br><input type="radio"/> 2 a 3 veces al día<br><input type="radio"/> 5 a 6 veces al día<br><input type="radio"/> más 6 veces al día |
| carne caza: Conejo o codorniz o pato | <input checked="" type="radio"/> Nunca o menos 1 vez al mes<br><input type="radio"/> 1 a 3 veces mes<br><input type="radio"/> 1 vez semana<br><input type="radio"/> 2 a 4 veces semana<br><input type="radio"/> 5 a 6 veces semana<br><input type="radio"/> 1 vez al día<br><input type="radio"/> 2 a 3 veces al día<br><input type="radio"/> 5 a 6 veces al día<br><input type="radio"/> más 6 veces al día |

---

Hígado de ternera o cerdo o pollo

- ☒ Nunca o menos 1 vez al mes  
☐ 1 a 3 veces mes  
☐ 1 vez semana  
☐ 2 a 4 veces semana  
☐ 5 a 6 veces semana  
☐ 1 vez al día  
☐ 2 a 3 veces al día  
☐ 5 a 6 veces al día  
☐ más 6 veces al día

---

Vísceras

- ☒ Nunca o menos 1 vez al mes  
☐ 1 a 3 veces mes  
☐ 1 vez semana  
☐ 2 a 4 veces semana  
☐ 5 a 6 veces semana  
☐ 1 vez al día  
☐ 2 a 3 veces al día  
☐ 5 a 6 veces al día  
☐ más 6 veces al día

---

Embutido

- ☐ Nunca o menos 1 vez al mes  
☒ 1 a 3 veces mes  
☐ 1 vez semana  
☐ 2 a 4 veces semana  
☐ 5 a 6 veces semana  
☐ 1 vez al día  
☐ 2 a 3 veces al día  
☐ 5 a 6 veces al día  
☐ más 6 veces al día

---

Salchicha o similar

- ☐ Nunca o menos 1 vez al mes  
☒ 1 a 3 veces mes  
☐ 1 vez semana  
☐ 2 a 4 veces semana  
☐ 5 a 6 veces semana  
☐ 1 vez al día  
☐ 2 a 3 veces al día  
☐ 5 a 6 veces al día  
☐ más 6 veces al día

---

Pate o foiegras

- ☒ Nunca o menos 1 vez al mes  
☐ 1 a 3 veces mes  
☐ 1 vez semana  
☐ 2 a 4 veces semana  
☐ 5 a 6 veces semana  
☐ 1 vez al día  
☐ 2 a 3 veces al día  
☐ 5 a 6 veces al día  
☐ más 6 veces al día

---

Hamburguesa

- ☐ Nunca o menos 1 vez al mes  
☒ 1 a 3 veces mes  
☐ 1 vez semana  
☐ 2 a 4 veces semana  
☐ 5 a 6 veces semana  
☐ 1 vez al día  
☐ 2 a 3 veces al día  
☐ 5 a 6 veces al día  
☐ más 6 veces al día

---

tocino o bacon

- ☒ Nunca o menos 1 vez al mes  
☐ 1 a 3 veces mes  
☐ 1 vez semana  
☐ 2 a 4 veces semana  
☐ 5 a 6 veces semana  
☐ 1 vez al día  
☐ 2 a 3 veces al día  
☐ 5 a 6 veces al día  
☐ más 6 veces al día

---

Pescado frito

- ☐ Nunca o menos 1 vez al mes  
☐ 1 a 3 veces mes  
☐ 1 vez semana  
☒ 2 a 4 veces semana  
☐ 5 a 6 veces semana  
☐ 1 vez al día  
☐ 2 a 3 veces al día  
☐ 5 a 6 veces al día  
☐ más 6 veces al día

---

pescado hervido blanco

- ☐ Nunca o menos 1 vez al mes  
☒ 1 a 3 veces mes  
☐ 1 vez semana  
☐ 2 a 4 veces semana  
☐ 5 a 6 veces semana  
☐ 1 vez al día  
☐ 2 a 3 veces al día  
☐ 5 a 6 veces al día  
☐ más 6 veces al día

---

pescado hervido azul

- ☐ Nunca o menos 1 vez al mes  
☒ 1 a 3 veces mes  
☐ 1 vez semana  
☐ 2 a 4 veces semana  
☐ 5 a 6 veces semana  
☐ 1 vez al día  
☐ 2 a 3 veces al día  
☐ 5 a 6 veces al día  
☐ más 6 veces al día

---

otros pescado azul

- ☐ Nunca o menos 1 vez al mes  
☐ 1 a 3 veces mes  
☐ 1 vez semana  
☒ 2 a 4 veces semana  
☐ 5 a 6 veces semana  
☐ 1 vez al día  
☐ 2 a 3 veces al día  
☐ 5 a 6 veces al día  
☐ más 6 veces al día

---

atun conserva

- ☐ Nunca o menos 1 vez al mes  
☐ 1 a 3 veces mes  
☐ 1 vez semana  
☒ 2 a 4 veces semana  
☐ 5 a 6 veces semana  
☐ 1 vez al día  
☐ 2 a 3 veces al día  
☐ 5 a 6 veces al día  
☐ más 6 veces al día

|                                         |                                                                                                                                                                                                                                                                                                                                                                                                              |
|-----------------------------------------|--------------------------------------------------------------------------------------------------------------------------------------------------------------------------------------------------------------------------------------------------------------------------------------------------------------------------------------------------------------------------------------------------------------|
| sardina conserva                        | <input checked="" type="radio"/> Nunca o menos 1 vez al mes<br><input type="radio"/> 1 a 3 veces mes<br><input type="radio"/> 1 vez semana<br><input type="radio"/> 2 a 4 veces semana<br><input type="radio"/> 5 a 6 veces semana<br><input type="radio"/> 1 vez al día<br><input type="radio"/> 2 a 3 veces al día<br><input type="radio"/> 5 a 6 veces al día<br><input type="radio"/> más 6 veces al día |
| pescado ahumado                         | <input type="radio"/> Nunca o menos 1 vez al mes<br><input type="radio"/> 1 a 3 veces mes<br><input type="radio"/> 1 vez semana<br><input checked="" type="radio"/> 2 a 4 veces semana<br><input type="radio"/> 5 a 6 veces semana<br><input type="radio"/> 1 vez al día<br><input type="radio"/> 2 a 3 veces al día<br><input type="radio"/> 5 a 6 veces al día<br><input type="radio"/> más 6 veces al día |
| almejas o mejillones o ostras unos 100g | <input type="radio"/> Nunca o menos 1 vez al mes<br><input checked="" type="radio"/> 1 a 3 veces mes<br><input type="radio"/> 1 vez semana<br><input type="radio"/> 2 a 4 veces semana<br><input type="radio"/> 5 a 6 veces semana<br><input type="radio"/> 1 vez al día<br><input type="radio"/> 2 a 3 veces al día<br><input type="radio"/> 5 a 6 veces al día<br><input type="radio"/> más 6 veces al día |
| calamar o chipiron o sepia unos 100g    | <input type="radio"/> Nunca o menos 1 vez al mes<br><input checked="" type="radio"/> 1 a 3 veces mes<br><input type="radio"/> 1 vez semana<br><input type="radio"/> 2 a 4 veces semana<br><input type="radio"/> 5 a 6 veces semana<br><input type="radio"/> 1 vez al día<br><input type="radio"/> 2 a 3 veces al día<br><input type="radio"/> 5 a 6 veces al día<br><input type="radio"/> más 6 veces al día |
| marisco unos 100g                       | <input type="radio"/> Nunca o menos 1 vez al mes<br><input type="radio"/> 1 a 3 veces mes<br><input checked="" type="radio"/> 1 vez semana<br><input type="radio"/> 2 a 4 veces semana<br><input type="radio"/> 5 a 6 veces semana<br><input type="radio"/> 1 vez al día<br><input type="radio"/> 2 a 3 veces al día<br><input type="radio"/> 5 a 6 veces al día<br><input type="radio"/> más 6 veces al día |
| Espinacas o acelgas cocinadas           | <input type="radio"/> Nunca o menos 1 vez al mes<br><input checked="" type="radio"/> 1 a 3 veces mes<br><input type="radio"/> 1 vez semana<br><input type="radio"/> 2 a 4 veces semana<br><input type="radio"/> 5 a 6 veces semana<br><input type="radio"/> 1 vez al día<br><input type="radio"/> 2 a 3 veces al día<br><input type="radio"/> 5 a 6 veces al día<br><input type="radio"/> más 6 veces al día |

---

Col o coliflor o brocoli cocinado

- ☐ Nunca o menos 1 vez al mes  
☐ 1 a 3 veces mes  
☒ 1 vez semana  
☐ 2 a 4 veces semana  
☐ 5 a 6 veces semana  
☐ 1 vez al día  
☐ 2 a 3 veces al día  
☐ 5 a 6 veces al día  
☐ más 6 veces al día

---

Lechuga o endivia o escarola

- ☐ Nunca o menos 1 vez al mes  
☒ 1 a 3 veces mes  
☐ 1 vez semana  
☐ 2 a 4 veces semana  
☐ 5 a 6 veces semana  
☐ 1 vez al día  
☐ 2 a 3 veces al día  
☐ 5 a 6 veces al día  
☐ más 6 veces al día

---

tomate ensalada

- ☐ Nunca o menos 1 vez al mes  
☐ 1 a 3 veces mes  
☐ 1 vez semana  
☒ 2 a 4 veces semana  
☐ 5 a 6 veces semana  
☐ 1 vez al día  
☐ 2 a 3 veces al día  
☐ 5 a 6 veces al día  
☐ más 6 veces al día

---

cebolla

- ☐ Nunca o menos 1 vez al mes  
☐ 1 a 3 veces mes  
☐ 1 vez semana  
☒ 2 a 4 veces semana  
☐ 5 a 6 veces semana  
☐ 1 vez al día  
☐ 2 a 3 veces al día  
☐ 5 a 6 veces al día  
☐ más 6 veces al día

---

Zanahoria o calabaza

- ☐ Nunca o menos 1 vez al mes  
☐ 1 a 3 veces mes  
☐ 1 vez semana  
☒ 2 a 4 veces semana  
☐ 5 a 6 veces semana  
☐ 1 vez al día  
☐ 2 a 3 veces al día  
☐ 5 a 6 veces al día  
☐ más 6 veces al día

---

Judias verdes

- ☐ Nunca o menos 1 vez al mes  
☐ 1 a 3 veces mes  
☐ 1 vez semana  
☒ 2 a 4 veces semana  
☐ 5 a 6 veces semana  
☐ 1 vez al día  
☐ 2 a 3 veces al día  
☐ 5 a 6 veces al día  
☐ más 6 veces al día

---

Berenjena o calabacin o pepino

- ☐ Nunca o menos 1 vez al mes  
☐ 1 a 3 veces mes  
☒ 1 vez semana  
☐ 2 a 4 veces semana  
☐ 5 a 6 veces semana  
☐ 1 vez al día  
☐ 2 a 3 veces al día  
☐ 5 a 6 veces al día  
☐ más 6 veces al día

---

pimiento

- ☒ Nunca o menos 1 vez al mes  
☐ 1 a 3 veces mes  
☐ 1 vez semana  
☐ 2 a 4 veces semana  
☐ 5 a 6 veces semana  
☐ 1 vez al día  
☐ 2 a 3 veces al día  
☐ 5 a 6 veces al día  
☐ más 6 veces al día

---

alcachofa

- ☐ Nunca o menos 1 vez al mes  
☒ 1 a 3 veces mes  
☐ 1 vez semana  
☐ 2 a 4 veces semana  
☐ 5 a 6 veces semana  
☐ 1 vez al día  
☐ 2 a 3 veces al día  
☐ 5 a 6 veces al día  
☐ más 6 veces al día

---

espárragos

- ☐ Nunca o menos 1 vez al mes  
☒ 1 a 3 veces mes  
☐ 1 vez semana  
☐ 2 a 4 veces semana  
☐ 5 a 6 veces semana  
☐ 1 vez al día  
☐ 2 a 3 veces al día  
☐ 5 a 6 veces al día  
☐ más 6 veces al día

---

maíz hervido

- ☒ Nunca o menos 1 vez al mes  
☐ 1 a 3 veces mes  
☐ 1 vez semana  
☐ 2 a 4 veces semana  
☐ 5 a 6 veces semana  
☐ 1 vez al día  
☐ 2 a 3 veces al día  
☐ 5 a 6 veces al día  
☐ más 6 veces al día

---

legumbres

- ☐ Nunca o menos 1 vez al mes  
☐ 1 a 3 veces mes  
☐ 1 vez semana  
☒ 2 a 4 veces semana  
☐ 5 a 6 veces semana  
☐ 1 vez al día  
☐ 2 a 3 veces al día  
☐ 5 a 6 veces al día  
☐ más 6 veces al día

|                          |                                                                                                                                                                                                                                                                                                                                                                                                              |
|--------------------------|--------------------------------------------------------------------------------------------------------------------------------------------------------------------------------------------------------------------------------------------------------------------------------------------------------------------------------------------------------------------------------------------------------------|
| naranjas o mandarinas    | <input type="radio"/> Nunca o menos 1 vez al mes<br><input checked="" type="radio"/> 1 a 3 veces mes<br><input type="radio"/> 1 vez semana<br><input type="radio"/> 2 a 4 veces semana<br><input type="radio"/> 5 a 6 veces semana<br><input type="radio"/> 1 vez al día<br><input type="radio"/> 2 a 3 veces al día<br><input type="radio"/> 5 a 6 veces al día<br><input type="radio"/> más 6 veces al día |
| zumos naturales de fruta | <input checked="" type="radio"/> Nunca o menos 1 vez al mes<br><input type="radio"/> 1 a 3 veces mes<br><input type="radio"/> 1 vez semana<br><input type="radio"/> 2 a 4 veces semana<br><input type="radio"/> 5 a 6 veces semana<br><input type="radio"/> 1 vez al día<br><input type="radio"/> 2 a 3 veces al día<br><input type="radio"/> 5 a 6 veces al día<br><input type="radio"/> más 6 veces al día |
| plátano                  | <input checked="" type="radio"/> Nunca o menos 1 vez al mes<br><input type="radio"/> 1 a 3 veces mes<br><input type="radio"/> 1 vez semana<br><input type="radio"/> 2 a 4 veces semana<br><input type="radio"/> 5 a 6 veces semana<br><input type="radio"/> 1 vez al día<br><input type="radio"/> 2 a 3 veces al día<br><input type="radio"/> 5 a 6 veces al día<br><input type="radio"/> más 6 veces al día |
| manzana o pera           | <input type="radio"/> Nunca o menos 1 vez al mes<br><input checked="" type="radio"/> 1 a 3 veces mes<br><input type="radio"/> 1 vez semana<br><input type="radio"/> 2 a 4 veces semana<br><input type="radio"/> 5 a 6 veces semana<br><input type="radio"/> 1 vez al día<br><input type="radio"/> 2 a 3 veces al día<br><input type="radio"/> 5 a 6 veces al día<br><input type="radio"/> más 6 veces al día |
| melocotón o nectarina    | <input type="radio"/> Nunca o menos 1 vez al mes<br><input type="radio"/> 1 a 3 veces mes<br><input type="radio"/> 1 vez semana<br><input checked="" type="radio"/> 2 a 4 veces semana<br><input type="radio"/> 5 a 6 veces semana<br><input type="radio"/> 1 vez al día<br><input type="radio"/> 2 a 3 veces al día<br><input type="radio"/> 5 a 6 veces al día<br><input type="radio"/> más 6 veces al día |
| sandía o melón           | <input type="radio"/> Nunca o menos 1 vez al mes<br><input type="radio"/> 1 a 3 veces mes<br><input type="radio"/> 1 vez semana<br><input type="radio"/> 2 a 4 veces semana<br><input checked="" type="radio"/> 5 a 6 veces semana<br><input type="radio"/> 1 vez al día<br><input type="radio"/> 2 a 3 veces al día<br><input type="radio"/> 5 a 6 veces al día<br><input type="radio"/> más 6 veces al día |

---

|     |                                                                                                                                                                                                                                                                                                                                                                                                              |
|-----|--------------------------------------------------------------------------------------------------------------------------------------------------------------------------------------------------------------------------------------------------------------------------------------------------------------------------------------------------------------------------------------------------------------|
| uva | <input type="radio"/> Nunca o menos 1 vez al mes<br><input checked="" type="radio"/> 1 a 3 veces mes<br><input type="radio"/> 1 vez semana<br><input type="radio"/> 2 a 4 veces semana<br><input type="radio"/> 5 a 6 veces semana<br><input type="radio"/> 1 vez al día<br><input type="radio"/> 2 a 3 veces al día<br><input type="radio"/> 5 a 6 veces al día<br><input type="radio"/> más 6 veces al día |
|-----|--------------------------------------------------------------------------------------------------------------------------------------------------------------------------------------------------------------------------------------------------------------------------------------------------------------------------------------------------------------------------------------------------------------|

---

|                 |                                                                                                                                                                                                                                                                                                                                                                                                              |
|-----------------|--------------------------------------------------------------------------------------------------------------------------------------------------------------------------------------------------------------------------------------------------------------------------------------------------------------------------------------------------------------------------------------------------------------|
| bruna o ciruela | <input checked="" type="radio"/> Nunca o menos 1 vez al mes<br><input type="radio"/> 1 a 3 veces mes<br><input type="radio"/> 1 vez semana<br><input type="radio"/> 2 a 4 veces semana<br><input type="radio"/> 5 a 6 veces semana<br><input type="radio"/> 1 vez al día<br><input type="radio"/> 2 a 3 veces al día<br><input type="radio"/> 5 a 6 veces al día<br><input type="radio"/> más 6 veces al día |
|-----------------|--------------------------------------------------------------------------------------------------------------------------------------------------------------------------------------------------------------------------------------------------------------------------------------------------------------------------------------------------------------------------------------------------------------|

---

|      |                                                                                                                                                                                                                                                                                                                                                                                                              |
|------|--------------------------------------------------------------------------------------------------------------------------------------------------------------------------------------------------------------------------------------------------------------------------------------------------------------------------------------------------------------------------------------------------------------|
| kiwi | <input checked="" type="radio"/> Nunca o menos 1 vez al mes<br><input type="radio"/> 1 a 3 veces mes<br><input type="radio"/> 1 vez semana<br><input type="radio"/> 2 a 4 veces semana<br><input type="radio"/> 5 a 6 veces semana<br><input type="radio"/> 1 vez al día<br><input type="radio"/> 2 a 3 veces al día<br><input type="radio"/> 5 a 6 veces al día<br><input type="radio"/> más 6 veces al día |
|------|--------------------------------------------------------------------------------------------------------------------------------------------------------------------------------------------------------------------------------------------------------------------------------------------------------------------------------------------------------------------------------------------------------------|

---

|          |                                                                                                                                                                                                                                                                                                                                                                                                              |
|----------|--------------------------------------------------------------------------------------------------------------------------------------------------------------------------------------------------------------------------------------------------------------------------------------------------------------------------------------------------------------------------------------------------------------|
| aceituna | <input type="radio"/> Nunca o menos 1 vez al mes<br><input type="radio"/> 1 a 3 veces mes<br><input type="radio"/> 1 vez semana<br><input checked="" type="radio"/> 2 a 4 veces semana<br><input type="radio"/> 5 a 6 veces semana<br><input type="radio"/> 1 vez al día<br><input type="radio"/> 2 a 3 veces al día<br><input type="radio"/> 5 a 6 veces al día<br><input type="radio"/> más 6 veces al día |
|----------|--------------------------------------------------------------------------------------------------------------------------------------------------------------------------------------------------------------------------------------------------------------------------------------------------------------------------------------------------------------------------------------------------------------|

---

|              |                                                                                                                                                                                                                                                                                                                                                                                                              |
|--------------|--------------------------------------------------------------------------------------------------------------------------------------------------------------------------------------------------------------------------------------------------------------------------------------------------------------------------------------------------------------------------------------------------------------|
| frutos secos | <input type="radio"/> Nunca o menos 1 vez al mes<br><input type="radio"/> 1 a 3 veces mes<br><input type="radio"/> 1 vez semana<br><input type="radio"/> 2 a 4 veces semana<br><input type="radio"/> 5 a 6 veces semana<br><input type="radio"/> 1 vez al día<br><input checked="" type="radio"/> 2 a 3 veces al día<br><input type="radio"/> 5 a 6 veces al día<br><input type="radio"/> más 6 veces al día |
|--------------|--------------------------------------------------------------------------------------------------------------------------------------------------------------------------------------------------------------------------------------------------------------------------------------------------------------------------------------------------------------------------------------------------------------|

---

|            |                                                                                                                                                                                                                                                                                                                                                                                                              |
|------------|--------------------------------------------------------------------------------------------------------------------------------------------------------------------------------------------------------------------------------------------------------------------------------------------------------------------------------------------------------------------------------------------------------------|
| pan blanco | <input type="radio"/> Nunca o menos 1 vez al mes<br><input type="radio"/> 1 a 3 veces mes<br><input type="radio"/> 1 vez semana<br><input checked="" type="radio"/> 2 a 4 veces semana<br><input type="radio"/> 5 a 6 veces semana<br><input type="radio"/> 1 vez al día<br><input type="radio"/> 2 a 3 veces al día<br><input type="radio"/> 5 a 6 veces al día<br><input type="radio"/> más 6 veces al día |
|------------|--------------------------------------------------------------------------------------------------------------------------------------------------------------------------------------------------------------------------------------------------------------------------------------------------------------------------------------------------------------------------------------------------------------|



---

|              |                                                                                                                                                                                                                                                                                                                                                                                                              |
|--------------|--------------------------------------------------------------------------------------------------------------------------------------------------------------------------------------------------------------------------------------------------------------------------------------------------------------------------------------------------------------------------------------------------------------|
| pan integral | <input type="radio"/> Nunca o menos 1 vez al mes<br><input checked="" type="radio"/> 1 a 3 veces mes<br><input type="radio"/> 1 vez semana<br><input type="radio"/> 2 a 4 veces semana<br><input type="radio"/> 5 a 6 veces semana<br><input type="radio"/> 1 vez al día<br><input type="radio"/> 2 a 3 veces al día<br><input type="radio"/> 5 a 6 veces al día<br><input type="radio"/> más 6 veces al día |
|--------------|--------------------------------------------------------------------------------------------------------------------------------------------------------------------------------------------------------------------------------------------------------------------------------------------------------------------------------------------------------------------------------------------------------------|

---

|                   |                                                                                                                                                                                                                                                                                                                                                                                                              |
|-------------------|--------------------------------------------------------------------------------------------------------------------------------------------------------------------------------------------------------------------------------------------------------------------------------------------------------------------------------------------------------------------------------------------------------------|
| cereales desayuno | <input checked="" type="radio"/> Nunca o menos 1 vez al mes<br><input type="radio"/> 1 a 3 veces mes<br><input type="radio"/> 1 vez semana<br><input type="radio"/> 2 a 4 veces semana<br><input type="radio"/> 5 a 6 veces semana<br><input type="radio"/> 1 vez al día<br><input type="radio"/> 2 a 3 veces al día<br><input type="radio"/> 5 a 6 veces al día<br><input type="radio"/> más 6 veces al día |
|-------------------|--------------------------------------------------------------------------------------------------------------------------------------------------------------------------------------------------------------------------------------------------------------------------------------------------------------------------------------------------------------------------------------------------------------|

---

|                |                                                                                                                                                                                                                                                                                                                                                                                                              |
|----------------|--------------------------------------------------------------------------------------------------------------------------------------------------------------------------------------------------------------------------------------------------------------------------------------------------------------------------------------------------------------------------------------------------------------|
| patatas fritas | <input checked="" type="radio"/> Nunca o menos 1 vez al mes<br><input type="radio"/> 1 a 3 veces mes<br><input type="radio"/> 1 vez semana<br><input type="radio"/> 2 a 4 veces semana<br><input type="radio"/> 5 a 6 veces semana<br><input type="radio"/> 1 vez al día<br><input type="radio"/> 2 a 3 veces al día<br><input type="radio"/> 5 a 6 veces al día<br><input type="radio"/> más 6 veces al día |
|----------------|--------------------------------------------------------------------------------------------------------------------------------------------------------------------------------------------------------------------------------------------------------------------------------------------------------------------------------------------------------------------------------------------------------------|

---

|                          |                                                                                                                                                                                                                                                                                                                                                                                                              |
|--------------------------|--------------------------------------------------------------------------------------------------------------------------------------------------------------------------------------------------------------------------------------------------------------------------------------------------------------------------------------------------------------------------------------------------------------|
| patatas cocidas o asadas | <input type="radio"/> Nunca o menos 1 vez al mes<br><input checked="" type="radio"/> 1 a 3 veces mes<br><input type="radio"/> 1 vez semana<br><input type="radio"/> 2 a 4 veces semana<br><input type="radio"/> 5 a 6 veces semana<br><input type="radio"/> 1 vez al día<br><input type="radio"/> 2 a 3 veces al día<br><input type="radio"/> 5 a 6 veces al día<br><input type="radio"/> más 6 veces al día |
|--------------------------|--------------------------------------------------------------------------------------------------------------------------------------------------------------------------------------------------------------------------------------------------------------------------------------------------------------------------------------------------------------------------------------------------------------|

---

|             |                                                                                                                                                                                                                                                                                                                                                                                                              |
|-------------|--------------------------------------------------------------------------------------------------------------------------------------------------------------------------------------------------------------------------------------------------------------------------------------------------------------------------------------------------------------------------------------------------------------|
| bolsa papas | <input type="radio"/> Nunca o menos 1 vez al mes<br><input type="radio"/> 1 a 3 veces mes<br><input checked="" type="radio"/> 1 vez semana<br><input type="radio"/> 2 a 4 veces semana<br><input type="radio"/> 5 a 6 veces semana<br><input type="radio"/> 1 vez al día<br><input type="radio"/> 2 a 3 veces al día<br><input type="radio"/> 5 a 6 veces al día<br><input type="radio"/> más 6 veces al día |
|-------------|--------------------------------------------------------------------------------------------------------------------------------------------------------------------------------------------------------------------------------------------------------------------------------------------------------------------------------------------------------------------------------------------------------------|

---

|                |                                                                                                                                                                                                                                                                                                                                                                                                              |
|----------------|--------------------------------------------------------------------------------------------------------------------------------------------------------------------------------------------------------------------------------------------------------------------------------------------------------------------------------------------------------------------------------------------------------------|
| arroz cocinado | <input type="radio"/> Nunca o menos 1 vez al mes<br><input type="radio"/> 1 a 3 veces mes<br><input type="radio"/> 1 vez semana<br><input checked="" type="radio"/> 2 a 4 veces semana<br><input type="radio"/> 5 a 6 veces semana<br><input type="radio"/> 1 vez al día<br><input type="radio"/> 2 a 3 veces al día<br><input type="radio"/> 5 a 6 veces al día<br><input type="radio"/> más 6 veces al día |
|----------------|--------------------------------------------------------------------------------------------------------------------------------------------------------------------------------------------------------------------------------------------------------------------------------------------------------------------------------------------------------------------------------------------------------------|

---

|               |                                                                                                                                                                                                                                                                                                                                                                                                              |
|---------------|--------------------------------------------------------------------------------------------------------------------------------------------------------------------------------------------------------------------------------------------------------------------------------------------------------------------------------------------------------------------------------------------------------------|
| pasta         | <input type="radio"/> Nunca o menos 1 vez al mes<br><input type="radio"/> 1 a 3 veces mes<br><input type="radio"/> 1 vez semana<br><input checked="" type="radio"/> 2 a 4 veces semana<br><input type="radio"/> 5 a 6 veces semana<br><input type="radio"/> 1 vez al día<br><input type="radio"/> 2 a 3 veces al día<br><input type="radio"/> 5 a 6 veces al día<br><input type="radio"/> más 6 veces al día |
| pizza         | <input type="radio"/> Nunca o menos 1 vez al mes<br><input checked="" type="radio"/> 1 a 3 veces mes<br><input type="radio"/> 1 vez semana<br><input type="radio"/> 2 a 4 veces semana<br><input type="radio"/> 5 a 6 veces semana<br><input type="radio"/> 1 vez al día<br><input type="radio"/> 2 a 3 veces al día<br><input type="radio"/> 5 a 6 veces al día<br><input type="radio"/> más 6 veces al día |
| aceite oliva  | <input type="radio"/> Nunca o menos 1 vez al mes<br><input type="radio"/> 1 a 3 veces mes<br><input type="radio"/> 1 vez semana<br><input type="radio"/> 2 a 4 veces semana<br><input type="radio"/> 5 a 6 veces semana<br><input checked="" type="radio"/> 1 vez al día<br><input type="radio"/> 2 a 3 veces al día<br><input type="radio"/> 5 a 6 veces al día<br><input type="radio"/> más 6 veces al día |
| otros aceites | <input checked="" type="radio"/> Nunca o menos 1 vez al mes<br><input type="radio"/> 1 a 3 veces mes<br><input type="radio"/> 1 vez semana<br><input type="radio"/> 2 a 4 veces semana<br><input type="radio"/> 5 a 6 veces semana<br><input type="radio"/> 1 vez al día<br><input type="radio"/> 2 a 3 veces al día<br><input type="radio"/> 5 a 6 veces al día<br><input type="radio"/> más 6 veces al día |
| margarina     | <input checked="" type="radio"/> Nunca o menos 1 vez al mes<br><input type="radio"/> 1 a 3 veces mes<br><input type="radio"/> 1 vez semana<br><input type="radio"/> 2 a 4 veces semana<br><input type="radio"/> 5 a 6 veces semana<br><input type="radio"/> 1 vez al día<br><input type="radio"/> 2 a 3 veces al día<br><input type="radio"/> 5 a 6 veces al día<br><input type="radio"/> más 6 veces al día |
| mantequilla   | <input type="radio"/> Nunca o menos 1 vez al mes<br><input checked="" type="radio"/> 1 a 3 veces mes<br><input type="radio"/> 1 vez semana<br><input type="radio"/> 2 a 4 veces semana<br><input type="radio"/> 5 a 6 veces semana<br><input type="radio"/> 1 vez al día<br><input type="radio"/> 2 a 3 veces al día<br><input type="radio"/> 5 a 6 veces al día<br><input type="radio"/> más 6 veces al día |

---

|                     |                                                                                                                                                                                                                                                                                                                                                                                                              |
|---------------------|--------------------------------------------------------------------------------------------------------------------------------------------------------------------------------------------------------------------------------------------------------------------------------------------------------------------------------------------------------------------------------------------------------------|
| galletas tipo maria | <input type="radio"/> Nunca o menos 1 vez al mes<br><input type="radio"/> 1 a 3 veces mes<br><input type="radio"/> 1 vez semana<br><input type="radio"/> 2 a 4 veces semana<br><input type="radio"/> 5 a 6 veces semana<br><input type="radio"/> 1 vez al día<br><input type="radio"/> 2 a 3 veces al día<br><input type="radio"/> 5 a 6 veces al día<br><input checked="" type="radio"/> más 6 veces al día |
|---------------------|--------------------------------------------------------------------------------------------------------------------------------------------------------------------------------------------------------------------------------------------------------------------------------------------------------------------------------------------------------------------------------------------------------------|

---

|                    |                                                                                                                                                                                                                                                                                                                                                                                                              |
|--------------------|--------------------------------------------------------------------------------------------------------------------------------------------------------------------------------------------------------------------------------------------------------------------------------------------------------------------------------------------------------------------------------------------------------------|
| galletas chocolate | <input checked="" type="radio"/> Nunca o menos 1 vez al mes<br><input type="radio"/> 1 a 3 veces mes<br><input type="radio"/> 1 vez semana<br><input type="radio"/> 2 a 4 veces semana<br><input type="radio"/> 5 a 6 veces semana<br><input type="radio"/> 1 vez al día<br><input type="radio"/> 2 a 3 veces al día<br><input type="radio"/> 5 a 6 veces al día<br><input type="radio"/> más 6 veces al día |
|--------------------|--------------------------------------------------------------------------------------------------------------------------------------------------------------------------------------------------------------------------------------------------------------------------------------------------------------------------------------------------------------------------------------------------------------|

---

|           |                                                                                                                                                                                                                                                                                                                                                                                                              |
|-----------|--------------------------------------------------------------------------------------------------------------------------------------------------------------------------------------------------------------------------------------------------------------------------------------------------------------------------------------------------------------------------------------------------------------|
| bollieria | <input type="radio"/> Nunca o menos 1 vez al mes<br><input type="radio"/> 1 a 3 veces mes<br><input checked="" type="radio"/> 1 vez semana<br><input type="radio"/> 2 a 4 veces semana<br><input type="radio"/> 5 a 6 veces semana<br><input type="radio"/> 1 vez al día<br><input type="radio"/> 2 a 3 veces al día<br><input type="radio"/> 5 a 6 veces al día<br><input type="radio"/> más 6 veces al día |
|-----------|--------------------------------------------------------------------------------------------------------------------------------------------------------------------------------------------------------------------------------------------------------------------------------------------------------------------------------------------------------------------------------------------------------------|

---

|                      |                                                                                                                                                                                                                                                                                                                                                                                                              |
|----------------------|--------------------------------------------------------------------------------------------------------------------------------------------------------------------------------------------------------------------------------------------------------------------------------------------------------------------------------------------------------------------------------------------------------------|
| chocolate o bombones | <input type="radio"/> Nunca o menos 1 vez al mes<br><input checked="" type="radio"/> 1 a 3 veces mes<br><input type="radio"/> 1 vez semana<br><input type="radio"/> 2 a 4 veces semana<br><input type="radio"/> 5 a 6 veces semana<br><input type="radio"/> 1 vez al día<br><input type="radio"/> 2 a 3 veces al día<br><input type="radio"/> 5 a 6 veces al día<br><input type="radio"/> más 6 veces al día |
|----------------------|--------------------------------------------------------------------------------------------------------------------------------------------------------------------------------------------------------------------------------------------------------------------------------------------------------------------------------------------------------------------------------------------------------------|

---

|                           |                                                                                                                                                                                                                                                                                                                                                                                                              |
|---------------------------|--------------------------------------------------------------------------------------------------------------------------------------------------------------------------------------------------------------------------------------------------------------------------------------------------------------------------------------------------------------------------------------------------------------|
| chocolate polvo o colacao | <input checked="" type="radio"/> Nunca o menos 1 vez al mes<br><input type="radio"/> 1 a 3 veces mes<br><input type="radio"/> 1 vez semana<br><input type="radio"/> 2 a 4 veces semana<br><input type="radio"/> 5 a 6 veces semana<br><input type="radio"/> 1 vez al día<br><input type="radio"/> 2 a 3 veces al día<br><input type="radio"/> 5 a 6 veces al día<br><input type="radio"/> más 6 veces al día |
|---------------------------|--------------------------------------------------------------------------------------------------------------------------------------------------------------------------------------------------------------------------------------------------------------------------------------------------------------------------------------------------------------------------------------------------------------|

---

|            |                                                                                                                                                                                                                                                                                                                                                                                                              |
|------------|--------------------------------------------------------------------------------------------------------------------------------------------------------------------------------------------------------------------------------------------------------------------------------------------------------------------------------------------------------------------------------------------------------------|
| vino tinto | <input checked="" type="radio"/> Nunca o menos 1 vez al mes<br><input type="radio"/> 1 a 3 veces mes<br><input type="radio"/> 1 vez semana<br><input type="radio"/> 2 a 4 veces semana<br><input type="radio"/> 5 a 6 veces semana<br><input type="radio"/> 1 vez al día<br><input type="radio"/> 2 a 3 veces al día<br><input type="radio"/> 5 a 6 veces al día<br><input type="radio"/> más 6 veces al día |
|------------|--------------------------------------------------------------------------------------------------------------------------------------------------------------------------------------------------------------------------------------------------------------------------------------------------------------------------------------------------------------------------------------------------------------|

---

---

|             |                                                                                                                                                                                                                                                                                                                                                                                                              |
|-------------|--------------------------------------------------------------------------------------------------------------------------------------------------------------------------------------------------------------------------------------------------------------------------------------------------------------------------------------------------------------------------------------------------------------|
| vino blanco | <input checked="" type="radio"/> Nunca o menos 1 vez al mes<br><input type="radio"/> 1 a 3 veces mes<br><input type="radio"/> 1 vez semana<br><input type="radio"/> 2 a 4 veces semana<br><input type="radio"/> 5 a 6 veces semana<br><input type="radio"/> 1 vez al día<br><input type="radio"/> 2 a 3 veces al día<br><input type="radio"/> 5 a 6 veces al día<br><input type="radio"/> más 6 veces al día |
|-------------|--------------------------------------------------------------------------------------------------------------------------------------------------------------------------------------------------------------------------------------------------------------------------------------------------------------------------------------------------------------------------------------------------------------|

---

|                    |                                                                                                                                                                                                                                                                                                                                                                                                              |
|--------------------|--------------------------------------------------------------------------------------------------------------------------------------------------------------------------------------------------------------------------------------------------------------------------------------------------------------------------------------------------------------------------------------------------------------|
| vino seco o vermut | <input checked="" type="radio"/> Nunca o menos 1 vez al mes<br><input type="radio"/> 1 a 3 veces mes<br><input type="radio"/> 1 vez semana<br><input type="radio"/> 2 a 4 veces semana<br><input type="radio"/> 5 a 6 veces semana<br><input type="radio"/> 1 vez al día<br><input type="radio"/> 2 a 3 veces al día<br><input type="radio"/> 5 a 6 veces al día<br><input type="radio"/> más 6 veces al día |
|--------------------|--------------------------------------------------------------------------------------------------------------------------------------------------------------------------------------------------------------------------------------------------------------------------------------------------------------------------------------------------------------------------------------------------------------|

---

|         |                                                                                                                                                                                                                                                                                                                                                                                                              |
|---------|--------------------------------------------------------------------------------------------------------------------------------------------------------------------------------------------------------------------------------------------------------------------------------------------------------------------------------------------------------------------------------------------------------------|
| cerveza | <input checked="" type="radio"/> Nunca o menos 1 vez al mes<br><input type="radio"/> 1 a 3 veces mes<br><input type="radio"/> 1 vez semana<br><input type="radio"/> 2 a 4 veces semana<br><input type="radio"/> 5 a 6 veces semana<br><input type="radio"/> 1 vez al día<br><input type="radio"/> 2 a 3 veces al día<br><input type="radio"/> 5 a 6 veces al día<br><input type="radio"/> más 6 veces al día |
|---------|--------------------------------------------------------------------------------------------------------------------------------------------------------------------------------------------------------------------------------------------------------------------------------------------------------------------------------------------------------------------------------------------------------------|

---

|                     |                                                                                                                                                                                                                                                                                                                                                                                                              |
|---------------------|--------------------------------------------------------------------------------------------------------------------------------------------------------------------------------------------------------------------------------------------------------------------------------------------------------------------------------------------------------------------------------------------------------------|
| cerveza sin alcohol | <input checked="" type="radio"/> Nunca o menos 1 vez al mes<br><input type="radio"/> 1 a 3 veces mes<br><input type="radio"/> 1 vez semana<br><input type="radio"/> 2 a 4 veces semana<br><input type="radio"/> 5 a 6 veces semana<br><input type="radio"/> 1 vez al día<br><input type="radio"/> 2 a 3 veces al día<br><input type="radio"/> 5 a 6 veces al día<br><input type="radio"/> más 6 veces al día |
|---------------------|--------------------------------------------------------------------------------------------------------------------------------------------------------------------------------------------------------------------------------------------------------------------------------------------------------------------------------------------------------------------------------------------------------------|

---

|         |                                                                                                                                                                                                                                                                                                                                                                                                              |
|---------|--------------------------------------------------------------------------------------------------------------------------------------------------------------------------------------------------------------------------------------------------------------------------------------------------------------------------------------------------------------------------------------------------------------|
| licores | <input checked="" type="radio"/> Nunca o menos 1 vez al mes<br><input type="radio"/> 1 a 3 veces mes<br><input type="radio"/> 1 vez semana<br><input type="radio"/> 2 a 4 veces semana<br><input type="radio"/> 5 a 6 veces semana<br><input type="radio"/> 1 vez al día<br><input type="radio"/> 2 a 3 veces al día<br><input type="radio"/> 5 a 6 veces al día<br><input type="radio"/> más 6 veces al día |
|---------|--------------------------------------------------------------------------------------------------------------------------------------------------------------------------------------------------------------------------------------------------------------------------------------------------------------------------------------------------------------------------------------------------------------|

---

|                       |                                                                                                                                                                                                                                                                                                                                                                                                              |
|-----------------------|--------------------------------------------------------------------------------------------------------------------------------------------------------------------------------------------------------------------------------------------------------------------------------------------------------------------------------------------------------------------------------------------------------------|
| ginebra o ron o vodka | <input checked="" type="radio"/> Nunca o menos 1 vez al mes<br><input type="radio"/> 1 a 3 veces mes<br><input type="radio"/> 1 vez semana<br><input type="radio"/> 2 a 4 veces semana<br><input type="radio"/> 5 a 6 veces semana<br><input type="radio"/> 1 vez al día<br><input type="radio"/> 2 a 3 veces al día<br><input type="radio"/> 5 a 6 veces al día<br><input type="radio"/> más 6 veces al día |
|-----------------------|--------------------------------------------------------------------------------------------------------------------------------------------------------------------------------------------------------------------------------------------------------------------------------------------------------------------------------------------------------------------------------------------------------------|

---

refresco normal

- ☒ Nunca o menos 1 vez al mes  
☐ 1 a 3 veces mes  
☐ 1 vez semana  
☐ 2 a 4 veces semana  
☐ 5 a 6 veces semana  
☐ 1 vez al día  
☐ 2 a 3 veces al día  
☐ 5 a 6 veces al día  
☐ más 6 veces al día

---

refresco sin azúcar

- ☒ Nunca o menos 1 vez al mes  
☐ 1 a 3 veces mes  
☐ 1 vez semana  
☐ 2 a 4 veces semana  
☐ 5 a 6 veces semana  
☐ 1 vez al día  
☐ 2 a 3 veces al día  
☐ 5 a 6 veces al día  
☐ más 6 veces al día

---

Agua del grifo

- ☐ Nunca o menos 1 vez al mes  
☐ 1 a 3 veces mes  
☐ 1 vez semana  
☐ 2 a 4 veces semana  
☐ 5 a 6 veces semana  
☐ 1 vez al día  
☐ 2 a 3 veces al día  
☐ 5 a 6 veces al día  
☒ más 6 veces al día

---

agua embotellada sin gas

- ☒ Nunca o menos 1 vez al mes  
☐ 1 a 3 veces mes  
☐ 1 vez semana  
☐ 2 a 4 veces semana  
☐ 5 a 6 veces semana  
☐ 1 vez al día  
☐ 2 a 3 veces al día  
☐ 5 a 6 veces al día  
☐ más 6 veces al día

---

agua embotellada con gas

- ☒ Nunca o menos 1 vez al mes  
☐ 1 a 3 veces mes  
☐ 1 vez semana  
☐ 2 a 4 veces semana  
☐ 5 a 6 veces semana  
☐ 1 vez al día  
☐ 2 a 3 veces al día  
☐ 5 a 6 veces al día  
☐ más 6 veces al día

---

zumo frutas embasado

- ☒ Nunca o menos 1 vez al mes  
☐ 1 a 3 veces mes  
☐ 1 vez semana  
☐ 2 a 4 veces semana  
☐ 5 a 6 veces semana  
☐ 1 vez al día  
☐ 2 a 3 veces al día  
☐ 5 a 6 veces al día  
☐ más 6 veces al día

|                       |                                                                                                                                                                                                                                                                                                                                                                                                              |
|-----------------------|--------------------------------------------------------------------------------------------------------------------------------------------------------------------------------------------------------------------------------------------------------------------------------------------------------------------------------------------------------------------------------------------------------------|
| cafe                  | <input checked="" type="radio"/> Nunca o menos 1 vez al mes<br><input type="radio"/> 1 a 3 veces mes<br><input type="radio"/> 1 vez semana<br><input type="radio"/> 2 a 4 veces semana<br><input type="radio"/> 5 a 6 veces semana<br><input type="radio"/> 1 vez al día<br><input type="radio"/> 2 a 3 veces al día<br><input type="radio"/> 5 a 6 veces al día<br><input type="radio"/> más 6 veces al día |
| cafe descafeinado     | <input type="radio"/> Nunca o menos 1 vez al mes<br><input type="radio"/> 1 a 3 veces mes<br><input type="radio"/> 1 vez semana<br><input checked="" type="radio"/> 2 a 4 veces semana<br><input type="radio"/> 5 a 6 veces semana<br><input type="radio"/> 1 vez al día<br><input type="radio"/> 2 a 3 veces al día<br><input type="radio"/> 5 a 6 veces al día<br><input type="radio"/> más 6 veces al día |
| te o infusión         | <input checked="" type="radio"/> Nunca o menos 1 vez al mes<br><input type="radio"/> 1 a 3 veces mes<br><input type="radio"/> 1 vez semana<br><input type="radio"/> 2 a 4 veces semana<br><input type="radio"/> 5 a 6 veces semana<br><input type="radio"/> 1 vez al día<br><input type="radio"/> 2 a 3 veces al día<br><input type="radio"/> 5 a 6 veces al día<br><input type="radio"/> más 6 veces al día |
| sopa o puré verduras  | <input type="radio"/> Nunca o menos 1 vez al mes<br><input checked="" type="radio"/> 1 a 3 veces mes<br><input type="radio"/> 1 vez semana<br><input type="radio"/> 2 a 4 veces semana<br><input type="radio"/> 5 a 6 veces semana<br><input type="radio"/> 1 vez al día<br><input type="radio"/> 2 a 3 veces al día<br><input type="radio"/> 5 a 6 veces al día<br><input type="radio"/> más 6 veces al día |
| croquetas pollo jamón | <input type="radio"/> Nunca o menos 1 vez al mes<br><input checked="" type="radio"/> 1 a 3 veces mes<br><input type="radio"/> 1 vez semana<br><input type="radio"/> 2 a 4 veces semana<br><input type="radio"/> 5 a 6 veces semana<br><input type="radio"/> 1 vez al día<br><input type="radio"/> 2 a 3 veces al día<br><input type="radio"/> 5 a 6 veces al día<br><input type="radio"/> más 6 veces al día |
| croquetas pescado     | <input type="radio"/> Nunca o menos 1 vez al mes<br><input checked="" type="radio"/> 1 a 3 veces mes<br><input type="radio"/> 1 vez semana<br><input type="radio"/> 2 a 4 veces semana<br><input type="radio"/> 5 a 6 veces semana<br><input type="radio"/> 1 vez al día<br><input type="radio"/> 2 a 3 veces al día<br><input type="radio"/> 5 a 6 veces al día<br><input type="radio"/> más 6 veces al día |

|                  |                                                                                                                                                                                                                                                                                                                                                                                                              |
|------------------|--------------------------------------------------------------------------------------------------------------------------------------------------------------------------------------------------------------------------------------------------------------------------------------------------------------------------------------------------------------------------------------------------------------|
| mayonesa         | <input type="radio"/> Nunca o menos 1 vez al mes<br><input checked="" type="radio"/> 1 a 3 veces mes<br><input type="radio"/> 1 vez semana<br><input type="radio"/> 2 a 4 veces semana<br><input type="radio"/> 5 a 6 veces semana<br><input type="radio"/> 1 vez al día<br><input type="radio"/> 2 a 3 veces al día<br><input type="radio"/> 5 a 6 veces al día<br><input type="radio"/> más 6 veces al día |
| salsa tomate     | <input type="radio"/> Nunca o menos 1 vez al mes<br><input checked="" type="radio"/> 1 a 3 veces mes<br><input type="radio"/> 1 vez semana<br><input type="radio"/> 2 a 4 veces semana<br><input type="radio"/> 5 a 6 veces semana<br><input type="radio"/> 1 vez al día<br><input type="radio"/> 2 a 3 veces al día<br><input type="radio"/> 5 a 6 veces al día<br><input type="radio"/> más 6 veces al día |
| ketchup          | <input checked="" type="radio"/> Nunca o menos 1 vez al mes<br><input type="radio"/> 1 a 3 veces mes<br><input type="radio"/> 1 vez semana<br><input type="radio"/> 2 a 4 veces semana<br><input type="radio"/> 5 a 6 veces semana<br><input type="radio"/> 1 vez al día<br><input type="radio"/> 2 a 3 veces al día<br><input type="radio"/> 5 a 6 veces al día<br><input type="radio"/> más 6 veces al día |
| sal              | <input type="radio"/> Nunca o menos 1 vez al mes<br><input checked="" type="radio"/> 1 a 3 veces mes<br><input type="radio"/> 1 vez semana<br><input type="radio"/> 2 a 4 veces semana<br><input type="radio"/> 5 a 6 veces semana<br><input type="radio"/> 1 vez al día<br><input type="radio"/> 2 a 3 veces al día<br><input type="radio"/> 5 a 6 veces al día<br><input type="radio"/> más 6 veces al día |
| ajo              | <input type="radio"/> Nunca o menos 1 vez al mes<br><input type="radio"/> 1 a 3 veces mes<br><input type="radio"/> 1 vez semana<br><input type="radio"/> 2 a 4 veces semana<br><input type="radio"/> 5 a 6 veces semana<br><input checked="" type="radio"/> 1 vez al día<br><input type="radio"/> 2 a 3 veces al día<br><input type="radio"/> 5 a 6 veces al día<br><input type="radio"/> más 6 veces al día |
| mermelada o miel | <input type="radio"/> Nunca o menos 1 vez al mes<br><input checked="" type="radio"/> 1 a 3 veces mes<br><input type="radio"/> 1 vez semana<br><input type="radio"/> 2 a 4 veces semana<br><input type="radio"/> 5 a 6 veces semana<br><input type="radio"/> 1 vez al día<br><input type="radio"/> 2 a 3 veces al día<br><input type="radio"/> 5 a 6 veces al día<br><input type="radio"/> más 6 veces al día |

|                                       |                                                                                                                                                                                                                                                                                                                                                                                                                                                                                                                               |
|---------------------------------------|-------------------------------------------------------------------------------------------------------------------------------------------------------------------------------------------------------------------------------------------------------------------------------------------------------------------------------------------------------------------------------------------------------------------------------------------------------------------------------------------------------------------------------|
| azúcar                                | <input checked="" type="radio"/> Nunca o menos 1 vez al mes<br><input type="radio"/> 1 a 3 veces mes<br><input type="radio"/> 1 vez semana<br><input type="radio"/> 2 a 4 veces semana<br><input type="radio"/> 5 a 6 veces semana<br><input type="radio"/> 1 vez al día<br><input type="radio"/> 2 a 3 veces al día<br><input type="radio"/> 5 a 6 veces al día<br><input type="radio"/> más 6 veces al día                                                                                                                  |
| Otro alimento                         | _____                                                                                                                                                                                                                                                                                                                                                                                                                                                                                                                         |
| suplementos vitamínicos               | <input type="radio"/> si<br><input checked="" type="radio"/> no                                                                                                                                                                                                                                                                                                                                                                                                                                                               |
| suplementos vitamínicos               | _____                                                                                                                                                                                                                                                                                                                                                                                                                                                                                                                         |
| dieta previa                          | <input type="radio"/> si<br><input checked="" type="radio"/> no                                                                                                                                                                                                                                                                                                                                                                                                                                                               |
| motivo dieta                          | <input checked="" type="radio"/> no dieta<br><input type="radio"/> control peso<br><input type="radio"/> control colesterol<br><input type="radio"/> control diabetes<br><input type="radio"/> problemas estómago<br><input type="radio"/> problemas vesícula o hepáticos<br><input type="radio"/> HTA o cardiopatía<br><input type="radio"/> problemas renales<br><input type="radio"/> alergia alimentaria<br><input type="radio"/> ácido úrico elevado<br><input type="radio"/> vegetariana<br><input type="radio"/> otros |
| cambio alimentos año previo gestación | <input checked="" type="radio"/> si<br><input type="radio"/> no                                                                                                                                                                                                                                                                                                                                                                                                                                                               |
| cambio lácteos                        | <input type="radio"/> eliminado<br><input type="radio"/> disminuido<br><input checked="" type="radio"/> igual<br><input type="radio"/> aumentado<br><input type="radio"/> no sabe                                                                                                                                                                                                                                                                                                                                             |
| cambio huevos                         | <input type="radio"/> eliminado<br><input type="radio"/> disminuido<br><input checked="" type="radio"/> igual<br><input type="radio"/> aumentado<br><input type="radio"/> no sabe                                                                                                                                                                                                                                                                                                                                             |
| cambio carne                          | <input type="radio"/> eliminado<br><input checked="" type="radio"/> disminuido<br><input type="radio"/> igual<br><input type="radio"/> aumentado<br><input type="radio"/> no sabe                                                                                                                                                                                                                                                                                                                                             |



---

|                |                                                                                                                                                                                   |
|----------------|-----------------------------------------------------------------------------------------------------------------------------------------------------------------------------------|
| cambio pescado | <input type="radio"/> eliminado<br><input type="radio"/> disminuido<br><input checked="" type="radio"/> igual<br><input type="radio"/> aumentado<br><input type="radio"/> no sabe |
|----------------|-----------------------------------------------------------------------------------------------------------------------------------------------------------------------------------|

---

|                 |                                                                                                                                                                                   |
|-----------------|-----------------------------------------------------------------------------------------------------------------------------------------------------------------------------------|
| cambio verduras | <input type="radio"/> eliminado<br><input type="radio"/> disminuido<br><input type="radio"/> igual<br><input checked="" type="radio"/> aumentado<br><input type="radio"/> no sabe |
|-----------------|-----------------------------------------------------------------------------------------------------------------------------------------------------------------------------------|

---

|                  |                                                                                                                                                                                   |
|------------------|-----------------------------------------------------------------------------------------------------------------------------------------------------------------------------------|
| cambio legumbres | <input type="radio"/> eliminado<br><input type="radio"/> disminuido<br><input checked="" type="radio"/> igual<br><input type="radio"/> aumentado<br><input type="radio"/> no sabe |
|------------------|-----------------------------------------------------------------------------------------------------------------------------------------------------------------------------------|

---

|              |                                                                                                                                                                                   |
|--------------|-----------------------------------------------------------------------------------------------------------------------------------------------------------------------------------|
| cambio fruta | <input type="radio"/> eliminado<br><input type="radio"/> disminuido<br><input checked="" type="radio"/> igual<br><input type="radio"/> aumentado<br><input type="radio"/> no sabe |
|--------------|-----------------------------------------------------------------------------------------------------------------------------------------------------------------------------------|

---

|            |                                                                                                                                                                                   |
|------------|-----------------------------------------------------------------------------------------------------------------------------------------------------------------------------------|
| cambio pan | <input type="radio"/> eliminado<br><input checked="" type="radio"/> disminuido<br><input type="radio"/> igual<br><input type="radio"/> aumentado<br><input type="radio"/> no sabe |
|------------|-----------------------------------------------------------------------------------------------------------------------------------------------------------------------------------|

---

|                     |                                                                                                                                                                                   |
|---------------------|-----------------------------------------------------------------------------------------------------------------------------------------------------------------------------------|
| cambio aceite oliva | <input type="radio"/> eliminado<br><input type="radio"/> disminuido<br><input checked="" type="radio"/> igual<br><input type="radio"/> aumentado<br><input type="radio"/> no sabe |
|---------------------|-----------------------------------------------------------------------------------------------------------------------------------------------------------------------------------|

---

|                          |                                                                                                                                                                                   |
|--------------------------|-----------------------------------------------------------------------------------------------------------------------------------------------------------------------------------|
| cambio mante o margarina | <input type="radio"/> eliminado<br><input type="radio"/> disminuido<br><input checked="" type="radio"/> igual<br><input type="radio"/> aumentado<br><input type="radio"/> no sabe |
|--------------------------|-----------------------------------------------------------------------------------------------------------------------------------------------------------------------------------|

---

|                        |                                                                                                                                                                                   |
|------------------------|-----------------------------------------------------------------------------------------------------------------------------------------------------------------------------------|
| cambio azúcar y dulces | <input type="radio"/> eliminado<br><input type="radio"/> disminuido<br><input checked="" type="radio"/> igual<br><input type="radio"/> aumentado<br><input type="radio"/> no sabe |
|------------------------|-----------------------------------------------------------------------------------------------------------------------------------------------------------------------------------|

---

|                            |                                                                                                                                                                                   |
|----------------------------|-----------------------------------------------------------------------------------------------------------------------------------------------------------------------------------|
| cambio bebidas alcohólicas | <input checked="" type="radio"/> eliminado<br><input type="radio"/> disminuido<br><input type="radio"/> igual<br><input type="radio"/> aumentado<br><input type="radio"/> no sabe |
|----------------------------|-----------------------------------------------------------------------------------------------------------------------------------------------------------------------------------|

---

|                           |                                                                                                                                                                                                                                                          |
|---------------------------|----------------------------------------------------------------------------------------------------------------------------------------------------------------------------------------------------------------------------------------------------------|
| frecuencia comidas fritas | <input type="radio"/> a diario<br><input type="radio"/> 5 a 6 veces semana<br><input type="radio"/> 2 a 4 veces semana<br><input checked="" type="radio"/> 1 vez semana<br><input type="radio"/> menos de 1 vez semana                                   |
| carne                     | <input type="radio"/> no como<br><input type="radio"/> cruda<br><input checked="" type="radio"/> poco hecha<br><input type="radio"/> hecha<br><input type="radio"/> muy hecha                                                                            |
| grasa visible carne       | <input type="radio"/> quita toda<br><input type="radio"/> quita mayoría<br><input type="radio"/> quita un poco<br><input checked="" type="radio"/> no quita nada                                                                                         |
| cocina carne              | <input checked="" type="radio"/> a la plancha<br><input type="radio"/> a la parrilla<br><input type="radio"/> asada<br><input type="radio"/> frita<br><input type="radio"/> guisada                                                                      |
| tostado quemado carne     | <input checked="" type="radio"/> nunca<br><input type="radio"/> 1 vez mes<br><input type="radio"/> 2 a 3 veces mes<br><input type="radio"/> 1 vez semana<br><input type="radio"/> 2 a 3 semanas                                                          |
| tostado quemado pescado   | <input checked="" type="radio"/> nunca<br><input type="radio"/> 1 vez mes<br><input type="radio"/> 2 a 3 veces mes<br><input type="radio"/> 1 vez semana<br><input type="radio"/> 2 a 3 semanas                                                          |
| socarrat paella           | <input checked="" type="radio"/> nunca<br><input type="radio"/> 1 vez mes<br><input type="radio"/> 2 a 3 veces mes<br><input type="radio"/> 1 vez semana<br><input type="radio"/> 2 a 3 semanas                                                          |
| grasa o aceite cocinar    | <input type="radio"/> mantequilla<br><input type="radio"/> margarina<br><input type="radio"/> aceite oliva<br><input checked="" type="radio"/> aceite oliva virgen extra<br><input type="radio"/> aceite vegetal<br><input type="radio"/> mezcla aceites |
| grasa aceite aliñar       | <input type="radio"/> mantequilla<br><input type="radio"/> margarina<br><input type="radio"/> aceite oliva<br><input checked="" type="radio"/> aceite oliva virgen extra<br><input type="radio"/> aceite vegetal<br><input type="radio"/> mezcla aceites |

|                                        |                                                                                                                                                                                                                                                                                                                                                                           |
|----------------------------------------|---------------------------------------------------------------------------------------------------------------------------------------------------------------------------------------------------------------------------------------------------------------------------------------------------------------------------------------------------------------------------|
| grasa aceite freir                     | <input type="radio"/> mantequilla<br><input type="radio"/> margarina<br><input type="radio"/> aceite oliva<br><input checked="" type="radio"/> aceite oliva virgen extra<br><input type="radio"/> aceite vegetal<br><input type="radio"/> mezcla aceites                                                                                                                  |
| Ejercicio cuestionario                 | <input checked="" type="radio"/> si<br><input type="radio"/> no                                                                                                                                                                                                                                                                                                           |
| horas de sueño incluido siesta         | [*DATA REMOVED*]                                                                                                                                                                                                                                                                                                                                                          |
| minutos siesta                         | [*DATA REMOVED*]                                                                                                                                                                                                                                                                                                                                                          |
| horas televisión semana                | [*DATA REMOVED*]                                                                                                                                                                                                                                                                                                                                                          |
| actividad trabajo                      | <input checked="" type="radio"/> casi siempre sentado<br><input type="radio"/> sentado 50 por cien<br><input type="radio"/> casi siempre de pie, quieto<br><input type="radio"/> casi siempre levantado caminando y llevando pocas cosas<br><input type="radio"/> casi siempre levantado, caminando y llevado muchas cosas<br><input type="radio"/> trabajo manual pesado |
| tiempo caminar o bici al día           | <input type="radio"/> casi nunca<br><input type="radio"/> menos 20min día<br><input type="radio"/> 20 a 40 min día<br><input type="radio"/> 40 a 60 min día<br><input checked="" type="radio"/> 1h o 1h y media día<br><input type="radio"/> más de 1h y media al día                                                                                                     |
| tiempo tareas casa al día              | <input checked="" type="radio"/> menos de 1h día<br><input type="radio"/> 1 a 2h día<br><input type="radio"/> 3 a 4h día<br><input type="radio"/> 5 a 6h día<br><input type="radio"/> 7 a 8h día<br><input type="radio"/> más de 8h día                                                                                                                                   |
| tiempo libre televisión ordenador leer | <input type="radio"/> menos 1h día<br><input type="radio"/> 1h día<br><input type="radio"/> 2h día<br><input type="radio"/> 3h día<br><input checked="" type="radio"/> 4h día<br><input type="radio"/> 5 a 6h día<br><input type="radio"/> mas 6h día                                                                                                                     |
| tiempo libre ejercicio o deporte       | <input type="radio"/> menos 1h semana<br><input type="radio"/> 1h semana<br><input type="radio"/> 2h semana<br><input type="radio"/> 3h semana<br><input type="radio"/> 4 a 5h semana<br><input checked="" type="radio"/> mas 5h semana                                                                                                                                   |

|                            |                                                                                                                                                                                                                                              |
|----------------------------|----------------------------------------------------------------------------------------------------------------------------------------------------------------------------------------------------------------------------------------------|
| como se considera          | <input type="radio"/> sedentaria<br><input checked="" type="radio"/> poco activa<br><input type="radio"/> moderadamente activa<br><input type="radio"/> bastante activa<br><input type="radio"/> muy activa<br><input type="radio"/> no sabe |
| FUR                        | [*DATA REMOVED*]                                                                                                                                                                                                                             |
| Semanas gestación 2T       | <input type="text"/>                                                                                                                                                                                                                         |
| Días gestación 2T          | <input type="text"/>                                                                                                                                                                                                                         |
| DBP 2T                     | <input type="text"/>                                                                                                                                                                                                                         |
| CC 2T                      | <input type="text"/>                                                                                                                                                                                                                         |
| AC 2T                      | <input type="text"/>                                                                                                                                                                                                                         |
| LF 2T                      | <input type="text"/>                                                                                                                                                                                                                         |
| PFE 2T (Hadlock)           | <input type="text"/>                                                                                                                                                                                                                         |
| Semanas gestación 3T       | [*DATA REMOVED*]                                                                                                                                                                                                                             |
| días 3T                    | [*DATA REMOVED*]                                                                                                                                                                                                                             |
| DBP 3T                     | [*DATA REMOVED*]                                                                                                                                                                                                                             |
| CC 3T                      | [*DATA REMOVED*]                                                                                                                                                                                                                             |
| AC 3T                      | [*DATA REMOVED*]                                                                                                                                                                                                                             |
| LF 3T                      | [*DATA REMOVED*]                                                                                                                                                                                                                             |
| PFE 3T (Hadlock)           | [*DATA REMOVED*]                                                                                                                                                                                                                             |
| Semanas de gestación final | [*DATA REMOVED*]                                                                                                                                                                                                                             |
| días gestación final       | [*DATA REMOVED*]                                                                                                                                                                                                                             |
| Localización placenta      | <input checked="" type="radio"/> anterior<br><input type="radio"/> lateral derecha<br><input type="radio"/> lateral izquierda<br><input type="radio"/> posterior<br><input type="radio"/> fondo                                              |

|                                                   |                                                                                                                                                                                       |
|---------------------------------------------------|---------------------------------------------------------------------------------------------------------------------------------------------------------------------------------------|
| Presentación longitudinal cefálica                | <input type="radio"/> no<br><input checked="" type="radio"/> sí                                                                                                                       |
| Dorso                                             | <input type="radio"/> izquierda anterior<br><input type="radio"/> izquierda posterior<br><input checked="" type="radio"/> derecha anterior<br><input type="radio"/> derecha posterior |
| diámetro biparietal                               | [*DATA REMOVED*]                                                                                                                                                                      |
| Circunferencia craneal                            | [*DATA REMOVED*]                                                                                                                                                                      |
| Circunferencia abdominal                          | [*DATA REMOVED*]                                                                                                                                                                      |
| Longitud de femur                                 | [*DATA REMOVED*]                                                                                                                                                                      |
| tejido celular subcutáneo a nivel del muslo en mm | [*DATA REMOVED*]                                                                                                                                                                      |
| tejido celular subcutáneo en abdomen en mm        | [*DATA REMOVED*]                                                                                                                                                                      |
| Volumen del muslo en cm3                          | [*DATA REMOVED*]                                                                                                                                                                      |
| Peso fetal estimado según fórmula de Hadlock      | [*DATA REMOVED*]                                                                                                                                                                      |
| Percentil                                         | [*DATA REMOVED*]                                                                                                                                                                      |
| Peso fetal estimado según fórmula de Scioscia     | _____                                                                                                                                                                                 |
| Peso fetal estimado según fórmula de LEE          | _____                                                                                                                                                                                 |
| Tipo de parto                                     | <input type="radio"/> eutocico<br><input type="radio"/> instrumentado/ventosa<br><input type="radio"/> cesarea                                                                        |
| fecha de nacimiento                               | [*DATA REMOVED*]                                                                                                                                                                      |
| Días entre exploración y nacimiento               | [*DATA REMOVED*]                                                                                                                                                                      |
| Peso RN en g                                      | [*DATA REMOVED*]                                                                                                                                                                      |
| sexo                                              | <input checked="" type="radio"/> mujer<br><input type="radio"/> hombre                                                                                                                |
| Apgar 1 minuto                                    | [*DATA REMOVED*]                                                                                                                                                                      |
| Apgar 5 minutos                                   | [*DATA REMOVED*]                                                                                                                                                                      |
| Apgar 10 minutos                                  | _____                                                                                                                                                                                 |

---

antecedente Covid durante gestación☐ Yes☒ No

---

Nivel de estudios☐ ninguno☐ primarios☒ secundarios☐ universitarios

## Base\_datos\_estimacion\_peso\_fetal

|                                       |                                                                                                                                                                                                                                                                                      |
|---------------------------------------|--------------------------------------------------------------------------------------------------------------------------------------------------------------------------------------------------------------------------------------------------------------------------------------|
| Número de identificación participante | 130                                                                                                                                                                                                                                                                                  |
| CODIGO PARTICIPANTE                   |                                                                                                                                                                                                                                                                                      |
| Edad                                  | [*DATA REMOVED*]                                                                                                                                                                                                                                                                     |
| Gestaciones                           | <input type="radio"/> 1<br><input type="radio"/> 2<br><input type="radio"/> 3<br><input checked="" type="radio"/> mas de 3                                                                                                                                                           |
| partos                                | <input type="radio"/> 0<br><input type="radio"/> 1<br><input checked="" type="radio"/> 2<br><input type="radio"/> 3<br><input type="radio"/> mas de 3                                                                                                                                |
| cesáreas                              | <input checked="" type="radio"/> 0<br><input type="radio"/> 1<br><input type="radio"/> 2<br><input type="radio"/> 3<br><input type="radio"/> mas de 3                                                                                                                                |
| Abortos                               | <input type="radio"/> 0<br><input checked="" type="radio"/> 1<br><input type="radio"/> 2<br><input type="radio"/> 3<br><input type="radio"/> mas de 3                                                                                                                                |
| Tipo de gestacion                     | <input checked="" type="radio"/> espontanea<br><input type="radio"/> IAC inseminación artificial conyuge<br><input type="radio"/> IAD inseminación artificial donante<br><input type="radio"/> FIV Fecundación in Vitro<br><input type="radio"/> Ovodon FIV con donación de ovocitos |
| peso previo a embarazo                | [*DATA REMOVED*]                                                                                                                                                                                                                                                                     |
| Ganancia ponderal embarazo            |                                                                                                                                                                                                                                                                                      |
| Talla madre                           | [*DATA REMOVED*]                                                                                                                                                                                                                                                                     |
| IMC previo embarazo                   | 38.22222222222222                                                                                                                                                                                                                                                                    |
| Patología obstétrica                  | <input checked="" type="radio"/> no<br><input type="radio"/> si                                                                                                                                                                                                                      |
| Diabetes pregestacional               | <input checked="" type="radio"/> no<br><input type="radio"/> si                                                                                                                                                                                                                      |
| Diabetes gestacional                  | <input checked="" type="radio"/> no<br><input type="radio"/> si                                                                                                                                                                                                                      |

|                                            |                                                                                                                                                                                      |
|--------------------------------------------|--------------------------------------------------------------------------------------------------------------------------------------------------------------------------------------|
| Diabetes gestacional con insulina          | <input checked="" type="radio"/> no<br><input type="radio"/> si                                                                                                                      |
| Diabetes gestacional con dieta y ejercicio | <input checked="" type="radio"/> no<br><input type="radio"/> si                                                                                                                      |
| Percentil fetos previos                    | <input type="radio"/> Nada<br><input type="radio"/> percentil menor de 10<br><input checked="" type="radio"/> percentil entre 10 y 90<br><input type="radio"/> percentil mayor de 90 |
| Exfumadora                                 | <input checked="" type="radio"/> Nada<br><input type="radio"/> menos de 5 años<br><input type="radio"/> 5 a 10 años<br><input type="radio"/> mayor o igual a 10 años                 |
| Hábito tabáquico                           | <input type="radio"/> no<br><input checked="" type="radio"/> si                                                                                                                      |
| fumadora                                   | [*DATA REMOVED*]                                                                                                                                                                     |
| Consumo otros tóxicos                      | <input checked="" type="radio"/> no<br><input type="radio"/> si                                                                                                                      |
| Hb 1T                                      | [*DATA REMOVED*]                                                                                                                                                                     |
| Htc 1T                                     | [*DATA REMOVED*]                                                                                                                                                                     |
| Hb 2T                                      | [*DATA REMOVED*]                                                                                                                                                                     |
| HTC 2T                                     | [*DATA REMOVED*]                                                                                                                                                                     |
| Hb 3T                                      | [*DATA REMOVED*]                                                                                                                                                                     |
| HTC 3T                                     | [*DATA REMOVED*]                                                                                                                                                                     |
| Suplemento FE oral                         | <input type="radio"/> si<br><input checked="" type="radio"/> no                                                                                                                      |
| Suplemento fe iv                           | <input type="radio"/> si<br><input checked="" type="radio"/> no                                                                                                                      |
| Transfusión                                | <input checked="" type="radio"/> no<br><input type="radio"/> si                                                                                                                      |
| Solicitada Vit D                           | <input type="radio"/> no<br><input checked="" type="radio"/> si                                                                                                                      |
| Deficit vit D                              | <input type="radio"/> no<br><input checked="" type="radio"/> si                                                                                                                      |
| Suplemento vit D                           | <input checked="" type="radio"/> si<br><input type="radio"/> no                                                                                                                      |



|                       |                                                                                                                                                                                                                                                                                                                                                                                                              |
|-----------------------|--------------------------------------------------------------------------------------------------------------------------------------------------------------------------------------------------------------------------------------------------------------------------------------------------------------------------------------------------------------------------------------------------------------|
| Dieta, cuestionario   | <input checked="" type="radio"/> sí<br><input type="radio"/> no                                                                                                                                                                                                                                                                                                                                              |
| Leche entera          | <input type="radio"/> Nunca o menos 1 vez al mes<br><input type="radio"/> 1 a 3 veces mes<br><input type="radio"/> 1 vez semana<br><input type="radio"/> 2 a 4 veces semana<br><input type="radio"/> 5 a 6 veces semana<br><input type="radio"/> 1 vez al día<br><input checked="" type="radio"/> 2 a 3 veces al día<br><input type="radio"/> 5 a 6 veces al día<br><input type="radio"/> más 6 veces al día |
| Leche semidesnatada   | <input type="radio"/> Nunca o menos 1 vez al mes<br><input type="radio"/> 1 a 3 veces mes<br><input type="radio"/> 1 vez semana<br><input type="radio"/> 2 a 4 veces semana<br><input type="radio"/> 5 a 6 veces semana<br><input type="radio"/> 1 vez al día<br><input type="radio"/> 2 a 3 veces al día<br><input type="radio"/> 5 a 6 veces al día<br><input type="radio"/> mas 6 veces al día            |
| Leche desnatada       | <input type="radio"/> Nunca o menos 1 vez al mes<br><input type="radio"/> 1 a 3 veces mes<br><input type="radio"/> 1 vez semana<br><input type="radio"/> 2 a 4 veces semana<br><input type="radio"/> 5 a 6 veces semana<br><input type="radio"/> 1 vez al día<br><input type="radio"/> 2 a 3 veces al día<br><input type="radio"/> 5 a 6 veces al día<br><input type="radio"/> más 6 veces al día            |
| Leche condensada      | <input type="radio"/> Nunca o menos 1 vez al mes<br><input type="radio"/> 1 a 3 veces mes<br><input type="radio"/> 1 vez semana<br><input type="radio"/> 2 a 4 veces semana<br><input type="radio"/> 5 a 6 veces semana<br><input type="radio"/> 1 vez al día<br><input type="radio"/> 2 a 3 veces al día<br><input type="radio"/> 5 a 6 veces al día<br><input type="radio"/> más 6 veces al día            |
| nata o crema de leche | <input type="radio"/> Nunca o menos 1 vez al mes<br><input type="radio"/> 1 a 3 veces mes<br><input type="radio"/> 1 vez semana<br><input type="radio"/> 2 a 4 veces semana<br><input type="radio"/> 5 a 6 veces semana<br><input type="radio"/> 1 vez al día<br><input type="radio"/> 2 a 3 veces al día<br><input type="radio"/> 5 a 6 veces al día<br><input type="radio"/> más 6 veces al día            |

|                                             |                                                                                                                                                                                                                                                                                                                                                                                                              |
|---------------------------------------------|--------------------------------------------------------------------------------------------------------------------------------------------------------------------------------------------------------------------------------------------------------------------------------------------------------------------------------------------------------------------------------------------------------------|
| Yogurt Entero                               | <input type="radio"/> Nunca o menos 1 vez al mes<br><input type="radio"/> 1 a 3 veces mes<br><input type="radio"/> 1 vez semana<br><input type="radio"/> 2 a 4 veces semana<br><input type="radio"/> 5 a 6 veces semana<br><input type="radio"/> 1 vez al día<br><input type="radio"/> 2 a 3 veces al día<br><input type="radio"/> 5 a 6 veces al día<br><input type="radio"/> más 6 veces al día            |
| Yogurt desnatado                            | <input type="radio"/> Nunca o menos 1 vez al mes<br><input type="radio"/> 1 a 3 veces mes<br><input type="radio"/> 1 vez semana<br><input type="radio"/> 2 a 4 veces semana<br><input type="radio"/> 5 a 6 veces semana<br><input type="radio"/> 1 vez al día<br><input type="radio"/> 2 a 3 veces al día<br><input type="radio"/> 5 a 6 veces al día<br><input type="radio"/> más 6 veces al día            |
| 100g requesón o queso blando o queso fresco | <input type="radio"/> Nunca o menos 1 vez al mes<br><input type="radio"/> 1 a 3 veces mes<br><input type="radio"/> 1 vez semana<br><input checked="" type="radio"/> 2 a 4 veces semana<br><input type="radio"/> 5 a 6 veces semana<br><input type="radio"/> 1 vez al día<br><input type="radio"/> 2 a 3 veces al día<br><input type="radio"/> 5 a 6 veces al día<br><input type="radio"/> más 6 veces al día |
| queso curado o semicurado o cremoso         | <input type="radio"/> Nunca o menos 1 vez al mes<br><input type="radio"/> 1 a 3 veces mes<br><input checked="" type="radio"/> 1 vez semana<br><input type="radio"/> 2 a 4 veces semana<br><input type="radio"/> 5 a 6 veces semana<br><input type="radio"/> 1 vez al día<br><input type="radio"/> 2 a 3 veces al día<br><input type="radio"/> 5 a 6 veces al día<br><input type="radio"/> más 6 veces al día |
| natillas flan pudding                       | <input type="radio"/> Nunca o menos 1 vez al mes<br><input type="radio"/> 1 a 3 veces mes<br><input type="radio"/> 1 vez semana<br><input type="radio"/> 2 a 4 veces semana<br><input type="radio"/> 5 a 6 veces semana<br><input type="radio"/> 1 vez al día<br><input type="radio"/> 2 a 3 veces al día<br><input type="radio"/> 5 a 6 veces al día<br><input type="radio"/> más 6 veces al día            |
| Helado                                      | <input type="radio"/> Nunca o menos 1 vez al mes<br><input type="radio"/> 1 a 3 veces mes<br><input type="radio"/> 1 vez semana<br><input type="radio"/> 2 a 4 veces semana<br><input type="radio"/> 5 a 6 veces semana<br><input checked="" type="radio"/> 1 vez al día<br><input type="radio"/> 2 a 3 veces al día<br><input type="radio"/> 5 a 6 veces al día<br><input type="radio"/> más 6 veces al día |

|                                      |                                                                                                                                                                                                                                                                                                                                                                                                              |
|--------------------------------------|--------------------------------------------------------------------------------------------------------------------------------------------------------------------------------------------------------------------------------------------------------------------------------------------------------------------------------------------------------------------------------------------------------------|
| huevo                                | <input type="radio"/> Nunca o menos 1 vez al mes<br><input type="radio"/> 1 a 3 veces mes<br><input type="radio"/> 1 vez semana<br><input type="radio"/> 2 a 4 veces semana<br><input type="radio"/> 5 a 6 veces semana<br><input type="radio"/> 1 vez al día<br><input type="radio"/> 2 a 3 veces al día<br><input type="radio"/> 5 a 6 veces al día<br><input type="radio"/> más 6 veces al día            |
| Pollo con piel                       | <input type="radio"/> Nunca o menos 1 vez al mes<br><input type="radio"/> 1 a 3 veces mes<br><input type="radio"/> 1 vez semana<br><input type="radio"/> 2 a 4 veces semana<br><input type="radio"/> 5 a 6 veces semana<br><input type="radio"/> 1 vez al día<br><input type="radio"/> 2 a 3 veces al día<br><input type="radio"/> 5 a 6 veces al día<br><input type="radio"/> más 6 veces al día            |
| pollo sin piel                       | <input type="radio"/> Nunca o menos 1 vez al mes<br><input type="radio"/> 1 a 3 veces mes<br><input type="radio"/> 1 vez semana<br><input checked="" type="radio"/> 2 a 4 veces semana<br><input type="radio"/> 5 a 6 veces semana<br><input type="radio"/> 1 vez al día<br><input type="radio"/> 2 a 3 veces al día<br><input type="radio"/> 5 a 6 veces al día<br><input type="radio"/> más 6 veces al día |
| Ternera o cerdo o cordero            | <input type="radio"/> Nunca o menos 1 vez al mes<br><input type="radio"/> 1 a 3 veces mes<br><input checked="" type="radio"/> 1 vez semana<br><input type="radio"/> 2 a 4 veces semana<br><input type="radio"/> 5 a 6 veces semana<br><input type="radio"/> 1 vez al día<br><input type="radio"/> 2 a 3 veces al día<br><input type="radio"/> 5 a 6 veces al día<br><input type="radio"/> más 6 veces al día |
| carne caza: Conejo o codorniz o pato | <input type="radio"/> Nunca o menos 1 vez al mes<br><input type="radio"/> 1 a 3 veces mes<br><input type="radio"/> 1 vez semana<br><input type="radio"/> 2 a 4 veces semana<br><input type="radio"/> 5 a 6 veces semana<br><input type="radio"/> 1 vez al día<br><input type="radio"/> 2 a 3 veces al día<br><input type="radio"/> 5 a 6 veces al día<br><input type="radio"/> más 6 veces al día            |
| Hígado de ternera o cerdo o pollo    | <input type="radio"/> Nunca o menos 1 vez al mes<br><input type="radio"/> 1 a 3 veces mes<br><input type="radio"/> 1 vez semana<br><input type="radio"/> 2 a 4 veces semana<br><input type="radio"/> 5 a 6 veces semana<br><input type="radio"/> 1 vez al día<br><input type="radio"/> 2 a 3 veces al día<br><input type="radio"/> 5 a 6 veces al día<br><input type="radio"/> más 6 veces al día            |

---

Vísceras

- ☐ Nunca o menos 1 vez al mes
- ☐ 1 a 3 veces mes
- ☐ 1 vez semana
- ☒ 2 a 4 veces semana
- ☐ 5 a 6 veces semana
- ☐ 1 vez al día
- ☐ 2 a 3 veces al día
- ☐ 5 a 6 veces al día
- ☐ más 6 veces al día

---

Embutido

- ☐ Nunca o menos 1 vez al mes
- ☐ 1 a 3 veces mes
- ☒ 1 vez semana
- ☐ 2 a 4 veces semana
- ☐ 5 a 6 veces semana
- ☐ 1 vez al día
- ☐ 2 a 3 veces al día
- ☐ 5 a 6 veces al día
- ☐ más 6 veces al día

---

Salchicha o similar

- ☐ Nunca o menos 1 vez al mes
- ☐ 1 a 3 veces mes
- ☐ 1 vez semana
- ☐ 2 a 4 veces semana
- ☐ 5 a 6 veces semana
- ☐ 1 vez al día
- ☐ 2 a 3 veces al día
- ☐ 5 a 6 veces al día
- ☐ más 6 veces al día

---

Pate o foiegras

- ☐ Nunca o menos 1 vez al mes
- ☐ 1 a 3 veces mes
- ☒ 1 vez semana
- ☐ 2 a 4 veces semana
- ☐ 5 a 6 veces semana
- ☐ 1 vez al día
- ☐ 2 a 3 veces al día
- ☐ 5 a 6 veces al día
- ☐ más 6 veces al día

---

Hamburguesa

- ☐ Nunca o menos 1 vez al mes
- ☐ 1 a 3 veces mes
- ☐ 1 vez semana
- ☐ 2 a 4 veces semana
- ☐ 5 a 6 veces semana
- ☐ 1 vez al día
- ☐ 2 a 3 veces al día
- ☐ 5 a 6 veces al día
- ☐ más 6 veces al día

---

tocino o bacon

- ☐ Nunca o menos 1 vez al mes
- ☐ 1 a 3 veces mes
- ☐ 1 vez semana
- ☐ 2 a 4 veces semana
- ☐ 5 a 6 veces semana
- ☐ 1 vez al día
- ☐ 2 a 3 veces al día
- ☐ 5 a 6 veces al día
- ☐ más 6 veces al día

---

Pescado frito

- ☐ Nunca o menos 1 vez al mes  
☐ 1 a 3 veces mes  
☒ 1 vez semana  
☐ 2 a 4 veces semana  
☐ 5 a 6 veces semana  
☐ 1 vez al día  
☐ 2 a 3 veces al día  
☐ 5 a 6 veces al día  
☐ más 6 veces al día

---

pescado hervido blanco

- ☐ Nunca o menos 1 vez al mes  
☐ 1 a 3 veces mes  
☒ 1 vez semana  
☐ 2 a 4 veces semana  
☐ 5 a 6 veces semana  
☐ 1 vez al día  
☐ 2 a 3 veces al día  
☐ 5 a 6 veces al día  
☐ más 6 veces al día

---

pescado hervido azul

- ☐ Nunca o menos 1 vez al mes  
☐ 1 a 3 veces mes  
☐ 1 vez semana  
☐ 2 a 4 veces semana  
☐ 5 a 6 veces semana  
☐ 1 vez al día  
☐ 2 a 3 veces al día  
☐ 5 a 6 veces al día  
☐ más 6 veces al día

---

otros pescado azul

- ☐ Nunca o menos 1 vez al mes  
☐ 1 a 3 veces mes  
☒ 1 vez semana  
☐ 2 a 4 veces semana  
☐ 5 a 6 veces semana  
☐ 1 vez al día  
☐ 2 a 3 veces al día  
☐ 5 a 6 veces al día  
☐ más 6 veces al día

---

atun conserva

- ☐ Nunca o menos 1 vez al mes  
☐ 1 a 3 veces mes  
☐ 1 vez semana  
☐ 2 a 4 veces semana  
☐ 5 a 6 veces semana  
☐ 1 vez al día  
☐ 2 a 3 veces al día  
☐ 5 a 6 veces al día  
☐ más 6 veces al día

---

sardina conserva

- ☐ Nunca o menos 1 vez al mes  
☐ 1 a 3 veces mes  
☐ 1 vez semana  
☐ 2 a 4 veces semana  
☐ 5 a 6 veces semana  
☐ 1 vez al día  
☐ 2 a 3 veces al día  
☐ 5 a 6 veces al día  
☐ más 6 veces al día

|                                         |                                                                                                                                                                                                                                                                                                                                                                                                              |
|-----------------------------------------|--------------------------------------------------------------------------------------------------------------------------------------------------------------------------------------------------------------------------------------------------------------------------------------------------------------------------------------------------------------------------------------------------------------|
| pescado ahumado                         | <input type="radio"/> Nunca o menos 1 vez al mes<br><input type="radio"/> 1 a 3 veces mes<br><input type="radio"/> 1 vez semana<br><input type="radio"/> 2 a 4 veces semana<br><input type="radio"/> 5 a 6 veces semana<br><input type="radio"/> 1 vez al día<br><input type="radio"/> 2 a 3 veces al día<br><input type="radio"/> 5 a 6 veces al día<br><input type="radio"/> más 6 veces al día            |
| almejas o mejillones o ostras unos 100g | <input type="radio"/> Nunca o menos 1 vez al mes<br><input type="radio"/> 1 a 3 veces mes<br><input type="radio"/> 1 vez semana<br><input type="radio"/> 2 a 4 veces semana<br><input type="radio"/> 5 a 6 veces semana<br><input type="radio"/> 1 vez al día<br><input type="radio"/> 2 a 3 veces al día<br><input type="radio"/> 5 a 6 veces al día<br><input type="radio"/> más 6 veces al día            |
| calamar o chipiron o sepia unos 100g    | <input type="radio"/> Nunca o menos 1 vez al mes<br><input checked="" type="radio"/> 1 a 3 veces mes<br><input type="radio"/> 1 vez semana<br><input type="radio"/> 2 a 4 veces semana<br><input type="radio"/> 5 a 6 veces semana<br><input type="radio"/> 1 vez al día<br><input type="radio"/> 2 a 3 veces al día<br><input type="radio"/> 5 a 6 veces al día<br><input type="radio"/> más 6 veces al día |
| marisco unos 100g                       | <input checked="" type="radio"/> Nunca o menos 1 vez al mes<br><input type="radio"/> 1 a 3 veces mes<br><input type="radio"/> 1 vez semana<br><input type="radio"/> 2 a 4 veces semana<br><input type="radio"/> 5 a 6 veces semana<br><input type="radio"/> 1 vez al día<br><input type="radio"/> 2 a 3 veces al día<br><input type="radio"/> 5 a 6 veces al día<br><input type="radio"/> más 6 veces al día |
| Espinacas o acelgas cocinadas           | <input type="radio"/> Nunca o menos 1 vez al mes<br><input type="radio"/> 1 a 3 veces mes<br><input type="radio"/> 1 vez semana<br><input type="radio"/> 2 a 4 veces semana<br><input type="radio"/> 5 a 6 veces semana<br><input type="radio"/> 1 vez al día<br><input type="radio"/> 2 a 3 veces al día<br><input type="radio"/> 5 a 6 veces al día<br><input type="radio"/> más 6 veces al día            |
| Col o coliflor o brocoli cocinado       | <input type="radio"/> Nunca o menos 1 vez al mes<br><input type="radio"/> 1 a 3 veces mes<br><input type="radio"/> 1 vez semana<br><input type="radio"/> 2 a 4 veces semana<br><input type="radio"/> 5 a 6 veces semana<br><input type="radio"/> 1 vez al día<br><input type="radio"/> 2 a 3 veces al día<br><input type="radio"/> 5 a 6 veces al día<br><input type="radio"/> más 6 veces al día            |

---

Lechuga o endivia o escarola

- ☐ Nunca o menos 1 vez al mes  
☐ 1 a 3 veces mes  
☐ 1 vez semana  
☐ 2 a 4 veces semana  
☐ 5 a 6 veces semana  
☐ 1 vez al día  
☐ 2 a 3 veces al día  
☐ 5 a 6 veces al día  
☐ más 6 veces al día

---

tomate ensalada

- ☐ Nunca o menos 1 vez al mes  
☐ 1 a 3 veces mes  
☐ 1 vez semana  
☒ 2 a 4 veces semana  
☐ 5 a 6 veces semana  
☐ 1 vez al día  
☐ 2 a 3 veces al día  
☐ 5 a 6 veces al día  
☐ más 6 veces al día

---

cebolla

- ☐ Nunca o menos 1 vez al mes  
☐ 1 a 3 veces mes  
☐ 1 vez semana  
☐ 2 a 4 veces semana  
☐ 5 a 6 veces semana  
☐ 1 vez al día  
☐ 2 a 3 veces al día  
☐ 5 a 6 veces al día  
☐ más 6 veces al día

---

Zanahoria o calabaza

- ☐ Nunca o menos 1 vez al mes  
☐ 1 a 3 veces mes  
☐ 1 vez semana  
☐ 2 a 4 veces semana  
☐ 5 a 6 veces semana  
☐ 1 vez al día  
☐ 2 a 3 veces al día  
☐ 5 a 6 veces al día  
☐ más 6 veces al día

---

Judías verdes

- ☐ Nunca o menos 1 vez al mes  
☐ 1 a 3 veces mes  
☐ 1 vez semana  
☐ 2 a 4 veces semana  
☐ 5 a 6 veces semana  
☐ 1 vez al día  
☐ 2 a 3 veces al día  
☐ 5 a 6 veces al día  
☐ más 6 veces al día

---

Berenjena o calabacin o pepino

- ☐ Nunca o menos 1 vez al mes  
☐ 1 a 3 veces mes  
☒ 1 vez semana  
☐ 2 a 4 veces semana  
☐ 5 a 6 veces semana  
☐ 1 vez al día  
☐ 2 a 3 veces al día  
☐ 5 a 6 veces al día  
☐ más 6 veces al día

|                       |                                                                                                                                                                                                                                                                                                                                                                                                              |
|-----------------------|--------------------------------------------------------------------------------------------------------------------------------------------------------------------------------------------------------------------------------------------------------------------------------------------------------------------------------------------------------------------------------------------------------------|
| pimiento              | <input type="radio"/> Nunca o menos 1 vez al mes<br><input type="radio"/> 1 a 3 veces mes<br><input type="radio"/> 1 vez semana<br><input type="radio"/> 2 a 4 veces semana<br><input type="radio"/> 5 a 6 veces semana<br><input type="radio"/> 1 vez al día<br><input type="radio"/> 2 a 3 veces al día<br><input type="radio"/> 5 a 6 veces al día<br><input type="radio"/> más 6 veces al día            |
| alcachofa             | <input type="radio"/> Nunca o menos 1 vez al mes<br><input type="radio"/> 1 a 3 veces mes<br><input type="radio"/> 1 vez semana<br><input type="radio"/> 2 a 4 veces semana<br><input type="radio"/> 5 a 6 veces semana<br><input type="radio"/> 1 vez al día<br><input type="radio"/> 2 a 3 veces al día<br><input type="radio"/> 5 a 6 veces al día<br><input type="radio"/> más 6 veces al día            |
| espárragos            | <input type="radio"/> Nunca o menos 1 vez al mes<br><input type="radio"/> 1 a 3 veces mes<br><input type="radio"/> 1 vez semana<br><input type="radio"/> 2 a 4 veces semana<br><input type="radio"/> 5 a 6 veces semana<br><input type="radio"/> 1 vez al día<br><input type="radio"/> 2 a 3 veces al día<br><input type="radio"/> 5 a 6 veces al día<br><input type="radio"/> más 6 veces al día            |
| maíz hervido          | <input type="radio"/> Nunca o menos 1 vez al mes<br><input type="radio"/> 1 a 3 veces mes<br><input type="radio"/> 1 vez semana<br><input type="radio"/> 2 a 4 veces semana<br><input type="radio"/> 5 a 6 veces semana<br><input type="radio"/> 1 vez al día<br><input type="radio"/> 2 a 3 veces al día<br><input type="radio"/> 5 a 6 veces al día<br><input type="radio"/> más 6 veces al día            |
| legumbres             | <input type="radio"/> Nunca o menos 1 vez al mes<br><input type="radio"/> 1 a 3 veces mes<br><input checked="" type="radio"/> 1 vez semana<br><input type="radio"/> 2 a 4 veces semana<br><input type="radio"/> 5 a 6 veces semana<br><input type="radio"/> 1 vez al día<br><input type="radio"/> 2 a 3 veces al día<br><input type="radio"/> 5 a 6 veces al día<br><input type="radio"/> más 6 veces al día |
| naranjas o mandarinas | <input type="radio"/> Nunca o menos 1 vez al mes<br><input type="radio"/> 1 a 3 veces mes<br><input type="radio"/> 1 vez semana<br><input type="radio"/> 2 a 4 veces semana<br><input type="radio"/> 5 a 6 veces semana<br><input type="radio"/> 1 vez al día<br><input type="radio"/> 2 a 3 veces al día<br><input type="radio"/> 5 a 6 veces al día<br><input type="radio"/> más 6 veces al día            |



---

zumو natural fruta

- ☐ Nunca o menos 1 vez al mes  
☐ 1 a 3 veces mes  
☐ 1 vez semana  
☐ 2 a 4 veces semana  
☐ 5 a 6 veces semana  
☐ 1 vez al día  
☐ 2 a 3 veces al día  
☐ 5 a 6 veces al día  
☐ más 6 veces al día

---

platano

- ☐ Nunca o menos 1 vez al mes  
☐ 1 a 3 veces mes  
☒ 1 vez semana  
☐ 2 a 4 veces semana  
☐ 5 a 6 veces semana  
☐ 1 vez al día  
☐ 2 a 3 veces al día  
☐ 5 a 6 veces al día  
☐ más 6 veces al día

---

manzana o pera

- ☐ Nunca o menos 1 vez al mes  
☐ 1 a 3 veces mes  
☒ 1 vez semana  
☐ 2 a 4 veces semana  
☐ 5 a 6 veces semana  
☐ 1 vez al día  
☐ 2 a 3 veces al día  
☐ 5 a 6 veces al día  
☐ más 6 veces al día

---

melocotón o nectarina

- ☐ Nunca o menos 1 vez al mes  
☐ 1 a 3 veces mes  
☐ 1 vez semana  
☐ 2 a 4 veces semana  
☐ 5 a 6 veces semana  
☐ 1 vez al día  
☐ 2 a 3 veces al día  
☐ 5 a 6 veces al día  
☐ más 6 veces al día

---

sandia o melon

- ☐ Nunca o menos 1 vez al mes  
☐ 1 a 3 veces mes  
☒ 1 vez semana  
☐ 2 a 4 veces semana  
☐ 5 a 6 veces semana  
☐ 1 vez al día  
☐ 2 a 3 veces al día  
☐ 5 a 6 veces al día  
☐ más 6 veces al día

---

uva

- ☐ Nunca o menos 1 vez al mes  
☐ 1 a 3 veces mes  
☐ 1 vez semana  
☐ 2 a 4 veces semana  
☐ 5 a 6 veces semana  
☐ 1 vez al día  
☐ 2 a 3 veces al día  
☐ 5 a 6 veces al día  
☐ más 6 veces al día

|                 |                                                                                                                                                                                                                                                                                                                                                                                                              |
|-----------------|--------------------------------------------------------------------------------------------------------------------------------------------------------------------------------------------------------------------------------------------------------------------------------------------------------------------------------------------------------------------------------------------------------------|
| bruna o ciruela | <input type="radio"/> Nunca o menos 1 vez al mes<br><input type="radio"/> 1 a 3 veces mes<br><input type="radio"/> 1 vez semana<br><input type="radio"/> 2 a 4 veces semana<br><input type="radio"/> 5 a 6 veces semana<br><input type="radio"/> 1 vez al día<br><input type="radio"/> 2 a 3 veces al día<br><input type="radio"/> 5 a 6 veces al día<br><input type="radio"/> más 6 veces al día            |
| kiwi            | <input type="radio"/> Nunca o menos 1 vez al mes<br><input type="radio"/> 1 a 3 veces mes<br><input type="radio"/> 1 vez semana<br><input type="radio"/> 2 a 4 veces semana<br><input type="radio"/> 5 a 6 veces semana<br><input type="radio"/> 1 vez al día<br><input type="radio"/> 2 a 3 veces al día<br><input type="radio"/> 5 a 6 veces al día<br><input type="radio"/> más 6 veces al día            |
| aceituna        | <input type="radio"/> Nunca o menos 1 vez al mes<br><input type="radio"/> 1 a 3 veces mes<br><input type="radio"/> 1 vez semana<br><input type="radio"/> 2 a 4 veces semana<br><input type="radio"/> 5 a 6 veces semana<br><input type="radio"/> 1 vez al día<br><input type="radio"/> 2 a 3 veces al día<br><input type="radio"/> 5 a 6 veces al día<br><input type="radio"/> más 6 veces al día            |
| frutos secos    | <input type="radio"/> Nunca o menos 1 vez al mes<br><input type="radio"/> 1 a 3 veces mes<br><input type="radio"/> 1 vez semana<br><input type="radio"/> 2 a 4 veces semana<br><input type="radio"/> 5 a 6 veces semana<br><input type="radio"/> 1 vez al día<br><input type="radio"/> 2 a 3 veces al día<br><input type="radio"/> 5 a 6 veces al día<br><input type="radio"/> más 6 veces al día            |
| pan blanco      | <input type="radio"/> Nunca o menos 1 vez al mes<br><input type="radio"/> 1 a 3 veces mes<br><input checked="" type="radio"/> 1 vez semana<br><input type="radio"/> 2 a 4 veces semana<br><input type="radio"/> 5 a 6 veces semana<br><input type="radio"/> 1 vez al día<br><input type="radio"/> 2 a 3 veces al día<br><input type="radio"/> 5 a 6 veces al día<br><input type="radio"/> más 6 veces al día |
| pan integral    | <input type="radio"/> Nunca o menos 1 vez al mes<br><input type="radio"/> 1 a 3 veces mes<br><input type="radio"/> 1 vez semana<br><input type="radio"/> 2 a 4 veces semana<br><input type="radio"/> 5 a 6 veces semana<br><input type="radio"/> 1 vez al día<br><input type="radio"/> 2 a 3 veces al día<br><input type="radio"/> 5 a 6 veces al día<br><input type="radio"/> más 6 veces al día            |

|                          |                                                                                                                                                                                                                                                                                                                                                                                                              |
|--------------------------|--------------------------------------------------------------------------------------------------------------------------------------------------------------------------------------------------------------------------------------------------------------------------------------------------------------------------------------------------------------------------------------------------------------|
| cereales desayuno        | <input type="radio"/> Nunca o menos 1 vez al mes<br><input type="radio"/> 1 a 3 veces mes<br><input type="radio"/> 1 vez semana<br><input type="radio"/> 2 a 4 veces semana<br><input type="radio"/> 5 a 6 veces semana<br><input type="radio"/> 1 vez al día<br><input type="radio"/> 2 a 3 veces al día<br><input type="radio"/> 5 a 6 veces al día<br><input type="radio"/> más 6 veces al día            |
| patatas fritas           | <input type="radio"/> Nunca o menos 1 vez al mes<br><input type="radio"/> 1 a 3 veces mes<br><input type="radio"/> 1 vez semana<br><input type="radio"/> 2 a 4 veces semana<br><input type="radio"/> 5 a 6 veces semana<br><input type="radio"/> 1 vez al día<br><input type="radio"/> 2 a 3 veces al día<br><input type="radio"/> 5 a 6 veces al día<br><input type="radio"/> más 6 veces al día            |
| patatas cocidas o asadas | <input type="radio"/> Nunca o menos 1 vez al mes<br><input type="radio"/> 1 a 3 veces mes<br><input type="radio"/> 1 vez semana<br><input type="radio"/> 2 a 4 veces semana<br><input type="radio"/> 5 a 6 veces semana<br><input type="radio"/> 1 vez al día<br><input type="radio"/> 2 a 3 veces al día<br><input type="radio"/> 5 a 6 veces al día<br><input type="radio"/> más 6 veces al día            |
| bolsa papas              | <input type="radio"/> Nunca o menos 1 vez al mes<br><input type="radio"/> 1 a 3 veces mes<br><input type="radio"/> 1 vez semana<br><input type="radio"/> 2 a 4 veces semana<br><input type="radio"/> 5 a 6 veces semana<br><input type="radio"/> 1 vez al día<br><input type="radio"/> 2 a 3 veces al día<br><input type="radio"/> 5 a 6 veces al día<br><input type="radio"/> más 6 veces al día            |
| arroz cocinado           | <input type="radio"/> Nunca o menos 1 vez al mes<br><input type="radio"/> 1 a 3 veces mes<br><input type="radio"/> 1 vez semana<br><input type="radio"/> 2 a 4 veces semana<br><input type="radio"/> 5 a 6 veces semana<br><input type="radio"/> 1 vez al día<br><input type="radio"/> 2 a 3 veces al día<br><input type="radio"/> 5 a 6 veces al día<br><input type="radio"/> más 6 veces al día            |
| pasta                    | <input type="radio"/> Nunca o menos 1 vez al mes<br><input type="radio"/> 1 a 3 veces mes<br><input checked="" type="radio"/> 1 vez semana<br><input type="radio"/> 2 a 4 veces semana<br><input type="radio"/> 5 a 6 veces semana<br><input type="radio"/> 1 vez al día<br><input type="radio"/> 2 a 3 veces al día<br><input type="radio"/> 5 a 6 veces al día<br><input type="radio"/> más 6 veces al día |

|                     |                                                                                                                                                                                                                                                                                                                                                                                                              |
|---------------------|--------------------------------------------------------------------------------------------------------------------------------------------------------------------------------------------------------------------------------------------------------------------------------------------------------------------------------------------------------------------------------------------------------------|
| pizza               | <input type="radio"/> Nunca o menos 1 vez al mes<br><input type="radio"/> 1 a 3 veces mes<br><input type="radio"/> 1 vez semana<br><input type="radio"/> 2 a 4 veces semana<br><input type="radio"/> 5 a 6 veces semana<br><input type="radio"/> 1 vez al día<br><input type="radio"/> 2 a 3 veces al día<br><input type="radio"/> 5 a 6 veces al día<br><input type="radio"/> más 6 veces al día            |
| aceite oliva        | <input type="radio"/> Nunca o menos 1 vez al mes<br><input type="radio"/> 1 a 3 veces mes<br><input type="radio"/> 1 vez semana<br><input checked="" type="radio"/> 2 a 4 veces semana<br><input type="radio"/> 5 a 6 veces semana<br><input type="radio"/> 1 vez al día<br><input type="radio"/> 2 a 3 veces al día<br><input type="radio"/> 5 a 6 veces al día<br><input type="radio"/> más 6 veces al día |
| otros aceites       | <input type="radio"/> Nunca o menos 1 vez al mes<br><input type="radio"/> 1 a 3 veces mes<br><input type="radio"/> 1 vez semana<br><input type="radio"/> 2 a 4 veces semana<br><input type="radio"/> 5 a 6 veces semana<br><input type="radio"/> 1 vez al día<br><input type="radio"/> 2 a 3 veces al día<br><input type="radio"/> 5 a 6 veces al día<br><input type="radio"/> más 6 veces al día            |
| margarina           | <input type="radio"/> Nunca o menos 1 vez al mes<br><input type="radio"/> 1 a 3 veces mes<br><input type="radio"/> 1 vez semana<br><input type="radio"/> 2 a 4 veces semana<br><input type="radio"/> 5 a 6 veces semana<br><input type="radio"/> 1 vez al día<br><input type="radio"/> 2 a 3 veces al día<br><input type="radio"/> 5 a 6 veces al día<br><input type="radio"/> más 6 veces al día            |
| mantequilla         | <input type="radio"/> Nunca o menos 1 vez al mes<br><input type="radio"/> 1 a 3 veces mes<br><input type="radio"/> 1 vez semana<br><input type="radio"/> 2 a 4 veces semana<br><input type="radio"/> 5 a 6 veces semana<br><input type="radio"/> 1 vez al día<br><input type="radio"/> 2 a 3 veces al día<br><input type="radio"/> 5 a 6 veces al día<br><input type="radio"/> más 6 veces al día            |
| galletas tipo maria | <input type="radio"/> Nunca o menos 1 vez al mes<br><input type="radio"/> 1 a 3 veces mes<br><input type="radio"/> 1 vez semana<br><input type="radio"/> 2 a 4 veces semana<br><input type="radio"/> 5 a 6 veces semana<br><input type="radio"/> 1 vez al día<br><input type="radio"/> 2 a 3 veces al día<br><input type="radio"/> 5 a 6 veces al día<br><input type="radio"/> más 6 veces al día            |

---

galletas chocolate

- ☐ Nunca o menos 1 vez al mes  
☐ 1 a 3 veces mes  
☐ 1 vez semana  
☐ 2 a 4 veces semana  
☐ 5 a 6 veces semana  
☐ 1 vez al día  
☐ 2 a 3 veces al día  
☐ 5 a 6 veces al día  
☐ más 6 veces al día

---

bolleria

- ☐ Nunca o menos 1 vez al mes  
☐ 1 a 3 veces mes  
☐ 1 vez semana  
☐ 2 a 4 veces semana  
☐ 5 a 6 veces semana  
☐ 1 vez al día  
☐ 2 a 3 veces al día  
☐ 5 a 6 veces al día  
☐ más 6 veces al día

---

chocolate o bombones

- ☐ Nunca o menos 1 vez al mes  
☐ 1 a 3 veces mes  
☒ 1 vez semana  
☐ 2 a 4 veces semana  
☐ 5 a 6 veces semana  
☐ 1 vez al día  
☐ 2 a 3 veces al día  
☐ 5 a 6 veces al día  
☐ más 6 veces al día

---

chocolate polvo o colacao

- ☐ Nunca o menos 1 vez al mes  
☐ 1 a 3 veces mes  
☐ 1 vez semana  
☐ 2 a 4 veces semana  
☐ 5 a 6 veces semana  
☐ 1 vez al día  
☐ 2 a 3 veces al día  
☐ 5 a 6 veces al día  
☐ más 6 veces al día

---

vino tinto

- ☐ Nunca o menos 1 vez al mes  
☐ 1 a 3 veces mes  
☐ 1 vez semana  
☐ 2 a 4 veces semana  
☐ 5 a 6 veces semana  
☐ 1 vez al día  
☐ 2 a 3 veces al día  
☐ 5 a 6 veces al día  
☐ más 6 veces al día

---

vino blanco

- ☐ Nunca o menos 1 vez al mes  
☐ 1 a 3 veces mes  
☐ 1 vez semana  
☐ 2 a 4 veces semana  
☐ 5 a 6 veces semana  
☐ 1 vez al día  
☐ 2 a 3 veces al día  
☐ 5 a 6 veces al día  
☐ más 6 veces al día

---

|                    |                                                                                                                                                                                                                                                                                                                                                                                                   |
|--------------------|---------------------------------------------------------------------------------------------------------------------------------------------------------------------------------------------------------------------------------------------------------------------------------------------------------------------------------------------------------------------------------------------------|
| vino seco o vermut | <input type="radio"/> Nunca o menos 1 vez al mes<br><input type="radio"/> 1 a 3 veces mes<br><input type="radio"/> 1 vez semana<br><input type="radio"/> 2 a 4 veces semana<br><input type="radio"/> 5 a 6 veces semana<br><input type="radio"/> 1 vez al día<br><input type="radio"/> 2 a 3 veces al día<br><input type="radio"/> 5 a 6 veces al día<br><input type="radio"/> más 6 veces al día |
|--------------------|---------------------------------------------------------------------------------------------------------------------------------------------------------------------------------------------------------------------------------------------------------------------------------------------------------------------------------------------------------------------------------------------------|

---

|         |                                                                                                                                                                                                                                                                                                                                                                                                   |
|---------|---------------------------------------------------------------------------------------------------------------------------------------------------------------------------------------------------------------------------------------------------------------------------------------------------------------------------------------------------------------------------------------------------|
| cerveza | <input type="radio"/> Nunca o menos 1 vez al mes<br><input type="radio"/> 1 a 3 veces mes<br><input type="radio"/> 1 vez semana<br><input type="radio"/> 2 a 4 veces semana<br><input type="radio"/> 5 a 6 veces semana<br><input type="radio"/> 1 vez al día<br><input type="radio"/> 2 a 3 veces al día<br><input type="radio"/> 5 a 6 veces al día<br><input type="radio"/> más 6 veces al día |
|---------|---------------------------------------------------------------------------------------------------------------------------------------------------------------------------------------------------------------------------------------------------------------------------------------------------------------------------------------------------------------------------------------------------|

---

|                     |                                                                                                                                                                                                                                                                                                                                                                                                   |
|---------------------|---------------------------------------------------------------------------------------------------------------------------------------------------------------------------------------------------------------------------------------------------------------------------------------------------------------------------------------------------------------------------------------------------|
| cerveza sin alcohol | <input type="radio"/> Nunca o menos 1 vez al mes<br><input type="radio"/> 1 a 3 veces mes<br><input type="radio"/> 1 vez semana<br><input type="radio"/> 2 a 4 veces semana<br><input type="radio"/> 5 a 6 veces semana<br><input type="radio"/> 1 vez al día<br><input type="radio"/> 2 a 3 veces al día<br><input type="radio"/> 5 a 6 veces al día<br><input type="radio"/> más 6 veces al día |
|---------------------|---------------------------------------------------------------------------------------------------------------------------------------------------------------------------------------------------------------------------------------------------------------------------------------------------------------------------------------------------------------------------------------------------|

---

|         |                                                                                                                                                                                                                                                                                                                                                                                                   |
|---------|---------------------------------------------------------------------------------------------------------------------------------------------------------------------------------------------------------------------------------------------------------------------------------------------------------------------------------------------------------------------------------------------------|
| licores | <input type="radio"/> Nunca o menos 1 vez al mes<br><input type="radio"/> 1 a 3 veces mes<br><input type="radio"/> 1 vez semana<br><input type="radio"/> 2 a 4 veces semana<br><input type="radio"/> 5 a 6 veces semana<br><input type="radio"/> 1 vez al día<br><input type="radio"/> 2 a 3 veces al día<br><input type="radio"/> 5 a 6 veces al día<br><input type="radio"/> más 6 veces al día |
|---------|---------------------------------------------------------------------------------------------------------------------------------------------------------------------------------------------------------------------------------------------------------------------------------------------------------------------------------------------------------------------------------------------------|

---

|                       |                                                                                                                                                                                                                                                                                                                                                                                                   |
|-----------------------|---------------------------------------------------------------------------------------------------------------------------------------------------------------------------------------------------------------------------------------------------------------------------------------------------------------------------------------------------------------------------------------------------|
| ginebra o ron o vodka | <input type="radio"/> Nunca o menos 1 vez al mes<br><input type="radio"/> 1 a 3 veces mes<br><input type="radio"/> 1 vez semana<br><input type="radio"/> 2 a 4 veces semana<br><input type="radio"/> 5 a 6 veces semana<br><input type="radio"/> 1 vez al día<br><input type="radio"/> 2 a 3 veces al día<br><input type="radio"/> 5 a 6 veces al día<br><input type="radio"/> más 6 veces al día |
|-----------------------|---------------------------------------------------------------------------------------------------------------------------------------------------------------------------------------------------------------------------------------------------------------------------------------------------------------------------------------------------------------------------------------------------|

---

|                 |                                                                                                                                                                                                                                                                                                                                                                                                   |
|-----------------|---------------------------------------------------------------------------------------------------------------------------------------------------------------------------------------------------------------------------------------------------------------------------------------------------------------------------------------------------------------------------------------------------|
| refresco normal | <input type="radio"/> Nunca o menos 1 vez al mes<br><input type="radio"/> 1 a 3 veces mes<br><input type="radio"/> 1 vez semana<br><input type="radio"/> 2 a 4 veces semana<br><input type="radio"/> 5 a 6 veces semana<br><input type="radio"/> 1 vez al día<br><input type="radio"/> 2 a 3 veces al día<br><input type="radio"/> 5 a 6 veces al día<br><input type="radio"/> más 6 veces al día |
|-----------------|---------------------------------------------------------------------------------------------------------------------------------------------------------------------------------------------------------------------------------------------------------------------------------------------------------------------------------------------------------------------------------------------------|

---

---

refresco sin azúcar

- ☐ Nunca o menos 1 vez al mes  
☐ 1 a 3 veces mes  
☒ 1 vez semana  
☐ 2 a 4 veces semana  
☐ 5 a 6 veces semana  
☐ 1 vez al día  
☐ 2 a 3 veces al día  
☐ 5 a 6 veces al día  
☐ más 6 veces al día

---

Agua del grifo

- ☐ Nunca o menos 1 vez al mes  
☐ 1 a 3 veces mes  
☐ 1 vez semana  
☐ 2 a 4 veces semana  
☐ 5 a 6 veces semana  
☐ 1 vez al día  
☐ 2 a 3 veces al día  
☐ 5 a 6 veces al día  
☐ más 6 veces al día

---

agua embotellada sin gas

- ☐ Nunca o menos 1 vez al mes  
☐ 1 a 3 veces mes  
☐ 1 vez semana  
☐ 2 a 4 veces semana  
☐ 5 a 6 veces semana  
☐ 1 vez al día  
☐ 2 a 3 veces al día  
☐ 5 a 6 veces al día  
☒ más 6 veces al día

---

agua embotellada con gas

- ☐ Nunca o menos 1 vez al mes  
☐ 1 a 3 veces mes  
☐ 1 vez semana  
☐ 2 a 4 veces semana  
☐ 5 a 6 veces semana  
☐ 1 vez al día  
☐ 2 a 3 veces al día  
☐ 5 a 6 veces al día  
☐ más 6 veces al día

---

zumو frutas embasado

- ☐ Nunca o menos 1 vez al mes  
☐ 1 a 3 veces mes  
☐ 1 vez semana  
☐ 2 a 4 veces semana  
☐ 5 a 6 veces semana  
☐ 1 vez al día  
☐ 2 a 3 veces al día  
☐ 5 a 6 veces al día  
☐ más 6 veces al día

---

cafe

- ☐ Nunca o menos 1 vez al mes  
☐ 1 a 3 veces mes  
☐ 1 vez semana  
☐ 2 a 4 veces semana  
☐ 5 a 6 veces semana  
☐ 1 vez al día  
☐ 2 a 3 veces al día  
☐ 5 a 6 veces al día  
☐ más 6 veces al día

---

cafe descafeinado

- ☐ Nunca o menos 1 vez al mes
- ☐ 1 a 3 veces mes
- ☐ 1 vez semana
- ☐ 2 a 4 veces semana
- ☒ 5 a 6 veces semana
- ☐ 1 vez al día
- ☐ 2 a 3 veces al día
- ☐ 5 a 6 veces al día
- ☐ más 6 veces al día

---

te o infusión

- ☐ Nunca o menos 1 vez al mes
- ☐ 1 a 3 veces mes
- ☐ 1 vez semana
- ☐ 2 a 4 veces semana
- ☐ 5 a 6 veces semana
- ☐ 1 vez al día
- ☐ 2 a 3 veces al día
- ☐ 5 a 6 veces al día
- ☐ más 6 veces al día

---

sopa o puré verduras

- ☐ Nunca o menos 1 vez al mes
- ☐ 1 a 3 veces mes
- ☐ 1 vez semana
- ☒ 2 a 4 veces semana
- ☐ 5 a 6 veces semana
- ☐ 1 vez al día
- ☐ 2 a 3 veces al día
- ☐ 5 a 6 veces al día
- ☐ más 6 veces al día

---

croquetas pollo jamón

- ☐ Nunca o menos 1 vez al mes
- ☐ 1 a 3 veces mes
- ☐ 1 vez semana
- ☐ 2 a 4 veces semana
- ☐ 5 a 6 veces semana
- ☐ 1 vez al día
- ☐ 2 a 3 veces al día
- ☐ 5 a 6 veces al día
- ☐ más 6 veces al día

---

croquetas pescado

- ☐ Nunca o menos 1 vez al mes
- ☐ 1 a 3 veces mes
- ☐ 1 vez semana
- ☐ 2 a 4 veces semana
- ☐ 5 a 6 veces semana
- ☐ 1 vez al día
- ☐ 2 a 3 veces al día
- ☐ 5 a 6 veces al día
- ☐ más 6 veces al día

---

mayonesa

- ☐ Nunca o menos 1 vez al mes
- ☐ 1 a 3 veces mes
- ☐ 1 vez semana
- ☐ 2 a 4 veces semana
- ☐ 5 a 6 veces semana
- ☐ 1 vez al día
- ☐ 2 a 3 veces al día
- ☐ 5 a 6 veces al día
- ☐ más 6 veces al día



---

salsa tomate

- ☐ Nunca o menos 1 vez al mes
- ☐ 1 a 3 veces mes
- ☐ 1 vez semana
- ☐ 2 a 4 veces semana
- ☐ 5 a 6 veces semana
- ☐ 1 vez al día
- ☐ 2 a 3 veces al día
- ☐ 5 a 6 veces al día
- ☐ más 6 veces al día

---

ketchup

- ☐ Nunca o menos 1 vez al mes
- ☐ 1 a 3 veces mes
- ☐ 1 vez semana
- ☐ 2 a 4 veces semana
- ☐ 5 a 6 veces semana
- ☐ 1 vez al día
- ☐ 2 a 3 veces al día
- ☐ 5 a 6 veces al día
- ☐ más 6 veces al día

---

sal

- ☐ Nunca o menos 1 vez al mes
- ☐ 1 a 3 veces mes
- ☐ 1 vez semana
- ☐ 2 a 4 veces semana
- ☐ 5 a 6 veces semana
- ☐ 1 vez al día
- ☐ 2 a 3 veces al día
- ☐ 5 a 6 veces al día
- ☐ más 6 veces al día

---

ajo

- ☐ Nunca o menos 1 vez al mes
- ☐ 1 a 3 veces mes
- ☐ 1 vez semana
- ☐ 2 a 4 veces semana
- ☐ 5 a 6 veces semana
- ☐ 1 vez al día
- ☐ 2 a 3 veces al día
- ☐ 5 a 6 veces al día
- ☐ más 6 veces al día

---

mermelada o miel

- ☐ Nunca o menos 1 vez al mes
- ☐ 1 a 3 veces mes
- ☐ 1 vez semana
- ☐ 2 a 4 veces semana
- ☐ 5 a 6 veces semana
- ☐ 1 vez al día
- ☐ 2 a 3 veces al día
- ☐ 5 a 6 veces al día
- ☐ más 6 veces al día

---

azúcar

- ☐ Nunca o menos 1 vez al mes
- ☐ 1 a 3 veces mes
- ☐ 1 vez semana
- ☐ 2 a 4 veces semana
- ☒ 5 a 6 veces semana
- ☐ 1 vez al día
- ☐ 2 a 3 veces al día
- ☐ 5 a 6 veces al día
- ☐ más 6 veces al día

|                                       |                                                                                                                                                                                                                                                                                                                                                                                                                                                                                                                               |
|---------------------------------------|-------------------------------------------------------------------------------------------------------------------------------------------------------------------------------------------------------------------------------------------------------------------------------------------------------------------------------------------------------------------------------------------------------------------------------------------------------------------------------------------------------------------------------|
| Otro alimento                         | <hr/>                                                                                                                                                                                                                                                                                                                                                                                                                                                                                                                         |
| suplementos vitamínicos               | <input type="radio"/> si<br><input checked="" type="radio"/> no                                                                                                                                                                                                                                                                                                                                                                                                                                                               |
| suplementos vitamínicos               | <hr/>                                                                                                                                                                                                                                                                                                                                                                                                                                                                                                                         |
| dieta previa                          | <input type="radio"/> si<br><input checked="" type="radio"/> no                                                                                                                                                                                                                                                                                                                                                                                                                                                               |
| motivo dieta                          | <input checked="" type="radio"/> no dieta<br><input type="radio"/> control peso<br><input type="radio"/> control colesterol<br><input type="radio"/> control diabetes<br><input type="radio"/> problemas estómago<br><input type="radio"/> problemas vesícula o hepáticos<br><input type="radio"/> HTA o cardiopatía<br><input type="radio"/> problemas renales<br><input type="radio"/> alergia alimentaria<br><input type="radio"/> ácido úrico elevado<br><input type="radio"/> vegetariana<br><input type="radio"/> otros |
| cambio alimentos año previo gestación | <input type="radio"/> si<br><input checked="" type="radio"/> no                                                                                                                                                                                                                                                                                                                                                                                                                                                               |
| cambio lácteos                        | <input type="radio"/> eliminado<br><input type="radio"/> disminuido<br><input type="radio"/> igual<br><input type="radio"/> aumentado<br><input type="radio"/> no sabe                                                                                                                                                                                                                                                                                                                                                        |
| cambio huevos                         | <input type="radio"/> eliminado<br><input type="radio"/> disminuido<br><input type="radio"/> igual<br><input type="radio"/> aumentado<br><input type="radio"/> no sabe                                                                                                                                                                                                                                                                                                                                                        |
| cambio carne                          | <input type="radio"/> eliminado<br><input type="radio"/> disminuido<br><input type="radio"/> igual<br><input type="radio"/> aumentado<br><input type="radio"/> no sabe                                                                                                                                                                                                                                                                                                                                                        |
| cambio pescado                        | <input type="radio"/> eliminado<br><input type="radio"/> disminuido<br><input type="radio"/> igual<br><input type="radio"/> aumentado<br><input type="radio"/> no sabe                                                                                                                                                                                                                                                                                                                                                        |
| cambio verduras                       | <input type="radio"/> eliminado<br><input type="radio"/> disminuido<br><input type="radio"/> igual<br><input type="radio"/> aumentado<br><input type="radio"/> no sabe                                                                                                                                                                                                                                                                                                                                                        |

|                            |                                                                                                                                                                                                             |
|----------------------------|-------------------------------------------------------------------------------------------------------------------------------------------------------------------------------------------------------------|
| cambio legumbres           | <input type="radio"/> eliminado<br><input type="radio"/> disminuido<br><input type="radio"/> igual<br><input type="radio"/> aumentado<br><input type="radio"/> no sabe                                      |
| cambio fruta               | <input type="radio"/> eliminado<br><input type="radio"/> disminuido<br><input type="radio"/> igual<br><input type="radio"/> aumentado<br><input type="radio"/> no sabe                                      |
| cambio pan                 | <input type="radio"/> eliminado<br><input type="radio"/> disminuido<br><input type="radio"/> igual<br><input type="radio"/> aumentado<br><input type="radio"/> no sabe                                      |
| cambio aceite oliva        | <input type="radio"/> eliminado<br><input type="radio"/> disminuido<br><input type="radio"/> igual<br><input type="radio"/> aumentado<br><input type="radio"/> no sabe                                      |
| cambio mante o margarina   | <input type="radio"/> eliminado<br><input type="radio"/> disminuido<br><input type="radio"/> igual<br><input type="radio"/> aumentado<br><input type="radio"/> no sabe                                      |
| cambio azúcar y dulces     | <input type="radio"/> eliminado<br><input type="radio"/> disminuido<br><input type="radio"/> igual<br><input type="radio"/> aumentado<br><input type="radio"/> no sabe                                      |
| cambio bebidas alcohólicas | <input type="radio"/> eliminado<br><input type="radio"/> disminuido<br><input type="radio"/> igual<br><input type="radio"/> aumentado<br><input type="radio"/> no sabe                                      |
| frecuencia comidas fritas  | <input type="radio"/> a diario<br><input type="radio"/> 5 a 6 veces semana<br><input type="radio"/> 2 a 4 veces semana<br><input type="radio"/> 1 vez semana<br><input type="radio"/> menos de 1 vez semana |
| carne                      | <input type="radio"/> no como<br><input type="radio"/> cruda<br><input type="radio"/> poco hecha<br><input type="radio"/> hecha<br><input type="radio"/> muy hecha                                          |
| grasa visible carne        | <input type="radio"/> quita toda<br><input type="radio"/> quita mayoría<br><input type="radio"/> quita un poco<br><input type="radio"/> no quita nada                                                       |

---

cocina carne

- ☐ a la plancha  
☐ a la parrilla  
☐ asada  
☐ frita  
☐ guisada

---

tostado quemado carne

- ☐ nunca  
☐ 1 vez mes  
☐ 2 a 3 veces mes  
☐ 1 vez semana  
☐ 2 a 3 semanas

---

tostado quemado pescado

- ☐ nunca  
☐ 1 vez mes  
☐ 2 a 3 veces mes  
☐ 1 vez semana  
☐ 2 a 3 semanas

---

socarrat paella

- ☐ nunca  
☐ 1 vez mes  
☐ 2 a 3 veces mes  
☐ 1 vez semana  
☐ 2 a 3 semanas

---

grasa o aceite cocinar

- ☐ mantequilla  
☐ margarina  
☐ aceite oliva  
☐ aceite oliva virgen extra  
☐ aceite vegetal  
☐ mezcla aceites

---

grasa aceite aliñar

- ☐ mantequilla  
☐ margarina  
☐ aceite oliva  
☐ aceite oliva virgen extra  
☐ aceite vegetal  
☐ mezcla aceites

---

grasa aceite freir

- ☐ mantequilla  
☐ margarina  
☐ aceite oliva  
☐ aceite oliva virgen extra  
☐ aceite vegetal  
☐ mezcla aceites

---

Ejercicio cuestionario

- ☐ si  
☒ no

---

horas de sueño incluido siesta

---

---

minutos siesta

---

---

horas televisión semana

---

|                                        |                                                                                                                                                                                                                                                                                                                                                                |
|----------------------------------------|----------------------------------------------------------------------------------------------------------------------------------------------------------------------------------------------------------------------------------------------------------------------------------------------------------------------------------------------------------------|
| actividad trabajo                      | <input type="radio"/> casi siempre sentado<br><input type="radio"/> sentado 50 por cien<br><input type="radio"/> casi siempre de pie, quieto<br><input type="radio"/> casi siempre levantado caminando y llevando pocas cosas<br><input type="radio"/> casi siempre levantado, caminando y llevado muchas cosas<br><input type="radio"/> trabajo manual pesado |
| tiempo caminar o bici al día           | <input type="radio"/> casi nunca<br><input type="radio"/> menos 20min día<br><input type="radio"/> 20 a 40 min día<br><input type="radio"/> 40 a 60 min día<br><input type="radio"/> 1h o 1h y media día<br><input type="radio"/> más de 1h y media al día                                                                                                     |
| tiempo tareas casa al día              | <input type="radio"/> menos de 1h día<br><input type="radio"/> 1 a 2h día<br><input type="radio"/> 3 a 4h día<br><input type="radio"/> 5 a 6h día<br><input type="radio"/> 7 a 8h día<br><input type="radio"/> más de 8h día                                                                                                                                   |
| tiempo libre televisión ordenador leer | <input type="radio"/> menos 1h día<br><input type="radio"/> 1h día<br><input type="radio"/> 2h día<br><input type="radio"/> 3h día<br><input type="radio"/> 4h día<br><input type="radio"/> 5 a 6h día<br><input type="radio"/> mas 6h día                                                                                                                     |
| tiempo libre ejercicio o deporte       | <input type="radio"/> menos 1h semana<br><input type="radio"/> 1h semana<br><input type="radio"/> 2h semana<br><input type="radio"/> 3h semana<br><input type="radio"/> 4 a 5h semana<br><input type="radio"/> mas 5h semana                                                                                                                                   |
| como se considera                      | <input type="radio"/> sedentaria<br><input type="radio"/> poco activa<br><input type="radio"/> moderadamente activa<br><input type="radio"/> bastante activa<br><input type="radio"/> muy activa<br><input type="radio"/> no sabe                                                                                                                              |
| FUR                                    | [*DATA REMOVED*]                                                                                                                                                                                                                                                                                                                                               |
| Semanas gestación 2T                   | [*DATA REMOVED*]                                                                                                                                                                                                                                                                                                                                               |
| Días gestación 2T                      | [*DATA REMOVED*]                                                                                                                                                                                                                                                                                                                                               |
| DBP 2T                                 | [*DATA REMOVED*]                                                                                                                                                                                                                                                                                                                                               |
| CC 2T                                  | [*DATA REMOVED*]                                                                                                                                                                                                                                                                                                                                               |
| AC 2T                                  | [*DATA REMOVED*]                                                                                                                                                                                                                                                                                                                                               |

|                                                   |                                                                                                                                                                                                 |
|---------------------------------------------------|-------------------------------------------------------------------------------------------------------------------------------------------------------------------------------------------------|
| LF 2T                                             | [*DATA REMOVED*]                                                                                                                                                                                |
| PFE 2T (Hadlock)                                  | [*DATA REMOVED*]                                                                                                                                                                                |
| Semanas gestación 3T                              | [*DATA REMOVED*]                                                                                                                                                                                |
| días 3T                                           | [*DATA REMOVED*]                                                                                                                                                                                |
| DBP 3T                                            | [*DATA REMOVED*]                                                                                                                                                                                |
| CC 3T                                             | [*DATA REMOVED*]                                                                                                                                                                                |
| AC 3T                                             | [*DATA REMOVED*]                                                                                                                                                                                |
| LF 3T                                             | [*DATA REMOVED*]                                                                                                                                                                                |
| PFE 3T (Hadlock)                                  | [*DATA REMOVED*]                                                                                                                                                                                |
| Semanas de gestación final                        | [*DATA REMOVED*]                                                                                                                                                                                |
| días gestación final                              | [*DATA REMOVED*]                                                                                                                                                                                |
| Localización placenta                             | <input checked="" type="radio"/> anterior<br><input type="radio"/> lateral derecha<br><input type="radio"/> lateral izquierda<br><input type="radio"/> posterior<br><input type="radio"/> fondo |
| Presentación longitudinal cefálica                | <input type="radio"/> no<br><input checked="" type="radio"/> si                                                                                                                                 |
| Dorso                                             | <input type="radio"/> izquierda anterior<br><input checked="" type="radio"/> izquierda posterior<br><input type="radio"/> derecha anterior<br><input type="radio"/> derecha posterior           |
| diámetro biparietal                               | [*DATA REMOVED*]                                                                                                                                                                                |
| Circunferencia craneal                            | [*DATA REMOVED*]                                                                                                                                                                                |
| Circunferencia abdominal                          | [*DATA REMOVED*]                                                                                                                                                                                |
| Longitud de femur                                 | [*DATA REMOVED*]                                                                                                                                                                                |
| tejido celular subcutáneo a nivel del muslo en mm | [*DATA REMOVED*]                                                                                                                                                                                |
| tejido celular subcutáneo en abdomen en mm        | [*DATA REMOVED*]                                                                                                                                                                                |
| Volumen del muslo en cm3                          | [*DATA REMOVED*]                                                                                                                                                                                |
| Peso fetal estimado según fórmula de Hadlock      | [*DATA REMOVED*]                                                                                                                                                                                |

|                                               |                                                                                                                                               |
|-----------------------------------------------|-----------------------------------------------------------------------------------------------------------------------------------------------|
| Percentil                                     | [*DATA REMOVED*]                                                                                                                              |
| Peso fetal estimado según fórmula de Scioscia | <hr/>                                                                                                                                         |
| Peso fetal estimado según fórmula de LEE      | <hr/>                                                                                                                                         |
| Tipo de parto                                 | <input checked="" type="radio"/> eutocico<br><input type="radio"/> instrumentado/ventosa<br><input type="radio"/> cesarea                     |
| fecha de nacimiento                           | [*DATA REMOVED*]                                                                                                                              |
| Días entre exploración y nacimiento           | [*DATA REMOVED*]                                                                                                                              |
| Peso RN en g                                  | [*DATA REMOVED*]                                                                                                                              |
| sexo                                          | <input checked="" type="radio"/> mujer<br><input type="radio"/> hombre                                                                        |
| Apgar 1 minuto                                | [*DATA REMOVED*]                                                                                                                              |
| Apgar 5 minutos                               | [*DATA REMOVED*]                                                                                                                              |
| Apgar 10 minutos                              | <hr/>                                                                                                                                         |
| antecedente Covid durante gestación           | <input type="radio"/> Yes<br><input checked="" type="radio"/> No                                                                              |
| Nivel de estudios                             | <input type="radio"/> ninguno<br><input type="radio"/> primarios<br><input type="radio"/> secundarios<br><input type="radio"/> universitarios |

# Base\_datos\_estimacion\_peso\_fetal

|                                       |                                                                                                                                                                                                                                                                                      |
|---------------------------------------|--------------------------------------------------------------------------------------------------------------------------------------------------------------------------------------------------------------------------------------------------------------------------------------|
| Número de identificación participante | 131                                                                                                                                                                                                                                                                                  |
| CODIGO PARTICIPANTE                   |                                                                                                                                                                                                                                                                                      |
| Edad                                  | [*DATA REMOVED*]                                                                                                                                                                                                                                                                     |
| Gestaciones                           | <input type="radio"/> 1<br><input checked="" type="radio"/> 2<br><input type="radio"/> 3<br><input type="radio"/> mas de 3                                                                                                                                                           |
| partos                                | <input checked="" type="radio"/> 0<br><input type="radio"/> 1<br><input type="radio"/> 2<br><input type="radio"/> 3<br><input type="radio"/> mas de 3                                                                                                                                |
| cesáreas                              | <input checked="" type="radio"/> 0<br><input type="radio"/> 1<br><input type="radio"/> 2<br><input type="radio"/> 3<br><input type="radio"/> mas de 3                                                                                                                                |
| Abortos                               | <input type="radio"/> 0<br><input checked="" type="radio"/> 1<br><input type="radio"/> 2<br><input type="radio"/> 3<br><input type="radio"/> mas de 3                                                                                                                                |
| Tipo de gestacion                     | <input checked="" type="radio"/> espontanea<br><input type="radio"/> IAC inseminación artificial conyuge<br><input type="radio"/> IAD inseminación artificial donante<br><input type="radio"/> FIV Fecundación in Vitro<br><input type="radio"/> Ovodon FIV con donación de ovocitos |
| peso previo a embarazo                | [*DATA REMOVED*]                                                                                                                                                                                                                                                                     |
| Ganancia ponderal embarazo            | [*DATA REMOVED*]                                                                                                                                                                                                                                                                     |
| Talla madre                           | [*DATA REMOVED*]                                                                                                                                                                                                                                                                     |
| IMC previo embarazo                   | 18.749999999999996                                                                                                                                                                                                                                                                   |
| Patología obstétrica                  | <input type="radio"/> no<br><input checked="" type="radio"/> si                                                                                                                                                                                                                      |
| Diabetes pregestacional               | <input checked="" type="radio"/> no<br><input type="radio"/> si                                                                                                                                                                                                                      |
| Diabetes gestacional                  | <input type="radio"/> no<br><input checked="" type="radio"/> si                                                                                                                                                                                                                      |



|                                            |                                                                                                                                                                                      |
|--------------------------------------------|--------------------------------------------------------------------------------------------------------------------------------------------------------------------------------------|
| Diabetes gestacional con insulina          | <input checked="" type="radio"/> no<br><input type="radio"/> si                                                                                                                      |
| Diabetes gestacional con dieta y ejercicio | <input type="radio"/> no<br><input checked="" type="radio"/> si                                                                                                                      |
| Percentil fetos previos                    | <input checked="" type="radio"/> Nada<br><input type="radio"/> percentil menor de 10<br><input type="radio"/> percentil entre 10 y 90<br><input type="radio"/> percentil mayor de 90 |
| Exfumadora                                 | <input type="radio"/> Nada<br><input checked="" type="radio"/> menos de 5 años<br><input type="radio"/> 5 a 10 años<br><input type="radio"/> mayor o igual a 10 años                 |
| Hábito tabáquico                           | <input checked="" type="radio"/> no<br><input type="radio"/> si                                                                                                                      |
| fumadora                                   | [*DATA REMOVED*]                                                                                                                                                                     |
| Consumo otros tóxicos                      | <input checked="" type="radio"/> no<br><input type="radio"/> si                                                                                                                      |
| Hb 1T                                      | [*DATA REMOVED*]                                                                                                                                                                     |
| Htc 1T                                     | [*DATA REMOVED*]                                                                                                                                                                     |
| Hb 2T                                      | [*DATA REMOVED*]                                                                                                                                                                     |
| HTC 2T                                     | [*DATA REMOVED*]                                                                                                                                                                     |
| Hb 3T                                      | [*DATA REMOVED*]                                                                                                                                                                     |
| HTC 3T                                     | [*DATA REMOVED*]                                                                                                                                                                     |
| Suplemento FE oral                         | <input checked="" type="radio"/> si<br><input type="radio"/> no                                                                                                                      |
| Suplemento fe iv                           | <input type="radio"/> si<br><input checked="" type="radio"/> no                                                                                                                      |
| Transfusión                                | <input checked="" type="radio"/> no<br><input type="radio"/> si                                                                                                                      |
| Solicitada Vit D                           | <input type="radio"/> no<br><input checked="" type="radio"/> si                                                                                                                      |
| Deficit vit D                              | <input type="radio"/> no<br><input checked="" type="radio"/> si                                                                                                                      |
| Suplemento vit D                           | <input checked="" type="radio"/> si<br><input type="radio"/> no                                                                                                                      |

|                       |                                                                                                                                                                                                                                                                                                                                                                                                              |
|-----------------------|--------------------------------------------------------------------------------------------------------------------------------------------------------------------------------------------------------------------------------------------------------------------------------------------------------------------------------------------------------------------------------------------------------------|
| Dieta, cuestionario   | <input checked="" type="radio"/> si<br><input type="radio"/> no                                                                                                                                                                                                                                                                                                                                              |
| Leche entera          | <input checked="" type="radio"/> Nunca o menos 1 vez al mes<br><input type="radio"/> 1 a 3 veces mes<br><input type="radio"/> 1 vez semana<br><input type="radio"/> 2 a 4 veces semana<br><input type="radio"/> 5 a 6 veces semana<br><input type="radio"/> 1 vez al día<br><input type="radio"/> 2 a 3 veces al día<br><input type="radio"/> 5 a 6 veces al día<br><input type="radio"/> más 6 veces al día |
| Leche semidesnatada   | <input type="radio"/> Nunca o menos 1 vez al mes<br><input type="radio"/> 1 a 3 veces mes<br><input type="radio"/> 1 vez semana<br><input type="radio"/> 2 a 4 veces semana<br><input checked="" type="radio"/> 5 a 6 veces semana<br><input type="radio"/> 1 vez al día<br><input type="radio"/> 2 a 3 veces al día<br><input type="radio"/> 5 a 6 veces al día<br><input type="radio"/> mas 6 veces al día |
| Leche desnatada       | <input checked="" type="radio"/> Nunca o menos 1 vez al mes<br><input type="radio"/> 1 a 3 veces mes<br><input type="radio"/> 1 vez semana<br><input type="radio"/> 2 a 4 veces semana<br><input type="radio"/> 5 a 6 veces semana<br><input type="radio"/> 1 vez al día<br><input type="radio"/> 2 a 3 veces al día<br><input type="radio"/> 5 a 6 veces al día<br><input type="radio"/> más 6 veces al día |
| Leche condensada      | <input checked="" type="radio"/> Nunca o menos 1 vez al mes<br><input type="radio"/> 1 a 3 veces mes<br><input type="radio"/> 1 vez semana<br><input type="radio"/> 2 a 4 veces semana<br><input type="radio"/> 5 a 6 veces semana<br><input type="radio"/> 1 vez al día<br><input type="radio"/> 2 a 3 veces al día<br><input type="radio"/> 5 a 6 veces al día<br><input type="radio"/> más 6 veces al día |
| nata o crema de leche | <input checked="" type="radio"/> Nunca o menos 1 vez al mes<br><input type="radio"/> 1 a 3 veces mes<br><input type="radio"/> 1 vez semana<br><input type="radio"/> 2 a 4 veces semana<br><input type="radio"/> 5 a 6 veces semana<br><input type="radio"/> 1 vez al día<br><input type="radio"/> 2 a 3 veces al día<br><input type="radio"/> 5 a 6 veces al día<br><input type="radio"/> más 6 veces al día |

---

Yogurt Entero

- ☒ Nunca o menos 1 vez al mes  
☐ 1 a 3 veces mes  
☐ 1 vez semana  
☐ 2 a 4 veces semana  
☐ 5 a 6 veces semana  
☐ 1 vez al día  
☐ 2 a 3 veces al día  
☐ 5 a 6 veces al día  
☐ más 6 veces al día

---

Yogurt desnatado

- ☒ Nunca o menos 1 vez al mes  
☐ 1 a 3 veces mes  
☐ 1 vez semana  
☐ 2 a 4 veces semana  
☐ 5 a 6 veces semana  
☐ 1 vez al día  
☐ 2 a 3 veces al día  
☐ 5 a 6 veces al día  
☐ más 6 veces al día

---

100g requesón o queso blando o queso fresco

- ☐ Nunca o menos 1 vez al mes  
☐ 1 a 3 veces mes  
☒ 1 vez semana  
☐ 2 a 4 veces semana  
☐ 5 a 6 veces semana  
☐ 1 vez al día  
☐ 2 a 3 veces al día  
☐ 5 a 6 veces al día  
☐ más 6 veces al día

---

queso curado o semicurado o cremoso

- ☐ Nunca o menos 1 vez al mes  
☐ 1 a 3 veces mes  
☒ 1 vez semana  
☐ 2 a 4 veces semana  
☐ 5 a 6 veces semana  
☐ 1 vez al día  
☐ 2 a 3 veces al día  
☐ 5 a 6 veces al día  
☐ más 6 veces al día

---

natillas flan pudding

- ☒ Nunca o menos 1 vez al mes  
☐ 1 a 3 veces mes  
☐ 1 vez semana  
☐ 2 a 4 veces semana  
☐ 5 a 6 veces semana  
☐ 1 vez al día  
☐ 2 a 3 veces al día  
☐ 5 a 6 veces al día  
☐ más 6 veces al día

---

Helado

- ☐ Nunca o menos 1 vez al mes  
☐ 1 a 3 veces mes  
☒ 1 vez semana  
☐ 2 a 4 veces semana  
☐ 5 a 6 veces semana  
☐ 1 vez al día  
☐ 2 a 3 veces al día  
☐ 5 a 6 veces al día  
☐ más 6 veces al día

|                                      |                                                                                                                                                                                                                                                                                                                                                                                                              |
|--------------------------------------|--------------------------------------------------------------------------------------------------------------------------------------------------------------------------------------------------------------------------------------------------------------------------------------------------------------------------------------------------------------------------------------------------------------|
| huevo                                | <input type="radio"/> Nunca o menos 1 vez al mes<br><input type="radio"/> 1 a 3 veces mes<br><input type="radio"/> 1 vez semana<br><input type="radio"/> 2 a 4 veces semana<br><input checked="" type="radio"/> 5 a 6 veces semana<br><input type="radio"/> 1 vez al día<br><input type="radio"/> 2 a 3 veces al día<br><input type="radio"/> 5 a 6 veces al día<br><input type="radio"/> más 6 veces al día |
| Pollo con piel                       | <input checked="" type="radio"/> Nunca o menos 1 vez al mes<br><input type="radio"/> 1 a 3 veces mes<br><input type="radio"/> 1 vez semana<br><input type="radio"/> 2 a 4 veces semana<br><input type="radio"/> 5 a 6 veces semana<br><input type="radio"/> 1 vez al día<br><input type="radio"/> 2 a 3 veces al día<br><input type="radio"/> 5 a 6 veces al día<br><input type="radio"/> más 6 veces al día |
| pollo sin piel                       | <input type="radio"/> Nunca o menos 1 vez al mes<br><input type="radio"/> 1 a 3 veces mes<br><input type="radio"/> 1 vez semana<br><input checked="" type="radio"/> 2 a 4 veces semana<br><input type="radio"/> 5 a 6 veces semana<br><input type="radio"/> 1 vez al día<br><input type="radio"/> 2 a 3 veces al día<br><input type="radio"/> 5 a 6 veces al día<br><input type="radio"/> más 6 veces al día |
| Ternera o cerdo o cordero            | <input type="radio"/> Nunca o menos 1 vez al mes<br><input type="radio"/> 1 a 3 veces mes<br><input type="radio"/> 1 vez semana<br><input checked="" type="radio"/> 2 a 4 veces semana<br><input type="radio"/> 5 a 6 veces semana<br><input type="radio"/> 1 vez al día<br><input type="radio"/> 2 a 3 veces al día<br><input type="radio"/> 5 a 6 veces al día<br><input type="radio"/> más 6 veces al día |
| carne caza: Conejo o codorniz o pato | <input checked="" type="radio"/> Nunca o menos 1 vez al mes<br><input type="radio"/> 1 a 3 veces mes<br><input type="radio"/> 1 vez semana<br><input type="radio"/> 2 a 4 veces semana<br><input type="radio"/> 5 a 6 veces semana<br><input type="radio"/> 1 vez al día<br><input type="radio"/> 2 a 3 veces al día<br><input type="radio"/> 5 a 6 veces al día<br><input type="radio"/> más 6 veces al día |
| Hígado de ternera o cerdo o pollo    | <input checked="" type="radio"/> Nunca o menos 1 vez al mes<br><input type="radio"/> 1 a 3 veces mes<br><input type="radio"/> 1 vez semana<br><input type="radio"/> 2 a 4 veces semana<br><input type="radio"/> 5 a 6 veces semana<br><input type="radio"/> 1 vez al día<br><input type="radio"/> 2 a 3 veces al día<br><input type="radio"/> 5 a 6 veces al día<br><input type="radio"/> más 6 veces al día |

|                     |                                                                                                                                                                                                                                                                                                                                                                                                              |
|---------------------|--------------------------------------------------------------------------------------------------------------------------------------------------------------------------------------------------------------------------------------------------------------------------------------------------------------------------------------------------------------------------------------------------------------|
| Vísceras            | <input checked="" type="radio"/> Nunca o menos 1 vez al mes<br><input type="radio"/> 1 a 3 veces mes<br><input type="radio"/> 1 vez semana<br><input type="radio"/> 2 a 4 veces semana<br><input type="radio"/> 5 a 6 veces semana<br><input type="radio"/> 1 vez al día<br><input type="radio"/> 2 a 3 veces al día<br><input type="radio"/> 5 a 6 veces al día<br><input type="radio"/> más 6 veces al día |
| Embutido            | <input checked="" type="radio"/> Nunca o menos 1 vez al mes<br><input type="radio"/> 1 a 3 veces mes<br><input type="radio"/> 1 vez semana<br><input type="radio"/> 2 a 4 veces semana<br><input type="radio"/> 5 a 6 veces semana<br><input type="radio"/> 1 vez al día<br><input type="radio"/> 2 a 3 veces al día<br><input type="radio"/> 5 a 6 veces al día<br><input type="radio"/> más 6 veces al día |
| Salchicha o similar | <input checked="" type="radio"/> Nunca o menos 1 vez al mes<br><input type="radio"/> 1 a 3 veces mes<br><input type="radio"/> 1 vez semana<br><input type="radio"/> 2 a 4 veces semana<br><input type="radio"/> 5 a 6 veces semana<br><input type="radio"/> 1 vez al día<br><input type="radio"/> 2 a 3 veces al día<br><input type="radio"/> 5 a 6 veces al día<br><input type="radio"/> más 6 veces al día |
| Pate o foiegras     | <input checked="" type="radio"/> Nunca o menos 1 vez al mes<br><input type="radio"/> 1 a 3 veces mes<br><input type="radio"/> 1 vez semana<br><input type="radio"/> 2 a 4 veces semana<br><input type="radio"/> 5 a 6 veces semana<br><input type="radio"/> 1 vez al día<br><input type="radio"/> 2 a 3 veces al día<br><input type="radio"/> 5 a 6 veces al día<br><input type="radio"/> más 6 veces al día |
| Hamburguesa         | <input type="radio"/> Nunca o menos 1 vez al mes<br><input checked="" type="radio"/> 1 a 3 veces mes<br><input type="radio"/> 1 vez semana<br><input type="radio"/> 2 a 4 veces semana<br><input type="radio"/> 5 a 6 veces semana<br><input type="radio"/> 1 vez al día<br><input type="radio"/> 2 a 3 veces al día<br><input type="radio"/> 5 a 6 veces al día<br><input type="radio"/> más 6 veces al día |
| tocino o bacon      | <input checked="" type="radio"/> Nunca o menos 1 vez al mes<br><input type="radio"/> 1 a 3 veces mes<br><input type="radio"/> 1 vez semana<br><input type="radio"/> 2 a 4 veces semana<br><input type="radio"/> 5 a 6 veces semana<br><input type="radio"/> 1 vez al día<br><input type="radio"/> 2 a 3 veces al día<br><input type="radio"/> 5 a 6 veces al día<br><input type="radio"/> más 6 veces al día |

---

|               |                                                                                                                                                                                                                                                                                                                                                                                                              |
|---------------|--------------------------------------------------------------------------------------------------------------------------------------------------------------------------------------------------------------------------------------------------------------------------------------------------------------------------------------------------------------------------------------------------------------|
| Pescado frito | <input type="radio"/> Nunca o menos 1 vez al mes<br><input checked="" type="radio"/> 1 a 3 veces mes<br><input type="radio"/> 1 vez semana<br><input type="radio"/> 2 a 4 veces semana<br><input type="radio"/> 5 a 6 veces semana<br><input type="radio"/> 1 vez al día<br><input type="radio"/> 2 a 3 veces al día<br><input type="radio"/> 5 a 6 veces al día<br><input type="radio"/> más 6 veces al día |
|---------------|--------------------------------------------------------------------------------------------------------------------------------------------------------------------------------------------------------------------------------------------------------------------------------------------------------------------------------------------------------------------------------------------------------------|

---

|                        |                                                                                                                                                                                                                                                                                                                                                                                                              |
|------------------------|--------------------------------------------------------------------------------------------------------------------------------------------------------------------------------------------------------------------------------------------------------------------------------------------------------------------------------------------------------------------------------------------------------------|
| pescado hervido blanco | <input type="radio"/> Nunca o menos 1 vez al mes<br><input checked="" type="radio"/> 1 a 3 veces mes<br><input type="radio"/> 1 vez semana<br><input type="radio"/> 2 a 4 veces semana<br><input type="radio"/> 5 a 6 veces semana<br><input type="radio"/> 1 vez al día<br><input type="radio"/> 2 a 3 veces al día<br><input type="radio"/> 5 a 6 veces al día<br><input type="radio"/> más 6 veces al día |
|------------------------|--------------------------------------------------------------------------------------------------------------------------------------------------------------------------------------------------------------------------------------------------------------------------------------------------------------------------------------------------------------------------------------------------------------|

---

|                      |                                                                                                                                                                                                                                                                                                                                                                                                              |
|----------------------|--------------------------------------------------------------------------------------------------------------------------------------------------------------------------------------------------------------------------------------------------------------------------------------------------------------------------------------------------------------------------------------------------------------|
| pescado hervido azul | <input checked="" type="radio"/> Nunca o menos 1 vez al mes<br><input type="radio"/> 1 a 3 veces mes<br><input type="radio"/> 1 vez semana<br><input type="radio"/> 2 a 4 veces semana<br><input type="radio"/> 5 a 6 veces semana<br><input type="radio"/> 1 vez al día<br><input type="radio"/> 2 a 3 veces al día<br><input type="radio"/> 5 a 6 veces al día<br><input type="radio"/> más 6 veces al día |
|----------------------|--------------------------------------------------------------------------------------------------------------------------------------------------------------------------------------------------------------------------------------------------------------------------------------------------------------------------------------------------------------------------------------------------------------|

---

|                    |                                                                                                                                                                                                                                                                                                                                                                                                              |
|--------------------|--------------------------------------------------------------------------------------------------------------------------------------------------------------------------------------------------------------------------------------------------------------------------------------------------------------------------------------------------------------------------------------------------------------|
| otros pescado azul | <input checked="" type="radio"/> Nunca o menos 1 vez al mes<br><input type="radio"/> 1 a 3 veces mes<br><input type="radio"/> 1 vez semana<br><input type="radio"/> 2 a 4 veces semana<br><input type="radio"/> 5 a 6 veces semana<br><input type="radio"/> 1 vez al día<br><input type="radio"/> 2 a 3 veces al día<br><input type="radio"/> 5 a 6 veces al día<br><input type="radio"/> más 6 veces al día |
|--------------------|--------------------------------------------------------------------------------------------------------------------------------------------------------------------------------------------------------------------------------------------------------------------------------------------------------------------------------------------------------------------------------------------------------------|

---

|               |                                                                                                                                                                                                                                                                                                                                                                                                              |
|---------------|--------------------------------------------------------------------------------------------------------------------------------------------------------------------------------------------------------------------------------------------------------------------------------------------------------------------------------------------------------------------------------------------------------------|
| atun conserva | <input type="radio"/> Nunca o menos 1 vez al mes<br><input type="radio"/> 1 a 3 veces mes<br><input checked="" type="radio"/> 1 vez semana<br><input type="radio"/> 2 a 4 veces semana<br><input type="radio"/> 5 a 6 veces semana<br><input type="radio"/> 1 vez al día<br><input type="radio"/> 2 a 3 veces al día<br><input type="radio"/> 5 a 6 veces al día<br><input type="radio"/> más 6 veces al día |
|---------------|--------------------------------------------------------------------------------------------------------------------------------------------------------------------------------------------------------------------------------------------------------------------------------------------------------------------------------------------------------------------------------------------------------------|

---

|                  |                                                                                                                                                                                                                                                                                                                                                                                                              |
|------------------|--------------------------------------------------------------------------------------------------------------------------------------------------------------------------------------------------------------------------------------------------------------------------------------------------------------------------------------------------------------------------------------------------------------|
| sardina conserva | <input checked="" type="radio"/> Nunca o menos 1 vez al mes<br><input type="radio"/> 1 a 3 veces mes<br><input type="radio"/> 1 vez semana<br><input type="radio"/> 2 a 4 veces semana<br><input type="radio"/> 5 a 6 veces semana<br><input type="radio"/> 1 vez al día<br><input type="radio"/> 2 a 3 veces al día<br><input type="radio"/> 5 a 6 veces al día<br><input type="radio"/> más 6 veces al día |
|------------------|--------------------------------------------------------------------------------------------------------------------------------------------------------------------------------------------------------------------------------------------------------------------------------------------------------------------------------------------------------------------------------------------------------------|

|                                         |                                                                                                                                                                                                                                                                                                                                                                                                              |
|-----------------------------------------|--------------------------------------------------------------------------------------------------------------------------------------------------------------------------------------------------------------------------------------------------------------------------------------------------------------------------------------------------------------------------------------------------------------|
| pescado ahumado                         | <input checked="" type="radio"/> Nunca o menos 1 vez al mes<br><input type="radio"/> 1 a 3 veces mes<br><input type="radio"/> 1 vez semana<br><input type="radio"/> 2 a 4 veces semana<br><input type="radio"/> 5 a 6 veces semana<br><input type="radio"/> 1 vez al día<br><input type="radio"/> 2 a 3 veces al día<br><input type="radio"/> 5 a 6 veces al día<br><input type="radio"/> más 6 veces al día |
| almejas o mejillones o ostras unos 100g | <input type="radio"/> Nunca o menos 1 vez al mes<br><input checked="" type="radio"/> 1 a 3 veces mes<br><input type="radio"/> 1 vez semana<br><input type="radio"/> 2 a 4 veces semana<br><input type="radio"/> 5 a 6 veces semana<br><input type="radio"/> 1 vez al día<br><input type="radio"/> 2 a 3 veces al día<br><input type="radio"/> 5 a 6 veces al día<br><input type="radio"/> más 6 veces al día |
| calamar o chipiron o sepia unos 100g    | <input type="radio"/> Nunca o menos 1 vez al mes<br><input checked="" type="radio"/> 1 a 3 veces mes<br><input type="radio"/> 1 vez semana<br><input type="radio"/> 2 a 4 veces semana<br><input type="radio"/> 5 a 6 veces semana<br><input type="radio"/> 1 vez al día<br><input type="radio"/> 2 a 3 veces al día<br><input type="radio"/> 5 a 6 veces al día<br><input type="radio"/> más 6 veces al día |
| marisco unos 100g                       | <input type="radio"/> Nunca o menos 1 vez al mes<br><input checked="" type="radio"/> 1 a 3 veces mes<br><input type="radio"/> 1 vez semana<br><input type="radio"/> 2 a 4 veces semana<br><input type="radio"/> 5 a 6 veces semana<br><input type="radio"/> 1 vez al día<br><input type="radio"/> 2 a 3 veces al día<br><input type="radio"/> 5 a 6 veces al día<br><input type="radio"/> más 6 veces al día |
| Espinacas o acelgas cocinadas           | <input type="radio"/> Nunca o menos 1 vez al mes<br><input type="radio"/> 1 a 3 veces mes<br><input checked="" type="radio"/> 1 vez semana<br><input type="radio"/> 2 a 4 veces semana<br><input type="radio"/> 5 a 6 veces semana<br><input type="radio"/> 1 vez al día<br><input type="radio"/> 2 a 3 veces al día<br><input type="radio"/> 5 a 6 veces al día<br><input type="radio"/> más 6 veces al día |
| Col o coliflor o brocoli cocinado       | <input checked="" type="radio"/> Nunca o menos 1 vez al mes<br><input type="radio"/> 1 a 3 veces mes<br><input type="radio"/> 1 vez semana<br><input type="radio"/> 2 a 4 veces semana<br><input type="radio"/> 5 a 6 veces semana<br><input type="radio"/> 1 vez al día<br><input type="radio"/> 2 a 3 veces al día<br><input type="radio"/> 5 a 6 veces al día<br><input type="radio"/> más 6 veces al día |

---

|                              |                                                                                                                                                                                                                                                                                                                                                                                                              |
|------------------------------|--------------------------------------------------------------------------------------------------------------------------------------------------------------------------------------------------------------------------------------------------------------------------------------------------------------------------------------------------------------------------------------------------------------|
| Lechuga o endivia o escarola | <input type="radio"/> Nunca o menos 1 vez al mes<br><input type="radio"/> 1 a 3 veces mes<br><input checked="" type="radio"/> 1 vez semana<br><input type="radio"/> 2 a 4 veces semana<br><input type="radio"/> 5 a 6 veces semana<br><input type="radio"/> 1 vez al día<br><input type="radio"/> 2 a 3 veces al día<br><input type="radio"/> 5 a 6 veces al día<br><input type="radio"/> más 6 veces al día |
|------------------------------|--------------------------------------------------------------------------------------------------------------------------------------------------------------------------------------------------------------------------------------------------------------------------------------------------------------------------------------------------------------------------------------------------------------|

---

|                 |                                                                                                                                                                                                                                                                                                                                                                                                              |
|-----------------|--------------------------------------------------------------------------------------------------------------------------------------------------------------------------------------------------------------------------------------------------------------------------------------------------------------------------------------------------------------------------------------------------------------|
| tomate ensalada | <input type="radio"/> Nunca o menos 1 vez al mes<br><input type="radio"/> 1 a 3 veces mes<br><input type="radio"/> 1 vez semana<br><input checked="" type="radio"/> 2 a 4 veces semana<br><input type="radio"/> 5 a 6 veces semana<br><input type="radio"/> 1 vez al día<br><input type="radio"/> 2 a 3 veces al día<br><input type="radio"/> 5 a 6 veces al día<br><input type="radio"/> más 6 veces al día |
|-----------------|--------------------------------------------------------------------------------------------------------------------------------------------------------------------------------------------------------------------------------------------------------------------------------------------------------------------------------------------------------------------------------------------------------------|

---

|         |                                                                                                                                                                                                                                                                                                                                                                                                              |
|---------|--------------------------------------------------------------------------------------------------------------------------------------------------------------------------------------------------------------------------------------------------------------------------------------------------------------------------------------------------------------------------------------------------------------|
| cebolla | <input type="radio"/> Nunca o menos 1 vez al mes<br><input type="radio"/> 1 a 3 veces mes<br><input type="radio"/> 1 vez semana<br><input checked="" type="radio"/> 2 a 4 veces semana<br><input type="radio"/> 5 a 6 veces semana<br><input type="radio"/> 1 vez al día<br><input type="radio"/> 2 a 3 veces al día<br><input type="radio"/> 5 a 6 veces al día<br><input type="radio"/> más 6 veces al día |
|---------|--------------------------------------------------------------------------------------------------------------------------------------------------------------------------------------------------------------------------------------------------------------------------------------------------------------------------------------------------------------------------------------------------------------|

---

|                      |                                                                                                                                                                                                                                                                                                                                                                                                              |
|----------------------|--------------------------------------------------------------------------------------------------------------------------------------------------------------------------------------------------------------------------------------------------------------------------------------------------------------------------------------------------------------------------------------------------------------|
| Zanahoria o calabaza | <input type="radio"/> Nunca o menos 1 vez al mes<br><input type="radio"/> 1 a 3 veces mes<br><input type="radio"/> 1 vez semana<br><input checked="" type="radio"/> 2 a 4 veces semana<br><input type="radio"/> 5 a 6 veces semana<br><input type="radio"/> 1 vez al día<br><input type="radio"/> 2 a 3 veces al día<br><input type="radio"/> 5 a 6 veces al día<br><input type="radio"/> más 6 veces al día |
|----------------------|--------------------------------------------------------------------------------------------------------------------------------------------------------------------------------------------------------------------------------------------------------------------------------------------------------------------------------------------------------------------------------------------------------------|

---

|               |                                                                                                                                                                                                                                                                                                                                                                                                              |
|---------------|--------------------------------------------------------------------------------------------------------------------------------------------------------------------------------------------------------------------------------------------------------------------------------------------------------------------------------------------------------------------------------------------------------------|
| Judías verdes | <input type="radio"/> Nunca o menos 1 vez al mes<br><input type="radio"/> 1 a 3 veces mes<br><input type="radio"/> 1 vez semana<br><input checked="" type="radio"/> 2 a 4 veces semana<br><input type="radio"/> 5 a 6 veces semana<br><input type="radio"/> 1 vez al día<br><input type="radio"/> 2 a 3 veces al día<br><input type="radio"/> 5 a 6 veces al día<br><input type="radio"/> más 6 veces al día |
|---------------|--------------------------------------------------------------------------------------------------------------------------------------------------------------------------------------------------------------------------------------------------------------------------------------------------------------------------------------------------------------------------------------------------------------|

---

|                                |                                                                                                                                                                                                                                                                                                                                                                                                              |
|--------------------------------|--------------------------------------------------------------------------------------------------------------------------------------------------------------------------------------------------------------------------------------------------------------------------------------------------------------------------------------------------------------------------------------------------------------|
| Berenjena o calabacin o pepino | <input checked="" type="radio"/> Nunca o menos 1 vez al mes<br><input type="radio"/> 1 a 3 veces mes<br><input type="radio"/> 1 vez semana<br><input type="radio"/> 2 a 4 veces semana<br><input type="radio"/> 5 a 6 veces semana<br><input type="radio"/> 1 vez al día<br><input type="radio"/> 2 a 3 veces al día<br><input type="radio"/> 5 a 6 veces al día<br><input type="radio"/> más 6 veces al día |
|--------------------------------|--------------------------------------------------------------------------------------------------------------------------------------------------------------------------------------------------------------------------------------------------------------------------------------------------------------------------------------------------------------------------------------------------------------|

---



|                       |                                                                                                                                                                                                                                                                                                                                                                                                              |
|-----------------------|--------------------------------------------------------------------------------------------------------------------------------------------------------------------------------------------------------------------------------------------------------------------------------------------------------------------------------------------------------------------------------------------------------------|
| pimiento              | <input type="radio"/> Nunca o menos 1 vez al mes<br><input type="radio"/> 1 a 3 veces mes<br><input type="radio"/> 1 vez semana<br><input checked="" type="radio"/> 2 a 4 veces semana<br><input type="radio"/> 5 a 6 veces semana<br><input type="radio"/> 1 vez al día<br><input type="radio"/> 2 a 3 veces al día<br><input type="radio"/> 5 a 6 veces al día<br><input type="radio"/> más 6 veces al día |
| alcachofa             | <input checked="" type="radio"/> Nunca o menos 1 vez al mes<br><input type="radio"/> 1 a 3 veces mes<br><input type="radio"/> 1 vez semana<br><input type="radio"/> 2 a 4 veces semana<br><input type="radio"/> 5 a 6 veces semana<br><input type="radio"/> 1 vez al día<br><input type="radio"/> 2 a 3 veces al día<br><input type="radio"/> 5 a 6 veces al día<br><input type="radio"/> más 6 veces al día |
| espárragos            | <input type="radio"/> Nunca o menos 1 vez al mes<br><input checked="" type="radio"/> 1 a 3 veces mes<br><input type="radio"/> 1 vez semana<br><input type="radio"/> 2 a 4 veces semana<br><input type="radio"/> 5 a 6 veces semana<br><input type="radio"/> 1 vez al día<br><input type="radio"/> 2 a 3 veces al día<br><input type="radio"/> 5 a 6 veces al día<br><input type="radio"/> más 6 veces al día |
| maíz hervido          | <input type="radio"/> Nunca o menos 1 vez al mes<br><input checked="" type="radio"/> 1 a 3 veces mes<br><input type="radio"/> 1 vez semana<br><input type="radio"/> 2 a 4 veces semana<br><input type="radio"/> 5 a 6 veces semana<br><input type="radio"/> 1 vez al día<br><input type="radio"/> 2 a 3 veces al día<br><input type="radio"/> 5 a 6 veces al día<br><input type="radio"/> más 6 veces al día |
| legumbres             | <input type="radio"/> Nunca o menos 1 vez al mes<br><input type="radio"/> 1 a 3 veces mes<br><input type="radio"/> 1 vez semana<br><input checked="" type="radio"/> 2 a 4 veces semana<br><input type="radio"/> 5 a 6 veces semana<br><input type="radio"/> 1 vez al día<br><input type="radio"/> 2 a 3 veces al día<br><input type="radio"/> 5 a 6 veces al día<br><input type="radio"/> más 6 veces al día |
| naranjas o mandarinas | <input type="radio"/> Nunca o menos 1 vez al mes<br><input type="radio"/> 1 a 3 veces mes<br><input type="radio"/> 1 vez semana<br><input type="radio"/> 2 a 4 veces semana<br><input checked="" type="radio"/> 5 a 6 veces semana<br><input type="radio"/> 1 vez al día<br><input type="radio"/> 2 a 3 veces al día<br><input type="radio"/> 5 a 6 veces al día<br><input type="radio"/> más 6 veces al día |

---

zum natural fruta

- ☐ Nunca o menos 1 vez al mes  
☐ 1 a 3 veces mes  
☐ 1 vez semana  
☒ 2 a 4 veces semana  
☐ 5 a 6 veces semana  
☐ 1 vez al día  
☐ 2 a 3 veces al día  
☐ 5 a 6 veces al día  
☐ más 6 veces al día

---

platano

- ☒ Nunca o menos 1 vez al mes  
☐ 1 a 3 veces mes  
☐ 1 vez semana  
☐ 2 a 4 veces semana  
☐ 5 a 6 veces semana  
☐ 1 vez al día  
☐ 2 a 3 veces al día  
☐ 5 a 6 veces al día  
☐ más 6 veces al día

---

manzana o pera

- ☐ Nunca o menos 1 vez al mes  
☐ 1 a 3 veces mes  
☐ 1 vez semana  
☒ 2 a 4 veces semana  
☐ 5 a 6 veces semana  
☐ 1 vez al día  
☐ 2 a 3 veces al día  
☐ 5 a 6 veces al día  
☐ más 6 veces al día

---

melocotón o nectarina

- ☒ Nunca o menos 1 vez al mes  
☐ 1 a 3 veces mes  
☐ 1 vez semana  
☐ 2 a 4 veces semana  
☐ 5 a 6 veces semana  
☐ 1 vez al día  
☐ 2 a 3 veces al día  
☐ 5 a 6 veces al día  
☐ más 6 veces al día

---

sandia o melon

- ☐ Nunca o menos 1 vez al mes  
☐ 1 a 3 veces mes  
☐ 1 vez semana  
☒ 2 a 4 veces semana  
☐ 5 a 6 veces semana  
☐ 1 vez al día  
☐ 2 a 3 veces al día  
☐ 5 a 6 veces al día  
☐ más 6 veces al día

---

uva

- ☒ Nunca o menos 1 vez al mes  
☐ 1 a 3 veces mes  
☐ 1 vez semana  
☐ 2 a 4 veces semana  
☐ 5 a 6 veces semana  
☐ 1 vez al día  
☐ 2 a 3 veces al día  
☐ 5 a 6 veces al día  
☐ más 6 veces al día

---

bruna o ciruela

- ☒ Nunca o menos 1 vez al mes  
☐ 1 a 3 veces mes  
☐ 1 vez semana  
☐ 2 a 4 veces semana  
☐ 5 a 6 veces semana  
☐ 1 vez al día  
☐ 2 a 3 veces al día  
☐ 5 a 6 veces al día  
☐ más 6 veces al día

---

kiwi

- ☐ Nunca o menos 1 vez al mes  
☐ 1 a 3 veces mes  
☒ 1 vez semana  
☐ 2 a 4 veces semana  
☐ 5 a 6 veces semana  
☐ 1 vez al día  
☐ 2 a 3 veces al día  
☐ 5 a 6 veces al día  
☐ más 6 veces al día

---

aceituna

- ☐ Nunca o menos 1 vez al mes  
☐ 1 a 3 veces mes  
☐ 1 vez semana  
☐ 2 a 4 veces semana  
☐ 5 a 6 veces semana  
☐ 1 vez al día  
☐ 2 a 3 veces al día  
☐ 5 a 6 veces al día  
☐ más 6 veces al día

---

frutos secos

- ☐ Nunca o menos 1 vez al mes  
☐ 1 a 3 veces mes  
☐ 1 vez semana  
☒ 2 a 4 veces semana  
☐ 5 a 6 veces semana  
☐ 1 vez al día  
☐ 2 a 3 veces al día  
☐ 5 a 6 veces al día  
☐ más 6 veces al día

---

pan blanco

- ☐ Nunca o menos 1 vez al mes  
☐ 1 a 3 veces mes  
☐ 1 vez semana  
☐ 2 a 4 veces semana  
☒ 5 a 6 veces semana  
☐ 1 vez al día  
☐ 2 a 3 veces al día  
☐ 5 a 6 veces al día  
☐ más 6 veces al día

---

pan integral

- ☒ Nunca o menos 1 vez al mes  
☐ 1 a 3 veces mes  
☐ 1 vez semana  
☐ 2 a 4 veces semana  
☐ 5 a 6 veces semana  
☐ 1 vez al día  
☐ 2 a 3 veces al día  
☐ 5 a 6 veces al día  
☐ más 6 veces al día

|                          |                                                                                                                                                                                                                                                                                                                                                                                                              |
|--------------------------|--------------------------------------------------------------------------------------------------------------------------------------------------------------------------------------------------------------------------------------------------------------------------------------------------------------------------------------------------------------------------------------------------------------|
| cereales desayuno        | <input checked="" type="radio"/> Nunca o menos 1 vez al mes<br><input type="radio"/> 1 a 3 veces mes<br><input type="radio"/> 1 vez semana<br><input type="radio"/> 2 a 4 veces semana<br><input type="radio"/> 5 a 6 veces semana<br><input type="radio"/> 1 vez al día<br><input type="radio"/> 2 a 3 veces al día<br><input type="radio"/> 5 a 6 veces al día<br><input type="radio"/> más 6 veces al día |
| patatas fritas           | <input type="radio"/> Nunca o menos 1 vez al mes<br><input type="radio"/> 1 a 3 veces mes<br><input type="radio"/> 1 vez semana<br><input checked="" type="radio"/> 2 a 4 veces semana<br><input type="radio"/> 5 a 6 veces semana<br><input type="radio"/> 1 vez al día<br><input type="radio"/> 2 a 3 veces al día<br><input type="radio"/> 5 a 6 veces al día<br><input type="radio"/> más 6 veces al día |
| patatas cocidas o asadas | <input type="radio"/> Nunca o menos 1 vez al mes<br><input type="radio"/> 1 a 3 veces mes<br><input type="radio"/> 1 vez semana<br><input type="radio"/> 2 a 4 veces semana<br><input checked="" type="radio"/> 5 a 6 veces semana<br><input type="radio"/> 1 vez al día<br><input type="radio"/> 2 a 3 veces al día<br><input type="radio"/> 5 a 6 veces al día<br><input type="radio"/> más 6 veces al día |
| bolsa papas              | <input type="radio"/> Nunca o menos 1 vez al mes<br><input type="radio"/> 1 a 3 veces mes<br><input type="radio"/> 1 vez semana<br><input checked="" type="radio"/> 2 a 4 veces semana<br><input type="radio"/> 5 a 6 veces semana<br><input type="radio"/> 1 vez al día<br><input type="radio"/> 2 a 3 veces al día<br><input type="radio"/> 5 a 6 veces al día<br><input type="radio"/> más 6 veces al día |
| arroz cocinado           | <input type="radio"/> Nunca o menos 1 vez al mes<br><input type="radio"/> 1 a 3 veces mes<br><input checked="" type="radio"/> 1 vez semana<br><input type="radio"/> 2 a 4 veces semana<br><input type="radio"/> 5 a 6 veces semana<br><input type="radio"/> 1 vez al día<br><input type="radio"/> 2 a 3 veces al día<br><input type="radio"/> 5 a 6 veces al día<br><input type="radio"/> más 6 veces al día |
| pasta                    | <input type="radio"/> Nunca o menos 1 vez al mes<br><input type="radio"/> 1 a 3 veces mes<br><input type="radio"/> 1 vez semana<br><input checked="" type="radio"/> 2 a 4 veces semana<br><input type="radio"/> 5 a 6 veces semana<br><input type="radio"/> 1 vez al día<br><input type="radio"/> 2 a 3 veces al día<br><input type="radio"/> 5 a 6 veces al día<br><input type="radio"/> más 6 veces al día |

|                     |                                                                                                                                                                                                                                                                                                                                                                                                              |
|---------------------|--------------------------------------------------------------------------------------------------------------------------------------------------------------------------------------------------------------------------------------------------------------------------------------------------------------------------------------------------------------------------------------------------------------|
| pizza               | <input type="radio"/> Nunca o menos 1 vez al mes<br><input type="radio"/> 1 a 3 veces mes<br><input checked="" type="radio"/> 1 vez semana<br><input type="radio"/> 2 a 4 veces semana<br><input type="radio"/> 5 a 6 veces semana<br><input type="radio"/> 1 vez al día<br><input type="radio"/> 2 a 3 veces al día<br><input type="radio"/> 5 a 6 veces al día<br><input type="radio"/> más 6 veces al día |
| aceite oliva        | <input type="radio"/> Nunca o menos 1 vez al mes<br><input type="radio"/> 1 a 3 veces mes<br><input type="radio"/> 1 vez semana<br><input type="radio"/> 2 a 4 veces semana<br><input type="radio"/> 5 a 6 veces semana<br><input type="radio"/> 1 vez al día<br><input checked="" type="radio"/> 2 a 3 veces al día<br><input type="radio"/> 5 a 6 veces al día<br><input type="radio"/> más 6 veces al día |
| otros aceites       | <input checked="" type="radio"/> Nunca o menos 1 vez al mes<br><input type="radio"/> 1 a 3 veces mes<br><input type="radio"/> 1 vez semana<br><input type="radio"/> 2 a 4 veces semana<br><input type="radio"/> 5 a 6 veces semana<br><input type="radio"/> 1 vez al día<br><input type="radio"/> 2 a 3 veces al día<br><input type="radio"/> 5 a 6 veces al día<br><input type="radio"/> más 6 veces al día |
| margarina           | <input checked="" type="radio"/> Nunca o menos 1 vez al mes<br><input type="radio"/> 1 a 3 veces mes<br><input type="radio"/> 1 vez semana<br><input type="radio"/> 2 a 4 veces semana<br><input type="radio"/> 5 a 6 veces semana<br><input type="radio"/> 1 vez al día<br><input type="radio"/> 2 a 3 veces al día<br><input type="radio"/> 5 a 6 veces al día<br><input type="radio"/> más 6 veces al día |
| mantequilla         | <input checked="" type="radio"/> Nunca o menos 1 vez al mes<br><input type="radio"/> 1 a 3 veces mes<br><input type="radio"/> 1 vez semana<br><input type="radio"/> 2 a 4 veces semana<br><input type="radio"/> 5 a 6 veces semana<br><input type="radio"/> 1 vez al día<br><input type="radio"/> 2 a 3 veces al día<br><input type="radio"/> 5 a 6 veces al día<br><input type="radio"/> más 6 veces al día |
| galletas tipo maria | <input type="radio"/> Nunca o menos 1 vez al mes<br><input type="radio"/> 1 a 3 veces mes<br><input type="radio"/> 1 vez semana<br><input checked="" type="radio"/> 2 a 4 veces semana<br><input type="radio"/> 5 a 6 veces semana<br><input type="radio"/> 1 vez al día<br><input type="radio"/> 2 a 3 veces al día<br><input type="radio"/> 5 a 6 veces al día<br><input type="radio"/> más 6 veces al día |

|                           |                                                                                                                                                                                                                                                                                                                                                                                                              |
|---------------------------|--------------------------------------------------------------------------------------------------------------------------------------------------------------------------------------------------------------------------------------------------------------------------------------------------------------------------------------------------------------------------------------------------------------|
| galletas chocolate        | <input type="radio"/> Nunca o menos 1 vez al mes<br><input checked="" type="radio"/> 1 a 3 veces mes<br><input type="radio"/> 1 vez semana<br><input type="radio"/> 2 a 4 veces semana<br><input type="radio"/> 5 a 6 veces semana<br><input type="radio"/> 1 vez al día<br><input type="radio"/> 2 a 3 veces al día<br><input type="radio"/> 5 a 6 veces al día<br><input type="radio"/> más 6 veces al día |
| bollieria                 | <input type="radio"/> Nunca o menos 1 vez al mes<br><input checked="" type="radio"/> 1 a 3 veces mes<br><input type="radio"/> 1 vez semana<br><input type="radio"/> 2 a 4 veces semana<br><input type="radio"/> 5 a 6 veces semana<br><input type="radio"/> 1 vez al día<br><input type="radio"/> 2 a 3 veces al día<br><input type="radio"/> 5 a 6 veces al día<br><input type="radio"/> más 6 veces al día |
| chocolate o bombones      | <input type="radio"/> Nunca o menos 1 vez al mes<br><input checked="" type="radio"/> 1 a 3 veces mes<br><input type="radio"/> 1 vez semana<br><input type="radio"/> 2 a 4 veces semana<br><input type="radio"/> 5 a 6 veces semana<br><input type="radio"/> 1 vez al día<br><input type="radio"/> 2 a 3 veces al día<br><input type="radio"/> 5 a 6 veces al día<br><input type="radio"/> más 6 veces al día |
| chocolate polvo o colacao | <input type="radio"/> Nunca o menos 1 vez al mes<br><input type="radio"/> 1 a 3 veces mes<br><input type="radio"/> 1 vez semana<br><input type="radio"/> 2 a 4 veces semana<br><input checked="" type="radio"/> 5 a 6 veces semana<br><input type="radio"/> 1 vez al día<br><input type="radio"/> 2 a 3 veces al día<br><input type="radio"/> 5 a 6 veces al día<br><input type="radio"/> más 6 veces al día |
| vino tinto                | <input checked="" type="radio"/> Nunca o menos 1 vez al mes<br><input type="radio"/> 1 a 3 veces mes<br><input type="radio"/> 1 vez semana<br><input type="radio"/> 2 a 4 veces semana<br><input type="radio"/> 5 a 6 veces semana<br><input type="radio"/> 1 vez al día<br><input type="radio"/> 2 a 3 veces al día<br><input type="radio"/> 5 a 6 veces al día<br><input type="radio"/> más 6 veces al día |
| vino blanco               | <input checked="" type="radio"/> Nunca o menos 1 vez al mes<br><input type="radio"/> 1 a 3 veces mes<br><input type="radio"/> 1 vez semana<br><input type="radio"/> 2 a 4 veces semana<br><input type="radio"/> 5 a 6 veces semana<br><input type="radio"/> 1 vez al día<br><input type="radio"/> 2 a 3 veces al día<br><input type="radio"/> 5 a 6 veces al día<br><input type="radio"/> más 6 veces al día |

|                       |                                                                                                                                                                                                                                                                                                                                                                                                              |
|-----------------------|--------------------------------------------------------------------------------------------------------------------------------------------------------------------------------------------------------------------------------------------------------------------------------------------------------------------------------------------------------------------------------------------------------------|
| vino seco o vermut    | <input checked="" type="radio"/> Nunca o menos 1 vez al mes<br><input type="radio"/> 1 a 3 veces mes<br><input type="radio"/> 1 vez semana<br><input type="radio"/> 2 a 4 veces semana<br><input type="radio"/> 5 a 6 veces semana<br><input type="radio"/> 1 vez al día<br><input type="radio"/> 2 a 3 veces al día<br><input type="radio"/> 5 a 6 veces al día<br><input type="radio"/> más 6 veces al día |
| cerveza               | <input checked="" type="radio"/> Nunca o menos 1 vez al mes<br><input type="radio"/> 1 a 3 veces mes<br><input type="radio"/> 1 vez semana<br><input type="radio"/> 2 a 4 veces semana<br><input type="radio"/> 5 a 6 veces semana<br><input type="radio"/> 1 vez al día<br><input type="radio"/> 2 a 3 veces al día<br><input type="radio"/> 5 a 6 veces al día<br><input type="radio"/> más 6 veces al día |
| cerveza sin alcohol   | <input checked="" type="radio"/> Nunca o menos 1 vez al mes<br><input type="radio"/> 1 a 3 veces mes<br><input type="radio"/> 1 vez semana<br><input type="radio"/> 2 a 4 veces semana<br><input type="radio"/> 5 a 6 veces semana<br><input type="radio"/> 1 vez al día<br><input type="radio"/> 2 a 3 veces al día<br><input type="radio"/> 5 a 6 veces al día<br><input type="radio"/> más 6 veces al día |
| licores               | <input checked="" type="radio"/> Nunca o menos 1 vez al mes<br><input type="radio"/> 1 a 3 veces mes<br><input type="radio"/> 1 vez semana<br><input type="radio"/> 2 a 4 veces semana<br><input type="radio"/> 5 a 6 veces semana<br><input type="radio"/> 1 vez al día<br><input type="radio"/> 2 a 3 veces al día<br><input type="radio"/> 5 a 6 veces al día<br><input type="radio"/> más 6 veces al día |
| ginebra o ron o vodka | <input checked="" type="radio"/> Nunca o menos 1 vez al mes<br><input type="radio"/> 1 a 3 veces mes<br><input type="radio"/> 1 vez semana<br><input type="radio"/> 2 a 4 veces semana<br><input type="radio"/> 5 a 6 veces semana<br><input type="radio"/> 1 vez al día<br><input type="radio"/> 2 a 3 veces al día<br><input type="radio"/> 5 a 6 veces al día<br><input type="radio"/> más 6 veces al día |
| refresco normal       | <input checked="" type="radio"/> Nunca o menos 1 vez al mes<br><input type="radio"/> 1 a 3 veces mes<br><input type="radio"/> 1 vez semana<br><input type="radio"/> 2 a 4 veces semana<br><input type="radio"/> 5 a 6 veces semana<br><input type="radio"/> 1 vez al día<br><input type="radio"/> 2 a 3 veces al día<br><input type="radio"/> 5 a 6 veces al día<br><input type="radio"/> más 6 veces al día |

---

refresco sin azúcar

- ☒ Nunca o menos 1 vez al mes  
☐ 1 a 3 veces mes  
☐ 1 vez semana  
☐ 2 a 4 veces semana  
☐ 5 a 6 veces semana  
☐ 1 vez al día  
☐ 2 a 3 veces al día  
☐ 5 a 6 veces al día  
☐ más 6 veces al día

---

Agua del grifo

- ☒ Nunca o menos 1 vez al mes  
☐ 1 a 3 veces mes  
☐ 1 vez semana  
☐ 2 a 4 veces semana  
☐ 5 a 6 veces semana  
☐ 1 vez al día  
☐ 2 a 3 veces al día  
☐ 5 a 6 veces al día  
☐ más 6 veces al día

---

agua embotellada sin gas

- ☐ Nunca o menos 1 vez al mes  
☐ 1 a 3 veces mes  
☐ 1 vez semana  
☐ 2 a 4 veces semana  
☐ 5 a 6 veces semana  
☐ 1 vez al día  
☐ 2 a 3 veces al día  
☐ 5 a 6 veces al día  
☒ más 6 veces al día

---

agua embotellada con gas

- ☒ Nunca o menos 1 vez al mes  
☐ 1 a 3 veces mes  
☐ 1 vez semana  
☐ 2 a 4 veces semana  
☐ 5 a 6 veces semana  
☐ 1 vez al día  
☐ 2 a 3 veces al día  
☐ 5 a 6 veces al día  
☐ más 6 veces al día

---

zumو frutas embasado

- ☒ Nunca o menos 1 vez al mes  
☐ 1 a 3 veces mes  
☐ 1 vez semana  
☐ 2 a 4 veces semana  
☐ 5 a 6 veces semana  
☐ 1 vez al día  
☐ 2 a 3 veces al día  
☐ 5 a 6 veces al día  
☐ más 6 veces al día

---

cafe

- ☒ Nunca o menos 1 vez al mes  
☐ 1 a 3 veces mes  
☐ 1 vez semana  
☐ 2 a 4 veces semana  
☐ 5 a 6 veces semana  
☐ 1 vez al día  
☐ 2 a 3 veces al día  
☐ 5 a 6 veces al día  
☐ más 6 veces al día



---

cafe descafeinado

- ☐ Nunca o menos 1 vez al mes  
☐ 1 a 3 veces mes  
☐ 1 vez semana  
☒ 2 a 4 veces semana  
☐ 5 a 6 veces semana  
☐ 1 vez al día  
☐ 2 a 3 veces al día  
☐ 5 a 6 veces al día  
☐ más 6 veces al día

---

te o infusión

- ☒ Nunca o menos 1 vez al mes  
☐ 1 a 3 veces mes  
☐ 1 vez semana  
☐ 2 a 4 veces semana  
☐ 5 a 6 veces semana  
☐ 1 vez al día  
☐ 2 a 3 veces al día  
☐ 5 a 6 veces al día  
☐ más 6 veces al día

---

sopa o puré verduras

- ☐ Nunca o menos 1 vez al mes  
☒ 1 a 3 veces mes  
☐ 1 vez semana  
☐ 2 a 4 veces semana  
☐ 5 a 6 veces semana  
☐ 1 vez al día  
☐ 2 a 3 veces al día  
☐ 5 a 6 veces al día  
☐ más 6 veces al día

---

croquetas pollo jamón

- ☐ Nunca o menos 1 vez al mes  
☒ 1 a 3 veces mes  
☐ 1 vez semana  
☐ 2 a 4 veces semana  
☐ 5 a 6 veces semana  
☐ 1 vez al día  
☐ 2 a 3 veces al día  
☐ 5 a 6 veces al día  
☐ más 6 veces al día

---

croquetas pescado

- ☒ Nunca o menos 1 vez al mes  
☐ 1 a 3 veces mes  
☐ 1 vez semana  
☐ 2 a 4 veces semana  
☐ 5 a 6 veces semana  
☐ 1 vez al día  
☐ 2 a 3 veces al día  
☐ 5 a 6 veces al día  
☐ más 6 veces al día

---

mayonesa

- ☐ Nunca o menos 1 vez al mes  
☐ 1 a 3 veces mes  
☐ 1 vez semana  
☒ 2 a 4 veces semana  
☐ 5 a 6 veces semana  
☐ 1 vez al día  
☐ 2 a 3 veces al día  
☐ 5 a 6 veces al día  
☐ más 6 veces al día

---

salsa tomate

- ☐ Nunca o menos 1 vez al mes
- ☐ 1 a 3 veces mes
- ☒ 1 vez semana
- ☐ 2 a 4 veces semana
- ☐ 5 a 6 veces semana
- ☐ 1 vez al día
- ☐ 2 a 3 veces al día
- ☐ 5 a 6 veces al día
- ☐ más 6 veces al día

---

ketchup

- ☒ Nunca o menos 1 vez al mes
- ☐ 1 a 3 veces mes
- ☐ 1 vez semana
- ☐ 2 a 4 veces semana
- ☐ 5 a 6 veces semana
- ☐ 1 vez al día
- ☐ 2 a 3 veces al día
- ☐ 5 a 6 veces al día
- ☐ más 6 veces al día

---

sal

- ☐ Nunca o menos 1 vez al mes
- ☐ 1 a 3 veces mes
- ☐ 1 vez semana
- ☒ 2 a 4 veces semana
- ☐ 5 a 6 veces semana
- ☐ 1 vez al día
- ☐ 2 a 3 veces al día
- ☐ 5 a 6 veces al día
- ☐ más 6 veces al día

---

ajo

- ☐ Nunca o menos 1 vez al mes
- ☐ 1 a 3 veces mes
- ☐ 1 vez semana
- ☒ 2 a 4 veces semana
- ☐ 5 a 6 veces semana
- ☐ 1 vez al día
- ☐ 2 a 3 veces al día
- ☐ 5 a 6 veces al día
- ☐ más 6 veces al día

---

mermelada o miel

- ☒ Nunca o menos 1 vez al mes
- ☐ 1 a 3 veces mes
- ☐ 1 vez semana
- ☐ 2 a 4 veces semana
- ☐ 5 a 6 veces semana
- ☐ 1 vez al día
- ☐ 2 a 3 veces al día
- ☐ 5 a 6 veces al día
- ☐ más 6 veces al día

---

azúcar

- ☒ Nunca o menos 1 vez al mes
- ☐ 1 a 3 veces mes
- ☐ 1 vez semana
- ☐ 2 a 4 veces semana
- ☐ 5 a 6 veces semana
- ☐ 1 vez al día
- ☐ 2 a 3 veces al día
- ☐ 5 a 6 veces al día
- ☐ más 6 veces al día

|                                       |                                                                                                                                                                                                                                                                                                                                                                                                                                                                                                                               |
|---------------------------------------|-------------------------------------------------------------------------------------------------------------------------------------------------------------------------------------------------------------------------------------------------------------------------------------------------------------------------------------------------------------------------------------------------------------------------------------------------------------------------------------------------------------------------------|
| Otro alimento                         |                                                                                                                                                                                                                                                                                                                                                                                                                                                                                                                               |
| suplementos vitamínicos               | <input checked="" type="radio"/> si<br><input type="radio"/> no                                                                                                                                                                                                                                                                                                                                                                                                                                                               |
| suplementos vitamínicos               | [*DATA REMOVED*]                                                                                                                                                                                                                                                                                                                                                                                                                                                                                                              |
| dieta previa                          | <input checked="" type="radio"/> si<br><input type="radio"/> no                                                                                                                                                                                                                                                                                                                                                                                                                                                               |
| motivo dieta                          | <input type="radio"/> no dieta<br><input type="radio"/> control peso<br><input type="radio"/> control colesterol<br><input checked="" type="radio"/> control diabetes<br><input type="radio"/> problemas estómago<br><input type="radio"/> problemas vesícula o hepáticos<br><input type="radio"/> HTA o cardiopatía<br><input type="radio"/> problemas renales<br><input type="radio"/> alergia alimentaria<br><input type="radio"/> ácido úrico elevado<br><input type="radio"/> vegetariana<br><input type="radio"/> otros |
| cambio alimentos año previo gestación | <input checked="" type="radio"/> si<br><input type="radio"/> no                                                                                                                                                                                                                                                                                                                                                                                                                                                               |
| cambio lácteos                        | <input type="radio"/> eliminado<br><input type="radio"/> disminuido<br><input checked="" type="radio"/> igual<br><input type="radio"/> aumentado<br><input type="radio"/> no sabe                                                                                                                                                                                                                                                                                                                                             |
| cambio huevos                         | <input type="radio"/> eliminado<br><input type="radio"/> disminuido<br><input checked="" type="radio"/> igual<br><input type="radio"/> aumentado<br><input type="radio"/> no sabe                                                                                                                                                                                                                                                                                                                                             |
| cambio carne                          | <input type="radio"/> eliminado<br><input type="radio"/> disminuido<br><input checked="" type="radio"/> igual<br><input type="radio"/> aumentado<br><input type="radio"/> no sabe                                                                                                                                                                                                                                                                                                                                             |
| cambio pescado                        | <input type="radio"/> eliminado<br><input type="radio"/> disminuido<br><input checked="" type="radio"/> igual<br><input type="radio"/> aumentado<br><input type="radio"/> no sabe                                                                                                                                                                                                                                                                                                                                             |
| cambio verduras                       | <input type="radio"/> eliminado<br><input type="radio"/> disminuido<br><input checked="" type="radio"/> igual<br><input type="radio"/> aumentado<br><input type="radio"/> no sabe                                                                                                                                                                                                                                                                                                                                             |

|                            |                                                                                                                                                                                                                        |
|----------------------------|------------------------------------------------------------------------------------------------------------------------------------------------------------------------------------------------------------------------|
| cambio legumbres           | <input type="radio"/> eliminado<br><input type="radio"/> disminuido<br><input checked="" type="radio"/> igual<br><input type="radio"/> aumentado<br><input type="radio"/> no sabe                                      |
| cambio fruta               | <input type="radio"/> eliminado<br><input type="radio"/> disminuido<br><input checked="" type="radio"/> igual<br><input type="radio"/> aumentado<br><input type="radio"/> no sabe                                      |
| cambio pan                 | <input type="radio"/> eliminado<br><input type="radio"/> disminuido<br><input checked="" type="radio"/> igual<br><input type="radio"/> aumentado<br><input type="radio"/> no sabe                                      |
| cambio aceite oliva        | <input type="radio"/> eliminado<br><input type="radio"/> disminuido<br><input checked="" type="radio"/> igual<br><input type="radio"/> aumentado<br><input type="radio"/> no sabe                                      |
| cambio mante o margarina   | <input checked="" type="radio"/> eliminado<br><input type="radio"/> disminuido<br><input type="radio"/> igual<br><input type="radio"/> aumentado<br><input type="radio"/> no sabe                                      |
| cambio azúcar y dulces     | <input checked="" type="radio"/> eliminado<br><input type="radio"/> disminuido<br><input type="radio"/> igual<br><input type="radio"/> aumentado<br><input type="radio"/> no sabe                                      |
| cambio bebidas alcohólicas | <input checked="" type="radio"/> eliminado<br><input type="radio"/> disminuido<br><input type="radio"/> igual<br><input type="radio"/> aumentado<br><input type="radio"/> no sabe                                      |
| frecuencia comidas fritas  | <input type="radio"/> a diario<br><input type="radio"/> 5 a 6 veces semana<br><input checked="" type="radio"/> 2 a 4 veces semana<br><input type="radio"/> 1 vez semana<br><input type="radio"/> menos de 1 vez semana |
| carne                      | <input type="radio"/> no como<br><input type="radio"/> cruda<br><input type="radio"/> poco hecha<br><input checked="" type="radio"/> hecha<br><input type="radio"/> muy hecha                                          |
| grasa visible carne        | <input type="radio"/> quita toda<br><input type="radio"/> quita mayoría<br><input type="radio"/> quita un poco<br><input checked="" type="radio"/> no quita nada                                                       |

|                                |                                                                                                                                                                                                                                                          |
|--------------------------------|----------------------------------------------------------------------------------------------------------------------------------------------------------------------------------------------------------------------------------------------------------|
| cocina carne                   | <input checked="" type="radio"/> a la plancha<br><input type="radio"/> a la parrilla<br><input type="radio"/> asada<br><input type="radio"/> frita<br><input type="radio"/> guisada                                                                      |
| tostado quemado carne          | <input checked="" type="radio"/> nunca<br><input type="radio"/> 1 vez mes<br><input type="radio"/> 2 a 3 veces mes<br><input type="radio"/> 1 vez semana<br><input type="radio"/> 2 a 3 semanas                                                          |
| tostado quemado pescado        | <input checked="" type="radio"/> nunca<br><input type="radio"/> 1 vez mes<br><input type="radio"/> 2 a 3 veces mes<br><input type="radio"/> 1 vez semana<br><input type="radio"/> 2 a 3 semanas                                                          |
| socarrat paella                | <input type="radio"/> nunca<br><input checked="" type="radio"/> 1 vez mes<br><input type="radio"/> 2 a 3 veces mes<br><input type="radio"/> 1 vez semana<br><input type="radio"/> 2 a 3 semanas                                                          |
| grasa o aceite cocinar         | <input type="radio"/> mantequilla<br><input type="radio"/> margarina<br><input type="radio"/> aceite oliva<br><input checked="" type="radio"/> aceite oliva virgen extra<br><input type="radio"/> aceite vegetal<br><input type="radio"/> mezcla aceites |
| grasa aceite aliñar            | <input type="radio"/> mantequilla<br><input type="radio"/> margarina<br><input type="radio"/> aceite oliva<br><input checked="" type="radio"/> aceite oliva virgen extra<br><input type="radio"/> aceite vegetal<br><input type="radio"/> mezcla aceites |
| grasa aceite freir             | <input type="radio"/> mantequilla<br><input type="radio"/> margarina<br><input type="radio"/> aceite oliva<br><input type="radio"/> aceite oliva virgen extra<br><input checked="" type="radio"/> aceite vegetal<br><input type="radio"/> mezcla aceites |
| Ejercicio cuestionario         | <input checked="" type="radio"/> si<br><input type="radio"/> no                                                                                                                                                                                          |
| horas de sueño incluido siesta | [*DATA REMOVED*]                                                                                                                                                                                                                                         |
| minutos siesta                 | [*DATA REMOVED*]                                                                                                                                                                                                                                         |
| horas televisión semana        | [*DATA REMOVED*]                                                                                                                                                                                                                                         |

|                                        |                                                                                                                                                                                                                                                                                                                                                                           |
|----------------------------------------|---------------------------------------------------------------------------------------------------------------------------------------------------------------------------------------------------------------------------------------------------------------------------------------------------------------------------------------------------------------------------|
| actividad trabajo                      | <input type="radio"/> casi siempre sentado<br><input type="radio"/> sentado 50 por cien<br><input checked="" type="radio"/> casi siempre de pie, quieto<br><input type="radio"/> casi siempre levantado caminando y llevando pocas cosas<br><input type="radio"/> casi siempre levantado, caminando y llevado muchas cosas<br><input type="radio"/> trabajo manual pesado |
| tiempo caminar o bici al día           | <input type="radio"/> casi nunca<br><input checked="" type="radio"/> menos 20min día<br><input type="radio"/> 20 a 40 min día<br><input type="radio"/> 40 a 60 min día<br><input type="radio"/> 1h o 1h y media día<br><input type="radio"/> más de 1h y media al día                                                                                                     |
| tiempo tareas casa al día              | <input type="radio"/> menos de 1h día<br><input type="radio"/> 1 a 2h día<br><input type="radio"/> 3 a 4h día<br><input checked="" type="radio"/> 5 a 6h día<br><input type="radio"/> 7 a 8h día<br><input type="radio"/> más de 8h día                                                                                                                                   |
| tiempo libre televisión ordenador leer | <input type="radio"/> menos 1h día<br><input type="radio"/> 1h día<br><input checked="" type="radio"/> 2h día<br><input type="radio"/> 3h día<br><input type="radio"/> 4h día<br><input type="radio"/> 5 a 6h día<br><input type="radio"/> mas 6h día                                                                                                                     |
| tiempo libre ejercicio o deporte       | <input checked="" type="radio"/> menos 1h semana<br><input type="radio"/> 1h semana<br><input type="radio"/> 2h semana<br><input type="radio"/> 3h semana<br><input type="radio"/> 4 a 5h semana<br><input type="radio"/> mas 5h semana                                                                                                                                   |
| como se considera                      | <input type="radio"/> sedentaria<br><input type="radio"/> poco activa<br><input checked="" type="radio"/> moderadamente activa<br><input type="radio"/> bastante activa<br><input type="radio"/> muy activa<br><input type="radio"/> no sabe                                                                                                                              |
| FUR                                    | [*DATA REMOVED*]                                                                                                                                                                                                                                                                                                                                                          |
| Semanas gestación 2T                   | [*DATA REMOVED*]                                                                                                                                                                                                                                                                                                                                                          |
| Días gestación 2T                      | [*DATA REMOVED*]                                                                                                                                                                                                                                                                                                                                                          |
| DBP 2T                                 | [*DATA REMOVED*]                                                                                                                                                                                                                                                                                                                                                          |
| CC 2T                                  | [*DATA REMOVED*]                                                                                                                                                                                                                                                                                                                                                          |
| AC 2T                                  | [*DATA REMOVED*]                                                                                                                                                                                                                                                                                                                                                          |

|                                                   |                                                                                                                                                                                                 |
|---------------------------------------------------|-------------------------------------------------------------------------------------------------------------------------------------------------------------------------------------------------|
| LF 2T                                             | [*DATA REMOVED*]                                                                                                                                                                                |
| PFE 2T (Hadlock)                                  | [*DATA REMOVED*]                                                                                                                                                                                |
| Semanas gestación 3T                              | [*DATA REMOVED*]                                                                                                                                                                                |
| días 3T                                           | [*DATA REMOVED*]                                                                                                                                                                                |
| DBP 3T                                            | [*DATA REMOVED*]                                                                                                                                                                                |
| CC 3T                                             | [*DATA REMOVED*]                                                                                                                                                                                |
| AC 3T                                             | [*DATA REMOVED*]                                                                                                                                                                                |
| LF 3T                                             | [*DATA REMOVED*]                                                                                                                                                                                |
| PFE 3T (Hadlock)                                  | [*DATA REMOVED*]                                                                                                                                                                                |
| Semanas de gestación final                        | [*DATA REMOVED*]                                                                                                                                                                                |
| días gestación final                              | [*DATA REMOVED*]                                                                                                                                                                                |
| Localización placenta                             | <input checked="" type="radio"/> anterior<br><input type="radio"/> lateral derecha<br><input type="radio"/> lateral izquierda<br><input type="radio"/> posterior<br><input type="radio"/> fondo |
| Presentación longitudinal cefálica                | <input type="radio"/> no<br><input checked="" type="radio"/> si                                                                                                                                 |
| Dorso                                             | <input checked="" type="radio"/> izquierda anterior<br><input type="radio"/> izquierda posterior<br><input type="radio"/> derecha anterior<br><input type="radio"/> derecha posterior           |
| diámetro biparietal                               | [*DATA REMOVED*]                                                                                                                                                                                |
| Circunferencia craneal                            | [*DATA REMOVED*]                                                                                                                                                                                |
| Circunferencia abdominal                          | [*DATA REMOVED*]                                                                                                                                                                                |
| Longitud de femur                                 | [*DATA REMOVED*]                                                                                                                                                                                |
| tejido celular subcutáneo a nivel del muslo en mm | [*DATA REMOVED*]                                                                                                                                                                                |
| tejido celular subcutáneo en abdomen en mm        | [*DATA REMOVED*]                                                                                                                                                                                |
| Volumen del muslo en cm3                          | [*DATA REMOVED*]                                                                                                                                                                                |
| Peso fetal estimado según fórmula de Hadlock      | [*DATA REMOVED*]                                                                                                                                                                                |

|                                               |                                                                                                                                                          |
|-----------------------------------------------|----------------------------------------------------------------------------------------------------------------------------------------------------------|
| Percentil                                     | [*DATA REMOVED*]                                                                                                                                         |
| Peso fetal estimado según fórmula de Scioscia | <hr/>                                                                                                                                                    |
| Peso fetal estimado según fórmula de LEE      | <hr/>                                                                                                                                                    |
| Tipo de parto                                 | <input checked="" type="radio"/> eutocico<br><input type="radio"/> instrumentado/ventosa<br><input type="radio"/> cesarea                                |
| fecha de nacimiento                           | [*DATA REMOVED*]                                                                                                                                         |
| Días entre exploración y nacimiento           | [*DATA REMOVED*]                                                                                                                                         |
| Peso RN en g                                  | [*DATA REMOVED*]                                                                                                                                         |
| sexo                                          | <input checked="" type="radio"/> mujer<br><input type="radio"/> hombre                                                                                   |
| Apgar 1 minuto                                | [*DATA REMOVED*]                                                                                                                                         |
| Apgar 5 minutos                               | [*DATA REMOVED*]                                                                                                                                         |
| Apgar 10 minutos                              | <hr/>                                                                                                                                                    |
| antecedente Covid durante gestación           | <input checked="" type="radio"/> Yes<br><input type="radio"/> No                                                                                         |
| Nivel de estudios                             | <input type="radio"/> ninguno<br><input checked="" type="radio"/> primarios<br><input type="radio"/> secundarios<br><input type="radio"/> universitarios |



## Base\_datos\_estimacion\_peso\_fetal

|                                       |                                                                                                                                                                                                                                                                                      |
|---------------------------------------|--------------------------------------------------------------------------------------------------------------------------------------------------------------------------------------------------------------------------------------------------------------------------------------|
| Número de identificación participante | 132                                                                                                                                                                                                                                                                                  |
| CODIGO PARTICIPANTE                   |                                                                                                                                                                                                                                                                                      |
| Edad                                  | [*DATA REMOVED*]                                                                                                                                                                                                                                                                     |
| Gestaciones                           | <input checked="" type="radio"/> 1<br><input type="radio"/> 2<br><input type="radio"/> 3<br><input type="radio"/> mas de 3                                                                                                                                                           |
| partos                                | <input checked="" type="radio"/> 0<br><input type="radio"/> 1<br><input type="radio"/> 2<br><input type="radio"/> 3<br><input type="radio"/> mas de 3                                                                                                                                |
| cesáreas                              | <input checked="" type="radio"/> 0<br><input type="radio"/> 1<br><input type="radio"/> 2<br><input type="radio"/> 3<br><input type="radio"/> mas de 3                                                                                                                                |
| Abortos                               | <input checked="" type="radio"/> 0<br><input type="radio"/> 1<br><input type="radio"/> 2<br><input type="radio"/> 3<br><input type="radio"/> mas de 3                                                                                                                                |
| Tipo de gestacion                     | <input type="radio"/> espontanea<br><input checked="" type="radio"/> IAC inseminación artificial conyuge<br><input type="radio"/> IAD inseminación artificial donante<br><input type="radio"/> FIV Fecundación in Vitro<br><input type="radio"/> Ovodon FIV con donación de ovocitos |
| peso previo a embarazo                | [*DATA REMOVED*]                                                                                                                                                                                                                                                                     |
| Ganancia ponderal embarazo            | [*DATA REMOVED*]                                                                                                                                                                                                                                                                     |
| Talla madre                           | [*DATA REMOVED*]                                                                                                                                                                                                                                                                     |
| IMC previo embarazo                   | 22.476586888657646                                                                                                                                                                                                                                                                   |
| Patología obstétrica                  | <input checked="" type="radio"/> no<br><input type="radio"/> si                                                                                                                                                                                                                      |
| Diabetes pregestacional               | <input checked="" type="radio"/> no<br><input type="radio"/> si                                                                                                                                                                                                                      |
| Diabetes gestacional                  | <input checked="" type="radio"/> no<br><input type="radio"/> si                                                                                                                                                                                                                      |

|                                            |                                                                                                                                                                                      |
|--------------------------------------------|--------------------------------------------------------------------------------------------------------------------------------------------------------------------------------------|
| Diabetes gestacional con insulina          | <input checked="" type="radio"/> no<br><input type="radio"/> si                                                                                                                      |
| Diabetes gestacional con dieta y ejercicio | <input checked="" type="radio"/> no<br><input type="radio"/> si                                                                                                                      |
| Percentil fetos previos                    | <input checked="" type="radio"/> Nada<br><input type="radio"/> percentil menor de 10<br><input type="radio"/> percentil entre 10 y 90<br><input type="radio"/> percentil mayor de 90 |
| Exfumadora                                 | <input checked="" type="radio"/> Nada<br><input type="radio"/> menos de 5 años<br><input type="radio"/> 5 a 10 años<br><input type="radio"/> mayor o igual a 10 años                 |
| Hábito tabáquico                           | <input type="radio"/> no<br><input checked="" type="radio"/> si                                                                                                                      |
| fumadora                                   | [*DATA REMOVED*]                                                                                                                                                                     |
| Consumo otros tóxicos                      | <input checked="" type="radio"/> no<br><input type="radio"/> si                                                                                                                      |
| Hb 1T                                      | _____                                                                                                                                                                                |
| Htc 1T                                     | _____                                                                                                                                                                                |
| Hb 2T                                      | _____                                                                                                                                                                                |
| HTC 2T                                     | _____                                                                                                                                                                                |
| Hb 3T                                      | _____                                                                                                                                                                                |
| HTC 3T                                     | _____                                                                                                                                                                                |
| Suplemento FE oral                         | <input checked="" type="radio"/> si<br><input type="radio"/> no                                                                                                                      |
| Suplemento fe iv                           | <input type="radio"/> si<br><input checked="" type="radio"/> no                                                                                                                      |
| Transfusión                                | <input checked="" type="radio"/> no<br><input type="radio"/> si                                                                                                                      |
| Solicitada Vit D                           | <input type="radio"/> no<br><input checked="" type="radio"/> si                                                                                                                      |

|                       |                                                                                                                                                                                                                                                                                                                                                                                                              |
|-----------------------|--------------------------------------------------------------------------------------------------------------------------------------------------------------------------------------------------------------------------------------------------------------------------------------------------------------------------------------------------------------------------------------------------------------|
| Deficit vit D         | <input type="radio"/> no<br><input checked="" type="radio"/> si                                                                                                                                                                                                                                                                                                                                              |
| Suplemento vit D      | <input checked="" type="radio"/> si<br><input type="radio"/> no                                                                                                                                                                                                                                                                                                                                              |
| Dieta, cuestionario   | <input checked="" type="radio"/> si<br><input type="radio"/> no                                                                                                                                                                                                                                                                                                                                              |
| Leche entera          | <input type="radio"/> Nunca o menos 1 vez al mes<br><input type="radio"/> 1 a 3 veces mes<br><input type="radio"/> 1 vez semana<br><input type="radio"/> 2 a 4 veces semana<br><input type="radio"/> 5 a 6 veces semana<br><input checked="" type="radio"/> 1 vez al día<br><input type="radio"/> 2 a 3 veces al día<br><input type="radio"/> 5 a 6 veces al día<br><input type="radio"/> más 6 veces al día |
| Leche semidesnatada   | <input checked="" type="radio"/> Nunca o menos 1 vez al mes<br><input type="radio"/> 1 a 3 veces mes<br><input type="radio"/> 1 vez semana<br><input type="radio"/> 2 a 4 veces semana<br><input type="radio"/> 5 a 6 veces semana<br><input type="radio"/> 1 vez al día<br><input type="radio"/> 2 a 3 veces al día<br><input type="radio"/> 5 a 6 veces al día<br><input type="radio"/> mas 6 veces al día |
| Leche desnatada       | <input checked="" type="radio"/> Nunca o menos 1 vez al mes<br><input type="radio"/> 1 a 3 veces mes<br><input type="radio"/> 1 vez semana<br><input type="radio"/> 2 a 4 veces semana<br><input type="radio"/> 5 a 6 veces semana<br><input type="radio"/> 1 vez al día<br><input type="radio"/> 2 a 3 veces al día<br><input type="radio"/> 5 a 6 veces al día<br><input type="radio"/> más 6 veces al día |
| Leche condensada      | <input checked="" type="radio"/> Nunca o menos 1 vez al mes<br><input type="radio"/> 1 a 3 veces mes<br><input type="radio"/> 1 vez semana<br><input type="radio"/> 2 a 4 veces semana<br><input type="radio"/> 5 a 6 veces semana<br><input type="radio"/> 1 vez al día<br><input type="radio"/> 2 a 3 veces al día<br><input type="radio"/> 5 a 6 veces al día<br><input type="radio"/> más 6 veces al día |
| nata o crema de leche | <input checked="" type="radio"/> Nunca o menos 1 vez al mes<br><input type="radio"/> 1 a 3 veces mes<br><input type="radio"/> 1 vez semana<br><input type="radio"/> 2 a 4 veces semana<br><input type="radio"/> 5 a 6 veces semana<br><input type="radio"/> 1 vez al día<br><input type="radio"/> 2 a 3 veces al día<br><input type="radio"/> 5 a 6 veces al día<br><input type="radio"/> más 6 veces al día |

---

Yogurt Entero

- ☐ Nunca o menos 1 vez al mes  
☐ 1 a 3 veces mes  
☐ 1 vez semana  
☒ 2 a 4 veces semana  
☐ 5 a 6 veces semana  
☐ 1 vez al día  
☐ 2 a 3 veces al día  
☐ 5 a 6 veces al día  
☐ más 6 veces al día

---

Yogurt desnatado

- ☒ Nunca o menos 1 vez al mes  
☐ 1 a 3 veces mes  
☐ 1 vez semana  
☐ 2 a 4 veces semana  
☐ 5 a 6 veces semana  
☐ 1 vez al día  
☐ 2 a 3 veces al día  
☐ 5 a 6 veces al día  
☐ más 6 veces al día

---

100g requesón o queso blando o queso fresco

- ☐ Nunca o menos 1 vez al mes  
☐ 1 a 3 veces mes  
☐ 1 vez semana  
☒ 2 a 4 veces semana  
☐ 5 a 6 veces semana  
☐ 1 vez al día  
☐ 2 a 3 veces al día  
☐ 5 a 6 veces al día  
☐ más 6 veces al día

---

queso curado o semicurado o cremoso

- ☐ Nunca o menos 1 vez al mes  
☐ 1 a 3 veces mes  
☒ 1 vez semana  
☐ 2 a 4 veces semana  
☐ 5 a 6 veces semana  
☐ 1 vez al día  
☐ 2 a 3 veces al día  
☐ 5 a 6 veces al día  
☐ más 6 veces al día

---

natillas flan pudding

- ☐ Nunca o menos 1 vez al mes  
☒ 1 a 3 veces mes  
☐ 1 vez semana  
☐ 2 a 4 veces semana  
☐ 5 a 6 veces semana  
☐ 1 vez al día  
☐ 2 a 3 veces al día  
☐ 5 a 6 veces al día  
☐ más 6 veces al día

---

Helado

- ☐ Nunca o menos 1 vez al mes  
☐ 1 a 3 veces mes  
☒ 1 vez semana  
☐ 2 a 4 veces semana  
☐ 5 a 6 veces semana  
☐ 1 vez al día  
☐ 2 a 3 veces al día  
☐ 5 a 6 veces al día  
☐ más 6 veces al día

|                                      |                                                                                                                                                                                                                                                                                                                                                                                                              |
|--------------------------------------|--------------------------------------------------------------------------------------------------------------------------------------------------------------------------------------------------------------------------------------------------------------------------------------------------------------------------------------------------------------------------------------------------------------|
| huevo                                | <input type="radio"/> Nunca o menos 1 vez al mes<br><input type="radio"/> 1 a 3 veces mes<br><input type="radio"/> 1 vez semana<br><input type="radio"/> 2 a 4 veces semana<br><input checked="" type="radio"/> 5 a 6 veces semana<br><input type="radio"/> 1 vez al día<br><input type="radio"/> 2 a 3 veces al día<br><input type="radio"/> 5 a 6 veces al día<br><input type="radio"/> más 6 veces al día |
| Pollo con piel                       | <input checked="" type="radio"/> Nunca o menos 1 vez al mes<br><input type="radio"/> 1 a 3 veces mes<br><input type="radio"/> 1 vez semana<br><input type="radio"/> 2 a 4 veces semana<br><input type="radio"/> 5 a 6 veces semana<br><input type="radio"/> 1 vez al día<br><input type="radio"/> 2 a 3 veces al día<br><input type="radio"/> 5 a 6 veces al día<br><input type="radio"/> más 6 veces al día |
| pollo sin piel                       | <input type="radio"/> Nunca o menos 1 vez al mes<br><input type="radio"/> 1 a 3 veces mes<br><input checked="" type="radio"/> 1 vez semana<br><input type="radio"/> 2 a 4 veces semana<br><input type="radio"/> 5 a 6 veces semana<br><input type="radio"/> 1 vez al día<br><input type="radio"/> 2 a 3 veces al día<br><input type="radio"/> 5 a 6 veces al día<br><input type="radio"/> más 6 veces al día |
| Ternera o cerdo o cordero            | <input type="radio"/> Nunca o menos 1 vez al mes<br><input type="radio"/> 1 a 3 veces mes<br><input checked="" type="radio"/> 1 vez semana<br><input type="radio"/> 2 a 4 veces semana<br><input type="radio"/> 5 a 6 veces semana<br><input type="radio"/> 1 vez al día<br><input type="radio"/> 2 a 3 veces al día<br><input type="radio"/> 5 a 6 veces al día<br><input type="radio"/> más 6 veces al día |
| carne caza: Conejo o codorniz o pato | <input checked="" type="radio"/> Nunca o menos 1 vez al mes<br><input type="radio"/> 1 a 3 veces mes<br><input type="radio"/> 1 vez semana<br><input type="radio"/> 2 a 4 veces semana<br><input type="radio"/> 5 a 6 veces semana<br><input type="radio"/> 1 vez al día<br><input type="radio"/> 2 a 3 veces al día<br><input type="radio"/> 5 a 6 veces al día<br><input type="radio"/> más 6 veces al día |
| Hígado de ternera o cerdo o pollo    | <input checked="" type="radio"/> Nunca o menos 1 vez al mes<br><input type="radio"/> 1 a 3 veces mes<br><input type="radio"/> 1 vez semana<br><input type="radio"/> 2 a 4 veces semana<br><input type="radio"/> 5 a 6 veces semana<br><input type="radio"/> 1 vez al día<br><input type="radio"/> 2 a 3 veces al día<br><input type="radio"/> 5 a 6 veces al día<br><input type="radio"/> más 6 veces al día |

|                     |                                                                                                                                                                                                                                                                                                                                                                                                              |
|---------------------|--------------------------------------------------------------------------------------------------------------------------------------------------------------------------------------------------------------------------------------------------------------------------------------------------------------------------------------------------------------------------------------------------------------|
| Vísceras            | <input checked="" type="radio"/> Nunca o menos 1 vez al mes<br><input type="radio"/> 1 a 3 veces mes<br><input type="radio"/> 1 vez semana<br><input type="radio"/> 2 a 4 veces semana<br><input type="radio"/> 5 a 6 veces semana<br><input type="radio"/> 1 vez al día<br><input type="radio"/> 2 a 3 veces al día<br><input type="radio"/> 5 a 6 veces al día<br><input type="radio"/> más 6 veces al día |
| Embutido            | <input checked="" type="radio"/> Nunca o menos 1 vez al mes<br><input type="radio"/> 1 a 3 veces mes<br><input type="radio"/> 1 vez semana<br><input type="radio"/> 2 a 4 veces semana<br><input type="radio"/> 5 a 6 veces semana<br><input type="radio"/> 1 vez al día<br><input type="radio"/> 2 a 3 veces al día<br><input type="radio"/> 5 a 6 veces al día<br><input type="radio"/> más 6 veces al día |
| Salchicha o similar | <input checked="" type="radio"/> Nunca o menos 1 vez al mes<br><input type="radio"/> 1 a 3 veces mes<br><input type="radio"/> 1 vez semana<br><input type="radio"/> 2 a 4 veces semana<br><input type="radio"/> 5 a 6 veces semana<br><input type="radio"/> 1 vez al día<br><input type="radio"/> 2 a 3 veces al día<br><input type="radio"/> 5 a 6 veces al día<br><input type="radio"/> más 6 veces al día |
| Pate o foiegras     | <input checked="" type="radio"/> Nunca o menos 1 vez al mes<br><input type="radio"/> 1 a 3 veces mes<br><input type="radio"/> 1 vez semana<br><input type="radio"/> 2 a 4 veces semana<br><input type="radio"/> 5 a 6 veces semana<br><input type="radio"/> 1 vez al día<br><input type="radio"/> 2 a 3 veces al día<br><input type="radio"/> 5 a 6 veces al día<br><input type="radio"/> más 6 veces al día |
| Hamburguesa         | <input type="radio"/> Nunca o menos 1 vez al mes<br><input checked="" type="radio"/> 1 a 3 veces mes<br><input type="radio"/> 1 vez semana<br><input type="radio"/> 2 a 4 veces semana<br><input type="radio"/> 5 a 6 veces semana<br><input type="radio"/> 1 vez al día<br><input type="radio"/> 2 a 3 veces al día<br><input type="radio"/> 5 a 6 veces al día<br><input type="radio"/> más 6 veces al día |
| tocino o bacon      | <input checked="" type="radio"/> Nunca o menos 1 vez al mes<br><input type="radio"/> 1 a 3 veces mes<br><input type="radio"/> 1 vez semana<br><input type="radio"/> 2 a 4 veces semana<br><input type="radio"/> 5 a 6 veces semana<br><input type="radio"/> 1 vez al día<br><input type="radio"/> 2 a 3 veces al día<br><input type="radio"/> 5 a 6 veces al día<br><input type="radio"/> más 6 veces al día |

---

Pescado frito

- ☐ Nunca o menos 1 vez al mes  
☒ 1 a 3 veces mes  
☐ 1 vez semana  
☐ 2 a 4 veces semana  
☐ 5 a 6 veces semana  
☐ 1 vez al día  
☐ 2 a 3 veces al día  
☐ 5 a 6 veces al día  
☐ más 6 veces al día

---

pescado hervido blanco

- ☐ Nunca o menos 1 vez al mes  
☐ 1 a 3 veces mes  
☒ 1 vez semana  
☐ 2 a 4 veces semana  
☐ 5 a 6 veces semana  
☐ 1 vez al día  
☐ 2 a 3 veces al día  
☐ 5 a 6 veces al día  
☐ más 6 veces al día

---

pescado hervido azul

- ☒ Nunca o menos 1 vez al mes  
☐ 1 a 3 veces mes  
☐ 1 vez semana  
☐ 2 a 4 veces semana  
☐ 5 a 6 veces semana  
☐ 1 vez al día  
☐ 2 a 3 veces al día  
☐ 5 a 6 veces al día  
☐ más 6 veces al día

---

otros pescado azul

- ☐ Nunca o menos 1 vez al mes  
☐ 1 a 3 veces mes  
☒ 1 vez semana  
☐ 2 a 4 veces semana  
☐ 5 a 6 veces semana  
☐ 1 vez al día  
☐ 2 a 3 veces al día  
☐ 5 a 6 veces al día  
☐ más 6 veces al día

---

atun conserva

- ☐ Nunca o menos 1 vez al mes  
☐ 1 a 3 veces mes  
☐ 1 vez semana  
☒ 2 a 4 veces semana  
☐ 5 a 6 veces semana  
☐ 1 vez al día  
☐ 2 a 3 veces al día  
☐ 5 a 6 veces al día  
☐ más 6 veces al día

---

sardina conserva

- ☐ Nunca o menos 1 vez al mes  
☐ 1 a 3 veces mes  
☒ 1 vez semana  
☐ 2 a 4 veces semana  
☐ 5 a 6 veces semana  
☐ 1 vez al día  
☐ 2 a 3 veces al día  
☐ 5 a 6 veces al día  
☐ más 6 veces al día

|                                         |                                                                                                                                                                                                                                                                                                                                                                                                              |
|-----------------------------------------|--------------------------------------------------------------------------------------------------------------------------------------------------------------------------------------------------------------------------------------------------------------------------------------------------------------------------------------------------------------------------------------------------------------|
| pescado ahumado                         | <input checked="" type="radio"/> Nunca o menos 1 vez al mes<br><input type="radio"/> 1 a 3 veces mes<br><input type="radio"/> 1 vez semana<br><input type="radio"/> 2 a 4 veces semana<br><input type="radio"/> 5 a 6 veces semana<br><input type="radio"/> 1 vez al día<br><input type="radio"/> 2 a 3 veces al día<br><input type="radio"/> 5 a 6 veces al día<br><input type="radio"/> más 6 veces al día |
| almejas o mejillones o ostras unos 100g | <input type="radio"/> Nunca o menos 1 vez al mes<br><input checked="" type="radio"/> 1 a 3 veces mes<br><input type="radio"/> 1 vez semana<br><input type="radio"/> 2 a 4 veces semana<br><input type="radio"/> 5 a 6 veces semana<br><input type="radio"/> 1 vez al día<br><input type="radio"/> 2 a 3 veces al día<br><input type="radio"/> 5 a 6 veces al día<br><input type="radio"/> más 6 veces al día |
| calamar o chipiron o sepia unos 100g    | <input type="radio"/> Nunca o menos 1 vez al mes<br><input checked="" type="radio"/> 1 a 3 veces mes<br><input type="radio"/> 1 vez semana<br><input type="radio"/> 2 a 4 veces semana<br><input type="radio"/> 5 a 6 veces semana<br><input type="radio"/> 1 vez al día<br><input type="radio"/> 2 a 3 veces al día<br><input type="radio"/> 5 a 6 veces al día<br><input type="radio"/> más 6 veces al día |
| marisco unos 100g                       | <input checked="" type="radio"/> Nunca o menos 1 vez al mes<br><input type="radio"/> 1 a 3 veces mes<br><input type="radio"/> 1 vez semana<br><input type="radio"/> 2 a 4 veces semana<br><input type="radio"/> 5 a 6 veces semana<br><input type="radio"/> 1 vez al día<br><input type="radio"/> 2 a 3 veces al día<br><input type="radio"/> 5 a 6 veces al día<br><input type="radio"/> más 6 veces al día |
| Espinacas o acelgas cocinadas           | <input type="radio"/> Nunca o menos 1 vez al mes<br><input checked="" type="radio"/> 1 a 3 veces mes<br><input type="radio"/> 1 vez semana<br><input type="radio"/> 2 a 4 veces semana<br><input type="radio"/> 5 a 6 veces semana<br><input type="radio"/> 1 vez al día<br><input type="radio"/> 2 a 3 veces al día<br><input type="radio"/> 5 a 6 veces al día<br><input type="radio"/> más 6 veces al día |
| Col o coliflor o brocoli cocinado       | <input type="radio"/> Nunca o menos 1 vez al mes<br><input checked="" type="radio"/> 1 a 3 veces mes<br><input type="radio"/> 1 vez semana<br><input type="radio"/> 2 a 4 veces semana<br><input type="radio"/> 5 a 6 veces semana<br><input type="radio"/> 1 vez al día<br><input type="radio"/> 2 a 3 veces al día<br><input type="radio"/> 5 a 6 veces al día<br><input type="radio"/> más 6 veces al día |



---

Lechuga o endivia o escarola

- ☐ Nunca o menos 1 vez al mes  
☐ 1 a 3 veces mes  
☐ 1 vez semana  
☒ 2 a 4 veces semana  
☐ 5 a 6 veces semana  
☐ 1 vez al día  
☐ 2 a 3 veces al día  
☐ 5 a 6 veces al día  
☐ más 6 veces al día

---

tomate ensalada

- ☐ Nunca o menos 1 vez al mes  
☐ 1 a 3 veces mes  
☐ 1 vez semana  
☐ 2 a 4 veces semana  
☐ 5 a 6 veces semana  
☐ 1 vez al día  
☒ 2 a 3 veces al día  
☐ 5 a 6 veces al día  
☐ más 6 veces al día

---

cebolla

- ☐ Nunca o menos 1 vez al mes  
☐ 1 a 3 veces mes  
☒ 1 vez semana  
☐ 2 a 4 veces semana  
☐ 5 a 6 veces semana  
☐ 1 vez al día  
☐ 2 a 3 veces al día  
☐ 5 a 6 veces al día  
☐ más 6 veces al día

---

Zanahoria o calabaza

- ☐ Nunca o menos 1 vez al mes  
☒ 1 a 3 veces mes  
☐ 1 vez semana  
☐ 2 a 4 veces semana  
☐ 5 a 6 veces semana  
☐ 1 vez al día  
☐ 2 a 3 veces al día  
☐ 5 a 6 veces al día  
☐ más 6 veces al día

---

Judías verdes

- ☒ Nunca o menos 1 vez al mes  
☐ 1 a 3 veces mes  
☐ 1 vez semana  
☐ 2 a 4 veces semana  
☐ 5 a 6 veces semana  
☐ 1 vez al día  
☐ 2 a 3 veces al día  
☐ 5 a 6 veces al día  
☐ más 6 veces al día

---

Berenjena o calabacin o pepino

- ☐ Nunca o menos 1 vez al mes  
☐ 1 a 3 veces mes  
☐ 1 vez semana  
☒ 2 a 4 veces semana  
☐ 5 a 6 veces semana  
☐ 1 vez al día  
☐ 2 a 3 veces al día  
☐ 5 a 6 veces al día  
☐ más 6 veces al día

---

|          |                                                                                                                                                                                                                                                                                                                                                                                                              |
|----------|--------------------------------------------------------------------------------------------------------------------------------------------------------------------------------------------------------------------------------------------------------------------------------------------------------------------------------------------------------------------------------------------------------------|
| pimiento | <input type="radio"/> Nunca o menos 1 vez al mes<br><input checked="" type="radio"/> 1 a 3 veces mes<br><input type="radio"/> 1 vez semana<br><input type="radio"/> 2 a 4 veces semana<br><input type="radio"/> 5 a 6 veces semana<br><input type="radio"/> 1 vez al día<br><input type="radio"/> 2 a 3 veces al día<br><input type="radio"/> 5 a 6 veces al día<br><input type="radio"/> más 6 veces al día |
|----------|--------------------------------------------------------------------------------------------------------------------------------------------------------------------------------------------------------------------------------------------------------------------------------------------------------------------------------------------------------------------------------------------------------------|

---

|           |                                                                                                                                                                                                                                                                                                                                                                                                              |
|-----------|--------------------------------------------------------------------------------------------------------------------------------------------------------------------------------------------------------------------------------------------------------------------------------------------------------------------------------------------------------------------------------------------------------------|
| alcachofa | <input type="radio"/> Nunca o menos 1 vez al mes<br><input checked="" type="radio"/> 1 a 3 veces mes<br><input type="radio"/> 1 vez semana<br><input type="radio"/> 2 a 4 veces semana<br><input type="radio"/> 5 a 6 veces semana<br><input type="radio"/> 1 vez al día<br><input type="radio"/> 2 a 3 veces al día<br><input type="radio"/> 5 a 6 veces al día<br><input type="radio"/> más 6 veces al día |
|-----------|--------------------------------------------------------------------------------------------------------------------------------------------------------------------------------------------------------------------------------------------------------------------------------------------------------------------------------------------------------------------------------------------------------------|

---

|            |                                                                                                                                                                                                                                                                                                                                                                                                              |
|------------|--------------------------------------------------------------------------------------------------------------------------------------------------------------------------------------------------------------------------------------------------------------------------------------------------------------------------------------------------------------------------------------------------------------|
| espárragos | <input checked="" type="radio"/> Nunca o menos 1 vez al mes<br><input type="radio"/> 1 a 3 veces mes<br><input type="radio"/> 1 vez semana<br><input type="radio"/> 2 a 4 veces semana<br><input type="radio"/> 5 a 6 veces semana<br><input type="radio"/> 1 vez al día<br><input type="radio"/> 2 a 3 veces al día<br><input type="radio"/> 5 a 6 veces al día<br><input type="radio"/> más 6 veces al día |
|------------|--------------------------------------------------------------------------------------------------------------------------------------------------------------------------------------------------------------------------------------------------------------------------------------------------------------------------------------------------------------------------------------------------------------|

---

|              |                                                                                                                                                                                                                                                                                                                                                                                                              |
|--------------|--------------------------------------------------------------------------------------------------------------------------------------------------------------------------------------------------------------------------------------------------------------------------------------------------------------------------------------------------------------------------------------------------------------|
| maíz hervido | <input checked="" type="radio"/> Nunca o menos 1 vez al mes<br><input type="radio"/> 1 a 3 veces mes<br><input type="radio"/> 1 vez semana<br><input type="radio"/> 2 a 4 veces semana<br><input type="radio"/> 5 a 6 veces semana<br><input type="radio"/> 1 vez al día<br><input type="radio"/> 2 a 3 veces al día<br><input type="radio"/> 5 a 6 veces al día<br><input type="radio"/> más 6 veces al día |
|--------------|--------------------------------------------------------------------------------------------------------------------------------------------------------------------------------------------------------------------------------------------------------------------------------------------------------------------------------------------------------------------------------------------------------------|

---

|           |                                                                                                                                                                                                                                                                                                                                                                                                              |
|-----------|--------------------------------------------------------------------------------------------------------------------------------------------------------------------------------------------------------------------------------------------------------------------------------------------------------------------------------------------------------------------------------------------------------------|
| legumbres | <input type="radio"/> Nunca o menos 1 vez al mes<br><input type="radio"/> 1 a 3 veces mes<br><input checked="" type="radio"/> 1 vez semana<br><input type="radio"/> 2 a 4 veces semana<br><input type="radio"/> 5 a 6 veces semana<br><input type="radio"/> 1 vez al día<br><input type="radio"/> 2 a 3 veces al día<br><input type="radio"/> 5 a 6 veces al día<br><input type="radio"/> más 6 veces al día |
|-----------|--------------------------------------------------------------------------------------------------------------------------------------------------------------------------------------------------------------------------------------------------------------------------------------------------------------------------------------------------------------------------------------------------------------|

---

|                       |                                                                                                                                                                                                                                                                                                                                                                                                              |
|-----------------------|--------------------------------------------------------------------------------------------------------------------------------------------------------------------------------------------------------------------------------------------------------------------------------------------------------------------------------------------------------------------------------------------------------------|
| naranjas o mandarinas | <input type="radio"/> Nunca o menos 1 vez al mes<br><input checked="" type="radio"/> 1 a 3 veces mes<br><input type="radio"/> 1 vez semana<br><input type="radio"/> 2 a 4 veces semana<br><input type="radio"/> 5 a 6 veces semana<br><input type="radio"/> 1 vez al día<br><input type="radio"/> 2 a 3 veces al día<br><input type="radio"/> 5 a 6 veces al día<br><input type="radio"/> más 6 veces al día |
|-----------------------|--------------------------------------------------------------------------------------------------------------------------------------------------------------------------------------------------------------------------------------------------------------------------------------------------------------------------------------------------------------------------------------------------------------|

---

---

zumo natural fruta

- ☐ Nunca o menos 1 vez al mes  
☒ 1 a 3 veces mes  
☐ 1 vez semana  
☐ 2 a 4 veces semana  
☐ 5 a 6 veces semana  
☐ 1 vez al día  
☐ 2 a 3 veces al día  
☐ 5 a 6 veces al día  
☐ más 6 veces al día

---

platano

- ☐ Nunca o menos 1 vez al mes  
☐ 1 a 3 veces mes  
☐ 1 vez semana  
☒ 2 a 4 veces semana  
☐ 5 a 6 veces semana  
☐ 1 vez al día  
☐ 2 a 3 veces al día  
☐ 5 a 6 veces al día  
☐ más 6 veces al día

---

manzana o pera

- ☐ Nunca o menos 1 vez al mes  
☐ 1 a 3 veces mes  
☐ 1 vez semana  
☒ 2 a 4 veces semana  
☐ 5 a 6 veces semana  
☐ 1 vez al día  
☐ 2 a 3 veces al día  
☐ 5 a 6 veces al día  
☐ más 6 veces al día

---

melocotón o nectarina

- ☐ Nunca o menos 1 vez al mes  
☐ 1 a 3 veces mes  
☐ 1 vez semana  
☐ 2 a 4 veces semana  
☒ 5 a 6 veces semana  
☐ 1 vez al día  
☐ 2 a 3 veces al día  
☐ 5 a 6 veces al día  
☐ más 6 veces al día

---

sandia o melon

- ☐ Nunca o menos 1 vez al mes  
☐ 1 a 3 veces mes  
☐ 1 vez semana  
☐ 2 a 4 veces semana  
☒ 5 a 6 veces semana  
☐ 1 vez al día  
☐ 2 a 3 veces al día  
☐ 5 a 6 veces al día  
☐ más 6 veces al día

---

uva

- ☐ Nunca o menos 1 vez al mes  
☐ 1 a 3 veces mes  
☒ 1 vez semana  
☐ 2 a 4 veces semana  
☐ 5 a 6 veces semana  
☐ 1 vez al día  
☐ 2 a 3 veces al día  
☐ 5 a 6 veces al día  
☐ más 6 veces al día

|                 |                                                                                                                                                                                                                                                                                                                                                                                                              |
|-----------------|--------------------------------------------------------------------------------------------------------------------------------------------------------------------------------------------------------------------------------------------------------------------------------------------------------------------------------------------------------------------------------------------------------------|
| bruna o ciruela | <input type="radio"/> Nunca o menos 1 vez al mes<br><input type="radio"/> 1 a 3 veces mes<br><input checked="" type="radio"/> 1 vez semana<br><input type="radio"/> 2 a 4 veces semana<br><input type="radio"/> 5 a 6 veces semana<br><input type="radio"/> 1 vez al día<br><input type="radio"/> 2 a 3 veces al día<br><input type="radio"/> 5 a 6 veces al día<br><input type="radio"/> más 6 veces al día |
| kiwi            | <input type="radio"/> Nunca o menos 1 vez al mes<br><input type="radio"/> 1 a 3 veces mes<br><input checked="" type="radio"/> 1 vez semana<br><input type="radio"/> 2 a 4 veces semana<br><input type="radio"/> 5 a 6 veces semana<br><input type="radio"/> 1 vez al día<br><input type="radio"/> 2 a 3 veces al día<br><input type="radio"/> 5 a 6 veces al día<br><input type="radio"/> más 6 veces al día |
| aceituna        | <input type="radio"/> Nunca o menos 1 vez al mes<br><input checked="" type="radio"/> 1 a 3 veces mes<br><input type="radio"/> 1 vez semana<br><input type="radio"/> 2 a 4 veces semana<br><input type="radio"/> 5 a 6 veces semana<br><input type="radio"/> 1 vez al día<br><input type="radio"/> 2 a 3 veces al día<br><input type="radio"/> 5 a 6 veces al día<br><input type="radio"/> más 6 veces al día |
| frutos secos    | <input type="radio"/> Nunca o menos 1 vez al mes<br><input type="radio"/> 1 a 3 veces mes<br><input type="radio"/> 1 vez semana<br><input checked="" type="radio"/> 2 a 4 veces semana<br><input type="radio"/> 5 a 6 veces semana<br><input type="radio"/> 1 vez al día<br><input type="radio"/> 2 a 3 veces al día<br><input type="radio"/> 5 a 6 veces al día<br><input type="radio"/> más 6 veces al día |
| pan blanco      | <input type="radio"/> Nunca o menos 1 vez al mes<br><input type="radio"/> 1 a 3 veces mes<br><input checked="" type="radio"/> 1 vez semana<br><input type="radio"/> 2 a 4 veces semana<br><input type="radio"/> 5 a 6 veces semana<br><input type="radio"/> 1 vez al día<br><input type="radio"/> 2 a 3 veces al día<br><input type="radio"/> 5 a 6 veces al día<br><input type="radio"/> más 6 veces al día |
| pan integral    | <input type="radio"/> Nunca o menos 1 vez al mes<br><input type="radio"/> 1 a 3 veces mes<br><input type="radio"/> 1 vez semana<br><input type="radio"/> 2 a 4 veces semana<br><input type="radio"/> 5 a 6 veces semana<br><input checked="" type="radio"/> 1 vez al día<br><input type="radio"/> 2 a 3 veces al día<br><input type="radio"/> 5 a 6 veces al día<br><input type="radio"/> más 6 veces al día |

---

|                   |                                                                                                                                                                                                                                                                                                                                                                                                              |
|-------------------|--------------------------------------------------------------------------------------------------------------------------------------------------------------------------------------------------------------------------------------------------------------------------------------------------------------------------------------------------------------------------------------------------------------|
| cereales desayuno | <input checked="" type="radio"/> Nunca o menos 1 vez al mes<br><input type="radio"/> 1 a 3 veces mes<br><input type="radio"/> 1 vez semana<br><input type="radio"/> 2 a 4 veces semana<br><input type="radio"/> 5 a 6 veces semana<br><input type="radio"/> 1 vez al día<br><input type="radio"/> 2 a 3 veces al día<br><input type="radio"/> 5 a 6 veces al día<br><input type="radio"/> más 6 veces al día |
|-------------------|--------------------------------------------------------------------------------------------------------------------------------------------------------------------------------------------------------------------------------------------------------------------------------------------------------------------------------------------------------------------------------------------------------------|

---

|                |                                                                                                                                                                                                                                                                                                                                                                                                              |
|----------------|--------------------------------------------------------------------------------------------------------------------------------------------------------------------------------------------------------------------------------------------------------------------------------------------------------------------------------------------------------------------------------------------------------------|
| patatas fritas | <input type="radio"/> Nunca o menos 1 vez al mes<br><input checked="" type="radio"/> 1 a 3 veces mes<br><input type="radio"/> 1 vez semana<br><input type="radio"/> 2 a 4 veces semana<br><input type="radio"/> 5 a 6 veces semana<br><input type="radio"/> 1 vez al día<br><input type="radio"/> 2 a 3 veces al día<br><input type="radio"/> 5 a 6 veces al día<br><input type="radio"/> más 6 veces al día |
|----------------|--------------------------------------------------------------------------------------------------------------------------------------------------------------------------------------------------------------------------------------------------------------------------------------------------------------------------------------------------------------------------------------------------------------|

---

|                          |                                                                                                                                                                                                                                                                                                                                                                                                   |
|--------------------------|---------------------------------------------------------------------------------------------------------------------------------------------------------------------------------------------------------------------------------------------------------------------------------------------------------------------------------------------------------------------------------------------------|
| patatas cocidas o asadas | <input type="radio"/> Nunca o menos 1 vez al mes<br><input type="radio"/> 1 a 3 veces mes<br><input type="radio"/> 1 vez semana<br><input type="radio"/> 2 a 4 veces semana<br><input type="radio"/> 5 a 6 veces semana<br><input type="radio"/> 1 vez al día<br><input type="radio"/> 2 a 3 veces al día<br><input type="radio"/> 5 a 6 veces al día<br><input type="radio"/> más 6 veces al día |
|--------------------------|---------------------------------------------------------------------------------------------------------------------------------------------------------------------------------------------------------------------------------------------------------------------------------------------------------------------------------------------------------------------------------------------------|

---

|             |                                                                                                                                                                                                                                                                                                                                                                                                              |
|-------------|--------------------------------------------------------------------------------------------------------------------------------------------------------------------------------------------------------------------------------------------------------------------------------------------------------------------------------------------------------------------------------------------------------------|
| bolsa papas | <input type="radio"/> Nunca o menos 1 vez al mes<br><input checked="" type="radio"/> 1 a 3 veces mes<br><input type="radio"/> 1 vez semana<br><input type="radio"/> 2 a 4 veces semana<br><input type="radio"/> 5 a 6 veces semana<br><input type="radio"/> 1 vez al día<br><input type="radio"/> 2 a 3 veces al día<br><input type="radio"/> 5 a 6 veces al día<br><input type="radio"/> más 6 veces al día |
|-------------|--------------------------------------------------------------------------------------------------------------------------------------------------------------------------------------------------------------------------------------------------------------------------------------------------------------------------------------------------------------------------------------------------------------|

---

|                |                                                                                                                                                                                                                                                                                                                                                                                                              |
|----------------|--------------------------------------------------------------------------------------------------------------------------------------------------------------------------------------------------------------------------------------------------------------------------------------------------------------------------------------------------------------------------------------------------------------|
| arroz cocinado | <input type="radio"/> Nunca o menos 1 vez al mes<br><input type="radio"/> 1 a 3 veces mes<br><input type="radio"/> 1 vez semana<br><input checked="" type="radio"/> 2 a 4 veces semana<br><input type="radio"/> 5 a 6 veces semana<br><input type="radio"/> 1 vez al día<br><input type="radio"/> 2 a 3 veces al día<br><input type="radio"/> 5 a 6 veces al día<br><input type="radio"/> más 6 veces al día |
|----------------|--------------------------------------------------------------------------------------------------------------------------------------------------------------------------------------------------------------------------------------------------------------------------------------------------------------------------------------------------------------------------------------------------------------|

---

|       |                                                                                                                                                                                                                                                                                                                                                                                                              |
|-------|--------------------------------------------------------------------------------------------------------------------------------------------------------------------------------------------------------------------------------------------------------------------------------------------------------------------------------------------------------------------------------------------------------------|
| pasta | <input type="radio"/> Nunca o menos 1 vez al mes<br><input type="radio"/> 1 a 3 veces mes<br><input type="radio"/> 1 vez semana<br><input checked="" type="radio"/> 2 a 4 veces semana<br><input type="radio"/> 5 a 6 veces semana<br><input type="radio"/> 1 vez al día<br><input type="radio"/> 2 a 3 veces al día<br><input type="radio"/> 5 a 6 veces al día<br><input type="radio"/> más 6 veces al día |
|-------|--------------------------------------------------------------------------------------------------------------------------------------------------------------------------------------------------------------------------------------------------------------------------------------------------------------------------------------------------------------------------------------------------------------|

---

|                     |                                                                                                                                                                                                                                                                                                                                                                                                              |
|---------------------|--------------------------------------------------------------------------------------------------------------------------------------------------------------------------------------------------------------------------------------------------------------------------------------------------------------------------------------------------------------------------------------------------------------|
| pizza               | <input type="radio"/> Nunca o menos 1 vez al mes<br><input checked="" type="radio"/> 1 a 3 veces mes<br><input type="radio"/> 1 vez semana<br><input type="radio"/> 2 a 4 veces semana<br><input type="radio"/> 5 a 6 veces semana<br><input type="radio"/> 1 vez al día<br><input type="radio"/> 2 a 3 veces al día<br><input type="radio"/> 5 a 6 veces al día<br><input type="radio"/> más 6 veces al día |
| aceite oliva        | <input type="radio"/> Nunca o menos 1 vez al mes<br><input type="radio"/> 1 a 3 veces mes<br><input type="radio"/> 1 vez semana<br><input type="radio"/> 2 a 4 veces semana<br><input type="radio"/> 5 a 6 veces semana<br><input type="radio"/> 1 vez al día<br><input checked="" type="radio"/> 2 a 3 veces al día<br><input type="radio"/> 5 a 6 veces al día<br><input type="radio"/> más 6 veces al día |
| otros aceites       | <input checked="" type="radio"/> Nunca o menos 1 vez al mes<br><input type="radio"/> 1 a 3 veces mes<br><input type="radio"/> 1 vez semana<br><input type="radio"/> 2 a 4 veces semana<br><input type="radio"/> 5 a 6 veces semana<br><input type="radio"/> 1 vez al día<br><input type="radio"/> 2 a 3 veces al día<br><input type="radio"/> 5 a 6 veces al día<br><input type="radio"/> más 6 veces al día |
| margarina           | <input checked="" type="radio"/> Nunca o menos 1 vez al mes<br><input type="radio"/> 1 a 3 veces mes<br><input type="radio"/> 1 vez semana<br><input type="radio"/> 2 a 4 veces semana<br><input type="radio"/> 5 a 6 veces semana<br><input type="radio"/> 1 vez al día<br><input type="radio"/> 2 a 3 veces al día<br><input type="radio"/> 5 a 6 veces al día<br><input type="radio"/> más 6 veces al día |
| mantequilla         | <input type="radio"/> Nunca o menos 1 vez al mes<br><input type="radio"/> 1 a 3 veces mes<br><input type="radio"/> 1 vez semana<br><input checked="" type="radio"/> 2 a 4 veces semana<br><input type="radio"/> 5 a 6 veces semana<br><input type="radio"/> 1 vez al día<br><input type="radio"/> 2 a 3 veces al día<br><input type="radio"/> 5 a 6 veces al día<br><input type="radio"/> más 6 veces al día |
| galletas tipo maria | <input checked="" type="radio"/> Nunca o menos 1 vez al mes<br><input type="radio"/> 1 a 3 veces mes<br><input type="radio"/> 1 vez semana<br><input type="radio"/> 2 a 4 veces semana<br><input type="radio"/> 5 a 6 veces semana<br><input type="radio"/> 1 vez al día<br><input type="radio"/> 2 a 3 veces al día<br><input type="radio"/> 5 a 6 veces al día<br><input type="radio"/> más 6 veces al día |

---

galletas chocolate

- ☒ Nunca o menos 1 vez al mes  
☐ 1 a 3 veces mes  
☐ 1 vez semana  
☐ 2 a 4 veces semana  
☐ 5 a 6 veces semana  
☐ 1 vez al día  
☐ 2 a 3 veces al día  
☐ 5 a 6 veces al día  
☐ más 6 veces al día

---

bolleria

- ☐ Nunca o menos 1 vez al mes  
☐ 1 a 3 veces mes  
☒ 1 vez semana  
☐ 2 a 4 veces semana  
☐ 5 a 6 veces semana  
☐ 1 vez al día  
☐ 2 a 3 veces al día  
☐ 5 a 6 veces al día  
☐ más 6 veces al día

---

chocolate o bombones

- ☐ Nunca o menos 1 vez al mes  
☐ 1 a 3 veces mes  
☒ 1 vez semana  
☐ 2 a 4 veces semana  
☐ 5 a 6 veces semana  
☐ 1 vez al día  
☐ 2 a 3 veces al día  
☐ 5 a 6 veces al día  
☐ más 6 veces al día

---

chocolate polvo o colacao

- ☐ Nunca o menos 1 vez al mes  
☐ 1 a 3 veces mes  
☐ 1 vez semana  
☐ 2 a 4 veces semana  
☒ 5 a 6 veces semana  
☐ 1 vez al día  
☐ 2 a 3 veces al día  
☐ 5 a 6 veces al día  
☐ más 6 veces al día

---

vino tinto

- ☒ Nunca o menos 1 vez al mes  
☐ 1 a 3 veces mes  
☐ 1 vez semana  
☐ 2 a 4 veces semana  
☐ 5 a 6 veces semana  
☐ 1 vez al día  
☐ 2 a 3 veces al día  
☐ 5 a 6 veces al día  
☐ más 6 veces al día

---

vino blanco

- ☒ Nunca o menos 1 vez al mes  
☐ 1 a 3 veces mes  
☐ 1 vez semana  
☐ 2 a 4 veces semana  
☐ 5 a 6 veces semana  
☐ 1 vez al día  
☐ 2 a 3 veces al día  
☐ 5 a 6 veces al día  
☐ más 6 veces al día

---

|                    |                                                                                                                                                                                                                                                                                                                                                                                                              |
|--------------------|--------------------------------------------------------------------------------------------------------------------------------------------------------------------------------------------------------------------------------------------------------------------------------------------------------------------------------------------------------------------------------------------------------------|
| vino seco o vermut | <input checked="" type="radio"/> Nunca o menos 1 vez al mes<br><input type="radio"/> 1 a 3 veces mes<br><input type="radio"/> 1 vez semana<br><input type="radio"/> 2 a 4 veces semana<br><input type="radio"/> 5 a 6 veces semana<br><input type="radio"/> 1 vez al día<br><input type="radio"/> 2 a 3 veces al día<br><input type="radio"/> 5 a 6 veces al día<br><input type="radio"/> más 6 veces al día |
|--------------------|--------------------------------------------------------------------------------------------------------------------------------------------------------------------------------------------------------------------------------------------------------------------------------------------------------------------------------------------------------------------------------------------------------------|

---

|         |                                                                                                                                                                                                                                                                                                                                                                                                              |
|---------|--------------------------------------------------------------------------------------------------------------------------------------------------------------------------------------------------------------------------------------------------------------------------------------------------------------------------------------------------------------------------------------------------------------|
| cerveza | <input checked="" type="radio"/> Nunca o menos 1 vez al mes<br><input type="radio"/> 1 a 3 veces mes<br><input type="radio"/> 1 vez semana<br><input type="radio"/> 2 a 4 veces semana<br><input type="radio"/> 5 a 6 veces semana<br><input type="radio"/> 1 vez al día<br><input type="radio"/> 2 a 3 veces al día<br><input type="radio"/> 5 a 6 veces al día<br><input type="radio"/> más 6 veces al día |
|---------|--------------------------------------------------------------------------------------------------------------------------------------------------------------------------------------------------------------------------------------------------------------------------------------------------------------------------------------------------------------------------------------------------------------|

---

|                     |                                                                                                                                                                                                                                                                                                                                                                                                              |
|---------------------|--------------------------------------------------------------------------------------------------------------------------------------------------------------------------------------------------------------------------------------------------------------------------------------------------------------------------------------------------------------------------------------------------------------|
| cerveza sin alcohol | <input checked="" type="radio"/> Nunca o menos 1 vez al mes<br><input type="radio"/> 1 a 3 veces mes<br><input type="radio"/> 1 vez semana<br><input type="radio"/> 2 a 4 veces semana<br><input type="radio"/> 5 a 6 veces semana<br><input type="radio"/> 1 vez al día<br><input type="radio"/> 2 a 3 veces al día<br><input type="radio"/> 5 a 6 veces al día<br><input type="radio"/> más 6 veces al día |
|---------------------|--------------------------------------------------------------------------------------------------------------------------------------------------------------------------------------------------------------------------------------------------------------------------------------------------------------------------------------------------------------------------------------------------------------|

---

|         |                                                                                                                                                                                                                                                                                                                                                                                                              |
|---------|--------------------------------------------------------------------------------------------------------------------------------------------------------------------------------------------------------------------------------------------------------------------------------------------------------------------------------------------------------------------------------------------------------------|
| licores | <input checked="" type="radio"/> Nunca o menos 1 vez al mes<br><input type="radio"/> 1 a 3 veces mes<br><input type="radio"/> 1 vez semana<br><input type="radio"/> 2 a 4 veces semana<br><input type="radio"/> 5 a 6 veces semana<br><input type="radio"/> 1 vez al día<br><input type="radio"/> 2 a 3 veces al día<br><input type="radio"/> 5 a 6 veces al día<br><input type="radio"/> más 6 veces al día |
|---------|--------------------------------------------------------------------------------------------------------------------------------------------------------------------------------------------------------------------------------------------------------------------------------------------------------------------------------------------------------------------------------------------------------------|

---

|                       |                                                                                                                                                                                                                                                                                                                                                                                                              |
|-----------------------|--------------------------------------------------------------------------------------------------------------------------------------------------------------------------------------------------------------------------------------------------------------------------------------------------------------------------------------------------------------------------------------------------------------|
| ginebra o ron o vodka | <input checked="" type="radio"/> Nunca o menos 1 vez al mes<br><input type="radio"/> 1 a 3 veces mes<br><input type="radio"/> 1 vez semana<br><input type="radio"/> 2 a 4 veces semana<br><input type="radio"/> 5 a 6 veces semana<br><input type="radio"/> 1 vez al día<br><input type="radio"/> 2 a 3 veces al día<br><input type="radio"/> 5 a 6 veces al día<br><input type="radio"/> más 6 veces al día |
|-----------------------|--------------------------------------------------------------------------------------------------------------------------------------------------------------------------------------------------------------------------------------------------------------------------------------------------------------------------------------------------------------------------------------------------------------|

---

|                 |                                                                                                                                                                                                                                                                                                                                                                                                              |
|-----------------|--------------------------------------------------------------------------------------------------------------------------------------------------------------------------------------------------------------------------------------------------------------------------------------------------------------------------------------------------------------------------------------------------------------|
| refresco normal | <input type="radio"/> Nunca o menos 1 vez al mes<br><input checked="" type="radio"/> 1 a 3 veces mes<br><input type="radio"/> 1 vez semana<br><input type="radio"/> 2 a 4 veces semana<br><input type="radio"/> 5 a 6 veces semana<br><input type="radio"/> 1 vez al día<br><input type="radio"/> 2 a 3 veces al día<br><input type="radio"/> 5 a 6 veces al día<br><input type="radio"/> más 6 veces al día |
|-----------------|--------------------------------------------------------------------------------------------------------------------------------------------------------------------------------------------------------------------------------------------------------------------------------------------------------------------------------------------------------------------------------------------------------------|

---



|                           |                                                                                                                                                                                                                                                                                                                                                                                                              |
|---------------------------|--------------------------------------------------------------------------------------------------------------------------------------------------------------------------------------------------------------------------------------------------------------------------------------------------------------------------------------------------------------------------------------------------------------|
| refresco sin azúcar       | <input type="radio"/> Nunca o menos 1 vez al mes<br><input checked="" type="radio"/> 1 a 3 veces mes<br><input type="radio"/> 1 vez semana<br><input type="radio"/> 2 a 4 veces semana<br><input type="radio"/> 5 a 6 veces semana<br><input type="radio"/> 1 vez al día<br><input type="radio"/> 2 a 3 veces al día<br><input type="radio"/> 5 a 6 veces al día<br><input type="radio"/> más 6 veces al día |
| Agua del grifo            | <input type="radio"/> Nunca o menos 1 vez al mes<br><input type="radio"/> 1 a 3 veces mes<br><input type="radio"/> 1 vez semana<br><input type="radio"/> 2 a 4 veces semana<br><input type="radio"/> 5 a 6 veces semana<br><input type="radio"/> 1 vez al día<br><input type="radio"/> 2 a 3 veces al día<br><input type="radio"/> 5 a 6 veces al día<br><input checked="" type="radio"/> más 6 veces al día |
| agua embotellada sin gas  | <input type="radio"/> Nunca o menos 1 vez al mes<br><input type="radio"/> 1 a 3 veces mes<br><input type="radio"/> 1 vez semana<br><input type="radio"/> 2 a 4 veces semana<br><input type="radio"/> 5 a 6 veces semana<br><input type="radio"/> 1 vez al día<br><input type="radio"/> 2 a 3 veces al día<br><input type="radio"/> 5 a 6 veces al día<br><input checked="" type="radio"/> más 6 veces al día |
| agua embotellada con gas  | <input checked="" type="radio"/> Nunca o menos 1 vez al mes<br><input type="radio"/> 1 a 3 veces mes<br><input type="radio"/> 1 vez semana<br><input type="radio"/> 2 a 4 veces semana<br><input type="radio"/> 5 a 6 veces semana<br><input type="radio"/> 1 vez al día<br><input type="radio"/> 2 a 3 veces al día<br><input type="radio"/> 5 a 6 veces al día<br><input type="radio"/> más 6 veces al día |
| zumos frutas embotellados | <input type="radio"/> Nunca o menos 1 vez al mes<br><input type="radio"/> 1 a 3 veces mes<br><input checked="" type="radio"/> 1 vez semana<br><input type="radio"/> 2 a 4 veces semana<br><input type="radio"/> 5 a 6 veces semana<br><input type="radio"/> 1 vez al día<br><input type="radio"/> 2 a 3 veces al día<br><input type="radio"/> 5 a 6 veces al día<br><input type="radio"/> más 6 veces al día |
| café                      | <input type="radio"/> Nunca o menos 1 vez al mes<br><input checked="" type="radio"/> 1 a 3 veces mes<br><input type="radio"/> 1 vez semana<br><input type="radio"/> 2 a 4 veces semana<br><input type="radio"/> 5 a 6 veces semana<br><input type="radio"/> 1 vez al día<br><input type="radio"/> 2 a 3 veces al día<br><input type="radio"/> 5 a 6 veces al día<br><input type="radio"/> más 6 veces al día |

---

cafe descafeinado

- ☐ Nunca o menos 1 vez al mes  
☐ 1 a 3 veces mes  
☐ 1 vez semana  
☐ 2 a 4 veces semana  
☐ 5 a 6 veces semana  
☐ 1 vez al día  
☒ 2 a 3 veces al día  
☐ 5 a 6 veces al día  
☐ más 6 veces al día

---

te o infusión

- ☒ Nunca o menos 1 vez al mes  
☐ 1 a 3 veces mes  
☐ 1 vez semana  
☐ 2 a 4 veces semana  
☐ 5 a 6 veces semana  
☐ 1 vez al día  
☐ 2 a 3 veces al día  
☐ 5 a 6 veces al día  
☐ más 6 veces al día

---

sopa o puré verduras

- ☐ Nunca o menos 1 vez al mes  
☒ 1 a 3 veces mes  
☐ 1 vez semana  
☐ 2 a 4 veces semana  
☐ 5 a 6 veces semana  
☐ 1 vez al día  
☐ 2 a 3 veces al día  
☐ 5 a 6 veces al día  
☐ más 6 veces al día

---

croquetas pollo jamón

- ☐ Nunca o menos 1 vez al mes  
☒ 1 a 3 veces mes  
☐ 1 vez semana  
☐ 2 a 4 veces semana  
☐ 5 a 6 veces semana  
☐ 1 vez al día  
☐ 2 a 3 veces al día  
☐ 5 a 6 veces al día  
☐ más 6 veces al día

---

croquetas pescado

- ☒ Nunca o menos 1 vez al mes  
☐ 1 a 3 veces mes  
☐ 1 vez semana  
☐ 2 a 4 veces semana  
☐ 5 a 6 veces semana  
☐ 1 vez al día  
☐ 2 a 3 veces al día  
☐ 5 a 6 veces al día  
☐ más 6 veces al día

---

mayonesa

- ☐ Nunca o menos 1 vez al mes  
☐ 1 a 3 veces mes  
☒ 1 vez semana  
☐ 2 a 4 veces semana  
☐ 5 a 6 veces semana  
☐ 1 vez al día  
☐ 2 a 3 veces al día  
☐ 5 a 6 veces al día  
☐ más 6 veces al día

|                  |                                                                                                                                                                                                                                                                                                                                                                                                              |
|------------------|--------------------------------------------------------------------------------------------------------------------------------------------------------------------------------------------------------------------------------------------------------------------------------------------------------------------------------------------------------------------------------------------------------------|
| salsa tomate     | <input checked="" type="radio"/> Nunca o menos 1 vez al mes<br><input type="radio"/> 1 a 3 veces mes<br><input type="radio"/> 1 vez semana<br><input type="radio"/> 2 a 4 veces semana<br><input type="radio"/> 5 a 6 veces semana<br><input type="radio"/> 1 vez al día<br><input type="radio"/> 2 a 3 veces al día<br><input type="radio"/> 5 a 6 veces al día<br><input type="radio"/> más 6 veces al día |
| ketchup          | <input checked="" type="radio"/> Nunca o menos 1 vez al mes<br><input type="radio"/> 1 a 3 veces mes<br><input type="radio"/> 1 vez semana<br><input type="radio"/> 2 a 4 veces semana<br><input type="radio"/> 5 a 6 veces semana<br><input type="radio"/> 1 vez al día<br><input type="radio"/> 2 a 3 veces al día<br><input type="radio"/> 5 a 6 veces al día<br><input type="radio"/> más 6 veces al día |
| sal              | <input type="radio"/> Nunca o menos 1 vez al mes<br><input type="radio"/> 1 a 3 veces mes<br><input type="radio"/> 1 vez semana<br><input type="radio"/> 2 a 4 veces semana<br><input checked="" type="radio"/> 5 a 6 veces semana<br><input type="radio"/> 1 vez al día<br><input type="radio"/> 2 a 3 veces al día<br><input type="radio"/> 5 a 6 veces al día<br><input type="radio"/> más 6 veces al día |
| ajo              | <input type="radio"/> Nunca o menos 1 vez al mes<br><input type="radio"/> 1 a 3 veces mes<br><input type="radio"/> 1 vez semana<br><input type="radio"/> 2 a 4 veces semana<br><input type="radio"/> 5 a 6 veces semana<br><input checked="" type="radio"/> 1 vez al día<br><input type="radio"/> 2 a 3 veces al día<br><input type="radio"/> 5 a 6 veces al día<br><input type="radio"/> más 6 veces al día |
| mermelada o miel | <input type="radio"/> Nunca o menos 1 vez al mes<br><input type="radio"/> 1 a 3 veces mes<br><input type="radio"/> 1 vez semana<br><input checked="" type="radio"/> 2 a 4 veces semana<br><input type="radio"/> 5 a 6 veces semana<br><input type="radio"/> 1 vez al día<br><input type="radio"/> 2 a 3 veces al día<br><input type="radio"/> 5 a 6 veces al día<br><input type="radio"/> más 6 veces al día |
| azúcar           | <input type="radio"/> Nunca o menos 1 vez al mes<br><input type="radio"/> 1 a 3 veces mes<br><input type="radio"/> 1 vez semana<br><input type="radio"/> 2 a 4 veces semana<br><input type="radio"/> 5 a 6 veces semana<br><input type="radio"/> 1 vez al día<br><input checked="" type="radio"/> 2 a 3 veces al día<br><input type="radio"/> 5 a 6 veces al día<br><input type="radio"/> más 6 veces al día |

|                                       |                                                                                                                                                                                                                                                                                                                                                                                                                                                                                                                               |
|---------------------------------------|-------------------------------------------------------------------------------------------------------------------------------------------------------------------------------------------------------------------------------------------------------------------------------------------------------------------------------------------------------------------------------------------------------------------------------------------------------------------------------------------------------------------------------|
| Otro alimento                         | <hr/>                                                                                                                                                                                                                                                                                                                                                                                                                                                                                                                         |
| suplementos vitamínicos               | <input type="radio"/> si<br><input checked="" type="radio"/> no                                                                                                                                                                                                                                                                                                                                                                                                                                                               |
| suplementos vitamínicos               | <hr/>                                                                                                                                                                                                                                                                                                                                                                                                                                                                                                                         |
| dieta previa                          | <input type="radio"/> si<br><input checked="" type="radio"/> no                                                                                                                                                                                                                                                                                                                                                                                                                                                               |
| motivo dieta                          | <input checked="" type="radio"/> no dieta<br><input type="radio"/> control peso<br><input type="radio"/> control colesterol<br><input type="radio"/> control diabetes<br><input type="radio"/> problemas estómago<br><input type="radio"/> problemas vesícula o hepáticos<br><input type="radio"/> HTA o cardiopatía<br><input type="radio"/> problemas renales<br><input type="radio"/> alergia alimentaria<br><input type="radio"/> ácido úrico elevado<br><input type="radio"/> vegetariana<br><input type="radio"/> otros |
| cambio alimentos año previo gestación | <input checked="" type="radio"/> si<br><input type="radio"/> no                                                                                                                                                                                                                                                                                                                                                                                                                                                               |
| cambio lácteos                        | <input type="radio"/> eliminado<br><input type="radio"/> disminuido<br><input checked="" type="radio"/> igual<br><input type="radio"/> aumentado<br><input type="radio"/> no sabe                                                                                                                                                                                                                                                                                                                                             |
| cambio huevos                         | <input type="radio"/> eliminado<br><input type="radio"/> disminuido<br><input checked="" type="radio"/> igual<br><input type="radio"/> aumentado<br><input type="radio"/> no sabe                                                                                                                                                                                                                                                                                                                                             |
| cambio carne                          | <input type="radio"/> eliminado<br><input checked="" type="radio"/> disminuido<br><input type="radio"/> igual<br><input type="radio"/> aumentado<br><input type="radio"/> no sabe                                                                                                                                                                                                                                                                                                                                             |
| cambio pescado                        | <input type="radio"/> eliminado<br><input type="radio"/> disminuido<br><input type="radio"/> igual<br><input checked="" type="radio"/> aumentado<br><input type="radio"/> no sabe                                                                                                                                                                                                                                                                                                                                             |
| cambio verduras                       | <input type="radio"/> eliminado<br><input type="radio"/> disminuido<br><input type="radio"/> igual<br><input checked="" type="radio"/> aumentado<br><input type="radio"/> no sabe                                                                                                                                                                                                                                                                                                                                             |

|                            |                                                                                                                                                                                                                        |
|----------------------------|------------------------------------------------------------------------------------------------------------------------------------------------------------------------------------------------------------------------|
| cambio legumbres           | <input type="radio"/> eliminado<br><input type="radio"/> disminuido<br><input type="radio"/> igual<br><input checked="" type="radio"/> aumentado<br><input type="radio"/> no sabe                                      |
| cambio fruta               | <input type="radio"/> eliminado<br><input type="radio"/> disminuido<br><input type="radio"/> igual<br><input checked="" type="radio"/> aumentado<br><input type="radio"/> no sabe                                      |
| cambio pan                 | <input type="radio"/> eliminado<br><input type="radio"/> disminuido<br><input checked="" type="radio"/> igual<br><input type="radio"/> aumentado<br><input type="radio"/> no sabe                                      |
| cambio aceite oliva        | <input type="radio"/> eliminado<br><input type="radio"/> disminuido<br><input type="radio"/> igual<br><input checked="" type="radio"/> aumentado<br><input type="radio"/> no sabe                                      |
| cambio mante o margarina   | <input type="radio"/> eliminado<br><input checked="" type="radio"/> disminuido<br><input type="radio"/> igual<br><input type="radio"/> aumentado<br><input type="radio"/> no sabe                                      |
| cambio azúcar y dulces     | <input type="radio"/> eliminado<br><input checked="" type="radio"/> disminuido<br><input type="radio"/> igual<br><input type="radio"/> aumentado<br><input type="radio"/> no sabe                                      |
| cambio bebidas alcohólicas | <input checked="" type="radio"/> eliminado<br><input type="radio"/> disminuido<br><input type="radio"/> igual<br><input type="radio"/> aumentado<br><input type="radio"/> no sabe                                      |
| frecuencia comidas fritas  | <input type="radio"/> a diario<br><input type="radio"/> 5 a 6 veces semana<br><input type="radio"/> 2 a 4 veces semana<br><input type="radio"/> 1 vez semana<br><input checked="" type="radio"/> menos de 1 vez semana |
| carne                      | <input type="radio"/> no como<br><input type="radio"/> cruda<br><input checked="" type="radio"/> poco hecha<br><input type="radio"/> hecha<br><input type="radio"/> muy hecha                                          |
| grasa visible carne        | <input type="radio"/> quita toda<br><input type="radio"/> quita mayoría<br><input checked="" type="radio"/> quita un poco<br><input type="radio"/> no quita nada                                                       |

|                                |                                                                                                                                                                                                                                                          |
|--------------------------------|----------------------------------------------------------------------------------------------------------------------------------------------------------------------------------------------------------------------------------------------------------|
| cocina carne                   | <input checked="" type="radio"/> a la plancha<br><input type="radio"/> a la parrilla<br><input type="radio"/> asada<br><input type="radio"/> frita<br><input type="radio"/> guisada                                                                      |
| tostado quemado carne          | <input checked="" type="radio"/> nunca<br><input type="radio"/> 1 vez mes<br><input type="radio"/> 2 a 3 veces mes<br><input type="radio"/> 1 vez semana<br><input type="radio"/> 2 a 3 semanas                                                          |
| tostado quemado pescado        | <input type="radio"/> nunca<br><input type="radio"/> 1 vez mes<br><input checked="" type="radio"/> 2 a 3 veces mes<br><input type="radio"/> 1 vez semana<br><input type="radio"/> 2 a 3 semanas                                                          |
| socarrat paella                | <input type="radio"/> nunca<br><input checked="" type="radio"/> 1 vez mes<br><input type="radio"/> 2 a 3 veces mes<br><input type="radio"/> 1 vez semana<br><input type="radio"/> 2 a 3 semanas                                                          |
| grasa o aceite cocinar         | <input type="radio"/> mantequilla<br><input type="radio"/> margarina<br><input type="radio"/> aceite oliva<br><input checked="" type="radio"/> aceite oliva virgen extra<br><input type="radio"/> aceite vegetal<br><input type="radio"/> mezcla aceites |
| grasa aceite aliñar            | <input type="radio"/> mantequilla<br><input type="radio"/> margarina<br><input type="radio"/> aceite oliva<br><input checked="" type="radio"/> aceite oliva virgen extra<br><input type="radio"/> aceite vegetal<br><input type="radio"/> mezcla aceites |
| grasa aceite freir             | <input type="radio"/> mantequilla<br><input type="radio"/> margarina<br><input type="radio"/> aceite oliva<br><input type="radio"/> aceite oliva virgen extra<br><input checked="" type="radio"/> aceite vegetal<br><input type="radio"/> mezcla aceites |
| Ejercicio cuestionario         | <input checked="" type="radio"/> si<br><input type="radio"/> no                                                                                                                                                                                          |
| horas de sueño incluido siesta | [*DATA REMOVED*]                                                                                                                                                                                                                                         |
| minutos siesta                 | [*DATA REMOVED*]                                                                                                                                                                                                                                         |
| horas televisión semana        | [*DATA REMOVED*]                                                                                                                                                                                                                                         |

|                                        |                                                                                                                                                                                                                                                                                                                                                                           |
|----------------------------------------|---------------------------------------------------------------------------------------------------------------------------------------------------------------------------------------------------------------------------------------------------------------------------------------------------------------------------------------------------------------------------|
| actividad trabajo                      | <input checked="" type="radio"/> casi siempre sentado<br><input type="radio"/> sentado 50 por cien<br><input type="radio"/> casi siempre de pie, quieto<br><input type="radio"/> casi siempre levantado caminando y llevando pocas cosas<br><input type="radio"/> casi siempre levantado, caminando y llevado muchas cosas<br><input type="radio"/> trabajo manual pesado |
| tiempo caminar o bici al día           | <input type="radio"/> casi nunca<br><input type="radio"/> menos 20min día<br><input type="radio"/> 20 a 40 min día<br><input type="radio"/> 40 a 60 min día<br><input checked="" type="radio"/> 1h o 1h y media día<br><input type="radio"/> más de 1h y media al día                                                                                                     |
| tiempo tareas casa al día              | <input checked="" type="radio"/> menos de 1h día<br><input type="radio"/> 1 a 2h día<br><input type="radio"/> 3 a 4h día<br><input type="radio"/> 5 a 6h día<br><input type="radio"/> 7 a 8h día<br><input type="radio"/> más de 8h día                                                                                                                                   |
| tiempo libre televisión ordenador leer | <input type="radio"/> menos 1h día<br><input type="radio"/> 1h día<br><input checked="" type="radio"/> 2h día<br><input type="radio"/> 3h día<br><input type="radio"/> 4h día<br><input type="radio"/> 5 a 6h día<br><input type="radio"/> mas 6h día                                                                                                                     |
| tiempo libre ejercicio o deporte       | <input type="radio"/> menos 1h semana<br><input type="radio"/> 1h semana<br><input type="radio"/> 2h semana<br><input checked="" type="radio"/> 3h semana<br><input type="radio"/> 4 a 5h semana<br><input type="radio"/> mas 5h semana                                                                                                                                   |
| como se considera                      | <input type="radio"/> sedentaria<br><input type="radio"/> poco activa<br><input checked="" type="radio"/> moderadamente activa<br><input type="radio"/> bastante activa<br><input type="radio"/> muy activa<br><input type="radio"/> no sabe                                                                                                                              |
| FUR                                    | [*DATA REMOVED*]                                                                                                                                                                                                                                                                                                                                                          |
| Semanas gestación 2T                   | _____                                                                                                                                                                                                                                                                                                                                                                     |
| Días gestación 2T                      | _____                                                                                                                                                                                                                                                                                                                                                                     |
| DBP 2T                                 | _____                                                                                                                                                                                                                                                                                                                                                                     |
| CC 2T                                  | _____                                                                                                                                                                                                                                                                                                                                                                     |

|                                                   |                                                                                                                                                                                                 |
|---------------------------------------------------|-------------------------------------------------------------------------------------------------------------------------------------------------------------------------------------------------|
| AC 2T                                             |                                                                                                                                                                                                 |
| LF 2T                                             |                                                                                                                                                                                                 |
| PFE 2T (Hadlock)                                  |                                                                                                                                                                                                 |
| Semanas gestación 3T                              | [*DATA REMOVED*]                                                                                                                                                                                |
| días 3T                                           | [*DATA REMOVED*]                                                                                                                                                                                |
| DBP 3T                                            | [*DATA REMOVED*]                                                                                                                                                                                |
| CC 3T                                             | [*DATA REMOVED*]                                                                                                                                                                                |
| AC 3T                                             | [*DATA REMOVED*]                                                                                                                                                                                |
| LF 3T                                             | [*DATA REMOVED*]                                                                                                                                                                                |
| PFE 3T (Hadlock)                                  | [*DATA REMOVED*]                                                                                                                                                                                |
| Semanas de gestación final                        | [*DATA REMOVED*]                                                                                                                                                                                |
| días gestación final                              | [*DATA REMOVED*]                                                                                                                                                                                |
| Localización placenta                             | <input checked="" type="radio"/> anterior<br><input type="radio"/> lateral derecha<br><input type="radio"/> lateral izquierda<br><input type="radio"/> posterior<br><input type="radio"/> fondo |
| Presentación longitudinal cefálica                | <input type="radio"/> no<br><input checked="" type="radio"/> si                                                                                                                                 |
| Dorso                                             | <input type="radio"/> izquierda anterior<br><input type="radio"/> izquierda posterior<br><input checked="" type="radio"/> derecha anterior<br><input type="radio"/> derecha posterior           |
| diámetro biparietal                               | [*DATA REMOVED*]                                                                                                                                                                                |
| Circunferencia craneal                            | [*DATA REMOVED*]                                                                                                                                                                                |
| Circunferencia abdominal                          | [*DATA REMOVED*]                                                                                                                                                                                |
| Longitud de femur                                 | [*DATA REMOVED*]                                                                                                                                                                                |
| tejido celular subcutáneo a nivel del muslo en mm | [*DATA REMOVED*]                                                                                                                                                                                |
| tejido celular subcutáneo en abdomen en mm        | [*DATA REMOVED*]                                                                                                                                                                                |



|                                               |                                                                                                                                                          |
|-----------------------------------------------|----------------------------------------------------------------------------------------------------------------------------------------------------------|
| Volumen del muslo en cm3                      | [*DATA REMOVED*]                                                                                                                                         |
| Peso fetal estimado según fórmula de Hadlock  | [*DATA REMOVED*]                                                                                                                                         |
| Percentil                                     | [*DATA REMOVED*]                                                                                                                                         |
| Peso fetal estimado según fórmula de Scioscia | _____                                                                                                                                                    |
| Peso fetal estimado según fórmula de LEE      | _____                                                                                                                                                    |
| Tipo de parto                                 | <input checked="" type="radio"/> eutocico<br><input type="radio"/> instrumentado/ventosa<br><input type="radio"/> cesarea                                |
| fecha de nacimiento                           | [*DATA REMOVED*]                                                                                                                                         |
| Días entre exploración y nacimiento           | [*DATA REMOVED*]                                                                                                                                         |
| Peso RN en g                                  | [*DATA REMOVED*]                                                                                                                                         |
| sexo                                          | <input checked="" type="radio"/> mujer<br><input type="radio"/> hombre                                                                                   |
| Apgar 1 minuto                                | [*DATA REMOVED*]                                                                                                                                         |
| Apgar 5 minutos                               | [*DATA REMOVED*]                                                                                                                                         |
| Apgar 10 minutos                              | _____                                                                                                                                                    |
| antecedente Covid durante gestación           | <input type="radio"/> Yes<br><input checked="" type="radio"/> No                                                                                         |
| Nivel de estudios                             | <input type="radio"/> ninguno<br><input type="radio"/> primarios<br><input type="radio"/> secundarios<br><input checked="" type="radio"/> universitarios |

# Base\_datos\_estimacion\_peso\_fetal

|                                       |                                                                                                                                                                                                                                                                                      |
|---------------------------------------|--------------------------------------------------------------------------------------------------------------------------------------------------------------------------------------------------------------------------------------------------------------------------------------|
| Número de identificación participante | 133                                                                                                                                                                                                                                                                                  |
| CODIGO PARTICIPANTE                   |                                                                                                                                                                                                                                                                                      |
| Edad                                  | [*DATA REMOVED*]                                                                                                                                                                                                                                                                     |
| Gestaciones                           | <input type="radio"/> 1<br><input checked="" type="radio"/> 2<br><input type="radio"/> 3<br><input type="radio"/> mas de 3                                                                                                                                                           |
| partos                                | <input checked="" type="radio"/> 0<br><input type="radio"/> 1<br><input type="radio"/> 2<br><input type="radio"/> 3<br><input type="radio"/> mas de 3                                                                                                                                |
| cesáreas                              | <input checked="" type="radio"/> 0<br><input type="radio"/> 1<br><input type="radio"/> 2<br><input type="radio"/> 3<br><input type="radio"/> mas de 3                                                                                                                                |
| Abortos                               | <input type="radio"/> 0<br><input checked="" type="radio"/> 1<br><input type="radio"/> 2<br><input type="radio"/> 3<br><input type="radio"/> mas de 3                                                                                                                                |
| Tipo de gestacion                     | <input checked="" type="radio"/> espontanea<br><input type="radio"/> IAC inseminación artificial conyuge<br><input type="radio"/> IAD inseminación artificial donante<br><input type="radio"/> FIV Fecundación in Vitro<br><input type="radio"/> Ovodon FIV con donación de ovocitos |
| peso previo a embarazo                | [*DATA REMOVED*]                                                                                                                                                                                                                                                                     |
| Ganancia ponderal embarazo            |                                                                                                                                                                                                                                                                                      |
| Talla madre                           | [*DATA REMOVED*]                                                                                                                                                                                                                                                                     |
| IMC previo embarazo                   | 18.590124925639504                                                                                                                                                                                                                                                                   |
| Patología obstétrica                  | <input checked="" type="radio"/> no<br><input type="radio"/> si                                                                                                                                                                                                                      |
| Diabetes pregestacional               | <input checked="" type="radio"/> no<br><input type="radio"/> si                                                                                                                                                                                                                      |
| Diabetes gestacional                  | <input checked="" type="radio"/> no<br><input type="radio"/> si                                                                                                                                                                                                                      |

|                                            |                                                                                                                                                                                      |
|--------------------------------------------|--------------------------------------------------------------------------------------------------------------------------------------------------------------------------------------|
| Diabetes gestacional con insulina          | <input checked="" type="radio"/> no<br><input type="radio"/> si                                                                                                                      |
| Diabetes gestacional con dieta y ejercicio | <input checked="" type="radio"/> no<br><input type="radio"/> si                                                                                                                      |
| Percentil fetos previos                    | <input checked="" type="radio"/> Nada<br><input type="radio"/> percentil menor de 10<br><input type="radio"/> percentil entre 10 y 90<br><input type="radio"/> percentil mayor de 90 |
| Exfumadora                                 | <input checked="" type="radio"/> Nada<br><input type="radio"/> menos de 5 años<br><input type="radio"/> 5 a 10 años<br><input type="radio"/> mayor o igual a 10 años                 |
| Hábito tabáquico                           | <input type="radio"/> no<br><input checked="" type="radio"/> si                                                                                                                      |
| fumadora                                   | [*DATA REMOVED*]                                                                                                                                                                     |
| Consumo otros tóxicos                      | <input checked="" type="radio"/> no<br><input type="radio"/> si                                                                                                                      |
| Hb 1T                                      | [*DATA REMOVED*]                                                                                                                                                                     |
| Htc 1T                                     | [*DATA REMOVED*]                                                                                                                                                                     |
| Hb 2T                                      | [*DATA REMOVED*]                                                                                                                                                                     |
| HTC 2T                                     | [*DATA REMOVED*]                                                                                                                                                                     |
| Hb 3T                                      | [*DATA REMOVED*]                                                                                                                                                                     |
| HTC 3T                                     | [*DATA REMOVED*]                                                                                                                                                                     |
| Suplemento FE oral                         | <input type="radio"/> si<br><input checked="" type="radio"/> no                                                                                                                      |
| Suplemento fe iv                           | <input type="radio"/> si<br><input checked="" type="radio"/> no                                                                                                                      |
| Transfusión                                | <input checked="" type="radio"/> no<br><input type="radio"/> si                                                                                                                      |
| Solicitada Vit D                           | <input checked="" type="radio"/> no<br><input type="radio"/> si                                                                                                                      |
| Deficit vit D                              | <input type="radio"/> no<br><input type="radio"/> si                                                                                                                                 |
| Suplemento vit D                           | <input type="radio"/> si<br><input type="radio"/> no                                                                                                                                 |

|                       |                                                                                                                                                                                                                                                                                                                                                                                                              |
|-----------------------|--------------------------------------------------------------------------------------------------------------------------------------------------------------------------------------------------------------------------------------------------------------------------------------------------------------------------------------------------------------------------------------------------------------|
| Dieta, cuestionario   | <input checked="" type="radio"/> sí<br><input type="radio"/> no                                                                                                                                                                                                                                                                                                                                              |
| Leche entera          | <input type="radio"/> Nunca o menos 1 vez al mes<br><input type="radio"/> 1 a 3 veces mes<br><input type="radio"/> 1 vez semana<br><input type="radio"/> 2 a 4 veces semana<br><input type="radio"/> 5 a 6 veces semana<br><input type="radio"/> 1 vez al día<br><input type="radio"/> 2 a 3 veces al día<br><input type="radio"/> 5 a 6 veces al día<br><input type="radio"/> más 6 veces al día            |
| Leche semidesnatada   | <input type="radio"/> Nunca o menos 1 vez al mes<br><input type="radio"/> 1 a 3 veces mes<br><input type="radio"/> 1 vez semana<br><input type="radio"/> 2 a 4 veces semana<br><input type="radio"/> 5 a 6 veces semana<br><input type="radio"/> 1 vez al día<br><input type="radio"/> 2 a 3 veces al día<br><input type="radio"/> 5 a 6 veces al día<br><input type="radio"/> mas 6 veces al día            |
| Leche desnatada       | <input type="radio"/> Nunca o menos 1 vez al mes<br><input type="radio"/> 1 a 3 veces mes<br><input type="radio"/> 1 vez semana<br><input type="radio"/> 2 a 4 veces semana<br><input type="radio"/> 5 a 6 veces semana<br><input type="radio"/> 1 vez al día<br><input checked="" type="radio"/> 2 a 3 veces al día<br><input type="radio"/> 5 a 6 veces al día<br><input type="radio"/> más 6 veces al día |
| Leche condensada      | <input type="radio"/> Nunca o menos 1 vez al mes<br><input type="radio"/> 1 a 3 veces mes<br><input type="radio"/> 1 vez semana<br><input type="radio"/> 2 a 4 veces semana<br><input type="radio"/> 5 a 6 veces semana<br><input type="radio"/> 1 vez al día<br><input type="radio"/> 2 a 3 veces al día<br><input type="radio"/> 5 a 6 veces al día<br><input type="radio"/> más 6 veces al día            |
| nata o crema de leche | <input type="radio"/> Nunca o menos 1 vez al mes<br><input type="radio"/> 1 a 3 veces mes<br><input type="radio"/> 1 vez semana<br><input type="radio"/> 2 a 4 veces semana<br><input type="radio"/> 5 a 6 veces semana<br><input checked="" type="radio"/> 1 vez al día<br><input type="radio"/> 2 a 3 veces al día<br><input type="radio"/> 5 a 6 veces al día<br><input type="radio"/> más 6 veces al día |

---

Yogurt Entero

- ☐ Nunca o menos 1 vez al mes  
☐ 1 a 3 veces mes  
☐ 1 vez semana  
☐ 2 a 4 veces semana  
☐ 5 a 6 veces semana  
☒ 1 vez al día  
☐ 2 a 3 veces al día  
☐ 5 a 6 veces al día  
☐ más 6 veces al día

---

Yogurt desnatado

- ☐ Nunca o menos 1 vez al mes  
☐ 1 a 3 veces mes  
☐ 1 vez semana  
☐ 2 a 4 veces semana  
☐ 5 a 6 veces semana  
☒ 1 vez al día  
☐ 2 a 3 veces al día  
☐ 5 a 6 veces al día  
☐ más 6 veces al día

---

100g requesón o queso blando o queso fresco

- ☐ Nunca o menos 1 vez al mes  
☐ 1 a 3 veces mes  
☐ 1 vez semana  
☐ 2 a 4 veces semana  
☐ 5 a 6 veces semana  
☒ 1 vez al día  
☐ 2 a 3 veces al día  
☐ 5 a 6 veces al día  
☐ más 6 veces al día

---

queso curado o semicurado o cremoso

- ☐ Nunca o menos 1 vez al mes  
☐ 1 a 3 veces mes  
☐ 1 vez semana  
☐ 2 a 4 veces semana  
☐ 5 a 6 veces semana  
☐ 1 vez al día  
☐ 2 a 3 veces al día  
☐ 5 a 6 veces al día  
☐ más 6 veces al día

---

natillas flan pudding

- ☐ Nunca o menos 1 vez al mes  
☒ 1 a 3 veces mes  
☐ 1 vez semana  
☐ 2 a 4 veces semana  
☐ 5 a 6 veces semana  
☐ 1 vez al día  
☐ 2 a 3 veces al día  
☐ 5 a 6 veces al día  
☐ más 6 veces al día

---

Helado

- ☐ Nunca o menos 1 vez al mes  
☐ 1 a 3 veces mes  
☐ 1 vez semana  
☒ 2 a 4 veces semana  
☐ 5 a 6 veces semana  
☐ 1 vez al día  
☐ 2 a 3 veces al día  
☐ 5 a 6 veces al día  
☐ más 6 veces al día

|                                      |                                                                                                                                                                                                                                                                                                                                                                                                              |
|--------------------------------------|--------------------------------------------------------------------------------------------------------------------------------------------------------------------------------------------------------------------------------------------------------------------------------------------------------------------------------------------------------------------------------------------------------------|
| huevo                                | <input type="radio"/> Nunca o menos 1 vez al mes<br><input type="radio"/> 1 a 3 veces mes<br><input type="radio"/> 1 vez semana<br><input checked="" type="radio"/> 2 a 4 veces semana<br><input type="radio"/> 5 a 6 veces semana<br><input type="radio"/> 1 vez al día<br><input type="radio"/> 2 a 3 veces al día<br><input type="radio"/> 5 a 6 veces al día<br><input type="radio"/> más 6 veces al día |
| Pollo con piel                       | <input type="radio"/> Nunca o menos 1 vez al mes<br><input type="radio"/> 1 a 3 veces mes<br><input type="radio"/> 1 vez semana<br><input checked="" type="radio"/> 2 a 4 veces semana<br><input type="radio"/> 5 a 6 veces semana<br><input type="radio"/> 1 vez al día<br><input type="radio"/> 2 a 3 veces al día<br><input type="radio"/> 5 a 6 veces al día<br><input type="radio"/> más 6 veces al día |
| pollo sin piel                       | <input type="radio"/> Nunca o menos 1 vez al mes<br><input type="radio"/> 1 a 3 veces mes<br><input type="radio"/> 1 vez semana<br><input checked="" type="radio"/> 2 a 4 veces semana<br><input type="radio"/> 5 a 6 veces semana<br><input type="radio"/> 1 vez al día<br><input type="radio"/> 2 a 3 veces al día<br><input type="radio"/> 5 a 6 veces al día<br><input type="radio"/> más 6 veces al día |
| Ternera o cerdo o cordero            | <input type="radio"/> Nunca o menos 1 vez al mes<br><input type="radio"/> 1 a 3 veces mes<br><input type="radio"/> 1 vez semana<br><input checked="" type="radio"/> 2 a 4 veces semana<br><input type="radio"/> 5 a 6 veces semana<br><input type="radio"/> 1 vez al día<br><input type="radio"/> 2 a 3 veces al día<br><input type="radio"/> 5 a 6 veces al día<br><input type="radio"/> más 6 veces al día |
| carne caza: Conejo o codorniz o pato | <input checked="" type="radio"/> Nunca o menos 1 vez al mes<br><input type="radio"/> 1 a 3 veces mes<br><input type="radio"/> 1 vez semana<br><input type="radio"/> 2 a 4 veces semana<br><input type="radio"/> 5 a 6 veces semana<br><input type="radio"/> 1 vez al día<br><input type="radio"/> 2 a 3 veces al día<br><input type="radio"/> 5 a 6 veces al día<br><input type="radio"/> más 6 veces al día |
| Hígado de ternera o cerdo o pollo    | <input checked="" type="radio"/> Nunca o menos 1 vez al mes<br><input type="radio"/> 1 a 3 veces mes<br><input type="radio"/> 1 vez semana<br><input type="radio"/> 2 a 4 veces semana<br><input type="radio"/> 5 a 6 veces semana<br><input type="radio"/> 1 vez al día<br><input type="radio"/> 2 a 3 veces al día<br><input type="radio"/> 5 a 6 veces al día<br><input type="radio"/> más 6 veces al día |

|                     |                                                                                                                                                                                                                                                                                                                                                                                                              |
|---------------------|--------------------------------------------------------------------------------------------------------------------------------------------------------------------------------------------------------------------------------------------------------------------------------------------------------------------------------------------------------------------------------------------------------------|
| Vísceras            | <input checked="" type="radio"/> Nunca o menos 1 vez al mes<br><input type="radio"/> 1 a 3 veces mes<br><input type="radio"/> 1 vez semana<br><input type="radio"/> 2 a 4 veces semana<br><input type="radio"/> 5 a 6 veces semana<br><input type="radio"/> 1 vez al día<br><input type="radio"/> 2 a 3 veces al día<br><input type="radio"/> 5 a 6 veces al día<br><input type="radio"/> más 6 veces al día |
| Embutido            | <input type="radio"/> Nunca o menos 1 vez al mes<br><input type="radio"/> 1 a 3 veces mes<br><input checked="" type="radio"/> 1 vez semana<br><input type="radio"/> 2 a 4 veces semana<br><input type="radio"/> 5 a 6 veces semana<br><input type="radio"/> 1 vez al día<br><input type="radio"/> 2 a 3 veces al día<br><input type="radio"/> 5 a 6 veces al día<br><input type="radio"/> más 6 veces al día |
| Salchicha o similar | <input checked="" type="radio"/> Nunca o menos 1 vez al mes<br><input type="radio"/> 1 a 3 veces mes<br><input type="radio"/> 1 vez semana<br><input type="radio"/> 2 a 4 veces semana<br><input type="radio"/> 5 a 6 veces semana<br><input type="radio"/> 1 vez al día<br><input type="radio"/> 2 a 3 veces al día<br><input type="radio"/> 5 a 6 veces al día<br><input type="radio"/> más 6 veces al día |
| Pate o foiegras     | <input checked="" type="radio"/> Nunca o menos 1 vez al mes<br><input type="radio"/> 1 a 3 veces mes<br><input type="radio"/> 1 vez semana<br><input type="radio"/> 2 a 4 veces semana<br><input type="radio"/> 5 a 6 veces semana<br><input type="radio"/> 1 vez al día<br><input type="radio"/> 2 a 3 veces al día<br><input type="radio"/> 5 a 6 veces al día<br><input type="radio"/> más 6 veces al día |
| Hamburguesa         | <input type="radio"/> Nunca o menos 1 vez al mes<br><input type="radio"/> 1 a 3 veces mes<br><input checked="" type="radio"/> 1 vez semana<br><input type="radio"/> 2 a 4 veces semana<br><input type="radio"/> 5 a 6 veces semana<br><input type="radio"/> 1 vez al día<br><input type="radio"/> 2 a 3 veces al día<br><input type="radio"/> 5 a 6 veces al día<br><input type="radio"/> más 6 veces al día |
| tocino o bacon      | <input type="radio"/> Nunca o menos 1 vez al mes<br><input type="radio"/> 1 a 3 veces mes<br><input checked="" type="radio"/> 1 vez semana<br><input type="radio"/> 2 a 4 veces semana<br><input type="radio"/> 5 a 6 veces semana<br><input type="radio"/> 1 vez al día<br><input type="radio"/> 2 a 3 veces al día<br><input type="radio"/> 5 a 6 veces al día<br><input type="radio"/> más 6 veces al día |

---

Pescado frito

- ☐ Nunca o menos 1 vez al mes  
☒ 1 a 3 veces mes  
☐ 1 vez semana  
☐ 2 a 4 veces semana  
☐ 5 a 6 veces semana  
☐ 1 vez al día  
☐ 2 a 3 veces al día  
☐ 5 a 6 veces al día  
☐ más 6 veces al día

---

pescado hervido blanco

- ☒ Nunca o menos 1 vez al mes  
☐ 1 a 3 veces mes  
☐ 1 vez semana  
☐ 2 a 4 veces semana  
☐ 5 a 6 veces semana  
☐ 1 vez al día  
☐ 2 a 3 veces al día  
☐ 5 a 6 veces al día  
☐ más 6 veces al día

---

pescado hervido azul

- ☐ Nunca o menos 1 vez al mes  
☒ 1 a 3 veces mes  
☐ 1 vez semana  
☐ 2 a 4 veces semana  
☐ 5 a 6 veces semana  
☐ 1 vez al día  
☐ 2 a 3 veces al día  
☐ 5 a 6 veces al día  
☐ más 6 veces al día

---

otros pescado azul

- ☐ Nunca o menos 1 vez al mes  
☒ 1 a 3 veces mes  
☐ 1 vez semana  
☐ 2 a 4 veces semana  
☐ 5 a 6 veces semana  
☐ 1 vez al día  
☐ 2 a 3 veces al día  
☐ 5 a 6 veces al día  
☐ más 6 veces al día

---

atun conserva

- ☐ Nunca o menos 1 vez al mes  
☒ 1 a 3 veces mes  
☐ 1 vez semana  
☐ 2 a 4 veces semana  
☐ 5 a 6 veces semana  
☐ 1 vez al día  
☐ 2 a 3 veces al día  
☐ 5 a 6 veces al día  
☐ más 6 veces al día

---

sardina conserva

- ☐ Nunca o menos 1 vez al mes  
☒ 1 a 3 veces mes  
☐ 1 vez semana  
☐ 2 a 4 veces semana  
☐ 5 a 6 veces semana  
☐ 1 vez al día  
☐ 2 a 3 veces al día  
☐ 5 a 6 veces al día  
☐ más 6 veces al día



|                                         |                                                                                                                                                                                                                                                                                                                                                                                                              |
|-----------------------------------------|--------------------------------------------------------------------------------------------------------------------------------------------------------------------------------------------------------------------------------------------------------------------------------------------------------------------------------------------------------------------------------------------------------------|
| pescado ahumado                         | <input checked="" type="radio"/> Nunca o menos 1 vez al mes<br><input type="radio"/> 1 a 3 veces mes<br><input type="radio"/> 1 vez semana<br><input type="radio"/> 2 a 4 veces semana<br><input type="radio"/> 5 a 6 veces semana<br><input type="radio"/> 1 vez al día<br><input type="radio"/> 2 a 3 veces al día<br><input type="radio"/> 5 a 6 veces al día<br><input type="radio"/> más 6 veces al día |
| almejas o mejillones o ostras unos 100g | <input type="radio"/> Nunca o menos 1 vez al mes<br><input checked="" type="radio"/> 1 a 3 veces mes<br><input type="radio"/> 1 vez semana<br><input type="radio"/> 2 a 4 veces semana<br><input type="radio"/> 5 a 6 veces semana<br><input type="radio"/> 1 vez al día<br><input type="radio"/> 2 a 3 veces al día<br><input type="radio"/> 5 a 6 veces al día<br><input type="radio"/> más 6 veces al día |
| calamar o chipiron o sepia unos 100g    | <input type="radio"/> Nunca o menos 1 vez al mes<br><input checked="" type="radio"/> 1 a 3 veces mes<br><input type="radio"/> 1 vez semana<br><input type="radio"/> 2 a 4 veces semana<br><input type="radio"/> 5 a 6 veces semana<br><input type="radio"/> 1 vez al día<br><input type="radio"/> 2 a 3 veces al día<br><input type="radio"/> 5 a 6 veces al día<br><input type="radio"/> más 6 veces al día |
| marisco unos 100g                       | <input type="radio"/> Nunca o menos 1 vez al mes<br><input checked="" type="radio"/> 1 a 3 veces mes<br><input type="radio"/> 1 vez semana<br><input type="radio"/> 2 a 4 veces semana<br><input type="radio"/> 5 a 6 veces semana<br><input type="radio"/> 1 vez al día<br><input type="radio"/> 2 a 3 veces al día<br><input type="radio"/> 5 a 6 veces al día<br><input type="radio"/> más 6 veces al día |
| Espinacas o acelgas cocinadas           | <input type="radio"/> Nunca o menos 1 vez al mes<br><input checked="" type="radio"/> 1 a 3 veces mes<br><input type="radio"/> 1 vez semana<br><input type="radio"/> 2 a 4 veces semana<br><input type="radio"/> 5 a 6 veces semana<br><input type="radio"/> 1 vez al día<br><input type="radio"/> 2 a 3 veces al día<br><input type="radio"/> 5 a 6 veces al día<br><input type="radio"/> más 6 veces al día |
| Col o coliflor o brocoli cocinado       | <input type="radio"/> Nunca o menos 1 vez al mes<br><input checked="" type="radio"/> 1 a 3 veces mes<br><input type="radio"/> 1 vez semana<br><input type="radio"/> 2 a 4 veces semana<br><input type="radio"/> 5 a 6 veces semana<br><input type="radio"/> 1 vez al día<br><input type="radio"/> 2 a 3 veces al día<br><input type="radio"/> 5 a 6 veces al día<br><input type="radio"/> más 6 veces al día |

---

|                              |                                                                                                                                                                                                                                                                                                                                                                                                              |
|------------------------------|--------------------------------------------------------------------------------------------------------------------------------------------------------------------------------------------------------------------------------------------------------------------------------------------------------------------------------------------------------------------------------------------------------------|
| Lechuga o endivia o escarola | <input checked="" type="radio"/> Nunca o menos 1 vez al mes<br><input type="radio"/> 1 a 3 veces mes<br><input type="radio"/> 1 vez semana<br><input type="radio"/> 2 a 4 veces semana<br><input type="radio"/> 5 a 6 veces semana<br><input type="radio"/> 1 vez al día<br><input type="radio"/> 2 a 3 veces al día<br><input type="radio"/> 5 a 6 veces al día<br><input type="radio"/> más 6 veces al día |
|------------------------------|--------------------------------------------------------------------------------------------------------------------------------------------------------------------------------------------------------------------------------------------------------------------------------------------------------------------------------------------------------------------------------------------------------------|

---

|                 |                                                                                                                                                                                                                                                                                                                                                                                                              |
|-----------------|--------------------------------------------------------------------------------------------------------------------------------------------------------------------------------------------------------------------------------------------------------------------------------------------------------------------------------------------------------------------------------------------------------------|
| tomate ensalada | <input type="radio"/> Nunca o menos 1 vez al mes<br><input type="radio"/> 1 a 3 veces mes<br><input type="radio"/> 1 vez semana<br><input type="radio"/> 2 a 4 veces semana<br><input checked="" type="radio"/> 5 a 6 veces semana<br><input type="radio"/> 1 vez al día<br><input type="radio"/> 2 a 3 veces al día<br><input type="radio"/> 5 a 6 veces al día<br><input type="radio"/> más 6 veces al día |
|-----------------|--------------------------------------------------------------------------------------------------------------------------------------------------------------------------------------------------------------------------------------------------------------------------------------------------------------------------------------------------------------------------------------------------------------|

---

|         |                                                                                                                                                                                                                                                                                                                                                                                                              |
|---------|--------------------------------------------------------------------------------------------------------------------------------------------------------------------------------------------------------------------------------------------------------------------------------------------------------------------------------------------------------------------------------------------------------------|
| cebolla | <input type="radio"/> Nunca o menos 1 vez al mes<br><input type="radio"/> 1 a 3 veces mes<br><input type="radio"/> 1 vez semana<br><input type="radio"/> 2 a 4 veces semana<br><input checked="" type="radio"/> 5 a 6 veces semana<br><input type="radio"/> 1 vez al día<br><input type="radio"/> 2 a 3 veces al día<br><input type="radio"/> 5 a 6 veces al día<br><input type="radio"/> más 6 veces al día |
|---------|--------------------------------------------------------------------------------------------------------------------------------------------------------------------------------------------------------------------------------------------------------------------------------------------------------------------------------------------------------------------------------------------------------------|

---

|                      |                                                                                                                                                                                                                                                                                                                                                                                                              |
|----------------------|--------------------------------------------------------------------------------------------------------------------------------------------------------------------------------------------------------------------------------------------------------------------------------------------------------------------------------------------------------------------------------------------------------------|
| Zanahoria o calabaza | <input checked="" type="radio"/> Nunca o menos 1 vez al mes<br><input type="radio"/> 1 a 3 veces mes<br><input type="radio"/> 1 vez semana<br><input type="radio"/> 2 a 4 veces semana<br><input type="radio"/> 5 a 6 veces semana<br><input type="radio"/> 1 vez al día<br><input type="radio"/> 2 a 3 veces al día<br><input type="radio"/> 5 a 6 veces al día<br><input type="radio"/> más 6 veces al día |
|----------------------|--------------------------------------------------------------------------------------------------------------------------------------------------------------------------------------------------------------------------------------------------------------------------------------------------------------------------------------------------------------------------------------------------------------|

---

|               |                                                                                                                                                                                                                                                                                                                                                                                                              |
|---------------|--------------------------------------------------------------------------------------------------------------------------------------------------------------------------------------------------------------------------------------------------------------------------------------------------------------------------------------------------------------------------------------------------------------|
| Judías verdes | <input type="radio"/> Nunca o menos 1 vez al mes<br><input checked="" type="radio"/> 1 a 3 veces mes<br><input type="radio"/> 1 vez semana<br><input type="radio"/> 2 a 4 veces semana<br><input type="radio"/> 5 a 6 veces semana<br><input type="radio"/> 1 vez al día<br><input type="radio"/> 2 a 3 veces al día<br><input type="radio"/> 5 a 6 veces al día<br><input type="radio"/> más 6 veces al día |
|---------------|--------------------------------------------------------------------------------------------------------------------------------------------------------------------------------------------------------------------------------------------------------------------------------------------------------------------------------------------------------------------------------------------------------------|

---

|                                |                                                                                                                                                                                                                                                                                                                                                                                                              |
|--------------------------------|--------------------------------------------------------------------------------------------------------------------------------------------------------------------------------------------------------------------------------------------------------------------------------------------------------------------------------------------------------------------------------------------------------------|
| Berenjena o calabacin o pepino | <input type="radio"/> Nunca o menos 1 vez al mes<br><input checked="" type="radio"/> 1 a 3 veces mes<br><input type="radio"/> 1 vez semana<br><input type="radio"/> 2 a 4 veces semana<br><input type="radio"/> 5 a 6 veces semana<br><input type="radio"/> 1 vez al día<br><input type="radio"/> 2 a 3 veces al día<br><input type="radio"/> 5 a 6 veces al día<br><input type="radio"/> más 6 veces al día |
|--------------------------------|--------------------------------------------------------------------------------------------------------------------------------------------------------------------------------------------------------------------------------------------------------------------------------------------------------------------------------------------------------------------------------------------------------------|

---

---

|          |                                                                                                                                                                                                                                                                                                                                                                                                              |
|----------|--------------------------------------------------------------------------------------------------------------------------------------------------------------------------------------------------------------------------------------------------------------------------------------------------------------------------------------------------------------------------------------------------------------|
| pimiento | <input type="radio"/> Nunca o menos 1 vez al mes<br><input type="radio"/> 1 a 3 veces mes<br><input type="radio"/> 1 vez semana<br><input checked="" type="radio"/> 2 a 4 veces semana<br><input type="radio"/> 5 a 6 veces semana<br><input type="radio"/> 1 vez al día<br><input type="radio"/> 2 a 3 veces al día<br><input type="radio"/> 5 a 6 veces al día<br><input type="radio"/> más 6 veces al día |
|----------|--------------------------------------------------------------------------------------------------------------------------------------------------------------------------------------------------------------------------------------------------------------------------------------------------------------------------------------------------------------------------------------------------------------|

---

|           |                                                                                                                                                                                                                                                                                                                                                                                                              |
|-----------|--------------------------------------------------------------------------------------------------------------------------------------------------------------------------------------------------------------------------------------------------------------------------------------------------------------------------------------------------------------------------------------------------------------|
| alcachofa | <input type="radio"/> Nunca o menos 1 vez al mes<br><input checked="" type="radio"/> 1 a 3 veces mes<br><input type="radio"/> 1 vez semana<br><input type="radio"/> 2 a 4 veces semana<br><input type="radio"/> 5 a 6 veces semana<br><input type="radio"/> 1 vez al día<br><input type="radio"/> 2 a 3 veces al día<br><input type="radio"/> 5 a 6 veces al día<br><input type="radio"/> más 6 veces al día |
|-----------|--------------------------------------------------------------------------------------------------------------------------------------------------------------------------------------------------------------------------------------------------------------------------------------------------------------------------------------------------------------------------------------------------------------|

---

|            |                                                                                                                                                                                                                                                                                                                                                                                                              |
|------------|--------------------------------------------------------------------------------------------------------------------------------------------------------------------------------------------------------------------------------------------------------------------------------------------------------------------------------------------------------------------------------------------------------------|
| espárragos | <input type="radio"/> Nunca o menos 1 vez al mes<br><input type="radio"/> 1 a 3 veces mes<br><input checked="" type="radio"/> 1 vez semana<br><input type="radio"/> 2 a 4 veces semana<br><input type="radio"/> 5 a 6 veces semana<br><input type="radio"/> 1 vez al día<br><input type="radio"/> 2 a 3 veces al día<br><input type="radio"/> 5 a 6 veces al día<br><input type="radio"/> más 6 veces al día |
|------------|--------------------------------------------------------------------------------------------------------------------------------------------------------------------------------------------------------------------------------------------------------------------------------------------------------------------------------------------------------------------------------------------------------------|

---

|              |                                                                                                                                                                                                                                                                                                                                                                                                              |
|--------------|--------------------------------------------------------------------------------------------------------------------------------------------------------------------------------------------------------------------------------------------------------------------------------------------------------------------------------------------------------------------------------------------------------------|
| maíz hervido | <input checked="" type="radio"/> Nunca o menos 1 vez al mes<br><input type="radio"/> 1 a 3 veces mes<br><input type="radio"/> 1 vez semana<br><input type="radio"/> 2 a 4 veces semana<br><input type="radio"/> 5 a 6 veces semana<br><input type="radio"/> 1 vez al día<br><input type="radio"/> 2 a 3 veces al día<br><input type="radio"/> 5 a 6 veces al día<br><input type="radio"/> más 6 veces al día |
|--------------|--------------------------------------------------------------------------------------------------------------------------------------------------------------------------------------------------------------------------------------------------------------------------------------------------------------------------------------------------------------------------------------------------------------|

---

|           |                                                                                                                                                                                                                                                                                                                                                                                                              |
|-----------|--------------------------------------------------------------------------------------------------------------------------------------------------------------------------------------------------------------------------------------------------------------------------------------------------------------------------------------------------------------------------------------------------------------|
| legumbres | <input type="radio"/> Nunca o menos 1 vez al mes<br><input checked="" type="radio"/> 1 a 3 veces mes<br><input type="radio"/> 1 vez semana<br><input type="radio"/> 2 a 4 veces semana<br><input type="radio"/> 5 a 6 veces semana<br><input type="radio"/> 1 vez al día<br><input type="radio"/> 2 a 3 veces al día<br><input type="radio"/> 5 a 6 veces al día<br><input type="radio"/> más 6 veces al día |
|-----------|--------------------------------------------------------------------------------------------------------------------------------------------------------------------------------------------------------------------------------------------------------------------------------------------------------------------------------------------------------------------------------------------------------------|

---

|                       |                                                                                                                                                                                                                                                                                                                                                                                                              |
|-----------------------|--------------------------------------------------------------------------------------------------------------------------------------------------------------------------------------------------------------------------------------------------------------------------------------------------------------------------------------------------------------------------------------------------------------|
| naranjas o mandarinas | <input type="radio"/> Nunca o menos 1 vez al mes<br><input checked="" type="radio"/> 1 a 3 veces mes<br><input type="radio"/> 1 vez semana<br><input type="radio"/> 2 a 4 veces semana<br><input type="radio"/> 5 a 6 veces semana<br><input type="radio"/> 1 vez al día<br><input type="radio"/> 2 a 3 veces al día<br><input type="radio"/> 5 a 6 veces al día<br><input type="radio"/> más 6 veces al día |
|-----------------------|--------------------------------------------------------------------------------------------------------------------------------------------------------------------------------------------------------------------------------------------------------------------------------------------------------------------------------------------------------------------------------------------------------------|

---

|                       |                                                                                                                                                                                                                                                                                                                                                                                                              |
|-----------------------|--------------------------------------------------------------------------------------------------------------------------------------------------------------------------------------------------------------------------------------------------------------------------------------------------------------------------------------------------------------------------------------------------------------|
| zum natural fruta     | <input type="radio"/> Nunca o menos 1 vez al mes<br><input checked="" type="radio"/> 1 a 3 veces mes<br><input type="radio"/> 1 vez semana<br><input type="radio"/> 2 a 4 veces semana<br><input type="radio"/> 5 a 6 veces semana<br><input type="radio"/> 1 vez al día<br><input type="radio"/> 2 a 3 veces al día<br><input type="radio"/> 5 a 6 veces al día<br><input type="radio"/> más 6 veces al día |
| platano               | <input type="radio"/> Nunca o menos 1 vez al mes<br><input checked="" type="radio"/> 1 a 3 veces mes<br><input type="radio"/> 1 vez semana<br><input type="radio"/> 2 a 4 veces semana<br><input type="radio"/> 5 a 6 veces semana<br><input type="radio"/> 1 vez al día<br><input type="radio"/> 2 a 3 veces al día<br><input type="radio"/> 5 a 6 veces al día<br><input type="radio"/> más 6 veces al día |
| manzana o pera        | <input checked="" type="radio"/> Nunca o menos 1 vez al mes<br><input type="radio"/> 1 a 3 veces mes<br><input type="radio"/> 1 vez semana<br><input type="radio"/> 2 a 4 veces semana<br><input type="radio"/> 5 a 6 veces semana<br><input type="radio"/> 1 vez al día<br><input type="radio"/> 2 a 3 veces al día<br><input type="radio"/> 5 a 6 veces al día<br><input type="radio"/> más 6 veces al día |
| melocotón o nectarina | <input checked="" type="radio"/> Nunca o menos 1 vez al mes<br><input type="radio"/> 1 a 3 veces mes<br><input type="radio"/> 1 vez semana<br><input type="radio"/> 2 a 4 veces semana<br><input type="radio"/> 5 a 6 veces semana<br><input type="radio"/> 1 vez al día<br><input type="radio"/> 2 a 3 veces al día<br><input type="radio"/> 5 a 6 veces al día<br><input type="radio"/> más 6 veces al día |
| sandia o melon        | <input type="radio"/> Nunca o menos 1 vez al mes<br><input type="radio"/> 1 a 3 veces mes<br><input type="radio"/> 1 vez semana<br><input checked="" type="radio"/> 2 a 4 veces semana<br><input type="radio"/> 5 a 6 veces semana<br><input type="radio"/> 1 vez al día<br><input type="radio"/> 2 a 3 veces al día<br><input type="radio"/> 5 a 6 veces al día<br><input type="radio"/> más 6 veces al día |
| uva                   | <input checked="" type="radio"/> Nunca o menos 1 vez al mes<br><input type="radio"/> 1 a 3 veces mes<br><input type="radio"/> 1 vez semana<br><input type="radio"/> 2 a 4 veces semana<br><input type="radio"/> 5 a 6 veces semana<br><input type="radio"/> 1 vez al día<br><input type="radio"/> 2 a 3 veces al día<br><input type="radio"/> 5 a 6 veces al día<br><input type="radio"/> más 6 veces al día |

---

bruna o ciruela

- ☒ Nunca o menos 1 vez al mes  
☐ 1 a 3 veces mes  
☐ 1 vez semana  
☐ 2 a 4 veces semana  
☐ 5 a 6 veces semana  
☐ 1 vez al día  
☐ 2 a 3 veces al día  
☐ 5 a 6 veces al día  
☐ más 6 veces al día

---

kiwi

- ☒ Nunca o menos 1 vez al mes  
☐ 1 a 3 veces mes  
☐ 1 vez semana  
☐ 2 a 4 veces semana  
☐ 5 a 6 veces semana  
☐ 1 vez al día  
☐ 2 a 3 veces al día  
☐ 5 a 6 veces al día  
☐ más 6 veces al día

---

aceituna

- ☐ Nunca o menos 1 vez al mes  
☒ 1 a 3 veces mes  
☐ 1 vez semana  
☐ 2 a 4 veces semana  
☐ 5 a 6 veces semana  
☐ 1 vez al día  
☐ 2 a 3 veces al día  
☐ 5 a 6 veces al día  
☐ más 6 veces al día

---

frutos secos

- ☒ Nunca o menos 1 vez al mes  
☐ 1 a 3 veces mes  
☐ 1 vez semana  
☐ 2 a 4 veces semana  
☐ 5 a 6 veces semana  
☐ 1 vez al día  
☐ 2 a 3 veces al día  
☐ 5 a 6 veces al día  
☐ más 6 veces al día

---

pan blanco

- ☐ Nunca o menos 1 vez al mes  
☐ 1 a 3 veces mes  
☐ 1 vez semana  
☒ 2 a 4 veces semana  
☐ 5 a 6 veces semana  
☐ 1 vez al día  
☐ 2 a 3 veces al día  
☐ 5 a 6 veces al día  
☐ más 6 veces al día

---

pan integral

- ☒ Nunca o menos 1 vez al mes  
☐ 1 a 3 veces mes  
☐ 1 vez semana  
☐ 2 a 4 veces semana  
☐ 5 a 6 veces semana  
☐ 1 vez al día  
☐ 2 a 3 veces al día  
☐ 5 a 6 veces al día  
☐ más 6 veces al día

---

cereales desayuno

- ☐ Nunca o menos 1 vez al mes  
☒ 1 a 3 veces mes  
☐ 1 vez semana  
☐ 2 a 4 veces semana  
☐ 5 a 6 veces semana  
☐ 1 vez al día  
☐ 2 a 3 veces al día  
☐ 5 a 6 veces al día  
☐ más 6 veces al día

---

patatas fritas

- ☐ Nunca o menos 1 vez al mes  
☒ 1 a 3 veces mes  
☐ 1 vez semana  
☐ 2 a 4 veces semana  
☐ 5 a 6 veces semana  
☐ 1 vez al día  
☐ 2 a 3 veces al día  
☐ 5 a 6 veces al día  
☐ más 6 veces al día

---

patatas cocidas o asadas

- ☐ Nunca o menos 1 vez al mes  
☒ 1 a 3 veces mes  
☐ 1 vez semana  
☐ 2 a 4 veces semana  
☐ 5 a 6 veces semana  
☐ 1 vez al día  
☐ 2 a 3 veces al día  
☐ 5 a 6 veces al día  
☐ más 6 veces al día

---

bolsa papas

- ☐ Nunca o menos 1 vez al mes  
☒ 1 a 3 veces mes  
☐ 1 vez semana  
☐ 2 a 4 veces semana  
☐ 5 a 6 veces semana  
☐ 1 vez al día  
☐ 2 a 3 veces al día  
☐ 5 a 6 veces al día  
☐ más 6 veces al día

---

arroz cocinado

- ☐ Nunca o menos 1 vez al mes  
☐ 1 a 3 veces mes  
☒ 1 vez semana  
☐ 2 a 4 veces semana  
☐ 5 a 6 veces semana  
☐ 1 vez al día  
☐ 2 a 3 veces al día  
☐ 5 a 6 veces al día  
☐ más 6 veces al día

---

pasta

- ☐ Nunca o menos 1 vez al mes  
☐ 1 a 3 veces mes  
☒ 1 vez semana  
☐ 2 a 4 veces semana  
☐ 5 a 6 veces semana  
☐ 1 vez al día  
☐ 2 a 3 veces al día  
☐ 5 a 6 veces al día  
☐ más 6 veces al día

|                     |                                                                                                                                                                                                                                                                                                                                                                                                              |
|---------------------|--------------------------------------------------------------------------------------------------------------------------------------------------------------------------------------------------------------------------------------------------------------------------------------------------------------------------------------------------------------------------------------------------------------|
| pizza               | <input type="radio"/> Nunca o menos 1 vez al mes<br><input checked="" type="radio"/> 1 a 3 veces mes<br><input type="radio"/> 1 vez semana<br><input type="radio"/> 2 a 4 veces semana<br><input type="radio"/> 5 a 6 veces semana<br><input type="radio"/> 1 vez al día<br><input type="radio"/> 2 a 3 veces al día<br><input type="radio"/> 5 a 6 veces al día<br><input type="radio"/> más 6 veces al día |
| aceite oliva        | <input type="radio"/> Nunca o menos 1 vez al mes<br><input type="radio"/> 1 a 3 veces mes<br><input type="radio"/> 1 vez semana<br><input type="radio"/> 2 a 4 veces semana<br><input type="radio"/> 5 a 6 veces semana<br><input checked="" type="radio"/> 1 vez al día<br><input type="radio"/> 2 a 3 veces al día<br><input type="radio"/> 5 a 6 veces al día<br><input type="radio"/> más 6 veces al día |
| otros aceites       | <input type="radio"/> Nunca o menos 1 vez al mes<br><input type="radio"/> 1 a 3 veces mes<br><input type="radio"/> 1 vez semana<br><input type="radio"/> 2 a 4 veces semana<br><input type="radio"/> 5 a 6 veces semana<br><input checked="" type="radio"/> 1 vez al día<br><input type="radio"/> 2 a 3 veces al día<br><input type="radio"/> 5 a 6 veces al día<br><input type="radio"/> más 6 veces al día |
| margarina           | <input checked="" type="radio"/> Nunca o menos 1 vez al mes<br><input type="radio"/> 1 a 3 veces mes<br><input type="radio"/> 1 vez semana<br><input type="radio"/> 2 a 4 veces semana<br><input type="radio"/> 5 a 6 veces semana<br><input type="radio"/> 1 vez al día<br><input type="radio"/> 2 a 3 veces al día<br><input type="radio"/> 5 a 6 veces al día<br><input type="radio"/> más 6 veces al día |
| mantequilla         | <input type="radio"/> Nunca o menos 1 vez al mes<br><input type="radio"/> 1 a 3 veces mes<br><input type="radio"/> 1 vez semana<br><input checked="" type="radio"/> 2 a 4 veces semana<br><input type="radio"/> 5 a 6 veces semana<br><input type="radio"/> 1 vez al día<br><input type="radio"/> 2 a 3 veces al día<br><input type="radio"/> 5 a 6 veces al día<br><input type="radio"/> más 6 veces al día |
| galletas tipo maria | <input type="radio"/> Nunca o menos 1 vez al mes<br><input type="radio"/> 1 a 3 veces mes<br><input type="radio"/> 1 vez semana<br><input type="radio"/> 2 a 4 veces semana<br><input type="radio"/> 5 a 6 veces semana<br><input checked="" type="radio"/> 1 vez al día<br><input type="radio"/> 2 a 3 veces al día<br><input type="radio"/> 5 a 6 veces al día<br><input type="radio"/> más 6 veces al día |

|                           |                                                                                                                                                                                                                                                                                                                                                                                                              |
|---------------------------|--------------------------------------------------------------------------------------------------------------------------------------------------------------------------------------------------------------------------------------------------------------------------------------------------------------------------------------------------------------------------------------------------------------|
| galletas chocolate        | <input type="radio"/> Nunca o menos 1 vez al mes<br><input type="radio"/> 1 a 3 veces mes<br><input type="radio"/> 1 vez semana<br><input type="radio"/> 2 a 4 veces semana<br><input type="radio"/> 5 a 6 veces semana<br><input checked="" type="radio"/> 1 vez al día<br><input type="radio"/> 2 a 3 veces al día<br><input type="radio"/> 5 a 6 veces al día<br><input type="radio"/> más 6 veces al día |
| bollieria                 | <input type="radio"/> Nunca o menos 1 vez al mes<br><input type="radio"/> 1 a 3 veces mes<br><input type="radio"/> 1 vez semana<br><input type="radio"/> 2 a 4 veces semana<br><input type="radio"/> 5 a 6 veces semana<br><input checked="" type="radio"/> 1 vez al día<br><input type="radio"/> 2 a 3 veces al día<br><input type="radio"/> 5 a 6 veces al día<br><input type="radio"/> más 6 veces al día |
| chocolate o bombones      | <input type="radio"/> Nunca o menos 1 vez al mes<br><input type="radio"/> 1 a 3 veces mes<br><input type="radio"/> 1 vez semana<br><input type="radio"/> 2 a 4 veces semana<br><input type="radio"/> 5 a 6 veces semana<br><input checked="" type="radio"/> 1 vez al día<br><input type="radio"/> 2 a 3 veces al día<br><input type="radio"/> 5 a 6 veces al día<br><input type="radio"/> más 6 veces al día |
| chocolate polvo o colacao | <input type="radio"/> Nunca o menos 1 vez al mes<br><input type="radio"/> 1 a 3 veces mes<br><input type="radio"/> 1 vez semana<br><input type="radio"/> 2 a 4 veces semana<br><input type="radio"/> 5 a 6 veces semana<br><input checked="" type="radio"/> 1 vez al día<br><input type="radio"/> 2 a 3 veces al día<br><input type="radio"/> 5 a 6 veces al día<br><input type="radio"/> más 6 veces al día |
| vino tinto                | <input checked="" type="radio"/> Nunca o menos 1 vez al mes<br><input type="radio"/> 1 a 3 veces mes<br><input type="radio"/> 1 vez semana<br><input type="radio"/> 2 a 4 veces semana<br><input type="radio"/> 5 a 6 veces semana<br><input type="radio"/> 1 vez al día<br><input type="radio"/> 2 a 3 veces al día<br><input type="radio"/> 5 a 6 veces al día<br><input type="radio"/> más 6 veces al día |
| vino blanco               | <input checked="" type="radio"/> Nunca o menos 1 vez al mes<br><input type="radio"/> 1 a 3 veces mes<br><input type="radio"/> 1 vez semana<br><input type="radio"/> 2 a 4 veces semana<br><input type="radio"/> 5 a 6 veces semana<br><input type="radio"/> 1 vez al día<br><input type="radio"/> 2 a 3 veces al día<br><input type="radio"/> 5 a 6 veces al día<br><input type="radio"/> más 6 veces al día |



|                       |                                                                                                                                                                                                                                                                                                                                                                                                              |
|-----------------------|--------------------------------------------------------------------------------------------------------------------------------------------------------------------------------------------------------------------------------------------------------------------------------------------------------------------------------------------------------------------------------------------------------------|
| vino seco o vermut    | <input checked="" type="radio"/> Nunca o menos 1 vez al mes<br><input type="radio"/> 1 a 3 veces mes<br><input type="radio"/> 1 vez semana<br><input type="radio"/> 2 a 4 veces semana<br><input type="radio"/> 5 a 6 veces semana<br><input type="radio"/> 1 vez al día<br><input type="radio"/> 2 a 3 veces al día<br><input type="radio"/> 5 a 6 veces al día<br><input type="radio"/> más 6 veces al día |
| cerveza               | <input checked="" type="radio"/> Nunca o menos 1 vez al mes<br><input type="radio"/> 1 a 3 veces mes<br><input type="radio"/> 1 vez semana<br><input type="radio"/> 2 a 4 veces semana<br><input type="radio"/> 5 a 6 veces semana<br><input type="radio"/> 1 vez al día<br><input type="radio"/> 2 a 3 veces al día<br><input type="radio"/> 5 a 6 veces al día<br><input type="radio"/> más 6 veces al día |
| cerveza sin alcohol   | <input checked="" type="radio"/> Nunca o menos 1 vez al mes<br><input type="radio"/> 1 a 3 veces mes<br><input type="radio"/> 1 vez semana<br><input type="radio"/> 2 a 4 veces semana<br><input type="radio"/> 5 a 6 veces semana<br><input type="radio"/> 1 vez al día<br><input type="radio"/> 2 a 3 veces al día<br><input type="radio"/> 5 a 6 veces al día<br><input type="radio"/> más 6 veces al día |
| licores               | <input checked="" type="radio"/> Nunca o menos 1 vez al mes<br><input type="radio"/> 1 a 3 veces mes<br><input type="radio"/> 1 vez semana<br><input type="radio"/> 2 a 4 veces semana<br><input type="radio"/> 5 a 6 veces semana<br><input type="radio"/> 1 vez al día<br><input type="radio"/> 2 a 3 veces al día<br><input type="radio"/> 5 a 6 veces al día<br><input type="radio"/> más 6 veces al día |
| ginebra o ron o vodka | <input checked="" type="radio"/> Nunca o menos 1 vez al mes<br><input type="radio"/> 1 a 3 veces mes<br><input type="radio"/> 1 vez semana<br><input type="radio"/> 2 a 4 veces semana<br><input type="radio"/> 5 a 6 veces semana<br><input type="radio"/> 1 vez al día<br><input type="radio"/> 2 a 3 veces al día<br><input type="radio"/> 5 a 6 veces al día<br><input type="radio"/> más 6 veces al día |
| refresco normal       | <input type="radio"/> Nunca o menos 1 vez al mes<br><input type="radio"/> 1 a 3 veces mes<br><input type="radio"/> 1 vez semana<br><input type="radio"/> 2 a 4 veces semana<br><input type="radio"/> 5 a 6 veces semana<br><input checked="" type="radio"/> 1 vez al día<br><input type="radio"/> 2 a 3 veces al día<br><input type="radio"/> 5 a 6 veces al día<br><input type="radio"/> más 6 veces al día |

|                          |                                                                                                                                                                                                                                                                                                                                                                                                              |
|--------------------------|--------------------------------------------------------------------------------------------------------------------------------------------------------------------------------------------------------------------------------------------------------------------------------------------------------------------------------------------------------------------------------------------------------------|
| refresco sin azúcar      | <input type="radio"/> Nunca o menos 1 vez al mes<br><input type="radio"/> 1 a 3 veces mes<br><input type="radio"/> 1 vez semana<br><input type="radio"/> 2 a 4 veces semana<br><input type="radio"/> 5 a 6 veces semana<br><input checked="" type="radio"/> 1 vez al día<br><input type="radio"/> 2 a 3 veces al día<br><input type="radio"/> 5 a 6 veces al día<br><input type="radio"/> más 6 veces al día |
| Agua del grifo           | <input checked="" type="radio"/> Nunca o menos 1 vez al mes<br><input type="radio"/> 1 a 3 veces mes<br><input type="radio"/> 1 vez semana<br><input type="radio"/> 2 a 4 veces semana<br><input type="radio"/> 5 a 6 veces semana<br><input type="radio"/> 1 vez al día<br><input type="radio"/> 2 a 3 veces al día<br><input type="radio"/> 5 a 6 veces al día<br><input type="radio"/> más 6 veces al día |
| agua embotellada sin gas | <input type="radio"/> Nunca o menos 1 vez al mes<br><input type="radio"/> 1 a 3 veces mes<br><input type="radio"/> 1 vez semana<br><input type="radio"/> 2 a 4 veces semana<br><input type="radio"/> 5 a 6 veces semana<br><input checked="" type="radio"/> 1 vez al día<br><input type="radio"/> 2 a 3 veces al día<br><input type="radio"/> 5 a 6 veces al día<br><input type="radio"/> más 6 veces al día |
| agua embotellada con gas | <input checked="" type="radio"/> Nunca o menos 1 vez al mes<br><input type="radio"/> 1 a 3 veces mes<br><input type="radio"/> 1 vez semana<br><input type="radio"/> 2 a 4 veces semana<br><input type="radio"/> 5 a 6 veces semana<br><input type="radio"/> 1 vez al día<br><input type="radio"/> 2 a 3 veces al día<br><input type="radio"/> 5 a 6 veces al día<br><input type="radio"/> más 6 veces al día |
| zumو frutas embasado     | <input checked="" type="radio"/> Nunca o menos 1 vez al mes<br><input type="radio"/> 1 a 3 veces mes<br><input type="radio"/> 1 vez semana<br><input type="radio"/> 2 a 4 veces semana<br><input type="radio"/> 5 a 6 veces semana<br><input type="radio"/> 1 vez al día<br><input type="radio"/> 2 a 3 veces al día<br><input type="radio"/> 5 a 6 veces al día<br><input type="radio"/> más 6 veces al día |
| cafe                     | <input type="radio"/> Nunca o menos 1 vez al mes<br><input type="radio"/> 1 a 3 veces mes<br><input type="radio"/> 1 vez semana<br><input checked="" type="radio"/> 2 a 4 veces semana<br><input type="radio"/> 5 a 6 veces semana<br><input type="radio"/> 1 vez al día<br><input type="radio"/> 2 a 3 veces al día<br><input type="radio"/> 5 a 6 veces al día<br><input type="radio"/> más 6 veces al día |

|                       |                                                                                                                                                                                                                                                                                                                                                                                                              |
|-----------------------|--------------------------------------------------------------------------------------------------------------------------------------------------------------------------------------------------------------------------------------------------------------------------------------------------------------------------------------------------------------------------------------------------------------|
| cafe descafeinado     | <input checked="" type="radio"/> Nunca o menos 1 vez al mes<br><input type="radio"/> 1 a 3 veces mes<br><input type="radio"/> 1 vez semana<br><input type="radio"/> 2 a 4 veces semana<br><input type="radio"/> 5 a 6 veces semana<br><input type="radio"/> 1 vez al día<br><input type="radio"/> 2 a 3 veces al día<br><input type="radio"/> 5 a 6 veces al día<br><input type="radio"/> más 6 veces al día |
| te o infusión         | <input checked="" type="radio"/> Nunca o menos 1 vez al mes<br><input type="radio"/> 1 a 3 veces mes<br><input type="radio"/> 1 vez semana<br><input type="radio"/> 2 a 4 veces semana<br><input type="radio"/> 5 a 6 veces semana<br><input type="radio"/> 1 vez al día<br><input type="radio"/> 2 a 3 veces al día<br><input type="radio"/> 5 a 6 veces al día<br><input type="radio"/> más 6 veces al día |
| sopa o puré verduras  | <input type="radio"/> Nunca o menos 1 vez al mes<br><input type="radio"/> 1 a 3 veces mes<br><input checked="" type="radio"/> 1 vez semana<br><input type="radio"/> 2 a 4 veces semana<br><input type="radio"/> 5 a 6 veces semana<br><input type="radio"/> 1 vez al día<br><input type="radio"/> 2 a 3 veces al día<br><input type="radio"/> 5 a 6 veces al día<br><input type="radio"/> más 6 veces al día |
| croquetas pollo jamón | <input type="radio"/> Nunca o menos 1 vez al mes<br><input checked="" type="radio"/> 1 a 3 veces mes<br><input type="radio"/> 1 vez semana<br><input type="radio"/> 2 a 4 veces semana<br><input type="radio"/> 5 a 6 veces semana<br><input type="radio"/> 1 vez al día<br><input type="radio"/> 2 a 3 veces al día<br><input type="radio"/> 5 a 6 veces al día<br><input type="radio"/> más 6 veces al día |
| croquetas pescado     | <input checked="" type="radio"/> Nunca o menos 1 vez al mes<br><input type="radio"/> 1 a 3 veces mes<br><input type="radio"/> 1 vez semana<br><input type="radio"/> 2 a 4 veces semana<br><input type="radio"/> 5 a 6 veces semana<br><input type="radio"/> 1 vez al día<br><input type="radio"/> 2 a 3 veces al día<br><input type="radio"/> 5 a 6 veces al día<br><input type="radio"/> más 6 veces al día |
| mayonesa              | <input type="radio"/> Nunca o menos 1 vez al mes<br><input type="radio"/> 1 a 3 veces mes<br><input checked="" type="radio"/> 1 vez semana<br><input type="radio"/> 2 a 4 veces semana<br><input type="radio"/> 5 a 6 veces semana<br><input type="radio"/> 1 vez al día<br><input type="radio"/> 2 a 3 veces al día<br><input type="radio"/> 5 a 6 veces al día<br><input type="radio"/> más 6 veces al día |

salsa tomate

- ☐ Nunca o menos 1 vez al mes  
☒ 1 a 3 veces mes  
☐ 1 vez semana  
☐ 2 a 4 veces semana  
☐ 5 a 6 veces semana  
☐ 1 vez al día  
☐ 2 a 3 veces al día  
☐ 5 a 6 veces al día  
☐ más 6 veces al día

ketchup

- ☐ Nunca o menos 1 vez al mes  
☐ 1 a 3 veces mes  
☒ 1 vez semana  
☐ 2 a 4 veces semana  
☐ 5 a 6 veces semana  
☐ 1 vez al día  
☐ 2 a 3 veces al día  
☐ 5 a 6 veces al día  
☐ más 6 veces al día

sal

- ☐ Nunca o menos 1 vez al mes  
☐ 1 a 3 veces mes  
☐ 1 vez semana  
☐ 2 a 4 veces semana  
☐ 5 a 6 veces semana  
☒ 1 vez al día  
☐ 2 a 3 veces al día  
☐ 5 a 6 veces al día  
☐ más 6 veces al día

ajo

- ☐ Nunca o menos 1 vez al mes  
☐ 1 a 3 veces mes  
☒ 1 vez semana  
☐ 2 a 4 veces semana  
☐ 5 a 6 veces semana  
☐ 1 vez al día  
☐ 2 a 3 veces al día  
☐ 5 a 6 veces al día  
☐ más 6 veces al día

mermelada o miel

- ☐ Nunca o menos 1 vez al mes  
☒ 1 a 3 veces mes  
☐ 1 vez semana  
☐ 2 a 4 veces semana  
☐ 5 a 6 veces semana  
☐ 1 vez al día  
☐ 2 a 3 veces al día  
☐ 5 a 6 veces al día  
☐ más 6 veces al día

azúcar

- ☐ Nunca o menos 1 vez al mes  
☐ 1 a 3 veces mes  
☐ 1 vez semana  
☐ 2 a 4 veces semana  
☐ 5 a 6 veces semana  
☒ 1 vez al día  
☐ 2 a 3 veces al día  
☐ 5 a 6 veces al día  
☐ más 6 veces al día

|                                       |                                                                                                                                                                                                                                                                                                                                                                                                                                                                                                                               |
|---------------------------------------|-------------------------------------------------------------------------------------------------------------------------------------------------------------------------------------------------------------------------------------------------------------------------------------------------------------------------------------------------------------------------------------------------------------------------------------------------------------------------------------------------------------------------------|
| Otro alimento                         | <hr/>                                                                                                                                                                                                                                                                                                                                                                                                                                                                                                                         |
| suplementos vitamínicos               | <input type="radio"/> si<br><input checked="" type="radio"/> no                                                                                                                                                                                                                                                                                                                                                                                                                                                               |
| suplementos vitamínicos               | <hr/>                                                                                                                                                                                                                                                                                                                                                                                                                                                                                                                         |
| dieta previa                          | <input type="radio"/> si<br><input checked="" type="radio"/> no                                                                                                                                                                                                                                                                                                                                                                                                                                                               |
| motivo dieta                          | <input checked="" type="radio"/> no dieta<br><input type="radio"/> control peso<br><input type="radio"/> control colesterol<br><input type="radio"/> control diabetes<br><input type="radio"/> problemas estómago<br><input type="radio"/> problemas vesícula o hepáticos<br><input type="radio"/> HTA o cardiopatía<br><input type="radio"/> problemas renales<br><input type="radio"/> alergia alimentaria<br><input type="radio"/> ácido úrico elevado<br><input type="radio"/> vegetariana<br><input type="radio"/> otros |
| cambio alimentos año previo gestación | <input checked="" type="radio"/> si<br><input type="radio"/> no                                                                                                                                                                                                                                                                                                                                                                                                                                                               |
| cambio lácteos                        | <input type="radio"/> eliminado<br><input type="radio"/> disminuido<br><input checked="" type="radio"/> igual<br><input type="radio"/> aumentado<br><input type="radio"/> no sabe                                                                                                                                                                                                                                                                                                                                             |
| cambio huevos                         | <input type="radio"/> eliminado<br><input type="radio"/> disminuido<br><input type="radio"/> igual<br><input type="radio"/> aumentado<br><input type="radio"/> no sabe                                                                                                                                                                                                                                                                                                                                                        |
| cambio carne                          | <input type="radio"/> eliminado<br><input type="radio"/> disminuido<br><input type="radio"/> igual<br><input type="radio"/> aumentado<br><input type="radio"/> no sabe                                                                                                                                                                                                                                                                                                                                                        |
| cambio pescado                        | <input type="radio"/> eliminado<br><input type="radio"/> disminuido<br><input type="radio"/> igual<br><input type="radio"/> aumentado<br><input type="radio"/> no sabe                                                                                                                                                                                                                                                                                                                                                        |
| cambio verduras                       | <input type="radio"/> eliminado<br><input type="radio"/> disminuido<br><input type="radio"/> igual<br><input type="radio"/> aumentado<br><input type="radio"/> no sabe                                                                                                                                                                                                                                                                                                                                                        |

|                            |                                                                                                                                                                                                                        |
|----------------------------|------------------------------------------------------------------------------------------------------------------------------------------------------------------------------------------------------------------------|
| cambio legumbres           | <input type="radio"/> eliminado<br><input type="radio"/> disminuido<br><input type="radio"/> igual<br><input type="radio"/> aumentado<br><input type="radio"/> no sabe                                                 |
| cambio fruta               | <input type="radio"/> eliminado<br><input type="radio"/> disminuido<br><input type="radio"/> igual<br><input type="radio"/> aumentado<br><input type="radio"/> no sabe                                                 |
| cambio pan                 | <input type="radio"/> eliminado<br><input type="radio"/> disminuido<br><input type="radio"/> igual<br><input type="radio"/> aumentado<br><input type="radio"/> no sabe                                                 |
| cambio aceite oliva        | <input type="radio"/> eliminado<br><input type="radio"/> disminuido<br><input type="radio"/> igual<br><input type="radio"/> aumentado<br><input type="radio"/> no sabe                                                 |
| cambio mante o margarina   | <input type="radio"/> eliminado<br><input type="radio"/> disminuido<br><input type="radio"/> igual<br><input type="radio"/> aumentado<br><input type="radio"/> no sabe                                                 |
| cambio azúcar y dulces     | <input type="radio"/> eliminado<br><input type="radio"/> disminuido<br><input type="radio"/> igual<br><input type="radio"/> aumentado<br><input type="radio"/> no sabe                                                 |
| cambio bebidas alcohólicas | <input checked="" type="radio"/> eliminado<br><input type="radio"/> disminuido<br><input type="radio"/> igual<br><input type="radio"/> aumentado<br><input type="radio"/> no sabe                                      |
| frecuencia comidas fritas  | <input type="radio"/> a diario<br><input type="radio"/> 5 a 6 veces semana<br><input type="radio"/> 2 a 4 veces semana<br><input checked="" type="radio"/> 1 vez semana<br><input type="radio"/> menos de 1 vez semana |
| carne                      | <input type="radio"/> no como<br><input type="radio"/> cruda<br><input type="radio"/> poco hecha<br><input type="radio"/> hecha<br><input checked="" type="radio"/> muy hecha                                          |
| grasa visible carne        | <input checked="" type="radio"/> quita toda<br><input type="radio"/> quita mayoría<br><input type="radio"/> quita un poco<br><input type="radio"/> no quita nada                                                       |

|                                |                                                                                                                                                                                                                                                          |
|--------------------------------|----------------------------------------------------------------------------------------------------------------------------------------------------------------------------------------------------------------------------------------------------------|
| cocina carne                   | <input checked="" type="radio"/> a la plancha<br><input type="radio"/> a la parrilla<br><input type="radio"/> asada<br><input type="radio"/> frita<br><input type="radio"/> guisada                                                                      |
| tostado quemado carne          | <input checked="" type="radio"/> nunca<br><input type="radio"/> 1 vez mes<br><input type="radio"/> 2 a 3 veces mes<br><input type="radio"/> 1 vez semana<br><input type="radio"/> 2 a 3 semanas                                                          |
| tostado quemado pescado        | <input checked="" type="radio"/> nunca<br><input type="radio"/> 1 vez mes<br><input type="radio"/> 2 a 3 veces mes<br><input type="radio"/> 1 vez semana<br><input type="radio"/> 2 a 3 semanas                                                          |
| socarrat paella                | <input checked="" type="radio"/> nunca<br><input type="radio"/> 1 vez mes<br><input type="radio"/> 2 a 3 veces mes<br><input type="radio"/> 1 vez semana<br><input type="radio"/> 2 a 3 semanas                                                          |
| grasa o aceite cocinar         | <input type="radio"/> mantequilla<br><input type="radio"/> margarina<br><input checked="" type="radio"/> aceite oliva<br><input type="radio"/> aceite oliva virgen extra<br><input type="radio"/> aceite vegetal<br><input type="radio"/> mezcla aceites |
| grasa aceite aliñar            | <input type="radio"/> mantequilla<br><input type="radio"/> margarina<br><input checked="" type="radio"/> aceite oliva<br><input type="radio"/> aceite oliva virgen extra<br><input type="radio"/> aceite vegetal<br><input type="radio"/> mezcla aceites |
| grasa aceite freir             | <input type="radio"/> mantequilla<br><input type="radio"/> margarina<br><input checked="" type="radio"/> aceite oliva<br><input type="radio"/> aceite oliva virgen extra<br><input type="radio"/> aceite vegetal<br><input type="radio"/> mezcla aceites |
| Ejercicio cuestionario         | <input checked="" type="radio"/> si<br><input type="radio"/> no                                                                                                                                                                                          |
| horas de sueño incluido siesta | [*DATA REMOVED*]                                                                                                                                                                                                                                         |
| minutos siesta                 | [*DATA REMOVED*]                                                                                                                                                                                                                                         |
| horas televisión semana        | [*DATA REMOVED*]                                                                                                                                                                                                                                         |

|                                        |                                                                                                                                                                                                                                                                                                                                                                |
|----------------------------------------|----------------------------------------------------------------------------------------------------------------------------------------------------------------------------------------------------------------------------------------------------------------------------------------------------------------------------------------------------------------|
| actividad trabajo                      | <input type="radio"/> casi siempre sentado<br><input type="radio"/> sentado 50 por cien<br><input type="radio"/> casi siempre de pie, quieto<br><input type="radio"/> casi siempre levantado caminando y llevando pocas cosas<br><input type="radio"/> casi siempre levantado, caminando y llevado muchas cosas<br><input type="radio"/> trabajo manual pesado |
| tiempo caminar o bici al día           | <input type="radio"/> casi nunca<br><input type="radio"/> menos 20min día<br><input type="radio"/> 20 a 40 min día<br><input checked="" type="radio"/> 40 a 60 min día<br><input type="radio"/> 1h o 1h y media día<br><input type="radio"/> más de 1h y media al día                                                                                          |
| tiempo tareas casa al día              | <input type="radio"/> menos de 1h día<br><input type="radio"/> 1 a 2h día<br><input checked="" type="radio"/> 3 a 4h día<br><input type="radio"/> 5 a 6h día<br><input type="radio"/> 7 a 8h día<br><input type="radio"/> más de 8h día                                                                                                                        |
| tiempo libre televisión ordenador leer | <input type="radio"/> menos 1h día<br><input type="radio"/> 1h día<br><input checked="" type="radio"/> 2h día<br><input type="radio"/> 3h día<br><input type="radio"/> 4h día<br><input type="radio"/> 5 a 6h día<br><input type="radio"/> mas 6h día                                                                                                          |
| tiempo libre ejercicio o deporte       | <input type="radio"/> menos 1h semana<br><input type="radio"/> 1h semana<br><input type="radio"/> 2h semana<br><input type="radio"/> 3h semana<br><input type="radio"/> 4 a 5h semana<br><input checked="" type="radio"/> mas 5h semana                                                                                                                        |
| como se considera                      | <input type="radio"/> sedentaria<br><input type="radio"/> poco activa<br><input checked="" type="radio"/> moderadamente activa<br><input type="radio"/> bastante activa<br><input type="radio"/> muy activa<br><input type="radio"/> no sabe                                                                                                                   |
| FUR                                    | [*DATA REMOVED*]                                                                                                                                                                                                                                                                                                                                               |
| Semanas gestación 2T                   | [*DATA REMOVED*]                                                                                                                                                                                                                                                                                                                                               |
| Días gestación 2T                      | [*DATA REMOVED*]                                                                                                                                                                                                                                                                                                                                               |
| DBP 2T                                 | [*DATA REMOVED*]                                                                                                                                                                                                                                                                                                                                               |
| CC 2T                                  | [*DATA REMOVED*]                                                                                                                                                                                                                                                                                                                                               |
| AC 2T                                  | [*DATA REMOVED*]                                                                                                                                                                                                                                                                                                                                               |



|                                                   |                                                                                                                                                                                                 |
|---------------------------------------------------|-------------------------------------------------------------------------------------------------------------------------------------------------------------------------------------------------|
| LF 2T                                             | [*DATA REMOVED*]                                                                                                                                                                                |
| PFE 2T (Hadlock)                                  | [*DATA REMOVED*]                                                                                                                                                                                |
| Semanas gestación 3T                              | [*DATA REMOVED*]                                                                                                                                                                                |
| días 3T                                           | [*DATA REMOVED*]                                                                                                                                                                                |
| DBP 3T                                            | [*DATA REMOVED*]                                                                                                                                                                                |
| CC 3T                                             | [*DATA REMOVED*]                                                                                                                                                                                |
| AC 3T                                             | [*DATA REMOVED*]                                                                                                                                                                                |
| LF 3T                                             |                                                                                                                                                                                                 |
| PFE 3T (Hadlock)                                  | [*DATA REMOVED*]                                                                                                                                                                                |
| Semanas de gestación final                        | [*DATA REMOVED*]                                                                                                                                                                                |
| días gestación final                              | [*DATA REMOVED*]                                                                                                                                                                                |
| Localización placenta                             | <input checked="" type="radio"/> anterior<br><input type="radio"/> lateral derecha<br><input type="radio"/> lateral izquierda<br><input type="radio"/> posterior<br><input type="radio"/> fondo |
| Presentación longitudinal cefálica                | <input type="radio"/> no<br><input checked="" type="radio"/> si                                                                                                                                 |
| Dorso                                             | <input type="radio"/> izquierda anterior<br><input type="radio"/> izquierda posterior<br><input checked="" type="radio"/> derecha anterior<br><input type="radio"/> derecha posterior           |
| diámetro biparietal                               | [*DATA REMOVED*]                                                                                                                                                                                |
| Circunferencia craneal                            | [*DATA REMOVED*]                                                                                                                                                                                |
| Circunferencia abdominal                          | [*DATA REMOVED*]                                                                                                                                                                                |
| Longitud de femur                                 | [*DATA REMOVED*]                                                                                                                                                                                |
| tejido celular subcutáneo a nivel del muslo en mm | [*DATA REMOVED*]                                                                                                                                                                                |
| tejido celular subcutáneo en abdomen en mm        | [*DATA REMOVED*]                                                                                                                                                                                |
| Volumen del muslo en cm3                          | [*DATA REMOVED*]                                                                                                                                                                                |
| Peso fetal estimado según fórmula de Hadlock      | [*DATA REMOVED*]                                                                                                                                                                                |

|                                               |                                                                                                                                                          |
|-----------------------------------------------|----------------------------------------------------------------------------------------------------------------------------------------------------------|
| Percentil                                     | [*DATA REMOVED*]                                                                                                                                         |
| Peso fetal estimado según fórmula de Scioscia | <hr/>                                                                                                                                                    |
| Peso fetal estimado según fórmula de LEE      | <hr/>                                                                                                                                                    |
| Tipo de parto                                 | <input checked="" type="radio"/> eutocico<br><input type="radio"/> instrumentado/ventosa<br><input type="radio"/> cesarea                                |
| fecha de nacimiento                           | [*DATA REMOVED*]                                                                                                                                         |
| Días entre exploración y nacimiento           | [*DATA REMOVED*]                                                                                                                                         |
| Peso RN en g                                  | [*DATA REMOVED*]                                                                                                                                         |
| sexo                                          | <input checked="" type="radio"/> mujer<br><input type="radio"/> hombre                                                                                   |
| Apgar 1 minuto                                | [*DATA REMOVED*]                                                                                                                                         |
| Apgar 5 minutos                               | [*DATA REMOVED*]                                                                                                                                         |
| Apgar 10 minutos                              | <hr/>                                                                                                                                                    |
| antecedente Covid durante gestación           | <input type="radio"/> Yes<br><input checked="" type="radio"/> No                                                                                         |
| Nivel de estudios                             | <input type="radio"/> ninguno<br><input type="radio"/> primarios<br><input checked="" type="radio"/> secundarios<br><input type="radio"/> universitarios |

# Base\_datos\_estimacion\_peso\_fetal

|                                       |                                                                                                                                                                                                                                                                                      |
|---------------------------------------|--------------------------------------------------------------------------------------------------------------------------------------------------------------------------------------------------------------------------------------------------------------------------------------|
| Número de identificación participante | 134                                                                                                                                                                                                                                                                                  |
| CODIGO PARTICIPANTE                   |                                                                                                                                                                                                                                                                                      |
| Edad                                  | [*DATA REMOVED*]                                                                                                                                                                                                                                                                     |
| Gestaciones                           | <input type="radio"/> 1<br><input checked="" type="radio"/> 2<br><input type="radio"/> 3<br><input type="radio"/> mas de 3                                                                                                                                                           |
| partos                                | <input type="radio"/> 0<br><input checked="" type="radio"/> 1<br><input type="radio"/> 2<br><input type="radio"/> 3<br><input type="radio"/> mas de 3                                                                                                                                |
| cesáreas                              | <input checked="" type="radio"/> 0<br><input type="radio"/> 1<br><input type="radio"/> 2<br><input type="radio"/> 3<br><input type="radio"/> mas de 3                                                                                                                                |
| Abortos                               | <input checked="" type="radio"/> 0<br><input type="radio"/> 1<br><input type="radio"/> 2<br><input type="radio"/> 3<br><input type="radio"/> mas de 3                                                                                                                                |
| Tipo de gestacion                     | <input checked="" type="radio"/> espontanea<br><input type="radio"/> IAC inseminación artificial conyuge<br><input type="radio"/> IAD inseminación artificial donante<br><input type="radio"/> FIV Fecundación in Vitro<br><input type="radio"/> Ovodon FIV con donación de ovocitos |
| peso previo a embarazo                | [*DATA REMOVED*]                                                                                                                                                                                                                                                                     |
| Ganancia ponderal embarazo            |                                                                                                                                                                                                                                                                                      |
| Talla madre                           | [*DATA REMOVED*]                                                                                                                                                                                                                                                                     |
| IMC previo embarazo                   | 19.14672216441207                                                                                                                                                                                                                                                                    |
| Patología obstétrica                  | <input checked="" type="radio"/> no<br><input type="radio"/> si                                                                                                                                                                                                                      |
| Diabetes pregestacional               | <input checked="" type="radio"/> no<br><input type="radio"/> si                                                                                                                                                                                                                      |
| Diabetes gestacional                  | <input checked="" type="radio"/> no<br><input type="radio"/> si                                                                                                                                                                                                                      |

|                                            |                                                                                                                                                                                      |
|--------------------------------------------|--------------------------------------------------------------------------------------------------------------------------------------------------------------------------------------|
| Diabetes gestacional con insulina          | <input checked="" type="radio"/> no<br><input type="radio"/> si                                                                                                                      |
| Diabetes gestacional con dieta y ejercicio | <input checked="" type="radio"/> no<br><input type="radio"/> si                                                                                                                      |
| Percentil fetos previos                    | <input checked="" type="radio"/> Nada<br><input type="radio"/> percentil menor de 10<br><input type="radio"/> percentil entre 10 y 90<br><input type="radio"/> percentil mayor de 90 |
| Exfumadora                                 | <input checked="" type="radio"/> Nada<br><input type="radio"/> menos de 5 años<br><input type="radio"/> 5 a 10 años<br><input type="radio"/> mayor o igual a 10 años                 |
| Hábito tabáquico                           | <input type="radio"/> no<br><input checked="" type="radio"/> si                                                                                                                      |
| fumadora                                   | [*DATA REMOVED*]                                                                                                                                                                     |
| Consumo otros tóxicos                      | <input checked="" type="radio"/> no<br><input type="radio"/> si                                                                                                                      |
| Hb 1T                                      | [*DATA REMOVED*]                                                                                                                                                                     |
| Htc 1T                                     | [*DATA REMOVED*]                                                                                                                                                                     |
| Hb 2T                                      | _____                                                                                                                                                                                |
| HTC 2T                                     | _____                                                                                                                                                                                |
| Hb 3T                                      | _____                                                                                                                                                                                |
| HTC 3T                                     | _____                                                                                                                                                                                |
| Suplemento FE oral                         | <input checked="" type="radio"/> si<br><input type="radio"/> no                                                                                                                      |
| Suplemento fe iv                           | <input type="radio"/> si<br><input checked="" type="radio"/> no                                                                                                                      |
| Transfusión                                | <input checked="" type="radio"/> no<br><input type="radio"/> si                                                                                                                      |
| Solicitada Vit D                           | <input checked="" type="radio"/> no<br><input type="radio"/> si                                                                                                                      |
| Deficit vit D                              | <input type="radio"/> no<br><input type="radio"/> si                                                                                                                                 |

|                       |                                                                                                                                                                                                                                                                                                                                                                                                              |
|-----------------------|--------------------------------------------------------------------------------------------------------------------------------------------------------------------------------------------------------------------------------------------------------------------------------------------------------------------------------------------------------------------------------------------------------------|
| Suplemento vit D      | <input type="radio"/> si<br><input type="radio"/> no                                                                                                                                                                                                                                                                                                                                                         |
| Dieta, cuestionario   | <input checked="" type="radio"/> si<br><input type="radio"/> no                                                                                                                                                                                                                                                                                                                                              |
| Leche entera          | <input checked="" type="radio"/> Nunca o menos 1 vez al mes<br><input type="radio"/> 1 a 3 veces mes<br><input type="radio"/> 1 vez semana<br><input type="radio"/> 2 a 4 veces semana<br><input type="radio"/> 5 a 6 veces semana<br><input type="radio"/> 1 vez al día<br><input type="radio"/> 2 a 3 veces al día<br><input type="radio"/> 5 a 6 veces al día<br><input type="radio"/> más 6 veces al día |
| Leche semidesnatada   | <input checked="" type="radio"/> Nunca o menos 1 vez al mes<br><input type="radio"/> 1 a 3 veces mes<br><input type="radio"/> 1 vez semana<br><input type="radio"/> 2 a 4 veces semana<br><input type="radio"/> 5 a 6 veces semana<br><input type="radio"/> 1 vez al día<br><input type="radio"/> 2 a 3 veces al día<br><input type="radio"/> 5 a 6 veces al día<br><input type="radio"/> mas 6 veces al día |
| Leche desnatada       | <input checked="" type="radio"/> Nunca o menos 1 vez al mes<br><input type="radio"/> 1 a 3 veces mes<br><input type="radio"/> 1 vez semana<br><input type="radio"/> 2 a 4 veces semana<br><input type="radio"/> 5 a 6 veces semana<br><input type="radio"/> 1 vez al día<br><input type="radio"/> 2 a 3 veces al día<br><input type="radio"/> 5 a 6 veces al día<br><input type="radio"/> más 6 veces al día |
| Leche condensada      | <input checked="" type="radio"/> Nunca o menos 1 vez al mes<br><input type="radio"/> 1 a 3 veces mes<br><input type="radio"/> 1 vez semana<br><input type="radio"/> 2 a 4 veces semana<br><input type="radio"/> 5 a 6 veces semana<br><input type="radio"/> 1 vez al día<br><input type="radio"/> 2 a 3 veces al día<br><input type="radio"/> 5 a 6 veces al día<br><input type="radio"/> más 6 veces al día |
| nata o crema de leche | <input checked="" type="radio"/> Nunca o menos 1 vez al mes<br><input type="radio"/> 1 a 3 veces mes<br><input type="radio"/> 1 vez semana<br><input type="radio"/> 2 a 4 veces semana<br><input type="radio"/> 5 a 6 veces semana<br><input type="radio"/> 1 vez al día<br><input type="radio"/> 2 a 3 veces al día<br><input type="radio"/> 5 a 6 veces al día<br><input type="radio"/> más 6 veces al día |

|                                             |                                                                                                                                                                                                                                                                                                                                                                                                              |
|---------------------------------------------|--------------------------------------------------------------------------------------------------------------------------------------------------------------------------------------------------------------------------------------------------------------------------------------------------------------------------------------------------------------------------------------------------------------|
| Yogurt Entero                               | <input type="radio"/> Nunca o menos 1 vez al mes<br><input checked="" type="radio"/> 1 a 3 veces mes<br><input type="radio"/> 1 vez semana<br><input type="radio"/> 2 a 4 veces semana<br><input type="radio"/> 5 a 6 veces semana<br><input type="radio"/> 1 vez al día<br><input type="radio"/> 2 a 3 veces al día<br><input type="radio"/> 5 a 6 veces al día<br><input type="radio"/> más 6 veces al día |
| Yogurt desnatado                            | <input checked="" type="radio"/> Nunca o menos 1 vez al mes<br><input type="radio"/> 1 a 3 veces mes<br><input type="radio"/> 1 vez semana<br><input type="radio"/> 2 a 4 veces semana<br><input type="radio"/> 5 a 6 veces semana<br><input type="radio"/> 1 vez al día<br><input type="radio"/> 2 a 3 veces al día<br><input type="radio"/> 5 a 6 veces al día<br><input type="radio"/> más 6 veces al día |
| 100g requesón o queso blando o queso fresco | <input checked="" type="radio"/> Nunca o menos 1 vez al mes<br><input type="radio"/> 1 a 3 veces mes<br><input type="radio"/> 1 vez semana<br><input type="radio"/> 2 a 4 veces semana<br><input type="radio"/> 5 a 6 veces semana<br><input type="radio"/> 1 vez al día<br><input type="radio"/> 2 a 3 veces al día<br><input type="radio"/> 5 a 6 veces al día<br><input type="radio"/> más 6 veces al día |
| queso curado o semicurado o cremoso         | <input checked="" type="radio"/> Nunca o menos 1 vez al mes<br><input type="radio"/> 1 a 3 veces mes<br><input type="radio"/> 1 vez semana<br><input type="radio"/> 2 a 4 veces semana<br><input type="radio"/> 5 a 6 veces semana<br><input type="radio"/> 1 vez al día<br><input type="radio"/> 2 a 3 veces al día<br><input type="radio"/> 5 a 6 veces al día<br><input type="radio"/> más 6 veces al día |
| natillas flan pudding                       | <input type="radio"/> Nunca o menos 1 vez al mes<br><input type="radio"/> 1 a 3 veces mes<br><input checked="" type="radio"/> 1 vez semana<br><input type="radio"/> 2 a 4 veces semana<br><input type="radio"/> 5 a 6 veces semana<br><input type="radio"/> 1 vez al día<br><input type="radio"/> 2 a 3 veces al día<br><input type="radio"/> 5 a 6 veces al día<br><input type="radio"/> más 6 veces al día |
| Helado                                      | <input type="radio"/> Nunca o menos 1 vez al mes<br><input type="radio"/> 1 a 3 veces mes<br><input checked="" type="radio"/> 1 vez semana<br><input type="radio"/> 2 a 4 veces semana<br><input type="radio"/> 5 a 6 veces semana<br><input type="radio"/> 1 vez al día<br><input type="radio"/> 2 a 3 veces al día<br><input type="radio"/> 5 a 6 veces al día<br><input type="radio"/> más 6 veces al día |

|                                      |                                                                                                                                                                                                                                                                                                                                                                                                              |
|--------------------------------------|--------------------------------------------------------------------------------------------------------------------------------------------------------------------------------------------------------------------------------------------------------------------------------------------------------------------------------------------------------------------------------------------------------------|
| huevo                                | <input type="radio"/> Nunca o menos 1 vez al mes<br><input type="radio"/> 1 a 3 veces mes<br><input type="radio"/> 1 vez semana<br><input checked="" type="radio"/> 2 a 4 veces semana<br><input type="radio"/> 5 a 6 veces semana<br><input type="radio"/> 1 vez al día<br><input type="radio"/> 2 a 3 veces al día<br><input type="radio"/> 5 a 6 veces al día<br><input type="radio"/> más 6 veces al día |
| Pollo con piel                       | <input type="radio"/> Nunca o menos 1 vez al mes<br><input type="radio"/> 1 a 3 veces mes<br><input checked="" type="radio"/> 1 vez semana<br><input type="radio"/> 2 a 4 veces semana<br><input type="radio"/> 5 a 6 veces semana<br><input type="radio"/> 1 vez al día<br><input type="radio"/> 2 a 3 veces al día<br><input type="radio"/> 5 a 6 veces al día<br><input type="radio"/> más 6 veces al día |
| pollo sin piel                       | <input type="radio"/> Nunca o menos 1 vez al mes<br><input type="radio"/> 1 a 3 veces mes<br><input checked="" type="radio"/> 1 vez semana<br><input type="radio"/> 2 a 4 veces semana<br><input type="radio"/> 5 a 6 veces semana<br><input type="radio"/> 1 vez al día<br><input type="radio"/> 2 a 3 veces al día<br><input type="radio"/> 5 a 6 veces al día<br><input type="radio"/> más 6 veces al día |
| Ternera o cerdo o cordero            | <input type="radio"/> Nunca o menos 1 vez al mes<br><input type="radio"/> 1 a 3 veces mes<br><input type="radio"/> 1 vez semana<br><input checked="" type="radio"/> 2 a 4 veces semana<br><input type="radio"/> 5 a 6 veces semana<br><input type="radio"/> 1 vez al día<br><input type="radio"/> 2 a 3 veces al día<br><input type="radio"/> 5 a 6 veces al día<br><input type="radio"/> más 6 veces al día |
| carne caza: Conejo o codorniz o pato | <input checked="" type="radio"/> Nunca o menos 1 vez al mes<br><input type="radio"/> 1 a 3 veces mes<br><input type="radio"/> 1 vez semana<br><input type="radio"/> 2 a 4 veces semana<br><input type="radio"/> 5 a 6 veces semana<br><input type="radio"/> 1 vez al día<br><input type="radio"/> 2 a 3 veces al día<br><input type="radio"/> 5 a 6 veces al día<br><input type="radio"/> más 6 veces al día |
| Hígado de ternera o cerdo o pollo    | <input checked="" type="radio"/> Nunca o menos 1 vez al mes<br><input type="radio"/> 1 a 3 veces mes<br><input type="radio"/> 1 vez semana<br><input type="radio"/> 2 a 4 veces semana<br><input type="radio"/> 5 a 6 veces semana<br><input type="radio"/> 1 vez al día<br><input type="radio"/> 2 a 3 veces al día<br><input type="radio"/> 5 a 6 veces al día<br><input type="radio"/> más 6 veces al día |

|                     |                                                                                                                                                                                                                                                                                                                                                                                                              |
|---------------------|--------------------------------------------------------------------------------------------------------------------------------------------------------------------------------------------------------------------------------------------------------------------------------------------------------------------------------------------------------------------------------------------------------------|
| Vísceras            | <input checked="" type="radio"/> Nunca o menos 1 vez al mes<br><input type="radio"/> 1 a 3 veces mes<br><input type="radio"/> 1 vez semana<br><input type="radio"/> 2 a 4 veces semana<br><input type="radio"/> 5 a 6 veces semana<br><input type="radio"/> 1 vez al día<br><input type="radio"/> 2 a 3 veces al día<br><input type="radio"/> 5 a 6 veces al día<br><input type="radio"/> más 6 veces al día |
| Embutido            | <input checked="" type="radio"/> Nunca o menos 1 vez al mes<br><input type="radio"/> 1 a 3 veces mes<br><input type="radio"/> 1 vez semana<br><input type="radio"/> 2 a 4 veces semana<br><input type="radio"/> 5 a 6 veces semana<br><input type="radio"/> 1 vez al día<br><input type="radio"/> 2 a 3 veces al día<br><input type="radio"/> 5 a 6 veces al día<br><input type="radio"/> más 6 veces al día |
| Salchicha o similar | <input checked="" type="radio"/> Nunca o menos 1 vez al mes<br><input type="radio"/> 1 a 3 veces mes<br><input type="radio"/> 1 vez semana<br><input type="radio"/> 2 a 4 veces semana<br><input type="radio"/> 5 a 6 veces semana<br><input type="radio"/> 1 vez al día<br><input type="radio"/> 2 a 3 veces al día<br><input type="radio"/> 5 a 6 veces al día<br><input type="radio"/> más 6 veces al día |
| Pate o foiegras     | <input checked="" type="radio"/> Nunca o menos 1 vez al mes<br><input type="radio"/> 1 a 3 veces mes<br><input type="radio"/> 1 vez semana<br><input type="radio"/> 2 a 4 veces semana<br><input type="radio"/> 5 a 6 veces semana<br><input type="radio"/> 1 vez al día<br><input type="radio"/> 2 a 3 veces al día<br><input type="radio"/> 5 a 6 veces al día<br><input type="radio"/> más 6 veces al día |
| Hamburguesa         | <input type="radio"/> Nunca o menos 1 vez al mes<br><input checked="" type="radio"/> 1 a 3 veces mes<br><input type="radio"/> 1 vez semana<br><input type="radio"/> 2 a 4 veces semana<br><input type="radio"/> 5 a 6 veces semana<br><input type="radio"/> 1 vez al día<br><input type="radio"/> 2 a 3 veces al día<br><input type="radio"/> 5 a 6 veces al día<br><input type="radio"/> más 6 veces al día |
| tocino o bacon      | <input type="radio"/> Nunca o menos 1 vez al mes<br><input checked="" type="radio"/> 1 a 3 veces mes<br><input type="radio"/> 1 vez semana<br><input type="radio"/> 2 a 4 veces semana<br><input type="radio"/> 5 a 6 veces semana<br><input type="radio"/> 1 vez al día<br><input type="radio"/> 2 a 3 veces al día<br><input type="radio"/> 5 a 6 veces al día<br><input type="radio"/> más 6 veces al día |



---

Pescado frito

- ☐ Nunca o menos 1 vez al mes  
☒ 1 a 3 veces mes  
☐ 1 vez semana  
☐ 2 a 4 veces semana  
☐ 5 a 6 veces semana  
☐ 1 vez al día  
☐ 2 a 3 veces al día  
☐ 5 a 6 veces al día  
☐ más 6 veces al día

---

pescado hervido blanco

- ☐ Nunca o menos 1 vez al mes  
☒ 1 a 3 veces mes  
☐ 1 vez semana  
☐ 2 a 4 veces semana  
☐ 5 a 6 veces semana  
☐ 1 vez al día  
☐ 2 a 3 veces al día  
☐ 5 a 6 veces al día  
☐ más 6 veces al día

---

pescado hervido azul

- ☒ Nunca o menos 1 vez al mes  
☐ 1 a 3 veces mes  
☐ 1 vez semana  
☐ 2 a 4 veces semana  
☐ 5 a 6 veces semana  
☐ 1 vez al día  
☐ 2 a 3 veces al día  
☐ 5 a 6 veces al día  
☐ más 6 veces al día

---

otros pescado azul

- ☒ Nunca o menos 1 vez al mes  
☐ 1 a 3 veces mes  
☐ 1 vez semana  
☐ 2 a 4 veces semana  
☐ 5 a 6 veces semana  
☐ 1 vez al día  
☐ 2 a 3 veces al día  
☐ 5 a 6 veces al día  
☐ más 6 veces al día

---

atun conserva

- ☐ Nunca o menos 1 vez al mes  
☒ 1 a 3 veces mes  
☐ 1 vez semana  
☐ 2 a 4 veces semana  
☐ 5 a 6 veces semana  
☐ 1 vez al día  
☐ 2 a 3 veces al día  
☐ 5 a 6 veces al día  
☐ más 6 veces al día

---

sardina conserva

- ☒ Nunca o menos 1 vez al mes  
☐ 1 a 3 veces mes  
☐ 1 vez semana  
☐ 2 a 4 veces semana  
☐ 5 a 6 veces semana  
☐ 1 vez al día  
☐ 2 a 3 veces al día  
☐ 5 a 6 veces al día  
☐ más 6 veces al día

|                                         |                                                                                                                                                                                                                                                                                                                                                                                                              |
|-----------------------------------------|--------------------------------------------------------------------------------------------------------------------------------------------------------------------------------------------------------------------------------------------------------------------------------------------------------------------------------------------------------------------------------------------------------------|
| pescado ahumado                         | <input checked="" type="radio"/> Nunca o menos 1 vez al mes<br><input type="radio"/> 1 a 3 veces mes<br><input type="radio"/> 1 vez semana<br><input type="radio"/> 2 a 4 veces semana<br><input type="radio"/> 5 a 6 veces semana<br><input type="radio"/> 1 vez al día<br><input type="radio"/> 2 a 3 veces al día<br><input type="radio"/> 5 a 6 veces al día<br><input type="radio"/> más 6 veces al día |
| almejas o mejillones o ostras unos 100g | <input type="radio"/> Nunca o menos 1 vez al mes<br><input checked="" type="radio"/> 1 a 3 veces mes<br><input type="radio"/> 1 vez semana<br><input type="radio"/> 2 a 4 veces semana<br><input type="radio"/> 5 a 6 veces semana<br><input type="radio"/> 1 vez al día<br><input type="radio"/> 2 a 3 veces al día<br><input type="radio"/> 5 a 6 veces al día<br><input type="radio"/> más 6 veces al día |
| calamar o chipiron o sepia unos 100g    | <input type="radio"/> Nunca o menos 1 vez al mes<br><input checked="" type="radio"/> 1 a 3 veces mes<br><input type="radio"/> 1 vez semana<br><input type="radio"/> 2 a 4 veces semana<br><input type="radio"/> 5 a 6 veces semana<br><input type="radio"/> 1 vez al día<br><input type="radio"/> 2 a 3 veces al día<br><input type="radio"/> 5 a 6 veces al día<br><input type="radio"/> más 6 veces al día |
| marisco unos 100g                       | <input type="radio"/> Nunca o menos 1 vez al mes<br><input checked="" type="radio"/> 1 a 3 veces mes<br><input type="radio"/> 1 vez semana<br><input type="radio"/> 2 a 4 veces semana<br><input type="radio"/> 5 a 6 veces semana<br><input type="radio"/> 1 vez al día<br><input type="radio"/> 2 a 3 veces al día<br><input type="radio"/> 5 a 6 veces al día<br><input type="radio"/> más 6 veces al día |
| Espinacas o acelgas cocinadas           | <input checked="" type="radio"/> Nunca o menos 1 vez al mes<br><input type="radio"/> 1 a 3 veces mes<br><input type="radio"/> 1 vez semana<br><input type="radio"/> 2 a 4 veces semana<br><input type="radio"/> 5 a 6 veces semana<br><input type="radio"/> 1 vez al día<br><input type="radio"/> 2 a 3 veces al día<br><input type="radio"/> 5 a 6 veces al día<br><input type="radio"/> más 6 veces al día |
| Col o coliflor o brocoli cocinado       | <input checked="" type="radio"/> Nunca o menos 1 vez al mes<br><input type="radio"/> 1 a 3 veces mes<br><input type="radio"/> 1 vez semana<br><input type="radio"/> 2 a 4 veces semana<br><input type="radio"/> 5 a 6 veces semana<br><input type="radio"/> 1 vez al día<br><input type="radio"/> 2 a 3 veces al día<br><input type="radio"/> 5 a 6 veces al día<br><input type="radio"/> más 6 veces al día |

---

Lechuga o endivia o escarola

- ☒ Nunca o menos 1 vez al mes  
☐ 1 a 3 veces mes  
☐ 1 vez semana  
☐ 2 a 4 veces semana  
☐ 5 a 6 veces semana  
☐ 1 vez al día  
☐ 2 a 3 veces al día  
☐ 5 a 6 veces al día  
☐ más 6 veces al día

---

tomate ensalada

- ☐ Nunca o menos 1 vez al mes  
☐ 1 a 3 veces mes  
☒ 1 vez semana  
☐ 2 a 4 veces semana  
☐ 5 a 6 veces semana  
☐ 1 vez al día  
☐ 2 a 3 veces al día  
☐ 5 a 6 veces al día  
☐ más 6 veces al día

---

cebolla

- ☐ Nunca o menos 1 vez al mes  
☐ 1 a 3 veces mes  
☒ 1 vez semana  
☐ 2 a 4 veces semana  
☐ 5 a 6 veces semana  
☐ 1 vez al día  
☐ 2 a 3 veces al día  
☐ 5 a 6 veces al día  
☐ más 6 veces al día

---

Zanahoria o calabaza

- ☐ Nunca o menos 1 vez al mes  
☐ 1 a 3 veces mes  
☒ 1 vez semana  
☐ 2 a 4 veces semana  
☐ 5 a 6 veces semana  
☐ 1 vez al día  
☐ 2 a 3 veces al día  
☐ 5 a 6 veces al día  
☐ más 6 veces al día

---

Judías verdes

- ☐ Nunca o menos 1 vez al mes  
☐ 1 a 3 veces mes  
☒ 1 vez semana  
☐ 2 a 4 veces semana  
☐ 5 a 6 veces semana  
☐ 1 vez al día  
☐ 2 a 3 veces al día  
☐ 5 a 6 veces al día  
☐ más 6 veces al día

---

Berenjena o calabacín o pepino

- ☐ Nunca o menos 1 vez al mes  
☒ 1 a 3 veces mes  
☐ 1 vez semana  
☐ 2 a 4 veces semana  
☐ 5 a 6 veces semana  
☐ 1 vez al día  
☐ 2 a 3 veces al día  
☐ 5 a 6 veces al día  
☐ más 6 veces al día

---

|          |                                                                                                                                                                                                                                                                                                                                                                                                              |
|----------|--------------------------------------------------------------------------------------------------------------------------------------------------------------------------------------------------------------------------------------------------------------------------------------------------------------------------------------------------------------------------------------------------------------|
| pimiento | <input checked="" type="radio"/> Nunca o menos 1 vez al mes<br><input type="radio"/> 1 a 3 veces mes<br><input type="radio"/> 1 vez semana<br><input type="radio"/> 2 a 4 veces semana<br><input type="radio"/> 5 a 6 veces semana<br><input type="radio"/> 1 vez al día<br><input type="radio"/> 2 a 3 veces al día<br><input type="radio"/> 5 a 6 veces al día<br><input type="radio"/> más 6 veces al día |
|----------|--------------------------------------------------------------------------------------------------------------------------------------------------------------------------------------------------------------------------------------------------------------------------------------------------------------------------------------------------------------------------------------------------------------|

---

|           |                                                                                                                                                                                                                                                                                                                                                                                                              |
|-----------|--------------------------------------------------------------------------------------------------------------------------------------------------------------------------------------------------------------------------------------------------------------------------------------------------------------------------------------------------------------------------------------------------------------|
| alcachofa | <input checked="" type="radio"/> Nunca o menos 1 vez al mes<br><input type="radio"/> 1 a 3 veces mes<br><input type="radio"/> 1 vez semana<br><input type="radio"/> 2 a 4 veces semana<br><input type="radio"/> 5 a 6 veces semana<br><input type="radio"/> 1 vez al día<br><input type="radio"/> 2 a 3 veces al día<br><input type="radio"/> 5 a 6 veces al día<br><input type="radio"/> más 6 veces al día |
|-----------|--------------------------------------------------------------------------------------------------------------------------------------------------------------------------------------------------------------------------------------------------------------------------------------------------------------------------------------------------------------------------------------------------------------|

---

|            |                                                                                                                                                                                                                                                                                                                                                                                                              |
|------------|--------------------------------------------------------------------------------------------------------------------------------------------------------------------------------------------------------------------------------------------------------------------------------------------------------------------------------------------------------------------------------------------------------------|
| espárragos | <input checked="" type="radio"/> Nunca o menos 1 vez al mes<br><input type="radio"/> 1 a 3 veces mes<br><input type="radio"/> 1 vez semana<br><input type="radio"/> 2 a 4 veces semana<br><input type="radio"/> 5 a 6 veces semana<br><input type="radio"/> 1 vez al día<br><input type="radio"/> 2 a 3 veces al día<br><input type="radio"/> 5 a 6 veces al día<br><input type="radio"/> más 6 veces al día |
|------------|--------------------------------------------------------------------------------------------------------------------------------------------------------------------------------------------------------------------------------------------------------------------------------------------------------------------------------------------------------------------------------------------------------------|

---

|              |                                                                                                                                                                                                                                                                                                                                                                                                              |
|--------------|--------------------------------------------------------------------------------------------------------------------------------------------------------------------------------------------------------------------------------------------------------------------------------------------------------------------------------------------------------------------------------------------------------------|
| maíz hervido | <input type="radio"/> Nunca o menos 1 vez al mes<br><input type="radio"/> 1 a 3 veces mes<br><input checked="" type="radio"/> 1 vez semana<br><input type="radio"/> 2 a 4 veces semana<br><input type="radio"/> 5 a 6 veces semana<br><input type="radio"/> 1 vez al día<br><input type="radio"/> 2 a 3 veces al día<br><input type="radio"/> 5 a 6 veces al día<br><input type="radio"/> más 6 veces al día |
|--------------|--------------------------------------------------------------------------------------------------------------------------------------------------------------------------------------------------------------------------------------------------------------------------------------------------------------------------------------------------------------------------------------------------------------|

---

|           |                                                                                                                                                                                                                                                                                                                                                                                                              |
|-----------|--------------------------------------------------------------------------------------------------------------------------------------------------------------------------------------------------------------------------------------------------------------------------------------------------------------------------------------------------------------------------------------------------------------|
| legumbres | <input type="radio"/> Nunca o menos 1 vez al mes<br><input type="radio"/> 1 a 3 veces mes<br><input checked="" type="radio"/> 1 vez semana<br><input type="radio"/> 2 a 4 veces semana<br><input type="radio"/> 5 a 6 veces semana<br><input type="radio"/> 1 vez al día<br><input type="radio"/> 2 a 3 veces al día<br><input type="radio"/> 5 a 6 veces al día<br><input type="radio"/> más 6 veces al día |
|-----------|--------------------------------------------------------------------------------------------------------------------------------------------------------------------------------------------------------------------------------------------------------------------------------------------------------------------------------------------------------------------------------------------------------------|

---

|                       |                                                                                                                                                                                                                                                                                                                                                                                                              |
|-----------------------|--------------------------------------------------------------------------------------------------------------------------------------------------------------------------------------------------------------------------------------------------------------------------------------------------------------------------------------------------------------------------------------------------------------|
| naranjas o mandarinas | <input type="radio"/> Nunca o menos 1 vez al mes<br><input type="radio"/> 1 a 3 veces mes<br><input checked="" type="radio"/> 1 vez semana<br><input type="radio"/> 2 a 4 veces semana<br><input type="radio"/> 5 a 6 veces semana<br><input type="radio"/> 1 vez al día<br><input type="radio"/> 2 a 3 veces al día<br><input type="radio"/> 5 a 6 veces al día<br><input type="radio"/> más 6 veces al día |
|-----------------------|--------------------------------------------------------------------------------------------------------------------------------------------------------------------------------------------------------------------------------------------------------------------------------------------------------------------------------------------------------------------------------------------------------------|

---

---

zum natural fruta

- ☐ Nunca o menos 1 vez al mes  
☐ 1 a 3 veces mes  
☒ 1 vez semana  
☐ 2 a 4 veces semana  
☐ 5 a 6 veces semana  
☐ 1 vez al día  
☐ 2 a 3 veces al día  
☐ 5 a 6 veces al día  
☐ más 6 veces al día

---

platano

- ☒ Nunca o menos 1 vez al mes  
☐ 1 a 3 veces mes  
☐ 1 vez semana  
☐ 2 a 4 veces semana  
☐ 5 a 6 veces semana  
☐ 1 vez al día  
☐ 2 a 3 veces al día  
☐ 5 a 6 veces al día  
☐ más 6 veces al día

---

manzana o pera

- ☐ Nunca o menos 1 vez al mes  
☒ 1 a 3 veces mes  
☐ 1 vez semana  
☐ 2 a 4 veces semana  
☐ 5 a 6 veces semana  
☐ 1 vez al día  
☐ 2 a 3 veces al día  
☐ 5 a 6 veces al día  
☐ más 6 veces al día

---

melocotón o nectarina

- ☐ Nunca o menos 1 vez al mes  
☒ 1 a 3 veces mes  
☐ 1 vez semana  
☐ 2 a 4 veces semana  
☐ 5 a 6 veces semana  
☐ 1 vez al día  
☐ 2 a 3 veces al día  
☐ 5 a 6 veces al día  
☐ más 6 veces al día

---

sandia o melon

- ☐ Nunca o menos 1 vez al mes  
☐ 1 a 3 veces mes  
☒ 1 vez semana  
☐ 2 a 4 veces semana  
☐ 5 a 6 veces semana  
☐ 1 vez al día  
☐ 2 a 3 veces al día  
☐ 5 a 6 veces al día  
☐ más 6 veces al día

---

uva

- ☒ Nunca o menos 1 vez al mes  
☐ 1 a 3 veces mes  
☐ 1 vez semana  
☐ 2 a 4 veces semana  
☐ 5 a 6 veces semana  
☐ 1 vez al día  
☐ 2 a 3 veces al día  
☐ 5 a 6 veces al día  
☐ más 6 veces al día

---

bruna o ciruela

- ☒ Nunca o menos 1 vez al mes  
☐ 1 a 3 veces mes  
☐ 1 vez semana  
☐ 2 a 4 veces semana  
☐ 5 a 6 veces semana  
☐ 1 vez al día  
☐ 2 a 3 veces al día  
☐ 5 a 6 veces al día  
☐ más 6 veces al día

---

kiwi

- ☐ Nunca o menos 1 vez al mes  
☒ 1 a 3 veces mes  
☐ 1 vez semana  
☐ 2 a 4 veces semana  
☐ 5 a 6 veces semana  
☐ 1 vez al día  
☐ 2 a 3 veces al día  
☐ 5 a 6 veces al día  
☐ más 6 veces al día

---

aceituna

- ☐ Nunca o menos 1 vez al mes  
☐ 1 a 3 veces mes  
☒ 1 vez semana  
☐ 2 a 4 veces semana  
☐ 5 a 6 veces semana  
☐ 1 vez al día  
☐ 2 a 3 veces al día  
☐ 5 a 6 veces al día  
☐ más 6 veces al día

---

frutos secos

- ☒ Nunca o menos 1 vez al mes  
☐ 1 a 3 veces mes  
☐ 1 vez semana  
☐ 2 a 4 veces semana  
☐ 5 a 6 veces semana  
☐ 1 vez al día  
☐ 2 a 3 veces al día  
☐ 5 a 6 veces al día  
☐ más 6 veces al día

---

pan blanco

- ☐ Nunca o menos 1 vez al mes  
☒ 1 a 3 veces mes  
☐ 1 vez semana  
☐ 2 a 4 veces semana  
☐ 5 a 6 veces semana  
☐ 1 vez al día  
☐ 2 a 3 veces al día  
☐ 5 a 6 veces al día  
☐ más 6 veces al día

---

pan integral

- ☒ Nunca o menos 1 vez al mes  
☐ 1 a 3 veces mes  
☐ 1 vez semana  
☐ 2 a 4 veces semana  
☐ 5 a 6 veces semana  
☐ 1 vez al día  
☐ 2 a 3 veces al día  
☐ 5 a 6 veces al día  
☐ más 6 veces al día

---

|                   |                                                                                                                                                                                                                                                                                                                                                                                                              |
|-------------------|--------------------------------------------------------------------------------------------------------------------------------------------------------------------------------------------------------------------------------------------------------------------------------------------------------------------------------------------------------------------------------------------------------------|
| cereales desayuno | <input checked="" type="radio"/> Nunca o menos 1 vez al mes<br><input type="radio"/> 1 a 3 veces mes<br><input type="radio"/> 1 vez semana<br><input type="radio"/> 2 a 4 veces semana<br><input type="radio"/> 5 a 6 veces semana<br><input type="radio"/> 1 vez al día<br><input type="radio"/> 2 a 3 veces al día<br><input type="radio"/> 5 a 6 veces al día<br><input type="radio"/> más 6 veces al día |
|-------------------|--------------------------------------------------------------------------------------------------------------------------------------------------------------------------------------------------------------------------------------------------------------------------------------------------------------------------------------------------------------------------------------------------------------|

---

|                |                                                                                                                                                                                                                                                                                                                                                                                                              |
|----------------|--------------------------------------------------------------------------------------------------------------------------------------------------------------------------------------------------------------------------------------------------------------------------------------------------------------------------------------------------------------------------------------------------------------|
| patatas fritas | <input type="radio"/> Nunca o menos 1 vez al mes<br><input checked="" type="radio"/> 1 a 3 veces mes<br><input type="radio"/> 1 vez semana<br><input type="radio"/> 2 a 4 veces semana<br><input type="radio"/> 5 a 6 veces semana<br><input type="radio"/> 1 vez al día<br><input type="radio"/> 2 a 3 veces al día<br><input type="radio"/> 5 a 6 veces al día<br><input type="radio"/> más 6 veces al día |
|----------------|--------------------------------------------------------------------------------------------------------------------------------------------------------------------------------------------------------------------------------------------------------------------------------------------------------------------------------------------------------------------------------------------------------------|

---

|                          |                                                                                                                                                                                                                                                                                                                                                                                                              |
|--------------------------|--------------------------------------------------------------------------------------------------------------------------------------------------------------------------------------------------------------------------------------------------------------------------------------------------------------------------------------------------------------------------------------------------------------|
| patatas cocidas o asadas | <input type="radio"/> Nunca o menos 1 vez al mes<br><input type="radio"/> 1 a 3 veces mes<br><input type="radio"/> 1 vez semana<br><input checked="" type="radio"/> 2 a 4 veces semana<br><input type="radio"/> 5 a 6 veces semana<br><input type="radio"/> 1 vez al día<br><input type="radio"/> 2 a 3 veces al día<br><input type="radio"/> 5 a 6 veces al día<br><input type="radio"/> más 6 veces al día |
|--------------------------|--------------------------------------------------------------------------------------------------------------------------------------------------------------------------------------------------------------------------------------------------------------------------------------------------------------------------------------------------------------------------------------------------------------|

---

|             |                                                                                                                                                                                                                                                                                                                                                                                                              |
|-------------|--------------------------------------------------------------------------------------------------------------------------------------------------------------------------------------------------------------------------------------------------------------------------------------------------------------------------------------------------------------------------------------------------------------|
| bolsa papas | <input type="radio"/> Nunca o menos 1 vez al mes<br><input checked="" type="radio"/> 1 a 3 veces mes<br><input type="radio"/> 1 vez semana<br><input type="radio"/> 2 a 4 veces semana<br><input type="radio"/> 5 a 6 veces semana<br><input type="radio"/> 1 vez al día<br><input type="radio"/> 2 a 3 veces al día<br><input type="radio"/> 5 a 6 veces al día<br><input type="radio"/> más 6 veces al día |
|-------------|--------------------------------------------------------------------------------------------------------------------------------------------------------------------------------------------------------------------------------------------------------------------------------------------------------------------------------------------------------------------------------------------------------------|

---

|                |                                                                                                                                                                                                                                                                                                                                                                                                              |
|----------------|--------------------------------------------------------------------------------------------------------------------------------------------------------------------------------------------------------------------------------------------------------------------------------------------------------------------------------------------------------------------------------------------------------------|
| arroz cocinado | <input type="radio"/> Nunca o menos 1 vez al mes<br><input type="radio"/> 1 a 3 veces mes<br><input checked="" type="radio"/> 1 vez semana<br><input type="radio"/> 2 a 4 veces semana<br><input type="radio"/> 5 a 6 veces semana<br><input type="radio"/> 1 vez al día<br><input type="radio"/> 2 a 3 veces al día<br><input type="radio"/> 5 a 6 veces al día<br><input type="radio"/> más 6 veces al día |
|----------------|--------------------------------------------------------------------------------------------------------------------------------------------------------------------------------------------------------------------------------------------------------------------------------------------------------------------------------------------------------------------------------------------------------------|

---

|       |                                                                                                                                                                                                                                                                                                                                                                                                              |
|-------|--------------------------------------------------------------------------------------------------------------------------------------------------------------------------------------------------------------------------------------------------------------------------------------------------------------------------------------------------------------------------------------------------------------|
| pasta | <input type="radio"/> Nunca o menos 1 vez al mes<br><input type="radio"/> 1 a 3 veces mes<br><input type="radio"/> 1 vez semana<br><input checked="" type="radio"/> 2 a 4 veces semana<br><input type="radio"/> 5 a 6 veces semana<br><input type="radio"/> 1 vez al día<br><input type="radio"/> 2 a 3 veces al día<br><input type="radio"/> 5 a 6 veces al día<br><input type="radio"/> más 6 veces al día |
|-------|--------------------------------------------------------------------------------------------------------------------------------------------------------------------------------------------------------------------------------------------------------------------------------------------------------------------------------------------------------------------------------------------------------------|

---

|                     |                                                                                                                                                                                                                                                                                                                                                                                                              |
|---------------------|--------------------------------------------------------------------------------------------------------------------------------------------------------------------------------------------------------------------------------------------------------------------------------------------------------------------------------------------------------------------------------------------------------------|
| pizza               | <input type="radio"/> Nunca o menos 1 vez al mes<br><input checked="" type="radio"/> 1 a 3 veces mes<br><input type="radio"/> 1 vez semana<br><input type="radio"/> 2 a 4 veces semana<br><input type="radio"/> 5 a 6 veces semana<br><input type="radio"/> 1 vez al día<br><input type="radio"/> 2 a 3 veces al día<br><input type="radio"/> 5 a 6 veces al día<br><input type="radio"/> más 6 veces al día |
| aceite oliva        | <input type="radio"/> Nunca o menos 1 vez al mes<br><input type="radio"/> 1 a 3 veces mes<br><input type="radio"/> 1 vez semana<br><input checked="" type="radio"/> 2 a 4 veces semana<br><input type="radio"/> 5 a 6 veces semana<br><input type="radio"/> 1 vez al día<br><input type="radio"/> 2 a 3 veces al día<br><input type="radio"/> 5 a 6 veces al día<br><input type="radio"/> más 6 veces al día |
| otros aceites       | <input checked="" type="radio"/> Nunca o menos 1 vez al mes<br><input type="radio"/> 1 a 3 veces mes<br><input type="radio"/> 1 vez semana<br><input type="radio"/> 2 a 4 veces semana<br><input type="radio"/> 5 a 6 veces semana<br><input type="radio"/> 1 vez al día<br><input type="radio"/> 2 a 3 veces al día<br><input type="radio"/> 5 a 6 veces al día<br><input type="radio"/> más 6 veces al día |
| margarina           | <input checked="" type="radio"/> Nunca o menos 1 vez al mes<br><input type="radio"/> 1 a 3 veces mes<br><input type="radio"/> 1 vez semana<br><input type="radio"/> 2 a 4 veces semana<br><input type="radio"/> 5 a 6 veces semana<br><input type="radio"/> 1 vez al día<br><input type="radio"/> 2 a 3 veces al día<br><input type="radio"/> 5 a 6 veces al día<br><input type="radio"/> más 6 veces al día |
| mantequilla         | <input checked="" type="radio"/> Nunca o menos 1 vez al mes<br><input type="radio"/> 1 a 3 veces mes<br><input type="radio"/> 1 vez semana<br><input type="radio"/> 2 a 4 veces semana<br><input type="radio"/> 5 a 6 veces semana<br><input type="radio"/> 1 vez al día<br><input type="radio"/> 2 a 3 veces al día<br><input type="radio"/> 5 a 6 veces al día<br><input type="radio"/> más 6 veces al día |
| galletas tipo maria | <input checked="" type="radio"/> Nunca o menos 1 vez al mes<br><input type="radio"/> 1 a 3 veces mes<br><input type="radio"/> 1 vez semana<br><input type="radio"/> 2 a 4 veces semana<br><input type="radio"/> 5 a 6 veces semana<br><input type="radio"/> 1 vez al día<br><input type="radio"/> 2 a 3 veces al día<br><input type="radio"/> 5 a 6 veces al día<br><input type="radio"/> más 6 veces al día |



---

galletas chocolate

- ☐ Nunca o menos 1 vez al mes  
☒ 1 a 3 veces mes  
☐ 1 vez semana  
☐ 2 a 4 veces semana  
☐ 5 a 6 veces semana  
☐ 1 vez al día  
☐ 2 a 3 veces al día  
☐ 5 a 6 veces al día  
☐ más 6 veces al día

---

bolleria

- ☐ Nunca o menos 1 vez al mes  
☐ 1 a 3 veces mes  
☐ 1 vez semana  
☐ 2 a 4 veces semana  
☐ 5 a 6 veces semana  
☒ 1 vez al día  
☐ 2 a 3 veces al día  
☐ 5 a 6 veces al día  
☐ más 6 veces al día

---

chocolate o bombones

- ☒ Nunca o menos 1 vez al mes  
☐ 1 a 3 veces mes  
☐ 1 vez semana  
☐ 2 a 4 veces semana  
☐ 5 a 6 veces semana  
☐ 1 vez al día  
☐ 2 a 3 veces al día  
☐ 5 a 6 veces al día  
☐ más 6 veces al día

---

chocolate polvo o colacao

- ☒ Nunca o menos 1 vez al mes  
☐ 1 a 3 veces mes  
☐ 1 vez semana  
☐ 2 a 4 veces semana  
☐ 5 a 6 veces semana  
☐ 1 vez al día  
☐ 2 a 3 veces al día  
☐ 5 a 6 veces al día  
☐ más 6 veces al día

---

vino tinto

- ☒ Nunca o menos 1 vez al mes  
☐ 1 a 3 veces mes  
☐ 1 vez semana  
☐ 2 a 4 veces semana  
☐ 5 a 6 veces semana  
☐ 1 vez al día  
☐ 2 a 3 veces al día  
☐ 5 a 6 veces al día  
☐ más 6 veces al día

---

vino blanco

- ☒ Nunca o menos 1 vez al mes  
☐ 1 a 3 veces mes  
☐ 1 vez semana  
☐ 2 a 4 veces semana  
☐ 5 a 6 veces semana  
☐ 1 vez al día  
☐ 2 a 3 veces al día  
☐ 5 a 6 veces al día  
☐ más 6 veces al día

---

|                    |                                                                                                                                                                                                                                                                                                                                                                                                              |
|--------------------|--------------------------------------------------------------------------------------------------------------------------------------------------------------------------------------------------------------------------------------------------------------------------------------------------------------------------------------------------------------------------------------------------------------|
| vino seco o vermut | <input checked="" type="radio"/> Nunca o menos 1 vez al mes<br><input type="radio"/> 1 a 3 veces mes<br><input type="radio"/> 1 vez semana<br><input type="radio"/> 2 a 4 veces semana<br><input type="radio"/> 5 a 6 veces semana<br><input type="radio"/> 1 vez al día<br><input type="radio"/> 2 a 3 veces al día<br><input type="radio"/> 5 a 6 veces al día<br><input type="radio"/> más 6 veces al día |
|--------------------|--------------------------------------------------------------------------------------------------------------------------------------------------------------------------------------------------------------------------------------------------------------------------------------------------------------------------------------------------------------------------------------------------------------|

---

|         |                                                                                                                                                                                                                                                                                                                                                                                                              |
|---------|--------------------------------------------------------------------------------------------------------------------------------------------------------------------------------------------------------------------------------------------------------------------------------------------------------------------------------------------------------------------------------------------------------------|
| cerveza | <input checked="" type="radio"/> Nunca o menos 1 vez al mes<br><input type="radio"/> 1 a 3 veces mes<br><input type="radio"/> 1 vez semana<br><input type="radio"/> 2 a 4 veces semana<br><input type="radio"/> 5 a 6 veces semana<br><input type="radio"/> 1 vez al día<br><input type="radio"/> 2 a 3 veces al día<br><input type="radio"/> 5 a 6 veces al día<br><input type="radio"/> más 6 veces al día |
|---------|--------------------------------------------------------------------------------------------------------------------------------------------------------------------------------------------------------------------------------------------------------------------------------------------------------------------------------------------------------------------------------------------------------------|

---

|                     |                                                                                                                                                                                                                                                                                                                                                                                                              |
|---------------------|--------------------------------------------------------------------------------------------------------------------------------------------------------------------------------------------------------------------------------------------------------------------------------------------------------------------------------------------------------------------------------------------------------------|
| cerveza sin alcohol | <input checked="" type="radio"/> Nunca o menos 1 vez al mes<br><input type="radio"/> 1 a 3 veces mes<br><input type="radio"/> 1 vez semana<br><input type="radio"/> 2 a 4 veces semana<br><input type="radio"/> 5 a 6 veces semana<br><input type="radio"/> 1 vez al día<br><input type="radio"/> 2 a 3 veces al día<br><input type="radio"/> 5 a 6 veces al día<br><input type="radio"/> más 6 veces al día |
|---------------------|--------------------------------------------------------------------------------------------------------------------------------------------------------------------------------------------------------------------------------------------------------------------------------------------------------------------------------------------------------------------------------------------------------------|

---

|         |                                                                                                                                                                                                                                                                                                                                                                                                              |
|---------|--------------------------------------------------------------------------------------------------------------------------------------------------------------------------------------------------------------------------------------------------------------------------------------------------------------------------------------------------------------------------------------------------------------|
| licores | <input checked="" type="radio"/> Nunca o menos 1 vez al mes<br><input type="radio"/> 1 a 3 veces mes<br><input type="radio"/> 1 vez semana<br><input type="radio"/> 2 a 4 veces semana<br><input type="radio"/> 5 a 6 veces semana<br><input type="radio"/> 1 vez al día<br><input type="radio"/> 2 a 3 veces al día<br><input type="radio"/> 5 a 6 veces al día<br><input type="radio"/> más 6 veces al día |
|---------|--------------------------------------------------------------------------------------------------------------------------------------------------------------------------------------------------------------------------------------------------------------------------------------------------------------------------------------------------------------------------------------------------------------|

---

|                       |                                                                                                                                                                                                                                                                                                                                                                                                              |
|-----------------------|--------------------------------------------------------------------------------------------------------------------------------------------------------------------------------------------------------------------------------------------------------------------------------------------------------------------------------------------------------------------------------------------------------------|
| ginebra o ron o vodka | <input checked="" type="radio"/> Nunca o menos 1 vez al mes<br><input type="radio"/> 1 a 3 veces mes<br><input type="radio"/> 1 vez semana<br><input type="radio"/> 2 a 4 veces semana<br><input type="radio"/> 5 a 6 veces semana<br><input type="radio"/> 1 vez al día<br><input type="radio"/> 2 a 3 veces al día<br><input type="radio"/> 5 a 6 veces al día<br><input type="radio"/> más 6 veces al día |
|-----------------------|--------------------------------------------------------------------------------------------------------------------------------------------------------------------------------------------------------------------------------------------------------------------------------------------------------------------------------------------------------------------------------------------------------------|

---

|                 |                                                                                                                                                                                                                                                                                                                                                                                                              |
|-----------------|--------------------------------------------------------------------------------------------------------------------------------------------------------------------------------------------------------------------------------------------------------------------------------------------------------------------------------------------------------------------------------------------------------------|
| refresco normal | <input type="radio"/> Nunca o menos 1 vez al mes<br><input type="radio"/> 1 a 3 veces mes<br><input checked="" type="radio"/> 1 vez semana<br><input type="radio"/> 2 a 4 veces semana<br><input type="radio"/> 5 a 6 veces semana<br><input type="radio"/> 1 vez al día<br><input type="radio"/> 2 a 3 veces al día<br><input type="radio"/> 5 a 6 veces al día<br><input type="radio"/> más 6 veces al día |
|-----------------|--------------------------------------------------------------------------------------------------------------------------------------------------------------------------------------------------------------------------------------------------------------------------------------------------------------------------------------------------------------------------------------------------------------|

---

---

refresco sin azúcar

- ☒ Nunca o menos 1 vez al mes  
☐ 1 a 3 veces mes  
☐ 1 vez semana  
☐ 2 a 4 veces semana  
☐ 5 a 6 veces semana  
☐ 1 vez al día  
☐ 2 a 3 veces al día  
☐ 5 a 6 veces al día  
☐ más 6 veces al día

---

Agua del grifo

- ☒ Nunca o menos 1 vez al mes  
☐ 1 a 3 veces mes  
☐ 1 vez semana  
☐ 2 a 4 veces semana  
☐ 5 a 6 veces semana  
☐ 1 vez al día  
☐ 2 a 3 veces al día  
☐ 5 a 6 veces al día  
☐ más 6 veces al día

---

agua embotellada sin gas

- ☐ Nunca o menos 1 vez al mes  
☐ 1 a 3 veces mes  
☐ 1 vez semana  
☐ 2 a 4 veces semana  
☐ 5 a 6 veces semana  
☐ 1 vez al día  
☐ 2 a 3 veces al día  
☐ 5 a 6 veces al día  
☒ más 6 veces al día

---

agua embotellada con gas

- ☒ Nunca o menos 1 vez al mes  
☐ 1 a 3 veces mes  
☐ 1 vez semana  
☐ 2 a 4 veces semana  
☐ 5 a 6 veces semana  
☐ 1 vez al día  
☐ 2 a 3 veces al día  
☐ 5 a 6 veces al día  
☐ más 6 veces al día

---

zumو frutas embasado

- ☐ Nunca o menos 1 vez al mes  
☒ 1 a 3 veces mes  
☐ 1 vez semana  
☐ 2 a 4 veces semana  
☐ 5 a 6 veces semana  
☐ 1 vez al día  
☐ 2 a 3 veces al día  
☐ 5 a 6 veces al día  
☐ más 6 veces al día

---

cafe

- ☐ Nunca o menos 1 vez al mes  
☐ 1 a 3 veces mes  
☐ 1 vez semana  
☐ 2 a 4 veces semana  
☐ 5 a 6 veces semana  
☒ 1 vez al día  
☐ 2 a 3 veces al día  
☐ 5 a 6 veces al día  
☐ más 6 veces al día

|                       |                                                                                                                                                                                                                                                                                                                                                                                                              |
|-----------------------|--------------------------------------------------------------------------------------------------------------------------------------------------------------------------------------------------------------------------------------------------------------------------------------------------------------------------------------------------------------------------------------------------------------|
| cafe descafeinado     | <input checked="" type="radio"/> Nunca o menos 1 vez al mes<br><input type="radio"/> 1 a 3 veces mes<br><input type="radio"/> 1 vez semana<br><input type="radio"/> 2 a 4 veces semana<br><input type="radio"/> 5 a 6 veces semana<br><input type="radio"/> 1 vez al día<br><input type="radio"/> 2 a 3 veces al día<br><input type="radio"/> 5 a 6 veces al día<br><input type="radio"/> más 6 veces al día |
| te o infusión         | <input checked="" type="radio"/> Nunca o menos 1 vez al mes<br><input type="radio"/> 1 a 3 veces mes<br><input type="radio"/> 1 vez semana<br><input type="radio"/> 2 a 4 veces semana<br><input type="radio"/> 5 a 6 veces semana<br><input type="radio"/> 1 vez al día<br><input type="radio"/> 2 a 3 veces al día<br><input type="radio"/> 5 a 6 veces al día<br><input type="radio"/> más 6 veces al día |
| sopa o puré verduras  | <input type="radio"/> Nunca o menos 1 vez al mes<br><input type="radio"/> 1 a 3 veces mes<br><input checked="" type="radio"/> 1 vez semana<br><input type="radio"/> 2 a 4 veces semana<br><input type="radio"/> 5 a 6 veces semana<br><input type="radio"/> 1 vez al día<br><input type="radio"/> 2 a 3 veces al día<br><input type="radio"/> 5 a 6 veces al día<br><input type="radio"/> más 6 veces al día |
| croquetas pollo jamón | <input checked="" type="radio"/> Nunca o menos 1 vez al mes<br><input type="radio"/> 1 a 3 veces mes<br><input type="radio"/> 1 vez semana<br><input type="radio"/> 2 a 4 veces semana<br><input type="radio"/> 5 a 6 veces semana<br><input type="radio"/> 1 vez al día<br><input type="radio"/> 2 a 3 veces al día<br><input type="radio"/> 5 a 6 veces al día<br><input type="radio"/> más 6 veces al día |
| croquetas pescado     | <input checked="" type="radio"/> Nunca o menos 1 vez al mes<br><input type="radio"/> 1 a 3 veces mes<br><input type="radio"/> 1 vez semana<br><input type="radio"/> 2 a 4 veces semana<br><input type="radio"/> 5 a 6 veces semana<br><input type="radio"/> 1 vez al día<br><input type="radio"/> 2 a 3 veces al día<br><input type="radio"/> 5 a 6 veces al día<br><input type="radio"/> más 6 veces al día |
| mayonesa              | <input type="radio"/> Nunca o menos 1 vez al mes<br><input checked="" type="radio"/> 1 a 3 veces mes<br><input type="radio"/> 1 vez semana<br><input type="radio"/> 2 a 4 veces semana<br><input type="radio"/> 5 a 6 veces semana<br><input type="radio"/> 1 vez al día<br><input type="radio"/> 2 a 3 veces al día<br><input type="radio"/> 5 a 6 veces al día<br><input type="radio"/> más 6 veces al día |

|                  |                                                                                                                                                                                                                                                                                                                                                                                                              |
|------------------|--------------------------------------------------------------------------------------------------------------------------------------------------------------------------------------------------------------------------------------------------------------------------------------------------------------------------------------------------------------------------------------------------------------|
| salsa tomate     | <input type="radio"/> Nunca o menos 1 vez al mes<br><input type="radio"/> 1 a 3 veces mes<br><input checked="" type="radio"/> 1 vez semana<br><input type="radio"/> 2 a 4 veces semana<br><input type="radio"/> 5 a 6 veces semana<br><input type="radio"/> 1 vez al día<br><input type="radio"/> 2 a 3 veces al día<br><input type="radio"/> 5 a 6 veces al día<br><input type="radio"/> más 6 veces al día |
| ketchup          | <input type="radio"/> Nunca o menos 1 vez al mes<br><input type="radio"/> 1 a 3 veces mes<br><input type="radio"/> 1 vez semana<br><input checked="" type="radio"/> 2 a 4 veces semana<br><input type="radio"/> 5 a 6 veces semana<br><input type="radio"/> 1 vez al día<br><input type="radio"/> 2 a 3 veces al día<br><input type="radio"/> 5 a 6 veces al día<br><input type="radio"/> más 6 veces al día |
| sal              | <input type="radio"/> Nunca o menos 1 vez al mes<br><input type="radio"/> 1 a 3 veces mes<br><input type="radio"/> 1 vez semana<br><input type="radio"/> 2 a 4 veces semana<br><input type="radio"/> 5 a 6 veces semana<br><input type="radio"/> 1 vez al día<br><input checked="" type="radio"/> 2 a 3 veces al día<br><input type="radio"/> 5 a 6 veces al día<br><input type="radio"/> más 6 veces al día |
| ajo              | <input type="radio"/> Nunca o menos 1 vez al mes<br><input type="radio"/> 1 a 3 veces mes<br><input type="radio"/> 1 vez semana<br><input type="radio"/> 2 a 4 veces semana<br><input type="radio"/> 5 a 6 veces semana<br><input checked="" type="radio"/> 1 vez al día<br><input type="radio"/> 2 a 3 veces al día<br><input type="radio"/> 5 a 6 veces al día<br><input type="radio"/> más 6 veces al día |
| mermelada o miel | <input checked="" type="radio"/> Nunca o menos 1 vez al mes<br><input type="radio"/> 1 a 3 veces mes<br><input type="radio"/> 1 vez semana<br><input type="radio"/> 2 a 4 veces semana<br><input type="radio"/> 5 a 6 veces semana<br><input type="radio"/> 1 vez al día<br><input type="radio"/> 2 a 3 veces al día<br><input type="radio"/> 5 a 6 veces al día<br><input type="radio"/> más 6 veces al día |
| azúcar           | <input type="radio"/> Nunca o menos 1 vez al mes<br><input type="radio"/> 1 a 3 veces mes<br><input type="radio"/> 1 vez semana<br><input type="radio"/> 2 a 4 veces semana<br><input type="radio"/> 5 a 6 veces semana<br><input checked="" type="radio"/> 1 vez al día<br><input type="radio"/> 2 a 3 veces al día<br><input type="radio"/> 5 a 6 veces al día<br><input type="radio"/> más 6 veces al día |

---

Otro alimento

---

suplementos vitamínicos

- ☐ si  
☒ no

---

suplementos vitamínicos

---

dieta previa

- ☐ si  
☒ no

motivo dieta

- ☒ no dieta  
☐ control peso  
☐ control colesterol  
☐ control diabetes  
☐ problemas estómago  
☐ problemas vesícula o hepáticos  
☐ HTA o cardiopatía  
☐ problemas renales  
☐ alergia alimentaria  
☐ ácido úrico elevado  
☐ vegetariana  
☐ otros

---

cambio alimentos año previo gestación

---

- ☐ si  
☒ no

cambio lácteos

- ☐ eliminado  
☐ disminuido  
☒ igual  
☐ aumentado  
☐ no sabe

---

cambio huevos

---

- ☐ eliminado  
☐ disminuido  
☒ igual  
☐ aumentado  
☐ no sabe

cambio carne

- ☐ eliminado  
☐ disminuido  
☒ igual  
☐ aumentado  
☐ no sabe

---

cambio pescado

---

- ☐ eliminado  
☐ disminuido  
☒ igual  
☐ aumentado  
☐ no sabe

cambio verduras

- ☐ eliminado  
☐ disminuido  
☒ igual  
☐ aumentado  
☐ no sabe

|                            |                                                                                                                                                                                                                        |
|----------------------------|------------------------------------------------------------------------------------------------------------------------------------------------------------------------------------------------------------------------|
| cambio legumbres           | <input type="radio"/> eliminado<br><input type="radio"/> disminuido<br><input checked="" type="radio"/> igual<br><input type="radio"/> aumentado<br><input type="radio"/> no sabe                                      |
| cambio fruta               | <input type="radio"/> eliminado<br><input type="radio"/> disminuido<br><input checked="" type="radio"/> igual<br><input type="radio"/> aumentado<br><input type="radio"/> no sabe                                      |
| cambio pan                 | <input type="radio"/> eliminado<br><input type="radio"/> disminuido<br><input checked="" type="radio"/> igual<br><input type="radio"/> aumentado<br><input type="radio"/> no sabe                                      |
| cambio aceite oliva        | <input type="radio"/> eliminado<br><input type="radio"/> disminuido<br><input checked="" type="radio"/> igual<br><input type="radio"/> aumentado<br><input type="radio"/> no sabe                                      |
| cambio mante o margarina   | <input type="radio"/> eliminado<br><input type="radio"/> disminuido<br><input checked="" type="radio"/> igual<br><input type="radio"/> aumentado<br><input type="radio"/> no sabe                                      |
| cambio azúcar y dulces     | <input type="radio"/> eliminado<br><input type="radio"/> disminuido<br><input checked="" type="radio"/> igual<br><input type="radio"/> aumentado<br><input type="radio"/> no sabe                                      |
| cambio bebidas alcohólicas | <input type="radio"/> eliminado<br><input type="radio"/> disminuido<br><input checked="" type="radio"/> igual<br><input type="radio"/> aumentado<br><input type="radio"/> no sabe                                      |
| frecuencia comidas fritas  | <input type="radio"/> a diario<br><input type="radio"/> 5 a 6 veces semana<br><input type="radio"/> 2 a 4 veces semana<br><input type="radio"/> 1 vez semana<br><input checked="" type="radio"/> menos de 1 vez semana |
| carne                      | <input type="radio"/> no como<br><input type="radio"/> cruda<br><input type="radio"/> poco hecha<br><input checked="" type="radio"/> hecha<br><input type="radio"/> muy hecha                                          |
| grasa visible carne        | <input type="radio"/> quita toda<br><input checked="" type="radio"/> quita mayoría<br><input type="radio"/> quita un poco<br><input type="radio"/> no quita nada                                                       |

|                                |                                                                                                                                                                                                                                                          |
|--------------------------------|----------------------------------------------------------------------------------------------------------------------------------------------------------------------------------------------------------------------------------------------------------|
| cocina carne                   | <input type="radio"/> a la plancha<br><input type="radio"/> a la parrilla<br><input type="radio"/> asada<br><input type="radio"/> frita<br><input checked="" type="radio"/> guisada                                                                      |
| tostado quemado carne          | <input type="radio"/> nunca<br><input type="radio"/> 1 vez mes<br><input type="radio"/> 2 a 3 veces mes<br><input checked="" type="radio"/> 1 vez semana<br><input type="radio"/> 2 a 3 semanas                                                          |
| tostado quemado pescado        | <input checked="" type="radio"/> nunca<br><input type="radio"/> 1 vez mes<br><input type="radio"/> 2 a 3 veces mes<br><input type="radio"/> 1 vez semana<br><input type="radio"/> 2 a 3 semanas                                                          |
| socarrat paella                | <input type="radio"/> nunca<br><input type="radio"/> 1 vez mes<br><input type="radio"/> 2 a 3 veces mes<br><input checked="" type="radio"/> 1 vez semana<br><input type="radio"/> 2 a 3 semanas                                                          |
| grasa o aceite cocinar         | <input type="radio"/> mantequilla<br><input type="radio"/> margarina<br><input type="radio"/> aceite oliva<br><input checked="" type="radio"/> aceite oliva virgen extra<br><input type="radio"/> aceite vegetal<br><input type="radio"/> mezcla aceites |
| grasa aceite aliñar            | <input type="radio"/> mantequilla<br><input type="radio"/> margarina<br><input type="radio"/> aceite oliva<br><input checked="" type="radio"/> aceite oliva virgen extra<br><input type="radio"/> aceite vegetal<br><input type="radio"/> mezcla aceites |
| grasa aceite freir             | <input type="radio"/> mantequilla<br><input type="radio"/> margarina<br><input type="radio"/> aceite oliva<br><input checked="" type="radio"/> aceite oliva virgen extra<br><input type="radio"/> aceite vegetal<br><input type="radio"/> mezcla aceites |
| Ejercicio cuestionario         | <input checked="" type="radio"/> si<br><input type="radio"/> no                                                                                                                                                                                          |
| horas de sueño incluido siesta | [*DATA REMOVED*]                                                                                                                                                                                                                                         |
| minutos siesta                 | [*DATA REMOVED*]                                                                                                                                                                                                                                         |
| horas televisión semana        | [*DATA REMOVED*]                                                                                                                                                                                                                                         |



|                                        |                                                                                                                                                                                                                                                                                                                                                                           |
|----------------------------------------|---------------------------------------------------------------------------------------------------------------------------------------------------------------------------------------------------------------------------------------------------------------------------------------------------------------------------------------------------------------------------|
| actividad trabajo                      | <input type="radio"/> casi siempre sentado<br><input type="radio"/> sentado 50 por cien<br><input type="radio"/> casi siempre de pie, quieto<br><input type="radio"/> casi siempre levantado caminando y llevando pocas cosas<br><input checked="" type="radio"/> casi siempre levantado, caminando y llevado muchas cosas<br><input type="radio"/> trabajo manual pesado |
| tiempo caminar o bici al día           | <input type="radio"/> casi nunca<br><input type="radio"/> menos 20min día<br><input type="radio"/> 20 a 40 min día<br><input checked="" type="radio"/> 40 a 60 min día<br><input type="radio"/> 1h o 1h y media día<br><input type="radio"/> más de 1h y media al día                                                                                                     |
| tiempo tareas casa al día              | <input type="radio"/> menos de 1h día<br><input type="radio"/> 1 a 2h día<br><input type="radio"/> 3 a 4h día<br><input type="radio"/> 5 a 6h día<br><input checked="" type="radio"/> 7 a 8h día<br><input type="radio"/> más de 8h día                                                                                                                                   |
| tiempo libre televisión ordenador leer | <input type="radio"/> menos 1h día<br><input type="radio"/> 1h día<br><input checked="" type="radio"/> 2h día<br><input type="radio"/> 3h día<br><input type="radio"/> 4h día<br><input type="radio"/> 5 a 6h día<br><input type="radio"/> mas 6h día                                                                                                                     |
| tiempo libre ejercicio o deporte       | <input type="radio"/> menos 1h semana<br><input checked="" type="radio"/> 1h semana<br><input type="radio"/> 2h semana<br><input type="radio"/> 3h semana<br><input type="radio"/> 4 a 5h semana<br><input type="radio"/> mas 5h semana                                                                                                                                   |
| como se considera                      | <input type="radio"/> sedentaria<br><input type="radio"/> poco activa<br><input type="radio"/> moderadamente activa<br><input checked="" type="radio"/> bastante activa<br><input type="radio"/> muy activa<br><input type="radio"/> no sabe                                                                                                                              |
| FUR                                    | [*DATA REMOVED*]                                                                                                                                                                                                                                                                                                                                                          |
| Semanas gestación 2T                   | [*DATA REMOVED*]                                                                                                                                                                                                                                                                                                                                                          |
| Días gestación 2T                      | [*DATA REMOVED*]                                                                                                                                                                                                                                                                                                                                                          |
| DBP 2T                                 | [*DATA REMOVED*]                                                                                                                                                                                                                                                                                                                                                          |
| CC 2T                                  | [*DATA REMOVED*]                                                                                                                                                                                                                                                                                                                                                          |
| AC 2T                                  | [*DATA REMOVED*]                                                                                                                                                                                                                                                                                                                                                          |

|                                                   |                                                                                                                                                                                                 |
|---------------------------------------------------|-------------------------------------------------------------------------------------------------------------------------------------------------------------------------------------------------|
| LF 2T                                             | [*DATA REMOVED*]                                                                                                                                                                                |
| PFE 2T (Hadlock)                                  | [*DATA REMOVED*]                                                                                                                                                                                |
| Semanas gestación 3T                              | [*DATA REMOVED*]                                                                                                                                                                                |
| días 3T                                           | [*DATA REMOVED*]                                                                                                                                                                                |
| DBP 3T                                            | [*DATA REMOVED*]                                                                                                                                                                                |
| CC 3T                                             | [*DATA REMOVED*]                                                                                                                                                                                |
| AC 3T                                             | [*DATA REMOVED*]                                                                                                                                                                                |
| LF 3T                                             | [*DATA REMOVED*]                                                                                                                                                                                |
| PFE 3T (Hadlock)                                  | [*DATA REMOVED*]                                                                                                                                                                                |
| Semanas de gestación final                        | [*DATA REMOVED*]                                                                                                                                                                                |
| días gestación final                              | [*DATA REMOVED*]                                                                                                                                                                                |
| Localización placenta                             | <input checked="" type="radio"/> anterior<br><input type="radio"/> lateral derecha<br><input type="radio"/> lateral izquierda<br><input type="radio"/> posterior<br><input type="radio"/> fondo |
| Presentación longitudinal cefálica                | <input type="radio"/> no<br><input checked="" type="radio"/> si                                                                                                                                 |
| Dorso                                             | <input checked="" type="radio"/> izquierda anterior<br><input type="radio"/> izquierda posterior<br><input type="radio"/> derecha anterior<br><input type="radio"/> derecha posterior           |
| diámetro biparietal                               | [*DATA REMOVED*]                                                                                                                                                                                |
| Circunferencia craneal                            | [*DATA REMOVED*]                                                                                                                                                                                |
| Circunferencia abdominal                          | [*DATA REMOVED*]                                                                                                                                                                                |
| Longitud de femur                                 | [*DATA REMOVED*]                                                                                                                                                                                |
| tejido celular subcutáneo a nivel del muslo en mm | [*DATA REMOVED*]                                                                                                                                                                                |
| tejido celular subcutáneo en abdomen en mm        | [*DATA REMOVED*]                                                                                                                                                                                |
| Volumen del muslo en cm3                          | [*DATA REMOVED*]                                                                                                                                                                                |
| Peso fetal estimado según fórmula de Hadlock      | [*DATA REMOVED*]                                                                                                                                                                                |

|                                               |                                                                                                                                               |
|-----------------------------------------------|-----------------------------------------------------------------------------------------------------------------------------------------------|
| Percentil                                     | [*DATA REMOVED*]                                                                                                                              |
| Peso fetal estimado según fórmula de Scioscia | <hr/>                                                                                                                                         |
| Peso fetal estimado según fórmula de LEE      | <hr/>                                                                                                                                         |
| Tipo de parto                                 | <input checked="" type="radio"/> eutocico<br><input type="radio"/> instrumentado/ventosa<br><input type="radio"/> cesarea                     |
| fecha de nacimiento                           | [*DATA REMOVED*]                                                                                                                              |
| Días entre exploración y nacimiento           | [*DATA REMOVED*]                                                                                                                              |
| Peso RN en g                                  | [*DATA REMOVED*]                                                                                                                              |
| sexo                                          | <input checked="" type="radio"/> mujer<br><input type="radio"/> hombre                                                                        |
| Apgar 1 minuto                                | [*DATA REMOVED*]                                                                                                                              |
| Apgar 5 minutos                               | [*DATA REMOVED*]                                                                                                                              |
| Apgar 10 minutos                              | <hr/>                                                                                                                                         |
| antecedente Covid durante gestación           | <input type="radio"/> Yes<br><input checked="" type="radio"/> No                                                                              |
| Nivel de estudios                             | <input type="radio"/> ninguno<br><input type="radio"/> primarios<br><input type="radio"/> secundarios<br><input type="radio"/> universitarios |

# Base\_datos\_estimacion\_peso\_fetal

|                                       |                                                                                                                                                                                                                                                                                      |
|---------------------------------------|--------------------------------------------------------------------------------------------------------------------------------------------------------------------------------------------------------------------------------------------------------------------------------------|
| Número de identificación participante | 135                                                                                                                                                                                                                                                                                  |
| CODIGO PARTICIPANTE                   |                                                                                                                                                                                                                                                                                      |
| Edad                                  | [*DATA REMOVED*]                                                                                                                                                                                                                                                                     |
| Gestaciones                           | <input checked="" type="radio"/> 1<br><input type="radio"/> 2<br><input type="radio"/> 3<br><input type="radio"/> mas de 3                                                                                                                                                           |
| partos                                | <input checked="" type="radio"/> 0<br><input type="radio"/> 1<br><input type="radio"/> 2<br><input type="radio"/> 3<br><input type="radio"/> mas de 3                                                                                                                                |
| cesáreas                              | <input checked="" type="radio"/> 0<br><input type="radio"/> 1<br><input type="radio"/> 2<br><input type="radio"/> 3<br><input type="radio"/> mas de 3                                                                                                                                |
| Abortos                               | <input checked="" type="radio"/> 0<br><input type="radio"/> 1<br><input type="radio"/> 2<br><input type="radio"/> 3<br><input type="radio"/> mas de 3                                                                                                                                |
| Tipo de gestacion                     | <input checked="" type="radio"/> espontanea<br><input type="radio"/> IAC inseminación artificial conyuge<br><input type="radio"/> IAD inseminación artificial donante<br><input type="radio"/> FIV Fecundación in Vitro<br><input type="radio"/> Ovodon FIV con donación de ovocitos |
| peso previo a embarazo                | [*DATA REMOVED*]                                                                                                                                                                                                                                                                     |
| Ganancia ponderal embarazo            | [*DATA REMOVED*]                                                                                                                                                                                                                                                                     |
| Talla madre                           | [*DATA REMOVED*]                                                                                                                                                                                                                                                                     |
| IMC previo embarazo                   | 27.734374999999993                                                                                                                                                                                                                                                                   |
| Patología obstétrica                  | <input checked="" type="radio"/> no<br><input type="radio"/> si                                                                                                                                                                                                                      |
| Diabetes pregestacional               | <input checked="" type="radio"/> no<br><input type="radio"/> si                                                                                                                                                                                                                      |
| Diabetes gestacional                  | <input checked="" type="radio"/> no<br><input type="radio"/> si                                                                                                                                                                                                                      |

|                                            |                                                                                                                                                                           |
|--------------------------------------------|---------------------------------------------------------------------------------------------------------------------------------------------------------------------------|
| Diabetes gestacional con insulina          | <input checked="" type="radio"/> no<br><input type="radio"/> si                                                                                                           |
| Diabetes gestacional con dieta y ejercicio | <input checked="" type="radio"/> no<br><input type="radio"/> si                                                                                                           |
| Percentil fetos previos                    | <input type="radio"/> Nada<br><input type="radio"/> percentil menor de 10<br><input type="radio"/> percentil entre 10 y 90<br><input type="radio"/> percentil mayor de 90 |
| Exfumadora                                 | <input checked="" type="radio"/> Nada<br><input type="radio"/> menos de 5 años<br><input type="radio"/> 5 a 10 años<br><input type="radio"/> mayor o igual a 10 años      |
| Hábito tabáquico                           | <input checked="" type="radio"/> no<br><input type="radio"/> si                                                                                                           |
| fumadora                                   | [*DATA REMOVED*]                                                                                                                                                          |
| Consumo otros tóxicos                      | <input checked="" type="radio"/> no<br><input type="radio"/> si                                                                                                           |
| Hb 1T                                      | [*DATA REMOVED*]                                                                                                                                                          |
| Htc 1T                                     | [*DATA REMOVED*]                                                                                                                                                          |
| Hb 2T                                      | [*DATA REMOVED*]                                                                                                                                                          |
| HTC 2T                                     | [*DATA REMOVED*]                                                                                                                                                          |
| Hb 3T                                      | [*DATA REMOVED*]                                                                                                                                                          |
| HTC 3T                                     | [*DATA REMOVED*]                                                                                                                                                          |
| Suplemento FE oral                         | <input checked="" type="radio"/> si<br><input type="radio"/> no                                                                                                           |
| Suplemento fe iv                           | <input type="radio"/> si<br><input checked="" type="radio"/> no                                                                                                           |
| Transfusión                                | <input checked="" type="radio"/> no<br><input type="radio"/> si                                                                                                           |
| Solicitada Vit D                           | <input type="radio"/> no<br><input type="radio"/> si                                                                                                                      |
| Deficit vit D                              | <input type="radio"/> no<br><input type="radio"/> si                                                                                                                      |
| Suplemento vit D                           | <input checked="" type="radio"/> si<br><input type="radio"/> no                                                                                                           |

|                       |                                                                                                                                                                                                                                                                                                                                                                                                              |
|-----------------------|--------------------------------------------------------------------------------------------------------------------------------------------------------------------------------------------------------------------------------------------------------------------------------------------------------------------------------------------------------------------------------------------------------------|
| Dieta, cuestionario   | <input checked="" type="radio"/> sí<br><input type="radio"/> no                                                                                                                                                                                                                                                                                                                                              |
| Leche entera          | <input type="radio"/> Nunca o menos 1 vez al mes<br><input type="radio"/> 1 a 3 veces mes<br><input type="radio"/> 1 vez semana<br><input type="radio"/> 2 a 4 veces semana<br><input type="radio"/> 5 a 6 veces semana<br><input checked="" type="radio"/> 1 vez al día<br><input type="radio"/> 2 a 3 veces al día<br><input type="radio"/> 5 a 6 veces al día<br><input type="radio"/> más 6 veces al día |
| Leche semidesnatada   | <input checked="" type="radio"/> Nunca o menos 1 vez al mes<br><input type="radio"/> 1 a 3 veces mes<br><input type="radio"/> 1 vez semana<br><input type="radio"/> 2 a 4 veces semana<br><input type="radio"/> 5 a 6 veces semana<br><input type="radio"/> 1 vez al día<br><input type="radio"/> 2 a 3 veces al día<br><input type="radio"/> 5 a 6 veces al día<br><input type="radio"/> mas 6 veces al día |
| Leche desnatada       | <input checked="" type="radio"/> Nunca o menos 1 vez al mes<br><input type="radio"/> 1 a 3 veces mes<br><input type="radio"/> 1 vez semana<br><input type="radio"/> 2 a 4 veces semana<br><input type="radio"/> 5 a 6 veces semana<br><input type="radio"/> 1 vez al día<br><input type="radio"/> 2 a 3 veces al día<br><input type="radio"/> 5 a 6 veces al día<br><input type="radio"/> más 6 veces al día |
| Leche condensada      | <input checked="" type="radio"/> Nunca o menos 1 vez al mes<br><input type="radio"/> 1 a 3 veces mes<br><input type="radio"/> 1 vez semana<br><input type="radio"/> 2 a 4 veces semana<br><input type="radio"/> 5 a 6 veces semana<br><input type="radio"/> 1 vez al día<br><input type="radio"/> 2 a 3 veces al día<br><input type="radio"/> 5 a 6 veces al día<br><input type="radio"/> más 6 veces al día |
| nata o crema de leche | <input type="radio"/> Nunca o menos 1 vez al mes<br><input checked="" type="radio"/> 1 a 3 veces mes<br><input type="radio"/> 1 vez semana<br><input type="radio"/> 2 a 4 veces semana<br><input type="radio"/> 5 a 6 veces semana<br><input type="radio"/> 1 vez al día<br><input type="radio"/> 2 a 3 veces al día<br><input type="radio"/> 5 a 6 veces al día<br><input type="radio"/> más 6 veces al día |

|                                             |                                                                                                                                                                                                                                                                                                                                                                                                              |
|---------------------------------------------|--------------------------------------------------------------------------------------------------------------------------------------------------------------------------------------------------------------------------------------------------------------------------------------------------------------------------------------------------------------------------------------------------------------|
| Yogurt Entero                               | <input checked="" type="radio"/> Nunca o menos 1 vez al mes<br><input type="radio"/> 1 a 3 veces mes<br><input type="radio"/> 1 vez semana<br><input type="radio"/> 2 a 4 veces semana<br><input type="radio"/> 5 a 6 veces semana<br><input type="radio"/> 1 vez al día<br><input type="radio"/> 2 a 3 veces al día<br><input type="radio"/> 5 a 6 veces al día<br><input type="radio"/> más 6 veces al día |
| Yogurt desnatado                            | <input type="radio"/> Nunca o menos 1 vez al mes<br><input checked="" type="radio"/> 1 a 3 veces mes<br><input type="radio"/> 1 vez semana<br><input type="radio"/> 2 a 4 veces semana<br><input type="radio"/> 5 a 6 veces semana<br><input type="radio"/> 1 vez al día<br><input type="radio"/> 2 a 3 veces al día<br><input type="radio"/> 5 a 6 veces al día<br><input type="radio"/> más 6 veces al día |
| 100g requesón o queso blando o queso fresco | <input type="radio"/> Nunca o menos 1 vez al mes<br><input type="radio"/> 1 a 3 veces mes<br><input checked="" type="radio"/> 1 vez semana<br><input type="radio"/> 2 a 4 veces semana<br><input type="radio"/> 5 a 6 veces semana<br><input type="radio"/> 1 vez al día<br><input type="radio"/> 2 a 3 veces al día<br><input type="radio"/> 5 a 6 veces al día<br><input type="radio"/> más 6 veces al día |
| queso curado o semicurado o cremoso         | <input type="radio"/> Nunca o menos 1 vez al mes<br><input type="radio"/> 1 a 3 veces mes<br><input checked="" type="radio"/> 1 vez semana<br><input type="radio"/> 2 a 4 veces semana<br><input type="radio"/> 5 a 6 veces semana<br><input type="radio"/> 1 vez al día<br><input type="radio"/> 2 a 3 veces al día<br><input type="radio"/> 5 a 6 veces al día<br><input type="radio"/> más 6 veces al día |
| natillas flan pudding                       | <input checked="" type="radio"/> Nunca o menos 1 vez al mes<br><input type="radio"/> 1 a 3 veces mes<br><input type="radio"/> 1 vez semana<br><input type="radio"/> 2 a 4 veces semana<br><input type="radio"/> 5 a 6 veces semana<br><input type="radio"/> 1 vez al día<br><input type="radio"/> 2 a 3 veces al día<br><input type="radio"/> 5 a 6 veces al día<br><input type="radio"/> más 6 veces al día |
| Helado                                      | <input type="radio"/> Nunca o menos 1 vez al mes<br><input checked="" type="radio"/> 1 a 3 veces mes<br><input type="radio"/> 1 vez semana<br><input type="radio"/> 2 a 4 veces semana<br><input type="radio"/> 5 a 6 veces semana<br><input type="radio"/> 1 vez al día<br><input type="radio"/> 2 a 3 veces al día<br><input type="radio"/> 5 a 6 veces al día<br><input type="radio"/> más 6 veces al día |

|                                      |                                                                                                                                                                                                                                                                                                                                                                                                              |
|--------------------------------------|--------------------------------------------------------------------------------------------------------------------------------------------------------------------------------------------------------------------------------------------------------------------------------------------------------------------------------------------------------------------------------------------------------------|
| huevo                                | <input type="radio"/> Nunca o menos 1 vez al mes<br><input type="radio"/> 1 a 3 veces mes<br><input type="radio"/> 1 vez semana<br><input type="radio"/> 2 a 4 veces semana<br><input type="radio"/> 5 a 6 veces semana<br><input checked="" type="radio"/> 1 vez al día<br><input type="radio"/> 2 a 3 veces al día<br><input type="radio"/> 5 a 6 veces al día<br><input type="radio"/> más 6 veces al día |
| Pollo con piel                       | <input type="radio"/> Nunca o menos 1 vez al mes<br><input type="radio"/> 1 a 3 veces mes<br><input type="radio"/> 1 vez semana<br><input checked="" type="radio"/> 2 a 4 veces semana<br><input type="radio"/> 5 a 6 veces semana<br><input type="radio"/> 1 vez al día<br><input type="radio"/> 2 a 3 veces al día<br><input type="radio"/> 5 a 6 veces al día<br><input type="radio"/> más 6 veces al día |
| pollo sin piel                       | <input type="radio"/> Nunca o menos 1 vez al mes<br><input type="radio"/> 1 a 3 veces mes<br><input type="radio"/> 1 vez semana<br><input checked="" type="radio"/> 2 a 4 veces semana<br><input type="radio"/> 5 a 6 veces semana<br><input type="radio"/> 1 vez al día<br><input type="radio"/> 2 a 3 veces al día<br><input type="radio"/> 5 a 6 veces al día<br><input type="radio"/> más 6 veces al día |
| Ternera o cerdo o cordero            | <input type="radio"/> Nunca o menos 1 vez al mes<br><input type="radio"/> 1 a 3 veces mes<br><input checked="" type="radio"/> 1 vez semana<br><input type="radio"/> 2 a 4 veces semana<br><input type="radio"/> 5 a 6 veces semana<br><input type="radio"/> 1 vez al día<br><input type="radio"/> 2 a 3 veces al día<br><input type="radio"/> 5 a 6 veces al día<br><input type="radio"/> más 6 veces al día |
| carne caza: Conejo o codorniz o pato | <input checked="" type="radio"/> Nunca o menos 1 vez al mes<br><input type="radio"/> 1 a 3 veces mes<br><input type="radio"/> 1 vez semana<br><input type="radio"/> 2 a 4 veces semana<br><input type="radio"/> 5 a 6 veces semana<br><input type="radio"/> 1 vez al día<br><input type="radio"/> 2 a 3 veces al día<br><input type="radio"/> 5 a 6 veces al día<br><input type="radio"/> más 6 veces al día |
| Hígado de ternera o cerdo o pollo    | <input checked="" type="radio"/> Nunca o menos 1 vez al mes<br><input type="radio"/> 1 a 3 veces mes<br><input type="radio"/> 1 vez semana<br><input type="radio"/> 2 a 4 veces semana<br><input type="radio"/> 5 a 6 veces semana<br><input type="radio"/> 1 vez al día<br><input type="radio"/> 2 a 3 veces al día<br><input type="radio"/> 5 a 6 veces al día<br><input type="radio"/> más 6 veces al día |



---

Vísceras

- ☒ Nunca o menos 1 vez al mes  
☐ 1 a 3 veces mes  
☐ 1 vez semana  
☐ 2 a 4 veces semana  
☐ 5 a 6 veces semana  
☐ 1 vez al día  
☐ 2 a 3 veces al día  
☐ 5 a 6 veces al día  
☐ más 6 veces al día

---

Embutido

- ☐ Nunca o menos 1 vez al mes  
☐ 1 a 3 veces mes  
☐ 1 vez semana  
☒ 2 a 4 veces semana  
☐ 5 a 6 veces semana  
☐ 1 vez al día  
☐ 2 a 3 veces al día  
☐ 5 a 6 veces al día  
☐ más 6 veces al día

---

Salchicha o similar

- ☒ Nunca o menos 1 vez al mes  
☐ 1 a 3 veces mes  
☐ 1 vez semana  
☐ 2 a 4 veces semana  
☐ 5 a 6 veces semana  
☐ 1 vez al día  
☐ 2 a 3 veces al día  
☐ 5 a 6 veces al día  
☐ más 6 veces al día

---

Pate o foiegras

- ☒ Nunca o menos 1 vez al mes  
☐ 1 a 3 veces mes  
☐ 1 vez semana  
☐ 2 a 4 veces semana  
☐ 5 a 6 veces semana  
☐ 1 vez al día  
☐ 2 a 3 veces al día  
☐ 5 a 6 veces al día  
☐ más 6 veces al día

---

Hamburguesa

- ☐ Nunca o menos 1 vez al mes  
☐ 1 a 3 veces mes  
☐ 1 vez semana  
☒ 2 a 4 veces semana  
☐ 5 a 6 veces semana  
☐ 1 vez al día  
☐ 2 a 3 veces al día  
☐ 5 a 6 veces al día  
☐ más 6 veces al día

---

tocino o bacon

- ☒ Nunca o menos 1 vez al mes  
☐ 1 a 3 veces mes  
☐ 1 vez semana  
☐ 2 a 4 veces semana  
☐ 5 a 6 veces semana  
☐ 1 vez al día  
☐ 2 a 3 veces al día  
☐ 5 a 6 veces al día  
☐ más 6 veces al día

---

Pescado frito

- ☐ Nunca o menos 1 vez al mes  
☒ 1 a 3 veces mes  
☐ 1 vez semana  
☐ 2 a 4 veces semana  
☐ 5 a 6 veces semana  
☐ 1 vez al día  
☐ 2 a 3 veces al día  
☐ 5 a 6 veces al día  
☐ más 6 veces al día

---

pescado hervido blanco

- ☐ Nunca o menos 1 vez al mes  
☒ 1 a 3 veces mes  
☐ 1 vez semana  
☐ 2 a 4 veces semana  
☐ 5 a 6 veces semana  
☐ 1 vez al día  
☐ 2 a 3 veces al día  
☐ 5 a 6 veces al día  
☐ más 6 veces al día

---

pescado hervido azul

- ☐ Nunca o menos 1 vez al mes  
☐ 1 a 3 veces mes  
☒ 1 vez semana  
☐ 2 a 4 veces semana  
☐ 5 a 6 veces semana  
☐ 1 vez al día  
☐ 2 a 3 veces al día  
☐ 5 a 6 veces al día  
☐ más 6 veces al día

---

otros pescado azul

- ☐ Nunca o menos 1 vez al mes  
☒ 1 a 3 veces mes  
☐ 1 vez semana  
☐ 2 a 4 veces semana  
☐ 5 a 6 veces semana  
☐ 1 vez al día  
☐ 2 a 3 veces al día  
☐ 5 a 6 veces al día  
☐ más 6 veces al día

---

atun conserva

- ☐ Nunca o menos 1 vez al mes  
☐ 1 a 3 veces mes  
☒ 1 vez semana  
☐ 2 a 4 veces semana  
☐ 5 a 6 veces semana  
☐ 1 vez al día  
☐ 2 a 3 veces al día  
☐ 5 a 6 veces al día  
☐ más 6 veces al día

---

sardina conserva

- ☒ Nunca o menos 1 vez al mes  
☐ 1 a 3 veces mes  
☐ 1 vez semana  
☐ 2 a 4 veces semana  
☐ 5 a 6 veces semana  
☐ 1 vez al día  
☐ 2 a 3 veces al día  
☐ 5 a 6 veces al día  
☐ más 6 veces al día

|                                         |                                                                                                                                                                                                                                                                                                                                                                                                              |
|-----------------------------------------|--------------------------------------------------------------------------------------------------------------------------------------------------------------------------------------------------------------------------------------------------------------------------------------------------------------------------------------------------------------------------------------------------------------|
| pescado ahumado                         | <input checked="" type="radio"/> Nunca o menos 1 vez al mes<br><input type="radio"/> 1 a 3 veces mes<br><input type="radio"/> 1 vez semana<br><input type="radio"/> 2 a 4 veces semana<br><input type="radio"/> 5 a 6 veces semana<br><input type="radio"/> 1 vez al día<br><input type="radio"/> 2 a 3 veces al día<br><input type="radio"/> 5 a 6 veces al día<br><input type="radio"/> más 6 veces al día |
| almejas o mejillones o ostras unos 100g | <input type="radio"/> Nunca o menos 1 vez al mes<br><input checked="" type="radio"/> 1 a 3 veces mes<br><input type="radio"/> 1 vez semana<br><input type="radio"/> 2 a 4 veces semana<br><input type="radio"/> 5 a 6 veces semana<br><input type="radio"/> 1 vez al día<br><input type="radio"/> 2 a 3 veces al día<br><input type="radio"/> 5 a 6 veces al día<br><input type="radio"/> más 6 veces al día |
| calamar o chipiron o sepia unos 100g    | <input type="radio"/> Nunca o menos 1 vez al mes<br><input checked="" type="radio"/> 1 a 3 veces mes<br><input type="radio"/> 1 vez semana<br><input type="radio"/> 2 a 4 veces semana<br><input type="radio"/> 5 a 6 veces semana<br><input type="radio"/> 1 vez al día<br><input type="radio"/> 2 a 3 veces al día<br><input type="radio"/> 5 a 6 veces al día<br><input type="radio"/> más 6 veces al día |
| marisco unos 100g                       | <input type="radio"/> Nunca o menos 1 vez al mes<br><input checked="" type="radio"/> 1 a 3 veces mes<br><input type="radio"/> 1 vez semana<br><input type="radio"/> 2 a 4 veces semana<br><input type="radio"/> 5 a 6 veces semana<br><input type="radio"/> 1 vez al día<br><input type="radio"/> 2 a 3 veces al día<br><input type="radio"/> 5 a 6 veces al día<br><input type="radio"/> más 6 veces al día |
| Espinacas o acelgas cocinadas           | <input type="radio"/> Nunca o menos 1 vez al mes<br><input checked="" type="radio"/> 1 a 3 veces mes<br><input type="radio"/> 1 vez semana<br><input type="radio"/> 2 a 4 veces semana<br><input type="radio"/> 5 a 6 veces semana<br><input type="radio"/> 1 vez al día<br><input type="radio"/> 2 a 3 veces al día<br><input type="radio"/> 5 a 6 veces al día<br><input type="radio"/> más 6 veces al día |
| Col o coliflor o brocoli cocinado       | <input type="radio"/> Nunca o menos 1 vez al mes<br><input type="radio"/> 1 a 3 veces mes<br><input checked="" type="radio"/> 1 vez semana<br><input type="radio"/> 2 a 4 veces semana<br><input type="radio"/> 5 a 6 veces semana<br><input type="radio"/> 1 vez al día<br><input type="radio"/> 2 a 3 veces al día<br><input type="radio"/> 5 a 6 veces al día<br><input type="radio"/> más 6 veces al día |

---

Lechuga o endivia o escarola

- ☐ Nunca o menos 1 vez al mes  
☐ 1 a 3 veces mes  
☒ 1 vez semana  
☐ 2 a 4 veces semana  
☐ 5 a 6 veces semana  
☐ 1 vez al día  
☐ 2 a 3 veces al día  
☐ 5 a 6 veces al día  
☐ más 6 veces al día

---

tomate ensalada

- ☐ Nunca o menos 1 vez al mes  
☐ 1 a 3 veces mes  
☒ 1 vez semana  
☐ 2 a 4 veces semana  
☐ 5 a 6 veces semana  
☐ 1 vez al día  
☐ 2 a 3 veces al día  
☐ 5 a 6 veces al día  
☐ más 6 veces al día

---

cebolla

- ☐ Nunca o menos 1 vez al mes  
☐ 1 a 3 veces mes  
☒ 1 vez semana  
☐ 2 a 4 veces semana  
☐ 5 a 6 veces semana  
☐ 1 vez al día  
☐ 2 a 3 veces al día  
☐ 5 a 6 veces al día  
☐ más 6 veces al día

---

Zanahoria o calabaza

- ☐ Nunca o menos 1 vez al mes  
☐ 1 a 3 veces mes  
☐ 1 vez semana  
☒ 2 a 4 veces semana  
☐ 5 a 6 veces semana  
☐ 1 vez al día  
☐ 2 a 3 veces al día  
☐ 5 a 6 veces al día  
☐ más 6 veces al día

---

Judías verdes

- ☐ Nunca o menos 1 vez al mes  
☐ 1 a 3 veces mes  
☒ 1 vez semana  
☐ 2 a 4 veces semana  
☐ 5 a 6 veces semana  
☐ 1 vez al día  
☐ 2 a 3 veces al día  
☐ 5 a 6 veces al día  
☐ más 6 veces al día

---

Berenjena o calabacin o pepino

- ☐ Nunca o menos 1 vez al mes  
☐ 1 a 3 veces mes  
☒ 1 vez semana  
☐ 2 a 4 veces semana  
☐ 5 a 6 veces semana  
☐ 1 vez al día  
☐ 2 a 3 veces al día  
☐ 5 a 6 veces al día  
☐ más 6 veces al día

---

|          |                                                                                                                                                                                                                                                                                                                                                                                                              |
|----------|--------------------------------------------------------------------------------------------------------------------------------------------------------------------------------------------------------------------------------------------------------------------------------------------------------------------------------------------------------------------------------------------------------------|
| pimiento | <input type="radio"/> Nunca o menos 1 vez al mes<br><input type="radio"/> 1 a 3 veces mes<br><input checked="" type="radio"/> 1 vez semana<br><input type="radio"/> 2 a 4 veces semana<br><input type="radio"/> 5 a 6 veces semana<br><input type="radio"/> 1 vez al día<br><input type="radio"/> 2 a 3 veces al día<br><input type="radio"/> 5 a 6 veces al día<br><input type="radio"/> más 6 veces al día |
|----------|--------------------------------------------------------------------------------------------------------------------------------------------------------------------------------------------------------------------------------------------------------------------------------------------------------------------------------------------------------------------------------------------------------------|

---

|           |                                                                                                                                                                                                                                                                                                                                                                                                              |
|-----------|--------------------------------------------------------------------------------------------------------------------------------------------------------------------------------------------------------------------------------------------------------------------------------------------------------------------------------------------------------------------------------------------------------------|
| alcachofa | <input type="radio"/> Nunca o menos 1 vez al mes<br><input type="radio"/> 1 a 3 veces mes<br><input checked="" type="radio"/> 1 vez semana<br><input type="radio"/> 2 a 4 veces semana<br><input type="radio"/> 5 a 6 veces semana<br><input type="radio"/> 1 vez al día<br><input type="radio"/> 2 a 3 veces al día<br><input type="radio"/> 5 a 6 veces al día<br><input type="radio"/> más 6 veces al día |
|-----------|--------------------------------------------------------------------------------------------------------------------------------------------------------------------------------------------------------------------------------------------------------------------------------------------------------------------------------------------------------------------------------------------------------------|

---

|            |                                                                                                                                                                                                                                                                                                                                                                                                              |
|------------|--------------------------------------------------------------------------------------------------------------------------------------------------------------------------------------------------------------------------------------------------------------------------------------------------------------------------------------------------------------------------------------------------------------|
| espárragos | <input type="radio"/> Nunca o menos 1 vez al mes<br><input type="radio"/> 1 a 3 veces mes<br><input checked="" type="radio"/> 1 vez semana<br><input type="radio"/> 2 a 4 veces semana<br><input type="radio"/> 5 a 6 veces semana<br><input type="radio"/> 1 vez al día<br><input type="radio"/> 2 a 3 veces al día<br><input type="radio"/> 5 a 6 veces al día<br><input type="radio"/> más 6 veces al día |
|------------|--------------------------------------------------------------------------------------------------------------------------------------------------------------------------------------------------------------------------------------------------------------------------------------------------------------------------------------------------------------------------------------------------------------|

---

|              |                                                                                                                                                                                                                                                                                                                                                                                                              |
|--------------|--------------------------------------------------------------------------------------------------------------------------------------------------------------------------------------------------------------------------------------------------------------------------------------------------------------------------------------------------------------------------------------------------------------|
| maíz hervido | <input type="radio"/> Nunca o menos 1 vez al mes<br><input checked="" type="radio"/> 1 a 3 veces mes<br><input type="radio"/> 1 vez semana<br><input type="radio"/> 2 a 4 veces semana<br><input type="radio"/> 5 a 6 veces semana<br><input type="radio"/> 1 vez al día<br><input type="radio"/> 2 a 3 veces al día<br><input type="radio"/> 5 a 6 veces al día<br><input type="radio"/> más 6 veces al día |
|--------------|--------------------------------------------------------------------------------------------------------------------------------------------------------------------------------------------------------------------------------------------------------------------------------------------------------------------------------------------------------------------------------------------------------------|

---

|           |                                                                                                                                                                                                                                                                                                                                                                                                              |
|-----------|--------------------------------------------------------------------------------------------------------------------------------------------------------------------------------------------------------------------------------------------------------------------------------------------------------------------------------------------------------------------------------------------------------------|
| legumbres | <input type="radio"/> Nunca o menos 1 vez al mes<br><input type="radio"/> 1 a 3 veces mes<br><input type="radio"/> 1 vez semana<br><input checked="" type="radio"/> 2 a 4 veces semana<br><input type="radio"/> 5 a 6 veces semana<br><input type="radio"/> 1 vez al día<br><input type="radio"/> 2 a 3 veces al día<br><input type="radio"/> 5 a 6 veces al día<br><input type="radio"/> más 6 veces al día |
|-----------|--------------------------------------------------------------------------------------------------------------------------------------------------------------------------------------------------------------------------------------------------------------------------------------------------------------------------------------------------------------------------------------------------------------|

---

|                       |                                                                                                                                                                                                                                                                                                                                                                                                              |
|-----------------------|--------------------------------------------------------------------------------------------------------------------------------------------------------------------------------------------------------------------------------------------------------------------------------------------------------------------------------------------------------------------------------------------------------------|
| naranjas o mandarinas | <input type="radio"/> Nunca o menos 1 vez al mes<br><input checked="" type="radio"/> 1 a 3 veces mes<br><input type="radio"/> 1 vez semana<br><input type="radio"/> 2 a 4 veces semana<br><input type="radio"/> 5 a 6 veces semana<br><input type="radio"/> 1 vez al día<br><input type="radio"/> 2 a 3 veces al día<br><input type="radio"/> 5 a 6 veces al día<br><input type="radio"/> más 6 veces al día |
|-----------------------|--------------------------------------------------------------------------------------------------------------------------------------------------------------------------------------------------------------------------------------------------------------------------------------------------------------------------------------------------------------------------------------------------------------|

---

|                       |                                                                                                                                                                                                                                                                                                                                                                                                              |
|-----------------------|--------------------------------------------------------------------------------------------------------------------------------------------------------------------------------------------------------------------------------------------------------------------------------------------------------------------------------------------------------------------------------------------------------------|
| zum natural fruta     | <input checked="" type="radio"/> Nunca o menos 1 vez al mes<br><input type="radio"/> 1 a 3 veces mes<br><input type="radio"/> 1 vez semana<br><input type="radio"/> 2 a 4 veces semana<br><input type="radio"/> 5 a 6 veces semana<br><input type="radio"/> 1 vez al día<br><input type="radio"/> 2 a 3 veces al día<br><input type="radio"/> 5 a 6 veces al día<br><input type="radio"/> más 6 veces al día |
| platano               | <input type="radio"/> Nunca o menos 1 vez al mes<br><input checked="" type="radio"/> 1 a 3 veces mes<br><input type="radio"/> 1 vez semana<br><input type="radio"/> 2 a 4 veces semana<br><input type="radio"/> 5 a 6 veces semana<br><input type="radio"/> 1 vez al día<br><input type="radio"/> 2 a 3 veces al día<br><input type="radio"/> 5 a 6 veces al día<br><input type="radio"/> más 6 veces al día |
| manzana o pera        | <input type="radio"/> Nunca o menos 1 vez al mes<br><input checked="" type="radio"/> 1 a 3 veces mes<br><input type="radio"/> 1 vez semana<br><input type="radio"/> 2 a 4 veces semana<br><input type="radio"/> 5 a 6 veces semana<br><input type="radio"/> 1 vez al día<br><input type="radio"/> 2 a 3 veces al día<br><input type="radio"/> 5 a 6 veces al día<br><input type="radio"/> más 6 veces al día |
| melocotón o nectarina | <input type="radio"/> Nunca o menos 1 vez al mes<br><input type="radio"/> 1 a 3 veces mes<br><input checked="" type="radio"/> 1 vez semana<br><input type="radio"/> 2 a 4 veces semana<br><input type="radio"/> 5 a 6 veces semana<br><input type="radio"/> 1 vez al día<br><input type="radio"/> 2 a 3 veces al día<br><input type="radio"/> 5 a 6 veces al día<br><input type="radio"/> más 6 veces al día |
| sandia o melon        | <input type="radio"/> Nunca o menos 1 vez al mes<br><input type="radio"/> 1 a 3 veces mes<br><input checked="" type="radio"/> 1 vez semana<br><input type="radio"/> 2 a 4 veces semana<br><input type="radio"/> 5 a 6 veces semana<br><input type="radio"/> 1 vez al día<br><input type="radio"/> 2 a 3 veces al día<br><input type="radio"/> 5 a 6 veces al día<br><input type="radio"/> más 6 veces al día |
| uva                   | <input checked="" type="radio"/> Nunca o menos 1 vez al mes<br><input type="radio"/> 1 a 3 veces mes<br><input type="radio"/> 1 vez semana<br><input type="radio"/> 2 a 4 veces semana<br><input type="radio"/> 5 a 6 veces semana<br><input type="radio"/> 1 vez al día<br><input type="radio"/> 2 a 3 veces al día<br><input type="radio"/> 5 a 6 veces al día<br><input type="radio"/> más 6 veces al día |

---

bruna o ciruela

- ☐ Nunca o menos 1 vez al mes  
☐ 1 a 3 veces mes  
☒ 1 vez semana  
☐ 2 a 4 veces semana  
☐ 5 a 6 veces semana  
☐ 1 vez al día  
☐ 2 a 3 veces al día  
☐ 5 a 6 veces al día  
☐ más 6 veces al día

---

kiwi

- ☒ Nunca o menos 1 vez al mes  
☐ 1 a 3 veces mes  
☐ 1 vez semana  
☐ 2 a 4 veces semana  
☐ 5 a 6 veces semana  
☐ 1 vez al día  
☐ 2 a 3 veces al día  
☐ 5 a 6 veces al día  
☐ más 6 veces al día

---

aceituna

- ☐ Nunca o menos 1 vez al mes  
☐ 1 a 3 veces mes  
☒ 1 vez semana  
☐ 2 a 4 veces semana  
☐ 5 a 6 veces semana  
☐ 1 vez al día  
☐ 2 a 3 veces al día  
☐ 5 a 6 veces al día  
☐ más 6 veces al día

---

frutos secos

- ☐ Nunca o menos 1 vez al mes  
☐ 1 a 3 veces mes  
☐ 1 vez semana  
☐ 2 a 4 veces semana  
☐ 5 a 6 veces semana  
☒ 1 vez al día  
☐ 2 a 3 veces al día  
☐ 5 a 6 veces al día  
☐ más 6 veces al día

---

pan blanco

- ☐ Nunca o menos 1 vez al mes  
☐ 1 a 3 veces mes  
☐ 1 vez semana  
☒ 2 a 4 veces semana  
☐ 5 a 6 veces semana  
☐ 1 vez al día  
☐ 2 a 3 veces al día  
☐ 5 a 6 veces al día  
☐ más 6 veces al día

---

pan integral

- ☐ Nunca o menos 1 vez al mes  
☒ 1 a 3 veces mes  
☐ 1 vez semana  
☐ 2 a 4 veces semana  
☐ 5 a 6 veces semana  
☐ 1 vez al día  
☐ 2 a 3 veces al día  
☐ 5 a 6 veces al día  
☐ más 6 veces al día

---

cereales desayuno

- ☐ Nunca o menos 1 vez al mes  
☐ 1 a 3 veces mes  
☐ 1 vez semana  
☐ 2 a 4 veces semana  
☐ 5 a 6 veces semana  
☒ 1 vez al día  
☐ 2 a 3 veces al día  
☐ 5 a 6 veces al día  
☐ más 6 veces al día

---

patatas fritas

- ☒ Nunca o menos 1 vez al mes  
☐ 1 a 3 veces mes  
☐ 1 vez semana  
☐ 2 a 4 veces semana  
☐ 5 a 6 veces semana  
☐ 1 vez al día  
☐ 2 a 3 veces al día  
☐ 5 a 6 veces al día  
☐ más 6 veces al día

---

patatas cocidas o asadas

- ☐ Nunca o menos 1 vez al mes  
☒ 1 a 3 veces mes  
☐ 1 vez semana  
☐ 2 a 4 veces semana  
☐ 5 a 6 veces semana  
☐ 1 vez al día  
☐ 2 a 3 veces al día  
☐ 5 a 6 veces al día  
☐ más 6 veces al día

---

bolsa papas

- ☐ Nunca o menos 1 vez al mes  
☒ 1 a 3 veces mes  
☐ 1 vez semana  
☐ 2 a 4 veces semana  
☐ 5 a 6 veces semana  
☐ 1 vez al día  
☐ 2 a 3 veces al día  
☐ 5 a 6 veces al día  
☐ más 6 veces al día

---

arroz cocinado

- ☐ Nunca o menos 1 vez al mes  
☒ 1 a 3 veces mes  
☐ 1 vez semana  
☐ 2 a 4 veces semana  
☐ 5 a 6 veces semana  
☐ 1 vez al día  
☐ 2 a 3 veces al día  
☐ 5 a 6 veces al día  
☐ más 6 veces al día

---

pasta

- ☐ Nunca o menos 1 vez al mes  
☒ 1 a 3 veces mes  
☐ 1 vez semana  
☐ 2 a 4 veces semana  
☐ 5 a 6 veces semana  
☐ 1 vez al día  
☐ 2 a 3 veces al día  
☐ 5 a 6 veces al día  
☐ más 6 veces al día



|                     |                                                                                                                                                                                                                                                                                                                                                                                                              |
|---------------------|--------------------------------------------------------------------------------------------------------------------------------------------------------------------------------------------------------------------------------------------------------------------------------------------------------------------------------------------------------------------------------------------------------------|
| pizza               | <input type="radio"/> Nunca o menos 1 vez al mes<br><input checked="" type="radio"/> 1 a 3 veces mes<br><input type="radio"/> 1 vez semana<br><input type="radio"/> 2 a 4 veces semana<br><input type="radio"/> 5 a 6 veces semana<br><input type="radio"/> 1 vez al día<br><input type="radio"/> 2 a 3 veces al día<br><input type="radio"/> 5 a 6 veces al día<br><input type="radio"/> más 6 veces al día |
| aceite oliva        | <input type="radio"/> Nunca o menos 1 vez al mes<br><input type="radio"/> 1 a 3 veces mes<br><input type="radio"/> 1 vez semana<br><input type="radio"/> 2 a 4 veces semana<br><input checked="" type="radio"/> 5 a 6 veces semana<br><input type="radio"/> 1 vez al día<br><input type="radio"/> 2 a 3 veces al día<br><input type="radio"/> 5 a 6 veces al día<br><input type="radio"/> más 6 veces al día |
| otros aceites       | <input checked="" type="radio"/> Nunca o menos 1 vez al mes<br><input type="radio"/> 1 a 3 veces mes<br><input type="radio"/> 1 vez semana<br><input type="radio"/> 2 a 4 veces semana<br><input type="radio"/> 5 a 6 veces semana<br><input type="radio"/> 1 vez al día<br><input type="radio"/> 2 a 3 veces al día<br><input type="radio"/> 5 a 6 veces al día<br><input type="radio"/> más 6 veces al día |
| margarina           | <input checked="" type="radio"/> Nunca o menos 1 vez al mes<br><input type="radio"/> 1 a 3 veces mes<br><input type="radio"/> 1 vez semana<br><input type="radio"/> 2 a 4 veces semana<br><input type="radio"/> 5 a 6 veces semana<br><input type="radio"/> 1 vez al día<br><input type="radio"/> 2 a 3 veces al día<br><input type="radio"/> 5 a 6 veces al día<br><input type="radio"/> más 6 veces al día |
| mantequilla         | <input checked="" type="radio"/> Nunca o menos 1 vez al mes<br><input type="radio"/> 1 a 3 veces mes<br><input type="radio"/> 1 vez semana<br><input type="radio"/> 2 a 4 veces semana<br><input type="radio"/> 5 a 6 veces semana<br><input type="radio"/> 1 vez al día<br><input type="radio"/> 2 a 3 veces al día<br><input type="radio"/> 5 a 6 veces al día<br><input type="radio"/> más 6 veces al día |
| galletas tipo maria | <input checked="" type="radio"/> Nunca o menos 1 vez al mes<br><input type="radio"/> 1 a 3 veces mes<br><input type="radio"/> 1 vez semana<br><input type="radio"/> 2 a 4 veces semana<br><input type="radio"/> 5 a 6 veces semana<br><input type="radio"/> 1 vez al día<br><input type="radio"/> 2 a 3 veces al día<br><input type="radio"/> 5 a 6 veces al día<br><input type="radio"/> más 6 veces al día |

---

galletas chocolate

- ☒ Nunca o menos 1 vez al mes  
☐ 1 a 3 veces mes  
☐ 1 vez semana  
☐ 2 a 4 veces semana  
☐ 5 a 6 veces semana  
☐ 1 vez al día  
☐ 2 a 3 veces al día  
☐ 5 a 6 veces al día  
☐ más 6 veces al día

---

bolleria

- ☒ Nunca o menos 1 vez al mes  
☐ 1 a 3 veces mes  
☐ 1 vez semana  
☐ 2 a 4 veces semana  
☐ 5 a 6 veces semana  
☐ 1 vez al día  
☐ 2 a 3 veces al día  
☐ 5 a 6 veces al día  
☐ más 6 veces al día

---

chocolate o bombones

- ☐ Nunca o menos 1 vez al mes  
☒ 1 a 3 veces mes  
☐ 1 vez semana  
☐ 2 a 4 veces semana  
☐ 5 a 6 veces semana  
☐ 1 vez al día  
☐ 2 a 3 veces al día  
☐ 5 a 6 veces al día  
☐ más 6 veces al día

---

chocolate polvo o colacao

- ☒ Nunca o menos 1 vez al mes  
☐ 1 a 3 veces mes  
☐ 1 vez semana  
☐ 2 a 4 veces semana  
☐ 5 a 6 veces semana  
☐ 1 vez al día  
☐ 2 a 3 veces al día  
☐ 5 a 6 veces al día  
☐ más 6 veces al día

---

vino tinto

- ☒ Nunca o menos 1 vez al mes  
☐ 1 a 3 veces mes  
☐ 1 vez semana  
☐ 2 a 4 veces semana  
☐ 5 a 6 veces semana  
☐ 1 vez al día  
☐ 2 a 3 veces al día  
☐ 5 a 6 veces al día  
☐ más 6 veces al día

---

vino blanco

- ☒ Nunca o menos 1 vez al mes  
☐ 1 a 3 veces mes  
☐ 1 vez semana  
☐ 2 a 4 veces semana  
☐ 5 a 6 veces semana  
☐ 1 vez al día  
☐ 2 a 3 veces al día  
☐ 5 a 6 veces al día  
☐ más 6 veces al día

|                       |                                                                                                                                                                                                                                                                                                                                                                                                              |
|-----------------------|--------------------------------------------------------------------------------------------------------------------------------------------------------------------------------------------------------------------------------------------------------------------------------------------------------------------------------------------------------------------------------------------------------------|
| vino seco o vermut    | <input checked="" type="radio"/> Nunca o menos 1 vez al mes<br><input type="radio"/> 1 a 3 veces mes<br><input type="radio"/> 1 vez semana<br><input type="radio"/> 2 a 4 veces semana<br><input type="radio"/> 5 a 6 veces semana<br><input type="radio"/> 1 vez al día<br><input type="radio"/> 2 a 3 veces al día<br><input type="radio"/> 5 a 6 veces al día<br><input type="radio"/> más 6 veces al día |
| cerveza               | <input checked="" type="radio"/> Nunca o menos 1 vez al mes<br><input type="radio"/> 1 a 3 veces mes<br><input type="radio"/> 1 vez semana<br><input type="radio"/> 2 a 4 veces semana<br><input type="radio"/> 5 a 6 veces semana<br><input type="radio"/> 1 vez al día<br><input type="radio"/> 2 a 3 veces al día<br><input type="radio"/> 5 a 6 veces al día<br><input type="radio"/> más 6 veces al día |
| cerveza sin alcohol   | <input type="radio"/> Nunca o menos 1 vez al mes<br><input type="radio"/> 1 a 3 veces mes<br><input checked="" type="radio"/> 1 vez semana<br><input type="radio"/> 2 a 4 veces semana<br><input type="radio"/> 5 a 6 veces semana<br><input type="radio"/> 1 vez al día<br><input type="radio"/> 2 a 3 veces al día<br><input type="radio"/> 5 a 6 veces al día<br><input type="radio"/> más 6 veces al día |
| licores               | <input checked="" type="radio"/> Nunca o menos 1 vez al mes<br><input type="radio"/> 1 a 3 veces mes<br><input type="radio"/> 1 vez semana<br><input type="radio"/> 2 a 4 veces semana<br><input type="radio"/> 5 a 6 veces semana<br><input type="radio"/> 1 vez al día<br><input type="radio"/> 2 a 3 veces al día<br><input type="radio"/> 5 a 6 veces al día<br><input type="radio"/> más 6 veces al día |
| ginebra o ron o vodka | <input checked="" type="radio"/> Nunca o menos 1 vez al mes<br><input type="radio"/> 1 a 3 veces mes<br><input type="radio"/> 1 vez semana<br><input type="radio"/> 2 a 4 veces semana<br><input type="radio"/> 5 a 6 veces semana<br><input type="radio"/> 1 vez al día<br><input type="radio"/> 2 a 3 veces al día<br><input type="radio"/> 5 a 6 veces al día<br><input type="radio"/> más 6 veces al día |
| refresco normal       | <input type="radio"/> Nunca o menos 1 vez al mes<br><input type="radio"/> 1 a 3 veces mes<br><input type="radio"/> 1 vez semana<br><input checked="" type="radio"/> 2 a 4 veces semana<br><input type="radio"/> 5 a 6 veces semana<br><input type="radio"/> 1 vez al día<br><input type="radio"/> 2 a 3 veces al día<br><input type="radio"/> 5 a 6 veces al día<br><input type="radio"/> más 6 veces al día |

---

refresco sin azúcar

- ☒ Nunca o menos 1 vez al mes  
☐ 1 a 3 veces mes  
☐ 1 vez semana  
☐ 2 a 4 veces semana  
☐ 5 a 6 veces semana  
☐ 1 vez al día  
☐ 2 a 3 veces al día  
☐ 5 a 6 veces al día  
☐ más 6 veces al día

---

Agua del grifo

- ☒ Nunca o menos 1 vez al mes  
☐ 1 a 3 veces mes  
☐ 1 vez semana  
☐ 2 a 4 veces semana  
☐ 5 a 6 veces semana  
☐ 1 vez al día  
☐ 2 a 3 veces al día  
☐ 5 a 6 veces al día  
☐ más 6 veces al día

---

agua embotellada sin gas

- ☐ Nunca o menos 1 vez al mes  
☐ 1 a 3 veces mes  
☐ 1 vez semana  
☐ 2 a 4 veces semana  
☐ 5 a 6 veces semana  
☐ 1 vez al día  
☐ 2 a 3 veces al día  
☐ 5 a 6 veces al día  
☒ más 6 veces al día

---

agua embotellada con gas

- ☒ Nunca o menos 1 vez al mes  
☐ 1 a 3 veces mes  
☐ 1 vez semana  
☐ 2 a 4 veces semana  
☐ 5 a 6 veces semana  
☐ 1 vez al día  
☐ 2 a 3 veces al día  
☐ 5 a 6 veces al día  
☐ más 6 veces al día

---

zumو frutas embasado

- ☒ Nunca o menos 1 vez al mes  
☐ 1 a 3 veces mes  
☐ 1 vez semana  
☐ 2 a 4 veces semana  
☐ 5 a 6 veces semana  
☐ 1 vez al día  
☐ 2 a 3 veces al día  
☐ 5 a 6 veces al día  
☐ más 6 veces al día

---

cafe

- ☒ Nunca o menos 1 vez al mes  
☐ 1 a 3 veces mes  
☐ 1 vez semana  
☐ 2 a 4 veces semana  
☐ 5 a 6 veces semana  
☐ 1 vez al día  
☐ 2 a 3 veces al día  
☐ 5 a 6 veces al día  
☐ más 6 veces al día

---

cafe descafeinado

- ☒ Nunca o menos 1 vez al mes  
☐ 1 a 3 veces mes  
☐ 1 vez semana  
☐ 2 a 4 veces semana  
☐ 5 a 6 veces semana  
☐ 1 vez al día  
☐ 2 a 3 veces al día  
☐ 5 a 6 veces al día  
☐ más 6 veces al día

---

te o infusión

- ☒ Nunca o menos 1 vez al mes  
☐ 1 a 3 veces mes  
☐ 1 vez semana  
☐ 2 a 4 veces semana  
☐ 5 a 6 veces semana  
☐ 1 vez al día  
☐ 2 a 3 veces al día  
☐ 5 a 6 veces al día  
☐ más 6 veces al día

---

sopa o puré verduras

- ☐ Nunca o menos 1 vez al mes  
☐ 1 a 3 veces mes  
☒ 1 vez semana  
☐ 2 a 4 veces semana  
☐ 5 a 6 veces semana  
☐ 1 vez al día  
☐ 2 a 3 veces al día  
☐ 5 a 6 veces al día  
☐ más 6 veces al día

---

croquetas pollo jamón

- ☐ Nunca o menos 1 vez al mes  
☒ 1 a 3 veces mes  
☐ 1 vez semana  
☐ 2 a 4 veces semana  
☐ 5 a 6 veces semana  
☐ 1 vez al día  
☐ 2 a 3 veces al día  
☐ 5 a 6 veces al día  
☐ más 6 veces al día

---

croquetas pescado

- ☒ Nunca o menos 1 vez al mes  
☐ 1 a 3 veces mes  
☐ 1 vez semana  
☐ 2 a 4 veces semana  
☐ 5 a 6 veces semana  
☐ 1 vez al día  
☐ 2 a 3 veces al día  
☐ 5 a 6 veces al día  
☐ más 6 veces al día

---

mayonesa

- ☐ Nunca o menos 1 vez al mes  
☐ 1 a 3 veces mes  
☐ 1 vez semana  
☒ 2 a 4 veces semana  
☐ 5 a 6 veces semana  
☐ 1 vez al día  
☐ 2 a 3 veces al día  
☐ 5 a 6 veces al día  
☐ más 6 veces al día

|                  |                                                                                                                                                                                                                                                                                                                                                                                                              |
|------------------|--------------------------------------------------------------------------------------------------------------------------------------------------------------------------------------------------------------------------------------------------------------------------------------------------------------------------------------------------------------------------------------------------------------|
| salsa tomate     | <input type="radio"/> Nunca o menos 1 vez al mes<br><input checked="" type="radio"/> 1 a 3 veces mes<br><input type="radio"/> 1 vez semana<br><input type="radio"/> 2 a 4 veces semana<br><input type="radio"/> 5 a 6 veces semana<br><input type="radio"/> 1 vez al día<br><input type="radio"/> 2 a 3 veces al día<br><input type="radio"/> 5 a 6 veces al día<br><input type="radio"/> más 6 veces al día |
| ketchup          | <input type="radio"/> Nunca o menos 1 vez al mes<br><input checked="" type="radio"/> 1 a 3 veces mes<br><input type="radio"/> 1 vez semana<br><input type="radio"/> 2 a 4 veces semana<br><input type="radio"/> 5 a 6 veces semana<br><input type="radio"/> 1 vez al día<br><input type="radio"/> 2 a 3 veces al día<br><input type="radio"/> 5 a 6 veces al día<br><input type="radio"/> más 6 veces al día |
| sal              | <input type="radio"/> Nunca o menos 1 vez al mes<br><input type="radio"/> 1 a 3 veces mes<br><input type="radio"/> 1 vez semana<br><input type="radio"/> 2 a 4 veces semana<br><input type="radio"/> 5 a 6 veces semana<br><input type="radio"/> 1 vez al día<br><input checked="" type="radio"/> 2 a 3 veces al día<br><input type="radio"/> 5 a 6 veces al día<br><input type="radio"/> más 6 veces al día |
| ajo              | <input type="radio"/> Nunca o menos 1 vez al mes<br><input type="radio"/> 1 a 3 veces mes<br><input checked="" type="radio"/> 1 vez semana<br><input type="radio"/> 2 a 4 veces semana<br><input type="radio"/> 5 a 6 veces semana<br><input type="radio"/> 1 vez al día<br><input type="radio"/> 2 a 3 veces al día<br><input type="radio"/> 5 a 6 veces al día<br><input type="radio"/> más 6 veces al día |
| mermelada o miel | <input checked="" type="radio"/> Nunca o menos 1 vez al mes<br><input type="radio"/> 1 a 3 veces mes<br><input type="radio"/> 1 vez semana<br><input type="radio"/> 2 a 4 veces semana<br><input type="radio"/> 5 a 6 veces semana<br><input type="radio"/> 1 vez al día<br><input type="radio"/> 2 a 3 veces al día<br><input type="radio"/> 5 a 6 veces al día<br><input type="radio"/> más 6 veces al día |
| azúcar           | <input type="radio"/> Nunca o menos 1 vez al mes<br><input type="radio"/> 1 a 3 veces mes<br><input type="radio"/> 1 vez semana<br><input type="radio"/> 2 a 4 veces semana<br><input type="radio"/> 5 a 6 veces semana<br><input checked="" type="radio"/> 1 vez al día<br><input type="radio"/> 2 a 3 veces al día<br><input type="radio"/> 5 a 6 veces al día<br><input type="radio"/> más 6 veces al día |

|                                       |                                                                                                                                                                                                                                                                                                                                                                                                                                                                                                                               |
|---------------------------------------|-------------------------------------------------------------------------------------------------------------------------------------------------------------------------------------------------------------------------------------------------------------------------------------------------------------------------------------------------------------------------------------------------------------------------------------------------------------------------------------------------------------------------------|
| Otro alimento                         | <hr/>                                                                                                                                                                                                                                                                                                                                                                                                                                                                                                                         |
| suplementos vitamínicos               | <input type="radio"/> si<br><input checked="" type="radio"/> no                                                                                                                                                                                                                                                                                                                                                                                                                                                               |
| suplementos vitamínicos               | <hr/>                                                                                                                                                                                                                                                                                                                                                                                                                                                                                                                         |
| dieta previa                          | <input type="radio"/> si<br><input checked="" type="radio"/> no                                                                                                                                                                                                                                                                                                                                                                                                                                                               |
| motivo dieta                          | <input checked="" type="radio"/> no dieta<br><input type="radio"/> control peso<br><input type="radio"/> control colesterol<br><input type="radio"/> control diabetes<br><input type="radio"/> problemas estómago<br><input type="radio"/> problemas vesícula o hepáticos<br><input type="radio"/> HTA o cardiopatía<br><input type="radio"/> problemas renales<br><input type="radio"/> alergia alimentaria<br><input type="radio"/> ácido úrico elevado<br><input type="radio"/> vegetariana<br><input type="radio"/> otros |
| cambio alimentos año previo gestación | <input checked="" type="radio"/> si<br><input type="radio"/> no                                                                                                                                                                                                                                                                                                                                                                                                                                                               |
| cambio lácteos                        | <input type="radio"/> eliminado<br><input type="radio"/> disminuido<br><input type="radio"/> igual<br><input checked="" type="radio"/> aumentado<br><input type="radio"/> no sabe                                                                                                                                                                                                                                                                                                                                             |
| cambio huevos                         | <input type="radio"/> eliminado<br><input type="radio"/> disminuido<br><input checked="" type="radio"/> igual<br><input type="radio"/> aumentado<br><input type="radio"/> no sabe                                                                                                                                                                                                                                                                                                                                             |
| cambio carne                          | <input type="radio"/> eliminado<br><input type="radio"/> disminuido<br><input checked="" type="radio"/> igual<br><input type="radio"/> aumentado<br><input type="radio"/> no sabe                                                                                                                                                                                                                                                                                                                                             |
| cambio pescado                        | <input type="radio"/> eliminado<br><input type="radio"/> disminuido<br><input checked="" type="radio"/> igual<br><input type="radio"/> aumentado<br><input type="radio"/> no sabe                                                                                                                                                                                                                                                                                                                                             |
| cambio verduras                       | <input type="radio"/> eliminado<br><input type="radio"/> disminuido<br><input checked="" type="radio"/> igual<br><input type="radio"/> aumentado<br><input type="radio"/> no sabe                                                                                                                                                                                                                                                                                                                                             |

|                            |                                                                                                                                                                                                                        |
|----------------------------|------------------------------------------------------------------------------------------------------------------------------------------------------------------------------------------------------------------------|
| cambio legumbres           | <input type="radio"/> eliminado<br><input type="radio"/> disminuido<br><input checked="" type="radio"/> igual<br><input type="radio"/> aumentado<br><input type="radio"/> no sabe                                      |
| cambio fruta               | <input type="radio"/> eliminado<br><input type="radio"/> disminuido<br><input checked="" type="radio"/> igual<br><input type="radio"/> aumentado<br><input type="radio"/> no sabe                                      |
| cambio pan                 | <input type="radio"/> eliminado<br><input type="radio"/> disminuido<br><input checked="" type="radio"/> igual<br><input type="radio"/> aumentado<br><input type="radio"/> no sabe                                      |
| cambio aceite oliva        | <input type="radio"/> eliminado<br><input type="radio"/> disminuido<br><input checked="" type="radio"/> igual<br><input type="radio"/> aumentado<br><input type="radio"/> no sabe                                      |
| cambio mante o margarina   | <input type="radio"/> eliminado<br><input type="radio"/> disminuido<br><input checked="" type="radio"/> igual<br><input type="radio"/> aumentado<br><input type="radio"/> no sabe                                      |
| cambio azúcar y dulces     | <input type="radio"/> eliminado<br><input type="radio"/> disminuido<br><input type="radio"/> igual<br><input checked="" type="radio"/> aumentado<br><input type="radio"/> no sabe                                      |
| cambio bebidas alcohólicas | <input checked="" type="radio"/> eliminado<br><input type="radio"/> disminuido<br><input type="radio"/> igual<br><input type="radio"/> aumentado<br><input type="radio"/> no sabe                                      |
| frecuencia comidas fritas  | <input type="radio"/> a diario<br><input type="radio"/> 5 a 6 veces semana<br><input type="radio"/> 2 a 4 veces semana<br><input checked="" type="radio"/> 1 vez semana<br><input type="radio"/> menos de 1 vez semana |
| carne                      | <input type="radio"/> no como<br><input type="radio"/> cruda<br><input type="radio"/> poco hecha<br><input checked="" type="radio"/> hecha<br><input type="radio"/> muy hecha                                          |
| grasa visible carne        | <input type="radio"/> quita toda<br><input type="radio"/> quita mayoría<br><input checked="" type="radio"/> quita un poco<br><input type="radio"/> no quita nada                                                       |



|                                |                                                                                                                                                                                                                                                          |
|--------------------------------|----------------------------------------------------------------------------------------------------------------------------------------------------------------------------------------------------------------------------------------------------------|
| cocina carne                   | <input checked="" type="radio"/> a la plancha<br><input type="radio"/> a la parrilla<br><input type="radio"/> asada<br><input type="radio"/> frita<br><input type="radio"/> guisada                                                                      |
| tostado quemado carne          | <input type="radio"/> nunca<br><input type="radio"/> 1 vez mes<br><input checked="" type="radio"/> 2 a 3 veces mes<br><input type="radio"/> 1 vez semana<br><input type="radio"/> 2 a 3 semanas                                                          |
| tostado quemado pescado        | <input type="radio"/> nunca<br><input checked="" type="radio"/> 1 vez mes<br><input type="radio"/> 2 a 3 veces mes<br><input type="radio"/> 1 vez semana<br><input type="radio"/> 2 a 3 semanas                                                          |
| socarrat paella                | <input type="radio"/> nunca<br><input type="radio"/> 1 vez mes<br><input type="radio"/> 2 a 3 veces mes<br><input checked="" type="radio"/> 1 vez semana<br><input type="radio"/> 2 a 3 semanas                                                          |
| grasa o aceite cocinar         | <input type="radio"/> mantequilla<br><input type="radio"/> margarina<br><input checked="" type="radio"/> aceite oliva<br><input type="radio"/> aceite oliva virgen extra<br><input type="radio"/> aceite vegetal<br><input type="radio"/> mezcla aceites |
| grasa aceite aliñar            | <input type="radio"/> mantequilla<br><input type="radio"/> margarina<br><input checked="" type="radio"/> aceite oliva<br><input type="radio"/> aceite oliva virgen extra<br><input type="radio"/> aceite vegetal<br><input type="radio"/> mezcla aceites |
| grasa aceite freir             | <input type="radio"/> mantequilla<br><input type="radio"/> margarina<br><input checked="" type="radio"/> aceite oliva<br><input type="radio"/> aceite oliva virgen extra<br><input type="radio"/> aceite vegetal<br><input type="radio"/> mezcla aceites |
| Ejercicio cuestionario         | <input checked="" type="radio"/> si<br><input type="radio"/> no                                                                                                                                                                                          |
| horas de sueño incluido siesta | [*DATA REMOVED*]                                                                                                                                                                                                                                         |
| minutos siesta                 | [*DATA REMOVED*]                                                                                                                                                                                                                                         |
| horas televisión semana        | [*DATA REMOVED*]                                                                                                                                                                                                                                         |

|                                        |                                                                                                                                                                                                                                                                                                                                                                           |
|----------------------------------------|---------------------------------------------------------------------------------------------------------------------------------------------------------------------------------------------------------------------------------------------------------------------------------------------------------------------------------------------------------------------------|
| actividad trabajo                      | <input type="radio"/> casi siempre sentado<br><input checked="" type="radio"/> sentado 50 por cien<br><input type="radio"/> casi siempre de pie, quieto<br><input type="radio"/> casi siempre levantado caminando y llevando pocas cosas<br><input type="radio"/> casi siempre levantado, caminando y llevado muchas cosas<br><input type="radio"/> trabajo manual pesado |
| tiempo caminar o bici al día           | <input type="radio"/> casi nunca<br><input type="radio"/> menos 20min día<br><input checked="" type="radio"/> 20 a 40 min día<br><input type="radio"/> 40 a 60 min día<br><input type="radio"/> 1h o 1h y media día<br><input type="radio"/> más de 1h y media al día                                                                                                     |
| tiempo tareas casa al día              | <input type="radio"/> menos de 1h día<br><input checked="" type="radio"/> 1 a 2h día<br><input type="radio"/> 3 a 4h día<br><input type="radio"/> 5 a 6h día<br><input type="radio"/> 7 a 8h día<br><input type="radio"/> más de 8h día                                                                                                                                   |
| tiempo libre televisión ordenador leer | <input type="radio"/> menos 1h día<br><input type="radio"/> 1h día<br><input checked="" type="radio"/> 2h día<br><input type="radio"/> 3h día<br><input type="radio"/> 4h día<br><input type="radio"/> 5 a 6h día<br><input type="radio"/> mas 6h día                                                                                                                     |
| tiempo libre ejercicio o deporte       | <input type="radio"/> menos 1h semana<br><input type="radio"/> 1h semana<br><input type="radio"/> 2h semana<br><input checked="" type="radio"/> 3h semana<br><input type="radio"/> 4 a 5h semana<br><input type="radio"/> mas 5h semana                                                                                                                                   |
| como se considera                      | <input type="radio"/> sedentaria<br><input type="radio"/> poco activa<br><input checked="" type="radio"/> moderadamente activa<br><input type="radio"/> bastante activa<br><input type="radio"/> muy activa<br><input type="radio"/> no sabe                                                                                                                              |
| FUR                                    | [*DATA REMOVED*]                                                                                                                                                                                                                                                                                                                                                          |
| Semanas gestación 2T                   | [*DATA REMOVED*]                                                                                                                                                                                                                                                                                                                                                          |
| Días gestación 2T                      | [*DATA REMOVED*]                                                                                                                                                                                                                                                                                                                                                          |
| DBP 2T                                 | [*DATA REMOVED*]                                                                                                                                                                                                                                                                                                                                                          |
| CC 2T                                  | [*DATA REMOVED*]                                                                                                                                                                                                                                                                                                                                                          |
| AC 2T                                  | [*DATA REMOVED*]                                                                                                                                                                                                                                                                                                                                                          |

|                                                   |                                                                                                                                                                                                 |
|---------------------------------------------------|-------------------------------------------------------------------------------------------------------------------------------------------------------------------------------------------------|
| LF 2T                                             | [*DATA REMOVED*]                                                                                                                                                                                |
| PFE 2T (Hadlock)                                  | [*DATA REMOVED*]                                                                                                                                                                                |
| Semanas gestación 3T                              | [*DATA REMOVED*]                                                                                                                                                                                |
| días 3T                                           | [*DATA REMOVED*]                                                                                                                                                                                |
| DBP 3T                                            | [*DATA REMOVED*]                                                                                                                                                                                |
| CC 3T                                             | [*DATA REMOVED*]                                                                                                                                                                                |
| AC 3T                                             | [*DATA REMOVED*]                                                                                                                                                                                |
| LF 3T                                             | [*DATA REMOVED*]                                                                                                                                                                                |
| PFE 3T (Hadlock)                                  | [*DATA REMOVED*]                                                                                                                                                                                |
| Semanas de gestación final                        | [*DATA REMOVED*]                                                                                                                                                                                |
| días gestación final                              | [*DATA REMOVED*]                                                                                                                                                                                |
| Localización placenta                             | <input type="radio"/> anterior<br><input type="radio"/> lateral derecha<br><input type="radio"/> lateral izquierda<br><input checked="" type="radio"/> posterior<br><input type="radio"/> fondo |
| Presentación longitudinal cefálica                | <input type="radio"/> no<br><input checked="" type="radio"/> si                                                                                                                                 |
| Dorso                                             | <input type="radio"/> izquierda anterior<br><input type="radio"/> izquierda posterior<br><input checked="" type="radio"/> derecha anterior<br><input type="radio"/> derecha posterior           |
| diámetro biparietal                               | [*DATA REMOVED*]                                                                                                                                                                                |
| Circunferencia craneal                            | [*DATA REMOVED*]                                                                                                                                                                                |
| Circunferencia abdominal                          | [*DATA REMOVED*]                                                                                                                                                                                |
| Longitud de femur                                 | [*DATA REMOVED*]                                                                                                                                                                                |
| tejido celular subcutáneo a nivel del muslo en mm | [*DATA REMOVED*]                                                                                                                                                                                |
| tejido celular subcutáneo en abdomen en mm        | [*DATA REMOVED*]                                                                                                                                                                                |
| Volumen del muslo en cm3                          | [*DATA REMOVED*]                                                                                                                                                                                |
| Peso fetal estimado según fórmula de Hadlock      | [*DATA REMOVED*]                                                                                                                                                                                |

|                                               |                                                                                                                                                          |
|-----------------------------------------------|----------------------------------------------------------------------------------------------------------------------------------------------------------|
| Percentil                                     | [*DATA REMOVED*]                                                                                                                                         |
| Peso fetal estimado según fórmula de Scioscia | <hr/>                                                                                                                                                    |
| Peso fetal estimado según fórmula de LEE      | <hr/>                                                                                                                                                    |
| Tipo de parto                                 | <input type="radio"/> eutocico<br><input type="radio"/> instrumentado/ventosa<br><input checked="" type="radio"/> cesarea                                |
| fecha de nacimiento                           | [*DATA REMOVED*]                                                                                                                                         |
| Días entre exploración y nacimiento           | [*DATA REMOVED*]                                                                                                                                         |
| Peso RN en g                                  | [*DATA REMOVED*]                                                                                                                                         |
| sexo                                          | <input type="radio"/> mujer<br><input checked="" type="radio"/> hombre                                                                                   |
| Apgar 1 minuto                                | [*DATA REMOVED*]                                                                                                                                         |
| Apgar 5 minutos                               | [*DATA REMOVED*]                                                                                                                                         |
| Apgar 10 minutos                              | <hr/>                                                                                                                                                    |
| antecedente Covid durante gestación           | <input type="radio"/> Yes<br><input checked="" type="radio"/> No                                                                                         |
| Nivel de estudios                             | <input type="radio"/> ninguno<br><input type="radio"/> primarios<br><input type="radio"/> secundarios<br><input checked="" type="radio"/> universitarios |

# Base\_datos\_estimacion\_peso\_fetal

|                                       |                                                                                                                                                                                                                                                                                      |
|---------------------------------------|--------------------------------------------------------------------------------------------------------------------------------------------------------------------------------------------------------------------------------------------------------------------------------------|
| Número de identificación participante | 136                                                                                                                                                                                                                                                                                  |
| CODIGO PARTICIPANTE                   |                                                                                                                                                                                                                                                                                      |
| Edad                                  | [*DATA REMOVED*]                                                                                                                                                                                                                                                                     |
| Gestaciones                           | <input type="radio"/> 1<br><input checked="" type="radio"/> 2<br><input type="radio"/> 3<br><input type="radio"/> mas de 3                                                                                                                                                           |
| partos                                | <input type="radio"/> 0<br><input checked="" type="radio"/> 1<br><input type="radio"/> 2<br><input type="radio"/> 3<br><input type="radio"/> mas de 3                                                                                                                                |
| cesáreas                              | <input checked="" type="radio"/> 0<br><input type="radio"/> 1<br><input type="radio"/> 2<br><input type="radio"/> 3<br><input type="radio"/> mas de 3                                                                                                                                |
| Abortos                               | <input checked="" type="radio"/> 0<br><input type="radio"/> 1<br><input type="radio"/> 2<br><input type="radio"/> 3<br><input type="radio"/> mas de 3                                                                                                                                |
| Tipo de gestacion                     | <input checked="" type="radio"/> espontanea<br><input type="radio"/> IAC inseminación artificial conyuge<br><input type="radio"/> IAD inseminación artificial donante<br><input type="radio"/> FIV Fecundación in Vitro<br><input type="radio"/> Ovodon FIV con donación de ovocitos |
| peso previo a embarazo                | [*DATA REMOVED*]                                                                                                                                                                                                                                                                     |
| Ganancia ponderal embarazo            |                                                                                                                                                                                                                                                                                      |
| Talla madre                           | [*DATA REMOVED*]                                                                                                                                                                                                                                                                     |
| IMC previo embarazo                   | 23.140495867768596                                                                                                                                                                                                                                                                   |
| Patología obstétrica                  | <input checked="" type="radio"/> no<br><input type="radio"/> si                                                                                                                                                                                                                      |
| Diabetes pregestacional               | <input checked="" type="radio"/> no<br><input type="radio"/> si                                                                                                                                                                                                                      |
| Diabetes gestacional                  | <input checked="" type="radio"/> no<br><input type="radio"/> si                                                                                                                                                                                                                      |

|                                            |                                                                                                                                                                                      |
|--------------------------------------------|--------------------------------------------------------------------------------------------------------------------------------------------------------------------------------------|
| Diabetes gestacional con insulina          | <input checked="" type="radio"/> no<br><input type="radio"/> si                                                                                                                      |
| Diabetes gestacional con dieta y ejercicio | <input checked="" type="radio"/> no<br><input type="radio"/> si                                                                                                                      |
| Percentil fetos previos                    | <input type="radio"/> Nada<br><input type="radio"/> percentil menor de 10<br><input type="radio"/> percentil entre 10 y 90<br><input checked="" type="radio"/> percentil mayor de 90 |
| Exfumadora                                 | <input checked="" type="radio"/> Nada<br><input type="radio"/> menos de 5 años<br><input type="radio"/> 5 a 10 años<br><input type="radio"/> mayor o igual a 10 años                 |
| Hábito tabáquico                           | <input checked="" type="radio"/> no<br><input type="radio"/> si                                                                                                                      |
| fumadora                                   | [*DATA REMOVED*]                                                                                                                                                                     |
| Consumo otros tóxicos                      | <input checked="" type="radio"/> no<br><input type="radio"/> si                                                                                                                      |
| Hb 1T                                      | [*DATA REMOVED*]                                                                                                                                                                     |
| Htc 1T                                     | [*DATA REMOVED*]                                                                                                                                                                     |
| Hb 2T                                      | [*DATA REMOVED*]                                                                                                                                                                     |
| HTC 2T                                     | [*DATA REMOVED*]                                                                                                                                                                     |
| Hb 3T                                      | [*DATA REMOVED*]                                                                                                                                                                     |
| HTC 3T                                     | [*DATA REMOVED*]                                                                                                                                                                     |
| Suplemento FE oral                         | <input type="radio"/> si<br><input checked="" type="radio"/> no                                                                                                                      |
| Suplemento fe iv                           | <input type="radio"/> si<br><input checked="" type="radio"/> no                                                                                                                      |
| Transfusión                                | <input checked="" type="radio"/> no<br><input type="radio"/> si                                                                                                                      |
| Solicitada Vit D                           | <input checked="" type="radio"/> no<br><input type="radio"/> si                                                                                                                      |
| Deficit vit D                              | <input type="radio"/> no<br><input type="radio"/> si                                                                                                                                 |
| Suplemento vit D                           | <input type="radio"/> si<br><input type="radio"/> no                                                                                                                                 |

|                       |                                                                                                                                                                                                                                                                                                                                                                                                              |
|-----------------------|--------------------------------------------------------------------------------------------------------------------------------------------------------------------------------------------------------------------------------------------------------------------------------------------------------------------------------------------------------------------------------------------------------------|
| Dieta, cuestionario   | <input checked="" type="radio"/> si<br><input type="radio"/> no                                                                                                                                                                                                                                                                                                                                              |
| Leche entera          | <input checked="" type="radio"/> Nunca o menos 1 vez al mes<br><input type="radio"/> 1 a 3 veces mes<br><input type="radio"/> 1 vez semana<br><input type="radio"/> 2 a 4 veces semana<br><input type="radio"/> 5 a 6 veces semana<br><input type="radio"/> 1 vez al día<br><input type="radio"/> 2 a 3 veces al día<br><input type="radio"/> 5 a 6 veces al día<br><input type="radio"/> más 6 veces al día |
| Leche semidesnatada   | <input checked="" type="radio"/> Nunca o menos 1 vez al mes<br><input type="radio"/> 1 a 3 veces mes<br><input type="radio"/> 1 vez semana<br><input type="radio"/> 2 a 4 veces semana<br><input type="radio"/> 5 a 6 veces semana<br><input type="radio"/> 1 vez al día<br><input type="radio"/> 2 a 3 veces al día<br><input type="radio"/> 5 a 6 veces al día<br><input type="radio"/> mas 6 veces al día |
| Leche desnatada       | <input type="radio"/> Nunca o menos 1 vez al mes<br><input type="radio"/> 1 a 3 veces mes<br><input type="radio"/> 1 vez semana<br><input type="radio"/> 2 a 4 veces semana<br><input type="radio"/> 5 a 6 veces semana<br><input checked="" type="radio"/> 1 vez al día<br><input type="radio"/> 2 a 3 veces al día<br><input type="radio"/> 5 a 6 veces al día<br><input type="radio"/> más 6 veces al día |
| Leche condensada      | <input type="radio"/> Nunca o menos 1 vez al mes<br><input checked="" type="radio"/> 1 a 3 veces mes<br><input type="radio"/> 1 vez semana<br><input type="radio"/> 2 a 4 veces semana<br><input type="radio"/> 5 a 6 veces semana<br><input type="radio"/> 1 vez al día<br><input type="radio"/> 2 a 3 veces al día<br><input type="radio"/> 5 a 6 veces al día<br><input type="radio"/> más 6 veces al día |
| nata o crema de leche | <input type="radio"/> Nunca o menos 1 vez al mes<br><input checked="" type="radio"/> 1 a 3 veces mes<br><input type="radio"/> 1 vez semana<br><input type="radio"/> 2 a 4 veces semana<br><input type="radio"/> 5 a 6 veces semana<br><input type="radio"/> 1 vez al día<br><input type="radio"/> 2 a 3 veces al día<br><input type="radio"/> 5 a 6 veces al día<br><input type="radio"/> más 6 veces al día |

|                                             |                                                                                                                                                                                                                                                                                                                                                                                                              |
|---------------------------------------------|--------------------------------------------------------------------------------------------------------------------------------------------------------------------------------------------------------------------------------------------------------------------------------------------------------------------------------------------------------------------------------------------------------------|
| Yogurt Entero                               | <input checked="" type="radio"/> Nunca o menos 1 vez al mes<br><input type="radio"/> 1 a 3 veces mes<br><input type="radio"/> 1 vez semana<br><input type="radio"/> 2 a 4 veces semana<br><input type="radio"/> 5 a 6 veces semana<br><input type="radio"/> 1 vez al día<br><input type="radio"/> 2 a 3 veces al día<br><input type="radio"/> 5 a 6 veces al día<br><input type="radio"/> más 6 veces al día |
| Yogurt desnatado                            | <input type="radio"/> Nunca o menos 1 vez al mes<br><input type="radio"/> 1 a 3 veces mes<br><input type="radio"/> 1 vez semana<br><input type="radio"/> 2 a 4 veces semana<br><input type="radio"/> 5 a 6 veces semana<br><input checked="" type="radio"/> 1 vez al día<br><input type="radio"/> 2 a 3 veces al día<br><input type="radio"/> 5 a 6 veces al día<br><input type="radio"/> más 6 veces al día |
| 100g requesón o queso blando o queso fresco | <input checked="" type="radio"/> Nunca o menos 1 vez al mes<br><input type="radio"/> 1 a 3 veces mes<br><input type="radio"/> 1 vez semana<br><input type="radio"/> 2 a 4 veces semana<br><input type="radio"/> 5 a 6 veces semana<br><input type="radio"/> 1 vez al día<br><input type="radio"/> 2 a 3 veces al día<br><input type="radio"/> 5 a 6 veces al día<br><input type="radio"/> más 6 veces al día |
| queso curado o semicurado o cremoso         | <input type="radio"/> Nunca o menos 1 vez al mes<br><input type="radio"/> 1 a 3 veces mes<br><input type="radio"/> 1 vez semana<br><input type="radio"/> 2 a 4 veces semana<br><input type="radio"/> 5 a 6 veces semana<br><input type="radio"/> 1 vez al día<br><input type="radio"/> 2 a 3 veces al día<br><input type="radio"/> 5 a 6 veces al día<br><input type="radio"/> más 6 veces al día            |
| natillas flan pudding                       | <input type="radio"/> Nunca o menos 1 vez al mes<br><input checked="" type="radio"/> 1 a 3 veces mes<br><input type="radio"/> 1 vez semana<br><input type="radio"/> 2 a 4 veces semana<br><input type="radio"/> 5 a 6 veces semana<br><input type="radio"/> 1 vez al día<br><input type="radio"/> 2 a 3 veces al día<br><input type="radio"/> 5 a 6 veces al día<br><input type="radio"/> más 6 veces al día |
| Helado                                      | <input type="radio"/> Nunca o menos 1 vez al mes<br><input type="radio"/> 1 a 3 veces mes<br><input type="radio"/> 1 vez semana<br><input type="radio"/> 2 a 4 veces semana<br><input type="radio"/> 5 a 6 veces semana<br><input checked="" type="radio"/> 1 vez al día<br><input type="radio"/> 2 a 3 veces al día<br><input type="radio"/> 5 a 6 veces al día<br><input type="radio"/> más 6 veces al día |



|                                      |                                                                                                                                                                                                                                                                                                                                                                                                              |
|--------------------------------------|--------------------------------------------------------------------------------------------------------------------------------------------------------------------------------------------------------------------------------------------------------------------------------------------------------------------------------------------------------------------------------------------------------------|
| huevo                                | <input checked="" type="radio"/> Nunca o menos 1 vez al mes<br><input type="radio"/> 1 a 3 veces mes<br><input type="radio"/> 1 vez semana<br><input type="radio"/> 2 a 4 veces semana<br><input type="radio"/> 5 a 6 veces semana<br><input type="radio"/> 1 vez al día<br><input type="radio"/> 2 a 3 veces al día<br><input type="radio"/> 5 a 6 veces al día<br><input type="radio"/> más 6 veces al día |
| Pollo con piel                       | <input checked="" type="radio"/> Nunca o menos 1 vez al mes<br><input type="radio"/> 1 a 3 veces mes<br><input type="radio"/> 1 vez semana<br><input type="radio"/> 2 a 4 veces semana<br><input type="radio"/> 5 a 6 veces semana<br><input type="radio"/> 1 vez al día<br><input type="radio"/> 2 a 3 veces al día<br><input type="radio"/> 5 a 6 veces al día<br><input type="radio"/> más 6 veces al día |
| pollo sin piel                       | <input type="radio"/> Nunca o menos 1 vez al mes<br><input type="radio"/> 1 a 3 veces mes<br><input type="radio"/> 1 vez semana<br><input type="radio"/> 2 a 4 veces semana<br><input checked="" type="radio"/> 5 a 6 veces semana<br><input type="radio"/> 1 vez al día<br><input type="radio"/> 2 a 3 veces al día<br><input type="radio"/> 5 a 6 veces al día<br><input type="radio"/> más 6 veces al día |
| Ternera o cerdo o cordero            | <input type="radio"/> Nunca o menos 1 vez al mes<br><input type="radio"/> 1 a 3 veces mes<br><input checked="" type="radio"/> 1 vez semana<br><input type="radio"/> 2 a 4 veces semana<br><input type="radio"/> 5 a 6 veces semana<br><input type="radio"/> 1 vez al día<br><input type="radio"/> 2 a 3 veces al día<br><input type="radio"/> 5 a 6 veces al día<br><input type="radio"/> más 6 veces al día |
| carne caza: Conejo o codorniz o pato | <input type="radio"/> Nunca o menos 1 vez al mes<br><input type="radio"/> 1 a 3 veces mes<br><input checked="" type="radio"/> 1 vez semana<br><input type="radio"/> 2 a 4 veces semana<br><input type="radio"/> 5 a 6 veces semana<br><input type="radio"/> 1 vez al día<br><input type="radio"/> 2 a 3 veces al día<br><input type="radio"/> 5 a 6 veces al día<br><input type="radio"/> más 6 veces al día |
| Hígado de ternera o cerdo o pollo    | <input checked="" type="radio"/> Nunca o menos 1 vez al mes<br><input type="radio"/> 1 a 3 veces mes<br><input type="radio"/> 1 vez semana<br><input type="radio"/> 2 a 4 veces semana<br><input type="radio"/> 5 a 6 veces semana<br><input type="radio"/> 1 vez al día<br><input type="radio"/> 2 a 3 veces al día<br><input type="radio"/> 5 a 6 veces al día<br><input type="radio"/> más 6 veces al día |

|                     |                                                                                                                                                                                                                                                                                                                                                                                                              |
|---------------------|--------------------------------------------------------------------------------------------------------------------------------------------------------------------------------------------------------------------------------------------------------------------------------------------------------------------------------------------------------------------------------------------------------------|
| Vísceras            | <input checked="" type="radio"/> Nunca o menos 1 vez al mes<br><input type="radio"/> 1 a 3 veces mes<br><input type="radio"/> 1 vez semana<br><input type="radio"/> 2 a 4 veces semana<br><input type="radio"/> 5 a 6 veces semana<br><input type="radio"/> 1 vez al día<br><input type="radio"/> 2 a 3 veces al día<br><input type="radio"/> 5 a 6 veces al día<br><input type="radio"/> más 6 veces al día |
| Embutido            | <input checked="" type="radio"/> Nunca o menos 1 vez al mes<br><input type="radio"/> 1 a 3 veces mes<br><input type="radio"/> 1 vez semana<br><input type="radio"/> 2 a 4 veces semana<br><input type="radio"/> 5 a 6 veces semana<br><input type="radio"/> 1 vez al día<br><input type="radio"/> 2 a 3 veces al día<br><input type="radio"/> 5 a 6 veces al día<br><input type="radio"/> más 6 veces al día |
| Salchicha o similar | <input type="radio"/> Nunca o menos 1 vez al mes<br><input type="radio"/> 1 a 3 veces mes<br><input checked="" type="radio"/> 1 vez semana<br><input type="radio"/> 2 a 4 veces semana<br><input type="radio"/> 5 a 6 veces semana<br><input type="radio"/> 1 vez al día<br><input type="radio"/> 2 a 3 veces al día<br><input type="radio"/> 5 a 6 veces al día<br><input type="radio"/> más 6 veces al día |
| Pate o foiegras     | <input checked="" type="radio"/> Nunca o menos 1 vez al mes<br><input type="radio"/> 1 a 3 veces mes<br><input type="radio"/> 1 vez semana<br><input type="radio"/> 2 a 4 veces semana<br><input type="radio"/> 5 a 6 veces semana<br><input type="radio"/> 1 vez al día<br><input type="radio"/> 2 a 3 veces al día<br><input type="radio"/> 5 a 6 veces al día<br><input type="radio"/> más 6 veces al día |
| Hamburguesa         | <input type="radio"/> Nunca o menos 1 vez al mes<br><input type="radio"/> 1 a 3 veces mes<br><input checked="" type="radio"/> 1 vez semana<br><input type="radio"/> 2 a 4 veces semana<br><input type="radio"/> 5 a 6 veces semana<br><input type="radio"/> 1 vez al día<br><input type="radio"/> 2 a 3 veces al día<br><input type="radio"/> 5 a 6 veces al día<br><input type="radio"/> más 6 veces al día |
| tocino o bacon      | <input checked="" type="radio"/> Nunca o menos 1 vez al mes<br><input type="radio"/> 1 a 3 veces mes<br><input type="radio"/> 1 vez semana<br><input type="radio"/> 2 a 4 veces semana<br><input type="radio"/> 5 a 6 veces semana<br><input type="radio"/> 1 vez al día<br><input type="radio"/> 2 a 3 veces al día<br><input type="radio"/> 5 a 6 veces al día<br><input type="radio"/> más 6 veces al día |

---

Pescado frito

- ☐ Nunca o menos 1 vez al mes  
☐ 1 a 3 veces mes  
☒ 1 vez semana  
☐ 2 a 4 veces semana  
☐ 5 a 6 veces semana  
☐ 1 vez al día  
☐ 2 a 3 veces al día  
☐ 5 a 6 veces al día  
☐ más 6 veces al día

---

pescado hervido blanco

- ☐ Nunca o menos 1 vez al mes  
☐ 1 a 3 veces mes  
☒ 1 vez semana  
☐ 2 a 4 veces semana  
☐ 5 a 6 veces semana  
☐ 1 vez al día  
☐ 2 a 3 veces al día  
☐ 5 a 6 veces al día  
☐ más 6 veces al día

---

pescado hervido azul

- ☒ Nunca o menos 1 vez al mes  
☐ 1 a 3 veces mes  
☐ 1 vez semana  
☐ 2 a 4 veces semana  
☐ 5 a 6 veces semana  
☐ 1 vez al día  
☐ 2 a 3 veces al día  
☐ 5 a 6 veces al día  
☐ más 6 veces al día

---

otros pescado azul

- ☒ Nunca o menos 1 vez al mes  
☐ 1 a 3 veces mes  
☐ 1 vez semana  
☐ 2 a 4 veces semana  
☐ 5 a 6 veces semana  
☐ 1 vez al día  
☐ 2 a 3 veces al día  
☐ 5 a 6 veces al día  
☐ más 6 veces al día

---

atun conserva

- ☒ Nunca o menos 1 vez al mes  
☐ 1 a 3 veces mes  
☐ 1 vez semana  
☐ 2 a 4 veces semana  
☐ 5 a 6 veces semana  
☐ 1 vez al día  
☐ 2 a 3 veces al día  
☐ 5 a 6 veces al día  
☐ más 6 veces al día

---

sardina conserva

- ☒ Nunca o menos 1 vez al mes  
☐ 1 a 3 veces mes  
☐ 1 vez semana  
☐ 2 a 4 veces semana  
☐ 5 a 6 veces semana  
☐ 1 vez al día  
☐ 2 a 3 veces al día  
☐ 5 a 6 veces al día  
☐ más 6 veces al día

|                                         |                                                                                                                                                                                                                                                                                                                                                                                                              |
|-----------------------------------------|--------------------------------------------------------------------------------------------------------------------------------------------------------------------------------------------------------------------------------------------------------------------------------------------------------------------------------------------------------------------------------------------------------------|
| pescado ahumado                         | <input checked="" type="radio"/> Nunca o menos 1 vez al mes<br><input type="radio"/> 1 a 3 veces mes<br><input type="radio"/> 1 vez semana<br><input type="radio"/> 2 a 4 veces semana<br><input type="radio"/> 5 a 6 veces semana<br><input type="radio"/> 1 vez al día<br><input type="radio"/> 2 a 3 veces al día<br><input type="radio"/> 5 a 6 veces al día<br><input type="radio"/> más 6 veces al día |
| almejas o mejillones o ostras unos 100g | <input checked="" type="radio"/> Nunca o menos 1 vez al mes<br><input type="radio"/> 1 a 3 veces mes<br><input type="radio"/> 1 vez semana<br><input type="radio"/> 2 a 4 veces semana<br><input type="radio"/> 5 a 6 veces semana<br><input type="radio"/> 1 vez al día<br><input type="radio"/> 2 a 3 veces al día<br><input type="radio"/> 5 a 6 veces al día<br><input type="radio"/> más 6 veces al día |
| calamar o chipiron o sepia unos 100g    | <input checked="" type="radio"/> Nunca o menos 1 vez al mes<br><input type="radio"/> 1 a 3 veces mes<br><input type="radio"/> 1 vez semana<br><input type="radio"/> 2 a 4 veces semana<br><input type="radio"/> 5 a 6 veces semana<br><input type="radio"/> 1 vez al día<br><input type="radio"/> 2 a 3 veces al día<br><input type="radio"/> 5 a 6 veces al día<br><input type="radio"/> más 6 veces al día |
| marisco unos 100g                       | <input checked="" type="radio"/> Nunca o menos 1 vez al mes<br><input type="radio"/> 1 a 3 veces mes<br><input type="radio"/> 1 vez semana<br><input type="radio"/> 2 a 4 veces semana<br><input type="radio"/> 5 a 6 veces semana<br><input type="radio"/> 1 vez al día<br><input type="radio"/> 2 a 3 veces al día<br><input type="radio"/> 5 a 6 veces al día<br><input type="radio"/> más 6 veces al día |
| Espinacas o acelgas cocinadas           | <input type="radio"/> Nunca o menos 1 vez al mes<br><input type="radio"/> 1 a 3 veces mes<br><input checked="" type="radio"/> 1 vez semana<br><input type="radio"/> 2 a 4 veces semana<br><input type="radio"/> 5 a 6 veces semana<br><input type="radio"/> 1 vez al día<br><input type="radio"/> 2 a 3 veces al día<br><input type="radio"/> 5 a 6 veces al día<br><input type="radio"/> más 6 veces al día |
| Col o coliflor o brocoli cocinado       | <input type="radio"/> Nunca o menos 1 vez al mes<br><input checked="" type="radio"/> 1 a 3 veces mes<br><input type="radio"/> 1 vez semana<br><input type="radio"/> 2 a 4 veces semana<br><input type="radio"/> 5 a 6 veces semana<br><input type="radio"/> 1 vez al día<br><input type="radio"/> 2 a 3 veces al día<br><input type="radio"/> 5 a 6 veces al día<br><input type="radio"/> más 6 veces al día |

---

Lechuga o endivia o escarola

- ☐ Nunca o menos 1 vez al mes  
☐ 1 a 3 veces mes  
☐ 1 vez semana  
☒ 2 a 4 veces semana  
☐ 5 a 6 veces semana  
☐ 1 vez al día  
☐ 2 a 3 veces al día  
☐ 5 a 6 veces al día  
☐ más 6 veces al día

---

tomate ensalada

- ☐ Nunca o menos 1 vez al mes  
☐ 1 a 3 veces mes  
☐ 1 vez semana  
☒ 2 a 4 veces semana  
☐ 5 a 6 veces semana  
☐ 1 vez al día  
☐ 2 a 3 veces al día  
☐ 5 a 6 veces al día  
☐ más 6 veces al día

---

cebolla

- ☐ Nunca o menos 1 vez al mes  
☐ 1 a 3 veces mes  
☐ 1 vez semana  
☒ 2 a 4 veces semana  
☐ 5 a 6 veces semana  
☐ 1 vez al día  
☐ 2 a 3 veces al día  
☐ 5 a 6 veces al día  
☐ más 6 veces al día

---

Zanahoria o calabaza

- ☐ Nunca o menos 1 vez al mes  
☐ 1 a 3 veces mes  
☒ 1 vez semana  
☐ 2 a 4 veces semana  
☐ 5 a 6 veces semana  
☐ 1 vez al día  
☐ 2 a 3 veces al día  
☐ 5 a 6 veces al día  
☐ más 6 veces al día

---

Judías verdes

- ☐ Nunca o menos 1 vez al mes  
☐ 1 a 3 veces mes  
☒ 1 vez semana  
☐ 2 a 4 veces semana  
☐ 5 a 6 veces semana  
☐ 1 vez al día  
☐ 2 a 3 veces al día  
☐ 5 a 6 veces al día  
☐ más 6 veces al día

---

Berenjena o calabacin o pepino

- ☐ Nunca o menos 1 vez al mes  
☐ 1 a 3 veces mes  
☐ 1 vez semana  
☐ 2 a 4 veces semana  
☐ 5 a 6 veces semana  
☐ 1 vez al día  
☐ 2 a 3 veces al día  
☐ 5 a 6 veces al día  
☐ más 6 veces al día

|                       |                                                                                                                                                                                                                                                                                                                                                                                                              |
|-----------------------|--------------------------------------------------------------------------------------------------------------------------------------------------------------------------------------------------------------------------------------------------------------------------------------------------------------------------------------------------------------------------------------------------------------|
| pimiento              | <input type="radio"/> Nunca o menos 1 vez al mes<br><input type="radio"/> 1 a 3 veces mes<br><input checked="" type="radio"/> 1 vez semana<br><input type="radio"/> 2 a 4 veces semana<br><input type="radio"/> 5 a 6 veces semana<br><input type="radio"/> 1 vez al día<br><input type="radio"/> 2 a 3 veces al día<br><input type="radio"/> 5 a 6 veces al día<br><input type="radio"/> más 6 veces al día |
| alcachofa             | <input checked="" type="radio"/> Nunca o menos 1 vez al mes<br><input type="radio"/> 1 a 3 veces mes<br><input type="radio"/> 1 vez semana<br><input type="radio"/> 2 a 4 veces semana<br><input type="radio"/> 5 a 6 veces semana<br><input type="radio"/> 1 vez al día<br><input type="radio"/> 2 a 3 veces al día<br><input type="radio"/> 5 a 6 veces al día<br><input type="radio"/> más 6 veces al día |
| espárragos            | <input checked="" type="radio"/> Nunca o menos 1 vez al mes<br><input type="radio"/> 1 a 3 veces mes<br><input type="radio"/> 1 vez semana<br><input type="radio"/> 2 a 4 veces semana<br><input type="radio"/> 5 a 6 veces semana<br><input type="radio"/> 1 vez al día<br><input type="radio"/> 2 a 3 veces al día<br><input type="radio"/> 5 a 6 veces al día<br><input type="radio"/> más 6 veces al día |
| maíz hervido          | <input checked="" type="radio"/> Nunca o menos 1 vez al mes<br><input type="radio"/> 1 a 3 veces mes<br><input type="radio"/> 1 vez semana<br><input type="radio"/> 2 a 4 veces semana<br><input type="radio"/> 5 a 6 veces semana<br><input type="radio"/> 1 vez al día<br><input type="radio"/> 2 a 3 veces al día<br><input type="radio"/> 5 a 6 veces al día<br><input type="radio"/> más 6 veces al día |
| legumbres             | <input type="radio"/> Nunca o menos 1 vez al mes<br><input type="radio"/> 1 a 3 veces mes<br><input type="radio"/> 1 vez semana<br><input checked="" type="radio"/> 2 a 4 veces semana<br><input type="radio"/> 5 a 6 veces semana<br><input type="radio"/> 1 vez al día<br><input type="radio"/> 2 a 3 veces al día<br><input type="radio"/> 5 a 6 veces al día<br><input type="radio"/> más 6 veces al día |
| naranjas o mandarinas | <input type="radio"/> Nunca o menos 1 vez al mes<br><input type="radio"/> 1 a 3 veces mes<br><input type="radio"/> 1 vez semana<br><input checked="" type="radio"/> 2 a 4 veces semana<br><input type="radio"/> 5 a 6 veces semana<br><input type="radio"/> 1 vez al día<br><input type="radio"/> 2 a 3 veces al día<br><input type="radio"/> 5 a 6 veces al día<br><input type="radio"/> más 6 veces al día |

---

zum natural fruta

- ☐ Nunca o menos 1 vez al mes  
☐ 1 a 3 veces mes  
☒ 1 vez semana  
☐ 2 a 4 veces semana  
☐ 5 a 6 veces semana  
☐ 1 vez al día  
☐ 2 a 3 veces al día  
☐ 5 a 6 veces al día  
☐ más 6 veces al día

---

platano

- ☐ Nunca o menos 1 vez al mes  
☐ 1 a 3 veces mes  
☐ 1 vez semana  
☒ 2 a 4 veces semana  
☐ 5 a 6 veces semana  
☐ 1 vez al día  
☐ 2 a 3 veces al día  
☐ 5 a 6 veces al día  
☐ más 6 veces al día

---

manzana o pera

- ☐ Nunca o menos 1 vez al mes  
☐ 1 a 3 veces mes  
☐ 1 vez semana  
☒ 2 a 4 veces semana  
☐ 5 a 6 veces semana  
☐ 1 vez al día  
☐ 2 a 3 veces al día  
☐ 5 a 6 veces al día  
☐ más 6 veces al día

---

melocotón o nectarina

- ☐ Nunca o menos 1 vez al mes  
☐ 1 a 3 veces mes  
☐ 1 vez semana  
☒ 2 a 4 veces semana  
☐ 5 a 6 veces semana  
☐ 1 vez al día  
☐ 2 a 3 veces al día  
☐ 5 a 6 veces al día  
☐ más 6 veces al día

---

sandia o melon

- ☒ Nunca o menos 1 vez al mes  
☐ 1 a 3 veces mes  
☐ 1 vez semana  
☐ 2 a 4 veces semana  
☐ 5 a 6 veces semana  
☐ 1 vez al día  
☐ 2 a 3 veces al día  
☐ 5 a 6 veces al día  
☐ más 6 veces al día

---

uva

- ☒ Nunca o menos 1 vez al mes  
☐ 1 a 3 veces mes  
☐ 1 vez semana  
☐ 2 a 4 veces semana  
☐ 5 a 6 veces semana  
☐ 1 vez al día  
☐ 2 a 3 veces al día  
☐ 5 a 6 veces al día  
☐ más 6 veces al día

|                 |                                                                                                                                                                                                                                                                                                                                                                                                              |
|-----------------|--------------------------------------------------------------------------------------------------------------------------------------------------------------------------------------------------------------------------------------------------------------------------------------------------------------------------------------------------------------------------------------------------------------|
| bruna o ciruela | <input checked="" type="radio"/> Nunca o menos 1 vez al mes<br><input type="radio"/> 1 a 3 veces mes<br><input type="radio"/> 1 vez semana<br><input type="radio"/> 2 a 4 veces semana<br><input type="radio"/> 5 a 6 veces semana<br><input type="radio"/> 1 vez al día<br><input type="radio"/> 2 a 3 veces al día<br><input type="radio"/> 5 a 6 veces al día<br><input type="radio"/> más 6 veces al día |
| kiwi            | <input checked="" type="radio"/> Nunca o menos 1 vez al mes<br><input type="radio"/> 1 a 3 veces mes<br><input type="radio"/> 1 vez semana<br><input type="radio"/> 2 a 4 veces semana<br><input type="radio"/> 5 a 6 veces semana<br><input type="radio"/> 1 vez al día<br><input type="radio"/> 2 a 3 veces al día<br><input type="radio"/> 5 a 6 veces al día<br><input type="radio"/> más 6 veces al día |
| aceituna        | <input checked="" type="radio"/> Nunca o menos 1 vez al mes<br><input type="radio"/> 1 a 3 veces mes<br><input type="radio"/> 1 vez semana<br><input type="radio"/> 2 a 4 veces semana<br><input type="radio"/> 5 a 6 veces semana<br><input type="radio"/> 1 vez al día<br><input type="radio"/> 2 a 3 veces al día<br><input type="radio"/> 5 a 6 veces al día<br><input type="radio"/> más 6 veces al día |
| frutos secos    | <input type="radio"/> Nunca o menos 1 vez al mes<br><input type="radio"/> 1 a 3 veces mes<br><input checked="" type="radio"/> 1 vez semana<br><input type="radio"/> 2 a 4 veces semana<br><input type="radio"/> 5 a 6 veces semana<br><input type="radio"/> 1 vez al día<br><input type="radio"/> 2 a 3 veces al día<br><input type="radio"/> 5 a 6 veces al día<br><input type="radio"/> más 6 veces al día |
| pan blanco      | <input type="radio"/> Nunca o menos 1 vez al mes<br><input type="radio"/> 1 a 3 veces mes<br><input checked="" type="radio"/> 1 vez semana<br><input type="radio"/> 2 a 4 veces semana<br><input type="radio"/> 5 a 6 veces semana<br><input type="radio"/> 1 vez al día<br><input type="radio"/> 2 a 3 veces al día<br><input type="radio"/> 5 a 6 veces al día<br><input type="radio"/> más 6 veces al día |
| pan integral    | <input type="radio"/> Nunca o menos 1 vez al mes<br><input checked="" type="radio"/> 1 a 3 veces mes<br><input type="radio"/> 1 vez semana<br><input type="radio"/> 2 a 4 veces semana<br><input type="radio"/> 5 a 6 veces semana<br><input type="radio"/> 1 vez al día<br><input type="radio"/> 2 a 3 veces al día<br><input type="radio"/> 5 a 6 veces al día<br><input type="radio"/> más 6 veces al día |



---

cereales desayuno

- ☐ Nunca o menos 1 vez al mes  
☐ 1 a 3 veces mes  
☒ 1 vez semana  
☐ 2 a 4 veces semana  
☐ 5 a 6 veces semana  
☐ 1 vez al día  
☐ 2 a 3 veces al día  
☐ 5 a 6 veces al día  
☐ más 6 veces al día

---

patatas fritas

- ☐ Nunca o menos 1 vez al mes  
☒ 1 a 3 veces mes  
☐ 1 vez semana  
☐ 2 a 4 veces semana  
☐ 5 a 6 veces semana  
☐ 1 vez al día  
☐ 2 a 3 veces al día  
☐ 5 a 6 veces al día  
☐ más 6 veces al día

---

patatas cocidas o asadas

- ☐ Nunca o menos 1 vez al mes  
☐ 1 a 3 veces mes  
☐ 1 vez semana  
☒ 2 a 4 veces semana  
☐ 5 a 6 veces semana  
☐ 1 vez al día  
☐ 2 a 3 veces al día  
☐ 5 a 6 veces al día  
☐ más 6 veces al día

---

bolsa papas

- ☐ Nunca o menos 1 vez al mes  
☒ 1 a 3 veces mes  
☐ 1 vez semana  
☐ 2 a 4 veces semana  
☐ 5 a 6 veces semana  
☐ 1 vez al día  
☐ 2 a 3 veces al día  
☐ 5 a 6 veces al día  
☐ más 6 veces al día

---

arroz cocinado

- ☐ Nunca o menos 1 vez al mes  
☐ 1 a 3 veces mes  
☐ 1 vez semana  
☒ 2 a 4 veces semana  
☐ 5 a 6 veces semana  
☐ 1 vez al día  
☐ 2 a 3 veces al día  
☐ 5 a 6 veces al día  
☐ más 6 veces al día

---

pasta

- ☐ Nunca o menos 1 vez al mes  
☐ 1 a 3 veces mes  
☐ 1 vez semana  
☒ 2 a 4 veces semana  
☐ 5 a 6 veces semana  
☐ 1 vez al día  
☐ 2 a 3 veces al día  
☐ 5 a 6 veces al día  
☐ más 6 veces al día

|                     |                                                                                                                                                                                                                                                                                                                                                                                                              |
|---------------------|--------------------------------------------------------------------------------------------------------------------------------------------------------------------------------------------------------------------------------------------------------------------------------------------------------------------------------------------------------------------------------------------------------------|
| pizza               | <input type="radio"/> Nunca o menos 1 vez al mes<br><input type="radio"/> 1 a 3 veces mes<br><input checked="" type="radio"/> 1 vez semana<br><input type="radio"/> 2 a 4 veces semana<br><input type="radio"/> 5 a 6 veces semana<br><input type="radio"/> 1 vez al día<br><input type="radio"/> 2 a 3 veces al día<br><input type="radio"/> 5 a 6 veces al día<br><input type="radio"/> más 6 veces al día |
| aceite oliva        | <input type="radio"/> Nunca o menos 1 vez al mes<br><input checked="" type="radio"/> 1 a 3 veces mes<br><input type="radio"/> 1 vez semana<br><input type="radio"/> 2 a 4 veces semana<br><input type="radio"/> 5 a 6 veces semana<br><input type="radio"/> 1 vez al día<br><input type="radio"/> 2 a 3 veces al día<br><input type="radio"/> 5 a 6 veces al día<br><input type="radio"/> más 6 veces al día |
| otros aceites       | <input checked="" type="radio"/> Nunca o menos 1 vez al mes<br><input type="radio"/> 1 a 3 veces mes<br><input type="radio"/> 1 vez semana<br><input type="radio"/> 2 a 4 veces semana<br><input type="radio"/> 5 a 6 veces semana<br><input type="radio"/> 1 vez al día<br><input type="radio"/> 2 a 3 veces al día<br><input type="radio"/> 5 a 6 veces al día<br><input type="radio"/> más 6 veces al día |
| margarina           | <input type="radio"/> Nunca o menos 1 vez al mes<br><input type="radio"/> 1 a 3 veces mes<br><input checked="" type="radio"/> 1 vez semana<br><input type="radio"/> 2 a 4 veces semana<br><input type="radio"/> 5 a 6 veces semana<br><input type="radio"/> 1 vez al día<br><input type="radio"/> 2 a 3 veces al día<br><input type="radio"/> 5 a 6 veces al día<br><input type="radio"/> más 6 veces al día |
| mantequilla         | <input checked="" type="radio"/> Nunca o menos 1 vez al mes<br><input type="radio"/> 1 a 3 veces mes<br><input type="radio"/> 1 vez semana<br><input type="radio"/> 2 a 4 veces semana<br><input type="radio"/> 5 a 6 veces semana<br><input type="radio"/> 1 vez al día<br><input type="radio"/> 2 a 3 veces al día<br><input type="radio"/> 5 a 6 veces al día<br><input type="radio"/> más 6 veces al día |
| galletas tipo maria | <input type="radio"/> Nunca o menos 1 vez al mes<br><input type="radio"/> 1 a 3 veces mes<br><input type="radio"/> 1 vez semana<br><input checked="" type="radio"/> 2 a 4 veces semana<br><input type="radio"/> 5 a 6 veces semana<br><input type="radio"/> 1 vez al día<br><input type="radio"/> 2 a 3 veces al día<br><input type="radio"/> 5 a 6 veces al día<br><input type="radio"/> más 6 veces al día |

|                           |                                                                                                                                                                                                                                                                                                                                                                                                              |
|---------------------------|--------------------------------------------------------------------------------------------------------------------------------------------------------------------------------------------------------------------------------------------------------------------------------------------------------------------------------------------------------------------------------------------------------------|
| galletas chocolate        | <input type="radio"/> Nunca o menos 1 vez al mes<br><input type="radio"/> 1 a 3 veces mes<br><input type="radio"/> 1 vez semana<br><input checked="" type="radio"/> 2 a 4 veces semana<br><input type="radio"/> 5 a 6 veces semana<br><input type="radio"/> 1 vez al día<br><input type="radio"/> 2 a 3 veces al día<br><input type="radio"/> 5 a 6 veces al día<br><input type="radio"/> más 6 veces al día |
| bollieria                 | <input type="radio"/> Nunca o menos 1 vez al mes<br><input type="radio"/> 1 a 3 veces mes<br><input type="radio"/> 1 vez semana<br><input checked="" type="radio"/> 2 a 4 veces semana<br><input type="radio"/> 5 a 6 veces semana<br><input type="radio"/> 1 vez al día<br><input type="radio"/> 2 a 3 veces al día<br><input type="radio"/> 5 a 6 veces al día<br><input type="radio"/> más 6 veces al día |
| chocolate o bombones      | <input type="radio"/> Nunca o menos 1 vez al mes<br><input checked="" type="radio"/> 1 a 3 veces mes<br><input type="radio"/> 1 vez semana<br><input type="radio"/> 2 a 4 veces semana<br><input type="radio"/> 5 a 6 veces semana<br><input type="radio"/> 1 vez al día<br><input type="radio"/> 2 a 3 veces al día<br><input type="radio"/> 5 a 6 veces al día<br><input type="radio"/> más 6 veces al día |
| chocolate polvo o colacao | <input type="radio"/> Nunca o menos 1 vez al mes<br><input type="radio"/> 1 a 3 veces mes<br><input type="radio"/> 1 vez semana<br><input checked="" type="radio"/> 2 a 4 veces semana<br><input type="radio"/> 5 a 6 veces semana<br><input type="radio"/> 1 vez al día<br><input type="radio"/> 2 a 3 veces al día<br><input type="radio"/> 5 a 6 veces al día<br><input type="radio"/> más 6 veces al día |
| vino tinto                | <input checked="" type="radio"/> Nunca o menos 1 vez al mes<br><input type="radio"/> 1 a 3 veces mes<br><input type="radio"/> 1 vez semana<br><input type="radio"/> 2 a 4 veces semana<br><input type="radio"/> 5 a 6 veces semana<br><input type="radio"/> 1 vez al día<br><input type="radio"/> 2 a 3 veces al día<br><input type="radio"/> 5 a 6 veces al día<br><input type="radio"/> más 6 veces al día |
| vino blanco               | <input checked="" type="radio"/> Nunca o menos 1 vez al mes<br><input type="radio"/> 1 a 3 veces mes<br><input type="radio"/> 1 vez semana<br><input type="radio"/> 2 a 4 veces semana<br><input type="radio"/> 5 a 6 veces semana<br><input type="radio"/> 1 vez al día<br><input type="radio"/> 2 a 3 veces al día<br><input type="radio"/> 5 a 6 veces al día<br><input type="radio"/> más 6 veces al día |

|                       |                                                                                                                                                                                                                                                                                                                                                                                                              |
|-----------------------|--------------------------------------------------------------------------------------------------------------------------------------------------------------------------------------------------------------------------------------------------------------------------------------------------------------------------------------------------------------------------------------------------------------|
| vino seco o vermut    | <input checked="" type="radio"/> Nunca o menos 1 vez al mes<br><input type="radio"/> 1 a 3 veces mes<br><input type="radio"/> 1 vez semana<br><input type="radio"/> 2 a 4 veces semana<br><input type="radio"/> 5 a 6 veces semana<br><input type="radio"/> 1 vez al día<br><input type="radio"/> 2 a 3 veces al día<br><input type="radio"/> 5 a 6 veces al día<br><input type="radio"/> más 6 veces al día |
| cerveza               | <input checked="" type="radio"/> Nunca o menos 1 vez al mes<br><input type="radio"/> 1 a 3 veces mes<br><input type="radio"/> 1 vez semana<br><input type="radio"/> 2 a 4 veces semana<br><input type="radio"/> 5 a 6 veces semana<br><input type="radio"/> 1 vez al día<br><input type="radio"/> 2 a 3 veces al día<br><input type="radio"/> 5 a 6 veces al día<br><input type="radio"/> más 6 veces al día |
| cerveza sin alcohol   | <input checked="" type="radio"/> Nunca o menos 1 vez al mes<br><input type="radio"/> 1 a 3 veces mes<br><input type="radio"/> 1 vez semana<br><input type="radio"/> 2 a 4 veces semana<br><input type="radio"/> 5 a 6 veces semana<br><input type="radio"/> 1 vez al día<br><input type="radio"/> 2 a 3 veces al día<br><input type="radio"/> 5 a 6 veces al día<br><input type="radio"/> más 6 veces al día |
| licores               | <input checked="" type="radio"/> Nunca o menos 1 vez al mes<br><input type="radio"/> 1 a 3 veces mes<br><input type="radio"/> 1 vez semana<br><input type="radio"/> 2 a 4 veces semana<br><input type="radio"/> 5 a 6 veces semana<br><input type="radio"/> 1 vez al día<br><input type="radio"/> 2 a 3 veces al día<br><input type="radio"/> 5 a 6 veces al día<br><input type="radio"/> más 6 veces al día |
| ginebra o ron o vodka | <input checked="" type="radio"/> Nunca o menos 1 vez al mes<br><input type="radio"/> 1 a 3 veces mes<br><input type="radio"/> 1 vez semana<br><input type="radio"/> 2 a 4 veces semana<br><input type="radio"/> 5 a 6 veces semana<br><input type="radio"/> 1 vez al día<br><input type="radio"/> 2 a 3 veces al día<br><input type="radio"/> 5 a 6 veces al día<br><input type="radio"/> más 6 veces al día |
| refresco normal       | <input type="radio"/> Nunca o menos 1 vez al mes<br><input checked="" type="radio"/> 1 a 3 veces mes<br><input type="radio"/> 1 vez semana<br><input type="radio"/> 2 a 4 veces semana<br><input type="radio"/> 5 a 6 veces semana<br><input type="radio"/> 1 vez al día<br><input type="radio"/> 2 a 3 veces al día<br><input type="radio"/> 5 a 6 veces al día<br><input type="radio"/> más 6 veces al día |

|                          |                                                                                                                                                                                                                                                                                                                                                                                                              |
|--------------------------|--------------------------------------------------------------------------------------------------------------------------------------------------------------------------------------------------------------------------------------------------------------------------------------------------------------------------------------------------------------------------------------------------------------|
| refresco sin azúcar      | <input type="radio"/> Nunca o menos 1 vez al mes<br><input checked="" type="radio"/> 1 a 3 veces mes<br><input type="radio"/> 1 vez semana<br><input type="radio"/> 2 a 4 veces semana<br><input type="radio"/> 5 a 6 veces semana<br><input type="radio"/> 1 vez al día<br><input type="radio"/> 2 a 3 veces al día<br><input type="radio"/> 5 a 6 veces al día<br><input type="radio"/> más 6 veces al día |
| Agua del grifo           | <input checked="" type="radio"/> Nunca o menos 1 vez al mes<br><input type="radio"/> 1 a 3 veces mes<br><input type="radio"/> 1 vez semana<br><input type="radio"/> 2 a 4 veces semana<br><input type="radio"/> 5 a 6 veces semana<br><input type="radio"/> 1 vez al día<br><input type="radio"/> 2 a 3 veces al día<br><input type="radio"/> 5 a 6 veces al día<br><input type="radio"/> más 6 veces al día |
| agua embotellada sin gas | <input type="radio"/> Nunca o menos 1 vez al mes<br><input type="radio"/> 1 a 3 veces mes<br><input type="radio"/> 1 vez semana<br><input type="radio"/> 2 a 4 veces semana<br><input type="radio"/> 5 a 6 veces semana<br><input type="radio"/> 1 vez al día<br><input type="radio"/> 2 a 3 veces al día<br><input type="radio"/> 5 a 6 veces al día<br><input checked="" type="radio"/> más 6 veces al día |
| agua embotellada con gas | <input checked="" type="radio"/> Nunca o menos 1 vez al mes<br><input type="radio"/> 1 a 3 veces mes<br><input type="radio"/> 1 vez semana<br><input type="radio"/> 2 a 4 veces semana<br><input type="radio"/> 5 a 6 veces semana<br><input type="radio"/> 1 vez al día<br><input type="radio"/> 2 a 3 veces al día<br><input type="radio"/> 5 a 6 veces al día<br><input type="radio"/> más 6 veces al día |
| zumو frutas embasado     | <input type="radio"/> Nunca o menos 1 vez al mes<br><input checked="" type="radio"/> 1 a 3 veces mes<br><input type="radio"/> 1 vez semana<br><input type="radio"/> 2 a 4 veces semana<br><input type="radio"/> 5 a 6 veces semana<br><input type="radio"/> 1 vez al día<br><input type="radio"/> 2 a 3 veces al día<br><input type="radio"/> 5 a 6 veces al día<br><input type="radio"/> más 6 veces al día |
| cafe                     | <input type="radio"/> Nunca o menos 1 vez al mes<br><input type="radio"/> 1 a 3 veces mes<br><input checked="" type="radio"/> 1 vez semana<br><input type="radio"/> 2 a 4 veces semana<br><input type="radio"/> 5 a 6 veces semana<br><input type="radio"/> 1 vez al día<br><input type="radio"/> 2 a 3 veces al día<br><input type="radio"/> 5 a 6 veces al día<br><input type="radio"/> más 6 veces al día |

|                       |                                                                                                                                                                                                                                                                                                                                                                                                              |
|-----------------------|--------------------------------------------------------------------------------------------------------------------------------------------------------------------------------------------------------------------------------------------------------------------------------------------------------------------------------------------------------------------------------------------------------------|
| cafe descafeinado     | <input type="radio"/> Nunca o menos 1 vez al mes<br><input type="radio"/> 1 a 3 veces mes<br><input type="radio"/> 1 vez semana<br><input checked="" type="radio"/> 2 a 4 veces semana<br><input type="radio"/> 5 a 6 veces semana<br><input type="radio"/> 1 vez al día<br><input type="radio"/> 2 a 3 veces al día<br><input type="radio"/> 5 a 6 veces al día<br><input type="radio"/> más 6 veces al día |
| te o infusión         | <input checked="" type="radio"/> Nunca o menos 1 vez al mes<br><input type="radio"/> 1 a 3 veces mes<br><input type="radio"/> 1 vez semana<br><input type="radio"/> 2 a 4 veces semana<br><input type="radio"/> 5 a 6 veces semana<br><input type="radio"/> 1 vez al día<br><input type="radio"/> 2 a 3 veces al día<br><input type="radio"/> 5 a 6 veces al día<br><input type="radio"/> más 6 veces al día |
| sopa o puré verduras  | <input type="radio"/> Nunca o menos 1 vez al mes<br><input type="radio"/> 1 a 3 veces mes<br><input checked="" type="radio"/> 1 vez semana<br><input type="radio"/> 2 a 4 veces semana<br><input type="radio"/> 5 a 6 veces semana<br><input type="radio"/> 1 vez al día<br><input type="radio"/> 2 a 3 veces al día<br><input type="radio"/> 5 a 6 veces al día<br><input type="radio"/> más 6 veces al día |
| croquetas pollo jamón | <input checked="" type="radio"/> Nunca o menos 1 vez al mes<br><input type="radio"/> 1 a 3 veces mes<br><input type="radio"/> 1 vez semana<br><input type="radio"/> 2 a 4 veces semana<br><input type="radio"/> 5 a 6 veces semana<br><input type="radio"/> 1 vez al día<br><input type="radio"/> 2 a 3 veces al día<br><input type="radio"/> 5 a 6 veces al día<br><input type="radio"/> más 6 veces al día |
| croquetas pescado     | <input checked="" type="radio"/> Nunca o menos 1 vez al mes<br><input type="radio"/> 1 a 3 veces mes<br><input type="radio"/> 1 vez semana<br><input type="radio"/> 2 a 4 veces semana<br><input type="radio"/> 5 a 6 veces semana<br><input type="radio"/> 1 vez al día<br><input type="radio"/> 2 a 3 veces al día<br><input type="radio"/> 5 a 6 veces al día<br><input type="radio"/> más 6 veces al día |
| mayonesa              | <input type="radio"/> Nunca o menos 1 vez al mes<br><input checked="" type="radio"/> 1 a 3 veces mes<br><input type="radio"/> 1 vez semana<br><input type="radio"/> 2 a 4 veces semana<br><input type="radio"/> 5 a 6 veces semana<br><input type="radio"/> 1 vez al día<br><input type="radio"/> 2 a 3 veces al día<br><input type="radio"/> 5 a 6 veces al día<br><input type="radio"/> más 6 veces al día |

---

salsa tomate

- ☐ Nunca o menos 1 vez al mes  
☒ 1 a 3 veces mes  
☐ 1 vez semana  
☐ 2 a 4 veces semana  
☐ 5 a 6 veces semana  
☐ 1 vez al día  
☐ 2 a 3 veces al día  
☐ 5 a 6 veces al día  
☐ más 6 veces al día

---

ketchup

- ☒ Nunca o menos 1 vez al mes  
☐ 1 a 3 veces mes  
☐ 1 vez semana  
☐ 2 a 4 veces semana  
☐ 5 a 6 veces semana  
☐ 1 vez al día  
☐ 2 a 3 veces al día  
☐ 5 a 6 veces al día  
☐ más 6 veces al día

---

sal

- ☒ Nunca o menos 1 vez al mes  
☐ 1 a 3 veces mes  
☐ 1 vez semana  
☐ 2 a 4 veces semana  
☐ 5 a 6 veces semana  
☐ 1 vez al día  
☐ 2 a 3 veces al día  
☐ 5 a 6 veces al día  
☐ más 6 veces al día

---

ajo

- ☐ Nunca o menos 1 vez al mes  
☒ 1 a 3 veces mes  
☐ 1 vez semana  
☐ 2 a 4 veces semana  
☐ 5 a 6 veces semana  
☐ 1 vez al día  
☐ 2 a 3 veces al día  
☐ 5 a 6 veces al día  
☐ más 6 veces al día

---

mermelada o miel

- ☐ Nunca o menos 1 vez al mes  
☐ 1 a 3 veces mes  
☒ 1 vez semana  
☐ 2 a 4 veces semana  
☐ 5 a 6 veces semana  
☐ 1 vez al día  
☐ 2 a 3 veces al día  
☐ 5 a 6 veces al día  
☐ más 6 veces al día

---

azúcar

- ☐ Nunca o menos 1 vez al mes  
☐ 1 a 3 veces mes  
☐ 1 vez semana  
☐ 2 a 4 veces semana  
☐ 5 a 6 veces semana  
☒ 1 vez al día  
☐ 2 a 3 veces al día  
☐ 5 a 6 veces al día  
☐ más 6 veces al día

---

Otro alimento

---

---

suplementos vitamínicos

- ☐ si  
☒ no
- 

---

suplementos vitamínicos

---

---

dieta previa

- ☐ si  
☒ no
- 

---

motivo dieta

- ☒ no dieta  
☐ control peso  
☐ control colesterol  
☐ control diabetes  
☐ problemas estómago  
☐ problemas vesícula o hepáticos  
☐ HTA o cardiopatía  
☐ problemas renales  
☐ alergia alimentaria  
☐ ácido úrico elevado  
☐ vegetariana  
☐ otros
- 

---

cambio alimentos año previo gestación

- ☒ si  
☐ no
- 

---

cambio lácteos

- ☐ eliminado  
☐ disminuido  
☒ igual  
☐ aumentado  
☐ no sabe
- 

---

cambio huevos

- ☐ eliminado  
☐ disminuido  
☒ igual  
☐ aumentado  
☐ no sabe
- 

---

cambio carne

- ☐ eliminado  
☐ disminuido  
☒ igual  
☐ aumentado  
☐ no sabe
- 

---

cambio pescado

- ☐ eliminado  
☐ disminuido  
☒ igual  
☐ aumentado  
☐ no sabe
- 

---

cambio verduras

- ☐ eliminado  
☐ disminuido  
☒ igual  
☐ aumentado  
☐ no sabe
-



|                            |                                                                                                                                                                                                                        |
|----------------------------|------------------------------------------------------------------------------------------------------------------------------------------------------------------------------------------------------------------------|
| cambio legumbres           | <input type="radio"/> eliminado<br><input type="radio"/> disminuido<br><input checked="" type="radio"/> igual<br><input type="radio"/> aumentado<br><input type="radio"/> no sabe                                      |
| cambio fruta               | <input type="radio"/> eliminado<br><input type="radio"/> disminuido<br><input checked="" type="radio"/> igual<br><input type="radio"/> aumentado<br><input type="radio"/> no sabe                                      |
| cambio pan                 | <input type="radio"/> eliminado<br><input type="radio"/> disminuido<br><input checked="" type="radio"/> igual<br><input type="radio"/> aumentado<br><input type="radio"/> no sabe                                      |
| cambio aceite oliva        | <input type="radio"/> eliminado<br><input type="radio"/> disminuido<br><input checked="" type="radio"/> igual<br><input type="radio"/> aumentado<br><input type="radio"/> no sabe                                      |
| cambio mante o margarina   | <input type="radio"/> eliminado<br><input type="radio"/> disminuido<br><input checked="" type="radio"/> igual<br><input type="radio"/> aumentado<br><input type="radio"/> no sabe                                      |
| cambio azúcar y dulces     | <input type="radio"/> eliminado<br><input type="radio"/> disminuido<br><input checked="" type="radio"/> igual<br><input type="radio"/> aumentado<br><input type="radio"/> no sabe                                      |
| cambio bebidas alcohólicas | <input checked="" type="radio"/> eliminado<br><input type="radio"/> disminuido<br><input type="radio"/> igual<br><input type="radio"/> aumentado<br><input type="radio"/> no sabe                                      |
| frecuencia comidas fritas  | <input type="radio"/> a diario<br><input type="radio"/> 5 a 6 veces semana<br><input type="radio"/> 2 a 4 veces semana<br><input checked="" type="radio"/> 1 vez semana<br><input type="radio"/> menos de 1 vez semana |
| carne                      | <input type="radio"/> no como<br><input type="radio"/> cruda<br><input type="radio"/> poco hecha<br><input type="radio"/> hecha<br><input checked="" type="radio"/> muy hecha                                          |
| grasa visible carne        | <input checked="" type="radio"/> quita toda<br><input type="radio"/> quita mayoría<br><input type="radio"/> quita un poco<br><input type="radio"/> no quita nada                                                       |

|                                |                                                                                                                                                                                                                                                          |
|--------------------------------|----------------------------------------------------------------------------------------------------------------------------------------------------------------------------------------------------------------------------------------------------------|
| cocina carne                   | <input type="radio"/> a la plancha<br><input type="radio"/> a la parrilla<br><input type="radio"/> asada<br><input type="radio"/> frita<br><input type="radio"/> guisada                                                                                 |
| tostado quemado carne          | <input type="radio"/> nunca<br><input type="radio"/> 1 vez mes<br><input type="radio"/> 2 a 3 veces mes<br><input type="radio"/> 1 vez semana<br><input type="radio"/> 2 a 3 semanas                                                                     |
| tostado quemado pescado        | <input checked="" type="radio"/> nunca<br><input type="radio"/> 1 vez mes<br><input type="radio"/> 2 a 3 veces mes<br><input type="radio"/> 1 vez semana<br><input type="radio"/> 2 a 3 semanas                                                          |
| socarrat paella                | <input checked="" type="radio"/> nunca<br><input type="radio"/> 1 vez mes<br><input type="radio"/> 2 a 3 veces mes<br><input type="radio"/> 1 vez semana<br><input type="radio"/> 2 a 3 semanas                                                          |
| grasa o aceite cocinar         | <input type="radio"/> mantequilla<br><input type="radio"/> margarina<br><input checked="" type="radio"/> aceite oliva<br><input type="radio"/> aceite oliva virgen extra<br><input type="radio"/> aceite vegetal<br><input type="radio"/> mezcla aceites |
| grasa aceite aliñar            | <input type="radio"/> mantequilla<br><input type="radio"/> margarina<br><input checked="" type="radio"/> aceite oliva<br><input type="radio"/> aceite oliva virgen extra<br><input type="radio"/> aceite vegetal<br><input type="radio"/> mezcla aceites |
| grasa aceite freir             | <input type="radio"/> mantequilla<br><input type="radio"/> margarina<br><input checked="" type="radio"/> aceite oliva<br><input type="radio"/> aceite oliva virgen extra<br><input type="radio"/> aceite vegetal<br><input type="radio"/> mezcla aceites |
| Ejercicio cuestionario         | <input checked="" type="radio"/> si<br><input type="radio"/> no                                                                                                                                                                                          |
| horas de sueño incluido siesta | [*DATA REMOVED*]                                                                                                                                                                                                                                         |
| minutos siesta                 | [*DATA REMOVED*]                                                                                                                                                                                                                                         |
| horas televisión semana        |                                                                                                                                                                                                                                                          |

|                                        |                                                                                                                                                                                                                                                                                                                                                                           |
|----------------------------------------|---------------------------------------------------------------------------------------------------------------------------------------------------------------------------------------------------------------------------------------------------------------------------------------------------------------------------------------------------------------------------|
| actividad trabajo                      | <input type="radio"/> casi siempre sentado<br><input type="radio"/> sentado 50 por cien<br><input type="radio"/> casi siempre de pie, quieto<br><input checked="" type="radio"/> casi siempre levantado caminando y llevando pocas cosas<br><input type="radio"/> casi siempre levantado, caminando y llevado muchas cosas<br><input type="radio"/> trabajo manual pesado |
| tiempo caminar o bici al día           | <input type="radio"/> casi nunca<br><input type="radio"/> menos 20min día<br><input type="radio"/> 20 a 40 min día<br><input type="radio"/> 40 a 60 min día<br><input checked="" type="radio"/> 1h o 1h y media día<br><input type="radio"/> más de 1h y media al día                                                                                                     |
| tiempo tareas casa al día              | <input type="radio"/> menos de 1h día<br><input type="radio"/> 1 a 2h día<br><input checked="" type="radio"/> 3 a 4h día<br><input type="radio"/> 5 a 6h día<br><input type="radio"/> 7 a 8h día<br><input type="radio"/> más de 8h día                                                                                                                                   |
| tiempo libre televisión ordenador leer | <input type="radio"/> menos 1h día<br><input type="radio"/> 1h día<br><input type="radio"/> 2h día<br><input type="radio"/> 3h día<br><input type="radio"/> 4h día<br><input type="radio"/> 5 a 6h día<br><input type="radio"/> mas 6h día                                                                                                                                |
| tiempo libre ejercicio o deporte       | <input type="radio"/> menos 1h semana<br><input type="radio"/> 1h semana<br><input type="radio"/> 2h semana<br><input type="radio"/> 3h semana<br><input type="radio"/> 4 a 5h semana<br><input type="radio"/> mas 5h semana                                                                                                                                              |
| como se considera                      | <input type="radio"/> sedentaria<br><input type="radio"/> poco activa<br><input checked="" type="radio"/> moderadamente activa<br><input type="radio"/> bastante activa<br><input type="radio"/> muy activa<br><input type="radio"/> no sabe                                                                                                                              |
| FUR                                    | [*DATA REMOVED*]                                                                                                                                                                                                                                                                                                                                                          |
| Semanas gestación 2T                   | [*DATA REMOVED*]                                                                                                                                                                                                                                                                                                                                                          |
| Días gestación 2T                      | [*DATA REMOVED*]                                                                                                                                                                                                                                                                                                                                                          |
| DBP 2T                                 | [*DATA REMOVED*]                                                                                                                                                                                                                                                                                                                                                          |
| CC 2T                                  | [*DATA REMOVED*]                                                                                                                                                                                                                                                                                                                                                          |
| AC 2T                                  | [*DATA REMOVED*]                                                                                                                                                                                                                                                                                                                                                          |

|                                                   |                                                                                                                                                                                                 |
|---------------------------------------------------|-------------------------------------------------------------------------------------------------------------------------------------------------------------------------------------------------|
| LF 2T                                             | [*DATA REMOVED*]                                                                                                                                                                                |
| PFE 2T (Hadlock)                                  | [*DATA REMOVED*]                                                                                                                                                                                |
| Semanas gestación 3T                              | [*DATA REMOVED*]                                                                                                                                                                                |
| días 3T                                           | [*DATA REMOVED*]                                                                                                                                                                                |
| DBP 3T                                            | [*DATA REMOVED*]                                                                                                                                                                                |
| CC 3T                                             | [*DATA REMOVED*]                                                                                                                                                                                |
| AC 3T                                             | [*DATA REMOVED*]                                                                                                                                                                                |
| LF 3T                                             | [*DATA REMOVED*]                                                                                                                                                                                |
| PFE 3T (Hadlock)                                  | [*DATA REMOVED*]                                                                                                                                                                                |
| Semanas de gestación final                        | [*DATA REMOVED*]                                                                                                                                                                                |
| días gestación final                              | [*DATA REMOVED*]                                                                                                                                                                                |
| Localización placenta                             | <input type="radio"/> anterior<br><input type="radio"/> lateral derecha<br><input type="radio"/> lateral izquierda<br><input type="radio"/> posterior<br><input checked="" type="radio"/> fondo |
| Presentación longitudinal cefálica                | <input type="radio"/> no<br><input checked="" type="radio"/> si                                                                                                                                 |
| Dorso                                             | <input checked="" type="radio"/> izquierda anterior<br><input type="radio"/> izquierda posterior<br><input type="radio"/> derecha anterior<br><input type="radio"/> derecha posterior           |
| diámetro biparietal                               | _____                                                                                                                                                                                           |
| Circunferencia craneal                            | _____                                                                                                                                                                                           |
| Circunferencia abdominal                          | _____                                                                                                                                                                                           |
| Longitud de femur                                 | _____                                                                                                                                                                                           |
| tejido celular subcutáneo a nivel del muslo en mm | _____                                                                                                                                                                                           |
| tejido celular subcutáneo en abdomen en mm        | _____                                                                                                                                                                                           |

|                                               |                                                                                                                                                          |
|-----------------------------------------------|----------------------------------------------------------------------------------------------------------------------------------------------------------|
| Volumen del muslo en cm3                      | [*DATA REMOVED*]                                                                                                                                         |
| Peso fetal estimado según fórmula de Hadlock  | [*DATA REMOVED*]                                                                                                                                         |
| Percentil                                     | [*DATA REMOVED*]                                                                                                                                         |
| Peso fetal estimado según fórmula de Scioscia | _____                                                                                                                                                    |
| Peso fetal estimado según fórmula de LEE      | _____                                                                                                                                                    |
| Tipo de parto                                 | <input checked="" type="radio"/> eutocico<br><input type="radio"/> instrumentado/ventosa<br><input type="radio"/> cesarea                                |
| fecha de nacimiento                           | [*DATA REMOVED*]                                                                                                                                         |
| Días entre exploración y nacimiento           | [*DATA REMOVED*]                                                                                                                                         |
| Peso RN en g                                  | [*DATA REMOVED*]                                                                                                                                         |
| sexo                                          | <input checked="" type="radio"/> mujer<br><input type="radio"/> hombre                                                                                   |
| Apgar 1 minuto                                | [*DATA REMOVED*]                                                                                                                                         |
| Apgar 5 minutos                               | [*DATA REMOVED*]                                                                                                                                         |
| Apgar 10 minutos                              | _____                                                                                                                                                    |
| antecedente Covid durante gestación           | <input checked="" type="radio"/> Yes<br><input type="radio"/> No                                                                                         |
| Nivel de estudios                             | <input type="radio"/> ninguno<br><input checked="" type="radio"/> primarios<br><input type="radio"/> secundarios<br><input type="radio"/> universitarios |

# Base\_datos\_estimacion\_peso\_fetal

|                                       |                                                                                                                                                                                                                                                                                      |
|---------------------------------------|--------------------------------------------------------------------------------------------------------------------------------------------------------------------------------------------------------------------------------------------------------------------------------------|
| Número de identificación participante | 137                                                                                                                                                                                                                                                                                  |
| CODIGO PARTICIPANTE                   |                                                                                                                                                                                                                                                                                      |
| Edad                                  | [*DATA REMOVED*]                                                                                                                                                                                                                                                                     |
| Gestaciones                           | <input checked="" type="radio"/> 1<br><input type="radio"/> 2<br><input type="radio"/> 3<br><input type="radio"/> mas de 3                                                                                                                                                           |
| partos                                | <input checked="" type="radio"/> 0<br><input type="radio"/> 1<br><input type="radio"/> 2<br><input type="radio"/> 3<br><input type="radio"/> mas de 3                                                                                                                                |
| cesáreas                              | <input checked="" type="radio"/> 0<br><input type="radio"/> 1<br><input type="radio"/> 2<br><input type="radio"/> 3<br><input type="radio"/> mas de 3                                                                                                                                |
| Abortos                               | <input checked="" type="radio"/> 0<br><input type="radio"/> 1<br><input type="radio"/> 2<br><input type="radio"/> 3<br><input type="radio"/> mas de 3                                                                                                                                |
| Tipo de gestacion                     | <input checked="" type="radio"/> espontanea<br><input type="radio"/> IAC inseminación artificial conyuge<br><input type="radio"/> IAD inseminación artificial donante<br><input type="radio"/> FIV Fecundación in Vitro<br><input type="radio"/> Ovodon FIV con donación de ovocitos |
| peso previo a embarazo                | [*DATA REMOVED*]                                                                                                                                                                                                                                                                     |
| Ganancia ponderal embarazo            |                                                                                                                                                                                                                                                                                      |
| Talla madre                           | [*DATA REMOVED*]                                                                                                                                                                                                                                                                     |
| IMC previo embarazo                   | 26.573129251700685                                                                                                                                                                                                                                                                   |
| Patología obstétrica                  | <input checked="" type="radio"/> no<br><input type="radio"/> si                                                                                                                                                                                                                      |
| Diabetes pregestacional               | <input checked="" type="radio"/> no<br><input type="radio"/> si                                                                                                                                                                                                                      |
| Diabetes gestacional                  | <input checked="" type="radio"/> no<br><input type="radio"/> si                                                                                                                                                                                                                      |

|                                            |                                                                                                                                                                                      |
|--------------------------------------------|--------------------------------------------------------------------------------------------------------------------------------------------------------------------------------------|
| Diabetes gestacional con insulina          | <input checked="" type="radio"/> no<br><input type="radio"/> si                                                                                                                      |
| Diabetes gestacional con dieta y ejercicio | <input checked="" type="radio"/> no<br><input type="radio"/> si                                                                                                                      |
| Percentil fetos previos                    | <input checked="" type="radio"/> Nada<br><input type="radio"/> percentil menor de 10<br><input type="radio"/> percentil entre 10 y 90<br><input type="radio"/> percentil mayor de 90 |
| Exfumadora                                 | <input checked="" type="radio"/> Nada<br><input type="radio"/> menos de 5 años<br><input type="radio"/> 5 a 10 años<br><input type="radio"/> mayor o igual a 10 años                 |
| Hábito tabáquico                           | <input checked="" type="radio"/> no<br><input type="radio"/> si                                                                                                                      |
| fumadora                                   | [*DATA REMOVED*]                                                                                                                                                                     |
| Consumo otros tóxicos                      | <input checked="" type="radio"/> no<br><input type="radio"/> si                                                                                                                      |
| Hb 1T                                      | [*DATA REMOVED*]                                                                                                                                                                     |
| Htc 1T                                     | [*DATA REMOVED*]                                                                                                                                                                     |
| Hb 2T                                      | [*DATA REMOVED*]                                                                                                                                                                     |
| HTC 2T                                     | [*DATA REMOVED*]                                                                                                                                                                     |
| Hb 3T                                      | [*DATA REMOVED*]                                                                                                                                                                     |
| HTC 3T                                     | [*DATA REMOVED*]                                                                                                                                                                     |
| Suplemento FE oral                         | <input checked="" type="radio"/> si<br><input type="radio"/> no                                                                                                                      |
| Suplemento fe iv                           | <input type="radio"/> si<br><input checked="" type="radio"/> no                                                                                                                      |
| Transfusión                                | <input type="radio"/> no<br><input type="radio"/> si                                                                                                                                 |
| Solicitada Vit D                           | <input checked="" type="radio"/> no<br><input type="radio"/> si                                                                                                                      |
| Deficit vit D                              | <input type="radio"/> no<br><input type="radio"/> si                                                                                                                                 |
| Suplemento vit D                           | <input type="radio"/> si<br><input type="radio"/> no                                                                                                                                 |

|                       |                                                                                                                                                                                                                                                                                                                                                                                                              |
|-----------------------|--------------------------------------------------------------------------------------------------------------------------------------------------------------------------------------------------------------------------------------------------------------------------------------------------------------------------------------------------------------------------------------------------------------|
| Dieta, cuestionario   | <input checked="" type="radio"/> sí<br><input type="radio"/> no                                                                                                                                                                                                                                                                                                                                              |
| Leche entera          | <input checked="" type="radio"/> Nunca o menos 1 vez al mes<br><input type="radio"/> 1 a 3 veces mes<br><input type="radio"/> 1 vez semana<br><input type="radio"/> 2 a 4 veces semana<br><input type="radio"/> 5 a 6 veces semana<br><input type="radio"/> 1 vez al día<br><input type="radio"/> 2 a 3 veces al día<br><input type="radio"/> 5 a 6 veces al día<br><input type="radio"/> más 6 veces al día |
| Leche semidesnatada   | <input type="radio"/> Nunca o menos 1 vez al mes<br><input type="radio"/> 1 a 3 veces mes<br><input type="radio"/> 1 vez semana<br><input type="radio"/> 2 a 4 veces semana<br><input type="radio"/> 5 a 6 veces semana<br><input checked="" type="radio"/> 1 vez al día<br><input type="radio"/> 2 a 3 veces al día<br><input type="radio"/> 5 a 6 veces al día<br><input type="radio"/> mas 6 veces al día |
| Leche desnatada       | <input checked="" type="radio"/> Nunca o menos 1 vez al mes<br><input type="radio"/> 1 a 3 veces mes<br><input type="radio"/> 1 vez semana<br><input type="radio"/> 2 a 4 veces semana<br><input type="radio"/> 5 a 6 veces semana<br><input type="radio"/> 1 vez al día<br><input type="radio"/> 2 a 3 veces al día<br><input type="radio"/> 5 a 6 veces al día<br><input type="radio"/> más 6 veces al día |
| Leche condensada      | <input checked="" type="radio"/> Nunca o menos 1 vez al mes<br><input type="radio"/> 1 a 3 veces mes<br><input type="radio"/> 1 vez semana<br><input type="radio"/> 2 a 4 veces semana<br><input type="radio"/> 5 a 6 veces semana<br><input type="radio"/> 1 vez al día<br><input type="radio"/> 2 a 3 veces al día<br><input type="radio"/> 5 a 6 veces al día<br><input type="radio"/> más 6 veces al día |
| nata o crema de leche | <input checked="" type="radio"/> Nunca o menos 1 vez al mes<br><input type="radio"/> 1 a 3 veces mes<br><input type="radio"/> 1 vez semana<br><input type="radio"/> 2 a 4 veces semana<br><input type="radio"/> 5 a 6 veces semana<br><input type="radio"/> 1 vez al día<br><input type="radio"/> 2 a 3 veces al día<br><input type="radio"/> 5 a 6 veces al día<br><input type="radio"/> más 6 veces al día |



---

Yogurt Entero

- ☒ Nunca o menos 1 vez al mes  
☐ 1 a 3 veces mes  
☐ 1 vez semana  
☐ 2 a 4 veces semana  
☐ 5 a 6 veces semana  
☐ 1 vez al día  
☐ 2 a 3 veces al día  
☐ 5 a 6 veces al día  
☐ más 6 veces al día

---

Yogurt desnatado

- ☐ Nunca o menos 1 vez al mes  
☐ 1 a 3 veces mes  
☐ 1 vez semana  
☒ 2 a 4 veces semana  
☐ 5 a 6 veces semana  
☐ 1 vez al día  
☐ 2 a 3 veces al día  
☐ 5 a 6 veces al día  
☐ más 6 veces al día

---

100g requesón o queso blando o queso fresco

- ☐ Nunca o menos 1 vez al mes  
☐ 1 a 3 veces mes  
☐ 1 vez semana  
☒ 2 a 4 veces semana  
☐ 5 a 6 veces semana  
☐ 1 vez al día  
☐ 2 a 3 veces al día  
☐ 5 a 6 veces al día  
☐ más 6 veces al día

---

queso curado o semicurado o cremoso

- ☐ Nunca o menos 1 vez al mes  
☐ 1 a 3 veces mes  
☐ 1 vez semana  
☐ 2 a 4 veces semana  
☐ 5 a 6 veces semana  
☐ 1 vez al día  
☐ 2 a 3 veces al día  
☐ 5 a 6 veces al día  
☐ más 6 veces al día

---

natillas flan pudding

- ☒ Nunca o menos 1 vez al mes  
☐ 1 a 3 veces mes  
☐ 1 vez semana  
☐ 2 a 4 veces semana  
☐ 5 a 6 veces semana  
☐ 1 vez al día  
☐ 2 a 3 veces al día  
☐ 5 a 6 veces al día  
☐ más 6 veces al día

---

Helado

- ☐ Nunca o menos 1 vez al mes  
☐ 1 a 3 veces mes  
☒ 1 vez semana  
☐ 2 a 4 veces semana  
☐ 5 a 6 veces semana  
☐ 1 vez al día  
☐ 2 a 3 veces al día  
☐ 5 a 6 veces al día  
☐ más 6 veces al día

|                                      |                                                                                                                                                                                                                                                                                                                                                                                                              |
|--------------------------------------|--------------------------------------------------------------------------------------------------------------------------------------------------------------------------------------------------------------------------------------------------------------------------------------------------------------------------------------------------------------------------------------------------------------|
| huevo                                | <input type="radio"/> Nunca o menos 1 vez al mes<br><input type="radio"/> 1 a 3 veces mes<br><input type="radio"/> 1 vez semana<br><input checked="" type="radio"/> 2 a 4 veces semana<br><input type="radio"/> 5 a 6 veces semana<br><input type="radio"/> 1 vez al día<br><input type="radio"/> 2 a 3 veces al día<br><input type="radio"/> 5 a 6 veces al día<br><input type="radio"/> más 6 veces al día |
| Pollo con piel                       | <input type="radio"/> Nunca o menos 1 vez al mes<br><input type="radio"/> 1 a 3 veces mes<br><input type="radio"/> 1 vez semana<br><input checked="" type="radio"/> 2 a 4 veces semana<br><input type="radio"/> 5 a 6 veces semana<br><input type="radio"/> 1 vez al día<br><input type="radio"/> 2 a 3 veces al día<br><input type="radio"/> 5 a 6 veces al día<br><input type="radio"/> más 6 veces al día |
| pollo sin piel                       | <input type="radio"/> Nunca o menos 1 vez al mes<br><input type="radio"/> 1 a 3 veces mes<br><input checked="" type="radio"/> 1 vez semana<br><input type="radio"/> 2 a 4 veces semana<br><input type="radio"/> 5 a 6 veces semana<br><input type="radio"/> 1 vez al día<br><input type="radio"/> 2 a 3 veces al día<br><input type="radio"/> 5 a 6 veces al día<br><input type="radio"/> más 6 veces al día |
| Ternera o cerdo o cordero            | <input type="radio"/> Nunca o menos 1 vez al mes<br><input type="radio"/> 1 a 3 veces mes<br><input checked="" type="radio"/> 1 vez semana<br><input type="radio"/> 2 a 4 veces semana<br><input type="radio"/> 5 a 6 veces semana<br><input type="radio"/> 1 vez al día<br><input type="radio"/> 2 a 3 veces al día<br><input type="radio"/> 5 a 6 veces al día<br><input type="radio"/> más 6 veces al día |
| carne caza: Conejo o codorniz o pato | <input checked="" type="radio"/> Nunca o menos 1 vez al mes<br><input type="radio"/> 1 a 3 veces mes<br><input type="radio"/> 1 vez semana<br><input type="radio"/> 2 a 4 veces semana<br><input type="radio"/> 5 a 6 veces semana<br><input type="radio"/> 1 vez al día<br><input type="radio"/> 2 a 3 veces al día<br><input type="radio"/> 5 a 6 veces al día<br><input type="radio"/> más 6 veces al día |
| Hígado de ternera o cerdo o pollo    | <input checked="" type="radio"/> Nunca o menos 1 vez al mes<br><input type="radio"/> 1 a 3 veces mes<br><input type="radio"/> 1 vez semana<br><input type="radio"/> 2 a 4 veces semana<br><input type="radio"/> 5 a 6 veces semana<br><input type="radio"/> 1 vez al día<br><input type="radio"/> 2 a 3 veces al día<br><input type="radio"/> 5 a 6 veces al día<br><input type="radio"/> más 6 veces al día |

---

Vísceras

- ☐ Nunca o menos 1 vez al mes  
☐ 1 a 3 veces mes  
☒ 1 vez semana  
☐ 2 a 4 veces semana  
☐ 5 a 6 veces semana  
☐ 1 vez al día  
☐ 2 a 3 veces al día  
☐ 5 a 6 veces al día  
☐ más 6 veces al día

---

Embutido

- ☐ Nunca o menos 1 vez al mes  
☐ 1 a 3 veces mes  
☒ 1 vez semana  
☐ 2 a 4 veces semana  
☐ 5 a 6 veces semana  
☐ 1 vez al día  
☐ 2 a 3 veces al día  
☐ 5 a 6 veces al día  
☐ más 6 veces al día

---

Salchicha o similar

- ☒ Nunca o menos 1 vez al mes  
☐ 1 a 3 veces mes  
☐ 1 vez semana  
☐ 2 a 4 veces semana  
☐ 5 a 6 veces semana  
☐ 1 vez al día  
☐ 2 a 3 veces al día  
☐ 5 a 6 veces al día  
☐ más 6 veces al día

---

Pate o foiegras

- ☐ Nunca o menos 1 vez al mes  
☐ 1 a 3 veces mes  
☒ 1 vez semana  
☐ 2 a 4 veces semana  
☐ 5 a 6 veces semana  
☐ 1 vez al día  
☐ 2 a 3 veces al día  
☐ 5 a 6 veces al día  
☐ más 6 veces al día

---

Hamburguesa

- ☐ Nunca o menos 1 vez al mes  
☒ 1 a 3 veces mes  
☐ 1 vez semana  
☐ 2 a 4 veces semana  
☐ 5 a 6 veces semana  
☐ 1 vez al día  
☐ 2 a 3 veces al día  
☐ 5 a 6 veces al día  
☐ más 6 veces al día

---

tocino o bacon

- ☒ Nunca o menos 1 vez al mes  
☐ 1 a 3 veces mes  
☐ 1 vez semana  
☐ 2 a 4 veces semana  
☐ 5 a 6 veces semana  
☐ 1 vez al día  
☐ 2 a 3 veces al día  
☐ 5 a 6 veces al día  
☐ más 6 veces al día

|                        |                                                                                                                                                                                                                                                                                                                                                                                                              |
|------------------------|--------------------------------------------------------------------------------------------------------------------------------------------------------------------------------------------------------------------------------------------------------------------------------------------------------------------------------------------------------------------------------------------------------------|
| Pescado frito          | <input checked="" type="radio"/> Nunca o menos 1 vez al mes<br><input type="radio"/> 1 a 3 veces mes<br><input type="radio"/> 1 vez semana<br><input type="radio"/> 2 a 4 veces semana<br><input type="radio"/> 5 a 6 veces semana<br><input type="radio"/> 1 vez al día<br><input type="radio"/> 2 a 3 veces al día<br><input type="radio"/> 5 a 6 veces al día<br><input type="radio"/> más 6 veces al día |
| pescado hervido blanco | <input checked="" type="radio"/> Nunca o menos 1 vez al mes<br><input type="radio"/> 1 a 3 veces mes<br><input type="radio"/> 1 vez semana<br><input type="radio"/> 2 a 4 veces semana<br><input type="radio"/> 5 a 6 veces semana<br><input type="radio"/> 1 vez al día<br><input type="radio"/> 2 a 3 veces al día<br><input type="radio"/> 5 a 6 veces al día<br><input type="radio"/> más 6 veces al día |
| pescado hervido azul   | <input checked="" type="radio"/> Nunca o menos 1 vez al mes<br><input type="radio"/> 1 a 3 veces mes<br><input type="radio"/> 1 vez semana<br><input type="radio"/> 2 a 4 veces semana<br><input type="radio"/> 5 a 6 veces semana<br><input type="radio"/> 1 vez al día<br><input type="radio"/> 2 a 3 veces al día<br><input type="radio"/> 5 a 6 veces al día<br><input type="radio"/> más 6 veces al día |
| otros pescado azul     | <input checked="" type="radio"/> Nunca o menos 1 vez al mes<br><input type="radio"/> 1 a 3 veces mes<br><input type="radio"/> 1 vez semana<br><input type="radio"/> 2 a 4 veces semana<br><input type="radio"/> 5 a 6 veces semana<br><input type="radio"/> 1 vez al día<br><input type="radio"/> 2 a 3 veces al día<br><input type="radio"/> 5 a 6 veces al día<br><input type="radio"/> más 6 veces al día |
| atun conserva          | <input checked="" type="radio"/> Nunca o menos 1 vez al mes<br><input type="radio"/> 1 a 3 veces mes<br><input type="radio"/> 1 vez semana<br><input type="radio"/> 2 a 4 veces semana<br><input type="radio"/> 5 a 6 veces semana<br><input type="radio"/> 1 vez al día<br><input type="radio"/> 2 a 3 veces al día<br><input type="radio"/> 5 a 6 veces al día<br><input type="radio"/> más 6 veces al día |
| sardina conserva       | <input type="radio"/> Nunca o menos 1 vez al mes<br><input type="radio"/> 1 a 3 veces mes<br><input type="radio"/> 1 vez semana<br><input type="radio"/> 2 a 4 veces semana<br><input type="radio"/> 5 a 6 veces semana<br><input type="radio"/> 1 vez al día<br><input type="radio"/> 2 a 3 veces al día<br><input type="radio"/> 5 a 6 veces al día<br><input type="radio"/> más 6 veces al día            |

|                                         |                                                                                                                                                                                                                                                                                                                                                                                                              |
|-----------------------------------------|--------------------------------------------------------------------------------------------------------------------------------------------------------------------------------------------------------------------------------------------------------------------------------------------------------------------------------------------------------------------------------------------------------------|
| pescado ahumado                         | <input checked="" type="radio"/> Nunca o menos 1 vez al mes<br><input type="radio"/> 1 a 3 veces mes<br><input type="radio"/> 1 vez semana<br><input type="radio"/> 2 a 4 veces semana<br><input type="radio"/> 5 a 6 veces semana<br><input type="radio"/> 1 vez al día<br><input type="radio"/> 2 a 3 veces al día<br><input type="radio"/> 5 a 6 veces al día<br><input type="radio"/> más 6 veces al día |
| almejas o mejillones o ostras unos 100g | <input checked="" type="radio"/> Nunca o menos 1 vez al mes<br><input type="radio"/> 1 a 3 veces mes<br><input type="radio"/> 1 vez semana<br><input type="radio"/> 2 a 4 veces semana<br><input type="radio"/> 5 a 6 veces semana<br><input type="radio"/> 1 vez al día<br><input type="radio"/> 2 a 3 veces al día<br><input type="radio"/> 5 a 6 veces al día<br><input type="radio"/> más 6 veces al día |
| calamar o chipiron o sepia unos 100g    | <input type="radio"/> Nunca o menos 1 vez al mes<br><input checked="" type="radio"/> 1 a 3 veces mes<br><input type="radio"/> 1 vez semana<br><input type="radio"/> 2 a 4 veces semana<br><input type="radio"/> 5 a 6 veces semana<br><input type="radio"/> 1 vez al día<br><input type="radio"/> 2 a 3 veces al día<br><input type="radio"/> 5 a 6 veces al día<br><input type="radio"/> más 6 veces al día |
| marisco unos 100g                       | <input type="radio"/> Nunca o menos 1 vez al mes<br><input checked="" type="radio"/> 1 a 3 veces mes<br><input type="radio"/> 1 vez semana<br><input type="radio"/> 2 a 4 veces semana<br><input type="radio"/> 5 a 6 veces semana<br><input type="radio"/> 1 vez al día<br><input type="radio"/> 2 a 3 veces al día<br><input type="radio"/> 5 a 6 veces al día<br><input type="radio"/> más 6 veces al día |
| Espinacas o acelgas cocinadas           | <input type="radio"/> Nunca o menos 1 vez al mes<br><input checked="" type="radio"/> 1 a 3 veces mes<br><input type="radio"/> 1 vez semana<br><input type="radio"/> 2 a 4 veces semana<br><input type="radio"/> 5 a 6 veces semana<br><input type="radio"/> 1 vez al día<br><input type="radio"/> 2 a 3 veces al día<br><input type="radio"/> 5 a 6 veces al día<br><input type="radio"/> más 6 veces al día |
| Col o coliflor o brocoli cocinado       | <input type="radio"/> Nunca o menos 1 vez al mes<br><input checked="" type="radio"/> 1 a 3 veces mes<br><input type="radio"/> 1 vez semana<br><input type="radio"/> 2 a 4 veces semana<br><input type="radio"/> 5 a 6 veces semana<br><input type="radio"/> 1 vez al día<br><input type="radio"/> 2 a 3 veces al día<br><input type="radio"/> 5 a 6 veces al día<br><input type="radio"/> más 6 veces al día |

---

Lechuga o endivia o escarola

- ☐ Nunca o menos 1 vez al mes  
☐ 1 a 3 veces mes  
☐ 1 vez semana  
☐ 2 a 4 veces semana  
☒ 5 a 6 veces semana  
☐ 1 vez al día  
☐ 2 a 3 veces al día  
☐ 5 a 6 veces al día  
☐ más 6 veces al día

---

tomate ensalada

- ☐ Nunca o menos 1 vez al mes  
☐ 1 a 3 veces mes  
☐ 1 vez semana  
☐ 2 a 4 veces semana  
☒ 5 a 6 veces semana  
☐ 1 vez al día  
☐ 2 a 3 veces al día  
☐ 5 a 6 veces al día  
☐ más 6 veces al día

---

cebolla

- ☐ Nunca o menos 1 vez al mes  
☐ 1 a 3 veces mes  
☒ 1 vez semana  
☐ 2 a 4 veces semana  
☐ 5 a 6 veces semana  
☐ 1 vez al día  
☐ 2 a 3 veces al día  
☐ 5 a 6 veces al día  
☐ más 6 veces al día

---

Zanahoria o calabaza

- ☐ Nunca o menos 1 vez al mes  
☐ 1 a 3 veces mes  
☐ 1 vez semana  
☒ 2 a 4 veces semana  
☐ 5 a 6 veces semana  
☐ 1 vez al día  
☐ 2 a 3 veces al día  
☐ 5 a 6 veces al día  
☐ más 6 veces al día

---

Judías verdes

- ☐ Nunca o menos 1 vez al mes  
☐ 1 a 3 veces mes  
☐ 1 vez semana  
☐ 2 a 4 veces semana  
☒ 5 a 6 veces semana  
☐ 1 vez al día  
☐ 2 a 3 veces al día  
☐ 5 a 6 veces al día  
☐ más 6 veces al día

---

Berenjena o calabacin o pepino

- ☐ Nunca o menos 1 vez al mes  
☐ 1 a 3 veces mes  
☐ 1 vez semana  
☒ 2 a 4 veces semana  
☐ 5 a 6 veces semana  
☐ 1 vez al día  
☐ 2 a 3 veces al día  
☐ 5 a 6 veces al día  
☐ más 6 veces al día

|                       |                                                                                                                                                                                                                                                                                                                                                                                                              |
|-----------------------|--------------------------------------------------------------------------------------------------------------------------------------------------------------------------------------------------------------------------------------------------------------------------------------------------------------------------------------------------------------------------------------------------------------|
| pimiento              | <input type="radio"/> Nunca o menos 1 vez al mes<br><input type="radio"/> 1 a 3 veces mes<br><input checked="" type="radio"/> 1 vez semana<br><input type="radio"/> 2 a 4 veces semana<br><input type="radio"/> 5 a 6 veces semana<br><input type="radio"/> 1 vez al día<br><input type="radio"/> 2 a 3 veces al día<br><input type="radio"/> 5 a 6 veces al día<br><input type="radio"/> más 6 veces al día |
| alcachofa             | <input type="radio"/> Nunca o menos 1 vez al mes<br><input type="radio"/> 1 a 3 veces mes<br><input checked="" type="radio"/> 1 vez semana<br><input type="radio"/> 2 a 4 veces semana<br><input type="radio"/> 5 a 6 veces semana<br><input type="radio"/> 1 vez al día<br><input type="radio"/> 2 a 3 veces al día<br><input type="radio"/> 5 a 6 veces al día<br><input type="radio"/> más 6 veces al día |
| espárragos            | <input type="radio"/> Nunca o menos 1 vez al mes<br><input checked="" type="radio"/> 1 a 3 veces mes<br><input type="radio"/> 1 vez semana<br><input type="radio"/> 2 a 4 veces semana<br><input type="radio"/> 5 a 6 veces semana<br><input type="radio"/> 1 vez al día<br><input type="radio"/> 2 a 3 veces al día<br><input type="radio"/> 5 a 6 veces al día<br><input type="radio"/> más 6 veces al día |
| maíz hervido          | <input type="radio"/> Nunca o menos 1 vez al mes<br><input type="radio"/> 1 a 3 veces mes<br><input type="radio"/> 1 vez semana<br><input type="radio"/> 2 a 4 veces semana<br><input type="radio"/> 5 a 6 veces semana<br><input type="radio"/> 1 vez al día<br><input type="radio"/> 2 a 3 veces al día<br><input type="radio"/> 5 a 6 veces al día<br><input type="radio"/> más 6 veces al día            |
| legumbres             | <input type="radio"/> Nunca o menos 1 vez al mes<br><input type="radio"/> 1 a 3 veces mes<br><input type="radio"/> 1 vez semana<br><input type="radio"/> 2 a 4 veces semana<br><input checked="" type="radio"/> 5 a 6 veces semana<br><input type="radio"/> 1 vez al día<br><input type="radio"/> 2 a 3 veces al día<br><input type="radio"/> 5 a 6 veces al día<br><input type="radio"/> más 6 veces al día |
| naranjas o mandarinas | <input type="radio"/> Nunca o menos 1 vez al mes<br><input type="radio"/> 1 a 3 veces mes<br><input type="radio"/> 1 vez semana<br><input checked="" type="radio"/> 2 a 4 veces semana<br><input type="radio"/> 5 a 6 veces semana<br><input type="radio"/> 1 vez al día<br><input type="radio"/> 2 a 3 veces al día<br><input type="radio"/> 5 a 6 veces al día<br><input type="radio"/> más 6 veces al día |

|                       |                                                                                                                                                                                                                                                                                                                                                                                                              |
|-----------------------|--------------------------------------------------------------------------------------------------------------------------------------------------------------------------------------------------------------------------------------------------------------------------------------------------------------------------------------------------------------------------------------------------------------|
| zum natural fruta     | <input type="radio"/> Nunca o menos 1 vez al mes<br><input type="radio"/> 1 a 3 veces mes<br><input checked="" type="radio"/> 1 vez semana<br><input type="radio"/> 2 a 4 veces semana<br><input type="radio"/> 5 a 6 veces semana<br><input type="radio"/> 1 vez al día<br><input type="radio"/> 2 a 3 veces al día<br><input type="radio"/> 5 a 6 veces al día<br><input type="radio"/> más 6 veces al día |
| platano               | <input checked="" type="radio"/> Nunca o menos 1 vez al mes<br><input type="radio"/> 1 a 3 veces mes<br><input type="radio"/> 1 vez semana<br><input type="radio"/> 2 a 4 veces semana<br><input type="radio"/> 5 a 6 veces semana<br><input type="radio"/> 1 vez al día<br><input type="radio"/> 2 a 3 veces al día<br><input type="radio"/> 5 a 6 veces al día<br><input type="radio"/> más 6 veces al día |
| manzana o pera        | <input type="radio"/> Nunca o menos 1 vez al mes<br><input type="radio"/> 1 a 3 veces mes<br><input checked="" type="radio"/> 1 vez semana<br><input type="radio"/> 2 a 4 veces semana<br><input type="radio"/> 5 a 6 veces semana<br><input type="radio"/> 1 vez al día<br><input type="radio"/> 2 a 3 veces al día<br><input type="radio"/> 5 a 6 veces al día<br><input type="radio"/> más 6 veces al día |
| melocotón o nectarina | <input type="radio"/> Nunca o menos 1 vez al mes<br><input type="radio"/> 1 a 3 veces mes<br><input type="radio"/> 1 vez semana<br><input checked="" type="radio"/> 2 a 4 veces semana<br><input type="radio"/> 5 a 6 veces semana<br><input type="radio"/> 1 vez al día<br><input type="radio"/> 2 a 3 veces al día<br><input type="radio"/> 5 a 6 veces al día<br><input type="radio"/> más 6 veces al día |
| sandia o melon        | <input type="radio"/> Nunca o menos 1 vez al mes<br><input type="radio"/> 1 a 3 veces mes<br><input type="radio"/> 1 vez semana<br><input checked="" type="radio"/> 2 a 4 veces semana<br><input type="radio"/> 5 a 6 veces semana<br><input type="radio"/> 1 vez al día<br><input type="radio"/> 2 a 3 veces al día<br><input type="radio"/> 5 a 6 veces al día<br><input type="radio"/> más 6 veces al día |
| uva                   | <input type="radio"/> Nunca o menos 1 vez al mes<br><input checked="" type="radio"/> 1 a 3 veces mes<br><input type="radio"/> 1 vez semana<br><input type="radio"/> 2 a 4 veces semana<br><input type="radio"/> 5 a 6 veces semana<br><input type="radio"/> 1 vez al día<br><input type="radio"/> 2 a 3 veces al día<br><input type="radio"/> 5 a 6 veces al día<br><input type="radio"/> más 6 veces al día |



|                 |                                                                                                                                                                                                                                                                                                                                                                                                              |
|-----------------|--------------------------------------------------------------------------------------------------------------------------------------------------------------------------------------------------------------------------------------------------------------------------------------------------------------------------------------------------------------------------------------------------------------|
| bruna o ciruela | <input checked="" type="radio"/> Nunca o menos 1 vez al mes<br><input type="radio"/> 1 a 3 veces mes<br><input type="radio"/> 1 vez semana<br><input type="radio"/> 2 a 4 veces semana<br><input type="radio"/> 5 a 6 veces semana<br><input type="radio"/> 1 vez al día<br><input type="radio"/> 2 a 3 veces al día<br><input type="radio"/> 5 a 6 veces al día<br><input type="radio"/> más 6 veces al día |
| kiwi            | <input type="radio"/> Nunca o menos 1 vez al mes<br><input checked="" type="radio"/> 1 a 3 veces mes<br><input type="radio"/> 1 vez semana<br><input type="radio"/> 2 a 4 veces semana<br><input type="radio"/> 5 a 6 veces semana<br><input type="radio"/> 1 vez al día<br><input type="radio"/> 2 a 3 veces al día<br><input type="radio"/> 5 a 6 veces al día<br><input type="radio"/> más 6 veces al día |
| aceituna        | <input type="radio"/> Nunca o menos 1 vez al mes<br><input checked="" type="radio"/> 1 a 3 veces mes<br><input type="radio"/> 1 vez semana<br><input type="radio"/> 2 a 4 veces semana<br><input type="radio"/> 5 a 6 veces semana<br><input type="radio"/> 1 vez al día<br><input type="radio"/> 2 a 3 veces al día<br><input type="radio"/> 5 a 6 veces al día<br><input type="radio"/> más 6 veces al día |
| frutos secos    | <input type="radio"/> Nunca o menos 1 vez al mes<br><input type="radio"/> 1 a 3 veces mes<br><input checked="" type="radio"/> 1 vez semana<br><input type="radio"/> 2 a 4 veces semana<br><input type="radio"/> 5 a 6 veces semana<br><input type="radio"/> 1 vez al día<br><input type="radio"/> 2 a 3 veces al día<br><input type="radio"/> 5 a 6 veces al día<br><input type="radio"/> más 6 veces al día |
| pan blanco      | <input checked="" type="radio"/> Nunca o menos 1 vez al mes<br><input type="radio"/> 1 a 3 veces mes<br><input type="radio"/> 1 vez semana<br><input type="radio"/> 2 a 4 veces semana<br><input type="radio"/> 5 a 6 veces semana<br><input type="radio"/> 1 vez al día<br><input type="radio"/> 2 a 3 veces al día<br><input type="radio"/> 5 a 6 veces al día<br><input type="radio"/> más 6 veces al día |
| pan integral    | <input type="radio"/> Nunca o menos 1 vez al mes<br><input type="radio"/> 1 a 3 veces mes<br><input type="radio"/> 1 vez semana<br><input type="radio"/> 2 a 4 veces semana<br><input checked="" type="radio"/> 5 a 6 veces semana<br><input type="radio"/> 1 vez al día<br><input type="radio"/> 2 a 3 veces al día<br><input type="radio"/> 5 a 6 veces al día<br><input type="radio"/> más 6 veces al día |

---

cereales desayuno

- ☒ Nunca o menos 1 vez al mes  
☐ 1 a 3 veces mes  
☐ 1 vez semana  
☐ 2 a 4 veces semana  
☐ 5 a 6 veces semana  
☐ 1 vez al día  
☐ 2 a 3 veces al día  
☐ 5 a 6 veces al día  
☐ más 6 veces al día

---

patatas fritas

- ☐ Nunca o menos 1 vez al mes  
☒ 1 a 3 veces mes  
☐ 1 vez semana  
☐ 2 a 4 veces semana  
☐ 5 a 6 veces semana  
☐ 1 vez al día  
☐ 2 a 3 veces al día  
☐ 5 a 6 veces al día  
☐ más 6 veces al día

---

patatas cocidas o asadas

- ☐ Nunca o menos 1 vez al mes  
☒ 1 a 3 veces mes  
☐ 1 vez semana  
☐ 2 a 4 veces semana  
☐ 5 a 6 veces semana  
☐ 1 vez al día  
☐ 2 a 3 veces al día  
☐ 5 a 6 veces al día  
☐ más 6 veces al día

---

bolsa papas

- ☐ Nunca o menos 1 vez al mes  
☒ 1 a 3 veces mes  
☐ 1 vez semana  
☐ 2 a 4 veces semana  
☐ 5 a 6 veces semana  
☐ 1 vez al día  
☐ 2 a 3 veces al día  
☐ 5 a 6 veces al día  
☐ más 6 veces al día

---

arroz cocinado

- ☒ Nunca o menos 1 vez al mes  
☐ 1 a 3 veces mes  
☐ 1 vez semana  
☐ 2 a 4 veces semana  
☐ 5 a 6 veces semana  
☐ 1 vez al día  
☐ 2 a 3 veces al día  
☐ 5 a 6 veces al día  
☐ más 6 veces al día

---

pasta

- ☐ Nunca o menos 1 vez al mes  
☒ 1 a 3 veces mes  
☐ 1 vez semana  
☐ 2 a 4 veces semana  
☐ 5 a 6 veces semana  
☐ 1 vez al día  
☐ 2 a 3 veces al día  
☐ 5 a 6 veces al día  
☐ más 6 veces al día

|                     |                                                                                                                                                                                                                                                                                                                                                                                                              |
|---------------------|--------------------------------------------------------------------------------------------------------------------------------------------------------------------------------------------------------------------------------------------------------------------------------------------------------------------------------------------------------------------------------------------------------------|
| pizza               | <input type="radio"/> Nunca o menos 1 vez al mes<br><input type="radio"/> 1 a 3 veces mes<br><input checked="" type="radio"/> 1 vez semana<br><input type="radio"/> 2 a 4 veces semana<br><input type="radio"/> 5 a 6 veces semana<br><input type="radio"/> 1 vez al día<br><input type="radio"/> 2 a 3 veces al día<br><input type="radio"/> 5 a 6 veces al día<br><input type="radio"/> más 6 veces al día |
| aceite oliva        | <input type="radio"/> Nunca o menos 1 vez al mes<br><input type="radio"/> 1 a 3 veces mes<br><input type="radio"/> 1 vez semana<br><input type="radio"/> 2 a 4 veces semana<br><input type="radio"/> 5 a 6 veces semana<br><input checked="" type="radio"/> 1 vez al día<br><input type="radio"/> 2 a 3 veces al día<br><input type="radio"/> 5 a 6 veces al día<br><input type="radio"/> más 6 veces al día |
| otros aceites       | <input type="radio"/> Nunca o menos 1 vez al mes<br><input type="radio"/> 1 a 3 veces mes<br><input type="radio"/> 1 vez semana<br><input type="radio"/> 2 a 4 veces semana<br><input checked="" type="radio"/> 5 a 6 veces semana<br><input type="radio"/> 1 vez al día<br><input type="radio"/> 2 a 3 veces al día<br><input type="radio"/> 5 a 6 veces al día<br><input type="radio"/> más 6 veces al día |
| margarina           | <input checked="" type="radio"/> Nunca o menos 1 vez al mes<br><input type="radio"/> 1 a 3 veces mes<br><input type="radio"/> 1 vez semana<br><input type="radio"/> 2 a 4 veces semana<br><input type="radio"/> 5 a 6 veces semana<br><input type="radio"/> 1 vez al día<br><input type="radio"/> 2 a 3 veces al día<br><input type="radio"/> 5 a 6 veces al día<br><input type="radio"/> más 6 veces al día |
| mantequilla         | <input checked="" type="radio"/> Nunca o menos 1 vez al mes<br><input type="radio"/> 1 a 3 veces mes<br><input type="radio"/> 1 vez semana<br><input type="radio"/> 2 a 4 veces semana<br><input type="radio"/> 5 a 6 veces semana<br><input type="radio"/> 1 vez al día<br><input type="radio"/> 2 a 3 veces al día<br><input type="radio"/> 5 a 6 veces al día<br><input type="radio"/> más 6 veces al día |
| galletas tipo maria | <input checked="" type="radio"/> Nunca o menos 1 vez al mes<br><input type="radio"/> 1 a 3 veces mes<br><input type="radio"/> 1 vez semana<br><input type="radio"/> 2 a 4 veces semana<br><input type="radio"/> 5 a 6 veces semana<br><input type="radio"/> 1 vez al día<br><input type="radio"/> 2 a 3 veces al día<br><input type="radio"/> 5 a 6 veces al día<br><input type="radio"/> más 6 veces al día |

|                           |                                                                                                                                                                                                                                                                                                                                                                                                              |
|---------------------------|--------------------------------------------------------------------------------------------------------------------------------------------------------------------------------------------------------------------------------------------------------------------------------------------------------------------------------------------------------------------------------------------------------------|
| galletas chocolate        | <input checked="" type="radio"/> Nunca o menos 1 vez al mes<br><input type="radio"/> 1 a 3 veces mes<br><input type="radio"/> 1 vez semana<br><input type="radio"/> 2 a 4 veces semana<br><input type="radio"/> 5 a 6 veces semana<br><input type="radio"/> 1 vez al día<br><input type="radio"/> 2 a 3 veces al día<br><input type="radio"/> 5 a 6 veces al día<br><input type="radio"/> más 6 veces al día |
| bollieria                 | <input type="radio"/> Nunca o menos 1 vez al mes<br><input type="radio"/> 1 a 3 veces mes<br><input checked="" type="radio"/> 1 vez semana<br><input type="radio"/> 2 a 4 veces semana<br><input type="radio"/> 5 a 6 veces semana<br><input type="radio"/> 1 vez al día<br><input type="radio"/> 2 a 3 veces al día<br><input type="radio"/> 5 a 6 veces al día<br><input type="radio"/> más 6 veces al día |
| chocolate o bombones      | <input type="radio"/> Nunca o menos 1 vez al mes<br><input checked="" type="radio"/> 1 a 3 veces mes<br><input type="radio"/> 1 vez semana<br><input type="radio"/> 2 a 4 veces semana<br><input type="radio"/> 5 a 6 veces semana<br><input type="radio"/> 1 vez al día<br><input type="radio"/> 2 a 3 veces al día<br><input type="radio"/> 5 a 6 veces al día<br><input type="radio"/> más 6 veces al día |
| chocolate polvo o colacao | <input type="radio"/> Nunca o menos 1 vez al mes<br><input type="radio"/> 1 a 3 veces mes<br><input type="radio"/> 1 vez semana<br><input type="radio"/> 2 a 4 veces semana<br><input checked="" type="radio"/> 5 a 6 veces semana<br><input type="radio"/> 1 vez al día<br><input type="radio"/> 2 a 3 veces al día<br><input type="radio"/> 5 a 6 veces al día<br><input type="radio"/> más 6 veces al día |
| vino tinto                | <input checked="" type="radio"/> Nunca o menos 1 vez al mes<br><input type="radio"/> 1 a 3 veces mes<br><input type="radio"/> 1 vez semana<br><input type="radio"/> 2 a 4 veces semana<br><input type="radio"/> 5 a 6 veces semana<br><input type="radio"/> 1 vez al día<br><input type="radio"/> 2 a 3 veces al día<br><input type="radio"/> 5 a 6 veces al día<br><input type="radio"/> más 6 veces al día |
| vino blanco               | <input checked="" type="radio"/> Nunca o menos 1 vez al mes<br><input type="radio"/> 1 a 3 veces mes<br><input type="radio"/> 1 vez semana<br><input type="radio"/> 2 a 4 veces semana<br><input type="radio"/> 5 a 6 veces semana<br><input type="radio"/> 1 vez al día<br><input type="radio"/> 2 a 3 veces al día<br><input type="radio"/> 5 a 6 veces al día<br><input type="radio"/> más 6 veces al día |

|                       |                                                                                                                                                                                                                                                                                                                                                                                                              |
|-----------------------|--------------------------------------------------------------------------------------------------------------------------------------------------------------------------------------------------------------------------------------------------------------------------------------------------------------------------------------------------------------------------------------------------------------|
| vino seco o vermut    | <input checked="" type="radio"/> Nunca o menos 1 vez al mes<br><input type="radio"/> 1 a 3 veces mes<br><input type="radio"/> 1 vez semana<br><input type="radio"/> 2 a 4 veces semana<br><input type="radio"/> 5 a 6 veces semana<br><input type="radio"/> 1 vez al día<br><input type="radio"/> 2 a 3 veces al día<br><input type="radio"/> 5 a 6 veces al día<br><input type="radio"/> más 6 veces al día |
| cerveza               | <input checked="" type="radio"/> Nunca o menos 1 vez al mes<br><input type="radio"/> 1 a 3 veces mes<br><input type="radio"/> 1 vez semana<br><input type="radio"/> 2 a 4 veces semana<br><input type="radio"/> 5 a 6 veces semana<br><input type="radio"/> 1 vez al día<br><input type="radio"/> 2 a 3 veces al día<br><input type="radio"/> 5 a 6 veces al día<br><input type="radio"/> más 6 veces al día |
| cerveza sin alcohol   | <input type="radio"/> Nunca o menos 1 vez al mes<br><input checked="" type="radio"/> 1 a 3 veces mes<br><input type="radio"/> 1 vez semana<br><input type="radio"/> 2 a 4 veces semana<br><input type="radio"/> 5 a 6 veces semana<br><input type="radio"/> 1 vez al día<br><input type="radio"/> 2 a 3 veces al día<br><input type="radio"/> 5 a 6 veces al día<br><input type="radio"/> más 6 veces al día |
| licores               | <input checked="" type="radio"/> Nunca o menos 1 vez al mes<br><input type="radio"/> 1 a 3 veces mes<br><input type="radio"/> 1 vez semana<br><input type="radio"/> 2 a 4 veces semana<br><input type="radio"/> 5 a 6 veces semana<br><input type="radio"/> 1 vez al día<br><input type="radio"/> 2 a 3 veces al día<br><input type="radio"/> 5 a 6 veces al día<br><input type="radio"/> más 6 veces al día |
| ginebra o ron o vodka | <input checked="" type="radio"/> Nunca o menos 1 vez al mes<br><input type="radio"/> 1 a 3 veces mes<br><input type="radio"/> 1 vez semana<br><input type="radio"/> 2 a 4 veces semana<br><input type="radio"/> 5 a 6 veces semana<br><input type="radio"/> 1 vez al día<br><input type="radio"/> 2 a 3 veces al día<br><input type="radio"/> 5 a 6 veces al día<br><input type="radio"/> más 6 veces al día |
| refresco normal       | <input checked="" type="radio"/> Nunca o menos 1 vez al mes<br><input type="radio"/> 1 a 3 veces mes<br><input type="radio"/> 1 vez semana<br><input type="radio"/> 2 a 4 veces semana<br><input type="radio"/> 5 a 6 veces semana<br><input type="radio"/> 1 vez al día<br><input type="radio"/> 2 a 3 veces al día<br><input type="radio"/> 5 a 6 veces al día<br><input type="radio"/> más 6 veces al día |

|                          |                                                                                                                                                                                                                                                                                                                                                                                                              |
|--------------------------|--------------------------------------------------------------------------------------------------------------------------------------------------------------------------------------------------------------------------------------------------------------------------------------------------------------------------------------------------------------------------------------------------------------|
| refresco sin azúcar      | <input type="radio"/> Nunca o menos 1 vez al mes<br><input type="radio"/> 1 a 3 veces mes<br><input checked="" type="radio"/> 1 vez semana<br><input type="radio"/> 2 a 4 veces semana<br><input type="radio"/> 5 a 6 veces semana<br><input type="radio"/> 1 vez al día<br><input type="radio"/> 2 a 3 veces al día<br><input type="radio"/> 5 a 6 veces al día<br><input type="radio"/> más 6 veces al día |
| Agua del grifo           | <input checked="" type="radio"/> Nunca o menos 1 vez al mes<br><input type="radio"/> 1 a 3 veces mes<br><input type="radio"/> 1 vez semana<br><input type="radio"/> 2 a 4 veces semana<br><input type="radio"/> 5 a 6 veces semana<br><input type="radio"/> 1 vez al día<br><input type="radio"/> 2 a 3 veces al día<br><input type="radio"/> 5 a 6 veces al día<br><input type="radio"/> más 6 veces al día |
| agua embotellada sin gas | <input type="radio"/> Nunca o menos 1 vez al mes<br><input type="radio"/> 1 a 3 veces mes<br><input type="radio"/> 1 vez semana<br><input type="radio"/> 2 a 4 veces semana<br><input type="radio"/> 5 a 6 veces semana<br><input type="radio"/> 1 vez al día<br><input type="radio"/> 2 a 3 veces al día<br><input checked="" type="radio"/> 5 a 6 veces al día<br><input type="radio"/> más 6 veces al día |
| agua embotellada con gas | <input type="radio"/> Nunca o menos 1 vez al mes<br><input type="radio"/> 1 a 3 veces mes<br><input checked="" type="radio"/> 1 vez semana<br><input type="radio"/> 2 a 4 veces semana<br><input type="radio"/> 5 a 6 veces semana<br><input type="radio"/> 1 vez al día<br><input type="radio"/> 2 a 3 veces al día<br><input type="radio"/> 5 a 6 veces al día<br><input type="radio"/> más 6 veces al día |
| zumو frutas embasado     | <input checked="" type="radio"/> Nunca o menos 1 vez al mes<br><input type="radio"/> 1 a 3 veces mes<br><input type="radio"/> 1 vez semana<br><input type="radio"/> 2 a 4 veces semana<br><input type="radio"/> 5 a 6 veces semana<br><input type="radio"/> 1 vez al día<br><input type="radio"/> 2 a 3 veces al día<br><input type="radio"/> 5 a 6 veces al día<br><input type="radio"/> más 6 veces al día |
| cafe                     | <input checked="" type="radio"/> Nunca o menos 1 vez al mes<br><input type="radio"/> 1 a 3 veces mes<br><input type="radio"/> 1 vez semana<br><input type="radio"/> 2 a 4 veces semana<br><input type="radio"/> 5 a 6 veces semana<br><input type="radio"/> 1 vez al día<br><input type="radio"/> 2 a 3 veces al día<br><input type="radio"/> 5 a 6 veces al día<br><input type="radio"/> más 6 veces al día |

|                       |                                                                                                                                                                                                                                                                                                                                                                                                              |
|-----------------------|--------------------------------------------------------------------------------------------------------------------------------------------------------------------------------------------------------------------------------------------------------------------------------------------------------------------------------------------------------------------------------------------------------------|
| cafe descafeinado     | <input checked="" type="radio"/> Nunca o menos 1 vez al mes<br><input type="radio"/> 1 a 3 veces mes<br><input type="radio"/> 1 vez semana<br><input type="radio"/> 2 a 4 veces semana<br><input type="radio"/> 5 a 6 veces semana<br><input type="radio"/> 1 vez al día<br><input type="radio"/> 2 a 3 veces al día<br><input type="radio"/> 5 a 6 veces al día<br><input type="radio"/> más 6 veces al día |
| te o infusión         | <input type="radio"/> Nunca o menos 1 vez al mes<br><input type="radio"/> 1 a 3 veces mes<br><input checked="" type="radio"/> 1 vez semana<br><input type="radio"/> 2 a 4 veces semana<br><input type="radio"/> 5 a 6 veces semana<br><input type="radio"/> 1 vez al día<br><input type="radio"/> 2 a 3 veces al día<br><input type="radio"/> 5 a 6 veces al día<br><input type="radio"/> más 6 veces al día |
| sopa o puré verduras  | <input type="radio"/> Nunca o menos 1 vez al mes<br><input type="radio"/> 1 a 3 veces mes<br><input checked="" type="radio"/> 1 vez semana<br><input type="radio"/> 2 a 4 veces semana<br><input type="radio"/> 5 a 6 veces semana<br><input type="radio"/> 1 vez al día<br><input type="radio"/> 2 a 3 veces al día<br><input type="radio"/> 5 a 6 veces al día<br><input type="radio"/> más 6 veces al día |
| croquetas pollo jamón | <input checked="" type="radio"/> Nunca o menos 1 vez al mes<br><input type="radio"/> 1 a 3 veces mes<br><input type="radio"/> 1 vez semana<br><input type="radio"/> 2 a 4 veces semana<br><input type="radio"/> 5 a 6 veces semana<br><input type="radio"/> 1 vez al día<br><input type="radio"/> 2 a 3 veces al día<br><input type="radio"/> 5 a 6 veces al día<br><input type="radio"/> más 6 veces al día |
| croquetas pescado     | <input type="radio"/> Nunca o menos 1 vez al mes<br><input type="radio"/> 1 a 3 veces mes<br><input checked="" type="radio"/> 1 vez semana<br><input type="radio"/> 2 a 4 veces semana<br><input type="radio"/> 5 a 6 veces semana<br><input type="radio"/> 1 vez al día<br><input type="radio"/> 2 a 3 veces al día<br><input type="radio"/> 5 a 6 veces al día<br><input type="radio"/> más 6 veces al día |
| mayonesa              | <input type="radio"/> Nunca o menos 1 vez al mes<br><input type="radio"/> 1 a 3 veces mes<br><input checked="" type="radio"/> 1 vez semana<br><input type="radio"/> 2 a 4 veces semana<br><input type="radio"/> 5 a 6 veces semana<br><input type="radio"/> 1 vez al día<br><input type="radio"/> 2 a 3 veces al día<br><input type="radio"/> 5 a 6 veces al día<br><input type="radio"/> más 6 veces al día |

---

salsa tomate

- ☐ Nunca o menos 1 vez al mes  
☒ 1 a 3 veces mes  
☐ 1 vez semana  
☐ 2 a 4 veces semana  
☐ 5 a 6 veces semana  
☐ 1 vez al día  
☐ 2 a 3 veces al día  
☐ 5 a 6 veces al día  
☐ más 6 veces al día

---

ketchup

- ☒ Nunca o menos 1 vez al mes  
☐ 1 a 3 veces mes  
☐ 1 vez semana  
☐ 2 a 4 veces semana  
☐ 5 a 6 veces semana  
☐ 1 vez al día  
☐ 2 a 3 veces al día  
☐ 5 a 6 veces al día  
☐ más 6 veces al día

---

sal

- ☐ Nunca o menos 1 vez al mes  
☐ 1 a 3 veces mes  
☒ 1 vez semana  
☐ 2 a 4 veces semana  
☐ 5 a 6 veces semana  
☐ 1 vez al día  
☐ 2 a 3 veces al día  
☐ 5 a 6 veces al día  
☐ más 6 veces al día

---

ajo

- ☐ Nunca o menos 1 vez al mes  
☐ 1 a 3 veces mes  
☐ 1 vez semana  
☐ 2 a 4 veces semana  
☐ 5 a 6 veces semana  
☐ 1 vez al día  
☐ 2 a 3 veces al día  
☐ 5 a 6 veces al día  
☐ más 6 veces al día

---

mermelada o miel

- ☐ Nunca o menos 1 vez al mes  
☒ 1 a 3 veces mes  
☐ 1 vez semana  
☐ 2 a 4 veces semana  
☐ 5 a 6 veces semana  
☐ 1 vez al día  
☐ 2 a 3 veces al día  
☐ 5 a 6 veces al día  
☐ más 6 veces al día

---

azúcar

- ☐ Nunca o menos 1 vez al mes  
☒ 1 a 3 veces mes  
☐ 1 vez semana  
☐ 2 a 4 veces semana  
☐ 5 a 6 veces semana  
☐ 1 vez al día  
☐ 2 a 3 veces al día  
☐ 5 a 6 veces al día  
☐ más 6 veces al día



---

Otro alimento

---

suplementos vitamínicos

- ☐ si  
☒ no

---

suplementos vitamínicos

---

dieta previa

- ☒ si  
☐ no

motivo dieta

- ☐ no dieta  
☒ control peso  
☐ control colesterol  
☐ control diabetes  
☐ problemas estómago  
☐ problemas vesícula o hepáticos  
☐ HTA o cardiopatía  
☐ problemas renales  
☐ alergia alimentaria  
☐ ácido úrico elevado  
☐ vegetariana  
☐ otros

---

cambio alimentos año previo gestación

- ☐ si  
☒ no

---

cambio lácteos

- ☐ eliminado  
☐ disminuido  
☒ igual  
☐ aumentado  
☐ no sabe

---

cambio huevos

- ☐ eliminado  
☐ disminuido  
☒ igual  
☐ aumentado  
☐ no sabe

---

cambio carne

- ☐ eliminado  
☐ disminuido  
☒ igual  
☐ aumentado  
☐ no sabe

---

cambio pescado

- ☐ eliminado  
☐ disminuido  
☒ igual  
☐ aumentado  
☐ no sabe

---

cambio verduras

- ☐ eliminado  
☐ disminuido  
☒ igual  
☐ aumentado  
☐ no sabe

|                            |                                                                                                                                                                                                                        |
|----------------------------|------------------------------------------------------------------------------------------------------------------------------------------------------------------------------------------------------------------------|
| cambio legumbres           | <input type="radio"/> eliminado<br><input type="radio"/> disminuido<br><input checked="" type="radio"/> igual<br><input type="radio"/> aumentado<br><input type="radio"/> no sabe                                      |
| cambio fruta               | <input type="radio"/> eliminado<br><input type="radio"/> disminuido<br><input checked="" type="radio"/> igual<br><input type="radio"/> aumentado<br><input type="radio"/> no sabe                                      |
| cambio pan                 | <input type="radio"/> eliminado<br><input type="radio"/> disminuido<br><input checked="" type="radio"/> igual<br><input type="radio"/> aumentado<br><input type="radio"/> no sabe                                      |
| cambio aceite oliva        | <input type="radio"/> eliminado<br><input type="radio"/> disminuido<br><input checked="" type="radio"/> igual<br><input type="radio"/> aumentado<br><input type="radio"/> no sabe                                      |
| cambio mante o margarina   | <input type="radio"/> eliminado<br><input type="radio"/> disminuido<br><input checked="" type="radio"/> igual<br><input type="radio"/> aumentado<br><input type="radio"/> no sabe                                      |
| cambio azúcar y dulces     | <input type="radio"/> eliminado<br><input type="radio"/> disminuido<br><input checked="" type="radio"/> igual<br><input type="radio"/> aumentado<br><input type="radio"/> no sabe                                      |
| cambio bebidas alcohólicas | <input type="radio"/> eliminado<br><input type="radio"/> disminuido<br><input checked="" type="radio"/> igual<br><input type="radio"/> aumentado<br><input type="radio"/> no sabe                                      |
| frecuencia comidas fritas  | <input type="radio"/> a diario<br><input type="radio"/> 5 a 6 veces semana<br><input type="radio"/> 2 a 4 veces semana<br><input checked="" type="radio"/> 1 vez semana<br><input type="radio"/> menos de 1 vez semana |
| carne                      | <input type="radio"/> no como<br><input type="radio"/> cruda<br><input type="radio"/> poco hecha<br><input type="radio"/> hecha<br><input checked="" type="radio"/> muy hecha                                          |
| grasa visible carne        | <input type="radio"/> quita toda<br><input checked="" type="radio"/> quita mayoría<br><input type="radio"/> quita un poco<br><input type="radio"/> no quita nada                                                       |

|                                |                                                                                                                                                                                                                                                          |
|--------------------------------|----------------------------------------------------------------------------------------------------------------------------------------------------------------------------------------------------------------------------------------------------------|
| cocina carne                   | <input checked="" type="radio"/> a la plancha<br><input type="radio"/> a la parrilla<br><input type="radio"/> asada<br><input type="radio"/> frita<br><input type="radio"/> guisada                                                                      |
| tostado quemado carne          | <input checked="" type="radio"/> nunca<br><input type="radio"/> 1 vez mes<br><input type="radio"/> 2 a 3 veces mes<br><input type="radio"/> 1 vez semana<br><input type="radio"/> 2 a 3 semanas                                                          |
| tostado quemado pescado        | <input checked="" type="radio"/> nunca<br><input type="radio"/> 1 vez mes<br><input type="radio"/> 2 a 3 veces mes<br><input type="radio"/> 1 vez semana<br><input type="radio"/> 2 a 3 semanas                                                          |
| socarrat paella                | <input checked="" type="radio"/> nunca<br><input type="radio"/> 1 vez mes<br><input type="radio"/> 2 a 3 veces mes<br><input type="radio"/> 1 vez semana<br><input type="radio"/> 2 a 3 semanas                                                          |
| grasa o aceite cocinar         | <input type="radio"/> mantequilla<br><input type="radio"/> margarina<br><input checked="" type="radio"/> aceite oliva<br><input type="radio"/> aceite oliva virgen extra<br><input type="radio"/> aceite vegetal<br><input type="radio"/> mezcla aceites |
| grasa aceite aliñar            | <input type="radio"/> mantequilla<br><input type="radio"/> margarina<br><input type="radio"/> aceite oliva<br><input checked="" type="radio"/> aceite oliva virgen extra<br><input type="radio"/> aceite vegetal<br><input type="radio"/> mezcla aceites |
| grasa aceite freir             | <input type="radio"/> mantequilla<br><input type="radio"/> margarina<br><input type="radio"/> aceite oliva<br><input type="radio"/> aceite oliva virgen extra<br><input checked="" type="radio"/> aceite vegetal<br><input type="radio"/> mezcla aceites |
| Ejercicio cuestionario         | <input checked="" type="radio"/> si<br><input type="radio"/> no                                                                                                                                                                                          |
| horas de sueño incluido siesta | [*DATA REMOVED*]                                                                                                                                                                                                                                         |
| minutos siesta                 | [*DATA REMOVED*]                                                                                                                                                                                                                                         |
| horas televisión semana        | [*DATA REMOVED*]                                                                                                                                                                                                                                         |

|                                        |                                                                                                                                                                                                                                                                                                                                                                           |
|----------------------------------------|---------------------------------------------------------------------------------------------------------------------------------------------------------------------------------------------------------------------------------------------------------------------------------------------------------------------------------------------------------------------------|
| actividad trabajo                      | <input checked="" type="radio"/> casi siempre sentado<br><input type="radio"/> sentado 50 por cien<br><input type="radio"/> casi siempre de pie, quieto<br><input type="radio"/> casi siempre levantado caminando y llevando pocas cosas<br><input type="radio"/> casi siempre levantado, caminando y llevado muchas cosas<br><input type="radio"/> trabajo manual pesado |
| tiempo caminar o bici al día           | <input type="radio"/> casi nunca<br><input type="radio"/> menos 20min día<br><input checked="" type="radio"/> 20 a 40 min día<br><input type="radio"/> 40 a 60 min día<br><input type="radio"/> 1h o 1h y media día<br><input type="radio"/> más de 1h y media al día                                                                                                     |
| tiempo tareas casa al día              | <input type="radio"/> menos de 1h día<br><input checked="" type="radio"/> 1 a 2h día<br><input type="radio"/> 3 a 4h día<br><input type="radio"/> 5 a 6h día<br><input type="radio"/> 7 a 8h día<br><input type="radio"/> más de 8h día                                                                                                                                   |
| tiempo libre televisión ordenador leer | <input type="radio"/> menos 1h día<br><input type="radio"/> 1h día<br><input checked="" type="radio"/> 2h día<br><input type="radio"/> 3h día<br><input type="radio"/> 4h día<br><input type="radio"/> 5 a 6h día<br><input type="radio"/> mas 6h día                                                                                                                     |
| tiempo libre ejercicio o deporte       | <input type="radio"/> menos 1h semana<br><input type="radio"/> 1h semana<br><input type="radio"/> 2h semana<br><input checked="" type="radio"/> 3h semana<br><input type="radio"/> 4 a 5h semana<br><input type="radio"/> mas 5h semana                                                                                                                                   |
| como se considera                      | <input type="radio"/> sedentaria<br><input checked="" type="radio"/> poco activa<br><input type="radio"/> moderadamente activa<br><input type="radio"/> bastante activa<br><input type="radio"/> muy activa<br><input type="radio"/> no sabe                                                                                                                              |
| FUR                                    | [*DATA REMOVED*]                                                                                                                                                                                                                                                                                                                                                          |
| Semanas gestación 2T                   | [*DATA REMOVED*]                                                                                                                                                                                                                                                                                                                                                          |
| Días gestación 2T                      | [*DATA REMOVED*]                                                                                                                                                                                                                                                                                                                                                          |
| DBP 2T                                 | [*DATA REMOVED*]                                                                                                                                                                                                                                                                                                                                                          |
| CC 2T                                  | [*DATA REMOVED*]                                                                                                                                                                                                                                                                                                                                                          |
| AC 2T                                  | [*DATA REMOVED*]                                                                                                                                                                                                                                                                                                                                                          |

|                                                   |                                                                                                                                                                                                 |
|---------------------------------------------------|-------------------------------------------------------------------------------------------------------------------------------------------------------------------------------------------------|
| LF 2T                                             | [*DATA REMOVED*]                                                                                                                                                                                |
| PFE 2T (Hadlock)                                  | [*DATA REMOVED*]                                                                                                                                                                                |
| Semanas gestación 3T                              | [*DATA REMOVED*]                                                                                                                                                                                |
| días 3T                                           | [*DATA REMOVED*]                                                                                                                                                                                |
| DBP 3T                                            | [*DATA REMOVED*]                                                                                                                                                                                |
| CC 3T                                             | [*DATA REMOVED*]                                                                                                                                                                                |
| AC 3T                                             | [*DATA REMOVED*]                                                                                                                                                                                |
| LF 3T                                             | [*DATA REMOVED*]                                                                                                                                                                                |
| PFE 3T (Hadlock)                                  | [*DATA REMOVED*]                                                                                                                                                                                |
| Semanas de gestación final                        | [*DATA REMOVED*]                                                                                                                                                                                |
| días gestación final                              | [*DATA REMOVED*]                                                                                                                                                                                |
| Localización placenta                             | <input checked="" type="radio"/> anterior<br><input type="radio"/> lateral derecha<br><input type="radio"/> lateral izquierda<br><input type="radio"/> posterior<br><input type="radio"/> fondo |
| Presentación longitudinal cefálica                | <input type="radio"/> no<br><input checked="" type="radio"/> si                                                                                                                                 |
| Dorso                                             | <input type="radio"/> izquierda anterior<br><input type="radio"/> izquierda posterior<br><input checked="" type="radio"/> derecha anterior<br><input type="radio"/> derecha posterior           |
| diámetro biparietal                               | [*DATA REMOVED*]                                                                                                                                                                                |
| Circunferencia craneal                            | [*DATA REMOVED*]                                                                                                                                                                                |
| Circunferencia abdominal                          | [*DATA REMOVED*]                                                                                                                                                                                |
| Longitud de femur                                 | [*DATA REMOVED*]                                                                                                                                                                                |
| tejido celular subcutáneo a nivel del muslo en mm | [*DATA REMOVED*]                                                                                                                                                                                |
| tejido celular subcutáneo en abdomen en mm        | [*DATA REMOVED*]                                                                                                                                                                                |
| Volumen del muslo en cm3                          | [*DATA REMOVED*]                                                                                                                                                                                |
| Peso fetal estimado según fórmula de Hadlock      | [*DATA REMOVED*]                                                                                                                                                                                |

|                                               |                                                                                                                                                          |
|-----------------------------------------------|----------------------------------------------------------------------------------------------------------------------------------------------------------|
| Percentil                                     | [*DATA REMOVED*]                                                                                                                                         |
| Peso fetal estimado según fórmula de Scioscia | <hr/>                                                                                                                                                    |
| Peso fetal estimado según fórmula de LEE      | <hr/>                                                                                                                                                    |
| Tipo de parto                                 | <input type="radio"/> eutocico<br><input checked="" type="radio"/> instrumentado/ventosa<br><input type="radio"/> cesarea                                |
| fecha de nacimiento                           | [*DATA REMOVED*]                                                                                                                                         |
| Días entre exploración y nacimiento           | [*DATA REMOVED*]                                                                                                                                         |
| Peso RN en g                                  | [*DATA REMOVED*]                                                                                                                                         |
| sexo                                          | <input checked="" type="radio"/> mujer<br><input type="radio"/> hombre                                                                                   |
| Apgar 1 minuto                                | [*DATA REMOVED*]                                                                                                                                         |
| Apgar 5 minutos                               | [*DATA REMOVED*]                                                                                                                                         |
| Apgar 10 minutos                              | <hr/>                                                                                                                                                    |
| antecedente Covid durante gestación           | <input type="radio"/> Yes<br><input checked="" type="radio"/> No                                                                                         |
| Nivel de estudios                             | <input type="radio"/> ninguno<br><input type="radio"/> primarios<br><input type="radio"/> secundarios<br><input checked="" type="radio"/> universitarios |

# Base\_datos\_estimacion\_peso\_fetal

|                                       |                                                                                                                                                                                                                                                                                      |
|---------------------------------------|--------------------------------------------------------------------------------------------------------------------------------------------------------------------------------------------------------------------------------------------------------------------------------------|
| Número de identificación participante | 138                                                                                                                                                                                                                                                                                  |
| CODIGO PARTICIPANTE                   |                                                                                                                                                                                                                                                                                      |
| Edad                                  | [*DATA REMOVED*]                                                                                                                                                                                                                                                                     |
| Gestaciones                           | <input type="radio"/> 1<br><input checked="" type="radio"/> 2<br><input type="radio"/> 3<br><input type="radio"/> mas de 3                                                                                                                                                           |
| partos                                | <input type="radio"/> 0<br><input checked="" type="radio"/> 1<br><input type="radio"/> 2<br><input type="radio"/> 3<br><input type="radio"/> mas de 3                                                                                                                                |
| cesáreas                              | <input checked="" type="radio"/> 0<br><input type="radio"/> 1<br><input type="radio"/> 2<br><input type="radio"/> 3<br><input type="radio"/> mas de 3                                                                                                                                |
| Abortos                               | <input checked="" type="radio"/> 0<br><input type="radio"/> 1<br><input type="radio"/> 2<br><input type="radio"/> 3<br><input type="radio"/> mas de 3                                                                                                                                |
| Tipo de gestacion                     | <input checked="" type="radio"/> espontanea<br><input type="radio"/> IAC inseminación artificial conyuge<br><input type="radio"/> IAD inseminación artificial donante<br><input type="radio"/> FIV Fecundación in Vitro<br><input type="radio"/> Ovodon FIV con donación de ovocitos |
| peso previo a embarazo                | [*DATA REMOVED*]                                                                                                                                                                                                                                                                     |
| Ganancia ponderal embarazo            | [*DATA REMOVED*]                                                                                                                                                                                                                                                                     |
| Talla madre                           | [*DATA REMOVED*]                                                                                                                                                                                                                                                                     |
| IMC previo embarazo                   | 25.142857142857142                                                                                                                                                                                                                                                                   |
| Patología obstétrica                  | <input checked="" type="radio"/> no<br><input type="radio"/> si                                                                                                                                                                                                                      |
| Diabetes pregestacional               | <input checked="" type="radio"/> no<br><input type="radio"/> si                                                                                                                                                                                                                      |
| Diabetes gestacional                  | <input checked="" type="radio"/> no<br><input type="radio"/> si                                                                                                                                                                                                                      |

|                                            |                                                                                                                                                                                      |
|--------------------------------------------|--------------------------------------------------------------------------------------------------------------------------------------------------------------------------------------|
| Diabetes gestacional con insulina          | <input checked="" type="radio"/> no<br><input type="radio"/> si                                                                                                                      |
| Diabetes gestacional con dieta y ejercicio | <input checked="" type="radio"/> no<br><input type="radio"/> si                                                                                                                      |
| Percentil fetos previos                    | <input checked="" type="radio"/> Nada<br><input type="radio"/> percentil menor de 10<br><input type="radio"/> percentil entre 10 y 90<br><input type="radio"/> percentil mayor de 90 |
| Exfumadora                                 | <input checked="" type="radio"/> Nada<br><input type="radio"/> menos de 5 años<br><input type="radio"/> 5 a 10 años<br><input type="radio"/> mayor o igual a 10 años                 |
| Hábito tabáquico                           | <input type="radio"/> no<br><input checked="" type="radio"/> si                                                                                                                      |
| fumadora                                   | [*DATA REMOVED*]                                                                                                                                                                     |
| Consumo otros tóxicos                      | <input checked="" type="radio"/> no<br><input type="radio"/> si                                                                                                                      |
| Hb 1T                                      | [*DATA REMOVED*]                                                                                                                                                                     |
| Htc 1T                                     | [*DATA REMOVED*]                                                                                                                                                                     |
| Hb 2T                                      | [*DATA REMOVED*]                                                                                                                                                                     |
| HTC 2T                                     | [*DATA REMOVED*]                                                                                                                                                                     |
| Hb 3T                                      | [*DATA REMOVED*]                                                                                                                                                                     |
| HTC 3T                                     | [*DATA REMOVED*]                                                                                                                                                                     |
| Suplemento FE oral                         | <input checked="" type="radio"/> si<br><input type="radio"/> no                                                                                                                      |
| Suplemento fe iv                           | <input type="radio"/> si<br><input checked="" type="radio"/> no                                                                                                                      |
| Transfusión                                | <input checked="" type="radio"/> no<br><input type="radio"/> si                                                                                                                      |
| Solicitada Vit D                           | <input checked="" type="radio"/> no<br><input type="radio"/> si                                                                                                                      |
| Deficit vit D                              | <input type="radio"/> no<br><input type="radio"/> si                                                                                                                                 |
| Suplemento vit D                           | <input type="radio"/> si<br><input type="radio"/> no                                                                                                                                 |



|                       |                                                                                                                                                                                                                                                                                                                                                                                                              |
|-----------------------|--------------------------------------------------------------------------------------------------------------------------------------------------------------------------------------------------------------------------------------------------------------------------------------------------------------------------------------------------------------------------------------------------------------|
| Dieta, cuestionario   | <input checked="" type="radio"/> si<br><input type="radio"/> no                                                                                                                                                                                                                                                                                                                                              |
| Leche entera          | <input type="radio"/> Nunca o menos 1 vez al mes<br><input type="radio"/> 1 a 3 veces mes<br><input type="radio"/> 1 vez semana<br><input checked="" type="radio"/> 2 a 4 veces semana<br><input type="radio"/> 5 a 6 veces semana<br><input type="radio"/> 1 vez al día<br><input type="radio"/> 2 a 3 veces al día<br><input type="radio"/> 5 a 6 veces al día<br><input type="radio"/> más 6 veces al día |
| Leche semidesnatada   | <input checked="" type="radio"/> Nunca o menos 1 vez al mes<br><input type="radio"/> 1 a 3 veces mes<br><input type="radio"/> 1 vez semana<br><input type="radio"/> 2 a 4 veces semana<br><input type="radio"/> 5 a 6 veces semana<br><input type="radio"/> 1 vez al día<br><input type="radio"/> 2 a 3 veces al día<br><input type="radio"/> 5 a 6 veces al día<br><input type="radio"/> mas 6 veces al día |
| Leche desnatada       | <input checked="" type="radio"/> Nunca o menos 1 vez al mes<br><input type="radio"/> 1 a 3 veces mes<br><input type="radio"/> 1 vez semana<br><input type="radio"/> 2 a 4 veces semana<br><input type="radio"/> 5 a 6 veces semana<br><input type="radio"/> 1 vez al día<br><input type="radio"/> 2 a 3 veces al día<br><input type="radio"/> 5 a 6 veces al día<br><input type="radio"/> más 6 veces al día |
| Leche condensada      | <input checked="" type="radio"/> Nunca o menos 1 vez al mes<br><input type="radio"/> 1 a 3 veces mes<br><input type="radio"/> 1 vez semana<br><input type="radio"/> 2 a 4 veces semana<br><input type="radio"/> 5 a 6 veces semana<br><input type="radio"/> 1 vez al día<br><input type="radio"/> 2 a 3 veces al día<br><input type="radio"/> 5 a 6 veces al día<br><input type="radio"/> más 6 veces al día |
| nata o crema de leche | <input checked="" type="radio"/> Nunca o menos 1 vez al mes<br><input type="radio"/> 1 a 3 veces mes<br><input type="radio"/> 1 vez semana<br><input type="radio"/> 2 a 4 veces semana<br><input type="radio"/> 5 a 6 veces semana<br><input type="radio"/> 1 vez al día<br><input type="radio"/> 2 a 3 veces al día<br><input type="radio"/> 5 a 6 veces al día<br><input type="radio"/> más 6 veces al día |

|                                             |                                                                                                                                                                                                                                                                                                                                                                                                              |
|---------------------------------------------|--------------------------------------------------------------------------------------------------------------------------------------------------------------------------------------------------------------------------------------------------------------------------------------------------------------------------------------------------------------------------------------------------------------|
| Yogurt Entero                               | <input type="radio"/> Nunca o menos 1 vez al mes<br><input checked="" type="radio"/> 1 a 3 veces mes<br><input type="radio"/> 1 vez semana<br><input type="radio"/> 2 a 4 veces semana<br><input type="radio"/> 5 a 6 veces semana<br><input type="radio"/> 1 vez al día<br><input type="radio"/> 2 a 3 veces al día<br><input type="radio"/> 5 a 6 veces al día<br><input type="radio"/> más 6 veces al día |
| Yogurt desnatado                            | <input checked="" type="radio"/> Nunca o menos 1 vez al mes<br><input type="radio"/> 1 a 3 veces mes<br><input type="radio"/> 1 vez semana<br><input type="radio"/> 2 a 4 veces semana<br><input type="radio"/> 5 a 6 veces semana<br><input type="radio"/> 1 vez al día<br><input type="radio"/> 2 a 3 veces al día<br><input type="radio"/> 5 a 6 veces al día<br><input type="radio"/> más 6 veces al día |
| 100g requesón o queso blando o queso fresco | <input type="radio"/> Nunca o menos 1 vez al mes<br><input checked="" type="radio"/> 1 a 3 veces mes<br><input type="radio"/> 1 vez semana<br><input type="radio"/> 2 a 4 veces semana<br><input type="radio"/> 5 a 6 veces semana<br><input type="radio"/> 1 vez al día<br><input type="radio"/> 2 a 3 veces al día<br><input type="radio"/> 5 a 6 veces al día<br><input type="radio"/> más 6 veces al día |
| queso curado o semicurado o cremoso         | <input type="radio"/> Nunca o menos 1 vez al mes<br><input checked="" type="radio"/> 1 a 3 veces mes<br><input type="radio"/> 1 vez semana<br><input type="radio"/> 2 a 4 veces semana<br><input type="radio"/> 5 a 6 veces semana<br><input type="radio"/> 1 vez al día<br><input type="radio"/> 2 a 3 veces al día<br><input type="radio"/> 5 a 6 veces al día<br><input type="radio"/> más 6 veces al día |
| natillas flan pudding                       | <input checked="" type="radio"/> Nunca o menos 1 vez al mes<br><input type="radio"/> 1 a 3 veces mes<br><input type="radio"/> 1 vez semana<br><input type="radio"/> 2 a 4 veces semana<br><input type="radio"/> 5 a 6 veces semana<br><input type="radio"/> 1 vez al día<br><input type="radio"/> 2 a 3 veces al día<br><input type="radio"/> 5 a 6 veces al día<br><input type="radio"/> más 6 veces al día |
| Helado                                      | <input type="radio"/> Nunca o menos 1 vez al mes<br><input checked="" type="radio"/> 1 a 3 veces mes<br><input type="radio"/> 1 vez semana<br><input type="radio"/> 2 a 4 veces semana<br><input type="radio"/> 5 a 6 veces semana<br><input type="radio"/> 1 vez al día<br><input type="radio"/> 2 a 3 veces al día<br><input type="radio"/> 5 a 6 veces al día<br><input type="radio"/> más 6 veces al día |

|                                      |                                                                                                                                                                                                                                                                                                                                                                                                              |
|--------------------------------------|--------------------------------------------------------------------------------------------------------------------------------------------------------------------------------------------------------------------------------------------------------------------------------------------------------------------------------------------------------------------------------------------------------------|
| huevo                                | <input type="radio"/> Nunca o menos 1 vez al mes<br><input type="radio"/> 1 a 3 veces mes<br><input checked="" type="radio"/> 1 vez semana<br><input type="radio"/> 2 a 4 veces semana<br><input type="radio"/> 5 a 6 veces semana<br><input type="radio"/> 1 vez al día<br><input type="radio"/> 2 a 3 veces al día<br><input type="radio"/> 5 a 6 veces al día<br><input type="radio"/> más 6 veces al día |
| Pollo con piel                       | <input checked="" type="radio"/> Nunca o menos 1 vez al mes<br><input type="radio"/> 1 a 3 veces mes<br><input type="radio"/> 1 vez semana<br><input type="radio"/> 2 a 4 veces semana<br><input type="radio"/> 5 a 6 veces semana<br><input type="radio"/> 1 vez al día<br><input type="radio"/> 2 a 3 veces al día<br><input type="radio"/> 5 a 6 veces al día<br><input type="radio"/> más 6 veces al día |
| pollo sin piel                       | <input type="radio"/> Nunca o menos 1 vez al mes<br><input checked="" type="radio"/> 1 a 3 veces mes<br><input type="radio"/> 1 vez semana<br><input type="radio"/> 2 a 4 veces semana<br><input type="radio"/> 5 a 6 veces semana<br><input type="radio"/> 1 vez al día<br><input type="radio"/> 2 a 3 veces al día<br><input type="radio"/> 5 a 6 veces al día<br><input type="radio"/> más 6 veces al día |
| Ternera o cerdo o cordero            | <input type="radio"/> Nunca o menos 1 vez al mes<br><input checked="" type="radio"/> 1 a 3 veces mes<br><input type="radio"/> 1 vez semana<br><input type="radio"/> 2 a 4 veces semana<br><input type="radio"/> 5 a 6 veces semana<br><input type="radio"/> 1 vez al día<br><input type="radio"/> 2 a 3 veces al día<br><input type="radio"/> 5 a 6 veces al día<br><input type="radio"/> más 6 veces al día |
| carne caza: Conejo o codorniz o pato | <input checked="" type="radio"/> Nunca o menos 1 vez al mes<br><input type="radio"/> 1 a 3 veces mes<br><input type="radio"/> 1 vez semana<br><input type="radio"/> 2 a 4 veces semana<br><input type="radio"/> 5 a 6 veces semana<br><input type="radio"/> 1 vez al día<br><input type="radio"/> 2 a 3 veces al día<br><input type="radio"/> 5 a 6 veces al día<br><input type="radio"/> más 6 veces al día |
| Hígado de ternera o cerdo o pollo    | <input checked="" type="radio"/> Nunca o menos 1 vez al mes<br><input type="radio"/> 1 a 3 veces mes<br><input type="radio"/> 1 vez semana<br><input type="radio"/> 2 a 4 veces semana<br><input type="radio"/> 5 a 6 veces semana<br><input type="radio"/> 1 vez al día<br><input type="radio"/> 2 a 3 veces al día<br><input type="radio"/> 5 a 6 veces al día<br><input type="radio"/> más 6 veces al día |

---

Vísceras

- ☒ Nunca o menos 1 vez al mes  
☐ 1 a 3 veces mes  
☐ 1 vez semana  
☐ 2 a 4 veces semana  
☐ 5 a 6 veces semana  
☐ 1 vez al día  
☐ 2 a 3 veces al día  
☐ 5 a 6 veces al día  
☐ más 6 veces al día

---

Embutido

- ☒ Nunca o menos 1 vez al mes  
☐ 1 a 3 veces mes  
☐ 1 vez semana  
☐ 2 a 4 veces semana  
☐ 5 a 6 veces semana  
☐ 1 vez al día  
☐ 2 a 3 veces al día  
☐ 5 a 6 veces al día  
☐ más 6 veces al día

---

Salchicha o similar

- ☐ Nunca o menos 1 vez al mes  
☒ 1 a 3 veces mes  
☐ 1 vez semana  
☐ 2 a 4 veces semana  
☐ 5 a 6 veces semana  
☐ 1 vez al día  
☐ 2 a 3 veces al día  
☐ 5 a 6 veces al día  
☐ más 6 veces al día

---

Pate o foiegras

- ☒ Nunca o menos 1 vez al mes  
☐ 1 a 3 veces mes  
☐ 1 vez semana  
☐ 2 a 4 veces semana  
☐ 5 a 6 veces semana  
☐ 1 vez al día  
☐ 2 a 3 veces al día  
☐ 5 a 6 veces al día  
☐ más 6 veces al día

---

Hamburguesa

- ☐ Nunca o menos 1 vez al mes  
☒ 1 a 3 veces mes  
☐ 1 vez semana  
☐ 2 a 4 veces semana  
☐ 5 a 6 veces semana  
☐ 1 vez al día  
☐ 2 a 3 veces al día  
☐ 5 a 6 veces al día  
☐ más 6 veces al día

---

tocino o bacon

- ☐ Nunca o menos 1 vez al mes  
☒ 1 a 3 veces mes  
☐ 1 vez semana  
☐ 2 a 4 veces semana  
☐ 5 a 6 veces semana  
☐ 1 vez al día  
☐ 2 a 3 veces al día  
☐ 5 a 6 veces al día  
☐ más 6 veces al día

|                        |                                                                                                                                                                                                                                                                                                                                                                                                              |
|------------------------|--------------------------------------------------------------------------------------------------------------------------------------------------------------------------------------------------------------------------------------------------------------------------------------------------------------------------------------------------------------------------------------------------------------|
| Pescado frito          | <input type="radio"/> Nunca o menos 1 vez al mes<br><input checked="" type="radio"/> 1 a 3 veces mes<br><input type="radio"/> 1 vez semana<br><input type="radio"/> 2 a 4 veces semana<br><input type="radio"/> 5 a 6 veces semana<br><input type="radio"/> 1 vez al día<br><input type="radio"/> 2 a 3 veces al día<br><input type="radio"/> 5 a 6 veces al día<br><input type="radio"/> más 6 veces al día |
| pescado hervido blanco | <input type="radio"/> Nunca o menos 1 vez al mes<br><input checked="" type="radio"/> 1 a 3 veces mes<br><input type="radio"/> 1 vez semana<br><input type="radio"/> 2 a 4 veces semana<br><input type="radio"/> 5 a 6 veces semana<br><input type="radio"/> 1 vez al día<br><input type="radio"/> 2 a 3 veces al día<br><input type="radio"/> 5 a 6 veces al día<br><input type="radio"/> más 6 veces al día |
| pescado hervido azul   | <input checked="" type="radio"/> Nunca o menos 1 vez al mes<br><input type="radio"/> 1 a 3 veces mes<br><input type="radio"/> 1 vez semana<br><input type="radio"/> 2 a 4 veces semana<br><input type="radio"/> 5 a 6 veces semana<br><input type="radio"/> 1 vez al día<br><input type="radio"/> 2 a 3 veces al día<br><input type="radio"/> 5 a 6 veces al día<br><input type="radio"/> más 6 veces al día |
| otros pescado azul     | <input checked="" type="radio"/> Nunca o menos 1 vez al mes<br><input type="radio"/> 1 a 3 veces mes<br><input type="radio"/> 1 vez semana<br><input type="radio"/> 2 a 4 veces semana<br><input type="radio"/> 5 a 6 veces semana<br><input type="radio"/> 1 vez al día<br><input type="radio"/> 2 a 3 veces al día<br><input type="radio"/> 5 a 6 veces al día<br><input type="radio"/> más 6 veces al día |
| atun conserva          | <input type="radio"/> Nunca o menos 1 vez al mes<br><input checked="" type="radio"/> 1 a 3 veces mes<br><input type="radio"/> 1 vez semana<br><input type="radio"/> 2 a 4 veces semana<br><input type="radio"/> 5 a 6 veces semana<br><input type="radio"/> 1 vez al día<br><input type="radio"/> 2 a 3 veces al día<br><input type="radio"/> 5 a 6 veces al día<br><input type="radio"/> más 6 veces al día |
| sardina conserva       | <input checked="" type="radio"/> Nunca o menos 1 vez al mes<br><input type="radio"/> 1 a 3 veces mes<br><input type="radio"/> 1 vez semana<br><input type="radio"/> 2 a 4 veces semana<br><input type="radio"/> 5 a 6 veces semana<br><input type="radio"/> 1 vez al día<br><input type="radio"/> 2 a 3 veces al día<br><input type="radio"/> 5 a 6 veces al día<br><input type="radio"/> más 6 veces al día |

|                                         |                                                                                                                                                                                                                                                                                                                                                                                                              |
|-----------------------------------------|--------------------------------------------------------------------------------------------------------------------------------------------------------------------------------------------------------------------------------------------------------------------------------------------------------------------------------------------------------------------------------------------------------------|
| pescado ahumado                         | <input checked="" type="radio"/> Nunca o menos 1 vez al mes<br><input type="radio"/> 1 a 3 veces mes<br><input type="radio"/> 1 vez semana<br><input type="radio"/> 2 a 4 veces semana<br><input type="radio"/> 5 a 6 veces semana<br><input type="radio"/> 1 vez al día<br><input type="radio"/> 2 a 3 veces al día<br><input type="radio"/> 5 a 6 veces al día<br><input type="radio"/> más 6 veces al día |
| almejas o mejillones o ostras unos 100g | <input type="radio"/> Nunca o menos 1 vez al mes<br><input type="radio"/> 1 a 3 veces mes<br><input checked="" type="radio"/> 1 vez semana<br><input type="radio"/> 2 a 4 veces semana<br><input type="radio"/> 5 a 6 veces semana<br><input type="radio"/> 1 vez al día<br><input type="radio"/> 2 a 3 veces al día<br><input type="radio"/> 5 a 6 veces al día<br><input type="radio"/> más 6 veces al día |
| calamar o chipiron o sepia unos 100g    | <input type="radio"/> Nunca o menos 1 vez al mes<br><input type="radio"/> 1 a 3 veces mes<br><input checked="" type="radio"/> 1 vez semana<br><input type="radio"/> 2 a 4 veces semana<br><input type="radio"/> 5 a 6 veces semana<br><input type="radio"/> 1 vez al día<br><input type="radio"/> 2 a 3 veces al día<br><input type="radio"/> 5 a 6 veces al día<br><input type="radio"/> más 6 veces al día |
| marisco unos 100g                       | <input type="radio"/> Nunca o menos 1 vez al mes<br><input type="radio"/> 1 a 3 veces mes<br><input checked="" type="radio"/> 1 vez semana<br><input type="radio"/> 2 a 4 veces semana<br><input type="radio"/> 5 a 6 veces semana<br><input type="radio"/> 1 vez al día<br><input type="radio"/> 2 a 3 veces al día<br><input type="radio"/> 5 a 6 veces al día<br><input type="radio"/> más 6 veces al día |
| Espinacas o acelgas cocinadas           | <input checked="" type="radio"/> Nunca o menos 1 vez al mes<br><input type="radio"/> 1 a 3 veces mes<br><input type="radio"/> 1 vez semana<br><input type="radio"/> 2 a 4 veces semana<br><input type="radio"/> 5 a 6 veces semana<br><input type="radio"/> 1 vez al día<br><input type="radio"/> 2 a 3 veces al día<br><input type="radio"/> 5 a 6 veces al día<br><input type="radio"/> más 6 veces al día |
| Col o coliflor o brocoli cocinado       | <input checked="" type="radio"/> Nunca o menos 1 vez al mes<br><input type="radio"/> 1 a 3 veces mes<br><input type="radio"/> 1 vez semana<br><input type="radio"/> 2 a 4 veces semana<br><input type="radio"/> 5 a 6 veces semana<br><input type="radio"/> 1 vez al día<br><input type="radio"/> 2 a 3 veces al día<br><input type="radio"/> 5 a 6 veces al día<br><input type="radio"/> más 6 veces al día |

---

Lechuga o endivia o escarola

- ☐ Nunca o menos 1 vez al mes  
☒ 1 a 3 veces mes  
☐ 1 vez semana  
☐ 2 a 4 veces semana  
☐ 5 a 6 veces semana  
☐ 1 vez al día  
☐ 2 a 3 veces al día  
☐ 5 a 6 veces al día  
☐ más 6 veces al día

---

tomate ensalada

- ☐ Nunca o menos 1 vez al mes  
☐ 1 a 3 veces mes  
☐ 1 vez semana  
☒ 2 a 4 veces semana  
☐ 5 a 6 veces semana  
☐ 1 vez al día  
☐ 2 a 3 veces al día  
☐ 5 a 6 veces al día  
☐ más 6 veces al día

---

cebolla

- ☒ Nunca o menos 1 vez al mes  
☐ 1 a 3 veces mes  
☐ 1 vez semana  
☐ 2 a 4 veces semana  
☐ 5 a 6 veces semana  
☐ 1 vez al día  
☐ 2 a 3 veces al día  
☐ 5 a 6 veces al día  
☐ más 6 veces al día

---

Zanahoria o calabaza

- ☒ Nunca o menos 1 vez al mes  
☐ 1 a 3 veces mes  
☐ 1 vez semana  
☐ 2 a 4 veces semana  
☐ 5 a 6 veces semana  
☐ 1 vez al día  
☐ 2 a 3 veces al día  
☐ 5 a 6 veces al día  
☐ más 6 veces al día

---

Judías verdes

- ☐ Nunca o menos 1 vez al mes  
☒ 1 a 3 veces mes  
☐ 1 vez semana  
☐ 2 a 4 veces semana  
☐ 5 a 6 veces semana  
☐ 1 vez al día  
☐ 2 a 3 veces al día  
☐ 5 a 6 veces al día  
☐ más 6 veces al día

---

Berenjena o calabacin o pepino

- ☐ Nunca o menos 1 vez al mes  
☒ 1 a 3 veces mes  
☐ 1 vez semana  
☐ 2 a 4 veces semana  
☐ 5 a 6 veces semana  
☐ 1 vez al día  
☐ 2 a 3 veces al día  
☐ 5 a 6 veces al día  
☐ más 6 veces al día

---

|          |                                                                                                                                                                                                                                                                                                                                                                                                              |
|----------|--------------------------------------------------------------------------------------------------------------------------------------------------------------------------------------------------------------------------------------------------------------------------------------------------------------------------------------------------------------------------------------------------------------|
| pimiento | <input checked="" type="radio"/> Nunca o menos 1 vez al mes<br><input type="radio"/> 1 a 3 veces mes<br><input type="radio"/> 1 vez semana<br><input type="radio"/> 2 a 4 veces semana<br><input type="radio"/> 5 a 6 veces semana<br><input type="radio"/> 1 vez al día<br><input type="radio"/> 2 a 3 veces al día<br><input type="radio"/> 5 a 6 veces al día<br><input type="radio"/> más 6 veces al día |
|----------|--------------------------------------------------------------------------------------------------------------------------------------------------------------------------------------------------------------------------------------------------------------------------------------------------------------------------------------------------------------------------------------------------------------|

---

|           |                                                                                                                                                                                                                                                                                                                                                                                                              |
|-----------|--------------------------------------------------------------------------------------------------------------------------------------------------------------------------------------------------------------------------------------------------------------------------------------------------------------------------------------------------------------------------------------------------------------|
| alcachofa | <input checked="" type="radio"/> Nunca o menos 1 vez al mes<br><input type="radio"/> 1 a 3 veces mes<br><input type="radio"/> 1 vez semana<br><input type="radio"/> 2 a 4 veces semana<br><input type="radio"/> 5 a 6 veces semana<br><input type="radio"/> 1 vez al día<br><input type="radio"/> 2 a 3 veces al día<br><input type="radio"/> 5 a 6 veces al día<br><input type="radio"/> más 6 veces al día |
|-----------|--------------------------------------------------------------------------------------------------------------------------------------------------------------------------------------------------------------------------------------------------------------------------------------------------------------------------------------------------------------------------------------------------------------|

---

|            |                                                                                                                                                                                                                                                                                                                                                                                                              |
|------------|--------------------------------------------------------------------------------------------------------------------------------------------------------------------------------------------------------------------------------------------------------------------------------------------------------------------------------------------------------------------------------------------------------------|
| espárragos | <input checked="" type="radio"/> Nunca o menos 1 vez al mes<br><input type="radio"/> 1 a 3 veces mes<br><input type="radio"/> 1 vez semana<br><input type="radio"/> 2 a 4 veces semana<br><input type="radio"/> 5 a 6 veces semana<br><input type="radio"/> 1 vez al día<br><input type="radio"/> 2 a 3 veces al día<br><input type="radio"/> 5 a 6 veces al día<br><input type="radio"/> más 6 veces al día |
|------------|--------------------------------------------------------------------------------------------------------------------------------------------------------------------------------------------------------------------------------------------------------------------------------------------------------------------------------------------------------------------------------------------------------------|

---

|              |                                                                                                                                                                                                                                                                                                                                                                                                              |
|--------------|--------------------------------------------------------------------------------------------------------------------------------------------------------------------------------------------------------------------------------------------------------------------------------------------------------------------------------------------------------------------------------------------------------------|
| maíz hervido | <input checked="" type="radio"/> Nunca o menos 1 vez al mes<br><input type="radio"/> 1 a 3 veces mes<br><input type="radio"/> 1 vez semana<br><input type="radio"/> 2 a 4 veces semana<br><input type="radio"/> 5 a 6 veces semana<br><input type="radio"/> 1 vez al día<br><input type="radio"/> 2 a 3 veces al día<br><input type="radio"/> 5 a 6 veces al día<br><input type="radio"/> más 6 veces al día |
|--------------|--------------------------------------------------------------------------------------------------------------------------------------------------------------------------------------------------------------------------------------------------------------------------------------------------------------------------------------------------------------------------------------------------------------|

---

|           |                                                                                                                                                                                                                                                                                                                                                                                                              |
|-----------|--------------------------------------------------------------------------------------------------------------------------------------------------------------------------------------------------------------------------------------------------------------------------------------------------------------------------------------------------------------------------------------------------------------|
| legumbres | <input type="radio"/> Nunca o menos 1 vez al mes<br><input type="radio"/> 1 a 3 veces mes<br><input checked="" type="radio"/> 1 vez semana<br><input type="radio"/> 2 a 4 veces semana<br><input type="radio"/> 5 a 6 veces semana<br><input type="radio"/> 1 vez al día<br><input type="radio"/> 2 a 3 veces al día<br><input type="radio"/> 5 a 6 veces al día<br><input type="radio"/> más 6 veces al día |
|-----------|--------------------------------------------------------------------------------------------------------------------------------------------------------------------------------------------------------------------------------------------------------------------------------------------------------------------------------------------------------------------------------------------------------------|

---

|                       |                                                                                                                                                                                                                                                                                                                                                                                                              |
|-----------------------|--------------------------------------------------------------------------------------------------------------------------------------------------------------------------------------------------------------------------------------------------------------------------------------------------------------------------------------------------------------------------------------------------------------|
| naranjas o mandarinas | <input checked="" type="radio"/> Nunca o menos 1 vez al mes<br><input type="radio"/> 1 a 3 veces mes<br><input type="radio"/> 1 vez semana<br><input type="radio"/> 2 a 4 veces semana<br><input type="radio"/> 5 a 6 veces semana<br><input type="radio"/> 1 vez al día<br><input type="radio"/> 2 a 3 veces al día<br><input type="radio"/> 5 a 6 veces al día<br><input type="radio"/> más 6 veces al día |
|-----------------------|--------------------------------------------------------------------------------------------------------------------------------------------------------------------------------------------------------------------------------------------------------------------------------------------------------------------------------------------------------------------------------------------------------------|

---



---

zum natural fruta

- ☒ Nunca o menos 1 vez al mes  
☐ 1 a 3 veces mes  
☐ 1 vez semana  
☐ 2 a 4 veces semana  
☐ 5 a 6 veces semana  
☐ 1 vez al día  
☐ 2 a 3 veces al día  
☐ 5 a 6 veces al día  
☐ más 6 veces al día

---

platano

- ☐ Nunca o menos 1 vez al mes  
☒ 1 a 3 veces mes  
☐ 1 vez semana  
☐ 2 a 4 veces semana  
☐ 5 a 6 veces semana  
☐ 1 vez al día  
☐ 2 a 3 veces al día  
☐ 5 a 6 veces al día  
☐ más 6 veces al día

---

manzana o pera

- ☒ Nunca o menos 1 vez al mes  
☐ 1 a 3 veces mes  
☐ 1 vez semana  
☐ 2 a 4 veces semana  
☐ 5 a 6 veces semana  
☐ 1 vez al día  
☐ 2 a 3 veces al día  
☐ 5 a 6 veces al día  
☐ más 6 veces al día

---

melocotón o nectarina

- ☐ Nunca o menos 1 vez al mes  
☒ 1 a 3 veces mes  
☐ 1 vez semana  
☐ 2 a 4 veces semana  
☐ 5 a 6 veces semana  
☐ 1 vez al día  
☐ 2 a 3 veces al día  
☐ 5 a 6 veces al día  
☐ más 6 veces al día

---

sandia o melon

- ☐ Nunca o menos 1 vez al mes  
☐ 1 a 3 veces mes  
☐ 1 vez semana  
☒ 2 a 4 veces semana  
☐ 5 a 6 veces semana  
☐ 1 vez al día  
☐ 2 a 3 veces al día  
☐ 5 a 6 veces al día  
☐ más 6 veces al día

---

uva

- ☒ Nunca o menos 1 vez al mes  
☐ 1 a 3 veces mes  
☐ 1 vez semana  
☐ 2 a 4 veces semana  
☐ 5 a 6 veces semana  
☐ 1 vez al día  
☐ 2 a 3 veces al día  
☐ 5 a 6 veces al día  
☐ más 6 veces al día

|                 |                                                                                                                                                                                                                                                                                                                                                                                                              |
|-----------------|--------------------------------------------------------------------------------------------------------------------------------------------------------------------------------------------------------------------------------------------------------------------------------------------------------------------------------------------------------------------------------------------------------------|
| bruna o ciruela | <input checked="" type="radio"/> Nunca o menos 1 vez al mes<br><input type="radio"/> 1 a 3 veces mes<br><input type="radio"/> 1 vez semana<br><input type="radio"/> 2 a 4 veces semana<br><input type="radio"/> 5 a 6 veces semana<br><input type="radio"/> 1 vez al día<br><input type="radio"/> 2 a 3 veces al día<br><input type="radio"/> 5 a 6 veces al día<br><input type="radio"/> más 6 veces al día |
| kiwi            | <input checked="" type="radio"/> Nunca o menos 1 vez al mes<br><input type="radio"/> 1 a 3 veces mes<br><input type="radio"/> 1 vez semana<br><input type="radio"/> 2 a 4 veces semana<br><input type="radio"/> 5 a 6 veces semana<br><input type="radio"/> 1 vez al día<br><input type="radio"/> 2 a 3 veces al día<br><input type="radio"/> 5 a 6 veces al día<br><input type="radio"/> más 6 veces al día |
| aceituna        | <input type="radio"/> Nunca o menos 1 vez al mes<br><input checked="" type="radio"/> 1 a 3 veces mes<br><input type="radio"/> 1 vez semana<br><input type="radio"/> 2 a 4 veces semana<br><input type="radio"/> 5 a 6 veces semana<br><input type="radio"/> 1 vez al día<br><input type="radio"/> 2 a 3 veces al día<br><input type="radio"/> 5 a 6 veces al día<br><input type="radio"/> más 6 veces al día |
| frutos secos    | <input type="radio"/> Nunca o menos 1 vez al mes<br><input checked="" type="radio"/> 1 a 3 veces mes<br><input type="radio"/> 1 vez semana<br><input type="radio"/> 2 a 4 veces semana<br><input type="radio"/> 5 a 6 veces semana<br><input type="radio"/> 1 vez al día<br><input type="radio"/> 2 a 3 veces al día<br><input type="radio"/> 5 a 6 veces al día<br><input type="radio"/> más 6 veces al día |
| pan blanco      | <input type="radio"/> Nunca o menos 1 vez al mes<br><input checked="" type="radio"/> 1 a 3 veces mes<br><input type="radio"/> 1 vez semana<br><input type="radio"/> 2 a 4 veces semana<br><input type="radio"/> 5 a 6 veces semana<br><input type="radio"/> 1 vez al día<br><input type="radio"/> 2 a 3 veces al día<br><input type="radio"/> 5 a 6 veces al día<br><input type="radio"/> más 6 veces al día |
| pan integral    | <input checked="" type="radio"/> Nunca o menos 1 vez al mes<br><input type="radio"/> 1 a 3 veces mes<br><input type="radio"/> 1 vez semana<br><input type="radio"/> 2 a 4 veces semana<br><input type="radio"/> 5 a 6 veces semana<br><input type="radio"/> 1 vez al día<br><input type="radio"/> 2 a 3 veces al día<br><input type="radio"/> 5 a 6 veces al día<br><input type="radio"/> más 6 veces al día |

|                          |                                                                                                                                                                                                                                                                                                                                                                                                              |
|--------------------------|--------------------------------------------------------------------------------------------------------------------------------------------------------------------------------------------------------------------------------------------------------------------------------------------------------------------------------------------------------------------------------------------------------------|
| cereales desayuno        | <input checked="" type="radio"/> Nunca o menos 1 vez al mes<br><input type="radio"/> 1 a 3 veces mes<br><input type="radio"/> 1 vez semana<br><input type="radio"/> 2 a 4 veces semana<br><input type="radio"/> 5 a 6 veces semana<br><input type="radio"/> 1 vez al día<br><input type="radio"/> 2 a 3 veces al día<br><input type="radio"/> 5 a 6 veces al día<br><input type="radio"/> más 6 veces al día |
| patatas fritas           | <input type="radio"/> Nunca o menos 1 vez al mes<br><input checked="" type="radio"/> 1 a 3 veces mes<br><input type="radio"/> 1 vez semana<br><input type="radio"/> 2 a 4 veces semana<br><input type="radio"/> 5 a 6 veces semana<br><input type="radio"/> 1 vez al día<br><input type="radio"/> 2 a 3 veces al día<br><input type="radio"/> 5 a 6 veces al día<br><input type="radio"/> más 6 veces al día |
| patatas cocidas o asadas | <input type="radio"/> Nunca o menos 1 vez al mes<br><input checked="" type="radio"/> 1 a 3 veces mes<br><input type="radio"/> 1 vez semana<br><input type="radio"/> 2 a 4 veces semana<br><input type="radio"/> 5 a 6 veces semana<br><input type="radio"/> 1 vez al día<br><input type="radio"/> 2 a 3 veces al día<br><input type="radio"/> 5 a 6 veces al día<br><input type="radio"/> más 6 veces al día |
| bolsa papas              | <input checked="" type="radio"/> Nunca o menos 1 vez al mes<br><input type="radio"/> 1 a 3 veces mes<br><input type="radio"/> 1 vez semana<br><input type="radio"/> 2 a 4 veces semana<br><input type="radio"/> 5 a 6 veces semana<br><input type="radio"/> 1 vez al día<br><input type="radio"/> 2 a 3 veces al día<br><input type="radio"/> 5 a 6 veces al día<br><input type="radio"/> más 6 veces al día |
| arroz cocinado           | <input type="radio"/> Nunca o menos 1 vez al mes<br><input checked="" type="radio"/> 1 a 3 veces mes<br><input type="radio"/> 1 vez semana<br><input type="radio"/> 2 a 4 veces semana<br><input type="radio"/> 5 a 6 veces semana<br><input type="radio"/> 1 vez al día<br><input type="radio"/> 2 a 3 veces al día<br><input type="radio"/> 5 a 6 veces al día<br><input type="radio"/> más 6 veces al día |
| pasta                    | <input type="radio"/> Nunca o menos 1 vez al mes<br><input checked="" type="radio"/> 1 a 3 veces mes<br><input type="radio"/> 1 vez semana<br><input type="radio"/> 2 a 4 veces semana<br><input type="radio"/> 5 a 6 veces semana<br><input type="radio"/> 1 vez al día<br><input type="radio"/> 2 a 3 veces al día<br><input type="radio"/> 5 a 6 veces al día<br><input type="radio"/> más 6 veces al día |

|                     |                                                                                                                                                                                                                                                                                                                                                                                                              |
|---------------------|--------------------------------------------------------------------------------------------------------------------------------------------------------------------------------------------------------------------------------------------------------------------------------------------------------------------------------------------------------------------------------------------------------------|
| pizza               | <input checked="" type="radio"/> Nunca o menos 1 vez al mes<br><input type="radio"/> 1 a 3 veces mes<br><input type="radio"/> 1 vez semana<br><input type="radio"/> 2 a 4 veces semana<br><input type="radio"/> 5 a 6 veces semana<br><input type="radio"/> 1 vez al día<br><input type="radio"/> 2 a 3 veces al día<br><input type="radio"/> 5 a 6 veces al día<br><input type="radio"/> más 6 veces al día |
| aceite oliva        | <input type="radio"/> Nunca o menos 1 vez al mes<br><input type="radio"/> 1 a 3 veces mes<br><input type="radio"/> 1 vez semana<br><input type="radio"/> 2 a 4 veces semana<br><input checked="" type="radio"/> 5 a 6 veces semana<br><input type="radio"/> 1 vez al día<br><input type="radio"/> 2 a 3 veces al día<br><input type="radio"/> 5 a 6 veces al día<br><input type="radio"/> más 6 veces al día |
| otros aceites       | <input type="radio"/> Nunca o menos 1 vez al mes<br><input type="radio"/> 1 a 3 veces mes<br><input checked="" type="radio"/> 1 vez semana<br><input type="radio"/> 2 a 4 veces semana<br><input type="radio"/> 5 a 6 veces semana<br><input type="radio"/> 1 vez al día<br><input type="radio"/> 2 a 3 veces al día<br><input type="radio"/> 5 a 6 veces al día<br><input type="radio"/> más 6 veces al día |
| margarina           | <input checked="" type="radio"/> Nunca o menos 1 vez al mes<br><input type="radio"/> 1 a 3 veces mes<br><input type="radio"/> 1 vez semana<br><input type="radio"/> 2 a 4 veces semana<br><input type="radio"/> 5 a 6 veces semana<br><input type="radio"/> 1 vez al día<br><input type="radio"/> 2 a 3 veces al día<br><input type="radio"/> 5 a 6 veces al día<br><input type="radio"/> más 6 veces al día |
| mantequilla         | <input checked="" type="radio"/> Nunca o menos 1 vez al mes<br><input type="radio"/> 1 a 3 veces mes<br><input type="radio"/> 1 vez semana<br><input type="radio"/> 2 a 4 veces semana<br><input type="radio"/> 5 a 6 veces semana<br><input type="radio"/> 1 vez al día<br><input type="radio"/> 2 a 3 veces al día<br><input type="radio"/> 5 a 6 veces al día<br><input type="radio"/> más 6 veces al día |
| galletas tipo maria | <input type="radio"/> Nunca o menos 1 vez al mes<br><input checked="" type="radio"/> 1 a 3 veces mes<br><input type="radio"/> 1 vez semana<br><input type="radio"/> 2 a 4 veces semana<br><input type="radio"/> 5 a 6 veces semana<br><input type="radio"/> 1 vez al día<br><input type="radio"/> 2 a 3 veces al día<br><input type="radio"/> 5 a 6 veces al día<br><input type="radio"/> más 6 veces al día |

---

galletas chocolate

- ☐ Nunca o menos 1 vez al mes  
☒ 1 a 3 veces mes  
☐ 1 vez semana  
☐ 2 a 4 veces semana  
☐ 5 a 6 veces semana  
☐ 1 vez al día  
☐ 2 a 3 veces al día  
☐ 5 a 6 veces al día  
☐ más 6 veces al día

---

bolleria

- ☐ Nunca o menos 1 vez al mes  
☒ 1 a 3 veces mes  
☐ 1 vez semana  
☐ 2 a 4 veces semana  
☐ 5 a 6 veces semana  
☐ 1 vez al día  
☐ 2 a 3 veces al día  
☐ 5 a 6 veces al día  
☐ más 6 veces al día

---

chocolate o bombones

- ☐ Nunca o menos 1 vez al mes  
☒ 1 a 3 veces mes  
☐ 1 vez semana  
☐ 2 a 4 veces semana  
☐ 5 a 6 veces semana  
☐ 1 vez al día  
☐ 2 a 3 veces al día  
☐ 5 a 6 veces al día  
☐ más 6 veces al día

---

chocolate polvo o colacao

- ☐ Nunca o menos 1 vez al mes  
☐ 1 a 3 veces mes  
☐ 1 vez semana  
☐ 2 a 4 veces semana  
☒ 5 a 6 veces semana  
☐ 1 vez al día  
☐ 2 a 3 veces al día  
☐ 5 a 6 veces al día  
☐ más 6 veces al día

---

vino tinto

- ☒ Nunca o menos 1 vez al mes  
☐ 1 a 3 veces mes  
☐ 1 vez semana  
☐ 2 a 4 veces semana  
☐ 5 a 6 veces semana  
☐ 1 vez al día  
☐ 2 a 3 veces al día  
☐ 5 a 6 veces al día  
☐ más 6 veces al día

---

vino blanco

- ☒ Nunca o menos 1 vez al mes  
☐ 1 a 3 veces mes  
☐ 1 vez semana  
☐ 2 a 4 veces semana  
☐ 5 a 6 veces semana  
☐ 1 vez al día  
☐ 2 a 3 veces al día  
☐ 5 a 6 veces al día  
☐ más 6 veces al día

---

|                    |                                                                                                                                                                                                                                                                                                                                                                                                              |
|--------------------|--------------------------------------------------------------------------------------------------------------------------------------------------------------------------------------------------------------------------------------------------------------------------------------------------------------------------------------------------------------------------------------------------------------|
| vino seco o vermut | <input checked="" type="radio"/> Nunca o menos 1 vez al mes<br><input type="radio"/> 1 a 3 veces mes<br><input type="radio"/> 1 vez semana<br><input type="radio"/> 2 a 4 veces semana<br><input type="radio"/> 5 a 6 veces semana<br><input type="radio"/> 1 vez al día<br><input type="radio"/> 2 a 3 veces al día<br><input type="radio"/> 5 a 6 veces al día<br><input type="radio"/> más 6 veces al día |
|--------------------|--------------------------------------------------------------------------------------------------------------------------------------------------------------------------------------------------------------------------------------------------------------------------------------------------------------------------------------------------------------------------------------------------------------|

---

|         |                                                                                                                                                                                                                                                                                                                                                                                                              |
|---------|--------------------------------------------------------------------------------------------------------------------------------------------------------------------------------------------------------------------------------------------------------------------------------------------------------------------------------------------------------------------------------------------------------------|
| cerveza | <input checked="" type="radio"/> Nunca o menos 1 vez al mes<br><input type="radio"/> 1 a 3 veces mes<br><input type="radio"/> 1 vez semana<br><input type="radio"/> 2 a 4 veces semana<br><input type="radio"/> 5 a 6 veces semana<br><input type="radio"/> 1 vez al día<br><input type="radio"/> 2 a 3 veces al día<br><input type="radio"/> 5 a 6 veces al día<br><input type="radio"/> más 6 veces al día |
|---------|--------------------------------------------------------------------------------------------------------------------------------------------------------------------------------------------------------------------------------------------------------------------------------------------------------------------------------------------------------------------------------------------------------------|

---

|                     |                                                                                                                                                                                                                                                                                                                                                                                                              |
|---------------------|--------------------------------------------------------------------------------------------------------------------------------------------------------------------------------------------------------------------------------------------------------------------------------------------------------------------------------------------------------------------------------------------------------------|
| cerveza sin alcohol | <input checked="" type="radio"/> Nunca o menos 1 vez al mes<br><input type="radio"/> 1 a 3 veces mes<br><input type="radio"/> 1 vez semana<br><input type="radio"/> 2 a 4 veces semana<br><input type="radio"/> 5 a 6 veces semana<br><input type="radio"/> 1 vez al día<br><input type="radio"/> 2 a 3 veces al día<br><input type="radio"/> 5 a 6 veces al día<br><input type="radio"/> más 6 veces al día |
|---------------------|--------------------------------------------------------------------------------------------------------------------------------------------------------------------------------------------------------------------------------------------------------------------------------------------------------------------------------------------------------------------------------------------------------------|

---

|         |                                                                                                                                                                                                                                                                                                                                                                                                              |
|---------|--------------------------------------------------------------------------------------------------------------------------------------------------------------------------------------------------------------------------------------------------------------------------------------------------------------------------------------------------------------------------------------------------------------|
| licores | <input checked="" type="radio"/> Nunca o menos 1 vez al mes<br><input type="radio"/> 1 a 3 veces mes<br><input type="radio"/> 1 vez semana<br><input type="radio"/> 2 a 4 veces semana<br><input type="radio"/> 5 a 6 veces semana<br><input type="radio"/> 1 vez al día<br><input type="radio"/> 2 a 3 veces al día<br><input type="radio"/> 5 a 6 veces al día<br><input type="radio"/> más 6 veces al día |
|---------|--------------------------------------------------------------------------------------------------------------------------------------------------------------------------------------------------------------------------------------------------------------------------------------------------------------------------------------------------------------------------------------------------------------|

---

|                       |                                                                                                                                                                                                                                                                                                                                                                                                              |
|-----------------------|--------------------------------------------------------------------------------------------------------------------------------------------------------------------------------------------------------------------------------------------------------------------------------------------------------------------------------------------------------------------------------------------------------------|
| ginebra o ron o vodka | <input checked="" type="radio"/> Nunca o menos 1 vez al mes<br><input type="radio"/> 1 a 3 veces mes<br><input type="radio"/> 1 vez semana<br><input type="radio"/> 2 a 4 veces semana<br><input type="radio"/> 5 a 6 veces semana<br><input type="radio"/> 1 vez al día<br><input type="radio"/> 2 a 3 veces al día<br><input type="radio"/> 5 a 6 veces al día<br><input type="radio"/> más 6 veces al día |
|-----------------------|--------------------------------------------------------------------------------------------------------------------------------------------------------------------------------------------------------------------------------------------------------------------------------------------------------------------------------------------------------------------------------------------------------------|

---

|                 |                                                                                                                                                                                                                                                                                                                                                                                                              |
|-----------------|--------------------------------------------------------------------------------------------------------------------------------------------------------------------------------------------------------------------------------------------------------------------------------------------------------------------------------------------------------------------------------------------------------------|
| refresco normal | <input type="radio"/> Nunca o menos 1 vez al mes<br><input type="radio"/> 1 a 3 veces mes<br><input type="radio"/> 1 vez semana<br><input checked="" type="radio"/> 2 a 4 veces semana<br><input type="radio"/> 5 a 6 veces semana<br><input type="radio"/> 1 vez al día<br><input type="radio"/> 2 a 3 veces al día<br><input type="radio"/> 5 a 6 veces al día<br><input type="radio"/> más 6 veces al día |
|-----------------|--------------------------------------------------------------------------------------------------------------------------------------------------------------------------------------------------------------------------------------------------------------------------------------------------------------------------------------------------------------------------------------------------------------|

---

|                           |                                                                                                                                                                                                                                                                                                                                                                                                              |
|---------------------------|--------------------------------------------------------------------------------------------------------------------------------------------------------------------------------------------------------------------------------------------------------------------------------------------------------------------------------------------------------------------------------------------------------------|
| refresco sin azúcar       | <input type="radio"/> Nunca o menos 1 vez al mes<br><input type="radio"/> 1 a 3 veces mes<br><input type="radio"/> 1 vez semana<br><input checked="" type="radio"/> 2 a 4 veces semana<br><input type="radio"/> 5 a 6 veces semana<br><input type="radio"/> 1 vez al día<br><input type="radio"/> 2 a 3 veces al día<br><input type="radio"/> 5 a 6 veces al día<br><input type="radio"/> más 6 veces al día |
| Agua del grifo            | <input checked="" type="radio"/> Nunca o menos 1 vez al mes<br><input type="radio"/> 1 a 3 veces mes<br><input type="radio"/> 1 vez semana<br><input type="radio"/> 2 a 4 veces semana<br><input type="radio"/> 5 a 6 veces semana<br><input type="radio"/> 1 vez al día<br><input type="radio"/> 2 a 3 veces al día<br><input type="radio"/> 5 a 6 veces al día<br><input type="radio"/> más 6 veces al día |
| agua embotellada sin gas  | <input type="radio"/> Nunca o menos 1 vez al mes<br><input type="radio"/> 1 a 3 veces mes<br><input type="radio"/> 1 vez semana<br><input type="radio"/> 2 a 4 veces semana<br><input type="radio"/> 5 a 6 veces semana<br><input type="radio"/> 1 vez al día<br><input type="radio"/> 2 a 3 veces al día<br><input type="radio"/> 5 a 6 veces al día<br><input type="radio"/> más 6 veces al día            |
| agua embotellada con gas  | <input checked="" type="radio"/> Nunca o menos 1 vez al mes<br><input type="radio"/> 1 a 3 veces mes<br><input type="radio"/> 1 vez semana<br><input type="radio"/> 2 a 4 veces semana<br><input type="radio"/> 5 a 6 veces semana<br><input type="radio"/> 1 vez al día<br><input type="radio"/> 2 a 3 veces al día<br><input type="radio"/> 5 a 6 veces al día<br><input type="radio"/> más 6 veces al día |
| zumos frutas embotellados | <input type="radio"/> Nunca o menos 1 vez al mes<br><input checked="" type="radio"/> 1 a 3 veces mes<br><input type="radio"/> 1 vez semana<br><input type="radio"/> 2 a 4 veces semana<br><input type="radio"/> 5 a 6 veces semana<br><input type="radio"/> 1 vez al día<br><input type="radio"/> 2 a 3 veces al día<br><input type="radio"/> 5 a 6 veces al día<br><input type="radio"/> más 6 veces al día |
| café                      | <input checked="" type="radio"/> Nunca o menos 1 vez al mes<br><input type="radio"/> 1 a 3 veces mes<br><input type="radio"/> 1 vez semana<br><input type="radio"/> 2 a 4 veces semana<br><input type="radio"/> 5 a 6 veces semana<br><input type="radio"/> 1 vez al día<br><input type="radio"/> 2 a 3 veces al día<br><input type="radio"/> 5 a 6 veces al día<br><input type="radio"/> más 6 veces al día |

---

cafe descafeinado

- ☐ Nunca o menos 1 vez al mes  
☐ 1 a 3 veces mes  
☐ 1 vez semana  
☒ 2 a 4 veces semana  
☐ 5 a 6 veces semana  
☐ 1 vez al día  
☐ 2 a 3 veces al día  
☐ 5 a 6 veces al día  
☐ más 6 veces al día

---

te o infusión

- ☒ Nunca o menos 1 vez al mes  
☐ 1 a 3 veces mes  
☐ 1 vez semana  
☐ 2 a 4 veces semana  
☐ 5 a 6 veces semana  
☐ 1 vez al día  
☐ 2 a 3 veces al día  
☐ 5 a 6 veces al día  
☐ más 6 veces al día

---

sopa o puré verduras

- ☐ Nunca o menos 1 vez al mes  
☒ 1 a 3 veces mes  
☐ 1 vez semana  
☐ 2 a 4 veces semana  
☐ 5 a 6 veces semana  
☐ 1 vez al día  
☐ 2 a 3 veces al día  
☐ 5 a 6 veces al día  
☐ más 6 veces al día

---

croquetas pollo jamón

- ☒ Nunca o menos 1 vez al mes  
☐ 1 a 3 veces mes  
☐ 1 vez semana  
☐ 2 a 4 veces semana  
☐ 5 a 6 veces semana  
☐ 1 vez al día  
☐ 2 a 3 veces al día  
☐ 5 a 6 veces al día  
☐ más 6 veces al día

---

croquetas pescado

- ☐ Nunca o menos 1 vez al mes  
☒ 1 a 3 veces mes  
☐ 1 vez semana  
☐ 2 a 4 veces semana  
☐ 5 a 6 veces semana  
☐ 1 vez al día  
☐ 2 a 3 veces al día  
☐ 5 a 6 veces al día  
☐ más 6 veces al día

---

mayonesa

- ☐ Nunca o menos 1 vez al mes  
☒ 1 a 3 veces mes  
☐ 1 vez semana  
☐ 2 a 4 veces semana  
☐ 5 a 6 veces semana  
☐ 1 vez al día  
☐ 2 a 3 veces al día  
☐ 5 a 6 veces al día  
☐ más 6 veces al día



|                  |                                                                                                                                                                                                                                                                                                                                                                                                              |
|------------------|--------------------------------------------------------------------------------------------------------------------------------------------------------------------------------------------------------------------------------------------------------------------------------------------------------------------------------------------------------------------------------------------------------------|
| salsa tomate     | <input checked="" type="radio"/> Nunca o menos 1 vez al mes<br><input type="radio"/> 1 a 3 veces mes<br><input type="radio"/> 1 vez semana<br><input type="radio"/> 2 a 4 veces semana<br><input type="radio"/> 5 a 6 veces semana<br><input type="radio"/> 1 vez al día<br><input type="radio"/> 2 a 3 veces al día<br><input type="radio"/> 5 a 6 veces al día<br><input type="radio"/> más 6 veces al día |
| ketchup          | <input checked="" type="radio"/> Nunca o menos 1 vez al mes<br><input type="radio"/> 1 a 3 veces mes<br><input type="radio"/> 1 vez semana<br><input type="radio"/> 2 a 4 veces semana<br><input type="radio"/> 5 a 6 veces semana<br><input type="radio"/> 1 vez al día<br><input type="radio"/> 2 a 3 veces al día<br><input type="radio"/> 5 a 6 veces al día<br><input type="radio"/> más 6 veces al día |
| sal              | <input type="radio"/> Nunca o menos 1 vez al mes<br><input checked="" type="radio"/> 1 a 3 veces mes<br><input type="radio"/> 1 vez semana<br><input type="radio"/> 2 a 4 veces semana<br><input type="radio"/> 5 a 6 veces semana<br><input type="radio"/> 1 vez al día<br><input type="radio"/> 2 a 3 veces al día<br><input type="radio"/> 5 a 6 veces al día<br><input type="radio"/> más 6 veces al día |
| ajo              | <input checked="" type="radio"/> Nunca o menos 1 vez al mes<br><input type="radio"/> 1 a 3 veces mes<br><input type="radio"/> 1 vez semana<br><input type="radio"/> 2 a 4 veces semana<br><input type="radio"/> 5 a 6 veces semana<br><input type="radio"/> 1 vez al día<br><input type="radio"/> 2 a 3 veces al día<br><input type="radio"/> 5 a 6 veces al día<br><input type="radio"/> más 6 veces al día |
| mermelada o miel | <input checked="" type="radio"/> Nunca o menos 1 vez al mes<br><input type="radio"/> 1 a 3 veces mes<br><input type="radio"/> 1 vez semana<br><input type="radio"/> 2 a 4 veces semana<br><input type="radio"/> 5 a 6 veces semana<br><input type="radio"/> 1 vez al día<br><input type="radio"/> 2 a 3 veces al día<br><input type="radio"/> 5 a 6 veces al día<br><input type="radio"/> más 6 veces al día |
| azúcar           | <input type="radio"/> Nunca o menos 1 vez al mes<br><input type="radio"/> 1 a 3 veces mes<br><input type="radio"/> 1 vez semana<br><input checked="" type="radio"/> 2 a 4 veces semana<br><input type="radio"/> 5 a 6 veces semana<br><input type="radio"/> 1 vez al día<br><input type="radio"/> 2 a 3 veces al día<br><input type="radio"/> 5 a 6 veces al día<br><input type="radio"/> más 6 veces al día |

|                                       |                                                                                                                                                                                                                                                                                                                                                                                                                                                                                                                               |
|---------------------------------------|-------------------------------------------------------------------------------------------------------------------------------------------------------------------------------------------------------------------------------------------------------------------------------------------------------------------------------------------------------------------------------------------------------------------------------------------------------------------------------------------------------------------------------|
| Otro alimento                         |                                                                                                                                                                                                                                                                                                                                                                                                                                                                                                                               |
| suplementos vitamínicos               | <input type="radio"/> si<br><input checked="" type="radio"/> no                                                                                                                                                                                                                                                                                                                                                                                                                                                               |
| suplementos vitamínicos               |                                                                                                                                                                                                                                                                                                                                                                                                                                                                                                                               |
| dieta previa                          | <input type="radio"/> si<br><input checked="" type="radio"/> no                                                                                                                                                                                                                                                                                                                                                                                                                                                               |
| motivo dieta                          | <input checked="" type="radio"/> no dieta<br><input type="radio"/> control peso<br><input type="radio"/> control colesterol<br><input type="radio"/> control diabetes<br><input type="radio"/> problemas estómago<br><input type="radio"/> problemas vesícula o hepáticos<br><input type="radio"/> HTA o cardiopatía<br><input type="radio"/> problemas renales<br><input type="radio"/> alergia alimentaria<br><input type="radio"/> ácido úrico elevado<br><input type="radio"/> vegetariana<br><input type="radio"/> otros |
| cambio alimentos año previo gestación | <input checked="" type="radio"/> si<br><input type="radio"/> no                                                                                                                                                                                                                                                                                                                                                                                                                                                               |
| cambio lácteos                        | <input type="radio"/> eliminado<br><input type="radio"/> disminuido<br><input checked="" type="radio"/> igual<br><input type="radio"/> aumentado<br><input type="radio"/> no sabe                                                                                                                                                                                                                                                                                                                                             |
| cambio huevos                         | <input type="radio"/> eliminado<br><input type="radio"/> disminuido<br><input checked="" type="radio"/> igual<br><input type="radio"/> aumentado<br><input type="radio"/> no sabe                                                                                                                                                                                                                                                                                                                                             |
| cambio carne                          | <input type="radio"/> eliminado<br><input type="radio"/> disminuido<br><input checked="" type="radio"/> igual<br><input type="radio"/> aumentado<br><input type="radio"/> no sabe                                                                                                                                                                                                                                                                                                                                             |
| cambio pescado                        | <input type="radio"/> eliminado<br><input type="radio"/> disminuido<br><input checked="" type="radio"/> igual<br><input type="radio"/> aumentado<br><input type="radio"/> no sabe                                                                                                                                                                                                                                                                                                                                             |
| cambio verduras                       | <input type="radio"/> eliminado<br><input type="radio"/> disminuido<br><input checked="" type="radio"/> igual<br><input type="radio"/> aumentado<br><input type="radio"/> no sabe                                                                                                                                                                                                                                                                                                                                             |

|                            |                                                                                                                                                                                                                        |
|----------------------------|------------------------------------------------------------------------------------------------------------------------------------------------------------------------------------------------------------------------|
| cambio legumbres           | <input type="radio"/> eliminado<br><input type="radio"/> disminuido<br><input checked="" type="radio"/> igual<br><input type="radio"/> aumentado<br><input type="radio"/> no sabe                                      |
| cambio fruta               | <input type="radio"/> eliminado<br><input type="radio"/> disminuido<br><input checked="" type="radio"/> igual<br><input type="radio"/> aumentado<br><input type="radio"/> no sabe                                      |
| cambio pan                 | <input type="radio"/> eliminado<br><input checked="" type="radio"/> disminuido<br><input type="radio"/> igual<br><input type="radio"/> aumentado<br><input type="radio"/> no sabe                                      |
| cambio aceite oliva        | <input type="radio"/> eliminado<br><input type="radio"/> disminuido<br><input checked="" type="radio"/> igual<br><input type="radio"/> aumentado<br><input type="radio"/> no sabe                                      |
| cambio mante o margarina   | <input type="radio"/> eliminado<br><input type="radio"/> disminuido<br><input checked="" type="radio"/> igual<br><input type="radio"/> aumentado<br><input type="radio"/> no sabe                                      |
| cambio azúcar y dulces     | <input type="radio"/> eliminado<br><input type="radio"/> disminuido<br><input checked="" type="radio"/> igual<br><input type="radio"/> aumentado<br><input type="radio"/> no sabe                                      |
| cambio bebidas alcohólicas | <input checked="" type="radio"/> eliminado<br><input type="radio"/> disminuido<br><input type="radio"/> igual<br><input type="radio"/> aumentado<br><input type="radio"/> no sabe                                      |
| frecuencia comidas fritas  | <input type="radio"/> a diario<br><input type="radio"/> 5 a 6 veces semana<br><input type="radio"/> 2 a 4 veces semana<br><input checked="" type="radio"/> 1 vez semana<br><input type="radio"/> menos de 1 vez semana |
| carne                      | <input type="radio"/> no como<br><input type="radio"/> cruda<br><input type="radio"/> poco hecha<br><input type="radio"/> hecha<br><input checked="" type="radio"/> muy hecha                                          |
| grasa visible carne        | <input type="radio"/> quita toda<br><input checked="" type="radio"/> quita mayoría<br><input type="radio"/> quita un poco<br><input type="radio"/> no quita nada                                                       |

|                                |                                                                                                                                                                                                                                                          |
|--------------------------------|----------------------------------------------------------------------------------------------------------------------------------------------------------------------------------------------------------------------------------------------------------|
| cocina carne                   | <input type="radio"/> a la plancha<br><input checked="" type="radio"/> a la parrilla<br><input type="radio"/> asada<br><input type="radio"/> frita<br><input type="radio"/> guisada                                                                      |
| tostado quemado carne          | <input checked="" type="radio"/> nunca<br><input type="radio"/> 1 vez mes<br><input type="radio"/> 2 a 3 veces mes<br><input type="radio"/> 1 vez semana<br><input type="radio"/> 2 a 3 semanas                                                          |
| tostado quemado pescado        | <input checked="" type="radio"/> nunca<br><input type="radio"/> 1 vez mes<br><input type="radio"/> 2 a 3 veces mes<br><input type="radio"/> 1 vez semana<br><input type="radio"/> 2 a 3 semanas                                                          |
| socarrat paella                | <input checked="" type="radio"/> nunca<br><input type="radio"/> 1 vez mes<br><input type="radio"/> 2 a 3 veces mes<br><input type="radio"/> 1 vez semana<br><input type="radio"/> 2 a 3 semanas                                                          |
| grasa o aceite cocinar         | <input type="radio"/> mantequilla<br><input type="radio"/> margarina<br><input checked="" type="radio"/> aceite oliva<br><input type="radio"/> aceite oliva virgen extra<br><input type="radio"/> aceite vegetal<br><input type="radio"/> mezcla aceites |
| grasa aceite aliñar            | <input type="radio"/> mantequilla<br><input type="radio"/> margarina<br><input checked="" type="radio"/> aceite oliva<br><input type="radio"/> aceite oliva virgen extra<br><input type="radio"/> aceite vegetal<br><input type="radio"/> mezcla aceites |
| grasa aceite freir             | <input type="radio"/> mantequilla<br><input type="radio"/> margarina<br><input checked="" type="radio"/> aceite oliva<br><input type="radio"/> aceite oliva virgen extra<br><input type="radio"/> aceite vegetal<br><input type="radio"/> mezcla aceites |
| Ejercicio cuestionario         | <input checked="" type="radio"/> si<br><input type="radio"/> no                                                                                                                                                                                          |
| horas de sueño incluido siesta | [*DATA REMOVED*]                                                                                                                                                                                                                                         |
| minutos siesta                 | [*DATA REMOVED*]                                                                                                                                                                                                                                         |
| horas televisión semana        | [*DATA REMOVED*]                                                                                                                                                                                                                                         |

|                                        |                                                                                                                                                                                                                                                                                                                                                                           |
|----------------------------------------|---------------------------------------------------------------------------------------------------------------------------------------------------------------------------------------------------------------------------------------------------------------------------------------------------------------------------------------------------------------------------|
| actividad trabajo                      | <input type="radio"/> casi siempre sentado<br><input checked="" type="radio"/> sentado 50 por cien<br><input type="radio"/> casi siempre de pie, quieto<br><input type="radio"/> casi siempre levantado caminando y llevando pocas cosas<br><input type="radio"/> casi siempre levantado, caminando y llevado muchas cosas<br><input type="radio"/> trabajo manual pesado |
| tiempo caminar o bici al día           | <input type="radio"/> casi nunca<br><input checked="" type="radio"/> menos 20min día<br><input type="radio"/> 20 a 40 min día<br><input type="radio"/> 40 a 60 min día<br><input type="radio"/> 1h o 1h y media día<br><input type="radio"/> más de 1h y media al día                                                                                                     |
| tiempo tareas casa al día              | <input type="radio"/> menos de 1h día<br><input checked="" type="radio"/> 1 a 2h día<br><input type="radio"/> 3 a 4h día<br><input type="radio"/> 5 a 6h día<br><input type="radio"/> 7 a 8h día<br><input type="radio"/> más de 8h día                                                                                                                                   |
| tiempo libre televisión ordenador leer | <input checked="" type="radio"/> menos 1h día<br><input type="radio"/> 1h día<br><input type="radio"/> 2h día<br><input type="radio"/> 3h día<br><input type="radio"/> 4h día<br><input type="radio"/> 5 a 6h día<br><input type="radio"/> mas 6h día                                                                                                                     |
| tiempo libre ejercicio o deporte       | <input checked="" type="radio"/> menos 1h semana<br><input type="radio"/> 1h semana<br><input type="radio"/> 2h semana<br><input type="radio"/> 3h semana<br><input type="radio"/> 4 a 5h semana<br><input type="radio"/> mas 5h semana                                                                                                                                   |
| como se considera                      | <input type="radio"/> sedentaria<br><input checked="" type="radio"/> poco activa<br><input type="radio"/> moderadamente activa<br><input type="radio"/> bastante activa<br><input type="radio"/> muy activa<br><input type="radio"/> no sabe                                                                                                                              |
| FUR                                    | [*DATA REMOVED*]                                                                                                                                                                                                                                                                                                                                                          |
| Semanas gestación 2T                   | [*DATA REMOVED*]                                                                                                                                                                                                                                                                                                                                                          |
| Días gestación 2T                      | [*DATA REMOVED*]                                                                                                                                                                                                                                                                                                                                                          |
| DBP 2T                                 | [*DATA REMOVED*]                                                                                                                                                                                                                                                                                                                                                          |
| CC 2T                                  | [*DATA REMOVED*]                                                                                                                                                                                                                                                                                                                                                          |
| AC 2T                                  | [*DATA REMOVED*]                                                                                                                                                                                                                                                                                                                                                          |

|                                                   |                                                                                                                                                                                                 |
|---------------------------------------------------|-------------------------------------------------------------------------------------------------------------------------------------------------------------------------------------------------|
| LF 2T                                             | [*DATA REMOVED*]                                                                                                                                                                                |
| PFE 2T (Hadlock)                                  | [*DATA REMOVED*]                                                                                                                                                                                |
| Semanas gestación 3T                              | [*DATA REMOVED*]                                                                                                                                                                                |
| días 3T                                           | [*DATA REMOVED*]                                                                                                                                                                                |
| DBP 3T                                            | [*DATA REMOVED*]                                                                                                                                                                                |
| CC 3T                                             | [*DATA REMOVED*]                                                                                                                                                                                |
| AC 3T                                             | [*DATA REMOVED*]                                                                                                                                                                                |
| LF 3T                                             | [*DATA REMOVED*]                                                                                                                                                                                |
| PFE 3T (Hadlock)                                  | [*DATA REMOVED*]                                                                                                                                                                                |
| Semanas de gestación final                        | [*DATA REMOVED*]                                                                                                                                                                                |
| días gestación final                              | [*DATA REMOVED*]                                                                                                                                                                                |
| Localización placenta                             | <input checked="" type="radio"/> anterior<br><input type="radio"/> lateral derecha<br><input type="radio"/> lateral izquierda<br><input type="radio"/> posterior<br><input type="radio"/> fondo |
| Presentación longitudinal cefálica                | <input type="radio"/> no<br><input checked="" type="radio"/> si                                                                                                                                 |
| Dorso                                             | <input type="radio"/> izquierda anterior<br><input type="radio"/> izquierda posterior<br><input checked="" type="radio"/> derecha anterior<br><input type="radio"/> derecha posterior           |
| diámetro biparietal                               | [*DATA REMOVED*]                                                                                                                                                                                |
| Circunferencia craneal                            | [*DATA REMOVED*]                                                                                                                                                                                |
| Circunferencia abdominal                          | [*DATA REMOVED*]                                                                                                                                                                                |
| Longitud de femur                                 | [*DATA REMOVED*]                                                                                                                                                                                |
| tejido celular subcutáneo a nivel del muslo en mm | [*DATA REMOVED*]                                                                                                                                                                                |
| tejido celular subcutáneo en abdomen en mm        | [*DATA REMOVED*]                                                                                                                                                                                |
| Volumen del muslo en cm3                          | [*DATA REMOVED*]                                                                                                                                                                                |
| Peso fetal estimado según fórmula de Hadlock      | [*DATA REMOVED*]                                                                                                                                                                                |

|                                               |                                                                                                                                                          |
|-----------------------------------------------|----------------------------------------------------------------------------------------------------------------------------------------------------------|
| Percentil                                     | [*DATA REMOVED*]                                                                                                                                         |
| Peso fetal estimado según fórmula de Scioscia | <hr/>                                                                                                                                                    |
| Peso fetal estimado según fórmula de LEE      | <hr/>                                                                                                                                                    |
| Tipo de parto                                 | <input checked="" type="radio"/> eutocico<br><input type="radio"/> instrumentado/ventosa<br><input type="radio"/> cesarea                                |
| fecha de nacimiento                           | [*DATA REMOVED*]                                                                                                                                         |
| Días entre exploración y nacimiento           | [*DATA REMOVED*]                                                                                                                                         |
| Peso RN en g                                  | [*DATA REMOVED*]                                                                                                                                         |
| sexo                                          | <input type="radio"/> mujer<br><input checked="" type="radio"/> hombre                                                                                   |
| Apgar 1 minuto                                | [*DATA REMOVED*]                                                                                                                                         |
| Apgar 5 minutos                               | [*DATA REMOVED*]                                                                                                                                         |
| Apgar 10 minutos                              | <hr/>                                                                                                                                                    |
| antecedente Covid durante gestación           | <input type="radio"/> Yes<br><input checked="" type="radio"/> No                                                                                         |
| Nivel de estudios                             | <input type="radio"/> ninguno<br><input type="radio"/> primarios<br><input checked="" type="radio"/> secundarios<br><input type="radio"/> universitarios |

# Base\_datos\_estimacion\_peso\_fetal

|                                       |                                                                                                                                                                                                                                                                                      |
|---------------------------------------|--------------------------------------------------------------------------------------------------------------------------------------------------------------------------------------------------------------------------------------------------------------------------------------|
| Número de identificación participante | 139                                                                                                                                                                                                                                                                                  |
| CODIGO PARTICIPANTE                   |                                                                                                                                                                                                                                                                                      |
| Edad                                  | [*DATA REMOVED*]                                                                                                                                                                                                                                                                     |
| Gestaciones                           | <input checked="" type="radio"/> 1<br><input type="radio"/> 2<br><input type="radio"/> 3<br><input type="radio"/> mas de 3                                                                                                                                                           |
| partos                                | <input checked="" type="radio"/> 0<br><input type="radio"/> 1<br><input type="radio"/> 2<br><input type="radio"/> 3<br><input type="radio"/> mas de 3                                                                                                                                |
| cesáreas                              | <input checked="" type="radio"/> 0<br><input type="radio"/> 1<br><input type="radio"/> 2<br><input type="radio"/> 3<br><input type="radio"/> mas de 3                                                                                                                                |
| Abortos                               | <input checked="" type="radio"/> 0<br><input type="radio"/> 1<br><input type="radio"/> 2<br><input type="radio"/> 3<br><input type="radio"/> mas de 3                                                                                                                                |
| Tipo de gestacion                     | <input checked="" type="radio"/> espontanea<br><input type="radio"/> IAC inseminación artificial conyuge<br><input type="radio"/> IAD inseminación artificial donante<br><input type="radio"/> FIV Fecundación in Vitro<br><input type="radio"/> Ovodon FIV con donación de ovocitos |
| peso previo a embarazo                | [*DATA REMOVED*]                                                                                                                                                                                                                                                                     |
| Ganancia ponderal embarazo            | [*DATA REMOVED*]                                                                                                                                                                                                                                                                     |
| Talla madre                           | [*DATA REMOVED*]                                                                                                                                                                                                                                                                     |
| IMC previo embarazo                   | 18.467220683287167                                                                                                                                                                                                                                                                   |
| Patología obstétrica                  | <input checked="" type="radio"/> no<br><input type="radio"/> si                                                                                                                                                                                                                      |
| Diabetes pregestacional               | <input checked="" type="radio"/> no<br><input type="radio"/> si                                                                                                                                                                                                                      |
| Diabetes gestacional                  | <input checked="" type="radio"/> no<br><input type="radio"/> si                                                                                                                                                                                                                      |



|                                            |                                                                                                                                                                                      |
|--------------------------------------------|--------------------------------------------------------------------------------------------------------------------------------------------------------------------------------------|
| Diabetes gestacional con insulina          | <input checked="" type="radio"/> no<br><input type="radio"/> si                                                                                                                      |
| Diabetes gestacional con dieta y ejercicio | <input checked="" type="radio"/> no<br><input type="radio"/> si                                                                                                                      |
| Percentil fetos previos                    | <input checked="" type="radio"/> Nada<br><input type="radio"/> percentil menor de 10<br><input type="radio"/> percentil entre 10 y 90<br><input type="radio"/> percentil mayor de 90 |
| Exfumadora                                 | <input checked="" type="radio"/> Nada<br><input type="radio"/> menos de 5 años<br><input type="radio"/> 5 a 10 años<br><input type="radio"/> mayor o igual a 10 años                 |
| Hábito tabáquico                           | <input checked="" type="radio"/> no<br><input type="radio"/> si                                                                                                                      |
| fumadora                                   | [*DATA REMOVED*]                                                                                                                                                                     |
| Consumo otros tóxicos                      | <input checked="" type="radio"/> no<br><input type="radio"/> si                                                                                                                      |
| Hb 1T                                      | [*DATA REMOVED*]                                                                                                                                                                     |
| Htc 1T                                     | [*DATA REMOVED*]                                                                                                                                                                     |
| Hb 2T                                      | [*DATA REMOVED*]                                                                                                                                                                     |
| HTC 2T                                     | [*DATA REMOVED*]                                                                                                                                                                     |
| Hb 3T                                      | [*DATA REMOVED*]                                                                                                                                                                     |
| HTC 3T                                     | [*DATA REMOVED*]                                                                                                                                                                     |
| Suplemento FE oral                         | <input type="radio"/> si<br><input checked="" type="radio"/> no                                                                                                                      |
| Suplemento fe iv                           | <input type="radio"/> si<br><input checked="" type="radio"/> no                                                                                                                      |
| Transfusión                                | <input checked="" type="radio"/> no<br><input type="radio"/> si                                                                                                                      |
| Solicitada Vit D                           | <input checked="" type="radio"/> no<br><input type="radio"/> si                                                                                                                      |
| Deficit vit D                              | <input type="radio"/> no<br><input type="radio"/> si                                                                                                                                 |
| Suplemento vit D                           | <input type="radio"/> si<br><input type="radio"/> no                                                                                                                                 |

|                       |                                                                                                                                                                                                                                                                                                                                                                                                              |
|-----------------------|--------------------------------------------------------------------------------------------------------------------------------------------------------------------------------------------------------------------------------------------------------------------------------------------------------------------------------------------------------------------------------------------------------------|
| Dieta, cuestionario   | <input checked="" type="radio"/> si<br><input type="radio"/> no                                                                                                                                                                                                                                                                                                                                              |
| Leche entera          | <input checked="" type="radio"/> Nunca o menos 1 vez al mes<br><input type="radio"/> 1 a 3 veces mes<br><input type="radio"/> 1 vez semana<br><input type="radio"/> 2 a 4 veces semana<br><input type="radio"/> 5 a 6 veces semana<br><input type="radio"/> 1 vez al día<br><input type="radio"/> 2 a 3 veces al día<br><input type="radio"/> 5 a 6 veces al día<br><input type="radio"/> más 6 veces al día |
| Leche semidesnatada   | <input type="radio"/> Nunca o menos 1 vez al mes<br><input type="radio"/> 1 a 3 veces mes<br><input type="radio"/> 1 vez semana<br><input type="radio"/> 2 a 4 veces semana<br><input type="radio"/> 5 a 6 veces semana<br><input checked="" type="radio"/> 1 vez al día<br><input type="radio"/> 2 a 3 veces al día<br><input type="radio"/> 5 a 6 veces al día<br><input type="radio"/> mas 6 veces al día |
| Leche desnatada       | <input checked="" type="radio"/> Nunca o menos 1 vez al mes<br><input type="radio"/> 1 a 3 veces mes<br><input type="radio"/> 1 vez semana<br><input type="radio"/> 2 a 4 veces semana<br><input type="radio"/> 5 a 6 veces semana<br><input type="radio"/> 1 vez al día<br><input type="radio"/> 2 a 3 veces al día<br><input type="radio"/> 5 a 6 veces al día<br><input type="radio"/> más 6 veces al día |
| Leche condensada      | <input checked="" type="radio"/> Nunca o menos 1 vez al mes<br><input type="radio"/> 1 a 3 veces mes<br><input type="radio"/> 1 vez semana<br><input type="radio"/> 2 a 4 veces semana<br><input type="radio"/> 5 a 6 veces semana<br><input type="radio"/> 1 vez al día<br><input type="radio"/> 2 a 3 veces al día<br><input type="radio"/> 5 a 6 veces al día<br><input type="radio"/> más 6 veces al día |
| nata o crema de leche | <input type="radio"/> Nunca o menos 1 vez al mes<br><input checked="" type="radio"/> 1 a 3 veces mes<br><input type="radio"/> 1 vez semana<br><input type="radio"/> 2 a 4 veces semana<br><input type="radio"/> 5 a 6 veces semana<br><input type="radio"/> 1 vez al día<br><input type="radio"/> 2 a 3 veces al día<br><input type="radio"/> 5 a 6 veces al día<br><input type="radio"/> más 6 veces al día |

|                                             |                                                                                                                                                                                                                                                                                                                                                                                                              |
|---------------------------------------------|--------------------------------------------------------------------------------------------------------------------------------------------------------------------------------------------------------------------------------------------------------------------------------------------------------------------------------------------------------------------------------------------------------------|
| Yogurt Entero                               | <input type="radio"/> Nunca o menos 1 vez al mes<br><input type="radio"/> 1 a 3 veces mes<br><input type="radio"/> 1 vez semana<br><input type="radio"/> 2 a 4 veces semana<br><input type="radio"/> 5 a 6 veces semana<br><input checked="" type="radio"/> 1 vez al día<br><input type="radio"/> 2 a 3 veces al día<br><input type="radio"/> 5 a 6 veces al día<br><input type="radio"/> más 6 veces al día |
| Yogurt desnatado                            | <input checked="" type="radio"/> Nunca o menos 1 vez al mes<br><input type="radio"/> 1 a 3 veces mes<br><input type="radio"/> 1 vez semana<br><input type="radio"/> 2 a 4 veces semana<br><input type="radio"/> 5 a 6 veces semana<br><input type="radio"/> 1 vez al día<br><input type="radio"/> 2 a 3 veces al día<br><input type="radio"/> 5 a 6 veces al día<br><input type="radio"/> más 6 veces al día |
| 100g requesón o queso blando o queso fresco | <input checked="" type="radio"/> Nunca o menos 1 vez al mes<br><input type="radio"/> 1 a 3 veces mes<br><input type="radio"/> 1 vez semana<br><input type="radio"/> 2 a 4 veces semana<br><input type="radio"/> 5 a 6 veces semana<br><input type="radio"/> 1 vez al día<br><input type="radio"/> 2 a 3 veces al día<br><input type="radio"/> 5 a 6 veces al día<br><input type="radio"/> más 6 veces al día |
| queso curado o semicurado o cremoso         | <input type="radio"/> Nunca o menos 1 vez al mes<br><input type="radio"/> 1 a 3 veces mes<br><input checked="" type="radio"/> 1 vez semana<br><input type="radio"/> 2 a 4 veces semana<br><input type="radio"/> 5 a 6 veces semana<br><input type="radio"/> 1 vez al día<br><input type="radio"/> 2 a 3 veces al día<br><input type="radio"/> 5 a 6 veces al día<br><input type="radio"/> más 6 veces al día |
| natillas flan pudding                       | <input checked="" type="radio"/> Nunca o menos 1 vez al mes<br><input type="radio"/> 1 a 3 veces mes<br><input type="radio"/> 1 vez semana<br><input type="radio"/> 2 a 4 veces semana<br><input type="radio"/> 5 a 6 veces semana<br><input type="radio"/> 1 vez al día<br><input type="radio"/> 2 a 3 veces al día<br><input type="radio"/> 5 a 6 veces al día<br><input type="radio"/> más 6 veces al día |
| Helado                                      | <input checked="" type="radio"/> Nunca o menos 1 vez al mes<br><input type="radio"/> 1 a 3 veces mes<br><input type="radio"/> 1 vez semana<br><input type="radio"/> 2 a 4 veces semana<br><input type="radio"/> 5 a 6 veces semana<br><input type="radio"/> 1 vez al día<br><input type="radio"/> 2 a 3 veces al día<br><input type="radio"/> 5 a 6 veces al día<br><input type="radio"/> más 6 veces al día |

|                                      |                                                                                                                                                                                                                                                                                                                                                                                                              |
|--------------------------------------|--------------------------------------------------------------------------------------------------------------------------------------------------------------------------------------------------------------------------------------------------------------------------------------------------------------------------------------------------------------------------------------------------------------|
| huevo                                | <input type="radio"/> Nunca o menos 1 vez al mes<br><input type="radio"/> 1 a 3 veces mes<br><input type="radio"/> 1 vez semana<br><input type="radio"/> 2 a 4 veces semana<br><input type="radio"/> 5 a 6 veces semana<br><input checked="" type="radio"/> 1 vez al día<br><input type="radio"/> 2 a 3 veces al día<br><input type="radio"/> 5 a 6 veces al día<br><input type="radio"/> más 6 veces al día |
| Pollo con piel                       | <input type="radio"/> Nunca o menos 1 vez al mes<br><input type="radio"/> 1 a 3 veces mes<br><input checked="" type="radio"/> 1 vez semana<br><input type="radio"/> 2 a 4 veces semana<br><input type="radio"/> 5 a 6 veces semana<br><input type="radio"/> 1 vez al día<br><input type="radio"/> 2 a 3 veces al día<br><input type="radio"/> 5 a 6 veces al día<br><input type="radio"/> más 6 veces al día |
| pollo sin piel                       | <input type="radio"/> Nunca o menos 1 vez al mes<br><input type="radio"/> 1 a 3 veces mes<br><input type="radio"/> 1 vez semana<br><input checked="" type="radio"/> 2 a 4 veces semana<br><input type="radio"/> 5 a 6 veces semana<br><input type="radio"/> 1 vez al día<br><input type="radio"/> 2 a 3 veces al día<br><input type="radio"/> 5 a 6 veces al día<br><input type="radio"/> más 6 veces al día |
| Tenera o cerdo o cordero             | <input type="radio"/> Nunca o menos 1 vez al mes<br><input checked="" type="radio"/> 1 a 3 veces mes<br><input type="radio"/> 1 vez semana<br><input type="radio"/> 2 a 4 veces semana<br><input type="radio"/> 5 a 6 veces semana<br><input type="radio"/> 1 vez al día<br><input type="radio"/> 2 a 3 veces al día<br><input type="radio"/> 5 a 6 veces al día<br><input type="radio"/> más 6 veces al día |
| carne caza: Conejo o codorniz o pato | <input type="radio"/> Nunca o menos 1 vez al mes<br><input checked="" type="radio"/> 1 a 3 veces mes<br><input type="radio"/> 1 vez semana<br><input type="radio"/> 2 a 4 veces semana<br><input type="radio"/> 5 a 6 veces semana<br><input type="radio"/> 1 vez al día<br><input type="radio"/> 2 a 3 veces al día<br><input type="radio"/> 5 a 6 veces al día<br><input type="radio"/> más 6 veces al día |
| Hígado de tenera o cerdo o pollo     | <input checked="" type="radio"/> Nunca o menos 1 vez al mes<br><input type="radio"/> 1 a 3 veces mes<br><input type="radio"/> 1 vez semana<br><input type="radio"/> 2 a 4 veces semana<br><input type="radio"/> 5 a 6 veces semana<br><input type="radio"/> 1 vez al día<br><input type="radio"/> 2 a 3 veces al día<br><input type="radio"/> 5 a 6 veces al día<br><input type="radio"/> más 6 veces al día |

---

Vísceras

- ☒ Nunca o menos 1 vez al mes  
☐ 1 a 3 veces mes  
☐ 1 vez semana  
☐ 2 a 4 veces semana  
☐ 5 a 6 veces semana  
☐ 1 vez al día  
☐ 2 a 3 veces al día  
☐ 5 a 6 veces al día  
☐ más 6 veces al día

---

Embutido

- ☒ Nunca o menos 1 vez al mes  
☐ 1 a 3 veces mes  
☐ 1 vez semana  
☐ 2 a 4 veces semana  
☐ 5 a 6 veces semana  
☐ 1 vez al día  
☐ 2 a 3 veces al día  
☐ 5 a 6 veces al día  
☐ más 6 veces al día

---

Salchicha o similar

- ☒ Nunca o menos 1 vez al mes  
☐ 1 a 3 veces mes  
☐ 1 vez semana  
☐ 2 a 4 veces semana  
☐ 5 a 6 veces semana  
☐ 1 vez al día  
☐ 2 a 3 veces al día  
☐ 5 a 6 veces al día  
☐ más 6 veces al día

---

Pate o foiegras

- ☒ Nunca o menos 1 vez al mes  
☐ 1 a 3 veces mes  
☐ 1 vez semana  
☐ 2 a 4 veces semana  
☐ 5 a 6 veces semana  
☐ 1 vez al día  
☐ 2 a 3 veces al día  
☐ 5 a 6 veces al día  
☐ más 6 veces al día

---

Hamburguesa

- ☐ Nunca o menos 1 vez al mes  
☐ 1 a 3 veces mes  
☒ 1 vez semana  
☐ 2 a 4 veces semana  
☐ 5 a 6 veces semana  
☐ 1 vez al día  
☐ 2 a 3 veces al día  
☐ 5 a 6 veces al día  
☐ más 6 veces al día

---

tocino o bacon

- ☐ Nunca o menos 1 vez al mes  
☒ 1 a 3 veces mes  
☐ 1 vez semana  
☐ 2 a 4 veces semana  
☐ 5 a 6 veces semana  
☐ 1 vez al día  
☐ 2 a 3 veces al día  
☐ 5 a 6 veces al día  
☐ más 6 veces al día

|                        |                                                                                                                                                                                                                                                                                                                                                                                                              |
|------------------------|--------------------------------------------------------------------------------------------------------------------------------------------------------------------------------------------------------------------------------------------------------------------------------------------------------------------------------------------------------------------------------------------------------------|
| Pescado frito          | <input type="radio"/> Nunca o menos 1 vez al mes<br><input type="radio"/> 1 a 3 veces mes<br><input type="radio"/> 1 vez semana<br><input type="radio"/> 2 a 4 veces semana<br><input type="radio"/> 5 a 6 veces semana<br><input type="radio"/> 1 vez al día<br><input type="radio"/> 2 a 3 veces al día<br><input type="radio"/> 5 a 6 veces al día<br><input type="radio"/> más 6 veces al día            |
| pescado hervido blanco | <input checked="" type="radio"/> Nunca o menos 1 vez al mes<br><input type="radio"/> 1 a 3 veces mes<br><input type="radio"/> 1 vez semana<br><input type="radio"/> 2 a 4 veces semana<br><input type="radio"/> 5 a 6 veces semana<br><input type="radio"/> 1 vez al día<br><input type="radio"/> 2 a 3 veces al día<br><input type="radio"/> 5 a 6 veces al día<br><input type="radio"/> más 6 veces al día |
| pescado hervido azul   | <input type="radio"/> Nunca o menos 1 vez al mes<br><input type="radio"/> 1 a 3 veces mes<br><input type="radio"/> 1 vez semana<br><input type="radio"/> 2 a 4 veces semana<br><input type="radio"/> 5 a 6 veces semana<br><input type="radio"/> 1 vez al día<br><input type="radio"/> 2 a 3 veces al día<br><input type="radio"/> 5 a 6 veces al día<br><input type="radio"/> más 6 veces al día            |
| otros pescado azul     | <input type="radio"/> Nunca o menos 1 vez al mes<br><input type="radio"/> 1 a 3 veces mes<br><input checked="" type="radio"/> 1 vez semana<br><input type="radio"/> 2 a 4 veces semana<br><input type="radio"/> 5 a 6 veces semana<br><input type="radio"/> 1 vez al día<br><input type="radio"/> 2 a 3 veces al día<br><input type="radio"/> 5 a 6 veces al día<br><input type="radio"/> más 6 veces al día |
| atun conserva          | <input type="radio"/> Nunca o menos 1 vez al mes<br><input type="radio"/> 1 a 3 veces mes<br><input checked="" type="radio"/> 1 vez semana<br><input type="radio"/> 2 a 4 veces semana<br><input type="radio"/> 5 a 6 veces semana<br><input type="radio"/> 1 vez al día<br><input type="radio"/> 2 a 3 veces al día<br><input type="radio"/> 5 a 6 veces al día<br><input type="radio"/> más 6 veces al día |
| sardina conserva       | <input checked="" type="radio"/> Nunca o menos 1 vez al mes<br><input type="radio"/> 1 a 3 veces mes<br><input type="radio"/> 1 vez semana<br><input type="radio"/> 2 a 4 veces semana<br><input type="radio"/> 5 a 6 veces semana<br><input type="radio"/> 1 vez al día<br><input type="radio"/> 2 a 3 veces al día<br><input type="radio"/> 5 a 6 veces al día<br><input type="radio"/> más 6 veces al día |

|                                         |                                                                                                                                                                                                                                                                                                                                                                                                              |
|-----------------------------------------|--------------------------------------------------------------------------------------------------------------------------------------------------------------------------------------------------------------------------------------------------------------------------------------------------------------------------------------------------------------------------------------------------------------|
| pescado ahumado                         | <input checked="" type="radio"/> Nunca o menos 1 vez al mes<br><input type="radio"/> 1 a 3 veces mes<br><input type="radio"/> 1 vez semana<br><input type="radio"/> 2 a 4 veces semana<br><input type="radio"/> 5 a 6 veces semana<br><input type="radio"/> 1 vez al día<br><input type="radio"/> 2 a 3 veces al día<br><input type="radio"/> 5 a 6 veces al día<br><input type="radio"/> más 6 veces al día |
| almejas o mejillones o ostras unos 100g | <input type="radio"/> Nunca o menos 1 vez al mes<br><input checked="" type="radio"/> 1 a 3 veces mes<br><input type="radio"/> 1 vez semana<br><input type="radio"/> 2 a 4 veces semana<br><input type="radio"/> 5 a 6 veces semana<br><input type="radio"/> 1 vez al día<br><input type="radio"/> 2 a 3 veces al día<br><input type="radio"/> 5 a 6 veces al día<br><input type="radio"/> más 6 veces al día |
| calamar o chipiron o sepia unos 100g    | <input checked="" type="radio"/> Nunca o menos 1 vez al mes<br><input type="radio"/> 1 a 3 veces mes<br><input type="radio"/> 1 vez semana<br><input type="radio"/> 2 a 4 veces semana<br><input type="radio"/> 5 a 6 veces semana<br><input type="radio"/> 1 vez al día<br><input type="radio"/> 2 a 3 veces al día<br><input type="radio"/> 5 a 6 veces al día<br><input type="radio"/> más 6 veces al día |
| marisco unos 100g                       | <input checked="" type="radio"/> Nunca o menos 1 vez al mes<br><input type="radio"/> 1 a 3 veces mes<br><input type="radio"/> 1 vez semana<br><input type="radio"/> 2 a 4 veces semana<br><input type="radio"/> 5 a 6 veces semana<br><input type="radio"/> 1 vez al día<br><input type="radio"/> 2 a 3 veces al día<br><input type="radio"/> 5 a 6 veces al día<br><input type="radio"/> más 6 veces al día |
| Espinacas o acelgas cocinadas           | <input checked="" type="radio"/> Nunca o menos 1 vez al mes<br><input type="radio"/> 1 a 3 veces mes<br><input type="radio"/> 1 vez semana<br><input type="radio"/> 2 a 4 veces semana<br><input type="radio"/> 5 a 6 veces semana<br><input type="radio"/> 1 vez al día<br><input type="radio"/> 2 a 3 veces al día<br><input type="radio"/> 5 a 6 veces al día<br><input type="radio"/> más 6 veces al día |
| Col o coliflor o brocoli cocinado       | <input checked="" type="radio"/> Nunca o menos 1 vez al mes<br><input type="radio"/> 1 a 3 veces mes<br><input type="radio"/> 1 vez semana<br><input type="radio"/> 2 a 4 veces semana<br><input type="radio"/> 5 a 6 veces semana<br><input type="radio"/> 1 vez al día<br><input type="radio"/> 2 a 3 veces al día<br><input type="radio"/> 5 a 6 veces al día<br><input type="radio"/> más 6 veces al día |

---

Lechuga o endivia o escarola

- ☐ Nunca o menos 1 vez al mes  
☒ 1 a 3 veces mes  
☐ 1 vez semana  
☐ 2 a 4 veces semana  
☐ 5 a 6 veces semana  
☐ 1 vez al día  
☐ 2 a 3 veces al día  
☐ 5 a 6 veces al día  
☐ más 6 veces al día

---

tomate ensalada

- ☐ Nunca o menos 1 vez al mes  
☐ 1 a 3 veces mes  
☒ 1 vez semana  
☐ 2 a 4 veces semana  
☐ 5 a 6 veces semana  
☐ 1 vez al día  
☐ 2 a 3 veces al día  
☐ 5 a 6 veces al día  
☐ más 6 veces al día

---

cebolla

- ☐ Nunca o menos 1 vez al mes  
☐ 1 a 3 veces mes  
☐ 1 vez semana  
☒ 2 a 4 veces semana  
☐ 5 a 6 veces semana  
☐ 1 vez al día  
☐ 2 a 3 veces al día  
☐ 5 a 6 veces al día  
☐ más 6 veces al día

---

Zanahoria o calabaza

- ☐ Nunca o menos 1 vez al mes  
☐ 1 a 3 veces mes  
☒ 1 vez semana  
☐ 2 a 4 veces semana  
☐ 5 a 6 veces semana  
☐ 1 vez al día  
☐ 2 a 3 veces al día  
☐ 5 a 6 veces al día  
☐ más 6 veces al día

---

Judías verdes

- ☐ Nunca o menos 1 vez al mes  
☒ 1 a 3 veces mes  
☐ 1 vez semana  
☐ 2 a 4 veces semana  
☐ 5 a 6 veces semana  
☐ 1 vez al día  
☐ 2 a 3 veces al día  
☐ 5 a 6 veces al día  
☐ más 6 veces al día

---

Berenjena o calabacin o pepino

- ☐ Nunca o menos 1 vez al mes  
☒ 1 a 3 veces mes  
☐ 1 vez semana  
☐ 2 a 4 veces semana  
☐ 5 a 6 veces semana  
☐ 1 vez al día  
☐ 2 a 3 veces al día  
☐ 5 a 6 veces al día  
☐ más 6 veces al día



---

|          |                                                                                                                                                                                                                                                                                                                                                                                                              |
|----------|--------------------------------------------------------------------------------------------------------------------------------------------------------------------------------------------------------------------------------------------------------------------------------------------------------------------------------------------------------------------------------------------------------------|
| pimiento | <input type="radio"/> Nunca o menos 1 vez al mes<br><input type="radio"/> 1 a 3 veces mes<br><input checked="" type="radio"/> 1 vez semana<br><input type="radio"/> 2 a 4 veces semana<br><input type="radio"/> 5 a 6 veces semana<br><input type="radio"/> 1 vez al día<br><input type="radio"/> 2 a 3 veces al día<br><input type="radio"/> 5 a 6 veces al día<br><input type="radio"/> más 6 veces al día |
|----------|--------------------------------------------------------------------------------------------------------------------------------------------------------------------------------------------------------------------------------------------------------------------------------------------------------------------------------------------------------------------------------------------------------------|

---

|           |                                                                                                                                                                                                                                                                                                                                                                                                              |
|-----------|--------------------------------------------------------------------------------------------------------------------------------------------------------------------------------------------------------------------------------------------------------------------------------------------------------------------------------------------------------------------------------------------------------------|
| alcachofa | <input type="radio"/> Nunca o menos 1 vez al mes<br><input checked="" type="radio"/> 1 a 3 veces mes<br><input type="radio"/> 1 vez semana<br><input type="radio"/> 2 a 4 veces semana<br><input type="radio"/> 5 a 6 veces semana<br><input type="radio"/> 1 vez al día<br><input type="radio"/> 2 a 3 veces al día<br><input type="radio"/> 5 a 6 veces al día<br><input type="radio"/> más 6 veces al día |
|-----------|--------------------------------------------------------------------------------------------------------------------------------------------------------------------------------------------------------------------------------------------------------------------------------------------------------------------------------------------------------------------------------------------------------------|

---

|            |                                                                                                                                                                                                                                                                                                                                                                                                              |
|------------|--------------------------------------------------------------------------------------------------------------------------------------------------------------------------------------------------------------------------------------------------------------------------------------------------------------------------------------------------------------------------------------------------------------|
| espárragos | <input type="radio"/> Nunca o menos 1 vez al mes<br><input checked="" type="radio"/> 1 a 3 veces mes<br><input type="radio"/> 1 vez semana<br><input type="radio"/> 2 a 4 veces semana<br><input type="radio"/> 5 a 6 veces semana<br><input type="radio"/> 1 vez al día<br><input type="radio"/> 2 a 3 veces al día<br><input type="radio"/> 5 a 6 veces al día<br><input type="radio"/> más 6 veces al día |
|------------|--------------------------------------------------------------------------------------------------------------------------------------------------------------------------------------------------------------------------------------------------------------------------------------------------------------------------------------------------------------------------------------------------------------|

---

|              |                                                                                                                                                                                                                                                                                                                                                                                                              |
|--------------|--------------------------------------------------------------------------------------------------------------------------------------------------------------------------------------------------------------------------------------------------------------------------------------------------------------------------------------------------------------------------------------------------------------|
| maíz hervido | <input checked="" type="radio"/> Nunca o menos 1 vez al mes<br><input type="radio"/> 1 a 3 veces mes<br><input type="radio"/> 1 vez semana<br><input type="radio"/> 2 a 4 veces semana<br><input type="radio"/> 5 a 6 veces semana<br><input type="radio"/> 1 vez al día<br><input type="radio"/> 2 a 3 veces al día<br><input type="radio"/> 5 a 6 veces al día<br><input type="radio"/> más 6 veces al día |
|--------------|--------------------------------------------------------------------------------------------------------------------------------------------------------------------------------------------------------------------------------------------------------------------------------------------------------------------------------------------------------------------------------------------------------------|

---

|           |                                                                                                                                                                                                                                                                                                                                                                                                              |
|-----------|--------------------------------------------------------------------------------------------------------------------------------------------------------------------------------------------------------------------------------------------------------------------------------------------------------------------------------------------------------------------------------------------------------------|
| legumbres | <input type="radio"/> Nunca o menos 1 vez al mes<br><input type="radio"/> 1 a 3 veces mes<br><input type="radio"/> 1 vez semana<br><input checked="" type="radio"/> 2 a 4 veces semana<br><input type="radio"/> 5 a 6 veces semana<br><input type="radio"/> 1 vez al día<br><input type="radio"/> 2 a 3 veces al día<br><input type="radio"/> 5 a 6 veces al día<br><input type="radio"/> más 6 veces al día |
|-----------|--------------------------------------------------------------------------------------------------------------------------------------------------------------------------------------------------------------------------------------------------------------------------------------------------------------------------------------------------------------------------------------------------------------|

---

|                       |                                                                                                                                                                                                                                                                                                                                                                                                              |
|-----------------------|--------------------------------------------------------------------------------------------------------------------------------------------------------------------------------------------------------------------------------------------------------------------------------------------------------------------------------------------------------------------------------------------------------------|
| naranjas o mandarinas | <input type="radio"/> Nunca o menos 1 vez al mes<br><input type="radio"/> 1 a 3 veces mes<br><input checked="" type="radio"/> 1 vez semana<br><input type="radio"/> 2 a 4 veces semana<br><input type="radio"/> 5 a 6 veces semana<br><input type="radio"/> 1 vez al día<br><input type="radio"/> 2 a 3 veces al día<br><input type="radio"/> 5 a 6 veces al día<br><input type="radio"/> más 6 veces al día |
|-----------------------|--------------------------------------------------------------------------------------------------------------------------------------------------------------------------------------------------------------------------------------------------------------------------------------------------------------------------------------------------------------------------------------------------------------|

---

---

zum natural fruta

- ☐ Nunca o menos 1 vez al mes  
☒ 1 a 3 veces mes  
☐ 1 vez semana  
☐ 2 a 4 veces semana  
☐ 5 a 6 veces semana  
☐ 1 vez al día  
☐ 2 a 3 veces al día  
☐ 5 a 6 veces al día  
☐ más 6 veces al día

---

platano

- ☐ Nunca o menos 1 vez al mes  
☐ 1 a 3 veces mes  
☐ 1 vez semana  
☐ 2 a 4 veces semana  
☒ 5 a 6 veces semana  
☐ 1 vez al día  
☐ 2 a 3 veces al día  
☐ 5 a 6 veces al día  
☐ más 6 veces al día

---

manzana o pera

- ☐ Nunca o menos 1 vez al mes  
☐ 1 a 3 veces mes  
☐ 1 vez semana  
☒ 2 a 4 veces semana  
☐ 5 a 6 veces semana  
☐ 1 vez al día  
☐ 2 a 3 veces al día  
☐ 5 a 6 veces al día  
☐ más 6 veces al día

---

melocotón o nectarina

- ☐ Nunca o menos 1 vez al mes  
☐ 1 a 3 veces mes  
☐ 1 vez semana  
☒ 2 a 4 veces semana  
☐ 5 a 6 veces semana  
☐ 1 vez al día  
☐ 2 a 3 veces al día  
☐ 5 a 6 veces al día  
☐ más 6 veces al día

---

sandia o melon

- ☐ Nunca o menos 1 vez al mes  
☐ 1 a 3 veces mes  
☐ 1 vez semana  
☒ 2 a 4 veces semana  
☐ 5 a 6 veces semana  
☐ 1 vez al día  
☐ 2 a 3 veces al día  
☐ 5 a 6 veces al día  
☐ más 6 veces al día

---

uva

- ☐ Nunca o menos 1 vez al mes  
☐ 1 a 3 veces mes  
☐ 1 vez semana  
☒ 2 a 4 veces semana  
☐ 5 a 6 veces semana  
☐ 1 vez al día  
☐ 2 a 3 veces al día  
☐ 5 a 6 veces al día  
☐ más 6 veces al día

|                 |                                                                                                                                                                                                                                                                                                                                                                                                              |
|-----------------|--------------------------------------------------------------------------------------------------------------------------------------------------------------------------------------------------------------------------------------------------------------------------------------------------------------------------------------------------------------------------------------------------------------|
| bruna o ciruela | <input checked="" type="radio"/> Nunca o menos 1 vez al mes<br><input type="radio"/> 1 a 3 veces mes<br><input type="radio"/> 1 vez semana<br><input type="radio"/> 2 a 4 veces semana<br><input type="radio"/> 5 a 6 veces semana<br><input type="radio"/> 1 vez al día<br><input type="radio"/> 2 a 3 veces al día<br><input type="radio"/> 5 a 6 veces al día<br><input type="radio"/> más 6 veces al día |
| kiwi            | <input checked="" type="radio"/> Nunca o menos 1 vez al mes<br><input type="radio"/> 1 a 3 veces mes<br><input type="radio"/> 1 vez semana<br><input type="radio"/> 2 a 4 veces semana<br><input type="radio"/> 5 a 6 veces semana<br><input type="radio"/> 1 vez al día<br><input type="radio"/> 2 a 3 veces al día<br><input type="radio"/> 5 a 6 veces al día<br><input type="radio"/> más 6 veces al día |
| aceituna        | <input type="radio"/> Nunca o menos 1 vez al mes<br><input checked="" type="radio"/> 1 a 3 veces mes<br><input type="radio"/> 1 vez semana<br><input type="radio"/> 2 a 4 veces semana<br><input type="radio"/> 5 a 6 veces semana<br><input type="radio"/> 1 vez al día<br><input type="radio"/> 2 a 3 veces al día<br><input type="radio"/> 5 a 6 veces al día<br><input type="radio"/> más 6 veces al día |
| frutos secos    | <input type="radio"/> Nunca o menos 1 vez al mes<br><input type="radio"/> 1 a 3 veces mes<br><input type="radio"/> 1 vez semana<br><input type="radio"/> 2 a 4 veces semana<br><input checked="" type="radio"/> 5 a 6 veces semana<br><input type="radio"/> 1 vez al día<br><input type="radio"/> 2 a 3 veces al día<br><input type="radio"/> 5 a 6 veces al día<br><input type="radio"/> más 6 veces al día |
| pan blanco      | <input type="radio"/> Nunca o menos 1 vez al mes<br><input type="radio"/> 1 a 3 veces mes<br><input type="radio"/> 1 vez semana<br><input type="radio"/> 2 a 4 veces semana<br><input type="radio"/> 5 a 6 veces semana<br><input type="radio"/> 1 vez al día<br><input checked="" type="radio"/> 2 a 3 veces al día<br><input type="radio"/> 5 a 6 veces al día<br><input type="radio"/> más 6 veces al día |
| pan integral    | <input type="radio"/> Nunca o menos 1 vez al mes<br><input checked="" type="radio"/> 1 a 3 veces mes<br><input type="radio"/> 1 vez semana<br><input type="radio"/> 2 a 4 veces semana<br><input type="radio"/> 5 a 6 veces semana<br><input type="radio"/> 1 vez al día<br><input type="radio"/> 2 a 3 veces al día<br><input type="radio"/> 5 a 6 veces al día<br><input type="radio"/> más 6 veces al día |

---

cereales desayuno

- ☒ Nunca o menos 1 vez al mes  
☐ 1 a 3 veces mes  
☐ 1 vez semana  
☐ 2 a 4 veces semana  
☐ 5 a 6 veces semana  
☐ 1 vez al día  
☐ 2 a 3 veces al día  
☐ 5 a 6 veces al día  
☐ más 6 veces al día

---

patatas fritas

- ☐ Nunca o menos 1 vez al mes  
☒ 1 a 3 veces mes  
☐ 1 vez semana  
☐ 2 a 4 veces semana  
☐ 5 a 6 veces semana  
☐ 1 vez al día  
☐ 2 a 3 veces al día  
☐ 5 a 6 veces al día  
☐ más 6 veces al día

---

patatas cocidas o asadas

- ☐ Nunca o menos 1 vez al mes  
☐ 1 a 3 veces mes  
☒ 1 vez semana  
☐ 2 a 4 veces semana  
☐ 5 a 6 veces semana  
☐ 1 vez al día  
☐ 2 a 3 veces al día  
☐ 5 a 6 veces al día  
☐ más 6 veces al día

---

bolsa papas

- ☒ Nunca o menos 1 vez al mes  
☐ 1 a 3 veces mes  
☐ 1 vez semana  
☐ 2 a 4 veces semana  
☐ 5 a 6 veces semana  
☐ 1 vez al día  
☐ 2 a 3 veces al día  
☐ 5 a 6 veces al día  
☐ más 6 veces al día

---

arroz cocinado

- ☐ Nunca o menos 1 vez al mes  
☐ 1 a 3 veces mes  
☐ 1 vez semana  
☒ 2 a 4 veces semana  
☐ 5 a 6 veces semana  
☐ 1 vez al día  
☐ 2 a 3 veces al día  
☐ 5 a 6 veces al día  
☐ más 6 veces al día

---

pasta

- ☐ Nunca o menos 1 vez al mes  
☐ 1 a 3 veces mes  
☐ 1 vez semana  
☒ 2 a 4 veces semana  
☐ 5 a 6 veces semana  
☐ 1 vez al día  
☐ 2 a 3 veces al día  
☐ 5 a 6 veces al día  
☐ más 6 veces al día

|                     |                                                                                                                                                                                                                                                                                                                                                                                                              |
|---------------------|--------------------------------------------------------------------------------------------------------------------------------------------------------------------------------------------------------------------------------------------------------------------------------------------------------------------------------------------------------------------------------------------------------------|
| pizza               | <input type="radio"/> Nunca o menos 1 vez al mes<br><input type="radio"/> 1 a 3 veces mes<br><input checked="" type="radio"/> 1 vez semana<br><input type="radio"/> 2 a 4 veces semana<br><input type="radio"/> 5 a 6 veces semana<br><input type="radio"/> 1 vez al día<br><input type="radio"/> 2 a 3 veces al día<br><input type="radio"/> 5 a 6 veces al día<br><input type="radio"/> más 6 veces al día |
| aceite oliva        | <input type="radio"/> Nunca o menos 1 vez al mes<br><input type="radio"/> 1 a 3 veces mes<br><input type="radio"/> 1 vez semana<br><input type="radio"/> 2 a 4 veces semana<br><input type="radio"/> 5 a 6 veces semana<br><input type="radio"/> 1 vez al día<br><input type="radio"/> 2 a 3 veces al día<br><input checked="" type="radio"/> 5 a 6 veces al día<br><input type="radio"/> más 6 veces al día |
| otros aceites       | <input type="radio"/> Nunca o menos 1 vez al mes<br><input checked="" type="radio"/> 1 a 3 veces mes<br><input type="radio"/> 1 vez semana<br><input type="radio"/> 2 a 4 veces semana<br><input type="radio"/> 5 a 6 veces semana<br><input type="radio"/> 1 vez al día<br><input type="radio"/> 2 a 3 veces al día<br><input type="radio"/> 5 a 6 veces al día<br><input type="radio"/> más 6 veces al día |
| margarina           | <input checked="" type="radio"/> Nunca o menos 1 vez al mes<br><input type="radio"/> 1 a 3 veces mes<br><input type="radio"/> 1 vez semana<br><input type="radio"/> 2 a 4 veces semana<br><input type="radio"/> 5 a 6 veces semana<br><input type="radio"/> 1 vez al día<br><input type="radio"/> 2 a 3 veces al día<br><input type="radio"/> 5 a 6 veces al día<br><input type="radio"/> más 6 veces al día |
| mantequilla         | <input checked="" type="radio"/> Nunca o menos 1 vez al mes<br><input type="radio"/> 1 a 3 veces mes<br><input type="radio"/> 1 vez semana<br><input type="radio"/> 2 a 4 veces semana<br><input type="radio"/> 5 a 6 veces semana<br><input type="radio"/> 1 vez al día<br><input type="radio"/> 2 a 3 veces al día<br><input type="radio"/> 5 a 6 veces al día<br><input type="radio"/> más 6 veces al día |
| galletas tipo maria | <input type="radio"/> Nunca o menos 1 vez al mes<br><input checked="" type="radio"/> 1 a 3 veces mes<br><input type="radio"/> 1 vez semana<br><input type="radio"/> 2 a 4 veces semana<br><input type="radio"/> 5 a 6 veces semana<br><input type="radio"/> 1 vez al día<br><input type="radio"/> 2 a 3 veces al día<br><input type="radio"/> 5 a 6 veces al día<br><input type="radio"/> más 6 veces al día |

---

galletas chocolate

- ☒ Nunca o menos 1 vez al mes  
☐ 1 a 3 veces mes  
☐ 1 vez semana  
☐ 2 a 4 veces semana  
☐ 5 a 6 veces semana  
☐ 1 vez al día  
☐ 2 a 3 veces al día  
☐ 5 a 6 veces al día  
☐ más 6 veces al día

---

bolleria

- ☐ Nunca o menos 1 vez al mes  
☒ 1 a 3 veces mes  
☐ 1 vez semana  
☐ 2 a 4 veces semana  
☐ 5 a 6 veces semana  
☐ 1 vez al día  
☐ 2 a 3 veces al día  
☐ 5 a 6 veces al día  
☐ más 6 veces al día

---

chocolate o bombones

- ☐ Nunca o menos 1 vez al mes  
☒ 1 a 3 veces mes  
☐ 1 vez semana  
☐ 2 a 4 veces semana  
☐ 5 a 6 veces semana  
☐ 1 vez al día  
☐ 2 a 3 veces al día  
☐ 5 a 6 veces al día  
☐ más 6 veces al día

---

chocolate polvo o colacao

- ☒ Nunca o menos 1 vez al mes  
☐ 1 a 3 veces mes  
☐ 1 vez semana  
☐ 2 a 4 veces semana  
☐ 5 a 6 veces semana  
☐ 1 vez al día  
☐ 2 a 3 veces al día  
☐ 5 a 6 veces al día  
☐ más 6 veces al día

---

vino tinto

- ☒ Nunca o menos 1 vez al mes  
☐ 1 a 3 veces mes  
☐ 1 vez semana  
☐ 2 a 4 veces semana  
☐ 5 a 6 veces semana  
☐ 1 vez al día  
☐ 2 a 3 veces al día  
☐ 5 a 6 veces al día  
☐ más 6 veces al día

---

vino blanco

- ☒ Nunca o menos 1 vez al mes  
☐ 1 a 3 veces mes  
☐ 1 vez semana  
☐ 2 a 4 veces semana  
☐ 5 a 6 veces semana  
☐ 1 vez al día  
☐ 2 a 3 veces al día  
☐ 5 a 6 veces al día  
☐ más 6 veces al día

|                       |                                                                                                                                                                                                                                                                                                                                                                                                              |
|-----------------------|--------------------------------------------------------------------------------------------------------------------------------------------------------------------------------------------------------------------------------------------------------------------------------------------------------------------------------------------------------------------------------------------------------------|
| vino seco o vermut    | <input checked="" type="radio"/> Nunca o menos 1 vez al mes<br><input type="radio"/> 1 a 3 veces mes<br><input type="radio"/> 1 vez semana<br><input type="radio"/> 2 a 4 veces semana<br><input type="radio"/> 5 a 6 veces semana<br><input type="radio"/> 1 vez al día<br><input type="radio"/> 2 a 3 veces al día<br><input type="radio"/> 5 a 6 veces al día<br><input type="radio"/> más 6 veces al día |
| cerveza               | <input checked="" type="radio"/> Nunca o menos 1 vez al mes<br><input type="radio"/> 1 a 3 veces mes<br><input type="radio"/> 1 vez semana<br><input type="radio"/> 2 a 4 veces semana<br><input type="radio"/> 5 a 6 veces semana<br><input type="radio"/> 1 vez al día<br><input type="radio"/> 2 a 3 veces al día<br><input type="radio"/> 5 a 6 veces al día<br><input type="radio"/> más 6 veces al día |
| cerveza sin alcohol   | <input type="radio"/> Nunca o menos 1 vez al mes<br><input checked="" type="radio"/> 1 a 3 veces mes<br><input type="radio"/> 1 vez semana<br><input type="radio"/> 2 a 4 veces semana<br><input type="radio"/> 5 a 6 veces semana<br><input type="radio"/> 1 vez al día<br><input type="radio"/> 2 a 3 veces al día<br><input type="radio"/> 5 a 6 veces al día<br><input type="radio"/> más 6 veces al día |
| licores               | <input checked="" type="radio"/> Nunca o menos 1 vez al mes<br><input type="radio"/> 1 a 3 veces mes<br><input type="radio"/> 1 vez semana<br><input type="radio"/> 2 a 4 veces semana<br><input type="radio"/> 5 a 6 veces semana<br><input type="radio"/> 1 vez al día<br><input type="radio"/> 2 a 3 veces al día<br><input type="radio"/> 5 a 6 veces al día<br><input type="radio"/> más 6 veces al día |
| ginebra o ron o vodka | <input checked="" type="radio"/> Nunca o menos 1 vez al mes<br><input type="radio"/> 1 a 3 veces mes<br><input type="radio"/> 1 vez semana<br><input type="radio"/> 2 a 4 veces semana<br><input type="radio"/> 5 a 6 veces semana<br><input type="radio"/> 1 vez al día<br><input type="radio"/> 2 a 3 veces al día<br><input type="radio"/> 5 a 6 veces al día<br><input type="radio"/> más 6 veces al día |
| refresco normal       | <input checked="" type="radio"/> Nunca o menos 1 vez al mes<br><input type="radio"/> 1 a 3 veces mes<br><input type="radio"/> 1 vez semana<br><input type="radio"/> 2 a 4 veces semana<br><input type="radio"/> 5 a 6 veces semana<br><input type="radio"/> 1 vez al día<br><input type="radio"/> 2 a 3 veces al día<br><input type="radio"/> 5 a 6 veces al día<br><input type="radio"/> más 6 veces al día |

|                          |                                                                                                                                                                                                                                                                                                                                                                                                              |
|--------------------------|--------------------------------------------------------------------------------------------------------------------------------------------------------------------------------------------------------------------------------------------------------------------------------------------------------------------------------------------------------------------------------------------------------------|
| refresco sin azúcar      | <input checked="" type="radio"/> Nunca o menos 1 vez al mes<br><input type="radio"/> 1 a 3 veces mes<br><input type="radio"/> 1 vez semana<br><input type="radio"/> 2 a 4 veces semana<br><input type="radio"/> 5 a 6 veces semana<br><input type="radio"/> 1 vez al día<br><input type="radio"/> 2 a 3 veces al día<br><input type="radio"/> 5 a 6 veces al día<br><input type="radio"/> más 6 veces al día |
| Agua del grifo           | <input checked="" type="radio"/> Nunca o menos 1 vez al mes<br><input type="radio"/> 1 a 3 veces mes<br><input type="radio"/> 1 vez semana<br><input type="radio"/> 2 a 4 veces semana<br><input type="radio"/> 5 a 6 veces semana<br><input type="radio"/> 1 vez al día<br><input type="radio"/> 2 a 3 veces al día<br><input type="radio"/> 5 a 6 veces al día<br><input type="radio"/> más 6 veces al día |
| agua embotellada sin gas | <input type="radio"/> Nunca o menos 1 vez al mes<br><input type="radio"/> 1 a 3 veces mes<br><input type="radio"/> 1 vez semana<br><input type="radio"/> 2 a 4 veces semana<br><input type="radio"/> 5 a 6 veces semana<br><input type="radio"/> 1 vez al día<br><input type="radio"/> 2 a 3 veces al día<br><input type="radio"/> 5 a 6 veces al día<br><input checked="" type="radio"/> más 6 veces al día |
| agua embotellada con gas | <input checked="" type="radio"/> Nunca o menos 1 vez al mes<br><input type="radio"/> 1 a 3 veces mes<br><input type="radio"/> 1 vez semana<br><input type="radio"/> 2 a 4 veces semana<br><input type="radio"/> 5 a 6 veces semana<br><input type="radio"/> 1 vez al día<br><input type="radio"/> 2 a 3 veces al día<br><input type="radio"/> 5 a 6 veces al día<br><input type="radio"/> más 6 veces al día |
| zumو frutas embasado     | <input checked="" type="radio"/> Nunca o menos 1 vez al mes<br><input type="radio"/> 1 a 3 veces mes<br><input type="radio"/> 1 vez semana<br><input type="radio"/> 2 a 4 veces semana<br><input type="radio"/> 5 a 6 veces semana<br><input type="radio"/> 1 vez al día<br><input type="radio"/> 2 a 3 veces al día<br><input type="radio"/> 5 a 6 veces al día<br><input type="radio"/> más 6 veces al día |
| cafe                     | <input checked="" type="radio"/> Nunca o menos 1 vez al mes<br><input type="radio"/> 1 a 3 veces mes<br><input type="radio"/> 1 vez semana<br><input type="radio"/> 2 a 4 veces semana<br><input type="radio"/> 5 a 6 veces semana<br><input type="radio"/> 1 vez al día<br><input type="radio"/> 2 a 3 veces al día<br><input type="radio"/> 5 a 6 veces al día<br><input type="radio"/> más 6 veces al día |



---

|                   |                                                                                                                                                                                                                                                                                                                                                                                                              |
|-------------------|--------------------------------------------------------------------------------------------------------------------------------------------------------------------------------------------------------------------------------------------------------------------------------------------------------------------------------------------------------------------------------------------------------------|
| cafe descafeinado | <input checked="" type="radio"/> Nunca o menos 1 vez al mes<br><input type="radio"/> 1 a 3 veces mes<br><input type="radio"/> 1 vez semana<br><input type="radio"/> 2 a 4 veces semana<br><input type="radio"/> 5 a 6 veces semana<br><input type="radio"/> 1 vez al día<br><input type="radio"/> 2 a 3 veces al día<br><input type="radio"/> 5 a 6 veces al día<br><input type="radio"/> más 6 veces al día |
|-------------------|--------------------------------------------------------------------------------------------------------------------------------------------------------------------------------------------------------------------------------------------------------------------------------------------------------------------------------------------------------------------------------------------------------------|

---

|               |                                                                                                                                                                                                                                                                                                                                                                                                              |
|---------------|--------------------------------------------------------------------------------------------------------------------------------------------------------------------------------------------------------------------------------------------------------------------------------------------------------------------------------------------------------------------------------------------------------------|
| te o infusión | <input checked="" type="radio"/> Nunca o menos 1 vez al mes<br><input type="radio"/> 1 a 3 veces mes<br><input type="radio"/> 1 vez semana<br><input type="radio"/> 2 a 4 veces semana<br><input type="radio"/> 5 a 6 veces semana<br><input type="radio"/> 1 vez al día<br><input type="radio"/> 2 a 3 veces al día<br><input type="radio"/> 5 a 6 veces al día<br><input type="radio"/> más 6 veces al día |
|---------------|--------------------------------------------------------------------------------------------------------------------------------------------------------------------------------------------------------------------------------------------------------------------------------------------------------------------------------------------------------------------------------------------------------------|

---

|                      |                                                                                                                                                                                                                                                                                                                                                                                                              |
|----------------------|--------------------------------------------------------------------------------------------------------------------------------------------------------------------------------------------------------------------------------------------------------------------------------------------------------------------------------------------------------------------------------------------------------------|
| sopa o puré verduras | <input type="radio"/> Nunca o menos 1 vez al mes<br><input type="radio"/> 1 a 3 veces mes<br><input checked="" type="radio"/> 1 vez semana<br><input type="radio"/> 2 a 4 veces semana<br><input type="radio"/> 5 a 6 veces semana<br><input type="radio"/> 1 vez al día<br><input type="radio"/> 2 a 3 veces al día<br><input type="radio"/> 5 a 6 veces al día<br><input type="radio"/> más 6 veces al día |
|----------------------|--------------------------------------------------------------------------------------------------------------------------------------------------------------------------------------------------------------------------------------------------------------------------------------------------------------------------------------------------------------------------------------------------------------|

---

|                       |                                                                                                                                                                                                                                                                                                                                                                                                              |
|-----------------------|--------------------------------------------------------------------------------------------------------------------------------------------------------------------------------------------------------------------------------------------------------------------------------------------------------------------------------------------------------------------------------------------------------------|
| croquetas pollo jamón | <input type="radio"/> Nunca o menos 1 vez al mes<br><input checked="" type="radio"/> 1 a 3 veces mes<br><input type="radio"/> 1 vez semana<br><input type="radio"/> 2 a 4 veces semana<br><input type="radio"/> 5 a 6 veces semana<br><input type="radio"/> 1 vez al día<br><input type="radio"/> 2 a 3 veces al día<br><input type="radio"/> 5 a 6 veces al día<br><input type="radio"/> más 6 veces al día |
|-----------------------|--------------------------------------------------------------------------------------------------------------------------------------------------------------------------------------------------------------------------------------------------------------------------------------------------------------------------------------------------------------------------------------------------------------|

---

|                   |                                                                                                                                                                                                                                                                                                                                                                                                              |
|-------------------|--------------------------------------------------------------------------------------------------------------------------------------------------------------------------------------------------------------------------------------------------------------------------------------------------------------------------------------------------------------------------------------------------------------|
| croquetas pescado | <input type="radio"/> Nunca o menos 1 vez al mes<br><input checked="" type="radio"/> 1 a 3 veces mes<br><input type="radio"/> 1 vez semana<br><input type="radio"/> 2 a 4 veces semana<br><input type="radio"/> 5 a 6 veces semana<br><input type="radio"/> 1 vez al día<br><input type="radio"/> 2 a 3 veces al día<br><input type="radio"/> 5 a 6 veces al día<br><input type="radio"/> más 6 veces al día |
|-------------------|--------------------------------------------------------------------------------------------------------------------------------------------------------------------------------------------------------------------------------------------------------------------------------------------------------------------------------------------------------------------------------------------------------------|

---

|          |                                                                                                                                                                                                                                                                                                                                                                                                              |
|----------|--------------------------------------------------------------------------------------------------------------------------------------------------------------------------------------------------------------------------------------------------------------------------------------------------------------------------------------------------------------------------------------------------------------|
| mayonesa | <input checked="" type="radio"/> Nunca o menos 1 vez al mes<br><input type="radio"/> 1 a 3 veces mes<br><input type="radio"/> 1 vez semana<br><input type="radio"/> 2 a 4 veces semana<br><input type="radio"/> 5 a 6 veces semana<br><input type="radio"/> 1 vez al día<br><input type="radio"/> 2 a 3 veces al día<br><input type="radio"/> 5 a 6 veces al día<br><input type="radio"/> más 6 veces al día |
|----------|--------------------------------------------------------------------------------------------------------------------------------------------------------------------------------------------------------------------------------------------------------------------------------------------------------------------------------------------------------------------------------------------------------------|

---

---

salsa tomate

- ☐ Nunca o menos 1 vez al mes  
☐ 1 a 3 veces mes  
☐ 1 vez semana  
☒ 2 a 4 veces semana  
☐ 5 a 6 veces semana  
☐ 1 vez al día  
☐ 2 a 3 veces al día  
☐ 5 a 6 veces al día  
☐ más 6 veces al día

---

ketchup

- ☒ Nunca o menos 1 vez al mes  
☐ 1 a 3 veces mes  
☐ 1 vez semana  
☐ 2 a 4 veces semana  
☐ 5 a 6 veces semana  
☐ 1 vez al día  
☐ 2 a 3 veces al día  
☐ 5 a 6 veces al día  
☐ más 6 veces al día

---

sal

- ☒ Nunca o menos 1 vez al mes  
☐ 1 a 3 veces mes  
☐ 1 vez semana  
☐ 2 a 4 veces semana  
☐ 5 a 6 veces semana  
☐ 1 vez al día  
☐ 2 a 3 veces al día  
☐ 5 a 6 veces al día  
☐ más 6 veces al día

---

ajo

- ☐ Nunca o menos 1 vez al mes  
☐ 1 a 3 veces mes  
☐ 1 vez semana  
☒ 2 a 4 veces semana  
☐ 5 a 6 veces semana  
☐ 1 vez al día  
☐ 2 a 3 veces al día  
☐ 5 a 6 veces al día  
☐ más 6 veces al día

---

mermelada o miel

- ☐ Nunca o menos 1 vez al mes  
☐ 1 a 3 veces mes  
☐ 1 vez semana  
☐ 2 a 4 veces semana  
☒ 5 a 6 veces semana  
☐ 1 vez al día  
☐ 2 a 3 veces al día  
☐ 5 a 6 veces al día  
☐ más 6 veces al día

---

azúcar

- ☒ Nunca o menos 1 vez al mes  
☐ 1 a 3 veces mes  
☐ 1 vez semana  
☐ 2 a 4 veces semana  
☐ 5 a 6 veces semana  
☐ 1 vez al día  
☐ 2 a 3 veces al día  
☐ 5 a 6 veces al día  
☐ más 6 veces al día

|                                       |                                                                                                                                                                                                                                                                                                                                                                                                                                                                                                                               |
|---------------------------------------|-------------------------------------------------------------------------------------------------------------------------------------------------------------------------------------------------------------------------------------------------------------------------------------------------------------------------------------------------------------------------------------------------------------------------------------------------------------------------------------------------------------------------------|
| Otro alimento                         | <hr/>                                                                                                                                                                                                                                                                                                                                                                                                                                                                                                                         |
| suplementos vitamínicos               | <input type="radio"/> si<br><input checked="" type="radio"/> no                                                                                                                                                                                                                                                                                                                                                                                                                                                               |
| suplementos vitamínicos               | <hr/>                                                                                                                                                                                                                                                                                                                                                                                                                                                                                                                         |
| dieta previa                          | <input type="radio"/> si<br><input checked="" type="radio"/> no                                                                                                                                                                                                                                                                                                                                                                                                                                                               |
| motivo dieta                          | <input checked="" type="radio"/> no dieta<br><input type="radio"/> control peso<br><input type="radio"/> control colesterol<br><input type="radio"/> control diabetes<br><input type="radio"/> problemas estómago<br><input type="radio"/> problemas vesícula o hepáticos<br><input type="radio"/> HTA o cardiopatía<br><input type="radio"/> problemas renales<br><input type="radio"/> alergia alimentaria<br><input type="radio"/> ácido úrico elevado<br><input type="radio"/> vegetariana<br><input type="radio"/> otros |
| cambio alimentos año previo gestación | <input checked="" type="radio"/> si<br><input type="radio"/> no                                                                                                                                                                                                                                                                                                                                                                                                                                                               |
| cambio lácteos                        | <input type="radio"/> eliminado<br><input type="radio"/> disminuido<br><input checked="" type="radio"/> igual<br><input type="radio"/> aumentado<br><input type="radio"/> no sabe                                                                                                                                                                                                                                                                                                                                             |
| cambio huevos                         | <input type="radio"/> eliminado<br><input type="radio"/> disminuido<br><input checked="" type="radio"/> igual<br><input type="radio"/> aumentado<br><input type="radio"/> no sabe                                                                                                                                                                                                                                                                                                                                             |
| cambio carne                          | <input type="radio"/> eliminado<br><input type="radio"/> disminuido<br><input checked="" type="radio"/> igual<br><input type="radio"/> aumentado<br><input type="radio"/> no sabe                                                                                                                                                                                                                                                                                                                                             |
| cambio pescado                        | <input type="radio"/> eliminado<br><input type="radio"/> disminuido<br><input checked="" type="radio"/> igual<br><input type="radio"/> aumentado<br><input type="radio"/> no sabe                                                                                                                                                                                                                                                                                                                                             |
| cambio verduras                       | <input type="radio"/> eliminado<br><input type="radio"/> disminuido<br><input checked="" type="radio"/> igual<br><input type="radio"/> aumentado<br><input type="radio"/> no sabe                                                                                                                                                                                                                                                                                                                                             |

|                            |                                                                                                                                                                                                                        |
|----------------------------|------------------------------------------------------------------------------------------------------------------------------------------------------------------------------------------------------------------------|
| cambio legumbres           | <input type="radio"/> eliminado<br><input type="radio"/> disminuido<br><input checked="" type="radio"/> igual<br><input type="radio"/> aumentado<br><input type="radio"/> no sabe                                      |
| cambio fruta               | <input type="radio"/> eliminado<br><input type="radio"/> disminuido<br><input type="radio"/> igual<br><input checked="" type="radio"/> aumentado<br><input type="radio"/> no sabe                                      |
| cambio pan                 | <input type="radio"/> eliminado<br><input type="radio"/> disminuido<br><input checked="" type="radio"/> igual<br><input type="radio"/> aumentado<br><input type="radio"/> no sabe                                      |
| cambio aceite oliva        | <input type="radio"/> eliminado<br><input type="radio"/> disminuido<br><input checked="" type="radio"/> igual<br><input type="radio"/> aumentado<br><input type="radio"/> no sabe                                      |
| cambio mante o margarina   | <input type="radio"/> eliminado<br><input type="radio"/> disminuido<br><input checked="" type="radio"/> igual<br><input type="radio"/> aumentado<br><input type="radio"/> no sabe                                      |
| cambio azúcar y dulces     | <input type="radio"/> eliminado<br><input type="radio"/> disminuido<br><input checked="" type="radio"/> igual<br><input type="radio"/> aumentado<br><input type="radio"/> no sabe                                      |
| cambio bebidas alcohólicas | <input checked="" type="radio"/> eliminado<br><input type="radio"/> disminuido<br><input type="radio"/> igual<br><input type="radio"/> aumentado<br><input type="radio"/> no sabe                                      |
| frecuencia comidas fritas  | <input type="radio"/> a diario<br><input type="radio"/> 5 a 6 veces semana<br><input checked="" type="radio"/> 2 a 4 veces semana<br><input type="radio"/> 1 vez semana<br><input type="radio"/> menos de 1 vez semana |
| carne                      | <input type="radio"/> no como<br><input type="radio"/> cruda<br><input type="radio"/> poco hecha<br><input checked="" type="radio"/> hecha<br><input type="radio"/> muy hecha                                          |
| grasa visible carne        | <input type="radio"/> quita toda<br><input checked="" type="radio"/> quita mayoría<br><input type="radio"/> quita un poco<br><input type="radio"/> no quita nada                                                       |

|                                |                                                                                                                                                                                                                                                          |
|--------------------------------|----------------------------------------------------------------------------------------------------------------------------------------------------------------------------------------------------------------------------------------------------------|
| cocina carne                   | <input type="radio"/> a la plancha<br><input type="radio"/> a la parrilla<br><input type="radio"/> asada<br><input checked="" type="radio"/> frita<br><input type="radio"/> guisada                                                                      |
| tostado quemado carne          | <input checked="" type="radio"/> nunca<br><input type="radio"/> 1 vez mes<br><input type="radio"/> 2 a 3 veces mes<br><input type="radio"/> 1 vez semana<br><input type="radio"/> 2 a 3 semanas                                                          |
| tostado quemado pescado        | <input checked="" type="radio"/> nunca<br><input type="radio"/> 1 vez mes<br><input type="radio"/> 2 a 3 veces mes<br><input type="radio"/> 1 vez semana<br><input type="radio"/> 2 a 3 semanas                                                          |
| socarrat paella                | <input checked="" type="radio"/> nunca<br><input type="radio"/> 1 vez mes<br><input type="radio"/> 2 a 3 veces mes<br><input type="radio"/> 1 vez semana<br><input type="radio"/> 2 a 3 semanas                                                          |
| grasa o aceite cocinar         | <input type="radio"/> mantequilla<br><input type="radio"/> margarina<br><input type="radio"/> aceite oliva<br><input checked="" type="radio"/> aceite oliva virgen extra<br><input type="radio"/> aceite vegetal<br><input type="radio"/> mezcla aceites |
| grasa aceite aliñar            | <input type="radio"/> mantequilla<br><input type="radio"/> margarina<br><input type="radio"/> aceite oliva<br><input checked="" type="radio"/> aceite oliva virgen extra<br><input type="radio"/> aceite vegetal<br><input type="radio"/> mezcla aceites |
| grasa aceite freir             | <input type="radio"/> mantequilla<br><input type="radio"/> margarina<br><input type="radio"/> aceite oliva<br><input checked="" type="radio"/> aceite oliva virgen extra<br><input type="radio"/> aceite vegetal<br><input type="radio"/> mezcla aceites |
| Ejercicio cuestionario         | <input checked="" type="radio"/> si<br><input type="radio"/> no                                                                                                                                                                                          |
| horas de sueño incluido siesta | [*DATA REMOVED*]                                                                                                                                                                                                                                         |
| minutos siesta                 | [*DATA REMOVED*]                                                                                                                                                                                                                                         |
| horas televisión semana        | [*DATA REMOVED*]                                                                                                                                                                                                                                         |

|                                        |                                                                                                                                                                                                                                                                                                                                                                |
|----------------------------------------|----------------------------------------------------------------------------------------------------------------------------------------------------------------------------------------------------------------------------------------------------------------------------------------------------------------------------------------------------------------|
| actividad trabajo                      | <input type="radio"/> casi siempre sentado<br><input type="radio"/> sentado 50 por cien<br><input type="radio"/> casi siempre de pie, quieto<br><input type="radio"/> casi siempre levantado caminando y llevando pocas cosas<br><input type="radio"/> casi siempre levantado, caminando y llevado muchas cosas<br><input type="radio"/> trabajo manual pesado |
| tiempo caminar o bici al día           | <input type="radio"/> casi nunca<br><input checked="" type="radio"/> menos 20min día<br><input type="radio"/> 20 a 40 min día<br><input type="radio"/> 40 a 60 min día<br><input type="radio"/> 1h o 1h y media día<br><input type="radio"/> más de 1h y media al día                                                                                          |
| tiempo tareas casa al día              | <input type="radio"/> menos de 1h día<br><input type="radio"/> 1 a 2h día<br><input checked="" type="radio"/> 3 a 4h día<br><input type="radio"/> 5 a 6h día<br><input type="radio"/> 7 a 8h día<br><input type="radio"/> más de 8h día                                                                                                                        |
| tiempo libre televisión ordenador leer | <input type="radio"/> menos 1h día<br><input type="radio"/> 1h día<br><input type="radio"/> 2h día<br><input checked="" type="radio"/> 3h día<br><input type="radio"/> 4h día<br><input type="radio"/> 5 a 6h día<br><input type="radio"/> mas 6h día                                                                                                          |
| tiempo libre ejercicio o deporte       | <input type="radio"/> menos 1h semana<br><input type="radio"/> 1h semana<br><input type="radio"/> 2h semana<br><input checked="" type="radio"/> 3h semana<br><input type="radio"/> 4 a 5h semana<br><input type="radio"/> mas 5h semana                                                                                                                        |
| como se considera                      | <input type="radio"/> sedentaria<br><input type="radio"/> poco activa<br><input checked="" type="radio"/> moderadamente activa<br><input type="radio"/> bastante activa<br><input type="radio"/> muy activa<br><input type="radio"/> no sabe                                                                                                                   |
| FUR                                    | [*DATA REMOVED*]                                                                                                                                                                                                                                                                                                                                               |
| Semanas gestación 2T                   | [*DATA REMOVED*]                                                                                                                                                                                                                                                                                                                                               |
| Días gestación 2T                      | [*DATA REMOVED*]                                                                                                                                                                                                                                                                                                                                               |
| DBP 2T                                 | [*DATA REMOVED*]                                                                                                                                                                                                                                                                                                                                               |
| CC 2T                                  | [*DATA REMOVED*]                                                                                                                                                                                                                                                                                                                                               |
| AC 2T                                  | [*DATA REMOVED*]                                                                                                                                                                                                                                                                                                                                               |

|                                                   |                                                                                                                                                                                                 |
|---------------------------------------------------|-------------------------------------------------------------------------------------------------------------------------------------------------------------------------------------------------|
| LF 2T                                             | [*DATA REMOVED*]                                                                                                                                                                                |
| PFE 2T (Hadlock)                                  | [*DATA REMOVED*]                                                                                                                                                                                |
| Semanas gestación 3T                              | [*DATA REMOVED*]                                                                                                                                                                                |
| días 3T                                           | [*DATA REMOVED*]                                                                                                                                                                                |
| DBP 3T                                            | [*DATA REMOVED*]                                                                                                                                                                                |
| CC 3T                                             | [*DATA REMOVED*]                                                                                                                                                                                |
| AC 3T                                             | [*DATA REMOVED*]                                                                                                                                                                                |
| LF 3T                                             | [*DATA REMOVED*]                                                                                                                                                                                |
| PFE 3T (Hadlock)                                  | [*DATA REMOVED*]                                                                                                                                                                                |
| Semanas de gestación final                        | [*DATA REMOVED*]                                                                                                                                                                                |
| días gestación final                              | [*DATA REMOVED*]                                                                                                                                                                                |
| Localización placenta                             | <input type="radio"/> anterior<br><input type="radio"/> lateral derecha<br><input type="radio"/> lateral izquierda<br><input checked="" type="radio"/> posterior<br><input type="radio"/> fondo |
| Presentación longitudinal cefálica                | <input type="radio"/> no<br><input checked="" type="radio"/> si                                                                                                                                 |
| Dorso                                             | <input checked="" type="radio"/> izquierda anterior<br><input type="radio"/> izquierda posterior<br><input type="radio"/> derecha anterior<br><input type="radio"/> derecha posterior           |
| diámetro biparietal                               | [*DATA REMOVED*]                                                                                                                                                                                |
| Circunferencia craneal                            | [*DATA REMOVED*]                                                                                                                                                                                |
| Circunferencia abdominal                          | [*DATA REMOVED*]                                                                                                                                                                                |
| Longitud de femur                                 | [*DATA REMOVED*]                                                                                                                                                                                |
| tejido celular subcutáneo a nivel del muslo en mm | [*DATA REMOVED*]                                                                                                                                                                                |
| tejido celular subcutáneo en abdomen en mm        | [*DATA REMOVED*]                                                                                                                                                                                |
| Volumen del muslo en cm3                          | [*DATA REMOVED*]                                                                                                                                                                                |
| Peso fetal estimado según fórmula de Hadlock      | [*DATA REMOVED*]                                                                                                                                                                                |

|                                               |                                                                                                                                               |
|-----------------------------------------------|-----------------------------------------------------------------------------------------------------------------------------------------------|
| Percentil                                     | [*DATA REMOVED*]                                                                                                                              |
| Peso fetal estimado según fórmula de Scioscia | <hr/>                                                                                                                                         |
| Peso fetal estimado según fórmula de LEE      | <hr/>                                                                                                                                         |
| Tipo de parto                                 | <input checked="" type="radio"/> eutocico<br><input type="radio"/> instrumentado/ventosa<br><input type="radio"/> cesarea                     |
| fecha de nacimiento                           | [*DATA REMOVED*]                                                                                                                              |
| Días entre exploración y nacimiento           | [*DATA REMOVED*]                                                                                                                              |
| Peso RN en g                                  | [*DATA REMOVED*]                                                                                                                              |
| sexo                                          | <input checked="" type="radio"/> mujer<br><input type="radio"/> hombre                                                                        |
| Apgar 1 minuto                                | [*DATA REMOVED*]                                                                                                                              |
| Apgar 5 minutos                               | [*DATA REMOVED*]                                                                                                                              |
| Apgar 10 minutos                              | <hr/>                                                                                                                                         |
| antecedente Covid durante gestación           | <input type="radio"/> Yes<br><input checked="" type="radio"/> No                                                                              |
| Nivel de estudios                             | <input type="radio"/> ninguno<br><input type="radio"/> primarios<br><input type="radio"/> secundarios<br><input type="radio"/> universitarios |



# Base\_datos\_estimacion\_peso\_fetal

|                                       |                                                                                                                                                                                                                                                                                      |
|---------------------------------------|--------------------------------------------------------------------------------------------------------------------------------------------------------------------------------------------------------------------------------------------------------------------------------------|
| Número de identificación participante | 140                                                                                                                                                                                                                                                                                  |
| CODIGO PARTICIPANTE                   |                                                                                                                                                                                                                                                                                      |
| Edad                                  | [*DATA REMOVED*]                                                                                                                                                                                                                                                                     |
| Gestaciones                           | <input checked="" type="radio"/> 1<br><input type="radio"/> 2<br><input type="radio"/> 3<br><input type="radio"/> mas de 3                                                                                                                                                           |
| partos                                | <input checked="" type="radio"/> 0<br><input type="radio"/> 1<br><input type="radio"/> 2<br><input type="radio"/> 3<br><input type="radio"/> mas de 3                                                                                                                                |
| cesáreas                              | <input checked="" type="radio"/> 0<br><input type="radio"/> 1<br><input type="radio"/> 2<br><input type="radio"/> 3<br><input type="radio"/> mas de 3                                                                                                                                |
| Abortos                               | <input checked="" type="radio"/> 0<br><input type="radio"/> 1<br><input type="radio"/> 2<br><input type="radio"/> 3<br><input type="radio"/> mas de 3                                                                                                                                |
| Tipo de gestacion                     | <input type="radio"/> espontanea<br><input type="radio"/> IAC inseminación artificial conyuge<br><input type="radio"/> IAD inseminación artificial donante<br><input checked="" type="radio"/> FIV Fecundación in Vitro<br><input type="radio"/> Ovodon FIV con donación de ovocitos |
| peso previo a embarazo                | [*DATA REMOVED*]                                                                                                                                                                                                                                                                     |
| Ganancia ponderal embarazo            | [*DATA REMOVED*]                                                                                                                                                                                                                                                                     |
| Talla madre                           | [*DATA REMOVED*]                                                                                                                                                                                                                                                                     |
| IMC previo embarazo                   | 30.116002379535995                                                                                                                                                                                                                                                                   |
| Patología obstétrica                  | <input checked="" type="radio"/> no<br><input type="radio"/> si                                                                                                                                                                                                                      |
| Diabetes pregestacional               | <input checked="" type="radio"/> no<br><input type="radio"/> si                                                                                                                                                                                                                      |
| Diabetes gestacional                  | <input checked="" type="radio"/> no<br><input type="radio"/> si                                                                                                                                                                                                                      |

|                                            |                                                                                                                                                                                      |
|--------------------------------------------|--------------------------------------------------------------------------------------------------------------------------------------------------------------------------------------|
| Diabetes gestacional con insulina          | <input checked="" type="radio"/> no<br><input type="radio"/> si                                                                                                                      |
| Diabetes gestacional con dieta y ejercicio | <input checked="" type="radio"/> no<br><input type="radio"/> si                                                                                                                      |
| Percentil fetos previos                    | <input checked="" type="radio"/> Nada<br><input type="radio"/> percentil menor de 10<br><input type="radio"/> percentil entre 10 y 90<br><input type="radio"/> percentil mayor de 90 |
| Exfumadora                                 | <input checked="" type="radio"/> Nada<br><input type="radio"/> menos de 5 años<br><input type="radio"/> 5 a 10 años<br><input type="radio"/> mayor o igual a 10 años                 |
| Hábito tabáquico                           | <input checked="" type="radio"/> no<br><input type="radio"/> si                                                                                                                      |
| fumadora                                   | [*DATA REMOVED*]                                                                                                                                                                     |
| Consumo otros tóxicos                      | <input checked="" type="radio"/> no<br><input type="radio"/> si                                                                                                                      |
| Hb 1T                                      | [*DATA REMOVED*]                                                                                                                                                                     |
| Htc 1T                                     | [*DATA REMOVED*]                                                                                                                                                                     |
| Hb 2T                                      | [*DATA REMOVED*]                                                                                                                                                                     |
| HTC 2T                                     | [*DATA REMOVED*]                                                                                                                                                                     |
| Hb 3T                                      | [*DATA REMOVED*]                                                                                                                                                                     |
| HTC 3T                                     | [*DATA REMOVED*]                                                                                                                                                                     |
| Suplemento FE oral                         | <input type="radio"/> si<br><input checked="" type="radio"/> no                                                                                                                      |
| Suplemento fe iv                           | <input checked="" type="radio"/> si<br><input type="radio"/> no                                                                                                                      |
| Transfusión                                | <input checked="" type="radio"/> no<br><input type="radio"/> si                                                                                                                      |
| Solicitada Vit D                           | <input checked="" type="radio"/> no<br><input type="radio"/> si                                                                                                                      |
| Deficit vit D                              | <input type="radio"/> no<br><input type="radio"/> si                                                                                                                                 |
| Suplemento vit D                           | <input type="radio"/> si<br><input type="radio"/> no                                                                                                                                 |

|                       |                                                                                                                                                                                                                                                                                                                                                                                                              |
|-----------------------|--------------------------------------------------------------------------------------------------------------------------------------------------------------------------------------------------------------------------------------------------------------------------------------------------------------------------------------------------------------------------------------------------------------|
| Dieta, cuestionario   | <input checked="" type="radio"/> si<br><input type="radio"/> no                                                                                                                                                                                                                                                                                                                                              |
| Leche entera          | <input type="radio"/> Nunca o menos 1 vez al mes<br><input type="radio"/> 1 a 3 veces mes<br><input type="radio"/> 1 vez semana<br><input type="radio"/> 2 a 4 veces semana<br><input type="radio"/> 5 a 6 veces semana<br><input type="radio"/> 1 vez al día<br><input type="radio"/> 2 a 3 veces al día<br><input type="radio"/> 5 a 6 veces al día<br><input type="radio"/> más 6 veces al día            |
| Leche semidesnatada   | <input type="radio"/> Nunca o menos 1 vez al mes<br><input type="radio"/> 1 a 3 veces mes<br><input type="radio"/> 1 vez semana<br><input type="radio"/> 2 a 4 veces semana<br><input type="radio"/> 5 a 6 veces semana<br><input type="radio"/> 1 vez al día<br><input type="radio"/> 2 a 3 veces al día<br><input type="radio"/> 5 a 6 veces al día<br><input type="radio"/> mas 6 veces al día            |
| Leche desnatada       | <input type="radio"/> Nunca o menos 1 vez al mes<br><input type="radio"/> 1 a 3 veces mes<br><input type="radio"/> 1 vez semana<br><input type="radio"/> 2 a 4 veces semana<br><input type="radio"/> 5 a 6 veces semana<br><input type="radio"/> 1 vez al día<br><input checked="" type="radio"/> 2 a 3 veces al día<br><input type="radio"/> 5 a 6 veces al día<br><input type="radio"/> más 6 veces al día |
| Leche condensada      | <input type="radio"/> Nunca o menos 1 vez al mes<br><input type="radio"/> 1 a 3 veces mes<br><input type="radio"/> 1 vez semana<br><input type="radio"/> 2 a 4 veces semana<br><input type="radio"/> 5 a 6 veces semana<br><input type="radio"/> 1 vez al día<br><input type="radio"/> 2 a 3 veces al día<br><input type="radio"/> 5 a 6 veces al día<br><input type="radio"/> más 6 veces al día            |
| nata o crema de leche | <input type="radio"/> Nunca o menos 1 vez al mes<br><input type="radio"/> 1 a 3 veces mes<br><input type="radio"/> 1 vez semana<br><input type="radio"/> 2 a 4 veces semana<br><input type="radio"/> 5 a 6 veces semana<br><input type="radio"/> 1 vez al día<br><input type="radio"/> 2 a 3 veces al día<br><input type="radio"/> 5 a 6 veces al día<br><input type="radio"/> más 6 veces al día            |

|                                             |                                                                                                                                                                                                                                                                                                                                                                                                              |
|---------------------------------------------|--------------------------------------------------------------------------------------------------------------------------------------------------------------------------------------------------------------------------------------------------------------------------------------------------------------------------------------------------------------------------------------------------------------|
| Yogurt Entero                               | <input type="radio"/> Nunca o menos 1 vez al mes<br><input type="radio"/> 1 a 3 veces mes<br><input type="radio"/> 1 vez semana<br><input type="radio"/> 2 a 4 veces semana<br><input type="radio"/> 5 a 6 veces semana<br><input type="radio"/> 1 vez al día<br><input type="radio"/> 2 a 3 veces al día<br><input type="radio"/> 5 a 6 veces al día<br><input type="radio"/> más 6 veces al día            |
| Yogurt desnatado                            | <input type="radio"/> Nunca o menos 1 vez al mes<br><input type="radio"/> 1 a 3 veces mes<br><input type="radio"/> 1 vez semana<br><input type="radio"/> 2 a 4 veces semana<br><input type="radio"/> 5 a 6 veces semana<br><input type="radio"/> 1 vez al día<br><input type="radio"/> 2 a 3 veces al día<br><input type="radio"/> 5 a 6 veces al día<br><input type="radio"/> más 6 veces al día            |
| 100g requesón o queso blando o queso fresco | <input type="radio"/> Nunca o menos 1 vez al mes<br><input type="radio"/> 1 a 3 veces mes<br><input type="radio"/> 1 vez semana<br><input type="radio"/> 2 a 4 veces semana<br><input type="radio"/> 5 a 6 veces semana<br><input type="radio"/> 1 vez al día<br><input type="radio"/> 2 a 3 veces al día<br><input type="radio"/> 5 a 6 veces al día<br><input type="radio"/> más 6 veces al día            |
| queso curado o semicurado o cremoso         | <input type="radio"/> Nunca o menos 1 vez al mes<br><input checked="" type="radio"/> 1 a 3 veces mes<br><input type="radio"/> 1 vez semana<br><input type="radio"/> 2 a 4 veces semana<br><input type="radio"/> 5 a 6 veces semana<br><input type="radio"/> 1 vez al día<br><input type="radio"/> 2 a 3 veces al día<br><input type="radio"/> 5 a 6 veces al día<br><input type="radio"/> más 6 veces al día |
| natillas flan pudding                       | <input type="radio"/> Nunca o menos 1 vez al mes<br><input type="radio"/> 1 a 3 veces mes<br><input type="radio"/> 1 vez semana<br><input type="radio"/> 2 a 4 veces semana<br><input type="radio"/> 5 a 6 veces semana<br><input type="radio"/> 1 vez al día<br><input type="radio"/> 2 a 3 veces al día<br><input type="radio"/> 5 a 6 veces al día<br><input type="radio"/> más 6 veces al día            |
| Helado                                      | <input type="radio"/> Nunca o menos 1 vez al mes<br><input type="radio"/> 1 a 3 veces mes<br><input type="radio"/> 1 vez semana<br><input type="radio"/> 2 a 4 veces semana<br><input type="radio"/> 5 a 6 veces semana<br><input checked="" type="radio"/> 1 vez al día<br><input type="radio"/> 2 a 3 veces al día<br><input type="radio"/> 5 a 6 veces al día<br><input type="radio"/> más 6 veces al día |

|                                      |                                                                                                                                                                                                                                                                                                                                                                                                              |
|--------------------------------------|--------------------------------------------------------------------------------------------------------------------------------------------------------------------------------------------------------------------------------------------------------------------------------------------------------------------------------------------------------------------------------------------------------------|
| huevo                                | <input type="radio"/> Nunca o menos 1 vez al mes<br><input type="radio"/> 1 a 3 veces mes<br><input checked="" type="radio"/> 1 vez semana<br><input type="radio"/> 2 a 4 veces semana<br><input type="radio"/> 5 a 6 veces semana<br><input type="radio"/> 1 vez al día<br><input type="radio"/> 2 a 3 veces al día<br><input type="radio"/> 5 a 6 veces al día<br><input type="radio"/> más 6 veces al día |
| Pollo con piel                       | <input type="radio"/> Nunca o menos 1 vez al mes<br><input type="radio"/> 1 a 3 veces mes<br><input type="radio"/> 1 vez semana<br><input type="radio"/> 2 a 4 veces semana<br><input type="radio"/> 5 a 6 veces semana<br><input type="radio"/> 1 vez al día<br><input type="radio"/> 2 a 3 veces al día<br><input type="radio"/> 5 a 6 veces al día<br><input type="radio"/> más 6 veces al día            |
| pollo sin piel                       | <input type="radio"/> Nunca o menos 1 vez al mes<br><input type="radio"/> 1 a 3 veces mes<br><input checked="" type="radio"/> 1 vez semana<br><input type="radio"/> 2 a 4 veces semana<br><input type="radio"/> 5 a 6 veces semana<br><input type="radio"/> 1 vez al día<br><input type="radio"/> 2 a 3 veces al día<br><input type="radio"/> 5 a 6 veces al día<br><input type="radio"/> más 6 veces al día |
| Ternera o cerdo o cordero            | <input type="radio"/> Nunca o menos 1 vez al mes<br><input type="radio"/> 1 a 3 veces mes<br><input checked="" type="radio"/> 1 vez semana<br><input type="radio"/> 2 a 4 veces semana<br><input type="radio"/> 5 a 6 veces semana<br><input type="radio"/> 1 vez al día<br><input type="radio"/> 2 a 3 veces al día<br><input type="radio"/> 5 a 6 veces al día<br><input type="radio"/> más 6 veces al día |
| carne caza: Conejo o codorniz o pato | <input type="radio"/> Nunca o menos 1 vez al mes<br><input type="radio"/> 1 a 3 veces mes<br><input type="radio"/> 1 vez semana<br><input type="radio"/> 2 a 4 veces semana<br><input type="radio"/> 5 a 6 veces semana<br><input type="radio"/> 1 vez al día<br><input type="radio"/> 2 a 3 veces al día<br><input type="radio"/> 5 a 6 veces al día<br><input type="radio"/> más 6 veces al día            |
| Hígado de ternera o cerdo o pollo    | <input type="radio"/> Nunca o menos 1 vez al mes<br><input type="radio"/> 1 a 3 veces mes<br><input type="radio"/> 1 vez semana<br><input type="radio"/> 2 a 4 veces semana<br><input type="radio"/> 5 a 6 veces semana<br><input type="radio"/> 1 vez al día<br><input type="radio"/> 2 a 3 veces al día<br><input type="radio"/> 5 a 6 veces al día<br><input type="radio"/> más 6 veces al día            |

|                     |                                                                                                                                                                                                                                                                                                                                                                                                              |
|---------------------|--------------------------------------------------------------------------------------------------------------------------------------------------------------------------------------------------------------------------------------------------------------------------------------------------------------------------------------------------------------------------------------------------------------|
| Vísceras            | <input type="radio"/> Nunca o menos 1 vez al mes<br><input type="radio"/> 1 a 3 veces mes<br><input type="radio"/> 1 vez semana<br><input type="radio"/> 2 a 4 veces semana<br><input type="radio"/> 5 a 6 veces semana<br><input type="radio"/> 1 vez al día<br><input type="radio"/> 2 a 3 veces al día<br><input type="radio"/> 5 a 6 veces al día<br><input type="radio"/> más 6 veces al día            |
| Embutido            | <input type="radio"/> Nunca o menos 1 vez al mes<br><input checked="" type="radio"/> 1 a 3 veces mes<br><input type="radio"/> 1 vez semana<br><input type="radio"/> 2 a 4 veces semana<br><input type="radio"/> 5 a 6 veces semana<br><input type="radio"/> 1 vez al día<br><input type="radio"/> 2 a 3 veces al día<br><input type="radio"/> 5 a 6 veces al día<br><input type="radio"/> más 6 veces al día |
| Salchicha o similar | <input type="radio"/> Nunca o menos 1 vez al mes<br><input type="radio"/> 1 a 3 veces mes<br><input type="radio"/> 1 vez semana<br><input type="radio"/> 2 a 4 veces semana<br><input type="radio"/> 5 a 6 veces semana<br><input type="radio"/> 1 vez al día<br><input type="radio"/> 2 a 3 veces al día<br><input type="radio"/> 5 a 6 veces al día<br><input type="radio"/> más 6 veces al día            |
| Pate o foiegras     | <input type="radio"/> Nunca o menos 1 vez al mes<br><input type="radio"/> 1 a 3 veces mes<br><input type="radio"/> 1 vez semana<br><input type="radio"/> 2 a 4 veces semana<br><input type="radio"/> 5 a 6 veces semana<br><input type="radio"/> 1 vez al día<br><input type="radio"/> 2 a 3 veces al día<br><input type="radio"/> 5 a 6 veces al día<br><input type="radio"/> más 6 veces al día            |
| Hamburguesa         | <input type="radio"/> Nunca o menos 1 vez al mes<br><input checked="" type="radio"/> 1 a 3 veces mes<br><input type="radio"/> 1 vez semana<br><input type="radio"/> 2 a 4 veces semana<br><input type="radio"/> 5 a 6 veces semana<br><input type="radio"/> 1 vez al día<br><input type="radio"/> 2 a 3 veces al día<br><input type="radio"/> 5 a 6 veces al día<br><input type="radio"/> más 6 veces al día |
| tocino o bacon      | <input type="radio"/> Nunca o menos 1 vez al mes<br><input checked="" type="radio"/> 1 a 3 veces mes<br><input type="radio"/> 1 vez semana<br><input type="radio"/> 2 a 4 veces semana<br><input type="radio"/> 5 a 6 veces semana<br><input type="radio"/> 1 vez al día<br><input type="radio"/> 2 a 3 veces al día<br><input type="radio"/> 5 a 6 veces al día<br><input type="radio"/> más 6 veces al día |

---

Pescado frito

- ☐ Nunca o menos 1 vez al mes  
☐ 1 a 3 veces mes  
☐ 1 vez semana  
☐ 2 a 4 veces semana  
☐ 5 a 6 veces semana  
☐ 1 vez al día  
☐ 2 a 3 veces al día  
☐ 5 a 6 veces al día  
☐ más 6 veces al día

---

pescado hervido blanco

- ☐ Nunca o menos 1 vez al mes  
☒ 1 a 3 veces mes  
☐ 1 vez semana  
☐ 2 a 4 veces semana  
☐ 5 a 6 veces semana  
☐ 1 vez al día  
☐ 2 a 3 veces al día  
☐ 5 a 6 veces al día  
☐ más 6 veces al día

---

pescado hervido azul

- ☐ Nunca o menos 1 vez al mes  
☐ 1 a 3 veces mes  
☐ 1 vez semana  
☐ 2 a 4 veces semana  
☐ 5 a 6 veces semana  
☐ 1 vez al día  
☐ 2 a 3 veces al día  
☐ 5 a 6 veces al día  
☐ más 6 veces al día

---

otros pescado azul

- ☐ Nunca o menos 1 vez al mes  
☒ 1 a 3 veces mes  
☐ 1 vez semana  
☐ 2 a 4 veces semana  
☐ 5 a 6 veces semana  
☐ 1 vez al día  
☐ 2 a 3 veces al día  
☐ 5 a 6 veces al día  
☐ más 6 veces al día

---

atun conserva

- ☐ Nunca o menos 1 vez al mes  
☐ 1 a 3 veces mes  
☐ 1 vez semana  
☐ 2 a 4 veces semana  
☐ 5 a 6 veces semana  
☐ 1 vez al día  
☐ 2 a 3 veces al día  
☐ 5 a 6 veces al día  
☐ más 6 veces al día

---

sardina conserva

- ☐ Nunca o menos 1 vez al mes  
☒ 1 a 3 veces mes  
☐ 1 vez semana  
☐ 2 a 4 veces semana  
☐ 5 a 6 veces semana  
☐ 1 vez al día  
☐ 2 a 3 veces al día  
☐ 5 a 6 veces al día  
☐ más 6 veces al día

|                                         |                                                                                                                                                                                                                                                                                                                                                                                                              |
|-----------------------------------------|--------------------------------------------------------------------------------------------------------------------------------------------------------------------------------------------------------------------------------------------------------------------------------------------------------------------------------------------------------------------------------------------------------------|
| pescado ahumado                         | <input type="radio"/> Nunca o menos 1 vez al mes<br><input type="radio"/> 1 a 3 veces mes<br><input type="radio"/> 1 vez semana<br><input type="radio"/> 2 a 4 veces semana<br><input type="radio"/> 5 a 6 veces semana<br><input type="radio"/> 1 vez al día<br><input type="radio"/> 2 a 3 veces al día<br><input type="radio"/> 5 a 6 veces al día<br><input type="radio"/> más 6 veces al día            |
| almejas o mejillones o ostras unos 100g | <input type="radio"/> Nunca o menos 1 vez al mes<br><input checked="" type="radio"/> 1 a 3 veces mes<br><input type="radio"/> 1 vez semana<br><input type="radio"/> 2 a 4 veces semana<br><input type="radio"/> 5 a 6 veces semana<br><input type="radio"/> 1 vez al día<br><input type="radio"/> 2 a 3 veces al día<br><input type="radio"/> 5 a 6 veces al día<br><input type="radio"/> más 6 veces al día |
| calamar o chipiron o sepia unos 100g    | <input type="radio"/> Nunca o menos 1 vez al mes<br><input type="radio"/> 1 a 3 veces mes<br><input type="radio"/> 1 vez semana<br><input type="radio"/> 2 a 4 veces semana<br><input type="radio"/> 5 a 6 veces semana<br><input type="radio"/> 1 vez al día<br><input type="radio"/> 2 a 3 veces al día<br><input type="radio"/> 5 a 6 veces al día<br><input type="radio"/> más 6 veces al día            |
| marisco unos 100g                       | <input checked="" type="radio"/> Nunca o menos 1 vez al mes<br><input type="radio"/> 1 a 3 veces mes<br><input type="radio"/> 1 vez semana<br><input type="radio"/> 2 a 4 veces semana<br><input type="radio"/> 5 a 6 veces semana<br><input type="radio"/> 1 vez al día<br><input type="radio"/> 2 a 3 veces al día<br><input type="radio"/> 5 a 6 veces al día<br><input type="radio"/> más 6 veces al día |
| Espinacas o acelgas cocinadas           | <input type="radio"/> Nunca o menos 1 vez al mes<br><input checked="" type="radio"/> 1 a 3 veces mes<br><input type="radio"/> 1 vez semana<br><input type="radio"/> 2 a 4 veces semana<br><input type="radio"/> 5 a 6 veces semana<br><input type="radio"/> 1 vez al día<br><input type="radio"/> 2 a 3 veces al día<br><input type="radio"/> 5 a 6 veces al día<br><input type="radio"/> más 6 veces al día |
| Col o coliflor o brocoli cocinado       | <input type="radio"/> Nunca o menos 1 vez al mes<br><input type="radio"/> 1 a 3 veces mes<br><input type="radio"/> 1 vez semana<br><input type="radio"/> 2 a 4 veces semana<br><input type="radio"/> 5 a 6 veces semana<br><input type="radio"/> 1 vez al día<br><input type="radio"/> 2 a 3 veces al día<br><input type="radio"/> 5 a 6 veces al día<br><input type="radio"/> más 6 veces al día            |



---

Lechuga o endivia o escarola

- ☐ Nunca o menos 1 vez al mes  
☒ 1 a 3 veces mes  
☐ 1 vez semana  
☐ 2 a 4 veces semana  
☐ 5 a 6 veces semana  
☐ 1 vez al día  
☐ 2 a 3 veces al día  
☐ 5 a 6 veces al día  
☐ más 6 veces al día

---

tomate ensalada

- ☐ Nunca o menos 1 vez al mes  
☒ 1 a 3 veces mes  
☐ 1 vez semana  
☐ 2 a 4 veces semana  
☐ 5 a 6 veces semana  
☐ 1 vez al día  
☐ 2 a 3 veces al día  
☐ 5 a 6 veces al día  
☐ más 6 veces al día

---

cebolla

- ☐ Nunca o menos 1 vez al mes  
☐ 1 a 3 veces mes  
☒ 1 vez semana  
☐ 2 a 4 veces semana  
☐ 5 a 6 veces semana  
☐ 1 vez al día  
☐ 2 a 3 veces al día  
☐ 5 a 6 veces al día  
☐ más 6 veces al día

---

Zanahoria o calabaza

- ☐ Nunca o menos 1 vez al mes  
☐ 1 a 3 veces mes  
☐ 1 vez semana  
☐ 2 a 4 veces semana  
☐ 5 a 6 veces semana  
☐ 1 vez al día  
☐ 2 a 3 veces al día  
☐ 5 a 6 veces al día  
☐ más 6 veces al día

---

Judías verdes

- ☐ Nunca o menos 1 vez al mes  
☐ 1 a 3 veces mes  
☒ 1 vez semana  
☐ 2 a 4 veces semana  
☐ 5 a 6 veces semana  
☐ 1 vez al día  
☐ 2 a 3 veces al día  
☐ 5 a 6 veces al día  
☐ más 6 veces al día

---

Berenjena o calabacin o pepino

- ☐ Nunca o menos 1 vez al mes  
☐ 1 a 3 veces mes  
☒ 1 vez semana  
☐ 2 a 4 veces semana  
☐ 5 a 6 veces semana  
☐ 1 vez al día  
☐ 2 a 3 veces al día  
☐ 5 a 6 veces al día  
☐ más 6 veces al día

---

|          |                                                                                                                                                                                                                                                                                                                                                                                                              |
|----------|--------------------------------------------------------------------------------------------------------------------------------------------------------------------------------------------------------------------------------------------------------------------------------------------------------------------------------------------------------------------------------------------------------------|
| pimiento | <input type="radio"/> Nunca o menos 1 vez al mes<br><input type="radio"/> 1 a 3 veces mes<br><input checked="" type="radio"/> 1 vez semana<br><input type="radio"/> 2 a 4 veces semana<br><input type="radio"/> 5 a 6 veces semana<br><input type="radio"/> 1 vez al día<br><input type="radio"/> 2 a 3 veces al día<br><input type="radio"/> 5 a 6 veces al día<br><input type="radio"/> más 6 veces al día |
|----------|--------------------------------------------------------------------------------------------------------------------------------------------------------------------------------------------------------------------------------------------------------------------------------------------------------------------------------------------------------------------------------------------------------------|

---

|           |                                                                                                                                                                                                                                                                                                                                                                                                              |
|-----------|--------------------------------------------------------------------------------------------------------------------------------------------------------------------------------------------------------------------------------------------------------------------------------------------------------------------------------------------------------------------------------------------------------------|
| alcachofa | <input type="radio"/> Nunca o menos 1 vez al mes<br><input checked="" type="radio"/> 1 a 3 veces mes<br><input type="radio"/> 1 vez semana<br><input type="radio"/> 2 a 4 veces semana<br><input type="radio"/> 5 a 6 veces semana<br><input type="radio"/> 1 vez al día<br><input type="radio"/> 2 a 3 veces al día<br><input type="radio"/> 5 a 6 veces al día<br><input type="radio"/> más 6 veces al día |
|-----------|--------------------------------------------------------------------------------------------------------------------------------------------------------------------------------------------------------------------------------------------------------------------------------------------------------------------------------------------------------------------------------------------------------------|

---

|            |                                                                                                                                                                                                                                                                                                                                                                                                   |
|------------|---------------------------------------------------------------------------------------------------------------------------------------------------------------------------------------------------------------------------------------------------------------------------------------------------------------------------------------------------------------------------------------------------|
| espárragos | <input type="radio"/> Nunca o menos 1 vez al mes<br><input type="radio"/> 1 a 3 veces mes<br><input type="radio"/> 1 vez semana<br><input type="radio"/> 2 a 4 veces semana<br><input type="radio"/> 5 a 6 veces semana<br><input type="radio"/> 1 vez al día<br><input type="radio"/> 2 a 3 veces al día<br><input type="radio"/> 5 a 6 veces al día<br><input type="radio"/> más 6 veces al día |
|------------|---------------------------------------------------------------------------------------------------------------------------------------------------------------------------------------------------------------------------------------------------------------------------------------------------------------------------------------------------------------------------------------------------|

---

|              |                                                                                                                                                                                                                                                                                                                                                                                                              |
|--------------|--------------------------------------------------------------------------------------------------------------------------------------------------------------------------------------------------------------------------------------------------------------------------------------------------------------------------------------------------------------------------------------------------------------|
| maíz hervido | <input type="radio"/> Nunca o menos 1 vez al mes<br><input type="radio"/> 1 a 3 veces mes<br><input checked="" type="radio"/> 1 vez semana<br><input type="radio"/> 2 a 4 veces semana<br><input type="radio"/> 5 a 6 veces semana<br><input type="radio"/> 1 vez al día<br><input type="radio"/> 2 a 3 veces al día<br><input type="radio"/> 5 a 6 veces al día<br><input type="radio"/> más 6 veces al día |
|--------------|--------------------------------------------------------------------------------------------------------------------------------------------------------------------------------------------------------------------------------------------------------------------------------------------------------------------------------------------------------------------------------------------------------------|

---

|           |                                                                                                                                                                                                                                                                                                                                                                                                              |
|-----------|--------------------------------------------------------------------------------------------------------------------------------------------------------------------------------------------------------------------------------------------------------------------------------------------------------------------------------------------------------------------------------------------------------------|
| legumbres | <input type="radio"/> Nunca o menos 1 vez al mes<br><input type="radio"/> 1 a 3 veces mes<br><input type="radio"/> 1 vez semana<br><input checked="" type="radio"/> 2 a 4 veces semana<br><input type="radio"/> 5 a 6 veces semana<br><input type="radio"/> 1 vez al día<br><input type="radio"/> 2 a 3 veces al día<br><input type="radio"/> 5 a 6 veces al día<br><input type="radio"/> más 6 veces al día |
|-----------|--------------------------------------------------------------------------------------------------------------------------------------------------------------------------------------------------------------------------------------------------------------------------------------------------------------------------------------------------------------------------------------------------------------|

---

|                       |                                                                                                                                                                                                                                                                                                                                                                                                   |
|-----------------------|---------------------------------------------------------------------------------------------------------------------------------------------------------------------------------------------------------------------------------------------------------------------------------------------------------------------------------------------------------------------------------------------------|
| naranjas o mandarinas | <input type="radio"/> Nunca o menos 1 vez al mes<br><input type="radio"/> 1 a 3 veces mes<br><input type="radio"/> 1 vez semana<br><input type="radio"/> 2 a 4 veces semana<br><input type="radio"/> 5 a 6 veces semana<br><input type="radio"/> 1 vez al día<br><input type="radio"/> 2 a 3 veces al día<br><input type="radio"/> 5 a 6 veces al día<br><input type="radio"/> más 6 veces al día |
|-----------------------|---------------------------------------------------------------------------------------------------------------------------------------------------------------------------------------------------------------------------------------------------------------------------------------------------------------------------------------------------------------------------------------------------|

---

---

zumو natural fruta

- ☐ Nunca o menos 1 vez al mes  
☐ 1 a 3 veces mes  
☐ 1 vez semana  
☐ 2 a 4 veces semana  
☐ 5 a 6 veces semana  
☐ 1 vez al día  
☐ 2 a 3 veces al día  
☐ 5 a 6 veces al día  
☐ más 6 veces al día

---

platano

- ☐ Nunca o menos 1 vez al mes  
☐ 1 a 3 veces mes  
☐ 1 vez semana  
☒ 2 a 4 veces semana  
☐ 5 a 6 veces semana  
☐ 1 vez al día  
☐ 2 a 3 veces al día  
☐ 5 a 6 veces al día  
☐ más 6 veces al día

---

manzana o pera

- ☐ Nunca o menos 1 vez al mes  
☐ 1 a 3 veces mes  
☐ 1 vez semana  
☐ 2 a 4 veces semana  
☐ 5 a 6 veces semana  
☐ 1 vez al día  
☐ 2 a 3 veces al día  
☐ 5 a 6 veces al día  
☐ más 6 veces al día

---

melocotón o nectarina

- ☐ Nunca o menos 1 vez al mes  
☐ 1 a 3 veces mes  
☐ 1 vez semana  
☐ 2 a 4 veces semana  
☐ 5 a 6 veces semana  
☐ 1 vez al día  
☐ 2 a 3 veces al día  
☐ 5 a 6 veces al día  
☐ más 6 veces al día

---

sandia o melon

- ☐ Nunca o menos 1 vez al mes  
☐ 1 a 3 veces mes  
☐ 1 vez semana  
☐ 2 a 4 veces semana  
☐ 5 a 6 veces semana  
☒ 1 vez al día  
☐ 2 a 3 veces al día  
☐ 5 a 6 veces al día  
☐ más 6 veces al día

---

uva

- ☐ Nunca o menos 1 vez al mes  
☐ 1 a 3 veces mes  
☐ 1 vez semana  
☐ 2 a 4 veces semana  
☐ 5 a 6 veces semana  
☐ 1 vez al día  
☐ 2 a 3 veces al día  
☐ 5 a 6 veces al día  
☐ más 6 veces al día

---

bruna o ciruela

- ☐ Nunca o menos 1 vez al mes
- ☐ 1 a 3 veces mes
- ☐ 1 vez semana
- ☐ 2 a 4 veces semana
- ☐ 5 a 6 veces semana
- ☐ 1 vez al día
- ☐ 2 a 3 veces al día
- ☐ 5 a 6 veces al día
- ☐ más 6 veces al día

---

kiwi

- ☐ Nunca o menos 1 vez al mes
- ☐ 1 a 3 veces mes
- ☐ 1 vez semana
- ☐ 2 a 4 veces semana
- ☐ 5 a 6 veces semana
- ☐ 1 vez al día
- ☐ 2 a 3 veces al día
- ☐ 5 a 6 veces al día
- ☐ más 6 veces al día

---

aceituna

- ☐ Nunca o menos 1 vez al mes
- ☐ 1 a 3 veces mes
- ☐ 1 vez semana
- ☐ 2 a 4 veces semana
- ☐ 5 a 6 veces semana
- ☐ 1 vez al día
- ☐ 2 a 3 veces al día
- ☐ 5 a 6 veces al día
- ☐ más 6 veces al día

---

frutos secos

- ☐ Nunca o menos 1 vez al mes
- ☒ 1 a 3 veces mes
- ☐ 1 vez semana
- ☐ 2 a 4 veces semana
- ☐ 5 a 6 veces semana
- ☐ 1 vez al día
- ☐ 2 a 3 veces al día
- ☐ 5 a 6 veces al día
- ☐ más 6 veces al día

---

pan blanco

- ☐ Nunca o menos 1 vez al mes
- ☐ 1 a 3 veces mes
- ☐ 1 vez semana
- ☐ 2 a 4 veces semana
- ☐ 5 a 6 veces semana
- ☒ 1 vez al día
- ☐ 2 a 3 veces al día
- ☐ 5 a 6 veces al día
- ☐ más 6 veces al día

---

pan integral

- ☐ Nunca o menos 1 vez al mes
- ☐ 1 a 3 veces mes
- ☐ 1 vez semana
- ☐ 2 a 4 veces semana
- ☐ 5 a 6 veces semana
- ☐ 1 vez al día
- ☐ 2 a 3 veces al día
- ☐ 5 a 6 veces al día
- ☐ más 6 veces al día

---

cereales desayuno

- ☐ Nunca o menos 1 vez al mes  
☐ 1 a 3 veces mes  
☐ 1 vez semana  
☐ 2 a 4 veces semana  
☐ 5 a 6 veces semana  
☐ 1 vez al día  
☐ 2 a 3 veces al día  
☐ 5 a 6 veces al día  
☐ más 6 veces al día

---

patatas fritas

- ☐ Nunca o menos 1 vez al mes  
☒ 1 a 3 veces mes  
☐ 1 vez semana  
☐ 2 a 4 veces semana  
☐ 5 a 6 veces semana  
☐ 1 vez al día  
☐ 2 a 3 veces al día  
☐ 5 a 6 veces al día  
☐ más 6 veces al día

---

patatas cocidas o asadas

- ☐ Nunca o menos 1 vez al mes  
☐ 1 a 3 veces mes  
☒ 1 vez semana  
☐ 2 a 4 veces semana  
☐ 5 a 6 veces semana  
☐ 1 vez al día  
☐ 2 a 3 veces al día  
☐ 5 a 6 veces al día  
☐ más 6 veces al día

---

bolsa papas

- ☐ Nunca o menos 1 vez al mes  
☐ 1 a 3 veces mes  
☐ 1 vez semana  
☒ 2 a 4 veces semana  
☐ 5 a 6 veces semana  
☐ 1 vez al día  
☐ 2 a 3 veces al día  
☐ 5 a 6 veces al día  
☐ más 6 veces al día

---

arroz cocinado

- ☐ Nunca o menos 1 vez al mes  
☐ 1 a 3 veces mes  
☒ 1 vez semana  
☐ 2 a 4 veces semana  
☐ 5 a 6 veces semana  
☐ 1 vez al día  
☐ 2 a 3 veces al día  
☐ 5 a 6 veces al día  
☐ más 6 veces al día

---

pasta

- ☐ Nunca o menos 1 vez al mes  
☐ 1 a 3 veces mes  
☒ 1 vez semana  
☐ 2 a 4 veces semana  
☐ 5 a 6 veces semana  
☐ 1 vez al día  
☐ 2 a 3 veces al día  
☐ 5 a 6 veces al día  
☐ más 6 veces al día

|                     |                                                                                                                                                                                                                                                                                                                                                                                                              |
|---------------------|--------------------------------------------------------------------------------------------------------------------------------------------------------------------------------------------------------------------------------------------------------------------------------------------------------------------------------------------------------------------------------------------------------------|
| pizza               | <input type="radio"/> Nunca o menos 1 vez al mes<br><input checked="" type="radio"/> 1 a 3 veces mes<br><input type="radio"/> 1 vez semana<br><input type="radio"/> 2 a 4 veces semana<br><input type="radio"/> 5 a 6 veces semana<br><input type="radio"/> 1 vez al día<br><input type="radio"/> 2 a 3 veces al día<br><input type="radio"/> 5 a 6 veces al día<br><input type="radio"/> más 6 veces al día |
| aceite oliva        | <input type="radio"/> Nunca o menos 1 vez al mes<br><input type="radio"/> 1 a 3 veces mes<br><input type="radio"/> 1 vez semana<br><input type="radio"/> 2 a 4 veces semana<br><input type="radio"/> 5 a 6 veces semana<br><input checked="" type="radio"/> 1 vez al día<br><input type="radio"/> 2 a 3 veces al día<br><input type="radio"/> 5 a 6 veces al día<br><input type="radio"/> más 6 veces al día |
| otros aceites       | <input type="radio"/> Nunca o menos 1 vez al mes<br><input type="radio"/> 1 a 3 veces mes<br><input type="radio"/> 1 vez semana<br><input type="radio"/> 2 a 4 veces semana<br><input type="radio"/> 5 a 6 veces semana<br><input type="radio"/> 1 vez al día<br><input type="radio"/> 2 a 3 veces al día<br><input type="radio"/> 5 a 6 veces al día<br><input type="radio"/> más 6 veces al día            |
| margarina           | <input type="radio"/> Nunca o menos 1 vez al mes<br><input type="radio"/> 1 a 3 veces mes<br><input type="radio"/> 1 vez semana<br><input type="radio"/> 2 a 4 veces semana<br><input type="radio"/> 5 a 6 veces semana<br><input type="radio"/> 1 vez al día<br><input type="radio"/> 2 a 3 veces al día<br><input type="radio"/> 5 a 6 veces al día<br><input type="radio"/> más 6 veces al día            |
| mantequilla         | <input type="radio"/> Nunca o menos 1 vez al mes<br><input type="radio"/> 1 a 3 veces mes<br><input type="radio"/> 1 vez semana<br><input type="radio"/> 2 a 4 veces semana<br><input type="radio"/> 5 a 6 veces semana<br><input type="radio"/> 1 vez al día<br><input type="radio"/> 2 a 3 veces al día<br><input type="radio"/> 5 a 6 veces al día<br><input type="radio"/> más 6 veces al día            |
| galletas tipo maria | <input type="radio"/> Nunca o menos 1 vez al mes<br><input type="radio"/> 1 a 3 veces mes<br><input type="radio"/> 1 vez semana<br><input type="radio"/> 2 a 4 veces semana<br><input type="radio"/> 5 a 6 veces semana<br><input type="radio"/> 1 vez al día<br><input type="radio"/> 2 a 3 veces al día<br><input type="radio"/> 5 a 6 veces al día<br><input type="radio"/> más 6 veces al día            |

---

galletas chocolate

- ☐ Nunca o menos 1 vez al mes  
☐ 1 a 3 veces mes  
☐ 1 vez semana  
☐ 2 a 4 veces semana  
☐ 5 a 6 veces semana  
☐ 1 vez al día  
☐ 2 a 3 veces al día  
☐ 5 a 6 veces al día  
☐ más 6 veces al día

---

bolleria

- ☐ Nunca o menos 1 vez al mes  
☐ 1 a 3 veces mes  
☐ 1 vez semana  
☐ 2 a 4 veces semana  
☐ 5 a 6 veces semana  
☒ 1 vez al día  
☐ 2 a 3 veces al día  
☐ 5 a 6 veces al día  
☐ más 6 veces al día

---

chocolate o bombones

- ☐ Nunca o menos 1 vez al mes  
☐ 1 a 3 veces mes  
☐ 1 vez semana  
☐ 2 a 4 veces semana  
☐ 5 a 6 veces semana  
☐ 1 vez al día  
☐ 2 a 3 veces al día  
☐ 5 a 6 veces al día  
☐ más 6 veces al día

---

chocolate polvo o colacao

- ☐ Nunca o menos 1 vez al mes  
☐ 1 a 3 veces mes  
☐ 1 vez semana  
☐ 2 a 4 veces semana  
☐ 5 a 6 veces semana  
☒ 1 vez al día  
☐ 2 a 3 veces al día  
☐ 5 a 6 veces al día  
☐ más 6 veces al día

---

vino tinto

- ☐ Nunca o menos 1 vez al mes  
☐ 1 a 3 veces mes  
☐ 1 vez semana  
☐ 2 a 4 veces semana  
☐ 5 a 6 veces semana  
☐ 1 vez al día  
☐ 2 a 3 veces al día  
☐ 5 a 6 veces al día  
☐ más 6 veces al día

---

vino blanco

- ☐ Nunca o menos 1 vez al mes  
☐ 1 a 3 veces mes  
☐ 1 vez semana  
☐ 2 a 4 veces semana  
☐ 5 a 6 veces semana  
☐ 1 vez al día  
☐ 2 a 3 veces al día  
☐ 5 a 6 veces al día  
☐ más 6 veces al día

---

|                    |                                                                                                                                                                                                                                                                                                                                                                                                   |
|--------------------|---------------------------------------------------------------------------------------------------------------------------------------------------------------------------------------------------------------------------------------------------------------------------------------------------------------------------------------------------------------------------------------------------|
| vino seco o vermut | <input type="radio"/> Nunca o menos 1 vez al mes<br><input type="radio"/> 1 a 3 veces mes<br><input type="radio"/> 1 vez semana<br><input type="radio"/> 2 a 4 veces semana<br><input type="radio"/> 5 a 6 veces semana<br><input type="radio"/> 1 vez al día<br><input type="radio"/> 2 a 3 veces al día<br><input type="radio"/> 5 a 6 veces al día<br><input type="radio"/> más 6 veces al día |
|--------------------|---------------------------------------------------------------------------------------------------------------------------------------------------------------------------------------------------------------------------------------------------------------------------------------------------------------------------------------------------------------------------------------------------|

---

|         |                                                                                                                                                                                                                                                                                                                                                                                                   |
|---------|---------------------------------------------------------------------------------------------------------------------------------------------------------------------------------------------------------------------------------------------------------------------------------------------------------------------------------------------------------------------------------------------------|
| cerveza | <input type="radio"/> Nunca o menos 1 vez al mes<br><input type="radio"/> 1 a 3 veces mes<br><input type="radio"/> 1 vez semana<br><input type="radio"/> 2 a 4 veces semana<br><input type="radio"/> 5 a 6 veces semana<br><input type="radio"/> 1 vez al día<br><input type="radio"/> 2 a 3 veces al día<br><input type="radio"/> 5 a 6 veces al día<br><input type="radio"/> más 6 veces al día |
|---------|---------------------------------------------------------------------------------------------------------------------------------------------------------------------------------------------------------------------------------------------------------------------------------------------------------------------------------------------------------------------------------------------------|

---

|                     |                                                                                                                                                                                                                                                                                                                                                                                                   |
|---------------------|---------------------------------------------------------------------------------------------------------------------------------------------------------------------------------------------------------------------------------------------------------------------------------------------------------------------------------------------------------------------------------------------------|
| cerveza sin alcohol | <input type="radio"/> Nunca o menos 1 vez al mes<br><input type="radio"/> 1 a 3 veces mes<br><input type="radio"/> 1 vez semana<br><input type="radio"/> 2 a 4 veces semana<br><input type="radio"/> 5 a 6 veces semana<br><input type="radio"/> 1 vez al día<br><input type="radio"/> 2 a 3 veces al día<br><input type="radio"/> 5 a 6 veces al día<br><input type="radio"/> más 6 veces al día |
|---------------------|---------------------------------------------------------------------------------------------------------------------------------------------------------------------------------------------------------------------------------------------------------------------------------------------------------------------------------------------------------------------------------------------------|

---

|         |                                                                                                                                                                                                                                                                                                                                                                                                   |
|---------|---------------------------------------------------------------------------------------------------------------------------------------------------------------------------------------------------------------------------------------------------------------------------------------------------------------------------------------------------------------------------------------------------|
| licores | <input type="radio"/> Nunca o menos 1 vez al mes<br><input type="radio"/> 1 a 3 veces mes<br><input type="radio"/> 1 vez semana<br><input type="radio"/> 2 a 4 veces semana<br><input type="radio"/> 5 a 6 veces semana<br><input type="radio"/> 1 vez al día<br><input type="radio"/> 2 a 3 veces al día<br><input type="radio"/> 5 a 6 veces al día<br><input type="radio"/> más 6 veces al día |
|---------|---------------------------------------------------------------------------------------------------------------------------------------------------------------------------------------------------------------------------------------------------------------------------------------------------------------------------------------------------------------------------------------------------|

---

|                       |                                                                                                                                                                                                                                                                                                                                                                                                   |
|-----------------------|---------------------------------------------------------------------------------------------------------------------------------------------------------------------------------------------------------------------------------------------------------------------------------------------------------------------------------------------------------------------------------------------------|
| ginebra o ron o vodka | <input type="radio"/> Nunca o menos 1 vez al mes<br><input type="radio"/> 1 a 3 veces mes<br><input type="radio"/> 1 vez semana<br><input type="radio"/> 2 a 4 veces semana<br><input type="radio"/> 5 a 6 veces semana<br><input type="radio"/> 1 vez al día<br><input type="radio"/> 2 a 3 veces al día<br><input type="radio"/> 5 a 6 veces al día<br><input type="radio"/> más 6 veces al día |
|-----------------------|---------------------------------------------------------------------------------------------------------------------------------------------------------------------------------------------------------------------------------------------------------------------------------------------------------------------------------------------------------------------------------------------------|

---

|                 |                                                                                                                                                                                                                                                                                                                                                                                                              |
|-----------------|--------------------------------------------------------------------------------------------------------------------------------------------------------------------------------------------------------------------------------------------------------------------------------------------------------------------------------------------------------------------------------------------------------------|
| refresco normal | <input type="radio"/> Nunca o menos 1 vez al mes<br><input type="radio"/> 1 a 3 veces mes<br><input type="radio"/> 1 vez semana<br><input type="radio"/> 2 a 4 veces semana<br><input type="radio"/> 5 a 6 veces semana<br><input checked="" type="radio"/> 1 vez al día<br><input type="radio"/> 2 a 3 veces al día<br><input type="radio"/> 5 a 6 veces al día<br><input type="radio"/> más 6 veces al día |
|-----------------|--------------------------------------------------------------------------------------------------------------------------------------------------------------------------------------------------------------------------------------------------------------------------------------------------------------------------------------------------------------------------------------------------------------|

---



|                          |                                                                                                                                                                                                                                                                                                                                                                                                              |
|--------------------------|--------------------------------------------------------------------------------------------------------------------------------------------------------------------------------------------------------------------------------------------------------------------------------------------------------------------------------------------------------------------------------------------------------------|
| refresco sin azúcar      | <input type="radio"/> Nunca o menos 1 vez al mes<br><input type="radio"/> 1 a 3 veces mes<br><input type="radio"/> 1 vez semana<br><input type="radio"/> 2 a 4 veces semana<br><input type="radio"/> 5 a 6 veces semana<br><input type="radio"/> 1 vez al día<br><input type="radio"/> 2 a 3 veces al día<br><input type="radio"/> 5 a 6 veces al día<br><input type="radio"/> más 6 veces al día            |
| Agua del grifo           | <input type="radio"/> Nunca o menos 1 vez al mes<br><input type="radio"/> 1 a 3 veces mes<br><input type="radio"/> 1 vez semana<br><input type="radio"/> 2 a 4 veces semana<br><input type="radio"/> 5 a 6 veces semana<br><input type="radio"/> 1 vez al día<br><input type="radio"/> 2 a 3 veces al día<br><input type="radio"/> 5 a 6 veces al día<br><input type="radio"/> más 6 veces al día            |
| agua embotellada sin gas | <input type="radio"/> Nunca o menos 1 vez al mes<br><input type="radio"/> 1 a 3 veces mes<br><input type="radio"/> 1 vez semana<br><input type="radio"/> 2 a 4 veces semana<br><input type="radio"/> 5 a 6 veces semana<br><input type="radio"/> 1 vez al día<br><input type="radio"/> 2 a 3 veces al día<br><input type="radio"/> 5 a 6 veces al día<br><input checked="" type="radio"/> más 6 veces al día |
| agua embotellada con gas | <input type="radio"/> Nunca o menos 1 vez al mes<br><input type="radio"/> 1 a 3 veces mes<br><input type="radio"/> 1 vez semana<br><input type="radio"/> 2 a 4 veces semana<br><input type="radio"/> 5 a 6 veces semana<br><input type="radio"/> 1 vez al día<br><input type="radio"/> 2 a 3 veces al día<br><input type="radio"/> 5 a 6 veces al día<br><input type="radio"/> más 6 veces al día            |
| zumو frutas embasado     | <input type="radio"/> Nunca o menos 1 vez al mes<br><input type="radio"/> 1 a 3 veces mes<br><input type="radio"/> 1 vez semana<br><input type="radio"/> 2 a 4 veces semana<br><input type="radio"/> 5 a 6 veces semana<br><input type="radio"/> 1 vez al día<br><input type="radio"/> 2 a 3 veces al día<br><input type="radio"/> 5 a 6 veces al día<br><input type="radio"/> más 6 veces al día            |
| cafe                     | <input type="radio"/> Nunca o menos 1 vez al mes<br><input type="radio"/> 1 a 3 veces mes<br><input type="radio"/> 1 vez semana<br><input type="radio"/> 2 a 4 veces semana<br><input type="radio"/> 5 a 6 veces semana<br><input type="radio"/> 1 vez al día<br><input type="radio"/> 2 a 3 veces al día<br><input type="radio"/> 5 a 6 veces al día<br><input type="radio"/> más 6 veces al día            |

---

cafe descafeinado

- ☐ Nunca o menos 1 vez al mes  
☐ 1 a 3 veces mes  
☐ 1 vez semana  
☐ 2 a 4 veces semana  
☐ 5 a 6 veces semana  
☐ 1 vez al día  
☐ 2 a 3 veces al día  
☐ 5 a 6 veces al día  
☐ más 6 veces al día

---

te o infusión

- ☐ Nunca o menos 1 vez al mes  
☐ 1 a 3 veces mes  
☐ 1 vez semana  
☐ 2 a 4 veces semana  
☐ 5 a 6 veces semana  
☒ 1 vez al día  
☐ 2 a 3 veces al día  
☐ 5 a 6 veces al día  
☐ más 6 veces al día

---

sopa o puré verduras

- ☐ Nunca o menos 1 vez al mes  
☐ 1 a 3 veces mes  
☐ 1 vez semana  
☐ 2 a 4 veces semana  
☐ 5 a 6 veces semana  
☐ 1 vez al día  
☐ 2 a 3 veces al día  
☐ 5 a 6 veces al día  
☐ más 6 veces al día

---

croquetas pollo jamón

- ☐ Nunca o menos 1 vez al mes  
☐ 1 a 3 veces mes  
☐ 1 vez semana  
☐ 2 a 4 veces semana  
☐ 5 a 6 veces semana  
☐ 1 vez al día  
☐ 2 a 3 veces al día  
☐ 5 a 6 veces al día  
☐ más 6 veces al día

---

croquetas pescado

- ☐ Nunca o menos 1 vez al mes  
☐ 1 a 3 veces mes  
☐ 1 vez semana  
☐ 2 a 4 veces semana  
☐ 5 a 6 veces semana  
☐ 1 vez al día  
☐ 2 a 3 veces al día  
☐ 5 a 6 veces al día  
☐ más 6 veces al día

---

mayonesa

- ☐ Nunca o menos 1 vez al mes  
☐ 1 a 3 veces mes  
☒ 1 vez semana  
☐ 2 a 4 veces semana  
☐ 5 a 6 veces semana  
☐ 1 vez al día  
☐ 2 a 3 veces al día  
☐ 5 a 6 veces al día  
☐ más 6 veces al día

|                  |                                                                                                                                                                                                                                                                                                                                                                                                              |
|------------------|--------------------------------------------------------------------------------------------------------------------------------------------------------------------------------------------------------------------------------------------------------------------------------------------------------------------------------------------------------------------------------------------------------------|
| salsa tomate     | <input type="radio"/> Nunca o menos 1 vez al mes<br><input type="radio"/> 1 a 3 veces mes<br><input checked="" type="radio"/> 1 vez semana<br><input type="radio"/> 2 a 4 veces semana<br><input type="radio"/> 5 a 6 veces semana<br><input type="radio"/> 1 vez al día<br><input type="radio"/> 2 a 3 veces al día<br><input type="radio"/> 5 a 6 veces al día<br><input type="radio"/> más 6 veces al día |
| ketchup          | <input type="radio"/> Nunca o menos 1 vez al mes<br><input type="radio"/> 1 a 3 veces mes<br><input type="radio"/> 1 vez semana<br><input type="radio"/> 2 a 4 veces semana<br><input type="radio"/> 5 a 6 veces semana<br><input type="radio"/> 1 vez al día<br><input type="radio"/> 2 a 3 veces al día<br><input type="radio"/> 5 a 6 veces al día<br><input type="radio"/> más 6 veces al día            |
| sal              | <input type="radio"/> Nunca o menos 1 vez al mes<br><input type="radio"/> 1 a 3 veces mes<br><input type="radio"/> 1 vez semana<br><input type="radio"/> 2 a 4 veces semana<br><input type="radio"/> 5 a 6 veces semana<br><input type="radio"/> 1 vez al día<br><input checked="" type="radio"/> 2 a 3 veces al día<br><input type="radio"/> 5 a 6 veces al día<br><input type="radio"/> más 6 veces al día |
| ajo              | <input type="radio"/> Nunca o menos 1 vez al mes<br><input type="radio"/> 1 a 3 veces mes<br><input checked="" type="radio"/> 1 vez semana<br><input type="radio"/> 2 a 4 veces semana<br><input type="radio"/> 5 a 6 veces semana<br><input type="radio"/> 1 vez al día<br><input type="radio"/> 2 a 3 veces al día<br><input type="radio"/> 5 a 6 veces al día<br><input type="radio"/> más 6 veces al día |
| mermelada o miel | <input type="radio"/> Nunca o menos 1 vez al mes<br><input type="radio"/> 1 a 3 veces mes<br><input type="radio"/> 1 vez semana<br><input type="radio"/> 2 a 4 veces semana<br><input type="radio"/> 5 a 6 veces semana<br><input type="radio"/> 1 vez al día<br><input type="radio"/> 2 a 3 veces al día<br><input type="radio"/> 5 a 6 veces al día<br><input type="radio"/> más 6 veces al día            |
| azúcar           | <input type="radio"/> Nunca o menos 1 vez al mes<br><input type="radio"/> 1 a 3 veces mes<br><input type="radio"/> 1 vez semana<br><input type="radio"/> 2 a 4 veces semana<br><input type="radio"/> 5 a 6 veces semana<br><input type="radio"/> 1 vez al día<br><input checked="" type="radio"/> 2 a 3 veces al día<br><input type="radio"/> 5 a 6 veces al día<br><input type="radio"/> más 6 veces al día |

|                                       |                                                                                                                                                                                                                                                                                                                                                                                                                                                                                                                               |
|---------------------------------------|-------------------------------------------------------------------------------------------------------------------------------------------------------------------------------------------------------------------------------------------------------------------------------------------------------------------------------------------------------------------------------------------------------------------------------------------------------------------------------------------------------------------------------|
| Otro alimento                         | [*DATA REMOVED*]                                                                                                                                                                                                                                                                                                                                                                                                                                                                                                              |
| suplementos vitamínicos               | <input type="radio"/> si<br><input checked="" type="radio"/> no                                                                                                                                                                                                                                                                                                                                                                                                                                                               |
| suplementos vitamínicos               |                                                                                                                                                                                                                                                                                                                                                                                                                                                                                                                               |
| dieta previa                          | <input type="radio"/> si<br><input checked="" type="radio"/> no                                                                                                                                                                                                                                                                                                                                                                                                                                                               |
| motivo dieta                          | <input checked="" type="radio"/> no dieta<br><input type="radio"/> control peso<br><input type="radio"/> control colesterol<br><input type="radio"/> control diabetes<br><input type="radio"/> problemas estómago<br><input type="radio"/> problemas vesícula o hepáticos<br><input type="radio"/> HTA o cardiopatía<br><input type="radio"/> problemas renales<br><input type="radio"/> alergia alimentaria<br><input type="radio"/> ácido úrico elevado<br><input type="radio"/> vegetariana<br><input type="radio"/> otros |
| cambio alimentos año previo gestación | <input type="radio"/> si<br><input checked="" type="radio"/> no                                                                                                                                                                                                                                                                                                                                                                                                                                                               |
| cambio lácteos                        | <input type="radio"/> eliminado<br><input type="radio"/> disminuido<br><input type="radio"/> igual<br><input type="radio"/> aumentado<br><input type="radio"/> no sabe                                                                                                                                                                                                                                                                                                                                                        |
| cambio huevos                         | <input type="radio"/> eliminado<br><input type="radio"/> disminuido<br><input type="radio"/> igual<br><input type="radio"/> aumentado<br><input type="radio"/> no sabe                                                                                                                                                                                                                                                                                                                                                        |
| cambio carne                          | <input type="radio"/> eliminado<br><input type="radio"/> disminuido<br><input type="radio"/> igual<br><input type="radio"/> aumentado<br><input type="radio"/> no sabe                                                                                                                                                                                                                                                                                                                                                        |
| cambio pescado                        | <input type="radio"/> eliminado<br><input type="radio"/> disminuido<br><input type="radio"/> igual<br><input type="radio"/> aumentado<br><input type="radio"/> no sabe                                                                                                                                                                                                                                                                                                                                                        |
| cambio verduras                       | <input type="radio"/> eliminado<br><input type="radio"/> disminuido<br><input type="radio"/> igual<br><input type="radio"/> aumentado<br><input type="radio"/> no sabe                                                                                                                                                                                                                                                                                                                                                        |

|                            |                                                                                                                                                                                                                        |
|----------------------------|------------------------------------------------------------------------------------------------------------------------------------------------------------------------------------------------------------------------|
| cambio legumbres           | <input type="radio"/> eliminado<br><input type="radio"/> disminuido<br><input type="radio"/> igual<br><input type="radio"/> aumentado<br><input type="radio"/> no sabe                                                 |
| cambio fruta               | <input type="radio"/> eliminado<br><input type="radio"/> disminuido<br><input type="radio"/> igual<br><input type="radio"/> aumentado<br><input type="radio"/> no sabe                                                 |
| cambio pan                 | <input type="radio"/> eliminado<br><input type="radio"/> disminuido<br><input type="radio"/> igual<br><input type="radio"/> aumentado<br><input type="radio"/> no sabe                                                 |
| cambio aceite oliva        | <input type="radio"/> eliminado<br><input type="radio"/> disminuido<br><input type="radio"/> igual<br><input type="radio"/> aumentado<br><input type="radio"/> no sabe                                                 |
| cambio mante o margarina   | <input type="radio"/> eliminado<br><input type="radio"/> disminuido<br><input type="radio"/> igual<br><input type="radio"/> aumentado<br><input type="radio"/> no sabe                                                 |
| cambio azúcar y dulces     | <input type="radio"/> eliminado<br><input type="radio"/> disminuido<br><input type="radio"/> igual<br><input type="radio"/> aumentado<br><input type="radio"/> no sabe                                                 |
| cambio bebidas alcohólicas | <input type="radio"/> eliminado<br><input type="radio"/> disminuido<br><input type="radio"/> igual<br><input type="radio"/> aumentado<br><input type="radio"/> no sabe                                                 |
| frecuencia comidas fritas  | <input type="radio"/> a diario<br><input type="radio"/> 5 a 6 veces semana<br><input type="radio"/> 2 a 4 veces semana<br><input type="radio"/> 1 vez semana<br><input checked="" type="radio"/> menos de 1 vez semana |
| carne                      | <input type="radio"/> no como<br><input type="radio"/> cruda<br><input type="radio"/> poco hecha<br><input type="radio"/> hecha<br><input checked="" type="radio"/> muy hecha                                          |
| grasa visible carne        | <input checked="" type="radio"/> quita toda<br><input type="radio"/> quita mayoría<br><input type="radio"/> quita un poco<br><input type="radio"/> no quita nada                                                       |

|                                |                                                                                                                                                                                                                                                          |
|--------------------------------|----------------------------------------------------------------------------------------------------------------------------------------------------------------------------------------------------------------------------------------------------------|
| cocina carne                   | <input checked="" type="radio"/> a la plancha<br><input type="radio"/> a la parrilla<br><input type="radio"/> asada<br><input type="radio"/> frita<br><input type="radio"/> guisada                                                                      |
| tostado quemado carne          | <input checked="" type="radio"/> nunca<br><input type="radio"/> 1 vez mes<br><input type="radio"/> 2 a 3 veces mes<br><input type="radio"/> 1 vez semana<br><input type="radio"/> 2 a 3 semanas                                                          |
| tostado quemado pescado        | <input checked="" type="radio"/> nunca<br><input type="radio"/> 1 vez mes<br><input type="radio"/> 2 a 3 veces mes<br><input type="radio"/> 1 vez semana<br><input type="radio"/> 2 a 3 semanas                                                          |
| socarrat paella                | <input checked="" type="radio"/> nunca<br><input type="radio"/> 1 vez mes<br><input type="radio"/> 2 a 3 veces mes<br><input type="radio"/> 1 vez semana<br><input type="radio"/> 2 a 3 semanas                                                          |
| grasa o aceite cocinar         | <input type="radio"/> mantequilla<br><input type="radio"/> margarina<br><input type="radio"/> aceite oliva<br><input checked="" type="radio"/> aceite oliva virgen extra<br><input type="radio"/> aceite vegetal<br><input type="radio"/> mezcla aceites |
| grasa aceite aliñar            | <input type="radio"/> mantequilla<br><input type="radio"/> margarina<br><input type="radio"/> aceite oliva<br><input checked="" type="radio"/> aceite oliva virgen extra<br><input type="radio"/> aceite vegetal<br><input type="radio"/> mezcla aceites |
| grasa aceite freir             | <input type="radio"/> mantequilla<br><input type="radio"/> margarina<br><input type="radio"/> aceite oliva<br><input type="radio"/> aceite oliva virgen extra<br><input checked="" type="radio"/> aceite vegetal<br><input type="radio"/> mezcla aceites |
| Ejercicio cuestionario         | <input checked="" type="radio"/> si<br><input type="radio"/> no                                                                                                                                                                                          |
| horas de sueño incluido siesta | [*DATA REMOVED*]                                                                                                                                                                                                                                         |
| minutos siesta                 | [*DATA REMOVED*]                                                                                                                                                                                                                                         |
| horas televisión semana        |                                                                                                                                                                                                                                                          |

|                                        |                                                                                                                                                                                                                                                                                                                                                                           |
|----------------------------------------|---------------------------------------------------------------------------------------------------------------------------------------------------------------------------------------------------------------------------------------------------------------------------------------------------------------------------------------------------------------------------|
| actividad trabajo                      | <input type="radio"/> casi siempre sentado<br><input type="radio"/> sentado 50 por cien<br><input type="radio"/> casi siempre de pie, quieto<br><input checked="" type="radio"/> casi siempre levantado caminando y llevando pocas cosas<br><input type="radio"/> casi siempre levantado, caminando y llevado muchas cosas<br><input type="radio"/> trabajo manual pesado |
| tiempo caminar o bici al día           | <input type="radio"/> casi nunca<br><input type="radio"/> menos 20min día<br><input type="radio"/> 20 a 40 min día<br><input type="radio"/> 40 a 60 min día<br><input checked="" type="radio"/> 1h o 1h y media día<br><input type="radio"/> más de 1h y media al día                                                                                                     |
| tiempo tareas casa al día              | <input type="radio"/> menos de 1h día<br><input type="radio"/> 1 a 2h día<br><input type="radio"/> 3 a 4h día<br><input checked="" type="radio"/> 5 a 6h día<br><input type="radio"/> 7 a 8h día<br><input type="radio"/> más de 8h día                                                                                                                                   |
| tiempo libre televisión ordenador leer | <input type="radio"/> menos 1h día<br><input type="radio"/> 1h día<br><input type="radio"/> 2h día<br><input type="radio"/> 3h día<br><input type="radio"/> 4h día<br><input checked="" type="radio"/> 5 a 6h día<br><input type="radio"/> mas 6h día                                                                                                                     |
| tiempo libre ejercicio o deporte       | <input type="radio"/> menos 1h semana<br><input type="radio"/> 1h semana<br><input type="radio"/> 2h semana<br><input type="radio"/> 3h semana<br><input checked="" type="radio"/> 4 a 5h semana<br><input type="radio"/> mas 5h semana                                                                                                                                   |
| como se considera                      | <input type="radio"/> sedentaria<br><input type="radio"/> poco activa<br><input checked="" type="radio"/> moderadamente activa<br><input type="radio"/> bastante activa<br><input type="radio"/> muy activa<br><input type="radio"/> no sabe                                                                                                                              |
| FUR                                    | [*DATA REMOVED*]                                                                                                                                                                                                                                                                                                                                                          |
| Semanas gestación 2T                   | [*DATA REMOVED*]                                                                                                                                                                                                                                                                                                                                                          |
| Días gestación 2T                      | [*DATA REMOVED*]                                                                                                                                                                                                                                                                                                                                                          |
| DBP 2T                                 | [*DATA REMOVED*]                                                                                                                                                                                                                                                                                                                                                          |
| CC 2T                                  | [*DATA REMOVED*]                                                                                                                                                                                                                                                                                                                                                          |
| AC 2T                                  | [*DATA REMOVED*]                                                                                                                                                                                                                                                                                                                                                          |

|                                                   |                                                                                                                                                                                                 |
|---------------------------------------------------|-------------------------------------------------------------------------------------------------------------------------------------------------------------------------------------------------|
| LF 2T                                             | [*DATA REMOVED*]                                                                                                                                                                                |
| PFE 2T (Hadlock)                                  | [*DATA REMOVED*]                                                                                                                                                                                |
| Semanas gestación 3T                              | [*DATA REMOVED*]                                                                                                                                                                                |
| días 3T                                           | [*DATA REMOVED*]                                                                                                                                                                                |
| DBP 3T                                            | [*DATA REMOVED*]                                                                                                                                                                                |
| CC 3T                                             | [*DATA REMOVED*]                                                                                                                                                                                |
| AC 3T                                             | [*DATA REMOVED*]                                                                                                                                                                                |
| LF 3T                                             | [*DATA REMOVED*]                                                                                                                                                                                |
| PFE 3T (Hadlock)                                  | [*DATA REMOVED*]                                                                                                                                                                                |
| Semanas de gestación final                        | [*DATA REMOVED*]                                                                                                                                                                                |
| días gestación final                              | [*DATA REMOVED*]                                                                                                                                                                                |
| Localización placenta                             | <input type="radio"/> anterior<br><input checked="" type="radio"/> lateral derecha<br><input type="radio"/> lateral izquierda<br><input type="radio"/> posterior<br><input type="radio"/> fondo |
| Presentación longitudinal cefálica                | <input type="radio"/> no<br><input checked="" type="radio"/> si                                                                                                                                 |
| Dorso                                             | <input type="radio"/> izquierda anterior<br><input type="radio"/> izquierda posterior<br><input checked="" type="radio"/> derecha anterior<br><input type="radio"/> derecha posterior           |
| diámetro biparietal                               | [*DATA REMOVED*]                                                                                                                                                                                |
| Circunferencia craneal                            | [*DATA REMOVED*]                                                                                                                                                                                |
| Circunferencia abdominal                          | [*DATA REMOVED*]                                                                                                                                                                                |
| Longitud de femur                                 | [*DATA REMOVED*]                                                                                                                                                                                |
| tejido celular subcutáneo a nivel del muslo en mm | [*DATA REMOVED*]                                                                                                                                                                                |
| tejido celular subcutáneo en abdomen en mm        | [*DATA REMOVED*]                                                                                                                                                                                |
| Volumen del muslo en cm3                          | [*DATA REMOVED*]                                                                                                                                                                                |
| Peso fetal estimado según fórmula de Hadlock      | [*DATA REMOVED*]                                                                                                                                                                                |



|                                               |                                                                                                                                                          |
|-----------------------------------------------|----------------------------------------------------------------------------------------------------------------------------------------------------------|
| Percentil                                     | [*DATA REMOVED*]                                                                                                                                         |
| Peso fetal estimado según fórmula de Scioscia | <hr/>                                                                                                                                                    |
| Peso fetal estimado según fórmula de LEE      | <hr/>                                                                                                                                                    |
| Tipo de parto                                 | <input type="radio"/> eutocico<br><input type="radio"/> instrumentado/ventosa<br><input checked="" type="radio"/> cesarea                                |
| fecha de nacimiento                           | [*DATA REMOVED*]                                                                                                                                         |
| Días entre exploración y nacimiento           | [*DATA REMOVED*]                                                                                                                                         |
| Peso RN en g                                  | [*DATA REMOVED*]                                                                                                                                         |
| sexo                                          | <input type="radio"/> mujer<br><input checked="" type="radio"/> hombre                                                                                   |
| Apgar 1 minuto                                | [*DATA REMOVED*]                                                                                                                                         |
| Apgar 5 minutos                               | [*DATA REMOVED*]                                                                                                                                         |
| Apgar 10 minutos                              | <hr/>                                                                                                                                                    |
| antecedente Covid durante gestación           | <input type="radio"/> Yes<br><input checked="" type="radio"/> No                                                                                         |
| Nivel de estudios                             | <input type="radio"/> ninguno<br><input type="radio"/> primarios<br><input checked="" type="radio"/> secundarios<br><input type="radio"/> universitarios |

# Base\_datos\_estimacion\_peso\_fetal

|                                       |                                                                                                                                                                                                                                                                                      |
|---------------------------------------|--------------------------------------------------------------------------------------------------------------------------------------------------------------------------------------------------------------------------------------------------------------------------------------|
| Número de identificación participante | 141                                                                                                                                                                                                                                                                                  |
| CODIGO PARTICIPANTE                   |                                                                                                                                                                                                                                                                                      |
| Edad                                  | [*DATA REMOVED*]                                                                                                                                                                                                                                                                     |
| Gestaciones                           | <input type="radio"/> 1<br><input type="radio"/> 2<br><input type="radio"/> 3<br><input checked="" type="radio"/> mas de 3                                                                                                                                                           |
| partos                                | <input type="radio"/> 0<br><input checked="" type="radio"/> 1<br><input type="radio"/> 2<br><input type="radio"/> 3<br><input type="radio"/> mas de 3                                                                                                                                |
| cesáreas                              | <input type="radio"/> 0<br><input checked="" type="radio"/> 1<br><input type="radio"/> 2<br><input type="radio"/> 3<br><input type="radio"/> mas de 3                                                                                                                                |
| Abortos                               | <input type="radio"/> 0<br><input checked="" type="radio"/> 1<br><input type="radio"/> 2<br><input type="radio"/> 3<br><input type="radio"/> mas de 3                                                                                                                                |
| Tipo de gestacion                     | <input checked="" type="radio"/> espontanea<br><input type="radio"/> IAC inseminación artificial conyuge<br><input type="radio"/> IAD inseminación artificial donante<br><input type="radio"/> FIV Fecundación in Vitro<br><input type="radio"/> Ovodon FIV con donación de ovocitos |
| peso previo a embarazo                | [*DATA REMOVED*]                                                                                                                                                                                                                                                                     |
| Ganancia ponderal embarazo            |                                                                                                                                                                                                                                                                                      |
| Talla madre                           | [*DATA REMOVED*]                                                                                                                                                                                                                                                                     |
| IMC previo embarazo                   | 39.06249999999999                                                                                                                                                                                                                                                                    |
| Patología obstétrica                  | <input checked="" type="radio"/> no<br><input type="radio"/> si                                                                                                                                                                                                                      |
| Diabetes pregestacional               | <input checked="" type="radio"/> no<br><input type="radio"/> si                                                                                                                                                                                                                      |
| Diabetes gestacional                  | <input checked="" type="radio"/> no<br><input type="radio"/> si                                                                                                                                                                                                                      |

|                                            |                                                                                                                                                                                      |
|--------------------------------------------|--------------------------------------------------------------------------------------------------------------------------------------------------------------------------------------|
| Diabetes gestacional con insulina          | <input checked="" type="radio"/> no<br><input type="radio"/> si                                                                                                                      |
| Diabetes gestacional con dieta y ejercicio | <input checked="" type="radio"/> no<br><input type="radio"/> si                                                                                                                      |
| Percentil fetos previos                    | <input type="radio"/> Nada<br><input type="radio"/> percentil menor de 10<br><input type="radio"/> percentil entre 10 y 90<br><input checked="" type="radio"/> percentil mayor de 90 |
| Exfumadora                                 | <input checked="" type="radio"/> Nada<br><input type="radio"/> menos de 5 años<br><input type="radio"/> 5 a 10 años<br><input type="radio"/> mayor o igual a 10 años                 |
| Hábito tabáquico                           | <input checked="" type="radio"/> no<br><input type="radio"/> si                                                                                                                      |
| fumadora                                   | [*DATA REMOVED*]                                                                                                                                                                     |
| Consumo otros tóxicos                      | <input checked="" type="radio"/> no<br><input type="radio"/> si                                                                                                                      |
| Hb 1T                                      | _____                                                                                                                                                                                |
| Htc 1T                                     | _____                                                                                                                                                                                |
| Hb 2T                                      | _____                                                                                                                                                                                |
| HTC 2T                                     | _____                                                                                                                                                                                |
| Hb 3T                                      | _____                                                                                                                                                                                |
| HTC 3T                                     | _____                                                                                                                                                                                |
| Suplemento FE oral                         | <input type="radio"/> si<br><input type="radio"/> no                                                                                                                                 |
| Suplemento fe iv                           | <input type="radio"/> si<br><input type="radio"/> no                                                                                                                                 |
| Transfusión                                | <input type="radio"/> no<br><input type="radio"/> si                                                                                                                                 |
| Solicitada Vit D                           | <input type="radio"/> no<br><input type="radio"/> si                                                                                                                                 |

|                       |                                                                                                                                                                                                                                                                                                                                                                                                   |
|-----------------------|---------------------------------------------------------------------------------------------------------------------------------------------------------------------------------------------------------------------------------------------------------------------------------------------------------------------------------------------------------------------------------------------------|
| Deficit vit D         | <input type="radio"/> no<br><input type="radio"/> si                                                                                                                                                                                                                                                                                                                                              |
| Suplemento vit D      | <input type="radio"/> si<br><input type="radio"/> no                                                                                                                                                                                                                                                                                                                                              |
| Dieta, cuestionario   | <input checked="" type="radio"/> si<br><input type="radio"/> no                                                                                                                                                                                                                                                                                                                                   |
| Leche entera          | <input type="radio"/> Nunca o menos 1 vez al mes<br><input type="radio"/> 1 a 3 veces mes<br><input type="radio"/> 1 vez semana<br><input type="radio"/> 2 a 4 veces semana<br><input type="radio"/> 5 a 6 veces semana<br><input type="radio"/> 1 vez al día<br><input type="radio"/> 2 a 3 veces al día<br><input type="radio"/> 5 a 6 veces al día<br><input type="radio"/> más 6 veces al día |
| Leche semidesnatada   | <input type="radio"/> Nunca o menos 1 vez al mes<br><input type="radio"/> 1 a 3 veces mes<br><input type="radio"/> 1 vez semana<br><input type="radio"/> 2 a 4 veces semana<br><input type="radio"/> 5 a 6 veces semana<br><input type="radio"/> 1 vez al día<br><input type="radio"/> 2 a 3 veces al día<br><input type="radio"/> 5 a 6 veces al día<br><input type="radio"/> mas 6 veces al día |
| Leche desnatada       | <input type="radio"/> Nunca o menos 1 vez al mes<br><input type="radio"/> 1 a 3 veces mes<br><input type="radio"/> 1 vez semana<br><input type="radio"/> 2 a 4 veces semana<br><input type="radio"/> 5 a 6 veces semana<br><input type="radio"/> 1 vez al día<br><input type="radio"/> 2 a 3 veces al día<br><input type="radio"/> 5 a 6 veces al día<br><input type="radio"/> más 6 veces al día |
| Leche condensada      | <input type="radio"/> Nunca o menos 1 vez al mes<br><input type="radio"/> 1 a 3 veces mes<br><input type="radio"/> 1 vez semana<br><input type="radio"/> 2 a 4 veces semana<br><input type="radio"/> 5 a 6 veces semana<br><input type="radio"/> 1 vez al día<br><input type="radio"/> 2 a 3 veces al día<br><input type="radio"/> 5 a 6 veces al día<br><input type="radio"/> más 6 veces al día |
| nata o crema de leche | <input type="radio"/> Nunca o menos 1 vez al mes<br><input type="radio"/> 1 a 3 veces mes<br><input type="radio"/> 1 vez semana<br><input type="radio"/> 2 a 4 veces semana<br><input type="radio"/> 5 a 6 veces semana<br><input type="radio"/> 1 vez al día<br><input type="radio"/> 2 a 3 veces al día<br><input type="radio"/> 5 a 6 veces al día<br><input type="radio"/> más 6 veces al día |

---

Yogurt Entero

- ☐ Nunca o menos 1 vez al mes
- ☐ 1 a 3 veces mes
- ☐ 1 vez semana
- ☐ 2 a 4 veces semana
- ☐ 5 a 6 veces semana
- ☐ 1 vez al día
- ☐ 2 a 3 veces al día
- ☐ 5 a 6 veces al día
- ☐ más 6 veces al día

---

Yogurt desnatado

- ☐ Nunca o menos 1 vez al mes
- ☐ 1 a 3 veces mes
- ☐ 1 vez semana
- ☐ 2 a 4 veces semana
- ☐ 5 a 6 veces semana
- ☐ 1 vez al día
- ☐ 2 a 3 veces al día
- ☐ 5 a 6 veces al día
- ☐ más 6 veces al día

---

100g requesón o queso blando o queso fresco

- ☐ Nunca o menos 1 vez al mes
- ☐ 1 a 3 veces mes
- ☐ 1 vez semana
- ☐ 2 a 4 veces semana
- ☐ 5 a 6 veces semana
- ☐ 1 vez al día
- ☐ 2 a 3 veces al día
- ☐ 5 a 6 veces al día
- ☐ más 6 veces al día

---

queso curado o semicurado o cremoso

- ☐ Nunca o menos 1 vez al mes
- ☐ 1 a 3 veces mes
- ☐ 1 vez semana
- ☐ 2 a 4 veces semana
- ☐ 5 a 6 veces semana
- ☐ 1 vez al día
- ☐ 2 a 3 veces al día
- ☐ 5 a 6 veces al día
- ☐ más 6 veces al día

---

natillas flan pudding

- ☐ Nunca o menos 1 vez al mes
- ☐ 1 a 3 veces mes
- ☐ 1 vez semana
- ☐ 2 a 4 veces semana
- ☐ 5 a 6 veces semana
- ☐ 1 vez al día
- ☐ 2 a 3 veces al día
- ☐ 5 a 6 veces al día
- ☐ más 6 veces al día

---

Helado

- ☐ Nunca o menos 1 vez al mes
- ☐ 1 a 3 veces mes
- ☐ 1 vez semana
- ☐ 2 a 4 veces semana
- ☐ 5 a 6 veces semana
- ☐ 1 vez al día
- ☐ 2 a 3 veces al día
- ☐ 5 a 6 veces al día
- ☐ más 6 veces al día

|                                      |                                                                                                                                                                                                                                                                                                                                                                                                   |
|--------------------------------------|---------------------------------------------------------------------------------------------------------------------------------------------------------------------------------------------------------------------------------------------------------------------------------------------------------------------------------------------------------------------------------------------------|
| huevo                                | <input type="radio"/> Nunca o menos 1 vez al mes<br><input type="radio"/> 1 a 3 veces mes<br><input type="radio"/> 1 vez semana<br><input type="radio"/> 2 a 4 veces semana<br><input type="radio"/> 5 a 6 veces semana<br><input type="radio"/> 1 vez al día<br><input type="radio"/> 2 a 3 veces al día<br><input type="radio"/> 5 a 6 veces al día<br><input type="radio"/> más 6 veces al día |
| Pollo con piel                       | <input type="radio"/> Nunca o menos 1 vez al mes<br><input type="radio"/> 1 a 3 veces mes<br><input type="radio"/> 1 vez semana<br><input type="radio"/> 2 a 4 veces semana<br><input type="radio"/> 5 a 6 veces semana<br><input type="radio"/> 1 vez al día<br><input type="radio"/> 2 a 3 veces al día<br><input type="radio"/> 5 a 6 veces al día<br><input type="radio"/> más 6 veces al día |
| pollo sin piel                       | <input type="radio"/> Nunca o menos 1 vez al mes<br><input type="radio"/> 1 a 3 veces mes<br><input type="radio"/> 1 vez semana<br><input type="radio"/> 2 a 4 veces semana<br><input type="radio"/> 5 a 6 veces semana<br><input type="radio"/> 1 vez al día<br><input type="radio"/> 2 a 3 veces al día<br><input type="radio"/> 5 a 6 veces al día<br><input type="radio"/> más 6 veces al día |
| Ternera o cerdo o cordero            | <input type="radio"/> Nunca o menos 1 vez al mes<br><input type="radio"/> 1 a 3 veces mes<br><input type="radio"/> 1 vez semana<br><input type="radio"/> 2 a 4 veces semana<br><input type="radio"/> 5 a 6 veces semana<br><input type="radio"/> 1 vez al día<br><input type="radio"/> 2 a 3 veces al día<br><input type="radio"/> 5 a 6 veces al día<br><input type="radio"/> más 6 veces al día |
| carne caza: Conejo o codorniz o pato | <input type="radio"/> Nunca o menos 1 vez al mes<br><input type="radio"/> 1 a 3 veces mes<br><input type="radio"/> 1 vez semana<br><input type="radio"/> 2 a 4 veces semana<br><input type="radio"/> 5 a 6 veces semana<br><input type="radio"/> 1 vez al día<br><input type="radio"/> 2 a 3 veces al día<br><input type="radio"/> 5 a 6 veces al día<br><input type="radio"/> más 6 veces al día |
| Hígado de ternera o cerdo o pollo    | <input type="radio"/> Nunca o menos 1 vez al mes<br><input type="radio"/> 1 a 3 veces mes<br><input type="radio"/> 1 vez semana<br><input type="radio"/> 2 a 4 veces semana<br><input type="radio"/> 5 a 6 veces semana<br><input type="radio"/> 1 vez al día<br><input type="radio"/> 2 a 3 veces al día<br><input type="radio"/> 5 a 6 veces al día<br><input type="radio"/> más 6 veces al día |

|                     |                                                                                                                                                                                                                                                                                                                                                                                                   |
|---------------------|---------------------------------------------------------------------------------------------------------------------------------------------------------------------------------------------------------------------------------------------------------------------------------------------------------------------------------------------------------------------------------------------------|
| Vísceras            | <input type="radio"/> Nunca o menos 1 vez al mes<br><input type="radio"/> 1 a 3 veces mes<br><input type="radio"/> 1 vez semana<br><input type="radio"/> 2 a 4 veces semana<br><input type="radio"/> 5 a 6 veces semana<br><input type="radio"/> 1 vez al día<br><input type="radio"/> 2 a 3 veces al día<br><input type="radio"/> 5 a 6 veces al día<br><input type="radio"/> más 6 veces al día |
| Embutido            | <input type="radio"/> Nunca o menos 1 vez al mes<br><input type="radio"/> 1 a 3 veces mes<br><input type="radio"/> 1 vez semana<br><input type="radio"/> 2 a 4 veces semana<br><input type="radio"/> 5 a 6 veces semana<br><input type="radio"/> 1 vez al día<br><input type="radio"/> 2 a 3 veces al día<br><input type="radio"/> 5 a 6 veces al día<br><input type="radio"/> más 6 veces al día |
| Salchicha o similar | <input type="radio"/> Nunca o menos 1 vez al mes<br><input type="radio"/> 1 a 3 veces mes<br><input type="radio"/> 1 vez semana<br><input type="radio"/> 2 a 4 veces semana<br><input type="radio"/> 5 a 6 veces semana<br><input type="radio"/> 1 vez al día<br><input type="radio"/> 2 a 3 veces al día<br><input type="radio"/> 5 a 6 veces al día<br><input type="radio"/> más 6 veces al día |
| Pate o foiegras     | <input type="radio"/> Nunca o menos 1 vez al mes<br><input type="radio"/> 1 a 3 veces mes<br><input type="radio"/> 1 vez semana<br><input type="radio"/> 2 a 4 veces semana<br><input type="radio"/> 5 a 6 veces semana<br><input type="radio"/> 1 vez al día<br><input type="radio"/> 2 a 3 veces al día<br><input type="radio"/> 5 a 6 veces al día<br><input type="radio"/> más 6 veces al día |
| Hamburguesa         | <input type="radio"/> Nunca o menos 1 vez al mes<br><input type="radio"/> 1 a 3 veces mes<br><input type="radio"/> 1 vez semana<br><input type="radio"/> 2 a 4 veces semana<br><input type="radio"/> 5 a 6 veces semana<br><input type="radio"/> 1 vez al día<br><input type="radio"/> 2 a 3 veces al día<br><input type="radio"/> 5 a 6 veces al día<br><input type="radio"/> más 6 veces al día |
| tocino o bacon      | <input type="radio"/> Nunca o menos 1 vez al mes<br><input type="radio"/> 1 a 3 veces mes<br><input type="radio"/> 1 vez semana<br><input type="radio"/> 2 a 4 veces semana<br><input type="radio"/> 5 a 6 veces semana<br><input type="radio"/> 1 vez al día<br><input type="radio"/> 2 a 3 veces al día<br><input type="radio"/> 5 a 6 veces al día<br><input type="radio"/> más 6 veces al día |

---

Pescado frito

- ☐ Nunca o menos 1 vez al mes
- ☐ 1 a 3 veces mes
- ☐ 1 vez semana
- ☐ 2 a 4 veces semana
- ☐ 5 a 6 veces semana
- ☐ 1 vez al día
- ☐ 2 a 3 veces al día
- ☐ 5 a 6 veces al día
- ☐ más 6 veces al día

---

pescado hervido blanco

- ☐ Nunca o menos 1 vez al mes
- ☐ 1 a 3 veces mes
- ☐ 1 vez semana
- ☐ 2 a 4 veces semana
- ☐ 5 a 6 veces semana
- ☐ 1 vez al día
- ☐ 2 a 3 veces al día
- ☐ 5 a 6 veces al día
- ☐ más 6 veces al día

---

pescado hervido azul

- ☐ Nunca o menos 1 vez al mes
- ☐ 1 a 3 veces mes
- ☐ 1 vez semana
- ☐ 2 a 4 veces semana
- ☐ 5 a 6 veces semana
- ☐ 1 vez al día
- ☐ 2 a 3 veces al día
- ☐ 5 a 6 veces al día
- ☐ más 6 veces al día

---

otros pescado azul

- ☐ Nunca o menos 1 vez al mes
- ☐ 1 a 3 veces mes
- ☐ 1 vez semana
- ☐ 2 a 4 veces semana
- ☐ 5 a 6 veces semana
- ☐ 1 vez al día
- ☐ 2 a 3 veces al día
- ☐ 5 a 6 veces al día
- ☐ más 6 veces al día

---

atun conserva

- ☐ Nunca o menos 1 vez al mes
- ☐ 1 a 3 veces mes
- ☐ 1 vez semana
- ☐ 2 a 4 veces semana
- ☐ 5 a 6 veces semana
- ☐ 1 vez al día
- ☐ 2 a 3 veces al día
- ☐ 5 a 6 veces al día
- ☐ más 6 veces al día

---

sardina conserva

- ☐ Nunca o menos 1 vez al mes
- ☐ 1 a 3 veces mes
- ☐ 1 vez semana
- ☐ 2 a 4 veces semana
- ☐ 5 a 6 veces semana
- ☐ 1 vez al día
- ☐ 2 a 3 veces al día
- ☐ 5 a 6 veces al día
- ☐ más 6 veces al día



---

pescado ahumado

- ☐ Nunca o menos 1 vez al mes
- ☐ 1 a 3 veces mes
- ☐ 1 vez semana
- ☐ 2 a 4 veces semana
- ☐ 5 a 6 veces semana
- ☐ 1 vez al día
- ☐ 2 a 3 veces al día
- ☐ 5 a 6 veces al día
- ☐ más 6 veces al día

---

almejas o mejillones o ostras unos 100g

- ☐ Nunca o menos 1 vez al mes
- ☐ 1 a 3 veces mes
- ☐ 1 vez semana
- ☐ 2 a 4 veces semana
- ☐ 5 a 6 veces semana
- ☐ 1 vez al día
- ☐ 2 a 3 veces al día
- ☐ 5 a 6 veces al día
- ☐ más 6 veces al día

---

calamar o chipiron o sepia unos 100g

- ☐ Nunca o menos 1 vez al mes
- ☐ 1 a 3 veces mes
- ☐ 1 vez semana
- ☐ 2 a 4 veces semana
- ☐ 5 a 6 veces semana
- ☐ 1 vez al día
- ☐ 2 a 3 veces al día
- ☐ 5 a 6 veces al día
- ☐ más 6 veces al día

---

marisco unos 100g

- ☐ Nunca o menos 1 vez al mes
- ☐ 1 a 3 veces mes
- ☐ 1 vez semana
- ☐ 2 a 4 veces semana
- ☐ 5 a 6 veces semana
- ☐ 1 vez al día
- ☐ 2 a 3 veces al día
- ☐ 5 a 6 veces al día
- ☐ más 6 veces al día

---

Espinacas o acelgas cocinadas

- ☐ Nunca o menos 1 vez al mes
- ☐ 1 a 3 veces mes
- ☐ 1 vez semana
- ☐ 2 a 4 veces semana
- ☐ 5 a 6 veces semana
- ☐ 1 vez al día
- ☐ 2 a 3 veces al día
- ☐ 5 a 6 veces al día
- ☐ más 6 veces al día

---

Col o coliflor o brocoli cocinado

- ☐ Nunca o menos 1 vez al mes
- ☐ 1 a 3 veces mes
- ☐ 1 vez semana
- ☐ 2 a 4 veces semana
- ☐ 5 a 6 veces semana
- ☐ 1 vez al día
- ☐ 2 a 3 veces al día
- ☐ 5 a 6 veces al día
- ☐ más 6 veces al día

---

Lechuga o endivia o escarola

- ☐ Nunca o menos 1 vez al mes
- ☐ 1 a 3 veces mes
- ☐ 1 vez semana
- ☐ 2 a 4 veces semana
- ☐ 5 a 6 veces semana
- ☐ 1 vez al día
- ☐ 2 a 3 veces al día
- ☐ 5 a 6 veces al día
- ☐ más 6 veces al día

---

tomate ensalada

- ☐ Nunca o menos 1 vez al mes
- ☐ 1 a 3 veces mes
- ☐ 1 vez semana
- ☐ 2 a 4 veces semana
- ☐ 5 a 6 veces semana
- ☐ 1 vez al día
- ☐ 2 a 3 veces al día
- ☐ 5 a 6 veces al día
- ☐ más 6 veces al día

---

cebolla

- ☐ Nunca o menos 1 vez al mes
- ☐ 1 a 3 veces mes
- ☐ 1 vez semana
- ☐ 2 a 4 veces semana
- ☐ 5 a 6 veces semana
- ☐ 1 vez al día
- ☐ 2 a 3 veces al día
- ☐ 5 a 6 veces al día
- ☐ más 6 veces al día

---

Zanahoria o calabaza

- ☐ Nunca o menos 1 vez al mes
- ☐ 1 a 3 veces mes
- ☐ 1 vez semana
- ☐ 2 a 4 veces semana
- ☐ 5 a 6 veces semana
- ☐ 1 vez al día
- ☐ 2 a 3 veces al día
- ☐ 5 a 6 veces al día
- ☐ más 6 veces al día

---

Judías verdes

- ☐ Nunca o menos 1 vez al mes
- ☐ 1 a 3 veces mes
- ☐ 1 vez semana
- ☐ 2 a 4 veces semana
- ☐ 5 a 6 veces semana
- ☐ 1 vez al día
- ☐ 2 a 3 veces al día
- ☐ 5 a 6 veces al día
- ☐ más 6 veces al día

---

Berenjena o calabacin o pepino

- ☐ Nunca o menos 1 vez al mes
- ☐ 1 a 3 veces mes
- ☐ 1 vez semana
- ☐ 2 a 4 veces semana
- ☐ 5 a 6 veces semana
- ☐ 1 vez al día
- ☐ 2 a 3 veces al día
- ☐ 5 a 6 veces al día
- ☐ más 6 veces al día

---

|          |                                                                                                                                                                                                                                                                                                                                                                                                   |
|----------|---------------------------------------------------------------------------------------------------------------------------------------------------------------------------------------------------------------------------------------------------------------------------------------------------------------------------------------------------------------------------------------------------|
| pimiento | <input type="radio"/> Nunca o menos 1 vez al mes<br><input type="radio"/> 1 a 3 veces mes<br><input type="radio"/> 1 vez semana<br><input type="radio"/> 2 a 4 veces semana<br><input type="radio"/> 5 a 6 veces semana<br><input type="radio"/> 1 vez al día<br><input type="radio"/> 2 a 3 veces al día<br><input type="radio"/> 5 a 6 veces al día<br><input type="radio"/> más 6 veces al día |
|----------|---------------------------------------------------------------------------------------------------------------------------------------------------------------------------------------------------------------------------------------------------------------------------------------------------------------------------------------------------------------------------------------------------|

---

|           |                                                                                                                                                                                                                                                                                                                                                                                                   |
|-----------|---------------------------------------------------------------------------------------------------------------------------------------------------------------------------------------------------------------------------------------------------------------------------------------------------------------------------------------------------------------------------------------------------|
| alcachofa | <input type="radio"/> Nunca o menos 1 vez al mes<br><input type="radio"/> 1 a 3 veces mes<br><input type="radio"/> 1 vez semana<br><input type="radio"/> 2 a 4 veces semana<br><input type="radio"/> 5 a 6 veces semana<br><input type="radio"/> 1 vez al día<br><input type="radio"/> 2 a 3 veces al día<br><input type="radio"/> 5 a 6 veces al día<br><input type="radio"/> más 6 veces al día |
|-----------|---------------------------------------------------------------------------------------------------------------------------------------------------------------------------------------------------------------------------------------------------------------------------------------------------------------------------------------------------------------------------------------------------|

---

|            |                                                                                                                                                                                                                                                                                                                                                                                                   |
|------------|---------------------------------------------------------------------------------------------------------------------------------------------------------------------------------------------------------------------------------------------------------------------------------------------------------------------------------------------------------------------------------------------------|
| espárragos | <input type="radio"/> Nunca o menos 1 vez al mes<br><input type="radio"/> 1 a 3 veces mes<br><input type="radio"/> 1 vez semana<br><input type="radio"/> 2 a 4 veces semana<br><input type="radio"/> 5 a 6 veces semana<br><input type="radio"/> 1 vez al día<br><input type="radio"/> 2 a 3 veces al día<br><input type="radio"/> 5 a 6 veces al día<br><input type="radio"/> más 6 veces al día |
|------------|---------------------------------------------------------------------------------------------------------------------------------------------------------------------------------------------------------------------------------------------------------------------------------------------------------------------------------------------------------------------------------------------------|

---

|              |                                                                                                                                                                                                                                                                                                                                                                                                   |
|--------------|---------------------------------------------------------------------------------------------------------------------------------------------------------------------------------------------------------------------------------------------------------------------------------------------------------------------------------------------------------------------------------------------------|
| maíz hervido | <input type="radio"/> Nunca o menos 1 vez al mes<br><input type="radio"/> 1 a 3 veces mes<br><input type="radio"/> 1 vez semana<br><input type="radio"/> 2 a 4 veces semana<br><input type="radio"/> 5 a 6 veces semana<br><input type="radio"/> 1 vez al día<br><input type="radio"/> 2 a 3 veces al día<br><input type="radio"/> 5 a 6 veces al día<br><input type="radio"/> más 6 veces al día |
|--------------|---------------------------------------------------------------------------------------------------------------------------------------------------------------------------------------------------------------------------------------------------------------------------------------------------------------------------------------------------------------------------------------------------|

---

|           |                                                                                                                                                                                                                                                                                                                                                                                                   |
|-----------|---------------------------------------------------------------------------------------------------------------------------------------------------------------------------------------------------------------------------------------------------------------------------------------------------------------------------------------------------------------------------------------------------|
| legumbres | <input type="radio"/> Nunca o menos 1 vez al mes<br><input type="radio"/> 1 a 3 veces mes<br><input type="radio"/> 1 vez semana<br><input type="radio"/> 2 a 4 veces semana<br><input type="radio"/> 5 a 6 veces semana<br><input type="radio"/> 1 vez al día<br><input type="radio"/> 2 a 3 veces al día<br><input type="radio"/> 5 a 6 veces al día<br><input type="radio"/> más 6 veces al día |
|-----------|---------------------------------------------------------------------------------------------------------------------------------------------------------------------------------------------------------------------------------------------------------------------------------------------------------------------------------------------------------------------------------------------------|

---

|                       |                                                                                                                                                                                                                                                                                                                                                                                                   |
|-----------------------|---------------------------------------------------------------------------------------------------------------------------------------------------------------------------------------------------------------------------------------------------------------------------------------------------------------------------------------------------------------------------------------------------|
| naranjas o mandarinas | <input type="radio"/> Nunca o menos 1 vez al mes<br><input type="radio"/> 1 a 3 veces mes<br><input type="radio"/> 1 vez semana<br><input type="radio"/> 2 a 4 veces semana<br><input type="radio"/> 5 a 6 veces semana<br><input type="radio"/> 1 vez al día<br><input type="radio"/> 2 a 3 veces al día<br><input type="radio"/> 5 a 6 veces al día<br><input type="radio"/> más 6 veces al día |
|-----------------------|---------------------------------------------------------------------------------------------------------------------------------------------------------------------------------------------------------------------------------------------------------------------------------------------------------------------------------------------------------------------------------------------------|

---

---

zumo natural fruta

- ☐ Nunca o menos 1 vez al mes
- ☐ 1 a 3 veces mes
- ☐ 1 vez semana
- ☐ 2 a 4 veces semana
- ☐ 5 a 6 veces semana
- ☐ 1 vez al día
- ☐ 2 a 3 veces al día
- ☐ 5 a 6 veces al día
- ☐ más 6 veces al día

---

platano

- ☐ Nunca o menos 1 vez al mes
- ☐ 1 a 3 veces mes
- ☐ 1 vez semana
- ☐ 2 a 4 veces semana
- ☐ 5 a 6 veces semana
- ☐ 1 vez al día
- ☐ 2 a 3 veces al día
- ☐ 5 a 6 veces al día
- ☐ más 6 veces al día

---

manzana o pera

- ☐ Nunca o menos 1 vez al mes
- ☐ 1 a 3 veces mes
- ☐ 1 vez semana
- ☐ 2 a 4 veces semana
- ☐ 5 a 6 veces semana
- ☐ 1 vez al día
- ☐ 2 a 3 veces al día
- ☐ 5 a 6 veces al día
- ☐ más 6 veces al día

---

melocotón o nectarina

- ☐ Nunca o menos 1 vez al mes
- ☐ 1 a 3 veces mes
- ☐ 1 vez semana
- ☐ 2 a 4 veces semana
- ☐ 5 a 6 veces semana
- ☐ 1 vez al día
- ☐ 2 a 3 veces al día
- ☐ 5 a 6 veces al día
- ☐ más 6 veces al día

---

sandia o melon

- ☐ Nunca o menos 1 vez al mes
- ☐ 1 a 3 veces mes
- ☐ 1 vez semana
- ☐ 2 a 4 veces semana
- ☐ 5 a 6 veces semana
- ☐ 1 vez al día
- ☐ 2 a 3 veces al día
- ☐ 5 a 6 veces al día
- ☐ más 6 veces al día

---

uva

- ☐ Nunca o menos 1 vez al mes
- ☐ 1 a 3 veces mes
- ☐ 1 vez semana
- ☐ 2 a 4 veces semana
- ☐ 5 a 6 veces semana
- ☐ 1 vez al día
- ☐ 2 a 3 veces al día
- ☐ 5 a 6 veces al día
- ☐ más 6 veces al día

---

bruna o ciruela

- ☐ Nunca o menos 1 vez al mes
- ☐ 1 a 3 veces mes
- ☐ 1 vez semana
- ☐ 2 a 4 veces semana
- ☐ 5 a 6 veces semana
- ☐ 1 vez al día
- ☐ 2 a 3 veces al día
- ☐ 5 a 6 veces al día
- ☐ más 6 veces al día

---

kiwi

- ☐ Nunca o menos 1 vez al mes
- ☐ 1 a 3 veces mes
- ☐ 1 vez semana
- ☐ 2 a 4 veces semana
- ☐ 5 a 6 veces semana
- ☐ 1 vez al día
- ☐ 2 a 3 veces al día
- ☐ 5 a 6 veces al día
- ☐ más 6 veces al día

---

aceituna

- ☐ Nunca o menos 1 vez al mes
- ☐ 1 a 3 veces mes
- ☐ 1 vez semana
- ☐ 2 a 4 veces semana
- ☐ 5 a 6 veces semana
- ☐ 1 vez al día
- ☐ 2 a 3 veces al día
- ☐ 5 a 6 veces al día
- ☐ más 6 veces al día

---

frutos secos

- ☐ Nunca o menos 1 vez al mes
- ☐ 1 a 3 veces mes
- ☐ 1 vez semana
- ☐ 2 a 4 veces semana
- ☐ 5 a 6 veces semana
- ☐ 1 vez al día
- ☐ 2 a 3 veces al día
- ☐ 5 a 6 veces al día
- ☐ más 6 veces al día

---

pan blanco

- ☐ Nunca o menos 1 vez al mes
- ☐ 1 a 3 veces mes
- ☐ 1 vez semana
- ☐ 2 a 4 veces semana
- ☐ 5 a 6 veces semana
- ☐ 1 vez al día
- ☐ 2 a 3 veces al día
- ☐ 5 a 6 veces al día
- ☐ más 6 veces al día

---

pan integral

- ☐ Nunca o menos 1 vez al mes
- ☐ 1 a 3 veces mes
- ☐ 1 vez semana
- ☐ 2 a 4 veces semana
- ☐ 5 a 6 veces semana
- ☐ 1 vez al día
- ☐ 2 a 3 veces al día
- ☐ 5 a 6 veces al día
- ☐ más 6 veces al día

---

cereales desayuno

- ☐ Nunca o menos 1 vez al mes
- ☐ 1 a 3 veces mes
- ☐ 1 vez semana
- ☐ 2 a 4 veces semana
- ☐ 5 a 6 veces semana
- ☐ 1 vez al día
- ☐ 2 a 3 veces al día
- ☐ 5 a 6 veces al día
- ☐ más 6 veces al día

---

patatas fritas

- ☐ Nunca o menos 1 vez al mes
- ☐ 1 a 3 veces mes
- ☐ 1 vez semana
- ☐ 2 a 4 veces semana
- ☐ 5 a 6 veces semana
- ☐ 1 vez al día
- ☐ 2 a 3 veces al día
- ☐ 5 a 6 veces al día
- ☐ más 6 veces al día

---

patatas cocidas o asadas

- ☐ Nunca o menos 1 vez al mes
- ☐ 1 a 3 veces mes
- ☐ 1 vez semana
- ☐ 2 a 4 veces semana
- ☐ 5 a 6 veces semana
- ☐ 1 vez al día
- ☐ 2 a 3 veces al día
- ☐ 5 a 6 veces al día
- ☐ más 6 veces al día

---

bolsa papas

- ☐ Nunca o menos 1 vez al mes
- ☐ 1 a 3 veces mes
- ☐ 1 vez semana
- ☐ 2 a 4 veces semana
- ☐ 5 a 6 veces semana
- ☐ 1 vez al día
- ☐ 2 a 3 veces al día
- ☐ 5 a 6 veces al día
- ☐ más 6 veces al día

---

arroz cocinado

- ☐ Nunca o menos 1 vez al mes
- ☐ 1 a 3 veces mes
- ☐ 1 vez semana
- ☐ 2 a 4 veces semana
- ☐ 5 a 6 veces semana
- ☐ 1 vez al día
- ☐ 2 a 3 veces al día
- ☐ 5 a 6 veces al día
- ☐ más 6 veces al día

---

pasta

- ☐ Nunca o menos 1 vez al mes
- ☐ 1 a 3 veces mes
- ☐ 1 vez semana
- ☐ 2 a 4 veces semana
- ☐ 5 a 6 veces semana
- ☐ 1 vez al día
- ☐ 2 a 3 veces al día
- ☐ 5 a 6 veces al día
- ☐ más 6 veces al día

|                     |                                                                                                                                                                                                                                                                                                                                                                                                   |
|---------------------|---------------------------------------------------------------------------------------------------------------------------------------------------------------------------------------------------------------------------------------------------------------------------------------------------------------------------------------------------------------------------------------------------|
| pizza               | <input type="radio"/> Nunca o menos 1 vez al mes<br><input type="radio"/> 1 a 3 veces mes<br><input type="radio"/> 1 vez semana<br><input type="radio"/> 2 a 4 veces semana<br><input type="radio"/> 5 a 6 veces semana<br><input type="radio"/> 1 vez al día<br><input type="radio"/> 2 a 3 veces al día<br><input type="radio"/> 5 a 6 veces al día<br><input type="radio"/> más 6 veces al día |
| aceite oliva        | <input type="radio"/> Nunca o menos 1 vez al mes<br><input type="radio"/> 1 a 3 veces mes<br><input type="radio"/> 1 vez semana<br><input type="radio"/> 2 a 4 veces semana<br><input type="radio"/> 5 a 6 veces semana<br><input type="radio"/> 1 vez al día<br><input type="radio"/> 2 a 3 veces al día<br><input type="radio"/> 5 a 6 veces al día<br><input type="radio"/> más 6 veces al día |
| otros aceites       | <input type="radio"/> Nunca o menos 1 vez al mes<br><input type="radio"/> 1 a 3 veces mes<br><input type="radio"/> 1 vez semana<br><input type="radio"/> 2 a 4 veces semana<br><input type="radio"/> 5 a 6 veces semana<br><input type="radio"/> 1 vez al día<br><input type="radio"/> 2 a 3 veces al día<br><input type="radio"/> 5 a 6 veces al día<br><input type="radio"/> más 6 veces al día |
| margarina           | <input type="radio"/> Nunca o menos 1 vez al mes<br><input type="radio"/> 1 a 3 veces mes<br><input type="radio"/> 1 vez semana<br><input type="radio"/> 2 a 4 veces semana<br><input type="radio"/> 5 a 6 veces semana<br><input type="radio"/> 1 vez al día<br><input type="radio"/> 2 a 3 veces al día<br><input type="radio"/> 5 a 6 veces al día<br><input type="radio"/> más 6 veces al día |
| mantequilla         | <input type="radio"/> Nunca o menos 1 vez al mes<br><input type="radio"/> 1 a 3 veces mes<br><input type="radio"/> 1 vez semana<br><input type="radio"/> 2 a 4 veces semana<br><input type="radio"/> 5 a 6 veces semana<br><input type="radio"/> 1 vez al día<br><input type="radio"/> 2 a 3 veces al día<br><input type="radio"/> 5 a 6 veces al día<br><input type="radio"/> más 6 veces al día |
| galletas tipo maria | <input type="radio"/> Nunca o menos 1 vez al mes<br><input type="radio"/> 1 a 3 veces mes<br><input type="radio"/> 1 vez semana<br><input type="radio"/> 2 a 4 veces semana<br><input type="radio"/> 5 a 6 veces semana<br><input type="radio"/> 1 vez al día<br><input type="radio"/> 2 a 3 veces al día<br><input type="radio"/> 5 a 6 veces al día<br><input type="radio"/> más 6 veces al día |

---

galletas chocolate

- ☐ Nunca o menos 1 vez al mes
- ☐ 1 a 3 veces mes
- ☐ 1 vez semana
- ☐ 2 a 4 veces semana
- ☐ 5 a 6 veces semana
- ☐ 1 vez al día
- ☐ 2 a 3 veces al día
- ☐ 5 a 6 veces al día
- ☐ más 6 veces al día

---

bolleria

- ☐ Nunca o menos 1 vez al mes
- ☐ 1 a 3 veces mes
- ☐ 1 vez semana
- ☐ 2 a 4 veces semana
- ☐ 5 a 6 veces semana
- ☐ 1 vez al día
- ☐ 2 a 3 veces al día
- ☐ 5 a 6 veces al día
- ☐ más 6 veces al día

---

chocolate o bombones

- ☐ Nunca o menos 1 vez al mes
- ☐ 1 a 3 veces mes
- ☐ 1 vez semana
- ☐ 2 a 4 veces semana
- ☐ 5 a 6 veces semana
- ☐ 1 vez al día
- ☐ 2 a 3 veces al día
- ☐ 5 a 6 veces al día
- ☐ más 6 veces al día

---

chocolate polvo o colacao

- ☐ Nunca o menos 1 vez al mes
- ☐ 1 a 3 veces mes
- ☐ 1 vez semana
- ☐ 2 a 4 veces semana
- ☐ 5 a 6 veces semana
- ☐ 1 vez al día
- ☐ 2 a 3 veces al día
- ☐ 5 a 6 veces al día
- ☐ más 6 veces al día

---

vino tinto

- ☐ Nunca o menos 1 vez al mes
- ☐ 1 a 3 veces mes
- ☐ 1 vez semana
- ☐ 2 a 4 veces semana
- ☐ 5 a 6 veces semana
- ☐ 1 vez al día
- ☐ 2 a 3 veces al día
- ☐ 5 a 6 veces al día
- ☐ más 6 veces al día

---

vino blanco

- ☐ Nunca o menos 1 vez al mes
- ☐ 1 a 3 veces mes
- ☐ 1 vez semana
- ☐ 2 a 4 veces semana
- ☐ 5 a 6 veces semana
- ☐ 1 vez al día
- ☐ 2 a 3 veces al día
- ☐ 5 a 6 veces al día
- ☐ más 6 veces al día



---

|                    |                                                                                                                                                                                                                                                                                                                                                                                                   |
|--------------------|---------------------------------------------------------------------------------------------------------------------------------------------------------------------------------------------------------------------------------------------------------------------------------------------------------------------------------------------------------------------------------------------------|
| vino seco o vermut | <input type="radio"/> Nunca o menos 1 vez al mes<br><input type="radio"/> 1 a 3 veces mes<br><input type="radio"/> 1 vez semana<br><input type="radio"/> 2 a 4 veces semana<br><input type="radio"/> 5 a 6 veces semana<br><input type="radio"/> 1 vez al día<br><input type="radio"/> 2 a 3 veces al día<br><input type="radio"/> 5 a 6 veces al día<br><input type="radio"/> más 6 veces al día |
|--------------------|---------------------------------------------------------------------------------------------------------------------------------------------------------------------------------------------------------------------------------------------------------------------------------------------------------------------------------------------------------------------------------------------------|

---

|         |                                                                                                                                                                                                                                                                                                                                                                                                   |
|---------|---------------------------------------------------------------------------------------------------------------------------------------------------------------------------------------------------------------------------------------------------------------------------------------------------------------------------------------------------------------------------------------------------|
| cerveza | <input type="radio"/> Nunca o menos 1 vez al mes<br><input type="radio"/> 1 a 3 veces mes<br><input type="radio"/> 1 vez semana<br><input type="radio"/> 2 a 4 veces semana<br><input type="radio"/> 5 a 6 veces semana<br><input type="radio"/> 1 vez al día<br><input type="radio"/> 2 a 3 veces al día<br><input type="radio"/> 5 a 6 veces al día<br><input type="radio"/> más 6 veces al día |
|---------|---------------------------------------------------------------------------------------------------------------------------------------------------------------------------------------------------------------------------------------------------------------------------------------------------------------------------------------------------------------------------------------------------|

---

|                     |                                                                                                                                                                                                                                                                                                                                                                                                   |
|---------------------|---------------------------------------------------------------------------------------------------------------------------------------------------------------------------------------------------------------------------------------------------------------------------------------------------------------------------------------------------------------------------------------------------|
| cerveza sin alcohol | <input type="radio"/> Nunca o menos 1 vez al mes<br><input type="radio"/> 1 a 3 veces mes<br><input type="radio"/> 1 vez semana<br><input type="radio"/> 2 a 4 veces semana<br><input type="radio"/> 5 a 6 veces semana<br><input type="radio"/> 1 vez al día<br><input type="radio"/> 2 a 3 veces al día<br><input type="radio"/> 5 a 6 veces al día<br><input type="radio"/> más 6 veces al día |
|---------------------|---------------------------------------------------------------------------------------------------------------------------------------------------------------------------------------------------------------------------------------------------------------------------------------------------------------------------------------------------------------------------------------------------|

---

|         |                                                                                                                                                                                                                                                                                                                                                                                                   |
|---------|---------------------------------------------------------------------------------------------------------------------------------------------------------------------------------------------------------------------------------------------------------------------------------------------------------------------------------------------------------------------------------------------------|
| licores | <input type="radio"/> Nunca o menos 1 vez al mes<br><input type="radio"/> 1 a 3 veces mes<br><input type="radio"/> 1 vez semana<br><input type="radio"/> 2 a 4 veces semana<br><input type="radio"/> 5 a 6 veces semana<br><input type="radio"/> 1 vez al día<br><input type="radio"/> 2 a 3 veces al día<br><input type="radio"/> 5 a 6 veces al día<br><input type="radio"/> más 6 veces al día |
|---------|---------------------------------------------------------------------------------------------------------------------------------------------------------------------------------------------------------------------------------------------------------------------------------------------------------------------------------------------------------------------------------------------------|

---

|                       |                                                                                                                                                                                                                                                                                                                                                                                                   |
|-----------------------|---------------------------------------------------------------------------------------------------------------------------------------------------------------------------------------------------------------------------------------------------------------------------------------------------------------------------------------------------------------------------------------------------|
| ginebra o ron o vodka | <input type="radio"/> Nunca o menos 1 vez al mes<br><input type="radio"/> 1 a 3 veces mes<br><input type="radio"/> 1 vez semana<br><input type="radio"/> 2 a 4 veces semana<br><input type="radio"/> 5 a 6 veces semana<br><input type="radio"/> 1 vez al día<br><input type="radio"/> 2 a 3 veces al día<br><input type="radio"/> 5 a 6 veces al día<br><input type="radio"/> más 6 veces al día |
|-----------------------|---------------------------------------------------------------------------------------------------------------------------------------------------------------------------------------------------------------------------------------------------------------------------------------------------------------------------------------------------------------------------------------------------|

---

|                 |                                                                                                                                                                                                                                                                                                                                                                                                   |
|-----------------|---------------------------------------------------------------------------------------------------------------------------------------------------------------------------------------------------------------------------------------------------------------------------------------------------------------------------------------------------------------------------------------------------|
| refresco normal | <input type="radio"/> Nunca o menos 1 vez al mes<br><input type="radio"/> 1 a 3 veces mes<br><input type="radio"/> 1 vez semana<br><input type="radio"/> 2 a 4 veces semana<br><input type="radio"/> 5 a 6 veces semana<br><input type="radio"/> 1 vez al día<br><input type="radio"/> 2 a 3 veces al día<br><input type="radio"/> 5 a 6 veces al día<br><input type="radio"/> más 6 veces al día |
|-----------------|---------------------------------------------------------------------------------------------------------------------------------------------------------------------------------------------------------------------------------------------------------------------------------------------------------------------------------------------------------------------------------------------------|

---

---

refresco sin azúcar

- ☐ Nunca o menos 1 vez al mes
- ☐ 1 a 3 veces mes
- ☐ 1 vez semana
- ☐ 2 a 4 veces semana
- ☐ 5 a 6 veces semana
- ☐ 1 vez al día
- ☐ 2 a 3 veces al día
- ☐ 5 a 6 veces al día
- ☐ más 6 veces al día

---

Agua del grifo

- ☐ Nunca o menos 1 vez al mes
- ☐ 1 a 3 veces mes
- ☐ 1 vez semana
- ☐ 2 a 4 veces semana
- ☐ 5 a 6 veces semana
- ☐ 1 vez al día
- ☐ 2 a 3 veces al día
- ☐ 5 a 6 veces al día
- ☐ más 6 veces al día

---

agua embotellada sin gas

- ☐ Nunca o menos 1 vez al mes
- ☐ 1 a 3 veces mes
- ☐ 1 vez semana
- ☐ 2 a 4 veces semana
- ☐ 5 a 6 veces semana
- ☐ 1 vez al día
- ☐ 2 a 3 veces al día
- ☐ 5 a 6 veces al día
- ☐ más 6 veces al día

---

agua embotellada con gas

- ☐ Nunca o menos 1 vez al mes
- ☐ 1 a 3 veces mes
- ☐ 1 vez semana
- ☐ 2 a 4 veces semana
- ☐ 5 a 6 veces semana
- ☐ 1 vez al día
- ☐ 2 a 3 veces al día
- ☐ 5 a 6 veces al día
- ☐ más 6 veces al día

---

zumو frutas embasado

- ☐ Nunca o menos 1 vez al mes
- ☐ 1 a 3 veces mes
- ☐ 1 vez semana
- ☐ 2 a 4 veces semana
- ☐ 5 a 6 veces semana
- ☐ 1 vez al día
- ☐ 2 a 3 veces al día
- ☐ 5 a 6 veces al día
- ☐ más 6 veces al día

---

cafe

- ☐ Nunca o menos 1 vez al mes
- ☐ 1 a 3 veces mes
- ☐ 1 vez semana
- ☐ 2 a 4 veces semana
- ☐ 5 a 6 veces semana
- ☐ 1 vez al día
- ☐ 2 a 3 veces al día
- ☐ 5 a 6 veces al día
- ☐ más 6 veces al día

---

cafe descafeinado

- ☐ Nunca o menos 1 vez al mes
- ☐ 1 a 3 veces mes
- ☐ 1 vez semana
- ☐ 2 a 4 veces semana
- ☐ 5 a 6 veces semana
- ☐ 1 vez al día
- ☐ 2 a 3 veces al día
- ☐ 5 a 6 veces al día
- ☐ más 6 veces al día

---

te o infusión

- ☐ Nunca o menos 1 vez al mes
- ☐ 1 a 3 veces mes
- ☐ 1 vez semana
- ☐ 2 a 4 veces semana
- ☐ 5 a 6 veces semana
- ☐ 1 vez al día
- ☐ 2 a 3 veces al día
- ☐ 5 a 6 veces al día
- ☐ más 6 veces al día

---

sopa o puré verduras

- ☐ Nunca o menos 1 vez al mes
- ☐ 1 a 3 veces mes
- ☐ 1 vez semana
- ☐ 2 a 4 veces semana
- ☐ 5 a 6 veces semana
- ☐ 1 vez al día
- ☐ 2 a 3 veces al día
- ☐ 5 a 6 veces al día
- ☐ más 6 veces al día

---

croquetas pollo jamón

- ☐ Nunca o menos 1 vez al mes
- ☐ 1 a 3 veces mes
- ☐ 1 vez semana
- ☐ 2 a 4 veces semana
- ☐ 5 a 6 veces semana
- ☐ 1 vez al día
- ☐ 2 a 3 veces al día
- ☐ 5 a 6 veces al día
- ☐ más 6 veces al día

---

croquetas pescado

- ☐ Nunca o menos 1 vez al mes
- ☐ 1 a 3 veces mes
- ☐ 1 vez semana
- ☐ 2 a 4 veces semana
- ☐ 5 a 6 veces semana
- ☐ 1 vez al día
- ☐ 2 a 3 veces al día
- ☐ 5 a 6 veces al día
- ☐ más 6 veces al día

---

mayonesa

- ☐ Nunca o menos 1 vez al mes
- ☐ 1 a 3 veces mes
- ☐ 1 vez semana
- ☐ 2 a 4 veces semana
- ☐ 5 a 6 veces semana
- ☐ 1 vez al día
- ☐ 2 a 3 veces al día
- ☐ 5 a 6 veces al día
- ☐ más 6 veces al día

---

|              |                                                                                                                                                                                                                                                                                                                                                                                                   |
|--------------|---------------------------------------------------------------------------------------------------------------------------------------------------------------------------------------------------------------------------------------------------------------------------------------------------------------------------------------------------------------------------------------------------|
| salsa tomate | <input type="radio"/> Nunca o menos 1 vez al mes<br><input type="radio"/> 1 a 3 veces mes<br><input type="radio"/> 1 vez semana<br><input type="radio"/> 2 a 4 veces semana<br><input type="radio"/> 5 a 6 veces semana<br><input type="radio"/> 1 vez al día<br><input type="radio"/> 2 a 3 veces al día<br><input type="radio"/> 5 a 6 veces al día<br><input type="radio"/> más 6 veces al día |
|--------------|---------------------------------------------------------------------------------------------------------------------------------------------------------------------------------------------------------------------------------------------------------------------------------------------------------------------------------------------------------------------------------------------------|

---

|         |                                                                                                                                                                                                                                                                                                                                                                                                   |
|---------|---------------------------------------------------------------------------------------------------------------------------------------------------------------------------------------------------------------------------------------------------------------------------------------------------------------------------------------------------------------------------------------------------|
| ketchup | <input type="radio"/> Nunca o menos 1 vez al mes<br><input type="radio"/> 1 a 3 veces mes<br><input type="radio"/> 1 vez semana<br><input type="radio"/> 2 a 4 veces semana<br><input type="radio"/> 5 a 6 veces semana<br><input type="radio"/> 1 vez al día<br><input type="radio"/> 2 a 3 veces al día<br><input type="radio"/> 5 a 6 veces al día<br><input type="radio"/> más 6 veces al día |
|---------|---------------------------------------------------------------------------------------------------------------------------------------------------------------------------------------------------------------------------------------------------------------------------------------------------------------------------------------------------------------------------------------------------|

---

|     |                                                                                                                                                                                                                                                                                                                                                                                                   |
|-----|---------------------------------------------------------------------------------------------------------------------------------------------------------------------------------------------------------------------------------------------------------------------------------------------------------------------------------------------------------------------------------------------------|
| sal | <input type="radio"/> Nunca o menos 1 vez al mes<br><input type="radio"/> 1 a 3 veces mes<br><input type="radio"/> 1 vez semana<br><input type="radio"/> 2 a 4 veces semana<br><input type="radio"/> 5 a 6 veces semana<br><input type="radio"/> 1 vez al día<br><input type="radio"/> 2 a 3 veces al día<br><input type="radio"/> 5 a 6 veces al día<br><input type="radio"/> más 6 veces al día |
|-----|---------------------------------------------------------------------------------------------------------------------------------------------------------------------------------------------------------------------------------------------------------------------------------------------------------------------------------------------------------------------------------------------------|

---

|     |                                                                                                                                                                                                                                                                                                                                                                                                   |
|-----|---------------------------------------------------------------------------------------------------------------------------------------------------------------------------------------------------------------------------------------------------------------------------------------------------------------------------------------------------------------------------------------------------|
| ajo | <input type="radio"/> Nunca o menos 1 vez al mes<br><input type="radio"/> 1 a 3 veces mes<br><input type="radio"/> 1 vez semana<br><input type="radio"/> 2 a 4 veces semana<br><input type="radio"/> 5 a 6 veces semana<br><input type="radio"/> 1 vez al día<br><input type="radio"/> 2 a 3 veces al día<br><input type="radio"/> 5 a 6 veces al día<br><input type="radio"/> más 6 veces al día |
|-----|---------------------------------------------------------------------------------------------------------------------------------------------------------------------------------------------------------------------------------------------------------------------------------------------------------------------------------------------------------------------------------------------------|

---

|                  |                                                                                                                                                                                                                                                                                                                                                                                                   |
|------------------|---------------------------------------------------------------------------------------------------------------------------------------------------------------------------------------------------------------------------------------------------------------------------------------------------------------------------------------------------------------------------------------------------|
| mermelada o miel | <input type="radio"/> Nunca o menos 1 vez al mes<br><input type="radio"/> 1 a 3 veces mes<br><input type="radio"/> 1 vez semana<br><input type="radio"/> 2 a 4 veces semana<br><input type="radio"/> 5 a 6 veces semana<br><input type="radio"/> 1 vez al día<br><input type="radio"/> 2 a 3 veces al día<br><input type="radio"/> 5 a 6 veces al día<br><input type="radio"/> más 6 veces al día |
|------------------|---------------------------------------------------------------------------------------------------------------------------------------------------------------------------------------------------------------------------------------------------------------------------------------------------------------------------------------------------------------------------------------------------|

---

|        |                                                                                                                                                                                                                                                                                                                                                                                                   |
|--------|---------------------------------------------------------------------------------------------------------------------------------------------------------------------------------------------------------------------------------------------------------------------------------------------------------------------------------------------------------------------------------------------------|
| azúcar | <input type="radio"/> Nunca o menos 1 vez al mes<br><input type="radio"/> 1 a 3 veces mes<br><input type="radio"/> 1 vez semana<br><input type="radio"/> 2 a 4 veces semana<br><input type="radio"/> 5 a 6 veces semana<br><input type="radio"/> 1 vez al día<br><input type="radio"/> 2 a 3 veces al día<br><input type="radio"/> 5 a 6 veces al día<br><input type="radio"/> más 6 veces al día |
|--------|---------------------------------------------------------------------------------------------------------------------------------------------------------------------------------------------------------------------------------------------------------------------------------------------------------------------------------------------------------------------------------------------------|

---

|                                       |                                                                                                                                                                                                                                                                                                                                                                                                                                                                                                                    |
|---------------------------------------|--------------------------------------------------------------------------------------------------------------------------------------------------------------------------------------------------------------------------------------------------------------------------------------------------------------------------------------------------------------------------------------------------------------------------------------------------------------------------------------------------------------------|
| Otro alimento                         | <hr/>                                                                                                                                                                                                                                                                                                                                                                                                                                                                                                              |
| suplementos vitamínicos               | <input type="radio"/> si<br><input type="radio"/> no                                                                                                                                                                                                                                                                                                                                                                                                                                                               |
| suplementos vitamínicos               | <hr/>                                                                                                                                                                                                                                                                                                                                                                                                                                                                                                              |
| dieta previa                          | <input type="radio"/> si<br><input type="radio"/> no                                                                                                                                                                                                                                                                                                                                                                                                                                                               |
| motivo dieta                          | <input type="radio"/> no dieta<br><input type="radio"/> control peso<br><input type="radio"/> control colesterol<br><input type="radio"/> control diabetes<br><input type="radio"/> problemas estómago<br><input type="radio"/> problemas vesícula o hepáticos<br><input type="radio"/> HTA o cardiopatía<br><input type="radio"/> problemas renales<br><input type="radio"/> alergia alimentaria<br><input type="radio"/> ácido úrico elevado<br><input type="radio"/> vegetariana<br><input type="radio"/> otros |
| cambio alimentos año previo gestación | <input type="radio"/> si<br><input type="radio"/> no                                                                                                                                                                                                                                                                                                                                                                                                                                                               |
| cambio lácteos                        | <input type="radio"/> eliminado<br><input type="radio"/> disminuido<br><input type="radio"/> igual<br><input type="radio"/> aumentado<br><input type="radio"/> no sabe                                                                                                                                                                                                                                                                                                                                             |
| cambio huevos                         | <input type="radio"/> eliminado<br><input type="radio"/> disminuido<br><input type="radio"/> igual<br><input type="radio"/> aumentado<br><input type="radio"/> no sabe                                                                                                                                                                                                                                                                                                                                             |
| cambio carne                          | <input type="radio"/> eliminado<br><input type="radio"/> disminuido<br><input type="radio"/> igual<br><input type="radio"/> aumentado<br><input type="radio"/> no sabe                                                                                                                                                                                                                                                                                                                                             |
| cambio pescado                        | <input type="radio"/> eliminado<br><input type="radio"/> disminuido<br><input type="radio"/> igual<br><input type="radio"/> aumentado<br><input type="radio"/> no sabe                                                                                                                                                                                                                                                                                                                                             |
| cambio verduras                       | <input type="radio"/> eliminado<br><input type="radio"/> disminuido<br><input type="radio"/> igual<br><input type="radio"/> aumentado<br><input type="radio"/> no sabe                                                                                                                                                                                                                                                                                                                                             |

|                            |                                                                                                                                                                                                             |
|----------------------------|-------------------------------------------------------------------------------------------------------------------------------------------------------------------------------------------------------------|
| cambio legumbres           | <input type="radio"/> eliminado<br><input type="radio"/> disminuido<br><input type="radio"/> igual<br><input type="radio"/> aumentado<br><input type="radio"/> no sabe                                      |
| cambio fruta               | <input type="radio"/> eliminado<br><input type="radio"/> disminuido<br><input type="radio"/> igual<br><input type="radio"/> aumentado<br><input type="radio"/> no sabe                                      |
| cambio pan                 | <input type="radio"/> eliminado<br><input type="radio"/> disminuido<br><input type="radio"/> igual<br><input type="radio"/> aumentado<br><input type="radio"/> no sabe                                      |
| cambio aceite oliva        | <input type="radio"/> eliminado<br><input type="radio"/> disminuido<br><input type="radio"/> igual<br><input type="radio"/> aumentado<br><input type="radio"/> no sabe                                      |
| cambio mante o margarina   | <input type="radio"/> eliminado<br><input type="radio"/> disminuido<br><input type="radio"/> igual<br><input type="radio"/> aumentado<br><input type="radio"/> no sabe                                      |
| cambio azúcar y dulces     | <input type="radio"/> eliminado<br><input type="radio"/> disminuido<br><input type="radio"/> igual<br><input type="radio"/> aumentado<br><input type="radio"/> no sabe                                      |
| cambio bebidas alcohólicas | <input type="radio"/> eliminado<br><input type="radio"/> disminuido<br><input type="radio"/> igual<br><input type="radio"/> aumentado<br><input type="radio"/> no sabe                                      |
| frecuencia comidas fritas  | <input type="radio"/> a diario<br><input type="radio"/> 5 a 6 veces semana<br><input type="radio"/> 2 a 4 veces semana<br><input type="radio"/> 1 vez semana<br><input type="radio"/> menos de 1 vez semana |
| carne                      | <input type="radio"/> no como<br><input type="radio"/> cruda<br><input type="radio"/> poco hecha<br><input type="radio"/> hecha<br><input type="radio"/> muy hecha                                          |
| grasa visible carne        | <input type="radio"/> quita toda<br><input type="radio"/> quita mayoría<br><input type="radio"/> quita un poco<br><input type="radio"/> no quita nada                                                       |

|                                |                                                                                                                                                                                                                                               |
|--------------------------------|-----------------------------------------------------------------------------------------------------------------------------------------------------------------------------------------------------------------------------------------------|
| cocina carne                   | <input type="radio"/> a la plancha<br><input type="radio"/> a la parrilla<br><input type="radio"/> asada<br><input type="radio"/> frita<br><input type="radio"/> guisada                                                                      |
| tostado quemado carne          | <input type="radio"/> nunca<br><input type="radio"/> 1 vez mes<br><input type="radio"/> 2 a 3 veces mes<br><input type="radio"/> 1 vez semana<br><input type="radio"/> 2 a 3 semanas                                                          |
| tostado quemado pescado        | <input type="radio"/> nunca<br><input type="radio"/> 1 vez mes<br><input type="radio"/> 2 a 3 veces mes<br><input type="radio"/> 1 vez semana<br><input type="radio"/> 2 a 3 semanas                                                          |
| socarrat paella                | <input type="radio"/> nunca<br><input type="radio"/> 1 vez mes<br><input type="radio"/> 2 a 3 veces mes<br><input type="radio"/> 1 vez semana<br><input type="radio"/> 2 a 3 semanas                                                          |
| grasa o aceite cocinar         | <input type="radio"/> mantequilla<br><input type="radio"/> margarina<br><input type="radio"/> aceite oliva<br><input type="radio"/> aceite oliva virgen extra<br><input type="radio"/> aceite vegetal<br><input type="radio"/> mezcla aceites |
| grasa aceite aliñar            | <input type="radio"/> mantequilla<br><input type="radio"/> margarina<br><input type="radio"/> aceite oliva<br><input type="radio"/> aceite oliva virgen extra<br><input type="radio"/> aceite vegetal<br><input type="radio"/> mezcla aceites |
| grasa aceite freir             | <input type="radio"/> mantequilla<br><input type="radio"/> margarina<br><input type="radio"/> aceite oliva<br><input type="radio"/> aceite oliva virgen extra<br><input type="radio"/> aceite vegetal<br><input type="radio"/> mezcla aceites |
| Ejercicio cuestionario         | <input type="radio"/> si<br><input type="radio"/> no                                                                                                                                                                                          |
| horas de sueño incluido siesta | _____                                                                                                                                                                                                                                         |
| minutos siesta                 | _____                                                                                                                                                                                                                                         |
| horas televisión semana        | _____                                                                                                                                                                                                                                         |

|                                        |                                                                                                                                                                                                                                                                                                                                                                |
|----------------------------------------|----------------------------------------------------------------------------------------------------------------------------------------------------------------------------------------------------------------------------------------------------------------------------------------------------------------------------------------------------------------|
| actividad trabajo                      | <input type="radio"/> casi siempre sentado<br><input type="radio"/> sentado 50 por cien<br><input type="radio"/> casi siempre de pie, quieto<br><input type="radio"/> casi siempre levantado caminando y llevando pocas cosas<br><input type="radio"/> casi siempre levantado, caminando y llevado muchas cosas<br><input type="radio"/> trabajo manual pesado |
| tiempo caminar o bici al día           | <input type="radio"/> casi nunca<br><input type="radio"/> menos 20min día<br><input type="radio"/> 20 a 40 min día<br><input type="radio"/> 40 a 60 min día<br><input type="radio"/> 1h o 1h y media día<br><input type="radio"/> más de 1h y media al día                                                                                                     |
| tiempo tareas casa al día              | <input type="radio"/> menos de 1h día<br><input type="radio"/> 1 a 2h día<br><input type="radio"/> 3 a 4h día<br><input type="radio"/> 5 a 6h día<br><input type="radio"/> 7 a 8h día<br><input type="radio"/> más de 8h día                                                                                                                                   |
| tiempo libre televisión ordenador leer | <input type="radio"/> menos 1h día<br><input type="radio"/> 1h día<br><input type="radio"/> 2h día<br><input type="radio"/> 3h día<br><input type="radio"/> 4h día<br><input type="radio"/> 5 a 6h día<br><input type="radio"/> mas 6h día                                                                                                                     |
| tiempo libre ejercicio o deporte       | <input type="radio"/> menos 1h semana<br><input type="radio"/> 1h semana<br><input type="radio"/> 2h semana<br><input type="radio"/> 3h semana<br><input type="radio"/> 4 a 5h semana<br><input type="radio"/> mas 5h semana                                                                                                                                   |
| como se considera                      | <input type="radio"/> sedentaria<br><input type="radio"/> poco activa<br><input type="radio"/> moderadamente activa<br><input type="radio"/> bastante activa<br><input type="radio"/> muy activa<br><input type="radio"/> no sabe                                                                                                                              |
| FUR                                    | [*DATA REMOVED*]                                                                                                                                                                                                                                                                                                                                               |
| Semanas gestación 2T                   | _____                                                                                                                                                                                                                                                                                                                                                          |
| Días gestación 2T                      | _____                                                                                                                                                                                                                                                                                                                                                          |
| DBP 2T                                 | _____                                                                                                                                                                                                                                                                                                                                                          |
| CC 2T                                  | _____                                                                                                                                                                                                                                                                                                                                                          |



|                                                   |                                                                                                                                                                                                 |
|---------------------------------------------------|-------------------------------------------------------------------------------------------------------------------------------------------------------------------------------------------------|
| AC 2T                                             |                                                                                                                                                                                                 |
| LF 2T                                             |                                                                                                                                                                                                 |
| PFE 2T (Hadlock)                                  |                                                                                                                                                                                                 |
| Semanas gestación 3T                              | [*DATA REMOVED*]                                                                                                                                                                                |
| días 3T                                           | [*DATA REMOVED*]                                                                                                                                                                                |
| DBP 3T                                            | [*DATA REMOVED*]                                                                                                                                                                                |
| CC 3T                                             | [*DATA REMOVED*]                                                                                                                                                                                |
| AC 3T                                             | [*DATA REMOVED*]                                                                                                                                                                                |
| LF 3T                                             | [*DATA REMOVED*]                                                                                                                                                                                |
| PFE 3T (Hadlock)                                  | [*DATA REMOVED*]                                                                                                                                                                                |
| Semanas de gestación final                        | [*DATA REMOVED*]                                                                                                                                                                                |
| días gestación final                              | [*DATA REMOVED*]                                                                                                                                                                                |
| Localización placenta                             | <input checked="" type="radio"/> anterior<br><input type="radio"/> lateral derecha<br><input type="radio"/> lateral izquierda<br><input type="radio"/> posterior<br><input type="radio"/> fondo |
| Presentación longitudinal cefálica                | <input type="radio"/> no<br><input checked="" type="radio"/> si                                                                                                                                 |
| Dorso                                             | <input type="radio"/> izquierda anterior<br><input type="radio"/> izquierda posterior<br><input checked="" type="radio"/> derecha anterior<br><input type="radio"/> derecha posterior           |
| diámetro biparietal                               | [*DATA REMOVED*]                                                                                                                                                                                |
| Circunferencia craneal                            | [*DATA REMOVED*]                                                                                                                                                                                |
| Circunferencia abdominal                          | [*DATA REMOVED*]                                                                                                                                                                                |
| Longitud de femur                                 | [*DATA REMOVED*]                                                                                                                                                                                |
| tejido celular subcutáneo a nivel del muslo en mm | [*DATA REMOVED*]                                                                                                                                                                                |
| tejido celular subcutáneo en abdomen en mm        | [*DATA REMOVED*]                                                                                                                                                                                |

|                                               |                                                                                                                                               |
|-----------------------------------------------|-----------------------------------------------------------------------------------------------------------------------------------------------|
| Volumen del muslo en cm3                      | [*DATA REMOVED*]                                                                                                                              |
| Peso fetal estimado según fórmula de Hadlock  | [*DATA REMOVED*]                                                                                                                              |
| Percentil                                     | [*DATA REMOVED*]                                                                                                                              |
| Peso fetal estimado según fórmula de Scioscia | _____                                                                                                                                         |
| Peso fetal estimado según fórmula de LEE      | _____                                                                                                                                         |
| Tipo de parto                                 | <input checked="" type="radio"/> eutocico<br><input type="radio"/> instrumentado/ventosa<br><input type="radio"/> cesarea                     |
| fecha de nacimiento                           | [*DATA REMOVED*]                                                                                                                              |
| Días entre exploración y nacimiento           | [*DATA REMOVED*]                                                                                                                              |
| Peso RN en g                                  | [*DATA REMOVED*]                                                                                                                              |
| sexo                                          | <input checked="" type="radio"/> mujer<br><input type="radio"/> hombre                                                                        |
| Apgar 1 minuto                                | [*DATA REMOVED*]                                                                                                                              |
| Apgar 5 minutos                               | [*DATA REMOVED*]                                                                                                                              |
| Apgar 10 minutos                              | _____                                                                                                                                         |
| antecedente Covid durante gestación           | <input type="radio"/> Yes<br><input checked="" type="radio"/> No                                                                              |
| Nivel de estudios                             | <input type="radio"/> ninguno<br><input type="radio"/> primarios<br><input type="radio"/> secundarios<br><input type="radio"/> universitarios |

# Base\_datos\_estimacion\_peso\_fetal

|                                       |                                                                                                                                                                                                                                                                                      |
|---------------------------------------|--------------------------------------------------------------------------------------------------------------------------------------------------------------------------------------------------------------------------------------------------------------------------------------|
| Número de identificación participante | 142                                                                                                                                                                                                                                                                                  |
| CODIGO PARTICIPANTE                   |                                                                                                                                                                                                                                                                                      |
| Edad                                  | [*DATA REMOVED*]                                                                                                                                                                                                                                                                     |
| Gestaciones                           | <input type="radio"/> 1<br><input checked="" type="radio"/> 2<br><input type="radio"/> 3<br><input type="radio"/> mas de 3                                                                                                                                                           |
| partos                                | <input type="radio"/> 0<br><input checked="" type="radio"/> 1<br><input type="radio"/> 2<br><input type="radio"/> 3<br><input type="radio"/> mas de 3                                                                                                                                |
| cesáreas                              | <input checked="" type="radio"/> 0<br><input type="radio"/> 1<br><input type="radio"/> 2<br><input type="radio"/> 3<br><input type="radio"/> mas de 3                                                                                                                                |
| Abortos                               | <input checked="" type="radio"/> 0<br><input type="radio"/> 1<br><input type="radio"/> 2<br><input type="radio"/> 3<br><input type="radio"/> mas de 3                                                                                                                                |
| Tipo de gestacion                     | <input checked="" type="radio"/> espontanea<br><input type="radio"/> IAC inseminación artificial conyuge<br><input type="radio"/> IAD inseminación artificial donante<br><input type="radio"/> FIV Fecundación in Vitro<br><input type="radio"/> Ovodon FIV con donación de ovocitos |
| peso previo a embarazo                | [*DATA REMOVED*]                                                                                                                                                                                                                                                                     |
| Ganancia ponderal embarazo            |                                                                                                                                                                                                                                                                                      |
| Talla madre                           | [*DATA REMOVED*]                                                                                                                                                                                                                                                                     |
| IMC previo embarazo                   | 29.017447199265384                                                                                                                                                                                                                                                                   |
| Patología obstétrica                  | <input checked="" type="radio"/> no<br><input type="radio"/> si                                                                                                                                                                                                                      |
| Diabetes pregestacional               | <input checked="" type="radio"/> no<br><input type="radio"/> si                                                                                                                                                                                                                      |
| Diabetes gestacional                  | <input checked="" type="radio"/> no<br><input type="radio"/> si                                                                                                                                                                                                                      |

|                                            |                                                                                                                                                                                      |
|--------------------------------------------|--------------------------------------------------------------------------------------------------------------------------------------------------------------------------------------|
| Diabetes gestacional con insulina          | <input checked="" type="radio"/> no<br><input type="radio"/> si                                                                                                                      |
| Diabetes gestacional con dieta y ejercicio | <input checked="" type="radio"/> no<br><input type="radio"/> si                                                                                                                      |
| Percentil fetos previos                    | <input type="radio"/> Nada<br><input checked="" type="radio"/> percentil menor de 10<br><input type="radio"/> percentil entre 10 y 90<br><input type="radio"/> percentil mayor de 90 |
| Exfumadora                                 | <input checked="" type="radio"/> Nada<br><input type="radio"/> menos de 5 años<br><input type="radio"/> 5 a 10 años<br><input type="radio"/> mayor o igual a 10 años                 |
| Hábito tabáquico                           | <input type="radio"/> no<br><input checked="" type="radio"/> si                                                                                                                      |
| fumadora                                   | [*DATA REMOVED*]                                                                                                                                                                     |
| Consumo otros tóxicos                      | <input checked="" type="radio"/> no<br><input type="radio"/> si                                                                                                                      |
| Hb 1T                                      | [*DATA REMOVED*]                                                                                                                                                                     |
| Htc 1T                                     | [*DATA REMOVED*]                                                                                                                                                                     |
| Hb 2T                                      | [*DATA REMOVED*]                                                                                                                                                                     |
| HTC 2T                                     | [*DATA REMOVED*]                                                                                                                                                                     |
| Hb 3T                                      | [*DATA REMOVED*]                                                                                                                                                                     |
| HTC 3T                                     | [*DATA REMOVED*]                                                                                                                                                                     |
| Suplemento FE oral                         | <input type="radio"/> si<br><input checked="" type="radio"/> no                                                                                                                      |
| Suplemento fe iv                           | <input type="radio"/> si<br><input checked="" type="radio"/> no                                                                                                                      |
| Transfusión                                | <input checked="" type="radio"/> no<br><input type="radio"/> si                                                                                                                      |
| Solicitada Vit D                           | <input type="radio"/> no<br><input checked="" type="radio"/> si                                                                                                                      |
| Deficit vit D                              | <input type="radio"/> no<br><input checked="" type="radio"/> si                                                                                                                      |
| Suplemento vit D                           | <input checked="" type="radio"/> si<br><input type="radio"/> no                                                                                                                      |

|                       |                                                                                                                                                                                                                                                                                                                                                                                                              |
|-----------------------|--------------------------------------------------------------------------------------------------------------------------------------------------------------------------------------------------------------------------------------------------------------------------------------------------------------------------------------------------------------------------------------------------------------|
| Dieta, cuestionario   | <input checked="" type="radio"/> sí<br><input type="radio"/> no                                                                                                                                                                                                                                                                                                                                              |
| Leche entera          | <input type="radio"/> Nunca o menos 1 vez al mes<br><input type="radio"/> 1 a 3 veces mes<br><input type="radio"/> 1 vez semana<br><input type="radio"/> 2 a 4 veces semana<br><input type="radio"/> 5 a 6 veces semana<br><input type="radio"/> 1 vez al día<br><input type="radio"/> 2 a 3 veces al día<br><input type="radio"/> 5 a 6 veces al día<br><input type="radio"/> más 6 veces al día            |
| Leche semidesnatada   | <input type="radio"/> Nunca o menos 1 vez al mes<br><input type="radio"/> 1 a 3 veces mes<br><input type="radio"/> 1 vez semana<br><input type="radio"/> 2 a 4 veces semana<br><input type="radio"/> 5 a 6 veces semana<br><input type="radio"/> 1 vez al día<br><input checked="" type="radio"/> 2 a 3 veces al día<br><input type="radio"/> 5 a 6 veces al día<br><input type="radio"/> mas 6 veces al día |
| Leche desnatada       | <input type="radio"/> Nunca o menos 1 vez al mes<br><input type="radio"/> 1 a 3 veces mes<br><input type="radio"/> 1 vez semana<br><input type="radio"/> 2 a 4 veces semana<br><input type="radio"/> 5 a 6 veces semana<br><input type="radio"/> 1 vez al día<br><input type="radio"/> 2 a 3 veces al día<br><input type="radio"/> 5 a 6 veces al día<br><input type="radio"/> más 6 veces al día            |
| Leche condensada      | <input type="radio"/> Nunca o menos 1 vez al mes<br><input type="radio"/> 1 a 3 veces mes<br><input type="radio"/> 1 vez semana<br><input type="radio"/> 2 a 4 veces semana<br><input type="radio"/> 5 a 6 veces semana<br><input type="radio"/> 1 vez al día<br><input type="radio"/> 2 a 3 veces al día<br><input type="radio"/> 5 a 6 veces al día<br><input type="radio"/> más 6 veces al día            |
| nata o crema de leche | <input type="radio"/> Nunca o menos 1 vez al mes<br><input type="radio"/> 1 a 3 veces mes<br><input type="radio"/> 1 vez semana<br><input type="radio"/> 2 a 4 veces semana<br><input type="radio"/> 5 a 6 veces semana<br><input type="radio"/> 1 vez al día<br><input type="radio"/> 2 a 3 veces al día<br><input type="radio"/> 5 a 6 veces al día<br><input type="radio"/> más 6 veces al día            |

|                                             |                                                                                                                                                                                                                                                                                                                                                                                                              |
|---------------------------------------------|--------------------------------------------------------------------------------------------------------------------------------------------------------------------------------------------------------------------------------------------------------------------------------------------------------------------------------------------------------------------------------------------------------------|
| Yogurt Entero                               | <input type="radio"/> Nunca o menos 1 vez al mes<br><input type="radio"/> 1 a 3 veces mes<br><input type="radio"/> 1 vez semana<br><input checked="" type="radio"/> 2 a 4 veces semana<br><input type="radio"/> 5 a 6 veces semana<br><input type="radio"/> 1 vez al día<br><input type="radio"/> 2 a 3 veces al día<br><input type="radio"/> 5 a 6 veces al día<br><input type="radio"/> más 6 veces al día |
| Yogurt desnatado                            | <input type="radio"/> Nunca o menos 1 vez al mes<br><input type="radio"/> 1 a 3 veces mes<br><input type="radio"/> 1 vez semana<br><input type="radio"/> 2 a 4 veces semana<br><input type="radio"/> 5 a 6 veces semana<br><input type="radio"/> 1 vez al día<br><input type="radio"/> 2 a 3 veces al día<br><input type="radio"/> 5 a 6 veces al día<br><input type="radio"/> más 6 veces al día            |
| 100g requesón o queso blando o queso fresco | <input type="radio"/> Nunca o menos 1 vez al mes<br><input type="radio"/> 1 a 3 veces mes<br><input type="radio"/> 1 vez semana<br><input type="radio"/> 2 a 4 veces semana<br><input type="radio"/> 5 a 6 veces semana<br><input type="radio"/> 1 vez al día<br><input type="radio"/> 2 a 3 veces al día<br><input type="radio"/> 5 a 6 veces al día<br><input type="radio"/> más 6 veces al día            |
| queso curado o semicurado o cremoso         | <input type="radio"/> Nunca o menos 1 vez al mes<br><input type="radio"/> 1 a 3 veces mes<br><input type="radio"/> 1 vez semana<br><input checked="" type="radio"/> 2 a 4 veces semana<br><input type="radio"/> 5 a 6 veces semana<br><input type="radio"/> 1 vez al día<br><input type="radio"/> 2 a 3 veces al día<br><input type="radio"/> 5 a 6 veces al día<br><input type="radio"/> más 6 veces al día |
| natillas flan pudding                       | <input type="radio"/> Nunca o menos 1 vez al mes<br><input type="radio"/> 1 a 3 veces mes<br><input type="radio"/> 1 vez semana<br><input type="radio"/> 2 a 4 veces semana<br><input type="radio"/> 5 a 6 veces semana<br><input type="radio"/> 1 vez al día<br><input type="radio"/> 2 a 3 veces al día<br><input type="radio"/> 5 a 6 veces al día<br><input type="radio"/> más 6 veces al día            |
| Helado                                      | <input type="radio"/> Nunca o menos 1 vez al mes<br><input type="radio"/> 1 a 3 veces mes<br><input type="radio"/> 1 vez semana<br><input type="radio"/> 2 a 4 veces semana<br><input type="radio"/> 5 a 6 veces semana<br><input checked="" type="radio"/> 1 vez al día<br><input type="radio"/> 2 a 3 veces al día<br><input type="radio"/> 5 a 6 veces al día<br><input type="radio"/> más 6 veces al día |

|                                      |                                                                                                                                                                                                                                                                                                                                                                                                              |
|--------------------------------------|--------------------------------------------------------------------------------------------------------------------------------------------------------------------------------------------------------------------------------------------------------------------------------------------------------------------------------------------------------------------------------------------------------------|
| huevo                                | <input type="radio"/> Nunca o menos 1 vez al mes<br><input type="radio"/> 1 a 3 veces mes<br><input type="radio"/> 1 vez semana<br><input checked="" type="radio"/> 2 a 4 veces semana<br><input type="radio"/> 5 a 6 veces semana<br><input type="radio"/> 1 vez al día<br><input type="radio"/> 2 a 3 veces al día<br><input type="radio"/> 5 a 6 veces al día<br><input type="radio"/> más 6 veces al día |
| Pollo con piel                       | <input type="radio"/> Nunca o menos 1 vez al mes<br><input type="radio"/> 1 a 3 veces mes<br><input type="radio"/> 1 vez semana<br><input type="radio"/> 2 a 4 veces semana<br><input type="radio"/> 5 a 6 veces semana<br><input type="radio"/> 1 vez al día<br><input type="radio"/> 2 a 3 veces al día<br><input type="radio"/> 5 a 6 veces al día<br><input type="radio"/> más 6 veces al día            |
| pollo sin piel                       | <input type="radio"/> Nunca o menos 1 vez al mes<br><input type="radio"/> 1 a 3 veces mes<br><input checked="" type="radio"/> 1 vez semana<br><input type="radio"/> 2 a 4 veces semana<br><input type="radio"/> 5 a 6 veces semana<br><input type="radio"/> 1 vez al día<br><input type="radio"/> 2 a 3 veces al día<br><input type="radio"/> 5 a 6 veces al día<br><input type="radio"/> más 6 veces al día |
| Ternera o cerdo o cordero            | <input type="radio"/> Nunca o menos 1 vez al mes<br><input type="radio"/> 1 a 3 veces mes<br><input checked="" type="radio"/> 1 vez semana<br><input type="radio"/> 2 a 4 veces semana<br><input type="radio"/> 5 a 6 veces semana<br><input type="radio"/> 1 vez al día<br><input type="radio"/> 2 a 3 veces al día<br><input type="radio"/> 5 a 6 veces al día<br><input type="radio"/> más 6 veces al día |
| carne caza: Conejo o codorniz o pato | <input type="radio"/> Nunca o menos 1 vez al mes<br><input checked="" type="radio"/> 1 a 3 veces mes<br><input type="radio"/> 1 vez semana<br><input type="radio"/> 2 a 4 veces semana<br><input type="radio"/> 5 a 6 veces semana<br><input type="radio"/> 1 vez al día<br><input type="radio"/> 2 a 3 veces al día<br><input type="radio"/> 5 a 6 veces al día<br><input type="radio"/> más 6 veces al día |
| Hígado de ternera o cerdo o pollo    | <input type="radio"/> Nunca o menos 1 vez al mes<br><input type="radio"/> 1 a 3 veces mes<br><input checked="" type="radio"/> 1 vez semana<br><input type="radio"/> 2 a 4 veces semana<br><input type="radio"/> 5 a 6 veces semana<br><input type="radio"/> 1 vez al día<br><input type="radio"/> 2 a 3 veces al día<br><input type="radio"/> 5 a 6 veces al día<br><input type="radio"/> más 6 veces al día |

|                     |                                                                                                                                                                                                                                                                                                                                                                                                              |
|---------------------|--------------------------------------------------------------------------------------------------------------------------------------------------------------------------------------------------------------------------------------------------------------------------------------------------------------------------------------------------------------------------------------------------------------|
| Vísceras            | <input type="radio"/> Nunca o menos 1 vez al mes<br><input type="radio"/> 1 a 3 veces mes<br><input type="radio"/> 1 vez semana<br><input type="radio"/> 2 a 4 veces semana<br><input type="radio"/> 5 a 6 veces semana<br><input type="radio"/> 1 vez al día<br><input type="radio"/> 2 a 3 veces al día<br><input type="radio"/> 5 a 6 veces al día<br><input type="radio"/> más 6 veces al día            |
| Embutido            | <input checked="" type="radio"/> Nunca o menos 1 vez al mes<br><input type="radio"/> 1 a 3 veces mes<br><input type="radio"/> 1 vez semana<br><input type="radio"/> 2 a 4 veces semana<br><input type="radio"/> 5 a 6 veces semana<br><input type="radio"/> 1 vez al día<br><input type="radio"/> 2 a 3 veces al día<br><input type="radio"/> 5 a 6 veces al día<br><input type="radio"/> más 6 veces al día |
| Salchicha o similar | <input checked="" type="radio"/> Nunca o menos 1 vez al mes<br><input type="radio"/> 1 a 3 veces mes<br><input type="radio"/> 1 vez semana<br><input type="radio"/> 2 a 4 veces semana<br><input type="radio"/> 5 a 6 veces semana<br><input type="radio"/> 1 vez al día<br><input type="radio"/> 2 a 3 veces al día<br><input type="radio"/> 5 a 6 veces al día<br><input type="radio"/> más 6 veces al día |
| Pate o foiegras     | <input type="radio"/> Nunca o menos 1 vez al mes<br><input checked="" type="radio"/> 1 a 3 veces mes<br><input type="radio"/> 1 vez semana<br><input type="radio"/> 2 a 4 veces semana<br><input type="radio"/> 5 a 6 veces semana<br><input type="radio"/> 1 vez al día<br><input type="radio"/> 2 a 3 veces al día<br><input type="radio"/> 5 a 6 veces al día<br><input type="radio"/> más 6 veces al día |
| Hamburguesa         | <input type="radio"/> Nunca o menos 1 vez al mes<br><input type="radio"/> 1 a 3 veces mes<br><input checked="" type="radio"/> 1 vez semana<br><input type="radio"/> 2 a 4 veces semana<br><input type="radio"/> 5 a 6 veces semana<br><input type="radio"/> 1 vez al día<br><input type="radio"/> 2 a 3 veces al día<br><input type="radio"/> 5 a 6 veces al día<br><input type="radio"/> más 6 veces al día |
| tocino o bacon      | <input type="radio"/> Nunca o menos 1 vez al mes<br><input type="radio"/> 1 a 3 veces mes<br><input checked="" type="radio"/> 1 vez semana<br><input type="radio"/> 2 a 4 veces semana<br><input type="radio"/> 5 a 6 veces semana<br><input type="radio"/> 1 vez al día<br><input type="radio"/> 2 a 3 veces al día<br><input type="radio"/> 5 a 6 veces al día<br><input type="radio"/> más 6 veces al día |



---

Pescado frito

- ☐ Nunca o menos 1 vez al mes
- ☐ 1 a 3 veces mes
- ☒ 1 vez semana
- ☐ 2 a 4 veces semana
- ☐ 5 a 6 veces semana
- ☐ 1 vez al día
- ☐ 2 a 3 veces al día
- ☐ 5 a 6 veces al día
- ☐ más 6 veces al día

---

pescado hervido blanco

- ☐ Nunca o menos 1 vez al mes
- ☒ 1 a 3 veces mes
- ☐ 1 vez semana
- ☐ 2 a 4 veces semana
- ☐ 5 a 6 veces semana
- ☐ 1 vez al día
- ☐ 2 a 3 veces al día
- ☐ 5 a 6 veces al día
- ☐ más 6 veces al día

---

pescado hervido azul

- ☐ Nunca o menos 1 vez al mes
- ☐ 1 a 3 veces mes
- ☒ 1 vez semana
- ☐ 2 a 4 veces semana
- ☐ 5 a 6 veces semana
- ☐ 1 vez al día
- ☐ 2 a 3 veces al día
- ☐ 5 a 6 veces al día
- ☐ más 6 veces al día

---

otros pescado azul

- ☐ Nunca o menos 1 vez al mes
- ☐ 1 a 3 veces mes
- ☒ 1 vez semana
- ☐ 2 a 4 veces semana
- ☐ 5 a 6 veces semana
- ☐ 1 vez al día
- ☐ 2 a 3 veces al día
- ☐ 5 a 6 veces al día
- ☐ más 6 veces al día

---

atun conserva

- ☐ Nunca o menos 1 vez al mes
- ☐ 1 a 3 veces mes
- ☐ 1 vez semana
- ☐ 2 a 4 veces semana
- ☒ 5 a 6 veces semana
- ☐ 1 vez al día
- ☐ 2 a 3 veces al día
- ☐ 5 a 6 veces al día
- ☐ más 6 veces al día

---

sardina conserva

- ☐ Nunca o menos 1 vez al mes
- ☐ 1 a 3 veces mes
- ☐ 1 vez semana
- ☐ 2 a 4 veces semana
- ☐ 5 a 6 veces semana
- ☐ 1 vez al día
- ☐ 2 a 3 veces al día
- ☐ 5 a 6 veces al día
- ☐ más 6 veces al día

|                                         |                                                                                                                                                                                                                                                                                                                                                                                                              |
|-----------------------------------------|--------------------------------------------------------------------------------------------------------------------------------------------------------------------------------------------------------------------------------------------------------------------------------------------------------------------------------------------------------------------------------------------------------------|
| pescado ahumado                         | <input type="radio"/> Nunca o menos 1 vez al mes<br><input type="radio"/> 1 a 3 veces mes<br><input type="radio"/> 1 vez semana<br><input type="radio"/> 2 a 4 veces semana<br><input type="radio"/> 5 a 6 veces semana<br><input type="radio"/> 1 vez al día<br><input type="radio"/> 2 a 3 veces al día<br><input type="radio"/> 5 a 6 veces al día<br><input type="radio"/> más 6 veces al día            |
| almejas o mejillones o ostras unos 100g | <input type="radio"/> Nunca o menos 1 vez al mes<br><input type="radio"/> 1 a 3 veces mes<br><input checked="" type="radio"/> 1 vez semana<br><input type="radio"/> 2 a 4 veces semana<br><input type="radio"/> 5 a 6 veces semana<br><input type="radio"/> 1 vez al día<br><input type="radio"/> 2 a 3 veces al día<br><input type="radio"/> 5 a 6 veces al día<br><input type="radio"/> más 6 veces al día |
| calamar o chipiron o sepia unos 100g    | <input type="radio"/> Nunca o menos 1 vez al mes<br><input checked="" type="radio"/> 1 a 3 veces mes<br><input type="radio"/> 1 vez semana<br><input type="radio"/> 2 a 4 veces semana<br><input type="radio"/> 5 a 6 veces semana<br><input type="radio"/> 1 vez al día<br><input type="radio"/> 2 a 3 veces al día<br><input type="radio"/> 5 a 6 veces al día<br><input type="radio"/> más 6 veces al día |
| marisco unos 100g                       | <input type="radio"/> Nunca o menos 1 vez al mes<br><input checked="" type="radio"/> 1 a 3 veces mes<br><input type="radio"/> 1 vez semana<br><input type="radio"/> 2 a 4 veces semana<br><input type="radio"/> 5 a 6 veces semana<br><input type="radio"/> 1 vez al día<br><input type="radio"/> 2 a 3 veces al día<br><input type="radio"/> 5 a 6 veces al día<br><input type="radio"/> más 6 veces al día |
| Espinacas o acelgas cocinadas           | <input checked="" type="radio"/> Nunca o menos 1 vez al mes<br><input type="radio"/> 1 a 3 veces mes<br><input type="radio"/> 1 vez semana<br><input type="radio"/> 2 a 4 veces semana<br><input type="radio"/> 5 a 6 veces semana<br><input type="radio"/> 1 vez al día<br><input type="radio"/> 2 a 3 veces al día<br><input type="radio"/> 5 a 6 veces al día<br><input type="radio"/> más 6 veces al día |
| Col o coliflor o brocoli cocinado       | <input type="radio"/> Nunca o menos 1 vez al mes<br><input checked="" type="radio"/> 1 a 3 veces mes<br><input type="radio"/> 1 vez semana<br><input type="radio"/> 2 a 4 veces semana<br><input type="radio"/> 5 a 6 veces semana<br><input type="radio"/> 1 vez al día<br><input type="radio"/> 2 a 3 veces al día<br><input type="radio"/> 5 a 6 veces al día<br><input type="radio"/> más 6 veces al día |

---

Lechuga o endivia o escarola

- ☐ Nunca o menos 1 vez al mes  
☐ 1 a 3 veces mes  
☐ 1 vez semana  
☐ 2 a 4 veces semana  
☒ 5 a 6 veces semana  
☐ 1 vez al día  
☐ 2 a 3 veces al día  
☐ 5 a 6 veces al día  
☐ más 6 veces al día

---

tomate ensalada

- ☐ Nunca o menos 1 vez al mes  
☐ 1 a 3 veces mes  
☐ 1 vez semana  
☐ 2 a 4 veces semana  
☒ 5 a 6 veces semana  
☐ 1 vez al día  
☐ 2 a 3 veces al día  
☐ 5 a 6 veces al día  
☐ más 6 veces al día

---

cebolla

- ☐ Nunca o menos 1 vez al mes  
☐ 1 a 3 veces mes  
☐ 1 vez semana  
☐ 2 a 4 veces semana  
☒ 5 a 6 veces semana  
☐ 1 vez al día  
☐ 2 a 3 veces al día  
☐ 5 a 6 veces al día  
☐ más 6 veces al día

---

Zanahoria o calabaza

- ☐ Nunca o menos 1 vez al mes  
☒ 1 a 3 veces mes  
☐ 1 vez semana  
☐ 2 a 4 veces semana  
☐ 5 a 6 veces semana  
☐ 1 vez al día  
☐ 2 a 3 veces al día  
☐ 5 a 6 veces al día  
☐ más 6 veces al día

---

Judías verdes

- ☐ Nunca o menos 1 vez al mes  
☐ 1 a 3 veces mes  
☒ 1 vez semana  
☐ 2 a 4 veces semana  
☐ 5 a 6 veces semana  
☐ 1 vez al día  
☐ 2 a 3 veces al día  
☐ 5 a 6 veces al día  
☐ más 6 veces al día

---

Berenjena o calabacin o pepino

- ☐ Nunca o menos 1 vez al mes  
☐ 1 a 3 veces mes  
☐ 1 vez semana  
☐ 2 a 4 veces semana  
☒ 5 a 6 veces semana  
☐ 1 vez al día  
☐ 2 a 3 veces al día  
☐ 5 a 6 veces al día  
☐ más 6 veces al día

---

|          |                                                                                                                                                                                                                                                                                                                                                                                                              |
|----------|--------------------------------------------------------------------------------------------------------------------------------------------------------------------------------------------------------------------------------------------------------------------------------------------------------------------------------------------------------------------------------------------------------------|
| pimiento | <input type="radio"/> Nunca o menos 1 vez al mes<br><input type="radio"/> 1 a 3 veces mes<br><input type="radio"/> 1 vez semana<br><input checked="" type="radio"/> 2 a 4 veces semana<br><input type="radio"/> 5 a 6 veces semana<br><input type="radio"/> 1 vez al día<br><input type="radio"/> 2 a 3 veces al día<br><input type="radio"/> 5 a 6 veces al día<br><input type="radio"/> más 6 veces al día |
|----------|--------------------------------------------------------------------------------------------------------------------------------------------------------------------------------------------------------------------------------------------------------------------------------------------------------------------------------------------------------------------------------------------------------------|

---

|           |                                                                                                                                                                                                                                                                                                                                                                                                              |
|-----------|--------------------------------------------------------------------------------------------------------------------------------------------------------------------------------------------------------------------------------------------------------------------------------------------------------------------------------------------------------------------------------------------------------------|
| alcachofa | <input type="radio"/> Nunca o menos 1 vez al mes<br><input checked="" type="radio"/> 1 a 3 veces mes<br><input type="radio"/> 1 vez semana<br><input type="radio"/> 2 a 4 veces semana<br><input type="radio"/> 5 a 6 veces semana<br><input type="radio"/> 1 vez al día<br><input type="radio"/> 2 a 3 veces al día<br><input type="radio"/> 5 a 6 veces al día<br><input type="radio"/> más 6 veces al día |
|-----------|--------------------------------------------------------------------------------------------------------------------------------------------------------------------------------------------------------------------------------------------------------------------------------------------------------------------------------------------------------------------------------------------------------------|

---

|            |                                                                                                                                                                                                                                                                                                                                                                                                   |
|------------|---------------------------------------------------------------------------------------------------------------------------------------------------------------------------------------------------------------------------------------------------------------------------------------------------------------------------------------------------------------------------------------------------|
| espárragos | <input type="radio"/> Nunca o menos 1 vez al mes<br><input type="radio"/> 1 a 3 veces mes<br><input type="radio"/> 1 vez semana<br><input type="radio"/> 2 a 4 veces semana<br><input type="radio"/> 5 a 6 veces semana<br><input type="radio"/> 1 vez al día<br><input type="radio"/> 2 a 3 veces al día<br><input type="radio"/> 5 a 6 veces al día<br><input type="radio"/> más 6 veces al día |
|------------|---------------------------------------------------------------------------------------------------------------------------------------------------------------------------------------------------------------------------------------------------------------------------------------------------------------------------------------------------------------------------------------------------|

---

|              |                                                                                                                                                                                                                                                                                                                                                                                                              |
|--------------|--------------------------------------------------------------------------------------------------------------------------------------------------------------------------------------------------------------------------------------------------------------------------------------------------------------------------------------------------------------------------------------------------------------|
| maíz hervido | <input type="radio"/> Nunca o menos 1 vez al mes<br><input type="radio"/> 1 a 3 veces mes<br><input type="radio"/> 1 vez semana<br><input type="radio"/> 2 a 4 veces semana<br><input checked="" type="radio"/> 5 a 6 veces semana<br><input type="radio"/> 1 vez al día<br><input type="radio"/> 2 a 3 veces al día<br><input type="radio"/> 5 a 6 veces al día<br><input type="radio"/> más 6 veces al día |
|--------------|--------------------------------------------------------------------------------------------------------------------------------------------------------------------------------------------------------------------------------------------------------------------------------------------------------------------------------------------------------------------------------------------------------------|

---

|           |                                                                                                                                                                                                                                                                                                                                                                                                              |
|-----------|--------------------------------------------------------------------------------------------------------------------------------------------------------------------------------------------------------------------------------------------------------------------------------------------------------------------------------------------------------------------------------------------------------------|
| legumbres | <input type="radio"/> Nunca o menos 1 vez al mes<br><input type="radio"/> 1 a 3 veces mes<br><input checked="" type="radio"/> 1 vez semana<br><input type="radio"/> 2 a 4 veces semana<br><input type="radio"/> 5 a 6 veces semana<br><input type="radio"/> 1 vez al día<br><input type="radio"/> 2 a 3 veces al día<br><input type="radio"/> 5 a 6 veces al día<br><input type="radio"/> más 6 veces al día |
|-----------|--------------------------------------------------------------------------------------------------------------------------------------------------------------------------------------------------------------------------------------------------------------------------------------------------------------------------------------------------------------------------------------------------------------|

---

|                       |                                                                                                                                                                                                                                                                                                                                                                                                              |
|-----------------------|--------------------------------------------------------------------------------------------------------------------------------------------------------------------------------------------------------------------------------------------------------------------------------------------------------------------------------------------------------------------------------------------------------------|
| naranjas o mandarinas | <input checked="" type="radio"/> Nunca o menos 1 vez al mes<br><input type="radio"/> 1 a 3 veces mes<br><input type="radio"/> 1 vez semana<br><input type="radio"/> 2 a 4 veces semana<br><input type="radio"/> 5 a 6 veces semana<br><input type="radio"/> 1 vez al día<br><input type="radio"/> 2 a 3 veces al día<br><input type="radio"/> 5 a 6 veces al día<br><input type="radio"/> más 6 veces al día |
|-----------------------|--------------------------------------------------------------------------------------------------------------------------------------------------------------------------------------------------------------------------------------------------------------------------------------------------------------------------------------------------------------------------------------------------------------|

---

---

zum natural fruta

- ☒ Nunca o menos 1 vez al mes  
☐ 1 a 3 veces mes  
☐ 1 vez semana  
☐ 2 a 4 veces semana  
☐ 5 a 6 veces semana  
☐ 1 vez al día  
☐ 2 a 3 veces al día  
☐ 5 a 6 veces al día  
☐ más 6 veces al día

---

platano

- ☒ Nunca o menos 1 vez al mes  
☐ 1 a 3 veces mes  
☐ 1 vez semana  
☐ 2 a 4 veces semana  
☐ 5 a 6 veces semana  
☐ 1 vez al día  
☐ 2 a 3 veces al día  
☐ 5 a 6 veces al día  
☐ más 6 veces al día

---

manzana o pera

- ☒ Nunca o menos 1 vez al mes  
☐ 1 a 3 veces mes  
☐ 1 vez semana  
☐ 2 a 4 veces semana  
☐ 5 a 6 veces semana  
☐ 1 vez al día  
☐ 2 a 3 veces al día  
☐ 5 a 6 veces al día  
☐ más 6 veces al día

---

melocotón o nectarina

- ☐ Nunca o menos 1 vez al mes  
☐ 1 a 3 veces mes  
☐ 1 vez semana  
☒ 2 a 4 veces semana  
☐ 5 a 6 veces semana  
☐ 1 vez al día  
☐ 2 a 3 veces al día  
☐ 5 a 6 veces al día  
☐ más 6 veces al día

---

sandia o melon

- ☐ Nunca o menos 1 vez al mes  
☐ 1 a 3 veces mes  
☐ 1 vez semana  
☒ 2 a 4 veces semana  
☐ 5 a 6 veces semana  
☐ 1 vez al día  
☐ 2 a 3 veces al día  
☐ 5 a 6 veces al día  
☐ más 6 veces al día

---

uva

- ☒ Nunca o menos 1 vez al mes  
☐ 1 a 3 veces mes  
☐ 1 vez semana  
☐ 2 a 4 veces semana  
☐ 5 a 6 veces semana  
☐ 1 vez al día  
☐ 2 a 3 veces al día  
☐ 5 a 6 veces al día  
☐ más 6 veces al día

|                 |                                                                                                                                                                                                                                                                                                                                                                                                              |
|-----------------|--------------------------------------------------------------------------------------------------------------------------------------------------------------------------------------------------------------------------------------------------------------------------------------------------------------------------------------------------------------------------------------------------------------|
| bruna o ciruela | <input checked="" type="radio"/> Nunca o menos 1 vez al mes<br><input type="radio"/> 1 a 3 veces mes<br><input type="radio"/> 1 vez semana<br><input type="radio"/> 2 a 4 veces semana<br><input type="radio"/> 5 a 6 veces semana<br><input type="radio"/> 1 vez al día<br><input type="radio"/> 2 a 3 veces al día<br><input type="radio"/> 5 a 6 veces al día<br><input type="radio"/> más 6 veces al día |
| kiwi            | <input type="radio"/> Nunca o menos 1 vez al mes<br><input checked="" type="radio"/> 1 a 3 veces mes<br><input type="radio"/> 1 vez semana<br><input type="radio"/> 2 a 4 veces semana<br><input type="radio"/> 5 a 6 veces semana<br><input type="radio"/> 1 vez al día<br><input type="radio"/> 2 a 3 veces al día<br><input type="radio"/> 5 a 6 veces al día<br><input type="radio"/> más 6 veces al día |
| aceituna        | <input type="radio"/> Nunca o menos 1 vez al mes<br><input type="radio"/> 1 a 3 veces mes<br><input type="radio"/> 1 vez semana<br><input checked="" type="radio"/> 2 a 4 veces semana<br><input type="radio"/> 5 a 6 veces semana<br><input type="radio"/> 1 vez al día<br><input type="radio"/> 2 a 3 veces al día<br><input type="radio"/> 5 a 6 veces al día<br><input type="radio"/> más 6 veces al día |
| frutos secos    | <input type="radio"/> Nunca o menos 1 vez al mes<br><input type="radio"/> 1 a 3 veces mes<br><input type="radio"/> 1 vez semana<br><input checked="" type="radio"/> 2 a 4 veces semana<br><input type="radio"/> 5 a 6 veces semana<br><input type="radio"/> 1 vez al día<br><input type="radio"/> 2 a 3 veces al día<br><input type="radio"/> 5 a 6 veces al día<br><input type="radio"/> más 6 veces al día |
| pan blanco      | <input type="radio"/> Nunca o menos 1 vez al mes<br><input type="radio"/> 1 a 3 veces mes<br><input type="radio"/> 1 vez semana<br><input checked="" type="radio"/> 2 a 4 veces semana<br><input type="radio"/> 5 a 6 veces semana<br><input type="radio"/> 1 vez al día<br><input type="radio"/> 2 a 3 veces al día<br><input type="radio"/> 5 a 6 veces al día<br><input type="radio"/> más 6 veces al día |
| pan integral    | <input type="radio"/> Nunca o menos 1 vez al mes<br><input type="radio"/> 1 a 3 veces mes<br><input checked="" type="radio"/> 1 vez semana<br><input type="radio"/> 2 a 4 veces semana<br><input type="radio"/> 5 a 6 veces semana<br><input type="radio"/> 1 vez al día<br><input type="radio"/> 2 a 3 veces al día<br><input type="radio"/> 5 a 6 veces al día<br><input type="radio"/> más 6 veces al día |

---

cereales desayuno

- ☒ Nunca o menos 1 vez al mes  
☐ 1 a 3 veces mes  
☐ 1 vez semana  
☐ 2 a 4 veces semana  
☐ 5 a 6 veces semana  
☐ 1 vez al día  
☐ 2 a 3 veces al día  
☐ 5 a 6 veces al día  
☐ más 6 veces al día

---

patatas fritas

- ☐ Nunca o menos 1 vez al mes  
☒ 1 a 3 veces mes  
☐ 1 vez semana  
☐ 2 a 4 veces semana  
☐ 5 a 6 veces semana  
☐ 1 vez al día  
☐ 2 a 3 veces al día  
☐ 5 a 6 veces al día  
☐ más 6 veces al día

---

patatas cocidas o asadas

- ☐ Nunca o menos 1 vez al mes  
☐ 1 a 3 veces mes  
☒ 1 vez semana  
☐ 2 a 4 veces semana  
☐ 5 a 6 veces semana  
☐ 1 vez al día  
☐ 2 a 3 veces al día  
☐ 5 a 6 veces al día  
☐ más 6 veces al día

---

bolsa papas

- ☐ Nunca o menos 1 vez al mes  
☒ 1 a 3 veces mes  
☐ 1 vez semana  
☐ 2 a 4 veces semana  
☐ 5 a 6 veces semana  
☐ 1 vez al día  
☐ 2 a 3 veces al día  
☐ 5 a 6 veces al día  
☐ más 6 veces al día

---

arroz cocinado

- ☐ Nunca o menos 1 vez al mes  
☐ 1 a 3 veces mes  
☒ 1 vez semana  
☐ 2 a 4 veces semana  
☐ 5 a 6 veces semana  
☐ 1 vez al día  
☐ 2 a 3 veces al día  
☐ 5 a 6 veces al día  
☐ más 6 veces al día

---

pasta

- ☐ Nunca o menos 1 vez al mes  
☐ 1 a 3 veces mes  
☒ 1 vez semana  
☐ 2 a 4 veces semana  
☐ 5 a 6 veces semana  
☐ 1 vez al día  
☐ 2 a 3 veces al día  
☐ 5 a 6 veces al día  
☐ más 6 veces al día

|                     |                                                                                                                                                                                                                                                                                                                                                                                                              |
|---------------------|--------------------------------------------------------------------------------------------------------------------------------------------------------------------------------------------------------------------------------------------------------------------------------------------------------------------------------------------------------------------------------------------------------------|
| pizza               | <input type="radio"/> Nunca o menos 1 vez al mes<br><input type="radio"/> 1 a 3 veces mes<br><input checked="" type="radio"/> 1 vez semana<br><input type="radio"/> 2 a 4 veces semana<br><input type="radio"/> 5 a 6 veces semana<br><input type="radio"/> 1 vez al día<br><input type="radio"/> 2 a 3 veces al día<br><input type="radio"/> 5 a 6 veces al día<br><input type="radio"/> más 6 veces al día |
| aceite oliva        | <input type="radio"/> Nunca o menos 1 vez al mes<br><input type="radio"/> 1 a 3 veces mes<br><input type="radio"/> 1 vez semana<br><input type="radio"/> 2 a 4 veces semana<br><input checked="" type="radio"/> 5 a 6 veces semana<br><input type="radio"/> 1 vez al día<br><input type="radio"/> 2 a 3 veces al día<br><input type="radio"/> 5 a 6 veces al día<br><input type="radio"/> más 6 veces al día |
| otros aceites       | <input checked="" type="radio"/> Nunca o menos 1 vez al mes<br><input type="radio"/> 1 a 3 veces mes<br><input type="radio"/> 1 vez semana<br><input type="radio"/> 2 a 4 veces semana<br><input type="radio"/> 5 a 6 veces semana<br><input type="radio"/> 1 vez al día<br><input type="radio"/> 2 a 3 veces al día<br><input type="radio"/> 5 a 6 veces al día<br><input type="radio"/> más 6 veces al día |
| margarina           | <input type="radio"/> Nunca o menos 1 vez al mes<br><input type="radio"/> 1 a 3 veces mes<br><input type="radio"/> 1 vez semana<br><input checked="" type="radio"/> 2 a 4 veces semana<br><input type="radio"/> 5 a 6 veces semana<br><input type="radio"/> 1 vez al día<br><input type="radio"/> 2 a 3 veces al día<br><input type="radio"/> 5 a 6 veces al día<br><input type="radio"/> más 6 veces al día |
| mantequilla         | <input checked="" type="radio"/> Nunca o menos 1 vez al mes<br><input type="radio"/> 1 a 3 veces mes<br><input type="radio"/> 1 vez semana<br><input type="radio"/> 2 a 4 veces semana<br><input type="radio"/> 5 a 6 veces semana<br><input type="radio"/> 1 vez al día<br><input type="radio"/> 2 a 3 veces al día<br><input type="radio"/> 5 a 6 veces al día<br><input type="radio"/> más 6 veces al día |
| galletas tipo maria | <input type="radio"/> Nunca o menos 1 vez al mes<br><input type="radio"/> 1 a 3 veces mes<br><input type="radio"/> 1 vez semana<br><input type="radio"/> 2 a 4 veces semana<br><input checked="" type="radio"/> 5 a 6 veces semana<br><input type="radio"/> 1 vez al día<br><input type="radio"/> 2 a 3 veces al día<br><input type="radio"/> 5 a 6 veces al día<br><input type="radio"/> más 6 veces al día |



---

galletas chocolate

- ☐ Nunca o menos 1 vez al mes  
☐ 1 a 3 veces mes  
☒ 1 vez semana  
☐ 2 a 4 veces semana  
☐ 5 a 6 veces semana  
☐ 1 vez al día  
☐ 2 a 3 veces al día  
☐ 5 a 6 veces al día  
☐ más 6 veces al día

---

bolleria

- ☐ Nunca o menos 1 vez al mes  
☐ 1 a 3 veces mes  
☒ 1 vez semana  
☐ 2 a 4 veces semana  
☐ 5 a 6 veces semana  
☐ 1 vez al día  
☐ 2 a 3 veces al día  
☐ 5 a 6 veces al día  
☐ más 6 veces al día

---

chocolate o bombones

- ☒ Nunca o menos 1 vez al mes  
☐ 1 a 3 veces mes  
☐ 1 vez semana  
☐ 2 a 4 veces semana  
☐ 5 a 6 veces semana  
☐ 1 vez al día  
☐ 2 a 3 veces al día  
☐ 5 a 6 veces al día  
☐ más 6 veces al día

---

chocolate polvo o colacao

- ☒ Nunca o menos 1 vez al mes  
☐ 1 a 3 veces mes  
☐ 1 vez semana  
☐ 2 a 4 veces semana  
☐ 5 a 6 veces semana  
☐ 1 vez al día  
☐ 2 a 3 veces al día  
☐ 5 a 6 veces al día  
☐ más 6 veces al día

---

vino tinto

- ☐ Nunca o menos 1 vez al mes  
☐ 1 a 3 veces mes  
☐ 1 vez semana  
☐ 2 a 4 veces semana  
☐ 5 a 6 veces semana  
☐ 1 vez al día  
☐ 2 a 3 veces al día  
☐ 5 a 6 veces al día  
☐ más 6 veces al día

---

vino blanco

- ☐ Nunca o menos 1 vez al mes  
☐ 1 a 3 veces mes  
☐ 1 vez semana  
☐ 2 a 4 veces semana  
☐ 5 a 6 veces semana  
☐ 1 vez al día  
☐ 2 a 3 veces al día  
☐ 5 a 6 veces al día  
☐ más 6 veces al día

---

|                    |                                                                                                                                                                                                                                                                                                                                                                                                   |
|--------------------|---------------------------------------------------------------------------------------------------------------------------------------------------------------------------------------------------------------------------------------------------------------------------------------------------------------------------------------------------------------------------------------------------|
| vino seco o vermut | <input type="radio"/> Nunca o menos 1 vez al mes<br><input type="radio"/> 1 a 3 veces mes<br><input type="radio"/> 1 vez semana<br><input type="radio"/> 2 a 4 veces semana<br><input type="radio"/> 5 a 6 veces semana<br><input type="radio"/> 1 vez al día<br><input type="radio"/> 2 a 3 veces al día<br><input type="radio"/> 5 a 6 veces al día<br><input type="radio"/> más 6 veces al día |
|--------------------|---------------------------------------------------------------------------------------------------------------------------------------------------------------------------------------------------------------------------------------------------------------------------------------------------------------------------------------------------------------------------------------------------|

---

|         |                                                                                                                                                                                                                                                                                                                                                                                                   |
|---------|---------------------------------------------------------------------------------------------------------------------------------------------------------------------------------------------------------------------------------------------------------------------------------------------------------------------------------------------------------------------------------------------------|
| cerveza | <input type="radio"/> Nunca o menos 1 vez al mes<br><input type="radio"/> 1 a 3 veces mes<br><input type="radio"/> 1 vez semana<br><input type="radio"/> 2 a 4 veces semana<br><input type="radio"/> 5 a 6 veces semana<br><input type="radio"/> 1 vez al día<br><input type="radio"/> 2 a 3 veces al día<br><input type="radio"/> 5 a 6 veces al día<br><input type="radio"/> más 6 veces al día |
|---------|---------------------------------------------------------------------------------------------------------------------------------------------------------------------------------------------------------------------------------------------------------------------------------------------------------------------------------------------------------------------------------------------------|

---

|                     |                                                                                                                                                                                                                                                                                                                                                                                                              |
|---------------------|--------------------------------------------------------------------------------------------------------------------------------------------------------------------------------------------------------------------------------------------------------------------------------------------------------------------------------------------------------------------------------------------------------------|
| cerveza sin alcohol | <input type="radio"/> Nunca o menos 1 vez al mes<br><input type="radio"/> 1 a 3 veces mes<br><input checked="" type="radio"/> 1 vez semana<br><input type="radio"/> 2 a 4 veces semana<br><input type="radio"/> 5 a 6 veces semana<br><input type="radio"/> 1 vez al día<br><input type="radio"/> 2 a 3 veces al día<br><input type="radio"/> 5 a 6 veces al día<br><input type="radio"/> más 6 veces al día |
|---------------------|--------------------------------------------------------------------------------------------------------------------------------------------------------------------------------------------------------------------------------------------------------------------------------------------------------------------------------------------------------------------------------------------------------------|

---

|         |                                                                                                                                                                                                                                                                                                                                                                                                   |
|---------|---------------------------------------------------------------------------------------------------------------------------------------------------------------------------------------------------------------------------------------------------------------------------------------------------------------------------------------------------------------------------------------------------|
| licores | <input type="radio"/> Nunca o menos 1 vez al mes<br><input type="radio"/> 1 a 3 veces mes<br><input type="radio"/> 1 vez semana<br><input type="radio"/> 2 a 4 veces semana<br><input type="radio"/> 5 a 6 veces semana<br><input type="radio"/> 1 vez al día<br><input type="radio"/> 2 a 3 veces al día<br><input type="radio"/> 5 a 6 veces al día<br><input type="radio"/> más 6 veces al día |
|---------|---------------------------------------------------------------------------------------------------------------------------------------------------------------------------------------------------------------------------------------------------------------------------------------------------------------------------------------------------------------------------------------------------|

---

|                       |                                                                                                                                                                                                                                                                                                                                                                                                   |
|-----------------------|---------------------------------------------------------------------------------------------------------------------------------------------------------------------------------------------------------------------------------------------------------------------------------------------------------------------------------------------------------------------------------------------------|
| ginebra o ron o vodka | <input type="radio"/> Nunca o menos 1 vez al mes<br><input type="radio"/> 1 a 3 veces mes<br><input type="radio"/> 1 vez semana<br><input type="radio"/> 2 a 4 veces semana<br><input type="radio"/> 5 a 6 veces semana<br><input type="radio"/> 1 vez al día<br><input type="radio"/> 2 a 3 veces al día<br><input type="radio"/> 5 a 6 veces al día<br><input type="radio"/> más 6 veces al día |
|-----------------------|---------------------------------------------------------------------------------------------------------------------------------------------------------------------------------------------------------------------------------------------------------------------------------------------------------------------------------------------------------------------------------------------------|

---

|                 |                                                                                                                                                                                                                                                                                                                                                                                                              |
|-----------------|--------------------------------------------------------------------------------------------------------------------------------------------------------------------------------------------------------------------------------------------------------------------------------------------------------------------------------------------------------------------------------------------------------------|
| refresco normal | <input type="radio"/> Nunca o menos 1 vez al mes<br><input type="radio"/> 1 a 3 veces mes<br><input checked="" type="radio"/> 1 vez semana<br><input type="radio"/> 2 a 4 veces semana<br><input type="radio"/> 5 a 6 veces semana<br><input type="radio"/> 1 vez al día<br><input type="radio"/> 2 a 3 veces al día<br><input type="radio"/> 5 a 6 veces al día<br><input type="radio"/> más 6 veces al día |
|-----------------|--------------------------------------------------------------------------------------------------------------------------------------------------------------------------------------------------------------------------------------------------------------------------------------------------------------------------------------------------------------------------------------------------------------|

---

|                          |                                                                                                                                                                                                                                                                                                                                                                                                              |
|--------------------------|--------------------------------------------------------------------------------------------------------------------------------------------------------------------------------------------------------------------------------------------------------------------------------------------------------------------------------------------------------------------------------------------------------------|
| refresco sin azúcar      | <input type="radio"/> Nunca o menos 1 vez al mes<br><input type="radio"/> 1 a 3 veces mes<br><input type="radio"/> 1 vez semana<br><input type="radio"/> 2 a 4 veces semana<br><input type="radio"/> 5 a 6 veces semana<br><input type="radio"/> 1 vez al día<br><input type="radio"/> 2 a 3 veces al día<br><input type="radio"/> 5 a 6 veces al día<br><input type="radio"/> más 6 veces al día            |
| Agua del grifo           | <input type="radio"/> Nunca o menos 1 vez al mes<br><input type="radio"/> 1 a 3 veces mes<br><input type="radio"/> 1 vez semana<br><input type="radio"/> 2 a 4 veces semana<br><input type="radio"/> 5 a 6 veces semana<br><input type="radio"/> 1 vez al día<br><input type="radio"/> 2 a 3 veces al día<br><input type="radio"/> 5 a 6 veces al día<br><input type="radio"/> más 6 veces al día            |
| agua embotellada sin gas | <input type="radio"/> Nunca o menos 1 vez al mes<br><input type="radio"/> 1 a 3 veces mes<br><input type="radio"/> 1 vez semana<br><input type="radio"/> 2 a 4 veces semana<br><input type="radio"/> 5 a 6 veces semana<br><input type="radio"/> 1 vez al día<br><input type="radio"/> 2 a 3 veces al día<br><input checked="" type="radio"/> 5 a 6 veces al día<br><input type="radio"/> más 6 veces al día |
| agua embotellada con gas | <input type="radio"/> Nunca o menos 1 vez al mes<br><input type="radio"/> 1 a 3 veces mes<br><input type="radio"/> 1 vez semana<br><input type="radio"/> 2 a 4 veces semana<br><input type="radio"/> 5 a 6 veces semana<br><input type="radio"/> 1 vez al día<br><input type="radio"/> 2 a 3 veces al día<br><input type="radio"/> 5 a 6 veces al día<br><input type="radio"/> más 6 veces al día            |
| zumos frutas emvasado    | <input type="radio"/> Nunca o menos 1 vez al mes<br><input type="radio"/> 1 a 3 veces mes<br><input type="radio"/> 1 vez semana<br><input checked="" type="radio"/> 2 a 4 veces semana<br><input type="radio"/> 5 a 6 veces semana<br><input type="radio"/> 1 vez al día<br><input type="radio"/> 2 a 3 veces al día<br><input type="radio"/> 5 a 6 veces al día<br><input type="radio"/> más 6 veces al día |
| café                     | <input type="radio"/> Nunca o menos 1 vez al mes<br><input type="radio"/> 1 a 3 veces mes<br><input type="radio"/> 1 vez semana<br><input type="radio"/> 2 a 4 veces semana<br><input type="radio"/> 5 a 6 veces semana<br><input checked="" type="radio"/> 1 vez al día<br><input type="radio"/> 2 a 3 veces al día<br><input type="radio"/> 5 a 6 veces al día<br><input type="radio"/> más 6 veces al día |

---

cafe descafeinado

- ☐ Nunca o menos 1 vez al mes  
☐ 1 a 3 veces mes  
☐ 1 vez semana  
☐ 2 a 4 veces semana  
☐ 5 a 6 veces semana  
☐ 1 vez al día  
☐ 2 a 3 veces al día  
☐ 5 a 6 veces al día  
☐ más 6 veces al día

---

te o infusión

- ☐ Nunca o menos 1 vez al mes  
☐ 1 a 3 veces mes  
☐ 1 vez semana  
☐ 2 a 4 veces semana  
☐ 5 a 6 veces semana  
☐ 1 vez al día  
☐ 2 a 3 veces al día  
☐ 5 a 6 veces al día  
☐ más 6 veces al día

---

sopa o puré verduras

- ☐ Nunca o menos 1 vez al mes  
☐ 1 a 3 veces mes  
☒ 1 vez semana  
☐ 2 a 4 veces semana  
☐ 5 a 6 veces semana  
☐ 1 vez al día  
☐ 2 a 3 veces al día  
☐ 5 a 6 veces al día  
☐ más 6 veces al día

---

croquetas pollo jamón

- ☐ Nunca o menos 1 vez al mes  
☐ 1 a 3 veces mes  
☐ 1 vez semana  
☐ 2 a 4 veces semana  
☐ 5 a 6 veces semana  
☐ 1 vez al día  
☐ 2 a 3 veces al día  
☐ 5 a 6 veces al día  
☐ más 6 veces al día

---

croquetas pescado

- ☐ Nunca o menos 1 vez al mes  
☐ 1 a 3 veces mes  
☐ 1 vez semana  
☐ 2 a 4 veces semana  
☐ 5 a 6 veces semana  
☐ 1 vez al día  
☐ 2 a 3 veces al día  
☐ 5 a 6 veces al día  
☐ más 6 veces al día

---

mayonesa

- ☐ Nunca o menos 1 vez al mes  
☐ 1 a 3 veces mes  
☒ 1 vez semana  
☐ 2 a 4 veces semana  
☐ 5 a 6 veces semana  
☐ 1 vez al día  
☐ 2 a 3 veces al día  
☐ 5 a 6 veces al día  
☐ más 6 veces al día

---

salsa tomate

- ☐ Nunca o menos 1 vez al mes
- ☐ 1 a 3 veces mes
- ☐ 1 vez semana
- ☐ 2 a 4 veces semana
- ☐ 5 a 6 veces semana
- ☐ 1 vez al día
- ☐ 2 a 3 veces al día
- ☐ 5 a 6 veces al día
- ☐ más 6 veces al día

---

ketchup

- ☐ Nunca o menos 1 vez al mes
- ☐ 1 a 3 veces mes
- ☒ 1 vez semana
- ☐ 2 a 4 veces semana
- ☐ 5 a 6 veces semana
- ☐ 1 vez al día
- ☐ 2 a 3 veces al día
- ☐ 5 a 6 veces al día
- ☐ más 6 veces al día

---

sal

- ☐ Nunca o menos 1 vez al mes
- ☐ 1 a 3 veces mes
- ☐ 1 vez semana
- ☒ 2 a 4 veces semana
- ☐ 5 a 6 veces semana
- ☐ 1 vez al día
- ☐ 2 a 3 veces al día
- ☐ 5 a 6 veces al día
- ☐ más 6 veces al día

---

ajo

- ☐ Nunca o menos 1 vez al mes
- ☐ 1 a 3 veces mes
- ☐ 1 vez semana
- ☐ 2 a 4 veces semana
- ☐ 5 a 6 veces semana
- ☐ 1 vez al día
- ☐ 2 a 3 veces al día
- ☐ 5 a 6 veces al día
- ☐ más 6 veces al día

---

mermelada o miel

- ☐ Nunca o menos 1 vez al mes
- ☐ 1 a 3 veces mes
- ☐ 1 vez semana
- ☒ 2 a 4 veces semana
- ☐ 5 a 6 veces semana
- ☐ 1 vez al día
- ☐ 2 a 3 veces al día
- ☐ 5 a 6 veces al día
- ☐ más 6 veces al día

---

azúcar

- ☐ Nunca o menos 1 vez al mes
- ☐ 1 a 3 veces mes
- ☐ 1 vez semana
- ☐ 2 a 4 veces semana
- ☐ 5 a 6 veces semana
- ☒ 1 vez al día
- ☐ 2 a 3 veces al día
- ☐ 5 a 6 veces al día
- ☐ más 6 veces al día

|                                       |                                                                                                                                                                                                                                                                                                                                                                                                                                                                                                                               |
|---------------------------------------|-------------------------------------------------------------------------------------------------------------------------------------------------------------------------------------------------------------------------------------------------------------------------------------------------------------------------------------------------------------------------------------------------------------------------------------------------------------------------------------------------------------------------------|
| Otro alimento                         | <hr/>                                                                                                                                                                                                                                                                                                                                                                                                                                                                                                                         |
| suplementos vitamínicos               | <input checked="" type="radio"/> si<br><input type="radio"/> no                                                                                                                                                                                                                                                                                                                                                                                                                                                               |
| suplementos vitamínicos               | <hr/>                                                                                                                                                                                                                                                                                                                                                                                                                                                                                                                         |
| dieta previa                          | <input type="radio"/> si<br><input checked="" type="radio"/> no                                                                                                                                                                                                                                                                                                                                                                                                                                                               |
| motivo dieta                          | <input checked="" type="radio"/> no dieta<br><input type="radio"/> control peso<br><input type="radio"/> control colesterol<br><input type="radio"/> control diabetes<br><input type="radio"/> problemas estómago<br><input type="radio"/> problemas vesícula o hepáticos<br><input type="radio"/> HTA o cardiopatía<br><input type="radio"/> problemas renales<br><input type="radio"/> alergia alimentaria<br><input type="radio"/> ácido úrico elevado<br><input type="radio"/> vegetariana<br><input type="radio"/> otros |
| cambio alimentos año previo gestación | <input type="radio"/> si<br><input checked="" type="radio"/> no                                                                                                                                                                                                                                                                                                                                                                                                                                                               |
| cambio lácteos                        | <input type="radio"/> eliminado<br><input type="radio"/> disminuido<br><input checked="" type="radio"/> igual<br><input type="radio"/> aumentado<br><input type="radio"/> no sabe                                                                                                                                                                                                                                                                                                                                             |
| cambio huevos                         | <input type="radio"/> eliminado<br><input type="radio"/> disminuido<br><input checked="" type="radio"/> igual<br><input type="radio"/> aumentado<br><input type="radio"/> no sabe                                                                                                                                                                                                                                                                                                                                             |
| cambio carne                          | <input type="radio"/> eliminado<br><input type="radio"/> disminuido<br><input checked="" type="radio"/> igual<br><input type="radio"/> aumentado<br><input type="radio"/> no sabe                                                                                                                                                                                                                                                                                                                                             |
| cambio pescado                        | <input type="radio"/> eliminado<br><input type="radio"/> disminuido<br><input checked="" type="radio"/> igual<br><input type="radio"/> aumentado<br><input type="radio"/> no sabe                                                                                                                                                                                                                                                                                                                                             |
| cambio verduras                       | <input type="radio"/> eliminado<br><input type="radio"/> disminuido<br><input checked="" type="radio"/> igual<br><input type="radio"/> aumentado<br><input type="radio"/> no sabe                                                                                                                                                                                                                                                                                                                                             |

|                            |                                                                                                                                                                                                                        |
|----------------------------|------------------------------------------------------------------------------------------------------------------------------------------------------------------------------------------------------------------------|
| cambio legumbres           | <input type="radio"/> eliminado<br><input type="radio"/> disminuido<br><input checked="" type="radio"/> igual<br><input type="radio"/> aumentado<br><input type="radio"/> no sabe                                      |
| cambio fruta               | <input type="radio"/> eliminado<br><input type="radio"/> disminuido<br><input checked="" type="radio"/> igual<br><input type="radio"/> aumentado<br><input type="radio"/> no sabe                                      |
| cambio pan                 | <input type="radio"/> eliminado<br><input type="radio"/> disminuido<br><input checked="" type="radio"/> igual<br><input type="radio"/> aumentado<br><input type="radio"/> no sabe                                      |
| cambio aceite oliva        | <input type="radio"/> eliminado<br><input type="radio"/> disminuido<br><input checked="" type="radio"/> igual<br><input type="radio"/> aumentado<br><input type="radio"/> no sabe                                      |
| cambio mante o margarina   | <input type="radio"/> eliminado<br><input type="radio"/> disminuido<br><input checked="" type="radio"/> igual<br><input type="radio"/> aumentado<br><input type="radio"/> no sabe                                      |
| cambio azúcar y dulces     | <input type="radio"/> eliminado<br><input type="radio"/> disminuido<br><input checked="" type="radio"/> igual<br><input type="radio"/> aumentado<br><input type="radio"/> no sabe                                      |
| cambio bebidas alcohólicas | <input type="radio"/> eliminado<br><input type="radio"/> disminuido<br><input checked="" type="radio"/> igual<br><input type="radio"/> aumentado<br><input type="radio"/> no sabe                                      |
| frecuencia comidas fritas  | <input type="radio"/> a diario<br><input type="radio"/> 5 a 6 veces semana<br><input type="radio"/> 2 a 4 veces semana<br><input checked="" type="radio"/> 1 vez semana<br><input type="radio"/> menos de 1 vez semana |
| carne                      | <input type="radio"/> no como<br><input type="radio"/> cruda<br><input type="radio"/> poco hecha<br><input checked="" type="radio"/> hecha<br><input type="radio"/> muy hecha                                          |
| grasa visible carne        | <input type="radio"/> quita toda<br><input checked="" type="radio"/> quita mayoría<br><input type="radio"/> quita un poco<br><input type="radio"/> no quita nada                                                       |

|                                |                                                                                                                                                                                                                                                          |
|--------------------------------|----------------------------------------------------------------------------------------------------------------------------------------------------------------------------------------------------------------------------------------------------------|
| cocina carne                   | <input checked="" type="radio"/> a la plancha<br><input type="radio"/> a la parrilla<br><input type="radio"/> asada<br><input type="radio"/> frita<br><input type="radio"/> guisada                                                                      |
| tostado quemado carne          | <input type="radio"/> nunca<br><input type="radio"/> 1 vez mes<br><input checked="" type="radio"/> 2 a 3 veces mes<br><input type="radio"/> 1 vez semana<br><input type="radio"/> 2 a 3 semanas                                                          |
| tostado quemado pescado        | <input type="radio"/> nunca<br><input type="radio"/> 1 vez mes<br><input checked="" type="radio"/> 2 a 3 veces mes<br><input type="radio"/> 1 vez semana<br><input type="radio"/> 2 a 3 semanas                                                          |
| socarrat paella                | <input checked="" type="radio"/> nunca<br><input type="radio"/> 1 vez mes<br><input type="radio"/> 2 a 3 veces mes<br><input type="radio"/> 1 vez semana<br><input type="radio"/> 2 a 3 semanas                                                          |
| grasa o aceite cocinar         | <input type="radio"/> mantequilla<br><input type="radio"/> margarina<br><input type="radio"/> aceite oliva<br><input checked="" type="radio"/> aceite oliva virgen extra<br><input type="radio"/> aceite vegetal<br><input type="radio"/> mezcla aceites |
| grasa aceite aliñar            | <input type="radio"/> mantequilla<br><input type="radio"/> margarina<br><input type="radio"/> aceite oliva<br><input checked="" type="radio"/> aceite oliva virgen extra<br><input type="radio"/> aceite vegetal<br><input type="radio"/> mezcla aceites |
| grasa aceite freir             | <input type="radio"/> mantequilla<br><input type="radio"/> margarina<br><input type="radio"/> aceite oliva<br><input checked="" type="radio"/> aceite oliva virgen extra<br><input type="radio"/> aceite vegetal<br><input type="radio"/> mezcla aceites |
| Ejercicio cuestionario         | <input checked="" type="radio"/> si<br><input type="radio"/> no                                                                                                                                                                                          |
| horas de sueño incluido siesta | [*DATA REMOVED*]                                                                                                                                                                                                                                         |
| minutos siesta                 | [*DATA REMOVED*]                                                                                                                                                                                                                                         |
| horas televisión semana        | [*DATA REMOVED*]                                                                                                                                                                                                                                         |



|                                        |                                                                                                                                                                                                                                                                                                                                                                           |
|----------------------------------------|---------------------------------------------------------------------------------------------------------------------------------------------------------------------------------------------------------------------------------------------------------------------------------------------------------------------------------------------------------------------------|
| actividad trabajo                      | <input checked="" type="radio"/> casi siempre sentado<br><input type="radio"/> sentado 50 por cien<br><input type="radio"/> casi siempre de pie, quieto<br><input type="radio"/> casi siempre levantado caminando y llevando pocas cosas<br><input type="radio"/> casi siempre levantado, caminando y llevado muchas cosas<br><input type="radio"/> trabajo manual pesado |
| tiempo caminar o bici al día           | <input type="radio"/> casi nunca<br><input checked="" type="radio"/> menos 20min día<br><input type="radio"/> 20 a 40 min día<br><input type="radio"/> 40 a 60 min día<br><input type="radio"/> 1h o 1h y media día<br><input type="radio"/> más de 1h y media al día                                                                                                     |
| tiempo tareas casa al día              | <input type="radio"/> menos de 1h día<br><input checked="" type="radio"/> 1 a 2h día<br><input type="radio"/> 3 a 4h día<br><input type="radio"/> 5 a 6h día<br><input type="radio"/> 7 a 8h día<br><input type="radio"/> más de 8h día                                                                                                                                   |
| tiempo libre televisión ordenador leer | <input type="radio"/> menos 1h día<br><input type="radio"/> 1h día<br><input type="radio"/> 2h día<br><input checked="" type="radio"/> 3h día<br><input type="radio"/> 4h día<br><input type="radio"/> 5 a 6h día<br><input type="radio"/> mas 6h día                                                                                                                     |
| tiempo libre ejercicio o deporte       | <input type="radio"/> menos 1h semana<br><input checked="" type="radio"/> 1h semana<br><input type="radio"/> 2h semana<br><input type="radio"/> 3h semana<br><input type="radio"/> 4 a 5h semana<br><input type="radio"/> mas 5h semana                                                                                                                                   |
| como se considera                      | <input type="radio"/> sedentaria<br><input checked="" type="radio"/> poco activa<br><input type="radio"/> moderadamente activa<br><input type="radio"/> bastante activa<br><input type="radio"/> muy activa<br><input type="radio"/> no sabe                                                                                                                              |
| FUR                                    | [*DATA REMOVED*]                                                                                                                                                                                                                                                                                                                                                          |
| Semanas gestación 2T                   | [*DATA REMOVED*]                                                                                                                                                                                                                                                                                                                                                          |
| Días gestación 2T                      | [*DATA REMOVED*]                                                                                                                                                                                                                                                                                                                                                          |
| DBP 2T                                 | [*DATA REMOVED*]                                                                                                                                                                                                                                                                                                                                                          |
| CC 2T                                  | [*DATA REMOVED*]                                                                                                                                                                                                                                                                                                                                                          |
| AC 2T                                  | [*DATA REMOVED*]                                                                                                                                                                                                                                                                                                                                                          |

|                                                   |                                                                                                                                                                                                 |
|---------------------------------------------------|-------------------------------------------------------------------------------------------------------------------------------------------------------------------------------------------------|
| LF 2T                                             | [*DATA REMOVED*]                                                                                                                                                                                |
| PFE 2T (Hadlock)                                  | [*DATA REMOVED*]                                                                                                                                                                                |
| Semanas gestación 3T                              | [*DATA REMOVED*]                                                                                                                                                                                |
| días 3T                                           | [*DATA REMOVED*]                                                                                                                                                                                |
| DBP 3T                                            | [*DATA REMOVED*]                                                                                                                                                                                |
| CC 3T                                             | [*DATA REMOVED*]                                                                                                                                                                                |
| AC 3T                                             | [*DATA REMOVED*]                                                                                                                                                                                |
| LF 3T                                             | [*DATA REMOVED*]                                                                                                                                                                                |
| PFE 3T (Hadlock)                                  | [*DATA REMOVED*]                                                                                                                                                                                |
| Semanas de gestación final                        | [*DATA REMOVED*]                                                                                                                                                                                |
| días gestación final                              | [*DATA REMOVED*]                                                                                                                                                                                |
| Localización placenta                             | <input checked="" type="radio"/> anterior<br><input type="radio"/> lateral derecha<br><input type="radio"/> lateral izquierda<br><input type="radio"/> posterior<br><input type="radio"/> fondo |
| Presentación longitudinal cefálica                | <input type="radio"/> no<br><input checked="" type="radio"/> si                                                                                                                                 |
| Dorso                                             | <input type="radio"/> izquierda anterior<br><input checked="" type="radio"/> izquierda posterior<br><input type="radio"/> derecha anterior<br><input type="radio"/> derecha posterior           |
| diámetro biparietal                               | [*DATA REMOVED*]                                                                                                                                                                                |
| Circunferencia craneal                            | [*DATA REMOVED*]                                                                                                                                                                                |
| Circunferencia abdominal                          | [*DATA REMOVED*]                                                                                                                                                                                |
| Longitud de femur                                 | [*DATA REMOVED*]                                                                                                                                                                                |
| tejido celular subcutáneo a nivel del muslo en mm | [*DATA REMOVED*]                                                                                                                                                                                |
| tejido celular subcutáneo en abdomen en mm        | [*DATA REMOVED*]                                                                                                                                                                                |
| Volumen del muslo en cm3                          | [*DATA REMOVED*]                                                                                                                                                                                |
| Peso fetal estimado según fórmula de Hadlock      | [*DATA REMOVED*]                                                                                                                                                                                |

|                                               |                                                                                                                                                          |
|-----------------------------------------------|----------------------------------------------------------------------------------------------------------------------------------------------------------|
| Percentil                                     | [*DATA REMOVED*]                                                                                                                                         |
| Peso fetal estimado según fórmula de Scioscia | <hr/>                                                                                                                                                    |
| Peso fetal estimado según fórmula de LEE      | <hr/>                                                                                                                                                    |
| Tipo de parto                                 | <input checked="" type="radio"/> eutocico<br><input type="radio"/> instrumentado/ventosa<br><input type="radio"/> cesarea                                |
| fecha de nacimiento                           | [*DATA REMOVED*]                                                                                                                                         |
| Días entre exploración y nacimiento           | [*DATA REMOVED*]                                                                                                                                         |
| Peso RN en g                                  | [*DATA REMOVED*]                                                                                                                                         |
| sexo                                          | <input type="radio"/> mujer<br><input checked="" type="radio"/> hombre                                                                                   |
| Apgar 1 minuto                                | [*DATA REMOVED*]                                                                                                                                         |
| Apgar 5 minutos                               | [*DATA REMOVED*]                                                                                                                                         |
| Apgar 10 minutos                              | <hr/>                                                                                                                                                    |
| antecedente Covid durante gestación           | <input type="radio"/> Yes<br><input checked="" type="radio"/> No                                                                                         |
| Nivel de estudios                             | <input type="radio"/> ninguno<br><input checked="" type="radio"/> primarios<br><input type="radio"/> secundarios<br><input type="radio"/> universitarios |

## Base\_datos\_estimacion\_peso\_fetal

|                                       |                                                                                                                                                                                                                                                                                      |
|---------------------------------------|--------------------------------------------------------------------------------------------------------------------------------------------------------------------------------------------------------------------------------------------------------------------------------------|
| Número de identificación participante | 143                                                                                                                                                                                                                                                                                  |
| CODIGO PARTICIPANTE                   |                                                                                                                                                                                                                                                                                      |
| Edad                                  | [*DATA REMOVED*]                                                                                                                                                                                                                                                                     |
| Gestaciones                           | <input type="radio"/> 1<br><input type="radio"/> 2<br><input type="radio"/> 3<br><input checked="" type="radio"/> mas de 3                                                                                                                                                           |
| partos                                | <input type="radio"/> 0<br><input type="radio"/> 1<br><input checked="" type="radio"/> 2<br><input type="radio"/> 3<br><input type="radio"/> mas de 3                                                                                                                                |
| cesáreas                              | <input checked="" type="radio"/> 0<br><input type="radio"/> 1<br><input type="radio"/> 2<br><input type="radio"/> 3<br><input type="radio"/> mas de 3                                                                                                                                |
| Abortos                               | <input type="radio"/> 0<br><input type="radio"/> 1<br><input checked="" type="radio"/> 2<br><input type="radio"/> 3<br><input type="radio"/> mas de 3                                                                                                                                |
| Tipo de gestacion                     | <input checked="" type="radio"/> espontanea<br><input type="radio"/> IAC inseminación artificial conyuge<br><input type="radio"/> IAD inseminación artificial donante<br><input type="radio"/> FIV Fecundación in Vitro<br><input type="radio"/> Ovodon FIV con donación de ovocitos |
| peso previo a embarazo                | [*DATA REMOVED*]                                                                                                                                                                                                                                                                     |
| Ganancia ponderal embarazo            |                                                                                                                                                                                                                                                                                      |
| Talla madre                           | [*DATA REMOVED*]                                                                                                                                                                                                                                                                     |
| IMC previo embarazo                   | 22.052190183434128                                                                                                                                                                                                                                                                   |
| Patología obstétrica                  | <input checked="" type="radio"/> no<br><input type="radio"/> si                                                                                                                                                                                                                      |
| Diabetes pregestacional               | <input checked="" type="radio"/> no<br><input type="radio"/> si                                                                                                                                                                                                                      |
| Diabetes gestacional                  | <input checked="" type="radio"/> no<br><input type="radio"/> si                                                                                                                                                                                                                      |

|                                            |                                                                                                                                                                                      |
|--------------------------------------------|--------------------------------------------------------------------------------------------------------------------------------------------------------------------------------------|
| Diabetes gestacional con insulina          | <input checked="" type="radio"/> no<br><input type="radio"/> si                                                                                                                      |
| Diabetes gestacional con dieta y ejercicio | <input checked="" type="radio"/> no<br><input type="radio"/> si                                                                                                                      |
| Percentil fetos previos                    | <input type="radio"/> Nada<br><input type="radio"/> percentil menor de 10<br><input checked="" type="radio"/> percentil entre 10 y 90<br><input type="radio"/> percentil mayor de 90 |
| Exfumadora                                 | <input checked="" type="radio"/> Nada<br><input type="radio"/> menos de 5 años<br><input type="radio"/> 5 a 10 años<br><input type="radio"/> mayor o igual a 10 años                 |
| Hábito tabáquico                           | <input checked="" type="radio"/> no<br><input type="radio"/> si                                                                                                                      |
| fumadora                                   | [*DATA REMOVED*]                                                                                                                                                                     |
| Consumo otros tóxicos                      | <input checked="" type="radio"/> no<br><input type="radio"/> si                                                                                                                      |
| Hb 1T                                      | [*DATA REMOVED*]                                                                                                                                                                     |
| Htc 1T                                     | [*DATA REMOVED*]                                                                                                                                                                     |
| Hb 2T                                      | [*DATA REMOVED*]                                                                                                                                                                     |
| HTC 2T                                     | [*DATA REMOVED*]                                                                                                                                                                     |
| Hb 3T                                      | [*DATA REMOVED*]                                                                                                                                                                     |
| HTC 3T                                     | [*DATA REMOVED*]                                                                                                                                                                     |
| Suplemento FE oral                         | <input checked="" type="radio"/> si<br><input type="radio"/> no                                                                                                                      |
| Suplemento fe iv                           | <input type="radio"/> si<br><input checked="" type="radio"/> no                                                                                                                      |
| Transfusión                                | <input checked="" type="radio"/> no<br><input type="radio"/> si                                                                                                                      |
| Solicitada Vit D                           | <input checked="" type="radio"/> no<br><input type="radio"/> si                                                                                                                      |
| Deficit vit D                              | <input type="radio"/> no<br><input type="radio"/> si                                                                                                                                 |
| Suplemento vit D                           | <input type="radio"/> si<br><input type="radio"/> no                                                                                                                                 |

|                       |                                                                                                                                                                                                                                                                                                                                                                                                              |
|-----------------------|--------------------------------------------------------------------------------------------------------------------------------------------------------------------------------------------------------------------------------------------------------------------------------------------------------------------------------------------------------------------------------------------------------------|
| Dieta, cuestionario   | <input checked="" type="radio"/> sí<br><input type="radio"/> no                                                                                                                                                                                                                                                                                                                                              |
| Leche entera          | <input type="radio"/> Nunca o menos 1 vez al mes<br><input type="radio"/> 1 a 3 veces mes<br><input type="radio"/> 1 vez semana<br><input type="radio"/> 2 a 4 veces semana<br><input type="radio"/> 5 a 6 veces semana<br><input checked="" type="radio"/> 1 vez al día<br><input type="radio"/> 2 a 3 veces al día<br><input type="radio"/> 5 a 6 veces al día<br><input type="radio"/> más 6 veces al día |
| Leche semidesnatada   | <input checked="" type="radio"/> Nunca o menos 1 vez al mes<br><input type="radio"/> 1 a 3 veces mes<br><input type="radio"/> 1 vez semana<br><input type="radio"/> 2 a 4 veces semana<br><input type="radio"/> 5 a 6 veces semana<br><input type="radio"/> 1 vez al día<br><input type="radio"/> 2 a 3 veces al día<br><input type="radio"/> 5 a 6 veces al día<br><input type="radio"/> mas 6 veces al día |
| Leche desnatada       | <input checked="" type="radio"/> Nunca o menos 1 vez al mes<br><input type="radio"/> 1 a 3 veces mes<br><input type="radio"/> 1 vez semana<br><input type="radio"/> 2 a 4 veces semana<br><input type="radio"/> 5 a 6 veces semana<br><input type="radio"/> 1 vez al día<br><input type="radio"/> 2 a 3 veces al día<br><input type="radio"/> 5 a 6 veces al día<br><input type="radio"/> más 6 veces al día |
| Leche condensada      | <input checked="" type="radio"/> Nunca o menos 1 vez al mes<br><input type="radio"/> 1 a 3 veces mes<br><input type="radio"/> 1 vez semana<br><input type="radio"/> 2 a 4 veces semana<br><input type="radio"/> 5 a 6 veces semana<br><input type="radio"/> 1 vez al día<br><input type="radio"/> 2 a 3 veces al día<br><input type="radio"/> 5 a 6 veces al día<br><input type="radio"/> más 6 veces al día |
| nata o crema de leche | <input type="radio"/> Nunca o menos 1 vez al mes<br><input checked="" type="radio"/> 1 a 3 veces mes<br><input type="radio"/> 1 vez semana<br><input type="radio"/> 2 a 4 veces semana<br><input type="radio"/> 5 a 6 veces semana<br><input type="radio"/> 1 vez al día<br><input type="radio"/> 2 a 3 veces al día<br><input type="radio"/> 5 a 6 veces al día<br><input type="radio"/> más 6 veces al día |

---

Yogurt Entero

- ☐ Nunca o menos 1 vez al mes
- ☐ 1 a 3 veces mes
- ☐ 1 vez semana
- ☐ 2 a 4 veces semana
- ☐ 5 a 6 veces semana
- ☒ 1 vez al día
- ☐ 2 a 3 veces al día
- ☐ 5 a 6 veces al día
- ☐ más 6 veces al día

---

Yogurt desnatado

- ☒ Nunca o menos 1 vez al mes
- ☐ 1 a 3 veces mes
- ☐ 1 vez semana
- ☐ 2 a 4 veces semana
- ☐ 5 a 6 veces semana
- ☐ 1 vez al día
- ☐ 2 a 3 veces al día
- ☐ 5 a 6 veces al día
- ☐ más 6 veces al día

---

100g requesón o queso blando o queso fresco

- ☐ Nunca o menos 1 vez al mes
- ☒ 1 a 3 veces mes
- ☐ 1 vez semana
- ☐ 2 a 4 veces semana
- ☐ 5 a 6 veces semana
- ☐ 1 vez al día
- ☐ 2 a 3 veces al día
- ☐ 5 a 6 veces al día
- ☐ más 6 veces al día

---

queso curado o semicurado o cremoso

- ☐ Nunca o menos 1 vez al mes
- ☒ 1 a 3 veces mes
- ☐ 1 vez semana
- ☐ 2 a 4 veces semana
- ☐ 5 a 6 veces semana
- ☐ 1 vez al día
- ☐ 2 a 3 veces al día
- ☐ 5 a 6 veces al día
- ☐ más 6 veces al día

---

natillas flan pudding

- ☐ Nunca o menos 1 vez al mes
- ☒ 1 a 3 veces mes
- ☐ 1 vez semana
- ☐ 2 a 4 veces semana
- ☐ 5 a 6 veces semana
- ☐ 1 vez al día
- ☐ 2 a 3 veces al día
- ☐ 5 a 6 veces al día
- ☐ más 6 veces al día

---

Helado

- ☐ Nunca o menos 1 vez al mes
- ☒ 1 a 3 veces mes
- ☐ 1 vez semana
- ☐ 2 a 4 veces semana
- ☐ 5 a 6 veces semana
- ☐ 1 vez al día
- ☐ 2 a 3 veces al día
- ☐ 5 a 6 veces al día
- ☐ más 6 veces al día

|                                      |                                                                                                                                                                                                                                                                                                                                                                                                              |
|--------------------------------------|--------------------------------------------------------------------------------------------------------------------------------------------------------------------------------------------------------------------------------------------------------------------------------------------------------------------------------------------------------------------------------------------------------------|
| huevo                                | <input type="radio"/> Nunca o menos 1 vez al mes<br><input type="radio"/> 1 a 3 veces mes<br><input checked="" type="radio"/> 1 vez semana<br><input type="radio"/> 2 a 4 veces semana<br><input type="radio"/> 5 a 6 veces semana<br><input type="radio"/> 1 vez al día<br><input type="radio"/> 2 a 3 veces al día<br><input type="radio"/> 5 a 6 veces al día<br><input type="radio"/> más 6 veces al día |
| Pollo con piel                       | <input type="radio"/> Nunca o menos 1 vez al mes<br><input type="radio"/> 1 a 3 veces mes<br><input checked="" type="radio"/> 1 vez semana<br><input type="radio"/> 2 a 4 veces semana<br><input type="radio"/> 5 a 6 veces semana<br><input type="radio"/> 1 vez al día<br><input type="radio"/> 2 a 3 veces al día<br><input type="radio"/> 5 a 6 veces al día<br><input type="radio"/> más 6 veces al día |
| pollo sin piel                       | <input checked="" type="radio"/> Nunca o menos 1 vez al mes<br><input type="radio"/> 1 a 3 veces mes<br><input type="radio"/> 1 vez semana<br><input type="radio"/> 2 a 4 veces semana<br><input type="radio"/> 5 a 6 veces semana<br><input type="radio"/> 1 vez al día<br><input type="radio"/> 2 a 3 veces al día<br><input type="radio"/> 5 a 6 veces al día<br><input type="radio"/> más 6 veces al día |
| Ternera o cerdo o cordero            | <input type="radio"/> Nunca o menos 1 vez al mes<br><input type="radio"/> 1 a 3 veces mes<br><input checked="" type="radio"/> 1 vez semana<br><input type="radio"/> 2 a 4 veces semana<br><input type="radio"/> 5 a 6 veces semana<br><input type="radio"/> 1 vez al día<br><input type="radio"/> 2 a 3 veces al día<br><input type="radio"/> 5 a 6 veces al día<br><input type="radio"/> más 6 veces al día |
| carne caza: Conejo o codorniz o pato | <input checked="" type="radio"/> Nunca o menos 1 vez al mes<br><input type="radio"/> 1 a 3 veces mes<br><input type="radio"/> 1 vez semana<br><input type="radio"/> 2 a 4 veces semana<br><input type="radio"/> 5 a 6 veces semana<br><input type="radio"/> 1 vez al día<br><input type="radio"/> 2 a 3 veces al día<br><input type="radio"/> 5 a 6 veces al día<br><input type="radio"/> más 6 veces al día |
| Hígado de ternera o cerdo o pollo    | <input checked="" type="radio"/> Nunca o menos 1 vez al mes<br><input type="radio"/> 1 a 3 veces mes<br><input type="radio"/> 1 vez semana<br><input type="radio"/> 2 a 4 veces semana<br><input type="radio"/> 5 a 6 veces semana<br><input type="radio"/> 1 vez al día<br><input type="radio"/> 2 a 3 veces al día<br><input type="radio"/> 5 a 6 veces al día<br><input type="radio"/> más 6 veces al día |



---

Vísceras

- ☒ Nunca o menos 1 vez al mes  
☐ 1 a 3 veces mes  
☐ 1 vez semana  
☐ 2 a 4 veces semana  
☐ 5 a 6 veces semana  
☐ 1 vez al día  
☐ 2 a 3 veces al día  
☐ 5 a 6 veces al día  
☐ más 6 veces al día

---

Embutido

- ☐ Nunca o menos 1 vez al mes  
☒ 1 a 3 veces mes  
☐ 1 vez semana  
☐ 2 a 4 veces semana  
☐ 5 a 6 veces semana  
☐ 1 vez al día  
☐ 2 a 3 veces al día  
☐ 5 a 6 veces al día  
☐ más 6 veces al día

---

Salchicha o similar

- ☐ Nunca o menos 1 vez al mes  
☒ 1 a 3 veces mes  
☐ 1 vez semana  
☐ 2 a 4 veces semana  
☐ 5 a 6 veces semana  
☐ 1 vez al día  
☐ 2 a 3 veces al día  
☐ 5 a 6 veces al día  
☐ más 6 veces al día

---

Pate o foiegras

- ☒ Nunca o menos 1 vez al mes  
☐ 1 a 3 veces mes  
☐ 1 vez semana  
☐ 2 a 4 veces semana  
☐ 5 a 6 veces semana  
☐ 1 vez al día  
☐ 2 a 3 veces al día  
☐ 5 a 6 veces al día  
☐ más 6 veces al día

---

Hamburguesa

- ☐ Nunca o menos 1 vez al mes  
☒ 1 a 3 veces mes  
☐ 1 vez semana  
☐ 2 a 4 veces semana  
☐ 5 a 6 veces semana  
☐ 1 vez al día  
☐ 2 a 3 veces al día  
☐ 5 a 6 veces al día  
☐ más 6 veces al día

---

tocino o bacon

- ☒ Nunca o menos 1 vez al mes  
☐ 1 a 3 veces mes  
☐ 1 vez semana  
☐ 2 a 4 veces semana  
☐ 5 a 6 veces semana  
☐ 1 vez al día  
☐ 2 a 3 veces al día  
☐ 5 a 6 veces al día  
☐ más 6 veces al día

|                        |                                                                                                                                                                                                                                                                                                                                                                                                              |
|------------------------|--------------------------------------------------------------------------------------------------------------------------------------------------------------------------------------------------------------------------------------------------------------------------------------------------------------------------------------------------------------------------------------------------------------|
| Pescado frito          | <input type="radio"/> Nunca o menos 1 vez al mes<br><input checked="" type="radio"/> 1 a 3 veces mes<br><input type="radio"/> 1 vez semana<br><input type="radio"/> 2 a 4 veces semana<br><input type="radio"/> 5 a 6 veces semana<br><input type="radio"/> 1 vez al día<br><input type="radio"/> 2 a 3 veces al día<br><input type="radio"/> 5 a 6 veces al día<br><input type="radio"/> más 6 veces al día |
| pescado hervido blanco | <input type="radio"/> Nunca o menos 1 vez al mes<br><input type="radio"/> 1 a 3 veces mes<br><input type="radio"/> 1 vez semana<br><input checked="" type="radio"/> 2 a 4 veces semana<br><input type="radio"/> 5 a 6 veces semana<br><input type="radio"/> 1 vez al día<br><input type="radio"/> 2 a 3 veces al día<br><input type="radio"/> 5 a 6 veces al día<br><input type="radio"/> más 6 veces al día |
| pescado hervido azul   | <input type="radio"/> Nunca o menos 1 vez al mes<br><input checked="" type="radio"/> 1 a 3 veces mes<br><input type="radio"/> 1 vez semana<br><input type="radio"/> 2 a 4 veces semana<br><input type="radio"/> 5 a 6 veces semana<br><input type="radio"/> 1 vez al día<br><input type="radio"/> 2 a 3 veces al día<br><input type="radio"/> 5 a 6 veces al día<br><input type="radio"/> más 6 veces al día |
| otros pescado azul     | <input type="radio"/> Nunca o menos 1 vez al mes<br><input checked="" type="radio"/> 1 a 3 veces mes<br><input type="radio"/> 1 vez semana<br><input type="radio"/> 2 a 4 veces semana<br><input type="radio"/> 5 a 6 veces semana<br><input type="radio"/> 1 vez al día<br><input type="radio"/> 2 a 3 veces al día<br><input type="radio"/> 5 a 6 veces al día<br><input type="radio"/> más 6 veces al día |
| atun conserva          | <input type="radio"/> Nunca o menos 1 vez al mes<br><input checked="" type="radio"/> 1 a 3 veces mes<br><input type="radio"/> 1 vez semana<br><input type="radio"/> 2 a 4 veces semana<br><input type="radio"/> 5 a 6 veces semana<br><input type="radio"/> 1 vez al día<br><input type="radio"/> 2 a 3 veces al día<br><input type="radio"/> 5 a 6 veces al día<br><input type="radio"/> más 6 veces al día |
| sardina conserva       | <input type="radio"/> Nunca o menos 1 vez al mes<br><input checked="" type="radio"/> 1 a 3 veces mes<br><input type="radio"/> 1 vez semana<br><input type="radio"/> 2 a 4 veces semana<br><input type="radio"/> 5 a 6 veces semana<br><input type="radio"/> 1 vez al día<br><input type="radio"/> 2 a 3 veces al día<br><input type="radio"/> 5 a 6 veces al día<br><input type="radio"/> más 6 veces al día |

|                                         |                                                                                                                                                                                                                                                                                                                                                                                                              |
|-----------------------------------------|--------------------------------------------------------------------------------------------------------------------------------------------------------------------------------------------------------------------------------------------------------------------------------------------------------------------------------------------------------------------------------------------------------------|
| pescado ahumado                         | <input checked="" type="radio"/> Nunca o menos 1 vez al mes<br><input type="radio"/> 1 a 3 veces mes<br><input type="radio"/> 1 vez semana<br><input type="radio"/> 2 a 4 veces semana<br><input type="radio"/> 5 a 6 veces semana<br><input type="radio"/> 1 vez al día<br><input type="radio"/> 2 a 3 veces al día<br><input type="radio"/> 5 a 6 veces al día<br><input type="radio"/> más 6 veces al día |
| almejas o mejillones o ostras unos 100g | <input type="radio"/> Nunca o menos 1 vez al mes<br><input checked="" type="radio"/> 1 a 3 veces mes<br><input type="radio"/> 1 vez semana<br><input type="radio"/> 2 a 4 veces semana<br><input type="radio"/> 5 a 6 veces semana<br><input type="radio"/> 1 vez al día<br><input type="radio"/> 2 a 3 veces al día<br><input type="radio"/> 5 a 6 veces al día<br><input type="radio"/> más 6 veces al día |
| calamar o chipiron o sepia unos 100g    | <input type="radio"/> Nunca o menos 1 vez al mes<br><input checked="" type="radio"/> 1 a 3 veces mes<br><input type="radio"/> 1 vez semana<br><input type="radio"/> 2 a 4 veces semana<br><input type="radio"/> 5 a 6 veces semana<br><input type="radio"/> 1 vez al día<br><input type="radio"/> 2 a 3 veces al día<br><input type="radio"/> 5 a 6 veces al día<br><input type="radio"/> más 6 veces al día |
| marisco unos 100g                       | <input type="radio"/> Nunca o menos 1 vez al mes<br><input checked="" type="radio"/> 1 a 3 veces mes<br><input type="radio"/> 1 vez semana<br><input type="radio"/> 2 a 4 veces semana<br><input type="radio"/> 5 a 6 veces semana<br><input type="radio"/> 1 vez al día<br><input type="radio"/> 2 a 3 veces al día<br><input type="radio"/> 5 a 6 veces al día<br><input type="radio"/> más 6 veces al día |
| Espinacas o acelgas cocinadas           | <input type="radio"/> Nunca o menos 1 vez al mes<br><input checked="" type="radio"/> 1 a 3 veces mes<br><input type="radio"/> 1 vez semana<br><input type="radio"/> 2 a 4 veces semana<br><input type="radio"/> 5 a 6 veces semana<br><input type="radio"/> 1 vez al día<br><input type="radio"/> 2 a 3 veces al día<br><input type="radio"/> 5 a 6 veces al día<br><input type="radio"/> más 6 veces al día |
| Col o coliflor o brocoli cocinado       | <input type="radio"/> Nunca o menos 1 vez al mes<br><input checked="" type="radio"/> 1 a 3 veces mes<br><input type="radio"/> 1 vez semana<br><input type="radio"/> 2 a 4 veces semana<br><input type="radio"/> 5 a 6 veces semana<br><input type="radio"/> 1 vez al día<br><input type="radio"/> 2 a 3 veces al día<br><input type="radio"/> 5 a 6 veces al día<br><input type="radio"/> más 6 veces al día |

---

Lechuga o endivia o escarola

- ☐ Nunca o menos 1 vez al mes  
☐ 1 a 3 veces mes  
☐ 1 vez semana  
☐ 2 a 4 veces semana  
☒ 5 a 6 veces semana  
☐ 1 vez al día  
☐ 2 a 3 veces al día  
☐ 5 a 6 veces al día  
☐ más 6 veces al día

---

tomate ensalada

- ☐ Nunca o menos 1 vez al mes  
☐ 1 a 3 veces mes  
☐ 1 vez semana  
☐ 2 a 4 veces semana  
☐ 5 a 6 veces semana  
☒ 1 vez al día  
☐ 2 a 3 veces al día  
☐ 5 a 6 veces al día  
☐ más 6 veces al día

---

cebolla

- ☐ Nunca o menos 1 vez al mes  
☐ 1 a 3 veces mes  
☐ 1 vez semana  
☐ 2 a 4 veces semana  
☒ 5 a 6 veces semana  
☐ 1 vez al día  
☐ 2 a 3 veces al día  
☐ 5 a 6 veces al día  
☐ más 6 veces al día

---

Zanahoria o calabaza

- ☐ Nunca o menos 1 vez al mes  
☐ 1 a 3 veces mes  
☐ 1 vez semana  
☒ 2 a 4 veces semana  
☐ 5 a 6 veces semana  
☐ 1 vez al día  
☐ 2 a 3 veces al día  
☐ 5 a 6 veces al día  
☐ más 6 veces al día

---

Judías verdes

- ☐ Nunca o menos 1 vez al mes  
☐ 1 a 3 veces mes  
☒ 1 vez semana  
☐ 2 a 4 veces semana  
☐ 5 a 6 veces semana  
☐ 1 vez al día  
☐ 2 a 3 veces al día  
☐ 5 a 6 veces al día  
☐ más 6 veces al día

---

Berenjena o calabacin o pepino

- ☐ Nunca o menos 1 vez al mes  
☐ 1 a 3 veces mes  
☐ 1 vez semana  
☒ 2 a 4 veces semana  
☐ 5 a 6 veces semana  
☐ 1 vez al día  
☐ 2 a 3 veces al día  
☐ 5 a 6 veces al día  
☐ más 6 veces al día

---

|          |                                                                                                                                                                                                                                                                                                                                                                                                              |
|----------|--------------------------------------------------------------------------------------------------------------------------------------------------------------------------------------------------------------------------------------------------------------------------------------------------------------------------------------------------------------------------------------------------------------|
| pimiento | <input type="radio"/> Nunca o menos 1 vez al mes<br><input type="radio"/> 1 a 3 veces mes<br><input checked="" type="radio"/> 1 vez semana<br><input type="radio"/> 2 a 4 veces semana<br><input type="radio"/> 5 a 6 veces semana<br><input type="radio"/> 1 vez al día<br><input type="radio"/> 2 a 3 veces al día<br><input type="radio"/> 5 a 6 veces al día<br><input type="radio"/> más 6 veces al día |
|----------|--------------------------------------------------------------------------------------------------------------------------------------------------------------------------------------------------------------------------------------------------------------------------------------------------------------------------------------------------------------------------------------------------------------|

---

|           |                                                                                                                                                                                                                                                                                                                                                                                                              |
|-----------|--------------------------------------------------------------------------------------------------------------------------------------------------------------------------------------------------------------------------------------------------------------------------------------------------------------------------------------------------------------------------------------------------------------|
| alcachofa | <input type="radio"/> Nunca o menos 1 vez al mes<br><input type="radio"/> 1 a 3 veces mes<br><input checked="" type="radio"/> 1 vez semana<br><input type="radio"/> 2 a 4 veces semana<br><input type="radio"/> 5 a 6 veces semana<br><input type="radio"/> 1 vez al día<br><input type="radio"/> 2 a 3 veces al día<br><input type="radio"/> 5 a 6 veces al día<br><input type="radio"/> más 6 veces al día |
|-----------|--------------------------------------------------------------------------------------------------------------------------------------------------------------------------------------------------------------------------------------------------------------------------------------------------------------------------------------------------------------------------------------------------------------|

---

|            |                                                                                                                                                                                                                                                                                                                                                                                                              |
|------------|--------------------------------------------------------------------------------------------------------------------------------------------------------------------------------------------------------------------------------------------------------------------------------------------------------------------------------------------------------------------------------------------------------------|
| espárragos | <input type="radio"/> Nunca o menos 1 vez al mes<br><input type="radio"/> 1 a 3 veces mes<br><input checked="" type="radio"/> 1 vez semana<br><input type="radio"/> 2 a 4 veces semana<br><input type="radio"/> 5 a 6 veces semana<br><input type="radio"/> 1 vez al día<br><input type="radio"/> 2 a 3 veces al día<br><input type="radio"/> 5 a 6 veces al día<br><input type="radio"/> más 6 veces al día |
|------------|--------------------------------------------------------------------------------------------------------------------------------------------------------------------------------------------------------------------------------------------------------------------------------------------------------------------------------------------------------------------------------------------------------------|

---

|              |                                                                                                                                                                                                                                                                                                                                                                                                              |
|--------------|--------------------------------------------------------------------------------------------------------------------------------------------------------------------------------------------------------------------------------------------------------------------------------------------------------------------------------------------------------------------------------------------------------------|
| maíz hervido | <input type="radio"/> Nunca o menos 1 vez al mes<br><input type="radio"/> 1 a 3 veces mes<br><input checked="" type="radio"/> 1 vez semana<br><input type="radio"/> 2 a 4 veces semana<br><input type="radio"/> 5 a 6 veces semana<br><input type="radio"/> 1 vez al día<br><input type="radio"/> 2 a 3 veces al día<br><input type="radio"/> 5 a 6 veces al día<br><input type="radio"/> más 6 veces al día |
|--------------|--------------------------------------------------------------------------------------------------------------------------------------------------------------------------------------------------------------------------------------------------------------------------------------------------------------------------------------------------------------------------------------------------------------|

---

|           |                                                                                                                                                                                                                                                                                                                                                                                                              |
|-----------|--------------------------------------------------------------------------------------------------------------------------------------------------------------------------------------------------------------------------------------------------------------------------------------------------------------------------------------------------------------------------------------------------------------|
| legumbres | <input type="radio"/> Nunca o menos 1 vez al mes<br><input type="radio"/> 1 a 3 veces mes<br><input type="radio"/> 1 vez semana<br><input checked="" type="radio"/> 2 a 4 veces semana<br><input type="radio"/> 5 a 6 veces semana<br><input type="radio"/> 1 vez al día<br><input type="radio"/> 2 a 3 veces al día<br><input type="radio"/> 5 a 6 veces al día<br><input type="radio"/> más 6 veces al día |
|-----------|--------------------------------------------------------------------------------------------------------------------------------------------------------------------------------------------------------------------------------------------------------------------------------------------------------------------------------------------------------------------------------------------------------------|

---

|                       |                                                                                                                                                                                                                                                                                                                                                                                                              |
|-----------------------|--------------------------------------------------------------------------------------------------------------------------------------------------------------------------------------------------------------------------------------------------------------------------------------------------------------------------------------------------------------------------------------------------------------|
| naranjas o mandarinas | <input type="radio"/> Nunca o menos 1 vez al mes<br><input checked="" type="radio"/> 1 a 3 veces mes<br><input type="radio"/> 1 vez semana<br><input type="radio"/> 2 a 4 veces semana<br><input type="radio"/> 5 a 6 veces semana<br><input type="radio"/> 1 vez al día<br><input type="radio"/> 2 a 3 veces al día<br><input type="radio"/> 5 a 6 veces al día<br><input type="radio"/> más 6 veces al día |
|-----------------------|--------------------------------------------------------------------------------------------------------------------------------------------------------------------------------------------------------------------------------------------------------------------------------------------------------------------------------------------------------------------------------------------------------------|

---

---

|                    |                                                                                                                                                                                                                                                                                                                                                                                                              |
|--------------------|--------------------------------------------------------------------------------------------------------------------------------------------------------------------------------------------------------------------------------------------------------------------------------------------------------------------------------------------------------------------------------------------------------------|
| zumو natural fruta | <input checked="" type="radio"/> Nunca o menos 1 vez al mes<br><input type="radio"/> 1 a 3 veces mes<br><input type="radio"/> 1 vez semana<br><input type="radio"/> 2 a 4 veces semana<br><input type="radio"/> 5 a 6 veces semana<br><input type="radio"/> 1 vez al día<br><input type="radio"/> 2 a 3 veces al día<br><input type="radio"/> 5 a 6 veces al día<br><input type="radio"/> más 6 veces al día |
|--------------------|--------------------------------------------------------------------------------------------------------------------------------------------------------------------------------------------------------------------------------------------------------------------------------------------------------------------------------------------------------------------------------------------------------------|

---

|         |                                                                                                                                                                                                                                                                                                                                                                                                              |
|---------|--------------------------------------------------------------------------------------------------------------------------------------------------------------------------------------------------------------------------------------------------------------------------------------------------------------------------------------------------------------------------------------------------------------|
| platano | <input type="radio"/> Nunca o menos 1 vez al mes<br><input type="radio"/> 1 a 3 veces mes<br><input checked="" type="radio"/> 1 vez semana<br><input type="radio"/> 2 a 4 veces semana<br><input type="radio"/> 5 a 6 veces semana<br><input type="radio"/> 1 vez al día<br><input type="radio"/> 2 a 3 veces al día<br><input type="radio"/> 5 a 6 veces al día<br><input type="radio"/> más 6 veces al día |
|---------|--------------------------------------------------------------------------------------------------------------------------------------------------------------------------------------------------------------------------------------------------------------------------------------------------------------------------------------------------------------------------------------------------------------|

---

|                |                                                                                                                                                                                                                                                                                                                                                                                                              |
|----------------|--------------------------------------------------------------------------------------------------------------------------------------------------------------------------------------------------------------------------------------------------------------------------------------------------------------------------------------------------------------------------------------------------------------|
| manzana o pera | <input type="radio"/> Nunca o menos 1 vez al mes<br><input type="radio"/> 1 a 3 veces mes<br><input checked="" type="radio"/> 1 vez semana<br><input type="radio"/> 2 a 4 veces semana<br><input type="radio"/> 5 a 6 veces semana<br><input type="radio"/> 1 vez al día<br><input type="radio"/> 2 a 3 veces al día<br><input type="radio"/> 5 a 6 veces al día<br><input type="radio"/> más 6 veces al día |
|----------------|--------------------------------------------------------------------------------------------------------------------------------------------------------------------------------------------------------------------------------------------------------------------------------------------------------------------------------------------------------------------------------------------------------------|

---

|                       |                                                                                                                                                                                                                                                                                                                                                                                                              |
|-----------------------|--------------------------------------------------------------------------------------------------------------------------------------------------------------------------------------------------------------------------------------------------------------------------------------------------------------------------------------------------------------------------------------------------------------|
| melocotón o nectarina | <input type="radio"/> Nunca o menos 1 vez al mes<br><input type="radio"/> 1 a 3 veces mes<br><input type="radio"/> 1 vez semana<br><input type="radio"/> 2 a 4 veces semana<br><input type="radio"/> 5 a 6 veces semana<br><input checked="" type="radio"/> 1 vez al día<br><input type="radio"/> 2 a 3 veces al día<br><input type="radio"/> 5 a 6 veces al día<br><input type="radio"/> más 6 veces al día |
|-----------------------|--------------------------------------------------------------------------------------------------------------------------------------------------------------------------------------------------------------------------------------------------------------------------------------------------------------------------------------------------------------------------------------------------------------|

---

|                |                                                                                                                                                                                                                                                                                                                                                                                                              |
|----------------|--------------------------------------------------------------------------------------------------------------------------------------------------------------------------------------------------------------------------------------------------------------------------------------------------------------------------------------------------------------------------------------------------------------|
| sandia o melon | <input type="radio"/> Nunca o menos 1 vez al mes<br><input type="radio"/> 1 a 3 veces mes<br><input type="radio"/> 1 vez semana<br><input type="radio"/> 2 a 4 veces semana<br><input type="radio"/> 5 a 6 veces semana<br><input checked="" type="radio"/> 1 vez al día<br><input type="radio"/> 2 a 3 veces al día<br><input type="radio"/> 5 a 6 veces al día<br><input type="radio"/> más 6 veces al día |
|----------------|--------------------------------------------------------------------------------------------------------------------------------------------------------------------------------------------------------------------------------------------------------------------------------------------------------------------------------------------------------------------------------------------------------------|

---

|     |                                                                                                                                                                                                                                                                                                                                                                                                              |
|-----|--------------------------------------------------------------------------------------------------------------------------------------------------------------------------------------------------------------------------------------------------------------------------------------------------------------------------------------------------------------------------------------------------------------|
| uva | <input type="radio"/> Nunca o menos 1 vez al mes<br><input checked="" type="radio"/> 1 a 3 veces mes<br><input type="radio"/> 1 vez semana<br><input type="radio"/> 2 a 4 veces semana<br><input type="radio"/> 5 a 6 veces semana<br><input type="radio"/> 1 vez al día<br><input type="radio"/> 2 a 3 veces al día<br><input type="radio"/> 5 a 6 veces al día<br><input type="radio"/> más 6 veces al día |
|-----|--------------------------------------------------------------------------------------------------------------------------------------------------------------------------------------------------------------------------------------------------------------------------------------------------------------------------------------------------------------------------------------------------------------|

---

---

bruna o ciruela

- ☐ Nunca o menos 1 vez al mes  
☒ 1 a 3 veces mes  
☐ 1 vez semana  
☐ 2 a 4 veces semana  
☐ 5 a 6 veces semana  
☐ 1 vez al día  
☐ 2 a 3 veces al día  
☐ 5 a 6 veces al día  
☐ más 6 veces al día

---

kiwi

- ☒ Nunca o menos 1 vez al mes  
☐ 1 a 3 veces mes  
☐ 1 vez semana  
☐ 2 a 4 veces semana  
☐ 5 a 6 veces semana  
☐ 1 vez al día  
☐ 2 a 3 veces al día  
☐ 5 a 6 veces al día  
☐ más 6 veces al día

---

aceituna

- ☐ Nunca o menos 1 vez al mes  
☐ 1 a 3 veces mes  
☒ 1 vez semana  
☐ 2 a 4 veces semana  
☐ 5 a 6 veces semana  
☐ 1 vez al día  
☐ 2 a 3 veces al día  
☐ 5 a 6 veces al día  
☐ más 6 veces al día

---

frutos secos

- ☐ Nunca o menos 1 vez al mes  
☐ 1 a 3 veces mes  
☒ 1 vez semana  
☐ 2 a 4 veces semana  
☐ 5 a 6 veces semana  
☐ 1 vez al día  
☐ 2 a 3 veces al día  
☐ 5 a 6 veces al día  
☐ más 6 veces al día

---

pan blanco

- ☐ Nunca o menos 1 vez al mes  
☐ 1 a 3 veces mes  
☐ 1 vez semana  
☒ 2 a 4 veces semana  
☐ 5 a 6 veces semana  
☐ 1 vez al día  
☐ 2 a 3 veces al día  
☐ 5 a 6 veces al día  
☐ más 6 veces al día

---

pan integral

- ☒ Nunca o menos 1 vez al mes  
☐ 1 a 3 veces mes  
☐ 1 vez semana  
☐ 2 a 4 veces semana  
☐ 5 a 6 veces semana  
☐ 1 vez al día  
☐ 2 a 3 veces al día  
☐ 5 a 6 veces al día  
☐ más 6 veces al día

---

cereales desayuno

- ☐ Nunca o menos 1 vez al mes  
☒ 1 a 3 veces mes  
☐ 1 vez semana  
☐ 2 a 4 veces semana  
☐ 5 a 6 veces semana  
☐ 1 vez al día  
☐ 2 a 3 veces al día  
☐ 5 a 6 veces al día  
☐ más 6 veces al día

---

patatas fritas

- ☐ Nunca o menos 1 vez al mes  
☒ 1 a 3 veces mes  
☐ 1 vez semana  
☐ 2 a 4 veces semana  
☐ 5 a 6 veces semana  
☐ 1 vez al día  
☐ 2 a 3 veces al día  
☐ 5 a 6 veces al día  
☐ más 6 veces al día

---

patatas cocidas o asadas

- ☐ Nunca o menos 1 vez al mes  
☐ 1 a 3 veces mes  
☐ 1 vez semana  
☒ 2 a 4 veces semana  
☐ 5 a 6 veces semana  
☐ 1 vez al día  
☐ 2 a 3 veces al día  
☐ 5 a 6 veces al día  
☐ más 6 veces al día

---

bolsa papas

- ☐ Nunca o menos 1 vez al mes  
☒ 1 a 3 veces mes  
☐ 1 vez semana  
☐ 2 a 4 veces semana  
☐ 5 a 6 veces semana  
☐ 1 vez al día  
☐ 2 a 3 veces al día  
☐ 5 a 6 veces al día  
☐ más 6 veces al día

---

arroz cocinado

- ☐ Nunca o menos 1 vez al mes  
☐ 1 a 3 veces mes  
☒ 1 vez semana  
☐ 2 a 4 veces semana  
☐ 5 a 6 veces semana  
☐ 1 vez al día  
☐ 2 a 3 veces al día  
☐ 5 a 6 veces al día  
☐ más 6 veces al día

---

pasta

- ☐ Nunca o menos 1 vez al mes  
☐ 1 a 3 veces mes  
☒ 1 vez semana  
☐ 2 a 4 veces semana  
☐ 5 a 6 veces semana  
☐ 1 vez al día  
☐ 2 a 3 veces al día  
☐ 5 a 6 veces al día  
☐ más 6 veces al día



|                     |                                                                                                                                                                                                                                                                                                                                                                                                              |
|---------------------|--------------------------------------------------------------------------------------------------------------------------------------------------------------------------------------------------------------------------------------------------------------------------------------------------------------------------------------------------------------------------------------------------------------|
| pizza               | <input type="radio"/> Nunca o menos 1 vez al mes<br><input checked="" type="radio"/> 1 a 3 veces mes<br><input type="radio"/> 1 vez semana<br><input type="radio"/> 2 a 4 veces semana<br><input type="radio"/> 5 a 6 veces semana<br><input type="radio"/> 1 vez al día<br><input type="radio"/> 2 a 3 veces al día<br><input type="radio"/> 5 a 6 veces al día<br><input type="radio"/> más 6 veces al día |
| aceite oliva        | <input type="radio"/> Nunca o menos 1 vez al mes<br><input type="radio"/> 1 a 3 veces mes<br><input type="radio"/> 1 vez semana<br><input type="radio"/> 2 a 4 veces semana<br><input type="radio"/> 5 a 6 veces semana<br><input checked="" type="radio"/> 1 vez al día<br><input type="radio"/> 2 a 3 veces al día<br><input type="radio"/> 5 a 6 veces al día<br><input type="radio"/> más 6 veces al día |
| otros aceites       | <input type="radio"/> Nunca o menos 1 vez al mes<br><input checked="" type="radio"/> 1 a 3 veces mes<br><input type="radio"/> 1 vez semana<br><input type="radio"/> 2 a 4 veces semana<br><input type="radio"/> 5 a 6 veces semana<br><input type="radio"/> 1 vez al día<br><input type="radio"/> 2 a 3 veces al día<br><input type="radio"/> 5 a 6 veces al día<br><input type="radio"/> más 6 veces al día |
| margarina           | <input type="radio"/> Nunca o menos 1 vez al mes<br><input checked="" type="radio"/> 1 a 3 veces mes<br><input type="radio"/> 1 vez semana<br><input type="radio"/> 2 a 4 veces semana<br><input type="radio"/> 5 a 6 veces semana<br><input type="radio"/> 1 vez al día<br><input type="radio"/> 2 a 3 veces al día<br><input type="radio"/> 5 a 6 veces al día<br><input type="radio"/> más 6 veces al día |
| mantequilla         | <input type="radio"/> Nunca o menos 1 vez al mes<br><input checked="" type="radio"/> 1 a 3 veces mes<br><input type="radio"/> 1 vez semana<br><input type="radio"/> 2 a 4 veces semana<br><input type="radio"/> 5 a 6 veces semana<br><input type="radio"/> 1 vez al día<br><input type="radio"/> 2 a 3 veces al día<br><input type="radio"/> 5 a 6 veces al día<br><input type="radio"/> más 6 veces al día |
| galletas tipo maria | <input type="radio"/> Nunca o menos 1 vez al mes<br><input checked="" type="radio"/> 1 a 3 veces mes<br><input type="radio"/> 1 vez semana<br><input type="radio"/> 2 a 4 veces semana<br><input type="radio"/> 5 a 6 veces semana<br><input type="radio"/> 1 vez al día<br><input type="radio"/> 2 a 3 veces al día<br><input type="radio"/> 5 a 6 veces al día<br><input type="radio"/> más 6 veces al día |

---

galletas chocolate

- ☒ Nunca o menos 1 vez al mes  
☐ 1 a 3 veces mes  
☐ 1 vez semana  
☐ 2 a 4 veces semana  
☐ 5 a 6 veces semana  
☐ 1 vez al día  
☐ 2 a 3 veces al día  
☐ 5 a 6 veces al día  
☐ más 6 veces al día

---

bolleria

- ☐ Nunca o menos 1 vez al mes  
☒ 1 a 3 veces mes  
☐ 1 vez semana  
☐ 2 a 4 veces semana  
☐ 5 a 6 veces semana  
☐ 1 vez al día  
☐ 2 a 3 veces al día  
☐ 5 a 6 veces al día  
☐ más 6 veces al día

---

chocolate o bombones

- ☒ Nunca o menos 1 vez al mes  
☐ 1 a 3 veces mes  
☐ 1 vez semana  
☐ 2 a 4 veces semana  
☐ 5 a 6 veces semana  
☐ 1 vez al día  
☐ 2 a 3 veces al día  
☐ 5 a 6 veces al día  
☐ más 6 veces al día

---

chocolate polvo o colacao

- ☐ Nunca o menos 1 vez al mes  
☒ 1 a 3 veces mes  
☐ 1 vez semana  
☐ 2 a 4 veces semana  
☐ 5 a 6 veces semana  
☐ 1 vez al día  
☐ 2 a 3 veces al día  
☐ 5 a 6 veces al día  
☐ más 6 veces al día

---

vino tinto

- ☒ Nunca o menos 1 vez al mes  
☐ 1 a 3 veces mes  
☐ 1 vez semana  
☐ 2 a 4 veces semana  
☐ 5 a 6 veces semana  
☐ 1 vez al día  
☐ 2 a 3 veces al día  
☐ 5 a 6 veces al día  
☐ más 6 veces al día

---

vino blanco

- ☒ Nunca o menos 1 vez al mes  
☐ 1 a 3 veces mes  
☐ 1 vez semana  
☐ 2 a 4 veces semana  
☐ 5 a 6 veces semana  
☐ 1 vez al día  
☐ 2 a 3 veces al día  
☐ 5 a 6 veces al día  
☐ más 6 veces al día

|                       |                                                                                                                                                                                                                                                                                                                                                                                                              |
|-----------------------|--------------------------------------------------------------------------------------------------------------------------------------------------------------------------------------------------------------------------------------------------------------------------------------------------------------------------------------------------------------------------------------------------------------|
| vino seco o vermut    | <input checked="" type="radio"/> Nunca o menos 1 vez al mes<br><input type="radio"/> 1 a 3 veces mes<br><input type="radio"/> 1 vez semana<br><input type="radio"/> 2 a 4 veces semana<br><input type="radio"/> 5 a 6 veces semana<br><input type="radio"/> 1 vez al día<br><input type="radio"/> 2 a 3 veces al día<br><input type="radio"/> 5 a 6 veces al día<br><input type="radio"/> más 6 veces al día |
| cerveza               | <input checked="" type="radio"/> Nunca o menos 1 vez al mes<br><input type="radio"/> 1 a 3 veces mes<br><input type="radio"/> 1 vez semana<br><input type="radio"/> 2 a 4 veces semana<br><input type="radio"/> 5 a 6 veces semana<br><input type="radio"/> 1 vez al día<br><input type="radio"/> 2 a 3 veces al día<br><input type="radio"/> 5 a 6 veces al día<br><input type="radio"/> más 6 veces al día |
| cerveza sin alcohol   | <input checked="" type="radio"/> Nunca o menos 1 vez al mes<br><input type="radio"/> 1 a 3 veces mes<br><input type="radio"/> 1 vez semana<br><input type="radio"/> 2 a 4 veces semana<br><input type="radio"/> 5 a 6 veces semana<br><input type="radio"/> 1 vez al día<br><input type="radio"/> 2 a 3 veces al día<br><input type="radio"/> 5 a 6 veces al día<br><input type="radio"/> más 6 veces al día |
| licores               | <input checked="" type="radio"/> Nunca o menos 1 vez al mes<br><input type="radio"/> 1 a 3 veces mes<br><input type="radio"/> 1 vez semana<br><input type="radio"/> 2 a 4 veces semana<br><input type="radio"/> 5 a 6 veces semana<br><input type="radio"/> 1 vez al día<br><input type="radio"/> 2 a 3 veces al día<br><input type="radio"/> 5 a 6 veces al día<br><input type="radio"/> más 6 veces al día |
| ginebra o ron o vodka | <input checked="" type="radio"/> Nunca o menos 1 vez al mes<br><input type="radio"/> 1 a 3 veces mes<br><input type="radio"/> 1 vez semana<br><input type="radio"/> 2 a 4 veces semana<br><input type="radio"/> 5 a 6 veces semana<br><input type="radio"/> 1 vez al día<br><input type="radio"/> 2 a 3 veces al día<br><input type="radio"/> 5 a 6 veces al día<br><input type="radio"/> más 6 veces al día |
| refresco normal       | <input checked="" type="radio"/> Nunca o menos 1 vez al mes<br><input type="radio"/> 1 a 3 veces mes<br><input type="radio"/> 1 vez semana<br><input type="radio"/> 2 a 4 veces semana<br><input type="radio"/> 5 a 6 veces semana<br><input type="radio"/> 1 vez al día<br><input type="radio"/> 2 a 3 veces al día<br><input type="radio"/> 5 a 6 veces al día<br><input type="radio"/> más 6 veces al día |

---

refresco sin azúcar

- ☒ Nunca o menos 1 vez al mes  
☐ 1 a 3 veces mes  
☐ 1 vez semana  
☐ 2 a 4 veces semana  
☐ 5 a 6 veces semana  
☐ 1 vez al día  
☐ 2 a 3 veces al día  
☐ 5 a 6 veces al día  
☐ más 6 veces al día

---

Agua del grifo

- ☐ Nunca o menos 1 vez al mes  
☐ 1 a 3 veces mes  
☐ 1 vez semana  
☐ 2 a 4 veces semana  
☐ 5 a 6 veces semana  
☐ 1 vez al día  
☐ 2 a 3 veces al día  
☒ 5 a 6 veces al día  
☐ más 6 veces al día

---

agua embotellada sin gas

- ☐ Nunca o menos 1 vez al mes  
☐ 1 a 3 veces mes  
☐ 1 vez semana  
☒ 2 a 4 veces semana  
☐ 5 a 6 veces semana  
☐ 1 vez al día  
☐ 2 a 3 veces al día  
☐ 5 a 6 veces al día  
☐ más 6 veces al día

---

agua embotellada con gas

- ☒ Nunca o menos 1 vez al mes  
☐ 1 a 3 veces mes  
☐ 1 vez semana  
☐ 2 a 4 veces semana  
☐ 5 a 6 veces semana  
☐ 1 vez al día  
☐ 2 a 3 veces al día  
☐ 5 a 6 veces al día  
☐ más 6 veces al día

---

zumو frutas embasado

- ☐ Nunca o menos 1 vez al mes  
☒ 1 a 3 veces mes  
☐ 1 vez semana  
☐ 2 a 4 veces semana  
☐ 5 a 6 veces semana  
☐ 1 vez al día  
☐ 2 a 3 veces al día  
☐ 5 a 6 veces al día  
☐ más 6 veces al día

---

cafe

- ☐ Nunca o menos 1 vez al mes  
☐ 1 a 3 veces mes  
☐ 1 vez semana  
☐ 2 a 4 veces semana  
☐ 5 a 6 veces semana  
☒ 1 vez al día  
☐ 2 a 3 veces al día  
☐ 5 a 6 veces al día  
☐ más 6 veces al día

---

cafe descafeinado

- ☒ Nunca o menos 1 vez al mes  
☐ 1 a 3 veces mes  
☐ 1 vez semana  
☐ 2 a 4 veces semana  
☐ 5 a 6 veces semana  
☐ 1 vez al día  
☐ 2 a 3 veces al día  
☐ 5 a 6 veces al día  
☐ más 6 veces al día

---

te o infusión

- ☐ Nunca o menos 1 vez al mes  
☐ 1 a 3 veces mes  
☒ 1 vez semana  
☐ 2 a 4 veces semana  
☐ 5 a 6 veces semana  
☐ 1 vez al día  
☐ 2 a 3 veces al día  
☐ 5 a 6 veces al día  
☐ más 6 veces al día

---

sopa o puré verduras

- ☐ Nunca o menos 1 vez al mes  
☐ 1 a 3 veces mes  
☐ 1 vez semana  
☐ 2 a 4 veces semana  
☒ 5 a 6 veces semana  
☐ 1 vez al día  
☐ 2 a 3 veces al día  
☐ 5 a 6 veces al día  
☐ más 6 veces al día

---

croquetas pollo jamón

- ☐ Nunca o menos 1 vez al mes  
☒ 1 a 3 veces mes  
☐ 1 vez semana  
☐ 2 a 4 veces semana  
☐ 5 a 6 veces semana  
☐ 1 vez al día  
☐ 2 a 3 veces al día  
☐ 5 a 6 veces al día  
☐ más 6 veces al día

---

croquetas pescado

- ☐ Nunca o menos 1 vez al mes  
☒ 1 a 3 veces mes  
☐ 1 vez semana  
☐ 2 a 4 veces semana  
☐ 5 a 6 veces semana  
☐ 1 vez al día  
☐ 2 a 3 veces al día  
☐ 5 a 6 veces al día  
☐ más 6 veces al día

---

mayonesa

- ☐ Nunca o menos 1 vez al mes  
☒ 1 a 3 veces mes  
☐ 1 vez semana  
☐ 2 a 4 veces semana  
☐ 5 a 6 veces semana  
☐ 1 vez al día  
☐ 2 a 3 veces al día  
☐ 5 a 6 veces al día  
☐ más 6 veces al día

|                  |                                                                                                                                                                                                                                                                                                                                                                                                              |
|------------------|--------------------------------------------------------------------------------------------------------------------------------------------------------------------------------------------------------------------------------------------------------------------------------------------------------------------------------------------------------------------------------------------------------------|
| salsa tomate     | <input type="radio"/> Nunca o menos 1 vez al mes<br><input type="radio"/> 1 a 3 veces mes<br><input checked="" type="radio"/> 1 vez semana<br><input type="radio"/> 2 a 4 veces semana<br><input type="radio"/> 5 a 6 veces semana<br><input type="radio"/> 1 vez al día<br><input type="radio"/> 2 a 3 veces al día<br><input type="radio"/> 5 a 6 veces al día<br><input type="radio"/> más 6 veces al día |
| ketchup          | <input type="radio"/> Nunca o menos 1 vez al mes<br><input checked="" type="radio"/> 1 a 3 veces mes<br><input type="radio"/> 1 vez semana<br><input type="radio"/> 2 a 4 veces semana<br><input type="radio"/> 5 a 6 veces semana<br><input type="radio"/> 1 vez al día<br><input type="radio"/> 2 a 3 veces al día<br><input type="radio"/> 5 a 6 veces al día<br><input type="radio"/> más 6 veces al día |
| sal              | <input type="radio"/> Nunca o menos 1 vez al mes<br><input type="radio"/> 1 a 3 veces mes<br><input type="radio"/> 1 vez semana<br><input type="radio"/> 2 a 4 veces semana<br><input type="radio"/> 5 a 6 veces semana<br><input type="radio"/> 1 vez al día<br><input checked="" type="radio"/> 2 a 3 veces al día<br><input type="radio"/> 5 a 6 veces al día<br><input type="radio"/> más 6 veces al día |
| ajo              | <input type="radio"/> Nunca o menos 1 vez al mes<br><input checked="" type="radio"/> 1 a 3 veces mes<br><input type="radio"/> 1 vez semana<br><input type="radio"/> 2 a 4 veces semana<br><input type="radio"/> 5 a 6 veces semana<br><input type="radio"/> 1 vez al día<br><input type="radio"/> 2 a 3 veces al día<br><input type="radio"/> 5 a 6 veces al día<br><input type="radio"/> más 6 veces al día |
| mermelada o miel | <input checked="" type="radio"/> Nunca o menos 1 vez al mes<br><input type="radio"/> 1 a 3 veces mes<br><input type="radio"/> 1 vez semana<br><input type="radio"/> 2 a 4 veces semana<br><input type="radio"/> 5 a 6 veces semana<br><input type="radio"/> 1 vez al día<br><input type="radio"/> 2 a 3 veces al día<br><input type="radio"/> 5 a 6 veces al día<br><input type="radio"/> más 6 veces al día |
| azúcar           | <input type="radio"/> Nunca o menos 1 vez al mes<br><input type="radio"/> 1 a 3 veces mes<br><input type="radio"/> 1 vez semana<br><input type="radio"/> 2 a 4 veces semana<br><input type="radio"/> 5 a 6 veces semana<br><input checked="" type="radio"/> 1 vez al día<br><input type="radio"/> 2 a 3 veces al día<br><input type="radio"/> 5 a 6 veces al día<br><input type="radio"/> más 6 veces al día |

---

Otro alimento

---

---

suplementos vitamínicos

- ☐ si  
☒ no
- 

---

suplementos vitamínicos

---

---

dieta previa

- ☐ si  
☒ no
- 

---

motivo dieta

- ☒ no dieta  
☐ control peso  
☐ control colesterol  
☐ control diabetes  
☐ problemas estómago  
☐ problemas vesícula o hepáticos  
☐ HTA o cardiopatía  
☐ problemas renales  
☐ alergia alimentaria  
☐ ácido úrico elevado  
☐ vegetariana  
☐ otros
- 

---

cambio alimentos año previo gestación

- ☒ si  
☐ no
- 

---

cambio lácteos

- ☐ eliminado  
☐ disminuido  
☒ igual  
☐ aumentado  
☐ no sabe
- 

---

cambio huevos

- ☐ eliminado  
☐ disminuido  
☒ igual  
☐ aumentado  
☐ no sabe
- 

---

cambio carne

- ☐ eliminado  
☐ disminuido  
☒ igual  
☐ aumentado  
☐ no sabe
- 

---

cambio pescado

- ☐ eliminado  
☐ disminuido  
☒ igual  
☐ aumentado  
☐ no sabe
- 

---

cambio verduras

- ☐ eliminado  
☐ disminuido  
☒ igual  
☐ aumentado  
☐ no sabe
-

|                            |                                                                                                                                                                                                                        |
|----------------------------|------------------------------------------------------------------------------------------------------------------------------------------------------------------------------------------------------------------------|
| cambio legumbres           | <input type="radio"/> eliminado<br><input type="radio"/> disminuido<br><input checked="" type="radio"/> igual<br><input type="radio"/> aumentado<br><input type="radio"/> no sabe                                      |
| cambio fruta               | <input type="radio"/> eliminado<br><input type="radio"/> disminuido<br><input checked="" type="radio"/> igual<br><input type="radio"/> aumentado<br><input type="radio"/> no sabe                                      |
| cambio pan                 | <input type="radio"/> eliminado<br><input type="radio"/> disminuido<br><input checked="" type="radio"/> igual<br><input type="radio"/> aumentado<br><input type="radio"/> no sabe                                      |
| cambio aceite oliva        | <input type="radio"/> eliminado<br><input type="radio"/> disminuido<br><input checked="" type="radio"/> igual<br><input type="radio"/> aumentado<br><input type="radio"/> no sabe                                      |
| cambio mante o margarina   | <input type="radio"/> eliminado<br><input type="radio"/> disminuido<br><input checked="" type="radio"/> igual<br><input type="radio"/> aumentado<br><input type="radio"/> no sabe                                      |
| cambio azúcar y dulces     | <input type="radio"/> eliminado<br><input checked="" type="radio"/> disminuido<br><input type="radio"/> igual<br><input type="radio"/> aumentado<br><input type="radio"/> no sabe                                      |
| cambio bebidas alcohólicas | <input checked="" type="radio"/> eliminado<br><input type="radio"/> disminuido<br><input type="radio"/> igual<br><input type="radio"/> aumentado<br><input type="radio"/> no sabe                                      |
| frecuencia comidas fritas  | <input type="radio"/> a diario<br><input type="radio"/> 5 a 6 veces semana<br><input type="radio"/> 2 a 4 veces semana<br><input type="radio"/> 1 vez semana<br><input checked="" type="radio"/> menos de 1 vez semana |
| carne                      | <input type="radio"/> no como<br><input type="radio"/> cruda<br><input type="radio"/> poco hecha<br><input checked="" type="radio"/> hecha<br><input type="radio"/> muy hecha                                          |
| grasa visible carne        | <input type="radio"/> quita toda<br><input checked="" type="radio"/> quita mayoría<br><input type="radio"/> quita un poco<br><input type="radio"/> no quita nada                                                       |



|                                |                                                                                                                                                                                                                                                          |
|--------------------------------|----------------------------------------------------------------------------------------------------------------------------------------------------------------------------------------------------------------------------------------------------------|
| cocina carne                   | <input checked="" type="radio"/> a la plancha<br><input type="radio"/> a la parrilla<br><input type="radio"/> asada<br><input type="radio"/> frita<br><input type="radio"/> guisada                                                                      |
| tostado quemado carne          | <input checked="" type="radio"/> nunca<br><input type="radio"/> 1 vez mes<br><input type="radio"/> 2 a 3 veces mes<br><input type="radio"/> 1 vez semana<br><input type="radio"/> 2 a 3 semanas                                                          |
| tostado quemado pescado        | <input checked="" type="radio"/> nunca<br><input type="radio"/> 1 vez mes<br><input type="radio"/> 2 a 3 veces mes<br><input type="radio"/> 1 vez semana<br><input type="radio"/> 2 a 3 semanas                                                          |
| socarrat paella                | <input checked="" type="radio"/> nunca<br><input type="radio"/> 1 vez mes<br><input type="radio"/> 2 a 3 veces mes<br><input type="radio"/> 1 vez semana<br><input type="radio"/> 2 a 3 semanas                                                          |
| grasa o aceite cocinar         | <input type="radio"/> mantequilla<br><input type="radio"/> margarina<br><input type="radio"/> aceite oliva<br><input checked="" type="radio"/> aceite oliva virgen extra<br><input type="radio"/> aceite vegetal<br><input type="radio"/> mezcla aceites |
| grasa aceite aliñar            | <input type="radio"/> mantequilla<br><input type="radio"/> margarina<br><input type="radio"/> aceite oliva<br><input checked="" type="radio"/> aceite oliva virgen extra<br><input type="radio"/> aceite vegetal<br><input type="radio"/> mezcla aceites |
| grasa aceite freir             | <input type="radio"/> mantequilla<br><input type="radio"/> margarina<br><input type="radio"/> aceite oliva<br><input type="radio"/> aceite oliva virgen extra<br><input checked="" type="radio"/> aceite vegetal<br><input type="radio"/> mezcla aceites |
| Ejercicio cuestionario         | <input checked="" type="radio"/> si<br><input type="radio"/> no                                                                                                                                                                                          |
| horas de sueño incluido siesta | [*DATA REMOVED*]                                                                                                                                                                                                                                         |
| minutos siesta                 | [*DATA REMOVED*]                                                                                                                                                                                                                                         |
| horas televisión semana        | [*DATA REMOVED*]                                                                                                                                                                                                                                         |

|                                        |                                                                                                                                                                                                                                                                                                                                                                           |
|----------------------------------------|---------------------------------------------------------------------------------------------------------------------------------------------------------------------------------------------------------------------------------------------------------------------------------------------------------------------------------------------------------------------------|
| actividad trabajo                      | <input type="radio"/> casi siempre sentado<br><input type="radio"/> sentado 50 por cien<br><input type="radio"/> casi siempre de pie, quieto<br><input checked="" type="radio"/> casi siempre levantado caminando y llevando pocas cosas<br><input type="radio"/> casi siempre levantado, caminando y llevado muchas cosas<br><input type="radio"/> trabajo manual pesado |
| tiempo caminar o bici al día           | <input type="radio"/> casi nunca<br><input type="radio"/> menos 20min día<br><input checked="" type="radio"/> 20 a 40 min día<br><input type="radio"/> 40 a 60 min día<br><input type="radio"/> 1h o 1h y media día<br><input type="radio"/> más de 1h y media al día                                                                                                     |
| tiempo tareas casa al día              | <input type="radio"/> menos de 1h día<br><input type="radio"/> 1 a 2h día<br><input type="radio"/> 3 a 4h día<br><input checked="" type="radio"/> 5 a 6h día<br><input type="radio"/> 7 a 8h día<br><input type="radio"/> más de 8h día                                                                                                                                   |
| tiempo libre televisión ordenador leer | <input checked="" type="radio"/> menos 1h día<br><input type="radio"/> 1h día<br><input type="radio"/> 2h día<br><input type="radio"/> 3h día<br><input type="radio"/> 4h día<br><input type="radio"/> 5 a 6h día<br><input type="radio"/> mas 6h día                                                                                                                     |
| tiempo libre ejercicio o deporte       | <input checked="" type="radio"/> menos 1h semana<br><input type="radio"/> 1h semana<br><input type="radio"/> 2h semana<br><input type="radio"/> 3h semana<br><input type="radio"/> 4 a 5h semana<br><input type="radio"/> mas 5h semana                                                                                                                                   |
| como se considera                      | <input type="radio"/> sedentaria<br><input type="radio"/> poco activa<br><input checked="" type="radio"/> moderadamente activa<br><input type="radio"/> bastante activa<br><input type="radio"/> muy activa<br><input type="radio"/> no sabe                                                                                                                              |
| FUR                                    | [*DATA REMOVED*]                                                                                                                                                                                                                                                                                                                                                          |
| Semanas gestación 2T                   | [*DATA REMOVED*]                                                                                                                                                                                                                                                                                                                                                          |
| Días gestación 2T                      | [*DATA REMOVED*]                                                                                                                                                                                                                                                                                                                                                          |
| DBP 2T                                 | [*DATA REMOVED*]                                                                                                                                                                                                                                                                                                                                                          |
| CC 2T                                  | [*DATA REMOVED*]                                                                                                                                                                                                                                                                                                                                                          |
| AC 2T                                  | [*DATA REMOVED*]                                                                                                                                                                                                                                                                                                                                                          |

|                                                   |                                                                                                                                                                                                 |
|---------------------------------------------------|-------------------------------------------------------------------------------------------------------------------------------------------------------------------------------------------------|
| LF 2T                                             | [*DATA REMOVED*]                                                                                                                                                                                |
| PFE 2T (Hadlock)                                  | [*DATA REMOVED*]                                                                                                                                                                                |
| Semanas gestación 3T                              | [*DATA REMOVED*]                                                                                                                                                                                |
| días 3T                                           | [*DATA REMOVED*]                                                                                                                                                                                |
| DBP 3T                                            | [*DATA REMOVED*]                                                                                                                                                                                |
| CC 3T                                             | [*DATA REMOVED*]                                                                                                                                                                                |
| AC 3T                                             | [*DATA REMOVED*]                                                                                                                                                                                |
| LF 3T                                             | [*DATA REMOVED*]                                                                                                                                                                                |
| PFE 3T (Hadlock)                                  | [*DATA REMOVED*]                                                                                                                                                                                |
| Semanas de gestación final                        | [*DATA REMOVED*]                                                                                                                                                                                |
| días gestación final                              | [*DATA REMOVED*]                                                                                                                                                                                |
| Localización placenta                             | <input type="radio"/> anterior<br><input type="radio"/> lateral derecha<br><input type="radio"/> lateral izquierda<br><input checked="" type="radio"/> posterior<br><input type="radio"/> fondo |
| Presentación longitudinal cefálica                | <input type="radio"/> no<br><input checked="" type="radio"/> si                                                                                                                                 |
| Dorso                                             | <input type="radio"/> izquierda anterior<br><input type="radio"/> izquierda posterior<br><input checked="" type="radio"/> derecha anterior<br><input type="radio"/> derecha posterior           |
| diámetro biparietal                               | [*DATA REMOVED*]                                                                                                                                                                                |
| Circunferencia craneal                            | [*DATA REMOVED*]                                                                                                                                                                                |
| Circunferencia abdominal                          | [*DATA REMOVED*]                                                                                                                                                                                |
| Longitud de femur                                 | [*DATA REMOVED*]                                                                                                                                                                                |
| tejido celular subcutáneo a nivel del muslo en mm | [*DATA REMOVED*]                                                                                                                                                                                |
| tejido celular subcutáneo en abdomen en mm        | [*DATA REMOVED*]                                                                                                                                                                                |
| Volumen del muslo en cm3                          | [*DATA REMOVED*]                                                                                                                                                                                |
| Peso fetal estimado según fórmula de Hadlock      | [*DATA REMOVED*]                                                                                                                                                                                |

|                                               |                                                                                                                                                          |
|-----------------------------------------------|----------------------------------------------------------------------------------------------------------------------------------------------------------|
| Percentil                                     | [*DATA REMOVED*]                                                                                                                                         |
| Peso fetal estimado según fórmula de Scioscia | <hr/>                                                                                                                                                    |
| Peso fetal estimado según fórmula de LEE      | <hr/>                                                                                                                                                    |
| Tipo de parto                                 | <input checked="" type="radio"/> eutocico<br><input type="radio"/> instrumentado/ventosa<br><input type="radio"/> cesarea                                |
| fecha de nacimiento                           | [*DATA REMOVED*]                                                                                                                                         |
| Días entre exploración y nacimiento           | [*DATA REMOVED*]                                                                                                                                         |
| Peso RN en g                                  | [*DATA REMOVED*]                                                                                                                                         |
| sexo                                          | <input checked="" type="radio"/> mujer<br><input type="radio"/> hombre                                                                                   |
| Apgar 1 minuto                                | [*DATA REMOVED*]                                                                                                                                         |
| Apgar 5 minutos                               | [*DATA REMOVED*]                                                                                                                                         |
| Apgar 10 minutos                              | <hr/>                                                                                                                                                    |
| antecedente Covid durante gestación           | <input type="radio"/> Yes<br><input checked="" type="radio"/> No                                                                                         |
| Nivel de estudios                             | <input type="radio"/> ninguno<br><input type="radio"/> primarios<br><input type="radio"/> secundarios<br><input checked="" type="radio"/> universitarios |

# Base\_datos\_estimacion\_peso\_fetal

|                                       |                                                                                                                                                                                                                                                                                      |
|---------------------------------------|--------------------------------------------------------------------------------------------------------------------------------------------------------------------------------------------------------------------------------------------------------------------------------------|
| Número de identificación participante | 144                                                                                                                                                                                                                                                                                  |
| CODIGO PARTICIPANTE                   |                                                                                                                                                                                                                                                                                      |
| Edad                                  | [*DATA REMOVED*]                                                                                                                                                                                                                                                                     |
| Gestaciones                           | <input type="radio"/> 1<br><input type="radio"/> 2<br><input checked="" type="radio"/> 3<br><input type="radio"/> mas de 3                                                                                                                                                           |
| partos                                | <input type="radio"/> 0<br><input checked="" type="radio"/> 1<br><input type="radio"/> 2<br><input type="radio"/> 3<br><input type="radio"/> mas de 3                                                                                                                                |
| cesáreas                              | <input checked="" type="radio"/> 0<br><input type="radio"/> 1<br><input type="radio"/> 2<br><input type="radio"/> 3<br><input type="radio"/> mas de 3                                                                                                                                |
| Abortos                               | <input type="radio"/> 0<br><input checked="" type="radio"/> 1<br><input type="radio"/> 2<br><input type="radio"/> 3<br><input type="radio"/> mas de 3                                                                                                                                |
| Tipo de gestacion                     | <input checked="" type="radio"/> espontanea<br><input type="radio"/> IAC inseminación artificial conyuge<br><input type="radio"/> IAD inseminación artificial donante<br><input type="radio"/> FIV Fecundación in Vitro<br><input type="radio"/> Ovodon FIV con donación de ovocitos |
| peso previo a embarazo                | [*DATA REMOVED*]                                                                                                                                                                                                                                                                     |
| Ganancia ponderal embarazo            | [*DATA REMOVED*]                                                                                                                                                                                                                                                                     |
| Talla madre                           | [*DATA REMOVED*]                                                                                                                                                                                                                                                                     |
| IMC previo embarazo                   | 30.468749999999993                                                                                                                                                                                                                                                                   |
| Patología obstétrica                  | <input checked="" type="radio"/> no<br><input type="radio"/> si                                                                                                                                                                                                                      |
| Diabetes pregestacional               | <input checked="" type="radio"/> no<br><input type="radio"/> si                                                                                                                                                                                                                      |
| Diabetes gestacional                  | <input checked="" type="radio"/> no<br><input type="radio"/> si                                                                                                                                                                                                                      |

|                                            |                                                                                                                                                                                      |
|--------------------------------------------|--------------------------------------------------------------------------------------------------------------------------------------------------------------------------------------|
| Diabetes gestacional con insulina          | <input checked="" type="radio"/> no<br><input type="radio"/> si                                                                                                                      |
| Diabetes gestacional con dieta y ejercicio | <input checked="" type="radio"/> no<br><input type="radio"/> si                                                                                                                      |
| Percentil fetos previos                    | <input type="radio"/> Nada<br><input checked="" type="radio"/> percentil menor de 10<br><input type="radio"/> percentil entre 10 y 90<br><input type="radio"/> percentil mayor de 90 |
| Exfumadora                                 | <input checked="" type="radio"/> Nada<br><input type="radio"/> menos de 5 años<br><input type="radio"/> 5 a 10 años<br><input type="radio"/> mayor o igual a 10 años                 |
| Hábito tabáquico                           | <input type="radio"/> no<br><input checked="" type="radio"/> si                                                                                                                      |
| fumadora                                   | [*DATA REMOVED*]                                                                                                                                                                     |
| Consumo otros tóxicos                      | <input checked="" type="radio"/> no<br><input type="radio"/> si                                                                                                                      |
| Hb 1T                                      | [*DATA REMOVED*]                                                                                                                                                                     |
| Htc 1T                                     | [*DATA REMOVED*]                                                                                                                                                                     |
| Hb 2T                                      | [*DATA REMOVED*]                                                                                                                                                                     |
| HTC 2T                                     | [*DATA REMOVED*]                                                                                                                                                                     |
| Hb 3T                                      | [*DATA REMOVED*]                                                                                                                                                                     |
| HTC 3T                                     | [*DATA REMOVED*]                                                                                                                                                                     |
| Suplemento FE oral                         | <input checked="" type="radio"/> si<br><input type="radio"/> no                                                                                                                      |
| Suplemento fe iv                           | <input type="radio"/> si<br><input checked="" type="radio"/> no                                                                                                                      |
| Transfusión                                | <input checked="" type="radio"/> no<br><input type="radio"/> si                                                                                                                      |
| Solicitada Vit D                           | <input type="radio"/> no<br><input checked="" type="radio"/> si                                                                                                                      |
| Deficit vit D                              | <input type="radio"/> no<br><input checked="" type="radio"/> si                                                                                                                      |
| Suplemento vit D                           | <input checked="" type="radio"/> si<br><input type="radio"/> no                                                                                                                      |

|                       |                                                                                                                                                                                                                                                                                                                                                                                                              |
|-----------------------|--------------------------------------------------------------------------------------------------------------------------------------------------------------------------------------------------------------------------------------------------------------------------------------------------------------------------------------------------------------------------------------------------------------|
| Dieta, cuestionario   | <input checked="" type="radio"/> sí<br><input type="radio"/> no                                                                                                                                                                                                                                                                                                                                              |
| Leche entera          | <input type="radio"/> Nunca o menos 1 vez al mes<br><input type="radio"/> 1 a 3 veces mes<br><input type="radio"/> 1 vez semana<br><input type="radio"/> 2 a 4 veces semana<br><input type="radio"/> 5 a 6 veces semana<br><input type="radio"/> 1 vez al día<br><input checked="" type="radio"/> 2 a 3 veces al día<br><input type="radio"/> 5 a 6 veces al día<br><input type="radio"/> más 6 veces al día |
| Leche semidesnatada   | <input checked="" type="radio"/> Nunca o menos 1 vez al mes<br><input type="radio"/> 1 a 3 veces mes<br><input type="radio"/> 1 vez semana<br><input type="radio"/> 2 a 4 veces semana<br><input type="radio"/> 5 a 6 veces semana<br><input type="radio"/> 1 vez al día<br><input type="radio"/> 2 a 3 veces al día<br><input type="radio"/> 5 a 6 veces al día<br><input type="radio"/> mas 6 veces al día |
| Leche desnatada       | <input checked="" type="radio"/> Nunca o menos 1 vez al mes<br><input type="radio"/> 1 a 3 veces mes<br><input type="radio"/> 1 vez semana<br><input type="radio"/> 2 a 4 veces semana<br><input type="radio"/> 5 a 6 veces semana<br><input type="radio"/> 1 vez al día<br><input type="radio"/> 2 a 3 veces al día<br><input type="radio"/> 5 a 6 veces al día<br><input type="radio"/> más 6 veces al día |
| Leche condensada      | <input checked="" type="radio"/> Nunca o menos 1 vez al mes<br><input type="radio"/> 1 a 3 veces mes<br><input type="radio"/> 1 vez semana<br><input type="radio"/> 2 a 4 veces semana<br><input type="radio"/> 5 a 6 veces semana<br><input type="radio"/> 1 vez al día<br><input type="radio"/> 2 a 3 veces al día<br><input type="radio"/> 5 a 6 veces al día<br><input type="radio"/> más 6 veces al día |
| nata o crema de leche | <input checked="" type="radio"/> Nunca o menos 1 vez al mes<br><input type="radio"/> 1 a 3 veces mes<br><input type="radio"/> 1 vez semana<br><input type="radio"/> 2 a 4 veces semana<br><input type="radio"/> 5 a 6 veces semana<br><input type="radio"/> 1 vez al día<br><input type="radio"/> 2 a 3 veces al día<br><input type="radio"/> 5 a 6 veces al día<br><input type="radio"/> más 6 veces al día |

---

Yogurt Entero

- ☒ Nunca o menos 1 vez al mes  
☐ 1 a 3 veces mes  
☐ 1 vez semana  
☐ 2 a 4 veces semana  
☐ 5 a 6 veces semana  
☐ 1 vez al día  
☐ 2 a 3 veces al día  
☐ 5 a 6 veces al día  
☐ más 6 veces al día

---

Yogurt desnatado

- ☒ Nunca o menos 1 vez al mes  
☐ 1 a 3 veces mes  
☐ 1 vez semana  
☐ 2 a 4 veces semana  
☐ 5 a 6 veces semana  
☐ 1 vez al día  
☐ 2 a 3 veces al día  
☐ 5 a 6 veces al día  
☐ más 6 veces al día

---

100g requesón o queso blando o queso fresco

- ☒ Nunca o menos 1 vez al mes  
☐ 1 a 3 veces mes  
☐ 1 vez semana  
☐ 2 a 4 veces semana  
☐ 5 a 6 veces semana  
☐ 1 vez al día  
☐ 2 a 3 veces al día  
☐ 5 a 6 veces al día  
☐ más 6 veces al día

---

queso curado o semicurado o cremoso

- ☐ Nunca o menos 1 vez al mes  
☒ 1 a 3 veces mes  
☐ 1 vez semana  
☐ 2 a 4 veces semana  
☐ 5 a 6 veces semana  
☐ 1 vez al día  
☐ 2 a 3 veces al día  
☐ 5 a 6 veces al día  
☐ más 6 veces al día

---

natillas flan pudding

- ☐ Nunca o menos 1 vez al mes  
☒ 1 a 3 veces mes  
☐ 1 vez semana  
☐ 2 a 4 veces semana  
☐ 5 a 6 veces semana  
☐ 1 vez al día  
☐ 2 a 3 veces al día  
☐ 5 a 6 veces al día  
☐ más 6 veces al día

---

Helado

- ☐ Nunca o menos 1 vez al mes  
☒ 1 a 3 veces mes  
☐ 1 vez semana  
☐ 2 a 4 veces semana  
☐ 5 a 6 veces semana  
☐ 1 vez al día  
☐ 2 a 3 veces al día  
☐ 5 a 6 veces al día  
☐ más 6 veces al día



|                                      |                                                                                                                                                                                                                                                                                                                                                                                                              |
|--------------------------------------|--------------------------------------------------------------------------------------------------------------------------------------------------------------------------------------------------------------------------------------------------------------------------------------------------------------------------------------------------------------------------------------------------------------|
| huevo                                | <input type="radio"/> Nunca o menos 1 vez al mes<br><input type="radio"/> 1 a 3 veces mes<br><input type="radio"/> 1 vez semana<br><input checked="" type="radio"/> 2 a 4 veces semana<br><input type="radio"/> 5 a 6 veces semana<br><input type="radio"/> 1 vez al día<br><input type="radio"/> 2 a 3 veces al día<br><input type="radio"/> 5 a 6 veces al día<br><input type="radio"/> más 6 veces al día |
| Pollo con piel                       | <input checked="" type="radio"/> Nunca o menos 1 vez al mes<br><input type="radio"/> 1 a 3 veces mes<br><input type="radio"/> 1 vez semana<br><input type="radio"/> 2 a 4 veces semana<br><input type="radio"/> 5 a 6 veces semana<br><input type="radio"/> 1 vez al día<br><input type="radio"/> 2 a 3 veces al día<br><input type="radio"/> 5 a 6 veces al día<br><input type="radio"/> más 6 veces al día |
| pollo sin piel                       | <input type="radio"/> Nunca o menos 1 vez al mes<br><input type="radio"/> 1 a 3 veces mes<br><input checked="" type="radio"/> 1 vez semana<br><input type="radio"/> 2 a 4 veces semana<br><input type="radio"/> 5 a 6 veces semana<br><input type="radio"/> 1 vez al día<br><input type="radio"/> 2 a 3 veces al día<br><input type="radio"/> 5 a 6 veces al día<br><input type="radio"/> más 6 veces al día |
| Ternera o cerdo o cordero            | <input type="radio"/> Nunca o menos 1 vez al mes<br><input type="radio"/> 1 a 3 veces mes<br><input checked="" type="radio"/> 1 vez semana<br><input type="radio"/> 2 a 4 veces semana<br><input type="radio"/> 5 a 6 veces semana<br><input type="radio"/> 1 vez al día<br><input type="radio"/> 2 a 3 veces al día<br><input type="radio"/> 5 a 6 veces al día<br><input type="radio"/> más 6 veces al día |
| carne caza: Conejo o codorniz o pato | <input checked="" type="radio"/> Nunca o menos 1 vez al mes<br><input type="radio"/> 1 a 3 veces mes<br><input type="radio"/> 1 vez semana<br><input type="radio"/> 2 a 4 veces semana<br><input type="radio"/> 5 a 6 veces semana<br><input type="radio"/> 1 vez al día<br><input type="radio"/> 2 a 3 veces al día<br><input type="radio"/> 5 a 6 veces al día<br><input type="radio"/> más 6 veces al día |
| Hígado de ternera o cerdo o pollo    | <input checked="" type="radio"/> Nunca o menos 1 vez al mes<br><input type="radio"/> 1 a 3 veces mes<br><input type="radio"/> 1 vez semana<br><input type="radio"/> 2 a 4 veces semana<br><input type="radio"/> 5 a 6 veces semana<br><input type="radio"/> 1 vez al día<br><input type="radio"/> 2 a 3 veces al día<br><input type="radio"/> 5 a 6 veces al día<br><input type="radio"/> más 6 veces al día |

|                     |                                                                                                                                                                                                                                                                                                                                                                                                              |
|---------------------|--------------------------------------------------------------------------------------------------------------------------------------------------------------------------------------------------------------------------------------------------------------------------------------------------------------------------------------------------------------------------------------------------------------|
| Vísceras            | <input checked="" type="radio"/> Nunca o menos 1 vez al mes<br><input type="radio"/> 1 a 3 veces mes<br><input type="radio"/> 1 vez semana<br><input type="radio"/> 2 a 4 veces semana<br><input type="radio"/> 5 a 6 veces semana<br><input type="radio"/> 1 vez al día<br><input type="radio"/> 2 a 3 veces al día<br><input type="radio"/> 5 a 6 veces al día<br><input type="radio"/> más 6 veces al día |
| Embutido            | <input checked="" type="radio"/> Nunca o menos 1 vez al mes<br><input type="radio"/> 1 a 3 veces mes<br><input type="radio"/> 1 vez semana<br><input type="radio"/> 2 a 4 veces semana<br><input type="radio"/> 5 a 6 veces semana<br><input type="radio"/> 1 vez al día<br><input type="radio"/> 2 a 3 veces al día<br><input type="radio"/> 5 a 6 veces al día<br><input type="radio"/> más 6 veces al día |
| Salchicha o similar | <input checked="" type="radio"/> Nunca o menos 1 vez al mes<br><input type="radio"/> 1 a 3 veces mes<br><input type="radio"/> 1 vez semana<br><input type="radio"/> 2 a 4 veces semana<br><input type="radio"/> 5 a 6 veces semana<br><input type="radio"/> 1 vez al día<br><input type="radio"/> 2 a 3 veces al día<br><input type="radio"/> 5 a 6 veces al día<br><input type="radio"/> más 6 veces al día |
| Pate o foiegras     | <input checked="" type="radio"/> Nunca o menos 1 vez al mes<br><input type="radio"/> 1 a 3 veces mes<br><input type="radio"/> 1 vez semana<br><input type="radio"/> 2 a 4 veces semana<br><input type="radio"/> 5 a 6 veces semana<br><input type="radio"/> 1 vez al día<br><input type="radio"/> 2 a 3 veces al día<br><input type="radio"/> 5 a 6 veces al día<br><input type="radio"/> más 6 veces al día |
| Hamburguesa         | <input type="radio"/> Nunca o menos 1 vez al mes<br><input type="radio"/> 1 a 3 veces mes<br><input checked="" type="radio"/> 1 vez semana<br><input type="radio"/> 2 a 4 veces semana<br><input type="radio"/> 5 a 6 veces semana<br><input type="radio"/> 1 vez al día<br><input type="radio"/> 2 a 3 veces al día<br><input type="radio"/> 5 a 6 veces al día<br><input type="radio"/> más 6 veces al día |
| tocino o bacon      | <input type="radio"/> Nunca o menos 1 vez al mes<br><input type="radio"/> 1 a 3 veces mes<br><input checked="" type="radio"/> 1 vez semana<br><input type="radio"/> 2 a 4 veces semana<br><input type="radio"/> 5 a 6 veces semana<br><input type="radio"/> 1 vez al día<br><input type="radio"/> 2 a 3 veces al día<br><input type="radio"/> 5 a 6 veces al día<br><input type="radio"/> más 6 veces al día |

|                        |                                                                                                                                                                                                                                                                                                                                                                                                              |
|------------------------|--------------------------------------------------------------------------------------------------------------------------------------------------------------------------------------------------------------------------------------------------------------------------------------------------------------------------------------------------------------------------------------------------------------|
| Pescado frito          | <input type="radio"/> Nunca o menos 1 vez al mes<br><input type="radio"/> 1 a 3 veces mes<br><input type="radio"/> 1 vez semana<br><input checked="" type="radio"/> 2 a 4 veces semana<br><input type="radio"/> 5 a 6 veces semana<br><input type="radio"/> 1 vez al día<br><input type="radio"/> 2 a 3 veces al día<br><input type="radio"/> 5 a 6 veces al día<br><input type="radio"/> más 6 veces al día |
| pescado hervido blanco | <input type="radio"/> Nunca o menos 1 vez al mes<br><input type="radio"/> 1 a 3 veces mes<br><input checked="" type="radio"/> 1 vez semana<br><input type="radio"/> 2 a 4 veces semana<br><input type="radio"/> 5 a 6 veces semana<br><input type="radio"/> 1 vez al día<br><input type="radio"/> 2 a 3 veces al día<br><input type="radio"/> 5 a 6 veces al día<br><input type="radio"/> más 6 veces al día |
| pescado hervido azul   | <input type="radio"/> Nunca o menos 1 vez al mes<br><input type="radio"/> 1 a 3 veces mes<br><input checked="" type="radio"/> 1 vez semana<br><input type="radio"/> 2 a 4 veces semana<br><input type="radio"/> 5 a 6 veces semana<br><input type="radio"/> 1 vez al día<br><input type="radio"/> 2 a 3 veces al día<br><input type="radio"/> 5 a 6 veces al día<br><input type="radio"/> más 6 veces al día |
| otros pescado azul     | <input checked="" type="radio"/> Nunca o menos 1 vez al mes<br><input type="radio"/> 1 a 3 veces mes<br><input type="radio"/> 1 vez semana<br><input type="radio"/> 2 a 4 veces semana<br><input type="radio"/> 5 a 6 veces semana<br><input type="radio"/> 1 vez al día<br><input type="radio"/> 2 a 3 veces al día<br><input type="radio"/> 5 a 6 veces al día<br><input type="radio"/> más 6 veces al día |
| atun conserva          | <input type="radio"/> Nunca o menos 1 vez al mes<br><input type="radio"/> 1 a 3 veces mes<br><input checked="" type="radio"/> 1 vez semana<br><input type="radio"/> 2 a 4 veces semana<br><input type="radio"/> 5 a 6 veces semana<br><input type="radio"/> 1 vez al día<br><input type="radio"/> 2 a 3 veces al día<br><input type="radio"/> 5 a 6 veces al día<br><input type="radio"/> más 6 veces al día |
| sardina conserva       | <input checked="" type="radio"/> Nunca o menos 1 vez al mes<br><input type="radio"/> 1 a 3 veces mes<br><input type="radio"/> 1 vez semana<br><input type="radio"/> 2 a 4 veces semana<br><input type="radio"/> 5 a 6 veces semana<br><input type="radio"/> 1 vez al día<br><input type="radio"/> 2 a 3 veces al día<br><input type="radio"/> 5 a 6 veces al día<br><input type="radio"/> más 6 veces al día |

|                                         |                                                                                                                                                                                                                                                                                                                                                                                                              |
|-----------------------------------------|--------------------------------------------------------------------------------------------------------------------------------------------------------------------------------------------------------------------------------------------------------------------------------------------------------------------------------------------------------------------------------------------------------------|
| pescado ahumado                         | <input checked="" type="radio"/> Nunca o menos 1 vez al mes<br><input type="radio"/> 1 a 3 veces mes<br><input type="radio"/> 1 vez semana<br><input type="radio"/> 2 a 4 veces semana<br><input type="radio"/> 5 a 6 veces semana<br><input type="radio"/> 1 vez al día<br><input type="radio"/> 2 a 3 veces al día<br><input type="radio"/> 5 a 6 veces al día<br><input type="radio"/> más 6 veces al día |
| almejas o mejillones o ostras unos 100g | <input type="radio"/> Nunca o menos 1 vez al mes<br><input checked="" type="radio"/> 1 a 3 veces mes<br><input type="radio"/> 1 vez semana<br><input type="radio"/> 2 a 4 veces semana<br><input type="radio"/> 5 a 6 veces semana<br><input type="radio"/> 1 vez al día<br><input type="radio"/> 2 a 3 veces al día<br><input type="radio"/> 5 a 6 veces al día<br><input type="radio"/> más 6 veces al día |
| calamar o chipiron o sepia unos 100g    | <input type="radio"/> Nunca o menos 1 vez al mes<br><input checked="" type="radio"/> 1 a 3 veces mes<br><input type="radio"/> 1 vez semana<br><input type="radio"/> 2 a 4 veces semana<br><input type="radio"/> 5 a 6 veces semana<br><input type="radio"/> 1 vez al día<br><input type="radio"/> 2 a 3 veces al día<br><input type="radio"/> 5 a 6 veces al día<br><input type="radio"/> más 6 veces al día |
| marisco unos 100g                       | <input type="radio"/> Nunca o menos 1 vez al mes<br><input checked="" type="radio"/> 1 a 3 veces mes<br><input type="radio"/> 1 vez semana<br><input type="radio"/> 2 a 4 veces semana<br><input type="radio"/> 5 a 6 veces semana<br><input type="radio"/> 1 vez al día<br><input type="radio"/> 2 a 3 veces al día<br><input type="radio"/> 5 a 6 veces al día<br><input type="radio"/> más 6 veces al día |
| Espinacas o acelgas cocinadas           | <input type="radio"/> Nunca o menos 1 vez al mes<br><input type="radio"/> 1 a 3 veces mes<br><input checked="" type="radio"/> 1 vez semana<br><input type="radio"/> 2 a 4 veces semana<br><input type="radio"/> 5 a 6 veces semana<br><input type="radio"/> 1 vez al día<br><input type="radio"/> 2 a 3 veces al día<br><input type="radio"/> 5 a 6 veces al día<br><input type="radio"/> más 6 veces al día |
| Col o coliflor o brocoli cocinado       | <input checked="" type="radio"/> Nunca o menos 1 vez al mes<br><input type="radio"/> 1 a 3 veces mes<br><input type="radio"/> 1 vez semana<br><input type="radio"/> 2 a 4 veces semana<br><input type="radio"/> 5 a 6 veces semana<br><input type="radio"/> 1 vez al día<br><input type="radio"/> 2 a 3 veces al día<br><input type="radio"/> 5 a 6 veces al día<br><input type="radio"/> más 6 veces al día |

---

Lechuga o endivia o escarola

- ☐ Nunca o menos 1 vez al mes  
☐ 1 a 3 veces mes  
☒ 1 vez semana  
☐ 2 a 4 veces semana  
☐ 5 a 6 veces semana  
☐ 1 vez al día  
☐ 2 a 3 veces al día  
☐ 5 a 6 veces al día  
☐ más 6 veces al día

---

tomate ensalada

- ☐ Nunca o menos 1 vez al mes  
☐ 1 a 3 veces mes  
☐ 1 vez semana  
☒ 2 a 4 veces semana  
☐ 5 a 6 veces semana  
☐ 1 vez al día  
☐ 2 a 3 veces al día  
☐ 5 a 6 veces al día  
☐ más 6 veces al día

---

cebolla

- ☐ Nunca o menos 1 vez al mes  
☐ 1 a 3 veces mes  
☐ 1 vez semana  
☒ 2 a 4 veces semana  
☐ 5 a 6 veces semana  
☐ 1 vez al día  
☐ 2 a 3 veces al día  
☐ 5 a 6 veces al día  
☐ más 6 veces al día

---

Zanahoria o calabaza

- ☐ Nunca o menos 1 vez al mes  
☐ 1 a 3 veces mes  
☐ 1 vez semana  
☒ 2 a 4 veces semana  
☐ 5 a 6 veces semana  
☐ 1 vez al día  
☐ 2 a 3 veces al día  
☐ 5 a 6 veces al día  
☐ más 6 veces al día

---

Judías verdes

- ☒ Nunca o menos 1 vez al mes  
☐ 1 a 3 veces mes  
☐ 1 vez semana  
☐ 2 a 4 veces semana  
☐ 5 a 6 veces semana  
☐ 1 vez al día  
☐ 2 a 3 veces al día  
☐ 5 a 6 veces al día  
☐ más 6 veces al día

---

Berenjena o calabacin o pepino

- ☐ Nunca o menos 1 vez al mes  
☒ 1 a 3 veces mes  
☐ 1 vez semana  
☐ 2 a 4 veces semana  
☐ 5 a 6 veces semana  
☐ 1 vez al día  
☐ 2 a 3 veces al día  
☐ 5 a 6 veces al día  
☐ más 6 veces al día

|                       |                                                                                                                                                                                                                                                                                                                                                                                                              |
|-----------------------|--------------------------------------------------------------------------------------------------------------------------------------------------------------------------------------------------------------------------------------------------------------------------------------------------------------------------------------------------------------------------------------------------------------|
| pimiento              | <input type="radio"/> Nunca o menos 1 vez al mes<br><input type="radio"/> 1 a 3 veces mes<br><input type="radio"/> 1 vez semana<br><input checked="" type="radio"/> 2 a 4 veces semana<br><input type="radio"/> 5 a 6 veces semana<br><input type="radio"/> 1 vez al día<br><input type="radio"/> 2 a 3 veces al día<br><input type="radio"/> 5 a 6 veces al día<br><input type="radio"/> más 6 veces al día |
| alcachofa             | <input checked="" type="radio"/> Nunca o menos 1 vez al mes<br><input type="radio"/> 1 a 3 veces mes<br><input type="radio"/> 1 vez semana<br><input type="radio"/> 2 a 4 veces semana<br><input type="radio"/> 5 a 6 veces semana<br><input type="radio"/> 1 vez al día<br><input type="radio"/> 2 a 3 veces al día<br><input type="radio"/> 5 a 6 veces al día<br><input type="radio"/> más 6 veces al día |
| espárragos            | <input type="radio"/> Nunca o menos 1 vez al mes<br><input type="radio"/> 1 a 3 veces mes<br><input checked="" type="radio"/> 1 vez semana<br><input type="radio"/> 2 a 4 veces semana<br><input type="radio"/> 5 a 6 veces semana<br><input type="radio"/> 1 vez al día<br><input type="radio"/> 2 a 3 veces al día<br><input type="radio"/> 5 a 6 veces al día<br><input type="radio"/> más 6 veces al día |
| maíz hervido          | <input type="radio"/> Nunca o menos 1 vez al mes<br><input type="radio"/> 1 a 3 veces mes<br><input checked="" type="radio"/> 1 vez semana<br><input type="radio"/> 2 a 4 veces semana<br><input type="radio"/> 5 a 6 veces semana<br><input type="radio"/> 1 vez al día<br><input type="radio"/> 2 a 3 veces al día<br><input type="radio"/> 5 a 6 veces al día<br><input type="radio"/> más 6 veces al día |
| legumbres             | <input type="radio"/> Nunca o menos 1 vez al mes<br><input type="radio"/> 1 a 3 veces mes<br><input checked="" type="radio"/> 1 vez semana<br><input type="radio"/> 2 a 4 veces semana<br><input type="radio"/> 5 a 6 veces semana<br><input type="radio"/> 1 vez al día<br><input type="radio"/> 2 a 3 veces al día<br><input type="radio"/> 5 a 6 veces al día<br><input type="radio"/> más 6 veces al día |
| naranjas o mandarinas | <input checked="" type="radio"/> Nunca o menos 1 vez al mes<br><input type="radio"/> 1 a 3 veces mes<br><input type="radio"/> 1 vez semana<br><input type="radio"/> 2 a 4 veces semana<br><input type="radio"/> 5 a 6 veces semana<br><input type="radio"/> 1 vez al día<br><input type="radio"/> 2 a 3 veces al día<br><input type="radio"/> 5 a 6 veces al día<br><input type="radio"/> más 6 veces al día |

---

zum natural fruta

- ☒ Nunca o menos 1 vez al mes  
☐ 1 a 3 veces mes  
☐ 1 vez semana  
☐ 2 a 4 veces semana  
☐ 5 a 6 veces semana  
☐ 1 vez al día  
☐ 2 a 3 veces al día  
☐ 5 a 6 veces al día  
☐ más 6 veces al día

---

platano

- ☐ Nunca o menos 1 vez al mes  
☐ 1 a 3 veces mes  
☐ 1 vez semana  
☒ 2 a 4 veces semana  
☐ 5 a 6 veces semana  
☐ 1 vez al día  
☐ 2 a 3 veces al día  
☐ 5 a 6 veces al día  
☐ más 6 veces al día

---

manzana o pera

- ☐ Nunca o menos 1 vez al mes  
☐ 1 a 3 veces mes  
☒ 1 vez semana  
☐ 2 a 4 veces semana  
☐ 5 a 6 veces semana  
☐ 1 vez al día  
☐ 2 a 3 veces al día  
☐ 5 a 6 veces al día  
☐ más 6 veces al día

---

melocotón o nectarina

- ☐ Nunca o menos 1 vez al mes  
☒ 1 a 3 veces mes  
☐ 1 vez semana  
☐ 2 a 4 veces semana  
☐ 5 a 6 veces semana  
☐ 1 vez al día  
☐ 2 a 3 veces al día  
☐ 5 a 6 veces al día  
☐ más 6 veces al día

---

sandia o melon

- ☐ Nunca o menos 1 vez al mes  
☐ 1 a 3 veces mes  
☒ 1 vez semana  
☐ 2 a 4 veces semana  
☐ 5 a 6 veces semana  
☐ 1 vez al día  
☐ 2 a 3 veces al día  
☐ 5 a 6 veces al día  
☐ más 6 veces al día

---

uva

- ☐ Nunca o menos 1 vez al mes  
☒ 1 a 3 veces mes  
☐ 1 vez semana  
☐ 2 a 4 veces semana  
☐ 5 a 6 veces semana  
☐ 1 vez al día  
☐ 2 a 3 veces al día  
☐ 5 a 6 veces al día  
☐ más 6 veces al día

---

bruna o ciruela

- ☐ Nunca o menos 1 vez al mes  
☐ 1 a 3 veces mes  
☒ 1 vez semana  
☐ 2 a 4 veces semana  
☐ 5 a 6 veces semana  
☐ 1 vez al día  
☐ 2 a 3 veces al día  
☐ 5 a 6 veces al día  
☐ más 6 veces al día

---

kiwi

- ☒ Nunca o menos 1 vez al mes  
☐ 1 a 3 veces mes  
☐ 1 vez semana  
☐ 2 a 4 veces semana  
☐ 5 a 6 veces semana  
☐ 1 vez al día  
☐ 2 a 3 veces al día  
☐ 5 a 6 veces al día  
☐ más 6 veces al día

---

aceituna

- ☐ Nunca o menos 1 vez al mes  
☐ 1 a 3 veces mes  
☐ 1 vez semana  
☒ 2 a 4 veces semana  
☐ 5 a 6 veces semana  
☐ 1 vez al día  
☐ 2 a 3 veces al día  
☐ 5 a 6 veces al día  
☐ más 6 veces al día

---

frutos secos

- ☐ Nunca o menos 1 vez al mes  
☐ 1 a 3 veces mes  
☐ 1 vez semana  
☒ 2 a 4 veces semana  
☐ 5 a 6 veces semana  
☐ 1 vez al día  
☐ 2 a 3 veces al día  
☐ 5 a 6 veces al día  
☐ más 6 veces al día

---

pan blanco

- ☐ Nunca o menos 1 vez al mes  
☐ 1 a 3 veces mes  
☐ 1 vez semana  
☐ 2 a 4 veces semana  
☒ 5 a 6 veces semana  
☐ 1 vez al día  
☐ 2 a 3 veces al día  
☐ 5 a 6 veces al día  
☐ más 6 veces al día

---

pan integral

- ☒ Nunca o menos 1 vez al mes  
☐ 1 a 3 veces mes  
☐ 1 vez semana  
☐ 2 a 4 veces semana  
☐ 5 a 6 veces semana  
☐ 1 vez al día  
☐ 2 a 3 veces al día  
☐ 5 a 6 veces al día  
☐ más 6 veces al día



---

cereales desayuno

- ☐ Nunca o menos 1 vez al mes  
☐ 1 a 3 veces mes  
☐ 1 vez semana  
☐ 2 a 4 veces semana  
☒ 5 a 6 veces semana  
☐ 1 vez al día  
☐ 2 a 3 veces al día  
☐ 5 a 6 veces al día  
☐ más 6 veces al día

---

patatas fritas

- ☐ Nunca o menos 1 vez al mes  
☐ 1 a 3 veces mes  
☒ 1 vez semana  
☐ 2 a 4 veces semana  
☐ 5 a 6 veces semana  
☐ 1 vez al día  
☐ 2 a 3 veces al día  
☐ 5 a 6 veces al día  
☐ más 6 veces al día

---

patatas cocidas o asadas

- ☐ Nunca o menos 1 vez al mes  
☐ 1 a 3 veces mes  
☐ 1 vez semana  
☒ 2 a 4 veces semana  
☐ 5 a 6 veces semana  
☐ 1 vez al día  
☐ 2 a 3 veces al día  
☐ 5 a 6 veces al día  
☐ más 6 veces al día

---

bolsa papas

- ☐ Nunca o menos 1 vez al mes  
☐ 1 a 3 veces mes  
☒ 1 vez semana  
☐ 2 a 4 veces semana  
☐ 5 a 6 veces semana  
☐ 1 vez al día  
☐ 2 a 3 veces al día  
☐ 5 a 6 veces al día  
☐ más 6 veces al día

---

arroz cocinado

- ☐ Nunca o menos 1 vez al mes  
☐ 1 a 3 veces mes  
☒ 1 vez semana  
☐ 2 a 4 veces semana  
☐ 5 a 6 veces semana  
☐ 1 vez al día  
☐ 2 a 3 veces al día  
☐ 5 a 6 veces al día  
☐ más 6 veces al día

---

pasta

- ☐ Nunca o menos 1 vez al mes  
☐ 1 a 3 veces mes  
☒ 1 vez semana  
☐ 2 a 4 veces semana  
☐ 5 a 6 veces semana  
☐ 1 vez al día  
☐ 2 a 3 veces al día  
☐ 5 a 6 veces al día  
☐ más 6 veces al día

|                     |                                                                                                                                                                                                                                                                                                                                                                                                              |
|---------------------|--------------------------------------------------------------------------------------------------------------------------------------------------------------------------------------------------------------------------------------------------------------------------------------------------------------------------------------------------------------------------------------------------------------|
| pizza               | <input type="radio"/> Nunca o menos 1 vez al mes<br><input checked="" type="radio"/> 1 a 3 veces mes<br><input type="radio"/> 1 vez semana<br><input type="radio"/> 2 a 4 veces semana<br><input type="radio"/> 5 a 6 veces semana<br><input type="radio"/> 1 vez al día<br><input type="radio"/> 2 a 3 veces al día<br><input type="radio"/> 5 a 6 veces al día<br><input type="radio"/> más 6 veces al día |
| aceite oliva        | <input type="radio"/> Nunca o menos 1 vez al mes<br><input type="radio"/> 1 a 3 veces mes<br><input checked="" type="radio"/> 1 vez semana<br><input type="radio"/> 2 a 4 veces semana<br><input type="radio"/> 5 a 6 veces semana<br><input type="radio"/> 1 vez al día<br><input type="radio"/> 2 a 3 veces al día<br><input type="radio"/> 5 a 6 veces al día<br><input type="radio"/> más 6 veces al día |
| otros aceites       | <input type="radio"/> Nunca o menos 1 vez al mes<br><input type="radio"/> 1 a 3 veces mes<br><input type="radio"/> 1 vez semana<br><input checked="" type="radio"/> 2 a 4 veces semana<br><input type="radio"/> 5 a 6 veces semana<br><input type="radio"/> 1 vez al día<br><input type="radio"/> 2 a 3 veces al día<br><input type="radio"/> 5 a 6 veces al día<br><input type="radio"/> más 6 veces al día |
| margarina           | <input type="radio"/> Nunca o menos 1 vez al mes<br><input checked="" type="radio"/> 1 a 3 veces mes<br><input type="radio"/> 1 vez semana<br><input type="radio"/> 2 a 4 veces semana<br><input type="radio"/> 5 a 6 veces semana<br><input type="radio"/> 1 vez al día<br><input type="radio"/> 2 a 3 veces al día<br><input type="radio"/> 5 a 6 veces al día<br><input type="radio"/> más 6 veces al día |
| mantequilla         | <input type="radio"/> Nunca o menos 1 vez al mes<br><input checked="" type="radio"/> 1 a 3 veces mes<br><input type="radio"/> 1 vez semana<br><input type="radio"/> 2 a 4 veces semana<br><input type="radio"/> 5 a 6 veces semana<br><input type="radio"/> 1 vez al día<br><input type="radio"/> 2 a 3 veces al día<br><input type="radio"/> 5 a 6 veces al día<br><input type="radio"/> más 6 veces al día |
| galletas tipo maria | <input checked="" type="radio"/> Nunca o menos 1 vez al mes<br><input type="radio"/> 1 a 3 veces mes<br><input type="radio"/> 1 vez semana<br><input type="radio"/> 2 a 4 veces semana<br><input type="radio"/> 5 a 6 veces semana<br><input type="radio"/> 1 vez al día<br><input type="radio"/> 2 a 3 veces al día<br><input type="radio"/> 5 a 6 veces al día<br><input type="radio"/> más 6 veces al día |

---

galletas chocolate

- ☒ Nunca o menos 1 vez al mes  
☐ 1 a 3 veces mes  
☐ 1 vez semana  
☐ 2 a 4 veces semana  
☐ 5 a 6 veces semana  
☐ 1 vez al día  
☐ 2 a 3 veces al día  
☐ 5 a 6 veces al día  
☐ más 6 veces al día

---

bolleria

- ☐ Nunca o menos 1 vez al mes  
☐ 1 a 3 veces mes  
☒ 1 vez semana  
☐ 2 a 4 veces semana  
☐ 5 a 6 veces semana  
☐ 1 vez al día  
☐ 2 a 3 veces al día  
☐ 5 a 6 veces al día  
☐ más 6 veces al día

---

chocolate o bombones

- ☐ Nunca o menos 1 vez al mes  
☐ 1 a 3 veces mes  
☒ 1 vez semana  
☐ 2 a 4 veces semana  
☐ 5 a 6 veces semana  
☐ 1 vez al día  
☐ 2 a 3 veces al día  
☐ 5 a 6 veces al día  
☐ más 6 veces al día

---

chocolate polvo o colacao

- ☒ Nunca o menos 1 vez al mes  
☐ 1 a 3 veces mes  
☐ 1 vez semana  
☐ 2 a 4 veces semana  
☐ 5 a 6 veces semana  
☐ 1 vez al día  
☐ 2 a 3 veces al día  
☐ 5 a 6 veces al día  
☐ más 6 veces al día

---

vino tinto

- ☒ Nunca o menos 1 vez al mes  
☐ 1 a 3 veces mes  
☐ 1 vez semana  
☐ 2 a 4 veces semana  
☐ 5 a 6 veces semana  
☐ 1 vez al día  
☐ 2 a 3 veces al día  
☐ 5 a 6 veces al día  
☐ más 6 veces al día

---

vino blanco

- ☒ Nunca o menos 1 vez al mes  
☐ 1 a 3 veces mes  
☐ 1 vez semana  
☐ 2 a 4 veces semana  
☐ 5 a 6 veces semana  
☐ 1 vez al día  
☐ 2 a 3 veces al día  
☐ 5 a 6 veces al día  
☐ más 6 veces al día

---

|                    |                                                                                                                                                                                                                                                                                                                                                                                                              |
|--------------------|--------------------------------------------------------------------------------------------------------------------------------------------------------------------------------------------------------------------------------------------------------------------------------------------------------------------------------------------------------------------------------------------------------------|
| vino seco o vermut | <input checked="" type="radio"/> Nunca o menos 1 vez al mes<br><input type="radio"/> 1 a 3 veces mes<br><input type="radio"/> 1 vez semana<br><input type="radio"/> 2 a 4 veces semana<br><input type="radio"/> 5 a 6 veces semana<br><input type="radio"/> 1 vez al día<br><input type="radio"/> 2 a 3 veces al día<br><input type="radio"/> 5 a 6 veces al día<br><input type="radio"/> más 6 veces al día |
|--------------------|--------------------------------------------------------------------------------------------------------------------------------------------------------------------------------------------------------------------------------------------------------------------------------------------------------------------------------------------------------------------------------------------------------------|

---

|         |                                                                                                                                                                                                                                                                                                                                                                                                              |
|---------|--------------------------------------------------------------------------------------------------------------------------------------------------------------------------------------------------------------------------------------------------------------------------------------------------------------------------------------------------------------------------------------------------------------|
| cerveza | <input checked="" type="radio"/> Nunca o menos 1 vez al mes<br><input type="radio"/> 1 a 3 veces mes<br><input type="radio"/> 1 vez semana<br><input type="radio"/> 2 a 4 veces semana<br><input type="radio"/> 5 a 6 veces semana<br><input type="radio"/> 1 vez al día<br><input type="radio"/> 2 a 3 veces al día<br><input type="radio"/> 5 a 6 veces al día<br><input type="radio"/> más 6 veces al día |
|---------|--------------------------------------------------------------------------------------------------------------------------------------------------------------------------------------------------------------------------------------------------------------------------------------------------------------------------------------------------------------------------------------------------------------|

---

|                     |                                                                                                                                                                                                                                                                                                                                                                                                              |
|---------------------|--------------------------------------------------------------------------------------------------------------------------------------------------------------------------------------------------------------------------------------------------------------------------------------------------------------------------------------------------------------------------------------------------------------|
| cerveza sin alcohol | <input checked="" type="radio"/> Nunca o menos 1 vez al mes<br><input type="radio"/> 1 a 3 veces mes<br><input type="radio"/> 1 vez semana<br><input type="radio"/> 2 a 4 veces semana<br><input type="radio"/> 5 a 6 veces semana<br><input type="radio"/> 1 vez al día<br><input type="radio"/> 2 a 3 veces al día<br><input type="radio"/> 5 a 6 veces al día<br><input type="radio"/> más 6 veces al día |
|---------------------|--------------------------------------------------------------------------------------------------------------------------------------------------------------------------------------------------------------------------------------------------------------------------------------------------------------------------------------------------------------------------------------------------------------|

---

|         |                                                                                                                                                                                                                                                                                                                                                                                                              |
|---------|--------------------------------------------------------------------------------------------------------------------------------------------------------------------------------------------------------------------------------------------------------------------------------------------------------------------------------------------------------------------------------------------------------------|
| licores | <input checked="" type="radio"/> Nunca o menos 1 vez al mes<br><input type="radio"/> 1 a 3 veces mes<br><input type="radio"/> 1 vez semana<br><input type="radio"/> 2 a 4 veces semana<br><input type="radio"/> 5 a 6 veces semana<br><input type="radio"/> 1 vez al día<br><input type="radio"/> 2 a 3 veces al día<br><input type="radio"/> 5 a 6 veces al día<br><input type="radio"/> más 6 veces al día |
|---------|--------------------------------------------------------------------------------------------------------------------------------------------------------------------------------------------------------------------------------------------------------------------------------------------------------------------------------------------------------------------------------------------------------------|

---

|                       |                                                                                                                                                                                                                                                                                                                                                                                                              |
|-----------------------|--------------------------------------------------------------------------------------------------------------------------------------------------------------------------------------------------------------------------------------------------------------------------------------------------------------------------------------------------------------------------------------------------------------|
| ginebra o ron o vodka | <input checked="" type="radio"/> Nunca o menos 1 vez al mes<br><input type="radio"/> 1 a 3 veces mes<br><input type="radio"/> 1 vez semana<br><input type="radio"/> 2 a 4 veces semana<br><input type="radio"/> 5 a 6 veces semana<br><input type="radio"/> 1 vez al día<br><input type="radio"/> 2 a 3 veces al día<br><input type="radio"/> 5 a 6 veces al día<br><input type="radio"/> más 6 veces al día |
|-----------------------|--------------------------------------------------------------------------------------------------------------------------------------------------------------------------------------------------------------------------------------------------------------------------------------------------------------------------------------------------------------------------------------------------------------|

---

|                 |                                                                                                                                                                                                                                                                                                                                                                                                              |
|-----------------|--------------------------------------------------------------------------------------------------------------------------------------------------------------------------------------------------------------------------------------------------------------------------------------------------------------------------------------------------------------------------------------------------------------|
| refresco normal | <input checked="" type="radio"/> Nunca o menos 1 vez al mes<br><input type="radio"/> 1 a 3 veces mes<br><input type="radio"/> 1 vez semana<br><input type="radio"/> 2 a 4 veces semana<br><input type="radio"/> 5 a 6 veces semana<br><input type="radio"/> 1 vez al día<br><input type="radio"/> 2 a 3 veces al día<br><input type="radio"/> 5 a 6 veces al día<br><input type="radio"/> más 6 veces al día |
|-----------------|--------------------------------------------------------------------------------------------------------------------------------------------------------------------------------------------------------------------------------------------------------------------------------------------------------------------------------------------------------------------------------------------------------------|

---

---

refresco sin azúcar

- ☒ Nunca o menos 1 vez al mes  
☐ 1 a 3 veces mes  
☐ 1 vez semana  
☐ 2 a 4 veces semana  
☐ 5 a 6 veces semana  
☐ 1 vez al día  
☐ 2 a 3 veces al día  
☐ 5 a 6 veces al día  
☐ más 6 veces al día

---

Agua del grifo

- ☒ Nunca o menos 1 vez al mes  
☐ 1 a 3 veces mes  
☐ 1 vez semana  
☐ 2 a 4 veces semana  
☐ 5 a 6 veces semana  
☐ 1 vez al día  
☐ 2 a 3 veces al día  
☐ 5 a 6 veces al día  
☐ más 6 veces al día

---

agua embotellada sin gas

- ☐ Nunca o menos 1 vez al mes  
☐ 1 a 3 veces mes  
☐ 1 vez semana  
☐ 2 a 4 veces semana  
☐ 5 a 6 veces semana  
☐ 1 vez al día  
☐ 2 a 3 veces al día  
☐ 5 a 6 veces al día  
☒ más 6 veces al día

---

agua embotellada con gas

- ☒ Nunca o menos 1 vez al mes  
☐ 1 a 3 veces mes  
☐ 1 vez semana  
☐ 2 a 4 veces semana  
☐ 5 a 6 veces semana  
☐ 1 vez al día  
☐ 2 a 3 veces al día  
☐ 5 a 6 veces al día  
☐ más 6 veces al día

---

zumو frutas embasado

- ☐ Nunca o menos 1 vez al mes  
☐ 1 a 3 veces mes  
☒ 1 vez semana  
☐ 2 a 4 veces semana  
☐ 5 a 6 veces semana  
☐ 1 vez al día  
☐ 2 a 3 veces al día  
☐ 5 a 6 veces al día  
☐ más 6 veces al día

---

cafe

- ☒ Nunca o menos 1 vez al mes  
☐ 1 a 3 veces mes  
☐ 1 vez semana  
☐ 2 a 4 veces semana  
☐ 5 a 6 veces semana  
☐ 1 vez al día  
☐ 2 a 3 veces al día  
☐ 5 a 6 veces al día  
☐ más 6 veces al día

---

cafe descafeinado

- ☒ Nunca o menos 1 vez al mes  
☐ 1 a 3 veces mes  
☐ 1 vez semana  
☐ 2 a 4 veces semana  
☐ 5 a 6 veces semana  
☐ 1 vez al día  
☐ 2 a 3 veces al día  
☐ 5 a 6 veces al día  
☐ más 6 veces al día

---

te o infusión

- ☒ Nunca o menos 1 vez al mes  
☐ 1 a 3 veces mes  
☐ 1 vez semana  
☐ 2 a 4 veces semana  
☐ 5 a 6 veces semana  
☐ 1 vez al día  
☐ 2 a 3 veces al día  
☐ 5 a 6 veces al día  
☐ más 6 veces al día

---

sopa o puré verduras

- ☐ Nunca o menos 1 vez al mes  
☐ 1 a 3 veces mes  
☒ 1 vez semana  
☐ 2 a 4 veces semana  
☐ 5 a 6 veces semana  
☐ 1 vez al día  
☐ 2 a 3 veces al día  
☐ 5 a 6 veces al día  
☐ más 6 veces al día

---

croquetas pollo jamón

- ☐ Nunca o menos 1 vez al mes  
☒ 1 a 3 veces mes  
☐ 1 vez semana  
☐ 2 a 4 veces semana  
☐ 5 a 6 veces semana  
☐ 1 vez al día  
☐ 2 a 3 veces al día  
☐ 5 a 6 veces al día  
☐ más 6 veces al día

---

croquetas pescado

- ☐ Nunca o menos 1 vez al mes  
☒ 1 a 3 veces mes  
☐ 1 vez semana  
☐ 2 a 4 veces semana  
☐ 5 a 6 veces semana  
☐ 1 vez al día  
☐ 2 a 3 veces al día  
☐ 5 a 6 veces al día  
☐ más 6 veces al día

---

mayonesa

- ☒ Nunca o menos 1 vez al mes  
☐ 1 a 3 veces mes  
☐ 1 vez semana  
☐ 2 a 4 veces semana  
☐ 5 a 6 veces semana  
☐ 1 vez al día  
☐ 2 a 3 veces al día  
☐ 5 a 6 veces al día  
☐ más 6 veces al día

|                  |                                                                                                                                                                                                                                                                                                                                                                                                              |
|------------------|--------------------------------------------------------------------------------------------------------------------------------------------------------------------------------------------------------------------------------------------------------------------------------------------------------------------------------------------------------------------------------------------------------------|
| salsa tomate     | <input checked="" type="radio"/> Nunca o menos 1 vez al mes<br><input type="radio"/> 1 a 3 veces mes<br><input type="radio"/> 1 vez semana<br><input type="radio"/> 2 a 4 veces semana<br><input type="radio"/> 5 a 6 veces semana<br><input type="radio"/> 1 vez al día<br><input type="radio"/> 2 a 3 veces al día<br><input type="radio"/> 5 a 6 veces al día<br><input type="radio"/> más 6 veces al día |
| ketchup          | <input type="radio"/> Nunca o menos 1 vez al mes<br><input checked="" type="radio"/> 1 a 3 veces mes<br><input type="radio"/> 1 vez semana<br><input type="radio"/> 2 a 4 veces semana<br><input type="radio"/> 5 a 6 veces semana<br><input type="radio"/> 1 vez al día<br><input type="radio"/> 2 a 3 veces al día<br><input type="radio"/> 5 a 6 veces al día<br><input type="radio"/> más 6 veces al día |
| sal              | <input checked="" type="radio"/> Nunca o menos 1 vez al mes<br><input type="radio"/> 1 a 3 veces mes<br><input type="radio"/> 1 vez semana<br><input type="radio"/> 2 a 4 veces semana<br><input type="radio"/> 5 a 6 veces semana<br><input type="radio"/> 1 vez al día<br><input type="radio"/> 2 a 3 veces al día<br><input type="radio"/> 5 a 6 veces al día<br><input type="radio"/> más 6 veces al día |
| ajo              | <input checked="" type="radio"/> Nunca o menos 1 vez al mes<br><input type="radio"/> 1 a 3 veces mes<br><input type="radio"/> 1 vez semana<br><input type="radio"/> 2 a 4 veces semana<br><input type="radio"/> 5 a 6 veces semana<br><input type="radio"/> 1 vez al día<br><input type="radio"/> 2 a 3 veces al día<br><input type="radio"/> 5 a 6 veces al día<br><input type="radio"/> más 6 veces al día |
| mermelada o miel | <input checked="" type="radio"/> Nunca o menos 1 vez al mes<br><input type="radio"/> 1 a 3 veces mes<br><input type="radio"/> 1 vez semana<br><input type="radio"/> 2 a 4 veces semana<br><input type="radio"/> 5 a 6 veces semana<br><input type="radio"/> 1 vez al día<br><input type="radio"/> 2 a 3 veces al día<br><input type="radio"/> 5 a 6 veces al día<br><input type="radio"/> más 6 veces al día |
| azúcar           | <input type="radio"/> Nunca o menos 1 vez al mes<br><input type="radio"/> 1 a 3 veces mes<br><input checked="" type="radio"/> 1 vez semana<br><input type="radio"/> 2 a 4 veces semana<br><input type="radio"/> 5 a 6 veces semana<br><input type="radio"/> 1 vez al día<br><input type="radio"/> 2 a 3 veces al día<br><input type="radio"/> 5 a 6 veces al día<br><input type="radio"/> más 6 veces al día |

|                                       |                                                                                                                                                                                                                                                                                                                                                                                                                                                                                                                               |
|---------------------------------------|-------------------------------------------------------------------------------------------------------------------------------------------------------------------------------------------------------------------------------------------------------------------------------------------------------------------------------------------------------------------------------------------------------------------------------------------------------------------------------------------------------------------------------|
| Otro alimento                         | <hr/>                                                                                                                                                                                                                                                                                                                                                                                                                                                                                                                         |
| suplementos vitamínicos               | <input type="radio"/> si<br><input checked="" type="radio"/> no                                                                                                                                                                                                                                                                                                                                                                                                                                                               |
| suplementos vitamínicos               | <hr/>                                                                                                                                                                                                                                                                                                                                                                                                                                                                                                                         |
| dieta previa                          | <input checked="" type="radio"/> si<br><input type="radio"/> no                                                                                                                                                                                                                                                                                                                                                                                                                                                               |
| motivo dieta                          | <input type="radio"/> no dieta<br><input checked="" type="radio"/> control peso<br><input type="radio"/> control colesterol<br><input type="radio"/> control diabetes<br><input type="radio"/> problemas estómago<br><input type="radio"/> problemas vesícula o hepáticos<br><input type="radio"/> HTA o cardiopatía<br><input type="radio"/> problemas renales<br><input type="radio"/> alergia alimentaria<br><input type="radio"/> ácido úrico elevado<br><input type="radio"/> vegetariana<br><input type="radio"/> otros |
| cambio alimentos año previo gestación | <input checked="" type="radio"/> si<br><input type="radio"/> no                                                                                                                                                                                                                                                                                                                                                                                                                                                               |
| cambio lácteos                        | <input type="radio"/> eliminado<br><input type="radio"/> disminuido<br><input checked="" type="radio"/> igual<br><input type="radio"/> aumentado<br><input type="radio"/> no sabe                                                                                                                                                                                                                                                                                                                                             |
| cambio huevos                         | <input type="radio"/> eliminado<br><input type="radio"/> disminuido<br><input checked="" type="radio"/> igual<br><input type="radio"/> aumentado<br><input type="radio"/> no sabe                                                                                                                                                                                                                                                                                                                                             |
| cambio carne                          | <input type="radio"/> eliminado<br><input type="radio"/> disminuido<br><input checked="" type="radio"/> igual<br><input type="radio"/> aumentado<br><input type="radio"/> no sabe                                                                                                                                                                                                                                                                                                                                             |
| cambio pescado                        | <input type="radio"/> eliminado<br><input type="radio"/> disminuido<br><input checked="" type="radio"/> igual<br><input type="radio"/> aumentado<br><input type="radio"/> no sabe                                                                                                                                                                                                                                                                                                                                             |
| cambio verduras                       | <input type="radio"/> eliminado<br><input type="radio"/> disminuido<br><input checked="" type="radio"/> igual<br><input type="radio"/> aumentado<br><input type="radio"/> no sabe                                                                                                                                                                                                                                                                                                                                             |



|                            |                                                                                                                                                                                                                        |
|----------------------------|------------------------------------------------------------------------------------------------------------------------------------------------------------------------------------------------------------------------|
| cambio legumbres           | <input type="radio"/> eliminado<br><input type="radio"/> disminuido<br><input checked="" type="radio"/> igual<br><input type="radio"/> aumentado<br><input type="radio"/> no sabe                                      |
| cambio fruta               | <input type="radio"/> eliminado<br><input type="radio"/> disminuido<br><input checked="" type="radio"/> igual<br><input type="radio"/> aumentado<br><input type="radio"/> no sabe                                      |
| cambio pan                 | <input type="radio"/> eliminado<br><input type="radio"/> disminuido<br><input checked="" type="radio"/> igual<br><input type="radio"/> aumentado<br><input type="radio"/> no sabe                                      |
| cambio aceite oliva        | <input type="radio"/> eliminado<br><input type="radio"/> disminuido<br><input checked="" type="radio"/> igual<br><input type="radio"/> aumentado<br><input type="radio"/> no sabe                                      |
| cambio mante o margarina   | <input type="radio"/> eliminado<br><input checked="" type="radio"/> disminuido<br><input type="radio"/> igual<br><input type="radio"/> aumentado<br><input type="radio"/> no sabe                                      |
| cambio azúcar y dulces     | <input type="radio"/> eliminado<br><input checked="" type="radio"/> disminuido<br><input type="radio"/> igual<br><input type="radio"/> aumentado<br><input type="radio"/> no sabe                                      |
| cambio bebidas alcohólicas | <input checked="" type="radio"/> eliminado<br><input type="radio"/> disminuido<br><input type="radio"/> igual<br><input type="radio"/> aumentado<br><input type="radio"/> no sabe                                      |
| frecuencia comidas fritas  | <input type="radio"/> a diario<br><input type="radio"/> 5 a 6 veces semana<br><input checked="" type="radio"/> 2 a 4 veces semana<br><input type="radio"/> 1 vez semana<br><input type="radio"/> menos de 1 vez semana |
| carne                      | <input type="radio"/> no como<br><input type="radio"/> cruda<br><input type="radio"/> poco hecha<br><input type="radio"/> hecha<br><input checked="" type="radio"/> muy hecha                                          |
| grasa visible carne        | <input type="radio"/> quita toda<br><input checked="" type="radio"/> quita mayoría<br><input type="radio"/> quita un poco<br><input type="radio"/> no quita nada                                                       |

|                                |                                                                                                                                                                                                                                                          |
|--------------------------------|----------------------------------------------------------------------------------------------------------------------------------------------------------------------------------------------------------------------------------------------------------|
| cocina carne                   | <input type="radio"/> a la plancha<br><input type="radio"/> a la parrilla<br><input type="radio"/> asada<br><input type="radio"/> frita<br><input type="radio"/> guisada                                                                                 |
| tostado quemado carne          | <input type="radio"/> nunca<br><input type="radio"/> 1 vez mes<br><input checked="" type="radio"/> 2 a 3 veces mes<br><input type="radio"/> 1 vez semana<br><input type="radio"/> 2 a 3 semanas                                                          |
| tostado quemado pescado        | <input type="radio"/> nunca<br><input type="radio"/> 1 vez mes<br><input checked="" type="radio"/> 2 a 3 veces mes<br><input type="radio"/> 1 vez semana<br><input type="radio"/> 2 a 3 semanas                                                          |
| socarrat paella                | <input type="radio"/> nunca<br><input type="radio"/> 1 vez mes<br><input checked="" type="radio"/> 2 a 3 veces mes<br><input type="radio"/> 1 vez semana<br><input type="radio"/> 2 a 3 semanas                                                          |
| grasa o aceite cocinar         | <input type="radio"/> mantequilla<br><input type="radio"/> margarina<br><input type="radio"/> aceite oliva<br><input checked="" type="radio"/> aceite oliva virgen extra<br><input type="radio"/> aceite vegetal<br><input type="radio"/> mezcla aceites |
| grasa aceite aliñar            | <input type="radio"/> mantequilla<br><input type="radio"/> margarina<br><input type="radio"/> aceite oliva<br><input checked="" type="radio"/> aceite oliva virgen extra<br><input type="radio"/> aceite vegetal<br><input type="radio"/> mezcla aceites |
| grasa aceite freir             | <input type="radio"/> mantequilla<br><input type="radio"/> margarina<br><input type="radio"/> aceite oliva<br><input checked="" type="radio"/> aceite oliva virgen extra<br><input type="radio"/> aceite vegetal<br><input type="radio"/> mezcla aceites |
| Ejercicio cuestionario         | <input checked="" type="radio"/> si<br><input type="radio"/> no                                                                                                                                                                                          |
| horas de sueño incluido siesta | [*DATA REMOVED*]                                                                                                                                                                                                                                         |
| minutos siesta                 | [*DATA REMOVED*]                                                                                                                                                                                                                                         |
| horas televisión semana        |                                                                                                                                                                                                                                                          |

|                                        |                                                                                                                                                                                                                                                                                                                                                                |
|----------------------------------------|----------------------------------------------------------------------------------------------------------------------------------------------------------------------------------------------------------------------------------------------------------------------------------------------------------------------------------------------------------------|
| actividad trabajo                      | <input type="radio"/> casi siempre sentado<br><input type="radio"/> sentado 50 por cien<br><input type="radio"/> casi siempre de pie, quieto<br><input type="radio"/> casi siempre levantado caminando y llevando pocas cosas<br><input type="radio"/> casi siempre levantado, caminando y llevado muchas cosas<br><input type="radio"/> trabajo manual pesado |
| tiempo caminar o bici al día           | <input type="radio"/> casi nunca<br><input type="radio"/> menos 20min día<br><input type="radio"/> 20 a 40 min día<br><input type="radio"/> 40 a 60 min día<br><input checked="" type="radio"/> 1h o 1h y media día<br><input type="radio"/> más de 1h y media al día                                                                                          |
| tiempo tareas casa al día              | <input type="radio"/> menos de 1h día<br><input type="radio"/> 1 a 2h día<br><input checked="" type="radio"/> 3 a 4h día<br><input type="radio"/> 5 a 6h día<br><input type="radio"/> 7 a 8h día<br><input type="radio"/> más de 8h día                                                                                                                        |
| tiempo libre televisión ordenador leer | <input type="radio"/> menos 1h día<br><input type="radio"/> 1h día<br><input type="radio"/> 2h día<br><input checked="" type="radio"/> 3h día<br><input type="radio"/> 4h día<br><input type="radio"/> 5 a 6h día<br><input type="radio"/> mas 6h día                                                                                                          |
| tiempo libre ejercicio o deporte       | <input type="radio"/> menos 1h semana<br><input type="radio"/> 1h semana<br><input type="radio"/> 2h semana<br><input type="radio"/> 3h semana<br><input checked="" type="radio"/> 4 a 5h semana<br><input type="radio"/> mas 5h semana                                                                                                                        |
| como se considera                      | <input type="radio"/> sedentaria<br><input type="radio"/> poco activa<br><input checked="" type="radio"/> moderadamente activa<br><input type="radio"/> bastante activa<br><input type="radio"/> muy activa<br><input type="radio"/> no sabe                                                                                                                   |
| FUR                                    | [*DATA REMOVED*]                                                                                                                                                                                                                                                                                                                                               |
| Semanas gestación 2T                   | [*DATA REMOVED*]                                                                                                                                                                                                                                                                                                                                               |
| Días gestación 2T                      | [*DATA REMOVED*]                                                                                                                                                                                                                                                                                                                                               |
| DBP 2T                                 | [*DATA REMOVED*]                                                                                                                                                                                                                                                                                                                                               |
| CC 2T                                  | [*DATA REMOVED*]                                                                                                                                                                                                                                                                                                                                               |
| AC 2T                                  | [*DATA REMOVED*]                                                                                                                                                                                                                                                                                                                                               |

|                                                   |                                                                                                                                                                                                 |
|---------------------------------------------------|-------------------------------------------------------------------------------------------------------------------------------------------------------------------------------------------------|
| LF 2T                                             | [*DATA REMOVED*]                                                                                                                                                                                |
| PFE 2T (Hadlock)                                  | [*DATA REMOVED*]                                                                                                                                                                                |
| Semanas gestación 3T                              | [*DATA REMOVED*]                                                                                                                                                                                |
| días 3T                                           | [*DATA REMOVED*]                                                                                                                                                                                |
| DBP 3T                                            | [*DATA REMOVED*]                                                                                                                                                                                |
| CC 3T                                             | [*DATA REMOVED*]                                                                                                                                                                                |
| AC 3T                                             | [*DATA REMOVED*]                                                                                                                                                                                |
| LF 3T                                             | [*DATA REMOVED*]                                                                                                                                                                                |
| PFE 3T (Hadlock)                                  | [*DATA REMOVED*]                                                                                                                                                                                |
| Semanas de gestación final                        | [*DATA REMOVED*]                                                                                                                                                                                |
| días gestación final                              | [*DATA REMOVED*]                                                                                                                                                                                |
| Localización placenta                             | <input type="radio"/> anterior<br><input type="radio"/> lateral derecha<br><input type="radio"/> lateral izquierda<br><input type="radio"/> posterior<br><input checked="" type="radio"/> fondo |
| Presentación longitudinal cefálica                | <input type="radio"/> no<br><input checked="" type="radio"/> si                                                                                                                                 |
| Dorso                                             | <input type="radio"/> izquierda anterior<br><input type="radio"/> izquierda posterior<br><input checked="" type="radio"/> derecha anterior<br><input type="radio"/> derecha posterior           |
| diámetro biparietal                               | [*DATA REMOVED*]                                                                                                                                                                                |
| Circunferencia craneal                            | [*DATA REMOVED*]                                                                                                                                                                                |
| Circunferencia abdominal                          | [*DATA REMOVED*]                                                                                                                                                                                |
| Longitud de femur                                 | [*DATA REMOVED*]                                                                                                                                                                                |
| tejido celular subcutáneo a nivel del muslo en mm | [*DATA REMOVED*]                                                                                                                                                                                |
| tejido celular subcutáneo en abdomen en mm        | [*DATA REMOVED*]                                                                                                                                                                                |
| Volumen del muslo en cm3                          | [*DATA REMOVED*]                                                                                                                                                                                |
| Peso fetal estimado según fórmula de Hadlock      | [*DATA REMOVED*]                                                                                                                                                                                |

|                                               |                                                                                                                                                          |
|-----------------------------------------------|----------------------------------------------------------------------------------------------------------------------------------------------------------|
| Percentil                                     | [*DATA REMOVED*]                                                                                                                                         |
| Peso fetal estimado según fórmula de Scioscia | <hr/>                                                                                                                                                    |
| Peso fetal estimado según fórmula de LEE      | <hr/>                                                                                                                                                    |
| Tipo de parto                                 | <input checked="" type="radio"/> eutocico<br><input type="radio"/> instrumentado/ventosa<br><input type="radio"/> cesarea                                |
| fecha de nacimiento                           | [*DATA REMOVED*]                                                                                                                                         |
| Días entre exploración y nacimiento           | [*DATA REMOVED*]                                                                                                                                         |
| Peso RN en g                                  | [*DATA REMOVED*]                                                                                                                                         |
| sexo                                          | <input type="radio"/> mujer<br><input checked="" type="radio"/> hombre                                                                                   |
| Apgar 1 minuto                                | [*DATA REMOVED*]                                                                                                                                         |
| Apgar 5 minutos                               | [*DATA REMOVED*]                                                                                                                                         |
| Apgar 10 minutos                              | <hr/>                                                                                                                                                    |
| antecedente Covid durante gestación           | <input type="radio"/> Yes<br><input type="radio"/> No                                                                                                    |
| Nivel de estudios                             | <input type="radio"/> ninguno<br><input checked="" type="radio"/> primarios<br><input type="radio"/> secundarios<br><input type="radio"/> universitarios |

# Base\_datos\_estimacion\_peso\_fetal

|                                       |                                                                                                                                                                                                                                                                                      |
|---------------------------------------|--------------------------------------------------------------------------------------------------------------------------------------------------------------------------------------------------------------------------------------------------------------------------------------|
| Número de identificación participante | 145                                                                                                                                                                                                                                                                                  |
| CODIGO PARTICIPANTE                   |                                                                                                                                                                                                                                                                                      |
| Edad                                  | [*DATA REMOVED*]                                                                                                                                                                                                                                                                     |
| Gestaciones                           | <input checked="" type="radio"/> 1<br><input type="radio"/> 2<br><input type="radio"/> 3<br><input type="radio"/> mas de 3                                                                                                                                                           |
| partos                                | <input checked="" type="radio"/> 0<br><input type="radio"/> 1<br><input type="radio"/> 2<br><input type="radio"/> 3<br><input type="radio"/> mas de 3                                                                                                                                |
| cesáreas                              | <input checked="" type="radio"/> 0<br><input type="radio"/> 1<br><input type="radio"/> 2<br><input type="radio"/> 3<br><input type="radio"/> mas de 3                                                                                                                                |
| Abortos                               | <input checked="" type="radio"/> 0<br><input type="radio"/> 1<br><input type="radio"/> 2<br><input type="radio"/> 3<br><input type="radio"/> mas de 3                                                                                                                                |
| Tipo de gestacion                     | <input checked="" type="radio"/> espontanea<br><input type="radio"/> IAC inseminación artificial conyuge<br><input type="radio"/> IAD inseminación artificial donante<br><input type="radio"/> FIV Fecundación in Vitro<br><input type="radio"/> Ovodon FIV con donación de ovocitos |
| peso previo a embarazo                | [*DATA REMOVED*]                                                                                                                                                                                                                                                                     |
| Ganancia ponderal embarazo            | [*DATA REMOVED*]                                                                                                                                                                                                                                                                     |
| Talla madre                           | [*DATA REMOVED*]                                                                                                                                                                                                                                                                     |
| IMC previo embarazo                   | 26.92743764172336                                                                                                                                                                                                                                                                    |
| Patología obstétrica                  | <input checked="" type="radio"/> no<br><input type="radio"/> si                                                                                                                                                                                                                      |
| Diabetes pregestacional               | <input checked="" type="radio"/> no<br><input type="radio"/> si                                                                                                                                                                                                                      |
| Diabetes gestacional                  | <input checked="" type="radio"/> no<br><input type="radio"/> si                                                                                                                                                                                                                      |

|                                            |                                                                                                                                                                                      |
|--------------------------------------------|--------------------------------------------------------------------------------------------------------------------------------------------------------------------------------------|
| Diabetes gestacional con insulina          | <input checked="" type="radio"/> no<br><input type="radio"/> si                                                                                                                      |
| Diabetes gestacional con dieta y ejercicio | <input checked="" type="radio"/> no<br><input type="radio"/> si                                                                                                                      |
| Percentil fetos previos                    | <input checked="" type="radio"/> Nada<br><input type="radio"/> percentil menor de 10<br><input type="radio"/> percentil entre 10 y 90<br><input type="radio"/> percentil mayor de 90 |
| Exfumadora                                 | <input type="radio"/> Nada<br><input type="radio"/> menos de 5 años<br><input checked="" type="radio"/> 5 a 10 años<br><input type="radio"/> mayor o igual a 10 años                 |
| Hábito tabáquico                           | <input checked="" type="radio"/> no<br><input type="radio"/> si                                                                                                                      |
| fumadora                                   | [*DATA REMOVED*]                                                                                                                                                                     |
| Consumo otros tóxicos                      | <input checked="" type="radio"/> no<br><input type="radio"/> si                                                                                                                      |
| Hb 1T                                      | [*DATA REMOVED*]                                                                                                                                                                     |
| Htc 1T                                     | [*DATA REMOVED*]                                                                                                                                                                     |
| Hb 2T                                      | [*DATA REMOVED*]                                                                                                                                                                     |
| HTC 2T                                     | [*DATA REMOVED*]                                                                                                                                                                     |
| Hb 3T                                      | [*DATA REMOVED*]                                                                                                                                                                     |
| HTC 3T                                     | [*DATA REMOVED*]                                                                                                                                                                     |
| Suplemento FE oral                         | <input type="radio"/> si<br><input checked="" type="radio"/> no                                                                                                                      |
| Suplemento fe iv                           | <input type="radio"/> si<br><input checked="" type="radio"/> no                                                                                                                      |
| Transfusión                                | <input checked="" type="radio"/> no<br><input type="radio"/> si                                                                                                                      |
| Solicitada Vit D                           | <input checked="" type="radio"/> no<br><input type="radio"/> si                                                                                                                      |
| Deficit vit D                              | <input type="radio"/> no<br><input type="radio"/> si                                                                                                                                 |
| Suplemento vit D                           | <input type="radio"/> si<br><input type="radio"/> no                                                                                                                                 |

|                       |                                                                                                                                                                                                                                                                                                                                                                                                              |
|-----------------------|--------------------------------------------------------------------------------------------------------------------------------------------------------------------------------------------------------------------------------------------------------------------------------------------------------------------------------------------------------------------------------------------------------------|
| Dieta, cuestionario   | <input checked="" type="radio"/> sí<br><input type="radio"/> no                                                                                                                                                                                                                                                                                                                                              |
| Leche entera          | <input checked="" type="radio"/> Nunca o menos 1 vez al mes<br><input type="radio"/> 1 a 3 veces mes<br><input type="radio"/> 1 vez semana<br><input type="radio"/> 2 a 4 veces semana<br><input type="radio"/> 5 a 6 veces semana<br><input type="radio"/> 1 vez al día<br><input type="radio"/> 2 a 3 veces al día<br><input type="radio"/> 5 a 6 veces al día<br><input type="radio"/> más 6 veces al día |
| Leche semidesnatada   | <input type="radio"/> Nunca o menos 1 vez al mes<br><input checked="" type="radio"/> 1 a 3 veces mes<br><input type="radio"/> 1 vez semana<br><input type="radio"/> 2 a 4 veces semana<br><input type="radio"/> 5 a 6 veces semana<br><input type="radio"/> 1 vez al día<br><input type="radio"/> 2 a 3 veces al día<br><input type="radio"/> 5 a 6 veces al día<br><input type="radio"/> mas 6 veces al día |
| Leche desnatada       | <input checked="" type="radio"/> Nunca o menos 1 vez al mes<br><input type="radio"/> 1 a 3 veces mes<br><input type="radio"/> 1 vez semana<br><input type="radio"/> 2 a 4 veces semana<br><input type="radio"/> 5 a 6 veces semana<br><input type="radio"/> 1 vez al día<br><input type="radio"/> 2 a 3 veces al día<br><input type="radio"/> 5 a 6 veces al día<br><input type="radio"/> más 6 veces al día |
| Leche condensada      | <input checked="" type="radio"/> Nunca o menos 1 vez al mes<br><input type="radio"/> 1 a 3 veces mes<br><input type="radio"/> 1 vez semana<br><input type="radio"/> 2 a 4 veces semana<br><input type="radio"/> 5 a 6 veces semana<br><input type="radio"/> 1 vez al día<br><input type="radio"/> 2 a 3 veces al día<br><input type="radio"/> 5 a 6 veces al día<br><input type="radio"/> más 6 veces al día |
| nata o crema de leche | <input checked="" type="radio"/> Nunca o menos 1 vez al mes<br><input type="radio"/> 1 a 3 veces mes<br><input type="radio"/> 1 vez semana<br><input type="radio"/> 2 a 4 veces semana<br><input type="radio"/> 5 a 6 veces semana<br><input type="radio"/> 1 vez al día<br><input type="radio"/> 2 a 3 veces al día<br><input type="radio"/> 5 a 6 veces al día<br><input type="radio"/> más 6 veces al día |



---

Yogurt Entero

- ☐ Nunca o menos 1 vez al mes  
☐ 1 a 3 veces mes  
☐ 1 vez semana  
☒ 2 a 4 veces semana  
☐ 5 a 6 veces semana  
☐ 1 vez al día  
☐ 2 a 3 veces al día  
☐ 5 a 6 veces al día  
☐ más 6 veces al día

---

Yogurt desnatado

- ☐ Nunca o menos 1 vez al mes  
☐ 1 a 3 veces mes  
☒ 1 vez semana  
☐ 2 a 4 veces semana  
☐ 5 a 6 veces semana  
☐ 1 vez al día  
☐ 2 a 3 veces al día  
☐ 5 a 6 veces al día  
☐ más 6 veces al día

---

100g requesón o queso blando o queso fresco

- ☐ Nunca o menos 1 vez al mes  
☐ 1 a 3 veces mes  
☒ 1 vez semana  
☐ 2 a 4 veces semana  
☐ 5 a 6 veces semana  
☐ 1 vez al día  
☐ 2 a 3 veces al día  
☐ 5 a 6 veces al día  
☐ más 6 veces al día

---

queso curado o semicurado o cremoso

- ☐ Nunca o menos 1 vez al mes  
☐ 1 a 3 veces mes  
☒ 1 vez semana  
☐ 2 a 4 veces semana  
☐ 5 a 6 veces semana  
☐ 1 vez al día  
☐ 2 a 3 veces al día  
☐ 5 a 6 veces al día  
☐ más 6 veces al día

---

natillas flan pudding

- ☒ Nunca o menos 1 vez al mes  
☐ 1 a 3 veces mes  
☐ 1 vez semana  
☐ 2 a 4 veces semana  
☐ 5 a 6 veces semana  
☐ 1 vez al día  
☐ 2 a 3 veces al día  
☐ 5 a 6 veces al día  
☐ más 6 veces al día

---

Helado

- ☐ Nunca o menos 1 vez al mes  
☐ 1 a 3 veces mes  
☐ 1 vez semana  
☒ 2 a 4 veces semana  
☐ 5 a 6 veces semana  
☐ 1 vez al día  
☐ 2 a 3 veces al día  
☐ 5 a 6 veces al día  
☐ más 6 veces al día

|                                      |                                                                                                                                                                                                                                                                                                                                                                                                              |
|--------------------------------------|--------------------------------------------------------------------------------------------------------------------------------------------------------------------------------------------------------------------------------------------------------------------------------------------------------------------------------------------------------------------------------------------------------------|
| huevo                                | <input type="radio"/> Nunca o menos 1 vez al mes<br><input type="radio"/> 1 a 3 veces mes<br><input type="radio"/> 1 vez semana<br><input checked="" type="radio"/> 2 a 4 veces semana<br><input type="radio"/> 5 a 6 veces semana<br><input type="radio"/> 1 vez al día<br><input type="radio"/> 2 a 3 veces al día<br><input type="radio"/> 5 a 6 veces al día<br><input type="radio"/> más 6 veces al día |
| Pollo con piel                       | <input type="radio"/> Nunca o menos 1 vez al mes<br><input type="radio"/> 1 a 3 veces mes<br><input checked="" type="radio"/> 1 vez semana<br><input type="radio"/> 2 a 4 veces semana<br><input type="radio"/> 5 a 6 veces semana<br><input type="radio"/> 1 vez al día<br><input type="radio"/> 2 a 3 veces al día<br><input type="radio"/> 5 a 6 veces al día<br><input type="radio"/> más 6 veces al día |
| pollo sin piel                       | <input type="radio"/> Nunca o menos 1 vez al mes<br><input type="radio"/> 1 a 3 veces mes<br><input checked="" type="radio"/> 1 vez semana<br><input type="radio"/> 2 a 4 veces semana<br><input type="radio"/> 5 a 6 veces semana<br><input type="radio"/> 1 vez al día<br><input type="radio"/> 2 a 3 veces al día<br><input type="radio"/> 5 a 6 veces al día<br><input type="radio"/> más 6 veces al día |
| Ternera o cerdo o cordero            | <input type="radio"/> Nunca o menos 1 vez al mes<br><input type="radio"/> 1 a 3 veces mes<br><input checked="" type="radio"/> 1 vez semana<br><input type="radio"/> 2 a 4 veces semana<br><input type="radio"/> 5 a 6 veces semana<br><input type="radio"/> 1 vez al día<br><input type="radio"/> 2 a 3 veces al día<br><input type="radio"/> 5 a 6 veces al día<br><input type="radio"/> más 6 veces al día |
| carne caza: Conejo o codorniz o pato | <input type="radio"/> Nunca o menos 1 vez al mes<br><input checked="" type="radio"/> 1 a 3 veces mes<br><input type="radio"/> 1 vez semana<br><input type="radio"/> 2 a 4 veces semana<br><input type="radio"/> 5 a 6 veces semana<br><input type="radio"/> 1 vez al día<br><input type="radio"/> 2 a 3 veces al día<br><input type="radio"/> 5 a 6 veces al día<br><input type="radio"/> más 6 veces al día |
| Hígado de ternera o cerdo o pollo    | <input type="radio"/> Nunca o menos 1 vez al mes<br><input checked="" type="radio"/> 1 a 3 veces mes<br><input type="radio"/> 1 vez semana<br><input type="radio"/> 2 a 4 veces semana<br><input type="radio"/> 5 a 6 veces semana<br><input type="radio"/> 1 vez al día<br><input type="radio"/> 2 a 3 veces al día<br><input type="radio"/> 5 a 6 veces al día<br><input type="radio"/> más 6 veces al día |

|                     |                                                                                                                                                                                                                                                                                                                                                                                                              |
|---------------------|--------------------------------------------------------------------------------------------------------------------------------------------------------------------------------------------------------------------------------------------------------------------------------------------------------------------------------------------------------------------------------------------------------------|
| Vísceras            | <input checked="" type="radio"/> Nunca o menos 1 vez al mes<br><input type="radio"/> 1 a 3 veces mes<br><input type="radio"/> 1 vez semana<br><input type="radio"/> 2 a 4 veces semana<br><input type="radio"/> 5 a 6 veces semana<br><input type="radio"/> 1 vez al día<br><input type="radio"/> 2 a 3 veces al día<br><input type="radio"/> 5 a 6 veces al día<br><input type="radio"/> más 6 veces al día |
| Embutido            | <input type="radio"/> Nunca o menos 1 vez al mes<br><input checked="" type="radio"/> 1 a 3 veces mes<br><input type="radio"/> 1 vez semana<br><input type="radio"/> 2 a 4 veces semana<br><input type="radio"/> 5 a 6 veces semana<br><input type="radio"/> 1 vez al día<br><input type="radio"/> 2 a 3 veces al día<br><input type="radio"/> 5 a 6 veces al día<br><input type="radio"/> más 6 veces al día |
| Salchicha o similar | <input checked="" type="radio"/> Nunca o menos 1 vez al mes<br><input type="radio"/> 1 a 3 veces mes<br><input type="radio"/> 1 vez semana<br><input type="radio"/> 2 a 4 veces semana<br><input type="radio"/> 5 a 6 veces semana<br><input type="radio"/> 1 vez al día<br><input type="radio"/> 2 a 3 veces al día<br><input type="radio"/> 5 a 6 veces al día<br><input type="radio"/> más 6 veces al día |
| Pate o foiegras     | <input checked="" type="radio"/> Nunca o menos 1 vez al mes<br><input type="radio"/> 1 a 3 veces mes<br><input type="radio"/> 1 vez semana<br><input type="radio"/> 2 a 4 veces semana<br><input type="radio"/> 5 a 6 veces semana<br><input type="radio"/> 1 vez al día<br><input type="radio"/> 2 a 3 veces al día<br><input type="radio"/> 5 a 6 veces al día<br><input type="radio"/> más 6 veces al día |
| Hamburguesa         | <input type="radio"/> Nunca o menos 1 vez al mes<br><input type="radio"/> 1 a 3 veces mes<br><input checked="" type="radio"/> 1 vez semana<br><input type="radio"/> 2 a 4 veces semana<br><input type="radio"/> 5 a 6 veces semana<br><input type="radio"/> 1 vez al día<br><input type="radio"/> 2 a 3 veces al día<br><input type="radio"/> 5 a 6 veces al día<br><input type="radio"/> más 6 veces al día |
| tocino o bacon      | <input type="radio"/> Nunca o menos 1 vez al mes<br><input checked="" type="radio"/> 1 a 3 veces mes<br><input type="radio"/> 1 vez semana<br><input type="radio"/> 2 a 4 veces semana<br><input type="radio"/> 5 a 6 veces semana<br><input type="radio"/> 1 vez al día<br><input type="radio"/> 2 a 3 veces al día<br><input type="radio"/> 5 a 6 veces al día<br><input type="radio"/> más 6 veces al día |

---

Pescado frito

- ☐ Nunca o menos 1 vez al mes  
☐ 1 a 3 veces mes  
☒ 1 vez semana  
☐ 2 a 4 veces semana  
☐ 5 a 6 veces semana  
☐ 1 vez al día  
☐ 2 a 3 veces al día  
☐ 5 a 6 veces al día  
☐ más 6 veces al día

---

pescado hervido blanco

- ☐ Nunca o menos 1 vez al mes  
☐ 1 a 3 veces mes  
☒ 1 vez semana  
☐ 2 a 4 veces semana  
☐ 5 a 6 veces semana  
☐ 1 vez al día  
☐ 2 a 3 veces al día  
☐ 5 a 6 veces al día  
☐ más 6 veces al día

---

pescado hervido azul

- ☐ Nunca o menos 1 vez al mes  
☐ 1 a 3 veces mes  
☒ 1 vez semana  
☐ 2 a 4 veces semana  
☐ 5 a 6 veces semana  
☐ 1 vez al día  
☐ 2 a 3 veces al día  
☐ 5 a 6 veces al día  
☐ más 6 veces al día

---

otros pescado azul

- ☐ Nunca o menos 1 vez al mes  
☐ 1 a 3 veces mes  
☒ 1 vez semana  
☐ 2 a 4 veces semana  
☐ 5 a 6 veces semana  
☐ 1 vez al día  
☐ 2 a 3 veces al día  
☐ 5 a 6 veces al día  
☐ más 6 veces al día

---

atun conserva

- ☐ Nunca o menos 1 vez al mes  
☐ 1 a 3 veces mes  
☐ 1 vez semana  
☒ 2 a 4 veces semana  
☐ 5 a 6 veces semana  
☐ 1 vez al día  
☐ 2 a 3 veces al día  
☐ 5 a 6 veces al día  
☐ más 6 veces al día

---

sardina conserva

- ☒ Nunca o menos 1 vez al mes  
☐ 1 a 3 veces mes  
☐ 1 vez semana  
☐ 2 a 4 veces semana  
☐ 5 a 6 veces semana  
☐ 1 vez al día  
☐ 2 a 3 veces al día  
☐ 5 a 6 veces al día  
☐ más 6 veces al día

|                                         |                                                                                                                                                                                                                                                                                                                                                                                                              |
|-----------------------------------------|--------------------------------------------------------------------------------------------------------------------------------------------------------------------------------------------------------------------------------------------------------------------------------------------------------------------------------------------------------------------------------------------------------------|
| pescado ahumado                         | <input checked="" type="radio"/> Nunca o menos 1 vez al mes<br><input type="radio"/> 1 a 3 veces mes<br><input type="radio"/> 1 vez semana<br><input type="radio"/> 2 a 4 veces semana<br><input type="radio"/> 5 a 6 veces semana<br><input type="radio"/> 1 vez al día<br><input type="radio"/> 2 a 3 veces al día<br><input type="radio"/> 5 a 6 veces al día<br><input type="radio"/> más 6 veces al día |
| almejas o mejillones o ostras unos 100g | <input type="radio"/> Nunca o menos 1 vez al mes<br><input checked="" type="radio"/> 1 a 3 veces mes<br><input type="radio"/> 1 vez semana<br><input type="radio"/> 2 a 4 veces semana<br><input type="radio"/> 5 a 6 veces semana<br><input type="radio"/> 1 vez al día<br><input type="radio"/> 2 a 3 veces al día<br><input type="radio"/> 5 a 6 veces al día<br><input type="radio"/> más 6 veces al día |
| calamar o chipiron o sepia unos 100g    | <input type="radio"/> Nunca o menos 1 vez al mes<br><input type="radio"/> 1 a 3 veces mes<br><input checked="" type="radio"/> 1 vez semana<br><input type="radio"/> 2 a 4 veces semana<br><input type="radio"/> 5 a 6 veces semana<br><input type="radio"/> 1 vez al día<br><input type="radio"/> 2 a 3 veces al día<br><input type="radio"/> 5 a 6 veces al día<br><input type="radio"/> más 6 veces al día |
| marisco unos 100g                       | <input type="radio"/> Nunca o menos 1 vez al mes<br><input type="radio"/> 1 a 3 veces mes<br><input checked="" type="radio"/> 1 vez semana<br><input type="radio"/> 2 a 4 veces semana<br><input type="radio"/> 5 a 6 veces semana<br><input type="radio"/> 1 vez al día<br><input type="radio"/> 2 a 3 veces al día<br><input type="radio"/> 5 a 6 veces al día<br><input type="radio"/> más 6 veces al día |
| Espinacas o acelgas cocinadas           | <input checked="" type="radio"/> Nunca o menos 1 vez al mes<br><input type="radio"/> 1 a 3 veces mes<br><input type="radio"/> 1 vez semana<br><input type="radio"/> 2 a 4 veces semana<br><input type="radio"/> 5 a 6 veces semana<br><input type="radio"/> 1 vez al día<br><input type="radio"/> 2 a 3 veces al día<br><input type="radio"/> 5 a 6 veces al día<br><input type="radio"/> más 6 veces al día |
| Col o coliflor o brocoli cocinado       | <input checked="" type="radio"/> Nunca o menos 1 vez al mes<br><input type="radio"/> 1 a 3 veces mes<br><input type="radio"/> 1 vez semana<br><input type="radio"/> 2 a 4 veces semana<br><input type="radio"/> 5 a 6 veces semana<br><input type="radio"/> 1 vez al día<br><input type="radio"/> 2 a 3 veces al día<br><input type="radio"/> 5 a 6 veces al día<br><input type="radio"/> más 6 veces al día |

---

Lechuga o endivia o escarola

- ☐ Nunca o menos 1 vez al mes  
☐ 1 a 3 veces mes  
☐ 1 vez semana  
☒ 2 a 4 veces semana  
☐ 5 a 6 veces semana  
☐ 1 vez al día  
☐ 2 a 3 veces al día  
☐ 5 a 6 veces al día  
☐ más 6 veces al día

---

tomate ensalada

- ☐ Nunca o menos 1 vez al mes  
☐ 1 a 3 veces mes  
☐ 1 vez semana  
☒ 2 a 4 veces semana  
☐ 5 a 6 veces semana  
☐ 1 vez al día  
☐ 2 a 3 veces al día  
☐ 5 a 6 veces al día  
☐ más 6 veces al día

---

cebolla

- ☐ Nunca o menos 1 vez al mes  
☒ 1 a 3 veces mes  
☐ 1 vez semana  
☐ 2 a 4 veces semana  
☐ 5 a 6 veces semana  
☐ 1 vez al día  
☐ 2 a 3 veces al día  
☐ 5 a 6 veces al día  
☐ más 6 veces al día

---

Zanahoria o calabaza

- ☐ Nunca o menos 1 vez al mes  
☐ 1 a 3 veces mes  
☒ 1 vez semana  
☐ 2 a 4 veces semana  
☐ 5 a 6 veces semana  
☐ 1 vez al día  
☐ 2 a 3 veces al día  
☐ 5 a 6 veces al día  
☐ más 6 veces al día

---

Judías verdes

- ☐ Nunca o menos 1 vez al mes  
☐ 1 a 3 veces mes  
☒ 1 vez semana  
☐ 2 a 4 veces semana  
☐ 5 a 6 veces semana  
☐ 1 vez al día  
☐ 2 a 3 veces al día  
☐ 5 a 6 veces al día  
☐ más 6 veces al día

---

Berenjena o calabacin o pepino

- ☐ Nunca o menos 1 vez al mes  
☐ 1 a 3 veces mes  
☐ 1 vez semana  
☒ 2 a 4 veces semana  
☐ 5 a 6 veces semana  
☐ 1 vez al día  
☐ 2 a 3 veces al día  
☐ 5 a 6 veces al día  
☐ más 6 veces al día

|                       |                                                                                                                                                                                                                                                                                                                                                                                                              |
|-----------------------|--------------------------------------------------------------------------------------------------------------------------------------------------------------------------------------------------------------------------------------------------------------------------------------------------------------------------------------------------------------------------------------------------------------|
| pimiento              | <input checked="" type="radio"/> Nunca o menos 1 vez al mes<br><input type="radio"/> 1 a 3 veces mes<br><input type="radio"/> 1 vez semana<br><input type="radio"/> 2 a 4 veces semana<br><input type="radio"/> 5 a 6 veces semana<br><input type="radio"/> 1 vez al día<br><input type="radio"/> 2 a 3 veces al día<br><input type="radio"/> 5 a 6 veces al día<br><input type="radio"/> más 6 veces al día |
| alcachofa             | <input type="radio"/> Nunca o menos 1 vez al mes<br><input type="radio"/> 1 a 3 veces mes<br><input checked="" type="radio"/> 1 vez semana<br><input type="radio"/> 2 a 4 veces semana<br><input type="radio"/> 5 a 6 veces semana<br><input type="radio"/> 1 vez al día<br><input type="radio"/> 2 a 3 veces al día<br><input type="radio"/> 5 a 6 veces al día<br><input type="radio"/> más 6 veces al día |
| espárragos            | <input checked="" type="radio"/> Nunca o menos 1 vez al mes<br><input type="radio"/> 1 a 3 veces mes<br><input type="radio"/> 1 vez semana<br><input type="radio"/> 2 a 4 veces semana<br><input type="radio"/> 5 a 6 veces semana<br><input type="radio"/> 1 vez al día<br><input type="radio"/> 2 a 3 veces al día<br><input type="radio"/> 5 a 6 veces al día<br><input type="radio"/> más 6 veces al día |
| maíz hervido          | <input type="radio"/> Nunca o menos 1 vez al mes<br><input type="radio"/> 1 a 3 veces mes<br><input checked="" type="radio"/> 1 vez semana<br><input type="radio"/> 2 a 4 veces semana<br><input type="radio"/> 5 a 6 veces semana<br><input type="radio"/> 1 vez al día<br><input type="radio"/> 2 a 3 veces al día<br><input type="radio"/> 5 a 6 veces al día<br><input type="radio"/> más 6 veces al día |
| legumbres             | <input type="radio"/> Nunca o menos 1 vez al mes<br><input type="radio"/> 1 a 3 veces mes<br><input type="radio"/> 1 vez semana<br><input checked="" type="radio"/> 2 a 4 veces semana<br><input type="radio"/> 5 a 6 veces semana<br><input type="radio"/> 1 vez al día<br><input type="radio"/> 2 a 3 veces al día<br><input type="radio"/> 5 a 6 veces al día<br><input type="radio"/> más 6 veces al día |
| naranjas o mandarinas | <input type="radio"/> Nunca o menos 1 vez al mes<br><input type="radio"/> 1 a 3 veces mes<br><input type="radio"/> 1 vez semana<br><input checked="" type="radio"/> 2 a 4 veces semana<br><input type="radio"/> 5 a 6 veces semana<br><input type="radio"/> 1 vez al día<br><input type="radio"/> 2 a 3 veces al día<br><input type="radio"/> 5 a 6 veces al día<br><input type="radio"/> más 6 veces al día |

---

zum natural fruta

- ☐ Nunca o menos 1 vez al mes  
☐ 1 a 3 veces mes  
☒ 1 vez semana  
☐ 2 a 4 veces semana  
☐ 5 a 6 veces semana  
☐ 1 vez al día  
☐ 2 a 3 veces al día  
☐ 5 a 6 veces al día  
☐ más 6 veces al día

---

platano

- ☐ Nunca o menos 1 vez al mes  
☐ 1 a 3 veces mes  
☐ 1 vez semana  
☒ 2 a 4 veces semana  
☐ 5 a 6 veces semana  
☐ 1 vez al día  
☐ 2 a 3 veces al día  
☐ 5 a 6 veces al día  
☐ más 6 veces al día

---

manzana o pera

- ☐ Nunca o menos 1 vez al mes  
☐ 1 a 3 veces mes  
☐ 1 vez semana  
☒ 2 a 4 veces semana  
☐ 5 a 6 veces semana  
☐ 1 vez al día  
☐ 2 a 3 veces al día  
☐ 5 a 6 veces al día  
☐ más 6 veces al día

---

melocotón o nectarina

- ☐ Nunca o menos 1 vez al mes  
☐ 1 a 3 veces mes  
☐ 1 vez semana  
☒ 2 a 4 veces semana  
☐ 5 a 6 veces semana  
☐ 1 vez al día  
☐ 2 a 3 veces al día  
☐ 5 a 6 veces al día  
☐ más 6 veces al día

---

sandia o melon

- ☐ Nunca o menos 1 vez al mes  
☐ 1 a 3 veces mes  
☐ 1 vez semana  
☒ 2 a 4 veces semana  
☐ 5 a 6 veces semana  
☐ 1 vez al día  
☐ 2 a 3 veces al día  
☐ 5 a 6 veces al día  
☐ más 6 veces al día

---

uva

- ☐ Nunca o menos 1 vez al mes  
☐ 1 a 3 veces mes  
☒ 1 vez semana  
☐ 2 a 4 veces semana  
☐ 5 a 6 veces semana  
☐ 1 vez al día  
☐ 2 a 3 veces al día  
☐ 5 a 6 veces al día  
☐ más 6 veces al día



---

bruna o ciruela

- ☐ Nunca o menos 1 vez al mes  
☐ 1 a 3 veces mes  
☒ 1 vez semana  
☐ 2 a 4 veces semana  
☐ 5 a 6 veces semana  
☐ 1 vez al día  
☐ 2 a 3 veces al día  
☐ 5 a 6 veces al día  
☐ más 6 veces al día

---

kiwi

- ☒ Nunca o menos 1 vez al mes  
☐ 1 a 3 veces mes  
☐ 1 vez semana  
☐ 2 a 4 veces semana  
☐ 5 a 6 veces semana  
☐ 1 vez al día  
☐ 2 a 3 veces al día  
☐ 5 a 6 veces al día  
☐ más 6 veces al día

---

aceituna

- ☐ Nunca o menos 1 vez al mes  
☐ 1 a 3 veces mes  
☐ 1 vez semana  
☐ 2 a 4 veces semana  
☐ 5 a 6 veces semana  
☐ 1 vez al día  
☐ 2 a 3 veces al día  
☐ 5 a 6 veces al día  
☐ más 6 veces al día

---

frutos secos

- ☐ Nunca o menos 1 vez al mes  
☐ 1 a 3 veces mes  
☐ 1 vez semana  
☒ 2 a 4 veces semana  
☐ 5 a 6 veces semana  
☐ 1 vez al día  
☐ 2 a 3 veces al día  
☐ 5 a 6 veces al día  
☐ más 6 veces al día

---

pan blanco

- ☐ Nunca o menos 1 vez al mes  
☒ 1 a 3 veces mes  
☐ 1 vez semana  
☐ 2 a 4 veces semana  
☐ 5 a 6 veces semana  
☐ 1 vez al día  
☐ 2 a 3 veces al día  
☐ 5 a 6 veces al día  
☐ más 6 veces al día

---

pan integral

- ☐ Nunca o menos 1 vez al mes  
☐ 1 a 3 veces mes  
☐ 1 vez semana  
☒ 2 a 4 veces semana  
☐ 5 a 6 veces semana  
☐ 1 vez al día  
☐ 2 a 3 veces al día  
☐ 5 a 6 veces al día  
☐ más 6 veces al día

|                          |                                                                                                                                                                                                                                                                                                                                                                                                              |
|--------------------------|--------------------------------------------------------------------------------------------------------------------------------------------------------------------------------------------------------------------------------------------------------------------------------------------------------------------------------------------------------------------------------------------------------------|
| cereales desayuno        | <input checked="" type="radio"/> Nunca o menos 1 vez al mes<br><input type="radio"/> 1 a 3 veces mes<br><input type="radio"/> 1 vez semana<br><input type="radio"/> 2 a 4 veces semana<br><input type="radio"/> 5 a 6 veces semana<br><input type="radio"/> 1 vez al día<br><input type="radio"/> 2 a 3 veces al día<br><input type="radio"/> 5 a 6 veces al día<br><input type="radio"/> más 6 veces al día |
| patatas fritas           | <input type="radio"/> Nunca o menos 1 vez al mes<br><input checked="" type="radio"/> 1 a 3 veces mes<br><input type="radio"/> 1 vez semana<br><input type="radio"/> 2 a 4 veces semana<br><input type="radio"/> 5 a 6 veces semana<br><input type="radio"/> 1 vez al día<br><input type="radio"/> 2 a 3 veces al día<br><input type="radio"/> 5 a 6 veces al día<br><input type="radio"/> más 6 veces al día |
| patatas cocidas o asadas | <input type="radio"/> Nunca o menos 1 vez al mes<br><input type="radio"/> 1 a 3 veces mes<br><input checked="" type="radio"/> 1 vez semana<br><input type="radio"/> 2 a 4 veces semana<br><input type="radio"/> 5 a 6 veces semana<br><input type="radio"/> 1 vez al día<br><input type="radio"/> 2 a 3 veces al día<br><input type="radio"/> 5 a 6 veces al día<br><input type="radio"/> más 6 veces al día |
| bolsa papas              | <input type="radio"/> Nunca o menos 1 vez al mes<br><input type="radio"/> 1 a 3 veces mes<br><input type="radio"/> 1 vez semana<br><input type="radio"/> 2 a 4 veces semana<br><input type="radio"/> 5 a 6 veces semana<br><input type="radio"/> 1 vez al día<br><input type="radio"/> 2 a 3 veces al día<br><input type="radio"/> 5 a 6 veces al día<br><input type="radio"/> más 6 veces al día            |
| arroz cocinado           | <input type="radio"/> Nunca o menos 1 vez al mes<br><input type="radio"/> 1 a 3 veces mes<br><input checked="" type="radio"/> 1 vez semana<br><input type="radio"/> 2 a 4 veces semana<br><input type="radio"/> 5 a 6 veces semana<br><input type="radio"/> 1 vez al día<br><input type="radio"/> 2 a 3 veces al día<br><input type="radio"/> 5 a 6 veces al día<br><input type="radio"/> más 6 veces al día |
| pasta                    | <input type="radio"/> Nunca o menos 1 vez al mes<br><input type="radio"/> 1 a 3 veces mes<br><input type="radio"/> 1 vez semana<br><input checked="" type="radio"/> 2 a 4 veces semana<br><input type="radio"/> 5 a 6 veces semana<br><input type="radio"/> 1 vez al día<br><input type="radio"/> 2 a 3 veces al día<br><input type="radio"/> 5 a 6 veces al día<br><input type="radio"/> más 6 veces al día |

|                     |                                                                                                                                                                                                                                                                                                                                                                                                              |
|---------------------|--------------------------------------------------------------------------------------------------------------------------------------------------------------------------------------------------------------------------------------------------------------------------------------------------------------------------------------------------------------------------------------------------------------|
| pizza               | <input type="radio"/> Nunca o menos 1 vez al mes<br><input type="radio"/> 1 a 3 veces mes<br><input checked="" type="radio"/> 1 vez semana<br><input type="radio"/> 2 a 4 veces semana<br><input type="radio"/> 5 a 6 veces semana<br><input type="radio"/> 1 vez al día<br><input type="radio"/> 2 a 3 veces al día<br><input type="radio"/> 5 a 6 veces al día<br><input type="radio"/> más 6 veces al día |
| aceite oliva        | <input type="radio"/> Nunca o menos 1 vez al mes<br><input type="radio"/> 1 a 3 veces mes<br><input type="radio"/> 1 vez semana<br><input checked="" type="radio"/> 2 a 4 veces semana<br><input type="radio"/> 5 a 6 veces semana<br><input type="radio"/> 1 vez al día<br><input type="radio"/> 2 a 3 veces al día<br><input type="radio"/> 5 a 6 veces al día<br><input type="radio"/> más 6 veces al día |
| otros aceites       | <input type="radio"/> Nunca o menos 1 vez al mes<br><input checked="" type="radio"/> 1 a 3 veces mes<br><input type="radio"/> 1 vez semana<br><input type="radio"/> 2 a 4 veces semana<br><input type="radio"/> 5 a 6 veces semana<br><input type="radio"/> 1 vez al día<br><input type="radio"/> 2 a 3 veces al día<br><input type="radio"/> 5 a 6 veces al día<br><input type="radio"/> más 6 veces al día |
| margarina           | <input checked="" type="radio"/> Nunca o menos 1 vez al mes<br><input type="radio"/> 1 a 3 veces mes<br><input type="radio"/> 1 vez semana<br><input type="radio"/> 2 a 4 veces semana<br><input type="radio"/> 5 a 6 veces semana<br><input type="radio"/> 1 vez al día<br><input type="radio"/> 2 a 3 veces al día<br><input type="radio"/> 5 a 6 veces al día<br><input type="radio"/> más 6 veces al día |
| mantequilla         | <input checked="" type="radio"/> Nunca o menos 1 vez al mes<br><input type="radio"/> 1 a 3 veces mes<br><input type="radio"/> 1 vez semana<br><input type="radio"/> 2 a 4 veces semana<br><input type="radio"/> 5 a 6 veces semana<br><input type="radio"/> 1 vez al día<br><input type="radio"/> 2 a 3 veces al día<br><input type="radio"/> 5 a 6 veces al día<br><input type="radio"/> más 6 veces al día |
| galletas tipo maria | <input type="radio"/> Nunca o menos 1 vez al mes<br><input checked="" type="radio"/> 1 a 3 veces mes<br><input type="radio"/> 1 vez semana<br><input type="radio"/> 2 a 4 veces semana<br><input type="radio"/> 5 a 6 veces semana<br><input type="radio"/> 1 vez al día<br><input type="radio"/> 2 a 3 veces al día<br><input type="radio"/> 5 a 6 veces al día<br><input type="radio"/> más 6 veces al día |

---

galletas chocolate

- ☒ Nunca o menos 1 vez al mes  
☐ 1 a 3 veces mes  
☐ 1 vez semana  
☐ 2 a 4 veces semana  
☐ 5 a 6 veces semana  
☐ 1 vez al día  
☐ 2 a 3 veces al día  
☐ 5 a 6 veces al día  
☐ más 6 veces al día

---

bolleria

- ☐ Nunca o menos 1 vez al mes  
☐ 1 a 3 veces mes  
☐ 1 vez semana  
☒ 2 a 4 veces semana  
☐ 5 a 6 veces semana  
☐ 1 vez al día  
☐ 2 a 3 veces al día  
☐ 5 a 6 veces al día  
☐ más 6 veces al día

---

chocolate o bombones

- ☐ Nunca o menos 1 vez al mes  
☐ 1 a 3 veces mes  
☐ 1 vez semana  
☒ 2 a 4 veces semana  
☐ 5 a 6 veces semana  
☐ 1 vez al día  
☐ 2 a 3 veces al día  
☐ 5 a 6 veces al día  
☐ más 6 veces al día

---

chocolate polvo o colacao

- ☒ Nunca o menos 1 vez al mes  
☐ 1 a 3 veces mes  
☐ 1 vez semana  
☐ 2 a 4 veces semana  
☐ 5 a 6 veces semana  
☐ 1 vez al día  
☐ 2 a 3 veces al día  
☐ 5 a 6 veces al día  
☐ más 6 veces al día

---

vino tinto

- ☒ Nunca o menos 1 vez al mes  
☐ 1 a 3 veces mes  
☐ 1 vez semana  
☐ 2 a 4 veces semana  
☐ 5 a 6 veces semana  
☐ 1 vez al día  
☐ 2 a 3 veces al día  
☐ 5 a 6 veces al día  
☐ más 6 veces al día

---

vino blanco

- ☒ Nunca o menos 1 vez al mes  
☐ 1 a 3 veces mes  
☐ 1 vez semana  
☐ 2 a 4 veces semana  
☐ 5 a 6 veces semana  
☐ 1 vez al día  
☐ 2 a 3 veces al día  
☐ 5 a 6 veces al día  
☐ más 6 veces al día

|                       |                                                                                                                                                                                                                                                                                                                                                                                                              |
|-----------------------|--------------------------------------------------------------------------------------------------------------------------------------------------------------------------------------------------------------------------------------------------------------------------------------------------------------------------------------------------------------------------------------------------------------|
| vino seco o vermut    | <input checked="" type="radio"/> Nunca o menos 1 vez al mes<br><input type="radio"/> 1 a 3 veces mes<br><input type="radio"/> 1 vez semana<br><input type="radio"/> 2 a 4 veces semana<br><input type="radio"/> 5 a 6 veces semana<br><input type="radio"/> 1 vez al día<br><input type="radio"/> 2 a 3 veces al día<br><input type="radio"/> 5 a 6 veces al día<br><input type="radio"/> más 6 veces al día |
| cerveza               | <input checked="" type="radio"/> Nunca o menos 1 vez al mes<br><input type="radio"/> 1 a 3 veces mes<br><input type="radio"/> 1 vez semana<br><input type="radio"/> 2 a 4 veces semana<br><input type="radio"/> 5 a 6 veces semana<br><input type="radio"/> 1 vez al día<br><input type="radio"/> 2 a 3 veces al día<br><input type="radio"/> 5 a 6 veces al día<br><input type="radio"/> más 6 veces al día |
| cerveza sin alcohol   | <input type="radio"/> Nunca o menos 1 vez al mes<br><input type="radio"/> 1 a 3 veces mes<br><input checked="" type="radio"/> 1 vez semana<br><input type="radio"/> 2 a 4 veces semana<br><input type="radio"/> 5 a 6 veces semana<br><input type="radio"/> 1 vez al día<br><input type="radio"/> 2 a 3 veces al día<br><input type="radio"/> 5 a 6 veces al día<br><input type="radio"/> más 6 veces al día |
| licores               | <input checked="" type="radio"/> Nunca o menos 1 vez al mes<br><input type="radio"/> 1 a 3 veces mes<br><input type="radio"/> 1 vez semana<br><input type="radio"/> 2 a 4 veces semana<br><input type="radio"/> 5 a 6 veces semana<br><input type="radio"/> 1 vez al día<br><input type="radio"/> 2 a 3 veces al día<br><input type="radio"/> 5 a 6 veces al día<br><input type="radio"/> más 6 veces al día |
| ginebra o ron o vodka | <input checked="" type="radio"/> Nunca o menos 1 vez al mes<br><input type="radio"/> 1 a 3 veces mes<br><input type="radio"/> 1 vez semana<br><input type="radio"/> 2 a 4 veces semana<br><input type="radio"/> 5 a 6 veces semana<br><input type="radio"/> 1 vez al día<br><input type="radio"/> 2 a 3 veces al día<br><input type="radio"/> 5 a 6 veces al día<br><input type="radio"/> más 6 veces al día |
| refresco normal       | <input type="radio"/> Nunca o menos 1 vez al mes<br><input type="radio"/> 1 a 3 veces mes<br><input checked="" type="radio"/> 1 vez semana<br><input type="radio"/> 2 a 4 veces semana<br><input type="radio"/> 5 a 6 veces semana<br><input type="radio"/> 1 vez al día<br><input type="radio"/> 2 a 3 veces al día<br><input type="radio"/> 5 a 6 veces al día<br><input type="radio"/> más 6 veces al día |

|                          |                                                                                                                                                                                                                                                                                                                                                                                                              |
|--------------------------|--------------------------------------------------------------------------------------------------------------------------------------------------------------------------------------------------------------------------------------------------------------------------------------------------------------------------------------------------------------------------------------------------------------|
| refresco sin azúcar      | <input type="radio"/> Nunca o menos 1 vez al mes<br><input type="radio"/> 1 a 3 veces mes<br><input type="radio"/> 1 vez semana<br><input type="radio"/> 2 a 4 veces semana<br><input checked="" type="radio"/> 5 a 6 veces semana<br><input type="radio"/> 1 vez al día<br><input type="radio"/> 2 a 3 veces al día<br><input type="radio"/> 5 a 6 veces al día<br><input type="radio"/> más 6 veces al día |
| Agua del grifo           | <input checked="" type="radio"/> Nunca o menos 1 vez al mes<br><input type="radio"/> 1 a 3 veces mes<br><input type="radio"/> 1 vez semana<br><input type="radio"/> 2 a 4 veces semana<br><input type="radio"/> 5 a 6 veces semana<br><input type="radio"/> 1 vez al día<br><input type="radio"/> 2 a 3 veces al día<br><input type="radio"/> 5 a 6 veces al día<br><input type="radio"/> más 6 veces al día |
| agua embotellada sin gas | <input type="radio"/> Nunca o menos 1 vez al mes<br><input type="radio"/> 1 a 3 veces mes<br><input type="radio"/> 1 vez semana<br><input type="radio"/> 2 a 4 veces semana<br><input type="radio"/> 5 a 6 veces semana<br><input type="radio"/> 1 vez al día<br><input checked="" type="radio"/> 2 a 3 veces al día<br><input type="radio"/> 5 a 6 veces al día<br><input type="radio"/> más 6 veces al día |
| agua embotellada con gas | <input checked="" type="radio"/> Nunca o menos 1 vez al mes<br><input type="radio"/> 1 a 3 veces mes<br><input type="radio"/> 1 vez semana<br><input type="radio"/> 2 a 4 veces semana<br><input type="radio"/> 5 a 6 veces semana<br><input type="radio"/> 1 vez al día<br><input type="radio"/> 2 a 3 veces al día<br><input type="radio"/> 5 a 6 veces al día<br><input type="radio"/> más 6 veces al día |
| zumو frutas embasado     | <input checked="" type="radio"/> Nunca o menos 1 vez al mes<br><input type="radio"/> 1 a 3 veces mes<br><input type="radio"/> 1 vez semana<br><input type="radio"/> 2 a 4 veces semana<br><input type="radio"/> 5 a 6 veces semana<br><input type="radio"/> 1 vez al día<br><input type="radio"/> 2 a 3 veces al día<br><input type="radio"/> 5 a 6 veces al día<br><input type="radio"/> más 6 veces al día |
| cafe                     | <input checked="" type="radio"/> Nunca o menos 1 vez al mes<br><input type="radio"/> 1 a 3 veces mes<br><input type="radio"/> 1 vez semana<br><input type="radio"/> 2 a 4 veces semana<br><input type="radio"/> 5 a 6 veces semana<br><input type="radio"/> 1 vez al día<br><input type="radio"/> 2 a 3 veces al día<br><input type="radio"/> 5 a 6 veces al día<br><input type="radio"/> más 6 veces al día |

---

cafe descafeinado

- ☐ Nunca o menos 1 vez al mes  
☐ 1 a 3 veces mes  
☐ 1 vez semana  
☒ 2 a 4 veces semana  
☐ 5 a 6 veces semana  
☐ 1 vez al día  
☐ 2 a 3 veces al día  
☐ 5 a 6 veces al día  
☐ más 6 veces al día

---

te o infusión

- ☒ Nunca o menos 1 vez al mes  
☐ 1 a 3 veces mes  
☐ 1 vez semana  
☐ 2 a 4 veces semana  
☐ 5 a 6 veces semana  
☐ 1 vez al día  
☐ 2 a 3 veces al día  
☐ 5 a 6 veces al día  
☐ más 6 veces al día

---

sopa o puré verduras

- ☐ Nunca o menos 1 vez al mes  
☒ 1 a 3 veces mes  
☐ 1 vez semana  
☐ 2 a 4 veces semana  
☐ 5 a 6 veces semana  
☐ 1 vez al día  
☐ 2 a 3 veces al día  
☐ 5 a 6 veces al día  
☐ más 6 veces al día

---

croquetas pollo jamón

- ☒ Nunca o menos 1 vez al mes  
☐ 1 a 3 veces mes  
☐ 1 vez semana  
☐ 2 a 4 veces semana  
☐ 5 a 6 veces semana  
☐ 1 vez al día  
☐ 2 a 3 veces al día  
☐ 5 a 6 veces al día  
☐ más 6 veces al día

---

croquetas pescado

- ☒ Nunca o menos 1 vez al mes  
☐ 1 a 3 veces mes  
☐ 1 vez semana  
☐ 2 a 4 veces semana  
☐ 5 a 6 veces semana  
☐ 1 vez al día  
☐ 2 a 3 veces al día  
☐ 5 a 6 veces al día  
☐ más 6 veces al día

---

mayonesa

- ☒ Nunca o menos 1 vez al mes  
☐ 1 a 3 veces mes  
☐ 1 vez semana  
☐ 2 a 4 veces semana  
☐ 5 a 6 veces semana  
☐ 1 vez al día  
☐ 2 a 3 veces al día  
☐ 5 a 6 veces al día  
☐ más 6 veces al día

|                  |                                                                                                                                                                                                                                                                                                                                                                                                              |
|------------------|--------------------------------------------------------------------------------------------------------------------------------------------------------------------------------------------------------------------------------------------------------------------------------------------------------------------------------------------------------------------------------------------------------------|
| salsa tomate     | <input type="radio"/> Nunca o menos 1 vez al mes<br><input type="radio"/> 1 a 3 veces mes<br><input checked="" type="radio"/> 1 vez semana<br><input type="radio"/> 2 a 4 veces semana<br><input type="radio"/> 5 a 6 veces semana<br><input type="radio"/> 1 vez al día<br><input type="radio"/> 2 a 3 veces al día<br><input type="radio"/> 5 a 6 veces al día<br><input type="radio"/> más 6 veces al día |
| ketchup          | <input type="radio"/> Nunca o menos 1 vez al mes<br><input type="radio"/> 1 a 3 veces mes<br><input checked="" type="radio"/> 1 vez semana<br><input type="radio"/> 2 a 4 veces semana<br><input type="radio"/> 5 a 6 veces semana<br><input type="radio"/> 1 vez al día<br><input type="radio"/> 2 a 3 veces al día<br><input type="radio"/> 5 a 6 veces al día<br><input type="radio"/> más 6 veces al día |
| sal              | <input type="radio"/> Nunca o menos 1 vez al mes<br><input type="radio"/> 1 a 3 veces mes<br><input type="radio"/> 1 vez semana<br><input type="radio"/> 2 a 4 veces semana<br><input type="radio"/> 5 a 6 veces semana<br><input type="radio"/> 1 vez al día<br><input checked="" type="radio"/> 2 a 3 veces al día<br><input type="radio"/> 5 a 6 veces al día<br><input type="radio"/> más 6 veces al día |
| ajo              | <input type="radio"/> Nunca o menos 1 vez al mes<br><input checked="" type="radio"/> 1 a 3 veces mes<br><input type="radio"/> 1 vez semana<br><input type="radio"/> 2 a 4 veces semana<br><input type="radio"/> 5 a 6 veces semana<br><input type="radio"/> 1 vez al día<br><input type="radio"/> 2 a 3 veces al día<br><input type="radio"/> 5 a 6 veces al día<br><input type="radio"/> más 6 veces al día |
| mermelada o miel | <input checked="" type="radio"/> Nunca o menos 1 vez al mes<br><input type="radio"/> 1 a 3 veces mes<br><input type="radio"/> 1 vez semana<br><input type="radio"/> 2 a 4 veces semana<br><input type="radio"/> 5 a 6 veces semana<br><input type="radio"/> 1 vez al día<br><input type="radio"/> 2 a 3 veces al día<br><input type="radio"/> 5 a 6 veces al día<br><input type="radio"/> más 6 veces al día |
| azúcar           | <input type="radio"/> Nunca o menos 1 vez al mes<br><input type="radio"/> 1 a 3 veces mes<br><input type="radio"/> 1 vez semana<br><input type="radio"/> 2 a 4 veces semana<br><input checked="" type="radio"/> 5 a 6 veces semana<br><input type="radio"/> 1 vez al día<br><input type="radio"/> 2 a 3 veces al día<br><input type="radio"/> 5 a 6 veces al día<br><input type="radio"/> más 6 veces al día |



|                                       |                                                                                                                                                                                                                                                                                                                                                                                                                                                                                                                               |
|---------------------------------------|-------------------------------------------------------------------------------------------------------------------------------------------------------------------------------------------------------------------------------------------------------------------------------------------------------------------------------------------------------------------------------------------------------------------------------------------------------------------------------------------------------------------------------|
| Otro alimento                         |                                                                                                                                                                                                                                                                                                                                                                                                                                                                                                                               |
| suplementos vitamínicos               | <input checked="" type="radio"/> si<br><input type="radio"/> no                                                                                                                                                                                                                                                                                                                                                                                                                                                               |
| suplementos vitamínicos               | [*DATA REMOVED*]                                                                                                                                                                                                                                                                                                                                                                                                                                                                                                              |
| dieta previa                          | <input type="radio"/> si<br><input checked="" type="radio"/> no                                                                                                                                                                                                                                                                                                                                                                                                                                                               |
| motivo dieta                          | <input checked="" type="radio"/> no dieta<br><input type="radio"/> control peso<br><input type="radio"/> control colesterol<br><input type="radio"/> control diabetes<br><input type="radio"/> problemas estómago<br><input type="radio"/> problemas vesícula o hepáticos<br><input type="radio"/> HTA o cardiopatía<br><input type="radio"/> problemas renales<br><input type="radio"/> alergia alimentaria<br><input type="radio"/> ácido úrico elevado<br><input type="radio"/> vegetariana<br><input type="radio"/> otros |
| cambio alimentos año previo gestación | <input type="radio"/> si<br><input checked="" type="radio"/> no                                                                                                                                                                                                                                                                                                                                                                                                                                                               |
| cambio lácteos                        | <input type="radio"/> eliminado<br><input type="radio"/> disminuido<br><input checked="" type="radio"/> igual<br><input type="radio"/> aumentado<br><input type="radio"/> no sabe                                                                                                                                                                                                                                                                                                                                             |
| cambio huevos                         | <input type="radio"/> eliminado<br><input type="radio"/> disminuido<br><input checked="" type="radio"/> igual<br><input type="radio"/> aumentado<br><input type="radio"/> no sabe                                                                                                                                                                                                                                                                                                                                             |
| cambio carne                          | <input type="radio"/> eliminado<br><input type="radio"/> disminuido<br><input checked="" type="radio"/> igual<br><input type="radio"/> aumentado<br><input type="radio"/> no sabe                                                                                                                                                                                                                                                                                                                                             |
| cambio pescado                        | <input type="radio"/> eliminado<br><input type="radio"/> disminuido<br><input checked="" type="radio"/> igual<br><input type="radio"/> aumentado<br><input type="radio"/> no sabe                                                                                                                                                                                                                                                                                                                                             |
| cambio verduras                       | <input type="radio"/> eliminado<br><input type="radio"/> disminuido<br><input checked="" type="radio"/> igual<br><input type="radio"/> aumentado<br><input type="radio"/> no sabe                                                                                                                                                                                                                                                                                                                                             |

|                            |                                                                                                                                                                                                                        |
|----------------------------|------------------------------------------------------------------------------------------------------------------------------------------------------------------------------------------------------------------------|
| cambio legumbres           | <input type="radio"/> eliminado<br><input type="radio"/> disminuido<br><input checked="" type="radio"/> igual<br><input type="radio"/> aumentado<br><input type="radio"/> no sabe                                      |
| cambio fruta               | <input type="radio"/> eliminado<br><input type="radio"/> disminuido<br><input checked="" type="radio"/> igual<br><input type="radio"/> aumentado<br><input type="radio"/> no sabe                                      |
| cambio pan                 | <input type="radio"/> eliminado<br><input type="radio"/> disminuido<br><input checked="" type="radio"/> igual<br><input type="radio"/> aumentado<br><input type="radio"/> no sabe                                      |
| cambio aceite oliva        | <input type="radio"/> eliminado<br><input type="radio"/> disminuido<br><input checked="" type="radio"/> igual<br><input type="radio"/> aumentado<br><input type="radio"/> no sabe                                      |
| cambio mante o margarina   | <input type="radio"/> eliminado<br><input type="radio"/> disminuido<br><input checked="" type="radio"/> igual<br><input type="radio"/> aumentado<br><input type="radio"/> no sabe                                      |
| cambio azúcar y dulces     | <input type="radio"/> eliminado<br><input type="radio"/> disminuido<br><input checked="" type="radio"/> igual<br><input type="radio"/> aumentado<br><input type="radio"/> no sabe                                      |
| cambio bebidas alcohólicas | <input type="radio"/> eliminado<br><input type="radio"/> disminuido<br><input checked="" type="radio"/> igual<br><input type="radio"/> aumentado<br><input type="radio"/> no sabe                                      |
| frecuencia comidas fritas  | <input type="radio"/> a diario<br><input type="radio"/> 5 a 6 veces semana<br><input type="radio"/> 2 a 4 veces semana<br><input checked="" type="radio"/> 1 vez semana<br><input type="radio"/> menos de 1 vez semana |
| carne                      | <input type="radio"/> no como<br><input type="radio"/> cruda<br><input type="radio"/> poco hecha<br><input type="radio"/> hecha<br><input checked="" type="radio"/> muy hecha                                          |
| grasa visible carne        | <input type="radio"/> quita toda<br><input type="radio"/> quita mayoría<br><input type="radio"/> quita un poco<br><input checked="" type="radio"/> no quita nada                                                       |

|                                |                                                                                                                                                                                                                                                          |
|--------------------------------|----------------------------------------------------------------------------------------------------------------------------------------------------------------------------------------------------------------------------------------------------------|
| cocina carne                   | <input checked="" type="radio"/> a la plancha<br><input type="radio"/> a la parrilla<br><input type="radio"/> asada<br><input type="radio"/> frita<br><input type="radio"/> guisada                                                                      |
| tostado quemado carne          | <input checked="" type="radio"/> nunca<br><input type="radio"/> 1 vez mes<br><input type="radio"/> 2 a 3 veces mes<br><input type="radio"/> 1 vez semana<br><input type="radio"/> 2 a 3 semanas                                                          |
| tostado quemado pescado        | <input checked="" type="radio"/> nunca<br><input type="radio"/> 1 vez mes<br><input type="radio"/> 2 a 3 veces mes<br><input type="radio"/> 1 vez semana<br><input type="radio"/> 2 a 3 semanas                                                          |
| socarrat paella                | <input checked="" type="radio"/> nunca<br><input type="radio"/> 1 vez mes<br><input type="radio"/> 2 a 3 veces mes<br><input type="radio"/> 1 vez semana<br><input type="radio"/> 2 a 3 semanas                                                          |
| grasa o aceite cocinar         | <input type="radio"/> mantequilla<br><input type="radio"/> margarina<br><input type="radio"/> aceite oliva<br><input checked="" type="radio"/> aceite oliva virgen extra<br><input type="radio"/> aceite vegetal<br><input type="radio"/> mezcla aceites |
| grasa aceite aliñar            | <input type="radio"/> mantequilla<br><input type="radio"/> margarina<br><input type="radio"/> aceite oliva<br><input checked="" type="radio"/> aceite oliva virgen extra<br><input type="radio"/> aceite vegetal<br><input type="radio"/> mezcla aceites |
| grasa aceite freir             | <input type="radio"/> mantequilla<br><input type="radio"/> margarina<br><input type="radio"/> aceite oliva<br><input type="radio"/> aceite oliva virgen extra<br><input checked="" type="radio"/> aceite vegetal<br><input type="radio"/> mezcla aceites |
| Ejercicio cuestionario         | <input checked="" type="radio"/> si<br><input type="radio"/> no                                                                                                                                                                                          |
| horas de sueño incluido siesta | [*DATA REMOVED*]                                                                                                                                                                                                                                         |
| minutos siesta                 | [*DATA REMOVED*]                                                                                                                                                                                                                                         |
| horas televisión semana        | [*DATA REMOVED*]                                                                                                                                                                                                                                         |

|                                        |                                                                                                                                                                                                                                                                                                                                                                           |
|----------------------------------------|---------------------------------------------------------------------------------------------------------------------------------------------------------------------------------------------------------------------------------------------------------------------------------------------------------------------------------------------------------------------------|
| actividad trabajo                      | <input type="radio"/> casi siempre sentado<br><input type="radio"/> sentado 50 por cien<br><input type="radio"/> casi siempre de pie, quieto<br><input checked="" type="radio"/> casi siempre levantado caminando y llevando pocas cosas<br><input type="radio"/> casi siempre levantado, caminando y llevado muchas cosas<br><input type="radio"/> trabajo manual pesado |
| tiempo caminar o bici al día           | <input type="radio"/> casi nunca<br><input type="radio"/> menos 20min día<br><input type="radio"/> 20 a 40 min día<br><input type="radio"/> 40 a 60 min día<br><input checked="" type="radio"/> 1h o 1h y media día<br><input type="radio"/> más de 1h y media al día                                                                                                     |
| tiempo tareas casa al día              | <input type="radio"/> menos de 1h día<br><input checked="" type="radio"/> 1 a 2h día<br><input type="radio"/> 3 a 4h día<br><input type="radio"/> 5 a 6h día<br><input type="radio"/> 7 a 8h día<br><input type="radio"/> más de 8h día                                                                                                                                   |
| tiempo libre televisión ordenador leer | <input type="radio"/> menos 1h día<br><input type="radio"/> 1h día<br><input checked="" type="radio"/> 2h día<br><input type="radio"/> 3h día<br><input type="radio"/> 4h día<br><input type="radio"/> 5 a 6h día<br><input type="radio"/> mas 6h día                                                                                                                     |
| tiempo libre ejercicio o deporte       | <input type="radio"/> menos 1h semana<br><input type="radio"/> 1h semana<br><input type="radio"/> 2h semana<br><input type="radio"/> 3h semana<br><input checked="" type="radio"/> 4 a 5h semana<br><input type="radio"/> mas 5h semana                                                                                                                                   |
| como se considera                      | <input type="radio"/> sedentaria<br><input type="radio"/> poco activa<br><input type="radio"/> moderadamente activa<br><input checked="" type="radio"/> bastante activa<br><input type="radio"/> muy activa<br><input type="radio"/> no sabe                                                                                                                              |
| FUR                                    | [*DATA REMOVED*]                                                                                                                                                                                                                                                                                                                                                          |
| Semanas gestación 2T                   | [*DATA REMOVED*]                                                                                                                                                                                                                                                                                                                                                          |
| Días gestación 2T                      | [*DATA REMOVED*]                                                                                                                                                                                                                                                                                                                                                          |
| DBP 2T                                 | [*DATA REMOVED*]                                                                                                                                                                                                                                                                                                                                                          |
| CC 2T                                  | [*DATA REMOVED*]                                                                                                                                                                                                                                                                                                                                                          |
| AC 2T                                  | [*DATA REMOVED*]                                                                                                                                                                                                                                                                                                                                                          |

|                                                   |                                                                                                                                                                                                 |
|---------------------------------------------------|-------------------------------------------------------------------------------------------------------------------------------------------------------------------------------------------------|
| LF 2T                                             | [*DATA REMOVED*]                                                                                                                                                                                |
| PFE 2T (Hadlock)                                  | [*DATA REMOVED*]                                                                                                                                                                                |
| Semanas gestación 3T                              | [*DATA REMOVED*]                                                                                                                                                                                |
| días 3T                                           | [*DATA REMOVED*]                                                                                                                                                                                |
| DBP 3T                                            | [*DATA REMOVED*]                                                                                                                                                                                |
| CC 3T                                             | [*DATA REMOVED*]                                                                                                                                                                                |
| AC 3T                                             | [*DATA REMOVED*]                                                                                                                                                                                |
| LF 3T                                             | [*DATA REMOVED*]                                                                                                                                                                                |
| PFE 3T (Hadlock)                                  | [*DATA REMOVED*]                                                                                                                                                                                |
| Semanas de gestación final                        | [*DATA REMOVED*]                                                                                                                                                                                |
| días gestación final                              | [*DATA REMOVED*]                                                                                                                                                                                |
| Localización placenta                             | <input type="radio"/> anterior<br><input type="radio"/> lateral derecha<br><input type="radio"/> lateral izquierda<br><input checked="" type="radio"/> posterior<br><input type="radio"/> fondo |
| Presentación longitudinal cefálica                | <input type="radio"/> no<br><input checked="" type="radio"/> si                                                                                                                                 |
| Dorso                                             | <input checked="" type="radio"/> izquierda anterior<br><input type="radio"/> izquierda posterior<br><input type="radio"/> derecha anterior<br><input type="radio"/> derecha posterior           |
| diámetro biparietal                               | [*DATA REMOVED*]                                                                                                                                                                                |
| Circunferencia craneal                            | [*DATA REMOVED*]                                                                                                                                                                                |
| Circunferencia abdominal                          | [*DATA REMOVED*]                                                                                                                                                                                |
| Longitud de femur                                 | [*DATA REMOVED*]                                                                                                                                                                                |
| tejido celular subcutáneo a nivel del muslo en mm | [*DATA REMOVED*]                                                                                                                                                                                |
| tejido celular subcutáneo en abdomen en mm        | [*DATA REMOVED*]                                                                                                                                                                                |
| Volumen del muslo en cm3                          | [*DATA REMOVED*]                                                                                                                                                                                |
| Peso fetal estimado según fórmula de Hadlock      | [*DATA REMOVED*]                                                                                                                                                                                |

|                                               |                                                                                                                                                          |
|-----------------------------------------------|----------------------------------------------------------------------------------------------------------------------------------------------------------|
| Percentil                                     | [*DATA REMOVED*]                                                                                                                                         |
| Peso fetal estimado según fórmula de Scioscia | <hr/>                                                                                                                                                    |
| Peso fetal estimado según fórmula de LEE      | <hr/>                                                                                                                                                    |
| Tipo de parto                                 | <input type="radio"/> eutocico<br><input type="radio"/> instrumentado/ventosa<br><input checked="" type="radio"/> cesarea                                |
| fecha de nacimiento                           | [*DATA REMOVED*]                                                                                                                                         |
| Días entre exploración y nacimiento           | [*DATA REMOVED*]                                                                                                                                         |
| Peso RN en g                                  | [*DATA REMOVED*]                                                                                                                                         |
| sexo                                          | <input checked="" type="radio"/> mujer<br><input type="radio"/> hombre                                                                                   |
| Apgar 1 minuto                                | [*DATA REMOVED*]                                                                                                                                         |
| Apgar 5 minutos                               | [*DATA REMOVED*]                                                                                                                                         |
| Apgar 10 minutos                              | <hr/>                                                                                                                                                    |
| antecedente Covid durante gestación           | <input checked="" type="radio"/> Yes<br><input type="radio"/> No                                                                                         |
| Nivel de estudios                             | <input type="radio"/> ninguno<br><input type="radio"/> primarios<br><input checked="" type="radio"/> secundarios<br><input type="radio"/> universitarios |

# Base\_datos\_estimacion\_peso\_fetal

|                                       |                                                                                                                                                                                                                                                                           |
|---------------------------------------|---------------------------------------------------------------------------------------------------------------------------------------------------------------------------------------------------------------------------------------------------------------------------|
| Número de identificación participante | 146                                                                                                                                                                                                                                                                       |
| CODIGO PARTICIPANTE                   |                                                                                                                                                                                                                                                                           |
| Edad                                  | [*DATA REMOVED*]                                                                                                                                                                                                                                                          |
| Gestaciones                           | <input type="radio"/> 1<br><input checked="" type="radio"/> 2<br><input type="radio"/> 3<br><input type="radio"/> mas de 3                                                                                                                                                |
| partos                                | <input checked="" type="radio"/> 0<br><input type="radio"/> 1<br><input type="radio"/> 2<br><input type="radio"/> 3<br><input type="radio"/> mas de 3                                                                                                                     |
| cesáreas                              | <input checked="" type="radio"/> 0<br><input type="radio"/> 1<br><input type="radio"/> 2<br><input type="radio"/> 3<br><input type="radio"/> mas de 3                                                                                                                     |
| Abortos                               | <input type="radio"/> 0<br><input checked="" type="radio"/> 1<br><input type="radio"/> 2<br><input type="radio"/> 3<br><input type="radio"/> mas de 3                                                                                                                     |
| Tipo de gestacion                     | <input type="radio"/> espontanea<br><input type="radio"/> IAC inseminación artificial conyuge<br><input type="radio"/> IAD inseminación artificial donante<br><input type="radio"/> FIV Fecundación in Vitro<br><input type="radio"/> Ovodon FIV con donación de ovocitos |
| peso previo a embarazo                | [*DATA REMOVED*]                                                                                                                                                                                                                                                          |
| Ganancia ponderal embarazo            |                                                                                                                                                                                                                                                                           |
| Talla madre                           | [*DATA REMOVED*]                                                                                                                                                                                                                                                          |
| IMC previo embarazo                   | 24.221453287197235                                                                                                                                                                                                                                                        |
| Patología obstétrica                  | <input checked="" type="radio"/> no<br><input type="radio"/> si                                                                                                                                                                                                           |
| Diabetes pregestacional               | <input checked="" type="radio"/> no<br><input type="radio"/> si                                                                                                                                                                                                           |
| Diabetes gestacional                  | <input checked="" type="radio"/> no<br><input type="radio"/> si                                                                                                                                                                                                           |

|                                            |                                                                                                                                                                                      |
|--------------------------------------------|--------------------------------------------------------------------------------------------------------------------------------------------------------------------------------------|
| Diabetes gestacional con insulina          | <input checked="" type="radio"/> no<br><input type="radio"/> si                                                                                                                      |
| Diabetes gestacional con dieta y ejercicio | <input checked="" type="radio"/> no<br><input type="radio"/> si                                                                                                                      |
| Percentil fetos previos                    | <input checked="" type="radio"/> Nada<br><input type="radio"/> percentil menor de 10<br><input type="radio"/> percentil entre 10 y 90<br><input type="radio"/> percentil mayor de 90 |
| Exfumadora                                 | <input checked="" type="radio"/> Nada<br><input type="radio"/> menos de 5 años<br><input type="radio"/> 5 a 10 años<br><input type="radio"/> mayor o igual a 10 años                 |
| Hábito tabáquico                           | <input checked="" type="radio"/> no<br><input type="radio"/> si                                                                                                                      |
| fumadora                                   | [*DATA REMOVED*]                                                                                                                                                                     |
| Consumo otros tóxicos                      | <input checked="" type="radio"/> no<br><input type="radio"/> si                                                                                                                      |
| Hb 1T                                      | _____                                                                                                                                                                                |
| Htc 1T                                     | _____                                                                                                                                                                                |
| Hb 2T                                      | _____                                                                                                                                                                                |
| HTC 2T                                     | _____                                                                                                                                                                                |
| Hb 3T                                      | _____                                                                                                                                                                                |
| HTC 3T                                     | _____                                                                                                                                                                                |
| Suplemento FE oral                         | <input type="radio"/> si<br><input type="radio"/> no                                                                                                                                 |
| Suplemento fe iv                           | <input type="radio"/> si<br><input type="radio"/> no                                                                                                                                 |
| Transfusión                                | <input type="radio"/> no<br><input type="radio"/> si                                                                                                                                 |
| Solicitada Vit D                           | <input type="radio"/> no<br><input type="radio"/> si                                                                                                                                 |



|                       |                                                                                                                                                                                                                                                                                                                                                                                                              |
|-----------------------|--------------------------------------------------------------------------------------------------------------------------------------------------------------------------------------------------------------------------------------------------------------------------------------------------------------------------------------------------------------------------------------------------------------|
| Deficit vit D         | <input type="radio"/> no<br><input type="radio"/> si                                                                                                                                                                                                                                                                                                                                                         |
| Suplemento vit D      | <input type="radio"/> si<br><input type="radio"/> no                                                                                                                                                                                                                                                                                                                                                         |
| Dieta, cuestionario   | <input checked="" type="radio"/> si<br><input type="radio"/> no                                                                                                                                                                                                                                                                                                                                              |
| Leche entera          | <input checked="" type="radio"/> Nunca o menos 1 vez al mes<br><input type="radio"/> 1 a 3 veces mes<br><input type="radio"/> 1 vez semana<br><input type="radio"/> 2 a 4 veces semana<br><input type="radio"/> 5 a 6 veces semana<br><input type="radio"/> 1 vez al día<br><input type="radio"/> 2 a 3 veces al día<br><input type="radio"/> 5 a 6 veces al día<br><input type="radio"/> más 6 veces al día |
| Leche semidesnatada   | <input type="radio"/> Nunca o menos 1 vez al mes<br><input type="radio"/> 1 a 3 veces mes<br><input type="radio"/> 1 vez semana<br><input type="radio"/> 2 a 4 veces semana<br><input type="radio"/> 5 a 6 veces semana<br><input checked="" type="radio"/> 1 vez al día<br><input type="radio"/> 2 a 3 veces al día<br><input type="radio"/> 5 a 6 veces al día<br><input type="radio"/> mas 6 veces al día |
| Leche desnatada       | <input checked="" type="radio"/> Nunca o menos 1 vez al mes<br><input type="radio"/> 1 a 3 veces mes<br><input type="radio"/> 1 vez semana<br><input type="radio"/> 2 a 4 veces semana<br><input type="radio"/> 5 a 6 veces semana<br><input type="radio"/> 1 vez al día<br><input type="radio"/> 2 a 3 veces al día<br><input type="radio"/> 5 a 6 veces al día<br><input type="radio"/> más 6 veces al día |
| Leche condensada      | <input checked="" type="radio"/> Nunca o menos 1 vez al mes<br><input type="radio"/> 1 a 3 veces mes<br><input type="radio"/> 1 vez semana<br><input type="radio"/> 2 a 4 veces semana<br><input type="radio"/> 5 a 6 veces semana<br><input type="radio"/> 1 vez al día<br><input type="radio"/> 2 a 3 veces al día<br><input type="radio"/> 5 a 6 veces al día<br><input type="radio"/> más 6 veces al día |
| nata o crema de leche | <input checked="" type="radio"/> Nunca o menos 1 vez al mes<br><input type="radio"/> 1 a 3 veces mes<br><input type="radio"/> 1 vez semana<br><input type="radio"/> 2 a 4 veces semana<br><input type="radio"/> 5 a 6 veces semana<br><input type="radio"/> 1 vez al día<br><input type="radio"/> 2 a 3 veces al día<br><input type="radio"/> 5 a 6 veces al día<br><input type="radio"/> más 6 veces al día |

---

Yogurt Entero

- ☒ Nunca o menos 1 vez al mes  
☐ 1 a 3 veces mes  
☐ 1 vez semana  
☐ 2 a 4 veces semana  
☐ 5 a 6 veces semana  
☐ 1 vez al día  
☐ 2 a 3 veces al día  
☐ 5 a 6 veces al día  
☐ más 6 veces al día

---

Yogurt desnatado

- ☒ Nunca o menos 1 vez al mes  
☐ 1 a 3 veces mes  
☐ 1 vez semana  
☐ 2 a 4 veces semana  
☐ 5 a 6 veces semana  
☐ 1 vez al día  
☐ 2 a 3 veces al día  
☐ 5 a 6 veces al día  
☐ más 6 veces al día

---

100g requesón o queso blando o queso fresco

- ☒ Nunca o menos 1 vez al mes  
☐ 1 a 3 veces mes  
☐ 1 vez semana  
☐ 2 a 4 veces semana  
☐ 5 a 6 veces semana  
☐ 1 vez al día  
☐ 2 a 3 veces al día  
☐ 5 a 6 veces al día  
☐ más 6 veces al día

---

queso curado o semicurado o cremoso

- ☐ Nunca o menos 1 vez al mes  
☐ 1 a 3 veces mes  
☒ 1 vez semana  
☐ 2 a 4 veces semana  
☐ 5 a 6 veces semana  
☐ 1 vez al día  
☐ 2 a 3 veces al día  
☐ 5 a 6 veces al día  
☐ más 6 veces al día

---

natillas flan pudding

- ☒ Nunca o menos 1 vez al mes  
☐ 1 a 3 veces mes  
☐ 1 vez semana  
☐ 2 a 4 veces semana  
☐ 5 a 6 veces semana  
☐ 1 vez al día  
☐ 2 a 3 veces al día  
☐ 5 a 6 veces al día  
☐ más 6 veces al día

---

Helado

- ☐ Nunca o menos 1 vez al mes  
☐ 1 a 3 veces mes  
☐ 1 vez semana  
☒ 2 a 4 veces semana  
☐ 5 a 6 veces semana  
☐ 1 vez al día  
☐ 2 a 3 veces al día  
☐ 5 a 6 veces al día  
☐ más 6 veces al día

|                                      |                                                                                                                                                                                                                                                                                                                                                                                                              |
|--------------------------------------|--------------------------------------------------------------------------------------------------------------------------------------------------------------------------------------------------------------------------------------------------------------------------------------------------------------------------------------------------------------------------------------------------------------|
| huevo                                | <input type="radio"/> Nunca o menos 1 vez al mes<br><input type="radio"/> 1 a 3 veces mes<br><input checked="" type="radio"/> 1 vez semana<br><input type="radio"/> 2 a 4 veces semana<br><input type="radio"/> 5 a 6 veces semana<br><input type="radio"/> 1 vez al día<br><input type="radio"/> 2 a 3 veces al día<br><input type="radio"/> 5 a 6 veces al día<br><input type="radio"/> más 6 veces al día |
| Pollo con piel                       | <input type="radio"/> Nunca o menos 1 vez al mes<br><input checked="" type="radio"/> 1 a 3 veces mes<br><input type="radio"/> 1 vez semana<br><input type="radio"/> 2 a 4 veces semana<br><input type="radio"/> 5 a 6 veces semana<br><input type="radio"/> 1 vez al día<br><input type="radio"/> 2 a 3 veces al día<br><input type="radio"/> 5 a 6 veces al día<br><input type="radio"/> más 6 veces al día |
| pollo sin piel                       | <input type="radio"/> Nunca o menos 1 vez al mes<br><input checked="" type="radio"/> 1 a 3 veces mes<br><input type="radio"/> 1 vez semana<br><input type="radio"/> 2 a 4 veces semana<br><input type="radio"/> 5 a 6 veces semana<br><input type="radio"/> 1 vez al día<br><input type="radio"/> 2 a 3 veces al día<br><input type="radio"/> 5 a 6 veces al día<br><input type="radio"/> más 6 veces al día |
| Ternera o cerdo o cordero            | <input type="radio"/> Nunca o menos 1 vez al mes<br><input checked="" type="radio"/> 1 a 3 veces mes<br><input type="radio"/> 1 vez semana<br><input type="radio"/> 2 a 4 veces semana<br><input type="radio"/> 5 a 6 veces semana<br><input type="radio"/> 1 vez al día<br><input type="radio"/> 2 a 3 veces al día<br><input type="radio"/> 5 a 6 veces al día<br><input type="radio"/> más 6 veces al día |
| carne caza: Conejo o codorniz o pato | <input checked="" type="radio"/> Nunca o menos 1 vez al mes<br><input type="radio"/> 1 a 3 veces mes<br><input type="radio"/> 1 vez semana<br><input type="radio"/> 2 a 4 veces semana<br><input type="radio"/> 5 a 6 veces semana<br><input type="radio"/> 1 vez al día<br><input type="radio"/> 2 a 3 veces al día<br><input type="radio"/> 5 a 6 veces al día<br><input type="radio"/> más 6 veces al día |
| Hígado de ternera o cerdo o pollo    | <input checked="" type="radio"/> Nunca o menos 1 vez al mes<br><input type="radio"/> 1 a 3 veces mes<br><input type="radio"/> 1 vez semana<br><input type="radio"/> 2 a 4 veces semana<br><input type="radio"/> 5 a 6 veces semana<br><input type="radio"/> 1 vez al día<br><input type="radio"/> 2 a 3 veces al día<br><input type="radio"/> 5 a 6 veces al día<br><input type="radio"/> más 6 veces al día |

|                     |                                                                                                                                                                                                                                                                                                                                                                                                              |
|---------------------|--------------------------------------------------------------------------------------------------------------------------------------------------------------------------------------------------------------------------------------------------------------------------------------------------------------------------------------------------------------------------------------------------------------|
| Vísceras            | <input checked="" type="radio"/> Nunca o menos 1 vez al mes<br><input type="radio"/> 1 a 3 veces mes<br><input type="radio"/> 1 vez semana<br><input type="radio"/> 2 a 4 veces semana<br><input type="radio"/> 5 a 6 veces semana<br><input type="radio"/> 1 vez al día<br><input type="radio"/> 2 a 3 veces al día<br><input type="radio"/> 5 a 6 veces al día<br><input type="radio"/> más 6 veces al día |
| Embutido            | <input checked="" type="radio"/> Nunca o menos 1 vez al mes<br><input type="radio"/> 1 a 3 veces mes<br><input type="radio"/> 1 vez semana<br><input type="radio"/> 2 a 4 veces semana<br><input type="radio"/> 5 a 6 veces semana<br><input type="radio"/> 1 vez al día<br><input type="radio"/> 2 a 3 veces al día<br><input type="radio"/> 5 a 6 veces al día<br><input type="radio"/> más 6 veces al día |
| Salchicha o similar | <input checked="" type="radio"/> Nunca o menos 1 vez al mes<br><input type="radio"/> 1 a 3 veces mes<br><input type="radio"/> 1 vez semana<br><input type="radio"/> 2 a 4 veces semana<br><input type="radio"/> 5 a 6 veces semana<br><input type="radio"/> 1 vez al día<br><input type="radio"/> 2 a 3 veces al día<br><input type="radio"/> 5 a 6 veces al día<br><input type="radio"/> más 6 veces al día |
| Pate o foiegras     | <input checked="" type="radio"/> Nunca o menos 1 vez al mes<br><input type="radio"/> 1 a 3 veces mes<br><input type="radio"/> 1 vez semana<br><input type="radio"/> 2 a 4 veces semana<br><input type="radio"/> 5 a 6 veces semana<br><input type="radio"/> 1 vez al día<br><input type="radio"/> 2 a 3 veces al día<br><input type="radio"/> 5 a 6 veces al día<br><input type="radio"/> más 6 veces al día |
| Hamburguesa         | <input type="radio"/> Nunca o menos 1 vez al mes<br><input type="radio"/> 1 a 3 veces mes<br><input checked="" type="radio"/> 1 vez semana<br><input type="radio"/> 2 a 4 veces semana<br><input type="radio"/> 5 a 6 veces semana<br><input type="radio"/> 1 vez al día<br><input type="radio"/> 2 a 3 veces al día<br><input type="radio"/> 5 a 6 veces al día<br><input type="radio"/> más 6 veces al día |
| tocino o bacon      | <input checked="" type="radio"/> Nunca o menos 1 vez al mes<br><input type="radio"/> 1 a 3 veces mes<br><input type="radio"/> 1 vez semana<br><input type="radio"/> 2 a 4 veces semana<br><input type="radio"/> 5 a 6 veces semana<br><input type="radio"/> 1 vez al día<br><input type="radio"/> 2 a 3 veces al día<br><input type="radio"/> 5 a 6 veces al día<br><input type="radio"/> más 6 veces al día |

---

|               |                                                                                                                                                                                                                                                                                                                                                                                                              |
|---------------|--------------------------------------------------------------------------------------------------------------------------------------------------------------------------------------------------------------------------------------------------------------------------------------------------------------------------------------------------------------------------------------------------------------|
| Pescado frito | <input checked="" type="radio"/> Nunca o menos 1 vez al mes<br><input type="radio"/> 1 a 3 veces mes<br><input type="radio"/> 1 vez semana<br><input type="radio"/> 2 a 4 veces semana<br><input type="radio"/> 5 a 6 veces semana<br><input type="radio"/> 1 vez al día<br><input type="radio"/> 2 a 3 veces al día<br><input type="radio"/> 5 a 6 veces al día<br><input type="radio"/> más 6 veces al día |
|---------------|--------------------------------------------------------------------------------------------------------------------------------------------------------------------------------------------------------------------------------------------------------------------------------------------------------------------------------------------------------------------------------------------------------------|

---

|                        |                                                                                                                                                                                                                                                                                                                                                                                                              |
|------------------------|--------------------------------------------------------------------------------------------------------------------------------------------------------------------------------------------------------------------------------------------------------------------------------------------------------------------------------------------------------------------------------------------------------------|
| pescado hervido blanco | <input type="radio"/> Nunca o menos 1 vez al mes<br><input type="radio"/> 1 a 3 veces mes<br><input checked="" type="radio"/> 1 vez semana<br><input type="radio"/> 2 a 4 veces semana<br><input type="radio"/> 5 a 6 veces semana<br><input type="radio"/> 1 vez al día<br><input type="radio"/> 2 a 3 veces al día<br><input type="radio"/> 5 a 6 veces al día<br><input type="radio"/> más 6 veces al día |
|------------------------|--------------------------------------------------------------------------------------------------------------------------------------------------------------------------------------------------------------------------------------------------------------------------------------------------------------------------------------------------------------------------------------------------------------|

---

|                      |                                                                                                                                                                                                                                                                                                                                                                                                              |
|----------------------|--------------------------------------------------------------------------------------------------------------------------------------------------------------------------------------------------------------------------------------------------------------------------------------------------------------------------------------------------------------------------------------------------------------|
| pescado hervido azul | <input type="radio"/> Nunca o menos 1 vez al mes<br><input type="radio"/> 1 a 3 veces mes<br><input checked="" type="radio"/> 1 vez semana<br><input type="radio"/> 2 a 4 veces semana<br><input type="radio"/> 5 a 6 veces semana<br><input type="radio"/> 1 vez al día<br><input type="radio"/> 2 a 3 veces al día<br><input type="radio"/> 5 a 6 veces al día<br><input type="radio"/> más 6 veces al día |
|----------------------|--------------------------------------------------------------------------------------------------------------------------------------------------------------------------------------------------------------------------------------------------------------------------------------------------------------------------------------------------------------------------------------------------------------|

---

|                    |                                                                                                                                                                                                                                                                                                                                                                                                              |
|--------------------|--------------------------------------------------------------------------------------------------------------------------------------------------------------------------------------------------------------------------------------------------------------------------------------------------------------------------------------------------------------------------------------------------------------|
| otros pescado azul | <input type="radio"/> Nunca o menos 1 vez al mes<br><input type="radio"/> 1 a 3 veces mes<br><input checked="" type="radio"/> 1 vez semana<br><input type="radio"/> 2 a 4 veces semana<br><input type="radio"/> 5 a 6 veces semana<br><input type="radio"/> 1 vez al día<br><input type="radio"/> 2 a 3 veces al día<br><input type="radio"/> 5 a 6 veces al día<br><input type="radio"/> más 6 veces al día |
|--------------------|--------------------------------------------------------------------------------------------------------------------------------------------------------------------------------------------------------------------------------------------------------------------------------------------------------------------------------------------------------------------------------------------------------------|

---

|               |                                                                                                                                                                                                                                                                                                                                                                                                              |
|---------------|--------------------------------------------------------------------------------------------------------------------------------------------------------------------------------------------------------------------------------------------------------------------------------------------------------------------------------------------------------------------------------------------------------------|
| atun conserva | <input type="radio"/> Nunca o menos 1 vez al mes<br><input checked="" type="radio"/> 1 a 3 veces mes<br><input type="radio"/> 1 vez semana<br><input type="radio"/> 2 a 4 veces semana<br><input type="radio"/> 5 a 6 veces semana<br><input type="radio"/> 1 vez al día<br><input type="radio"/> 2 a 3 veces al día<br><input type="radio"/> 5 a 6 veces al día<br><input type="radio"/> más 6 veces al día |
|---------------|--------------------------------------------------------------------------------------------------------------------------------------------------------------------------------------------------------------------------------------------------------------------------------------------------------------------------------------------------------------------------------------------------------------|

---

|                  |                                                                                                                                                                                                                                                                                                                                                                                                              |
|------------------|--------------------------------------------------------------------------------------------------------------------------------------------------------------------------------------------------------------------------------------------------------------------------------------------------------------------------------------------------------------------------------------------------------------|
| sardina conserva | <input checked="" type="radio"/> Nunca o menos 1 vez al mes<br><input type="radio"/> 1 a 3 veces mes<br><input type="radio"/> 1 vez semana<br><input type="radio"/> 2 a 4 veces semana<br><input type="radio"/> 5 a 6 veces semana<br><input type="radio"/> 1 vez al día<br><input type="radio"/> 2 a 3 veces al día<br><input type="radio"/> 5 a 6 veces al día<br><input type="radio"/> más 6 veces al día |
|------------------|--------------------------------------------------------------------------------------------------------------------------------------------------------------------------------------------------------------------------------------------------------------------------------------------------------------------------------------------------------------------------------------------------------------|

---

|                                         |                                                                                                                                                                                                                                                                                                                                                                                                              |
|-----------------------------------------|--------------------------------------------------------------------------------------------------------------------------------------------------------------------------------------------------------------------------------------------------------------------------------------------------------------------------------------------------------------------------------------------------------------|
| pescado ahumado                         | <input checked="" type="radio"/> Nunca o menos 1 vez al mes<br><input type="radio"/> 1 a 3 veces mes<br><input type="radio"/> 1 vez semana<br><input type="radio"/> 2 a 4 veces semana<br><input type="radio"/> 5 a 6 veces semana<br><input type="radio"/> 1 vez al día<br><input type="radio"/> 2 a 3 veces al día<br><input type="radio"/> 5 a 6 veces al día<br><input type="radio"/> más 6 veces al día |
| almejas o mejillones o ostras unos 100g | <input type="radio"/> Nunca o menos 1 vez al mes<br><input checked="" type="radio"/> 1 a 3 veces mes<br><input type="radio"/> 1 vez semana<br><input type="radio"/> 2 a 4 veces semana<br><input type="radio"/> 5 a 6 veces semana<br><input type="radio"/> 1 vez al día<br><input type="radio"/> 2 a 3 veces al día<br><input type="radio"/> 5 a 6 veces al día<br><input type="radio"/> más 6 veces al día |
| calamar o chipiron o sepia unos 100g    | <input type="radio"/> Nunca o menos 1 vez al mes<br><input checked="" type="radio"/> 1 a 3 veces mes<br><input type="radio"/> 1 vez semana<br><input type="radio"/> 2 a 4 veces semana<br><input type="radio"/> 5 a 6 veces semana<br><input type="radio"/> 1 vez al día<br><input type="radio"/> 2 a 3 veces al día<br><input type="radio"/> 5 a 6 veces al día<br><input type="radio"/> más 6 veces al día |
| marisco unos 100g                       | <input checked="" type="radio"/> Nunca o menos 1 vez al mes<br><input type="radio"/> 1 a 3 veces mes<br><input type="radio"/> 1 vez semana<br><input type="radio"/> 2 a 4 veces semana<br><input type="radio"/> 5 a 6 veces semana<br><input type="radio"/> 1 vez al día<br><input type="radio"/> 2 a 3 veces al día<br><input type="radio"/> 5 a 6 veces al día<br><input type="radio"/> más 6 veces al día |
| Espinacas o acelgas cocinadas           | <input checked="" type="radio"/> Nunca o menos 1 vez al mes<br><input type="radio"/> 1 a 3 veces mes<br><input type="radio"/> 1 vez semana<br><input type="radio"/> 2 a 4 veces semana<br><input type="radio"/> 5 a 6 veces semana<br><input type="radio"/> 1 vez al día<br><input type="radio"/> 2 a 3 veces al día<br><input type="radio"/> 5 a 6 veces al día<br><input type="radio"/> más 6 veces al día |
| Col o coliflor o brocoli cocinado       | <input type="radio"/> Nunca o menos 1 vez al mes<br><input type="radio"/> 1 a 3 veces mes<br><input checked="" type="radio"/> 1 vez semana<br><input type="radio"/> 2 a 4 veces semana<br><input type="radio"/> 5 a 6 veces semana<br><input type="radio"/> 1 vez al día<br><input type="radio"/> 2 a 3 veces al día<br><input type="radio"/> 5 a 6 veces al día<br><input type="radio"/> más 6 veces al día |

---

Lechuga o endivia o escarola

- ☐ Nunca o menos 1 vez al mes  
☐ 1 a 3 veces mes  
☒ 1 vez semana  
☐ 2 a 4 veces semana  
☐ 5 a 6 veces semana  
☐ 1 vez al día  
☐ 2 a 3 veces al día  
☐ 5 a 6 veces al día  
☐ más 6 veces al día

---

tomate ensalada

- ☐ Nunca o menos 1 vez al mes  
☐ 1 a 3 veces mes  
☐ 1 vez semana  
☒ 2 a 4 veces semana  
☐ 5 a 6 veces semana  
☐ 1 vez al día  
☐ 2 a 3 veces al día  
☐ 5 a 6 veces al día  
☐ más 6 veces al día

---

cebolla

- ☐ Nunca o menos 1 vez al mes  
☐ 1 a 3 veces mes  
☐ 1 vez semana  
☒ 2 a 4 veces semana  
☐ 5 a 6 veces semana  
☐ 1 vez al día  
☐ 2 a 3 veces al día  
☐ 5 a 6 veces al día  
☐ más 6 veces al día

---

Zanahoria o calabaza

- ☐ Nunca o menos 1 vez al mes  
☐ 1 a 3 veces mes  
☐ 1 vez semana  
☒ 2 a 4 veces semana  
☐ 5 a 6 veces semana  
☐ 1 vez al día  
☐ 2 a 3 veces al día  
☐ 5 a 6 veces al día  
☐ más 6 veces al día

---

Judías verdes

- ☐ Nunca o menos 1 vez al mes  
☒ 1 a 3 veces mes  
☐ 1 vez semana  
☐ 2 a 4 veces semana  
☐ 5 a 6 veces semana  
☐ 1 vez al día  
☐ 2 a 3 veces al día  
☐ 5 a 6 veces al día  
☐ más 6 veces al día

---

Berenjena o calabacin o pepino

- ☐ Nunca o menos 1 vez al mes  
☐ 1 a 3 veces mes  
☒ 1 vez semana  
☐ 2 a 4 veces semana  
☐ 5 a 6 veces semana  
☐ 1 vez al día  
☐ 2 a 3 veces al día  
☐ 5 a 6 veces al día  
☐ más 6 veces al día

---

|          |                                                                                                                                                                                                                                                                                                                                                                                                              |
|----------|--------------------------------------------------------------------------------------------------------------------------------------------------------------------------------------------------------------------------------------------------------------------------------------------------------------------------------------------------------------------------------------------------------------|
| pimiento | <input type="radio"/> Nunca o menos 1 vez al mes<br><input type="radio"/> 1 a 3 veces mes<br><input checked="" type="radio"/> 1 vez semana<br><input type="radio"/> 2 a 4 veces semana<br><input type="radio"/> 5 a 6 veces semana<br><input type="radio"/> 1 vez al día<br><input type="radio"/> 2 a 3 veces al día<br><input type="radio"/> 5 a 6 veces al día<br><input type="radio"/> más 6 veces al día |
|----------|--------------------------------------------------------------------------------------------------------------------------------------------------------------------------------------------------------------------------------------------------------------------------------------------------------------------------------------------------------------------------------------------------------------|

---

|           |                                                                                                                                                                                                                                                                                                                                                                                                              |
|-----------|--------------------------------------------------------------------------------------------------------------------------------------------------------------------------------------------------------------------------------------------------------------------------------------------------------------------------------------------------------------------------------------------------------------|
| alcachofa | <input type="radio"/> Nunca o menos 1 vez al mes<br><input type="radio"/> 1 a 3 veces mes<br><input type="radio"/> 1 vez semana<br><input checked="" type="radio"/> 2 a 4 veces semana<br><input type="radio"/> 5 a 6 veces semana<br><input type="radio"/> 1 vez al día<br><input type="radio"/> 2 a 3 veces al día<br><input type="radio"/> 5 a 6 veces al día<br><input type="radio"/> más 6 veces al día |
|-----------|--------------------------------------------------------------------------------------------------------------------------------------------------------------------------------------------------------------------------------------------------------------------------------------------------------------------------------------------------------------------------------------------------------------|

---

|            |                                                                                                                                                                                                                                                                                                                                                                                                              |
|------------|--------------------------------------------------------------------------------------------------------------------------------------------------------------------------------------------------------------------------------------------------------------------------------------------------------------------------------------------------------------------------------------------------------------|
| espárragos | <input checked="" type="radio"/> Nunca o menos 1 vez al mes<br><input type="radio"/> 1 a 3 veces mes<br><input type="radio"/> 1 vez semana<br><input type="radio"/> 2 a 4 veces semana<br><input type="radio"/> 5 a 6 veces semana<br><input type="radio"/> 1 vez al día<br><input type="radio"/> 2 a 3 veces al día<br><input type="radio"/> 5 a 6 veces al día<br><input type="radio"/> más 6 veces al día |
|------------|--------------------------------------------------------------------------------------------------------------------------------------------------------------------------------------------------------------------------------------------------------------------------------------------------------------------------------------------------------------------------------------------------------------|

---

|              |                                                                                                                                                                                                                                                                                                                                                                                                              |
|--------------|--------------------------------------------------------------------------------------------------------------------------------------------------------------------------------------------------------------------------------------------------------------------------------------------------------------------------------------------------------------------------------------------------------------|
| maíz hervido | <input checked="" type="radio"/> Nunca o menos 1 vez al mes<br><input type="radio"/> 1 a 3 veces mes<br><input type="radio"/> 1 vez semana<br><input type="radio"/> 2 a 4 veces semana<br><input type="radio"/> 5 a 6 veces semana<br><input type="radio"/> 1 vez al día<br><input type="radio"/> 2 a 3 veces al día<br><input type="radio"/> 5 a 6 veces al día<br><input type="radio"/> más 6 veces al día |
|--------------|--------------------------------------------------------------------------------------------------------------------------------------------------------------------------------------------------------------------------------------------------------------------------------------------------------------------------------------------------------------------------------------------------------------|

---

|           |                                                                                                                                                                                                                                                                                                                                                                                                              |
|-----------|--------------------------------------------------------------------------------------------------------------------------------------------------------------------------------------------------------------------------------------------------------------------------------------------------------------------------------------------------------------------------------------------------------------|
| legumbres | <input type="radio"/> Nunca o menos 1 vez al mes<br><input checked="" type="radio"/> 1 a 3 veces mes<br><input type="radio"/> 1 vez semana<br><input type="radio"/> 2 a 4 veces semana<br><input type="radio"/> 5 a 6 veces semana<br><input type="radio"/> 1 vez al día<br><input type="radio"/> 2 a 3 veces al día<br><input type="radio"/> 5 a 6 veces al día<br><input type="radio"/> más 6 veces al día |
|-----------|--------------------------------------------------------------------------------------------------------------------------------------------------------------------------------------------------------------------------------------------------------------------------------------------------------------------------------------------------------------------------------------------------------------|

---

|                       |                                                                                                                                                                                                                                                                                                                                                                                                              |
|-----------------------|--------------------------------------------------------------------------------------------------------------------------------------------------------------------------------------------------------------------------------------------------------------------------------------------------------------------------------------------------------------------------------------------------------------|
| naranjas o mandarinas | <input type="radio"/> Nunca o menos 1 vez al mes<br><input type="radio"/> 1 a 3 veces mes<br><input checked="" type="radio"/> 1 vez semana<br><input type="radio"/> 2 a 4 veces semana<br><input type="radio"/> 5 a 6 veces semana<br><input type="radio"/> 1 vez al día<br><input type="radio"/> 2 a 3 veces al día<br><input type="radio"/> 5 a 6 veces al día<br><input type="radio"/> más 6 veces al día |
|-----------------------|--------------------------------------------------------------------------------------------------------------------------------------------------------------------------------------------------------------------------------------------------------------------------------------------------------------------------------------------------------------------------------------------------------------|

---



|                       |                                                                                                                                                                                                                                                                                                                                                                                                              |
|-----------------------|--------------------------------------------------------------------------------------------------------------------------------------------------------------------------------------------------------------------------------------------------------------------------------------------------------------------------------------------------------------------------------------------------------------|
| zum natural fruta     | <input type="radio"/> Nunca o menos 1 vez al mes<br><input type="radio"/> 1 a 3 veces mes<br><input type="radio"/> 1 vez semana<br><input checked="" type="radio"/> 2 a 4 veces semana<br><input type="radio"/> 5 a 6 veces semana<br><input type="radio"/> 1 vez al día<br><input type="radio"/> 2 a 3 veces al día<br><input type="radio"/> 5 a 6 veces al día<br><input type="radio"/> más 6 veces al día |
| platano               | <input checked="" type="radio"/> Nunca o menos 1 vez al mes<br><input type="radio"/> 1 a 3 veces mes<br><input type="radio"/> 1 vez semana<br><input type="radio"/> 2 a 4 veces semana<br><input type="radio"/> 5 a 6 veces semana<br><input type="radio"/> 1 vez al día<br><input type="radio"/> 2 a 3 veces al día<br><input type="radio"/> 5 a 6 veces al día<br><input type="radio"/> más 6 veces al día |
| manzana o pera        | <input checked="" type="radio"/> Nunca o menos 1 vez al mes<br><input type="radio"/> 1 a 3 veces mes<br><input type="radio"/> 1 vez semana<br><input type="radio"/> 2 a 4 veces semana<br><input type="radio"/> 5 a 6 veces semana<br><input type="radio"/> 1 vez al día<br><input type="radio"/> 2 a 3 veces al día<br><input type="radio"/> 5 a 6 veces al día<br><input type="radio"/> más 6 veces al día |
| melocotón o nectarina | <input checked="" type="radio"/> Nunca o menos 1 vez al mes<br><input type="radio"/> 1 a 3 veces mes<br><input type="radio"/> 1 vez semana<br><input type="radio"/> 2 a 4 veces semana<br><input type="radio"/> 5 a 6 veces semana<br><input type="radio"/> 1 vez al día<br><input type="radio"/> 2 a 3 veces al día<br><input type="radio"/> 5 a 6 veces al día<br><input type="radio"/> más 6 veces al día |
| sandia o melon        | <input type="radio"/> Nunca o menos 1 vez al mes<br><input type="radio"/> 1 a 3 veces mes<br><input type="radio"/> 1 vez semana<br><input checked="" type="radio"/> 2 a 4 veces semana<br><input type="radio"/> 5 a 6 veces semana<br><input type="radio"/> 1 vez al día<br><input type="radio"/> 2 a 3 veces al día<br><input type="radio"/> 5 a 6 veces al día<br><input type="radio"/> más 6 veces al día |
| uva                   | <input type="radio"/> Nunca o menos 1 vez al mes<br><input type="radio"/> 1 a 3 veces mes<br><input type="radio"/> 1 vez semana<br><input checked="" type="radio"/> 2 a 4 veces semana<br><input type="radio"/> 5 a 6 veces semana<br><input type="radio"/> 1 vez al día<br><input type="radio"/> 2 a 3 veces al día<br><input type="radio"/> 5 a 6 veces al día<br><input type="radio"/> más 6 veces al día |

---

bruna o ciruela

- ☐ Nunca o menos 1 vez al mes  
☐ 1 a 3 veces mes  
☒ 1 vez semana  
☐ 2 a 4 veces semana  
☐ 5 a 6 veces semana  
☐ 1 vez al día  
☐ 2 a 3 veces al día  
☐ 5 a 6 veces al día  
☐ más 6 veces al día

---

kiwi

- ☒ Nunca o menos 1 vez al mes  
☐ 1 a 3 veces mes  
☐ 1 vez semana  
☐ 2 a 4 veces semana  
☐ 5 a 6 veces semana  
☐ 1 vez al día  
☐ 2 a 3 veces al día  
☐ 5 a 6 veces al día  
☐ más 6 veces al día

---

aceituna

- ☒ Nunca o menos 1 vez al mes  
☐ 1 a 3 veces mes  
☐ 1 vez semana  
☐ 2 a 4 veces semana  
☐ 5 a 6 veces semana  
☐ 1 vez al día  
☐ 2 a 3 veces al día  
☐ 5 a 6 veces al día  
☐ más 6 veces al día

---

frutos secos

- ☐ Nunca o menos 1 vez al mes  
☒ 1 a 3 veces mes  
☐ 1 vez semana  
☐ 2 a 4 veces semana  
☐ 5 a 6 veces semana  
☐ 1 vez al día  
☐ 2 a 3 veces al día  
☐ 5 a 6 veces al día  
☐ más 6 veces al día

---

pan blanco

- ☐ Nunca o menos 1 vez al mes  
☐ 1 a 3 veces mes  
☐ 1 vez semana  
☐ 2 a 4 veces semana  
☒ 5 a 6 veces semana  
☐ 1 vez al día  
☐ 2 a 3 veces al día  
☐ 5 a 6 veces al día  
☐ más 6 veces al día

---

pan integral

- ☒ Nunca o menos 1 vez al mes  
☐ 1 a 3 veces mes  
☐ 1 vez semana  
☐ 2 a 4 veces semana  
☐ 5 a 6 veces semana  
☐ 1 vez al día  
☐ 2 a 3 veces al día  
☐ 5 a 6 veces al día  
☐ más 6 veces al día

---

cereales desayuno

- ☒ Nunca o menos 1 vez al mes  
☐ 1 a 3 veces mes  
☐ 1 vez semana  
☐ 2 a 4 veces semana  
☐ 5 a 6 veces semana  
☐ 1 vez al día  
☐ 2 a 3 veces al día  
☐ 5 a 6 veces al día  
☐ más 6 veces al día

---

patatas fritas

- ☐ Nunca o menos 1 vez al mes  
☒ 1 a 3 veces mes  
☐ 1 vez semana  
☐ 2 a 4 veces semana  
☐ 5 a 6 veces semana  
☐ 1 vez al día  
☐ 2 a 3 veces al día  
☐ 5 a 6 veces al día  
☐ más 6 veces al día

---

patatas cocidas o asadas

- ☐ Nunca o menos 1 vez al mes  
☒ 1 a 3 veces mes  
☐ 1 vez semana  
☐ 2 a 4 veces semana  
☐ 5 a 6 veces semana  
☐ 1 vez al día  
☐ 2 a 3 veces al día  
☐ 5 a 6 veces al día  
☐ más 6 veces al día

---

bolsa papas

- ☒ Nunca o menos 1 vez al mes  
☐ 1 a 3 veces mes  
☐ 1 vez semana  
☐ 2 a 4 veces semana  
☐ 5 a 6 veces semana  
☐ 1 vez al día  
☐ 2 a 3 veces al día  
☐ 5 a 6 veces al día  
☐ más 6 veces al día

---

arroz cocinado

- ☐ Nunca o menos 1 vez al mes  
☐ 1 a 3 veces mes  
☒ 1 vez semana  
☐ 2 a 4 veces semana  
☐ 5 a 6 veces semana  
☐ 1 vez al día  
☐ 2 a 3 veces al día  
☐ 5 a 6 veces al día  
☐ más 6 veces al día

---

pasta

- ☐ Nunca o menos 1 vez al mes  
☐ 1 a 3 veces mes  
☒ 1 vez semana  
☐ 2 a 4 veces semana  
☐ 5 a 6 veces semana  
☐ 1 vez al día  
☐ 2 a 3 veces al día  
☐ 5 a 6 veces al día  
☐ más 6 veces al día

|                     |                                                                                                                                                                                                                                                                                                                                                                                                              |
|---------------------|--------------------------------------------------------------------------------------------------------------------------------------------------------------------------------------------------------------------------------------------------------------------------------------------------------------------------------------------------------------------------------------------------------------|
| pizza               | <input type="radio"/> Nunca o menos 1 vez al mes<br><input checked="" type="radio"/> 1 a 3 veces mes<br><input type="radio"/> 1 vez semana<br><input type="radio"/> 2 a 4 veces semana<br><input type="radio"/> 5 a 6 veces semana<br><input type="radio"/> 1 vez al día<br><input type="radio"/> 2 a 3 veces al día<br><input type="radio"/> 5 a 6 veces al día<br><input type="radio"/> más 6 veces al día |
| aceite oliva        | <input type="radio"/> Nunca o menos 1 vez al mes<br><input type="radio"/> 1 a 3 veces mes<br><input type="radio"/> 1 vez semana<br><input checked="" type="radio"/> 2 a 4 veces semana<br><input type="radio"/> 5 a 6 veces semana<br><input type="radio"/> 1 vez al día<br><input type="radio"/> 2 a 3 veces al día<br><input type="radio"/> 5 a 6 veces al día<br><input type="radio"/> más 6 veces al día |
| otros aceites       | <input checked="" type="radio"/> Nunca o menos 1 vez al mes<br><input type="radio"/> 1 a 3 veces mes<br><input type="radio"/> 1 vez semana<br><input type="radio"/> 2 a 4 veces semana<br><input type="radio"/> 5 a 6 veces semana<br><input type="radio"/> 1 vez al día<br><input type="radio"/> 2 a 3 veces al día<br><input type="radio"/> 5 a 6 veces al día<br><input type="radio"/> más 6 veces al día |
| margarina           | <input checked="" type="radio"/> Nunca o menos 1 vez al mes<br><input type="radio"/> 1 a 3 veces mes<br><input type="radio"/> 1 vez semana<br><input type="radio"/> 2 a 4 veces semana<br><input type="radio"/> 5 a 6 veces semana<br><input type="radio"/> 1 vez al día<br><input type="radio"/> 2 a 3 veces al día<br><input type="radio"/> 5 a 6 veces al día<br><input type="radio"/> más 6 veces al día |
| mantequilla         | <input checked="" type="radio"/> Nunca o menos 1 vez al mes<br><input type="radio"/> 1 a 3 veces mes<br><input type="radio"/> 1 vez semana<br><input type="radio"/> 2 a 4 veces semana<br><input type="radio"/> 5 a 6 veces semana<br><input type="radio"/> 1 vez al día<br><input type="radio"/> 2 a 3 veces al día<br><input type="radio"/> 5 a 6 veces al día<br><input type="radio"/> más 6 veces al día |
| galletas tipo maria | <input checked="" type="radio"/> Nunca o menos 1 vez al mes<br><input type="radio"/> 1 a 3 veces mes<br><input type="radio"/> 1 vez semana<br><input type="radio"/> 2 a 4 veces semana<br><input type="radio"/> 5 a 6 veces semana<br><input type="radio"/> 1 vez al día<br><input type="radio"/> 2 a 3 veces al día<br><input type="radio"/> 5 a 6 veces al día<br><input type="radio"/> más 6 veces al día |

|                           |                                                                                                                                                                                                                                                                                                                                                                                                              |
|---------------------------|--------------------------------------------------------------------------------------------------------------------------------------------------------------------------------------------------------------------------------------------------------------------------------------------------------------------------------------------------------------------------------------------------------------|
| galletas chocolate        | <input type="radio"/> Nunca o menos 1 vez al mes<br><input type="radio"/> 1 a 3 veces mes<br><input checked="" type="radio"/> 1 vez semana<br><input type="radio"/> 2 a 4 veces semana<br><input type="radio"/> 5 a 6 veces semana<br><input type="radio"/> 1 vez al día<br><input type="radio"/> 2 a 3 veces al día<br><input type="radio"/> 5 a 6 veces al día<br><input type="radio"/> más 6 veces al día |
| bollieria                 | <input type="radio"/> Nunca o menos 1 vez al mes<br><input checked="" type="radio"/> 1 a 3 veces mes<br><input type="radio"/> 1 vez semana<br><input type="radio"/> 2 a 4 veces semana<br><input type="radio"/> 5 a 6 veces semana<br><input type="radio"/> 1 vez al día<br><input type="radio"/> 2 a 3 veces al día<br><input type="radio"/> 5 a 6 veces al día<br><input type="radio"/> más 6 veces al día |
| chocolate o bombones      | <input type="radio"/> Nunca o menos 1 vez al mes<br><input type="radio"/> 1 a 3 veces mes<br><input checked="" type="radio"/> 1 vez semana<br><input type="radio"/> 2 a 4 veces semana<br><input type="radio"/> 5 a 6 veces semana<br><input type="radio"/> 1 vez al día<br><input type="radio"/> 2 a 3 veces al día<br><input type="radio"/> 5 a 6 veces al día<br><input type="radio"/> más 6 veces al día |
| chocolate polvo o colacao | <input type="radio"/> Nunca o menos 1 vez al mes<br><input type="radio"/> 1 a 3 veces mes<br><input type="radio"/> 1 vez semana<br><input type="radio"/> 2 a 4 veces semana<br><input checked="" type="radio"/> 5 a 6 veces semana<br><input type="radio"/> 1 vez al día<br><input type="radio"/> 2 a 3 veces al día<br><input type="radio"/> 5 a 6 veces al día<br><input type="radio"/> más 6 veces al día |
| vino tinto                | <input checked="" type="radio"/> Nunca o menos 1 vez al mes<br><input type="radio"/> 1 a 3 veces mes<br><input type="radio"/> 1 vez semana<br><input type="radio"/> 2 a 4 veces semana<br><input type="radio"/> 5 a 6 veces semana<br><input type="radio"/> 1 vez al día<br><input type="radio"/> 2 a 3 veces al día<br><input type="radio"/> 5 a 6 veces al día<br><input type="radio"/> más 6 veces al día |
| vino blanco               | <input checked="" type="radio"/> Nunca o menos 1 vez al mes<br><input type="radio"/> 1 a 3 veces mes<br><input type="radio"/> 1 vez semana<br><input type="radio"/> 2 a 4 veces semana<br><input type="radio"/> 5 a 6 veces semana<br><input type="radio"/> 1 vez al día<br><input type="radio"/> 2 a 3 veces al día<br><input type="radio"/> 5 a 6 veces al día<br><input type="radio"/> más 6 veces al día |

|                       |                                                                                                                                                                                                                                                                                                                                                                                                              |
|-----------------------|--------------------------------------------------------------------------------------------------------------------------------------------------------------------------------------------------------------------------------------------------------------------------------------------------------------------------------------------------------------------------------------------------------------|
| vino seco o vermut    | <input checked="" type="radio"/> Nunca o menos 1 vez al mes<br><input type="radio"/> 1 a 3 veces mes<br><input type="radio"/> 1 vez semana<br><input type="radio"/> 2 a 4 veces semana<br><input type="radio"/> 5 a 6 veces semana<br><input type="radio"/> 1 vez al día<br><input type="radio"/> 2 a 3 veces al día<br><input type="radio"/> 5 a 6 veces al día<br><input type="radio"/> más 6 veces al día |
| cerveza               | <input checked="" type="radio"/> Nunca o menos 1 vez al mes<br><input type="radio"/> 1 a 3 veces mes<br><input type="radio"/> 1 vez semana<br><input type="radio"/> 2 a 4 veces semana<br><input type="radio"/> 5 a 6 veces semana<br><input type="radio"/> 1 vez al día<br><input type="radio"/> 2 a 3 veces al día<br><input type="radio"/> 5 a 6 veces al día<br><input type="radio"/> más 6 veces al día |
| cerveza sin alcohol   | <input checked="" type="radio"/> Nunca o menos 1 vez al mes<br><input type="radio"/> 1 a 3 veces mes<br><input type="radio"/> 1 vez semana<br><input type="radio"/> 2 a 4 veces semana<br><input type="radio"/> 5 a 6 veces semana<br><input type="radio"/> 1 vez al día<br><input type="radio"/> 2 a 3 veces al día<br><input type="radio"/> 5 a 6 veces al día<br><input type="radio"/> más 6 veces al día |
| licores               | <input checked="" type="radio"/> Nunca o menos 1 vez al mes<br><input type="radio"/> 1 a 3 veces mes<br><input type="radio"/> 1 vez semana<br><input type="radio"/> 2 a 4 veces semana<br><input type="radio"/> 5 a 6 veces semana<br><input type="radio"/> 1 vez al día<br><input type="radio"/> 2 a 3 veces al día<br><input type="radio"/> 5 a 6 veces al día<br><input type="radio"/> más 6 veces al día |
| ginebra o ron o vodka | <input checked="" type="radio"/> Nunca o menos 1 vez al mes<br><input type="radio"/> 1 a 3 veces mes<br><input type="radio"/> 1 vez semana<br><input type="radio"/> 2 a 4 veces semana<br><input type="radio"/> 5 a 6 veces semana<br><input type="radio"/> 1 vez al día<br><input type="radio"/> 2 a 3 veces al día<br><input type="radio"/> 5 a 6 veces al día<br><input type="radio"/> más 6 veces al día |
| refresco normal       | <input type="radio"/> Nunca o menos 1 vez al mes<br><input type="radio"/> 1 a 3 veces mes<br><input checked="" type="radio"/> 1 vez semana<br><input type="radio"/> 2 a 4 veces semana<br><input type="radio"/> 5 a 6 veces semana<br><input type="radio"/> 1 vez al día<br><input type="radio"/> 2 a 3 veces al día<br><input type="radio"/> 5 a 6 veces al día<br><input type="radio"/> más 6 veces al día |

|                          |                                                                                                                                                                                                                                                                                                                                                                                                              |
|--------------------------|--------------------------------------------------------------------------------------------------------------------------------------------------------------------------------------------------------------------------------------------------------------------------------------------------------------------------------------------------------------------------------------------------------------|
| refresco sin azúcar      | <input type="radio"/> Nunca o menos 1 vez al mes<br><input type="radio"/> 1 a 3 veces mes<br><input checked="" type="radio"/> 1 vez semana<br><input type="radio"/> 2 a 4 veces semana<br><input type="radio"/> 5 a 6 veces semana<br><input type="radio"/> 1 vez al día<br><input type="radio"/> 2 a 3 veces al día<br><input type="radio"/> 5 a 6 veces al día<br><input type="radio"/> más 6 veces al día |
| Agua del grifo           | <input checked="" type="radio"/> Nunca o menos 1 vez al mes<br><input type="radio"/> 1 a 3 veces mes<br><input type="radio"/> 1 vez semana<br><input type="radio"/> 2 a 4 veces semana<br><input type="radio"/> 5 a 6 veces semana<br><input type="radio"/> 1 vez al día<br><input type="radio"/> 2 a 3 veces al día<br><input type="radio"/> 5 a 6 veces al día<br><input type="radio"/> más 6 veces al día |
| agua embotellada sin gas | <input type="radio"/> Nunca o menos 1 vez al mes<br><input type="radio"/> 1 a 3 veces mes<br><input type="radio"/> 1 vez semana<br><input type="radio"/> 2 a 4 veces semana<br><input type="radio"/> 5 a 6 veces semana<br><input type="radio"/> 1 vez al día<br><input type="radio"/> 2 a 3 veces al día<br><input type="radio"/> 5 a 6 veces al día<br><input checked="" type="radio"/> más 6 veces al día |
| agua embotellada con gas | <input checked="" type="radio"/> Nunca o menos 1 vez al mes<br><input type="radio"/> 1 a 3 veces mes<br><input type="radio"/> 1 vez semana<br><input type="radio"/> 2 a 4 veces semana<br><input type="radio"/> 5 a 6 veces semana<br><input type="radio"/> 1 vez al día<br><input type="radio"/> 2 a 3 veces al día<br><input type="radio"/> 5 a 6 veces al día<br><input type="radio"/> más 6 veces al día |
| zumو frutas embasado     | <input checked="" type="radio"/> Nunca o menos 1 vez al mes<br><input type="radio"/> 1 a 3 veces mes<br><input type="radio"/> 1 vez semana<br><input type="radio"/> 2 a 4 veces semana<br><input type="radio"/> 5 a 6 veces semana<br><input type="radio"/> 1 vez al día<br><input type="radio"/> 2 a 3 veces al día<br><input type="radio"/> 5 a 6 veces al día<br><input type="radio"/> más 6 veces al día |
| cafe                     | <input type="radio"/> Nunca o menos 1 vez al mes<br><input type="radio"/> 1 a 3 veces mes<br><input type="radio"/> 1 vez semana<br><input checked="" type="radio"/> 2 a 4 veces semana<br><input type="radio"/> 5 a 6 veces semana<br><input type="radio"/> 1 vez al día<br><input type="radio"/> 2 a 3 veces al día<br><input type="radio"/> 5 a 6 veces al día<br><input type="radio"/> más 6 veces al día |

---

cafe descafeinado

- ☒ Nunca o menos 1 vez al mes  
☐ 1 a 3 veces mes  
☐ 1 vez semana  
☐ 2 a 4 veces semana  
☐ 5 a 6 veces semana  
☐ 1 vez al día  
☐ 2 a 3 veces al día  
☐ 5 a 6 veces al día  
☐ más 6 veces al día

---

te o infusión

- ☒ Nunca o menos 1 vez al mes  
☐ 1 a 3 veces mes  
☐ 1 vez semana  
☐ 2 a 4 veces semana  
☐ 5 a 6 veces semana  
☐ 1 vez al día  
☐ 2 a 3 veces al día  
☐ 5 a 6 veces al día  
☐ más 6 veces al día

---

sopa o puré verduras

- ☐ Nunca o menos 1 vez al mes  
☐ 1 a 3 veces mes  
☒ 1 vez semana  
☐ 2 a 4 veces semana  
☐ 5 a 6 veces semana  
☐ 1 vez al día  
☐ 2 a 3 veces al día  
☐ 5 a 6 veces al día  
☐ más 6 veces al día

---

croquetas pollo jamón

- ☐ Nunca o menos 1 vez al mes  
☒ 1 a 3 veces mes  
☐ 1 vez semana  
☐ 2 a 4 veces semana  
☐ 5 a 6 veces semana  
☐ 1 vez al día  
☐ 2 a 3 veces al día  
☐ 5 a 6 veces al día  
☐ más 6 veces al día

---

croquetas pescado

- ☒ Nunca o menos 1 vez al mes  
☐ 1 a 3 veces mes  
☐ 1 vez semana  
☐ 2 a 4 veces semana  
☐ 5 a 6 veces semana  
☐ 1 vez al día  
☐ 2 a 3 veces al día  
☐ 5 a 6 veces al día  
☐ más 6 veces al día

---

mayonesa

- ☐ Nunca o menos 1 vez al mes  
☒ 1 a 3 veces mes  
☐ 1 vez semana  
☐ 2 a 4 veces semana  
☐ 5 a 6 veces semana  
☐ 1 vez al día  
☐ 2 a 3 veces al día  
☐ 5 a 6 veces al día  
☐ más 6 veces al día



|                  |                                                                                                                                                                                                                                                                                                                                                                                                              |
|------------------|--------------------------------------------------------------------------------------------------------------------------------------------------------------------------------------------------------------------------------------------------------------------------------------------------------------------------------------------------------------------------------------------------------------|
| salsa tomate     | <input checked="" type="radio"/> Nunca o menos 1 vez al mes<br><input type="radio"/> 1 a 3 veces mes<br><input type="radio"/> 1 vez semana<br><input type="radio"/> 2 a 4 veces semana<br><input type="radio"/> 5 a 6 veces semana<br><input type="radio"/> 1 vez al día<br><input type="radio"/> 2 a 3 veces al día<br><input type="radio"/> 5 a 6 veces al día<br><input type="radio"/> más 6 veces al día |
| ketchup          | <input checked="" type="radio"/> Nunca o menos 1 vez al mes<br><input type="radio"/> 1 a 3 veces mes<br><input type="radio"/> 1 vez semana<br><input type="radio"/> 2 a 4 veces semana<br><input type="radio"/> 5 a 6 veces semana<br><input type="radio"/> 1 vez al día<br><input type="radio"/> 2 a 3 veces al día<br><input type="radio"/> 5 a 6 veces al día<br><input type="radio"/> más 6 veces al día |
| sal              | <input checked="" type="radio"/> Nunca o menos 1 vez al mes<br><input type="radio"/> 1 a 3 veces mes<br><input type="radio"/> 1 vez semana<br><input type="radio"/> 2 a 4 veces semana<br><input type="radio"/> 5 a 6 veces semana<br><input type="radio"/> 1 vez al día<br><input type="radio"/> 2 a 3 veces al día<br><input type="radio"/> 5 a 6 veces al día<br><input type="radio"/> más 6 veces al día |
| ajo              | <input type="radio"/> Nunca o menos 1 vez al mes<br><input type="radio"/> 1 a 3 veces mes<br><input type="radio"/> 1 vez semana<br><input checked="" type="radio"/> 2 a 4 veces semana<br><input type="radio"/> 5 a 6 veces semana<br><input type="radio"/> 1 vez al día<br><input type="radio"/> 2 a 3 veces al día<br><input type="radio"/> 5 a 6 veces al día<br><input type="radio"/> más 6 veces al día |
| mermelada o miel | <input checked="" type="radio"/> Nunca o menos 1 vez al mes<br><input type="radio"/> 1 a 3 veces mes<br><input type="radio"/> 1 vez semana<br><input type="radio"/> 2 a 4 veces semana<br><input type="radio"/> 5 a 6 veces semana<br><input type="radio"/> 1 vez al día<br><input type="radio"/> 2 a 3 veces al día<br><input type="radio"/> 5 a 6 veces al día<br><input type="radio"/> más 6 veces al día |
| azúcar           | <input checked="" type="radio"/> Nunca o menos 1 vez al mes<br><input type="radio"/> 1 a 3 veces mes<br><input type="radio"/> 1 vez semana<br><input type="radio"/> 2 a 4 veces semana<br><input type="radio"/> 5 a 6 veces semana<br><input type="radio"/> 1 vez al día<br><input type="radio"/> 2 a 3 veces al día<br><input type="radio"/> 5 a 6 veces al día<br><input type="radio"/> más 6 veces al día |

|                                       |                                                                                                                                                                                                                                                                                                                                                                                                                                                                                                                               |
|---------------------------------------|-------------------------------------------------------------------------------------------------------------------------------------------------------------------------------------------------------------------------------------------------------------------------------------------------------------------------------------------------------------------------------------------------------------------------------------------------------------------------------------------------------------------------------|
| Otro alimento                         |                                                                                                                                                                                                                                                                                                                                                                                                                                                                                                                               |
| suplementos vitamínicos               | <input checked="" type="radio"/> si<br><input type="radio"/> no                                                                                                                                                                                                                                                                                                                                                                                                                                                               |
| suplementos vitamínicos               | [*DATA REMOVED*]                                                                                                                                                                                                                                                                                                                                                                                                                                                                                                              |
| dieta previa                          | <input type="radio"/> si<br><input checked="" type="radio"/> no                                                                                                                                                                                                                                                                                                                                                                                                                                                               |
| motivo dieta                          | <input checked="" type="radio"/> no dieta<br><input type="radio"/> control peso<br><input type="radio"/> control colesterol<br><input type="radio"/> control diabetes<br><input type="radio"/> problemas estómago<br><input type="radio"/> problemas vesícula o hepáticos<br><input type="radio"/> HTA o cardiopatía<br><input type="radio"/> problemas renales<br><input type="radio"/> alergia alimentaria<br><input type="radio"/> ácido úrico elevado<br><input type="radio"/> vegetariana<br><input type="radio"/> otros |
| cambio alimentos año previo gestación | <input type="radio"/> si<br><input checked="" type="radio"/> no                                                                                                                                                                                                                                                                                                                                                                                                                                                               |
| cambio lácteos                        | <input type="radio"/> eliminado<br><input type="radio"/> disminuido<br><input type="radio"/> igual<br><input type="radio"/> aumentado<br><input type="radio"/> no sabe                                                                                                                                                                                                                                                                                                                                                        |
| cambio huevos                         | <input type="radio"/> eliminado<br><input type="radio"/> disminuido<br><input type="radio"/> igual<br><input type="radio"/> aumentado<br><input type="radio"/> no sabe                                                                                                                                                                                                                                                                                                                                                        |
| cambio carne                          | <input type="radio"/> eliminado<br><input type="radio"/> disminuido<br><input type="radio"/> igual<br><input type="radio"/> aumentado<br><input type="radio"/> no sabe                                                                                                                                                                                                                                                                                                                                                        |
| cambio pescado                        | <input type="radio"/> eliminado<br><input type="radio"/> disminuido<br><input type="radio"/> igual<br><input type="radio"/> aumentado<br><input type="radio"/> no sabe                                                                                                                                                                                                                                                                                                                                                        |
| cambio verduras                       | <input type="radio"/> eliminado<br><input type="radio"/> disminuido<br><input type="radio"/> igual<br><input type="radio"/> aumentado<br><input type="radio"/> no sabe                                                                                                                                                                                                                                                                                                                                                        |

|                            |                                                                                                                                                                                                                        |
|----------------------------|------------------------------------------------------------------------------------------------------------------------------------------------------------------------------------------------------------------------|
| cambio legumbres           | <input type="radio"/> eliminado<br><input type="radio"/> disminuido<br><input type="radio"/> igual<br><input type="radio"/> aumentado<br><input type="radio"/> no sabe                                                 |
| cambio fruta               | <input type="radio"/> eliminado<br><input type="radio"/> disminuido<br><input type="radio"/> igual<br><input type="radio"/> aumentado<br><input type="radio"/> no sabe                                                 |
| cambio pan                 | <input type="radio"/> eliminado<br><input type="radio"/> disminuido<br><input type="radio"/> igual<br><input type="radio"/> aumentado<br><input type="radio"/> no sabe                                                 |
| cambio aceite oliva        | <input type="radio"/> eliminado<br><input type="radio"/> disminuido<br><input type="radio"/> igual<br><input type="radio"/> aumentado<br><input type="radio"/> no sabe                                                 |
| cambio mante o margarina   | <input type="radio"/> eliminado<br><input type="radio"/> disminuido<br><input type="radio"/> igual<br><input type="radio"/> aumentado<br><input type="radio"/> no sabe                                                 |
| cambio azúcar y dulces     | <input type="radio"/> eliminado<br><input type="radio"/> disminuido<br><input type="radio"/> igual<br><input type="radio"/> aumentado<br><input type="radio"/> no sabe                                                 |
| cambio bebidas alcohólicas | <input type="radio"/> eliminado<br><input type="radio"/> disminuido<br><input type="radio"/> igual<br><input type="radio"/> aumentado<br><input type="radio"/> no sabe                                                 |
| frecuencia comidas fritas  | <input type="radio"/> a diario<br><input type="radio"/> 5 a 6 veces semana<br><input type="radio"/> 2 a 4 veces semana<br><input type="radio"/> 1 vez semana<br><input checked="" type="radio"/> menos de 1 vez semana |
| carne                      | <input type="radio"/> no como<br><input type="radio"/> cruda<br><input type="radio"/> poco hecha<br><input checked="" type="radio"/> hecha<br><input type="radio"/> muy hecha                                          |
| grasa visible carne        | <input checked="" type="radio"/> quita toda<br><input type="radio"/> quita mayoría<br><input type="radio"/> quita un poco<br><input type="radio"/> no quita nada                                                       |

|                                |                                                                                                                                                                                                                                               |
|--------------------------------|-----------------------------------------------------------------------------------------------------------------------------------------------------------------------------------------------------------------------------------------------|
| cocina carne                   | <input checked="" type="radio"/> a la plancha<br><input type="radio"/> a la parrilla<br><input type="radio"/> asada<br><input type="radio"/> frita<br><input type="radio"/> guisada                                                           |
| tostado quemado carne          | <input checked="" type="radio"/> nunca<br><input type="radio"/> 1 vez mes<br><input type="radio"/> 2 a 3 veces mes<br><input type="radio"/> 1 vez semana<br><input type="radio"/> 2 a 3 semanas                                               |
| tostado quemado pescado        | <input type="radio"/> nunca<br><input type="radio"/> 1 vez mes<br><input type="radio"/> 2 a 3 veces mes<br><input checked="" type="radio"/> 1 vez semana<br><input type="radio"/> 2 a 3 semanas                                               |
| socarrat paella                | <input checked="" type="radio"/> nunca<br><input type="radio"/> 1 vez mes<br><input type="radio"/> 2 a 3 veces mes<br><input type="radio"/> 1 vez semana<br><input type="radio"/> 2 a 3 semanas                                               |
| grasa o aceite cocinar         | <input type="radio"/> mantequilla<br><input type="radio"/> margarina<br><input type="radio"/> aceite oliva<br><input type="radio"/> aceite oliva virgen extra<br><input type="radio"/> aceite vegetal<br><input type="radio"/> mezcla aceites |
| grasa aceite aliñar            | <input type="radio"/> mantequilla<br><input type="radio"/> margarina<br><input type="radio"/> aceite oliva<br><input type="radio"/> aceite oliva virgen extra<br><input type="radio"/> aceite vegetal<br><input type="radio"/> mezcla aceites |
| grasa aceite freir             | <input type="radio"/> mantequilla<br><input type="radio"/> margarina<br><input type="radio"/> aceite oliva<br><input type="radio"/> aceite oliva virgen extra<br><input type="radio"/> aceite vegetal<br><input type="radio"/> mezcla aceites |
| Ejercicio cuestionario         | <input checked="" type="radio"/> si<br><input type="radio"/> no                                                                                                                                                                               |
| horas de sueño incluido siesta | [*DATA REMOVED*]                                                                                                                                                                                                                              |
| minutos siesta                 | [*DATA REMOVED*]                                                                                                                                                                                                                              |
| horas televisión semana        | [*DATA REMOVED*]                                                                                                                                                                                                                              |

|                                        |                                                                                                                                                                                                                                                                                                                                                                           |
|----------------------------------------|---------------------------------------------------------------------------------------------------------------------------------------------------------------------------------------------------------------------------------------------------------------------------------------------------------------------------------------------------------------------------|
| actividad trabajo                      | <input type="radio"/> casi siempre sentado<br><input type="radio"/> sentado 50 por cien<br><input checked="" type="radio"/> casi siempre de pie, quieto<br><input type="radio"/> casi siempre levantado caminando y llevando pocas cosas<br><input type="radio"/> casi siempre levantado, caminando y llevado muchas cosas<br><input type="radio"/> trabajo manual pesado |
| tiempo caminar o bici al día           | <input type="radio"/> casi nunca<br><input type="radio"/> menos 20min día<br><input checked="" type="radio"/> 20 a 40 min día<br><input type="radio"/> 40 a 60 min día<br><input type="radio"/> 1h o 1h y media día<br><input type="radio"/> más de 1h y media al día                                                                                                     |
| tiempo tareas casa al día              | <input checked="" type="radio"/> menos de 1h día<br><input type="radio"/> 1 a 2h día<br><input type="radio"/> 3 a 4h día<br><input type="radio"/> 5 a 6h día<br><input type="radio"/> 7 a 8h día<br><input type="radio"/> más de 8h día                                                                                                                                   |
| tiempo libre televisión ordenador leer | <input type="radio"/> menos 1h día<br><input checked="" type="radio"/> 1h día<br><input type="radio"/> 2h día<br><input type="radio"/> 3h día<br><input type="radio"/> 4h día<br><input type="radio"/> 5 a 6h día<br><input type="radio"/> mas 6h día                                                                                                                     |
| tiempo libre ejercicio o deporte       | <input type="radio"/> menos 1h semana<br><input type="radio"/> 1h semana<br><input type="radio"/> 2h semana<br><input checked="" type="radio"/> 3h semana<br><input type="radio"/> 4 a 5h semana<br><input type="radio"/> mas 5h semana                                                                                                                                   |
| como se considera                      | <input type="radio"/> sedentaria<br><input type="radio"/> poco activa<br><input checked="" type="radio"/> moderadamente activa<br><input type="radio"/> bastante activa<br><input type="radio"/> muy activa<br><input type="radio"/> no sabe                                                                                                                              |
| FUR                                    | [*DATA REMOVED*]                                                                                                                                                                                                                                                                                                                                                          |
| Semanas gestación 2T                   | _____                                                                                                                                                                                                                                                                                                                                                                     |
| Días gestación 2T                      | _____                                                                                                                                                                                                                                                                                                                                                                     |
| DBP 2T                                 | _____                                                                                                                                                                                                                                                                                                                                                                     |
| CC 2T                                  | _____                                                                                                                                                                                                                                                                                                                                                                     |

|                                                   |                                                                                                                                                                                                 |
|---------------------------------------------------|-------------------------------------------------------------------------------------------------------------------------------------------------------------------------------------------------|
| AC 2T                                             |                                                                                                                                                                                                 |
| LF 2T                                             |                                                                                                                                                                                                 |
| PFE 2T (Hadlock)                                  |                                                                                                                                                                                                 |
| Semanas gestación 3T                              | [*DATA REMOVED*]                                                                                                                                                                                |
| días 3T                                           | [*DATA REMOVED*]                                                                                                                                                                                |
| DBP 3T                                            | [*DATA REMOVED*]                                                                                                                                                                                |
| CC 3T                                             | [*DATA REMOVED*]                                                                                                                                                                                |
| AC 3T                                             | [*DATA REMOVED*]                                                                                                                                                                                |
| LF 3T                                             | [*DATA REMOVED*]                                                                                                                                                                                |
| PFE 3T (Hadlock)                                  | [*DATA REMOVED*]                                                                                                                                                                                |
| Semanas de gestación final                        | [*DATA REMOVED*]                                                                                                                                                                                |
| días gestación final                              | [*DATA REMOVED*]                                                                                                                                                                                |
| Localización placenta                             | <input checked="" type="radio"/> anterior<br><input type="radio"/> lateral derecha<br><input type="radio"/> lateral izquierda<br><input type="radio"/> posterior<br><input type="radio"/> fondo |
| Presentación longitudinal cefálica                | <input type="radio"/> no<br><input checked="" type="radio"/> si                                                                                                                                 |
| Dorso                                             | <input type="radio"/> izquierda anterior<br><input type="radio"/> izquierda posterior<br><input type="radio"/> derecha anterior<br><input checked="" type="radio"/> derecha posterior           |
| diámetro biparietal                               | [*DATA REMOVED*]                                                                                                                                                                                |
| Circunferencia craneal                            | [*DATA REMOVED*]                                                                                                                                                                                |
| Circunferencia abdominal                          | [*DATA REMOVED*]                                                                                                                                                                                |
| Longitud de femur                                 | [*DATA REMOVED*]                                                                                                                                                                                |
| tejido celular subcutáneo a nivel del muslo en mm | [*DATA REMOVED*]                                                                                                                                                                                |
| tejido celular subcutáneo en abdomen en mm        | [*DATA REMOVED*]                                                                                                                                                                                |

|                                               |                                                                                                                                                          |
|-----------------------------------------------|----------------------------------------------------------------------------------------------------------------------------------------------------------|
| Volumen del muslo en cm3                      | [*DATA REMOVED*]                                                                                                                                         |
| Peso fetal estimado según fórmula de Hadlock  | [*DATA REMOVED*]                                                                                                                                         |
| Percentil                                     | [*DATA REMOVED*]                                                                                                                                         |
| Peso fetal estimado según fórmula de Scioscia | _____                                                                                                                                                    |
| Peso fetal estimado según fórmula de LEE      | _____                                                                                                                                                    |
| Tipo de parto                                 | <input checked="" type="radio"/> eutocico<br><input type="radio"/> instrumentado/ventosa<br><input type="radio"/> cesarea                                |
| fecha de nacimiento                           | [*DATA REMOVED*]                                                                                                                                         |
| Días entre exploración y nacimiento           | [*DATA REMOVED*]                                                                                                                                         |
| Peso RN en g                                  | [*DATA REMOVED*]                                                                                                                                         |
| sexo                                          | <input type="radio"/> mujer<br><input checked="" type="radio"/> hombre                                                                                   |
| Apgar 1 minuto                                | [*DATA REMOVED*]                                                                                                                                         |
| Apgar 5 minutos                               | [*DATA REMOVED*]                                                                                                                                         |
| Apgar 10 minutos                              | [*DATA REMOVED*]                                                                                                                                         |
| antecedente Covid durante gestación           | <input type="radio"/> Yes<br><input checked="" type="radio"/> No                                                                                         |
| Nivel de estudios                             | <input type="radio"/> ninguno<br><input type="radio"/> primarios<br><input type="radio"/> secundarios<br><input checked="" type="radio"/> universitarios |

# Base\_datos\_estimacion\_peso\_fetal

|                                       |                                                                                                                                                                                                                                                                                      |
|---------------------------------------|--------------------------------------------------------------------------------------------------------------------------------------------------------------------------------------------------------------------------------------------------------------------------------------|
| Número de identificación participante | 147                                                                                                                                                                                                                                                                                  |
| CODIGO PARTICIPANTE                   |                                                                                                                                                                                                                                                                                      |
| Edad                                  | [*DATA REMOVED*]                                                                                                                                                                                                                                                                     |
| Gestaciones                           | <input checked="" type="radio"/> 1<br><input type="radio"/> 2<br><input type="radio"/> 3<br><input type="radio"/> mas de 3                                                                                                                                                           |
| partos                                | <input checked="" type="radio"/> 0<br><input type="radio"/> 1<br><input type="radio"/> 2<br><input type="radio"/> 3<br><input type="radio"/> mas de 3                                                                                                                                |
| cesáreas                              | <input checked="" type="radio"/> 0<br><input type="radio"/> 1<br><input type="radio"/> 2<br><input type="radio"/> 3<br><input type="radio"/> mas de 3                                                                                                                                |
| Abortos                               | <input checked="" type="radio"/> 0<br><input type="radio"/> 1<br><input type="radio"/> 2<br><input type="radio"/> 3<br><input type="radio"/> mas de 3                                                                                                                                |
| Tipo de gestacion                     | <input checked="" type="radio"/> espontanea<br><input type="radio"/> IAC inseminación artificial conyuge<br><input type="radio"/> IAD inseminación artificial donante<br><input type="radio"/> FIV Fecundación in Vitro<br><input type="radio"/> Ovodon FIV con donación de ovocitos |
| peso previo a embarazo                | [*DATA REMOVED*]                                                                                                                                                                                                                                                                     |
| Ganancia ponderal embarazo            |                                                                                                                                                                                                                                                                                      |
| Talla madre                           | [*DATA REMOVED*]                                                                                                                                                                                                                                                                     |
| IMC previo embarazo                   | 24.56747404844291                                                                                                                                                                                                                                                                    |
| Patología obstétrica                  | <input checked="" type="radio"/> no<br><input type="radio"/> si                                                                                                                                                                                                                      |
| Diabetes pregestacional               | <input checked="" type="radio"/> no<br><input type="radio"/> si                                                                                                                                                                                                                      |
| Diabetes gestacional                  | <input checked="" type="radio"/> no<br><input type="radio"/> si                                                                                                                                                                                                                      |



|                                            |                                                                                                                                                                                      |
|--------------------------------------------|--------------------------------------------------------------------------------------------------------------------------------------------------------------------------------------|
| Diabetes gestacional con insulina          | <input checked="" type="radio"/> no<br><input type="radio"/> si                                                                                                                      |
| Diabetes gestacional con dieta y ejercicio | <input checked="" type="radio"/> no<br><input type="radio"/> si                                                                                                                      |
| Percentil fetos previos                    | <input checked="" type="radio"/> Nada<br><input type="radio"/> percentil menor de 10<br><input type="radio"/> percentil entre 10 y 90<br><input type="radio"/> percentil mayor de 90 |
| Exfumadora                                 | <input checked="" type="radio"/> Nada<br><input type="radio"/> menos de 5 años<br><input type="radio"/> 5 a 10 años<br><input type="radio"/> mayor o igual a 10 años                 |
| Hábito tabáquico                           | <input checked="" type="radio"/> no<br><input type="radio"/> si                                                                                                                      |
| fumadora                                   | [*DATA REMOVED*]                                                                                                                                                                     |
| Consumo otros tóxicos                      | <input checked="" type="radio"/> no<br><input type="radio"/> si                                                                                                                      |
| Hb 1T                                      | [*DATA REMOVED*]                                                                                                                                                                     |
| Htc 1T                                     | [*DATA REMOVED*]                                                                                                                                                                     |
| Hb 2T                                      | [*DATA REMOVED*]                                                                                                                                                                     |
| HTC 2T                                     | [*DATA REMOVED*]                                                                                                                                                                     |
| Hb 3T                                      | [*DATA REMOVED*]                                                                                                                                                                     |
| HTC 3T                                     | [*DATA REMOVED*]                                                                                                                                                                     |
| Suplemento FE oral                         | <input checked="" type="radio"/> si<br><input type="radio"/> no                                                                                                                      |
| Suplemento fe iv                           | <input type="radio"/> si<br><input checked="" type="radio"/> no                                                                                                                      |
| Transfusión                                | <input checked="" type="radio"/> no<br><input type="radio"/> si                                                                                                                      |
| Solicitada Vit D                           | <input type="radio"/> no<br><input checked="" type="radio"/> si                                                                                                                      |
| Deficit vit D                              | <input type="radio"/> no<br><input checked="" type="radio"/> si                                                                                                                      |
| Suplemento vit D                           | <input checked="" type="radio"/> si<br><input type="radio"/> no                                                                                                                      |

|                       |                                                                                                                                                                                                                                                                                                                                                                                                              |
|-----------------------|--------------------------------------------------------------------------------------------------------------------------------------------------------------------------------------------------------------------------------------------------------------------------------------------------------------------------------------------------------------------------------------------------------------|
| Dieta, cuestionario   | <input checked="" type="radio"/> sí<br><input type="radio"/> no                                                                                                                                                                                                                                                                                                                                              |
| Leche entera          | <input type="radio"/> Nunca o menos 1 vez al mes<br><input type="radio"/> 1 a 3 veces mes<br><input type="radio"/> 1 vez semana<br><input type="radio"/> 2 a 4 veces semana<br><input type="radio"/> 5 a 6 veces semana<br><input checked="" type="radio"/> 1 vez al día<br><input type="radio"/> 2 a 3 veces al día<br><input type="radio"/> 5 a 6 veces al día<br><input type="radio"/> más 6 veces al día |
| Leche semidesnatada   | <input checked="" type="radio"/> Nunca o menos 1 vez al mes<br><input type="radio"/> 1 a 3 veces mes<br><input type="radio"/> 1 vez semana<br><input type="radio"/> 2 a 4 veces semana<br><input type="radio"/> 5 a 6 veces semana<br><input type="radio"/> 1 vez al día<br><input type="radio"/> 2 a 3 veces al día<br><input type="radio"/> 5 a 6 veces al día<br><input type="radio"/> mas 6 veces al día |
| Leche desnatada       | <input checked="" type="radio"/> Nunca o menos 1 vez al mes<br><input type="radio"/> 1 a 3 veces mes<br><input type="radio"/> 1 vez semana<br><input type="radio"/> 2 a 4 veces semana<br><input type="radio"/> 5 a 6 veces semana<br><input type="radio"/> 1 vez al día<br><input type="radio"/> 2 a 3 veces al día<br><input type="radio"/> 5 a 6 veces al día<br><input type="radio"/> más 6 veces al día |
| Leche condensada      | <input checked="" type="radio"/> Nunca o menos 1 vez al mes<br><input type="radio"/> 1 a 3 veces mes<br><input type="radio"/> 1 vez semana<br><input type="radio"/> 2 a 4 veces semana<br><input type="radio"/> 5 a 6 veces semana<br><input type="radio"/> 1 vez al día<br><input type="radio"/> 2 a 3 veces al día<br><input type="radio"/> 5 a 6 veces al día<br><input type="radio"/> más 6 veces al día |
| nata o crema de leche | <input checked="" type="radio"/> Nunca o menos 1 vez al mes<br><input type="radio"/> 1 a 3 veces mes<br><input type="radio"/> 1 vez semana<br><input type="radio"/> 2 a 4 veces semana<br><input type="radio"/> 5 a 6 veces semana<br><input type="radio"/> 1 vez al día<br><input type="radio"/> 2 a 3 veces al día<br><input type="radio"/> 5 a 6 veces al día<br><input type="radio"/> más 6 veces al día |

---

Yogurt Entero

- ☐ Nunca o menos 1 vez al mes
- ☐ 1 a 3 veces mes
- ☒ 1 vez semana
- ☐ 2 a 4 veces semana
- ☐ 5 a 6 veces semana
- ☐ 1 vez al día
- ☐ 2 a 3 veces al día
- ☐ 5 a 6 veces al día
- ☐ más 6 veces al día

---

Yogurt desnatado

- ☒ Nunca o menos 1 vez al mes
- ☐ 1 a 3 veces mes
- ☐ 1 vez semana
- ☐ 2 a 4 veces semana
- ☐ 5 a 6 veces semana
- ☐ 1 vez al día
- ☐ 2 a 3 veces al día
- ☐ 5 a 6 veces al día
- ☐ más 6 veces al día

---

100g requesón o queso blando o queso fresco

- ☐ Nunca o menos 1 vez al mes
- ☐ 1 a 3 veces mes
- ☒ 1 vez semana
- ☐ 2 a 4 veces semana
- ☐ 5 a 6 veces semana
- ☐ 1 vez al día
- ☐ 2 a 3 veces al día
- ☐ 5 a 6 veces al día
- ☐ más 6 veces al día

---

queso curado o semicurado o cremoso

- ☐ Nunca o menos 1 vez al mes
- ☐ 1 a 3 veces mes
- ☐ 1 vez semana
- ☐ 2 a 4 veces semana
- ☒ 5 a 6 veces semana
- ☐ 1 vez al día
- ☐ 2 a 3 veces al día
- ☐ 5 a 6 veces al día
- ☐ más 6 veces al día

---

natillas flan pudding

- ☒ Nunca o menos 1 vez al mes
- ☐ 1 a 3 veces mes
- ☐ 1 vez semana
- ☐ 2 a 4 veces semana
- ☐ 5 a 6 veces semana
- ☐ 1 vez al día
- ☐ 2 a 3 veces al día
- ☐ 5 a 6 veces al día
- ☐ más 6 veces al día

---

Helado

- ☐ Nunca o menos 1 vez al mes
- ☐ 1 a 3 veces mes
- ☒ 1 vez semana
- ☐ 2 a 4 veces semana
- ☐ 5 a 6 veces semana
- ☐ 1 vez al día
- ☐ 2 a 3 veces al día
- ☐ 5 a 6 veces al día
- ☐ más 6 veces al día

|                                      |                                                                                                                                                                                                                                                                                                                                                                                                              |
|--------------------------------------|--------------------------------------------------------------------------------------------------------------------------------------------------------------------------------------------------------------------------------------------------------------------------------------------------------------------------------------------------------------------------------------------------------------|
| huevo                                | <input type="radio"/> Nunca o menos 1 vez al mes<br><input type="radio"/> 1 a 3 veces mes<br><input type="radio"/> 1 vez semana<br><input checked="" type="radio"/> 2 a 4 veces semana<br><input type="radio"/> 5 a 6 veces semana<br><input type="radio"/> 1 vez al día<br><input type="radio"/> 2 a 3 veces al día<br><input type="radio"/> 5 a 6 veces al día<br><input type="radio"/> más 6 veces al día |
| Pollo con piel                       | <input type="radio"/> Nunca o menos 1 vez al mes<br><input checked="" type="radio"/> 1 a 3 veces mes<br><input type="radio"/> 1 vez semana<br><input type="radio"/> 2 a 4 veces semana<br><input type="radio"/> 5 a 6 veces semana<br><input type="radio"/> 1 vez al día<br><input type="radio"/> 2 a 3 veces al día<br><input type="radio"/> 5 a 6 veces al día<br><input type="radio"/> más 6 veces al día |
| pollo sin piel                       | <input type="radio"/> Nunca o menos 1 vez al mes<br><input type="radio"/> 1 a 3 veces mes<br><input checked="" type="radio"/> 1 vez semana<br><input type="radio"/> 2 a 4 veces semana<br><input type="radio"/> 5 a 6 veces semana<br><input type="radio"/> 1 vez al día<br><input type="radio"/> 2 a 3 veces al día<br><input type="radio"/> 5 a 6 veces al día<br><input type="radio"/> más 6 veces al día |
| Ternera o cerdo o cordero            | <input type="radio"/> Nunca o menos 1 vez al mes<br><input checked="" type="radio"/> 1 a 3 veces mes<br><input type="radio"/> 1 vez semana<br><input type="radio"/> 2 a 4 veces semana<br><input type="radio"/> 5 a 6 veces semana<br><input type="radio"/> 1 vez al día<br><input type="radio"/> 2 a 3 veces al día<br><input type="radio"/> 5 a 6 veces al día<br><input type="radio"/> más 6 veces al día |
| carne caza: Conejo o codorniz o pato | <input checked="" type="radio"/> Nunca o menos 1 vez al mes<br><input type="radio"/> 1 a 3 veces mes<br><input type="radio"/> 1 vez semana<br><input type="radio"/> 2 a 4 veces semana<br><input type="radio"/> 5 a 6 veces semana<br><input type="radio"/> 1 vez al día<br><input type="radio"/> 2 a 3 veces al día<br><input type="radio"/> 5 a 6 veces al día<br><input type="radio"/> más 6 veces al día |
| Hígado de ternera o cerdo o pollo    | <input checked="" type="radio"/> Nunca o menos 1 vez al mes<br><input type="radio"/> 1 a 3 veces mes<br><input type="radio"/> 1 vez semana<br><input type="radio"/> 2 a 4 veces semana<br><input type="radio"/> 5 a 6 veces semana<br><input type="radio"/> 1 vez al día<br><input type="radio"/> 2 a 3 veces al día<br><input type="radio"/> 5 a 6 veces al día<br><input type="radio"/> más 6 veces al día |

---

Vísceras

- ☒ Nunca o menos 1 vez al mes  
☐ 1 a 3 veces mes  
☐ 1 vez semana  
☐ 2 a 4 veces semana  
☐ 5 a 6 veces semana  
☐ 1 vez al día  
☐ 2 a 3 veces al día  
☐ 5 a 6 veces al día  
☐ más 6 veces al día

---

Embutido

- ☒ Nunca o menos 1 vez al mes  
☐ 1 a 3 veces mes  
☐ 1 vez semana  
☐ 2 a 4 veces semana  
☐ 5 a 6 veces semana  
☐ 1 vez al día  
☐ 2 a 3 veces al día  
☐ 5 a 6 veces al día  
☐ más 6 veces al día

---

Salchicha o similar

- ☒ Nunca o menos 1 vez al mes  
☐ 1 a 3 veces mes  
☐ 1 vez semana  
☐ 2 a 4 veces semana  
☐ 5 a 6 veces semana  
☐ 1 vez al día  
☐ 2 a 3 veces al día  
☐ 5 a 6 veces al día  
☐ más 6 veces al día

---

Pate o foiegras

- ☒ Nunca o menos 1 vez al mes  
☐ 1 a 3 veces mes  
☐ 1 vez semana  
☐ 2 a 4 veces semana  
☐ 5 a 6 veces semana  
☐ 1 vez al día  
☐ 2 a 3 veces al día  
☐ 5 a 6 veces al día  
☐ más 6 veces al día

---

Hamburguesa

- ☐ Nunca o menos 1 vez al mes  
☒ 1 a 3 veces mes  
☐ 1 vez semana  
☐ 2 a 4 veces semana  
☐ 5 a 6 veces semana  
☐ 1 vez al día  
☐ 2 a 3 veces al día  
☐ 5 a 6 veces al día  
☐ más 6 veces al día

---

tocino o bacon

- ☐ Nunca o menos 1 vez al mes  
☒ 1 a 3 veces mes  
☐ 1 vez semana  
☐ 2 a 4 veces semana  
☐ 5 a 6 veces semana  
☐ 1 vez al día  
☐ 2 a 3 veces al día  
☐ 5 a 6 veces al día  
☐ más 6 veces al día

---

Pescado frito

- ☒ Nunca o menos 1 vez al mes
- ☐ 1 a 3 veces mes
- ☐ 1 vez semana
- ☐ 2 a 4 veces semana
- ☐ 5 a 6 veces semana
- ☐ 1 vez al día
- ☐ 2 a 3 veces al día
- ☐ 5 a 6 veces al día
- ☐ más 6 veces al día

---

pescado hervido blanco

- ☐ Nunca o menos 1 vez al mes
- ☐ 1 a 3 veces mes
- ☒ 1 vez semana
- ☐ 2 a 4 veces semana
- ☐ 5 a 6 veces semana
- ☐ 1 vez al día
- ☐ 2 a 3 veces al día
- ☐ 5 a 6 veces al día
- ☐ más 6 veces al día

---

pescado hervido azul

- ☐ Nunca o menos 1 vez al mes
- ☐ 1 a 3 veces mes
- ☒ 1 vez semana
- ☐ 2 a 4 veces semana
- ☐ 5 a 6 veces semana
- ☐ 1 vez al día
- ☐ 2 a 3 veces al día
- ☐ 5 a 6 veces al día
- ☐ más 6 veces al día

---

otros pescado azul

- ☐ Nunca o menos 1 vez al mes
- ☐ 1 a 3 veces mes
- ☒ 1 vez semana
- ☐ 2 a 4 veces semana
- ☐ 5 a 6 veces semana
- ☐ 1 vez al día
- ☐ 2 a 3 veces al día
- ☐ 5 a 6 veces al día
- ☐ más 6 veces al día

---

atun conserva

- ☐ Nunca o menos 1 vez al mes
- ☐ 1 a 3 veces mes
- ☐ 1 vez semana
- ☒ 2 a 4 veces semana
- ☐ 5 a 6 veces semana
- ☐ 1 vez al día
- ☐ 2 a 3 veces al día
- ☐ 5 a 6 veces al día
- ☐ más 6 veces al día

---

sardina conserva

- ☐ Nunca o menos 1 vez al mes
- ☒ 1 a 3 veces mes
- ☐ 1 vez semana
- ☐ 2 a 4 veces semana
- ☐ 5 a 6 veces semana
- ☐ 1 vez al día
- ☐ 2 a 3 veces al día
- ☐ 5 a 6 veces al día
- ☐ más 6 veces al día

|                                         |                                                                                                                                                                                                                                                                                                                                                                                                              |
|-----------------------------------------|--------------------------------------------------------------------------------------------------------------------------------------------------------------------------------------------------------------------------------------------------------------------------------------------------------------------------------------------------------------------------------------------------------------|
| pescado ahumado                         | <input checked="" type="radio"/> Nunca o menos 1 vez al mes<br><input type="radio"/> 1 a 3 veces mes<br><input type="radio"/> 1 vez semana<br><input type="radio"/> 2 a 4 veces semana<br><input type="radio"/> 5 a 6 veces semana<br><input type="radio"/> 1 vez al día<br><input type="radio"/> 2 a 3 veces al día<br><input type="radio"/> 5 a 6 veces al día<br><input type="radio"/> más 6 veces al día |
| almejas o mejillones o ostras unos 100g | <input type="radio"/> Nunca o menos 1 vez al mes<br><input checked="" type="radio"/> 1 a 3 veces mes<br><input type="radio"/> 1 vez semana<br><input type="radio"/> 2 a 4 veces semana<br><input type="radio"/> 5 a 6 veces semana<br><input type="radio"/> 1 vez al día<br><input type="radio"/> 2 a 3 veces al día<br><input type="radio"/> 5 a 6 veces al día<br><input type="radio"/> más 6 veces al día |
| calamar o chipiron o sepia unos 100g    | <input type="radio"/> Nunca o menos 1 vez al mes<br><input checked="" type="radio"/> 1 a 3 veces mes<br><input type="radio"/> 1 vez semana<br><input type="radio"/> 2 a 4 veces semana<br><input type="radio"/> 5 a 6 veces semana<br><input type="radio"/> 1 vez al día<br><input type="radio"/> 2 a 3 veces al día<br><input type="radio"/> 5 a 6 veces al día<br><input type="radio"/> más 6 veces al día |
| marisco unos 100g                       | <input type="radio"/> Nunca o menos 1 vez al mes<br><input checked="" type="radio"/> 1 a 3 veces mes<br><input type="radio"/> 1 vez semana<br><input type="radio"/> 2 a 4 veces semana<br><input type="radio"/> 5 a 6 veces semana<br><input type="radio"/> 1 vez al día<br><input type="radio"/> 2 a 3 veces al día<br><input type="radio"/> 5 a 6 veces al día<br><input type="radio"/> más 6 veces al día |
| Espinacas o acelgas cocinadas           | <input checked="" type="radio"/> Nunca o menos 1 vez al mes<br><input type="radio"/> 1 a 3 veces mes<br><input type="radio"/> 1 vez semana<br><input type="radio"/> 2 a 4 veces semana<br><input type="radio"/> 5 a 6 veces semana<br><input type="radio"/> 1 vez al día<br><input type="radio"/> 2 a 3 veces al día<br><input type="radio"/> 5 a 6 veces al día<br><input type="radio"/> más 6 veces al día |
| Col o coliflor o brocoli cocinado       | <input checked="" type="radio"/> Nunca o menos 1 vez al mes<br><input type="radio"/> 1 a 3 veces mes<br><input type="radio"/> 1 vez semana<br><input type="radio"/> 2 a 4 veces semana<br><input type="radio"/> 5 a 6 veces semana<br><input type="radio"/> 1 vez al día<br><input type="radio"/> 2 a 3 veces al día<br><input type="radio"/> 5 a 6 veces al día<br><input type="radio"/> más 6 veces al día |

---

Lechuga o endivia o escarola

- ☐ Nunca o menos 1 vez al mes  
☐ 1 a 3 veces mes  
☐ 1 vez semana  
☐ 2 a 4 veces semana  
☐ 5 a 6 veces semana  
☐ 1 vez al día  
☒ 2 a 3 veces al día  
☐ 5 a 6 veces al día  
☐ más 6 veces al día

---

tomate ensalada

- ☐ Nunca o menos 1 vez al mes  
☐ 1 a 3 veces mes  
☐ 1 vez semana  
☐ 2 a 4 veces semana  
☐ 5 a 6 veces semana  
☐ 1 vez al día  
☒ 2 a 3 veces al día  
☐ 5 a 6 veces al día  
☐ más 6 veces al día

---

cebolla

- ☐ Nunca o menos 1 vez al mes  
☐ 1 a 3 veces mes  
☐ 1 vez semana  
☒ 2 a 4 veces semana  
☐ 5 a 6 veces semana  
☐ 1 vez al día  
☐ 2 a 3 veces al día  
☐ 5 a 6 veces al día  
☐ más 6 veces al día

---

Zanahoria o calabaza

- ☐ Nunca o menos 1 vez al mes  
☐ 1 a 3 veces mes  
☒ 1 vez semana  
☐ 2 a 4 veces semana  
☐ 5 a 6 veces semana  
☐ 1 vez al día  
☐ 2 a 3 veces al día  
☐ 5 a 6 veces al día  
☐ más 6 veces al día

---

Judías verdes

- ☐ Nunca o menos 1 vez al mes  
☒ 1 a 3 veces mes  
☐ 1 vez semana  
☐ 2 a 4 veces semana  
☐ 5 a 6 veces semana  
☐ 1 vez al día  
☐ 2 a 3 veces al día  
☐ 5 a 6 veces al día  
☐ más 6 veces al día

---

Berenjena o calabacin o pepino

- ☐ Nunca o menos 1 vez al mes  
☐ 1 a 3 veces mes  
☒ 1 vez semana  
☐ 2 a 4 veces semana  
☐ 5 a 6 veces semana  
☐ 1 vez al día  
☐ 2 a 3 veces al día  
☐ 5 a 6 veces al día  
☐ más 6 veces al día



---

|          |                                                                                                                                                                                                                                                                                                                                                                                                              |
|----------|--------------------------------------------------------------------------------------------------------------------------------------------------------------------------------------------------------------------------------------------------------------------------------------------------------------------------------------------------------------------------------------------------------------|
| pimiento | <input type="radio"/> Nunca o menos 1 vez al mes<br><input type="radio"/> 1 a 3 veces mes<br><input checked="" type="radio"/> 1 vez semana<br><input type="radio"/> 2 a 4 veces semana<br><input type="radio"/> 5 a 6 veces semana<br><input type="radio"/> 1 vez al día<br><input type="radio"/> 2 a 3 veces al día<br><input type="radio"/> 5 a 6 veces al día<br><input type="radio"/> más 6 veces al día |
|----------|--------------------------------------------------------------------------------------------------------------------------------------------------------------------------------------------------------------------------------------------------------------------------------------------------------------------------------------------------------------------------------------------------------------|

---

|           |                                                                                                                                                                                                                                                                                                                                                                                                              |
|-----------|--------------------------------------------------------------------------------------------------------------------------------------------------------------------------------------------------------------------------------------------------------------------------------------------------------------------------------------------------------------------------------------------------------------|
| alcachofa | <input type="radio"/> Nunca o menos 1 vez al mes<br><input checked="" type="radio"/> 1 a 3 veces mes<br><input type="radio"/> 1 vez semana<br><input type="radio"/> 2 a 4 veces semana<br><input type="radio"/> 5 a 6 veces semana<br><input type="radio"/> 1 vez al día<br><input type="radio"/> 2 a 3 veces al día<br><input type="radio"/> 5 a 6 veces al día<br><input type="radio"/> más 6 veces al día |
|-----------|--------------------------------------------------------------------------------------------------------------------------------------------------------------------------------------------------------------------------------------------------------------------------------------------------------------------------------------------------------------------------------------------------------------|

---

|            |                                                                                                                                                                                                                                                                                                                                                                                                              |
|------------|--------------------------------------------------------------------------------------------------------------------------------------------------------------------------------------------------------------------------------------------------------------------------------------------------------------------------------------------------------------------------------------------------------------|
| espárragos | <input type="radio"/> Nunca o menos 1 vez al mes<br><input type="radio"/> 1 a 3 veces mes<br><input checked="" type="radio"/> 1 vez semana<br><input type="radio"/> 2 a 4 veces semana<br><input type="radio"/> 5 a 6 veces semana<br><input type="radio"/> 1 vez al día<br><input type="radio"/> 2 a 3 veces al día<br><input type="radio"/> 5 a 6 veces al día<br><input type="radio"/> más 6 veces al día |
|------------|--------------------------------------------------------------------------------------------------------------------------------------------------------------------------------------------------------------------------------------------------------------------------------------------------------------------------------------------------------------------------------------------------------------|

---

|              |                                                                                                                                                                                                                                                                                                                                                                                                              |
|--------------|--------------------------------------------------------------------------------------------------------------------------------------------------------------------------------------------------------------------------------------------------------------------------------------------------------------------------------------------------------------------------------------------------------------|
| maíz hervido | <input checked="" type="radio"/> Nunca o menos 1 vez al mes<br><input type="radio"/> 1 a 3 veces mes<br><input type="radio"/> 1 vez semana<br><input type="radio"/> 2 a 4 veces semana<br><input type="radio"/> 5 a 6 veces semana<br><input type="radio"/> 1 vez al día<br><input type="radio"/> 2 a 3 veces al día<br><input type="radio"/> 5 a 6 veces al día<br><input type="radio"/> más 6 veces al día |
|--------------|--------------------------------------------------------------------------------------------------------------------------------------------------------------------------------------------------------------------------------------------------------------------------------------------------------------------------------------------------------------------------------------------------------------|

---

|           |                                                                                                                                                                                                                                                                                                                                                                                                              |
|-----------|--------------------------------------------------------------------------------------------------------------------------------------------------------------------------------------------------------------------------------------------------------------------------------------------------------------------------------------------------------------------------------------------------------------|
| legumbres | <input type="radio"/> Nunca o menos 1 vez al mes<br><input type="radio"/> 1 a 3 veces mes<br><input checked="" type="radio"/> 1 vez semana<br><input type="radio"/> 2 a 4 veces semana<br><input type="radio"/> 5 a 6 veces semana<br><input type="radio"/> 1 vez al día<br><input type="radio"/> 2 a 3 veces al día<br><input type="radio"/> 5 a 6 veces al día<br><input type="radio"/> más 6 veces al día |
|-----------|--------------------------------------------------------------------------------------------------------------------------------------------------------------------------------------------------------------------------------------------------------------------------------------------------------------------------------------------------------------------------------------------------------------|

---

|                       |                                                                                                                                                                                                                                                                                                                                                                                                              |
|-----------------------|--------------------------------------------------------------------------------------------------------------------------------------------------------------------------------------------------------------------------------------------------------------------------------------------------------------------------------------------------------------------------------------------------------------|
| naranjas o mandarinas | <input type="radio"/> Nunca o menos 1 vez al mes<br><input checked="" type="radio"/> 1 a 3 veces mes<br><input type="radio"/> 1 vez semana<br><input type="radio"/> 2 a 4 veces semana<br><input type="radio"/> 5 a 6 veces semana<br><input type="radio"/> 1 vez al día<br><input type="radio"/> 2 a 3 veces al día<br><input type="radio"/> 5 a 6 veces al día<br><input type="radio"/> más 6 veces al día |
|-----------------------|--------------------------------------------------------------------------------------------------------------------------------------------------------------------------------------------------------------------------------------------------------------------------------------------------------------------------------------------------------------------------------------------------------------|

---

|                       |                                                                                                                                                                                                                                                                                                                                                                                                              |
|-----------------------|--------------------------------------------------------------------------------------------------------------------------------------------------------------------------------------------------------------------------------------------------------------------------------------------------------------------------------------------------------------------------------------------------------------|
| zum natural fruta     | <input type="radio"/> Nunca o menos 1 vez al mes<br><input checked="" type="radio"/> 1 a 3 veces mes<br><input type="radio"/> 1 vez semana<br><input type="radio"/> 2 a 4 veces semana<br><input type="radio"/> 5 a 6 veces semana<br><input type="radio"/> 1 vez al día<br><input type="radio"/> 2 a 3 veces al día<br><input type="radio"/> 5 a 6 veces al día<br><input type="radio"/> más 6 veces al día |
| platano               | <input type="radio"/> Nunca o menos 1 vez al mes<br><input type="radio"/> 1 a 3 veces mes<br><input checked="" type="radio"/> 1 vez semana<br><input type="radio"/> 2 a 4 veces semana<br><input type="radio"/> 5 a 6 veces semana<br><input type="radio"/> 1 vez al día<br><input type="radio"/> 2 a 3 veces al día<br><input type="radio"/> 5 a 6 veces al día<br><input type="radio"/> más 6 veces al día |
| manzana o pera        | <input type="radio"/> Nunca o menos 1 vez al mes<br><input type="radio"/> 1 a 3 veces mes<br><input checked="" type="radio"/> 1 vez semana<br><input type="radio"/> 2 a 4 veces semana<br><input type="radio"/> 5 a 6 veces semana<br><input type="radio"/> 1 vez al día<br><input type="radio"/> 2 a 3 veces al día<br><input type="radio"/> 5 a 6 veces al día<br><input type="radio"/> más 6 veces al día |
| melocotón o nectarina | <input type="radio"/> Nunca o menos 1 vez al mes<br><input type="radio"/> 1 a 3 veces mes<br><input type="radio"/> 1 vez semana<br><input type="radio"/> 2 a 4 veces semana<br><input type="radio"/> 5 a 6 veces semana<br><input checked="" type="radio"/> 1 vez al día<br><input type="radio"/> 2 a 3 veces al día<br><input type="radio"/> 5 a 6 veces al día<br><input type="radio"/> más 6 veces al día |
| sandia o melon        | <input type="radio"/> Nunca o menos 1 vez al mes<br><input type="radio"/> 1 a 3 veces mes<br><input type="radio"/> 1 vez semana<br><input type="radio"/> 2 a 4 veces semana<br><input type="radio"/> 5 a 6 veces semana<br><input checked="" type="radio"/> 1 vez al día<br><input type="radio"/> 2 a 3 veces al día<br><input type="radio"/> 5 a 6 veces al día<br><input type="radio"/> más 6 veces al día |
| uva                   | <input checked="" type="radio"/> Nunca o menos 1 vez al mes<br><input type="radio"/> 1 a 3 veces mes<br><input type="radio"/> 1 vez semana<br><input type="radio"/> 2 a 4 veces semana<br><input type="radio"/> 5 a 6 veces semana<br><input type="radio"/> 1 vez al día<br><input type="radio"/> 2 a 3 veces al día<br><input type="radio"/> 5 a 6 veces al día<br><input type="radio"/> más 6 veces al día |

---

bruna o ciruela

- ☐ Nunca o menos 1 vez al mes  
☐ 1 a 3 veces mes  
☐ 1 vez semana  
☒ 2 a 4 veces semana  
☐ 5 a 6 veces semana  
☐ 1 vez al día  
☐ 2 a 3 veces al día  
☐ 5 a 6 veces al día  
☐ más 6 veces al día

---

kiwi

- ☐ Nunca o menos 1 vez al mes  
☒ 1 a 3 veces mes  
☐ 1 vez semana  
☐ 2 a 4 veces semana  
☐ 5 a 6 veces semana  
☐ 1 vez al día  
☐ 2 a 3 veces al día  
☐ 5 a 6 veces al día  
☐ más 6 veces al día

---

aceituna

- ☐ Nunca o menos 1 vez al mes  
☒ 1 a 3 veces mes  
☐ 1 vez semana  
☐ 2 a 4 veces semana  
☐ 5 a 6 veces semana  
☐ 1 vez al día  
☐ 2 a 3 veces al día  
☐ 5 a 6 veces al día  
☐ más 6 veces al día

---

frutos secos

- ☐ Nunca o menos 1 vez al mes  
☐ 1 a 3 veces mes  
☐ 1 vez semana  
☒ 2 a 4 veces semana  
☐ 5 a 6 veces semana  
☐ 1 vez al día  
☐ 2 a 3 veces al día  
☐ 5 a 6 veces al día  
☐ más 6 veces al día

---

pan blanco

- ☐ Nunca o menos 1 vez al mes  
☐ 1 a 3 veces mes  
☐ 1 vez semana  
☐ 2 a 4 veces semana  
☐ 5 a 6 veces semana  
☒ 1 vez al día  
☐ 2 a 3 veces al día  
☐ 5 a 6 veces al día  
☐ más 6 veces al día

---

pan integral

- ☐ Nunca o menos 1 vez al mes  
☐ 1 a 3 veces mes  
☒ 1 vez semana  
☐ 2 a 4 veces semana  
☐ 5 a 6 veces semana  
☐ 1 vez al día  
☐ 2 a 3 veces al día  
☐ 5 a 6 veces al día  
☐ más 6 veces al día

---

cereales desayuno

- ☐ Nunca o menos 1 vez al mes  
☐ 1 a 3 veces mes  
☐ 1 vez semana  
☐ 2 a 4 veces semana  
☐ 5 a 6 veces semana  
☒ 1 vez al día  
☐ 2 a 3 veces al día  
☐ 5 a 6 veces al día  
☐ más 6 veces al día

---

patatas fritas

- ☐ Nunca o menos 1 vez al mes  
☒ 1 a 3 veces mes  
☐ 1 vez semana  
☐ 2 a 4 veces semana  
☐ 5 a 6 veces semana  
☐ 1 vez al día  
☐ 2 a 3 veces al día  
☐ 5 a 6 veces al día  
☐ más 6 veces al día

---

patatas cocidas o asadas

- ☐ Nunca o menos 1 vez al mes  
☐ 1 a 3 veces mes  
☒ 1 vez semana  
☐ 2 a 4 veces semana  
☐ 5 a 6 veces semana  
☐ 1 vez al día  
☐ 2 a 3 veces al día  
☐ 5 a 6 veces al día  
☐ más 6 veces al día

---

bolsa papas

- ☐ Nunca o menos 1 vez al mes  
☒ 1 a 3 veces mes  
☐ 1 vez semana  
☐ 2 a 4 veces semana  
☐ 5 a 6 veces semana  
☐ 1 vez al día  
☐ 2 a 3 veces al día  
☐ 5 a 6 veces al día  
☐ más 6 veces al día

---

arroz cocinado

- ☐ Nunca o menos 1 vez al mes  
☐ 1 a 3 veces mes  
☒ 1 vez semana  
☐ 2 a 4 veces semana  
☐ 5 a 6 veces semana  
☐ 1 vez al día  
☐ 2 a 3 veces al día  
☐ 5 a 6 veces al día  
☐ más 6 veces al día

---

pasta

- ☐ Nunca o menos 1 vez al mes  
☐ 1 a 3 veces mes  
☐ 1 vez semana  
☒ 2 a 4 veces semana  
☐ 5 a 6 veces semana  
☐ 1 vez al día  
☐ 2 a 3 veces al día  
☐ 5 a 6 veces al día  
☐ más 6 veces al día

|                     |                                                                                                                                                                                                                                                                                                                                                                                                              |
|---------------------|--------------------------------------------------------------------------------------------------------------------------------------------------------------------------------------------------------------------------------------------------------------------------------------------------------------------------------------------------------------------------------------------------------------|
| pizza               | <input type="radio"/> Nunca o menos 1 vez al mes<br><input checked="" type="radio"/> 1 a 3 veces mes<br><input type="radio"/> 1 vez semana<br><input type="radio"/> 2 a 4 veces semana<br><input type="radio"/> 5 a 6 veces semana<br><input type="radio"/> 1 vez al día<br><input type="radio"/> 2 a 3 veces al día<br><input type="radio"/> 5 a 6 veces al día<br><input type="radio"/> más 6 veces al día |
| aceite oliva        | <input type="radio"/> Nunca o menos 1 vez al mes<br><input type="radio"/> 1 a 3 veces mes<br><input type="radio"/> 1 vez semana<br><input type="radio"/> 2 a 4 veces semana<br><input type="radio"/> 5 a 6 veces semana<br><input type="radio"/> 1 vez al día<br><input checked="" type="radio"/> 2 a 3 veces al día<br><input type="radio"/> 5 a 6 veces al día<br><input type="radio"/> más 6 veces al día |
| otros aceites       | <input checked="" type="radio"/> Nunca o menos 1 vez al mes<br><input type="radio"/> 1 a 3 veces mes<br><input type="radio"/> 1 vez semana<br><input type="radio"/> 2 a 4 veces semana<br><input type="radio"/> 5 a 6 veces semana<br><input type="radio"/> 1 vez al día<br><input type="radio"/> 2 a 3 veces al día<br><input type="radio"/> 5 a 6 veces al día<br><input type="radio"/> más 6 veces al día |
| margarina           | <input checked="" type="radio"/> Nunca o menos 1 vez al mes<br><input type="radio"/> 1 a 3 veces mes<br><input type="radio"/> 1 vez semana<br><input type="radio"/> 2 a 4 veces semana<br><input type="radio"/> 5 a 6 veces semana<br><input type="radio"/> 1 vez al día<br><input type="radio"/> 2 a 3 veces al día<br><input type="radio"/> 5 a 6 veces al día<br><input type="radio"/> más 6 veces al día |
| mantequilla         | <input checked="" type="radio"/> Nunca o menos 1 vez al mes<br><input type="radio"/> 1 a 3 veces mes<br><input type="radio"/> 1 vez semana<br><input type="radio"/> 2 a 4 veces semana<br><input type="radio"/> 5 a 6 veces semana<br><input type="radio"/> 1 vez al día<br><input type="radio"/> 2 a 3 veces al día<br><input type="radio"/> 5 a 6 veces al día<br><input type="radio"/> más 6 veces al día |
| galletas tipo maria | <input type="radio"/> Nunca o menos 1 vez al mes<br><input checked="" type="radio"/> 1 a 3 veces mes<br><input type="radio"/> 1 vez semana<br><input type="radio"/> 2 a 4 veces semana<br><input type="radio"/> 5 a 6 veces semana<br><input type="radio"/> 1 vez al día<br><input type="radio"/> 2 a 3 veces al día<br><input type="radio"/> 5 a 6 veces al día<br><input type="radio"/> más 6 veces al día |

|                           |                                                                                                                                                                                                                                                                                                                                                                                                              |
|---------------------------|--------------------------------------------------------------------------------------------------------------------------------------------------------------------------------------------------------------------------------------------------------------------------------------------------------------------------------------------------------------------------------------------------------------|
| galletas chocolate        | <input type="radio"/> Nunca o menos 1 vez al mes<br><input type="radio"/> 1 a 3 veces mes<br><input checked="" type="radio"/> 1 vez semana<br><input type="radio"/> 2 a 4 veces semana<br><input type="radio"/> 5 a 6 veces semana<br><input type="radio"/> 1 vez al día<br><input type="radio"/> 2 a 3 veces al día<br><input type="radio"/> 5 a 6 veces al día<br><input type="radio"/> más 6 veces al día |
| bollieria                 | <input type="radio"/> Nunca o menos 1 vez al mes<br><input type="radio"/> 1 a 3 veces mes<br><input checked="" type="radio"/> 1 vez semana<br><input type="radio"/> 2 a 4 veces semana<br><input type="radio"/> 5 a 6 veces semana<br><input type="radio"/> 1 vez al día<br><input type="radio"/> 2 a 3 veces al día<br><input type="radio"/> 5 a 6 veces al día<br><input type="radio"/> más 6 veces al día |
| chocolate o bombones      | <input checked="" type="radio"/> Nunca o menos 1 vez al mes<br><input type="radio"/> 1 a 3 veces mes<br><input type="radio"/> 1 vez semana<br><input type="radio"/> 2 a 4 veces semana<br><input type="radio"/> 5 a 6 veces semana<br><input type="radio"/> 1 vez al día<br><input type="radio"/> 2 a 3 veces al día<br><input type="radio"/> 5 a 6 veces al día<br><input type="radio"/> más 6 veces al día |
| chocolate polvo o colacao | <input type="radio"/> Nunca o menos 1 vez al mes<br><input type="radio"/> 1 a 3 veces mes<br><input type="radio"/> 1 vez semana<br><input type="radio"/> 2 a 4 veces semana<br><input type="radio"/> 5 a 6 veces semana<br><input checked="" type="radio"/> 1 vez al día<br><input type="radio"/> 2 a 3 veces al día<br><input type="radio"/> 5 a 6 veces al día<br><input type="radio"/> más 6 veces al día |
| vino tinto                | <input checked="" type="radio"/> Nunca o menos 1 vez al mes<br><input type="radio"/> 1 a 3 veces mes<br><input type="radio"/> 1 vez semana<br><input type="radio"/> 2 a 4 veces semana<br><input type="radio"/> 5 a 6 veces semana<br><input type="radio"/> 1 vez al día<br><input type="radio"/> 2 a 3 veces al día<br><input type="radio"/> 5 a 6 veces al día<br><input type="radio"/> más 6 veces al día |
| vino blanco               | <input checked="" type="radio"/> Nunca o menos 1 vez al mes<br><input type="radio"/> 1 a 3 veces mes<br><input type="radio"/> 1 vez semana<br><input type="radio"/> 2 a 4 veces semana<br><input type="radio"/> 5 a 6 veces semana<br><input type="radio"/> 1 vez al día<br><input type="radio"/> 2 a 3 veces al día<br><input type="radio"/> 5 a 6 veces al día<br><input type="radio"/> más 6 veces al día |

---

|                    |                                                                                                                                                                                                                                                                                                                                                                                                              |
|--------------------|--------------------------------------------------------------------------------------------------------------------------------------------------------------------------------------------------------------------------------------------------------------------------------------------------------------------------------------------------------------------------------------------------------------|
| vino seco o vermut | <input checked="" type="radio"/> Nunca o menos 1 vez al mes<br><input type="radio"/> 1 a 3 veces mes<br><input type="radio"/> 1 vez semana<br><input type="radio"/> 2 a 4 veces semana<br><input type="radio"/> 5 a 6 veces semana<br><input type="radio"/> 1 vez al día<br><input type="radio"/> 2 a 3 veces al día<br><input type="radio"/> 5 a 6 veces al día<br><input type="radio"/> más 6 veces al día |
|--------------------|--------------------------------------------------------------------------------------------------------------------------------------------------------------------------------------------------------------------------------------------------------------------------------------------------------------------------------------------------------------------------------------------------------------|

---

|         |                                                                                                                                                                                                                                                                                                                                                                                                              |
|---------|--------------------------------------------------------------------------------------------------------------------------------------------------------------------------------------------------------------------------------------------------------------------------------------------------------------------------------------------------------------------------------------------------------------|
| cerveza | <input checked="" type="radio"/> Nunca o menos 1 vez al mes<br><input type="radio"/> 1 a 3 veces mes<br><input type="radio"/> 1 vez semana<br><input type="radio"/> 2 a 4 veces semana<br><input type="radio"/> 5 a 6 veces semana<br><input type="radio"/> 1 vez al día<br><input type="radio"/> 2 a 3 veces al día<br><input type="radio"/> 5 a 6 veces al día<br><input type="radio"/> más 6 veces al día |
|---------|--------------------------------------------------------------------------------------------------------------------------------------------------------------------------------------------------------------------------------------------------------------------------------------------------------------------------------------------------------------------------------------------------------------|

---

|                     |                                                                                                                                                                                                                                                                                                                                                                                                              |
|---------------------|--------------------------------------------------------------------------------------------------------------------------------------------------------------------------------------------------------------------------------------------------------------------------------------------------------------------------------------------------------------------------------------------------------------|
| cerveza sin alcohol | <input type="radio"/> Nunca o menos 1 vez al mes<br><input checked="" type="radio"/> 1 a 3 veces mes<br><input type="radio"/> 1 vez semana<br><input type="radio"/> 2 a 4 veces semana<br><input type="radio"/> 5 a 6 veces semana<br><input type="radio"/> 1 vez al día<br><input type="radio"/> 2 a 3 veces al día<br><input type="radio"/> 5 a 6 veces al día<br><input type="radio"/> más 6 veces al día |
|---------------------|--------------------------------------------------------------------------------------------------------------------------------------------------------------------------------------------------------------------------------------------------------------------------------------------------------------------------------------------------------------------------------------------------------------|

---

|         |                                                                                                                                                                                                                                                                                                                                                                                                              |
|---------|--------------------------------------------------------------------------------------------------------------------------------------------------------------------------------------------------------------------------------------------------------------------------------------------------------------------------------------------------------------------------------------------------------------|
| licores | <input checked="" type="radio"/> Nunca o menos 1 vez al mes<br><input type="radio"/> 1 a 3 veces mes<br><input type="radio"/> 1 vez semana<br><input type="radio"/> 2 a 4 veces semana<br><input type="radio"/> 5 a 6 veces semana<br><input type="radio"/> 1 vez al día<br><input type="radio"/> 2 a 3 veces al día<br><input type="radio"/> 5 a 6 veces al día<br><input type="radio"/> más 6 veces al día |
|---------|--------------------------------------------------------------------------------------------------------------------------------------------------------------------------------------------------------------------------------------------------------------------------------------------------------------------------------------------------------------------------------------------------------------|

---

|                       |                                                                                                                                                                                                                                                                                                                                                                                                              |
|-----------------------|--------------------------------------------------------------------------------------------------------------------------------------------------------------------------------------------------------------------------------------------------------------------------------------------------------------------------------------------------------------------------------------------------------------|
| ginebra o ron o vodka | <input checked="" type="radio"/> Nunca o menos 1 vez al mes<br><input type="radio"/> 1 a 3 veces mes<br><input type="radio"/> 1 vez semana<br><input type="radio"/> 2 a 4 veces semana<br><input type="radio"/> 5 a 6 veces semana<br><input type="radio"/> 1 vez al día<br><input type="radio"/> 2 a 3 veces al día<br><input type="radio"/> 5 a 6 veces al día<br><input type="radio"/> más 6 veces al día |
|-----------------------|--------------------------------------------------------------------------------------------------------------------------------------------------------------------------------------------------------------------------------------------------------------------------------------------------------------------------------------------------------------------------------------------------------------|

---

|                 |                                                                                                                                                                                                                                                                                                                                                                                                              |
|-----------------|--------------------------------------------------------------------------------------------------------------------------------------------------------------------------------------------------------------------------------------------------------------------------------------------------------------------------------------------------------------------------------------------------------------|
| refresco normal | <input checked="" type="radio"/> Nunca o menos 1 vez al mes<br><input type="radio"/> 1 a 3 veces mes<br><input type="radio"/> 1 vez semana<br><input type="radio"/> 2 a 4 veces semana<br><input type="radio"/> 5 a 6 veces semana<br><input type="radio"/> 1 vez al día<br><input type="radio"/> 2 a 3 veces al día<br><input type="radio"/> 5 a 6 veces al día<br><input type="radio"/> más 6 veces al día |
|-----------------|--------------------------------------------------------------------------------------------------------------------------------------------------------------------------------------------------------------------------------------------------------------------------------------------------------------------------------------------------------------------------------------------------------------|

---

---

refresco sin azúcar

- ☐ Nunca o menos 1 vez al mes  
☐ 1 a 3 veces mes  
☐ 1 vez semana  
☒ 2 a 4 veces semana  
☐ 5 a 6 veces semana  
☐ 1 vez al día  
☐ 2 a 3 veces al día  
☐ 5 a 6 veces al día  
☐ más 6 veces al día

---

Agua del grifo

- ☒ Nunca o menos 1 vez al mes  
☐ 1 a 3 veces mes  
☐ 1 vez semana  
☐ 2 a 4 veces semana  
☐ 5 a 6 veces semana  
☐ 1 vez al día  
☐ 2 a 3 veces al día  
☐ 5 a 6 veces al día  
☐ más 6 veces al día

---

agua embotellada sin gas

- ☐ Nunca o menos 1 vez al mes  
☐ 1 a 3 veces mes  
☐ 1 vez semana  
☐ 2 a 4 veces semana  
☐ 5 a 6 veces semana  
☐ 1 vez al día  
☐ 2 a 3 veces al día  
☐ 5 a 6 veces al día  
☒ más 6 veces al día

---

agua embotellada con gas

- ☒ Nunca o menos 1 vez al mes  
☐ 1 a 3 veces mes  
☐ 1 vez semana  
☐ 2 a 4 veces semana  
☐ 5 a 6 veces semana  
☐ 1 vez al día  
☐ 2 a 3 veces al día  
☐ 5 a 6 veces al día  
☐ más 6 veces al día

---

zumو frutas embasado

- ☐ Nunca o menos 1 vez al mes  
☒ 1 a 3 veces mes  
☐ 1 vez semana  
☐ 2 a 4 veces semana  
☐ 5 a 6 veces semana  
☐ 1 vez al día  
☐ 2 a 3 veces al día  
☐ 5 a 6 veces al día  
☐ más 6 veces al día

---

cafe

- ☒ Nunca o menos 1 vez al mes  
☐ 1 a 3 veces mes  
☐ 1 vez semana  
☐ 2 a 4 veces semana  
☐ 5 a 6 veces semana  
☐ 1 vez al día  
☐ 2 a 3 veces al día  
☐ 5 a 6 veces al día  
☐ más 6 veces al día



|                       |                                                                                                                                                                                                                                                                                                                                                                                                              |
|-----------------------|--------------------------------------------------------------------------------------------------------------------------------------------------------------------------------------------------------------------------------------------------------------------------------------------------------------------------------------------------------------------------------------------------------------|
| cafe descafeinado     | <input checked="" type="radio"/> Nunca o menos 1 vez al mes<br><input type="radio"/> 1 a 3 veces mes<br><input type="radio"/> 1 vez semana<br><input type="radio"/> 2 a 4 veces semana<br><input type="radio"/> 5 a 6 veces semana<br><input type="radio"/> 1 vez al día<br><input type="radio"/> 2 a 3 veces al día<br><input type="radio"/> 5 a 6 veces al día<br><input type="radio"/> más 6 veces al día |
| te o infusión         | <input type="radio"/> Nunca o menos 1 vez al mes<br><input type="radio"/> 1 a 3 veces mes<br><input checked="" type="radio"/> 1 vez semana<br><input type="radio"/> 2 a 4 veces semana<br><input type="radio"/> 5 a 6 veces semana<br><input type="radio"/> 1 vez al día<br><input type="radio"/> 2 a 3 veces al día<br><input type="radio"/> 5 a 6 veces al día<br><input type="radio"/> más 6 veces al día |
| sopa o puré verduras  | <input type="radio"/> Nunca o menos 1 vez al mes<br><input type="radio"/> 1 a 3 veces mes<br><input checked="" type="radio"/> 1 vez semana<br><input type="radio"/> 2 a 4 veces semana<br><input type="radio"/> 5 a 6 veces semana<br><input type="radio"/> 1 vez al día<br><input type="radio"/> 2 a 3 veces al día<br><input type="radio"/> 5 a 6 veces al día<br><input type="radio"/> más 6 veces al día |
| croquetas pollo jamón | <input checked="" type="radio"/> Nunca o menos 1 vez al mes<br><input type="radio"/> 1 a 3 veces mes<br><input type="radio"/> 1 vez semana<br><input type="radio"/> 2 a 4 veces semana<br><input type="radio"/> 5 a 6 veces semana<br><input type="radio"/> 1 vez al día<br><input type="radio"/> 2 a 3 veces al día<br><input type="radio"/> 5 a 6 veces al día<br><input type="radio"/> más 6 veces al día |
| croquetas pescado     | <input checked="" type="radio"/> Nunca o menos 1 vez al mes<br><input type="radio"/> 1 a 3 veces mes<br><input type="radio"/> 1 vez semana<br><input type="radio"/> 2 a 4 veces semana<br><input type="radio"/> 5 a 6 veces semana<br><input type="radio"/> 1 vez al día<br><input type="radio"/> 2 a 3 veces al día<br><input type="radio"/> 5 a 6 veces al día<br><input type="radio"/> más 6 veces al día |
| mayonesa              | <input checked="" type="radio"/> Nunca o menos 1 vez al mes<br><input type="radio"/> 1 a 3 veces mes<br><input type="radio"/> 1 vez semana<br><input type="radio"/> 2 a 4 veces semana<br><input type="radio"/> 5 a 6 veces semana<br><input type="radio"/> 1 vez al día<br><input type="radio"/> 2 a 3 veces al día<br><input type="radio"/> 5 a 6 veces al día<br><input type="radio"/> más 6 veces al día |

---

salsa tomate

- ☐ Nunca o menos 1 vez al mes  
☒ 1 a 3 veces mes  
☐ 1 vez semana  
☐ 2 a 4 veces semana  
☐ 5 a 6 veces semana  
☐ 1 vez al día  
☐ 2 a 3 veces al día  
☐ 5 a 6 veces al día  
☐ más 6 veces al día

---

ketchup

- ☒ Nunca o menos 1 vez al mes  
☐ 1 a 3 veces mes  
☐ 1 vez semana  
☐ 2 a 4 veces semana  
☐ 5 a 6 veces semana  
☐ 1 vez al día  
☐ 2 a 3 veces al día  
☐ 5 a 6 veces al día  
☐ más 6 veces al día

---

sal

- ☐ Nunca o menos 1 vez al mes  
☐ 1 a 3 veces mes  
☐ 1 vez semana  
☐ 2 a 4 veces semana  
☐ 5 a 6 veces semana  
☐ 1 vez al día  
☒ 2 a 3 veces al día  
☐ 5 a 6 veces al día  
☐ más 6 veces al día

---

ajo

- ☐ Nunca o menos 1 vez al mes  
☐ 1 a 3 veces mes  
☒ 1 vez semana  
☐ 2 a 4 veces semana  
☐ 5 a 6 veces semana  
☐ 1 vez al día  
☐ 2 a 3 veces al día  
☐ 5 a 6 veces al día  
☐ más 6 veces al día

---

mermelada o miel

- ☒ Nunca o menos 1 vez al mes  
☐ 1 a 3 veces mes  
☐ 1 vez semana  
☐ 2 a 4 veces semana  
☐ 5 a 6 veces semana  
☐ 1 vez al día  
☐ 2 a 3 veces al día  
☐ 5 a 6 veces al día  
☐ más 6 veces al día

---

azúcar

- ☐ Nunca o menos 1 vez al mes  
☒ 1 a 3 veces mes  
☐ 1 vez semana  
☐ 2 a 4 veces semana  
☐ 5 a 6 veces semana  
☐ 1 vez al día  
☐ 2 a 3 veces al día  
☐ 5 a 6 veces al día  
☐ más 6 veces al día

|                                       |                                                                                                                                                                                                                                                                                                                                                                                                                                                                                                                               |
|---------------------------------------|-------------------------------------------------------------------------------------------------------------------------------------------------------------------------------------------------------------------------------------------------------------------------------------------------------------------------------------------------------------------------------------------------------------------------------------------------------------------------------------------------------------------------------|
| Otro alimento                         |                                                                                                                                                                                                                                                                                                                                                                                                                                                                                                                               |
| suplementos vitamínicos               | <input checked="" type="radio"/> si<br><input type="radio"/> no                                                                                                                                                                                                                                                                                                                                                                                                                                                               |
| suplementos vitamínicos               | [*DATA REMOVED*]                                                                                                                                                                                                                                                                                                                                                                                                                                                                                                              |
| dieta previa                          | <input type="radio"/> si<br><input checked="" type="radio"/> no                                                                                                                                                                                                                                                                                                                                                                                                                                                               |
| motivo dieta                          | <input checked="" type="radio"/> no dieta<br><input type="radio"/> control peso<br><input type="radio"/> control colesterol<br><input type="radio"/> control diabetes<br><input type="radio"/> problemas estómago<br><input type="radio"/> problemas vesícula o hepáticos<br><input type="radio"/> HTA o cardiopatía<br><input type="radio"/> problemas renales<br><input type="radio"/> alergia alimentaria<br><input type="radio"/> ácido úrico elevado<br><input type="radio"/> vegetariana<br><input type="radio"/> otros |
| cambio alimentos año previo gestación | <input checked="" type="radio"/> si<br><input type="radio"/> no                                                                                                                                                                                                                                                                                                                                                                                                                                                               |
| cambio lácteos                        | <input type="radio"/> eliminado<br><input type="radio"/> disminuido<br><input checked="" type="radio"/> igual<br><input type="radio"/> aumentado<br><input type="radio"/> no sabe                                                                                                                                                                                                                                                                                                                                             |
| cambio huevos                         | <input type="radio"/> eliminado<br><input type="radio"/> disminuido<br><input checked="" type="radio"/> igual<br><input type="radio"/> aumentado<br><input type="radio"/> no sabe                                                                                                                                                                                                                                                                                                                                             |
| cambio carne                          | <input type="radio"/> eliminado<br><input type="radio"/> disminuido<br><input checked="" type="radio"/> igual<br><input type="radio"/> aumentado<br><input type="radio"/> no sabe                                                                                                                                                                                                                                                                                                                                             |
| cambio pescado                        | <input type="radio"/> eliminado<br><input type="radio"/> disminuido<br><input checked="" type="radio"/> igual<br><input type="radio"/> aumentado<br><input type="radio"/> no sabe                                                                                                                                                                                                                                                                                                                                             |
| cambio verduras                       | <input type="radio"/> eliminado<br><input type="radio"/> disminuido<br><input checked="" type="radio"/> igual<br><input type="radio"/> aumentado<br><input type="radio"/> no sabe                                                                                                                                                                                                                                                                                                                                             |

|                            |                                                                                                                                                                                                                        |
|----------------------------|------------------------------------------------------------------------------------------------------------------------------------------------------------------------------------------------------------------------|
| cambio legumbres           | <input type="radio"/> eliminado<br><input type="radio"/> disminuido<br><input checked="" type="radio"/> igual<br><input type="radio"/> aumentado<br><input type="radio"/> no sabe                                      |
| cambio fruta               | <input type="radio"/> eliminado<br><input type="radio"/> disminuido<br><input checked="" type="radio"/> igual<br><input type="radio"/> aumentado<br><input type="radio"/> no sabe                                      |
| cambio pan                 | <input type="radio"/> eliminado<br><input type="radio"/> disminuido<br><input checked="" type="radio"/> igual<br><input type="radio"/> aumentado<br><input type="radio"/> no sabe                                      |
| cambio aceite oliva        | <input type="radio"/> eliminado<br><input type="radio"/> disminuido<br><input checked="" type="radio"/> igual<br><input type="radio"/> aumentado<br><input type="radio"/> no sabe                                      |
| cambio mante o margarina   | <input type="radio"/> eliminado<br><input type="radio"/> disminuido<br><input checked="" type="radio"/> igual<br><input type="radio"/> aumentado<br><input type="radio"/> no sabe                                      |
| cambio azúcar y dulces     | <input type="radio"/> eliminado<br><input type="radio"/> disminuido<br><input type="radio"/> igual<br><input checked="" type="radio"/> aumentado<br><input type="radio"/> no sabe                                      |
| cambio bebidas alcohólicas | <input checked="" type="radio"/> eliminado<br><input type="radio"/> disminuido<br><input type="radio"/> igual<br><input type="radio"/> aumentado<br><input type="radio"/> no sabe                                      |
| frecuencia comidas fritas  | <input type="radio"/> a diario<br><input type="radio"/> 5 a 6 veces semana<br><input type="radio"/> 2 a 4 veces semana<br><input type="radio"/> 1 vez semana<br><input checked="" type="radio"/> menos de 1 vez semana |
| carne                      | <input type="radio"/> no como<br><input type="radio"/> cruda<br><input type="radio"/> poco hecha<br><input type="radio"/> hecha<br><input checked="" type="radio"/> muy hecha                                          |
| grasa visible carne        | <input type="radio"/> quita toda<br><input type="radio"/> quita mayoría<br><input checked="" type="radio"/> quita un poco<br><input type="radio"/> no quita nada                                                       |

|                                |                                                                                                                                                                                                                                                          |
|--------------------------------|----------------------------------------------------------------------------------------------------------------------------------------------------------------------------------------------------------------------------------------------------------|
| cocina carne                   | <input checked="" type="radio"/> a la plancha<br><input type="radio"/> a la parrilla<br><input type="radio"/> asada<br><input type="radio"/> frita<br><input type="radio"/> guisada                                                                      |
| tostado quemado carne          | <input type="radio"/> nunca<br><input type="radio"/> 1 vez mes<br><input type="radio"/> 2 a 3 veces mes<br><input checked="" type="radio"/> 1 vez semana<br><input type="radio"/> 2 a 3 semanas                                                          |
| tostado quemado pescado        | <input type="radio"/> nunca<br><input type="radio"/> 1 vez mes<br><input type="radio"/> 2 a 3 veces mes<br><input checked="" type="radio"/> 1 vez semana<br><input type="radio"/> 2 a 3 semanas                                                          |
| socarrat paella                | <input type="radio"/> nunca<br><input type="radio"/> 1 vez mes<br><input type="radio"/> 2 a 3 veces mes<br><input checked="" type="radio"/> 1 vez semana<br><input type="radio"/> 2 a 3 semanas                                                          |
| grasa o aceite cocinar         | <input type="radio"/> mantequilla<br><input type="radio"/> margarina<br><input type="radio"/> aceite oliva<br><input checked="" type="radio"/> aceite oliva virgen extra<br><input type="radio"/> aceite vegetal<br><input type="radio"/> mezcla aceites |
| grasa aceite aliñar            | <input type="radio"/> mantequilla<br><input type="radio"/> margarina<br><input type="radio"/> aceite oliva<br><input checked="" type="radio"/> aceite oliva virgen extra<br><input type="radio"/> aceite vegetal<br><input type="radio"/> mezcla aceites |
| grasa aceite freir             | <input type="radio"/> mantequilla<br><input type="radio"/> margarina<br><input type="radio"/> aceite oliva<br><input type="radio"/> aceite oliva virgen extra<br><input type="radio"/> aceite vegetal<br><input type="radio"/> mezcla aceites            |
| Ejercicio cuestionario         | <input checked="" type="radio"/> si<br><input type="radio"/> no                                                                                                                                                                                          |
| horas de sueño incluido siesta | [*DATA REMOVED*]                                                                                                                                                                                                                                         |
| minutos siesta                 | [*DATA REMOVED*]                                                                                                                                                                                                                                         |
| horas televisión semana        | [*DATA REMOVED*]                                                                                                                                                                                                                                         |

|                                        |                                                                                                                                                                                                                                                                                                                                                                           |
|----------------------------------------|---------------------------------------------------------------------------------------------------------------------------------------------------------------------------------------------------------------------------------------------------------------------------------------------------------------------------------------------------------------------------|
| actividad trabajo                      | <input checked="" type="radio"/> casi siempre sentado<br><input type="radio"/> sentado 50 por cien<br><input type="radio"/> casi siempre de pie, quieto<br><input type="radio"/> casi siempre levantado caminando y llevando pocas cosas<br><input type="radio"/> casi siempre levantado, caminando y llevado muchas cosas<br><input type="radio"/> trabajo manual pesado |
| tiempo caminar o bici al día           | <input type="radio"/> casi nunca<br><input type="radio"/> menos 20min día<br><input type="radio"/> 20 a 40 min día<br><input checked="" type="radio"/> 40 a 60 min día<br><input type="radio"/> 1h o 1h y media día<br><input type="radio"/> más de 1h y media al día                                                                                                     |
| tiempo tareas casa al día              | <input type="radio"/> menos de 1h día<br><input checked="" type="radio"/> 1 a 2h día<br><input type="radio"/> 3 a 4h día<br><input type="radio"/> 5 a 6h día<br><input type="radio"/> 7 a 8h día<br><input type="radio"/> más de 8h día                                                                                                                                   |
| tiempo libre televisión ordenador leer | <input type="radio"/> menos 1h día<br><input type="radio"/> 1h día<br><input checked="" type="radio"/> 2h día<br><input type="radio"/> 3h día<br><input type="radio"/> 4h día<br><input type="radio"/> 5 a 6h día<br><input type="radio"/> mas 6h día                                                                                                                     |
| tiempo libre ejercicio o deporte       | <input type="radio"/> menos 1h semana<br><input type="radio"/> 1h semana<br><input type="radio"/> 2h semana<br><input checked="" type="radio"/> 3h semana<br><input type="radio"/> 4 a 5h semana<br><input type="radio"/> mas 5h semana                                                                                                                                   |
| como se considera                      | <input type="radio"/> sedentaria<br><input type="radio"/> poco activa<br><input checked="" type="radio"/> moderadamente activa<br><input type="radio"/> bastante activa<br><input type="radio"/> muy activa<br><input type="radio"/> no sabe                                                                                                                              |
| FUR                                    | [*DATA REMOVED*]                                                                                                                                                                                                                                                                                                                                                          |
| Semanas gestación 2T                   | [*DATA REMOVED*]                                                                                                                                                                                                                                                                                                                                                          |
| Días gestación 2T                      | [*DATA REMOVED*]                                                                                                                                                                                                                                                                                                                                                          |
| DBP 2T                                 | [*DATA REMOVED*]                                                                                                                                                                                                                                                                                                                                                          |
| CC 2T                                  | [*DATA REMOVED*]                                                                                                                                                                                                                                                                                                                                                          |
| AC 2T                                  | [*DATA REMOVED*]                                                                                                                                                                                                                                                                                                                                                          |

|                                                   |                                                                                                                                                                                                 |
|---------------------------------------------------|-------------------------------------------------------------------------------------------------------------------------------------------------------------------------------------------------|
| LF 2T                                             | [*DATA REMOVED*]                                                                                                                                                                                |
| PFE 2T (Hadlock)                                  | [*DATA REMOVED*]                                                                                                                                                                                |
| Semanas gestación 3T                              | [*DATA REMOVED*]                                                                                                                                                                                |
| días 3T                                           | [*DATA REMOVED*]                                                                                                                                                                                |
| DBP 3T                                            | [*DATA REMOVED*]                                                                                                                                                                                |
| CC 3T                                             | [*DATA REMOVED*]                                                                                                                                                                                |
| AC 3T                                             | [*DATA REMOVED*]                                                                                                                                                                                |
| LF 3T                                             | [*DATA REMOVED*]                                                                                                                                                                                |
| PFE 3T (Hadlock)                                  | [*DATA REMOVED*]                                                                                                                                                                                |
| Semanas de gestación final                        | [*DATA REMOVED*]                                                                                                                                                                                |
| días gestación final                              | [*DATA REMOVED*]                                                                                                                                                                                |
| Localización placenta                             | <input checked="" type="radio"/> anterior<br><input type="radio"/> lateral derecha<br><input type="radio"/> lateral izquierda<br><input type="radio"/> posterior<br><input type="radio"/> fondo |
| Presentación longitudinal cefálica                | <input type="radio"/> no<br><input checked="" type="radio"/> si                                                                                                                                 |
| Dorso                                             | <input type="radio"/> izquierda anterior<br><input checked="" type="radio"/> izquierda posterior<br><input type="radio"/> derecha anterior<br><input type="radio"/> derecha posterior           |
| diámetro biparietal                               | [*DATA REMOVED*]                                                                                                                                                                                |
| Circunferencia craneal                            | [*DATA REMOVED*]                                                                                                                                                                                |
| Circunferencia abdominal                          | [*DATA REMOVED*]                                                                                                                                                                                |
| Longitud de femur                                 | [*DATA REMOVED*]                                                                                                                                                                                |
| tejido celular subcutáneo a nivel del muslo en mm | [*DATA REMOVED*]                                                                                                                                                                                |
| tejido celular subcutáneo en abdomen en mm        | [*DATA REMOVED*]                                                                                                                                                                                |
| Volumen del muslo en cm3                          | [*DATA REMOVED*]                                                                                                                                                                                |
| Peso fetal estimado según fórmula de Hadlock      | [*DATA REMOVED*]                                                                                                                                                                                |

|                                               |                                                                                                                                                          |
|-----------------------------------------------|----------------------------------------------------------------------------------------------------------------------------------------------------------|
| Percentil                                     | [*DATA REMOVED*]                                                                                                                                         |
| Peso fetal estimado según fórmula de Scioscia | <hr/>                                                                                                                                                    |
| Peso fetal estimado según fórmula de LEE      | <hr/>                                                                                                                                                    |
| Tipo de parto                                 | <input checked="" type="radio"/> eutocico<br><input type="radio"/> instrumentado/ventosa<br><input type="radio"/> cesarea                                |
| fecha de nacimiento                           | [*DATA REMOVED*]                                                                                                                                         |
| Días entre exploración y nacimiento           | [*DATA REMOVED*]                                                                                                                                         |
| Peso RN en g                                  | [*DATA REMOVED*]                                                                                                                                         |
| sexo                                          | <input checked="" type="radio"/> mujer<br><input type="radio"/> hombre                                                                                   |
| Apgar 1 minuto                                | [*DATA REMOVED*]                                                                                                                                         |
| Apgar 5 minutos                               | [*DATA REMOVED*]                                                                                                                                         |
| Apgar 10 minutos                              | <hr/>                                                                                                                                                    |
| antecedente Covid durante gestación           | <input type="radio"/> Yes<br><input checked="" type="radio"/> No                                                                                         |
| Nivel de estudios                             | <input type="radio"/> ninguno<br><input type="radio"/> primarios<br><input type="radio"/> secundarios<br><input checked="" type="radio"/> universitarios |



## Base\_datos\_estimacion\_peso\_fetal

|                                       |                                                                                                                                                                                                                                                                                      |
|---------------------------------------|--------------------------------------------------------------------------------------------------------------------------------------------------------------------------------------------------------------------------------------------------------------------------------------|
| Número de identificación participante | 148                                                                                                                                                                                                                                                                                  |
| CODIGO PARTICIPANTE                   |                                                                                                                                                                                                                                                                                      |
| Edad                                  | [*DATA REMOVED*]                                                                                                                                                                                                                                                                     |
| Gestaciones                           | <input type="radio"/> 1<br><input type="radio"/> 2<br><input type="radio"/> 3<br><input checked="" type="radio"/> mas de 3                                                                                                                                                           |
| partos                                | <input type="radio"/> 0<br><input type="radio"/> 1<br><input type="radio"/> 2<br><input checked="" type="radio"/> 3<br><input type="radio"/> mas de 3                                                                                                                                |
| cesáreas                              | <input checked="" type="radio"/> 0<br><input type="radio"/> 1<br><input type="radio"/> 2<br><input type="radio"/> 3<br><input type="radio"/> mas de 3                                                                                                                                |
| Abortos                               | <input type="radio"/> 0<br><input type="radio"/> 1<br><input checked="" type="radio"/> 2<br><input type="radio"/> 3<br><input type="radio"/> mas de 3                                                                                                                                |
| Tipo de gestacion                     | <input checked="" type="radio"/> espontanea<br><input type="radio"/> IAC inseminación artificial conyuge<br><input type="radio"/> IAD inseminación artificial donante<br><input type="radio"/> FIV Fecundación in Vitro<br><input type="radio"/> Ovodon FIV con donación de ovocitos |
| peso previo a embarazo                | [*DATA REMOVED*]                                                                                                                                                                                                                                                                     |
| Ganancia ponderal embarazo            |                                                                                                                                                                                                                                                                                      |
| Talla madre                           | [*DATA REMOVED*]                                                                                                                                                                                                                                                                     |
| IMC previo embarazo                   | 21.453573713726524                                                                                                                                                                                                                                                                   |
| Patología obstétrica                  | <input checked="" type="radio"/> no<br><input type="radio"/> si                                                                                                                                                                                                                      |
| Diabetes pregestacional               | <input checked="" type="radio"/> no<br><input type="radio"/> si                                                                                                                                                                                                                      |
| Diabetes gestacional                  | <input checked="" type="radio"/> no<br><input type="radio"/> si                                                                                                                                                                                                                      |

|                                            |                                                                                                                                                                                      |
|--------------------------------------------|--------------------------------------------------------------------------------------------------------------------------------------------------------------------------------------|
| Diabetes gestacional con insulina          | <input checked="" type="radio"/> no<br><input type="radio"/> si                                                                                                                      |
| Diabetes gestacional con dieta y ejercicio | <input checked="" type="radio"/> no<br><input type="radio"/> si                                                                                                                      |
| Percentil fetos previos                    | <input type="radio"/> Nada<br><input type="radio"/> percentil menor de 10<br><input checked="" type="radio"/> percentil entre 10 y 90<br><input type="radio"/> percentil mayor de 90 |
| Exfumadora                                 | <input checked="" type="radio"/> Nada<br><input type="radio"/> menos de 5 años<br><input type="radio"/> 5 a 10 años<br><input type="radio"/> mayor o igual a 10 años                 |
| Hábito tabáquico                           | <input checked="" type="radio"/> no<br><input type="radio"/> si                                                                                                                      |
| fumadora                                   | [*DATA REMOVED*]                                                                                                                                                                     |
| Consumo otros tóxicos                      | <input checked="" type="radio"/> no<br><input type="radio"/> si                                                                                                                      |
| Hb 1T                                      | _____                                                                                                                                                                                |
| Htc 1T                                     | _____                                                                                                                                                                                |
| Hb 2T                                      | _____                                                                                                                                                                                |
| HTC 2T                                     | _____                                                                                                                                                                                |
| Hb 3T                                      | _____                                                                                                                                                                                |
| HTC 3T                                     | _____                                                                                                                                                                                |
| Suplemento FE oral                         | <input checked="" type="radio"/> si<br><input type="radio"/> no                                                                                                                      |
| Suplemento fe iv                           | <input type="radio"/> si<br><input checked="" type="radio"/> no                                                                                                                      |
| Transfusión                                | <input checked="" type="radio"/> no<br><input type="radio"/> si                                                                                                                      |
| Solicitada Vit D                           | <input type="radio"/> no<br><input checked="" type="radio"/> si                                                                                                                      |

|                       |                                                                                                                                                                                                                                                                                                                                                                                                              |
|-----------------------|--------------------------------------------------------------------------------------------------------------------------------------------------------------------------------------------------------------------------------------------------------------------------------------------------------------------------------------------------------------------------------------------------------------|
| Deficit vit D         | <input type="radio"/> no<br><input checked="" type="radio"/> si                                                                                                                                                                                                                                                                                                                                              |
| Suplemento vit D      | <input checked="" type="radio"/> si<br><input type="radio"/> no                                                                                                                                                                                                                                                                                                                                              |
| Dieta, cuestionario   | <input checked="" type="radio"/> si<br><input type="radio"/> no                                                                                                                                                                                                                                                                                                                                              |
| Leche entera          | <input type="radio"/> Nunca o menos 1 vez al mes<br><input type="radio"/> 1 a 3 veces mes<br><input type="radio"/> 1 vez semana<br><input type="radio"/> 2 a 4 veces semana<br><input type="radio"/> 5 a 6 veces semana<br><input checked="" type="radio"/> 1 vez al día<br><input type="radio"/> 2 a 3 veces al día<br><input type="radio"/> 5 a 6 veces al día<br><input type="radio"/> más 6 veces al día |
| Leche semidesnatada   | <input checked="" type="radio"/> Nunca o menos 1 vez al mes<br><input type="radio"/> 1 a 3 veces mes<br><input type="radio"/> 1 vez semana<br><input type="radio"/> 2 a 4 veces semana<br><input type="radio"/> 5 a 6 veces semana<br><input type="radio"/> 1 vez al día<br><input type="radio"/> 2 a 3 veces al día<br><input type="radio"/> 5 a 6 veces al día<br><input type="radio"/> mas 6 veces al día |
| Leche desnatada       | <input checked="" type="radio"/> Nunca o menos 1 vez al mes<br><input type="radio"/> 1 a 3 veces mes<br><input type="radio"/> 1 vez semana<br><input type="radio"/> 2 a 4 veces semana<br><input type="radio"/> 5 a 6 veces semana<br><input type="radio"/> 1 vez al día<br><input type="radio"/> 2 a 3 veces al día<br><input type="radio"/> 5 a 6 veces al día<br><input type="radio"/> más 6 veces al día |
| Leche condensada      | <input checked="" type="radio"/> Nunca o menos 1 vez al mes<br><input type="radio"/> 1 a 3 veces mes<br><input type="radio"/> 1 vez semana<br><input type="radio"/> 2 a 4 veces semana<br><input type="radio"/> 5 a 6 veces semana<br><input type="radio"/> 1 vez al día<br><input type="radio"/> 2 a 3 veces al día<br><input type="radio"/> 5 a 6 veces al día<br><input type="radio"/> más 6 veces al día |
| nata o crema de leche | <input type="radio"/> Nunca o menos 1 vez al mes<br><input checked="" type="radio"/> 1 a 3 veces mes<br><input type="radio"/> 1 vez semana<br><input type="radio"/> 2 a 4 veces semana<br><input type="radio"/> 5 a 6 veces semana<br><input type="radio"/> 1 vez al día<br><input type="radio"/> 2 a 3 veces al día<br><input type="radio"/> 5 a 6 veces al día<br><input type="radio"/> más 6 veces al día |

---

Yogurt Entero

- ☐ Nunca o menos 1 vez al mes  
☐ 1 a 3 veces mes  
☒ 1 vez semana  
☐ 2 a 4 veces semana  
☐ 5 a 6 veces semana  
☐ 1 vez al día  
☐ 2 a 3 veces al día  
☐ 5 a 6 veces al día  
☐ más 6 veces al día

---

Yogurt desnatado

- ☒ Nunca o menos 1 vez al mes  
☐ 1 a 3 veces mes  
☐ 1 vez semana  
☐ 2 a 4 veces semana  
☐ 5 a 6 veces semana  
☐ 1 vez al día  
☐ 2 a 3 veces al día  
☐ 5 a 6 veces al día  
☐ más 6 veces al día

---

100g requesón o queso blando o queso fresco

- ☐ Nunca o menos 1 vez al mes  
☐ 1 a 3 veces mes  
☐ 1 vez semana  
☒ 2 a 4 veces semana  
☐ 5 a 6 veces semana  
☐ 1 vez al día  
☐ 2 a 3 veces al día  
☐ 5 a 6 veces al día  
☐ más 6 veces al día

---

queso curado o semicurado o cremoso

- ☐ Nunca o menos 1 vez al mes  
☐ 1 a 3 veces mes  
☒ 1 vez semana  
☐ 2 a 4 veces semana  
☐ 5 a 6 veces semana  
☐ 1 vez al día  
☐ 2 a 3 veces al día  
☐ 5 a 6 veces al día  
☐ más 6 veces al día

---

natillas flan pudding

- ☒ Nunca o menos 1 vez al mes  
☐ 1 a 3 veces mes  
☐ 1 vez semana  
☐ 2 a 4 veces semana  
☐ 5 a 6 veces semana  
☐ 1 vez al día  
☐ 2 a 3 veces al día  
☐ 5 a 6 veces al día  
☐ más 6 veces al día

---

Helado

- ☒ Nunca o menos 1 vez al mes  
☐ 1 a 3 veces mes  
☐ 1 vez semana  
☐ 2 a 4 veces semana  
☐ 5 a 6 veces semana  
☐ 1 vez al día  
☐ 2 a 3 veces al día  
☐ 5 a 6 veces al día  
☐ más 6 veces al día

|                                      |                                                                                                                                                                                                                                                                                                                                                                                                              |
|--------------------------------------|--------------------------------------------------------------------------------------------------------------------------------------------------------------------------------------------------------------------------------------------------------------------------------------------------------------------------------------------------------------------------------------------------------------|
| huevo                                | <input type="radio"/> Nunca o menos 1 vez al mes<br><input type="radio"/> 1 a 3 veces mes<br><input type="radio"/> 1 vez semana<br><input type="radio"/> 2 a 4 veces semana<br><input type="radio"/> 5 a 6 veces semana<br><input checked="" type="radio"/> 1 vez al día<br><input type="radio"/> 2 a 3 veces al día<br><input type="radio"/> 5 a 6 veces al día<br><input type="radio"/> más 6 veces al día |
| Pollo con piel                       | <input checked="" type="radio"/> Nunca o menos 1 vez al mes<br><input type="radio"/> 1 a 3 veces mes<br><input type="radio"/> 1 vez semana<br><input type="radio"/> 2 a 4 veces semana<br><input type="radio"/> 5 a 6 veces semana<br><input type="radio"/> 1 vez al día<br><input type="radio"/> 2 a 3 veces al día<br><input type="radio"/> 5 a 6 veces al día<br><input type="radio"/> más 6 veces al día |
| pollo sin piel                       | <input type="radio"/> Nunca o menos 1 vez al mes<br><input type="radio"/> 1 a 3 veces mes<br><input checked="" type="radio"/> 1 vez semana<br><input type="radio"/> 2 a 4 veces semana<br><input type="radio"/> 5 a 6 veces semana<br><input type="radio"/> 1 vez al día<br><input type="radio"/> 2 a 3 veces al día<br><input type="radio"/> 5 a 6 veces al día<br><input type="radio"/> más 6 veces al día |
| Ternera o cerdo o cordero            | <input type="radio"/> Nunca o menos 1 vez al mes<br><input checked="" type="radio"/> 1 a 3 veces mes<br><input type="radio"/> 1 vez semana<br><input type="radio"/> 2 a 4 veces semana<br><input type="radio"/> 5 a 6 veces semana<br><input type="radio"/> 1 vez al día<br><input type="radio"/> 2 a 3 veces al día<br><input type="radio"/> 5 a 6 veces al día<br><input type="radio"/> más 6 veces al día |
| carne caza: Conejo o codorniz o pato | <input checked="" type="radio"/> Nunca o menos 1 vez al mes<br><input type="radio"/> 1 a 3 veces mes<br><input type="radio"/> 1 vez semana<br><input type="radio"/> 2 a 4 veces semana<br><input type="radio"/> 5 a 6 veces semana<br><input type="radio"/> 1 vez al día<br><input type="radio"/> 2 a 3 veces al día<br><input type="radio"/> 5 a 6 veces al día<br><input type="radio"/> más 6 veces al día |
| Hígado de ternera o cerdo o pollo    | <input checked="" type="radio"/> Nunca o menos 1 vez al mes<br><input type="radio"/> 1 a 3 veces mes<br><input type="radio"/> 1 vez semana<br><input type="radio"/> 2 a 4 veces semana<br><input type="radio"/> 5 a 6 veces semana<br><input type="radio"/> 1 vez al día<br><input type="radio"/> 2 a 3 veces al día<br><input type="radio"/> 5 a 6 veces al día<br><input type="radio"/> más 6 veces al día |

|                     |                                                                                                                                                                                                                                                                                                                                                                                                              |
|---------------------|--------------------------------------------------------------------------------------------------------------------------------------------------------------------------------------------------------------------------------------------------------------------------------------------------------------------------------------------------------------------------------------------------------------|
| Vísceras            | <input checked="" type="radio"/> Nunca o menos 1 vez al mes<br><input type="radio"/> 1 a 3 veces mes<br><input type="radio"/> 1 vez semana<br><input type="radio"/> 2 a 4 veces semana<br><input type="radio"/> 5 a 6 veces semana<br><input type="radio"/> 1 vez al día<br><input type="radio"/> 2 a 3 veces al día<br><input type="radio"/> 5 a 6 veces al día<br><input type="radio"/> más 6 veces al día |
| Embutido            | <input checked="" type="radio"/> Nunca o menos 1 vez al mes<br><input type="radio"/> 1 a 3 veces mes<br><input type="radio"/> 1 vez semana<br><input type="radio"/> 2 a 4 veces semana<br><input type="radio"/> 5 a 6 veces semana<br><input type="radio"/> 1 vez al día<br><input type="radio"/> 2 a 3 veces al día<br><input type="radio"/> 5 a 6 veces al día<br><input type="radio"/> más 6 veces al día |
| Salchicha o similar | <input checked="" type="radio"/> Nunca o menos 1 vez al mes<br><input type="radio"/> 1 a 3 veces mes<br><input type="radio"/> 1 vez semana<br><input type="radio"/> 2 a 4 veces semana<br><input type="radio"/> 5 a 6 veces semana<br><input type="radio"/> 1 vez al día<br><input type="radio"/> 2 a 3 veces al día<br><input type="radio"/> 5 a 6 veces al día<br><input type="radio"/> más 6 veces al día |
| Pate o foiegras     | <input checked="" type="radio"/> Nunca o menos 1 vez al mes<br><input type="radio"/> 1 a 3 veces mes<br><input type="radio"/> 1 vez semana<br><input type="radio"/> 2 a 4 veces semana<br><input type="radio"/> 5 a 6 veces semana<br><input type="radio"/> 1 vez al día<br><input type="radio"/> 2 a 3 veces al día<br><input type="radio"/> 5 a 6 veces al día<br><input type="radio"/> más 6 veces al día |
| Hamburguesa         | <input type="radio"/> Nunca o menos 1 vez al mes<br><input type="radio"/> 1 a 3 veces mes<br><input checked="" type="radio"/> 1 vez semana<br><input type="radio"/> 2 a 4 veces semana<br><input type="radio"/> 5 a 6 veces semana<br><input type="radio"/> 1 vez al día<br><input type="radio"/> 2 a 3 veces al día<br><input type="radio"/> 5 a 6 veces al día<br><input type="radio"/> más 6 veces al día |
| tocino o bacon      | <input checked="" type="radio"/> Nunca o menos 1 vez al mes<br><input type="radio"/> 1 a 3 veces mes<br><input type="radio"/> 1 vez semana<br><input type="radio"/> 2 a 4 veces semana<br><input type="radio"/> 5 a 6 veces semana<br><input type="radio"/> 1 vez al día<br><input type="radio"/> 2 a 3 veces al día<br><input type="radio"/> 5 a 6 veces al día<br><input type="radio"/> más 6 veces al día |

---

|               |                                                                                                                                                                                                                                                                                                                                                                                                              |
|---------------|--------------------------------------------------------------------------------------------------------------------------------------------------------------------------------------------------------------------------------------------------------------------------------------------------------------------------------------------------------------------------------------------------------------|
| Pescado frito | <input checked="" type="radio"/> Nunca o menos 1 vez al mes<br><input type="radio"/> 1 a 3 veces mes<br><input type="radio"/> 1 vez semana<br><input type="radio"/> 2 a 4 veces semana<br><input type="radio"/> 5 a 6 veces semana<br><input type="radio"/> 1 vez al día<br><input type="radio"/> 2 a 3 veces al día<br><input type="radio"/> 5 a 6 veces al día<br><input type="radio"/> más 6 veces al día |
|---------------|--------------------------------------------------------------------------------------------------------------------------------------------------------------------------------------------------------------------------------------------------------------------------------------------------------------------------------------------------------------------------------------------------------------|

---

|                        |                                                                                                                                                                                                                                                                                                                                                                                                              |
|------------------------|--------------------------------------------------------------------------------------------------------------------------------------------------------------------------------------------------------------------------------------------------------------------------------------------------------------------------------------------------------------------------------------------------------------|
| pescado hervido blanco | <input type="radio"/> Nunca o menos 1 vez al mes<br><input type="radio"/> 1 a 3 veces mes<br><input checked="" type="radio"/> 1 vez semana<br><input type="radio"/> 2 a 4 veces semana<br><input type="radio"/> 5 a 6 veces semana<br><input type="radio"/> 1 vez al día<br><input type="radio"/> 2 a 3 veces al día<br><input type="radio"/> 5 a 6 veces al día<br><input type="radio"/> más 6 veces al día |
|------------------------|--------------------------------------------------------------------------------------------------------------------------------------------------------------------------------------------------------------------------------------------------------------------------------------------------------------------------------------------------------------------------------------------------------------|

---

|                      |                                                                                                                                                                                                                                                                                                                                                                                                              |
|----------------------|--------------------------------------------------------------------------------------------------------------------------------------------------------------------------------------------------------------------------------------------------------------------------------------------------------------------------------------------------------------------------------------------------------------|
| pescado hervido azul | <input checked="" type="radio"/> Nunca o menos 1 vez al mes<br><input type="radio"/> 1 a 3 veces mes<br><input type="radio"/> 1 vez semana<br><input type="radio"/> 2 a 4 veces semana<br><input type="radio"/> 5 a 6 veces semana<br><input type="radio"/> 1 vez al día<br><input type="radio"/> 2 a 3 veces al día<br><input type="radio"/> 5 a 6 veces al día<br><input type="radio"/> más 6 veces al día |
|----------------------|--------------------------------------------------------------------------------------------------------------------------------------------------------------------------------------------------------------------------------------------------------------------------------------------------------------------------------------------------------------------------------------------------------------|

---

|                    |                                                                                                                                                                                                                                                                                                                                                                                                              |
|--------------------|--------------------------------------------------------------------------------------------------------------------------------------------------------------------------------------------------------------------------------------------------------------------------------------------------------------------------------------------------------------------------------------------------------------|
| otros pescado azul | <input type="radio"/> Nunca o menos 1 vez al mes<br><input type="radio"/> 1 a 3 veces mes<br><input checked="" type="radio"/> 1 vez semana<br><input type="radio"/> 2 a 4 veces semana<br><input type="radio"/> 5 a 6 veces semana<br><input type="radio"/> 1 vez al día<br><input type="radio"/> 2 a 3 veces al día<br><input type="radio"/> 5 a 6 veces al día<br><input type="radio"/> más 6 veces al día |
|--------------------|--------------------------------------------------------------------------------------------------------------------------------------------------------------------------------------------------------------------------------------------------------------------------------------------------------------------------------------------------------------------------------------------------------------|

---

|               |                                                                                                                                                                                                                                                                                                                                                                                                              |
|---------------|--------------------------------------------------------------------------------------------------------------------------------------------------------------------------------------------------------------------------------------------------------------------------------------------------------------------------------------------------------------------------------------------------------------|
| atun conserva | <input type="radio"/> Nunca o menos 1 vez al mes<br><input type="radio"/> 1 a 3 veces mes<br><input type="radio"/> 1 vez semana<br><input checked="" type="radio"/> 2 a 4 veces semana<br><input type="radio"/> 5 a 6 veces semana<br><input type="radio"/> 1 vez al día<br><input type="radio"/> 2 a 3 veces al día<br><input type="radio"/> 5 a 6 veces al día<br><input type="radio"/> más 6 veces al día |
|---------------|--------------------------------------------------------------------------------------------------------------------------------------------------------------------------------------------------------------------------------------------------------------------------------------------------------------------------------------------------------------------------------------------------------------|

---

|                  |                                                                                                                                                                                                                                                                                                                                                                                                              |
|------------------|--------------------------------------------------------------------------------------------------------------------------------------------------------------------------------------------------------------------------------------------------------------------------------------------------------------------------------------------------------------------------------------------------------------|
| sardina conserva | <input checked="" type="radio"/> Nunca o menos 1 vez al mes<br><input type="radio"/> 1 a 3 veces mes<br><input type="radio"/> 1 vez semana<br><input type="radio"/> 2 a 4 veces semana<br><input type="radio"/> 5 a 6 veces semana<br><input type="radio"/> 1 vez al día<br><input type="radio"/> 2 a 3 veces al día<br><input type="radio"/> 5 a 6 veces al día<br><input type="radio"/> más 6 veces al día |
|------------------|--------------------------------------------------------------------------------------------------------------------------------------------------------------------------------------------------------------------------------------------------------------------------------------------------------------------------------------------------------------------------------------------------------------|

---

|                                         |                                                                                                                                                                                                                                                                                                                                                                                                              |
|-----------------------------------------|--------------------------------------------------------------------------------------------------------------------------------------------------------------------------------------------------------------------------------------------------------------------------------------------------------------------------------------------------------------------------------------------------------------|
| pescado ahumado                         | <input checked="" type="radio"/> Nunca o menos 1 vez al mes<br><input type="radio"/> 1 a 3 veces mes<br><input type="radio"/> 1 vez semana<br><input type="radio"/> 2 a 4 veces semana<br><input type="radio"/> 5 a 6 veces semana<br><input type="radio"/> 1 vez al día<br><input type="radio"/> 2 a 3 veces al día<br><input type="radio"/> 5 a 6 veces al día<br><input type="radio"/> más 6 veces al día |
| almejas o mejillones o ostras unos 100g | <input checked="" type="radio"/> Nunca o menos 1 vez al mes<br><input type="radio"/> 1 a 3 veces mes<br><input type="radio"/> 1 vez semana<br><input type="radio"/> 2 a 4 veces semana<br><input type="radio"/> 5 a 6 veces semana<br><input type="radio"/> 1 vez al día<br><input type="radio"/> 2 a 3 veces al día<br><input type="radio"/> 5 a 6 veces al día<br><input type="radio"/> más 6 veces al día |
| calamar o chipiron o sepia unos 100g    | <input type="radio"/> Nunca o menos 1 vez al mes<br><input type="radio"/> 1 a 3 veces mes<br><input checked="" type="radio"/> 1 vez semana<br><input type="radio"/> 2 a 4 veces semana<br><input type="radio"/> 5 a 6 veces semana<br><input type="radio"/> 1 vez al día<br><input type="radio"/> 2 a 3 veces al día<br><input type="radio"/> 5 a 6 veces al día<br><input type="radio"/> más 6 veces al día |
| marisco unos 100g                       | <input checked="" type="radio"/> Nunca o menos 1 vez al mes<br><input type="radio"/> 1 a 3 veces mes<br><input type="radio"/> 1 vez semana<br><input type="radio"/> 2 a 4 veces semana<br><input type="radio"/> 5 a 6 veces semana<br><input type="radio"/> 1 vez al día<br><input type="radio"/> 2 a 3 veces al día<br><input type="radio"/> 5 a 6 veces al día<br><input type="radio"/> más 6 veces al día |
| Espinacas o acelgas cocinadas           | <input checked="" type="radio"/> Nunca o menos 1 vez al mes<br><input type="radio"/> 1 a 3 veces mes<br><input type="radio"/> 1 vez semana<br><input type="radio"/> 2 a 4 veces semana<br><input type="radio"/> 5 a 6 veces semana<br><input type="radio"/> 1 vez al día<br><input type="radio"/> 2 a 3 veces al día<br><input type="radio"/> 5 a 6 veces al día<br><input type="radio"/> más 6 veces al día |
| Col o coliflor o brocoli cocinado       | <input checked="" type="radio"/> Nunca o menos 1 vez al mes<br><input type="radio"/> 1 a 3 veces mes<br><input type="radio"/> 1 vez semana<br><input type="radio"/> 2 a 4 veces semana<br><input type="radio"/> 5 a 6 veces semana<br><input type="radio"/> 1 vez al día<br><input type="radio"/> 2 a 3 veces al día<br><input type="radio"/> 5 a 6 veces al día<br><input type="radio"/> más 6 veces al día |



---

|                              |                                                                                                                                                                                                                                                                                                                                                                                                              |
|------------------------------|--------------------------------------------------------------------------------------------------------------------------------------------------------------------------------------------------------------------------------------------------------------------------------------------------------------------------------------------------------------------------------------------------------------|
| Lechuga o endivia o escarola | <input type="radio"/> Nunca o menos 1 vez al mes<br><input type="radio"/> 1 a 3 veces mes<br><input type="radio"/> 1 vez semana<br><input type="radio"/> 2 a 4 veces semana<br><input checked="" type="radio"/> 5 a 6 veces semana<br><input type="radio"/> 1 vez al día<br><input type="radio"/> 2 a 3 veces al día<br><input type="radio"/> 5 a 6 veces al día<br><input type="radio"/> más 6 veces al día |
|------------------------------|--------------------------------------------------------------------------------------------------------------------------------------------------------------------------------------------------------------------------------------------------------------------------------------------------------------------------------------------------------------------------------------------------------------|

---

|                 |                                                                                                                                                                                                                                                                                                                                                                                                              |
|-----------------|--------------------------------------------------------------------------------------------------------------------------------------------------------------------------------------------------------------------------------------------------------------------------------------------------------------------------------------------------------------------------------------------------------------|
| tomate ensalada | <input type="radio"/> Nunca o menos 1 vez al mes<br><input type="radio"/> 1 a 3 veces mes<br><input type="radio"/> 1 vez semana<br><input type="radio"/> 2 a 4 veces semana<br><input type="radio"/> 5 a 6 veces semana<br><input checked="" type="radio"/> 1 vez al día<br><input type="radio"/> 2 a 3 veces al día<br><input type="radio"/> 5 a 6 veces al día<br><input type="radio"/> más 6 veces al día |
|-----------------|--------------------------------------------------------------------------------------------------------------------------------------------------------------------------------------------------------------------------------------------------------------------------------------------------------------------------------------------------------------------------------------------------------------|

---

|         |                                                                                                                                                                                                                                                                                                                                                                                                              |
|---------|--------------------------------------------------------------------------------------------------------------------------------------------------------------------------------------------------------------------------------------------------------------------------------------------------------------------------------------------------------------------------------------------------------------|
| cebolla | <input checked="" type="radio"/> Nunca o menos 1 vez al mes<br><input type="radio"/> 1 a 3 veces mes<br><input type="radio"/> 1 vez semana<br><input type="radio"/> 2 a 4 veces semana<br><input type="radio"/> 5 a 6 veces semana<br><input type="radio"/> 1 vez al día<br><input type="radio"/> 2 a 3 veces al día<br><input type="radio"/> 5 a 6 veces al día<br><input type="radio"/> más 6 veces al día |
|---------|--------------------------------------------------------------------------------------------------------------------------------------------------------------------------------------------------------------------------------------------------------------------------------------------------------------------------------------------------------------------------------------------------------------|

---

|                      |                                                                                                                                                                                                                                                                                                                                                                                                              |
|----------------------|--------------------------------------------------------------------------------------------------------------------------------------------------------------------------------------------------------------------------------------------------------------------------------------------------------------------------------------------------------------------------------------------------------------|
| Zanahoria o calabaza | <input type="radio"/> Nunca o menos 1 vez al mes<br><input checked="" type="radio"/> 1 a 3 veces mes<br><input type="radio"/> 1 vez semana<br><input type="radio"/> 2 a 4 veces semana<br><input type="radio"/> 5 a 6 veces semana<br><input type="radio"/> 1 vez al día<br><input type="radio"/> 2 a 3 veces al día<br><input type="radio"/> 5 a 6 veces al día<br><input type="radio"/> más 6 veces al día |
|----------------------|--------------------------------------------------------------------------------------------------------------------------------------------------------------------------------------------------------------------------------------------------------------------------------------------------------------------------------------------------------------------------------------------------------------|

---

|               |                                                                                                                                                                                                                                                                                                                                                                                                              |
|---------------|--------------------------------------------------------------------------------------------------------------------------------------------------------------------------------------------------------------------------------------------------------------------------------------------------------------------------------------------------------------------------------------------------------------|
| Judías verdes | <input type="radio"/> Nunca o menos 1 vez al mes<br><input type="radio"/> 1 a 3 veces mes<br><input checked="" type="radio"/> 1 vez semana<br><input type="radio"/> 2 a 4 veces semana<br><input type="radio"/> 5 a 6 veces semana<br><input type="radio"/> 1 vez al día<br><input type="radio"/> 2 a 3 veces al día<br><input type="radio"/> 5 a 6 veces al día<br><input type="radio"/> más 6 veces al día |
|---------------|--------------------------------------------------------------------------------------------------------------------------------------------------------------------------------------------------------------------------------------------------------------------------------------------------------------------------------------------------------------------------------------------------------------|

---

|                                |                                                                                                                                                                                                                                                                                                                                                                                                              |
|--------------------------------|--------------------------------------------------------------------------------------------------------------------------------------------------------------------------------------------------------------------------------------------------------------------------------------------------------------------------------------------------------------------------------------------------------------|
| Berenjena o calabacin o pepino | <input type="radio"/> Nunca o menos 1 vez al mes<br><input type="radio"/> 1 a 3 veces mes<br><input checked="" type="radio"/> 1 vez semana<br><input type="radio"/> 2 a 4 veces semana<br><input type="radio"/> 5 a 6 veces semana<br><input type="radio"/> 1 vez al día<br><input type="radio"/> 2 a 3 veces al día<br><input type="radio"/> 5 a 6 veces al día<br><input type="radio"/> más 6 veces al día |
|--------------------------------|--------------------------------------------------------------------------------------------------------------------------------------------------------------------------------------------------------------------------------------------------------------------------------------------------------------------------------------------------------------------------------------------------------------|

---

---

|          |                                                                                                                                                                                                                                                                                                                                                                                                              |
|----------|--------------------------------------------------------------------------------------------------------------------------------------------------------------------------------------------------------------------------------------------------------------------------------------------------------------------------------------------------------------------------------------------------------------|
| pimiento | <input checked="" type="radio"/> Nunca o menos 1 vez al mes<br><input type="radio"/> 1 a 3 veces mes<br><input type="radio"/> 1 vez semana<br><input type="radio"/> 2 a 4 veces semana<br><input type="radio"/> 5 a 6 veces semana<br><input type="radio"/> 1 vez al día<br><input type="radio"/> 2 a 3 veces al día<br><input type="radio"/> 5 a 6 veces al día<br><input type="radio"/> más 6 veces al día |
|----------|--------------------------------------------------------------------------------------------------------------------------------------------------------------------------------------------------------------------------------------------------------------------------------------------------------------------------------------------------------------------------------------------------------------|

---

|           |                                                                                                                                                                                                                                                                                                                                                                                                              |
|-----------|--------------------------------------------------------------------------------------------------------------------------------------------------------------------------------------------------------------------------------------------------------------------------------------------------------------------------------------------------------------------------------------------------------------|
| alcachofa | <input checked="" type="radio"/> Nunca o menos 1 vez al mes<br><input type="radio"/> 1 a 3 veces mes<br><input type="radio"/> 1 vez semana<br><input type="radio"/> 2 a 4 veces semana<br><input type="radio"/> 5 a 6 veces semana<br><input type="radio"/> 1 vez al día<br><input type="radio"/> 2 a 3 veces al día<br><input type="radio"/> 5 a 6 veces al día<br><input type="radio"/> más 6 veces al día |
|-----------|--------------------------------------------------------------------------------------------------------------------------------------------------------------------------------------------------------------------------------------------------------------------------------------------------------------------------------------------------------------------------------------------------------------|

---

|            |                                                                                                                                                                                                                                                                                                                                                                                                              |
|------------|--------------------------------------------------------------------------------------------------------------------------------------------------------------------------------------------------------------------------------------------------------------------------------------------------------------------------------------------------------------------------------------------------------------|
| espárragos | <input checked="" type="radio"/> Nunca o menos 1 vez al mes<br><input type="radio"/> 1 a 3 veces mes<br><input type="radio"/> 1 vez semana<br><input type="radio"/> 2 a 4 veces semana<br><input type="radio"/> 5 a 6 veces semana<br><input type="radio"/> 1 vez al día<br><input type="radio"/> 2 a 3 veces al día<br><input type="radio"/> 5 a 6 veces al día<br><input type="radio"/> más 6 veces al día |
|------------|--------------------------------------------------------------------------------------------------------------------------------------------------------------------------------------------------------------------------------------------------------------------------------------------------------------------------------------------------------------------------------------------------------------|

---

|              |                                                                                                                                                                                                                                                                                                                                                                                                              |
|--------------|--------------------------------------------------------------------------------------------------------------------------------------------------------------------------------------------------------------------------------------------------------------------------------------------------------------------------------------------------------------------------------------------------------------|
| maíz hervido | <input checked="" type="radio"/> Nunca o menos 1 vez al mes<br><input type="radio"/> 1 a 3 veces mes<br><input type="radio"/> 1 vez semana<br><input type="radio"/> 2 a 4 veces semana<br><input type="radio"/> 5 a 6 veces semana<br><input type="radio"/> 1 vez al día<br><input type="radio"/> 2 a 3 veces al día<br><input type="radio"/> 5 a 6 veces al día<br><input type="radio"/> más 6 veces al día |
|--------------|--------------------------------------------------------------------------------------------------------------------------------------------------------------------------------------------------------------------------------------------------------------------------------------------------------------------------------------------------------------------------------------------------------------|

---

|           |                                                                                                                                                                                                                                                                                                                                                                                                              |
|-----------|--------------------------------------------------------------------------------------------------------------------------------------------------------------------------------------------------------------------------------------------------------------------------------------------------------------------------------------------------------------------------------------------------------------|
| legumbres | <input type="radio"/> Nunca o menos 1 vez al mes<br><input type="radio"/> 1 a 3 veces mes<br><input type="radio"/> 1 vez semana<br><input checked="" type="radio"/> 2 a 4 veces semana<br><input type="radio"/> 5 a 6 veces semana<br><input type="radio"/> 1 vez al día<br><input type="radio"/> 2 a 3 veces al día<br><input type="radio"/> 5 a 6 veces al día<br><input type="radio"/> más 6 veces al día |
|-----------|--------------------------------------------------------------------------------------------------------------------------------------------------------------------------------------------------------------------------------------------------------------------------------------------------------------------------------------------------------------------------------------------------------------|

---

|                       |                                                                                                                                                                                                                                                                                                                                                                                                              |
|-----------------------|--------------------------------------------------------------------------------------------------------------------------------------------------------------------------------------------------------------------------------------------------------------------------------------------------------------------------------------------------------------------------------------------------------------|
| naranjas o mandarinas | <input checked="" type="radio"/> Nunca o menos 1 vez al mes<br><input type="radio"/> 1 a 3 veces mes<br><input type="radio"/> 1 vez semana<br><input type="radio"/> 2 a 4 veces semana<br><input type="radio"/> 5 a 6 veces semana<br><input type="radio"/> 1 vez al día<br><input type="radio"/> 2 a 3 veces al día<br><input type="radio"/> 5 a 6 veces al día<br><input type="radio"/> más 6 veces al día |
|-----------------------|--------------------------------------------------------------------------------------------------------------------------------------------------------------------------------------------------------------------------------------------------------------------------------------------------------------------------------------------------------------------------------------------------------------|

---

|                       |                                                                                                                                                                                                                                                                                                                                                                                                              |
|-----------------------|--------------------------------------------------------------------------------------------------------------------------------------------------------------------------------------------------------------------------------------------------------------------------------------------------------------------------------------------------------------------------------------------------------------|
| zum natural fruta     | <input checked="" type="radio"/> Nunca o menos 1 vez al mes<br><input type="radio"/> 1 a 3 veces mes<br><input type="radio"/> 1 vez semana<br><input type="radio"/> 2 a 4 veces semana<br><input type="radio"/> 5 a 6 veces semana<br><input type="radio"/> 1 vez al día<br><input type="radio"/> 2 a 3 veces al día<br><input type="radio"/> 5 a 6 veces al día<br><input type="radio"/> más 6 veces al día |
| platano               | <input type="radio"/> Nunca o menos 1 vez al mes<br><input type="radio"/> 1 a 3 veces mes<br><input checked="" type="radio"/> 1 vez semana<br><input type="radio"/> 2 a 4 veces semana<br><input type="radio"/> 5 a 6 veces semana<br><input type="radio"/> 1 vez al día<br><input type="radio"/> 2 a 3 veces al día<br><input type="radio"/> 5 a 6 veces al día<br><input type="radio"/> más 6 veces al día |
| manzana o pera        | <input checked="" type="radio"/> Nunca o menos 1 vez al mes<br><input type="radio"/> 1 a 3 veces mes<br><input type="radio"/> 1 vez semana<br><input type="radio"/> 2 a 4 veces semana<br><input type="radio"/> 5 a 6 veces semana<br><input type="radio"/> 1 vez al día<br><input type="radio"/> 2 a 3 veces al día<br><input type="radio"/> 5 a 6 veces al día<br><input type="radio"/> más 6 veces al día |
| melocotón o nectarina | <input type="radio"/> Nunca o menos 1 vez al mes<br><input type="radio"/> 1 a 3 veces mes<br><input type="radio"/> 1 vez semana<br><input checked="" type="radio"/> 2 a 4 veces semana<br><input type="radio"/> 5 a 6 veces semana<br><input type="radio"/> 1 vez al día<br><input type="radio"/> 2 a 3 veces al día<br><input type="radio"/> 5 a 6 veces al día<br><input type="radio"/> más 6 veces al día |
| sandia o melon        | <input type="radio"/> Nunca o menos 1 vez al mes<br><input type="radio"/> 1 a 3 veces mes<br><input type="radio"/> 1 vez semana<br><input type="radio"/> 2 a 4 veces semana<br><input type="radio"/> 5 a 6 veces semana<br><input checked="" type="radio"/> 1 vez al día<br><input type="radio"/> 2 a 3 veces al día<br><input type="radio"/> 5 a 6 veces al día<br><input type="radio"/> más 6 veces al día |
| uva                   | <input checked="" type="radio"/> Nunca o menos 1 vez al mes<br><input type="radio"/> 1 a 3 veces mes<br><input type="radio"/> 1 vez semana<br><input type="radio"/> 2 a 4 veces semana<br><input type="radio"/> 5 a 6 veces semana<br><input type="radio"/> 1 vez al día<br><input type="radio"/> 2 a 3 veces al día<br><input type="radio"/> 5 a 6 veces al día<br><input type="radio"/> más 6 veces al día |

---

bruna o ciruela

- ☒ Nunca o menos 1 vez al mes  
☐ 1 a 3 veces mes  
☐ 1 vez semana  
☐ 2 a 4 veces semana  
☐ 5 a 6 veces semana  
☐ 1 vez al día  
☐ 2 a 3 veces al día  
☐ 5 a 6 veces al día  
☐ más 6 veces al día

---

kiwi

- ☒ Nunca o menos 1 vez al mes  
☐ 1 a 3 veces mes  
☐ 1 vez semana  
☐ 2 a 4 veces semana  
☐ 5 a 6 veces semana  
☐ 1 vez al día  
☐ 2 a 3 veces al día  
☐ 5 a 6 veces al día  
☐ más 6 veces al día

---

aceituna

- ☐ Nunca o menos 1 vez al mes  
☒ 1 a 3 veces mes  
☐ 1 vez semana  
☐ 2 a 4 veces semana  
☐ 5 a 6 veces semana  
☐ 1 vez al día  
☐ 2 a 3 veces al día  
☐ 5 a 6 veces al día  
☐ más 6 veces al día

---

frutos secos

- ☐ Nunca o menos 1 vez al mes  
☐ 1 a 3 veces mes  
☐ 1 vez semana  
☒ 2 a 4 veces semana  
☐ 5 a 6 veces semana  
☐ 1 vez al día  
☐ 2 a 3 veces al día  
☐ 5 a 6 veces al día  
☐ más 6 veces al día

---

pan blanco

- ☐ Nunca o menos 1 vez al mes  
☐ 1 a 3 veces mes  
☐ 1 vez semana  
☐ 2 a 4 veces semana  
☐ 5 a 6 veces semana  
☒ 1 vez al día  
☐ 2 a 3 veces al día  
☐ 5 a 6 veces al día  
☐ más 6 veces al día

---

pan integral

- ☒ Nunca o menos 1 vez al mes  
☐ 1 a 3 veces mes  
☐ 1 vez semana  
☐ 2 a 4 veces semana  
☐ 5 a 6 veces semana  
☐ 1 vez al día  
☐ 2 a 3 veces al día  
☐ 5 a 6 veces al día  
☐ más 6 veces al día

|                          |                                                                                                                                                                                                                                                                                                                                                                                                              |
|--------------------------|--------------------------------------------------------------------------------------------------------------------------------------------------------------------------------------------------------------------------------------------------------------------------------------------------------------------------------------------------------------------------------------------------------------|
| cereales desayuno        | <input checked="" type="radio"/> Nunca o menos 1 vez al mes<br><input type="radio"/> 1 a 3 veces mes<br><input type="radio"/> 1 vez semana<br><input type="radio"/> 2 a 4 veces semana<br><input type="radio"/> 5 a 6 veces semana<br><input type="radio"/> 1 vez al día<br><input type="radio"/> 2 a 3 veces al día<br><input type="radio"/> 5 a 6 veces al día<br><input type="radio"/> más 6 veces al día |
| patatas fritas           | <input type="radio"/> Nunca o menos 1 vez al mes<br><input checked="" type="radio"/> 1 a 3 veces mes<br><input type="radio"/> 1 vez semana<br><input type="radio"/> 2 a 4 veces semana<br><input type="radio"/> 5 a 6 veces semana<br><input type="radio"/> 1 vez al día<br><input type="radio"/> 2 a 3 veces al día<br><input type="radio"/> 5 a 6 veces al día<br><input type="radio"/> más 6 veces al día |
| patatas cocidas o asadas | <input type="radio"/> Nunca o menos 1 vez al mes<br><input type="radio"/> 1 a 3 veces mes<br><input checked="" type="radio"/> 1 vez semana<br><input type="radio"/> 2 a 4 veces semana<br><input type="radio"/> 5 a 6 veces semana<br><input type="radio"/> 1 vez al día<br><input type="radio"/> 2 a 3 veces al día<br><input type="radio"/> 5 a 6 veces al día<br><input type="radio"/> más 6 veces al día |
| bolsa papas              | <input type="radio"/> Nunca o menos 1 vez al mes<br><input checked="" type="radio"/> 1 a 3 veces mes<br><input type="radio"/> 1 vez semana<br><input type="radio"/> 2 a 4 veces semana<br><input type="radio"/> 5 a 6 veces semana<br><input type="radio"/> 1 vez al día<br><input type="radio"/> 2 a 3 veces al día<br><input type="radio"/> 5 a 6 veces al día<br><input type="radio"/> más 6 veces al día |
| arroz cocinado           | <input type="radio"/> Nunca o menos 1 vez al mes<br><input type="radio"/> 1 a 3 veces mes<br><input checked="" type="radio"/> 1 vez semana<br><input type="radio"/> 2 a 4 veces semana<br><input type="radio"/> 5 a 6 veces semana<br><input type="radio"/> 1 vez al día<br><input type="radio"/> 2 a 3 veces al día<br><input type="radio"/> 5 a 6 veces al día<br><input type="radio"/> más 6 veces al día |
| pasta                    | <input type="radio"/> Nunca o menos 1 vez al mes<br><input type="radio"/> 1 a 3 veces mes<br><input checked="" type="radio"/> 1 vez semana<br><input type="radio"/> 2 a 4 veces semana<br><input type="radio"/> 5 a 6 veces semana<br><input type="radio"/> 1 vez al día<br><input type="radio"/> 2 a 3 veces al día<br><input type="radio"/> 5 a 6 veces al día<br><input type="radio"/> más 6 veces al día |

|                     |                                                                                                                                                                                                                                                                                                                                                                                                              |
|---------------------|--------------------------------------------------------------------------------------------------------------------------------------------------------------------------------------------------------------------------------------------------------------------------------------------------------------------------------------------------------------------------------------------------------------|
| pizza               | <input type="radio"/> Nunca o menos 1 vez al mes<br><input checked="" type="radio"/> 1 a 3 veces mes<br><input type="radio"/> 1 vez semana<br><input type="radio"/> 2 a 4 veces semana<br><input type="radio"/> 5 a 6 veces semana<br><input type="radio"/> 1 vez al día<br><input type="radio"/> 2 a 3 veces al día<br><input type="radio"/> 5 a 6 veces al día<br><input type="radio"/> más 6 veces al día |
| aceite oliva        | <input type="radio"/> Nunca o menos 1 vez al mes<br><input type="radio"/> 1 a 3 veces mes<br><input type="radio"/> 1 vez semana<br><input type="radio"/> 2 a 4 veces semana<br><input type="radio"/> 5 a 6 veces semana<br><input checked="" type="radio"/> 1 vez al día<br><input type="radio"/> 2 a 3 veces al día<br><input type="radio"/> 5 a 6 veces al día<br><input type="radio"/> más 6 veces al día |
| otros aceites       | <input type="radio"/> Nunca o menos 1 vez al mes<br><input checked="" type="radio"/> 1 a 3 veces mes<br><input type="radio"/> 1 vez semana<br><input type="radio"/> 2 a 4 veces semana<br><input type="radio"/> 5 a 6 veces semana<br><input type="radio"/> 1 vez al día<br><input type="radio"/> 2 a 3 veces al día<br><input type="radio"/> 5 a 6 veces al día<br><input type="radio"/> más 6 veces al día |
| margarina           | <input checked="" type="radio"/> Nunca o menos 1 vez al mes<br><input type="radio"/> 1 a 3 veces mes<br><input type="radio"/> 1 vez semana<br><input type="radio"/> 2 a 4 veces semana<br><input type="radio"/> 5 a 6 veces semana<br><input type="radio"/> 1 vez al día<br><input type="radio"/> 2 a 3 veces al día<br><input type="radio"/> 5 a 6 veces al día<br><input type="radio"/> más 6 veces al día |
| mantequilla         | <input checked="" type="radio"/> Nunca o menos 1 vez al mes<br><input type="radio"/> 1 a 3 veces mes<br><input type="radio"/> 1 vez semana<br><input type="radio"/> 2 a 4 veces semana<br><input type="radio"/> 5 a 6 veces semana<br><input type="radio"/> 1 vez al día<br><input type="radio"/> 2 a 3 veces al día<br><input type="radio"/> 5 a 6 veces al día<br><input type="radio"/> más 6 veces al día |
| galletas tipo maria | <input type="radio"/> Nunca o menos 1 vez al mes<br><input type="radio"/> 1 a 3 veces mes<br><input type="radio"/> 1 vez semana<br><input checked="" type="radio"/> 2 a 4 veces semana<br><input type="radio"/> 5 a 6 veces semana<br><input type="radio"/> 1 vez al día<br><input type="radio"/> 2 a 3 veces al día<br><input type="radio"/> 5 a 6 veces al día<br><input type="radio"/> más 6 veces al día |

---

galletas chocolate

- ☐ Nunca o menos 1 vez al mes  
☐ 1 a 3 veces mes  
☐ 1 vez semana  
☒ 2 a 4 veces semana  
☐ 5 a 6 veces semana  
☐ 1 vez al día  
☐ 2 a 3 veces al día  
☐ 5 a 6 veces al día  
☐ más 6 veces al día

---

bolleria

- ☒ Nunca o menos 1 vez al mes  
☐ 1 a 3 veces mes  
☐ 1 vez semana  
☐ 2 a 4 veces semana  
☐ 5 a 6 veces semana  
☐ 1 vez al día  
☐ 2 a 3 veces al día  
☐ 5 a 6 veces al día  
☐ más 6 veces al día

---

chocolate o bombones

- ☐ Nunca o menos 1 vez al mes  
☐ 1 a 3 veces mes  
☒ 1 vez semana  
☐ 2 a 4 veces semana  
☐ 5 a 6 veces semana  
☐ 1 vez al día  
☐ 2 a 3 veces al día  
☐ 5 a 6 veces al día  
☐ más 6 veces al día

---

chocolate polvo o colacao

- ☐ Nunca o menos 1 vez al mes  
☒ 1 a 3 veces mes  
☐ 1 vez semana  
☐ 2 a 4 veces semana  
☐ 5 a 6 veces semana  
☐ 1 vez al día  
☐ 2 a 3 veces al día  
☐ 5 a 6 veces al día  
☐ más 6 veces al día

---

vino tinto

- ☒ Nunca o menos 1 vez al mes  
☐ 1 a 3 veces mes  
☐ 1 vez semana  
☐ 2 a 4 veces semana  
☐ 5 a 6 veces semana  
☐ 1 vez al día  
☐ 2 a 3 veces al día  
☐ 5 a 6 veces al día  
☐ más 6 veces al día

---

vino blanco

- ☒ Nunca o menos 1 vez al mes  
☐ 1 a 3 veces mes  
☐ 1 vez semana  
☐ 2 a 4 veces semana  
☐ 5 a 6 veces semana  
☐ 1 vez al día  
☐ 2 a 3 veces al día  
☐ 5 a 6 veces al día  
☐ más 6 veces al día

|                       |                                                                                                                                                                                                                                                                                                                                                                                                              |
|-----------------------|--------------------------------------------------------------------------------------------------------------------------------------------------------------------------------------------------------------------------------------------------------------------------------------------------------------------------------------------------------------------------------------------------------------|
| vino seco o vermut    | <input checked="" type="radio"/> Nunca o menos 1 vez al mes<br><input type="radio"/> 1 a 3 veces mes<br><input type="radio"/> 1 vez semana<br><input type="radio"/> 2 a 4 veces semana<br><input type="radio"/> 5 a 6 veces semana<br><input type="radio"/> 1 vez al día<br><input type="radio"/> 2 a 3 veces al día<br><input type="radio"/> 5 a 6 veces al día<br><input type="radio"/> más 6 veces al día |
| cerveza               | <input checked="" type="radio"/> Nunca o menos 1 vez al mes<br><input type="radio"/> 1 a 3 veces mes<br><input type="radio"/> 1 vez semana<br><input type="radio"/> 2 a 4 veces semana<br><input type="radio"/> 5 a 6 veces semana<br><input type="radio"/> 1 vez al día<br><input type="radio"/> 2 a 3 veces al día<br><input type="radio"/> 5 a 6 veces al día<br><input type="radio"/> más 6 veces al día |
| cerveza sin alcohol   | <input checked="" type="radio"/> Nunca o menos 1 vez al mes<br><input type="radio"/> 1 a 3 veces mes<br><input type="radio"/> 1 vez semana<br><input type="radio"/> 2 a 4 veces semana<br><input type="radio"/> 5 a 6 veces semana<br><input type="radio"/> 1 vez al día<br><input type="radio"/> 2 a 3 veces al día<br><input type="radio"/> 5 a 6 veces al día<br><input type="radio"/> más 6 veces al día |
| licores               | <input checked="" type="radio"/> Nunca o menos 1 vez al mes<br><input type="radio"/> 1 a 3 veces mes<br><input type="radio"/> 1 vez semana<br><input type="radio"/> 2 a 4 veces semana<br><input type="radio"/> 5 a 6 veces semana<br><input type="radio"/> 1 vez al día<br><input type="radio"/> 2 a 3 veces al día<br><input type="radio"/> 5 a 6 veces al día<br><input type="radio"/> más 6 veces al día |
| ginebra o ron o vodka | <input checked="" type="radio"/> Nunca o menos 1 vez al mes<br><input type="radio"/> 1 a 3 veces mes<br><input type="radio"/> 1 vez semana<br><input type="radio"/> 2 a 4 veces semana<br><input type="radio"/> 5 a 6 veces semana<br><input type="radio"/> 1 vez al día<br><input type="radio"/> 2 a 3 veces al día<br><input type="radio"/> 5 a 6 veces al día<br><input type="radio"/> más 6 veces al día |
| refresco normal       | <input checked="" type="radio"/> Nunca o menos 1 vez al mes<br><input type="radio"/> 1 a 3 veces mes<br><input type="radio"/> 1 vez semana<br><input type="radio"/> 2 a 4 veces semana<br><input type="radio"/> 5 a 6 veces semana<br><input type="radio"/> 1 vez al día<br><input type="radio"/> 2 a 3 veces al día<br><input type="radio"/> 5 a 6 veces al día<br><input type="radio"/> más 6 veces al día |



---

refresco sin azúcar

- ☒ Nunca o menos 1 vez al mes  
☐ 1 a 3 veces mes  
☐ 1 vez semana  
☐ 2 a 4 veces semana  
☐ 5 a 6 veces semana  
☐ 1 vez al día  
☐ 2 a 3 veces al día  
☐ 5 a 6 veces al día  
☐ más 6 veces al día

---

Agua del grifo

- ☐ Nunca o menos 1 vez al mes  
☐ 1 a 3 veces mes  
☐ 1 vez semana  
☐ 2 a 4 veces semana  
☐ 5 a 6 veces semana  
☐ 1 vez al día  
☐ 2 a 3 veces al día  
☒ 5 a 6 veces al día  
☐ más 6 veces al día

---

agua embotellada sin gas

- ☒ Nunca o menos 1 vez al mes  
☐ 1 a 3 veces mes  
☐ 1 vez semana  
☐ 2 a 4 veces semana  
☐ 5 a 6 veces semana  
☐ 1 vez al día  
☐ 2 a 3 veces al día  
☐ 5 a 6 veces al día  
☐ más 6 veces al día

---

agua embotellada con gas

- ☒ Nunca o menos 1 vez al mes  
☐ 1 a 3 veces mes  
☐ 1 vez semana  
☐ 2 a 4 veces semana  
☐ 5 a 6 veces semana  
☐ 1 vez al día  
☐ 2 a 3 veces al día  
☐ 5 a 6 veces al día  
☐ más 6 veces al día

---

zumو frutas embasado

- ☒ Nunca o menos 1 vez al mes  
☐ 1 a 3 veces mes  
☐ 1 vez semana  
☐ 2 a 4 veces semana  
☐ 5 a 6 veces semana  
☐ 1 vez al día  
☐ 2 a 3 veces al día  
☐ 5 a 6 veces al día  
☐ más 6 veces al día

---

cafe

- ☒ Nunca o menos 1 vez al mes  
☐ 1 a 3 veces mes  
☐ 1 vez semana  
☐ 2 a 4 veces semana  
☐ 5 a 6 veces semana  
☐ 1 vez al día  
☐ 2 a 3 veces al día  
☐ 5 a 6 veces al día  
☐ más 6 veces al día

---

cafe descafeinado

- ☒ Nunca o menos 1 vez al mes  
☐ 1 a 3 veces mes  
☐ 1 vez semana  
☐ 2 a 4 veces semana  
☐ 5 a 6 veces semana  
☐ 1 vez al día  
☐ 2 a 3 veces al día  
☐ 5 a 6 veces al día  
☐ más 6 veces al día

---

te o infusión

- ☒ Nunca o menos 1 vez al mes  
☐ 1 a 3 veces mes  
☐ 1 vez semana  
☐ 2 a 4 veces semana  
☐ 5 a 6 veces semana  
☐ 1 vez al día  
☐ 2 a 3 veces al día  
☐ 5 a 6 veces al día  
☐ más 6 veces al día

---

sopa o puré verduras

- ☐ Nunca o menos 1 vez al mes  
☐ 1 a 3 veces mes  
☒ 1 vez semana  
☐ 2 a 4 veces semana  
☐ 5 a 6 veces semana  
☐ 1 vez al día  
☐ 2 a 3 veces al día  
☐ 5 a 6 veces al día  
☐ más 6 veces al día

---

croquetas pollo jamón

- ☐ Nunca o menos 1 vez al mes  
☒ 1 a 3 veces mes  
☐ 1 vez semana  
☐ 2 a 4 veces semana  
☐ 5 a 6 veces semana  
☐ 1 vez al día  
☐ 2 a 3 veces al día  
☐ 5 a 6 veces al día  
☐ más 6 veces al día

---

croquetas pescado

- ☒ Nunca o menos 1 vez al mes  
☐ 1 a 3 veces mes  
☐ 1 vez semana  
☐ 2 a 4 veces semana  
☐ 5 a 6 veces semana  
☐ 1 vez al día  
☐ 2 a 3 veces al día  
☐ 5 a 6 veces al día  
☐ más 6 veces al día

---

mayonesa

- ☒ Nunca o menos 1 vez al mes  
☐ 1 a 3 veces mes  
☐ 1 vez semana  
☐ 2 a 4 veces semana  
☐ 5 a 6 veces semana  
☐ 1 vez al día  
☐ 2 a 3 veces al día  
☐ 5 a 6 veces al día  
☐ más 6 veces al día

|                  |                                                                                                                                                                                                                                                                                                                                                                                                              |
|------------------|--------------------------------------------------------------------------------------------------------------------------------------------------------------------------------------------------------------------------------------------------------------------------------------------------------------------------------------------------------------------------------------------------------------|
| salsa tomate     | <input checked="" type="radio"/> Nunca o menos 1 vez al mes<br><input type="radio"/> 1 a 3 veces mes<br><input type="radio"/> 1 vez semana<br><input type="radio"/> 2 a 4 veces semana<br><input type="radio"/> 5 a 6 veces semana<br><input type="radio"/> 1 vez al día<br><input type="radio"/> 2 a 3 veces al día<br><input type="radio"/> 5 a 6 veces al día<br><input type="radio"/> más 6 veces al día |
| ketchup          | <input checked="" type="radio"/> Nunca o menos 1 vez al mes<br><input type="radio"/> 1 a 3 veces mes<br><input type="radio"/> 1 vez semana<br><input type="radio"/> 2 a 4 veces semana<br><input type="radio"/> 5 a 6 veces semana<br><input type="radio"/> 1 vez al día<br><input type="radio"/> 2 a 3 veces al día<br><input type="radio"/> 5 a 6 veces al día<br><input type="radio"/> más 6 veces al día |
| sal              | <input type="radio"/> Nunca o menos 1 vez al mes<br><input type="radio"/> 1 a 3 veces mes<br><input type="radio"/> 1 vez semana<br><input type="radio"/> 2 a 4 veces semana<br><input type="radio"/> 5 a 6 veces semana<br><input checked="" type="radio"/> 1 vez al día<br><input type="radio"/> 2 a 3 veces al día<br><input type="radio"/> 5 a 6 veces al día<br><input type="radio"/> más 6 veces al día |
| ajo              | <input type="radio"/> Nunca o menos 1 vez al mes<br><input type="radio"/> 1 a 3 veces mes<br><input type="radio"/> 1 vez semana<br><input type="radio"/> 2 a 4 veces semana<br><input checked="" type="radio"/> 5 a 6 veces semana<br><input type="radio"/> 1 vez al día<br><input type="radio"/> 2 a 3 veces al día<br><input type="radio"/> 5 a 6 veces al día<br><input type="radio"/> más 6 veces al día |
| mermelada o miel | <input checked="" type="radio"/> Nunca o menos 1 vez al mes<br><input type="radio"/> 1 a 3 veces mes<br><input type="radio"/> 1 vez semana<br><input type="radio"/> 2 a 4 veces semana<br><input type="radio"/> 5 a 6 veces semana<br><input type="radio"/> 1 vez al día<br><input type="radio"/> 2 a 3 veces al día<br><input type="radio"/> 5 a 6 veces al día<br><input type="radio"/> más 6 veces al día |
| azúcar           | <input type="radio"/> Nunca o menos 1 vez al mes<br><input type="radio"/> 1 a 3 veces mes<br><input type="radio"/> 1 vez semana<br><input type="radio"/> 2 a 4 veces semana<br><input type="radio"/> 5 a 6 veces semana<br><input checked="" type="radio"/> 1 vez al día<br><input type="radio"/> 2 a 3 veces al día<br><input type="radio"/> 5 a 6 veces al día<br><input type="radio"/> más 6 veces al día |

---

Otro alimento

---

suplementos vitamínicos

- ☐ si  
☐ no

---

suplementos vitamínicos

---

dieta previa

- ☐ si  
☐ no

motivo dieta

- ☐ no dieta  
☐ control peso  
☐ control colesterol  
☐ control diabetes  
☐ problemas estómago  
☐ problemas vesícula o hepáticos  
☐ HTA o cardiopatía  
☐ problemas renales  
☐ alergia alimentaria  
☐ ácido úrico elevado  
☐ vegetariana  
☐ otros

---

cambio alimentos año previo gestación

---

- ☐ si  
☐ no

cambio lácteos

- ☐ eliminado  
☐ disminuido  
☐ igual  
☐ aumentado  
☐ no sabe

---

cambio huevos

---

- ☐ eliminado  
☐ disminuido  
☐ igual  
☐ aumentado  
☐ no sabe

cambio carne

- ☐ eliminado  
☐ disminuido  
☐ igual  
☐ aumentado  
☐ no sabe

---

cambio pescado

---

- ☐ eliminado  
☐ disminuido  
☐ igual  
☐ aumentado  
☐ no sabe

cambio verduras

- ☐ eliminado  
☐ disminuido  
☐ igual  
☐ aumentado  
☐ no sabe

|                            |                                                                                                                                                                                                                        |
|----------------------------|------------------------------------------------------------------------------------------------------------------------------------------------------------------------------------------------------------------------|
| cambio legumbres           | <input type="radio"/> eliminado<br><input type="radio"/> disminuido<br><input type="radio"/> igual<br><input type="radio"/> aumentado<br><input type="radio"/> no sabe                                                 |
| cambio fruta               | <input type="radio"/> eliminado<br><input type="radio"/> disminuido<br><input type="radio"/> igual<br><input type="radio"/> aumentado<br><input type="radio"/> no sabe                                                 |
| cambio pan                 | <input type="radio"/> eliminado<br><input type="radio"/> disminuido<br><input type="radio"/> igual<br><input type="radio"/> aumentado<br><input type="radio"/> no sabe                                                 |
| cambio aceite oliva        | <input type="radio"/> eliminado<br><input type="radio"/> disminuido<br><input type="radio"/> igual<br><input type="radio"/> aumentado<br><input type="radio"/> no sabe                                                 |
| cambio mante o margarina   | <input type="radio"/> eliminado<br><input type="radio"/> disminuido<br><input type="radio"/> igual<br><input type="radio"/> aumentado<br><input type="radio"/> no sabe                                                 |
| cambio azúcar y dulces     | <input type="radio"/> eliminado<br><input type="radio"/> disminuido<br><input type="radio"/> igual<br><input type="radio"/> aumentado<br><input type="radio"/> no sabe                                                 |
| cambio bebidas alcohólicas | <input type="radio"/> eliminado<br><input type="radio"/> disminuido<br><input type="radio"/> igual<br><input type="radio"/> aumentado<br><input type="radio"/> no sabe                                                 |
| frecuencia comidas fritas  | <input type="radio"/> a diario<br><input type="radio"/> 5 a 6 veces semana<br><input type="radio"/> 2 a 4 veces semana<br><input type="radio"/> 1 vez semana<br><input checked="" type="radio"/> menos de 1 vez semana |
| carne                      | <input type="radio"/> no como<br><input type="radio"/> cruda<br><input checked="" type="radio"/> poco hecha<br><input type="radio"/> hecha<br><input type="radio"/> muy hecha                                          |
| grasa visible carne        | <input type="radio"/> quita toda<br><input type="radio"/> quita mayoría<br><input checked="" type="radio"/> quita un poco<br><input type="radio"/> no quita nada                                                       |

|                                |                                                                                                                                                                                                                                                          |
|--------------------------------|----------------------------------------------------------------------------------------------------------------------------------------------------------------------------------------------------------------------------------------------------------|
| cocina carne                   | <input checked="" type="radio"/> a la plancha<br><input type="radio"/> a la parrilla<br><input type="radio"/> asada<br><input type="radio"/> frita<br><input type="radio"/> guisada                                                                      |
| tostado quemado carne          | <input checked="" type="radio"/> nunca<br><input type="radio"/> 1 vez mes<br><input type="radio"/> 2 a 3 veces mes<br><input type="radio"/> 1 vez semana<br><input type="radio"/> 2 a 3 semanas                                                          |
| tostado quemado pescado        | <input checked="" type="radio"/> nunca<br><input type="radio"/> 1 vez mes<br><input type="radio"/> 2 a 3 veces mes<br><input type="radio"/> 1 vez semana<br><input type="radio"/> 2 a 3 semanas                                                          |
| socarrat paella                | <input checked="" type="radio"/> nunca<br><input type="radio"/> 1 vez mes<br><input type="radio"/> 2 a 3 veces mes<br><input type="radio"/> 1 vez semana<br><input type="radio"/> 2 a 3 semanas                                                          |
| grasa o aceite cocinar         | <input type="radio"/> mantequilla<br><input type="radio"/> margarina<br><input type="radio"/> aceite oliva<br><input checked="" type="radio"/> aceite oliva virgen extra<br><input type="radio"/> aceite vegetal<br><input type="radio"/> mezcla aceites |
| grasa aceite aliñar            | <input type="radio"/> mantequilla<br><input type="radio"/> margarina<br><input type="radio"/> aceite oliva<br><input checked="" type="radio"/> aceite oliva virgen extra<br><input type="radio"/> aceite vegetal<br><input type="radio"/> mezcla aceites |
| grasa aceite freir             | <input type="radio"/> mantequilla<br><input type="radio"/> margarina<br><input type="radio"/> aceite oliva<br><input checked="" type="radio"/> aceite oliva virgen extra<br><input type="radio"/> aceite vegetal<br><input type="radio"/> mezcla aceites |
| Ejercicio cuestionario         | <input type="radio"/> si<br><input checked="" type="radio"/> no                                                                                                                                                                                          |
| horas de sueño incluido siesta | _____                                                                                                                                                                                                                                                    |
| minutos siesta                 | _____                                                                                                                                                                                                                                                    |
| horas televisión semana        | _____                                                                                                                                                                                                                                                    |

|                                        |                                                                                                                                                                                                                                                                                                                                                                |
|----------------------------------------|----------------------------------------------------------------------------------------------------------------------------------------------------------------------------------------------------------------------------------------------------------------------------------------------------------------------------------------------------------------|
| actividad trabajo                      | <input type="radio"/> casi siempre sentado<br><input type="radio"/> sentado 50 por cien<br><input type="radio"/> casi siempre de pie, quieto<br><input type="radio"/> casi siempre levantado caminando y llevando pocas cosas<br><input type="radio"/> casi siempre levantado, caminando y llevado muchas cosas<br><input type="radio"/> trabajo manual pesado |
| tiempo caminar o bici al día           | <input type="radio"/> casi nunca<br><input type="radio"/> menos 20min día<br><input type="radio"/> 20 a 40 min día<br><input type="radio"/> 40 a 60 min día<br><input type="radio"/> 1h o 1h y media día<br><input type="radio"/> más de 1h y media al día                                                                                                     |
| tiempo tareas casa al día              | <input type="radio"/> menos de 1h día<br><input type="radio"/> 1 a 2h día<br><input type="radio"/> 3 a 4h día<br><input type="radio"/> 5 a 6h día<br><input type="radio"/> 7 a 8h día<br><input type="radio"/> más de 8h día                                                                                                                                   |
| tiempo libre televisión ordenador leer | <input type="radio"/> menos 1h día<br><input type="radio"/> 1h día<br><input type="radio"/> 2h día<br><input type="radio"/> 3h día<br><input type="radio"/> 4h día<br><input type="radio"/> 5 a 6h día<br><input type="radio"/> mas 6h día                                                                                                                     |
| tiempo libre ejercicio o deporte       | <input type="radio"/> menos 1h semana<br><input type="radio"/> 1h semana<br><input type="radio"/> 2h semana<br><input type="radio"/> 3h semana<br><input type="radio"/> 4 a 5h semana<br><input type="radio"/> mas 5h semana                                                                                                                                   |
| como se considera                      | <input type="radio"/> sedentaria<br><input type="radio"/> poco activa<br><input type="radio"/> moderadamente activa<br><input type="radio"/> bastante activa<br><input type="radio"/> muy activa<br><input type="radio"/> no sabe                                                                                                                              |
| FUR                                    | [*DATA REMOVED*]                                                                                                                                                                                                                                                                                                                                               |
| Semanas gestación 2T                   | _____                                                                                                                                                                                                                                                                                                                                                          |
| Días gestación 2T                      | _____                                                                                                                                                                                                                                                                                                                                                          |
| DBP 2T                                 | _____                                                                                                                                                                                                                                                                                                                                                          |
| CC 2T                                  | _____                                                                                                                                                                                                                                                                                                                                                          |

|                                                   |                                                                                                                                                                                                 |
|---------------------------------------------------|-------------------------------------------------------------------------------------------------------------------------------------------------------------------------------------------------|
| AC 2T                                             |                                                                                                                                                                                                 |
| LF 2T                                             |                                                                                                                                                                                                 |
| PFE 2T (Hadlock)                                  |                                                                                                                                                                                                 |
| Semanas gestación 3T                              | [*DATA REMOVED*]                                                                                                                                                                                |
| días 3T                                           | [*DATA REMOVED*]                                                                                                                                                                                |
| DBP 3T                                            | [*DATA REMOVED*]                                                                                                                                                                                |
| CC 3T                                             | [*DATA REMOVED*]                                                                                                                                                                                |
| AC 3T                                             | [*DATA REMOVED*]                                                                                                                                                                                |
| LF 3T                                             | [*DATA REMOVED*]                                                                                                                                                                                |
| PFE 3T (Hadlock)                                  | [*DATA REMOVED*]                                                                                                                                                                                |
| Semanas de gestación final                        | [*DATA REMOVED*]                                                                                                                                                                                |
| días gestación final                              | [*DATA REMOVED*]                                                                                                                                                                                |
| Localización placenta                             | <input type="radio"/> anterior<br><input type="radio"/> lateral derecha<br><input type="radio"/> lateral izquierda<br><input checked="" type="radio"/> posterior<br><input type="radio"/> fondo |
| Presentación longitudinal cefálica                | <input type="radio"/> no<br><input checked="" type="radio"/> si                                                                                                                                 |
| Dorso                                             | <input type="radio"/> izquierda anterior<br><input type="radio"/> izquierda posterior<br><input type="radio"/> derecha anterior<br><input checked="" type="radio"/> derecha posterior           |
| diámetro biparietal                               | [*DATA REMOVED*]                                                                                                                                                                                |
| Circunferencia craneal                            | [*DATA REMOVED*]                                                                                                                                                                                |
| Circunferencia abdominal                          | [*DATA REMOVED*]                                                                                                                                                                                |
| Longitud de femur                                 | [*DATA REMOVED*]                                                                                                                                                                                |
| tejido celular subcutáneo a nivel del muslo en mm | [*DATA REMOVED*]                                                                                                                                                                                |
| tejido celular subcutáneo en abdomen en mm        | [*DATA REMOVED*]                                                                                                                                                                                |



|                                               |                                                                                                                                               |
|-----------------------------------------------|-----------------------------------------------------------------------------------------------------------------------------------------------|
| Volumen del muslo en cm3                      | [*DATA REMOVED*]                                                                                                                              |
| Peso fetal estimado según fórmula de Hadlock  | [*DATA REMOVED*]                                                                                                                              |
| Percentil                                     | [*DATA REMOVED*]                                                                                                                              |
| Peso fetal estimado según fórmula de Scioscia | _____                                                                                                                                         |
| Peso fetal estimado según fórmula de LEE      | _____                                                                                                                                         |
| Tipo de parto                                 | <input checked="" type="radio"/> eutocico<br><input type="radio"/> instrumentado/ventosa<br><input type="radio"/> cesarea                     |
| fecha de nacimiento                           | [*DATA REMOVED*]                                                                                                                              |
| Días entre exploración y nacimiento           | [*DATA REMOVED*]                                                                                                                              |
| Peso RN en g                                  | [*DATA REMOVED*]                                                                                                                              |
| sexo                                          | <input checked="" type="radio"/> mujer<br><input type="radio"/> hombre                                                                        |
| Apgar 1 minuto                                | [*DATA REMOVED*]                                                                                                                              |
| Apgar 5 minutos                               | [*DATA REMOVED*]                                                                                                                              |
| Apgar 10 minutos                              | _____                                                                                                                                         |
| antecedente Covid durante gestación           | <input type="radio"/> Yes<br><input checked="" type="radio"/> No                                                                              |
| Nivel de estudios                             | <input type="radio"/> ninguno<br><input type="radio"/> primarios<br><input type="radio"/> secundarios<br><input type="radio"/> universitarios |

## Base\_datos\_estimacion\_peso\_fetal

|                                       |                                                                                                                                                                                                                                                                                      |
|---------------------------------------|--------------------------------------------------------------------------------------------------------------------------------------------------------------------------------------------------------------------------------------------------------------------------------------|
| Número de identificación participante | 149                                                                                                                                                                                                                                                                                  |
| CODIGO PARTICIPANTE                   |                                                                                                                                                                                                                                                                                      |
| Edad                                  | [*DATA REMOVED*]                                                                                                                                                                                                                                                                     |
| Gestaciones                           | <input checked="" type="radio"/> 1<br><input type="radio"/> 2<br><input type="radio"/> 3<br><input type="radio"/> mas de 3                                                                                                                                                           |
| partos                                | <input checked="" type="radio"/> 0<br><input type="radio"/> 1<br><input type="radio"/> 2<br><input type="radio"/> 3<br><input type="radio"/> mas de 3                                                                                                                                |
| cesáreas                              | <input checked="" type="radio"/> 0<br><input type="radio"/> 1<br><input type="radio"/> 2<br><input type="radio"/> 3<br><input type="radio"/> mas de 3                                                                                                                                |
| Abortos                               | <input checked="" type="radio"/> 0<br><input type="radio"/> 1<br><input type="radio"/> 2<br><input type="radio"/> 3<br><input type="radio"/> mas de 3                                                                                                                                |
| Tipo de gestacion                     | <input checked="" type="radio"/> espontanea<br><input type="radio"/> IAC inseminación artificial conyuge<br><input type="radio"/> IAD inseminación artificial donante<br><input type="radio"/> FIV Fecundación in Vitro<br><input type="radio"/> Ovodon FIV con donación de ovocitos |
| peso previo a embarazo                | [*DATA REMOVED*]                                                                                                                                                                                                                                                                     |
| Ganancia ponderal embarazo            | [*DATA REMOVED*]                                                                                                                                                                                                                                                                     |
| Talla madre                           | [*DATA REMOVED*]                                                                                                                                                                                                                                                                     |
| IMC previo embarazo                   | 34.37499999999999                                                                                                                                                                                                                                                                    |
| Patología obstétrica                  | <input checked="" type="radio"/> no<br><input type="radio"/> si                                                                                                                                                                                                                      |
| Diabetes pregestacional               | <input checked="" type="radio"/> no<br><input type="radio"/> si                                                                                                                                                                                                                      |
| Diabetes gestacional                  | <input checked="" type="radio"/> no<br><input type="radio"/> si                                                                                                                                                                                                                      |

|                                            |                                                                                                                                                                                      |
|--------------------------------------------|--------------------------------------------------------------------------------------------------------------------------------------------------------------------------------------|
| Diabetes gestacional con insulina          | <input checked="" type="radio"/> no<br><input type="radio"/> si                                                                                                                      |
| Diabetes gestacional con dieta y ejercicio | <input checked="" type="radio"/> no<br><input type="radio"/> si                                                                                                                      |
| Percentil fetos previos                    | <input checked="" type="radio"/> Nada<br><input type="radio"/> percentil menor de 10<br><input type="radio"/> percentil entre 10 y 90<br><input type="radio"/> percentil mayor de 90 |
| Exfumadora                                 | <input checked="" type="radio"/> Nada<br><input type="radio"/> menos de 5 años<br><input type="radio"/> 5 a 10 años<br><input type="radio"/> mayor o igual a 10 años                 |
| Hábito tabáquico                           | <input checked="" type="radio"/> no<br><input type="radio"/> si                                                                                                                      |
| fumadora                                   | [*DATA REMOVED*]                                                                                                                                                                     |
| Consumo otros tóxicos                      | <input checked="" type="radio"/> no<br><input type="radio"/> si                                                                                                                      |
| Hb 1T                                      | [*DATA REMOVED*]                                                                                                                                                                     |
| Htc 1T                                     | [*DATA REMOVED*]                                                                                                                                                                     |
| Hb 2T                                      | [*DATA REMOVED*]                                                                                                                                                                     |
| HTC 2T                                     | [*DATA REMOVED*]                                                                                                                                                                     |
| Hb 3T                                      | [*DATA REMOVED*]                                                                                                                                                                     |
| HTC 3T                                     | [*DATA REMOVED*]                                                                                                                                                                     |
| Suplemento FE oral                         | <input type="radio"/> si<br><input checked="" type="radio"/> no                                                                                                                      |
| Suplemento fe iv                           | <input type="radio"/> si<br><input checked="" type="radio"/> no                                                                                                                      |
| Transfusión                                | <input checked="" type="radio"/> no<br><input type="radio"/> si                                                                                                                      |
| Solicitada Vit D                           | <input checked="" type="radio"/> no<br><input type="radio"/> si                                                                                                                      |
| Deficit vit D                              | <input type="radio"/> no<br><input type="radio"/> si                                                                                                                                 |
| Suplemento vit D                           | <input type="radio"/> si<br><input type="radio"/> no                                                                                                                                 |

|                       |                                                                                                                                                                                                                                                                                                                                                                                                              |
|-----------------------|--------------------------------------------------------------------------------------------------------------------------------------------------------------------------------------------------------------------------------------------------------------------------------------------------------------------------------------------------------------------------------------------------------------|
| Dieta, cuestionario   | <input checked="" type="radio"/> sí<br><input type="radio"/> no                                                                                                                                                                                                                                                                                                                                              |
| Leche entera          | <input checked="" type="radio"/> Nunca o menos 1 vez al mes<br><input type="radio"/> 1 a 3 veces mes<br><input type="radio"/> 1 vez semana<br><input type="radio"/> 2 a 4 veces semana<br><input type="radio"/> 5 a 6 veces semana<br><input type="radio"/> 1 vez al día<br><input type="radio"/> 2 a 3 veces al día<br><input type="radio"/> 5 a 6 veces al día<br><input type="radio"/> más 6 veces al día |
| Leche semidesnatada   | <input type="radio"/> Nunca o menos 1 vez al mes<br><input type="radio"/> 1 a 3 veces mes<br><input type="radio"/> 1 vez semana<br><input type="radio"/> 2 a 4 veces semana<br><input type="radio"/> 5 a 6 veces semana<br><input checked="" type="radio"/> 1 vez al día<br><input type="radio"/> 2 a 3 veces al día<br><input type="radio"/> 5 a 6 veces al día<br><input type="radio"/> mas 6 veces al día |
| Leche desnatada       | <input type="radio"/> Nunca o menos 1 vez al mes<br><input type="radio"/> 1 a 3 veces mes<br><input checked="" type="radio"/> 1 vez semana<br><input type="radio"/> 2 a 4 veces semana<br><input type="radio"/> 5 a 6 veces semana<br><input type="radio"/> 1 vez al día<br><input type="radio"/> 2 a 3 veces al día<br><input type="radio"/> 5 a 6 veces al día<br><input type="radio"/> más 6 veces al día |
| Leche condensada      | <input checked="" type="radio"/> Nunca o menos 1 vez al mes<br><input type="radio"/> 1 a 3 veces mes<br><input type="radio"/> 1 vez semana<br><input type="radio"/> 2 a 4 veces semana<br><input type="radio"/> 5 a 6 veces semana<br><input type="radio"/> 1 vez al día<br><input type="radio"/> 2 a 3 veces al día<br><input type="radio"/> 5 a 6 veces al día<br><input type="radio"/> más 6 veces al día |
| nata o crema de leche | <input checked="" type="radio"/> Nunca o menos 1 vez al mes<br><input type="radio"/> 1 a 3 veces mes<br><input type="radio"/> 1 vez semana<br><input type="radio"/> 2 a 4 veces semana<br><input type="radio"/> 5 a 6 veces semana<br><input type="radio"/> 1 vez al día<br><input type="radio"/> 2 a 3 veces al día<br><input type="radio"/> 5 a 6 veces al día<br><input type="radio"/> más 6 veces al día |

|                                             |                                                                                                                                                                                                                                                                                                                                                                                                              |
|---------------------------------------------|--------------------------------------------------------------------------------------------------------------------------------------------------------------------------------------------------------------------------------------------------------------------------------------------------------------------------------------------------------------------------------------------------------------|
| Yogurt Entero                               | <input checked="" type="radio"/> Nunca o menos 1 vez al mes<br><input type="radio"/> 1 a 3 veces mes<br><input type="radio"/> 1 vez semana<br><input type="radio"/> 2 a 4 veces semana<br><input type="radio"/> 5 a 6 veces semana<br><input type="radio"/> 1 vez al día<br><input type="radio"/> 2 a 3 veces al día<br><input type="radio"/> 5 a 6 veces al día<br><input type="radio"/> más 6 veces al día |
| Yogurt desnatado                            | <input type="radio"/> Nunca o menos 1 vez al mes<br><input type="radio"/> 1 a 3 veces mes<br><input type="radio"/> 1 vez semana<br><input type="radio"/> 2 a 4 veces semana<br><input checked="" type="radio"/> 5 a 6 veces semana<br><input type="radio"/> 1 vez al día<br><input type="radio"/> 2 a 3 veces al día<br><input type="radio"/> 5 a 6 veces al día<br><input type="radio"/> más 6 veces al día |
| 100g requesón o queso blando o queso fresco | <input checked="" type="radio"/> Nunca o menos 1 vez al mes<br><input type="radio"/> 1 a 3 veces mes<br><input type="radio"/> 1 vez semana<br><input type="radio"/> 2 a 4 veces semana<br><input type="radio"/> 5 a 6 veces semana<br><input type="radio"/> 1 vez al día<br><input type="radio"/> 2 a 3 veces al día<br><input type="radio"/> 5 a 6 veces al día<br><input type="radio"/> más 6 veces al día |
| queso curado o semicurado o cremoso         | <input type="radio"/> Nunca o menos 1 vez al mes<br><input type="radio"/> 1 a 3 veces mes<br><input type="radio"/> 1 vez semana<br><input checked="" type="radio"/> 2 a 4 veces semana<br><input type="radio"/> 5 a 6 veces semana<br><input type="radio"/> 1 vez al día<br><input type="radio"/> 2 a 3 veces al día<br><input type="radio"/> 5 a 6 veces al día<br><input type="radio"/> más 6 veces al día |
| natillas flan pudding                       | <input checked="" type="radio"/> Nunca o menos 1 vez al mes<br><input type="radio"/> 1 a 3 veces mes<br><input type="radio"/> 1 vez semana<br><input type="radio"/> 2 a 4 veces semana<br><input type="radio"/> 5 a 6 veces semana<br><input type="radio"/> 1 vez al día<br><input type="radio"/> 2 a 3 veces al día<br><input type="radio"/> 5 a 6 veces al día<br><input type="radio"/> más 6 veces al día |
| Helado                                      | <input type="radio"/> Nunca o menos 1 vez al mes<br><input type="radio"/> 1 a 3 veces mes<br><input type="radio"/> 1 vez semana<br><input checked="" type="radio"/> 2 a 4 veces semana<br><input type="radio"/> 5 a 6 veces semana<br><input type="radio"/> 1 vez al día<br><input type="radio"/> 2 a 3 veces al día<br><input type="radio"/> 5 a 6 veces al día<br><input type="radio"/> más 6 veces al día |

|                                      |                                                                                                                                                                                                                                                                                                                                                                                                              |
|--------------------------------------|--------------------------------------------------------------------------------------------------------------------------------------------------------------------------------------------------------------------------------------------------------------------------------------------------------------------------------------------------------------------------------------------------------------|
| huevo                                | <input type="radio"/> Nunca o menos 1 vez al mes<br><input type="radio"/> 1 a 3 veces mes<br><input type="radio"/> 1 vez semana<br><input checked="" type="radio"/> 2 a 4 veces semana<br><input type="radio"/> 5 a 6 veces semana<br><input type="radio"/> 1 vez al día<br><input type="radio"/> 2 a 3 veces al día<br><input type="radio"/> 5 a 6 veces al día<br><input type="radio"/> más 6 veces al día |
| Pollo con piel                       | <input type="radio"/> Nunca o menos 1 vez al mes<br><input type="radio"/> 1 a 3 veces mes<br><input type="radio"/> 1 vez semana<br><input checked="" type="radio"/> 2 a 4 veces semana<br><input type="radio"/> 5 a 6 veces semana<br><input type="radio"/> 1 vez al día<br><input type="radio"/> 2 a 3 veces al día<br><input type="radio"/> 5 a 6 veces al día<br><input type="radio"/> más 6 veces al día |
| pollo sin piel                       | <input type="radio"/> Nunca o menos 1 vez al mes<br><input type="radio"/> 1 a 3 veces mes<br><input type="radio"/> 1 vez semana<br><input type="radio"/> 2 a 4 veces semana<br><input checked="" type="radio"/> 5 a 6 veces semana<br><input type="radio"/> 1 vez al día<br><input type="radio"/> 2 a 3 veces al día<br><input type="radio"/> 5 a 6 veces al día<br><input type="radio"/> más 6 veces al día |
| Ternera o cerdo o cordero            | <input type="radio"/> Nunca o menos 1 vez al mes<br><input checked="" type="radio"/> 1 a 3 veces mes<br><input type="radio"/> 1 vez semana<br><input type="radio"/> 2 a 4 veces semana<br><input type="radio"/> 5 a 6 veces semana<br><input type="radio"/> 1 vez al día<br><input type="radio"/> 2 a 3 veces al día<br><input type="radio"/> 5 a 6 veces al día<br><input type="radio"/> más 6 veces al día |
| carne caza: Conejo o codorniz o pato | <input checked="" type="radio"/> Nunca o menos 1 vez al mes<br><input type="radio"/> 1 a 3 veces mes<br><input type="radio"/> 1 vez semana<br><input type="radio"/> 2 a 4 veces semana<br><input type="radio"/> 5 a 6 veces semana<br><input type="radio"/> 1 vez al día<br><input type="radio"/> 2 a 3 veces al día<br><input type="radio"/> 5 a 6 veces al día<br><input type="radio"/> más 6 veces al día |
| Hígado de ternera o cerdo o pollo    | <input checked="" type="radio"/> Nunca o menos 1 vez al mes<br><input type="radio"/> 1 a 3 veces mes<br><input type="radio"/> 1 vez semana<br><input type="radio"/> 2 a 4 veces semana<br><input type="radio"/> 5 a 6 veces semana<br><input type="radio"/> 1 vez al día<br><input type="radio"/> 2 a 3 veces al día<br><input type="radio"/> 5 a 6 veces al día<br><input type="radio"/> más 6 veces al día |

|                     |                                                                                                                                                                                                                                                                                                                                                                                                              |
|---------------------|--------------------------------------------------------------------------------------------------------------------------------------------------------------------------------------------------------------------------------------------------------------------------------------------------------------------------------------------------------------------------------------------------------------|
| Vísceras            | <input checked="" type="radio"/> Nunca o menos 1 vez al mes<br><input type="radio"/> 1 a 3 veces mes<br><input type="radio"/> 1 vez semana<br><input type="radio"/> 2 a 4 veces semana<br><input type="radio"/> 5 a 6 veces semana<br><input type="radio"/> 1 vez al día<br><input type="radio"/> 2 a 3 veces al día<br><input type="radio"/> 5 a 6 veces al día<br><input type="radio"/> más 6 veces al día |
| Embutido            | <input checked="" type="radio"/> Nunca o menos 1 vez al mes<br><input type="radio"/> 1 a 3 veces mes<br><input type="radio"/> 1 vez semana<br><input type="radio"/> 2 a 4 veces semana<br><input type="radio"/> 5 a 6 veces semana<br><input type="radio"/> 1 vez al día<br><input type="radio"/> 2 a 3 veces al día<br><input type="radio"/> 5 a 6 veces al día<br><input type="radio"/> más 6 veces al día |
| Salchicha o similar | <input checked="" type="radio"/> Nunca o menos 1 vez al mes<br><input type="radio"/> 1 a 3 veces mes<br><input type="radio"/> 1 vez semana<br><input type="radio"/> 2 a 4 veces semana<br><input type="radio"/> 5 a 6 veces semana<br><input type="radio"/> 1 vez al día<br><input type="radio"/> 2 a 3 veces al día<br><input type="radio"/> 5 a 6 veces al día<br><input type="radio"/> más 6 veces al día |
| Pate o foiegras     | <input checked="" type="radio"/> Nunca o menos 1 vez al mes<br><input type="radio"/> 1 a 3 veces mes<br><input type="radio"/> 1 vez semana<br><input type="radio"/> 2 a 4 veces semana<br><input type="radio"/> 5 a 6 veces semana<br><input type="radio"/> 1 vez al día<br><input type="radio"/> 2 a 3 veces al día<br><input type="radio"/> 5 a 6 veces al día<br><input type="radio"/> más 6 veces al día |
| Hamburguesa         | <input type="radio"/> Nunca o menos 1 vez al mes<br><input type="radio"/> 1 a 3 veces mes<br><input checked="" type="radio"/> 1 vez semana<br><input type="radio"/> 2 a 4 veces semana<br><input type="radio"/> 5 a 6 veces semana<br><input type="radio"/> 1 vez al día<br><input type="radio"/> 2 a 3 veces al día<br><input type="radio"/> 5 a 6 veces al día<br><input type="radio"/> más 6 veces al día |
| tocino o bacon      | <input checked="" type="radio"/> Nunca o menos 1 vez al mes<br><input type="radio"/> 1 a 3 veces mes<br><input type="radio"/> 1 vez semana<br><input type="radio"/> 2 a 4 veces semana<br><input type="radio"/> 5 a 6 veces semana<br><input type="radio"/> 1 vez al día<br><input type="radio"/> 2 a 3 veces al día<br><input type="radio"/> 5 a 6 veces al día<br><input type="radio"/> más 6 veces al día |

---

|               |                                                                                                                                                                                                                                                                                                                                                                                                              |
|---------------|--------------------------------------------------------------------------------------------------------------------------------------------------------------------------------------------------------------------------------------------------------------------------------------------------------------------------------------------------------------------------------------------------------------|
| Pescado frito | <input checked="" type="radio"/> Nunca o menos 1 vez al mes<br><input type="radio"/> 1 a 3 veces mes<br><input type="radio"/> 1 vez semana<br><input type="radio"/> 2 a 4 veces semana<br><input type="radio"/> 5 a 6 veces semana<br><input type="radio"/> 1 vez al día<br><input type="radio"/> 2 a 3 veces al día<br><input type="radio"/> 5 a 6 veces al día<br><input type="radio"/> más 6 veces al día |
|---------------|--------------------------------------------------------------------------------------------------------------------------------------------------------------------------------------------------------------------------------------------------------------------------------------------------------------------------------------------------------------------------------------------------------------|

---

|                        |                                                                                                                                                                                                                                                                                                                                                                                                              |
|------------------------|--------------------------------------------------------------------------------------------------------------------------------------------------------------------------------------------------------------------------------------------------------------------------------------------------------------------------------------------------------------------------------------------------------------|
| pescado hervido blanco | <input type="radio"/> Nunca o menos 1 vez al mes<br><input type="radio"/> 1 a 3 veces mes<br><input type="radio"/> 1 vez semana<br><input type="radio"/> 2 a 4 veces semana<br><input checked="" type="radio"/> 5 a 6 veces semana<br><input type="radio"/> 1 vez al día<br><input type="radio"/> 2 a 3 veces al día<br><input type="radio"/> 5 a 6 veces al día<br><input type="radio"/> más 6 veces al día |
|------------------------|--------------------------------------------------------------------------------------------------------------------------------------------------------------------------------------------------------------------------------------------------------------------------------------------------------------------------------------------------------------------------------------------------------------|

---

|                      |                                                                                                                                                                                                                                                                                                                                                                                                              |
|----------------------|--------------------------------------------------------------------------------------------------------------------------------------------------------------------------------------------------------------------------------------------------------------------------------------------------------------------------------------------------------------------------------------------------------------|
| pescado hervido azul | <input type="radio"/> Nunca o menos 1 vez al mes<br><input type="radio"/> 1 a 3 veces mes<br><input type="radio"/> 1 vez semana<br><input type="radio"/> 2 a 4 veces semana<br><input checked="" type="radio"/> 5 a 6 veces semana<br><input type="radio"/> 1 vez al día<br><input type="radio"/> 2 a 3 veces al día<br><input type="radio"/> 5 a 6 veces al día<br><input type="radio"/> más 6 veces al día |
|----------------------|--------------------------------------------------------------------------------------------------------------------------------------------------------------------------------------------------------------------------------------------------------------------------------------------------------------------------------------------------------------------------------------------------------------|

---

|                    |                                                                                                                                                                                                                                                                                                                                                                                                              |
|--------------------|--------------------------------------------------------------------------------------------------------------------------------------------------------------------------------------------------------------------------------------------------------------------------------------------------------------------------------------------------------------------------------------------------------------|
| otros pescado azul | <input type="radio"/> Nunca o menos 1 vez al mes<br><input type="radio"/> 1 a 3 veces mes<br><input type="radio"/> 1 vez semana<br><input checked="" type="radio"/> 2 a 4 veces semana<br><input type="radio"/> 5 a 6 veces semana<br><input type="radio"/> 1 vez al día<br><input type="radio"/> 2 a 3 veces al día<br><input type="radio"/> 5 a 6 veces al día<br><input type="radio"/> más 6 veces al día |
|--------------------|--------------------------------------------------------------------------------------------------------------------------------------------------------------------------------------------------------------------------------------------------------------------------------------------------------------------------------------------------------------------------------------------------------------|

---

|               |                                                                                                                                                                                                                                                                                                                                                                                                              |
|---------------|--------------------------------------------------------------------------------------------------------------------------------------------------------------------------------------------------------------------------------------------------------------------------------------------------------------------------------------------------------------------------------------------------------------|
| atun conserva | <input type="radio"/> Nunca o menos 1 vez al mes<br><input type="radio"/> 1 a 3 veces mes<br><input type="radio"/> 1 vez semana<br><input type="radio"/> 2 a 4 veces semana<br><input checked="" type="radio"/> 5 a 6 veces semana<br><input type="radio"/> 1 vez al día<br><input type="radio"/> 2 a 3 veces al día<br><input type="radio"/> 5 a 6 veces al día<br><input type="radio"/> más 6 veces al día |
|---------------|--------------------------------------------------------------------------------------------------------------------------------------------------------------------------------------------------------------------------------------------------------------------------------------------------------------------------------------------------------------------------------------------------------------|

---

|                  |                                                                                                                                                                                                                                                                                                                                                                                                              |
|------------------|--------------------------------------------------------------------------------------------------------------------------------------------------------------------------------------------------------------------------------------------------------------------------------------------------------------------------------------------------------------------------------------------------------------|
| sardina conserva | <input checked="" type="radio"/> Nunca o menos 1 vez al mes<br><input type="radio"/> 1 a 3 veces mes<br><input type="radio"/> 1 vez semana<br><input type="radio"/> 2 a 4 veces semana<br><input type="radio"/> 5 a 6 veces semana<br><input type="radio"/> 1 vez al día<br><input type="radio"/> 2 a 3 veces al día<br><input type="radio"/> 5 a 6 veces al día<br><input type="radio"/> más 6 veces al día |
|------------------|--------------------------------------------------------------------------------------------------------------------------------------------------------------------------------------------------------------------------------------------------------------------------------------------------------------------------------------------------------------------------------------------------------------|

---



|                                         |                                                                                                                                                                                                                                                                                                                                                                                                              |
|-----------------------------------------|--------------------------------------------------------------------------------------------------------------------------------------------------------------------------------------------------------------------------------------------------------------------------------------------------------------------------------------------------------------------------------------------------------------|
| pescado ahumado                         | <input checked="" type="radio"/> Nunca o menos 1 vez al mes<br><input type="radio"/> 1 a 3 veces mes<br><input type="radio"/> 1 vez semana<br><input type="radio"/> 2 a 4 veces semana<br><input type="radio"/> 5 a 6 veces semana<br><input type="radio"/> 1 vez al día<br><input type="radio"/> 2 a 3 veces al día<br><input type="radio"/> 5 a 6 veces al día<br><input type="radio"/> más 6 veces al día |
| almejas o mejillones o ostras unos 100g | <input type="radio"/> Nunca o menos 1 vez al mes<br><input type="radio"/> 1 a 3 veces mes<br><input checked="" type="radio"/> 1 vez semana<br><input type="radio"/> 2 a 4 veces semana<br><input type="radio"/> 5 a 6 veces semana<br><input type="radio"/> 1 vez al día<br><input type="radio"/> 2 a 3 veces al día<br><input type="radio"/> 5 a 6 veces al día<br><input type="radio"/> más 6 veces al día |
| calamar o chipiron o sepia unos 100g    | <input type="radio"/> Nunca o menos 1 vez al mes<br><input checked="" type="radio"/> 1 a 3 veces mes<br><input type="radio"/> 1 vez semana<br><input type="radio"/> 2 a 4 veces semana<br><input type="radio"/> 5 a 6 veces semana<br><input type="radio"/> 1 vez al día<br><input type="radio"/> 2 a 3 veces al día<br><input type="radio"/> 5 a 6 veces al día<br><input type="radio"/> más 6 veces al día |
| marisco unos 100g                       | <input type="radio"/> Nunca o menos 1 vez al mes<br><input checked="" type="radio"/> 1 a 3 veces mes<br><input type="radio"/> 1 vez semana<br><input type="radio"/> 2 a 4 veces semana<br><input type="radio"/> 5 a 6 veces semana<br><input type="radio"/> 1 vez al día<br><input type="radio"/> 2 a 3 veces al día<br><input type="radio"/> 5 a 6 veces al día<br><input type="radio"/> más 6 veces al día |
| Espinacas o acelgas cocinadas           | <input type="radio"/> Nunca o menos 1 vez al mes<br><input checked="" type="radio"/> 1 a 3 veces mes<br><input type="radio"/> 1 vez semana<br><input type="radio"/> 2 a 4 veces semana<br><input type="radio"/> 5 a 6 veces semana<br><input type="radio"/> 1 vez al día<br><input type="radio"/> 2 a 3 veces al día<br><input type="radio"/> 5 a 6 veces al día<br><input type="radio"/> más 6 veces al día |
| Col o coliflor o brocoli cocinado       | <input type="radio"/> Nunca o menos 1 vez al mes<br><input type="radio"/> 1 a 3 veces mes<br><input type="radio"/> 1 vez semana<br><input type="radio"/> 2 a 4 veces semana<br><input checked="" type="radio"/> 5 a 6 veces semana<br><input type="radio"/> 1 vez al día<br><input type="radio"/> 2 a 3 veces al día<br><input type="radio"/> 5 a 6 veces al día<br><input type="radio"/> más 6 veces al día |

---

Lechuga o endivia o escarola

- ☐ Nunca o menos 1 vez al mes  
☐ 1 a 3 veces mes  
☐ 1 vez semana  
☐ 2 a 4 veces semana  
☒ 5 a 6 veces semana  
☐ 1 vez al día  
☐ 2 a 3 veces al día  
☐ 5 a 6 veces al día  
☐ más 6 veces al día

---

tomate ensalada

- ☐ Nunca o menos 1 vez al mes  
☐ 1 a 3 veces mes  
☐ 1 vez semana  
☐ 2 a 4 veces semana  
☒ 5 a 6 veces semana  
☐ 1 vez al día  
☐ 2 a 3 veces al día  
☐ 5 a 6 veces al día  
☐ más 6 veces al día

---

cebolla

- ☐ Nunca o menos 1 vez al mes  
☐ 1 a 3 veces mes  
☐ 1 vez semana  
☐ 2 a 4 veces semana  
☒ 5 a 6 veces semana  
☐ 1 vez al día  
☐ 2 a 3 veces al día  
☐ 5 a 6 veces al día  
☐ más 6 veces al día

---

Zanahoria o calabaza

- ☐ Nunca o menos 1 vez al mes  
☐ 1 a 3 veces mes  
☐ 1 vez semana  
☐ 2 a 4 veces semana  
☒ 5 a 6 veces semana  
☐ 1 vez al día  
☐ 2 a 3 veces al día  
☐ 5 a 6 veces al día  
☐ más 6 veces al día

---

Judías verdes

- ☐ Nunca o menos 1 vez al mes  
☐ 1 a 3 veces mes  
☐ 1 vez semana  
☐ 2 a 4 veces semana  
☒ 5 a 6 veces semana  
☐ 1 vez al día  
☐ 2 a 3 veces al día  
☐ 5 a 6 veces al día  
☐ más 6 veces al día

---

Berenjena o calabacin o pepino

- ☐ Nunca o menos 1 vez al mes  
☐ 1 a 3 veces mes  
☐ 1 vez semana  
☐ 2 a 4 veces semana  
☒ 5 a 6 veces semana  
☐ 1 vez al día  
☐ 2 a 3 veces al día  
☐ 5 a 6 veces al día  
☐ más 6 veces al día

|                       |                                                                                                                                                                                                                                                                                                                                                                                                              |
|-----------------------|--------------------------------------------------------------------------------------------------------------------------------------------------------------------------------------------------------------------------------------------------------------------------------------------------------------------------------------------------------------------------------------------------------------|
| pimiento              | <input type="radio"/> Nunca o menos 1 vez al mes<br><input type="radio"/> 1 a 3 veces mes<br><input type="radio"/> 1 vez semana<br><input type="radio"/> 2 a 4 veces semana<br><input checked="" type="radio"/> 5 a 6 veces semana<br><input type="radio"/> 1 vez al día<br><input type="radio"/> 2 a 3 veces al día<br><input type="radio"/> 5 a 6 veces al día<br><input type="radio"/> más 6 veces al día |
| alcachofa             | <input type="radio"/> Nunca o menos 1 vez al mes<br><input checked="" type="radio"/> 1 a 3 veces mes<br><input type="radio"/> 1 vez semana<br><input type="radio"/> 2 a 4 veces semana<br><input type="radio"/> 5 a 6 veces semana<br><input type="radio"/> 1 vez al día<br><input type="radio"/> 2 a 3 veces al día<br><input type="radio"/> 5 a 6 veces al día<br><input type="radio"/> más 6 veces al día |
| espárragos            | <input type="radio"/> Nunca o menos 1 vez al mes<br><input checked="" type="radio"/> 1 a 3 veces mes<br><input type="radio"/> 1 vez semana<br><input type="radio"/> 2 a 4 veces semana<br><input type="radio"/> 5 a 6 veces semana<br><input type="radio"/> 1 vez al día<br><input type="radio"/> 2 a 3 veces al día<br><input type="radio"/> 5 a 6 veces al día<br><input type="radio"/> más 6 veces al día |
| maíz hervido          | <input type="radio"/> Nunca o menos 1 vez al mes<br><input type="radio"/> 1 a 3 veces mes<br><input type="radio"/> 1 vez semana<br><input type="radio"/> 2 a 4 veces semana<br><input type="radio"/> 5 a 6 veces semana<br><input type="radio"/> 1 vez al día<br><input type="radio"/> 2 a 3 veces al día<br><input type="radio"/> 5 a 6 veces al día<br><input type="radio"/> más 6 veces al día            |
| legumbres             | <input type="radio"/> Nunca o menos 1 vez al mes<br><input type="radio"/> 1 a 3 veces mes<br><input type="radio"/> 1 vez semana<br><input checked="" type="radio"/> 2 a 4 veces semana<br><input type="radio"/> 5 a 6 veces semana<br><input type="radio"/> 1 vez al día<br><input type="radio"/> 2 a 3 veces al día<br><input type="radio"/> 5 a 6 veces al día<br><input type="radio"/> más 6 veces al día |
| naranjas o mandarinas | <input checked="" type="radio"/> Nunca o menos 1 vez al mes<br><input type="radio"/> 1 a 3 veces mes<br><input type="radio"/> 1 vez semana<br><input type="radio"/> 2 a 4 veces semana<br><input type="radio"/> 5 a 6 veces semana<br><input type="radio"/> 1 vez al día<br><input type="radio"/> 2 a 3 veces al día<br><input type="radio"/> 5 a 6 veces al día<br><input type="radio"/> más 6 veces al día |

---

zum natural fruta

- ☐ Nunca o menos 1 vez al mes  
☐ 1 a 3 veces mes  
☒ 1 vez semana  
☐ 2 a 4 veces semana  
☐ 5 a 6 veces semana  
☐ 1 vez al día  
☐ 2 a 3 veces al día  
☐ 5 a 6 veces al día  
☐ más 6 veces al día

---

platano

- ☐ Nunca o menos 1 vez al mes  
☐ 1 a 3 veces mes  
☐ 1 vez semana  
☒ 2 a 4 veces semana  
☐ 5 a 6 veces semana  
☐ 1 vez al día  
☐ 2 a 3 veces al día  
☐ 5 a 6 veces al día  
☐ más 6 veces al día

---

manzana o pera

- ☐ Nunca o menos 1 vez al mes  
☐ 1 a 3 veces mes  
☐ 1 vez semana  
☒ 2 a 4 veces semana  
☐ 5 a 6 veces semana  
☐ 1 vez al día  
☐ 2 a 3 veces al día  
☐ 5 a 6 veces al día  
☐ más 6 veces al día

---

melocotón o nectarina

- ☐ Nunca o menos 1 vez al mes  
☐ 1 a 3 veces mes  
☐ 1 vez semana  
☒ 2 a 4 veces semana  
☐ 5 a 6 veces semana  
☐ 1 vez al día  
☐ 2 a 3 veces al día  
☐ 5 a 6 veces al día  
☐ más 6 veces al día

---

sandia o melon

- ☐ Nunca o menos 1 vez al mes  
☐ 1 a 3 veces mes  
☐ 1 vez semana  
☐ 2 a 4 veces semana  
☐ 5 a 6 veces semana  
☒ 1 vez al día  
☐ 2 a 3 veces al día  
☐ 5 a 6 veces al día  
☐ más 6 veces al día

---

uva

- ☐ Nunca o menos 1 vez al mes  
☐ 1 a 3 veces mes  
☐ 1 vez semana  
☒ 2 a 4 veces semana  
☐ 5 a 6 veces semana  
☐ 1 vez al día  
☐ 2 a 3 veces al día  
☐ 5 a 6 veces al día  
☐ más 6 veces al día

|                 |                                                                                                                                                                                                                                                                                                                                                                                                              |
|-----------------|--------------------------------------------------------------------------------------------------------------------------------------------------------------------------------------------------------------------------------------------------------------------------------------------------------------------------------------------------------------------------------------------------------------|
| bruna o ciruela | <input checked="" type="radio"/> Nunca o menos 1 vez al mes<br><input type="radio"/> 1 a 3 veces mes<br><input type="radio"/> 1 vez semana<br><input type="radio"/> 2 a 4 veces semana<br><input type="radio"/> 5 a 6 veces semana<br><input type="radio"/> 1 vez al día<br><input type="radio"/> 2 a 3 veces al día<br><input type="radio"/> 5 a 6 veces al día<br><input type="radio"/> más 6 veces al día |
| kiwi            | <input type="radio"/> Nunca o menos 1 vez al mes<br><input checked="" type="radio"/> 1 a 3 veces mes<br><input type="radio"/> 1 vez semana<br><input type="radio"/> 2 a 4 veces semana<br><input type="radio"/> 5 a 6 veces semana<br><input type="radio"/> 1 vez al día<br><input type="radio"/> 2 a 3 veces al día<br><input type="radio"/> 5 a 6 veces al día<br><input type="radio"/> más 6 veces al día |
| aceituna        | <input type="radio"/> Nunca o menos 1 vez al mes<br><input type="radio"/> 1 a 3 veces mes<br><input type="radio"/> 1 vez semana<br><input type="radio"/> 2 a 4 veces semana<br><input checked="" type="radio"/> 5 a 6 veces semana<br><input type="radio"/> 1 vez al día<br><input type="radio"/> 2 a 3 veces al día<br><input type="radio"/> 5 a 6 veces al día<br><input type="radio"/> más 6 veces al día |
| frutos secos    | <input type="radio"/> Nunca o menos 1 vez al mes<br><input type="radio"/> 1 a 3 veces mes<br><input type="radio"/> 1 vez semana<br><input type="radio"/> 2 a 4 veces semana<br><input type="radio"/> 5 a 6 veces semana<br><input checked="" type="radio"/> 1 vez al día<br><input type="radio"/> 2 a 3 veces al día<br><input type="radio"/> 5 a 6 veces al día<br><input type="radio"/> más 6 veces al día |
| pan blanco      | <input checked="" type="radio"/> Nunca o menos 1 vez al mes<br><input type="radio"/> 1 a 3 veces mes<br><input type="radio"/> 1 vez semana<br><input type="radio"/> 2 a 4 veces semana<br><input type="radio"/> 5 a 6 veces semana<br><input type="radio"/> 1 vez al día<br><input type="radio"/> 2 a 3 veces al día<br><input type="radio"/> 5 a 6 veces al día<br><input type="radio"/> más 6 veces al día |
| pan integral    | <input type="radio"/> Nunca o menos 1 vez al mes<br><input type="radio"/> 1 a 3 veces mes<br><input type="radio"/> 1 vez semana<br><input type="radio"/> 2 a 4 veces semana<br><input type="radio"/> 5 a 6 veces semana<br><input checked="" type="radio"/> 1 vez al día<br><input type="radio"/> 2 a 3 veces al día<br><input type="radio"/> 5 a 6 veces al día<br><input type="radio"/> más 6 veces al día |

---

|                   |                                                                                                                                                                                                                                                                                                                                                                                                              |
|-------------------|--------------------------------------------------------------------------------------------------------------------------------------------------------------------------------------------------------------------------------------------------------------------------------------------------------------------------------------------------------------------------------------------------------------|
| cereales desayuno | <input type="radio"/> Nunca o menos 1 vez al mes<br><input type="radio"/> 1 a 3 veces mes<br><input checked="" type="radio"/> 1 vez semana<br><input type="radio"/> 2 a 4 veces semana<br><input type="radio"/> 5 a 6 veces semana<br><input type="radio"/> 1 vez al día<br><input type="radio"/> 2 a 3 veces al día<br><input type="radio"/> 5 a 6 veces al día<br><input type="radio"/> más 6 veces al día |
|-------------------|--------------------------------------------------------------------------------------------------------------------------------------------------------------------------------------------------------------------------------------------------------------------------------------------------------------------------------------------------------------------------------------------------------------|

---

|                |                                                                                                                                                                                                                                                                                                                                                                                                              |
|----------------|--------------------------------------------------------------------------------------------------------------------------------------------------------------------------------------------------------------------------------------------------------------------------------------------------------------------------------------------------------------------------------------------------------------|
| patatas fritas | <input checked="" type="radio"/> Nunca o menos 1 vez al mes<br><input type="radio"/> 1 a 3 veces mes<br><input type="radio"/> 1 vez semana<br><input type="radio"/> 2 a 4 veces semana<br><input type="radio"/> 5 a 6 veces semana<br><input type="radio"/> 1 vez al día<br><input type="radio"/> 2 a 3 veces al día<br><input type="radio"/> 5 a 6 veces al día<br><input type="radio"/> más 6 veces al día |
|----------------|--------------------------------------------------------------------------------------------------------------------------------------------------------------------------------------------------------------------------------------------------------------------------------------------------------------------------------------------------------------------------------------------------------------|

---

|                          |                                                                                                                                                                                                                                                                                                                                                                                                              |
|--------------------------|--------------------------------------------------------------------------------------------------------------------------------------------------------------------------------------------------------------------------------------------------------------------------------------------------------------------------------------------------------------------------------------------------------------|
| patatas cocidas o asadas | <input type="radio"/> Nunca o menos 1 vez al mes<br><input type="radio"/> 1 a 3 veces mes<br><input type="radio"/> 1 vez semana<br><input checked="" type="radio"/> 2 a 4 veces semana<br><input type="radio"/> 5 a 6 veces semana<br><input type="radio"/> 1 vez al día<br><input type="radio"/> 2 a 3 veces al día<br><input type="radio"/> 5 a 6 veces al día<br><input type="radio"/> más 6 veces al día |
|--------------------------|--------------------------------------------------------------------------------------------------------------------------------------------------------------------------------------------------------------------------------------------------------------------------------------------------------------------------------------------------------------------------------------------------------------|

---

|             |                                                                                                                                                                                                                                                                                                                                                                                                              |
|-------------|--------------------------------------------------------------------------------------------------------------------------------------------------------------------------------------------------------------------------------------------------------------------------------------------------------------------------------------------------------------------------------------------------------------|
| bolsa papas | <input checked="" type="radio"/> Nunca o menos 1 vez al mes<br><input type="radio"/> 1 a 3 veces mes<br><input type="radio"/> 1 vez semana<br><input type="radio"/> 2 a 4 veces semana<br><input type="radio"/> 5 a 6 veces semana<br><input type="radio"/> 1 vez al día<br><input type="radio"/> 2 a 3 veces al día<br><input type="radio"/> 5 a 6 veces al día<br><input type="radio"/> más 6 veces al día |
|-------------|--------------------------------------------------------------------------------------------------------------------------------------------------------------------------------------------------------------------------------------------------------------------------------------------------------------------------------------------------------------------------------------------------------------|

---

|                |                                                                                                                                                                                                                                                                                                                                                                                                              |
|----------------|--------------------------------------------------------------------------------------------------------------------------------------------------------------------------------------------------------------------------------------------------------------------------------------------------------------------------------------------------------------------------------------------------------------|
| arroz cocinado | <input type="radio"/> Nunca o menos 1 vez al mes<br><input type="radio"/> 1 a 3 veces mes<br><input type="radio"/> 1 vez semana<br><input checked="" type="radio"/> 2 a 4 veces semana<br><input type="radio"/> 5 a 6 veces semana<br><input type="radio"/> 1 vez al día<br><input type="radio"/> 2 a 3 veces al día<br><input type="radio"/> 5 a 6 veces al día<br><input type="radio"/> más 6 veces al día |
|----------------|--------------------------------------------------------------------------------------------------------------------------------------------------------------------------------------------------------------------------------------------------------------------------------------------------------------------------------------------------------------------------------------------------------------|

---

|       |                                                                                                                                                                                                                                                                                                                                                                                                              |
|-------|--------------------------------------------------------------------------------------------------------------------------------------------------------------------------------------------------------------------------------------------------------------------------------------------------------------------------------------------------------------------------------------------------------------|
| pasta | <input type="radio"/> Nunca o menos 1 vez al mes<br><input type="radio"/> 1 a 3 veces mes<br><input type="radio"/> 1 vez semana<br><input checked="" type="radio"/> 2 a 4 veces semana<br><input type="radio"/> 5 a 6 veces semana<br><input type="radio"/> 1 vez al día<br><input type="radio"/> 2 a 3 veces al día<br><input type="radio"/> 5 a 6 veces al día<br><input type="radio"/> más 6 veces al día |
|-------|--------------------------------------------------------------------------------------------------------------------------------------------------------------------------------------------------------------------------------------------------------------------------------------------------------------------------------------------------------------------------------------------------------------|

---

|                     |                                                                                                                                                                                                                                                                                                                                                                                                              |
|---------------------|--------------------------------------------------------------------------------------------------------------------------------------------------------------------------------------------------------------------------------------------------------------------------------------------------------------------------------------------------------------------------------------------------------------|
| pizza               | <input type="radio"/> Nunca o menos 1 vez al mes<br><input type="radio"/> 1 a 3 veces mes<br><input type="radio"/> 1 vez semana<br><input type="radio"/> 2 a 4 veces semana<br><input checked="" type="radio"/> 5 a 6 veces semana<br><input type="radio"/> 1 vez al día<br><input type="radio"/> 2 a 3 veces al día<br><input type="radio"/> 5 a 6 veces al día<br><input type="radio"/> más 6 veces al día |
| aceite oliva        | <input type="radio"/> Nunca o menos 1 vez al mes<br><input type="radio"/> 1 a 3 veces mes<br><input type="radio"/> 1 vez semana<br><input type="radio"/> 2 a 4 veces semana<br><input type="radio"/> 5 a 6 veces semana<br><input type="radio"/> 1 vez al día<br><input checked="" type="radio"/> 2 a 3 veces al día<br><input type="radio"/> 5 a 6 veces al día<br><input type="radio"/> más 6 veces al día |
| otros aceites       | <input checked="" type="radio"/> Nunca o menos 1 vez al mes<br><input type="radio"/> 1 a 3 veces mes<br><input type="radio"/> 1 vez semana<br><input type="radio"/> 2 a 4 veces semana<br><input type="radio"/> 5 a 6 veces semana<br><input type="radio"/> 1 vez al día<br><input type="radio"/> 2 a 3 veces al día<br><input type="radio"/> 5 a 6 veces al día<br><input type="radio"/> más 6 veces al día |
| margarina           | <input checked="" type="radio"/> Nunca o menos 1 vez al mes<br><input type="radio"/> 1 a 3 veces mes<br><input type="radio"/> 1 vez semana<br><input type="radio"/> 2 a 4 veces semana<br><input type="radio"/> 5 a 6 veces semana<br><input type="radio"/> 1 vez al día<br><input type="radio"/> 2 a 3 veces al día<br><input type="radio"/> 5 a 6 veces al día<br><input type="radio"/> más 6 veces al día |
| mantequilla         | <input type="radio"/> Nunca o menos 1 vez al mes<br><input type="radio"/> 1 a 3 veces mes<br><input checked="" type="radio"/> 1 vez semana<br><input type="radio"/> 2 a 4 veces semana<br><input type="radio"/> 5 a 6 veces semana<br><input type="radio"/> 1 vez al día<br><input type="radio"/> 2 a 3 veces al día<br><input type="radio"/> 5 a 6 veces al día<br><input type="radio"/> más 6 veces al día |
| galletas tipo maria | <input checked="" type="radio"/> Nunca o menos 1 vez al mes<br><input type="radio"/> 1 a 3 veces mes<br><input type="radio"/> 1 vez semana<br><input type="radio"/> 2 a 4 veces semana<br><input type="radio"/> 5 a 6 veces semana<br><input type="radio"/> 1 vez al día<br><input type="radio"/> 2 a 3 veces al día<br><input type="radio"/> 5 a 6 veces al día<br><input type="radio"/> más 6 veces al día |

|                           |                                                                                                                                                                                                                                                                                                                                                                                                              |
|---------------------------|--------------------------------------------------------------------------------------------------------------------------------------------------------------------------------------------------------------------------------------------------------------------------------------------------------------------------------------------------------------------------------------------------------------|
| galletas chocolate        | <input type="radio"/> Nunca o menos 1 vez al mes<br><input type="radio"/> 1 a 3 veces mes<br><input type="radio"/> 1 vez semana<br><input checked="" type="radio"/> 2 a 4 veces semana<br><input type="radio"/> 5 a 6 veces semana<br><input type="radio"/> 1 vez al día<br><input type="radio"/> 2 a 3 veces al día<br><input type="radio"/> 5 a 6 veces al día<br><input type="radio"/> más 6 veces al día |
| bollieria                 | <input checked="" type="radio"/> Nunca o menos 1 vez al mes<br><input type="radio"/> 1 a 3 veces mes<br><input type="radio"/> 1 vez semana<br><input type="radio"/> 2 a 4 veces semana<br><input type="radio"/> 5 a 6 veces semana<br><input type="radio"/> 1 vez al día<br><input type="radio"/> 2 a 3 veces al día<br><input type="radio"/> 5 a 6 veces al día<br><input type="radio"/> más 6 veces al día |
| chocolate o bombones      | <input type="radio"/> Nunca o menos 1 vez al mes<br><input type="radio"/> 1 a 3 veces mes<br><input type="radio"/> 1 vez semana<br><input type="radio"/> 2 a 4 veces semana<br><input type="radio"/> 5 a 6 veces semana<br><input checked="" type="radio"/> 1 vez al día<br><input type="radio"/> 2 a 3 veces al día<br><input type="radio"/> 5 a 6 veces al día<br><input type="radio"/> más 6 veces al día |
| chocolate polvo o colacao | <input checked="" type="radio"/> Nunca o menos 1 vez al mes<br><input type="radio"/> 1 a 3 veces mes<br><input type="radio"/> 1 vez semana<br><input type="radio"/> 2 a 4 veces semana<br><input type="radio"/> 5 a 6 veces semana<br><input type="radio"/> 1 vez al día<br><input type="radio"/> 2 a 3 veces al día<br><input type="radio"/> 5 a 6 veces al día<br><input type="radio"/> más 6 veces al día |
| vino tinto                | <input checked="" type="radio"/> Nunca o menos 1 vez al mes<br><input type="radio"/> 1 a 3 veces mes<br><input type="radio"/> 1 vez semana<br><input type="radio"/> 2 a 4 veces semana<br><input type="radio"/> 5 a 6 veces semana<br><input type="radio"/> 1 vez al día<br><input type="radio"/> 2 a 3 veces al día<br><input type="radio"/> 5 a 6 veces al día<br><input type="radio"/> más 6 veces al día |
| vino blanco               | <input checked="" type="radio"/> Nunca o menos 1 vez al mes<br><input type="radio"/> 1 a 3 veces mes<br><input type="radio"/> 1 vez semana<br><input type="radio"/> 2 a 4 veces semana<br><input type="radio"/> 5 a 6 veces semana<br><input type="radio"/> 1 vez al día<br><input type="radio"/> 2 a 3 veces al día<br><input type="radio"/> 5 a 6 veces al día<br><input type="radio"/> más 6 veces al día |



|                       |                                                                                                                                                                                                                                                                                                                                                                                                              |
|-----------------------|--------------------------------------------------------------------------------------------------------------------------------------------------------------------------------------------------------------------------------------------------------------------------------------------------------------------------------------------------------------------------------------------------------------|
| vino seco o vermut    | <input checked="" type="radio"/> Nunca o menos 1 vez al mes<br><input type="radio"/> 1 a 3 veces mes<br><input type="radio"/> 1 vez semana<br><input type="radio"/> 2 a 4 veces semana<br><input type="radio"/> 5 a 6 veces semana<br><input type="radio"/> 1 vez al día<br><input type="radio"/> 2 a 3 veces al día<br><input type="radio"/> 5 a 6 veces al día<br><input type="radio"/> más 6 veces al día |
| cerveza               | <input checked="" type="radio"/> Nunca o menos 1 vez al mes<br><input type="radio"/> 1 a 3 veces mes<br><input type="radio"/> 1 vez semana<br><input type="radio"/> 2 a 4 veces semana<br><input type="radio"/> 5 a 6 veces semana<br><input type="radio"/> 1 vez al día<br><input type="radio"/> 2 a 3 veces al día<br><input type="radio"/> 5 a 6 veces al día<br><input type="radio"/> más 6 veces al día |
| cerveza sin alcohol   | <input type="radio"/> Nunca o menos 1 vez al mes<br><input checked="" type="radio"/> 1 a 3 veces mes<br><input type="radio"/> 1 vez semana<br><input type="radio"/> 2 a 4 veces semana<br><input type="radio"/> 5 a 6 veces semana<br><input type="radio"/> 1 vez al día<br><input type="radio"/> 2 a 3 veces al día<br><input type="radio"/> 5 a 6 veces al día<br><input type="radio"/> más 6 veces al día |
| licores               | <input checked="" type="radio"/> Nunca o menos 1 vez al mes<br><input type="radio"/> 1 a 3 veces mes<br><input type="radio"/> 1 vez semana<br><input type="radio"/> 2 a 4 veces semana<br><input type="radio"/> 5 a 6 veces semana<br><input type="radio"/> 1 vez al día<br><input type="radio"/> 2 a 3 veces al día<br><input type="radio"/> 5 a 6 veces al día<br><input type="radio"/> más 6 veces al día |
| ginebra o ron o vodka | <input checked="" type="radio"/> Nunca o menos 1 vez al mes<br><input type="radio"/> 1 a 3 veces mes<br><input type="radio"/> 1 vez semana<br><input type="radio"/> 2 a 4 veces semana<br><input type="radio"/> 5 a 6 veces semana<br><input type="radio"/> 1 vez al día<br><input type="radio"/> 2 a 3 veces al día<br><input type="radio"/> 5 a 6 veces al día<br><input type="radio"/> más 6 veces al día |
| refresco normal       | <input checked="" type="radio"/> Nunca o menos 1 vez al mes<br><input type="radio"/> 1 a 3 veces mes<br><input type="radio"/> 1 vez semana<br><input type="radio"/> 2 a 4 veces semana<br><input type="radio"/> 5 a 6 veces semana<br><input type="radio"/> 1 vez al día<br><input type="radio"/> 2 a 3 veces al día<br><input type="radio"/> 5 a 6 veces al día<br><input type="radio"/> más 6 veces al día |

---

|                     |                                                                                                                                                                                                                                                                                                                                                                                                              |
|---------------------|--------------------------------------------------------------------------------------------------------------------------------------------------------------------------------------------------------------------------------------------------------------------------------------------------------------------------------------------------------------------------------------------------------------|
| refresco sin azúcar | <input type="radio"/> Nunca o menos 1 vez al mes<br><input type="radio"/> 1 a 3 veces mes<br><input checked="" type="radio"/> 1 vez semana<br><input type="radio"/> 2 a 4 veces semana<br><input type="radio"/> 5 a 6 veces semana<br><input type="radio"/> 1 vez al día<br><input type="radio"/> 2 a 3 veces al día<br><input type="radio"/> 5 a 6 veces al día<br><input type="radio"/> más 6 veces al día |
|---------------------|--------------------------------------------------------------------------------------------------------------------------------------------------------------------------------------------------------------------------------------------------------------------------------------------------------------------------------------------------------------------------------------------------------------|

---

|                |                                                                                                                                                                                                                                                                                                                                                                                                              |
|----------------|--------------------------------------------------------------------------------------------------------------------------------------------------------------------------------------------------------------------------------------------------------------------------------------------------------------------------------------------------------------------------------------------------------------|
| Agua del grifo | <input checked="" type="radio"/> Nunca o menos 1 vez al mes<br><input type="radio"/> 1 a 3 veces mes<br><input type="radio"/> 1 vez semana<br><input type="radio"/> 2 a 4 veces semana<br><input type="radio"/> 5 a 6 veces semana<br><input type="radio"/> 1 vez al día<br><input type="radio"/> 2 a 3 veces al día<br><input type="radio"/> 5 a 6 veces al día<br><input type="radio"/> más 6 veces al día |
|----------------|--------------------------------------------------------------------------------------------------------------------------------------------------------------------------------------------------------------------------------------------------------------------------------------------------------------------------------------------------------------------------------------------------------------|

---

|                          |                                                                                                                                                                                                                                                                                                                                                                                                              |
|--------------------------|--------------------------------------------------------------------------------------------------------------------------------------------------------------------------------------------------------------------------------------------------------------------------------------------------------------------------------------------------------------------------------------------------------------|
| agua embotellada sin gas | <input type="radio"/> Nunca o menos 1 vez al mes<br><input type="radio"/> 1 a 3 veces mes<br><input type="radio"/> 1 vez semana<br><input type="radio"/> 2 a 4 veces semana<br><input type="radio"/> 5 a 6 veces semana<br><input type="radio"/> 1 vez al día<br><input type="radio"/> 2 a 3 veces al día<br><input checked="" type="radio"/> 5 a 6 veces al día<br><input type="radio"/> más 6 veces al día |
|--------------------------|--------------------------------------------------------------------------------------------------------------------------------------------------------------------------------------------------------------------------------------------------------------------------------------------------------------------------------------------------------------------------------------------------------------|

---

|                          |                                                                                                                                                                                                                                                                                                                                                                                                              |
|--------------------------|--------------------------------------------------------------------------------------------------------------------------------------------------------------------------------------------------------------------------------------------------------------------------------------------------------------------------------------------------------------------------------------------------------------|
| agua embotellada con gas | <input type="radio"/> Nunca o menos 1 vez al mes<br><input type="radio"/> 1 a 3 veces mes<br><input checked="" type="radio"/> 1 vez semana<br><input type="radio"/> 2 a 4 veces semana<br><input type="radio"/> 5 a 6 veces semana<br><input type="radio"/> 1 vez al día<br><input type="radio"/> 2 a 3 veces al día<br><input type="radio"/> 5 a 6 veces al día<br><input type="radio"/> más 6 veces al día |
|--------------------------|--------------------------------------------------------------------------------------------------------------------------------------------------------------------------------------------------------------------------------------------------------------------------------------------------------------------------------------------------------------------------------------------------------------|

---

|                       |                                                                                                                                                                                                                                                                                                                                                                                                              |
|-----------------------|--------------------------------------------------------------------------------------------------------------------------------------------------------------------------------------------------------------------------------------------------------------------------------------------------------------------------------------------------------------------------------------------------------------|
| zumos frutas emvasado | <input checked="" type="radio"/> Nunca o menos 1 vez al mes<br><input type="radio"/> 1 a 3 veces mes<br><input type="radio"/> 1 vez semana<br><input type="radio"/> 2 a 4 veces semana<br><input type="radio"/> 5 a 6 veces semana<br><input type="radio"/> 1 vez al día<br><input type="radio"/> 2 a 3 veces al día<br><input type="radio"/> 5 a 6 veces al día<br><input type="radio"/> más 6 veces al día |
|-----------------------|--------------------------------------------------------------------------------------------------------------------------------------------------------------------------------------------------------------------------------------------------------------------------------------------------------------------------------------------------------------------------------------------------------------|

---

|      |                                                                                                                                                                                                                                                                                                                                                                                                              |
|------|--------------------------------------------------------------------------------------------------------------------------------------------------------------------------------------------------------------------------------------------------------------------------------------------------------------------------------------------------------------------------------------------------------------|
| café | <input type="radio"/> Nunca o menos 1 vez al mes<br><input type="radio"/> 1 a 3 veces mes<br><input type="radio"/> 1 vez semana<br><input type="radio"/> 2 a 4 veces semana<br><input type="radio"/> 5 a 6 veces semana<br><input checked="" type="radio"/> 1 vez al día<br><input type="radio"/> 2 a 3 veces al día<br><input type="radio"/> 5 a 6 veces al día<br><input type="radio"/> más 6 veces al día |
|------|--------------------------------------------------------------------------------------------------------------------------------------------------------------------------------------------------------------------------------------------------------------------------------------------------------------------------------------------------------------------------------------------------------------|

---

---

cafe descafeinado

- ☐ Nunca o menos 1 vez al mes  
☐ 1 a 3 veces mes  
☐ 1 vez semana  
☐ 2 a 4 veces semana  
☐ 5 a 6 veces semana  
☒ 1 vez al día  
☐ 2 a 3 veces al día  
☐ 5 a 6 veces al día  
☐ más 6 veces al día

---

te o infusión

- ☐ Nunca o menos 1 vez al mes  
☐ 1 a 3 veces mes  
☐ 1 vez semana  
☐ 2 a 4 veces semana  
☒ 5 a 6 veces semana  
☐ 1 vez al día  
☐ 2 a 3 veces al día  
☐ 5 a 6 veces al día  
☐ más 6 veces al día

---

sopa o puré verduras

- ☐ Nunca o menos 1 vez al mes  
☐ 1 a 3 veces mes  
☐ 1 vez semana  
☐ 2 a 4 veces semana  
☒ 5 a 6 veces semana  
☐ 1 vez al día  
☐ 2 a 3 veces al día  
☐ 5 a 6 veces al día  
☐ más 6 veces al día

---

croquetas pollo jamón

- ☒ Nunca o menos 1 vez al mes  
☐ 1 a 3 veces mes  
☐ 1 vez semana  
☐ 2 a 4 veces semana  
☐ 5 a 6 veces semana  
☐ 1 vez al día  
☐ 2 a 3 veces al día  
☐ 5 a 6 veces al día  
☐ más 6 veces al día

---

croquetas pescado

- ☒ Nunca o menos 1 vez al mes  
☐ 1 a 3 veces mes  
☐ 1 vez semana  
☐ 2 a 4 veces semana  
☐ 5 a 6 veces semana  
☐ 1 vez al día  
☐ 2 a 3 veces al día  
☐ 5 a 6 veces al día  
☐ más 6 veces al día

---

mayonesa

- ☒ Nunca o menos 1 vez al mes  
☐ 1 a 3 veces mes  
☐ 1 vez semana  
☐ 2 a 4 veces semana  
☐ 5 a 6 veces semana  
☐ 1 vez al día  
☐ 2 a 3 veces al día  
☐ 5 a 6 veces al día  
☐ más 6 veces al día

---

salsa tomate

- ☐ Nunca o menos 1 vez al mes  
☐ 1 a 3 veces mes  
☐ 1 vez semana  
☒ 2 a 4 veces semana  
☐ 5 a 6 veces semana  
☐ 1 vez al día  
☐ 2 a 3 veces al día  
☐ 5 a 6 veces al día  
☐ más 6 veces al día

---

ketchup

- ☐ Nunca o menos 1 vez al mes  
☐ 1 a 3 veces mes  
☐ 1 vez semana  
☐ 2 a 4 veces semana  
☐ 5 a 6 veces semana  
☒ 1 vez al día  
☐ 2 a 3 veces al día  
☐ 5 a 6 veces al día  
☐ más 6 veces al día

---

sal

- ☐ Nunca o menos 1 vez al mes  
☐ 1 a 3 veces mes  
☐ 1 vez semana  
☐ 2 a 4 veces semana  
☐ 5 a 6 veces semana  
☒ 1 vez al día  
☐ 2 a 3 veces al día  
☐ 5 a 6 veces al día  
☐ más 6 veces al día

---

ajo

- ☒ Nunca o menos 1 vez al mes  
☐ 1 a 3 veces mes  
☐ 1 vez semana  
☐ 2 a 4 veces semana  
☐ 5 a 6 veces semana  
☐ 1 vez al día  
☐ 2 a 3 veces al día  
☐ 5 a 6 veces al día  
☐ más 6 veces al día

---

mermelada o miel

- ☒ Nunca o menos 1 vez al mes  
☐ 1 a 3 veces mes  
☐ 1 vez semana  
☐ 2 a 4 veces semana  
☐ 5 a 6 veces semana  
☐ 1 vez al día  
☐ 2 a 3 veces al día  
☐ 5 a 6 veces al día  
☐ más 6 veces al día

---

azúcar

- ☒ Nunca o menos 1 vez al mes  
☐ 1 a 3 veces mes  
☐ 1 vez semana  
☐ 2 a 4 veces semana  
☐ 5 a 6 veces semana  
☐ 1 vez al día  
☐ 2 a 3 veces al día  
☐ 5 a 6 veces al día  
☐ más 6 veces al día

|                                       |                                                                                                                                                                                                                                                                                                                                                                                                                                                                                                                               |
|---------------------------------------|-------------------------------------------------------------------------------------------------------------------------------------------------------------------------------------------------------------------------------------------------------------------------------------------------------------------------------------------------------------------------------------------------------------------------------------------------------------------------------------------------------------------------------|
| Otro alimento                         |                                                                                                                                                                                                                                                                                                                                                                                                                                                                                                                               |
| suplementos vitamínicos               | <input checked="" type="radio"/> si<br><input type="radio"/> no                                                                                                                                                                                                                                                                                                                                                                                                                                                               |
| suplementos vitamínicos               | [*DATA REMOVED*]                                                                                                                                                                                                                                                                                                                                                                                                                                                                                                              |
| dieta previa                          | <input checked="" type="radio"/> si<br><input type="radio"/> no                                                                                                                                                                                                                                                                                                                                                                                                                                                               |
| motivo dieta                          | <input type="radio"/> no dieta<br><input checked="" type="radio"/> control peso<br><input type="radio"/> control colesterol<br><input type="radio"/> control diabetes<br><input type="radio"/> problemas estómago<br><input type="radio"/> problemas vesícula o hepáticos<br><input type="radio"/> HTA o cardiopatía<br><input type="radio"/> problemas renales<br><input type="radio"/> alergia alimentaria<br><input type="radio"/> ácido úrico elevado<br><input type="radio"/> vegetariana<br><input type="radio"/> otros |
| cambio alimentos año previo gestación | <input checked="" type="radio"/> si<br><input type="radio"/> no                                                                                                                                                                                                                                                                                                                                                                                                                                                               |
| cambio lácteos                        | <input type="radio"/> eliminado<br><input type="radio"/> disminuido<br><input checked="" type="radio"/> igual<br><input type="radio"/> aumentado<br><input type="radio"/> no sabe                                                                                                                                                                                                                                                                                                                                             |
| cambio huevos                         | <input type="radio"/> eliminado<br><input type="radio"/> disminuido<br><input checked="" type="radio"/> igual<br><input type="radio"/> aumentado<br><input type="radio"/> no sabe                                                                                                                                                                                                                                                                                                                                             |
| cambio carne                          | <input type="radio"/> eliminado<br><input type="radio"/> disminuido<br><input checked="" type="radio"/> igual<br><input type="radio"/> aumentado<br><input type="radio"/> no sabe                                                                                                                                                                                                                                                                                                                                             |
| cambio pescado                        | <input type="radio"/> eliminado<br><input type="radio"/> disminuido<br><input checked="" type="radio"/> igual<br><input type="radio"/> aumentado<br><input type="radio"/> no sabe                                                                                                                                                                                                                                                                                                                                             |
| cambio verduras                       | <input type="radio"/> eliminado<br><input type="radio"/> disminuido<br><input checked="" type="radio"/> igual<br><input type="radio"/> aumentado<br><input type="radio"/> no sabe                                                                                                                                                                                                                                                                                                                                             |

|                            |                                                                                                                                                                                                                        |
|----------------------------|------------------------------------------------------------------------------------------------------------------------------------------------------------------------------------------------------------------------|
| cambio legumbres           | <input type="radio"/> eliminado<br><input type="radio"/> disminuido<br><input checked="" type="radio"/> igual<br><input type="radio"/> aumentado<br><input type="radio"/> no sabe                                      |
| cambio fruta               | <input type="radio"/> eliminado<br><input type="radio"/> disminuido<br><input checked="" type="radio"/> igual<br><input type="radio"/> aumentado<br><input type="radio"/> no sabe                                      |
| cambio pan                 | <input type="radio"/> eliminado<br><input type="radio"/> disminuido<br><input checked="" type="radio"/> igual<br><input type="radio"/> aumentado<br><input type="radio"/> no sabe                                      |
| cambio aceite oliva        | <input type="radio"/> eliminado<br><input type="radio"/> disminuido<br><input checked="" type="radio"/> igual<br><input type="radio"/> aumentado<br><input type="radio"/> no sabe                                      |
| cambio mante o margarina   | <input type="radio"/> eliminado<br><input type="radio"/> disminuido<br><input checked="" type="radio"/> igual<br><input type="radio"/> aumentado<br><input type="radio"/> no sabe                                      |
| cambio azúcar y dulces     | <input type="radio"/> eliminado<br><input type="radio"/> disminuido<br><input checked="" type="radio"/> igual<br><input type="radio"/> aumentado<br><input type="radio"/> no sabe                                      |
| cambio bebidas alcohólicas | <input checked="" type="radio"/> eliminado<br><input type="radio"/> disminuido<br><input type="radio"/> igual<br><input type="radio"/> aumentado<br><input type="radio"/> no sabe                                      |
| frecuencia comidas fritas  | <input type="radio"/> a diario<br><input type="radio"/> 5 a 6 veces semana<br><input type="radio"/> 2 a 4 veces semana<br><input type="radio"/> 1 vez semana<br><input checked="" type="radio"/> menos de 1 vez semana |
| carne                      | <input type="radio"/> no como<br><input type="radio"/> cruda<br><input type="radio"/> poco hecha<br><input checked="" type="radio"/> hecha<br><input type="radio"/> muy hecha                                          |
| grasa visible carne        | <input type="radio"/> quita toda<br><input checked="" type="radio"/> quita mayoría<br><input type="radio"/> quita un poco<br><input type="radio"/> no quita nada                                                       |

|                                |                                                                                                                                                                                                                                                          |
|--------------------------------|----------------------------------------------------------------------------------------------------------------------------------------------------------------------------------------------------------------------------------------------------------|
| cocina carne                   | <input checked="" type="radio"/> a la plancha<br><input type="radio"/> a la parrilla<br><input type="radio"/> asada<br><input type="radio"/> frita<br><input type="radio"/> guisada                                                                      |
| tostado quemado carne          | <input checked="" type="radio"/> nunca<br><input type="radio"/> 1 vez mes<br><input type="radio"/> 2 a 3 veces mes<br><input type="radio"/> 1 vez semana<br><input type="radio"/> 2 a 3 semanas                                                          |
| tostado quemado pescado        | <input checked="" type="radio"/> nunca<br><input type="radio"/> 1 vez mes<br><input type="radio"/> 2 a 3 veces mes<br><input type="radio"/> 1 vez semana<br><input type="radio"/> 2 a 3 semanas                                                          |
| socarrat paella                | <input type="radio"/> nunca<br><input checked="" type="radio"/> 1 vez mes<br><input type="radio"/> 2 a 3 veces mes<br><input type="radio"/> 1 vez semana<br><input type="radio"/> 2 a 3 semanas                                                          |
| grasa o aceite cocinar         | <input type="radio"/> mantequilla<br><input type="radio"/> margarina<br><input checked="" type="radio"/> aceite oliva<br><input type="radio"/> aceite oliva virgen extra<br><input type="radio"/> aceite vegetal<br><input type="radio"/> mezcla aceites |
| grasa aceite aliñar            | <input type="radio"/> mantequilla<br><input type="radio"/> margarina<br><input checked="" type="radio"/> aceite oliva<br><input type="radio"/> aceite oliva virgen extra<br><input type="radio"/> aceite vegetal<br><input type="radio"/> mezcla aceites |
| grasa aceite freir             | <input type="radio"/> mantequilla<br><input type="radio"/> margarina<br><input type="radio"/> aceite oliva<br><input type="radio"/> aceite oliva virgen extra<br><input type="radio"/> aceite vegetal<br><input type="radio"/> mezcla aceites            |
| Ejercicio cuestionario         | <input checked="" type="radio"/> si<br><input type="radio"/> no                                                                                                                                                                                          |
| horas de sueño incluido siesta | <hr/>                                                                                                                                                                                                                                                    |
| minutos siesta                 | [*DATA REMOVED*]                                                                                                                                                                                                                                         |
| horas televisión semana        | [*DATA REMOVED*]                                                                                                                                                                                                                                         |

|                                        |                                                                                                                                                                                                                                                                                                                                                                           |
|----------------------------------------|---------------------------------------------------------------------------------------------------------------------------------------------------------------------------------------------------------------------------------------------------------------------------------------------------------------------------------------------------------------------------|
| actividad trabajo                      | <input type="radio"/> casi siempre sentado<br><input type="radio"/> sentado 50 por cien<br><input type="radio"/> casi siempre de pie, quieto<br><input type="radio"/> casi siempre levantado caminando y llevando pocas cosas<br><input checked="" type="radio"/> casi siempre levantado, caminando y llevado muchas cosas<br><input type="radio"/> trabajo manual pesado |
| tiempo caminar o bici al día           | <input type="radio"/> casi nunca<br><input type="radio"/> menos 20min día<br><input type="radio"/> 20 a 40 min día<br><input type="radio"/> 40 a 60 min día<br><input type="radio"/> 1h o 1h y media día<br><input checked="" type="radio"/> más de 1h y media al día                                                                                                     |
| tiempo tareas casa al día              | <input type="radio"/> menos de 1h día<br><input checked="" type="radio"/> 1 a 2h día<br><input type="radio"/> 3 a 4h día<br><input type="radio"/> 5 a 6h día<br><input type="radio"/> 7 a 8h día<br><input type="radio"/> más de 8h día                                                                                                                                   |
| tiempo libre televisión ordenador leer | <input checked="" type="radio"/> menos 1h día<br><input type="radio"/> 1h día<br><input type="radio"/> 2h día<br><input type="radio"/> 3h día<br><input type="radio"/> 4h día<br><input type="radio"/> 5 a 6h día<br><input type="radio"/> mas 6h día                                                                                                                     |
| tiempo libre ejercicio o deporte       | <input type="radio"/> menos 1h semana<br><input checked="" type="radio"/> 1h semana<br><input type="radio"/> 2h semana<br><input type="radio"/> 3h semana<br><input type="radio"/> 4 a 5h semana<br><input type="radio"/> mas 5h semana                                                                                                                                   |
| como se considera                      | <input type="radio"/> sedentaria<br><input type="radio"/> poco activa<br><input type="radio"/> moderadamente activa<br><input checked="" type="radio"/> bastante activa<br><input type="radio"/> muy activa<br><input type="radio"/> no sabe                                                                                                                              |
| FUR                                    | [*DATA REMOVED*]                                                                                                                                                                                                                                                                                                                                                          |
| Semanas gestación 2T                   | [*DATA REMOVED*]                                                                                                                                                                                                                                                                                                                                                          |
| Días gestación 2T                      | [*DATA REMOVED*]                                                                                                                                                                                                                                                                                                                                                          |
| DBP 2T                                 | [*DATA REMOVED*]                                                                                                                                                                                                                                                                                                                                                          |
| CC 2T                                  | [*DATA REMOVED*]                                                                                                                                                                                                                                                                                                                                                          |
| AC 2T                                  | [*DATA REMOVED*]                                                                                                                                                                                                                                                                                                                                                          |



|                                                   |                                                                                                                                                                                                 |
|---------------------------------------------------|-------------------------------------------------------------------------------------------------------------------------------------------------------------------------------------------------|
| LF 2T                                             | [*DATA REMOVED*]                                                                                                                                                                                |
| PFE 2T (Hadlock)                                  | [*DATA REMOVED*]                                                                                                                                                                                |
| Semanas gestación 3T                              | [*DATA REMOVED*]                                                                                                                                                                                |
| días 3T                                           | [*DATA REMOVED*]                                                                                                                                                                                |
| DBP 3T                                            | [*DATA REMOVED*]                                                                                                                                                                                |
| CC 3T                                             | [*DATA REMOVED*]                                                                                                                                                                                |
| AC 3T                                             | [*DATA REMOVED*]                                                                                                                                                                                |
| LF 3T                                             | [*DATA REMOVED*]                                                                                                                                                                                |
| PFE 3T (Hadlock)                                  | [*DATA REMOVED*]                                                                                                                                                                                |
| Semanas de gestación final                        | [*DATA REMOVED*]                                                                                                                                                                                |
| días gestación final                              | [*DATA REMOVED*]                                                                                                                                                                                |
| Localización placenta                             | <input checked="" type="radio"/> anterior<br><input type="radio"/> lateral derecha<br><input type="radio"/> lateral izquierda<br><input type="radio"/> posterior<br><input type="radio"/> fondo |
| Presentación longitudinal cefálica                | <input type="radio"/> no<br><input checked="" type="radio"/> si                                                                                                                                 |
| Dorso                                             | <input checked="" type="radio"/> izquierda anterior<br><input type="radio"/> izquierda posterior<br><input type="radio"/> derecha anterior<br><input type="radio"/> derecha posterior           |
| diámetro biparietal                               | [*DATA REMOVED*]                                                                                                                                                                                |
| Circunferencia craneal                            | [*DATA REMOVED*]                                                                                                                                                                                |
| Circunferencia abdominal                          | [*DATA REMOVED*]                                                                                                                                                                                |
| Longitud de femur                                 | [*DATA REMOVED*]                                                                                                                                                                                |
| tejido celular subcutáneo a nivel del muslo en mm | [*DATA REMOVED*]                                                                                                                                                                                |
| tejido celular subcutáneo en abdomen en mm        | [*DATA REMOVED*]                                                                                                                                                                                |
| Volumen del muslo en cm3                          | [*DATA REMOVED*]                                                                                                                                                                                |
| Peso fetal estimado según fórmula de Hadlock      | [*DATA REMOVED*]                                                                                                                                                                                |

|                                               |                                                                                                                                               |
|-----------------------------------------------|-----------------------------------------------------------------------------------------------------------------------------------------------|
| Percentil                                     | [*DATA REMOVED*]                                                                                                                              |
| Peso fetal estimado según fórmula de Scioscia | <hr/>                                                                                                                                         |
| Peso fetal estimado según fórmula de LEE      | <hr/>                                                                                                                                         |
| Tipo de parto                                 | <input type="radio"/> eutocico<br><input type="radio"/> instrumentado/ventosa<br><input type="radio"/> cesarea                                |
| fecha de nacimiento                           | [*DATA REMOVED*]                                                                                                                              |
| Días entre exploración y nacimiento           | [*DATA REMOVED*]                                                                                                                              |
| Peso RN en g                                  | [*DATA REMOVED*]                                                                                                                              |
| sexo                                          | <input checked="" type="radio"/> mujer<br><input type="radio"/> hombre                                                                        |
| Apgar 1 minuto                                | [*DATA REMOVED*]                                                                                                                              |
| Apgar 5 minutos                               | [*DATA REMOVED*]                                                                                                                              |
| Apgar 10 minutos                              | <hr/>                                                                                                                                         |
| antecedente Covid durante gestación           | <input type="radio"/> Yes<br><input checked="" type="radio"/> No                                                                              |
| Nivel de estudios                             | <input type="radio"/> ninguno<br><input type="radio"/> primarios<br><input type="radio"/> secundarios<br><input type="radio"/> universitarios |

## Base\_datos\_estimacion\_peso\_fetal

|                                       |                                                                                                                                                                                                                                                                                      |
|---------------------------------------|--------------------------------------------------------------------------------------------------------------------------------------------------------------------------------------------------------------------------------------------------------------------------------------|
| Número de identificación participante | 150                                                                                                                                                                                                                                                                                  |
| CODIGO PARTICIPANTE                   |                                                                                                                                                                                                                                                                                      |
| Edad                                  | [*DATA REMOVED*]                                                                                                                                                                                                                                                                     |
| Gestaciones                           | <input checked="" type="radio"/> 1<br><input type="radio"/> 2<br><input type="radio"/> 3<br><input type="radio"/> mas de 3                                                                                                                                                           |
| partos                                | <input checked="" type="radio"/> 0<br><input type="radio"/> 1<br><input type="radio"/> 2<br><input type="radio"/> 3<br><input type="radio"/> mas de 3                                                                                                                                |
| cesáreas                              | <input checked="" type="radio"/> 0<br><input type="radio"/> 1<br><input type="radio"/> 2<br><input type="radio"/> 3<br><input type="radio"/> mas de 3                                                                                                                                |
| Abortos                               | <input checked="" type="radio"/> 0<br><input type="radio"/> 1<br><input type="radio"/> 2<br><input type="radio"/> 3<br><input type="radio"/> mas de 3                                                                                                                                |
| Tipo de gestacion                     | <input checked="" type="radio"/> espontanea<br><input type="radio"/> IAC inseminación artificial conyuge<br><input type="radio"/> IAD inseminación artificial donante<br><input type="radio"/> FIV Fecundación in Vitro<br><input type="radio"/> Ovodon FIV con donación de ovocitos |
| peso previo a embarazo                | [*DATA REMOVED*]                                                                                                                                                                                                                                                                     |
| Ganancia ponderal embarazo            | [*DATA REMOVED*]                                                                                                                                                                                                                                                                     |
| Talla madre                           | [*DATA REMOVED*]                                                                                                                                                                                                                                                                     |
| IMC previo embarazo                   | 18.556773222226116                                                                                                                                                                                                                                                                   |
| Patología obstétrica                  | <input checked="" type="radio"/> no<br><input type="radio"/> si                                                                                                                                                                                                                      |
| Diabetes pregestacional               | <input checked="" type="radio"/> no<br><input type="radio"/> si                                                                                                                                                                                                                      |
| Diabetes gestacional                  | <input checked="" type="radio"/> no<br><input type="radio"/> si                                                                                                                                                                                                                      |

|                                            |                                                                                                                                                                                      |
|--------------------------------------------|--------------------------------------------------------------------------------------------------------------------------------------------------------------------------------------|
| Diabetes gestacional con insulina          | <input checked="" type="radio"/> no<br><input type="radio"/> si                                                                                                                      |
| Diabetes gestacional con dieta y ejercicio | <input checked="" type="radio"/> no<br><input type="radio"/> si                                                                                                                      |
| Percentil fetos previos                    | <input checked="" type="radio"/> Nada<br><input type="radio"/> percentil menor de 10<br><input type="radio"/> percentil entre 10 y 90<br><input type="radio"/> percentil mayor de 90 |
| Exfumadora                                 | <input checked="" type="radio"/> Nada<br><input type="radio"/> menos de 5 años<br><input type="radio"/> 5 a 10 años<br><input type="radio"/> mayor o igual a 10 años                 |
| Hábito tabáquico                           | <input checked="" type="radio"/> no<br><input type="radio"/> si                                                                                                                      |
| fumadora                                   | [*DATA REMOVED*]                                                                                                                                                                     |
| Consumo otros tóxicos                      | <input checked="" type="radio"/> no<br><input type="radio"/> si                                                                                                                      |
| Hb 1T                                      | [*DATA REMOVED*]                                                                                                                                                                     |
| Htc 1T                                     | [*DATA REMOVED*]                                                                                                                                                                     |
| Hb 2T                                      | [*DATA REMOVED*]                                                                                                                                                                     |
| HTC 2T                                     | [*DATA REMOVED*]                                                                                                                                                                     |
| Hb 3T                                      | [*DATA REMOVED*]                                                                                                                                                                     |
| HTC 3T                                     | [*DATA REMOVED*]                                                                                                                                                                     |
| Suplemento FE oral                         | <input checked="" type="radio"/> si<br><input type="radio"/> no                                                                                                                      |
| Suplemento fe iv                           | <input type="radio"/> si<br><input checked="" type="radio"/> no                                                                                                                      |
| Transfusión                                | <input checked="" type="radio"/> no<br><input type="radio"/> si                                                                                                                      |
| Solicitada Vit D                           | <input checked="" type="radio"/> no<br><input type="radio"/> si                                                                                                                      |
| Deficit vit D                              | <input type="radio"/> no<br><input type="radio"/> si                                                                                                                                 |
| Suplemento vit D                           | <input type="radio"/> si<br><input type="radio"/> no                                                                                                                                 |

|                       |                                                                                                                                                                                                                                                                                                                                                                                                              |
|-----------------------|--------------------------------------------------------------------------------------------------------------------------------------------------------------------------------------------------------------------------------------------------------------------------------------------------------------------------------------------------------------------------------------------------------------|
| Dieta, cuestionario   | <input checked="" type="radio"/> sí<br><input type="radio"/> no                                                                                                                                                                                                                                                                                                                                              |
| Leche entera          | <input checked="" type="radio"/> Nunca o menos 1 vez al mes<br><input type="radio"/> 1 a 3 veces mes<br><input type="radio"/> 1 vez semana<br><input type="radio"/> 2 a 4 veces semana<br><input type="radio"/> 5 a 6 veces semana<br><input type="radio"/> 1 vez al día<br><input type="radio"/> 2 a 3 veces al día<br><input type="radio"/> 5 a 6 veces al día<br><input type="radio"/> más 6 veces al día |
| Leche semidesnatada   | <input checked="" type="radio"/> Nunca o menos 1 vez al mes<br><input type="radio"/> 1 a 3 veces mes<br><input type="radio"/> 1 vez semana<br><input type="radio"/> 2 a 4 veces semana<br><input type="radio"/> 5 a 6 veces semana<br><input type="radio"/> 1 vez al día<br><input type="radio"/> 2 a 3 veces al día<br><input type="radio"/> 5 a 6 veces al día<br><input type="radio"/> mas 6 veces al día |
| Leche desnatada       | <input type="radio"/> Nunca o menos 1 vez al mes<br><input type="radio"/> 1 a 3 veces mes<br><input type="radio"/> 1 vez semana<br><input type="radio"/> 2 a 4 veces semana<br><input type="radio"/> 5 a 6 veces semana<br><input type="radio"/> 1 vez al día<br><input checked="" type="radio"/> 2 a 3 veces al día<br><input type="radio"/> 5 a 6 veces al día<br><input type="radio"/> más 6 veces al día |
| Leche condensada      | <input checked="" type="radio"/> Nunca o menos 1 vez al mes<br><input type="radio"/> 1 a 3 veces mes<br><input type="radio"/> 1 vez semana<br><input type="radio"/> 2 a 4 veces semana<br><input type="radio"/> 5 a 6 veces semana<br><input type="radio"/> 1 vez al día<br><input type="radio"/> 2 a 3 veces al día<br><input type="radio"/> 5 a 6 veces al día<br><input type="radio"/> más 6 veces al día |
| nata o crema de leche | <input checked="" type="radio"/> Nunca o menos 1 vez al mes<br><input type="radio"/> 1 a 3 veces mes<br><input type="radio"/> 1 vez semana<br><input type="radio"/> 2 a 4 veces semana<br><input type="radio"/> 5 a 6 veces semana<br><input type="radio"/> 1 vez al día<br><input type="radio"/> 2 a 3 veces al día<br><input type="radio"/> 5 a 6 veces al día<br><input type="radio"/> más 6 veces al día |

---

Yogurt Entero

- ☒ Nunca o menos 1 vez al mes  
☐ 1 a 3 veces mes  
☐ 1 vez semana  
☐ 2 a 4 veces semana  
☐ 5 a 6 veces semana  
☐ 1 vez al día  
☐ 2 a 3 veces al día  
☐ 5 a 6 veces al día  
☐ más 6 veces al día

---

Yogurt desnatado

- ☒ Nunca o menos 1 vez al mes  
☐ 1 a 3 veces mes  
☐ 1 vez semana  
☐ 2 a 4 veces semana  
☐ 5 a 6 veces semana  
☐ 1 vez al día  
☐ 2 a 3 veces al día  
☐ 5 a 6 veces al día  
☐ más 6 veces al día

---

100g requesón o queso blando o queso fresco

- ☒ Nunca o menos 1 vez al mes  
☐ 1 a 3 veces mes  
☐ 1 vez semana  
☐ 2 a 4 veces semana  
☐ 5 a 6 veces semana  
☐ 1 vez al día  
☐ 2 a 3 veces al día  
☐ 5 a 6 veces al día  
☐ más 6 veces al día

---

queso curado o semicurado o cremoso

- ☒ Nunca o menos 1 vez al mes  
☐ 1 a 3 veces mes  
☐ 1 vez semana  
☐ 2 a 4 veces semana  
☐ 5 a 6 veces semana  
☐ 1 vez al día  
☐ 2 a 3 veces al día  
☐ 5 a 6 veces al día  
☐ más 6 veces al día

---

natillas flan pudding

- ☒ Nunca o menos 1 vez al mes  
☐ 1 a 3 veces mes  
☐ 1 vez semana  
☐ 2 a 4 veces semana  
☐ 5 a 6 veces semana  
☐ 1 vez al día  
☐ 2 a 3 veces al día  
☐ 5 a 6 veces al día  
☐ más 6 veces al día

---

Helado

- ☐ Nunca o menos 1 vez al mes  
☐ 1 a 3 veces mes  
☐ 1 vez semana  
☒ 2 a 4 veces semana  
☐ 5 a 6 veces semana  
☐ 1 vez al día  
☐ 2 a 3 veces al día  
☐ 5 a 6 veces al día  
☐ más 6 veces al día

|                                      |                                                                                                                                                                                                                                                                                                                                                                                                              |
|--------------------------------------|--------------------------------------------------------------------------------------------------------------------------------------------------------------------------------------------------------------------------------------------------------------------------------------------------------------------------------------------------------------------------------------------------------------|
| huevo                                | <input type="radio"/> Nunca o menos 1 vez al mes<br><input checked="" type="radio"/> 1 a 3 veces mes<br><input type="radio"/> 1 vez semana<br><input type="radio"/> 2 a 4 veces semana<br><input type="radio"/> 5 a 6 veces semana<br><input type="radio"/> 1 vez al día<br><input type="radio"/> 2 a 3 veces al día<br><input type="radio"/> 5 a 6 veces al día<br><input type="radio"/> más 6 veces al día |
| Pollo con piel                       | <input checked="" type="radio"/> Nunca o menos 1 vez al mes<br><input type="radio"/> 1 a 3 veces mes<br><input type="radio"/> 1 vez semana<br><input type="radio"/> 2 a 4 veces semana<br><input type="radio"/> 5 a 6 veces semana<br><input type="radio"/> 1 vez al día<br><input type="radio"/> 2 a 3 veces al día<br><input type="radio"/> 5 a 6 veces al día<br><input type="radio"/> más 6 veces al día |
| pollo sin piel                       | <input type="radio"/> Nunca o menos 1 vez al mes<br><input type="radio"/> 1 a 3 veces mes<br><input checked="" type="radio"/> 1 vez semana<br><input type="radio"/> 2 a 4 veces semana<br><input type="radio"/> 5 a 6 veces semana<br><input type="radio"/> 1 vez al día<br><input type="radio"/> 2 a 3 veces al día<br><input type="radio"/> 5 a 6 veces al día<br><input type="radio"/> más 6 veces al día |
| Ternera o cerdo o cordero            | <input checked="" type="radio"/> Nunca o menos 1 vez al mes<br><input type="radio"/> 1 a 3 veces mes<br><input type="radio"/> 1 vez semana<br><input type="radio"/> 2 a 4 veces semana<br><input type="radio"/> 5 a 6 veces semana<br><input type="radio"/> 1 vez al día<br><input type="radio"/> 2 a 3 veces al día<br><input type="radio"/> 5 a 6 veces al día<br><input type="radio"/> más 6 veces al día |
| carne caza: Conejo o codorniz o pato | <input checked="" type="radio"/> Nunca o menos 1 vez al mes<br><input type="radio"/> 1 a 3 veces mes<br><input type="radio"/> 1 vez semana<br><input type="radio"/> 2 a 4 veces semana<br><input type="radio"/> 5 a 6 veces semana<br><input type="radio"/> 1 vez al día<br><input type="radio"/> 2 a 3 veces al día<br><input type="radio"/> 5 a 6 veces al día<br><input type="radio"/> más 6 veces al día |
| Hígado de ternera o cerdo o pollo    | <input checked="" type="radio"/> Nunca o menos 1 vez al mes<br><input type="radio"/> 1 a 3 veces mes<br><input type="radio"/> 1 vez semana<br><input type="radio"/> 2 a 4 veces semana<br><input type="radio"/> 5 a 6 veces semana<br><input type="radio"/> 1 vez al día<br><input type="radio"/> 2 a 3 veces al día<br><input type="radio"/> 5 a 6 veces al día<br><input type="radio"/> más 6 veces al día |

---

Vísceras

- ☒ Nunca o menos 1 vez al mes  
☐ 1 a 3 veces mes  
☐ 1 vez semana  
☐ 2 a 4 veces semana  
☐ 5 a 6 veces semana  
☐ 1 vez al día  
☐ 2 a 3 veces al día  
☐ 5 a 6 veces al día  
☐ más 6 veces al día

---

Embutido

- ☒ Nunca o menos 1 vez al mes  
☐ 1 a 3 veces mes  
☐ 1 vez semana  
☐ 2 a 4 veces semana  
☐ 5 a 6 veces semana  
☐ 1 vez al día  
☐ 2 a 3 veces al día  
☐ 5 a 6 veces al día  
☐ más 6 veces al día

---

Salchicha o similar

- ☐ Nunca o menos 1 vez al mes  
☒ 1 a 3 veces mes  
☐ 1 vez semana  
☐ 2 a 4 veces semana  
☐ 5 a 6 veces semana  
☐ 1 vez al día  
☐ 2 a 3 veces al día  
☐ 5 a 6 veces al día  
☐ más 6 veces al día

---

Pate o foiegras

- ☒ Nunca o menos 1 vez al mes  
☐ 1 a 3 veces mes  
☐ 1 vez semana  
☐ 2 a 4 veces semana  
☐ 5 a 6 veces semana  
☐ 1 vez al día  
☐ 2 a 3 veces al día  
☐ 5 a 6 veces al día  
☐ más 6 veces al día

---

Hamburguesa

- ☐ Nunca o menos 1 vez al mes  
☒ 1 a 3 veces mes  
☐ 1 vez semana  
☐ 2 a 4 veces semana  
☐ 5 a 6 veces semana  
☐ 1 vez al día  
☐ 2 a 3 veces al día  
☐ 5 a 6 veces al día  
☐ más 6 veces al día

---

tocino o bacon

- ☒ Nunca o menos 1 vez al mes  
☐ 1 a 3 veces mes  
☐ 1 vez semana  
☐ 2 a 4 veces semana  
☐ 5 a 6 veces semana  
☐ 1 vez al día  
☐ 2 a 3 veces al día  
☐ 5 a 6 veces al día  
☐ más 6 veces al día



---

Pescado frito

- ☐ Nunca o menos 1 vez al mes  
☒ 1 a 3 veces mes  
☐ 1 vez semana  
☐ 2 a 4 veces semana  
☐ 5 a 6 veces semana  
☐ 1 vez al día  
☐ 2 a 3 veces al día  
☐ 5 a 6 veces al día  
☐ más 6 veces al día

---

pescado hervido blanco

- ☐ Nunca o menos 1 vez al mes  
☐ 1 a 3 veces mes  
☒ 1 vez semana  
☐ 2 a 4 veces semana  
☐ 5 a 6 veces semana  
☐ 1 vez al día  
☐ 2 a 3 veces al día  
☐ 5 a 6 veces al día  
☐ más 6 veces al día

---

pescado hervido azul

- ☒ Nunca o menos 1 vez al mes  
☐ 1 a 3 veces mes  
☐ 1 vez semana  
☐ 2 a 4 veces semana  
☐ 5 a 6 veces semana  
☐ 1 vez al día  
☐ 2 a 3 veces al día  
☐ 5 a 6 veces al día  
☐ más 6 veces al día

---

otros pescado azul

- ☒ Nunca o menos 1 vez al mes  
☐ 1 a 3 veces mes  
☐ 1 vez semana  
☐ 2 a 4 veces semana  
☐ 5 a 6 veces semana  
☐ 1 vez al día  
☐ 2 a 3 veces al día  
☐ 5 a 6 veces al día  
☐ más 6 veces al día

---

atun conserva

- ☐ Nunca o menos 1 vez al mes  
☒ 1 a 3 veces mes  
☐ 1 vez semana  
☐ 2 a 4 veces semana  
☐ 5 a 6 veces semana  
☐ 1 vez al día  
☐ 2 a 3 veces al día  
☐ 5 a 6 veces al día  
☐ más 6 veces al día

---

sardina conserva

- ☒ Nunca o menos 1 vez al mes  
☐ 1 a 3 veces mes  
☐ 1 vez semana  
☐ 2 a 4 veces semana  
☐ 5 a 6 veces semana  
☐ 1 vez al día  
☐ 2 a 3 veces al día  
☐ 5 a 6 veces al día  
☐ más 6 veces al día

|                                         |                                                                                                                                                                                                                                                                                                                                                                                                              |
|-----------------------------------------|--------------------------------------------------------------------------------------------------------------------------------------------------------------------------------------------------------------------------------------------------------------------------------------------------------------------------------------------------------------------------------------------------------------|
| pescado ahumado                         | <input checked="" type="radio"/> Nunca o menos 1 vez al mes<br><input type="radio"/> 1 a 3 veces mes<br><input type="radio"/> 1 vez semana<br><input type="radio"/> 2 a 4 veces semana<br><input type="radio"/> 5 a 6 veces semana<br><input type="radio"/> 1 vez al día<br><input type="radio"/> 2 a 3 veces al día<br><input type="radio"/> 5 a 6 veces al día<br><input type="radio"/> más 6 veces al día |
| almejas o mejillones o ostras unos 100g | <input checked="" type="radio"/> Nunca o menos 1 vez al mes<br><input type="radio"/> 1 a 3 veces mes<br><input type="radio"/> 1 vez semana<br><input type="radio"/> 2 a 4 veces semana<br><input type="radio"/> 5 a 6 veces semana<br><input type="radio"/> 1 vez al día<br><input type="radio"/> 2 a 3 veces al día<br><input type="radio"/> 5 a 6 veces al día<br><input type="radio"/> más 6 veces al día |
| calamar o chipiron o sepia unos 100g    | <input type="radio"/> Nunca o menos 1 vez al mes<br><input checked="" type="radio"/> 1 a 3 veces mes<br><input type="radio"/> 1 vez semana<br><input type="radio"/> 2 a 4 veces semana<br><input type="radio"/> 5 a 6 veces semana<br><input type="radio"/> 1 vez al día<br><input type="radio"/> 2 a 3 veces al día<br><input type="radio"/> 5 a 6 veces al día<br><input type="radio"/> más 6 veces al día |
| marisco unos 100g                       | <input type="radio"/> Nunca o menos 1 vez al mes<br><input checked="" type="radio"/> 1 a 3 veces mes<br><input type="radio"/> 1 vez semana<br><input type="radio"/> 2 a 4 veces semana<br><input type="radio"/> 5 a 6 veces semana<br><input type="radio"/> 1 vez al día<br><input type="radio"/> 2 a 3 veces al día<br><input type="radio"/> 5 a 6 veces al día<br><input type="radio"/> más 6 veces al día |
| Espinacas o acelgas cocinadas           | <input checked="" type="radio"/> Nunca o menos 1 vez al mes<br><input type="radio"/> 1 a 3 veces mes<br><input type="radio"/> 1 vez semana<br><input type="radio"/> 2 a 4 veces semana<br><input type="radio"/> 5 a 6 veces semana<br><input type="radio"/> 1 vez al día<br><input type="radio"/> 2 a 3 veces al día<br><input type="radio"/> 5 a 6 veces al día<br><input type="radio"/> más 6 veces al día |
| Col o coliflor o brocoli cocinado       | <input checked="" type="radio"/> Nunca o menos 1 vez al mes<br><input type="radio"/> 1 a 3 veces mes<br><input type="radio"/> 1 vez semana<br><input type="radio"/> 2 a 4 veces semana<br><input type="radio"/> 5 a 6 veces semana<br><input type="radio"/> 1 vez al día<br><input type="radio"/> 2 a 3 veces al día<br><input type="radio"/> 5 a 6 veces al día<br><input type="radio"/> más 6 veces al día |

---

Lechuga o endivia o escarola

- ☐ Nunca o menos 1 vez al mes  
☐ 1 a 3 veces mes  
☒ 1 vez semana  
☐ 2 a 4 veces semana  
☐ 5 a 6 veces semana  
☐ 1 vez al día  
☐ 2 a 3 veces al día  
☐ 5 a 6 veces al día  
☐ más 6 veces al día

---

tomate ensalada

- ☐ Nunca o menos 1 vez al mes  
☐ 1 a 3 veces mes  
☒ 1 vez semana  
☐ 2 a 4 veces semana  
☐ 5 a 6 veces semana  
☐ 1 vez al día  
☐ 2 a 3 veces al día  
☐ 5 a 6 veces al día  
☐ más 6 veces al día

---

cebolla

- ☐ Nunca o menos 1 vez al mes  
☐ 1 a 3 veces mes  
☒ 1 vez semana  
☐ 2 a 4 veces semana  
☐ 5 a 6 veces semana  
☐ 1 vez al día  
☐ 2 a 3 veces al día  
☐ 5 a 6 veces al día  
☐ más 6 veces al día

---

Zanahoria o calabaza

- ☒ Nunca o menos 1 vez al mes  
☐ 1 a 3 veces mes  
☐ 1 vez semana  
☐ 2 a 4 veces semana  
☐ 5 a 6 veces semana  
☐ 1 vez al día  
☐ 2 a 3 veces al día  
☐ 5 a 6 veces al día  
☐ más 6 veces al día

---

Judías verdes

- ☒ Nunca o menos 1 vez al mes  
☐ 1 a 3 veces mes  
☐ 1 vez semana  
☐ 2 a 4 veces semana  
☐ 5 a 6 veces semana  
☐ 1 vez al día  
☐ 2 a 3 veces al día  
☐ 5 a 6 veces al día  
☐ más 6 veces al día

---

Berenjena o calabacin o pepino

- ☐ Nunca o menos 1 vez al mes  
☒ 1 a 3 veces mes  
☐ 1 vez semana  
☐ 2 a 4 veces semana  
☐ 5 a 6 veces semana  
☐ 1 vez al día  
☐ 2 a 3 veces al día  
☐ 5 a 6 veces al día  
☐ más 6 veces al día

|                       |                                                                                                                                                                                                                                                                                                                                                                                                              |
|-----------------------|--------------------------------------------------------------------------------------------------------------------------------------------------------------------------------------------------------------------------------------------------------------------------------------------------------------------------------------------------------------------------------------------------------------|
| pimiento              | <input checked="" type="radio"/> Nunca o menos 1 vez al mes<br><input type="radio"/> 1 a 3 veces mes<br><input type="radio"/> 1 vez semana<br><input type="radio"/> 2 a 4 veces semana<br><input type="radio"/> 5 a 6 veces semana<br><input type="radio"/> 1 vez al día<br><input type="radio"/> 2 a 3 veces al día<br><input type="radio"/> 5 a 6 veces al día<br><input type="radio"/> más 6 veces al día |
| alcachofa             | <input checked="" type="radio"/> Nunca o menos 1 vez al mes<br><input type="radio"/> 1 a 3 veces mes<br><input type="radio"/> 1 vez semana<br><input type="radio"/> 2 a 4 veces semana<br><input type="radio"/> 5 a 6 veces semana<br><input type="radio"/> 1 vez al día<br><input type="radio"/> 2 a 3 veces al día<br><input type="radio"/> 5 a 6 veces al día<br><input type="radio"/> más 6 veces al día |
| espárragos            | <input checked="" type="radio"/> Nunca o menos 1 vez al mes<br><input type="radio"/> 1 a 3 veces mes<br><input type="radio"/> 1 vez semana<br><input type="radio"/> 2 a 4 veces semana<br><input type="radio"/> 5 a 6 veces semana<br><input type="radio"/> 1 vez al día<br><input type="radio"/> 2 a 3 veces al día<br><input type="radio"/> 5 a 6 veces al día<br><input type="radio"/> más 6 veces al día |
| maíz hervido          | <input checked="" type="radio"/> Nunca o menos 1 vez al mes<br><input type="radio"/> 1 a 3 veces mes<br><input type="radio"/> 1 vez semana<br><input type="radio"/> 2 a 4 veces semana<br><input type="radio"/> 5 a 6 veces semana<br><input type="radio"/> 1 vez al día<br><input type="radio"/> 2 a 3 veces al día<br><input type="radio"/> 5 a 6 veces al día<br><input type="radio"/> más 6 veces al día |
| legumbres             | <input type="radio"/> Nunca o menos 1 vez al mes<br><input checked="" type="radio"/> 1 a 3 veces mes<br><input type="radio"/> 1 vez semana<br><input type="radio"/> 2 a 4 veces semana<br><input type="radio"/> 5 a 6 veces semana<br><input type="radio"/> 1 vez al día<br><input type="radio"/> 2 a 3 veces al día<br><input type="radio"/> 5 a 6 veces al día<br><input type="radio"/> más 6 veces al día |
| naranjas o mandarinas | <input type="radio"/> Nunca o menos 1 vez al mes<br><input type="radio"/> 1 a 3 veces mes<br><input checked="" type="radio"/> 1 vez semana<br><input type="radio"/> 2 a 4 veces semana<br><input type="radio"/> 5 a 6 veces semana<br><input type="radio"/> 1 vez al día<br><input type="radio"/> 2 a 3 veces al día<br><input type="radio"/> 5 a 6 veces al día<br><input type="radio"/> más 6 veces al día |

|                       |                                                                                                                                                                                                                                                                                                                                                                                                              |
|-----------------------|--------------------------------------------------------------------------------------------------------------------------------------------------------------------------------------------------------------------------------------------------------------------------------------------------------------------------------------------------------------------------------------------------------------|
| zum natural fruta     | <input type="radio"/> Nunca o menos 1 vez al mes<br><input type="radio"/> 1 a 3 veces mes<br><input checked="" type="radio"/> 1 vez semana<br><input type="radio"/> 2 a 4 veces semana<br><input type="radio"/> 5 a 6 veces semana<br><input type="radio"/> 1 vez al día<br><input type="radio"/> 2 a 3 veces al día<br><input type="radio"/> 5 a 6 veces al día<br><input type="radio"/> más 6 veces al día |
| platano               | <input type="radio"/> Nunca o menos 1 vez al mes<br><input checked="" type="radio"/> 1 a 3 veces mes<br><input type="radio"/> 1 vez semana<br><input type="radio"/> 2 a 4 veces semana<br><input type="radio"/> 5 a 6 veces semana<br><input type="radio"/> 1 vez al día<br><input type="radio"/> 2 a 3 veces al día<br><input type="radio"/> 5 a 6 veces al día<br><input type="radio"/> más 6 veces al día |
| manzana o pera        | <input type="radio"/> Nunca o menos 1 vez al mes<br><input checked="" type="radio"/> 1 a 3 veces mes<br><input type="radio"/> 1 vez semana<br><input type="radio"/> 2 a 4 veces semana<br><input type="radio"/> 5 a 6 veces semana<br><input type="radio"/> 1 vez al día<br><input type="radio"/> 2 a 3 veces al día<br><input type="radio"/> 5 a 6 veces al día<br><input type="radio"/> más 6 veces al día |
| melocotón o nectarina | <input type="radio"/> Nunca o menos 1 vez al mes<br><input type="radio"/> 1 a 3 veces mes<br><input type="radio"/> 1 vez semana<br><input type="radio"/> 2 a 4 veces semana<br><input type="radio"/> 5 a 6 veces semana<br><input checked="" type="radio"/> 1 vez al día<br><input type="radio"/> 2 a 3 veces al día<br><input type="radio"/> 5 a 6 veces al día<br><input type="radio"/> más 6 veces al día |
| sandia o melon        | <input type="radio"/> Nunca o menos 1 vez al mes<br><input type="radio"/> 1 a 3 veces mes<br><input type="radio"/> 1 vez semana<br><input type="radio"/> 2 a 4 veces semana<br><input type="radio"/> 5 a 6 veces semana<br><input checked="" type="radio"/> 1 vez al día<br><input type="radio"/> 2 a 3 veces al día<br><input type="radio"/> 5 a 6 veces al día<br><input type="radio"/> más 6 veces al día |
| uva                   | <input checked="" type="radio"/> Nunca o menos 1 vez al mes<br><input type="radio"/> 1 a 3 veces mes<br><input type="radio"/> 1 vez semana<br><input type="radio"/> 2 a 4 veces semana<br><input type="radio"/> 5 a 6 veces semana<br><input type="radio"/> 1 vez al día<br><input type="radio"/> 2 a 3 veces al día<br><input type="radio"/> 5 a 6 veces al día<br><input type="radio"/> más 6 veces al día |

|                 |                                                                                                                                                                                                                                                                                                                                                                                                              |
|-----------------|--------------------------------------------------------------------------------------------------------------------------------------------------------------------------------------------------------------------------------------------------------------------------------------------------------------------------------------------------------------------------------------------------------------|
| bruna o ciruela | <input checked="" type="radio"/> Nunca o menos 1 vez al mes<br><input type="radio"/> 1 a 3 veces mes<br><input type="radio"/> 1 vez semana<br><input type="radio"/> 2 a 4 veces semana<br><input type="radio"/> 5 a 6 veces semana<br><input type="radio"/> 1 vez al día<br><input type="radio"/> 2 a 3 veces al día<br><input type="radio"/> 5 a 6 veces al día<br><input type="radio"/> más 6 veces al día |
| kiwi            | <input type="radio"/> Nunca o menos 1 vez al mes<br><input checked="" type="radio"/> 1 a 3 veces mes<br><input type="radio"/> 1 vez semana<br><input type="radio"/> 2 a 4 veces semana<br><input type="radio"/> 5 a 6 veces semana<br><input type="radio"/> 1 vez al día<br><input type="radio"/> 2 a 3 veces al día<br><input type="radio"/> 5 a 6 veces al día<br><input type="radio"/> más 6 veces al día |
| aceituna        | <input type="radio"/> Nunca o menos 1 vez al mes<br><input checked="" type="radio"/> 1 a 3 veces mes<br><input type="radio"/> 1 vez semana<br><input type="radio"/> 2 a 4 veces semana<br><input type="radio"/> 5 a 6 veces semana<br><input type="radio"/> 1 vez al día<br><input type="radio"/> 2 a 3 veces al día<br><input type="radio"/> 5 a 6 veces al día<br><input type="radio"/> más 6 veces al día |
| frutos secos    | <input type="radio"/> Nunca o menos 1 vez al mes<br><input type="radio"/> 1 a 3 veces mes<br><input type="radio"/> 1 vez semana<br><input type="radio"/> 2 a 4 veces semana<br><input type="radio"/> 5 a 6 veces semana<br><input type="radio"/> 1 vez al día<br><input type="radio"/> 2 a 3 veces al día<br><input type="radio"/> 5 a 6 veces al día<br><input type="radio"/> más 6 veces al día            |
| pan blanco      | <input type="radio"/> Nunca o menos 1 vez al mes<br><input checked="" type="radio"/> 1 a 3 veces mes<br><input type="radio"/> 1 vez semana<br><input type="radio"/> 2 a 4 veces semana<br><input type="radio"/> 5 a 6 veces semana<br><input type="radio"/> 1 vez al día<br><input type="radio"/> 2 a 3 veces al día<br><input type="radio"/> 5 a 6 veces al día<br><input type="radio"/> más 6 veces al día |
| pan integral    | <input checked="" type="radio"/> Nunca o menos 1 vez al mes<br><input type="radio"/> 1 a 3 veces mes<br><input type="radio"/> 1 vez semana<br><input type="radio"/> 2 a 4 veces semana<br><input type="radio"/> 5 a 6 veces semana<br><input type="radio"/> 1 vez al día<br><input type="radio"/> 2 a 3 veces al día<br><input type="radio"/> 5 a 6 veces al día<br><input type="radio"/> más 6 veces al día |

---

cereales desayuno

- ☐ Nunca o menos 1 vez al mes  
☐ 1 a 3 veces mes  
☐ 1 vez semana  
☐ 2 a 4 veces semana  
☐ 5 a 6 veces semana  
☒ 1 vez al día  
☐ 2 a 3 veces al día  
☐ 5 a 6 veces al día  
☐ más 6 veces al día

---

patatas fritas

- ☐ Nunca o menos 1 vez al mes  
☒ 1 a 3 veces mes  
☐ 1 vez semana  
☐ 2 a 4 veces semana  
☐ 5 a 6 veces semana  
☐ 1 vez al día  
☐ 2 a 3 veces al día  
☐ 5 a 6 veces al día  
☐ más 6 veces al día

---

patatas cocidas o asadas

- ☒ Nunca o menos 1 vez al mes  
☐ 1 a 3 veces mes  
☐ 1 vez semana  
☐ 2 a 4 veces semana  
☐ 5 a 6 veces semana  
☐ 1 vez al día  
☐ 2 a 3 veces al día  
☐ 5 a 6 veces al día  
☐ más 6 veces al día

---

bolsa papas

- ☐ Nunca o menos 1 vez al mes  
☐ 1 a 3 veces mes  
☒ 1 vez semana  
☐ 2 a 4 veces semana  
☐ 5 a 6 veces semana  
☐ 1 vez al día  
☐ 2 a 3 veces al día  
☐ 5 a 6 veces al día  
☐ más 6 veces al día

---

arroz cocinado

- ☐ Nunca o menos 1 vez al mes  
☐ 1 a 3 veces mes  
☒ 1 vez semana  
☐ 2 a 4 veces semana  
☐ 5 a 6 veces semana  
☐ 1 vez al día  
☐ 2 a 3 veces al día  
☐ 5 a 6 veces al día  
☐ más 6 veces al día

---

pasta

- ☐ Nunca o menos 1 vez al mes  
☐ 1 a 3 veces mes  
☒ 1 vez semana  
☐ 2 a 4 veces semana  
☐ 5 a 6 veces semana  
☐ 1 vez al día  
☐ 2 a 3 veces al día  
☐ 5 a 6 veces al día  
☐ más 6 veces al día

|                     |                                                                                                                                                                                                                                                                                                                                                                                                              |
|---------------------|--------------------------------------------------------------------------------------------------------------------------------------------------------------------------------------------------------------------------------------------------------------------------------------------------------------------------------------------------------------------------------------------------------------|
| pizza               | <input type="radio"/> Nunca o menos 1 vez al mes<br><input type="radio"/> 1 a 3 veces mes<br><input checked="" type="radio"/> 1 vez semana<br><input type="radio"/> 2 a 4 veces semana<br><input type="radio"/> 5 a 6 veces semana<br><input type="radio"/> 1 vez al día<br><input type="radio"/> 2 a 3 veces al día<br><input type="radio"/> 5 a 6 veces al día<br><input type="radio"/> más 6 veces al día |
| aceite oliva        | <input type="radio"/> Nunca o menos 1 vez al mes<br><input type="radio"/> 1 a 3 veces mes<br><input checked="" type="radio"/> 1 vez semana<br><input type="radio"/> 2 a 4 veces semana<br><input type="radio"/> 5 a 6 veces semana<br><input type="radio"/> 1 vez al día<br><input type="radio"/> 2 a 3 veces al día<br><input type="radio"/> 5 a 6 veces al día<br><input type="radio"/> más 6 veces al día |
| otros aceites       | <input type="radio"/> Nunca o menos 1 vez al mes<br><input type="radio"/> 1 a 3 veces mes<br><input type="radio"/> 1 vez semana<br><input type="radio"/> 2 a 4 veces semana<br><input type="radio"/> 5 a 6 veces semana<br><input checked="" type="radio"/> 1 vez al día<br><input type="radio"/> 2 a 3 veces al día<br><input type="radio"/> 5 a 6 veces al día<br><input type="radio"/> más 6 veces al día |
| margarina           | <input checked="" type="radio"/> Nunca o menos 1 vez al mes<br><input type="radio"/> 1 a 3 veces mes<br><input type="radio"/> 1 vez semana<br><input type="radio"/> 2 a 4 veces semana<br><input type="radio"/> 5 a 6 veces semana<br><input type="radio"/> 1 vez al día<br><input type="radio"/> 2 a 3 veces al día<br><input type="radio"/> 5 a 6 veces al día<br><input type="radio"/> más 6 veces al día |
| mantequilla         | <input checked="" type="radio"/> Nunca o menos 1 vez al mes<br><input type="radio"/> 1 a 3 veces mes<br><input type="radio"/> 1 vez semana<br><input type="radio"/> 2 a 4 veces semana<br><input type="radio"/> 5 a 6 veces semana<br><input type="radio"/> 1 vez al día<br><input type="radio"/> 2 a 3 veces al día<br><input type="radio"/> 5 a 6 veces al día<br><input type="radio"/> más 6 veces al día |
| galletas tipo maria | <input checked="" type="radio"/> Nunca o menos 1 vez al mes<br><input type="radio"/> 1 a 3 veces mes<br><input type="radio"/> 1 vez semana<br><input type="radio"/> 2 a 4 veces semana<br><input type="radio"/> 5 a 6 veces semana<br><input type="radio"/> 1 vez al día<br><input type="radio"/> 2 a 3 veces al día<br><input type="radio"/> 5 a 6 veces al día<br><input type="radio"/> más 6 veces al día |



|                           |                                                                                                                                                                                                                                                                                                                                                                                                              |
|---------------------------|--------------------------------------------------------------------------------------------------------------------------------------------------------------------------------------------------------------------------------------------------------------------------------------------------------------------------------------------------------------------------------------------------------------|
| galletas chocolate        | <input checked="" type="radio"/> Nunca o menos 1 vez al mes<br><input type="radio"/> 1 a 3 veces mes<br><input type="radio"/> 1 vez semana<br><input type="radio"/> 2 a 4 veces semana<br><input type="radio"/> 5 a 6 veces semana<br><input type="radio"/> 1 vez al día<br><input type="radio"/> 2 a 3 veces al día<br><input type="radio"/> 5 a 6 veces al día<br><input type="radio"/> más 6 veces al día |
| bollieria                 | <input type="radio"/> Nunca o menos 1 vez al mes<br><input checked="" type="radio"/> 1 a 3 veces mes<br><input type="radio"/> 1 vez semana<br><input type="radio"/> 2 a 4 veces semana<br><input type="radio"/> 5 a 6 veces semana<br><input type="radio"/> 1 vez al día<br><input type="radio"/> 2 a 3 veces al día<br><input type="radio"/> 5 a 6 veces al día<br><input type="radio"/> más 6 veces al día |
| chocolate o bombones      | <input checked="" type="radio"/> Nunca o menos 1 vez al mes<br><input type="radio"/> 1 a 3 veces mes<br><input type="radio"/> 1 vez semana<br><input type="radio"/> 2 a 4 veces semana<br><input type="radio"/> 5 a 6 veces semana<br><input type="radio"/> 1 vez al día<br><input type="radio"/> 2 a 3 veces al día<br><input type="radio"/> 5 a 6 veces al día<br><input type="radio"/> más 6 veces al día |
| chocolate polvo o colacao | <input checked="" type="radio"/> Nunca o menos 1 vez al mes<br><input type="radio"/> 1 a 3 veces mes<br><input type="radio"/> 1 vez semana<br><input type="radio"/> 2 a 4 veces semana<br><input type="radio"/> 5 a 6 veces semana<br><input type="radio"/> 1 vez al día<br><input type="radio"/> 2 a 3 veces al día<br><input type="radio"/> 5 a 6 veces al día<br><input type="radio"/> más 6 veces al día |
| vino tinto                | <input type="radio"/> Nunca o menos 1 vez al mes<br><input type="radio"/> 1 a 3 veces mes<br><input type="radio"/> 1 vez semana<br><input type="radio"/> 2 a 4 veces semana<br><input type="radio"/> 5 a 6 veces semana<br><input checked="" type="radio"/> 1 vez al día<br><input type="radio"/> 2 a 3 veces al día<br><input type="radio"/> 5 a 6 veces al día<br><input type="radio"/> más 6 veces al día |
| vino blanco               | <input checked="" type="radio"/> Nunca o menos 1 vez al mes<br><input type="radio"/> 1 a 3 veces mes<br><input type="radio"/> 1 vez semana<br><input type="radio"/> 2 a 4 veces semana<br><input type="radio"/> 5 a 6 veces semana<br><input type="radio"/> 1 vez al día<br><input type="radio"/> 2 a 3 veces al día<br><input type="radio"/> 5 a 6 veces al día<br><input type="radio"/> más 6 veces al día |

---

|                    |                                                                                                                                                                                                                                                                                                                                                                                                              |
|--------------------|--------------------------------------------------------------------------------------------------------------------------------------------------------------------------------------------------------------------------------------------------------------------------------------------------------------------------------------------------------------------------------------------------------------|
| vino seco o vermut | <input checked="" type="radio"/> Nunca o menos 1 vez al mes<br><input type="radio"/> 1 a 3 veces mes<br><input type="radio"/> 1 vez semana<br><input type="radio"/> 2 a 4 veces semana<br><input type="radio"/> 5 a 6 veces semana<br><input type="radio"/> 1 vez al día<br><input type="radio"/> 2 a 3 veces al día<br><input type="radio"/> 5 a 6 veces al día<br><input type="radio"/> más 6 veces al día |
|--------------------|--------------------------------------------------------------------------------------------------------------------------------------------------------------------------------------------------------------------------------------------------------------------------------------------------------------------------------------------------------------------------------------------------------------|

---

|         |                                                                                                                                                                                                                                                                                                                                                                                                              |
|---------|--------------------------------------------------------------------------------------------------------------------------------------------------------------------------------------------------------------------------------------------------------------------------------------------------------------------------------------------------------------------------------------------------------------|
| cerveza | <input checked="" type="radio"/> Nunca o menos 1 vez al mes<br><input type="radio"/> 1 a 3 veces mes<br><input type="radio"/> 1 vez semana<br><input type="radio"/> 2 a 4 veces semana<br><input type="radio"/> 5 a 6 veces semana<br><input type="radio"/> 1 vez al día<br><input type="radio"/> 2 a 3 veces al día<br><input type="radio"/> 5 a 6 veces al día<br><input type="radio"/> más 6 veces al día |
|---------|--------------------------------------------------------------------------------------------------------------------------------------------------------------------------------------------------------------------------------------------------------------------------------------------------------------------------------------------------------------------------------------------------------------|

---

|                     |                                                                                                                                                                                                                                                                                                                                                                                                              |
|---------------------|--------------------------------------------------------------------------------------------------------------------------------------------------------------------------------------------------------------------------------------------------------------------------------------------------------------------------------------------------------------------------------------------------------------|
| cerveza sin alcohol | <input checked="" type="radio"/> Nunca o menos 1 vez al mes<br><input type="radio"/> 1 a 3 veces mes<br><input type="radio"/> 1 vez semana<br><input type="radio"/> 2 a 4 veces semana<br><input type="radio"/> 5 a 6 veces semana<br><input type="radio"/> 1 vez al día<br><input type="radio"/> 2 a 3 veces al día<br><input type="radio"/> 5 a 6 veces al día<br><input type="radio"/> más 6 veces al día |
|---------------------|--------------------------------------------------------------------------------------------------------------------------------------------------------------------------------------------------------------------------------------------------------------------------------------------------------------------------------------------------------------------------------------------------------------|

---

|         |                                                                                                                                                                                                                                                                                                                                                                                                              |
|---------|--------------------------------------------------------------------------------------------------------------------------------------------------------------------------------------------------------------------------------------------------------------------------------------------------------------------------------------------------------------------------------------------------------------|
| licores | <input checked="" type="radio"/> Nunca o menos 1 vez al mes<br><input type="radio"/> 1 a 3 veces mes<br><input type="radio"/> 1 vez semana<br><input type="radio"/> 2 a 4 veces semana<br><input type="radio"/> 5 a 6 veces semana<br><input type="radio"/> 1 vez al día<br><input type="radio"/> 2 a 3 veces al día<br><input type="radio"/> 5 a 6 veces al día<br><input type="radio"/> más 6 veces al día |
|---------|--------------------------------------------------------------------------------------------------------------------------------------------------------------------------------------------------------------------------------------------------------------------------------------------------------------------------------------------------------------------------------------------------------------|

---

|                       |                                                                                                                                                                                                                                                                                                                                                                                                              |
|-----------------------|--------------------------------------------------------------------------------------------------------------------------------------------------------------------------------------------------------------------------------------------------------------------------------------------------------------------------------------------------------------------------------------------------------------|
| ginebra o ron o vodka | <input checked="" type="radio"/> Nunca o menos 1 vez al mes<br><input type="radio"/> 1 a 3 veces mes<br><input type="radio"/> 1 vez semana<br><input type="radio"/> 2 a 4 veces semana<br><input type="radio"/> 5 a 6 veces semana<br><input type="radio"/> 1 vez al día<br><input type="radio"/> 2 a 3 veces al día<br><input type="radio"/> 5 a 6 veces al día<br><input type="radio"/> más 6 veces al día |
|-----------------------|--------------------------------------------------------------------------------------------------------------------------------------------------------------------------------------------------------------------------------------------------------------------------------------------------------------------------------------------------------------------------------------------------------------|

---

|                 |                                                                                                                                                                                                                                                                                                                                                                                                              |
|-----------------|--------------------------------------------------------------------------------------------------------------------------------------------------------------------------------------------------------------------------------------------------------------------------------------------------------------------------------------------------------------------------------------------------------------|
| refresco normal | <input checked="" type="radio"/> Nunca o menos 1 vez al mes<br><input type="radio"/> 1 a 3 veces mes<br><input type="radio"/> 1 vez semana<br><input type="radio"/> 2 a 4 veces semana<br><input type="radio"/> 5 a 6 veces semana<br><input type="radio"/> 1 vez al día<br><input type="radio"/> 2 a 3 veces al día<br><input type="radio"/> 5 a 6 veces al día<br><input type="radio"/> más 6 veces al día |
|-----------------|--------------------------------------------------------------------------------------------------------------------------------------------------------------------------------------------------------------------------------------------------------------------------------------------------------------------------------------------------------------------------------------------------------------|

---

---

refresco sin azúcar

- ☐ Nunca o menos 1 vez al mes  
☒ 1 a 3 veces mes  
☐ 1 vez semana  
☐ 2 a 4 veces semana  
☐ 5 a 6 veces semana  
☐ 1 vez al día  
☐ 2 a 3 veces al día  
☐ 5 a 6 veces al día  
☐ más 6 veces al día

---

Agua del grifo

- ☒ Nunca o menos 1 vez al mes  
☐ 1 a 3 veces mes  
☐ 1 vez semana  
☐ 2 a 4 veces semana  
☐ 5 a 6 veces semana  
☐ 1 vez al día  
☐ 2 a 3 veces al día  
☐ 5 a 6 veces al día  
☐ más 6 veces al día

---

agua embotellada sin gas

- ☐ Nunca o menos 1 vez al mes  
☐ 1 a 3 veces mes  
☐ 1 vez semana  
☐ 2 a 4 veces semana  
☐ 5 a 6 veces semana  
☐ 1 vez al día  
☒ 2 a 3 veces al día  
☐ 5 a 6 veces al día  
☐ más 6 veces al día

---

agua embotellada con gas

- ☒ Nunca o menos 1 vez al mes  
☐ 1 a 3 veces mes  
☐ 1 vez semana  
☐ 2 a 4 veces semana  
☐ 5 a 6 veces semana  
☐ 1 vez al día  
☐ 2 a 3 veces al día  
☐ 5 a 6 veces al día  
☐ más 6 veces al día

---

zumو frutas embasado

- ☒ Nunca o menos 1 vez al mes  
☐ 1 a 3 veces mes  
☐ 1 vez semana  
☐ 2 a 4 veces semana  
☐ 5 a 6 veces semana  
☐ 1 vez al día  
☐ 2 a 3 veces al día  
☐ 5 a 6 veces al día  
☐ más 6 veces al día

---

cafe

- ☒ Nunca o menos 1 vez al mes  
☐ 1 a 3 veces mes  
☐ 1 vez semana  
☐ 2 a 4 veces semana  
☐ 5 a 6 veces semana  
☐ 1 vez al día  
☐ 2 a 3 veces al día  
☐ 5 a 6 veces al día  
☐ más 6 veces al día

|                       |                                                                                                                                                                                                                                                                                                                                                                                                              |
|-----------------------|--------------------------------------------------------------------------------------------------------------------------------------------------------------------------------------------------------------------------------------------------------------------------------------------------------------------------------------------------------------------------------------------------------------|
| cafe descafeinado     | <input checked="" type="radio"/> Nunca o menos 1 vez al mes<br><input type="radio"/> 1 a 3 veces mes<br><input type="radio"/> 1 vez semana<br><input type="radio"/> 2 a 4 veces semana<br><input type="radio"/> 5 a 6 veces semana<br><input type="radio"/> 1 vez al día<br><input type="radio"/> 2 a 3 veces al día<br><input type="radio"/> 5 a 6 veces al día<br><input type="radio"/> más 6 veces al día |
| te o infusión         | <input checked="" type="radio"/> Nunca o menos 1 vez al mes<br><input type="radio"/> 1 a 3 veces mes<br><input type="radio"/> 1 vez semana<br><input type="radio"/> 2 a 4 veces semana<br><input type="radio"/> 5 a 6 veces semana<br><input type="radio"/> 1 vez al día<br><input type="radio"/> 2 a 3 veces al día<br><input type="radio"/> 5 a 6 veces al día<br><input type="radio"/> más 6 veces al día |
| sopa o puré verduras  | <input checked="" type="radio"/> Nunca o menos 1 vez al mes<br><input type="radio"/> 1 a 3 veces mes<br><input type="radio"/> 1 vez semana<br><input type="radio"/> 2 a 4 veces semana<br><input type="radio"/> 5 a 6 veces semana<br><input type="radio"/> 1 vez al día<br><input type="radio"/> 2 a 3 veces al día<br><input type="radio"/> 5 a 6 veces al día<br><input type="radio"/> más 6 veces al día |
| croquetas pollo jamón | <input checked="" type="radio"/> Nunca o menos 1 vez al mes<br><input type="radio"/> 1 a 3 veces mes<br><input type="radio"/> 1 vez semana<br><input type="radio"/> 2 a 4 veces semana<br><input type="radio"/> 5 a 6 veces semana<br><input type="radio"/> 1 vez al día<br><input type="radio"/> 2 a 3 veces al día<br><input type="radio"/> 5 a 6 veces al día<br><input type="radio"/> más 6 veces al día |
| croquetas pescado     | <input checked="" type="radio"/> Nunca o menos 1 vez al mes<br><input type="radio"/> 1 a 3 veces mes<br><input type="radio"/> 1 vez semana<br><input type="radio"/> 2 a 4 veces semana<br><input type="radio"/> 5 a 6 veces semana<br><input type="radio"/> 1 vez al día<br><input type="radio"/> 2 a 3 veces al día<br><input type="radio"/> 5 a 6 veces al día<br><input type="radio"/> más 6 veces al día |
| mayonesa              | <input type="radio"/> Nunca o menos 1 vez al mes<br><input checked="" type="radio"/> 1 a 3 veces mes<br><input type="radio"/> 1 vez semana<br><input type="radio"/> 2 a 4 veces semana<br><input type="radio"/> 5 a 6 veces semana<br><input type="radio"/> 1 vez al día<br><input type="radio"/> 2 a 3 veces al día<br><input type="radio"/> 5 a 6 veces al día<br><input type="radio"/> más 6 veces al día |

|                  |                                                                                                                                                                                                                                                                                                                                                                                                              |
|------------------|--------------------------------------------------------------------------------------------------------------------------------------------------------------------------------------------------------------------------------------------------------------------------------------------------------------------------------------------------------------------------------------------------------------|
| salsa tomate     | <input type="radio"/> Nunca o menos 1 vez al mes<br><input type="radio"/> 1 a 3 veces mes<br><input checked="" type="radio"/> 1 vez semana<br><input type="radio"/> 2 a 4 veces semana<br><input type="radio"/> 5 a 6 veces semana<br><input type="radio"/> 1 vez al día<br><input type="radio"/> 2 a 3 veces al día<br><input type="radio"/> 5 a 6 veces al día<br><input type="radio"/> más 6 veces al día |
| ketchup          | <input type="radio"/> Nunca o menos 1 vez al mes<br><input checked="" type="radio"/> 1 a 3 veces mes<br><input type="radio"/> 1 vez semana<br><input type="radio"/> 2 a 4 veces semana<br><input type="radio"/> 5 a 6 veces semana<br><input type="radio"/> 1 vez al día<br><input type="radio"/> 2 a 3 veces al día<br><input type="radio"/> 5 a 6 veces al día<br><input type="radio"/> más 6 veces al día |
| sal              | <input type="radio"/> Nunca o menos 1 vez al mes<br><input type="radio"/> 1 a 3 veces mes<br><input type="radio"/> 1 vez semana<br><input type="radio"/> 2 a 4 veces semana<br><input type="radio"/> 5 a 6 veces semana<br><input checked="" type="radio"/> 1 vez al día<br><input type="radio"/> 2 a 3 veces al día<br><input type="radio"/> 5 a 6 veces al día<br><input type="radio"/> más 6 veces al día |
| ajo              | <input type="radio"/> Nunca o menos 1 vez al mes<br><input checked="" type="radio"/> 1 a 3 veces mes<br><input type="radio"/> 1 vez semana<br><input type="radio"/> 2 a 4 veces semana<br><input type="radio"/> 5 a 6 veces semana<br><input type="radio"/> 1 vez al día<br><input type="radio"/> 2 a 3 veces al día<br><input type="radio"/> 5 a 6 veces al día<br><input type="radio"/> más 6 veces al día |
| mermelada o miel | <input checked="" type="radio"/> Nunca o menos 1 vez al mes<br><input type="radio"/> 1 a 3 veces mes<br><input type="radio"/> 1 vez semana<br><input type="radio"/> 2 a 4 veces semana<br><input type="radio"/> 5 a 6 veces semana<br><input type="radio"/> 1 vez al día<br><input type="radio"/> 2 a 3 veces al día<br><input type="radio"/> 5 a 6 veces al día<br><input type="radio"/> más 6 veces al día |
| azúcar           | <input checked="" type="radio"/> Nunca o menos 1 vez al mes<br><input type="radio"/> 1 a 3 veces mes<br><input type="radio"/> 1 vez semana<br><input type="radio"/> 2 a 4 veces semana<br><input type="radio"/> 5 a 6 veces semana<br><input type="radio"/> 1 vez al día<br><input type="radio"/> 2 a 3 veces al día<br><input type="radio"/> 5 a 6 veces al día<br><input type="radio"/> más 6 veces al día |

|                                       |                                                                                                                                                                                                                                                                                                                                                                                                                                                                                                                               |
|---------------------------------------|-------------------------------------------------------------------------------------------------------------------------------------------------------------------------------------------------------------------------------------------------------------------------------------------------------------------------------------------------------------------------------------------------------------------------------------------------------------------------------------------------------------------------------|
| Otro alimento                         | <hr/>                                                                                                                                                                                                                                                                                                                                                                                                                                                                                                                         |
| suplementos vitamínicos               | <input type="radio"/> si<br><input checked="" type="radio"/> no                                                                                                                                                                                                                                                                                                                                                                                                                                                               |
| suplementos vitamínicos               | <hr/>                                                                                                                                                                                                                                                                                                                                                                                                                                                                                                                         |
| dieta previa                          | <input type="radio"/> si<br><input checked="" type="radio"/> no                                                                                                                                                                                                                                                                                                                                                                                                                                                               |
| motivo dieta                          | <input checked="" type="radio"/> no dieta<br><input type="radio"/> control peso<br><input type="radio"/> control colesterol<br><input type="radio"/> control diabetes<br><input type="radio"/> problemas estómago<br><input type="radio"/> problemas vesícula o hepáticos<br><input type="radio"/> HTA o cardiopatía<br><input type="radio"/> problemas renales<br><input type="radio"/> alergia alimentaria<br><input type="radio"/> ácido úrico elevado<br><input type="radio"/> vegetariana<br><input type="radio"/> otros |
| cambio alimentos año previo gestación | <input checked="" type="radio"/> si<br><input type="radio"/> no                                                                                                                                                                                                                                                                                                                                                                                                                                                               |
| cambio lácteos                        | <input type="radio"/> eliminado<br><input type="radio"/> disminuido<br><input checked="" type="radio"/> igual<br><input type="radio"/> aumentado<br><input type="radio"/> no sabe                                                                                                                                                                                                                                                                                                                                             |
| cambio huevos                         | <input type="radio"/> eliminado<br><input type="radio"/> disminuido<br><input checked="" type="radio"/> igual<br><input type="radio"/> aumentado<br><input type="radio"/> no sabe                                                                                                                                                                                                                                                                                                                                             |
| cambio carne                          | <input type="radio"/> eliminado<br><input checked="" type="radio"/> disminuido<br><input type="radio"/> igual<br><input type="radio"/> aumentado<br><input type="radio"/> no sabe                                                                                                                                                                                                                                                                                                                                             |
| cambio pescado                        | <input type="radio"/> eliminado<br><input type="radio"/> disminuido<br><input checked="" type="radio"/> igual<br><input type="radio"/> aumentado<br><input type="radio"/> no sabe                                                                                                                                                                                                                                                                                                                                             |
| cambio verduras                       | <input type="radio"/> eliminado<br><input type="radio"/> disminuido<br><input checked="" type="radio"/> igual<br><input type="radio"/> aumentado<br><input type="radio"/> no sabe                                                                                                                                                                                                                                                                                                                                             |

|                            |                                                                                                                                                                                                                        |
|----------------------------|------------------------------------------------------------------------------------------------------------------------------------------------------------------------------------------------------------------------|
| cambio legumbres           | <input type="radio"/> eliminado<br><input type="radio"/> disminuido<br><input checked="" type="radio"/> igual<br><input type="radio"/> aumentado<br><input type="radio"/> no sabe                                      |
| cambio fruta               | <input type="radio"/> eliminado<br><input type="radio"/> disminuido<br><input type="radio"/> igual<br><input checked="" type="radio"/> aumentado<br><input type="radio"/> no sabe                                      |
| cambio pan                 | <input type="radio"/> eliminado<br><input type="radio"/> disminuido<br><input checked="" type="radio"/> igual<br><input type="radio"/> aumentado<br><input type="radio"/> no sabe                                      |
| cambio aceite oliva        | <input type="radio"/> eliminado<br><input type="radio"/> disminuido<br><input checked="" type="radio"/> igual<br><input type="radio"/> aumentado<br><input type="radio"/> no sabe                                      |
| cambio mante o margarina   | <input checked="" type="radio"/> eliminado<br><input type="radio"/> disminuido<br><input type="radio"/> igual<br><input type="radio"/> aumentado<br><input type="radio"/> no sabe                                      |
| cambio azúcar y dulces     | <input type="radio"/> eliminado<br><input checked="" type="radio"/> disminuido<br><input type="radio"/> igual<br><input type="radio"/> aumentado<br><input type="radio"/> no sabe                                      |
| cambio bebidas alcohólicas | <input checked="" type="radio"/> eliminado<br><input type="radio"/> disminuido<br><input type="radio"/> igual<br><input type="radio"/> aumentado<br><input type="radio"/> no sabe                                      |
| frecuencia comidas fritas  | <input type="radio"/> a diario<br><input type="radio"/> 5 a 6 veces semana<br><input type="radio"/> 2 a 4 veces semana<br><input type="radio"/> 1 vez semana<br><input checked="" type="radio"/> menos de 1 vez semana |
| carne                      | <input type="radio"/> no como<br><input type="radio"/> cruda<br><input type="radio"/> poco hecha<br><input type="radio"/> hecha<br><input checked="" type="radio"/> muy hecha                                          |
| grasa visible carne        | <input checked="" type="radio"/> quita toda<br><input type="radio"/> quita mayoría<br><input type="radio"/> quita un poco<br><input type="radio"/> no quita nada                                                       |

|                                |                                                                                                                                                                                                                                                          |
|--------------------------------|----------------------------------------------------------------------------------------------------------------------------------------------------------------------------------------------------------------------------------------------------------|
| cocina carne                   | <input checked="" type="radio"/> a la plancha<br><input type="radio"/> a la parrilla<br><input type="radio"/> asada<br><input type="radio"/> frita<br><input type="radio"/> guisada                                                                      |
| tostado quemado carne          | <input checked="" type="radio"/> nunca<br><input type="radio"/> 1 vez mes<br><input type="radio"/> 2 a 3 veces mes<br><input type="radio"/> 1 vez semana<br><input type="radio"/> 2 a 3 semanas                                                          |
| tostado quemado pescado        | <input checked="" type="radio"/> nunca<br><input type="radio"/> 1 vez mes<br><input type="radio"/> 2 a 3 veces mes<br><input type="radio"/> 1 vez semana<br><input type="radio"/> 2 a 3 semanas                                                          |
| socarrat paella                | <input type="radio"/> nunca<br><input checked="" type="radio"/> 1 vez mes<br><input type="radio"/> 2 a 3 veces mes<br><input type="radio"/> 1 vez semana<br><input type="radio"/> 2 a 3 semanas                                                          |
| grasa o aceite cocinar         | <input type="radio"/> mantequilla<br><input type="radio"/> margarina<br><input type="radio"/> aceite oliva<br><input checked="" type="radio"/> aceite oliva virgen extra<br><input type="radio"/> aceite vegetal<br><input type="radio"/> mezcla aceites |
| grasa aceite aliñar            | <input type="radio"/> mantequilla<br><input type="radio"/> margarina<br><input type="radio"/> aceite oliva<br><input checked="" type="radio"/> aceite oliva virgen extra<br><input type="radio"/> aceite vegetal<br><input type="radio"/> mezcla aceites |
| grasa aceite freir             | <input type="radio"/> mantequilla<br><input type="radio"/> margarina<br><input type="radio"/> aceite oliva<br><input checked="" type="radio"/> aceite oliva virgen extra<br><input type="radio"/> aceite vegetal<br><input type="radio"/> mezcla aceites |
| Ejercicio cuestionario         | <input checked="" type="radio"/> si<br><input type="radio"/> no                                                                                                                                                                                          |
| horas de sueño incluido siesta | [*DATA REMOVED*]                                                                                                                                                                                                                                         |
| minutos siesta                 | [*DATA REMOVED*]                                                                                                                                                                                                                                         |
| horas televisión semana        | [*DATA REMOVED*]                                                                                                                                                                                                                                         |



|                                        |                                                                                                                                                                                                                                                                                                                                                                           |
|----------------------------------------|---------------------------------------------------------------------------------------------------------------------------------------------------------------------------------------------------------------------------------------------------------------------------------------------------------------------------------------------------------------------------|
| actividad trabajo                      | <input type="radio"/> casi siempre sentado<br><input type="radio"/> sentado 50 por cien<br><input type="radio"/> casi siempre de pie, quieto<br><input checked="" type="radio"/> casi siempre levantado caminando y llevando pocas cosas<br><input type="radio"/> casi siempre levantado, caminando y llevado muchas cosas<br><input type="radio"/> trabajo manual pesado |
| tiempo caminar o bici al día           | <input type="radio"/> casi nunca<br><input type="radio"/> menos 20min día<br><input type="radio"/> 20 a 40 min día<br><input checked="" type="radio"/> 40 a 60 min día<br><input type="radio"/> 1h o 1h y media día<br><input type="radio"/> más de 1h y media al día                                                                                                     |
| tiempo tareas casa al día              | <input type="radio"/> menos de 1h día<br><input type="radio"/> 1 a 2h día<br><input checked="" type="radio"/> 3 a 4h día<br><input type="radio"/> 5 a 6h día<br><input type="radio"/> 7 a 8h día<br><input type="radio"/> más de 8h día                                                                                                                                   |
| tiempo libre televisión ordenador leer | <input type="radio"/> menos 1h día<br><input type="radio"/> 1h día<br><input type="radio"/> 2h día<br><input checked="" type="radio"/> 3h día<br><input type="radio"/> 4h día<br><input type="radio"/> 5 a 6h día<br><input type="radio"/> mas 6h día                                                                                                                     |
| tiempo libre ejercicio o deporte       | <input type="radio"/> menos 1h semana<br><input type="radio"/> 1h semana<br><input type="radio"/> 2h semana<br><input checked="" type="radio"/> 3h semana<br><input type="radio"/> 4 a 5h semana<br><input type="radio"/> mas 5h semana                                                                                                                                   |
| como se considera                      | <input type="radio"/> sedentaria<br><input type="radio"/> poco activa<br><input type="radio"/> moderadamente activa<br><input checked="" type="radio"/> bastante activa<br><input type="radio"/> muy activa<br><input type="radio"/> no sabe                                                                                                                              |
| FUR                                    | [*DATA REMOVED*]                                                                                                                                                                                                                                                                                                                                                          |
| Semanas gestación 2T                   | [*DATA REMOVED*]                                                                                                                                                                                                                                                                                                                                                          |
| Días gestación 2T                      | [*DATA REMOVED*]                                                                                                                                                                                                                                                                                                                                                          |
| DBP 2T                                 | [*DATA REMOVED*]                                                                                                                                                                                                                                                                                                                                                          |
| CC 2T                                  | [*DATA REMOVED*]                                                                                                                                                                                                                                                                                                                                                          |
| AC 2T                                  | [*DATA REMOVED*]                                                                                                                                                                                                                                                                                                                                                          |

|                                                   |                                                                                                                                                                                                 |
|---------------------------------------------------|-------------------------------------------------------------------------------------------------------------------------------------------------------------------------------------------------|
| LF 2T                                             | [*DATA REMOVED*]                                                                                                                                                                                |
| PFE 2T (Hadlock)                                  | [*DATA REMOVED*]                                                                                                                                                                                |
| Semanas gestación 3T                              | [*DATA REMOVED*]                                                                                                                                                                                |
| días 3T                                           | [*DATA REMOVED*]                                                                                                                                                                                |
| DBP 3T                                            | [*DATA REMOVED*]                                                                                                                                                                                |
| CC 3T                                             | [*DATA REMOVED*]                                                                                                                                                                                |
| AC 3T                                             | [*DATA REMOVED*]                                                                                                                                                                                |
| LF 3T                                             | [*DATA REMOVED*]                                                                                                                                                                                |
| PFE 3T (Hadlock)                                  | [*DATA REMOVED*]                                                                                                                                                                                |
| Semanas de gestación final                        | [*DATA REMOVED*]                                                                                                                                                                                |
| días gestación final                              | [*DATA REMOVED*]                                                                                                                                                                                |
| Localización placenta                             | <input checked="" type="radio"/> anterior<br><input type="radio"/> lateral derecha<br><input type="radio"/> lateral izquierda<br><input type="radio"/> posterior<br><input type="radio"/> fondo |
| Presentación longitudinal cefálica                | <input type="radio"/> no<br><input checked="" type="radio"/> si                                                                                                                                 |
| Dorso                                             | <input type="radio"/> izquierda anterior<br><input type="radio"/> izquierda posterior<br><input type="radio"/> derecha anterior<br><input checked="" type="radio"/> derecha posterior           |
| diámetro biparietal                               | [*DATA REMOVED*]                                                                                                                                                                                |
| Circunferencia craneal                            | [*DATA REMOVED*]                                                                                                                                                                                |
| Circunferencia abdominal                          | [*DATA REMOVED*]                                                                                                                                                                                |
| Longitud de femur                                 | [*DATA REMOVED*]                                                                                                                                                                                |
| tejido celular subcutáneo a nivel del muslo en mm | [*DATA REMOVED*]                                                                                                                                                                                |
| tejido celular subcutáneo en abdomen en mm        | [*DATA REMOVED*]                                                                                                                                                                                |
| Volumen del muslo en cm3                          | [*DATA REMOVED*]                                                                                                                                                                                |
| Peso fetal estimado según fórmula de Hadlock      | [*DATA REMOVED*]                                                                                                                                                                                |

|                                               |                                                                                                                                               |
|-----------------------------------------------|-----------------------------------------------------------------------------------------------------------------------------------------------|
| Percentil                                     | [*DATA REMOVED*]                                                                                                                              |
| Peso fetal estimado según fórmula de Scioscia | <hr/>                                                                                                                                         |
| Peso fetal estimado según fórmula de LEE      | <hr/>                                                                                                                                         |
| Tipo de parto                                 | <input type="radio"/> eutocico<br><input type="radio"/> instrumentado/ventosa<br><input type="radio"/> cesarea                                |
| fecha de nacimiento                           | [*DATA REMOVED*]                                                                                                                              |
| Días entre exploración y nacimiento           | [*DATA REMOVED*]                                                                                                                              |
| Peso RN en g                                  | [*DATA REMOVED*]                                                                                                                              |
| sexo                                          | <input checked="" type="radio"/> mujer<br><input type="radio"/> hombre                                                                        |
| Apgar 1 minuto                                | [*DATA REMOVED*]                                                                                                                              |
| Apgar 5 minutos                               | [*DATA REMOVED*]                                                                                                                              |
| Apgar 10 minutos                              | <hr/>                                                                                                                                         |
| antecedente Covid durante gestación           | <input type="radio"/> Yes<br><input checked="" type="radio"/> No                                                                              |
| Nivel de estudios                             | <input type="radio"/> ninguno<br><input type="radio"/> primarios<br><input type="radio"/> secundarios<br><input type="radio"/> universitarios |

## Base\_datos\_estimacion\_peso\_fetal

|                                       |                                                                                                                                                                                                                                                                                      |
|---------------------------------------|--------------------------------------------------------------------------------------------------------------------------------------------------------------------------------------------------------------------------------------------------------------------------------------|
| Número de identificación participante | 151                                                                                                                                                                                                                                                                                  |
| CODIGO PARTICIPANTE                   |                                                                                                                                                                                                                                                                                      |
| Edad                                  | [*DATA REMOVED*]                                                                                                                                                                                                                                                                     |
| Gestaciones                           | <input type="radio"/> 1<br><input type="radio"/> 2<br><input checked="" type="radio"/> 3<br><input type="radio"/> mas de 3                                                                                                                                                           |
| partos                                | <input type="radio"/> 0<br><input checked="" type="radio"/> 1<br><input type="radio"/> 2<br><input type="radio"/> 3<br><input type="radio"/> mas de 3                                                                                                                                |
| cesáreas                              | <input checked="" type="radio"/> 0<br><input type="radio"/> 1<br><input type="radio"/> 2<br><input type="radio"/> 3<br><input type="radio"/> mas de 3                                                                                                                                |
| Abortos                               | <input type="radio"/> 0<br><input checked="" type="radio"/> 1<br><input type="radio"/> 2<br><input type="radio"/> 3<br><input type="radio"/> mas de 3                                                                                                                                |
| Tipo de gestacion                     | <input checked="" type="radio"/> espontanea<br><input type="radio"/> IAC inseminación artificial conyuge<br><input type="radio"/> IAD inseminación artificial donante<br><input type="radio"/> FIV Fecundación in Vitro<br><input type="radio"/> Ovodon FIV con donación de ovocitos |
| peso previo a embarazo                | [*DATA REMOVED*]                                                                                                                                                                                                                                                                     |
| Ganancia ponderal embarazo            | [*DATA REMOVED*]                                                                                                                                                                                                                                                                     |
| Talla madre                           | [*DATA REMOVED*]                                                                                                                                                                                                                                                                     |
| IMC previo embarazo                   | 20.820939916716245                                                                                                                                                                                                                                                                   |
| Patología obstétrica                  | <input checked="" type="radio"/> no<br><input type="radio"/> si                                                                                                                                                                                                                      |
| Diabetes pregestacional               | <input checked="" type="radio"/> no<br><input type="radio"/> si                                                                                                                                                                                                                      |
| Diabetes gestacional                  | <input checked="" type="radio"/> no<br><input type="radio"/> si                                                                                                                                                                                                                      |

|                                            |                                                                                                                                                                                      |
|--------------------------------------------|--------------------------------------------------------------------------------------------------------------------------------------------------------------------------------------|
| Diabetes gestacional con insulina          | <input checked="" type="radio"/> no<br><input type="radio"/> si                                                                                                                      |
| Diabetes gestacional con dieta y ejercicio | <input checked="" type="radio"/> no<br><input type="radio"/> si                                                                                                                      |
| Percentil fetos previos                    | <input type="radio"/> Nada<br><input type="radio"/> percentil menor de 10<br><input checked="" type="radio"/> percentil entre 10 y 90<br><input type="radio"/> percentil mayor de 90 |
| Exfumadora                                 | <input checked="" type="radio"/> Nada<br><input type="radio"/> menos de 5 años<br><input type="radio"/> 5 a 10 años<br><input type="radio"/> mayor o igual a 10 años                 |
| Hábito tabáquico                           | <input checked="" type="radio"/> no<br><input type="radio"/> si                                                                                                                      |
| fumadora                                   | [*DATA REMOVED*]                                                                                                                                                                     |
| Consumo otros tóxicos                      | <input checked="" type="radio"/> no<br><input type="radio"/> si                                                                                                                      |
| Hb 1T                                      | [*DATA REMOVED*]                                                                                                                                                                     |
| Htc 1T                                     | [*DATA REMOVED*]                                                                                                                                                                     |
| Hb 2T                                      | [*DATA REMOVED*]                                                                                                                                                                     |
| HTC 2T                                     | [*DATA REMOVED*]                                                                                                                                                                     |
| Hb 3T                                      | [*DATA REMOVED*]                                                                                                                                                                     |
| HTC 3T                                     | [*DATA REMOVED*]                                                                                                                                                                     |
| Suplemento FE oral                         | <input type="radio"/> si<br><input checked="" type="radio"/> no                                                                                                                      |
| Suplemento fe iv                           | <input type="radio"/> si<br><input checked="" type="radio"/> no                                                                                                                      |
| Transfusión                                | <input checked="" type="radio"/> no<br><input type="radio"/> si                                                                                                                      |
| Solicitada Vit D                           | <input checked="" type="radio"/> no<br><input type="radio"/> si                                                                                                                      |
| Deficit vit D                              | <input type="radio"/> no<br><input type="radio"/> si                                                                                                                                 |
| Suplemento vit D                           | <input type="radio"/> si<br><input type="radio"/> no                                                                                                                                 |

|                       |                                                                                                                                                                                                                                                                                                                                                                                                              |
|-----------------------|--------------------------------------------------------------------------------------------------------------------------------------------------------------------------------------------------------------------------------------------------------------------------------------------------------------------------------------------------------------------------------------------------------------|
| Dieta, cuestionario   | <input checked="" type="radio"/> sí<br><input type="radio"/> no                                                                                                                                                                                                                                                                                                                                              |
| Leche entera          | <input checked="" type="radio"/> Nunca o menos 1 vez al mes<br><input type="radio"/> 1 a 3 veces mes<br><input type="radio"/> 1 vez semana<br><input type="radio"/> 2 a 4 veces semana<br><input type="radio"/> 5 a 6 veces semana<br><input type="radio"/> 1 vez al día<br><input type="radio"/> 2 a 3 veces al día<br><input type="radio"/> 5 a 6 veces al día<br><input type="radio"/> más 6 veces al día |
| Leche semidesnatada   | <input type="radio"/> Nunca o menos 1 vez al mes<br><input type="radio"/> 1 a 3 veces mes<br><input type="radio"/> 1 vez semana<br><input type="radio"/> 2 a 4 veces semana<br><input checked="" type="radio"/> 5 a 6 veces semana<br><input type="radio"/> 1 vez al día<br><input type="radio"/> 2 a 3 veces al día<br><input type="radio"/> 5 a 6 veces al día<br><input type="radio"/> mas 6 veces al día |
| Leche desnatada       | <input checked="" type="radio"/> Nunca o menos 1 vez al mes<br><input type="radio"/> 1 a 3 veces mes<br><input type="radio"/> 1 vez semana<br><input type="radio"/> 2 a 4 veces semana<br><input type="radio"/> 5 a 6 veces semana<br><input type="radio"/> 1 vez al día<br><input type="radio"/> 2 a 3 veces al día<br><input type="radio"/> 5 a 6 veces al día<br><input type="radio"/> más 6 veces al día |
| Leche condensada      | <input checked="" type="radio"/> Nunca o menos 1 vez al mes<br><input type="radio"/> 1 a 3 veces mes<br><input type="radio"/> 1 vez semana<br><input type="radio"/> 2 a 4 veces semana<br><input type="radio"/> 5 a 6 veces semana<br><input type="radio"/> 1 vez al día<br><input type="radio"/> 2 a 3 veces al día<br><input type="radio"/> 5 a 6 veces al día<br><input type="radio"/> más 6 veces al día |
| nata o crema de leche | <input checked="" type="radio"/> Nunca o menos 1 vez al mes<br><input type="radio"/> 1 a 3 veces mes<br><input type="radio"/> 1 vez semana<br><input type="radio"/> 2 a 4 veces semana<br><input type="radio"/> 5 a 6 veces semana<br><input type="radio"/> 1 vez al día<br><input type="radio"/> 2 a 3 veces al día<br><input type="radio"/> 5 a 6 veces al día<br><input type="radio"/> más 6 veces al día |

---

Yogurt Entero

- ☒ Nunca o menos 1 vez al mes  
☐ 1 a 3 veces mes  
☐ 1 vez semana  
☐ 2 a 4 veces semana  
☐ 5 a 6 veces semana  
☐ 1 vez al día  
☐ 2 a 3 veces al día  
☐ 5 a 6 veces al día  
☐ más 6 veces al día

---

Yogurt desnatado

- ☒ Nunca o menos 1 vez al mes  
☐ 1 a 3 veces mes  
☐ 1 vez semana  
☐ 2 a 4 veces semana  
☐ 5 a 6 veces semana  
☐ 1 vez al día  
☐ 2 a 3 veces al día  
☐ 5 a 6 veces al día  
☐ más 6 veces al día

---

100g requesón o queso blando o queso fresco

- ☐ Nunca o menos 1 vez al mes  
☐ 1 a 3 veces mes  
☐ 1 vez semana  
☒ 2 a 4 veces semana  
☐ 5 a 6 veces semana  
☐ 1 vez al día  
☐ 2 a 3 veces al día  
☐ 5 a 6 veces al día  
☐ más 6 veces al día

---

queso curado o semicurado o cremoso

- ☒ Nunca o menos 1 vez al mes  
☐ 1 a 3 veces mes  
☐ 1 vez semana  
☐ 2 a 4 veces semana  
☐ 5 a 6 veces semana  
☐ 1 vez al día  
☐ 2 a 3 veces al día  
☐ 5 a 6 veces al día  
☐ más 6 veces al día

---

natillas flan pudding

- ☒ Nunca o menos 1 vez al mes  
☐ 1 a 3 veces mes  
☐ 1 vez semana  
☐ 2 a 4 veces semana  
☐ 5 a 6 veces semana  
☐ 1 vez al día  
☐ 2 a 3 veces al día  
☐ 5 a 6 veces al día  
☐ más 6 veces al día

---

Helado

- ☐ Nunca o menos 1 vez al mes  
☐ 1 a 3 veces mes  
☐ 1 vez semana  
☒ 2 a 4 veces semana  
☐ 5 a 6 veces semana  
☐ 1 vez al día  
☐ 2 a 3 veces al día  
☐ 5 a 6 veces al día  
☐ más 6 veces al día

|                                      |                                                                                                                                                                                                                                                                                                                                                                                                              |
|--------------------------------------|--------------------------------------------------------------------------------------------------------------------------------------------------------------------------------------------------------------------------------------------------------------------------------------------------------------------------------------------------------------------------------------------------------------|
| huevo                                | <input type="radio"/> Nunca o menos 1 vez al mes<br><input type="radio"/> 1 a 3 veces mes<br><input type="radio"/> 1 vez semana<br><input checked="" type="radio"/> 2 a 4 veces semana<br><input type="radio"/> 5 a 6 veces semana<br><input type="radio"/> 1 vez al día<br><input type="radio"/> 2 a 3 veces al día<br><input type="radio"/> 5 a 6 veces al día<br><input type="radio"/> más 6 veces al día |
| Pollo con piel                       | <input checked="" type="radio"/> Nunca o menos 1 vez al mes<br><input type="radio"/> 1 a 3 veces mes<br><input type="radio"/> 1 vez semana<br><input type="radio"/> 2 a 4 veces semana<br><input type="radio"/> 5 a 6 veces semana<br><input type="radio"/> 1 vez al día<br><input type="radio"/> 2 a 3 veces al día<br><input type="radio"/> 5 a 6 veces al día<br><input type="radio"/> más 6 veces al día |
| pollo sin piel                       | <input type="radio"/> Nunca o menos 1 vez al mes<br><input type="radio"/> 1 a 3 veces mes<br><input type="radio"/> 1 vez semana<br><input checked="" type="radio"/> 2 a 4 veces semana<br><input type="radio"/> 5 a 6 veces semana<br><input type="radio"/> 1 vez al día<br><input type="radio"/> 2 a 3 veces al día<br><input type="radio"/> 5 a 6 veces al día<br><input type="radio"/> más 6 veces al día |
| Ternera o cerdo o cordero            | <input type="radio"/> Nunca o menos 1 vez al mes<br><input type="radio"/> 1 a 3 veces mes<br><input checked="" type="radio"/> 1 vez semana<br><input type="radio"/> 2 a 4 veces semana<br><input type="radio"/> 5 a 6 veces semana<br><input type="radio"/> 1 vez al día<br><input type="radio"/> 2 a 3 veces al día<br><input type="radio"/> 5 a 6 veces al día<br><input type="radio"/> más 6 veces al día |
| carne caza: Conejo o codorniz o pato | <input checked="" type="radio"/> Nunca o menos 1 vez al mes<br><input type="radio"/> 1 a 3 veces mes<br><input type="radio"/> 1 vez semana<br><input type="radio"/> 2 a 4 veces semana<br><input type="radio"/> 5 a 6 veces semana<br><input type="radio"/> 1 vez al día<br><input type="radio"/> 2 a 3 veces al día<br><input type="radio"/> 5 a 6 veces al día<br><input type="radio"/> más 6 veces al día |
| Hígado de ternera o cerdo o pollo    | <input checked="" type="radio"/> Nunca o menos 1 vez al mes<br><input type="radio"/> 1 a 3 veces mes<br><input type="radio"/> 1 vez semana<br><input type="radio"/> 2 a 4 veces semana<br><input type="radio"/> 5 a 6 veces semana<br><input type="radio"/> 1 vez al día<br><input type="radio"/> 2 a 3 veces al día<br><input type="radio"/> 5 a 6 veces al día<br><input type="radio"/> más 6 veces al día |



---

Vísceras

- ☒ Nunca o menos 1 vez al mes  
☐ 1 a 3 veces mes  
☐ 1 vez semana  
☐ 2 a 4 veces semana  
☐ 5 a 6 veces semana  
☐ 1 vez al día  
☐ 2 a 3 veces al día  
☐ 5 a 6 veces al día  
☐ más 6 veces al día

---

Embutido

- ☐ Nunca o menos 1 vez al mes  
☒ 1 a 3 veces mes  
☐ 1 vez semana  
☐ 2 a 4 veces semana  
☐ 5 a 6 veces semana  
☐ 1 vez al día  
☐ 2 a 3 veces al día  
☐ 5 a 6 veces al día  
☐ más 6 veces al día

---

Salchicha o similar

- ☒ Nunca o menos 1 vez al mes  
☐ 1 a 3 veces mes  
☐ 1 vez semana  
☐ 2 a 4 veces semana  
☐ 5 a 6 veces semana  
☐ 1 vez al día  
☐ 2 a 3 veces al día  
☐ 5 a 6 veces al día  
☐ más 6 veces al día

---

Pate o foiegras

- ☐ Nunca o menos 1 vez al mes  
☒ 1 a 3 veces mes  
☐ 1 vez semana  
☐ 2 a 4 veces semana  
☐ 5 a 6 veces semana  
☐ 1 vez al día  
☐ 2 a 3 veces al día  
☐ 5 a 6 veces al día  
☐ más 6 veces al día

---

Hamburguesa

- ☐ Nunca o menos 1 vez al mes  
☒ 1 a 3 veces mes  
☐ 1 vez semana  
☐ 2 a 4 veces semana  
☐ 5 a 6 veces semana  
☐ 1 vez al día  
☐ 2 a 3 veces al día  
☐ 5 a 6 veces al día  
☐ más 6 veces al día

---

tocino o bacon

- ☒ Nunca o menos 1 vez al mes  
☐ 1 a 3 veces mes  
☐ 1 vez semana  
☐ 2 a 4 veces semana  
☐ 5 a 6 veces semana  
☐ 1 vez al día  
☐ 2 a 3 veces al día  
☐ 5 a 6 veces al día  
☐ más 6 veces al día

---

Pescado frito

- ☐ Nunca o menos 1 vez al mes  
☒ 1 a 3 veces mes  
☐ 1 vez semana  
☐ 2 a 4 veces semana  
☐ 5 a 6 veces semana  
☐ 1 vez al día  
☐ 2 a 3 veces al día  
☐ 5 a 6 veces al día  
☐ más 6 veces al día

---

pescado hervido blanco

- ☐ Nunca o menos 1 vez al mes  
☐ 1 a 3 veces mes  
☒ 1 vez semana  
☐ 2 a 4 veces semana  
☐ 5 a 6 veces semana  
☐ 1 vez al día  
☐ 2 a 3 veces al día  
☐ 5 a 6 veces al día  
☐ más 6 veces al día

---

pescado hervido azul

- ☐ Nunca o menos 1 vez al mes  
☒ 1 a 3 veces mes  
☐ 1 vez semana  
☐ 2 a 4 veces semana  
☐ 5 a 6 veces semana  
☐ 1 vez al día  
☐ 2 a 3 veces al día  
☐ 5 a 6 veces al día  
☐ más 6 veces al día

---

otros pescado azul

- ☐ Nunca o menos 1 vez al mes  
☒ 1 a 3 veces mes  
☐ 1 vez semana  
☐ 2 a 4 veces semana  
☐ 5 a 6 veces semana  
☐ 1 vez al día  
☐ 2 a 3 veces al día  
☐ 5 a 6 veces al día  
☐ más 6 veces al día

---

atun conserva

- ☐ Nunca o menos 1 vez al mes  
☐ 1 a 3 veces mes  
☒ 1 vez semana  
☐ 2 a 4 veces semana  
☐ 5 a 6 veces semana  
☐ 1 vez al día  
☐ 2 a 3 veces al día  
☐ 5 a 6 veces al día  
☐ más 6 veces al día

---

sardina conserva

- ☒ Nunca o menos 1 vez al mes  
☐ 1 a 3 veces mes  
☐ 1 vez semana  
☐ 2 a 4 veces semana  
☐ 5 a 6 veces semana  
☐ 1 vez al día  
☐ 2 a 3 veces al día  
☐ 5 a 6 veces al día  
☐ más 6 veces al día

|                                         |                                                                                                                                                                                                                                                                                                                                                                                                              |
|-----------------------------------------|--------------------------------------------------------------------------------------------------------------------------------------------------------------------------------------------------------------------------------------------------------------------------------------------------------------------------------------------------------------------------------------------------------------|
| pescado ahumado                         | <input type="radio"/> Nunca o menos 1 vez al mes<br><input type="radio"/> 1 a 3 veces mes<br><input checked="" type="radio"/> 1 vez semana<br><input type="radio"/> 2 a 4 veces semana<br><input type="radio"/> 5 a 6 veces semana<br><input type="radio"/> 1 vez al día<br><input type="radio"/> 2 a 3 veces al día<br><input type="radio"/> 5 a 6 veces al día<br><input type="radio"/> más 6 veces al día |
| almejas o mejillones o ostras unos 100g | <input type="radio"/> Nunca o menos 1 vez al mes<br><input checked="" type="radio"/> 1 a 3 veces mes<br><input type="radio"/> 1 vez semana<br><input type="radio"/> 2 a 4 veces semana<br><input type="radio"/> 5 a 6 veces semana<br><input type="radio"/> 1 vez al día<br><input type="radio"/> 2 a 3 veces al día<br><input type="radio"/> 5 a 6 veces al día<br><input type="radio"/> más 6 veces al día |
| calamar o chipiron o sepia unos 100g    | <input type="radio"/> Nunca o menos 1 vez al mes<br><input type="radio"/> 1 a 3 veces mes<br><input checked="" type="radio"/> 1 vez semana<br><input type="radio"/> 2 a 4 veces semana<br><input type="radio"/> 5 a 6 veces semana<br><input type="radio"/> 1 vez al día<br><input type="radio"/> 2 a 3 veces al día<br><input type="radio"/> 5 a 6 veces al día<br><input type="radio"/> más 6 veces al día |
| marisco unos 100g                       | <input type="radio"/> Nunca o menos 1 vez al mes<br><input type="radio"/> 1 a 3 veces mes<br><input checked="" type="radio"/> 1 vez semana<br><input type="radio"/> 2 a 4 veces semana<br><input type="radio"/> 5 a 6 veces semana<br><input type="radio"/> 1 vez al día<br><input type="radio"/> 2 a 3 veces al día<br><input type="radio"/> 5 a 6 veces al día<br><input type="radio"/> más 6 veces al día |
| Espinacas o acelgas cocinadas           | <input checked="" type="radio"/> Nunca o menos 1 vez al mes<br><input type="radio"/> 1 a 3 veces mes<br><input type="radio"/> 1 vez semana<br><input type="radio"/> 2 a 4 veces semana<br><input type="radio"/> 5 a 6 veces semana<br><input type="radio"/> 1 vez al día<br><input type="radio"/> 2 a 3 veces al día<br><input type="radio"/> 5 a 6 veces al día<br><input type="radio"/> más 6 veces al día |
| Col o coliflor o brocoli cocinado       | <input type="radio"/> Nunca o menos 1 vez al mes<br><input checked="" type="radio"/> 1 a 3 veces mes<br><input type="radio"/> 1 vez semana<br><input type="radio"/> 2 a 4 veces semana<br><input type="radio"/> 5 a 6 veces semana<br><input type="radio"/> 1 vez al día<br><input type="radio"/> 2 a 3 veces al día<br><input type="radio"/> 5 a 6 veces al día<br><input type="radio"/> más 6 veces al día |

---

Lechuga o endivia o escarola

- ☐ Nunca o menos 1 vez al mes  
☒ 1 a 3 veces mes  
☐ 1 vez semana  
☐ 2 a 4 veces semana  
☐ 5 a 6 veces semana  
☐ 1 vez al día  
☐ 2 a 3 veces al día  
☐ 5 a 6 veces al día  
☐ más 6 veces al día

---

tomate ensalada

- ☐ Nunca o menos 1 vez al mes  
☐ 1 a 3 veces mes  
☐ 1 vez semana  
☒ 2 a 4 veces semana  
☐ 5 a 6 veces semana  
☐ 1 vez al día  
☐ 2 a 3 veces al día  
☐ 5 a 6 veces al día  
☐ más 6 veces al día

---

cebolla

- ☐ Nunca o menos 1 vez al mes  
☐ 1 a 3 veces mes  
☐ 1 vez semana  
☒ 2 a 4 veces semana  
☐ 5 a 6 veces semana  
☐ 1 vez al día  
☐ 2 a 3 veces al día  
☐ 5 a 6 veces al día  
☐ más 6 veces al día

---

Zanahoria o calabaza

- ☐ Nunca o menos 1 vez al mes  
☐ 1 a 3 veces mes  
☐ 1 vez semana  
☒ 2 a 4 veces semana  
☐ 5 a 6 veces semana  
☐ 1 vez al día  
☐ 2 a 3 veces al día  
☐ 5 a 6 veces al día  
☐ más 6 veces al día

---

Judías verdes

- ☒ Nunca o menos 1 vez al mes  
☐ 1 a 3 veces mes  
☐ 1 vez semana  
☐ 2 a 4 veces semana  
☐ 5 a 6 veces semana  
☐ 1 vez al día  
☐ 2 a 3 veces al día  
☐ 5 a 6 veces al día  
☐ más 6 veces al día

---

Berenjena o calabacin o pepino

- ☐ Nunca o menos 1 vez al mes  
☐ 1 a 3 veces mes  
☐ 1 vez semana  
☒ 2 a 4 veces semana  
☐ 5 a 6 veces semana  
☐ 1 vez al día  
☐ 2 a 3 veces al día  
☐ 5 a 6 veces al día  
☐ más 6 veces al día

|                       |                                                                                                                                                                                                                                                                                                                                                                                                              |
|-----------------------|--------------------------------------------------------------------------------------------------------------------------------------------------------------------------------------------------------------------------------------------------------------------------------------------------------------------------------------------------------------------------------------------------------------|
| pimiento              | <input checked="" type="radio"/> Nunca o menos 1 vez al mes<br><input type="radio"/> 1 a 3 veces mes<br><input type="radio"/> 1 vez semana<br><input type="radio"/> 2 a 4 veces semana<br><input type="radio"/> 5 a 6 veces semana<br><input type="radio"/> 1 vez al día<br><input type="radio"/> 2 a 3 veces al día<br><input type="radio"/> 5 a 6 veces al día<br><input type="radio"/> más 6 veces al día |
| alcachofa             | <input type="radio"/> Nunca o menos 1 vez al mes<br><input type="radio"/> 1 a 3 veces mes<br><input type="radio"/> 1 vez semana<br><input checked="" type="radio"/> 2 a 4 veces semana<br><input type="radio"/> 5 a 6 veces semana<br><input type="radio"/> 1 vez al día<br><input type="radio"/> 2 a 3 veces al día<br><input type="radio"/> 5 a 6 veces al día<br><input type="radio"/> más 6 veces al día |
| espárragos            | <input type="radio"/> Nunca o menos 1 vez al mes<br><input type="radio"/> 1 a 3 veces mes<br><input checked="" type="radio"/> 1 vez semana<br><input type="radio"/> 2 a 4 veces semana<br><input type="radio"/> 5 a 6 veces semana<br><input type="radio"/> 1 vez al día<br><input type="radio"/> 2 a 3 veces al día<br><input type="radio"/> 5 a 6 veces al día<br><input type="radio"/> más 6 veces al día |
| maíz hervido          | <input type="radio"/> Nunca o menos 1 vez al mes<br><input type="radio"/> 1 a 3 veces mes<br><input type="radio"/> 1 vez semana<br><input checked="" type="radio"/> 2 a 4 veces semana<br><input type="radio"/> 5 a 6 veces semana<br><input type="radio"/> 1 vez al día<br><input type="radio"/> 2 a 3 veces al día<br><input type="radio"/> 5 a 6 veces al día<br><input type="radio"/> más 6 veces al día |
| legumbres             | <input type="radio"/> Nunca o menos 1 vez al mes<br><input type="radio"/> 1 a 3 veces mes<br><input type="radio"/> 1 vez semana<br><input checked="" type="radio"/> 2 a 4 veces semana<br><input type="radio"/> 5 a 6 veces semana<br><input type="radio"/> 1 vez al día<br><input type="radio"/> 2 a 3 veces al día<br><input type="radio"/> 5 a 6 veces al día<br><input type="radio"/> más 6 veces al día |
| naranjas o mandarinas | <input type="radio"/> Nunca o menos 1 vez al mes<br><input type="radio"/> 1 a 3 veces mes<br><input type="radio"/> 1 vez semana<br><input checked="" type="radio"/> 2 a 4 veces semana<br><input type="radio"/> 5 a 6 veces semana<br><input type="radio"/> 1 vez al día<br><input type="radio"/> 2 a 3 veces al día<br><input type="radio"/> 5 a 6 veces al día<br><input type="radio"/> más 6 veces al día |

---

zumo natural fruta

- ☐ Nunca o menos 1 vez al mes  
☒ 1 a 3 veces mes  
☐ 1 vez semana  
☐ 2 a 4 veces semana  
☐ 5 a 6 veces semana  
☐ 1 vez al día  
☐ 2 a 3 veces al día  
☐ 5 a 6 veces al día  
☐ más 6 veces al día

---

platano

- ☐ Nunca o menos 1 vez al mes  
☐ 1 a 3 veces mes  
☐ 1 vez semana  
☒ 2 a 4 veces semana  
☐ 5 a 6 veces semana  
☐ 1 vez al día  
☐ 2 a 3 veces al día  
☐ 5 a 6 veces al día  
☐ más 6 veces al día

---

manzana o pera

- ☐ Nunca o menos 1 vez al mes  
☐ 1 a 3 veces mes  
☐ 1 vez semana  
☒ 2 a 4 veces semana  
☐ 5 a 6 veces semana  
☐ 1 vez al día  
☐ 2 a 3 veces al día  
☐ 5 a 6 veces al día  
☐ más 6 veces al día

---

melocotón o nectarina

- ☐ Nunca o menos 1 vez al mes  
☐ 1 a 3 veces mes  
☐ 1 vez semana  
☒ 2 a 4 veces semana  
☐ 5 a 6 veces semana  
☐ 1 vez al día  
☐ 2 a 3 veces al día  
☐ 5 a 6 veces al día  
☐ más 6 veces al día

---

sandia o melon

- ☐ Nunca o menos 1 vez al mes  
☐ 1 a 3 veces mes  
☐ 1 vez semana  
☒ 2 a 4 veces semana  
☐ 5 a 6 veces semana  
☐ 1 vez al día  
☐ 2 a 3 veces al día  
☐ 5 a 6 veces al día  
☐ más 6 veces al día

---

uva

- ☐ Nunca o menos 1 vez al mes  
☐ 1 a 3 veces mes  
☒ 1 vez semana  
☐ 2 a 4 veces semana  
☐ 5 a 6 veces semana  
☐ 1 vez al día  
☐ 2 a 3 veces al día  
☐ 5 a 6 veces al día  
☐ más 6 veces al día

---

bruna o ciruela

- ☐ Nunca o menos 1 vez al mes  
☐ 1 a 3 veces mes  
☐ 1 vez semana  
☒ 2 a 4 veces semana  
☐ 5 a 6 veces semana  
☐ 1 vez al día  
☐ 2 a 3 veces al día  
☐ 5 a 6 veces al día  
☐ más 6 veces al día

---

kiwi

- ☐ Nunca o menos 1 vez al mes  
☐ 1 a 3 veces mes  
☒ 1 vez semana  
☐ 2 a 4 veces semana  
☐ 5 a 6 veces semana  
☐ 1 vez al día  
☐ 2 a 3 veces al día  
☐ 5 a 6 veces al día  
☐ más 6 veces al día

---

aceituna

- ☐ Nunca o menos 1 vez al mes  
☐ 1 a 3 veces mes  
☐ 1 vez semana  
☒ 2 a 4 veces semana  
☐ 5 a 6 veces semana  
☐ 1 vez al día  
☐ 2 a 3 veces al día  
☐ 5 a 6 veces al día  
☐ más 6 veces al día

---

frutos secos

- ☐ Nunca o menos 1 vez al mes  
☐ 1 a 3 veces mes  
☒ 1 vez semana  
☐ 2 a 4 veces semana  
☐ 5 a 6 veces semana  
☐ 1 vez al día  
☐ 2 a 3 veces al día  
☐ 5 a 6 veces al día  
☐ más 6 veces al día

---

pan blanco

- ☐ Nunca o menos 1 vez al mes  
☐ 1 a 3 veces mes  
☐ 1 vez semana  
☒ 2 a 4 veces semana  
☐ 5 a 6 veces semana  
☐ 1 vez al día  
☐ 2 a 3 veces al día  
☐ 5 a 6 veces al día  
☐ más 6 veces al día

---

pan integral

- ☐ Nunca o menos 1 vez al mes  
☐ 1 a 3 veces mes  
☐ 1 vez semana  
☒ 2 a 4 veces semana  
☐ 5 a 6 veces semana  
☐ 1 vez al día  
☐ 2 a 3 veces al día  
☐ 5 a 6 veces al día  
☐ más 6 veces al día

---

cereales desayuno

- ☐ Nunca o menos 1 vez al mes  
☐ 1 a 3 veces mes  
☐ 1 vez semana  
☒ 2 a 4 veces semana  
☐ 5 a 6 veces semana  
☐ 1 vez al día  
☐ 2 a 3 veces al día  
☐ 5 a 6 veces al día  
☐ más 6 veces al día

---

patatas fritas

- ☐ Nunca o menos 1 vez al mes  
☐ 1 a 3 veces mes  
☐ 1 vez semana  
☒ 2 a 4 veces semana  
☐ 5 a 6 veces semana  
☐ 1 vez al día  
☐ 2 a 3 veces al día  
☐ 5 a 6 veces al día  
☐ más 6 veces al día

---

patatas cocidas o asadas

- ☐ Nunca o menos 1 vez al mes  
☐ 1 a 3 veces mes  
☒ 1 vez semana  
☐ 2 a 4 veces semana  
☐ 5 a 6 veces semana  
☐ 1 vez al día  
☐ 2 a 3 veces al día  
☐ 5 a 6 veces al día  
☐ más 6 veces al día

---

bolsa papas

- ☐ Nunca o menos 1 vez al mes  
☒ 1 a 3 veces mes  
☐ 1 vez semana  
☐ 2 a 4 veces semana  
☐ 5 a 6 veces semana  
☐ 1 vez al día  
☐ 2 a 3 veces al día  
☐ 5 a 6 veces al día  
☐ más 6 veces al día

---

arroz cocinado

- ☐ Nunca o menos 1 vez al mes  
☐ 1 a 3 veces mes  
☒ 1 vez semana  
☐ 2 a 4 veces semana  
☐ 5 a 6 veces semana  
☐ 1 vez al día  
☐ 2 a 3 veces al día  
☐ 5 a 6 veces al día  
☐ más 6 veces al día

---

pasta

- ☐ Nunca o menos 1 vez al mes  
☐ 1 a 3 veces mes  
☐ 1 vez semana  
☒ 2 a 4 veces semana  
☐ 5 a 6 veces semana  
☐ 1 vez al día  
☐ 2 a 3 veces al día  
☐ 5 a 6 veces al día  
☐ más 6 veces al día



|                     |                                                                                                                                                                                                                                                                                                                                                                                                              |
|---------------------|--------------------------------------------------------------------------------------------------------------------------------------------------------------------------------------------------------------------------------------------------------------------------------------------------------------------------------------------------------------------------------------------------------------|
| pizza               | <input type="radio"/> Nunca o menos 1 vez al mes<br><input type="radio"/> 1 a 3 veces mes<br><input checked="" type="radio"/> 1 vez semana<br><input type="radio"/> 2 a 4 veces semana<br><input type="radio"/> 5 a 6 veces semana<br><input type="radio"/> 1 vez al día<br><input type="radio"/> 2 a 3 veces al día<br><input type="radio"/> 5 a 6 veces al día<br><input type="radio"/> más 6 veces al día |
| aceite oliva        | <input type="radio"/> Nunca o menos 1 vez al mes<br><input type="radio"/> 1 a 3 veces mes<br><input type="radio"/> 1 vez semana<br><input type="radio"/> 2 a 4 veces semana<br><input checked="" type="radio"/> 5 a 6 veces semana<br><input type="radio"/> 1 vez al día<br><input type="radio"/> 2 a 3 veces al día<br><input type="radio"/> 5 a 6 veces al día<br><input type="radio"/> más 6 veces al día |
| otros aceites       | <input type="radio"/> Nunca o menos 1 vez al mes<br><input checked="" type="radio"/> 1 a 3 veces mes<br><input type="radio"/> 1 vez semana<br><input type="radio"/> 2 a 4 veces semana<br><input type="radio"/> 5 a 6 veces semana<br><input type="radio"/> 1 vez al día<br><input type="radio"/> 2 a 3 veces al día<br><input type="radio"/> 5 a 6 veces al día<br><input type="radio"/> más 6 veces al día |
| margarina           | <input checked="" type="radio"/> Nunca o menos 1 vez al mes<br><input type="radio"/> 1 a 3 veces mes<br><input type="radio"/> 1 vez semana<br><input type="radio"/> 2 a 4 veces semana<br><input type="radio"/> 5 a 6 veces semana<br><input type="radio"/> 1 vez al día<br><input type="radio"/> 2 a 3 veces al día<br><input type="radio"/> 5 a 6 veces al día<br><input type="radio"/> más 6 veces al día |
| mantequilla         | <input checked="" type="radio"/> Nunca o menos 1 vez al mes<br><input type="radio"/> 1 a 3 veces mes<br><input type="radio"/> 1 vez semana<br><input type="radio"/> 2 a 4 veces semana<br><input type="radio"/> 5 a 6 veces semana<br><input type="radio"/> 1 vez al día<br><input type="radio"/> 2 a 3 veces al día<br><input type="radio"/> 5 a 6 veces al día<br><input type="radio"/> más 6 veces al día |
| galletas tipo maria | <input type="radio"/> Nunca o menos 1 vez al mes<br><input checked="" type="radio"/> 1 a 3 veces mes<br><input type="radio"/> 1 vez semana<br><input type="radio"/> 2 a 4 veces semana<br><input type="radio"/> 5 a 6 veces semana<br><input type="radio"/> 1 vez al día<br><input type="radio"/> 2 a 3 veces al día<br><input type="radio"/> 5 a 6 veces al día<br><input type="radio"/> más 6 veces al día |

|                           |                                                                                                                                                                                                                                                                                                                                                                                                              |
|---------------------------|--------------------------------------------------------------------------------------------------------------------------------------------------------------------------------------------------------------------------------------------------------------------------------------------------------------------------------------------------------------------------------------------------------------|
| galletas chocolate        | <input checked="" type="radio"/> Nunca o menos 1 vez al mes<br><input type="radio"/> 1 a 3 veces mes<br><input type="radio"/> 1 vez semana<br><input type="radio"/> 2 a 4 veces semana<br><input type="radio"/> 5 a 6 veces semana<br><input type="radio"/> 1 vez al día<br><input type="radio"/> 2 a 3 veces al día<br><input type="radio"/> 5 a 6 veces al día<br><input type="radio"/> más 6 veces al día |
| bollieria                 | <input type="radio"/> Nunca o menos 1 vez al mes<br><input checked="" type="radio"/> 1 a 3 veces mes<br><input type="radio"/> 1 vez semana<br><input type="radio"/> 2 a 4 veces semana<br><input type="radio"/> 5 a 6 veces semana<br><input type="radio"/> 1 vez al día<br><input type="radio"/> 2 a 3 veces al día<br><input type="radio"/> 5 a 6 veces al día<br><input type="radio"/> más 6 veces al día |
| chocolate o bombones      | <input type="radio"/> Nunca o menos 1 vez al mes<br><input checked="" type="radio"/> 1 a 3 veces mes<br><input type="radio"/> 1 vez semana<br><input type="radio"/> 2 a 4 veces semana<br><input type="radio"/> 5 a 6 veces semana<br><input type="radio"/> 1 vez al día<br><input type="radio"/> 2 a 3 veces al día<br><input type="radio"/> 5 a 6 veces al día<br><input type="radio"/> más 6 veces al día |
| chocolate polvo o colacao | <input checked="" type="radio"/> Nunca o menos 1 vez al mes<br><input type="radio"/> 1 a 3 veces mes<br><input type="radio"/> 1 vez semana<br><input type="radio"/> 2 a 4 veces semana<br><input type="radio"/> 5 a 6 veces semana<br><input type="radio"/> 1 vez al día<br><input type="radio"/> 2 a 3 veces al día<br><input type="radio"/> 5 a 6 veces al día<br><input type="radio"/> más 6 veces al día |
| vino tinto                | <input checked="" type="radio"/> Nunca o menos 1 vez al mes<br><input type="radio"/> 1 a 3 veces mes<br><input type="radio"/> 1 vez semana<br><input type="radio"/> 2 a 4 veces semana<br><input type="radio"/> 5 a 6 veces semana<br><input type="radio"/> 1 vez al día<br><input type="radio"/> 2 a 3 veces al día<br><input type="radio"/> 5 a 6 veces al día<br><input type="radio"/> más 6 veces al día |
| vino blanco               | <input checked="" type="radio"/> Nunca o menos 1 vez al mes<br><input type="radio"/> 1 a 3 veces mes<br><input type="radio"/> 1 vez semana<br><input type="radio"/> 2 a 4 veces semana<br><input type="radio"/> 5 a 6 veces semana<br><input type="radio"/> 1 vez al día<br><input type="radio"/> 2 a 3 veces al día<br><input type="radio"/> 5 a 6 veces al día<br><input type="radio"/> más 6 veces al día |

|                       |                                                                                                                                                                                                                                                                                                                                                                                                              |
|-----------------------|--------------------------------------------------------------------------------------------------------------------------------------------------------------------------------------------------------------------------------------------------------------------------------------------------------------------------------------------------------------------------------------------------------------|
| vino seco o vermut    | <input checked="" type="radio"/> Nunca o menos 1 vez al mes<br><input type="radio"/> 1 a 3 veces mes<br><input type="radio"/> 1 vez semana<br><input type="radio"/> 2 a 4 veces semana<br><input type="radio"/> 5 a 6 veces semana<br><input type="radio"/> 1 vez al día<br><input type="radio"/> 2 a 3 veces al día<br><input type="radio"/> 5 a 6 veces al día<br><input type="radio"/> más 6 veces al día |
| cerveza               | <input checked="" type="radio"/> Nunca o menos 1 vez al mes<br><input type="radio"/> 1 a 3 veces mes<br><input type="radio"/> 1 vez semana<br><input type="radio"/> 2 a 4 veces semana<br><input type="radio"/> 5 a 6 veces semana<br><input type="radio"/> 1 vez al día<br><input type="radio"/> 2 a 3 veces al día<br><input type="radio"/> 5 a 6 veces al día<br><input type="radio"/> más 6 veces al día |
| cerveza sin alcohol   | <input type="radio"/> Nunca o menos 1 vez al mes<br><input checked="" type="radio"/> 1 a 3 veces mes<br><input type="radio"/> 1 vez semana<br><input type="radio"/> 2 a 4 veces semana<br><input type="radio"/> 5 a 6 veces semana<br><input type="radio"/> 1 vez al día<br><input type="radio"/> 2 a 3 veces al día<br><input type="radio"/> 5 a 6 veces al día<br><input type="radio"/> más 6 veces al día |
| licores               | <input checked="" type="radio"/> Nunca o menos 1 vez al mes<br><input type="radio"/> 1 a 3 veces mes<br><input type="radio"/> 1 vez semana<br><input type="radio"/> 2 a 4 veces semana<br><input type="radio"/> 5 a 6 veces semana<br><input type="radio"/> 1 vez al día<br><input type="radio"/> 2 a 3 veces al día<br><input type="radio"/> 5 a 6 veces al día<br><input type="radio"/> más 6 veces al día |
| ginebra o ron o vodka | <input checked="" type="radio"/> Nunca o menos 1 vez al mes<br><input type="radio"/> 1 a 3 veces mes<br><input type="radio"/> 1 vez semana<br><input type="radio"/> 2 a 4 veces semana<br><input type="radio"/> 5 a 6 veces semana<br><input type="radio"/> 1 vez al día<br><input type="radio"/> 2 a 3 veces al día<br><input type="radio"/> 5 a 6 veces al día<br><input type="radio"/> más 6 veces al día |
| refresco normal       | <input checked="" type="radio"/> Nunca o menos 1 vez al mes<br><input type="radio"/> 1 a 3 veces mes<br><input type="radio"/> 1 vez semana<br><input type="radio"/> 2 a 4 veces semana<br><input type="radio"/> 5 a 6 veces semana<br><input type="radio"/> 1 vez al día<br><input type="radio"/> 2 a 3 veces al día<br><input type="radio"/> 5 a 6 veces al día<br><input type="radio"/> más 6 veces al día |

|                          |                                                                                                                                                                                                                                                                                                                                                                                                              |
|--------------------------|--------------------------------------------------------------------------------------------------------------------------------------------------------------------------------------------------------------------------------------------------------------------------------------------------------------------------------------------------------------------------------------------------------------|
| refresco sin azúcar      | <input checked="" type="radio"/> Nunca o menos 1 vez al mes<br><input type="radio"/> 1 a 3 veces mes<br><input type="radio"/> 1 vez semana<br><input type="radio"/> 2 a 4 veces semana<br><input type="radio"/> 5 a 6 veces semana<br><input type="radio"/> 1 vez al día<br><input type="radio"/> 2 a 3 veces al día<br><input type="radio"/> 5 a 6 veces al día<br><input type="radio"/> más 6 veces al día |
| Agua del grifo           | <input checked="" type="radio"/> Nunca o menos 1 vez al mes<br><input type="radio"/> 1 a 3 veces mes<br><input type="radio"/> 1 vez semana<br><input type="radio"/> 2 a 4 veces semana<br><input type="radio"/> 5 a 6 veces semana<br><input type="radio"/> 1 vez al día<br><input type="radio"/> 2 a 3 veces al día<br><input type="radio"/> 5 a 6 veces al día<br><input type="radio"/> más 6 veces al día |
| agua embotellada sin gas | <input type="radio"/> Nunca o menos 1 vez al mes<br><input type="radio"/> 1 a 3 veces mes<br><input type="radio"/> 1 vez semana<br><input type="radio"/> 2 a 4 veces semana<br><input type="radio"/> 5 a 6 veces semana<br><input type="radio"/> 1 vez al día<br><input type="radio"/> 2 a 3 veces al día<br><input checked="" type="radio"/> 5 a 6 veces al día<br><input type="radio"/> más 6 veces al día |
| agua embotellada con gas | <input checked="" type="radio"/> Nunca o menos 1 vez al mes<br><input type="radio"/> 1 a 3 veces mes<br><input type="radio"/> 1 vez semana<br><input type="radio"/> 2 a 4 veces semana<br><input type="radio"/> 5 a 6 veces semana<br><input type="radio"/> 1 vez al día<br><input type="radio"/> 2 a 3 veces al día<br><input type="radio"/> 5 a 6 veces al día<br><input type="radio"/> más 6 veces al día |
| zumو frutas embasado     | <input checked="" type="radio"/> Nunca o menos 1 vez al mes<br><input type="radio"/> 1 a 3 veces mes<br><input type="radio"/> 1 vez semana<br><input type="radio"/> 2 a 4 veces semana<br><input type="radio"/> 5 a 6 veces semana<br><input type="radio"/> 1 vez al día<br><input type="radio"/> 2 a 3 veces al día<br><input type="radio"/> 5 a 6 veces al día<br><input type="radio"/> más 6 veces al día |
| cafe                     | <input type="radio"/> Nunca o menos 1 vez al mes<br><input checked="" type="radio"/> 1 a 3 veces mes<br><input type="radio"/> 1 vez semana<br><input type="radio"/> 2 a 4 veces semana<br><input type="radio"/> 5 a 6 veces semana<br><input type="radio"/> 1 vez al día<br><input type="radio"/> 2 a 3 veces al día<br><input type="radio"/> 5 a 6 veces al día<br><input type="radio"/> más 6 veces al día |

---

cafe descafeinado

- ☒ Nunca o menos 1 vez al mes  
☐ 1 a 3 veces mes  
☐ 1 vez semana  
☐ 2 a 4 veces semana  
☐ 5 a 6 veces semana  
☐ 1 vez al día  
☐ 2 a 3 veces al día  
☐ 5 a 6 veces al día  
☐ más 6 veces al día

---

te o infusión

- ☒ Nunca o menos 1 vez al mes  
☐ 1 a 3 veces mes  
☐ 1 vez semana  
☐ 2 a 4 veces semana  
☐ 5 a 6 veces semana  
☐ 1 vez al día  
☐ 2 a 3 veces al día  
☐ 5 a 6 veces al día  
☐ más 6 veces al día

---

sopa o puré verduras

- ☐ Nunca o menos 1 vez al mes  
☐ 1 a 3 veces mes  
☐ 1 vez semana  
☒ 2 a 4 veces semana  
☐ 5 a 6 veces semana  
☐ 1 vez al día  
☐ 2 a 3 veces al día  
☐ 5 a 6 veces al día  
☐ más 6 veces al día

---

croquetas pollo jamón

- ☐ Nunca o menos 1 vez al mes  
☒ 1 a 3 veces mes  
☐ 1 vez semana  
☐ 2 a 4 veces semana  
☐ 5 a 6 veces semana  
☐ 1 vez al día  
☐ 2 a 3 veces al día  
☐ 5 a 6 veces al día  
☐ más 6 veces al día

---

croquetas pescado

- ☐ Nunca o menos 1 vez al mes  
☒ 1 a 3 veces mes  
☐ 1 vez semana  
☐ 2 a 4 veces semana  
☐ 5 a 6 veces semana  
☐ 1 vez al día  
☐ 2 a 3 veces al día  
☐ 5 a 6 veces al día  
☐ más 6 veces al día

---

mayonesa

- ☒ Nunca o menos 1 vez al mes  
☐ 1 a 3 veces mes  
☐ 1 vez semana  
☐ 2 a 4 veces semana  
☐ 5 a 6 veces semana  
☐ 1 vez al día  
☐ 2 a 3 veces al día  
☐ 5 a 6 veces al día  
☐ más 6 veces al día

|                  |                                                                                                                                                                                                                                                                                                                                                                                                              |
|------------------|--------------------------------------------------------------------------------------------------------------------------------------------------------------------------------------------------------------------------------------------------------------------------------------------------------------------------------------------------------------------------------------------------------------|
| salsa tomate     | <input type="radio"/> Nunca o menos 1 vez al mes<br><input type="radio"/> 1 a 3 veces mes<br><input checked="" type="radio"/> 1 vez semana<br><input type="radio"/> 2 a 4 veces semana<br><input type="radio"/> 5 a 6 veces semana<br><input type="radio"/> 1 vez al día<br><input type="radio"/> 2 a 3 veces al día<br><input type="radio"/> 5 a 6 veces al día<br><input type="radio"/> más 6 veces al día |
| ketchup          | <input type="radio"/> Nunca o menos 1 vez al mes<br><input checked="" type="radio"/> 1 a 3 veces mes<br><input type="radio"/> 1 vez semana<br><input type="radio"/> 2 a 4 veces semana<br><input type="radio"/> 5 a 6 veces semana<br><input type="radio"/> 1 vez al día<br><input type="radio"/> 2 a 3 veces al día<br><input type="radio"/> 5 a 6 veces al día<br><input type="radio"/> más 6 veces al día |
| sal              | <input type="radio"/> Nunca o menos 1 vez al mes<br><input type="radio"/> 1 a 3 veces mes<br><input type="radio"/> 1 vez semana<br><input checked="" type="radio"/> 2 a 4 veces semana<br><input type="radio"/> 5 a 6 veces semana<br><input type="radio"/> 1 vez al día<br><input type="radio"/> 2 a 3 veces al día<br><input type="radio"/> 5 a 6 veces al día<br><input type="radio"/> más 6 veces al día |
| ajo              | <input type="radio"/> Nunca o menos 1 vez al mes<br><input type="radio"/> 1 a 3 veces mes<br><input checked="" type="radio"/> 1 vez semana<br><input type="radio"/> 2 a 4 veces semana<br><input type="radio"/> 5 a 6 veces semana<br><input type="radio"/> 1 vez al día<br><input type="radio"/> 2 a 3 veces al día<br><input type="radio"/> 5 a 6 veces al día<br><input type="radio"/> más 6 veces al día |
| mermelada o miel | <input type="radio"/> Nunca o menos 1 vez al mes<br><input checked="" type="radio"/> 1 a 3 veces mes<br><input type="radio"/> 1 vez semana<br><input type="radio"/> 2 a 4 veces semana<br><input type="radio"/> 5 a 6 veces semana<br><input type="radio"/> 1 vez al día<br><input type="radio"/> 2 a 3 veces al día<br><input type="radio"/> 5 a 6 veces al día<br><input type="radio"/> más 6 veces al día |
| azúcar           | <input type="radio"/> Nunca o menos 1 vez al mes<br><input type="radio"/> 1 a 3 veces mes<br><input checked="" type="radio"/> 1 vez semana<br><input type="radio"/> 2 a 4 veces semana<br><input type="radio"/> 5 a 6 veces semana<br><input type="radio"/> 1 vez al día<br><input type="radio"/> 2 a 3 veces al día<br><input type="radio"/> 5 a 6 veces al día<br><input type="radio"/> más 6 veces al día |

|                                       |                                                                                                                                                                                                                                                                                                                                                                                                                                                                                                                               |
|---------------------------------------|-------------------------------------------------------------------------------------------------------------------------------------------------------------------------------------------------------------------------------------------------------------------------------------------------------------------------------------------------------------------------------------------------------------------------------------------------------------------------------------------------------------------------------|
| Otro alimento                         |                                                                                                                                                                                                                                                                                                                                                                                                                                                                                                                               |
| suplementos vitamínicos               | <input checked="" type="radio"/> si<br><input type="radio"/> no                                                                                                                                                                                                                                                                                                                                                                                                                                                               |
| suplementos vitamínicos               | [*DATA REMOVED*]                                                                                                                                                                                                                                                                                                                                                                                                                                                                                                              |
| dieta previa                          | <input type="radio"/> si<br><input checked="" type="radio"/> no                                                                                                                                                                                                                                                                                                                                                                                                                                                               |
| motivo dieta                          | <input checked="" type="radio"/> no dieta<br><input type="radio"/> control peso<br><input type="radio"/> control colesterol<br><input type="radio"/> control diabetes<br><input type="radio"/> problemas estómago<br><input type="radio"/> problemas vesícula o hepáticos<br><input type="radio"/> HTA o cardiopatía<br><input type="radio"/> problemas renales<br><input type="radio"/> alergia alimentaria<br><input type="radio"/> ácido úrico elevado<br><input type="radio"/> vegetariana<br><input type="radio"/> otros |
| cambio alimentos año previo gestación | <input type="radio"/> si<br><input checked="" type="radio"/> no                                                                                                                                                                                                                                                                                                                                                                                                                                                               |
| cambio lácteos                        | <input type="radio"/> eliminado<br><input type="radio"/> disminuido<br><input checked="" type="radio"/> igual<br><input type="radio"/> aumentado<br><input type="radio"/> no sabe                                                                                                                                                                                                                                                                                                                                             |
| cambio huevos                         | <input type="radio"/> eliminado<br><input type="radio"/> disminuido<br><input checked="" type="radio"/> igual<br><input type="radio"/> aumentado<br><input type="radio"/> no sabe                                                                                                                                                                                                                                                                                                                                             |
| cambio carne                          | <input type="radio"/> eliminado<br><input type="radio"/> disminuido<br><input checked="" type="radio"/> igual<br><input type="radio"/> aumentado<br><input type="radio"/> no sabe                                                                                                                                                                                                                                                                                                                                             |
| cambio pescado                        | <input type="radio"/> eliminado<br><input type="radio"/> disminuido<br><input checked="" type="radio"/> igual<br><input type="radio"/> aumentado<br><input type="radio"/> no sabe                                                                                                                                                                                                                                                                                                                                             |
| cambio verduras                       | <input type="radio"/> eliminado<br><input type="radio"/> disminuido<br><input checked="" type="radio"/> igual<br><input type="radio"/> aumentado<br><input type="radio"/> no sabe                                                                                                                                                                                                                                                                                                                                             |

|                            |                                                                                                                                                                                                                        |
|----------------------------|------------------------------------------------------------------------------------------------------------------------------------------------------------------------------------------------------------------------|
| cambio legumbres           | <input type="radio"/> eliminado<br><input type="radio"/> disminuido<br><input checked="" type="radio"/> igual<br><input type="radio"/> aumentado<br><input type="radio"/> no sabe                                      |
| cambio fruta               | <input type="radio"/> eliminado<br><input type="radio"/> disminuido<br><input checked="" type="radio"/> igual<br><input type="radio"/> aumentado<br><input type="radio"/> no sabe                                      |
| cambio pan                 | <input type="radio"/> eliminado<br><input type="radio"/> disminuido<br><input checked="" type="radio"/> igual<br><input type="radio"/> aumentado<br><input type="radio"/> no sabe                                      |
| cambio aceite oliva        | <input type="radio"/> eliminado<br><input type="radio"/> disminuido<br><input checked="" type="radio"/> igual<br><input type="radio"/> aumentado<br><input type="radio"/> no sabe                                      |
| cambio mante o margarina   | <input type="radio"/> eliminado<br><input type="radio"/> disminuido<br><input checked="" type="radio"/> igual<br><input type="radio"/> aumentado<br><input type="radio"/> no sabe                                      |
| cambio azúcar y dulces     | <input type="radio"/> eliminado<br><input type="radio"/> disminuido<br><input checked="" type="radio"/> igual<br><input type="radio"/> aumentado<br><input type="radio"/> no sabe                                      |
| cambio bebidas alcohólicas | <input type="radio"/> eliminado<br><input type="radio"/> disminuido<br><input checked="" type="radio"/> igual<br><input type="radio"/> aumentado<br><input type="radio"/> no sabe                                      |
| frecuencia comidas fritas  | <input type="radio"/> a diario<br><input type="radio"/> 5 a 6 veces semana<br><input type="radio"/> 2 a 4 veces semana<br><input checked="" type="radio"/> 1 vez semana<br><input type="radio"/> menos de 1 vez semana |
| carne                      | <input type="radio"/> no como<br><input type="radio"/> cruda<br><input type="radio"/> poco hecha<br><input checked="" type="radio"/> hecha<br><input type="radio"/> muy hecha                                          |
| grasa visible carne        | <input type="radio"/> quita toda<br><input checked="" type="radio"/> quita mayoría<br><input type="radio"/> quita un poco<br><input type="radio"/> no quita nada                                                       |



|                                |                                                                                                                                                                                                                                                          |
|--------------------------------|----------------------------------------------------------------------------------------------------------------------------------------------------------------------------------------------------------------------------------------------------------|
| cocina carne                   | <input checked="" type="radio"/> a la plancha<br><input type="radio"/> a la parrilla<br><input type="radio"/> asada<br><input type="radio"/> frita<br><input type="radio"/> guisada                                                                      |
| tostado quemado carne          | <input checked="" type="radio"/> nunca<br><input type="radio"/> 1 vez mes<br><input type="radio"/> 2 a 3 veces mes<br><input type="radio"/> 1 vez semana<br><input type="radio"/> 2 a 3 semanas                                                          |
| tostado quemado pescado        | <input checked="" type="radio"/> nunca<br><input type="radio"/> 1 vez mes<br><input type="radio"/> 2 a 3 veces mes<br><input type="radio"/> 1 vez semana<br><input type="radio"/> 2 a 3 semanas                                                          |
| socarrat paella                | <input checked="" type="radio"/> nunca<br><input type="radio"/> 1 vez mes<br><input type="radio"/> 2 a 3 veces mes<br><input type="radio"/> 1 vez semana<br><input type="radio"/> 2 a 3 semanas                                                          |
| grasa o aceite cocinar         | <input type="radio"/> mantequilla<br><input type="radio"/> margarina<br><input checked="" type="radio"/> aceite oliva<br><input type="radio"/> aceite oliva virgen extra<br><input type="radio"/> aceite vegetal<br><input type="radio"/> mezcla aceites |
| grasa aceite aliñar            | <input type="radio"/> mantequilla<br><input type="radio"/> margarina<br><input checked="" type="radio"/> aceite oliva<br><input type="radio"/> aceite oliva virgen extra<br><input type="radio"/> aceite vegetal<br><input type="radio"/> mezcla aceites |
| grasa aceite freir             | <input type="radio"/> mantequilla<br><input type="radio"/> margarina<br><input checked="" type="radio"/> aceite oliva<br><input type="radio"/> aceite oliva virgen extra<br><input type="radio"/> aceite vegetal<br><input type="radio"/> mezcla aceites |
| Ejercicio cuestionario         | <input checked="" type="radio"/> si<br><input type="radio"/> no                                                                                                                                                                                          |
| horas de sueño incluido siesta | [*DATA REMOVED*]                                                                                                                                                                                                                                         |
| minutos siesta                 | [*DATA REMOVED*]                                                                                                                                                                                                                                         |
| horas televisión semana        |                                                                                                                                                                                                                                                          |

|                                        |                                                                                                                                                                                                                                                                                                                                                                           |
|----------------------------------------|---------------------------------------------------------------------------------------------------------------------------------------------------------------------------------------------------------------------------------------------------------------------------------------------------------------------------------------------------------------------------|
| actividad trabajo                      | <input checked="" type="radio"/> casi siempre sentado<br><input type="radio"/> sentado 50 por cien<br><input type="radio"/> casi siempre de pie, quieto<br><input type="radio"/> casi siempre levantado caminando y llevando pocas cosas<br><input type="radio"/> casi siempre levantado, caminando y llevado muchas cosas<br><input type="radio"/> trabajo manual pesado |
| tiempo caminar o bici al día           | <input type="radio"/> casi nunca<br><input type="radio"/> menos 20min día<br><input type="radio"/> 20 a 40 min día<br><input checked="" type="radio"/> 40 a 60 min día<br><input type="radio"/> 1h o 1h y media día<br><input type="radio"/> más de 1h y media al día                                                                                                     |
| tiempo tareas casa al día              | <input type="radio"/> menos de 1h día<br><input checked="" type="radio"/> 1 a 2h día<br><input type="radio"/> 3 a 4h día<br><input type="radio"/> 5 a 6h día<br><input type="radio"/> 7 a 8h día<br><input type="radio"/> más de 8h día                                                                                                                                   |
| tiempo libre televisión ordenador leer | <input type="radio"/> menos 1h día<br><input checked="" type="radio"/> 1h día<br><input type="radio"/> 2h día<br><input type="radio"/> 3h día<br><input type="radio"/> 4h día<br><input type="radio"/> 5 a 6h día<br><input type="radio"/> mas 6h día                                                                                                                     |
| tiempo libre ejercicio o deporte       | <input type="radio"/> menos 1h semana<br><input checked="" type="radio"/> 1h semana<br><input type="radio"/> 2h semana<br><input type="radio"/> 3h semana<br><input type="radio"/> 4 a 5h semana<br><input type="radio"/> mas 5h semana                                                                                                                                   |
| como se considera                      | <input type="radio"/> sedentaria<br><input checked="" type="radio"/> poco activa<br><input type="radio"/> moderadamente activa<br><input type="radio"/> bastante activa<br><input type="radio"/> muy activa<br><input type="radio"/> no sabe                                                                                                                              |
| FUR                                    | [*DATA REMOVED*]                                                                                                                                                                                                                                                                                                                                                          |
| Semanas gestación 2T                   | [*DATA REMOVED*]                                                                                                                                                                                                                                                                                                                                                          |
| Días gestación 2T                      | [*DATA REMOVED*]                                                                                                                                                                                                                                                                                                                                                          |
| DBP 2T                                 | [*DATA REMOVED*]                                                                                                                                                                                                                                                                                                                                                          |
| CC 2T                                  | [*DATA REMOVED*]                                                                                                                                                                                                                                                                                                                                                          |
| AC 2T                                  | [*DATA REMOVED*]                                                                                                                                                                                                                                                                                                                                                          |

|                                                   |                                                                                                                                                                                                 |
|---------------------------------------------------|-------------------------------------------------------------------------------------------------------------------------------------------------------------------------------------------------|
| LF 2T                                             | [*DATA REMOVED*]                                                                                                                                                                                |
| PFE 2T (Hadlock)                                  | [*DATA REMOVED*]                                                                                                                                                                                |
| Semanas gestación 3T                              | [*DATA REMOVED*]                                                                                                                                                                                |
| días 3T                                           | [*DATA REMOVED*]                                                                                                                                                                                |
| DBP 3T                                            | [*DATA REMOVED*]                                                                                                                                                                                |
| CC 3T                                             | [*DATA REMOVED*]                                                                                                                                                                                |
| AC 3T                                             | [*DATA REMOVED*]                                                                                                                                                                                |
| LF 3T                                             | [*DATA REMOVED*]                                                                                                                                                                                |
| PFE 3T (Hadlock)                                  | [*DATA REMOVED*]                                                                                                                                                                                |
| Semanas de gestación final                        | [*DATA REMOVED*]                                                                                                                                                                                |
| días gestación final                              | [*DATA REMOVED*]                                                                                                                                                                                |
| Localización placenta                             | <input checked="" type="radio"/> anterior<br><input type="radio"/> lateral derecha<br><input type="radio"/> lateral izquierda<br><input type="radio"/> posterior<br><input type="radio"/> fondo |
| Presentación longitudinal cefálica                | <input type="radio"/> no<br><input checked="" type="radio"/> si                                                                                                                                 |
| Dorso                                             | <input type="radio"/> izquierda anterior<br><input checked="" type="radio"/> izquierda posterior<br><input type="radio"/> derecha anterior<br><input type="radio"/> derecha posterior           |
| diámetro biparietal                               | [*DATA REMOVED*]                                                                                                                                                                                |
| Circunferencia craneal                            | [*DATA REMOVED*]                                                                                                                                                                                |
| Circunferencia abdominal                          | [*DATA REMOVED*]                                                                                                                                                                                |
| Longitud de femur                                 | [*DATA REMOVED*]                                                                                                                                                                                |
| tejido celular subcutáneo a nivel del muslo en mm | [*DATA REMOVED*]                                                                                                                                                                                |
| tejido celular subcutáneo en abdomen en mm        | [*DATA REMOVED*]                                                                                                                                                                                |
| Volumen del muslo en cm3                          | [*DATA REMOVED*]                                                                                                                                                                                |
| Peso fetal estimado según fórmula de Hadlock      | [*DATA REMOVED*]                                                                                                                                                                                |

|                                               |                                                                                                                                                          |
|-----------------------------------------------|----------------------------------------------------------------------------------------------------------------------------------------------------------|
| Percentil                                     | [*DATA REMOVED*]                                                                                                                                         |
| Peso fetal estimado según fórmula de Scioscia | <hr/>                                                                                                                                                    |
| Peso fetal estimado según fórmula de LEE      | <hr/>                                                                                                                                                    |
| Tipo de parto                                 | <input checked="" type="radio"/> eutocico<br><input type="radio"/> instrumentado/ventosa<br><input type="radio"/> cesarea                                |
| fecha de nacimiento                           | [*DATA REMOVED*]                                                                                                                                         |
| Días entre exploración y nacimiento           | [*DATA REMOVED*]                                                                                                                                         |
| Peso RN en g                                  | [*DATA REMOVED*]                                                                                                                                         |
| sexo                                          | <input type="radio"/> mujer<br><input checked="" type="radio"/> hombre                                                                                   |
| Apgar 1 minuto                                | [*DATA REMOVED*]                                                                                                                                         |
| Apgar 5 minutos                               | [*DATA REMOVED*]                                                                                                                                         |
| Apgar 10 minutos                              | <hr/>                                                                                                                                                    |
| antecedente Covid durante gestación           | <input type="radio"/> Yes<br><input checked="" type="radio"/> No                                                                                         |
| Nivel de estudios                             | <input type="radio"/> ninguno<br><input type="radio"/> primarios<br><input type="radio"/> secundarios<br><input checked="" type="radio"/> universitarios |

# Base\_datos\_estimacion\_peso\_fetal

|                                       |                                                                                                                                                                                                                                                                                      |
|---------------------------------------|--------------------------------------------------------------------------------------------------------------------------------------------------------------------------------------------------------------------------------------------------------------------------------------|
| Número de identificación participante | 152                                                                                                                                                                                                                                                                                  |
| CODIGO PARTICIPANTE                   |                                                                                                                                                                                                                                                                                      |
| Edad                                  | [*DATA REMOVED*]                                                                                                                                                                                                                                                                     |
| Gestaciones                           | <input type="radio"/> 1<br><input checked="" type="radio"/> 2<br><input type="radio"/> 3<br><input type="radio"/> mas de 3                                                                                                                                                           |
| partos                                | <input type="radio"/> 0<br><input checked="" type="radio"/> 1<br><input type="radio"/> 2<br><input type="radio"/> 3<br><input type="radio"/> mas de 3                                                                                                                                |
| cesáreas                              | <input checked="" type="radio"/> 0<br><input type="radio"/> 1<br><input type="radio"/> 2<br><input type="radio"/> 3<br><input type="radio"/> mas de 3                                                                                                                                |
| Abortos                               | <input checked="" type="radio"/> 0<br><input type="radio"/> 1<br><input type="radio"/> 2<br><input type="radio"/> 3<br><input type="radio"/> mas de 3                                                                                                                                |
| Tipo de gestacion                     | <input checked="" type="radio"/> espontanea<br><input type="radio"/> IAC inseminación artificial conyuge<br><input type="radio"/> IAD inseminación artificial donante<br><input type="radio"/> FIV Fecundación in Vitro<br><input type="radio"/> Ovodon FIV con donación de ovocitos |
| peso previo a embarazo                | [*DATA REMOVED*]                                                                                                                                                                                                                                                                     |
| Ganancia ponderal embarazo            | [*DATA REMOVED*]                                                                                                                                                                                                                                                                     |
| Talla madre                           | [*DATA REMOVED*]                                                                                                                                                                                                                                                                     |
| IMC previo embarazo                   | 21.6712580348944                                                                                                                                                                                                                                                                     |
| Patología obstétrica                  | <input checked="" type="radio"/> no<br><input type="radio"/> si                                                                                                                                                                                                                      |
| Diabetes pregestacional               | <input checked="" type="radio"/> no<br><input type="radio"/> si                                                                                                                                                                                                                      |
| Diabetes gestacional                  | <input checked="" type="radio"/> no<br><input type="radio"/> si                                                                                                                                                                                                                      |

|                                            |                                                                                                                                                                                      |
|--------------------------------------------|--------------------------------------------------------------------------------------------------------------------------------------------------------------------------------------|
| Diabetes gestacional con insulina          | <input checked="" type="radio"/> no<br><input type="radio"/> si                                                                                                                      |
| Diabetes gestacional con dieta y ejercicio | <input checked="" type="radio"/> no<br><input type="radio"/> si                                                                                                                      |
| Percentil fetos previos                    | <input type="radio"/> Nada<br><input type="radio"/> percentil menor de 10<br><input checked="" type="radio"/> percentil entre 10 y 90<br><input type="radio"/> percentil mayor de 90 |
| Exfumadora                                 | <input type="radio"/> Nada<br><input type="radio"/> menos de 5 años<br><input checked="" type="radio"/> 5 a 10 años<br><input type="radio"/> mayor o igual a 10 años                 |
| Hábito tabáquico                           | <input checked="" type="radio"/> no<br><input type="radio"/> si                                                                                                                      |
| fumadora                                   | [*DATA REMOVED*]                                                                                                                                                                     |
| Consumo otros tóxicos                      | <input checked="" type="radio"/> no<br><input type="radio"/> si                                                                                                                      |
| Hb 1T                                      | _____                                                                                                                                                                                |
| Htc 1T                                     | _____                                                                                                                                                                                |
| Hb 2T                                      | _____                                                                                                                                                                                |
| HTC 2T                                     | _____                                                                                                                                                                                |
| Hb 3T                                      | [*DATA REMOVED*]                                                                                                                                                                     |
| HTC 3T                                     | [*DATA REMOVED*]                                                                                                                                                                     |
| Suplemento FE oral                         | <input type="radio"/> si<br><input checked="" type="radio"/> no                                                                                                                      |
| Suplemento fe iv                           | <input type="radio"/> si<br><input checked="" type="radio"/> no                                                                                                                      |
| Transfusión                                | <input checked="" type="radio"/> no<br><input type="radio"/> si                                                                                                                      |
| Solicitada Vit D                           | <input checked="" type="radio"/> no<br><input type="radio"/> si                                                                                                                      |
| Deficit vit D                              | <input checked="" type="radio"/> no<br><input type="radio"/> si                                                                                                                      |

|                       |                                                                                                                                                                                                                                                                                                                                                                                                   |
|-----------------------|---------------------------------------------------------------------------------------------------------------------------------------------------------------------------------------------------------------------------------------------------------------------------------------------------------------------------------------------------------------------------------------------------|
| Suplemento vit D      | <input type="radio"/> si<br><input checked="" type="radio"/> no                                                                                                                                                                                                                                                                                                                                   |
| Dieta, cuestionario   | <input checked="" type="radio"/> si<br><input type="radio"/> no                                                                                                                                                                                                                                                                                                                                   |
| Leche entera          | <input type="radio"/> Nunca o menos 1 vez al mes<br><input type="radio"/> 1 a 3 veces mes<br><input type="radio"/> 1 vez semana<br><input type="radio"/> 2 a 4 veces semana<br><input type="radio"/> 5 a 6 veces semana<br><input type="radio"/> 1 vez al día<br><input type="radio"/> 2 a 3 veces al día<br><input type="radio"/> 5 a 6 veces al día<br><input type="radio"/> más 6 veces al día |
| Leche semidesnatada   | <input type="radio"/> Nunca o menos 1 vez al mes<br><input type="radio"/> 1 a 3 veces mes<br><input type="radio"/> 1 vez semana<br><input type="radio"/> 2 a 4 veces semana<br><input type="radio"/> 5 a 6 veces semana<br><input type="radio"/> 1 vez al día<br><input type="radio"/> 2 a 3 veces al día<br><input type="radio"/> 5 a 6 veces al día<br><input type="radio"/> mas 6 veces al día |
| Leche desnatada       | <input type="radio"/> Nunca o menos 1 vez al mes<br><input type="radio"/> 1 a 3 veces mes<br><input type="radio"/> 1 vez semana<br><input type="radio"/> 2 a 4 veces semana<br><input type="radio"/> 5 a 6 veces semana<br><input type="radio"/> 1 vez al día<br><input type="radio"/> 2 a 3 veces al día<br><input type="radio"/> 5 a 6 veces al día<br><input type="radio"/> más 6 veces al día |
| Leche condensada      | <input type="radio"/> Nunca o menos 1 vez al mes<br><input type="radio"/> 1 a 3 veces mes<br><input type="radio"/> 1 vez semana<br><input type="radio"/> 2 a 4 veces semana<br><input type="radio"/> 5 a 6 veces semana<br><input type="radio"/> 1 vez al día<br><input type="radio"/> 2 a 3 veces al día<br><input type="radio"/> 5 a 6 veces al día<br><input type="radio"/> más 6 veces al día |
| nata o crema de leche | <input type="radio"/> Nunca o menos 1 vez al mes<br><input type="radio"/> 1 a 3 veces mes<br><input type="radio"/> 1 vez semana<br><input type="radio"/> 2 a 4 veces semana<br><input type="radio"/> 5 a 6 veces semana<br><input type="radio"/> 1 vez al día<br><input type="radio"/> 2 a 3 veces al día<br><input type="radio"/> 5 a 6 veces al día<br><input type="radio"/> más 6 veces al día |

|                                             |                                                                                                                                                                                                                                                                                                                                                                                                   |
|---------------------------------------------|---------------------------------------------------------------------------------------------------------------------------------------------------------------------------------------------------------------------------------------------------------------------------------------------------------------------------------------------------------------------------------------------------|
| Yogurt Entero                               | <input type="radio"/> Nunca o menos 1 vez al mes<br><input type="radio"/> 1 a 3 veces mes<br><input type="radio"/> 1 vez semana<br><input type="radio"/> 2 a 4 veces semana<br><input type="radio"/> 5 a 6 veces semana<br><input type="radio"/> 1 vez al día<br><input type="radio"/> 2 a 3 veces al día<br><input type="radio"/> 5 a 6 veces al día<br><input type="radio"/> más 6 veces al día |
| Yogurt desnatado                            | <input type="radio"/> Nunca o menos 1 vez al mes<br><input type="radio"/> 1 a 3 veces mes<br><input type="radio"/> 1 vez semana<br><input type="radio"/> 2 a 4 veces semana<br><input type="radio"/> 5 a 6 veces semana<br><input type="radio"/> 1 vez al día<br><input type="radio"/> 2 a 3 veces al día<br><input type="radio"/> 5 a 6 veces al día<br><input type="radio"/> más 6 veces al día |
| 100g requesón o queso blando o queso fresco | <input type="radio"/> Nunca o menos 1 vez al mes<br><input type="radio"/> 1 a 3 veces mes<br><input type="radio"/> 1 vez semana<br><input type="radio"/> 2 a 4 veces semana<br><input type="radio"/> 5 a 6 veces semana<br><input type="radio"/> 1 vez al día<br><input type="radio"/> 2 a 3 veces al día<br><input type="radio"/> 5 a 6 veces al día<br><input type="radio"/> más 6 veces al día |
| queso curado o semicurado o cremoso         | <input type="radio"/> Nunca o menos 1 vez al mes<br><input type="radio"/> 1 a 3 veces mes<br><input type="radio"/> 1 vez semana<br><input type="radio"/> 2 a 4 veces semana<br><input type="radio"/> 5 a 6 veces semana<br><input type="radio"/> 1 vez al día<br><input type="radio"/> 2 a 3 veces al día<br><input type="radio"/> 5 a 6 veces al día<br><input type="radio"/> más 6 veces al día |
| natillas flan pudding                       | <input type="radio"/> Nunca o menos 1 vez al mes<br><input type="radio"/> 1 a 3 veces mes<br><input type="radio"/> 1 vez semana<br><input type="radio"/> 2 a 4 veces semana<br><input type="radio"/> 5 a 6 veces semana<br><input type="radio"/> 1 vez al día<br><input type="radio"/> 2 a 3 veces al día<br><input type="radio"/> 5 a 6 veces al día<br><input type="radio"/> más 6 veces al día |
| Helado                                      | <input type="radio"/> Nunca o menos 1 vez al mes<br><input type="radio"/> 1 a 3 veces mes<br><input type="radio"/> 1 vez semana<br><input type="radio"/> 2 a 4 veces semana<br><input type="radio"/> 5 a 6 veces semana<br><input type="radio"/> 1 vez al día<br><input type="radio"/> 2 a 3 veces al día<br><input type="radio"/> 5 a 6 veces al día<br><input type="radio"/> más 6 veces al día |



|                                      |                                                                                                                                                                                                                                                                                                                                                                                                   |
|--------------------------------------|---------------------------------------------------------------------------------------------------------------------------------------------------------------------------------------------------------------------------------------------------------------------------------------------------------------------------------------------------------------------------------------------------|
| huevo                                | <input type="radio"/> Nunca o menos 1 vez al mes<br><input type="radio"/> 1 a 3 veces mes<br><input type="radio"/> 1 vez semana<br><input type="radio"/> 2 a 4 veces semana<br><input type="radio"/> 5 a 6 veces semana<br><input type="radio"/> 1 vez al día<br><input type="radio"/> 2 a 3 veces al día<br><input type="radio"/> 5 a 6 veces al día<br><input type="radio"/> más 6 veces al día |
| Pollo con piel                       | <input type="radio"/> Nunca o menos 1 vez al mes<br><input type="radio"/> 1 a 3 veces mes<br><input type="radio"/> 1 vez semana<br><input type="radio"/> 2 a 4 veces semana<br><input type="radio"/> 5 a 6 veces semana<br><input type="radio"/> 1 vez al día<br><input type="radio"/> 2 a 3 veces al día<br><input type="radio"/> 5 a 6 veces al día<br><input type="radio"/> más 6 veces al día |
| pollo sin piel                       | <input type="radio"/> Nunca o menos 1 vez al mes<br><input type="radio"/> 1 a 3 veces mes<br><input type="radio"/> 1 vez semana<br><input type="radio"/> 2 a 4 veces semana<br><input type="radio"/> 5 a 6 veces semana<br><input type="radio"/> 1 vez al día<br><input type="radio"/> 2 a 3 veces al día<br><input type="radio"/> 5 a 6 veces al día<br><input type="radio"/> más 6 veces al día |
| Ternera o cerdo o cordero            | <input type="radio"/> Nunca o menos 1 vez al mes<br><input type="radio"/> 1 a 3 veces mes<br><input type="radio"/> 1 vez semana<br><input type="radio"/> 2 a 4 veces semana<br><input type="radio"/> 5 a 6 veces semana<br><input type="radio"/> 1 vez al día<br><input type="radio"/> 2 a 3 veces al día<br><input type="radio"/> 5 a 6 veces al día<br><input type="radio"/> más 6 veces al día |
| carne caza: Conejo o codorniz o pato | <input type="radio"/> Nunca o menos 1 vez al mes<br><input type="radio"/> 1 a 3 veces mes<br><input type="radio"/> 1 vez semana<br><input type="radio"/> 2 a 4 veces semana<br><input type="radio"/> 5 a 6 veces semana<br><input type="radio"/> 1 vez al día<br><input type="radio"/> 2 a 3 veces al día<br><input type="radio"/> 5 a 6 veces al día<br><input type="radio"/> más 6 veces al día |
| Hígado de ternera o cerdo o pollo    | <input type="radio"/> Nunca o menos 1 vez al mes<br><input type="radio"/> 1 a 3 veces mes<br><input type="radio"/> 1 vez semana<br><input type="radio"/> 2 a 4 veces semana<br><input type="radio"/> 5 a 6 veces semana<br><input type="radio"/> 1 vez al día<br><input type="radio"/> 2 a 3 veces al día<br><input type="radio"/> 5 a 6 veces al día<br><input type="radio"/> más 6 veces al día |

---

Vísceras

- ☐ Nunca o menos 1 vez al mes
- ☐ 1 a 3 veces mes
- ☐ 1 vez semana
- ☐ 2 a 4 veces semana
- ☐ 5 a 6 veces semana
- ☐ 1 vez al día
- ☐ 2 a 3 veces al día
- ☐ 5 a 6 veces al día
- ☐ más 6 veces al día

---

Embutido

- ☐ Nunca o menos 1 vez al mes
- ☐ 1 a 3 veces mes
- ☐ 1 vez semana
- ☐ 2 a 4 veces semana
- ☐ 5 a 6 veces semana
- ☐ 1 vez al día
- ☐ 2 a 3 veces al día
- ☐ 5 a 6 veces al día
- ☐ más 6 veces al día

---

Salchicha o similar

- ☐ Nunca o menos 1 vez al mes
- ☐ 1 a 3 veces mes
- ☐ 1 vez semana
- ☐ 2 a 4 veces semana
- ☐ 5 a 6 veces semana
- ☐ 1 vez al día
- ☐ 2 a 3 veces al día
- ☐ 5 a 6 veces al día
- ☐ más 6 veces al día

---

Pate o foiegras

- ☐ Nunca o menos 1 vez al mes
- ☐ 1 a 3 veces mes
- ☐ 1 vez semana
- ☐ 2 a 4 veces semana
- ☐ 5 a 6 veces semana
- ☐ 1 vez al día
- ☐ 2 a 3 veces al día
- ☐ 5 a 6 veces al día
- ☐ más 6 veces al día

---

Hamburguesa

- ☐ Nunca o menos 1 vez al mes
- ☐ 1 a 3 veces mes
- ☐ 1 vez semana
- ☐ 2 a 4 veces semana
- ☐ 5 a 6 veces semana
- ☐ 1 vez al día
- ☐ 2 a 3 veces al día
- ☐ 5 a 6 veces al día
- ☐ más 6 veces al día

---

tocino o bacon

- ☐ Nunca o menos 1 vez al mes
- ☐ 1 a 3 veces mes
- ☐ 1 vez semana
- ☐ 2 a 4 veces semana
- ☐ 5 a 6 veces semana
- ☐ 1 vez al día
- ☐ 2 a 3 veces al día
- ☐ 5 a 6 veces al día
- ☐ más 6 veces al día

---

|               |                                                                                                                                                                                                                                                                                                                                                                                                   |
|---------------|---------------------------------------------------------------------------------------------------------------------------------------------------------------------------------------------------------------------------------------------------------------------------------------------------------------------------------------------------------------------------------------------------|
| Pescado frito | <input type="radio"/> Nunca o menos 1 vez al mes<br><input type="radio"/> 1 a 3 veces mes<br><input type="radio"/> 1 vez semana<br><input type="radio"/> 2 a 4 veces semana<br><input type="radio"/> 5 a 6 veces semana<br><input type="radio"/> 1 vez al día<br><input type="radio"/> 2 a 3 veces al día<br><input type="radio"/> 5 a 6 veces al día<br><input type="radio"/> más 6 veces al día |
|---------------|---------------------------------------------------------------------------------------------------------------------------------------------------------------------------------------------------------------------------------------------------------------------------------------------------------------------------------------------------------------------------------------------------|

---

|                        |                                                                                                                                                                                                                                                                                                                                                                                                   |
|------------------------|---------------------------------------------------------------------------------------------------------------------------------------------------------------------------------------------------------------------------------------------------------------------------------------------------------------------------------------------------------------------------------------------------|
| pescado hervido blanco | <input type="radio"/> Nunca o menos 1 vez al mes<br><input type="radio"/> 1 a 3 veces mes<br><input type="radio"/> 1 vez semana<br><input type="radio"/> 2 a 4 veces semana<br><input type="radio"/> 5 a 6 veces semana<br><input type="radio"/> 1 vez al día<br><input type="radio"/> 2 a 3 veces al día<br><input type="radio"/> 5 a 6 veces al día<br><input type="radio"/> más 6 veces al día |
|------------------------|---------------------------------------------------------------------------------------------------------------------------------------------------------------------------------------------------------------------------------------------------------------------------------------------------------------------------------------------------------------------------------------------------|

---

|                      |                                                                                                                                                                                                                                                                                                                                                                                                   |
|----------------------|---------------------------------------------------------------------------------------------------------------------------------------------------------------------------------------------------------------------------------------------------------------------------------------------------------------------------------------------------------------------------------------------------|
| pescado hervido azul | <input type="radio"/> Nunca o menos 1 vez al mes<br><input type="radio"/> 1 a 3 veces mes<br><input type="radio"/> 1 vez semana<br><input type="radio"/> 2 a 4 veces semana<br><input type="radio"/> 5 a 6 veces semana<br><input type="radio"/> 1 vez al día<br><input type="radio"/> 2 a 3 veces al día<br><input type="radio"/> 5 a 6 veces al día<br><input type="radio"/> más 6 veces al día |
|----------------------|---------------------------------------------------------------------------------------------------------------------------------------------------------------------------------------------------------------------------------------------------------------------------------------------------------------------------------------------------------------------------------------------------|

---

|                    |                                                                                                                                                                                                                                                                                                                                                                                                   |
|--------------------|---------------------------------------------------------------------------------------------------------------------------------------------------------------------------------------------------------------------------------------------------------------------------------------------------------------------------------------------------------------------------------------------------|
| otros pescado azul | <input type="radio"/> Nunca o menos 1 vez al mes<br><input type="radio"/> 1 a 3 veces mes<br><input type="radio"/> 1 vez semana<br><input type="radio"/> 2 a 4 veces semana<br><input type="radio"/> 5 a 6 veces semana<br><input type="radio"/> 1 vez al día<br><input type="radio"/> 2 a 3 veces al día<br><input type="radio"/> 5 a 6 veces al día<br><input type="radio"/> más 6 veces al día |
|--------------------|---------------------------------------------------------------------------------------------------------------------------------------------------------------------------------------------------------------------------------------------------------------------------------------------------------------------------------------------------------------------------------------------------|

---

|               |                                                                                                                                                                                                                                                                                                                                                                                                   |
|---------------|---------------------------------------------------------------------------------------------------------------------------------------------------------------------------------------------------------------------------------------------------------------------------------------------------------------------------------------------------------------------------------------------------|
| atun conserva | <input type="radio"/> Nunca o menos 1 vez al mes<br><input type="radio"/> 1 a 3 veces mes<br><input type="radio"/> 1 vez semana<br><input type="radio"/> 2 a 4 veces semana<br><input type="radio"/> 5 a 6 veces semana<br><input type="radio"/> 1 vez al día<br><input type="radio"/> 2 a 3 veces al día<br><input type="radio"/> 5 a 6 veces al día<br><input type="radio"/> más 6 veces al día |
|---------------|---------------------------------------------------------------------------------------------------------------------------------------------------------------------------------------------------------------------------------------------------------------------------------------------------------------------------------------------------------------------------------------------------|

---

|                  |                                                                                                                                                                                                                                                                                                                                                                                                   |
|------------------|---------------------------------------------------------------------------------------------------------------------------------------------------------------------------------------------------------------------------------------------------------------------------------------------------------------------------------------------------------------------------------------------------|
| sardina conserva | <input type="radio"/> Nunca o menos 1 vez al mes<br><input type="radio"/> 1 a 3 veces mes<br><input type="radio"/> 1 vez semana<br><input type="radio"/> 2 a 4 veces semana<br><input type="radio"/> 5 a 6 veces semana<br><input type="radio"/> 1 vez al día<br><input type="radio"/> 2 a 3 veces al día<br><input type="radio"/> 5 a 6 veces al día<br><input type="radio"/> más 6 veces al día |
|------------------|---------------------------------------------------------------------------------------------------------------------------------------------------------------------------------------------------------------------------------------------------------------------------------------------------------------------------------------------------------------------------------------------------|

---

---

pescado ahumado

- ☐ Nunca o menos 1 vez al mes
- ☐ 1 a 3 veces mes
- ☐ 1 vez semana
- ☐ 2 a 4 veces semana
- ☐ 5 a 6 veces semana
- ☐ 1 vez al día
- ☐ 2 a 3 veces al día
- ☐ 5 a 6 veces al día
- ☐ más 6 veces al día

---

almejas o mejillones o ostras unos 100g

- ☐ Nunca o menos 1 vez al mes
- ☐ 1 a 3 veces mes
- ☐ 1 vez semana
- ☐ 2 a 4 veces semana
- ☐ 5 a 6 veces semana
- ☐ 1 vez al día
- ☐ 2 a 3 veces al día
- ☐ 5 a 6 veces al día
- ☐ más 6 veces al día

---

calamar o chipiron o sepia unos 100g

- ☐ Nunca o menos 1 vez al mes
- ☐ 1 a 3 veces mes
- ☐ 1 vez semana
- ☐ 2 a 4 veces semana
- ☐ 5 a 6 veces semana
- ☐ 1 vez al día
- ☐ 2 a 3 veces al día
- ☐ 5 a 6 veces al día
- ☐ más 6 veces al día

---

marisco unos 100g

- ☐ Nunca o menos 1 vez al mes
- ☐ 1 a 3 veces mes
- ☐ 1 vez semana
- ☐ 2 a 4 veces semana
- ☐ 5 a 6 veces semana
- ☐ 1 vez al día
- ☐ 2 a 3 veces al día
- ☐ 5 a 6 veces al día
- ☐ más 6 veces al día

---

Espinacas o acelgas cocinadas

- ☐ Nunca o menos 1 vez al mes
- ☐ 1 a 3 veces mes
- ☐ 1 vez semana
- ☐ 2 a 4 veces semana
- ☐ 5 a 6 veces semana
- ☐ 1 vez al día
- ☐ 2 a 3 veces al día
- ☐ 5 a 6 veces al día
- ☐ más 6 veces al día

---

Col o coliflor o brocoli cocinado

- ☐ Nunca o menos 1 vez al mes
- ☐ 1 a 3 veces mes
- ☐ 1 vez semana
- ☐ 2 a 4 veces semana
- ☐ 5 a 6 veces semana
- ☐ 1 vez al día
- ☐ 2 a 3 veces al día
- ☐ 5 a 6 veces al día
- ☐ más 6 veces al día

---

Lechuga o endivia o escarola

- ☐ Nunca o menos 1 vez al mes
- ☐ 1 a 3 veces mes
- ☐ 1 vez semana
- ☐ 2 a 4 veces semana
- ☐ 5 a 6 veces semana
- ☐ 1 vez al día
- ☐ 2 a 3 veces al día
- ☐ 5 a 6 veces al día
- ☐ más 6 veces al día

---

tomate ensalada

- ☐ Nunca o menos 1 vez al mes
- ☐ 1 a 3 veces mes
- ☐ 1 vez semana
- ☐ 2 a 4 veces semana
- ☐ 5 a 6 veces semana
- ☐ 1 vez al día
- ☐ 2 a 3 veces al día
- ☐ 5 a 6 veces al día
- ☐ más 6 veces al día

---

cebolla

- ☐ Nunca o menos 1 vez al mes
- ☐ 1 a 3 veces mes
- ☐ 1 vez semana
- ☐ 2 a 4 veces semana
- ☐ 5 a 6 veces semana
- ☐ 1 vez al día
- ☐ 2 a 3 veces al día
- ☐ 5 a 6 veces al día
- ☐ más 6 veces al día

---

Zanahoria o calabaza

- ☐ Nunca o menos 1 vez al mes
- ☐ 1 a 3 veces mes
- ☐ 1 vez semana
- ☐ 2 a 4 veces semana
- ☐ 5 a 6 veces semana
- ☐ 1 vez al día
- ☐ 2 a 3 veces al día
- ☐ 5 a 6 veces al día
- ☐ más 6 veces al día

---

Judías verdes

- ☐ Nunca o menos 1 vez al mes
- ☐ 1 a 3 veces mes
- ☐ 1 vez semana
- ☐ 2 a 4 veces semana
- ☐ 5 a 6 veces semana
- ☐ 1 vez al día
- ☐ 2 a 3 veces al día
- ☐ 5 a 6 veces al día
- ☐ más 6 veces al día

---

Berenjena o calabacin o pepino

- ☐ Nunca o menos 1 vez al mes
- ☐ 1 a 3 veces mes
- ☐ 1 vez semana
- ☐ 2 a 4 veces semana
- ☐ 5 a 6 veces semana
- ☐ 1 vez al día
- ☐ 2 a 3 veces al día
- ☐ 5 a 6 veces al día
- ☐ más 6 veces al día

---

pimiento

- ☐ Nunca o menos 1 vez al mes
- ☐ 1 a 3 veces mes
- ☐ 1 vez semana
- ☐ 2 a 4 veces semana
- ☐ 5 a 6 veces semana
- ☐ 1 vez al día
- ☐ 2 a 3 veces al día
- ☐ 5 a 6 veces al día
- ☐ más 6 veces al día

---

alcachofa

- ☐ Nunca o menos 1 vez al mes
- ☐ 1 a 3 veces mes
- ☐ 1 vez semana
- ☐ 2 a 4 veces semana
- ☐ 5 a 6 veces semana
- ☐ 1 vez al día
- ☐ 2 a 3 veces al día
- ☐ 5 a 6 veces al día
- ☐ más 6 veces al día

---

espárragos

- ☐ Nunca o menos 1 vez al mes
- ☐ 1 a 3 veces mes
- ☐ 1 vez semana
- ☐ 2 a 4 veces semana
- ☐ 5 a 6 veces semana
- ☐ 1 vez al día
- ☐ 2 a 3 veces al día
- ☐ 5 a 6 veces al día
- ☐ más 6 veces al día

---

maíz hervido

- ☐ Nunca o menos 1 vez al mes
- ☐ 1 a 3 veces mes
- ☐ 1 vez semana
- ☐ 2 a 4 veces semana
- ☐ 5 a 6 veces semana
- ☐ 1 vez al día
- ☐ 2 a 3 veces al día
- ☐ 5 a 6 veces al día
- ☐ más 6 veces al día

---

legumbres

- ☐ Nunca o menos 1 vez al mes
- ☐ 1 a 3 veces mes
- ☐ 1 vez semana
- ☐ 2 a 4 veces semana
- ☐ 5 a 6 veces semana
- ☐ 1 vez al día
- ☐ 2 a 3 veces al día
- ☐ 5 a 6 veces al día
- ☐ más 6 veces al día

---

naranjas o mandarinas

- ☐ Nunca o menos 1 vez al mes
- ☐ 1 a 3 veces mes
- ☐ 1 vez semana
- ☐ 2 a 4 veces semana
- ☐ 5 a 6 veces semana
- ☐ 1 vez al día
- ☐ 2 a 3 veces al día
- ☐ 5 a 6 veces al día
- ☐ más 6 veces al día

---

zum natural fruta

- ☐ Nunca o menos 1 vez al mes
- ☐ 1 a 3 veces mes
- ☐ 1 vez semana
- ☐ 2 a 4 veces semana
- ☐ 5 a 6 veces semana
- ☐ 1 vez al día
- ☐ 2 a 3 veces al día
- ☐ 5 a 6 veces al día
- ☐ más 6 veces al día

---

platano

- ☐ Nunca o menos 1 vez al mes
- ☐ 1 a 3 veces mes
- ☐ 1 vez semana
- ☐ 2 a 4 veces semana
- ☐ 5 a 6 veces semana
- ☐ 1 vez al día
- ☐ 2 a 3 veces al día
- ☐ 5 a 6 veces al día
- ☐ más 6 veces al día

---

manzana o pera

- ☐ Nunca o menos 1 vez al mes
- ☐ 1 a 3 veces mes
- ☐ 1 vez semana
- ☐ 2 a 4 veces semana
- ☐ 5 a 6 veces semana
- ☐ 1 vez al día
- ☐ 2 a 3 veces al día
- ☐ 5 a 6 veces al día
- ☐ más 6 veces al día

---

melocotón o nectarina

- ☐ Nunca o menos 1 vez al mes
- ☐ 1 a 3 veces mes
- ☐ 1 vez semana
- ☐ 2 a 4 veces semana
- ☐ 5 a 6 veces semana
- ☐ 1 vez al día
- ☐ 2 a 3 veces al día
- ☐ 5 a 6 veces al día
- ☐ más 6 veces al día

---

sandia o melon

- ☐ Nunca o menos 1 vez al mes
- ☐ 1 a 3 veces mes
- ☐ 1 vez semana
- ☐ 2 a 4 veces semana
- ☐ 5 a 6 veces semana
- ☐ 1 vez al día
- ☐ 2 a 3 veces al día
- ☐ 5 a 6 veces al día
- ☐ más 6 veces al día

---

uva

- ☐ Nunca o menos 1 vez al mes
- ☐ 1 a 3 veces mes
- ☐ 1 vez semana
- ☐ 2 a 4 veces semana
- ☐ 5 a 6 veces semana
- ☐ 1 vez al día
- ☐ 2 a 3 veces al día
- ☐ 5 a 6 veces al día
- ☐ más 6 veces al día

---

bruna o ciruela

- ☐ Nunca o menos 1 vez al mes
- ☐ 1 a 3 veces mes
- ☐ 1 vez semana
- ☐ 2 a 4 veces semana
- ☐ 5 a 6 veces semana
- ☐ 1 vez al día
- ☐ 2 a 3 veces al día
- ☐ 5 a 6 veces al día
- ☐ más 6 veces al día

---

kiwi

- ☐ Nunca o menos 1 vez al mes
- ☐ 1 a 3 veces mes
- ☐ 1 vez semana
- ☐ 2 a 4 veces semana
- ☐ 5 a 6 veces semana
- ☐ 1 vez al día
- ☐ 2 a 3 veces al día
- ☐ 5 a 6 veces al día
- ☐ más 6 veces al día

---

aceituna

- ☐ Nunca o menos 1 vez al mes
- ☐ 1 a 3 veces mes
- ☐ 1 vez semana
- ☐ 2 a 4 veces semana
- ☐ 5 a 6 veces semana
- ☐ 1 vez al día
- ☐ 2 a 3 veces al día
- ☐ 5 a 6 veces al día
- ☐ más 6 veces al día

---

frutos secos

- ☐ Nunca o menos 1 vez al mes
- ☐ 1 a 3 veces mes
- ☐ 1 vez semana
- ☐ 2 a 4 veces semana
- ☐ 5 a 6 veces semana
- ☐ 1 vez al día
- ☐ 2 a 3 veces al día
- ☐ 5 a 6 veces al día
- ☐ más 6 veces al día

---

pan blanco

- ☐ Nunca o menos 1 vez al mes
- ☐ 1 a 3 veces mes
- ☐ 1 vez semana
- ☐ 2 a 4 veces semana
- ☐ 5 a 6 veces semana
- ☐ 1 vez al día
- ☐ 2 a 3 veces al día
- ☐ 5 a 6 veces al día
- ☐ más 6 veces al día

---

pan integral

- ☐ Nunca o menos 1 vez al mes
- ☐ 1 a 3 veces mes
- ☐ 1 vez semana
- ☐ 2 a 4 veces semana
- ☐ 5 a 6 veces semana
- ☐ 1 vez al día
- ☐ 2 a 3 veces al día
- ☐ 5 a 6 veces al día
- ☐ más 6 veces al día



---

cereales desayuno

- ☐ Nunca o menos 1 vez al mes
- ☐ 1 a 3 veces mes
- ☐ 1 vez semana
- ☐ 2 a 4 veces semana
- ☐ 5 a 6 veces semana
- ☐ 1 vez al día
- ☐ 2 a 3 veces al día
- ☐ 5 a 6 veces al día
- ☐ más 6 veces al día

---

patatas fritas

- ☐ Nunca o menos 1 vez al mes
- ☐ 1 a 3 veces mes
- ☐ 1 vez semana
- ☐ 2 a 4 veces semana
- ☐ 5 a 6 veces semana
- ☐ 1 vez al día
- ☐ 2 a 3 veces al día
- ☐ 5 a 6 veces al día
- ☐ más 6 veces al día

---

patatas cocidas o asadas

- ☐ Nunca o menos 1 vez al mes
- ☐ 1 a 3 veces mes
- ☐ 1 vez semana
- ☐ 2 a 4 veces semana
- ☐ 5 a 6 veces semana
- ☐ 1 vez al día
- ☐ 2 a 3 veces al día
- ☐ 5 a 6 veces al día
- ☐ más 6 veces al día

---

bolsa papas

- ☐ Nunca o menos 1 vez al mes
- ☐ 1 a 3 veces mes
- ☐ 1 vez semana
- ☐ 2 a 4 veces semana
- ☐ 5 a 6 veces semana
- ☐ 1 vez al día
- ☐ 2 a 3 veces al día
- ☐ 5 a 6 veces al día
- ☐ más 6 veces al día

---

arroz cocinado

- ☐ Nunca o menos 1 vez al mes
- ☐ 1 a 3 veces mes
- ☐ 1 vez semana
- ☐ 2 a 4 veces semana
- ☐ 5 a 6 veces semana
- ☐ 1 vez al día
- ☐ 2 a 3 veces al día
- ☐ 5 a 6 veces al día
- ☐ más 6 veces al día

---

pasta

- ☐ Nunca o menos 1 vez al mes
- ☐ 1 a 3 veces mes
- ☐ 1 vez semana
- ☐ 2 a 4 veces semana
- ☐ 5 a 6 veces semana
- ☐ 1 vez al día
- ☐ 2 a 3 veces al día
- ☐ 5 a 6 veces al día
- ☐ más 6 veces al día

|                     |                                                                                                                                                                                                                                                                                                                                                                                                   |
|---------------------|---------------------------------------------------------------------------------------------------------------------------------------------------------------------------------------------------------------------------------------------------------------------------------------------------------------------------------------------------------------------------------------------------|
| pizza               | <input type="radio"/> Nunca o menos 1 vez al mes<br><input type="radio"/> 1 a 3 veces mes<br><input type="radio"/> 1 vez semana<br><input type="radio"/> 2 a 4 veces semana<br><input type="radio"/> 5 a 6 veces semana<br><input type="radio"/> 1 vez al día<br><input type="radio"/> 2 a 3 veces al día<br><input type="radio"/> 5 a 6 veces al día<br><input type="radio"/> más 6 veces al día |
| aceite oliva        | <input type="radio"/> Nunca o menos 1 vez al mes<br><input type="radio"/> 1 a 3 veces mes<br><input type="radio"/> 1 vez semana<br><input type="radio"/> 2 a 4 veces semana<br><input type="radio"/> 5 a 6 veces semana<br><input type="radio"/> 1 vez al día<br><input type="radio"/> 2 a 3 veces al día<br><input type="radio"/> 5 a 6 veces al día<br><input type="radio"/> más 6 veces al día |
| otros aceites       | <input type="radio"/> Nunca o menos 1 vez al mes<br><input type="radio"/> 1 a 3 veces mes<br><input type="radio"/> 1 vez semana<br><input type="radio"/> 2 a 4 veces semana<br><input type="radio"/> 5 a 6 veces semana<br><input type="radio"/> 1 vez al día<br><input type="radio"/> 2 a 3 veces al día<br><input type="radio"/> 5 a 6 veces al día<br><input type="radio"/> más 6 veces al día |
| margarina           | <input type="radio"/> Nunca o menos 1 vez al mes<br><input type="radio"/> 1 a 3 veces mes<br><input type="radio"/> 1 vez semana<br><input type="radio"/> 2 a 4 veces semana<br><input type="radio"/> 5 a 6 veces semana<br><input type="radio"/> 1 vez al día<br><input type="radio"/> 2 a 3 veces al día<br><input type="radio"/> 5 a 6 veces al día<br><input type="radio"/> más 6 veces al día |
| mantequilla         | <input type="radio"/> Nunca o menos 1 vez al mes<br><input type="radio"/> 1 a 3 veces mes<br><input type="radio"/> 1 vez semana<br><input type="radio"/> 2 a 4 veces semana<br><input type="radio"/> 5 a 6 veces semana<br><input type="radio"/> 1 vez al día<br><input type="radio"/> 2 a 3 veces al día<br><input type="radio"/> 5 a 6 veces al día<br><input type="radio"/> más 6 veces al día |
| galletas tipo maria | <input type="radio"/> Nunca o menos 1 vez al mes<br><input type="radio"/> 1 a 3 veces mes<br><input type="radio"/> 1 vez semana<br><input type="radio"/> 2 a 4 veces semana<br><input type="radio"/> 5 a 6 veces semana<br><input type="radio"/> 1 vez al día<br><input type="radio"/> 2 a 3 veces al día<br><input type="radio"/> 5 a 6 veces al día<br><input type="radio"/> más 6 veces al día |

---

|                    |                                                                                                                                                                                                                                                                                                                                                                                                   |
|--------------------|---------------------------------------------------------------------------------------------------------------------------------------------------------------------------------------------------------------------------------------------------------------------------------------------------------------------------------------------------------------------------------------------------|
| galletas chocolate | <input type="radio"/> Nunca o menos 1 vez al mes<br><input type="radio"/> 1 a 3 veces mes<br><input type="radio"/> 1 vez semana<br><input type="radio"/> 2 a 4 veces semana<br><input type="radio"/> 5 a 6 veces semana<br><input type="radio"/> 1 vez al día<br><input type="radio"/> 2 a 3 veces al día<br><input type="radio"/> 5 a 6 veces al día<br><input type="radio"/> más 6 veces al día |
|--------------------|---------------------------------------------------------------------------------------------------------------------------------------------------------------------------------------------------------------------------------------------------------------------------------------------------------------------------------------------------------------------------------------------------|

---

|           |                                                                                                                                                                                                                                                                                                                                                                                                   |
|-----------|---------------------------------------------------------------------------------------------------------------------------------------------------------------------------------------------------------------------------------------------------------------------------------------------------------------------------------------------------------------------------------------------------|
| bollieria | <input type="radio"/> Nunca o menos 1 vez al mes<br><input type="radio"/> 1 a 3 veces mes<br><input type="radio"/> 1 vez semana<br><input type="radio"/> 2 a 4 veces semana<br><input type="radio"/> 5 a 6 veces semana<br><input type="radio"/> 1 vez al día<br><input type="radio"/> 2 a 3 veces al día<br><input type="radio"/> 5 a 6 veces al día<br><input type="radio"/> más 6 veces al día |
|-----------|---------------------------------------------------------------------------------------------------------------------------------------------------------------------------------------------------------------------------------------------------------------------------------------------------------------------------------------------------------------------------------------------------|

---

|                      |                                                                                                                                                                                                                                                                                                                                                                                                   |
|----------------------|---------------------------------------------------------------------------------------------------------------------------------------------------------------------------------------------------------------------------------------------------------------------------------------------------------------------------------------------------------------------------------------------------|
| chocolate o bombones | <input type="radio"/> Nunca o menos 1 vez al mes<br><input type="radio"/> 1 a 3 veces mes<br><input type="radio"/> 1 vez semana<br><input type="radio"/> 2 a 4 veces semana<br><input type="radio"/> 5 a 6 veces semana<br><input type="radio"/> 1 vez al día<br><input type="radio"/> 2 a 3 veces al día<br><input type="radio"/> 5 a 6 veces al día<br><input type="radio"/> más 6 veces al día |
|----------------------|---------------------------------------------------------------------------------------------------------------------------------------------------------------------------------------------------------------------------------------------------------------------------------------------------------------------------------------------------------------------------------------------------|

---

|                           |                                                                                                                                                                                                                                                                                                                                                                                                   |
|---------------------------|---------------------------------------------------------------------------------------------------------------------------------------------------------------------------------------------------------------------------------------------------------------------------------------------------------------------------------------------------------------------------------------------------|
| chocolate polvo o colacao | <input type="radio"/> Nunca o menos 1 vez al mes<br><input type="radio"/> 1 a 3 veces mes<br><input type="radio"/> 1 vez semana<br><input type="radio"/> 2 a 4 veces semana<br><input type="radio"/> 5 a 6 veces semana<br><input type="radio"/> 1 vez al día<br><input type="radio"/> 2 a 3 veces al día<br><input type="radio"/> 5 a 6 veces al día<br><input type="radio"/> más 6 veces al día |
|---------------------------|---------------------------------------------------------------------------------------------------------------------------------------------------------------------------------------------------------------------------------------------------------------------------------------------------------------------------------------------------------------------------------------------------|

---

|            |                                                                                                                                                                                                                                                                                                                                                                                                   |
|------------|---------------------------------------------------------------------------------------------------------------------------------------------------------------------------------------------------------------------------------------------------------------------------------------------------------------------------------------------------------------------------------------------------|
| vino tinto | <input type="radio"/> Nunca o menos 1 vez al mes<br><input type="radio"/> 1 a 3 veces mes<br><input type="radio"/> 1 vez semana<br><input type="radio"/> 2 a 4 veces semana<br><input type="radio"/> 5 a 6 veces semana<br><input type="radio"/> 1 vez al día<br><input type="radio"/> 2 a 3 veces al día<br><input type="radio"/> 5 a 6 veces al día<br><input type="radio"/> más 6 veces al día |
|------------|---------------------------------------------------------------------------------------------------------------------------------------------------------------------------------------------------------------------------------------------------------------------------------------------------------------------------------------------------------------------------------------------------|

---

|             |                                                                                                                                                                                                                                                                                                                                                                                                   |
|-------------|---------------------------------------------------------------------------------------------------------------------------------------------------------------------------------------------------------------------------------------------------------------------------------------------------------------------------------------------------------------------------------------------------|
| vino blanco | <input type="radio"/> Nunca o menos 1 vez al mes<br><input type="radio"/> 1 a 3 veces mes<br><input type="radio"/> 1 vez semana<br><input type="radio"/> 2 a 4 veces semana<br><input type="radio"/> 5 a 6 veces semana<br><input type="radio"/> 1 vez al día<br><input type="radio"/> 2 a 3 veces al día<br><input type="radio"/> 5 a 6 veces al día<br><input type="radio"/> más 6 veces al día |
|-------------|---------------------------------------------------------------------------------------------------------------------------------------------------------------------------------------------------------------------------------------------------------------------------------------------------------------------------------------------------------------------------------------------------|

---

---

|                    |                                                                                                                                                                                                                                                                                                                                                                                                   |
|--------------------|---------------------------------------------------------------------------------------------------------------------------------------------------------------------------------------------------------------------------------------------------------------------------------------------------------------------------------------------------------------------------------------------------|
| vino seco o vermut | <input type="radio"/> Nunca o menos 1 vez al mes<br><input type="radio"/> 1 a 3 veces mes<br><input type="radio"/> 1 vez semana<br><input type="radio"/> 2 a 4 veces semana<br><input type="radio"/> 5 a 6 veces semana<br><input type="radio"/> 1 vez al día<br><input type="radio"/> 2 a 3 veces al día<br><input type="radio"/> 5 a 6 veces al día<br><input type="radio"/> más 6 veces al día |
|--------------------|---------------------------------------------------------------------------------------------------------------------------------------------------------------------------------------------------------------------------------------------------------------------------------------------------------------------------------------------------------------------------------------------------|

---

|         |                                                                                                                                                                                                                                                                                                                                                                                                   |
|---------|---------------------------------------------------------------------------------------------------------------------------------------------------------------------------------------------------------------------------------------------------------------------------------------------------------------------------------------------------------------------------------------------------|
| cerveza | <input type="radio"/> Nunca o menos 1 vez al mes<br><input type="radio"/> 1 a 3 veces mes<br><input type="radio"/> 1 vez semana<br><input type="radio"/> 2 a 4 veces semana<br><input type="radio"/> 5 a 6 veces semana<br><input type="radio"/> 1 vez al día<br><input type="radio"/> 2 a 3 veces al día<br><input type="radio"/> 5 a 6 veces al día<br><input type="radio"/> más 6 veces al día |
|---------|---------------------------------------------------------------------------------------------------------------------------------------------------------------------------------------------------------------------------------------------------------------------------------------------------------------------------------------------------------------------------------------------------|

---

|                     |                                                                                                                                                                                                                                                                                                                                                                                                   |
|---------------------|---------------------------------------------------------------------------------------------------------------------------------------------------------------------------------------------------------------------------------------------------------------------------------------------------------------------------------------------------------------------------------------------------|
| cerveza sin alcohol | <input type="radio"/> Nunca o menos 1 vez al mes<br><input type="radio"/> 1 a 3 veces mes<br><input type="radio"/> 1 vez semana<br><input type="radio"/> 2 a 4 veces semana<br><input type="radio"/> 5 a 6 veces semana<br><input type="radio"/> 1 vez al día<br><input type="radio"/> 2 a 3 veces al día<br><input type="radio"/> 5 a 6 veces al día<br><input type="radio"/> más 6 veces al día |
|---------------------|---------------------------------------------------------------------------------------------------------------------------------------------------------------------------------------------------------------------------------------------------------------------------------------------------------------------------------------------------------------------------------------------------|

---

|         |                                                                                                                                                                                                                                                                                                                                                                                                   |
|---------|---------------------------------------------------------------------------------------------------------------------------------------------------------------------------------------------------------------------------------------------------------------------------------------------------------------------------------------------------------------------------------------------------|
| licores | <input type="radio"/> Nunca o menos 1 vez al mes<br><input type="radio"/> 1 a 3 veces mes<br><input type="radio"/> 1 vez semana<br><input type="radio"/> 2 a 4 veces semana<br><input type="radio"/> 5 a 6 veces semana<br><input type="radio"/> 1 vez al día<br><input type="radio"/> 2 a 3 veces al día<br><input type="radio"/> 5 a 6 veces al día<br><input type="radio"/> más 6 veces al día |
|---------|---------------------------------------------------------------------------------------------------------------------------------------------------------------------------------------------------------------------------------------------------------------------------------------------------------------------------------------------------------------------------------------------------|

---

|                       |                                                                                                                                                                                                                                                                                                                                                                                                   |
|-----------------------|---------------------------------------------------------------------------------------------------------------------------------------------------------------------------------------------------------------------------------------------------------------------------------------------------------------------------------------------------------------------------------------------------|
| ginebra o ron o vodka | <input type="radio"/> Nunca o menos 1 vez al mes<br><input type="radio"/> 1 a 3 veces mes<br><input type="radio"/> 1 vez semana<br><input type="radio"/> 2 a 4 veces semana<br><input type="radio"/> 5 a 6 veces semana<br><input type="radio"/> 1 vez al día<br><input type="radio"/> 2 a 3 veces al día<br><input type="radio"/> 5 a 6 veces al día<br><input type="radio"/> más 6 veces al día |
|-----------------------|---------------------------------------------------------------------------------------------------------------------------------------------------------------------------------------------------------------------------------------------------------------------------------------------------------------------------------------------------------------------------------------------------|

---

|                 |                                                                                                                                                                                                                                                                                                                                                                                                   |
|-----------------|---------------------------------------------------------------------------------------------------------------------------------------------------------------------------------------------------------------------------------------------------------------------------------------------------------------------------------------------------------------------------------------------------|
| refresco normal | <input type="radio"/> Nunca o menos 1 vez al mes<br><input type="radio"/> 1 a 3 veces mes<br><input type="radio"/> 1 vez semana<br><input type="radio"/> 2 a 4 veces semana<br><input type="radio"/> 5 a 6 veces semana<br><input type="radio"/> 1 vez al día<br><input type="radio"/> 2 a 3 veces al día<br><input type="radio"/> 5 a 6 veces al día<br><input type="radio"/> más 6 veces al día |
|-----------------|---------------------------------------------------------------------------------------------------------------------------------------------------------------------------------------------------------------------------------------------------------------------------------------------------------------------------------------------------------------------------------------------------|

---

---

refresco sin azúcar

- ☐ Nunca o menos 1 vez al mes
- ☐ 1 a 3 veces mes
- ☐ 1 vez semana
- ☐ 2 a 4 veces semana
- ☐ 5 a 6 veces semana
- ☐ 1 vez al día
- ☐ 2 a 3 veces al día
- ☐ 5 a 6 veces al día
- ☐ más 6 veces al día

---

Agua del grifo

- ☐ Nunca o menos 1 vez al mes
- ☐ 1 a 3 veces mes
- ☐ 1 vez semana
- ☐ 2 a 4 veces semana
- ☐ 5 a 6 veces semana
- ☐ 1 vez al día
- ☐ 2 a 3 veces al día
- ☐ 5 a 6 veces al día
- ☐ más 6 veces al día

---

agua embotellada sin gas

- ☐ Nunca o menos 1 vez al mes
- ☐ 1 a 3 veces mes
- ☐ 1 vez semana
- ☐ 2 a 4 veces semana
- ☐ 5 a 6 veces semana
- ☐ 1 vez al día
- ☐ 2 a 3 veces al día
- ☐ 5 a 6 veces al día
- ☐ más 6 veces al día

---

agua embotellada con gas

- ☐ Nunca o menos 1 vez al mes
- ☐ 1 a 3 veces mes
- ☐ 1 vez semana
- ☐ 2 a 4 veces semana
- ☐ 5 a 6 veces semana
- ☐ 1 vez al día
- ☐ 2 a 3 veces al día
- ☐ 5 a 6 veces al día
- ☐ más 6 veces al día

---

zumو frutas embasado

- ☐ Nunca o menos 1 vez al mes
- ☐ 1 a 3 veces mes
- ☐ 1 vez semana
- ☐ 2 a 4 veces semana
- ☐ 5 a 6 veces semana
- ☐ 1 vez al día
- ☐ 2 a 3 veces al día
- ☐ 5 a 6 veces al día
- ☐ más 6 veces al día

---

cafe

- ☐ Nunca o menos 1 vez al mes
- ☐ 1 a 3 veces mes
- ☐ 1 vez semana
- ☐ 2 a 4 veces semana
- ☐ 5 a 6 veces semana
- ☐ 1 vez al día
- ☐ 2 a 3 veces al día
- ☐ 5 a 6 veces al día
- ☐ más 6 veces al día

---

cafe descafeinado

- ☐ Nunca o menos 1 vez al mes
- ☐ 1 a 3 veces mes
- ☐ 1 vez semana
- ☐ 2 a 4 veces semana
- ☐ 5 a 6 veces semana
- ☐ 1 vez al día
- ☐ 2 a 3 veces al día
- ☐ 5 a 6 veces al día
- ☐ más 6 veces al día

---

te o infusión

- ☐ Nunca o menos 1 vez al mes
- ☐ 1 a 3 veces mes
- ☐ 1 vez semana
- ☐ 2 a 4 veces semana
- ☐ 5 a 6 veces semana
- ☐ 1 vez al día
- ☐ 2 a 3 veces al día
- ☐ 5 a 6 veces al día
- ☐ más 6 veces al día

---

sopa o puré verduras

- ☐ Nunca o menos 1 vez al mes
- ☐ 1 a 3 veces mes
- ☐ 1 vez semana
- ☐ 2 a 4 veces semana
- ☐ 5 a 6 veces semana
- ☐ 1 vez al día
- ☐ 2 a 3 veces al día
- ☐ 5 a 6 veces al día
- ☐ más 6 veces al día

---

croquetas pollo jamón

- ☐ Nunca o menos 1 vez al mes
- ☐ 1 a 3 veces mes
- ☐ 1 vez semana
- ☐ 2 a 4 veces semana
- ☐ 5 a 6 veces semana
- ☐ 1 vez al día
- ☐ 2 a 3 veces al día
- ☐ 5 a 6 veces al día
- ☐ más 6 veces al día

---

croquetas pescado

- ☐ Nunca o menos 1 vez al mes
- ☐ 1 a 3 veces mes
- ☐ 1 vez semana
- ☐ 2 a 4 veces semana
- ☐ 5 a 6 veces semana
- ☐ 1 vez al día
- ☐ 2 a 3 veces al día
- ☐ 5 a 6 veces al día
- ☐ más 6 veces al día

---

mayonesa

- ☐ Nunca o menos 1 vez al mes
- ☐ 1 a 3 veces mes
- ☐ 1 vez semana
- ☐ 2 a 4 veces semana
- ☐ 5 a 6 veces semana
- ☐ 1 vez al día
- ☐ 2 a 3 veces al día
- ☐ 5 a 6 veces al día
- ☐ más 6 veces al día

---

salsa tomate

- ☐ Nunca o menos 1 vez al mes
- ☐ 1 a 3 veces mes
- ☐ 1 vez semana
- ☐ 2 a 4 veces semana
- ☐ 5 a 6 veces semana
- ☐ 1 vez al día
- ☐ 2 a 3 veces al día
- ☐ 5 a 6 veces al día
- ☐ más 6 veces al día

---

ketchup

- ☐ Nunca o menos 1 vez al mes
- ☐ 1 a 3 veces mes
- ☐ 1 vez semana
- ☐ 2 a 4 veces semana
- ☐ 5 a 6 veces semana
- ☐ 1 vez al día
- ☐ 2 a 3 veces al día
- ☐ 5 a 6 veces al día
- ☐ más 6 veces al día

---

sal

- ☐ Nunca o menos 1 vez al mes
- ☐ 1 a 3 veces mes
- ☐ 1 vez semana
- ☐ 2 a 4 veces semana
- ☐ 5 a 6 veces semana
- ☐ 1 vez al día
- ☐ 2 a 3 veces al día
- ☐ 5 a 6 veces al día
- ☐ más 6 veces al día

---

ajo

- ☐ Nunca o menos 1 vez al mes
- ☐ 1 a 3 veces mes
- ☐ 1 vez semana
- ☐ 2 a 4 veces semana
- ☐ 5 a 6 veces semana
- ☐ 1 vez al día
- ☐ 2 a 3 veces al día
- ☐ 5 a 6 veces al día
- ☐ más 6 veces al día

---

mermelada o miel

- ☐ Nunca o menos 1 vez al mes
- ☐ 1 a 3 veces mes
- ☐ 1 vez semana
- ☐ 2 a 4 veces semana
- ☐ 5 a 6 veces semana
- ☐ 1 vez al día
- ☐ 2 a 3 veces al día
- ☐ 5 a 6 veces al día
- ☐ más 6 veces al día

---

azúcar

- ☐ Nunca o menos 1 vez al mes
- ☐ 1 a 3 veces mes
- ☐ 1 vez semana
- ☐ 2 a 4 veces semana
- ☐ 5 a 6 veces semana
- ☐ 1 vez al día
- ☐ 2 a 3 veces al día
- ☐ 5 a 6 veces al día
- ☐ más 6 veces al día

---

Otro alimento

---

suplementos vitamínicos

- ☐ si  
☐ no

---

suplementos vitamínicos

---

dieta previa

- ☐ si  
☐ no

motivo dieta

- ☐ no dieta  
☐ control peso  
☐ control colesterol  
☐ control diabetes  
☐ problemas estómago  
☐ problemas vesícula o hepáticos  
☐ HTA o cardiopatía  
☐ problemas renales  
☐ alergia alimentaria  
☐ ácido úrico elevado  
☐ vegetariana  
☐ otros

---

cambio alimentos año previo gestación

- ☐ si  
☐ no

---

cambio lácteos

- ☐ eliminado  
☐ disminuido  
☐ igual  
☐ aumentado  
☐ no sabe

---

cambio huevos

- ☐ eliminado  
☐ disminuido  
☐ igual  
☐ aumentado  
☐ no sabe

---

cambio carne

- ☐ eliminado  
☐ disminuido  
☐ igual  
☐ aumentado  
☐ no sabe

---

cambio pescado

- ☐ eliminado  
☐ disminuido  
☐ igual  
☐ aumentado  
☐ no sabe

---

cambio verduras

- ☐ eliminado  
☐ disminuido  
☐ igual  
☐ aumentado  
☐ no sabe



|                            |                                                                                                                                                                                                             |
|----------------------------|-------------------------------------------------------------------------------------------------------------------------------------------------------------------------------------------------------------|
| cambio legumbres           | <input type="radio"/> eliminado<br><input type="radio"/> disminuido<br><input type="radio"/> igual<br><input type="radio"/> aumentado<br><input type="radio"/> no sabe                                      |
| cambio fruta               | <input type="radio"/> eliminado<br><input type="radio"/> disminuido<br><input type="radio"/> igual<br><input type="radio"/> aumentado<br><input type="radio"/> no sabe                                      |
| cambio pan                 | <input type="radio"/> eliminado<br><input type="radio"/> disminuido<br><input type="radio"/> igual<br><input type="radio"/> aumentado<br><input type="radio"/> no sabe                                      |
| cambio aceite oliva        | <input type="radio"/> eliminado<br><input type="radio"/> disminuido<br><input type="radio"/> igual<br><input type="radio"/> aumentado<br><input type="radio"/> no sabe                                      |
| cambio mante o margarina   | <input type="radio"/> eliminado<br><input type="radio"/> disminuido<br><input type="radio"/> igual<br><input type="radio"/> aumentado<br><input type="radio"/> no sabe                                      |
| cambio azúcar y dulces     | <input type="radio"/> eliminado<br><input type="radio"/> disminuido<br><input type="radio"/> igual<br><input type="radio"/> aumentado<br><input type="radio"/> no sabe                                      |
| cambio bebidas alcohólicas | <input type="radio"/> eliminado<br><input type="radio"/> disminuido<br><input type="radio"/> igual<br><input type="radio"/> aumentado<br><input type="radio"/> no sabe                                      |
| frecuencia comidas fritas  | <input type="radio"/> a diario<br><input type="radio"/> 5 a 6 veces semana<br><input type="radio"/> 2 a 4 veces semana<br><input type="radio"/> 1 vez semana<br><input type="radio"/> menos de 1 vez semana |
| carne                      | <input type="radio"/> no como<br><input type="radio"/> cruda<br><input type="radio"/> poco hecha<br><input type="radio"/> hecha<br><input type="radio"/> muy hecha                                          |
| grasa visible carne        | <input type="radio"/> quita toda<br><input type="radio"/> quita mayoría<br><input type="radio"/> quita un poco<br><input type="radio"/> no quita nada                                                       |

|                                |                                                                                                                                                                                                                                               |
|--------------------------------|-----------------------------------------------------------------------------------------------------------------------------------------------------------------------------------------------------------------------------------------------|
| cocina carne                   | <input type="radio"/> a la plancha<br><input type="radio"/> a la parrilla<br><input type="radio"/> asada<br><input type="radio"/> frita<br><input type="radio"/> guisada                                                                      |
| tostado quemado carne          | <input type="radio"/> nunca<br><input type="radio"/> 1 vez mes<br><input type="radio"/> 2 a 3 veces mes<br><input type="radio"/> 1 vez semana<br><input type="radio"/> 2 a 3 semanas                                                          |
| tostado quemado pescado        | <input type="radio"/> nunca<br><input type="radio"/> 1 vez mes<br><input type="radio"/> 2 a 3 veces mes<br><input type="radio"/> 1 vez semana<br><input type="radio"/> 2 a 3 semanas                                                          |
| socarrat paella                | <input type="radio"/> nunca<br><input type="radio"/> 1 vez mes<br><input type="radio"/> 2 a 3 veces mes<br><input type="radio"/> 1 vez semana<br><input type="radio"/> 2 a 3 semanas                                                          |
| grasa o aceite cocinar         | <input type="radio"/> mantequilla<br><input type="radio"/> margarina<br><input type="radio"/> aceite oliva<br><input type="radio"/> aceite oliva virgen extra<br><input type="radio"/> aceite vegetal<br><input type="radio"/> mezcla aceites |
| grasa aceite aliñar            | <input type="radio"/> mantequilla<br><input type="radio"/> margarina<br><input type="radio"/> aceite oliva<br><input type="radio"/> aceite oliva virgen extra<br><input type="radio"/> aceite vegetal<br><input type="radio"/> mezcla aceites |
| grasa aceite freir             | <input type="radio"/> mantequilla<br><input type="radio"/> margarina<br><input type="radio"/> aceite oliva<br><input type="radio"/> aceite oliva virgen extra<br><input type="radio"/> aceite vegetal<br><input type="radio"/> mezcla aceites |
| Ejercicio cuestionario         | <input type="radio"/> si<br><input type="radio"/> no                                                                                                                                                                                          |
| horas de sueño incluido siesta | <hr/>                                                                                                                                                                                                                                         |
| minutos siesta                 | <hr/>                                                                                                                                                                                                                                         |
| horas televisión semana        | <hr/>                                                                                                                                                                                                                                         |

|                                        |                                                                                                                                                                                                                                                                                                                                                                |
|----------------------------------------|----------------------------------------------------------------------------------------------------------------------------------------------------------------------------------------------------------------------------------------------------------------------------------------------------------------------------------------------------------------|
| actividad trabajo                      | <input type="radio"/> casi siempre sentado<br><input type="radio"/> sentado 50 por cien<br><input type="radio"/> casi siempre de pie, quieto<br><input type="radio"/> casi siempre levantado caminando y llevando pocas cosas<br><input type="radio"/> casi siempre levantado, caminando y llevado muchas cosas<br><input type="radio"/> trabajo manual pesado |
| tiempo caminar o bici al día           | <input type="radio"/> casi nunca<br><input type="radio"/> menos 20min día<br><input type="radio"/> 20 a 40 min día<br><input type="radio"/> 40 a 60 min día<br><input type="radio"/> 1h o 1h y media día<br><input type="radio"/> más de 1h y media al día                                                                                                     |
| tiempo tareas casa al día              | <input type="radio"/> menos de 1h día<br><input type="radio"/> 1 a 2h día<br><input type="radio"/> 3 a 4h día<br><input type="radio"/> 5 a 6h día<br><input type="radio"/> 7 a 8h día<br><input type="radio"/> más de 8h día                                                                                                                                   |
| tiempo libre televisión ordenador leer | <input type="radio"/> menos 1h día<br><input type="radio"/> 1h día<br><input type="radio"/> 2h día<br><input type="radio"/> 3h día<br><input type="radio"/> 4h día<br><input type="radio"/> 5 a 6h día<br><input type="radio"/> mas 6h día                                                                                                                     |
| tiempo libre ejercicio o deporte       | <input type="radio"/> menos 1h semana<br><input type="radio"/> 1h semana<br><input type="radio"/> 2h semana<br><input type="radio"/> 3h semana<br><input type="radio"/> 4 a 5h semana<br><input type="radio"/> mas 5h semana                                                                                                                                   |
| como se considera                      | <input type="radio"/> sedentaria<br><input type="radio"/> poco activa<br><input type="radio"/> moderadamente activa<br><input type="radio"/> bastante activa<br><input type="radio"/> muy activa<br><input type="radio"/> no sabe                                                                                                                              |
| FUR                                    | [*DATA REMOVED*]                                                                                                                                                                                                                                                                                                                                               |
| Semanas gestación 2T                   | _____                                                                                                                                                                                                                                                                                                                                                          |
| Días gestación 2T                      | _____                                                                                                                                                                                                                                                                                                                                                          |
| DBP 2T                                 | _____                                                                                                                                                                                                                                                                                                                                                          |
| CC 2T                                  | _____                                                                                                                                                                                                                                                                                                                                                          |

|                                                   |                                                                                                                                                                                                 |
|---------------------------------------------------|-------------------------------------------------------------------------------------------------------------------------------------------------------------------------------------------------|
| AC 2T                                             |                                                                                                                                                                                                 |
| LF 2T                                             |                                                                                                                                                                                                 |
| PFE 2T (Hadlock)                                  |                                                                                                                                                                                                 |
| Semanas gestación 3T                              | [*DATA REMOVED*]                                                                                                                                                                                |
| días 3T                                           | [*DATA REMOVED*]                                                                                                                                                                                |
| DBP 3T                                            | [*DATA REMOVED*]                                                                                                                                                                                |
| CC 3T                                             | [*DATA REMOVED*]                                                                                                                                                                                |
| AC 3T                                             | [*DATA REMOVED*]                                                                                                                                                                                |
| LF 3T                                             | [*DATA REMOVED*]                                                                                                                                                                                |
| PFE 3T (Hadlock)                                  | [*DATA REMOVED*]                                                                                                                                                                                |
| Semanas de gestación final                        | [*DATA REMOVED*]                                                                                                                                                                                |
| días gestación final                              | [*DATA REMOVED*]                                                                                                                                                                                |
| Localización placenta                             | <input checked="" type="radio"/> anterior<br><input type="radio"/> lateral derecha<br><input type="radio"/> lateral izquierda<br><input type="radio"/> posterior<br><input type="radio"/> fondo |
| Presentación longitudinal cefálica                | <input type="radio"/> no<br><input checked="" type="radio"/> si                                                                                                                                 |
| Dorso                                             | <input type="radio"/> izquierda anterior<br><input checked="" type="radio"/> izquierda posterior<br><input type="radio"/> derecha anterior<br><input type="radio"/> derecha posterior           |
| diámetro biparietal                               | [*DATA REMOVED*]                                                                                                                                                                                |
| Circunferencia craneal                            | [*DATA REMOVED*]                                                                                                                                                                                |
| Circunferencia abdominal                          | [*DATA REMOVED*]                                                                                                                                                                                |
| Longitud de femur                                 | [*DATA REMOVED*]                                                                                                                                                                                |
| tejido celular subcutáneo a nivel del muslo en mm | [*DATA REMOVED*]                                                                                                                                                                                |
| tejido celular subcutáneo en abdomen en mm        | [*DATA REMOVED*]                                                                                                                                                                                |

|                                               |                                                                                                                                                          |
|-----------------------------------------------|----------------------------------------------------------------------------------------------------------------------------------------------------------|
| Volumen del muslo en cm3                      | [*DATA REMOVED*]                                                                                                                                         |
| Peso fetal estimado según fórmula de Hadlock  | [*DATA REMOVED*]                                                                                                                                         |
| Percentil                                     | [*DATA REMOVED*]                                                                                                                                         |
| Peso fetal estimado según fórmula de Scioscia | _____                                                                                                                                                    |
| Peso fetal estimado según fórmula de LEE      | _____                                                                                                                                                    |
| Tipo de parto                                 | <input type="radio"/> eutocico<br><input checked="" type="radio"/> instrumentado/ventosa<br><input type="radio"/> cesarea                                |
| fecha de nacimiento                           | [*DATA REMOVED*]                                                                                                                                         |
| Días entre exploración y nacimiento           | [*DATA REMOVED*]                                                                                                                                         |
| Peso RN en g                                  | [*DATA REMOVED*]                                                                                                                                         |
| sexo                                          | <input type="radio"/> mujer<br><input checked="" type="radio"/> hombre                                                                                   |
| Apgar 1 minuto                                | [*DATA REMOVED*]                                                                                                                                         |
| Apgar 5 minutos                               | [*DATA REMOVED*]                                                                                                                                         |
| Apgar 10 minutos                              | _____                                                                                                                                                    |
| antecedente Covid durante gestación           | <input type="radio"/> Yes<br><input checked="" type="radio"/> No                                                                                         |
| Nivel de estudios                             | <input type="radio"/> ninguno<br><input type="radio"/> primarios<br><input type="radio"/> secundarios<br><input checked="" type="radio"/> universitarios |

# Base\_datos\_estimacion\_peso\_fetal

|                                       |                                                                                                                                                                                                                                                                                      |
|---------------------------------------|--------------------------------------------------------------------------------------------------------------------------------------------------------------------------------------------------------------------------------------------------------------------------------------|
| Número de identificación participante | 153                                                                                                                                                                                                                                                                                  |
| CODIGO PARTICIPANTE                   |                                                                                                                                                                                                                                                                                      |
| Edad                                  | [*DATA REMOVED*]                                                                                                                                                                                                                                                                     |
| Gestaciones                           | <input type="radio"/> 1<br><input type="radio"/> 2<br><input checked="" type="radio"/> 3<br><input type="radio"/> mas de 3                                                                                                                                                           |
| partos                                | <input type="radio"/> 0<br><input checked="" type="radio"/> 1<br><input type="radio"/> 2<br><input type="radio"/> 3<br><input type="radio"/> mas de 3                                                                                                                                |
| cesáreas                              | <input checked="" type="radio"/> 0<br><input type="radio"/> 1<br><input type="radio"/> 2<br><input type="radio"/> 3<br><input type="radio"/> mas de 3                                                                                                                                |
| Abortos                               | <input type="radio"/> 0<br><input checked="" type="radio"/> 1<br><input type="radio"/> 2<br><input type="radio"/> 3<br><input type="radio"/> mas de 3                                                                                                                                |
| Tipo de gestacion                     | <input type="radio"/> espontanea<br><input checked="" type="radio"/> IAC inseminación artificial conyuge<br><input type="radio"/> IAD inseminación artificial donante<br><input type="radio"/> FIV Fecundación in Vitro<br><input type="radio"/> Ovodon FIV con donación de ovocitos |
| peso previo a embarazo                | [*DATA REMOVED*]                                                                                                                                                                                                                                                                     |
| Ganancia ponderal embarazo            |                                                                                                                                                                                                                                                                                      |
| Talla madre                           | [*DATA REMOVED*]                                                                                                                                                                                                                                                                     |
| IMC previo embarazo                   | 18.73278236914601                                                                                                                                                                                                                                                                    |
| Patología obstétrica                  | <input type="radio"/> no<br><input checked="" type="radio"/> si                                                                                                                                                                                                                      |
| Diabetes pregestacional               | <input checked="" type="radio"/> no<br><input type="radio"/> si                                                                                                                                                                                                                      |
| Diabetes gestacional                  | <input type="radio"/> no<br><input checked="" type="radio"/> si                                                                                                                                                                                                                      |

|                                            |                                                                                                                                                                                      |
|--------------------------------------------|--------------------------------------------------------------------------------------------------------------------------------------------------------------------------------------|
| Diabetes gestacional con insulina          | <input checked="" type="radio"/> no<br><input type="radio"/> si                                                                                                                      |
| Diabetes gestacional con dieta y ejercicio | <input type="radio"/> no<br><input checked="" type="radio"/> si                                                                                                                      |
| Percentil fetos previos                    | <input type="radio"/> Nada<br><input type="radio"/> percentil menor de 10<br><input checked="" type="radio"/> percentil entre 10 y 90<br><input type="radio"/> percentil mayor de 90 |
| Exfumadora                                 | <input checked="" type="radio"/> Nada<br><input type="radio"/> menos de 5 años<br><input type="radio"/> 5 a 10 años<br><input type="radio"/> mayor o igual a 10 años                 |
| Hábito tabáquico                           | <input checked="" type="radio"/> no<br><input type="radio"/> si                                                                                                                      |
| fumadora                                   | [*DATA REMOVED*]                                                                                                                                                                     |
| Consumo otros tóxicos                      | <input checked="" type="radio"/> no<br><input type="radio"/> si                                                                                                                      |
| Hb 1T                                      | [*DATA REMOVED*]                                                                                                                                                                     |
| Htc 1T                                     | [*DATA REMOVED*]                                                                                                                                                                     |
| Hb 2T                                      | [*DATA REMOVED*]                                                                                                                                                                     |
| HTC 2T                                     | [*DATA REMOVED*]                                                                                                                                                                     |
| Hb 3T                                      | [*DATA REMOVED*]                                                                                                                                                                     |
| HTC 3T                                     | [*DATA REMOVED*]                                                                                                                                                                     |
| Suplemento FE oral                         | <input checked="" type="radio"/> si<br><input type="radio"/> no                                                                                                                      |
| Suplemento fe iv                           | <input type="radio"/> si<br><input checked="" type="radio"/> no                                                                                                                      |
| Transfusión                                | <input checked="" type="radio"/> no<br><input type="radio"/> si                                                                                                                      |
| Solicitada Vit D                           | <input checked="" type="radio"/> no<br><input type="radio"/> si                                                                                                                      |
| Deficit vit D                              | <input type="radio"/> no<br><input type="radio"/> si                                                                                                                                 |
| Suplemento vit D                           | <input type="radio"/> si<br><input type="radio"/> no                                                                                                                                 |

|                       |                                                                                                                                                                                                                                                                                                                                                                                                              |
|-----------------------|--------------------------------------------------------------------------------------------------------------------------------------------------------------------------------------------------------------------------------------------------------------------------------------------------------------------------------------------------------------------------------------------------------------|
| Dieta, cuestionario   | <input checked="" type="radio"/> sí<br><input type="radio"/> no                                                                                                                                                                                                                                                                                                                                              |
| Leche entera          | <input type="radio"/> Nunca o menos 1 vez al mes<br><input checked="" type="radio"/> 1 a 3 veces mes<br><input type="radio"/> 1 vez semana<br><input type="radio"/> 2 a 4 veces semana<br><input type="radio"/> 5 a 6 veces semana<br><input type="radio"/> 1 vez al día<br><input type="radio"/> 2 a 3 veces al día<br><input type="radio"/> 5 a 6 veces al día<br><input type="radio"/> más 6 veces al día |
| Leche semidesnatada   | <input type="radio"/> Nunca o menos 1 vez al mes<br><input checked="" type="radio"/> 1 a 3 veces mes<br><input type="radio"/> 1 vez semana<br><input type="radio"/> 2 a 4 veces semana<br><input type="radio"/> 5 a 6 veces semana<br><input type="radio"/> 1 vez al día<br><input type="radio"/> 2 a 3 veces al día<br><input type="radio"/> 5 a 6 veces al día<br><input type="radio"/> mas 6 veces al día |
| Leche desnatada       | <input type="radio"/> Nunca o menos 1 vez al mes<br><input type="radio"/> 1 a 3 veces mes<br><input type="radio"/> 1 vez semana<br><input type="radio"/> 2 a 4 veces semana<br><input type="radio"/> 5 a 6 veces semana<br><input type="radio"/> 1 vez al día<br><input checked="" type="radio"/> 2 a 3 veces al día<br><input type="radio"/> 5 a 6 veces al día<br><input type="radio"/> más 6 veces al día |
| Leche condensada      | <input checked="" type="radio"/> Nunca o menos 1 vez al mes<br><input type="radio"/> 1 a 3 veces mes<br><input type="radio"/> 1 vez semana<br><input type="radio"/> 2 a 4 veces semana<br><input type="radio"/> 5 a 6 veces semana<br><input type="radio"/> 1 vez al día<br><input type="radio"/> 2 a 3 veces al día<br><input type="radio"/> 5 a 6 veces al día<br><input type="radio"/> más 6 veces al día |
| nata o crema de leche | <input checked="" type="radio"/> Nunca o menos 1 vez al mes<br><input type="radio"/> 1 a 3 veces mes<br><input type="radio"/> 1 vez semana<br><input type="radio"/> 2 a 4 veces semana<br><input type="radio"/> 5 a 6 veces semana<br><input type="radio"/> 1 vez al día<br><input type="radio"/> 2 a 3 veces al día<br><input type="radio"/> 5 a 6 veces al día<br><input type="radio"/> más 6 veces al día |



---

Yogurt Entero

- ☐ Nunca o menos 1 vez al mes  
☒ 1 a 3 veces mes  
☐ 1 vez semana  
☐ 2 a 4 veces semana  
☐ 5 a 6 veces semana  
☐ 1 vez al día  
☐ 2 a 3 veces al día  
☐ 5 a 6 veces al día  
☐ más 6 veces al día

---

Yogurt desnatado

- ☐ Nunca o menos 1 vez al mes  
☐ 1 a 3 veces mes  
☐ 1 vez semana  
☒ 2 a 4 veces semana  
☐ 5 a 6 veces semana  
☐ 1 vez al día  
☐ 2 a 3 veces al día  
☐ 5 a 6 veces al día  
☐ más 6 veces al día

---

100g requesón o queso blando o queso fresco

- ☐ Nunca o menos 1 vez al mes  
☐ 1 a 3 veces mes  
☐ 1 vez semana  
☒ 2 a 4 veces semana  
☐ 5 a 6 veces semana  
☐ 1 vez al día  
☐ 2 a 3 veces al día  
☐ 5 a 6 veces al día  
☐ más 6 veces al día

---

queso curado o semicurado o cremoso

- ☐ Nunca o menos 1 vez al mes  
☒ 1 a 3 veces mes  
☐ 1 vez semana  
☐ 2 a 4 veces semana  
☐ 5 a 6 veces semana  
☐ 1 vez al día  
☐ 2 a 3 veces al día  
☐ 5 a 6 veces al día  
☐ más 6 veces al día

---

natillas flan pudding

- ☒ Nunca o menos 1 vez al mes  
☐ 1 a 3 veces mes  
☐ 1 vez semana  
☐ 2 a 4 veces semana  
☐ 5 a 6 veces semana  
☐ 1 vez al día  
☐ 2 a 3 veces al día  
☐ 5 a 6 veces al día  
☐ más 6 veces al día

---

Helado

- ☒ Nunca o menos 1 vez al mes  
☐ 1 a 3 veces mes  
☐ 1 vez semana  
☐ 2 a 4 veces semana  
☐ 5 a 6 veces semana  
☐ 1 vez al día  
☐ 2 a 3 veces al día  
☐ 5 a 6 veces al día  
☐ más 6 veces al día

|                                      |                                                                                                                                                                                                                                                                                                                                                                                                              |
|--------------------------------------|--------------------------------------------------------------------------------------------------------------------------------------------------------------------------------------------------------------------------------------------------------------------------------------------------------------------------------------------------------------------------------------------------------------|
| huevo                                | <input type="radio"/> Nunca o menos 1 vez al mes<br><input type="radio"/> 1 a 3 veces mes<br><input type="radio"/> 1 vez semana<br><input checked="" type="radio"/> 2 a 4 veces semana<br><input type="radio"/> 5 a 6 veces semana<br><input type="radio"/> 1 vez al día<br><input type="radio"/> 2 a 3 veces al día<br><input type="radio"/> 5 a 6 veces al día<br><input type="radio"/> más 6 veces al día |
| Pollo con piel                       | <input checked="" type="radio"/> Nunca o menos 1 vez al mes<br><input type="radio"/> 1 a 3 veces mes<br><input type="radio"/> 1 vez semana<br><input type="radio"/> 2 a 4 veces semana<br><input type="radio"/> 5 a 6 veces semana<br><input type="radio"/> 1 vez al día<br><input type="radio"/> 2 a 3 veces al día<br><input type="radio"/> 5 a 6 veces al día<br><input type="radio"/> más 6 veces al día |
| pollo sin piel                       | <input type="radio"/> Nunca o menos 1 vez al mes<br><input type="radio"/> 1 a 3 veces mes<br><input type="radio"/> 1 vez semana<br><input checked="" type="radio"/> 2 a 4 veces semana<br><input type="radio"/> 5 a 6 veces semana<br><input type="radio"/> 1 vez al día<br><input type="radio"/> 2 a 3 veces al día<br><input type="radio"/> 5 a 6 veces al día<br><input type="radio"/> más 6 veces al día |
| Ternera o cerdo o cordero            | <input type="radio"/> Nunca o menos 1 vez al mes<br><input type="radio"/> 1 a 3 veces mes<br><input checked="" type="radio"/> 1 vez semana<br><input type="radio"/> 2 a 4 veces semana<br><input type="radio"/> 5 a 6 veces semana<br><input type="radio"/> 1 vez al día<br><input type="radio"/> 2 a 3 veces al día<br><input type="radio"/> 5 a 6 veces al día<br><input type="radio"/> más 6 veces al día |
| carne caza: Conejo o codorniz o pato | <input checked="" type="radio"/> Nunca o menos 1 vez al mes<br><input type="radio"/> 1 a 3 veces mes<br><input type="radio"/> 1 vez semana<br><input type="radio"/> 2 a 4 veces semana<br><input type="radio"/> 5 a 6 veces semana<br><input type="radio"/> 1 vez al día<br><input type="radio"/> 2 a 3 veces al día<br><input type="radio"/> 5 a 6 veces al día<br><input type="radio"/> más 6 veces al día |
| Hígado de ternera o cerdo o pollo    | <input checked="" type="radio"/> Nunca o menos 1 vez al mes<br><input type="radio"/> 1 a 3 veces mes<br><input type="radio"/> 1 vez semana<br><input type="radio"/> 2 a 4 veces semana<br><input type="radio"/> 5 a 6 veces semana<br><input type="radio"/> 1 vez al día<br><input type="radio"/> 2 a 3 veces al día<br><input type="radio"/> 5 a 6 veces al día<br><input type="radio"/> más 6 veces al día |

|                     |                                                                                                                                                                                                                                                                                                                                                                                                              |
|---------------------|--------------------------------------------------------------------------------------------------------------------------------------------------------------------------------------------------------------------------------------------------------------------------------------------------------------------------------------------------------------------------------------------------------------|
| Vísceras            | <input checked="" type="radio"/> Nunca o menos 1 vez al mes<br><input type="radio"/> 1 a 3 veces mes<br><input type="radio"/> 1 vez semana<br><input type="radio"/> 2 a 4 veces semana<br><input type="radio"/> 5 a 6 veces semana<br><input type="radio"/> 1 vez al día<br><input type="radio"/> 2 a 3 veces al día<br><input type="radio"/> 5 a 6 veces al día<br><input type="radio"/> más 6 veces al día |
| Embutido            | <input checked="" type="radio"/> Nunca o menos 1 vez al mes<br><input type="radio"/> 1 a 3 veces mes<br><input type="radio"/> 1 vez semana<br><input type="radio"/> 2 a 4 veces semana<br><input type="radio"/> 5 a 6 veces semana<br><input type="radio"/> 1 vez al día<br><input type="radio"/> 2 a 3 veces al día<br><input type="radio"/> 5 a 6 veces al día<br><input type="radio"/> más 6 veces al día |
| Salchicha o similar | <input checked="" type="radio"/> Nunca o menos 1 vez al mes<br><input type="radio"/> 1 a 3 veces mes<br><input type="radio"/> 1 vez semana<br><input type="radio"/> 2 a 4 veces semana<br><input type="radio"/> 5 a 6 veces semana<br><input type="radio"/> 1 vez al día<br><input type="radio"/> 2 a 3 veces al día<br><input type="radio"/> 5 a 6 veces al día<br><input type="radio"/> más 6 veces al día |
| Pate o foiegras     | <input checked="" type="radio"/> Nunca o menos 1 vez al mes<br><input type="radio"/> 1 a 3 veces mes<br><input type="radio"/> 1 vez semana<br><input type="radio"/> 2 a 4 veces semana<br><input type="radio"/> 5 a 6 veces semana<br><input type="radio"/> 1 vez al día<br><input type="radio"/> 2 a 3 veces al día<br><input type="radio"/> 5 a 6 veces al día<br><input type="radio"/> más 6 veces al día |
| Hamburguesa         | <input type="radio"/> Nunca o menos 1 vez al mes<br><input type="radio"/> 1 a 3 veces mes<br><input checked="" type="radio"/> 1 vez semana<br><input type="radio"/> 2 a 4 veces semana<br><input type="radio"/> 5 a 6 veces semana<br><input type="radio"/> 1 vez al día<br><input type="radio"/> 2 a 3 veces al día<br><input type="radio"/> 5 a 6 veces al día<br><input type="radio"/> más 6 veces al día |
| tocino o bacon      | <input checked="" type="radio"/> Nunca o menos 1 vez al mes<br><input type="radio"/> 1 a 3 veces mes<br><input type="radio"/> 1 vez semana<br><input type="radio"/> 2 a 4 veces semana<br><input type="radio"/> 5 a 6 veces semana<br><input type="radio"/> 1 vez al día<br><input type="radio"/> 2 a 3 veces al día<br><input type="radio"/> 5 a 6 veces al día<br><input type="radio"/> más 6 veces al día |

|                        |                                                                                                                                                                                                                                                                                                                                                                                                              |
|------------------------|--------------------------------------------------------------------------------------------------------------------------------------------------------------------------------------------------------------------------------------------------------------------------------------------------------------------------------------------------------------------------------------------------------------|
| Pescado frito          | <input checked="" type="radio"/> Nunca o menos 1 vez al mes<br><input type="radio"/> 1 a 3 veces mes<br><input type="radio"/> 1 vez semana<br><input type="radio"/> 2 a 4 veces semana<br><input type="radio"/> 5 a 6 veces semana<br><input type="radio"/> 1 vez al día<br><input type="radio"/> 2 a 3 veces al día<br><input type="radio"/> 5 a 6 veces al día<br><input type="radio"/> más 6 veces al día |
| pescado hervido blanco | <input type="radio"/> Nunca o menos 1 vez al mes<br><input type="radio"/> 1 a 3 veces mes<br><input type="radio"/> 1 vez semana<br><input checked="" type="radio"/> 2 a 4 veces semana<br><input type="radio"/> 5 a 6 veces semana<br><input type="radio"/> 1 vez al día<br><input type="radio"/> 2 a 3 veces al día<br><input type="radio"/> 5 a 6 veces al día<br><input type="radio"/> más 6 veces al día |
| pescado hervido azul   | <input type="radio"/> Nunca o menos 1 vez al mes<br><input type="radio"/> 1 a 3 veces mes<br><input checked="" type="radio"/> 1 vez semana<br><input type="radio"/> 2 a 4 veces semana<br><input type="radio"/> 5 a 6 veces semana<br><input type="radio"/> 1 vez al día<br><input type="radio"/> 2 a 3 veces al día<br><input type="radio"/> 5 a 6 veces al día<br><input type="radio"/> más 6 veces al día |
| otros pescado azul     | <input checked="" type="radio"/> Nunca o menos 1 vez al mes<br><input type="radio"/> 1 a 3 veces mes<br><input type="radio"/> 1 vez semana<br><input type="radio"/> 2 a 4 veces semana<br><input type="radio"/> 5 a 6 veces semana<br><input type="radio"/> 1 vez al día<br><input type="radio"/> 2 a 3 veces al día<br><input type="radio"/> 5 a 6 veces al día<br><input type="radio"/> más 6 veces al día |
| atun conserva          | <input type="radio"/> Nunca o menos 1 vez al mes<br><input checked="" type="radio"/> 1 a 3 veces mes<br><input type="radio"/> 1 vez semana<br><input type="radio"/> 2 a 4 veces semana<br><input type="radio"/> 5 a 6 veces semana<br><input type="radio"/> 1 vez al día<br><input type="radio"/> 2 a 3 veces al día<br><input type="radio"/> 5 a 6 veces al día<br><input type="radio"/> más 6 veces al día |
| sardina conserva       | <input checked="" type="radio"/> Nunca o menos 1 vez al mes<br><input type="radio"/> 1 a 3 veces mes<br><input type="radio"/> 1 vez semana<br><input type="radio"/> 2 a 4 veces semana<br><input type="radio"/> 5 a 6 veces semana<br><input type="radio"/> 1 vez al día<br><input type="radio"/> 2 a 3 veces al día<br><input type="radio"/> 5 a 6 veces al día<br><input type="radio"/> más 6 veces al día |

|                                         |                                                                                                                                                                                                                                                                                                                                                                                                              |
|-----------------------------------------|--------------------------------------------------------------------------------------------------------------------------------------------------------------------------------------------------------------------------------------------------------------------------------------------------------------------------------------------------------------------------------------------------------------|
| pescado ahumado                         | <input checked="" type="radio"/> Nunca o menos 1 vez al mes<br><input type="radio"/> 1 a 3 veces mes<br><input type="radio"/> 1 vez semana<br><input type="radio"/> 2 a 4 veces semana<br><input type="radio"/> 5 a 6 veces semana<br><input type="radio"/> 1 vez al día<br><input type="radio"/> 2 a 3 veces al día<br><input type="radio"/> 5 a 6 veces al día<br><input type="radio"/> más 6 veces al día |
| almejas o mejillones o ostras unos 100g | <input type="radio"/> Nunca o menos 1 vez al mes<br><input checked="" type="radio"/> 1 a 3 veces mes<br><input type="radio"/> 1 vez semana<br><input type="radio"/> 2 a 4 veces semana<br><input type="radio"/> 5 a 6 veces semana<br><input type="radio"/> 1 vez al día<br><input type="radio"/> 2 a 3 veces al día<br><input type="radio"/> 5 a 6 veces al día<br><input type="radio"/> más 6 veces al día |
| calamar o chipiron o sepia unos 100g    | <input type="radio"/> Nunca o menos 1 vez al mes<br><input checked="" type="radio"/> 1 a 3 veces mes<br><input type="radio"/> 1 vez semana<br><input type="radio"/> 2 a 4 veces semana<br><input type="radio"/> 5 a 6 veces semana<br><input type="radio"/> 1 vez al día<br><input type="radio"/> 2 a 3 veces al día<br><input type="radio"/> 5 a 6 veces al día<br><input type="radio"/> más 6 veces al día |
| marisco unos 100g                       | <input type="radio"/> Nunca o menos 1 vez al mes<br><input checked="" type="radio"/> 1 a 3 veces mes<br><input type="radio"/> 1 vez semana<br><input type="radio"/> 2 a 4 veces semana<br><input type="radio"/> 5 a 6 veces semana<br><input type="radio"/> 1 vez al día<br><input type="radio"/> 2 a 3 veces al día<br><input type="radio"/> 5 a 6 veces al día<br><input type="radio"/> más 6 veces al día |
| Espinacas o acelgas cocinadas           | <input type="radio"/> Nunca o menos 1 vez al mes<br><input checked="" type="radio"/> 1 a 3 veces mes<br><input type="radio"/> 1 vez semana<br><input type="radio"/> 2 a 4 veces semana<br><input type="radio"/> 5 a 6 veces semana<br><input type="radio"/> 1 vez al día<br><input type="radio"/> 2 a 3 veces al día<br><input type="radio"/> 5 a 6 veces al día<br><input type="radio"/> más 6 veces al día |
| Col o coliflor o brocoli cocinado       | <input type="radio"/> Nunca o menos 1 vez al mes<br><input checked="" type="radio"/> 1 a 3 veces mes<br><input type="radio"/> 1 vez semana<br><input type="radio"/> 2 a 4 veces semana<br><input type="radio"/> 5 a 6 veces semana<br><input type="radio"/> 1 vez al día<br><input type="radio"/> 2 a 3 veces al día<br><input type="radio"/> 5 a 6 veces al día<br><input type="radio"/> más 6 veces al día |

---

Lechuga o endivia o escarola

- ☐ Nunca o menos 1 vez al mes  
☐ 1 a 3 veces mes  
☐ 1 vez semana  
☐ 2 a 4 veces semana  
☒ 5 a 6 veces semana  
☐ 1 vez al día  
☐ 2 a 3 veces al día  
☐ 5 a 6 veces al día  
☐ más 6 veces al día

---

tomate ensalada

- ☐ Nunca o menos 1 vez al mes  
☐ 1 a 3 veces mes  
☐ 1 vez semana  
☐ 2 a 4 veces semana  
☒ 5 a 6 veces semana  
☐ 1 vez al día  
☐ 2 a 3 veces al día  
☐ 5 a 6 veces al día  
☐ más 6 veces al día

---

cebolla

- ☐ Nunca o menos 1 vez al mes  
☐ 1 a 3 veces mes  
☐ 1 vez semana  
☐ 2 a 4 veces semana  
☒ 5 a 6 veces semana  
☐ 1 vez al día  
☐ 2 a 3 veces al día  
☐ 5 a 6 veces al día  
☐ más 6 veces al día

---

Zanahoria o calabaza

- ☐ Nunca o menos 1 vez al mes  
☐ 1 a 3 veces mes  
☐ 1 vez semana  
☒ 2 a 4 veces semana  
☐ 5 a 6 veces semana  
☐ 1 vez al día  
☐ 2 a 3 veces al día  
☐ 5 a 6 veces al día  
☐ más 6 veces al día

---

Judías verdes

- ☐ Nunca o menos 1 vez al mes  
☐ 1 a 3 veces mes  
☒ 1 vez semana  
☐ 2 a 4 veces semana  
☐ 5 a 6 veces semana  
☐ 1 vez al día  
☐ 2 a 3 veces al día  
☐ 5 a 6 veces al día  
☐ más 6 veces al día

---

Berenjena o calabacin o pepino

- ☐ Nunca o menos 1 vez al mes  
☐ 1 a 3 veces mes  
☒ 1 vez semana  
☐ 2 a 4 veces semana  
☐ 5 a 6 veces semana  
☐ 1 vez al día  
☐ 2 a 3 veces al día  
☐ 5 a 6 veces al día  
☐ más 6 veces al día

|                       |                                                                                                                                                                                                                                                                                                                                                                                                              |
|-----------------------|--------------------------------------------------------------------------------------------------------------------------------------------------------------------------------------------------------------------------------------------------------------------------------------------------------------------------------------------------------------------------------------------------------------|
| pimiento              | <input type="radio"/> Nunca o menos 1 vez al mes<br><input type="radio"/> 1 a 3 veces mes<br><input checked="" type="radio"/> 1 vez semana<br><input type="radio"/> 2 a 4 veces semana<br><input type="radio"/> 5 a 6 veces semana<br><input type="radio"/> 1 vez al día<br><input type="radio"/> 2 a 3 veces al día<br><input type="radio"/> 5 a 6 veces al día<br><input type="radio"/> más 6 veces al día |
| alcachofa             | <input type="radio"/> Nunca o menos 1 vez al mes<br><input checked="" type="radio"/> 1 a 3 veces mes<br><input type="radio"/> 1 vez semana<br><input type="radio"/> 2 a 4 veces semana<br><input type="radio"/> 5 a 6 veces semana<br><input type="radio"/> 1 vez al día<br><input type="radio"/> 2 a 3 veces al día<br><input type="radio"/> 5 a 6 veces al día<br><input type="radio"/> más 6 veces al día |
| espárragos            | <input checked="" type="radio"/> Nunca o menos 1 vez al mes<br><input type="radio"/> 1 a 3 veces mes<br><input type="radio"/> 1 vez semana<br><input type="radio"/> 2 a 4 veces semana<br><input type="radio"/> 5 a 6 veces semana<br><input type="radio"/> 1 vez al día<br><input type="radio"/> 2 a 3 veces al día<br><input type="radio"/> 5 a 6 veces al día<br><input type="radio"/> más 6 veces al día |
| maíz hervido          | <input checked="" type="radio"/> Nunca o menos 1 vez al mes<br><input type="radio"/> 1 a 3 veces mes<br><input type="radio"/> 1 vez semana<br><input type="radio"/> 2 a 4 veces semana<br><input type="radio"/> 5 a 6 veces semana<br><input type="radio"/> 1 vez al día<br><input type="radio"/> 2 a 3 veces al día<br><input type="radio"/> 5 a 6 veces al día<br><input type="radio"/> más 6 veces al día |
| legumbres             | <input type="radio"/> Nunca o menos 1 vez al mes<br><input type="radio"/> 1 a 3 veces mes<br><input type="radio"/> 1 vez semana<br><input checked="" type="radio"/> 2 a 4 veces semana<br><input type="radio"/> 5 a 6 veces semana<br><input type="radio"/> 1 vez al día<br><input type="radio"/> 2 a 3 veces al día<br><input type="radio"/> 5 a 6 veces al día<br><input type="radio"/> más 6 veces al día |
| naranjas o mandarinas | <input checked="" type="radio"/> Nunca o menos 1 vez al mes<br><input type="radio"/> 1 a 3 veces mes<br><input type="radio"/> 1 vez semana<br><input type="radio"/> 2 a 4 veces semana<br><input type="radio"/> 5 a 6 veces semana<br><input type="radio"/> 1 vez al día<br><input type="radio"/> 2 a 3 veces al día<br><input type="radio"/> 5 a 6 veces al día<br><input type="radio"/> más 6 veces al día |

---

zumo natural fruta

- ☒ Nunca o menos 1 vez al mes  
☐ 1 a 3 veces mes  
☐ 1 vez semana  
☐ 2 a 4 veces semana  
☐ 5 a 6 veces semana  
☐ 1 vez al día  
☐ 2 a 3 veces al día  
☐ 5 a 6 veces al día  
☐ más 6 veces al día

---

platano

- ☐ Nunca o menos 1 vez al mes  
☐ 1 a 3 veces mes  
☒ 1 vez semana  
☐ 2 a 4 veces semana  
☐ 5 a 6 veces semana  
☐ 1 vez al día  
☐ 2 a 3 veces al día  
☐ 5 a 6 veces al día  
☐ más 6 veces al día

---

manzana o pera

- ☐ Nunca o menos 1 vez al mes  
☐ 1 a 3 veces mes  
☒ 1 vez semana  
☐ 2 a 4 veces semana  
☐ 5 a 6 veces semana  
☐ 1 vez al día  
☐ 2 a 3 veces al día  
☐ 5 a 6 veces al día  
☐ más 6 veces al día

---

melocotón o nectarina

- ☐ Nunca o menos 1 vez al mes  
☐ 1 a 3 veces mes  
☒ 1 vez semana  
☐ 2 a 4 veces semana  
☐ 5 a 6 veces semana  
☐ 1 vez al día  
☐ 2 a 3 veces al día  
☐ 5 a 6 veces al día  
☐ más 6 veces al día

---

sandia o melon

- ☐ Nunca o menos 1 vez al mes  
☐ 1 a 3 veces mes  
☐ 1 vez semana  
☒ 2 a 4 veces semana  
☐ 5 a 6 veces semana  
☐ 1 vez al día  
☐ 2 a 3 veces al día  
☐ 5 a 6 veces al día  
☐ más 6 veces al día

---

uva

- ☐ Nunca o menos 1 vez al mes  
☐ 1 a 3 veces mes  
☒ 1 vez semana  
☐ 2 a 4 veces semana  
☐ 5 a 6 veces semana  
☐ 1 vez al día  
☐ 2 a 3 veces al día  
☐ 5 a 6 veces al día  
☐ más 6 veces al día



---

bruna o ciruela

- ☐ Nunca o menos 1 vez al mes  
☐ 1 a 3 veces mes  
☐ 1 vez semana  
☒ 2 a 4 veces semana  
☐ 5 a 6 veces semana  
☐ 1 vez al día  
☐ 2 a 3 veces al día  
☐ 5 a 6 veces al día  
☐ más 6 veces al día

---

kiwi

- ☐ Nunca o menos 1 vez al mes  
☐ 1 a 3 veces mes  
☐ 1 vez semana  
☐ 2 a 4 veces semana  
☒ 5 a 6 veces semana  
☐ 1 vez al día  
☐ 2 a 3 veces al día  
☐ 5 a 6 veces al día  
☐ más 6 veces al día

---

aceituna

- ☐ Nunca o menos 1 vez al mes  
☐ 1 a 3 veces mes  
☒ 1 vez semana  
☐ 2 a 4 veces semana  
☐ 5 a 6 veces semana  
☐ 1 vez al día  
☐ 2 a 3 veces al día  
☐ 5 a 6 veces al día  
☐ más 6 veces al día

---

frutos secos

- ☐ Nunca o menos 1 vez al mes  
☐ 1 a 3 veces mes  
☒ 1 vez semana  
☐ 2 a 4 veces semana  
☐ 5 a 6 veces semana  
☐ 1 vez al día  
☐ 2 a 3 veces al día  
☐ 5 a 6 veces al día  
☐ más 6 veces al día

---

pan blanco

- ☒ Nunca o menos 1 vez al mes  
☐ 1 a 3 veces mes  
☐ 1 vez semana  
☐ 2 a 4 veces semana  
☐ 5 a 6 veces semana  
☐ 1 vez al día  
☐ 2 a 3 veces al día  
☐ 5 a 6 veces al día  
☐ más 6 veces al día

---

pan integral

- ☐ Nunca o menos 1 vez al mes  
☐ 1 a 3 veces mes  
☐ 1 vez semana  
☐ 2 a 4 veces semana  
☒ 5 a 6 veces semana  
☐ 1 vez al día  
☐ 2 a 3 veces al día  
☐ 5 a 6 veces al día  
☐ más 6 veces al día

---

cereales desayuno

- ☒ Nunca o menos 1 vez al mes  
☐ 1 a 3 veces mes  
☐ 1 vez semana  
☐ 2 a 4 veces semana  
☐ 5 a 6 veces semana  
☐ 1 vez al día  
☐ 2 a 3 veces al día  
☐ 5 a 6 veces al día  
☐ más 6 veces al día

---

patatas fritas

- ☒ Nunca o menos 1 vez al mes  
☐ 1 a 3 veces mes  
☐ 1 vez semana  
☐ 2 a 4 veces semana  
☐ 5 a 6 veces semana  
☐ 1 vez al día  
☐ 2 a 3 veces al día  
☐ 5 a 6 veces al día  
☐ más 6 veces al día

---

patatas cocidas o asadas

- ☐ Nunca o menos 1 vez al mes  
☒ 1 a 3 veces mes  
☐ 1 vez semana  
☐ 2 a 4 veces semana  
☐ 5 a 6 veces semana  
☐ 1 vez al día  
☐ 2 a 3 veces al día  
☐ 5 a 6 veces al día  
☐ más 6 veces al día

---

bolsa papas

- ☒ Nunca o menos 1 vez al mes  
☐ 1 a 3 veces mes  
☐ 1 vez semana  
☐ 2 a 4 veces semana  
☐ 5 a 6 veces semana  
☐ 1 vez al día  
☐ 2 a 3 veces al día  
☐ 5 a 6 veces al día  
☐ más 6 veces al día

---

arroz cocinado

- ☒ Nunca o menos 1 vez al mes  
☐ 1 a 3 veces mes  
☐ 1 vez semana  
☐ 2 a 4 veces semana  
☐ 5 a 6 veces semana  
☐ 1 vez al día  
☐ 2 a 3 veces al día  
☐ 5 a 6 veces al día  
☐ más 6 veces al día

---

pasta

- ☒ Nunca o menos 1 vez al mes  
☐ 1 a 3 veces mes  
☐ 1 vez semana  
☐ 2 a 4 veces semana  
☐ 5 a 6 veces semana  
☐ 1 vez al día  
☐ 2 a 3 veces al día  
☐ 5 a 6 veces al día  
☐ más 6 veces al día

|                     |                                                                                                                                                                                                                                                                                                                                                                                                              |
|---------------------|--------------------------------------------------------------------------------------------------------------------------------------------------------------------------------------------------------------------------------------------------------------------------------------------------------------------------------------------------------------------------------------------------------------|
| pizza               | <input checked="" type="radio"/> Nunca o menos 1 vez al mes<br><input type="radio"/> 1 a 3 veces mes<br><input type="radio"/> 1 vez semana<br><input type="radio"/> 2 a 4 veces semana<br><input type="radio"/> 5 a 6 veces semana<br><input type="radio"/> 1 vez al día<br><input type="radio"/> 2 a 3 veces al día<br><input type="radio"/> 5 a 6 veces al día<br><input type="radio"/> más 6 veces al día |
| aceite oliva        | <input type="radio"/> Nunca o menos 1 vez al mes<br><input type="radio"/> 1 a 3 veces mes<br><input type="radio"/> 1 vez semana<br><input type="radio"/> 2 a 4 veces semana<br><input type="radio"/> 5 a 6 veces semana<br><input checked="" type="radio"/> 1 vez al día<br><input type="radio"/> 2 a 3 veces al día<br><input type="radio"/> 5 a 6 veces al día<br><input type="radio"/> más 6 veces al día |
| otros aceites       | <input type="radio"/> Nunca o menos 1 vez al mes<br><input type="radio"/> 1 a 3 veces mes<br><input type="radio"/> 1 vez semana<br><input type="radio"/> 2 a 4 veces semana<br><input type="radio"/> 5 a 6 veces semana<br><input checked="" type="radio"/> 1 vez al día<br><input type="radio"/> 2 a 3 veces al día<br><input type="radio"/> 5 a 6 veces al día<br><input type="radio"/> más 6 veces al día |
| margarina           | <input checked="" type="radio"/> Nunca o menos 1 vez al mes<br><input type="radio"/> 1 a 3 veces mes<br><input type="radio"/> 1 vez semana<br><input type="radio"/> 2 a 4 veces semana<br><input type="radio"/> 5 a 6 veces semana<br><input type="radio"/> 1 vez al día<br><input type="radio"/> 2 a 3 veces al día<br><input type="radio"/> 5 a 6 veces al día<br><input type="radio"/> más 6 veces al día |
| mantequilla         | <input checked="" type="radio"/> Nunca o menos 1 vez al mes<br><input type="radio"/> 1 a 3 veces mes<br><input type="radio"/> 1 vez semana<br><input type="radio"/> 2 a 4 veces semana<br><input type="radio"/> 5 a 6 veces semana<br><input type="radio"/> 1 vez al día<br><input type="radio"/> 2 a 3 veces al día<br><input type="radio"/> 5 a 6 veces al día<br><input type="radio"/> más 6 veces al día |
| galletas tipo maria | <input type="radio"/> Nunca o menos 1 vez al mes<br><input checked="" type="radio"/> 1 a 3 veces mes<br><input type="radio"/> 1 vez semana<br><input type="radio"/> 2 a 4 veces semana<br><input type="radio"/> 5 a 6 veces semana<br><input type="radio"/> 1 vez al día<br><input type="radio"/> 2 a 3 veces al día<br><input type="radio"/> 5 a 6 veces al día<br><input type="radio"/> más 6 veces al día |

|                           |                                                                                                                                                                                                                                                                                                                                                                                                              |
|---------------------------|--------------------------------------------------------------------------------------------------------------------------------------------------------------------------------------------------------------------------------------------------------------------------------------------------------------------------------------------------------------------------------------------------------------|
| galletas chocolate        | <input checked="" type="radio"/> Nunca o menos 1 vez al mes<br><input type="radio"/> 1 a 3 veces mes<br><input type="radio"/> 1 vez semana<br><input type="radio"/> 2 a 4 veces semana<br><input type="radio"/> 5 a 6 veces semana<br><input type="radio"/> 1 vez al día<br><input type="radio"/> 2 a 3 veces al día<br><input type="radio"/> 5 a 6 veces al día<br><input type="radio"/> más 6 veces al día |
| bollieria                 | <input checked="" type="radio"/> Nunca o menos 1 vez al mes<br><input type="radio"/> 1 a 3 veces mes<br><input type="radio"/> 1 vez semana<br><input type="radio"/> 2 a 4 veces semana<br><input type="radio"/> 5 a 6 veces semana<br><input type="radio"/> 1 vez al día<br><input type="radio"/> 2 a 3 veces al día<br><input type="radio"/> 5 a 6 veces al día<br><input type="radio"/> más 6 veces al día |
| chocolate o bombones      | <input checked="" type="radio"/> Nunca o menos 1 vez al mes<br><input type="radio"/> 1 a 3 veces mes<br><input type="radio"/> 1 vez semana<br><input type="radio"/> 2 a 4 veces semana<br><input type="radio"/> 5 a 6 veces semana<br><input type="radio"/> 1 vez al día<br><input type="radio"/> 2 a 3 veces al día<br><input type="radio"/> 5 a 6 veces al día<br><input type="radio"/> más 6 veces al día |
| chocolate polvo o colacao | <input checked="" type="radio"/> Nunca o menos 1 vez al mes<br><input type="radio"/> 1 a 3 veces mes<br><input type="radio"/> 1 vez semana<br><input type="radio"/> 2 a 4 veces semana<br><input type="radio"/> 5 a 6 veces semana<br><input type="radio"/> 1 vez al día<br><input type="radio"/> 2 a 3 veces al día<br><input type="radio"/> 5 a 6 veces al día<br><input type="radio"/> más 6 veces al día |
| vino tinto                | <input checked="" type="radio"/> Nunca o menos 1 vez al mes<br><input type="radio"/> 1 a 3 veces mes<br><input type="radio"/> 1 vez semana<br><input type="radio"/> 2 a 4 veces semana<br><input type="radio"/> 5 a 6 veces semana<br><input type="radio"/> 1 vez al día<br><input type="radio"/> 2 a 3 veces al día<br><input type="radio"/> 5 a 6 veces al día<br><input type="radio"/> más 6 veces al día |
| vino blanco               | <input checked="" type="radio"/> Nunca o menos 1 vez al mes<br><input type="radio"/> 1 a 3 veces mes<br><input type="radio"/> 1 vez semana<br><input type="radio"/> 2 a 4 veces semana<br><input type="radio"/> 5 a 6 veces semana<br><input type="radio"/> 1 vez al día<br><input type="radio"/> 2 a 3 veces al día<br><input type="radio"/> 5 a 6 veces al día<br><input type="radio"/> más 6 veces al día |

---

|                    |                                                                                                                                                                                                                                                                                                                                                                                                              |
|--------------------|--------------------------------------------------------------------------------------------------------------------------------------------------------------------------------------------------------------------------------------------------------------------------------------------------------------------------------------------------------------------------------------------------------------|
| vino seco o vermut | <input checked="" type="radio"/> Nunca o menos 1 vez al mes<br><input type="radio"/> 1 a 3 veces mes<br><input type="radio"/> 1 vez semana<br><input type="radio"/> 2 a 4 veces semana<br><input type="radio"/> 5 a 6 veces semana<br><input type="radio"/> 1 vez al día<br><input type="radio"/> 2 a 3 veces al día<br><input type="radio"/> 5 a 6 veces al día<br><input type="radio"/> más 6 veces al día |
|--------------------|--------------------------------------------------------------------------------------------------------------------------------------------------------------------------------------------------------------------------------------------------------------------------------------------------------------------------------------------------------------------------------------------------------------|

---

|         |                                                                                                                                                                                                                                                                                                                                                                                                              |
|---------|--------------------------------------------------------------------------------------------------------------------------------------------------------------------------------------------------------------------------------------------------------------------------------------------------------------------------------------------------------------------------------------------------------------|
| cerveza | <input checked="" type="radio"/> Nunca o menos 1 vez al mes<br><input type="radio"/> 1 a 3 veces mes<br><input type="radio"/> 1 vez semana<br><input type="radio"/> 2 a 4 veces semana<br><input type="radio"/> 5 a 6 veces semana<br><input type="radio"/> 1 vez al día<br><input type="radio"/> 2 a 3 veces al día<br><input type="radio"/> 5 a 6 veces al día<br><input type="radio"/> más 6 veces al día |
|---------|--------------------------------------------------------------------------------------------------------------------------------------------------------------------------------------------------------------------------------------------------------------------------------------------------------------------------------------------------------------------------------------------------------------|

---

|                     |                                                                                                                                                                                                                                                                                                                                                                                                              |
|---------------------|--------------------------------------------------------------------------------------------------------------------------------------------------------------------------------------------------------------------------------------------------------------------------------------------------------------------------------------------------------------------------------------------------------------|
| cerveza sin alcohol | <input checked="" type="radio"/> Nunca o menos 1 vez al mes<br><input type="radio"/> 1 a 3 veces mes<br><input type="radio"/> 1 vez semana<br><input type="radio"/> 2 a 4 veces semana<br><input type="radio"/> 5 a 6 veces semana<br><input type="radio"/> 1 vez al día<br><input type="radio"/> 2 a 3 veces al día<br><input type="radio"/> 5 a 6 veces al día<br><input type="radio"/> más 6 veces al día |
|---------------------|--------------------------------------------------------------------------------------------------------------------------------------------------------------------------------------------------------------------------------------------------------------------------------------------------------------------------------------------------------------------------------------------------------------|

---

|         |                                                                                                                                                                                                                                                                                                                                                                                                              |
|---------|--------------------------------------------------------------------------------------------------------------------------------------------------------------------------------------------------------------------------------------------------------------------------------------------------------------------------------------------------------------------------------------------------------------|
| licores | <input checked="" type="radio"/> Nunca o menos 1 vez al mes<br><input type="radio"/> 1 a 3 veces mes<br><input type="radio"/> 1 vez semana<br><input type="radio"/> 2 a 4 veces semana<br><input type="radio"/> 5 a 6 veces semana<br><input type="radio"/> 1 vez al día<br><input type="radio"/> 2 a 3 veces al día<br><input type="radio"/> 5 a 6 veces al día<br><input type="radio"/> más 6 veces al día |
|---------|--------------------------------------------------------------------------------------------------------------------------------------------------------------------------------------------------------------------------------------------------------------------------------------------------------------------------------------------------------------------------------------------------------------|

---

|                       |                                                                                                                                                                                                                                                                                                                                                                                                              |
|-----------------------|--------------------------------------------------------------------------------------------------------------------------------------------------------------------------------------------------------------------------------------------------------------------------------------------------------------------------------------------------------------------------------------------------------------|
| ginebra o ron o vodka | <input checked="" type="radio"/> Nunca o menos 1 vez al mes<br><input type="radio"/> 1 a 3 veces mes<br><input type="radio"/> 1 vez semana<br><input type="radio"/> 2 a 4 veces semana<br><input type="radio"/> 5 a 6 veces semana<br><input type="radio"/> 1 vez al día<br><input type="radio"/> 2 a 3 veces al día<br><input type="radio"/> 5 a 6 veces al día<br><input type="radio"/> más 6 veces al día |
|-----------------------|--------------------------------------------------------------------------------------------------------------------------------------------------------------------------------------------------------------------------------------------------------------------------------------------------------------------------------------------------------------------------------------------------------------|

---

|                 |                                                                                                                                                                                                                                                                                                                                                                                                              |
|-----------------|--------------------------------------------------------------------------------------------------------------------------------------------------------------------------------------------------------------------------------------------------------------------------------------------------------------------------------------------------------------------------------------------------------------|
| refresco normal | <input checked="" type="radio"/> Nunca o menos 1 vez al mes<br><input type="radio"/> 1 a 3 veces mes<br><input type="radio"/> 1 vez semana<br><input type="radio"/> 2 a 4 veces semana<br><input type="radio"/> 5 a 6 veces semana<br><input type="radio"/> 1 vez al día<br><input type="radio"/> 2 a 3 veces al día<br><input type="radio"/> 5 a 6 veces al día<br><input type="radio"/> más 6 veces al día |
|-----------------|--------------------------------------------------------------------------------------------------------------------------------------------------------------------------------------------------------------------------------------------------------------------------------------------------------------------------------------------------------------------------------------------------------------|

---

|                          |                                                                                                                                                                                                                                                                                                                                                                                                              |
|--------------------------|--------------------------------------------------------------------------------------------------------------------------------------------------------------------------------------------------------------------------------------------------------------------------------------------------------------------------------------------------------------------------------------------------------------|
| refresco sin azúcar      | <input checked="" type="radio"/> Nunca o menos 1 vez al mes<br><input type="radio"/> 1 a 3 veces mes<br><input type="radio"/> 1 vez semana<br><input type="radio"/> 2 a 4 veces semana<br><input type="radio"/> 5 a 6 veces semana<br><input type="radio"/> 1 vez al día<br><input type="radio"/> 2 a 3 veces al día<br><input type="radio"/> 5 a 6 veces al día<br><input type="radio"/> más 6 veces al día |
| Agua del grifo           | <input checked="" type="radio"/> Nunca o menos 1 vez al mes<br><input type="radio"/> 1 a 3 veces mes<br><input type="radio"/> 1 vez semana<br><input type="radio"/> 2 a 4 veces semana<br><input type="radio"/> 5 a 6 veces semana<br><input type="radio"/> 1 vez al día<br><input type="radio"/> 2 a 3 veces al día<br><input type="radio"/> 5 a 6 veces al día<br><input type="radio"/> más 6 veces al día |
| agua embotellada sin gas | <input type="radio"/> Nunca o menos 1 vez al mes<br><input type="radio"/> 1 a 3 veces mes<br><input type="radio"/> 1 vez semana<br><input type="radio"/> 2 a 4 veces semana<br><input type="radio"/> 5 a 6 veces semana<br><input type="radio"/> 1 vez al día<br><input type="radio"/> 2 a 3 veces al día<br><input checked="" type="radio"/> 5 a 6 veces al día<br><input type="radio"/> más 6 veces al día |
| agua embotellada con gas | <input type="radio"/> Nunca o menos 1 vez al mes<br><input type="radio"/> 1 a 3 veces mes<br><input type="radio"/> 1 vez semana<br><input checked="" type="radio"/> 2 a 4 veces semana<br><input type="radio"/> 5 a 6 veces semana<br><input type="radio"/> 1 vez al día<br><input type="radio"/> 2 a 3 veces al día<br><input type="radio"/> 5 a 6 veces al día<br><input type="radio"/> más 6 veces al día |
| zumو frutas embasado     | <input checked="" type="radio"/> Nunca o menos 1 vez al mes<br><input type="radio"/> 1 a 3 veces mes<br><input type="radio"/> 1 vez semana<br><input type="radio"/> 2 a 4 veces semana<br><input type="radio"/> 5 a 6 veces semana<br><input type="radio"/> 1 vez al día<br><input type="radio"/> 2 a 3 veces al día<br><input type="radio"/> 5 a 6 veces al día<br><input type="radio"/> más 6 veces al día |
| cafe                     | <input type="radio"/> Nunca o menos 1 vez al mes<br><input checked="" type="radio"/> 1 a 3 veces mes<br><input type="radio"/> 1 vez semana<br><input type="radio"/> 2 a 4 veces semana<br><input type="radio"/> 5 a 6 veces semana<br><input type="radio"/> 1 vez al día<br><input type="radio"/> 2 a 3 veces al día<br><input type="radio"/> 5 a 6 veces al día<br><input type="radio"/> más 6 veces al día |

|                       |                                                                                                                                                                                                                                                                                                                                                                                                              |
|-----------------------|--------------------------------------------------------------------------------------------------------------------------------------------------------------------------------------------------------------------------------------------------------------------------------------------------------------------------------------------------------------------------------------------------------------|
| cafe descafeinado     | <input type="radio"/> Nunca o menos 1 vez al mes<br><input checked="" type="radio"/> 1 a 3 veces mes<br><input type="radio"/> 1 vez semana<br><input type="radio"/> 2 a 4 veces semana<br><input type="radio"/> 5 a 6 veces semana<br><input type="radio"/> 1 vez al día<br><input type="radio"/> 2 a 3 veces al día<br><input type="radio"/> 5 a 6 veces al día<br><input type="radio"/> más 6 veces al día |
| te o infusión         | <input checked="" type="radio"/> Nunca o menos 1 vez al mes<br><input type="radio"/> 1 a 3 veces mes<br><input type="radio"/> 1 vez semana<br><input type="radio"/> 2 a 4 veces semana<br><input type="radio"/> 5 a 6 veces semana<br><input type="radio"/> 1 vez al día<br><input type="radio"/> 2 a 3 veces al día<br><input type="radio"/> 5 a 6 veces al día<br><input type="radio"/> más 6 veces al día |
| sopa o puré verduras  | <input type="radio"/> Nunca o menos 1 vez al mes<br><input type="radio"/> 1 a 3 veces mes<br><input type="radio"/> 1 vez semana<br><input checked="" type="radio"/> 2 a 4 veces semana<br><input type="radio"/> 5 a 6 veces semana<br><input type="radio"/> 1 vez al día<br><input type="radio"/> 2 a 3 veces al día<br><input type="radio"/> 5 a 6 veces al día<br><input type="radio"/> más 6 veces al día |
| croquetas pollo jamón | <input checked="" type="radio"/> Nunca o menos 1 vez al mes<br><input type="radio"/> 1 a 3 veces mes<br><input type="radio"/> 1 vez semana<br><input type="radio"/> 2 a 4 veces semana<br><input type="radio"/> 5 a 6 veces semana<br><input type="radio"/> 1 vez al día<br><input type="radio"/> 2 a 3 veces al día<br><input type="radio"/> 5 a 6 veces al día<br><input type="radio"/> más 6 veces al día |
| croquetas pescado     | <input checked="" type="radio"/> Nunca o menos 1 vez al mes<br><input type="radio"/> 1 a 3 veces mes<br><input type="radio"/> 1 vez semana<br><input type="radio"/> 2 a 4 veces semana<br><input type="radio"/> 5 a 6 veces semana<br><input type="radio"/> 1 vez al día<br><input type="radio"/> 2 a 3 veces al día<br><input type="radio"/> 5 a 6 veces al día<br><input type="radio"/> más 6 veces al día |
| mayonesa              | <input checked="" type="radio"/> Nunca o menos 1 vez al mes<br><input type="radio"/> 1 a 3 veces mes<br><input type="radio"/> 1 vez semana<br><input type="radio"/> 2 a 4 veces semana<br><input type="radio"/> 5 a 6 veces semana<br><input type="radio"/> 1 vez al día<br><input type="radio"/> 2 a 3 veces al día<br><input type="radio"/> 5 a 6 veces al día<br><input type="radio"/> más 6 veces al día |

|                  |                                                                                                                                                                                                                                                                                                                                                                                                              |
|------------------|--------------------------------------------------------------------------------------------------------------------------------------------------------------------------------------------------------------------------------------------------------------------------------------------------------------------------------------------------------------------------------------------------------------|
| salsa tomate     | <input checked="" type="radio"/> Nunca o menos 1 vez al mes<br><input type="radio"/> 1 a 3 veces mes<br><input type="radio"/> 1 vez semana<br><input type="radio"/> 2 a 4 veces semana<br><input type="radio"/> 5 a 6 veces semana<br><input type="radio"/> 1 vez al día<br><input type="radio"/> 2 a 3 veces al día<br><input type="radio"/> 5 a 6 veces al día<br><input type="radio"/> más 6 veces al día |
| ketchup          | <input checked="" type="radio"/> Nunca o menos 1 vez al mes<br><input type="radio"/> 1 a 3 veces mes<br><input type="radio"/> 1 vez semana<br><input type="radio"/> 2 a 4 veces semana<br><input type="radio"/> 5 a 6 veces semana<br><input type="radio"/> 1 vez al día<br><input type="radio"/> 2 a 3 veces al día<br><input type="radio"/> 5 a 6 veces al día<br><input type="radio"/> más 6 veces al día |
| sal              | <input type="radio"/> Nunca o menos 1 vez al mes<br><input type="radio"/> 1 a 3 veces mes<br><input type="radio"/> 1 vez semana<br><input type="radio"/> 2 a 4 veces semana<br><input type="radio"/> 5 a 6 veces semana<br><input type="radio"/> 1 vez al día<br><input type="radio"/> 2 a 3 veces al día<br><input checked="" type="radio"/> 5 a 6 veces al día<br><input type="radio"/> más 6 veces al día |
| ajo              | <input type="radio"/> Nunca o menos 1 vez al mes<br><input type="radio"/> 1 a 3 veces mes<br><input type="radio"/> 1 vez semana<br><input checked="" type="radio"/> 2 a 4 veces semana<br><input type="radio"/> 5 a 6 veces semana<br><input type="radio"/> 1 vez al día<br><input type="radio"/> 2 a 3 veces al día<br><input type="radio"/> 5 a 6 veces al día<br><input type="radio"/> más 6 veces al día |
| mermelada o miel | <input checked="" type="radio"/> Nunca o menos 1 vez al mes<br><input type="radio"/> 1 a 3 veces mes<br><input type="radio"/> 1 vez semana<br><input type="radio"/> 2 a 4 veces semana<br><input type="radio"/> 5 a 6 veces semana<br><input type="radio"/> 1 vez al día<br><input type="radio"/> 2 a 3 veces al día<br><input type="radio"/> 5 a 6 veces al día<br><input type="radio"/> más 6 veces al día |
| azúcar           | <input checked="" type="radio"/> Nunca o menos 1 vez al mes<br><input type="radio"/> 1 a 3 veces mes<br><input type="radio"/> 1 vez semana<br><input type="radio"/> 2 a 4 veces semana<br><input type="radio"/> 5 a 6 veces semana<br><input type="radio"/> 1 vez al día<br><input type="radio"/> 2 a 3 veces al día<br><input type="radio"/> 5 a 6 veces al día<br><input type="radio"/> más 6 veces al día |



|                                       |                                                                                                                                                                                                                                                                                                                                                                                                                                                                                                                               |
|---------------------------------------|-------------------------------------------------------------------------------------------------------------------------------------------------------------------------------------------------------------------------------------------------------------------------------------------------------------------------------------------------------------------------------------------------------------------------------------------------------------------------------------------------------------------------------|
| Otro alimento                         | <hr/>                                                                                                                                                                                                                                                                                                                                                                                                                                                                                                                         |
| suplementos vitamínicos               | <input type="radio"/> si<br><input checked="" type="radio"/> no                                                                                                                                                                                                                                                                                                                                                                                                                                                               |
| suplementos vitamínicos               | <hr/>                                                                                                                                                                                                                                                                                                                                                                                                                                                                                                                         |
| dieta previa                          | <input checked="" type="radio"/> si<br><input type="radio"/> no                                                                                                                                                                                                                                                                                                                                                                                                                                                               |
| motivo dieta                          | <input type="radio"/> no dieta<br><input type="radio"/> control peso<br><input type="radio"/> control colesterol<br><input checked="" type="radio"/> control diabetes<br><input type="radio"/> problemas estómago<br><input type="radio"/> problemas vesícula o hepáticos<br><input type="radio"/> HTA o cardiopatía<br><input type="radio"/> problemas renales<br><input type="radio"/> alergia alimentaria<br><input type="radio"/> ácido úrico elevado<br><input type="radio"/> vegetariana<br><input type="radio"/> otros |
| cambio alimentos año previo gestación | <input checked="" type="radio"/> si<br><input type="radio"/> no                                                                                                                                                                                                                                                                                                                                                                                                                                                               |
| cambio lácteos                        | <input type="radio"/> eliminado<br><input type="radio"/> disminuido<br><input checked="" type="radio"/> igual<br><input type="radio"/> aumentado<br><input type="radio"/> no sabe                                                                                                                                                                                                                                                                                                                                             |
| cambio huevos                         | <input type="radio"/> eliminado<br><input type="radio"/> disminuido<br><input checked="" type="radio"/> igual<br><input type="radio"/> aumentado<br><input type="radio"/> no sabe                                                                                                                                                                                                                                                                                                                                             |
| cambio carne                          | <input type="radio"/> eliminado<br><input type="radio"/> disminuido<br><input checked="" type="radio"/> igual<br><input type="radio"/> aumentado<br><input type="radio"/> no sabe                                                                                                                                                                                                                                                                                                                                             |
| cambio pescado                        | <input type="radio"/> eliminado<br><input type="radio"/> disminuido<br><input checked="" type="radio"/> igual<br><input type="radio"/> aumentado<br><input type="radio"/> no sabe                                                                                                                                                                                                                                                                                                                                             |
| cambio verduras                       | <input type="radio"/> eliminado<br><input type="radio"/> disminuido<br><input checked="" type="radio"/> igual<br><input type="radio"/> aumentado<br><input type="radio"/> no sabe                                                                                                                                                                                                                                                                                                                                             |

|                            |                                                                                                                                                                                                                        |
|----------------------------|------------------------------------------------------------------------------------------------------------------------------------------------------------------------------------------------------------------------|
| cambio legumbres           | <input type="radio"/> eliminado<br><input type="radio"/> disminuido<br><input checked="" type="radio"/> igual<br><input type="radio"/> aumentado<br><input type="radio"/> no sabe                                      |
| cambio fruta               | <input type="radio"/> eliminado<br><input type="radio"/> disminuido<br><input checked="" type="radio"/> igual<br><input type="radio"/> aumentado<br><input type="radio"/> no sabe                                      |
| cambio pan                 | <input type="radio"/> eliminado<br><input type="radio"/> disminuido<br><input checked="" type="radio"/> igual<br><input type="radio"/> aumentado<br><input type="radio"/> no sabe                                      |
| cambio aceite oliva        | <input type="radio"/> eliminado<br><input type="radio"/> disminuido<br><input checked="" type="radio"/> igual<br><input type="radio"/> aumentado<br><input type="radio"/> no sabe                                      |
| cambio mante o margarina   | <input type="radio"/> eliminado<br><input type="radio"/> disminuido<br><input type="radio"/> igual<br><input checked="" type="radio"/> aumentado<br><input type="radio"/> no sabe                                      |
| cambio azúcar y dulces     | <input type="radio"/> eliminado<br><input type="radio"/> disminuido<br><input type="radio"/> igual<br><input checked="" type="radio"/> aumentado<br><input type="radio"/> no sabe                                      |
| cambio bebidas alcohólicas | <input checked="" type="radio"/> eliminado<br><input type="radio"/> disminuido<br><input type="radio"/> igual<br><input type="radio"/> aumentado<br><input type="radio"/> no sabe                                      |
| frecuencia comidas fritas  | <input type="radio"/> a diario<br><input type="radio"/> 5 a 6 veces semana<br><input type="radio"/> 2 a 4 veces semana<br><input checked="" type="radio"/> 1 vez semana<br><input type="radio"/> menos de 1 vez semana |
| carne                      | <input type="radio"/> no como<br><input type="radio"/> cruda<br><input type="radio"/> poco hecha<br><input checked="" type="radio"/> hecha<br><input type="radio"/> muy hecha                                          |
| grasa visible carne        | <input checked="" type="radio"/> quita toda<br><input type="radio"/> quita mayoría<br><input type="radio"/> quita un poco<br><input type="radio"/> no quita nada                                                       |

|                                |                                                                                                                                                                                                                                                          |
|--------------------------------|----------------------------------------------------------------------------------------------------------------------------------------------------------------------------------------------------------------------------------------------------------|
| cocina carne                   | <input checked="" type="radio"/> a la plancha<br><input type="radio"/> a la parrilla<br><input type="radio"/> asada<br><input type="radio"/> frita<br><input type="radio"/> guisada                                                                      |
| tostado quemado carne          | <input checked="" type="radio"/> nunca<br><input type="radio"/> 1 vez mes<br><input type="radio"/> 2 a 3 veces mes<br><input type="radio"/> 1 vez semana<br><input type="radio"/> 2 a 3 semanas                                                          |
| tostado quemado pescado        | <input checked="" type="radio"/> nunca<br><input type="radio"/> 1 vez mes<br><input type="radio"/> 2 a 3 veces mes<br><input type="radio"/> 1 vez semana<br><input type="radio"/> 2 a 3 semanas                                                          |
| socarrat paella                | <input type="radio"/> nunca<br><input type="radio"/> 1 vez mes<br><input checked="" type="radio"/> 2 a 3 veces mes<br><input type="radio"/> 1 vez semana<br><input type="radio"/> 2 a 3 semanas                                                          |
| grasa o aceite cocinar         | <input type="radio"/> mantequilla<br><input type="radio"/> margarina<br><input type="radio"/> aceite oliva<br><input checked="" type="radio"/> aceite oliva virgen extra<br><input type="radio"/> aceite vegetal<br><input type="radio"/> mezcla aceites |
| grasa aceite aliñar            | <input type="radio"/> mantequilla<br><input type="radio"/> margarina<br><input type="radio"/> aceite oliva<br><input checked="" type="radio"/> aceite oliva virgen extra<br><input type="radio"/> aceite vegetal<br><input type="radio"/> mezcla aceites |
| grasa aceite freir             | <input type="radio"/> mantequilla<br><input type="radio"/> margarina<br><input checked="" type="radio"/> aceite oliva<br><input type="radio"/> aceite oliva virgen extra<br><input type="radio"/> aceite vegetal<br><input type="radio"/> mezcla aceites |
| Ejercicio cuestionario         | <input checked="" type="radio"/> si<br><input type="radio"/> no                                                                                                                                                                                          |
| horas de sueño incluido siesta | [*DATA REMOVED*]                                                                                                                                                                                                                                         |
| minutos siesta                 | _____                                                                                                                                                                                                                                                    |
| horas televisión semana        | [*DATA REMOVED*]                                                                                                                                                                                                                                         |

|                                        |                                                                                                                                                                                                                                                                                                                                                                           |
|----------------------------------------|---------------------------------------------------------------------------------------------------------------------------------------------------------------------------------------------------------------------------------------------------------------------------------------------------------------------------------------------------------------------------|
| actividad trabajo                      | <input type="radio"/> casi siempre sentado<br><input type="radio"/> sentado 50 por cien<br><input type="radio"/> casi siempre de pie, quieto<br><input type="radio"/> casi siempre levantado caminando y llevando pocas cosas<br><input checked="" type="radio"/> casi siempre levantado, caminando y llevado muchas cosas<br><input type="radio"/> trabajo manual pesado |
| tiempo caminar o bici al día           | <input type="radio"/> casi nunca<br><input type="radio"/> menos 20min día<br><input checked="" type="radio"/> 20 a 40 min día<br><input type="radio"/> 40 a 60 min día<br><input type="radio"/> 1h o 1h y media día<br><input type="radio"/> más de 1h y media al día                                                                                                     |
| tiempo tareas casa al día              | <input type="radio"/> menos de 1h día<br><input checked="" type="radio"/> 1 a 2h día<br><input type="radio"/> 3 a 4h día<br><input type="radio"/> 5 a 6h día<br><input type="radio"/> 7 a 8h día<br><input type="radio"/> más de 8h día                                                                                                                                   |
| tiempo libre televisión ordenador leer | <input type="radio"/> menos 1h día<br><input checked="" type="radio"/> 1h día<br><input type="radio"/> 2h día<br><input type="radio"/> 3h día<br><input type="radio"/> 4h día<br><input type="radio"/> 5 a 6h día<br><input type="radio"/> mas 6h día                                                                                                                     |
| tiempo libre ejercicio o deporte       | <input type="radio"/> menos 1h semana<br><input type="radio"/> 1h semana<br><input type="radio"/> 2h semana<br><input checked="" type="radio"/> 3h semana<br><input type="radio"/> 4 a 5h semana<br><input type="radio"/> mas 5h semana                                                                                                                                   |
| como se considera                      | <input type="radio"/> sedentaria<br><input type="radio"/> poco activa<br><input checked="" type="radio"/> moderadamente activa<br><input type="radio"/> bastante activa<br><input type="radio"/> muy activa<br><input type="radio"/> no sabe                                                                                                                              |
| FUR                                    | [*DATA REMOVED*]                                                                                                                                                                                                                                                                                                                                                          |
| Semanas gestación 2T                   | [*DATA REMOVED*]                                                                                                                                                                                                                                                                                                                                                          |
| Días gestación 2T                      | [*DATA REMOVED*]                                                                                                                                                                                                                                                                                                                                                          |
| DBP 2T                                 | [*DATA REMOVED*]                                                                                                                                                                                                                                                                                                                                                          |
| CC 2T                                  | [*DATA REMOVED*]                                                                                                                                                                                                                                                                                                                                                          |
| AC 2T                                  | [*DATA REMOVED*]                                                                                                                                                                                                                                                                                                                                                          |

|                                                   |                                                                                                                                                                                                 |
|---------------------------------------------------|-------------------------------------------------------------------------------------------------------------------------------------------------------------------------------------------------|
| LF 2T                                             | [*DATA REMOVED*]                                                                                                                                                                                |
| PFE 2T (Hadlock)                                  | [*DATA REMOVED*]                                                                                                                                                                                |
| Semanas gestación 3T                              | [*DATA REMOVED*]                                                                                                                                                                                |
| días 3T                                           | [*DATA REMOVED*]                                                                                                                                                                                |
| DBP 3T                                            | [*DATA REMOVED*]                                                                                                                                                                                |
| CC 3T                                             | [*DATA REMOVED*]                                                                                                                                                                                |
| AC 3T                                             | [*DATA REMOVED*]                                                                                                                                                                                |
| LF 3T                                             | [*DATA REMOVED*]                                                                                                                                                                                |
| PFE 3T (Hadlock)                                  | [*DATA REMOVED*]                                                                                                                                                                                |
| Semanas de gestación final                        | [*DATA REMOVED*]                                                                                                                                                                                |
| días gestación final                              | [*DATA REMOVED*]                                                                                                                                                                                |
| Localización placenta                             | <input checked="" type="radio"/> anterior<br><input type="radio"/> lateral derecha<br><input type="radio"/> lateral izquierda<br><input type="radio"/> posterior<br><input type="radio"/> fondo |
| Presentación longitudinal cefálica                | <input type="radio"/> no<br><input checked="" type="radio"/> si                                                                                                                                 |
| Dorso                                             | <input type="radio"/> izquierda anterior<br><input type="radio"/> izquierda posterior<br><input checked="" type="radio"/> derecha anterior<br><input type="radio"/> derecha posterior           |
| diámetro biparietal                               | [*DATA REMOVED*]                                                                                                                                                                                |
| Circunferencia craneal                            | [*DATA REMOVED*]                                                                                                                                                                                |
| Circunferencia abdominal                          | [*DATA REMOVED*]                                                                                                                                                                                |
| Longitud de femur                                 | [*DATA REMOVED*]                                                                                                                                                                                |
| tejido celular subcutáneo a nivel del muslo en mm | [*DATA REMOVED*]                                                                                                                                                                                |
| tejido celular subcutáneo en abdomen en mm        | [*DATA REMOVED*]                                                                                                                                                                                |
| Volumen del muslo en cm3                          | [*DATA REMOVED*]                                                                                                                                                                                |
| Peso fetal estimado según fórmula de Hadlock      | [*DATA REMOVED*]                                                                                                                                                                                |

|                                               |                                                                                                                                                          |
|-----------------------------------------------|----------------------------------------------------------------------------------------------------------------------------------------------------------|
| Percentil                                     | [*DATA REMOVED*]                                                                                                                                         |
| Peso fetal estimado según fórmula de Scioscia | <hr/>                                                                                                                                                    |
| Peso fetal estimado según fórmula de LEE      | <hr/>                                                                                                                                                    |
| Tipo de parto                                 | <input checked="" type="radio"/> eutocico<br><input type="radio"/> instrumentado/ventosa<br><input type="radio"/> cesarea                                |
| fecha de nacimiento                           | [*DATA REMOVED*]                                                                                                                                         |
| Días entre exploración y nacimiento           | [*DATA REMOVED*]                                                                                                                                         |
| Peso RN en g                                  | [*DATA REMOVED*]                                                                                                                                         |
| sexo                                          | <input checked="" type="radio"/> mujer<br><input type="radio"/> hombre                                                                                   |
| Apgar 1 minuto                                | [*DATA REMOVED*]                                                                                                                                         |
| Apgar 5 minutos                               | [*DATA REMOVED*]                                                                                                                                         |
| Apgar 10 minutos                              | <hr/>                                                                                                                                                    |
| antecedente Covid durante gestación           | <input checked="" type="radio"/> Yes<br><input type="radio"/> No                                                                                         |
| Nivel de estudios                             | <input type="radio"/> ninguno<br><input type="radio"/> primarios<br><input checked="" type="radio"/> secundarios<br><input type="radio"/> universitarios |

# Base\_datos\_estimacion\_peso\_fetal

|                                       |                                                                                                                                                                                                                                                                                      |
|---------------------------------------|--------------------------------------------------------------------------------------------------------------------------------------------------------------------------------------------------------------------------------------------------------------------------------------|
| Número de identificación participante | 154                                                                                                                                                                                                                                                                                  |
| CODIGO PARTICIPANTE                   |                                                                                                                                                                                                                                                                                      |
| Edad                                  | [*DATA REMOVED*]                                                                                                                                                                                                                                                                     |
| Gestaciones                           | <input type="radio"/> 1<br><input checked="" type="radio"/> 2<br><input type="radio"/> 3<br><input type="radio"/> mas de 3                                                                                                                                                           |
| partos                                | <input checked="" type="radio"/> 0<br><input type="radio"/> 1<br><input type="radio"/> 2<br><input type="radio"/> 3<br><input type="radio"/> mas de 3                                                                                                                                |
| cesáreas                              | <input checked="" type="radio"/> 0<br><input type="radio"/> 1<br><input type="radio"/> 2<br><input type="radio"/> 3<br><input type="radio"/> mas de 3                                                                                                                                |
| Abortos                               | <input type="radio"/> 0<br><input checked="" type="radio"/> 1<br><input type="radio"/> 2<br><input type="radio"/> 3<br><input type="radio"/> mas de 3                                                                                                                                |
| Tipo de gestacion                     | <input type="radio"/> espontanea<br><input type="radio"/> IAC inseminación artificial conyuge<br><input type="radio"/> IAD inseminación artificial donante<br><input checked="" type="radio"/> FIV Fecundación in Vitro<br><input type="radio"/> Ovodon FIV con donación de ovocitos |
| peso previo a embarazo                | [*DATA REMOVED*]                                                                                                                                                                                                                                                                     |
| Ganancia ponderal embarazo            |                                                                                                                                                                                                                                                                                      |
| Talla madre                           | [*DATA REMOVED*]                                                                                                                                                                                                                                                                     |
| IMC previo embarazo                   | 26.365603028664147                                                                                                                                                                                                                                                                   |
| Patología obstétrica                  | <input checked="" type="radio"/> no<br><input type="radio"/> si                                                                                                                                                                                                                      |
| Diabetes pregestacional               | <input checked="" type="radio"/> no<br><input type="radio"/> si                                                                                                                                                                                                                      |
| Diabetes gestacional                  | <input checked="" type="radio"/> no<br><input type="radio"/> si                                                                                                                                                                                                                      |

|                                            |                                                                                                                                                                                      |
|--------------------------------------------|--------------------------------------------------------------------------------------------------------------------------------------------------------------------------------------|
| Diabetes gestacional con insulina          | <input checked="" type="radio"/> no<br><input type="radio"/> si                                                                                                                      |
| Diabetes gestacional con dieta y ejercicio | <input checked="" type="radio"/> no<br><input type="radio"/> si                                                                                                                      |
| Percentil fetos previos                    | <input checked="" type="radio"/> Nada<br><input type="radio"/> percentil menor de 10<br><input type="radio"/> percentil entre 10 y 90<br><input type="radio"/> percentil mayor de 90 |
| Exfumadora                                 | <input checked="" type="radio"/> Nada<br><input type="radio"/> menos de 5 años<br><input type="radio"/> 5 a 10 años<br><input type="radio"/> mayor o igual a 10 años                 |
| Hábito tabáquico                           | <input checked="" type="radio"/> no<br><input type="radio"/> si                                                                                                                      |
| fumadora                                   | [*DATA REMOVED*]                                                                                                                                                                     |
| Consumo otros tóxicos                      | <input checked="" type="radio"/> no<br><input type="radio"/> si                                                                                                                      |
| Hb 1T                                      | _____                                                                                                                                                                                |
| Htc 1T                                     | _____                                                                                                                                                                                |
| Hb 2T                                      | _____                                                                                                                                                                                |
| HTC 2T                                     | _____                                                                                                                                                                                |
| Hb 3T                                      | _____                                                                                                                                                                                |
| HTC 3T                                     | _____                                                                                                                                                                                |
| Suplemento FE oral                         | <input type="radio"/> si<br><input checked="" type="radio"/> no                                                                                                                      |
| Suplemento fe iv                           | <input type="radio"/> si<br><input checked="" type="radio"/> no                                                                                                                      |
| Transfusión                                | <input checked="" type="radio"/> no<br><input type="radio"/> si                                                                                                                      |
| Solicitada Vit D                           | <input checked="" type="radio"/> no<br><input type="radio"/> si                                                                                                                      |



|                       |                                                                                                                                                                                                                                                                                                                                                                                                              |
|-----------------------|--------------------------------------------------------------------------------------------------------------------------------------------------------------------------------------------------------------------------------------------------------------------------------------------------------------------------------------------------------------------------------------------------------------|
| Deficit vit D         | <input type="radio"/> no<br><input type="radio"/> si                                                                                                                                                                                                                                                                                                                                                         |
| Suplemento vit D      | <input type="radio"/> si<br><input type="radio"/> no                                                                                                                                                                                                                                                                                                                                                         |
| Dieta, cuestionario   | <input checked="" type="radio"/> si<br><input type="radio"/> no                                                                                                                                                                                                                                                                                                                                              |
| Leche entera          | <input checked="" type="radio"/> Nunca o menos 1 vez al mes<br><input type="radio"/> 1 a 3 veces mes<br><input type="radio"/> 1 vez semana<br><input type="radio"/> 2 a 4 veces semana<br><input type="radio"/> 5 a 6 veces semana<br><input type="radio"/> 1 vez al día<br><input type="radio"/> 2 a 3 veces al día<br><input type="radio"/> 5 a 6 veces al día<br><input type="radio"/> más 6 veces al día |
| Leche semidesnatada   | <input type="radio"/> Nunca o menos 1 vez al mes<br><input type="radio"/> 1 a 3 veces mes<br><input type="radio"/> 1 vez semana<br><input type="radio"/> 2 a 4 veces semana<br><input type="radio"/> 5 a 6 veces semana<br><input checked="" type="radio"/> 1 vez al día<br><input type="radio"/> 2 a 3 veces al día<br><input type="radio"/> 5 a 6 veces al día<br><input type="radio"/> mas 6 veces al día |
| Leche desnatada       | <input checked="" type="radio"/> Nunca o menos 1 vez al mes<br><input type="radio"/> 1 a 3 veces mes<br><input type="radio"/> 1 vez semana<br><input type="radio"/> 2 a 4 veces semana<br><input type="radio"/> 5 a 6 veces semana<br><input type="radio"/> 1 vez al día<br><input type="radio"/> 2 a 3 veces al día<br><input type="radio"/> 5 a 6 veces al día<br><input type="radio"/> más 6 veces al día |
| Leche condensada      | <input checked="" type="radio"/> Nunca o menos 1 vez al mes<br><input type="radio"/> 1 a 3 veces mes<br><input type="radio"/> 1 vez semana<br><input type="radio"/> 2 a 4 veces semana<br><input type="radio"/> 5 a 6 veces semana<br><input type="radio"/> 1 vez al día<br><input type="radio"/> 2 a 3 veces al día<br><input type="radio"/> 5 a 6 veces al día<br><input type="radio"/> más 6 veces al día |
| nata o crema de leche | <input checked="" type="radio"/> Nunca o menos 1 vez al mes<br><input type="radio"/> 1 a 3 veces mes<br><input type="radio"/> 1 vez semana<br><input type="radio"/> 2 a 4 veces semana<br><input type="radio"/> 5 a 6 veces semana<br><input type="radio"/> 1 vez al día<br><input type="radio"/> 2 a 3 veces al día<br><input type="radio"/> 5 a 6 veces al día<br><input type="radio"/> más 6 veces al día |

|                                             |                                                                                                                                                                                                                                                                                                                                                                                                              |
|---------------------------------------------|--------------------------------------------------------------------------------------------------------------------------------------------------------------------------------------------------------------------------------------------------------------------------------------------------------------------------------------------------------------------------------------------------------------|
| Yogurt Entero                               | <input type="radio"/> Nunca o menos 1 vez al mes<br><input type="radio"/> 1 a 3 veces mes<br><input checked="" type="radio"/> 1 vez semana<br><input type="radio"/> 2 a 4 veces semana<br><input type="radio"/> 5 a 6 veces semana<br><input type="radio"/> 1 vez al día<br><input type="radio"/> 2 a 3 veces al día<br><input type="radio"/> 5 a 6 veces al día<br><input type="radio"/> más 6 veces al día |
| Yogurt desnatado                            | <input type="radio"/> Nunca o menos 1 vez al mes<br><input type="radio"/> 1 a 3 veces mes<br><input type="radio"/> 1 vez semana<br><input checked="" type="radio"/> 2 a 4 veces semana<br><input type="radio"/> 5 a 6 veces semana<br><input type="radio"/> 1 vez al día<br><input type="radio"/> 2 a 3 veces al día<br><input type="radio"/> 5 a 6 veces al día<br><input type="radio"/> más 6 veces al día |
| 100g requesón o queso blando o queso fresco | <input type="radio"/> Nunca o menos 1 vez al mes<br><input type="radio"/> 1 a 3 veces mes<br><input type="radio"/> 1 vez semana<br><input type="radio"/> 2 a 4 veces semana<br><input type="radio"/> 5 a 6 veces semana<br><input checked="" type="radio"/> 1 vez al día<br><input type="radio"/> 2 a 3 veces al día<br><input type="radio"/> 5 a 6 veces al día<br><input type="radio"/> más 6 veces al día |
| queso curado o semicurado o cremoso         | <input type="radio"/> Nunca o menos 1 vez al mes<br><input checked="" type="radio"/> 1 a 3 veces mes<br><input type="radio"/> 1 vez semana<br><input type="radio"/> 2 a 4 veces semana<br><input type="radio"/> 5 a 6 veces semana<br><input type="radio"/> 1 vez al día<br><input type="radio"/> 2 a 3 veces al día<br><input type="radio"/> 5 a 6 veces al día<br><input type="radio"/> más 6 veces al día |
| natillas flan pudding                       | <input checked="" type="radio"/> Nunca o menos 1 vez al mes<br><input type="radio"/> 1 a 3 veces mes<br><input type="radio"/> 1 vez semana<br><input type="radio"/> 2 a 4 veces semana<br><input type="radio"/> 5 a 6 veces semana<br><input type="radio"/> 1 vez al día<br><input type="radio"/> 2 a 3 veces al día<br><input type="radio"/> 5 a 6 veces al día<br><input type="radio"/> más 6 veces al día |
| Helado                                      | <input type="radio"/> Nunca o menos 1 vez al mes<br><input type="radio"/> 1 a 3 veces mes<br><input type="radio"/> 1 vez semana<br><input type="radio"/> 2 a 4 veces semana<br><input checked="" type="radio"/> 5 a 6 veces semana<br><input type="radio"/> 1 vez al día<br><input type="radio"/> 2 a 3 veces al día<br><input type="radio"/> 5 a 6 veces al día<br><input type="radio"/> más 6 veces al día |

|                                      |                                                                                                                                                                                                                                                                                                                                                                                                              |
|--------------------------------------|--------------------------------------------------------------------------------------------------------------------------------------------------------------------------------------------------------------------------------------------------------------------------------------------------------------------------------------------------------------------------------------------------------------|
| huevo                                | <input type="radio"/> Nunca o menos 1 vez al mes<br><input type="radio"/> 1 a 3 veces mes<br><input type="radio"/> 1 vez semana<br><input type="radio"/> 2 a 4 veces semana<br><input checked="" type="radio"/> 5 a 6 veces semana<br><input type="radio"/> 1 vez al día<br><input type="radio"/> 2 a 3 veces al día<br><input type="radio"/> 5 a 6 veces al día<br><input type="radio"/> más 6 veces al día |
| Pollo con piel                       | <input type="radio"/> Nunca o menos 1 vez al mes<br><input type="radio"/> 1 a 3 veces mes<br><input checked="" type="radio"/> 1 vez semana<br><input type="radio"/> 2 a 4 veces semana<br><input type="radio"/> 5 a 6 veces semana<br><input type="radio"/> 1 vez al día<br><input type="radio"/> 2 a 3 veces al día<br><input type="radio"/> 5 a 6 veces al día<br><input type="radio"/> más 6 veces al día |
| pollo sin piel                       | <input type="radio"/> Nunca o menos 1 vez al mes<br><input type="radio"/> 1 a 3 veces mes<br><input type="radio"/> 1 vez semana<br><input type="radio"/> 2 a 4 veces semana<br><input type="radio"/> 5 a 6 veces semana<br><input type="radio"/> 1 vez al día<br><input type="radio"/> 2 a 3 veces al día<br><input type="radio"/> 5 a 6 veces al día<br><input type="radio"/> más 6 veces al día            |
| Ternera o cerdo o cordero            | <input type="radio"/> Nunca o menos 1 vez al mes<br><input type="radio"/> 1 a 3 veces mes<br><input type="radio"/> 1 vez semana<br><input type="radio"/> 2 a 4 veces semana<br><input checked="" type="radio"/> 5 a 6 veces semana<br><input type="radio"/> 1 vez al día<br><input type="radio"/> 2 a 3 veces al día<br><input type="radio"/> 5 a 6 veces al día<br><input type="radio"/> más 6 veces al día |
| carne caza: Conejo o codorniz o pato | <input type="radio"/> Nunca o menos 1 vez al mes<br><input type="radio"/> 1 a 3 veces mes<br><input type="radio"/> 1 vez semana<br><input checked="" type="radio"/> 2 a 4 veces semana<br><input type="radio"/> 5 a 6 veces semana<br><input type="radio"/> 1 vez al día<br><input type="radio"/> 2 a 3 veces al día<br><input type="radio"/> 5 a 6 veces al día<br><input type="radio"/> más 6 veces al día |
| Hígado de ternera o cerdo o pollo    | <input checked="" type="radio"/> Nunca o menos 1 vez al mes<br><input type="radio"/> 1 a 3 veces mes<br><input type="radio"/> 1 vez semana<br><input type="radio"/> 2 a 4 veces semana<br><input type="radio"/> 5 a 6 veces semana<br><input type="radio"/> 1 vez al día<br><input type="radio"/> 2 a 3 veces al día<br><input type="radio"/> 5 a 6 veces al día<br><input type="radio"/> más 6 veces al día |

---

Vísceras

- ☒ Nunca o menos 1 vez al mes  
☐ 1 a 3 veces mes  
☐ 1 vez semana  
☐ 2 a 4 veces semana  
☐ 5 a 6 veces semana  
☐ 1 vez al día  
☐ 2 a 3 veces al día  
☐ 5 a 6 veces al día  
☐ más 6 veces al día

---

Embutido

- ☒ Nunca o menos 1 vez al mes  
☐ 1 a 3 veces mes  
☐ 1 vez semana  
☐ 2 a 4 veces semana  
☐ 5 a 6 veces semana  
☐ 1 vez al día  
☐ 2 a 3 veces al día  
☐ 5 a 6 veces al día  
☐ más 6 veces al día

---

Salchicha o similar

- ☒ Nunca o menos 1 vez al mes  
☐ 1 a 3 veces mes  
☐ 1 vez semana  
☐ 2 a 4 veces semana  
☐ 5 a 6 veces semana  
☐ 1 vez al día  
☐ 2 a 3 veces al día  
☐ 5 a 6 veces al día  
☐ más 6 veces al día

---

Pate o foiegras

- ☒ Nunca o menos 1 vez al mes  
☐ 1 a 3 veces mes  
☐ 1 vez semana  
☐ 2 a 4 veces semana  
☐ 5 a 6 veces semana  
☐ 1 vez al día  
☐ 2 a 3 veces al día  
☐ 5 a 6 veces al día  
☐ más 6 veces al día

---

Hamburguesa

- ☐ Nunca o menos 1 vez al mes  
☐ 1 a 3 veces mes  
☐ 1 vez semana  
☒ 2 a 4 veces semana  
☐ 5 a 6 veces semana  
☐ 1 vez al día  
☐ 2 a 3 veces al día  
☐ 5 a 6 veces al día  
☐ más 6 veces al día

---

tocino o bacon

- ☒ Nunca o menos 1 vez al mes  
☐ 1 a 3 veces mes  
☐ 1 vez semana  
☐ 2 a 4 veces semana  
☐ 5 a 6 veces semana  
☐ 1 vez al día  
☐ 2 a 3 veces al día  
☐ 5 a 6 veces al día  
☐ más 6 veces al día

|                        |                                                                                                                                                                                                                                                                                                                                                                                                              |
|------------------------|--------------------------------------------------------------------------------------------------------------------------------------------------------------------------------------------------------------------------------------------------------------------------------------------------------------------------------------------------------------------------------------------------------------|
| Pescado frito          | <input checked="" type="radio"/> Nunca o menos 1 vez al mes<br><input type="radio"/> 1 a 3 veces mes<br><input type="radio"/> 1 vez semana<br><input type="radio"/> 2 a 4 veces semana<br><input type="radio"/> 5 a 6 veces semana<br><input type="radio"/> 1 vez al día<br><input type="radio"/> 2 a 3 veces al día<br><input type="radio"/> 5 a 6 veces al día<br><input type="radio"/> más 6 veces al día |
| pescado hervido blanco | <input type="radio"/> Nunca o menos 1 vez al mes<br><input checked="" type="radio"/> 1 a 3 veces mes<br><input type="radio"/> 1 vez semana<br><input type="radio"/> 2 a 4 veces semana<br><input type="radio"/> 5 a 6 veces semana<br><input type="radio"/> 1 vez al día<br><input type="radio"/> 2 a 3 veces al día<br><input type="radio"/> 5 a 6 veces al día<br><input type="radio"/> más 6 veces al día |
| pescado hervido azul   | <input checked="" type="radio"/> Nunca o menos 1 vez al mes<br><input type="radio"/> 1 a 3 veces mes<br><input type="radio"/> 1 vez semana<br><input type="radio"/> 2 a 4 veces semana<br><input type="radio"/> 5 a 6 veces semana<br><input type="radio"/> 1 vez al día<br><input type="radio"/> 2 a 3 veces al día<br><input type="radio"/> 5 a 6 veces al día<br><input type="radio"/> más 6 veces al día |
| otros pescado azul     | <input type="radio"/> Nunca o menos 1 vez al mes<br><input type="radio"/> 1 a 3 veces mes<br><input checked="" type="radio"/> 1 vez semana<br><input type="radio"/> 2 a 4 veces semana<br><input type="radio"/> 5 a 6 veces semana<br><input type="radio"/> 1 vez al día<br><input type="radio"/> 2 a 3 veces al día<br><input type="radio"/> 5 a 6 veces al día<br><input type="radio"/> más 6 veces al día |
| atun conserva          | <input type="radio"/> Nunca o menos 1 vez al mes<br><input type="radio"/> 1 a 3 veces mes<br><input checked="" type="radio"/> 1 vez semana<br><input type="radio"/> 2 a 4 veces semana<br><input type="radio"/> 5 a 6 veces semana<br><input type="radio"/> 1 vez al día<br><input type="radio"/> 2 a 3 veces al día<br><input type="radio"/> 5 a 6 veces al día<br><input type="radio"/> más 6 veces al día |
| sardina conserva       | <input checked="" type="radio"/> Nunca o menos 1 vez al mes<br><input type="radio"/> 1 a 3 veces mes<br><input type="radio"/> 1 vez semana<br><input type="radio"/> 2 a 4 veces semana<br><input type="radio"/> 5 a 6 veces semana<br><input type="radio"/> 1 vez al día<br><input type="radio"/> 2 a 3 veces al día<br><input type="radio"/> 5 a 6 veces al día<br><input type="radio"/> más 6 veces al día |

|                                         |                                                                                                                                                                                                                                                                                                                                                                                                              |
|-----------------------------------------|--------------------------------------------------------------------------------------------------------------------------------------------------------------------------------------------------------------------------------------------------------------------------------------------------------------------------------------------------------------------------------------------------------------|
| pescado ahumado                         | <input type="radio"/> Nunca o menos 1 vez al mes<br><input type="radio"/> 1 a 3 veces mes<br><input checked="" type="radio"/> 1 vez semana<br><input type="radio"/> 2 a 4 veces semana<br><input type="radio"/> 5 a 6 veces semana<br><input type="radio"/> 1 vez al día<br><input type="radio"/> 2 a 3 veces al día<br><input type="radio"/> 5 a 6 veces al día<br><input type="radio"/> más 6 veces al día |
| almejas o mejillones o ostras unos 100g | <input type="radio"/> Nunca o menos 1 vez al mes<br><input checked="" type="radio"/> 1 a 3 veces mes<br><input type="radio"/> 1 vez semana<br><input type="radio"/> 2 a 4 veces semana<br><input type="radio"/> 5 a 6 veces semana<br><input type="radio"/> 1 vez al día<br><input type="radio"/> 2 a 3 veces al día<br><input type="radio"/> 5 a 6 veces al día<br><input type="radio"/> más 6 veces al día |
| calamar o chipiron o sepia unos 100g    | <input checked="" type="radio"/> Nunca o menos 1 vez al mes<br><input type="radio"/> 1 a 3 veces mes<br><input type="radio"/> 1 vez semana<br><input type="radio"/> 2 a 4 veces semana<br><input type="radio"/> 5 a 6 veces semana<br><input type="radio"/> 1 vez al día<br><input type="radio"/> 2 a 3 veces al día<br><input type="radio"/> 5 a 6 veces al día<br><input type="radio"/> más 6 veces al día |
| marisco unos 100g                       | <input type="radio"/> Nunca o menos 1 vez al mes<br><input checked="" type="radio"/> 1 a 3 veces mes<br><input type="radio"/> 1 vez semana<br><input type="radio"/> 2 a 4 veces semana<br><input type="radio"/> 5 a 6 veces semana<br><input type="radio"/> 1 vez al día<br><input type="radio"/> 2 a 3 veces al día<br><input type="radio"/> 5 a 6 veces al día<br><input type="radio"/> más 6 veces al día |
| Espinacas o acelgas cocinadas           | <input type="radio"/> Nunca o menos 1 vez al mes<br><input type="radio"/> 1 a 3 veces mes<br><input type="radio"/> 1 vez semana<br><input checked="" type="radio"/> 2 a 4 veces semana<br><input type="radio"/> 5 a 6 veces semana<br><input type="radio"/> 1 vez al día<br><input type="radio"/> 2 a 3 veces al día<br><input type="radio"/> 5 a 6 veces al día<br><input type="radio"/> más 6 veces al día |
| Col o coliflor o brocoli cocinado       | <input type="radio"/> Nunca o menos 1 vez al mes<br><input checked="" type="radio"/> 1 a 3 veces mes<br><input type="radio"/> 1 vez semana<br><input type="radio"/> 2 a 4 veces semana<br><input type="radio"/> 5 a 6 veces semana<br><input type="radio"/> 1 vez al día<br><input type="radio"/> 2 a 3 veces al día<br><input type="radio"/> 5 a 6 veces al día<br><input type="radio"/> más 6 veces al día |

---

Lechuga o endivia o escarola

- ☐ Nunca o menos 1 vez al mes  
☐ 1 a 3 veces mes  
☒ 1 vez semana  
☐ 2 a 4 veces semana  
☐ 5 a 6 veces semana  
☐ 1 vez al día  
☐ 2 a 3 veces al día  
☐ 5 a 6 veces al día  
☐ más 6 veces al día

---

tomate ensalada

- ☐ Nunca o menos 1 vez al mes  
☐ 1 a 3 veces mes  
☐ 1 vez semana  
☐ 2 a 4 veces semana  
☐ 5 a 6 veces semana  
☒ 1 vez al día  
☐ 2 a 3 veces al día  
☐ 5 a 6 veces al día  
☐ más 6 veces al día

---

cebolla

- ☐ Nunca o menos 1 vez al mes  
☐ 1 a 3 veces mes  
☐ 1 vez semana  
☐ 2 a 4 veces semana  
☐ 5 a 6 veces semana  
☒ 1 vez al día  
☐ 2 a 3 veces al día  
☐ 5 a 6 veces al día  
☐ más 6 veces al día

---

Zanahoria o calabaza

- ☐ Nunca o menos 1 vez al mes  
☒ 1 a 3 veces mes  
☐ 1 vez semana  
☐ 2 a 4 veces semana  
☐ 5 a 6 veces semana  
☐ 1 vez al día  
☐ 2 a 3 veces al día  
☐ 5 a 6 veces al día  
☐ más 6 veces al día

---

Judías verdes

- ☐ Nunca o menos 1 vez al mes  
☒ 1 a 3 veces mes  
☐ 1 vez semana  
☐ 2 a 4 veces semana  
☐ 5 a 6 veces semana  
☐ 1 vez al día  
☐ 2 a 3 veces al día  
☐ 5 a 6 veces al día  
☐ más 6 veces al día

---

Berenjena o calabacin o pepino

- ☐ Nunca o menos 1 vez al mes  
☐ 1 a 3 veces mes  
☐ 1 vez semana  
☐ 2 a 4 veces semana  
☒ 5 a 6 veces semana  
☐ 1 vez al día  
☐ 2 a 3 veces al día  
☐ 5 a 6 veces al día  
☐ más 6 veces al día

|                       |                                                                                                                                                                                                                                                                                                                                                                                                              |
|-----------------------|--------------------------------------------------------------------------------------------------------------------------------------------------------------------------------------------------------------------------------------------------------------------------------------------------------------------------------------------------------------------------------------------------------------|
| pimiento              | <input type="radio"/> Nunca o menos 1 vez al mes<br><input checked="" type="radio"/> 1 a 3 veces mes<br><input type="radio"/> 1 vez semana<br><input type="radio"/> 2 a 4 veces semana<br><input type="radio"/> 5 a 6 veces semana<br><input type="radio"/> 1 vez al día<br><input type="radio"/> 2 a 3 veces al día<br><input type="radio"/> 5 a 6 veces al día<br><input type="radio"/> más 6 veces al día |
| alcachofa             | <input type="radio"/> Nunca o menos 1 vez al mes<br><input type="radio"/> 1 a 3 veces mes<br><input type="radio"/> 1 vez semana<br><input checked="" type="radio"/> 2 a 4 veces semana<br><input type="radio"/> 5 a 6 veces semana<br><input type="radio"/> 1 vez al día<br><input type="radio"/> 2 a 3 veces al día<br><input type="radio"/> 5 a 6 veces al día<br><input type="radio"/> más 6 veces al día |
| espárragos            | <input type="radio"/> Nunca o menos 1 vez al mes<br><input checked="" type="radio"/> 1 a 3 veces mes<br><input type="radio"/> 1 vez semana<br><input type="radio"/> 2 a 4 veces semana<br><input type="radio"/> 5 a 6 veces semana<br><input type="radio"/> 1 vez al día<br><input type="radio"/> 2 a 3 veces al día<br><input type="radio"/> 5 a 6 veces al día<br><input type="radio"/> más 6 veces al día |
| maíz hervido          | <input checked="" type="radio"/> Nunca o menos 1 vez al mes<br><input type="radio"/> 1 a 3 veces mes<br><input type="radio"/> 1 vez semana<br><input type="radio"/> 2 a 4 veces semana<br><input type="radio"/> 5 a 6 veces semana<br><input type="radio"/> 1 vez al día<br><input type="radio"/> 2 a 3 veces al día<br><input type="radio"/> 5 a 6 veces al día<br><input type="radio"/> más 6 veces al día |
| legumbres             | <input type="radio"/> Nunca o menos 1 vez al mes<br><input type="radio"/> 1 a 3 veces mes<br><input type="radio"/> 1 vez semana<br><input type="radio"/> 2 a 4 veces semana<br><input type="radio"/> 5 a 6 veces semana<br><input checked="" type="radio"/> 1 vez al día<br><input type="radio"/> 2 a 3 veces al día<br><input type="radio"/> 5 a 6 veces al día<br><input type="radio"/> más 6 veces al día |
| naranjas o mandarinas | <input type="radio"/> Nunca o menos 1 vez al mes<br><input type="radio"/> 1 a 3 veces mes<br><input checked="" type="radio"/> 1 vez semana<br><input type="radio"/> 2 a 4 veces semana<br><input type="radio"/> 5 a 6 veces semana<br><input type="radio"/> 1 vez al día<br><input type="radio"/> 2 a 3 veces al día<br><input type="radio"/> 5 a 6 veces al día<br><input type="radio"/> más 6 veces al día |



---

zumو natural fruta

- ☐ Nunca o menos 1 vez al mes  
☐ 1 a 3 veces mes  
☐ 1 vez semana  
☒ 2 a 4 veces semana  
☐ 5 a 6 veces semana  
☐ 1 vez al día  
☐ 2 a 3 veces al día  
☐ 5 a 6 veces al día  
☐ más 6 veces al día

---

platano

- ☐ Nunca o menos 1 vez al mes  
☐ 1 a 3 veces mes  
☐ 1 vez semana  
☐ 2 a 4 veces semana  
☐ 5 a 6 veces semana  
☒ 1 vez al día  
☐ 2 a 3 veces al día  
☐ 5 a 6 veces al día  
☐ más 6 veces al día

---

manzana o pera

- ☐ Nunca o menos 1 vez al mes  
☐ 1 a 3 veces mes  
☐ 1 vez semana  
☐ 2 a 4 veces semana  
☐ 5 a 6 veces semana  
☐ 1 vez al día  
☐ 2 a 3 veces al día  
☒ 5 a 6 veces al día  
☐ más 6 veces al día

---

melocotón o nectarina

- ☐ Nunca o menos 1 vez al mes  
☐ 1 a 3 veces mes  
☐ 1 vez semana  
☐ 2 a 4 veces semana  
☐ 5 a 6 veces semana  
☐ 1 vez al día  
☒ 2 a 3 veces al día  
☐ 5 a 6 veces al día  
☐ más 6 veces al día

---

sandia o melon

- ☐ Nunca o menos 1 vez al mes  
☐ 1 a 3 veces mes  
☐ 1 vez semana  
☐ 2 a 4 veces semana  
☐ 5 a 6 veces semana  
☐ 1 vez al día  
☒ 2 a 3 veces al día  
☐ 5 a 6 veces al día  
☐ más 6 veces al día

---

uva

- ☐ Nunca o menos 1 vez al mes  
☐ 1 a 3 veces mes  
☐ 1 vez semana  
☐ 2 a 4 veces semana  
☐ 5 a 6 veces semana  
☐ 1 vez al día  
☒ 2 a 3 veces al día  
☐ 5 a 6 veces al día  
☐ más 6 veces al día

---

bruna o ciruela

- ☐ Nunca o menos 1 vez al mes  
☐ 1 a 3 veces mes  
☐ 1 vez semana  
☐ 2 a 4 veces semana  
☐ 5 a 6 veces semana  
☒ 1 vez al día  
☐ 2 a 3 veces al día  
☐ 5 a 6 veces al día  
☐ más 6 veces al día

---

kiwi

- ☐ Nunca o menos 1 vez al mes  
☐ 1 a 3 veces mes  
☐ 1 vez semana  
☐ 2 a 4 veces semana  
☐ 5 a 6 veces semana  
☒ 1 vez al día  
☐ 2 a 3 veces al día  
☐ 5 a 6 veces al día  
☐ más 6 veces al día

---

aceituna

- ☐ Nunca o menos 1 vez al mes  
☐ 1 a 3 veces mes  
☐ 1 vez semana  
☒ 2 a 4 veces semana  
☐ 5 a 6 veces semana  
☐ 1 vez al día  
☐ 2 a 3 veces al día  
☐ 5 a 6 veces al día  
☐ más 6 veces al día

---

frutos secos

- ☐ Nunca o menos 1 vez al mes  
☐ 1 a 3 veces mes  
☐ 1 vez semana  
☐ 2 a 4 veces semana  
☐ 5 a 6 veces semana  
☒ 1 vez al día  
☐ 2 a 3 veces al día  
☐ 5 a 6 veces al día  
☐ más 6 veces al día

---

pan blanco

- ☐ Nunca o menos 1 vez al mes  
☐ 1 a 3 veces mes  
☐ 1 vez semana  
☐ 2 a 4 veces semana  
☐ 5 a 6 veces semana  
☒ 1 vez al día  
☐ 2 a 3 veces al día  
☐ 5 a 6 veces al día  
☐ más 6 veces al día

---

pan integral

- ☐ Nunca o menos 1 vez al mes  
☐ 1 a 3 veces mes  
☐ 1 vez semana  
☐ 2 a 4 veces semana  
☐ 5 a 6 veces semana  
☐ 1 vez al día  
☒ 2 a 3 veces al día  
☐ 5 a 6 veces al día  
☐ más 6 veces al día

---

cereales desayuno

- ☒ Nunca o menos 1 vez al mes  
☐ 1 a 3 veces mes  
☐ 1 vez semana  
☐ 2 a 4 veces semana  
☐ 5 a 6 veces semana  
☐ 1 vez al día  
☐ 2 a 3 veces al día  
☐ 5 a 6 veces al día  
☐ más 6 veces al día

---

patatas fritas

- ☒ Nunca o menos 1 vez al mes  
☐ 1 a 3 veces mes  
☐ 1 vez semana  
☐ 2 a 4 veces semana  
☐ 5 a 6 veces semana  
☐ 1 vez al día  
☐ 2 a 3 veces al día  
☐ 5 a 6 veces al día  
☐ más 6 veces al día

---

patatas cocidas o asadas

- ☐ Nunca o menos 1 vez al mes  
☐ 1 a 3 veces mes  
☒ 1 vez semana  
☐ 2 a 4 veces semana  
☐ 5 a 6 veces semana  
☐ 1 vez al día  
☐ 2 a 3 veces al día  
☐ 5 a 6 veces al día  
☐ más 6 veces al día

---

bolsa papas

- ☐ Nunca o menos 1 vez al mes  
☒ 1 a 3 veces mes  
☐ 1 vez semana  
☐ 2 a 4 veces semana  
☐ 5 a 6 veces semana  
☐ 1 vez al día  
☐ 2 a 3 veces al día  
☐ 5 a 6 veces al día  
☐ más 6 veces al día

---

arroz cocinado

- ☐ Nunca o menos 1 vez al mes  
☐ 1 a 3 veces mes  
☐ 1 vez semana  
☐ 2 a 4 veces semana  
☒ 5 a 6 veces semana  
☐ 1 vez al día  
☐ 2 a 3 veces al día  
☐ 5 a 6 veces al día  
☐ más 6 veces al día

---

pasta

- ☐ Nunca o menos 1 vez al mes  
☐ 1 a 3 veces mes  
☐ 1 vez semana  
☐ 2 a 4 veces semana  
☒ 5 a 6 veces semana  
☐ 1 vez al día  
☐ 2 a 3 veces al día  
☐ 5 a 6 veces al día  
☐ más 6 veces al día

|                     |                                                                                                                                                                                                                                                                                                                                                                                                              |
|---------------------|--------------------------------------------------------------------------------------------------------------------------------------------------------------------------------------------------------------------------------------------------------------------------------------------------------------------------------------------------------------------------------------------------------------|
| pizza               | <input type="radio"/> Nunca o menos 1 vez al mes<br><input checked="" type="radio"/> 1 a 3 veces mes<br><input type="radio"/> 1 vez semana<br><input type="radio"/> 2 a 4 veces semana<br><input type="radio"/> 5 a 6 veces semana<br><input type="radio"/> 1 vez al día<br><input type="radio"/> 2 a 3 veces al día<br><input type="radio"/> 5 a 6 veces al día<br><input type="radio"/> más 6 veces al día |
| aceite oliva        | <input type="radio"/> Nunca o menos 1 vez al mes<br><input type="radio"/> 1 a 3 veces mes<br><input type="radio"/> 1 vez semana<br><input type="radio"/> 2 a 4 veces semana<br><input type="radio"/> 5 a 6 veces semana<br><input checked="" type="radio"/> 1 vez al día<br><input type="radio"/> 2 a 3 veces al día<br><input type="radio"/> 5 a 6 veces al día<br><input type="radio"/> más 6 veces al día |
| otros aceites       | <input checked="" type="radio"/> Nunca o menos 1 vez al mes<br><input type="radio"/> 1 a 3 veces mes<br><input type="radio"/> 1 vez semana<br><input type="radio"/> 2 a 4 veces semana<br><input type="radio"/> 5 a 6 veces semana<br><input type="radio"/> 1 vez al día<br><input type="radio"/> 2 a 3 veces al día<br><input type="radio"/> 5 a 6 veces al día<br><input type="radio"/> más 6 veces al día |
| margarina           | <input checked="" type="radio"/> Nunca o menos 1 vez al mes<br><input type="radio"/> 1 a 3 veces mes<br><input type="radio"/> 1 vez semana<br><input type="radio"/> 2 a 4 veces semana<br><input type="radio"/> 5 a 6 veces semana<br><input type="radio"/> 1 vez al día<br><input type="radio"/> 2 a 3 veces al día<br><input type="radio"/> 5 a 6 veces al día<br><input type="radio"/> más 6 veces al día |
| mantequilla         | <input checked="" type="radio"/> Nunca o menos 1 vez al mes<br><input type="radio"/> 1 a 3 veces mes<br><input type="radio"/> 1 vez semana<br><input type="radio"/> 2 a 4 veces semana<br><input type="radio"/> 5 a 6 veces semana<br><input type="radio"/> 1 vez al día<br><input type="radio"/> 2 a 3 veces al día<br><input type="radio"/> 5 a 6 veces al día<br><input type="radio"/> más 6 veces al día |
| galletas tipo maria | <input type="radio"/> Nunca o menos 1 vez al mes<br><input type="radio"/> 1 a 3 veces mes<br><input checked="" type="radio"/> 1 vez semana<br><input type="radio"/> 2 a 4 veces semana<br><input type="radio"/> 5 a 6 veces semana<br><input type="radio"/> 1 vez al día<br><input type="radio"/> 2 a 3 veces al día<br><input type="radio"/> 5 a 6 veces al día<br><input type="radio"/> más 6 veces al día |

---

galletas chocolate

- ☐ Nunca o menos 1 vez al mes  
☒ 1 a 3 veces mes  
☐ 1 vez semana  
☐ 2 a 4 veces semana  
☐ 5 a 6 veces semana  
☐ 1 vez al día  
☐ 2 a 3 veces al día  
☐ 5 a 6 veces al día  
☐ más 6 veces al día

---

bolleria

- ☐ Nunca o menos 1 vez al mes  
☒ 1 a 3 veces mes  
☐ 1 vez semana  
☐ 2 a 4 veces semana  
☐ 5 a 6 veces semana  
☐ 1 vez al día  
☐ 2 a 3 veces al día  
☐ 5 a 6 veces al día  
☐ más 6 veces al día

---

chocolate o bombones

- ☐ Nunca o menos 1 vez al mes  
☐ 1 a 3 veces mes  
☐ 1 vez semana  
☐ 2 a 4 veces semana  
☐ 5 a 6 veces semana  
☒ 1 vez al día  
☐ 2 a 3 veces al día  
☐ 5 a 6 veces al día  
☐ más 6 veces al día

---

chocolate polvo o colacao

- ☒ Nunca o menos 1 vez al mes  
☐ 1 a 3 veces mes  
☐ 1 vez semana  
☐ 2 a 4 veces semana  
☐ 5 a 6 veces semana  
☐ 1 vez al día  
☐ 2 a 3 veces al día  
☐ 5 a 6 veces al día  
☐ más 6 veces al día

---

vino tinto

- ☒ Nunca o menos 1 vez al mes  
☐ 1 a 3 veces mes  
☐ 1 vez semana  
☐ 2 a 4 veces semana  
☐ 5 a 6 veces semana  
☐ 1 vez al día  
☐ 2 a 3 veces al día  
☐ 5 a 6 veces al día  
☐ más 6 veces al día

---

vino blanco

- ☒ Nunca o menos 1 vez al mes  
☐ 1 a 3 veces mes  
☐ 1 vez semana  
☐ 2 a 4 veces semana  
☐ 5 a 6 veces semana  
☐ 1 vez al día  
☐ 2 a 3 veces al día  
☐ 5 a 6 veces al día  
☐ más 6 veces al día

|                       |                                                                                                                                                                                                                                                                                                                                                                                                              |
|-----------------------|--------------------------------------------------------------------------------------------------------------------------------------------------------------------------------------------------------------------------------------------------------------------------------------------------------------------------------------------------------------------------------------------------------------|
| vino seco o vermut    | <input checked="" type="radio"/> Nunca o menos 1 vez al mes<br><input type="radio"/> 1 a 3 veces mes<br><input type="radio"/> 1 vez semana<br><input type="radio"/> 2 a 4 veces semana<br><input type="radio"/> 5 a 6 veces semana<br><input type="radio"/> 1 vez al día<br><input type="radio"/> 2 a 3 veces al día<br><input type="radio"/> 5 a 6 veces al día<br><input type="radio"/> más 6 veces al día |
| cerveza               | <input checked="" type="radio"/> Nunca o menos 1 vez al mes<br><input type="radio"/> 1 a 3 veces mes<br><input type="radio"/> 1 vez semana<br><input type="radio"/> 2 a 4 veces semana<br><input type="radio"/> 5 a 6 veces semana<br><input type="radio"/> 1 vez al día<br><input type="radio"/> 2 a 3 veces al día<br><input type="radio"/> 5 a 6 veces al día<br><input type="radio"/> más 6 veces al día |
| cerveza sin alcohol   | <input type="radio"/> Nunca o menos 1 vez al mes<br><input type="radio"/> 1 a 3 veces mes<br><input type="radio"/> 1 vez semana<br><input checked="" type="radio"/> 2 a 4 veces semana<br><input type="radio"/> 5 a 6 veces semana<br><input type="radio"/> 1 vez al día<br><input type="radio"/> 2 a 3 veces al día<br><input type="radio"/> 5 a 6 veces al día<br><input type="radio"/> más 6 veces al día |
| licores               | <input checked="" type="radio"/> Nunca o menos 1 vez al mes<br><input type="radio"/> 1 a 3 veces mes<br><input type="radio"/> 1 vez semana<br><input type="radio"/> 2 a 4 veces semana<br><input type="radio"/> 5 a 6 veces semana<br><input type="radio"/> 1 vez al día<br><input type="radio"/> 2 a 3 veces al día<br><input type="radio"/> 5 a 6 veces al día<br><input type="radio"/> más 6 veces al día |
| ginebra o ron o vodka | <input checked="" type="radio"/> Nunca o menos 1 vez al mes<br><input type="radio"/> 1 a 3 veces mes<br><input type="radio"/> 1 vez semana<br><input type="radio"/> 2 a 4 veces semana<br><input type="radio"/> 5 a 6 veces semana<br><input type="radio"/> 1 vez al día<br><input type="radio"/> 2 a 3 veces al día<br><input type="radio"/> 5 a 6 veces al día<br><input type="radio"/> más 6 veces al día |
| refresco normal       | <input checked="" type="radio"/> Nunca o menos 1 vez al mes<br><input type="radio"/> 1 a 3 veces mes<br><input type="radio"/> 1 vez semana<br><input type="radio"/> 2 a 4 veces semana<br><input type="radio"/> 5 a 6 veces semana<br><input type="radio"/> 1 vez al día<br><input type="radio"/> 2 a 3 veces al día<br><input type="radio"/> 5 a 6 veces al día<br><input type="radio"/> más 6 veces al día |

---

refresco sin azúcar

- ☒ Nunca o menos 1 vez al mes  
☐ 1 a 3 veces mes  
☐ 1 vez semana  
☐ 2 a 4 veces semana  
☐ 5 a 6 veces semana  
☐ 1 vez al día  
☐ 2 a 3 veces al día  
☐ 5 a 6 veces al día  
☐ más 6 veces al día

---

Agua del grifo

- ☐ Nunca o menos 1 vez al mes  
☐ 1 a 3 veces mes  
☐ 1 vez semana  
☐ 2 a 4 veces semana  
☐ 5 a 6 veces semana  
☐ 1 vez al día  
☐ 2 a 3 veces al día  
☐ 5 a 6 veces al día  
☒ más 6 veces al día

---

agua embotellada sin gas

- ☐ Nunca o menos 1 vez al mes  
☐ 1 a 3 veces mes  
☐ 1 vez semana  
☐ 2 a 4 veces semana  
☐ 5 a 6 veces semana  
☐ 1 vez al día  
☐ 2 a 3 veces al día  
☐ 5 a 6 veces al día  
☒ más 6 veces al día

---

agua embotellada con gas

- ☒ Nunca o menos 1 vez al mes  
☐ 1 a 3 veces mes  
☐ 1 vez semana  
☐ 2 a 4 veces semana  
☐ 5 a 6 veces semana  
☐ 1 vez al día  
☐ 2 a 3 veces al día  
☐ 5 a 6 veces al día  
☐ más 6 veces al día

---

zumو frutas embasado

- ☒ Nunca o menos 1 vez al mes  
☐ 1 a 3 veces mes  
☐ 1 vez semana  
☐ 2 a 4 veces semana  
☐ 5 a 6 veces semana  
☐ 1 vez al día  
☐ 2 a 3 veces al día  
☐ 5 a 6 veces al día  
☐ más 6 veces al día

---

cafe

- ☒ Nunca o menos 1 vez al mes  
☐ 1 a 3 veces mes  
☐ 1 vez semana  
☐ 2 a 4 veces semana  
☐ 5 a 6 veces semana  
☐ 1 vez al día  
☐ 2 a 3 veces al día  
☐ 5 a 6 veces al día  
☐ más 6 veces al día

---

cafe descafeinado

- ☐ Nunca o menos 1 vez al mes  
☐ 1 a 3 veces mes  
☐ 1 vez semana  
☒ 2 a 4 veces semana  
☐ 5 a 6 veces semana  
☐ 1 vez al día  
☐ 2 a 3 veces al día  
☐ 5 a 6 veces al día  
☐ más 6 veces al día

---

te o infusión

- ☒ Nunca o menos 1 vez al mes  
☐ 1 a 3 veces mes  
☐ 1 vez semana  
☐ 2 a 4 veces semana  
☐ 5 a 6 veces semana  
☐ 1 vez al día  
☐ 2 a 3 veces al día  
☐ 5 a 6 veces al día  
☐ más 6 veces al día

---

sopa o puré verduras

- ☐ Nunca o menos 1 vez al mes  
☐ 1 a 3 veces mes  
☐ 1 vez semana  
☐ 2 a 4 veces semana  
☒ 5 a 6 veces semana  
☐ 1 vez al día  
☐ 2 a 3 veces al día  
☐ 5 a 6 veces al día  
☐ más 6 veces al día

---

croquetas pollo jamón

- ☐ Nunca o menos 1 vez al mes  
☒ 1 a 3 veces mes  
☐ 1 vez semana  
☐ 2 a 4 veces semana  
☐ 5 a 6 veces semana  
☐ 1 vez al día  
☐ 2 a 3 veces al día  
☐ 5 a 6 veces al día  
☐ más 6 veces al día

---

croquetas pescado

- ☐ Nunca o menos 1 vez al mes  
☒ 1 a 3 veces mes  
☐ 1 vez semana  
☐ 2 a 4 veces semana  
☐ 5 a 6 veces semana  
☐ 1 vez al día  
☐ 2 a 3 veces al día  
☐ 5 a 6 veces al día  
☐ más 6 veces al día

---

mayonesa

- ☒ Nunca o menos 1 vez al mes  
☐ 1 a 3 veces mes  
☐ 1 vez semana  
☐ 2 a 4 veces semana  
☐ 5 a 6 veces semana  
☐ 1 vez al día  
☐ 2 a 3 veces al día  
☐ 5 a 6 veces al día  
☐ más 6 veces al día



|                  |                                                                                                                                                                                                                                                                                                                                                                                                              |
|------------------|--------------------------------------------------------------------------------------------------------------------------------------------------------------------------------------------------------------------------------------------------------------------------------------------------------------------------------------------------------------------------------------------------------------|
| salsa tomate     | <input checked="" type="radio"/> Nunca o menos 1 vez al mes<br><input type="radio"/> 1 a 3 veces mes<br><input type="radio"/> 1 vez semana<br><input type="radio"/> 2 a 4 veces semana<br><input type="radio"/> 5 a 6 veces semana<br><input type="radio"/> 1 vez al día<br><input type="radio"/> 2 a 3 veces al día<br><input type="radio"/> 5 a 6 veces al día<br><input type="radio"/> más 6 veces al día |
| ketchup          | <input checked="" type="radio"/> Nunca o menos 1 vez al mes<br><input type="radio"/> 1 a 3 veces mes<br><input type="radio"/> 1 vez semana<br><input type="radio"/> 2 a 4 veces semana<br><input type="radio"/> 5 a 6 veces semana<br><input type="radio"/> 1 vez al día<br><input type="radio"/> 2 a 3 veces al día<br><input type="radio"/> 5 a 6 veces al día<br><input type="radio"/> más 6 veces al día |
| sal              | <input type="radio"/> Nunca o menos 1 vez al mes<br><input type="radio"/> 1 a 3 veces mes<br><input type="radio"/> 1 vez semana<br><input type="radio"/> 2 a 4 veces semana<br><input type="radio"/> 5 a 6 veces semana<br><input checked="" type="radio"/> 1 vez al día<br><input type="radio"/> 2 a 3 veces al día<br><input type="radio"/> 5 a 6 veces al día<br><input type="radio"/> más 6 veces al día |
| ajo              | <input type="radio"/> Nunca o menos 1 vez al mes<br><input type="radio"/> 1 a 3 veces mes<br><input type="radio"/> 1 vez semana<br><input type="radio"/> 2 a 4 veces semana<br><input type="radio"/> 5 a 6 veces semana<br><input checked="" type="radio"/> 1 vez al día<br><input type="radio"/> 2 a 3 veces al día<br><input type="radio"/> 5 a 6 veces al día<br><input type="radio"/> más 6 veces al día |
| mermelada o miel | <input checked="" type="radio"/> Nunca o menos 1 vez al mes<br><input type="radio"/> 1 a 3 veces mes<br><input type="radio"/> 1 vez semana<br><input type="radio"/> 2 a 4 veces semana<br><input type="radio"/> 5 a 6 veces semana<br><input type="radio"/> 1 vez al día<br><input type="radio"/> 2 a 3 veces al día<br><input type="radio"/> 5 a 6 veces al día<br><input type="radio"/> más 6 veces al día |
| azúcar           | <input checked="" type="radio"/> Nunca o menos 1 vez al mes<br><input type="radio"/> 1 a 3 veces mes<br><input type="radio"/> 1 vez semana<br><input type="radio"/> 2 a 4 veces semana<br><input type="radio"/> 5 a 6 veces semana<br><input type="radio"/> 1 vez al día<br><input type="radio"/> 2 a 3 veces al día<br><input type="radio"/> 5 a 6 veces al día<br><input type="radio"/> más 6 veces al día |

|                                       |                                                                                                                                                                                                                                                                                                                                                                                                                                                                                                                               |
|---------------------------------------|-------------------------------------------------------------------------------------------------------------------------------------------------------------------------------------------------------------------------------------------------------------------------------------------------------------------------------------------------------------------------------------------------------------------------------------------------------------------------------------------------------------------------------|
| Otro alimento                         | [*DATA REMOVED*]                                                                                                                                                                                                                                                                                                                                                                                                                                                                                                              |
| suplementos vitamínicos               | <input checked="" type="radio"/> si<br><input type="radio"/> no                                                                                                                                                                                                                                                                                                                                                                                                                                                               |
| suplementos vitamínicos               | [*DATA REMOVED*]                                                                                                                                                                                                                                                                                                                                                                                                                                                                                                              |
| dieta previa                          | <input type="radio"/> si<br><input checked="" type="radio"/> no                                                                                                                                                                                                                                                                                                                                                                                                                                                               |
| motivo dieta                          | <input checked="" type="radio"/> no dieta<br><input type="radio"/> control peso<br><input type="radio"/> control colesterol<br><input type="radio"/> control diabetes<br><input type="radio"/> problemas estómago<br><input type="radio"/> problemas vesícula o hepáticos<br><input type="radio"/> HTA o cardiopatía<br><input type="radio"/> problemas renales<br><input type="radio"/> alergia alimentaria<br><input type="radio"/> ácido úrico elevado<br><input type="radio"/> vegetariana<br><input type="radio"/> otros |
| cambio alimentos año previo gestación | <input checked="" type="radio"/> si<br><input type="radio"/> no                                                                                                                                                                                                                                                                                                                                                                                                                                                               |
| cambio lácteos                        | <input type="radio"/> eliminado<br><input type="radio"/> disminuido<br><input checked="" type="radio"/> igual<br><input type="radio"/> aumentado<br><input type="radio"/> no sabe                                                                                                                                                                                                                                                                                                                                             |
| cambio huevos                         | <input type="radio"/> eliminado<br><input type="radio"/> disminuido<br><input checked="" type="radio"/> igual<br><input type="radio"/> aumentado<br><input type="radio"/> no sabe                                                                                                                                                                                                                                                                                                                                             |
| cambio carne                          | <input type="radio"/> eliminado<br><input type="radio"/> disminuido<br><input checked="" type="radio"/> igual<br><input type="radio"/> aumentado<br><input type="radio"/> no sabe                                                                                                                                                                                                                                                                                                                                             |
| cambio pescado                        | <input type="radio"/> eliminado<br><input type="radio"/> disminuido<br><input checked="" type="radio"/> igual<br><input type="radio"/> aumentado<br><input type="radio"/> no sabe                                                                                                                                                                                                                                                                                                                                             |
| cambio verduras                       | <input type="radio"/> eliminado<br><input type="radio"/> disminuido<br><input checked="" type="radio"/> igual<br><input type="radio"/> aumentado<br><input type="radio"/> no sabe                                                                                                                                                                                                                                                                                                                                             |

|                            |                                                                                                                                                                                                                        |
|----------------------------|------------------------------------------------------------------------------------------------------------------------------------------------------------------------------------------------------------------------|
| cambio legumbres           | <input type="radio"/> eliminado<br><input type="radio"/> disminuido<br><input type="radio"/> igual<br><input checked="" type="radio"/> aumentado<br><input type="radio"/> no sabe                                      |
| cambio fruta               | <input type="radio"/> eliminado<br><input type="radio"/> disminuido<br><input checked="" type="radio"/> igual<br><input type="radio"/> aumentado<br><input type="radio"/> no sabe                                      |
| cambio pan                 | <input type="radio"/> eliminado<br><input type="radio"/> disminuido<br><input checked="" type="radio"/> igual<br><input type="radio"/> aumentado<br><input type="radio"/> no sabe                                      |
| cambio aceite oliva        | <input type="radio"/> eliminado<br><input type="radio"/> disminuido<br><input checked="" type="radio"/> igual<br><input type="radio"/> aumentado<br><input type="radio"/> no sabe                                      |
| cambio mante o margarina   | <input type="radio"/> eliminado<br><input type="radio"/> disminuido<br><input checked="" type="radio"/> igual<br><input type="radio"/> aumentado<br><input type="radio"/> no sabe                                      |
| cambio azúcar y dulces     | <input type="radio"/> eliminado<br><input type="radio"/> disminuido<br><input type="radio"/> igual<br><input checked="" type="radio"/> aumentado<br><input type="radio"/> no sabe                                      |
| cambio bebidas alcohólicas | <input checked="" type="radio"/> eliminado<br><input type="radio"/> disminuido<br><input type="radio"/> igual<br><input type="radio"/> aumentado<br><input type="radio"/> no sabe                                      |
| frecuencia comidas fritas  | <input type="radio"/> a diario<br><input type="radio"/> 5 a 6 veces semana<br><input type="radio"/> 2 a 4 veces semana<br><input type="radio"/> 1 vez semana<br><input checked="" type="radio"/> menos de 1 vez semana |
| carne                      | <input type="radio"/> no como<br><input type="radio"/> cruda<br><input type="radio"/> poco hecha<br><input checked="" type="radio"/> hecha<br><input type="radio"/> muy hecha                                          |
| grasa visible carne        | <input checked="" type="radio"/> quita toda<br><input type="radio"/> quita mayoría<br><input type="radio"/> quita un poco<br><input type="radio"/> no quita nada                                                       |

|                                |                                                                                                                                                                                                                                                          |
|--------------------------------|----------------------------------------------------------------------------------------------------------------------------------------------------------------------------------------------------------------------------------------------------------|
| cocina carne                   | <input checked="" type="radio"/> a la plancha<br><input type="radio"/> a la parrilla<br><input type="radio"/> asada<br><input type="radio"/> frita<br><input type="radio"/> guisada                                                                      |
| tostado quemado carne          | <input checked="" type="radio"/> nunca<br><input type="radio"/> 1 vez mes<br><input type="radio"/> 2 a 3 veces mes<br><input type="radio"/> 1 vez semana<br><input type="radio"/> 2 a 3 semanas                                                          |
| tostado quemado pescado        | <input checked="" type="radio"/> nunca<br><input type="radio"/> 1 vez mes<br><input type="radio"/> 2 a 3 veces mes<br><input type="radio"/> 1 vez semana<br><input type="radio"/> 2 a 3 semanas                                                          |
| socarrat paella                | <input type="radio"/> nunca<br><input type="radio"/> 1 vez mes<br><input checked="" type="radio"/> 2 a 3 veces mes<br><input type="radio"/> 1 vez semana<br><input type="radio"/> 2 a 3 semanas                                                          |
| grasa o aceite cocinar         | <input type="radio"/> mantequilla<br><input type="radio"/> margarina<br><input checked="" type="radio"/> aceite oliva<br><input type="radio"/> aceite oliva virgen extra<br><input type="radio"/> aceite vegetal<br><input type="radio"/> mezcla aceites |
| grasa aceite aliñar            | <input type="radio"/> mantequilla<br><input type="radio"/> margarina<br><input checked="" type="radio"/> aceite oliva<br><input type="radio"/> aceite oliva virgen extra<br><input type="radio"/> aceite vegetal<br><input type="radio"/> mezcla aceites |
| grasa aceite freir             | <input type="radio"/> mantequilla<br><input type="radio"/> margarina<br><input type="radio"/> aceite oliva<br><input type="radio"/> aceite oliva virgen extra<br><input type="radio"/> aceite vegetal<br><input type="radio"/> mezcla aceites            |
| Ejercicio cuestionario         | <input checked="" type="radio"/> si<br><input type="radio"/> no                                                                                                                                                                                          |
| horas de sueño incluido siesta | [*DATA REMOVED*]                                                                                                                                                                                                                                         |
| minutos siesta                 | [*DATA REMOVED*]                                                                                                                                                                                                                                         |
| horas televisión semana        | [*DATA REMOVED*]                                                                                                                                                                                                                                         |

|                                        |                                                                                                                                                                                                                                                                                                                                                                           |
|----------------------------------------|---------------------------------------------------------------------------------------------------------------------------------------------------------------------------------------------------------------------------------------------------------------------------------------------------------------------------------------------------------------------------|
| actividad trabajo                      | <input type="radio"/> casi siempre sentado<br><input type="radio"/> sentado 50 por cien<br><input type="radio"/> casi siempre de pie, quieto<br><input checked="" type="radio"/> casi siempre levantado caminando y llevando pocas cosas<br><input type="radio"/> casi siempre levantado, caminando y llevado muchas cosas<br><input type="radio"/> trabajo manual pesado |
| tiempo caminar o bici al día           | <input type="radio"/> casi nunca<br><input type="radio"/> menos 20min día<br><input checked="" type="radio"/> 20 a 40 min día<br><input type="radio"/> 40 a 60 min día<br><input type="radio"/> 1h o 1h y media día<br><input type="radio"/> más de 1h y media al día                                                                                                     |
| tiempo tareas casa al día              | <input type="radio"/> menos de 1h día<br><input checked="" type="radio"/> 1 a 2h día<br><input type="radio"/> 3 a 4h día<br><input type="radio"/> 5 a 6h día<br><input type="radio"/> 7 a 8h día<br><input type="radio"/> más de 8h día                                                                                                                                   |
| tiempo libre televisión ordenador leer | <input type="radio"/> menos 1h día<br><input type="radio"/> 1h día<br><input type="radio"/> 2h día<br><input type="radio"/> 3h día<br><input checked="" type="radio"/> 4h día<br><input type="radio"/> 5 a 6h día<br><input type="radio"/> mas 6h día                                                                                                                     |
| tiempo libre ejercicio o deporte       | <input type="radio"/> menos 1h semana<br><input checked="" type="radio"/> 1h semana<br><input type="radio"/> 2h semana<br><input type="radio"/> 3h semana<br><input type="radio"/> 4 a 5h semana<br><input type="radio"/> mas 5h semana                                                                                                                                   |
| como se considera                      | <input type="radio"/> sedentaria<br><input type="radio"/> poco activa<br><input checked="" type="radio"/> moderadamente activa<br><input type="radio"/> bastante activa<br><input type="radio"/> muy activa<br><input type="radio"/> no sabe                                                                                                                              |
| FUR                                    | [*DATA REMOVED*]                                                                                                                                                                                                                                                                                                                                                          |
| Semanas gestación 2T                   | [*DATA REMOVED*]                                                                                                                                                                                                                                                                                                                                                          |
| Días gestación 2T                      | [*DATA REMOVED*]                                                                                                                                                                                                                                                                                                                                                          |
| DBP 2T                                 | [*DATA REMOVED*]                                                                                                                                                                                                                                                                                                                                                          |
| CC 2T                                  | [*DATA REMOVED*]                                                                                                                                                                                                                                                                                                                                                          |
| AC 2T                                  | [*DATA REMOVED*]                                                                                                                                                                                                                                                                                                                                                          |

|                                                   |                                                                                                                                                                                                 |
|---------------------------------------------------|-------------------------------------------------------------------------------------------------------------------------------------------------------------------------------------------------|
| LF 2T                                             | [*DATA REMOVED*]                                                                                                                                                                                |
| PFE 2T (Hadlock)                                  | [*DATA REMOVED*]                                                                                                                                                                                |
| Semanas gestación 3T                              | [*DATA REMOVED*]                                                                                                                                                                                |
| días 3T                                           | [*DATA REMOVED*]                                                                                                                                                                                |
| DBP 3T                                            | [*DATA REMOVED*]                                                                                                                                                                                |
| CC 3T                                             | [*DATA REMOVED*]                                                                                                                                                                                |
| AC 3T                                             | [*DATA REMOVED*]                                                                                                                                                                                |
| LF 3T                                             | [*DATA REMOVED*]                                                                                                                                                                                |
| PFE 3T (Hadlock)                                  | [*DATA REMOVED*]                                                                                                                                                                                |
| Semanas de gestación final                        | [*DATA REMOVED*]                                                                                                                                                                                |
| días gestación final                              | [*DATA REMOVED*]                                                                                                                                                                                |
| Localización placenta                             | <input checked="" type="radio"/> anterior<br><input type="radio"/> lateral derecha<br><input type="radio"/> lateral izquierda<br><input type="radio"/> posterior<br><input type="radio"/> fondo |
| Presentación longitudinal cefálica                | <input type="radio"/> no<br><input checked="" type="radio"/> si                                                                                                                                 |
| Dorso                                             | <input type="radio"/> izquierda anterior<br><input type="radio"/> izquierda posterior<br><input checked="" type="radio"/> derecha anterior<br><input type="radio"/> derecha posterior           |
| diámetro biparietal                               | [*DATA REMOVED*]                                                                                                                                                                                |
| Circunferencia craneal                            | [*DATA REMOVED*]                                                                                                                                                                                |
| Circunferencia abdominal                          | [*DATA REMOVED*]                                                                                                                                                                                |
| Longitud de femur                                 | [*DATA REMOVED*]                                                                                                                                                                                |
| tejido celular subcutáneo a nivel del muslo en mm | [*DATA REMOVED*]                                                                                                                                                                                |
| tejido celular subcutáneo en abdomen en mm        | [*DATA REMOVED*]                                                                                                                                                                                |
| Volumen del muslo en cm3                          | [*DATA REMOVED*]                                                                                                                                                                                |
| Peso fetal estimado según fórmula de Hadlock      | [*DATA REMOVED*]                                                                                                                                                                                |

|                                               |                                                                                                                                                          |
|-----------------------------------------------|----------------------------------------------------------------------------------------------------------------------------------------------------------|
| Percentil                                     | [*DATA REMOVED*]                                                                                                                                         |
| Peso fetal estimado según fórmula de Scioscia | <hr/>                                                                                                                                                    |
| Peso fetal estimado según fórmula de LEE      | <hr/>                                                                                                                                                    |
| Tipo de parto                                 | <input type="radio"/> eutocico<br><input type="radio"/> instrumentado/ventosa<br><input checked="" type="radio"/> cesarea                                |
| fecha de nacimiento                           | [*DATA REMOVED*]                                                                                                                                         |
| Días entre exploración y nacimiento           | [*DATA REMOVED*]                                                                                                                                         |
| Peso RN en g                                  | [*DATA REMOVED*]                                                                                                                                         |
| sexo                                          | <input type="radio"/> mujer<br><input checked="" type="radio"/> hombre                                                                                   |
| Apgar 1 minuto                                | [*DATA REMOVED*]                                                                                                                                         |
| Apgar 5 minutos                               | [*DATA REMOVED*]                                                                                                                                         |
| Apgar 10 minutos                              | <hr/>                                                                                                                                                    |
| antecedente Covid durante gestación           | <input type="radio"/> Yes<br><input checked="" type="radio"/> No                                                                                         |
| Nivel de estudios                             | <input type="radio"/> ninguno<br><input type="radio"/> primarios<br><input type="radio"/> secundarios<br><input checked="" type="radio"/> universitarios |

# Base\_datos\_estimacion\_peso\_fetal

|                                       |                                                                                                                                                                                                                                                                           |
|---------------------------------------|---------------------------------------------------------------------------------------------------------------------------------------------------------------------------------------------------------------------------------------------------------------------------|
| Número de identificación participante | 155                                                                                                                                                                                                                                                                       |
| CODIGO PARTICIPANTE                   |                                                                                                                                                                                                                                                                           |
| Edad                                  | [*DATA REMOVED*]                                                                                                                                                                                                                                                          |
| Gestaciones                           | <input checked="" type="radio"/> 1<br><input type="radio"/> 2<br><input type="radio"/> 3<br><input type="radio"/> mas de 3                                                                                                                                                |
| partos                                | <input checked="" type="radio"/> 0<br><input type="radio"/> 1<br><input type="radio"/> 2<br><input type="radio"/> 3<br><input type="radio"/> mas de 3                                                                                                                     |
| cesáreas                              | <input checked="" type="radio"/> 0<br><input type="radio"/> 1<br><input type="radio"/> 2<br><input type="radio"/> 3<br><input type="radio"/> mas de 3                                                                                                                     |
| Abortos                               | <input checked="" type="radio"/> 0<br><input type="radio"/> 1<br><input type="radio"/> 2<br><input type="radio"/> 3<br><input type="radio"/> mas de 3                                                                                                                     |
| Tipo de gestacion                     | <input type="radio"/> espontanea<br><input type="radio"/> IAC inseminación artificial conyuge<br><input type="radio"/> IAD inseminación artificial donante<br><input type="radio"/> FIV Fecundación in Vitro<br><input type="radio"/> Ovodon FIV con donación de ovocitos |
| peso previo a embarazo                | [*DATA REMOVED*]                                                                                                                                                                                                                                                          |
| Ganancia ponderal embarazo            | [*DATA REMOVED*]                                                                                                                                                                                                                                                          |
| Talla madre                           | [*DATA REMOVED*]                                                                                                                                                                                                                                                          |
| IMC previo embarazo                   | 37.29068808490803                                                                                                                                                                                                                                                         |
| Patología obstétrica                  | <input checked="" type="radio"/> no<br><input type="radio"/> si                                                                                                                                                                                                           |
| Diabetes pregestacional               | <input checked="" type="radio"/> no<br><input type="radio"/> si                                                                                                                                                                                                           |
| Diabetes gestacional                  | <input checked="" type="radio"/> no<br><input type="radio"/> si                                                                                                                                                                                                           |



|                                            |                                                                                                                                                                                      |
|--------------------------------------------|--------------------------------------------------------------------------------------------------------------------------------------------------------------------------------------|
| Diabetes gestacional con insulina          | <input checked="" type="radio"/> no<br><input type="radio"/> si                                                                                                                      |
| Diabetes gestacional con dieta y ejercicio | <input checked="" type="radio"/> no<br><input type="radio"/> si                                                                                                                      |
| Percentil fetos previos                    | <input checked="" type="radio"/> Nada<br><input type="radio"/> percentil menor de 10<br><input type="radio"/> percentil entre 10 y 90<br><input type="radio"/> percentil mayor de 90 |
| Exfumadora                                 | <input checked="" type="radio"/> Nada<br><input type="radio"/> menos de 5 años<br><input type="radio"/> 5 a 10 años<br><input type="radio"/> mayor o igual a 10 años                 |
| Hábito tabáquico                           | <input checked="" type="radio"/> no<br><input type="radio"/> si                                                                                                                      |
| fumadora                                   | [*DATA REMOVED*]                                                                                                                                                                     |
| Consumo otros tóxicos                      | <input checked="" type="radio"/> no<br><input type="radio"/> si                                                                                                                      |
| Hb 1T                                      | [*DATA REMOVED*]                                                                                                                                                                     |
| Htc 1T                                     | [*DATA REMOVED*]                                                                                                                                                                     |
| Hb 2T                                      | [*DATA REMOVED*]                                                                                                                                                                     |
| HTC 2T                                     | [*DATA REMOVED*]                                                                                                                                                                     |
| Hb 3T                                      | [*DATA REMOVED*]                                                                                                                                                                     |
| HTC 3T                                     | [*DATA REMOVED*]                                                                                                                                                                     |
| Suplemento FE oral                         | <input type="radio"/> si<br><input checked="" type="radio"/> no                                                                                                                      |
| Suplemento fe iv                           | <input type="radio"/> si<br><input checked="" type="radio"/> no                                                                                                                      |
| Transfusión                                | <input checked="" type="radio"/> no<br><input type="radio"/> si                                                                                                                      |
| Solicitada Vit D                           | <input checked="" type="radio"/> no<br><input type="radio"/> si                                                                                                                      |
| Deficit vit D                              | <input type="radio"/> no<br><input type="radio"/> si                                                                                                                                 |
| Suplemento vit D                           | <input type="radio"/> si<br><input type="radio"/> no                                                                                                                                 |

|                       |                                                                                                                                                                                                                                                                                                                                                                                                              |
|-----------------------|--------------------------------------------------------------------------------------------------------------------------------------------------------------------------------------------------------------------------------------------------------------------------------------------------------------------------------------------------------------------------------------------------------------|
| Dieta, cuestionario   | <input checked="" type="radio"/> sí<br><input type="radio"/> no                                                                                                                                                                                                                                                                                                                                              |
| Leche entera          | <input checked="" type="radio"/> Nunca o menos 1 vez al mes<br><input type="radio"/> 1 a 3 veces mes<br><input type="radio"/> 1 vez semana<br><input type="radio"/> 2 a 4 veces semana<br><input type="radio"/> 5 a 6 veces semana<br><input type="radio"/> 1 vez al día<br><input type="radio"/> 2 a 3 veces al día<br><input type="radio"/> 5 a 6 veces al día<br><input type="radio"/> más 6 veces al día |
| Leche semidesnatada   | <input type="radio"/> Nunca o menos 1 vez al mes<br><input type="radio"/> 1 a 3 veces mes<br><input type="radio"/> 1 vez semana<br><input type="radio"/> 2 a 4 veces semana<br><input type="radio"/> 5 a 6 veces semana<br><input checked="" type="radio"/> 1 vez al día<br><input type="radio"/> 2 a 3 veces al día<br><input type="radio"/> 5 a 6 veces al día<br><input type="radio"/> mas 6 veces al día |
| Leche desnatada       | <input checked="" type="radio"/> Nunca o menos 1 vez al mes<br><input type="radio"/> 1 a 3 veces mes<br><input type="radio"/> 1 vez semana<br><input type="radio"/> 2 a 4 veces semana<br><input type="radio"/> 5 a 6 veces semana<br><input type="radio"/> 1 vez al día<br><input type="radio"/> 2 a 3 veces al día<br><input type="radio"/> 5 a 6 veces al día<br><input type="radio"/> más 6 veces al día |
| Leche condensada      | <input checked="" type="radio"/> Nunca o menos 1 vez al mes<br><input type="radio"/> 1 a 3 veces mes<br><input type="radio"/> 1 vez semana<br><input type="radio"/> 2 a 4 veces semana<br><input type="radio"/> 5 a 6 veces semana<br><input type="radio"/> 1 vez al día<br><input type="radio"/> 2 a 3 veces al día<br><input type="radio"/> 5 a 6 veces al día<br><input type="radio"/> más 6 veces al día |
| nata o crema de leche | <input type="radio"/> Nunca o menos 1 vez al mes<br><input checked="" type="radio"/> 1 a 3 veces mes<br><input type="radio"/> 1 vez semana<br><input type="radio"/> 2 a 4 veces semana<br><input type="radio"/> 5 a 6 veces semana<br><input type="radio"/> 1 vez al día<br><input type="radio"/> 2 a 3 veces al día<br><input type="radio"/> 5 a 6 veces al día<br><input type="radio"/> más 6 veces al día |

---

Yogurt Entero

- ☒ Nunca o menos 1 vez al mes  
☐ 1 a 3 veces mes  
☐ 1 vez semana  
☐ 2 a 4 veces semana  
☐ 5 a 6 veces semana  
☐ 1 vez al día  
☐ 2 a 3 veces al día  
☐ 5 a 6 veces al día  
☐ más 6 veces al día

---

Yogurt desnatado

- ☒ Nunca o menos 1 vez al mes  
☐ 1 a 3 veces mes  
☐ 1 vez semana  
☐ 2 a 4 veces semana  
☐ 5 a 6 veces semana  
☐ 1 vez al día  
☐ 2 a 3 veces al día  
☐ 5 a 6 veces al día  
☐ más 6 veces al día

---

100g requesón o queso blando o queso fresco

- ☐ Nunca o menos 1 vez al mes  
☒ 1 a 3 veces mes  
☐ 1 vez semana  
☐ 2 a 4 veces semana  
☐ 5 a 6 veces semana  
☐ 1 vez al día  
☐ 2 a 3 veces al día  
☐ 5 a 6 veces al día  
☐ más 6 veces al día

---

queso curado o semicurado o cremoso

- ☐ Nunca o menos 1 vez al mes  
☐ 1 a 3 veces mes  
☒ 1 vez semana  
☐ 2 a 4 veces semana  
☐ 5 a 6 veces semana  
☐ 1 vez al día  
☐ 2 a 3 veces al día  
☐ 5 a 6 veces al día  
☐ más 6 veces al día

---

natillas flan pudding

- ☒ Nunca o menos 1 vez al mes  
☐ 1 a 3 veces mes  
☐ 1 vez semana  
☐ 2 a 4 veces semana  
☐ 5 a 6 veces semana  
☐ 1 vez al día  
☐ 2 a 3 veces al día  
☐ 5 a 6 veces al día  
☐ más 6 veces al día

---

Helado

- ☐ Nunca o menos 1 vez al mes  
☒ 1 a 3 veces mes  
☐ 1 vez semana  
☐ 2 a 4 veces semana  
☐ 5 a 6 veces semana  
☐ 1 vez al día  
☐ 2 a 3 veces al día  
☐ 5 a 6 veces al día  
☐ más 6 veces al día

|                                      |                                                                                                                                                                                                                                                                                                                                                                                                              |
|--------------------------------------|--------------------------------------------------------------------------------------------------------------------------------------------------------------------------------------------------------------------------------------------------------------------------------------------------------------------------------------------------------------------------------------------------------------|
| huevo                                | <input type="radio"/> Nunca o menos 1 vez al mes<br><input type="radio"/> 1 a 3 veces mes<br><input type="radio"/> 1 vez semana<br><input checked="" type="radio"/> 2 a 4 veces semana<br><input type="radio"/> 5 a 6 veces semana<br><input type="radio"/> 1 vez al día<br><input type="radio"/> 2 a 3 veces al día<br><input type="radio"/> 5 a 6 veces al día<br><input type="radio"/> más 6 veces al día |
| Pollo con piel                       | <input type="radio"/> Nunca o menos 1 vez al mes<br><input type="radio"/> 1 a 3 veces mes<br><input checked="" type="radio"/> 1 vez semana<br><input type="radio"/> 2 a 4 veces semana<br><input type="radio"/> 5 a 6 veces semana<br><input type="radio"/> 1 vez al día<br><input type="radio"/> 2 a 3 veces al día<br><input type="radio"/> 5 a 6 veces al día<br><input type="radio"/> más 6 veces al día |
| pollo sin piel                       | <input type="radio"/> Nunca o menos 1 vez al mes<br><input type="radio"/> 1 a 3 veces mes<br><input checked="" type="radio"/> 1 vez semana<br><input type="radio"/> 2 a 4 veces semana<br><input type="radio"/> 5 a 6 veces semana<br><input type="radio"/> 1 vez al día<br><input type="radio"/> 2 a 3 veces al día<br><input type="radio"/> 5 a 6 veces al día<br><input type="radio"/> más 6 veces al día |
| Ternera o cerdo o cordero            | <input type="radio"/> Nunca o menos 1 vez al mes<br><input checked="" type="radio"/> 1 a 3 veces mes<br><input type="radio"/> 1 vez semana<br><input type="radio"/> 2 a 4 veces semana<br><input type="radio"/> 5 a 6 veces semana<br><input type="radio"/> 1 vez al día<br><input type="radio"/> 2 a 3 veces al día<br><input type="radio"/> 5 a 6 veces al día<br><input type="radio"/> más 6 veces al día |
| carne caza: Conejo o codorniz o pato | <input checked="" type="radio"/> Nunca o menos 1 vez al mes<br><input type="radio"/> 1 a 3 veces mes<br><input type="radio"/> 1 vez semana<br><input type="radio"/> 2 a 4 veces semana<br><input type="radio"/> 5 a 6 veces semana<br><input type="radio"/> 1 vez al día<br><input type="radio"/> 2 a 3 veces al día<br><input type="radio"/> 5 a 6 veces al día<br><input type="radio"/> más 6 veces al día |
| Hígado de ternera o cerdo o pollo    | <input checked="" type="radio"/> Nunca o menos 1 vez al mes<br><input type="radio"/> 1 a 3 veces mes<br><input type="radio"/> 1 vez semana<br><input type="radio"/> 2 a 4 veces semana<br><input type="radio"/> 5 a 6 veces semana<br><input type="radio"/> 1 vez al día<br><input type="radio"/> 2 a 3 veces al día<br><input type="radio"/> 5 a 6 veces al día<br><input type="radio"/> más 6 veces al día |

---

Vísceras

- ☒ Nunca o menos 1 vez al mes  
☐ 1 a 3 veces mes  
☐ 1 vez semana  
☐ 2 a 4 veces semana  
☐ 5 a 6 veces semana  
☐ 1 vez al día  
☐ 2 a 3 veces al día  
☐ 5 a 6 veces al día  
☐ más 6 veces al día

---

Embutido

- ☐ Nunca o menos 1 vez al mes  
☒ 1 a 3 veces mes  
☐ 1 vez semana  
☐ 2 a 4 veces semana  
☐ 5 a 6 veces semana  
☐ 1 vez al día  
☐ 2 a 3 veces al día  
☐ 5 a 6 veces al día  
☐ más 6 veces al día

---

Salchicha o similar

- ☐ Nunca o menos 1 vez al mes  
☒ 1 a 3 veces mes  
☐ 1 vez semana  
☐ 2 a 4 veces semana  
☐ 5 a 6 veces semana  
☐ 1 vez al día  
☐ 2 a 3 veces al día  
☐ 5 a 6 veces al día  
☐ más 6 veces al día

---

Pate o foiegras

- ☒ Nunca o menos 1 vez al mes  
☐ 1 a 3 veces mes  
☐ 1 vez semana  
☐ 2 a 4 veces semana  
☐ 5 a 6 veces semana  
☐ 1 vez al día  
☐ 2 a 3 veces al día  
☐ 5 a 6 veces al día  
☐ más 6 veces al día

---

Hamburguesa

- ☐ Nunca o menos 1 vez al mes  
☒ 1 a 3 veces mes  
☐ 1 vez semana  
☐ 2 a 4 veces semana  
☐ 5 a 6 veces semana  
☐ 1 vez al día  
☐ 2 a 3 veces al día  
☐ 5 a 6 veces al día  
☐ más 6 veces al día

---

tocino o bacon

- ☒ Nunca o menos 1 vez al mes  
☐ 1 a 3 veces mes  
☐ 1 vez semana  
☐ 2 a 4 veces semana  
☐ 5 a 6 veces semana  
☐ 1 vez al día  
☐ 2 a 3 veces al día  
☐ 5 a 6 veces al día  
☐ más 6 veces al día

---

Pescado frito

- ☐ Nunca o menos 1 vez al mes  
☒ 1 a 3 veces mes  
☐ 1 vez semana  
☐ 2 a 4 veces semana  
☐ 5 a 6 veces semana  
☐ 1 vez al día  
☐ 2 a 3 veces al día  
☐ 5 a 6 veces al día  
☐ más 6 veces al día

---

pescado hervido blanco

- ☐ Nunca o menos 1 vez al mes  
☒ 1 a 3 veces mes  
☐ 1 vez semana  
☐ 2 a 4 veces semana  
☐ 5 a 6 veces semana  
☐ 1 vez al día  
☐ 2 a 3 veces al día  
☐ 5 a 6 veces al día  
☐ más 6 veces al día

---

pescado hervido azul

- ☒ Nunca o menos 1 vez al mes  
☐ 1 a 3 veces mes  
☐ 1 vez semana  
☐ 2 a 4 veces semana  
☐ 5 a 6 veces semana  
☐ 1 vez al día  
☐ 2 a 3 veces al día  
☐ 5 a 6 veces al día  
☐ más 6 veces al día

---

otros pescado azul

- ☐ Nunca o menos 1 vez al mes  
☒ 1 a 3 veces mes  
☐ 1 vez semana  
☐ 2 a 4 veces semana  
☐ 5 a 6 veces semana  
☐ 1 vez al día  
☐ 2 a 3 veces al día  
☐ 5 a 6 veces al día  
☐ más 6 veces al día

---

atun conserva

- ☐ Nunca o menos 1 vez al mes  
☐ 1 a 3 veces mes  
☒ 1 vez semana  
☐ 2 a 4 veces semana  
☐ 5 a 6 veces semana  
☐ 1 vez al día  
☐ 2 a 3 veces al día  
☐ 5 a 6 veces al día  
☐ más 6 veces al día

---

sardina conserva

- ☒ Nunca o menos 1 vez al mes  
☐ 1 a 3 veces mes  
☐ 1 vez semana  
☐ 2 a 4 veces semana  
☐ 5 a 6 veces semana  
☐ 1 vez al día  
☐ 2 a 3 veces al día  
☐ 5 a 6 veces al día  
☐ más 6 veces al día

|                                         |                                                                                                                                                                                                                                                                                                                                                                                                              |
|-----------------------------------------|--------------------------------------------------------------------------------------------------------------------------------------------------------------------------------------------------------------------------------------------------------------------------------------------------------------------------------------------------------------------------------------------------------------|
| pescado ahumado                         | <input checked="" type="radio"/> Nunca o menos 1 vez al mes<br><input type="radio"/> 1 a 3 veces mes<br><input type="radio"/> 1 vez semana<br><input type="radio"/> 2 a 4 veces semana<br><input type="radio"/> 5 a 6 veces semana<br><input type="radio"/> 1 vez al día<br><input type="radio"/> 2 a 3 veces al día<br><input type="radio"/> 5 a 6 veces al día<br><input type="radio"/> más 6 veces al día |
| almejas o mejillones o ostras unos 100g | <input checked="" type="radio"/> Nunca o menos 1 vez al mes<br><input type="radio"/> 1 a 3 veces mes<br><input type="radio"/> 1 vez semana<br><input type="radio"/> 2 a 4 veces semana<br><input type="radio"/> 5 a 6 veces semana<br><input type="radio"/> 1 vez al día<br><input type="radio"/> 2 a 3 veces al día<br><input type="radio"/> 5 a 6 veces al día<br><input type="radio"/> más 6 veces al día |
| calamar o chipiron o sepia unos 100g    | <input type="radio"/> Nunca o menos 1 vez al mes<br><input type="radio"/> 1 a 3 veces mes<br><input type="radio"/> 1 vez semana<br><input checked="" type="radio"/> 2 a 4 veces semana<br><input type="radio"/> 5 a 6 veces semana<br><input type="radio"/> 1 vez al día<br><input type="radio"/> 2 a 3 veces al día<br><input type="radio"/> 5 a 6 veces al día<br><input type="radio"/> más 6 veces al día |
| marisco unos 100g                       | <input type="radio"/> Nunca o menos 1 vez al mes<br><input checked="" type="radio"/> 1 a 3 veces mes<br><input type="radio"/> 1 vez semana<br><input type="radio"/> 2 a 4 veces semana<br><input type="radio"/> 5 a 6 veces semana<br><input type="radio"/> 1 vez al día<br><input type="radio"/> 2 a 3 veces al día<br><input type="radio"/> 5 a 6 veces al día<br><input type="radio"/> más 6 veces al día |
| Espinacas o acelgas cocinadas           | <input checked="" type="radio"/> Nunca o menos 1 vez al mes<br><input type="radio"/> 1 a 3 veces mes<br><input type="radio"/> 1 vez semana<br><input type="radio"/> 2 a 4 veces semana<br><input type="radio"/> 5 a 6 veces semana<br><input type="radio"/> 1 vez al día<br><input type="radio"/> 2 a 3 veces al día<br><input type="radio"/> 5 a 6 veces al día<br><input type="radio"/> más 6 veces al día |
| Col o coliflor o brocoli cocinado       | <input checked="" type="radio"/> Nunca o menos 1 vez al mes<br><input type="radio"/> 1 a 3 veces mes<br><input type="radio"/> 1 vez semana<br><input type="radio"/> 2 a 4 veces semana<br><input type="radio"/> 5 a 6 veces semana<br><input type="radio"/> 1 vez al día<br><input type="radio"/> 2 a 3 veces al día<br><input type="radio"/> 5 a 6 veces al día<br><input type="radio"/> más 6 veces al día |

---

Lechuga o endivia o escarola

- ☐ Nunca o menos 1 vez al mes  
☐ 1 a 3 veces mes  
☐ 1 vez semana  
☒ 2 a 4 veces semana  
☐ 5 a 6 veces semana  
☐ 1 vez al día  
☐ 2 a 3 veces al día  
☐ 5 a 6 veces al día  
☐ más 6 veces al día

---

tomate ensalada

- ☒ Nunca o menos 1 vez al mes  
☐ 1 a 3 veces mes  
☐ 1 vez semana  
☐ 2 a 4 veces semana  
☐ 5 a 6 veces semana  
☐ 1 vez al día  
☐ 2 a 3 veces al día  
☐ 5 a 6 veces al día  
☐ más 6 veces al día

---

cebolla

- ☒ Nunca o menos 1 vez al mes  
☐ 1 a 3 veces mes  
☐ 1 vez semana  
☐ 2 a 4 veces semana  
☐ 5 a 6 veces semana  
☐ 1 vez al día  
☐ 2 a 3 veces al día  
☐ 5 a 6 veces al día  
☐ más 6 veces al día

---

Zanahoria o calabaza

- ☐ Nunca o menos 1 vez al mes  
☒ 1 a 3 veces mes  
☐ 1 vez semana  
☐ 2 a 4 veces semana  
☐ 5 a 6 veces semana  
☐ 1 vez al día  
☐ 2 a 3 veces al día  
☐ 5 a 6 veces al día  
☐ más 6 veces al día

---

Judías verdes

- ☒ Nunca o menos 1 vez al mes  
☐ 1 a 3 veces mes  
☐ 1 vez semana  
☐ 2 a 4 veces semana  
☐ 5 a 6 veces semana  
☐ 1 vez al día  
☐ 2 a 3 veces al día  
☐ 5 a 6 veces al día  
☐ más 6 veces al día

---

Berenjena o calabacin o pepino

- ☐ Nunca o menos 1 vez al mes  
☐ 1 a 3 veces mes  
☐ 1 vez semana  
☒ 2 a 4 veces semana  
☐ 5 a 6 veces semana  
☐ 1 vez al día  
☐ 2 a 3 veces al día  
☐ 5 a 6 veces al día  
☐ más 6 veces al día



---

|          |                                                                                                                                                                                                                                                                                                                                                                                                              |
|----------|--------------------------------------------------------------------------------------------------------------------------------------------------------------------------------------------------------------------------------------------------------------------------------------------------------------------------------------------------------------------------------------------------------------|
| pimiento | <input type="radio"/> Nunca o menos 1 vez al mes<br><input type="radio"/> 1 a 3 veces mes<br><input checked="" type="radio"/> 1 vez semana<br><input type="radio"/> 2 a 4 veces semana<br><input type="radio"/> 5 a 6 veces semana<br><input type="radio"/> 1 vez al día<br><input type="radio"/> 2 a 3 veces al día<br><input type="radio"/> 5 a 6 veces al día<br><input type="radio"/> más 6 veces al día |
|----------|--------------------------------------------------------------------------------------------------------------------------------------------------------------------------------------------------------------------------------------------------------------------------------------------------------------------------------------------------------------------------------------------------------------|

---

|           |                                                                                                                                                                                                                                                                                                                                                                                                              |
|-----------|--------------------------------------------------------------------------------------------------------------------------------------------------------------------------------------------------------------------------------------------------------------------------------------------------------------------------------------------------------------------------------------------------------------|
| alcachofa | <input type="radio"/> Nunca o menos 1 vez al mes<br><input type="radio"/> 1 a 3 veces mes<br><input checked="" type="radio"/> 1 vez semana<br><input type="radio"/> 2 a 4 veces semana<br><input type="radio"/> 5 a 6 veces semana<br><input type="radio"/> 1 vez al día<br><input type="radio"/> 2 a 3 veces al día<br><input type="radio"/> 5 a 6 veces al día<br><input type="radio"/> más 6 veces al día |
|-----------|--------------------------------------------------------------------------------------------------------------------------------------------------------------------------------------------------------------------------------------------------------------------------------------------------------------------------------------------------------------------------------------------------------------|

---

|            |                                                                                                                                                                                                                                                                                                                                                                                                              |
|------------|--------------------------------------------------------------------------------------------------------------------------------------------------------------------------------------------------------------------------------------------------------------------------------------------------------------------------------------------------------------------------------------------------------------|
| espárragos | <input type="radio"/> Nunca o menos 1 vez al mes<br><input checked="" type="radio"/> 1 a 3 veces mes<br><input type="radio"/> 1 vez semana<br><input type="radio"/> 2 a 4 veces semana<br><input type="radio"/> 5 a 6 veces semana<br><input type="radio"/> 1 vez al día<br><input type="radio"/> 2 a 3 veces al día<br><input type="radio"/> 5 a 6 veces al día<br><input type="radio"/> más 6 veces al día |
|------------|--------------------------------------------------------------------------------------------------------------------------------------------------------------------------------------------------------------------------------------------------------------------------------------------------------------------------------------------------------------------------------------------------------------|

---

|              |                                                                                                                                                                                                                                                                                                                                                                                                              |
|--------------|--------------------------------------------------------------------------------------------------------------------------------------------------------------------------------------------------------------------------------------------------------------------------------------------------------------------------------------------------------------------------------------------------------------|
| maíz hervido | <input type="radio"/> Nunca o menos 1 vez al mes<br><input type="radio"/> 1 a 3 veces mes<br><input checked="" type="radio"/> 1 vez semana<br><input type="radio"/> 2 a 4 veces semana<br><input type="radio"/> 5 a 6 veces semana<br><input type="radio"/> 1 vez al día<br><input type="radio"/> 2 a 3 veces al día<br><input type="radio"/> 5 a 6 veces al día<br><input type="radio"/> más 6 veces al día |
|--------------|--------------------------------------------------------------------------------------------------------------------------------------------------------------------------------------------------------------------------------------------------------------------------------------------------------------------------------------------------------------------------------------------------------------|

---

|           |                                                                                                                                                                                                                                                                                                                                                                                                              |
|-----------|--------------------------------------------------------------------------------------------------------------------------------------------------------------------------------------------------------------------------------------------------------------------------------------------------------------------------------------------------------------------------------------------------------------|
| legumbres | <input type="radio"/> Nunca o menos 1 vez al mes<br><input type="radio"/> 1 a 3 veces mes<br><input type="radio"/> 1 vez semana<br><input checked="" type="radio"/> 2 a 4 veces semana<br><input type="radio"/> 5 a 6 veces semana<br><input type="radio"/> 1 vez al día<br><input type="radio"/> 2 a 3 veces al día<br><input type="radio"/> 5 a 6 veces al día<br><input type="radio"/> más 6 veces al día |
|-----------|--------------------------------------------------------------------------------------------------------------------------------------------------------------------------------------------------------------------------------------------------------------------------------------------------------------------------------------------------------------------------------------------------------------|

---

|                       |                                                                                                                                                                                                                                                                                                                                                                                                              |
|-----------------------|--------------------------------------------------------------------------------------------------------------------------------------------------------------------------------------------------------------------------------------------------------------------------------------------------------------------------------------------------------------------------------------------------------------|
| naranjas o mandarinas | <input type="radio"/> Nunca o menos 1 vez al mes<br><input checked="" type="radio"/> 1 a 3 veces mes<br><input type="radio"/> 1 vez semana<br><input type="radio"/> 2 a 4 veces semana<br><input type="radio"/> 5 a 6 veces semana<br><input type="radio"/> 1 vez al día<br><input type="radio"/> 2 a 3 veces al día<br><input type="radio"/> 5 a 6 veces al día<br><input type="radio"/> más 6 veces al día |
|-----------------------|--------------------------------------------------------------------------------------------------------------------------------------------------------------------------------------------------------------------------------------------------------------------------------------------------------------------------------------------------------------------------------------------------------------|

---

---

zum natural fruta

- ☐ Nunca o menos 1 vez al mes  
☐ 1 a 3 veces mes  
☐ 1 vez semana  
☒ 2 a 4 veces semana  
☐ 5 a 6 veces semana  
☐ 1 vez al día  
☐ 2 a 3 veces al día  
☐ 5 a 6 veces al día  
☐ más 6 veces al día

---

platano

- ☐ Nunca o menos 1 vez al mes  
☒ 1 a 3 veces mes  
☐ 1 vez semana  
☐ 2 a 4 veces semana  
☐ 5 a 6 veces semana  
☐ 1 vez al día  
☐ 2 a 3 veces al día  
☐ 5 a 6 veces al día  
☐ más 6 veces al día

---

manzana o pera

- ☐ Nunca o menos 1 vez al mes  
☒ 1 a 3 veces mes  
☐ 1 vez semana  
☐ 2 a 4 veces semana  
☐ 5 a 6 veces semana  
☐ 1 vez al día  
☐ 2 a 3 veces al día  
☐ 5 a 6 veces al día  
☐ más 6 veces al día

---

melocotón o nectarina

- ☐ Nunca o menos 1 vez al mes  
☐ 1 a 3 veces mes  
☒ 1 vez semana  
☐ 2 a 4 veces semana  
☐ 5 a 6 veces semana  
☐ 1 vez al día  
☐ 2 a 3 veces al día  
☐ 5 a 6 veces al día  
☐ más 6 veces al día

---

sandia o melon

- ☐ Nunca o menos 1 vez al mes  
☐ 1 a 3 veces mes  
☒ 1 vez semana  
☐ 2 a 4 veces semana  
☐ 5 a 6 veces semana  
☐ 1 vez al día  
☐ 2 a 3 veces al día  
☐ 5 a 6 veces al día  
☐ más 6 veces al día

---

uva

- ☒ Nunca o menos 1 vez al mes  
☐ 1 a 3 veces mes  
☐ 1 vez semana  
☐ 2 a 4 veces semana  
☐ 5 a 6 veces semana  
☐ 1 vez al día  
☐ 2 a 3 veces al día  
☐ 5 a 6 veces al día  
☐ más 6 veces al día

---

bruna o ciruela

- ☒ Nunca o menos 1 vez al mes  
☐ 1 a 3 veces mes  
☐ 1 vez semana  
☐ 2 a 4 veces semana  
☐ 5 a 6 veces semana  
☐ 1 vez al día  
☐ 2 a 3 veces al día  
☐ 5 a 6 veces al día  
☐ más 6 veces al día

---

kiwi

- ☒ Nunca o menos 1 vez al mes  
☐ 1 a 3 veces mes  
☐ 1 vez semana  
☐ 2 a 4 veces semana  
☐ 5 a 6 veces semana  
☐ 1 vez al día  
☐ 2 a 3 veces al día  
☐ 5 a 6 veces al día  
☐ más 6 veces al día

---

aceituna

- ☒ Nunca o menos 1 vez al mes  
☐ 1 a 3 veces mes  
☐ 1 vez semana  
☐ 2 a 4 veces semana  
☐ 5 a 6 veces semana  
☐ 1 vez al día  
☐ 2 a 3 veces al día  
☐ 5 a 6 veces al día  
☐ más 6 veces al día

---

frutos secos

- ☐ Nunca o menos 1 vez al mes  
☐ 1 a 3 veces mes  
☐ 1 vez semana  
☒ 2 a 4 veces semana  
☐ 5 a 6 veces semana  
☐ 1 vez al día  
☐ 2 a 3 veces al día  
☐ 5 a 6 veces al día  
☐ más 6 veces al día

---

pan blanco

- ☐ Nunca o menos 1 vez al mes  
☐ 1 a 3 veces mes  
☐ 1 vez semana  
☐ 2 a 4 veces semana  
☐ 5 a 6 veces semana  
☒ 1 vez al día  
☐ 2 a 3 veces al día  
☐ 5 a 6 veces al día  
☐ más 6 veces al día

---

pan integral

- ☐ Nunca o menos 1 vez al mes  
☐ 1 a 3 veces mes  
☒ 1 vez semana  
☐ 2 a 4 veces semana  
☐ 5 a 6 veces semana  
☐ 1 vez al día  
☐ 2 a 3 veces al día  
☐ 5 a 6 veces al día  
☐ más 6 veces al día

|                          |                                                                                                                                                                                                                                                                                                                                                                                                              |
|--------------------------|--------------------------------------------------------------------------------------------------------------------------------------------------------------------------------------------------------------------------------------------------------------------------------------------------------------------------------------------------------------------------------------------------------------|
| cereales desayuno        | <input checked="" type="radio"/> Nunca o menos 1 vez al mes<br><input type="radio"/> 1 a 3 veces mes<br><input type="radio"/> 1 vez semana<br><input type="radio"/> 2 a 4 veces semana<br><input type="radio"/> 5 a 6 veces semana<br><input type="radio"/> 1 vez al día<br><input type="radio"/> 2 a 3 veces al día<br><input type="radio"/> 5 a 6 veces al día<br><input type="radio"/> más 6 veces al día |
| patatas fritas           | <input type="radio"/> Nunca o menos 1 vez al mes<br><input type="radio"/> 1 a 3 veces mes<br><input checked="" type="radio"/> 1 vez semana<br><input type="radio"/> 2 a 4 veces semana<br><input type="radio"/> 5 a 6 veces semana<br><input type="radio"/> 1 vez al día<br><input type="radio"/> 2 a 3 veces al día<br><input type="radio"/> 5 a 6 veces al día<br><input type="radio"/> más 6 veces al día |
| patatas cocidas o asadas | <input type="radio"/> Nunca o menos 1 vez al mes<br><input checked="" type="radio"/> 1 a 3 veces mes<br><input type="radio"/> 1 vez semana<br><input type="radio"/> 2 a 4 veces semana<br><input type="radio"/> 5 a 6 veces semana<br><input type="radio"/> 1 vez al día<br><input type="radio"/> 2 a 3 veces al día<br><input type="radio"/> 5 a 6 veces al día<br><input type="radio"/> más 6 veces al día |
| bolsa papas              | <input type="radio"/> Nunca o menos 1 vez al mes<br><input type="radio"/> 1 a 3 veces mes<br><input type="radio"/> 1 vez semana<br><input checked="" type="radio"/> 2 a 4 veces semana<br><input type="radio"/> 5 a 6 veces semana<br><input type="radio"/> 1 vez al día<br><input type="radio"/> 2 a 3 veces al día<br><input type="radio"/> 5 a 6 veces al día<br><input type="radio"/> más 6 veces al día |
| arroz cocinado           | <input type="radio"/> Nunca o menos 1 vez al mes<br><input type="radio"/> 1 a 3 veces mes<br><input checked="" type="radio"/> 1 vez semana<br><input type="radio"/> 2 a 4 veces semana<br><input type="radio"/> 5 a 6 veces semana<br><input type="radio"/> 1 vez al día<br><input type="radio"/> 2 a 3 veces al día<br><input type="radio"/> 5 a 6 veces al día<br><input type="radio"/> más 6 veces al día |
| pasta                    | <input type="radio"/> Nunca o menos 1 vez al mes<br><input type="radio"/> 1 a 3 veces mes<br><input checked="" type="radio"/> 1 vez semana<br><input type="radio"/> 2 a 4 veces semana<br><input type="radio"/> 5 a 6 veces semana<br><input type="radio"/> 1 vez al día<br><input type="radio"/> 2 a 3 veces al día<br><input type="radio"/> 5 a 6 veces al día<br><input type="radio"/> más 6 veces al día |

|                     |                                                                                                                                                                                                                                                                                                                                                                                                              |
|---------------------|--------------------------------------------------------------------------------------------------------------------------------------------------------------------------------------------------------------------------------------------------------------------------------------------------------------------------------------------------------------------------------------------------------------|
| pizza               | <input type="radio"/> Nunca o menos 1 vez al mes<br><input checked="" type="radio"/> 1 a 3 veces mes<br><input type="radio"/> 1 vez semana<br><input type="radio"/> 2 a 4 veces semana<br><input type="radio"/> 5 a 6 veces semana<br><input type="radio"/> 1 vez al día<br><input type="radio"/> 2 a 3 veces al día<br><input type="radio"/> 5 a 6 veces al día<br><input type="radio"/> más 6 veces al día |
| aceite oliva        | <input type="radio"/> Nunca o menos 1 vez al mes<br><input type="radio"/> 1 a 3 veces mes<br><input type="radio"/> 1 vez semana<br><input type="radio"/> 2 a 4 veces semana<br><input type="radio"/> 5 a 6 veces semana<br><input type="radio"/> 1 vez al día<br><input checked="" type="radio"/> 2 a 3 veces al día<br><input type="radio"/> 5 a 6 veces al día<br><input type="radio"/> más 6 veces al día |
| otros aceites       | <input checked="" type="radio"/> Nunca o menos 1 vez al mes<br><input type="radio"/> 1 a 3 veces mes<br><input type="radio"/> 1 vez semana<br><input type="radio"/> 2 a 4 veces semana<br><input type="radio"/> 5 a 6 veces semana<br><input type="radio"/> 1 vez al día<br><input type="radio"/> 2 a 3 veces al día<br><input type="radio"/> 5 a 6 veces al día<br><input type="radio"/> más 6 veces al día |
| margarina           | <input type="radio"/> Nunca o menos 1 vez al mes<br><input type="radio"/> 1 a 3 veces mes<br><input type="radio"/> 1 vez semana<br><input checked="" type="radio"/> 2 a 4 veces semana<br><input type="radio"/> 5 a 6 veces semana<br><input type="radio"/> 1 vez al día<br><input type="radio"/> 2 a 3 veces al día<br><input type="radio"/> 5 a 6 veces al día<br><input type="radio"/> más 6 veces al día |
| mantequilla         | <input type="radio"/> Nunca o menos 1 vez al mes<br><input type="radio"/> 1 a 3 veces mes<br><input checked="" type="radio"/> 1 vez semana<br><input type="radio"/> 2 a 4 veces semana<br><input type="radio"/> 5 a 6 veces semana<br><input type="radio"/> 1 vez al día<br><input type="radio"/> 2 a 3 veces al día<br><input type="radio"/> 5 a 6 veces al día<br><input type="radio"/> más 6 veces al día |
| galletas tipo maria | <input type="radio"/> Nunca o menos 1 vez al mes<br><input checked="" type="radio"/> 1 a 3 veces mes<br><input type="radio"/> 1 vez semana<br><input type="radio"/> 2 a 4 veces semana<br><input type="radio"/> 5 a 6 veces semana<br><input type="radio"/> 1 vez al día<br><input type="radio"/> 2 a 3 veces al día<br><input type="radio"/> 5 a 6 veces al día<br><input type="radio"/> más 6 veces al día |

---

galletas chocolate

- ☒ Nunca o menos 1 vez al mes  
☐ 1 a 3 veces mes  
☐ 1 vez semana  
☐ 2 a 4 veces semana  
☐ 5 a 6 veces semana  
☐ 1 vez al día  
☐ 2 a 3 veces al día  
☐ 5 a 6 veces al día  
☐ más 6 veces al día

---

bolleria

- ☒ Nunca o menos 1 vez al mes  
☐ 1 a 3 veces mes  
☐ 1 vez semana  
☐ 2 a 4 veces semana  
☐ 5 a 6 veces semana  
☐ 1 vez al día  
☐ 2 a 3 veces al día  
☐ 5 a 6 veces al día  
☐ más 6 veces al día

---

chocolate o bombones

- ☐ Nunca o menos 1 vez al mes  
☒ 1 a 3 veces mes  
☐ 1 vez semana  
☐ 2 a 4 veces semana  
☐ 5 a 6 veces semana  
☐ 1 vez al día  
☐ 2 a 3 veces al día  
☐ 5 a 6 veces al día  
☐ más 6 veces al día

---

chocolate polvo o colacao

- ☐ Nunca o menos 1 vez al mes  
☐ 1 a 3 veces mes  
☐ 1 vez semana  
☐ 2 a 4 veces semana  
☐ 5 a 6 veces semana  
☒ 1 vez al día  
☐ 2 a 3 veces al día  
☐ 5 a 6 veces al día  
☐ más 6 veces al día

---

vino tinto

- ☒ Nunca o menos 1 vez al mes  
☐ 1 a 3 veces mes  
☐ 1 vez semana  
☐ 2 a 4 veces semana  
☐ 5 a 6 veces semana  
☐ 1 vez al día  
☐ 2 a 3 veces al día  
☐ 5 a 6 veces al día  
☐ más 6 veces al día

---

vino blanco

- ☒ Nunca o menos 1 vez al mes  
☐ 1 a 3 veces mes  
☐ 1 vez semana  
☐ 2 a 4 veces semana  
☐ 5 a 6 veces semana  
☐ 1 vez al día  
☐ 2 a 3 veces al día  
☐ 5 a 6 veces al día  
☐ más 6 veces al día

---

|                    |                                                                                                                                                                                                                                                                                                                                                                                                              |
|--------------------|--------------------------------------------------------------------------------------------------------------------------------------------------------------------------------------------------------------------------------------------------------------------------------------------------------------------------------------------------------------------------------------------------------------|
| vino seco o vermut | <input checked="" type="radio"/> Nunca o menos 1 vez al mes<br><input type="radio"/> 1 a 3 veces mes<br><input type="radio"/> 1 vez semana<br><input type="radio"/> 2 a 4 veces semana<br><input type="radio"/> 5 a 6 veces semana<br><input type="radio"/> 1 vez al día<br><input type="radio"/> 2 a 3 veces al día<br><input type="radio"/> 5 a 6 veces al día<br><input type="radio"/> más 6 veces al día |
|--------------------|--------------------------------------------------------------------------------------------------------------------------------------------------------------------------------------------------------------------------------------------------------------------------------------------------------------------------------------------------------------------------------------------------------------|

---

|         |                                                                                                                                                                                                                                                                                                                                                                                                              |
|---------|--------------------------------------------------------------------------------------------------------------------------------------------------------------------------------------------------------------------------------------------------------------------------------------------------------------------------------------------------------------------------------------------------------------|
| cerveza | <input checked="" type="radio"/> Nunca o menos 1 vez al mes<br><input type="radio"/> 1 a 3 veces mes<br><input type="radio"/> 1 vez semana<br><input type="radio"/> 2 a 4 veces semana<br><input type="radio"/> 5 a 6 veces semana<br><input type="radio"/> 1 vez al día<br><input type="radio"/> 2 a 3 veces al día<br><input type="radio"/> 5 a 6 veces al día<br><input type="radio"/> más 6 veces al día |
|---------|--------------------------------------------------------------------------------------------------------------------------------------------------------------------------------------------------------------------------------------------------------------------------------------------------------------------------------------------------------------------------------------------------------------|

---

|                     |                                                                                                                                                                                                                                                                                                                                                                                                              |
|---------------------|--------------------------------------------------------------------------------------------------------------------------------------------------------------------------------------------------------------------------------------------------------------------------------------------------------------------------------------------------------------------------------------------------------------|
| cerveza sin alcohol | <input checked="" type="radio"/> Nunca o menos 1 vez al mes<br><input type="radio"/> 1 a 3 veces mes<br><input type="radio"/> 1 vez semana<br><input type="radio"/> 2 a 4 veces semana<br><input type="radio"/> 5 a 6 veces semana<br><input type="radio"/> 1 vez al día<br><input type="radio"/> 2 a 3 veces al día<br><input type="radio"/> 5 a 6 veces al día<br><input type="radio"/> más 6 veces al día |
|---------------------|--------------------------------------------------------------------------------------------------------------------------------------------------------------------------------------------------------------------------------------------------------------------------------------------------------------------------------------------------------------------------------------------------------------|

---

|         |                                                                                                                                                                                                                                                                                                                                                                                                              |
|---------|--------------------------------------------------------------------------------------------------------------------------------------------------------------------------------------------------------------------------------------------------------------------------------------------------------------------------------------------------------------------------------------------------------------|
| licores | <input checked="" type="radio"/> Nunca o menos 1 vez al mes<br><input type="radio"/> 1 a 3 veces mes<br><input type="radio"/> 1 vez semana<br><input type="radio"/> 2 a 4 veces semana<br><input type="radio"/> 5 a 6 veces semana<br><input type="radio"/> 1 vez al día<br><input type="radio"/> 2 a 3 veces al día<br><input type="radio"/> 5 a 6 veces al día<br><input type="radio"/> más 6 veces al día |
|---------|--------------------------------------------------------------------------------------------------------------------------------------------------------------------------------------------------------------------------------------------------------------------------------------------------------------------------------------------------------------------------------------------------------------|

---

|                       |                                                                                                                                                                                                                                                                                                                                                                                                              |
|-----------------------|--------------------------------------------------------------------------------------------------------------------------------------------------------------------------------------------------------------------------------------------------------------------------------------------------------------------------------------------------------------------------------------------------------------|
| ginebra o ron o vodka | <input checked="" type="radio"/> Nunca o menos 1 vez al mes<br><input type="radio"/> 1 a 3 veces mes<br><input type="radio"/> 1 vez semana<br><input type="radio"/> 2 a 4 veces semana<br><input type="radio"/> 5 a 6 veces semana<br><input type="radio"/> 1 vez al día<br><input type="radio"/> 2 a 3 veces al día<br><input type="radio"/> 5 a 6 veces al día<br><input type="radio"/> más 6 veces al día |
|-----------------------|--------------------------------------------------------------------------------------------------------------------------------------------------------------------------------------------------------------------------------------------------------------------------------------------------------------------------------------------------------------------------------------------------------------|

---

|                 |                                                                                                                                                                                                                                                                                                                                                                                                              |
|-----------------|--------------------------------------------------------------------------------------------------------------------------------------------------------------------------------------------------------------------------------------------------------------------------------------------------------------------------------------------------------------------------------------------------------------|
| refresco normal | <input checked="" type="radio"/> Nunca o menos 1 vez al mes<br><input type="radio"/> 1 a 3 veces mes<br><input type="radio"/> 1 vez semana<br><input type="radio"/> 2 a 4 veces semana<br><input type="radio"/> 5 a 6 veces semana<br><input type="radio"/> 1 vez al día<br><input type="radio"/> 2 a 3 veces al día<br><input type="radio"/> 5 a 6 veces al día<br><input type="radio"/> más 6 veces al día |
|-----------------|--------------------------------------------------------------------------------------------------------------------------------------------------------------------------------------------------------------------------------------------------------------------------------------------------------------------------------------------------------------------------------------------------------------|

---

---

refresco sin azúcar

- ☐ Nunca o menos 1 vez al mes  
☐ 1 a 3 veces mes  
☐ 1 vez semana  
☒ 2 a 4 veces semana  
☐ 5 a 6 veces semana  
☐ 1 vez al día  
☐ 2 a 3 veces al día  
☐ 5 a 6 veces al día  
☐ más 6 veces al día

---

Agua del grifo

- ☐ Nunca o menos 1 vez al mes  
☐ 1 a 3 veces mes  
☐ 1 vez semana  
☐ 2 a 4 veces semana  
☐ 5 a 6 veces semana  
☐ 1 vez al día  
☐ 2 a 3 veces al día  
☒ 5 a 6 veces al día  
☐ más 6 veces al día

---

agua embotellada sin gas

- ☐ Nunca o menos 1 vez al mes  
☐ 1 a 3 veces mes  
☐ 1 vez semana  
☐ 2 a 4 veces semana  
☐ 5 a 6 veces semana  
☐ 1 vez al día  
☐ 2 a 3 veces al día  
☒ 5 a 6 veces al día  
☐ más 6 veces al día

---

agua embotellada con gas

- ☒ Nunca o menos 1 vez al mes  
☐ 1 a 3 veces mes  
☐ 1 vez semana  
☐ 2 a 4 veces semana  
☐ 5 a 6 veces semana  
☐ 1 vez al día  
☐ 2 a 3 veces al día  
☐ 5 a 6 veces al día  
☐ más 6 veces al día

---

zumو frutas embasado

- ☒ Nunca o menos 1 vez al mes  
☐ 1 a 3 veces mes  
☐ 1 vez semana  
☐ 2 a 4 veces semana  
☐ 5 a 6 veces semana  
☐ 1 vez al día  
☐ 2 a 3 veces al día  
☐ 5 a 6 veces al día  
☐ más 6 veces al día

---

cafe

- ☐ Nunca o menos 1 vez al mes  
☐ 1 a 3 veces mes  
☒ 1 vez semana  
☐ 2 a 4 veces semana  
☐ 5 a 6 veces semana  
☐ 1 vez al día  
☐ 2 a 3 veces al día  
☐ 5 a 6 veces al día  
☐ más 6 veces al día



---

cafe descafeinado

- ☐ Nunca o menos 1 vez al mes  
☐ 1 a 3 veces mes  
☒ 1 vez semana  
☐ 2 a 4 veces semana  
☐ 5 a 6 veces semana  
☐ 1 vez al día  
☐ 2 a 3 veces al día  
☐ 5 a 6 veces al día  
☐ más 6 veces al día

---

te o infusión

- ☐ Nunca o menos 1 vez al mes  
☒ 1 a 3 veces mes  
☐ 1 vez semana  
☐ 2 a 4 veces semana  
☐ 5 a 6 veces semana  
☐ 1 vez al día  
☐ 2 a 3 veces al día  
☐ 5 a 6 veces al día  
☐ más 6 veces al día

---

sopa o puré verduras

- ☐ Nunca o menos 1 vez al mes  
☐ 1 a 3 veces mes  
☒ 1 vez semana  
☐ 2 a 4 veces semana  
☐ 5 a 6 veces semana  
☐ 1 vez al día  
☐ 2 a 3 veces al día  
☐ 5 a 6 veces al día  
☐ más 6 veces al día

---

croquetas pollo jamón

- ☐ Nunca o menos 1 vez al mes  
☒ 1 a 3 veces mes  
☐ 1 vez semana  
☐ 2 a 4 veces semana  
☐ 5 a 6 veces semana  
☐ 1 vez al día  
☐ 2 a 3 veces al día  
☐ 5 a 6 veces al día  
☐ más 6 veces al día

---

croquetas pescado

- ☐ Nunca o menos 1 vez al mes  
☒ 1 a 3 veces mes  
☐ 1 vez semana  
☐ 2 a 4 veces semana  
☐ 5 a 6 veces semana  
☐ 1 vez al día  
☐ 2 a 3 veces al día  
☐ 5 a 6 veces al día  
☐ más 6 veces al día

---

mayonesa

- ☐ Nunca o menos 1 vez al mes  
☒ 1 a 3 veces mes  
☐ 1 vez semana  
☐ 2 a 4 veces semana  
☐ 5 a 6 veces semana  
☐ 1 vez al día  
☐ 2 a 3 veces al día  
☐ 5 a 6 veces al día  
☐ más 6 veces al día

---

salsa tomate

- ☐ Nunca o menos 1 vez al mes  
☒ 1 a 3 veces mes  
☐ 1 vez semana  
☐ 2 a 4 veces semana  
☐ 5 a 6 veces semana  
☐ 1 vez al día  
☐ 2 a 3 veces al día  
☐ 5 a 6 veces al día  
☐ más 6 veces al día

---

ketchup

- ☐ Nunca o menos 1 vez al mes  
☒ 1 a 3 veces mes  
☐ 1 vez semana  
☐ 2 a 4 veces semana  
☐ 5 a 6 veces semana  
☐ 1 vez al día  
☐ 2 a 3 veces al día  
☐ 5 a 6 veces al día  
☐ más 6 veces al día

---

sal

- ☐ Nunca o menos 1 vez al mes  
☒ 1 a 3 veces mes  
☐ 1 vez semana  
☐ 2 a 4 veces semana  
☐ 5 a 6 veces semana  
☐ 1 vez al día  
☐ 2 a 3 veces al día  
☐ 5 a 6 veces al día  
☐ más 6 veces al día

---

ajo

- ☒ Nunca o menos 1 vez al mes  
☐ 1 a 3 veces mes  
☐ 1 vez semana  
☐ 2 a 4 veces semana  
☐ 5 a 6 veces semana  
☐ 1 vez al día  
☐ 2 a 3 veces al día  
☐ 5 a 6 veces al día  
☐ más 6 veces al día

---

mermelada o miel

- ☐ Nunca o menos 1 vez al mes  
☒ 1 a 3 veces mes  
☐ 1 vez semana  
☐ 2 a 4 veces semana  
☐ 5 a 6 veces semana  
☐ 1 vez al día  
☐ 2 a 3 veces al día  
☐ 5 a 6 veces al día  
☐ más 6 veces al día

---

azúcar

- ☐ Nunca o menos 1 vez al mes  
☐ 1 a 3 veces mes  
☒ 1 vez semana  
☐ 2 a 4 veces semana  
☐ 5 a 6 veces semana  
☐ 1 vez al día  
☐ 2 a 3 veces al día  
☐ 5 a 6 veces al día  
☐ más 6 veces al día

|                                       |                                                                                                                                                                                                                                                                                                                                                                                                                                                                                                                               |
|---------------------------------------|-------------------------------------------------------------------------------------------------------------------------------------------------------------------------------------------------------------------------------------------------------------------------------------------------------------------------------------------------------------------------------------------------------------------------------------------------------------------------------------------------------------------------------|
| Otro alimento                         | <hr/>                                                                                                                                                                                                                                                                                                                                                                                                                                                                                                                         |
| suplementos vitamínicos               | <input type="radio"/> si<br><input checked="" type="radio"/> no                                                                                                                                                                                                                                                                                                                                                                                                                                                               |
| suplementos vitamínicos               | <hr/>                                                                                                                                                                                                                                                                                                                                                                                                                                                                                                                         |
| dieta previa                          | <input type="radio"/> si<br><input checked="" type="radio"/> no                                                                                                                                                                                                                                                                                                                                                                                                                                                               |
| motivo dieta                          | <input checked="" type="radio"/> no dieta<br><input type="radio"/> control peso<br><input type="radio"/> control colesterol<br><input type="radio"/> control diabetes<br><input type="radio"/> problemas estómago<br><input type="radio"/> problemas vesícula o hepáticos<br><input type="radio"/> HTA o cardiopatía<br><input type="radio"/> problemas renales<br><input type="radio"/> alergia alimentaria<br><input type="radio"/> ácido úrico elevado<br><input type="radio"/> vegetariana<br><input type="radio"/> otros |
| cambio alimentos año previo gestación | <input checked="" type="radio"/> si<br><input type="radio"/> no                                                                                                                                                                                                                                                                                                                                                                                                                                                               |
| cambio lácteos                        | <input type="radio"/> eliminado<br><input type="radio"/> disminuido<br><input checked="" type="radio"/> igual<br><input type="radio"/> aumentado<br><input type="radio"/> no sabe                                                                                                                                                                                                                                                                                                                                             |
| cambio huevos                         | <input type="radio"/> eliminado<br><input checked="" type="radio"/> disminuido<br><input type="radio"/> igual<br><input type="radio"/> aumentado<br><input type="radio"/> no sabe                                                                                                                                                                                                                                                                                                                                             |
| cambio carne                          | <input type="radio"/> eliminado<br><input checked="" type="radio"/> disminuido<br><input type="radio"/> igual<br><input type="radio"/> aumentado<br><input type="radio"/> no sabe                                                                                                                                                                                                                                                                                                                                             |
| cambio pescado                        | <input type="radio"/> eliminado<br><input checked="" type="radio"/> disminuido<br><input type="radio"/> igual<br><input type="radio"/> aumentado<br><input type="radio"/> no sabe                                                                                                                                                                                                                                                                                                                                             |
| cambio verduras                       | <input type="radio"/> eliminado<br><input type="radio"/> disminuido<br><input checked="" type="radio"/> igual<br><input type="radio"/> aumentado<br><input type="radio"/> no sabe                                                                                                                                                                                                                                                                                                                                             |

|                            |                                                                                                                                                                                                                        |
|----------------------------|------------------------------------------------------------------------------------------------------------------------------------------------------------------------------------------------------------------------|
| cambio legumbres           | <input type="radio"/> eliminado<br><input checked="" type="radio"/> disminuido<br><input type="radio"/> igual<br><input type="radio"/> aumentado<br><input type="radio"/> no sabe                                      |
| cambio fruta               | <input type="radio"/> eliminado<br><input checked="" type="radio"/> disminuido<br><input type="radio"/> igual<br><input type="radio"/> aumentado<br><input type="radio"/> no sabe                                      |
| cambio pan                 | <input type="radio"/> eliminado<br><input type="radio"/> disminuido<br><input checked="" type="radio"/> igual<br><input type="radio"/> aumentado<br><input type="radio"/> no sabe                                      |
| cambio aceite oliva        | <input type="radio"/> eliminado<br><input type="radio"/> disminuido<br><input checked="" type="radio"/> igual<br><input type="radio"/> aumentado<br><input type="radio"/> no sabe                                      |
| cambio mante o margarina   | <input type="radio"/> eliminado<br><input type="radio"/> disminuido<br><input type="radio"/> igual<br><input checked="" type="radio"/> aumentado<br><input type="radio"/> no sabe                                      |
| cambio azúcar y dulces     | <input type="radio"/> eliminado<br><input type="radio"/> disminuido<br><input type="radio"/> igual<br><input checked="" type="radio"/> aumentado<br><input type="radio"/> no sabe                                      |
| cambio bebidas alcohólicas | <input type="radio"/> eliminado<br><input checked="" type="radio"/> disminuido<br><input type="radio"/> igual<br><input type="radio"/> aumentado<br><input type="radio"/> no sabe                                      |
| frecuencia comidas fritas  | <input type="radio"/> a diario<br><input type="radio"/> 5 a 6 veces semana<br><input type="radio"/> 2 a 4 veces semana<br><input checked="" type="radio"/> 1 vez semana<br><input type="radio"/> menos de 1 vez semana |
| carne                      | <input type="radio"/> no como<br><input type="radio"/> cruda<br><input type="radio"/> poco hecha<br><input checked="" type="radio"/> hecha<br><input type="radio"/> muy hecha                                          |
| grasa visible carne        | <input checked="" type="radio"/> quita toda<br><input type="radio"/> quita mayoría<br><input type="radio"/> quita un poco<br><input type="radio"/> no quita nada                                                       |

|                                |                                                                                                                                                                                                                                                          |
|--------------------------------|----------------------------------------------------------------------------------------------------------------------------------------------------------------------------------------------------------------------------------------------------------|
| cocina carne                   | <input checked="" type="radio"/> a la plancha<br><input type="radio"/> a la parrilla<br><input type="radio"/> asada<br><input type="radio"/> frita<br><input type="radio"/> guisada                                                                      |
| tostado quemado carne          | <input type="radio"/> nunca<br><input checked="" type="radio"/> 1 vez mes<br><input type="radio"/> 2 a 3 veces mes<br><input type="radio"/> 1 vez semana<br><input type="radio"/> 2 a 3 semanas                                                          |
| tostado quemado pescado        | <input checked="" type="radio"/> nunca<br><input type="radio"/> 1 vez mes<br><input type="radio"/> 2 a 3 veces mes<br><input type="radio"/> 1 vez semana<br><input type="radio"/> 2 a 3 semanas                                                          |
| socarrat paella                | <input type="radio"/> nunca<br><input type="radio"/> 1 vez mes<br><input checked="" type="radio"/> 2 a 3 veces mes<br><input type="radio"/> 1 vez semana<br><input type="radio"/> 2 a 3 semanas                                                          |
| grasa o aceite cocinar         | <input type="radio"/> mantequilla<br><input type="radio"/> margarina<br><input type="radio"/> aceite oliva<br><input checked="" type="radio"/> aceite oliva virgen extra<br><input type="radio"/> aceite vegetal<br><input type="radio"/> mezcla aceites |
| grasa aceite aliñar            | <input type="radio"/> mantequilla<br><input type="radio"/> margarina<br><input type="radio"/> aceite oliva<br><input checked="" type="radio"/> aceite oliva virgen extra<br><input type="radio"/> aceite vegetal<br><input type="radio"/> mezcla aceites |
| grasa aceite freir             | <input type="radio"/> mantequilla<br><input type="radio"/> margarina<br><input type="radio"/> aceite oliva<br><input checked="" type="radio"/> aceite oliva virgen extra<br><input type="radio"/> aceite vegetal<br><input type="radio"/> mezcla aceites |
| Ejercicio cuestionario         | <input checked="" type="radio"/> si<br><input type="radio"/> no                                                                                                                                                                                          |
| horas de sueño incluido siesta | [*DATA REMOVED*]                                                                                                                                                                                                                                         |
| minutos siesta                 | [*DATA REMOVED*]                                                                                                                                                                                                                                         |
| horas televisión semana        | [*DATA REMOVED*]                                                                                                                                                                                                                                         |

|                                        |                                                                                                                                                                                                                                                                                                                                                                           |
|----------------------------------------|---------------------------------------------------------------------------------------------------------------------------------------------------------------------------------------------------------------------------------------------------------------------------------------------------------------------------------------------------------------------------|
| actividad trabajo                      | <input type="radio"/> casi siempre sentado<br><input type="radio"/> sentado 50 por cien<br><input type="radio"/> casi siempre de pie, quieto<br><input checked="" type="radio"/> casi siempre levantado caminando y llevando pocas cosas<br><input type="radio"/> casi siempre levantado, caminando y llevado muchas cosas<br><input type="radio"/> trabajo manual pesado |
| tiempo caminar o bici al día           | <input type="radio"/> casi nunca<br><input type="radio"/> menos 20min día<br><input checked="" type="radio"/> 20 a 40 min día<br><input type="radio"/> 40 a 60 min día<br><input type="radio"/> 1h o 1h y media día<br><input type="radio"/> más de 1h y media al día                                                                                                     |
| tiempo tareas casa al día              | <input type="radio"/> menos de 1h día<br><input checked="" type="radio"/> 1 a 2h día<br><input type="radio"/> 3 a 4h día<br><input type="radio"/> 5 a 6h día<br><input type="radio"/> 7 a 8h día<br><input type="radio"/> más de 8h día                                                                                                                                   |
| tiempo libre televisión ordenador leer | <input checked="" type="radio"/> menos 1h día<br><input type="radio"/> 1h día<br><input type="radio"/> 2h día<br><input type="radio"/> 3h día<br><input type="radio"/> 4h día<br><input type="radio"/> 5 a 6h día<br><input type="radio"/> mas 6h día                                                                                                                     |
| tiempo libre ejercicio o deporte       | <input type="radio"/> menos 1h semana<br><input type="radio"/> 1h semana<br><input type="radio"/> 2h semana<br><input type="radio"/> 3h semana<br><input checked="" type="radio"/> 4 a 5h semana<br><input type="radio"/> mas 5h semana                                                                                                                                   |
| como se considera                      | <input type="radio"/> sedentaria<br><input type="radio"/> poco activa<br><input type="radio"/> moderadamente activa<br><input checked="" type="radio"/> bastante activa<br><input type="radio"/> muy activa<br><input type="radio"/> no sabe                                                                                                                              |
| FUR                                    | [*DATA REMOVED*]                                                                                                                                                                                                                                                                                                                                                          |
| Semanas gestación 2T                   | [*DATA REMOVED*]                                                                                                                                                                                                                                                                                                                                                          |
| Días gestación 2T                      | [*DATA REMOVED*]                                                                                                                                                                                                                                                                                                                                                          |
| DBP 2T                                 | [*DATA REMOVED*]                                                                                                                                                                                                                                                                                                                                                          |
| CC 2T                                  | [*DATA REMOVED*]                                                                                                                                                                                                                                                                                                                                                          |
| AC 2T                                  | [*DATA REMOVED*]                                                                                                                                                                                                                                                                                                                                                          |

|                                                   |                                                                                                                                                                                                 |
|---------------------------------------------------|-------------------------------------------------------------------------------------------------------------------------------------------------------------------------------------------------|
| LF 2T                                             | [*DATA REMOVED*]                                                                                                                                                                                |
| PFE 2T (Hadlock)                                  | [*DATA REMOVED*]                                                                                                                                                                                |
| Semanas gestación 3T                              | [*DATA REMOVED*]                                                                                                                                                                                |
| días 3T                                           | [*DATA REMOVED*]                                                                                                                                                                                |
| DBP 3T                                            | [*DATA REMOVED*]                                                                                                                                                                                |
| CC 3T                                             | [*DATA REMOVED*]                                                                                                                                                                                |
| AC 3T                                             | [*DATA REMOVED*]                                                                                                                                                                                |
| LF 3T                                             | [*DATA REMOVED*]                                                                                                                                                                                |
| PFE 3T (Hadlock)                                  | [*DATA REMOVED*]                                                                                                                                                                                |
| Semanas de gestación final                        | [*DATA REMOVED*]                                                                                                                                                                                |
| días gestación final                              | [*DATA REMOVED*]                                                                                                                                                                                |
| Localización placenta                             | <input type="radio"/> anterior<br><input checked="" type="radio"/> lateral derecha<br><input type="radio"/> lateral izquierda<br><input type="radio"/> posterior<br><input type="radio"/> fondo |
| Presentación longitudinal cefálica                | <input type="radio"/> no<br><input checked="" type="radio"/> si                                                                                                                                 |
| Dorso                                             | <input type="radio"/> izquierda anterior<br><input checked="" type="radio"/> izquierda posterior<br><input type="radio"/> derecha anterior<br><input type="radio"/> derecha posterior           |
| diámetro biparietal                               | [*DATA REMOVED*]                                                                                                                                                                                |
| Circunferencia craneal                            | [*DATA REMOVED*]                                                                                                                                                                                |
| Circunferencia abdominal                          | [*DATA REMOVED*]                                                                                                                                                                                |
| Longitud de femur                                 | [*DATA REMOVED*]                                                                                                                                                                                |
| tejido celular subcutáneo a nivel del muslo en mm | [*DATA REMOVED*]                                                                                                                                                                                |
| tejido celular subcutáneo en abdomen en mm        | [*DATA REMOVED*]                                                                                                                                                                                |
| Volumen del muslo en cm3                          | [*DATA REMOVED*]                                                                                                                                                                                |
| Peso fetal estimado según fórmula de Hadlock      | [*DATA REMOVED*]                                                                                                                                                                                |

|                                               |                                                                                                                                                          |
|-----------------------------------------------|----------------------------------------------------------------------------------------------------------------------------------------------------------|
| Percentil                                     | [*DATA REMOVED*]                                                                                                                                         |
| Peso fetal estimado según fórmula de Scioscia | <hr/>                                                                                                                                                    |
| Peso fetal estimado según fórmula de LEE      | <hr/>                                                                                                                                                    |
| Tipo de parto                                 | <input type="radio"/> eutocico<br><input checked="" type="radio"/> instrumentado/ventosa<br><input type="radio"/> cesarea                                |
| fecha de nacimiento                           | [*DATA REMOVED*]                                                                                                                                         |
| Días entre exploración y nacimiento           | [*DATA REMOVED*]                                                                                                                                         |
| Peso RN en g                                  | [*DATA REMOVED*]                                                                                                                                         |
| sexo                                          | <input checked="" type="radio"/> mujer<br><input type="radio"/> hombre                                                                                   |
| Apgar 1 minuto                                | [*DATA REMOVED*]                                                                                                                                         |
| Apgar 5 minutos                               | [*DATA REMOVED*]                                                                                                                                         |
| Apgar 10 minutos                              | <hr/>                                                                                                                                                    |
| antecedente Covid durante gestación           | <input type="radio"/> Yes<br><input checked="" type="radio"/> No                                                                                         |
| Nivel de estudios                             | <input type="radio"/> ninguno<br><input type="radio"/> primarios<br><input type="radio"/> secundarios<br><input checked="" type="radio"/> universitarios |



# Base\_datos\_estimacion\_peso\_fetal

|                                       |                                                                                                                                                                                                                                                                                      |
|---------------------------------------|--------------------------------------------------------------------------------------------------------------------------------------------------------------------------------------------------------------------------------------------------------------------------------------|
| Número de identificación participante | 156                                                                                                                                                                                                                                                                                  |
| CODIGO PARTICIPANTE                   |                                                                                                                                                                                                                                                                                      |
| Edad                                  | [*DATA REMOVED*]                                                                                                                                                                                                                                                                     |
| Gestaciones                           | <input type="radio"/> 1<br><input checked="" type="radio"/> 2<br><input type="radio"/> 3<br><input type="radio"/> mas de 3                                                                                                                                                           |
| partos                                | <input checked="" type="radio"/> 0<br><input type="radio"/> 1<br><input type="radio"/> 2<br><input type="radio"/> 3<br><input type="radio"/> mas de 3                                                                                                                                |
| cesáreas                              | <input type="radio"/> 0<br><input checked="" type="radio"/> 1<br><input type="radio"/> 2<br><input type="radio"/> 3<br><input type="radio"/> mas de 3                                                                                                                                |
| Abortos                               | <input checked="" type="radio"/> 0<br><input type="radio"/> 1<br><input type="radio"/> 2<br><input type="radio"/> 3<br><input type="radio"/> mas de 3                                                                                                                                |
| Tipo de gestacion                     | <input checked="" type="radio"/> espontanea<br><input type="radio"/> IAC inseminación artificial conyuge<br><input type="radio"/> IAD inseminación artificial donante<br><input type="radio"/> FIV Fecundación in Vitro<br><input type="radio"/> Ovodon FIV con donación de ovocitos |
| peso previo a embarazo                | [*DATA REMOVED*]                                                                                                                                                                                                                                                                     |
| Ganancia ponderal embarazo            | [*DATA REMOVED*]                                                                                                                                                                                                                                                                     |
| Talla madre                           | [*DATA REMOVED*]                                                                                                                                                                                                                                                                     |
| IMC previo embarazo                   | 29.372397382510414                                                                                                                                                                                                                                                                   |
| Patología obstétrica                  | <input checked="" type="radio"/> no<br><input type="radio"/> si                                                                                                                                                                                                                      |
| Diabetes pregestacional               | <input checked="" type="radio"/> no<br><input type="radio"/> si                                                                                                                                                                                                                      |
| Diabetes gestacional                  | <input checked="" type="radio"/> no<br><input type="radio"/> si                                                                                                                                                                                                                      |

|                                            |                                                                                                                                                                                      |
|--------------------------------------------|--------------------------------------------------------------------------------------------------------------------------------------------------------------------------------------|
| Diabetes gestacional con insulina          | <input checked="" type="radio"/> no<br><input type="radio"/> si                                                                                                                      |
| Diabetes gestacional con dieta y ejercicio | <input checked="" type="radio"/> no<br><input type="radio"/> si                                                                                                                      |
| Percentil fetos previos                    | <input type="radio"/> Nada<br><input type="radio"/> percentil menor de 10<br><input type="radio"/> percentil entre 10 y 90<br><input checked="" type="radio"/> percentil mayor de 90 |
| Exfumadora                                 | <input checked="" type="radio"/> Nada<br><input type="radio"/> menos de 5 años<br><input type="radio"/> 5 a 10 años<br><input type="radio"/> mayor o igual a 10 años                 |
| Hábito tabáquico                           | <input checked="" type="radio"/> no<br><input type="radio"/> si                                                                                                                      |
| fumadora                                   | [*DATA REMOVED*]                                                                                                                                                                     |
| Consumo otros tóxicos                      | <input checked="" type="radio"/> no<br><input type="radio"/> si                                                                                                                      |
| Hb 1T                                      | [*DATA REMOVED*]                                                                                                                                                                     |
| Htc 1T                                     | [*DATA REMOVED*]                                                                                                                                                                     |
| Hb 2T                                      | [*DATA REMOVED*]                                                                                                                                                                     |
| HTC 2T                                     | [*DATA REMOVED*]                                                                                                                                                                     |
| Hb 3T                                      | [*DATA REMOVED*]                                                                                                                                                                     |
| HTC 3T                                     | [*DATA REMOVED*]                                                                                                                                                                     |
| Suplemento FE oral                         | <input checked="" type="radio"/> si<br><input type="radio"/> no                                                                                                                      |
| Suplemento fe iv                           | <input type="radio"/> si<br><input checked="" type="radio"/> no                                                                                                                      |
| Transfusión                                | <input checked="" type="radio"/> no<br><input type="radio"/> si                                                                                                                      |
| Solicitada Vit D                           | <input checked="" type="radio"/> no<br><input type="radio"/> si                                                                                                                      |
| Deficit vit D                              | <input type="radio"/> no<br><input type="radio"/> si                                                                                                                                 |
| Suplemento vit D                           | <input type="radio"/> si<br><input type="radio"/> no                                                                                                                                 |

|                       |                                                                                                                                                                                                                                                                                                                                                                                                              |
|-----------------------|--------------------------------------------------------------------------------------------------------------------------------------------------------------------------------------------------------------------------------------------------------------------------------------------------------------------------------------------------------------------------------------------------------------|
| Dieta, cuestionario   | <input checked="" type="radio"/> sí<br><input type="radio"/> no                                                                                                                                                                                                                                                                                                                                              |
| Leche entera          | <input checked="" type="radio"/> Nunca o menos 1 vez al mes<br><input type="radio"/> 1 a 3 veces mes<br><input type="radio"/> 1 vez semana<br><input type="radio"/> 2 a 4 veces semana<br><input type="radio"/> 5 a 6 veces semana<br><input type="radio"/> 1 vez al día<br><input type="radio"/> 2 a 3 veces al día<br><input type="radio"/> 5 a 6 veces al día<br><input type="radio"/> más 6 veces al día |
| Leche semidesnatada   | <input checked="" type="radio"/> Nunca o menos 1 vez al mes<br><input type="radio"/> 1 a 3 veces mes<br><input type="radio"/> 1 vez semana<br><input type="radio"/> 2 a 4 veces semana<br><input type="radio"/> 5 a 6 veces semana<br><input type="radio"/> 1 vez al día<br><input type="radio"/> 2 a 3 veces al día<br><input type="radio"/> 5 a 6 veces al día<br><input type="radio"/> mas 6 veces al día |
| Leche desnatada       | <input type="radio"/> Nunca o menos 1 vez al mes<br><input type="radio"/> 1 a 3 veces mes<br><input type="radio"/> 1 vez semana<br><input type="radio"/> 2 a 4 veces semana<br><input type="radio"/> 5 a 6 veces semana<br><input checked="" type="radio"/> 1 vez al día<br><input type="radio"/> 2 a 3 veces al día<br><input type="radio"/> 5 a 6 veces al día<br><input type="radio"/> más 6 veces al día |
| Leche condensada      | <input checked="" type="radio"/> Nunca o menos 1 vez al mes<br><input type="radio"/> 1 a 3 veces mes<br><input type="radio"/> 1 vez semana<br><input type="radio"/> 2 a 4 veces semana<br><input type="radio"/> 5 a 6 veces semana<br><input type="radio"/> 1 vez al día<br><input type="radio"/> 2 a 3 veces al día<br><input type="radio"/> 5 a 6 veces al día<br><input type="radio"/> más 6 veces al día |
| nata o crema de leche | <input checked="" type="radio"/> Nunca o menos 1 vez al mes<br><input type="radio"/> 1 a 3 veces mes<br><input type="radio"/> 1 vez semana<br><input type="radio"/> 2 a 4 veces semana<br><input type="radio"/> 5 a 6 veces semana<br><input type="radio"/> 1 vez al día<br><input type="radio"/> 2 a 3 veces al día<br><input type="radio"/> 5 a 6 veces al día<br><input type="radio"/> más 6 veces al día |

---

Yogurt Entero

- ☐ Nunca o menos 1 vez al mes
- ☐ 1 a 3 veces mes
- ☐ 1 vez semana
- ☐ 2 a 4 veces semana
- ☒ 5 a 6 veces semana
- ☐ 1 vez al día
- ☐ 2 a 3 veces al día
- ☐ 5 a 6 veces al día
- ☐ más 6 veces al día

---

Yogurt desnatado

- ☒ Nunca o menos 1 vez al mes
- ☐ 1 a 3 veces mes
- ☐ 1 vez semana
- ☐ 2 a 4 veces semana
- ☐ 5 a 6 veces semana
- ☐ 1 vez al día
- ☐ 2 a 3 veces al día
- ☐ 5 a 6 veces al día
- ☐ más 6 veces al día

---

100g requesón o queso blando o queso fresco

- ☒ Nunca o menos 1 vez al mes
- ☐ 1 a 3 veces mes
- ☐ 1 vez semana
- ☐ 2 a 4 veces semana
- ☐ 5 a 6 veces semana
- ☐ 1 vez al día
- ☐ 2 a 3 veces al día
- ☐ 5 a 6 veces al día
- ☐ más 6 veces al día

---

queso curado o semicurado o cremoso

- ☒ Nunca o menos 1 vez al mes
- ☐ 1 a 3 veces mes
- ☐ 1 vez semana
- ☐ 2 a 4 veces semana
- ☐ 5 a 6 veces semana
- ☐ 1 vez al día
- ☐ 2 a 3 veces al día
- ☐ 5 a 6 veces al día
- ☐ más 6 veces al día

---

natillas flan pudding

- ☒ Nunca o menos 1 vez al mes
- ☐ 1 a 3 veces mes
- ☐ 1 vez semana
- ☐ 2 a 4 veces semana
- ☐ 5 a 6 veces semana
- ☐ 1 vez al día
- ☐ 2 a 3 veces al día
- ☐ 5 a 6 veces al día
- ☐ más 6 veces al día

---

Helado

- ☐ Nunca o menos 1 vez al mes
- ☐ 1 a 3 veces mes
- ☐ 1 vez semana
- ☒ 2 a 4 veces semana
- ☐ 5 a 6 veces semana
- ☐ 1 vez al día
- ☐ 2 a 3 veces al día
- ☐ 5 a 6 veces al día
- ☐ más 6 veces al día

|                                      |                                                                                                                                                                                                                                                                                                                                                                                                              |
|--------------------------------------|--------------------------------------------------------------------------------------------------------------------------------------------------------------------------------------------------------------------------------------------------------------------------------------------------------------------------------------------------------------------------------------------------------------|
| huevo                                | <input type="radio"/> Nunca o menos 1 vez al mes<br><input type="radio"/> 1 a 3 veces mes<br><input type="radio"/> 1 vez semana<br><input checked="" type="radio"/> 2 a 4 veces semana<br><input type="radio"/> 5 a 6 veces semana<br><input type="radio"/> 1 vez al día<br><input type="radio"/> 2 a 3 veces al día<br><input type="radio"/> 5 a 6 veces al día<br><input type="radio"/> más 6 veces al día |
| Pollo con piel                       | <input checked="" type="radio"/> Nunca o menos 1 vez al mes<br><input type="radio"/> 1 a 3 veces mes<br><input type="radio"/> 1 vez semana<br><input type="radio"/> 2 a 4 veces semana<br><input type="radio"/> 5 a 6 veces semana<br><input type="radio"/> 1 vez al día<br><input type="radio"/> 2 a 3 veces al día<br><input type="radio"/> 5 a 6 veces al día<br><input type="radio"/> más 6 veces al día |
| pollo sin piel                       | <input type="radio"/> Nunca o menos 1 vez al mes<br><input type="radio"/> 1 a 3 veces mes<br><input checked="" type="radio"/> 1 vez semana<br><input type="radio"/> 2 a 4 veces semana<br><input type="radio"/> 5 a 6 veces semana<br><input type="radio"/> 1 vez al día<br><input type="radio"/> 2 a 3 veces al día<br><input type="radio"/> 5 a 6 veces al día<br><input type="radio"/> más 6 veces al día |
| Ternera o cerdo o cordero            | <input type="radio"/> Nunca o menos 1 vez al mes<br><input checked="" type="radio"/> 1 a 3 veces mes<br><input type="radio"/> 1 vez semana<br><input type="radio"/> 2 a 4 veces semana<br><input type="radio"/> 5 a 6 veces semana<br><input type="radio"/> 1 vez al día<br><input type="radio"/> 2 a 3 veces al día<br><input type="radio"/> 5 a 6 veces al día<br><input type="radio"/> más 6 veces al día |
| carne caza: Conejo o codorniz o pato | <input checked="" type="radio"/> Nunca o menos 1 vez al mes<br><input type="radio"/> 1 a 3 veces mes<br><input type="radio"/> 1 vez semana<br><input type="radio"/> 2 a 4 veces semana<br><input type="radio"/> 5 a 6 veces semana<br><input type="radio"/> 1 vez al día<br><input type="radio"/> 2 a 3 veces al día<br><input type="radio"/> 5 a 6 veces al día<br><input type="radio"/> más 6 veces al día |
| Hígado de ternera o cerdo o pollo    | <input checked="" type="radio"/> Nunca o menos 1 vez al mes<br><input type="radio"/> 1 a 3 veces mes<br><input type="radio"/> 1 vez semana<br><input type="radio"/> 2 a 4 veces semana<br><input type="radio"/> 5 a 6 veces semana<br><input type="radio"/> 1 vez al día<br><input type="radio"/> 2 a 3 veces al día<br><input type="radio"/> 5 a 6 veces al día<br><input type="radio"/> más 6 veces al día |

---

Vísceras

- ☒ Nunca o menos 1 vez al mes  
☐ 1 a 3 veces mes  
☐ 1 vez semana  
☐ 2 a 4 veces semana  
☐ 5 a 6 veces semana  
☐ 1 vez al día  
☐ 2 a 3 veces al día  
☐ 5 a 6 veces al día  
☐ más 6 veces al día

---

Embutido

- ☐ Nunca o menos 1 vez al mes  
☐ 1 a 3 veces mes  
☒ 1 vez semana  
☐ 2 a 4 veces semana  
☐ 5 a 6 veces semana  
☐ 1 vez al día  
☐ 2 a 3 veces al día  
☐ 5 a 6 veces al día  
☐ más 6 veces al día

---

Salchicha o similar

- ☐ Nunca o menos 1 vez al mes  
☒ 1 a 3 veces mes  
☐ 1 vez semana  
☐ 2 a 4 veces semana  
☐ 5 a 6 veces semana  
☐ 1 vez al día  
☐ 2 a 3 veces al día  
☐ 5 a 6 veces al día  
☐ más 6 veces al día

---

Pate o foiegras

- ☐ Nunca o menos 1 vez al mes  
☐ 1 a 3 veces mes  
☒ 1 vez semana  
☐ 2 a 4 veces semana  
☐ 5 a 6 veces semana  
☐ 1 vez al día  
☐ 2 a 3 veces al día  
☐ 5 a 6 veces al día  
☐ más 6 veces al día

---

Hamburguesa

- ☐ Nunca o menos 1 vez al mes  
☐ 1 a 3 veces mes  
☒ 1 vez semana  
☐ 2 a 4 veces semana  
☐ 5 a 6 veces semana  
☐ 1 vez al día  
☐ 2 a 3 veces al día  
☐ 5 a 6 veces al día  
☐ más 6 veces al día

---

tocino o bacon

- ☐ Nunca o menos 1 vez al mes  
☒ 1 a 3 veces mes  
☐ 1 vez semana  
☐ 2 a 4 veces semana  
☐ 5 a 6 veces semana  
☐ 1 vez al día  
☐ 2 a 3 veces al día  
☐ 5 a 6 veces al día  
☐ más 6 veces al día

---

Pescado frito

- ☐ Nunca o menos 1 vez al mes  
☒ 1 a 3 veces mes  
☐ 1 vez semana  
☐ 2 a 4 veces semana  
☐ 5 a 6 veces semana  
☐ 1 vez al día  
☐ 2 a 3 veces al día  
☐ 5 a 6 veces al día  
☐ más 6 veces al día

---

pescado hervido blanco

- ☐ Nunca o menos 1 vez al mes  
☐ 1 a 3 veces mes  
☐ 1 vez semana  
☒ 2 a 4 veces semana  
☐ 5 a 6 veces semana  
☐ 1 vez al día  
☐ 2 a 3 veces al día  
☐ 5 a 6 veces al día  
☐ más 6 veces al día

---

pescado hervido azul

- ☐ Nunca o menos 1 vez al mes  
☒ 1 a 3 veces mes  
☐ 1 vez semana  
☐ 2 a 4 veces semana  
☐ 5 a 6 veces semana  
☐ 1 vez al día  
☐ 2 a 3 veces al día  
☐ 5 a 6 veces al día  
☐ más 6 veces al día

---

otros pescado azul

- ☐ Nunca o menos 1 vez al mes  
☒ 1 a 3 veces mes  
☐ 1 vez semana  
☐ 2 a 4 veces semana  
☐ 5 a 6 veces semana  
☐ 1 vez al día  
☐ 2 a 3 veces al día  
☐ 5 a 6 veces al día  
☐ más 6 veces al día

---

atun conserva

- ☐ Nunca o menos 1 vez al mes  
☐ 1 a 3 veces mes  
☒ 1 vez semana  
☐ 2 a 4 veces semana  
☐ 5 a 6 veces semana  
☐ 1 vez al día  
☐ 2 a 3 veces al día  
☐ 5 a 6 veces al día  
☐ más 6 veces al día

---

sardina conserva

- ☐ Nunca o menos 1 vez al mes  
☒ 1 a 3 veces mes  
☐ 1 vez semana  
☐ 2 a 4 veces semana  
☐ 5 a 6 veces semana  
☐ 1 vez al día  
☐ 2 a 3 veces al día  
☐ 5 a 6 veces al día  
☐ más 6 veces al día

|                                         |                                                                                                                                                                                                                                                                                                                                                                                                              |
|-----------------------------------------|--------------------------------------------------------------------------------------------------------------------------------------------------------------------------------------------------------------------------------------------------------------------------------------------------------------------------------------------------------------------------------------------------------------|
| pescado ahumado                         | <input checked="" type="radio"/> Nunca o menos 1 vez al mes<br><input type="radio"/> 1 a 3 veces mes<br><input type="radio"/> 1 vez semana<br><input type="radio"/> 2 a 4 veces semana<br><input type="radio"/> 5 a 6 veces semana<br><input type="radio"/> 1 vez al día<br><input type="radio"/> 2 a 3 veces al día<br><input type="radio"/> 5 a 6 veces al día<br><input type="radio"/> más 6 veces al día |
| almejas o mejillones o ostras unos 100g | <input type="radio"/> Nunca o menos 1 vez al mes<br><input checked="" type="radio"/> 1 a 3 veces mes<br><input type="radio"/> 1 vez semana<br><input type="radio"/> 2 a 4 veces semana<br><input type="radio"/> 5 a 6 veces semana<br><input type="radio"/> 1 vez al día<br><input type="radio"/> 2 a 3 veces al día<br><input type="radio"/> 5 a 6 veces al día<br><input type="radio"/> más 6 veces al día |
| calamar o chipiron o sepia unos 100g    | <input type="radio"/> Nunca o menos 1 vez al mes<br><input checked="" type="radio"/> 1 a 3 veces mes<br><input type="radio"/> 1 vez semana<br><input type="radio"/> 2 a 4 veces semana<br><input type="radio"/> 5 a 6 veces semana<br><input type="radio"/> 1 vez al día<br><input type="radio"/> 2 a 3 veces al día<br><input type="radio"/> 5 a 6 veces al día<br><input type="radio"/> más 6 veces al día |
| marisco unos 100g                       | <input type="radio"/> Nunca o menos 1 vez al mes<br><input checked="" type="radio"/> 1 a 3 veces mes<br><input type="radio"/> 1 vez semana<br><input type="radio"/> 2 a 4 veces semana<br><input type="radio"/> 5 a 6 veces semana<br><input type="radio"/> 1 vez al día<br><input type="radio"/> 2 a 3 veces al día<br><input type="radio"/> 5 a 6 veces al día<br><input type="radio"/> más 6 veces al día |
| Espinacas o acelgas cocinadas           | <input type="radio"/> Nunca o menos 1 vez al mes<br><input type="radio"/> 1 a 3 veces mes<br><input checked="" type="radio"/> 1 vez semana<br><input type="radio"/> 2 a 4 veces semana<br><input type="radio"/> 5 a 6 veces semana<br><input type="radio"/> 1 vez al día<br><input type="radio"/> 2 a 3 veces al día<br><input type="radio"/> 5 a 6 veces al día<br><input type="radio"/> más 6 veces al día |
| Col o coliflor o brocoli cocinado       | <input checked="" type="radio"/> Nunca o menos 1 vez al mes<br><input type="radio"/> 1 a 3 veces mes<br><input type="radio"/> 1 vez semana<br><input type="radio"/> 2 a 4 veces semana<br><input type="radio"/> 5 a 6 veces semana<br><input type="radio"/> 1 vez al día<br><input type="radio"/> 2 a 3 veces al día<br><input type="radio"/> 5 a 6 veces al día<br><input type="radio"/> más 6 veces al día |



---

Lechuga o endivia o escarola

- ☐ Nunca o menos 1 vez al mes  
☐ 1 a 3 veces mes  
☐ 1 vez semana  
☒ 2 a 4 veces semana  
☐ 5 a 6 veces semana  
☐ 1 vez al día  
☐ 2 a 3 veces al día  
☐ 5 a 6 veces al día  
☐ más 6 veces al día

---

tomate ensalada

- ☐ Nunca o menos 1 vez al mes  
☐ 1 a 3 veces mes  
☐ 1 vez semana  
☐ 2 a 4 veces semana  
☐ 5 a 6 veces semana  
☒ 1 vez al día  
☐ 2 a 3 veces al día  
☐ 5 a 6 veces al día  
☐ más 6 veces al día

---

cebolla

- ☐ Nunca o menos 1 vez al mes  
☐ 1 a 3 veces mes  
☐ 1 vez semana  
☐ 2 a 4 veces semana  
☒ 5 a 6 veces semana  
☐ 1 vez al día  
☐ 2 a 3 veces al día  
☐ 5 a 6 veces al día  
☐ más 6 veces al día

---

Zanahoria o calabaza

- ☐ Nunca o menos 1 vez al mes  
☒ 1 a 3 veces mes  
☐ 1 vez semana  
☐ 2 a 4 veces semana  
☐ 5 a 6 veces semana  
☐ 1 vez al día  
☐ 2 a 3 veces al día  
☐ 5 a 6 veces al día  
☐ más 6 veces al día

---

Judías verdes

- ☐ Nunca o menos 1 vez al mes  
☐ 1 a 3 veces mes  
☒ 1 vez semana  
☐ 2 a 4 veces semana  
☐ 5 a 6 veces semana  
☐ 1 vez al día  
☐ 2 a 3 veces al día  
☐ 5 a 6 veces al día  
☐ más 6 veces al día

---

Berenjena o calabacin o pepino

- ☐ Nunca o menos 1 vez al mes  
☐ 1 a 3 veces mes  
☐ 1 vez semana  
☒ 2 a 4 veces semana  
☐ 5 a 6 veces semana  
☐ 1 vez al día  
☐ 2 a 3 veces al día  
☐ 5 a 6 veces al día  
☐ más 6 veces al día

---

|          |                                                                                                                                                                                                                                                                                                                                                                                                              |
|----------|--------------------------------------------------------------------------------------------------------------------------------------------------------------------------------------------------------------------------------------------------------------------------------------------------------------------------------------------------------------------------------------------------------------|
| pimiento | <input type="radio"/> Nunca o menos 1 vez al mes<br><input type="radio"/> 1 a 3 veces mes<br><input type="radio"/> 1 vez semana<br><input checked="" type="radio"/> 2 a 4 veces semana<br><input type="radio"/> 5 a 6 veces semana<br><input type="radio"/> 1 vez al día<br><input type="radio"/> 2 a 3 veces al día<br><input type="radio"/> 5 a 6 veces al día<br><input type="radio"/> más 6 veces al día |
|----------|--------------------------------------------------------------------------------------------------------------------------------------------------------------------------------------------------------------------------------------------------------------------------------------------------------------------------------------------------------------------------------------------------------------|

---

|           |                                                                                                                                                                                                                                                                                                                                                                                                              |
|-----------|--------------------------------------------------------------------------------------------------------------------------------------------------------------------------------------------------------------------------------------------------------------------------------------------------------------------------------------------------------------------------------------------------------------|
| alcachofa | <input type="radio"/> Nunca o menos 1 vez al mes<br><input checked="" type="radio"/> 1 a 3 veces mes<br><input type="radio"/> 1 vez semana<br><input type="radio"/> 2 a 4 veces semana<br><input type="radio"/> 5 a 6 veces semana<br><input type="radio"/> 1 vez al día<br><input type="radio"/> 2 a 3 veces al día<br><input type="radio"/> 5 a 6 veces al día<br><input type="radio"/> más 6 veces al día |
|-----------|--------------------------------------------------------------------------------------------------------------------------------------------------------------------------------------------------------------------------------------------------------------------------------------------------------------------------------------------------------------------------------------------------------------|

---

|            |                                                                                                                                                                                                                                                                                                                                                                                                              |
|------------|--------------------------------------------------------------------------------------------------------------------------------------------------------------------------------------------------------------------------------------------------------------------------------------------------------------------------------------------------------------------------------------------------------------|
| espárragos | <input type="radio"/> Nunca o menos 1 vez al mes<br><input checked="" type="radio"/> 1 a 3 veces mes<br><input type="radio"/> 1 vez semana<br><input type="radio"/> 2 a 4 veces semana<br><input type="radio"/> 5 a 6 veces semana<br><input type="radio"/> 1 vez al día<br><input type="radio"/> 2 a 3 veces al día<br><input type="radio"/> 5 a 6 veces al día<br><input type="radio"/> más 6 veces al día |
|------------|--------------------------------------------------------------------------------------------------------------------------------------------------------------------------------------------------------------------------------------------------------------------------------------------------------------------------------------------------------------------------------------------------------------|

---

|              |                                                                                                                                                                                                                                                                                                                                                                                                              |
|--------------|--------------------------------------------------------------------------------------------------------------------------------------------------------------------------------------------------------------------------------------------------------------------------------------------------------------------------------------------------------------------------------------------------------------|
| maíz hervido | <input type="radio"/> Nunca o menos 1 vez al mes<br><input checked="" type="radio"/> 1 a 3 veces mes<br><input type="radio"/> 1 vez semana<br><input type="radio"/> 2 a 4 veces semana<br><input type="radio"/> 5 a 6 veces semana<br><input type="radio"/> 1 vez al día<br><input type="radio"/> 2 a 3 veces al día<br><input type="radio"/> 5 a 6 veces al día<br><input type="radio"/> más 6 veces al día |
|--------------|--------------------------------------------------------------------------------------------------------------------------------------------------------------------------------------------------------------------------------------------------------------------------------------------------------------------------------------------------------------------------------------------------------------|

---

|           |                                                                                                                                                                                                                                                                                                                                                                                                              |
|-----------|--------------------------------------------------------------------------------------------------------------------------------------------------------------------------------------------------------------------------------------------------------------------------------------------------------------------------------------------------------------------------------------------------------------|
| legumbres | <input type="radio"/> Nunca o menos 1 vez al mes<br><input type="radio"/> 1 a 3 veces mes<br><input checked="" type="radio"/> 1 vez semana<br><input type="radio"/> 2 a 4 veces semana<br><input type="radio"/> 5 a 6 veces semana<br><input type="radio"/> 1 vez al día<br><input type="radio"/> 2 a 3 veces al día<br><input type="radio"/> 5 a 6 veces al día<br><input type="radio"/> más 6 veces al día |
|-----------|--------------------------------------------------------------------------------------------------------------------------------------------------------------------------------------------------------------------------------------------------------------------------------------------------------------------------------------------------------------------------------------------------------------|

---

|                       |                                                                                                                                                                                                                                                                                                                                                                                                              |
|-----------------------|--------------------------------------------------------------------------------------------------------------------------------------------------------------------------------------------------------------------------------------------------------------------------------------------------------------------------------------------------------------------------------------------------------------|
| naranjas o mandarinas | <input checked="" type="radio"/> Nunca o menos 1 vez al mes<br><input type="radio"/> 1 a 3 veces mes<br><input type="radio"/> 1 vez semana<br><input type="radio"/> 2 a 4 veces semana<br><input type="radio"/> 5 a 6 veces semana<br><input type="radio"/> 1 vez al día<br><input type="radio"/> 2 a 3 veces al día<br><input type="radio"/> 5 a 6 veces al día<br><input type="radio"/> más 6 veces al día |
|-----------------------|--------------------------------------------------------------------------------------------------------------------------------------------------------------------------------------------------------------------------------------------------------------------------------------------------------------------------------------------------------------------------------------------------------------|

---

|                       |                                                                                                                                                                                                                                                                                                                                                                                                              |
|-----------------------|--------------------------------------------------------------------------------------------------------------------------------------------------------------------------------------------------------------------------------------------------------------------------------------------------------------------------------------------------------------------------------------------------------------|
| zum natural fruta     | <input checked="" type="radio"/> Nunca o menos 1 vez al mes<br><input type="radio"/> 1 a 3 veces mes<br><input type="radio"/> 1 vez semana<br><input type="radio"/> 2 a 4 veces semana<br><input type="radio"/> 5 a 6 veces semana<br><input type="radio"/> 1 vez al día<br><input type="radio"/> 2 a 3 veces al día<br><input type="radio"/> 5 a 6 veces al día<br><input type="radio"/> más 6 veces al día |
| platano               | <input type="radio"/> Nunca o menos 1 vez al mes<br><input type="radio"/> 1 a 3 veces mes<br><input checked="" type="radio"/> 1 vez semana<br><input type="radio"/> 2 a 4 veces semana<br><input type="radio"/> 5 a 6 veces semana<br><input type="radio"/> 1 vez al día<br><input type="radio"/> 2 a 3 veces al día<br><input type="radio"/> 5 a 6 veces al día<br><input type="radio"/> más 6 veces al día |
| manzana o pera        | <input type="radio"/> Nunca o menos 1 vez al mes<br><input type="radio"/> 1 a 3 veces mes<br><input checked="" type="radio"/> 1 vez semana<br><input type="radio"/> 2 a 4 veces semana<br><input type="radio"/> 5 a 6 veces semana<br><input type="radio"/> 1 vez al día<br><input type="radio"/> 2 a 3 veces al día<br><input type="radio"/> 5 a 6 veces al día<br><input type="radio"/> más 6 veces al día |
| melocotón o nectarina | <input type="radio"/> Nunca o menos 1 vez al mes<br><input type="radio"/> 1 a 3 veces mes<br><input type="radio"/> 1 vez semana<br><input type="radio"/> 2 a 4 veces semana<br><input checked="" type="radio"/> 5 a 6 veces semana<br><input type="radio"/> 1 vez al día<br><input type="radio"/> 2 a 3 veces al día<br><input type="radio"/> 5 a 6 veces al día<br><input type="radio"/> más 6 veces al día |
| sandia o melon        | <input type="radio"/> Nunca o menos 1 vez al mes<br><input type="radio"/> 1 a 3 veces mes<br><input type="radio"/> 1 vez semana<br><input type="radio"/> 2 a 4 veces semana<br><input checked="" type="radio"/> 5 a 6 veces semana<br><input type="radio"/> 1 vez al día<br><input type="radio"/> 2 a 3 veces al día<br><input type="radio"/> 5 a 6 veces al día<br><input type="radio"/> más 6 veces al día |
| uva                   | <input type="radio"/> Nunca o menos 1 vez al mes<br><input checked="" type="radio"/> 1 a 3 veces mes<br><input type="radio"/> 1 vez semana<br><input type="radio"/> 2 a 4 veces semana<br><input type="radio"/> 5 a 6 veces semana<br><input type="radio"/> 1 vez al día<br><input type="radio"/> 2 a 3 veces al día<br><input type="radio"/> 5 a 6 veces al día<br><input type="radio"/> más 6 veces al día |

---

bruna o ciruela

- ☐ Nunca o menos 1 vez al mes  
☐ 1 a 3 veces mes  
☐ 1 vez semana  
☒ 2 a 4 veces semana  
☐ 5 a 6 veces semana  
☐ 1 vez al día  
☐ 2 a 3 veces al día  
☐ 5 a 6 veces al día  
☐ más 6 veces al día

---

kiwi

- ☒ Nunca o menos 1 vez al mes  
☐ 1 a 3 veces mes  
☐ 1 vez semana  
☐ 2 a 4 veces semana  
☐ 5 a 6 veces semana  
☐ 1 vez al día  
☐ 2 a 3 veces al día  
☐ 5 a 6 veces al día  
☐ más 6 veces al día

---

aceituna

- ☐ Nunca o menos 1 vez al mes  
☒ 1 a 3 veces mes  
☐ 1 vez semana  
☐ 2 a 4 veces semana  
☐ 5 a 6 veces semana  
☐ 1 vez al día  
☐ 2 a 3 veces al día  
☐ 5 a 6 veces al día  
☐ más 6 veces al día

---

frutos secos

- ☐ Nunca o menos 1 vez al mes  
☒ 1 a 3 veces mes  
☐ 1 vez semana  
☐ 2 a 4 veces semana  
☐ 5 a 6 veces semana  
☐ 1 vez al día  
☐ 2 a 3 veces al día  
☐ 5 a 6 veces al día  
☐ más 6 veces al día

---

pan blanco

- ☐ Nunca o menos 1 vez al mes  
☐ 1 a 3 veces mes  
☐ 1 vez semana  
☒ 2 a 4 veces semana  
☐ 5 a 6 veces semana  
☐ 1 vez al día  
☐ 2 a 3 veces al día  
☐ 5 a 6 veces al día  
☐ más 6 veces al día

---

pan integral

- ☐ Nunca o menos 1 vez al mes  
☐ 1 a 3 veces mes  
☐ 1 vez semana  
☒ 2 a 4 veces semana  
☐ 5 a 6 veces semana  
☐ 1 vez al día  
☐ 2 a 3 veces al día  
☐ 5 a 6 veces al día  
☐ más 6 veces al día

---

cereales desayuno

- ☐ Nunca o menos 1 vez al mes  
☒ 1 a 3 veces mes  
☐ 1 vez semana  
☐ 2 a 4 veces semana  
☐ 5 a 6 veces semana  
☐ 1 vez al día  
☐ 2 a 3 veces al día  
☐ 5 a 6 veces al día  
☐ más 6 veces al día

---

patatas fritas

- ☐ Nunca o menos 1 vez al mes  
☒ 1 a 3 veces mes  
☐ 1 vez semana  
☐ 2 a 4 veces semana  
☐ 5 a 6 veces semana  
☐ 1 vez al día  
☐ 2 a 3 veces al día  
☐ 5 a 6 veces al día  
☐ más 6 veces al día

---

patatas cocidas o asadas

- ☐ Nunca o menos 1 vez al mes  
☐ 1 a 3 veces mes  
☒ 1 vez semana  
☐ 2 a 4 veces semana  
☐ 5 a 6 veces semana  
☐ 1 vez al día  
☐ 2 a 3 veces al día  
☐ 5 a 6 veces al día  
☐ más 6 veces al día

---

bolsa papas

- ☐ Nunca o menos 1 vez al mes  
☐ 1 a 3 veces mes  
☒ 1 vez semana  
☐ 2 a 4 veces semana  
☐ 5 a 6 veces semana  
☐ 1 vez al día  
☐ 2 a 3 veces al día  
☐ 5 a 6 veces al día  
☐ más 6 veces al día

---

arroz cocinado

- ☐ Nunca o menos 1 vez al mes  
☐ 1 a 3 veces mes  
☒ 1 vez semana  
☐ 2 a 4 veces semana  
☐ 5 a 6 veces semana  
☐ 1 vez al día  
☐ 2 a 3 veces al día  
☐ 5 a 6 veces al día  
☐ más 6 veces al día

---

pasta

- ☐ Nunca o menos 1 vez al mes  
☐ 1 a 3 veces mes  
☒ 1 vez semana  
☐ 2 a 4 veces semana  
☐ 5 a 6 veces semana  
☐ 1 vez al día  
☐ 2 a 3 veces al día  
☐ 5 a 6 veces al día  
☐ más 6 veces al día

|                     |                                                                                                                                                                                                                                                                                                                                                                                                              |
|---------------------|--------------------------------------------------------------------------------------------------------------------------------------------------------------------------------------------------------------------------------------------------------------------------------------------------------------------------------------------------------------------------------------------------------------|
| pizza               | <input type="radio"/> Nunca o menos 1 vez al mes<br><input type="radio"/> 1 a 3 veces mes<br><input checked="" type="radio"/> 1 vez semana<br><input type="radio"/> 2 a 4 veces semana<br><input type="radio"/> 5 a 6 veces semana<br><input type="radio"/> 1 vez al día<br><input type="radio"/> 2 a 3 veces al día<br><input type="radio"/> 5 a 6 veces al día<br><input type="radio"/> más 6 veces al día |
| aceite oliva        | <input type="radio"/> Nunca o menos 1 vez al mes<br><input type="radio"/> 1 a 3 veces mes<br><input type="radio"/> 1 vez semana<br><input type="radio"/> 2 a 4 veces semana<br><input type="radio"/> 5 a 6 veces semana<br><input type="radio"/> 1 vez al día<br><input checked="" type="radio"/> 2 a 3 veces al día<br><input type="radio"/> 5 a 6 veces al día<br><input type="radio"/> más 6 veces al día |
| otros aceites       | <input checked="" type="radio"/> Nunca o menos 1 vez al mes<br><input type="radio"/> 1 a 3 veces mes<br><input type="radio"/> 1 vez semana<br><input type="radio"/> 2 a 4 veces semana<br><input type="radio"/> 5 a 6 veces semana<br><input type="radio"/> 1 vez al día<br><input type="radio"/> 2 a 3 veces al día<br><input type="radio"/> 5 a 6 veces al día<br><input type="radio"/> más 6 veces al día |
| margarina           | <input checked="" type="radio"/> Nunca o menos 1 vez al mes<br><input type="radio"/> 1 a 3 veces mes<br><input type="radio"/> 1 vez semana<br><input type="radio"/> 2 a 4 veces semana<br><input type="radio"/> 5 a 6 veces semana<br><input type="radio"/> 1 vez al día<br><input type="radio"/> 2 a 3 veces al día<br><input type="radio"/> 5 a 6 veces al día<br><input type="radio"/> más 6 veces al día |
| mantequilla         | <input checked="" type="radio"/> Nunca o menos 1 vez al mes<br><input type="radio"/> 1 a 3 veces mes<br><input type="radio"/> 1 vez semana<br><input type="radio"/> 2 a 4 veces semana<br><input type="radio"/> 5 a 6 veces semana<br><input type="radio"/> 1 vez al día<br><input type="radio"/> 2 a 3 veces al día<br><input type="radio"/> 5 a 6 veces al día<br><input type="radio"/> más 6 veces al día |
| galletas tipo maria | <input checked="" type="radio"/> Nunca o menos 1 vez al mes<br><input type="radio"/> 1 a 3 veces mes<br><input type="radio"/> 1 vez semana<br><input type="radio"/> 2 a 4 veces semana<br><input type="radio"/> 5 a 6 veces semana<br><input type="radio"/> 1 vez al día<br><input type="radio"/> 2 a 3 veces al día<br><input type="radio"/> 5 a 6 veces al día<br><input type="radio"/> más 6 veces al día |

|                           |                                                                                                                                                                                                                                                                                                                                                                                                              |
|---------------------------|--------------------------------------------------------------------------------------------------------------------------------------------------------------------------------------------------------------------------------------------------------------------------------------------------------------------------------------------------------------------------------------------------------------|
| galletas chocolate        | <input type="radio"/> Nunca o menos 1 vez al mes<br><input type="radio"/> 1 a 3 veces mes<br><input checked="" type="radio"/> 1 vez semana<br><input type="radio"/> 2 a 4 veces semana<br><input type="radio"/> 5 a 6 veces semana<br><input type="radio"/> 1 vez al día<br><input type="radio"/> 2 a 3 veces al día<br><input type="radio"/> 5 a 6 veces al día<br><input type="radio"/> más 6 veces al día |
| bollieria                 | <input type="radio"/> Nunca o menos 1 vez al mes<br><input type="radio"/> 1 a 3 veces mes<br><input checked="" type="radio"/> 1 vez semana<br><input type="radio"/> 2 a 4 veces semana<br><input type="radio"/> 5 a 6 veces semana<br><input type="radio"/> 1 vez al día<br><input type="radio"/> 2 a 3 veces al día<br><input type="radio"/> 5 a 6 veces al día<br><input type="radio"/> más 6 veces al día |
| chocolate o bombones      | <input type="radio"/> Nunca o menos 1 vez al mes<br><input type="radio"/> 1 a 3 veces mes<br><input type="radio"/> 1 vez semana<br><input checked="" type="radio"/> 2 a 4 veces semana<br><input type="radio"/> 5 a 6 veces semana<br><input type="radio"/> 1 vez al día<br><input type="radio"/> 2 a 3 veces al día<br><input type="radio"/> 5 a 6 veces al día<br><input type="radio"/> más 6 veces al día |
| chocolate polvo o colacao | <input type="radio"/> Nunca o menos 1 vez al mes<br><input type="radio"/> 1 a 3 veces mes<br><input type="radio"/> 1 vez semana<br><input type="radio"/> 2 a 4 veces semana<br><input type="radio"/> 5 a 6 veces semana<br><input checked="" type="radio"/> 1 vez al día<br><input type="radio"/> 2 a 3 veces al día<br><input type="radio"/> 5 a 6 veces al día<br><input type="radio"/> más 6 veces al día |
| vino tinto                | <input checked="" type="radio"/> Nunca o menos 1 vez al mes<br><input type="radio"/> 1 a 3 veces mes<br><input type="radio"/> 1 vez semana<br><input type="radio"/> 2 a 4 veces semana<br><input type="radio"/> 5 a 6 veces semana<br><input type="radio"/> 1 vez al día<br><input type="radio"/> 2 a 3 veces al día<br><input type="radio"/> 5 a 6 veces al día<br><input type="radio"/> más 6 veces al día |
| vino blanco               | <input checked="" type="radio"/> Nunca o menos 1 vez al mes<br><input type="radio"/> 1 a 3 veces mes<br><input type="radio"/> 1 vez semana<br><input type="radio"/> 2 a 4 veces semana<br><input type="radio"/> 5 a 6 veces semana<br><input type="radio"/> 1 vez al día<br><input type="radio"/> 2 a 3 veces al día<br><input type="radio"/> 5 a 6 veces al día<br><input type="radio"/> más 6 veces al día |

---

|                    |                                                                                                                                                                                                                                                                                                                                                                                                              |
|--------------------|--------------------------------------------------------------------------------------------------------------------------------------------------------------------------------------------------------------------------------------------------------------------------------------------------------------------------------------------------------------------------------------------------------------|
| vino seco o vermut | <input checked="" type="radio"/> Nunca o menos 1 vez al mes<br><input type="radio"/> 1 a 3 veces mes<br><input type="radio"/> 1 vez semana<br><input type="radio"/> 2 a 4 veces semana<br><input type="radio"/> 5 a 6 veces semana<br><input type="radio"/> 1 vez al día<br><input type="radio"/> 2 a 3 veces al día<br><input type="radio"/> 5 a 6 veces al día<br><input type="radio"/> más 6 veces al día |
|--------------------|--------------------------------------------------------------------------------------------------------------------------------------------------------------------------------------------------------------------------------------------------------------------------------------------------------------------------------------------------------------------------------------------------------------|

---

|         |                                                                                                                                                                                                                                                                                                                                                                                                              |
|---------|--------------------------------------------------------------------------------------------------------------------------------------------------------------------------------------------------------------------------------------------------------------------------------------------------------------------------------------------------------------------------------------------------------------|
| cerveza | <input checked="" type="radio"/> Nunca o menos 1 vez al mes<br><input type="radio"/> 1 a 3 veces mes<br><input type="radio"/> 1 vez semana<br><input type="radio"/> 2 a 4 veces semana<br><input type="radio"/> 5 a 6 veces semana<br><input type="radio"/> 1 vez al día<br><input type="radio"/> 2 a 3 veces al día<br><input type="radio"/> 5 a 6 veces al día<br><input type="radio"/> más 6 veces al día |
|---------|--------------------------------------------------------------------------------------------------------------------------------------------------------------------------------------------------------------------------------------------------------------------------------------------------------------------------------------------------------------------------------------------------------------|

---

|                     |                                                                                                                                                                                                                                                                                                                                                                                                              |
|---------------------|--------------------------------------------------------------------------------------------------------------------------------------------------------------------------------------------------------------------------------------------------------------------------------------------------------------------------------------------------------------------------------------------------------------|
| cerveza sin alcohol | <input type="radio"/> Nunca o menos 1 vez al mes<br><input checked="" type="radio"/> 1 a 3 veces mes<br><input type="radio"/> 1 vez semana<br><input type="radio"/> 2 a 4 veces semana<br><input type="radio"/> 5 a 6 veces semana<br><input type="radio"/> 1 vez al día<br><input type="radio"/> 2 a 3 veces al día<br><input type="radio"/> 5 a 6 veces al día<br><input type="radio"/> más 6 veces al día |
|---------------------|--------------------------------------------------------------------------------------------------------------------------------------------------------------------------------------------------------------------------------------------------------------------------------------------------------------------------------------------------------------------------------------------------------------|

---

|         |                                                                                                                                                                                                                                                                                                                                                                                                              |
|---------|--------------------------------------------------------------------------------------------------------------------------------------------------------------------------------------------------------------------------------------------------------------------------------------------------------------------------------------------------------------------------------------------------------------|
| licores | <input checked="" type="radio"/> Nunca o menos 1 vez al mes<br><input type="radio"/> 1 a 3 veces mes<br><input type="radio"/> 1 vez semana<br><input type="radio"/> 2 a 4 veces semana<br><input type="radio"/> 5 a 6 veces semana<br><input type="radio"/> 1 vez al día<br><input type="radio"/> 2 a 3 veces al día<br><input type="radio"/> 5 a 6 veces al día<br><input type="radio"/> más 6 veces al día |
|---------|--------------------------------------------------------------------------------------------------------------------------------------------------------------------------------------------------------------------------------------------------------------------------------------------------------------------------------------------------------------------------------------------------------------|

---

|                       |                                                                                                                                                                                                                                                                                                                                                                                                              |
|-----------------------|--------------------------------------------------------------------------------------------------------------------------------------------------------------------------------------------------------------------------------------------------------------------------------------------------------------------------------------------------------------------------------------------------------------|
| ginebra o ron o vodka | <input checked="" type="radio"/> Nunca o menos 1 vez al mes<br><input type="radio"/> 1 a 3 veces mes<br><input type="radio"/> 1 vez semana<br><input type="radio"/> 2 a 4 veces semana<br><input type="radio"/> 5 a 6 veces semana<br><input type="radio"/> 1 vez al día<br><input type="radio"/> 2 a 3 veces al día<br><input type="radio"/> 5 a 6 veces al día<br><input type="radio"/> más 6 veces al día |
|-----------------------|--------------------------------------------------------------------------------------------------------------------------------------------------------------------------------------------------------------------------------------------------------------------------------------------------------------------------------------------------------------------------------------------------------------|

---

|                 |                                                                                                                                                                                                                                                                                                                                                                                                              |
|-----------------|--------------------------------------------------------------------------------------------------------------------------------------------------------------------------------------------------------------------------------------------------------------------------------------------------------------------------------------------------------------------------------------------------------------|
| refresco normal | <input checked="" type="radio"/> Nunca o menos 1 vez al mes<br><input type="radio"/> 1 a 3 veces mes<br><input type="radio"/> 1 vez semana<br><input type="radio"/> 2 a 4 veces semana<br><input type="radio"/> 5 a 6 veces semana<br><input type="radio"/> 1 vez al día<br><input type="radio"/> 2 a 3 veces al día<br><input type="radio"/> 5 a 6 veces al día<br><input type="radio"/> más 6 veces al día |
|-----------------|--------------------------------------------------------------------------------------------------------------------------------------------------------------------------------------------------------------------------------------------------------------------------------------------------------------------------------------------------------------------------------------------------------------|

---



|                          |                                                                                                                                                                                                                                                                                                                                                                                                              |
|--------------------------|--------------------------------------------------------------------------------------------------------------------------------------------------------------------------------------------------------------------------------------------------------------------------------------------------------------------------------------------------------------------------------------------------------------|
| refresco sin azúcar      | <input type="radio"/> Nunca o menos 1 vez al mes<br><input checked="" type="radio"/> 1 a 3 veces mes<br><input type="radio"/> 1 vez semana<br><input type="radio"/> 2 a 4 veces semana<br><input type="radio"/> 5 a 6 veces semana<br><input type="radio"/> 1 vez al día<br><input type="radio"/> 2 a 3 veces al día<br><input type="radio"/> 5 a 6 veces al día<br><input type="radio"/> más 6 veces al día |
| Agua del grifo           | <input checked="" type="radio"/> Nunca o menos 1 vez al mes<br><input type="radio"/> 1 a 3 veces mes<br><input type="radio"/> 1 vez semana<br><input type="radio"/> 2 a 4 veces semana<br><input type="radio"/> 5 a 6 veces semana<br><input type="radio"/> 1 vez al día<br><input type="radio"/> 2 a 3 veces al día<br><input type="radio"/> 5 a 6 veces al día<br><input type="radio"/> más 6 veces al día |
| agua embotellada sin gas | <input type="radio"/> Nunca o menos 1 vez al mes<br><input type="radio"/> 1 a 3 veces mes<br><input type="radio"/> 1 vez semana<br><input type="radio"/> 2 a 4 veces semana<br><input type="radio"/> 5 a 6 veces semana<br><input type="radio"/> 1 vez al día<br><input type="radio"/> 2 a 3 veces al día<br><input checked="" type="radio"/> 5 a 6 veces al día<br><input type="radio"/> más 6 veces al día |
| agua embotellada con gas | <input checked="" type="radio"/> Nunca o menos 1 vez al mes<br><input type="radio"/> 1 a 3 veces mes<br><input type="radio"/> 1 vez semana<br><input type="radio"/> 2 a 4 veces semana<br><input type="radio"/> 5 a 6 veces semana<br><input type="radio"/> 1 vez al día<br><input type="radio"/> 2 a 3 veces al día<br><input type="radio"/> 5 a 6 veces al día<br><input type="radio"/> más 6 veces al día |
| zumos frutas emvasado    | <input type="radio"/> Nunca o menos 1 vez al mes<br><input checked="" type="radio"/> 1 a 3 veces mes<br><input type="radio"/> 1 vez semana<br><input type="radio"/> 2 a 4 veces semana<br><input type="radio"/> 5 a 6 veces semana<br><input type="radio"/> 1 vez al día<br><input type="radio"/> 2 a 3 veces al día<br><input type="radio"/> 5 a 6 veces al día<br><input type="radio"/> más 6 veces al día |
| café                     | <input checked="" type="radio"/> Nunca o menos 1 vez al mes<br><input type="radio"/> 1 a 3 veces mes<br><input type="radio"/> 1 vez semana<br><input type="radio"/> 2 a 4 veces semana<br><input type="radio"/> 5 a 6 veces semana<br><input type="radio"/> 1 vez al día<br><input type="radio"/> 2 a 3 veces al día<br><input type="radio"/> 5 a 6 veces al día<br><input type="radio"/> más 6 veces al día |

---

cafe descafeinado

- ☐ Nunca o menos 1 vez al mes  
☐ 1 a 3 veces mes  
☒ 1 vez semana  
☐ 2 a 4 veces semana  
☐ 5 a 6 veces semana  
☐ 1 vez al día  
☐ 2 a 3 veces al día  
☐ 5 a 6 veces al día  
☐ más 6 veces al día

---

te o infusión

- ☒ Nunca o menos 1 vez al mes  
☐ 1 a 3 veces mes  
☐ 1 vez semana  
☐ 2 a 4 veces semana  
☐ 5 a 6 veces semana  
☐ 1 vez al día  
☐ 2 a 3 veces al día  
☐ 5 a 6 veces al día  
☐ más 6 veces al día

---

sopa o puré verduras

- ☒ Nunca o menos 1 vez al mes  
☐ 1 a 3 veces mes  
☐ 1 vez semana  
☐ 2 a 4 veces semana  
☐ 5 a 6 veces semana  
☐ 1 vez al día  
☐ 2 a 3 veces al día  
☐ 5 a 6 veces al día  
☐ más 6 veces al día

---

croquetas pollo jamón

- ☐ Nunca o menos 1 vez al mes  
☒ 1 a 3 veces mes  
☐ 1 vez semana  
☐ 2 a 4 veces semana  
☐ 5 a 6 veces semana  
☐ 1 vez al día  
☐ 2 a 3 veces al día  
☐ 5 a 6 veces al día  
☐ más 6 veces al día

---

croquetas pescado

- ☐ Nunca o menos 1 vez al mes  
☐ 1 a 3 veces mes  
☒ 1 vez semana  
☐ 2 a 4 veces semana  
☐ 5 a 6 veces semana  
☐ 1 vez al día  
☐ 2 a 3 veces al día  
☐ 5 a 6 veces al día  
☐ más 6 veces al día

---

mayonesa

- ☒ Nunca o menos 1 vez al mes  
☐ 1 a 3 veces mes  
☐ 1 vez semana  
☐ 2 a 4 veces semana  
☐ 5 a 6 veces semana  
☐ 1 vez al día  
☐ 2 a 3 veces al día  
☐ 5 a 6 veces al día  
☐ más 6 veces al día

---

salsa tomate

- ☒ Nunca o menos 1 vez al mes  
☐ 1 a 3 veces mes  
☐ 1 vez semana  
☐ 2 a 4 veces semana  
☐ 5 a 6 veces semana  
☐ 1 vez al día  
☐ 2 a 3 veces al día  
☐ 5 a 6 veces al día  
☐ más 6 veces al día

---

ketchup

- ☒ Nunca o menos 1 vez al mes  
☐ 1 a 3 veces mes  
☐ 1 vez semana  
☐ 2 a 4 veces semana  
☐ 5 a 6 veces semana  
☐ 1 vez al día  
☐ 2 a 3 veces al día  
☐ 5 a 6 veces al día  
☐ más 6 veces al día

---

sal

- ☒ Nunca o menos 1 vez al mes  
☐ 1 a 3 veces mes  
☐ 1 vez semana  
☐ 2 a 4 veces semana  
☐ 5 a 6 veces semana  
☐ 1 vez al día  
☐ 2 a 3 veces al día  
☐ 5 a 6 veces al día  
☐ más 6 veces al día

---

ajo

- ☐ Nunca o menos 1 vez al mes  
☐ 1 a 3 veces mes  
☐ 1 vez semana  
☒ 2 a 4 veces semana  
☐ 5 a 6 veces semana  
☐ 1 vez al día  
☐ 2 a 3 veces al día  
☐ 5 a 6 veces al día  
☐ más 6 veces al día

---

mermelada o miel

- ☒ Nunca o menos 1 vez al mes  
☐ 1 a 3 veces mes  
☐ 1 vez semana  
☐ 2 a 4 veces semana  
☐ 5 a 6 veces semana  
☐ 1 vez al día  
☐ 2 a 3 veces al día  
☐ 5 a 6 veces al día  
☐ más 6 veces al día

---

azúcar

- ☐ Nunca o menos 1 vez al mes  
☐ 1 a 3 veces mes  
☒ 1 vez semana  
☐ 2 a 4 veces semana  
☐ 5 a 6 veces semana  
☐ 1 vez al día  
☐ 2 a 3 veces al día  
☐ 5 a 6 veces al día  
☐ más 6 veces al día

---

Otro alimento

---

suplementos vitamínicos

- ☒ si  
☐ no

suplementos vitamínicos

---

dieta previa

- ☐ si  
☒ no

motivo dieta

- ☒ no dieta  
☐ control peso  
☐ control colesterol  
☐ control diabetes  
☐ problemas estómago  
☐ problemas vesícula o hepáticos  
☐ HTA o cardiopatía  
☐ problemas renales  
☐ alergia alimentaria  
☐ ácido úrico elevado  
☐ vegetariana  
☐ otros

cambio alimentos año previo gestación

- ☒ si  
☐ no

cambio lácteos

- ☐ eliminado  
☐ disminuido  
☐ igual  
☒ aumentado  
☐ no sabe

cambio huevos

- ☐ eliminado  
☐ disminuido  
☒ igual  
☐ aumentado  
☐ no sabe

cambio carne

- ☐ eliminado  
☐ disminuido  
☒ igual  
☐ aumentado  
☐ no sabe

cambio pescado

- ☐ eliminado  
☐ disminuido  
☒ igual  
☐ aumentado  
☐ no sabe

cambio verduras

- ☐ eliminado  
☐ disminuido  
☐ igual  
☒ aumentado  
☐ no sabe

|                            |                                                                                                                                                                                                                        |
|----------------------------|------------------------------------------------------------------------------------------------------------------------------------------------------------------------------------------------------------------------|
| cambio legumbres           | <input type="radio"/> eliminado<br><input type="radio"/> disminuido<br><input type="radio"/> igual<br><input checked="" type="radio"/> aumentado<br><input type="radio"/> no sabe                                      |
| cambio fruta               | <input type="radio"/> eliminado<br><input type="radio"/> disminuido<br><input type="radio"/> igual<br><input checked="" type="radio"/> aumentado<br><input type="radio"/> no sabe                                      |
| cambio pan                 | <input type="radio"/> eliminado<br><input type="radio"/> disminuido<br><input checked="" type="radio"/> igual<br><input type="radio"/> aumentado<br><input type="radio"/> no sabe                                      |
| cambio aceite oliva        | <input type="radio"/> eliminado<br><input type="radio"/> disminuido<br><input checked="" type="radio"/> igual<br><input type="radio"/> aumentado<br><input type="radio"/> no sabe                                      |
| cambio mante o margarina   | <input type="radio"/> eliminado<br><input type="radio"/> disminuido<br><input checked="" type="radio"/> igual<br><input type="radio"/> aumentado<br><input type="radio"/> no sabe                                      |
| cambio azúcar y dulces     | <input type="radio"/> eliminado<br><input type="radio"/> disminuido<br><input checked="" type="radio"/> igual<br><input type="radio"/> aumentado<br><input type="radio"/> no sabe                                      |
| cambio bebidas alcohólicas | <input checked="" type="radio"/> eliminado<br><input type="radio"/> disminuido<br><input type="radio"/> igual<br><input type="radio"/> aumentado<br><input type="radio"/> no sabe                                      |
| frecuencia comidas fritas  | <input type="radio"/> a diario<br><input type="radio"/> 5 a 6 veces semana<br><input type="radio"/> 2 a 4 veces semana<br><input checked="" type="radio"/> 1 vez semana<br><input type="radio"/> menos de 1 vez semana |
| carne                      | <input type="radio"/> no como<br><input type="radio"/> cruda<br><input type="radio"/> poco hecha<br><input type="radio"/> hecha<br><input checked="" type="radio"/> muy hecha                                          |
| grasa visible carne        | <input type="radio"/> quita toda<br><input checked="" type="radio"/> quita mayoría<br><input type="radio"/> quita un poco<br><input type="radio"/> no quita nada                                                       |

|                                |                                                                                                                                                                                                                                                          |
|--------------------------------|----------------------------------------------------------------------------------------------------------------------------------------------------------------------------------------------------------------------------------------------------------|
| cocina carne                   | <input checked="" type="radio"/> a la plancha<br><input type="radio"/> a la parrilla<br><input type="radio"/> asada<br><input type="radio"/> frita<br><input type="radio"/> guisada                                                                      |
| tostado quemado carne          | <input checked="" type="radio"/> nunca<br><input type="radio"/> 1 vez mes<br><input type="radio"/> 2 a 3 veces mes<br><input type="radio"/> 1 vez semana<br><input type="radio"/> 2 a 3 semanas                                                          |
| tostado quemado pescado        | <input type="radio"/> nunca<br><input type="radio"/> 1 vez mes<br><input type="radio"/> 2 a 3 veces mes<br><input checked="" type="radio"/> 1 vez semana<br><input type="radio"/> 2 a 3 semanas                                                          |
| socarrat paella                | <input type="radio"/> nunca<br><input checked="" type="radio"/> 1 vez mes<br><input type="radio"/> 2 a 3 veces mes<br><input type="radio"/> 1 vez semana<br><input type="radio"/> 2 a 3 semanas                                                          |
| grasa o aceite cocinar         | <input type="radio"/> mantequilla<br><input type="radio"/> margarina<br><input type="radio"/> aceite oliva<br><input checked="" type="radio"/> aceite oliva virgen extra<br><input type="radio"/> aceite vegetal<br><input type="radio"/> mezcla aceites |
| grasa aceite aliñar            | <input type="radio"/> mantequilla<br><input type="radio"/> margarina<br><input type="radio"/> aceite oliva<br><input checked="" type="radio"/> aceite oliva virgen extra<br><input type="radio"/> aceite vegetal<br><input type="radio"/> mezcla aceites |
| grasa aceite freir             | <input type="radio"/> mantequilla<br><input type="radio"/> margarina<br><input type="radio"/> aceite oliva<br><input checked="" type="radio"/> aceite oliva virgen extra<br><input type="radio"/> aceite vegetal<br><input type="radio"/> mezcla aceites |
| Ejercicio cuestionario         | <input checked="" type="radio"/> si<br><input type="radio"/> no                                                                                                                                                                                          |
| horas de sueño incluido siesta | [*DATA REMOVED*]                                                                                                                                                                                                                                         |
| minutos siesta                 | [*DATA REMOVED*]                                                                                                                                                                                                                                         |
| horas televisión semana        | [*DATA REMOVED*]                                                                                                                                                                                                                                         |

|                                        |                                                                                                                                                                                                                                                                                                                                                                           |
|----------------------------------------|---------------------------------------------------------------------------------------------------------------------------------------------------------------------------------------------------------------------------------------------------------------------------------------------------------------------------------------------------------------------------|
| actividad trabajo                      | <input checked="" type="radio"/> casi siempre sentado<br><input type="radio"/> sentado 50 por cien<br><input type="radio"/> casi siempre de pie, quieto<br><input type="radio"/> casi siempre levantado caminando y llevando pocas cosas<br><input type="radio"/> casi siempre levantado, caminando y llevado muchas cosas<br><input type="radio"/> trabajo manual pesado |
| tiempo caminar o bici al día           | <input type="radio"/> casi nunca<br><input checked="" type="radio"/> menos 20min día<br><input type="radio"/> 20 a 40 min día<br><input type="radio"/> 40 a 60 min día<br><input type="radio"/> 1h o 1h y media día<br><input type="radio"/> más de 1h y media al día                                                                                                     |
| tiempo tareas casa al día              | <input type="radio"/> menos de 1h día<br><input checked="" type="radio"/> 1 a 2h día<br><input type="radio"/> 3 a 4h día<br><input type="radio"/> 5 a 6h día<br><input type="radio"/> 7 a 8h día<br><input type="radio"/> más de 8h día                                                                                                                                   |
| tiempo libre televisión ordenador leer | <input type="radio"/> menos 1h día<br><input type="radio"/> 1h día<br><input type="radio"/> 2h día<br><input checked="" type="radio"/> 3h día<br><input type="radio"/> 4h día<br><input type="radio"/> 5 a 6h día<br><input type="radio"/> mas 6h día                                                                                                                     |
| tiempo libre ejercicio o deporte       | <input checked="" type="radio"/> menos 1h semana<br><input type="radio"/> 1h semana<br><input type="radio"/> 2h semana<br><input type="radio"/> 3h semana<br><input type="radio"/> 4 a 5h semana<br><input type="radio"/> mas 5h semana                                                                                                                                   |
| como se considera                      | <input checked="" type="radio"/> sedentaria<br><input type="radio"/> poco activa<br><input type="radio"/> moderadamente activa<br><input type="radio"/> bastante activa<br><input type="radio"/> muy activa<br><input type="radio"/> no sabe                                                                                                                              |
| FUR                                    | [*DATA REMOVED*]                                                                                                                                                                                                                                                                                                                                                          |
| Semanas gestación 2T                   | [*DATA REMOVED*]                                                                                                                                                                                                                                                                                                                                                          |
| Días gestación 2T                      | [*DATA REMOVED*]                                                                                                                                                                                                                                                                                                                                                          |
| DBP 2T                                 | [*DATA REMOVED*]                                                                                                                                                                                                                                                                                                                                                          |
| CC 2T                                  | [*DATA REMOVED*]                                                                                                                                                                                                                                                                                                                                                          |
| AC 2T                                  | [*DATA REMOVED*]                                                                                                                                                                                                                                                                                                                                                          |

|                                                   |                                                                                                                                                                                                 |
|---------------------------------------------------|-------------------------------------------------------------------------------------------------------------------------------------------------------------------------------------------------|
| LF 2T                                             | [*DATA REMOVED*]                                                                                                                                                                                |
| PFE 2T (Hadlock)                                  | [*DATA REMOVED*]                                                                                                                                                                                |
| Semanas gestación 3T                              | [*DATA REMOVED*]                                                                                                                                                                                |
| días 3T                                           | [*DATA REMOVED*]                                                                                                                                                                                |
| DBP 3T                                            | [*DATA REMOVED*]                                                                                                                                                                                |
| CC 3T                                             | [*DATA REMOVED*]                                                                                                                                                                                |
| AC 3T                                             | [*DATA REMOVED*]                                                                                                                                                                                |
| LF 3T                                             | [*DATA REMOVED*]                                                                                                                                                                                |
| PFE 3T (Hadlock)                                  | [*DATA REMOVED*]                                                                                                                                                                                |
| Semanas de gestación final                        | [*DATA REMOVED*]                                                                                                                                                                                |
| días gestación final                              | [*DATA REMOVED*]                                                                                                                                                                                |
| Localización placenta                             | <input checked="" type="radio"/> anterior<br><input type="radio"/> lateral derecha<br><input type="radio"/> lateral izquierda<br><input type="radio"/> posterior<br><input type="radio"/> fondo |
| Presentación longitudinal cefálica                | <input type="radio"/> no<br><input checked="" type="radio"/> si                                                                                                                                 |
| Dorso                                             | <input checked="" type="radio"/> izquierda anterior<br><input type="radio"/> izquierda posterior<br><input type="radio"/> derecha anterior<br><input type="radio"/> derecha posterior           |
| diámetro biparietal                               | [*DATA REMOVED*]                                                                                                                                                                                |
| Circunferencia craneal                            | [*DATA REMOVED*]                                                                                                                                                                                |
| Circunferencia abdominal                          | [*DATA REMOVED*]                                                                                                                                                                                |
| Longitud de femur                                 | [*DATA REMOVED*]                                                                                                                                                                                |
| tejido celular subcutáneo a nivel del muslo en mm | [*DATA REMOVED*]                                                                                                                                                                                |
| tejido celular subcutáneo en abdomen en mm        | [*DATA REMOVED*]                                                                                                                                                                                |
| Volumen del muslo en cm3                          | [*DATA REMOVED*]                                                                                                                                                                                |
| Peso fetal estimado según fórmula de Hadlock      | [*DATA REMOVED*]                                                                                                                                                                                |



|                                               |                                                                                                                                                          |
|-----------------------------------------------|----------------------------------------------------------------------------------------------------------------------------------------------------------|
| Percentil                                     | [*DATA REMOVED*]                                                                                                                                         |
| Peso fetal estimado según fórmula de Scioscia | <hr/>                                                                                                                                                    |
| Peso fetal estimado según fórmula de LEE      | <hr/>                                                                                                                                                    |
| Tipo de parto                                 | <input checked="" type="radio"/> eutocico<br><input type="radio"/> instrumentado/ventosa<br><input type="radio"/> cesarea                                |
| fecha de nacimiento                           | [*DATA REMOVED*]                                                                                                                                         |
| Días entre exploración y nacimiento           | [*DATA REMOVED*]                                                                                                                                         |
| Peso RN en g                                  | [*DATA REMOVED*]                                                                                                                                         |
| sexo                                          | <input type="radio"/> mujer<br><input checked="" type="radio"/> hombre                                                                                   |
| Apgar 1 minuto                                | [*DATA REMOVED*]                                                                                                                                         |
| Apgar 5 minutos                               | [*DATA REMOVED*]                                                                                                                                         |
| Apgar 10 minutos                              | [*DATA REMOVED*]                                                                                                                                         |
| antecedente Covid durante gestación           | <input type="radio"/> Yes<br><input checked="" type="radio"/> No                                                                                         |
| Nivel de estudios                             | <input type="radio"/> ninguno<br><input type="radio"/> primarios<br><input checked="" type="radio"/> secundarios<br><input type="radio"/> universitarios |

# Base\_datos\_estimacion\_peso\_fetal

|                                       |                                                                                                                                                                                                                                                                                      |
|---------------------------------------|--------------------------------------------------------------------------------------------------------------------------------------------------------------------------------------------------------------------------------------------------------------------------------------|
| Número de identificación participante | 157                                                                                                                                                                                                                                                                                  |
| CODIGO PARTICIPANTE                   |                                                                                                                                                                                                                                                                                      |
| Edad                                  | [*DATA REMOVED*]                                                                                                                                                                                                                                                                     |
| Gestaciones                           | <input type="radio"/> 1<br><input type="radio"/> 2<br><input type="radio"/> 3<br><input checked="" type="radio"/> mas de 3                                                                                                                                                           |
| partos                                | <input type="radio"/> 0<br><input type="radio"/> 1<br><input type="radio"/> 2<br><input type="radio"/> 3<br><input checked="" type="radio"/> mas de 3                                                                                                                                |
| cesáreas                              | <input checked="" type="radio"/> 0<br><input type="radio"/> 1<br><input type="radio"/> 2<br><input type="radio"/> 3<br><input type="radio"/> mas de 3                                                                                                                                |
| Abortos                               | <input type="radio"/> 0<br><input type="radio"/> 1<br><input type="radio"/> 2<br><input checked="" type="radio"/> 3<br><input type="radio"/> mas de 3                                                                                                                                |
| Tipo de gestacion                     | <input checked="" type="radio"/> espontanea<br><input type="radio"/> IAC inseminación artificial conyuge<br><input type="radio"/> IAD inseminación artificial donante<br><input type="radio"/> FIV Fecundación in Vitro<br><input type="radio"/> Ovodon FIV con donación de ovocitos |
| peso previo a embarazo                | [*DATA REMOVED*]                                                                                                                                                                                                                                                                     |
| Ganancia ponderal embarazo            | [*DATA REMOVED*]                                                                                                                                                                                                                                                                     |
| Talla madre                           | [*DATA REMOVED*]                                                                                                                                                                                                                                                                     |
| IMC previo embarazo                   | 21.63114885435026                                                                                                                                                                                                                                                                    |
| Patología obstétrica                  | <input checked="" type="radio"/> no<br><input type="radio"/> si                                                                                                                                                                                                                      |
| Diabetes pregestacional               | <input checked="" type="radio"/> no<br><input type="radio"/> si                                                                                                                                                                                                                      |
| Diabetes gestacional                  | <input checked="" type="radio"/> no<br><input type="radio"/> si                                                                                                                                                                                                                      |

|                                            |                                                                                                                                                                                      |
|--------------------------------------------|--------------------------------------------------------------------------------------------------------------------------------------------------------------------------------------|
| Diabetes gestacional con insulina          | <input checked="" type="radio"/> no<br><input type="radio"/> si                                                                                                                      |
| Diabetes gestacional con dieta y ejercicio | <input checked="" type="radio"/> no<br><input type="radio"/> si                                                                                                                      |
| Percentil fetos previos                    | <input type="radio"/> Nada<br><input type="radio"/> percentil menor de 10<br><input checked="" type="radio"/> percentil entre 10 y 90<br><input type="radio"/> percentil mayor de 90 |
| Exfumadora                                 | <input checked="" type="radio"/> Nada<br><input type="radio"/> menos de 5 años<br><input type="radio"/> 5 a 10 años<br><input type="radio"/> mayor o igual a 10 años                 |
| Hábito tabáquico                           | <input checked="" type="radio"/> no<br><input type="radio"/> si                                                                                                                      |
| fumadora                                   | [*DATA REMOVED*]                                                                                                                                                                     |
| Consumo otros tóxicos                      | <input checked="" type="radio"/> no<br><input type="radio"/> si                                                                                                                      |
| Hb 1T                                      | [*DATA REMOVED*]                                                                                                                                                                     |
| Htc 1T                                     | [*DATA REMOVED*]                                                                                                                                                                     |
| Hb 2T                                      | [*DATA REMOVED*]                                                                                                                                                                     |
| HTC 2T                                     | [*DATA REMOVED*]                                                                                                                                                                     |
| Hb 3T                                      | [*DATA REMOVED*]                                                                                                                                                                     |
| HTC 3T                                     | [*DATA REMOVED*]                                                                                                                                                                     |
| Suplemento FE oral                         | <input checked="" type="radio"/> si<br><input type="radio"/> no                                                                                                                      |
| Suplemento fe iv                           | <input checked="" type="radio"/> si<br><input type="radio"/> no                                                                                                                      |
| Transfusión                                | <input checked="" type="radio"/> no<br><input type="radio"/> si                                                                                                                      |
| Solicitada Vit D                           | <input checked="" type="radio"/> no<br><input type="radio"/> si                                                                                                                      |
| Deficit vit D                              | <input type="radio"/> no<br><input type="radio"/> si                                                                                                                                 |
| Suplemento vit D                           | <input type="radio"/> si<br><input type="radio"/> no                                                                                                                                 |

|                       |                                                                                                                                                                                                                                                                                                                                                                                                              |
|-----------------------|--------------------------------------------------------------------------------------------------------------------------------------------------------------------------------------------------------------------------------------------------------------------------------------------------------------------------------------------------------------------------------------------------------------|
| Dieta, cuestionario   | <input checked="" type="radio"/> si<br><input type="radio"/> no                                                                                                                                                                                                                                                                                                                                              |
| Leche entera          | <input type="radio"/> Nunca o menos 1 vez al mes<br><input type="radio"/> 1 a 3 veces mes<br><input type="radio"/> 1 vez semana<br><input type="radio"/> 2 a 4 veces semana<br><input type="radio"/> 5 a 6 veces semana<br><input checked="" type="radio"/> 1 vez al día<br><input type="radio"/> 2 a 3 veces al día<br><input type="radio"/> 5 a 6 veces al día<br><input type="radio"/> más 6 veces al día |
| Leche semidesnatada   | <input checked="" type="radio"/> Nunca o menos 1 vez al mes<br><input type="radio"/> 1 a 3 veces mes<br><input type="radio"/> 1 vez semana<br><input type="radio"/> 2 a 4 veces semana<br><input type="radio"/> 5 a 6 veces semana<br><input type="radio"/> 1 vez al día<br><input type="radio"/> 2 a 3 veces al día<br><input type="radio"/> 5 a 6 veces al día<br><input type="radio"/> mas 6 veces al día |
| Leche desnatada       | <input checked="" type="radio"/> Nunca o menos 1 vez al mes<br><input type="radio"/> 1 a 3 veces mes<br><input type="radio"/> 1 vez semana<br><input type="radio"/> 2 a 4 veces semana<br><input type="radio"/> 5 a 6 veces semana<br><input type="radio"/> 1 vez al día<br><input type="radio"/> 2 a 3 veces al día<br><input type="radio"/> 5 a 6 veces al día<br><input type="radio"/> más 6 veces al día |
| Leche condensada      | <input checked="" type="radio"/> Nunca o menos 1 vez al mes<br><input type="radio"/> 1 a 3 veces mes<br><input type="radio"/> 1 vez semana<br><input type="radio"/> 2 a 4 veces semana<br><input type="radio"/> 5 a 6 veces semana<br><input type="radio"/> 1 vez al día<br><input type="radio"/> 2 a 3 veces al día<br><input type="radio"/> 5 a 6 veces al día<br><input type="radio"/> más 6 veces al día |
| nata o crema de leche | <input type="radio"/> Nunca o menos 1 vez al mes<br><input type="radio"/> 1 a 3 veces mes<br><input type="radio"/> 1 vez semana<br><input type="radio"/> 2 a 4 veces semana<br><input type="radio"/> 5 a 6 veces semana<br><input checked="" type="radio"/> 1 vez al día<br><input type="radio"/> 2 a 3 veces al día<br><input type="radio"/> 5 a 6 veces al día<br><input type="radio"/> más 6 veces al día |

---

Yogurt Entero

- ☒ Nunca o menos 1 vez al mes  
☐ 1 a 3 veces mes  
☐ 1 vez semana  
☐ 2 a 4 veces semana  
☐ 5 a 6 veces semana  
☐ 1 vez al día  
☐ 2 a 3 veces al día  
☐ 5 a 6 veces al día  
☐ más 6 veces al día

---

Yogurt desnatado

- ☒ Nunca o menos 1 vez al mes  
☐ 1 a 3 veces mes  
☐ 1 vez semana  
☐ 2 a 4 veces semana  
☐ 5 a 6 veces semana  
☐ 1 vez al día  
☐ 2 a 3 veces al día  
☐ 5 a 6 veces al día  
☐ más 6 veces al día

---

100g requesón o queso blando o queso fresco

- ☒ Nunca o menos 1 vez al mes  
☐ 1 a 3 veces mes  
☐ 1 vez semana  
☐ 2 a 4 veces semana  
☐ 5 a 6 veces semana  
☐ 1 vez al día  
☐ 2 a 3 veces al día  
☐ 5 a 6 veces al día  
☐ más 6 veces al día

---

queso curado o semicurado o cremoso

- ☐ Nunca o menos 1 vez al mes  
☐ 1 a 3 veces mes  
☐ 1 vez semana  
☐ 2 a 4 veces semana  
☐ 5 a 6 veces semana  
☒ 1 vez al día  
☐ 2 a 3 veces al día  
☐ 5 a 6 veces al día  
☐ más 6 veces al día

---

natillas flan pudding

- ☐ Nunca o menos 1 vez al mes  
☐ 1 a 3 veces mes  
☐ 1 vez semana  
☐ 2 a 4 veces semana  
☐ 5 a 6 veces semana  
☒ 1 vez al día  
☐ 2 a 3 veces al día  
☐ 5 a 6 veces al día  
☐ más 6 veces al día

---

Helado

- ☒ Nunca o menos 1 vez al mes  
☐ 1 a 3 veces mes  
☐ 1 vez semana  
☐ 2 a 4 veces semana  
☐ 5 a 6 veces semana  
☐ 1 vez al día  
☐ 2 a 3 veces al día  
☐ 5 a 6 veces al día  
☐ más 6 veces al día

|                                      |                                                                                                                                                                                                                                                                                                                                                                                                              |
|--------------------------------------|--------------------------------------------------------------------------------------------------------------------------------------------------------------------------------------------------------------------------------------------------------------------------------------------------------------------------------------------------------------------------------------------------------------|
| huevo                                | <input type="radio"/> Nunca o menos 1 vez al mes<br><input type="radio"/> 1 a 3 veces mes<br><input type="radio"/> 1 vez semana<br><input checked="" type="radio"/> 2 a 4 veces semana<br><input type="radio"/> 5 a 6 veces semana<br><input type="radio"/> 1 vez al día<br><input type="radio"/> 2 a 3 veces al día<br><input type="radio"/> 5 a 6 veces al día<br><input type="radio"/> más 6 veces al día |
| Pollo con piel                       | <input type="radio"/> Nunca o menos 1 vez al mes<br><input type="radio"/> 1 a 3 veces mes<br><input type="radio"/> 1 vez semana<br><input checked="" type="radio"/> 2 a 4 veces semana<br><input type="radio"/> 5 a 6 veces semana<br><input type="radio"/> 1 vez al día<br><input type="radio"/> 2 a 3 veces al día<br><input type="radio"/> 5 a 6 veces al día<br><input type="radio"/> más 6 veces al día |
| pollo sin piel                       | <input type="radio"/> Nunca o menos 1 vez al mes<br><input type="radio"/> 1 a 3 veces mes<br><input checked="" type="radio"/> 1 vez semana<br><input type="radio"/> 2 a 4 veces semana<br><input type="radio"/> 5 a 6 veces semana<br><input type="radio"/> 1 vez al día<br><input type="radio"/> 2 a 3 veces al día<br><input type="radio"/> 5 a 6 veces al día<br><input type="radio"/> más 6 veces al día |
| Ternera o cerdo o cordero            | <input checked="" type="radio"/> Nunca o menos 1 vez al mes<br><input type="radio"/> 1 a 3 veces mes<br><input type="radio"/> 1 vez semana<br><input type="radio"/> 2 a 4 veces semana<br><input type="radio"/> 5 a 6 veces semana<br><input type="radio"/> 1 vez al día<br><input type="radio"/> 2 a 3 veces al día<br><input type="radio"/> 5 a 6 veces al día<br><input type="radio"/> más 6 veces al día |
| carne caza: Conejo o codorniz o pato | <input type="radio"/> Nunca o menos 1 vez al mes<br><input type="radio"/> 1 a 3 veces mes<br><input checked="" type="radio"/> 1 vez semana<br><input type="radio"/> 2 a 4 veces semana<br><input type="radio"/> 5 a 6 veces semana<br><input type="radio"/> 1 vez al día<br><input type="radio"/> 2 a 3 veces al día<br><input type="radio"/> 5 a 6 veces al día<br><input type="radio"/> más 6 veces al día |
| Hígado de ternera o cerdo o pollo    | <input checked="" type="radio"/> Nunca o menos 1 vez al mes<br><input type="radio"/> 1 a 3 veces mes<br><input type="radio"/> 1 vez semana<br><input type="radio"/> 2 a 4 veces semana<br><input type="radio"/> 5 a 6 veces semana<br><input type="radio"/> 1 vez al día<br><input type="radio"/> 2 a 3 veces al día<br><input type="radio"/> 5 a 6 veces al día<br><input type="radio"/> más 6 veces al día |

---

Vísceras

- ☐ Nunca o menos 1 vez al mes  
☐ 1 a 3 veces mes  
☐ 1 vez semana  
☐ 2 a 4 veces semana  
☐ 5 a 6 veces semana  
☒ 1 vez al día  
☐ 2 a 3 veces al día  
☐ 5 a 6 veces al día  
☐ más 6 veces al día

---

Embutido

- ☒ Nunca o menos 1 vez al mes  
☐ 1 a 3 veces mes  
☐ 1 vez semana  
☐ 2 a 4 veces semana  
☐ 5 a 6 veces semana  
☐ 1 vez al día  
☐ 2 a 3 veces al día  
☐ 5 a 6 veces al día  
☐ más 6 veces al día

---

Salchicha o similar

- ☒ Nunca o menos 1 vez al mes  
☐ 1 a 3 veces mes  
☐ 1 vez semana  
☐ 2 a 4 veces semana  
☐ 5 a 6 veces semana  
☐ 1 vez al día  
☐ 2 a 3 veces al día  
☐ 5 a 6 veces al día  
☐ más 6 veces al día

---

Pate o foiegras

- ☐ Nunca o menos 1 vez al mes  
☐ 1 a 3 veces mes  
☒ 1 vez semana  
☐ 2 a 4 veces semana  
☐ 5 a 6 veces semana  
☐ 1 vez al día  
☐ 2 a 3 veces al día  
☐ 5 a 6 veces al día  
☐ más 6 veces al día

---

Hamburguesa

- ☐ Nunca o menos 1 vez al mes  
☐ 1 a 3 veces mes  
☒ 1 vez semana  
☐ 2 a 4 veces semana  
☐ 5 a 6 veces semana  
☐ 1 vez al día  
☐ 2 a 3 veces al día  
☐ 5 a 6 veces al día  
☐ más 6 veces al día

---

tocino o bacon

- ☐ Nunca o menos 1 vez al mes  
☐ 1 a 3 veces mes  
☒ 1 vez semana  
☐ 2 a 4 veces semana  
☐ 5 a 6 veces semana  
☐ 1 vez al día  
☐ 2 a 3 veces al día  
☐ 5 a 6 veces al día  
☐ más 6 veces al día

|                        |                                                                                                                                                                                                                                                                                                                                                                                                              |
|------------------------|--------------------------------------------------------------------------------------------------------------------------------------------------------------------------------------------------------------------------------------------------------------------------------------------------------------------------------------------------------------------------------------------------------------|
| Pescado frito          | <input checked="" type="radio"/> Nunca o menos 1 vez al mes<br><input type="radio"/> 1 a 3 veces mes<br><input type="radio"/> 1 vez semana<br><input type="radio"/> 2 a 4 veces semana<br><input type="radio"/> 5 a 6 veces semana<br><input type="radio"/> 1 vez al día<br><input type="radio"/> 2 a 3 veces al día<br><input type="radio"/> 5 a 6 veces al día<br><input type="radio"/> más 6 veces al día |
| pescado hervido blanco | <input checked="" type="radio"/> Nunca o menos 1 vez al mes<br><input type="radio"/> 1 a 3 veces mes<br><input type="radio"/> 1 vez semana<br><input type="radio"/> 2 a 4 veces semana<br><input type="radio"/> 5 a 6 veces semana<br><input type="radio"/> 1 vez al día<br><input type="radio"/> 2 a 3 veces al día<br><input type="radio"/> 5 a 6 veces al día<br><input type="radio"/> más 6 veces al día |
| pescado hervido azul   | <input checked="" type="radio"/> Nunca o menos 1 vez al mes<br><input type="radio"/> 1 a 3 veces mes<br><input type="radio"/> 1 vez semana<br><input type="radio"/> 2 a 4 veces semana<br><input type="radio"/> 5 a 6 veces semana<br><input type="radio"/> 1 vez al día<br><input type="radio"/> 2 a 3 veces al día<br><input type="radio"/> 5 a 6 veces al día<br><input type="radio"/> más 6 veces al día |
| otros pescado azul     | <input type="radio"/> Nunca o menos 1 vez al mes<br><input type="radio"/> 1 a 3 veces mes<br><input checked="" type="radio"/> 1 vez semana<br><input type="radio"/> 2 a 4 veces semana<br><input type="radio"/> 5 a 6 veces semana<br><input type="radio"/> 1 vez al día<br><input type="radio"/> 2 a 3 veces al día<br><input type="radio"/> 5 a 6 veces al día<br><input type="radio"/> más 6 veces al día |
| atun conserva          | <input checked="" type="radio"/> Nunca o menos 1 vez al mes<br><input type="radio"/> 1 a 3 veces mes<br><input type="radio"/> 1 vez semana<br><input type="radio"/> 2 a 4 veces semana<br><input type="radio"/> 5 a 6 veces semana<br><input type="radio"/> 1 vez al día<br><input type="radio"/> 2 a 3 veces al día<br><input type="radio"/> 5 a 6 veces al día<br><input type="radio"/> más 6 veces al día |
| sardina conserva       | <input checked="" type="radio"/> Nunca o menos 1 vez al mes<br><input type="radio"/> 1 a 3 veces mes<br><input type="radio"/> 1 vez semana<br><input type="radio"/> 2 a 4 veces semana<br><input type="radio"/> 5 a 6 veces semana<br><input type="radio"/> 1 vez al día<br><input type="radio"/> 2 a 3 veces al día<br><input type="radio"/> 5 a 6 veces al día<br><input type="radio"/> más 6 veces al día |



|                                         |                                                                                                                                                                                                                                                                                                                                                                                                              |
|-----------------------------------------|--------------------------------------------------------------------------------------------------------------------------------------------------------------------------------------------------------------------------------------------------------------------------------------------------------------------------------------------------------------------------------------------------------------|
| pescado ahumado                         | <input type="radio"/> Nunca o menos 1 vez al mes<br><input type="radio"/> 1 a 3 veces mes<br><input checked="" type="radio"/> 1 vez semana<br><input type="radio"/> 2 a 4 veces semana<br><input type="radio"/> 5 a 6 veces semana<br><input type="radio"/> 1 vez al día<br><input type="radio"/> 2 a 3 veces al día<br><input type="radio"/> 5 a 6 veces al día<br><input type="radio"/> más 6 veces al día |
| almejas o mejillones o ostras unos 100g | <input type="radio"/> Nunca o menos 1 vez al mes<br><input type="radio"/> 1 a 3 veces mes<br><input type="radio"/> 1 vez semana<br><input type="radio"/> 2 a 4 veces semana<br><input type="radio"/> 5 a 6 veces semana<br><input type="radio"/> 1 vez al día<br><input type="radio"/> 2 a 3 veces al día<br><input type="radio"/> 5 a 6 veces al día<br><input type="radio"/> más 6 veces al día            |
| calamar o chipiron o sepia unos 100g    | <input checked="" type="radio"/> Nunca o menos 1 vez al mes<br><input type="radio"/> 1 a 3 veces mes<br><input type="radio"/> 1 vez semana<br><input type="radio"/> 2 a 4 veces semana<br><input type="radio"/> 5 a 6 veces semana<br><input type="radio"/> 1 vez al día<br><input type="radio"/> 2 a 3 veces al día<br><input type="radio"/> 5 a 6 veces al día<br><input type="radio"/> más 6 veces al día |
| marisco unos 100g                       | <input checked="" type="radio"/> Nunca o menos 1 vez al mes<br><input type="radio"/> 1 a 3 veces mes<br><input type="radio"/> 1 vez semana<br><input type="radio"/> 2 a 4 veces semana<br><input type="radio"/> 5 a 6 veces semana<br><input type="radio"/> 1 vez al día<br><input type="radio"/> 2 a 3 veces al día<br><input type="radio"/> 5 a 6 veces al día<br><input type="radio"/> más 6 veces al día |
| Espinacas o acelgas cocinadas           | <input checked="" type="radio"/> Nunca o menos 1 vez al mes<br><input type="radio"/> 1 a 3 veces mes<br><input type="radio"/> 1 vez semana<br><input type="radio"/> 2 a 4 veces semana<br><input type="radio"/> 5 a 6 veces semana<br><input type="radio"/> 1 vez al día<br><input type="radio"/> 2 a 3 veces al día<br><input type="radio"/> 5 a 6 veces al día<br><input type="radio"/> más 6 veces al día |
| Col o coliflor o brocoli cocinado       | <input type="radio"/> Nunca o menos 1 vez al mes<br><input type="radio"/> 1 a 3 veces mes<br><input checked="" type="radio"/> 1 vez semana<br><input type="radio"/> 2 a 4 veces semana<br><input type="radio"/> 5 a 6 veces semana<br><input type="radio"/> 1 vez al día<br><input type="radio"/> 2 a 3 veces al día<br><input type="radio"/> 5 a 6 veces al día<br><input type="radio"/> más 6 veces al día |

---

Lechuga o endivia o escarola

- ☐ Nunca o menos 1 vez al mes  
☐ 1 a 3 veces mes  
☒ 1 vez semana  
☐ 2 a 4 veces semana  
☐ 5 a 6 veces semana  
☐ 1 vez al día  
☐ 2 a 3 veces al día  
☐ 5 a 6 veces al día  
☐ más 6 veces al día

---

tomate ensalada

- ☒ Nunca o menos 1 vez al mes  
☐ 1 a 3 veces mes  
☐ 1 vez semana  
☐ 2 a 4 veces semana  
☐ 5 a 6 veces semana  
☐ 1 vez al día  
☐ 2 a 3 veces al día  
☐ 5 a 6 veces al día  
☐ más 6 veces al día

---

cebolla

- ☒ Nunca o menos 1 vez al mes  
☐ 1 a 3 veces mes  
☐ 1 vez semana  
☐ 2 a 4 veces semana  
☐ 5 a 6 veces semana  
☐ 1 vez al día  
☐ 2 a 3 veces al día  
☐ 5 a 6 veces al día  
☐ más 6 veces al día

---

Zanahoria o calabaza

- ☒ Nunca o menos 1 vez al mes  
☐ 1 a 3 veces mes  
☐ 1 vez semana  
☐ 2 a 4 veces semana  
☐ 5 a 6 veces semana  
☐ 1 vez al día  
☐ 2 a 3 veces al día  
☐ 5 a 6 veces al día  
☐ más 6 veces al día

---

Judías verdes

- ☒ Nunca o menos 1 vez al mes  
☐ 1 a 3 veces mes  
☐ 1 vez semana  
☐ 2 a 4 veces semana  
☐ 5 a 6 veces semana  
☐ 1 vez al día  
☐ 2 a 3 veces al día  
☐ 5 a 6 veces al día  
☐ más 6 veces al día

---

Berenjena o calabacin o pepino

- ☒ Nunca o menos 1 vez al mes  
☐ 1 a 3 veces mes  
☐ 1 vez semana  
☐ 2 a 4 veces semana  
☐ 5 a 6 veces semana  
☐ 1 vez al día  
☐ 2 a 3 veces al día  
☐ 5 a 6 veces al día  
☐ más 6 veces al día

|                       |                                                                                                                                                                                                                                                                                                                                                                                                              |
|-----------------------|--------------------------------------------------------------------------------------------------------------------------------------------------------------------------------------------------------------------------------------------------------------------------------------------------------------------------------------------------------------------------------------------------------------|
| pimiento              | <input checked="" type="radio"/> Nunca o menos 1 vez al mes<br><input type="radio"/> 1 a 3 veces mes<br><input type="radio"/> 1 vez semana<br><input type="radio"/> 2 a 4 veces semana<br><input type="radio"/> 5 a 6 veces semana<br><input type="radio"/> 1 vez al día<br><input type="radio"/> 2 a 3 veces al día<br><input type="radio"/> 5 a 6 veces al día<br><input type="radio"/> más 6 veces al día |
| alcachofa             | <input checked="" type="radio"/> Nunca o menos 1 vez al mes<br><input type="radio"/> 1 a 3 veces mes<br><input type="radio"/> 1 vez semana<br><input type="radio"/> 2 a 4 veces semana<br><input type="radio"/> 5 a 6 veces semana<br><input type="radio"/> 1 vez al día<br><input type="radio"/> 2 a 3 veces al día<br><input type="radio"/> 5 a 6 veces al día<br><input type="radio"/> más 6 veces al día |
| espárragos            | <input checked="" type="radio"/> Nunca o menos 1 vez al mes<br><input type="radio"/> 1 a 3 veces mes<br><input type="radio"/> 1 vez semana<br><input type="radio"/> 2 a 4 veces semana<br><input type="radio"/> 5 a 6 veces semana<br><input type="radio"/> 1 vez al día<br><input type="radio"/> 2 a 3 veces al día<br><input type="radio"/> 5 a 6 veces al día<br><input type="radio"/> más 6 veces al día |
| maíz hervido          | <input checked="" type="radio"/> Nunca o menos 1 vez al mes<br><input type="radio"/> 1 a 3 veces mes<br><input type="radio"/> 1 vez semana<br><input type="radio"/> 2 a 4 veces semana<br><input type="radio"/> 5 a 6 veces semana<br><input type="radio"/> 1 vez al día<br><input type="radio"/> 2 a 3 veces al día<br><input type="radio"/> 5 a 6 veces al día<br><input type="radio"/> más 6 veces al día |
| legumbres             | <input type="radio"/> Nunca o menos 1 vez al mes<br><input type="radio"/> 1 a 3 veces mes<br><input checked="" type="radio"/> 1 vez semana<br><input type="radio"/> 2 a 4 veces semana<br><input type="radio"/> 5 a 6 veces semana<br><input type="radio"/> 1 vez al día<br><input type="radio"/> 2 a 3 veces al día<br><input type="radio"/> 5 a 6 veces al día<br><input type="radio"/> más 6 veces al día |
| naranjas o mandarinas | <input checked="" type="radio"/> Nunca o menos 1 vez al mes<br><input type="radio"/> 1 a 3 veces mes<br><input type="radio"/> 1 vez semana<br><input type="radio"/> 2 a 4 veces semana<br><input type="radio"/> 5 a 6 veces semana<br><input type="radio"/> 1 vez al día<br><input type="radio"/> 2 a 3 veces al día<br><input type="radio"/> 5 a 6 veces al día<br><input type="radio"/> más 6 veces al día |

|                       |                                                                                                                                                                                                                                                                                                                                                                                                              |
|-----------------------|--------------------------------------------------------------------------------------------------------------------------------------------------------------------------------------------------------------------------------------------------------------------------------------------------------------------------------------------------------------------------------------------------------------|
| zum natural fruta     | <input type="radio"/> Nunca o menos 1 vez al mes<br><input type="radio"/> 1 a 3 veces mes<br><input checked="" type="radio"/> 1 vez semana<br><input type="radio"/> 2 a 4 veces semana<br><input type="radio"/> 5 a 6 veces semana<br><input type="radio"/> 1 vez al día<br><input type="radio"/> 2 a 3 veces al día<br><input type="radio"/> 5 a 6 veces al día<br><input type="radio"/> más 6 veces al día |
| platano               | <input checked="" type="radio"/> Nunca o menos 1 vez al mes<br><input type="radio"/> 1 a 3 veces mes<br><input type="radio"/> 1 vez semana<br><input type="radio"/> 2 a 4 veces semana<br><input type="radio"/> 5 a 6 veces semana<br><input type="radio"/> 1 vez al día<br><input type="radio"/> 2 a 3 veces al día<br><input type="radio"/> 5 a 6 veces al día<br><input type="radio"/> más 6 veces al día |
| manzana o pera        | <input checked="" type="radio"/> Nunca o menos 1 vez al mes<br><input type="radio"/> 1 a 3 veces mes<br><input type="radio"/> 1 vez semana<br><input type="radio"/> 2 a 4 veces semana<br><input type="radio"/> 5 a 6 veces semana<br><input type="radio"/> 1 vez al día<br><input type="radio"/> 2 a 3 veces al día<br><input type="radio"/> 5 a 6 veces al día<br><input type="radio"/> más 6 veces al día |
| melocotón o nectarina | <input checked="" type="radio"/> Nunca o menos 1 vez al mes<br><input type="radio"/> 1 a 3 veces mes<br><input type="radio"/> 1 vez semana<br><input type="radio"/> 2 a 4 veces semana<br><input type="radio"/> 5 a 6 veces semana<br><input type="radio"/> 1 vez al día<br><input type="radio"/> 2 a 3 veces al día<br><input type="radio"/> 5 a 6 veces al día<br><input type="radio"/> más 6 veces al día |
| sandia o melon        | <input type="radio"/> Nunca o menos 1 vez al mes<br><input type="radio"/> 1 a 3 veces mes<br><input checked="" type="radio"/> 1 vez semana<br><input type="radio"/> 2 a 4 veces semana<br><input type="radio"/> 5 a 6 veces semana<br><input type="radio"/> 1 vez al día<br><input type="radio"/> 2 a 3 veces al día<br><input type="radio"/> 5 a 6 veces al día<br><input type="radio"/> más 6 veces al día |
| uva                   | <input checked="" type="radio"/> Nunca o menos 1 vez al mes<br><input type="radio"/> 1 a 3 veces mes<br><input type="radio"/> 1 vez semana<br><input type="radio"/> 2 a 4 veces semana<br><input type="radio"/> 5 a 6 veces semana<br><input type="radio"/> 1 vez al día<br><input type="radio"/> 2 a 3 veces al día<br><input type="radio"/> 5 a 6 veces al día<br><input type="radio"/> más 6 veces al día |

---

bruna o ciruela

- ☒ Nunca o menos 1 vez al mes  
☐ 1 a 3 veces mes  
☐ 1 vez semana  
☐ 2 a 4 veces semana  
☐ 5 a 6 veces semana  
☐ 1 vez al día  
☐ 2 a 3 veces al día  
☐ 5 a 6 veces al día  
☐ más 6 veces al día

---

kiwi

- ☒ Nunca o menos 1 vez al mes  
☐ 1 a 3 veces mes  
☐ 1 vez semana  
☐ 2 a 4 veces semana  
☐ 5 a 6 veces semana  
☐ 1 vez al día  
☐ 2 a 3 veces al día  
☐ 5 a 6 veces al día  
☐ más 6 veces al día

---

aceituna

- ☐ Nunca o menos 1 vez al mes  
☐ 1 a 3 veces mes  
☒ 1 vez semana  
☐ 2 a 4 veces semana  
☐ 5 a 6 veces semana  
☐ 1 vez al día  
☐ 2 a 3 veces al día  
☐ 5 a 6 veces al día  
☐ más 6 veces al día

---

frutos secos

- ☐ Nunca o menos 1 vez al mes  
☐ 1 a 3 veces mes  
☒ 1 vez semana  
☐ 2 a 4 veces semana  
☐ 5 a 6 veces semana  
☐ 1 vez al día  
☐ 2 a 3 veces al día  
☐ 5 a 6 veces al día  
☐ más 6 veces al día

---

pan blanco

- ☒ Nunca o menos 1 vez al mes  
☐ 1 a 3 veces mes  
☐ 1 vez semana  
☐ 2 a 4 veces semana  
☐ 5 a 6 veces semana  
☐ 1 vez al día  
☐ 2 a 3 veces al día  
☐ 5 a 6 veces al día  
☐ más 6 veces al día

---

pan integral

- ☐ Nunca o menos 1 vez al mes  
☐ 1 a 3 veces mes  
☒ 1 vez semana  
☐ 2 a 4 veces semana  
☐ 5 a 6 veces semana  
☐ 1 vez al día  
☐ 2 a 3 veces al día  
☐ 5 a 6 veces al día  
☐ más 6 veces al día

|                          |                                                                                                                                                                                                                                                                                                                                                                                                              |
|--------------------------|--------------------------------------------------------------------------------------------------------------------------------------------------------------------------------------------------------------------------------------------------------------------------------------------------------------------------------------------------------------------------------------------------------------|
| cereales desayuno        | <input checked="" type="radio"/> Nunca o menos 1 vez al mes<br><input type="radio"/> 1 a 3 veces mes<br><input type="radio"/> 1 vez semana<br><input type="radio"/> 2 a 4 veces semana<br><input type="radio"/> 5 a 6 veces semana<br><input type="radio"/> 1 vez al día<br><input type="radio"/> 2 a 3 veces al día<br><input type="radio"/> 5 a 6 veces al día<br><input type="radio"/> más 6 veces al día |
| patatas fritas           | <input type="radio"/> Nunca o menos 1 vez al mes<br><input type="radio"/> 1 a 3 veces mes<br><input checked="" type="radio"/> 1 vez semana<br><input type="radio"/> 2 a 4 veces semana<br><input type="radio"/> 5 a 6 veces semana<br><input type="radio"/> 1 vez al día<br><input type="radio"/> 2 a 3 veces al día<br><input type="radio"/> 5 a 6 veces al día<br><input type="radio"/> más 6 veces al día |
| patatas cocidas o asadas | <input checked="" type="radio"/> Nunca o menos 1 vez al mes<br><input type="radio"/> 1 a 3 veces mes<br><input type="radio"/> 1 vez semana<br><input type="radio"/> 2 a 4 veces semana<br><input type="radio"/> 5 a 6 veces semana<br><input type="radio"/> 1 vez al día<br><input type="radio"/> 2 a 3 veces al día<br><input type="radio"/> 5 a 6 veces al día<br><input type="radio"/> más 6 veces al día |
| bolsa papas              | <input type="radio"/> Nunca o menos 1 vez al mes<br><input type="radio"/> 1 a 3 veces mes<br><input checked="" type="radio"/> 1 vez semana<br><input type="radio"/> 2 a 4 veces semana<br><input type="radio"/> 5 a 6 veces semana<br><input type="radio"/> 1 vez al día<br><input type="radio"/> 2 a 3 veces al día<br><input type="radio"/> 5 a 6 veces al día<br><input type="radio"/> más 6 veces al día |
| arroz cocinado           | <input type="radio"/> Nunca o menos 1 vez al mes<br><input type="radio"/> 1 a 3 veces mes<br><input checked="" type="radio"/> 1 vez semana<br><input type="radio"/> 2 a 4 veces semana<br><input type="radio"/> 5 a 6 veces semana<br><input type="radio"/> 1 vez al día<br><input type="radio"/> 2 a 3 veces al día<br><input type="radio"/> 5 a 6 veces al día<br><input type="radio"/> más 6 veces al día |
| pasta                    | <input type="radio"/> Nunca o menos 1 vez al mes<br><input type="radio"/> 1 a 3 veces mes<br><input type="radio"/> 1 vez semana<br><input checked="" type="radio"/> 2 a 4 veces semana<br><input type="radio"/> 5 a 6 veces semana<br><input type="radio"/> 1 vez al día<br><input type="radio"/> 2 a 3 veces al día<br><input type="radio"/> 5 a 6 veces al día<br><input type="radio"/> más 6 veces al día |

|                     |                                                                                                                                                                                                                                                                                                                                                                                                              |
|---------------------|--------------------------------------------------------------------------------------------------------------------------------------------------------------------------------------------------------------------------------------------------------------------------------------------------------------------------------------------------------------------------------------------------------------|
| pizza               | <input type="radio"/> Nunca o menos 1 vez al mes<br><input type="radio"/> 1 a 3 veces mes<br><input checked="" type="radio"/> 1 vez semana<br><input type="radio"/> 2 a 4 veces semana<br><input type="radio"/> 5 a 6 veces semana<br><input type="radio"/> 1 vez al día<br><input type="radio"/> 2 a 3 veces al día<br><input type="radio"/> 5 a 6 veces al día<br><input type="radio"/> más 6 veces al día |
| aceite oliva        | <input type="radio"/> Nunca o menos 1 vez al mes<br><input type="radio"/> 1 a 3 veces mes<br><input type="radio"/> 1 vez semana<br><input checked="" type="radio"/> 2 a 4 veces semana<br><input type="radio"/> 5 a 6 veces semana<br><input type="radio"/> 1 vez al día<br><input type="radio"/> 2 a 3 veces al día<br><input type="radio"/> 5 a 6 veces al día<br><input type="radio"/> más 6 veces al día |
| otros aceites       | <input checked="" type="radio"/> Nunca o menos 1 vez al mes<br><input type="radio"/> 1 a 3 veces mes<br><input type="radio"/> 1 vez semana<br><input type="radio"/> 2 a 4 veces semana<br><input type="radio"/> 5 a 6 veces semana<br><input type="radio"/> 1 vez al día<br><input type="radio"/> 2 a 3 veces al día<br><input type="radio"/> 5 a 6 veces al día<br><input type="radio"/> más 6 veces al día |
| margarina           | <input checked="" type="radio"/> Nunca o menos 1 vez al mes<br><input type="radio"/> 1 a 3 veces mes<br><input type="radio"/> 1 vez semana<br><input type="radio"/> 2 a 4 veces semana<br><input type="radio"/> 5 a 6 veces semana<br><input type="radio"/> 1 vez al día<br><input type="radio"/> 2 a 3 veces al día<br><input type="radio"/> 5 a 6 veces al día<br><input type="radio"/> más 6 veces al día |
| mantequilla         | <input checked="" type="radio"/> Nunca o menos 1 vez al mes<br><input type="radio"/> 1 a 3 veces mes<br><input type="radio"/> 1 vez semana<br><input type="radio"/> 2 a 4 veces semana<br><input type="radio"/> 5 a 6 veces semana<br><input type="radio"/> 1 vez al día<br><input type="radio"/> 2 a 3 veces al día<br><input type="radio"/> 5 a 6 veces al día<br><input type="radio"/> más 6 veces al día |
| galletas tipo maria | <input type="radio"/> Nunca o menos 1 vez al mes<br><input type="radio"/> 1 a 3 veces mes<br><input checked="" type="radio"/> 1 vez semana<br><input type="radio"/> 2 a 4 veces semana<br><input type="radio"/> 5 a 6 veces semana<br><input type="radio"/> 1 vez al día<br><input type="radio"/> 2 a 3 veces al día<br><input type="radio"/> 5 a 6 veces al día<br><input type="radio"/> más 6 veces al día |

---

galletas chocolate

- ☐ Nunca o menos 1 vez al mes  
☐ 1 a 3 veces mes  
☒ 1 vez semana  
☐ 2 a 4 veces semana  
☐ 5 a 6 veces semana  
☐ 1 vez al día  
☐ 2 a 3 veces al día  
☐ 5 a 6 veces al día  
☐ más 6 veces al día

---

bolleria

- ☐ Nunca o menos 1 vez al mes  
☐ 1 a 3 veces mes  
☒ 1 vez semana  
☐ 2 a 4 veces semana  
☐ 5 a 6 veces semana  
☐ 1 vez al día  
☐ 2 a 3 veces al día  
☐ 5 a 6 veces al día  
☐ más 6 veces al día

---

chocolate o bombones

- ☐ Nunca o menos 1 vez al mes  
☐ 1 a 3 veces mes  
☐ 1 vez semana  
☒ 2 a 4 veces semana  
☐ 5 a 6 veces semana  
☐ 1 vez al día  
☐ 2 a 3 veces al día  
☐ 5 a 6 veces al día  
☐ más 6 veces al día

---

chocolate polvo o colacao

- ☐ Nunca o menos 1 vez al mes  
☐ 1 a 3 veces mes  
☐ 1 vez semana  
☐ 2 a 4 veces semana  
☐ 5 a 6 veces semana  
☒ 1 vez al día  
☐ 2 a 3 veces al día  
☐ 5 a 6 veces al día  
☐ más 6 veces al día

---

vino tinto

- ☒ Nunca o menos 1 vez al mes  
☐ 1 a 3 veces mes  
☐ 1 vez semana  
☐ 2 a 4 veces semana  
☐ 5 a 6 veces semana  
☐ 1 vez al día  
☐ 2 a 3 veces al día  
☐ 5 a 6 veces al día  
☐ más 6 veces al día

---

vino blanco

- ☒ Nunca o menos 1 vez al mes  
☐ 1 a 3 veces mes  
☐ 1 vez semana  
☐ 2 a 4 veces semana  
☐ 5 a 6 veces semana  
☐ 1 vez al día  
☐ 2 a 3 veces al día  
☐ 5 a 6 veces al día  
☐ más 6 veces al día



|                       |                                                                                                                                                                                                                                                                                                                                                                                                              |
|-----------------------|--------------------------------------------------------------------------------------------------------------------------------------------------------------------------------------------------------------------------------------------------------------------------------------------------------------------------------------------------------------------------------------------------------------|
| vino seco o vermut    | <input checked="" type="radio"/> Nunca o menos 1 vez al mes<br><input type="radio"/> 1 a 3 veces mes<br><input type="radio"/> 1 vez semana<br><input type="radio"/> 2 a 4 veces semana<br><input type="radio"/> 5 a 6 veces semana<br><input type="radio"/> 1 vez al día<br><input type="radio"/> 2 a 3 veces al día<br><input type="radio"/> 5 a 6 veces al día<br><input type="radio"/> más 6 veces al día |
| cerveza               | <input checked="" type="radio"/> Nunca o menos 1 vez al mes<br><input type="radio"/> 1 a 3 veces mes<br><input type="radio"/> 1 vez semana<br><input type="radio"/> 2 a 4 veces semana<br><input type="radio"/> 5 a 6 veces semana<br><input type="radio"/> 1 vez al día<br><input type="radio"/> 2 a 3 veces al día<br><input type="radio"/> 5 a 6 veces al día<br><input type="radio"/> más 6 veces al día |
| cerveza sin alcohol   | <input checked="" type="radio"/> Nunca o menos 1 vez al mes<br><input type="radio"/> 1 a 3 veces mes<br><input type="radio"/> 1 vez semana<br><input type="radio"/> 2 a 4 veces semana<br><input type="radio"/> 5 a 6 veces semana<br><input type="radio"/> 1 vez al día<br><input type="radio"/> 2 a 3 veces al día<br><input type="radio"/> 5 a 6 veces al día<br><input type="radio"/> más 6 veces al día |
| licores               | <input checked="" type="radio"/> Nunca o menos 1 vez al mes<br><input type="radio"/> 1 a 3 veces mes<br><input type="radio"/> 1 vez semana<br><input type="radio"/> 2 a 4 veces semana<br><input type="radio"/> 5 a 6 veces semana<br><input type="radio"/> 1 vez al día<br><input type="radio"/> 2 a 3 veces al día<br><input type="radio"/> 5 a 6 veces al día<br><input type="radio"/> más 6 veces al día |
| ginebra o ron o vodka | <input checked="" type="radio"/> Nunca o menos 1 vez al mes<br><input type="radio"/> 1 a 3 veces mes<br><input type="radio"/> 1 vez semana<br><input type="radio"/> 2 a 4 veces semana<br><input type="radio"/> 5 a 6 veces semana<br><input type="radio"/> 1 vez al día<br><input type="radio"/> 2 a 3 veces al día<br><input type="radio"/> 5 a 6 veces al día<br><input type="radio"/> más 6 veces al día |
| refresco normal       | <input type="radio"/> Nunca o menos 1 vez al mes<br><input type="radio"/> 1 a 3 veces mes<br><input type="radio"/> 1 vez semana<br><input type="radio"/> 2 a 4 veces semana<br><input type="radio"/> 5 a 6 veces semana<br><input checked="" type="radio"/> 1 vez al día<br><input type="radio"/> 2 a 3 veces al día<br><input type="radio"/> 5 a 6 veces al día<br><input type="radio"/> más 6 veces al día |

|                           |                                                                                                                                                                                                                                                                                                                                                                                                              |
|---------------------------|--------------------------------------------------------------------------------------------------------------------------------------------------------------------------------------------------------------------------------------------------------------------------------------------------------------------------------------------------------------------------------------------------------------|
| refresco sin azúcar       | <input checked="" type="radio"/> Nunca o menos 1 vez al mes<br><input type="radio"/> 1 a 3 veces mes<br><input type="radio"/> 1 vez semana<br><input type="radio"/> 2 a 4 veces semana<br><input type="radio"/> 5 a 6 veces semana<br><input type="radio"/> 1 vez al día<br><input type="radio"/> 2 a 3 veces al día<br><input type="radio"/> 5 a 6 veces al día<br><input type="radio"/> más 6 veces al día |
| Agua del grifo            | <input type="radio"/> Nunca o menos 1 vez al mes<br><input type="radio"/> 1 a 3 veces mes<br><input type="radio"/> 1 vez semana<br><input type="radio"/> 2 a 4 veces semana<br><input type="radio"/> 5 a 6 veces semana<br><input checked="" type="radio"/> 1 vez al día<br><input type="radio"/> 2 a 3 veces al día<br><input type="radio"/> 5 a 6 veces al día<br><input type="radio"/> más 6 veces al día |
| agua embotellada sin gas  | <input checked="" type="radio"/> Nunca o menos 1 vez al mes<br><input type="radio"/> 1 a 3 veces mes<br><input type="radio"/> 1 vez semana<br><input type="radio"/> 2 a 4 veces semana<br><input type="radio"/> 5 a 6 veces semana<br><input type="radio"/> 1 vez al día<br><input type="radio"/> 2 a 3 veces al día<br><input type="radio"/> 5 a 6 veces al día<br><input type="radio"/> más 6 veces al día |
| agua embotellada con gas  | <input checked="" type="radio"/> Nunca o menos 1 vez al mes<br><input type="radio"/> 1 a 3 veces mes<br><input type="radio"/> 1 vez semana<br><input type="radio"/> 2 a 4 veces semana<br><input type="radio"/> 5 a 6 veces semana<br><input type="radio"/> 1 vez al día<br><input type="radio"/> 2 a 3 veces al día<br><input type="radio"/> 5 a 6 veces al día<br><input type="radio"/> más 6 veces al día |
| zumos frutas embotellados | <input checked="" type="radio"/> Nunca o menos 1 vez al mes<br><input type="radio"/> 1 a 3 veces mes<br><input type="radio"/> 1 vez semana<br><input type="radio"/> 2 a 4 veces semana<br><input type="radio"/> 5 a 6 veces semana<br><input type="radio"/> 1 vez al día<br><input type="radio"/> 2 a 3 veces al día<br><input type="radio"/> 5 a 6 veces al día<br><input type="radio"/> más 6 veces al día |
| café                      | <input type="radio"/> Nunca o menos 1 vez al mes<br><input type="radio"/> 1 a 3 veces mes<br><input type="radio"/> 1 vez semana<br><input type="radio"/> 2 a 4 veces semana<br><input type="radio"/> 5 a 6 veces semana<br><input checked="" type="radio"/> 1 vez al día<br><input type="radio"/> 2 a 3 veces al día<br><input type="radio"/> 5 a 6 veces al día<br><input type="radio"/> más 6 veces al día |

---

cafe descafeinado

- ☒ Nunca o menos 1 vez al mes  
☐ 1 a 3 veces mes  
☐ 1 vez semana  
☐ 2 a 4 veces semana  
☐ 5 a 6 veces semana  
☐ 1 vez al día  
☐ 2 a 3 veces al día  
☐ 5 a 6 veces al día  
☐ más 6 veces al día

---

te o infusión

- ☒ Nunca o menos 1 vez al mes  
☐ 1 a 3 veces mes  
☐ 1 vez semana  
☐ 2 a 4 veces semana  
☐ 5 a 6 veces semana  
☐ 1 vez al día  
☐ 2 a 3 veces al día  
☐ 5 a 6 veces al día  
☐ más 6 veces al día

---

sopa o puré verduras

- ☒ Nunca o menos 1 vez al mes  
☐ 1 a 3 veces mes  
☐ 1 vez semana  
☐ 2 a 4 veces semana  
☐ 5 a 6 veces semana  
☐ 1 vez al día  
☐ 2 a 3 veces al día  
☐ 5 a 6 veces al día  
☐ más 6 veces al día

---

croquetas pollo jamón

- ☐ Nunca o menos 1 vez al mes  
☐ 1 a 3 veces mes  
☒ 1 vez semana  
☐ 2 a 4 veces semana  
☐ 5 a 6 veces semana  
☐ 1 vez al día  
☐ 2 a 3 veces al día  
☐ 5 a 6 veces al día  
☐ más 6 veces al día

---

croquetas pescado

- ☐ Nunca o menos 1 vez al mes  
☐ 1 a 3 veces mes  
☒ 1 vez semana  
☐ 2 a 4 veces semana  
☐ 5 a 6 veces semana  
☐ 1 vez al día  
☐ 2 a 3 veces al día  
☐ 5 a 6 veces al día  
☐ más 6 veces al día

---

mayonesa

- ☒ Nunca o menos 1 vez al mes  
☐ 1 a 3 veces mes  
☐ 1 vez semana  
☐ 2 a 4 veces semana  
☐ 5 a 6 veces semana  
☐ 1 vez al día  
☐ 2 a 3 veces al día  
☐ 5 a 6 veces al día  
☐ más 6 veces al día

---

salsa tomate

- ☒ Nunca o menos 1 vez al mes  
☐ 1 a 3 veces mes  
☐ 1 vez semana  
☐ 2 a 4 veces semana  
☐ 5 a 6 veces semana  
☐ 1 vez al día  
☐ 2 a 3 veces al día  
☐ 5 a 6 veces al día  
☐ más 6 veces al día

---

ketchup

- ☒ Nunca o menos 1 vez al mes  
☐ 1 a 3 veces mes  
☐ 1 vez semana  
☐ 2 a 4 veces semana  
☐ 5 a 6 veces semana  
☐ 1 vez al día  
☐ 2 a 3 veces al día  
☐ 5 a 6 veces al día  
☐ más 6 veces al día

---

sal

- ☒ Nunca o menos 1 vez al mes  
☐ 1 a 3 veces mes  
☐ 1 vez semana  
☐ 2 a 4 veces semana  
☐ 5 a 6 veces semana  
☐ 1 vez al día  
☐ 2 a 3 veces al día  
☐ 5 a 6 veces al día  
☐ más 6 veces al día

---

ajo

- ☒ Nunca o menos 1 vez al mes  
☐ 1 a 3 veces mes  
☐ 1 vez semana  
☐ 2 a 4 veces semana  
☐ 5 a 6 veces semana  
☐ 1 vez al día  
☐ 2 a 3 veces al día  
☐ 5 a 6 veces al día  
☐ más 6 veces al día

---

mermelada o miel

- ☐ Nunca o menos 1 vez al mes  
☐ 1 a 3 veces mes  
☐ 1 vez semana  
☐ 2 a 4 veces semana  
☐ 5 a 6 veces semana  
☒ 1 vez al día  
☐ 2 a 3 veces al día  
☐ 5 a 6 veces al día  
☐ más 6 veces al día

---

azúcar

- ☐ Nunca o menos 1 vez al mes  
☐ 1 a 3 veces mes  
☐ 1 vez semana  
☐ 2 a 4 veces semana  
☐ 5 a 6 veces semana  
☒ 1 vez al día  
☐ 2 a 3 veces al día  
☐ 5 a 6 veces al día  
☐ más 6 veces al día

|                                       |                                                                                                                                                                                                                                                                                                                                                                                                                                                                                                                               |
|---------------------------------------|-------------------------------------------------------------------------------------------------------------------------------------------------------------------------------------------------------------------------------------------------------------------------------------------------------------------------------------------------------------------------------------------------------------------------------------------------------------------------------------------------------------------------------|
| Otro alimento                         | <hr/>                                                                                                                                                                                                                                                                                                                                                                                                                                                                                                                         |
| suplementos vitamínicos               | <input type="radio"/> si<br><input checked="" type="radio"/> no                                                                                                                                                                                                                                                                                                                                                                                                                                                               |
| suplementos vitamínicos               | <hr/>                                                                                                                                                                                                                                                                                                                                                                                                                                                                                                                         |
| dieta previa                          | <input type="radio"/> si<br><input checked="" type="radio"/> no                                                                                                                                                                                                                                                                                                                                                                                                                                                               |
| motivo dieta                          | <input checked="" type="radio"/> no dieta<br><input type="radio"/> control peso<br><input type="radio"/> control colesterol<br><input type="radio"/> control diabetes<br><input type="radio"/> problemas estómago<br><input type="radio"/> problemas vesícula o hepáticos<br><input type="radio"/> HTA o cardiopatía<br><input type="radio"/> problemas renales<br><input type="radio"/> alergia alimentaria<br><input type="radio"/> ácido úrico elevado<br><input type="radio"/> vegetariana<br><input type="radio"/> otros |
| cambio alimentos año previo gestación | <input checked="" type="radio"/> si<br><input type="radio"/> no                                                                                                                                                                                                                                                                                                                                                                                                                                                               |
| cambio lácteos                        | <input type="radio"/> eliminado<br><input type="radio"/> disminuido<br><input checked="" type="radio"/> igual<br><input type="radio"/> aumentado<br><input type="radio"/> no sabe                                                                                                                                                                                                                                                                                                                                             |
| cambio huevos                         | <input type="radio"/> eliminado<br><input type="radio"/> disminuido<br><input checked="" type="radio"/> igual<br><input type="radio"/> aumentado<br><input type="radio"/> no sabe                                                                                                                                                                                                                                                                                                                                             |
| cambio carne                          | <input type="radio"/> eliminado<br><input type="radio"/> disminuido<br><input checked="" type="radio"/> igual<br><input type="radio"/> aumentado<br><input type="radio"/> no sabe                                                                                                                                                                                                                                                                                                                                             |
| cambio pescado                        | <input type="radio"/> eliminado<br><input checked="" type="radio"/> disminuido<br><input type="radio"/> igual<br><input type="radio"/> aumentado<br><input type="radio"/> no sabe                                                                                                                                                                                                                                                                                                                                             |
| cambio verduras                       | <input type="radio"/> eliminado<br><input checked="" type="radio"/> disminuido<br><input type="radio"/> igual<br><input type="radio"/> aumentado<br><input type="radio"/> no sabe                                                                                                                                                                                                                                                                                                                                             |

|                            |                                                                                                                                                                                                                        |
|----------------------------|------------------------------------------------------------------------------------------------------------------------------------------------------------------------------------------------------------------------|
| cambio legumbres           | <input type="radio"/> eliminado<br><input type="radio"/> disminuido<br><input checked="" type="radio"/> igual<br><input type="radio"/> aumentado<br><input type="radio"/> no sabe                                      |
| cambio fruta               | <input type="radio"/> eliminado<br><input type="radio"/> disminuido<br><input checked="" type="radio"/> igual<br><input type="radio"/> aumentado<br><input type="radio"/> no sabe                                      |
| cambio pan                 | <input type="radio"/> eliminado<br><input type="radio"/> disminuido<br><input checked="" type="radio"/> igual<br><input type="radio"/> aumentado<br><input type="radio"/> no sabe                                      |
| cambio aceite oliva        | <input type="radio"/> eliminado<br><input checked="" type="radio"/> disminuido<br><input type="radio"/> igual<br><input type="radio"/> aumentado<br><input type="radio"/> no sabe                                      |
| cambio mante o margarina   | <input type="radio"/> eliminado<br><input type="radio"/> disminuido<br><input type="radio"/> igual<br><input checked="" type="radio"/> aumentado<br><input type="radio"/> no sabe                                      |
| cambio azúcar y dulces     | <input type="radio"/> eliminado<br><input type="radio"/> disminuido<br><input type="radio"/> igual<br><input type="radio"/> aumentado<br><input type="radio"/> no sabe                                                 |
| cambio bebidas alcohólicas | <input type="radio"/> eliminado<br><input type="radio"/> disminuido<br><input type="radio"/> igual<br><input type="radio"/> aumentado<br><input type="radio"/> no sabe                                                 |
| frecuencia comidas fritas  | <input checked="" type="radio"/> a diario<br><input type="radio"/> 5 a 6 veces semana<br><input type="radio"/> 2 a 4 veces semana<br><input type="radio"/> 1 vez semana<br><input type="radio"/> menos de 1 vez semana |
| carne                      | <input type="radio"/> no como<br><input type="radio"/> cruda<br><input type="radio"/> poco hecha<br><input checked="" type="radio"/> hecha<br><input type="radio"/> muy hecha                                          |
| grasa visible carne        | <input type="radio"/> quita toda<br><input checked="" type="radio"/> quita mayoría<br><input type="radio"/> quita un poco<br><input type="radio"/> no quita nada                                                       |

|                                |                                                                                                                                                                                                                                                          |
|--------------------------------|----------------------------------------------------------------------------------------------------------------------------------------------------------------------------------------------------------------------------------------------------------|
| cocina carne                   | <input checked="" type="radio"/> a la plancha<br><input type="radio"/> a la parrilla<br><input type="radio"/> asada<br><input type="radio"/> frita<br><input type="radio"/> guisada                                                                      |
| tostado quemado carne          | <input checked="" type="radio"/> nunca<br><input type="radio"/> 1 vez mes<br><input type="radio"/> 2 a 3 veces mes<br><input type="radio"/> 1 vez semana<br><input type="radio"/> 2 a 3 semanas                                                          |
| tostado quemado pescado        | <input checked="" type="radio"/> nunca<br><input type="radio"/> 1 vez mes<br><input type="radio"/> 2 a 3 veces mes<br><input type="radio"/> 1 vez semana<br><input type="radio"/> 2 a 3 semanas                                                          |
| socarrat paella                | <input type="radio"/> nunca<br><input type="radio"/> 1 vez mes<br><input type="radio"/> 2 a 3 veces mes<br><input checked="" type="radio"/> 1 vez semana<br><input type="radio"/> 2 a 3 semanas                                                          |
| grasa o aceite cocinar         | <input type="radio"/> mantequilla<br><input type="radio"/> margarina<br><input type="radio"/> aceite oliva<br><input checked="" type="radio"/> aceite oliva virgen extra<br><input type="radio"/> aceite vegetal<br><input type="radio"/> mezcla aceites |
| grasa aceite aliñar            | <input type="radio"/> mantequilla<br><input type="radio"/> margarina<br><input type="radio"/> aceite oliva<br><input checked="" type="radio"/> aceite oliva virgen extra<br><input type="radio"/> aceite vegetal<br><input type="radio"/> mezcla aceites |
| grasa aceite freir             | <input type="radio"/> mantequilla<br><input type="radio"/> margarina<br><input type="radio"/> aceite oliva<br><input checked="" type="radio"/> aceite oliva virgen extra<br><input type="radio"/> aceite vegetal<br><input type="radio"/> mezcla aceites |
| Ejercicio cuestionario         | <input checked="" type="radio"/> si<br><input type="radio"/> no                                                                                                                                                                                          |
| horas de sueño incluido siesta | [*DATA REMOVED*]                                                                                                                                                                                                                                         |
| minutos siesta                 | [*DATA REMOVED*]                                                                                                                                                                                                                                         |
| horas televisión semana        | [*DATA REMOVED*]                                                                                                                                                                                                                                         |

|                                        |                                                                                                                                                                                                                                                                                                                                                                           |
|----------------------------------------|---------------------------------------------------------------------------------------------------------------------------------------------------------------------------------------------------------------------------------------------------------------------------------------------------------------------------------------------------------------------------|
| actividad trabajo                      | <input type="radio"/> casi siempre sentado<br><input type="radio"/> sentado 50 por cien<br><input type="radio"/> casi siempre de pie, quieto<br><input type="radio"/> casi siempre levantado caminando y llevando pocas cosas<br><input checked="" type="radio"/> casi siempre levantado, caminando y llevado muchas cosas<br><input type="radio"/> trabajo manual pesado |
| tiempo caminar o bici al día           | <input type="radio"/> casi nunca<br><input type="radio"/> menos 20min día<br><input checked="" type="radio"/> 20 a 40 min día<br><input type="radio"/> 40 a 60 min día<br><input type="radio"/> 1h o 1h y media día<br><input type="radio"/> más de 1h y media al día                                                                                                     |
| tiempo tareas casa al día              | <input type="radio"/> menos de 1h día<br><input type="radio"/> 1 a 2h día<br><input checked="" type="radio"/> 3 a 4h día<br><input type="radio"/> 5 a 6h día<br><input type="radio"/> 7 a 8h día<br><input type="radio"/> más de 8h día                                                                                                                                   |
| tiempo libre televisión ordenador leer | <input type="radio"/> menos 1h día<br><input type="radio"/> 1h día<br><input type="radio"/> 2h día<br><input type="radio"/> 3h día<br><input type="radio"/> 4h día<br><input checked="" type="radio"/> 5 a 6h día<br><input type="radio"/> mas 6h día                                                                                                                     |
| tiempo libre ejercicio o deporte       | <input checked="" type="radio"/> menos 1h semana<br><input type="radio"/> 1h semana<br><input type="radio"/> 2h semana<br><input type="radio"/> 3h semana<br><input type="radio"/> 4 a 5h semana<br><input type="radio"/> mas 5h semana                                                                                                                                   |
| como se considera                      | <input type="radio"/> sedentaria<br><input type="radio"/> poco activa<br><input checked="" type="radio"/> moderadamente activa<br><input type="radio"/> bastante activa<br><input type="radio"/> muy activa<br><input type="radio"/> no sabe                                                                                                                              |
| FUR                                    | [*DATA REMOVED*]                                                                                                                                                                                                                                                                                                                                                          |
| Semanas gestación 2T                   | [*DATA REMOVED*]                                                                                                                                                                                                                                                                                                                                                          |
| Días gestación 2T                      | [*DATA REMOVED*]                                                                                                                                                                                                                                                                                                                                                          |
| DBP 2T                                 | [*DATA REMOVED*]                                                                                                                                                                                                                                                                                                                                                          |
| CC 2T                                  | [*DATA REMOVED*]                                                                                                                                                                                                                                                                                                                                                          |
| AC 2T                                  | [*DATA REMOVED*]                                                                                                                                                                                                                                                                                                                                                          |



|                                                   |                                                                                                                                                                                                 |
|---------------------------------------------------|-------------------------------------------------------------------------------------------------------------------------------------------------------------------------------------------------|
| LF 2T                                             | [*DATA REMOVED*]                                                                                                                                                                                |
| PFE 2T (Hadlock)                                  | [*DATA REMOVED*]                                                                                                                                                                                |
| Semanas gestación 3T                              | [*DATA REMOVED*]                                                                                                                                                                                |
| días 3T                                           | [*DATA REMOVED*]                                                                                                                                                                                |
| DBP 3T                                            | [*DATA REMOVED*]                                                                                                                                                                                |
| CC 3T                                             | [*DATA REMOVED*]                                                                                                                                                                                |
| AC 3T                                             | [*DATA REMOVED*]                                                                                                                                                                                |
| LF 3T                                             | [*DATA REMOVED*]                                                                                                                                                                                |
| PFE 3T (Hadlock)                                  | [*DATA REMOVED*]                                                                                                                                                                                |
| Semanas de gestación final                        | [*DATA REMOVED*]                                                                                                                                                                                |
| días gestación final                              | [*DATA REMOVED*]                                                                                                                                                                                |
| Localización placenta                             | <input checked="" type="radio"/> anterior<br><input type="radio"/> lateral derecha<br><input type="radio"/> lateral izquierda<br><input type="radio"/> posterior<br><input type="radio"/> fondo |
| Presentación longitudinal cefálica                | <input type="radio"/> no<br><input checked="" type="radio"/> si                                                                                                                                 |
| Dorso                                             | <input type="radio"/> izquierda anterior<br><input type="radio"/> izquierda posterior<br><input checked="" type="radio"/> derecha anterior<br><input type="radio"/> derecha posterior           |
| diámetro biparietal                               | [*DATA REMOVED*]                                                                                                                                                                                |
| Circunferencia craneal                            | [*DATA REMOVED*]                                                                                                                                                                                |
| Circunferencia abdominal                          | [*DATA REMOVED*]                                                                                                                                                                                |
| Longitud de femur                                 | [*DATA REMOVED*]                                                                                                                                                                                |
| tejido celular subcutáneo a nivel del muslo en mm | [*DATA REMOVED*]                                                                                                                                                                                |
| tejido celular subcutáneo en abdomen en mm        | [*DATA REMOVED*]                                                                                                                                                                                |
| Volumen del muslo en cm3                          | [*DATA REMOVED*]                                                                                                                                                                                |
| Peso fetal estimado según fórmula de Hadlock      | [*DATA REMOVED*]                                                                                                                                                                                |

|                                               |                                                                                                                                               |
|-----------------------------------------------|-----------------------------------------------------------------------------------------------------------------------------------------------|
| Percentil                                     | [*DATA REMOVED*]                                                                                                                              |
| Peso fetal estimado según fórmula de Scioscia | <hr/>                                                                                                                                         |
| Peso fetal estimado según fórmula de LEE      | <hr/>                                                                                                                                         |
| Tipo de parto                                 | <input checked="" type="radio"/> eutocico<br><input type="radio"/> instrumentado/ventosa<br><input type="radio"/> cesarea                     |
| fecha de nacimiento                           | [*DATA REMOVED*]                                                                                                                              |
| Días entre exploración y nacimiento           | [*DATA REMOVED*]                                                                                                                              |
| Peso RN en g                                  | [*DATA REMOVED*]                                                                                                                              |
| sexo                                          | <input checked="" type="radio"/> mujer<br><input type="radio"/> hombre                                                                        |
| Apgar 1 minuto                                | [*DATA REMOVED*]                                                                                                                              |
| Apgar 5 minutos                               | [*DATA REMOVED*]                                                                                                                              |
| Apgar 10 minutos                              | <hr/>                                                                                                                                         |
| antecedente Covid durante gestación           | <input type="radio"/> Yes<br><input checked="" type="radio"/> No                                                                              |
| Nivel de estudios                             | <input type="radio"/> ninguno<br><input type="radio"/> primarios<br><input type="radio"/> secundarios<br><input type="radio"/> universitarios |

# Base\_datos\_estimacion\_peso\_fetal

|                                       |                                                                                                                                                                                                                                                                                      |
|---------------------------------------|--------------------------------------------------------------------------------------------------------------------------------------------------------------------------------------------------------------------------------------------------------------------------------------|
| Número de identificación participante | 158                                                                                                                                                                                                                                                                                  |
| CODIGO PARTICIPANTE                   |                                                                                                                                                                                                                                                                                      |
| Edad                                  | [*DATA REMOVED*]                                                                                                                                                                                                                                                                     |
| Gestaciones                           | <input type="radio"/> 1<br><input checked="" type="radio"/> 2<br><input type="radio"/> 3<br><input type="radio"/> mas de 3                                                                                                                                                           |
| partos                                | <input type="radio"/> 0<br><input checked="" type="radio"/> 1<br><input type="radio"/> 2<br><input type="radio"/> 3<br><input type="radio"/> mas de 3                                                                                                                                |
| cesáreas                              | <input checked="" type="radio"/> 0<br><input type="radio"/> 1<br><input type="radio"/> 2<br><input type="radio"/> 3<br><input type="radio"/> mas de 3                                                                                                                                |
| Abortos                               | <input checked="" type="radio"/> 0<br><input type="radio"/> 1<br><input type="radio"/> 2<br><input type="radio"/> 3<br><input type="radio"/> mas de 3                                                                                                                                |
| Tipo de gestacion                     | <input checked="" type="radio"/> espontanea<br><input type="radio"/> IAC inseminación artificial conyuge<br><input type="radio"/> IAD inseminación artificial donante<br><input type="radio"/> FIV Fecundación in Vitro<br><input type="radio"/> Ovodon FIV con donación de ovocitos |
| peso previo a embarazo                | [*DATA REMOVED*]                                                                                                                                                                                                                                                                     |
| Ganancia ponderal embarazo            | [*DATA REMOVED*]                                                                                                                                                                                                                                                                     |
| Talla madre                           | [*DATA REMOVED*]                                                                                                                                                                                                                                                                     |
| IMC previo embarazo                   | 19.607156612163443                                                                                                                                                                                                                                                                   |
| Patología obstétrica                  | <input checked="" type="radio"/> no<br><input type="radio"/> si                                                                                                                                                                                                                      |
| Diabetes pregestacional               | <input checked="" type="radio"/> no<br><input type="radio"/> si                                                                                                                                                                                                                      |
| Diabetes gestacional                  | <input checked="" type="radio"/> no<br><input type="radio"/> si                                                                                                                                                                                                                      |

|                                            |                                                                                                                                                                                      |
|--------------------------------------------|--------------------------------------------------------------------------------------------------------------------------------------------------------------------------------------|
| Diabetes gestacional con insulina          | <input checked="" type="radio"/> no<br><input type="radio"/> si                                                                                                                      |
| Diabetes gestacional con dieta y ejercicio | <input checked="" type="radio"/> no<br><input type="radio"/> si                                                                                                                      |
| Percentil fetos previos                    | <input type="radio"/> Nada<br><input type="radio"/> percentil menor de 10<br><input checked="" type="radio"/> percentil entre 10 y 90<br><input type="radio"/> percentil mayor de 90 |
| Exfumadora                                 | <input type="radio"/> Nada<br><input checked="" type="radio"/> menos de 5 años<br><input type="radio"/> 5 a 10 años<br><input type="radio"/> mayor o igual a 10 años                 |
| Hábito tabáquico                           | <input checked="" type="radio"/> no<br><input type="radio"/> si                                                                                                                      |
| fumadora                                   | [*DATA REMOVED*]                                                                                                                                                                     |
| Consumo otros tóxicos                      | <input checked="" type="radio"/> no<br><input type="radio"/> si                                                                                                                      |
| Hb 1T                                      | _____                                                                                                                                                                                |
| Htc 1T                                     | _____                                                                                                                                                                                |
| Hb 2T                                      | _____                                                                                                                                                                                |
| HTC 2T                                     | _____                                                                                                                                                                                |
| Hb 3T                                      | _____                                                                                                                                                                                |
| HTC 3T                                     | _____                                                                                                                                                                                |
| Suplemento FE oral                         | <input checked="" type="radio"/> si<br><input type="radio"/> no                                                                                                                      |
| Suplemento fe iv                           | <input checked="" type="radio"/> si<br><input type="radio"/> no                                                                                                                      |
| Transfusión                                | <input checked="" type="radio"/> no<br><input type="radio"/> si                                                                                                                      |
| Solicitada Vit D                           | <input type="radio"/> no<br><input checked="" type="radio"/> si                                                                                                                      |

|                       |                                                                                                                                                                                                                                                                                                                                                                                                              |
|-----------------------|--------------------------------------------------------------------------------------------------------------------------------------------------------------------------------------------------------------------------------------------------------------------------------------------------------------------------------------------------------------------------------------------------------------|
| Deficit vit D         | <input type="radio"/> no<br><input checked="" type="radio"/> si                                                                                                                                                                                                                                                                                                                                              |
| Suplemento vit D      | <input checked="" type="radio"/> si<br><input type="radio"/> no                                                                                                                                                                                                                                                                                                                                              |
| Dieta, cuestionario   | <input checked="" type="radio"/> si<br><input type="radio"/> no                                                                                                                                                                                                                                                                                                                                              |
| Leche entera          | <input type="radio"/> Nunca o menos 1 vez al mes<br><input type="radio"/> 1 a 3 veces mes<br><input type="radio"/> 1 vez semana<br><input checked="" type="radio"/> 2 a 4 veces semana<br><input type="radio"/> 5 a 6 veces semana<br><input type="radio"/> 1 vez al día<br><input type="radio"/> 2 a 3 veces al día<br><input type="radio"/> 5 a 6 veces al día<br><input type="radio"/> más 6 veces al día |
| Leche semidesnatada   | <input type="radio"/> Nunca o menos 1 vez al mes<br><input type="radio"/> 1 a 3 veces mes<br><input type="radio"/> 1 vez semana<br><input type="radio"/> 2 a 4 veces semana<br><input type="radio"/> 5 a 6 veces semana<br><input type="radio"/> 1 vez al día<br><input type="radio"/> 2 a 3 veces al día<br><input type="radio"/> 5 a 6 veces al día<br><input type="radio"/> mas 6 veces al día            |
| Leche desnatada       | <input type="radio"/> Nunca o menos 1 vez al mes<br><input type="radio"/> 1 a 3 veces mes<br><input type="radio"/> 1 vez semana<br><input type="radio"/> 2 a 4 veces semana<br><input type="radio"/> 5 a 6 veces semana<br><input type="radio"/> 1 vez al día<br><input type="radio"/> 2 a 3 veces al día<br><input type="radio"/> 5 a 6 veces al día<br><input type="radio"/> más 6 veces al día            |
| Leche condensada      | <input type="radio"/> Nunca o menos 1 vez al mes<br><input type="radio"/> 1 a 3 veces mes<br><input type="radio"/> 1 vez semana<br><input type="radio"/> 2 a 4 veces semana<br><input type="radio"/> 5 a 6 veces semana<br><input type="radio"/> 1 vez al día<br><input type="radio"/> 2 a 3 veces al día<br><input type="radio"/> 5 a 6 veces al día<br><input type="radio"/> más 6 veces al día            |
| nata o crema de leche | <input type="radio"/> Nunca o menos 1 vez al mes<br><input type="radio"/> 1 a 3 veces mes<br><input type="radio"/> 1 vez semana<br><input type="radio"/> 2 a 4 veces semana<br><input type="radio"/> 5 a 6 veces semana<br><input type="radio"/> 1 vez al día<br><input type="radio"/> 2 a 3 veces al día<br><input type="radio"/> 5 a 6 veces al día<br><input type="radio"/> más 6 veces al día            |

---

Yogurt Entero

- ☐ Nunca o menos 1 vez al mes  
☐ 1 a 3 veces mes  
☐ 1 vez semana  
☐ 2 a 4 veces semana  
☐ 5 a 6 veces semana  
☐ 1 vez al día  
☐ 2 a 3 veces al día  
☐ 5 a 6 veces al día  
☐ más 6 veces al día

---

Yogurt desnatado

- ☐ Nunca o menos 1 vez al mes  
☐ 1 a 3 veces mes  
☐ 1 vez semana  
☐ 2 a 4 veces semana  
☐ 5 a 6 veces semana  
☐ 1 vez al día  
☐ 2 a 3 veces al día  
☐ 5 a 6 veces al día  
☐ más 6 veces al día

---

100g requesón o queso blando o queso fresco

- ☐ Nunca o menos 1 vez al mes  
☒ 1 a 3 veces mes  
☐ 1 vez semana  
☐ 2 a 4 veces semana  
☐ 5 a 6 veces semana  
☐ 1 vez al día  
☐ 2 a 3 veces al día  
☐ 5 a 6 veces al día  
☐ más 6 veces al día

---

queso curado o semicurado o cremoso

- ☐ Nunca o menos 1 vez al mes  
☒ 1 a 3 veces mes  
☐ 1 vez semana  
☐ 2 a 4 veces semana  
☐ 5 a 6 veces semana  
☐ 1 vez al día  
☐ 2 a 3 veces al día  
☐ 5 a 6 veces al día  
☐ más 6 veces al día

---

natillas flan pudding

- ☐ Nunca o menos 1 vez al mes  
☒ 1 a 3 veces mes  
☐ 1 vez semana  
☐ 2 a 4 veces semana  
☐ 5 a 6 veces semana  
☐ 1 vez al día  
☐ 2 a 3 veces al día  
☐ 5 a 6 veces al día  
☐ más 6 veces al día

---

Helado

- ☐ Nunca o menos 1 vez al mes  
☐ 1 a 3 veces mes  
☐ 1 vez semana  
☐ 2 a 4 veces semana  
☐ 5 a 6 veces semana  
☐ 1 vez al día  
☐ 2 a 3 veces al día  
☐ 5 a 6 veces al día  
☐ más 6 veces al día

|                                      |                                                                                                                                                                                                                                                                                                                                                                                                   |
|--------------------------------------|---------------------------------------------------------------------------------------------------------------------------------------------------------------------------------------------------------------------------------------------------------------------------------------------------------------------------------------------------------------------------------------------------|
| huevo                                | <input type="radio"/> Nunca o menos 1 vez al mes<br><input type="radio"/> 1 a 3 veces mes<br><input type="radio"/> 1 vez semana<br><input type="radio"/> 2 a 4 veces semana<br><input type="radio"/> 5 a 6 veces semana<br><input type="radio"/> 1 vez al día<br><input type="radio"/> 2 a 3 veces al día<br><input type="radio"/> 5 a 6 veces al día<br><input type="radio"/> más 6 veces al día |
| Pollo con piel                       | <input type="radio"/> Nunca o menos 1 vez al mes<br><input type="radio"/> 1 a 3 veces mes<br><input type="radio"/> 1 vez semana<br><input type="radio"/> 2 a 4 veces semana<br><input type="radio"/> 5 a 6 veces semana<br><input type="radio"/> 1 vez al día<br><input type="radio"/> 2 a 3 veces al día<br><input type="radio"/> 5 a 6 veces al día<br><input type="radio"/> más 6 veces al día |
| pollo sin piel                       | <input type="radio"/> Nunca o menos 1 vez al mes<br><input type="radio"/> 1 a 3 veces mes<br><input type="radio"/> 1 vez semana<br><input type="radio"/> 2 a 4 veces semana<br><input type="radio"/> 5 a 6 veces semana<br><input type="radio"/> 1 vez al día<br><input type="radio"/> 2 a 3 veces al día<br><input type="radio"/> 5 a 6 veces al día<br><input type="radio"/> más 6 veces al día |
| Ternera o cerdo o cordero            | <input type="radio"/> Nunca o menos 1 vez al mes<br><input type="radio"/> 1 a 3 veces mes<br><input type="radio"/> 1 vez semana<br><input type="radio"/> 2 a 4 veces semana<br><input type="radio"/> 5 a 6 veces semana<br><input type="radio"/> 1 vez al día<br><input type="radio"/> 2 a 3 veces al día<br><input type="radio"/> 5 a 6 veces al día<br><input type="radio"/> más 6 veces al día |
| carne caza: Conejo o codorniz o pato | <input type="radio"/> Nunca o menos 1 vez al mes<br><input type="radio"/> 1 a 3 veces mes<br><input type="radio"/> 1 vez semana<br><input type="radio"/> 2 a 4 veces semana<br><input type="radio"/> 5 a 6 veces semana<br><input type="radio"/> 1 vez al día<br><input type="radio"/> 2 a 3 veces al día<br><input type="radio"/> 5 a 6 veces al día<br><input type="radio"/> más 6 veces al día |
| Hígado de ternera o cerdo o pollo    | <input type="radio"/> Nunca o menos 1 vez al mes<br><input type="radio"/> 1 a 3 veces mes<br><input type="radio"/> 1 vez semana<br><input type="radio"/> 2 a 4 veces semana<br><input type="radio"/> 5 a 6 veces semana<br><input type="radio"/> 1 vez al día<br><input type="radio"/> 2 a 3 veces al día<br><input type="radio"/> 5 a 6 veces al día<br><input type="radio"/> más 6 veces al día |

---

Vísceras

- ☐ Nunca o menos 1 vez al mes  
☐ 1 a 3 veces mes  
☐ 1 vez semana  
☐ 2 a 4 veces semana  
☐ 5 a 6 veces semana  
☐ 1 vez al día  
☐ 2 a 3 veces al día  
☐ 5 a 6 veces al día  
☐ más 6 veces al día

---

Embutido

- ☐ Nunca o menos 1 vez al mes  
☒ 1 a 3 veces mes  
☐ 1 vez semana  
☐ 2 a 4 veces semana  
☐ 5 a 6 veces semana  
☐ 1 vez al día  
☐ 2 a 3 veces al día  
☐ 5 a 6 veces al día  
☐ más 6 veces al día

---

Salchicha o similar

- ☐ Nunca o menos 1 vez al mes  
☒ 1 a 3 veces mes  
☐ 1 vez semana  
☐ 2 a 4 veces semana  
☐ 5 a 6 veces semana  
☐ 1 vez al día  
☐ 2 a 3 veces al día  
☐ 5 a 6 veces al día  
☐ más 6 veces al día

---

Pate o foiegras

- ☐ Nunca o menos 1 vez al mes  
☒ 1 a 3 veces mes  
☐ 1 vez semana  
☐ 2 a 4 veces semana  
☐ 5 a 6 veces semana  
☐ 1 vez al día  
☐ 2 a 3 veces al día  
☐ 5 a 6 veces al día  
☐ más 6 veces al día

---

Hamburguesa

- ☐ Nunca o menos 1 vez al mes  
☐ 1 a 3 veces mes  
☐ 1 vez semana  
☐ 2 a 4 veces semana  
☐ 5 a 6 veces semana  
☐ 1 vez al día  
☐ 2 a 3 veces al día  
☐ 5 a 6 veces al día  
☐ más 6 veces al día

---

tocino o bacon

- ☐ Nunca o menos 1 vez al mes  
☐ 1 a 3 veces mes  
☐ 1 vez semana  
☐ 2 a 4 veces semana  
☐ 5 a 6 veces semana  
☐ 1 vez al día  
☐ 2 a 3 veces al día  
☐ 5 a 6 veces al día  
☐ más 6 veces al día



---

Pescado frito

- ☐ Nunca o menos 1 vez al mes  
☒ 1 a 3 veces mes  
☐ 1 vez semana  
☐ 2 a 4 veces semana  
☐ 5 a 6 veces semana  
☐ 1 vez al día  
☐ 2 a 3 veces al día  
☐ 5 a 6 veces al día  
☐ más 6 veces al día

---

pescado hervido blanco

- ☐ Nunca o menos 1 vez al mes  
☐ 1 a 3 veces mes  
☐ 1 vez semana  
☐ 2 a 4 veces semana  
☐ 5 a 6 veces semana  
☐ 1 vez al día  
☐ 2 a 3 veces al día  
☐ 5 a 6 veces al día  
☐ más 6 veces al día

---

pescado hervido azul

- ☒ Nunca o menos 1 vez al mes  
☐ 1 a 3 veces mes  
☐ 1 vez semana  
☐ 2 a 4 veces semana  
☐ 5 a 6 veces semana  
☐ 1 vez al día  
☐ 2 a 3 veces al día  
☐ 5 a 6 veces al día  
☐ más 6 veces al día

---

otros pescado azul

- ☐ Nunca o menos 1 vez al mes  
☐ 1 a 3 veces mes  
☐ 1 vez semana  
☐ 2 a 4 veces semana  
☐ 5 a 6 veces semana  
☐ 1 vez al día  
☐ 2 a 3 veces al día  
☐ 5 a 6 veces al día  
☐ más 6 veces al día

---

atun conserva

- ☐ Nunca o menos 1 vez al mes  
☐ 1 a 3 veces mes  
☐ 1 vez semana  
☐ 2 a 4 veces semana  
☐ 5 a 6 veces semana  
☐ 1 vez al día  
☐ 2 a 3 veces al día  
☐ 5 a 6 veces al día  
☐ más 6 veces al día

---

sardina conserva

- ☐ Nunca o menos 1 vez al mes  
☐ 1 a 3 veces mes  
☐ 1 vez semana  
☐ 2 a 4 veces semana  
☐ 5 a 6 veces semana  
☐ 1 vez al día  
☐ 2 a 3 veces al día  
☐ 5 a 6 veces al día  
☐ más 6 veces al día

---

pescado ahumado

- ☐ Nunca o menos 1 vez al mes  
☐ 1 a 3 veces mes  
☐ 1 vez semana  
☐ 2 a 4 veces semana  
☐ 5 a 6 veces semana  
☐ 1 vez al día  
☐ 2 a 3 veces al día  
☐ 5 a 6 veces al día  
☐ más 6 veces al día

---

almejas o mejillones o ostras unos 100g

- ☐ Nunca o menos 1 vez al mes  
☐ 1 a 3 veces mes  
☐ 1 vez semana  
☐ 2 a 4 veces semana  
☐ 5 a 6 veces semana  
☐ 1 vez al día  
☐ 2 a 3 veces al día  
☐ 5 a 6 veces al día  
☐ más 6 veces al día

---

calamar o chipiron o sepia unos 100g

- ☐ Nunca o menos 1 vez al mes  
☒ 1 a 3 veces mes  
☐ 1 vez semana  
☐ 2 a 4 veces semana  
☐ 5 a 6 veces semana  
☐ 1 vez al día  
☐ 2 a 3 veces al día  
☐ 5 a 6 veces al día  
☐ más 6 veces al día

---

marisco unos 100g

- ☐ Nunca o menos 1 vez al mes  
☒ 1 a 3 veces mes  
☐ 1 vez semana  
☐ 2 a 4 veces semana  
☐ 5 a 6 veces semana  
☐ 1 vez al día  
☐ 2 a 3 veces al día  
☐ 5 a 6 veces al día  
☐ más 6 veces al día

---

Espinacas o acelgas cocinadas

- ☐ Nunca o menos 1 vez al mes  
☐ 1 a 3 veces mes  
☐ 1 vez semana  
☐ 2 a 4 veces semana  
☐ 5 a 6 veces semana  
☐ 1 vez al día  
☐ 2 a 3 veces al día  
☐ 5 a 6 veces al día  
☐ más 6 veces al día

---

Col o coliflor o brocoli cocinado

- ☐ Nunca o menos 1 vez al mes  
☐ 1 a 3 veces mes  
☐ 1 vez semana  
☐ 2 a 4 veces semana  
☐ 5 a 6 veces semana  
☐ 1 vez al día  
☐ 2 a 3 veces al día  
☐ 5 a 6 veces al día  
☐ más 6 veces al día

---

Lechuga o endivia o escarola

- ☐ Nunca o menos 1 vez al mes  
☐ 1 a 3 veces mes  
☐ 1 vez semana  
☐ 2 a 4 veces semana  
☐ 5 a 6 veces semana  
☒ 1 vez al día  
☐ 2 a 3 veces al día  
☐ 5 a 6 veces al día  
☐ más 6 veces al día

---

tomate ensalada

- ☐ Nunca o menos 1 vez al mes  
☐ 1 a 3 veces mes  
☐ 1 vez semana  
☐ 2 a 4 veces semana  
☐ 5 a 6 veces semana  
☒ 1 vez al día  
☐ 2 a 3 veces al día  
☐ 5 a 6 veces al día  
☐ más 6 veces al día

---

cebolla

- ☐ Nunca o menos 1 vez al mes  
☐ 1 a 3 veces mes  
☐ 1 vez semana  
☐ 2 a 4 veces semana  
☐ 5 a 6 veces semana  
☒ 1 vez al día  
☐ 2 a 3 veces al día  
☐ 5 a 6 veces al día  
☐ más 6 veces al día

---

Zanahoria o calabaza

- ☐ Nunca o menos 1 vez al mes  
☐ 1 a 3 veces mes  
☐ 1 vez semana  
☐ 2 a 4 veces semana  
☐ 5 a 6 veces semana  
☐ 1 vez al día  
☐ 2 a 3 veces al día  
☐ 5 a 6 veces al día  
☐ más 6 veces al día

---

Judías verdes

- ☐ Nunca o menos 1 vez al mes  
☐ 1 a 3 veces mes  
☐ 1 vez semana  
☒ 2 a 4 veces semana  
☐ 5 a 6 veces semana  
☐ 1 vez al día  
☐ 2 a 3 veces al día  
☐ 5 a 6 veces al día  
☐ más 6 veces al día

---

Berenjena o calabacin o pepino

- ☐ Nunca o menos 1 vez al mes  
☐ 1 a 3 veces mes  
☐ 1 vez semana  
☒ 2 a 4 veces semana  
☐ 5 a 6 veces semana  
☐ 1 vez al día  
☐ 2 a 3 veces al día  
☐ 5 a 6 veces al día  
☐ más 6 veces al día

---

|          |                                                                                                                                                                                                                                                                                                                                                                                                              |
|----------|--------------------------------------------------------------------------------------------------------------------------------------------------------------------------------------------------------------------------------------------------------------------------------------------------------------------------------------------------------------------------------------------------------------|
| pimiento | <input type="radio"/> Nunca o menos 1 vez al mes<br><input type="radio"/> 1 a 3 veces mes<br><input type="radio"/> 1 vez semana<br><input checked="" type="radio"/> 2 a 4 veces semana<br><input type="radio"/> 5 a 6 veces semana<br><input type="radio"/> 1 vez al día<br><input type="radio"/> 2 a 3 veces al día<br><input type="radio"/> 5 a 6 veces al día<br><input type="radio"/> más 6 veces al día |
|----------|--------------------------------------------------------------------------------------------------------------------------------------------------------------------------------------------------------------------------------------------------------------------------------------------------------------------------------------------------------------------------------------------------------------|

---

|           |                                                                                                                                                                                                                                                                                                                                                                                                   |
|-----------|---------------------------------------------------------------------------------------------------------------------------------------------------------------------------------------------------------------------------------------------------------------------------------------------------------------------------------------------------------------------------------------------------|
| alcachofa | <input type="radio"/> Nunca o menos 1 vez al mes<br><input type="radio"/> 1 a 3 veces mes<br><input type="radio"/> 1 vez semana<br><input type="radio"/> 2 a 4 veces semana<br><input type="radio"/> 5 a 6 veces semana<br><input type="radio"/> 1 vez al día<br><input type="radio"/> 2 a 3 veces al día<br><input type="radio"/> 5 a 6 veces al día<br><input type="radio"/> más 6 veces al día |
|-----------|---------------------------------------------------------------------------------------------------------------------------------------------------------------------------------------------------------------------------------------------------------------------------------------------------------------------------------------------------------------------------------------------------|

---

|            |                                                                                                                                                                                                                                                                                                                                                                                                              |
|------------|--------------------------------------------------------------------------------------------------------------------------------------------------------------------------------------------------------------------------------------------------------------------------------------------------------------------------------------------------------------------------------------------------------------|
| espárragos | <input type="radio"/> Nunca o menos 1 vez al mes<br><input type="radio"/> 1 a 3 veces mes<br><input type="radio"/> 1 vez semana<br><input checked="" type="radio"/> 2 a 4 veces semana<br><input type="radio"/> 5 a 6 veces semana<br><input type="radio"/> 1 vez al día<br><input type="radio"/> 2 a 3 veces al día<br><input type="radio"/> 5 a 6 veces al día<br><input type="radio"/> más 6 veces al día |
|------------|--------------------------------------------------------------------------------------------------------------------------------------------------------------------------------------------------------------------------------------------------------------------------------------------------------------------------------------------------------------------------------------------------------------|

---

|              |                                                                                                                                                                                                                                                                                                                                                                                                   |
|--------------|---------------------------------------------------------------------------------------------------------------------------------------------------------------------------------------------------------------------------------------------------------------------------------------------------------------------------------------------------------------------------------------------------|
| maíz hervido | <input type="radio"/> Nunca o menos 1 vez al mes<br><input type="radio"/> 1 a 3 veces mes<br><input type="radio"/> 1 vez semana<br><input type="radio"/> 2 a 4 veces semana<br><input type="radio"/> 5 a 6 veces semana<br><input type="radio"/> 1 vez al día<br><input type="radio"/> 2 a 3 veces al día<br><input type="radio"/> 5 a 6 veces al día<br><input type="radio"/> más 6 veces al día |
|--------------|---------------------------------------------------------------------------------------------------------------------------------------------------------------------------------------------------------------------------------------------------------------------------------------------------------------------------------------------------------------------------------------------------|

---

|           |                                                                                                                                                                                                                                                                                                                                                                                                              |
|-----------|--------------------------------------------------------------------------------------------------------------------------------------------------------------------------------------------------------------------------------------------------------------------------------------------------------------------------------------------------------------------------------------------------------------|
| legumbres | <input type="radio"/> Nunca o menos 1 vez al mes<br><input type="radio"/> 1 a 3 veces mes<br><input checked="" type="radio"/> 1 vez semana<br><input type="radio"/> 2 a 4 veces semana<br><input type="radio"/> 5 a 6 veces semana<br><input type="radio"/> 1 vez al día<br><input type="radio"/> 2 a 3 veces al día<br><input type="radio"/> 5 a 6 veces al día<br><input type="radio"/> más 6 veces al día |
|-----------|--------------------------------------------------------------------------------------------------------------------------------------------------------------------------------------------------------------------------------------------------------------------------------------------------------------------------------------------------------------------------------------------------------------|

---

|                       |                                                                                                                                                                                                                                                                                                                                                                                                              |
|-----------------------|--------------------------------------------------------------------------------------------------------------------------------------------------------------------------------------------------------------------------------------------------------------------------------------------------------------------------------------------------------------------------------------------------------------|
| naranjas o mandarinas | <input checked="" type="radio"/> Nunca o menos 1 vez al mes<br><input type="radio"/> 1 a 3 veces mes<br><input type="radio"/> 1 vez semana<br><input type="radio"/> 2 a 4 veces semana<br><input type="radio"/> 5 a 6 veces semana<br><input type="radio"/> 1 vez al día<br><input type="radio"/> 2 a 3 veces al día<br><input type="radio"/> 5 a 6 veces al día<br><input type="radio"/> más 6 veces al día |
|-----------------------|--------------------------------------------------------------------------------------------------------------------------------------------------------------------------------------------------------------------------------------------------------------------------------------------------------------------------------------------------------------------------------------------------------------|

---

---

zum natural fruta

- ☐ Nunca o menos 1 vez al mes  
☐ 1 a 3 veces mes  
☐ 1 vez semana  
☐ 2 a 4 veces semana  
☐ 5 a 6 veces semana  
☐ 1 vez al día  
☐ 2 a 3 veces al día  
☐ 5 a 6 veces al día  
☐ más 6 veces al día

---

platano

- ☐ Nunca o menos 1 vez al mes  
☒ 1 a 3 veces mes  
☐ 1 vez semana  
☐ 2 a 4 veces semana  
☐ 5 a 6 veces semana  
☐ 1 vez al día  
☐ 2 a 3 veces al día  
☐ 5 a 6 veces al día  
☐ más 6 veces al día

---

manzana o pera

- ☐ Nunca o menos 1 vez al mes  
☒ 1 a 3 veces mes  
☐ 1 vez semana  
☐ 2 a 4 veces semana  
☐ 5 a 6 veces semana  
☐ 1 vez al día  
☐ 2 a 3 veces al día  
☐ 5 a 6 veces al día  
☐ más 6 veces al día

---

melocotón o nectarina

- ☐ Nunca o menos 1 vez al mes  
☒ 1 a 3 veces mes  
☐ 1 vez semana  
☐ 2 a 4 veces semana  
☐ 5 a 6 veces semana  
☐ 1 vez al día  
☐ 2 a 3 veces al día  
☐ 5 a 6 veces al día  
☐ más 6 veces al día

---

sandia o melon

- ☐ Nunca o menos 1 vez al mes  
☐ 1 a 3 veces mes  
☐ 1 vez semana  
☐ 2 a 4 veces semana  
☒ 5 a 6 veces semana  
☐ 1 vez al día  
☐ 2 a 3 veces al día  
☐ 5 a 6 veces al día  
☐ más 6 veces al día

---

uva

- ☐ Nunca o menos 1 vez al mes  
☐ 1 a 3 veces mes  
☐ 1 vez semana  
☒ 2 a 4 veces semana  
☐ 5 a 6 veces semana  
☐ 1 vez al día  
☐ 2 a 3 veces al día  
☐ 5 a 6 veces al día  
☐ más 6 veces al día

---

bruna o ciruela

- ☐ Nunca o menos 1 vez al mes  
☐ 1 a 3 veces mes  
☐ 1 vez semana  
☒ 2 a 4 veces semana  
☐ 5 a 6 veces semana  
☐ 1 vez al día  
☐ 2 a 3 veces al día  
☐ 5 a 6 veces al día  
☐ más 6 veces al día

---

kiwi

- ☐ Nunca o menos 1 vez al mes  
☐ 1 a 3 veces mes  
☐ 1 vez semana  
☐ 2 a 4 veces semana  
☐ 5 a 6 veces semana  
☐ 1 vez al día  
☐ 2 a 3 veces al día  
☐ 5 a 6 veces al día  
☐ más 6 veces al día

---

aceituna

- ☐ Nunca o menos 1 vez al mes  
☐ 1 a 3 veces mes  
☒ 1 vez semana  
☐ 2 a 4 veces semana  
☐ 5 a 6 veces semana  
☐ 1 vez al día  
☐ 2 a 3 veces al día  
☐ 5 a 6 veces al día  
☐ más 6 veces al día

---

frutos secos

- ☐ Nunca o menos 1 vez al mes  
☐ 1 a 3 veces mes  
☒ 1 vez semana  
☐ 2 a 4 veces semana  
☐ 5 a 6 veces semana  
☐ 1 vez al día  
☐ 2 a 3 veces al día  
☐ 5 a 6 veces al día  
☐ más 6 veces al día

---

pan blanco

- ☐ Nunca o menos 1 vez al mes  
☐ 1 a 3 veces mes  
☒ 1 vez semana  
☐ 2 a 4 veces semana  
☐ 5 a 6 veces semana  
☐ 1 vez al día  
☐ 2 a 3 veces al día  
☐ 5 a 6 veces al día  
☐ más 6 veces al día

---

pan integral

- ☒ Nunca o menos 1 vez al mes  
☐ 1 a 3 veces mes  
☐ 1 vez semana  
☐ 2 a 4 veces semana  
☐ 5 a 6 veces semana  
☐ 1 vez al día  
☐ 2 a 3 veces al día  
☐ 5 a 6 veces al día  
☐ más 6 veces al día

---

cereales desayuno

- ☒ Nunca o menos 1 vez al mes  
☐ 1 a 3 veces mes  
☐ 1 vez semana  
☐ 2 a 4 veces semana  
☐ 5 a 6 veces semana  
☐ 1 vez al día  
☐ 2 a 3 veces al día  
☐ 5 a 6 veces al día  
☐ más 6 veces al día

---

patatas fritas

- ☐ Nunca o menos 1 vez al mes  
☐ 1 a 3 veces mes  
☐ 1 vez semana  
☐ 2 a 4 veces semana  
☐ 5 a 6 veces semana  
☐ 1 vez al día  
☐ 2 a 3 veces al día  
☐ 5 a 6 veces al día  
☐ más 6 veces al día

---

patatas cocidas o asadas

- ☐ Nunca o menos 1 vez al mes  
☐ 1 a 3 veces mes  
☐ 1 vez semana  
☒ 2 a 4 veces semana  
☐ 5 a 6 veces semana  
☐ 1 vez al día  
☐ 2 a 3 veces al día  
☐ 5 a 6 veces al día  
☐ más 6 veces al día

---

bolsa papas

- ☐ Nunca o menos 1 vez al mes  
☐ 1 a 3 veces mes  
☐ 1 vez semana  
☒ 2 a 4 veces semana  
☐ 5 a 6 veces semana  
☐ 1 vez al día  
☐ 2 a 3 veces al día  
☐ 5 a 6 veces al día  
☐ más 6 veces al día

---

arroz cocinado

- ☐ Nunca o menos 1 vez al mes  
☐ 1 a 3 veces mes  
☐ 1 vez semana  
☒ 2 a 4 veces semana  
☐ 5 a 6 veces semana  
☐ 1 vez al día  
☐ 2 a 3 veces al día  
☐ 5 a 6 veces al día  
☐ más 6 veces al día

---

pasta

- ☐ Nunca o menos 1 vez al mes  
☐ 1 a 3 veces mes  
☐ 1 vez semana  
☒ 2 a 4 veces semana  
☐ 5 a 6 veces semana  
☐ 1 vez al día  
☐ 2 a 3 veces al día  
☐ 5 a 6 veces al día  
☐ más 6 veces al día

|                     |                                                                                                                                                                                                                                                                                                                                                                                                              |
|---------------------|--------------------------------------------------------------------------------------------------------------------------------------------------------------------------------------------------------------------------------------------------------------------------------------------------------------------------------------------------------------------------------------------------------------|
| pizza               | <input type="radio"/> Nunca o menos 1 vez al mes<br><input checked="" type="radio"/> 1 a 3 veces mes<br><input type="radio"/> 1 vez semana<br><input type="radio"/> 2 a 4 veces semana<br><input type="radio"/> 5 a 6 veces semana<br><input type="radio"/> 1 vez al día<br><input type="radio"/> 2 a 3 veces al día<br><input type="radio"/> 5 a 6 veces al día<br><input type="radio"/> más 6 veces al día |
| aceite oliva        | <input type="radio"/> Nunca o menos 1 vez al mes<br><input type="radio"/> 1 a 3 veces mes<br><input type="radio"/> 1 vez semana<br><input type="radio"/> 2 a 4 veces semana<br><input type="radio"/> 5 a 6 veces semana<br><input checked="" type="radio"/> 1 vez al día<br><input type="radio"/> 2 a 3 veces al día<br><input type="radio"/> 5 a 6 veces al día<br><input type="radio"/> más 6 veces al día |
| otros aceites       | <input type="radio"/> Nunca o menos 1 vez al mes<br><input type="radio"/> 1 a 3 veces mes<br><input type="radio"/> 1 vez semana<br><input type="radio"/> 2 a 4 veces semana<br><input type="radio"/> 5 a 6 veces semana<br><input type="radio"/> 1 vez al día<br><input type="radio"/> 2 a 3 veces al día<br><input type="radio"/> 5 a 6 veces al día<br><input type="radio"/> más 6 veces al día            |
| margarina           | <input type="radio"/> Nunca o menos 1 vez al mes<br><input checked="" type="radio"/> 1 a 3 veces mes<br><input type="radio"/> 1 vez semana<br><input type="radio"/> 2 a 4 veces semana<br><input type="radio"/> 5 a 6 veces semana<br><input type="radio"/> 1 vez al día<br><input type="radio"/> 2 a 3 veces al día<br><input type="radio"/> 5 a 6 veces al día<br><input type="radio"/> más 6 veces al día |
| mantequilla         | <input type="radio"/> Nunca o menos 1 vez al mes<br><input type="radio"/> 1 a 3 veces mes<br><input type="radio"/> 1 vez semana<br><input type="radio"/> 2 a 4 veces semana<br><input type="radio"/> 5 a 6 veces semana<br><input type="radio"/> 1 vez al día<br><input type="radio"/> 2 a 3 veces al día<br><input type="radio"/> 5 a 6 veces al día<br><input type="radio"/> más 6 veces al día            |
| galletas tipo maria | <input type="radio"/> Nunca o menos 1 vez al mes<br><input type="radio"/> 1 a 3 veces mes<br><input type="radio"/> 1 vez semana<br><input type="radio"/> 2 a 4 veces semana<br><input type="radio"/> 5 a 6 veces semana<br><input type="radio"/> 1 vez al día<br><input type="radio"/> 2 a 3 veces al día<br><input type="radio"/> 5 a 6 veces al día<br><input type="radio"/> más 6 veces al día            |



---

galletas chocolate

- ☐ Nunca o menos 1 vez al mes  
☐ 1 a 3 veces mes  
☐ 1 vez semana  
☒ 2 a 4 veces semana  
☐ 5 a 6 veces semana  
☐ 1 vez al día  
☐ 2 a 3 veces al día  
☐ 5 a 6 veces al día  
☐ más 6 veces al día

---

bolleria

- ☐ Nunca o menos 1 vez al mes  
☐ 1 a 3 veces mes  
☐ 1 vez semana  
☒ 2 a 4 veces semana  
☐ 5 a 6 veces semana  
☐ 1 vez al día  
☐ 2 a 3 veces al día  
☐ 5 a 6 veces al día  
☐ más 6 veces al día

---

chocolate o bombones

- ☐ Nunca o menos 1 vez al mes  
☐ 1 a 3 veces mes  
☐ 1 vez semana  
☒ 2 a 4 veces semana  
☐ 5 a 6 veces semana  
☐ 1 vez al día  
☐ 2 a 3 veces al día  
☐ 5 a 6 veces al día  
☐ más 6 veces al día

---

chocolate polvo o colacao

- ☐ Nunca o menos 1 vez al mes  
☐ 1 a 3 veces mes  
☐ 1 vez semana  
☐ 2 a 4 veces semana  
☐ 5 a 6 veces semana  
☐ 1 vez al día  
☐ 2 a 3 veces al día  
☐ 5 a 6 veces al día  
☐ más 6 veces al día

---

vino tinto

- ☐ Nunca o menos 1 vez al mes  
☐ 1 a 3 veces mes  
☐ 1 vez semana  
☐ 2 a 4 veces semana  
☐ 5 a 6 veces semana  
☐ 1 vez al día  
☐ 2 a 3 veces al día  
☐ 5 a 6 veces al día  
☐ más 6 veces al día

---

vino blanco

- ☐ Nunca o menos 1 vez al mes  
☐ 1 a 3 veces mes  
☐ 1 vez semana  
☐ 2 a 4 veces semana  
☐ 5 a 6 veces semana  
☐ 1 vez al día  
☐ 2 a 3 veces al día  
☐ 5 a 6 veces al día  
☐ más 6 veces al día

|                       |                                                                                                                                                                                                                                                                                                                                                                                                              |
|-----------------------|--------------------------------------------------------------------------------------------------------------------------------------------------------------------------------------------------------------------------------------------------------------------------------------------------------------------------------------------------------------------------------------------------------------|
| vino seco o vermut    | <input type="radio"/> Nunca o menos 1 vez al mes<br><input type="radio"/> 1 a 3 veces mes<br><input type="radio"/> 1 vez semana<br><input type="radio"/> 2 a 4 veces semana<br><input type="radio"/> 5 a 6 veces semana<br><input type="radio"/> 1 vez al día<br><input type="radio"/> 2 a 3 veces al día<br><input type="radio"/> 5 a 6 veces al día<br><input type="radio"/> más 6 veces al día            |
| cerveza               | <input type="radio"/> Nunca o menos 1 vez al mes<br><input type="radio"/> 1 a 3 veces mes<br><input type="radio"/> 1 vez semana<br><input type="radio"/> 2 a 4 veces semana<br><input type="radio"/> 5 a 6 veces semana<br><input type="radio"/> 1 vez al día<br><input type="radio"/> 2 a 3 veces al día<br><input type="radio"/> 5 a 6 veces al día<br><input type="radio"/> más 6 veces al día            |
| cerveza sin alcohol   | <input type="radio"/> Nunca o menos 1 vez al mes<br><input type="radio"/> 1 a 3 veces mes<br><input type="radio"/> 1 vez semana<br><input type="radio"/> 2 a 4 veces semana<br><input type="radio"/> 5 a 6 veces semana<br><input type="radio"/> 1 vez al día<br><input type="radio"/> 2 a 3 veces al día<br><input type="radio"/> 5 a 6 veces al día<br><input type="radio"/> más 6 veces al día            |
| licores               | <input type="radio"/> Nunca o menos 1 vez al mes<br><input type="radio"/> 1 a 3 veces mes<br><input type="radio"/> 1 vez semana<br><input type="radio"/> 2 a 4 veces semana<br><input type="radio"/> 5 a 6 veces semana<br><input type="radio"/> 1 vez al día<br><input type="radio"/> 2 a 3 veces al día<br><input type="radio"/> 5 a 6 veces al día<br><input type="radio"/> más 6 veces al día            |
| ginebra o ron o vodka | <input type="radio"/> Nunca o menos 1 vez al mes<br><input type="radio"/> 1 a 3 veces mes<br><input type="radio"/> 1 vez semana<br><input type="radio"/> 2 a 4 veces semana<br><input type="radio"/> 5 a 6 veces semana<br><input type="radio"/> 1 vez al día<br><input type="radio"/> 2 a 3 veces al día<br><input type="radio"/> 5 a 6 veces al día<br><input type="radio"/> más 6 veces al día            |
| refresco normal       | <input type="radio"/> Nunca o menos 1 vez al mes<br><input type="radio"/> 1 a 3 veces mes<br><input type="radio"/> 1 vez semana<br><input checked="" type="radio"/> 2 a 4 veces semana<br><input type="radio"/> 5 a 6 veces semana<br><input type="radio"/> 1 vez al día<br><input type="radio"/> 2 a 3 veces al día<br><input type="radio"/> 5 a 6 veces al día<br><input type="radio"/> más 6 veces al día |

---

refresco sin azúcar

- ☐ Nunca o menos 1 vez al mes
- ☐ 1 a 3 veces mes
- ☐ 1 vez semana
- ☐ 2 a 4 veces semana
- ☐ 5 a 6 veces semana
- ☐ 1 vez al día
- ☐ 2 a 3 veces al día
- ☐ 5 a 6 veces al día
- ☐ más 6 veces al día

---

Agua del grifo

- ☐ Nunca o menos 1 vez al mes
- ☐ 1 a 3 veces mes
- ☐ 1 vez semana
- ☐ 2 a 4 veces semana
- ☐ 5 a 6 veces semana
- ☐ 1 vez al día
- ☐ 2 a 3 veces al día
- ☐ 5 a 6 veces al día
- ☐ más 6 veces al día

---

agua embotellada sin gas

- ☐ Nunca o menos 1 vez al mes
- ☐ 1 a 3 veces mes
- ☐ 1 vez semana
- ☐ 2 a 4 veces semana
- ☐ 5 a 6 veces semana
- ☐ 1 vez al día
- ☒ 2 a 3 veces al día
- ☐ 5 a 6 veces al día
- ☐ más 6 veces al día

---

agua embotellada con gas

- ☐ Nunca o menos 1 vez al mes
- ☐ 1 a 3 veces mes
- ☐ 1 vez semana
- ☐ 2 a 4 veces semana
- ☐ 5 a 6 veces semana
- ☐ 1 vez al día
- ☐ 2 a 3 veces al día
- ☐ 5 a 6 veces al día
- ☐ más 6 veces al día

---

zumو frutas embasado

- ☐ Nunca o menos 1 vez al mes
- ☐ 1 a 3 veces mes
- ☐ 1 vez semana
- ☐ 2 a 4 veces semana
- ☐ 5 a 6 veces semana
- ☐ 1 vez al día
- ☐ 2 a 3 veces al día
- ☐ 5 a 6 veces al día
- ☐ más 6 veces al día

---

cafe

- ☐ Nunca o menos 1 vez al mes
- ☐ 1 a 3 veces mes
- ☐ 1 vez semana
- ☐ 2 a 4 veces semana
- ☐ 5 a 6 veces semana
- ☐ 1 vez al día
- ☐ 2 a 3 veces al día
- ☐ 5 a 6 veces al día
- ☐ más 6 veces al día

---

café descafeinado

- ☐ Nunca o menos 1 vez al mes  
☐ 1 a 3 veces mes  
☐ 1 vez semana  
☒ 2 a 4 veces semana  
☐ 5 a 6 veces semana  
☐ 1 vez al día  
☐ 2 a 3 veces al día  
☐ 5 a 6 veces al día  
☐ más 6 veces al día

---

té o infusión

- ☐ Nunca o menos 1 vez al mes  
☐ 1 a 3 veces mes  
☐ 1 vez semana  
☐ 2 a 4 veces semana  
☐ 5 a 6 veces semana  
☐ 1 vez al día  
☐ 2 a 3 veces al día  
☐ 5 a 6 veces al día  
☐ más 6 veces al día

---

sopa o puré verduras

- ☐ Nunca o menos 1 vez al mes  
☐ 1 a 3 veces mes  
☐ 1 vez semana  
☒ 2 a 4 veces semana  
☐ 5 a 6 veces semana  
☐ 1 vez al día  
☐ 2 a 3 veces al día  
☐ 5 a 6 veces al día  
☐ más 6 veces al día

---

croquetas pollo jamón

- ☐ Nunca o menos 1 vez al mes  
☐ 1 a 3 veces mes  
☐ 1 vez semana  
☒ 2 a 4 veces semana  
☐ 5 a 6 veces semana  
☐ 1 vez al día  
☐ 2 a 3 veces al día  
☐ 5 a 6 veces al día  
☐ más 6 veces al día

---

croquetas pescado

- ☐ Nunca o menos 1 vez al mes  
☐ 1 a 3 veces mes  
☐ 1 vez semana  
☐ 2 a 4 veces semana  
☐ 5 a 6 veces semana  
☐ 1 vez al día  
☐ 2 a 3 veces al día  
☐ 5 a 6 veces al día  
☐ más 6 veces al día

---

mayonesa

- ☐ Nunca o menos 1 vez al mes  
☐ 1 a 3 veces mes  
☐ 1 vez semana  
☒ 2 a 4 veces semana  
☐ 5 a 6 veces semana  
☐ 1 vez al día  
☐ 2 a 3 veces al día  
☐ 5 a 6 veces al día  
☐ más 6 veces al día

---

salsa tomate

- ☐ Nunca o menos 1 vez al mes  
☐ 1 a 3 veces mes  
☐ 1 vez semana  
☒ 2 a 4 veces semana  
☐ 5 a 6 veces semana  
☐ 1 vez al día  
☐ 2 a 3 veces al día  
☐ 5 a 6 veces al día  
☐ más 6 veces al día

---

ketchup

- ☐ Nunca o menos 1 vez al mes  
☐ 1 a 3 veces mes  
☐ 1 vez semana  
☒ 2 a 4 veces semana  
☐ 5 a 6 veces semana  
☐ 1 vez al día  
☐ 2 a 3 veces al día  
☐ 5 a 6 veces al día  
☐ más 6 veces al día

---

sal

- ☐ Nunca o menos 1 vez al mes  
☐ 1 a 3 veces mes  
☐ 1 vez semana  
☒ 2 a 4 veces semana  
☐ 5 a 6 veces semana  
☐ 1 vez al día  
☐ 2 a 3 veces al día  
☐ 5 a 6 veces al día  
☐ más 6 veces al día

---

ajo

- ☐ Nunca o menos 1 vez al mes  
☐ 1 a 3 veces mes  
☐ 1 vez semana  
☐ 2 a 4 veces semana  
☐ 5 a 6 veces semana  
☐ 1 vez al día  
☐ 2 a 3 veces al día  
☐ 5 a 6 veces al día  
☐ más 6 veces al día

---

mermelada o miel

- ☐ Nunca o menos 1 vez al mes  
☐ 1 a 3 veces mes  
☒ 1 vez semana  
☐ 2 a 4 veces semana  
☐ 5 a 6 veces semana  
☐ 1 vez al día  
☐ 2 a 3 veces al día  
☐ 5 a 6 veces al día  
☐ más 6 veces al día

---

azúcar

- ☐ Nunca o menos 1 vez al mes  
☐ 1 a 3 veces mes  
☐ 1 vez semana  
☒ 2 a 4 veces semana  
☐ 5 a 6 veces semana  
☐ 1 vez al día  
☐ 2 a 3 veces al día  
☐ 5 a 6 veces al día  
☐ más 6 veces al día

---

Otro alimento

---

suplementos vitamínicos

- ☐ si  
☒ no

suplementos vitamínicos

---

dieta previa

- ☐ si  
☒ no

motivo dieta

- ☒ no dieta  
☐ control peso  
☐ control colesterol  
☐ control diabetes  
☐ problemas estómago  
☐ problemas vesícula o hepáticos  
☐ HTA o cardiopatía  
☐ problemas renales  
☐ alergia alimentaria  
☐ ácido úrico elevado  
☐ vegetariana  
☐ otros

cambio alimentos año previo gestación

- ☒ si  
☐ no

cambio lácteos

- ☐ eliminado  
☐ disminuido  
☐ igual  
☐ aumentado  
☒ no sabe

cambio huevos

- ☐ eliminado  
☐ disminuido  
☐ igual  
☐ aumentado  
☒ no sabe

cambio carne

- ☐ eliminado  
☐ disminuido  
☒ igual  
☐ aumentado  
☐ no sabe

cambio pescado

- ☐ eliminado  
☐ disminuido  
☒ igual  
☐ aumentado  
☐ no sabe

cambio verduras

- ☐ eliminado  
☐ disminuido  
☒ igual  
☐ aumentado  
☐ no sabe

|                            |                                                                                                                                                                                                                        |
|----------------------------|------------------------------------------------------------------------------------------------------------------------------------------------------------------------------------------------------------------------|
| cambio legumbres           | <input type="radio"/> eliminado<br><input type="radio"/> disminuido<br><input checked="" type="radio"/> igual<br><input type="radio"/> aumentado<br><input type="radio"/> no sabe                                      |
| cambio fruta               | <input type="radio"/> eliminado<br><input type="radio"/> disminuido<br><input checked="" type="radio"/> igual<br><input type="radio"/> aumentado<br><input type="radio"/> no sabe                                      |
| cambio pan                 | <input type="radio"/> eliminado<br><input type="radio"/> disminuido<br><input checked="" type="radio"/> igual<br><input type="radio"/> aumentado<br><input type="radio"/> no sabe                                      |
| cambio aceite oliva        | <input type="radio"/> eliminado<br><input type="radio"/> disminuido<br><input checked="" type="radio"/> igual<br><input type="radio"/> aumentado<br><input type="radio"/> no sabe                                      |
| cambio mante o margarina   | <input type="radio"/> eliminado<br><input type="radio"/> disminuido<br><input checked="" type="radio"/> igual<br><input type="radio"/> aumentado<br><input type="radio"/> no sabe                                      |
| cambio azúcar y dulces     | <input type="radio"/> eliminado<br><input type="radio"/> disminuido<br><input checked="" type="radio"/> igual<br><input type="radio"/> aumentado<br><input type="radio"/> no sabe                                      |
| cambio bebidas alcohólicas | <input checked="" type="radio"/> eliminado<br><input type="radio"/> disminuido<br><input type="radio"/> igual<br><input type="radio"/> aumentado<br><input type="radio"/> no sabe                                      |
| frecuencia comidas fritas  | <input type="radio"/> a diario<br><input type="radio"/> 5 a 6 veces semana<br><input checked="" type="radio"/> 2 a 4 veces semana<br><input type="radio"/> 1 vez semana<br><input type="radio"/> menos de 1 vez semana |
| carne                      | <input type="radio"/> no como<br><input type="radio"/> cruda<br><input checked="" type="radio"/> poco hecha<br><input type="radio"/> hecha<br><input type="radio"/> muy hecha                                          |
| grasa visible carne        | <input type="radio"/> quita toda<br><input type="radio"/> quita mayoría<br><input checked="" type="radio"/> quita un poco<br><input type="radio"/> no quita nada                                                       |

|                                |                                                                                                                                                                                                                                                          |
|--------------------------------|----------------------------------------------------------------------------------------------------------------------------------------------------------------------------------------------------------------------------------------------------------|
| cocina carne                   | <input type="radio"/> a la plancha<br><input type="radio"/> a la parrilla<br><input type="radio"/> asada<br><input type="radio"/> frita<br><input type="radio"/> guisada                                                                                 |
| tostado quemado carne          | <input checked="" type="radio"/> nunca<br><input type="radio"/> 1 vez mes<br><input type="radio"/> 2 a 3 veces mes<br><input type="radio"/> 1 vez semana<br><input type="radio"/> 2 a 3 semanas                                                          |
| tostado quemado pescado        | <input checked="" type="radio"/> nunca<br><input type="radio"/> 1 vez mes<br><input type="radio"/> 2 a 3 veces mes<br><input type="radio"/> 1 vez semana<br><input type="radio"/> 2 a 3 semanas                                                          |
| socarrat paella                | <input type="radio"/> nunca<br><input type="radio"/> 1 vez mes<br><input checked="" type="radio"/> 2 a 3 veces mes<br><input type="radio"/> 1 vez semana<br><input type="radio"/> 2 a 3 semanas                                                          |
| grasa o aceite cocinar         | <input type="radio"/> mantequilla<br><input type="radio"/> margarina<br><input checked="" type="radio"/> aceite oliva<br><input type="radio"/> aceite oliva virgen extra<br><input type="radio"/> aceite vegetal<br><input type="radio"/> mezcla aceites |
| grasa aceite aliñar            | <input type="radio"/> mantequilla<br><input type="radio"/> margarina<br><input checked="" type="radio"/> aceite oliva<br><input type="radio"/> aceite oliva virgen extra<br><input type="radio"/> aceite vegetal<br><input type="radio"/> mezcla aceites |
| grasa aceite freir             | <input type="radio"/> mantequilla<br><input type="radio"/> margarina<br><input type="radio"/> aceite oliva<br><input type="radio"/> aceite oliva virgen extra<br><input checked="" type="radio"/> aceite vegetal<br><input type="radio"/> mezcla aceites |
| Ejercicio cuestionario         | <input checked="" type="radio"/> si<br><input type="radio"/> no                                                                                                                                                                                          |
| horas de sueño incluido siesta | [*DATA REMOVED*]                                                                                                                                                                                                                                         |
| minutos siesta                 | [*DATA REMOVED*]                                                                                                                                                                                                                                         |
| horas televisión semana        | [*DATA REMOVED*]                                                                                                                                                                                                                                         |



|                                        |                                                                                                                                                                                                                                                                                                                                                                           |
|----------------------------------------|---------------------------------------------------------------------------------------------------------------------------------------------------------------------------------------------------------------------------------------------------------------------------------------------------------------------------------------------------------------------------|
| actividad trabajo                      | <input type="radio"/> casi siempre sentado<br><input type="radio"/> sentado 50 por cien<br><input type="radio"/> casi siempre de pie, quieto<br><input checked="" type="radio"/> casi siempre levantado caminando y llevando pocas cosas<br><input type="radio"/> casi siempre levantado, caminando y llevado muchas cosas<br><input type="radio"/> trabajo manual pesado |
| tiempo caminar o bici al día           | <input type="radio"/> casi nunca<br><input type="radio"/> menos 20min día<br><input checked="" type="radio"/> 20 a 40 min día<br><input type="radio"/> 40 a 60 min día<br><input type="radio"/> 1h o 1h y media día<br><input type="radio"/> más de 1h y media al día                                                                                                     |
| tiempo tareas casa al día              | <input type="radio"/> menos de 1h día<br><input checked="" type="radio"/> 1 a 2h día<br><input type="radio"/> 3 a 4h día<br><input type="radio"/> 5 a 6h día<br><input type="radio"/> 7 a 8h día<br><input type="radio"/> más de 8h día                                                                                                                                   |
| tiempo libre televisión ordenador leer | <input type="radio"/> menos 1h día<br><input type="radio"/> 1h día<br><input checked="" type="radio"/> 2h día<br><input type="radio"/> 3h día<br><input type="radio"/> 4h día<br><input type="radio"/> 5 a 6h día<br><input type="radio"/> mas 6h día                                                                                                                     |
| tiempo libre ejercicio o deporte       | <input type="radio"/> menos 1h semana<br><input type="radio"/> 1h semana<br><input checked="" type="radio"/> 2h semana<br><input type="radio"/> 3h semana<br><input type="radio"/> 4 a 5h semana<br><input type="radio"/> mas 5h semana                                                                                                                                   |
| como se considera                      | <input type="radio"/> sedentaria<br><input type="radio"/> poco activa<br><input type="radio"/> moderadamente activa<br><input checked="" type="radio"/> bastante activa<br><input type="radio"/> muy activa<br><input type="radio"/> no sabe                                                                                                                              |
| FUR                                    | [*DATA REMOVED*]                                                                                                                                                                                                                                                                                                                                                          |
| Semanas gestación 2T                   | _____                                                                                                                                                                                                                                                                                                                                                                     |
| Días gestación 2T                      | _____                                                                                                                                                                                                                                                                                                                                                                     |
| DBP 2T                                 | _____                                                                                                                                                                                                                                                                                                                                                                     |
| CC 2T                                  | _____                                                                                                                                                                                                                                                                                                                                                                     |

|                                                   |                                                                                                                                                                                                 |
|---------------------------------------------------|-------------------------------------------------------------------------------------------------------------------------------------------------------------------------------------------------|
| AC 2T                                             |                                                                                                                                                                                                 |
| LF 2T                                             |                                                                                                                                                                                                 |
| PFE 2T (Hadlock)                                  |                                                                                                                                                                                                 |
| Semanas gestación 3T                              | [*DATA REMOVED*]                                                                                                                                                                                |
| días 3T                                           | [*DATA REMOVED*]                                                                                                                                                                                |
| DBP 3T                                            | [*DATA REMOVED*]                                                                                                                                                                                |
| CC 3T                                             | [*DATA REMOVED*]                                                                                                                                                                                |
| AC 3T                                             | [*DATA REMOVED*]                                                                                                                                                                                |
| LF 3T                                             | [*DATA REMOVED*]                                                                                                                                                                                |
| PFE 3T (Hadlock)                                  | [*DATA REMOVED*]                                                                                                                                                                                |
| Semanas de gestación final                        | [*DATA REMOVED*]                                                                                                                                                                                |
| días gestación final                              | [*DATA REMOVED*]                                                                                                                                                                                |
| Localización placenta                             | <input checked="" type="radio"/> anterior<br><input type="radio"/> lateral derecha<br><input type="radio"/> lateral izquierda<br><input type="radio"/> posterior<br><input type="radio"/> fondo |
| Presentación longitudinal cefálica                | <input type="radio"/> no<br><input checked="" type="radio"/> si                                                                                                                                 |
| Dorso                                             | <input type="radio"/> izquierda anterior<br><input type="radio"/> izquierda posterior<br><input checked="" type="radio"/> derecha anterior<br><input type="radio"/> derecha posterior           |
| diámetro biparietal                               | [*DATA REMOVED*]                                                                                                                                                                                |
| Circunferencia craneal                            | [*DATA REMOVED*]                                                                                                                                                                                |
| Circunferencia abdominal                          | [*DATA REMOVED*]                                                                                                                                                                                |
| Longitud de femur                                 | [*DATA REMOVED*]                                                                                                                                                                                |
| tejido celular subcutáneo a nivel del muslo en mm | [*DATA REMOVED*]                                                                                                                                                                                |
| tejido celular subcutáneo en abdomen en mm        | [*DATA REMOVED*]                                                                                                                                                                                |

|                                               |                                                                                                                                               |
|-----------------------------------------------|-----------------------------------------------------------------------------------------------------------------------------------------------|
| Volumen del muslo en cm3                      | [*DATA REMOVED*]                                                                                                                              |
| Peso fetal estimado según fórmula de Hadlock  | [*DATA REMOVED*]                                                                                                                              |
| Percentil                                     | [*DATA REMOVED*]                                                                                                                              |
| Peso fetal estimado según fórmula de Scioscia | _____                                                                                                                                         |
| Peso fetal estimado según fórmula de LEE      | _____                                                                                                                                         |
| Tipo de parto                                 | <input checked="" type="radio"/> eutocico<br><input type="radio"/> instrumentado/ventosa<br><input type="radio"/> cesarea                     |
| fecha de nacimiento                           | [*DATA REMOVED*]                                                                                                                              |
| Días entre exploración y nacimiento           | [*DATA REMOVED*]                                                                                                                              |
| Peso RN en g                                  | [*DATA REMOVED*]                                                                                                                              |
| sexo                                          | <input checked="" type="radio"/> mujer<br><input type="radio"/> hombre                                                                        |
| Apgar 1 minuto                                | [*DATA REMOVED*]                                                                                                                              |
| Apgar 5 minutos                               | [*DATA REMOVED*]                                                                                                                              |
| Apgar 10 minutos                              | _____                                                                                                                                         |
| antecedente Covid durante gestación           | <input type="radio"/> Yes<br><input checked="" type="radio"/> No                                                                              |
| Nivel de estudios                             | <input type="radio"/> ninguno<br><input type="radio"/> primarios<br><input type="radio"/> secundarios<br><input type="radio"/> universitarios |

# Base\_datos\_estimacion\_peso\_fetal

|                                       |                                                                                                                                                                                                                                                                                      |
|---------------------------------------|--------------------------------------------------------------------------------------------------------------------------------------------------------------------------------------------------------------------------------------------------------------------------------------|
| Número de identificación participante | 159                                                                                                                                                                                                                                                                                  |
| CODIGO PARTICIPANTE                   |                                                                                                                                                                                                                                                                                      |
| Edad                                  | [*DATA REMOVED*]                                                                                                                                                                                                                                                                     |
| Gestaciones                           | <input type="radio"/> 1<br><input type="radio"/> 2<br><input checked="" type="radio"/> 3<br><input type="radio"/> mas de 3                                                                                                                                                           |
| partos                                | <input type="radio"/> 0<br><input type="radio"/> 1<br><input checked="" type="radio"/> 2<br><input type="radio"/> 3<br><input type="radio"/> mas de 3                                                                                                                                |
| cesáreas                              | <input checked="" type="radio"/> 0<br><input type="radio"/> 1<br><input type="radio"/> 2<br><input type="radio"/> 3<br><input type="radio"/> mas de 3                                                                                                                                |
| Abortos                               | <input checked="" type="radio"/> 0<br><input type="radio"/> 1<br><input type="radio"/> 2<br><input type="radio"/> 3<br><input type="radio"/> mas de 3                                                                                                                                |
| Tipo de gestacion                     | <input checked="" type="radio"/> espontanea<br><input type="radio"/> IAC inseminación artificial conyuge<br><input type="radio"/> IAD inseminación artificial donante<br><input type="radio"/> FIV Fecundación in Vitro<br><input type="radio"/> Ovodon FIV con donación de ovocitos |
| peso previo a embarazo                | [*DATA REMOVED*]                                                                                                                                                                                                                                                                     |
| Ganancia ponderal embarazo            | [*DATA REMOVED*]                                                                                                                                                                                                                                                                     |
| Talla madre                           | [*DATA REMOVED*]                                                                                                                                                                                                                                                                     |
| IMC previo embarazo                   | 23.588329220496444                                                                                                                                                                                                                                                                   |
| Patología obstétrica                  | <input checked="" type="radio"/> no<br><input type="radio"/> si                                                                                                                                                                                                                      |
| Diabetes pregestacional               | <input checked="" type="radio"/> no<br><input type="radio"/> si                                                                                                                                                                                                                      |
| Diabetes gestacional                  | <input checked="" type="radio"/> no<br><input type="radio"/> si                                                                                                                                                                                                                      |

|                                            |                                                                                                                                                                                      |
|--------------------------------------------|--------------------------------------------------------------------------------------------------------------------------------------------------------------------------------------|
| Diabetes gestacional con insulina          | <input checked="" type="radio"/> no<br><input type="radio"/> si                                                                                                                      |
| Diabetes gestacional con dieta y ejercicio | <input checked="" type="radio"/> no<br><input type="radio"/> si                                                                                                                      |
| Percentil fetos previos                    | <input type="radio"/> Nada<br><input type="radio"/> percentil menor de 10<br><input checked="" type="radio"/> percentil entre 10 y 90<br><input type="radio"/> percentil mayor de 90 |
| Exfumadora                                 | <input type="radio"/> Nada<br><input type="radio"/> menos de 5 años<br><input checked="" type="radio"/> 5 a 10 años<br><input type="radio"/> mayor o igual a 10 años                 |
| Hábito tabáquico                           | <input checked="" type="radio"/> no<br><input type="radio"/> si                                                                                                                      |
| fumadora                                   | [*DATA REMOVED*]                                                                                                                                                                     |
| Consumo otros tóxicos                      | <input checked="" type="radio"/> no<br><input type="radio"/> si                                                                                                                      |
| Hb 1T                                      | _____                                                                                                                                                                                |
| Htc 1T                                     | _____                                                                                                                                                                                |
| Hb 2T                                      | _____                                                                                                                                                                                |
| HTC 2T                                     | _____                                                                                                                                                                                |
| Hb 3T                                      | _____                                                                                                                                                                                |
| HTC 3T                                     | _____                                                                                                                                                                                |
| Suplemento FE oral                         | <input checked="" type="radio"/> si<br><input type="radio"/> no                                                                                                                      |
| Suplemento fe iv                           | <input type="radio"/> si<br><input checked="" type="radio"/> no                                                                                                                      |
| Transfusión                                | <input checked="" type="radio"/> no<br><input type="radio"/> si                                                                                                                      |
| Solicitada Vit D                           | <input checked="" type="radio"/> no<br><input type="radio"/> si                                                                                                                      |

|                       |                                                                                                                                                                                                                                                                                                                                                                                                              |
|-----------------------|--------------------------------------------------------------------------------------------------------------------------------------------------------------------------------------------------------------------------------------------------------------------------------------------------------------------------------------------------------------------------------------------------------------|
| Deficit vit D         | <input type="radio"/> no<br><input type="radio"/> si                                                                                                                                                                                                                                                                                                                                                         |
| Suplemento vit D      | <input type="radio"/> si<br><input type="radio"/> no                                                                                                                                                                                                                                                                                                                                                         |
| Dieta, cuestionario   | <input checked="" type="radio"/> si<br><input type="radio"/> no                                                                                                                                                                                                                                                                                                                                              |
| Leche entera          | <input checked="" type="radio"/> Nunca o menos 1 vez al mes<br><input type="radio"/> 1 a 3 veces mes<br><input type="radio"/> 1 vez semana<br><input type="radio"/> 2 a 4 veces semana<br><input type="radio"/> 5 a 6 veces semana<br><input type="radio"/> 1 vez al día<br><input type="radio"/> 2 a 3 veces al día<br><input type="radio"/> 5 a 6 veces al día<br><input type="radio"/> más 6 veces al día |
| Leche semidesnatada   | <input checked="" type="radio"/> Nunca o menos 1 vez al mes<br><input type="radio"/> 1 a 3 veces mes<br><input type="radio"/> 1 vez semana<br><input type="radio"/> 2 a 4 veces semana<br><input type="radio"/> 5 a 6 veces semana<br><input type="radio"/> 1 vez al día<br><input type="radio"/> 2 a 3 veces al día<br><input type="radio"/> 5 a 6 veces al día<br><input type="radio"/> mas 6 veces al día |
| Leche desnatada       | <input checked="" type="radio"/> Nunca o menos 1 vez al mes<br><input type="radio"/> 1 a 3 veces mes<br><input type="radio"/> 1 vez semana<br><input type="radio"/> 2 a 4 veces semana<br><input type="radio"/> 5 a 6 veces semana<br><input type="radio"/> 1 vez al día<br><input type="radio"/> 2 a 3 veces al día<br><input type="radio"/> 5 a 6 veces al día<br><input type="radio"/> más 6 veces al día |
| Leche condensada      | <input checked="" type="radio"/> Nunca o menos 1 vez al mes<br><input type="radio"/> 1 a 3 veces mes<br><input type="radio"/> 1 vez semana<br><input type="radio"/> 2 a 4 veces semana<br><input type="radio"/> 5 a 6 veces semana<br><input type="radio"/> 1 vez al día<br><input type="radio"/> 2 a 3 veces al día<br><input type="radio"/> 5 a 6 veces al día<br><input type="radio"/> más 6 veces al día |
| nata o crema de leche | <input checked="" type="radio"/> Nunca o menos 1 vez al mes<br><input type="radio"/> 1 a 3 veces mes<br><input type="radio"/> 1 vez semana<br><input type="radio"/> 2 a 4 veces semana<br><input type="radio"/> 5 a 6 veces semana<br><input type="radio"/> 1 vez al día<br><input type="radio"/> 2 a 3 veces al día<br><input type="radio"/> 5 a 6 veces al día<br><input type="radio"/> más 6 veces al día |

---

Yogurt Entero

- ☐ Nunca o menos 1 vez al mes  
☒ 1 a 3 veces mes  
☐ 1 vez semana  
☐ 2 a 4 veces semana  
☐ 5 a 6 veces semana  
☐ 1 vez al día  
☐ 2 a 3 veces al día  
☐ 5 a 6 veces al día  
☐ más 6 veces al día

---

Yogurt desnatado

- ☒ Nunca o menos 1 vez al mes  
☐ 1 a 3 veces mes  
☐ 1 vez semana  
☐ 2 a 4 veces semana  
☐ 5 a 6 veces semana  
☐ 1 vez al día  
☐ 2 a 3 veces al día  
☐ 5 a 6 veces al día  
☐ más 6 veces al día

---

100g requesón o queso blando o queso fresco

- ☐ Nunca o menos 1 vez al mes  
☐ 1 a 3 veces mes  
☐ 1 vez semana  
☒ 2 a 4 veces semana  
☐ 5 a 6 veces semana  
☐ 1 vez al día  
☐ 2 a 3 veces al día  
☐ 5 a 6 veces al día  
☐ más 6 veces al día

---

queso curado o semicurado o cremoso

- ☐ Nunca o menos 1 vez al mes  
☐ 1 a 3 veces mes  
☐ 1 vez semana  
☒ 2 a 4 veces semana  
☐ 5 a 6 veces semana  
☐ 1 vez al día  
☐ 2 a 3 veces al día  
☐ 5 a 6 veces al día  
☐ más 6 veces al día

---

natillas flan pudding

- ☒ Nunca o menos 1 vez al mes  
☐ 1 a 3 veces mes  
☐ 1 vez semana  
☐ 2 a 4 veces semana  
☐ 5 a 6 veces semana  
☐ 1 vez al día  
☐ 2 a 3 veces al día  
☐ 5 a 6 veces al día  
☐ más 6 veces al día

---

Helado

- ☐ Nunca o menos 1 vez al mes  
☐ 1 a 3 veces mes  
☐ 1 vez semana  
☒ 2 a 4 veces semana  
☐ 5 a 6 veces semana  
☐ 1 vez al día  
☐ 2 a 3 veces al día  
☐ 5 a 6 veces al día  
☐ más 6 veces al día

|                                      |                                                                                                                                                                                                                                                                                                                                                                                                              |
|--------------------------------------|--------------------------------------------------------------------------------------------------------------------------------------------------------------------------------------------------------------------------------------------------------------------------------------------------------------------------------------------------------------------------------------------------------------|
| huevo                                | <input type="radio"/> Nunca o menos 1 vez al mes<br><input type="radio"/> 1 a 3 veces mes<br><input type="radio"/> 1 vez semana<br><input type="radio"/> 2 a 4 veces semana<br><input checked="" type="radio"/> 5 a 6 veces semana<br><input type="radio"/> 1 vez al día<br><input type="radio"/> 2 a 3 veces al día<br><input type="radio"/> 5 a 6 veces al día<br><input type="radio"/> más 6 veces al día |
| Pollo con piel                       | <input checked="" type="radio"/> Nunca o menos 1 vez al mes<br><input type="radio"/> 1 a 3 veces mes<br><input type="radio"/> 1 vez semana<br><input type="radio"/> 2 a 4 veces semana<br><input type="radio"/> 5 a 6 veces semana<br><input type="radio"/> 1 vez al día<br><input type="radio"/> 2 a 3 veces al día<br><input type="radio"/> 5 a 6 veces al día<br><input type="radio"/> más 6 veces al día |
| pollo sin piel                       | <input type="radio"/> Nunca o menos 1 vez al mes<br><input type="radio"/> 1 a 3 veces mes<br><input checked="" type="radio"/> 1 vez semana<br><input type="radio"/> 2 a 4 veces semana<br><input type="radio"/> 5 a 6 veces semana<br><input type="radio"/> 1 vez al día<br><input type="radio"/> 2 a 3 veces al día<br><input type="radio"/> 5 a 6 veces al día<br><input type="radio"/> más 6 veces al día |
| Ternera o cerdo o cordero            | <input type="radio"/> Nunca o menos 1 vez al mes<br><input type="radio"/> 1 a 3 veces mes<br><input checked="" type="radio"/> 1 vez semana<br><input type="radio"/> 2 a 4 veces semana<br><input type="radio"/> 5 a 6 veces semana<br><input type="radio"/> 1 vez al día<br><input type="radio"/> 2 a 3 veces al día<br><input type="radio"/> 5 a 6 veces al día<br><input type="radio"/> más 6 veces al día |
| carne caza: Conejo o codorniz o pato | <input checked="" type="radio"/> Nunca o menos 1 vez al mes<br><input type="radio"/> 1 a 3 veces mes<br><input type="radio"/> 1 vez semana<br><input type="radio"/> 2 a 4 veces semana<br><input type="radio"/> 5 a 6 veces semana<br><input type="radio"/> 1 vez al día<br><input type="radio"/> 2 a 3 veces al día<br><input type="radio"/> 5 a 6 veces al día<br><input type="radio"/> más 6 veces al día |
| Hígado de ternera o cerdo o pollo    | <input checked="" type="radio"/> Nunca o menos 1 vez al mes<br><input type="radio"/> 1 a 3 veces mes<br><input type="radio"/> 1 vez semana<br><input type="radio"/> 2 a 4 veces semana<br><input type="radio"/> 5 a 6 veces semana<br><input type="radio"/> 1 vez al día<br><input type="radio"/> 2 a 3 veces al día<br><input type="radio"/> 5 a 6 veces al día<br><input type="radio"/> más 6 veces al día |



|                     |                                                                                                                                                                                                                                                                                                                                                                                                              |
|---------------------|--------------------------------------------------------------------------------------------------------------------------------------------------------------------------------------------------------------------------------------------------------------------------------------------------------------------------------------------------------------------------------------------------------------|
| Vísceras            | <input checked="" type="radio"/> Nunca o menos 1 vez al mes<br><input type="radio"/> 1 a 3 veces mes<br><input type="radio"/> 1 vez semana<br><input type="radio"/> 2 a 4 veces semana<br><input type="radio"/> 5 a 6 veces semana<br><input type="radio"/> 1 vez al día<br><input type="radio"/> 2 a 3 veces al día<br><input type="radio"/> 5 a 6 veces al día<br><input type="radio"/> más 6 veces al día |
| Embutido            | <input type="radio"/> Nunca o menos 1 vez al mes<br><input type="radio"/> 1 a 3 veces mes<br><input type="radio"/> 1 vez semana<br><input checked="" type="radio"/> 2 a 4 veces semana<br><input type="radio"/> 5 a 6 veces semana<br><input type="radio"/> 1 vez al día<br><input type="radio"/> 2 a 3 veces al día<br><input type="radio"/> 5 a 6 veces al día<br><input type="radio"/> más 6 veces al día |
| Salchicha o similar | <input checked="" type="radio"/> Nunca o menos 1 vez al mes<br><input type="radio"/> 1 a 3 veces mes<br><input type="radio"/> 1 vez semana<br><input type="radio"/> 2 a 4 veces semana<br><input type="radio"/> 5 a 6 veces semana<br><input type="radio"/> 1 vez al día<br><input type="radio"/> 2 a 3 veces al día<br><input type="radio"/> 5 a 6 veces al día<br><input type="radio"/> más 6 veces al día |
| Pate o foiegras     | <input checked="" type="radio"/> Nunca o menos 1 vez al mes<br><input type="radio"/> 1 a 3 veces mes<br><input type="radio"/> 1 vez semana<br><input type="radio"/> 2 a 4 veces semana<br><input type="radio"/> 5 a 6 veces semana<br><input type="radio"/> 1 vez al día<br><input type="radio"/> 2 a 3 veces al día<br><input type="radio"/> 5 a 6 veces al día<br><input type="radio"/> más 6 veces al día |
| Hamburguesa         | <input type="radio"/> Nunca o menos 1 vez al mes<br><input checked="" type="radio"/> 1 a 3 veces mes<br><input type="radio"/> 1 vez semana<br><input type="radio"/> 2 a 4 veces semana<br><input type="radio"/> 5 a 6 veces semana<br><input type="radio"/> 1 vez al día<br><input type="radio"/> 2 a 3 veces al día<br><input type="radio"/> 5 a 6 veces al día<br><input type="radio"/> más 6 veces al día |
| tocino o bacon      | <input checked="" type="radio"/> Nunca o menos 1 vez al mes<br><input type="radio"/> 1 a 3 veces mes<br><input type="radio"/> 1 vez semana<br><input type="radio"/> 2 a 4 veces semana<br><input type="radio"/> 5 a 6 veces semana<br><input type="radio"/> 1 vez al día<br><input type="radio"/> 2 a 3 veces al día<br><input type="radio"/> 5 a 6 veces al día<br><input type="radio"/> más 6 veces al día |

---

Pescado frito

- ☐ Nunca o menos 1 vez al mes  
☒ 1 a 3 veces mes  
☐ 1 vez semana  
☐ 2 a 4 veces semana  
☐ 5 a 6 veces semana  
☐ 1 vez al día  
☐ 2 a 3 veces al día  
☐ 5 a 6 veces al día  
☐ más 6 veces al día

---

pescado hervido blanco

- ☐ Nunca o menos 1 vez al mes  
☒ 1 a 3 veces mes  
☐ 1 vez semana  
☐ 2 a 4 veces semana  
☐ 5 a 6 veces semana  
☐ 1 vez al día  
☐ 2 a 3 veces al día  
☐ 5 a 6 veces al día  
☐ más 6 veces al día

---

pescado hervido azul

- ☒ Nunca o menos 1 vez al mes  
☐ 1 a 3 veces mes  
☐ 1 vez semana  
☐ 2 a 4 veces semana  
☐ 5 a 6 veces semana  
☐ 1 vez al día  
☐ 2 a 3 veces al día  
☐ 5 a 6 veces al día  
☐ más 6 veces al día

---

otros pescado azul

- ☐ Nunca o menos 1 vez al mes  
☐ 1 a 3 veces mes  
☒ 1 vez semana  
☐ 2 a 4 veces semana  
☐ 5 a 6 veces semana  
☐ 1 vez al día  
☐ 2 a 3 veces al día  
☐ 5 a 6 veces al día  
☐ más 6 veces al día

---

atun conserva

- ☐ Nunca o menos 1 vez al mes  
☐ 1 a 3 veces mes  
☒ 1 vez semana  
☐ 2 a 4 veces semana  
☐ 5 a 6 veces semana  
☐ 1 vez al día  
☐ 2 a 3 veces al día  
☐ 5 a 6 veces al día  
☐ más 6 veces al día

---

sardina conserva

- ☐ Nunca o menos 1 vez al mes  
☐ 1 a 3 veces mes  
☒ 1 vez semana  
☐ 2 a 4 veces semana  
☐ 5 a 6 veces semana  
☐ 1 vez al día  
☐ 2 a 3 veces al día  
☐ 5 a 6 veces al día  
☐ más 6 veces al día

---

pescado ahumado

- ☐ Nunca o menos 1 vez al mes  
☒ 1 a 3 veces mes  
☐ 1 vez semana  
☐ 2 a 4 veces semana  
☐ 5 a 6 veces semana  
☐ 1 vez al día  
☐ 2 a 3 veces al día  
☐ 5 a 6 veces al día  
☐ más 6 veces al día

---

almejas o mejillones o ostras unos 100g

- ☐ Nunca o menos 1 vez al mes  
☐ 1 a 3 veces mes  
☒ 1 vez semana  
☐ 2 a 4 veces semana  
☐ 5 a 6 veces semana  
☐ 1 vez al día  
☐ 2 a 3 veces al día  
☐ 5 a 6 veces al día  
☐ más 6 veces al día

---

calamar o chipiron o sepia unos 100g

- ☐ Nunca o menos 1 vez al mes  
☒ 1 a 3 veces mes  
☐ 1 vez semana  
☐ 2 a 4 veces semana  
☐ 5 a 6 veces semana  
☐ 1 vez al día  
☐ 2 a 3 veces al día  
☐ 5 a 6 veces al día  
☐ más 6 veces al día

---

marisco unos 100g

- ☒ Nunca o menos 1 vez al mes  
☐ 1 a 3 veces mes  
☐ 1 vez semana  
☐ 2 a 4 veces semana  
☐ 5 a 6 veces semana  
☐ 1 vez al día  
☐ 2 a 3 veces al día  
☐ 5 a 6 veces al día  
☐ más 6 veces al día

---

Espinacas o acelgas cocinadas

- ☐ Nunca o menos 1 vez al mes  
☒ 1 a 3 veces mes  
☐ 1 vez semana  
☐ 2 a 4 veces semana  
☐ 5 a 6 veces semana  
☐ 1 vez al día  
☐ 2 a 3 veces al día  
☐ 5 a 6 veces al día  
☐ más 6 veces al día

---

Col o coliflor o brocoli cocinado

- ☐ Nunca o menos 1 vez al mes  
☒ 1 a 3 veces mes  
☐ 1 vez semana  
☐ 2 a 4 veces semana  
☐ 5 a 6 veces semana  
☐ 1 vez al día  
☐ 2 a 3 veces al día  
☐ 5 a 6 veces al día  
☐ más 6 veces al día

---

|                              |                                                                                                                                                                                                                                                                                                                                                                                                              |
|------------------------------|--------------------------------------------------------------------------------------------------------------------------------------------------------------------------------------------------------------------------------------------------------------------------------------------------------------------------------------------------------------------------------------------------------------|
| Lechuga o endivia o escarola | <input type="radio"/> Nunca o menos 1 vez al mes<br><input type="radio"/> 1 a 3 veces mes<br><input type="radio"/> 1 vez semana<br><input checked="" type="radio"/> 2 a 4 veces semana<br><input type="radio"/> 5 a 6 veces semana<br><input type="radio"/> 1 vez al día<br><input type="radio"/> 2 a 3 veces al día<br><input type="radio"/> 5 a 6 veces al día<br><input type="radio"/> más 6 veces al día |
|------------------------------|--------------------------------------------------------------------------------------------------------------------------------------------------------------------------------------------------------------------------------------------------------------------------------------------------------------------------------------------------------------------------------------------------------------|

---

|                 |                                                                                                                                                                                                                                                                                                                                                                                                              |
|-----------------|--------------------------------------------------------------------------------------------------------------------------------------------------------------------------------------------------------------------------------------------------------------------------------------------------------------------------------------------------------------------------------------------------------------|
| tomate ensalada | <input type="radio"/> Nunca o menos 1 vez al mes<br><input type="radio"/> 1 a 3 veces mes<br><input type="radio"/> 1 vez semana<br><input type="radio"/> 2 a 4 veces semana<br><input type="radio"/> 5 a 6 veces semana<br><input checked="" type="radio"/> 1 vez al día<br><input type="radio"/> 2 a 3 veces al día<br><input type="radio"/> 5 a 6 veces al día<br><input type="radio"/> más 6 veces al día |
|-----------------|--------------------------------------------------------------------------------------------------------------------------------------------------------------------------------------------------------------------------------------------------------------------------------------------------------------------------------------------------------------------------------------------------------------|

---

|         |                                                                                                                                                                                                                                                                                                                                                                                                              |
|---------|--------------------------------------------------------------------------------------------------------------------------------------------------------------------------------------------------------------------------------------------------------------------------------------------------------------------------------------------------------------------------------------------------------------|
| cebolla | <input type="radio"/> Nunca o menos 1 vez al mes<br><input type="radio"/> 1 a 3 veces mes<br><input type="radio"/> 1 vez semana<br><input type="radio"/> 2 a 4 veces semana<br><input type="radio"/> 5 a 6 veces semana<br><input checked="" type="radio"/> 1 vez al día<br><input type="radio"/> 2 a 3 veces al día<br><input type="radio"/> 5 a 6 veces al día<br><input type="radio"/> más 6 veces al día |
|---------|--------------------------------------------------------------------------------------------------------------------------------------------------------------------------------------------------------------------------------------------------------------------------------------------------------------------------------------------------------------------------------------------------------------|

---

|                      |                                                                                                                                                                                                                                                                                                                                                                                                              |
|----------------------|--------------------------------------------------------------------------------------------------------------------------------------------------------------------------------------------------------------------------------------------------------------------------------------------------------------------------------------------------------------------------------------------------------------|
| Zanahoria o calabaza | <input type="radio"/> Nunca o menos 1 vez al mes<br><input type="radio"/> 1 a 3 veces mes<br><input type="radio"/> 1 vez semana<br><input type="radio"/> 2 a 4 veces semana<br><input checked="" type="radio"/> 5 a 6 veces semana<br><input type="radio"/> 1 vez al día<br><input type="radio"/> 2 a 3 veces al día<br><input type="radio"/> 5 a 6 veces al día<br><input type="radio"/> más 6 veces al día |
|----------------------|--------------------------------------------------------------------------------------------------------------------------------------------------------------------------------------------------------------------------------------------------------------------------------------------------------------------------------------------------------------------------------------------------------------|

---

|               |                                                                                                                                                                                                                                                                                                                                                                                                              |
|---------------|--------------------------------------------------------------------------------------------------------------------------------------------------------------------------------------------------------------------------------------------------------------------------------------------------------------------------------------------------------------------------------------------------------------|
| Judías verdes | <input type="radio"/> Nunca o menos 1 vez al mes<br><input type="radio"/> 1 a 3 veces mes<br><input checked="" type="radio"/> 1 vez semana<br><input type="radio"/> 2 a 4 veces semana<br><input type="radio"/> 5 a 6 veces semana<br><input type="radio"/> 1 vez al día<br><input type="radio"/> 2 a 3 veces al día<br><input type="radio"/> 5 a 6 veces al día<br><input type="radio"/> más 6 veces al día |
|---------------|--------------------------------------------------------------------------------------------------------------------------------------------------------------------------------------------------------------------------------------------------------------------------------------------------------------------------------------------------------------------------------------------------------------|

---

|                                |                                                                                                                                                                                                                                                                                                                                                                                                              |
|--------------------------------|--------------------------------------------------------------------------------------------------------------------------------------------------------------------------------------------------------------------------------------------------------------------------------------------------------------------------------------------------------------------------------------------------------------|
| Berenjena o calabacin o pepino | <input type="radio"/> Nunca o menos 1 vez al mes<br><input type="radio"/> 1 a 3 veces mes<br><input type="radio"/> 1 vez semana<br><input checked="" type="radio"/> 2 a 4 veces semana<br><input type="radio"/> 5 a 6 veces semana<br><input type="radio"/> 1 vez al día<br><input type="radio"/> 2 a 3 veces al día<br><input type="radio"/> 5 a 6 veces al día<br><input type="radio"/> más 6 veces al día |
|--------------------------------|--------------------------------------------------------------------------------------------------------------------------------------------------------------------------------------------------------------------------------------------------------------------------------------------------------------------------------------------------------------------------------------------------------------|

---

---

|          |                                                                                                                                                                                                                                                                                                                                                                                                              |
|----------|--------------------------------------------------------------------------------------------------------------------------------------------------------------------------------------------------------------------------------------------------------------------------------------------------------------------------------------------------------------------------------------------------------------|
| pimiento | <input type="radio"/> Nunca o menos 1 vez al mes<br><input type="radio"/> 1 a 3 veces mes<br><input type="radio"/> 1 vez semana<br><input checked="" type="radio"/> 2 a 4 veces semana<br><input type="radio"/> 5 a 6 veces semana<br><input type="radio"/> 1 vez al día<br><input type="radio"/> 2 a 3 veces al día<br><input type="radio"/> 5 a 6 veces al día<br><input type="radio"/> más 6 veces al día |
|----------|--------------------------------------------------------------------------------------------------------------------------------------------------------------------------------------------------------------------------------------------------------------------------------------------------------------------------------------------------------------------------------------------------------------|

---

|           |                                                                                                                                                                                                                                                                                                                                                                                                              |
|-----------|--------------------------------------------------------------------------------------------------------------------------------------------------------------------------------------------------------------------------------------------------------------------------------------------------------------------------------------------------------------------------------------------------------------|
| alcachofa | <input type="radio"/> Nunca o menos 1 vez al mes<br><input checked="" type="radio"/> 1 a 3 veces mes<br><input type="radio"/> 1 vez semana<br><input type="radio"/> 2 a 4 veces semana<br><input type="radio"/> 5 a 6 veces semana<br><input type="radio"/> 1 vez al día<br><input type="radio"/> 2 a 3 veces al día<br><input type="radio"/> 5 a 6 veces al día<br><input type="radio"/> más 6 veces al día |
|-----------|--------------------------------------------------------------------------------------------------------------------------------------------------------------------------------------------------------------------------------------------------------------------------------------------------------------------------------------------------------------------------------------------------------------|

---

|            |                                                                                                                                                                                                                                                                                                                                                                                                              |
|------------|--------------------------------------------------------------------------------------------------------------------------------------------------------------------------------------------------------------------------------------------------------------------------------------------------------------------------------------------------------------------------------------------------------------|
| espárragos | <input checked="" type="radio"/> Nunca o menos 1 vez al mes<br><input type="radio"/> 1 a 3 veces mes<br><input type="radio"/> 1 vez semana<br><input type="radio"/> 2 a 4 veces semana<br><input type="radio"/> 5 a 6 veces semana<br><input type="radio"/> 1 vez al día<br><input type="radio"/> 2 a 3 veces al día<br><input type="radio"/> 5 a 6 veces al día<br><input type="radio"/> más 6 veces al día |
|------------|--------------------------------------------------------------------------------------------------------------------------------------------------------------------------------------------------------------------------------------------------------------------------------------------------------------------------------------------------------------------------------------------------------------|

---

|              |                                                                                                                                                                                                                                                                                                                                                                                                              |
|--------------|--------------------------------------------------------------------------------------------------------------------------------------------------------------------------------------------------------------------------------------------------------------------------------------------------------------------------------------------------------------------------------------------------------------|
| maíz hervido | <input checked="" type="radio"/> Nunca o menos 1 vez al mes<br><input type="radio"/> 1 a 3 veces mes<br><input type="radio"/> 1 vez semana<br><input type="radio"/> 2 a 4 veces semana<br><input type="radio"/> 5 a 6 veces semana<br><input type="radio"/> 1 vez al día<br><input type="radio"/> 2 a 3 veces al día<br><input type="radio"/> 5 a 6 veces al día<br><input type="radio"/> más 6 veces al día |
|--------------|--------------------------------------------------------------------------------------------------------------------------------------------------------------------------------------------------------------------------------------------------------------------------------------------------------------------------------------------------------------------------------------------------------------|

---

|           |                                                                                                                                                                                                                                                                                                                                                                                                              |
|-----------|--------------------------------------------------------------------------------------------------------------------------------------------------------------------------------------------------------------------------------------------------------------------------------------------------------------------------------------------------------------------------------------------------------------|
| legumbres | <input type="radio"/> Nunca o menos 1 vez al mes<br><input type="radio"/> 1 a 3 veces mes<br><input type="radio"/> 1 vez semana<br><input checked="" type="radio"/> 2 a 4 veces semana<br><input type="radio"/> 5 a 6 veces semana<br><input type="radio"/> 1 vez al día<br><input type="radio"/> 2 a 3 veces al día<br><input type="radio"/> 5 a 6 veces al día<br><input type="radio"/> más 6 veces al día |
|-----------|--------------------------------------------------------------------------------------------------------------------------------------------------------------------------------------------------------------------------------------------------------------------------------------------------------------------------------------------------------------------------------------------------------------|

---

|                       |                                                                                                                                                                                                                                                                                                                                                                                                              |
|-----------------------|--------------------------------------------------------------------------------------------------------------------------------------------------------------------------------------------------------------------------------------------------------------------------------------------------------------------------------------------------------------------------------------------------------------|
| naranjas o mandarinas | <input type="radio"/> Nunca o menos 1 vez al mes<br><input type="radio"/> 1 a 3 veces mes<br><input type="radio"/> 1 vez semana<br><input checked="" type="radio"/> 2 a 4 veces semana<br><input type="radio"/> 5 a 6 veces semana<br><input type="radio"/> 1 vez al día<br><input type="radio"/> 2 a 3 veces al día<br><input type="radio"/> 5 a 6 veces al día<br><input type="radio"/> más 6 veces al día |
|-----------------------|--------------------------------------------------------------------------------------------------------------------------------------------------------------------------------------------------------------------------------------------------------------------------------------------------------------------------------------------------------------------------------------------------------------|

---

|                       |                                                                                                                                                                                                                                                                                                                                                                                                              |
|-----------------------|--------------------------------------------------------------------------------------------------------------------------------------------------------------------------------------------------------------------------------------------------------------------------------------------------------------------------------------------------------------------------------------------------------------|
| zum natural fruta     | <input checked="" type="radio"/> Nunca o menos 1 vez al mes<br><input type="radio"/> 1 a 3 veces mes<br><input type="radio"/> 1 vez semana<br><input type="radio"/> 2 a 4 veces semana<br><input type="radio"/> 5 a 6 veces semana<br><input type="radio"/> 1 vez al día<br><input type="radio"/> 2 a 3 veces al día<br><input type="radio"/> 5 a 6 veces al día<br><input type="radio"/> más 6 veces al día |
| platano               | <input type="radio"/> Nunca o menos 1 vez al mes<br><input type="radio"/> 1 a 3 veces mes<br><input type="radio"/> 1 vez semana<br><input checked="" type="radio"/> 2 a 4 veces semana<br><input type="radio"/> 5 a 6 veces semana<br><input type="radio"/> 1 vez al día<br><input type="radio"/> 2 a 3 veces al día<br><input type="radio"/> 5 a 6 veces al día<br><input type="radio"/> más 6 veces al día |
| manzana o pera        | <input type="radio"/> Nunca o menos 1 vez al mes<br><input type="radio"/> 1 a 3 veces mes<br><input checked="" type="radio"/> 1 vez semana<br><input type="radio"/> 2 a 4 veces semana<br><input type="radio"/> 5 a 6 veces semana<br><input type="radio"/> 1 vez al día<br><input type="radio"/> 2 a 3 veces al día<br><input type="radio"/> 5 a 6 veces al día<br><input type="radio"/> más 6 veces al día |
| melocotón o nectarina | <input type="radio"/> Nunca o menos 1 vez al mes<br><input type="radio"/> 1 a 3 veces mes<br><input type="radio"/> 1 vez semana<br><input checked="" type="radio"/> 2 a 4 veces semana<br><input type="radio"/> 5 a 6 veces semana<br><input type="radio"/> 1 vez al día<br><input type="radio"/> 2 a 3 veces al día<br><input type="radio"/> 5 a 6 veces al día<br><input type="radio"/> más 6 veces al día |
| sandia o melon        | <input type="radio"/> Nunca o menos 1 vez al mes<br><input type="radio"/> 1 a 3 veces mes<br><input type="radio"/> 1 vez semana<br><input type="radio"/> 2 a 4 veces semana<br><input checked="" type="radio"/> 5 a 6 veces semana<br><input type="radio"/> 1 vez al día<br><input type="radio"/> 2 a 3 veces al día<br><input type="radio"/> 5 a 6 veces al día<br><input type="radio"/> más 6 veces al día |
| uva                   | <input type="radio"/> Nunca o menos 1 vez al mes<br><input type="radio"/> 1 a 3 veces mes<br><input checked="" type="radio"/> 1 vez semana<br><input type="radio"/> 2 a 4 veces semana<br><input type="radio"/> 5 a 6 veces semana<br><input type="radio"/> 1 vez al día<br><input type="radio"/> 2 a 3 veces al día<br><input type="radio"/> 5 a 6 veces al día<br><input type="radio"/> más 6 veces al día |

---

bruna o ciruela

- ☐ Nunca o menos 1 vez al mes  
☒ 1 a 3 veces mes  
☐ 1 vez semana  
☐ 2 a 4 veces semana  
☐ 5 a 6 veces semana  
☐ 1 vez al día  
☐ 2 a 3 veces al día  
☐ 5 a 6 veces al día  
☐ más 6 veces al día

---

kiwi

- ☒ Nunca o menos 1 vez al mes  
☐ 1 a 3 veces mes  
☐ 1 vez semana  
☐ 2 a 4 veces semana  
☐ 5 a 6 veces semana  
☐ 1 vez al día  
☐ 2 a 3 veces al día  
☐ 5 a 6 veces al día  
☐ más 6 veces al día

---

aceituna

- ☐ Nunca o menos 1 vez al mes  
☒ 1 a 3 veces mes  
☐ 1 vez semana  
☐ 2 a 4 veces semana  
☐ 5 a 6 veces semana  
☐ 1 vez al día  
☐ 2 a 3 veces al día  
☐ 5 a 6 veces al día  
☐ más 6 veces al día

---

frutos secos

- ☐ Nunca o menos 1 vez al mes  
☐ 1 a 3 veces mes  
☐ 1 vez semana  
☒ 2 a 4 veces semana  
☐ 5 a 6 veces semana  
☐ 1 vez al día  
☐ 2 a 3 veces al día  
☐ 5 a 6 veces al día  
☐ más 6 veces al día

---

pan blanco

- ☒ Nunca o menos 1 vez al mes  
☐ 1 a 3 veces mes  
☐ 1 vez semana  
☐ 2 a 4 veces semana  
☐ 5 a 6 veces semana  
☐ 1 vez al día  
☐ 2 a 3 veces al día  
☐ 5 a 6 veces al día  
☐ más 6 veces al día

---

pan integral

- ☐ Nunca o menos 1 vez al mes  
☐ 1 a 3 veces mes  
☐ 1 vez semana  
☐ 2 a 4 veces semana  
☐ 5 a 6 veces semana  
☒ 1 vez al día  
☐ 2 a 3 veces al día  
☐ 5 a 6 veces al día  
☐ más 6 veces al día

---

cereales desayuno

- ☒ Nunca o menos 1 vez al mes  
☐ 1 a 3 veces mes  
☐ 1 vez semana  
☐ 2 a 4 veces semana  
☐ 5 a 6 veces semana  
☐ 1 vez al día  
☐ 2 a 3 veces al día  
☐ 5 a 6 veces al día  
☐ más 6 veces al día

---

patatas fritas

- ☐ Nunca o menos 1 vez al mes  
☒ 1 a 3 veces mes  
☐ 1 vez semana  
☐ 2 a 4 veces semana  
☐ 5 a 6 veces semana  
☐ 1 vez al día  
☐ 2 a 3 veces al día  
☐ 5 a 6 veces al día  
☐ más 6 veces al día

---

patatas cocidas o asadas

- ☐ Nunca o menos 1 vez al mes  
☐ 1 a 3 veces mes  
☒ 1 vez semana  
☐ 2 a 4 veces semana  
☐ 5 a 6 veces semana  
☐ 1 vez al día  
☐ 2 a 3 veces al día  
☐ 5 a 6 veces al día  
☐ más 6 veces al día

---

bolsa papas

- ☒ Nunca o menos 1 vez al mes  
☐ 1 a 3 veces mes  
☐ 1 vez semana  
☐ 2 a 4 veces semana  
☐ 5 a 6 veces semana  
☐ 1 vez al día  
☐ 2 a 3 veces al día  
☐ 5 a 6 veces al día  
☐ más 6 veces al día

---

arroz cocinado

- ☐ Nunca o menos 1 vez al mes  
☐ 1 a 3 veces mes  
☒ 1 vez semana  
☐ 2 a 4 veces semana  
☐ 5 a 6 veces semana  
☐ 1 vez al día  
☐ 2 a 3 veces al día  
☐ 5 a 6 veces al día  
☐ más 6 veces al día

---

pasta

- ☐ Nunca o menos 1 vez al mes  
☐ 1 a 3 veces mes  
☒ 1 vez semana  
☐ 2 a 4 veces semana  
☐ 5 a 6 veces semana  
☐ 1 vez al día  
☐ 2 a 3 veces al día  
☐ 5 a 6 veces al día  
☐ más 6 veces al día



|                     |                                                                                                                                                                                                                                                                                                                                                                                                              |
|---------------------|--------------------------------------------------------------------------------------------------------------------------------------------------------------------------------------------------------------------------------------------------------------------------------------------------------------------------------------------------------------------------------------------------------------|
| pizza               | <input type="radio"/> Nunca o menos 1 vez al mes<br><input type="radio"/> 1 a 3 veces mes<br><input checked="" type="radio"/> 1 vez semana<br><input type="radio"/> 2 a 4 veces semana<br><input type="radio"/> 5 a 6 veces semana<br><input type="radio"/> 1 vez al día<br><input type="radio"/> 2 a 3 veces al día<br><input type="radio"/> 5 a 6 veces al día<br><input type="radio"/> más 6 veces al día |
| aceite oliva        | <input type="radio"/> Nunca o menos 1 vez al mes<br><input type="radio"/> 1 a 3 veces mes<br><input type="radio"/> 1 vez semana<br><input type="radio"/> 2 a 4 veces semana<br><input type="radio"/> 5 a 6 veces semana<br><input checked="" type="radio"/> 1 vez al día<br><input type="radio"/> 2 a 3 veces al día<br><input type="radio"/> 5 a 6 veces al día<br><input type="radio"/> más 6 veces al día |
| otros aceites       | <input checked="" type="radio"/> Nunca o menos 1 vez al mes<br><input type="radio"/> 1 a 3 veces mes<br><input type="radio"/> 1 vez semana<br><input type="radio"/> 2 a 4 veces semana<br><input type="radio"/> 5 a 6 veces semana<br><input type="radio"/> 1 vez al día<br><input type="radio"/> 2 a 3 veces al día<br><input type="radio"/> 5 a 6 veces al día<br><input type="radio"/> más 6 veces al día |
| margarina           | <input checked="" type="radio"/> Nunca o menos 1 vez al mes<br><input type="radio"/> 1 a 3 veces mes<br><input type="radio"/> 1 vez semana<br><input type="radio"/> 2 a 4 veces semana<br><input type="radio"/> 5 a 6 veces semana<br><input type="radio"/> 1 vez al día<br><input type="radio"/> 2 a 3 veces al día<br><input type="radio"/> 5 a 6 veces al día<br><input type="radio"/> más 6 veces al día |
| mantequilla         | <input checked="" type="radio"/> Nunca o menos 1 vez al mes<br><input type="radio"/> 1 a 3 veces mes<br><input type="radio"/> 1 vez semana<br><input type="radio"/> 2 a 4 veces semana<br><input type="radio"/> 5 a 6 veces semana<br><input type="radio"/> 1 vez al día<br><input type="radio"/> 2 a 3 veces al día<br><input type="radio"/> 5 a 6 veces al día<br><input type="radio"/> más 6 veces al día |
| galletas tipo maria | <input checked="" type="radio"/> Nunca o menos 1 vez al mes<br><input type="radio"/> 1 a 3 veces mes<br><input type="radio"/> 1 vez semana<br><input type="radio"/> 2 a 4 veces semana<br><input type="radio"/> 5 a 6 veces semana<br><input type="radio"/> 1 vez al día<br><input type="radio"/> 2 a 3 veces al día<br><input type="radio"/> 5 a 6 veces al día<br><input type="radio"/> más 6 veces al día |

|                           |                                                                                                                                                                                                                                                                                                                                                                                                              |
|---------------------------|--------------------------------------------------------------------------------------------------------------------------------------------------------------------------------------------------------------------------------------------------------------------------------------------------------------------------------------------------------------------------------------------------------------|
| galletas chocolate        | <input checked="" type="radio"/> Nunca o menos 1 vez al mes<br><input type="radio"/> 1 a 3 veces mes<br><input type="radio"/> 1 vez semana<br><input type="radio"/> 2 a 4 veces semana<br><input type="radio"/> 5 a 6 veces semana<br><input type="radio"/> 1 vez al día<br><input type="radio"/> 2 a 3 veces al día<br><input type="radio"/> 5 a 6 veces al día<br><input type="radio"/> más 6 veces al día |
| bollieria                 | <input checked="" type="radio"/> Nunca o menos 1 vez al mes<br><input type="radio"/> 1 a 3 veces mes<br><input type="radio"/> 1 vez semana<br><input type="radio"/> 2 a 4 veces semana<br><input type="radio"/> 5 a 6 veces semana<br><input type="radio"/> 1 vez al día<br><input type="radio"/> 2 a 3 veces al día<br><input type="radio"/> 5 a 6 veces al día<br><input type="radio"/> más 6 veces al día |
| chocolate o bombones      | <input type="radio"/> Nunca o menos 1 vez al mes<br><input checked="" type="radio"/> 1 a 3 veces mes<br><input type="radio"/> 1 vez semana<br><input type="radio"/> 2 a 4 veces semana<br><input type="radio"/> 5 a 6 veces semana<br><input type="radio"/> 1 vez al día<br><input type="radio"/> 2 a 3 veces al día<br><input type="radio"/> 5 a 6 veces al día<br><input type="radio"/> más 6 veces al día |
| chocolate polvo o colacao | <input checked="" type="radio"/> Nunca o menos 1 vez al mes<br><input type="radio"/> 1 a 3 veces mes<br><input type="radio"/> 1 vez semana<br><input type="radio"/> 2 a 4 veces semana<br><input type="radio"/> 5 a 6 veces semana<br><input type="radio"/> 1 vez al día<br><input type="radio"/> 2 a 3 veces al día<br><input type="radio"/> 5 a 6 veces al día<br><input type="radio"/> más 6 veces al día |
| vino tinto                | <input checked="" type="radio"/> Nunca o menos 1 vez al mes<br><input type="radio"/> 1 a 3 veces mes<br><input type="radio"/> 1 vez semana<br><input type="radio"/> 2 a 4 veces semana<br><input type="radio"/> 5 a 6 veces semana<br><input type="radio"/> 1 vez al día<br><input type="radio"/> 2 a 3 veces al día<br><input type="radio"/> 5 a 6 veces al día<br><input type="radio"/> más 6 veces al día |
| vino blanco               | <input checked="" type="radio"/> Nunca o menos 1 vez al mes<br><input type="radio"/> 1 a 3 veces mes<br><input type="radio"/> 1 vez semana<br><input type="radio"/> 2 a 4 veces semana<br><input type="radio"/> 5 a 6 veces semana<br><input type="radio"/> 1 vez al día<br><input type="radio"/> 2 a 3 veces al día<br><input type="radio"/> 5 a 6 veces al día<br><input type="radio"/> más 6 veces al día |

---

|                    |                                                                                                                                                                                                                                                                                                                                                                                                              |
|--------------------|--------------------------------------------------------------------------------------------------------------------------------------------------------------------------------------------------------------------------------------------------------------------------------------------------------------------------------------------------------------------------------------------------------------|
| vino seco o vermut | <input checked="" type="radio"/> Nunca o menos 1 vez al mes<br><input type="radio"/> 1 a 3 veces mes<br><input type="radio"/> 1 vez semana<br><input type="radio"/> 2 a 4 veces semana<br><input type="radio"/> 5 a 6 veces semana<br><input type="radio"/> 1 vez al día<br><input type="radio"/> 2 a 3 veces al día<br><input type="radio"/> 5 a 6 veces al día<br><input type="radio"/> más 6 veces al día |
|--------------------|--------------------------------------------------------------------------------------------------------------------------------------------------------------------------------------------------------------------------------------------------------------------------------------------------------------------------------------------------------------------------------------------------------------|

---

|         |                                                                                                                                                                                                                                                                                                                                                                                                              |
|---------|--------------------------------------------------------------------------------------------------------------------------------------------------------------------------------------------------------------------------------------------------------------------------------------------------------------------------------------------------------------------------------------------------------------|
| cerveza | <input checked="" type="radio"/> Nunca o menos 1 vez al mes<br><input type="radio"/> 1 a 3 veces mes<br><input type="radio"/> 1 vez semana<br><input type="radio"/> 2 a 4 veces semana<br><input type="radio"/> 5 a 6 veces semana<br><input type="radio"/> 1 vez al día<br><input type="radio"/> 2 a 3 veces al día<br><input type="radio"/> 5 a 6 veces al día<br><input type="radio"/> más 6 veces al día |
|---------|--------------------------------------------------------------------------------------------------------------------------------------------------------------------------------------------------------------------------------------------------------------------------------------------------------------------------------------------------------------------------------------------------------------|

---

|                     |                                                                                                                                                                                                                                                                                                                                                                                                              |
|---------------------|--------------------------------------------------------------------------------------------------------------------------------------------------------------------------------------------------------------------------------------------------------------------------------------------------------------------------------------------------------------------------------------------------------------|
| cerveza sin alcohol | <input type="radio"/> Nunca o menos 1 vez al mes<br><input type="radio"/> 1 a 3 veces mes<br><input checked="" type="radio"/> 1 vez semana<br><input type="radio"/> 2 a 4 veces semana<br><input type="radio"/> 5 a 6 veces semana<br><input type="radio"/> 1 vez al día<br><input type="radio"/> 2 a 3 veces al día<br><input type="radio"/> 5 a 6 veces al día<br><input type="radio"/> más 6 veces al día |
|---------------------|--------------------------------------------------------------------------------------------------------------------------------------------------------------------------------------------------------------------------------------------------------------------------------------------------------------------------------------------------------------------------------------------------------------|

---

|         |                                                                                                                                                                                                                                                                                                                                                                                                              |
|---------|--------------------------------------------------------------------------------------------------------------------------------------------------------------------------------------------------------------------------------------------------------------------------------------------------------------------------------------------------------------------------------------------------------------|
| licores | <input checked="" type="radio"/> Nunca o menos 1 vez al mes<br><input type="radio"/> 1 a 3 veces mes<br><input type="radio"/> 1 vez semana<br><input type="radio"/> 2 a 4 veces semana<br><input type="radio"/> 5 a 6 veces semana<br><input type="radio"/> 1 vez al día<br><input type="radio"/> 2 a 3 veces al día<br><input type="radio"/> 5 a 6 veces al día<br><input type="radio"/> más 6 veces al día |
|---------|--------------------------------------------------------------------------------------------------------------------------------------------------------------------------------------------------------------------------------------------------------------------------------------------------------------------------------------------------------------------------------------------------------------|

---

|                       |                                                                                                                                                                                                                                                                                                                                                                                                              |
|-----------------------|--------------------------------------------------------------------------------------------------------------------------------------------------------------------------------------------------------------------------------------------------------------------------------------------------------------------------------------------------------------------------------------------------------------|
| ginebra o ron o vodka | <input checked="" type="radio"/> Nunca o menos 1 vez al mes<br><input type="radio"/> 1 a 3 veces mes<br><input type="radio"/> 1 vez semana<br><input type="radio"/> 2 a 4 veces semana<br><input type="radio"/> 5 a 6 veces semana<br><input type="radio"/> 1 vez al día<br><input type="radio"/> 2 a 3 veces al día<br><input type="radio"/> 5 a 6 veces al día<br><input type="radio"/> más 6 veces al día |
|-----------------------|--------------------------------------------------------------------------------------------------------------------------------------------------------------------------------------------------------------------------------------------------------------------------------------------------------------------------------------------------------------------------------------------------------------|

---

|                 |                                                                                                                                                                                                                                                                                                                                                                                                              |
|-----------------|--------------------------------------------------------------------------------------------------------------------------------------------------------------------------------------------------------------------------------------------------------------------------------------------------------------------------------------------------------------------------------------------------------------|
| refresco normal | <input checked="" type="radio"/> Nunca o menos 1 vez al mes<br><input type="radio"/> 1 a 3 veces mes<br><input type="radio"/> 1 vez semana<br><input type="radio"/> 2 a 4 veces semana<br><input type="radio"/> 5 a 6 veces semana<br><input type="radio"/> 1 vez al día<br><input type="radio"/> 2 a 3 veces al día<br><input type="radio"/> 5 a 6 veces al día<br><input type="radio"/> más 6 veces al día |
|-----------------|--------------------------------------------------------------------------------------------------------------------------------------------------------------------------------------------------------------------------------------------------------------------------------------------------------------------------------------------------------------------------------------------------------------|

---

---

refresco sin azúcar

- ☒ Nunca o menos 1 vez al mes  
☐ 1 a 3 veces mes  
☐ 1 vez semana  
☐ 2 a 4 veces semana  
☐ 5 a 6 veces semana  
☐ 1 vez al día  
☐ 2 a 3 veces al día  
☐ 5 a 6 veces al día  
☐ más 6 veces al día

---

Agua del grifo

- ☐ Nunca o menos 1 vez al mes  
☐ 1 a 3 veces mes  
☐ 1 vez semana  
☐ 2 a 4 veces semana  
☐ 5 a 6 veces semana  
☐ 1 vez al día  
☐ 2 a 3 veces al día  
☒ 5 a 6 veces al día  
☐ más 6 veces al día

---

agua embotellada sin gas

- ☒ Nunca o menos 1 vez al mes  
☐ 1 a 3 veces mes  
☐ 1 vez semana  
☐ 2 a 4 veces semana  
☐ 5 a 6 veces semana  
☐ 1 vez al día  
☐ 2 a 3 veces al día  
☐ 5 a 6 veces al día  
☐ más 6 veces al día

---

agua embotellada con gas

- ☐ Nunca o menos 1 vez al mes  
☐ 1 a 3 veces mes  
☒ 1 vez semana  
☐ 2 a 4 veces semana  
☐ 5 a 6 veces semana  
☐ 1 vez al día  
☐ 2 a 3 veces al día  
☐ 5 a 6 veces al día  
☐ más 6 veces al día

---

zumو frutas embasado

- ☒ Nunca o menos 1 vez al mes  
☐ 1 a 3 veces mes  
☐ 1 vez semana  
☐ 2 a 4 veces semana  
☐ 5 a 6 veces semana  
☐ 1 vez al día  
☐ 2 a 3 veces al día  
☐ 5 a 6 veces al día  
☐ más 6 veces al día

---

cafe

- ☐ Nunca o menos 1 vez al mes  
☐ 1 a 3 veces mes  
☐ 1 vez semana  
☐ 2 a 4 veces semana  
☐ 5 a 6 veces semana  
☒ 1 vez al día  
☐ 2 a 3 veces al día  
☐ 5 a 6 veces al día  
☐ más 6 veces al día

|                       |                                                                                                                                                                                                                                                                                                                                                                                                              |
|-----------------------|--------------------------------------------------------------------------------------------------------------------------------------------------------------------------------------------------------------------------------------------------------------------------------------------------------------------------------------------------------------------------------------------------------------|
| cafe descafeinado     | <input checked="" type="radio"/> Nunca o menos 1 vez al mes<br><input type="radio"/> 1 a 3 veces mes<br><input type="radio"/> 1 vez semana<br><input type="radio"/> 2 a 4 veces semana<br><input type="radio"/> 5 a 6 veces semana<br><input type="radio"/> 1 vez al día<br><input type="radio"/> 2 a 3 veces al día<br><input type="radio"/> 5 a 6 veces al día<br><input type="radio"/> más 6 veces al día |
| te o infusión         | <input type="radio"/> Nunca o menos 1 vez al mes<br><input type="radio"/> 1 a 3 veces mes<br><input type="radio"/> 1 vez semana<br><input checked="" type="radio"/> 2 a 4 veces semana<br><input type="radio"/> 5 a 6 veces semana<br><input type="radio"/> 1 vez al día<br><input type="radio"/> 2 a 3 veces al día<br><input type="radio"/> 5 a 6 veces al día<br><input type="radio"/> más 6 veces al día |
| sopa o puré verduras  | <input type="radio"/> Nunca o menos 1 vez al mes<br><input type="radio"/> 1 a 3 veces mes<br><input checked="" type="radio"/> 1 vez semana<br><input type="radio"/> 2 a 4 veces semana<br><input type="radio"/> 5 a 6 veces semana<br><input type="radio"/> 1 vez al día<br><input type="radio"/> 2 a 3 veces al día<br><input type="radio"/> 5 a 6 veces al día<br><input type="radio"/> más 6 veces al día |
| croquetas pollo jamón | <input type="radio"/> Nunca o menos 1 vez al mes<br><input type="radio"/> 1 a 3 veces mes<br><input checked="" type="radio"/> 1 vez semana<br><input type="radio"/> 2 a 4 veces semana<br><input type="radio"/> 5 a 6 veces semana<br><input type="radio"/> 1 vez al día<br><input type="radio"/> 2 a 3 veces al día<br><input type="radio"/> 5 a 6 veces al día<br><input type="radio"/> más 6 veces al día |
| croquetas pescado     | <input checked="" type="radio"/> Nunca o menos 1 vez al mes<br><input type="radio"/> 1 a 3 veces mes<br><input type="radio"/> 1 vez semana<br><input type="radio"/> 2 a 4 veces semana<br><input type="radio"/> 5 a 6 veces semana<br><input type="radio"/> 1 vez al día<br><input type="radio"/> 2 a 3 veces al día<br><input type="radio"/> 5 a 6 veces al día<br><input type="radio"/> más 6 veces al día |
| mayonesa              | <input type="radio"/> Nunca o menos 1 vez al mes<br><input checked="" type="radio"/> 1 a 3 veces mes<br><input type="radio"/> 1 vez semana<br><input type="radio"/> 2 a 4 veces semana<br><input type="radio"/> 5 a 6 veces semana<br><input type="radio"/> 1 vez al día<br><input type="radio"/> 2 a 3 veces al día<br><input type="radio"/> 5 a 6 veces al día<br><input type="radio"/> más 6 veces al día |

---

salsa tomate

- ☐ Nunca o menos 1 vez al mes  
☐ 1 a 3 veces mes  
☒ 1 vez semana  
☐ 2 a 4 veces semana  
☐ 5 a 6 veces semana  
☐ 1 vez al día  
☐ 2 a 3 veces al día  
☐ 5 a 6 veces al día  
☐ más 6 veces al día

---

ketchup

- ☒ Nunca o menos 1 vez al mes  
☐ 1 a 3 veces mes  
☐ 1 vez semana  
☐ 2 a 4 veces semana  
☐ 5 a 6 veces semana  
☐ 1 vez al día  
☐ 2 a 3 veces al día  
☐ 5 a 6 veces al día  
☐ más 6 veces al día

---

sal

- ☐ Nunca o menos 1 vez al mes  
☐ 1 a 3 veces mes  
☒ 1 vez semana  
☐ 2 a 4 veces semana  
☐ 5 a 6 veces semana  
☐ 1 vez al día  
☐ 2 a 3 veces al día  
☐ 5 a 6 veces al día  
☐ más 6 veces al día

---

ajo

- ☐ Nunca o menos 1 vez al mes  
☐ 1 a 3 veces mes  
☐ 1 vez semana  
☒ 2 a 4 veces semana  
☐ 5 a 6 veces semana  
☐ 1 vez al día  
☐ 2 a 3 veces al día  
☐ 5 a 6 veces al día  
☐ más 6 veces al día

---

mermelada o miel

- ☒ Nunca o menos 1 vez al mes  
☐ 1 a 3 veces mes  
☐ 1 vez semana  
☐ 2 a 4 veces semana  
☐ 5 a 6 veces semana  
☐ 1 vez al día  
☐ 2 a 3 veces al día  
☐ 5 a 6 veces al día  
☐ más 6 veces al día

---

azúcar

- ☐ Nunca o menos 1 vez al mes  
☒ 1 a 3 veces mes  
☐ 1 vez semana  
☐ 2 a 4 veces semana  
☐ 5 a 6 veces semana  
☐ 1 vez al día  
☐ 2 a 3 veces al día  
☐ 5 a 6 veces al día  
☐ más 6 veces al día

|                                       |                                                                                                                                                                                                                                                                                                                                                                                                                                                                                                                               |
|---------------------------------------|-------------------------------------------------------------------------------------------------------------------------------------------------------------------------------------------------------------------------------------------------------------------------------------------------------------------------------------------------------------------------------------------------------------------------------------------------------------------------------------------------------------------------------|
| Otro alimento                         | [*DATA REMOVED*]                                                                                                                                                                                                                                                                                                                                                                                                                                                                                                              |
| suplementos vitamínicos               | <input checked="" type="radio"/> si<br><input type="radio"/> no                                                                                                                                                                                                                                                                                                                                                                                                                                                               |
| suplementos vitamínicos               | [*DATA REMOVED*]                                                                                                                                                                                                                                                                                                                                                                                                                                                                                                              |
| dieta previa                          | <input type="radio"/> si<br><input checked="" type="radio"/> no                                                                                                                                                                                                                                                                                                                                                                                                                                                               |
| motivo dieta                          | <input checked="" type="radio"/> no dieta<br><input type="radio"/> control peso<br><input type="radio"/> control colesterol<br><input type="radio"/> control diabetes<br><input type="radio"/> problemas estómago<br><input type="radio"/> problemas vesícula o hepáticos<br><input type="radio"/> HTA o cardiopatía<br><input type="radio"/> problemas renales<br><input type="radio"/> alergia alimentaria<br><input type="radio"/> ácido úrico elevado<br><input type="radio"/> vegetariana<br><input type="radio"/> otros |
| cambio alimentos año previo gestación | <input checked="" type="radio"/> si<br><input type="radio"/> no                                                                                                                                                                                                                                                                                                                                                                                                                                                               |
| cambio lácteos                        | <input type="radio"/> eliminado<br><input type="radio"/> disminuido<br><input checked="" type="radio"/> igual<br><input type="radio"/> aumentado<br><input type="radio"/> no sabe                                                                                                                                                                                                                                                                                                                                             |
| cambio huevos                         | <input type="radio"/> eliminado<br><input type="radio"/> disminuido<br><input checked="" type="radio"/> igual<br><input type="radio"/> aumentado<br><input type="radio"/> no sabe                                                                                                                                                                                                                                                                                                                                             |
| cambio carne                          | <input type="radio"/> eliminado<br><input type="radio"/> disminuido<br><input checked="" type="radio"/> igual<br><input type="radio"/> aumentado<br><input type="radio"/> no sabe                                                                                                                                                                                                                                                                                                                                             |
| cambio pescado                        | <input type="radio"/> eliminado<br><input type="radio"/> disminuido<br><input checked="" type="radio"/> igual<br><input type="radio"/> aumentado<br><input type="radio"/> no sabe                                                                                                                                                                                                                                                                                                                                             |
| cambio verduras                       | <input type="radio"/> eliminado<br><input type="radio"/> disminuido<br><input checked="" type="radio"/> igual<br><input type="radio"/> aumentado<br><input type="radio"/> no sabe                                                                                                                                                                                                                                                                                                                                             |

|                            |                                                                                                                                                                                                                        |
|----------------------------|------------------------------------------------------------------------------------------------------------------------------------------------------------------------------------------------------------------------|
| cambio legumbres           | <input type="radio"/> eliminado<br><input type="radio"/> disminuido<br><input checked="" type="radio"/> igual<br><input type="radio"/> aumentado<br><input type="radio"/> no sabe                                      |
| cambio fruta               | <input type="radio"/> eliminado<br><input type="radio"/> disminuido<br><input checked="" type="radio"/> igual<br><input type="radio"/> aumentado<br><input type="radio"/> no sabe                                      |
| cambio pan                 | <input type="radio"/> eliminado<br><input type="radio"/> disminuido<br><input checked="" type="radio"/> igual<br><input type="radio"/> aumentado<br><input type="radio"/> no sabe                                      |
| cambio aceite oliva        | <input type="radio"/> eliminado<br><input type="radio"/> disminuido<br><input checked="" type="radio"/> igual<br><input type="radio"/> aumentado<br><input type="radio"/> no sabe                                      |
| cambio mante o margarina   | <input type="radio"/> eliminado<br><input type="radio"/> disminuido<br><input checked="" type="radio"/> igual<br><input type="radio"/> aumentado<br><input type="radio"/> no sabe                                      |
| cambio azúcar y dulces     | <input type="radio"/> eliminado<br><input type="radio"/> disminuido<br><input checked="" type="radio"/> igual<br><input type="radio"/> aumentado<br><input type="radio"/> no sabe                                      |
| cambio bebidas alcohólicas | <input checked="" type="radio"/> eliminado<br><input type="radio"/> disminuido<br><input type="radio"/> igual<br><input type="radio"/> aumentado<br><input type="radio"/> no sabe                                      |
| frecuencia comidas fritas  | <input type="radio"/> a diario<br><input type="radio"/> 5 a 6 veces semana<br><input type="radio"/> 2 a 4 veces semana<br><input checked="" type="radio"/> 1 vez semana<br><input type="radio"/> menos de 1 vez semana |
| carne                      | <input type="radio"/> no como<br><input type="radio"/> cruda<br><input type="radio"/> poco hecha<br><input checked="" type="radio"/> hecha<br><input type="radio"/> muy hecha                                          |
| grasa visible carne        | <input checked="" type="radio"/> quita toda<br><input type="radio"/> quita mayoría<br><input type="radio"/> quita un poco<br><input type="radio"/> no quita nada                                                       |



|                                |                                                                                                                                                                                                                                                          |
|--------------------------------|----------------------------------------------------------------------------------------------------------------------------------------------------------------------------------------------------------------------------------------------------------|
| cocina carne                   | <input type="radio"/> a la plancha<br><input type="radio"/> a la parrilla<br><input checked="" type="radio"/> asada<br><input type="radio"/> frita<br><input type="radio"/> guisada                                                                      |
| tostado quemado carne          | <input checked="" type="radio"/> nunca<br><input type="radio"/> 1 vez mes<br><input type="radio"/> 2 a 3 veces mes<br><input type="radio"/> 1 vez semana<br><input type="radio"/> 2 a 3 semanas                                                          |
| tostado quemado pescado        | <input checked="" type="radio"/> nunca<br><input type="radio"/> 1 vez mes<br><input type="radio"/> 2 a 3 veces mes<br><input type="radio"/> 1 vez semana<br><input type="radio"/> 2 a 3 semanas                                                          |
| socarrat paella                | <input checked="" type="radio"/> nunca<br><input type="radio"/> 1 vez mes<br><input type="radio"/> 2 a 3 veces mes<br><input type="radio"/> 1 vez semana<br><input type="radio"/> 2 a 3 semanas                                                          |
| grasa o aceite cocinar         | <input type="radio"/> mantequilla<br><input type="radio"/> margarina<br><input type="radio"/> aceite oliva<br><input checked="" type="radio"/> aceite oliva virgen extra<br><input type="radio"/> aceite vegetal<br><input type="radio"/> mezcla aceites |
| grasa aceite aliñar            | <input type="radio"/> mantequilla<br><input type="radio"/> margarina<br><input type="radio"/> aceite oliva<br><input checked="" type="radio"/> aceite oliva virgen extra<br><input type="radio"/> aceite vegetal<br><input type="radio"/> mezcla aceites |
| grasa aceite freir             | <input type="radio"/> mantequilla<br><input type="radio"/> margarina<br><input type="radio"/> aceite oliva<br><input type="radio"/> aceite oliva virgen extra<br><input checked="" type="radio"/> aceite vegetal<br><input type="radio"/> mezcla aceites |
| Ejercicio cuestionario         | <input checked="" type="radio"/> si<br><input type="radio"/> no                                                                                                                                                                                          |
| horas de sueño incluido siesta | [*DATA REMOVED*]                                                                                                                                                                                                                                         |
| minutos siesta                 | [*DATA REMOVED*]                                                                                                                                                                                                                                         |
| horas televisión semana        | [*DATA REMOVED*]                                                                                                                                                                                                                                         |

|                                        |                                                                                                                                                                                                                                                                                                                                                                           |
|----------------------------------------|---------------------------------------------------------------------------------------------------------------------------------------------------------------------------------------------------------------------------------------------------------------------------------------------------------------------------------------------------------------------------|
| actividad trabajo                      | <input checked="" type="radio"/> casi siempre sentado<br><input type="radio"/> sentado 50 por cien<br><input type="radio"/> casi siempre de pie, quieto<br><input type="radio"/> casi siempre levantado caminando y llevando pocas cosas<br><input type="radio"/> casi siempre levantado, caminando y llevado muchas cosas<br><input type="radio"/> trabajo manual pesado |
| tiempo caminar o bici al día           | <input type="radio"/> casi nunca<br><input type="radio"/> menos 20min día<br><input checked="" type="radio"/> 20 a 40 min día<br><input type="radio"/> 40 a 60 min día<br><input type="radio"/> 1h o 1h y media día<br><input type="radio"/> más de 1h y media al día                                                                                                     |
| tiempo tareas casa al día              | <input type="radio"/> menos de 1h día<br><input type="radio"/> 1 a 2h día<br><input checked="" type="radio"/> 3 a 4h día<br><input type="radio"/> 5 a 6h día<br><input type="radio"/> 7 a 8h día<br><input type="radio"/> más de 8h día                                                                                                                                   |
| tiempo libre televisión ordenador leer | <input type="radio"/> menos 1h día<br><input checked="" type="radio"/> 1h día<br><input type="radio"/> 2h día<br><input type="radio"/> 3h día<br><input type="radio"/> 4h día<br><input type="radio"/> 5 a 6h día<br><input type="radio"/> mas 6h día                                                                                                                     |
| tiempo libre ejercicio o deporte       | <input type="radio"/> menos 1h semana<br><input type="radio"/> 1h semana<br><input checked="" type="radio"/> 2h semana<br><input type="radio"/> 3h semana<br><input type="radio"/> 4 a 5h semana<br><input type="radio"/> mas 5h semana                                                                                                                                   |
| como se considera                      | <input type="radio"/> sedentaria<br><input checked="" type="radio"/> poco activa<br><input type="radio"/> moderadamente activa<br><input type="radio"/> bastante activa<br><input type="radio"/> muy activa<br><input type="radio"/> no sabe                                                                                                                              |
| FUR                                    | [*DATA REMOVED*]                                                                                                                                                                                                                                                                                                                                                          |
| Semanas gestación 2T                   | [*DATA REMOVED*]                                                                                                                                                                                                                                                                                                                                                          |
| Días gestación 2T                      | [*DATA REMOVED*]                                                                                                                                                                                                                                                                                                                                                          |
| DBP 2T                                 | [*DATA REMOVED*]                                                                                                                                                                                                                                                                                                                                                          |
| CC 2T                                  | [*DATA REMOVED*]                                                                                                                                                                                                                                                                                                                                                          |
| AC 2T                                  | [*DATA REMOVED*]                                                                                                                                                                                                                                                                                                                                                          |

|                                                   |                                                                                                                                                                                                 |
|---------------------------------------------------|-------------------------------------------------------------------------------------------------------------------------------------------------------------------------------------------------|
| LF 2T                                             | [*DATA REMOVED*]                                                                                                                                                                                |
| PFE 2T (Hadlock)                                  | [*DATA REMOVED*]                                                                                                                                                                                |
| Semanas gestación 3T                              | [*DATA REMOVED*]                                                                                                                                                                                |
| días 3T                                           | [*DATA REMOVED*]                                                                                                                                                                                |
| DBP 3T                                            | [*DATA REMOVED*]                                                                                                                                                                                |
| CC 3T                                             | [*DATA REMOVED*]                                                                                                                                                                                |
| AC 3T                                             | [*DATA REMOVED*]                                                                                                                                                                                |
| LF 3T                                             | [*DATA REMOVED*]                                                                                                                                                                                |
| PFE 3T (Hadlock)                                  | [*DATA REMOVED*]                                                                                                                                                                                |
| Semanas de gestación final                        | [*DATA REMOVED*]                                                                                                                                                                                |
| días gestación final                              | [*DATA REMOVED*]                                                                                                                                                                                |
| Localización placenta                             | <input type="radio"/> anterior<br><input type="radio"/> lateral derecha<br><input type="radio"/> lateral izquierda<br><input checked="" type="radio"/> posterior<br><input type="radio"/> fondo |
| Presentación longitudinal cefálica                | <input type="radio"/> no<br><input checked="" type="radio"/> si                                                                                                                                 |
| Dorso                                             | <input type="radio"/> izquierda anterior<br><input type="radio"/> izquierda posterior<br><input checked="" type="radio"/> derecha anterior<br><input type="radio"/> derecha posterior           |
| diámetro biparietal                               | [*DATA REMOVED*]                                                                                                                                                                                |
| Circunferencia craneal                            | [*DATA REMOVED*]                                                                                                                                                                                |
| Circunferencia abdominal                          | [*DATA REMOVED*]                                                                                                                                                                                |
| Longitud de femur                                 | [*DATA REMOVED*]                                                                                                                                                                                |
| tejido celular subcutáneo a nivel del muslo en mm | [*DATA REMOVED*]                                                                                                                                                                                |
| tejido celular subcutáneo en abdomen en mm        | [*DATA REMOVED*]                                                                                                                                                                                |
| Volumen del muslo en cm3                          | [*DATA REMOVED*]                                                                                                                                                                                |
| Peso fetal estimado según fórmula de Hadlock      | [*DATA REMOVED*]                                                                                                                                                                                |

|                                               |                                                                                                                                                          |
|-----------------------------------------------|----------------------------------------------------------------------------------------------------------------------------------------------------------|
| Percentil                                     | [*DATA REMOVED*]                                                                                                                                         |
| Peso fetal estimado según fórmula de Scioscia | <hr/>                                                                                                                                                    |
| Peso fetal estimado según fórmula de LEE      | <hr/>                                                                                                                                                    |
| Tipo de parto                                 | <input checked="" type="radio"/> eutocico<br><input type="radio"/> instrumentado/ventosa<br><input type="radio"/> cesarea                                |
| fecha de nacimiento                           | [*DATA REMOVED*]                                                                                                                                         |
| Días entre exploración y nacimiento           | [*DATA REMOVED*]                                                                                                                                         |
| Peso RN en g                                  | [*DATA REMOVED*]                                                                                                                                         |
| sexo                                          | <input checked="" type="radio"/> mujer<br><input type="radio"/> hombre                                                                                   |
| Apgar 1 minuto                                | [*DATA REMOVED*]                                                                                                                                         |
| Apgar 5 minutos                               | [*DATA REMOVED*]                                                                                                                                         |
| Apgar 10 minutos                              | <hr/>                                                                                                                                                    |
| antecedente Covid durante gestación           | <input type="radio"/> Yes<br><input checked="" type="radio"/> No                                                                                         |
| Nivel de estudios                             | <input type="radio"/> ninguno<br><input type="radio"/> primarios<br><input type="radio"/> secundarios<br><input checked="" type="radio"/> universitarios |

## Base\_datos\_estimacion\_peso\_fetal

|                                       |                                                                                                                                                                                                                                                                                      |
|---------------------------------------|--------------------------------------------------------------------------------------------------------------------------------------------------------------------------------------------------------------------------------------------------------------------------------------|
| Número de identificación participante | 160                                                                                                                                                                                                                                                                                  |
| CODIGO PARTICIPANTE                   |                                                                                                                                                                                                                                                                                      |
| Edad                                  | [*DATA REMOVED*]                                                                                                                                                                                                                                                                     |
| Gestaciones                           | <input type="radio"/> 1<br><input type="radio"/> 2<br><input checked="" type="radio"/> 3<br><input type="radio"/> mas de 3                                                                                                                                                           |
| partos                                | <input type="radio"/> 0<br><input checked="" type="radio"/> 1<br><input type="radio"/> 2<br><input type="radio"/> 3<br><input type="radio"/> mas de 3                                                                                                                                |
| cesáreas                              | <input checked="" type="radio"/> 0<br><input type="radio"/> 1<br><input type="radio"/> 2<br><input type="radio"/> 3<br><input type="radio"/> mas de 3                                                                                                                                |
| Abortos                               | <input type="radio"/> 0<br><input checked="" type="radio"/> 1<br><input type="radio"/> 2<br><input type="radio"/> 3<br><input type="radio"/> mas de 3                                                                                                                                |
| Tipo de gestacion                     | <input checked="" type="radio"/> espontanea<br><input type="radio"/> IAC inseminación artificial conyuge<br><input type="radio"/> IAD inseminación artificial donante<br><input type="radio"/> FIV Fecundación in Vitro<br><input type="radio"/> Ovodon FIV con donación de ovocitos |
| peso previo a embarazo                | [*DATA REMOVED*]                                                                                                                                                                                                                                                                     |
| Ganancia ponderal embarazo            | [*DATA REMOVED*]                                                                                                                                                                                                                                                                     |
| Talla madre                           | [*DATA REMOVED*]                                                                                                                                                                                                                                                                     |
| IMC previo embarazo                   | 22.20633068613798                                                                                                                                                                                                                                                                    |
| Patología obstétrica                  | <input checked="" type="radio"/> no<br><input type="radio"/> si                                                                                                                                                                                                                      |
| Diabetes pregestacional               | <input checked="" type="radio"/> no<br><input type="radio"/> si                                                                                                                                                                                                                      |
| Diabetes gestacional                  | <input checked="" type="radio"/> no<br><input type="radio"/> si                                                                                                                                                                                                                      |

|                                            |                                                                                                                                                                                      |
|--------------------------------------------|--------------------------------------------------------------------------------------------------------------------------------------------------------------------------------------|
| Diabetes gestacional con insulina          | <input checked="" type="radio"/> no<br><input type="radio"/> si                                                                                                                      |
| Diabetes gestacional con dieta y ejercicio | <input checked="" type="radio"/> no<br><input type="radio"/> si                                                                                                                      |
| Percentil fetos previos                    | <input type="radio"/> Nada<br><input checked="" type="radio"/> percentil menor de 10<br><input type="radio"/> percentil entre 10 y 90<br><input type="radio"/> percentil mayor de 90 |
| Exfumadora                                 | <input type="radio"/> Nada<br><input checked="" type="radio"/> menos de 5 años<br><input type="radio"/> 5 a 10 años<br><input type="radio"/> mayor o igual a 10 años                 |
| Hábito tabáquico                           | <input checked="" type="radio"/> no<br><input type="radio"/> si                                                                                                                      |
| fumadora                                   | [*DATA REMOVED*]                                                                                                                                                                     |
| Consumo otros tóxicos                      | <input checked="" type="radio"/> no<br><input type="radio"/> si                                                                                                                      |
| Hb 1T                                      | _____                                                                                                                                                                                |
| Htc 1T                                     | _____                                                                                                                                                                                |
| Hb 2T                                      | [*DATA REMOVED*]                                                                                                                                                                     |
| HTC 2T                                     | [*DATA REMOVED*]                                                                                                                                                                     |
| Hb 3T                                      | [*DATA REMOVED*]                                                                                                                                                                     |
| HTC 3T                                     | [*DATA REMOVED*]                                                                                                                                                                     |
| Suplemento FE oral                         | <input checked="" type="radio"/> si<br><input type="radio"/> no                                                                                                                      |
| Suplemento fe iv                           | <input type="radio"/> si<br><input checked="" type="radio"/> no                                                                                                                      |
| Transfusión                                | <input checked="" type="radio"/> no<br><input type="radio"/> si                                                                                                                      |
| Solicitada Vit D                           | <input checked="" type="radio"/> no<br><input type="radio"/> si                                                                                                                      |
| Deficit vit D                              | <input type="radio"/> no<br><input type="radio"/> si                                                                                                                                 |

|                       |                                                                                                                                                                                                                                                                                                                                                                                                              |
|-----------------------|--------------------------------------------------------------------------------------------------------------------------------------------------------------------------------------------------------------------------------------------------------------------------------------------------------------------------------------------------------------------------------------------------------------|
| Suplemento vit D      | <input type="radio"/> si<br><input type="radio"/> no                                                                                                                                                                                                                                                                                                                                                         |
| Dieta, cuestionario   | <input type="radio"/> si<br><input checked="" type="radio"/> no                                                                                                                                                                                                                                                                                                                                              |
| Leche entera          | <input checked="" type="radio"/> Nunca o menos 1 vez al mes<br><input type="radio"/> 1 a 3 veces mes<br><input type="radio"/> 1 vez semana<br><input type="radio"/> 2 a 4 veces semana<br><input type="radio"/> 5 a 6 veces semana<br><input type="radio"/> 1 vez al día<br><input type="radio"/> 2 a 3 veces al día<br><input type="radio"/> 5 a 6 veces al día<br><input type="radio"/> más 6 veces al día |
| Leche semidesnatada   | <input type="radio"/> Nunca o menos 1 vez al mes<br><input type="radio"/> 1 a 3 veces mes<br><input type="radio"/> 1 vez semana<br><input type="radio"/> 2 a 4 veces semana<br><input type="radio"/> 5 a 6 veces semana<br><input checked="" type="radio"/> 1 vez al día<br><input type="radio"/> 2 a 3 veces al día<br><input type="radio"/> 5 a 6 veces al día<br><input type="radio"/> mas 6 veces al día |
| Leche desnatada       | <input checked="" type="radio"/> Nunca o menos 1 vez al mes<br><input type="radio"/> 1 a 3 veces mes<br><input type="radio"/> 1 vez semana<br><input type="radio"/> 2 a 4 veces semana<br><input type="radio"/> 5 a 6 veces semana<br><input type="radio"/> 1 vez al día<br><input type="radio"/> 2 a 3 veces al día<br><input type="radio"/> 5 a 6 veces al día<br><input type="radio"/> más 6 veces al día |
| Leche condensada      | <input checked="" type="radio"/> Nunca o menos 1 vez al mes<br><input type="radio"/> 1 a 3 veces mes<br><input type="radio"/> 1 vez semana<br><input type="radio"/> 2 a 4 veces semana<br><input type="radio"/> 5 a 6 veces semana<br><input type="radio"/> 1 vez al día<br><input type="radio"/> 2 a 3 veces al día<br><input type="radio"/> 5 a 6 veces al día<br><input type="radio"/> más 6 veces al día |
| nata o crema de leche | <input type="radio"/> Nunca o menos 1 vez al mes<br><input checked="" type="radio"/> 1 a 3 veces mes<br><input type="radio"/> 1 vez semana<br><input type="radio"/> 2 a 4 veces semana<br><input type="radio"/> 5 a 6 veces semana<br><input type="radio"/> 1 vez al día<br><input type="radio"/> 2 a 3 veces al día<br><input type="radio"/> 5 a 6 veces al día<br><input type="radio"/> más 6 veces al día |

|                                             |                                                                                                                                                                                                                                                                                                                                                                                                              |
|---------------------------------------------|--------------------------------------------------------------------------------------------------------------------------------------------------------------------------------------------------------------------------------------------------------------------------------------------------------------------------------------------------------------------------------------------------------------|
| Yogurt Entero                               | <input type="radio"/> Nunca o menos 1 vez al mes<br><input checked="" type="radio"/> 1 a 3 veces mes<br><input type="radio"/> 1 vez semana<br><input type="radio"/> 2 a 4 veces semana<br><input type="radio"/> 5 a 6 veces semana<br><input type="radio"/> 1 vez al día<br><input type="radio"/> 2 a 3 veces al día<br><input type="radio"/> 5 a 6 veces al día<br><input type="radio"/> más 6 veces al día |
| Yogurt desnatado                            | <input checked="" type="radio"/> Nunca o menos 1 vez al mes<br><input type="radio"/> 1 a 3 veces mes<br><input type="radio"/> 1 vez semana<br><input type="radio"/> 2 a 4 veces semana<br><input type="radio"/> 5 a 6 veces semana<br><input type="radio"/> 1 vez al día<br><input type="radio"/> 2 a 3 veces al día<br><input type="radio"/> 5 a 6 veces al día<br><input type="radio"/> más 6 veces al día |
| 100g requesón o queso blando o queso fresco | <input type="radio"/> Nunca o menos 1 vez al mes<br><input type="radio"/> 1 a 3 veces mes<br><input checked="" type="radio"/> 1 vez semana<br><input type="radio"/> 2 a 4 veces semana<br><input type="radio"/> 5 a 6 veces semana<br><input type="radio"/> 1 vez al día<br><input type="radio"/> 2 a 3 veces al día<br><input type="radio"/> 5 a 6 veces al día<br><input type="radio"/> más 6 veces al día |
| queso curado o semicurado o cremoso         | <input type="radio"/> Nunca o menos 1 vez al mes<br><input type="radio"/> 1 a 3 veces mes<br><input checked="" type="radio"/> 1 vez semana<br><input type="radio"/> 2 a 4 veces semana<br><input type="radio"/> 5 a 6 veces semana<br><input type="radio"/> 1 vez al día<br><input type="radio"/> 2 a 3 veces al día<br><input type="radio"/> 5 a 6 veces al día<br><input type="radio"/> más 6 veces al día |
| natillas flan pudding                       | <input type="radio"/> Nunca o menos 1 vez al mes<br><input type="radio"/> 1 a 3 veces mes<br><input type="radio"/> 1 vez semana<br><input checked="" type="radio"/> 2 a 4 veces semana<br><input type="radio"/> 5 a 6 veces semana<br><input type="radio"/> 1 vez al día<br><input type="radio"/> 2 a 3 veces al día<br><input type="radio"/> 5 a 6 veces al día<br><input type="radio"/> más 6 veces al día |
| Helado                                      | <input type="radio"/> Nunca o menos 1 vez al mes<br><input type="radio"/> 1 a 3 veces mes<br><input type="radio"/> 1 vez semana<br><input checked="" type="radio"/> 2 a 4 veces semana<br><input type="radio"/> 5 a 6 veces semana<br><input type="radio"/> 1 vez al día<br><input type="radio"/> 2 a 3 veces al día<br><input type="radio"/> 5 a 6 veces al día<br><input type="radio"/> más 6 veces al día |



|                                      |                                                                                                                                                                                                                                                                                                                                                                                                              |
|--------------------------------------|--------------------------------------------------------------------------------------------------------------------------------------------------------------------------------------------------------------------------------------------------------------------------------------------------------------------------------------------------------------------------------------------------------------|
| huevo                                | <input type="radio"/> Nunca o menos 1 vez al mes<br><input type="radio"/> 1 a 3 veces mes<br><input type="radio"/> 1 vez semana<br><input checked="" type="radio"/> 2 a 4 veces semana<br><input type="radio"/> 5 a 6 veces semana<br><input type="radio"/> 1 vez al día<br><input type="radio"/> 2 a 3 veces al día<br><input type="radio"/> 5 a 6 veces al día<br><input type="radio"/> más 6 veces al día |
| Pollo con piel                       | <input type="radio"/> Nunca o menos 1 vez al mes<br><input type="radio"/> 1 a 3 veces mes<br><input checked="" type="radio"/> 1 vez semana<br><input type="radio"/> 2 a 4 veces semana<br><input type="radio"/> 5 a 6 veces semana<br><input type="radio"/> 1 vez al día<br><input type="radio"/> 2 a 3 veces al día<br><input type="radio"/> 5 a 6 veces al día<br><input type="radio"/> más 6 veces al día |
| pollo sin piel                       | <input type="radio"/> Nunca o menos 1 vez al mes<br><input type="radio"/> 1 a 3 veces mes<br><input type="radio"/> 1 vez semana<br><input checked="" type="radio"/> 2 a 4 veces semana<br><input type="radio"/> 5 a 6 veces semana<br><input type="radio"/> 1 vez al día<br><input type="radio"/> 2 a 3 veces al día<br><input type="radio"/> 5 a 6 veces al día<br><input type="radio"/> más 6 veces al día |
| Ternera o cerdo o cordero            | <input type="radio"/> Nunca o menos 1 vez al mes<br><input type="radio"/> 1 a 3 veces mes<br><input checked="" type="radio"/> 1 vez semana<br><input type="radio"/> 2 a 4 veces semana<br><input type="radio"/> 5 a 6 veces semana<br><input type="radio"/> 1 vez al día<br><input type="radio"/> 2 a 3 veces al día<br><input type="radio"/> 5 a 6 veces al día<br><input type="radio"/> más 6 veces al día |
| carne caza: Conejo o codorniz o pato | <input type="radio"/> Nunca o menos 1 vez al mes<br><input checked="" type="radio"/> 1 a 3 veces mes<br><input type="radio"/> 1 vez semana<br><input type="radio"/> 2 a 4 veces semana<br><input type="radio"/> 5 a 6 veces semana<br><input type="radio"/> 1 vez al día<br><input type="radio"/> 2 a 3 veces al día<br><input type="radio"/> 5 a 6 veces al día<br><input type="radio"/> más 6 veces al día |
| Hígado de ternera o cerdo o pollo    | <input checked="" type="radio"/> Nunca o menos 1 vez al mes<br><input type="radio"/> 1 a 3 veces mes<br><input type="radio"/> 1 vez semana<br><input type="radio"/> 2 a 4 veces semana<br><input type="radio"/> 5 a 6 veces semana<br><input type="radio"/> 1 vez al día<br><input type="radio"/> 2 a 3 veces al día<br><input type="radio"/> 5 a 6 veces al día<br><input type="radio"/> más 6 veces al día |

|                     |                                                                                                                                                                                                                                                                                                                                                                                                              |
|---------------------|--------------------------------------------------------------------------------------------------------------------------------------------------------------------------------------------------------------------------------------------------------------------------------------------------------------------------------------------------------------------------------------------------------------|
| Vísceras            | <input checked="" type="radio"/> Nunca o menos 1 vez al mes<br><input type="radio"/> 1 a 3 veces mes<br><input type="radio"/> 1 vez semana<br><input type="radio"/> 2 a 4 veces semana<br><input type="radio"/> 5 a 6 veces semana<br><input type="radio"/> 1 vez al día<br><input type="radio"/> 2 a 3 veces al día<br><input type="radio"/> 5 a 6 veces al día<br><input type="radio"/> más 6 veces al día |
| Embutido            | <input type="radio"/> Nunca o menos 1 vez al mes<br><input checked="" type="radio"/> 1 a 3 veces mes<br><input type="radio"/> 1 vez semana<br><input type="radio"/> 2 a 4 veces semana<br><input type="radio"/> 5 a 6 veces semana<br><input type="radio"/> 1 vez al día<br><input type="radio"/> 2 a 3 veces al día<br><input type="radio"/> 5 a 6 veces al día<br><input type="radio"/> más 6 veces al día |
| Salchicha o similar | <input type="radio"/> Nunca o menos 1 vez al mes<br><input type="radio"/> 1 a 3 veces mes<br><input checked="" type="radio"/> 1 vez semana<br><input type="radio"/> 2 a 4 veces semana<br><input type="radio"/> 5 a 6 veces semana<br><input type="radio"/> 1 vez al día<br><input type="radio"/> 2 a 3 veces al día<br><input type="radio"/> 5 a 6 veces al día<br><input type="radio"/> más 6 veces al día |
| Pate o foiegras     | <input type="radio"/> Nunca o menos 1 vez al mes<br><input checked="" type="radio"/> 1 a 3 veces mes<br><input type="radio"/> 1 vez semana<br><input type="radio"/> 2 a 4 veces semana<br><input type="radio"/> 5 a 6 veces semana<br><input type="radio"/> 1 vez al día<br><input type="radio"/> 2 a 3 veces al día<br><input type="radio"/> 5 a 6 veces al día<br><input type="radio"/> más 6 veces al día |
| Hamburguesa         | <input type="radio"/> Nunca o menos 1 vez al mes<br><input type="radio"/> 1 a 3 veces mes<br><input checked="" type="radio"/> 1 vez semana<br><input type="radio"/> 2 a 4 veces semana<br><input type="radio"/> 5 a 6 veces semana<br><input type="radio"/> 1 vez al día<br><input type="radio"/> 2 a 3 veces al día<br><input type="radio"/> 5 a 6 veces al día<br><input type="radio"/> más 6 veces al día |
| tocino o bacon      | <input type="radio"/> Nunca o menos 1 vez al mes<br><input type="radio"/> 1 a 3 veces mes<br><input checked="" type="radio"/> 1 vez semana<br><input type="radio"/> 2 a 4 veces semana<br><input type="radio"/> 5 a 6 veces semana<br><input type="radio"/> 1 vez al día<br><input type="radio"/> 2 a 3 veces al día<br><input type="radio"/> 5 a 6 veces al día<br><input type="radio"/> más 6 veces al día |

---

Pescado frito

- ☐ Nunca o menos 1 vez al mes
- ☐ 1 a 3 veces mes
- ☒ 1 vez semana
- ☐ 2 a 4 veces semana
- ☐ 5 a 6 veces semana
- ☐ 1 vez al día
- ☐ 2 a 3 veces al día
- ☐ 5 a 6 veces al día
- ☐ más 6 veces al día

---

pescado hervido blanco

- ☐ Nunca o menos 1 vez al mes
- ☒ 1 a 3 veces mes
- ☐ 1 vez semana
- ☐ 2 a 4 veces semana
- ☐ 5 a 6 veces semana
- ☐ 1 vez al día
- ☐ 2 a 3 veces al día
- ☐ 5 a 6 veces al día
- ☐ más 6 veces al día

---

pescado hervido azul

- ☒ Nunca o menos 1 vez al mes
- ☐ 1 a 3 veces mes
- ☐ 1 vez semana
- ☐ 2 a 4 veces semana
- ☐ 5 a 6 veces semana
- ☐ 1 vez al día
- ☐ 2 a 3 veces al día
- ☐ 5 a 6 veces al día
- ☐ más 6 veces al día

---

otros pescado azul

- ☐ Nunca o menos 1 vez al mes
- ☐ 1 a 3 veces mes
- ☐ 1 vez semana
- ☒ 2 a 4 veces semana
- ☐ 5 a 6 veces semana
- ☐ 1 vez al día
- ☐ 2 a 3 veces al día
- ☐ 5 a 6 veces al día
- ☐ más 6 veces al día

---

atun conserva

- ☐ Nunca o menos 1 vez al mes
- ☐ 1 a 3 veces mes
- ☒ 1 vez semana
- ☐ 2 a 4 veces semana
- ☐ 5 a 6 veces semana
- ☐ 1 vez al día
- ☐ 2 a 3 veces al día
- ☐ 5 a 6 veces al día
- ☐ más 6 veces al día

---

sardina conserva

- ☒ Nunca o menos 1 vez al mes
- ☐ 1 a 3 veces mes
- ☐ 1 vez semana
- ☐ 2 a 4 veces semana
- ☐ 5 a 6 veces semana
- ☐ 1 vez al día
- ☐ 2 a 3 veces al día
- ☐ 5 a 6 veces al día
- ☐ más 6 veces al día

|                                         |                                                                                                                                                                                                                                                                                                                                                                                                              |
|-----------------------------------------|--------------------------------------------------------------------------------------------------------------------------------------------------------------------------------------------------------------------------------------------------------------------------------------------------------------------------------------------------------------------------------------------------------------|
| pescado ahumado                         | <input checked="" type="radio"/> Nunca o menos 1 vez al mes<br><input type="radio"/> 1 a 3 veces mes<br><input type="radio"/> 1 vez semana<br><input type="radio"/> 2 a 4 veces semana<br><input type="radio"/> 5 a 6 veces semana<br><input type="radio"/> 1 vez al día<br><input type="radio"/> 2 a 3 veces al día<br><input type="radio"/> 5 a 6 veces al día<br><input type="radio"/> más 6 veces al día |
| almejas o mejillones o ostras unos 100g | <input type="radio"/> Nunca o menos 1 vez al mes<br><input type="radio"/> 1 a 3 veces mes<br><input type="radio"/> 1 vez semana<br><input checked="" type="radio"/> 2 a 4 veces semana<br><input type="radio"/> 5 a 6 veces semana<br><input type="radio"/> 1 vez al día<br><input type="radio"/> 2 a 3 veces al día<br><input type="radio"/> 5 a 6 veces al día<br><input type="radio"/> más 6 veces al día |
| calamar o chipiron o sepia unos 100g    | <input type="radio"/> Nunca o menos 1 vez al mes<br><input type="radio"/> 1 a 3 veces mes<br><input type="radio"/> 1 vez semana<br><input checked="" type="radio"/> 2 a 4 veces semana<br><input type="radio"/> 5 a 6 veces semana<br><input type="radio"/> 1 vez al día<br><input type="radio"/> 2 a 3 veces al día<br><input type="radio"/> 5 a 6 veces al día<br><input type="radio"/> más 6 veces al día |
| marisco unos 100g                       | <input type="radio"/> Nunca o menos 1 vez al mes<br><input type="radio"/> 1 a 3 veces mes<br><input checked="" type="radio"/> 1 vez semana<br><input type="radio"/> 2 a 4 veces semana<br><input type="radio"/> 5 a 6 veces semana<br><input type="radio"/> 1 vez al día<br><input type="radio"/> 2 a 3 veces al día<br><input type="radio"/> 5 a 6 veces al día<br><input type="radio"/> más 6 veces al día |
| Espinacas o acelgas cocinadas           | <input type="radio"/> Nunca o menos 1 vez al mes<br><input checked="" type="radio"/> 1 a 3 veces mes<br><input type="radio"/> 1 vez semana<br><input type="radio"/> 2 a 4 veces semana<br><input type="radio"/> 5 a 6 veces semana<br><input type="radio"/> 1 vez al día<br><input type="radio"/> 2 a 3 veces al día<br><input type="radio"/> 5 a 6 veces al día<br><input type="radio"/> más 6 veces al día |
| Col o coliflor o brocoli cocinado       | <input type="radio"/> Nunca o menos 1 vez al mes<br><input checked="" type="radio"/> 1 a 3 veces mes<br><input type="radio"/> 1 vez semana<br><input type="radio"/> 2 a 4 veces semana<br><input type="radio"/> 5 a 6 veces semana<br><input type="radio"/> 1 vez al día<br><input type="radio"/> 2 a 3 veces al día<br><input type="radio"/> 5 a 6 veces al día<br><input type="radio"/> más 6 veces al día |

---

Lechuga o endivia o escarola

- ☐ Nunca o menos 1 vez al mes  
☐ 1 a 3 veces mes  
☐ 1 vez semana  
☒ 2 a 4 veces semana  
☐ 5 a 6 veces semana  
☐ 1 vez al día  
☐ 2 a 3 veces al día  
☐ 5 a 6 veces al día  
☐ más 6 veces al día

---

tomate ensalada

- ☐ Nunca o menos 1 vez al mes  
☐ 1 a 3 veces mes  
☐ 1 vez semana  
☐ 2 a 4 veces semana  
☐ 5 a 6 veces semana  
☒ 1 vez al día  
☐ 2 a 3 veces al día  
☐ 5 a 6 veces al día  
☐ más 6 veces al día

---

cebolla

- ☐ Nunca o menos 1 vez al mes  
☐ 1 a 3 veces mes  
☐ 1 vez semana  
☐ 2 a 4 veces semana  
☐ 5 a 6 veces semana  
☒ 1 vez al día  
☐ 2 a 3 veces al día  
☐ 5 a 6 veces al día  
☐ más 6 veces al día

---

Zanahoria o calabaza

- ☐ Nunca o menos 1 vez al mes  
☐ 1 a 3 veces mes  
☐ 1 vez semana  
☒ 2 a 4 veces semana  
☐ 5 a 6 veces semana  
☐ 1 vez al día  
☐ 2 a 3 veces al día  
☐ 5 a 6 veces al día  
☐ más 6 veces al día

---

Judías verdes

- ☐ Nunca o menos 1 vez al mes  
☐ 1 a 3 veces mes  
☒ 1 vez semana  
☐ 2 a 4 veces semana  
☐ 5 a 6 veces semana  
☐ 1 vez al día  
☐ 2 a 3 veces al día  
☐ 5 a 6 veces al día  
☐ más 6 veces al día

---

Berenjena o calabacin o pepino

- ☐ Nunca o menos 1 vez al mes  
☐ 1 a 3 veces mes  
☐ 1 vez semana  
☐ 2 a 4 veces semana  
☒ 5 a 6 veces semana  
☐ 1 vez al día  
☐ 2 a 3 veces al día  
☐ 5 a 6 veces al día  
☐ más 6 veces al día

---

|          |                                                                                                                                                                                                                                                                                                                                                                                                              |
|----------|--------------------------------------------------------------------------------------------------------------------------------------------------------------------------------------------------------------------------------------------------------------------------------------------------------------------------------------------------------------------------------------------------------------|
| pimiento | <input type="radio"/> Nunca o menos 1 vez al mes<br><input type="radio"/> 1 a 3 veces mes<br><input type="radio"/> 1 vez semana<br><input type="radio"/> 2 a 4 veces semana<br><input checked="" type="radio"/> 5 a 6 veces semana<br><input type="radio"/> 1 vez al día<br><input type="radio"/> 2 a 3 veces al día<br><input type="radio"/> 5 a 6 veces al día<br><input type="radio"/> más 6 veces al día |
|----------|--------------------------------------------------------------------------------------------------------------------------------------------------------------------------------------------------------------------------------------------------------------------------------------------------------------------------------------------------------------------------------------------------------------|

---

|           |                                                                                                                                                                                                                                                                                                                                                                                                              |
|-----------|--------------------------------------------------------------------------------------------------------------------------------------------------------------------------------------------------------------------------------------------------------------------------------------------------------------------------------------------------------------------------------------------------------------|
| alcachofa | <input checked="" type="radio"/> Nunca o menos 1 vez al mes<br><input type="radio"/> 1 a 3 veces mes<br><input type="radio"/> 1 vez semana<br><input type="radio"/> 2 a 4 veces semana<br><input type="radio"/> 5 a 6 veces semana<br><input type="radio"/> 1 vez al día<br><input type="radio"/> 2 a 3 veces al día<br><input type="radio"/> 5 a 6 veces al día<br><input type="radio"/> más 6 veces al día |
|-----------|--------------------------------------------------------------------------------------------------------------------------------------------------------------------------------------------------------------------------------------------------------------------------------------------------------------------------------------------------------------------------------------------------------------|

---

|            |                                                                                                                                                                                                                                                                                                                                                                                                              |
|------------|--------------------------------------------------------------------------------------------------------------------------------------------------------------------------------------------------------------------------------------------------------------------------------------------------------------------------------------------------------------------------------------------------------------|
| espárragos | <input type="radio"/> Nunca o menos 1 vez al mes<br><input type="radio"/> 1 a 3 veces mes<br><input checked="" type="radio"/> 1 vez semana<br><input type="radio"/> 2 a 4 veces semana<br><input type="radio"/> 5 a 6 veces semana<br><input type="radio"/> 1 vez al día<br><input type="radio"/> 2 a 3 veces al día<br><input type="radio"/> 5 a 6 veces al día<br><input type="radio"/> más 6 veces al día |
|------------|--------------------------------------------------------------------------------------------------------------------------------------------------------------------------------------------------------------------------------------------------------------------------------------------------------------------------------------------------------------------------------------------------------------|

---

|              |                                                                                                                                                                                                                                                                                                                                                                                                              |
|--------------|--------------------------------------------------------------------------------------------------------------------------------------------------------------------------------------------------------------------------------------------------------------------------------------------------------------------------------------------------------------------------------------------------------------|
| maíz hervido | <input type="radio"/> Nunca o menos 1 vez al mes<br><input type="radio"/> 1 a 3 veces mes<br><input checked="" type="radio"/> 1 vez semana<br><input type="radio"/> 2 a 4 veces semana<br><input type="radio"/> 5 a 6 veces semana<br><input type="radio"/> 1 vez al día<br><input type="radio"/> 2 a 3 veces al día<br><input type="radio"/> 5 a 6 veces al día<br><input type="radio"/> más 6 veces al día |
|--------------|--------------------------------------------------------------------------------------------------------------------------------------------------------------------------------------------------------------------------------------------------------------------------------------------------------------------------------------------------------------------------------------------------------------|

---

|           |                                                                                                                                                                                                                                                                                                                                                                                                              |
|-----------|--------------------------------------------------------------------------------------------------------------------------------------------------------------------------------------------------------------------------------------------------------------------------------------------------------------------------------------------------------------------------------------------------------------|
| legumbres | <input type="radio"/> Nunca o menos 1 vez al mes<br><input type="radio"/> 1 a 3 veces mes<br><input type="radio"/> 1 vez semana<br><input checked="" type="radio"/> 2 a 4 veces semana<br><input type="radio"/> 5 a 6 veces semana<br><input type="radio"/> 1 vez al día<br><input type="radio"/> 2 a 3 veces al día<br><input type="radio"/> 5 a 6 veces al día<br><input type="radio"/> más 6 veces al día |
|-----------|--------------------------------------------------------------------------------------------------------------------------------------------------------------------------------------------------------------------------------------------------------------------------------------------------------------------------------------------------------------------------------------------------------------|

---

|                       |                                                                                                                                                                                                                                                                                                                                                                                                              |
|-----------------------|--------------------------------------------------------------------------------------------------------------------------------------------------------------------------------------------------------------------------------------------------------------------------------------------------------------------------------------------------------------------------------------------------------------|
| naranjas o mandarinas | <input type="radio"/> Nunca o menos 1 vez al mes<br><input checked="" type="radio"/> 1 a 3 veces mes<br><input type="radio"/> 1 vez semana<br><input type="radio"/> 2 a 4 veces semana<br><input type="radio"/> 5 a 6 veces semana<br><input type="radio"/> 1 vez al día<br><input type="radio"/> 2 a 3 veces al día<br><input type="radio"/> 5 a 6 veces al día<br><input type="radio"/> más 6 veces al día |
|-----------------------|--------------------------------------------------------------------------------------------------------------------------------------------------------------------------------------------------------------------------------------------------------------------------------------------------------------------------------------------------------------------------------------------------------------|

---

---

zum natural fruta

- ☐ Nunca o menos 1 vez al mes  
☒ 1 a 3 veces mes  
☐ 1 vez semana  
☐ 2 a 4 veces semana  
☐ 5 a 6 veces semana  
☐ 1 vez al día  
☐ 2 a 3 veces al día  
☐ 5 a 6 veces al día  
☐ más 6 veces al día

---

platano

- ☐ Nunca o menos 1 vez al mes  
☐ 1 a 3 veces mes  
☒ 1 vez semana  
☐ 2 a 4 veces semana  
☐ 5 a 6 veces semana  
☐ 1 vez al día  
☐ 2 a 3 veces al día  
☐ 5 a 6 veces al día  
☐ más 6 veces al día

---

manzana o pera

- ☐ Nunca o menos 1 vez al mes  
☐ 1 a 3 veces mes  
☒ 1 vez semana  
☐ 2 a 4 veces semana  
☐ 5 a 6 veces semana  
☐ 1 vez al día  
☐ 2 a 3 veces al día  
☐ 5 a 6 veces al día  
☐ más 6 veces al día

---

melocotón o nectarina

- ☐ Nunca o menos 1 vez al mes  
☐ 1 a 3 veces mes  
☐ 1 vez semana  
☒ 2 a 4 veces semana  
☐ 5 a 6 veces semana  
☐ 1 vez al día  
☐ 2 a 3 veces al día  
☐ 5 a 6 veces al día  
☐ más 6 veces al día

---

sandia o melon

- ☐ Nunca o menos 1 vez al mes  
☐ 1 a 3 veces mes  
☐ 1 vez semana  
☐ 2 a 4 veces semana  
☐ 5 a 6 veces semana  
☒ 1 vez al día  
☐ 2 a 3 veces al día  
☐ 5 a 6 veces al día  
☐ más 6 veces al día

---

uva

- ☐ Nunca o menos 1 vez al mes  
☐ 1 a 3 veces mes  
☐ 1 vez semana  
☐ 2 a 4 veces semana  
☒ 5 a 6 veces semana  
☐ 1 vez al día  
☐ 2 a 3 veces al día  
☐ 5 a 6 veces al día  
☐ más 6 veces al día

---

bruna o ciruela

- ☐ Nunca o menos 1 vez al mes  
☐ 1 a 3 veces mes  
☐ 1 vez semana  
☐ 2 a 4 veces semana  
☒ 5 a 6 veces semana  
☐ 1 vez al día  
☐ 2 a 3 veces al día  
☐ 5 a 6 veces al día  
☐ más 6 veces al día

---

kiwi

- ☐ Nunca o menos 1 vez al mes  
☐ 1 a 3 veces mes  
☐ 1 vez semana  
☒ 2 a 4 veces semana  
☐ 5 a 6 veces semana  
☐ 1 vez al día  
☐ 2 a 3 veces al día  
☐ 5 a 6 veces al día  
☐ más 6 veces al día

---

aceituna

- ☐ Nunca o menos 1 vez al mes  
☐ 1 a 3 veces mes  
☐ 1 vez semana  
☒ 2 a 4 veces semana  
☐ 5 a 6 veces semana  
☐ 1 vez al día  
☐ 2 a 3 veces al día  
☐ 5 a 6 veces al día  
☐ más 6 veces al día

---

frutos secos

- ☐ Nunca o menos 1 vez al mes  
☐ 1 a 3 veces mes  
☐ 1 vez semana  
☒ 2 a 4 veces semana  
☐ 5 a 6 veces semana  
☐ 1 vez al día  
☐ 2 a 3 veces al día  
☐ 5 a 6 veces al día  
☐ más 6 veces al día

---

pan blanco

- ☐ Nunca o menos 1 vez al mes  
☐ 1 a 3 veces mes  
☐ 1 vez semana  
☐ 2 a 4 veces semana  
☐ 5 a 6 veces semana  
☒ 1 vez al día  
☐ 2 a 3 veces al día  
☐ 5 a 6 veces al día  
☐ más 6 veces al día

---

pan integral

- ☒ Nunca o menos 1 vez al mes  
☐ 1 a 3 veces mes  
☐ 1 vez semana  
☐ 2 a 4 veces semana  
☐ 5 a 6 veces semana  
☐ 1 vez al día  
☐ 2 a 3 veces al día  
☐ 5 a 6 veces al día  
☐ más 6 veces al día



---

cereales desayuno

- ☐ Nunca o menos 1 vez al mes  
☐ 1 a 3 veces mes  
☒ 1 vez semana  
☐ 2 a 4 veces semana  
☐ 5 a 6 veces semana  
☐ 1 vez al día  
☐ 2 a 3 veces al día  
☐ 5 a 6 veces al día  
☐ más 6 veces al día

---

patatas fritas

- ☐ Nunca o menos 1 vez al mes  
☐ 1 a 3 veces mes  
☒ 1 vez semana  
☐ 2 a 4 veces semana  
☐ 5 a 6 veces semana  
☐ 1 vez al día  
☐ 2 a 3 veces al día  
☐ 5 a 6 veces al día  
☐ más 6 veces al día

---

patatas cocidas o asadas

- ☐ Nunca o menos 1 vez al mes  
☐ 1 a 3 veces mes  
☒ 1 vez semana  
☐ 2 a 4 veces semana  
☐ 5 a 6 veces semana  
☐ 1 vez al día  
☐ 2 a 3 veces al día  
☐ 5 a 6 veces al día  
☐ más 6 veces al día

---

bolsa papas

- ☐ Nunca o menos 1 vez al mes  
☐ 1 a 3 veces mes  
☒ 1 vez semana  
☐ 2 a 4 veces semana  
☐ 5 a 6 veces semana  
☐ 1 vez al día  
☐ 2 a 3 veces al día  
☐ 5 a 6 veces al día  
☐ más 6 veces al día

---

arroz cocinado

- ☐ Nunca o menos 1 vez al mes  
☐ 1 a 3 veces mes  
☐ 1 vez semana  
☒ 2 a 4 veces semana  
☐ 5 a 6 veces semana  
☐ 1 vez al día  
☐ 2 a 3 veces al día  
☐ 5 a 6 veces al día  
☐ más 6 veces al día

---

pasta

- ☐ Nunca o menos 1 vez al mes  
☐ 1 a 3 veces mes  
☐ 1 vez semana  
☒ 2 a 4 veces semana  
☐ 5 a 6 veces semana  
☐ 1 vez al día  
☐ 2 a 3 veces al día  
☐ 5 a 6 veces al día  
☐ más 6 veces al día

|                     |                                                                                                                                                                                                                                                                                                                                                                                                              |
|---------------------|--------------------------------------------------------------------------------------------------------------------------------------------------------------------------------------------------------------------------------------------------------------------------------------------------------------------------------------------------------------------------------------------------------------|
| pizza               | <input type="radio"/> Nunca o menos 1 vez al mes<br><input type="radio"/> 1 a 3 veces mes<br><input checked="" type="radio"/> 1 vez semana<br><input type="radio"/> 2 a 4 veces semana<br><input type="radio"/> 5 a 6 veces semana<br><input type="radio"/> 1 vez al día<br><input type="radio"/> 2 a 3 veces al día<br><input type="radio"/> 5 a 6 veces al día<br><input type="radio"/> más 6 veces al día |
| aceite oliva        | <input type="radio"/> Nunca o menos 1 vez al mes<br><input type="radio"/> 1 a 3 veces mes<br><input type="radio"/> 1 vez semana<br><input type="radio"/> 2 a 4 veces semana<br><input type="radio"/> 5 a 6 veces semana<br><input checked="" type="radio"/> 1 vez al día<br><input type="radio"/> 2 a 3 veces al día<br><input type="radio"/> 5 a 6 veces al día<br><input type="radio"/> más 6 veces al día |
| otros aceites       | <input checked="" type="radio"/> Nunca o menos 1 vez al mes<br><input type="radio"/> 1 a 3 veces mes<br><input type="radio"/> 1 vez semana<br><input type="radio"/> 2 a 4 veces semana<br><input type="radio"/> 5 a 6 veces semana<br><input type="radio"/> 1 vez al día<br><input type="radio"/> 2 a 3 veces al día<br><input type="radio"/> 5 a 6 veces al día<br><input type="radio"/> más 6 veces al día |
| margarina           | <input checked="" type="radio"/> Nunca o menos 1 vez al mes<br><input type="radio"/> 1 a 3 veces mes<br><input type="radio"/> 1 vez semana<br><input type="radio"/> 2 a 4 veces semana<br><input type="radio"/> 5 a 6 veces semana<br><input type="radio"/> 1 vez al día<br><input type="radio"/> 2 a 3 veces al día<br><input type="radio"/> 5 a 6 veces al día<br><input type="radio"/> más 6 veces al día |
| mantequilla         | <input type="radio"/> Nunca o menos 1 vez al mes<br><input type="radio"/> 1 a 3 veces mes<br><input checked="" type="radio"/> 1 vez semana<br><input type="radio"/> 2 a 4 veces semana<br><input type="radio"/> 5 a 6 veces semana<br><input type="radio"/> 1 vez al día<br><input type="radio"/> 2 a 3 veces al día<br><input type="radio"/> 5 a 6 veces al día<br><input type="radio"/> más 6 veces al día |
| galletas tipo maria | <input checked="" type="radio"/> Nunca o menos 1 vez al mes<br><input type="radio"/> 1 a 3 veces mes<br><input type="radio"/> 1 vez semana<br><input type="radio"/> 2 a 4 veces semana<br><input type="radio"/> 5 a 6 veces semana<br><input type="radio"/> 1 vez al día<br><input type="radio"/> 2 a 3 veces al día<br><input type="radio"/> 5 a 6 veces al día<br><input type="radio"/> más 6 veces al día |

---

galletas chocolate

- ☒ Nunca o menos 1 vez al mes  
☐ 1 a 3 veces mes  
☐ 1 vez semana  
☐ 2 a 4 veces semana  
☐ 5 a 6 veces semana  
☐ 1 vez al día  
☐ 2 a 3 veces al día  
☐ 5 a 6 veces al día  
☐ más 6 veces al día

---

bolleria

- ☐ Nunca o menos 1 vez al mes  
☐ 1 a 3 veces mes  
☒ 1 vez semana  
☐ 2 a 4 veces semana  
☐ 5 a 6 veces semana  
☐ 1 vez al día  
☐ 2 a 3 veces al día  
☐ 5 a 6 veces al día  
☐ más 6 veces al día

---

chocolate o bombones

- ☐ Nunca o menos 1 vez al mes  
☐ 1 a 3 veces mes  
☐ 1 vez semana  
☒ 2 a 4 veces semana  
☐ 5 a 6 veces semana  
☐ 1 vez al día  
☐ 2 a 3 veces al día  
☐ 5 a 6 veces al día  
☐ más 6 veces al día

---

chocolate polvo o colacao

- ☐ Nunca o menos 1 vez al mes  
☐ 1 a 3 veces mes  
☒ 1 vez semana  
☐ 2 a 4 veces semana  
☐ 5 a 6 veces semana  
☐ 1 vez al día  
☐ 2 a 3 veces al día  
☐ 5 a 6 veces al día  
☐ más 6 veces al día

---

vino tinto

- ☒ Nunca o menos 1 vez al mes  
☐ 1 a 3 veces mes  
☐ 1 vez semana  
☐ 2 a 4 veces semana  
☐ 5 a 6 veces semana  
☐ 1 vez al día  
☐ 2 a 3 veces al día  
☐ 5 a 6 veces al día  
☐ más 6 veces al día

---

vino blanco

- ☒ Nunca o menos 1 vez al mes  
☐ 1 a 3 veces mes  
☐ 1 vez semana  
☐ 2 a 4 veces semana  
☐ 5 a 6 veces semana  
☐ 1 vez al día  
☐ 2 a 3 veces al día  
☐ 5 a 6 veces al día  
☐ más 6 veces al día

---

|                    |                                                                                                                                                                                                                                                                                                                                                                                                              |
|--------------------|--------------------------------------------------------------------------------------------------------------------------------------------------------------------------------------------------------------------------------------------------------------------------------------------------------------------------------------------------------------------------------------------------------------|
| vino seco o vermut | <input checked="" type="radio"/> Nunca o menos 1 vez al mes<br><input type="radio"/> 1 a 3 veces mes<br><input type="radio"/> 1 vez semana<br><input type="radio"/> 2 a 4 veces semana<br><input type="radio"/> 5 a 6 veces semana<br><input type="radio"/> 1 vez al día<br><input type="radio"/> 2 a 3 veces al día<br><input type="radio"/> 5 a 6 veces al día<br><input type="radio"/> más 6 veces al día |
|--------------------|--------------------------------------------------------------------------------------------------------------------------------------------------------------------------------------------------------------------------------------------------------------------------------------------------------------------------------------------------------------------------------------------------------------|

---

|         |                                                                                                                                                                                                                                                                                                                                                                                                              |
|---------|--------------------------------------------------------------------------------------------------------------------------------------------------------------------------------------------------------------------------------------------------------------------------------------------------------------------------------------------------------------------------------------------------------------|
| cerveza | <input checked="" type="radio"/> Nunca o menos 1 vez al mes<br><input type="radio"/> 1 a 3 veces mes<br><input type="radio"/> 1 vez semana<br><input type="radio"/> 2 a 4 veces semana<br><input type="radio"/> 5 a 6 veces semana<br><input type="radio"/> 1 vez al día<br><input type="radio"/> 2 a 3 veces al día<br><input type="radio"/> 5 a 6 veces al día<br><input type="radio"/> más 6 veces al día |
|---------|--------------------------------------------------------------------------------------------------------------------------------------------------------------------------------------------------------------------------------------------------------------------------------------------------------------------------------------------------------------------------------------------------------------|

---

|                     |                                                                                                                                                                                                                                                                                                                                                                                                              |
|---------------------|--------------------------------------------------------------------------------------------------------------------------------------------------------------------------------------------------------------------------------------------------------------------------------------------------------------------------------------------------------------------------------------------------------------|
| cerveza sin alcohol | <input type="radio"/> Nunca o menos 1 vez al mes<br><input type="radio"/> 1 a 3 veces mes<br><input checked="" type="radio"/> 1 vez semana<br><input type="radio"/> 2 a 4 veces semana<br><input type="radio"/> 5 a 6 veces semana<br><input type="radio"/> 1 vez al día<br><input type="radio"/> 2 a 3 veces al día<br><input type="radio"/> 5 a 6 veces al día<br><input type="radio"/> más 6 veces al día |
|---------------------|--------------------------------------------------------------------------------------------------------------------------------------------------------------------------------------------------------------------------------------------------------------------------------------------------------------------------------------------------------------------------------------------------------------|

---

|         |                                                                                                                                                                                                                                                                                                                                                                                                              |
|---------|--------------------------------------------------------------------------------------------------------------------------------------------------------------------------------------------------------------------------------------------------------------------------------------------------------------------------------------------------------------------------------------------------------------|
| licores | <input checked="" type="radio"/> Nunca o menos 1 vez al mes<br><input type="radio"/> 1 a 3 veces mes<br><input type="radio"/> 1 vez semana<br><input type="radio"/> 2 a 4 veces semana<br><input type="radio"/> 5 a 6 veces semana<br><input type="radio"/> 1 vez al día<br><input type="radio"/> 2 a 3 veces al día<br><input type="radio"/> 5 a 6 veces al día<br><input type="radio"/> más 6 veces al día |
|---------|--------------------------------------------------------------------------------------------------------------------------------------------------------------------------------------------------------------------------------------------------------------------------------------------------------------------------------------------------------------------------------------------------------------|

---

|                       |                                                                                                                                                                                                                                                                                                                                                                                                              |
|-----------------------|--------------------------------------------------------------------------------------------------------------------------------------------------------------------------------------------------------------------------------------------------------------------------------------------------------------------------------------------------------------------------------------------------------------|
| ginebra o ron o vodka | <input checked="" type="radio"/> Nunca o menos 1 vez al mes<br><input type="radio"/> 1 a 3 veces mes<br><input type="radio"/> 1 vez semana<br><input type="radio"/> 2 a 4 veces semana<br><input type="radio"/> 5 a 6 veces semana<br><input type="radio"/> 1 vez al día<br><input type="radio"/> 2 a 3 veces al día<br><input type="radio"/> 5 a 6 veces al día<br><input type="radio"/> más 6 veces al día |
|-----------------------|--------------------------------------------------------------------------------------------------------------------------------------------------------------------------------------------------------------------------------------------------------------------------------------------------------------------------------------------------------------------------------------------------------------|

---

|                 |                                                                                                                                                                                                                                                                                                                                                                                                              |
|-----------------|--------------------------------------------------------------------------------------------------------------------------------------------------------------------------------------------------------------------------------------------------------------------------------------------------------------------------------------------------------------------------------------------------------------|
| refresco normal | <input checked="" type="radio"/> Nunca o menos 1 vez al mes<br><input type="radio"/> 1 a 3 veces mes<br><input type="radio"/> 1 vez semana<br><input type="radio"/> 2 a 4 veces semana<br><input type="radio"/> 5 a 6 veces semana<br><input type="radio"/> 1 vez al día<br><input type="radio"/> 2 a 3 veces al día<br><input type="radio"/> 5 a 6 veces al día<br><input type="radio"/> más 6 veces al día |
|-----------------|--------------------------------------------------------------------------------------------------------------------------------------------------------------------------------------------------------------------------------------------------------------------------------------------------------------------------------------------------------------------------------------------------------------|

---

---

refresco sin azúcar

- ☒ Nunca o menos 1 vez al mes  
☐ 1 a 3 veces mes  
☐ 1 vez semana  
☐ 2 a 4 veces semana  
☐ 5 a 6 veces semana  
☐ 1 vez al día  
☐ 2 a 3 veces al día  
☐ 5 a 6 veces al día  
☐ más 6 veces al día

---

Agua del grifo

- ☒ Nunca o menos 1 vez al mes  
☐ 1 a 3 veces mes  
☐ 1 vez semana  
☐ 2 a 4 veces semana  
☐ 5 a 6 veces semana  
☐ 1 vez al día  
☐ 2 a 3 veces al día  
☐ 5 a 6 veces al día  
☐ más 6 veces al día

---

agua embotellada sin gas

- ☐ Nunca o menos 1 vez al mes  
☐ 1 a 3 veces mes  
☐ 1 vez semana  
☐ 2 a 4 veces semana  
☐ 5 a 6 veces semana  
☐ 1 vez al día  
☐ 2 a 3 veces al día  
☐ 5 a 6 veces al día  
☒ más 6 veces al día

---

agua embotellada con gas

- ☒ Nunca o menos 1 vez al mes  
☐ 1 a 3 veces mes  
☐ 1 vez semana  
☐ 2 a 4 veces semana  
☐ 5 a 6 veces semana  
☐ 1 vez al día  
☐ 2 a 3 veces al día  
☐ 5 a 6 veces al día  
☐ más 6 veces al día

---

zumو frutas embasado

- ☐ Nunca o menos 1 vez al mes  
☐ 1 a 3 veces mes  
☒ 1 vez semana  
☐ 2 a 4 veces semana  
☐ 5 a 6 veces semana  
☐ 1 vez al día  
☐ 2 a 3 veces al día  
☐ 5 a 6 veces al día  
☐ más 6 veces al día

---

cafe

- ☐ Nunca o menos 1 vez al mes  
☐ 1 a 3 veces mes  
☐ 1 vez semana  
☐ 2 a 4 veces semana  
☐ 5 a 6 veces semana  
☒ 1 vez al día  
☐ 2 a 3 veces al día  
☐ 5 a 6 veces al día  
☐ más 6 veces al día

---

cafe descafeinado

- ☐ Nunca o menos 1 vez al mes  
☐ 1 a 3 veces mes  
☐ 1 vez semana  
☐ 2 a 4 veces semana  
☐ 5 a 6 veces semana  
☒ 1 vez al día  
☐ 2 a 3 veces al día  
☐ 5 a 6 veces al día  
☐ más 6 veces al día

---

te o infusión

- ☒ Nunca o menos 1 vez al mes  
☐ 1 a 3 veces mes  
☐ 1 vez semana  
☐ 2 a 4 veces semana  
☐ 5 a 6 veces semana  
☐ 1 vez al día  
☐ 2 a 3 veces al día  
☐ 5 a 6 veces al día  
☐ más 6 veces al día

---

sopa o puré verduras

- ☐ Nunca o menos 1 vez al mes  
☐ 1 a 3 veces mes  
☐ 1 vez semana  
☒ 2 a 4 veces semana  
☐ 5 a 6 veces semana  
☐ 1 vez al día  
☐ 2 a 3 veces al día  
☐ 5 a 6 veces al día  
☐ más 6 veces al día

---

croquetas pollo jamón

- ☐ Nunca o menos 1 vez al mes  
☐ 1 a 3 veces mes  
☐ 1 vez semana  
☒ 2 a 4 veces semana  
☐ 5 a 6 veces semana  
☐ 1 vez al día  
☐ 2 a 3 veces al día  
☐ 5 a 6 veces al día  
☐ más 6 veces al día

---

croquetas pescado

- ☐ Nunca o menos 1 vez al mes  
☐ 1 a 3 veces mes  
☐ 1 vez semana  
☒ 2 a 4 veces semana  
☐ 5 a 6 veces semana  
☐ 1 vez al día  
☐ 2 a 3 veces al día  
☐ 5 a 6 veces al día  
☐ más 6 veces al día

---

mayonesa

- ☐ Nunca o menos 1 vez al mes  
☐ 1 a 3 veces mes  
☐ 1 vez semana  
☒ 2 a 4 veces semana  
☐ 5 a 6 veces semana  
☐ 1 vez al día  
☐ 2 a 3 veces al día  
☐ 5 a 6 veces al día  
☐ más 6 veces al día

|                  |                                                                                                                                                                                                                                                                                                                                                                                                              |
|------------------|--------------------------------------------------------------------------------------------------------------------------------------------------------------------------------------------------------------------------------------------------------------------------------------------------------------------------------------------------------------------------------------------------------------|
| salsa tomate     | <input type="radio"/> Nunca o menos 1 vez al mes<br><input type="radio"/> 1 a 3 veces mes<br><input type="radio"/> 1 vez semana<br><input checked="" type="radio"/> 2 a 4 veces semana<br><input type="radio"/> 5 a 6 veces semana<br><input type="radio"/> 1 vez al día<br><input type="radio"/> 2 a 3 veces al día<br><input type="radio"/> 5 a 6 veces al día<br><input type="radio"/> más 6 veces al día |
| ketchup          | <input type="radio"/> Nunca o menos 1 vez al mes<br><input type="radio"/> 1 a 3 veces mes<br><input checked="" type="radio"/> 1 vez semana<br><input type="radio"/> 2 a 4 veces semana<br><input type="radio"/> 5 a 6 veces semana<br><input type="radio"/> 1 vez al día<br><input type="radio"/> 2 a 3 veces al día<br><input type="radio"/> 5 a 6 veces al día<br><input type="radio"/> más 6 veces al día |
| sal              | <input type="radio"/> Nunca o menos 1 vez al mes<br><input type="radio"/> 1 a 3 veces mes<br><input type="radio"/> 1 vez semana<br><input type="radio"/> 2 a 4 veces semana<br><input type="radio"/> 5 a 6 veces semana<br><input checked="" type="radio"/> 1 vez al día<br><input type="radio"/> 2 a 3 veces al día<br><input type="radio"/> 5 a 6 veces al día<br><input type="radio"/> más 6 veces al día |
| ajo              | <input type="radio"/> Nunca o menos 1 vez al mes<br><input type="radio"/> 1 a 3 veces mes<br><input type="radio"/> 1 vez semana<br><input checked="" type="radio"/> 2 a 4 veces semana<br><input type="radio"/> 5 a 6 veces semana<br><input type="radio"/> 1 vez al día<br><input type="radio"/> 2 a 3 veces al día<br><input type="radio"/> 5 a 6 veces al día<br><input type="radio"/> más 6 veces al día |
| mermelada o miel | <input type="radio"/> Nunca o menos 1 vez al mes<br><input checked="" type="radio"/> 1 a 3 veces mes<br><input type="radio"/> 1 vez semana<br><input type="radio"/> 2 a 4 veces semana<br><input type="radio"/> 5 a 6 veces semana<br><input type="radio"/> 1 vez al día<br><input type="radio"/> 2 a 3 veces al día<br><input type="radio"/> 5 a 6 veces al día<br><input type="radio"/> más 6 veces al día |
| azúcar           | <input type="radio"/> Nunca o menos 1 vez al mes<br><input type="radio"/> 1 a 3 veces mes<br><input type="radio"/> 1 vez semana<br><input type="radio"/> 2 a 4 veces semana<br><input type="radio"/> 5 a 6 veces semana<br><input checked="" type="radio"/> 1 vez al día<br><input type="radio"/> 2 a 3 veces al día<br><input type="radio"/> 5 a 6 veces al día<br><input type="radio"/> más 6 veces al día |

|                                       |                                                                                                                                                                                                                                                                                                                                                                                                                                                                                                                               |
|---------------------------------------|-------------------------------------------------------------------------------------------------------------------------------------------------------------------------------------------------------------------------------------------------------------------------------------------------------------------------------------------------------------------------------------------------------------------------------------------------------------------------------------------------------------------------------|
| Otro alimento                         |                                                                                                                                                                                                                                                                                                                                                                                                                                                                                                                               |
| suplementos vitamínicos               | <input checked="" type="radio"/> si<br><input type="radio"/> no                                                                                                                                                                                                                                                                                                                                                                                                                                                               |
| suplementos vitamínicos               | [*DATA REMOVED*]                                                                                                                                                                                                                                                                                                                                                                                                                                                                                                              |
| dieta previa                          | <input type="radio"/> si<br><input checked="" type="radio"/> no                                                                                                                                                                                                                                                                                                                                                                                                                                                               |
| motivo dieta                          | <input checked="" type="radio"/> no dieta<br><input type="radio"/> control peso<br><input type="radio"/> control colesterol<br><input type="radio"/> control diabetes<br><input type="radio"/> problemas estómago<br><input type="radio"/> problemas vesícula o hepáticos<br><input type="radio"/> HTA o cardiopatía<br><input type="radio"/> problemas renales<br><input type="radio"/> alergia alimentaria<br><input type="radio"/> ácido úrico elevado<br><input type="radio"/> vegetariana<br><input type="radio"/> otros |
| cambio alimentos año previo gestación | <input checked="" type="radio"/> si<br><input type="radio"/> no                                                                                                                                                                                                                                                                                                                                                                                                                                                               |
| cambio lácteos                        | <input type="radio"/> eliminado<br><input type="radio"/> disminuido<br><input checked="" type="radio"/> igual<br><input type="radio"/> aumentado<br><input type="radio"/> no sabe                                                                                                                                                                                                                                                                                                                                             |
| cambio huevos                         | <input type="radio"/> eliminado<br><input type="radio"/> disminuido<br><input checked="" type="radio"/> igual<br><input type="radio"/> aumentado<br><input type="radio"/> no sabe                                                                                                                                                                                                                                                                                                                                             |
| cambio carne                          | <input type="radio"/> eliminado<br><input type="radio"/> disminuido<br><input checked="" type="radio"/> igual<br><input type="radio"/> aumentado<br><input type="radio"/> no sabe                                                                                                                                                                                                                                                                                                                                             |
| cambio pescado                        | <input type="radio"/> eliminado<br><input type="radio"/> disminuido<br><input checked="" type="radio"/> igual<br><input type="radio"/> aumentado<br><input type="radio"/> no sabe                                                                                                                                                                                                                                                                                                                                             |
| cambio verduras                       | <input type="radio"/> eliminado<br><input type="radio"/> disminuido<br><input checked="" type="radio"/> igual<br><input type="radio"/> aumentado<br><input type="radio"/> no sabe                                                                                                                                                                                                                                                                                                                                             |



|                            |                                                                                                                                                                                                             |
|----------------------------|-------------------------------------------------------------------------------------------------------------------------------------------------------------------------------------------------------------|
| cambio legumbres           | <input type="radio"/> eliminado<br><input type="radio"/> disminuido<br><input checked="" type="radio"/> igual<br><input type="radio"/> aumentado<br><input type="radio"/> no sabe                           |
| cambio fruta               | <input type="radio"/> eliminado<br><input type="radio"/> disminuido<br><input checked="" type="radio"/> igual<br><input type="radio"/> aumentado<br><input type="radio"/> no sabe                           |
| cambio pan                 | <input type="radio"/> eliminado<br><input type="radio"/> disminuido<br><input checked="" type="radio"/> igual<br><input type="radio"/> aumentado<br><input type="radio"/> no sabe                           |
| cambio aceite oliva        | <input type="radio"/> eliminado<br><input type="radio"/> disminuido<br><input checked="" type="radio"/> igual<br><input type="radio"/> aumentado<br><input type="radio"/> no sabe                           |
| cambio mante o margarina   | <input type="radio"/> eliminado<br><input checked="" type="radio"/> disminuido<br><input type="radio"/> igual<br><input type="radio"/> aumentado<br><input type="radio"/> no sabe                           |
| cambio azúcar y dulces     | <input type="radio"/> eliminado<br><input type="radio"/> disminuido<br><input checked="" type="radio"/> igual<br><input type="radio"/> aumentado<br><input type="radio"/> no sabe                           |
| cambio bebidas alcohólicas | <input checked="" type="radio"/> eliminado<br><input type="radio"/> disminuido<br><input type="radio"/> igual<br><input type="radio"/> aumentado<br><input type="radio"/> no sabe                           |
| frecuencia comidas fritas  | <input type="radio"/> a diario<br><input type="radio"/> 5 a 6 veces semana<br><input type="radio"/> 2 a 4 veces semana<br><input type="radio"/> 1 vez semana<br><input type="radio"/> menos de 1 vez semana |
| carne                      | <input type="radio"/> no como<br><input type="radio"/> cruda<br><input type="radio"/> poco hecha<br><input checked="" type="radio"/> hecha<br><input type="radio"/> muy hecha                               |
| grasa visible carne        | <input type="radio"/> quita toda<br><input checked="" type="radio"/> quita mayoría<br><input type="radio"/> quita un poco<br><input type="radio"/> no quita nada                                            |

|                                |                                                                                                                                                                                                                                                          |
|--------------------------------|----------------------------------------------------------------------------------------------------------------------------------------------------------------------------------------------------------------------------------------------------------|
| cocina carne                   | <input checked="" type="radio"/> a la plancha<br><input type="radio"/> a la parrilla<br><input type="radio"/> asada<br><input type="radio"/> frita<br><input type="radio"/> guisada                                                                      |
| tostado quemado carne          | <input checked="" type="radio"/> nunca<br><input type="radio"/> 1 vez mes<br><input type="radio"/> 2 a 3 veces mes<br><input type="radio"/> 1 vez semana<br><input type="radio"/> 2 a 3 semanas                                                          |
| tostado quemado pescado        | <input checked="" type="radio"/> nunca<br><input type="radio"/> 1 vez mes<br><input type="radio"/> 2 a 3 veces mes<br><input type="radio"/> 1 vez semana<br><input type="radio"/> 2 a 3 semanas                                                          |
| socarrat paella                | <input checked="" type="radio"/> nunca<br><input type="radio"/> 1 vez mes<br><input type="radio"/> 2 a 3 veces mes<br><input type="radio"/> 1 vez semana<br><input type="radio"/> 2 a 3 semanas                                                          |
| grasa o aceite cocinar         | <input type="radio"/> mantequilla<br><input type="radio"/> margarina<br><input type="radio"/> aceite oliva<br><input type="radio"/> aceite oliva virgen extra<br><input checked="" type="radio"/> aceite vegetal<br><input type="radio"/> mezcla aceites |
| grasa aceite aliñar            | <input type="radio"/> mantequilla<br><input type="radio"/> margarina<br><input type="radio"/> aceite oliva<br><input checked="" type="radio"/> aceite oliva virgen extra<br><input type="radio"/> aceite vegetal<br><input type="radio"/> mezcla aceites |
| grasa aceite freir             | <input type="radio"/> mantequilla<br><input type="radio"/> margarina<br><input checked="" type="radio"/> aceite oliva<br><input type="radio"/> aceite oliva virgen extra<br><input type="radio"/> aceite vegetal<br><input type="radio"/> mezcla aceites |
| Ejercicio cuestionario         | <input checked="" type="radio"/> si<br><input type="radio"/> no                                                                                                                                                                                          |
| horas de sueño incluido siesta | [*DATA REMOVED*]                                                                                                                                                                                                                                         |
| minutos siesta                 | [*DATA REMOVED*]                                                                                                                                                                                                                                         |
| horas televisión semana        | [*DATA REMOVED*]                                                                                                                                                                                                                                         |

|                                        |                                                                                                                                                                                                                                                                                                                                                                |
|----------------------------------------|----------------------------------------------------------------------------------------------------------------------------------------------------------------------------------------------------------------------------------------------------------------------------------------------------------------------------------------------------------------|
| actividad trabajo                      | <input type="radio"/> casi siempre sentado<br><input type="radio"/> sentado 50 por cien<br><input type="radio"/> casi siempre de pie, quieto<br><input type="radio"/> casi siempre levantado caminando y llevando pocas cosas<br><input type="radio"/> casi siempre levantado, caminando y llevado muchas cosas<br><input type="radio"/> trabajo manual pesado |
| tiempo caminar o bici al día           | <input type="radio"/> casi nunca<br><input type="radio"/> menos 20min día<br><input checked="" type="radio"/> 20 a 40 min día<br><input type="radio"/> 40 a 60 min día<br><input type="radio"/> 1h o 1h y media día<br><input type="radio"/> más de 1h y media al día                                                                                          |
| tiempo tareas casa al día              | <input type="radio"/> menos de 1h día<br><input type="radio"/> 1 a 2h día<br><input checked="" type="radio"/> 3 a 4h día<br><input type="radio"/> 5 a 6h día<br><input type="radio"/> 7 a 8h día<br><input type="radio"/> más de 8h día                                                                                                                        |
| tiempo libre televisión ordenador leer | <input checked="" type="radio"/> menos 1h día<br><input type="radio"/> 1h día<br><input type="radio"/> 2h día<br><input type="radio"/> 3h día<br><input type="radio"/> 4h día<br><input type="radio"/> 5 a 6h día<br><input type="radio"/> mas 6h día                                                                                                          |
| tiempo libre ejercicio o deporte       | <input type="radio"/> menos 1h semana<br><input type="radio"/> 1h semana<br><input type="radio"/> 2h semana<br><input checked="" type="radio"/> 3h semana<br><input type="radio"/> 4 a 5h semana<br><input type="radio"/> mas 5h semana                                                                                                                        |
| como se considera                      | <input type="radio"/> sedentaria<br><input type="radio"/> poco activa<br><input checked="" type="radio"/> moderadamente activa<br><input type="radio"/> bastante activa<br><input type="radio"/> muy activa<br><input type="radio"/> no sabe                                                                                                                   |
| FUR                                    | [*DATA REMOVED*]                                                                                                                                                                                                                                                                                                                                               |
| Semanas gestación 2T                   | [*DATA REMOVED*]                                                                                                                                                                                                                                                                                                                                               |
| Días gestación 2T                      | [*DATA REMOVED*]                                                                                                                                                                                                                                                                                                                                               |
| DBP 2T                                 | [*DATA REMOVED*]                                                                                                                                                                                                                                                                                                                                               |
| CC 2T                                  | [*DATA REMOVED*]                                                                                                                                                                                                                                                                                                                                               |
| AC 2T                                  | [*DATA REMOVED*]                                                                                                                                                                                                                                                                                                                                               |

|                                                   |                                                                                                                                                                                                 |
|---------------------------------------------------|-------------------------------------------------------------------------------------------------------------------------------------------------------------------------------------------------|
| LF 2T                                             | [*DATA REMOVED*]                                                                                                                                                                                |
| PFE 2T (Hadlock)                                  | [*DATA REMOVED*]                                                                                                                                                                                |
| Semanas gestación 3T                              | [*DATA REMOVED*]                                                                                                                                                                                |
| días 3T                                           | [*DATA REMOVED*]                                                                                                                                                                                |
| DBP 3T                                            | [*DATA REMOVED*]                                                                                                                                                                                |
| CC 3T                                             | [*DATA REMOVED*]                                                                                                                                                                                |
| AC 3T                                             | [*DATA REMOVED*]                                                                                                                                                                                |
| LF 3T                                             | [*DATA REMOVED*]                                                                                                                                                                                |
| PFE 3T (Hadlock)                                  | [*DATA REMOVED*]                                                                                                                                                                                |
| Semanas de gestación final                        | [*DATA REMOVED*]                                                                                                                                                                                |
| días gestación final                              | [*DATA REMOVED*]                                                                                                                                                                                |
| Localización placenta                             | <input type="radio"/> anterior<br><input type="radio"/> lateral derecha<br><input type="radio"/> lateral izquierda<br><input type="radio"/> posterior<br><input checked="" type="radio"/> fondo |
| Presentación longitudinal cefálica                | <input type="radio"/> no<br><input checked="" type="radio"/> si                                                                                                                                 |
| Dorso                                             | <input type="radio"/> izquierda anterior<br><input type="radio"/> izquierda posterior<br><input checked="" type="radio"/> derecha anterior<br><input type="radio"/> derecha posterior           |
| diámetro biparietal                               | [*DATA REMOVED*]                                                                                                                                                                                |
| Circunferencia craneal                            | [*DATA REMOVED*]                                                                                                                                                                                |
| Circunferencia abdominal                          | [*DATA REMOVED*]                                                                                                                                                                                |
| Longitud de femur                                 | [*DATA REMOVED*]                                                                                                                                                                                |
| tejido celular subcutáneo a nivel del muslo en mm | [*DATA REMOVED*]                                                                                                                                                                                |
| tejido celular subcutáneo en abdomen en mm        | [*DATA REMOVED*]                                                                                                                                                                                |
| Volumen del muslo en cm3                          | [*DATA REMOVED*]                                                                                                                                                                                |
| Peso fetal estimado según fórmula de Hadlock      | [*DATA REMOVED*]                                                                                                                                                                                |

|                                               |                                                                                                                                                          |
|-----------------------------------------------|----------------------------------------------------------------------------------------------------------------------------------------------------------|
| Percentil                                     | [*DATA REMOVED*]                                                                                                                                         |
| Peso fetal estimado según fórmula de Scioscia | <hr/>                                                                                                                                                    |
| Peso fetal estimado según fórmula de LEE      | <hr/>                                                                                                                                                    |
| Tipo de parto                                 | <input type="radio"/> eutocico<br><input checked="" type="radio"/> instrumentado/ventosa<br><input type="radio"/> cesarea                                |
| fecha de nacimiento                           | [*DATA REMOVED*]                                                                                                                                         |
| Días entre exploración y nacimiento           | [*DATA REMOVED*]                                                                                                                                         |
| Peso RN en g                                  | [*DATA REMOVED*]                                                                                                                                         |
| sexo                                          | <input checked="" type="radio"/> mujer<br><input type="radio"/> hombre                                                                                   |
| Apgar 1 minuto                                | [*DATA REMOVED*]                                                                                                                                         |
| Apgar 5 minutos                               | [*DATA REMOVED*]                                                                                                                                         |
| Apgar 10 minutos                              | <hr/>                                                                                                                                                    |
| antecedente Covid durante gestación           | <input checked="" type="radio"/> Yes<br><input type="radio"/> No                                                                                         |
| Nivel de estudios                             | <input type="radio"/> ninguno<br><input type="radio"/> primarios<br><input type="radio"/> secundarios<br><input checked="" type="radio"/> universitarios |

# Base\_datos\_estimacion\_peso\_fetal

|                                       |                                                                                                                                                                                                                                                                                      |
|---------------------------------------|--------------------------------------------------------------------------------------------------------------------------------------------------------------------------------------------------------------------------------------------------------------------------------------|
| Número de identificación participante | 161                                                                                                                                                                                                                                                                                  |
| CODIGO PARTICIPANTE                   |                                                                                                                                                                                                                                                                                      |
| Edad                                  | [*DATA REMOVED*]                                                                                                                                                                                                                                                                     |
| Gestaciones                           | <input checked="" type="radio"/> 1<br><input type="radio"/> 2<br><input type="radio"/> 3<br><input type="radio"/> mas de 3                                                                                                                                                           |
| partos                                | <input checked="" type="radio"/> 0<br><input type="radio"/> 1<br><input type="radio"/> 2<br><input type="radio"/> 3<br><input type="radio"/> mas de 3                                                                                                                                |
| cesáreas                              | <input checked="" type="radio"/> 0<br><input type="radio"/> 1<br><input type="radio"/> 2<br><input type="radio"/> 3<br><input type="radio"/> mas de 3                                                                                                                                |
| Abortos                               | <input checked="" type="radio"/> 0<br><input type="radio"/> 1<br><input type="radio"/> 2<br><input type="radio"/> 3<br><input type="radio"/> mas de 3                                                                                                                                |
| Tipo de gestacion                     | <input checked="" type="radio"/> espontanea<br><input type="radio"/> IAC inseminación artificial conyuge<br><input type="radio"/> IAD inseminación artificial donante<br><input type="radio"/> FIV Fecundación in Vitro<br><input type="radio"/> Ovodon FIV con donación de ovocitos |
| peso previo a embarazo                | [*DATA REMOVED*]                                                                                                                                                                                                                                                                     |
| Ganancia ponderal embarazo            | [*DATA REMOVED*]                                                                                                                                                                                                                                                                     |
| Talla madre                           | [*DATA REMOVED*]                                                                                                                                                                                                                                                                     |
| IMC previo embarazo                   | 24.740937287102444                                                                                                                                                                                                                                                                   |
| Patología obstétrica                  | <input checked="" type="radio"/> no<br><input type="radio"/> si                                                                                                                                                                                                                      |
| Diabetes pregestacional               | <input checked="" type="radio"/> no<br><input type="radio"/> si                                                                                                                                                                                                                      |
| Diabetes gestacional                  | <input checked="" type="radio"/> no<br><input type="radio"/> si                                                                                                                                                                                                                      |

|                                            |                                                                                                                                                                                      |
|--------------------------------------------|--------------------------------------------------------------------------------------------------------------------------------------------------------------------------------------|
| Diabetes gestacional con insulina          | <input checked="" type="radio"/> no<br><input type="radio"/> si                                                                                                                      |
| Diabetes gestacional con dieta y ejercicio | <input checked="" type="radio"/> no<br><input type="radio"/> si                                                                                                                      |
| Percentil fetos previos                    | <input checked="" type="radio"/> Nada<br><input type="radio"/> percentil menor de 10<br><input type="radio"/> percentil entre 10 y 90<br><input type="radio"/> percentil mayor de 90 |
| Exfumadora                                 | <input type="radio"/> Nada<br><input checked="" type="radio"/> menos de 5 años<br><input type="radio"/> 5 a 10 años<br><input type="radio"/> mayor o igual a 10 años                 |
| Hábito tabáquico                           | <input checked="" type="radio"/> no<br><input type="radio"/> si                                                                                                                      |
| fumadora                                   | [*DATA REMOVED*]                                                                                                                                                                     |
| Consumo otros tóxicos                      | <input checked="" type="radio"/> no<br><input type="radio"/> si                                                                                                                      |
| Hb 1T                                      | [*DATA REMOVED*]                                                                                                                                                                     |
| Htc 1T                                     | [*DATA REMOVED*]                                                                                                                                                                     |
| Hb 2T                                      | [*DATA REMOVED*]                                                                                                                                                                     |
| HTC 2T                                     | [*DATA REMOVED*]                                                                                                                                                                     |
| Hb 3T                                      | [*DATA REMOVED*]                                                                                                                                                                     |
| HTC 3T                                     | [*DATA REMOVED*]                                                                                                                                                                     |
| Suplemento FE oral                         | <input checked="" type="radio"/> si<br><input type="radio"/> no                                                                                                                      |
| Suplemento fe iv                           | <input type="radio"/> si<br><input checked="" type="radio"/> no                                                                                                                      |
| Transfusión                                | <input checked="" type="radio"/> no<br><input type="radio"/> si                                                                                                                      |
| Solicitada Vit D                           | <input checked="" type="radio"/> no<br><input type="radio"/> si                                                                                                                      |
| Deficit vit D                              | <input type="radio"/> no<br><input type="radio"/> si                                                                                                                                 |
| Suplemento vit D                           | <input type="radio"/> si<br><input type="radio"/> no                                                                                                                                 |

|                       |                                                                                                                                                                                                                                                                                                                                                                                                              |
|-----------------------|--------------------------------------------------------------------------------------------------------------------------------------------------------------------------------------------------------------------------------------------------------------------------------------------------------------------------------------------------------------------------------------------------------------|
| Dieta, cuestionario   | <input checked="" type="radio"/> sí<br><input type="radio"/> no                                                                                                                                                                                                                                                                                                                                              |
| Leche entera          | <input type="radio"/> Nunca o menos 1 vez al mes<br><input type="radio"/> 1 a 3 veces mes<br><input type="radio"/> 1 vez semana<br><input type="radio"/> 2 a 4 veces semana<br><input type="radio"/> 5 a 6 veces semana<br><input checked="" type="radio"/> 1 vez al día<br><input type="radio"/> 2 a 3 veces al día<br><input type="radio"/> 5 a 6 veces al día<br><input type="radio"/> más 6 veces al día |
| Leche semidesnatada   | <input checked="" type="radio"/> Nunca o menos 1 vez al mes<br><input type="radio"/> 1 a 3 veces mes<br><input type="radio"/> 1 vez semana<br><input type="radio"/> 2 a 4 veces semana<br><input type="radio"/> 5 a 6 veces semana<br><input type="radio"/> 1 vez al día<br><input type="radio"/> 2 a 3 veces al día<br><input type="radio"/> 5 a 6 veces al día<br><input type="radio"/> mas 6 veces al día |
| Leche desnatada       | <input checked="" type="radio"/> Nunca o menos 1 vez al mes<br><input type="radio"/> 1 a 3 veces mes<br><input type="radio"/> 1 vez semana<br><input type="radio"/> 2 a 4 veces semana<br><input type="radio"/> 5 a 6 veces semana<br><input type="radio"/> 1 vez al día<br><input type="radio"/> 2 a 3 veces al día<br><input type="radio"/> 5 a 6 veces al día<br><input type="radio"/> más 6 veces al día |
| Leche condensada      | <input checked="" type="radio"/> Nunca o menos 1 vez al mes<br><input type="radio"/> 1 a 3 veces mes<br><input type="radio"/> 1 vez semana<br><input type="radio"/> 2 a 4 veces semana<br><input type="radio"/> 5 a 6 veces semana<br><input type="radio"/> 1 vez al día<br><input type="radio"/> 2 a 3 veces al día<br><input type="radio"/> 5 a 6 veces al día<br><input type="radio"/> más 6 veces al día |
| nata o crema de leche | <input type="radio"/> Nunca o menos 1 vez al mes<br><input checked="" type="radio"/> 1 a 3 veces mes<br><input type="radio"/> 1 vez semana<br><input type="radio"/> 2 a 4 veces semana<br><input type="radio"/> 5 a 6 veces semana<br><input type="radio"/> 1 vez al día<br><input type="radio"/> 2 a 3 veces al día<br><input type="radio"/> 5 a 6 veces al día<br><input type="radio"/> más 6 veces al día |



|                                             |                                                                                                                                                                                                                                                                                                                                                                                                              |
|---------------------------------------------|--------------------------------------------------------------------------------------------------------------------------------------------------------------------------------------------------------------------------------------------------------------------------------------------------------------------------------------------------------------------------------------------------------------|
| Yogurt Entero                               | <input type="radio"/> Nunca o menos 1 vez al mes<br><input type="radio"/> 1 a 3 veces mes<br><input type="radio"/> 1 vez semana<br><input checked="" type="radio"/> 2 a 4 veces semana<br><input type="radio"/> 5 a 6 veces semana<br><input type="radio"/> 1 vez al día<br><input type="radio"/> 2 a 3 veces al día<br><input type="radio"/> 5 a 6 veces al día<br><input type="radio"/> más 6 veces al día |
| Yogurt desnatado                            | <input checked="" type="radio"/> Nunca o menos 1 vez al mes<br><input type="radio"/> 1 a 3 veces mes<br><input type="radio"/> 1 vez semana<br><input type="radio"/> 2 a 4 veces semana<br><input type="radio"/> 5 a 6 veces semana<br><input type="radio"/> 1 vez al día<br><input type="radio"/> 2 a 3 veces al día<br><input type="radio"/> 5 a 6 veces al día<br><input type="radio"/> más 6 veces al día |
| 100g requesón o queso blando o queso fresco | <input type="radio"/> Nunca o menos 1 vez al mes<br><input checked="" type="radio"/> 1 a 3 veces mes<br><input type="radio"/> 1 vez semana<br><input type="radio"/> 2 a 4 veces semana<br><input type="radio"/> 5 a 6 veces semana<br><input type="radio"/> 1 vez al día<br><input type="radio"/> 2 a 3 veces al día<br><input type="radio"/> 5 a 6 veces al día<br><input type="radio"/> más 6 veces al día |
| queso curado o semicurado o cremoso         | <input type="radio"/> Nunca o menos 1 vez al mes<br><input type="radio"/> 1 a 3 veces mes<br><input type="radio"/> 1 vez semana<br><input checked="" type="radio"/> 2 a 4 veces semana<br><input type="radio"/> 5 a 6 veces semana<br><input type="radio"/> 1 vez al día<br><input type="radio"/> 2 a 3 veces al día<br><input type="radio"/> 5 a 6 veces al día<br><input type="radio"/> más 6 veces al día |
| natillas flan pudding                       | <input type="radio"/> Nunca o menos 1 vez al mes<br><input type="radio"/> 1 a 3 veces mes<br><input checked="" type="radio"/> 1 vez semana<br><input type="radio"/> 2 a 4 veces semana<br><input type="radio"/> 5 a 6 veces semana<br><input type="radio"/> 1 vez al día<br><input type="radio"/> 2 a 3 veces al día<br><input type="radio"/> 5 a 6 veces al día<br><input type="radio"/> más 6 veces al día |
| Helado                                      | <input type="radio"/> Nunca o menos 1 vez al mes<br><input type="radio"/> 1 a 3 veces mes<br><input type="radio"/> 1 vez semana<br><input checked="" type="radio"/> 2 a 4 veces semana<br><input type="radio"/> 5 a 6 veces semana<br><input type="radio"/> 1 vez al día<br><input type="radio"/> 2 a 3 veces al día<br><input type="radio"/> 5 a 6 veces al día<br><input type="radio"/> más 6 veces al día |

|                                      |                                                                                                                                                                                                                                                                                                                                                                                                              |
|--------------------------------------|--------------------------------------------------------------------------------------------------------------------------------------------------------------------------------------------------------------------------------------------------------------------------------------------------------------------------------------------------------------------------------------------------------------|
| huevo                                | <input type="radio"/> Nunca o menos 1 vez al mes<br><input type="radio"/> 1 a 3 veces mes<br><input type="radio"/> 1 vez semana<br><input checked="" type="radio"/> 2 a 4 veces semana<br><input type="radio"/> 5 a 6 veces semana<br><input type="radio"/> 1 vez al día<br><input type="radio"/> 2 a 3 veces al día<br><input type="radio"/> 5 a 6 veces al día<br><input type="radio"/> más 6 veces al día |
| Pollo con piel                       | <input type="radio"/> Nunca o menos 1 vez al mes<br><input type="radio"/> 1 a 3 veces mes<br><input checked="" type="radio"/> 1 vez semana<br><input type="radio"/> 2 a 4 veces semana<br><input type="radio"/> 5 a 6 veces semana<br><input type="radio"/> 1 vez al día<br><input type="radio"/> 2 a 3 veces al día<br><input type="radio"/> 5 a 6 veces al día<br><input type="radio"/> más 6 veces al día |
| pollo sin piel                       | <input type="radio"/> Nunca o menos 1 vez al mes<br><input type="radio"/> 1 a 3 veces mes<br><input checked="" type="radio"/> 1 vez semana<br><input type="radio"/> 2 a 4 veces semana<br><input type="radio"/> 5 a 6 veces semana<br><input type="radio"/> 1 vez al día<br><input type="radio"/> 2 a 3 veces al día<br><input type="radio"/> 5 a 6 veces al día<br><input type="radio"/> más 6 veces al día |
| Ternera o cerdo o cordero            | <input type="radio"/> Nunca o menos 1 vez al mes<br><input type="radio"/> 1 a 3 veces mes<br><input checked="" type="radio"/> 1 vez semana<br><input type="radio"/> 2 a 4 veces semana<br><input type="radio"/> 5 a 6 veces semana<br><input type="radio"/> 1 vez al día<br><input type="radio"/> 2 a 3 veces al día<br><input type="radio"/> 5 a 6 veces al día<br><input type="radio"/> más 6 veces al día |
| carne caza: Conejo o codorniz o pato | <input checked="" type="radio"/> Nunca o menos 1 vez al mes<br><input type="radio"/> 1 a 3 veces mes<br><input type="radio"/> 1 vez semana<br><input type="radio"/> 2 a 4 veces semana<br><input type="radio"/> 5 a 6 veces semana<br><input type="radio"/> 1 vez al día<br><input type="radio"/> 2 a 3 veces al día<br><input type="radio"/> 5 a 6 veces al día<br><input type="radio"/> más 6 veces al día |
| Hígado de ternera o cerdo o pollo    | <input type="radio"/> Nunca o menos 1 vez al mes<br><input type="radio"/> 1 a 3 veces mes<br><input type="radio"/> 1 vez semana<br><input checked="" type="radio"/> 2 a 4 veces semana<br><input type="radio"/> 5 a 6 veces semana<br><input type="radio"/> 1 vez al día<br><input type="radio"/> 2 a 3 veces al día<br><input type="radio"/> 5 a 6 veces al día<br><input type="radio"/> más 6 veces al día |

---

Vísceras

- ☒ Nunca o menos 1 vez al mes  
☐ 1 a 3 veces mes  
☐ 1 vez semana  
☐ 2 a 4 veces semana  
☐ 5 a 6 veces semana  
☐ 1 vez al día  
☐ 2 a 3 veces al día  
☐ 5 a 6 veces al día  
☐ más 6 veces al día

---

Embutido

- ☒ Nunca o menos 1 vez al mes  
☐ 1 a 3 veces mes  
☐ 1 vez semana  
☐ 2 a 4 veces semana  
☐ 5 a 6 veces semana  
☐ 1 vez al día  
☐ 2 a 3 veces al día  
☐ 5 a 6 veces al día  
☐ más 6 veces al día

---

Salchicha o similar

- ☒ Nunca o menos 1 vez al mes  
☐ 1 a 3 veces mes  
☐ 1 vez semana  
☐ 2 a 4 veces semana  
☐ 5 a 6 veces semana  
☐ 1 vez al día  
☐ 2 a 3 veces al día  
☐ 5 a 6 veces al día  
☐ más 6 veces al día

---

Pate o foiegras

- ☒ Nunca o menos 1 vez al mes  
☐ 1 a 3 veces mes  
☐ 1 vez semana  
☐ 2 a 4 veces semana  
☐ 5 a 6 veces semana  
☐ 1 vez al día  
☐ 2 a 3 veces al día  
☐ 5 a 6 veces al día  
☐ más 6 veces al día

---

Hamburguesa

- ☐ Nunca o menos 1 vez al mes  
☐ 1 a 3 veces mes  
☒ 1 vez semana  
☐ 2 a 4 veces semana  
☐ 5 a 6 veces semana  
☐ 1 vez al día  
☐ 2 a 3 veces al día  
☐ 5 a 6 veces al día  
☐ más 6 veces al día

---

tocino o bacon

- ☐ Nunca o menos 1 vez al mes  
☐ 1 a 3 veces mes  
☒ 1 vez semana  
☐ 2 a 4 veces semana  
☐ 5 a 6 veces semana  
☐ 1 vez al día  
☐ 2 a 3 veces al día  
☐ 5 a 6 veces al día  
☐ más 6 veces al día

---

Pescado frito

- ☒ Nunca o menos 1 vez al mes  
☐ 1 a 3 veces mes  
☐ 1 vez semana  
☐ 2 a 4 veces semana  
☐ 5 a 6 veces semana  
☐ 1 vez al día  
☐ 2 a 3 veces al día  
☐ 5 a 6 veces al día  
☐ más 6 veces al día

---

pescado hervido blanco

- ☒ Nunca o menos 1 vez al mes  
☐ 1 a 3 veces mes  
☐ 1 vez semana  
☐ 2 a 4 veces semana  
☐ 5 a 6 veces semana  
☐ 1 vez al día  
☐ 2 a 3 veces al día  
☐ 5 a 6 veces al día  
☐ más 6 veces al día

---

pescado hervido azul

- ☒ Nunca o menos 1 vez al mes  
☐ 1 a 3 veces mes  
☐ 1 vez semana  
☐ 2 a 4 veces semana  
☐ 5 a 6 veces semana  
☐ 1 vez al día  
☐ 2 a 3 veces al día  
☐ 5 a 6 veces al día  
☐ más 6 veces al día

---

otros pescado azul

- ☒ Nunca o menos 1 vez al mes  
☐ 1 a 3 veces mes  
☐ 1 vez semana  
☐ 2 a 4 veces semana  
☐ 5 a 6 veces semana  
☐ 1 vez al día  
☐ 2 a 3 veces al día  
☐ 5 a 6 veces al día  
☐ más 6 veces al día

---

atun conserva

- ☐ Nunca o menos 1 vez al mes  
☐ 1 a 3 veces mes  
☒ 1 vez semana  
☐ 2 a 4 veces semana  
☐ 5 a 6 veces semana  
☐ 1 vez al día  
☐ 2 a 3 veces al día  
☐ 5 a 6 veces al día  
☐ más 6 veces al día

---

sardina conserva

- ☐ Nunca o menos 1 vez al mes  
☒ 1 a 3 veces mes  
☐ 1 vez semana  
☐ 2 a 4 veces semana  
☐ 5 a 6 veces semana  
☐ 1 vez al día  
☐ 2 a 3 veces al día  
☐ 5 a 6 veces al día  
☐ más 6 veces al día

|                                         |                                                                                                                                                                                                                                                                                                                                                                                                              |
|-----------------------------------------|--------------------------------------------------------------------------------------------------------------------------------------------------------------------------------------------------------------------------------------------------------------------------------------------------------------------------------------------------------------------------------------------------------------|
| pescado ahumado                         | <input checked="" type="radio"/> Nunca o menos 1 vez al mes<br><input type="radio"/> 1 a 3 veces mes<br><input type="radio"/> 1 vez semana<br><input type="radio"/> 2 a 4 veces semana<br><input type="radio"/> 5 a 6 veces semana<br><input type="radio"/> 1 vez al día<br><input type="radio"/> 2 a 3 veces al día<br><input type="radio"/> 5 a 6 veces al día<br><input type="radio"/> más 6 veces al día |
| almejas o mejillones o ostras unos 100g | <input checked="" type="radio"/> Nunca o menos 1 vez al mes<br><input type="radio"/> 1 a 3 veces mes<br><input type="radio"/> 1 vez semana<br><input type="radio"/> 2 a 4 veces semana<br><input type="radio"/> 5 a 6 veces semana<br><input type="radio"/> 1 vez al día<br><input type="radio"/> 2 a 3 veces al día<br><input type="radio"/> 5 a 6 veces al día<br><input type="radio"/> más 6 veces al día |
| calamar o chipiron o sepia unos 100g    | <input type="radio"/> Nunca o menos 1 vez al mes<br><input type="radio"/> 1 a 3 veces mes<br><input checked="" type="radio"/> 1 vez semana<br><input type="radio"/> 2 a 4 veces semana<br><input type="radio"/> 5 a 6 veces semana<br><input type="radio"/> 1 vez al día<br><input type="radio"/> 2 a 3 veces al día<br><input type="radio"/> 5 a 6 veces al día<br><input type="radio"/> más 6 veces al día |
| marisco unos 100g                       | <input type="radio"/> Nunca o menos 1 vez al mes<br><input checked="" type="radio"/> 1 a 3 veces mes<br><input type="radio"/> 1 vez semana<br><input type="radio"/> 2 a 4 veces semana<br><input type="radio"/> 5 a 6 veces semana<br><input type="radio"/> 1 vez al día<br><input type="radio"/> 2 a 3 veces al día<br><input type="radio"/> 5 a 6 veces al día<br><input type="radio"/> más 6 veces al día |
| Espinacas o acelgas cocinadas           | <input type="radio"/> Nunca o menos 1 vez al mes<br><input checked="" type="radio"/> 1 a 3 veces mes<br><input type="radio"/> 1 vez semana<br><input type="radio"/> 2 a 4 veces semana<br><input type="radio"/> 5 a 6 veces semana<br><input type="radio"/> 1 vez al día<br><input type="radio"/> 2 a 3 veces al día<br><input type="radio"/> 5 a 6 veces al día<br><input type="radio"/> más 6 veces al día |
| Col o coliflor o brocoli cocinado       | <input type="radio"/> Nunca o menos 1 vez al mes<br><input type="radio"/> 1 a 3 veces mes<br><input checked="" type="radio"/> 1 vez semana<br><input type="radio"/> 2 a 4 veces semana<br><input type="radio"/> 5 a 6 veces semana<br><input type="radio"/> 1 vez al día<br><input type="radio"/> 2 a 3 veces al día<br><input type="radio"/> 5 a 6 veces al día<br><input type="radio"/> más 6 veces al día |

---

Lechuga o endivia o escarola

- ☐ Nunca o menos 1 vez al mes  
☐ 1 a 3 veces mes  
☒ 1 vez semana  
☐ 2 a 4 veces semana  
☐ 5 a 6 veces semana  
☐ 1 vez al día  
☐ 2 a 3 veces al día  
☐ 5 a 6 veces al día  
☐ más 6 veces al día

---

tomate ensalada

- ☐ Nunca o menos 1 vez al mes  
☐ 1 a 3 veces mes  
☐ 1 vez semana  
☒ 2 a 4 veces semana  
☐ 5 a 6 veces semana  
☐ 1 vez al día  
☐ 2 a 3 veces al día  
☐ 5 a 6 veces al día  
☐ más 6 veces al día

---

cebolla

- ☐ Nunca o menos 1 vez al mes  
☒ 1 a 3 veces mes  
☐ 1 vez semana  
☐ 2 a 4 veces semana  
☐ 5 a 6 veces semana  
☐ 1 vez al día  
☐ 2 a 3 veces al día  
☐ 5 a 6 veces al día  
☐ más 6 veces al día

---

Zanahoria o calabaza

- ☐ Nunca o menos 1 vez al mes  
☐ 1 a 3 veces mes  
☒ 1 vez semana  
☐ 2 a 4 veces semana  
☐ 5 a 6 veces semana  
☐ 1 vez al día  
☐ 2 a 3 veces al día  
☐ 5 a 6 veces al día  
☐ más 6 veces al día

---

Judías verdes

- ☐ Nunca o menos 1 vez al mes  
☐ 1 a 3 veces mes  
☒ 1 vez semana  
☐ 2 a 4 veces semana  
☐ 5 a 6 veces semana  
☐ 1 vez al día  
☐ 2 a 3 veces al día  
☐ 5 a 6 veces al día  
☐ más 6 veces al día

---

Berenjena o calabacin o pepino

- ☐ Nunca o menos 1 vez al mes  
☐ 1 a 3 veces mes  
☐ 1 vez semana  
☒ 2 a 4 veces semana  
☐ 5 a 6 veces semana  
☐ 1 vez al día  
☐ 2 a 3 veces al día  
☐ 5 a 6 veces al día  
☐ más 6 veces al día

---

|          |                                                                                                                                                                                                                                                                                                                                                                                                              |
|----------|--------------------------------------------------------------------------------------------------------------------------------------------------------------------------------------------------------------------------------------------------------------------------------------------------------------------------------------------------------------------------------------------------------------|
| pimiento | <input type="radio"/> Nunca o menos 1 vez al mes<br><input checked="" type="radio"/> 1 a 3 veces mes<br><input type="radio"/> 1 vez semana<br><input type="radio"/> 2 a 4 veces semana<br><input type="radio"/> 5 a 6 veces semana<br><input type="radio"/> 1 vez al día<br><input type="radio"/> 2 a 3 veces al día<br><input type="radio"/> 5 a 6 veces al día<br><input type="radio"/> más 6 veces al día |
|----------|--------------------------------------------------------------------------------------------------------------------------------------------------------------------------------------------------------------------------------------------------------------------------------------------------------------------------------------------------------------------------------------------------------------|

---

|           |                                                                                                                                                                                                                                                                                                                                                                                                              |
|-----------|--------------------------------------------------------------------------------------------------------------------------------------------------------------------------------------------------------------------------------------------------------------------------------------------------------------------------------------------------------------------------------------------------------------|
| alcachofa | <input checked="" type="radio"/> Nunca o menos 1 vez al mes<br><input type="radio"/> 1 a 3 veces mes<br><input type="radio"/> 1 vez semana<br><input type="radio"/> 2 a 4 veces semana<br><input type="radio"/> 5 a 6 veces semana<br><input type="radio"/> 1 vez al día<br><input type="radio"/> 2 a 3 veces al día<br><input type="radio"/> 5 a 6 veces al día<br><input type="radio"/> más 6 veces al día |
|-----------|--------------------------------------------------------------------------------------------------------------------------------------------------------------------------------------------------------------------------------------------------------------------------------------------------------------------------------------------------------------------------------------------------------------|

---

|            |                                                                                                                                                                                                                                                                                                                                                                                                              |
|------------|--------------------------------------------------------------------------------------------------------------------------------------------------------------------------------------------------------------------------------------------------------------------------------------------------------------------------------------------------------------------------------------------------------------|
| espárragos | <input type="radio"/> Nunca o menos 1 vez al mes<br><input type="radio"/> 1 a 3 veces mes<br><input checked="" type="radio"/> 1 vez semana<br><input type="radio"/> 2 a 4 veces semana<br><input type="radio"/> 5 a 6 veces semana<br><input type="radio"/> 1 vez al día<br><input type="radio"/> 2 a 3 veces al día<br><input type="radio"/> 5 a 6 veces al día<br><input type="radio"/> más 6 veces al día |
|------------|--------------------------------------------------------------------------------------------------------------------------------------------------------------------------------------------------------------------------------------------------------------------------------------------------------------------------------------------------------------------------------------------------------------|

---

|              |                                                                                                                                                                                                                                                                                                                                                                                                              |
|--------------|--------------------------------------------------------------------------------------------------------------------------------------------------------------------------------------------------------------------------------------------------------------------------------------------------------------------------------------------------------------------------------------------------------------|
| maíz hervido | <input type="radio"/> Nunca o menos 1 vez al mes<br><input checked="" type="radio"/> 1 a 3 veces mes<br><input type="radio"/> 1 vez semana<br><input type="radio"/> 2 a 4 veces semana<br><input type="radio"/> 5 a 6 veces semana<br><input type="radio"/> 1 vez al día<br><input type="radio"/> 2 a 3 veces al día<br><input type="radio"/> 5 a 6 veces al día<br><input type="radio"/> más 6 veces al día |
|--------------|--------------------------------------------------------------------------------------------------------------------------------------------------------------------------------------------------------------------------------------------------------------------------------------------------------------------------------------------------------------------------------------------------------------|

---

|           |                                                                                                                                                                                                                                                                                                                                                                                                              |
|-----------|--------------------------------------------------------------------------------------------------------------------------------------------------------------------------------------------------------------------------------------------------------------------------------------------------------------------------------------------------------------------------------------------------------------|
| legumbres | <input type="radio"/> Nunca o menos 1 vez al mes<br><input type="radio"/> 1 a 3 veces mes<br><input checked="" type="radio"/> 1 vez semana<br><input type="radio"/> 2 a 4 veces semana<br><input type="radio"/> 5 a 6 veces semana<br><input type="radio"/> 1 vez al día<br><input type="radio"/> 2 a 3 veces al día<br><input type="radio"/> 5 a 6 veces al día<br><input type="radio"/> más 6 veces al día |
|-----------|--------------------------------------------------------------------------------------------------------------------------------------------------------------------------------------------------------------------------------------------------------------------------------------------------------------------------------------------------------------------------------------------------------------|

---

|                       |                                                                                                                                                                                                                                                                                                                                                                                                              |
|-----------------------|--------------------------------------------------------------------------------------------------------------------------------------------------------------------------------------------------------------------------------------------------------------------------------------------------------------------------------------------------------------------------------------------------------------|
| naranjas o mandarinas | <input type="radio"/> Nunca o menos 1 vez al mes<br><input type="radio"/> 1 a 3 veces mes<br><input checked="" type="radio"/> 1 vez semana<br><input type="radio"/> 2 a 4 veces semana<br><input type="radio"/> 5 a 6 veces semana<br><input type="radio"/> 1 vez al día<br><input type="radio"/> 2 a 3 veces al día<br><input type="radio"/> 5 a 6 veces al día<br><input type="radio"/> más 6 veces al día |
|-----------------------|--------------------------------------------------------------------------------------------------------------------------------------------------------------------------------------------------------------------------------------------------------------------------------------------------------------------------------------------------------------------------------------------------------------|

---

---

zumo natural fruta

- ☒ Nunca o menos 1 vez al mes  
☐ 1 a 3 veces mes  
☐ 1 vez semana  
☐ 2 a 4 veces semana  
☐ 5 a 6 veces semana  
☐ 1 vez al día  
☐ 2 a 3 veces al día  
☐ 5 a 6 veces al día  
☐ más 6 veces al día

---

platano

- ☐ Nunca o menos 1 vez al mes  
☐ 1 a 3 veces mes  
☐ 1 vez semana  
☒ 2 a 4 veces semana  
☐ 5 a 6 veces semana  
☐ 1 vez al día  
☐ 2 a 3 veces al día  
☐ 5 a 6 veces al día  
☐ más 6 veces al día

---

manzana o pera

- ☐ Nunca o menos 1 vez al mes  
☐ 1 a 3 veces mes  
☐ 1 vez semana  
☒ 2 a 4 veces semana  
☐ 5 a 6 veces semana  
☐ 1 vez al día  
☐ 2 a 3 veces al día  
☐ 5 a 6 veces al día  
☐ más 6 veces al día

---

melocotón o nectarina

- ☐ Nunca o menos 1 vez al mes  
☐ 1 a 3 veces mes  
☐ 1 vez semana  
☒ 2 a 4 veces semana  
☐ 5 a 6 veces semana  
☐ 1 vez al día  
☐ 2 a 3 veces al día  
☐ 5 a 6 veces al día  
☐ más 6 veces al día

---

sandia o melon

- ☐ Nunca o menos 1 vez al mes  
☐ 1 a 3 veces mes  
☐ 1 vez semana  
☒ 2 a 4 veces semana  
☐ 5 a 6 veces semana  
☐ 1 vez al día  
☐ 2 a 3 veces al día  
☐ 5 a 6 veces al día  
☐ más 6 veces al día

---

uva

- ☐ Nunca o menos 1 vez al mes  
☐ 1 a 3 veces mes  
☐ 1 vez semana  
☒ 2 a 4 veces semana  
☐ 5 a 6 veces semana  
☐ 1 vez al día  
☐ 2 a 3 veces al día  
☐ 5 a 6 veces al día  
☐ más 6 veces al día



---

bruna o ciruela

- ☐ Nunca o menos 1 vez al mes  
☐ 1 a 3 veces mes  
☐ 1 vez semana  
☒ 2 a 4 veces semana  
☐ 5 a 6 veces semana  
☐ 1 vez al día  
☐ 2 a 3 veces al día  
☐ 5 a 6 veces al día  
☐ más 6 veces al día

---

kiwi

- ☐ Nunca o menos 1 vez al mes  
☐ 1 a 3 veces mes  
☐ 1 vez semana  
☒ 2 a 4 veces semana  
☐ 5 a 6 veces semana  
☐ 1 vez al día  
☐ 2 a 3 veces al día  
☐ 5 a 6 veces al día  
☐ más 6 veces al día

---

aceituna

- ☐ Nunca o menos 1 vez al mes  
☐ 1 a 3 veces mes  
☐ 1 vez semana  
☒ 2 a 4 veces semana  
☐ 5 a 6 veces semana  
☐ 1 vez al día  
☐ 2 a 3 veces al día  
☐ 5 a 6 veces al día  
☐ más 6 veces al día

---

frutos secos

- ☐ Nunca o menos 1 vez al mes  
☐ 1 a 3 veces mes  
☒ 1 vez semana  
☐ 2 a 4 veces semana  
☐ 5 a 6 veces semana  
☐ 1 vez al día  
☐ 2 a 3 veces al día  
☐ 5 a 6 veces al día  
☐ más 6 veces al día

---

pan blanco

- ☐ Nunca o menos 1 vez al mes  
☐ 1 a 3 veces mes  
☐ 1 vez semana  
☐ 2 a 4 veces semana  
☐ 5 a 6 veces semana  
☐ 1 vez al día  
☒ 2 a 3 veces al día  
☐ 5 a 6 veces al día  
☐ más 6 veces al día

---

pan integral

- ☐ Nunca o menos 1 vez al mes  
☒ 1 a 3 veces mes  
☐ 1 vez semana  
☐ 2 a 4 veces semana  
☐ 5 a 6 veces semana  
☐ 1 vez al día  
☐ 2 a 3 veces al día  
☐ 5 a 6 veces al día  
☐ más 6 veces al día

---

cereales desayuno

- ☐ Nunca o menos 1 vez al mes  
☐ 1 a 3 veces mes  
☒ 1 vez semana  
☐ 2 a 4 veces semana  
☐ 5 a 6 veces semana  
☐ 1 vez al día  
☐ 2 a 3 veces al día  
☐ 5 a 6 veces al día  
☐ más 6 veces al día

---

patatas fritas

- ☐ Nunca o menos 1 vez al mes  
☐ 1 a 3 veces mes  
☒ 1 vez semana  
☐ 2 a 4 veces semana  
☐ 5 a 6 veces semana  
☐ 1 vez al día  
☐ 2 a 3 veces al día  
☐ 5 a 6 veces al día  
☐ más 6 veces al día

---

patatas cocidas o asadas

- ☐ Nunca o menos 1 vez al mes  
☐ 1 a 3 veces mes  
☒ 1 vez semana  
☐ 2 a 4 veces semana  
☐ 5 a 6 veces semana  
☐ 1 vez al día  
☐ 2 a 3 veces al día  
☐ 5 a 6 veces al día  
☐ más 6 veces al día

---

bolsa papas

- ☐ Nunca o menos 1 vez al mes  
☒ 1 a 3 veces mes  
☐ 1 vez semana  
☐ 2 a 4 veces semana  
☐ 5 a 6 veces semana  
☐ 1 vez al día  
☐ 2 a 3 veces al día  
☐ 5 a 6 veces al día  
☐ más 6 veces al día

---

arroz cocinado

- ☐ Nunca o menos 1 vez al mes  
☐ 1 a 3 veces mes  
☐ 1 vez semana  
☐ 2 a 4 veces semana  
☒ 5 a 6 veces semana  
☐ 1 vez al día  
☐ 2 a 3 veces al día  
☐ 5 a 6 veces al día  
☐ más 6 veces al día

---

pasta

- ☐ Nunca o menos 1 vez al mes  
☐ 1 a 3 veces mes  
☐ 1 vez semana  
☐ 2 a 4 veces semana  
☒ 5 a 6 veces semana  
☐ 1 vez al día  
☐ 2 a 3 veces al día  
☐ 5 a 6 veces al día  
☐ más 6 veces al día

|                     |                                                                                                                                                                                                                                                                                                                                                                                                              |
|---------------------|--------------------------------------------------------------------------------------------------------------------------------------------------------------------------------------------------------------------------------------------------------------------------------------------------------------------------------------------------------------------------------------------------------------|
| pizza               | <input type="radio"/> Nunca o menos 1 vez al mes<br><input type="radio"/> 1 a 3 veces mes<br><input checked="" type="radio"/> 1 vez semana<br><input type="radio"/> 2 a 4 veces semana<br><input type="radio"/> 5 a 6 veces semana<br><input type="radio"/> 1 vez al día<br><input type="radio"/> 2 a 3 veces al día<br><input type="radio"/> 5 a 6 veces al día<br><input type="radio"/> más 6 veces al día |
| aceite oliva        | <input type="radio"/> Nunca o menos 1 vez al mes<br><input type="radio"/> 1 a 3 veces mes<br><input type="radio"/> 1 vez semana<br><input type="radio"/> 2 a 4 veces semana<br><input type="radio"/> 5 a 6 veces semana<br><input type="radio"/> 1 vez al día<br><input checked="" type="radio"/> 2 a 3 veces al día<br><input type="radio"/> 5 a 6 veces al día<br><input type="radio"/> más 6 veces al día |
| otros aceites       | <input type="radio"/> Nunca o menos 1 vez al mes<br><input type="radio"/> 1 a 3 veces mes<br><input type="radio"/> 1 vez semana<br><input type="radio"/> 2 a 4 veces semana<br><input type="radio"/> 5 a 6 veces semana<br><input checked="" type="radio"/> 1 vez al día<br><input type="radio"/> 2 a 3 veces al día<br><input type="radio"/> 5 a 6 veces al día<br><input type="radio"/> más 6 veces al día |
| margarina           | <input checked="" type="radio"/> Nunca o menos 1 vez al mes<br><input type="radio"/> 1 a 3 veces mes<br><input type="radio"/> 1 vez semana<br><input type="radio"/> 2 a 4 veces semana<br><input type="radio"/> 5 a 6 veces semana<br><input type="radio"/> 1 vez al día<br><input type="radio"/> 2 a 3 veces al día<br><input type="radio"/> 5 a 6 veces al día<br><input type="radio"/> más 6 veces al día |
| mantequilla         | <input type="radio"/> Nunca o menos 1 vez al mes<br><input checked="" type="radio"/> 1 a 3 veces mes<br><input type="radio"/> 1 vez semana<br><input type="radio"/> 2 a 4 veces semana<br><input type="radio"/> 5 a 6 veces semana<br><input type="radio"/> 1 vez al día<br><input type="radio"/> 2 a 3 veces al día<br><input type="radio"/> 5 a 6 veces al día<br><input type="radio"/> más 6 veces al día |
| galletas tipo maria | <input type="radio"/> Nunca o menos 1 vez al mes<br><input type="radio"/> 1 a 3 veces mes<br><input type="radio"/> 1 vez semana<br><input type="radio"/> 2 a 4 veces semana<br><input type="radio"/> 5 a 6 veces semana<br><input type="radio"/> 1 vez al día<br><input type="radio"/> 2 a 3 veces al día<br><input type="radio"/> 5 a 6 veces al día<br><input checked="" type="radio"/> más 6 veces al día |

---

galletas chocolate

- ☐ Nunca o menos 1 vez al mes  
☒ 1 a 3 veces mes  
☐ 1 vez semana  
☐ 2 a 4 veces semana  
☐ 5 a 6 veces semana  
☐ 1 vez al día  
☐ 2 a 3 veces al día  
☐ 5 a 6 veces al día  
☐ más 6 veces al día

---

bolleria

- ☐ Nunca o menos 1 vez al mes  
☐ 1 a 3 veces mes  
☐ 1 vez semana  
☒ 2 a 4 veces semana  
☐ 5 a 6 veces semana  
☐ 1 vez al día  
☐ 2 a 3 veces al día  
☐ 5 a 6 veces al día  
☐ más 6 veces al día

---

chocolate o bombones

- ☐ Nunca o menos 1 vez al mes  
☐ 1 a 3 veces mes  
☐ 1 vez semana  
☐ 2 a 4 veces semana  
☒ 5 a 6 veces semana  
☐ 1 vez al día  
☐ 2 a 3 veces al día  
☐ 5 a 6 veces al día  
☐ más 6 veces al día

---

chocolate polvo o colacao

- ☐ Nunca o menos 1 vez al mes  
☐ 1 a 3 veces mes  
☐ 1 vez semana  
☒ 2 a 4 veces semana  
☐ 5 a 6 veces semana  
☐ 1 vez al día  
☐ 2 a 3 veces al día  
☐ 5 a 6 veces al día  
☐ más 6 veces al día

---

vino tinto

- ☒ Nunca o menos 1 vez al mes  
☐ 1 a 3 veces mes  
☐ 1 vez semana  
☐ 2 a 4 veces semana  
☐ 5 a 6 veces semana  
☐ 1 vez al día  
☐ 2 a 3 veces al día  
☐ 5 a 6 veces al día  
☐ más 6 veces al día

---

vino blanco

- ☒ Nunca o menos 1 vez al mes  
☐ 1 a 3 veces mes  
☐ 1 vez semana  
☐ 2 a 4 veces semana  
☐ 5 a 6 veces semana  
☐ 1 vez al día  
☐ 2 a 3 veces al día  
☐ 5 a 6 veces al día  
☐ más 6 veces al día

---

|                    |                                                                                                                                                                                                                                                                                                                                                                                                              |
|--------------------|--------------------------------------------------------------------------------------------------------------------------------------------------------------------------------------------------------------------------------------------------------------------------------------------------------------------------------------------------------------------------------------------------------------|
| vino seco o vermut | <input checked="" type="radio"/> Nunca o menos 1 vez al mes<br><input type="radio"/> 1 a 3 veces mes<br><input type="radio"/> 1 vez semana<br><input type="radio"/> 2 a 4 veces semana<br><input type="radio"/> 5 a 6 veces semana<br><input type="radio"/> 1 vez al día<br><input type="radio"/> 2 a 3 veces al día<br><input type="radio"/> 5 a 6 veces al día<br><input type="radio"/> más 6 veces al día |
|--------------------|--------------------------------------------------------------------------------------------------------------------------------------------------------------------------------------------------------------------------------------------------------------------------------------------------------------------------------------------------------------------------------------------------------------|

---

|         |                                                                                                                                                                                                                                                                                                                                                                                                              |
|---------|--------------------------------------------------------------------------------------------------------------------------------------------------------------------------------------------------------------------------------------------------------------------------------------------------------------------------------------------------------------------------------------------------------------|
| cerveza | <input checked="" type="radio"/> Nunca o menos 1 vez al mes<br><input type="radio"/> 1 a 3 veces mes<br><input type="radio"/> 1 vez semana<br><input type="radio"/> 2 a 4 veces semana<br><input type="radio"/> 5 a 6 veces semana<br><input type="radio"/> 1 vez al día<br><input type="radio"/> 2 a 3 veces al día<br><input type="radio"/> 5 a 6 veces al día<br><input type="radio"/> más 6 veces al día |
|---------|--------------------------------------------------------------------------------------------------------------------------------------------------------------------------------------------------------------------------------------------------------------------------------------------------------------------------------------------------------------------------------------------------------------|

---

|                     |                                                                                                                                                                                                                                                                                                                                                                                                              |
|---------------------|--------------------------------------------------------------------------------------------------------------------------------------------------------------------------------------------------------------------------------------------------------------------------------------------------------------------------------------------------------------------------------------------------------------|
| cerveza sin alcohol | <input checked="" type="radio"/> Nunca o menos 1 vez al mes<br><input type="radio"/> 1 a 3 veces mes<br><input type="radio"/> 1 vez semana<br><input type="radio"/> 2 a 4 veces semana<br><input type="radio"/> 5 a 6 veces semana<br><input type="radio"/> 1 vez al día<br><input type="radio"/> 2 a 3 veces al día<br><input type="radio"/> 5 a 6 veces al día<br><input type="radio"/> más 6 veces al día |
|---------------------|--------------------------------------------------------------------------------------------------------------------------------------------------------------------------------------------------------------------------------------------------------------------------------------------------------------------------------------------------------------------------------------------------------------|

---

|         |                                                                                                                                                                                                                                                                                                                                                                                                              |
|---------|--------------------------------------------------------------------------------------------------------------------------------------------------------------------------------------------------------------------------------------------------------------------------------------------------------------------------------------------------------------------------------------------------------------|
| licores | <input checked="" type="radio"/> Nunca o menos 1 vez al mes<br><input type="radio"/> 1 a 3 veces mes<br><input type="radio"/> 1 vez semana<br><input type="radio"/> 2 a 4 veces semana<br><input type="radio"/> 5 a 6 veces semana<br><input type="radio"/> 1 vez al día<br><input type="radio"/> 2 a 3 veces al día<br><input type="radio"/> 5 a 6 veces al día<br><input type="radio"/> más 6 veces al día |
|---------|--------------------------------------------------------------------------------------------------------------------------------------------------------------------------------------------------------------------------------------------------------------------------------------------------------------------------------------------------------------------------------------------------------------|

---

|                       |                                                                                                                                                                                                                                                                                                                                                                                                              |
|-----------------------|--------------------------------------------------------------------------------------------------------------------------------------------------------------------------------------------------------------------------------------------------------------------------------------------------------------------------------------------------------------------------------------------------------------|
| ginebra o ron o vodka | <input checked="" type="radio"/> Nunca o menos 1 vez al mes<br><input type="radio"/> 1 a 3 veces mes<br><input type="radio"/> 1 vez semana<br><input type="radio"/> 2 a 4 veces semana<br><input type="radio"/> 5 a 6 veces semana<br><input type="radio"/> 1 vez al día<br><input type="radio"/> 2 a 3 veces al día<br><input type="radio"/> 5 a 6 veces al día<br><input type="radio"/> más 6 veces al día |
|-----------------------|--------------------------------------------------------------------------------------------------------------------------------------------------------------------------------------------------------------------------------------------------------------------------------------------------------------------------------------------------------------------------------------------------------------|

---

|                 |                                                                                                                                                                                                                                                                                                                                                                                                              |
|-----------------|--------------------------------------------------------------------------------------------------------------------------------------------------------------------------------------------------------------------------------------------------------------------------------------------------------------------------------------------------------------------------------------------------------------|
| refresco normal | <input checked="" type="radio"/> Nunca o menos 1 vez al mes<br><input type="radio"/> 1 a 3 veces mes<br><input type="radio"/> 1 vez semana<br><input type="radio"/> 2 a 4 veces semana<br><input type="radio"/> 5 a 6 veces semana<br><input type="radio"/> 1 vez al día<br><input type="radio"/> 2 a 3 veces al día<br><input type="radio"/> 5 a 6 veces al día<br><input type="radio"/> más 6 veces al día |
|-----------------|--------------------------------------------------------------------------------------------------------------------------------------------------------------------------------------------------------------------------------------------------------------------------------------------------------------------------------------------------------------------------------------------------------------|

---

|                          |                                                                                                                                                                                                                                                                                                                                                                                                              |
|--------------------------|--------------------------------------------------------------------------------------------------------------------------------------------------------------------------------------------------------------------------------------------------------------------------------------------------------------------------------------------------------------------------------------------------------------|
| refresco sin azúcar      | <input type="radio"/> Nunca o menos 1 vez al mes<br><input type="radio"/> 1 a 3 veces mes<br><input type="radio"/> 1 vez semana<br><input checked="" type="radio"/> 2 a 4 veces semana<br><input type="radio"/> 5 a 6 veces semana<br><input type="radio"/> 1 vez al día<br><input type="radio"/> 2 a 3 veces al día<br><input type="radio"/> 5 a 6 veces al día<br><input type="radio"/> más 6 veces al día |
| Agua del grifo           | <input checked="" type="radio"/> Nunca o menos 1 vez al mes<br><input type="radio"/> 1 a 3 veces mes<br><input type="radio"/> 1 vez semana<br><input type="radio"/> 2 a 4 veces semana<br><input type="radio"/> 5 a 6 veces semana<br><input type="radio"/> 1 vez al día<br><input type="radio"/> 2 a 3 veces al día<br><input type="radio"/> 5 a 6 veces al día<br><input type="radio"/> más 6 veces al día |
| agua embotellada sin gas | <input type="radio"/> Nunca o menos 1 vez al mes<br><input type="radio"/> 1 a 3 veces mes<br><input type="radio"/> 1 vez semana<br><input type="radio"/> 2 a 4 veces semana<br><input type="radio"/> 5 a 6 veces semana<br><input type="radio"/> 1 vez al día<br><input type="radio"/> 2 a 3 veces al día<br><input type="radio"/> 5 a 6 veces al día<br><input checked="" type="radio"/> más 6 veces al día |
| agua embotellada con gas | <input checked="" type="radio"/> Nunca o menos 1 vez al mes<br><input type="radio"/> 1 a 3 veces mes<br><input type="radio"/> 1 vez semana<br><input type="radio"/> 2 a 4 veces semana<br><input type="radio"/> 5 a 6 veces semana<br><input type="radio"/> 1 vez al día<br><input type="radio"/> 2 a 3 veces al día<br><input type="radio"/> 5 a 6 veces al día<br><input type="radio"/> más 6 veces al día |
| zumو frutas embasado     | <input checked="" type="radio"/> Nunca o menos 1 vez al mes<br><input type="radio"/> 1 a 3 veces mes<br><input type="radio"/> 1 vez semana<br><input type="radio"/> 2 a 4 veces semana<br><input type="radio"/> 5 a 6 veces semana<br><input type="radio"/> 1 vez al día<br><input type="radio"/> 2 a 3 veces al día<br><input type="radio"/> 5 a 6 veces al día<br><input type="radio"/> más 6 veces al día |
| cafe                     | <input checked="" type="radio"/> Nunca o menos 1 vez al mes<br><input type="radio"/> 1 a 3 veces mes<br><input type="radio"/> 1 vez semana<br><input type="radio"/> 2 a 4 veces semana<br><input type="radio"/> 5 a 6 veces semana<br><input type="radio"/> 1 vez al día<br><input type="radio"/> 2 a 3 veces al día<br><input type="radio"/> 5 a 6 veces al día<br><input type="radio"/> más 6 veces al día |

---

cafe descafeinado

- ☐ Nunca o menos 1 vez al mes  
☒ 1 a 3 veces mes  
☐ 1 vez semana  
☐ 2 a 4 veces semana  
☐ 5 a 6 veces semana  
☐ 1 vez al día  
☐ 2 a 3 veces al día  
☐ 5 a 6 veces al día  
☐ más 6 veces al día

---

te o infusión

- ☒ Nunca o menos 1 vez al mes  
☐ 1 a 3 veces mes  
☐ 1 vez semana  
☐ 2 a 4 veces semana  
☐ 5 a 6 veces semana  
☐ 1 vez al día  
☐ 2 a 3 veces al día  
☐ 5 a 6 veces al día  
☐ más 6 veces al día

---

sopa o puré verduras

- ☐ Nunca o menos 1 vez al mes  
☐ 1 a 3 veces mes  
☒ 1 vez semana  
☐ 2 a 4 veces semana  
☐ 5 a 6 veces semana  
☐ 1 vez al día  
☐ 2 a 3 veces al día  
☐ 5 a 6 veces al día  
☐ más 6 veces al día

---

croquetas pollo jamón

- ☐ Nunca o menos 1 vez al mes  
☒ 1 a 3 veces mes  
☐ 1 vez semana  
☐ 2 a 4 veces semana  
☐ 5 a 6 veces semana  
☐ 1 vez al día  
☐ 2 a 3 veces al día  
☐ 5 a 6 veces al día  
☐ más 6 veces al día

---

croquetas pescado

- ☐ Nunca o menos 1 vez al mes  
☐ 1 a 3 veces mes  
☐ 1 vez semana  
☒ 2 a 4 veces semana  
☐ 5 a 6 veces semana  
☐ 1 vez al día  
☐ 2 a 3 veces al día  
☐ 5 a 6 veces al día  
☐ más 6 veces al día

---

mayonesa

- ☐ Nunca o menos 1 vez al mes  
☐ 1 a 3 veces mes  
☐ 1 vez semana  
☒ 2 a 4 veces semana  
☐ 5 a 6 veces semana  
☐ 1 vez al día  
☐ 2 a 3 veces al día  
☐ 5 a 6 veces al día  
☐ más 6 veces al día

|                  |                                                                                                                                                                                                                                                                                                                                                                                                              |
|------------------|--------------------------------------------------------------------------------------------------------------------------------------------------------------------------------------------------------------------------------------------------------------------------------------------------------------------------------------------------------------------------------------------------------------|
| salsa tomate     | <input type="radio"/> Nunca o menos 1 vez al mes<br><input type="radio"/> 1 a 3 veces mes<br><input type="radio"/> 1 vez semana<br><input checked="" type="radio"/> 2 a 4 veces semana<br><input type="radio"/> 5 a 6 veces semana<br><input type="radio"/> 1 vez al día<br><input type="radio"/> 2 a 3 veces al día<br><input type="radio"/> 5 a 6 veces al día<br><input type="radio"/> más 6 veces al día |
| ketchup          | <input type="radio"/> Nunca o menos 1 vez al mes<br><input type="radio"/> 1 a 3 veces mes<br><input checked="" type="radio"/> 1 vez semana<br><input type="radio"/> 2 a 4 veces semana<br><input type="radio"/> 5 a 6 veces semana<br><input type="radio"/> 1 vez al día<br><input type="radio"/> 2 a 3 veces al día<br><input type="radio"/> 5 a 6 veces al día<br><input type="radio"/> más 6 veces al día |
| sal              | <input type="radio"/> Nunca o menos 1 vez al mes<br><input checked="" type="radio"/> 1 a 3 veces mes<br><input type="radio"/> 1 vez semana<br><input type="radio"/> 2 a 4 veces semana<br><input type="radio"/> 5 a 6 veces semana<br><input type="radio"/> 1 vez al día<br><input type="radio"/> 2 a 3 veces al día<br><input type="radio"/> 5 a 6 veces al día<br><input type="radio"/> más 6 veces al día |
| ajo              | <input type="radio"/> Nunca o menos 1 vez al mes<br><input type="radio"/> 1 a 3 veces mes<br><input checked="" type="radio"/> 1 vez semana<br><input type="radio"/> 2 a 4 veces semana<br><input type="radio"/> 5 a 6 veces semana<br><input type="radio"/> 1 vez al día<br><input type="radio"/> 2 a 3 veces al día<br><input type="radio"/> 5 a 6 veces al día<br><input type="radio"/> más 6 veces al día |
| mermelada o miel | <input checked="" type="radio"/> Nunca o menos 1 vez al mes<br><input type="radio"/> 1 a 3 veces mes<br><input type="radio"/> 1 vez semana<br><input type="radio"/> 2 a 4 veces semana<br><input type="radio"/> 5 a 6 veces semana<br><input type="radio"/> 1 vez al día<br><input type="radio"/> 2 a 3 veces al día<br><input type="radio"/> 5 a 6 veces al día<br><input type="radio"/> más 6 veces al día |
| azúcar           | <input type="radio"/> Nunca o menos 1 vez al mes<br><input type="radio"/> 1 a 3 veces mes<br><input type="radio"/> 1 vez semana<br><input checked="" type="radio"/> 2 a 4 veces semana<br><input type="radio"/> 5 a 6 veces semana<br><input type="radio"/> 1 vez al día<br><input type="radio"/> 2 a 3 veces al día<br><input type="radio"/> 5 a 6 veces al día<br><input type="radio"/> más 6 veces al día |



|                                       |                                                                                                                                                                                                                                                                                                                                                                                                                                                                                                                               |
|---------------------------------------|-------------------------------------------------------------------------------------------------------------------------------------------------------------------------------------------------------------------------------------------------------------------------------------------------------------------------------------------------------------------------------------------------------------------------------------------------------------------------------------------------------------------------------|
| Otro alimento                         |                                                                                                                                                                                                                                                                                                                                                                                                                                                                                                                               |
| suplementos vitamínicos               | <input type="radio"/> si<br><input checked="" type="radio"/> no                                                                                                                                                                                                                                                                                                                                                                                                                                                               |
| suplementos vitamínicos               |                                                                                                                                                                                                                                                                                                                                                                                                                                                                                                                               |
| dieta previa                          | <input type="radio"/> si<br><input checked="" type="radio"/> no                                                                                                                                                                                                                                                                                                                                                                                                                                                               |
| motivo dieta                          | <input checked="" type="radio"/> no dieta<br><input type="radio"/> control peso<br><input type="radio"/> control colesterol<br><input type="radio"/> control diabetes<br><input type="radio"/> problemas estómago<br><input type="radio"/> problemas vesícula o hepáticos<br><input type="radio"/> HTA o cardiopatía<br><input type="radio"/> problemas renales<br><input type="radio"/> alergia alimentaria<br><input type="radio"/> ácido úrico elevado<br><input type="radio"/> vegetariana<br><input type="radio"/> otros |
| cambio alimentos año previo gestación | <input checked="" type="radio"/> si<br><input type="radio"/> no                                                                                                                                                                                                                                                                                                                                                                                                                                                               |
| cambio lácteos                        | <input type="radio"/> eliminado<br><input type="radio"/> disminuido<br><input checked="" type="radio"/> igual<br><input type="radio"/> aumentado<br><input type="radio"/> no sabe                                                                                                                                                                                                                                                                                                                                             |
| cambio huevos                         | <input type="radio"/> eliminado<br><input type="radio"/> disminuido<br><input checked="" type="radio"/> igual<br><input type="radio"/> aumentado<br><input type="radio"/> no sabe                                                                                                                                                                                                                                                                                                                                             |
| cambio carne                          | <input type="radio"/> eliminado<br><input type="radio"/> disminuido<br><input type="radio"/> igual<br><input checked="" type="radio"/> aumentado<br><input type="radio"/> no sabe                                                                                                                                                                                                                                                                                                                                             |
| cambio pescado                        | <input type="radio"/> eliminado<br><input type="radio"/> disminuido<br><input type="radio"/> igual<br><input checked="" type="radio"/> aumentado<br><input type="radio"/> no sabe                                                                                                                                                                                                                                                                                                                                             |
| cambio verduras                       | <input type="radio"/> eliminado<br><input type="radio"/> disminuido<br><input checked="" type="radio"/> igual<br><input type="radio"/> aumentado<br><input type="radio"/> no sabe                                                                                                                                                                                                                                                                                                                                             |

|                            |                                                                                                                                                                                                                        |
|----------------------------|------------------------------------------------------------------------------------------------------------------------------------------------------------------------------------------------------------------------|
| cambio legumbres           | <input type="radio"/> eliminado<br><input type="radio"/> disminuido<br><input checked="" type="radio"/> igual<br><input type="radio"/> aumentado<br><input type="radio"/> no sabe                                      |
| cambio fruta               | <input type="radio"/> eliminado<br><input type="radio"/> disminuido<br><input checked="" type="radio"/> igual<br><input type="radio"/> aumentado<br><input type="radio"/> no sabe                                      |
| cambio pan                 | <input type="radio"/> eliminado<br><input type="radio"/> disminuido<br><input checked="" type="radio"/> igual<br><input type="radio"/> aumentado<br><input type="radio"/> no sabe                                      |
| cambio aceite oliva        | <input type="radio"/> eliminado<br><input type="radio"/> disminuido<br><input checked="" type="radio"/> igual<br><input type="radio"/> aumentado<br><input type="radio"/> no sabe                                      |
| cambio mante o margarina   | <input type="radio"/> eliminado<br><input type="radio"/> disminuido<br><input checked="" type="radio"/> igual<br><input type="radio"/> aumentado<br><input type="radio"/> no sabe                                      |
| cambio azúcar y dulces     | <input type="radio"/> eliminado<br><input type="radio"/> disminuido<br><input checked="" type="radio"/> igual<br><input type="radio"/> aumentado<br><input type="radio"/> no sabe                                      |
| cambio bebidas alcohólicas | <input checked="" type="radio"/> eliminado<br><input type="radio"/> disminuido<br><input type="radio"/> igual<br><input type="radio"/> aumentado<br><input type="radio"/> no sabe                                      |
| frecuencia comidas fritas  | <input type="radio"/> a diario<br><input type="radio"/> 5 a 6 veces semana<br><input checked="" type="radio"/> 2 a 4 veces semana<br><input type="radio"/> 1 vez semana<br><input type="radio"/> menos de 1 vez semana |
| carne                      | <input type="radio"/> no como<br><input type="radio"/> cruda<br><input type="radio"/> poco hecha<br><input type="radio"/> hecha<br><input checked="" type="radio"/> muy hecha                                          |
| grasa visible carne        | <input type="radio"/> quita toda<br><input checked="" type="radio"/> quita mayoría<br><input type="radio"/> quita un poco<br><input type="radio"/> no quita nada                                                       |

|                                |                                                                                                                                                                                                                                                          |
|--------------------------------|----------------------------------------------------------------------------------------------------------------------------------------------------------------------------------------------------------------------------------------------------------|
| cocina carne                   | <input checked="" type="radio"/> a la plancha<br><input type="radio"/> a la parrilla<br><input type="radio"/> asada<br><input type="radio"/> frita<br><input type="radio"/> guisada                                                                      |
| tostado quemado carne          | <input type="radio"/> nunca<br><input type="radio"/> 1 vez mes<br><input type="radio"/> 2 a 3 veces mes<br><input type="radio"/> 1 vez semana<br><input type="radio"/> 2 a 3 semanas                                                                     |
| tostado quemado pescado        | <input type="radio"/> nunca<br><input type="radio"/> 1 vez mes<br><input type="radio"/> 2 a 3 veces mes<br><input type="radio"/> 1 vez semana<br><input type="radio"/> 2 a 3 semanas                                                                     |
| socarrat paella                | <input type="radio"/> nunca<br><input type="radio"/> 1 vez mes<br><input checked="" type="radio"/> 2 a 3 veces mes<br><input type="radio"/> 1 vez semana<br><input type="radio"/> 2 a 3 semanas                                                          |
| grasa o aceite cocinar         | <input type="radio"/> mantequilla<br><input type="radio"/> margarina<br><input type="radio"/> aceite oliva<br><input checked="" type="radio"/> aceite oliva virgen extra<br><input type="radio"/> aceite vegetal<br><input type="radio"/> mezcla aceites |
| grasa aceite aliñar            | <input type="radio"/> mantequilla<br><input type="radio"/> margarina<br><input type="radio"/> aceite oliva<br><input checked="" type="radio"/> aceite oliva virgen extra<br><input type="radio"/> aceite vegetal<br><input type="radio"/> mezcla aceites |
| grasa aceite freir             | <input type="radio"/> mantequilla<br><input type="radio"/> margarina<br><input type="radio"/> aceite oliva<br><input type="radio"/> aceite oliva virgen extra<br><input type="radio"/> aceite vegetal<br><input checked="" type="radio"/> mezcla aceites |
| Ejercicio cuestionario         | <input checked="" type="radio"/> si<br><input type="radio"/> no                                                                                                                                                                                          |
| horas de sueño incluido siesta | [*DATA REMOVED*]                                                                                                                                                                                                                                         |
| minutos siesta                 | [*DATA REMOVED*]                                                                                                                                                                                                                                         |
| horas televisión semana        |                                                                                                                                                                                                                                                          |

|                                        |                                                                                                                                                                                                                                                                                                                                                                           |
|----------------------------------------|---------------------------------------------------------------------------------------------------------------------------------------------------------------------------------------------------------------------------------------------------------------------------------------------------------------------------------------------------------------------------|
| actividad trabajo                      | <input type="radio"/> casi siempre sentado<br><input type="radio"/> sentado 50 por cien<br><input type="radio"/> casi siempre de pie, quieto<br><input checked="" type="radio"/> casi siempre levantado caminando y llevando pocas cosas<br><input type="radio"/> casi siempre levantado, caminando y llevado muchas cosas<br><input type="radio"/> trabajo manual pesado |
| tiempo caminar o bici al día           | <input checked="" type="radio"/> casi nunca<br><input type="radio"/> menos 20min día<br><input type="radio"/> 20 a 40 min día<br><input type="radio"/> 40 a 60 min día<br><input type="radio"/> 1h o 1h y media día<br><input type="radio"/> más de 1h y media al día                                                                                                     |
| tiempo tareas casa al día              | <input type="radio"/> menos de 1h día<br><input checked="" type="radio"/> 1 a 2h día<br><input type="radio"/> 3 a 4h día<br><input type="radio"/> 5 a 6h día<br><input type="radio"/> 7 a 8h día<br><input type="radio"/> más de 8h día                                                                                                                                   |
| tiempo libre televisión ordenador leer | <input type="radio"/> menos 1h día<br><input type="radio"/> 1h día<br><input type="radio"/> 2h día<br><input type="radio"/> 3h día<br><input type="radio"/> 4h día<br><input checked="" type="radio"/> 5 a 6h día<br><input type="radio"/> mas 6h día                                                                                                                     |
| tiempo libre ejercicio o deporte       | <input checked="" type="radio"/> menos 1h semana<br><input type="radio"/> 1h semana<br><input type="radio"/> 2h semana<br><input type="radio"/> 3h semana<br><input type="radio"/> 4 a 5h semana<br><input type="radio"/> mas 5h semana                                                                                                                                   |
| como se considera                      | <input type="radio"/> sedentaria<br><input checked="" type="radio"/> poco activa<br><input type="radio"/> moderadamente activa<br><input type="radio"/> bastante activa<br><input type="radio"/> muy activa<br><input type="radio"/> no sabe                                                                                                                              |
| FUR                                    | [*DATA REMOVED*]                                                                                                                                                                                                                                                                                                                                                          |
| Semanas gestación 2T                   | [*DATA REMOVED*]                                                                                                                                                                                                                                                                                                                                                          |
| Días gestación 2T                      | [*DATA REMOVED*]                                                                                                                                                                                                                                                                                                                                                          |
| DBP 2T                                 | [*DATA REMOVED*]                                                                                                                                                                                                                                                                                                                                                          |
| CC 2T                                  | [*DATA REMOVED*]                                                                                                                                                                                                                                                                                                                                                          |
| AC 2T                                  | [*DATA REMOVED*]                                                                                                                                                                                                                                                                                                                                                          |

|                                                   |                                                                                                                                                                                                 |
|---------------------------------------------------|-------------------------------------------------------------------------------------------------------------------------------------------------------------------------------------------------|
| LF 2T                                             | [*DATA REMOVED*]                                                                                                                                                                                |
| PFE 2T (Hadlock)                                  | [*DATA REMOVED*]                                                                                                                                                                                |
| Semanas gestación 3T                              | [*DATA REMOVED*]                                                                                                                                                                                |
| días 3T                                           | [*DATA REMOVED*]                                                                                                                                                                                |
| DBP 3T                                            | [*DATA REMOVED*]                                                                                                                                                                                |
| CC 3T                                             | [*DATA REMOVED*]                                                                                                                                                                                |
| AC 3T                                             | [*DATA REMOVED*]                                                                                                                                                                                |
| LF 3T                                             | [*DATA REMOVED*]                                                                                                                                                                                |
| PFE 3T (Hadlock)                                  | [*DATA REMOVED*]                                                                                                                                                                                |
| Semanas de gestación final                        | [*DATA REMOVED*]                                                                                                                                                                                |
| días gestación final                              | [*DATA REMOVED*]                                                                                                                                                                                |
| Localización placenta                             | <input type="radio"/> anterior<br><input type="radio"/> lateral derecha<br><input type="radio"/> lateral izquierda<br><input checked="" type="radio"/> posterior<br><input type="radio"/> fondo |
| Presentación longitudinal cefálica                | <input type="radio"/> no<br><input checked="" type="radio"/> si                                                                                                                                 |
| Dorso                                             | <input type="radio"/> izquierda anterior<br><input type="radio"/> izquierda posterior<br><input checked="" type="radio"/> derecha anterior<br><input type="radio"/> derecha posterior           |
| diámetro biparietal                               | [*DATA REMOVED*]                                                                                                                                                                                |
| Circunferencia craneal                            | [*DATA REMOVED*]                                                                                                                                                                                |
| Circunferencia abdominal                          | [*DATA REMOVED*]                                                                                                                                                                                |
| Longitud de femur                                 | [*DATA REMOVED*]                                                                                                                                                                                |
| tejido celular subcutáneo a nivel del muslo en mm | [*DATA REMOVED*]                                                                                                                                                                                |
| tejido celular subcutáneo en abdomen en mm        | [*DATA REMOVED*]                                                                                                                                                                                |
| Volumen del muslo en cm3                          | [*DATA REMOVED*]                                                                                                                                                                                |
| Peso fetal estimado según fórmula de Hadlock      | [*DATA REMOVED*]                                                                                                                                                                                |

|                                               |                                                                                                                                                          |
|-----------------------------------------------|----------------------------------------------------------------------------------------------------------------------------------------------------------|
| Percentil                                     | [*DATA REMOVED*]                                                                                                                                         |
| Peso fetal estimado según fórmula de Scioscia | <hr/>                                                                                                                                                    |
| Peso fetal estimado según fórmula de LEE      | <hr/>                                                                                                                                                    |
| Tipo de parto                                 | <input type="radio"/> eutocico<br><input type="radio"/> instrumentado/ventosa<br><input checked="" type="radio"/> cesarea                                |
| fecha de nacimiento                           | [*DATA REMOVED*]                                                                                                                                         |
| Días entre exploración y nacimiento           | [*DATA REMOVED*]                                                                                                                                         |
| Peso RN en g                                  | [*DATA REMOVED*]                                                                                                                                         |
| sexo                                          | <input type="radio"/> mujer<br><input checked="" type="radio"/> hombre                                                                                   |
| Apgar 1 minuto                                | [*DATA REMOVED*]                                                                                                                                         |
| Apgar 5 minutos                               | [*DATA REMOVED*]                                                                                                                                         |
| Apgar 10 minutos                              | <hr/>                                                                                                                                                    |
| antecedente Covid durante gestación           | <input type="radio"/> Yes<br><input checked="" type="radio"/> No                                                                                         |
| Nivel de estudios                             | <input type="radio"/> ninguno<br><input type="radio"/> primarios<br><input checked="" type="radio"/> secundarios<br><input type="radio"/> universitarios |

# Base\_datos\_estimacion\_peso\_fetal

|                                       |                                                                                                                                                                                                                                                                                      |
|---------------------------------------|--------------------------------------------------------------------------------------------------------------------------------------------------------------------------------------------------------------------------------------------------------------------------------------|
| Número de identificación participante | 162                                                                                                                                                                                                                                                                                  |
| CODIGO PARTICIPANTE                   |                                                                                                                                                                                                                                                                                      |
| Edad                                  | [*DATA REMOVED*]                                                                                                                                                                                                                                                                     |
| Gestaciones                           | <input type="radio"/> 1<br><input type="radio"/> 2<br><input checked="" type="radio"/> 3<br><input type="radio"/> mas de 3                                                                                                                                                           |
| partos                                | <input type="radio"/> 0<br><input checked="" type="radio"/> 1<br><input type="radio"/> 2<br><input type="radio"/> 3<br><input type="radio"/> mas de 3                                                                                                                                |
| cesáreas                              | <input checked="" type="radio"/> 0<br><input type="radio"/> 1<br><input type="radio"/> 2<br><input type="radio"/> 3<br><input type="radio"/> mas de 3                                                                                                                                |
| Abortos                               | <input type="radio"/> 0<br><input checked="" type="radio"/> 1<br><input type="radio"/> 2<br><input type="radio"/> 3<br><input type="radio"/> mas de 3                                                                                                                                |
| Tipo de gestacion                     | <input checked="" type="radio"/> espontanea<br><input type="radio"/> IAC inseminación artificial conyuge<br><input type="radio"/> IAD inseminación artificial donante<br><input type="radio"/> FIV Fecundación in Vitro<br><input type="radio"/> Ovodon FIV con donación de ovocitos |
| peso previo a embarazo                | [*DATA REMOVED*]                                                                                                                                                                                                                                                                     |
| Ganancia ponderal embarazo            | [*DATA REMOVED*]                                                                                                                                                                                                                                                                     |
| Talla madre                           | [*DATA REMOVED*]                                                                                                                                                                                                                                                                     |
| IMC previo embarazo                   | 21.829952199932254                                                                                                                                                                                                                                                                   |
| Patología obstétrica                  | <input checked="" type="radio"/> no<br><input type="radio"/> si                                                                                                                                                                                                                      |
| Diabetes pregestacional               | <input checked="" type="radio"/> no<br><input type="radio"/> si                                                                                                                                                                                                                      |
| Diabetes gestacional                  | <input checked="" type="radio"/> no<br><input type="radio"/> si                                                                                                                                                                                                                      |

|                                            |                                                                                                                                                                                      |
|--------------------------------------------|--------------------------------------------------------------------------------------------------------------------------------------------------------------------------------------|
| Diabetes gestacional con insulina          | <input checked="" type="radio"/> no<br><input type="radio"/> si                                                                                                                      |
| Diabetes gestacional con dieta y ejercicio | <input checked="" type="radio"/> no<br><input type="radio"/> si                                                                                                                      |
| Percentil fetos previos                    | <input type="radio"/> Nada<br><input type="radio"/> percentil menor de 10<br><input checked="" type="radio"/> percentil entre 10 y 90<br><input type="radio"/> percentil mayor de 90 |
| Exfumadora                                 | <input type="radio"/> Nada<br><input type="radio"/> menos de 5 años<br><input checked="" type="radio"/> 5 a 10 años<br><input type="radio"/> mayor o igual a 10 años                 |
| Hábito tabáquico                           | <input checked="" type="radio"/> no<br><input type="radio"/> si                                                                                                                      |
| fumadora                                   | [*DATA REMOVED*]                                                                                                                                                                     |
| Consumo otros tóxicos                      | <input checked="" type="radio"/> no<br><input type="radio"/> si                                                                                                                      |
| Hb 1T                                      | [*DATA REMOVED*]                                                                                                                                                                     |
| Htc 1T                                     | [*DATA REMOVED*]                                                                                                                                                                     |
| Hb 2T                                      | [*DATA REMOVED*]                                                                                                                                                                     |
| HTC 2T                                     | [*DATA REMOVED*]                                                                                                                                                                     |
| Hb 3T                                      | [*DATA REMOVED*]                                                                                                                                                                     |
| HTC 3T                                     | [*DATA REMOVED*]                                                                                                                                                                     |
| Suplemento FE oral                         | <input checked="" type="radio"/> si<br><input type="radio"/> no                                                                                                                      |
| Suplemento fe iv                           | <input type="radio"/> si<br><input checked="" type="radio"/> no                                                                                                                      |
| Transfusión                                | <input checked="" type="radio"/> no<br><input type="radio"/> si                                                                                                                      |
| Solicitada Vit D                           | <input checked="" type="radio"/> no<br><input type="radio"/> si                                                                                                                      |
| Deficit vit D                              | <input type="radio"/> no<br><input type="radio"/> si                                                                                                                                 |
| Suplemento vit D                           | <input type="radio"/> si<br><input type="radio"/> no                                                                                                                                 |



|                       |                                                                                                                                                                                                                                                                                                                                                                                                              |
|-----------------------|--------------------------------------------------------------------------------------------------------------------------------------------------------------------------------------------------------------------------------------------------------------------------------------------------------------------------------------------------------------------------------------------------------------|
| Dieta, cuestionario   | <input checked="" type="radio"/> sí<br><input type="radio"/> no                                                                                                                                                                                                                                                                                                                                              |
| Leche entera          | <input checked="" type="radio"/> Nunca o menos 1 vez al mes<br><input type="radio"/> 1 a 3 veces mes<br><input type="radio"/> 1 vez semana<br><input type="radio"/> 2 a 4 veces semana<br><input type="radio"/> 5 a 6 veces semana<br><input type="radio"/> 1 vez al día<br><input type="radio"/> 2 a 3 veces al día<br><input type="radio"/> 5 a 6 veces al día<br><input type="radio"/> más 6 veces al día |
| Leche semidesnatada   | <input type="radio"/> Nunca o menos 1 vez al mes<br><input type="radio"/> 1 a 3 veces mes<br><input checked="" type="radio"/> 1 vez semana<br><input type="radio"/> 2 a 4 veces semana<br><input type="radio"/> 5 a 6 veces semana<br><input type="radio"/> 1 vez al día<br><input type="radio"/> 2 a 3 veces al día<br><input type="radio"/> 5 a 6 veces al día<br><input type="radio"/> mas 6 veces al día |
| Leche desnatada       | <input checked="" type="radio"/> Nunca o menos 1 vez al mes<br><input type="radio"/> 1 a 3 veces mes<br><input type="radio"/> 1 vez semana<br><input type="radio"/> 2 a 4 veces semana<br><input type="radio"/> 5 a 6 veces semana<br><input type="radio"/> 1 vez al día<br><input type="radio"/> 2 a 3 veces al día<br><input type="radio"/> 5 a 6 veces al día<br><input type="radio"/> más 6 veces al día |
| Leche condensada      | <input checked="" type="radio"/> Nunca o menos 1 vez al mes<br><input type="radio"/> 1 a 3 veces mes<br><input type="radio"/> 1 vez semana<br><input type="radio"/> 2 a 4 veces semana<br><input type="radio"/> 5 a 6 veces semana<br><input type="radio"/> 1 vez al día<br><input type="radio"/> 2 a 3 veces al día<br><input type="radio"/> 5 a 6 veces al día<br><input type="radio"/> más 6 veces al día |
| nata o crema de leche | <input type="radio"/> Nunca o menos 1 vez al mes<br><input type="radio"/> 1 a 3 veces mes<br><input type="radio"/> 1 vez semana<br><input type="radio"/> 2 a 4 veces semana<br><input type="radio"/> 5 a 6 veces semana<br><input type="radio"/> 1 vez al día<br><input type="radio"/> 2 a 3 veces al día<br><input type="radio"/> 5 a 6 veces al día<br><input type="radio"/> más 6 veces al día            |

---

Yogurt Entero

- ☐ Nunca o menos 1 vez al mes  
☐ 1 a 3 veces mes  
☐ 1 vez semana  
☒ 2 a 4 veces semana  
☐ 5 a 6 veces semana  
☐ 1 vez al día  
☐ 2 a 3 veces al día  
☐ 5 a 6 veces al día  
☐ más 6 veces al día

---

Yogurt desnatado

- ☐ Nunca o menos 1 vez al mes  
☐ 1 a 3 veces mes  
☒ 1 vez semana  
☐ 2 a 4 veces semana  
☐ 5 a 6 veces semana  
☐ 1 vez al día  
☐ 2 a 3 veces al día  
☐ 5 a 6 veces al día  
☐ más 6 veces al día

---

100g requesón o queso blando o queso fresco

- ☐ Nunca o menos 1 vez al mes  
☐ 1 a 3 veces mes  
☐ 1 vez semana  
☒ 2 a 4 veces semana  
☐ 5 a 6 veces semana  
☐ 1 vez al día  
☐ 2 a 3 veces al día  
☐ 5 a 6 veces al día  
☐ más 6 veces al día

---

queso curado o semicurado o cremoso

- ☐ Nunca o menos 1 vez al mes  
☐ 1 a 3 veces mes  
☐ 1 vez semana  
☒ 2 a 4 veces semana  
☐ 5 a 6 veces semana  
☐ 1 vez al día  
☐ 2 a 3 veces al día  
☐ 5 a 6 veces al día  
☐ más 6 veces al día

---

natillas flan pudding

- ☐ Nunca o menos 1 vez al mes  
☒ 1 a 3 veces mes  
☐ 1 vez semana  
☐ 2 a 4 veces semana  
☐ 5 a 6 veces semana  
☐ 1 vez al día  
☐ 2 a 3 veces al día  
☐ 5 a 6 veces al día  
☐ más 6 veces al día

---

Helado

- ☐ Nunca o menos 1 vez al mes  
☐ 1 a 3 veces mes  
☐ 1 vez semana  
☒ 2 a 4 veces semana  
☐ 5 a 6 veces semana  
☐ 1 vez al día  
☐ 2 a 3 veces al día  
☐ 5 a 6 veces al día  
☐ más 6 veces al día

|                                      |                                                                                                                                                                                                                                                                                                                                                                                                              |
|--------------------------------------|--------------------------------------------------------------------------------------------------------------------------------------------------------------------------------------------------------------------------------------------------------------------------------------------------------------------------------------------------------------------------------------------------------------|
| huevo                                | <input type="radio"/> Nunca o menos 1 vez al mes<br><input type="radio"/> 1 a 3 veces mes<br><input type="radio"/> 1 vez semana<br><input checked="" type="radio"/> 2 a 4 veces semana<br><input type="radio"/> 5 a 6 veces semana<br><input type="radio"/> 1 vez al día<br><input type="radio"/> 2 a 3 veces al día<br><input type="radio"/> 5 a 6 veces al día<br><input type="radio"/> más 6 veces al día |
| Pollo con piel                       | <input type="radio"/> Nunca o menos 1 vez al mes<br><input type="radio"/> 1 a 3 veces mes<br><input type="radio"/> 1 vez semana<br><input checked="" type="radio"/> 2 a 4 veces semana<br><input type="radio"/> 5 a 6 veces semana<br><input type="radio"/> 1 vez al día<br><input type="radio"/> 2 a 3 veces al día<br><input type="radio"/> 5 a 6 veces al día<br><input type="radio"/> más 6 veces al día |
| pollo sin piel                       | <input type="radio"/> Nunca o menos 1 vez al mes<br><input type="radio"/> 1 a 3 veces mes<br><input type="radio"/> 1 vez semana<br><input type="radio"/> 2 a 4 veces semana<br><input type="radio"/> 5 a 6 veces semana<br><input type="radio"/> 1 vez al día<br><input type="radio"/> 2 a 3 veces al día<br><input type="radio"/> 5 a 6 veces al día<br><input type="radio"/> más 6 veces al día            |
| Ternera o cerdo o cordero            | <input type="radio"/> Nunca o menos 1 vez al mes<br><input type="radio"/> 1 a 3 veces mes<br><input checked="" type="radio"/> 1 vez semana<br><input type="radio"/> 2 a 4 veces semana<br><input type="radio"/> 5 a 6 veces semana<br><input type="radio"/> 1 vez al día<br><input type="radio"/> 2 a 3 veces al día<br><input type="radio"/> 5 a 6 veces al día<br><input type="radio"/> más 6 veces al día |
| carne caza: Conejo o codorniz o pato | <input checked="" type="radio"/> Nunca o menos 1 vez al mes<br><input type="radio"/> 1 a 3 veces mes<br><input type="radio"/> 1 vez semana<br><input type="radio"/> 2 a 4 veces semana<br><input type="radio"/> 5 a 6 veces semana<br><input type="radio"/> 1 vez al día<br><input type="radio"/> 2 a 3 veces al día<br><input type="radio"/> 5 a 6 veces al día<br><input type="radio"/> más 6 veces al día |
| Hígado de ternera o cerdo o pollo    | <input type="radio"/> Nunca o menos 1 vez al mes<br><input type="radio"/> 1 a 3 veces mes<br><input checked="" type="radio"/> 1 vez semana<br><input type="radio"/> 2 a 4 veces semana<br><input type="radio"/> 5 a 6 veces semana<br><input type="radio"/> 1 vez al día<br><input type="radio"/> 2 a 3 veces al día<br><input type="radio"/> 5 a 6 veces al día<br><input type="radio"/> más 6 veces al día |

---

Vísceras

- ☒ Nunca o menos 1 vez al mes  
☐ 1 a 3 veces mes  
☐ 1 vez semana  
☐ 2 a 4 veces semana  
☐ 5 a 6 veces semana  
☐ 1 vez al día  
☐ 2 a 3 veces al día  
☐ 5 a 6 veces al día  
☐ más 6 veces al día

---

Embutido

- ☐ Nunca o menos 1 vez al mes  
☐ 1 a 3 veces mes  
☒ 1 vez semana  
☐ 2 a 4 veces semana  
☐ 5 a 6 veces semana  
☐ 1 vez al día  
☐ 2 a 3 veces al día  
☐ 5 a 6 veces al día  
☐ más 6 veces al día

---

Salchicha o similar

- ☒ Nunca o menos 1 vez al mes  
☐ 1 a 3 veces mes  
☐ 1 vez semana  
☐ 2 a 4 veces semana  
☐ 5 a 6 veces semana  
☐ 1 vez al día  
☐ 2 a 3 veces al día  
☐ 5 a 6 veces al día  
☐ más 6 veces al día

---

Pate o foiegras

- ☒ Nunca o menos 1 vez al mes  
☐ 1 a 3 veces mes  
☐ 1 vez semana  
☐ 2 a 4 veces semana  
☐ 5 a 6 veces semana  
☐ 1 vez al día  
☐ 2 a 3 veces al día  
☐ 5 a 6 veces al día  
☐ más 6 veces al día

---

Hamburguesa

- ☐ Nunca o menos 1 vez al mes  
☐ 1 a 3 veces mes  
☒ 1 vez semana  
☐ 2 a 4 veces semana  
☐ 5 a 6 veces semana  
☐ 1 vez al día  
☐ 2 a 3 veces al día  
☐ 5 a 6 veces al día  
☐ más 6 veces al día

---

tocino o bacon

- ☐ Nunca o menos 1 vez al mes  
☐ 1 a 3 veces mes  
☒ 1 vez semana  
☐ 2 a 4 veces semana  
☐ 5 a 6 veces semana  
☐ 1 vez al día  
☐ 2 a 3 veces al día  
☐ 5 a 6 veces al día  
☐ más 6 veces al día

---

|               |                                                                                                                                                                                                                                                                                                                                                                                                              |
|---------------|--------------------------------------------------------------------------------------------------------------------------------------------------------------------------------------------------------------------------------------------------------------------------------------------------------------------------------------------------------------------------------------------------------------|
| Pescado frito | <input type="radio"/> Nunca o menos 1 vez al mes<br><input type="radio"/> 1 a 3 veces mes<br><input checked="" type="radio"/> 1 vez semana<br><input type="radio"/> 2 a 4 veces semana<br><input type="radio"/> 5 a 6 veces semana<br><input type="radio"/> 1 vez al día<br><input type="radio"/> 2 a 3 veces al día<br><input type="radio"/> 5 a 6 veces al día<br><input type="radio"/> más 6 veces al día |
|---------------|--------------------------------------------------------------------------------------------------------------------------------------------------------------------------------------------------------------------------------------------------------------------------------------------------------------------------------------------------------------------------------------------------------------|

---

|                        |                                                                                                                                                                                                                                                                                                                                                                                                              |
|------------------------|--------------------------------------------------------------------------------------------------------------------------------------------------------------------------------------------------------------------------------------------------------------------------------------------------------------------------------------------------------------------------------------------------------------|
| pescado hervido blanco | <input type="radio"/> Nunca o menos 1 vez al mes<br><input checked="" type="radio"/> 1 a 3 veces mes<br><input type="radio"/> 1 vez semana<br><input type="radio"/> 2 a 4 veces semana<br><input type="radio"/> 5 a 6 veces semana<br><input type="radio"/> 1 vez al día<br><input type="radio"/> 2 a 3 veces al día<br><input type="radio"/> 5 a 6 veces al día<br><input type="radio"/> más 6 veces al día |
|------------------------|--------------------------------------------------------------------------------------------------------------------------------------------------------------------------------------------------------------------------------------------------------------------------------------------------------------------------------------------------------------------------------------------------------------|

---

|                      |                                                                                                                                                                                                                                                                                                                                                                                                              |
|----------------------|--------------------------------------------------------------------------------------------------------------------------------------------------------------------------------------------------------------------------------------------------------------------------------------------------------------------------------------------------------------------------------------------------------------|
| pescado hervido azul | <input type="radio"/> Nunca o menos 1 vez al mes<br><input type="radio"/> 1 a 3 veces mes<br><input checked="" type="radio"/> 1 vez semana<br><input type="radio"/> 2 a 4 veces semana<br><input type="radio"/> 5 a 6 veces semana<br><input type="radio"/> 1 vez al día<br><input type="radio"/> 2 a 3 veces al día<br><input type="radio"/> 5 a 6 veces al día<br><input type="radio"/> más 6 veces al día |
|----------------------|--------------------------------------------------------------------------------------------------------------------------------------------------------------------------------------------------------------------------------------------------------------------------------------------------------------------------------------------------------------------------------------------------------------|

---

|                    |                                                                                                                                                                                                                                                                                                                                                                                                              |
|--------------------|--------------------------------------------------------------------------------------------------------------------------------------------------------------------------------------------------------------------------------------------------------------------------------------------------------------------------------------------------------------------------------------------------------------|
| otros pescado azul | <input type="radio"/> Nunca o menos 1 vez al mes<br><input type="radio"/> 1 a 3 veces mes<br><input type="radio"/> 1 vez semana<br><input checked="" type="radio"/> 2 a 4 veces semana<br><input type="radio"/> 5 a 6 veces semana<br><input type="radio"/> 1 vez al día<br><input type="radio"/> 2 a 3 veces al día<br><input type="radio"/> 5 a 6 veces al día<br><input type="radio"/> más 6 veces al día |
|--------------------|--------------------------------------------------------------------------------------------------------------------------------------------------------------------------------------------------------------------------------------------------------------------------------------------------------------------------------------------------------------------------------------------------------------|

---

|               |                                                                                                                                                                                                                                                                                                                                                                                                              |
|---------------|--------------------------------------------------------------------------------------------------------------------------------------------------------------------------------------------------------------------------------------------------------------------------------------------------------------------------------------------------------------------------------------------------------------|
| atun conserva | <input checked="" type="radio"/> Nunca o menos 1 vez al mes<br><input type="radio"/> 1 a 3 veces mes<br><input type="radio"/> 1 vez semana<br><input type="radio"/> 2 a 4 veces semana<br><input type="radio"/> 5 a 6 veces semana<br><input type="radio"/> 1 vez al día<br><input type="radio"/> 2 a 3 veces al día<br><input type="radio"/> 5 a 6 veces al día<br><input type="radio"/> más 6 veces al día |
|---------------|--------------------------------------------------------------------------------------------------------------------------------------------------------------------------------------------------------------------------------------------------------------------------------------------------------------------------------------------------------------------------------------------------------------|

---

|                  |                                                                                                                                                                                                                                                                                                                                                                                                              |
|------------------|--------------------------------------------------------------------------------------------------------------------------------------------------------------------------------------------------------------------------------------------------------------------------------------------------------------------------------------------------------------------------------------------------------------|
| sardina conserva | <input checked="" type="radio"/> Nunca o menos 1 vez al mes<br><input type="radio"/> 1 a 3 veces mes<br><input type="radio"/> 1 vez semana<br><input type="radio"/> 2 a 4 veces semana<br><input type="radio"/> 5 a 6 veces semana<br><input type="radio"/> 1 vez al día<br><input type="radio"/> 2 a 3 veces al día<br><input type="radio"/> 5 a 6 veces al día<br><input type="radio"/> más 6 veces al día |
|------------------|--------------------------------------------------------------------------------------------------------------------------------------------------------------------------------------------------------------------------------------------------------------------------------------------------------------------------------------------------------------------------------------------------------------|

---

|                                         |                                                                                                                                                                                                                                                                                                                                                                                                              |
|-----------------------------------------|--------------------------------------------------------------------------------------------------------------------------------------------------------------------------------------------------------------------------------------------------------------------------------------------------------------------------------------------------------------------------------------------------------------|
| pescado ahumado                         | <input checked="" type="radio"/> Nunca o menos 1 vez al mes<br><input type="radio"/> 1 a 3 veces mes<br><input type="radio"/> 1 vez semana<br><input type="radio"/> 2 a 4 veces semana<br><input type="radio"/> 5 a 6 veces semana<br><input type="radio"/> 1 vez al día<br><input type="radio"/> 2 a 3 veces al día<br><input type="radio"/> 5 a 6 veces al día<br><input type="radio"/> más 6 veces al día |
| almejas o mejillones o ostras unos 100g | <input checked="" type="radio"/> Nunca o menos 1 vez al mes<br><input type="radio"/> 1 a 3 veces mes<br><input type="radio"/> 1 vez semana<br><input type="radio"/> 2 a 4 veces semana<br><input type="radio"/> 5 a 6 veces semana<br><input type="radio"/> 1 vez al día<br><input type="radio"/> 2 a 3 veces al día<br><input type="radio"/> 5 a 6 veces al día<br><input type="radio"/> más 6 veces al día |
| calamar o chipiron o sepia unos 100g    | <input type="radio"/> Nunca o menos 1 vez al mes<br><input checked="" type="radio"/> 1 a 3 veces mes<br><input type="radio"/> 1 vez semana<br><input type="radio"/> 2 a 4 veces semana<br><input type="radio"/> 5 a 6 veces semana<br><input type="radio"/> 1 vez al día<br><input type="radio"/> 2 a 3 veces al día<br><input type="radio"/> 5 a 6 veces al día<br><input type="radio"/> más 6 veces al día |
| marisco unos 100g                       | <input type="radio"/> Nunca o menos 1 vez al mes<br><input checked="" type="radio"/> 1 a 3 veces mes<br><input type="radio"/> 1 vez semana<br><input type="radio"/> 2 a 4 veces semana<br><input type="radio"/> 5 a 6 veces semana<br><input type="radio"/> 1 vez al día<br><input type="radio"/> 2 a 3 veces al día<br><input type="radio"/> 5 a 6 veces al día<br><input type="radio"/> más 6 veces al día |
| Espinacas o acelgas cocinadas           | <input type="radio"/> Nunca o menos 1 vez al mes<br><input type="radio"/> 1 a 3 veces mes<br><input type="radio"/> 1 vez semana<br><input checked="" type="radio"/> 2 a 4 veces semana<br><input type="radio"/> 5 a 6 veces semana<br><input type="radio"/> 1 vez al día<br><input type="radio"/> 2 a 3 veces al día<br><input type="radio"/> 5 a 6 veces al día<br><input type="radio"/> más 6 veces al día |
| Col o coliflor o brocoli cocinado       | <input type="radio"/> Nunca o menos 1 vez al mes<br><input type="radio"/> 1 a 3 veces mes<br><input type="radio"/> 1 vez semana<br><input checked="" type="radio"/> 2 a 4 veces semana<br><input type="radio"/> 5 a 6 veces semana<br><input type="radio"/> 1 vez al día<br><input type="radio"/> 2 a 3 veces al día<br><input type="radio"/> 5 a 6 veces al día<br><input type="radio"/> más 6 veces al día |

---

Lechuga o endivia o escarola

- ☐ Nunca o menos 1 vez al mes  
☐ 1 a 3 veces mes  
☐ 1 vez semana  
☒ 2 a 4 veces semana  
☐ 5 a 6 veces semana  
☐ 1 vez al día  
☐ 2 a 3 veces al día  
☐ 5 a 6 veces al día  
☐ más 6 veces al día

---

tomate ensalada

- ☐ Nunca o menos 1 vez al mes  
☐ 1 a 3 veces mes  
☐ 1 vez semana  
☐ 2 a 4 veces semana  
☒ 5 a 6 veces semana  
☐ 1 vez al día  
☐ 2 a 3 veces al día  
☐ 5 a 6 veces al día  
☐ más 6 veces al día

---

cebolla

- ☐ Nunca o menos 1 vez al mes  
☐ 1 a 3 veces mes  
☒ 1 vez semana  
☐ 2 a 4 veces semana  
☐ 5 a 6 veces semana  
☐ 1 vez al día  
☐ 2 a 3 veces al día  
☐ 5 a 6 veces al día  
☐ más 6 veces al día

---

Zanahoria o calabaza

- ☐ Nunca o menos 1 vez al mes  
☐ 1 a 3 veces mes  
☐ 1 vez semana  
☒ 2 a 4 veces semana  
☐ 5 a 6 veces semana  
☐ 1 vez al día  
☐ 2 a 3 veces al día  
☐ 5 a 6 veces al día  
☐ más 6 veces al día

---

Judías verdes

- ☐ Nunca o menos 1 vez al mes  
☒ 1 a 3 veces mes  
☐ 1 vez semana  
☐ 2 a 4 veces semana  
☐ 5 a 6 veces semana  
☐ 1 vez al día  
☐ 2 a 3 veces al día  
☐ 5 a 6 veces al día  
☐ más 6 veces al día

---

Berenjena o calabacin o pepino

- ☐ Nunca o menos 1 vez al mes  
☐ 1 a 3 veces mes  
☐ 1 vez semana  
☒ 2 a 4 veces semana  
☐ 5 a 6 veces semana  
☐ 1 vez al día  
☐ 2 a 3 veces al día  
☐ 5 a 6 veces al día  
☐ más 6 veces al día

---

|          |                                                                                                                                                                                                                                                                                                                                                                                                              |
|----------|--------------------------------------------------------------------------------------------------------------------------------------------------------------------------------------------------------------------------------------------------------------------------------------------------------------------------------------------------------------------------------------------------------------|
| pimiento | <input type="radio"/> Nunca o menos 1 vez al mes<br><input type="radio"/> 1 a 3 veces mes<br><input type="radio"/> 1 vez semana<br><input checked="" type="radio"/> 2 a 4 veces semana<br><input type="radio"/> 5 a 6 veces semana<br><input type="radio"/> 1 vez al día<br><input type="radio"/> 2 a 3 veces al día<br><input type="radio"/> 5 a 6 veces al día<br><input type="radio"/> más 6 veces al día |
|----------|--------------------------------------------------------------------------------------------------------------------------------------------------------------------------------------------------------------------------------------------------------------------------------------------------------------------------------------------------------------------------------------------------------------|

---

|           |                                                                                                                                                                                                                                                                                                                                                                                                              |
|-----------|--------------------------------------------------------------------------------------------------------------------------------------------------------------------------------------------------------------------------------------------------------------------------------------------------------------------------------------------------------------------------------------------------------------|
| alcachofa | <input type="radio"/> Nunca o menos 1 vez al mes<br><input type="radio"/> 1 a 3 veces mes<br><input checked="" type="radio"/> 1 vez semana<br><input type="radio"/> 2 a 4 veces semana<br><input type="radio"/> 5 a 6 veces semana<br><input type="radio"/> 1 vez al día<br><input type="radio"/> 2 a 3 veces al día<br><input type="radio"/> 5 a 6 veces al día<br><input type="radio"/> más 6 veces al día |
|-----------|--------------------------------------------------------------------------------------------------------------------------------------------------------------------------------------------------------------------------------------------------------------------------------------------------------------------------------------------------------------------------------------------------------------|

---

|            |                                                                                                                                                                                                                                                                                                                                                                                                              |
|------------|--------------------------------------------------------------------------------------------------------------------------------------------------------------------------------------------------------------------------------------------------------------------------------------------------------------------------------------------------------------------------------------------------------------|
| espárragos | <input type="radio"/> Nunca o menos 1 vez al mes<br><input type="radio"/> 1 a 3 veces mes<br><input checked="" type="radio"/> 1 vez semana<br><input type="radio"/> 2 a 4 veces semana<br><input type="radio"/> 5 a 6 veces semana<br><input type="radio"/> 1 vez al día<br><input type="radio"/> 2 a 3 veces al día<br><input type="radio"/> 5 a 6 veces al día<br><input type="radio"/> más 6 veces al día |
|------------|--------------------------------------------------------------------------------------------------------------------------------------------------------------------------------------------------------------------------------------------------------------------------------------------------------------------------------------------------------------------------------------------------------------|

---

|              |                                                                                                                                                                                                                                                                                                                                                                                                              |
|--------------|--------------------------------------------------------------------------------------------------------------------------------------------------------------------------------------------------------------------------------------------------------------------------------------------------------------------------------------------------------------------------------------------------------------|
| maíz hervido | <input type="radio"/> Nunca o menos 1 vez al mes<br><input type="radio"/> 1 a 3 veces mes<br><input checked="" type="radio"/> 1 vez semana<br><input type="radio"/> 2 a 4 veces semana<br><input type="radio"/> 5 a 6 veces semana<br><input type="radio"/> 1 vez al día<br><input type="radio"/> 2 a 3 veces al día<br><input type="radio"/> 5 a 6 veces al día<br><input type="radio"/> más 6 veces al día |
|--------------|--------------------------------------------------------------------------------------------------------------------------------------------------------------------------------------------------------------------------------------------------------------------------------------------------------------------------------------------------------------------------------------------------------------|

---

|           |                                                                                                                                                                                                                                                                                                                                                                                                              |
|-----------|--------------------------------------------------------------------------------------------------------------------------------------------------------------------------------------------------------------------------------------------------------------------------------------------------------------------------------------------------------------------------------------------------------------|
| legumbres | <input type="radio"/> Nunca o menos 1 vez al mes<br><input type="radio"/> 1 a 3 veces mes<br><input checked="" type="radio"/> 1 vez semana<br><input type="radio"/> 2 a 4 veces semana<br><input type="radio"/> 5 a 6 veces semana<br><input type="radio"/> 1 vez al día<br><input type="radio"/> 2 a 3 veces al día<br><input type="radio"/> 5 a 6 veces al día<br><input type="radio"/> más 6 veces al día |
|-----------|--------------------------------------------------------------------------------------------------------------------------------------------------------------------------------------------------------------------------------------------------------------------------------------------------------------------------------------------------------------------------------------------------------------|

---

|                       |                                                                                                                                                                                                                                                                                                                                                                                                              |
|-----------------------|--------------------------------------------------------------------------------------------------------------------------------------------------------------------------------------------------------------------------------------------------------------------------------------------------------------------------------------------------------------------------------------------------------------|
| naranjas o mandarinas | <input type="radio"/> Nunca o menos 1 vez al mes<br><input checked="" type="radio"/> 1 a 3 veces mes<br><input type="radio"/> 1 vez semana<br><input type="radio"/> 2 a 4 veces semana<br><input type="radio"/> 5 a 6 veces semana<br><input type="radio"/> 1 vez al día<br><input type="radio"/> 2 a 3 veces al día<br><input type="radio"/> 5 a 6 veces al día<br><input type="radio"/> más 6 veces al día |
|-----------------------|--------------------------------------------------------------------------------------------------------------------------------------------------------------------------------------------------------------------------------------------------------------------------------------------------------------------------------------------------------------------------------------------------------------|

---



---

zumو natural fruta

- ☒ Nunca o menos 1 vez al mes  
☐ 1 a 3 veces mes  
☐ 1 vez semana  
☐ 2 a 4 veces semana  
☐ 5 a 6 veces semana  
☐ 1 vez al día  
☐ 2 a 3 veces al día  
☐ 5 a 6 veces al día  
☐ más 6 veces al día

---

platano

- ☐ Nunca o menos 1 vez al mes  
☐ 1 a 3 veces mes  
☐ 1 vez semana  
☒ 2 a 4 veces semana  
☐ 5 a 6 veces semana  
☐ 1 vez al día  
☐ 2 a 3 veces al día  
☐ 5 a 6 veces al día  
☐ más 6 veces al día

---

manzana o pera

- ☐ Nunca o menos 1 vez al mes  
☒ 1 a 3 veces mes  
☐ 1 vez semana  
☐ 2 a 4 veces semana  
☐ 5 a 6 veces semana  
☐ 1 vez al día  
☐ 2 a 3 veces al día  
☐ 5 a 6 veces al día  
☐ más 6 veces al día

---

melocotón o nectarina

- ☐ Nunca o menos 1 vez al mes  
☐ 1 a 3 veces mes  
☐ 1 vez semana  
☒ 2 a 4 veces semana  
☐ 5 a 6 veces semana  
☐ 1 vez al día  
☐ 2 a 3 veces al día  
☐ 5 a 6 veces al día  
☐ más 6 veces al día

---

sandia o melon

- ☐ Nunca o menos 1 vez al mes  
☐ 1 a 3 veces mes  
☐ 1 vez semana  
☐ 2 a 4 veces semana  
☐ 5 a 6 veces semana  
☒ 1 vez al día  
☐ 2 a 3 veces al día  
☐ 5 a 6 veces al día  
☐ más 6 veces al día

---

uva

- ☐ Nunca o menos 1 vez al mes  
☒ 1 a 3 veces mes  
☐ 1 vez semana  
☐ 2 a 4 veces semana  
☐ 5 a 6 veces semana  
☐ 1 vez al día  
☐ 2 a 3 veces al día  
☐ 5 a 6 veces al día  
☐ más 6 veces al día

---

bruna o ciruela

- ☐ Nunca o menos 1 vez al mes  
☒ 1 a 3 veces mes  
☐ 1 vez semana  
☐ 2 a 4 veces semana  
☐ 5 a 6 veces semana  
☐ 1 vez al día  
☐ 2 a 3 veces al día  
☐ 5 a 6 veces al día  
☐ más 6 veces al día

---

kiwi

- ☐ Nunca o menos 1 vez al mes  
☐ 1 a 3 veces mes  
☒ 1 vez semana  
☐ 2 a 4 veces semana  
☐ 5 a 6 veces semana  
☐ 1 vez al día  
☐ 2 a 3 veces al día  
☐ 5 a 6 veces al día  
☐ más 6 veces al día

---

aceituna

- ☐ Nunca o menos 1 vez al mes  
☒ 1 a 3 veces mes  
☐ 1 vez semana  
☐ 2 a 4 veces semana  
☐ 5 a 6 veces semana  
☐ 1 vez al día  
☐ 2 a 3 veces al día  
☐ 5 a 6 veces al día  
☐ más 6 veces al día

---

frutos secos

- ☐ Nunca o menos 1 vez al mes  
☐ 1 a 3 veces mes  
☐ 1 vez semana  
☐ 2 a 4 veces semana  
☐ 5 a 6 veces semana  
☐ 1 vez al día  
☒ 2 a 3 veces al día  
☐ 5 a 6 veces al día  
☐ más 6 veces al día

---

pan blanco

- ☐ Nunca o menos 1 vez al mes  
☐ 1 a 3 veces mes  
☐ 1 vez semana  
☐ 2 a 4 veces semana  
☐ 5 a 6 veces semana  
☐ 1 vez al día  
☒ 2 a 3 veces al día  
☐ 5 a 6 veces al día  
☐ más 6 veces al día

---

pan integral

- ☐ Nunca o menos 1 vez al mes  
☒ 1 a 3 veces mes  
☐ 1 vez semana  
☐ 2 a 4 veces semana  
☐ 5 a 6 veces semana  
☐ 1 vez al día  
☐ 2 a 3 veces al día  
☐ 5 a 6 veces al día  
☐ más 6 veces al día

|                          |                                                                                                                                                                                                                                                                                                                                                                                                              |
|--------------------------|--------------------------------------------------------------------------------------------------------------------------------------------------------------------------------------------------------------------------------------------------------------------------------------------------------------------------------------------------------------------------------------------------------------|
| cereales desayuno        | <input checked="" type="radio"/> Nunca o menos 1 vez al mes<br><input type="radio"/> 1 a 3 veces mes<br><input type="radio"/> 1 vez semana<br><input type="radio"/> 2 a 4 veces semana<br><input type="radio"/> 5 a 6 veces semana<br><input type="radio"/> 1 vez al día<br><input type="radio"/> 2 a 3 veces al día<br><input type="radio"/> 5 a 6 veces al día<br><input type="radio"/> más 6 veces al día |
| patatas fritas           | <input type="radio"/> Nunca o menos 1 vez al mes<br><input checked="" type="radio"/> 1 a 3 veces mes<br><input type="radio"/> 1 vez semana<br><input type="radio"/> 2 a 4 veces semana<br><input type="radio"/> 5 a 6 veces semana<br><input type="radio"/> 1 vez al día<br><input type="radio"/> 2 a 3 veces al día<br><input type="radio"/> 5 a 6 veces al día<br><input type="radio"/> más 6 veces al día |
| patatas cocidas o asadas | <input type="radio"/> Nunca o menos 1 vez al mes<br><input type="radio"/> 1 a 3 veces mes<br><input type="radio"/> 1 vez semana<br><input checked="" type="radio"/> 2 a 4 veces semana<br><input type="radio"/> 5 a 6 veces semana<br><input type="radio"/> 1 vez al día<br><input type="radio"/> 2 a 3 veces al día<br><input type="radio"/> 5 a 6 veces al día<br><input type="radio"/> más 6 veces al día |
| bolsa papas              | <input type="radio"/> Nunca o menos 1 vez al mes<br><input checked="" type="radio"/> 1 a 3 veces mes<br><input type="radio"/> 1 vez semana<br><input type="radio"/> 2 a 4 veces semana<br><input type="radio"/> 5 a 6 veces semana<br><input type="radio"/> 1 vez al día<br><input type="radio"/> 2 a 3 veces al día<br><input type="radio"/> 5 a 6 veces al día<br><input type="radio"/> más 6 veces al día |
| arroz cocinado           | <input type="radio"/> Nunca o menos 1 vez al mes<br><input type="radio"/> 1 a 3 veces mes<br><input type="radio"/> 1 vez semana<br><input checked="" type="radio"/> 2 a 4 veces semana<br><input type="radio"/> 5 a 6 veces semana<br><input type="radio"/> 1 vez al día<br><input type="radio"/> 2 a 3 veces al día<br><input type="radio"/> 5 a 6 veces al día<br><input type="radio"/> más 6 veces al día |
| pasta                    | <input type="radio"/> Nunca o menos 1 vez al mes<br><input type="radio"/> 1 a 3 veces mes<br><input type="radio"/> 1 vez semana<br><input checked="" type="radio"/> 2 a 4 veces semana<br><input type="radio"/> 5 a 6 veces semana<br><input type="radio"/> 1 vez al día<br><input type="radio"/> 2 a 3 veces al día<br><input type="radio"/> 5 a 6 veces al día<br><input type="radio"/> más 6 veces al día |

|                     |                                                                                                                                                                                                                                                                                                                                                                                                              |
|---------------------|--------------------------------------------------------------------------------------------------------------------------------------------------------------------------------------------------------------------------------------------------------------------------------------------------------------------------------------------------------------------------------------------------------------|
| pizza               | <input type="radio"/> Nunca o menos 1 vez al mes<br><input checked="" type="radio"/> 1 a 3 veces mes<br><input type="radio"/> 1 vez semana<br><input type="radio"/> 2 a 4 veces semana<br><input type="radio"/> 5 a 6 veces semana<br><input type="radio"/> 1 vez al día<br><input type="radio"/> 2 a 3 veces al día<br><input type="radio"/> 5 a 6 veces al día<br><input type="radio"/> más 6 veces al día |
| aceite oliva        | <input type="radio"/> Nunca o menos 1 vez al mes<br><input type="radio"/> 1 a 3 veces mes<br><input type="radio"/> 1 vez semana<br><input type="radio"/> 2 a 4 veces semana<br><input type="radio"/> 5 a 6 veces semana<br><input type="radio"/> 1 vez al día<br><input checked="" type="radio"/> 2 a 3 veces al día<br><input type="radio"/> 5 a 6 veces al día<br><input type="radio"/> más 6 veces al día |
| otros aceites       | <input type="radio"/> Nunca o menos 1 vez al mes<br><input checked="" type="radio"/> 1 a 3 veces mes<br><input type="radio"/> 1 vez semana<br><input type="radio"/> 2 a 4 veces semana<br><input type="radio"/> 5 a 6 veces semana<br><input type="radio"/> 1 vez al día<br><input type="radio"/> 2 a 3 veces al día<br><input type="radio"/> 5 a 6 veces al día<br><input type="radio"/> más 6 veces al día |
| margarina           | <input type="radio"/> Nunca o menos 1 vez al mes<br><input checked="" type="radio"/> 1 a 3 veces mes<br><input type="radio"/> 1 vez semana<br><input type="radio"/> 2 a 4 veces semana<br><input type="radio"/> 5 a 6 veces semana<br><input type="radio"/> 1 vez al día<br><input type="radio"/> 2 a 3 veces al día<br><input type="radio"/> 5 a 6 veces al día<br><input type="radio"/> más 6 veces al día |
| mantequilla         | <input type="radio"/> Nunca o menos 1 vez al mes<br><input checked="" type="radio"/> 1 a 3 veces mes<br><input type="radio"/> 1 vez semana<br><input type="radio"/> 2 a 4 veces semana<br><input type="radio"/> 5 a 6 veces semana<br><input type="radio"/> 1 vez al día<br><input type="radio"/> 2 a 3 veces al día<br><input type="radio"/> 5 a 6 veces al día<br><input type="radio"/> más 6 veces al día |
| galletas tipo maria | <input type="radio"/> Nunca o menos 1 vez al mes<br><input type="radio"/> 1 a 3 veces mes<br><input type="radio"/> 1 vez semana<br><input checked="" type="radio"/> 2 a 4 veces semana<br><input type="radio"/> 5 a 6 veces semana<br><input type="radio"/> 1 vez al día<br><input type="radio"/> 2 a 3 veces al día<br><input type="radio"/> 5 a 6 veces al día<br><input type="radio"/> más 6 veces al día |

---

galletas chocolate

- ☐ Nunca o menos 1 vez al mes  
☐ 1 a 3 veces mes  
☒ 1 vez semana  
☐ 2 a 4 veces semana  
☐ 5 a 6 veces semana  
☐ 1 vez al día  
☐ 2 a 3 veces al día  
☐ 5 a 6 veces al día  
☐ más 6 veces al día

---

bolleria

- ☐ Nunca o menos 1 vez al mes  
☒ 1 a 3 veces mes  
☐ 1 vez semana  
☐ 2 a 4 veces semana  
☐ 5 a 6 veces semana  
☐ 1 vez al día  
☐ 2 a 3 veces al día  
☐ 5 a 6 veces al día  
☐ más 6 veces al día

---

chocolate o bombones

- ☐ Nunca o menos 1 vez al mes  
☐ 1 a 3 veces mes  
☒ 1 vez semana  
☐ 2 a 4 veces semana  
☐ 5 a 6 veces semana  
☐ 1 vez al día  
☐ 2 a 3 veces al día  
☐ 5 a 6 veces al día  
☐ más 6 veces al día

---

chocolate polvo o colacao

- ☐ Nunca o menos 1 vez al mes  
☐ 1 a 3 veces mes  
☒ 1 vez semana  
☐ 2 a 4 veces semana  
☐ 5 a 6 veces semana  
☐ 1 vez al día  
☐ 2 a 3 veces al día  
☐ 5 a 6 veces al día  
☐ más 6 veces al día

---

vino tinto

- ☒ Nunca o menos 1 vez al mes  
☐ 1 a 3 veces mes  
☐ 1 vez semana  
☐ 2 a 4 veces semana  
☐ 5 a 6 veces semana  
☐ 1 vez al día  
☐ 2 a 3 veces al día  
☐ 5 a 6 veces al día  
☐ más 6 veces al día

---

vino blanco

- ☒ Nunca o menos 1 vez al mes  
☐ 1 a 3 veces mes  
☐ 1 vez semana  
☐ 2 a 4 veces semana  
☐ 5 a 6 veces semana  
☐ 1 vez al día  
☐ 2 a 3 veces al día  
☐ 5 a 6 veces al día  
☐ más 6 veces al día

|                       |                                                                                                                                                                                                                                                                                                                                                                                                              |
|-----------------------|--------------------------------------------------------------------------------------------------------------------------------------------------------------------------------------------------------------------------------------------------------------------------------------------------------------------------------------------------------------------------------------------------------------|
| vino seco o vermut    | <input checked="" type="radio"/> Nunca o menos 1 vez al mes<br><input type="radio"/> 1 a 3 veces mes<br><input type="radio"/> 1 vez semana<br><input type="radio"/> 2 a 4 veces semana<br><input type="radio"/> 5 a 6 veces semana<br><input type="radio"/> 1 vez al día<br><input type="radio"/> 2 a 3 veces al día<br><input type="radio"/> 5 a 6 veces al día<br><input type="radio"/> más 6 veces al día |
| cerveza               | <input checked="" type="radio"/> Nunca o menos 1 vez al mes<br><input type="radio"/> 1 a 3 veces mes<br><input type="radio"/> 1 vez semana<br><input type="radio"/> 2 a 4 veces semana<br><input type="radio"/> 5 a 6 veces semana<br><input type="radio"/> 1 vez al día<br><input type="radio"/> 2 a 3 veces al día<br><input type="radio"/> 5 a 6 veces al día<br><input type="radio"/> más 6 veces al día |
| cerveza sin alcohol   | <input type="radio"/> Nunca o menos 1 vez al mes<br><input checked="" type="radio"/> 1 a 3 veces mes<br><input type="radio"/> 1 vez semana<br><input type="radio"/> 2 a 4 veces semana<br><input type="radio"/> 5 a 6 veces semana<br><input type="radio"/> 1 vez al día<br><input type="radio"/> 2 a 3 veces al día<br><input type="radio"/> 5 a 6 veces al día<br><input type="radio"/> más 6 veces al día |
| licores               | <input checked="" type="radio"/> Nunca o menos 1 vez al mes<br><input type="radio"/> 1 a 3 veces mes<br><input type="radio"/> 1 vez semana<br><input type="radio"/> 2 a 4 veces semana<br><input type="radio"/> 5 a 6 veces semana<br><input type="radio"/> 1 vez al día<br><input type="radio"/> 2 a 3 veces al día<br><input type="radio"/> 5 a 6 veces al día<br><input type="radio"/> más 6 veces al día |
| ginebra o ron o vodka | <input checked="" type="radio"/> Nunca o menos 1 vez al mes<br><input type="radio"/> 1 a 3 veces mes<br><input type="radio"/> 1 vez semana<br><input type="radio"/> 2 a 4 veces semana<br><input type="radio"/> 5 a 6 veces semana<br><input type="radio"/> 1 vez al día<br><input type="radio"/> 2 a 3 veces al día<br><input type="radio"/> 5 a 6 veces al día<br><input type="radio"/> más 6 veces al día |
| refresco normal       | <input checked="" type="radio"/> Nunca o menos 1 vez al mes<br><input type="radio"/> 1 a 3 veces mes<br><input type="radio"/> 1 vez semana<br><input type="radio"/> 2 a 4 veces semana<br><input type="radio"/> 5 a 6 veces semana<br><input type="radio"/> 1 vez al día<br><input type="radio"/> 2 a 3 veces al día<br><input type="radio"/> 5 a 6 veces al día<br><input type="radio"/> más 6 veces al día |

|                           |                                                                                                                                                                                                                                                                                                                                                                                                              |
|---------------------------|--------------------------------------------------------------------------------------------------------------------------------------------------------------------------------------------------------------------------------------------------------------------------------------------------------------------------------------------------------------------------------------------------------------|
| refresco sin azúcar       | <input checked="" type="radio"/> Nunca o menos 1 vez al mes<br><input type="radio"/> 1 a 3 veces mes<br><input type="radio"/> 1 vez semana<br><input type="radio"/> 2 a 4 veces semana<br><input type="radio"/> 5 a 6 veces semana<br><input type="radio"/> 1 vez al día<br><input type="radio"/> 2 a 3 veces al día<br><input type="radio"/> 5 a 6 veces al día<br><input type="radio"/> más 6 veces al día |
| Agua del grifo            | <input checked="" type="radio"/> Nunca o menos 1 vez al mes<br><input type="radio"/> 1 a 3 veces mes<br><input type="radio"/> 1 vez semana<br><input type="radio"/> 2 a 4 veces semana<br><input type="radio"/> 5 a 6 veces semana<br><input type="radio"/> 1 vez al día<br><input type="radio"/> 2 a 3 veces al día<br><input type="radio"/> 5 a 6 veces al día<br><input type="radio"/> más 6 veces al día |
| agua embotellada sin gas  | <input type="radio"/> Nunca o menos 1 vez al mes<br><input type="radio"/> 1 a 3 veces mes<br><input type="radio"/> 1 vez semana<br><input type="radio"/> 2 a 4 veces semana<br><input type="radio"/> 5 a 6 veces semana<br><input type="radio"/> 1 vez al día<br><input type="radio"/> 2 a 3 veces al día<br><input type="radio"/> 5 a 6 veces al día<br><input checked="" type="radio"/> más 6 veces al día |
| agua embotellada con gas  | <input checked="" type="radio"/> Nunca o menos 1 vez al mes<br><input type="radio"/> 1 a 3 veces mes<br><input type="radio"/> 1 vez semana<br><input type="radio"/> 2 a 4 veces semana<br><input type="radio"/> 5 a 6 veces semana<br><input type="radio"/> 1 vez al día<br><input type="radio"/> 2 a 3 veces al día<br><input type="radio"/> 5 a 6 veces al día<br><input type="radio"/> más 6 veces al día |
| zumos frutas embotellados | <input checked="" type="radio"/> Nunca o menos 1 vez al mes<br><input type="radio"/> 1 a 3 veces mes<br><input type="radio"/> 1 vez semana<br><input type="radio"/> 2 a 4 veces semana<br><input type="radio"/> 5 a 6 veces semana<br><input type="radio"/> 1 vez al día<br><input type="radio"/> 2 a 3 veces al día<br><input type="radio"/> 5 a 6 veces al día<br><input type="radio"/> más 6 veces al día |
| café                      | <input type="radio"/> Nunca o menos 1 vez al mes<br><input type="radio"/> 1 a 3 veces mes<br><input type="radio"/> 1 vez semana<br><input type="radio"/> 2 a 4 veces semana<br><input type="radio"/> 5 a 6 veces semana<br><input checked="" type="radio"/> 1 vez al día<br><input type="radio"/> 2 a 3 veces al día<br><input type="radio"/> 5 a 6 veces al día<br><input type="radio"/> más 6 veces al día |

---

café descafeinado

- ☐ Nunca o menos 1 vez al mes  
☐ 1 a 3 veces mes  
☐ 1 vez semana  
☐ 2 a 4 veces semana  
☐ 5 a 6 veces semana  
☒ 1 vez al día  
☐ 2 a 3 veces al día  
☐ 5 a 6 veces al día  
☐ más 6 veces al día

---

té o infusión

- ☒ Nunca o menos 1 vez al mes  
☐ 1 a 3 veces mes  
☐ 1 vez semana  
☐ 2 a 4 veces semana  
☐ 5 a 6 veces semana  
☐ 1 vez al día  
☐ 2 a 3 veces al día  
☐ 5 a 6 veces al día  
☐ más 6 veces al día

---

sopa o puré verduras

- ☐ Nunca o menos 1 vez al mes  
☐ 1 a 3 veces mes  
☒ 1 vez semana  
☐ 2 a 4 veces semana  
☐ 5 a 6 veces semana  
☐ 1 vez al día  
☐ 2 a 3 veces al día  
☐ 5 a 6 veces al día  
☐ más 6 veces al día

---

croquetas pollo jamón

- ☒ Nunca o menos 1 vez al mes  
☐ 1 a 3 veces mes  
☐ 1 vez semana  
☐ 2 a 4 veces semana  
☐ 5 a 6 veces semana  
☐ 1 vez al día  
☐ 2 a 3 veces al día  
☐ 5 a 6 veces al día  
☐ más 6 veces al día

---

croquetas pescado

- ☒ Nunca o menos 1 vez al mes  
☐ 1 a 3 veces mes  
☐ 1 vez semana  
☐ 2 a 4 veces semana  
☐ 5 a 6 veces semana  
☐ 1 vez al día  
☐ 2 a 3 veces al día  
☐ 5 a 6 veces al día  
☐ más 6 veces al día

---

mayonesa

- ☒ Nunca o menos 1 vez al mes  
☐ 1 a 3 veces mes  
☐ 1 vez semana  
☐ 2 a 4 veces semana  
☐ 5 a 6 veces semana  
☐ 1 vez al día  
☐ 2 a 3 veces al día  
☐ 5 a 6 veces al día  
☐ más 6 veces al día



---

salsa tomate

- ☒ Nunca o menos 1 vez al mes  
☐ 1 a 3 veces mes  
☐ 1 vez semana  
☐ 2 a 4 veces semana  
☐ 5 a 6 veces semana  
☐ 1 vez al día  
☐ 2 a 3 veces al día  
☐ 5 a 6 veces al día  
☐ más 6 veces al día

---

ketchup

- ☒ Nunca o menos 1 vez al mes  
☐ 1 a 3 veces mes  
☐ 1 vez semana  
☐ 2 a 4 veces semana  
☐ 5 a 6 veces semana  
☐ 1 vez al día  
☐ 2 a 3 veces al día  
☐ 5 a 6 veces al día  
☐ más 6 veces al día

---

sal

- ☐ Nunca o menos 1 vez al mes  
☐ 1 a 3 veces mes  
☐ 1 vez semana  
☐ 2 a 4 veces semana  
☐ 5 a 6 veces semana  
☒ 1 vez al día  
☐ 2 a 3 veces al día  
☐ 5 a 6 veces al día  
☐ más 6 veces al día

---

ajo

- ☐ Nunca o menos 1 vez al mes  
☒ 1 a 3 veces mes  
☐ 1 vez semana  
☐ 2 a 4 veces semana  
☐ 5 a 6 veces semana  
☐ 1 vez al día  
☐ 2 a 3 veces al día  
☐ 5 a 6 veces al día  
☐ más 6 veces al día

---

mermelada o miel

- ☐ Nunca o menos 1 vez al mes  
☐ 1 a 3 veces mes  
☐ 1 vez semana  
☐ 2 a 4 veces semana  
☐ 5 a 6 veces semana  
☐ 1 vez al día  
☒ 2 a 3 veces al día  
☐ 5 a 6 veces al día  
☐ más 6 veces al día

---

azúcar

- ☒ Nunca o menos 1 vez al mes  
☐ 1 a 3 veces mes  
☐ 1 vez semana  
☐ 2 a 4 veces semana  
☐ 5 a 6 veces semana  
☐ 1 vez al día  
☐ 2 a 3 veces al día  
☐ 5 a 6 veces al día  
☐ más 6 veces al día

|                                       |                                                                                                                                                                                                                                                                                                                                                                                                                                                                                                                               |
|---------------------------------------|-------------------------------------------------------------------------------------------------------------------------------------------------------------------------------------------------------------------------------------------------------------------------------------------------------------------------------------------------------------------------------------------------------------------------------------------------------------------------------------------------------------------------------|
| Otro alimento                         |                                                                                                                                                                                                                                                                                                                                                                                                                                                                                                                               |
| suplementos vitamínicos               | <input checked="" type="radio"/> si<br><input type="radio"/> no                                                                                                                                                                                                                                                                                                                                                                                                                                                               |
| suplementos vitamínicos               | [*DATA REMOVED*]                                                                                                                                                                                                                                                                                                                                                                                                                                                                                                              |
| dieta previa                          | <input type="radio"/> si<br><input checked="" type="radio"/> no                                                                                                                                                                                                                                                                                                                                                                                                                                                               |
| motivo dieta                          | <input checked="" type="radio"/> no dieta<br><input type="radio"/> control peso<br><input type="radio"/> control colesterol<br><input type="radio"/> control diabetes<br><input type="radio"/> problemas estómago<br><input type="radio"/> problemas vesícula o hepáticos<br><input type="radio"/> HTA o cardiopatía<br><input type="radio"/> problemas renales<br><input type="radio"/> alergia alimentaria<br><input type="radio"/> ácido úrico elevado<br><input type="radio"/> vegetariana<br><input type="radio"/> otros |
| cambio alimentos año previo gestación | <input checked="" type="radio"/> si<br><input type="radio"/> no                                                                                                                                                                                                                                                                                                                                                                                                                                                               |
| cambio lácteos                        | <input type="radio"/> eliminado<br><input type="radio"/> disminuido<br><input type="radio"/> igual<br><input checked="" type="radio"/> aumentado<br><input type="radio"/> no sabe                                                                                                                                                                                                                                                                                                                                             |
| cambio huevos                         | <input type="radio"/> eliminado<br><input checked="" type="radio"/> disminuido<br><input type="radio"/> igual<br><input type="radio"/> aumentado<br><input type="radio"/> no sabe                                                                                                                                                                                                                                                                                                                                             |
| cambio carne                          | <input type="radio"/> eliminado<br><input type="radio"/> disminuido<br><input checked="" type="radio"/> igual<br><input type="radio"/> aumentado<br><input type="radio"/> no sabe                                                                                                                                                                                                                                                                                                                                             |
| cambio pescado                        | <input type="radio"/> eliminado<br><input checked="" type="radio"/> disminuido<br><input type="radio"/> igual<br><input type="radio"/> aumentado<br><input type="radio"/> no sabe                                                                                                                                                                                                                                                                                                                                             |
| cambio verduras                       | <input type="radio"/> eliminado<br><input type="radio"/> disminuido<br><input checked="" type="radio"/> igual<br><input type="radio"/> aumentado<br><input type="radio"/> no sabe                                                                                                                                                                                                                                                                                                                                             |

|                            |                                                                                                                                                                                                                        |
|----------------------------|------------------------------------------------------------------------------------------------------------------------------------------------------------------------------------------------------------------------|
| cambio legumbres           | <input type="radio"/> eliminado<br><input checked="" type="radio"/> disminuido<br><input type="radio"/> igual<br><input type="radio"/> aumentado<br><input type="radio"/> no sabe                                      |
| cambio fruta               | <input type="radio"/> eliminado<br><input type="radio"/> disminuido<br><input type="radio"/> igual<br><input checked="" type="radio"/> aumentado<br><input type="radio"/> no sabe                                      |
| cambio pan                 | <input type="radio"/> eliminado<br><input type="radio"/> disminuido<br><input type="radio"/> igual<br><input checked="" type="radio"/> aumentado<br><input type="radio"/> no sabe                                      |
| cambio aceite oliva        | <input type="radio"/> eliminado<br><input type="radio"/> disminuido<br><input checked="" type="radio"/> igual<br><input type="radio"/> aumentado<br><input type="radio"/> no sabe                                      |
| cambio mante o margarina   | <input type="radio"/> eliminado<br><input type="radio"/> disminuido<br><input type="radio"/> igual<br><input checked="" type="radio"/> aumentado<br><input type="radio"/> no sabe                                      |
| cambio azúcar y dulces     | <input type="radio"/> eliminado<br><input type="radio"/> disminuido<br><input type="radio"/> igual<br><input checked="" type="radio"/> aumentado<br><input type="radio"/> no sabe                                      |
| cambio bebidas alcohólicas | <input checked="" type="radio"/> eliminado<br><input type="radio"/> disminuido<br><input type="radio"/> igual<br><input type="radio"/> aumentado<br><input type="radio"/> no sabe                                      |
| frecuencia comidas fritas  | <input type="radio"/> a diario<br><input type="radio"/> 5 a 6 veces semana<br><input type="radio"/> 2 a 4 veces semana<br><input type="radio"/> 1 vez semana<br><input checked="" type="radio"/> menos de 1 vez semana |
| carne                      | <input type="radio"/> no como<br><input type="radio"/> cruda<br><input type="radio"/> poco hecha<br><input checked="" type="radio"/> hecha<br><input type="radio"/> muy hecha                                          |
| grasa visible carne        | <input type="radio"/> quita toda<br><input type="radio"/> quita mayoría<br><input checked="" type="radio"/> quita un poco<br><input type="radio"/> no quita nada                                                       |

|                                |                                                                                                                                                                                                                                                          |
|--------------------------------|----------------------------------------------------------------------------------------------------------------------------------------------------------------------------------------------------------------------------------------------------------|
| cocina carne                   | <input checked="" type="radio"/> a la plancha<br><input type="radio"/> a la parrilla<br><input type="radio"/> asada<br><input type="radio"/> frita<br><input type="radio"/> guisada                                                                      |
| tostado quemado carne          | <input checked="" type="radio"/> nunca<br><input type="radio"/> 1 vez mes<br><input type="radio"/> 2 a 3 veces mes<br><input type="radio"/> 1 vez semana<br><input type="radio"/> 2 a 3 semanas                                                          |
| tostado quemado pescado        | <input type="radio"/> nunca<br><input checked="" type="radio"/> 1 vez mes<br><input type="radio"/> 2 a 3 veces mes<br><input type="radio"/> 1 vez semana<br><input type="radio"/> 2 a 3 semanas                                                          |
| socarrat paella                | <input type="radio"/> nunca<br><input checked="" type="radio"/> 1 vez mes<br><input type="radio"/> 2 a 3 veces mes<br><input type="radio"/> 1 vez semana<br><input type="radio"/> 2 a 3 semanas                                                          |
| grasa o aceite cocinar         | <input type="radio"/> mantequilla<br><input type="radio"/> margarina<br><input type="radio"/> aceite oliva<br><input checked="" type="radio"/> aceite oliva virgen extra<br><input type="radio"/> aceite vegetal<br><input type="radio"/> mezcla aceites |
| grasa aceite aliñar            | <input type="radio"/> mantequilla<br><input type="radio"/> margarina<br><input type="radio"/> aceite oliva<br><input checked="" type="radio"/> aceite oliva virgen extra<br><input type="radio"/> aceite vegetal<br><input type="radio"/> mezcla aceites |
| grasa aceite freir             | <input type="radio"/> mantequilla<br><input type="radio"/> margarina<br><input type="radio"/> aceite oliva<br><input type="radio"/> aceite oliva virgen extra<br><input checked="" type="radio"/> aceite vegetal<br><input type="radio"/> mezcla aceites |
| Ejercicio cuestionario         | <input checked="" type="radio"/> si<br><input type="radio"/> no                                                                                                                                                                                          |
| horas de sueño incluido siesta | [*DATA REMOVED*]                                                                                                                                                                                                                                         |
| minutos siesta                 | [*DATA REMOVED*]                                                                                                                                                                                                                                         |
| horas televisión semana        | [*DATA REMOVED*]                                                                                                                                                                                                                                         |

|                                        |                                                                                                                                                                                                                                                                                                                                                                           |
|----------------------------------------|---------------------------------------------------------------------------------------------------------------------------------------------------------------------------------------------------------------------------------------------------------------------------------------------------------------------------------------------------------------------------|
| actividad trabajo                      | <input type="radio"/> casi siempre sentado<br><input type="radio"/> sentado 50 por cien<br><input type="radio"/> casi siempre de pie, quieto<br><input checked="" type="radio"/> casi siempre levantado caminando y llevando pocas cosas<br><input type="radio"/> casi siempre levantado, caminando y llevado muchas cosas<br><input type="radio"/> trabajo manual pesado |
| tiempo caminar o bici al día           | <input type="radio"/> casi nunca<br><input type="radio"/> menos 20min día<br><input checked="" type="radio"/> 20 a 40 min día<br><input type="radio"/> 40 a 60 min día<br><input type="radio"/> 1h o 1h y media día<br><input type="radio"/> más de 1h y media al día                                                                                                     |
| tiempo tareas casa al día              | <input type="radio"/> menos de 1h día<br><input checked="" type="radio"/> 1 a 2h día<br><input type="radio"/> 3 a 4h día<br><input type="radio"/> 5 a 6h día<br><input type="radio"/> 7 a 8h día<br><input type="radio"/> más de 8h día                                                                                                                                   |
| tiempo libre televisión ordenador leer | <input type="radio"/> menos 1h día<br><input checked="" type="radio"/> 1h día<br><input type="radio"/> 2h día<br><input type="radio"/> 3h día<br><input type="radio"/> 4h día<br><input type="radio"/> 5 a 6h día<br><input type="radio"/> mas 6h día                                                                                                                     |
| tiempo libre ejercicio o deporte       | <input checked="" type="radio"/> menos 1h semana<br><input type="radio"/> 1h semana<br><input type="radio"/> 2h semana<br><input type="radio"/> 3h semana<br><input type="radio"/> 4 a 5h semana<br><input type="radio"/> mas 5h semana                                                                                                                                   |
| como se considera                      | <input type="radio"/> sedentaria<br><input checked="" type="radio"/> poco activa<br><input type="radio"/> moderadamente activa<br><input type="radio"/> bastante activa<br><input type="radio"/> muy activa<br><input type="radio"/> no sabe                                                                                                                              |
| FUR                                    | [*DATA REMOVED*]                                                                                                                                                                                                                                                                                                                                                          |
| Semanas gestación 2T                   | [*DATA REMOVED*]                                                                                                                                                                                                                                                                                                                                                          |
| Días gestación 2T                      | [*DATA REMOVED*]                                                                                                                                                                                                                                                                                                                                                          |
| DBP 2T                                 | [*DATA REMOVED*]                                                                                                                                                                                                                                                                                                                                                          |
| CC 2T                                  | [*DATA REMOVED*]                                                                                                                                                                                                                                                                                                                                                          |
| AC 2T                                  | [*DATA REMOVED*]                                                                                                                                                                                                                                                                                                                                                          |

|                                                   |                                                                                                                                                                                                 |
|---------------------------------------------------|-------------------------------------------------------------------------------------------------------------------------------------------------------------------------------------------------|
| LF 2T                                             | [*DATA REMOVED*]                                                                                                                                                                                |
| PFE 2T (Hadlock)                                  | [*DATA REMOVED*]                                                                                                                                                                                |
| Semanas gestación 3T                              | [*DATA REMOVED*]                                                                                                                                                                                |
| días 3T                                           | [*DATA REMOVED*]                                                                                                                                                                                |
| DBP 3T                                            | [*DATA REMOVED*]                                                                                                                                                                                |
| CC 3T                                             | [*DATA REMOVED*]                                                                                                                                                                                |
| AC 3T                                             | [*DATA REMOVED*]                                                                                                                                                                                |
| LF 3T                                             | [*DATA REMOVED*]                                                                                                                                                                                |
| PFE 3T (Hadlock)                                  | [*DATA REMOVED*]                                                                                                                                                                                |
| Semanas de gestación final                        | [*DATA REMOVED*]                                                                                                                                                                                |
| días gestación final                              | [*DATA REMOVED*]                                                                                                                                                                                |
| Localización placenta                             | <input checked="" type="radio"/> anterior<br><input type="radio"/> lateral derecha<br><input type="radio"/> lateral izquierda<br><input type="radio"/> posterior<br><input type="radio"/> fondo |
| Presentación longitudinal cefálica                | <input type="radio"/> no<br><input checked="" type="radio"/> si                                                                                                                                 |
| Dorso                                             | <input type="radio"/> izquierda anterior<br><input type="radio"/> izquierda posterior<br><input checked="" type="radio"/> derecha anterior<br><input type="radio"/> derecha posterior           |
| diámetro biparietal                               | [*DATA REMOVED*]                                                                                                                                                                                |
| Circunferencia craneal                            | [*DATA REMOVED*]                                                                                                                                                                                |
| Circunferencia abdominal                          | [*DATA REMOVED*]                                                                                                                                                                                |
| Longitud de femur                                 | [*DATA REMOVED*]                                                                                                                                                                                |
| tejido celular subcutáneo a nivel del muslo en mm | [*DATA REMOVED*]                                                                                                                                                                                |
| tejido celular subcutáneo en abdomen en mm        | [*DATA REMOVED*]                                                                                                                                                                                |
| Volumen del muslo en cm3                          | [*DATA REMOVED*]                                                                                                                                                                                |
| Peso fetal estimado según fórmula de Hadlock      | [*DATA REMOVED*]                                                                                                                                                                                |

|                                               |                                                                                                                                                          |
|-----------------------------------------------|----------------------------------------------------------------------------------------------------------------------------------------------------------|
| Percentil                                     | [*DATA REMOVED*]                                                                                                                                         |
| Peso fetal estimado según fórmula de Scioscia | <hr/>                                                                                                                                                    |
| Peso fetal estimado según fórmula de LEE      | <hr/>                                                                                                                                                    |
| Tipo de parto                                 | <input checked="" type="radio"/> eutocico<br><input type="radio"/> instrumentado/ventosa<br><input type="radio"/> cesarea                                |
| fecha de nacimiento                           | [*DATA REMOVED*]                                                                                                                                         |
| Días entre exploración y nacimiento           | [*DATA REMOVED*]                                                                                                                                         |
| Peso RN en g                                  | [*DATA REMOVED*]                                                                                                                                         |
| sexo                                          | <input type="radio"/> mujer<br><input checked="" type="radio"/> hombre                                                                                   |
| Apgar 1 minuto                                | [*DATA REMOVED*]                                                                                                                                         |
| Apgar 5 minutos                               | [*DATA REMOVED*]                                                                                                                                         |
| Apgar 10 minutos                              | <hr/>                                                                                                                                                    |
| antecedente Covid durante gestación           | <input type="radio"/> Yes<br><input checked="" type="radio"/> No                                                                                         |
| Nivel de estudios                             | <input type="radio"/> ninguno<br><input type="radio"/> primarios<br><input checked="" type="radio"/> secundarios<br><input type="radio"/> universitarios |

# Base\_datos\_estimacion\_peso\_fetal

|                                       |                                                                                                                                                                                                                                                                                      |
|---------------------------------------|--------------------------------------------------------------------------------------------------------------------------------------------------------------------------------------------------------------------------------------------------------------------------------------|
| Número de identificación participante | 163                                                                                                                                                                                                                                                                                  |
| CODIGO PARTICIPANTE                   |                                                                                                                                                                                                                                                                                      |
| Edad                                  | [*DATA REMOVED*]                                                                                                                                                                                                                                                                     |
| Gestaciones                           | <input checked="" type="radio"/> 1<br><input type="radio"/> 2<br><input type="radio"/> 3<br><input type="radio"/> mas de 3                                                                                                                                                           |
| partos                                | <input checked="" type="radio"/> 0<br><input type="radio"/> 1<br><input type="radio"/> 2<br><input type="radio"/> 3<br><input type="radio"/> mas de 3                                                                                                                                |
| cesáreas                              | <input checked="" type="radio"/> 0<br><input type="radio"/> 1<br><input type="radio"/> 2<br><input type="radio"/> 3<br><input type="radio"/> mas de 3                                                                                                                                |
| Abortos                               | <input checked="" type="radio"/> 0<br><input type="radio"/> 1<br><input type="radio"/> 2<br><input type="radio"/> 3<br><input type="radio"/> mas de 3                                                                                                                                |
| Tipo de gestacion                     | <input checked="" type="radio"/> espontanea<br><input type="radio"/> IAC inseminación artificial conyuge<br><input type="radio"/> IAD inseminación artificial donante<br><input type="radio"/> FIV Fecundación in Vitro<br><input type="radio"/> Ovodon FIV con donación de ovocitos |
| peso previo a embarazo                | [*DATA REMOVED*]                                                                                                                                                                                                                                                                     |
| Ganancia ponderal embarazo            | [*DATA REMOVED*]                                                                                                                                                                                                                                                                     |
| Talla madre                           | [*DATA REMOVED*]                                                                                                                                                                                                                                                                     |
| IMC previo embarazo                   | 23.55555555555557                                                                                                                                                                                                                                                                    |
| Patología obstétrica                  | <input checked="" type="radio"/> no<br><input type="radio"/> si                                                                                                                                                                                                                      |
| Diabetes pregestacional               | <input checked="" type="radio"/> no<br><input type="radio"/> si                                                                                                                                                                                                                      |
| Diabetes gestacional                  | <input checked="" type="radio"/> no<br><input type="radio"/> si                                                                                                                                                                                                                      |



|                                            |                                                                                                                                                                                      |
|--------------------------------------------|--------------------------------------------------------------------------------------------------------------------------------------------------------------------------------------|
| Diabetes gestacional con insulina          | <input checked="" type="radio"/> no<br><input type="radio"/> si                                                                                                                      |
| Diabetes gestacional con dieta y ejercicio | <input checked="" type="radio"/> no<br><input type="radio"/> si                                                                                                                      |
| Percentil fetos previos                    | <input checked="" type="radio"/> Nada<br><input type="radio"/> percentil menor de 10<br><input type="radio"/> percentil entre 10 y 90<br><input type="radio"/> percentil mayor de 90 |
| Exfumadora                                 | <input checked="" type="radio"/> Nada<br><input type="radio"/> menos de 5 años<br><input type="radio"/> 5 a 10 años<br><input type="radio"/> mayor o igual a 10 años                 |
| Hábito tabáquico                           | <input checked="" type="radio"/> no<br><input type="radio"/> si                                                                                                                      |
| fumadora                                   | [*DATA REMOVED*]                                                                                                                                                                     |
| Consumo otros tóxicos                      | <input checked="" type="radio"/> no<br><input type="radio"/> si                                                                                                                      |
| Hb 1T                                      | _____                                                                                                                                                                                |
| Htc 1T                                     | _____                                                                                                                                                                                |
| Hb 2T                                      | _____                                                                                                                                                                                |
| HTC 2T                                     | _____                                                                                                                                                                                |
| Hb 3T                                      | _____                                                                                                                                                                                |
| HTC 3T                                     | _____                                                                                                                                                                                |
| Suplemento FE oral                         | <input type="radio"/> si<br><input checked="" type="radio"/> no                                                                                                                      |
| Suplemento fe iv                           | <input type="radio"/> si<br><input checked="" type="radio"/> no                                                                                                                      |
| Transfusión                                | <input checked="" type="radio"/> no<br><input type="radio"/> si                                                                                                                      |
| Solicitada Vit D                           | <input type="radio"/> no<br><input checked="" type="radio"/> si                                                                                                                      |

|                       |                                                                                                                                                                                                                                                                                                                                                                                                              |
|-----------------------|--------------------------------------------------------------------------------------------------------------------------------------------------------------------------------------------------------------------------------------------------------------------------------------------------------------------------------------------------------------------------------------------------------------|
| Deficit vit D         | <input type="radio"/> no<br><input checked="" type="radio"/> si                                                                                                                                                                                                                                                                                                                                              |
| Suplemento vit D      | <input checked="" type="radio"/> si<br><input type="radio"/> no                                                                                                                                                                                                                                                                                                                                              |
| Dieta, cuestionario   | <input checked="" type="radio"/> si<br><input type="radio"/> no                                                                                                                                                                                                                                                                                                                                              |
| Leche entera          | <input type="radio"/> Nunca o menos 1 vez al mes<br><input type="radio"/> 1 a 3 veces mes<br><input type="radio"/> 1 vez semana<br><input checked="" type="radio"/> 2 a 4 veces semana<br><input type="radio"/> 5 a 6 veces semana<br><input type="radio"/> 1 vez al día<br><input type="radio"/> 2 a 3 veces al día<br><input type="radio"/> 5 a 6 veces al día<br><input type="radio"/> más 6 veces al día |
| Leche semidesnatada   | <input type="radio"/> Nunca o menos 1 vez al mes<br><input type="radio"/> 1 a 3 veces mes<br><input type="radio"/> 1 vez semana<br><input checked="" type="radio"/> 2 a 4 veces semana<br><input type="radio"/> 5 a 6 veces semana<br><input type="radio"/> 1 vez al día<br><input type="radio"/> 2 a 3 veces al día<br><input type="radio"/> 5 a 6 veces al día<br><input type="radio"/> mas 6 veces al día |
| Leche desnatada       | <input type="radio"/> Nunca o menos 1 vez al mes<br><input checked="" type="radio"/> 1 a 3 veces mes<br><input type="radio"/> 1 vez semana<br><input type="radio"/> 2 a 4 veces semana<br><input type="radio"/> 5 a 6 veces semana<br><input type="radio"/> 1 vez al día<br><input type="radio"/> 2 a 3 veces al día<br><input type="radio"/> 5 a 6 veces al día<br><input type="radio"/> más 6 veces al día |
| Leche condensada      | <input checked="" type="radio"/> Nunca o menos 1 vez al mes<br><input type="radio"/> 1 a 3 veces mes<br><input type="radio"/> 1 vez semana<br><input type="radio"/> 2 a 4 veces semana<br><input type="radio"/> 5 a 6 veces semana<br><input type="radio"/> 1 vez al día<br><input type="radio"/> 2 a 3 veces al día<br><input type="radio"/> 5 a 6 veces al día<br><input type="radio"/> más 6 veces al día |
| nata o crema de leche | <input checked="" type="radio"/> Nunca o menos 1 vez al mes<br><input type="radio"/> 1 a 3 veces mes<br><input type="radio"/> 1 vez semana<br><input type="radio"/> 2 a 4 veces semana<br><input type="radio"/> 5 a 6 veces semana<br><input type="radio"/> 1 vez al día<br><input type="radio"/> 2 a 3 veces al día<br><input type="radio"/> 5 a 6 veces al día<br><input type="radio"/> más 6 veces al día |

---

Yogurt Entero

- ☐ Nunca o menos 1 vez al mes  
☒ 1 a 3 veces mes  
☐ 1 vez semana  
☐ 2 a 4 veces semana  
☐ 5 a 6 veces semana  
☐ 1 vez al día  
☐ 2 a 3 veces al día  
☐ 5 a 6 veces al día  
☐ más 6 veces al día

---

Yogurt desnatado

- ☒ Nunca o menos 1 vez al mes  
☐ 1 a 3 veces mes  
☐ 1 vez semana  
☐ 2 a 4 veces semana  
☐ 5 a 6 veces semana  
☐ 1 vez al día  
☐ 2 a 3 veces al día  
☐ 5 a 6 veces al día  
☐ más 6 veces al día

---

100g requesón o queso blando o queso fresco

- ☐ Nunca o menos 1 vez al mes  
☐ 1 a 3 veces mes  
☒ 1 vez semana  
☐ 2 a 4 veces semana  
☐ 5 a 6 veces semana  
☐ 1 vez al día  
☐ 2 a 3 veces al día  
☐ 5 a 6 veces al día  
☐ más 6 veces al día

---

queso curado o semicurado o cremoso

- ☐ Nunca o menos 1 vez al mes  
☐ 1 a 3 veces mes  
☐ 1 vez semana  
☒ 2 a 4 veces semana  
☐ 5 a 6 veces semana  
☐ 1 vez al día  
☐ 2 a 3 veces al día  
☐ 5 a 6 veces al día  
☐ más 6 veces al día

---

natillas flan pudding

- ☒ Nunca o menos 1 vez al mes  
☐ 1 a 3 veces mes  
☐ 1 vez semana  
☐ 2 a 4 veces semana  
☐ 5 a 6 veces semana  
☐ 1 vez al día  
☐ 2 a 3 veces al día  
☐ 5 a 6 veces al día  
☐ más 6 veces al día

---

Helado

- ☒ Nunca o menos 1 vez al mes  
☐ 1 a 3 veces mes  
☐ 1 vez semana  
☐ 2 a 4 veces semana  
☐ 5 a 6 veces semana  
☐ 1 vez al día  
☐ 2 a 3 veces al día  
☐ 5 a 6 veces al día  
☐ más 6 veces al día

|                                      |                                                                                                                                                                                                                                                                                                                                                                                                              |
|--------------------------------------|--------------------------------------------------------------------------------------------------------------------------------------------------------------------------------------------------------------------------------------------------------------------------------------------------------------------------------------------------------------------------------------------------------------|
| huevo                                | <input type="radio"/> Nunca o menos 1 vez al mes<br><input type="radio"/> 1 a 3 veces mes<br><input type="radio"/> 1 vez semana<br><input checked="" type="radio"/> 2 a 4 veces semana<br><input type="radio"/> 5 a 6 veces semana<br><input type="radio"/> 1 vez al día<br><input type="radio"/> 2 a 3 veces al día<br><input type="radio"/> 5 a 6 veces al día<br><input type="radio"/> más 6 veces al día |
| Pollo con piel                       | <input type="radio"/> Nunca o menos 1 vez al mes<br><input checked="" type="radio"/> 1 a 3 veces mes<br><input type="radio"/> 1 vez semana<br><input type="radio"/> 2 a 4 veces semana<br><input type="radio"/> 5 a 6 veces semana<br><input type="radio"/> 1 vez al día<br><input type="radio"/> 2 a 3 veces al día<br><input type="radio"/> 5 a 6 veces al día<br><input type="radio"/> más 6 veces al día |
| pollo sin piel                       | <input type="radio"/> Nunca o menos 1 vez al mes<br><input checked="" type="radio"/> 1 a 3 veces mes<br><input type="radio"/> 1 vez semana<br><input type="radio"/> 2 a 4 veces semana<br><input type="radio"/> 5 a 6 veces semana<br><input type="radio"/> 1 vez al día<br><input type="radio"/> 2 a 3 veces al día<br><input type="radio"/> 5 a 6 veces al día<br><input type="radio"/> más 6 veces al día |
| Ternera o cerdo o cordero            | <input type="radio"/> Nunca o menos 1 vez al mes<br><input checked="" type="radio"/> 1 a 3 veces mes<br><input type="radio"/> 1 vez semana<br><input type="radio"/> 2 a 4 veces semana<br><input type="radio"/> 5 a 6 veces semana<br><input type="radio"/> 1 vez al día<br><input type="radio"/> 2 a 3 veces al día<br><input type="radio"/> 5 a 6 veces al día<br><input type="radio"/> más 6 veces al día |
| carne caza: Conejo o codorniz o pato | <input type="radio"/> Nunca o menos 1 vez al mes<br><input checked="" type="radio"/> 1 a 3 veces mes<br><input type="radio"/> 1 vez semana<br><input type="radio"/> 2 a 4 veces semana<br><input type="radio"/> 5 a 6 veces semana<br><input type="radio"/> 1 vez al día<br><input type="radio"/> 2 a 3 veces al día<br><input type="radio"/> 5 a 6 veces al día<br><input type="radio"/> más 6 veces al día |
| Hígado de ternera o cerdo o pollo    | <input checked="" type="radio"/> Nunca o menos 1 vez al mes<br><input type="radio"/> 1 a 3 veces mes<br><input type="radio"/> 1 vez semana<br><input type="radio"/> 2 a 4 veces semana<br><input type="radio"/> 5 a 6 veces semana<br><input type="radio"/> 1 vez al día<br><input type="radio"/> 2 a 3 veces al día<br><input type="radio"/> 5 a 6 veces al día<br><input type="radio"/> más 6 veces al día |

---

Vísceras

- ☒ Nunca o menos 1 vez al mes  
☐ 1 a 3 veces mes  
☐ 1 vez semana  
☐ 2 a 4 veces semana  
☐ 5 a 6 veces semana  
☐ 1 vez al día  
☐ 2 a 3 veces al día  
☐ 5 a 6 veces al día  
☐ más 6 veces al día

---

Embutido

- ☐ Nunca o menos 1 vez al mes  
☒ 1 a 3 veces mes  
☐ 1 vez semana  
☐ 2 a 4 veces semana  
☐ 5 a 6 veces semana  
☐ 1 vez al día  
☐ 2 a 3 veces al día  
☐ 5 a 6 veces al día  
☐ más 6 veces al día

---

Salchicha o similar

- ☒ Nunca o menos 1 vez al mes  
☐ 1 a 3 veces mes  
☐ 1 vez semana  
☐ 2 a 4 veces semana  
☐ 5 a 6 veces semana  
☐ 1 vez al día  
☐ 2 a 3 veces al día  
☐ 5 a 6 veces al día  
☐ más 6 veces al día

---

Pate o foiegras

- ☒ Nunca o menos 1 vez al mes  
☐ 1 a 3 veces mes  
☐ 1 vez semana  
☐ 2 a 4 veces semana  
☐ 5 a 6 veces semana  
☐ 1 vez al día  
☐ 2 a 3 veces al día  
☐ 5 a 6 veces al día  
☐ más 6 veces al día

---

Hamburguesa

- ☐ Nunca o menos 1 vez al mes  
☒ 1 a 3 veces mes  
☐ 1 vez semana  
☐ 2 a 4 veces semana  
☐ 5 a 6 veces semana  
☐ 1 vez al día  
☐ 2 a 3 veces al día  
☐ 5 a 6 veces al día  
☐ más 6 veces al día

---

tocino o bacon

- ☒ Nunca o menos 1 vez al mes  
☐ 1 a 3 veces mes  
☐ 1 vez semana  
☐ 2 a 4 veces semana  
☐ 5 a 6 veces semana  
☐ 1 vez al día  
☐ 2 a 3 veces al día  
☐ 5 a 6 veces al día  
☐ más 6 veces al día

---

|               |                                                                                                                                                                                                                                                                                                                                                                                                              |
|---------------|--------------------------------------------------------------------------------------------------------------------------------------------------------------------------------------------------------------------------------------------------------------------------------------------------------------------------------------------------------------------------------------------------------------|
| Pescado frito | <input type="radio"/> Nunca o menos 1 vez al mes<br><input checked="" type="radio"/> 1 a 3 veces mes<br><input type="radio"/> 1 vez semana<br><input type="radio"/> 2 a 4 veces semana<br><input type="radio"/> 5 a 6 veces semana<br><input type="radio"/> 1 vez al día<br><input type="radio"/> 2 a 3 veces al día<br><input type="radio"/> 5 a 6 veces al día<br><input type="radio"/> más 6 veces al día |
|---------------|--------------------------------------------------------------------------------------------------------------------------------------------------------------------------------------------------------------------------------------------------------------------------------------------------------------------------------------------------------------------------------------------------------------|

---

|                        |                                                                                                                                                                                                                                                                                                                                                                                                              |
|------------------------|--------------------------------------------------------------------------------------------------------------------------------------------------------------------------------------------------------------------------------------------------------------------------------------------------------------------------------------------------------------------------------------------------------------|
| pescado hervido blanco | <input type="radio"/> Nunca o menos 1 vez al mes<br><input checked="" type="radio"/> 1 a 3 veces mes<br><input type="radio"/> 1 vez semana<br><input type="radio"/> 2 a 4 veces semana<br><input type="radio"/> 5 a 6 veces semana<br><input type="radio"/> 1 vez al día<br><input type="radio"/> 2 a 3 veces al día<br><input type="radio"/> 5 a 6 veces al día<br><input type="radio"/> más 6 veces al día |
|------------------------|--------------------------------------------------------------------------------------------------------------------------------------------------------------------------------------------------------------------------------------------------------------------------------------------------------------------------------------------------------------------------------------------------------------|

---

|                      |                                                                                                                                                                                                                                                                                                                                                                                                              |
|----------------------|--------------------------------------------------------------------------------------------------------------------------------------------------------------------------------------------------------------------------------------------------------------------------------------------------------------------------------------------------------------------------------------------------------------|
| pescado hervido azul | <input type="radio"/> Nunca o menos 1 vez al mes<br><input checked="" type="radio"/> 1 a 3 veces mes<br><input type="radio"/> 1 vez semana<br><input type="radio"/> 2 a 4 veces semana<br><input type="radio"/> 5 a 6 veces semana<br><input type="radio"/> 1 vez al día<br><input type="radio"/> 2 a 3 veces al día<br><input type="radio"/> 5 a 6 veces al día<br><input type="radio"/> más 6 veces al día |
|----------------------|--------------------------------------------------------------------------------------------------------------------------------------------------------------------------------------------------------------------------------------------------------------------------------------------------------------------------------------------------------------------------------------------------------------|

---

|                    |                                                                                                                                                                                                                                                                                                                                                                                                              |
|--------------------|--------------------------------------------------------------------------------------------------------------------------------------------------------------------------------------------------------------------------------------------------------------------------------------------------------------------------------------------------------------------------------------------------------------|
| otros pescado azul | <input checked="" type="radio"/> Nunca o menos 1 vez al mes<br><input type="radio"/> 1 a 3 veces mes<br><input type="radio"/> 1 vez semana<br><input type="radio"/> 2 a 4 veces semana<br><input type="radio"/> 5 a 6 veces semana<br><input type="radio"/> 1 vez al día<br><input type="radio"/> 2 a 3 veces al día<br><input type="radio"/> 5 a 6 veces al día<br><input type="radio"/> más 6 veces al día |
|--------------------|--------------------------------------------------------------------------------------------------------------------------------------------------------------------------------------------------------------------------------------------------------------------------------------------------------------------------------------------------------------------------------------------------------------|

---

|               |                                                                                                                                                                                                                                                                                                                                                                                                              |
|---------------|--------------------------------------------------------------------------------------------------------------------------------------------------------------------------------------------------------------------------------------------------------------------------------------------------------------------------------------------------------------------------------------------------------------|
| atun conserva | <input type="radio"/> Nunca o menos 1 vez al mes<br><input type="radio"/> 1 a 3 veces mes<br><input checked="" type="radio"/> 1 vez semana<br><input type="radio"/> 2 a 4 veces semana<br><input type="radio"/> 5 a 6 veces semana<br><input type="radio"/> 1 vez al día<br><input type="radio"/> 2 a 3 veces al día<br><input type="radio"/> 5 a 6 veces al día<br><input type="radio"/> más 6 veces al día |
|---------------|--------------------------------------------------------------------------------------------------------------------------------------------------------------------------------------------------------------------------------------------------------------------------------------------------------------------------------------------------------------------------------------------------------------|

---

|                  |                                                                                                                                                                                                                                                                                                                                                                                                              |
|------------------|--------------------------------------------------------------------------------------------------------------------------------------------------------------------------------------------------------------------------------------------------------------------------------------------------------------------------------------------------------------------------------------------------------------|
| sardina conserva | <input checked="" type="radio"/> Nunca o menos 1 vez al mes<br><input type="radio"/> 1 a 3 veces mes<br><input type="radio"/> 1 vez semana<br><input type="radio"/> 2 a 4 veces semana<br><input type="radio"/> 5 a 6 veces semana<br><input type="radio"/> 1 vez al día<br><input type="radio"/> 2 a 3 veces al día<br><input type="radio"/> 5 a 6 veces al día<br><input type="radio"/> más 6 veces al día |
|------------------|--------------------------------------------------------------------------------------------------------------------------------------------------------------------------------------------------------------------------------------------------------------------------------------------------------------------------------------------------------------------------------------------------------------|

|                                         |                                                                                                                                                                                                                                                                                                                                                                                                              |
|-----------------------------------------|--------------------------------------------------------------------------------------------------------------------------------------------------------------------------------------------------------------------------------------------------------------------------------------------------------------------------------------------------------------------------------------------------------------|
| pescado ahumado                         | <input type="radio"/> Nunca o menos 1 vez al mes<br><input checked="" type="radio"/> 1 a 3 veces mes<br><input type="radio"/> 1 vez semana<br><input type="radio"/> 2 a 4 veces semana<br><input type="radio"/> 5 a 6 veces semana<br><input type="radio"/> 1 vez al día<br><input type="radio"/> 2 a 3 veces al día<br><input type="radio"/> 5 a 6 veces al día<br><input type="radio"/> más 6 veces al día |
| almejas o mejillones o ostras unos 100g | <input type="radio"/> Nunca o menos 1 vez al mes<br><input checked="" type="radio"/> 1 a 3 veces mes<br><input type="radio"/> 1 vez semana<br><input type="radio"/> 2 a 4 veces semana<br><input type="radio"/> 5 a 6 veces semana<br><input type="radio"/> 1 vez al día<br><input type="radio"/> 2 a 3 veces al día<br><input type="radio"/> 5 a 6 veces al día<br><input type="radio"/> más 6 veces al día |
| calamar o chipiron o sepia unos 100g    | <input type="radio"/> Nunca o menos 1 vez al mes<br><input type="radio"/> 1 a 3 veces mes<br><input checked="" type="radio"/> 1 vez semana<br><input type="radio"/> 2 a 4 veces semana<br><input type="radio"/> 5 a 6 veces semana<br><input type="radio"/> 1 vez al día<br><input type="radio"/> 2 a 3 veces al día<br><input type="radio"/> 5 a 6 veces al día<br><input type="radio"/> más 6 veces al día |
| marisco unos 100g                       | <input type="radio"/> Nunca o menos 1 vez al mes<br><input checked="" type="radio"/> 1 a 3 veces mes<br><input type="radio"/> 1 vez semana<br><input type="radio"/> 2 a 4 veces semana<br><input type="radio"/> 5 a 6 veces semana<br><input type="radio"/> 1 vez al día<br><input type="radio"/> 2 a 3 veces al día<br><input type="radio"/> 5 a 6 veces al día<br><input type="radio"/> más 6 veces al día |
| Espinacas o acelgas cocinadas           | <input type="radio"/> Nunca o menos 1 vez al mes<br><input checked="" type="radio"/> 1 a 3 veces mes<br><input type="radio"/> 1 vez semana<br><input type="radio"/> 2 a 4 veces semana<br><input type="radio"/> 5 a 6 veces semana<br><input type="radio"/> 1 vez al día<br><input type="radio"/> 2 a 3 veces al día<br><input type="radio"/> 5 a 6 veces al día<br><input type="radio"/> más 6 veces al día |
| Col o coliflor o brocoli cocinado       | <input type="radio"/> Nunca o menos 1 vez al mes<br><input checked="" type="radio"/> 1 a 3 veces mes<br><input type="radio"/> 1 vez semana<br><input type="radio"/> 2 a 4 veces semana<br><input type="radio"/> 5 a 6 veces semana<br><input type="radio"/> 1 vez al día<br><input type="radio"/> 2 a 3 veces al día<br><input type="radio"/> 5 a 6 veces al día<br><input type="radio"/> más 6 veces al día |

---

Lechuga o endivia o escarola

- ☐ Nunca o menos 1 vez al mes  
☐ 1 a 3 veces mes  
☐ 1 vez semana  
☐ 2 a 4 veces semana  
☒ 5 a 6 veces semana  
☐ 1 vez al día  
☐ 2 a 3 veces al día  
☐ 5 a 6 veces al día  
☐ más 6 veces al día

---

tomate ensalada

- ☐ Nunca o menos 1 vez al mes  
☐ 1 a 3 veces mes  
☐ 1 vez semana  
☐ 2 a 4 veces semana  
☒ 5 a 6 veces semana  
☐ 1 vez al día  
☐ 2 a 3 veces al día  
☐ 5 a 6 veces al día  
☐ más 6 veces al día

---

cebolla

- ☐ Nunca o menos 1 vez al mes  
☐ 1 a 3 veces mes  
☐ 1 vez semana  
☒ 2 a 4 veces semana  
☐ 5 a 6 veces semana  
☐ 1 vez al día  
☐ 2 a 3 veces al día  
☐ 5 a 6 veces al día  
☐ más 6 veces al día

---

Zanahoria o calabaza

- ☐ Nunca o menos 1 vez al mes  
☐ 1 a 3 veces mes  
☒ 1 vez semana  
☐ 2 a 4 veces semana  
☐ 5 a 6 veces semana  
☐ 1 vez al día  
☐ 2 a 3 veces al día  
☐ 5 a 6 veces al día  
☐ más 6 veces al día

---

Judías verdes

- ☐ Nunca o menos 1 vez al mes  
☒ 1 a 3 veces mes  
☐ 1 vez semana  
☐ 2 a 4 veces semana  
☐ 5 a 6 veces semana  
☐ 1 vez al día  
☐ 2 a 3 veces al día  
☐ 5 a 6 veces al día  
☐ más 6 veces al día

---

Berenjena o calabacin o pepino

- ☐ Nunca o menos 1 vez al mes  
☒ 1 a 3 veces mes  
☐ 1 vez semana  
☐ 2 a 4 veces semana  
☐ 5 a 6 veces semana  
☐ 1 vez al día  
☐ 2 a 3 veces al día  
☐ 5 a 6 veces al día  
☐ más 6 veces al día



---

|          |                                                                                                                                                                                                                                                                                                                                                                                                              |
|----------|--------------------------------------------------------------------------------------------------------------------------------------------------------------------------------------------------------------------------------------------------------------------------------------------------------------------------------------------------------------------------------------------------------------|
| pimiento | <input type="radio"/> Nunca o menos 1 vez al mes<br><input type="radio"/> 1 a 3 veces mes<br><input checked="" type="radio"/> 1 vez semana<br><input type="radio"/> 2 a 4 veces semana<br><input type="radio"/> 5 a 6 veces semana<br><input type="radio"/> 1 vez al día<br><input type="radio"/> 2 a 3 veces al día<br><input type="radio"/> 5 a 6 veces al día<br><input type="radio"/> más 6 veces al día |
|----------|--------------------------------------------------------------------------------------------------------------------------------------------------------------------------------------------------------------------------------------------------------------------------------------------------------------------------------------------------------------------------------------------------------------|

---

|           |                                                                                                                                                                                                                                                                                                                                                                                                              |
|-----------|--------------------------------------------------------------------------------------------------------------------------------------------------------------------------------------------------------------------------------------------------------------------------------------------------------------------------------------------------------------------------------------------------------------|
| alcachofa | <input type="radio"/> Nunca o menos 1 vez al mes<br><input type="radio"/> 1 a 3 veces mes<br><input checked="" type="radio"/> 1 vez semana<br><input type="radio"/> 2 a 4 veces semana<br><input type="radio"/> 5 a 6 veces semana<br><input type="radio"/> 1 vez al día<br><input type="radio"/> 2 a 3 veces al día<br><input type="radio"/> 5 a 6 veces al día<br><input type="radio"/> más 6 veces al día |
|-----------|--------------------------------------------------------------------------------------------------------------------------------------------------------------------------------------------------------------------------------------------------------------------------------------------------------------------------------------------------------------------------------------------------------------|

---

|            |                                                                                                                                                                                                                                                                                                                                                                                                              |
|------------|--------------------------------------------------------------------------------------------------------------------------------------------------------------------------------------------------------------------------------------------------------------------------------------------------------------------------------------------------------------------------------------------------------------|
| espárragos | <input type="radio"/> Nunca o menos 1 vez al mes<br><input type="radio"/> 1 a 3 veces mes<br><input checked="" type="radio"/> 1 vez semana<br><input type="radio"/> 2 a 4 veces semana<br><input type="radio"/> 5 a 6 veces semana<br><input type="radio"/> 1 vez al día<br><input type="radio"/> 2 a 3 veces al día<br><input type="radio"/> 5 a 6 veces al día<br><input type="radio"/> más 6 veces al día |
|------------|--------------------------------------------------------------------------------------------------------------------------------------------------------------------------------------------------------------------------------------------------------------------------------------------------------------------------------------------------------------------------------------------------------------|

---

|              |                                                                                                                                                                                                                                                                                                                                                                                                              |
|--------------|--------------------------------------------------------------------------------------------------------------------------------------------------------------------------------------------------------------------------------------------------------------------------------------------------------------------------------------------------------------------------------------------------------------|
| maíz hervido | <input type="radio"/> Nunca o menos 1 vez al mes<br><input checked="" type="radio"/> 1 a 3 veces mes<br><input type="radio"/> 1 vez semana<br><input type="radio"/> 2 a 4 veces semana<br><input type="radio"/> 5 a 6 veces semana<br><input type="radio"/> 1 vez al día<br><input type="radio"/> 2 a 3 veces al día<br><input type="radio"/> 5 a 6 veces al día<br><input type="radio"/> más 6 veces al día |
|--------------|--------------------------------------------------------------------------------------------------------------------------------------------------------------------------------------------------------------------------------------------------------------------------------------------------------------------------------------------------------------------------------------------------------------|

---

|           |                                                                                                                                                                                                                                                                                                                                                                                                              |
|-----------|--------------------------------------------------------------------------------------------------------------------------------------------------------------------------------------------------------------------------------------------------------------------------------------------------------------------------------------------------------------------------------------------------------------|
| legumbres | <input type="radio"/> Nunca o menos 1 vez al mes<br><input checked="" type="radio"/> 1 a 3 veces mes<br><input type="radio"/> 1 vez semana<br><input type="radio"/> 2 a 4 veces semana<br><input type="radio"/> 5 a 6 veces semana<br><input type="radio"/> 1 vez al día<br><input type="radio"/> 2 a 3 veces al día<br><input type="radio"/> 5 a 6 veces al día<br><input type="radio"/> más 6 veces al día |
|-----------|--------------------------------------------------------------------------------------------------------------------------------------------------------------------------------------------------------------------------------------------------------------------------------------------------------------------------------------------------------------------------------------------------------------|

---

|                       |                                                                                                                                                                                                                                                                                                                                                                                                              |
|-----------------------|--------------------------------------------------------------------------------------------------------------------------------------------------------------------------------------------------------------------------------------------------------------------------------------------------------------------------------------------------------------------------------------------------------------|
| naranjas o mandarinas | <input type="radio"/> Nunca o menos 1 vez al mes<br><input type="radio"/> 1 a 3 veces mes<br><input checked="" type="radio"/> 1 vez semana<br><input type="radio"/> 2 a 4 veces semana<br><input type="radio"/> 5 a 6 veces semana<br><input type="radio"/> 1 vez al día<br><input type="radio"/> 2 a 3 veces al día<br><input type="radio"/> 5 a 6 veces al día<br><input type="radio"/> más 6 veces al día |
|-----------------------|--------------------------------------------------------------------------------------------------------------------------------------------------------------------------------------------------------------------------------------------------------------------------------------------------------------------------------------------------------------------------------------------------------------|

---

|                       |                                                                                                                                                                                                                                                                                                                                                                                                              |
|-----------------------|--------------------------------------------------------------------------------------------------------------------------------------------------------------------------------------------------------------------------------------------------------------------------------------------------------------------------------------------------------------------------------------------------------------|
| zum natural fruta     | <input type="radio"/> Nunca o menos 1 vez al mes<br><input type="radio"/> 1 a 3 veces mes<br><input type="radio"/> 1 vez semana<br><input checked="" type="radio"/> 2 a 4 veces semana<br><input type="radio"/> 5 a 6 veces semana<br><input type="radio"/> 1 vez al día<br><input type="radio"/> 2 a 3 veces al día<br><input type="radio"/> 5 a 6 veces al día<br><input type="radio"/> más 6 veces al día |
| platano               | <input type="radio"/> Nunca o menos 1 vez al mes<br><input type="radio"/> 1 a 3 veces mes<br><input type="radio"/> 1 vez semana<br><input type="radio"/> 2 a 4 veces semana<br><input checked="" type="radio"/> 5 a 6 veces semana<br><input type="radio"/> 1 vez al día<br><input type="radio"/> 2 a 3 veces al día<br><input type="radio"/> 5 a 6 veces al día<br><input type="radio"/> más 6 veces al día |
| manzana o pera        | <input type="radio"/> Nunca o menos 1 vez al mes<br><input type="radio"/> 1 a 3 veces mes<br><input checked="" type="radio"/> 1 vez semana<br><input type="radio"/> 2 a 4 veces semana<br><input type="radio"/> 5 a 6 veces semana<br><input type="radio"/> 1 vez al día<br><input type="radio"/> 2 a 3 veces al día<br><input type="radio"/> 5 a 6 veces al día<br><input type="radio"/> más 6 veces al día |
| melocotón o nectarina | <input type="radio"/> Nunca o menos 1 vez al mes<br><input type="radio"/> 1 a 3 veces mes<br><input type="radio"/> 1 vez semana<br><input checked="" type="radio"/> 2 a 4 veces semana<br><input type="radio"/> 5 a 6 veces semana<br><input type="radio"/> 1 vez al día<br><input type="radio"/> 2 a 3 veces al día<br><input type="radio"/> 5 a 6 veces al día<br><input type="radio"/> más 6 veces al día |
| sandia o melon        | <input type="radio"/> Nunca o menos 1 vez al mes<br><input type="radio"/> 1 a 3 veces mes<br><input type="radio"/> 1 vez semana<br><input checked="" type="radio"/> 2 a 4 veces semana<br><input type="radio"/> 5 a 6 veces semana<br><input type="radio"/> 1 vez al día<br><input type="radio"/> 2 a 3 veces al día<br><input type="radio"/> 5 a 6 veces al día<br><input type="radio"/> más 6 veces al día |
| uva                   | <input type="radio"/> Nunca o menos 1 vez al mes<br><input type="radio"/> 1 a 3 veces mes<br><input checked="" type="radio"/> 1 vez semana<br><input type="radio"/> 2 a 4 veces semana<br><input type="radio"/> 5 a 6 veces semana<br><input type="radio"/> 1 vez al día<br><input type="radio"/> 2 a 3 veces al día<br><input type="radio"/> 5 a 6 veces al día<br><input type="radio"/> más 6 veces al día |

---

bruna o ciruela

- ☐ Nunca o menos 1 vez al mes  
☒ 1 a 3 veces mes  
☐ 1 vez semana  
☐ 2 a 4 veces semana  
☐ 5 a 6 veces semana  
☐ 1 vez al día  
☐ 2 a 3 veces al día  
☐ 5 a 6 veces al día  
☐ más 6 veces al día

---

kiwi

- ☐ Nunca o menos 1 vez al mes  
☐ 1 a 3 veces mes  
☐ 1 vez semana  
☐ 2 a 4 veces semana  
☐ 5 a 6 veces semana  
☒ 1 vez al día  
☐ 2 a 3 veces al día  
☐ 5 a 6 veces al día  
☐ más 6 veces al día

---

aceituna

- ☐ Nunca o menos 1 vez al mes  
☐ 1 a 3 veces mes  
☐ 1 vez semana  
☒ 2 a 4 veces semana  
☐ 5 a 6 veces semana  
☐ 1 vez al día  
☐ 2 a 3 veces al día  
☐ 5 a 6 veces al día  
☐ más 6 veces al día

---

frutos secos

- ☐ Nunca o menos 1 vez al mes  
☐ 1 a 3 veces mes  
☐ 1 vez semana  
☒ 2 a 4 veces semana  
☐ 5 a 6 veces semana  
☐ 1 vez al día  
☐ 2 a 3 veces al día  
☐ 5 a 6 veces al día  
☐ más 6 veces al día

---

pan blanco

- ☐ Nunca o menos 1 vez al mes  
☐ 1 a 3 veces mes  
☐ 1 vez semana  
☒ 2 a 4 veces semana  
☐ 5 a 6 veces semana  
☐ 1 vez al día  
☐ 2 a 3 veces al día  
☐ 5 a 6 veces al día  
☐ más 6 veces al día

---

pan integral

- ☐ Nunca o menos 1 vez al mes  
☐ 1 a 3 veces mes  
☒ 1 vez semana  
☐ 2 a 4 veces semana  
☐ 5 a 6 veces semana  
☐ 1 vez al día  
☐ 2 a 3 veces al día  
☐ 5 a 6 veces al día  
☐ más 6 veces al día

---

cereales desayuno

- ☐ Nunca o menos 1 vez al mes  
☐ 1 a 3 veces mes  
☐ 1 vez semana  
☐ 2 a 4 veces semana  
☒ 5 a 6 veces semana  
☐ 1 vez al día  
☐ 2 a 3 veces al día  
☐ 5 a 6 veces al día  
☐ más 6 veces al día

---

patatas fritas

- ☐ Nunca o menos 1 vez al mes  
☒ 1 a 3 veces mes  
☐ 1 vez semana  
☐ 2 a 4 veces semana  
☐ 5 a 6 veces semana  
☐ 1 vez al día  
☐ 2 a 3 veces al día  
☐ 5 a 6 veces al día  
☐ más 6 veces al día

---

patatas cocidas o asadas

- ☐ Nunca o menos 1 vez al mes  
☒ 1 a 3 veces mes  
☐ 1 vez semana  
☐ 2 a 4 veces semana  
☐ 5 a 6 veces semana  
☐ 1 vez al día  
☐ 2 a 3 veces al día  
☐ 5 a 6 veces al día  
☐ más 6 veces al día

---

bolsa papas

- ☐ Nunca o menos 1 vez al mes  
☒ 1 a 3 veces mes  
☐ 1 vez semana  
☐ 2 a 4 veces semana  
☐ 5 a 6 veces semana  
☐ 1 vez al día  
☐ 2 a 3 veces al día  
☐ 5 a 6 veces al día  
☐ más 6 veces al día

---

arroz cocinado

- ☐ Nunca o menos 1 vez al mes  
☐ 1 a 3 veces mes  
☒ 1 vez semana  
☐ 2 a 4 veces semana  
☐ 5 a 6 veces semana  
☐ 1 vez al día  
☐ 2 a 3 veces al día  
☐ 5 a 6 veces al día  
☐ más 6 veces al día

---

pasta

- ☐ Nunca o menos 1 vez al mes  
☐ 1 a 3 veces mes  
☒ 1 vez semana  
☐ 2 a 4 veces semana  
☐ 5 a 6 veces semana  
☐ 1 vez al día  
☐ 2 a 3 veces al día  
☐ 5 a 6 veces al día  
☐ más 6 veces al día

|                     |                                                                                                                                                                                                                                                                                                                                                                                                              |
|---------------------|--------------------------------------------------------------------------------------------------------------------------------------------------------------------------------------------------------------------------------------------------------------------------------------------------------------------------------------------------------------------------------------------------------------|
| pizza               | <input type="radio"/> Nunca o menos 1 vez al mes<br><input type="radio"/> 1 a 3 veces mes<br><input checked="" type="radio"/> 1 vez semana<br><input type="radio"/> 2 a 4 veces semana<br><input type="radio"/> 5 a 6 veces semana<br><input type="radio"/> 1 vez al día<br><input type="radio"/> 2 a 3 veces al día<br><input type="radio"/> 5 a 6 veces al día<br><input type="radio"/> más 6 veces al día |
| aceite oliva        | <input type="radio"/> Nunca o menos 1 vez al mes<br><input type="radio"/> 1 a 3 veces mes<br><input type="radio"/> 1 vez semana<br><input type="radio"/> 2 a 4 veces semana<br><input type="radio"/> 5 a 6 veces semana<br><input type="radio"/> 1 vez al día<br><input checked="" type="radio"/> 2 a 3 veces al día<br><input type="radio"/> 5 a 6 veces al día<br><input type="radio"/> más 6 veces al día |
| otros aceites       | <input checked="" type="radio"/> Nunca o menos 1 vez al mes<br><input type="radio"/> 1 a 3 veces mes<br><input type="radio"/> 1 vez semana<br><input type="radio"/> 2 a 4 veces semana<br><input type="radio"/> 5 a 6 veces semana<br><input type="radio"/> 1 vez al día<br><input type="radio"/> 2 a 3 veces al día<br><input type="radio"/> 5 a 6 veces al día<br><input type="radio"/> más 6 veces al día |
| margarina           | <input checked="" type="radio"/> Nunca o menos 1 vez al mes<br><input type="radio"/> 1 a 3 veces mes<br><input type="radio"/> 1 vez semana<br><input type="radio"/> 2 a 4 veces semana<br><input type="radio"/> 5 a 6 veces semana<br><input type="radio"/> 1 vez al día<br><input type="radio"/> 2 a 3 veces al día<br><input type="radio"/> 5 a 6 veces al día<br><input type="radio"/> más 6 veces al día |
| mantequilla         | <input checked="" type="radio"/> Nunca o menos 1 vez al mes<br><input type="radio"/> 1 a 3 veces mes<br><input type="radio"/> 1 vez semana<br><input type="radio"/> 2 a 4 veces semana<br><input type="radio"/> 5 a 6 veces semana<br><input type="radio"/> 1 vez al día<br><input type="radio"/> 2 a 3 veces al día<br><input type="radio"/> 5 a 6 veces al día<br><input type="radio"/> más 6 veces al día |
| galletas tipo maria | <input checked="" type="radio"/> Nunca o menos 1 vez al mes<br><input type="radio"/> 1 a 3 veces mes<br><input type="radio"/> 1 vez semana<br><input type="radio"/> 2 a 4 veces semana<br><input type="radio"/> 5 a 6 veces semana<br><input type="radio"/> 1 vez al día<br><input type="radio"/> 2 a 3 veces al día<br><input type="radio"/> 5 a 6 veces al día<br><input type="radio"/> más 6 veces al día |

|                           |                                                                                                                                                                                                                                                                                                                                                                                                              |
|---------------------------|--------------------------------------------------------------------------------------------------------------------------------------------------------------------------------------------------------------------------------------------------------------------------------------------------------------------------------------------------------------------------------------------------------------|
| galletas chocolate        | <input checked="" type="radio"/> Nunca o menos 1 vez al mes<br><input type="radio"/> 1 a 3 veces mes<br><input type="radio"/> 1 vez semana<br><input type="radio"/> 2 a 4 veces semana<br><input type="radio"/> 5 a 6 veces semana<br><input type="radio"/> 1 vez al día<br><input type="radio"/> 2 a 3 veces al día<br><input type="radio"/> 5 a 6 veces al día<br><input type="radio"/> más 6 veces al día |
| bollieria                 | <input type="radio"/> Nunca o menos 1 vez al mes<br><input type="radio"/> 1 a 3 veces mes<br><input checked="" type="radio"/> 1 vez semana<br><input type="radio"/> 2 a 4 veces semana<br><input type="radio"/> 5 a 6 veces semana<br><input type="radio"/> 1 vez al día<br><input type="radio"/> 2 a 3 veces al día<br><input type="radio"/> 5 a 6 veces al día<br><input type="radio"/> más 6 veces al día |
| chocolate o bombones      | <input type="radio"/> Nunca o menos 1 vez al mes<br><input checked="" type="radio"/> 1 a 3 veces mes<br><input type="radio"/> 1 vez semana<br><input type="radio"/> 2 a 4 veces semana<br><input type="radio"/> 5 a 6 veces semana<br><input type="radio"/> 1 vez al día<br><input type="radio"/> 2 a 3 veces al día<br><input type="radio"/> 5 a 6 veces al día<br><input type="radio"/> más 6 veces al día |
| chocolate polvo o colacao | <input type="radio"/> Nunca o menos 1 vez al mes<br><input checked="" type="radio"/> 1 a 3 veces mes<br><input type="radio"/> 1 vez semana<br><input type="radio"/> 2 a 4 veces semana<br><input type="radio"/> 5 a 6 veces semana<br><input type="radio"/> 1 vez al día<br><input type="radio"/> 2 a 3 veces al día<br><input type="radio"/> 5 a 6 veces al día<br><input type="radio"/> más 6 veces al día |
| vino tinto                | <input checked="" type="radio"/> Nunca o menos 1 vez al mes<br><input type="radio"/> 1 a 3 veces mes<br><input type="radio"/> 1 vez semana<br><input type="radio"/> 2 a 4 veces semana<br><input type="radio"/> 5 a 6 veces semana<br><input type="radio"/> 1 vez al día<br><input type="radio"/> 2 a 3 veces al día<br><input type="radio"/> 5 a 6 veces al día<br><input type="radio"/> más 6 veces al día |
| vino blanco               | <input checked="" type="radio"/> Nunca o menos 1 vez al mes<br><input type="radio"/> 1 a 3 veces mes<br><input type="radio"/> 1 vez semana<br><input type="radio"/> 2 a 4 veces semana<br><input type="radio"/> 5 a 6 veces semana<br><input type="radio"/> 1 vez al día<br><input type="radio"/> 2 a 3 veces al día<br><input type="radio"/> 5 a 6 veces al día<br><input type="radio"/> más 6 veces al día |

---

|                    |                                                                                                                                                                                                                                                                                                                                                                                                              |
|--------------------|--------------------------------------------------------------------------------------------------------------------------------------------------------------------------------------------------------------------------------------------------------------------------------------------------------------------------------------------------------------------------------------------------------------|
| vino seco o vermut | <input checked="" type="radio"/> Nunca o menos 1 vez al mes<br><input type="radio"/> 1 a 3 veces mes<br><input type="radio"/> 1 vez semana<br><input type="radio"/> 2 a 4 veces semana<br><input type="radio"/> 5 a 6 veces semana<br><input type="radio"/> 1 vez al día<br><input type="radio"/> 2 a 3 veces al día<br><input type="radio"/> 5 a 6 veces al día<br><input type="radio"/> más 6 veces al día |
|--------------------|--------------------------------------------------------------------------------------------------------------------------------------------------------------------------------------------------------------------------------------------------------------------------------------------------------------------------------------------------------------------------------------------------------------|

---

|         |                                                                                                                                                                                                                                                                                                                                                                                                              |
|---------|--------------------------------------------------------------------------------------------------------------------------------------------------------------------------------------------------------------------------------------------------------------------------------------------------------------------------------------------------------------------------------------------------------------|
| cerveza | <input checked="" type="radio"/> Nunca o menos 1 vez al mes<br><input type="radio"/> 1 a 3 veces mes<br><input type="radio"/> 1 vez semana<br><input type="radio"/> 2 a 4 veces semana<br><input type="radio"/> 5 a 6 veces semana<br><input type="radio"/> 1 vez al día<br><input type="radio"/> 2 a 3 veces al día<br><input type="radio"/> 5 a 6 veces al día<br><input type="radio"/> más 6 veces al día |
|---------|--------------------------------------------------------------------------------------------------------------------------------------------------------------------------------------------------------------------------------------------------------------------------------------------------------------------------------------------------------------------------------------------------------------|

---

|                     |                                                                                                                                                                                                                                                                                                                                                                                                              |
|---------------------|--------------------------------------------------------------------------------------------------------------------------------------------------------------------------------------------------------------------------------------------------------------------------------------------------------------------------------------------------------------------------------------------------------------|
| cerveza sin alcohol | <input checked="" type="radio"/> Nunca o menos 1 vez al mes<br><input type="radio"/> 1 a 3 veces mes<br><input type="radio"/> 1 vez semana<br><input type="radio"/> 2 a 4 veces semana<br><input type="radio"/> 5 a 6 veces semana<br><input type="radio"/> 1 vez al día<br><input type="radio"/> 2 a 3 veces al día<br><input type="radio"/> 5 a 6 veces al día<br><input type="radio"/> más 6 veces al día |
|---------------------|--------------------------------------------------------------------------------------------------------------------------------------------------------------------------------------------------------------------------------------------------------------------------------------------------------------------------------------------------------------------------------------------------------------|

---

|         |                                                                                                                                                                                                                                                                                                                                                                                                              |
|---------|--------------------------------------------------------------------------------------------------------------------------------------------------------------------------------------------------------------------------------------------------------------------------------------------------------------------------------------------------------------------------------------------------------------|
| licores | <input checked="" type="radio"/> Nunca o menos 1 vez al mes<br><input type="radio"/> 1 a 3 veces mes<br><input type="radio"/> 1 vez semana<br><input type="radio"/> 2 a 4 veces semana<br><input type="radio"/> 5 a 6 veces semana<br><input type="radio"/> 1 vez al día<br><input type="radio"/> 2 a 3 veces al día<br><input type="radio"/> 5 a 6 veces al día<br><input type="radio"/> más 6 veces al día |
|---------|--------------------------------------------------------------------------------------------------------------------------------------------------------------------------------------------------------------------------------------------------------------------------------------------------------------------------------------------------------------------------------------------------------------|

---

|                       |                                                                                                                                                                                                                                                                                                                                                                                                              |
|-----------------------|--------------------------------------------------------------------------------------------------------------------------------------------------------------------------------------------------------------------------------------------------------------------------------------------------------------------------------------------------------------------------------------------------------------|
| ginebra o ron o vodka | <input checked="" type="radio"/> Nunca o menos 1 vez al mes<br><input type="radio"/> 1 a 3 veces mes<br><input type="radio"/> 1 vez semana<br><input type="radio"/> 2 a 4 veces semana<br><input type="radio"/> 5 a 6 veces semana<br><input type="radio"/> 1 vez al día<br><input type="radio"/> 2 a 3 veces al día<br><input type="radio"/> 5 a 6 veces al día<br><input type="radio"/> más 6 veces al día |
|-----------------------|--------------------------------------------------------------------------------------------------------------------------------------------------------------------------------------------------------------------------------------------------------------------------------------------------------------------------------------------------------------------------------------------------------------|

---

|                 |                                                                                                                                                                                                                                                                                                                                                                                                              |
|-----------------|--------------------------------------------------------------------------------------------------------------------------------------------------------------------------------------------------------------------------------------------------------------------------------------------------------------------------------------------------------------------------------------------------------------|
| refresco normal | <input type="radio"/> Nunca o menos 1 vez al mes<br><input type="radio"/> 1 a 3 veces mes<br><input checked="" type="radio"/> 1 vez semana<br><input type="radio"/> 2 a 4 veces semana<br><input type="radio"/> 5 a 6 veces semana<br><input type="radio"/> 1 vez al día<br><input type="radio"/> 2 a 3 veces al día<br><input type="radio"/> 5 a 6 veces al día<br><input type="radio"/> más 6 veces al día |
|-----------------|--------------------------------------------------------------------------------------------------------------------------------------------------------------------------------------------------------------------------------------------------------------------------------------------------------------------------------------------------------------------------------------------------------------|

---

---

refresco sin azúcar

- ☐ Nunca o menos 1 vez al mes  
☒ 1 a 3 veces mes  
☐ 1 vez semana  
☐ 2 a 4 veces semana  
☐ 5 a 6 veces semana  
☐ 1 vez al día  
☐ 2 a 3 veces al día  
☐ 5 a 6 veces al día  
☐ más 6 veces al día

---

Agua del grifo

- ☐ Nunca o menos 1 vez al mes  
☐ 1 a 3 veces mes  
☐ 1 vez semana  
☐ 2 a 4 veces semana  
☐ 5 a 6 veces semana  
☒ 1 vez al día  
☐ 2 a 3 veces al día  
☐ 5 a 6 veces al día  
☐ más 6 veces al día

---

agua embotellada sin gas

- ☐ Nunca o menos 1 vez al mes  
☐ 1 a 3 veces mes  
☐ 1 vez semana  
☐ 2 a 4 veces semana  
☐ 5 a 6 veces semana  
☐ 1 vez al día  
☐ 2 a 3 veces al día  
☐ 5 a 6 veces al día  
☒ más 6 veces al día

---

agua embotellada con gas

- ☐ Nunca o menos 1 vez al mes  
☐ 1 a 3 veces mes  
☐ 1 vez semana  
☐ 2 a 4 veces semana  
☒ 5 a 6 veces semana  
☐ 1 vez al día  
☐ 2 a 3 veces al día  
☐ 5 a 6 veces al día  
☐ más 6 veces al día

---

zumو frutas embasado

- ☒ Nunca o menos 1 vez al mes  
☐ 1 a 3 veces mes  
☐ 1 vez semana  
☐ 2 a 4 veces semana  
☐ 5 a 6 veces semana  
☐ 1 vez al día  
☐ 2 a 3 veces al día  
☐ 5 a 6 veces al día  
☐ más 6 veces al día

---

cafe

- ☐ Nunca o menos 1 vez al mes  
☐ 1 a 3 veces mes  
☐ 1 vez semana  
☐ 2 a 4 veces semana  
☐ 5 a 6 veces semana  
☒ 1 vez al día  
☐ 2 a 3 veces al día  
☐ 5 a 6 veces al día  
☐ más 6 veces al día



|                       |                                                                                                                                                                                                                                                                                                                                                                                                              |
|-----------------------|--------------------------------------------------------------------------------------------------------------------------------------------------------------------------------------------------------------------------------------------------------------------------------------------------------------------------------------------------------------------------------------------------------------|
| cafe descafeinado     | <input type="radio"/> Nunca o menos 1 vez al mes<br><input checked="" type="radio"/> 1 a 3 veces mes<br><input type="radio"/> 1 vez semana<br><input type="radio"/> 2 a 4 veces semana<br><input type="radio"/> 5 a 6 veces semana<br><input type="radio"/> 1 vez al día<br><input type="radio"/> 2 a 3 veces al día<br><input type="radio"/> 5 a 6 veces al día<br><input type="radio"/> más 6 veces al día |
| te o infusión         | <input type="radio"/> Nunca o menos 1 vez al mes<br><input checked="" type="radio"/> 1 a 3 veces mes<br><input type="radio"/> 1 vez semana<br><input type="radio"/> 2 a 4 veces semana<br><input type="radio"/> 5 a 6 veces semana<br><input type="radio"/> 1 vez al día<br><input type="radio"/> 2 a 3 veces al día<br><input type="radio"/> 5 a 6 veces al día<br><input type="radio"/> más 6 veces al día |
| sopa o puré verduras  | <input type="radio"/> Nunca o menos 1 vez al mes<br><input checked="" type="radio"/> 1 a 3 veces mes<br><input type="radio"/> 1 vez semana<br><input type="radio"/> 2 a 4 veces semana<br><input type="radio"/> 5 a 6 veces semana<br><input type="radio"/> 1 vez al día<br><input type="radio"/> 2 a 3 veces al día<br><input type="radio"/> 5 a 6 veces al día<br><input type="radio"/> más 6 veces al día |
| croquetas pollo jamón | <input type="radio"/> Nunca o menos 1 vez al mes<br><input checked="" type="radio"/> 1 a 3 veces mes<br><input type="radio"/> 1 vez semana<br><input type="radio"/> 2 a 4 veces semana<br><input type="radio"/> 5 a 6 veces semana<br><input type="radio"/> 1 vez al día<br><input type="radio"/> 2 a 3 veces al día<br><input type="radio"/> 5 a 6 veces al día<br><input type="radio"/> más 6 veces al día |
| croquetas pescado     | <input type="radio"/> Nunca o menos 1 vez al mes<br><input checked="" type="radio"/> 1 a 3 veces mes<br><input type="radio"/> 1 vez semana<br><input type="radio"/> 2 a 4 veces semana<br><input type="radio"/> 5 a 6 veces semana<br><input type="radio"/> 1 vez al día<br><input type="radio"/> 2 a 3 veces al día<br><input type="radio"/> 5 a 6 veces al día<br><input type="radio"/> más 6 veces al día |
| mayonesa              | <input checked="" type="radio"/> Nunca o menos 1 vez al mes<br><input type="radio"/> 1 a 3 veces mes<br><input type="radio"/> 1 vez semana<br><input type="radio"/> 2 a 4 veces semana<br><input type="radio"/> 5 a 6 veces semana<br><input type="radio"/> 1 vez al día<br><input type="radio"/> 2 a 3 veces al día<br><input type="radio"/> 5 a 6 veces al día<br><input type="radio"/> más 6 veces al día |

---

salsa tomate

- ☐ Nunca o menos 1 vez al mes  
☐ 1 a 3 veces mes  
☐ 1 vez semana  
☒ 2 a 4 veces semana  
☐ 5 a 6 veces semana  
☐ 1 vez al día  
☐ 2 a 3 veces al día  
☐ 5 a 6 veces al día  
☐ más 6 veces al día

---

ketchup

- ☐ Nunca o menos 1 vez al mes  
☒ 1 a 3 veces mes  
☐ 1 vez semana  
☐ 2 a 4 veces semana  
☐ 5 a 6 veces semana  
☐ 1 vez al día  
☐ 2 a 3 veces al día  
☐ 5 a 6 veces al día  
☐ más 6 veces al día

---

sal

- ☐ Nunca o menos 1 vez al mes  
☐ 1 a 3 veces mes  
☐ 1 vez semana  
☐ 2 a 4 veces semana  
☐ 5 a 6 veces semana  
☐ 1 vez al día  
☒ 2 a 3 veces al día  
☐ 5 a 6 veces al día  
☐ más 6 veces al día

---

ajo

- ☐ Nunca o menos 1 vez al mes  
☐ 1 a 3 veces mes  
☐ 1 vez semana  
☒ 2 a 4 veces semana  
☐ 5 a 6 veces semana  
☐ 1 vez al día  
☐ 2 a 3 veces al día  
☐ 5 a 6 veces al día  
☐ más 6 veces al día

---

mermelada o miel

- ☒ Nunca o menos 1 vez al mes  
☐ 1 a 3 veces mes  
☐ 1 vez semana  
☐ 2 a 4 veces semana  
☐ 5 a 6 veces semana  
☐ 1 vez al día  
☐ 2 a 3 veces al día  
☐ 5 a 6 veces al día  
☐ más 6 veces al día

---

azúcar

- ☐ Nunca o menos 1 vez al mes  
☐ 1 a 3 veces mes  
☐ 1 vez semana  
☒ 2 a 4 veces semana  
☐ 5 a 6 veces semana  
☐ 1 vez al día  
☐ 2 a 3 veces al día  
☐ 5 a 6 veces al día  
☐ más 6 veces al día

|                                       |                                                                                                                                                                                                                                                                                                                                                                                                                                                                                                                               |
|---------------------------------------|-------------------------------------------------------------------------------------------------------------------------------------------------------------------------------------------------------------------------------------------------------------------------------------------------------------------------------------------------------------------------------------------------------------------------------------------------------------------------------------------------------------------------------|
| Otro alimento                         | <hr/>                                                                                                                                                                                                                                                                                                                                                                                                                                                                                                                         |
| suplementos vitamínicos               | <input type="radio"/> si<br><input checked="" type="radio"/> no                                                                                                                                                                                                                                                                                                                                                                                                                                                               |
| suplementos vitamínicos               | <hr/>                                                                                                                                                                                                                                                                                                                                                                                                                                                                                                                         |
| dieta previa                          | <input type="radio"/> si<br><input checked="" type="radio"/> no                                                                                                                                                                                                                                                                                                                                                                                                                                                               |
| motivo dieta                          | <input checked="" type="radio"/> no dieta<br><input type="radio"/> control peso<br><input type="radio"/> control colesterol<br><input type="radio"/> control diabetes<br><input type="radio"/> problemas estómago<br><input type="radio"/> problemas vesícula o hepáticos<br><input type="radio"/> HTA o cardiopatía<br><input type="radio"/> problemas renales<br><input type="radio"/> alergia alimentaria<br><input type="radio"/> ácido úrico elevado<br><input type="radio"/> vegetariana<br><input type="radio"/> otros |
| cambio alimentos año previo gestación | <input type="radio"/> si<br><input checked="" type="radio"/> no                                                                                                                                                                                                                                                                                                                                                                                                                                                               |
| cambio lácteos                        | <input type="radio"/> eliminado<br><input type="radio"/> disminuido<br><input checked="" type="radio"/> igual<br><input type="radio"/> aumentado<br><input type="radio"/> no sabe                                                                                                                                                                                                                                                                                                                                             |
| cambio huevos                         | <input type="radio"/> eliminado<br><input type="radio"/> disminuido<br><input checked="" type="radio"/> igual<br><input type="radio"/> aumentado<br><input type="radio"/> no sabe                                                                                                                                                                                                                                                                                                                                             |
| cambio carne                          | <input type="radio"/> eliminado<br><input type="radio"/> disminuido<br><input checked="" type="radio"/> igual<br><input type="radio"/> aumentado<br><input type="radio"/> no sabe                                                                                                                                                                                                                                                                                                                                             |
| cambio pescado                        | <input type="radio"/> eliminado<br><input type="radio"/> disminuido<br><input checked="" type="radio"/> igual<br><input type="radio"/> aumentado<br><input type="radio"/> no sabe                                                                                                                                                                                                                                                                                                                                             |
| cambio verduras                       | <input type="radio"/> eliminado<br><input type="radio"/> disminuido<br><input checked="" type="radio"/> igual<br><input type="radio"/> aumentado<br><input type="radio"/> no sabe                                                                                                                                                                                                                                                                                                                                             |

|                            |                                                                                                                                                                                                                        |
|----------------------------|------------------------------------------------------------------------------------------------------------------------------------------------------------------------------------------------------------------------|
| cambio legumbres           | <input type="radio"/> eliminado<br><input type="radio"/> disminuido<br><input checked="" type="radio"/> igual<br><input type="radio"/> aumentado<br><input type="radio"/> no sabe                                      |
| cambio fruta               | <input type="radio"/> eliminado<br><input type="radio"/> disminuido<br><input checked="" type="radio"/> igual<br><input type="radio"/> aumentado<br><input type="radio"/> no sabe                                      |
| cambio pan                 | <input type="radio"/> eliminado<br><input type="radio"/> disminuido<br><input checked="" type="radio"/> igual<br><input type="radio"/> aumentado<br><input type="radio"/> no sabe                                      |
| cambio aceite oliva        | <input type="radio"/> eliminado<br><input type="radio"/> disminuido<br><input checked="" type="radio"/> igual<br><input type="radio"/> aumentado<br><input type="radio"/> no sabe                                      |
| cambio mante o margarina   | <input type="radio"/> eliminado<br><input type="radio"/> disminuido<br><input checked="" type="radio"/> igual<br><input type="radio"/> aumentado<br><input type="radio"/> no sabe                                      |
| cambio azúcar y dulces     | <input type="radio"/> eliminado<br><input type="radio"/> disminuido<br><input checked="" type="radio"/> igual<br><input type="radio"/> aumentado<br><input type="radio"/> no sabe                                      |
| cambio bebidas alcohólicas | <input checked="" type="radio"/> eliminado<br><input type="radio"/> disminuido<br><input type="radio"/> igual<br><input type="radio"/> aumentado<br><input type="radio"/> no sabe                                      |
| frecuencia comidas fritas  | <input type="radio"/> a diario<br><input type="radio"/> 5 a 6 veces semana<br><input type="radio"/> 2 a 4 veces semana<br><input type="radio"/> 1 vez semana<br><input checked="" type="radio"/> menos de 1 vez semana |
| carne                      | <input type="radio"/> no como<br><input type="radio"/> cruda<br><input type="radio"/> poco hecha<br><input checked="" type="radio"/> hecha<br><input type="radio"/> muy hecha                                          |
| grasa visible carne        | <input type="radio"/> quita toda<br><input checked="" type="radio"/> quita mayoría<br><input type="radio"/> quita un poco<br><input type="radio"/> no quita nada                                                       |

|                                |                                                                                                                                                                                                                                                          |
|--------------------------------|----------------------------------------------------------------------------------------------------------------------------------------------------------------------------------------------------------------------------------------------------------|
| cocina carne                   | <input checked="" type="radio"/> a la plancha<br><input type="radio"/> a la parrilla<br><input type="radio"/> asada<br><input type="radio"/> frita<br><input type="radio"/> guisada                                                                      |
| tostado quemado carne          | <input checked="" type="radio"/> nunca<br><input type="radio"/> 1 vez mes<br><input type="radio"/> 2 a 3 veces mes<br><input type="radio"/> 1 vez semana<br><input type="radio"/> 2 a 3 semanas                                                          |
| tostado quemado pescado        | <input checked="" type="radio"/> nunca<br><input type="radio"/> 1 vez mes<br><input type="radio"/> 2 a 3 veces mes<br><input type="radio"/> 1 vez semana<br><input type="radio"/> 2 a 3 semanas                                                          |
| socarrat paella                | <input type="radio"/> nunca<br><input checked="" type="radio"/> 1 vez mes<br><input type="radio"/> 2 a 3 veces mes<br><input type="radio"/> 1 vez semana<br><input type="radio"/> 2 a 3 semanas                                                          |
| grasa o aceite cocinar         | <input type="radio"/> mantequilla<br><input type="radio"/> margarina<br><input type="radio"/> aceite oliva<br><input checked="" type="radio"/> aceite oliva virgen extra<br><input type="radio"/> aceite vegetal<br><input type="radio"/> mezcla aceites |
| grasa aceite aliñar            | <input type="radio"/> mantequilla<br><input type="radio"/> margarina<br><input type="radio"/> aceite oliva<br><input checked="" type="radio"/> aceite oliva virgen extra<br><input type="radio"/> aceite vegetal<br><input type="radio"/> mezcla aceites |
| grasa aceite freir             | <input type="radio"/> mantequilla<br><input type="radio"/> margarina<br><input type="radio"/> aceite oliva<br><input checked="" type="radio"/> aceite oliva virgen extra<br><input type="radio"/> aceite vegetal<br><input type="radio"/> mezcla aceites |
| Ejercicio cuestionario         | <input checked="" type="radio"/> si<br><input type="radio"/> no                                                                                                                                                                                          |
| horas de sueño incluido siesta | [*DATA REMOVED*]                                                                                                                                                                                                                                         |
| minutos siesta                 | [*DATA REMOVED*]                                                                                                                                                                                                                                         |
| horas televisión semana        | [*DATA REMOVED*]                                                                                                                                                                                                                                         |

|                                        |                                                                                                                                                                                                                                                                                                                                                                           |
|----------------------------------------|---------------------------------------------------------------------------------------------------------------------------------------------------------------------------------------------------------------------------------------------------------------------------------------------------------------------------------------------------------------------------|
| actividad trabajo                      | <input type="radio"/> casi siempre sentado<br><input type="radio"/> sentado 50 por cien<br><input type="radio"/> casi siempre de pie, quieto<br><input checked="" type="radio"/> casi siempre levantado caminando y llevando pocas cosas<br><input type="radio"/> casi siempre levantado, caminando y llevado muchas cosas<br><input type="radio"/> trabajo manual pesado |
| tiempo caminar o bici al día           | <input type="radio"/> casi nunca<br><input type="radio"/> menos 20min día<br><input checked="" type="radio"/> 20 a 40 min día<br><input type="radio"/> 40 a 60 min día<br><input type="radio"/> 1h o 1h y media día<br><input type="radio"/> más de 1h y media al día                                                                                                     |
| tiempo tareas casa al día              | <input type="radio"/> menos de 1h día<br><input checked="" type="radio"/> 1 a 2h día<br><input type="radio"/> 3 a 4h día<br><input type="radio"/> 5 a 6h día<br><input type="radio"/> 7 a 8h día<br><input type="radio"/> más de 8h día                                                                                                                                   |
| tiempo libre televisión ordenador leer | <input type="radio"/> menos 1h día<br><input checked="" type="radio"/> 1h día<br><input type="radio"/> 2h día<br><input type="radio"/> 3h día<br><input type="radio"/> 4h día<br><input type="radio"/> 5 a 6h día<br><input type="radio"/> mas 6h día                                                                                                                     |
| tiempo libre ejercicio o deporte       | <input type="radio"/> menos 1h semana<br><input type="radio"/> 1h semana<br><input checked="" type="radio"/> 2h semana<br><input type="radio"/> 3h semana<br><input type="radio"/> 4 a 5h semana<br><input type="radio"/> mas 5h semana                                                                                                                                   |
| como se considera                      | <input type="radio"/> sedentaria<br><input type="radio"/> poco activa<br><input checked="" type="radio"/> moderadamente activa<br><input type="radio"/> bastante activa<br><input type="radio"/> muy activa<br><input type="radio"/> no sabe                                                                                                                              |
| FUR                                    | [*DATA REMOVED*]                                                                                                                                                                                                                                                                                                                                                          |
| Semanas gestación 2T                   | [*DATA REMOVED*]                                                                                                                                                                                                                                                                                                                                                          |
| Días gestación 2T                      | [*DATA REMOVED*]                                                                                                                                                                                                                                                                                                                                                          |
| DBP 2T                                 | [*DATA REMOVED*]                                                                                                                                                                                                                                                                                                                                                          |
| CC 2T                                  | [*DATA REMOVED*]                                                                                                                                                                                                                                                                                                                                                          |
| AC 2T                                  | [*DATA REMOVED*]                                                                                                                                                                                                                                                                                                                                                          |

|                                                   |                                                                                                                                                                                                 |
|---------------------------------------------------|-------------------------------------------------------------------------------------------------------------------------------------------------------------------------------------------------|
| LF 2T                                             | [*DATA REMOVED*]                                                                                                                                                                                |
| PFE 2T (Hadlock)                                  | [*DATA REMOVED*]                                                                                                                                                                                |
| Semanas gestación 3T                              | [*DATA REMOVED*]                                                                                                                                                                                |
| días 3T                                           | [*DATA REMOVED*]                                                                                                                                                                                |
| DBP 3T                                            | [*DATA REMOVED*]                                                                                                                                                                                |
| CC 3T                                             | [*DATA REMOVED*]                                                                                                                                                                                |
| AC 3T                                             | [*DATA REMOVED*]                                                                                                                                                                                |
| LF 3T                                             | [*DATA REMOVED*]                                                                                                                                                                                |
| PFE 3T (Hadlock)                                  | [*DATA REMOVED*]                                                                                                                                                                                |
| Semanas de gestación final                        | [*DATA REMOVED*]                                                                                                                                                                                |
| días gestación final                              | [*DATA REMOVED*]                                                                                                                                                                                |
| Localización placenta                             | <input type="radio"/> anterior<br><input type="radio"/> lateral derecha<br><input type="radio"/> lateral izquierda<br><input checked="" type="radio"/> posterior<br><input type="radio"/> fondo |
| Presentación longitudinal cefálica                | <input type="radio"/> no<br><input checked="" type="radio"/> si                                                                                                                                 |
| Dorso                                             | <input checked="" type="radio"/> izquierda anterior<br><input type="radio"/> izquierda posterior<br><input type="radio"/> derecha anterior<br><input type="radio"/> derecha posterior           |
| diámetro biparietal                               | [*DATA REMOVED*]                                                                                                                                                                                |
| Circunferencia craneal                            | [*DATA REMOVED*]                                                                                                                                                                                |
| Circunferencia abdominal                          | [*DATA REMOVED*]                                                                                                                                                                                |
| Longitud de femur                                 | [*DATA REMOVED*]                                                                                                                                                                                |
| tejido celular subcutáneo a nivel del muslo en mm | [*DATA REMOVED*]                                                                                                                                                                                |
| tejido celular subcutáneo en abdomen en mm        | [*DATA REMOVED*]                                                                                                                                                                                |
| Volumen del muslo en cm3                          | [*DATA REMOVED*]                                                                                                                                                                                |
| Peso fetal estimado según fórmula de Hadlock      | [*DATA REMOVED*]                                                                                                                                                                                |

|                                               |                                                                                                                                                          |
|-----------------------------------------------|----------------------------------------------------------------------------------------------------------------------------------------------------------|
| Percentil                                     | [*DATA REMOVED*]                                                                                                                                         |
| Peso fetal estimado según fórmula de Scioscia | <hr/>                                                                                                                                                    |
| Peso fetal estimado según fórmula de LEE      | <hr/>                                                                                                                                                    |
| Tipo de parto                                 | <input checked="" type="radio"/> eutocico<br><input type="radio"/> instrumentado/ventosa<br><input type="radio"/> cesarea                                |
| fecha de nacimiento                           | [*DATA REMOVED*]                                                                                                                                         |
| Días entre exploración y nacimiento           | [*DATA REMOVED*]                                                                                                                                         |
| Peso RN en g                                  | [*DATA REMOVED*]                                                                                                                                         |
| sexo                                          | <input type="radio"/> mujer<br><input checked="" type="radio"/> hombre                                                                                   |
| Apgar 1 minuto                                | [*DATA REMOVED*]                                                                                                                                         |
| Apgar 5 minutos                               | [*DATA REMOVED*]                                                                                                                                         |
| Apgar 10 minutos                              | <hr/>                                                                                                                                                    |
| antecedente Covid durante gestación           | <input type="radio"/> Yes<br><input checked="" type="radio"/> No                                                                                         |
| Nivel de estudios                             | <input type="radio"/> ninguno<br><input type="radio"/> primarios<br><input type="radio"/> secundarios<br><input checked="" type="radio"/> universitarios |



# Base\_datos\_estimacion\_peso\_fetal

|                                       |                                                                                                                                                                                                                                                                                      |
|---------------------------------------|--------------------------------------------------------------------------------------------------------------------------------------------------------------------------------------------------------------------------------------------------------------------------------------|
| Número de identificación participante | 164                                                                                                                                                                                                                                                                                  |
| CODIGO PARTICIPANTE                   |                                                                                                                                                                                                                                                                                      |
| Edad                                  | [*DATA REMOVED*]                                                                                                                                                                                                                                                                     |
| Gestaciones                           | <input type="radio"/> 1<br><input type="radio"/> 2<br><input checked="" type="radio"/> 3<br><input type="radio"/> mas de 3                                                                                                                                                           |
| partos                                | <input type="radio"/> 0<br><input checked="" type="radio"/> 1<br><input type="radio"/> 2<br><input type="radio"/> 3<br><input type="radio"/> mas de 3                                                                                                                                |
| cesáreas                              | <input checked="" type="radio"/> 0<br><input type="radio"/> 1<br><input type="radio"/> 2<br><input type="radio"/> 3<br><input type="radio"/> mas de 3                                                                                                                                |
| Abortos                               | <input type="radio"/> 0<br><input checked="" type="radio"/> 1<br><input type="radio"/> 2<br><input type="radio"/> 3<br><input type="radio"/> mas de 3                                                                                                                                |
| Tipo de gestacion                     | <input checked="" type="radio"/> espontanea<br><input type="radio"/> IAC inseminación artificial conyuge<br><input type="radio"/> IAD inseminación artificial donante<br><input type="radio"/> FIV Fecundación in Vitro<br><input type="radio"/> Ovodon FIV con donación de ovocitos |
| peso previo a embarazo                | [*DATA REMOVED*]                                                                                                                                                                                                                                                                     |
| Ganancia ponderal embarazo            |                                                                                                                                                                                                                                                                                      |
| Talla madre                           | [*DATA REMOVED*]                                                                                                                                                                                                                                                                     |
| IMC previo embarazo                   | 21.383941996057334                                                                                                                                                                                                                                                                   |
| Patología obstétrica                  | <input checked="" type="radio"/> no<br><input type="radio"/> si                                                                                                                                                                                                                      |
| Diabetes pregestacional               | <input checked="" type="radio"/> no<br><input type="radio"/> si                                                                                                                                                                                                                      |
| Diabetes gestacional                  | <input checked="" type="radio"/> no<br><input type="radio"/> si                                                                                                                                                                                                                      |

|                                            |                                                                                                                                                                                      |
|--------------------------------------------|--------------------------------------------------------------------------------------------------------------------------------------------------------------------------------------|
| Diabetes gestacional con insulina          | <input checked="" type="radio"/> no<br><input type="radio"/> si                                                                                                                      |
| Diabetes gestacional con dieta y ejercicio | <input checked="" type="radio"/> no<br><input type="radio"/> si                                                                                                                      |
| Percentil fetos previos                    | <input checked="" type="radio"/> Nada<br><input type="radio"/> percentil menor de 10<br><input type="radio"/> percentil entre 10 y 90<br><input type="radio"/> percentil mayor de 90 |
| Exfumadora                                 | <input checked="" type="radio"/> Nada<br><input type="radio"/> menos de 5 años<br><input type="radio"/> 5 a 10 años<br><input type="radio"/> mayor o igual a 10 años                 |
| Hábito tabáquico                           | <input checked="" type="radio"/> no<br><input type="radio"/> si                                                                                                                      |
| fumadora                                   | [*DATA REMOVED*]                                                                                                                                                                     |
| Consumo otros tóxicos                      | <input checked="" type="radio"/> no<br><input type="radio"/> si                                                                                                                      |
| Hb 1T                                      | [*DATA REMOVED*]                                                                                                                                                                     |
| Htc 1T                                     | [*DATA REMOVED*]                                                                                                                                                                     |
| Hb 2T                                      | [*DATA REMOVED*]                                                                                                                                                                     |
| HTC 2T                                     | [*DATA REMOVED*]                                                                                                                                                                     |
| Hb 3T                                      | [*DATA REMOVED*]                                                                                                                                                                     |
| HTC 3T                                     | [*DATA REMOVED*]                                                                                                                                                                     |
| Suplemento FE oral                         | <input checked="" type="radio"/> si<br><input type="radio"/> no                                                                                                                      |
| Suplemento fe iv                           | <input type="radio"/> si<br><input checked="" type="radio"/> no                                                                                                                      |
| Transfusión                                | <input checked="" type="radio"/> no<br><input type="radio"/> si                                                                                                                      |
| Solicitada Vit D                           | <input checked="" type="radio"/> no<br><input type="radio"/> si                                                                                                                      |
| Deficit vit D                              | <input type="radio"/> no<br><input type="radio"/> si                                                                                                                                 |
| Suplemento vit D                           | <input type="radio"/> si<br><input type="radio"/> no                                                                                                                                 |

|                       |                                                                                                                                                                                                                                                                                                                                                                                                              |
|-----------------------|--------------------------------------------------------------------------------------------------------------------------------------------------------------------------------------------------------------------------------------------------------------------------------------------------------------------------------------------------------------------------------------------------------------|
| Dieta, cuestionario   | <input checked="" type="radio"/> sí<br><input type="radio"/> no                                                                                                                                                                                                                                                                                                                                              |
| Leche entera          | <input type="radio"/> Nunca o menos 1 vez al mes<br><input type="radio"/> 1 a 3 veces mes<br><input checked="" type="radio"/> 1 vez semana<br><input type="radio"/> 2 a 4 veces semana<br><input type="radio"/> 5 a 6 veces semana<br><input type="radio"/> 1 vez al día<br><input type="radio"/> 2 a 3 veces al día<br><input type="radio"/> 5 a 6 veces al día<br><input type="radio"/> más 6 veces al día |
| Leche semidesnatada   | <input checked="" type="radio"/> Nunca o menos 1 vez al mes<br><input type="radio"/> 1 a 3 veces mes<br><input type="radio"/> 1 vez semana<br><input type="radio"/> 2 a 4 veces semana<br><input type="radio"/> 5 a 6 veces semana<br><input type="radio"/> 1 vez al día<br><input type="radio"/> 2 a 3 veces al día<br><input type="radio"/> 5 a 6 veces al día<br><input type="radio"/> mas 6 veces al día |
| Leche desnatada       | <input checked="" type="radio"/> Nunca o menos 1 vez al mes<br><input type="radio"/> 1 a 3 veces mes<br><input type="radio"/> 1 vez semana<br><input type="radio"/> 2 a 4 veces semana<br><input type="radio"/> 5 a 6 veces semana<br><input type="radio"/> 1 vez al día<br><input type="radio"/> 2 a 3 veces al día<br><input type="radio"/> 5 a 6 veces al día<br><input type="radio"/> más 6 veces al día |
| Leche condensada      | <input checked="" type="radio"/> Nunca o menos 1 vez al mes<br><input type="radio"/> 1 a 3 veces mes<br><input type="radio"/> 1 vez semana<br><input type="radio"/> 2 a 4 veces semana<br><input type="radio"/> 5 a 6 veces semana<br><input type="radio"/> 1 vez al día<br><input type="radio"/> 2 a 3 veces al día<br><input type="radio"/> 5 a 6 veces al día<br><input type="radio"/> más 6 veces al día |
| nata o crema de leche | <input checked="" type="radio"/> Nunca o menos 1 vez al mes<br><input type="radio"/> 1 a 3 veces mes<br><input type="radio"/> 1 vez semana<br><input type="radio"/> 2 a 4 veces semana<br><input type="radio"/> 5 a 6 veces semana<br><input type="radio"/> 1 vez al día<br><input type="radio"/> 2 a 3 veces al día<br><input type="radio"/> 5 a 6 veces al día<br><input type="radio"/> más 6 veces al día |

---

Yogurt Entero

- ☐ Nunca o menos 1 vez al mes  
☐ 1 a 3 veces mes  
☐ 1 vez semana  
☒ 2 a 4 veces semana  
☐ 5 a 6 veces semana  
☐ 1 vez al día  
☐ 2 a 3 veces al día  
☐ 5 a 6 veces al día  
☐ más 6 veces al día

---

Yogurt desnatado

- ☒ Nunca o menos 1 vez al mes  
☐ 1 a 3 veces mes  
☐ 1 vez semana  
☐ 2 a 4 veces semana  
☐ 5 a 6 veces semana  
☐ 1 vez al día  
☐ 2 a 3 veces al día  
☐ 5 a 6 veces al día  
☐ más 6 veces al día

---

100g requesón o queso blando o queso fresco

- ☐ Nunca o menos 1 vez al mes  
☐ 1 a 3 veces mes  
☒ 1 vez semana  
☐ 2 a 4 veces semana  
☐ 5 a 6 veces semana  
☐ 1 vez al día  
☐ 2 a 3 veces al día  
☐ 5 a 6 veces al día  
☐ más 6 veces al día

---

queso curado o semicurado o cremoso

- ☐ Nunca o menos 1 vez al mes  
☐ 1 a 3 veces mes  
☐ 1 vez semana  
☐ 2 a 4 veces semana  
☒ 5 a 6 veces semana  
☐ 1 vez al día  
☐ 2 a 3 veces al día  
☐ 5 a 6 veces al día  
☐ más 6 veces al día

---

natillas flan pudding

- ☒ Nunca o menos 1 vez al mes  
☐ 1 a 3 veces mes  
☐ 1 vez semana  
☐ 2 a 4 veces semana  
☐ 5 a 6 veces semana  
☐ 1 vez al día  
☐ 2 a 3 veces al día  
☐ 5 a 6 veces al día  
☐ más 6 veces al día

---

Helado

- ☒ Nunca o menos 1 vez al mes  
☐ 1 a 3 veces mes  
☐ 1 vez semana  
☐ 2 a 4 veces semana  
☐ 5 a 6 veces semana  
☐ 1 vez al día  
☐ 2 a 3 veces al día  
☐ 5 a 6 veces al día  
☐ más 6 veces al día

|                                      |                                                                                                                                                                                                                                                                                                                                                                                                              |
|--------------------------------------|--------------------------------------------------------------------------------------------------------------------------------------------------------------------------------------------------------------------------------------------------------------------------------------------------------------------------------------------------------------------------------------------------------------|
| huevo                                | <input type="radio"/> Nunca o menos 1 vez al mes<br><input type="radio"/> 1 a 3 veces mes<br><input type="radio"/> 1 vez semana<br><input checked="" type="radio"/> 2 a 4 veces semana<br><input type="radio"/> 5 a 6 veces semana<br><input type="radio"/> 1 vez al día<br><input type="radio"/> 2 a 3 veces al día<br><input type="radio"/> 5 a 6 veces al día<br><input type="radio"/> más 6 veces al día |
| Pollo con piel                       | <input checked="" type="radio"/> Nunca o menos 1 vez al mes<br><input type="radio"/> 1 a 3 veces mes<br><input type="radio"/> 1 vez semana<br><input type="radio"/> 2 a 4 veces semana<br><input type="radio"/> 5 a 6 veces semana<br><input type="radio"/> 1 vez al día<br><input type="radio"/> 2 a 3 veces al día<br><input type="radio"/> 5 a 6 veces al día<br><input type="radio"/> más 6 veces al día |
| pollo sin piel                       | <input type="radio"/> Nunca o menos 1 vez al mes<br><input type="radio"/> 1 a 3 veces mes<br><input checked="" type="radio"/> 1 vez semana<br><input type="radio"/> 2 a 4 veces semana<br><input type="radio"/> 5 a 6 veces semana<br><input type="radio"/> 1 vez al día<br><input type="radio"/> 2 a 3 veces al día<br><input type="radio"/> 5 a 6 veces al día<br><input type="radio"/> más 6 veces al día |
| Ternera o cerdo o cordero            | <input checked="" type="radio"/> Nunca o menos 1 vez al mes<br><input type="radio"/> 1 a 3 veces mes<br><input type="radio"/> 1 vez semana<br><input type="radio"/> 2 a 4 veces semana<br><input type="radio"/> 5 a 6 veces semana<br><input type="radio"/> 1 vez al día<br><input type="radio"/> 2 a 3 veces al día<br><input type="radio"/> 5 a 6 veces al día<br><input type="radio"/> más 6 veces al día |
| carne caza: Conejo o codorniz o pato | <input checked="" type="radio"/> Nunca o menos 1 vez al mes<br><input type="radio"/> 1 a 3 veces mes<br><input type="radio"/> 1 vez semana<br><input type="radio"/> 2 a 4 veces semana<br><input type="radio"/> 5 a 6 veces semana<br><input type="radio"/> 1 vez al día<br><input type="radio"/> 2 a 3 veces al día<br><input type="radio"/> 5 a 6 veces al día<br><input type="radio"/> más 6 veces al día |
| Hígado de ternera o cerdo o pollo    | <input checked="" type="radio"/> Nunca o menos 1 vez al mes<br><input type="radio"/> 1 a 3 veces mes<br><input type="radio"/> 1 vez semana<br><input type="radio"/> 2 a 4 veces semana<br><input type="radio"/> 5 a 6 veces semana<br><input type="radio"/> 1 vez al día<br><input type="radio"/> 2 a 3 veces al día<br><input type="radio"/> 5 a 6 veces al día<br><input type="radio"/> más 6 veces al día |

|                     |                                                                                                                                                                                                                                                                                                                                                                                                              |
|---------------------|--------------------------------------------------------------------------------------------------------------------------------------------------------------------------------------------------------------------------------------------------------------------------------------------------------------------------------------------------------------------------------------------------------------|
| Vísceras            | <input checked="" type="radio"/> Nunca o menos 1 vez al mes<br><input type="radio"/> 1 a 3 veces mes<br><input type="radio"/> 1 vez semana<br><input type="radio"/> 2 a 4 veces semana<br><input type="radio"/> 5 a 6 veces semana<br><input type="radio"/> 1 vez al día<br><input type="radio"/> 2 a 3 veces al día<br><input type="radio"/> 5 a 6 veces al día<br><input type="radio"/> más 6 veces al día |
| Embutido            | <input checked="" type="radio"/> Nunca o menos 1 vez al mes<br><input type="radio"/> 1 a 3 veces mes<br><input type="radio"/> 1 vez semana<br><input type="radio"/> 2 a 4 veces semana<br><input type="radio"/> 5 a 6 veces semana<br><input type="radio"/> 1 vez al día<br><input type="radio"/> 2 a 3 veces al día<br><input type="radio"/> 5 a 6 veces al día<br><input type="radio"/> más 6 veces al día |
| Salchicha o similar | <input type="radio"/> Nunca o menos 1 vez al mes<br><input checked="" type="radio"/> 1 a 3 veces mes<br><input type="radio"/> 1 vez semana<br><input type="radio"/> 2 a 4 veces semana<br><input type="radio"/> 5 a 6 veces semana<br><input type="radio"/> 1 vez al día<br><input type="radio"/> 2 a 3 veces al día<br><input type="radio"/> 5 a 6 veces al día<br><input type="radio"/> más 6 veces al día |
| Pate o foiegras     | <input checked="" type="radio"/> Nunca o menos 1 vez al mes<br><input type="radio"/> 1 a 3 veces mes<br><input type="radio"/> 1 vez semana<br><input type="radio"/> 2 a 4 veces semana<br><input type="radio"/> 5 a 6 veces semana<br><input type="radio"/> 1 vez al día<br><input type="radio"/> 2 a 3 veces al día<br><input type="radio"/> 5 a 6 veces al día<br><input type="radio"/> más 6 veces al día |
| Hamburguesa         | <input type="radio"/> Nunca o menos 1 vez al mes<br><input type="radio"/> 1 a 3 veces mes<br><input checked="" type="radio"/> 1 vez semana<br><input type="radio"/> 2 a 4 veces semana<br><input type="radio"/> 5 a 6 veces semana<br><input type="radio"/> 1 vez al día<br><input type="radio"/> 2 a 3 veces al día<br><input type="radio"/> 5 a 6 veces al día<br><input type="radio"/> más 6 veces al día |
| tocino o bacon      | <input checked="" type="radio"/> Nunca o menos 1 vez al mes<br><input type="radio"/> 1 a 3 veces mes<br><input type="radio"/> 1 vez semana<br><input type="radio"/> 2 a 4 veces semana<br><input type="radio"/> 5 a 6 veces semana<br><input type="radio"/> 1 vez al día<br><input type="radio"/> 2 a 3 veces al día<br><input type="radio"/> 5 a 6 veces al día<br><input type="radio"/> más 6 veces al día |

---

Pescado frito

- ☒ Nunca o menos 1 vez al mes  
☐ 1 a 3 veces mes  
☐ 1 vez semana  
☐ 2 a 4 veces semana  
☐ 5 a 6 veces semana  
☐ 1 vez al día  
☐ 2 a 3 veces al día  
☐ 5 a 6 veces al día  
☐ más 6 veces al día

---

pescado hervido blanco

- ☒ Nunca o menos 1 vez al mes  
☐ 1 a 3 veces mes  
☐ 1 vez semana  
☐ 2 a 4 veces semana  
☐ 5 a 6 veces semana  
☐ 1 vez al día  
☐ 2 a 3 veces al día  
☐ 5 a 6 veces al día  
☐ más 6 veces al día

---

pescado hervido azul

- ☐ Nunca o menos 1 vez al mes  
☐ 1 a 3 veces mes  
☒ 1 vez semana  
☐ 2 a 4 veces semana  
☐ 5 a 6 veces semana  
☐ 1 vez al día  
☐ 2 a 3 veces al día  
☐ 5 a 6 veces al día  
☐ más 6 veces al día

---

otros pescado azul

- ☐ Nunca o menos 1 vez al mes  
☐ 1 a 3 veces mes  
☒ 1 vez semana  
☐ 2 a 4 veces semana  
☐ 5 a 6 veces semana  
☐ 1 vez al día  
☐ 2 a 3 veces al día  
☐ 5 a 6 veces al día  
☐ más 6 veces al día

---

atun conserva

- ☐ Nunca o menos 1 vez al mes  
☐ 1 a 3 veces mes  
☒ 1 vez semana  
☐ 2 a 4 veces semana  
☐ 5 a 6 veces semana  
☐ 1 vez al día  
☐ 2 a 3 veces al día  
☐ 5 a 6 veces al día  
☐ más 6 veces al día

---

sardina conserva

- ☒ Nunca o menos 1 vez al mes  
☐ 1 a 3 veces mes  
☐ 1 vez semana  
☐ 2 a 4 veces semana  
☐ 5 a 6 veces semana  
☐ 1 vez al día  
☐ 2 a 3 veces al día  
☐ 5 a 6 veces al día  
☐ más 6 veces al día

|                                         |                                                                                                                                                                                                                                                                                                                                                                                                              |
|-----------------------------------------|--------------------------------------------------------------------------------------------------------------------------------------------------------------------------------------------------------------------------------------------------------------------------------------------------------------------------------------------------------------------------------------------------------------|
| pescado ahumado                         | <input checked="" type="radio"/> Nunca o menos 1 vez al mes<br><input type="radio"/> 1 a 3 veces mes<br><input type="radio"/> 1 vez semana<br><input type="radio"/> 2 a 4 veces semana<br><input type="radio"/> 5 a 6 veces semana<br><input type="radio"/> 1 vez al día<br><input type="radio"/> 2 a 3 veces al día<br><input type="radio"/> 5 a 6 veces al día<br><input type="radio"/> más 6 veces al día |
| almejas o mejillones o ostras unos 100g | <input type="radio"/> Nunca o menos 1 vez al mes<br><input type="radio"/> 1 a 3 veces mes<br><input checked="" type="radio"/> 1 vez semana<br><input type="radio"/> 2 a 4 veces semana<br><input type="radio"/> 5 a 6 veces semana<br><input type="radio"/> 1 vez al día<br><input type="radio"/> 2 a 3 veces al día<br><input type="radio"/> 5 a 6 veces al día<br><input type="radio"/> más 6 veces al día |
| calamar o chipiron o sepia unos 100g    | <input checked="" type="radio"/> Nunca o menos 1 vez al mes<br><input type="radio"/> 1 a 3 veces mes<br><input type="radio"/> 1 vez semana<br><input type="radio"/> 2 a 4 veces semana<br><input type="radio"/> 5 a 6 veces semana<br><input type="radio"/> 1 vez al día<br><input type="radio"/> 2 a 3 veces al día<br><input type="radio"/> 5 a 6 veces al día<br><input type="radio"/> más 6 veces al día |
| marisco unos 100g                       | <input checked="" type="radio"/> Nunca o menos 1 vez al mes<br><input type="radio"/> 1 a 3 veces mes<br><input type="radio"/> 1 vez semana<br><input type="radio"/> 2 a 4 veces semana<br><input type="radio"/> 5 a 6 veces semana<br><input type="radio"/> 1 vez al día<br><input type="radio"/> 2 a 3 veces al día<br><input type="radio"/> 5 a 6 veces al día<br><input type="radio"/> más 6 veces al día |
| Espinacas o acelgas cocinadas           | <input type="radio"/> Nunca o menos 1 vez al mes<br><input checked="" type="radio"/> 1 a 3 veces mes<br><input type="radio"/> 1 vez semana<br><input type="radio"/> 2 a 4 veces semana<br><input type="radio"/> 5 a 6 veces semana<br><input type="radio"/> 1 vez al día<br><input type="radio"/> 2 a 3 veces al día<br><input type="radio"/> 5 a 6 veces al día<br><input type="radio"/> más 6 veces al día |
| Col o coliflor o brocoli cocinado       | <input checked="" type="radio"/> Nunca o menos 1 vez al mes<br><input type="radio"/> 1 a 3 veces mes<br><input type="radio"/> 1 vez semana<br><input type="radio"/> 2 a 4 veces semana<br><input type="radio"/> 5 a 6 veces semana<br><input type="radio"/> 1 vez al día<br><input type="radio"/> 2 a 3 veces al día<br><input type="radio"/> 5 a 6 veces al día<br><input type="radio"/> más 6 veces al día |



---

|                              |                                                                                                                                                                                                                                                                                                                                                                                                              |
|------------------------------|--------------------------------------------------------------------------------------------------------------------------------------------------------------------------------------------------------------------------------------------------------------------------------------------------------------------------------------------------------------------------------------------------------------|
| Lechuga o endivia o escarola | <input type="radio"/> Nunca o menos 1 vez al mes<br><input type="radio"/> 1 a 3 veces mes<br><input type="radio"/> 1 vez semana<br><input checked="" type="radio"/> 2 a 4 veces semana<br><input type="radio"/> 5 a 6 veces semana<br><input type="radio"/> 1 vez al día<br><input type="radio"/> 2 a 3 veces al día<br><input type="radio"/> 5 a 6 veces al día<br><input type="radio"/> más 6 veces al día |
|------------------------------|--------------------------------------------------------------------------------------------------------------------------------------------------------------------------------------------------------------------------------------------------------------------------------------------------------------------------------------------------------------------------------------------------------------|

---

|                 |                                                                                                                                                                                                                                                                                                                                                                                                              |
|-----------------|--------------------------------------------------------------------------------------------------------------------------------------------------------------------------------------------------------------------------------------------------------------------------------------------------------------------------------------------------------------------------------------------------------------|
| tomate ensalada | <input type="radio"/> Nunca o menos 1 vez al mes<br><input type="radio"/> 1 a 3 veces mes<br><input type="radio"/> 1 vez semana<br><input checked="" type="radio"/> 2 a 4 veces semana<br><input type="radio"/> 5 a 6 veces semana<br><input type="radio"/> 1 vez al día<br><input type="radio"/> 2 a 3 veces al día<br><input type="radio"/> 5 a 6 veces al día<br><input type="radio"/> más 6 veces al día |
|-----------------|--------------------------------------------------------------------------------------------------------------------------------------------------------------------------------------------------------------------------------------------------------------------------------------------------------------------------------------------------------------------------------------------------------------|

---

|         |                                                                                                                                                                                                                                                                                                                                                                                                              |
|---------|--------------------------------------------------------------------------------------------------------------------------------------------------------------------------------------------------------------------------------------------------------------------------------------------------------------------------------------------------------------------------------------------------------------|
| cebolla | <input type="radio"/> Nunca o menos 1 vez al mes<br><input type="radio"/> 1 a 3 veces mes<br><input checked="" type="radio"/> 1 vez semana<br><input type="radio"/> 2 a 4 veces semana<br><input type="radio"/> 5 a 6 veces semana<br><input type="radio"/> 1 vez al día<br><input type="radio"/> 2 a 3 veces al día<br><input type="radio"/> 5 a 6 veces al día<br><input type="radio"/> más 6 veces al día |
|---------|--------------------------------------------------------------------------------------------------------------------------------------------------------------------------------------------------------------------------------------------------------------------------------------------------------------------------------------------------------------------------------------------------------------|

---

|                      |                                                                                                                                                                                                                                                                                                                                                                                                              |
|----------------------|--------------------------------------------------------------------------------------------------------------------------------------------------------------------------------------------------------------------------------------------------------------------------------------------------------------------------------------------------------------------------------------------------------------|
| Zanahoria o calabaza | <input type="radio"/> Nunca o menos 1 vez al mes<br><input type="radio"/> 1 a 3 veces mes<br><input type="radio"/> 1 vez semana<br><input checked="" type="radio"/> 2 a 4 veces semana<br><input type="radio"/> 5 a 6 veces semana<br><input type="radio"/> 1 vez al día<br><input type="radio"/> 2 a 3 veces al día<br><input type="radio"/> 5 a 6 veces al día<br><input type="radio"/> más 6 veces al día |
|----------------------|--------------------------------------------------------------------------------------------------------------------------------------------------------------------------------------------------------------------------------------------------------------------------------------------------------------------------------------------------------------------------------------------------------------|

---

|               |                                                                                                                                                                                                                                                                                                                                                                                                              |
|---------------|--------------------------------------------------------------------------------------------------------------------------------------------------------------------------------------------------------------------------------------------------------------------------------------------------------------------------------------------------------------------------------------------------------------|
| Judías verdes | <input checked="" type="radio"/> Nunca o menos 1 vez al mes<br><input type="radio"/> 1 a 3 veces mes<br><input type="radio"/> 1 vez semana<br><input type="radio"/> 2 a 4 veces semana<br><input type="radio"/> 5 a 6 veces semana<br><input type="radio"/> 1 vez al día<br><input type="radio"/> 2 a 3 veces al día<br><input type="radio"/> 5 a 6 veces al día<br><input type="radio"/> más 6 veces al día |
|---------------|--------------------------------------------------------------------------------------------------------------------------------------------------------------------------------------------------------------------------------------------------------------------------------------------------------------------------------------------------------------------------------------------------------------|

---

|                                |                                                                                                                                                                                                                                                                                                                                                                                                              |
|--------------------------------|--------------------------------------------------------------------------------------------------------------------------------------------------------------------------------------------------------------------------------------------------------------------------------------------------------------------------------------------------------------------------------------------------------------|
| Berenjena o calabacin o pepino | <input type="radio"/> Nunca o menos 1 vez al mes<br><input checked="" type="radio"/> 1 a 3 veces mes<br><input type="radio"/> 1 vez semana<br><input type="radio"/> 2 a 4 veces semana<br><input type="radio"/> 5 a 6 veces semana<br><input type="radio"/> 1 vez al día<br><input type="radio"/> 2 a 3 veces al día<br><input type="radio"/> 5 a 6 veces al día<br><input type="radio"/> más 6 veces al día |
|--------------------------------|--------------------------------------------------------------------------------------------------------------------------------------------------------------------------------------------------------------------------------------------------------------------------------------------------------------------------------------------------------------------------------------------------------------|

---

|                       |                                                                                                                                                                                                                                                                                                                                                                                                              |
|-----------------------|--------------------------------------------------------------------------------------------------------------------------------------------------------------------------------------------------------------------------------------------------------------------------------------------------------------------------------------------------------------------------------------------------------------|
| pimiento              | <input type="radio"/> Nunca o menos 1 vez al mes<br><input type="radio"/> 1 a 3 veces mes<br><input checked="" type="radio"/> 1 vez semana<br><input type="radio"/> 2 a 4 veces semana<br><input type="radio"/> 5 a 6 veces semana<br><input type="radio"/> 1 vez al día<br><input type="radio"/> 2 a 3 veces al día<br><input type="radio"/> 5 a 6 veces al día<br><input type="radio"/> más 6 veces al día |
| alcachofa             | <input checked="" type="radio"/> Nunca o menos 1 vez al mes<br><input type="radio"/> 1 a 3 veces mes<br><input type="radio"/> 1 vez semana<br><input type="radio"/> 2 a 4 veces semana<br><input type="radio"/> 5 a 6 veces semana<br><input type="radio"/> 1 vez al día<br><input type="radio"/> 2 a 3 veces al día<br><input type="radio"/> 5 a 6 veces al día<br><input type="radio"/> más 6 veces al día |
| espárragos            | <input type="radio"/> Nunca o menos 1 vez al mes<br><input type="radio"/> 1 a 3 veces mes<br><input checked="" type="radio"/> 1 vez semana<br><input type="radio"/> 2 a 4 veces semana<br><input type="radio"/> 5 a 6 veces semana<br><input type="radio"/> 1 vez al día<br><input type="radio"/> 2 a 3 veces al día<br><input type="radio"/> 5 a 6 veces al día<br><input type="radio"/> más 6 veces al día |
| maíz hervido          | <input checked="" type="radio"/> Nunca o menos 1 vez al mes<br><input type="radio"/> 1 a 3 veces mes<br><input type="radio"/> 1 vez semana<br><input type="radio"/> 2 a 4 veces semana<br><input type="radio"/> 5 a 6 veces semana<br><input type="radio"/> 1 vez al día<br><input type="radio"/> 2 a 3 veces al día<br><input type="radio"/> 5 a 6 veces al día<br><input type="radio"/> más 6 veces al día |
| legumbres             | <input type="radio"/> Nunca o menos 1 vez al mes<br><input type="radio"/> 1 a 3 veces mes<br><input type="radio"/> 1 vez semana<br><input checked="" type="radio"/> 2 a 4 veces semana<br><input type="radio"/> 5 a 6 veces semana<br><input type="radio"/> 1 vez al día<br><input type="radio"/> 2 a 3 veces al día<br><input type="radio"/> 5 a 6 veces al día<br><input type="radio"/> más 6 veces al día |
| naranjas o mandarinas | <input type="radio"/> Nunca o menos 1 vez al mes<br><input type="radio"/> 1 a 3 veces mes<br><input type="radio"/> 1 vez semana<br><input checked="" type="radio"/> 2 a 4 veces semana<br><input type="radio"/> 5 a 6 veces semana<br><input type="radio"/> 1 vez al día<br><input type="radio"/> 2 a 3 veces al día<br><input type="radio"/> 5 a 6 veces al día<br><input type="radio"/> más 6 veces al día |

|                       |                                                                                                                                                                                                                                                                                                                                                                                                              |
|-----------------------|--------------------------------------------------------------------------------------------------------------------------------------------------------------------------------------------------------------------------------------------------------------------------------------------------------------------------------------------------------------------------------------------------------------|
| zum natural fruta     | <input type="radio"/> Nunca o menos 1 vez al mes<br><input type="radio"/> 1 a 3 veces mes<br><input type="radio"/> 1 vez semana<br><input type="radio"/> 2 a 4 veces semana<br><input type="radio"/> 5 a 6 veces semana<br><input checked="" type="radio"/> 1 vez al día<br><input type="radio"/> 2 a 3 veces al día<br><input type="radio"/> 5 a 6 veces al día<br><input type="radio"/> más 6 veces al día |
| platano               | <input type="radio"/> Nunca o menos 1 vez al mes<br><input type="radio"/> 1 a 3 veces mes<br><input checked="" type="radio"/> 1 vez semana<br><input type="radio"/> 2 a 4 veces semana<br><input type="radio"/> 5 a 6 veces semana<br><input type="radio"/> 1 vez al día<br><input type="radio"/> 2 a 3 veces al día<br><input type="radio"/> 5 a 6 veces al día<br><input type="radio"/> más 6 veces al día |
| manzana o pera        | <input type="radio"/> Nunca o menos 1 vez al mes<br><input type="radio"/> 1 a 3 veces mes<br><input checked="" type="radio"/> 1 vez semana<br><input type="radio"/> 2 a 4 veces semana<br><input type="radio"/> 5 a 6 veces semana<br><input type="radio"/> 1 vez al día<br><input type="radio"/> 2 a 3 veces al día<br><input type="radio"/> 5 a 6 veces al día<br><input type="radio"/> más 6 veces al día |
| melocotón o nectarina | <input checked="" type="radio"/> Nunca o menos 1 vez al mes<br><input type="radio"/> 1 a 3 veces mes<br><input type="radio"/> 1 vez semana<br><input type="radio"/> 2 a 4 veces semana<br><input type="radio"/> 5 a 6 veces semana<br><input type="radio"/> 1 vez al día<br><input type="radio"/> 2 a 3 veces al día<br><input type="radio"/> 5 a 6 veces al día<br><input type="radio"/> más 6 veces al día |
| sandia o melon        | <input checked="" type="radio"/> Nunca o menos 1 vez al mes<br><input type="radio"/> 1 a 3 veces mes<br><input type="radio"/> 1 vez semana<br><input type="radio"/> 2 a 4 veces semana<br><input type="radio"/> 5 a 6 veces semana<br><input type="radio"/> 1 vez al día<br><input type="radio"/> 2 a 3 veces al día<br><input type="radio"/> 5 a 6 veces al día<br><input type="radio"/> más 6 veces al día |
| uva                   | <input type="radio"/> Nunca o menos 1 vez al mes<br><input type="radio"/> 1 a 3 veces mes<br><input checked="" type="radio"/> 1 vez semana<br><input type="radio"/> 2 a 4 veces semana<br><input type="radio"/> 5 a 6 veces semana<br><input type="radio"/> 1 vez al día<br><input type="radio"/> 2 a 3 veces al día<br><input type="radio"/> 5 a 6 veces al día<br><input type="radio"/> más 6 veces al día |

---

bruna o ciruela

- ☒ Nunca o menos 1 vez al mes  
☐ 1 a 3 veces mes  
☐ 1 vez semana  
☐ 2 a 4 veces semana  
☐ 5 a 6 veces semana  
☐ 1 vez al día  
☐ 2 a 3 veces al día  
☐ 5 a 6 veces al día  
☐ más 6 veces al día

---

kiwi

- ☐ Nunca o menos 1 vez al mes  
☐ 1 a 3 veces mes  
☒ 1 vez semana  
☐ 2 a 4 veces semana  
☐ 5 a 6 veces semana  
☐ 1 vez al día  
☐ 2 a 3 veces al día  
☐ 5 a 6 veces al día  
☐ más 6 veces al día

---

aceituna

- ☐ Nunca o menos 1 vez al mes  
☒ 1 a 3 veces mes  
☐ 1 vez semana  
☐ 2 a 4 veces semana  
☐ 5 a 6 veces semana  
☐ 1 vez al día  
☐ 2 a 3 veces al día  
☐ 5 a 6 veces al día  
☐ más 6 veces al día

---

frutos secos

- ☐ Nunca o menos 1 vez al mes  
☐ 1 a 3 veces mes  
☐ 1 vez semana  
☐ 2 a 4 veces semana  
☐ 5 a 6 veces semana  
☒ 1 vez al día  
☐ 2 a 3 veces al día  
☐ 5 a 6 veces al día  
☐ más 6 veces al día

---

pan blanco

- ☐ Nunca o menos 1 vez al mes  
☐ 1 a 3 veces mes  
☐ 1 vez semana  
☐ 2 a 4 veces semana  
☐ 5 a 6 veces semana  
☒ 1 vez al día  
☐ 2 a 3 veces al día  
☐ 5 a 6 veces al día  
☐ más 6 veces al día

---

pan integral

- ☒ Nunca o menos 1 vez al mes  
☐ 1 a 3 veces mes  
☐ 1 vez semana  
☐ 2 a 4 veces semana  
☐ 5 a 6 veces semana  
☐ 1 vez al día  
☐ 2 a 3 veces al día  
☐ 5 a 6 veces al día  
☐ más 6 veces al día

---

cereales desayuno

- ☐ Nunca o menos 1 vez al mes  
☐ 1 a 3 veces mes  
☒ 1 vez semana  
☐ 2 a 4 veces semana  
☐ 5 a 6 veces semana  
☐ 1 vez al día  
☐ 2 a 3 veces al día  
☐ 5 a 6 veces al día  
☐ más 6 veces al día

---

patatas fritas

- ☐ Nunca o menos 1 vez al mes  
☐ 1 a 3 veces mes  
☒ 1 vez semana  
☐ 2 a 4 veces semana  
☐ 5 a 6 veces semana  
☐ 1 vez al día  
☐ 2 a 3 veces al día  
☐ 5 a 6 veces al día  
☐ más 6 veces al día

---

patatas cocidas o asadas

- ☐ Nunca o menos 1 vez al mes  
☐ 1 a 3 veces mes  
☒ 1 vez semana  
☐ 2 a 4 veces semana  
☐ 5 a 6 veces semana  
☐ 1 vez al día  
☐ 2 a 3 veces al día  
☐ 5 a 6 veces al día  
☐ más 6 veces al día

---

bolsa papas

- ☐ Nunca o menos 1 vez al mes  
☐ 1 a 3 veces mes  
☒ 1 vez semana  
☐ 2 a 4 veces semana  
☐ 5 a 6 veces semana  
☐ 1 vez al día  
☐ 2 a 3 veces al día  
☐ 5 a 6 veces al día  
☐ más 6 veces al día

---

arroz cocinado

- ☐ Nunca o menos 1 vez al mes  
☐ 1 a 3 veces mes  
☒ 1 vez semana  
☐ 2 a 4 veces semana  
☐ 5 a 6 veces semana  
☐ 1 vez al día  
☐ 2 a 3 veces al día  
☐ 5 a 6 veces al día  
☐ más 6 veces al día

---

pasta

- ☐ Nunca o menos 1 vez al mes  
☐ 1 a 3 veces mes  
☐ 1 vez semana  
☒ 2 a 4 veces semana  
☐ 5 a 6 veces semana  
☐ 1 vez al día  
☐ 2 a 3 veces al día  
☐ 5 a 6 veces al día  
☐ más 6 veces al día

|                     |                                                                                                                                                                                                                                                                                                                                                                                                              |
|---------------------|--------------------------------------------------------------------------------------------------------------------------------------------------------------------------------------------------------------------------------------------------------------------------------------------------------------------------------------------------------------------------------------------------------------|
| pizza               | <input type="radio"/> Nunca o menos 1 vez al mes<br><input type="radio"/> 1 a 3 veces mes<br><input checked="" type="radio"/> 1 vez semana<br><input type="radio"/> 2 a 4 veces semana<br><input type="radio"/> 5 a 6 veces semana<br><input type="radio"/> 1 vez al día<br><input type="radio"/> 2 a 3 veces al día<br><input type="radio"/> 5 a 6 veces al día<br><input type="radio"/> más 6 veces al día |
| aceite oliva        | <input type="radio"/> Nunca o menos 1 vez al mes<br><input type="radio"/> 1 a 3 veces mes<br><input type="radio"/> 1 vez semana<br><input type="radio"/> 2 a 4 veces semana<br><input type="radio"/> 5 a 6 veces semana<br><input checked="" type="radio"/> 1 vez al día<br><input type="radio"/> 2 a 3 veces al día<br><input type="radio"/> 5 a 6 veces al día<br><input type="radio"/> más 6 veces al día |
| otros aceites       | <input checked="" type="radio"/> Nunca o menos 1 vez al mes<br><input type="radio"/> 1 a 3 veces mes<br><input type="radio"/> 1 vez semana<br><input type="radio"/> 2 a 4 veces semana<br><input type="radio"/> 5 a 6 veces semana<br><input type="radio"/> 1 vez al día<br><input type="radio"/> 2 a 3 veces al día<br><input type="radio"/> 5 a 6 veces al día<br><input type="radio"/> más 6 veces al día |
| margarina           | <input checked="" type="radio"/> Nunca o menos 1 vez al mes<br><input type="radio"/> 1 a 3 veces mes<br><input type="radio"/> 1 vez semana<br><input type="radio"/> 2 a 4 veces semana<br><input type="radio"/> 5 a 6 veces semana<br><input type="radio"/> 1 vez al día<br><input type="radio"/> 2 a 3 veces al día<br><input type="radio"/> 5 a 6 veces al día<br><input type="radio"/> más 6 veces al día |
| mantequilla         | <input type="radio"/> Nunca o menos 1 vez al mes<br><input checked="" type="radio"/> 1 a 3 veces mes<br><input type="radio"/> 1 vez semana<br><input type="radio"/> 2 a 4 veces semana<br><input type="radio"/> 5 a 6 veces semana<br><input type="radio"/> 1 vez al día<br><input type="radio"/> 2 a 3 veces al día<br><input type="radio"/> 5 a 6 veces al día<br><input type="radio"/> más 6 veces al día |
| galletas tipo maria | <input type="radio"/> Nunca o menos 1 vez al mes<br><input type="radio"/> 1 a 3 veces mes<br><input checked="" type="radio"/> 1 vez semana<br><input type="radio"/> 2 a 4 veces semana<br><input type="radio"/> 5 a 6 veces semana<br><input type="radio"/> 1 vez al día<br><input type="radio"/> 2 a 3 veces al día<br><input type="radio"/> 5 a 6 veces al día<br><input type="radio"/> más 6 veces al día |

---

galletas chocolate

- ☐ Nunca o menos 1 vez al mes  
☒ 1 a 3 veces mes  
☐ 1 vez semana  
☐ 2 a 4 veces semana  
☐ 5 a 6 veces semana  
☐ 1 vez al día  
☐ 2 a 3 veces al día  
☐ 5 a 6 veces al día  
☐ más 6 veces al día

---

bolleria

- ☐ Nunca o menos 1 vez al mes  
☐ 1 a 3 veces mes  
☒ 1 vez semana  
☐ 2 a 4 veces semana  
☐ 5 a 6 veces semana  
☐ 1 vez al día  
☐ 2 a 3 veces al día  
☐ 5 a 6 veces al día  
☐ más 6 veces al día

---

chocolate o bombones

- ☐ Nunca o menos 1 vez al mes  
☐ 1 a 3 veces mes  
☒ 1 vez semana  
☐ 2 a 4 veces semana  
☐ 5 a 6 veces semana  
☐ 1 vez al día  
☐ 2 a 3 veces al día  
☐ 5 a 6 veces al día  
☐ más 6 veces al día

---

chocolate polvo o colacao

- ☐ Nunca o menos 1 vez al mes  
☒ 1 a 3 veces mes  
☐ 1 vez semana  
☐ 2 a 4 veces semana  
☐ 5 a 6 veces semana  
☐ 1 vez al día  
☐ 2 a 3 veces al día  
☐ 5 a 6 veces al día  
☐ más 6 veces al día

---

vino tinto

- ☒ Nunca o menos 1 vez al mes  
☐ 1 a 3 veces mes  
☐ 1 vez semana  
☐ 2 a 4 veces semana  
☐ 5 a 6 veces semana  
☐ 1 vez al día  
☐ 2 a 3 veces al día  
☐ 5 a 6 veces al día  
☐ más 6 veces al día

---

vino blanco

- ☒ Nunca o menos 1 vez al mes  
☐ 1 a 3 veces mes  
☐ 1 vez semana  
☐ 2 a 4 veces semana  
☐ 5 a 6 veces semana  
☐ 1 vez al día  
☐ 2 a 3 veces al día  
☐ 5 a 6 veces al día  
☐ más 6 veces al día

---

|                    |                                                                                                                                                                                                                                                                                                                                                                                                              |
|--------------------|--------------------------------------------------------------------------------------------------------------------------------------------------------------------------------------------------------------------------------------------------------------------------------------------------------------------------------------------------------------------------------------------------------------|
| vino seco o vermut | <input checked="" type="radio"/> Nunca o menos 1 vez al mes<br><input type="radio"/> 1 a 3 veces mes<br><input type="radio"/> 1 vez semana<br><input type="radio"/> 2 a 4 veces semana<br><input type="radio"/> 5 a 6 veces semana<br><input type="radio"/> 1 vez al día<br><input type="radio"/> 2 a 3 veces al día<br><input type="radio"/> 5 a 6 veces al día<br><input type="radio"/> más 6 veces al día |
|--------------------|--------------------------------------------------------------------------------------------------------------------------------------------------------------------------------------------------------------------------------------------------------------------------------------------------------------------------------------------------------------------------------------------------------------|

---

|         |                                                                                                                                                                                                                                                                                                                                                                                                              |
|---------|--------------------------------------------------------------------------------------------------------------------------------------------------------------------------------------------------------------------------------------------------------------------------------------------------------------------------------------------------------------------------------------------------------------|
| cerveza | <input checked="" type="radio"/> Nunca o menos 1 vez al mes<br><input type="radio"/> 1 a 3 veces mes<br><input type="radio"/> 1 vez semana<br><input type="radio"/> 2 a 4 veces semana<br><input type="radio"/> 5 a 6 veces semana<br><input type="radio"/> 1 vez al día<br><input type="radio"/> 2 a 3 veces al día<br><input type="radio"/> 5 a 6 veces al día<br><input type="radio"/> más 6 veces al día |
|---------|--------------------------------------------------------------------------------------------------------------------------------------------------------------------------------------------------------------------------------------------------------------------------------------------------------------------------------------------------------------------------------------------------------------|

---

|                     |                                                                                                                                                                                                                                                                                                                                                                                                              |
|---------------------|--------------------------------------------------------------------------------------------------------------------------------------------------------------------------------------------------------------------------------------------------------------------------------------------------------------------------------------------------------------------------------------------------------------|
| cerveza sin alcohol | <input checked="" type="radio"/> Nunca o menos 1 vez al mes<br><input type="radio"/> 1 a 3 veces mes<br><input type="radio"/> 1 vez semana<br><input type="radio"/> 2 a 4 veces semana<br><input type="radio"/> 5 a 6 veces semana<br><input type="radio"/> 1 vez al día<br><input type="radio"/> 2 a 3 veces al día<br><input type="radio"/> 5 a 6 veces al día<br><input type="radio"/> más 6 veces al día |
|---------------------|--------------------------------------------------------------------------------------------------------------------------------------------------------------------------------------------------------------------------------------------------------------------------------------------------------------------------------------------------------------------------------------------------------------|

---

|         |                                                                                                                                                                                                                                                                                                                                                                                                              |
|---------|--------------------------------------------------------------------------------------------------------------------------------------------------------------------------------------------------------------------------------------------------------------------------------------------------------------------------------------------------------------------------------------------------------------|
| licores | <input checked="" type="radio"/> Nunca o menos 1 vez al mes<br><input type="radio"/> 1 a 3 veces mes<br><input type="radio"/> 1 vez semana<br><input type="radio"/> 2 a 4 veces semana<br><input type="radio"/> 5 a 6 veces semana<br><input type="radio"/> 1 vez al día<br><input type="radio"/> 2 a 3 veces al día<br><input type="radio"/> 5 a 6 veces al día<br><input type="radio"/> más 6 veces al día |
|---------|--------------------------------------------------------------------------------------------------------------------------------------------------------------------------------------------------------------------------------------------------------------------------------------------------------------------------------------------------------------------------------------------------------------|

---

|                       |                                                                                                                                                                                                                                                                                                                                                                                                              |
|-----------------------|--------------------------------------------------------------------------------------------------------------------------------------------------------------------------------------------------------------------------------------------------------------------------------------------------------------------------------------------------------------------------------------------------------------|
| ginebra o ron o vodka | <input checked="" type="radio"/> Nunca o menos 1 vez al mes<br><input type="radio"/> 1 a 3 veces mes<br><input type="radio"/> 1 vez semana<br><input type="radio"/> 2 a 4 veces semana<br><input type="radio"/> 5 a 6 veces semana<br><input type="radio"/> 1 vez al día<br><input type="radio"/> 2 a 3 veces al día<br><input type="radio"/> 5 a 6 veces al día<br><input type="radio"/> más 6 veces al día |
|-----------------------|--------------------------------------------------------------------------------------------------------------------------------------------------------------------------------------------------------------------------------------------------------------------------------------------------------------------------------------------------------------------------------------------------------------|

---

|                 |                                                                                                                                                                                                                                                                                                                                                                                                              |
|-----------------|--------------------------------------------------------------------------------------------------------------------------------------------------------------------------------------------------------------------------------------------------------------------------------------------------------------------------------------------------------------------------------------------------------------|
| refresco normal | <input checked="" type="radio"/> Nunca o menos 1 vez al mes<br><input type="radio"/> 1 a 3 veces mes<br><input type="radio"/> 1 vez semana<br><input type="radio"/> 2 a 4 veces semana<br><input type="radio"/> 5 a 6 veces semana<br><input type="radio"/> 1 vez al día<br><input type="radio"/> 2 a 3 veces al día<br><input type="radio"/> 5 a 6 veces al día<br><input type="radio"/> más 6 veces al día |
|-----------------|--------------------------------------------------------------------------------------------------------------------------------------------------------------------------------------------------------------------------------------------------------------------------------------------------------------------------------------------------------------------------------------------------------------|

---



|                          |                                                                                                                                                                                                                                                                                                                                                                                                              |
|--------------------------|--------------------------------------------------------------------------------------------------------------------------------------------------------------------------------------------------------------------------------------------------------------------------------------------------------------------------------------------------------------------------------------------------------------|
| refresco sin azúcar      | <input checked="" type="radio"/> Nunca o menos 1 vez al mes<br><input type="radio"/> 1 a 3 veces mes<br><input type="radio"/> 1 vez semana<br><input type="radio"/> 2 a 4 veces semana<br><input type="radio"/> 5 a 6 veces semana<br><input type="radio"/> 1 vez al día<br><input type="radio"/> 2 a 3 veces al día<br><input type="radio"/> 5 a 6 veces al día<br><input type="radio"/> más 6 veces al día |
| Agua del grifo           | <input checked="" type="radio"/> Nunca o menos 1 vez al mes<br><input type="radio"/> 1 a 3 veces mes<br><input type="radio"/> 1 vez semana<br><input type="radio"/> 2 a 4 veces semana<br><input type="radio"/> 5 a 6 veces semana<br><input type="radio"/> 1 vez al día<br><input type="radio"/> 2 a 3 veces al día<br><input type="radio"/> 5 a 6 veces al día<br><input type="radio"/> más 6 veces al día |
| agua embotellada sin gas | <input type="radio"/> Nunca o menos 1 vez al mes<br><input type="radio"/> 1 a 3 veces mes<br><input type="radio"/> 1 vez semana<br><input type="radio"/> 2 a 4 veces semana<br><input type="radio"/> 5 a 6 veces semana<br><input type="radio"/> 1 vez al día<br><input type="radio"/> 2 a 3 veces al día<br><input checked="" type="radio"/> 5 a 6 veces al día<br><input type="radio"/> más 6 veces al día |
| agua embotellada con gas | <input type="radio"/> Nunca o menos 1 vez al mes<br><input type="radio"/> 1 a 3 veces mes<br><input type="radio"/> 1 vez semana<br><input type="radio"/> 2 a 4 veces semana<br><input type="radio"/> 5 a 6 veces semana<br><input type="radio"/> 1 vez al día<br><input type="radio"/> 2 a 3 veces al día<br><input type="radio"/> 5 a 6 veces al día<br><input type="radio"/> más 6 veces al día            |
| zumو frutas embasado     | <input type="radio"/> Nunca o menos 1 vez al mes<br><input type="radio"/> 1 a 3 veces mes<br><input type="radio"/> 1 vez semana<br><input checked="" type="radio"/> 2 a 4 veces semana<br><input type="radio"/> 5 a 6 veces semana<br><input type="radio"/> 1 vez al día<br><input type="radio"/> 2 a 3 veces al día<br><input type="radio"/> 5 a 6 veces al día<br><input type="radio"/> más 6 veces al día |
| cafe                     | <input checked="" type="radio"/> Nunca o menos 1 vez al mes<br><input type="radio"/> 1 a 3 veces mes<br><input type="radio"/> 1 vez semana<br><input type="radio"/> 2 a 4 veces semana<br><input type="radio"/> 5 a 6 veces semana<br><input type="radio"/> 1 vez al día<br><input type="radio"/> 2 a 3 veces al día<br><input type="radio"/> 5 a 6 veces al día<br><input type="radio"/> más 6 veces al día |

---

cafe descafeinado

- ☐ Nunca o menos 1 vez al mes  
☐ 1 a 3 veces mes  
☐ 1 vez semana  
☐ 2 a 4 veces semana  
☐ 5 a 6 veces semana  
☒ 1 vez al día  
☐ 2 a 3 veces al día  
☐ 5 a 6 veces al día  
☐ más 6 veces al día

---

te o infusión

- ☒ Nunca o menos 1 vez al mes  
☐ 1 a 3 veces mes  
☐ 1 vez semana  
☐ 2 a 4 veces semana  
☐ 5 a 6 veces semana  
☐ 1 vez al día  
☐ 2 a 3 veces al día  
☐ 5 a 6 veces al día  
☐ más 6 veces al día

---

sopa o puré verduras

- ☐ Nunca o menos 1 vez al mes  
☐ 1 a 3 veces mes  
☒ 1 vez semana  
☐ 2 a 4 veces semana  
☐ 5 a 6 veces semana  
☐ 1 vez al día  
☐ 2 a 3 veces al día  
☐ 5 a 6 veces al día  
☐ más 6 veces al día

---

croquetas pollo jamón

- ☐ Nunca o menos 1 vez al mes  
☒ 1 a 3 veces mes  
☐ 1 vez semana  
☐ 2 a 4 veces semana  
☐ 5 a 6 veces semana  
☐ 1 vez al día  
☐ 2 a 3 veces al día  
☐ 5 a 6 veces al día  
☐ más 6 veces al día

---

croquetas pescado

- ☐ Nunca o menos 1 vez al mes  
☒ 1 a 3 veces mes  
☐ 1 vez semana  
☐ 2 a 4 veces semana  
☐ 5 a 6 veces semana  
☐ 1 vez al día  
☐ 2 a 3 veces al día  
☐ 5 a 6 veces al día  
☐ más 6 veces al día

---

mayonesa

- ☒ Nunca o menos 1 vez al mes  
☐ 1 a 3 veces mes  
☐ 1 vez semana  
☐ 2 a 4 veces semana  
☐ 5 a 6 veces semana  
☐ 1 vez al día  
☐ 2 a 3 veces al día  
☐ 5 a 6 veces al día  
☐ más 6 veces al día

salsa tomate

- ☐ Nunca o menos 1 vez al mes  
☐ 1 a 3 veces mes  
☐ 1 vez semana  
☒ 2 a 4 veces semana  
☐ 5 a 6 veces semana  
☐ 1 vez al día  
☐ 2 a 3 veces al día  
☐ 5 a 6 veces al día  
☐ más 6 veces al día

ketchup

- ☒ Nunca o menos 1 vez al mes  
☐ 1 a 3 veces mes  
☐ 1 vez semana  
☐ 2 a 4 veces semana  
☐ 5 a 6 veces semana  
☐ 1 vez al día  
☐ 2 a 3 veces al día  
☐ 5 a 6 veces al día  
☐ más 6 veces al día

sal

- ☐ Nunca o menos 1 vez al mes  
☐ 1 a 3 veces mes  
☐ 1 vez semana  
☐ 2 a 4 veces semana  
☐ 5 a 6 veces semana  
☒ 1 vez al día  
☐ 2 a 3 veces al día  
☐ 5 a 6 veces al día  
☐ más 6 veces al día

ajo

- ☒ Nunca o menos 1 vez al mes  
☐ 1 a 3 veces mes  
☐ 1 vez semana  
☐ 2 a 4 veces semana  
☐ 5 a 6 veces semana  
☐ 1 vez al día  
☐ 2 a 3 veces al día  
☐ 5 a 6 veces al día  
☐ más 6 veces al día

mermelada o miel

- ☐ Nunca o menos 1 vez al mes  
☒ 1 a 3 veces mes  
☐ 1 vez semana  
☐ 2 a 4 veces semana  
☐ 5 a 6 veces semana  
☐ 1 vez al día  
☐ 2 a 3 veces al día  
☐ 5 a 6 veces al día  
☐ más 6 veces al día

azúcar

- ☐ Nunca o menos 1 vez al mes  
☐ 1 a 3 veces mes  
☐ 1 vez semana  
☐ 2 a 4 veces semana  
☐ 5 a 6 veces semana  
☒ 1 vez al día  
☐ 2 a 3 veces al día  
☐ 5 a 6 veces al día  
☐ más 6 veces al día

|                                       |                                                                                                                                                                                                                                                                                                                                                                                                                                                                                                                               |
|---------------------------------------|-------------------------------------------------------------------------------------------------------------------------------------------------------------------------------------------------------------------------------------------------------------------------------------------------------------------------------------------------------------------------------------------------------------------------------------------------------------------------------------------------------------------------------|
| Otro alimento                         | <hr/>                                                                                                                                                                                                                                                                                                                                                                                                                                                                                                                         |
| suplementos vitamínicos               | <input type="radio"/> si<br><input checked="" type="radio"/> no                                                                                                                                                                                                                                                                                                                                                                                                                                                               |
| suplementos vitamínicos               | <hr/>                                                                                                                                                                                                                                                                                                                                                                                                                                                                                                                         |
| dieta previa                          | <input type="radio"/> si<br><input checked="" type="radio"/> no                                                                                                                                                                                                                                                                                                                                                                                                                                                               |
| motivo dieta                          | <input checked="" type="radio"/> no dieta<br><input type="radio"/> control peso<br><input type="radio"/> control colesterol<br><input type="radio"/> control diabetes<br><input type="radio"/> problemas estómago<br><input type="radio"/> problemas vesícula o hepáticos<br><input type="radio"/> HTA o cardiopatía<br><input type="radio"/> problemas renales<br><input type="radio"/> alergia alimentaria<br><input type="radio"/> ácido úrico elevado<br><input type="radio"/> vegetariana<br><input type="radio"/> otros |
| cambio alimentos año previo gestación | <input type="radio"/> si<br><input checked="" type="radio"/> no                                                                                                                                                                                                                                                                                                                                                                                                                                                               |
| cambio lácteos                        | <input type="radio"/> eliminado<br><input type="radio"/> disminuido<br><input type="radio"/> igual<br><input type="radio"/> aumentado<br><input type="radio"/> no sabe                                                                                                                                                                                                                                                                                                                                                        |
| cambio huevos                         | <input type="radio"/> eliminado<br><input type="radio"/> disminuido<br><input type="radio"/> igual<br><input type="radio"/> aumentado<br><input type="radio"/> no sabe                                                                                                                                                                                                                                                                                                                                                        |
| cambio carne                          | <input type="radio"/> eliminado<br><input type="radio"/> disminuido<br><input type="radio"/> igual<br><input type="radio"/> aumentado<br><input type="radio"/> no sabe                                                                                                                                                                                                                                                                                                                                                        |
| cambio pescado                        | <input type="radio"/> eliminado<br><input type="radio"/> disminuido<br><input type="radio"/> igual<br><input type="radio"/> aumentado<br><input type="radio"/> no sabe                                                                                                                                                                                                                                                                                                                                                        |
| cambio verduras                       | <input type="radio"/> eliminado<br><input type="radio"/> disminuido<br><input type="radio"/> igual<br><input type="radio"/> aumentado<br><input type="radio"/> no sabe                                                                                                                                                                                                                                                                                                                                                        |

|                            |                                                                                                                                                                                                                        |
|----------------------------|------------------------------------------------------------------------------------------------------------------------------------------------------------------------------------------------------------------------|
| cambio legumbres           | <input type="radio"/> eliminado<br><input type="radio"/> disminuido<br><input type="radio"/> igual<br><input type="radio"/> aumentado<br><input type="radio"/> no sabe                                                 |
| cambio fruta               | <input type="radio"/> eliminado<br><input type="radio"/> disminuido<br><input type="radio"/> igual<br><input type="radio"/> aumentado<br><input type="radio"/> no sabe                                                 |
| cambio pan                 | <input type="radio"/> eliminado<br><input type="radio"/> disminuido<br><input type="radio"/> igual<br><input type="radio"/> aumentado<br><input type="radio"/> no sabe                                                 |
| cambio aceite oliva        | <input type="radio"/> eliminado<br><input type="radio"/> disminuido<br><input type="radio"/> igual<br><input type="radio"/> aumentado<br><input type="radio"/> no sabe                                                 |
| cambio mante o margarina   | <input type="radio"/> eliminado<br><input type="radio"/> disminuido<br><input type="radio"/> igual<br><input type="radio"/> aumentado<br><input type="radio"/> no sabe                                                 |
| cambio azúcar y dulces     | <input type="radio"/> eliminado<br><input type="radio"/> disminuido<br><input type="radio"/> igual<br><input type="radio"/> aumentado<br><input type="radio"/> no sabe                                                 |
| cambio bebidas alcohólicas | <input type="radio"/> eliminado<br><input type="radio"/> disminuido<br><input type="radio"/> igual<br><input type="radio"/> aumentado<br><input type="radio"/> no sabe                                                 |
| frecuencia comidas fritas  | <input type="radio"/> a diario<br><input type="radio"/> 5 a 6 veces semana<br><input type="radio"/> 2 a 4 veces semana<br><input checked="" type="radio"/> 1 vez semana<br><input type="radio"/> menos de 1 vez semana |
| carne                      | <input type="radio"/> no como<br><input type="radio"/> cruda<br><input type="radio"/> poco hecha<br><input type="radio"/> hecha<br><input checked="" type="radio"/> muy hecha                                          |
| grasa visible carne        | <input checked="" type="radio"/> quita toda<br><input type="radio"/> quita mayoría<br><input type="radio"/> quita un poco<br><input type="radio"/> no quita nada                                                       |

|                                |                                                                                                                                                                                                                                                          |
|--------------------------------|----------------------------------------------------------------------------------------------------------------------------------------------------------------------------------------------------------------------------------------------------------|
| cocina carne                   | <input checked="" type="radio"/> a la plancha<br><input type="radio"/> a la parrilla<br><input type="radio"/> asada<br><input type="radio"/> frita<br><input type="radio"/> guisada                                                                      |
| tostado quemado carne          | <input checked="" type="radio"/> nunca<br><input type="radio"/> 1 vez mes<br><input type="radio"/> 2 a 3 veces mes<br><input type="radio"/> 1 vez semana<br><input type="radio"/> 2 a 3 semanas                                                          |
| tostado quemado pescado        | <input checked="" type="radio"/> nunca<br><input type="radio"/> 1 vez mes<br><input type="radio"/> 2 a 3 veces mes<br><input type="radio"/> 1 vez semana<br><input type="radio"/> 2 a 3 semanas                                                          |
| socarrat paella                | <input checked="" type="radio"/> nunca<br><input type="radio"/> 1 vez mes<br><input type="radio"/> 2 a 3 veces mes<br><input type="radio"/> 1 vez semana<br><input type="radio"/> 2 a 3 semanas                                                          |
| grasa o aceite cocinar         | <input type="radio"/> mantequilla<br><input type="radio"/> margarina<br><input checked="" type="radio"/> aceite oliva<br><input type="radio"/> aceite oliva virgen extra<br><input type="radio"/> aceite vegetal<br><input type="radio"/> mezcla aceites |
| grasa aceite aliñar            | <input type="radio"/> mantequilla<br><input type="radio"/> margarina<br><input checked="" type="radio"/> aceite oliva<br><input type="radio"/> aceite oliva virgen extra<br><input type="radio"/> aceite vegetal<br><input type="radio"/> mezcla aceites |
| grasa aceite freir             | <input type="radio"/> mantequilla<br><input type="radio"/> margarina<br><input checked="" type="radio"/> aceite oliva<br><input type="radio"/> aceite oliva virgen extra<br><input type="radio"/> aceite vegetal<br><input type="radio"/> mezcla aceites |
| Ejercicio cuestionario         | <input checked="" type="radio"/> si<br><input type="radio"/> no                                                                                                                                                                                          |
| horas de sueño incluido siesta | [*DATA REMOVED*]                                                                                                                                                                                                                                         |
| minutos siesta                 | [*DATA REMOVED*]                                                                                                                                                                                                                                         |
| horas televisión semana        | [*DATA REMOVED*]                                                                                                                                                                                                                                         |

|                                        |                                                                                                                                                                                                                                                                                                                                                                           |
|----------------------------------------|---------------------------------------------------------------------------------------------------------------------------------------------------------------------------------------------------------------------------------------------------------------------------------------------------------------------------------------------------------------------------|
| actividad trabajo                      | <input type="radio"/> casi siempre sentado<br><input type="radio"/> sentado 50 por cien<br><input checked="" type="radio"/> casi siempre de pie, quieto<br><input type="radio"/> casi siempre levantado caminando y llevando pocas cosas<br><input type="radio"/> casi siempre levantado, caminando y llevado muchas cosas<br><input type="radio"/> trabajo manual pesado |
| tiempo caminar o bici al día           | <input type="radio"/> casi nunca<br><input checked="" type="radio"/> menos 20min día<br><input type="radio"/> 20 a 40 min día<br><input type="radio"/> 40 a 60 min día<br><input type="radio"/> 1h o 1h y media día<br><input type="radio"/> más de 1h y media al día                                                                                                     |
| tiempo tareas casa al día              | <input type="radio"/> menos de 1h día<br><input type="radio"/> 1 a 2h día<br><input type="radio"/> 3 a 4h día<br><input checked="" type="radio"/> 5 a 6h día<br><input type="radio"/> 7 a 8h día<br><input type="radio"/> más de 8h día                                                                                                                                   |
| tiempo libre televisión ordenador leer | <input type="radio"/> menos 1h día<br><input checked="" type="radio"/> 1h día<br><input type="radio"/> 2h día<br><input type="radio"/> 3h día<br><input type="radio"/> 4h día<br><input type="radio"/> 5 a 6h día<br><input type="radio"/> mas 6h día                                                                                                                     |
| tiempo libre ejercicio o deporte       | <input checked="" type="radio"/> menos 1h semana<br><input type="radio"/> 1h semana<br><input type="radio"/> 2h semana<br><input type="radio"/> 3h semana<br><input type="radio"/> 4 a 5h semana<br><input type="radio"/> mas 5h semana                                                                                                                                   |
| como se considera                      | <input type="radio"/> sedentaria<br><input type="radio"/> poco activa<br><input checked="" type="radio"/> moderadamente activa<br><input type="radio"/> bastante activa<br><input type="radio"/> muy activa<br><input type="radio"/> no sabe                                                                                                                              |
| FUR                                    | [*DATA REMOVED*]                                                                                                                                                                                                                                                                                                                                                          |
| Semanas gestación 2T                   | [*DATA REMOVED*]                                                                                                                                                                                                                                                                                                                                                          |
| Días gestación 2T                      | [*DATA REMOVED*]                                                                                                                                                                                                                                                                                                                                                          |
| DBP 2T                                 | [*DATA REMOVED*]                                                                                                                                                                                                                                                                                                                                                          |
| CC 2T                                  | [*DATA REMOVED*]                                                                                                                                                                                                                                                                                                                                                          |
| AC 2T                                  | [*DATA REMOVED*]                                                                                                                                                                                                                                                                                                                                                          |

|                                                   |                                                                                                                                                                                                 |
|---------------------------------------------------|-------------------------------------------------------------------------------------------------------------------------------------------------------------------------------------------------|
| LF 2T                                             | [*DATA REMOVED*]                                                                                                                                                                                |
| PFE 2T (Hadlock)                                  | [*DATA REMOVED*]                                                                                                                                                                                |
| Semanas gestación 3T                              | [*DATA REMOVED*]                                                                                                                                                                                |
| días 3T                                           | [*DATA REMOVED*]                                                                                                                                                                                |
| DBP 3T                                            | [*DATA REMOVED*]                                                                                                                                                                                |
| CC 3T                                             | [*DATA REMOVED*]                                                                                                                                                                                |
| AC 3T                                             | [*DATA REMOVED*]                                                                                                                                                                                |
| LF 3T                                             | [*DATA REMOVED*]                                                                                                                                                                                |
| PFE 3T (Hadlock)                                  | [*DATA REMOVED*]                                                                                                                                                                                |
| Semanas de gestación final                        | [*DATA REMOVED*]                                                                                                                                                                                |
| días gestación final                              | [*DATA REMOVED*]                                                                                                                                                                                |
| Localización placenta                             | <input checked="" type="radio"/> anterior<br><input type="radio"/> lateral derecha<br><input type="radio"/> lateral izquierda<br><input type="radio"/> posterior<br><input type="radio"/> fondo |
| Presentación longitudinal cefálica                | <input type="radio"/> no<br><input checked="" type="radio"/> si                                                                                                                                 |
| Dorso                                             | <input type="radio"/> izquierda anterior<br><input type="radio"/> izquierda posterior<br><input checked="" type="radio"/> derecha anterior<br><input type="radio"/> derecha posterior           |
| diámetro biparietal                               | [*DATA REMOVED*]                                                                                                                                                                                |
| Circunferencia craneal                            | [*DATA REMOVED*]                                                                                                                                                                                |
| Circunferencia abdominal                          | [*DATA REMOVED*]                                                                                                                                                                                |
| Longitud de femur                                 | [*DATA REMOVED*]                                                                                                                                                                                |
| tejido celular subcutáneo a nivel del muslo en mm | [*DATA REMOVED*]                                                                                                                                                                                |
| tejido celular subcutáneo en abdomen en mm        | _____                                                                                                                                                                                           |
| Volumen del muslo en cm3                          | [*DATA REMOVED*]                                                                                                                                                                                |
| Peso fetal estimado según fórmula de Hadlock      | [*DATA REMOVED*]                                                                                                                                                                                |



|                                               |                                                                                                                                               |
|-----------------------------------------------|-----------------------------------------------------------------------------------------------------------------------------------------------|
| Percentil                                     | [*DATA REMOVED*]                                                                                                                              |
| Peso fetal estimado según fórmula de Scioscia | <hr/>                                                                                                                                         |
| Peso fetal estimado según fórmula de LEE      | <hr/>                                                                                                                                         |
| Tipo de parto                                 | <input type="radio"/> eutocico<br><input type="radio"/> instrumentado/ventosa<br><input type="radio"/> cesarea                                |
| fecha de nacimiento                           | [*DATA REMOVED*]                                                                                                                              |
| Días entre exploración y nacimiento           | [*DATA REMOVED*]                                                                                                                              |
| Peso RN en g                                  | [*DATA REMOVED*]                                                                                                                              |
| sexo                                          | <input checked="" type="radio"/> mujer<br><input type="radio"/> hombre                                                                        |
| Apgar 1 minuto                                | [*DATA REMOVED*]                                                                                                                              |
| Apgar 5 minutos                               | [*DATA REMOVED*]                                                                                                                              |
| Apgar 10 minutos                              | <hr/>                                                                                                                                         |
| antecedente Covid durante gestación           | <input type="radio"/> Yes<br><input checked="" type="radio"/> No                                                                              |
| Nivel de estudios                             | <input type="radio"/> ninguno<br><input type="radio"/> primarios<br><input type="radio"/> secundarios<br><input type="radio"/> universitarios |

# Base\_datos\_estimacion\_peso\_fetal

|                                       |                                                                                                                                                                                                                                                                                      |
|---------------------------------------|--------------------------------------------------------------------------------------------------------------------------------------------------------------------------------------------------------------------------------------------------------------------------------------|
| Número de identificación participante | 165                                                                                                                                                                                                                                                                                  |
| CODIGO PARTICIPANTE                   |                                                                                                                                                                                                                                                                                      |
| Edad                                  | [*DATA REMOVED*]                                                                                                                                                                                                                                                                     |
| Gestaciones                           | <input type="radio"/> 1<br><input checked="" type="radio"/> 2<br><input type="radio"/> 3<br><input type="radio"/> mas de 3                                                                                                                                                           |
| partos                                | <input checked="" type="radio"/> 0<br><input type="radio"/> 1<br><input type="radio"/> 2<br><input type="radio"/> 3<br><input type="radio"/> mas de 3                                                                                                                                |
| cesáreas                              | <input type="radio"/> 0<br><input checked="" type="radio"/> 1<br><input type="radio"/> 2<br><input type="radio"/> 3<br><input type="radio"/> mas de 3                                                                                                                                |
| Abortos                               | <input checked="" type="radio"/> 0<br><input type="radio"/> 1<br><input type="radio"/> 2<br><input type="radio"/> 3<br><input type="radio"/> mas de 3                                                                                                                                |
| Tipo de gestacion                     | <input checked="" type="radio"/> espontanea<br><input type="radio"/> IAC inseminación artificial conyuge<br><input type="radio"/> IAD inseminación artificial donante<br><input type="radio"/> FIV Fecundación in Vitro<br><input type="radio"/> Ovodon FIV con donación de ovocitos |
| peso previo a embarazo                | [*DATA REMOVED*]                                                                                                                                                                                                                                                                     |
| Ganancia ponderal embarazo            |                                                                                                                                                                                                                                                                                      |
| Talla madre                           | [*DATA REMOVED*]                                                                                                                                                                                                                                                                     |
| IMC previo embarazo                   | 41.13865932047751                                                                                                                                                                                                                                                                    |
| Patología obstétrica                  | <input checked="" type="radio"/> no<br><input type="radio"/> si                                                                                                                                                                                                                      |
| Diabetes pregestacional               | <input checked="" type="radio"/> no<br><input type="radio"/> si                                                                                                                                                                                                                      |
| Diabetes gestacional                  | <input checked="" type="radio"/> no<br><input type="radio"/> si                                                                                                                                                                                                                      |

|                                            |                                                                                                                                                                                      |
|--------------------------------------------|--------------------------------------------------------------------------------------------------------------------------------------------------------------------------------------|
| Diabetes gestacional con insulina          | <input checked="" type="radio"/> no<br><input type="radio"/> si                                                                                                                      |
| Diabetes gestacional con dieta y ejercicio | <input checked="" type="radio"/> no<br><input type="radio"/> si                                                                                                                      |
| Percentil fetos previos                    | <input type="radio"/> Nada<br><input type="radio"/> percentil menor de 10<br><input checked="" type="radio"/> percentil entre 10 y 90<br><input type="radio"/> percentil mayor de 90 |
| Exfumadora                                 | <input checked="" type="radio"/> Nada<br><input type="radio"/> menos de 5 años<br><input type="radio"/> 5 a 10 años<br><input type="radio"/> mayor o igual a 10 años                 |
| Hábito tabáquico                           | <input checked="" type="radio"/> no<br><input type="radio"/> si                                                                                                                      |
| fumadora                                   | [*DATA REMOVED*]                                                                                                                                                                     |
| Consumo otros tóxicos                      | <input checked="" type="radio"/> no<br><input type="radio"/> si                                                                                                                      |
| Hb 1T                                      | [*DATA REMOVED*]                                                                                                                                                                     |
| Htc 1T                                     | [*DATA REMOVED*]                                                                                                                                                                     |
| Hb 2T                                      | [*DATA REMOVED*]                                                                                                                                                                     |
| HTC 2T                                     | [*DATA REMOVED*]                                                                                                                                                                     |
| Hb 3T                                      | [*DATA REMOVED*]                                                                                                                                                                     |
| HTC 3T                                     | [*DATA REMOVED*]                                                                                                                                                                     |
| Suplemento FE oral                         | <input checked="" type="radio"/> si<br><input type="radio"/> no                                                                                                                      |
| Suplemento fe iv                           | <input type="radio"/> si<br><input checked="" type="radio"/> no                                                                                                                      |
| Transfusión                                | <input checked="" type="radio"/> no<br><input type="radio"/> si                                                                                                                      |
| Solicitada Vit D                           | <input checked="" type="radio"/> no<br><input type="radio"/> si                                                                                                                      |
| Deficit vit D                              | <input type="radio"/> no<br><input checked="" type="radio"/> si                                                                                                                      |
| Suplemento vit D                           | <input checked="" type="radio"/> si<br><input type="radio"/> no                                                                                                                      |

|                       |                                                                                                                                                                                                                                                                                                                                                                                                              |
|-----------------------|--------------------------------------------------------------------------------------------------------------------------------------------------------------------------------------------------------------------------------------------------------------------------------------------------------------------------------------------------------------------------------------------------------------|
| Dieta, cuestionario   | <input checked="" type="radio"/> si<br><input type="radio"/> no                                                                                                                                                                                                                                                                                                                                              |
| Leche entera          | <input checked="" type="radio"/> Nunca o menos 1 vez al mes<br><input type="radio"/> 1 a 3 veces mes<br><input type="radio"/> 1 vez semana<br><input type="radio"/> 2 a 4 veces semana<br><input type="radio"/> 5 a 6 veces semana<br><input type="radio"/> 1 vez al día<br><input type="radio"/> 2 a 3 veces al día<br><input type="radio"/> 5 a 6 veces al día<br><input type="radio"/> más 6 veces al día |
| Leche semidesnatada   | <input type="radio"/> Nunca o menos 1 vez al mes<br><input type="radio"/> 1 a 3 veces mes<br><input type="radio"/> 1 vez semana<br><input type="radio"/> 2 a 4 veces semana<br><input type="radio"/> 5 a 6 veces semana<br><input checked="" type="radio"/> 1 vez al día<br><input type="radio"/> 2 a 3 veces al día<br><input type="radio"/> 5 a 6 veces al día<br><input type="radio"/> mas 6 veces al día |
| Leche desnatada       | <input checked="" type="radio"/> Nunca o menos 1 vez al mes<br><input type="radio"/> 1 a 3 veces mes<br><input type="radio"/> 1 vez semana<br><input type="radio"/> 2 a 4 veces semana<br><input type="radio"/> 5 a 6 veces semana<br><input type="radio"/> 1 vez al día<br><input type="radio"/> 2 a 3 veces al día<br><input type="radio"/> 5 a 6 veces al día<br><input type="radio"/> más 6 veces al día |
| Leche condensada      | <input checked="" type="radio"/> Nunca o menos 1 vez al mes<br><input type="radio"/> 1 a 3 veces mes<br><input type="radio"/> 1 vez semana<br><input type="radio"/> 2 a 4 veces semana<br><input type="radio"/> 5 a 6 veces semana<br><input type="radio"/> 1 vez al día<br><input type="radio"/> 2 a 3 veces al día<br><input type="radio"/> 5 a 6 veces al día<br><input type="radio"/> más 6 veces al día |
| nata o crema de leche | <input type="radio"/> Nunca o menos 1 vez al mes<br><input checked="" type="radio"/> 1 a 3 veces mes<br><input type="radio"/> 1 vez semana<br><input type="radio"/> 2 a 4 veces semana<br><input type="radio"/> 5 a 6 veces semana<br><input type="radio"/> 1 vez al día<br><input type="radio"/> 2 a 3 veces al día<br><input type="radio"/> 5 a 6 veces al día<br><input type="radio"/> más 6 veces al día |

---

Yogurt Entero

- ☐ Nunca o menos 1 vez al mes  
☐ 1 a 3 veces mes  
☒ 1 vez semana  
☐ 2 a 4 veces semana  
☐ 5 a 6 veces semana  
☐ 1 vez al día  
☐ 2 a 3 veces al día  
☐ 5 a 6 veces al día  
☐ más 6 veces al día

---

Yogurt desnatado

- ☒ Nunca o menos 1 vez al mes  
☐ 1 a 3 veces mes  
☐ 1 vez semana  
☐ 2 a 4 veces semana  
☐ 5 a 6 veces semana  
☐ 1 vez al día  
☐ 2 a 3 veces al día  
☐ 5 a 6 veces al día  
☐ más 6 veces al día

---

100g requesón o queso blando o queso fresco

- ☒ Nunca o menos 1 vez al mes  
☐ 1 a 3 veces mes  
☐ 1 vez semana  
☐ 2 a 4 veces semana  
☐ 5 a 6 veces semana  
☐ 1 vez al día  
☐ 2 a 3 veces al día  
☐ 5 a 6 veces al día  
☐ más 6 veces al día

---

queso curado o semicurado o cremoso

- ☐ Nunca o menos 1 vez al mes  
☒ 1 a 3 veces mes  
☐ 1 vez semana  
☐ 2 a 4 veces semana  
☐ 5 a 6 veces semana  
☐ 1 vez al día  
☐ 2 a 3 veces al día  
☐ 5 a 6 veces al día  
☐ más 6 veces al día

---

natillas flan pudding

- ☒ Nunca o menos 1 vez al mes  
☐ 1 a 3 veces mes  
☐ 1 vez semana  
☐ 2 a 4 veces semana  
☐ 5 a 6 veces semana  
☐ 1 vez al día  
☐ 2 a 3 veces al día  
☐ 5 a 6 veces al día  
☐ más 6 veces al día

---

Helado

- ☐ Nunca o menos 1 vez al mes  
☒ 1 a 3 veces mes  
☐ 1 vez semana  
☐ 2 a 4 veces semana  
☐ 5 a 6 veces semana  
☐ 1 vez al día  
☐ 2 a 3 veces al día  
☐ 5 a 6 veces al día  
☐ más 6 veces al día

|                                      |                                                                                                                                                                                                                                                                                                                                                                                                              |
|--------------------------------------|--------------------------------------------------------------------------------------------------------------------------------------------------------------------------------------------------------------------------------------------------------------------------------------------------------------------------------------------------------------------------------------------------------------|
| huevo                                | <input type="radio"/> Nunca o menos 1 vez al mes<br><input type="radio"/> 1 a 3 veces mes<br><input type="radio"/> 1 vez semana<br><input type="radio"/> 2 a 4 veces semana<br><input type="radio"/> 5 a 6 veces semana<br><input type="radio"/> 1 vez al día<br><input type="radio"/> 2 a 3 veces al día<br><input type="radio"/> 5 a 6 veces al día<br><input type="radio"/> más 6 veces al día            |
| Pollo con piel                       | <input type="radio"/> Nunca o menos 1 vez al mes<br><input type="radio"/> 1 a 3 veces mes<br><input type="radio"/> 1 vez semana<br><input checked="" type="radio"/> 2 a 4 veces semana<br><input type="radio"/> 5 a 6 veces semana<br><input type="radio"/> 1 vez al día<br><input type="radio"/> 2 a 3 veces al día<br><input type="radio"/> 5 a 6 veces al día<br><input type="radio"/> más 6 veces al día |
| pollo sin piel                       | <input type="radio"/> Nunca o menos 1 vez al mes<br><input type="radio"/> 1 a 3 veces mes<br><input type="radio"/> 1 vez semana<br><input checked="" type="radio"/> 2 a 4 veces semana<br><input type="radio"/> 5 a 6 veces semana<br><input type="radio"/> 1 vez al día<br><input type="radio"/> 2 a 3 veces al día<br><input type="radio"/> 5 a 6 veces al día<br><input type="radio"/> más 6 veces al día |
| Ternera o cerdo o cordero            | <input type="radio"/> Nunca o menos 1 vez al mes<br><input checked="" type="radio"/> 1 a 3 veces mes<br><input type="radio"/> 1 vez semana<br><input type="radio"/> 2 a 4 veces semana<br><input type="radio"/> 5 a 6 veces semana<br><input type="radio"/> 1 vez al día<br><input type="radio"/> 2 a 3 veces al día<br><input type="radio"/> 5 a 6 veces al día<br><input type="radio"/> más 6 veces al día |
| carne caza: Conejo o codorniz o pato | <input type="radio"/> Nunca o menos 1 vez al mes<br><input type="radio"/> 1 a 3 veces mes<br><input type="radio"/> 1 vez semana<br><input type="radio"/> 2 a 4 veces semana<br><input checked="" type="radio"/> 5 a 6 veces semana<br><input type="radio"/> 1 vez al día<br><input type="radio"/> 2 a 3 veces al día<br><input type="radio"/> 5 a 6 veces al día<br><input type="radio"/> más 6 veces al día |
| Hígado de ternera o cerdo o pollo    | <input checked="" type="radio"/> Nunca o menos 1 vez al mes<br><input type="radio"/> 1 a 3 veces mes<br><input type="radio"/> 1 vez semana<br><input type="radio"/> 2 a 4 veces semana<br><input type="radio"/> 5 a 6 veces semana<br><input type="radio"/> 1 vez al día<br><input type="radio"/> 2 a 3 veces al día<br><input type="radio"/> 5 a 6 veces al día<br><input type="radio"/> más 6 veces al día |

---

Vísceras

- ☒ Nunca o menos 1 vez al mes  
☐ 1 a 3 veces mes  
☐ 1 vez semana  
☐ 2 a 4 veces semana  
☐ 5 a 6 veces semana  
☐ 1 vez al día  
☐ 2 a 3 veces al día  
☐ 5 a 6 veces al día  
☐ más 6 veces al día

---

Embutido

- ☒ Nunca o menos 1 vez al mes  
☐ 1 a 3 veces mes  
☐ 1 vez semana  
☐ 2 a 4 veces semana  
☐ 5 a 6 veces semana  
☐ 1 vez al día  
☐ 2 a 3 veces al día  
☐ 5 a 6 veces al día  
☐ más 6 veces al día

---

Salchicha o similar

- ☒ Nunca o menos 1 vez al mes  
☐ 1 a 3 veces mes  
☐ 1 vez semana  
☐ 2 a 4 veces semana  
☐ 5 a 6 veces semana  
☐ 1 vez al día  
☐ 2 a 3 veces al día  
☐ 5 a 6 veces al día  
☐ más 6 veces al día

---

Pate o foiegras

- ☐ Nunca o menos 1 vez al mes  
☐ 1 a 3 veces mes  
☒ 1 vez semana  
☐ 2 a 4 veces semana  
☐ 5 a 6 veces semana  
☐ 1 vez al día  
☐ 2 a 3 veces al día  
☐ 5 a 6 veces al día  
☐ más 6 veces al día

---

Hamburguesa

- ☐ Nunca o menos 1 vez al mes  
☒ 1 a 3 veces mes  
☐ 1 vez semana  
☐ 2 a 4 veces semana  
☐ 5 a 6 veces semana  
☐ 1 vez al día  
☐ 2 a 3 veces al día  
☐ 5 a 6 veces al día  
☐ más 6 veces al día

---

tocino o bacon

- ☐ Nunca o menos 1 vez al mes  
☐ 1 a 3 veces mes  
☒ 1 vez semana  
☐ 2 a 4 veces semana  
☐ 5 a 6 veces semana  
☐ 1 vez al día  
☐ 2 a 3 veces al día  
☐ 5 a 6 veces al día  
☐ más 6 veces al día

|                        |                                                                                                                                                                                                                                                                                                                                                                                                              |
|------------------------|--------------------------------------------------------------------------------------------------------------------------------------------------------------------------------------------------------------------------------------------------------------------------------------------------------------------------------------------------------------------------------------------------------------|
| Pescado frito          | <input type="radio"/> Nunca o menos 1 vez al mes<br><input type="radio"/> 1 a 3 veces mes<br><input checked="" type="radio"/> 1 vez semana<br><input type="radio"/> 2 a 4 veces semana<br><input type="radio"/> 5 a 6 veces semana<br><input type="radio"/> 1 vez al día<br><input type="radio"/> 2 a 3 veces al día<br><input type="radio"/> 5 a 6 veces al día<br><input type="radio"/> más 6 veces al día |
| pescado hervido blanco | <input checked="" type="radio"/> Nunca o menos 1 vez al mes<br><input type="radio"/> 1 a 3 veces mes<br><input type="radio"/> 1 vez semana<br><input type="radio"/> 2 a 4 veces semana<br><input type="radio"/> 5 a 6 veces semana<br><input type="radio"/> 1 vez al día<br><input type="radio"/> 2 a 3 veces al día<br><input type="radio"/> 5 a 6 veces al día<br><input type="radio"/> más 6 veces al día |
| pescado hervido azul   | <input checked="" type="radio"/> Nunca o menos 1 vez al mes<br><input type="radio"/> 1 a 3 veces mes<br><input type="radio"/> 1 vez semana<br><input type="radio"/> 2 a 4 veces semana<br><input type="radio"/> 5 a 6 veces semana<br><input type="radio"/> 1 vez al día<br><input type="radio"/> 2 a 3 veces al día<br><input type="radio"/> 5 a 6 veces al día<br><input type="radio"/> más 6 veces al día |
| otros pescado azul     | <input checked="" type="radio"/> Nunca o menos 1 vez al mes<br><input type="radio"/> 1 a 3 veces mes<br><input type="radio"/> 1 vez semana<br><input type="radio"/> 2 a 4 veces semana<br><input type="radio"/> 5 a 6 veces semana<br><input type="radio"/> 1 vez al día<br><input type="radio"/> 2 a 3 veces al día<br><input type="radio"/> 5 a 6 veces al día<br><input type="radio"/> más 6 veces al día |
| atun conserva          | <input type="radio"/> Nunca o menos 1 vez al mes<br><input type="radio"/> 1 a 3 veces mes<br><input checked="" type="radio"/> 1 vez semana<br><input type="radio"/> 2 a 4 veces semana<br><input type="radio"/> 5 a 6 veces semana<br><input type="radio"/> 1 vez al día<br><input type="radio"/> 2 a 3 veces al día<br><input type="radio"/> 5 a 6 veces al día<br><input type="radio"/> más 6 veces al día |
| sardina conserva       | <input type="radio"/> Nunca o menos 1 vez al mes<br><input type="radio"/> 1 a 3 veces mes<br><input checked="" type="radio"/> 1 vez semana<br><input type="radio"/> 2 a 4 veces semana<br><input type="radio"/> 5 a 6 veces semana<br><input type="radio"/> 1 vez al día<br><input type="radio"/> 2 a 3 veces al día<br><input type="radio"/> 5 a 6 veces al día<br><input type="radio"/> más 6 veces al día |



|                                         |                                                                                                                                                                                                                                                                                                                                                                                                              |
|-----------------------------------------|--------------------------------------------------------------------------------------------------------------------------------------------------------------------------------------------------------------------------------------------------------------------------------------------------------------------------------------------------------------------------------------------------------------|
| pescado ahumado                         | <input checked="" type="radio"/> Nunca o menos 1 vez al mes<br><input type="radio"/> 1 a 3 veces mes<br><input type="radio"/> 1 vez semana<br><input type="radio"/> 2 a 4 veces semana<br><input type="radio"/> 5 a 6 veces semana<br><input type="radio"/> 1 vez al día<br><input type="radio"/> 2 a 3 veces al día<br><input type="radio"/> 5 a 6 veces al día<br><input type="radio"/> más 6 veces al día |
| almejas o mejillones o ostras unos 100g | <input checked="" type="radio"/> Nunca o menos 1 vez al mes<br><input type="radio"/> 1 a 3 veces mes<br><input type="radio"/> 1 vez semana<br><input type="radio"/> 2 a 4 veces semana<br><input type="radio"/> 5 a 6 veces semana<br><input type="radio"/> 1 vez al día<br><input type="radio"/> 2 a 3 veces al día<br><input type="radio"/> 5 a 6 veces al día<br><input type="radio"/> más 6 veces al día |
| calamar o chipiron o sepia unos 100g    | <input type="radio"/> Nunca o menos 1 vez al mes<br><input checked="" type="radio"/> 1 a 3 veces mes<br><input type="radio"/> 1 vez semana<br><input type="radio"/> 2 a 4 veces semana<br><input type="radio"/> 5 a 6 veces semana<br><input type="radio"/> 1 vez al día<br><input type="radio"/> 2 a 3 veces al día<br><input type="radio"/> 5 a 6 veces al día<br><input type="radio"/> más 6 veces al día |
| marisco unos 100g                       | <input type="radio"/> Nunca o menos 1 vez al mes<br><input type="radio"/> 1 a 3 veces mes<br><input checked="" type="radio"/> 1 vez semana<br><input type="radio"/> 2 a 4 veces semana<br><input type="radio"/> 5 a 6 veces semana<br><input type="radio"/> 1 vez al día<br><input type="radio"/> 2 a 3 veces al día<br><input type="radio"/> 5 a 6 veces al día<br><input type="radio"/> más 6 veces al día |
| Espinacas o acelgas cocinadas           | <input checked="" type="radio"/> Nunca o menos 1 vez al mes<br><input type="radio"/> 1 a 3 veces mes<br><input type="radio"/> 1 vez semana<br><input type="radio"/> 2 a 4 veces semana<br><input type="radio"/> 5 a 6 veces semana<br><input type="radio"/> 1 vez al día<br><input type="radio"/> 2 a 3 veces al día<br><input type="radio"/> 5 a 6 veces al día<br><input type="radio"/> más 6 veces al día |
| Col o coliflor o brocoli cocinado       | <input checked="" type="radio"/> Nunca o menos 1 vez al mes<br><input type="radio"/> 1 a 3 veces mes<br><input type="radio"/> 1 vez semana<br><input type="radio"/> 2 a 4 veces semana<br><input type="radio"/> 5 a 6 veces semana<br><input type="radio"/> 1 vez al día<br><input type="radio"/> 2 a 3 veces al día<br><input type="radio"/> 5 a 6 veces al día<br><input type="radio"/> más 6 veces al día |

---

|                              |                                                                                                                                                                                                                                                                                                                                                                                                              |
|------------------------------|--------------------------------------------------------------------------------------------------------------------------------------------------------------------------------------------------------------------------------------------------------------------------------------------------------------------------------------------------------------------------------------------------------------|
| Lechuga o endivia o escarola | <input checked="" type="radio"/> Nunca o menos 1 vez al mes<br><input type="radio"/> 1 a 3 veces mes<br><input type="radio"/> 1 vez semana<br><input type="radio"/> 2 a 4 veces semana<br><input type="radio"/> 5 a 6 veces semana<br><input type="radio"/> 1 vez al día<br><input type="radio"/> 2 a 3 veces al día<br><input type="radio"/> 5 a 6 veces al día<br><input type="radio"/> más 6 veces al día |
|------------------------------|--------------------------------------------------------------------------------------------------------------------------------------------------------------------------------------------------------------------------------------------------------------------------------------------------------------------------------------------------------------------------------------------------------------|

---

|                 |                                                                                                                                                                                                                                                                                                                                                                                                              |
|-----------------|--------------------------------------------------------------------------------------------------------------------------------------------------------------------------------------------------------------------------------------------------------------------------------------------------------------------------------------------------------------------------------------------------------------|
| tomate ensalada | <input type="radio"/> Nunca o menos 1 vez al mes<br><input type="radio"/> 1 a 3 veces mes<br><input checked="" type="radio"/> 1 vez semana<br><input type="radio"/> 2 a 4 veces semana<br><input type="radio"/> 5 a 6 veces semana<br><input type="radio"/> 1 vez al día<br><input type="radio"/> 2 a 3 veces al día<br><input type="radio"/> 5 a 6 veces al día<br><input type="radio"/> más 6 veces al día |
|-----------------|--------------------------------------------------------------------------------------------------------------------------------------------------------------------------------------------------------------------------------------------------------------------------------------------------------------------------------------------------------------------------------------------------------------|

---

|         |                                                                                                                                                                                                                                                                                                                                                                                                              |
|---------|--------------------------------------------------------------------------------------------------------------------------------------------------------------------------------------------------------------------------------------------------------------------------------------------------------------------------------------------------------------------------------------------------------------|
| cebolla | <input type="radio"/> Nunca o menos 1 vez al mes<br><input type="radio"/> 1 a 3 veces mes<br><input checked="" type="radio"/> 1 vez semana<br><input type="radio"/> 2 a 4 veces semana<br><input type="radio"/> 5 a 6 veces semana<br><input type="radio"/> 1 vez al día<br><input type="radio"/> 2 a 3 veces al día<br><input type="radio"/> 5 a 6 veces al día<br><input type="radio"/> más 6 veces al día |
|---------|--------------------------------------------------------------------------------------------------------------------------------------------------------------------------------------------------------------------------------------------------------------------------------------------------------------------------------------------------------------------------------------------------------------|

---

|                      |                                                                                                                                                                                                                                                                                                                                                                                                              |
|----------------------|--------------------------------------------------------------------------------------------------------------------------------------------------------------------------------------------------------------------------------------------------------------------------------------------------------------------------------------------------------------------------------------------------------------|
| Zanahoria o calabaza | <input checked="" type="radio"/> Nunca o menos 1 vez al mes<br><input type="radio"/> 1 a 3 veces mes<br><input type="radio"/> 1 vez semana<br><input type="radio"/> 2 a 4 veces semana<br><input type="radio"/> 5 a 6 veces semana<br><input type="radio"/> 1 vez al día<br><input type="radio"/> 2 a 3 veces al día<br><input type="radio"/> 5 a 6 veces al día<br><input type="radio"/> más 6 veces al día |
|----------------------|--------------------------------------------------------------------------------------------------------------------------------------------------------------------------------------------------------------------------------------------------------------------------------------------------------------------------------------------------------------------------------------------------------------|

---

|               |                                                                                                                                                                                                                                                                                                                                                                                                              |
|---------------|--------------------------------------------------------------------------------------------------------------------------------------------------------------------------------------------------------------------------------------------------------------------------------------------------------------------------------------------------------------------------------------------------------------|
| Judías verdes | <input type="radio"/> Nunca o menos 1 vez al mes<br><input type="radio"/> 1 a 3 veces mes<br><input checked="" type="radio"/> 1 vez semana<br><input type="radio"/> 2 a 4 veces semana<br><input type="radio"/> 5 a 6 veces semana<br><input type="radio"/> 1 vez al día<br><input type="radio"/> 2 a 3 veces al día<br><input type="radio"/> 5 a 6 veces al día<br><input type="radio"/> más 6 veces al día |
|---------------|--------------------------------------------------------------------------------------------------------------------------------------------------------------------------------------------------------------------------------------------------------------------------------------------------------------------------------------------------------------------------------------------------------------|

---

|                                |                                                                                                                                                                                                                                                                                                                                                                                                              |
|--------------------------------|--------------------------------------------------------------------------------------------------------------------------------------------------------------------------------------------------------------------------------------------------------------------------------------------------------------------------------------------------------------------------------------------------------------|
| Berenjena o calabacin o pepino | <input checked="" type="radio"/> Nunca o menos 1 vez al mes<br><input type="radio"/> 1 a 3 veces mes<br><input type="radio"/> 1 vez semana<br><input type="radio"/> 2 a 4 veces semana<br><input type="radio"/> 5 a 6 veces semana<br><input type="radio"/> 1 vez al día<br><input type="radio"/> 2 a 3 veces al día<br><input type="radio"/> 5 a 6 veces al día<br><input type="radio"/> más 6 veces al día |
|--------------------------------|--------------------------------------------------------------------------------------------------------------------------------------------------------------------------------------------------------------------------------------------------------------------------------------------------------------------------------------------------------------------------------------------------------------|

---

---

|          |                                                                                                                                                                                                                                                                                                                                                                                                              |
|----------|--------------------------------------------------------------------------------------------------------------------------------------------------------------------------------------------------------------------------------------------------------------------------------------------------------------------------------------------------------------------------------------------------------------|
| pimiento | <input checked="" type="radio"/> Nunca o menos 1 vez al mes<br><input type="radio"/> 1 a 3 veces mes<br><input type="radio"/> 1 vez semana<br><input type="radio"/> 2 a 4 veces semana<br><input type="radio"/> 5 a 6 veces semana<br><input type="radio"/> 1 vez al día<br><input type="radio"/> 2 a 3 veces al día<br><input type="radio"/> 5 a 6 veces al día<br><input type="radio"/> más 6 veces al día |
|----------|--------------------------------------------------------------------------------------------------------------------------------------------------------------------------------------------------------------------------------------------------------------------------------------------------------------------------------------------------------------------------------------------------------------|

---

|           |                                                                                                                                                                                                                                                                                                                                                                                                              |
|-----------|--------------------------------------------------------------------------------------------------------------------------------------------------------------------------------------------------------------------------------------------------------------------------------------------------------------------------------------------------------------------------------------------------------------|
| alcachofa | <input checked="" type="radio"/> Nunca o menos 1 vez al mes<br><input type="radio"/> 1 a 3 veces mes<br><input type="radio"/> 1 vez semana<br><input type="radio"/> 2 a 4 veces semana<br><input type="radio"/> 5 a 6 veces semana<br><input type="radio"/> 1 vez al día<br><input type="radio"/> 2 a 3 veces al día<br><input type="radio"/> 5 a 6 veces al día<br><input type="radio"/> más 6 veces al día |
|-----------|--------------------------------------------------------------------------------------------------------------------------------------------------------------------------------------------------------------------------------------------------------------------------------------------------------------------------------------------------------------------------------------------------------------|

---

|            |                                                                                                                                                                                                                                                                                                                                                                                                              |
|------------|--------------------------------------------------------------------------------------------------------------------------------------------------------------------------------------------------------------------------------------------------------------------------------------------------------------------------------------------------------------------------------------------------------------|
| espárragos | <input checked="" type="radio"/> Nunca o menos 1 vez al mes<br><input type="radio"/> 1 a 3 veces mes<br><input type="radio"/> 1 vez semana<br><input type="radio"/> 2 a 4 veces semana<br><input type="radio"/> 5 a 6 veces semana<br><input type="radio"/> 1 vez al día<br><input type="radio"/> 2 a 3 veces al día<br><input type="radio"/> 5 a 6 veces al día<br><input type="radio"/> más 6 veces al día |
|------------|--------------------------------------------------------------------------------------------------------------------------------------------------------------------------------------------------------------------------------------------------------------------------------------------------------------------------------------------------------------------------------------------------------------|

---

|              |                                                                                                                                                                                                                                                                                                                                                                                                              |
|--------------|--------------------------------------------------------------------------------------------------------------------------------------------------------------------------------------------------------------------------------------------------------------------------------------------------------------------------------------------------------------------------------------------------------------|
| maíz hervido | <input checked="" type="radio"/> Nunca o menos 1 vez al mes<br><input type="radio"/> 1 a 3 veces mes<br><input type="radio"/> 1 vez semana<br><input type="radio"/> 2 a 4 veces semana<br><input type="radio"/> 5 a 6 veces semana<br><input type="radio"/> 1 vez al día<br><input type="radio"/> 2 a 3 veces al día<br><input type="radio"/> 5 a 6 veces al día<br><input type="radio"/> más 6 veces al día |
|--------------|--------------------------------------------------------------------------------------------------------------------------------------------------------------------------------------------------------------------------------------------------------------------------------------------------------------------------------------------------------------------------------------------------------------|

---

|           |                                                                                                                                                                                                                                                                                                                                                                                                              |
|-----------|--------------------------------------------------------------------------------------------------------------------------------------------------------------------------------------------------------------------------------------------------------------------------------------------------------------------------------------------------------------------------------------------------------------|
| legumbres | <input type="radio"/> Nunca o menos 1 vez al mes<br><input type="radio"/> 1 a 3 veces mes<br><input checked="" type="radio"/> 1 vez semana<br><input type="radio"/> 2 a 4 veces semana<br><input type="radio"/> 5 a 6 veces semana<br><input type="radio"/> 1 vez al día<br><input type="radio"/> 2 a 3 veces al día<br><input type="radio"/> 5 a 6 veces al día<br><input type="radio"/> más 6 veces al día |
|-----------|--------------------------------------------------------------------------------------------------------------------------------------------------------------------------------------------------------------------------------------------------------------------------------------------------------------------------------------------------------------------------------------------------------------|

---

|                       |                                                                                                                                                                                                                                                                                                                                                                                                              |
|-----------------------|--------------------------------------------------------------------------------------------------------------------------------------------------------------------------------------------------------------------------------------------------------------------------------------------------------------------------------------------------------------------------------------------------------------|
| naranjas o mandarinas | <input checked="" type="radio"/> Nunca o menos 1 vez al mes<br><input type="radio"/> 1 a 3 veces mes<br><input type="radio"/> 1 vez semana<br><input type="radio"/> 2 a 4 veces semana<br><input type="radio"/> 5 a 6 veces semana<br><input type="radio"/> 1 vez al día<br><input type="radio"/> 2 a 3 veces al día<br><input type="radio"/> 5 a 6 veces al día<br><input type="radio"/> más 6 veces al día |
|-----------------------|--------------------------------------------------------------------------------------------------------------------------------------------------------------------------------------------------------------------------------------------------------------------------------------------------------------------------------------------------------------------------------------------------------------|

---

---

|                    |                                                                                                                                                                                                                                                                                                                                                                                                              |
|--------------------|--------------------------------------------------------------------------------------------------------------------------------------------------------------------------------------------------------------------------------------------------------------------------------------------------------------------------------------------------------------------------------------------------------------|
| zumو natural fruta | <input checked="" type="radio"/> Nunca o menos 1 vez al mes<br><input type="radio"/> 1 a 3 veces mes<br><input type="radio"/> 1 vez semana<br><input type="radio"/> 2 a 4 veces semana<br><input type="radio"/> 5 a 6 veces semana<br><input type="radio"/> 1 vez al día<br><input type="radio"/> 2 a 3 veces al día<br><input type="radio"/> 5 a 6 veces al día<br><input type="radio"/> más 6 veces al día |
|--------------------|--------------------------------------------------------------------------------------------------------------------------------------------------------------------------------------------------------------------------------------------------------------------------------------------------------------------------------------------------------------------------------------------------------------|

---

|         |                                                                                                                                                                                                                                                                                                                                                                                                              |
|---------|--------------------------------------------------------------------------------------------------------------------------------------------------------------------------------------------------------------------------------------------------------------------------------------------------------------------------------------------------------------------------------------------------------------|
| platano | <input type="radio"/> Nunca o menos 1 vez al mes<br><input type="radio"/> 1 a 3 veces mes<br><input checked="" type="radio"/> 1 vez semana<br><input type="radio"/> 2 a 4 veces semana<br><input type="radio"/> 5 a 6 veces semana<br><input type="radio"/> 1 vez al día<br><input type="radio"/> 2 a 3 veces al día<br><input type="radio"/> 5 a 6 veces al día<br><input type="radio"/> más 6 veces al día |
|---------|--------------------------------------------------------------------------------------------------------------------------------------------------------------------------------------------------------------------------------------------------------------------------------------------------------------------------------------------------------------------------------------------------------------|

---

|                |                                                                                                                                                                                                                                                                                                                                                                                                              |
|----------------|--------------------------------------------------------------------------------------------------------------------------------------------------------------------------------------------------------------------------------------------------------------------------------------------------------------------------------------------------------------------------------------------------------------|
| manzana o pera | <input type="radio"/> Nunca o menos 1 vez al mes<br><input type="radio"/> 1 a 3 veces mes<br><input checked="" type="radio"/> 1 vez semana<br><input type="radio"/> 2 a 4 veces semana<br><input type="radio"/> 5 a 6 veces semana<br><input type="radio"/> 1 vez al día<br><input type="radio"/> 2 a 3 veces al día<br><input type="radio"/> 5 a 6 veces al día<br><input type="radio"/> más 6 veces al día |
|----------------|--------------------------------------------------------------------------------------------------------------------------------------------------------------------------------------------------------------------------------------------------------------------------------------------------------------------------------------------------------------------------------------------------------------|

---

|                       |                                                                                                                                                                                                                                                                                                                                                                                                              |
|-----------------------|--------------------------------------------------------------------------------------------------------------------------------------------------------------------------------------------------------------------------------------------------------------------------------------------------------------------------------------------------------------------------------------------------------------|
| melocotón o nectarina | <input type="radio"/> Nunca o menos 1 vez al mes<br><input type="radio"/> 1 a 3 veces mes<br><input type="radio"/> 1 vez semana<br><input checked="" type="radio"/> 2 a 4 veces semana<br><input type="radio"/> 5 a 6 veces semana<br><input type="radio"/> 1 vez al día<br><input type="radio"/> 2 a 3 veces al día<br><input type="radio"/> 5 a 6 veces al día<br><input type="radio"/> más 6 veces al día |
|-----------------------|--------------------------------------------------------------------------------------------------------------------------------------------------------------------------------------------------------------------------------------------------------------------------------------------------------------------------------------------------------------------------------------------------------------|

---

|                |                                                                                                                                                                                                                                                                                                                                                                                                              |
|----------------|--------------------------------------------------------------------------------------------------------------------------------------------------------------------------------------------------------------------------------------------------------------------------------------------------------------------------------------------------------------------------------------------------------------|
| sandia o melon | <input type="radio"/> Nunca o menos 1 vez al mes<br><input type="radio"/> 1 a 3 veces mes<br><input type="radio"/> 1 vez semana<br><input checked="" type="radio"/> 2 a 4 veces semana<br><input type="radio"/> 5 a 6 veces semana<br><input type="radio"/> 1 vez al día<br><input type="radio"/> 2 a 3 veces al día<br><input type="radio"/> 5 a 6 veces al día<br><input type="radio"/> más 6 veces al día |
|----------------|--------------------------------------------------------------------------------------------------------------------------------------------------------------------------------------------------------------------------------------------------------------------------------------------------------------------------------------------------------------------------------------------------------------|

---

|     |                                                                                                                                                                                                                                                                                                                                                                                                              |
|-----|--------------------------------------------------------------------------------------------------------------------------------------------------------------------------------------------------------------------------------------------------------------------------------------------------------------------------------------------------------------------------------------------------------------|
| uva | <input checked="" type="radio"/> Nunca o menos 1 vez al mes<br><input type="radio"/> 1 a 3 veces mes<br><input type="radio"/> 1 vez semana<br><input type="radio"/> 2 a 4 veces semana<br><input type="radio"/> 5 a 6 veces semana<br><input type="radio"/> 1 vez al día<br><input type="radio"/> 2 a 3 veces al día<br><input type="radio"/> 5 a 6 veces al día<br><input type="radio"/> más 6 veces al día |
|-----|--------------------------------------------------------------------------------------------------------------------------------------------------------------------------------------------------------------------------------------------------------------------------------------------------------------------------------------------------------------------------------------------------------------|

---

---

bruna o ciruela

- ☐ Nunca o menos 1 vez al mes  
☒ 1 a 3 veces mes  
☐ 1 vez semana  
☐ 2 a 4 veces semana  
☐ 5 a 6 veces semana  
☐ 1 vez al día  
☐ 2 a 3 veces al día  
☐ 5 a 6 veces al día  
☐ más 6 veces al día

---

kiwi

- ☒ Nunca o menos 1 vez al mes  
☐ 1 a 3 veces mes  
☐ 1 vez semana  
☐ 2 a 4 veces semana  
☐ 5 a 6 veces semana  
☐ 1 vez al día  
☐ 2 a 3 veces al día  
☐ 5 a 6 veces al día  
☐ más 6 veces al día

---

aceituna

- ☐ Nunca o menos 1 vez al mes  
☐ 1 a 3 veces mes  
☐ 1 vez semana  
☒ 2 a 4 veces semana  
☐ 5 a 6 veces semana  
☐ 1 vez al día  
☐ 2 a 3 veces al día  
☐ 5 a 6 veces al día  
☐ más 6 veces al día

---

frutos secos

- ☐ Nunca o menos 1 vez al mes  
☐ 1 a 3 veces mes  
☐ 1 vez semana  
☒ 2 a 4 veces semana  
☐ 5 a 6 veces semana  
☐ 1 vez al día  
☐ 2 a 3 veces al día  
☐ 5 a 6 veces al día  
☐ más 6 veces al día

---

pan blanco

- ☐ Nunca o menos 1 vez al mes  
☐ 1 a 3 veces mes  
☒ 1 vez semana  
☐ 2 a 4 veces semana  
☐ 5 a 6 veces semana  
☐ 1 vez al día  
☐ 2 a 3 veces al día  
☐ 5 a 6 veces al día  
☐ más 6 veces al día

---

pan integral

- ☒ Nunca o menos 1 vez al mes  
☐ 1 a 3 veces mes  
☐ 1 vez semana  
☐ 2 a 4 veces semana  
☐ 5 a 6 veces semana  
☐ 1 vez al día  
☐ 2 a 3 veces al día  
☐ 5 a 6 veces al día  
☐ más 6 veces al día

---

cereales desayuno

- ☐ Nunca o menos 1 vez al mes  
☐ 1 a 3 veces mes  
☐ 1 vez semana  
☒ 2 a 4 veces semana  
☐ 5 a 6 veces semana  
☐ 1 vez al día  
☐ 2 a 3 veces al día  
☐ 5 a 6 veces al día  
☐ más 6 veces al día

---

patatas fritas

- ☐ Nunca o menos 1 vez al mes  
☐ 1 a 3 veces mes  
☐ 1 vez semana  
☒ 2 a 4 veces semana  
☐ 5 a 6 veces semana  
☐ 1 vez al día  
☐ 2 a 3 veces al día  
☐ 5 a 6 veces al día  
☐ más 6 veces al día

---

patatas cocidas o asadas

- ☐ Nunca o menos 1 vez al mes  
☒ 1 a 3 veces mes  
☐ 1 vez semana  
☐ 2 a 4 veces semana  
☐ 5 a 6 veces semana  
☐ 1 vez al día  
☐ 2 a 3 veces al día  
☐ 5 a 6 veces al día  
☐ más 6 veces al día

---

bolsa papas

- ☐ Nunca o menos 1 vez al mes  
☐ 1 a 3 veces mes  
☒ 1 vez semana  
☐ 2 a 4 veces semana  
☐ 5 a 6 veces semana  
☐ 1 vez al día  
☐ 2 a 3 veces al día  
☐ 5 a 6 veces al día  
☐ más 6 veces al día

---

arroz cocinado

- ☐ Nunca o menos 1 vez al mes  
☐ 1 a 3 veces mes  
☒ 1 vez semana  
☐ 2 a 4 veces semana  
☐ 5 a 6 veces semana  
☐ 1 vez al día  
☐ 2 a 3 veces al día  
☐ 5 a 6 veces al día  
☐ más 6 veces al día

---

pasta

- ☐ Nunca o menos 1 vez al mes  
☐ 1 a 3 veces mes  
☒ 1 vez semana  
☐ 2 a 4 veces semana  
☐ 5 a 6 veces semana  
☐ 1 vez al día  
☐ 2 a 3 veces al día  
☐ 5 a 6 veces al día  
☐ más 6 veces al día

|                     |                                                                                                                                                                                                                                                                                                                                                                                                              |
|---------------------|--------------------------------------------------------------------------------------------------------------------------------------------------------------------------------------------------------------------------------------------------------------------------------------------------------------------------------------------------------------------------------------------------------------|
| pizza               | <input type="radio"/> Nunca o menos 1 vez al mes<br><input type="radio"/> 1 a 3 veces mes<br><input checked="" type="radio"/> 1 vez semana<br><input type="radio"/> 2 a 4 veces semana<br><input type="radio"/> 5 a 6 veces semana<br><input type="radio"/> 1 vez al día<br><input type="radio"/> 2 a 3 veces al día<br><input type="radio"/> 5 a 6 veces al día<br><input type="radio"/> más 6 veces al día |
| aceite oliva        | <input checked="" type="radio"/> Nunca o menos 1 vez al mes<br><input type="radio"/> 1 a 3 veces mes<br><input type="radio"/> 1 vez semana<br><input type="radio"/> 2 a 4 veces semana<br><input type="radio"/> 5 a 6 veces semana<br><input type="radio"/> 1 vez al día<br><input type="radio"/> 2 a 3 veces al día<br><input type="radio"/> 5 a 6 veces al día<br><input type="radio"/> más 6 veces al día |
| otros aceites       | <input checked="" type="radio"/> Nunca o menos 1 vez al mes<br><input type="radio"/> 1 a 3 veces mes<br><input type="radio"/> 1 vez semana<br><input type="radio"/> 2 a 4 veces semana<br><input type="radio"/> 5 a 6 veces semana<br><input type="radio"/> 1 vez al día<br><input type="radio"/> 2 a 3 veces al día<br><input type="radio"/> 5 a 6 veces al día<br><input type="radio"/> más 6 veces al día |
| margarina           | <input type="radio"/> Nunca o menos 1 vez al mes<br><input type="radio"/> 1 a 3 veces mes<br><input checked="" type="radio"/> 1 vez semana<br><input type="radio"/> 2 a 4 veces semana<br><input type="radio"/> 5 a 6 veces semana<br><input type="radio"/> 1 vez al día<br><input type="radio"/> 2 a 3 veces al día<br><input type="radio"/> 5 a 6 veces al día<br><input type="radio"/> más 6 veces al día |
| mantequilla         | <input checked="" type="radio"/> Nunca o menos 1 vez al mes<br><input type="radio"/> 1 a 3 veces mes<br><input type="radio"/> 1 vez semana<br><input type="radio"/> 2 a 4 veces semana<br><input type="radio"/> 5 a 6 veces semana<br><input type="radio"/> 1 vez al día<br><input type="radio"/> 2 a 3 veces al día<br><input type="radio"/> 5 a 6 veces al día<br><input type="radio"/> más 6 veces al día |
| galletas tipo maria | <input checked="" type="radio"/> Nunca o menos 1 vez al mes<br><input type="radio"/> 1 a 3 veces mes<br><input type="radio"/> 1 vez semana<br><input type="radio"/> 2 a 4 veces semana<br><input type="radio"/> 5 a 6 veces semana<br><input type="radio"/> 1 vez al día<br><input type="radio"/> 2 a 3 veces al día<br><input type="radio"/> 5 a 6 veces al día<br><input type="radio"/> más 6 veces al día |

---

galletas chocolate

- ☐ Nunca o menos 1 vez al mes  
☐ 1 a 3 veces mes  
☒ 1 vez semana  
☐ 2 a 4 veces semana  
☐ 5 a 6 veces semana  
☐ 1 vez al día  
☐ 2 a 3 veces al día  
☐ 5 a 6 veces al día  
☐ más 6 veces al día

---

bolleria

- ☐ Nunca o menos 1 vez al mes  
☐ 1 a 3 veces mes  
☐ 1 vez semana  
☒ 2 a 4 veces semana  
☐ 5 a 6 veces semana  
☐ 1 vez al día  
☐ 2 a 3 veces al día  
☐ 5 a 6 veces al día  
☐ más 6 veces al día

---

chocolate o bombones

- ☒ Nunca o menos 1 vez al mes  
☐ 1 a 3 veces mes  
☐ 1 vez semana  
☐ 2 a 4 veces semana  
☐ 5 a 6 veces semana  
☐ 1 vez al día  
☐ 2 a 3 veces al día  
☐ 5 a 6 veces al día  
☐ más 6 veces al día

---

chocolate polvo o colacao

- ☐ Nunca o menos 1 vez al mes  
☐ 1 a 3 veces mes  
☐ 1 vez semana  
☐ 2 a 4 veces semana  
☐ 5 a 6 veces semana  
☒ 1 vez al día  
☐ 2 a 3 veces al día  
☐ 5 a 6 veces al día  
☐ más 6 veces al día

---

vino tinto

- ☒ Nunca o menos 1 vez al mes  
☐ 1 a 3 veces mes  
☐ 1 vez semana  
☐ 2 a 4 veces semana  
☐ 5 a 6 veces semana  
☐ 1 vez al día  
☐ 2 a 3 veces al día  
☐ 5 a 6 veces al día  
☐ más 6 veces al día

---

vino blanco

- ☒ Nunca o menos 1 vez al mes  
☐ 1 a 3 veces mes  
☐ 1 vez semana  
☐ 2 a 4 veces semana  
☐ 5 a 6 veces semana  
☐ 1 vez al día  
☐ 2 a 3 veces al día  
☐ 5 a 6 veces al día  
☐ más 6 veces al día



|                       |                                                                                                                                                                                                                                                                                                                                                                                                              |
|-----------------------|--------------------------------------------------------------------------------------------------------------------------------------------------------------------------------------------------------------------------------------------------------------------------------------------------------------------------------------------------------------------------------------------------------------|
| vino seco o vermut    | <input checked="" type="radio"/> Nunca o menos 1 vez al mes<br><input type="radio"/> 1 a 3 veces mes<br><input type="radio"/> 1 vez semana<br><input type="radio"/> 2 a 4 veces semana<br><input type="radio"/> 5 a 6 veces semana<br><input type="radio"/> 1 vez al día<br><input type="radio"/> 2 a 3 veces al día<br><input type="radio"/> 5 a 6 veces al día<br><input type="radio"/> más 6 veces al día |
| cerveza               | <input checked="" type="radio"/> Nunca o menos 1 vez al mes<br><input type="radio"/> 1 a 3 veces mes<br><input type="radio"/> 1 vez semana<br><input type="radio"/> 2 a 4 veces semana<br><input type="radio"/> 5 a 6 veces semana<br><input type="radio"/> 1 vez al día<br><input type="radio"/> 2 a 3 veces al día<br><input type="radio"/> 5 a 6 veces al día<br><input type="radio"/> más 6 veces al día |
| cerveza sin alcohol   | <input checked="" type="radio"/> Nunca o menos 1 vez al mes<br><input type="radio"/> 1 a 3 veces mes<br><input type="radio"/> 1 vez semana<br><input type="radio"/> 2 a 4 veces semana<br><input type="radio"/> 5 a 6 veces semana<br><input type="radio"/> 1 vez al día<br><input type="radio"/> 2 a 3 veces al día<br><input type="radio"/> 5 a 6 veces al día<br><input type="radio"/> más 6 veces al día |
| licores               | <input checked="" type="radio"/> Nunca o menos 1 vez al mes<br><input type="radio"/> 1 a 3 veces mes<br><input type="radio"/> 1 vez semana<br><input type="radio"/> 2 a 4 veces semana<br><input type="radio"/> 5 a 6 veces semana<br><input type="radio"/> 1 vez al día<br><input type="radio"/> 2 a 3 veces al día<br><input type="radio"/> 5 a 6 veces al día<br><input type="radio"/> más 6 veces al día |
| ginebra o ron o vodka | <input checked="" type="radio"/> Nunca o menos 1 vez al mes<br><input type="radio"/> 1 a 3 veces mes<br><input type="radio"/> 1 vez semana<br><input type="radio"/> 2 a 4 veces semana<br><input type="radio"/> 5 a 6 veces semana<br><input type="radio"/> 1 vez al día<br><input type="radio"/> 2 a 3 veces al día<br><input type="radio"/> 5 a 6 veces al día<br><input type="radio"/> más 6 veces al día |
| refresco normal       | <input checked="" type="radio"/> Nunca o menos 1 vez al mes<br><input type="radio"/> 1 a 3 veces mes<br><input type="radio"/> 1 vez semana<br><input type="radio"/> 2 a 4 veces semana<br><input type="radio"/> 5 a 6 veces semana<br><input type="radio"/> 1 vez al día<br><input type="radio"/> 2 a 3 veces al día<br><input type="radio"/> 5 a 6 veces al día<br><input type="radio"/> más 6 veces al día |

|                          |                                                                                                                                                                                                                                                                                                                                                                                                              |
|--------------------------|--------------------------------------------------------------------------------------------------------------------------------------------------------------------------------------------------------------------------------------------------------------------------------------------------------------------------------------------------------------------------------------------------------------|
| refresco sin azúcar      | <input type="radio"/> Nunca o menos 1 vez al mes<br><input type="radio"/> 1 a 3 veces mes<br><input type="radio"/> 1 vez semana<br><input type="radio"/> 2 a 4 veces semana<br><input checked="" type="radio"/> 5 a 6 veces semana<br><input type="radio"/> 1 vez al día<br><input type="radio"/> 2 a 3 veces al día<br><input type="radio"/> 5 a 6 veces al día<br><input type="radio"/> más 6 veces al día |
| Agua del grifo           | <input checked="" type="radio"/> Nunca o menos 1 vez al mes<br><input type="radio"/> 1 a 3 veces mes<br><input type="radio"/> 1 vez semana<br><input type="radio"/> 2 a 4 veces semana<br><input type="radio"/> 5 a 6 veces semana<br><input type="radio"/> 1 vez al día<br><input type="radio"/> 2 a 3 veces al día<br><input type="radio"/> 5 a 6 veces al día<br><input type="radio"/> más 6 veces al día |
| agua embotellada sin gas | <input type="radio"/> Nunca o menos 1 vez al mes<br><input type="radio"/> 1 a 3 veces mes<br><input type="radio"/> 1 vez semana<br><input type="radio"/> 2 a 4 veces semana<br><input type="radio"/> 5 a 6 veces semana<br><input type="radio"/> 1 vez al día<br><input type="radio"/> 2 a 3 veces al día<br><input type="radio"/> 5 a 6 veces al día<br><input checked="" type="radio"/> más 6 veces al día |
| agua embotellada con gas | <input checked="" type="radio"/> Nunca o menos 1 vez al mes<br><input type="radio"/> 1 a 3 veces mes<br><input type="radio"/> 1 vez semana<br><input type="radio"/> 2 a 4 veces semana<br><input type="radio"/> 5 a 6 veces semana<br><input type="radio"/> 1 vez al día<br><input type="radio"/> 2 a 3 veces al día<br><input type="radio"/> 5 a 6 veces al día<br><input type="radio"/> más 6 veces al día |
| zumو frutas embasado     | <input checked="" type="radio"/> Nunca o menos 1 vez al mes<br><input type="radio"/> 1 a 3 veces mes<br><input type="radio"/> 1 vez semana<br><input type="radio"/> 2 a 4 veces semana<br><input type="radio"/> 5 a 6 veces semana<br><input type="radio"/> 1 vez al día<br><input type="radio"/> 2 a 3 veces al día<br><input type="radio"/> 5 a 6 veces al día<br><input type="radio"/> más 6 veces al día |
| cafe                     | <input checked="" type="radio"/> Nunca o menos 1 vez al mes<br><input type="radio"/> 1 a 3 veces mes<br><input type="radio"/> 1 vez semana<br><input type="radio"/> 2 a 4 veces semana<br><input type="radio"/> 5 a 6 veces semana<br><input type="radio"/> 1 vez al día<br><input type="radio"/> 2 a 3 veces al día<br><input type="radio"/> 5 a 6 veces al día<br><input type="radio"/> más 6 veces al día |

---

cafe descafeinado

- ☐ Nunca o menos 1 vez al mes  
☐ 1 a 3 veces mes  
☐ 1 vez semana  
☐ 2 a 4 veces semana  
☐ 5 a 6 veces semana  
☒ 1 vez al día  
☐ 2 a 3 veces al día  
☐ 5 a 6 veces al día  
☐ más 6 veces al día

---

te o infusión

- ☒ Nunca o menos 1 vez al mes  
☐ 1 a 3 veces mes  
☐ 1 vez semana  
☐ 2 a 4 veces semana  
☐ 5 a 6 veces semana  
☐ 1 vez al día  
☐ 2 a 3 veces al día  
☐ 5 a 6 veces al día  
☐ más 6 veces al día

---

sopa o puré verduras

- ☐ Nunca o menos 1 vez al mes  
☒ 1 a 3 veces mes  
☐ 1 vez semana  
☐ 2 a 4 veces semana  
☐ 5 a 6 veces semana  
☐ 1 vez al día  
☐ 2 a 3 veces al día  
☐ 5 a 6 veces al día  
☐ más 6 veces al día

---

croquetas pollo jamón

- ☐ Nunca o menos 1 vez al mes  
☒ 1 a 3 veces mes  
☐ 1 vez semana  
☐ 2 a 4 veces semana  
☐ 5 a 6 veces semana  
☐ 1 vez al día  
☐ 2 a 3 veces al día  
☐ 5 a 6 veces al día  
☐ más 6 veces al día

---

croquetas pescado

- ☒ Nunca o menos 1 vez al mes  
☐ 1 a 3 veces mes  
☐ 1 vez semana  
☐ 2 a 4 veces semana  
☐ 5 a 6 veces semana  
☐ 1 vez al día  
☐ 2 a 3 veces al día  
☐ 5 a 6 veces al día  
☐ más 6 veces al día

---

mayonesa

- ☐ Nunca o menos 1 vez al mes  
☐ 1 a 3 veces mes  
☐ 1 vez semana  
☒ 2 a 4 veces semana  
☐ 5 a 6 veces semana  
☐ 1 vez al día  
☐ 2 a 3 veces al día  
☐ 5 a 6 veces al día  
☐ más 6 veces al día

---

salsa tomate

- ☐ Nunca o menos 1 vez al mes  
☒ 1 a 3 veces mes  
☐ 1 vez semana  
☐ 2 a 4 veces semana  
☐ 5 a 6 veces semana  
☐ 1 vez al día  
☐ 2 a 3 veces al día  
☐ 5 a 6 veces al día  
☐ más 6 veces al día

---

ketchup

- ☐ Nunca o menos 1 vez al mes  
☐ 1 a 3 veces mes  
☒ 1 vez semana  
☐ 2 a 4 veces semana  
☐ 5 a 6 veces semana  
☐ 1 vez al día  
☐ 2 a 3 veces al día  
☐ 5 a 6 veces al día  
☐ más 6 veces al día

---

sal

- ☒ Nunca o menos 1 vez al mes  
☐ 1 a 3 veces mes  
☐ 1 vez semana  
☐ 2 a 4 veces semana  
☐ 5 a 6 veces semana  
☐ 1 vez al día  
☐ 2 a 3 veces al día  
☐ 5 a 6 veces al día  
☐ más 6 veces al día

---

ajo

- ☒ Nunca o menos 1 vez al mes  
☐ 1 a 3 veces mes  
☐ 1 vez semana  
☐ 2 a 4 veces semana  
☐ 5 a 6 veces semana  
☐ 1 vez al día  
☐ 2 a 3 veces al día  
☐ 5 a 6 veces al día  
☐ más 6 veces al día

---

mermelada o miel

- ☐ Nunca o menos 1 vez al mes  
☒ 1 a 3 veces mes  
☐ 1 vez semana  
☐ 2 a 4 veces semana  
☐ 5 a 6 veces semana  
☐ 1 vez al día  
☐ 2 a 3 veces al día  
☐ 5 a 6 veces al día  
☐ más 6 veces al día

---

azúcar

- ☐ Nunca o menos 1 vez al mes  
☒ 1 a 3 veces mes  
☐ 1 vez semana  
☐ 2 a 4 veces semana  
☐ 5 a 6 veces semana  
☐ 1 vez al día  
☐ 2 a 3 veces al día  
☐ 5 a 6 veces al día  
☐ más 6 veces al día

---

Otro alimento

---

suplementos vitamínicos

- ☐ si  
☒ no

suplementos vitamínicos

---

dieta previa

- ☒ si  
☐ no

motivo dieta

- ☐ no dieta  
☒ control peso  
☐ control colesterol  
☐ control diabetes  
☐ problemas estómago  
☐ problemas vesícula o hepáticos  
☐ HTA o cardiopatía  
☐ problemas renales  
☐ alergia alimentaria  
☐ ácido úrico elevado  
☐ vegetariana  
☐ otros

cambio alimentos año previo gestación

- ☒ si  
☐ no

cambio lácteos

- ☐ eliminado  
☐ disminuido  
☒ igual  
☐ aumentado  
☐ no sabe

cambio huevos

- ☐ eliminado  
☐ disminuido  
☒ igual  
☐ aumentado  
☐ no sabe

cambio carne

- ☐ eliminado  
☒ disminuido  
☐ igual  
☐ aumentado  
☐ no sabe

cambio pescado

- ☐ eliminado  
☐ disminuido  
☐ igual  
☒ aumentado  
☐ no sabe

cambio verduras

- ☐ eliminado  
☐ disminuido  
☒ igual  
☐ aumentado  
☐ no sabe

|                            |                                                                                                                                                                                                                        |
|----------------------------|------------------------------------------------------------------------------------------------------------------------------------------------------------------------------------------------------------------------|
| cambio legumbres           | <input type="radio"/> eliminado<br><input type="radio"/> disminuido<br><input checked="" type="radio"/> igual<br><input type="radio"/> aumentado<br><input type="radio"/> no sabe                                      |
| cambio fruta               | <input type="radio"/> eliminado<br><input type="radio"/> disminuido<br><input type="radio"/> igual<br><input checked="" type="radio"/> aumentado<br><input type="radio"/> no sabe                                      |
| cambio pan                 | <input type="radio"/> eliminado<br><input checked="" type="radio"/> disminuido<br><input type="radio"/> igual<br><input type="radio"/> aumentado<br><input type="radio"/> no sabe                                      |
| cambio aceite oliva        | <input type="radio"/> eliminado<br><input checked="" type="radio"/> disminuido<br><input type="radio"/> igual<br><input type="radio"/> aumentado<br><input type="radio"/> no sabe                                      |
| cambio mante o margarina   | <input type="radio"/> eliminado<br><input checked="" type="radio"/> disminuido<br><input type="radio"/> igual<br><input type="radio"/> aumentado<br><input type="radio"/> no sabe                                      |
| cambio azúcar y dulces     | <input type="radio"/> eliminado<br><input checked="" type="radio"/> disminuido<br><input type="radio"/> igual<br><input type="radio"/> aumentado<br><input type="radio"/> no sabe                                      |
| cambio bebidas alcohólicas | <input checked="" type="radio"/> eliminado<br><input type="radio"/> disminuido<br><input type="radio"/> igual<br><input type="radio"/> aumentado<br><input type="radio"/> no sabe                                      |
| frecuencia comidas fritas  | <input type="radio"/> a diario<br><input type="radio"/> 5 a 6 veces semana<br><input checked="" type="radio"/> 2 a 4 veces semana<br><input type="radio"/> 1 vez semana<br><input type="radio"/> menos de 1 vez semana |
| carne                      | <input type="radio"/> no como<br><input type="radio"/> cruda<br><input type="radio"/> poco hecha<br><input checked="" type="radio"/> hecha<br><input type="radio"/> muy hecha                                          |
| grasa visible carne        | <input type="radio"/> quita toda<br><input checked="" type="radio"/> quita mayoría<br><input type="radio"/> quita un poco<br><input type="radio"/> no quita nada                                                       |

|                                |                                                                                                                                                                                                                                                          |
|--------------------------------|----------------------------------------------------------------------------------------------------------------------------------------------------------------------------------------------------------------------------------------------------------|
| cocina carne                   | <input checked="" type="radio"/> a la plancha<br><input type="radio"/> a la parrilla<br><input type="radio"/> asada<br><input type="radio"/> frita<br><input type="radio"/> guisada                                                                      |
| tostado quemado carne          | <input checked="" type="radio"/> nunca<br><input type="radio"/> 1 vez mes<br><input type="radio"/> 2 a 3 veces mes<br><input type="radio"/> 1 vez semana<br><input type="radio"/> 2 a 3 semanas                                                          |
| tostado quemado pescado        | <input checked="" type="radio"/> nunca<br><input type="radio"/> 1 vez mes<br><input type="radio"/> 2 a 3 veces mes<br><input type="radio"/> 1 vez semana<br><input type="radio"/> 2 a 3 semanas                                                          |
| socarrat paella                | <input checked="" type="radio"/> nunca<br><input type="radio"/> 1 vez mes<br><input type="radio"/> 2 a 3 veces mes<br><input type="radio"/> 1 vez semana<br><input type="radio"/> 2 a 3 semanas                                                          |
| grasa o aceite cocinar         | <input type="radio"/> mantequilla<br><input type="radio"/> margarina<br><input type="radio"/> aceite oliva<br><input checked="" type="radio"/> aceite oliva virgen extra<br><input type="radio"/> aceite vegetal<br><input type="radio"/> mezcla aceites |
| grasa aceite aliñar            | <input type="radio"/> mantequilla<br><input type="radio"/> margarina<br><input type="radio"/> aceite oliva<br><input checked="" type="radio"/> aceite oliva virgen extra<br><input type="radio"/> aceite vegetal<br><input type="radio"/> mezcla aceites |
| grasa aceite freir             | <input type="radio"/> mantequilla<br><input type="radio"/> margarina<br><input type="radio"/> aceite oliva<br><input type="radio"/> aceite oliva virgen extra<br><input checked="" type="radio"/> aceite vegetal<br><input type="radio"/> mezcla aceites |
| Ejercicio cuestionario         | <input checked="" type="radio"/> si<br><input type="radio"/> no                                                                                                                                                                                          |
| horas de sueño incluido siesta | [*DATA REMOVED*]                                                                                                                                                                                                                                         |
| minutos siesta                 | [*DATA REMOVED*]                                                                                                                                                                                                                                         |
| horas televisión semana        | [*DATA REMOVED*]                                                                                                                                                                                                                                         |

|                                        |                                                                                                                                                                                                                                                                                                                                                                           |
|----------------------------------------|---------------------------------------------------------------------------------------------------------------------------------------------------------------------------------------------------------------------------------------------------------------------------------------------------------------------------------------------------------------------------|
| actividad trabajo                      | <input checked="" type="radio"/> casi siempre sentado<br><input type="radio"/> sentado 50 por cien<br><input type="radio"/> casi siempre de pie, quieto<br><input type="radio"/> casi siempre levantado caminando y llevando pocas cosas<br><input type="radio"/> casi siempre levantado, caminando y llevado muchas cosas<br><input type="radio"/> trabajo manual pesado |
| tiempo caminar o bici al día           | <input type="radio"/> casi nunca<br><input checked="" type="radio"/> menos 20min día<br><input type="radio"/> 20 a 40 min día<br><input type="radio"/> 40 a 60 min día<br><input type="radio"/> 1h o 1h y media día<br><input type="radio"/> más de 1h y media al día                                                                                                     |
| tiempo tareas casa al día              | <input checked="" type="radio"/> menos de 1h día<br><input type="radio"/> 1 a 2h día<br><input type="radio"/> 3 a 4h día<br><input type="radio"/> 5 a 6h día<br><input type="radio"/> 7 a 8h día<br><input type="radio"/> más de 8h día                                                                                                                                   |
| tiempo libre televisión ordenador leer | <input type="radio"/> menos 1h día<br><input type="radio"/> 1h día<br><input checked="" type="radio"/> 2h día<br><input type="radio"/> 3h día<br><input type="radio"/> 4h día<br><input type="radio"/> 5 a 6h día<br><input type="radio"/> mas 6h día                                                                                                                     |
| tiempo libre ejercicio o deporte       | <input type="radio"/> menos 1h semana<br><input checked="" type="radio"/> 1h semana<br><input type="radio"/> 2h semana<br><input type="radio"/> 3h semana<br><input type="radio"/> 4 a 5h semana<br><input type="radio"/> mas 5h semana                                                                                                                                   |
| como se considera                      | <input type="radio"/> sedentaria<br><input checked="" type="radio"/> poco activa<br><input type="radio"/> moderadamente activa<br><input type="radio"/> bastante activa<br><input type="radio"/> muy activa<br><input type="radio"/> no sabe                                                                                                                              |
| FUR                                    | [*DATA REMOVED*]                                                                                                                                                                                                                                                                                                                                                          |
| Semanas gestación 2T                   | [*DATA REMOVED*]                                                                                                                                                                                                                                                                                                                                                          |
| Días gestación 2T                      | [*DATA REMOVED*]                                                                                                                                                                                                                                                                                                                                                          |
| DBP 2T                                 | [*DATA REMOVED*]                                                                                                                                                                                                                                                                                                                                                          |
| CC 2T                                  | [*DATA REMOVED*]                                                                                                                                                                                                                                                                                                                                                          |
| AC 2T                                  | [*DATA REMOVED*]                                                                                                                                                                                                                                                                                                                                                          |



|                                                   |                                                                                                                                                                                                 |
|---------------------------------------------------|-------------------------------------------------------------------------------------------------------------------------------------------------------------------------------------------------|
| LF 2T                                             | [*DATA REMOVED*]                                                                                                                                                                                |
| PFE 2T (Hadlock)                                  | [*DATA REMOVED*]                                                                                                                                                                                |
| Semanas gestación 3T                              | [*DATA REMOVED*]                                                                                                                                                                                |
| días 3T                                           | [*DATA REMOVED*]                                                                                                                                                                                |
| DBP 3T                                            | [*DATA REMOVED*]                                                                                                                                                                                |
| CC 3T                                             | [*DATA REMOVED*]                                                                                                                                                                                |
| AC 3T                                             | [*DATA REMOVED*]                                                                                                                                                                                |
| LF 3T                                             | [*DATA REMOVED*]                                                                                                                                                                                |
| PFE 3T (Hadlock)                                  | [*DATA REMOVED*]                                                                                                                                                                                |
| Semanas de gestación final                        | [*DATA REMOVED*]                                                                                                                                                                                |
| días gestación final                              | [*DATA REMOVED*]                                                                                                                                                                                |
| Localización placenta                             | <input type="radio"/> anterior<br><input checked="" type="radio"/> lateral derecha<br><input type="radio"/> lateral izquierda<br><input type="radio"/> posterior<br><input type="radio"/> fondo |
| Presentación longitudinal cefálica                | <input type="radio"/> no<br><input checked="" type="radio"/> si                                                                                                                                 |
| Dorso                                             | <input type="radio"/> izquierda anterior<br><input type="radio"/> izquierda posterior<br><input checked="" type="radio"/> derecha anterior<br><input type="radio"/> derecha posterior           |
| diámetro biparietal                               | [*DATA REMOVED*]                                                                                                                                                                                |
| Circunferencia craneal                            | [*DATA REMOVED*]                                                                                                                                                                                |
| Circunferencia abdominal                          | [*DATA REMOVED*]                                                                                                                                                                                |
| Longitud de femur                                 | [*DATA REMOVED*]                                                                                                                                                                                |
| tejido celular subcutáneo a nivel del muslo en mm | [*DATA REMOVED*]                                                                                                                                                                                |
| tejido celular subcutáneo en abdomen en mm        | [*DATA REMOVED*]                                                                                                                                                                                |
| Volumen del muslo en cm3                          | [*DATA REMOVED*]                                                                                                                                                                                |
| Peso fetal estimado según fórmula de Hadlock      | [*DATA REMOVED*]                                                                                                                                                                                |

|                                               |                                                                                                                                                          |
|-----------------------------------------------|----------------------------------------------------------------------------------------------------------------------------------------------------------|
| Percentil                                     | [*DATA REMOVED*]                                                                                                                                         |
| Peso fetal estimado según fórmula de Scioscia | <hr/>                                                                                                                                                    |
| Peso fetal estimado según fórmula de LEE      | <hr/>                                                                                                                                                    |
| Tipo de parto                                 | <input type="radio"/> eutocico<br><input type="radio"/> instrumentado/ventosa<br><input type="radio"/> cesarea                                           |
| fecha de nacimiento                           | [*DATA REMOVED*]                                                                                                                                         |
| Días entre exploración y nacimiento           | [*DATA REMOVED*]                                                                                                                                         |
| Peso RN en g                                  | [*DATA REMOVED*]                                                                                                                                         |
| sexo                                          | <input type="radio"/> mujer<br><input checked="" type="radio"/> hombre                                                                                   |
| Apgar 1 minuto                                | [*DATA REMOVED*]                                                                                                                                         |
| Apgar 5 minutos                               | [*DATA REMOVED*]                                                                                                                                         |
| Apgar 10 minutos                              | <hr/>                                                                                                                                                    |
| antecedente Covid durante gestación           | <input type="radio"/> Yes<br><input checked="" type="radio"/> No                                                                                         |
| Nivel de estudios                             | <input type="radio"/> ninguno<br><input type="radio"/> primarios<br><input checked="" type="radio"/> secundarios<br><input type="radio"/> universitarios |

# Base\_datos\_estimacion\_peso\_fetal

|                                       |                                                                                                                                                                                                                                                                                      |
|---------------------------------------|--------------------------------------------------------------------------------------------------------------------------------------------------------------------------------------------------------------------------------------------------------------------------------------|
| Número de identificación participante | 166                                                                                                                                                                                                                                                                                  |
| CODIGO PARTICIPANTE                   |                                                                                                                                                                                                                                                                                      |
| Edad                                  | [*DATA REMOVED*]                                                                                                                                                                                                                                                                     |
| Gestaciones                           | <input type="radio"/> 1<br><input checked="" type="radio"/> 2<br><input type="radio"/> 3<br><input type="radio"/> mas de 3                                                                                                                                                           |
| partos                                | <input type="radio"/> 0<br><input checked="" type="radio"/> 1<br><input type="radio"/> 2<br><input type="radio"/> 3<br><input type="radio"/> mas de 3                                                                                                                                |
| cesáreas                              | <input checked="" type="radio"/> 0<br><input type="radio"/> 1<br><input type="radio"/> 2<br><input type="radio"/> 3<br><input type="radio"/> mas de 3                                                                                                                                |
| Abortos                               | <input checked="" type="radio"/> 0<br><input type="radio"/> 1<br><input type="radio"/> 2<br><input type="radio"/> 3<br><input type="radio"/> mas de 3                                                                                                                                |
| Tipo de gestacion                     | <input checked="" type="radio"/> espontanea<br><input type="radio"/> IAC inseminación artificial conyuge<br><input type="radio"/> IAD inseminación artificial donante<br><input type="radio"/> FIV Fecundación in Vitro<br><input type="radio"/> Ovodon FIV con donación de ovocitos |
| peso previo a embarazo                | [*DATA REMOVED*]                                                                                                                                                                                                                                                                     |
| Ganancia ponderal embarazo            |                                                                                                                                                                                                                                                                                      |
| Talla madre                           | [*DATA REMOVED*]                                                                                                                                                                                                                                                                     |
| IMC previo embarazo                   | 23.120623596247853                                                                                                                                                                                                                                                                   |
| Patología obstétrica                  | <input checked="" type="radio"/> no<br><input type="radio"/> si                                                                                                                                                                                                                      |
| Diabetes pregestacional               | <input checked="" type="radio"/> no<br><input type="radio"/> si                                                                                                                                                                                                                      |
| Diabetes gestacional                  | <input checked="" type="radio"/> no<br><input type="radio"/> si                                                                                                                                                                                                                      |

|                                            |                                                                                                                                                                                      |
|--------------------------------------------|--------------------------------------------------------------------------------------------------------------------------------------------------------------------------------------|
| Diabetes gestacional con insulina          | <input checked="" type="radio"/> no<br><input type="radio"/> si                                                                                                                      |
| Diabetes gestacional con dieta y ejercicio | <input checked="" type="radio"/> no<br><input type="radio"/> si                                                                                                                      |
| Percentil fetos previos                    | <input type="radio"/> Nada<br><input type="radio"/> percentil menor de 10<br><input checked="" type="radio"/> percentil entre 10 y 90<br><input type="radio"/> percentil mayor de 90 |
| Exfumadora                                 | <input checked="" type="radio"/> Nada<br><input type="radio"/> menos de 5 años<br><input type="radio"/> 5 a 10 años<br><input type="radio"/> mayor o igual a 10 años                 |
| Hábito tabáquico                           | <input checked="" type="radio"/> no<br><input type="radio"/> si                                                                                                                      |
| fumadora                                   | [*DATA REMOVED*]                                                                                                                                                                     |
| Consumo otros tóxicos                      | <input checked="" type="radio"/> no<br><input type="radio"/> si                                                                                                                      |
| Hb 1T                                      | [*DATA REMOVED*]                                                                                                                                                                     |
| Htc 1T                                     | [*DATA REMOVED*]                                                                                                                                                                     |
| Hb 2T                                      | [*DATA REMOVED*]                                                                                                                                                                     |
| HTC 2T                                     | [*DATA REMOVED*]                                                                                                                                                                     |
| Hb 3T                                      | _____                                                                                                                                                                                |
| HTC 3T                                     | _____                                                                                                                                                                                |
| Suplemento FE oral                         | <input type="radio"/> si<br><input type="radio"/> no                                                                                                                                 |
| Suplemento fe iv                           | <input type="radio"/> si<br><input checked="" type="radio"/> no                                                                                                                      |
| Transfusión                                | <input checked="" type="radio"/> no<br><input type="radio"/> si                                                                                                                      |
| Solicitada Vit D                           | <input checked="" type="radio"/> no<br><input type="radio"/> si                                                                                                                      |
| Deficit vit D                              | <input type="radio"/> no<br><input type="radio"/> si                                                                                                                                 |

|                       |                                                                                                                                                                                                                                                                                                                                                                                                              |
|-----------------------|--------------------------------------------------------------------------------------------------------------------------------------------------------------------------------------------------------------------------------------------------------------------------------------------------------------------------------------------------------------------------------------------------------------|
| Suplemento vit D      | <input type="radio"/> si<br><input type="radio"/> no                                                                                                                                                                                                                                                                                                                                                         |
| Dieta, cuestionario   | <input checked="" type="radio"/> si<br><input type="radio"/> no                                                                                                                                                                                                                                                                                                                                              |
| Leche entera          | <input checked="" type="radio"/> Nunca o menos 1 vez al mes<br><input type="radio"/> 1 a 3 veces mes<br><input type="radio"/> 1 vez semana<br><input type="radio"/> 2 a 4 veces semana<br><input type="radio"/> 5 a 6 veces semana<br><input type="radio"/> 1 vez al día<br><input type="radio"/> 2 a 3 veces al día<br><input type="radio"/> 5 a 6 veces al día<br><input type="radio"/> más 6 veces al día |
| Leche semidesnatada   | <input type="radio"/> Nunca o menos 1 vez al mes<br><input type="radio"/> 1 a 3 veces mes<br><input type="radio"/> 1 vez semana<br><input checked="" type="radio"/> 2 a 4 veces semana<br><input type="radio"/> 5 a 6 veces semana<br><input type="radio"/> 1 vez al día<br><input type="radio"/> 2 a 3 veces al día<br><input type="radio"/> 5 a 6 veces al día<br><input type="radio"/> mas 6 veces al día |
| Leche desnatada       | <input checked="" type="radio"/> Nunca o menos 1 vez al mes<br><input type="radio"/> 1 a 3 veces mes<br><input type="radio"/> 1 vez semana<br><input type="radio"/> 2 a 4 veces semana<br><input type="radio"/> 5 a 6 veces semana<br><input type="radio"/> 1 vez al día<br><input type="radio"/> 2 a 3 veces al día<br><input type="radio"/> 5 a 6 veces al día<br><input type="radio"/> más 6 veces al día |
| Leche condensada      | <input checked="" type="radio"/> Nunca o menos 1 vez al mes<br><input type="radio"/> 1 a 3 veces mes<br><input type="radio"/> 1 vez semana<br><input type="radio"/> 2 a 4 veces semana<br><input type="radio"/> 5 a 6 veces semana<br><input type="radio"/> 1 vez al día<br><input type="radio"/> 2 a 3 veces al día<br><input type="radio"/> 5 a 6 veces al día<br><input type="radio"/> más 6 veces al día |
| nata o crema de leche | <input checked="" type="radio"/> Nunca o menos 1 vez al mes<br><input type="radio"/> 1 a 3 veces mes<br><input type="radio"/> 1 vez semana<br><input type="radio"/> 2 a 4 veces semana<br><input type="radio"/> 5 a 6 veces semana<br><input type="radio"/> 1 vez al día<br><input type="radio"/> 2 a 3 veces al día<br><input type="radio"/> 5 a 6 veces al día<br><input type="radio"/> más 6 veces al día |

|                                             |                                                                                                                                                                                                                                                                                                                                                                                                              |
|---------------------------------------------|--------------------------------------------------------------------------------------------------------------------------------------------------------------------------------------------------------------------------------------------------------------------------------------------------------------------------------------------------------------------------------------------------------------|
| Yogurt Entero                               | <input checked="" type="radio"/> Nunca o menos 1 vez al mes<br><input type="radio"/> 1 a 3 veces mes<br><input type="radio"/> 1 vez semana<br><input type="radio"/> 2 a 4 veces semana<br><input type="radio"/> 5 a 6 veces semana<br><input type="radio"/> 1 vez al día<br><input type="radio"/> 2 a 3 veces al día<br><input type="radio"/> 5 a 6 veces al día<br><input type="radio"/> más 6 veces al día |
| Yogurt desnatado                            | <input checked="" type="radio"/> Nunca o menos 1 vez al mes<br><input type="radio"/> 1 a 3 veces mes<br><input type="radio"/> 1 vez semana<br><input type="radio"/> 2 a 4 veces semana<br><input type="radio"/> 5 a 6 veces semana<br><input type="radio"/> 1 vez al día<br><input type="radio"/> 2 a 3 veces al día<br><input type="radio"/> 5 a 6 veces al día<br><input type="radio"/> más 6 veces al día |
| 100g requesón o queso blando o queso fresco | <input checked="" type="radio"/> Nunca o menos 1 vez al mes<br><input type="radio"/> 1 a 3 veces mes<br><input type="radio"/> 1 vez semana<br><input type="radio"/> 2 a 4 veces semana<br><input type="radio"/> 5 a 6 veces semana<br><input type="radio"/> 1 vez al día<br><input type="radio"/> 2 a 3 veces al día<br><input type="radio"/> 5 a 6 veces al día<br><input type="radio"/> más 6 veces al día |
| queso curado o semicurado o cremoso         | <input checked="" type="radio"/> Nunca o menos 1 vez al mes<br><input type="radio"/> 1 a 3 veces mes<br><input type="radio"/> 1 vez semana<br><input type="radio"/> 2 a 4 veces semana<br><input type="radio"/> 5 a 6 veces semana<br><input type="radio"/> 1 vez al día<br><input type="radio"/> 2 a 3 veces al día<br><input type="radio"/> 5 a 6 veces al día<br><input type="radio"/> más 6 veces al día |
| natillas flan pudding                       | <input checked="" type="radio"/> Nunca o menos 1 vez al mes<br><input type="radio"/> 1 a 3 veces mes<br><input type="radio"/> 1 vez semana<br><input type="radio"/> 2 a 4 veces semana<br><input type="radio"/> 5 a 6 veces semana<br><input type="radio"/> 1 vez al día<br><input type="radio"/> 2 a 3 veces al día<br><input type="radio"/> 5 a 6 veces al día<br><input type="radio"/> más 6 veces al día |
| Helado                                      | <input type="radio"/> Nunca o menos 1 vez al mes<br><input checked="" type="radio"/> 1 a 3 veces mes<br><input type="radio"/> 1 vez semana<br><input type="radio"/> 2 a 4 veces semana<br><input type="radio"/> 5 a 6 veces semana<br><input type="radio"/> 1 vez al día<br><input type="radio"/> 2 a 3 veces al día<br><input type="radio"/> 5 a 6 veces al día<br><input type="radio"/> más 6 veces al día |

|                                      |                                                                                                                                                                                                                                                                                                                                                                                                              |
|--------------------------------------|--------------------------------------------------------------------------------------------------------------------------------------------------------------------------------------------------------------------------------------------------------------------------------------------------------------------------------------------------------------------------------------------------------------|
| huevo                                | <input type="radio"/> Nunca o menos 1 vez al mes<br><input type="radio"/> 1 a 3 veces mes<br><input type="radio"/> 1 vez semana<br><input type="radio"/> 2 a 4 veces semana<br><input checked="" type="radio"/> 5 a 6 veces semana<br><input type="radio"/> 1 vez al día<br><input type="radio"/> 2 a 3 veces al día<br><input type="radio"/> 5 a 6 veces al día<br><input type="radio"/> más 6 veces al día |
| Pollo con piel                       | <input type="radio"/> Nunca o menos 1 vez al mes<br><input type="radio"/> 1 a 3 veces mes<br><input type="radio"/> 1 vez semana<br><input checked="" type="radio"/> 2 a 4 veces semana<br><input type="radio"/> 5 a 6 veces semana<br><input type="radio"/> 1 vez al día<br><input type="radio"/> 2 a 3 veces al día<br><input type="radio"/> 5 a 6 veces al día<br><input type="radio"/> más 6 veces al día |
| pollo sin piel                       | <input type="radio"/> Nunca o menos 1 vez al mes<br><input type="radio"/> 1 a 3 veces mes<br><input checked="" type="radio"/> 1 vez semana<br><input type="radio"/> 2 a 4 veces semana<br><input type="radio"/> 5 a 6 veces semana<br><input type="radio"/> 1 vez al día<br><input type="radio"/> 2 a 3 veces al día<br><input type="radio"/> 5 a 6 veces al día<br><input type="radio"/> más 6 veces al día |
| Ternera o cerdo o cordero            | <input type="radio"/> Nunca o menos 1 vez al mes<br><input type="radio"/> 1 a 3 veces mes<br><input checked="" type="radio"/> 1 vez semana<br><input type="radio"/> 2 a 4 veces semana<br><input type="radio"/> 5 a 6 veces semana<br><input type="radio"/> 1 vez al día<br><input type="radio"/> 2 a 3 veces al día<br><input type="radio"/> 5 a 6 veces al día<br><input type="radio"/> más 6 veces al día |
| carne caza: Conejo o codorniz o pato | <input type="radio"/> Nunca o menos 1 vez al mes<br><input type="radio"/> 1 a 3 veces mes<br><input checked="" type="radio"/> 1 vez semana<br><input type="radio"/> 2 a 4 veces semana<br><input type="radio"/> 5 a 6 veces semana<br><input type="radio"/> 1 vez al día<br><input type="radio"/> 2 a 3 veces al día<br><input type="radio"/> 5 a 6 veces al día<br><input type="radio"/> más 6 veces al día |
| Hígado de ternera o cerdo o pollo    | <input type="radio"/> Nunca o menos 1 vez al mes<br><input type="radio"/> 1 a 3 veces mes<br><input checked="" type="radio"/> 1 vez semana<br><input type="radio"/> 2 a 4 veces semana<br><input type="radio"/> 5 a 6 veces semana<br><input type="radio"/> 1 vez al día<br><input type="radio"/> 2 a 3 veces al día<br><input type="radio"/> 5 a 6 veces al día<br><input type="radio"/> más 6 veces al día |

---

Vísceras

- ☒ Nunca o menos 1 vez al mes  
☐ 1 a 3 veces mes  
☐ 1 vez semana  
☐ 2 a 4 veces semana  
☐ 5 a 6 veces semana  
☐ 1 vez al día  
☐ 2 a 3 veces al día  
☐ 5 a 6 veces al día  
☐ más 6 veces al día

---

Embutido

- ☒ Nunca o menos 1 vez al mes  
☐ 1 a 3 veces mes  
☐ 1 vez semana  
☐ 2 a 4 veces semana  
☐ 5 a 6 veces semana  
☐ 1 vez al día  
☐ 2 a 3 veces al día  
☐ 5 a 6 veces al día  
☐ más 6 veces al día

---

Salchicha o similar

- ☐ Nunca o menos 1 vez al mes  
☐ 1 a 3 veces mes  
☒ 1 vez semana  
☐ 2 a 4 veces semana  
☐ 5 a 6 veces semana  
☐ 1 vez al día  
☐ 2 a 3 veces al día  
☐ 5 a 6 veces al día  
☐ más 6 veces al día

---

Pate o foiegras

- ☒ Nunca o menos 1 vez al mes  
☐ 1 a 3 veces mes  
☐ 1 vez semana  
☐ 2 a 4 veces semana  
☐ 5 a 6 veces semana  
☐ 1 vez al día  
☐ 2 a 3 veces al día  
☐ 5 a 6 veces al día  
☐ más 6 veces al día

---

Hamburguesa

- ☐ Nunca o menos 1 vez al mes  
☒ 1 a 3 veces mes  
☐ 1 vez semana  
☐ 2 a 4 veces semana  
☐ 5 a 6 veces semana  
☐ 1 vez al día  
☐ 2 a 3 veces al día  
☐ 5 a 6 veces al día  
☐ más 6 veces al día

---

tocino o bacon

- ☐ Nunca o menos 1 vez al mes  
☐ 1 a 3 veces mes  
☐ 1 vez semana  
☒ 2 a 4 veces semana  
☐ 5 a 6 veces semana  
☐ 1 vez al día  
☐ 2 a 3 veces al día  
☐ 5 a 6 veces al día  
☐ más 6 veces al día



---

Pescado frito

- ☐ Nunca o menos 1 vez al mes  
☐ 1 a 3 veces mes  
☒ 1 vez semana  
☐ 2 a 4 veces semana  
☐ 5 a 6 veces semana  
☐ 1 vez al día  
☐ 2 a 3 veces al día  
☐ 5 a 6 veces al día  
☐ más 6 veces al día

---

pescado hervido blanco

- ☐ Nunca o menos 1 vez al mes  
☐ 1 a 3 veces mes  
☒ 1 vez semana  
☐ 2 a 4 veces semana  
☐ 5 a 6 veces semana  
☐ 1 vez al día  
☐ 2 a 3 veces al día  
☐ 5 a 6 veces al día  
☐ más 6 veces al día

---

pescado hervido azul

- ☐ Nunca o menos 1 vez al mes  
☐ 1 a 3 veces mes  
☒ 1 vez semana  
☐ 2 a 4 veces semana  
☐ 5 a 6 veces semana  
☐ 1 vez al día  
☐ 2 a 3 veces al día  
☐ 5 a 6 veces al día  
☐ más 6 veces al día

---

otros pescado azul

- ☒ Nunca o menos 1 vez al mes  
☐ 1 a 3 veces mes  
☐ 1 vez semana  
☐ 2 a 4 veces semana  
☐ 5 a 6 veces semana  
☐ 1 vez al día  
☐ 2 a 3 veces al día  
☐ 5 a 6 veces al día  
☐ más 6 veces al día

---

atun conserva

- ☐ Nunca o menos 1 vez al mes  
☐ 1 a 3 veces mes  
☒ 1 vez semana  
☐ 2 a 4 veces semana  
☐ 5 a 6 veces semana  
☐ 1 vez al día  
☐ 2 a 3 veces al día  
☐ 5 a 6 veces al día  
☐ más 6 veces al día

---

sardina conserva

- ☐ Nunca o menos 1 vez al mes  
☐ 1 a 3 veces mes  
☒ 1 vez semana  
☐ 2 a 4 veces semana  
☐ 5 a 6 veces semana  
☐ 1 vez al día  
☐ 2 a 3 veces al día  
☐ 5 a 6 veces al día  
☐ más 6 veces al día

|                                         |                                                                                                                                                                                                                                                                                                                                                                                                              |
|-----------------------------------------|--------------------------------------------------------------------------------------------------------------------------------------------------------------------------------------------------------------------------------------------------------------------------------------------------------------------------------------------------------------------------------------------------------------|
| pescado ahumado                         | <input checked="" type="radio"/> Nunca o menos 1 vez al mes<br><input type="radio"/> 1 a 3 veces mes<br><input type="radio"/> 1 vez semana<br><input type="radio"/> 2 a 4 veces semana<br><input type="radio"/> 5 a 6 veces semana<br><input type="radio"/> 1 vez al día<br><input type="radio"/> 2 a 3 veces al día<br><input type="radio"/> 5 a 6 veces al día<br><input type="radio"/> más 6 veces al día |
| almejas o mejillones o ostras unos 100g | <input checked="" type="radio"/> Nunca o menos 1 vez al mes<br><input type="radio"/> 1 a 3 veces mes<br><input type="radio"/> 1 vez semana<br><input type="radio"/> 2 a 4 veces semana<br><input type="radio"/> 5 a 6 veces semana<br><input type="radio"/> 1 vez al día<br><input type="radio"/> 2 a 3 veces al día<br><input type="radio"/> 5 a 6 veces al día<br><input type="radio"/> más 6 veces al día |
| calamar o chipiron o sepia unos 100g    | <input type="radio"/> Nunca o menos 1 vez al mes<br><input checked="" type="radio"/> 1 a 3 veces mes<br><input type="radio"/> 1 vez semana<br><input type="radio"/> 2 a 4 veces semana<br><input type="radio"/> 5 a 6 veces semana<br><input type="radio"/> 1 vez al día<br><input type="radio"/> 2 a 3 veces al día<br><input type="radio"/> 5 a 6 veces al día<br><input type="radio"/> más 6 veces al día |
| marisco unos 100g                       | <input type="radio"/> Nunca o menos 1 vez al mes<br><input checked="" type="radio"/> 1 a 3 veces mes<br><input type="radio"/> 1 vez semana<br><input type="radio"/> 2 a 4 veces semana<br><input type="radio"/> 5 a 6 veces semana<br><input type="radio"/> 1 vez al día<br><input type="radio"/> 2 a 3 veces al día<br><input type="radio"/> 5 a 6 veces al día<br><input type="radio"/> más 6 veces al día |
| Espinacas o acelgas cocinadas           | <input type="radio"/> Nunca o menos 1 vez al mes<br><input type="radio"/> 1 a 3 veces mes<br><input checked="" type="radio"/> 1 vez semana<br><input type="radio"/> 2 a 4 veces semana<br><input type="radio"/> 5 a 6 veces semana<br><input type="radio"/> 1 vez al día<br><input type="radio"/> 2 a 3 veces al día<br><input type="radio"/> 5 a 6 veces al día<br><input type="radio"/> más 6 veces al día |
| Col o coliflor o brocoli cocinado       | <input type="radio"/> Nunca o menos 1 vez al mes<br><input type="radio"/> 1 a 3 veces mes<br><input checked="" type="radio"/> 1 vez semana<br><input type="radio"/> 2 a 4 veces semana<br><input type="radio"/> 5 a 6 veces semana<br><input type="radio"/> 1 vez al día<br><input type="radio"/> 2 a 3 veces al día<br><input type="radio"/> 5 a 6 veces al día<br><input type="radio"/> más 6 veces al día |

---

Lechuga o endivia o escarola

- ☐ Nunca o menos 1 vez al mes  
☐ 1 a 3 veces mes  
☒ 1 vez semana  
☐ 2 a 4 veces semana  
☐ 5 a 6 veces semana  
☐ 1 vez al día  
☐ 2 a 3 veces al día  
☐ 5 a 6 veces al día  
☐ más 6 veces al día

---

tomate ensalada

- ☐ Nunca o menos 1 vez al mes  
☐ 1 a 3 veces mes  
☐ 1 vez semana  
☒ 2 a 4 veces semana  
☐ 5 a 6 veces semana  
☐ 1 vez al día  
☐ 2 a 3 veces al día  
☐ 5 a 6 veces al día  
☐ más 6 veces al día

---

cebolla

- ☐ Nunca o menos 1 vez al mes  
☐ 1 a 3 veces mes  
☐ 1 vez semana  
☐ 2 a 4 veces semana  
☒ 5 a 6 veces semana  
☐ 1 vez al día  
☐ 2 a 3 veces al día  
☐ 5 a 6 veces al día  
☐ más 6 veces al día

---

Zanahoria o calabaza

- ☐ Nunca o menos 1 vez al mes  
☐ 1 a 3 veces mes  
☐ 1 vez semana  
☐ 2 a 4 veces semana  
☒ 5 a 6 veces semana  
☐ 1 vez al día  
☐ 2 a 3 veces al día  
☐ 5 a 6 veces al día  
☐ más 6 veces al día

---

Judías verdes

- ☐ Nunca o menos 1 vez al mes  
☐ 1 a 3 veces mes  
☐ 1 vez semana  
☒ 2 a 4 veces semana  
☐ 5 a 6 veces semana  
☐ 1 vez al día  
☐ 2 a 3 veces al día  
☐ 5 a 6 veces al día  
☐ más 6 veces al día

---

Berenjena o calabacin o pepino

- ☐ Nunca o menos 1 vez al mes  
☐ 1 a 3 veces mes  
☒ 1 vez semana  
☐ 2 a 4 veces semana  
☐ 5 a 6 veces semana  
☐ 1 vez al día  
☐ 2 a 3 veces al día  
☐ 5 a 6 veces al día  
☐ más 6 veces al día

---

|          |                                                                                                                                                                                                                                                                                                                                                                                                              |
|----------|--------------------------------------------------------------------------------------------------------------------------------------------------------------------------------------------------------------------------------------------------------------------------------------------------------------------------------------------------------------------------------------------------------------|
| pimiento | <input type="radio"/> Nunca o menos 1 vez al mes<br><input type="radio"/> 1 a 3 veces mes<br><input checked="" type="radio"/> 1 vez semana<br><input type="radio"/> 2 a 4 veces semana<br><input type="radio"/> 5 a 6 veces semana<br><input type="radio"/> 1 vez al día<br><input type="radio"/> 2 a 3 veces al día<br><input type="radio"/> 5 a 6 veces al día<br><input type="radio"/> más 6 veces al día |
|----------|--------------------------------------------------------------------------------------------------------------------------------------------------------------------------------------------------------------------------------------------------------------------------------------------------------------------------------------------------------------------------------------------------------------|

---

|           |                                                                                                                                                                                                                                                                                                                                                                                                              |
|-----------|--------------------------------------------------------------------------------------------------------------------------------------------------------------------------------------------------------------------------------------------------------------------------------------------------------------------------------------------------------------------------------------------------------------|
| alcachofa | <input type="radio"/> Nunca o menos 1 vez al mes<br><input type="radio"/> 1 a 3 veces mes<br><input type="radio"/> 1 vez semana<br><input checked="" type="radio"/> 2 a 4 veces semana<br><input type="radio"/> 5 a 6 veces semana<br><input type="radio"/> 1 vez al día<br><input type="radio"/> 2 a 3 veces al día<br><input type="radio"/> 5 a 6 veces al día<br><input type="radio"/> más 6 veces al día |
|-----------|--------------------------------------------------------------------------------------------------------------------------------------------------------------------------------------------------------------------------------------------------------------------------------------------------------------------------------------------------------------------------------------------------------------|

---

|            |                                                                                                                                                                                                                                                                                                                                                                                                              |
|------------|--------------------------------------------------------------------------------------------------------------------------------------------------------------------------------------------------------------------------------------------------------------------------------------------------------------------------------------------------------------------------------------------------------------|
| espárragos | <input type="radio"/> Nunca o menos 1 vez al mes<br><input checked="" type="radio"/> 1 a 3 veces mes<br><input type="radio"/> 1 vez semana<br><input type="radio"/> 2 a 4 veces semana<br><input type="radio"/> 5 a 6 veces semana<br><input type="radio"/> 1 vez al día<br><input type="radio"/> 2 a 3 veces al día<br><input type="radio"/> 5 a 6 veces al día<br><input type="radio"/> más 6 veces al día |
|------------|--------------------------------------------------------------------------------------------------------------------------------------------------------------------------------------------------------------------------------------------------------------------------------------------------------------------------------------------------------------------------------------------------------------|

---

|              |                                                                                                                                                                                                                                                                                                                                                                                                              |
|--------------|--------------------------------------------------------------------------------------------------------------------------------------------------------------------------------------------------------------------------------------------------------------------------------------------------------------------------------------------------------------------------------------------------------------|
| maíz hervido | <input type="radio"/> Nunca o menos 1 vez al mes<br><input type="radio"/> 1 a 3 veces mes<br><input checked="" type="radio"/> 1 vez semana<br><input type="radio"/> 2 a 4 veces semana<br><input type="radio"/> 5 a 6 veces semana<br><input type="radio"/> 1 vez al día<br><input type="radio"/> 2 a 3 veces al día<br><input type="radio"/> 5 a 6 veces al día<br><input type="radio"/> más 6 veces al día |
|--------------|--------------------------------------------------------------------------------------------------------------------------------------------------------------------------------------------------------------------------------------------------------------------------------------------------------------------------------------------------------------------------------------------------------------|

---

|           |                                                                                                                                                                                                                                                                                                                                                                                                              |
|-----------|--------------------------------------------------------------------------------------------------------------------------------------------------------------------------------------------------------------------------------------------------------------------------------------------------------------------------------------------------------------------------------------------------------------|
| legumbres | <input type="radio"/> Nunca o menos 1 vez al mes<br><input type="radio"/> 1 a 3 veces mes<br><input type="radio"/> 1 vez semana<br><input checked="" type="radio"/> 2 a 4 veces semana<br><input type="radio"/> 5 a 6 veces semana<br><input type="radio"/> 1 vez al día<br><input type="radio"/> 2 a 3 veces al día<br><input type="radio"/> 5 a 6 veces al día<br><input type="radio"/> más 6 veces al día |
|-----------|--------------------------------------------------------------------------------------------------------------------------------------------------------------------------------------------------------------------------------------------------------------------------------------------------------------------------------------------------------------------------------------------------------------|

---

|                       |                                                                                                                                                                                                                                                                                                                                                                                                              |
|-----------------------|--------------------------------------------------------------------------------------------------------------------------------------------------------------------------------------------------------------------------------------------------------------------------------------------------------------------------------------------------------------------------------------------------------------|
| naranjas o mandarinas | <input type="radio"/> Nunca o menos 1 vez al mes<br><input type="radio"/> 1 a 3 veces mes<br><input checked="" type="radio"/> 1 vez semana<br><input type="radio"/> 2 a 4 veces semana<br><input type="radio"/> 5 a 6 veces semana<br><input type="radio"/> 1 vez al día<br><input type="radio"/> 2 a 3 veces al día<br><input type="radio"/> 5 a 6 veces al día<br><input type="radio"/> más 6 veces al día |
|-----------------------|--------------------------------------------------------------------------------------------------------------------------------------------------------------------------------------------------------------------------------------------------------------------------------------------------------------------------------------------------------------------------------------------------------------|

---

|                       |                                                                                                                                                                                                                                                                                                                                                                                                              |
|-----------------------|--------------------------------------------------------------------------------------------------------------------------------------------------------------------------------------------------------------------------------------------------------------------------------------------------------------------------------------------------------------------------------------------------------------|
| zum natural fruta     | <input checked="" type="radio"/> Nunca o menos 1 vez al mes<br><input type="radio"/> 1 a 3 veces mes<br><input type="radio"/> 1 vez semana<br><input type="radio"/> 2 a 4 veces semana<br><input type="radio"/> 5 a 6 veces semana<br><input type="radio"/> 1 vez al día<br><input type="radio"/> 2 a 3 veces al día<br><input type="radio"/> 5 a 6 veces al día<br><input type="radio"/> más 6 veces al día |
| platano               | <input type="radio"/> Nunca o menos 1 vez al mes<br><input type="radio"/> 1 a 3 veces mes<br><input checked="" type="radio"/> 1 vez semana<br><input type="radio"/> 2 a 4 veces semana<br><input type="radio"/> 5 a 6 veces semana<br><input type="radio"/> 1 vez al día<br><input type="radio"/> 2 a 3 veces al día<br><input type="radio"/> 5 a 6 veces al día<br><input type="radio"/> más 6 veces al día |
| manzana o pera        | <input type="radio"/> Nunca o menos 1 vez al mes<br><input type="radio"/> 1 a 3 veces mes<br><input checked="" type="radio"/> 1 vez semana<br><input type="radio"/> 2 a 4 veces semana<br><input type="radio"/> 5 a 6 veces semana<br><input type="radio"/> 1 vez al día<br><input type="radio"/> 2 a 3 veces al día<br><input type="radio"/> 5 a 6 veces al día<br><input type="radio"/> más 6 veces al día |
| melocotón o nectarina | <input type="radio"/> Nunca o menos 1 vez al mes<br><input checked="" type="radio"/> 1 a 3 veces mes<br><input type="radio"/> 1 vez semana<br><input type="radio"/> 2 a 4 veces semana<br><input type="radio"/> 5 a 6 veces semana<br><input type="radio"/> 1 vez al día<br><input type="radio"/> 2 a 3 veces al día<br><input type="radio"/> 5 a 6 veces al día<br><input type="radio"/> más 6 veces al día |
| sandia o melon        | <input type="radio"/> Nunca o menos 1 vez al mes<br><input type="radio"/> 1 a 3 veces mes<br><input type="radio"/> 1 vez semana<br><input checked="" type="radio"/> 2 a 4 veces semana<br><input type="radio"/> 5 a 6 veces semana<br><input type="radio"/> 1 vez al día<br><input type="radio"/> 2 a 3 veces al día<br><input type="radio"/> 5 a 6 veces al día<br><input type="radio"/> más 6 veces al día |
| uva                   | <input type="radio"/> Nunca o menos 1 vez al mes<br><input type="radio"/> 1 a 3 veces mes<br><input type="radio"/> 1 vez semana<br><input checked="" type="radio"/> 2 a 4 veces semana<br><input type="radio"/> 5 a 6 veces semana<br><input type="radio"/> 1 vez al día<br><input type="radio"/> 2 a 3 veces al día<br><input type="radio"/> 5 a 6 veces al día<br><input type="radio"/> más 6 veces al día |

|                 |                                                                                                                                                                                                                                                                                                                                                                                                              |
|-----------------|--------------------------------------------------------------------------------------------------------------------------------------------------------------------------------------------------------------------------------------------------------------------------------------------------------------------------------------------------------------------------------------------------------------|
| bruna o ciruela | <input checked="" type="radio"/> Nunca o menos 1 vez al mes<br><input type="radio"/> 1 a 3 veces mes<br><input type="radio"/> 1 vez semana<br><input type="radio"/> 2 a 4 veces semana<br><input type="radio"/> 5 a 6 veces semana<br><input type="radio"/> 1 vez al día<br><input type="radio"/> 2 a 3 veces al día<br><input type="radio"/> 5 a 6 veces al día<br><input type="radio"/> más 6 veces al día |
| kiwi            | <input type="radio"/> Nunca o menos 1 vez al mes<br><input type="radio"/> 1 a 3 veces mes<br><input type="radio"/> 1 vez semana<br><input checked="" type="radio"/> 2 a 4 veces semana<br><input type="radio"/> 5 a 6 veces semana<br><input type="radio"/> 1 vez al día<br><input type="radio"/> 2 a 3 veces al día<br><input type="radio"/> 5 a 6 veces al día<br><input type="radio"/> más 6 veces al día |
| aceituna        | <input type="radio"/> Nunca o menos 1 vez al mes<br><input type="radio"/> 1 a 3 veces mes<br><input type="radio"/> 1 vez semana<br><input checked="" type="radio"/> 2 a 4 veces semana<br><input type="radio"/> 5 a 6 veces semana<br><input type="radio"/> 1 vez al día<br><input type="radio"/> 2 a 3 veces al día<br><input type="radio"/> 5 a 6 veces al día<br><input type="radio"/> más 6 veces al día |
| frutos secos    | <input type="radio"/> Nunca o menos 1 vez al mes<br><input checked="" type="radio"/> 1 a 3 veces mes<br><input type="radio"/> 1 vez semana<br><input type="radio"/> 2 a 4 veces semana<br><input type="radio"/> 5 a 6 veces semana<br><input type="radio"/> 1 vez al día<br><input type="radio"/> 2 a 3 veces al día<br><input type="radio"/> 5 a 6 veces al día<br><input type="radio"/> más 6 veces al día |
| pan blanco      | <input type="radio"/> Nunca o menos 1 vez al mes<br><input type="radio"/> 1 a 3 veces mes<br><input checked="" type="radio"/> 1 vez semana<br><input type="radio"/> 2 a 4 veces semana<br><input type="radio"/> 5 a 6 veces semana<br><input type="radio"/> 1 vez al día<br><input type="radio"/> 2 a 3 veces al día<br><input type="radio"/> 5 a 6 veces al día<br><input type="radio"/> más 6 veces al día |
| pan integral    | <input checked="" type="radio"/> Nunca o menos 1 vez al mes<br><input type="radio"/> 1 a 3 veces mes<br><input type="radio"/> 1 vez semana<br><input type="radio"/> 2 a 4 veces semana<br><input type="radio"/> 5 a 6 veces semana<br><input type="radio"/> 1 vez al día<br><input type="radio"/> 2 a 3 veces al día<br><input type="radio"/> 5 a 6 veces al día<br><input type="radio"/> más 6 veces al día |

---

cereales desayuno

- ☐ Nunca o menos 1 vez al mes  
☐ 1 a 3 veces mes  
☐ 1 vez semana  
☒ 2 a 4 veces semana  
☐ 5 a 6 veces semana  
☐ 1 vez al día  
☐ 2 a 3 veces al día  
☐ 5 a 6 veces al día  
☐ más 6 veces al día

---

patatas fritas

- ☐ Nunca o menos 1 vez al mes  
☐ 1 a 3 veces mes  
☐ 1 vez semana  
☒ 2 a 4 veces semana  
☐ 5 a 6 veces semana  
☐ 1 vez al día  
☐ 2 a 3 veces al día  
☐ 5 a 6 veces al día  
☐ más 6 veces al día

---

patatas cocidas o asadas

- ☐ Nunca o menos 1 vez al mes  
☐ 1 a 3 veces mes  
☒ 1 vez semana  
☐ 2 a 4 veces semana  
☐ 5 a 6 veces semana  
☐ 1 vez al día  
☐ 2 a 3 veces al día  
☐ 5 a 6 veces al día  
☐ más 6 veces al día

---

bolsa papas

- ☒ Nunca o menos 1 vez al mes  
☐ 1 a 3 veces mes  
☐ 1 vez semana  
☐ 2 a 4 veces semana  
☐ 5 a 6 veces semana  
☐ 1 vez al día  
☐ 2 a 3 veces al día  
☐ 5 a 6 veces al día  
☐ más 6 veces al día

---

arroz cocinado

- ☐ Nunca o menos 1 vez al mes  
☐ 1 a 3 veces mes  
☐ 1 vez semana  
☒ 2 a 4 veces semana  
☐ 5 a 6 veces semana  
☐ 1 vez al día  
☐ 2 a 3 veces al día  
☐ 5 a 6 veces al día  
☐ más 6 veces al día

---

pasta

- ☐ Nunca o menos 1 vez al mes  
☐ 1 a 3 veces mes  
☐ 1 vez semana  
☒ 2 a 4 veces semana  
☐ 5 a 6 veces semana  
☐ 1 vez al día  
☐ 2 a 3 veces al día  
☐ 5 a 6 veces al día  
☐ más 6 veces al día

|                     |                                                                                                                                                                                                                                                                                                                                                                                                              |
|---------------------|--------------------------------------------------------------------------------------------------------------------------------------------------------------------------------------------------------------------------------------------------------------------------------------------------------------------------------------------------------------------------------------------------------------|
| pizza               | <input type="radio"/> Nunca o menos 1 vez al mes<br><input checked="" type="radio"/> 1 a 3 veces mes<br><input type="radio"/> 1 vez semana<br><input type="radio"/> 2 a 4 veces semana<br><input type="radio"/> 5 a 6 veces semana<br><input type="radio"/> 1 vez al día<br><input type="radio"/> 2 a 3 veces al día<br><input type="radio"/> 5 a 6 veces al día<br><input type="radio"/> más 6 veces al día |
| aceite oliva        | <input type="radio"/> Nunca o menos 1 vez al mes<br><input type="radio"/> 1 a 3 veces mes<br><input type="radio"/> 1 vez semana<br><input type="radio"/> 2 a 4 veces semana<br><input checked="" type="radio"/> 5 a 6 veces semana<br><input type="radio"/> 1 vez al día<br><input type="radio"/> 2 a 3 veces al día<br><input type="radio"/> 5 a 6 veces al día<br><input type="radio"/> más 6 veces al día |
| otros aceites       | <input checked="" type="radio"/> Nunca o menos 1 vez al mes<br><input type="radio"/> 1 a 3 veces mes<br><input type="radio"/> 1 vez semana<br><input type="radio"/> 2 a 4 veces semana<br><input type="radio"/> 5 a 6 veces semana<br><input type="radio"/> 1 vez al día<br><input type="radio"/> 2 a 3 veces al día<br><input type="radio"/> 5 a 6 veces al día<br><input type="radio"/> más 6 veces al día |
| margarina           | <input checked="" type="radio"/> Nunca o menos 1 vez al mes<br><input type="radio"/> 1 a 3 veces mes<br><input type="radio"/> 1 vez semana<br><input type="radio"/> 2 a 4 veces semana<br><input type="radio"/> 5 a 6 veces semana<br><input type="radio"/> 1 vez al día<br><input type="radio"/> 2 a 3 veces al día<br><input type="radio"/> 5 a 6 veces al día<br><input type="radio"/> más 6 veces al día |
| mantequilla         | <input checked="" type="radio"/> Nunca o menos 1 vez al mes<br><input type="radio"/> 1 a 3 veces mes<br><input type="radio"/> 1 vez semana<br><input type="radio"/> 2 a 4 veces semana<br><input type="radio"/> 5 a 6 veces semana<br><input type="radio"/> 1 vez al día<br><input type="radio"/> 2 a 3 veces al día<br><input type="radio"/> 5 a 6 veces al día<br><input type="radio"/> más 6 veces al día |
| galletas tipo maria | <input type="radio"/> Nunca o menos 1 vez al mes<br><input checked="" type="radio"/> 1 a 3 veces mes<br><input type="radio"/> 1 vez semana<br><input type="radio"/> 2 a 4 veces semana<br><input type="radio"/> 5 a 6 veces semana<br><input type="radio"/> 1 vez al día<br><input type="radio"/> 2 a 3 veces al día<br><input type="radio"/> 5 a 6 veces al día<br><input type="radio"/> más 6 veces al día |



---

galletas chocolate

- ☐ Nunca o menos 1 vez al mes  
☐ 1 a 3 veces mes  
☐ 1 vez semana  
☒ 2 a 4 veces semana  
☐ 5 a 6 veces semana  
☐ 1 vez al día  
☐ 2 a 3 veces al día  
☐ 5 a 6 veces al día  
☐ más 6 veces al día

---

bolleria

- ☐ Nunca o menos 1 vez al mes  
☐ 1 a 3 veces mes  
☐ 1 vez semana  
☒ 2 a 4 veces semana  
☐ 5 a 6 veces semana  
☐ 1 vez al día  
☐ 2 a 3 veces al día  
☐ 5 a 6 veces al día  
☐ más 6 veces al día

---

chocolate o bombones

- ☐ Nunca o menos 1 vez al mes  
☐ 1 a 3 veces mes  
☐ 1 vez semana  
☐ 2 a 4 veces semana  
☒ 5 a 6 veces semana  
☐ 1 vez al día  
☐ 2 a 3 veces al día  
☐ 5 a 6 veces al día  
☐ más 6 veces al día

---

chocolate polvo o colacao

- ☐ Nunca o menos 1 vez al mes  
☐ 1 a 3 veces mes  
☐ 1 vez semana  
☒ 2 a 4 veces semana  
☐ 5 a 6 veces semana  
☐ 1 vez al día  
☐ 2 a 3 veces al día  
☐ 5 a 6 veces al día  
☐ más 6 veces al día

---

vino tinto

- ☒ Nunca o menos 1 vez al mes  
☐ 1 a 3 veces mes  
☐ 1 vez semana  
☐ 2 a 4 veces semana  
☐ 5 a 6 veces semana  
☐ 1 vez al día  
☐ 2 a 3 veces al día  
☐ 5 a 6 veces al día  
☐ más 6 veces al día

---

vino blanco

- ☒ Nunca o menos 1 vez al mes  
☐ 1 a 3 veces mes  
☐ 1 vez semana  
☐ 2 a 4 veces semana  
☐ 5 a 6 veces semana  
☐ 1 vez al día  
☐ 2 a 3 veces al día  
☐ 5 a 6 veces al día  
☐ más 6 veces al día

|                       |                                                                                                                                                                                                                                                                                                                                                                                                              |
|-----------------------|--------------------------------------------------------------------------------------------------------------------------------------------------------------------------------------------------------------------------------------------------------------------------------------------------------------------------------------------------------------------------------------------------------------|
| vino seco o vermut    | <input checked="" type="radio"/> Nunca o menos 1 vez al mes<br><input type="radio"/> 1 a 3 veces mes<br><input type="radio"/> 1 vez semana<br><input type="radio"/> 2 a 4 veces semana<br><input type="radio"/> 5 a 6 veces semana<br><input type="radio"/> 1 vez al día<br><input type="radio"/> 2 a 3 veces al día<br><input type="radio"/> 5 a 6 veces al día<br><input type="radio"/> más 6 veces al día |
| cerveza               | <input checked="" type="radio"/> Nunca o menos 1 vez al mes<br><input type="radio"/> 1 a 3 veces mes<br><input type="radio"/> 1 vez semana<br><input type="radio"/> 2 a 4 veces semana<br><input type="radio"/> 5 a 6 veces semana<br><input type="radio"/> 1 vez al día<br><input type="radio"/> 2 a 3 veces al día<br><input type="radio"/> 5 a 6 veces al día<br><input type="radio"/> más 6 veces al día |
| cerveza sin alcohol   | <input type="radio"/> Nunca o menos 1 vez al mes<br><input checked="" type="radio"/> 1 a 3 veces mes<br><input type="radio"/> 1 vez semana<br><input type="radio"/> 2 a 4 veces semana<br><input type="radio"/> 5 a 6 veces semana<br><input type="radio"/> 1 vez al día<br><input type="radio"/> 2 a 3 veces al día<br><input type="radio"/> 5 a 6 veces al día<br><input type="radio"/> más 6 veces al día |
| licores               | <input checked="" type="radio"/> Nunca o menos 1 vez al mes<br><input type="radio"/> 1 a 3 veces mes<br><input type="radio"/> 1 vez semana<br><input type="radio"/> 2 a 4 veces semana<br><input type="radio"/> 5 a 6 veces semana<br><input type="radio"/> 1 vez al día<br><input type="radio"/> 2 a 3 veces al día<br><input type="radio"/> 5 a 6 veces al día<br><input type="radio"/> más 6 veces al día |
| ginebra o ron o vodka | <input checked="" type="radio"/> Nunca o menos 1 vez al mes<br><input type="radio"/> 1 a 3 veces mes<br><input type="radio"/> 1 vez semana<br><input type="radio"/> 2 a 4 veces semana<br><input type="radio"/> 5 a 6 veces semana<br><input type="radio"/> 1 vez al día<br><input type="radio"/> 2 a 3 veces al día<br><input type="radio"/> 5 a 6 veces al día<br><input type="radio"/> más 6 veces al día |
| refresco normal       | <input type="radio"/> Nunca o menos 1 vez al mes<br><input type="radio"/> 1 a 3 veces mes<br><input checked="" type="radio"/> 1 vez semana<br><input type="radio"/> 2 a 4 veces semana<br><input type="radio"/> 5 a 6 veces semana<br><input type="radio"/> 1 vez al día<br><input type="radio"/> 2 a 3 veces al día<br><input type="radio"/> 5 a 6 veces al día<br><input type="radio"/> más 6 veces al día |

|                          |                                                                                                                                                                                                                                                                                                                                                                                                              |
|--------------------------|--------------------------------------------------------------------------------------------------------------------------------------------------------------------------------------------------------------------------------------------------------------------------------------------------------------------------------------------------------------------------------------------------------------|
| refresco sin azúcar      | <input type="radio"/> Nunca o menos 1 vez al mes<br><input type="radio"/> 1 a 3 veces mes<br><input type="radio"/> 1 vez semana<br><input checked="" type="radio"/> 2 a 4 veces semana<br><input type="radio"/> 5 a 6 veces semana<br><input type="radio"/> 1 vez al día<br><input type="radio"/> 2 a 3 veces al día<br><input type="radio"/> 5 a 6 veces al día<br><input type="radio"/> más 6 veces al día |
| Agua del grifo           | <input checked="" type="radio"/> Nunca o menos 1 vez al mes<br><input type="radio"/> 1 a 3 veces mes<br><input type="radio"/> 1 vez semana<br><input type="radio"/> 2 a 4 veces semana<br><input type="radio"/> 5 a 6 veces semana<br><input type="radio"/> 1 vez al día<br><input type="radio"/> 2 a 3 veces al día<br><input type="radio"/> 5 a 6 veces al día<br><input type="radio"/> más 6 veces al día |
| agua embotellada sin gas | <input type="radio"/> Nunca o menos 1 vez al mes<br><input type="radio"/> 1 a 3 veces mes<br><input type="radio"/> 1 vez semana<br><input type="radio"/> 2 a 4 veces semana<br><input type="radio"/> 5 a 6 veces semana<br><input type="radio"/> 1 vez al día<br><input type="radio"/> 2 a 3 veces al día<br><input checked="" type="radio"/> 5 a 6 veces al día<br><input type="radio"/> más 6 veces al día |
| agua embotellada con gas | <input checked="" type="radio"/> Nunca o menos 1 vez al mes<br><input type="radio"/> 1 a 3 veces mes<br><input type="radio"/> 1 vez semana<br><input type="radio"/> 2 a 4 veces semana<br><input type="radio"/> 5 a 6 veces semana<br><input type="radio"/> 1 vez al día<br><input type="radio"/> 2 a 3 veces al día<br><input type="radio"/> 5 a 6 veces al día<br><input type="radio"/> más 6 veces al día |
| zumو frutas embasado     | <input checked="" type="radio"/> Nunca o menos 1 vez al mes<br><input type="radio"/> 1 a 3 veces mes<br><input type="radio"/> 1 vez semana<br><input type="radio"/> 2 a 4 veces semana<br><input type="radio"/> 5 a 6 veces semana<br><input type="radio"/> 1 vez al día<br><input type="radio"/> 2 a 3 veces al día<br><input type="radio"/> 5 a 6 veces al día<br><input type="radio"/> más 6 veces al día |
| cafe                     | <input type="radio"/> Nunca o menos 1 vez al mes<br><input type="radio"/> 1 a 3 veces mes<br><input type="radio"/> 1 vez semana<br><input type="radio"/> 2 a 4 veces semana<br><input type="radio"/> 5 a 6 veces semana<br><input checked="" type="radio"/> 1 vez al día<br><input type="radio"/> 2 a 3 veces al día<br><input type="radio"/> 5 a 6 veces al día<br><input type="radio"/> más 6 veces al día |

|                       |                                                                                                                                                                                                                                                                                                                                                                                                              |
|-----------------------|--------------------------------------------------------------------------------------------------------------------------------------------------------------------------------------------------------------------------------------------------------------------------------------------------------------------------------------------------------------------------------------------------------------|
| cafe descafeinado     | <input checked="" type="radio"/> Nunca o menos 1 vez al mes<br><input type="radio"/> 1 a 3 veces mes<br><input type="radio"/> 1 vez semana<br><input type="radio"/> 2 a 4 veces semana<br><input type="radio"/> 5 a 6 veces semana<br><input type="radio"/> 1 vez al día<br><input type="radio"/> 2 a 3 veces al día<br><input type="radio"/> 5 a 6 veces al día<br><input type="radio"/> más 6 veces al día |
| te o infusión         | <input checked="" type="radio"/> Nunca o menos 1 vez al mes<br><input type="radio"/> 1 a 3 veces mes<br><input type="radio"/> 1 vez semana<br><input type="radio"/> 2 a 4 veces semana<br><input type="radio"/> 5 a 6 veces semana<br><input type="radio"/> 1 vez al día<br><input type="radio"/> 2 a 3 veces al día<br><input type="radio"/> 5 a 6 veces al día<br><input type="radio"/> más 6 veces al día |
| sopa o puré verduras  | <input type="radio"/> Nunca o menos 1 vez al mes<br><input type="radio"/> 1 a 3 veces mes<br><input checked="" type="radio"/> 1 vez semana<br><input type="radio"/> 2 a 4 veces semana<br><input type="radio"/> 5 a 6 veces semana<br><input type="radio"/> 1 vez al día<br><input type="radio"/> 2 a 3 veces al día<br><input type="radio"/> 5 a 6 veces al día<br><input type="radio"/> más 6 veces al día |
| croquetas pollo jamón | <input type="radio"/> Nunca o menos 1 vez al mes<br><input checked="" type="radio"/> 1 a 3 veces mes<br><input type="radio"/> 1 vez semana<br><input type="radio"/> 2 a 4 veces semana<br><input type="radio"/> 5 a 6 veces semana<br><input type="radio"/> 1 vez al día<br><input type="radio"/> 2 a 3 veces al día<br><input type="radio"/> 5 a 6 veces al día<br><input type="radio"/> más 6 veces al día |
| croquetas pescado     | <input checked="" type="radio"/> Nunca o menos 1 vez al mes<br><input type="radio"/> 1 a 3 veces mes<br><input type="radio"/> 1 vez semana<br><input type="radio"/> 2 a 4 veces semana<br><input type="radio"/> 5 a 6 veces semana<br><input type="radio"/> 1 vez al día<br><input type="radio"/> 2 a 3 veces al día<br><input type="radio"/> 5 a 6 veces al día<br><input type="radio"/> más 6 veces al día |
| mayonesa              | <input checked="" type="radio"/> Nunca o menos 1 vez al mes<br><input type="radio"/> 1 a 3 veces mes<br><input type="radio"/> 1 vez semana<br><input type="radio"/> 2 a 4 veces semana<br><input type="radio"/> 5 a 6 veces semana<br><input type="radio"/> 1 vez al día<br><input type="radio"/> 2 a 3 veces al día<br><input type="radio"/> 5 a 6 veces al día<br><input type="radio"/> más 6 veces al día |

|                  |                                                                                                                                                                                                                                                                                                                                                                                                              |
|------------------|--------------------------------------------------------------------------------------------------------------------------------------------------------------------------------------------------------------------------------------------------------------------------------------------------------------------------------------------------------------------------------------------------------------|
| salsa tomate     | <input type="radio"/> Nunca o menos 1 vez al mes<br><input type="radio"/> 1 a 3 veces mes<br><input type="radio"/> 1 vez semana<br><input checked="" type="radio"/> 2 a 4 veces semana<br><input type="radio"/> 5 a 6 veces semana<br><input type="radio"/> 1 vez al día<br><input type="radio"/> 2 a 3 veces al día<br><input type="radio"/> 5 a 6 veces al día<br><input type="radio"/> más 6 veces al día |
| ketchup          | <input type="radio"/> Nunca o menos 1 vez al mes<br><input type="radio"/> 1 a 3 veces mes<br><input checked="" type="radio"/> 1 vez semana<br><input type="radio"/> 2 a 4 veces semana<br><input type="radio"/> 5 a 6 veces semana<br><input type="radio"/> 1 vez al día<br><input type="radio"/> 2 a 3 veces al día<br><input type="radio"/> 5 a 6 veces al día<br><input type="radio"/> más 6 veces al día |
| sal              | <input type="radio"/> Nunca o menos 1 vez al mes<br><input checked="" type="radio"/> 1 a 3 veces mes<br><input type="radio"/> 1 vez semana<br><input type="radio"/> 2 a 4 veces semana<br><input type="radio"/> 5 a 6 veces semana<br><input type="radio"/> 1 vez al día<br><input type="radio"/> 2 a 3 veces al día<br><input type="radio"/> 5 a 6 veces al día<br><input type="radio"/> más 6 veces al día |
| ajo              | <input type="radio"/> Nunca o menos 1 vez al mes<br><input type="radio"/> 1 a 3 veces mes<br><input type="radio"/> 1 vez semana<br><input type="radio"/> 2 a 4 veces semana<br><input type="radio"/> 5 a 6 veces semana<br><input checked="" type="radio"/> 1 vez al día<br><input type="radio"/> 2 a 3 veces al día<br><input type="radio"/> 5 a 6 veces al día<br><input type="radio"/> más 6 veces al día |
| mermelada o miel | <input checked="" type="radio"/> Nunca o menos 1 vez al mes<br><input type="radio"/> 1 a 3 veces mes<br><input type="radio"/> 1 vez semana<br><input type="radio"/> 2 a 4 veces semana<br><input type="radio"/> 5 a 6 veces semana<br><input type="radio"/> 1 vez al día<br><input type="radio"/> 2 a 3 veces al día<br><input type="radio"/> 5 a 6 veces al día<br><input type="radio"/> más 6 veces al día |
| azúcar           | <input type="radio"/> Nunca o menos 1 vez al mes<br><input type="radio"/> 1 a 3 veces mes<br><input type="radio"/> 1 vez semana<br><input type="radio"/> 2 a 4 veces semana<br><input type="radio"/> 5 a 6 veces semana<br><input checked="" type="radio"/> 1 vez al día<br><input type="radio"/> 2 a 3 veces al día<br><input type="radio"/> 5 a 6 veces al día<br><input type="radio"/> más 6 veces al día |

---

Otro alimento

---

suplementos vitamínicos

- ☐ si  
☒ no

suplementos vitamínicos

---

dieta previa

- ☐ si  
☒ no

motivo dieta

- ☐ no dieta  
☐ control peso  
☐ control colesterol  
☐ control diabetes  
☐ problemas estómago  
☐ problemas vesícula o hepáticos  
☐ HTA o cardiopatía  
☐ problemas renales  
☐ alergia alimentaria  
☐ ácido úrico elevado  
☐ vegetariana  
☐ otros

cambio alimentos año previo gestación

- ☐ si  
☒ no

cambio lácteos

- ☐ eliminado  
☐ disminuido  
☐ igual  
☐ aumentado  
☐ no sabe

cambio huevos

- ☐ eliminado  
☐ disminuido  
☐ igual  
☐ aumentado  
☐ no sabe

cambio carne

- ☐ eliminado  
☐ disminuido  
☐ igual  
☐ aumentado  
☐ no sabe

cambio pescado

- ☐ eliminado  
☐ disminuido  
☐ igual  
☐ aumentado  
☐ no sabe

cambio verduras

- ☐ eliminado  
☐ disminuido  
☐ igual  
☐ aumentado  
☐ no sabe

|                            |                                                                                                                                                                                                                        |
|----------------------------|------------------------------------------------------------------------------------------------------------------------------------------------------------------------------------------------------------------------|
| cambio legumbres           | <input type="radio"/> eliminado<br><input type="radio"/> disminuido<br><input type="radio"/> igual<br><input type="radio"/> aumentado<br><input type="radio"/> no sabe                                                 |
| cambio fruta               | <input type="radio"/> eliminado<br><input type="radio"/> disminuido<br><input type="radio"/> igual<br><input type="radio"/> aumentado<br><input type="radio"/> no sabe                                                 |
| cambio pan                 | <input type="radio"/> eliminado<br><input type="radio"/> disminuido<br><input type="radio"/> igual<br><input type="radio"/> aumentado<br><input type="radio"/> no sabe                                                 |
| cambio aceite oliva        | <input type="radio"/> eliminado<br><input type="radio"/> disminuido<br><input type="radio"/> igual<br><input type="radio"/> aumentado<br><input type="radio"/> no sabe                                                 |
| cambio mante o margarina   | <input type="radio"/> eliminado<br><input type="radio"/> disminuido<br><input type="radio"/> igual<br><input type="radio"/> aumentado<br><input type="radio"/> no sabe                                                 |
| cambio azúcar y dulces     | <input type="radio"/> eliminado<br><input type="radio"/> disminuido<br><input type="radio"/> igual<br><input type="radio"/> aumentado<br><input type="radio"/> no sabe                                                 |
| cambio bebidas alcohólicas | <input type="radio"/> eliminado<br><input type="radio"/> disminuido<br><input type="radio"/> igual<br><input type="radio"/> aumentado<br><input type="radio"/> no sabe                                                 |
| frecuencia comidas fritas  | <input type="radio"/> a diario<br><input type="radio"/> 5 a 6 veces semana<br><input type="radio"/> 2 a 4 veces semana<br><input checked="" type="radio"/> 1 vez semana<br><input type="radio"/> menos de 1 vez semana |
| carne                      | <input type="radio"/> no como<br><input type="radio"/> cruda<br><input type="radio"/> poco hecha<br><input checked="" type="radio"/> hecha<br><input type="radio"/> muy hecha                                          |
| grasa visible carne        | <input type="radio"/> quita toda<br><input type="radio"/> quita mayoría<br><input checked="" type="radio"/> quita un poco<br><input type="radio"/> no quita nada                                                       |

|                                |                                                                                                                                                                                                                                                          |
|--------------------------------|----------------------------------------------------------------------------------------------------------------------------------------------------------------------------------------------------------------------------------------------------------|
| cocina carne                   | <input checked="" type="radio"/> a la plancha<br><input type="radio"/> a la parrilla<br><input type="radio"/> asada<br><input type="radio"/> frita<br><input type="radio"/> guisada                                                                      |
| tostado quemado carne          | <input type="radio"/> nunca<br><input checked="" type="radio"/> 1 vez mes<br><input type="radio"/> 2 a 3 veces mes<br><input type="radio"/> 1 vez semana<br><input type="radio"/> 2 a 3 semanas                                                          |
| tostado quemado pescado        | <input type="radio"/> nunca<br><input checked="" type="radio"/> 1 vez mes<br><input type="radio"/> 2 a 3 veces mes<br><input type="radio"/> 1 vez semana<br><input type="radio"/> 2 a 3 semanas                                                          |
| socarrat paella                | <input checked="" type="radio"/> nunca<br><input type="radio"/> 1 vez mes<br><input type="radio"/> 2 a 3 veces mes<br><input type="radio"/> 1 vez semana<br><input type="radio"/> 2 a 3 semanas                                                          |
| grasa o aceite cocinar         | <input type="radio"/> mantequilla<br><input type="radio"/> margarina<br><input type="radio"/> aceite oliva<br><input checked="" type="radio"/> aceite oliva virgen extra<br><input type="radio"/> aceite vegetal<br><input type="radio"/> mezcla aceites |
| grasa aceite aliñar            | <input type="radio"/> mantequilla<br><input type="radio"/> margarina<br><input type="radio"/> aceite oliva<br><input checked="" type="radio"/> aceite oliva virgen extra<br><input type="radio"/> aceite vegetal<br><input type="radio"/> mezcla aceites |
| grasa aceite freir             | <input type="radio"/> mantequilla<br><input type="radio"/> margarina<br><input type="radio"/> aceite oliva<br><input checked="" type="radio"/> aceite oliva virgen extra<br><input type="radio"/> aceite vegetal<br><input type="radio"/> mezcla aceites |
| Ejercicio cuestionario         | <input checked="" type="radio"/> si<br><input type="radio"/> no                                                                                                                                                                                          |
| horas de sueño incluido siesta | [*DATA REMOVED*]                                                                                                                                                                                                                                         |
| minutos siesta                 | [*DATA REMOVED*]                                                                                                                                                                                                                                         |
| horas televisión semana        |                                                                                                                                                                                                                                                          |



|                                        |                                                                                                                                                                                                                                                                                                                                                                |
|----------------------------------------|----------------------------------------------------------------------------------------------------------------------------------------------------------------------------------------------------------------------------------------------------------------------------------------------------------------------------------------------------------------|
| actividad trabajo                      | <input type="radio"/> casi siempre sentado<br><input type="radio"/> sentado 50 por cien<br><input type="radio"/> casi siempre de pie, quieto<br><input type="radio"/> casi siempre levantado caminando y llevando pocas cosas<br><input type="radio"/> casi siempre levantado, caminando y llevado muchas cosas<br><input type="radio"/> trabajo manual pesado |
| tiempo caminar o bici al día           | <input type="radio"/> casi nunca<br><input checked="" type="radio"/> menos 20min día<br><input type="radio"/> 20 a 40 min día<br><input type="radio"/> 40 a 60 min día<br><input type="radio"/> 1h o 1h y media día<br><input type="radio"/> más de 1h y media al día                                                                                          |
| tiempo tareas casa al día              | <input type="radio"/> menos de 1h día<br><input checked="" type="radio"/> 1 a 2h día<br><input type="radio"/> 3 a 4h día<br><input type="radio"/> 5 a 6h día<br><input type="radio"/> 7 a 8h día<br><input type="radio"/> más de 8h día                                                                                                                        |
| tiempo libre televisión ordenador leer | <input type="radio"/> menos 1h día<br><input type="radio"/> 1h día<br><input checked="" type="radio"/> 2h día<br><input type="radio"/> 3h día<br><input type="radio"/> 4h día<br><input type="radio"/> 5 a 6h día<br><input type="radio"/> mas 6h día                                                                                                          |
| tiempo libre ejercicio o deporte       | <input type="radio"/> menos 1h semana<br><input type="radio"/> 1h semana<br><input checked="" type="radio"/> 2h semana<br><input type="radio"/> 3h semana<br><input type="radio"/> 4 a 5h semana<br><input type="radio"/> mas 5h semana                                                                                                                        |
| como se considera                      | <input type="radio"/> sedentaria<br><input checked="" type="radio"/> poco activa<br><input type="radio"/> moderadamente activa<br><input type="radio"/> bastante activa<br><input type="radio"/> muy activa<br><input type="radio"/> no sabe                                                                                                                   |
| FUR                                    | [*DATA REMOVED*]                                                                                                                                                                                                                                                                                                                                               |
| Semanas gestación 2T                   | [*DATA REMOVED*]                                                                                                                                                                                                                                                                                                                                               |
| Días gestación 2T                      | [*DATA REMOVED*]                                                                                                                                                                                                                                                                                                                                               |
| DBP 2T                                 | [*DATA REMOVED*]                                                                                                                                                                                                                                                                                                                                               |
| CC 2T                                  | [*DATA REMOVED*]                                                                                                                                                                                                                                                                                                                                               |
| AC 2T                                  | [*DATA REMOVED*]                                                                                                                                                                                                                                                                                                                                               |

|                                                   |                                                                                                                                                                                                 |
|---------------------------------------------------|-------------------------------------------------------------------------------------------------------------------------------------------------------------------------------------------------|
| LF 2T                                             | [*DATA REMOVED*]                                                                                                                                                                                |
| PFE 2T (Hadlock)                                  | [*DATA REMOVED*]                                                                                                                                                                                |
| Semanas gestación 3T                              | [*DATA REMOVED*]                                                                                                                                                                                |
| días 3T                                           | [*DATA REMOVED*]                                                                                                                                                                                |
| DBP 3T                                            | [*DATA REMOVED*]                                                                                                                                                                                |
| CC 3T                                             | [*DATA REMOVED*]                                                                                                                                                                                |
| AC 3T                                             | [*DATA REMOVED*]                                                                                                                                                                                |
| LF 3T                                             | [*DATA REMOVED*]                                                                                                                                                                                |
| PFE 3T (Hadlock)                                  | [*DATA REMOVED*]                                                                                                                                                                                |
| Semanas de gestación final                        | [*DATA REMOVED*]                                                                                                                                                                                |
| días gestación final                              | [*DATA REMOVED*]                                                                                                                                                                                |
| Localización placenta                             | <input checked="" type="radio"/> anterior<br><input type="radio"/> lateral derecha<br><input type="radio"/> lateral izquierda<br><input type="radio"/> posterior<br><input type="radio"/> fondo |
| Presentación longitudinal cefálica                | <input type="radio"/> no<br><input checked="" type="radio"/> si                                                                                                                                 |
| Dorso                                             | <input type="radio"/> izquierda anterior<br><input type="radio"/> izquierda posterior<br><input checked="" type="radio"/> derecha anterior<br><input type="radio"/> derecha posterior           |
| diámetro biparietal                               | [*DATA REMOVED*]                                                                                                                                                                                |
| Circunferencia craneal                            | [*DATA REMOVED*]                                                                                                                                                                                |
| Circunferencia abdominal                          | [*DATA REMOVED*]                                                                                                                                                                                |
| Longitud de femur                                 | [*DATA REMOVED*]                                                                                                                                                                                |
| tejido celular subcutáneo a nivel del muslo en mm | [*DATA REMOVED*]                                                                                                                                                                                |
| tejido celular subcutáneo en abdomen en mm        | [*DATA REMOVED*]                                                                                                                                                                                |
| Volumen del muslo en cm3                          | [*DATA REMOVED*]                                                                                                                                                                                |
| Peso fetal estimado según fórmula de Hadlock      | [*DATA REMOVED*]                                                                                                                                                                                |

|                                               |                                                                                                                                                          |
|-----------------------------------------------|----------------------------------------------------------------------------------------------------------------------------------------------------------|
| Percentil                                     | [*DATA REMOVED*]                                                                                                                                         |
| Peso fetal estimado según fórmula de Scioscia | <hr/>                                                                                                                                                    |
| Peso fetal estimado según fórmula de LEE      | <hr/>                                                                                                                                                    |
| Tipo de parto                                 | <input checked="" type="radio"/> eutocico<br><input type="radio"/> instrumentado/ventosa<br><input type="radio"/> cesarea                                |
| fecha de nacimiento                           | [*DATA REMOVED*]                                                                                                                                         |
| Días entre exploración y nacimiento           | [*DATA REMOVED*]                                                                                                                                         |
| Peso RN en g                                  | [*DATA REMOVED*]                                                                                                                                         |
| sexo                                          | <input type="radio"/> mujer<br><input checked="" type="radio"/> hombre                                                                                   |
| Apgar 1 minuto                                | [*DATA REMOVED*]                                                                                                                                         |
| Apgar 5 minutos                               | [*DATA REMOVED*]                                                                                                                                         |
| Apgar 10 minutos                              | <hr/>                                                                                                                                                    |
| antecedente Covid durante gestación           | <input type="radio"/> Yes<br><input checked="" type="radio"/> No                                                                                         |
| Nivel de estudios                             | <input type="radio"/> ninguno<br><input type="radio"/> primarios<br><input checked="" type="radio"/> secundarios<br><input type="radio"/> universitarios |

# Base\_datos\_estimacion\_peso\_fetal

|                                       |                                                                                                                                                                                                                                                                                      |
|---------------------------------------|--------------------------------------------------------------------------------------------------------------------------------------------------------------------------------------------------------------------------------------------------------------------------------------|
| Número de identificación participante | 167                                                                                                                                                                                                                                                                                  |
| CODIGO PARTICIPANTE                   |                                                                                                                                                                                                                                                                                      |
| Edad                                  | [*DATA REMOVED*]                                                                                                                                                                                                                                                                     |
| Gestaciones                           | <input checked="" type="radio"/> 1<br><input type="radio"/> 2<br><input type="radio"/> 3<br><input type="radio"/> mas de 3                                                                                                                                                           |
| partos                                | <input checked="" type="radio"/> 0<br><input type="radio"/> 1<br><input type="radio"/> 2<br><input type="radio"/> 3<br><input type="radio"/> mas de 3                                                                                                                                |
| cesáreas                              | <input checked="" type="radio"/> 0<br><input type="radio"/> 1<br><input type="radio"/> 2<br><input type="radio"/> 3<br><input type="radio"/> mas de 3                                                                                                                                |
| Abortos                               | <input checked="" type="radio"/> 0<br><input type="radio"/> 1<br><input type="radio"/> 2<br><input type="radio"/> 3<br><input type="radio"/> mas de 3                                                                                                                                |
| Tipo de gestacion                     | <input checked="" type="radio"/> espontanea<br><input type="radio"/> IAC inseminación artificial conyuge<br><input type="radio"/> IAD inseminación artificial donante<br><input type="radio"/> FIV Fecundación in Vitro<br><input type="radio"/> Ovodon FIV con donación de ovocitos |
| peso previo a embarazo                | [*DATA REMOVED*]                                                                                                                                                                                                                                                                     |
| Ganancia ponderal embarazo            |                                                                                                                                                                                                                                                                                      |
| Talla madre                           | [*DATA REMOVED*]                                                                                                                                                                                                                                                                     |
| IMC previo embarazo                   | 21.874999999999996                                                                                                                                                                                                                                                                   |
| Patología obstétrica                  | <input checked="" type="radio"/> no<br><input type="radio"/> si                                                                                                                                                                                                                      |
| Diabetes pregestacional               | <input checked="" type="radio"/> no<br><input type="radio"/> si                                                                                                                                                                                                                      |
| Diabetes gestacional                  | <input checked="" type="radio"/> no<br><input type="radio"/> si                                                                                                                                                                                                                      |

|                                            |                                                                                                                                                                                      |
|--------------------------------------------|--------------------------------------------------------------------------------------------------------------------------------------------------------------------------------------|
| Diabetes gestacional con insulina          | <input checked="" type="radio"/> no<br><input type="radio"/> si                                                                                                                      |
| Diabetes gestacional con dieta y ejercicio | <input checked="" type="radio"/> no<br><input type="radio"/> si                                                                                                                      |
| Percentil fetos previos                    | <input checked="" type="radio"/> Nada<br><input type="radio"/> percentil menor de 10<br><input type="radio"/> percentil entre 10 y 90<br><input type="radio"/> percentil mayor de 90 |
| Exfumadora                                 | <input checked="" type="radio"/> Nada<br><input type="radio"/> menos de 5 años<br><input type="radio"/> 5 a 10 años<br><input type="radio"/> mayor o igual a 10 años                 |
| Hábito tabáquico                           | <input checked="" type="radio"/> no<br><input type="radio"/> si                                                                                                                      |
| fumadora                                   | [*DATA REMOVED*]                                                                                                                                                                     |
| Consumo otros tóxicos                      | <input checked="" type="radio"/> no<br><input type="radio"/> si                                                                                                                      |
| Hb 1T                                      | [*DATA REMOVED*]                                                                                                                                                                     |
| Htc 1T                                     | [*DATA REMOVED*]                                                                                                                                                                     |
| Hb 2T                                      | [*DATA REMOVED*]                                                                                                                                                                     |
| HTC 2T                                     | [*DATA REMOVED*]                                                                                                                                                                     |
| Hb 3T                                      | [*DATA REMOVED*]                                                                                                                                                                     |
| HTC 3T                                     | [*DATA REMOVED*]                                                                                                                                                                     |
| Suplemento FE oral                         | <input checked="" type="radio"/> si<br><input type="radio"/> no                                                                                                                      |
| Suplemento fe iv                           | <input type="radio"/> si<br><input checked="" type="radio"/> no                                                                                                                      |
| Transfusión                                | <input checked="" type="radio"/> no<br><input type="radio"/> si                                                                                                                      |
| Solicitada Vit D                           | <input checked="" type="radio"/> no<br><input type="radio"/> si                                                                                                                      |
| Deficit vit D                              | <input type="radio"/> no<br><input type="radio"/> si                                                                                                                                 |
| Suplemento vit D                           | <input type="radio"/> si<br><input type="radio"/> no                                                                                                                                 |

|                       |                                                                                                                                                                                                                                                                                                                                                                                                              |
|-----------------------|--------------------------------------------------------------------------------------------------------------------------------------------------------------------------------------------------------------------------------------------------------------------------------------------------------------------------------------------------------------------------------------------------------------|
| Dieta, cuestionario   | <input checked="" type="radio"/> si<br><input type="radio"/> no                                                                                                                                                                                                                                                                                                                                              |
| Leche entera          | <input checked="" type="radio"/> Nunca o menos 1 vez al mes<br><input type="radio"/> 1 a 3 veces mes<br><input type="radio"/> 1 vez semana<br><input type="radio"/> 2 a 4 veces semana<br><input type="radio"/> 5 a 6 veces semana<br><input type="radio"/> 1 vez al día<br><input type="radio"/> 2 a 3 veces al día<br><input type="radio"/> 5 a 6 veces al día<br><input type="radio"/> más 6 veces al día |
| Leche semidesnatada   | <input type="radio"/> Nunca o menos 1 vez al mes<br><input type="radio"/> 1 a 3 veces mes<br><input type="radio"/> 1 vez semana<br><input type="radio"/> 2 a 4 veces semana<br><input type="radio"/> 5 a 6 veces semana<br><input type="radio"/> 1 vez al día<br><input checked="" type="radio"/> 2 a 3 veces al día<br><input type="radio"/> 5 a 6 veces al día<br><input type="radio"/> mas 6 veces al día |
| Leche desnatada       | <input type="radio"/> Nunca o menos 1 vez al mes<br><input checked="" type="radio"/> 1 a 3 veces mes<br><input type="radio"/> 1 vez semana<br><input type="radio"/> 2 a 4 veces semana<br><input type="radio"/> 5 a 6 veces semana<br><input type="radio"/> 1 vez al día<br><input type="radio"/> 2 a 3 veces al día<br><input type="radio"/> 5 a 6 veces al día<br><input type="radio"/> más 6 veces al día |
| Leche condensada      | <input type="radio"/> Nunca o menos 1 vez al mes<br><input checked="" type="radio"/> 1 a 3 veces mes<br><input type="radio"/> 1 vez semana<br><input type="radio"/> 2 a 4 veces semana<br><input type="radio"/> 5 a 6 veces semana<br><input type="radio"/> 1 vez al día<br><input type="radio"/> 2 a 3 veces al día<br><input type="radio"/> 5 a 6 veces al día<br><input type="radio"/> más 6 veces al día |
| nata o crema de leche | <input type="radio"/> Nunca o menos 1 vez al mes<br><input type="radio"/> 1 a 3 veces mes<br><input type="radio"/> 1 vez semana<br><input checked="" type="radio"/> 2 a 4 veces semana<br><input type="radio"/> 5 a 6 veces semana<br><input type="radio"/> 1 vez al día<br><input type="radio"/> 2 a 3 veces al día<br><input type="radio"/> 5 a 6 veces al día<br><input type="radio"/> más 6 veces al día |

---

Yogurt Entero

- ☒ Nunca o menos 1 vez al mes  
☐ 1 a 3 veces mes  
☐ 1 vez semana  
☐ 2 a 4 veces semana  
☐ 5 a 6 veces semana  
☐ 1 vez al día  
☐ 2 a 3 veces al día  
☐ 5 a 6 veces al día  
☐ más 6 veces al día

---

Yogurt desnatado

- ☐ Nunca o menos 1 vez al mes  
☒ 1 a 3 veces mes  
☐ 1 vez semana  
☐ 2 a 4 veces semana  
☐ 5 a 6 veces semana  
☐ 1 vez al día  
☐ 2 a 3 veces al día  
☐ 5 a 6 veces al día  
☐ más 6 veces al día

---

100g requesón o queso blando o queso fresco

- ☐ Nunca o menos 1 vez al mes  
☒ 1 a 3 veces mes  
☐ 1 vez semana  
☐ 2 a 4 veces semana  
☐ 5 a 6 veces semana  
☐ 1 vez al día  
☐ 2 a 3 veces al día  
☐ 5 a 6 veces al día  
☐ más 6 veces al día

---

queso curado o semicurado o cremoso

- ☐ Nunca o menos 1 vez al mes  
☒ 1 a 3 veces mes  
☐ 1 vez semana  
☐ 2 a 4 veces semana  
☐ 5 a 6 veces semana  
☐ 1 vez al día  
☐ 2 a 3 veces al día  
☐ 5 a 6 veces al día  
☐ más 6 veces al día

---

natillas flan pudding

- ☐ Nunca o menos 1 vez al mes  
☒ 1 a 3 veces mes  
☐ 1 vez semana  
☐ 2 a 4 veces semana  
☐ 5 a 6 veces semana  
☐ 1 vez al día  
☐ 2 a 3 veces al día  
☐ 5 a 6 veces al día  
☐ más 6 veces al día

---

Helado

- ☐ Nunca o menos 1 vez al mes  
☐ 1 a 3 veces mes  
☐ 1 vez semana  
☒ 2 a 4 veces semana  
☐ 5 a 6 veces semana  
☐ 1 vez al día  
☐ 2 a 3 veces al día  
☐ 5 a 6 veces al día  
☐ más 6 veces al día

|                                      |                                                                                                                                                                                                                                                                                                                                                                                                              |
|--------------------------------------|--------------------------------------------------------------------------------------------------------------------------------------------------------------------------------------------------------------------------------------------------------------------------------------------------------------------------------------------------------------------------------------------------------------|
| huevo                                | <input checked="" type="radio"/> Nunca o menos 1 vez al mes<br><input type="radio"/> 1 a 3 veces mes<br><input type="radio"/> 1 vez semana<br><input type="radio"/> 2 a 4 veces semana<br><input type="radio"/> 5 a 6 veces semana<br><input type="radio"/> 1 vez al día<br><input type="radio"/> 2 a 3 veces al día<br><input type="radio"/> 5 a 6 veces al día<br><input type="radio"/> más 6 veces al día |
| Pollo con piel                       | <input type="radio"/> Nunca o menos 1 vez al mes<br><input type="radio"/> 1 a 3 veces mes<br><input checked="" type="radio"/> 1 vez semana<br><input type="radio"/> 2 a 4 veces semana<br><input type="radio"/> 5 a 6 veces semana<br><input type="radio"/> 1 vez al día<br><input type="radio"/> 2 a 3 veces al día<br><input type="radio"/> 5 a 6 veces al día<br><input type="radio"/> más 6 veces al día |
| pollo sin piel                       | <input type="radio"/> Nunca o menos 1 vez al mes<br><input type="radio"/> 1 a 3 veces mes<br><input checked="" type="radio"/> 1 vez semana<br><input type="radio"/> 2 a 4 veces semana<br><input type="radio"/> 5 a 6 veces semana<br><input type="radio"/> 1 vez al día<br><input type="radio"/> 2 a 3 veces al día<br><input type="radio"/> 5 a 6 veces al día<br><input type="radio"/> más 6 veces al día |
| Ternera o cerdo o cordero            | <input type="radio"/> Nunca o menos 1 vez al mes<br><input checked="" type="radio"/> 1 a 3 veces mes<br><input type="radio"/> 1 vez semana<br><input type="radio"/> 2 a 4 veces semana<br><input type="radio"/> 5 a 6 veces semana<br><input type="radio"/> 1 vez al día<br><input type="radio"/> 2 a 3 veces al día<br><input type="radio"/> 5 a 6 veces al día<br><input type="radio"/> más 6 veces al día |
| carne caza: Conejo o codorniz o pato | <input type="radio"/> Nunca o menos 1 vez al mes<br><input checked="" type="radio"/> 1 a 3 veces mes<br><input type="radio"/> 1 vez semana<br><input type="radio"/> 2 a 4 veces semana<br><input type="radio"/> 5 a 6 veces semana<br><input type="radio"/> 1 vez al día<br><input type="radio"/> 2 a 3 veces al día<br><input type="radio"/> 5 a 6 veces al día<br><input type="radio"/> más 6 veces al día |
| Hígado de ternera o cerdo o pollo    | <input type="radio"/> Nunca o menos 1 vez al mes<br><input checked="" type="radio"/> 1 a 3 veces mes<br><input type="radio"/> 1 vez semana<br><input type="radio"/> 2 a 4 veces semana<br><input type="radio"/> 5 a 6 veces semana<br><input type="radio"/> 1 vez al día<br><input type="radio"/> 2 a 3 veces al día<br><input type="radio"/> 5 a 6 veces al día<br><input type="radio"/> más 6 veces al día |



|                     |                                                                                                                                                                                                                                                                                                                                                                                                              |
|---------------------|--------------------------------------------------------------------------------------------------------------------------------------------------------------------------------------------------------------------------------------------------------------------------------------------------------------------------------------------------------------------------------------------------------------|
| Vísceras            | <input checked="" type="radio"/> Nunca o menos 1 vez al mes<br><input type="radio"/> 1 a 3 veces mes<br><input type="radio"/> 1 vez semana<br><input type="radio"/> 2 a 4 veces semana<br><input type="radio"/> 5 a 6 veces semana<br><input type="radio"/> 1 vez al día<br><input type="radio"/> 2 a 3 veces al día<br><input type="radio"/> 5 a 6 veces al día<br><input type="radio"/> más 6 veces al día |
| Embutido            | <input type="radio"/> Nunca o menos 1 vez al mes<br><input type="radio"/> 1 a 3 veces mes<br><input type="radio"/> 1 vez semana<br><input type="radio"/> 2 a 4 veces semana<br><input type="radio"/> 5 a 6 veces semana<br><input checked="" type="radio"/> 1 vez al día<br><input type="radio"/> 2 a 3 veces al día<br><input type="radio"/> 5 a 6 veces al día<br><input type="radio"/> más 6 veces al día |
| Salchicha o similar | <input type="radio"/> Nunca o menos 1 vez al mes<br><input type="radio"/> 1 a 3 veces mes<br><input type="radio"/> 1 vez semana<br><input type="radio"/> 2 a 4 veces semana<br><input type="radio"/> 5 a 6 veces semana<br><input checked="" type="radio"/> 1 vez al día<br><input type="radio"/> 2 a 3 veces al día<br><input type="radio"/> 5 a 6 veces al día<br><input type="radio"/> más 6 veces al día |
| Pate o foiegras     | <input type="radio"/> Nunca o menos 1 vez al mes<br><input checked="" type="radio"/> 1 a 3 veces mes<br><input type="radio"/> 1 vez semana<br><input type="radio"/> 2 a 4 veces semana<br><input type="radio"/> 5 a 6 veces semana<br><input type="radio"/> 1 vez al día<br><input type="radio"/> 2 a 3 veces al día<br><input type="radio"/> 5 a 6 veces al día<br><input type="radio"/> más 6 veces al día |
| Hamburguesa         | <input type="radio"/> Nunca o menos 1 vez al mes<br><input checked="" type="radio"/> 1 a 3 veces mes<br><input type="radio"/> 1 vez semana<br><input type="radio"/> 2 a 4 veces semana<br><input type="radio"/> 5 a 6 veces semana<br><input type="radio"/> 1 vez al día<br><input type="radio"/> 2 a 3 veces al día<br><input type="radio"/> 5 a 6 veces al día<br><input type="radio"/> más 6 veces al día |
| tocino o bacon      | <input type="radio"/> Nunca o menos 1 vez al mes<br><input checked="" type="radio"/> 1 a 3 veces mes<br><input type="radio"/> 1 vez semana<br><input type="radio"/> 2 a 4 veces semana<br><input type="radio"/> 5 a 6 veces semana<br><input type="radio"/> 1 vez al día<br><input type="radio"/> 2 a 3 veces al día<br><input type="radio"/> 5 a 6 veces al día<br><input type="radio"/> más 6 veces al día |

---

Pescado frito

- ☐ Nunca o menos 1 vez al mes  
☒ 1 a 3 veces mes  
☐ 1 vez semana  
☐ 2 a 4 veces semana  
☐ 5 a 6 veces semana  
☐ 1 vez al día  
☐ 2 a 3 veces al día  
☐ 5 a 6 veces al día  
☐ más 6 veces al día

---

pescado hervido blanco

- ☐ Nunca o menos 1 vez al mes  
☒ 1 a 3 veces mes  
☐ 1 vez semana  
☐ 2 a 4 veces semana  
☐ 5 a 6 veces semana  
☐ 1 vez al día  
☐ 2 a 3 veces al día  
☐ 5 a 6 veces al día  
☐ más 6 veces al día

---

pescado hervido azul

- ☐ Nunca o menos 1 vez al mes  
☒ 1 a 3 veces mes  
☐ 1 vez semana  
☐ 2 a 4 veces semana  
☐ 5 a 6 veces semana  
☐ 1 vez al día  
☐ 2 a 3 veces al día  
☐ 5 a 6 veces al día  
☐ más 6 veces al día

---

otros pescado azul

- ☐ Nunca o menos 1 vez al mes  
☒ 1 a 3 veces mes  
☐ 1 vez semana  
☐ 2 a 4 veces semana  
☐ 5 a 6 veces semana  
☐ 1 vez al día  
☐ 2 a 3 veces al día  
☐ 5 a 6 veces al día  
☐ más 6 veces al día

---

atun conserva

- ☐ Nunca o menos 1 vez al mes  
☒ 1 a 3 veces mes  
☐ 1 vez semana  
☐ 2 a 4 veces semana  
☐ 5 a 6 veces semana  
☐ 1 vez al día  
☐ 2 a 3 veces al día  
☐ 5 a 6 veces al día  
☐ más 6 veces al día

---

sardina conserva

- ☐ Nunca o menos 1 vez al mes  
☒ 1 a 3 veces mes  
☐ 1 vez semana  
☐ 2 a 4 veces semana  
☐ 5 a 6 veces semana  
☐ 1 vez al día  
☐ 2 a 3 veces al día  
☐ 5 a 6 veces al día  
☐ más 6 veces al día

---

pescado ahumado

- ☐ Nunca o menos 1 vez al mes  
☒ 1 a 3 veces mes  
☐ 1 vez semana  
☐ 2 a 4 veces semana  
☐ 5 a 6 veces semana  
☐ 1 vez al día  
☐ 2 a 3 veces al día  
☐ 5 a 6 veces al día  
☐ más 6 veces al día

---

almejas o mejillones o ostras unos 100g

- ☐ Nunca o menos 1 vez al mes  
☒ 1 a 3 veces mes  
☐ 1 vez semana  
☐ 2 a 4 veces semana  
☐ 5 a 6 veces semana  
☐ 1 vez al día  
☐ 2 a 3 veces al día  
☐ 5 a 6 veces al día  
☐ más 6 veces al día

---

calamar o chipiron o sepia unos 100g

- ☐ Nunca o menos 1 vez al mes  
☒ 1 a 3 veces mes  
☐ 1 vez semana  
☐ 2 a 4 veces semana  
☐ 5 a 6 veces semana  
☐ 1 vez al día  
☐ 2 a 3 veces al día  
☐ 5 a 6 veces al día  
☐ más 6 veces al día

---

marisco unos 100g

- ☐ Nunca o menos 1 vez al mes  
☒ 1 a 3 veces mes  
☐ 1 vez semana  
☐ 2 a 4 veces semana  
☐ 5 a 6 veces semana  
☐ 1 vez al día  
☐ 2 a 3 veces al día  
☐ 5 a 6 veces al día  
☐ más 6 veces al día

---

Espinacas o acelgas cocinadas

- ☐ Nunca o menos 1 vez al mes  
☒ 1 a 3 veces mes  
☐ 1 vez semana  
☐ 2 a 4 veces semana  
☐ 5 a 6 veces semana  
☐ 1 vez al día  
☐ 2 a 3 veces al día  
☐ 5 a 6 veces al día  
☐ más 6 veces al día

---

Col o coliflor o brocoli cocinado

- ☐ Nunca o menos 1 vez al mes  
☒ 1 a 3 veces mes  
☐ 1 vez semana  
☐ 2 a 4 veces semana  
☐ 5 a 6 veces semana  
☐ 1 vez al día  
☐ 2 a 3 veces al día  
☐ 5 a 6 veces al día  
☐ más 6 veces al día

---

|                              |                                                                                                                                                                                                                                                                                                                                                                                                              |
|------------------------------|--------------------------------------------------------------------------------------------------------------------------------------------------------------------------------------------------------------------------------------------------------------------------------------------------------------------------------------------------------------------------------------------------------------|
| Lechuga o endivia o escarola | <input type="radio"/> Nunca o menos 1 vez al mes<br><input checked="" type="radio"/> 1 a 3 veces mes<br><input type="radio"/> 1 vez semana<br><input type="radio"/> 2 a 4 veces semana<br><input type="radio"/> 5 a 6 veces semana<br><input type="radio"/> 1 vez al día<br><input type="radio"/> 2 a 3 veces al día<br><input type="radio"/> 5 a 6 veces al día<br><input type="radio"/> más 6 veces al día |
|------------------------------|--------------------------------------------------------------------------------------------------------------------------------------------------------------------------------------------------------------------------------------------------------------------------------------------------------------------------------------------------------------------------------------------------------------|

---

|                 |                                                                                                                                                                                                                                                                                                                                                                                                              |
|-----------------|--------------------------------------------------------------------------------------------------------------------------------------------------------------------------------------------------------------------------------------------------------------------------------------------------------------------------------------------------------------------------------------------------------------|
| tomate ensalada | <input type="radio"/> Nunca o menos 1 vez al mes<br><input type="radio"/> 1 a 3 veces mes<br><input checked="" type="radio"/> 1 vez semana<br><input type="radio"/> 2 a 4 veces semana<br><input type="radio"/> 5 a 6 veces semana<br><input type="radio"/> 1 vez al día<br><input type="radio"/> 2 a 3 veces al día<br><input type="radio"/> 5 a 6 veces al día<br><input type="radio"/> más 6 veces al día |
|-----------------|--------------------------------------------------------------------------------------------------------------------------------------------------------------------------------------------------------------------------------------------------------------------------------------------------------------------------------------------------------------------------------------------------------------|

---

|         |                                                                                                                                                                                                                                                                                                                                                                                                              |
|---------|--------------------------------------------------------------------------------------------------------------------------------------------------------------------------------------------------------------------------------------------------------------------------------------------------------------------------------------------------------------------------------------------------------------|
| cebolla | <input type="radio"/> Nunca o menos 1 vez al mes<br><input type="radio"/> 1 a 3 veces mes<br><input checked="" type="radio"/> 1 vez semana<br><input type="radio"/> 2 a 4 veces semana<br><input type="radio"/> 5 a 6 veces semana<br><input type="radio"/> 1 vez al día<br><input type="radio"/> 2 a 3 veces al día<br><input type="radio"/> 5 a 6 veces al día<br><input type="radio"/> más 6 veces al día |
|---------|--------------------------------------------------------------------------------------------------------------------------------------------------------------------------------------------------------------------------------------------------------------------------------------------------------------------------------------------------------------------------------------------------------------|

---

|                      |                                                                                                                                                                                                                                                                                                                                                                                                              |
|----------------------|--------------------------------------------------------------------------------------------------------------------------------------------------------------------------------------------------------------------------------------------------------------------------------------------------------------------------------------------------------------------------------------------------------------|
| Zanahoria o calabaza | <input type="radio"/> Nunca o menos 1 vez al mes<br><input type="radio"/> 1 a 3 veces mes<br><input checked="" type="radio"/> 1 vez semana<br><input type="radio"/> 2 a 4 veces semana<br><input type="radio"/> 5 a 6 veces semana<br><input type="radio"/> 1 vez al día<br><input type="radio"/> 2 a 3 veces al día<br><input type="radio"/> 5 a 6 veces al día<br><input type="radio"/> más 6 veces al día |
|----------------------|--------------------------------------------------------------------------------------------------------------------------------------------------------------------------------------------------------------------------------------------------------------------------------------------------------------------------------------------------------------------------------------------------------------|

---

|               |                                                                                                                                                                                                                                                                                                                                                                                                              |
|---------------|--------------------------------------------------------------------------------------------------------------------------------------------------------------------------------------------------------------------------------------------------------------------------------------------------------------------------------------------------------------------------------------------------------------|
| Judías verdes | <input type="radio"/> Nunca o menos 1 vez al mes<br><input checked="" type="radio"/> 1 a 3 veces mes<br><input type="radio"/> 1 vez semana<br><input type="radio"/> 2 a 4 veces semana<br><input type="radio"/> 5 a 6 veces semana<br><input type="radio"/> 1 vez al día<br><input type="radio"/> 2 a 3 veces al día<br><input type="radio"/> 5 a 6 veces al día<br><input type="radio"/> más 6 veces al día |
|---------------|--------------------------------------------------------------------------------------------------------------------------------------------------------------------------------------------------------------------------------------------------------------------------------------------------------------------------------------------------------------------------------------------------------------|

---

|                                |                                                                                                                                                                                                                                                                                                                                                                                                              |
|--------------------------------|--------------------------------------------------------------------------------------------------------------------------------------------------------------------------------------------------------------------------------------------------------------------------------------------------------------------------------------------------------------------------------------------------------------|
| Berenjena o calabacin o pepino | <input type="radio"/> Nunca o menos 1 vez al mes<br><input checked="" type="radio"/> 1 a 3 veces mes<br><input type="radio"/> 1 vez semana<br><input type="radio"/> 2 a 4 veces semana<br><input type="radio"/> 5 a 6 veces semana<br><input type="radio"/> 1 vez al día<br><input type="radio"/> 2 a 3 veces al día<br><input type="radio"/> 5 a 6 veces al día<br><input type="radio"/> más 6 veces al día |
|--------------------------------|--------------------------------------------------------------------------------------------------------------------------------------------------------------------------------------------------------------------------------------------------------------------------------------------------------------------------------------------------------------------------------------------------------------|

---

---

|          |                                                                                                                                                                                                                                                                                                                                                                                                              |
|----------|--------------------------------------------------------------------------------------------------------------------------------------------------------------------------------------------------------------------------------------------------------------------------------------------------------------------------------------------------------------------------------------------------------------|
| pimiento | <input type="radio"/> Nunca o menos 1 vez al mes<br><input type="radio"/> 1 a 3 veces mes<br><input checked="" type="radio"/> 1 vez semana<br><input type="radio"/> 2 a 4 veces semana<br><input type="radio"/> 5 a 6 veces semana<br><input type="radio"/> 1 vez al día<br><input type="radio"/> 2 a 3 veces al día<br><input type="radio"/> 5 a 6 veces al día<br><input type="radio"/> más 6 veces al día |
|----------|--------------------------------------------------------------------------------------------------------------------------------------------------------------------------------------------------------------------------------------------------------------------------------------------------------------------------------------------------------------------------------------------------------------|

---

|           |                                                                                                                                                                                                                                                                                                                                                                                                              |
|-----------|--------------------------------------------------------------------------------------------------------------------------------------------------------------------------------------------------------------------------------------------------------------------------------------------------------------------------------------------------------------------------------------------------------------|
| alcachofa | <input type="radio"/> Nunca o menos 1 vez al mes<br><input type="radio"/> 1 a 3 veces mes<br><input checked="" type="radio"/> 1 vez semana<br><input type="radio"/> 2 a 4 veces semana<br><input type="radio"/> 5 a 6 veces semana<br><input type="radio"/> 1 vez al día<br><input type="radio"/> 2 a 3 veces al día<br><input type="radio"/> 5 a 6 veces al día<br><input type="radio"/> más 6 veces al día |
|-----------|--------------------------------------------------------------------------------------------------------------------------------------------------------------------------------------------------------------------------------------------------------------------------------------------------------------------------------------------------------------------------------------------------------------|

---

|            |                                                                                                                                                                                                                                                                                                                                                                                                              |
|------------|--------------------------------------------------------------------------------------------------------------------------------------------------------------------------------------------------------------------------------------------------------------------------------------------------------------------------------------------------------------------------------------------------------------|
| espárragos | <input type="radio"/> Nunca o menos 1 vez al mes<br><input checked="" type="radio"/> 1 a 3 veces mes<br><input type="radio"/> 1 vez semana<br><input type="radio"/> 2 a 4 veces semana<br><input type="radio"/> 5 a 6 veces semana<br><input type="radio"/> 1 vez al día<br><input type="radio"/> 2 a 3 veces al día<br><input type="radio"/> 5 a 6 veces al día<br><input type="radio"/> más 6 veces al día |
|------------|--------------------------------------------------------------------------------------------------------------------------------------------------------------------------------------------------------------------------------------------------------------------------------------------------------------------------------------------------------------------------------------------------------------|

---

|              |                                                                                                                                                                                                                                                                                                                                                                                                              |
|--------------|--------------------------------------------------------------------------------------------------------------------------------------------------------------------------------------------------------------------------------------------------------------------------------------------------------------------------------------------------------------------------------------------------------------|
| maíz hervido | <input type="radio"/> Nunca o menos 1 vez al mes<br><input checked="" type="radio"/> 1 a 3 veces mes<br><input type="radio"/> 1 vez semana<br><input type="radio"/> 2 a 4 veces semana<br><input type="radio"/> 5 a 6 veces semana<br><input type="radio"/> 1 vez al día<br><input type="radio"/> 2 a 3 veces al día<br><input type="radio"/> 5 a 6 veces al día<br><input type="radio"/> más 6 veces al día |
|--------------|--------------------------------------------------------------------------------------------------------------------------------------------------------------------------------------------------------------------------------------------------------------------------------------------------------------------------------------------------------------------------------------------------------------|

---

|           |                                                                                                                                                                                                                                                                                                                                                                                                              |
|-----------|--------------------------------------------------------------------------------------------------------------------------------------------------------------------------------------------------------------------------------------------------------------------------------------------------------------------------------------------------------------------------------------------------------------|
| legumbres | <input type="radio"/> Nunca o menos 1 vez al mes<br><input type="radio"/> 1 a 3 veces mes<br><input checked="" type="radio"/> 1 vez semana<br><input type="radio"/> 2 a 4 veces semana<br><input type="radio"/> 5 a 6 veces semana<br><input type="radio"/> 1 vez al día<br><input type="radio"/> 2 a 3 veces al día<br><input type="radio"/> 5 a 6 veces al día<br><input type="radio"/> más 6 veces al día |
|-----------|--------------------------------------------------------------------------------------------------------------------------------------------------------------------------------------------------------------------------------------------------------------------------------------------------------------------------------------------------------------------------------------------------------------|

---

|                       |                                                                                                                                                                                                                                                                                                                                                                                                              |
|-----------------------|--------------------------------------------------------------------------------------------------------------------------------------------------------------------------------------------------------------------------------------------------------------------------------------------------------------------------------------------------------------------------------------------------------------|
| naranjas o mandarinas | <input type="radio"/> Nunca o menos 1 vez al mes<br><input type="radio"/> 1 a 3 veces mes<br><input type="radio"/> 1 vez semana<br><input type="radio"/> 2 a 4 veces semana<br><input type="radio"/> 5 a 6 veces semana<br><input type="radio"/> 1 vez al día<br><input checked="" type="radio"/> 2 a 3 veces al día<br><input type="radio"/> 5 a 6 veces al día<br><input type="radio"/> más 6 veces al día |
|-----------------------|--------------------------------------------------------------------------------------------------------------------------------------------------------------------------------------------------------------------------------------------------------------------------------------------------------------------------------------------------------------------------------------------------------------|

---

|                       |                                                                                                                                                                                                                                                                                                                                                                                                              |
|-----------------------|--------------------------------------------------------------------------------------------------------------------------------------------------------------------------------------------------------------------------------------------------------------------------------------------------------------------------------------------------------------------------------------------------------------|
| zum natural fruta     | <input type="radio"/> Nunca o menos 1 vez al mes<br><input checked="" type="radio"/> 1 a 3 veces mes<br><input type="radio"/> 1 vez semana<br><input type="radio"/> 2 a 4 veces semana<br><input type="radio"/> 5 a 6 veces semana<br><input type="radio"/> 1 vez al día<br><input type="radio"/> 2 a 3 veces al día<br><input type="radio"/> 5 a 6 veces al día<br><input type="radio"/> más 6 veces al día |
| platano               | <input type="radio"/> Nunca o menos 1 vez al mes<br><input type="radio"/> 1 a 3 veces mes<br><input type="radio"/> 1 vez semana<br><input type="radio"/> 2 a 4 veces semana<br><input type="radio"/> 5 a 6 veces semana<br><input checked="" type="radio"/> 1 vez al día<br><input type="radio"/> 2 a 3 veces al día<br><input type="radio"/> 5 a 6 veces al día<br><input type="radio"/> más 6 veces al día |
| manzana o pera        | <input type="radio"/> Nunca o menos 1 vez al mes<br><input checked="" type="radio"/> 1 a 3 veces mes<br><input type="radio"/> 1 vez semana<br><input type="radio"/> 2 a 4 veces semana<br><input type="radio"/> 5 a 6 veces semana<br><input type="radio"/> 1 vez al día<br><input type="radio"/> 2 a 3 veces al día<br><input type="radio"/> 5 a 6 veces al día<br><input type="radio"/> más 6 veces al día |
| melocotón o nectarina | <input type="radio"/> Nunca o menos 1 vez al mes<br><input checked="" type="radio"/> 1 a 3 veces mes<br><input type="radio"/> 1 vez semana<br><input type="radio"/> 2 a 4 veces semana<br><input type="radio"/> 5 a 6 veces semana<br><input type="radio"/> 1 vez al día<br><input type="radio"/> 2 a 3 veces al día<br><input type="radio"/> 5 a 6 veces al día<br><input type="radio"/> más 6 veces al día |
| sandia o melon        | <input type="radio"/> Nunca o menos 1 vez al mes<br><input checked="" type="radio"/> 1 a 3 veces mes<br><input type="radio"/> 1 vez semana<br><input type="radio"/> 2 a 4 veces semana<br><input type="radio"/> 5 a 6 veces semana<br><input type="radio"/> 1 vez al día<br><input type="radio"/> 2 a 3 veces al día<br><input type="radio"/> 5 a 6 veces al día<br><input type="radio"/> más 6 veces al día |
| uva                   | <input checked="" type="radio"/> Nunca o menos 1 vez al mes<br><input type="radio"/> 1 a 3 veces mes<br><input type="radio"/> 1 vez semana<br><input type="radio"/> 2 a 4 veces semana<br><input type="radio"/> 5 a 6 veces semana<br><input type="radio"/> 1 vez al día<br><input type="radio"/> 2 a 3 veces al día<br><input type="radio"/> 5 a 6 veces al día<br><input type="radio"/> más 6 veces al día |

|                 |                                                                                                                                                                                                                                                                                                                                                                                                              |
|-----------------|--------------------------------------------------------------------------------------------------------------------------------------------------------------------------------------------------------------------------------------------------------------------------------------------------------------------------------------------------------------------------------------------------------------|
| bruna o ciruela | <input checked="" type="radio"/> Nunca o menos 1 vez al mes<br><input type="radio"/> 1 a 3 veces mes<br><input type="radio"/> 1 vez semana<br><input type="radio"/> 2 a 4 veces semana<br><input type="radio"/> 5 a 6 veces semana<br><input type="radio"/> 1 vez al día<br><input type="radio"/> 2 a 3 veces al día<br><input type="radio"/> 5 a 6 veces al día<br><input type="radio"/> más 6 veces al día |
| kiwi            | <input type="radio"/> Nunca o menos 1 vez al mes<br><input checked="" type="radio"/> 1 a 3 veces mes<br><input type="radio"/> 1 vez semana<br><input type="radio"/> 2 a 4 veces semana<br><input type="radio"/> 5 a 6 veces semana<br><input type="radio"/> 1 vez al día<br><input type="radio"/> 2 a 3 veces al día<br><input type="radio"/> 5 a 6 veces al día<br><input type="radio"/> más 6 veces al día |
| aceituna        | <input type="radio"/> Nunca o menos 1 vez al mes<br><input type="radio"/> 1 a 3 veces mes<br><input checked="" type="radio"/> 1 vez semana<br><input type="radio"/> 2 a 4 veces semana<br><input type="radio"/> 5 a 6 veces semana<br><input type="radio"/> 1 vez al día<br><input type="radio"/> 2 a 3 veces al día<br><input type="radio"/> 5 a 6 veces al día<br><input type="radio"/> más 6 veces al día |
| frutos secos    | <input type="radio"/> Nunca o menos 1 vez al mes<br><input type="radio"/> 1 a 3 veces mes<br><input checked="" type="radio"/> 1 vez semana<br><input type="radio"/> 2 a 4 veces semana<br><input type="radio"/> 5 a 6 veces semana<br><input type="radio"/> 1 vez al día<br><input type="radio"/> 2 a 3 veces al día<br><input type="radio"/> 5 a 6 veces al día<br><input type="radio"/> más 6 veces al día |
| pan blanco      | <input type="radio"/> Nunca o menos 1 vez al mes<br><input type="radio"/> 1 a 3 veces mes<br><input type="radio"/> 1 vez semana<br><input type="radio"/> 2 a 4 veces semana<br><input type="radio"/> 5 a 6 veces semana<br><input type="radio"/> 1 vez al día<br><input checked="" type="radio"/> 2 a 3 veces al día<br><input type="radio"/> 5 a 6 veces al día<br><input type="radio"/> más 6 veces al día |
| pan integral    | <input type="radio"/> Nunca o menos 1 vez al mes<br><input checked="" type="radio"/> 1 a 3 veces mes<br><input type="radio"/> 1 vez semana<br><input type="radio"/> 2 a 4 veces semana<br><input type="radio"/> 5 a 6 veces semana<br><input type="radio"/> 1 vez al día<br><input type="radio"/> 2 a 3 veces al día<br><input type="radio"/> 5 a 6 veces al día<br><input type="radio"/> más 6 veces al día |

---

cereales desayuno

- ☐ Nunca o menos 1 vez al mes  
☐ 1 a 3 veces mes  
☐ 1 vez semana  
☒ 2 a 4 veces semana  
☐ 5 a 6 veces semana  
☐ 1 vez al día  
☐ 2 a 3 veces al día  
☐ 5 a 6 veces al día  
☐ más 6 veces al día

---

patatas fritas

- ☐ Nunca o menos 1 vez al mes  
☒ 1 a 3 veces mes  
☐ 1 vez semana  
☐ 2 a 4 veces semana  
☐ 5 a 6 veces semana  
☐ 1 vez al día  
☐ 2 a 3 veces al día  
☐ 5 a 6 veces al día  
☐ más 6 veces al día

---

patatas cocidas o asadas

- ☐ Nunca o menos 1 vez al mes  
☐ 1 a 3 veces mes  
☐ 1 vez semana  
☒ 2 a 4 veces semana  
☐ 5 a 6 veces semana  
☐ 1 vez al día  
☐ 2 a 3 veces al día  
☐ 5 a 6 veces al día  
☐ más 6 veces al día

---

bolsa papas

- ☐ Nunca o menos 1 vez al mes  
☒ 1 a 3 veces mes  
☐ 1 vez semana  
☐ 2 a 4 veces semana  
☐ 5 a 6 veces semana  
☐ 1 vez al día  
☐ 2 a 3 veces al día  
☐ 5 a 6 veces al día  
☐ más 6 veces al día

---

arroz cocinado

- ☐ Nunca o menos 1 vez al mes  
☐ 1 a 3 veces mes  
☐ 1 vez semana  
☒ 2 a 4 veces semana  
☐ 5 a 6 veces semana  
☐ 1 vez al día  
☐ 2 a 3 veces al día  
☐ 5 a 6 veces al día  
☐ más 6 veces al día

---

pasta

- ☐ Nunca o menos 1 vez al mes  
☐ 1 a 3 veces mes  
☐ 1 vez semana  
☒ 2 a 4 veces semana  
☐ 5 a 6 veces semana  
☐ 1 vez al día  
☐ 2 a 3 veces al día  
☐ 5 a 6 veces al día  
☐ más 6 veces al día



|                     |                                                                                                                                                                                                                                                                                                                                                                                                              |
|---------------------|--------------------------------------------------------------------------------------------------------------------------------------------------------------------------------------------------------------------------------------------------------------------------------------------------------------------------------------------------------------------------------------------------------------|
| pizza               | <input type="radio"/> Nunca o menos 1 vez al mes<br><input type="radio"/> 1 a 3 veces mes<br><input type="radio"/> 1 vez semana<br><input type="radio"/> 2 a 4 veces semana<br><input type="radio"/> 5 a 6 veces semana<br><input type="radio"/> 1 vez al día<br><input type="radio"/> 2 a 3 veces al día<br><input checked="" type="radio"/> 5 a 6 veces al día<br><input type="radio"/> más 6 veces al día |
| aceite oliva        | <input type="radio"/> Nunca o menos 1 vez al mes<br><input type="radio"/> 1 a 3 veces mes<br><input checked="" type="radio"/> 1 vez semana<br><input type="radio"/> 2 a 4 veces semana<br><input type="radio"/> 5 a 6 veces semana<br><input type="radio"/> 1 vez al día<br><input type="radio"/> 2 a 3 veces al día<br><input type="radio"/> 5 a 6 veces al día<br><input type="radio"/> más 6 veces al día |
| otros aceites       | <input checked="" type="radio"/> Nunca o menos 1 vez al mes<br><input type="radio"/> 1 a 3 veces mes<br><input type="radio"/> 1 vez semana<br><input type="radio"/> 2 a 4 veces semana<br><input type="radio"/> 5 a 6 veces semana<br><input type="radio"/> 1 vez al día<br><input type="radio"/> 2 a 3 veces al día<br><input type="radio"/> 5 a 6 veces al día<br><input type="radio"/> más 6 veces al día |
| margarina           | <input checked="" type="radio"/> Nunca o menos 1 vez al mes<br><input type="radio"/> 1 a 3 veces mes<br><input type="radio"/> 1 vez semana<br><input type="radio"/> 2 a 4 veces semana<br><input type="radio"/> 5 a 6 veces semana<br><input type="radio"/> 1 vez al día<br><input type="radio"/> 2 a 3 veces al día<br><input type="radio"/> 5 a 6 veces al día<br><input type="radio"/> más 6 veces al día |
| mantequilla         | <input type="radio"/> Nunca o menos 1 vez al mes<br><input type="radio"/> 1 a 3 veces mes<br><input type="radio"/> 1 vez semana<br><input checked="" type="radio"/> 2 a 4 veces semana<br><input type="radio"/> 5 a 6 veces semana<br><input type="radio"/> 1 vez al día<br><input type="radio"/> 2 a 3 veces al día<br><input type="radio"/> 5 a 6 veces al día<br><input type="radio"/> más 6 veces al día |
| galletas tipo maria | <input type="radio"/> Nunca o menos 1 vez al mes<br><input checked="" type="radio"/> 1 a 3 veces mes<br><input type="radio"/> 1 vez semana<br><input type="radio"/> 2 a 4 veces semana<br><input type="radio"/> 5 a 6 veces semana<br><input type="radio"/> 1 vez al día<br><input type="radio"/> 2 a 3 veces al día<br><input type="radio"/> 5 a 6 veces al día<br><input type="radio"/> más 6 veces al día |

---

galletas chocolate

- ☐ Nunca o menos 1 vez al mes  
☐ 1 a 3 veces mes  
☐ 1 vez semana  
☒ 2 a 4 veces semana  
☐ 5 a 6 veces semana  
☐ 1 vez al día  
☐ 2 a 3 veces al día  
☐ 5 a 6 veces al día  
☐ más 6 veces al día

---

bolleria

- ☐ Nunca o menos 1 vez al mes  
☒ 1 a 3 veces mes  
☐ 1 vez semana  
☐ 2 a 4 veces semana  
☐ 5 a 6 veces semana  
☐ 1 vez al día  
☐ 2 a 3 veces al día  
☐ 5 a 6 veces al día  
☐ más 6 veces al día

---

chocolate o bombones

- ☐ Nunca o menos 1 vez al mes  
☐ 1 a 3 veces mes  
☐ 1 vez semana  
☒ 2 a 4 veces semana  
☐ 5 a 6 veces semana  
☐ 1 vez al día  
☐ 2 a 3 veces al día  
☐ 5 a 6 veces al día  
☐ más 6 veces al día

---

chocolate polvo o colacao

- ☐ Nunca o menos 1 vez al mes  
☐ 1 a 3 veces mes  
☐ 1 vez semana  
☒ 2 a 4 veces semana  
☐ 5 a 6 veces semana  
☐ 1 vez al día  
☐ 2 a 3 veces al día  
☐ 5 a 6 veces al día  
☐ más 6 veces al día

---

vino tinto

- ☒ Nunca o menos 1 vez al mes  
☐ 1 a 3 veces mes  
☐ 1 vez semana  
☐ 2 a 4 veces semana  
☐ 5 a 6 veces semana  
☐ 1 vez al día  
☐ 2 a 3 veces al día  
☐ 5 a 6 veces al día  
☐ más 6 veces al día

---

vino blanco

- ☒ Nunca o menos 1 vez al mes  
☐ 1 a 3 veces mes  
☐ 1 vez semana  
☐ 2 a 4 veces semana  
☐ 5 a 6 veces semana  
☐ 1 vez al día  
☐ 2 a 3 veces al día  
☐ 5 a 6 veces al día  
☐ más 6 veces al día

---

|                    |                                                                                                                                                                                                                                                                                                                                                                                                              |
|--------------------|--------------------------------------------------------------------------------------------------------------------------------------------------------------------------------------------------------------------------------------------------------------------------------------------------------------------------------------------------------------------------------------------------------------|
| vino seco o vermut | <input checked="" type="radio"/> Nunca o menos 1 vez al mes<br><input type="radio"/> 1 a 3 veces mes<br><input type="radio"/> 1 vez semana<br><input type="radio"/> 2 a 4 veces semana<br><input type="radio"/> 5 a 6 veces semana<br><input type="radio"/> 1 vez al día<br><input type="radio"/> 2 a 3 veces al día<br><input type="radio"/> 5 a 6 veces al día<br><input type="radio"/> más 6 veces al día |
|--------------------|--------------------------------------------------------------------------------------------------------------------------------------------------------------------------------------------------------------------------------------------------------------------------------------------------------------------------------------------------------------------------------------------------------------|

---

|         |                                                                                                                                                                                                                                                                                                                                                                                                              |
|---------|--------------------------------------------------------------------------------------------------------------------------------------------------------------------------------------------------------------------------------------------------------------------------------------------------------------------------------------------------------------------------------------------------------------|
| cerveza | <input checked="" type="radio"/> Nunca o menos 1 vez al mes<br><input type="radio"/> 1 a 3 veces mes<br><input type="radio"/> 1 vez semana<br><input type="radio"/> 2 a 4 veces semana<br><input type="radio"/> 5 a 6 veces semana<br><input type="radio"/> 1 vez al día<br><input type="radio"/> 2 a 3 veces al día<br><input type="radio"/> 5 a 6 veces al día<br><input type="radio"/> más 6 veces al día |
|---------|--------------------------------------------------------------------------------------------------------------------------------------------------------------------------------------------------------------------------------------------------------------------------------------------------------------------------------------------------------------------------------------------------------------|

---

|                     |                                                                                                                                                                                                                                                                                                                                                                                                              |
|---------------------|--------------------------------------------------------------------------------------------------------------------------------------------------------------------------------------------------------------------------------------------------------------------------------------------------------------------------------------------------------------------------------------------------------------|
| cerveza sin alcohol | <input type="radio"/> Nunca o menos 1 vez al mes<br><input checked="" type="radio"/> 1 a 3 veces mes<br><input type="radio"/> 1 vez semana<br><input type="radio"/> 2 a 4 veces semana<br><input type="radio"/> 5 a 6 veces semana<br><input type="radio"/> 1 vez al día<br><input type="radio"/> 2 a 3 veces al día<br><input type="radio"/> 5 a 6 veces al día<br><input type="radio"/> más 6 veces al día |
|---------------------|--------------------------------------------------------------------------------------------------------------------------------------------------------------------------------------------------------------------------------------------------------------------------------------------------------------------------------------------------------------------------------------------------------------|

---

|         |                                                                                                                                                                                                                                                                                                                                                                                                              |
|---------|--------------------------------------------------------------------------------------------------------------------------------------------------------------------------------------------------------------------------------------------------------------------------------------------------------------------------------------------------------------------------------------------------------------|
| licores | <input checked="" type="radio"/> Nunca o menos 1 vez al mes<br><input type="radio"/> 1 a 3 veces mes<br><input type="radio"/> 1 vez semana<br><input type="radio"/> 2 a 4 veces semana<br><input type="radio"/> 5 a 6 veces semana<br><input type="radio"/> 1 vez al día<br><input type="radio"/> 2 a 3 veces al día<br><input type="radio"/> 5 a 6 veces al día<br><input type="radio"/> más 6 veces al día |
|---------|--------------------------------------------------------------------------------------------------------------------------------------------------------------------------------------------------------------------------------------------------------------------------------------------------------------------------------------------------------------------------------------------------------------|

---

|                       |                                                                                                                                                                                                                                                                                                                                                                                                   |
|-----------------------|---------------------------------------------------------------------------------------------------------------------------------------------------------------------------------------------------------------------------------------------------------------------------------------------------------------------------------------------------------------------------------------------------|
| ginebra o ron o vodka | <input type="radio"/> Nunca o menos 1 vez al mes<br><input type="radio"/> 1 a 3 veces mes<br><input type="radio"/> 1 vez semana<br><input type="radio"/> 2 a 4 veces semana<br><input type="radio"/> 5 a 6 veces semana<br><input type="radio"/> 1 vez al día<br><input type="radio"/> 2 a 3 veces al día<br><input type="radio"/> 5 a 6 veces al día<br><input type="radio"/> más 6 veces al día |
|-----------------------|---------------------------------------------------------------------------------------------------------------------------------------------------------------------------------------------------------------------------------------------------------------------------------------------------------------------------------------------------------------------------------------------------|

---

|                 |                                                                                                                                                                                                                                                                                                                                                                                                              |
|-----------------|--------------------------------------------------------------------------------------------------------------------------------------------------------------------------------------------------------------------------------------------------------------------------------------------------------------------------------------------------------------------------------------------------------------|
| refresco normal | <input type="radio"/> Nunca o menos 1 vez al mes<br><input type="radio"/> 1 a 3 veces mes<br><input type="radio"/> 1 vez semana<br><input type="radio"/> 2 a 4 veces semana<br><input type="radio"/> 5 a 6 veces semana<br><input type="radio"/> 1 vez al día<br><input checked="" type="radio"/> 2 a 3 veces al día<br><input type="radio"/> 5 a 6 veces al día<br><input type="radio"/> más 6 veces al día |
|-----------------|--------------------------------------------------------------------------------------------------------------------------------------------------------------------------------------------------------------------------------------------------------------------------------------------------------------------------------------------------------------------------------------------------------------|

---

|                          |                                                                                                                                                                                                                                                                                                                                                                                                              |
|--------------------------|--------------------------------------------------------------------------------------------------------------------------------------------------------------------------------------------------------------------------------------------------------------------------------------------------------------------------------------------------------------------------------------------------------------|
| refresco sin azúcar      | <input type="radio"/> Nunca o menos 1 vez al mes<br><input type="radio"/> 1 a 3 veces mes<br><input type="radio"/> 1 vez semana<br><input type="radio"/> 2 a 4 veces semana<br><input type="radio"/> 5 a 6 veces semana<br><input type="radio"/> 1 vez al día<br><input checked="" type="radio"/> 2 a 3 veces al día<br><input type="radio"/> 5 a 6 veces al día<br><input type="radio"/> más 6 veces al día |
| Agua del grifo           | <input checked="" type="radio"/> Nunca o menos 1 vez al mes<br><input type="radio"/> 1 a 3 veces mes<br><input type="radio"/> 1 vez semana<br><input type="radio"/> 2 a 4 veces semana<br><input type="radio"/> 5 a 6 veces semana<br><input type="radio"/> 1 vez al día<br><input type="radio"/> 2 a 3 veces al día<br><input type="radio"/> 5 a 6 veces al día<br><input type="radio"/> más 6 veces al día |
| agua embotellada sin gas | <input type="radio"/> Nunca o menos 1 vez al mes<br><input type="radio"/> 1 a 3 veces mes<br><input type="radio"/> 1 vez semana<br><input type="radio"/> 2 a 4 veces semana<br><input type="radio"/> 5 a 6 veces semana<br><input type="radio"/> 1 vez al día<br><input type="radio"/> 2 a 3 veces al día<br><input checked="" type="radio"/> 5 a 6 veces al día<br><input type="radio"/> más 6 veces al día |
| agua embotellada con gas | <input checked="" type="radio"/> Nunca o menos 1 vez al mes<br><input type="radio"/> 1 a 3 veces mes<br><input type="radio"/> 1 vez semana<br><input type="radio"/> 2 a 4 veces semana<br><input type="radio"/> 5 a 6 veces semana<br><input type="radio"/> 1 vez al día<br><input type="radio"/> 2 a 3 veces al día<br><input type="radio"/> 5 a 6 veces al día<br><input type="radio"/> más 6 veces al día |
| zumو frutas embasado     | <input type="radio"/> Nunca o menos 1 vez al mes<br><input type="radio"/> 1 a 3 veces mes<br><input checked="" type="radio"/> 1 vez semana<br><input type="radio"/> 2 a 4 veces semana<br><input type="radio"/> 5 a 6 veces semana<br><input type="radio"/> 1 vez al día<br><input type="radio"/> 2 a 3 veces al día<br><input type="radio"/> 5 a 6 veces al día<br><input type="radio"/> más 6 veces al día |
| cafe                     | <input checked="" type="radio"/> Nunca o menos 1 vez al mes<br><input type="radio"/> 1 a 3 veces mes<br><input type="radio"/> 1 vez semana<br><input type="radio"/> 2 a 4 veces semana<br><input type="radio"/> 5 a 6 veces semana<br><input type="radio"/> 1 vez al día<br><input type="radio"/> 2 a 3 veces al día<br><input type="radio"/> 5 a 6 veces al día<br><input type="radio"/> más 6 veces al día |

|                       |                                                                                                                                                                                                                                                                                                                                                                                                              |
|-----------------------|--------------------------------------------------------------------------------------------------------------------------------------------------------------------------------------------------------------------------------------------------------------------------------------------------------------------------------------------------------------------------------------------------------------|
| cafe descafeinado     | <input type="radio"/> Nunca o menos 1 vez al mes<br><input type="radio"/> 1 a 3 veces mes<br><input checked="" type="radio"/> 1 vez semana<br><input type="radio"/> 2 a 4 veces semana<br><input type="radio"/> 5 a 6 veces semana<br><input type="radio"/> 1 vez al día<br><input type="radio"/> 2 a 3 veces al día<br><input type="radio"/> 5 a 6 veces al día<br><input type="radio"/> más 6 veces al día |
| te o infusión         | <input checked="" type="radio"/> Nunca o menos 1 vez al mes<br><input type="radio"/> 1 a 3 veces mes<br><input type="radio"/> 1 vez semana<br><input type="radio"/> 2 a 4 veces semana<br><input type="radio"/> 5 a 6 veces semana<br><input type="radio"/> 1 vez al día<br><input type="radio"/> 2 a 3 veces al día<br><input type="radio"/> 5 a 6 veces al día<br><input type="radio"/> más 6 veces al día |
| sopa o puré verduras  | <input type="radio"/> Nunca o menos 1 vez al mes<br><input type="radio"/> 1 a 3 veces mes<br><input type="radio"/> 1 vez semana<br><input checked="" type="radio"/> 2 a 4 veces semana<br><input type="radio"/> 5 a 6 veces semana<br><input type="radio"/> 1 vez al día<br><input type="radio"/> 2 a 3 veces al día<br><input type="radio"/> 5 a 6 veces al día<br><input type="radio"/> más 6 veces al día |
| croquetas pollo jamón | <input type="radio"/> Nunca o menos 1 vez al mes<br><input checked="" type="radio"/> 1 a 3 veces mes<br><input type="radio"/> 1 vez semana<br><input type="radio"/> 2 a 4 veces semana<br><input type="radio"/> 5 a 6 veces semana<br><input type="radio"/> 1 vez al día<br><input type="radio"/> 2 a 3 veces al día<br><input type="radio"/> 5 a 6 veces al día<br><input type="radio"/> más 6 veces al día |
| croquetas pescado     | <input type="radio"/> Nunca o menos 1 vez al mes<br><input checked="" type="radio"/> 1 a 3 veces mes<br><input type="radio"/> 1 vez semana<br><input type="radio"/> 2 a 4 veces semana<br><input type="radio"/> 5 a 6 veces semana<br><input type="radio"/> 1 vez al día<br><input type="radio"/> 2 a 3 veces al día<br><input type="radio"/> 5 a 6 veces al día<br><input type="radio"/> más 6 veces al día |
| mayonesa              | <input type="radio"/> Nunca o menos 1 vez al mes<br><input checked="" type="radio"/> 1 a 3 veces mes<br><input type="radio"/> 1 vez semana<br><input type="radio"/> 2 a 4 veces semana<br><input type="radio"/> 5 a 6 veces semana<br><input type="radio"/> 1 vez al día<br><input type="radio"/> 2 a 3 veces al día<br><input type="radio"/> 5 a 6 veces al día<br><input type="radio"/> más 6 veces al día |

---

salsa tomate

- ☐ Nunca o menos 1 vez al mes  
☒ 1 a 3 veces mes  
☐ 1 vez semana  
☐ 2 a 4 veces semana  
☐ 5 a 6 veces semana  
☐ 1 vez al día  
☐ 2 a 3 veces al día  
☐ 5 a 6 veces al día  
☐ más 6 veces al día

---

ketchup

- ☐ Nunca o menos 1 vez al mes  
☒ 1 a 3 veces mes  
☐ 1 vez semana  
☐ 2 a 4 veces semana  
☐ 5 a 6 veces semana  
☐ 1 vez al día  
☐ 2 a 3 veces al día  
☐ 5 a 6 veces al día  
☐ más 6 veces al día

---

sal

- ☐ Nunca o menos 1 vez al mes  
☐ 1 a 3 veces mes  
☐ 1 vez semana  
☐ 2 a 4 veces semana  
☐ 5 a 6 veces semana  
☒ 1 vez al día  
☐ 2 a 3 veces al día  
☐ 5 a 6 veces al día  
☐ más 6 veces al día

---

ajo

- ☐ Nunca o menos 1 vez al mes  
☐ 1 a 3 veces mes  
☒ 1 vez semana  
☐ 2 a 4 veces semana  
☐ 5 a 6 veces semana  
☐ 1 vez al día  
☐ 2 a 3 veces al día  
☐ 5 a 6 veces al día  
☐ más 6 veces al día

---

mermelada o miel

- ☐ Nunca o menos 1 vez al mes  
☒ 1 a 3 veces mes  
☐ 1 vez semana  
☐ 2 a 4 veces semana  
☐ 5 a 6 veces semana  
☐ 1 vez al día  
☐ 2 a 3 veces al día  
☐ 5 a 6 veces al día  
☐ más 6 veces al día

---

azúcar

- ☐ Nunca o menos 1 vez al mes  
☐ 1 a 3 veces mes  
☐ 1 vez semana  
☒ 2 a 4 veces semana  
☐ 5 a 6 veces semana  
☐ 1 vez al día  
☐ 2 a 3 veces al día  
☐ 5 a 6 veces al día  
☐ más 6 veces al día

|                                       |                                                                                                                                                                                                                                                                                                                                                                                                                                                                                                                               |
|---------------------------------------|-------------------------------------------------------------------------------------------------------------------------------------------------------------------------------------------------------------------------------------------------------------------------------------------------------------------------------------------------------------------------------------------------------------------------------------------------------------------------------------------------------------------------------|
| Otro alimento                         |                                                                                                                                                                                                                                                                                                                                                                                                                                                                                                                               |
| suplementos vitamínicos               | <input type="radio"/> si<br><input checked="" type="radio"/> no                                                                                                                                                                                                                                                                                                                                                                                                                                                               |
| suplementos vitamínicos               |                                                                                                                                                                                                                                                                                                                                                                                                                                                                                                                               |
| dieta previa                          | <input type="radio"/> si<br><input checked="" type="radio"/> no                                                                                                                                                                                                                                                                                                                                                                                                                                                               |
| motivo dieta                          | <input checked="" type="radio"/> no dieta<br><input type="radio"/> control peso<br><input type="radio"/> control colesterol<br><input type="radio"/> control diabetes<br><input type="radio"/> problemas estómago<br><input type="radio"/> problemas vesícula o hepáticos<br><input type="radio"/> HTA o cardiopatía<br><input type="radio"/> problemas renales<br><input type="radio"/> alergia alimentaria<br><input type="radio"/> ácido úrico elevado<br><input type="radio"/> vegetariana<br><input type="radio"/> otros |
| cambio alimentos año previo gestación | <input type="radio"/> si<br><input checked="" type="radio"/> no                                                                                                                                                                                                                                                                                                                                                                                                                                                               |
| cambio lácteos                        | <input type="radio"/> eliminado<br><input type="radio"/> disminuido<br><input type="radio"/> igual<br><input type="radio"/> aumentado<br><input type="radio"/> no sabe                                                                                                                                                                                                                                                                                                                                                        |
| cambio huevos                         | <input type="radio"/> eliminado<br><input type="radio"/> disminuido<br><input type="radio"/> igual<br><input type="radio"/> aumentado<br><input type="radio"/> no sabe                                                                                                                                                                                                                                                                                                                                                        |
| cambio carne                          | <input type="radio"/> eliminado<br><input type="radio"/> disminuido<br><input type="radio"/> igual<br><input type="radio"/> aumentado<br><input type="radio"/> no sabe                                                                                                                                                                                                                                                                                                                                                        |
| cambio pescado                        | <input type="radio"/> eliminado<br><input type="radio"/> disminuido<br><input type="radio"/> igual<br><input type="radio"/> aumentado<br><input type="radio"/> no sabe                                                                                                                                                                                                                                                                                                                                                        |
| cambio verduras                       | <input type="radio"/> eliminado<br><input type="radio"/> disminuido<br><input type="radio"/> igual<br><input type="radio"/> aumentado<br><input type="radio"/> no sabe                                                                                                                                                                                                                                                                                                                                                        |

|                            |                                                                                                                                                                                                                        |
|----------------------------|------------------------------------------------------------------------------------------------------------------------------------------------------------------------------------------------------------------------|
| cambio legumbres           | <input type="radio"/> eliminado<br><input type="radio"/> disminuido<br><input type="radio"/> igual<br><input type="radio"/> aumentado<br><input type="radio"/> no sabe                                                 |
| cambio fruta               | <input type="radio"/> eliminado<br><input type="radio"/> disminuido<br><input type="radio"/> igual<br><input type="radio"/> aumentado<br><input type="radio"/> no sabe                                                 |
| cambio pan                 | <input type="radio"/> eliminado<br><input type="radio"/> disminuido<br><input type="radio"/> igual<br><input type="radio"/> aumentado<br><input type="radio"/> no sabe                                                 |
| cambio aceite oliva        | <input type="radio"/> eliminado<br><input type="radio"/> disminuido<br><input type="radio"/> igual<br><input type="radio"/> aumentado<br><input type="radio"/> no sabe                                                 |
| cambio mante o margarina   | <input type="radio"/> eliminado<br><input type="radio"/> disminuido<br><input type="radio"/> igual<br><input type="radio"/> aumentado<br><input type="radio"/> no sabe                                                 |
| cambio azúcar y dulces     | <input type="radio"/> eliminado<br><input type="radio"/> disminuido<br><input type="radio"/> igual<br><input type="radio"/> aumentado<br><input type="radio"/> no sabe                                                 |
| cambio bebidas alcohólicas | <input type="radio"/> eliminado<br><input type="radio"/> disminuido<br><input type="radio"/> igual<br><input type="radio"/> aumentado<br><input type="radio"/> no sabe                                                 |
| frecuencia comidas fritas  | <input type="radio"/> a diario<br><input type="radio"/> 5 a 6 veces semana<br><input checked="" type="radio"/> 2 a 4 veces semana<br><input type="radio"/> 1 vez semana<br><input type="radio"/> menos de 1 vez semana |
| carne                      | <input type="radio"/> no como<br><input type="radio"/> cruda<br><input type="radio"/> poco hecha<br><input type="radio"/> hecha<br><input checked="" type="radio"/> muy hecha                                          |
| grasa visible carne        | <input type="radio"/> quita toda<br><input checked="" type="radio"/> quita mayoría<br><input type="radio"/> quita un poco<br><input type="radio"/> no quita nada                                                       |



|                                |                                                                                                                                                                                                                                                          |
|--------------------------------|----------------------------------------------------------------------------------------------------------------------------------------------------------------------------------------------------------------------------------------------------------|
| cocina carne                   | <input checked="" type="radio"/> a la plancha<br><input type="radio"/> a la parrilla<br><input type="radio"/> asada<br><input type="radio"/> frita<br><input type="radio"/> guisada                                                                      |
| tostado quemado carne          | <input checked="" type="radio"/> nunca<br><input type="radio"/> 1 vez mes<br><input type="radio"/> 2 a 3 veces mes<br><input type="radio"/> 1 vez semana<br><input type="radio"/> 2 a 3 semanas                                                          |
| tostado quemado pescado        | <input checked="" type="radio"/> nunca<br><input type="radio"/> 1 vez mes<br><input type="radio"/> 2 a 3 veces mes<br><input type="radio"/> 1 vez semana<br><input type="radio"/> 2 a 3 semanas                                                          |
| socarrat paella                | <input checked="" type="radio"/> nunca<br><input type="radio"/> 1 vez mes<br><input type="radio"/> 2 a 3 veces mes<br><input type="radio"/> 1 vez semana<br><input type="radio"/> 2 a 3 semanas                                                          |
| grasa o aceite cocinar         | <input type="radio"/> mantequilla<br><input type="radio"/> margarina<br><input type="radio"/> aceite oliva<br><input checked="" type="radio"/> aceite oliva virgen extra<br><input type="radio"/> aceite vegetal<br><input type="radio"/> mezcla aceites |
| grasa aceite aliñar            | <input type="radio"/> mantequilla<br><input type="radio"/> margarina<br><input type="radio"/> aceite oliva<br><input checked="" type="radio"/> aceite oliva virgen extra<br><input type="radio"/> aceite vegetal<br><input type="radio"/> mezcla aceites |
| grasa aceite freir             | <input type="radio"/> mantequilla<br><input type="radio"/> margarina<br><input type="radio"/> aceite oliva<br><input checked="" type="radio"/> aceite oliva virgen extra<br><input type="radio"/> aceite vegetal<br><input type="radio"/> mezcla aceites |
| Ejercicio cuestionario         | <input checked="" type="radio"/> si<br><input type="radio"/> no                                                                                                                                                                                          |
| horas de sueño incluido siesta | [*DATA REMOVED*]                                                                                                                                                                                                                                         |
| minutos siesta                 | [*DATA REMOVED*]                                                                                                                                                                                                                                         |
| horas televisión semana        | [*DATA REMOVED*]                                                                                                                                                                                                                                         |

|                                        |                                                                                                                                                                                                                                                                                                                                                                           |
|----------------------------------------|---------------------------------------------------------------------------------------------------------------------------------------------------------------------------------------------------------------------------------------------------------------------------------------------------------------------------------------------------------------------------|
| actividad trabajo                      | <input type="radio"/> casi siempre sentado<br><input type="radio"/> sentado 50 por cien<br><input checked="" type="radio"/> casi siempre de pie, quieto<br><input type="radio"/> casi siempre levantado caminando y llevando pocas cosas<br><input type="radio"/> casi siempre levantado, caminando y llevado muchas cosas<br><input type="radio"/> trabajo manual pesado |
| tiempo caminar o bici al día           | <input type="radio"/> casi nunca<br><input checked="" type="radio"/> menos 20min día<br><input type="radio"/> 20 a 40 min día<br><input type="radio"/> 40 a 60 min día<br><input type="radio"/> 1h o 1h y media día<br><input type="radio"/> más de 1h y media al día                                                                                                     |
| tiempo tareas casa al día              | <input type="radio"/> menos de 1h día<br><input checked="" type="radio"/> 1 a 2h día<br><input type="radio"/> 3 a 4h día<br><input type="radio"/> 5 a 6h día<br><input type="radio"/> 7 a 8h día<br><input type="radio"/> más de 8h día                                                                                                                                   |
| tiempo libre televisión ordenador leer | <input type="radio"/> menos 1h día<br><input type="radio"/> 1h día<br><input checked="" type="radio"/> 2h día<br><input type="radio"/> 3h día<br><input type="radio"/> 4h día<br><input type="radio"/> 5 a 6h día<br><input type="radio"/> mas 6h día                                                                                                                     |
| tiempo libre ejercicio o deporte       | <input type="radio"/> menos 1h semana<br><input checked="" type="radio"/> 1h semana<br><input type="radio"/> 2h semana<br><input type="radio"/> 3h semana<br><input type="radio"/> 4 a 5h semana<br><input type="radio"/> mas 5h semana                                                                                                                                   |
| como se considera                      | <input type="radio"/> sedentaria<br><input type="radio"/> poco activa<br><input checked="" type="radio"/> moderadamente activa<br><input type="radio"/> bastante activa<br><input type="radio"/> muy activa<br><input type="radio"/> no sabe                                                                                                                              |
| FUR                                    | [*DATA REMOVED*]                                                                                                                                                                                                                                                                                                                                                          |
| Semanas gestación 2T                   | [*DATA REMOVED*]                                                                                                                                                                                                                                                                                                                                                          |
| Días gestación 2T                      | [*DATA REMOVED*]                                                                                                                                                                                                                                                                                                                                                          |
| DBP 2T                                 | [*DATA REMOVED*]                                                                                                                                                                                                                                                                                                                                                          |
| CC 2T                                  | [*DATA REMOVED*]                                                                                                                                                                                                                                                                                                                                                          |
| AC 2T                                  | [*DATA REMOVED*]                                                                                                                                                                                                                                                                                                                                                          |

|                                                   |                                                                                                                                                                                                 |
|---------------------------------------------------|-------------------------------------------------------------------------------------------------------------------------------------------------------------------------------------------------|
| LF 2T                                             | [*DATA REMOVED*]                                                                                                                                                                                |
| PFE 2T (Hadlock)                                  | [*DATA REMOVED*]                                                                                                                                                                                |
| Semanas gestación 3T                              | [*DATA REMOVED*]                                                                                                                                                                                |
| días 3T                                           | [*DATA REMOVED*]                                                                                                                                                                                |
| DBP 3T                                            | [*DATA REMOVED*]                                                                                                                                                                                |
| CC 3T                                             | [*DATA REMOVED*]                                                                                                                                                                                |
| AC 3T                                             | [*DATA REMOVED*]                                                                                                                                                                                |
| LF 3T                                             | [*DATA REMOVED*]                                                                                                                                                                                |
| PFE 3T (Hadlock)                                  | [*DATA REMOVED*]                                                                                                                                                                                |
| Semanas de gestación final                        | [*DATA REMOVED*]                                                                                                                                                                                |
| días gestación final                              | [*DATA REMOVED*]                                                                                                                                                                                |
| Localización placenta                             | <input checked="" type="radio"/> anterior<br><input type="radio"/> lateral derecha<br><input type="radio"/> lateral izquierda<br><input type="radio"/> posterior<br><input type="radio"/> fondo |
| Presentación longitudinal cefálica                | <input type="radio"/> no<br><input checked="" type="radio"/> si                                                                                                                                 |
| Dorso                                             | <input type="radio"/> izquierda anterior<br><input type="radio"/> izquierda posterior<br><input type="radio"/> derecha anterior<br><input checked="" type="radio"/> derecha posterior           |
| diámetro biparietal                               | [*DATA REMOVED*]                                                                                                                                                                                |
| Circunferencia craneal                            | [*DATA REMOVED*]                                                                                                                                                                                |
| Circunferencia abdominal                          | [*DATA REMOVED*]                                                                                                                                                                                |
| Longitud de femur                                 | [*DATA REMOVED*]                                                                                                                                                                                |
| tejido celular subcutáneo a nivel del muslo en mm | [*DATA REMOVED*]                                                                                                                                                                                |
| tejido celular subcutáneo en abdomen en mm        | [*DATA REMOVED*]                                                                                                                                                                                |
| Volumen del muslo en cm3                          | [*DATA REMOVED*]                                                                                                                                                                                |
| Peso fetal estimado según fórmula de Hadlock      | [*DATA REMOVED*]                                                                                                                                                                                |

|                                               |                                                                                                                                               |
|-----------------------------------------------|-----------------------------------------------------------------------------------------------------------------------------------------------|
| Percentil                                     | [*DATA REMOVED*]                                                                                                                              |
| Peso fetal estimado según fórmula de Scioscia | <hr/>                                                                                                                                         |
| Peso fetal estimado según fórmula de LEE      | <hr/>                                                                                                                                         |
| Tipo de parto                                 | <input type="radio"/> eutocico<br><input type="radio"/> instrumentado/ventosa<br><input type="radio"/> cesarea                                |
| fecha de nacimiento                           | [*DATA REMOVED*]                                                                                                                              |
| Días entre exploración y nacimiento           | [*DATA REMOVED*]                                                                                                                              |
| Peso RN en g                                  | [*DATA REMOVED*]                                                                                                                              |
| sexo                                          | <input checked="" type="radio"/> mujer<br><input type="radio"/> hombre                                                                        |
| Apgar 1 minuto                                | [*DATA REMOVED*]                                                                                                                              |
| Apgar 5 minutos                               | [*DATA REMOVED*]                                                                                                                              |
| Apgar 10 minutos                              | <hr/>                                                                                                                                         |
| antecedente Covid durante gestación           | <input type="radio"/> Yes<br><input checked="" type="radio"/> No                                                                              |
| Nivel de estudios                             | <input type="radio"/> ninguno<br><input type="radio"/> primarios<br><input type="radio"/> secundarios<br><input type="radio"/> universitarios |

# Base\_datos\_estimacion\_peso\_fetal

|                                       |                                                                                                                                                                                                                                                                                      |
|---------------------------------------|--------------------------------------------------------------------------------------------------------------------------------------------------------------------------------------------------------------------------------------------------------------------------------------|
| Número de identificación participante | 168                                                                                                                                                                                                                                                                                  |
| CODIGO PARTICIPANTE                   |                                                                                                                                                                                                                                                                                      |
| Edad                                  | [*DATA REMOVED*]                                                                                                                                                                                                                                                                     |
| Gestaciones                           | <input checked="" type="radio"/> 1<br><input type="radio"/> 2<br><input type="radio"/> 3<br><input type="radio"/> mas de 3                                                                                                                                                           |
| partos                                | <input checked="" type="radio"/> 0<br><input type="radio"/> 1<br><input type="radio"/> 2<br><input type="radio"/> 3<br><input type="radio"/> mas de 3                                                                                                                                |
| cesáreas                              | <input checked="" type="radio"/> 0<br><input type="radio"/> 1<br><input type="radio"/> 2<br><input type="radio"/> 3<br><input type="radio"/> mas de 3                                                                                                                                |
| Abortos                               | <input checked="" type="radio"/> 0<br><input type="radio"/> 1<br><input type="radio"/> 2<br><input type="radio"/> 3<br><input type="radio"/> mas de 3                                                                                                                                |
| Tipo de gestacion                     | <input checked="" type="radio"/> espontanea<br><input type="radio"/> IAC inseminación artificial conyuge<br><input type="radio"/> IAD inseminación artificial donante<br><input type="radio"/> FIV Fecundación in Vitro<br><input type="radio"/> Ovodon FIV con donación de ovocitos |
| peso previo a embarazo                | [*DATA REMOVED*]                                                                                                                                                                                                                                                                     |
| Ganancia ponderal embarazo            |                                                                                                                                                                                                                                                                                      |
| Talla madre                           | [*DATA REMOVED*]                                                                                                                                                                                                                                                                     |
| IMC previo embarazo                   | 20.23950075898128                                                                                                                                                                                                                                                                    |
| Patología obstétrica                  | <input checked="" type="radio"/> no<br><input type="radio"/> si                                                                                                                                                                                                                      |
| Diabetes pregestacional               | <input checked="" type="radio"/> no<br><input type="radio"/> si                                                                                                                                                                                                                      |
| Diabetes gestacional                  | <input checked="" type="radio"/> no<br><input type="radio"/> si                                                                                                                                                                                                                      |

|                                            |                                                                                                                                                                                      |
|--------------------------------------------|--------------------------------------------------------------------------------------------------------------------------------------------------------------------------------------|
| Diabetes gestacional con insulina          | <input checked="" type="radio"/> no<br><input type="radio"/> si                                                                                                                      |
| Diabetes gestacional con dieta y ejercicio | <input checked="" type="radio"/> no<br><input type="radio"/> si                                                                                                                      |
| Percentil fetos previos                    | <input checked="" type="radio"/> Nada<br><input type="radio"/> percentil menor de 10<br><input type="radio"/> percentil entre 10 y 90<br><input type="radio"/> percentil mayor de 90 |
| Exfumadora                                 | <input checked="" type="radio"/> Nada<br><input type="radio"/> menos de 5 años<br><input type="radio"/> 5 a 10 años<br><input type="radio"/> mayor o igual a 10 años                 |
| Hábito tabáquico                           | <input checked="" type="radio"/> no<br><input type="radio"/> si                                                                                                                      |
| fumadora                                   | [*DATA REMOVED*]                                                                                                                                                                     |
| Consumo otros tóxicos                      | <input checked="" type="radio"/> no<br><input type="radio"/> si                                                                                                                      |
| Hb 1T                                      | [*DATA REMOVED*]                                                                                                                                                                     |
| Htc 1T                                     | [*DATA REMOVED*]                                                                                                                                                                     |
| Hb 2T                                      | [*DATA REMOVED*]                                                                                                                                                                     |
| HTC 2T                                     | [*DATA REMOVED*]                                                                                                                                                                     |
| Hb 3T                                      | [*DATA REMOVED*]                                                                                                                                                                     |
| HTC 3T                                     | [*DATA REMOVED*]                                                                                                                                                                     |
| Suplemento FE oral                         | <input checked="" type="radio"/> si<br><input type="radio"/> no                                                                                                                      |
| Suplemento fe iv                           | <input type="radio"/> si<br><input checked="" type="radio"/> no                                                                                                                      |
| Transfusión                                | <input checked="" type="radio"/> no<br><input type="radio"/> si                                                                                                                      |
| Solicitada Vit D                           | <input checked="" type="radio"/> no<br><input type="radio"/> si                                                                                                                      |
| Deficit vit D                              | <input type="radio"/> no<br><input type="radio"/> si                                                                                                                                 |
| Suplemento vit D                           | <input type="radio"/> si<br><input type="radio"/> no                                                                                                                                 |

|                       |                                                                                                                                                                                                                                                                                                                                                                                                              |
|-----------------------|--------------------------------------------------------------------------------------------------------------------------------------------------------------------------------------------------------------------------------------------------------------------------------------------------------------------------------------------------------------------------------------------------------------|
| Dieta, cuestionario   | <input checked="" type="radio"/> si<br><input type="radio"/> no                                                                                                                                                                                                                                                                                                                                              |
| Leche entera          | <input type="radio"/> Nunca o menos 1 vez al mes<br><input type="radio"/> 1 a 3 veces mes<br><input type="radio"/> 1 vez semana<br><input type="radio"/> 2 a 4 veces semana<br><input type="radio"/> 5 a 6 veces semana<br><input checked="" type="radio"/> 1 vez al día<br><input type="radio"/> 2 a 3 veces al día<br><input type="radio"/> 5 a 6 veces al día<br><input type="radio"/> más 6 veces al día |
| Leche semidesnatada   | <input checked="" type="radio"/> Nunca o menos 1 vez al mes<br><input type="radio"/> 1 a 3 veces mes<br><input type="radio"/> 1 vez semana<br><input type="radio"/> 2 a 4 veces semana<br><input type="radio"/> 5 a 6 veces semana<br><input type="radio"/> 1 vez al día<br><input type="radio"/> 2 a 3 veces al día<br><input type="radio"/> 5 a 6 veces al día<br><input type="radio"/> mas 6 veces al día |
| Leche desnatada       | <input checked="" type="radio"/> Nunca o menos 1 vez al mes<br><input type="radio"/> 1 a 3 veces mes<br><input type="radio"/> 1 vez semana<br><input type="radio"/> 2 a 4 veces semana<br><input type="radio"/> 5 a 6 veces semana<br><input type="radio"/> 1 vez al día<br><input type="radio"/> 2 a 3 veces al día<br><input type="radio"/> 5 a 6 veces al día<br><input type="radio"/> más 6 veces al día |
| Leche condensada      | <input checked="" type="radio"/> Nunca o menos 1 vez al mes<br><input type="radio"/> 1 a 3 veces mes<br><input type="radio"/> 1 vez semana<br><input type="radio"/> 2 a 4 veces semana<br><input type="radio"/> 5 a 6 veces semana<br><input type="radio"/> 1 vez al día<br><input type="radio"/> 2 a 3 veces al día<br><input type="radio"/> 5 a 6 veces al día<br><input type="radio"/> más 6 veces al día |
| nata o crema de leche | <input type="radio"/> Nunca o menos 1 vez al mes<br><input checked="" type="radio"/> 1 a 3 veces mes<br><input type="radio"/> 1 vez semana<br><input type="radio"/> 2 a 4 veces semana<br><input type="radio"/> 5 a 6 veces semana<br><input type="radio"/> 1 vez al día<br><input type="radio"/> 2 a 3 veces al día<br><input type="radio"/> 5 a 6 veces al día<br><input type="radio"/> más 6 veces al día |

---

Yogurt Entero

- ☐ Nunca o menos 1 vez al mes  
☐ 1 a 3 veces mes  
☐ 1 vez semana  
☒ 2 a 4 veces semana  
☐ 5 a 6 veces semana  
☐ 1 vez al día  
☐ 2 a 3 veces al día  
☐ 5 a 6 veces al día  
☐ más 6 veces al día

---

Yogurt desnatado

- ☒ Nunca o menos 1 vez al mes  
☐ 1 a 3 veces mes  
☐ 1 vez semana  
☐ 2 a 4 veces semana  
☐ 5 a 6 veces semana  
☐ 1 vez al día  
☐ 2 a 3 veces al día  
☐ 5 a 6 veces al día  
☐ más 6 veces al día

---

100g requesón o queso blando o queso fresco

- ☒ Nunca o menos 1 vez al mes  
☐ 1 a 3 veces mes  
☐ 1 vez semana  
☐ 2 a 4 veces semana  
☐ 5 a 6 veces semana  
☐ 1 vez al día  
☐ 2 a 3 veces al día  
☐ 5 a 6 veces al día  
☐ más 6 veces al día

---

queso curado o semicurado o cremoso

- ☒ Nunca o menos 1 vez al mes  
☐ 1 a 3 veces mes  
☐ 1 vez semana  
☐ 2 a 4 veces semana  
☐ 5 a 6 veces semana  
☐ 1 vez al día  
☐ 2 a 3 veces al día  
☐ 5 a 6 veces al día  
☐ más 6 veces al día

---

natillas flan pudding

- ☐ Nunca o menos 1 vez al mes  
☐ 1 a 3 veces mes  
☒ 1 vez semana  
☐ 2 a 4 veces semana  
☐ 5 a 6 veces semana  
☐ 1 vez al día  
☐ 2 a 3 veces al día  
☐ 5 a 6 veces al día  
☐ más 6 veces al día

---

Helado

- ☐ Nunca o menos 1 vez al mes  
☐ 1 a 3 veces mes  
☐ 1 vez semana  
☒ 2 a 4 veces semana  
☐ 5 a 6 veces semana  
☐ 1 vez al día  
☐ 2 a 3 veces al día  
☐ 5 a 6 veces al día  
☐ más 6 veces al día



|                                      |                                                                                                                                                                                                                                                                                                                                                                                                              |
|--------------------------------------|--------------------------------------------------------------------------------------------------------------------------------------------------------------------------------------------------------------------------------------------------------------------------------------------------------------------------------------------------------------------------------------------------------------|
| huevo                                | <input type="radio"/> Nunca o menos 1 vez al mes<br><input type="radio"/> 1 a 3 veces mes<br><input type="radio"/> 1 vez semana<br><input checked="" type="radio"/> 2 a 4 veces semana<br><input type="radio"/> 5 a 6 veces semana<br><input type="radio"/> 1 vez al día<br><input type="radio"/> 2 a 3 veces al día<br><input type="radio"/> 5 a 6 veces al día<br><input type="radio"/> más 6 veces al día |
| Pollo con piel                       | <input type="radio"/> Nunca o menos 1 vez al mes<br><input checked="" type="radio"/> 1 a 3 veces mes<br><input type="radio"/> 1 vez semana<br><input type="radio"/> 2 a 4 veces semana<br><input type="radio"/> 5 a 6 veces semana<br><input type="radio"/> 1 vez al día<br><input type="radio"/> 2 a 3 veces al día<br><input type="radio"/> 5 a 6 veces al día<br><input type="radio"/> más 6 veces al día |
| pollo sin piel                       | <input type="radio"/> Nunca o menos 1 vez al mes<br><input type="radio"/> 1 a 3 veces mes<br><input type="radio"/> 1 vez semana<br><input checked="" type="radio"/> 2 a 4 veces semana<br><input type="radio"/> 5 a 6 veces semana<br><input type="radio"/> 1 vez al día<br><input type="radio"/> 2 a 3 veces al día<br><input type="radio"/> 5 a 6 veces al día<br><input type="radio"/> más 6 veces al día |
| Ternera o cerdo o cordero            | <input type="radio"/> Nunca o menos 1 vez al mes<br><input type="radio"/> 1 a 3 veces mes<br><input type="radio"/> 1 vez semana<br><input checked="" type="radio"/> 2 a 4 veces semana<br><input type="radio"/> 5 a 6 veces semana<br><input type="radio"/> 1 vez al día<br><input type="radio"/> 2 a 3 veces al día<br><input type="radio"/> 5 a 6 veces al día<br><input type="radio"/> más 6 veces al día |
| carne caza: Conejo o codorniz o pato | <input checked="" type="radio"/> Nunca o menos 1 vez al mes<br><input type="radio"/> 1 a 3 veces mes<br><input type="radio"/> 1 vez semana<br><input type="radio"/> 2 a 4 veces semana<br><input type="radio"/> 5 a 6 veces semana<br><input type="radio"/> 1 vez al día<br><input type="radio"/> 2 a 3 veces al día<br><input type="radio"/> 5 a 6 veces al día<br><input type="radio"/> más 6 veces al día |
| Hígado de ternera o cerdo o pollo    | <input checked="" type="radio"/> Nunca o menos 1 vez al mes<br><input type="radio"/> 1 a 3 veces mes<br><input type="radio"/> 1 vez semana<br><input type="radio"/> 2 a 4 veces semana<br><input type="radio"/> 5 a 6 veces semana<br><input type="radio"/> 1 vez al día<br><input type="radio"/> 2 a 3 veces al día<br><input type="radio"/> 5 a 6 veces al día<br><input type="radio"/> más 6 veces al día |

---

Vísceras

- ☒ Nunca o menos 1 vez al mes  
☐ 1 a 3 veces mes  
☐ 1 vez semana  
☐ 2 a 4 veces semana  
☐ 5 a 6 veces semana  
☐ 1 vez al día  
☐ 2 a 3 veces al día  
☐ 5 a 6 veces al día  
☐ más 6 veces al día

---

Embutido

- ☒ Nunca o menos 1 vez al mes  
☐ 1 a 3 veces mes  
☐ 1 vez semana  
☐ 2 a 4 veces semana  
☐ 5 a 6 veces semana  
☐ 1 vez al día  
☐ 2 a 3 veces al día  
☐ 5 a 6 veces al día  
☐ más 6 veces al día

---

Salchicha o similar

- ☒ Nunca o menos 1 vez al mes  
☐ 1 a 3 veces mes  
☐ 1 vez semana  
☐ 2 a 4 veces semana  
☐ 5 a 6 veces semana  
☐ 1 vez al día  
☐ 2 a 3 veces al día  
☐ 5 a 6 veces al día  
☐ más 6 veces al día

---

Pate o foiegras

- ☒ Nunca o menos 1 vez al mes  
☐ 1 a 3 veces mes  
☐ 1 vez semana  
☐ 2 a 4 veces semana  
☐ 5 a 6 veces semana  
☐ 1 vez al día  
☐ 2 a 3 veces al día  
☐ 5 a 6 veces al día  
☐ más 6 veces al día

---

Hamburguesa

- ☐ Nunca o menos 1 vez al mes  
☒ 1 a 3 veces mes  
☐ 1 vez semana  
☐ 2 a 4 veces semana  
☐ 5 a 6 veces semana  
☐ 1 vez al día  
☐ 2 a 3 veces al día  
☐ 5 a 6 veces al día  
☐ más 6 veces al día

---

tocino o bacon

- ☐ Nunca o menos 1 vez al mes  
☐ 1 a 3 veces mes  
☒ 1 vez semana  
☐ 2 a 4 veces semana  
☐ 5 a 6 veces semana  
☐ 1 vez al día  
☐ 2 a 3 veces al día  
☐ 5 a 6 veces al día  
☐ más 6 veces al día

|                        |                                                                                                                                                                                                                                                                                                                                                                                                              |
|------------------------|--------------------------------------------------------------------------------------------------------------------------------------------------------------------------------------------------------------------------------------------------------------------------------------------------------------------------------------------------------------------------------------------------------------|
| Pescado frito          | <input checked="" type="radio"/> Nunca o menos 1 vez al mes<br><input type="radio"/> 1 a 3 veces mes<br><input type="radio"/> 1 vez semana<br><input type="radio"/> 2 a 4 veces semana<br><input type="radio"/> 5 a 6 veces semana<br><input type="radio"/> 1 vez al día<br><input type="radio"/> 2 a 3 veces al día<br><input type="radio"/> 5 a 6 veces al día<br><input type="radio"/> más 6 veces al día |
| pescado hervido blanco | <input checked="" type="radio"/> Nunca o menos 1 vez al mes<br><input type="radio"/> 1 a 3 veces mes<br><input type="radio"/> 1 vez semana<br><input type="radio"/> 2 a 4 veces semana<br><input type="radio"/> 5 a 6 veces semana<br><input type="radio"/> 1 vez al día<br><input type="radio"/> 2 a 3 veces al día<br><input type="radio"/> 5 a 6 veces al día<br><input type="radio"/> más 6 veces al día |
| pescado hervido azul   | <input checked="" type="radio"/> Nunca o menos 1 vez al mes<br><input type="radio"/> 1 a 3 veces mes<br><input type="radio"/> 1 vez semana<br><input type="radio"/> 2 a 4 veces semana<br><input type="radio"/> 5 a 6 veces semana<br><input type="radio"/> 1 vez al día<br><input type="radio"/> 2 a 3 veces al día<br><input type="radio"/> 5 a 6 veces al día<br><input type="radio"/> más 6 veces al día |
| otros pescado azul     | <input checked="" type="radio"/> Nunca o menos 1 vez al mes<br><input type="radio"/> 1 a 3 veces mes<br><input type="radio"/> 1 vez semana<br><input type="radio"/> 2 a 4 veces semana<br><input type="radio"/> 5 a 6 veces semana<br><input type="radio"/> 1 vez al día<br><input type="radio"/> 2 a 3 veces al día<br><input type="radio"/> 5 a 6 veces al día<br><input type="radio"/> más 6 veces al día |
| atun conserva          | <input checked="" type="radio"/> Nunca o menos 1 vez al mes<br><input type="radio"/> 1 a 3 veces mes<br><input type="radio"/> 1 vez semana<br><input type="radio"/> 2 a 4 veces semana<br><input type="radio"/> 5 a 6 veces semana<br><input type="radio"/> 1 vez al día<br><input type="radio"/> 2 a 3 veces al día<br><input type="radio"/> 5 a 6 veces al día<br><input type="radio"/> más 6 veces al día |
| sardina conserva       | <input checked="" type="radio"/> Nunca o menos 1 vez al mes<br><input type="radio"/> 1 a 3 veces mes<br><input type="radio"/> 1 vez semana<br><input type="radio"/> 2 a 4 veces semana<br><input type="radio"/> 5 a 6 veces semana<br><input type="radio"/> 1 vez al día<br><input type="radio"/> 2 a 3 veces al día<br><input type="radio"/> 5 a 6 veces al día<br><input type="radio"/> más 6 veces al día |

|                                         |                                                                                                                                                                                                                                                                                                                                                                                                              |
|-----------------------------------------|--------------------------------------------------------------------------------------------------------------------------------------------------------------------------------------------------------------------------------------------------------------------------------------------------------------------------------------------------------------------------------------------------------------|
| pescado ahumado                         | <input checked="" type="radio"/> Nunca o menos 1 vez al mes<br><input type="radio"/> 1 a 3 veces mes<br><input type="radio"/> 1 vez semana<br><input type="radio"/> 2 a 4 veces semana<br><input type="radio"/> 5 a 6 veces semana<br><input type="radio"/> 1 vez al día<br><input type="radio"/> 2 a 3 veces al día<br><input type="radio"/> 5 a 6 veces al día<br><input type="radio"/> más 6 veces al día |
| almejas o mejillones o ostras unos 100g | <input checked="" type="radio"/> Nunca o menos 1 vez al mes<br><input type="radio"/> 1 a 3 veces mes<br><input type="radio"/> 1 vez semana<br><input type="radio"/> 2 a 4 veces semana<br><input type="radio"/> 5 a 6 veces semana<br><input type="radio"/> 1 vez al día<br><input type="radio"/> 2 a 3 veces al día<br><input type="radio"/> 5 a 6 veces al día<br><input type="radio"/> más 6 veces al día |
| calamar o chipiron o sepia unos 100g    | <input checked="" type="radio"/> Nunca o menos 1 vez al mes<br><input type="radio"/> 1 a 3 veces mes<br><input type="radio"/> 1 vez semana<br><input type="radio"/> 2 a 4 veces semana<br><input type="radio"/> 5 a 6 veces semana<br><input type="radio"/> 1 vez al día<br><input type="radio"/> 2 a 3 veces al día<br><input type="radio"/> 5 a 6 veces al día<br><input type="radio"/> más 6 veces al día |
| marisco unos 100g                       | <input checked="" type="radio"/> Nunca o menos 1 vez al mes<br><input type="radio"/> 1 a 3 veces mes<br><input type="radio"/> 1 vez semana<br><input type="radio"/> 2 a 4 veces semana<br><input type="radio"/> 5 a 6 veces semana<br><input type="radio"/> 1 vez al día<br><input type="radio"/> 2 a 3 veces al día<br><input type="radio"/> 5 a 6 veces al día<br><input type="radio"/> más 6 veces al día |
| Espinacas o acelgas cocinadas           | <input checked="" type="radio"/> Nunca o menos 1 vez al mes<br><input type="radio"/> 1 a 3 veces mes<br><input type="radio"/> 1 vez semana<br><input type="radio"/> 2 a 4 veces semana<br><input type="radio"/> 5 a 6 veces semana<br><input type="radio"/> 1 vez al día<br><input type="radio"/> 2 a 3 veces al día<br><input type="radio"/> 5 a 6 veces al día<br><input type="radio"/> más 6 veces al día |
| Col o coliflor o brocoli cocinado       | <input checked="" type="radio"/> Nunca o menos 1 vez al mes<br><input type="radio"/> 1 a 3 veces mes<br><input type="radio"/> 1 vez semana<br><input type="radio"/> 2 a 4 veces semana<br><input type="radio"/> 5 a 6 veces semana<br><input type="radio"/> 1 vez al día<br><input type="radio"/> 2 a 3 veces al día<br><input type="radio"/> 5 a 6 veces al día<br><input type="radio"/> más 6 veces al día |

---

|                              |                                                                                                                                                                                                                                                                                                                                                                                                              |
|------------------------------|--------------------------------------------------------------------------------------------------------------------------------------------------------------------------------------------------------------------------------------------------------------------------------------------------------------------------------------------------------------------------------------------------------------|
| Lechuga o endivia o escarola | <input type="radio"/> Nunca o menos 1 vez al mes<br><input type="radio"/> 1 a 3 veces mes<br><input checked="" type="radio"/> 1 vez semana<br><input type="radio"/> 2 a 4 veces semana<br><input type="radio"/> 5 a 6 veces semana<br><input type="radio"/> 1 vez al día<br><input type="radio"/> 2 a 3 veces al día<br><input type="radio"/> 5 a 6 veces al día<br><input type="radio"/> más 6 veces al día |
|------------------------------|--------------------------------------------------------------------------------------------------------------------------------------------------------------------------------------------------------------------------------------------------------------------------------------------------------------------------------------------------------------------------------------------------------------|

---

|                 |                                                                                                                                                                                                                                                                                                                                                                                                              |
|-----------------|--------------------------------------------------------------------------------------------------------------------------------------------------------------------------------------------------------------------------------------------------------------------------------------------------------------------------------------------------------------------------------------------------------------|
| tomate ensalada | <input type="radio"/> Nunca o menos 1 vez al mes<br><input type="radio"/> 1 a 3 veces mes<br><input type="radio"/> 1 vez semana<br><input checked="" type="radio"/> 2 a 4 veces semana<br><input type="radio"/> 5 a 6 veces semana<br><input type="radio"/> 1 vez al día<br><input type="radio"/> 2 a 3 veces al día<br><input type="radio"/> 5 a 6 veces al día<br><input type="radio"/> más 6 veces al día |
|-----------------|--------------------------------------------------------------------------------------------------------------------------------------------------------------------------------------------------------------------------------------------------------------------------------------------------------------------------------------------------------------------------------------------------------------|

---

|         |                                                                                                                                                                                                                                                                                                                                                                                                              |
|---------|--------------------------------------------------------------------------------------------------------------------------------------------------------------------------------------------------------------------------------------------------------------------------------------------------------------------------------------------------------------------------------------------------------------|
| cebolla | <input type="radio"/> Nunca o menos 1 vez al mes<br><input type="radio"/> 1 a 3 veces mes<br><input checked="" type="radio"/> 1 vez semana<br><input type="radio"/> 2 a 4 veces semana<br><input type="radio"/> 5 a 6 veces semana<br><input type="radio"/> 1 vez al día<br><input type="radio"/> 2 a 3 veces al día<br><input type="radio"/> 5 a 6 veces al día<br><input type="radio"/> más 6 veces al día |
|---------|--------------------------------------------------------------------------------------------------------------------------------------------------------------------------------------------------------------------------------------------------------------------------------------------------------------------------------------------------------------------------------------------------------------|

---

|                      |                                                                                                                                                                                                                                                                                                                                                                                                              |
|----------------------|--------------------------------------------------------------------------------------------------------------------------------------------------------------------------------------------------------------------------------------------------------------------------------------------------------------------------------------------------------------------------------------------------------------|
| Zanahoria o calabaza | <input checked="" type="radio"/> Nunca o menos 1 vez al mes<br><input type="radio"/> 1 a 3 veces mes<br><input type="radio"/> 1 vez semana<br><input type="radio"/> 2 a 4 veces semana<br><input type="radio"/> 5 a 6 veces semana<br><input type="radio"/> 1 vez al día<br><input type="radio"/> 2 a 3 veces al día<br><input type="radio"/> 5 a 6 veces al día<br><input type="radio"/> más 6 veces al día |
|----------------------|--------------------------------------------------------------------------------------------------------------------------------------------------------------------------------------------------------------------------------------------------------------------------------------------------------------------------------------------------------------------------------------------------------------|

---

|               |                                                                                                                                                                                                                                                                                                                                                                                                              |
|---------------|--------------------------------------------------------------------------------------------------------------------------------------------------------------------------------------------------------------------------------------------------------------------------------------------------------------------------------------------------------------------------------------------------------------|
| Judías verdes | <input checked="" type="radio"/> Nunca o menos 1 vez al mes<br><input type="radio"/> 1 a 3 veces mes<br><input type="radio"/> 1 vez semana<br><input type="radio"/> 2 a 4 veces semana<br><input type="radio"/> 5 a 6 veces semana<br><input type="radio"/> 1 vez al día<br><input type="radio"/> 2 a 3 veces al día<br><input type="radio"/> 5 a 6 veces al día<br><input type="radio"/> más 6 veces al día |
|---------------|--------------------------------------------------------------------------------------------------------------------------------------------------------------------------------------------------------------------------------------------------------------------------------------------------------------------------------------------------------------------------------------------------------------|

---

|                                |                                                                                                                                                                                                                                                                                                                                                                                                              |
|--------------------------------|--------------------------------------------------------------------------------------------------------------------------------------------------------------------------------------------------------------------------------------------------------------------------------------------------------------------------------------------------------------------------------------------------------------|
| Berenjena o calabacin o pepino | <input checked="" type="radio"/> Nunca o menos 1 vez al mes<br><input type="radio"/> 1 a 3 veces mes<br><input type="radio"/> 1 vez semana<br><input type="radio"/> 2 a 4 veces semana<br><input type="radio"/> 5 a 6 veces semana<br><input type="radio"/> 1 vez al día<br><input type="radio"/> 2 a 3 veces al día<br><input type="radio"/> 5 a 6 veces al día<br><input type="radio"/> más 6 veces al día |
|--------------------------------|--------------------------------------------------------------------------------------------------------------------------------------------------------------------------------------------------------------------------------------------------------------------------------------------------------------------------------------------------------------------------------------------------------------|

---

|                       |                                                                                                                                                                                                                                                                                                                                                                                                              |
|-----------------------|--------------------------------------------------------------------------------------------------------------------------------------------------------------------------------------------------------------------------------------------------------------------------------------------------------------------------------------------------------------------------------------------------------------|
| pimiento              | <input checked="" type="radio"/> Nunca o menos 1 vez al mes<br><input type="radio"/> 1 a 3 veces mes<br><input type="radio"/> 1 vez semana<br><input type="radio"/> 2 a 4 veces semana<br><input type="radio"/> 5 a 6 veces semana<br><input type="radio"/> 1 vez al día<br><input type="radio"/> 2 a 3 veces al día<br><input type="radio"/> 5 a 6 veces al día<br><input type="radio"/> más 6 veces al día |
| alcachofa             | <input checked="" type="radio"/> Nunca o menos 1 vez al mes<br><input type="radio"/> 1 a 3 veces mes<br><input type="radio"/> 1 vez semana<br><input type="radio"/> 2 a 4 veces semana<br><input type="radio"/> 5 a 6 veces semana<br><input type="radio"/> 1 vez al día<br><input type="radio"/> 2 a 3 veces al día<br><input type="radio"/> 5 a 6 veces al día<br><input type="radio"/> más 6 veces al día |
| espárragos            | <input checked="" type="radio"/> Nunca o menos 1 vez al mes<br><input type="radio"/> 1 a 3 veces mes<br><input type="radio"/> 1 vez semana<br><input type="radio"/> 2 a 4 veces semana<br><input type="radio"/> 5 a 6 veces semana<br><input type="radio"/> 1 vez al día<br><input type="radio"/> 2 a 3 veces al día<br><input type="radio"/> 5 a 6 veces al día<br><input type="radio"/> más 6 veces al día |
| maíz hervido          | <input checked="" type="radio"/> Nunca o menos 1 vez al mes<br><input type="radio"/> 1 a 3 veces mes<br><input type="radio"/> 1 vez semana<br><input type="radio"/> 2 a 4 veces semana<br><input type="radio"/> 5 a 6 veces semana<br><input type="radio"/> 1 vez al día<br><input type="radio"/> 2 a 3 veces al día<br><input type="radio"/> 5 a 6 veces al día<br><input type="radio"/> más 6 veces al día |
| legumbres             | <input type="radio"/> Nunca o menos 1 vez al mes<br><input type="radio"/> 1 a 3 veces mes<br><input type="radio"/> 1 vez semana<br><input checked="" type="radio"/> 2 a 4 veces semana<br><input type="radio"/> 5 a 6 veces semana<br><input type="radio"/> 1 vez al día<br><input type="radio"/> 2 a 3 veces al día<br><input type="radio"/> 5 a 6 veces al día<br><input type="radio"/> más 6 veces al día |
| naranjas o mandarinas | <input type="radio"/> Nunca o menos 1 vez al mes<br><input type="radio"/> 1 a 3 veces mes<br><input type="radio"/> 1 vez semana<br><input type="radio"/> 2 a 4 veces semana<br><input type="radio"/> 5 a 6 veces semana<br><input type="radio"/> 1 vez al día<br><input checked="" type="radio"/> 2 a 3 veces al día<br><input type="radio"/> 5 a 6 veces al día<br><input type="radio"/> más 6 veces al día |

|                       |                                                                                                                                                                                                                                                                                                                                                                                                              |
|-----------------------|--------------------------------------------------------------------------------------------------------------------------------------------------------------------------------------------------------------------------------------------------------------------------------------------------------------------------------------------------------------------------------------------------------------|
| zum natural fruta     | <input type="radio"/> Nunca o menos 1 vez al mes<br><input type="radio"/> 1 a 3 veces mes<br><input type="radio"/> 1 vez semana<br><input type="radio"/> 2 a 4 veces semana<br><input type="radio"/> 5 a 6 veces semana<br><input checked="" type="radio"/> 1 vez al día<br><input type="radio"/> 2 a 3 veces al día<br><input type="radio"/> 5 a 6 veces al día<br><input type="radio"/> más 6 veces al día |
| platano               | <input type="radio"/> Nunca o menos 1 vez al mes<br><input type="radio"/> 1 a 3 veces mes<br><input checked="" type="radio"/> 1 vez semana<br><input type="radio"/> 2 a 4 veces semana<br><input type="radio"/> 5 a 6 veces semana<br><input type="radio"/> 1 vez al día<br><input type="radio"/> 2 a 3 veces al día<br><input type="radio"/> 5 a 6 veces al día<br><input type="radio"/> más 6 veces al día |
| manzana o pera        | <input checked="" type="radio"/> Nunca o menos 1 vez al mes<br><input type="radio"/> 1 a 3 veces mes<br><input type="radio"/> 1 vez semana<br><input type="radio"/> 2 a 4 veces semana<br><input type="radio"/> 5 a 6 veces semana<br><input type="radio"/> 1 vez al día<br><input type="radio"/> 2 a 3 veces al día<br><input type="radio"/> 5 a 6 veces al día<br><input type="radio"/> más 6 veces al día |
| melocotón o nectarina | <input checked="" type="radio"/> Nunca o menos 1 vez al mes<br><input type="radio"/> 1 a 3 veces mes<br><input type="radio"/> 1 vez semana<br><input type="radio"/> 2 a 4 veces semana<br><input type="radio"/> 5 a 6 veces semana<br><input type="radio"/> 1 vez al día<br><input type="radio"/> 2 a 3 veces al día<br><input type="radio"/> 5 a 6 veces al día<br><input type="radio"/> más 6 veces al día |
| sandia o melon        | <input type="radio"/> Nunca o menos 1 vez al mes<br><input checked="" type="radio"/> 1 a 3 veces mes<br><input type="radio"/> 1 vez semana<br><input type="radio"/> 2 a 4 veces semana<br><input type="radio"/> 5 a 6 veces semana<br><input type="radio"/> 1 vez al día<br><input type="radio"/> 2 a 3 veces al día<br><input type="radio"/> 5 a 6 veces al día<br><input type="radio"/> más 6 veces al día |
| uva                   | <input checked="" type="radio"/> Nunca o menos 1 vez al mes<br><input type="radio"/> 1 a 3 veces mes<br><input type="radio"/> 1 vez semana<br><input type="radio"/> 2 a 4 veces semana<br><input type="radio"/> 5 a 6 veces semana<br><input type="radio"/> 1 vez al día<br><input type="radio"/> 2 a 3 veces al día<br><input type="radio"/> 5 a 6 veces al día<br><input type="radio"/> más 6 veces al día |

---

bruna o ciruela

- ☒ Nunca o menos 1 vez al mes  
☐ 1 a 3 veces mes  
☐ 1 vez semana  
☐ 2 a 4 veces semana  
☐ 5 a 6 veces semana  
☐ 1 vez al día  
☐ 2 a 3 veces al día  
☐ 5 a 6 veces al día  
☐ más 6 veces al día

---

kiwi

- ☐ Nunca o menos 1 vez al mes  
☐ 1 a 3 veces mes  
☐ 1 vez semana  
☐ 2 a 4 veces semana  
☐ 5 a 6 veces semana  
☐ 1 vez al día  
☒ 2 a 3 veces al día  
☐ 5 a 6 veces al día  
☐ más 6 veces al día

---

aceituna

- ☐ Nunca o menos 1 vez al mes  
☒ 1 a 3 veces mes  
☐ 1 vez semana  
☐ 2 a 4 veces semana  
☐ 5 a 6 veces semana  
☐ 1 vez al día  
☐ 2 a 3 veces al día  
☐ 5 a 6 veces al día  
☐ más 6 veces al día

---

frutos secos

- ☒ Nunca o menos 1 vez al mes  
☐ 1 a 3 veces mes  
☐ 1 vez semana  
☐ 2 a 4 veces semana  
☐ 5 a 6 veces semana  
☐ 1 vez al día  
☐ 2 a 3 veces al día  
☐ 5 a 6 veces al día  
☐ más 6 veces al día

---

pan blanco

- ☐ Nunca o menos 1 vez al mes  
☐ 1 a 3 veces mes  
☐ 1 vez semana  
☐ 2 a 4 veces semana  
☐ 5 a 6 veces semana  
☒ 1 vez al día  
☐ 2 a 3 veces al día  
☐ 5 a 6 veces al día  
☐ más 6 veces al día

---

pan integral

- ☒ Nunca o menos 1 vez al mes  
☐ 1 a 3 veces mes  
☐ 1 vez semana  
☐ 2 a 4 veces semana  
☐ 5 a 6 veces semana  
☐ 1 vez al día  
☐ 2 a 3 veces al día  
☐ 5 a 6 veces al día  
☐ más 6 veces al día



---

|                   |                                                                                                                                                                                                                                                                                                                                                                                                              |
|-------------------|--------------------------------------------------------------------------------------------------------------------------------------------------------------------------------------------------------------------------------------------------------------------------------------------------------------------------------------------------------------------------------------------------------------|
| cereales desayuno | <input checked="" type="radio"/> Nunca o menos 1 vez al mes<br><input type="radio"/> 1 a 3 veces mes<br><input type="radio"/> 1 vez semana<br><input type="radio"/> 2 a 4 veces semana<br><input type="radio"/> 5 a 6 veces semana<br><input type="radio"/> 1 vez al día<br><input type="radio"/> 2 a 3 veces al día<br><input type="radio"/> 5 a 6 veces al día<br><input type="radio"/> más 6 veces al día |
|-------------------|--------------------------------------------------------------------------------------------------------------------------------------------------------------------------------------------------------------------------------------------------------------------------------------------------------------------------------------------------------------------------------------------------------------|

---

|                |                                                                                                                                                                                                                                                                                                                                                                                                              |
|----------------|--------------------------------------------------------------------------------------------------------------------------------------------------------------------------------------------------------------------------------------------------------------------------------------------------------------------------------------------------------------------------------------------------------------|
| patatas fritas | <input type="radio"/> Nunca o menos 1 vez al mes<br><input type="radio"/> 1 a 3 veces mes<br><input type="radio"/> 1 vez semana<br><input checked="" type="radio"/> 2 a 4 veces semana<br><input type="radio"/> 5 a 6 veces semana<br><input type="radio"/> 1 vez al día<br><input type="radio"/> 2 a 3 veces al día<br><input type="radio"/> 5 a 6 veces al día<br><input type="radio"/> más 6 veces al día |
|----------------|--------------------------------------------------------------------------------------------------------------------------------------------------------------------------------------------------------------------------------------------------------------------------------------------------------------------------------------------------------------------------------------------------------------|

---

|                          |                                                                                                                                                                                                                                                                                                                                                                                                              |
|--------------------------|--------------------------------------------------------------------------------------------------------------------------------------------------------------------------------------------------------------------------------------------------------------------------------------------------------------------------------------------------------------------------------------------------------------|
| patatas cocidas o asadas | <input type="radio"/> Nunca o menos 1 vez al mes<br><input type="radio"/> 1 a 3 veces mes<br><input checked="" type="radio"/> 1 vez semana<br><input type="radio"/> 2 a 4 veces semana<br><input type="radio"/> 5 a 6 veces semana<br><input type="radio"/> 1 vez al día<br><input type="radio"/> 2 a 3 veces al día<br><input type="radio"/> 5 a 6 veces al día<br><input type="radio"/> más 6 veces al día |
|--------------------------|--------------------------------------------------------------------------------------------------------------------------------------------------------------------------------------------------------------------------------------------------------------------------------------------------------------------------------------------------------------------------------------------------------------|

---

|             |                                                                                                                                                                                                                                                                                                                                                                                                              |
|-------------|--------------------------------------------------------------------------------------------------------------------------------------------------------------------------------------------------------------------------------------------------------------------------------------------------------------------------------------------------------------------------------------------------------------|
| bolsa papas | <input type="radio"/> Nunca o menos 1 vez al mes<br><input checked="" type="radio"/> 1 a 3 veces mes<br><input type="radio"/> 1 vez semana<br><input type="radio"/> 2 a 4 veces semana<br><input type="radio"/> 5 a 6 veces semana<br><input type="radio"/> 1 vez al día<br><input type="radio"/> 2 a 3 veces al día<br><input type="radio"/> 5 a 6 veces al día<br><input type="radio"/> más 6 veces al día |
|-------------|--------------------------------------------------------------------------------------------------------------------------------------------------------------------------------------------------------------------------------------------------------------------------------------------------------------------------------------------------------------------------------------------------------------|

---

|                |                                                                                                                                                                                                                                                                                                                                                                                                              |
|----------------|--------------------------------------------------------------------------------------------------------------------------------------------------------------------------------------------------------------------------------------------------------------------------------------------------------------------------------------------------------------------------------------------------------------|
| arroz cocinado | <input type="radio"/> Nunca o menos 1 vez al mes<br><input checked="" type="radio"/> 1 a 3 veces mes<br><input type="radio"/> 1 vez semana<br><input type="radio"/> 2 a 4 veces semana<br><input type="radio"/> 5 a 6 veces semana<br><input type="radio"/> 1 vez al día<br><input type="radio"/> 2 a 3 veces al día<br><input type="radio"/> 5 a 6 veces al día<br><input type="radio"/> más 6 veces al día |
|----------------|--------------------------------------------------------------------------------------------------------------------------------------------------------------------------------------------------------------------------------------------------------------------------------------------------------------------------------------------------------------------------------------------------------------|

---

|       |                                                                                                                                                                                                                                                                                                                                                                                                              |
|-------|--------------------------------------------------------------------------------------------------------------------------------------------------------------------------------------------------------------------------------------------------------------------------------------------------------------------------------------------------------------------------------------------------------------|
| pasta | <input type="radio"/> Nunca o menos 1 vez al mes<br><input type="radio"/> 1 a 3 veces mes<br><input checked="" type="radio"/> 1 vez semana<br><input type="radio"/> 2 a 4 veces semana<br><input type="radio"/> 5 a 6 veces semana<br><input type="radio"/> 1 vez al día<br><input type="radio"/> 2 a 3 veces al día<br><input type="radio"/> 5 a 6 veces al día<br><input type="radio"/> más 6 veces al día |
|-------|--------------------------------------------------------------------------------------------------------------------------------------------------------------------------------------------------------------------------------------------------------------------------------------------------------------------------------------------------------------------------------------------------------------|

---

|                     |                                                                                                                                                                                                                                                                                                                                                                                                              |
|---------------------|--------------------------------------------------------------------------------------------------------------------------------------------------------------------------------------------------------------------------------------------------------------------------------------------------------------------------------------------------------------------------------------------------------------|
| pizza               | <input type="radio"/> Nunca o menos 1 vez al mes<br><input type="radio"/> 1 a 3 veces mes<br><input type="radio"/> 1 vez semana<br><input checked="" type="radio"/> 2 a 4 veces semana<br><input type="radio"/> 5 a 6 veces semana<br><input type="radio"/> 1 vez al día<br><input type="radio"/> 2 a 3 veces al día<br><input type="radio"/> 5 a 6 veces al día<br><input type="radio"/> más 6 veces al día |
| aceite oliva        | <input type="radio"/> Nunca o menos 1 vez al mes<br><input type="radio"/> 1 a 3 veces mes<br><input type="radio"/> 1 vez semana<br><input type="radio"/> 2 a 4 veces semana<br><input type="radio"/> 5 a 6 veces semana<br><input checked="" type="radio"/> 1 vez al día<br><input type="radio"/> 2 a 3 veces al día<br><input type="radio"/> 5 a 6 veces al día<br><input type="radio"/> más 6 veces al día |
| otros aceites       | <input checked="" type="radio"/> Nunca o menos 1 vez al mes<br><input type="radio"/> 1 a 3 veces mes<br><input type="radio"/> 1 vez semana<br><input type="radio"/> 2 a 4 veces semana<br><input type="radio"/> 5 a 6 veces semana<br><input type="radio"/> 1 vez al día<br><input type="radio"/> 2 a 3 veces al día<br><input type="radio"/> 5 a 6 veces al día<br><input type="radio"/> más 6 veces al día |
| margarina           | <input checked="" type="radio"/> Nunca o menos 1 vez al mes<br><input type="radio"/> 1 a 3 veces mes<br><input type="radio"/> 1 vez semana<br><input type="radio"/> 2 a 4 veces semana<br><input type="radio"/> 5 a 6 veces semana<br><input type="radio"/> 1 vez al día<br><input type="radio"/> 2 a 3 veces al día<br><input type="radio"/> 5 a 6 veces al día<br><input type="radio"/> más 6 veces al día |
| mantequilla         | <input type="radio"/> Nunca o menos 1 vez al mes<br><input checked="" type="radio"/> 1 a 3 veces mes<br><input type="radio"/> 1 vez semana<br><input type="radio"/> 2 a 4 veces semana<br><input type="radio"/> 5 a 6 veces semana<br><input type="radio"/> 1 vez al día<br><input type="radio"/> 2 a 3 veces al día<br><input type="radio"/> 5 a 6 veces al día<br><input type="radio"/> más 6 veces al día |
| galletas tipo maria | <input checked="" type="radio"/> Nunca o menos 1 vez al mes<br><input type="radio"/> 1 a 3 veces mes<br><input type="radio"/> 1 vez semana<br><input type="radio"/> 2 a 4 veces semana<br><input type="radio"/> 5 a 6 veces semana<br><input type="radio"/> 1 vez al día<br><input type="radio"/> 2 a 3 veces al día<br><input type="radio"/> 5 a 6 veces al día<br><input type="radio"/> más 6 veces al día |

|                           |                                                                                                                                                                                                                                                                                                                                                                                                              |
|---------------------------|--------------------------------------------------------------------------------------------------------------------------------------------------------------------------------------------------------------------------------------------------------------------------------------------------------------------------------------------------------------------------------------------------------------|
| galletas chocolate        | <input checked="" type="radio"/> Nunca o menos 1 vez al mes<br><input type="radio"/> 1 a 3 veces mes<br><input type="radio"/> 1 vez semana<br><input type="radio"/> 2 a 4 veces semana<br><input type="radio"/> 5 a 6 veces semana<br><input type="radio"/> 1 vez al día<br><input type="radio"/> 2 a 3 veces al día<br><input type="radio"/> 5 a 6 veces al día<br><input type="radio"/> más 6 veces al día |
| bollieria                 | <input type="radio"/> Nunca o menos 1 vez al mes<br><input type="radio"/> 1 a 3 veces mes<br><input type="radio"/> 1 vez semana<br><input checked="" type="radio"/> 2 a 4 veces semana<br><input type="radio"/> 5 a 6 veces semana<br><input type="radio"/> 1 vez al día<br><input type="radio"/> 2 a 3 veces al día<br><input type="radio"/> 5 a 6 veces al día<br><input type="radio"/> más 6 veces al día |
| chocolate o bombones      | <input type="radio"/> Nunca o menos 1 vez al mes<br><input type="radio"/> 1 a 3 veces mes<br><input type="radio"/> 1 vez semana<br><input checked="" type="radio"/> 2 a 4 veces semana<br><input type="radio"/> 5 a 6 veces semana<br><input type="radio"/> 1 vez al día<br><input type="radio"/> 2 a 3 veces al día<br><input type="radio"/> 5 a 6 veces al día<br><input type="radio"/> más 6 veces al día |
| chocolate polvo o colacao | <input type="radio"/> Nunca o menos 1 vez al mes<br><input type="radio"/> 1 a 3 veces mes<br><input type="radio"/> 1 vez semana<br><input type="radio"/> 2 a 4 veces semana<br><input type="radio"/> 5 a 6 veces semana<br><input checked="" type="radio"/> 1 vez al día<br><input type="radio"/> 2 a 3 veces al día<br><input type="radio"/> 5 a 6 veces al día<br><input type="radio"/> más 6 veces al día |
| vino tinto                | <input checked="" type="radio"/> Nunca o menos 1 vez al mes<br><input type="radio"/> 1 a 3 veces mes<br><input type="radio"/> 1 vez semana<br><input type="radio"/> 2 a 4 veces semana<br><input type="radio"/> 5 a 6 veces semana<br><input type="radio"/> 1 vez al día<br><input type="radio"/> 2 a 3 veces al día<br><input type="radio"/> 5 a 6 veces al día<br><input type="radio"/> más 6 veces al día |
| vino blanco               | <input checked="" type="radio"/> Nunca o menos 1 vez al mes<br><input type="radio"/> 1 a 3 veces mes<br><input type="radio"/> 1 vez semana<br><input type="radio"/> 2 a 4 veces semana<br><input type="radio"/> 5 a 6 veces semana<br><input type="radio"/> 1 vez al día<br><input type="radio"/> 2 a 3 veces al día<br><input type="radio"/> 5 a 6 veces al día<br><input type="radio"/> más 6 veces al día |

|                       |                                                                                                                                                                                                                                                                                                                                                                                                              |
|-----------------------|--------------------------------------------------------------------------------------------------------------------------------------------------------------------------------------------------------------------------------------------------------------------------------------------------------------------------------------------------------------------------------------------------------------|
| vino seco o vermut    | <input checked="" type="radio"/> Nunca o menos 1 vez al mes<br><input type="radio"/> 1 a 3 veces mes<br><input type="radio"/> 1 vez semana<br><input type="radio"/> 2 a 4 veces semana<br><input type="radio"/> 5 a 6 veces semana<br><input type="radio"/> 1 vez al día<br><input type="radio"/> 2 a 3 veces al día<br><input type="radio"/> 5 a 6 veces al día<br><input type="radio"/> más 6 veces al día |
| cerveza               | <input checked="" type="radio"/> Nunca o menos 1 vez al mes<br><input type="radio"/> 1 a 3 veces mes<br><input type="radio"/> 1 vez semana<br><input type="radio"/> 2 a 4 veces semana<br><input type="radio"/> 5 a 6 veces semana<br><input type="radio"/> 1 vez al día<br><input type="radio"/> 2 a 3 veces al día<br><input type="radio"/> 5 a 6 veces al día<br><input type="radio"/> más 6 veces al día |
| cerveza sin alcohol   | <input checked="" type="radio"/> Nunca o menos 1 vez al mes<br><input type="radio"/> 1 a 3 veces mes<br><input type="radio"/> 1 vez semana<br><input type="radio"/> 2 a 4 veces semana<br><input type="radio"/> 5 a 6 veces semana<br><input type="radio"/> 1 vez al día<br><input type="radio"/> 2 a 3 veces al día<br><input type="radio"/> 5 a 6 veces al día<br><input type="radio"/> más 6 veces al día |
| licores               | <input checked="" type="radio"/> Nunca o menos 1 vez al mes<br><input type="radio"/> 1 a 3 veces mes<br><input type="radio"/> 1 vez semana<br><input type="radio"/> 2 a 4 veces semana<br><input type="radio"/> 5 a 6 veces semana<br><input type="radio"/> 1 vez al día<br><input type="radio"/> 2 a 3 veces al día<br><input type="radio"/> 5 a 6 veces al día<br><input type="radio"/> más 6 veces al día |
| ginebra o ron o vodka | <input checked="" type="radio"/> Nunca o menos 1 vez al mes<br><input type="radio"/> 1 a 3 veces mes<br><input type="radio"/> 1 vez semana<br><input type="radio"/> 2 a 4 veces semana<br><input type="radio"/> 5 a 6 veces semana<br><input type="radio"/> 1 vez al día<br><input type="radio"/> 2 a 3 veces al día<br><input type="radio"/> 5 a 6 veces al día<br><input type="radio"/> más 6 veces al día |
| refresco normal       | <input checked="" type="radio"/> Nunca o menos 1 vez al mes<br><input type="radio"/> 1 a 3 veces mes<br><input type="radio"/> 1 vez semana<br><input type="radio"/> 2 a 4 veces semana<br><input type="radio"/> 5 a 6 veces semana<br><input type="radio"/> 1 vez al día<br><input type="radio"/> 2 a 3 veces al día<br><input type="radio"/> 5 a 6 veces al día<br><input type="radio"/> más 6 veces al día |

|                          |                                                                                                                                                                                                                                                                                                                                                                                                              |
|--------------------------|--------------------------------------------------------------------------------------------------------------------------------------------------------------------------------------------------------------------------------------------------------------------------------------------------------------------------------------------------------------------------------------------------------------|
| refresco sin azúcar      | <input checked="" type="radio"/> Nunca o menos 1 vez al mes<br><input type="radio"/> 1 a 3 veces mes<br><input type="radio"/> 1 vez semana<br><input type="radio"/> 2 a 4 veces semana<br><input type="radio"/> 5 a 6 veces semana<br><input type="radio"/> 1 vez al día<br><input type="radio"/> 2 a 3 veces al día<br><input type="radio"/> 5 a 6 veces al día<br><input type="radio"/> más 6 veces al día |
| Agua del grifo           | <input checked="" type="radio"/> Nunca o menos 1 vez al mes<br><input type="radio"/> 1 a 3 veces mes<br><input type="radio"/> 1 vez semana<br><input type="radio"/> 2 a 4 veces semana<br><input type="radio"/> 5 a 6 veces semana<br><input type="radio"/> 1 vez al día<br><input type="radio"/> 2 a 3 veces al día<br><input type="radio"/> 5 a 6 veces al día<br><input type="radio"/> más 6 veces al día |
| agua embotellada sin gas | <input type="radio"/> Nunca o menos 1 vez al mes<br><input type="radio"/> 1 a 3 veces mes<br><input type="radio"/> 1 vez semana<br><input type="radio"/> 2 a 4 veces semana<br><input type="radio"/> 5 a 6 veces semana<br><input type="radio"/> 1 vez al día<br><input type="radio"/> 2 a 3 veces al día<br><input type="radio"/> 5 a 6 veces al día<br><input checked="" type="radio"/> más 6 veces al día |
| agua embotellada con gas | <input checked="" type="radio"/> Nunca o menos 1 vez al mes<br><input type="radio"/> 1 a 3 veces mes<br><input type="radio"/> 1 vez semana<br><input type="radio"/> 2 a 4 veces semana<br><input type="radio"/> 5 a 6 veces semana<br><input type="radio"/> 1 vez al día<br><input type="radio"/> 2 a 3 veces al día<br><input type="radio"/> 5 a 6 veces al día<br><input type="radio"/> más 6 veces al día |
| zumو frutas embasado     | <input type="radio"/> Nunca o menos 1 vez al mes<br><input type="radio"/> 1 a 3 veces mes<br><input checked="" type="radio"/> 1 vez semana<br><input type="radio"/> 2 a 4 veces semana<br><input type="radio"/> 5 a 6 veces semana<br><input type="radio"/> 1 vez al día<br><input type="radio"/> 2 a 3 veces al día<br><input type="radio"/> 5 a 6 veces al día<br><input type="radio"/> más 6 veces al día |
| cafe                     | <input checked="" type="radio"/> Nunca o menos 1 vez al mes<br><input type="radio"/> 1 a 3 veces mes<br><input type="radio"/> 1 vez semana<br><input type="radio"/> 2 a 4 veces semana<br><input type="radio"/> 5 a 6 veces semana<br><input type="radio"/> 1 vez al día<br><input type="radio"/> 2 a 3 veces al día<br><input type="radio"/> 5 a 6 veces al día<br><input type="radio"/> más 6 veces al día |

---

cafe descafeinado

- ☒ Nunca o menos 1 vez al mes  
☐ 1 a 3 veces mes  
☐ 1 vez semana  
☐ 2 a 4 veces semana  
☐ 5 a 6 veces semana  
☐ 1 vez al día  
☐ 2 a 3 veces al día  
☐ 5 a 6 veces al día  
☐ más 6 veces al día

---

te o infusión

- ☒ Nunca o menos 1 vez al mes  
☐ 1 a 3 veces mes  
☐ 1 vez semana  
☐ 2 a 4 veces semana  
☐ 5 a 6 veces semana  
☐ 1 vez al día  
☐ 2 a 3 veces al día  
☐ 5 a 6 veces al día  
☐ más 6 veces al día

---

sopa o puré verduras

- ☒ Nunca o menos 1 vez al mes  
☐ 1 a 3 veces mes  
☐ 1 vez semana  
☐ 2 a 4 veces semana  
☐ 5 a 6 veces semana  
☐ 1 vez al día  
☐ 2 a 3 veces al día  
☐ 5 a 6 veces al día  
☐ más 6 veces al día

---

croquetas pollo jamón

- ☒ Nunca o menos 1 vez al mes  
☐ 1 a 3 veces mes  
☐ 1 vez semana  
☐ 2 a 4 veces semana  
☐ 5 a 6 veces semana  
☐ 1 vez al día  
☐ 2 a 3 veces al día  
☐ 5 a 6 veces al día  
☐ más 6 veces al día

---

croquetas pescado

- ☒ Nunca o menos 1 vez al mes  
☐ 1 a 3 veces mes  
☐ 1 vez semana  
☐ 2 a 4 veces semana  
☐ 5 a 6 veces semana  
☐ 1 vez al día  
☐ 2 a 3 veces al día  
☐ 5 a 6 veces al día  
☐ más 6 veces al día

---

mayonesa

- ☒ Nunca o menos 1 vez al mes  
☐ 1 a 3 veces mes  
☐ 1 vez semana  
☐ 2 a 4 veces semana  
☐ 5 a 6 veces semana  
☐ 1 vez al día  
☐ 2 a 3 veces al día  
☐ 5 a 6 veces al día  
☐ más 6 veces al día

---

salsa tomate

- ☐ Nunca o menos 1 vez al mes  
☐ 1 a 3 veces mes  
☒ 1 vez semana  
☐ 2 a 4 veces semana  
☐ 5 a 6 veces semana  
☐ 1 vez al día  
☐ 2 a 3 veces al día  
☐ 5 a 6 veces al día  
☐ más 6 veces al día

---

ketchup

- ☐ Nunca o menos 1 vez al mes  
☒ 1 a 3 veces mes  
☐ 1 vez semana  
☐ 2 a 4 veces semana  
☐ 5 a 6 veces semana  
☐ 1 vez al día  
☐ 2 a 3 veces al día  
☐ 5 a 6 veces al día  
☐ más 6 veces al día

---

sal

- ☐ Nunca o menos 1 vez al mes  
☐ 1 a 3 veces mes  
☐ 1 vez semana  
☐ 2 a 4 veces semana  
☐ 5 a 6 veces semana  
☐ 1 vez al día  
☒ 2 a 3 veces al día  
☐ 5 a 6 veces al día  
☐ más 6 veces al día

---

ajo

- ☐ Nunca o menos 1 vez al mes  
☐ 1 a 3 veces mes  
☐ 1 vez semana  
☒ 2 a 4 veces semana  
☐ 5 a 6 veces semana  
☐ 1 vez al día  
☐ 2 a 3 veces al día  
☐ 5 a 6 veces al día  
☐ más 6 veces al día

---

mermelada o miel

- ☒ Nunca o menos 1 vez al mes  
☐ 1 a 3 veces mes  
☐ 1 vez semana  
☐ 2 a 4 veces semana  
☐ 5 a 6 veces semana  
☐ 1 vez al día  
☐ 2 a 3 veces al día  
☐ 5 a 6 veces al día  
☐ más 6 veces al día

---

azúcar

- ☐ Nunca o menos 1 vez al mes  
☐ 1 a 3 veces mes  
☒ 1 vez semana  
☐ 2 a 4 veces semana  
☐ 5 a 6 veces semana  
☐ 1 vez al día  
☐ 2 a 3 veces al día  
☐ 5 a 6 veces al día  
☐ más 6 veces al día

|                                       |                                                                                                                                                                                                                                                                                                                                                                                                                                                                                                                               |
|---------------------------------------|-------------------------------------------------------------------------------------------------------------------------------------------------------------------------------------------------------------------------------------------------------------------------------------------------------------------------------------------------------------------------------------------------------------------------------------------------------------------------------------------------------------------------------|
| Otro alimento                         |                                                                                                                                                                                                                                                                                                                                                                                                                                                                                                                               |
| suplementos vitamínicos               | <input checked="" type="radio"/> si<br><input type="radio"/> no                                                                                                                                                                                                                                                                                                                                                                                                                                                               |
| suplementos vitamínicos               | [*DATA REMOVED*]                                                                                                                                                                                                                                                                                                                                                                                                                                                                                                              |
| dieta previa                          | <input type="radio"/> si<br><input checked="" type="radio"/> no                                                                                                                                                                                                                                                                                                                                                                                                                                                               |
| motivo dieta                          | <input checked="" type="radio"/> no dieta<br><input type="radio"/> control peso<br><input type="radio"/> control colesterol<br><input type="radio"/> control diabetes<br><input type="radio"/> problemas estómago<br><input type="radio"/> problemas vesícula o hepáticos<br><input type="radio"/> HTA o cardiopatía<br><input type="radio"/> problemas renales<br><input type="radio"/> alergia alimentaria<br><input type="radio"/> ácido úrico elevado<br><input type="radio"/> vegetariana<br><input type="radio"/> otros |
| cambio alimentos año previo gestación | <input checked="" type="radio"/> si<br><input type="radio"/> no                                                                                                                                                                                                                                                                                                                                                                                                                                                               |
| cambio lácteos                        | <input type="radio"/> eliminado<br><input type="radio"/> disminuido<br><input checked="" type="radio"/> igual<br><input type="radio"/> aumentado<br><input type="radio"/> no sabe                                                                                                                                                                                                                                                                                                                                             |
| cambio huevos                         | <input type="radio"/> eliminado<br><input type="radio"/> disminuido<br><input checked="" type="radio"/> igual<br><input type="radio"/> aumentado<br><input type="radio"/> no sabe                                                                                                                                                                                                                                                                                                                                             |
| cambio carne                          | <input type="radio"/> eliminado<br><input type="radio"/> disminuido<br><input checked="" type="radio"/> igual<br><input type="radio"/> aumentado<br><input type="radio"/> no sabe                                                                                                                                                                                                                                                                                                                                             |
| cambio pescado                        | <input type="radio"/> eliminado<br><input type="radio"/> disminuido<br><input type="radio"/> igual<br><input checked="" type="radio"/> aumentado<br><input type="radio"/> no sabe                                                                                                                                                                                                                                                                                                                                             |
| cambio verduras                       | <input type="radio"/> eliminado<br><input type="radio"/> disminuido<br><input type="radio"/> igual<br><input checked="" type="radio"/> aumentado<br><input type="radio"/> no sabe                                                                                                                                                                                                                                                                                                                                             |



|                            |                                                                                                                                                                                                                        |
|----------------------------|------------------------------------------------------------------------------------------------------------------------------------------------------------------------------------------------------------------------|
| cambio legumbres           | <input type="radio"/> eliminado<br><input type="radio"/> disminuido<br><input type="radio"/> igual<br><input checked="" type="radio"/> aumentado<br><input type="radio"/> no sabe                                      |
| cambio fruta               | <input type="radio"/> eliminado<br><input type="radio"/> disminuido<br><input checked="" type="radio"/> igual<br><input type="radio"/> aumentado<br><input type="radio"/> no sabe                                      |
| cambio pan                 | <input type="radio"/> eliminado<br><input type="radio"/> disminuido<br><input checked="" type="radio"/> igual<br><input type="radio"/> aumentado<br><input type="radio"/> no sabe                                      |
| cambio aceite oliva        | <input type="radio"/> eliminado<br><input type="radio"/> disminuido<br><input checked="" type="radio"/> igual<br><input type="radio"/> aumentado<br><input type="radio"/> no sabe                                      |
| cambio mante o margarina   | <input type="radio"/> eliminado<br><input checked="" type="radio"/> disminuido<br><input type="radio"/> igual<br><input type="radio"/> aumentado<br><input type="radio"/> no sabe                                      |
| cambio azúcar y dulces     | <input type="radio"/> eliminado<br><input checked="" type="radio"/> disminuido<br><input type="radio"/> igual<br><input type="radio"/> aumentado<br><input type="radio"/> no sabe                                      |
| cambio bebidas alcohólicas | <input checked="" type="radio"/> eliminado<br><input type="radio"/> disminuido<br><input type="radio"/> igual<br><input type="radio"/> aumentado<br><input type="radio"/> no sabe                                      |
| frecuencia comidas fritas  | <input type="radio"/> a diario<br><input type="radio"/> 5 a 6 veces semana<br><input checked="" type="radio"/> 2 a 4 veces semana<br><input type="radio"/> 1 vez semana<br><input type="radio"/> menos de 1 vez semana |
| carne                      | <input type="radio"/> no como<br><input type="radio"/> cruda<br><input type="radio"/> poco hecha<br><input type="radio"/> hecha<br><input checked="" type="radio"/> muy hecha                                          |
| grasa visible carne        | <input checked="" type="radio"/> quita toda<br><input type="radio"/> quita mayoría<br><input type="radio"/> quita un poco<br><input type="radio"/> no quita nada                                                       |

|                                |                                                                                                                                                                                                                                                          |
|--------------------------------|----------------------------------------------------------------------------------------------------------------------------------------------------------------------------------------------------------------------------------------------------------|
| cocina carne                   | <input type="radio"/> a la plancha<br><input type="radio"/> a la parrilla<br><input type="radio"/> asada<br><input checked="" type="radio"/> frita<br><input type="radio"/> guisada                                                                      |
| tostado quemado carne          | <input checked="" type="radio"/> nunca<br><input type="radio"/> 1 vez mes<br><input type="radio"/> 2 a 3 veces mes<br><input type="radio"/> 1 vez semana<br><input type="radio"/> 2 a 3 semanas                                                          |
| tostado quemado pescado        | <input checked="" type="radio"/> nunca<br><input type="radio"/> 1 vez mes<br><input type="radio"/> 2 a 3 veces mes<br><input type="radio"/> 1 vez semana<br><input type="radio"/> 2 a 3 semanas                                                          |
| socarrat paella                | <input checked="" type="radio"/> nunca<br><input type="radio"/> 1 vez mes<br><input type="radio"/> 2 a 3 veces mes<br><input type="radio"/> 1 vez semana<br><input type="radio"/> 2 a 3 semanas                                                          |
| grasa o aceite cocinar         | <input type="radio"/> mantequilla<br><input type="radio"/> margarina<br><input type="radio"/> aceite oliva<br><input checked="" type="radio"/> aceite oliva virgen extra<br><input type="radio"/> aceite vegetal<br><input type="radio"/> mezcla aceites |
| grasa aceite aliñar            | <input type="radio"/> mantequilla<br><input type="radio"/> margarina<br><input type="radio"/> aceite oliva<br><input checked="" type="radio"/> aceite oliva virgen extra<br><input type="radio"/> aceite vegetal<br><input type="radio"/> mezcla aceites |
| grasa aceite freir             | <input type="radio"/> mantequilla<br><input type="radio"/> margarina<br><input type="radio"/> aceite oliva<br><input checked="" type="radio"/> aceite oliva virgen extra<br><input type="radio"/> aceite vegetal<br><input type="radio"/> mezcla aceites |
| Ejercicio cuestionario         | <input checked="" type="radio"/> si<br><input type="radio"/> no                                                                                                                                                                                          |
| horas de sueño incluido siesta | [*DATA REMOVED*]                                                                                                                                                                                                                                         |
| minutos siesta                 | [*DATA REMOVED*]                                                                                                                                                                                                                                         |
| horas televisión semana        | [*DATA REMOVED*]                                                                                                                                                                                                                                         |

|                                        |                                                                                                                                                                                                                                                                                                                                                                           |
|----------------------------------------|---------------------------------------------------------------------------------------------------------------------------------------------------------------------------------------------------------------------------------------------------------------------------------------------------------------------------------------------------------------------------|
| actividad trabajo                      | <input type="radio"/> casi siempre sentado<br><input type="radio"/> sentado 50 por cien<br><input type="radio"/> casi siempre de pie, quieto<br><input checked="" type="radio"/> casi siempre levantado caminando y llevando pocas cosas<br><input type="radio"/> casi siempre levantado, caminando y llevado muchas cosas<br><input type="radio"/> trabajo manual pesado |
| tiempo caminar o bici al día           | <input type="radio"/> casi nunca<br><input type="radio"/> menos 20min día<br><input checked="" type="radio"/> 20 a 40 min día<br><input type="radio"/> 40 a 60 min día<br><input type="radio"/> 1h o 1h y media día<br><input type="radio"/> más de 1h y media al día                                                                                                     |
| tiempo tareas casa al día              | <input type="radio"/> menos de 1h día<br><input type="radio"/> 1 a 2h día<br><input checked="" type="radio"/> 3 a 4h día<br><input type="radio"/> 5 a 6h día<br><input type="radio"/> 7 a 8h día<br><input type="radio"/> más de 8h día                                                                                                                                   |
| tiempo libre televisión ordenador leer | <input type="radio"/> menos 1h día<br><input type="radio"/> 1h día<br><input type="radio"/> 2h día<br><input type="radio"/> 3h día<br><input type="radio"/> 4h día<br><input checked="" type="radio"/> 5 a 6h día<br><input type="radio"/> mas 6h día                                                                                                                     |
| tiempo libre ejercicio o deporte       | <input type="radio"/> menos 1h semana<br><input type="radio"/> 1h semana<br><input checked="" type="radio"/> 2h semana<br><input type="radio"/> 3h semana<br><input type="radio"/> 4 a 5h semana<br><input type="radio"/> mas 5h semana                                                                                                                                   |
| como se considera                      | <input type="radio"/> sedentaria<br><input type="radio"/> poco activa<br><input checked="" type="radio"/> moderadamente activa<br><input type="radio"/> bastante activa<br><input type="radio"/> muy activa<br><input type="radio"/> no sabe                                                                                                                              |
| FUR                                    | [*DATA REMOVED*]                                                                                                                                                                                                                                                                                                                                                          |
| Semanas gestación 2T                   | [*DATA REMOVED*]                                                                                                                                                                                                                                                                                                                                                          |
| Días gestación 2T                      | [*DATA REMOVED*]                                                                                                                                                                                                                                                                                                                                                          |
| DBP 2T                                 | [*DATA REMOVED*]                                                                                                                                                                                                                                                                                                                                                          |
| CC 2T                                  | [*DATA REMOVED*]                                                                                                                                                                                                                                                                                                                                                          |
| AC 2T                                  | [*DATA REMOVED*]                                                                                                                                                                                                                                                                                                                                                          |

|                                                   |                                                                                                                                                                                                 |
|---------------------------------------------------|-------------------------------------------------------------------------------------------------------------------------------------------------------------------------------------------------|
| LF 2T                                             | [*DATA REMOVED*]                                                                                                                                                                                |
| PFE 2T (Hadlock)                                  | [*DATA REMOVED*]                                                                                                                                                                                |
| Semanas gestación 3T                              | [*DATA REMOVED*]                                                                                                                                                                                |
| días 3T                                           | [*DATA REMOVED*]                                                                                                                                                                                |
| DBP 3T                                            | [*DATA REMOVED*]                                                                                                                                                                                |
| CC 3T                                             | [*DATA REMOVED*]                                                                                                                                                                                |
| AC 3T                                             | [*DATA REMOVED*]                                                                                                                                                                                |
| LF 3T                                             | [*DATA REMOVED*]                                                                                                                                                                                |
| PFE 3T (Hadlock)                                  | [*DATA REMOVED*]                                                                                                                                                                                |
| Semanas de gestación final                        | [*DATA REMOVED*]                                                                                                                                                                                |
| días gestación final                              | [*DATA REMOVED*]                                                                                                                                                                                |
| Localización placenta                             | <input type="radio"/> anterior<br><input type="radio"/> lateral derecha<br><input type="radio"/> lateral izquierda<br><input type="radio"/> posterior<br><input checked="" type="radio"/> fondo |
| Presentación longitudinal cefálica                | <input type="radio"/> no<br><input checked="" type="radio"/> si                                                                                                                                 |
| Dorso                                             | <input type="radio"/> izquierda anterior<br><input type="radio"/> izquierda posterior<br><input checked="" type="radio"/> derecha anterior<br><input type="radio"/> derecha posterior           |
| diámetro biparietal                               | [*DATA REMOVED*]                                                                                                                                                                                |
| Circunferencia craneal                            | [*DATA REMOVED*]                                                                                                                                                                                |
| Circunferencia abdominal                          | [*DATA REMOVED*]                                                                                                                                                                                |
| Longitud de femur                                 | [*DATA REMOVED*]                                                                                                                                                                                |
| tejido celular subcutáneo a nivel del muslo en mm | [*DATA REMOVED*]                                                                                                                                                                                |
| tejido celular subcutáneo en abdomen en mm        | [*DATA REMOVED*]                                                                                                                                                                                |
| Volumen del muslo en cm3                          | [*DATA REMOVED*]                                                                                                                                                                                |
| Peso fetal estimado según fórmula de Hadlock      | [*DATA REMOVED*]                                                                                                                                                                                |

|                                               |                                                                                                                                                          |
|-----------------------------------------------|----------------------------------------------------------------------------------------------------------------------------------------------------------|
| Percentil                                     | [*DATA REMOVED*]                                                                                                                                         |
| Peso fetal estimado según fórmula de Scioscia | <hr/>                                                                                                                                                    |
| Peso fetal estimado según fórmula de LEE      | <hr/>                                                                                                                                                    |
| Tipo de parto                                 | <input checked="" type="radio"/> eutocico<br><input type="radio"/> instrumentado/ventosa<br><input type="radio"/> cesarea                                |
| fecha de nacimiento                           | [*DATA REMOVED*]                                                                                                                                         |
| Días entre exploración y nacimiento           | [*DATA REMOVED*]                                                                                                                                         |
| Peso RN en g                                  | [*DATA REMOVED*]                                                                                                                                         |
| sexo                                          | <input type="radio"/> mujer<br><input checked="" type="radio"/> hombre                                                                                   |
| Apgar 1 minuto                                | [*DATA REMOVED*]                                                                                                                                         |
| Apgar 5 minutos                               | [*DATA REMOVED*]                                                                                                                                         |
| Apgar 10 minutos                              | <hr/>                                                                                                                                                    |
| antecedente Covid durante gestación           | <input type="radio"/> Yes<br><input checked="" type="radio"/> No                                                                                         |
| Nivel de estudios                             | <input type="radio"/> ninguno<br><input type="radio"/> primarios<br><input type="radio"/> secundarios<br><input checked="" type="radio"/> universitarios |

# Base\_datos\_estimacion\_peso\_fetal

|                                       |                                                                                                                                                                                                                                                                                      |
|---------------------------------------|--------------------------------------------------------------------------------------------------------------------------------------------------------------------------------------------------------------------------------------------------------------------------------------|
| Número de identificación participante | 169                                                                                                                                                                                                                                                                                  |
| CODIGO PARTICIPANTE                   |                                                                                                                                                                                                                                                                                      |
| Edad                                  | [*DATA REMOVED*]                                                                                                                                                                                                                                                                     |
| Gestaciones                           | <input type="radio"/> 1<br><input checked="" type="radio"/> 2<br><input type="radio"/> 3<br><input type="radio"/> mas de 3                                                                                                                                                           |
| partos                                | <input checked="" type="radio"/> 0<br><input type="radio"/> 1<br><input type="radio"/> 2<br><input type="radio"/> 3<br><input type="radio"/> mas de 3                                                                                                                                |
| cesáreas                              | <input type="radio"/> 0<br><input checked="" type="radio"/> 1<br><input type="radio"/> 2<br><input type="radio"/> 3<br><input type="radio"/> mas de 3                                                                                                                                |
| Abortos                               | <input checked="" type="radio"/> 0<br><input type="radio"/> 1<br><input type="radio"/> 2<br><input type="radio"/> 3<br><input type="radio"/> mas de 3                                                                                                                                |
| Tipo de gestacion                     | <input checked="" type="radio"/> espontanea<br><input type="radio"/> IAC inseminación artificial conyuge<br><input type="radio"/> IAD inseminación artificial donante<br><input type="radio"/> FIV Fecundación in Vitro<br><input type="radio"/> Ovodon FIV con donación de ovocitos |
| peso previo a embarazo                | [*DATA REMOVED*]                                                                                                                                                                                                                                                                     |
| Ganancia ponderal embarazo            |                                                                                                                                                                                                                                                                                      |
| Talla madre                           | [*DATA REMOVED*]                                                                                                                                                                                                                                                                     |
| IMC previo embarazo                   | 22.296292959776586                                                                                                                                                                                                                                                                   |
| Patología obstétrica                  | <input checked="" type="radio"/> no<br><input type="radio"/> si                                                                                                                                                                                                                      |
| Diabetes pregestacional               | <input checked="" type="radio"/> no<br><input type="radio"/> si                                                                                                                                                                                                                      |
| Diabetes gestacional                  | <input checked="" type="radio"/> no<br><input type="radio"/> si                                                                                                                                                                                                                      |

|                                            |                                                                                                                                                                                      |
|--------------------------------------------|--------------------------------------------------------------------------------------------------------------------------------------------------------------------------------------|
| Diabetes gestacional con insulina          | <input checked="" type="radio"/> no<br><input type="radio"/> si                                                                                                                      |
| Diabetes gestacional con dieta y ejercicio | <input checked="" type="radio"/> no<br><input type="radio"/> si                                                                                                                      |
| Percentil fetos previos                    | <input type="radio"/> Nada<br><input type="radio"/> percentil menor de 10<br><input checked="" type="radio"/> percentil entre 10 y 90<br><input type="radio"/> percentil mayor de 90 |
| Exfumadora                                 | <input checked="" type="radio"/> Nada<br><input type="radio"/> menos de 5 años<br><input type="radio"/> 5 a 10 años<br><input type="radio"/> mayor o igual a 10 años                 |
| Hábito tabáquico                           | <input checked="" type="radio"/> no<br><input type="radio"/> si                                                                                                                      |
| fumadora                                   | [*DATA REMOVED*]                                                                                                                                                                     |
| Consumo otros tóxicos                      | <input checked="" type="radio"/> no<br><input type="radio"/> si                                                                                                                      |
| Hb 1T                                      | [*DATA REMOVED*]                                                                                                                                                                     |
| Htc 1T                                     | [*DATA REMOVED*]                                                                                                                                                                     |
| Hb 2T                                      | [*DATA REMOVED*]                                                                                                                                                                     |
| HTC 2T                                     | [*DATA REMOVED*]                                                                                                                                                                     |
| Hb 3T                                      | [*DATA REMOVED*]                                                                                                                                                                     |
| HTC 3T                                     | [*DATA REMOVED*]                                                                                                                                                                     |
| Suplemento FE oral                         | <input checked="" type="radio"/> si<br><input type="radio"/> no                                                                                                                      |
| Suplemento fe iv                           | <input type="radio"/> si<br><input checked="" type="radio"/> no                                                                                                                      |
| Transfusión                                | <input checked="" type="radio"/> no<br><input type="radio"/> si                                                                                                                      |
| Solicitada Vit D                           | <input checked="" type="radio"/> no<br><input type="radio"/> si                                                                                                                      |
| Deficit vit D                              | <input type="radio"/> no<br><input type="radio"/> si                                                                                                                                 |
| Suplemento vit D                           | <input type="radio"/> si<br><input type="radio"/> no                                                                                                                                 |

|                       |                                                                                                                                                                                                                                                                                                                                                                                                              |
|-----------------------|--------------------------------------------------------------------------------------------------------------------------------------------------------------------------------------------------------------------------------------------------------------------------------------------------------------------------------------------------------------------------------------------------------------|
| Dieta, cuestionario   | <input checked="" type="radio"/> sí<br><input type="radio"/> no                                                                                                                                                                                                                                                                                                                                              |
| Leche entera          | <input type="radio"/> Nunca o menos 1 vez al mes<br><input type="radio"/> 1 a 3 veces mes<br><input type="radio"/> 1 vez semana<br><input type="radio"/> 2 a 4 veces semana<br><input type="radio"/> 5 a 6 veces semana<br><input type="radio"/> 1 vez al día<br><input checked="" type="radio"/> 2 a 3 veces al día<br><input type="radio"/> 5 a 6 veces al día<br><input type="radio"/> más 6 veces al día |
| Leche semidesnatada   | <input checked="" type="radio"/> Nunca o menos 1 vez al mes<br><input type="radio"/> 1 a 3 veces mes<br><input type="radio"/> 1 vez semana<br><input type="radio"/> 2 a 4 veces semana<br><input type="radio"/> 5 a 6 veces semana<br><input type="radio"/> 1 vez al día<br><input type="radio"/> 2 a 3 veces al día<br><input type="radio"/> 5 a 6 veces al día<br><input type="radio"/> mas 6 veces al día |
| Leche desnatada       | <input checked="" type="radio"/> Nunca o menos 1 vez al mes<br><input type="radio"/> 1 a 3 veces mes<br><input type="radio"/> 1 vez semana<br><input type="radio"/> 2 a 4 veces semana<br><input type="radio"/> 5 a 6 veces semana<br><input type="radio"/> 1 vez al día<br><input type="radio"/> 2 a 3 veces al día<br><input type="radio"/> 5 a 6 veces al día<br><input type="radio"/> más 6 veces al día |
| Leche condensada      | <input checked="" type="radio"/> Nunca o menos 1 vez al mes<br><input type="radio"/> 1 a 3 veces mes<br><input type="radio"/> 1 vez semana<br><input type="radio"/> 2 a 4 veces semana<br><input type="radio"/> 5 a 6 veces semana<br><input type="radio"/> 1 vez al día<br><input type="radio"/> 2 a 3 veces al día<br><input type="radio"/> 5 a 6 veces al día<br><input type="radio"/> más 6 veces al día |
| nata o crema de leche | <input checked="" type="radio"/> Nunca o menos 1 vez al mes<br><input type="radio"/> 1 a 3 veces mes<br><input type="radio"/> 1 vez semana<br><input type="radio"/> 2 a 4 veces semana<br><input type="radio"/> 5 a 6 veces semana<br><input type="radio"/> 1 vez al día<br><input type="radio"/> 2 a 3 veces al día<br><input type="radio"/> 5 a 6 veces al día<br><input type="radio"/> más 6 veces al día |



|                                             |                                                                                                                                                                                                                                                                                                                                                                                                              |
|---------------------------------------------|--------------------------------------------------------------------------------------------------------------------------------------------------------------------------------------------------------------------------------------------------------------------------------------------------------------------------------------------------------------------------------------------------------------|
| Yogurt Entero                               | <input type="radio"/> Nunca o menos 1 vez al mes<br><input type="radio"/> 1 a 3 veces mes<br><input type="radio"/> 1 vez semana<br><input type="radio"/> 2 a 4 veces semana<br><input type="radio"/> 5 a 6 veces semana<br><input checked="" type="radio"/> 1 vez al día<br><input type="radio"/> 2 a 3 veces al día<br><input type="radio"/> 5 a 6 veces al día<br><input type="radio"/> más 6 veces al día |
| Yogurt desnatado                            | <input checked="" type="radio"/> Nunca o menos 1 vez al mes<br><input type="radio"/> 1 a 3 veces mes<br><input type="radio"/> 1 vez semana<br><input type="radio"/> 2 a 4 veces semana<br><input type="radio"/> 5 a 6 veces semana<br><input type="radio"/> 1 vez al día<br><input type="radio"/> 2 a 3 veces al día<br><input type="radio"/> 5 a 6 veces al día<br><input type="radio"/> más 6 veces al día |
| 100g requesón o queso blando o queso fresco | <input checked="" type="radio"/> Nunca o menos 1 vez al mes<br><input type="radio"/> 1 a 3 veces mes<br><input type="radio"/> 1 vez semana<br><input type="radio"/> 2 a 4 veces semana<br><input type="radio"/> 5 a 6 veces semana<br><input type="radio"/> 1 vez al día<br><input type="radio"/> 2 a 3 veces al día<br><input type="radio"/> 5 a 6 veces al día<br><input type="radio"/> más 6 veces al día |
| queso curado o semicurado o cremoso         | <input checked="" type="radio"/> Nunca o menos 1 vez al mes<br><input type="radio"/> 1 a 3 veces mes<br><input type="radio"/> 1 vez semana<br><input type="radio"/> 2 a 4 veces semana<br><input type="radio"/> 5 a 6 veces semana<br><input type="radio"/> 1 vez al día<br><input type="radio"/> 2 a 3 veces al día<br><input type="radio"/> 5 a 6 veces al día<br><input type="radio"/> más 6 veces al día |
| natillas flan pudding                       | <input type="radio"/> Nunca o menos 1 vez al mes<br><input type="radio"/> 1 a 3 veces mes<br><input checked="" type="radio"/> 1 vez semana<br><input type="radio"/> 2 a 4 veces semana<br><input type="radio"/> 5 a 6 veces semana<br><input type="radio"/> 1 vez al día<br><input type="radio"/> 2 a 3 veces al día<br><input type="radio"/> 5 a 6 veces al día<br><input type="radio"/> más 6 veces al día |
| Helado                                      | <input type="radio"/> Nunca o menos 1 vez al mes<br><input checked="" type="radio"/> 1 a 3 veces mes<br><input type="radio"/> 1 vez semana<br><input type="radio"/> 2 a 4 veces semana<br><input type="radio"/> 5 a 6 veces semana<br><input type="radio"/> 1 vez al día<br><input type="radio"/> 2 a 3 veces al día<br><input type="radio"/> 5 a 6 veces al día<br><input type="radio"/> más 6 veces al día |

|                                      |                                                                                                                                                                                                                                                                                                                                                                                                              |
|--------------------------------------|--------------------------------------------------------------------------------------------------------------------------------------------------------------------------------------------------------------------------------------------------------------------------------------------------------------------------------------------------------------------------------------------------------------|
| huevo                                | <input type="radio"/> Nunca o menos 1 vez al mes<br><input type="radio"/> 1 a 3 veces mes<br><input checked="" type="radio"/> 1 vez semana<br><input type="radio"/> 2 a 4 veces semana<br><input type="radio"/> 5 a 6 veces semana<br><input type="radio"/> 1 vez al día<br><input type="radio"/> 2 a 3 veces al día<br><input type="radio"/> 5 a 6 veces al día<br><input type="radio"/> más 6 veces al día |
| Pollo con piel                       | <input type="radio"/> Nunca o menos 1 vez al mes<br><input type="radio"/> 1 a 3 veces mes<br><input checked="" type="radio"/> 1 vez semana<br><input type="radio"/> 2 a 4 veces semana<br><input type="radio"/> 5 a 6 veces semana<br><input type="radio"/> 1 vez al día<br><input type="radio"/> 2 a 3 veces al día<br><input type="radio"/> 5 a 6 veces al día<br><input type="radio"/> más 6 veces al día |
| pollo sin piel                       | <input checked="" type="radio"/> Nunca o menos 1 vez al mes<br><input type="radio"/> 1 a 3 veces mes<br><input type="radio"/> 1 vez semana<br><input type="radio"/> 2 a 4 veces semana<br><input type="radio"/> 5 a 6 veces semana<br><input type="radio"/> 1 vez al día<br><input type="radio"/> 2 a 3 veces al día<br><input type="radio"/> 5 a 6 veces al día<br><input type="radio"/> más 6 veces al día |
| Ternera o cerdo o cordero            | <input type="radio"/> Nunca o menos 1 vez al mes<br><input type="radio"/> 1 a 3 veces mes<br><input checked="" type="radio"/> 1 vez semana<br><input type="radio"/> 2 a 4 veces semana<br><input type="radio"/> 5 a 6 veces semana<br><input type="radio"/> 1 vez al día<br><input type="radio"/> 2 a 3 veces al día<br><input type="radio"/> 5 a 6 veces al día<br><input type="radio"/> más 6 veces al día |
| carne caza: Conejo o codorniz o pato | <input type="radio"/> Nunca o menos 1 vez al mes<br><input type="radio"/> 1 a 3 veces mes<br><input checked="" type="radio"/> 1 vez semana<br><input type="radio"/> 2 a 4 veces semana<br><input type="radio"/> 5 a 6 veces semana<br><input type="radio"/> 1 vez al día<br><input type="radio"/> 2 a 3 veces al día<br><input type="radio"/> 5 a 6 veces al día<br><input type="radio"/> más 6 veces al día |
| Hígado de ternera o cerdo o pollo    | <input type="radio"/> Nunca o menos 1 vez al mes<br><input type="radio"/> 1 a 3 veces mes<br><input type="radio"/> 1 vez semana<br><input type="radio"/> 2 a 4 veces semana<br><input type="radio"/> 5 a 6 veces semana<br><input type="radio"/> 1 vez al día<br><input type="radio"/> 2 a 3 veces al día<br><input type="radio"/> 5 a 6 veces al día<br><input type="radio"/> más 6 veces al día            |

---

Vísceras

- ☐ Nunca o menos 1 vez al mes  
☒ 1 a 3 veces mes  
☐ 1 vez semana  
☐ 2 a 4 veces semana  
☐ 5 a 6 veces semana  
☐ 1 vez al día  
☐ 2 a 3 veces al día  
☐ 5 a 6 veces al día  
☐ más 6 veces al día

---

Embutido

- ☒ Nunca o menos 1 vez al mes  
☐ 1 a 3 veces mes  
☐ 1 vez semana  
☐ 2 a 4 veces semana  
☐ 5 a 6 veces semana  
☐ 1 vez al día  
☐ 2 a 3 veces al día  
☐ 5 a 6 veces al día  
☐ más 6 veces al día

---

Salchicha o similar

- ☒ Nunca o menos 1 vez al mes  
☐ 1 a 3 veces mes  
☐ 1 vez semana  
☐ 2 a 4 veces semana  
☐ 5 a 6 veces semana  
☐ 1 vez al día  
☐ 2 a 3 veces al día  
☐ 5 a 6 veces al día  
☐ más 6 veces al día

---

Pate o foiegras

- ☒ Nunca o menos 1 vez al mes  
☐ 1 a 3 veces mes  
☐ 1 vez semana  
☐ 2 a 4 veces semana  
☐ 5 a 6 veces semana  
☐ 1 vez al día  
☐ 2 a 3 veces al día  
☐ 5 a 6 veces al día  
☐ más 6 veces al día

---

Hamburguesa

- ☐ Nunca o menos 1 vez al mes  
☒ 1 a 3 veces mes  
☐ 1 vez semana  
☐ 2 a 4 veces semana  
☐ 5 a 6 veces semana  
☐ 1 vez al día  
☐ 2 a 3 veces al día  
☐ 5 a 6 veces al día  
☐ más 6 veces al día

---

tocino o bacon

- ☒ Nunca o menos 1 vez al mes  
☐ 1 a 3 veces mes  
☐ 1 vez semana  
☐ 2 a 4 veces semana  
☐ 5 a 6 veces semana  
☐ 1 vez al día  
☐ 2 a 3 veces al día  
☐ 5 a 6 veces al día  
☐ más 6 veces al día

---

Pescado frito

- ☒ Nunca o menos 1 vez al mes  
☐ 1 a 3 veces mes  
☐ 1 vez semana  
☐ 2 a 4 veces semana  
☐ 5 a 6 veces semana  
☐ 1 vez al día  
☐ 2 a 3 veces al día  
☐ 5 a 6 veces al día  
☐ más 6 veces al día

---

pescado hervido blanco

- ☐ Nunca o menos 1 vez al mes  
☒ 1 a 3 veces mes  
☐ 1 vez semana  
☐ 2 a 4 veces semana  
☐ 5 a 6 veces semana  
☐ 1 vez al día  
☐ 2 a 3 veces al día  
☐ 5 a 6 veces al día  
☐ más 6 veces al día

---

pescado hervido azul

- ☒ Nunca o menos 1 vez al mes  
☐ 1 a 3 veces mes  
☐ 1 vez semana  
☐ 2 a 4 veces semana  
☐ 5 a 6 veces semana  
☐ 1 vez al día  
☐ 2 a 3 veces al día  
☐ 5 a 6 veces al día  
☐ más 6 veces al día

---

otros pescado azul

- ☒ Nunca o menos 1 vez al mes  
☐ 1 a 3 veces mes  
☐ 1 vez semana  
☐ 2 a 4 veces semana  
☐ 5 a 6 veces semana  
☐ 1 vez al día  
☐ 2 a 3 veces al día  
☐ 5 a 6 veces al día  
☐ más 6 veces al día

---

atun conserva

- ☒ Nunca o menos 1 vez al mes  
☐ 1 a 3 veces mes  
☐ 1 vez semana  
☐ 2 a 4 veces semana  
☐ 5 a 6 veces semana  
☐ 1 vez al día  
☐ 2 a 3 veces al día  
☐ 5 a 6 veces al día  
☐ más 6 veces al día

---

sardina conserva

- ☒ Nunca o menos 1 vez al mes  
☐ 1 a 3 veces mes  
☐ 1 vez semana  
☐ 2 a 4 veces semana  
☐ 5 a 6 veces semana  
☐ 1 vez al día  
☐ 2 a 3 veces al día  
☐ 5 a 6 veces al día  
☐ más 6 veces al día

|                                         |                                                                                                                                                                                                                                                                                                                                                                                                              |
|-----------------------------------------|--------------------------------------------------------------------------------------------------------------------------------------------------------------------------------------------------------------------------------------------------------------------------------------------------------------------------------------------------------------------------------------------------------------|
| pescado ahumado                         | <input checked="" type="radio"/> Nunca o menos 1 vez al mes<br><input type="radio"/> 1 a 3 veces mes<br><input type="radio"/> 1 vez semana<br><input type="radio"/> 2 a 4 veces semana<br><input type="radio"/> 5 a 6 veces semana<br><input type="radio"/> 1 vez al día<br><input type="radio"/> 2 a 3 veces al día<br><input type="radio"/> 5 a 6 veces al día<br><input type="radio"/> más 6 veces al día |
| almejas o mejillones o ostras unos 100g | <input checked="" type="radio"/> Nunca o menos 1 vez al mes<br><input type="radio"/> 1 a 3 veces mes<br><input type="radio"/> 1 vez semana<br><input type="radio"/> 2 a 4 veces semana<br><input type="radio"/> 5 a 6 veces semana<br><input type="radio"/> 1 vez al día<br><input type="radio"/> 2 a 3 veces al día<br><input type="radio"/> 5 a 6 veces al día<br><input type="radio"/> más 6 veces al día |
| calamar o chipiron o sepia unos 100g    | <input checked="" type="radio"/> Nunca o menos 1 vez al mes<br><input type="radio"/> 1 a 3 veces mes<br><input type="radio"/> 1 vez semana<br><input type="radio"/> 2 a 4 veces semana<br><input type="radio"/> 5 a 6 veces semana<br><input type="radio"/> 1 vez al día<br><input type="radio"/> 2 a 3 veces al día<br><input type="radio"/> 5 a 6 veces al día<br><input type="radio"/> más 6 veces al día |
| marisco unos 100g                       | <input checked="" type="radio"/> Nunca o menos 1 vez al mes<br><input type="radio"/> 1 a 3 veces mes<br><input type="radio"/> 1 vez semana<br><input type="radio"/> 2 a 4 veces semana<br><input type="radio"/> 5 a 6 veces semana<br><input type="radio"/> 1 vez al día<br><input type="radio"/> 2 a 3 veces al día<br><input type="radio"/> 5 a 6 veces al día<br><input type="radio"/> más 6 veces al día |
| Espinacas o acelgas cocinadas           | <input type="radio"/> Nunca o menos 1 vez al mes<br><input checked="" type="radio"/> 1 a 3 veces mes<br><input type="radio"/> 1 vez semana<br><input type="radio"/> 2 a 4 veces semana<br><input type="radio"/> 5 a 6 veces semana<br><input type="radio"/> 1 vez al día<br><input type="radio"/> 2 a 3 veces al día<br><input type="radio"/> 5 a 6 veces al día<br><input type="radio"/> más 6 veces al día |
| Col o coliflor o brocoli cocinado       | <input type="radio"/> Nunca o menos 1 vez al mes<br><input checked="" type="radio"/> 1 a 3 veces mes<br><input type="radio"/> 1 vez semana<br><input type="radio"/> 2 a 4 veces semana<br><input type="radio"/> 5 a 6 veces semana<br><input type="radio"/> 1 vez al día<br><input type="radio"/> 2 a 3 veces al día<br><input type="radio"/> 5 a 6 veces al día<br><input type="radio"/> más 6 veces al día |

---

Lechuga o endivia o escarola

- ☒ Nunca o menos 1 vez al mes  
☐ 1 a 3 veces mes  
☐ 1 vez semana  
☐ 2 a 4 veces semana  
☐ 5 a 6 veces semana  
☐ 1 vez al día  
☐ 2 a 3 veces al día  
☐ 5 a 6 veces al día  
☐ más 6 veces al día

---

tomate ensalada

- ☐ Nunca o menos 1 vez al mes  
☒ 1 a 3 veces mes  
☐ 1 vez semana  
☐ 2 a 4 veces semana  
☐ 5 a 6 veces semana  
☐ 1 vez al día  
☐ 2 a 3 veces al día  
☐ 5 a 6 veces al día  
☐ más 6 veces al día

---

cebolla

- ☐ Nunca o menos 1 vez al mes  
☒ 1 a 3 veces mes  
☐ 1 vez semana  
☐ 2 a 4 veces semana  
☐ 5 a 6 veces semana  
☐ 1 vez al día  
☐ 2 a 3 veces al día  
☐ 5 a 6 veces al día  
☐ más 6 veces al día

---

Zanahoria o calabaza

- ☐ Nunca o menos 1 vez al mes  
☒ 1 a 3 veces mes  
☐ 1 vez semana  
☐ 2 a 4 veces semana  
☐ 5 a 6 veces semana  
☐ 1 vez al día  
☐ 2 a 3 veces al día  
☐ 5 a 6 veces al día  
☐ más 6 veces al día

---

Judías verdes

- ☐ Nunca o menos 1 vez al mes  
☒ 1 a 3 veces mes  
☐ 1 vez semana  
☐ 2 a 4 veces semana  
☐ 5 a 6 veces semana  
☐ 1 vez al día  
☐ 2 a 3 veces al día  
☐ 5 a 6 veces al día  
☐ más 6 veces al día

---

Berenjena o calabacin o pepino

- ☐ Nunca o menos 1 vez al mes  
☒ 1 a 3 veces mes  
☐ 1 vez semana  
☐ 2 a 4 veces semana  
☐ 5 a 6 veces semana  
☐ 1 vez al día  
☐ 2 a 3 veces al día  
☐ 5 a 6 veces al día  
☐ más 6 veces al día

---

|          |                                                                                                                                                                                                                                                                                                                                                                                                              |
|----------|--------------------------------------------------------------------------------------------------------------------------------------------------------------------------------------------------------------------------------------------------------------------------------------------------------------------------------------------------------------------------------------------------------------|
| pimiento | <input checked="" type="radio"/> Nunca o menos 1 vez al mes<br><input type="radio"/> 1 a 3 veces mes<br><input type="radio"/> 1 vez semana<br><input type="radio"/> 2 a 4 veces semana<br><input type="radio"/> 5 a 6 veces semana<br><input type="radio"/> 1 vez al día<br><input type="radio"/> 2 a 3 veces al día<br><input type="radio"/> 5 a 6 veces al día<br><input type="radio"/> más 6 veces al día |
|----------|--------------------------------------------------------------------------------------------------------------------------------------------------------------------------------------------------------------------------------------------------------------------------------------------------------------------------------------------------------------------------------------------------------------|

---

|           |                                                                                                                                                                                                                                                                                                                                                                                                              |
|-----------|--------------------------------------------------------------------------------------------------------------------------------------------------------------------------------------------------------------------------------------------------------------------------------------------------------------------------------------------------------------------------------------------------------------|
| alcachofa | <input checked="" type="radio"/> Nunca o menos 1 vez al mes<br><input type="radio"/> 1 a 3 veces mes<br><input type="radio"/> 1 vez semana<br><input type="radio"/> 2 a 4 veces semana<br><input type="radio"/> 5 a 6 veces semana<br><input type="radio"/> 1 vez al día<br><input type="radio"/> 2 a 3 veces al día<br><input type="radio"/> 5 a 6 veces al día<br><input type="radio"/> más 6 veces al día |
|-----------|--------------------------------------------------------------------------------------------------------------------------------------------------------------------------------------------------------------------------------------------------------------------------------------------------------------------------------------------------------------------------------------------------------------|

---

|            |                                                                                                                                                                                                                                                                                                                                                                                                              |
|------------|--------------------------------------------------------------------------------------------------------------------------------------------------------------------------------------------------------------------------------------------------------------------------------------------------------------------------------------------------------------------------------------------------------------|
| espárragos | <input checked="" type="radio"/> Nunca o menos 1 vez al mes<br><input type="radio"/> 1 a 3 veces mes<br><input type="radio"/> 1 vez semana<br><input type="radio"/> 2 a 4 veces semana<br><input type="radio"/> 5 a 6 veces semana<br><input type="radio"/> 1 vez al día<br><input type="radio"/> 2 a 3 veces al día<br><input type="radio"/> 5 a 6 veces al día<br><input type="radio"/> más 6 veces al día |
|------------|--------------------------------------------------------------------------------------------------------------------------------------------------------------------------------------------------------------------------------------------------------------------------------------------------------------------------------------------------------------------------------------------------------------|

---

|              |                                                                                                                                                                                                                                                                                                                                                                                                              |
|--------------|--------------------------------------------------------------------------------------------------------------------------------------------------------------------------------------------------------------------------------------------------------------------------------------------------------------------------------------------------------------------------------------------------------------|
| maíz hervido | <input type="radio"/> Nunca o menos 1 vez al mes<br><input checked="" type="radio"/> 1 a 3 veces mes<br><input type="radio"/> 1 vez semana<br><input type="radio"/> 2 a 4 veces semana<br><input type="radio"/> 5 a 6 veces semana<br><input type="radio"/> 1 vez al día<br><input type="radio"/> 2 a 3 veces al día<br><input type="radio"/> 5 a 6 veces al día<br><input type="radio"/> más 6 veces al día |
|--------------|--------------------------------------------------------------------------------------------------------------------------------------------------------------------------------------------------------------------------------------------------------------------------------------------------------------------------------------------------------------------------------------------------------------|

---

|           |                                                                                                                                                                                                                                                                                                                                                                                                              |
|-----------|--------------------------------------------------------------------------------------------------------------------------------------------------------------------------------------------------------------------------------------------------------------------------------------------------------------------------------------------------------------------------------------------------------------|
| legumbres | <input type="radio"/> Nunca o menos 1 vez al mes<br><input checked="" type="radio"/> 1 a 3 veces mes<br><input type="radio"/> 1 vez semana<br><input type="radio"/> 2 a 4 veces semana<br><input type="radio"/> 5 a 6 veces semana<br><input type="radio"/> 1 vez al día<br><input type="radio"/> 2 a 3 veces al día<br><input type="radio"/> 5 a 6 veces al día<br><input type="radio"/> más 6 veces al día |
|-----------|--------------------------------------------------------------------------------------------------------------------------------------------------------------------------------------------------------------------------------------------------------------------------------------------------------------------------------------------------------------------------------------------------------------|

---

|                       |                                                                                                                                                                                                                                                                                                                                                                                                              |
|-----------------------|--------------------------------------------------------------------------------------------------------------------------------------------------------------------------------------------------------------------------------------------------------------------------------------------------------------------------------------------------------------------------------------------------------------|
| naranjas o mandarinas | <input checked="" type="radio"/> Nunca o menos 1 vez al mes<br><input type="radio"/> 1 a 3 veces mes<br><input type="radio"/> 1 vez semana<br><input type="radio"/> 2 a 4 veces semana<br><input type="radio"/> 5 a 6 veces semana<br><input type="radio"/> 1 vez al día<br><input type="radio"/> 2 a 3 veces al día<br><input type="radio"/> 5 a 6 veces al día<br><input type="radio"/> más 6 veces al día |
|-----------------------|--------------------------------------------------------------------------------------------------------------------------------------------------------------------------------------------------------------------------------------------------------------------------------------------------------------------------------------------------------------------------------------------------------------|

---

|                       |                                                                                                                                                                                                                                                                                                                                                                                                              |
|-----------------------|--------------------------------------------------------------------------------------------------------------------------------------------------------------------------------------------------------------------------------------------------------------------------------------------------------------------------------------------------------------------------------------------------------------|
| zum natural fruta     | <input checked="" type="radio"/> Nunca o menos 1 vez al mes<br><input type="radio"/> 1 a 3 veces mes<br><input type="radio"/> 1 vez semana<br><input type="radio"/> 2 a 4 veces semana<br><input type="radio"/> 5 a 6 veces semana<br><input type="radio"/> 1 vez al día<br><input type="radio"/> 2 a 3 veces al día<br><input type="radio"/> 5 a 6 veces al día<br><input type="radio"/> más 6 veces al día |
| platano               | <input checked="" type="radio"/> Nunca o menos 1 vez al mes<br><input type="radio"/> 1 a 3 veces mes<br><input type="radio"/> 1 vez semana<br><input type="radio"/> 2 a 4 veces semana<br><input type="radio"/> 5 a 6 veces semana<br><input type="radio"/> 1 vez al día<br><input type="radio"/> 2 a 3 veces al día<br><input type="radio"/> 5 a 6 veces al día<br><input type="radio"/> más 6 veces al día |
| manzana o pera        | <input type="radio"/> Nunca o menos 1 vez al mes<br><input type="radio"/> 1 a 3 veces mes<br><input type="radio"/> 1 vez semana<br><input checked="" type="radio"/> 2 a 4 veces semana<br><input type="radio"/> 5 a 6 veces semana<br><input type="radio"/> 1 vez al día<br><input type="radio"/> 2 a 3 veces al día<br><input type="radio"/> 5 a 6 veces al día<br><input type="radio"/> más 6 veces al día |
| melocotón o nectarina | <input type="radio"/> Nunca o menos 1 vez al mes<br><input type="radio"/> 1 a 3 veces mes<br><input checked="" type="radio"/> 1 vez semana<br><input type="radio"/> 2 a 4 veces semana<br><input type="radio"/> 5 a 6 veces semana<br><input type="radio"/> 1 vez al día<br><input type="radio"/> 2 a 3 veces al día<br><input type="radio"/> 5 a 6 veces al día<br><input type="radio"/> más 6 veces al día |
| sandia o melon        | <input type="radio"/> Nunca o menos 1 vez al mes<br><input type="radio"/> 1 a 3 veces mes<br><input checked="" type="radio"/> 1 vez semana<br><input type="radio"/> 2 a 4 veces semana<br><input type="radio"/> 5 a 6 veces semana<br><input type="radio"/> 1 vez al día<br><input type="radio"/> 2 a 3 veces al día<br><input type="radio"/> 5 a 6 veces al día<br><input type="radio"/> más 6 veces al día |
| uva                   | <input type="radio"/> Nunca o menos 1 vez al mes<br><input type="radio"/> 1 a 3 veces mes<br><input checked="" type="radio"/> 1 vez semana<br><input type="radio"/> 2 a 4 veces semana<br><input type="radio"/> 5 a 6 veces semana<br><input type="radio"/> 1 vez al día<br><input type="radio"/> 2 a 3 veces al día<br><input type="radio"/> 5 a 6 veces al día<br><input type="radio"/> más 6 veces al día |



|                 |                                                                                                                                                                                                                                                                                                                                                                                                              |
|-----------------|--------------------------------------------------------------------------------------------------------------------------------------------------------------------------------------------------------------------------------------------------------------------------------------------------------------------------------------------------------------------------------------------------------------|
| bruna o ciruela | <input checked="" type="radio"/> Nunca o menos 1 vez al mes<br><input type="radio"/> 1 a 3 veces mes<br><input type="radio"/> 1 vez semana<br><input type="radio"/> 2 a 4 veces semana<br><input type="radio"/> 5 a 6 veces semana<br><input type="radio"/> 1 vez al día<br><input type="radio"/> 2 a 3 veces al día<br><input type="radio"/> 5 a 6 veces al día<br><input type="radio"/> más 6 veces al día |
| kiwi            | <input checked="" type="radio"/> Nunca o menos 1 vez al mes<br><input type="radio"/> 1 a 3 veces mes<br><input type="radio"/> 1 vez semana<br><input type="radio"/> 2 a 4 veces semana<br><input type="radio"/> 5 a 6 veces semana<br><input type="radio"/> 1 vez al día<br><input type="radio"/> 2 a 3 veces al día<br><input type="radio"/> 5 a 6 veces al día<br><input type="radio"/> más 6 veces al día |
| aceituna        | <input type="radio"/> Nunca o menos 1 vez al mes<br><input checked="" type="radio"/> 1 a 3 veces mes<br><input type="radio"/> 1 vez semana<br><input type="radio"/> 2 a 4 veces semana<br><input type="radio"/> 5 a 6 veces semana<br><input type="radio"/> 1 vez al día<br><input type="radio"/> 2 a 3 veces al día<br><input type="radio"/> 5 a 6 veces al día<br><input type="radio"/> más 6 veces al día |
| frutos secos    | <input type="radio"/> Nunca o menos 1 vez al mes<br><input type="radio"/> 1 a 3 veces mes<br><input checked="" type="radio"/> 1 vez semana<br><input type="radio"/> 2 a 4 veces semana<br><input type="radio"/> 5 a 6 veces semana<br><input type="radio"/> 1 vez al día<br><input type="radio"/> 2 a 3 veces al día<br><input type="radio"/> 5 a 6 veces al día<br><input type="radio"/> más 6 veces al día |
| pan blanco      | <input type="radio"/> Nunca o menos 1 vez al mes<br><input type="radio"/> 1 a 3 veces mes<br><input type="radio"/> 1 vez semana<br><input checked="" type="radio"/> 2 a 4 veces semana<br><input type="radio"/> 5 a 6 veces semana<br><input type="radio"/> 1 vez al día<br><input type="radio"/> 2 a 3 veces al día<br><input type="radio"/> 5 a 6 veces al día<br><input type="radio"/> más 6 veces al día |
| pan integral    | <input checked="" type="radio"/> Nunca o menos 1 vez al mes<br><input type="radio"/> 1 a 3 veces mes<br><input type="radio"/> 1 vez semana<br><input type="radio"/> 2 a 4 veces semana<br><input type="radio"/> 5 a 6 veces semana<br><input type="radio"/> 1 vez al día<br><input type="radio"/> 2 a 3 veces al día<br><input type="radio"/> 5 a 6 veces al día<br><input type="radio"/> más 6 veces al día |

---

cereales desayuno

- ☐ Nunca o menos 1 vez al mes  
☐ 1 a 3 veces mes  
☒ 1 vez semana  
☐ 2 a 4 veces semana  
☐ 5 a 6 veces semana  
☐ 1 vez al día  
☐ 2 a 3 veces al día  
☐ 5 a 6 veces al día  
☐ más 6 veces al día

---

patatas fritas

- ☐ Nunca o menos 1 vez al mes  
☒ 1 a 3 veces mes  
☐ 1 vez semana  
☐ 2 a 4 veces semana  
☐ 5 a 6 veces semana  
☐ 1 vez al día  
☐ 2 a 3 veces al día  
☐ 5 a 6 veces al día  
☐ más 6 veces al día

---

patatas cocidas o asadas

- ☐ Nunca o menos 1 vez al mes  
☒ 1 a 3 veces mes  
☐ 1 vez semana  
☐ 2 a 4 veces semana  
☐ 5 a 6 veces semana  
☐ 1 vez al día  
☐ 2 a 3 veces al día  
☐ 5 a 6 veces al día  
☐ más 6 veces al día

---

bolsa papas

- ☐ Nunca o menos 1 vez al mes  
☒ 1 a 3 veces mes  
☐ 1 vez semana  
☐ 2 a 4 veces semana  
☐ 5 a 6 veces semana  
☐ 1 vez al día  
☐ 2 a 3 veces al día  
☐ 5 a 6 veces al día  
☐ más 6 veces al día

---

arroz cocinado

- ☐ Nunca o menos 1 vez al mes  
☐ 1 a 3 veces mes  
☒ 1 vez semana  
☐ 2 a 4 veces semana  
☐ 5 a 6 veces semana  
☐ 1 vez al día  
☐ 2 a 3 veces al día  
☐ 5 a 6 veces al día  
☐ más 6 veces al día

---

pasta

- ☐ Nunca o menos 1 vez al mes  
☐ 1 a 3 veces mes  
☒ 1 vez semana  
☐ 2 a 4 veces semana  
☐ 5 a 6 veces semana  
☐ 1 vez al día  
☐ 2 a 3 veces al día  
☐ 5 a 6 veces al día  
☐ más 6 veces al día

|                     |                                                                                                                                                                                                                                                                                                                                                                                                              |
|---------------------|--------------------------------------------------------------------------------------------------------------------------------------------------------------------------------------------------------------------------------------------------------------------------------------------------------------------------------------------------------------------------------------------------------------|
| pizza               | <input checked="" type="radio"/> Nunca o menos 1 vez al mes<br><input type="radio"/> 1 a 3 veces mes<br><input type="radio"/> 1 vez semana<br><input type="radio"/> 2 a 4 veces semana<br><input type="radio"/> 5 a 6 veces semana<br><input type="radio"/> 1 vez al día<br><input type="radio"/> 2 a 3 veces al día<br><input type="radio"/> 5 a 6 veces al día<br><input type="radio"/> más 6 veces al día |
| aceite oliva        | <input type="radio"/> Nunca o menos 1 vez al mes<br><input type="radio"/> 1 a 3 veces mes<br><input type="radio"/> 1 vez semana<br><input type="radio"/> 2 a 4 veces semana<br><input type="radio"/> 5 a 6 veces semana<br><input checked="" type="radio"/> 1 vez al día<br><input type="radio"/> 2 a 3 veces al día<br><input type="radio"/> 5 a 6 veces al día<br><input type="radio"/> más 6 veces al día |
| otros aceites       | <input type="radio"/> Nunca o menos 1 vez al mes<br><input type="radio"/> 1 a 3 veces mes<br><input checked="" type="radio"/> 1 vez semana<br><input type="radio"/> 2 a 4 veces semana<br><input type="radio"/> 5 a 6 veces semana<br><input type="radio"/> 1 vez al día<br><input type="radio"/> 2 a 3 veces al día<br><input type="radio"/> 5 a 6 veces al día<br><input type="radio"/> más 6 veces al día |
| margarina           | <input checked="" type="radio"/> Nunca o menos 1 vez al mes<br><input type="radio"/> 1 a 3 veces mes<br><input type="radio"/> 1 vez semana<br><input type="radio"/> 2 a 4 veces semana<br><input type="radio"/> 5 a 6 veces semana<br><input type="radio"/> 1 vez al día<br><input type="radio"/> 2 a 3 veces al día<br><input type="radio"/> 5 a 6 veces al día<br><input type="radio"/> más 6 veces al día |
| mantequilla         | <input checked="" type="radio"/> Nunca o menos 1 vez al mes<br><input type="radio"/> 1 a 3 veces mes<br><input type="radio"/> 1 vez semana<br><input type="radio"/> 2 a 4 veces semana<br><input type="radio"/> 5 a 6 veces semana<br><input type="radio"/> 1 vez al día<br><input type="radio"/> 2 a 3 veces al día<br><input type="radio"/> 5 a 6 veces al día<br><input type="radio"/> más 6 veces al día |
| galletas tipo maria | <input checked="" type="radio"/> Nunca o menos 1 vez al mes<br><input type="radio"/> 1 a 3 veces mes<br><input type="radio"/> 1 vez semana<br><input type="radio"/> 2 a 4 veces semana<br><input type="radio"/> 5 a 6 veces semana<br><input type="radio"/> 1 vez al día<br><input type="radio"/> 2 a 3 veces al día<br><input type="radio"/> 5 a 6 veces al día<br><input type="radio"/> más 6 veces al día |

|                           |                                                                                                                                                                                                                                                                                                                                                                                                              |
|---------------------------|--------------------------------------------------------------------------------------------------------------------------------------------------------------------------------------------------------------------------------------------------------------------------------------------------------------------------------------------------------------------------------------------------------------|
| galletas chocolate        | <input type="radio"/> Nunca o menos 1 vez al mes<br><input type="radio"/> 1 a 3 veces mes<br><input checked="" type="radio"/> 1 vez semana<br><input type="radio"/> 2 a 4 veces semana<br><input type="radio"/> 5 a 6 veces semana<br><input type="radio"/> 1 vez al día<br><input type="radio"/> 2 a 3 veces al día<br><input type="radio"/> 5 a 6 veces al día<br><input type="radio"/> más 6 veces al día |
| bollieria                 | <input type="radio"/> Nunca o menos 1 vez al mes<br><input type="radio"/> 1 a 3 veces mes<br><input checked="" type="radio"/> 1 vez semana<br><input type="radio"/> 2 a 4 veces semana<br><input type="radio"/> 5 a 6 veces semana<br><input type="radio"/> 1 vez al día<br><input type="radio"/> 2 a 3 veces al día<br><input type="radio"/> 5 a 6 veces al día<br><input type="radio"/> más 6 veces al día |
| chocolate o bombones      | <input type="radio"/> Nunca o menos 1 vez al mes<br><input type="radio"/> 1 a 3 veces mes<br><input type="radio"/> 1 vez semana<br><input type="radio"/> 2 a 4 veces semana<br><input type="radio"/> 5 a 6 veces semana<br><input checked="" type="radio"/> 1 vez al día<br><input type="radio"/> 2 a 3 veces al día<br><input type="radio"/> 5 a 6 veces al día<br><input type="radio"/> más 6 veces al día |
| chocolate polvo o colacao | <input checked="" type="radio"/> Nunca o menos 1 vez al mes<br><input type="radio"/> 1 a 3 veces mes<br><input type="radio"/> 1 vez semana<br><input type="radio"/> 2 a 4 veces semana<br><input type="radio"/> 5 a 6 veces semana<br><input type="radio"/> 1 vez al día<br><input type="radio"/> 2 a 3 veces al día<br><input type="radio"/> 5 a 6 veces al día<br><input type="radio"/> más 6 veces al día |
| vino tinto                | <input checked="" type="radio"/> Nunca o menos 1 vez al mes<br><input type="radio"/> 1 a 3 veces mes<br><input type="radio"/> 1 vez semana<br><input type="radio"/> 2 a 4 veces semana<br><input type="radio"/> 5 a 6 veces semana<br><input type="radio"/> 1 vez al día<br><input type="radio"/> 2 a 3 veces al día<br><input type="radio"/> 5 a 6 veces al día<br><input type="radio"/> más 6 veces al día |
| vino blanco               | <input checked="" type="radio"/> Nunca o menos 1 vez al mes<br><input type="radio"/> 1 a 3 veces mes<br><input type="radio"/> 1 vez semana<br><input type="radio"/> 2 a 4 veces semana<br><input type="radio"/> 5 a 6 veces semana<br><input type="radio"/> 1 vez al día<br><input type="radio"/> 2 a 3 veces al día<br><input type="radio"/> 5 a 6 veces al día<br><input type="radio"/> más 6 veces al día |

---

|                    |                                                                                                                                                                                                                                                                                                                                                                                                              |
|--------------------|--------------------------------------------------------------------------------------------------------------------------------------------------------------------------------------------------------------------------------------------------------------------------------------------------------------------------------------------------------------------------------------------------------------|
| vino seco o vermut | <input checked="" type="radio"/> Nunca o menos 1 vez al mes<br><input type="radio"/> 1 a 3 veces mes<br><input type="radio"/> 1 vez semana<br><input type="radio"/> 2 a 4 veces semana<br><input type="radio"/> 5 a 6 veces semana<br><input type="radio"/> 1 vez al día<br><input type="radio"/> 2 a 3 veces al día<br><input type="radio"/> 5 a 6 veces al día<br><input type="radio"/> más 6 veces al día |
|--------------------|--------------------------------------------------------------------------------------------------------------------------------------------------------------------------------------------------------------------------------------------------------------------------------------------------------------------------------------------------------------------------------------------------------------|

---

|         |                                                                                                                                                                                                                                                                                                                                                                                                              |
|---------|--------------------------------------------------------------------------------------------------------------------------------------------------------------------------------------------------------------------------------------------------------------------------------------------------------------------------------------------------------------------------------------------------------------|
| cerveza | <input checked="" type="radio"/> Nunca o menos 1 vez al mes<br><input type="radio"/> 1 a 3 veces mes<br><input type="radio"/> 1 vez semana<br><input type="radio"/> 2 a 4 veces semana<br><input type="radio"/> 5 a 6 veces semana<br><input type="radio"/> 1 vez al día<br><input type="radio"/> 2 a 3 veces al día<br><input type="radio"/> 5 a 6 veces al día<br><input type="radio"/> más 6 veces al día |
|---------|--------------------------------------------------------------------------------------------------------------------------------------------------------------------------------------------------------------------------------------------------------------------------------------------------------------------------------------------------------------------------------------------------------------|

---

|                     |                                                                                                                                                                                                                                                                                                                                                                                                              |
|---------------------|--------------------------------------------------------------------------------------------------------------------------------------------------------------------------------------------------------------------------------------------------------------------------------------------------------------------------------------------------------------------------------------------------------------|
| cerveza sin alcohol | <input checked="" type="radio"/> Nunca o menos 1 vez al mes<br><input type="radio"/> 1 a 3 veces mes<br><input type="radio"/> 1 vez semana<br><input type="radio"/> 2 a 4 veces semana<br><input type="radio"/> 5 a 6 veces semana<br><input type="radio"/> 1 vez al día<br><input type="radio"/> 2 a 3 veces al día<br><input type="radio"/> 5 a 6 veces al día<br><input type="radio"/> más 6 veces al día |
|---------------------|--------------------------------------------------------------------------------------------------------------------------------------------------------------------------------------------------------------------------------------------------------------------------------------------------------------------------------------------------------------------------------------------------------------|

---

|         |                                                                                                                                                                                                                                                                                                                                                                                                              |
|---------|--------------------------------------------------------------------------------------------------------------------------------------------------------------------------------------------------------------------------------------------------------------------------------------------------------------------------------------------------------------------------------------------------------------|
| licores | <input checked="" type="radio"/> Nunca o menos 1 vez al mes<br><input type="radio"/> 1 a 3 veces mes<br><input type="radio"/> 1 vez semana<br><input type="radio"/> 2 a 4 veces semana<br><input type="radio"/> 5 a 6 veces semana<br><input type="radio"/> 1 vez al día<br><input type="radio"/> 2 a 3 veces al día<br><input type="radio"/> 5 a 6 veces al día<br><input type="radio"/> más 6 veces al día |
|---------|--------------------------------------------------------------------------------------------------------------------------------------------------------------------------------------------------------------------------------------------------------------------------------------------------------------------------------------------------------------------------------------------------------------|

---

|                       |                                                                                                                                                                                                                                                                                                                                                                                                              |
|-----------------------|--------------------------------------------------------------------------------------------------------------------------------------------------------------------------------------------------------------------------------------------------------------------------------------------------------------------------------------------------------------------------------------------------------------|
| ginebra o ron o vodka | <input checked="" type="radio"/> Nunca o menos 1 vez al mes<br><input type="radio"/> 1 a 3 veces mes<br><input type="radio"/> 1 vez semana<br><input type="radio"/> 2 a 4 veces semana<br><input type="radio"/> 5 a 6 veces semana<br><input type="radio"/> 1 vez al día<br><input type="radio"/> 2 a 3 veces al día<br><input type="radio"/> 5 a 6 veces al día<br><input type="radio"/> más 6 veces al día |
|-----------------------|--------------------------------------------------------------------------------------------------------------------------------------------------------------------------------------------------------------------------------------------------------------------------------------------------------------------------------------------------------------------------------------------------------------|

---

|                 |                                                                                                                                                                                                                                                                                                                                                                                                              |
|-----------------|--------------------------------------------------------------------------------------------------------------------------------------------------------------------------------------------------------------------------------------------------------------------------------------------------------------------------------------------------------------------------------------------------------------|
| refresco normal | <input checked="" type="radio"/> Nunca o menos 1 vez al mes<br><input type="radio"/> 1 a 3 veces mes<br><input type="radio"/> 1 vez semana<br><input type="radio"/> 2 a 4 veces semana<br><input type="radio"/> 5 a 6 veces semana<br><input type="radio"/> 1 vez al día<br><input type="radio"/> 2 a 3 veces al día<br><input type="radio"/> 5 a 6 veces al día<br><input type="radio"/> más 6 veces al día |
|-----------------|--------------------------------------------------------------------------------------------------------------------------------------------------------------------------------------------------------------------------------------------------------------------------------------------------------------------------------------------------------------------------------------------------------------|

---

|                          |                                                                                                                                                                                                                                                                                                                                                                                                              |
|--------------------------|--------------------------------------------------------------------------------------------------------------------------------------------------------------------------------------------------------------------------------------------------------------------------------------------------------------------------------------------------------------------------------------------------------------|
| refresco sin azúcar      | <input checked="" type="radio"/> Nunca o menos 1 vez al mes<br><input type="radio"/> 1 a 3 veces mes<br><input type="radio"/> 1 vez semana<br><input type="radio"/> 2 a 4 veces semana<br><input type="radio"/> 5 a 6 veces semana<br><input type="radio"/> 1 vez al día<br><input type="radio"/> 2 a 3 veces al día<br><input type="radio"/> 5 a 6 veces al día<br><input type="radio"/> más 6 veces al día |
| Agua del grifo           | <input type="radio"/> Nunca o menos 1 vez al mes<br><input type="radio"/> 1 a 3 veces mes<br><input type="radio"/> 1 vez semana<br><input type="radio"/> 2 a 4 veces semana<br><input type="radio"/> 5 a 6 veces semana<br><input type="radio"/> 1 vez al día<br><input type="radio"/> 2 a 3 veces al día<br><input type="radio"/> 5 a 6 veces al día<br><input checked="" type="radio"/> más 6 veces al día |
| agua embotellada sin gas | <input type="radio"/> Nunca o menos 1 vez al mes<br><input type="radio"/> 1 a 3 veces mes<br><input type="radio"/> 1 vez semana<br><input type="radio"/> 2 a 4 veces semana<br><input type="radio"/> 5 a 6 veces semana<br><input type="radio"/> 1 vez al día<br><input type="radio"/> 2 a 3 veces al día<br><input type="radio"/> 5 a 6 veces al día<br><input type="radio"/> más 6 veces al día            |
| agua embotellada con gas | <input checked="" type="radio"/> Nunca o menos 1 vez al mes<br><input type="radio"/> 1 a 3 veces mes<br><input type="radio"/> 1 vez semana<br><input type="radio"/> 2 a 4 veces semana<br><input type="radio"/> 5 a 6 veces semana<br><input type="radio"/> 1 vez al día<br><input type="radio"/> 2 a 3 veces al día<br><input type="radio"/> 5 a 6 veces al día<br><input type="radio"/> más 6 veces al día |
| zumو frutas embasado     | <input checked="" type="radio"/> Nunca o menos 1 vez al mes<br><input type="radio"/> 1 a 3 veces mes<br><input type="radio"/> 1 vez semana<br><input type="radio"/> 2 a 4 veces semana<br><input type="radio"/> 5 a 6 veces semana<br><input type="radio"/> 1 vez al día<br><input type="radio"/> 2 a 3 veces al día<br><input type="radio"/> 5 a 6 veces al día<br><input type="radio"/> más 6 veces al día |
| cafe                     | <input checked="" type="radio"/> Nunca o menos 1 vez al mes<br><input type="radio"/> 1 a 3 veces mes<br><input type="radio"/> 1 vez semana<br><input type="radio"/> 2 a 4 veces semana<br><input type="radio"/> 5 a 6 veces semana<br><input type="radio"/> 1 vez al día<br><input type="radio"/> 2 a 3 veces al día<br><input type="radio"/> 5 a 6 veces al día<br><input type="radio"/> más 6 veces al día |

---

cafe descafeinado

- ☒ Nunca o menos 1 vez al mes  
☐ 1 a 3 veces mes  
☐ 1 vez semana  
☐ 2 a 4 veces semana  
☐ 5 a 6 veces semana  
☐ 1 vez al día  
☐ 2 a 3 veces al día  
☐ 5 a 6 veces al día  
☐ más 6 veces al día

---

te o infusión

- ☒ Nunca o menos 1 vez al mes  
☐ 1 a 3 veces mes  
☐ 1 vez semana  
☐ 2 a 4 veces semana  
☐ 5 a 6 veces semana  
☐ 1 vez al día  
☐ 2 a 3 veces al día  
☐ 5 a 6 veces al día  
☐ más 6 veces al día

---

sopa o puré verduras

- ☐ Nunca o menos 1 vez al mes  
☐ 1 a 3 veces mes  
☒ 1 vez semana  
☐ 2 a 4 veces semana  
☐ 5 a 6 veces semana  
☐ 1 vez al día  
☐ 2 a 3 veces al día  
☐ 5 a 6 veces al día  
☐ más 6 veces al día

---

croquetas pollo jamón

- ☐ Nunca o menos 1 vez al mes  
☒ 1 a 3 veces mes  
☐ 1 vez semana  
☐ 2 a 4 veces semana  
☐ 5 a 6 veces semana  
☐ 1 vez al día  
☐ 2 a 3 veces al día  
☐ 5 a 6 veces al día  
☐ más 6 veces al día

---

croquetas pescado

- ☒ Nunca o menos 1 vez al mes  
☐ 1 a 3 veces mes  
☐ 1 vez semana  
☐ 2 a 4 veces semana  
☐ 5 a 6 veces semana  
☐ 1 vez al día  
☐ 2 a 3 veces al día  
☐ 5 a 6 veces al día  
☐ más 6 veces al día

---

mayonesa

- ☐ Nunca o menos 1 vez al mes  
☒ 1 a 3 veces mes  
☐ 1 vez semana  
☐ 2 a 4 veces semana  
☐ 5 a 6 veces semana  
☐ 1 vez al día  
☐ 2 a 3 veces al día  
☐ 5 a 6 veces al día  
☐ más 6 veces al día

---

salsa tomate

- ☐ Nunca o menos 1 vez al mes  
☒ 1 a 3 veces mes  
☐ 1 vez semana  
☐ 2 a 4 veces semana  
☐ 5 a 6 veces semana  
☐ 1 vez al día  
☐ 2 a 3 veces al día  
☐ 5 a 6 veces al día  
☐ más 6 veces al día

---

ketchup

- ☒ Nunca o menos 1 vez al mes  
☐ 1 a 3 veces mes  
☐ 1 vez semana  
☐ 2 a 4 veces semana  
☐ 5 a 6 veces semana  
☐ 1 vez al día  
☐ 2 a 3 veces al día  
☐ 5 a 6 veces al día  
☐ más 6 veces al día

---

sal

- ☒ Nunca o menos 1 vez al mes  
☐ 1 a 3 veces mes  
☐ 1 vez semana  
☐ 2 a 4 veces semana  
☐ 5 a 6 veces semana  
☐ 1 vez al día  
☐ 2 a 3 veces al día  
☐ 5 a 6 veces al día  
☐ más 6 veces al día

---

ajo

- ☒ Nunca o menos 1 vez al mes  
☐ 1 a 3 veces mes  
☐ 1 vez semana  
☐ 2 a 4 veces semana  
☐ 5 a 6 veces semana  
☐ 1 vez al día  
☐ 2 a 3 veces al día  
☐ 5 a 6 veces al día  
☐ más 6 veces al día

---

mermelada o miel

- ☐ Nunca o menos 1 vez al mes  
☒ 1 a 3 veces mes  
☐ 1 vez semana  
☐ 2 a 4 veces semana  
☐ 5 a 6 veces semana  
☐ 1 vez al día  
☐ 2 a 3 veces al día  
☐ 5 a 6 veces al día  
☐ más 6 veces al día

---

azúcar

- ☐ Nunca o menos 1 vez al mes  
☒ 1 a 3 veces mes  
☐ 1 vez semana  
☐ 2 a 4 veces semana  
☐ 5 a 6 veces semana  
☐ 1 vez al día  
☐ 2 a 3 veces al día  
☐ 5 a 6 veces al día  
☐ más 6 veces al día



---

Otro alimento

---

suplementos vitamínicos

- ☐ si  
☐ no

---

suplementos vitamínicos

---

dieta previa

- ☐ si  
☒ no

motivo dieta

- ☒ no dieta  
☐ control peso  
☐ control colesterol  
☐ control diabetes  
☐ problemas estómago  
☐ problemas vesícula o hepáticos  
☐ HTA o cardiopatía  
☐ problemas renales  
☐ alergia alimentaria  
☐ ácido úrico elevado  
☐ vegetariana  
☐ otros

---

cambio alimentos año previo gestación

---

- ☐ si  
☒ no

cambio lácteos

- ☐ eliminado  
☐ disminuido  
☐ igual  
☐ aumentado  
☐ no sabe

---

cambio huevos

---

- ☐ eliminado  
☐ disminuido  
☐ igual  
☐ aumentado  
☐ no sabe

cambio carne

- ☐ eliminado  
☐ disminuido  
☐ igual  
☐ aumentado  
☐ no sabe

---

cambio pescado

---

- ☐ eliminado  
☐ disminuido  
☐ igual  
☐ aumentado  
☐ no sabe

cambio verduras

- ☐ eliminado  
☐ disminuido  
☐ igual  
☐ aumentado  
☐ no sabe

|                            |                                                                                                                                                                                                                        |
|----------------------------|------------------------------------------------------------------------------------------------------------------------------------------------------------------------------------------------------------------------|
| cambio legumbres           | <input type="radio"/> eliminado<br><input type="radio"/> disminuido<br><input type="radio"/> igual<br><input type="radio"/> aumentado<br><input type="radio"/> no sabe                                                 |
| cambio fruta               | <input type="radio"/> eliminado<br><input type="radio"/> disminuido<br><input type="radio"/> igual<br><input type="radio"/> aumentado<br><input type="radio"/> no sabe                                                 |
| cambio pan                 | <input type="radio"/> eliminado<br><input type="radio"/> disminuido<br><input type="radio"/> igual<br><input type="radio"/> aumentado<br><input type="radio"/> no sabe                                                 |
| cambio aceite oliva        | <input type="radio"/> eliminado<br><input type="radio"/> disminuido<br><input type="radio"/> igual<br><input type="radio"/> aumentado<br><input type="radio"/> no sabe                                                 |
| cambio mante o margarina   | <input type="radio"/> eliminado<br><input type="radio"/> disminuido<br><input type="radio"/> igual<br><input type="radio"/> aumentado<br><input type="radio"/> no sabe                                                 |
| cambio azúcar y dulces     | <input type="radio"/> eliminado<br><input type="radio"/> disminuido<br><input type="radio"/> igual<br><input type="radio"/> aumentado<br><input type="radio"/> no sabe                                                 |
| cambio bebidas alcohólicas | <input type="radio"/> eliminado<br><input type="radio"/> disminuido<br><input type="radio"/> igual<br><input type="radio"/> aumentado<br><input type="radio"/> no sabe                                                 |
| frecuencia comidas fritas  | <input type="radio"/> a diario<br><input type="radio"/> 5 a 6 veces semana<br><input type="radio"/> 2 a 4 veces semana<br><input checked="" type="radio"/> 1 vez semana<br><input type="radio"/> menos de 1 vez semana |
| carne                      | <input type="radio"/> no como<br><input type="radio"/> cruda<br><input type="radio"/> poco hecha<br><input checked="" type="radio"/> hecha<br><input type="radio"/> muy hecha                                          |
| grasa visible carne        | <input type="radio"/> quita toda<br><input checked="" type="radio"/> quita mayoría<br><input type="radio"/> quita un poco<br><input type="radio"/> no quita nada                                                       |

|                                |                                                                                                                                                                                                                                                          |
|--------------------------------|----------------------------------------------------------------------------------------------------------------------------------------------------------------------------------------------------------------------------------------------------------|
| cocina carne                   | <input type="radio"/> a la plancha<br><input type="radio"/> a la parrilla<br><input type="radio"/> asada<br><input type="radio"/> frita<br><input checked="" type="radio"/> guisada                                                                      |
| tostado quemado carne          | <input checked="" type="radio"/> nunca<br><input type="radio"/> 1 vez mes<br><input type="radio"/> 2 a 3 veces mes<br><input type="radio"/> 1 vez semana<br><input type="radio"/> 2 a 3 semanas                                                          |
| tostado quemado pescado        | <input checked="" type="radio"/> nunca<br><input type="radio"/> 1 vez mes<br><input type="radio"/> 2 a 3 veces mes<br><input type="radio"/> 1 vez semana<br><input type="radio"/> 2 a 3 semanas                                                          |
| socarrat paella                | <input checked="" type="radio"/> nunca<br><input type="radio"/> 1 vez mes<br><input type="radio"/> 2 a 3 veces mes<br><input type="radio"/> 1 vez semana<br><input type="radio"/> 2 a 3 semanas                                                          |
| grasa o aceite cocinar         | <input type="radio"/> mantequilla<br><input type="radio"/> margarina<br><input type="radio"/> aceite oliva<br><input checked="" type="radio"/> aceite oliva virgen extra<br><input type="radio"/> aceite vegetal<br><input type="radio"/> mezcla aceites |
| grasa aceite aliñar            | <input type="radio"/> mantequilla<br><input type="radio"/> margarina<br><input type="radio"/> aceite oliva<br><input type="radio"/> aceite oliva virgen extra<br><input type="radio"/> aceite vegetal<br><input type="radio"/> mezcla aceites            |
| grasa aceite freir             | <input type="radio"/> mantequilla<br><input type="radio"/> margarina<br><input type="radio"/> aceite oliva<br><input type="radio"/> aceite oliva virgen extra<br><input type="radio"/> aceite vegetal<br><input type="radio"/> mezcla aceites            |
| Ejercicio cuestionario         | <input checked="" type="radio"/> si<br><input type="radio"/> no                                                                                                                                                                                          |
| horas de sueño incluido siesta | [*DATA REMOVED*]                                                                                                                                                                                                                                         |
| minutos siesta                 | [*DATA REMOVED*]                                                                                                                                                                                                                                         |
| horas televisión semana        | [*DATA REMOVED*]                                                                                                                                                                                                                                         |

|                                        |                                                                                                                                                                                                                                                                                                                                                                           |
|----------------------------------------|---------------------------------------------------------------------------------------------------------------------------------------------------------------------------------------------------------------------------------------------------------------------------------------------------------------------------------------------------------------------------|
| actividad trabajo                      | <input type="radio"/> casi siempre sentado<br><input type="radio"/> sentado 50 por cien<br><input type="radio"/> casi siempre de pie, quieto<br><input checked="" type="radio"/> casi siempre levantado caminando y llevando pocas cosas<br><input type="radio"/> casi siempre levantado, caminando y llevado muchas cosas<br><input type="radio"/> trabajo manual pesado |
| tiempo caminar o bici al día           | <input type="radio"/> casi nunca<br><input checked="" type="radio"/> menos 20min día<br><input type="radio"/> 20 a 40 min día<br><input type="radio"/> 40 a 60 min día<br><input type="radio"/> 1h o 1h y media día<br><input type="radio"/> más de 1h y media al día                                                                                                     |
| tiempo tareas casa al día              | <input type="radio"/> menos de 1h día<br><input type="radio"/> 1 a 2h día<br><input checked="" type="radio"/> 3 a 4h día<br><input type="radio"/> 5 a 6h día<br><input type="radio"/> 7 a 8h día<br><input type="radio"/> más de 8h día                                                                                                                                   |
| tiempo libre televisión ordenador leer | <input type="radio"/> menos 1h día<br><input type="radio"/> 1h día<br><input checked="" type="radio"/> 2h día<br><input type="radio"/> 3h día<br><input type="radio"/> 4h día<br><input type="radio"/> 5 a 6h día<br><input type="radio"/> mas 6h día                                                                                                                     |
| tiempo libre ejercicio o deporte       | <input type="radio"/> menos 1h semana<br><input checked="" type="radio"/> 1h semana<br><input type="radio"/> 2h semana<br><input type="radio"/> 3h semana<br><input type="radio"/> 4 a 5h semana<br><input type="radio"/> mas 5h semana                                                                                                                                   |
| como se considera                      | <input type="radio"/> sedentaria<br><input type="radio"/> poco activa<br><input type="radio"/> moderadamente activa<br><input checked="" type="radio"/> bastante activa<br><input type="radio"/> muy activa<br><input type="radio"/> no sabe                                                                                                                              |
| FUR                                    | [*DATA REMOVED*]                                                                                                                                                                                                                                                                                                                                                          |
| Semanas gestación 2T                   | [*DATA REMOVED*]                                                                                                                                                                                                                                                                                                                                                          |
| Días gestación 2T                      | [*DATA REMOVED*]                                                                                                                                                                                                                                                                                                                                                          |
| DBP 2T                                 | [*DATA REMOVED*]                                                                                                                                                                                                                                                                                                                                                          |
| CC 2T                                  | [*DATA REMOVED*]                                                                                                                                                                                                                                                                                                                                                          |
| AC 2T                                  | [*DATA REMOVED*]                                                                                                                                                                                                                                                                                                                                                          |

|                                                   |                                                                                                                                                                                                 |
|---------------------------------------------------|-------------------------------------------------------------------------------------------------------------------------------------------------------------------------------------------------|
| LF 2T                                             | [*DATA REMOVED*]                                                                                                                                                                                |
| PFE 2T (Hadlock)                                  | [*DATA REMOVED*]                                                                                                                                                                                |
| Semanas gestación 3T                              | [*DATA REMOVED*]                                                                                                                                                                                |
| días 3T                                           | [*DATA REMOVED*]                                                                                                                                                                                |
| DBP 3T                                            | [*DATA REMOVED*]                                                                                                                                                                                |
| CC 3T                                             | [*DATA REMOVED*]                                                                                                                                                                                |
| AC 3T                                             | [*DATA REMOVED*]                                                                                                                                                                                |
| LF 3T                                             | [*DATA REMOVED*]                                                                                                                                                                                |
| PFE 3T (Hadlock)                                  | [*DATA REMOVED*]                                                                                                                                                                                |
| Semanas de gestación final                        | [*DATA REMOVED*]                                                                                                                                                                                |
| días gestación final                              | [*DATA REMOVED*]                                                                                                                                                                                |
| Localización placenta                             | <input checked="" type="radio"/> anterior<br><input type="radio"/> lateral derecha<br><input type="radio"/> lateral izquierda<br><input type="radio"/> posterior<br><input type="radio"/> fondo |
| Presentación longitudinal cefálica                | <input type="radio"/> no<br><input checked="" type="radio"/> si                                                                                                                                 |
| Dorso                                             | <input checked="" type="radio"/> izquierda anterior<br><input type="radio"/> izquierda posterior<br><input type="radio"/> derecha anterior<br><input type="radio"/> derecha posterior           |
| diámetro biparietal                               | [*DATA REMOVED*]                                                                                                                                                                                |
| Circunferencia craneal                            | [*DATA REMOVED*]                                                                                                                                                                                |
| Circunferencia abdominal                          | [*DATA REMOVED*]                                                                                                                                                                                |
| Longitud de femur                                 | [*DATA REMOVED*]                                                                                                                                                                                |
| tejido celular subcutáneo a nivel del muslo en mm | [*DATA REMOVED*]                                                                                                                                                                                |
| tejido celular subcutáneo en abdomen en mm        | [*DATA REMOVED*]                                                                                                                                                                                |
| Volumen del muslo en cm3                          | [*DATA REMOVED*]                                                                                                                                                                                |
| Peso fetal estimado según fórmula de Hadlock      | [*DATA REMOVED*]                                                                                                                                                                                |

|                                               |                                                                                                                                                          |
|-----------------------------------------------|----------------------------------------------------------------------------------------------------------------------------------------------------------|
| Percentil                                     | [*DATA REMOVED*]                                                                                                                                         |
| Peso fetal estimado según fórmula de Scioscia | <hr/>                                                                                                                                                    |
| Peso fetal estimado según fórmula de LEE      | <hr/>                                                                                                                                                    |
| Tipo de parto                                 | <input checked="" type="radio"/> eutocico<br><input type="radio"/> instrumentado/ventosa<br><input type="radio"/> cesarea                                |
| fecha de nacimiento                           | [*DATA REMOVED*]                                                                                                                                         |
| Días entre exploración y nacimiento           | [*DATA REMOVED*]                                                                                                                                         |
| Peso RN en g                                  | [*DATA REMOVED*]                                                                                                                                         |
| sexo                                          | <input checked="" type="radio"/> mujer<br><input type="radio"/> hombre                                                                                   |
| Apgar 1 minuto                                | [*DATA REMOVED*]                                                                                                                                         |
| Apgar 5 minutos                               | [*DATA REMOVED*]                                                                                                                                         |
| Apgar 10 minutos                              | <hr/>                                                                                                                                                    |
| antecedente Covid durante gestación           | <input type="radio"/> Yes<br><input type="radio"/> No                                                                                                    |
| Nivel de estudios                             | <input type="radio"/> ninguno<br><input checked="" type="radio"/> primarios<br><input type="radio"/> secundarios<br><input type="radio"/> universitarios |

# Base\_datos\_estimacion\_peso\_fetal

|                                       |                                                                                                                                                                                                                                                                                      |
|---------------------------------------|--------------------------------------------------------------------------------------------------------------------------------------------------------------------------------------------------------------------------------------------------------------------------------------|
| Número de identificación participante | 170                                                                                                                                                                                                                                                                                  |
| CODIGO PARTICIPANTE                   |                                                                                                                                                                                                                                                                                      |
| Edad                                  | [*DATA REMOVED*]                                                                                                                                                                                                                                                                     |
| Gestaciones                           | <input type="radio"/> 1<br><input type="radio"/> 2<br><input checked="" type="radio"/> 3<br><input type="radio"/> mas de 3                                                                                                                                                           |
| partos                                | <input checked="" type="radio"/> 0<br><input type="radio"/> 1<br><input type="radio"/> 2<br><input type="radio"/> 3<br><input type="radio"/> mas de 3                                                                                                                                |
| cesáreas                              | <input type="radio"/> 0<br><input checked="" type="radio"/> 1<br><input type="radio"/> 2<br><input type="radio"/> 3<br><input type="radio"/> mas de 3                                                                                                                                |
| Abortos                               | <input type="radio"/> 0<br><input checked="" type="radio"/> 1<br><input type="radio"/> 2<br><input type="radio"/> 3<br><input type="radio"/> mas de 3                                                                                                                                |
| Tipo de gestacion                     | <input checked="" type="radio"/> espontanea<br><input type="radio"/> IAC inseminación artificial conyuge<br><input type="radio"/> IAD inseminación artificial donante<br><input type="radio"/> FIV Fecundación in Vitro<br><input type="radio"/> Ovodon FIV con donación de ovocitos |
| peso previo a embarazo                |                                                                                                                                                                                                                                                                                      |
| Ganancia ponderal embarazo            |                                                                                                                                                                                                                                                                                      |
| Talla madre                           |                                                                                                                                                                                                                                                                                      |
| IMC previo embarazo                   |                                                                                                                                                                                                                                                                                      |
| Patología obstétrica                  | <input checked="" type="radio"/> no<br><input type="radio"/> si                                                                                                                                                                                                                      |
| Diabetes pregestacional               | <input checked="" type="radio"/> no<br><input type="radio"/> si                                                                                                                                                                                                                      |

|                                            |                                                                                                                                                                                      |
|--------------------------------------------|--------------------------------------------------------------------------------------------------------------------------------------------------------------------------------------|
| Diabetes gestacional                       | <input checked="" type="radio"/> no<br><input type="radio"/> si                                                                                                                      |
| Diabetes gestacional con insulina          | <input checked="" type="radio"/> no<br><input type="radio"/> si                                                                                                                      |
| Diabetes gestacional con dieta y ejercicio | <input checked="" type="radio"/> no<br><input type="radio"/> si                                                                                                                      |
| Percentil fetos previos                    | <input type="radio"/> Nada<br><input type="radio"/> percentil menor de 10<br><input checked="" type="radio"/> percentil entre 10 y 90<br><input type="radio"/> percentil mayor de 90 |
| Exfumadora                                 | <input checked="" type="radio"/> Nada<br><input type="radio"/> menos de 5 años<br><input type="radio"/> 5 a 10 años<br><input type="radio"/> mayor o igual a 10 años                 |
| Hábito tabáquico                           | <input type="radio"/> no<br><input checked="" type="radio"/> si                                                                                                                      |
| fumadora                                   | [*DATA REMOVED*]                                                                                                                                                                     |
| Consumo otros tóxicos                      | <input checked="" type="radio"/> no<br><input type="radio"/> si                                                                                                                      |
| Hb 1T                                      | [*DATA REMOVED*]                                                                                                                                                                     |
| Htc 1T                                     | [*DATA REMOVED*]                                                                                                                                                                     |
| Hb 2T                                      | [*DATA REMOVED*]                                                                                                                                                                     |
| HTC 2T                                     | [*DATA REMOVED*]                                                                                                                                                                     |
| Hb 3T                                      | [*DATA REMOVED*]                                                                                                                                                                     |
| HTC 3T                                     | [*DATA REMOVED*]                                                                                                                                                                     |
| Suplemento FE oral                         | <input type="radio"/> si<br><input checked="" type="radio"/> no                                                                                                                      |
| Suplemento fe iv                           | <input type="radio"/> si<br><input checked="" type="radio"/> no                                                                                                                      |
| Transfusión                                | <input checked="" type="radio"/> no<br><input type="radio"/> si                                                                                                                      |
| Solicitada Vit D                           | <input checked="" type="radio"/> no<br><input type="radio"/> si                                                                                                                      |
| Deficit vit D                              | <input type="radio"/> no<br><input type="radio"/> si                                                                                                                                 |



|                       |                                                                                                                                                                                                                                                                                                                                                                                                              |
|-----------------------|--------------------------------------------------------------------------------------------------------------------------------------------------------------------------------------------------------------------------------------------------------------------------------------------------------------------------------------------------------------------------------------------------------------|
| Suplemento vit D      | <input type="radio"/> si<br><input type="radio"/> no                                                                                                                                                                                                                                                                                                                                                         |
| Dieta, cuestionario   | <input checked="" type="radio"/> si<br><input type="radio"/> no                                                                                                                                                                                                                                                                                                                                              |
| Leche entera          | <input checked="" type="radio"/> Nunca o menos 1 vez al mes<br><input type="radio"/> 1 a 3 veces mes<br><input type="radio"/> 1 vez semana<br><input type="radio"/> 2 a 4 veces semana<br><input type="radio"/> 5 a 6 veces semana<br><input type="radio"/> 1 vez al día<br><input type="radio"/> 2 a 3 veces al día<br><input type="radio"/> 5 a 6 veces al día<br><input type="radio"/> más 6 veces al día |
| Leche semidesnatada   | <input checked="" type="radio"/> Nunca o menos 1 vez al mes<br><input type="radio"/> 1 a 3 veces mes<br><input type="radio"/> 1 vez semana<br><input type="radio"/> 2 a 4 veces semana<br><input type="radio"/> 5 a 6 veces semana<br><input type="radio"/> 1 vez al día<br><input type="radio"/> 2 a 3 veces al día<br><input type="radio"/> 5 a 6 veces al día<br><input type="radio"/> mas 6 veces al día |
| Leche desnatada       | <input type="radio"/> Nunca o menos 1 vez al mes<br><input type="radio"/> 1 a 3 veces mes<br><input type="radio"/> 1 vez semana<br><input type="radio"/> 2 a 4 veces semana<br><input checked="" type="radio"/> 5 a 6 veces semana<br><input type="radio"/> 1 vez al día<br><input type="radio"/> 2 a 3 veces al día<br><input type="radio"/> 5 a 6 veces al día<br><input type="radio"/> más 6 veces al día |
| Leche condensada      | <input checked="" type="radio"/> Nunca o menos 1 vez al mes<br><input type="radio"/> 1 a 3 veces mes<br><input type="radio"/> 1 vez semana<br><input type="radio"/> 2 a 4 veces semana<br><input type="radio"/> 5 a 6 veces semana<br><input type="radio"/> 1 vez al día<br><input type="radio"/> 2 a 3 veces al día<br><input type="radio"/> 5 a 6 veces al día<br><input type="radio"/> más 6 veces al día |
| nata o crema de leche | <input checked="" type="radio"/> Nunca o menos 1 vez al mes<br><input type="radio"/> 1 a 3 veces mes<br><input type="radio"/> 1 vez semana<br><input type="radio"/> 2 a 4 veces semana<br><input type="radio"/> 5 a 6 veces semana<br><input type="radio"/> 1 vez al día<br><input type="radio"/> 2 a 3 veces al día<br><input type="radio"/> 5 a 6 veces al día<br><input type="radio"/> más 6 veces al día |

---

Yogurt Entero

- ☒ Nunca o menos 1 vez al mes  
☐ 1 a 3 veces mes  
☐ 1 vez semana  
☐ 2 a 4 veces semana  
☐ 5 a 6 veces semana  
☐ 1 vez al día  
☐ 2 a 3 veces al día  
☐ 5 a 6 veces al día  
☐ más 6 veces al día

---

Yogurt desnatado

- ☒ Nunca o menos 1 vez al mes  
☐ 1 a 3 veces mes  
☐ 1 vez semana  
☐ 2 a 4 veces semana  
☐ 5 a 6 veces semana  
☐ 1 vez al día  
☐ 2 a 3 veces al día  
☐ 5 a 6 veces al día  
☐ más 6 veces al día

---

100g requesón o queso blando o queso fresco

- ☒ Nunca o menos 1 vez al mes  
☐ 1 a 3 veces mes  
☐ 1 vez semana  
☐ 2 a 4 veces semana  
☐ 5 a 6 veces semana  
☐ 1 vez al día  
☐ 2 a 3 veces al día  
☐ 5 a 6 veces al día  
☐ más 6 veces al día

---

queso curado o semicurado o cremoso

- ☐ Nunca o menos 1 vez al mes  
☐ 1 a 3 veces mes  
☐ 1 vez semana  
☒ 2 a 4 veces semana  
☐ 5 a 6 veces semana  
☐ 1 vez al día  
☐ 2 a 3 veces al día  
☐ 5 a 6 veces al día  
☐ más 6 veces al día

---

natillas flan pudding

- ☐ Nunca o menos 1 vez al mes  
☐ 1 a 3 veces mes  
☐ 1 vez semana  
☒ 2 a 4 veces semana  
☐ 5 a 6 veces semana  
☐ 1 vez al día  
☐ 2 a 3 veces al día  
☐ 5 a 6 veces al día  
☐ más 6 veces al día

---

Helado

- ☒ Nunca o menos 1 vez al mes  
☐ 1 a 3 veces mes  
☐ 1 vez semana  
☐ 2 a 4 veces semana  
☐ 5 a 6 veces semana  
☐ 1 vez al día  
☐ 2 a 3 veces al día  
☐ 5 a 6 veces al día  
☐ más 6 veces al día

|                                      |                                                                                                                                                                                                                                                                                                                                                                                                              |
|--------------------------------------|--------------------------------------------------------------------------------------------------------------------------------------------------------------------------------------------------------------------------------------------------------------------------------------------------------------------------------------------------------------------------------------------------------------|
| huevo                                | <input type="radio"/> Nunca o menos 1 vez al mes<br><input type="radio"/> 1 a 3 veces mes<br><input type="radio"/> 1 vez semana<br><input checked="" type="radio"/> 2 a 4 veces semana<br><input type="radio"/> 5 a 6 veces semana<br><input type="radio"/> 1 vez al día<br><input type="radio"/> 2 a 3 veces al día<br><input type="radio"/> 5 a 6 veces al día<br><input type="radio"/> más 6 veces al día |
| Pollo con piel                       | <input checked="" type="radio"/> Nunca o menos 1 vez al mes<br><input type="radio"/> 1 a 3 veces mes<br><input type="radio"/> 1 vez semana<br><input type="radio"/> 2 a 4 veces semana<br><input type="radio"/> 5 a 6 veces semana<br><input type="radio"/> 1 vez al día<br><input type="radio"/> 2 a 3 veces al día<br><input type="radio"/> 5 a 6 veces al día<br><input type="radio"/> más 6 veces al día |
| pollo sin piel                       | <input type="radio"/> Nunca o menos 1 vez al mes<br><input type="radio"/> 1 a 3 veces mes<br><input checked="" type="radio"/> 1 vez semana<br><input type="radio"/> 2 a 4 veces semana<br><input type="radio"/> 5 a 6 veces semana<br><input type="radio"/> 1 vez al día<br><input type="radio"/> 2 a 3 veces al día<br><input type="radio"/> 5 a 6 veces al día<br><input type="radio"/> más 6 veces al día |
| Ternera o cerdo o cordero            | <input type="radio"/> Nunca o menos 1 vez al mes<br><input type="radio"/> 1 a 3 veces mes<br><input type="radio"/> 1 vez semana<br><input checked="" type="radio"/> 2 a 4 veces semana<br><input type="radio"/> 5 a 6 veces semana<br><input type="radio"/> 1 vez al día<br><input type="radio"/> 2 a 3 veces al día<br><input type="radio"/> 5 a 6 veces al día<br><input type="radio"/> más 6 veces al día |
| carne caza: Conejo o codorniz o pato | <input checked="" type="radio"/> Nunca o menos 1 vez al mes<br><input type="radio"/> 1 a 3 veces mes<br><input type="radio"/> 1 vez semana<br><input type="radio"/> 2 a 4 veces semana<br><input type="radio"/> 5 a 6 veces semana<br><input type="radio"/> 1 vez al día<br><input type="radio"/> 2 a 3 veces al día<br><input type="radio"/> 5 a 6 veces al día<br><input type="radio"/> más 6 veces al día |
| Hígado de ternera o cerdo o pollo    | <input checked="" type="radio"/> Nunca o menos 1 vez al mes<br><input type="radio"/> 1 a 3 veces mes<br><input type="radio"/> 1 vez semana<br><input type="radio"/> 2 a 4 veces semana<br><input type="radio"/> 5 a 6 veces semana<br><input type="radio"/> 1 vez al día<br><input type="radio"/> 2 a 3 veces al día<br><input type="radio"/> 5 a 6 veces al día<br><input type="radio"/> más 6 veces al día |

|                     |                                                                                                                                                                                                                                                                                                                                                                                                              |
|---------------------|--------------------------------------------------------------------------------------------------------------------------------------------------------------------------------------------------------------------------------------------------------------------------------------------------------------------------------------------------------------------------------------------------------------|
| Vísceras            | <input checked="" type="radio"/> Nunca o menos 1 vez al mes<br><input type="radio"/> 1 a 3 veces mes<br><input type="radio"/> 1 vez semana<br><input type="radio"/> 2 a 4 veces semana<br><input type="radio"/> 5 a 6 veces semana<br><input type="radio"/> 1 vez al día<br><input type="radio"/> 2 a 3 veces al día<br><input type="radio"/> 5 a 6 veces al día<br><input type="radio"/> más 6 veces al día |
| Embutido            | <input checked="" type="radio"/> Nunca o menos 1 vez al mes<br><input type="radio"/> 1 a 3 veces mes<br><input type="radio"/> 1 vez semana<br><input type="radio"/> 2 a 4 veces semana<br><input type="radio"/> 5 a 6 veces semana<br><input type="radio"/> 1 vez al día<br><input type="radio"/> 2 a 3 veces al día<br><input type="radio"/> 5 a 6 veces al día<br><input type="radio"/> más 6 veces al día |
| Salchicha o similar | <input checked="" type="radio"/> Nunca o menos 1 vez al mes<br><input type="radio"/> 1 a 3 veces mes<br><input type="radio"/> 1 vez semana<br><input type="radio"/> 2 a 4 veces semana<br><input type="radio"/> 5 a 6 veces semana<br><input type="radio"/> 1 vez al día<br><input type="radio"/> 2 a 3 veces al día<br><input type="radio"/> 5 a 6 veces al día<br><input type="radio"/> más 6 veces al día |
| Pate o foiegras     | <input checked="" type="radio"/> Nunca o menos 1 vez al mes<br><input type="radio"/> 1 a 3 veces mes<br><input type="radio"/> 1 vez semana<br><input type="radio"/> 2 a 4 veces semana<br><input type="radio"/> 5 a 6 veces semana<br><input type="radio"/> 1 vez al día<br><input type="radio"/> 2 a 3 veces al día<br><input type="radio"/> 5 a 6 veces al día<br><input type="radio"/> más 6 veces al día |
| Hamburguesa         | <input type="radio"/> Nunca o menos 1 vez al mes<br><input type="radio"/> 1 a 3 veces mes<br><input checked="" type="radio"/> 1 vez semana<br><input type="radio"/> 2 a 4 veces semana<br><input type="radio"/> 5 a 6 veces semana<br><input type="radio"/> 1 vez al día<br><input type="radio"/> 2 a 3 veces al día<br><input type="radio"/> 5 a 6 veces al día<br><input type="radio"/> más 6 veces al día |
| tocino o bacon      | <input checked="" type="radio"/> Nunca o menos 1 vez al mes<br><input type="radio"/> 1 a 3 veces mes<br><input type="radio"/> 1 vez semana<br><input type="radio"/> 2 a 4 veces semana<br><input type="radio"/> 5 a 6 veces semana<br><input type="radio"/> 1 vez al día<br><input type="radio"/> 2 a 3 veces al día<br><input type="radio"/> 5 a 6 veces al día<br><input type="radio"/> más 6 veces al día |

---

Pescado frito

- ☐ Nunca o menos 1 vez al mes  
☐ 1 a 3 veces mes  
☒ 1 vez semana  
☐ 2 a 4 veces semana  
☐ 5 a 6 veces semana  
☐ 1 vez al día  
☐ 2 a 3 veces al día  
☐ 5 a 6 veces al día  
☐ más 6 veces al día

---

pescado hervido blanco

- ☐ Nunca o menos 1 vez al mes  
☒ 1 a 3 veces mes  
☐ 1 vez semana  
☐ 2 a 4 veces semana  
☐ 5 a 6 veces semana  
☐ 1 vez al día  
☐ 2 a 3 veces al día  
☐ 5 a 6 veces al día  
☐ más 6 veces al día

---

pescado hervido azul

- ☐ Nunca o menos 1 vez al mes  
☐ 1 a 3 veces mes  
☒ 1 vez semana  
☐ 2 a 4 veces semana  
☐ 5 a 6 veces semana  
☐ 1 vez al día  
☐ 2 a 3 veces al día  
☐ 5 a 6 veces al día  
☐ más 6 veces al día

---

otros pescado azul

- ☒ Nunca o menos 1 vez al mes  
☐ 1 a 3 veces mes  
☐ 1 vez semana  
☐ 2 a 4 veces semana  
☐ 5 a 6 veces semana  
☐ 1 vez al día  
☐ 2 a 3 veces al día  
☐ 5 a 6 veces al día  
☐ más 6 veces al día

---

atun conserva

- ☐ Nunca o menos 1 vez al mes  
☒ 1 a 3 veces mes  
☐ 1 vez semana  
☐ 2 a 4 veces semana  
☐ 5 a 6 veces semana  
☐ 1 vez al día  
☐ 2 a 3 veces al día  
☐ 5 a 6 veces al día  
☐ más 6 veces al día

---

sardina conserva

- ☒ Nunca o menos 1 vez al mes  
☐ 1 a 3 veces mes  
☐ 1 vez semana  
☐ 2 a 4 veces semana  
☐ 5 a 6 veces semana  
☐ 1 vez al día  
☐ 2 a 3 veces al día  
☐ 5 a 6 veces al día  
☐ más 6 veces al día

|                                         |                                                                                                                                                                                                                                                                                                                                                                                                              |
|-----------------------------------------|--------------------------------------------------------------------------------------------------------------------------------------------------------------------------------------------------------------------------------------------------------------------------------------------------------------------------------------------------------------------------------------------------------------|
| pescado ahumado                         | <input type="radio"/> Nunca o menos 1 vez al mes<br><input type="radio"/> 1 a 3 veces mes<br><input checked="" type="radio"/> 1 vez semana<br><input type="radio"/> 2 a 4 veces semana<br><input type="radio"/> 5 a 6 veces semana<br><input type="radio"/> 1 vez al día<br><input type="radio"/> 2 a 3 veces al día<br><input type="radio"/> 5 a 6 veces al día<br><input type="radio"/> más 6 veces al día |
| almejas o mejillones o ostras unos 100g | <input type="radio"/> Nunca o menos 1 vez al mes<br><input type="radio"/> 1 a 3 veces mes<br><input type="radio"/> 1 vez semana<br><input checked="" type="radio"/> 2 a 4 veces semana<br><input type="radio"/> 5 a 6 veces semana<br><input type="radio"/> 1 vez al día<br><input type="radio"/> 2 a 3 veces al día<br><input type="radio"/> 5 a 6 veces al día<br><input type="radio"/> más 6 veces al día |
| calamar o chipiron o sepia unos 100g    | <input type="radio"/> Nunca o menos 1 vez al mes<br><input type="radio"/> 1 a 3 veces mes<br><input type="radio"/> 1 vez semana<br><input checked="" type="radio"/> 2 a 4 veces semana<br><input type="radio"/> 5 a 6 veces semana<br><input type="radio"/> 1 vez al día<br><input type="radio"/> 2 a 3 veces al día<br><input type="radio"/> 5 a 6 veces al día<br><input type="radio"/> más 6 veces al día |
| marisco unos 100g                       | <input type="radio"/> Nunca o menos 1 vez al mes<br><input type="radio"/> 1 a 3 veces mes<br><input type="radio"/> 1 vez semana<br><input checked="" type="radio"/> 2 a 4 veces semana<br><input type="radio"/> 5 a 6 veces semana<br><input type="radio"/> 1 vez al día<br><input type="radio"/> 2 a 3 veces al día<br><input type="radio"/> 5 a 6 veces al día<br><input type="radio"/> más 6 veces al día |
| Espinacas o acelgas cocinadas           | <input type="radio"/> Nunca o menos 1 vez al mes<br><input checked="" type="radio"/> 1 a 3 veces mes<br><input type="radio"/> 1 vez semana<br><input type="radio"/> 2 a 4 veces semana<br><input type="radio"/> 5 a 6 veces semana<br><input type="radio"/> 1 vez al día<br><input type="radio"/> 2 a 3 veces al día<br><input type="radio"/> 5 a 6 veces al día<br><input type="radio"/> más 6 veces al día |
| Col o coliflor o brocoli cocinado       | <input type="radio"/> Nunca o menos 1 vez al mes<br><input type="radio"/> 1 a 3 veces mes<br><input checked="" type="radio"/> 1 vez semana<br><input type="radio"/> 2 a 4 veces semana<br><input type="radio"/> 5 a 6 veces semana<br><input type="radio"/> 1 vez al día<br><input type="radio"/> 2 a 3 veces al día<br><input type="radio"/> 5 a 6 veces al día<br><input type="radio"/> más 6 veces al día |

---

Lechuga o endivia o escarola

- ☐ Nunca o menos 1 vez al mes  
☐ 1 a 3 veces mes  
☒ 1 vez semana  
☐ 2 a 4 veces semana  
☐ 5 a 6 veces semana  
☐ 1 vez al día  
☐ 2 a 3 veces al día  
☐ 5 a 6 veces al día  
☐ más 6 veces al día

---

tomate ensalada

- ☐ Nunca o menos 1 vez al mes  
☐ 1 a 3 veces mes  
☐ 1 vez semana  
☐ 2 a 4 veces semana  
☒ 5 a 6 veces semana  
☐ 1 vez al día  
☐ 2 a 3 veces al día  
☐ 5 a 6 veces al día  
☐ más 6 veces al día

---

cebolla

- ☐ Nunca o menos 1 vez al mes  
☒ 1 a 3 veces mes  
☐ 1 vez semana  
☐ 2 a 4 veces semana  
☐ 5 a 6 veces semana  
☐ 1 vez al día  
☐ 2 a 3 veces al día  
☐ 5 a 6 veces al día  
☐ más 6 veces al día

---

Zanahoria o calabaza

- ☐ Nunca o menos 1 vez al mes  
☒ 1 a 3 veces mes  
☐ 1 vez semana  
☐ 2 a 4 veces semana  
☐ 5 a 6 veces semana  
☐ 1 vez al día  
☐ 2 a 3 veces al día  
☐ 5 a 6 veces al día  
☐ más 6 veces al día

---

Judías verdes

- ☐ Nunca o menos 1 vez al mes  
☐ 1 a 3 veces mes  
☐ 1 vez semana  
☒ 2 a 4 veces semana  
☐ 5 a 6 veces semana  
☐ 1 vez al día  
☐ 2 a 3 veces al día  
☐ 5 a 6 veces al día  
☐ más 6 veces al día

---

Berenjena o calabacin o pepino

- ☐ Nunca o menos 1 vez al mes  
☐ 1 a 3 veces mes  
☐ 1 vez semana  
☒ 2 a 4 veces semana  
☐ 5 a 6 veces semana  
☐ 1 vez al día  
☐ 2 a 3 veces al día  
☐ 5 a 6 veces al día  
☐ más 6 veces al día

|                       |                                                                                                                                                                                                                                                                                                                                                                                                              |
|-----------------------|--------------------------------------------------------------------------------------------------------------------------------------------------------------------------------------------------------------------------------------------------------------------------------------------------------------------------------------------------------------------------------------------------------------|
| pimiento              | <input type="radio"/> Nunca o menos 1 vez al mes<br><input checked="" type="radio"/> 1 a 3 veces mes<br><input type="radio"/> 1 vez semana<br><input type="radio"/> 2 a 4 veces semana<br><input type="radio"/> 5 a 6 veces semana<br><input type="radio"/> 1 vez al día<br><input type="radio"/> 2 a 3 veces al día<br><input type="radio"/> 5 a 6 veces al día<br><input type="radio"/> más 6 veces al día |
| alcachofa             | <input type="radio"/> Nunca o menos 1 vez al mes<br><input checked="" type="radio"/> 1 a 3 veces mes<br><input type="radio"/> 1 vez semana<br><input type="radio"/> 2 a 4 veces semana<br><input type="radio"/> 5 a 6 veces semana<br><input type="radio"/> 1 vez al día<br><input type="radio"/> 2 a 3 veces al día<br><input type="radio"/> 5 a 6 veces al día<br><input type="radio"/> más 6 veces al día |
| espárragos            | <input type="radio"/> Nunca o menos 1 vez al mes<br><input checked="" type="radio"/> 1 a 3 veces mes<br><input type="radio"/> 1 vez semana<br><input type="radio"/> 2 a 4 veces semana<br><input type="radio"/> 5 a 6 veces semana<br><input type="radio"/> 1 vez al día<br><input type="radio"/> 2 a 3 veces al día<br><input type="radio"/> 5 a 6 veces al día<br><input type="radio"/> más 6 veces al día |
| maíz hervido          | <input type="radio"/> Nunca o menos 1 vez al mes<br><input checked="" type="radio"/> 1 a 3 veces mes<br><input type="radio"/> 1 vez semana<br><input type="radio"/> 2 a 4 veces semana<br><input type="radio"/> 5 a 6 veces semana<br><input type="radio"/> 1 vez al día<br><input type="radio"/> 2 a 3 veces al día<br><input type="radio"/> 5 a 6 veces al día<br><input type="radio"/> más 6 veces al día |
| legumbres             | <input type="radio"/> Nunca o menos 1 vez al mes<br><input type="radio"/> 1 a 3 veces mes<br><input checked="" type="radio"/> 1 vez semana<br><input type="radio"/> 2 a 4 veces semana<br><input type="radio"/> 5 a 6 veces semana<br><input type="radio"/> 1 vez al día<br><input type="radio"/> 2 a 3 veces al día<br><input type="radio"/> 5 a 6 veces al día<br><input type="radio"/> más 6 veces al día |
| naranjas o mandarinas | <input type="radio"/> Nunca o menos 1 vez al mes<br><input type="radio"/> 1 a 3 veces mes<br><input checked="" type="radio"/> 1 vez semana<br><input type="radio"/> 2 a 4 veces semana<br><input type="radio"/> 5 a 6 veces semana<br><input type="radio"/> 1 vez al día<br><input type="radio"/> 2 a 3 veces al día<br><input type="radio"/> 5 a 6 veces al día<br><input type="radio"/> más 6 veces al día |



---

zum natural fruta

- ☐ Nunca o menos 1 vez al mes  
☒ 1 a 3 veces mes  
☐ 1 vez semana  
☐ 2 a 4 veces semana  
☐ 5 a 6 veces semana  
☐ 1 vez al día  
☐ 2 a 3 veces al día  
☐ 5 a 6 veces al día  
☐ más 6 veces al día

---

platano

- ☐ Nunca o menos 1 vez al mes  
☐ 1 a 3 veces mes  
☒ 1 vez semana  
☐ 2 a 4 veces semana  
☐ 5 a 6 veces semana  
☐ 1 vez al día  
☐ 2 a 3 veces al día  
☐ 5 a 6 veces al día  
☐ más 6 veces al día

---

manzana o pera

- ☐ Nunca o menos 1 vez al mes  
☐ 1 a 3 veces mes  
☒ 1 vez semana  
☐ 2 a 4 veces semana  
☐ 5 a 6 veces semana  
☐ 1 vez al día  
☐ 2 a 3 veces al día  
☐ 5 a 6 veces al día  
☐ más 6 veces al día

---

melocotón o nectarina

- ☐ Nunca o menos 1 vez al mes  
☒ 1 a 3 veces mes  
☐ 1 vez semana  
☐ 2 a 4 veces semana  
☐ 5 a 6 veces semana  
☐ 1 vez al día  
☐ 2 a 3 veces al día  
☐ 5 a 6 veces al día  
☐ más 6 veces al día

---

sandia o melon

- ☐ Nunca o menos 1 vez al mes  
☐ 1 a 3 veces mes  
☒ 1 vez semana  
☐ 2 a 4 veces semana  
☐ 5 a 6 veces semana  
☐ 1 vez al día  
☐ 2 a 3 veces al día  
☐ 5 a 6 veces al día  
☐ más 6 veces al día

---

uva

- ☐ Nunca o menos 1 vez al mes  
☒ 1 a 3 veces mes  
☐ 1 vez semana  
☐ 2 a 4 veces semana  
☐ 5 a 6 veces semana  
☐ 1 vez al día  
☐ 2 a 3 veces al día  
☐ 5 a 6 veces al día  
☐ más 6 veces al día

|                 |                                                                                                                                                                                                                                                                                                                                                                                                              |
|-----------------|--------------------------------------------------------------------------------------------------------------------------------------------------------------------------------------------------------------------------------------------------------------------------------------------------------------------------------------------------------------------------------------------------------------|
| bruna o ciruela | <input checked="" type="radio"/> Nunca o menos 1 vez al mes<br><input type="radio"/> 1 a 3 veces mes<br><input type="radio"/> 1 vez semana<br><input type="radio"/> 2 a 4 veces semana<br><input type="radio"/> 5 a 6 veces semana<br><input type="radio"/> 1 vez al día<br><input type="radio"/> 2 a 3 veces al día<br><input type="radio"/> 5 a 6 veces al día<br><input type="radio"/> más 6 veces al día |
| kiwi            | <input checked="" type="radio"/> Nunca o menos 1 vez al mes<br><input type="radio"/> 1 a 3 veces mes<br><input type="radio"/> 1 vez semana<br><input type="radio"/> 2 a 4 veces semana<br><input type="radio"/> 5 a 6 veces semana<br><input type="radio"/> 1 vez al día<br><input type="radio"/> 2 a 3 veces al día<br><input type="radio"/> 5 a 6 veces al día<br><input type="radio"/> más 6 veces al día |
| aceituna        | <input type="radio"/> Nunca o menos 1 vez al mes<br><input type="radio"/> 1 a 3 veces mes<br><input checked="" type="radio"/> 1 vez semana<br><input type="radio"/> 2 a 4 veces semana<br><input type="radio"/> 5 a 6 veces semana<br><input type="radio"/> 1 vez al día<br><input type="radio"/> 2 a 3 veces al día<br><input type="radio"/> 5 a 6 veces al día<br><input type="radio"/> más 6 veces al día |
| frutos secos    | <input type="radio"/> Nunca o menos 1 vez al mes<br><input checked="" type="radio"/> 1 a 3 veces mes<br><input type="radio"/> 1 vez semana<br><input type="radio"/> 2 a 4 veces semana<br><input type="radio"/> 5 a 6 veces semana<br><input type="radio"/> 1 vez al día<br><input type="radio"/> 2 a 3 veces al día<br><input type="radio"/> 5 a 6 veces al día<br><input type="radio"/> más 6 veces al día |
| pan blanco      | <input type="radio"/> Nunca o menos 1 vez al mes<br><input type="radio"/> 1 a 3 veces mes<br><input type="radio"/> 1 vez semana<br><input checked="" type="radio"/> 2 a 4 veces semana<br><input type="radio"/> 5 a 6 veces semana<br><input type="radio"/> 1 vez al día<br><input type="radio"/> 2 a 3 veces al día<br><input type="radio"/> 5 a 6 veces al día<br><input type="radio"/> más 6 veces al día |
| pan integral    | <input checked="" type="radio"/> Nunca o menos 1 vez al mes<br><input type="radio"/> 1 a 3 veces mes<br><input type="radio"/> 1 vez semana<br><input type="radio"/> 2 a 4 veces semana<br><input type="radio"/> 5 a 6 veces semana<br><input type="radio"/> 1 vez al día<br><input type="radio"/> 2 a 3 veces al día<br><input type="radio"/> 5 a 6 veces al día<br><input type="radio"/> más 6 veces al día |

---

cereales desayuno

- ☒ Nunca o menos 1 vez al mes  
☐ 1 a 3 veces mes  
☐ 1 vez semana  
☐ 2 a 4 veces semana  
☐ 5 a 6 veces semana  
☐ 1 vez al día  
☐ 2 a 3 veces al día  
☐ 5 a 6 veces al día  
☐ más 6 veces al día

---

patatas fritas

- ☐ Nunca o menos 1 vez al mes  
☐ 1 a 3 veces mes  
☐ 1 vez semana  
☐ 2 a 4 veces semana  
☒ 5 a 6 veces semana  
☐ 1 vez al día  
☐ 2 a 3 veces al día  
☐ 5 a 6 veces al día  
☐ más 6 veces al día

---

patatas cocidas o asadas

- ☐ Nunca o menos 1 vez al mes  
☐ 1 a 3 veces mes  
☒ 1 vez semana  
☐ 2 a 4 veces semana  
☐ 5 a 6 veces semana  
☐ 1 vez al día  
☐ 2 a 3 veces al día  
☐ 5 a 6 veces al día  
☐ más 6 veces al día

---

bolsa papas

- ☐ Nunca o menos 1 vez al mes  
☐ 1 a 3 veces mes  
☐ 1 vez semana  
☐ 2 a 4 veces semana  
☒ 5 a 6 veces semana  
☐ 1 vez al día  
☐ 2 a 3 veces al día  
☐ 5 a 6 veces al día  
☐ más 6 veces al día

---

arroz cocinado

- ☐ Nunca o menos 1 vez al mes  
☐ 1 a 3 veces mes  
☒ 1 vez semana  
☐ 2 a 4 veces semana  
☐ 5 a 6 veces semana  
☐ 1 vez al día  
☐ 2 a 3 veces al día  
☐ 5 a 6 veces al día  
☐ más 6 veces al día

---

pasta

- ☐ Nunca o menos 1 vez al mes  
☐ 1 a 3 veces mes  
☐ 1 vez semana  
☒ 2 a 4 veces semana  
☐ 5 a 6 veces semana  
☐ 1 vez al día  
☐ 2 a 3 veces al día  
☐ 5 a 6 veces al día  
☐ más 6 veces al día

|                     |                                                                                                                                                                                                                                                                                                                                                                                                              |
|---------------------|--------------------------------------------------------------------------------------------------------------------------------------------------------------------------------------------------------------------------------------------------------------------------------------------------------------------------------------------------------------------------------------------------------------|
| pizza               | <input type="radio"/> Nunca o menos 1 vez al mes<br><input type="radio"/> 1 a 3 veces mes<br><input checked="" type="radio"/> 1 vez semana<br><input type="radio"/> 2 a 4 veces semana<br><input type="radio"/> 5 a 6 veces semana<br><input type="radio"/> 1 vez al día<br><input type="radio"/> 2 a 3 veces al día<br><input type="radio"/> 5 a 6 veces al día<br><input type="radio"/> más 6 veces al día |
| aceite oliva        | <input type="radio"/> Nunca o menos 1 vez al mes<br><input type="radio"/> 1 a 3 veces mes<br><input type="radio"/> 1 vez semana<br><input type="radio"/> 2 a 4 veces semana<br><input checked="" type="radio"/> 5 a 6 veces semana<br><input type="radio"/> 1 vez al día<br><input type="radio"/> 2 a 3 veces al día<br><input type="radio"/> 5 a 6 veces al día<br><input type="radio"/> más 6 veces al día |
| otros aceites       | <input type="radio"/> Nunca o menos 1 vez al mes<br><input type="radio"/> 1 a 3 veces mes<br><input type="radio"/> 1 vez semana<br><input checked="" type="radio"/> 2 a 4 veces semana<br><input type="radio"/> 5 a 6 veces semana<br><input type="radio"/> 1 vez al día<br><input type="radio"/> 2 a 3 veces al día<br><input type="radio"/> 5 a 6 veces al día<br><input type="radio"/> más 6 veces al día |
| margarina           | <input type="radio"/> Nunca o menos 1 vez al mes<br><input type="radio"/> 1 a 3 veces mes<br><input checked="" type="radio"/> 1 vez semana<br><input type="radio"/> 2 a 4 veces semana<br><input type="radio"/> 5 a 6 veces semana<br><input type="radio"/> 1 vez al día<br><input type="radio"/> 2 a 3 veces al día<br><input type="radio"/> 5 a 6 veces al día<br><input type="radio"/> más 6 veces al día |
| mantequilla         | <input type="radio"/> Nunca o menos 1 vez al mes<br><input type="radio"/> 1 a 3 veces mes<br><input type="radio"/> 1 vez semana<br><input type="radio"/> 2 a 4 veces semana<br><input checked="" type="radio"/> 5 a 6 veces semana<br><input type="radio"/> 1 vez al día<br><input type="radio"/> 2 a 3 veces al día<br><input type="radio"/> 5 a 6 veces al día<br><input type="radio"/> más 6 veces al día |
| galletas tipo maria | <input checked="" type="radio"/> Nunca o menos 1 vez al mes<br><input type="radio"/> 1 a 3 veces mes<br><input type="radio"/> 1 vez semana<br><input type="radio"/> 2 a 4 veces semana<br><input type="radio"/> 5 a 6 veces semana<br><input type="radio"/> 1 vez al día<br><input type="radio"/> 2 a 3 veces al día<br><input type="radio"/> 5 a 6 veces al día<br><input type="radio"/> más 6 veces al día |

---

galletas chocolate

- ☒ Nunca o menos 1 vez al mes  
☐ 1 a 3 veces mes  
☐ 1 vez semana  
☐ 2 a 4 veces semana  
☐ 5 a 6 veces semana  
☐ 1 vez al día  
☐ 2 a 3 veces al día  
☐ 5 a 6 veces al día  
☐ más 6 veces al día

---

bolleria

- ☐ Nunca o menos 1 vez al mes  
☐ 1 a 3 veces mes  
☐ 1 vez semana  
☒ 2 a 4 veces semana  
☐ 5 a 6 veces semana  
☐ 1 vez al día  
☐ 2 a 3 veces al día  
☐ 5 a 6 veces al día  
☐ más 6 veces al día

---

chocolate o bombones

- ☐ Nunca o menos 1 vez al mes  
☒ 1 a 3 veces mes  
☐ 1 vez semana  
☐ 2 a 4 veces semana  
☐ 5 a 6 veces semana  
☐ 1 vez al día  
☐ 2 a 3 veces al día  
☐ 5 a 6 veces al día  
☐ más 6 veces al día

---

chocolate polvo o colacao

- ☒ Nunca o menos 1 vez al mes  
☐ 1 a 3 veces mes  
☐ 1 vez semana  
☐ 2 a 4 veces semana  
☐ 5 a 6 veces semana  
☐ 1 vez al día  
☐ 2 a 3 veces al día  
☐ 5 a 6 veces al día  
☐ más 6 veces al día

---

vino tinto

- ☒ Nunca o menos 1 vez al mes  
☐ 1 a 3 veces mes  
☐ 1 vez semana  
☐ 2 a 4 veces semana  
☐ 5 a 6 veces semana  
☐ 1 vez al día  
☐ 2 a 3 veces al día  
☐ 5 a 6 veces al día  
☐ más 6 veces al día

---

vino blanco

- ☒ Nunca o menos 1 vez al mes  
☐ 1 a 3 veces mes  
☐ 1 vez semana  
☐ 2 a 4 veces semana  
☐ 5 a 6 veces semana  
☐ 1 vez al día  
☐ 2 a 3 veces al día  
☐ 5 a 6 veces al día  
☐ más 6 veces al día

|                       |                                                                                                                                                                                                                                                                                                                                                                                                              |
|-----------------------|--------------------------------------------------------------------------------------------------------------------------------------------------------------------------------------------------------------------------------------------------------------------------------------------------------------------------------------------------------------------------------------------------------------|
| vino seco o vermut    | <input checked="" type="radio"/> Nunca o menos 1 vez al mes<br><input type="radio"/> 1 a 3 veces mes<br><input type="radio"/> 1 vez semana<br><input type="radio"/> 2 a 4 veces semana<br><input type="radio"/> 5 a 6 veces semana<br><input type="radio"/> 1 vez al día<br><input type="radio"/> 2 a 3 veces al día<br><input type="radio"/> 5 a 6 veces al día<br><input type="radio"/> más 6 veces al día |
| cerveza               | <input checked="" type="radio"/> Nunca o menos 1 vez al mes<br><input type="radio"/> 1 a 3 veces mes<br><input type="radio"/> 1 vez semana<br><input type="radio"/> 2 a 4 veces semana<br><input type="radio"/> 5 a 6 veces semana<br><input type="radio"/> 1 vez al día<br><input type="radio"/> 2 a 3 veces al día<br><input type="radio"/> 5 a 6 veces al día<br><input type="radio"/> más 6 veces al día |
| cerveza sin alcohol   | <input checked="" type="radio"/> Nunca o menos 1 vez al mes<br><input type="radio"/> 1 a 3 veces mes<br><input type="radio"/> 1 vez semana<br><input type="radio"/> 2 a 4 veces semana<br><input type="radio"/> 5 a 6 veces semana<br><input type="radio"/> 1 vez al día<br><input type="radio"/> 2 a 3 veces al día<br><input type="radio"/> 5 a 6 veces al día<br><input type="radio"/> más 6 veces al día |
| licores               | <input checked="" type="radio"/> Nunca o menos 1 vez al mes<br><input type="radio"/> 1 a 3 veces mes<br><input type="radio"/> 1 vez semana<br><input type="radio"/> 2 a 4 veces semana<br><input type="radio"/> 5 a 6 veces semana<br><input type="radio"/> 1 vez al día<br><input type="radio"/> 2 a 3 veces al día<br><input type="radio"/> 5 a 6 veces al día<br><input type="radio"/> más 6 veces al día |
| ginebra o ron o vodka | <input checked="" type="radio"/> Nunca o menos 1 vez al mes<br><input type="radio"/> 1 a 3 veces mes<br><input type="radio"/> 1 vez semana<br><input type="radio"/> 2 a 4 veces semana<br><input type="radio"/> 5 a 6 veces semana<br><input type="radio"/> 1 vez al día<br><input type="radio"/> 2 a 3 veces al día<br><input type="radio"/> 5 a 6 veces al día<br><input type="radio"/> más 6 veces al día |
| refresco normal       | <input type="radio"/> Nunca o menos 1 vez al mes<br><input type="radio"/> 1 a 3 veces mes<br><input type="radio"/> 1 vez semana<br><input type="radio"/> 2 a 4 veces semana<br><input checked="" type="radio"/> 5 a 6 veces semana<br><input type="radio"/> 1 vez al día<br><input type="radio"/> 2 a 3 veces al día<br><input type="radio"/> 5 a 6 veces al día<br><input type="radio"/> más 6 veces al día |

---

refresco sin azúcar

- ☒ Nunca o menos 1 vez al mes  
☐ 1 a 3 veces mes  
☐ 1 vez semana  
☐ 2 a 4 veces semana  
☐ 5 a 6 veces semana  
☐ 1 vez al día  
☐ 2 a 3 veces al día  
☐ 5 a 6 veces al día  
☐ más 6 veces al día

---

Agua del grifo

- ☒ Nunca o menos 1 vez al mes  
☐ 1 a 3 veces mes  
☐ 1 vez semana  
☐ 2 a 4 veces semana  
☐ 5 a 6 veces semana  
☐ 1 vez al día  
☐ 2 a 3 veces al día  
☐ 5 a 6 veces al día  
☐ más 6 veces al día

---

agua embotellada sin gas

- ☐ Nunca o menos 1 vez al mes  
☐ 1 a 3 veces mes  
☐ 1 vez semana  
☐ 2 a 4 veces semana  
☐ 5 a 6 veces semana  
☐ 1 vez al día  
☐ 2 a 3 veces al día  
☐ 5 a 6 veces al día  
☒ más 6 veces al día

---

agua embotellada con gas

- ☒ Nunca o menos 1 vez al mes  
☐ 1 a 3 veces mes  
☐ 1 vez semana  
☐ 2 a 4 veces semana  
☐ 5 a 6 veces semana  
☐ 1 vez al día  
☐ 2 a 3 veces al día  
☐ 5 a 6 veces al día  
☐ más 6 veces al día

---

zumو frutas embasado

- ☐ Nunca o menos 1 vez al mes  
☐ 1 a 3 veces mes  
☐ 1 vez semana  
☒ 2 a 4 veces semana  
☐ 5 a 6 veces semana  
☐ 1 vez al día  
☐ 2 a 3 veces al día  
☐ 5 a 6 veces al día  
☐ más 6 veces al día

---

cafe

- ☐ Nunca o menos 1 vez al mes  
☐ 1 a 3 veces mes  
☐ 1 vez semana  
☐ 2 a 4 veces semana  
☐ 5 a 6 veces semana  
☐ 1 vez al día  
☐ 2 a 3 veces al día  
☒ 5 a 6 veces al día  
☐ más 6 veces al día

---

cafe descafeinado

- ☐ Nunca o menos 1 vez al mes  
☐ 1 a 3 veces mes  
☐ 1 vez semana  
☐ 2 a 4 veces semana  
☐ 5 a 6 veces semana  
☒ 1 vez al día  
☐ 2 a 3 veces al día  
☐ 5 a 6 veces al día  
☐ más 6 veces al día

---

te o infusión

- ☒ Nunca o menos 1 vez al mes  
☐ 1 a 3 veces mes  
☐ 1 vez semana  
☐ 2 a 4 veces semana  
☐ 5 a 6 veces semana  
☐ 1 vez al día  
☐ 2 a 3 veces al día  
☐ 5 a 6 veces al día  
☐ más 6 veces al día

---

sopa o puré verduras

- ☐ Nunca o menos 1 vez al mes  
☐ 1 a 3 veces mes  
☐ 1 vez semana  
☒ 2 a 4 veces semana  
☐ 5 a 6 veces semana  
☐ 1 vez al día  
☐ 2 a 3 veces al día  
☐ 5 a 6 veces al día  
☐ más 6 veces al día

---

croquetas pollo jamón

- ☐ Nunca o menos 1 vez al mes  
☒ 1 a 3 veces mes  
☐ 1 vez semana  
☐ 2 a 4 veces semana  
☐ 5 a 6 veces semana  
☐ 1 vez al día  
☐ 2 a 3 veces al día  
☐ 5 a 6 veces al día  
☐ más 6 veces al día

---

croquetas pescado

- ☐ Nunca o menos 1 vez al mes  
☒ 1 a 3 veces mes  
☐ 1 vez semana  
☐ 2 a 4 veces semana  
☐ 5 a 6 veces semana  
☐ 1 vez al día  
☐ 2 a 3 veces al día  
☐ 5 a 6 veces al día  
☐ más 6 veces al día

---

mayonesa

- ☐ Nunca o menos 1 vez al mes  
☐ 1 a 3 veces mes  
☒ 1 vez semana  
☐ 2 a 4 veces semana  
☐ 5 a 6 veces semana  
☐ 1 vez al día  
☐ 2 a 3 veces al día  
☐ 5 a 6 veces al día  
☐ más 6 veces al día



salsa tomate

- ☐ Nunca o menos 1 vez al mes  
☐ 1 a 3 veces mes  
☒ 1 vez semana  
☐ 2 a 4 veces semana  
☐ 5 a 6 veces semana  
☐ 1 vez al día  
☐ 2 a 3 veces al día  
☐ 5 a 6 veces al día  
☐ más 6 veces al día

ketchup

- ☐ Nunca o menos 1 vez al mes  
☐ 1 a 3 veces mes  
☒ 1 vez semana  
☐ 2 a 4 veces semana  
☐ 5 a 6 veces semana  
☐ 1 vez al día  
☐ 2 a 3 veces al día  
☐ 5 a 6 veces al día  
☐ más 6 veces al día

sal

- ☐ Nunca o menos 1 vez al mes  
☐ 1 a 3 veces mes  
☐ 1 vez semana  
☐ 2 a 4 veces semana  
☐ 5 a 6 veces semana  
☐ 1 vez al día  
☐ 2 a 3 veces al día  
☒ 5 a 6 veces al día  
☐ más 6 veces al día

ajo

- ☐ Nunca o menos 1 vez al mes  
☐ 1 a 3 veces mes  
☐ 1 vez semana  
☐ 2 a 4 veces semana  
☒ 5 a 6 veces semana  
☐ 1 vez al día  
☐ 2 a 3 veces al día  
☐ 5 a 6 veces al día  
☐ más 6 veces al día

mermelada o miel

- ☐ Nunca o menos 1 vez al mes  
☐ 1 a 3 veces mes  
☐ 1 vez semana  
☐ 2 a 4 veces semana  
☐ 5 a 6 veces semana  
☒ 1 vez al día  
☐ 2 a 3 veces al día  
☐ 5 a 6 veces al día  
☐ más 6 veces al día

azúcar

- ☐ Nunca o menos 1 vez al mes  
☐ 1 a 3 veces mes  
☐ 1 vez semana  
☐ 2 a 4 veces semana  
☐ 5 a 6 veces semana  
☐ 1 vez al día  
☐ 2 a 3 veces al día  
☐ 5 a 6 veces al día  
☒ más 6 veces al día

---

Otro alimento

---

suplementos vitamínicos

- ☐ si  
☒ no

---

suplementos vitamínicos

---

dieta previa

- ☐ si  
☒ no

motivo dieta

- ☒ no dieta  
☐ control peso  
☐ control colesterol  
☐ control diabetes  
☐ problemas estómago  
☐ problemas vesícula o hepáticos  
☐ HTA o cardiopatía  
☐ problemas renales  
☐ alergia alimentaria  
☐ ácido úrico elevado  
☐ vegetariana  
☐ otros

---

cambio alimentos año previo gestación

- ☐ si  
☒ no

---

cambio lácteos

- ☐ eliminado  
☐ disminuido  
☐ igual  
☐ aumentado  
☐ no sabe

---

cambio huevos

- ☐ eliminado  
☐ disminuido  
☐ igual  
☐ aumentado  
☐ no sabe

---

cambio carne

- ☐ eliminado  
☐ disminuido  
☐ igual  
☐ aumentado  
☐ no sabe

---

cambio pescado

- ☐ eliminado  
☐ disminuido  
☐ igual  
☐ aumentado  
☐ no sabe

---

cambio verduras

- ☐ eliminado  
☐ disminuido  
☐ igual  
☐ aumentado  
☐ no sabe

|                            |                                                                                                                                                                                                                        |
|----------------------------|------------------------------------------------------------------------------------------------------------------------------------------------------------------------------------------------------------------------|
| cambio legumbres           | <input type="radio"/> eliminado<br><input type="radio"/> disminuido<br><input type="radio"/> igual<br><input type="radio"/> aumentado<br><input type="radio"/> no sabe                                                 |
| cambio fruta               | <input type="radio"/> eliminado<br><input type="radio"/> disminuido<br><input type="radio"/> igual<br><input type="radio"/> aumentado<br><input type="radio"/> no sabe                                                 |
| cambio pan                 | <input type="radio"/> eliminado<br><input type="radio"/> disminuido<br><input type="radio"/> igual<br><input type="radio"/> aumentado<br><input type="radio"/> no sabe                                                 |
| cambio aceite oliva        | <input type="radio"/> eliminado<br><input type="radio"/> disminuido<br><input type="radio"/> igual<br><input type="radio"/> aumentado<br><input type="radio"/> no sabe                                                 |
| cambio mante o margarina   | <input type="radio"/> eliminado<br><input type="radio"/> disminuido<br><input type="radio"/> igual<br><input type="radio"/> aumentado<br><input type="radio"/> no sabe                                                 |
| cambio azúcar y dulces     | <input type="radio"/> eliminado<br><input type="radio"/> disminuido<br><input type="radio"/> igual<br><input type="radio"/> aumentado<br><input type="radio"/> no sabe                                                 |
| cambio bebidas alcohólicas | <input type="radio"/> eliminado<br><input type="radio"/> disminuido<br><input type="radio"/> igual<br><input type="radio"/> aumentado<br><input type="radio"/> no sabe                                                 |
| frecuencia comidas fritas  | <input type="radio"/> a diario<br><input type="radio"/> 5 a 6 veces semana<br><input checked="" type="radio"/> 2 a 4 veces semana<br><input type="radio"/> 1 vez semana<br><input type="radio"/> menos de 1 vez semana |
| carne                      | <input type="radio"/> no como<br><input type="radio"/> cruda<br><input type="radio"/> poco hecha<br><input checked="" type="radio"/> hecha<br><input type="radio"/> muy hecha                                          |
| grasa visible carne        | <input checked="" type="radio"/> quita toda<br><input type="radio"/> quita mayoría<br><input type="radio"/> quita un poco<br><input type="radio"/> no quita nada                                                       |

|                                |                                                                                                                                                                                                                                                          |
|--------------------------------|----------------------------------------------------------------------------------------------------------------------------------------------------------------------------------------------------------------------------------------------------------|
| cocina carne                   | <input checked="" type="radio"/> a la plancha<br><input type="radio"/> a la parrilla<br><input type="radio"/> asada<br><input type="radio"/> frita<br><input type="radio"/> guisada                                                                      |
| tostado quemado carne          | <input checked="" type="radio"/> nunca<br><input type="radio"/> 1 vez mes<br><input type="radio"/> 2 a 3 veces mes<br><input type="radio"/> 1 vez semana<br><input type="radio"/> 2 a 3 semanas                                                          |
| tostado quemado pescado        | <input checked="" type="radio"/> nunca<br><input type="radio"/> 1 vez mes<br><input type="radio"/> 2 a 3 veces mes<br><input type="radio"/> 1 vez semana<br><input type="radio"/> 2 a 3 semanas                                                          |
| socarrat paella                | <input type="radio"/> nunca<br><input type="radio"/> 1 vez mes<br><input type="radio"/> 2 a 3 veces mes<br><input checked="" type="radio"/> 1 vez semana<br><input type="radio"/> 2 a 3 semanas                                                          |
| grasa o aceite cocinar         | <input type="radio"/> mantequilla<br><input type="radio"/> margarina<br><input checked="" type="radio"/> aceite oliva<br><input type="radio"/> aceite oliva virgen extra<br><input type="radio"/> aceite vegetal<br><input type="radio"/> mezcla aceites |
| grasa aceite aliñar            | <input type="radio"/> mantequilla<br><input type="radio"/> margarina<br><input checked="" type="radio"/> aceite oliva<br><input type="radio"/> aceite oliva virgen extra<br><input type="radio"/> aceite vegetal<br><input type="radio"/> mezcla aceites |
| grasa aceite freir             | <input type="radio"/> mantequilla<br><input type="radio"/> margarina<br><input checked="" type="radio"/> aceite oliva<br><input type="radio"/> aceite oliva virgen extra<br><input type="radio"/> aceite vegetal<br><input type="radio"/> mezcla aceites |
| Ejercicio cuestionario         | <input checked="" type="radio"/> si<br><input type="radio"/> no                                                                                                                                                                                          |
| horas de sueño incluido siesta | [*DATA REMOVED*]                                                                                                                                                                                                                                         |
| minutos siesta                 | [*DATA REMOVED*]                                                                                                                                                                                                                                         |
| horas televisión semana        | [*DATA REMOVED*]                                                                                                                                                                                                                                         |

|                                        |                                                                                                                                                                                                                                                                                                                                                                           |
|----------------------------------------|---------------------------------------------------------------------------------------------------------------------------------------------------------------------------------------------------------------------------------------------------------------------------------------------------------------------------------------------------------------------------|
| actividad trabajo                      | <input type="radio"/> casi siempre sentado<br><input type="radio"/> sentado 50 por cien<br><input checked="" type="radio"/> casi siempre de pie, quieto<br><input type="radio"/> casi siempre levantado caminando y llevando pocas cosas<br><input type="radio"/> casi siempre levantado, caminando y llevado muchas cosas<br><input type="radio"/> trabajo manual pesado |
| tiempo caminar o bici al día           | <input type="radio"/> casi nunca<br><input type="radio"/> menos 20min día<br><input checked="" type="radio"/> 20 a 40 min día<br><input type="radio"/> 40 a 60 min día<br><input type="radio"/> 1h o 1h y media día<br><input type="radio"/> más de 1h y media al día                                                                                                     |
| tiempo tareas casa al día              | <input type="radio"/> menos de 1h día<br><input type="radio"/> 1 a 2h día<br><input checked="" type="radio"/> 3 a 4h día<br><input type="radio"/> 5 a 6h día<br><input type="radio"/> 7 a 8h día<br><input type="radio"/> más de 8h día                                                                                                                                   |
| tiempo libre televisión ordenador leer | <input type="radio"/> menos 1h día<br><input type="radio"/> 1h día<br><input type="radio"/> 2h día<br><input checked="" type="radio"/> 3h día<br><input type="radio"/> 4h día<br><input type="radio"/> 5 a 6h día<br><input type="radio"/> mas 6h día                                                                                                                     |
| tiempo libre ejercicio o deporte       | <input checked="" type="radio"/> menos 1h semana<br><input type="radio"/> 1h semana<br><input type="radio"/> 2h semana<br><input type="radio"/> 3h semana<br><input type="radio"/> 4 a 5h semana<br><input type="radio"/> mas 5h semana                                                                                                                                   |
| como se considera                      | <input type="radio"/> sedentaria<br><input type="radio"/> poco activa<br><input checked="" type="radio"/> moderadamente activa<br><input type="radio"/> bastante activa<br><input type="radio"/> muy activa<br><input type="radio"/> no sabe                                                                                                                              |
| FUR                                    | [*DATA REMOVED*]                                                                                                                                                                                                                                                                                                                                                          |
| Semanas gestación 2T                   | [*DATA REMOVED*]                                                                                                                                                                                                                                                                                                                                                          |
| Días gestación 2T                      | [*DATA REMOVED*]                                                                                                                                                                                                                                                                                                                                                          |
| DBP 2T                                 | [*DATA REMOVED*]                                                                                                                                                                                                                                                                                                                                                          |
| CC 2T                                  | [*DATA REMOVED*]                                                                                                                                                                                                                                                                                                                                                          |
| AC 2T                                  | [*DATA REMOVED*]                                                                                                                                                                                                                                                                                                                                                          |

|                                                   |                                                                                                                                                                                                 |
|---------------------------------------------------|-------------------------------------------------------------------------------------------------------------------------------------------------------------------------------------------------|
| LF 2T                                             | [*DATA REMOVED*]                                                                                                                                                                                |
| PFE 2T (Hadlock)                                  | [*DATA REMOVED*]                                                                                                                                                                                |
| Semanas gestación 3T                              | [*DATA REMOVED*]                                                                                                                                                                                |
| días 3T                                           | [*DATA REMOVED*]                                                                                                                                                                                |
| DBP 3T                                            | [*DATA REMOVED*]                                                                                                                                                                                |
| CC 3T                                             | [*DATA REMOVED*]                                                                                                                                                                                |
| AC 3T                                             | [*DATA REMOVED*]                                                                                                                                                                                |
| LF 3T                                             | [*DATA REMOVED*]                                                                                                                                                                                |
| PFE 3T (Hadlock)                                  | [*DATA REMOVED*]                                                                                                                                                                                |
| Semanas de gestación final                        | [*DATA REMOVED*]                                                                                                                                                                                |
| días gestación final                              | [*DATA REMOVED*]                                                                                                                                                                                |
| Localización placenta                             | <input type="radio"/> anterior<br><input type="radio"/> lateral derecha<br><input type="radio"/> lateral izquierda<br><input checked="" type="radio"/> posterior<br><input type="radio"/> fondo |
| Presentación longitudinal cefálica                | <input type="radio"/> no<br><input checked="" type="radio"/> si                                                                                                                                 |
| Dorso                                             | <input type="radio"/> izquierda anterior<br><input type="radio"/> izquierda posterior<br><input type="radio"/> derecha anterior<br><input checked="" type="radio"/> derecha posterior           |
| diámetro biparietal                               | [*DATA REMOVED*]                                                                                                                                                                                |
| Circunferencia craneal                            | [*DATA REMOVED*]                                                                                                                                                                                |
| Circunferencia abdominal                          | [*DATA REMOVED*]                                                                                                                                                                                |
| Longitud de femur                                 | [*DATA REMOVED*]                                                                                                                                                                                |
| tejido celular subcutáneo a nivel del muslo en mm | [*DATA REMOVED*]                                                                                                                                                                                |
| tejido celular subcutáneo en abdomen en mm        | [*DATA REMOVED*]                                                                                                                                                                                |
| Volumen del muslo en cm3                          | [*DATA REMOVED*]                                                                                                                                                                                |
| Peso fetal estimado según fórmula de Hadlock      | [*DATA REMOVED*]                                                                                                                                                                                |

|                                               |                                                                                                                                                          |
|-----------------------------------------------|----------------------------------------------------------------------------------------------------------------------------------------------------------|
| Percentil                                     | [*DATA REMOVED*]                                                                                                                                         |
| Peso fetal estimado según fórmula de Scioscia | <hr/>                                                                                                                                                    |
| Peso fetal estimado según fórmula de LEE      | <hr/>                                                                                                                                                    |
| Tipo de parto                                 | <input checked="" type="radio"/> eutocico<br><input type="radio"/> instrumentado/ventosa<br><input type="radio"/> cesarea                                |
| fecha de nacimiento                           | [*DATA REMOVED*]                                                                                                                                         |
| Días entre exploración y nacimiento           | [*DATA REMOVED*]                                                                                                                                         |
| Peso RN en g                                  | [*DATA REMOVED*]                                                                                                                                         |
| sexo                                          | <input checked="" type="radio"/> mujer<br><input type="radio"/> hombre                                                                                   |
| Apgar 1 minuto                                | [*DATA REMOVED*]                                                                                                                                         |
| Apgar 5 minutos                               | [*DATA REMOVED*]                                                                                                                                         |
| Apgar 10 minutos                              | <hr/>                                                                                                                                                    |
| antecedente Covid durante gestación           | <input type="radio"/> Yes<br><input checked="" type="radio"/> No                                                                                         |
| Nivel de estudios                             | <input type="radio"/> ninguno<br><input type="radio"/> primarios<br><input checked="" type="radio"/> secundarios<br><input type="radio"/> universitarios |

# Base\_datos\_estimacion\_peso\_fetal

|                                       |                                                                                                                                                                                                                                                                                      |
|---------------------------------------|--------------------------------------------------------------------------------------------------------------------------------------------------------------------------------------------------------------------------------------------------------------------------------------|
| Número de identificación participante | 171                                                                                                                                                                                                                                                                                  |
| CODIGO PARTICIPANTE                   |                                                                                                                                                                                                                                                                                      |
| Edad                                  | [*DATA REMOVED*]                                                                                                                                                                                                                                                                     |
| Gestaciones                           | <input type="radio"/> 1<br><input checked="" type="radio"/> 2<br><input type="radio"/> 3<br><input type="radio"/> mas de 3                                                                                                                                                           |
| partos                                | <input checked="" type="radio"/> 0<br><input type="radio"/> 1<br><input type="radio"/> 2<br><input type="radio"/> 3<br><input type="radio"/> mas de 3                                                                                                                                |
| cesáreas                              | <input type="radio"/> 0<br><input checked="" type="radio"/> 1<br><input type="radio"/> 2<br><input type="radio"/> 3<br><input type="radio"/> mas de 3                                                                                                                                |
| Abortos                               | <input checked="" type="radio"/> 0<br><input type="radio"/> 1<br><input type="radio"/> 2<br><input type="radio"/> 3<br><input type="radio"/> mas de 3                                                                                                                                |
| Tipo de gestacion                     | <input checked="" type="radio"/> espontanea<br><input type="radio"/> IAC inseminación artificial conyuge<br><input type="radio"/> IAD inseminación artificial donante<br><input type="radio"/> FIV Fecundación in Vitro<br><input type="radio"/> Ovodon FIV con donación de ovocitos |
| peso previo a embarazo                | [*DATA REMOVED*]                                                                                                                                                                                                                                                                     |
| Ganancia ponderal embarazo            |                                                                                                                                                                                                                                                                                      |
| Talla madre                           | [*DATA REMOVED*]                                                                                                                                                                                                                                                                     |
| IMC previo embarazo                   | 27.885187388459254                                                                                                                                                                                                                                                                   |
| Patología obstétrica                  | <input type="radio"/> no<br><input checked="" type="radio"/> si                                                                                                                                                                                                                      |
| Diabetes pregestacional               | <input checked="" type="radio"/> no<br><input type="radio"/> si                                                                                                                                                                                                                      |
| Diabetes gestacional                  | <input type="radio"/> no<br><input checked="" type="radio"/> si                                                                                                                                                                                                                      |



|                                            |                                                                                                                                                                                      |
|--------------------------------------------|--------------------------------------------------------------------------------------------------------------------------------------------------------------------------------------|
| Diabetes gestacional con insulina          | <input checked="" type="radio"/> no<br><input type="radio"/> si                                                                                                                      |
| Diabetes gestacional con dieta y ejercicio | <input type="radio"/> no<br><input checked="" type="radio"/> si                                                                                                                      |
| Percentil fetos previos                    | <input type="radio"/> Nada<br><input type="radio"/> percentil menor de 10<br><input type="radio"/> percentil entre 10 y 90<br><input checked="" type="radio"/> percentil mayor de 90 |
| Exfumadora                                 | <input type="radio"/> Nada<br><input type="radio"/> menos de 5 años<br><input type="radio"/> 5 a 10 años<br><input type="radio"/> mayor o igual a 10 años                            |
| Hábito tabáquico                           | <input type="radio"/> no<br><input type="radio"/> si                                                                                                                                 |
| fumadora                                   | <hr/>                                                                                                                                                                                |
| Consumo otros tóxicos                      | <input type="radio"/> no<br><input type="radio"/> si                                                                                                                                 |
| Hb 1T                                      | [*DATA REMOVED*]                                                                                                                                                                     |
| Htc 1T                                     | [*DATA REMOVED*]                                                                                                                                                                     |
| Hb 2T                                      | [*DATA REMOVED*]                                                                                                                                                                     |
| HTC 2T                                     | [*DATA REMOVED*]                                                                                                                                                                     |
| Hb 3T                                      | [*DATA REMOVED*]                                                                                                                                                                     |
| HTC 3T                                     | [*DATA REMOVED*]                                                                                                                                                                     |
| Suplemento FE oral                         | <input checked="" type="radio"/> si<br><input type="radio"/> no                                                                                                                      |
| Suplemento fe iv                           | <input type="radio"/> si<br><input checked="" type="radio"/> no                                                                                                                      |
| Transfusión                                | <input checked="" type="radio"/> no<br><input type="radio"/> si                                                                                                                      |
| Solicitada Vit D                           | <input checked="" type="radio"/> no<br><input type="radio"/> si                                                                                                                      |
| Deficit vit D                              | <input type="radio"/> no<br><input type="radio"/> si                                                                                                                                 |
| Suplemento vit D                           | <input type="radio"/> si<br><input type="radio"/> no                                                                                                                                 |

|                       |                                                                                                                                                                                                                                                                                                                                                                                                              |
|-----------------------|--------------------------------------------------------------------------------------------------------------------------------------------------------------------------------------------------------------------------------------------------------------------------------------------------------------------------------------------------------------------------------------------------------------|
| Dieta, cuestionario   | <input checked="" type="radio"/> si<br><input type="radio"/> no                                                                                                                                                                                                                                                                                                                                              |
| Leche entera          | <input checked="" type="radio"/> Nunca o menos 1 vez al mes<br><input type="radio"/> 1 a 3 veces mes<br><input type="radio"/> 1 vez semana<br><input type="radio"/> 2 a 4 veces semana<br><input type="radio"/> 5 a 6 veces semana<br><input type="radio"/> 1 vez al día<br><input type="radio"/> 2 a 3 veces al día<br><input type="radio"/> 5 a 6 veces al día<br><input type="radio"/> más 6 veces al día |
| Leche semidesnatada   | <input type="radio"/> Nunca o menos 1 vez al mes<br><input type="radio"/> 1 a 3 veces mes<br><input type="radio"/> 1 vez semana<br><input type="radio"/> 2 a 4 veces semana<br><input checked="" type="radio"/> 5 a 6 veces semana<br><input type="radio"/> 1 vez al día<br><input type="radio"/> 2 a 3 veces al día<br><input type="radio"/> 5 a 6 veces al día<br><input type="radio"/> mas 6 veces al día |
| Leche desnatada       | <input checked="" type="radio"/> Nunca o menos 1 vez al mes<br><input type="radio"/> 1 a 3 veces mes<br><input type="radio"/> 1 vez semana<br><input type="radio"/> 2 a 4 veces semana<br><input type="radio"/> 5 a 6 veces semana<br><input type="radio"/> 1 vez al día<br><input type="radio"/> 2 a 3 veces al día<br><input type="radio"/> 5 a 6 veces al día<br><input type="radio"/> más 6 veces al día |
| Leche condensada      | <input checked="" type="radio"/> Nunca o menos 1 vez al mes<br><input type="radio"/> 1 a 3 veces mes<br><input type="radio"/> 1 vez semana<br><input type="radio"/> 2 a 4 veces semana<br><input type="radio"/> 5 a 6 veces semana<br><input type="radio"/> 1 vez al día<br><input type="radio"/> 2 a 3 veces al día<br><input type="radio"/> 5 a 6 veces al día<br><input type="radio"/> más 6 veces al día |
| nata o crema de leche | <input checked="" type="radio"/> Nunca o menos 1 vez al mes<br><input type="radio"/> 1 a 3 veces mes<br><input type="radio"/> 1 vez semana<br><input type="radio"/> 2 a 4 veces semana<br><input type="radio"/> 5 a 6 veces semana<br><input type="radio"/> 1 vez al día<br><input type="radio"/> 2 a 3 veces al día<br><input type="radio"/> 5 a 6 veces al día<br><input type="radio"/> más 6 veces al día |

---

Yogurt Entero

- ☒ Nunca o menos 1 vez al mes  
☐ 1 a 3 veces mes  
☐ 1 vez semana  
☐ 2 a 4 veces semana  
☐ 5 a 6 veces semana  
☐ 1 vez al día  
☐ 2 a 3 veces al día  
☐ 5 a 6 veces al día  
☐ más 6 veces al día

---

Yogurt desnatado

- ☐ Nunca o menos 1 vez al mes  
☐ 1 a 3 veces mes  
☐ 1 vez semana  
☒ 2 a 4 veces semana  
☐ 5 a 6 veces semana  
☐ 1 vez al día  
☐ 2 a 3 veces al día  
☐ 5 a 6 veces al día  
☐ más 6 veces al día

---

100g requesón o queso blando o queso fresco

- ☐ Nunca o menos 1 vez al mes  
☐ 1 a 3 veces mes  
☐ 1 vez semana  
☒ 2 a 4 veces semana  
☐ 5 a 6 veces semana  
☐ 1 vez al día  
☐ 2 a 3 veces al día  
☐ 5 a 6 veces al día  
☐ más 6 veces al día

---

queso curado o semicurado o cremoso

- ☐ Nunca o menos 1 vez al mes  
☐ 1 a 3 veces mes  
☒ 1 vez semana  
☐ 2 a 4 veces semana  
☐ 5 a 6 veces semana  
☐ 1 vez al día  
☐ 2 a 3 veces al día  
☐ 5 a 6 veces al día  
☐ más 6 veces al día

---

natillas flan pudding

- ☐ Nunca o menos 1 vez al mes  
☒ 1 a 3 veces mes  
☐ 1 vez semana  
☐ 2 a 4 veces semana  
☐ 5 a 6 veces semana  
☐ 1 vez al día  
☐ 2 a 3 veces al día  
☐ 5 a 6 veces al día  
☐ más 6 veces al día

---

Helado

- ☐ Nunca o menos 1 vez al mes  
☒ 1 a 3 veces mes  
☐ 1 vez semana  
☐ 2 a 4 veces semana  
☐ 5 a 6 veces semana  
☐ 1 vez al día  
☐ 2 a 3 veces al día  
☐ 5 a 6 veces al día  
☐ más 6 veces al día

|                                      |                                                                                                                                                                                                                                                                                                                                                                                                              |
|--------------------------------------|--------------------------------------------------------------------------------------------------------------------------------------------------------------------------------------------------------------------------------------------------------------------------------------------------------------------------------------------------------------------------------------------------------------|
| huevo                                | <input type="radio"/> Nunca o menos 1 vez al mes<br><input type="radio"/> 1 a 3 veces mes<br><input type="radio"/> 1 vez semana<br><input checked="" type="radio"/> 2 a 4 veces semana<br><input type="radio"/> 5 a 6 veces semana<br><input type="radio"/> 1 vez al día<br><input type="radio"/> 2 a 3 veces al día<br><input type="radio"/> 5 a 6 veces al día<br><input type="radio"/> más 6 veces al día |
| Pollo con piel                       | <input type="radio"/> Nunca o menos 1 vez al mes<br><input type="radio"/> 1 a 3 veces mes<br><input type="radio"/> 1 vez semana<br><input checked="" type="radio"/> 2 a 4 veces semana<br><input type="radio"/> 5 a 6 veces semana<br><input type="radio"/> 1 vez al día<br><input type="radio"/> 2 a 3 veces al día<br><input type="radio"/> 5 a 6 veces al día<br><input type="radio"/> más 6 veces al día |
| pollo sin piel                       | <input type="radio"/> Nunca o menos 1 vez al mes<br><input type="radio"/> 1 a 3 veces mes<br><input type="radio"/> 1 vez semana<br><input checked="" type="radio"/> 2 a 4 veces semana<br><input type="radio"/> 5 a 6 veces semana<br><input type="radio"/> 1 vez al día<br><input type="radio"/> 2 a 3 veces al día<br><input type="radio"/> 5 a 6 veces al día<br><input type="radio"/> más 6 veces al día |
| Ternera o cerdo o cordero            | <input type="radio"/> Nunca o menos 1 vez al mes<br><input type="radio"/> 1 a 3 veces mes<br><input checked="" type="radio"/> 1 vez semana<br><input type="radio"/> 2 a 4 veces semana<br><input type="radio"/> 5 a 6 veces semana<br><input type="radio"/> 1 vez al día<br><input type="radio"/> 2 a 3 veces al día<br><input type="radio"/> 5 a 6 veces al día<br><input type="radio"/> más 6 veces al día |
| carne caza: Conejo o codorniz o pato | <input type="radio"/> Nunca o menos 1 vez al mes<br><input checked="" type="radio"/> 1 a 3 veces mes<br><input type="radio"/> 1 vez semana<br><input type="radio"/> 2 a 4 veces semana<br><input type="radio"/> 5 a 6 veces semana<br><input type="radio"/> 1 vez al día<br><input type="radio"/> 2 a 3 veces al día<br><input type="radio"/> 5 a 6 veces al día<br><input type="radio"/> más 6 veces al día |
| Hígado de ternera o cerdo o pollo    | <input checked="" type="radio"/> Nunca o menos 1 vez al mes<br><input type="radio"/> 1 a 3 veces mes<br><input type="radio"/> 1 vez semana<br><input type="radio"/> 2 a 4 veces semana<br><input type="radio"/> 5 a 6 veces semana<br><input type="radio"/> 1 vez al día<br><input type="radio"/> 2 a 3 veces al día<br><input type="radio"/> 5 a 6 veces al día<br><input type="radio"/> más 6 veces al día |

---

Vísceras

- ☒ Nunca o menos 1 vez al mes  
☐ 1 a 3 veces mes  
☐ 1 vez semana  
☐ 2 a 4 veces semana  
☐ 5 a 6 veces semana  
☐ 1 vez al día  
☐ 2 a 3 veces al día  
☐ 5 a 6 veces al día  
☐ más 6 veces al día

---

Embutido

- ☒ Nunca o menos 1 vez al mes  
☐ 1 a 3 veces mes  
☐ 1 vez semana  
☐ 2 a 4 veces semana  
☐ 5 a 6 veces semana  
☐ 1 vez al día  
☐ 2 a 3 veces al día  
☐ 5 a 6 veces al día  
☐ más 6 veces al día

---

Salchicha o similar

- ☒ Nunca o menos 1 vez al mes  
☐ 1 a 3 veces mes  
☐ 1 vez semana  
☐ 2 a 4 veces semana  
☐ 5 a 6 veces semana  
☐ 1 vez al día  
☐ 2 a 3 veces al día  
☐ 5 a 6 veces al día  
☐ más 6 veces al día

---

Pate o foiegras

- ☒ Nunca o menos 1 vez al mes  
☐ 1 a 3 veces mes  
☐ 1 vez semana  
☐ 2 a 4 veces semana  
☐ 5 a 6 veces semana  
☐ 1 vez al día  
☐ 2 a 3 veces al día  
☐ 5 a 6 veces al día  
☐ más 6 veces al día

---

Hamburguesa

- ☐ Nunca o menos 1 vez al mes  
☐ 1 a 3 veces mes  
☒ 1 vez semana  
☐ 2 a 4 veces semana  
☐ 5 a 6 veces semana  
☐ 1 vez al día  
☐ 2 a 3 veces al día  
☐ 5 a 6 veces al día  
☐ más 6 veces al día

---

tocino o bacon

- ☐ Nunca o menos 1 vez al mes  
☒ 1 a 3 veces mes  
☐ 1 vez semana  
☐ 2 a 4 veces semana  
☐ 5 a 6 veces semana  
☐ 1 vez al día  
☐ 2 a 3 veces al día  
☐ 5 a 6 veces al día  
☐ más 6 veces al día

---

Pescado frito

- ☒ Nunca o menos 1 vez al mes  
☐ 1 a 3 veces mes  
☐ 1 vez semana  
☐ 2 a 4 veces semana  
☐ 5 a 6 veces semana  
☐ 1 vez al día  
☐ 2 a 3 veces al día  
☐ 5 a 6 veces al día  
☐ más 6 veces al día

---

pescado hervido blanco

- ☐ Nunca o menos 1 vez al mes  
☐ 1 a 3 veces mes  
☐ 1 vez semana  
☒ 2 a 4 veces semana  
☐ 5 a 6 veces semana  
☐ 1 vez al día  
☐ 2 a 3 veces al día  
☐ 5 a 6 veces al día  
☐ más 6 veces al día

---

pescado hervido azul

- ☐ Nunca o menos 1 vez al mes  
☒ 1 a 3 veces mes  
☐ 1 vez semana  
☐ 2 a 4 veces semana  
☐ 5 a 6 veces semana  
☐ 1 vez al día  
☐ 2 a 3 veces al día  
☐ 5 a 6 veces al día  
☐ más 6 veces al día

---

otros pescado azul

- ☒ Nunca o menos 1 vez al mes  
☐ 1 a 3 veces mes  
☐ 1 vez semana  
☐ 2 a 4 veces semana  
☐ 5 a 6 veces semana  
☐ 1 vez al día  
☐ 2 a 3 veces al día  
☐ 5 a 6 veces al día  
☐ más 6 veces al día

---

atun conserva

- ☐ Nunca o menos 1 vez al mes  
☒ 1 a 3 veces mes  
☐ 1 vez semana  
☐ 2 a 4 veces semana  
☐ 5 a 6 veces semana  
☐ 1 vez al día  
☐ 2 a 3 veces al día  
☐ 5 a 6 veces al día  
☐ más 6 veces al día

---

sardina conserva

- ☒ Nunca o menos 1 vez al mes  
☐ 1 a 3 veces mes  
☐ 1 vez semana  
☐ 2 a 4 veces semana  
☐ 5 a 6 veces semana  
☐ 1 vez al día  
☐ 2 a 3 veces al día  
☐ 5 a 6 veces al día  
☐ más 6 veces al día

|                                         |                                                                                                                                                                                                                                                                                                                                                                                                              |
|-----------------------------------------|--------------------------------------------------------------------------------------------------------------------------------------------------------------------------------------------------------------------------------------------------------------------------------------------------------------------------------------------------------------------------------------------------------------|
| pescado ahumado                         | <input checked="" type="radio"/> Nunca o menos 1 vez al mes<br><input type="radio"/> 1 a 3 veces mes<br><input type="radio"/> 1 vez semana<br><input type="radio"/> 2 a 4 veces semana<br><input type="radio"/> 5 a 6 veces semana<br><input type="radio"/> 1 vez al día<br><input type="radio"/> 2 a 3 veces al día<br><input type="radio"/> 5 a 6 veces al día<br><input type="radio"/> más 6 veces al día |
| almejas o mejillones o ostras unos 100g | <input checked="" type="radio"/> Nunca o menos 1 vez al mes<br><input type="radio"/> 1 a 3 veces mes<br><input type="radio"/> 1 vez semana<br><input type="radio"/> 2 a 4 veces semana<br><input type="radio"/> 5 a 6 veces semana<br><input type="radio"/> 1 vez al día<br><input type="radio"/> 2 a 3 veces al día<br><input type="radio"/> 5 a 6 veces al día<br><input type="radio"/> más 6 veces al día |
| calamar o chipiron o sepia unos 100g    | <input type="radio"/> Nunca o menos 1 vez al mes<br><input checked="" type="radio"/> 1 a 3 veces mes<br><input type="radio"/> 1 vez semana<br><input type="radio"/> 2 a 4 veces semana<br><input type="radio"/> 5 a 6 veces semana<br><input type="radio"/> 1 vez al día<br><input type="radio"/> 2 a 3 veces al día<br><input type="radio"/> 5 a 6 veces al día<br><input type="radio"/> más 6 veces al día |
| marisco unos 100g                       | <input checked="" type="radio"/> Nunca o menos 1 vez al mes<br><input type="radio"/> 1 a 3 veces mes<br><input type="radio"/> 1 vez semana<br><input type="radio"/> 2 a 4 veces semana<br><input type="radio"/> 5 a 6 veces semana<br><input type="radio"/> 1 vez al día<br><input type="radio"/> 2 a 3 veces al día<br><input type="radio"/> 5 a 6 veces al día<br><input type="radio"/> más 6 veces al día |
| Espinacas o acelgas cocinadas           | <input type="radio"/> Nunca o menos 1 vez al mes<br><input type="radio"/> 1 a 3 veces mes<br><input checked="" type="radio"/> 1 vez semana<br><input type="radio"/> 2 a 4 veces semana<br><input type="radio"/> 5 a 6 veces semana<br><input type="radio"/> 1 vez al día<br><input type="radio"/> 2 a 3 veces al día<br><input type="radio"/> 5 a 6 veces al día<br><input type="radio"/> más 6 veces al día |
| Col o coliflor o brocoli cocinado       | <input checked="" type="radio"/> Nunca o menos 1 vez al mes<br><input type="radio"/> 1 a 3 veces mes<br><input type="radio"/> 1 vez semana<br><input type="radio"/> 2 a 4 veces semana<br><input type="radio"/> 5 a 6 veces semana<br><input type="radio"/> 1 vez al día<br><input type="radio"/> 2 a 3 veces al día<br><input type="radio"/> 5 a 6 veces al día<br><input type="radio"/> más 6 veces al día |

---

Lechuga o endivia o escarola

- ☐ Nunca o menos 1 vez al mes  
☐ 1 a 3 veces mes  
☐ 1 vez semana  
☐ 2 a 4 veces semana  
☒ 5 a 6 veces semana  
☐ 1 vez al día  
☐ 2 a 3 veces al día  
☐ 5 a 6 veces al día  
☐ más 6 veces al día

---

tomate ensalada

- ☐ Nunca o menos 1 vez al mes  
☐ 1 a 3 veces mes  
☐ 1 vez semana  
☒ 2 a 4 veces semana  
☐ 5 a 6 veces semana  
☐ 1 vez al día  
☐ 2 a 3 veces al día  
☐ 5 a 6 veces al día  
☐ más 6 veces al día

---

cebolla

- ☐ Nunca o menos 1 vez al mes  
☐ 1 a 3 veces mes  
☐ 1 vez semana  
☒ 2 a 4 veces semana  
☐ 5 a 6 veces semana  
☐ 1 vez al día  
☐ 2 a 3 veces al día  
☐ 5 a 6 veces al día  
☐ más 6 veces al día

---

Zanahoria o calabaza

- ☐ Nunca o menos 1 vez al mes  
☐ 1 a 3 veces mes  
☐ 1 vez semana  
☒ 2 a 4 veces semana  
☐ 5 a 6 veces semana  
☐ 1 vez al día  
☐ 2 a 3 veces al día  
☐ 5 a 6 veces al día  
☐ más 6 veces al día

---

Judías verdes

- ☐ Nunca o menos 1 vez al mes  
☒ 1 a 3 veces mes  
☐ 1 vez semana  
☐ 2 a 4 veces semana  
☐ 5 a 6 veces semana  
☐ 1 vez al día  
☐ 2 a 3 veces al día  
☐ 5 a 6 veces al día  
☐ más 6 veces al día

---

Berenjena o calabacin o pepino

- ☐ Nunca o menos 1 vez al mes  
☐ 1 a 3 veces mes  
☐ 1 vez semana  
☒ 2 a 4 veces semana  
☐ 5 a 6 veces semana  
☐ 1 vez al día  
☐ 2 a 3 veces al día  
☐ 5 a 6 veces al día  
☐ más 6 veces al día



|                       |                                                                                                                                                                                                                                                                                                                                                                                                              |
|-----------------------|--------------------------------------------------------------------------------------------------------------------------------------------------------------------------------------------------------------------------------------------------------------------------------------------------------------------------------------------------------------------------------------------------------------|
| pimiento              | <input type="radio"/> Nunca o menos 1 vez al mes<br><input type="radio"/> 1 a 3 veces mes<br><input checked="" type="radio"/> 1 vez semana<br><input type="radio"/> 2 a 4 veces semana<br><input type="radio"/> 5 a 6 veces semana<br><input type="radio"/> 1 vez al día<br><input type="radio"/> 2 a 3 veces al día<br><input type="radio"/> 5 a 6 veces al día<br><input type="radio"/> más 6 veces al día |
| alcachofa             | <input type="radio"/> Nunca o menos 1 vez al mes<br><input type="radio"/> 1 a 3 veces mes<br><input checked="" type="radio"/> 1 vez semana<br><input type="radio"/> 2 a 4 veces semana<br><input type="radio"/> 5 a 6 veces semana<br><input type="radio"/> 1 vez al día<br><input type="radio"/> 2 a 3 veces al día<br><input type="radio"/> 5 a 6 veces al día<br><input type="radio"/> más 6 veces al día |
| espárragos            | <input checked="" type="radio"/> Nunca o menos 1 vez al mes<br><input type="radio"/> 1 a 3 veces mes<br><input type="radio"/> 1 vez semana<br><input type="radio"/> 2 a 4 veces semana<br><input type="radio"/> 5 a 6 veces semana<br><input type="radio"/> 1 vez al día<br><input type="radio"/> 2 a 3 veces al día<br><input type="radio"/> 5 a 6 veces al día<br><input type="radio"/> más 6 veces al día |
| maíz hervido          | <input type="radio"/> Nunca o menos 1 vez al mes<br><input type="radio"/> 1 a 3 veces mes<br><input checked="" type="radio"/> 1 vez semana<br><input type="radio"/> 2 a 4 veces semana<br><input type="radio"/> 5 a 6 veces semana<br><input type="radio"/> 1 vez al día<br><input type="radio"/> 2 a 3 veces al día<br><input type="radio"/> 5 a 6 veces al día<br><input type="radio"/> más 6 veces al día |
| legumbres             | <input type="radio"/> Nunca o menos 1 vez al mes<br><input type="radio"/> 1 a 3 veces mes<br><input type="radio"/> 1 vez semana<br><input checked="" type="radio"/> 2 a 4 veces semana<br><input type="radio"/> 5 a 6 veces semana<br><input type="radio"/> 1 vez al día<br><input type="radio"/> 2 a 3 veces al día<br><input type="radio"/> 5 a 6 veces al día<br><input type="radio"/> más 6 veces al día |
| naranjas o mandarinas | <input type="radio"/> Nunca o menos 1 vez al mes<br><input checked="" type="radio"/> 1 a 3 veces mes<br><input type="radio"/> 1 vez semana<br><input type="radio"/> 2 a 4 veces semana<br><input type="radio"/> 5 a 6 veces semana<br><input type="radio"/> 1 vez al día<br><input type="radio"/> 2 a 3 veces al día<br><input type="radio"/> 5 a 6 veces al día<br><input type="radio"/> más 6 veces al día |

|                       |                                                                                                                                                                                                                                                                                                                                                                                                              |
|-----------------------|--------------------------------------------------------------------------------------------------------------------------------------------------------------------------------------------------------------------------------------------------------------------------------------------------------------------------------------------------------------------------------------------------------------|
| zum natural fruta     | <input checked="" type="radio"/> Nunca o menos 1 vez al mes<br><input type="radio"/> 1 a 3 veces mes<br><input type="radio"/> 1 vez semana<br><input type="radio"/> 2 a 4 veces semana<br><input type="radio"/> 5 a 6 veces semana<br><input type="radio"/> 1 vez al día<br><input type="radio"/> 2 a 3 veces al día<br><input type="radio"/> 5 a 6 veces al día<br><input type="radio"/> más 6 veces al día |
| platano               | <input type="radio"/> Nunca o menos 1 vez al mes<br><input type="radio"/> 1 a 3 veces mes<br><input checked="" type="radio"/> 1 vez semana<br><input type="radio"/> 2 a 4 veces semana<br><input type="radio"/> 5 a 6 veces semana<br><input type="radio"/> 1 vez al día<br><input type="radio"/> 2 a 3 veces al día<br><input type="radio"/> 5 a 6 veces al día<br><input type="radio"/> más 6 veces al día |
| manzana o pera        | <input type="radio"/> Nunca o menos 1 vez al mes<br><input type="radio"/> 1 a 3 veces mes<br><input type="radio"/> 1 vez semana<br><input checked="" type="radio"/> 2 a 4 veces semana<br><input type="radio"/> 5 a 6 veces semana<br><input type="radio"/> 1 vez al día<br><input type="radio"/> 2 a 3 veces al día<br><input type="radio"/> 5 a 6 veces al día<br><input type="radio"/> más 6 veces al día |
| melocotón o nectarina | <input type="radio"/> Nunca o menos 1 vez al mes<br><input type="radio"/> 1 a 3 veces mes<br><input checked="" type="radio"/> 1 vez semana<br><input type="radio"/> 2 a 4 veces semana<br><input type="radio"/> 5 a 6 veces semana<br><input type="radio"/> 1 vez al día<br><input type="radio"/> 2 a 3 veces al día<br><input type="radio"/> 5 a 6 veces al día<br><input type="radio"/> más 6 veces al día |
| sandia o melon        | <input type="radio"/> Nunca o menos 1 vez al mes<br><input type="radio"/> 1 a 3 veces mes<br><input checked="" type="radio"/> 1 vez semana<br><input type="radio"/> 2 a 4 veces semana<br><input type="radio"/> 5 a 6 veces semana<br><input type="radio"/> 1 vez al día<br><input type="radio"/> 2 a 3 veces al día<br><input type="radio"/> 5 a 6 veces al día<br><input type="radio"/> más 6 veces al día |
| uva                   | <input type="radio"/> Nunca o menos 1 vez al mes<br><input type="radio"/> 1 a 3 veces mes<br><input type="radio"/> 1 vez semana<br><input checked="" type="radio"/> 2 a 4 veces semana<br><input type="radio"/> 5 a 6 veces semana<br><input type="radio"/> 1 vez al día<br><input type="radio"/> 2 a 3 veces al día<br><input type="radio"/> 5 a 6 veces al día<br><input type="radio"/> más 6 veces al día |

---

bruna o ciruela

- ☒ Nunca o menos 1 vez al mes  
☐ 1 a 3 veces mes  
☐ 1 vez semana  
☐ 2 a 4 veces semana  
☐ 5 a 6 veces semana  
☐ 1 vez al día  
☐ 2 a 3 veces al día  
☐ 5 a 6 veces al día  
☐ más 6 veces al día

---

kiwi

- ☒ Nunca o menos 1 vez al mes  
☐ 1 a 3 veces mes  
☐ 1 vez semana  
☐ 2 a 4 veces semana  
☐ 5 a 6 veces semana  
☐ 1 vez al día  
☐ 2 a 3 veces al día  
☐ 5 a 6 veces al día  
☐ más 6 veces al día

---

aceituna

- ☐ Nunca o menos 1 vez al mes  
☒ 1 a 3 veces mes  
☐ 1 vez semana  
☐ 2 a 4 veces semana  
☐ 5 a 6 veces semana  
☐ 1 vez al día  
☐ 2 a 3 veces al día  
☐ 5 a 6 veces al día  
☐ más 6 veces al día

---

frutos secos

- ☐ Nunca o menos 1 vez al mes  
☐ 1 a 3 veces mes  
☒ 1 vez semana  
☐ 2 a 4 veces semana  
☐ 5 a 6 veces semana  
☐ 1 vez al día  
☐ 2 a 3 veces al día  
☐ 5 a 6 veces al día  
☐ más 6 veces al día

---

pan blanco

- ☐ Nunca o menos 1 vez al mes  
☒ 1 a 3 veces mes  
☐ 1 vez semana  
☐ 2 a 4 veces semana  
☐ 5 a 6 veces semana  
☐ 1 vez al día  
☐ 2 a 3 veces al día  
☐ 5 a 6 veces al día  
☐ más 6 veces al día

---

pan integral

- ☒ Nunca o menos 1 vez al mes  
☐ 1 a 3 veces mes  
☐ 1 vez semana  
☐ 2 a 4 veces semana  
☐ 5 a 6 veces semana  
☐ 1 vez al día  
☐ 2 a 3 veces al día  
☐ 5 a 6 veces al día  
☐ más 6 veces al día

---

cereales desayuno

- ☐ Nunca o menos 1 vez al mes  
☐ 1 a 3 veces mes  
☐ 1 vez semana  
☒ 2 a 4 veces semana  
☐ 5 a 6 veces semana  
☐ 1 vez al día  
☐ 2 a 3 veces al día  
☐ 5 a 6 veces al día  
☐ más 6 veces al día

---

patatas fritas

- ☐ Nunca o menos 1 vez al mes  
☐ 1 a 3 veces mes  
☒ 1 vez semana  
☐ 2 a 4 veces semana  
☐ 5 a 6 veces semana  
☐ 1 vez al día  
☐ 2 a 3 veces al día  
☐ 5 a 6 veces al día  
☐ más 6 veces al día

---

patatas cocidas o asadas

- ☐ Nunca o menos 1 vez al mes  
☐ 1 a 3 veces mes  
☐ 1 vez semana  
☒ 2 a 4 veces semana  
☐ 5 a 6 veces semana  
☐ 1 vez al día  
☐ 2 a 3 veces al día  
☐ 5 a 6 veces al día  
☐ más 6 veces al día

---

bolsa papas

- ☒ Nunca o menos 1 vez al mes  
☐ 1 a 3 veces mes  
☐ 1 vez semana  
☐ 2 a 4 veces semana  
☐ 5 a 6 veces semana  
☐ 1 vez al día  
☐ 2 a 3 veces al día  
☐ 5 a 6 veces al día  
☐ más 6 veces al día

---

arroz cocinado

- ☐ Nunca o menos 1 vez al mes  
☒ 1 a 3 veces mes  
☐ 1 vez semana  
☐ 2 a 4 veces semana  
☐ 5 a 6 veces semana  
☐ 1 vez al día  
☐ 2 a 3 veces al día  
☐ 5 a 6 veces al día  
☐ más 6 veces al día

---

pasta

- ☐ Nunca o menos 1 vez al mes  
☐ 1 a 3 veces mes  
☒ 1 vez semana  
☐ 2 a 4 veces semana  
☐ 5 a 6 veces semana  
☐ 1 vez al día  
☐ 2 a 3 veces al día  
☐ 5 a 6 veces al día  
☐ más 6 veces al día

|                     |                                                                                                                                                                                                                                                                                                                                                                                                              |
|---------------------|--------------------------------------------------------------------------------------------------------------------------------------------------------------------------------------------------------------------------------------------------------------------------------------------------------------------------------------------------------------------------------------------------------------|
| pizza               | <input type="radio"/> Nunca o menos 1 vez al mes<br><input checked="" type="radio"/> 1 a 3 veces mes<br><input type="radio"/> 1 vez semana<br><input type="radio"/> 2 a 4 veces semana<br><input type="radio"/> 5 a 6 veces semana<br><input type="radio"/> 1 vez al día<br><input type="radio"/> 2 a 3 veces al día<br><input type="radio"/> 5 a 6 veces al día<br><input type="radio"/> más 6 veces al día |
| aceite oliva        | <input type="radio"/> Nunca o menos 1 vez al mes<br><input type="radio"/> 1 a 3 veces mes<br><input type="radio"/> 1 vez semana<br><input type="radio"/> 2 a 4 veces semana<br><input type="radio"/> 5 a 6 veces semana<br><input type="radio"/> 1 vez al día<br><input checked="" type="radio"/> 2 a 3 veces al día<br><input type="radio"/> 5 a 6 veces al día<br><input type="radio"/> más 6 veces al día |
| otros aceites       | <input checked="" type="radio"/> Nunca o menos 1 vez al mes<br><input type="radio"/> 1 a 3 veces mes<br><input type="radio"/> 1 vez semana<br><input type="radio"/> 2 a 4 veces semana<br><input type="radio"/> 5 a 6 veces semana<br><input type="radio"/> 1 vez al día<br><input type="radio"/> 2 a 3 veces al día<br><input type="radio"/> 5 a 6 veces al día<br><input type="radio"/> más 6 veces al día |
| margarina           | <input checked="" type="radio"/> Nunca o menos 1 vez al mes<br><input type="radio"/> 1 a 3 veces mes<br><input type="radio"/> 1 vez semana<br><input type="radio"/> 2 a 4 veces semana<br><input type="radio"/> 5 a 6 veces semana<br><input type="radio"/> 1 vez al día<br><input type="radio"/> 2 a 3 veces al día<br><input type="radio"/> 5 a 6 veces al día<br><input type="radio"/> más 6 veces al día |
| mantequilla         | <input checked="" type="radio"/> Nunca o menos 1 vez al mes<br><input type="radio"/> 1 a 3 veces mes<br><input type="radio"/> 1 vez semana<br><input type="radio"/> 2 a 4 veces semana<br><input type="radio"/> 5 a 6 veces semana<br><input type="radio"/> 1 vez al día<br><input type="radio"/> 2 a 3 veces al día<br><input type="radio"/> 5 a 6 veces al día<br><input type="radio"/> más 6 veces al día |
| galletas tipo maria | <input checked="" type="radio"/> Nunca o menos 1 vez al mes<br><input type="radio"/> 1 a 3 veces mes<br><input type="radio"/> 1 vez semana<br><input type="radio"/> 2 a 4 veces semana<br><input type="radio"/> 5 a 6 veces semana<br><input type="radio"/> 1 vez al día<br><input type="radio"/> 2 a 3 veces al día<br><input type="radio"/> 5 a 6 veces al día<br><input type="radio"/> más 6 veces al día |

|                           |                                                                                                                                                                                                                                                                                                                                                                                                              |
|---------------------------|--------------------------------------------------------------------------------------------------------------------------------------------------------------------------------------------------------------------------------------------------------------------------------------------------------------------------------------------------------------------------------------------------------------|
| galletas chocolate        | <input type="radio"/> Nunca o menos 1 vez al mes<br><input checked="" type="radio"/> 1 a 3 veces mes<br><input type="radio"/> 1 vez semana<br><input type="radio"/> 2 a 4 veces semana<br><input type="radio"/> 5 a 6 veces semana<br><input type="radio"/> 1 vez al día<br><input type="radio"/> 2 a 3 veces al día<br><input type="radio"/> 5 a 6 veces al día<br><input type="radio"/> más 6 veces al día |
| bollieria                 | <input type="radio"/> Nunca o menos 1 vez al mes<br><input checked="" type="radio"/> 1 a 3 veces mes<br><input type="radio"/> 1 vez semana<br><input type="radio"/> 2 a 4 veces semana<br><input type="radio"/> 5 a 6 veces semana<br><input type="radio"/> 1 vez al día<br><input type="radio"/> 2 a 3 veces al día<br><input type="radio"/> 5 a 6 veces al día<br><input type="radio"/> más 6 veces al día |
| chocolate o bombones      | <input type="radio"/> Nunca o menos 1 vez al mes<br><input checked="" type="radio"/> 1 a 3 veces mes<br><input type="radio"/> 1 vez semana<br><input type="radio"/> 2 a 4 veces semana<br><input type="radio"/> 5 a 6 veces semana<br><input type="radio"/> 1 vez al día<br><input type="radio"/> 2 a 3 veces al día<br><input type="radio"/> 5 a 6 veces al día<br><input type="radio"/> más 6 veces al día |
| chocolate polvo o colacao | <input checked="" type="radio"/> Nunca o menos 1 vez al mes<br><input type="radio"/> 1 a 3 veces mes<br><input type="radio"/> 1 vez semana<br><input type="radio"/> 2 a 4 veces semana<br><input type="radio"/> 5 a 6 veces semana<br><input type="radio"/> 1 vez al día<br><input type="radio"/> 2 a 3 veces al día<br><input type="radio"/> 5 a 6 veces al día<br><input type="radio"/> más 6 veces al día |
| vino tinto                | <input checked="" type="radio"/> Nunca o menos 1 vez al mes<br><input type="radio"/> 1 a 3 veces mes<br><input type="radio"/> 1 vez semana<br><input type="radio"/> 2 a 4 veces semana<br><input type="radio"/> 5 a 6 veces semana<br><input type="radio"/> 1 vez al día<br><input type="radio"/> 2 a 3 veces al día<br><input type="radio"/> 5 a 6 veces al día<br><input type="radio"/> más 6 veces al día |
| vino blanco               | <input checked="" type="radio"/> Nunca o menos 1 vez al mes<br><input type="radio"/> 1 a 3 veces mes<br><input type="radio"/> 1 vez semana<br><input type="radio"/> 2 a 4 veces semana<br><input type="radio"/> 5 a 6 veces semana<br><input type="radio"/> 1 vez al día<br><input type="radio"/> 2 a 3 veces al día<br><input type="radio"/> 5 a 6 veces al día<br><input type="radio"/> más 6 veces al día |

|                       |                                                                                                                                                                                                                                                                                                                                                                                                              |
|-----------------------|--------------------------------------------------------------------------------------------------------------------------------------------------------------------------------------------------------------------------------------------------------------------------------------------------------------------------------------------------------------------------------------------------------------|
| vino seco o vermut    | <input checked="" type="radio"/> Nunca o menos 1 vez al mes<br><input type="radio"/> 1 a 3 veces mes<br><input type="radio"/> 1 vez semana<br><input type="radio"/> 2 a 4 veces semana<br><input type="radio"/> 5 a 6 veces semana<br><input type="radio"/> 1 vez al día<br><input type="radio"/> 2 a 3 veces al día<br><input type="radio"/> 5 a 6 veces al día<br><input type="radio"/> más 6 veces al día |
| cerveza               | <input checked="" type="radio"/> Nunca o menos 1 vez al mes<br><input type="radio"/> 1 a 3 veces mes<br><input type="radio"/> 1 vez semana<br><input type="radio"/> 2 a 4 veces semana<br><input type="radio"/> 5 a 6 veces semana<br><input type="radio"/> 1 vez al día<br><input type="radio"/> 2 a 3 veces al día<br><input type="radio"/> 5 a 6 veces al día<br><input type="radio"/> más 6 veces al día |
| cerveza sin alcohol   | <input checked="" type="radio"/> Nunca o menos 1 vez al mes<br><input type="radio"/> 1 a 3 veces mes<br><input type="radio"/> 1 vez semana<br><input type="radio"/> 2 a 4 veces semana<br><input type="radio"/> 5 a 6 veces semana<br><input type="radio"/> 1 vez al día<br><input type="radio"/> 2 a 3 veces al día<br><input type="radio"/> 5 a 6 veces al día<br><input type="radio"/> más 6 veces al día |
| licores               | <input checked="" type="radio"/> Nunca o menos 1 vez al mes<br><input type="radio"/> 1 a 3 veces mes<br><input type="radio"/> 1 vez semana<br><input type="radio"/> 2 a 4 veces semana<br><input type="radio"/> 5 a 6 veces semana<br><input type="radio"/> 1 vez al día<br><input type="radio"/> 2 a 3 veces al día<br><input type="radio"/> 5 a 6 veces al día<br><input type="radio"/> más 6 veces al día |
| ginebra o ron o vodka | <input checked="" type="radio"/> Nunca o menos 1 vez al mes<br><input type="radio"/> 1 a 3 veces mes<br><input type="radio"/> 1 vez semana<br><input type="radio"/> 2 a 4 veces semana<br><input type="radio"/> 5 a 6 veces semana<br><input type="radio"/> 1 vez al día<br><input type="radio"/> 2 a 3 veces al día<br><input type="radio"/> 5 a 6 veces al día<br><input type="radio"/> más 6 veces al día |
| refresco normal       | <input checked="" type="radio"/> Nunca o menos 1 vez al mes<br><input type="radio"/> 1 a 3 veces mes<br><input type="radio"/> 1 vez semana<br><input type="radio"/> 2 a 4 veces semana<br><input type="radio"/> 5 a 6 veces semana<br><input type="radio"/> 1 vez al día<br><input type="radio"/> 2 a 3 veces al día<br><input type="radio"/> 5 a 6 veces al día<br><input type="radio"/> más 6 veces al día |

---

refresco sin azúcar

- ☐ Nunca o menos 1 vez al mes  
☐ 1 a 3 veces mes  
☒ 1 vez semana  
☐ 2 a 4 veces semana  
☐ 5 a 6 veces semana  
☐ 1 vez al día  
☐ 2 a 3 veces al día  
☐ 5 a 6 veces al día  
☐ más 6 veces al día

---

Agua del grifo

- ☒ Nunca o menos 1 vez al mes  
☐ 1 a 3 veces mes  
☐ 1 vez semana  
☐ 2 a 4 veces semana  
☐ 5 a 6 veces semana  
☐ 1 vez al día  
☐ 2 a 3 veces al día  
☐ 5 a 6 veces al día  
☐ más 6 veces al día

---

agua embotellada sin gas

- ☐ Nunca o menos 1 vez al mes  
☐ 1 a 3 veces mes  
☐ 1 vez semana  
☐ 2 a 4 veces semana  
☐ 5 a 6 veces semana  
☐ 1 vez al día  
☐ 2 a 3 veces al día  
☐ 5 a 6 veces al día  
☒ más 6 veces al día

---

agua embotellada con gas

- ☒ Nunca o menos 1 vez al mes  
☐ 1 a 3 veces mes  
☐ 1 vez semana  
☐ 2 a 4 veces semana  
☐ 5 a 6 veces semana  
☐ 1 vez al día  
☐ 2 a 3 veces al día  
☐ 5 a 6 veces al día  
☐ más 6 veces al día

---

zumو frutas embasado

- ☒ Nunca o menos 1 vez al mes  
☐ 1 a 3 veces mes  
☐ 1 vez semana  
☐ 2 a 4 veces semana  
☐ 5 a 6 veces semana  
☐ 1 vez al día  
☐ 2 a 3 veces al día  
☐ 5 a 6 veces al día  
☐ más 6 veces al día

---

cafe

- ☒ Nunca o menos 1 vez al mes  
☐ 1 a 3 veces mes  
☐ 1 vez semana  
☐ 2 a 4 veces semana  
☐ 5 a 6 veces semana  
☐ 1 vez al día  
☐ 2 a 3 veces al día  
☐ 5 a 6 veces al día  
☐ más 6 veces al día



|                       |                                                                                                                                                                                                                                                                                                                                                                                                              |
|-----------------------|--------------------------------------------------------------------------------------------------------------------------------------------------------------------------------------------------------------------------------------------------------------------------------------------------------------------------------------------------------------------------------------------------------------|
| cafe descafeinado     | <input checked="" type="radio"/> Nunca o menos 1 vez al mes<br><input type="radio"/> 1 a 3 veces mes<br><input type="radio"/> 1 vez semana<br><input type="radio"/> 2 a 4 veces semana<br><input type="radio"/> 5 a 6 veces semana<br><input type="radio"/> 1 vez al día<br><input type="radio"/> 2 a 3 veces al día<br><input type="radio"/> 5 a 6 veces al día<br><input type="radio"/> más 6 veces al día |
| te o infusión         | <input type="radio"/> Nunca o menos 1 vez al mes<br><input checked="" type="radio"/> 1 a 3 veces mes<br><input type="radio"/> 1 vez semana<br><input type="radio"/> 2 a 4 veces semana<br><input type="radio"/> 5 a 6 veces semana<br><input type="radio"/> 1 vez al día<br><input type="radio"/> 2 a 3 veces al día<br><input type="radio"/> 5 a 6 veces al día<br><input type="radio"/> más 6 veces al día |
| sopa o puré verduras  | <input type="radio"/> Nunca o menos 1 vez al mes<br><input type="radio"/> 1 a 3 veces mes<br><input type="radio"/> 1 vez semana<br><input checked="" type="radio"/> 2 a 4 veces semana<br><input type="radio"/> 5 a 6 veces semana<br><input type="radio"/> 1 vez al día<br><input type="radio"/> 2 a 3 veces al día<br><input type="radio"/> 5 a 6 veces al día<br><input type="radio"/> más 6 veces al día |
| croquetas pollo jamón | <input type="radio"/> Nunca o menos 1 vez al mes<br><input type="radio"/> 1 a 3 veces mes<br><input checked="" type="radio"/> 1 vez semana<br><input type="radio"/> 2 a 4 veces semana<br><input type="radio"/> 5 a 6 veces semana<br><input type="radio"/> 1 vez al día<br><input type="radio"/> 2 a 3 veces al día<br><input type="radio"/> 5 a 6 veces al día<br><input type="radio"/> más 6 veces al día |
| croquetas pescado     | <input checked="" type="radio"/> Nunca o menos 1 vez al mes<br><input type="radio"/> 1 a 3 veces mes<br><input type="radio"/> 1 vez semana<br><input type="radio"/> 2 a 4 veces semana<br><input type="radio"/> 5 a 6 veces semana<br><input type="radio"/> 1 vez al día<br><input type="radio"/> 2 a 3 veces al día<br><input type="radio"/> 5 a 6 veces al día<br><input type="radio"/> más 6 veces al día |
| mayonesa              | <input checked="" type="radio"/> Nunca o menos 1 vez al mes<br><input type="radio"/> 1 a 3 veces mes<br><input type="radio"/> 1 vez semana<br><input type="radio"/> 2 a 4 veces semana<br><input type="radio"/> 5 a 6 veces semana<br><input type="radio"/> 1 vez al día<br><input type="radio"/> 2 a 3 veces al día<br><input type="radio"/> 5 a 6 veces al día<br><input type="radio"/> más 6 veces al día |

---

salsa tomate

- ☐ Nunca o menos 1 vez al mes  
☒ 1 a 3 veces mes  
☐ 1 vez semana  
☐ 2 a 4 veces semana  
☐ 5 a 6 veces semana  
☐ 1 vez al día  
☐ 2 a 3 veces al día  
☐ 5 a 6 veces al día  
☐ más 6 veces al día

---

ketchup

- ☒ Nunca o menos 1 vez al mes  
☐ 1 a 3 veces mes  
☐ 1 vez semana  
☐ 2 a 4 veces semana  
☐ 5 a 6 veces semana  
☐ 1 vez al día  
☐ 2 a 3 veces al día  
☐ 5 a 6 veces al día  
☐ más 6 veces al día

---

sal

- ☒ Nunca o menos 1 vez al mes  
☐ 1 a 3 veces mes  
☐ 1 vez semana  
☐ 2 a 4 veces semana  
☐ 5 a 6 veces semana  
☐ 1 vez al día  
☐ 2 a 3 veces al día  
☐ 5 a 6 veces al día  
☐ más 6 veces al día

---

ajo

- ☐ Nunca o menos 1 vez al mes  
☐ 1 a 3 veces mes  
☒ 1 vez semana  
☐ 2 a 4 veces semana  
☐ 5 a 6 veces semana  
☐ 1 vez al día  
☐ 2 a 3 veces al día  
☐ 5 a 6 veces al día  
☐ más 6 veces al día

---

mermelada o miel

- ☒ Nunca o menos 1 vez al mes  
☐ 1 a 3 veces mes  
☐ 1 vez semana  
☐ 2 a 4 veces semana  
☐ 5 a 6 veces semana  
☐ 1 vez al día  
☐ 2 a 3 veces al día  
☐ 5 a 6 veces al día  
☐ más 6 veces al día

---

azúcar

- ☐ Nunca o menos 1 vez al mes  
☒ 1 a 3 veces mes  
☐ 1 vez semana  
☐ 2 a 4 veces semana  
☐ 5 a 6 veces semana  
☐ 1 vez al día  
☐ 2 a 3 veces al día  
☐ 5 a 6 veces al día  
☐ más 6 veces al día

---

Otro alimento

---

suplementos vitamínicos

- ☐ si  
☒ no

---

suplementos vitamínicos

---

dieta previa

- ☒ si  
☐ no

motivo dieta

- ☐ no dieta  
☐ control peso  
☐ control colesterol  
☒ control diabetes  
☐ problemas estómago  
☐ problemas vesícula o hepáticos  
☐ HTA o cardiopatía  
☐ problemas renales  
☐ alergia alimentaria  
☐ ácido úrico elevado  
☐ vegetariana  
☐ otros

---

cambio alimentos año previo gestación

---

- ☒ si  
☐ no

cambio lácteos

- ☐ eliminado  
☐ disminuido  
☒ igual  
☐ aumentado  
☐ no sabe

---

cambio huevos

---

- ☐ eliminado  
☐ disminuido  
☒ igual  
☐ aumentado  
☐ no sabe

---

cambio carne

---

- ☐ eliminado  
☐ disminuido  
☒ igual  
☐ aumentado  
☐ no sabe

---

cambio pescado

---

- ☐ eliminado  
☐ disminuido  
☐ igual  
☒ aumentado  
☐ no sabe

---

cambio verduras

---

- ☐ eliminado  
☐ disminuido  
☐ igual  
☒ aumentado  
☐ no sabe

|                            |                                                                                                                                                                                                                        |
|----------------------------|------------------------------------------------------------------------------------------------------------------------------------------------------------------------------------------------------------------------|
| cambio legumbres           | <input type="radio"/> eliminado<br><input type="radio"/> disminuido<br><input checked="" type="radio"/> igual<br><input type="radio"/> aumentado<br><input type="radio"/> no sabe                                      |
| cambio fruta               | <input type="radio"/> eliminado<br><input type="radio"/> disminuido<br><input checked="" type="radio"/> igual<br><input type="radio"/> aumentado<br><input type="radio"/> no sabe                                      |
| cambio pan                 | <input checked="" type="radio"/> eliminado<br><input type="radio"/> disminuido<br><input type="radio"/> igual<br><input type="radio"/> aumentado<br><input type="radio"/> no sabe                                      |
| cambio aceite oliva        | <input type="radio"/> eliminado<br><input type="radio"/> disminuido<br><input checked="" type="radio"/> igual<br><input type="radio"/> aumentado<br><input type="radio"/> no sabe                                      |
| cambio mante o margarina   | <input type="radio"/> eliminado<br><input type="radio"/> disminuido<br><input checked="" type="radio"/> igual<br><input type="radio"/> aumentado<br><input type="radio"/> no sabe                                      |
| cambio azúcar y dulces     | <input type="radio"/> eliminado<br><input checked="" type="radio"/> disminuido<br><input type="radio"/> igual<br><input type="radio"/> aumentado<br><input type="radio"/> no sabe                                      |
| cambio bebidas alcohólicas | <input checked="" type="radio"/> eliminado<br><input type="radio"/> disminuido<br><input type="radio"/> igual<br><input type="radio"/> aumentado<br><input type="radio"/> no sabe                                      |
| frecuencia comidas fritas  | <input type="radio"/> a diario<br><input type="radio"/> 5 a 6 veces semana<br><input type="radio"/> 2 a 4 veces semana<br><input type="radio"/> 1 vez semana<br><input checked="" type="radio"/> menos de 1 vez semana |
| carne                      | <input type="radio"/> no como<br><input type="radio"/> cruda<br><input type="radio"/> poco hecha<br><input checked="" type="radio"/> hecha<br><input type="radio"/> muy hecha                                          |
| grasa visible carne        | <input type="radio"/> quita toda<br><input checked="" type="radio"/> quita mayoría<br><input type="radio"/> quita un poco<br><input type="radio"/> no quita nada                                                       |

|                                |                                                                                                                                                                                                                                                          |
|--------------------------------|----------------------------------------------------------------------------------------------------------------------------------------------------------------------------------------------------------------------------------------------------------|
| cocina carne                   | <input checked="" type="radio"/> a la plancha<br><input type="radio"/> a la parrilla<br><input type="radio"/> asada<br><input type="radio"/> frita<br><input type="radio"/> guisada                                                                      |
| tostado quemado carne          | <input checked="" type="radio"/> nunca<br><input type="radio"/> 1 vez mes<br><input type="radio"/> 2 a 3 veces mes<br><input type="radio"/> 1 vez semana<br><input type="radio"/> 2 a 3 semanas                                                          |
| tostado quemado pescado        | <input checked="" type="radio"/> nunca<br><input type="radio"/> 1 vez mes<br><input type="radio"/> 2 a 3 veces mes<br><input type="radio"/> 1 vez semana<br><input type="radio"/> 2 a 3 semanas                                                          |
| socarrat paella                | <input checked="" type="radio"/> nunca<br><input type="radio"/> 1 vez mes<br><input type="radio"/> 2 a 3 veces mes<br><input type="radio"/> 1 vez semana<br><input type="radio"/> 2 a 3 semanas                                                          |
| grasa o aceite cocinar         | <input type="radio"/> mantequilla<br><input type="radio"/> margarina<br><input type="radio"/> aceite oliva<br><input checked="" type="radio"/> aceite oliva virgen extra<br><input type="radio"/> aceite vegetal<br><input type="radio"/> mezcla aceites |
| grasa aceite aliñar            | <input type="radio"/> mantequilla<br><input type="radio"/> margarina<br><input type="radio"/> aceite oliva<br><input checked="" type="radio"/> aceite oliva virgen extra<br><input type="radio"/> aceite vegetal<br><input type="radio"/> mezcla aceites |
| grasa aceite freir             | <input type="radio"/> mantequilla<br><input type="radio"/> margarina<br><input type="radio"/> aceite oliva<br><input checked="" type="radio"/> aceite oliva virgen extra<br><input type="radio"/> aceite vegetal<br><input type="radio"/> mezcla aceites |
| Ejercicio cuestionario         | <input checked="" type="radio"/> si<br><input type="radio"/> no                                                                                                                                                                                          |
| horas de sueño incluido siesta | [*DATA REMOVED*]                                                                                                                                                                                                                                         |
| minutos siesta                 | [*DATA REMOVED*]                                                                                                                                                                                                                                         |
| horas televisión semana        | [*DATA REMOVED*]                                                                                                                                                                                                                                         |

|                                        |                                                                                                                                                                                                                                                                                                                                                                           |
|----------------------------------------|---------------------------------------------------------------------------------------------------------------------------------------------------------------------------------------------------------------------------------------------------------------------------------------------------------------------------------------------------------------------------|
| actividad trabajo                      | <input type="radio"/> casi siempre sentado<br><input type="radio"/> sentado 50 por cien<br><input type="radio"/> casi siempre de pie, quieto<br><input type="radio"/> casi siempre levantado caminando y llevando pocas cosas<br><input type="radio"/> casi siempre levantado, caminando y llevado muchas cosas<br><input checked="" type="radio"/> trabajo manual pesado |
| tiempo caminar o bici al día           | <input type="radio"/> casi nunca<br><input type="radio"/> menos 20min día<br><input checked="" type="radio"/> 20 a 40 min día<br><input type="radio"/> 40 a 60 min día<br><input type="radio"/> 1h o 1h y media día<br><input type="radio"/> más de 1h y media al día                                                                                                     |
| tiempo tareas casa al día              | <input type="radio"/> menos de 1h día<br><input checked="" type="radio"/> 1 a 2h día<br><input type="radio"/> 3 a 4h día<br><input type="radio"/> 5 a 6h día<br><input type="radio"/> 7 a 8h día<br><input type="radio"/> más de 8h día                                                                                                                                   |
| tiempo libre televisión ordenador leer | <input type="radio"/> menos 1h día<br><input type="radio"/> 1h día<br><input type="radio"/> 2h día<br><input type="radio"/> 3h día<br><input checked="" type="radio"/> 4h día<br><input type="radio"/> 5 a 6h día<br><input type="radio"/> mas 6h día                                                                                                                     |
| tiempo libre ejercicio o deporte       | <input type="radio"/> menos 1h semana<br><input type="radio"/> 1h semana<br><input type="radio"/> 2h semana<br><input checked="" type="radio"/> 3h semana<br><input type="radio"/> 4 a 5h semana<br><input type="radio"/> mas 5h semana                                                                                                                                   |
| como se considera                      | <input type="radio"/> sedentaria<br><input type="radio"/> poco activa<br><input checked="" type="radio"/> moderadamente activa<br><input type="radio"/> bastante activa<br><input type="radio"/> muy activa<br><input type="radio"/> no sabe                                                                                                                              |
| FUR                                    | [*DATA REMOVED*]                                                                                                                                                                                                                                                                                                                                                          |
| Semanas gestación 2T                   | _____                                                                                                                                                                                                                                                                                                                                                                     |
| Días gestación 2T                      | _____                                                                                                                                                                                                                                                                                                                                                                     |
| DBP 2T                                 | _____                                                                                                                                                                                                                                                                                                                                                                     |
| CC 2T                                  | _____                                                                                                                                                                                                                                                                                                                                                                     |

|                                    |                                                                                                                                                                                                 |
|------------------------------------|-------------------------------------------------------------------------------------------------------------------------------------------------------------------------------------------------|
| AC 2T                              | <hr/>                                                                                                                                                                                           |
| LF 2T                              | <hr/>                                                                                                                                                                                           |
| PFE 2T (Hadlock)                   | <hr/>                                                                                                                                                                                           |
| Semanas gestación 3T               | <hr/>                                                                                                                                                                                           |
| días 3T                            | <hr/>                                                                                                                                                                                           |
| DBP 3T                             | <hr/>                                                                                                                                                                                           |
| CC 3T                              | <hr/>                                                                                                                                                                                           |
| AC 3T                              | <hr/>                                                                                                                                                                                           |
| LF 3T                              | <hr/>                                                                                                                                                                                           |
| PFE 3T (Hadlock)                   | <hr/>                                                                                                                                                                                           |
| Semanas de gestación final         | [*DATA REMOVED*]                                                                                                                                                                                |
| días gestación final               | [*DATA REMOVED*]                                                                                                                                                                                |
| Localización placenta              | <input type="radio"/> anterior<br><input type="radio"/> lateral derecha<br><input type="radio"/> lateral izquierda<br><input checked="" type="radio"/> posterior<br><input type="radio"/> fondo |
| Presentación longitudinal cefálica | <input type="radio"/> no<br><input checked="" type="radio"/> si                                                                                                                                 |
| Dorso                              | <input type="radio"/> izquierda anterior<br><input type="radio"/> izquierda posterior<br><input checked="" type="radio"/> derecha anterior<br><input type="radio"/> derecha posterior           |
| diámetro biparietal                | [*DATA REMOVED*]                                                                                                                                                                                |
| Circunferencia craneal             | [*DATA REMOVED*]                                                                                                                                                                                |
| Circunferencia abdominal           | [*DATA REMOVED*]                                                                                                                                                                                |

|                                                   |                                                                                                                                                          |
|---------------------------------------------------|----------------------------------------------------------------------------------------------------------------------------------------------------------|
| Longitud de femur                                 | [*DATA REMOVED*]                                                                                                                                         |
| tejido celular subcutáneo a nivel del muslo en mm | [*DATA REMOVED*]                                                                                                                                         |
| tejido celular subcutáneo en abdomen en mm        | [*DATA REMOVED*]                                                                                                                                         |
| Volumen del muslo en cm3                          | [*DATA REMOVED*]                                                                                                                                         |
| Peso fetal estimado según fórmula de Hadlock      | [*DATA REMOVED*]                                                                                                                                         |
| Percentil                                         | [*DATA REMOVED*]                                                                                                                                         |
| Peso fetal estimado según fórmula de Scioscia     | _____                                                                                                                                                    |
| Peso fetal estimado según fórmula de LEE          | _____                                                                                                                                                    |
| Tipo de parto                                     | <input type="radio"/> eutocico<br><input type="radio"/> instrumentado/ventosa<br><input checked="" type="radio"/> cesarea                                |
| fecha de nacimiento                               | [*DATA REMOVED*]                                                                                                                                         |
| Días entre exploración y nacimiento               | [*DATA REMOVED*]                                                                                                                                         |
| Peso RN en g                                      | [*DATA REMOVED*]                                                                                                                                         |
| sexo                                              | <input type="radio"/> mujer<br><input checked="" type="radio"/> hombre                                                                                   |
| Apgar 1 minuto                                    | [*DATA REMOVED*]                                                                                                                                         |
| Apgar 5 minutos                                   | [*DATA REMOVED*]                                                                                                                                         |
| Apgar 10 minutos                                  | _____                                                                                                                                                    |
| antecedente Covid durante gestación               | <input type="radio"/> Yes<br><input checked="" type="radio"/> No                                                                                         |
| Nivel de estudios                                 | <input type="radio"/> ninguno<br><input type="radio"/> primarios<br><input checked="" type="radio"/> secundarios<br><input type="radio"/> universitarios |



## Base\_datos\_estimacion\_peso\_fetal

|                                       |                                                                                                                                                                                                                                                                                      |
|---------------------------------------|--------------------------------------------------------------------------------------------------------------------------------------------------------------------------------------------------------------------------------------------------------------------------------------|
| Número de identificación participante | 172                                                                                                                                                                                                                                                                                  |
| CODIGO PARTICIPANTE                   |                                                                                                                                                                                                                                                                                      |
| Edad                                  | [*DATA REMOVED*]                                                                                                                                                                                                                                                                     |
| Gestaciones                           | <input type="radio"/> 1<br><input type="radio"/> 2<br><input type="radio"/> 3<br><input checked="" type="radio"/> mas de 3                                                                                                                                                           |
| partos                                | <input type="radio"/> 0<br><input type="radio"/> 1<br><input type="radio"/> 2<br><input checked="" type="radio"/> 3<br><input type="radio"/> mas de 3                                                                                                                                |
| cesáreas                              | <input checked="" type="radio"/> 0<br><input type="radio"/> 1<br><input type="radio"/> 2<br><input type="radio"/> 3<br><input type="radio"/> mas de 3                                                                                                                                |
| Abortos                               | <input checked="" type="radio"/> 0<br><input type="radio"/> 1<br><input type="radio"/> 2<br><input type="radio"/> 3<br><input type="radio"/> mas de 3                                                                                                                                |
| Tipo de gestacion                     | <input checked="" type="radio"/> espontanea<br><input type="radio"/> IAC inseminación artificial conyuge<br><input type="radio"/> IAD inseminación artificial donante<br><input type="radio"/> FIV Fecundación in Vitro<br><input type="radio"/> Ovodon FIV con donación de ovocitos |
| peso previo a embarazo                | [*DATA REMOVED*]                                                                                                                                                                                                                                                                     |
| Ganancia ponderal embarazo            |                                                                                                                                                                                                                                                                                      |
| Talla madre                           | [*DATA REMOVED*]                                                                                                                                                                                                                                                                     |
| IMC previo embarazo                   | 20.603537981269508                                                                                                                                                                                                                                                                   |
| Patología obstétrica                  | <input type="radio"/> no<br><input checked="" type="radio"/> si                                                                                                                                                                                                                      |
| Diabetes pregestacional               | <input checked="" type="radio"/> no<br><input type="radio"/> si                                                                                                                                                                                                                      |
| Diabetes gestacional                  | <input type="radio"/> no<br><input checked="" type="radio"/> si                                                                                                                                                                                                                      |

|                                            |                                                                                                                                                                                      |
|--------------------------------------------|--------------------------------------------------------------------------------------------------------------------------------------------------------------------------------------|
| Diabetes gestacional con insulina          | <input checked="" type="radio"/> no<br><input type="radio"/> si                                                                                                                      |
| Diabetes gestacional con dieta y ejercicio | <input type="radio"/> no<br><input checked="" type="radio"/> si                                                                                                                      |
| Percentil fetos previos                    | <input type="radio"/> Nada<br><input type="radio"/> percentil menor de 10<br><input checked="" type="radio"/> percentil entre 10 y 90<br><input type="radio"/> percentil mayor de 90 |
| Exfumadora                                 | <input type="radio"/> Nada<br><input type="radio"/> menos de 5 años<br><input type="radio"/> 5 a 10 años<br><input type="radio"/> mayor o igual a 10 años                            |
| Hábito tabáquico                           | <input checked="" type="radio"/> no<br><input type="radio"/> si                                                                                                                      |
| fumadora                                   | [*DATA REMOVED*]                                                                                                                                                                     |
| Consumo otros tóxicos                      | <input checked="" type="radio"/> no<br><input type="radio"/> si                                                                                                                      |
| Hb 1T                                      | [*DATA REMOVED*]                                                                                                                                                                     |
| Htc 1T                                     | [*DATA REMOVED*]                                                                                                                                                                     |
| Hb 2T                                      | [*DATA REMOVED*]                                                                                                                                                                     |
| HTC 2T                                     | [*DATA REMOVED*]                                                                                                                                                                     |
| Hb 3T                                      | [*DATA REMOVED*]                                                                                                                                                                     |
| HTC 3T                                     | [*DATA REMOVED*]                                                                                                                                                                     |
| Suplemento FE oral                         | <input checked="" type="radio"/> si<br><input type="radio"/> no                                                                                                                      |
| Suplemento fe iv                           | <input type="radio"/> si<br><input checked="" type="radio"/> no                                                                                                                      |
| Transfusión                                | <input checked="" type="radio"/> no<br><input type="radio"/> si                                                                                                                      |
| Solicitada Vit D                           | <input checked="" type="radio"/> no<br><input type="radio"/> si                                                                                                                      |
| Deficit vit D                              | <input type="radio"/> no<br><input type="radio"/> si                                                                                                                                 |
| Suplemento vit D                           | <input type="radio"/> si<br><input type="radio"/> no                                                                                                                                 |

|                       |                                                                                                                                                                                                                                                                                                                                                                                                              |
|-----------------------|--------------------------------------------------------------------------------------------------------------------------------------------------------------------------------------------------------------------------------------------------------------------------------------------------------------------------------------------------------------------------------------------------------------|
| Dieta, cuestionario   | <input checked="" type="radio"/> sí<br><input type="radio"/> no                                                                                                                                                                                                                                                                                                                                              |
| Leche entera          | <input type="radio"/> Nunca o menos 1 vez al mes<br><input type="radio"/> 1 a 3 veces mes<br><input type="radio"/> 1 vez semana<br><input type="radio"/> 2 a 4 veces semana<br><input type="radio"/> 5 a 6 veces semana<br><input checked="" type="radio"/> 1 vez al día<br><input type="radio"/> 2 a 3 veces al día<br><input type="radio"/> 5 a 6 veces al día<br><input type="radio"/> más 6 veces al día |
| Leche semidesnatada   | <input type="radio"/> Nunca o menos 1 vez al mes<br><input checked="" type="radio"/> 1 a 3 veces mes<br><input type="radio"/> 1 vez semana<br><input type="radio"/> 2 a 4 veces semana<br><input type="radio"/> 5 a 6 veces semana<br><input type="radio"/> 1 vez al día<br><input type="radio"/> 2 a 3 veces al día<br><input type="radio"/> 5 a 6 veces al día<br><input type="radio"/> mas 6 veces al día |
| Leche desnatada       | <input type="radio"/> Nunca o menos 1 vez al mes<br><input checked="" type="radio"/> 1 a 3 veces mes<br><input type="radio"/> 1 vez semana<br><input type="radio"/> 2 a 4 veces semana<br><input type="radio"/> 5 a 6 veces semana<br><input type="radio"/> 1 vez al día<br><input type="radio"/> 2 a 3 veces al día<br><input type="radio"/> 5 a 6 veces al día<br><input type="radio"/> más 6 veces al día |
| Leche condensada      | <input checked="" type="radio"/> Nunca o menos 1 vez al mes<br><input type="radio"/> 1 a 3 veces mes<br><input type="radio"/> 1 vez semana<br><input type="radio"/> 2 a 4 veces semana<br><input type="radio"/> 5 a 6 veces semana<br><input type="radio"/> 1 vez al día<br><input type="radio"/> 2 a 3 veces al día<br><input type="radio"/> 5 a 6 veces al día<br><input type="radio"/> más 6 veces al día |
| nata o crema de leche | <input checked="" type="radio"/> Nunca o menos 1 vez al mes<br><input type="radio"/> 1 a 3 veces mes<br><input type="radio"/> 1 vez semana<br><input type="radio"/> 2 a 4 veces semana<br><input type="radio"/> 5 a 6 veces semana<br><input type="radio"/> 1 vez al día<br><input type="radio"/> 2 a 3 veces al día<br><input type="radio"/> 5 a 6 veces al día<br><input type="radio"/> más 6 veces al día |

---

Yogurt Entero

- ☐ Nunca o menos 1 vez al mes  
☒ 1 a 3 veces mes  
☐ 1 vez semana  
☐ 2 a 4 veces semana  
☐ 5 a 6 veces semana  
☐ 1 vez al día  
☐ 2 a 3 veces al día  
☐ 5 a 6 veces al día  
☐ más 6 veces al día

---

Yogurt desnatado

- ☒ Nunca o menos 1 vez al mes  
☐ 1 a 3 veces mes  
☐ 1 vez semana  
☐ 2 a 4 veces semana  
☐ 5 a 6 veces semana  
☐ 1 vez al día  
☐ 2 a 3 veces al día  
☐ 5 a 6 veces al día  
☐ más 6 veces al día

---

100g requesón o queso blando o queso fresco

- ☐ Nunca o menos 1 vez al mes  
☐ 1 a 3 veces mes  
☐ 1 vez semana  
☐ 2 a 4 veces semana  
☐ 5 a 6 veces semana  
☒ 1 vez al día  
☐ 2 a 3 veces al día  
☐ 5 a 6 veces al día  
☐ más 6 veces al día

---

queso curado o semicurado o cremoso

- ☐ Nunca o menos 1 vez al mes  
☒ 1 a 3 veces mes  
☐ 1 vez semana  
☐ 2 a 4 veces semana  
☐ 5 a 6 veces semana  
☐ 1 vez al día  
☐ 2 a 3 veces al día  
☐ 5 a 6 veces al día  
☐ más 6 veces al día

---

natillas flan pudding

- ☐ Nunca o menos 1 vez al mes  
☐ 1 a 3 veces mes  
☒ 1 vez semana  
☐ 2 a 4 veces semana  
☐ 5 a 6 veces semana  
☐ 1 vez al día  
☐ 2 a 3 veces al día  
☐ 5 a 6 veces al día  
☐ más 6 veces al día

---

Helado

- ☐ Nunca o menos 1 vez al mes  
☐ 1 a 3 veces mes  
☐ 1 vez semana  
☒ 2 a 4 veces semana  
☐ 5 a 6 veces semana  
☐ 1 vez al día  
☐ 2 a 3 veces al día  
☐ 5 a 6 veces al día  
☐ más 6 veces al día

|                                      |                                                                                                                                                                                                                                                                                                                                                                                                              |
|--------------------------------------|--------------------------------------------------------------------------------------------------------------------------------------------------------------------------------------------------------------------------------------------------------------------------------------------------------------------------------------------------------------------------------------------------------------|
| huevo                                | <input type="radio"/> Nunca o menos 1 vez al mes<br><input checked="" type="radio"/> 1 a 3 veces mes<br><input type="radio"/> 1 vez semana<br><input type="radio"/> 2 a 4 veces semana<br><input type="radio"/> 5 a 6 veces semana<br><input type="radio"/> 1 vez al día<br><input type="radio"/> 2 a 3 veces al día<br><input type="radio"/> 5 a 6 veces al día<br><input type="radio"/> más 6 veces al día |
| Pollo con piel                       | <input type="radio"/> Nunca o menos 1 vez al mes<br><input type="radio"/> 1 a 3 veces mes<br><input type="radio"/> 1 vez semana<br><input checked="" type="radio"/> 2 a 4 veces semana<br><input type="radio"/> 5 a 6 veces semana<br><input type="radio"/> 1 vez al día<br><input type="radio"/> 2 a 3 veces al día<br><input type="radio"/> 5 a 6 veces al día<br><input type="radio"/> más 6 veces al día |
| pollo sin piel                       | <input type="radio"/> Nunca o menos 1 vez al mes<br><input type="radio"/> 1 a 3 veces mes<br><input type="radio"/> 1 vez semana<br><input checked="" type="radio"/> 2 a 4 veces semana<br><input type="radio"/> 5 a 6 veces semana<br><input type="radio"/> 1 vez al día<br><input type="radio"/> 2 a 3 veces al día<br><input type="radio"/> 5 a 6 veces al día<br><input type="radio"/> más 6 veces al día |
| Ternera o cerdo o cordero            | <input checked="" type="radio"/> Nunca o menos 1 vez al mes<br><input type="radio"/> 1 a 3 veces mes<br><input type="radio"/> 1 vez semana<br><input type="radio"/> 2 a 4 veces semana<br><input type="radio"/> 5 a 6 veces semana<br><input type="radio"/> 1 vez al día<br><input type="radio"/> 2 a 3 veces al día<br><input type="radio"/> 5 a 6 veces al día<br><input type="radio"/> más 6 veces al día |
| carne caza: Conejo o codorniz o pato | <input checked="" type="radio"/> Nunca o menos 1 vez al mes<br><input type="radio"/> 1 a 3 veces mes<br><input type="radio"/> 1 vez semana<br><input type="radio"/> 2 a 4 veces semana<br><input type="radio"/> 5 a 6 veces semana<br><input type="radio"/> 1 vez al día<br><input type="radio"/> 2 a 3 veces al día<br><input type="radio"/> 5 a 6 veces al día<br><input type="radio"/> más 6 veces al día |
| Hígado de ternera o cerdo o pollo    | <input checked="" type="radio"/> Nunca o menos 1 vez al mes<br><input type="radio"/> 1 a 3 veces mes<br><input type="radio"/> 1 vez semana<br><input type="radio"/> 2 a 4 veces semana<br><input type="radio"/> 5 a 6 veces semana<br><input type="radio"/> 1 vez al día<br><input type="radio"/> 2 a 3 veces al día<br><input type="radio"/> 5 a 6 veces al día<br><input type="radio"/> más 6 veces al día |

---

Vísceras

- ☐ Nunca o menos 1 vez al mes  
☐ 1 a 3 veces mes  
☐ 1 vez semana  
☐ 2 a 4 veces semana  
☐ 5 a 6 veces semana  
☒ 1 vez al día  
☐ 2 a 3 veces al día  
☐ 5 a 6 veces al día  
☐ más 6 veces al día

---

Embutido

- ☐ Nunca o menos 1 vez al mes  
☒ 1 a 3 veces mes  
☐ 1 vez semana  
☐ 2 a 4 veces semana  
☐ 5 a 6 veces semana  
☐ 1 vez al día  
☐ 2 a 3 veces al día  
☐ 5 a 6 veces al día  
☐ más 6 veces al día

---

Salchicha o similar

- ☐ Nunca o menos 1 vez al mes  
☒ 1 a 3 veces mes  
☐ 1 vez semana  
☐ 2 a 4 veces semana  
☐ 5 a 6 veces semana  
☐ 1 vez al día  
☐ 2 a 3 veces al día  
☐ 5 a 6 veces al día  
☐ más 6 veces al día

---

Pate o foiegras

- ☐ Nunca o menos 1 vez al mes  
☐ 1 a 3 veces mes  
☒ 1 vez semana  
☐ 2 a 4 veces semana  
☐ 5 a 6 veces semana  
☐ 1 vez al día  
☐ 2 a 3 veces al día  
☐ 5 a 6 veces al día  
☐ más 6 veces al día

---

Hamburguesa

- ☐ Nunca o menos 1 vez al mes  
☒ 1 a 3 veces mes  
☐ 1 vez semana  
☐ 2 a 4 veces semana  
☐ 5 a 6 veces semana  
☐ 1 vez al día  
☐ 2 a 3 veces al día  
☐ 5 a 6 veces al día  
☐ más 6 veces al día

---

tocino o bacon

- ☐ Nunca o menos 1 vez al mes  
☐ 1 a 3 veces mes  
☒ 1 vez semana  
☐ 2 a 4 veces semana  
☐ 5 a 6 veces semana  
☐ 1 vez al día  
☐ 2 a 3 veces al día  
☐ 5 a 6 veces al día  
☐ más 6 veces al día

|                        |                                                                                                                                                                                                                                                                                                                                                                                                              |
|------------------------|--------------------------------------------------------------------------------------------------------------------------------------------------------------------------------------------------------------------------------------------------------------------------------------------------------------------------------------------------------------------------------------------------------------|
| Pescado frito          | <input checked="" type="radio"/> Nunca o menos 1 vez al mes<br><input type="radio"/> 1 a 3 veces mes<br><input type="radio"/> 1 vez semana<br><input type="radio"/> 2 a 4 veces semana<br><input type="radio"/> 5 a 6 veces semana<br><input type="radio"/> 1 vez al día<br><input type="radio"/> 2 a 3 veces al día<br><input type="radio"/> 5 a 6 veces al día<br><input type="radio"/> más 6 veces al día |
| pescado hervido blanco | <input type="radio"/> Nunca o menos 1 vez al mes<br><input checked="" type="radio"/> 1 a 3 veces mes<br><input type="radio"/> 1 vez semana<br><input type="radio"/> 2 a 4 veces semana<br><input type="radio"/> 5 a 6 veces semana<br><input type="radio"/> 1 vez al día<br><input type="radio"/> 2 a 3 veces al día<br><input type="radio"/> 5 a 6 veces al día<br><input type="radio"/> más 6 veces al día |
| pescado hervido azul   | <input checked="" type="radio"/> Nunca o menos 1 vez al mes<br><input type="radio"/> 1 a 3 veces mes<br><input type="radio"/> 1 vez semana<br><input type="radio"/> 2 a 4 veces semana<br><input type="radio"/> 5 a 6 veces semana<br><input type="radio"/> 1 vez al día<br><input type="radio"/> 2 a 3 veces al día<br><input type="radio"/> 5 a 6 veces al día<br><input type="radio"/> más 6 veces al día |
| otros pescado azul     | <input type="radio"/> Nunca o menos 1 vez al mes<br><input type="radio"/> 1 a 3 veces mes<br><input type="radio"/> 1 vez semana<br><input checked="" type="radio"/> 2 a 4 veces semana<br><input type="radio"/> 5 a 6 veces semana<br><input type="radio"/> 1 vez al día<br><input type="radio"/> 2 a 3 veces al día<br><input type="radio"/> 5 a 6 veces al día<br><input type="radio"/> más 6 veces al día |
| atun conserva          | <input checked="" type="radio"/> Nunca o menos 1 vez al mes<br><input type="radio"/> 1 a 3 veces mes<br><input type="radio"/> 1 vez semana<br><input type="radio"/> 2 a 4 veces semana<br><input type="radio"/> 5 a 6 veces semana<br><input type="radio"/> 1 vez al día<br><input type="radio"/> 2 a 3 veces al día<br><input type="radio"/> 5 a 6 veces al día<br><input type="radio"/> más 6 veces al día |
| sardina conserva       | <input checked="" type="radio"/> Nunca o menos 1 vez al mes<br><input type="radio"/> 1 a 3 veces mes<br><input type="radio"/> 1 vez semana<br><input type="radio"/> 2 a 4 veces semana<br><input type="radio"/> 5 a 6 veces semana<br><input type="radio"/> 1 vez al día<br><input type="radio"/> 2 a 3 veces al día<br><input type="radio"/> 5 a 6 veces al día<br><input type="radio"/> más 6 veces al día |

|                                         |                                                                                                                                                                                                                                                                                                                                                                                                              |
|-----------------------------------------|--------------------------------------------------------------------------------------------------------------------------------------------------------------------------------------------------------------------------------------------------------------------------------------------------------------------------------------------------------------------------------------------------------------|
| pescado ahumado                         | <input checked="" type="radio"/> Nunca o menos 1 vez al mes<br><input type="radio"/> 1 a 3 veces mes<br><input type="radio"/> 1 vez semana<br><input type="radio"/> 2 a 4 veces semana<br><input type="radio"/> 5 a 6 veces semana<br><input type="radio"/> 1 vez al día<br><input type="radio"/> 2 a 3 veces al día<br><input type="radio"/> 5 a 6 veces al día<br><input type="radio"/> más 6 veces al día |
| almejas o mejillones o ostras unos 100g | <input checked="" type="radio"/> Nunca o menos 1 vez al mes<br><input type="radio"/> 1 a 3 veces mes<br><input type="radio"/> 1 vez semana<br><input type="radio"/> 2 a 4 veces semana<br><input type="radio"/> 5 a 6 veces semana<br><input type="radio"/> 1 vez al día<br><input type="radio"/> 2 a 3 veces al día<br><input type="radio"/> 5 a 6 veces al día<br><input type="radio"/> más 6 veces al día |
| calamar o chipiron o sepia unos 100g    | <input type="radio"/> Nunca o menos 1 vez al mes<br><input checked="" type="radio"/> 1 a 3 veces mes<br><input type="radio"/> 1 vez semana<br><input type="radio"/> 2 a 4 veces semana<br><input type="radio"/> 5 a 6 veces semana<br><input type="radio"/> 1 vez al día<br><input type="radio"/> 2 a 3 veces al día<br><input type="radio"/> 5 a 6 veces al día<br><input type="radio"/> más 6 veces al día |
| marisco unos 100g                       | <input checked="" type="radio"/> Nunca o menos 1 vez al mes<br><input type="radio"/> 1 a 3 veces mes<br><input type="radio"/> 1 vez semana<br><input type="radio"/> 2 a 4 veces semana<br><input type="radio"/> 5 a 6 veces semana<br><input type="radio"/> 1 vez al día<br><input type="radio"/> 2 a 3 veces al día<br><input type="radio"/> 5 a 6 veces al día<br><input type="radio"/> más 6 veces al día |
| Espinacas o acelgas cocinadas           | <input checked="" type="radio"/> Nunca o menos 1 vez al mes<br><input type="radio"/> 1 a 3 veces mes<br><input type="radio"/> 1 vez semana<br><input type="radio"/> 2 a 4 veces semana<br><input type="radio"/> 5 a 6 veces semana<br><input type="radio"/> 1 vez al día<br><input type="radio"/> 2 a 3 veces al día<br><input type="radio"/> 5 a 6 veces al día<br><input type="radio"/> más 6 veces al día |
| Col o coliflor o brocoli cocinado       | <input type="radio"/> Nunca o menos 1 vez al mes<br><input checked="" type="radio"/> 1 a 3 veces mes<br><input type="radio"/> 1 vez semana<br><input type="radio"/> 2 a 4 veces semana<br><input type="radio"/> 5 a 6 veces semana<br><input type="radio"/> 1 vez al día<br><input type="radio"/> 2 a 3 veces al día<br><input type="radio"/> 5 a 6 veces al día<br><input type="radio"/> más 6 veces al día |



---

Lechuga o endivia o escarola

- ☐ Nunca o menos 1 vez al mes  
☐ 1 a 3 veces mes  
☐ 1 vez semana  
☐ 2 a 4 veces semana  
☐ 5 a 6 veces semana  
☐ 1 vez al día  
☒ 2 a 3 veces al día  
☐ 5 a 6 veces al día  
☐ más 6 veces al día

---

tomate ensalada

- ☐ Nunca o menos 1 vez al mes  
☐ 1 a 3 veces mes  
☐ 1 vez semana  
☐ 2 a 4 veces semana  
☐ 5 a 6 veces semana  
☐ 1 vez al día  
☒ 2 a 3 veces al día  
☐ 5 a 6 veces al día  
☐ más 6 veces al día

---

cebolla

- ☐ Nunca o menos 1 vez al mes  
☐ 1 a 3 veces mes  
☐ 1 vez semana  
☐ 2 a 4 veces semana  
☒ 5 a 6 veces semana  
☐ 1 vez al día  
☐ 2 a 3 veces al día  
☐ 5 a 6 veces al día  
☐ más 6 veces al día

---

Zanahoria o calabaza

- ☐ Nunca o menos 1 vez al mes  
☐ 1 a 3 veces mes  
☒ 1 vez semana  
☐ 2 a 4 veces semana  
☐ 5 a 6 veces semana  
☐ 1 vez al día  
☐ 2 a 3 veces al día  
☐ 5 a 6 veces al día  
☐ más 6 veces al día

---

Judías verdes

- ☐ Nunca o menos 1 vez al mes  
☐ 1 a 3 veces mes  
☒ 1 vez semana  
☐ 2 a 4 veces semana  
☐ 5 a 6 veces semana  
☐ 1 vez al día  
☐ 2 a 3 veces al día  
☐ 5 a 6 veces al día  
☐ más 6 veces al día

---

Berenjena o calabacin o pepino

- ☐ Nunca o menos 1 vez al mes  
☐ 1 a 3 veces mes  
☐ 1 vez semana  
☒ 2 a 4 veces semana  
☐ 5 a 6 veces semana  
☐ 1 vez al día  
☐ 2 a 3 veces al día  
☐ 5 a 6 veces al día  
☐ más 6 veces al día

---

|          |                                                                                                                                                                                                                                                                                                                                                                                                              |
|----------|--------------------------------------------------------------------------------------------------------------------------------------------------------------------------------------------------------------------------------------------------------------------------------------------------------------------------------------------------------------------------------------------------------------|
| pimiento | <input type="radio"/> Nunca o menos 1 vez al mes<br><input type="radio"/> 1 a 3 veces mes<br><input type="radio"/> 1 vez semana<br><input checked="" type="radio"/> 2 a 4 veces semana<br><input type="radio"/> 5 a 6 veces semana<br><input type="radio"/> 1 vez al día<br><input type="radio"/> 2 a 3 veces al día<br><input type="radio"/> 5 a 6 veces al día<br><input type="radio"/> más 6 veces al día |
|----------|--------------------------------------------------------------------------------------------------------------------------------------------------------------------------------------------------------------------------------------------------------------------------------------------------------------------------------------------------------------------------------------------------------------|

---

|           |                                                                                                                                                                                                                                                                                                                                                                                                              |
|-----------|--------------------------------------------------------------------------------------------------------------------------------------------------------------------------------------------------------------------------------------------------------------------------------------------------------------------------------------------------------------------------------------------------------------|
| alcachofa | <input type="radio"/> Nunca o menos 1 vez al mes<br><input checked="" type="radio"/> 1 a 3 veces mes<br><input type="radio"/> 1 vez semana<br><input type="radio"/> 2 a 4 veces semana<br><input type="radio"/> 5 a 6 veces semana<br><input type="radio"/> 1 vez al día<br><input type="radio"/> 2 a 3 veces al día<br><input type="radio"/> 5 a 6 veces al día<br><input type="radio"/> más 6 veces al día |
|-----------|--------------------------------------------------------------------------------------------------------------------------------------------------------------------------------------------------------------------------------------------------------------------------------------------------------------------------------------------------------------------------------------------------------------|

---

|            |                                                                                                                                                                                                                                                                                                                                                                                                              |
|------------|--------------------------------------------------------------------------------------------------------------------------------------------------------------------------------------------------------------------------------------------------------------------------------------------------------------------------------------------------------------------------------------------------------------|
| espárragos | <input checked="" type="radio"/> Nunca o menos 1 vez al mes<br><input type="radio"/> 1 a 3 veces mes<br><input type="radio"/> 1 vez semana<br><input type="radio"/> 2 a 4 veces semana<br><input type="radio"/> 5 a 6 veces semana<br><input type="radio"/> 1 vez al día<br><input type="radio"/> 2 a 3 veces al día<br><input type="radio"/> 5 a 6 veces al día<br><input type="radio"/> más 6 veces al día |
|------------|--------------------------------------------------------------------------------------------------------------------------------------------------------------------------------------------------------------------------------------------------------------------------------------------------------------------------------------------------------------------------------------------------------------|

---

|              |                                                                                                                                                                                                                                                                                                                                                                                                              |
|--------------|--------------------------------------------------------------------------------------------------------------------------------------------------------------------------------------------------------------------------------------------------------------------------------------------------------------------------------------------------------------------------------------------------------------|
| maíz hervido | <input type="radio"/> Nunca o menos 1 vez al mes<br><input checked="" type="radio"/> 1 a 3 veces mes<br><input type="radio"/> 1 vez semana<br><input type="radio"/> 2 a 4 veces semana<br><input type="radio"/> 5 a 6 veces semana<br><input type="radio"/> 1 vez al día<br><input type="radio"/> 2 a 3 veces al día<br><input type="radio"/> 5 a 6 veces al día<br><input type="radio"/> más 6 veces al día |
|--------------|--------------------------------------------------------------------------------------------------------------------------------------------------------------------------------------------------------------------------------------------------------------------------------------------------------------------------------------------------------------------------------------------------------------|

---

|           |                                                                                                                                                                                                                                                                                                                                                                                                              |
|-----------|--------------------------------------------------------------------------------------------------------------------------------------------------------------------------------------------------------------------------------------------------------------------------------------------------------------------------------------------------------------------------------------------------------------|
| legumbres | <input type="radio"/> Nunca o menos 1 vez al mes<br><input type="radio"/> 1 a 3 veces mes<br><input checked="" type="radio"/> 1 vez semana<br><input type="radio"/> 2 a 4 veces semana<br><input type="radio"/> 5 a 6 veces semana<br><input type="radio"/> 1 vez al día<br><input type="radio"/> 2 a 3 veces al día<br><input type="radio"/> 5 a 6 veces al día<br><input type="radio"/> más 6 veces al día |
|-----------|--------------------------------------------------------------------------------------------------------------------------------------------------------------------------------------------------------------------------------------------------------------------------------------------------------------------------------------------------------------------------------------------------------------|

---

|                       |                                                                                                                                                                                                                                                                                                                                                                                                              |
|-----------------------|--------------------------------------------------------------------------------------------------------------------------------------------------------------------------------------------------------------------------------------------------------------------------------------------------------------------------------------------------------------------------------------------------------------|
| naranjas o mandarinas | <input type="radio"/> Nunca o menos 1 vez al mes<br><input checked="" type="radio"/> 1 a 3 veces mes<br><input type="radio"/> 1 vez semana<br><input type="radio"/> 2 a 4 veces semana<br><input type="radio"/> 5 a 6 veces semana<br><input type="radio"/> 1 vez al día<br><input type="radio"/> 2 a 3 veces al día<br><input type="radio"/> 5 a 6 veces al día<br><input type="radio"/> más 6 veces al día |
|-----------------------|--------------------------------------------------------------------------------------------------------------------------------------------------------------------------------------------------------------------------------------------------------------------------------------------------------------------------------------------------------------------------------------------------------------|

---

---

zumو natural fruta

- ☐ Nunca o menos 1 vez al mes  
☒ 1 a 3 veces mes  
☐ 1 vez semana  
☐ 2 a 4 veces semana  
☐ 5 a 6 veces semana  
☐ 1 vez al día  
☐ 2 a 3 veces al día  
☐ 5 a 6 veces al día  
☐ más 6 veces al día

---

platano

- ☐ Nunca o menos 1 vez al mes  
☐ 1 a 3 veces mes  
☐ 1 vez semana  
☒ 2 a 4 veces semana  
☐ 5 a 6 veces semana  
☐ 1 vez al día  
☐ 2 a 3 veces al día  
☐ 5 a 6 veces al día  
☐ más 6 veces al día

---

manzana o pera

- ☐ Nunca o menos 1 vez al mes  
☐ 1 a 3 veces mes  
☐ 1 vez semana  
☐ 2 a 4 veces semana  
☒ 5 a 6 veces semana  
☐ 1 vez al día  
☐ 2 a 3 veces al día  
☐ 5 a 6 veces al día  
☐ más 6 veces al día

---

melocotón o nectarina

- ☒ Nunca o menos 1 vez al mes  
☐ 1 a 3 veces mes  
☐ 1 vez semana  
☐ 2 a 4 veces semana  
☐ 5 a 6 veces semana  
☐ 1 vez al día  
☐ 2 a 3 veces al día  
☐ 5 a 6 veces al día  
☐ más 6 veces al día

---

sandia o melon

- ☐ Nunca o menos 1 vez al mes  
☐ 1 a 3 veces mes  
☐ 1 vez semana  
☐ 2 a 4 veces semana  
☒ 5 a 6 veces semana  
☐ 1 vez al día  
☐ 2 a 3 veces al día  
☐ 5 a 6 veces al día  
☐ más 6 veces al día

---

uva

- ☐ Nunca o menos 1 vez al mes  
☐ 1 a 3 veces mes  
☐ 1 vez semana  
☒ 2 a 4 veces semana  
☐ 5 a 6 veces semana  
☐ 1 vez al día  
☐ 2 a 3 veces al día  
☐ 5 a 6 veces al día  
☐ más 6 veces al día

---

bruna o ciruela

- ☒ Nunca o menos 1 vez al mes  
☐ 1 a 3 veces mes  
☐ 1 vez semana  
☐ 2 a 4 veces semana  
☐ 5 a 6 veces semana  
☐ 1 vez al día  
☐ 2 a 3 veces al día  
☐ 5 a 6 veces al día  
☐ más 6 veces al día

---

kiwi

- ☐ Nunca o menos 1 vez al mes  
☒ 1 a 3 veces mes  
☐ 1 vez semana  
☐ 2 a 4 veces semana  
☐ 5 a 6 veces semana  
☐ 1 vez al día  
☐ 2 a 3 veces al día  
☐ 5 a 6 veces al día  
☐ más 6 veces al día

---

aceituna

- ☐ Nunca o menos 1 vez al mes  
☒ 1 a 3 veces mes  
☐ 1 vez semana  
☐ 2 a 4 veces semana  
☐ 5 a 6 veces semana  
☐ 1 vez al día  
☐ 2 a 3 veces al día  
☐ 5 a 6 veces al día  
☐ más 6 veces al día

---

frutos secos

- ☐ Nunca o menos 1 vez al mes  
☐ 1 a 3 veces mes  
☐ 1 vez semana  
☒ 2 a 4 veces semana  
☐ 5 a 6 veces semana  
☐ 1 vez al día  
☐ 2 a 3 veces al día  
☐ 5 a 6 veces al día  
☐ más 6 veces al día

---

pan blanco

- ☒ Nunca o menos 1 vez al mes  
☐ 1 a 3 veces mes  
☐ 1 vez semana  
☐ 2 a 4 veces semana  
☐ 5 a 6 veces semana  
☐ 1 vez al día  
☐ 2 a 3 veces al día  
☐ 5 a 6 veces al día  
☐ más 6 veces al día

---

pan integral

- ☐ Nunca o menos 1 vez al mes  
☐ 1 a 3 veces mes  
☐ 1 vez semana  
☒ 2 a 4 veces semana  
☐ 5 a 6 veces semana  
☐ 1 vez al día  
☐ 2 a 3 veces al día  
☐ 5 a 6 veces al día  
☐ más 6 veces al día

---

|                   |                                                                                                                                                                                                                                                                                                                                                                                                              |
|-------------------|--------------------------------------------------------------------------------------------------------------------------------------------------------------------------------------------------------------------------------------------------------------------------------------------------------------------------------------------------------------------------------------------------------------|
| cereales desayuno | <input type="radio"/> Nunca o menos 1 vez al mes<br><input type="radio"/> 1 a 3 veces mes<br><input checked="" type="radio"/> 1 vez semana<br><input type="radio"/> 2 a 4 veces semana<br><input type="radio"/> 5 a 6 veces semana<br><input type="radio"/> 1 vez al día<br><input type="radio"/> 2 a 3 veces al día<br><input type="radio"/> 5 a 6 veces al día<br><input type="radio"/> más 6 veces al día |
|-------------------|--------------------------------------------------------------------------------------------------------------------------------------------------------------------------------------------------------------------------------------------------------------------------------------------------------------------------------------------------------------------------------------------------------------|

---

|                |                                                                                                                                                                                                                                                                                                                                                                                                              |
|----------------|--------------------------------------------------------------------------------------------------------------------------------------------------------------------------------------------------------------------------------------------------------------------------------------------------------------------------------------------------------------------------------------------------------------|
| patatas fritas | <input type="radio"/> Nunca o menos 1 vez al mes<br><input type="radio"/> 1 a 3 veces mes<br><input checked="" type="radio"/> 1 vez semana<br><input type="radio"/> 2 a 4 veces semana<br><input type="radio"/> 5 a 6 veces semana<br><input type="radio"/> 1 vez al día<br><input type="radio"/> 2 a 3 veces al día<br><input type="radio"/> 5 a 6 veces al día<br><input type="radio"/> más 6 veces al día |
|----------------|--------------------------------------------------------------------------------------------------------------------------------------------------------------------------------------------------------------------------------------------------------------------------------------------------------------------------------------------------------------------------------------------------------------|

---

|                          |                                                                                                                                                                                                                                                                                                                                                                                                              |
|--------------------------|--------------------------------------------------------------------------------------------------------------------------------------------------------------------------------------------------------------------------------------------------------------------------------------------------------------------------------------------------------------------------------------------------------------|
| patatas cocidas o asadas | <input type="radio"/> Nunca o menos 1 vez al mes<br><input type="radio"/> 1 a 3 veces mes<br><input type="radio"/> 1 vez semana<br><input checked="" type="radio"/> 2 a 4 veces semana<br><input type="radio"/> 5 a 6 veces semana<br><input type="radio"/> 1 vez al día<br><input type="radio"/> 2 a 3 veces al día<br><input type="radio"/> 5 a 6 veces al día<br><input type="radio"/> más 6 veces al día |
|--------------------------|--------------------------------------------------------------------------------------------------------------------------------------------------------------------------------------------------------------------------------------------------------------------------------------------------------------------------------------------------------------------------------------------------------------|

---

|             |                                                                                                                                                                                                                                                                                                                                                                                                              |
|-------------|--------------------------------------------------------------------------------------------------------------------------------------------------------------------------------------------------------------------------------------------------------------------------------------------------------------------------------------------------------------------------------------------------------------|
| bolsa papas | <input type="radio"/> Nunca o menos 1 vez al mes<br><input type="radio"/> 1 a 3 veces mes<br><input checked="" type="radio"/> 1 vez semana<br><input type="radio"/> 2 a 4 veces semana<br><input type="radio"/> 5 a 6 veces semana<br><input type="radio"/> 1 vez al día<br><input type="radio"/> 2 a 3 veces al día<br><input type="radio"/> 5 a 6 veces al día<br><input type="radio"/> más 6 veces al día |
|-------------|--------------------------------------------------------------------------------------------------------------------------------------------------------------------------------------------------------------------------------------------------------------------------------------------------------------------------------------------------------------------------------------------------------------|

---

|                |                                                                                                                                                                                                                                                                                                                                                                                                              |
|----------------|--------------------------------------------------------------------------------------------------------------------------------------------------------------------------------------------------------------------------------------------------------------------------------------------------------------------------------------------------------------------------------------------------------------|
| arroz cocinado | <input type="radio"/> Nunca o menos 1 vez al mes<br><input type="radio"/> 1 a 3 veces mes<br><input type="radio"/> 1 vez semana<br><input checked="" type="radio"/> 2 a 4 veces semana<br><input type="radio"/> 5 a 6 veces semana<br><input type="radio"/> 1 vez al día<br><input type="radio"/> 2 a 3 veces al día<br><input type="radio"/> 5 a 6 veces al día<br><input type="radio"/> más 6 veces al día |
|----------------|--------------------------------------------------------------------------------------------------------------------------------------------------------------------------------------------------------------------------------------------------------------------------------------------------------------------------------------------------------------------------------------------------------------|

---

|       |                                                                                                                                                                                                                                                                                                                                                                                                              |
|-------|--------------------------------------------------------------------------------------------------------------------------------------------------------------------------------------------------------------------------------------------------------------------------------------------------------------------------------------------------------------------------------------------------------------|
| pasta | <input type="radio"/> Nunca o menos 1 vez al mes<br><input type="radio"/> 1 a 3 veces mes<br><input type="radio"/> 1 vez semana<br><input checked="" type="radio"/> 2 a 4 veces semana<br><input type="radio"/> 5 a 6 veces semana<br><input type="radio"/> 1 vez al día<br><input type="radio"/> 2 a 3 veces al día<br><input type="radio"/> 5 a 6 veces al día<br><input type="radio"/> más 6 veces al día |
|-------|--------------------------------------------------------------------------------------------------------------------------------------------------------------------------------------------------------------------------------------------------------------------------------------------------------------------------------------------------------------------------------------------------------------|

---

|                     |                                                                                                                                                                                                                                                                                                                                                                                                              |
|---------------------|--------------------------------------------------------------------------------------------------------------------------------------------------------------------------------------------------------------------------------------------------------------------------------------------------------------------------------------------------------------------------------------------------------------|
| pizza               | <input type="radio"/> Nunca o menos 1 vez al mes<br><input type="radio"/> 1 a 3 veces mes<br><input checked="" type="radio"/> 1 vez semana<br><input type="radio"/> 2 a 4 veces semana<br><input type="radio"/> 5 a 6 veces semana<br><input type="radio"/> 1 vez al día<br><input type="radio"/> 2 a 3 veces al día<br><input type="radio"/> 5 a 6 veces al día<br><input type="radio"/> más 6 veces al día |
| aceite oliva        | <input type="radio"/> Nunca o menos 1 vez al mes<br><input type="radio"/> 1 a 3 veces mes<br><input type="radio"/> 1 vez semana<br><input type="radio"/> 2 a 4 veces semana<br><input type="radio"/> 5 a 6 veces semana<br><input type="radio"/> 1 vez al día<br><input checked="" type="radio"/> 2 a 3 veces al día<br><input type="radio"/> 5 a 6 veces al día<br><input type="radio"/> más 6 veces al día |
| otros aceites       | <input type="radio"/> Nunca o menos 1 vez al mes<br><input type="radio"/> 1 a 3 veces mes<br><input checked="" type="radio"/> 1 vez semana<br><input type="radio"/> 2 a 4 veces semana<br><input type="radio"/> 5 a 6 veces semana<br><input type="radio"/> 1 vez al día<br><input type="radio"/> 2 a 3 veces al día<br><input type="radio"/> 5 a 6 veces al día<br><input type="radio"/> más 6 veces al día |
| margarina           | <input type="radio"/> Nunca o menos 1 vez al mes<br><input type="radio"/> 1 a 3 veces mes<br><input checked="" type="radio"/> 1 vez semana<br><input type="radio"/> 2 a 4 veces semana<br><input type="radio"/> 5 a 6 veces semana<br><input type="radio"/> 1 vez al día<br><input type="radio"/> 2 a 3 veces al día<br><input type="radio"/> 5 a 6 veces al día<br><input type="radio"/> más 6 veces al día |
| mantequilla         | <input type="radio"/> Nunca o menos 1 vez al mes<br><input checked="" type="radio"/> 1 a 3 veces mes<br><input type="radio"/> 1 vez semana<br><input type="radio"/> 2 a 4 veces semana<br><input type="radio"/> 5 a 6 veces semana<br><input type="radio"/> 1 vez al día<br><input type="radio"/> 2 a 3 veces al día<br><input type="radio"/> 5 a 6 veces al día<br><input type="radio"/> más 6 veces al día |
| galletas tipo maria | <input type="radio"/> Nunca o menos 1 vez al mes<br><input type="radio"/> 1 a 3 veces mes<br><input checked="" type="radio"/> 1 vez semana<br><input type="radio"/> 2 a 4 veces semana<br><input type="radio"/> 5 a 6 veces semana<br><input type="radio"/> 1 vez al día<br><input type="radio"/> 2 a 3 veces al día<br><input type="radio"/> 5 a 6 veces al día<br><input type="radio"/> más 6 veces al día |

|                           |                                                                                                                                                                                                                                                                                                                                                                                                              |
|---------------------------|--------------------------------------------------------------------------------------------------------------------------------------------------------------------------------------------------------------------------------------------------------------------------------------------------------------------------------------------------------------------------------------------------------------|
| galletas chocolate        | <input checked="" type="radio"/> Nunca o menos 1 vez al mes<br><input type="radio"/> 1 a 3 veces mes<br><input type="radio"/> 1 vez semana<br><input type="radio"/> 2 a 4 veces semana<br><input type="radio"/> 5 a 6 veces semana<br><input type="radio"/> 1 vez al día<br><input type="radio"/> 2 a 3 veces al día<br><input type="radio"/> 5 a 6 veces al día<br><input type="radio"/> más 6 veces al día |
| bollieria                 | <input checked="" type="radio"/> Nunca o menos 1 vez al mes<br><input type="radio"/> 1 a 3 veces mes<br><input type="radio"/> 1 vez semana<br><input type="radio"/> 2 a 4 veces semana<br><input type="radio"/> 5 a 6 veces semana<br><input type="radio"/> 1 vez al día<br><input type="radio"/> 2 a 3 veces al día<br><input type="radio"/> 5 a 6 veces al día<br><input type="radio"/> más 6 veces al día |
| chocolate o bombones      | <input checked="" type="radio"/> Nunca o menos 1 vez al mes<br><input type="radio"/> 1 a 3 veces mes<br><input type="radio"/> 1 vez semana<br><input type="radio"/> 2 a 4 veces semana<br><input type="radio"/> 5 a 6 veces semana<br><input type="radio"/> 1 vez al día<br><input type="radio"/> 2 a 3 veces al día<br><input type="radio"/> 5 a 6 veces al día<br><input type="radio"/> más 6 veces al día |
| chocolate polvo o colacao | <input type="radio"/> Nunca o menos 1 vez al mes<br><input checked="" type="radio"/> 1 a 3 veces mes<br><input type="radio"/> 1 vez semana<br><input type="radio"/> 2 a 4 veces semana<br><input type="radio"/> 5 a 6 veces semana<br><input type="radio"/> 1 vez al día<br><input type="radio"/> 2 a 3 veces al día<br><input type="radio"/> 5 a 6 veces al día<br><input type="radio"/> más 6 veces al día |
| vino tinto                | <input checked="" type="radio"/> Nunca o menos 1 vez al mes<br><input type="radio"/> 1 a 3 veces mes<br><input type="radio"/> 1 vez semana<br><input type="radio"/> 2 a 4 veces semana<br><input type="radio"/> 5 a 6 veces semana<br><input type="radio"/> 1 vez al día<br><input type="radio"/> 2 a 3 veces al día<br><input type="radio"/> 5 a 6 veces al día<br><input type="radio"/> más 6 veces al día |
| vino blanco               | <input checked="" type="radio"/> Nunca o menos 1 vez al mes<br><input type="radio"/> 1 a 3 veces mes<br><input type="radio"/> 1 vez semana<br><input type="radio"/> 2 a 4 veces semana<br><input type="radio"/> 5 a 6 veces semana<br><input type="radio"/> 1 vez al día<br><input type="radio"/> 2 a 3 veces al día<br><input type="radio"/> 5 a 6 veces al día<br><input type="radio"/> más 6 veces al día |

|                       |                                                                                                                                                                                                                                                                                                                                                                                                              |
|-----------------------|--------------------------------------------------------------------------------------------------------------------------------------------------------------------------------------------------------------------------------------------------------------------------------------------------------------------------------------------------------------------------------------------------------------|
| vino seco o vermut    | <input checked="" type="radio"/> Nunca o menos 1 vez al mes<br><input type="radio"/> 1 a 3 veces mes<br><input type="radio"/> 1 vez semana<br><input type="radio"/> 2 a 4 veces semana<br><input type="radio"/> 5 a 6 veces semana<br><input type="radio"/> 1 vez al día<br><input type="radio"/> 2 a 3 veces al día<br><input type="radio"/> 5 a 6 veces al día<br><input type="radio"/> más 6 veces al día |
| cerveza               | <input checked="" type="radio"/> Nunca o menos 1 vez al mes<br><input type="radio"/> 1 a 3 veces mes<br><input type="radio"/> 1 vez semana<br><input type="radio"/> 2 a 4 veces semana<br><input type="radio"/> 5 a 6 veces semana<br><input type="radio"/> 1 vez al día<br><input type="radio"/> 2 a 3 veces al día<br><input type="radio"/> 5 a 6 veces al día<br><input type="radio"/> más 6 veces al día |
| cerveza sin alcohol   | <input checked="" type="radio"/> Nunca o menos 1 vez al mes<br><input type="radio"/> 1 a 3 veces mes<br><input type="radio"/> 1 vez semana<br><input type="radio"/> 2 a 4 veces semana<br><input type="radio"/> 5 a 6 veces semana<br><input type="radio"/> 1 vez al día<br><input type="radio"/> 2 a 3 veces al día<br><input type="radio"/> 5 a 6 veces al día<br><input type="radio"/> más 6 veces al día |
| licores               | <input checked="" type="radio"/> Nunca o menos 1 vez al mes<br><input type="radio"/> 1 a 3 veces mes<br><input type="radio"/> 1 vez semana<br><input type="radio"/> 2 a 4 veces semana<br><input type="radio"/> 5 a 6 veces semana<br><input type="radio"/> 1 vez al día<br><input type="radio"/> 2 a 3 veces al día<br><input type="radio"/> 5 a 6 veces al día<br><input type="radio"/> más 6 veces al día |
| ginebra o ron o vodka | <input checked="" type="radio"/> Nunca o menos 1 vez al mes<br><input type="radio"/> 1 a 3 veces mes<br><input type="radio"/> 1 vez semana<br><input type="radio"/> 2 a 4 veces semana<br><input type="radio"/> 5 a 6 veces semana<br><input type="radio"/> 1 vez al día<br><input type="radio"/> 2 a 3 veces al día<br><input type="radio"/> 5 a 6 veces al día<br><input type="radio"/> más 6 veces al día |
| refresco normal       | <input checked="" type="radio"/> Nunca o menos 1 vez al mes<br><input type="radio"/> 1 a 3 veces mes<br><input type="radio"/> 1 vez semana<br><input type="radio"/> 2 a 4 veces semana<br><input type="radio"/> 5 a 6 veces semana<br><input type="radio"/> 1 vez al día<br><input type="radio"/> 2 a 3 veces al día<br><input type="radio"/> 5 a 6 veces al día<br><input type="radio"/> más 6 veces al día |



---

refresco sin azúcar

- ☐ Nunca o menos 1 vez al mes  
☒ 1 a 3 veces mes  
☐ 1 vez semana  
☐ 2 a 4 veces semana  
☐ 5 a 6 veces semana  
☐ 1 vez al día  
☐ 2 a 3 veces al día  
☐ 5 a 6 veces al día  
☐ más 6 veces al día

---

Agua del grifo

- ☐ Nunca o menos 1 vez al mes  
☐ 1 a 3 veces mes  
☐ 1 vez semana  
☐ 2 a 4 veces semana  
☐ 5 a 6 veces semana  
☐ 1 vez al día  
☒ 2 a 3 veces al día  
☐ 5 a 6 veces al día  
☐ más 6 veces al día

---

agua embotellada sin gas

- ☒ Nunca o menos 1 vez al mes  
☐ 1 a 3 veces mes  
☐ 1 vez semana  
☐ 2 a 4 veces semana  
☐ 5 a 6 veces semana  
☐ 1 vez al día  
☐ 2 a 3 veces al día  
☐ 5 a 6 veces al día  
☐ más 6 veces al día

---

agua embotellada con gas

- ☒ Nunca o menos 1 vez al mes  
☐ 1 a 3 veces mes  
☐ 1 vez semana  
☐ 2 a 4 veces semana  
☐ 5 a 6 veces semana  
☐ 1 vez al día  
☐ 2 a 3 veces al día  
☐ 5 a 6 veces al día  
☐ más 6 veces al día

---

zumو frutas embasado

- ☒ Nunca o menos 1 vez al mes  
☐ 1 a 3 veces mes  
☐ 1 vez semana  
☐ 2 a 4 veces semana  
☐ 5 a 6 veces semana  
☐ 1 vez al día  
☐ 2 a 3 veces al día  
☐ 5 a 6 veces al día  
☐ más 6 veces al día

---

cafe

- ☒ Nunca o menos 1 vez al mes  
☐ 1 a 3 veces mes  
☐ 1 vez semana  
☐ 2 a 4 veces semana  
☐ 5 a 6 veces semana  
☐ 1 vez al día  
☐ 2 a 3 veces al día  
☐ 5 a 6 veces al día  
☐ más 6 veces al día

---

cafe descafeinado

- ☐ Nunca o menos 1 vez al mes  
☒ 1 a 3 veces mes  
☐ 1 vez semana  
☐ 2 a 4 veces semana  
☐ 5 a 6 veces semana  
☐ 1 vez al día  
☐ 2 a 3 veces al día  
☐ 5 a 6 veces al día  
☐ más 6 veces al día

---

te o infusión

- ☐ Nunca o menos 1 vez al mes  
☐ 1 a 3 veces mes  
☒ 1 vez semana  
☐ 2 a 4 veces semana  
☐ 5 a 6 veces semana  
☐ 1 vez al día  
☐ 2 a 3 veces al día  
☐ 5 a 6 veces al día  
☐ más 6 veces al día

---

sopa o puré verduras

- ☐ Nunca o menos 1 vez al mes  
☒ 1 a 3 veces mes  
☐ 1 vez semana  
☐ 2 a 4 veces semana  
☐ 5 a 6 veces semana  
☐ 1 vez al día  
☐ 2 a 3 veces al día  
☐ 5 a 6 veces al día  
☐ más 6 veces al día

---

croquetas pollo jamón

- ☒ Nunca o menos 1 vez al mes  
☐ 1 a 3 veces mes  
☐ 1 vez semana  
☐ 2 a 4 veces semana  
☐ 5 a 6 veces semana  
☐ 1 vez al día  
☐ 2 a 3 veces al día  
☐ 5 a 6 veces al día  
☐ más 6 veces al día

---

croquetas pescado

- ☐ Nunca o menos 1 vez al mes  
☒ 1 a 3 veces mes  
☐ 1 vez semana  
☐ 2 a 4 veces semana  
☐ 5 a 6 veces semana  
☐ 1 vez al día  
☐ 2 a 3 veces al día  
☐ 5 a 6 veces al día  
☐ más 6 veces al día

---

mayonesa

- ☐ Nunca o menos 1 vez al mes  
☐ 1 a 3 veces mes  
☒ 1 vez semana  
☐ 2 a 4 veces semana  
☐ 5 a 6 veces semana  
☐ 1 vez al día  
☐ 2 a 3 veces al día  
☐ 5 a 6 veces al día  
☐ más 6 veces al día

|                  |                                                                                                                                                                                                                                                                                                                                                                                                              |
|------------------|--------------------------------------------------------------------------------------------------------------------------------------------------------------------------------------------------------------------------------------------------------------------------------------------------------------------------------------------------------------------------------------------------------------|
| salsa tomate     | <input type="radio"/> Nunca o menos 1 vez al mes<br><input checked="" type="radio"/> 1 a 3 veces mes<br><input type="radio"/> 1 vez semana<br><input type="radio"/> 2 a 4 veces semana<br><input type="radio"/> 5 a 6 veces semana<br><input type="radio"/> 1 vez al día<br><input type="radio"/> 2 a 3 veces al día<br><input type="radio"/> 5 a 6 veces al día<br><input type="radio"/> más 6 veces al día |
| ketchup          | <input type="radio"/> Nunca o menos 1 vez al mes<br><input checked="" type="radio"/> 1 a 3 veces mes<br><input type="radio"/> 1 vez semana<br><input type="radio"/> 2 a 4 veces semana<br><input type="radio"/> 5 a 6 veces semana<br><input type="radio"/> 1 vez al día<br><input type="radio"/> 2 a 3 veces al día<br><input type="radio"/> 5 a 6 veces al día<br><input type="radio"/> más 6 veces al día |
| sal              | <input type="radio"/> Nunca o menos 1 vez al mes<br><input checked="" type="radio"/> 1 a 3 veces mes<br><input type="radio"/> 1 vez semana<br><input type="radio"/> 2 a 4 veces semana<br><input type="radio"/> 5 a 6 veces semana<br><input type="radio"/> 1 vez al día<br><input type="radio"/> 2 a 3 veces al día<br><input type="radio"/> 5 a 6 veces al día<br><input type="radio"/> más 6 veces al día |
| ajo              | <input type="radio"/> Nunca o menos 1 vez al mes<br><input checked="" type="radio"/> 1 a 3 veces mes<br><input type="radio"/> 1 vez semana<br><input type="radio"/> 2 a 4 veces semana<br><input type="radio"/> 5 a 6 veces semana<br><input type="radio"/> 1 vez al día<br><input type="radio"/> 2 a 3 veces al día<br><input type="radio"/> 5 a 6 veces al día<br><input type="radio"/> más 6 veces al día |
| mermelada o miel | <input checked="" type="radio"/> Nunca o menos 1 vez al mes<br><input type="radio"/> 1 a 3 veces mes<br><input type="radio"/> 1 vez semana<br><input type="radio"/> 2 a 4 veces semana<br><input type="radio"/> 5 a 6 veces semana<br><input type="radio"/> 1 vez al día<br><input type="radio"/> 2 a 3 veces al día<br><input type="radio"/> 5 a 6 veces al día<br><input type="radio"/> más 6 veces al día |
| azúcar           | <input checked="" type="radio"/> Nunca o menos 1 vez al mes<br><input type="radio"/> 1 a 3 veces mes<br><input type="radio"/> 1 vez semana<br><input type="radio"/> 2 a 4 veces semana<br><input type="radio"/> 5 a 6 veces semana<br><input type="radio"/> 1 vez al día<br><input type="radio"/> 2 a 3 veces al día<br><input type="radio"/> 5 a 6 veces al día<br><input type="radio"/> más 6 veces al día |

---

Otro alimento

---

suplementos vitamínicos

- ☐ si  
☒ no

suplementos vitamínicos

---

dieta previa

- ☒ si  
☐ no

motivo dieta

- ☐ no dieta  
☐ control peso  
☐ control colesterol  
☒ control diabetes  
☐ problemas estómago  
☐ problemas vesícula o hepáticos  
☐ HTA o cardiopatía  
☐ problemas renales  
☐ alergia alimentaria  
☐ ácido úrico elevado  
☐ vegetariana  
☐ otros

cambio alimentos año previo gestación

- ☐ si  
☒ no

cambio lácteos

- ☐ eliminado  
☐ disminuido  
☐ igual  
☐ aumentado  
☐ no sabe

cambio huevos

- ☐ eliminado  
☐ disminuido  
☐ igual  
☐ aumentado  
☐ no sabe

cambio carne

- ☐ eliminado  
☐ disminuido  
☐ igual  
☐ aumentado  
☐ no sabe

cambio pescado

- ☐ eliminado  
☐ disminuido  
☐ igual  
☐ aumentado  
☐ no sabe

cambio verduras

- ☐ eliminado  
☐ disminuido  
☐ igual  
☐ aumentado  
☐ no sabe

|                            |                                                                                                                                                                                                                        |
|----------------------------|------------------------------------------------------------------------------------------------------------------------------------------------------------------------------------------------------------------------|
| cambio legumbres           | <input type="radio"/> eliminado<br><input type="radio"/> disminuido<br><input type="radio"/> igual<br><input type="radio"/> aumentado<br><input type="radio"/> no sabe                                                 |
| cambio fruta               | <input type="radio"/> eliminado<br><input type="radio"/> disminuido<br><input type="radio"/> igual<br><input type="radio"/> aumentado<br><input type="radio"/> no sabe                                                 |
| cambio pan                 | <input type="radio"/> eliminado<br><input type="radio"/> disminuido<br><input type="radio"/> igual<br><input type="radio"/> aumentado<br><input type="radio"/> no sabe                                                 |
| cambio aceite oliva        | <input type="radio"/> eliminado<br><input type="radio"/> disminuido<br><input type="radio"/> igual<br><input type="radio"/> aumentado<br><input type="radio"/> no sabe                                                 |
| cambio mante o margarina   | <input type="radio"/> eliminado<br><input type="radio"/> disminuido<br><input type="radio"/> igual<br><input type="radio"/> aumentado<br><input type="radio"/> no sabe                                                 |
| cambio azúcar y dulces     | <input type="radio"/> eliminado<br><input type="radio"/> disminuido<br><input type="radio"/> igual<br><input type="radio"/> aumentado<br><input type="radio"/> no sabe                                                 |
| cambio bebidas alcohólicas | <input type="radio"/> eliminado<br><input type="radio"/> disminuido<br><input type="radio"/> igual<br><input type="radio"/> aumentado<br><input type="radio"/> no sabe                                                 |
| frecuencia comidas fritas  | <input type="radio"/> a diario<br><input type="radio"/> 5 a 6 veces semana<br><input type="radio"/> 2 a 4 veces semana<br><input checked="" type="radio"/> 1 vez semana<br><input type="radio"/> menos de 1 vez semana |
| carne                      | <input type="radio"/> no como<br><input type="radio"/> cruda<br><input type="radio"/> poco hecha<br><input type="radio"/> hecha<br><input type="radio"/> muy hecha                                                     |
| grasa visible carne        | <input type="radio"/> quita toda<br><input type="radio"/> quita mayoría<br><input type="radio"/> quita un poco<br><input type="radio"/> no quita nada                                                                  |

|                                |                                                                                                                                                                                                                                               |
|--------------------------------|-----------------------------------------------------------------------------------------------------------------------------------------------------------------------------------------------------------------------------------------------|
| cocina carne                   | <input type="radio"/> a la plancha<br><input type="radio"/> a la parrilla<br><input type="radio"/> asada<br><input type="radio"/> frita<br><input type="radio"/> guisada                                                                      |
| tostado quemado carne          | <input type="radio"/> nunca<br><input type="radio"/> 1 vez mes<br><input type="radio"/> 2 a 3 veces mes<br><input type="radio"/> 1 vez semana<br><input type="radio"/> 2 a 3 semanas                                                          |
| tostado quemado pescado        | <input type="radio"/> nunca<br><input type="radio"/> 1 vez mes<br><input type="radio"/> 2 a 3 veces mes<br><input type="radio"/> 1 vez semana<br><input type="radio"/> 2 a 3 semanas                                                          |
| socarrat paella                | <input type="radio"/> nunca<br><input type="radio"/> 1 vez mes<br><input type="radio"/> 2 a 3 veces mes<br><input type="radio"/> 1 vez semana<br><input type="radio"/> 2 a 3 semanas                                                          |
| grasa o aceite cocinar         | <input type="radio"/> mantequilla<br><input type="radio"/> margarina<br><input type="radio"/> aceite oliva<br><input type="radio"/> aceite oliva virgen extra<br><input type="radio"/> aceite vegetal<br><input type="radio"/> mezcla aceites |
| grasa aceite aliñar            | <input type="radio"/> mantequilla<br><input type="radio"/> margarina<br><input type="radio"/> aceite oliva<br><input type="radio"/> aceite oliva virgen extra<br><input type="radio"/> aceite vegetal<br><input type="radio"/> mezcla aceites |
| grasa aceite freir             | <input type="radio"/> mantequilla<br><input type="radio"/> margarina<br><input type="radio"/> aceite oliva<br><input type="radio"/> aceite oliva virgen extra<br><input type="radio"/> aceite vegetal<br><input type="radio"/> mezcla aceites |
| Ejercicio cuestionario         | <input checked="" type="radio"/> si<br><input type="radio"/> no                                                                                                                                                                               |
| horas de sueño incluido siesta | [*DATA REMOVED*]                                                                                                                                                                                                                              |
| minutos siesta                 | [*DATA REMOVED*]                                                                                                                                                                                                                              |
| horas televisión semana        | [*DATA REMOVED*]                                                                                                                                                                                                                              |

|                                        |                                                                                                                                                                                                                                                                                                                                                                           |
|----------------------------------------|---------------------------------------------------------------------------------------------------------------------------------------------------------------------------------------------------------------------------------------------------------------------------------------------------------------------------------------------------------------------------|
| actividad trabajo                      | <input type="radio"/> casi siempre sentado<br><input checked="" type="radio"/> sentado 50 por cien<br><input type="radio"/> casi siempre de pie, quieto<br><input type="radio"/> casi siempre levantado caminando y llevando pocas cosas<br><input type="radio"/> casi siempre levantado, caminando y llevado muchas cosas<br><input type="radio"/> trabajo manual pesado |
| tiempo caminar o bici al día           | <input type="radio"/> casi nunca<br><input checked="" type="radio"/> menos 20min día<br><input type="radio"/> 20 a 40 min día<br><input type="radio"/> 40 a 60 min día<br><input type="radio"/> 1h o 1h y media día<br><input type="radio"/> más de 1h y media al día                                                                                                     |
| tiempo tareas casa al día              | <input checked="" type="radio"/> menos de 1h día<br><input type="radio"/> 1 a 2h día<br><input type="radio"/> 3 a 4h día<br><input type="radio"/> 5 a 6h día<br><input type="radio"/> 7 a 8h día<br><input type="radio"/> más de 8h día                                                                                                                                   |
| tiempo libre televisión ordenador leer | <input checked="" type="radio"/> menos 1h día<br><input type="radio"/> 1h día<br><input type="radio"/> 2h día<br><input type="radio"/> 3h día<br><input type="radio"/> 4h día<br><input type="radio"/> 5 a 6h día<br><input type="radio"/> mas 6h día                                                                                                                     |
| tiempo libre ejercicio o deporte       | <input type="radio"/> menos 1h semana<br><input type="radio"/> 1h semana<br><input checked="" type="radio"/> 2h semana<br><input type="radio"/> 3h semana<br><input type="radio"/> 4 a 5h semana<br><input type="radio"/> mas 5h semana                                                                                                                                   |
| como se considera                      | <input type="radio"/> sedentaria<br><input type="radio"/> poco activa<br><input checked="" type="radio"/> moderadamente activa<br><input type="radio"/> bastante activa<br><input type="radio"/> muy activa<br><input type="radio"/> no sabe                                                                                                                              |
| FUR                                    | [*DATA REMOVED*]                                                                                                                                                                                                                                                                                                                                                          |
| Semanas gestación 2T                   | [*DATA REMOVED*]                                                                                                                                                                                                                                                                                                                                                          |
| Días gestación 2T                      | [*DATA REMOVED*]                                                                                                                                                                                                                                                                                                                                                          |
| DBP 2T                                 | [*DATA REMOVED*]                                                                                                                                                                                                                                                                                                                                                          |
| CC 2T                                  | [*DATA REMOVED*]                                                                                                                                                                                                                                                                                                                                                          |
| AC 2T                                  | [*DATA REMOVED*]                                                                                                                                                                                                                                                                                                                                                          |

|                                                   |                                                                                                                                                                                                 |
|---------------------------------------------------|-------------------------------------------------------------------------------------------------------------------------------------------------------------------------------------------------|
| LF 2T                                             | [*DATA REMOVED*]                                                                                                                                                                                |
| PFE 2T (Hadlock)                                  | [*DATA REMOVED*]                                                                                                                                                                                |
| Semanas gestación 3T                              | [*DATA REMOVED*]                                                                                                                                                                                |
| días 3T                                           | [*DATA REMOVED*]                                                                                                                                                                                |
| DBP 3T                                            | [*DATA REMOVED*]                                                                                                                                                                                |
| CC 3T                                             | [*DATA REMOVED*]                                                                                                                                                                                |
| AC 3T                                             | [*DATA REMOVED*]                                                                                                                                                                                |
| LF 3T                                             | [*DATA REMOVED*]                                                                                                                                                                                |
| PFE 3T (Hadlock)                                  | [*DATA REMOVED*]                                                                                                                                                                                |
| Semanas de gestación final                        | [*DATA REMOVED*]                                                                                                                                                                                |
| días gestación final                              | [*DATA REMOVED*]                                                                                                                                                                                |
| Localización placenta                             | <input checked="" type="radio"/> anterior<br><input type="radio"/> lateral derecha<br><input type="radio"/> lateral izquierda<br><input type="radio"/> posterior<br><input type="radio"/> fondo |
| Presentación longitudinal cefálica                | <input type="radio"/> no<br><input checked="" type="radio"/> si                                                                                                                                 |
| Dorso                                             | <input type="radio"/> izquierda anterior<br><input type="radio"/> izquierda posterior<br><input checked="" type="radio"/> derecha anterior<br><input type="radio"/> derecha posterior           |
| diámetro biparietal                               | [*DATA REMOVED*]                                                                                                                                                                                |
| Circunferencia craneal                            | [*DATA REMOVED*]                                                                                                                                                                                |
| Circunferencia abdominal                          | [*DATA REMOVED*]                                                                                                                                                                                |
| Longitud de femur                                 | [*DATA REMOVED*]                                                                                                                                                                                |
| tejido celular subcutáneo a nivel del muslo en mm | [*DATA REMOVED*]                                                                                                                                                                                |
| tejido celular subcutáneo en abdomen en mm        | [*DATA REMOVED*]                                                                                                                                                                                |
| Volumen del muslo en cm3                          | [*DATA REMOVED*]                                                                                                                                                                                |
| Peso fetal estimado según fórmula de Hadlock      | [*DATA REMOVED*]                                                                                                                                                                                |



|                                               |                                                                                                                                                          |
|-----------------------------------------------|----------------------------------------------------------------------------------------------------------------------------------------------------------|
| Percentil                                     | [*DATA REMOVED*]                                                                                                                                         |
| Peso fetal estimado según fórmula de Scioscia | <hr/>                                                                                                                                                    |
| Peso fetal estimado según fórmula de LEE      | <hr/>                                                                                                                                                    |
| Tipo de parto                                 | <input checked="" type="radio"/> eutocico<br><input type="radio"/> instrumentado/ventosa<br><input type="radio"/> cesarea                                |
| fecha de nacimiento                           | [*DATA REMOVED*]                                                                                                                                         |
| Días entre exploración y nacimiento           | [*DATA REMOVED*]                                                                                                                                         |
| Peso RN en g                                  | [*DATA REMOVED*]                                                                                                                                         |
| sexo                                          | <input type="radio"/> mujer<br><input checked="" type="radio"/> hombre                                                                                   |
| Apgar 1 minuto                                | [*DATA REMOVED*]                                                                                                                                         |
| Apgar 5 minutos                               | [*DATA REMOVED*]                                                                                                                                         |
| Apgar 10 minutos                              | <hr/>                                                                                                                                                    |
| antecedente Covid durante gestación           | <input type="radio"/> Yes<br><input checked="" type="radio"/> No                                                                                         |
| Nivel de estudios                             | <input type="radio"/> ninguno<br><input checked="" type="radio"/> primarios<br><input type="radio"/> secundarios<br><input type="radio"/> universitarios |

## Base\_datos\_estimacion\_peso\_fetal

|                                       |                                                                                                                                                                                                                                                                                      |
|---------------------------------------|--------------------------------------------------------------------------------------------------------------------------------------------------------------------------------------------------------------------------------------------------------------------------------------|
| Número de identificación participante | 173                                                                                                                                                                                                                                                                                  |
| CODIGO PARTICIPANTE                   |                                                                                                                                                                                                                                                                                      |
| Edad                                  | [*DATA REMOVED*]                                                                                                                                                                                                                                                                     |
| Gestaciones                           | <input type="radio"/> 1<br><input checked="" type="radio"/> 2<br><input type="radio"/> 3<br><input type="radio"/> mas de 3                                                                                                                                                           |
| partos                                | <input checked="" type="radio"/> 0<br><input type="radio"/> 1<br><input type="radio"/> 2<br><input type="radio"/> 3<br><input type="radio"/> mas de 3                                                                                                                                |
| cesáreas                              | <input checked="" type="radio"/> 0<br><input type="radio"/> 1<br><input type="radio"/> 2<br><input type="radio"/> 3<br><input type="radio"/> mas de 3                                                                                                                                |
| Abortos                               | <input type="radio"/> 0<br><input checked="" type="radio"/> 1<br><input type="radio"/> 2<br><input type="radio"/> 3<br><input type="radio"/> mas de 3                                                                                                                                |
| Tipo de gestacion                     | <input checked="" type="radio"/> espontanea<br><input type="radio"/> IAC inseminación artificial conyuge<br><input type="radio"/> IAD inseminación artificial donante<br><input type="radio"/> FIV Fecundación in Vitro<br><input type="radio"/> Ovodon FIV con donación de ovocitos |
| peso previo a embarazo                | [*DATA REMOVED*]                                                                                                                                                                                                                                                                     |
| Ganancia ponderal embarazo            |                                                                                                                                                                                                                                                                                      |
| Talla madre                           | [*DATA REMOVED*]                                                                                                                                                                                                                                                                     |
| IMC previo embarazo                   | 24.495572652054                                                                                                                                                                                                                                                                      |
| Patología obstétrica                  | <input checked="" type="radio"/> no<br><input type="radio"/> si                                                                                                                                                                                                                      |
| Diabetes pregestacional               | <input checked="" type="radio"/> no<br><input type="radio"/> si                                                                                                                                                                                                                      |
| Diabetes gestacional                  | <input checked="" type="radio"/> no<br><input type="radio"/> si                                                                                                                                                                                                                      |

|                                            |                                                                                                                                                                           |
|--------------------------------------------|---------------------------------------------------------------------------------------------------------------------------------------------------------------------------|
| Diabetes gestacional con insulina          | <input checked="" type="radio"/> no<br><input type="radio"/> si                                                                                                           |
| Diabetes gestacional con dieta y ejercicio | <input checked="" type="radio"/> no<br><input type="radio"/> si                                                                                                           |
| Percentil fetos previos                    | <input type="radio"/> Nada<br><input type="radio"/> percentil menor de 10<br><input type="radio"/> percentil entre 10 y 90<br><input type="radio"/> percentil mayor de 90 |
| Exfumadora                                 | <input type="radio"/> Nada<br><input type="radio"/> menos de 5 años<br><input type="radio"/> 5 a 10 años<br><input type="radio"/> mayor o igual a 10 años                 |
| Hábito tabáquico                           | <input checked="" type="radio"/> no<br><input type="radio"/> si                                                                                                           |
| fumadora                                   | [*DATA REMOVED*]                                                                                                                                                          |
| Consumo otros tóxicos                      | <input checked="" type="radio"/> no<br><input type="radio"/> si                                                                                                           |
| Hb 1T                                      | [*DATA REMOVED*]                                                                                                                                                          |
| Htc 1T                                     | [*DATA REMOVED*]                                                                                                                                                          |
| Hb 2T                                      | [*DATA REMOVED*]                                                                                                                                                          |
| HTC 2T                                     | [*DATA REMOVED*]                                                                                                                                                          |
| Hb 3T                                      | [*DATA REMOVED*]                                                                                                                                                          |
| HTC 3T                                     | [*DATA REMOVED*]                                                                                                                                                          |
| Suplemento FE oral                         | <input type="radio"/> si<br><input checked="" type="radio"/> no                                                                                                           |
| Suplemento fe iv                           | <input type="radio"/> si<br><input checked="" type="radio"/> no                                                                                                           |
| Transfusión                                | <input checked="" type="radio"/> no<br><input type="radio"/> si                                                                                                           |
| Solicitada Vit D                           | <input type="radio"/> no<br><input checked="" type="radio"/> si                                                                                                           |
| Deficit vit D                              | <input checked="" type="radio"/> no<br><input type="radio"/> si                                                                                                           |
| Suplemento vit D                           | <input type="radio"/> si<br><input checked="" type="radio"/> no                                                                                                           |

|                       |                                                                                                                                                                                                                                                                                                                                                                                                              |
|-----------------------|--------------------------------------------------------------------------------------------------------------------------------------------------------------------------------------------------------------------------------------------------------------------------------------------------------------------------------------------------------------------------------------------------------------|
| Dieta, cuestionario   | <input checked="" type="radio"/> si<br><input type="radio"/> no                                                                                                                                                                                                                                                                                                                                              |
| Leche entera          | <input checked="" type="radio"/> Nunca o menos 1 vez al mes<br><input type="radio"/> 1 a 3 veces mes<br><input type="radio"/> 1 vez semana<br><input type="radio"/> 2 a 4 veces semana<br><input type="radio"/> 5 a 6 veces semana<br><input type="radio"/> 1 vez al día<br><input type="radio"/> 2 a 3 veces al día<br><input type="radio"/> 5 a 6 veces al día<br><input type="radio"/> más 6 veces al día |
| Leche semidesnatada   | <input checked="" type="radio"/> Nunca o menos 1 vez al mes<br><input type="radio"/> 1 a 3 veces mes<br><input type="radio"/> 1 vez semana<br><input type="radio"/> 2 a 4 veces semana<br><input type="radio"/> 5 a 6 veces semana<br><input type="radio"/> 1 vez al día<br><input type="radio"/> 2 a 3 veces al día<br><input type="radio"/> 5 a 6 veces al día<br><input type="radio"/> mas 6 veces al día |
| Leche desnatada       | <input type="radio"/> Nunca o menos 1 vez al mes<br><input type="radio"/> 1 a 3 veces mes<br><input type="radio"/> 1 vez semana<br><input type="radio"/> 2 a 4 veces semana<br><input type="radio"/> 5 a 6 veces semana<br><input checked="" type="radio"/> 1 vez al día<br><input type="radio"/> 2 a 3 veces al día<br><input type="radio"/> 5 a 6 veces al día<br><input type="radio"/> más 6 veces al día |
| Leche condensada      | <input checked="" type="radio"/> Nunca o menos 1 vez al mes<br><input type="radio"/> 1 a 3 veces mes<br><input type="radio"/> 1 vez semana<br><input type="radio"/> 2 a 4 veces semana<br><input type="radio"/> 5 a 6 veces semana<br><input type="radio"/> 1 vez al día<br><input type="radio"/> 2 a 3 veces al día<br><input type="radio"/> 5 a 6 veces al día<br><input type="radio"/> más 6 veces al día |
| nata o crema de leche | <input type="radio"/> Nunca o menos 1 vez al mes<br><input type="radio"/> 1 a 3 veces mes<br><input checked="" type="radio"/> 1 vez semana<br><input type="radio"/> 2 a 4 veces semana<br><input type="radio"/> 5 a 6 veces semana<br><input type="radio"/> 1 vez al día<br><input type="radio"/> 2 a 3 veces al día<br><input type="radio"/> 5 a 6 veces al día<br><input type="radio"/> más 6 veces al día |

---

Yogurt Entero

- ☐ Nunca o menos 1 vez al mes  
☐ 1 a 3 veces mes  
☐ 1 vez semana  
☒ 2 a 4 veces semana  
☐ 5 a 6 veces semana  
☐ 1 vez al día  
☐ 2 a 3 veces al día  
☐ 5 a 6 veces al día  
☐ más 6 veces al día

---

Yogurt desnatado

- ☒ Nunca o menos 1 vez al mes  
☐ 1 a 3 veces mes  
☐ 1 vez semana  
☐ 2 a 4 veces semana  
☐ 5 a 6 veces semana  
☐ 1 vez al día  
☐ 2 a 3 veces al día  
☐ 5 a 6 veces al día  
☐ más 6 veces al día

---

100g requesón o queso blando o queso fresco

- ☐ Nunca o menos 1 vez al mes  
☐ 1 a 3 veces mes  
☒ 1 vez semana  
☐ 2 a 4 veces semana  
☐ 5 a 6 veces semana  
☐ 1 vez al día  
☐ 2 a 3 veces al día  
☐ 5 a 6 veces al día  
☐ más 6 veces al día

---

queso curado o semicurado o cremoso

- ☐ Nunca o menos 1 vez al mes  
☒ 1 a 3 veces mes  
☐ 1 vez semana  
☐ 2 a 4 veces semana  
☐ 5 a 6 veces semana  
☐ 1 vez al día  
☐ 2 a 3 veces al día  
☐ 5 a 6 veces al día  
☐ más 6 veces al día

---

natillas flan pudding

- ☐ Nunca o menos 1 vez al mes  
☒ 1 a 3 veces mes  
☐ 1 vez semana  
☐ 2 a 4 veces semana  
☐ 5 a 6 veces semana  
☐ 1 vez al día  
☐ 2 a 3 veces al día  
☐ 5 a 6 veces al día  
☐ más 6 veces al día

---

Helado

- ☐ Nunca o menos 1 vez al mes  
☒ 1 a 3 veces mes  
☐ 1 vez semana  
☐ 2 a 4 veces semana  
☐ 5 a 6 veces semana  
☐ 1 vez al día  
☐ 2 a 3 veces al día  
☐ 5 a 6 veces al día  
☐ más 6 veces al día

|                                      |                                                                                                                                                                                                                                                                                                                                                                                                              |
|--------------------------------------|--------------------------------------------------------------------------------------------------------------------------------------------------------------------------------------------------------------------------------------------------------------------------------------------------------------------------------------------------------------------------------------------------------------|
| huevo                                | <input type="radio"/> Nunca o menos 1 vez al mes<br><input type="radio"/> 1 a 3 veces mes<br><input checked="" type="radio"/> 1 vez semana<br><input type="radio"/> 2 a 4 veces semana<br><input type="radio"/> 5 a 6 veces semana<br><input type="radio"/> 1 vez al día<br><input type="radio"/> 2 a 3 veces al día<br><input type="radio"/> 5 a 6 veces al día<br><input type="radio"/> más 6 veces al día |
| Pollo con piel                       | <input type="radio"/> Nunca o menos 1 vez al mes<br><input type="radio"/> 1 a 3 veces mes<br><input type="radio"/> 1 vez semana<br><input checked="" type="radio"/> 2 a 4 veces semana<br><input type="radio"/> 5 a 6 veces semana<br><input type="radio"/> 1 vez al día<br><input type="radio"/> 2 a 3 veces al día<br><input type="radio"/> 5 a 6 veces al día<br><input type="radio"/> más 6 veces al día |
| pollo sin piel                       | <input type="radio"/> Nunca o menos 1 vez al mes<br><input type="radio"/> 1 a 3 veces mes<br><input type="radio"/> 1 vez semana<br><input checked="" type="radio"/> 2 a 4 veces semana<br><input type="radio"/> 5 a 6 veces semana<br><input type="radio"/> 1 vez al día<br><input type="radio"/> 2 a 3 veces al día<br><input type="radio"/> 5 a 6 veces al día<br><input type="radio"/> más 6 veces al día |
| Ternera o cerdo o cordero            | <input type="radio"/> Nunca o menos 1 vez al mes<br><input type="radio"/> 1 a 3 veces mes<br><input checked="" type="radio"/> 1 vez semana<br><input type="radio"/> 2 a 4 veces semana<br><input type="radio"/> 5 a 6 veces semana<br><input type="radio"/> 1 vez al día<br><input type="radio"/> 2 a 3 veces al día<br><input type="radio"/> 5 a 6 veces al día<br><input type="radio"/> más 6 veces al día |
| carne caza: Conejo o codorniz o pato | <input type="radio"/> Nunca o menos 1 vez al mes<br><input checked="" type="radio"/> 1 a 3 veces mes<br><input type="radio"/> 1 vez semana<br><input type="radio"/> 2 a 4 veces semana<br><input type="radio"/> 5 a 6 veces semana<br><input type="radio"/> 1 vez al día<br><input type="radio"/> 2 a 3 veces al día<br><input type="radio"/> 5 a 6 veces al día<br><input type="radio"/> más 6 veces al día |
| Hígado de ternera o cerdo o pollo    | <input type="radio"/> Nunca o menos 1 vez al mes<br><input checked="" type="radio"/> 1 a 3 veces mes<br><input type="radio"/> 1 vez semana<br><input type="radio"/> 2 a 4 veces semana<br><input type="radio"/> 5 a 6 veces semana<br><input type="radio"/> 1 vez al día<br><input type="radio"/> 2 a 3 veces al día<br><input type="radio"/> 5 a 6 veces al día<br><input type="radio"/> más 6 veces al día |

---

Vísceras

- ☐ Nunca o menos 1 vez al mes  
☒ 1 a 3 veces mes  
☐ 1 vez semana  
☐ 2 a 4 veces semana  
☐ 5 a 6 veces semana  
☐ 1 vez al día  
☐ 2 a 3 veces al día  
☐ 5 a 6 veces al día  
☐ más 6 veces al día

---

Embutido

- ☐ Nunca o menos 1 vez al mes  
☒ 1 a 3 veces mes  
☐ 1 vez semana  
☐ 2 a 4 veces semana  
☐ 5 a 6 veces semana  
☐ 1 vez al día  
☐ 2 a 3 veces al día  
☐ 5 a 6 veces al día  
☐ más 6 veces al día

---

Salchicha o similar

- ☒ Nunca o menos 1 vez al mes  
☐ 1 a 3 veces mes  
☐ 1 vez semana  
☐ 2 a 4 veces semana  
☐ 5 a 6 veces semana  
☐ 1 vez al día  
☐ 2 a 3 veces al día  
☐ 5 a 6 veces al día  
☐ más 6 veces al día

---

Pate o foiegras

- ☒ Nunca o menos 1 vez al mes  
☐ 1 a 3 veces mes  
☐ 1 vez semana  
☐ 2 a 4 veces semana  
☐ 5 a 6 veces semana  
☐ 1 vez al día  
☐ 2 a 3 veces al día  
☐ 5 a 6 veces al día  
☐ más 6 veces al día

---

Hamburguesa

- ☒ Nunca o menos 1 vez al mes  
☐ 1 a 3 veces mes  
☐ 1 vez semana  
☐ 2 a 4 veces semana  
☐ 5 a 6 veces semana  
☐ 1 vez al día  
☐ 2 a 3 veces al día  
☐ 5 a 6 veces al día  
☐ más 6 veces al día

---

tocino o bacon

- ☐ Nunca o menos 1 vez al mes  
☐ 1 a 3 veces mes  
☒ 1 vez semana  
☐ 2 a 4 veces semana  
☐ 5 a 6 veces semana  
☐ 1 vez al día  
☐ 2 a 3 veces al día  
☐ 5 a 6 veces al día  
☐ más 6 veces al día

---

|               |                                                                                                                                                                                                                                                                                                                                                                                                              |
|---------------|--------------------------------------------------------------------------------------------------------------------------------------------------------------------------------------------------------------------------------------------------------------------------------------------------------------------------------------------------------------------------------------------------------------|
| Pescado frito | <input checked="" type="radio"/> Nunca o menos 1 vez al mes<br><input type="radio"/> 1 a 3 veces mes<br><input type="radio"/> 1 vez semana<br><input type="radio"/> 2 a 4 veces semana<br><input type="radio"/> 5 a 6 veces semana<br><input type="radio"/> 1 vez al día<br><input type="radio"/> 2 a 3 veces al día<br><input type="radio"/> 5 a 6 veces al día<br><input type="radio"/> más 6 veces al día |
|---------------|--------------------------------------------------------------------------------------------------------------------------------------------------------------------------------------------------------------------------------------------------------------------------------------------------------------------------------------------------------------------------------------------------------------|

---

|                        |                                                                                                                                                                                                                                                                                                                                                                                                              |
|------------------------|--------------------------------------------------------------------------------------------------------------------------------------------------------------------------------------------------------------------------------------------------------------------------------------------------------------------------------------------------------------------------------------------------------------|
| pescado hervido blanco | <input type="radio"/> Nunca o menos 1 vez al mes<br><input type="radio"/> 1 a 3 veces mes<br><input type="radio"/> 1 vez semana<br><input type="radio"/> 2 a 4 veces semana<br><input checked="" type="radio"/> 5 a 6 veces semana<br><input type="radio"/> 1 vez al día<br><input type="radio"/> 2 a 3 veces al día<br><input type="radio"/> 5 a 6 veces al día<br><input type="radio"/> más 6 veces al día |
|------------------------|--------------------------------------------------------------------------------------------------------------------------------------------------------------------------------------------------------------------------------------------------------------------------------------------------------------------------------------------------------------------------------------------------------------|

---

|                      |                                                                                                                                                                                                                                                                                                                                                                                                              |
|----------------------|--------------------------------------------------------------------------------------------------------------------------------------------------------------------------------------------------------------------------------------------------------------------------------------------------------------------------------------------------------------------------------------------------------------|
| pescado hervido azul | <input type="radio"/> Nunca o menos 1 vez al mes<br><input type="radio"/> 1 a 3 veces mes<br><input type="radio"/> 1 vez semana<br><input checked="" type="radio"/> 2 a 4 veces semana<br><input type="radio"/> 5 a 6 veces semana<br><input type="radio"/> 1 vez al día<br><input type="radio"/> 2 a 3 veces al día<br><input type="radio"/> 5 a 6 veces al día<br><input type="radio"/> más 6 veces al día |
|----------------------|--------------------------------------------------------------------------------------------------------------------------------------------------------------------------------------------------------------------------------------------------------------------------------------------------------------------------------------------------------------------------------------------------------------|

---

|                    |                                                                                                                                                                                                                                                                                                                                                                                                              |
|--------------------|--------------------------------------------------------------------------------------------------------------------------------------------------------------------------------------------------------------------------------------------------------------------------------------------------------------------------------------------------------------------------------------------------------------|
| otros pescado azul | <input type="radio"/> Nunca o menos 1 vez al mes<br><input type="radio"/> 1 a 3 veces mes<br><input type="radio"/> 1 vez semana<br><input checked="" type="radio"/> 2 a 4 veces semana<br><input type="radio"/> 5 a 6 veces semana<br><input type="radio"/> 1 vez al día<br><input type="radio"/> 2 a 3 veces al día<br><input type="radio"/> 5 a 6 veces al día<br><input type="radio"/> más 6 veces al día |
|--------------------|--------------------------------------------------------------------------------------------------------------------------------------------------------------------------------------------------------------------------------------------------------------------------------------------------------------------------------------------------------------------------------------------------------------|

---

|               |                                                                                                                                                                                                                                                                                                                                                                                                              |
|---------------|--------------------------------------------------------------------------------------------------------------------------------------------------------------------------------------------------------------------------------------------------------------------------------------------------------------------------------------------------------------------------------------------------------------|
| atun conserva | <input type="radio"/> Nunca o menos 1 vez al mes<br><input type="radio"/> 1 a 3 veces mes<br><input checked="" type="radio"/> 1 vez semana<br><input type="radio"/> 2 a 4 veces semana<br><input type="radio"/> 5 a 6 veces semana<br><input type="radio"/> 1 vez al día<br><input type="radio"/> 2 a 3 veces al día<br><input type="radio"/> 5 a 6 veces al día<br><input type="radio"/> más 6 veces al día |
|---------------|--------------------------------------------------------------------------------------------------------------------------------------------------------------------------------------------------------------------------------------------------------------------------------------------------------------------------------------------------------------------------------------------------------------|

---

|                  |                                                                                                                                                                                                                                                                                                                                                                                                              |
|------------------|--------------------------------------------------------------------------------------------------------------------------------------------------------------------------------------------------------------------------------------------------------------------------------------------------------------------------------------------------------------------------------------------------------------|
| sardina conserva | <input type="radio"/> Nunca o menos 1 vez al mes<br><input type="radio"/> 1 a 3 veces mes<br><input checked="" type="radio"/> 1 vez semana<br><input type="radio"/> 2 a 4 veces semana<br><input type="radio"/> 5 a 6 veces semana<br><input type="radio"/> 1 vez al día<br><input type="radio"/> 2 a 3 veces al día<br><input type="radio"/> 5 a 6 veces al día<br><input type="radio"/> más 6 veces al día |
|------------------|--------------------------------------------------------------------------------------------------------------------------------------------------------------------------------------------------------------------------------------------------------------------------------------------------------------------------------------------------------------------------------------------------------------|

---



|                                         |                                                                                                                                                                                                                                                                                                                                                                                                              |
|-----------------------------------------|--------------------------------------------------------------------------------------------------------------------------------------------------------------------------------------------------------------------------------------------------------------------------------------------------------------------------------------------------------------------------------------------------------------|
| pescado ahumado                         | <input type="radio"/> Nunca o menos 1 vez al mes<br><input type="radio"/> 1 a 3 veces mes<br><input checked="" type="radio"/> 1 vez semana<br><input type="radio"/> 2 a 4 veces semana<br><input type="radio"/> 5 a 6 veces semana<br><input type="radio"/> 1 vez al día<br><input type="radio"/> 2 a 3 veces al día<br><input type="radio"/> 5 a 6 veces al día<br><input type="radio"/> más 6 veces al día |
| almejas o mejillones o ostras unos 100g | <input type="radio"/> Nunca o menos 1 vez al mes<br><input checked="" type="radio"/> 1 a 3 veces mes<br><input type="radio"/> 1 vez semana<br><input type="radio"/> 2 a 4 veces semana<br><input type="radio"/> 5 a 6 veces semana<br><input type="radio"/> 1 vez al día<br><input type="radio"/> 2 a 3 veces al día<br><input type="radio"/> 5 a 6 veces al día<br><input type="radio"/> más 6 veces al día |
| calamar o chipiron o sepia unos 100g    | <input type="radio"/> Nunca o menos 1 vez al mes<br><input checked="" type="radio"/> 1 a 3 veces mes<br><input type="radio"/> 1 vez semana<br><input type="radio"/> 2 a 4 veces semana<br><input type="radio"/> 5 a 6 veces semana<br><input type="radio"/> 1 vez al día<br><input type="radio"/> 2 a 3 veces al día<br><input type="radio"/> 5 a 6 veces al día<br><input type="radio"/> más 6 veces al día |
| marisco unos 100g                       | <input type="radio"/> Nunca o menos 1 vez al mes<br><input checked="" type="radio"/> 1 a 3 veces mes<br><input type="radio"/> 1 vez semana<br><input type="radio"/> 2 a 4 veces semana<br><input type="radio"/> 5 a 6 veces semana<br><input type="radio"/> 1 vez al día<br><input type="radio"/> 2 a 3 veces al día<br><input type="radio"/> 5 a 6 veces al día<br><input type="radio"/> más 6 veces al día |
| Espinacas o acelgas cocinadas           | <input type="radio"/> Nunca o menos 1 vez al mes<br><input type="radio"/> 1 a 3 veces mes<br><input checked="" type="radio"/> 1 vez semana<br><input type="radio"/> 2 a 4 veces semana<br><input type="radio"/> 5 a 6 veces semana<br><input type="radio"/> 1 vez al día<br><input type="radio"/> 2 a 3 veces al día<br><input type="radio"/> 5 a 6 veces al día<br><input type="radio"/> más 6 veces al día |
| Col o coliflor o brocoli cocinado       | <input type="radio"/> Nunca o menos 1 vez al mes<br><input type="radio"/> 1 a 3 veces mes<br><input checked="" type="radio"/> 1 vez semana<br><input type="radio"/> 2 a 4 veces semana<br><input type="radio"/> 5 a 6 veces semana<br><input type="radio"/> 1 vez al día<br><input type="radio"/> 2 a 3 veces al día<br><input type="radio"/> 5 a 6 veces al día<br><input type="radio"/> más 6 veces al día |

---

Lechuga o endivia o escarola

- ☐ Nunca o menos 1 vez al mes  
☐ 1 a 3 veces mes  
☐ 1 vez semana  
☒ 2 a 4 veces semana  
☐ 5 a 6 veces semana  
☐ 1 vez al día  
☐ 2 a 3 veces al día  
☐ 5 a 6 veces al día  
☐ más 6 veces al día

---

tomate ensalada

- ☐ Nunca o menos 1 vez al mes  
☐ 1 a 3 veces mes  
☐ 1 vez semana  
☒ 2 a 4 veces semana  
☐ 5 a 6 veces semana  
☐ 1 vez al día  
☐ 2 a 3 veces al día  
☐ 5 a 6 veces al día  
☐ más 6 veces al día

---

cebolla

- ☐ Nunca o menos 1 vez al mes  
☐ 1 a 3 veces mes  
☐ 1 vez semana  
☒ 2 a 4 veces semana  
☐ 5 a 6 veces semana  
☐ 1 vez al día  
☐ 2 a 3 veces al día  
☐ 5 a 6 veces al día  
☐ más 6 veces al día

---

Zanahoria o calabaza

- ☐ Nunca o menos 1 vez al mes  
☐ 1 a 3 veces mes  
☐ 1 vez semana  
☒ 2 a 4 veces semana  
☐ 5 a 6 veces semana  
☐ 1 vez al día  
☐ 2 a 3 veces al día  
☐ 5 a 6 veces al día  
☐ más 6 veces al día

---

Judías verdes

- ☐ Nunca o menos 1 vez al mes  
☐ 1 a 3 veces mes  
☐ 1 vez semana  
☒ 2 a 4 veces semana  
☐ 5 a 6 veces semana  
☐ 1 vez al día  
☐ 2 a 3 veces al día  
☐ 5 a 6 veces al día  
☐ más 6 veces al día

---

Berenjena o calabacin o pepino

- ☐ Nunca o menos 1 vez al mes  
☐ 1 a 3 veces mes  
☐ 1 vez semana  
☒ 2 a 4 veces semana  
☐ 5 a 6 veces semana  
☐ 1 vez al día  
☐ 2 a 3 veces al día  
☐ 5 a 6 veces al día  
☐ más 6 veces al día

---

|          |                                                                                                                                                                                                                                                                                                                                                                                                              |
|----------|--------------------------------------------------------------------------------------------------------------------------------------------------------------------------------------------------------------------------------------------------------------------------------------------------------------------------------------------------------------------------------------------------------------|
| pimiento | <input type="radio"/> Nunca o menos 1 vez al mes<br><input type="radio"/> 1 a 3 veces mes<br><input type="radio"/> 1 vez semana<br><input checked="" type="radio"/> 2 a 4 veces semana<br><input type="radio"/> 5 a 6 veces semana<br><input type="radio"/> 1 vez al día<br><input type="radio"/> 2 a 3 veces al día<br><input type="radio"/> 5 a 6 veces al día<br><input type="radio"/> más 6 veces al día |
|----------|--------------------------------------------------------------------------------------------------------------------------------------------------------------------------------------------------------------------------------------------------------------------------------------------------------------------------------------------------------------------------------------------------------------|

---

|           |                                                                                                                                                                                                                                                                                                                                                                                                              |
|-----------|--------------------------------------------------------------------------------------------------------------------------------------------------------------------------------------------------------------------------------------------------------------------------------------------------------------------------------------------------------------------------------------------------------------|
| alcachofa | <input type="radio"/> Nunca o menos 1 vez al mes<br><input type="radio"/> 1 a 3 veces mes<br><input type="radio"/> 1 vez semana<br><input checked="" type="radio"/> 2 a 4 veces semana<br><input type="radio"/> 5 a 6 veces semana<br><input type="radio"/> 1 vez al día<br><input type="radio"/> 2 a 3 veces al día<br><input type="radio"/> 5 a 6 veces al día<br><input type="radio"/> más 6 veces al día |
|-----------|--------------------------------------------------------------------------------------------------------------------------------------------------------------------------------------------------------------------------------------------------------------------------------------------------------------------------------------------------------------------------------------------------------------|

---

|            |                                                                                                                                                                                                                                                                                                                                                                                                              |
|------------|--------------------------------------------------------------------------------------------------------------------------------------------------------------------------------------------------------------------------------------------------------------------------------------------------------------------------------------------------------------------------------------------------------------|
| espárragos | <input type="radio"/> Nunca o menos 1 vez al mes<br><input type="radio"/> 1 a 3 veces mes<br><input type="radio"/> 1 vez semana<br><input checked="" type="radio"/> 2 a 4 veces semana<br><input type="radio"/> 5 a 6 veces semana<br><input type="radio"/> 1 vez al día<br><input type="radio"/> 2 a 3 veces al día<br><input type="radio"/> 5 a 6 veces al día<br><input type="radio"/> más 6 veces al día |
|------------|--------------------------------------------------------------------------------------------------------------------------------------------------------------------------------------------------------------------------------------------------------------------------------------------------------------------------------------------------------------------------------------------------------------|

---

|              |                                                                                                                                                                                                                                                                                                                                                                                                              |
|--------------|--------------------------------------------------------------------------------------------------------------------------------------------------------------------------------------------------------------------------------------------------------------------------------------------------------------------------------------------------------------------------------------------------------------|
| maíz hervido | <input type="radio"/> Nunca o menos 1 vez al mes<br><input type="radio"/> 1 a 3 veces mes<br><input type="radio"/> 1 vez semana<br><input checked="" type="radio"/> 2 a 4 veces semana<br><input type="radio"/> 5 a 6 veces semana<br><input type="radio"/> 1 vez al día<br><input type="radio"/> 2 a 3 veces al día<br><input type="radio"/> 5 a 6 veces al día<br><input type="radio"/> más 6 veces al día |
|--------------|--------------------------------------------------------------------------------------------------------------------------------------------------------------------------------------------------------------------------------------------------------------------------------------------------------------------------------------------------------------------------------------------------------------|

---

|           |                                                                                                                                                                                                                                                                                                                                                                                                              |
|-----------|--------------------------------------------------------------------------------------------------------------------------------------------------------------------------------------------------------------------------------------------------------------------------------------------------------------------------------------------------------------------------------------------------------------|
| legumbres | <input type="radio"/> Nunca o menos 1 vez al mes<br><input type="radio"/> 1 a 3 veces mes<br><input type="radio"/> 1 vez semana<br><input checked="" type="radio"/> 2 a 4 veces semana<br><input type="radio"/> 5 a 6 veces semana<br><input type="radio"/> 1 vez al día<br><input type="radio"/> 2 a 3 veces al día<br><input type="radio"/> 5 a 6 veces al día<br><input type="radio"/> más 6 veces al día |
|-----------|--------------------------------------------------------------------------------------------------------------------------------------------------------------------------------------------------------------------------------------------------------------------------------------------------------------------------------------------------------------------------------------------------------------|

---

|                       |                                                                                                                                                                                                                                                                                                                                                                                                              |
|-----------------------|--------------------------------------------------------------------------------------------------------------------------------------------------------------------------------------------------------------------------------------------------------------------------------------------------------------------------------------------------------------------------------------------------------------|
| naranjas o mandarinas | <input type="radio"/> Nunca o menos 1 vez al mes<br><input type="radio"/> 1 a 3 veces mes<br><input type="radio"/> 1 vez semana<br><input checked="" type="radio"/> 2 a 4 veces semana<br><input type="radio"/> 5 a 6 veces semana<br><input type="radio"/> 1 vez al día<br><input type="radio"/> 2 a 3 veces al día<br><input type="radio"/> 5 a 6 veces al día<br><input type="radio"/> más 6 veces al día |
|-----------------------|--------------------------------------------------------------------------------------------------------------------------------------------------------------------------------------------------------------------------------------------------------------------------------------------------------------------------------------------------------------------------------------------------------------|

---

---

zum natural fruta

- ☐ Nunca o menos 1 vez al mes  
☐ 1 a 3 veces mes  
☐ 1 vez semana  
☐ 2 a 4 veces semana  
☒ 5 a 6 veces semana  
☐ 1 vez al día  
☐ 2 a 3 veces al día  
☐ 5 a 6 veces al día  
☐ más 6 veces al día

---

platano

- ☐ Nunca o menos 1 vez al mes  
☐ 1 a 3 veces mes  
☐ 1 vez semana  
☐ 2 a 4 veces semana  
☒ 5 a 6 veces semana  
☐ 1 vez al día  
☐ 2 a 3 veces al día  
☐ 5 a 6 veces al día  
☐ más 6 veces al día

---

manzana o pera

- ☐ Nunca o menos 1 vez al mes  
☐ 1 a 3 veces mes  
☐ 1 vez semana  
☐ 2 a 4 veces semana  
☒ 5 a 6 veces semana  
☐ 1 vez al día  
☐ 2 a 3 veces al día  
☐ 5 a 6 veces al día  
☐ más 6 veces al día

---

melocotón o nectarina

- ☐ Nunca o menos 1 vez al mes  
☐ 1 a 3 veces mes  
☒ 1 vez semana  
☐ 2 a 4 veces semana  
☐ 5 a 6 veces semana  
☐ 1 vez al día  
☐ 2 a 3 veces al día  
☐ 5 a 6 veces al día  
☐ más 6 veces al día

---

sandia o melon

- ☐ Nunca o menos 1 vez al mes  
☐ 1 a 3 veces mes  
☒ 1 vez semana  
☐ 2 a 4 veces semana  
☐ 5 a 6 veces semana  
☐ 1 vez al día  
☐ 2 a 3 veces al día  
☐ 5 a 6 veces al día  
☐ más 6 veces al día

---

uva

- ☐ Nunca o menos 1 vez al mes  
☐ 1 a 3 veces mes  
☐ 1 vez semana  
☐ 2 a 4 veces semana  
☒ 5 a 6 veces semana  
☐ 1 vez al día  
☐ 2 a 3 veces al día  
☐ 5 a 6 veces al día  
☐ más 6 veces al día

---

bruna o ciruela

- ☐ Nunca o menos 1 vez al mes  
☐ 1 a 3 veces mes  
☒ 1 vez semana  
☐ 2 a 4 veces semana  
☐ 5 a 6 veces semana  
☐ 1 vez al día  
☐ 2 a 3 veces al día  
☐ 5 a 6 veces al día  
☐ más 6 veces al día

---

kiwi

- ☐ Nunca o menos 1 vez al mes  
☐ 1 a 3 veces mes  
☒ 1 vez semana  
☐ 2 a 4 veces semana  
☐ 5 a 6 veces semana  
☐ 1 vez al día  
☐ 2 a 3 veces al día  
☐ 5 a 6 veces al día  
☐ más 6 veces al día

---

aceituna

- ☐ Nunca o menos 1 vez al mes  
☐ 1 a 3 veces mes  
☐ 1 vez semana  
☐ 2 a 4 veces semana  
☒ 5 a 6 veces semana  
☐ 1 vez al día  
☐ 2 a 3 veces al día  
☐ 5 a 6 veces al día  
☐ más 6 veces al día

---

frutos secos

- ☐ Nunca o menos 1 vez al mes  
☐ 1 a 3 veces mes  
☐ 1 vez semana  
☐ 2 a 4 veces semana  
☐ 5 a 6 veces semana  
☒ 1 vez al día  
☐ 2 a 3 veces al día  
☐ 5 a 6 veces al día  
☐ más 6 veces al día

---

pan blanco

- ☐ Nunca o menos 1 vez al mes  
☒ 1 a 3 veces mes  
☐ 1 vez semana  
☐ 2 a 4 veces semana  
☐ 5 a 6 veces semana  
☐ 1 vez al día  
☐ 2 a 3 veces al día  
☐ 5 a 6 veces al día  
☐ más 6 veces al día

---

pan integral

- ☐ Nunca o menos 1 vez al mes  
☐ 1 a 3 veces mes  
☐ 1 vez semana  
☒ 2 a 4 veces semana  
☐ 5 a 6 veces semana  
☐ 1 vez al día  
☐ 2 a 3 veces al día  
☐ 5 a 6 veces al día  
☐ más 6 veces al día

---

cereales desayuno

- ☐ Nunca o menos 1 vez al mes  
☐ 1 a 3 veces mes  
☒ 1 vez semana  
☐ 2 a 4 veces semana  
☐ 5 a 6 veces semana  
☐ 1 vez al día  
☐ 2 a 3 veces al día  
☐ 5 a 6 veces al día  
☐ más 6 veces al día

---

patatas fritas

- ☐ Nunca o menos 1 vez al mes  
☒ 1 a 3 veces mes  
☐ 1 vez semana  
☐ 2 a 4 veces semana  
☐ 5 a 6 veces semana  
☐ 1 vez al día  
☐ 2 a 3 veces al día  
☐ 5 a 6 veces al día  
☐ más 6 veces al día

---

patatas cocidas o asadas

- ☐ Nunca o menos 1 vez al mes  
☒ 1 a 3 veces mes  
☐ 1 vez semana  
☐ 2 a 4 veces semana  
☐ 5 a 6 veces semana  
☐ 1 vez al día  
☐ 2 a 3 veces al día  
☐ 5 a 6 veces al día  
☐ más 6 veces al día

---

bolsa papas

- ☐ Nunca o menos 1 vez al mes  
☐ 1 a 3 veces mes  
☐ 1 vez semana  
☒ 2 a 4 veces semana  
☐ 5 a 6 veces semana  
☐ 1 vez al día  
☐ 2 a 3 veces al día  
☐ 5 a 6 veces al día  
☐ más 6 veces al día

---

arroz cocinado

- ☐ Nunca o menos 1 vez al mes  
☐ 1 a 3 veces mes  
☒ 1 vez semana  
☐ 2 a 4 veces semana  
☐ 5 a 6 veces semana  
☐ 1 vez al día  
☐ 2 a 3 veces al día  
☐ 5 a 6 veces al día  
☐ más 6 veces al día

---

pasta

- ☐ Nunca o menos 1 vez al mes  
☐ 1 a 3 veces mes  
☒ 1 vez semana  
☐ 2 a 4 veces semana  
☐ 5 a 6 veces semana  
☐ 1 vez al día  
☐ 2 a 3 veces al día  
☐ 5 a 6 veces al día  
☐ más 6 veces al día

|                     |                                                                                                                                                                                                                                                                                                                                                                                                              |
|---------------------|--------------------------------------------------------------------------------------------------------------------------------------------------------------------------------------------------------------------------------------------------------------------------------------------------------------------------------------------------------------------------------------------------------------|
| pizza               | <input type="radio"/> Nunca o menos 1 vez al mes<br><input type="radio"/> 1 a 3 veces mes<br><input checked="" type="radio"/> 1 vez semana<br><input type="radio"/> 2 a 4 veces semana<br><input type="radio"/> 5 a 6 veces semana<br><input type="radio"/> 1 vez al día<br><input type="radio"/> 2 a 3 veces al día<br><input type="radio"/> 5 a 6 veces al día<br><input type="radio"/> más 6 veces al día |
| aceite oliva        | <input type="radio"/> Nunca o menos 1 vez al mes<br><input type="radio"/> 1 a 3 veces mes<br><input type="radio"/> 1 vez semana<br><input type="radio"/> 2 a 4 veces semana<br><input checked="" type="radio"/> 5 a 6 veces semana<br><input type="radio"/> 1 vez al día<br><input type="radio"/> 2 a 3 veces al día<br><input type="radio"/> 5 a 6 veces al día<br><input type="radio"/> más 6 veces al día |
| otros aceites       | <input type="radio"/> Nunca o menos 1 vez al mes<br><input type="radio"/> 1 a 3 veces mes<br><input type="radio"/> 1 vez semana<br><input checked="" type="radio"/> 2 a 4 veces semana<br><input type="radio"/> 5 a 6 veces semana<br><input type="radio"/> 1 vez al día<br><input type="radio"/> 2 a 3 veces al día<br><input type="radio"/> 5 a 6 veces al día<br><input type="radio"/> más 6 veces al día |
| margarina           | <input type="radio"/> Nunca o menos 1 vez al mes<br><input type="radio"/> 1 a 3 veces mes<br><input type="radio"/> 1 vez semana<br><input checked="" type="radio"/> 2 a 4 veces semana<br><input type="radio"/> 5 a 6 veces semana<br><input type="radio"/> 1 vez al día<br><input type="radio"/> 2 a 3 veces al día<br><input type="radio"/> 5 a 6 veces al día<br><input type="radio"/> más 6 veces al día |
| mantequilla         | <input checked="" type="radio"/> Nunca o menos 1 vez al mes<br><input type="radio"/> 1 a 3 veces mes<br><input type="radio"/> 1 vez semana<br><input type="radio"/> 2 a 4 veces semana<br><input type="radio"/> 5 a 6 veces semana<br><input type="radio"/> 1 vez al día<br><input type="radio"/> 2 a 3 veces al día<br><input type="radio"/> 5 a 6 veces al día<br><input type="radio"/> más 6 veces al día |
| galletas tipo maria | <input type="radio"/> Nunca o menos 1 vez al mes<br><input type="radio"/> 1 a 3 veces mes<br><input type="radio"/> 1 vez semana<br><input checked="" type="radio"/> 2 a 4 veces semana<br><input type="radio"/> 5 a 6 veces semana<br><input type="radio"/> 1 vez al día<br><input type="radio"/> 2 a 3 veces al día<br><input type="radio"/> 5 a 6 veces al día<br><input type="radio"/> más 6 veces al día |

---

galletas chocolate

- ☐ Nunca o menos 1 vez al mes  
☒ 1 a 3 veces mes  
☐ 1 vez semana  
☐ 2 a 4 veces semana  
☐ 5 a 6 veces semana  
☐ 1 vez al día  
☐ 2 a 3 veces al día  
☐ 5 a 6 veces al día  
☐ más 6 veces al día

---

bolleria

- ☐ Nunca o menos 1 vez al mes  
☐ 1 a 3 veces mes  
☒ 1 vez semana  
☐ 2 a 4 veces semana  
☐ 5 a 6 veces semana  
☐ 1 vez al día  
☐ 2 a 3 veces al día  
☐ 5 a 6 veces al día  
☐ más 6 veces al día

---

chocolate o bombones

- ☐ Nunca o menos 1 vez al mes  
☐ 1 a 3 veces mes  
☒ 1 vez semana  
☐ 2 a 4 veces semana  
☐ 5 a 6 veces semana  
☐ 1 vez al día  
☐ 2 a 3 veces al día  
☐ 5 a 6 veces al día  
☐ más 6 veces al día

---

chocolate polvo o colacao

- ☐ Nunca o menos 1 vez al mes  
☐ 1 a 3 veces mes  
☐ 1 vez semana  
☒ 2 a 4 veces semana  
☐ 5 a 6 veces semana  
☐ 1 vez al día  
☐ 2 a 3 veces al día  
☐ 5 a 6 veces al día  
☐ más 6 veces al día

---

vino tinto

- ☒ Nunca o menos 1 vez al mes  
☐ 1 a 3 veces mes  
☐ 1 vez semana  
☐ 2 a 4 veces semana  
☐ 5 a 6 veces semana  
☐ 1 vez al día  
☐ 2 a 3 veces al día  
☐ 5 a 6 veces al día  
☐ más 6 veces al día

---

vino blanco

- ☒ Nunca o menos 1 vez al mes  
☐ 1 a 3 veces mes  
☐ 1 vez semana  
☐ 2 a 4 veces semana  
☐ 5 a 6 veces semana  
☐ 1 vez al día  
☐ 2 a 3 veces al día  
☐ 5 a 6 veces al día  
☐ más 6 veces al día



|                       |                                                                                                                                                                                                                                                                                                                                                                                                              |
|-----------------------|--------------------------------------------------------------------------------------------------------------------------------------------------------------------------------------------------------------------------------------------------------------------------------------------------------------------------------------------------------------------------------------------------------------|
| vino seco o vermut    | <input checked="" type="radio"/> Nunca o menos 1 vez al mes<br><input type="radio"/> 1 a 3 veces mes<br><input type="radio"/> 1 vez semana<br><input type="radio"/> 2 a 4 veces semana<br><input type="radio"/> 5 a 6 veces semana<br><input type="radio"/> 1 vez al día<br><input type="radio"/> 2 a 3 veces al día<br><input type="radio"/> 5 a 6 veces al día<br><input type="radio"/> más 6 veces al día |
| cerveza               | <input checked="" type="radio"/> Nunca o menos 1 vez al mes<br><input type="radio"/> 1 a 3 veces mes<br><input type="radio"/> 1 vez semana<br><input type="radio"/> 2 a 4 veces semana<br><input type="radio"/> 5 a 6 veces semana<br><input type="radio"/> 1 vez al día<br><input type="radio"/> 2 a 3 veces al día<br><input type="radio"/> 5 a 6 veces al día<br><input type="radio"/> más 6 veces al día |
| cerveza sin alcohol   | <input checked="" type="radio"/> Nunca o menos 1 vez al mes<br><input type="radio"/> 1 a 3 veces mes<br><input type="radio"/> 1 vez semana<br><input type="radio"/> 2 a 4 veces semana<br><input type="radio"/> 5 a 6 veces semana<br><input type="radio"/> 1 vez al día<br><input type="radio"/> 2 a 3 veces al día<br><input type="radio"/> 5 a 6 veces al día<br><input type="radio"/> más 6 veces al día |
| licores               | <input checked="" type="radio"/> Nunca o menos 1 vez al mes<br><input type="radio"/> 1 a 3 veces mes<br><input type="radio"/> 1 vez semana<br><input type="radio"/> 2 a 4 veces semana<br><input type="radio"/> 5 a 6 veces semana<br><input type="radio"/> 1 vez al día<br><input type="radio"/> 2 a 3 veces al día<br><input type="radio"/> 5 a 6 veces al día<br><input type="radio"/> más 6 veces al día |
| ginebra o ron o vodka | <input checked="" type="radio"/> Nunca o menos 1 vez al mes<br><input type="radio"/> 1 a 3 veces mes<br><input type="radio"/> 1 vez semana<br><input type="radio"/> 2 a 4 veces semana<br><input type="radio"/> 5 a 6 veces semana<br><input type="radio"/> 1 vez al día<br><input type="radio"/> 2 a 3 veces al día<br><input type="radio"/> 5 a 6 veces al día<br><input type="radio"/> más 6 veces al día |
| refresco normal       | <input type="radio"/> Nunca o menos 1 vez al mes<br><input type="radio"/> 1 a 3 veces mes<br><input type="radio"/> 1 vez semana<br><input checked="" type="radio"/> 2 a 4 veces semana<br><input type="radio"/> 5 a 6 veces semana<br><input type="radio"/> 1 vez al día<br><input type="radio"/> 2 a 3 veces al día<br><input type="radio"/> 5 a 6 veces al día<br><input type="radio"/> más 6 veces al día |

|                          |                                                                                                                                                                                                                                                                                                                                                                                                              |
|--------------------------|--------------------------------------------------------------------------------------------------------------------------------------------------------------------------------------------------------------------------------------------------------------------------------------------------------------------------------------------------------------------------------------------------------------|
| refresco sin azúcar      | <input type="radio"/> Nunca o menos 1 vez al mes<br><input type="radio"/> 1 a 3 veces mes<br><input type="radio"/> 1 vez semana<br><input checked="" type="radio"/> 2 a 4 veces semana<br><input type="radio"/> 5 a 6 veces semana<br><input type="radio"/> 1 vez al día<br><input type="radio"/> 2 a 3 veces al día<br><input type="radio"/> 5 a 6 veces al día<br><input type="radio"/> más 6 veces al día |
| Agua del grifo           | <input checked="" type="radio"/> Nunca o menos 1 vez al mes<br><input type="radio"/> 1 a 3 veces mes<br><input type="radio"/> 1 vez semana<br><input type="radio"/> 2 a 4 veces semana<br><input type="radio"/> 5 a 6 veces semana<br><input type="radio"/> 1 vez al día<br><input type="radio"/> 2 a 3 veces al día<br><input type="radio"/> 5 a 6 veces al día<br><input type="radio"/> más 6 veces al día |
| agua embotellada sin gas | <input type="radio"/> Nunca o menos 1 vez al mes<br><input type="radio"/> 1 a 3 veces mes<br><input type="radio"/> 1 vez semana<br><input type="radio"/> 2 a 4 veces semana<br><input type="radio"/> 5 a 6 veces semana<br><input type="radio"/> 1 vez al día<br><input type="radio"/> 2 a 3 veces al día<br><input type="radio"/> 5 a 6 veces al día<br><input checked="" type="radio"/> más 6 veces al día |
| agua embotellada con gas | <input type="radio"/> Nunca o menos 1 vez al mes<br><input checked="" type="radio"/> 1 a 3 veces mes<br><input type="radio"/> 1 vez semana<br><input type="radio"/> 2 a 4 veces semana<br><input type="radio"/> 5 a 6 veces semana<br><input type="radio"/> 1 vez al día<br><input type="radio"/> 2 a 3 veces al día<br><input type="radio"/> 5 a 6 veces al día<br><input type="radio"/> más 6 veces al día |
| zumو frutas embasado     | <input type="radio"/> Nunca o menos 1 vez al mes<br><input type="radio"/> 1 a 3 veces mes<br><input type="radio"/> 1 vez semana<br><input type="radio"/> 2 a 4 veces semana<br><input type="radio"/> 5 a 6 veces semana<br><input type="radio"/> 1 vez al día<br><input checked="" type="radio"/> 2 a 3 veces al día<br><input type="radio"/> 5 a 6 veces al día<br><input type="radio"/> más 6 veces al día |
| cafe                     | <input type="radio"/> Nunca o menos 1 vez al mes<br><input type="radio"/> 1 a 3 veces mes<br><input type="radio"/> 1 vez semana<br><input type="radio"/> 2 a 4 veces semana<br><input type="radio"/> 5 a 6 veces semana<br><input checked="" type="radio"/> 1 vez al día<br><input type="radio"/> 2 a 3 veces al día<br><input type="radio"/> 5 a 6 veces al día<br><input type="radio"/> más 6 veces al día |

---

cafe descafeinado

- ☐ Nunca o menos 1 vez al mes  
☐ 1 a 3 veces mes  
☐ 1 vez semana  
☐ 2 a 4 veces semana  
☐ 5 a 6 veces semana  
☒ 1 vez al día  
☐ 2 a 3 veces al día  
☐ 5 a 6 veces al día  
☐ más 6 veces al día

---

te o infusión

- ☐ Nunca o menos 1 vez al mes  
☐ 1 a 3 veces mes  
☐ 1 vez semana  
☐ 2 a 4 veces semana  
☐ 5 a 6 veces semana  
☒ 1 vez al día  
☐ 2 a 3 veces al día  
☐ 5 a 6 veces al día  
☐ más 6 veces al día

---

sopa o puré verduras

- ☐ Nunca o menos 1 vez al mes  
☐ 1 a 3 veces mes  
☐ 1 vez semana  
☒ 2 a 4 veces semana  
☐ 5 a 6 veces semana  
☐ 1 vez al día  
☐ 2 a 3 veces al día  
☐ 5 a 6 veces al día  
☐ más 6 veces al día

---

croquetas pollo jamón

- ☐ Nunca o menos 1 vez al mes  
☐ 1 a 3 veces mes  
☒ 1 vez semana  
☐ 2 a 4 veces semana  
☐ 5 a 6 veces semana  
☐ 1 vez al día  
☐ 2 a 3 veces al día  
☐ 5 a 6 veces al día  
☐ más 6 veces al día

---

croquetas pescado

- ☐ Nunca o menos 1 vez al mes  
☐ 1 a 3 veces mes  
☒ 1 vez semana  
☐ 2 a 4 veces semana  
☐ 5 a 6 veces semana  
☐ 1 vez al día  
☐ 2 a 3 veces al día  
☐ 5 a 6 veces al día  
☐ más 6 veces al día

---

mayonesa

- ☐ Nunca o menos 1 vez al mes  
☐ 1 a 3 veces mes  
☐ 1 vez semana  
☒ 2 a 4 veces semana  
☐ 5 a 6 veces semana  
☐ 1 vez al día  
☐ 2 a 3 veces al día  
☐ 5 a 6 veces al día  
☐ más 6 veces al día

|                  |                                                                                                                                                                                                                                                                                                                                                                                                              |
|------------------|--------------------------------------------------------------------------------------------------------------------------------------------------------------------------------------------------------------------------------------------------------------------------------------------------------------------------------------------------------------------------------------------------------------|
| salsa tomate     | <input type="radio"/> Nunca o menos 1 vez al mes<br><input type="radio"/> 1 a 3 veces mes<br><input checked="" type="radio"/> 1 vez semana<br><input type="radio"/> 2 a 4 veces semana<br><input type="radio"/> 5 a 6 veces semana<br><input type="radio"/> 1 vez al día<br><input type="radio"/> 2 a 3 veces al día<br><input type="radio"/> 5 a 6 veces al día<br><input type="radio"/> más 6 veces al día |
| ketchup          | <input type="radio"/> Nunca o menos 1 vez al mes<br><input checked="" type="radio"/> 1 a 3 veces mes<br><input type="radio"/> 1 vez semana<br><input type="radio"/> 2 a 4 veces semana<br><input type="radio"/> 5 a 6 veces semana<br><input type="radio"/> 1 vez al día<br><input type="radio"/> 2 a 3 veces al día<br><input type="radio"/> 5 a 6 veces al día<br><input type="radio"/> más 6 veces al día |
| sal              | <input type="radio"/> Nunca o menos 1 vez al mes<br><input type="radio"/> 1 a 3 veces mes<br><input type="radio"/> 1 vez semana<br><input checked="" type="radio"/> 2 a 4 veces semana<br><input type="radio"/> 5 a 6 veces semana<br><input type="radio"/> 1 vez al día<br><input type="radio"/> 2 a 3 veces al día<br><input type="radio"/> 5 a 6 veces al día<br><input type="radio"/> más 6 veces al día |
| ajo              | <input type="radio"/> Nunca o menos 1 vez al mes<br><input type="radio"/> 1 a 3 veces mes<br><input type="radio"/> 1 vez semana<br><input checked="" type="radio"/> 2 a 4 veces semana<br><input type="radio"/> 5 a 6 veces semana<br><input type="radio"/> 1 vez al día<br><input type="radio"/> 2 a 3 veces al día<br><input type="radio"/> 5 a 6 veces al día<br><input type="radio"/> más 6 veces al día |
| mermelada o miel | <input type="radio"/> Nunca o menos 1 vez al mes<br><input type="radio"/> 1 a 3 veces mes<br><input checked="" type="radio"/> 1 vez semana<br><input type="radio"/> 2 a 4 veces semana<br><input type="radio"/> 5 a 6 veces semana<br><input type="radio"/> 1 vez al día<br><input type="radio"/> 2 a 3 veces al día<br><input type="radio"/> 5 a 6 veces al día<br><input type="radio"/> más 6 veces al día |
| azúcar           | <input type="radio"/> Nunca o menos 1 vez al mes<br><input type="radio"/> 1 a 3 veces mes<br><input type="radio"/> 1 vez semana<br><input type="radio"/> 2 a 4 veces semana<br><input type="radio"/> 5 a 6 veces semana<br><input type="radio"/> 1 vez al día<br><input type="radio"/> 2 a 3 veces al día<br><input type="radio"/> 5 a 6 veces al día<br><input type="radio"/> más 6 veces al día            |

---

Otro alimento

---

suplementos vitamínicos

- ☐ si  
☒ no

---

suplementos vitamínicos

---

dieta previa

- ☐ si  
☒ no

motivo dieta

- ☒ no dieta  
☐ control peso  
☐ control colesterol  
☐ control diabetes  
☐ problemas estómago  
☐ problemas vesícula o hepáticos  
☐ HTA o cardiopatía  
☐ problemas renales  
☐ alergia alimentaria  
☐ ácido úrico elevado  
☐ vegetariana  
☐ otros

---

cambio alimentos año previo gestación

---

- ☐ si  
☒ no

cambio lácteos

- ☐ eliminado  
☐ disminuido  
☐ igual  
☐ aumentado  
☐ no sabe

cambio huevos

- ☐ eliminado  
☐ disminuido  
☐ igual  
☐ aumentado  
☐ no sabe

cambio carne

- ☐ eliminado  
☐ disminuido  
☐ igual  
☐ aumentado  
☐ no sabe

cambio pescado

- ☐ eliminado  
☐ disminuido  
☐ igual  
☐ aumentado  
☐ no sabe

cambio verduras

- ☐ eliminado  
☐ disminuido  
☐ igual  
☐ aumentado  
☐ no sabe

|                            |                                                                                                                                                                                                                        |
|----------------------------|------------------------------------------------------------------------------------------------------------------------------------------------------------------------------------------------------------------------|
| cambio legumbres           | <input type="radio"/> eliminado<br><input type="radio"/> disminuido<br><input type="radio"/> igual<br><input type="radio"/> aumentado<br><input type="radio"/> no sabe                                                 |
| cambio fruta               | <input type="radio"/> eliminado<br><input type="radio"/> disminuido<br><input type="radio"/> igual<br><input type="radio"/> aumentado<br><input type="radio"/> no sabe                                                 |
| cambio pan                 | <input type="radio"/> eliminado<br><input type="radio"/> disminuido<br><input type="radio"/> igual<br><input type="radio"/> aumentado<br><input type="radio"/> no sabe                                                 |
| cambio aceite oliva        | <input type="radio"/> eliminado<br><input type="radio"/> disminuido<br><input type="radio"/> igual<br><input type="radio"/> aumentado<br><input type="radio"/> no sabe                                                 |
| cambio mante o margarina   | <input type="radio"/> eliminado<br><input type="radio"/> disminuido<br><input type="radio"/> igual<br><input type="radio"/> aumentado<br><input type="radio"/> no sabe                                                 |
| cambio azúcar y dulces     | <input type="radio"/> eliminado<br><input type="radio"/> disminuido<br><input type="radio"/> igual<br><input type="radio"/> aumentado<br><input type="radio"/> no sabe                                                 |
| cambio bebidas alcohólicas | <input type="radio"/> eliminado<br><input type="radio"/> disminuido<br><input type="radio"/> igual<br><input type="radio"/> aumentado<br><input type="radio"/> no sabe                                                 |
| frecuencia comidas fritas  | <input type="radio"/> a diario<br><input type="radio"/> 5 a 6 veces semana<br><input type="radio"/> 2 a 4 veces semana<br><input checked="" type="radio"/> 1 vez semana<br><input type="radio"/> menos de 1 vez semana |
| carne                      | <input type="radio"/> no como<br><input type="radio"/> cruda<br><input type="radio"/> poco hecha<br><input type="radio"/> hecha<br><input checked="" type="radio"/> muy hecha                                          |
| grasa visible carne        | <input type="radio"/> quita toda<br><input checked="" type="radio"/> quita mayoría<br><input type="radio"/> quita un poco<br><input type="radio"/> no quita nada                                                       |

---

cocina carne

- ☒ a la plancha  
☐ a la parrilla  
☐ asada  
☐ frita  
☐ guisada

---

tostado quemado carne

- ☐ nunca  
☐ 1 vez mes  
☐ 2 a 3 veces mes  
☐ 1 vez semana  
☐ 2 a 3 semanas

---

tostado quemado pescado

- ☒ nunca  
☐ 1 vez mes  
☐ 2 a 3 veces mes  
☐ 1 vez semana  
☐ 2 a 3 semanas

---

socarrat paella

- ☐ nunca  
☐ 1 vez mes  
☐ 2 a 3 veces mes  
☒ 1 vez semana  
☐ 2 a 3 semanas

---

grasa o aceite cocinar

- ☐ mantequilla  
☐ margarina  
☒ aceite oliva  
☐ aceite oliva virgen extra  
☐ aceite vegetal  
☐ mezcla aceites

---

grasa aceite aliñar

- ☐ mantequilla  
☐ margarina  
☒ aceite oliva  
☐ aceite oliva virgen extra  
☐ aceite vegetal  
☐ mezcla aceites

---

grasa aceite freir

- ☐ mantequilla  
☐ margarina  
☒ aceite oliva  
☐ aceite oliva virgen extra  
☐ aceite vegetal  
☐ mezcla aceites

---

Ejercicio cuestionario

- ☒ si  
☐ no

---

horas de sueño incluido siesta

---

---

minutos siesta

---

---

horas televisión semana

---

|                                        |                                                                                                                                                                                                                                                                                                                                                                |
|----------------------------------------|----------------------------------------------------------------------------------------------------------------------------------------------------------------------------------------------------------------------------------------------------------------------------------------------------------------------------------------------------------------|
| actividad trabajo                      | <input type="radio"/> casi siempre sentado<br><input type="radio"/> sentado 50 por cien<br><input type="radio"/> casi siempre de pie, quieto<br><input type="radio"/> casi siempre levantado caminando y llevando pocas cosas<br><input type="radio"/> casi siempre levantado, caminando y llevado muchas cosas<br><input type="radio"/> trabajo manual pesado |
| tiempo caminar o bici al día           | <input type="radio"/> casi nunca<br><input type="radio"/> menos 20min día<br><input type="radio"/> 20 a 40 min día<br><input type="radio"/> 40 a 60 min día<br><input type="radio"/> 1h o 1h y media día<br><input type="radio"/> más de 1h y media al día                                                                                                     |
| tiempo tareas casa al día              | <input type="radio"/> menos de 1h día<br><input type="radio"/> 1 a 2h día<br><input type="radio"/> 3 a 4h día<br><input type="radio"/> 5 a 6h día<br><input type="radio"/> 7 a 8h día<br><input type="radio"/> más de 8h día                                                                                                                                   |
| tiempo libre televisión ordenador leer | <input type="radio"/> menos 1h día<br><input type="radio"/> 1h día<br><input checked="" type="radio"/> 2h día<br><input type="radio"/> 3h día<br><input type="radio"/> 4h día<br><input type="radio"/> 5 a 6h día<br><input type="radio"/> mas 6h día                                                                                                          |
| tiempo libre ejercicio o deporte       | <input type="radio"/> menos 1h semana<br><input type="radio"/> 1h semana<br><input type="radio"/> 2h semana<br><input checked="" type="radio"/> 3h semana<br><input type="radio"/> 4 a 5h semana<br><input type="radio"/> mas 5h semana                                                                                                                        |
| como se considera                      | <input type="radio"/> sedentaria<br><input type="radio"/> poco activa<br><input checked="" type="radio"/> moderadamente activa<br><input type="radio"/> bastante activa<br><input type="radio"/> muy activa<br><input type="radio"/> no sabe                                                                                                                   |
| FUR                                    | [*DATA REMOVED*]                                                                                                                                                                                                                                                                                                                                               |
| Semanas gestación 2T                   | [*DATA REMOVED*]                                                                                                                                                                                                                                                                                                                                               |
| Días gestación 2T                      | [*DATA REMOVED*]                                                                                                                                                                                                                                                                                                                                               |
| DBP 2T                                 | [*DATA REMOVED*]                                                                                                                                                                                                                                                                                                                                               |
| CC 2T                                  | [*DATA REMOVED*]                                                                                                                                                                                                                                                                                                                                               |
| AC 2T                                  | [*DATA REMOVED*]                                                                                                                                                                                                                                                                                                                                               |



|                                                   |                                                                                                                                                                                                 |
|---------------------------------------------------|-------------------------------------------------------------------------------------------------------------------------------------------------------------------------------------------------|
| LF 2T                                             | [*DATA REMOVED*]                                                                                                                                                                                |
| PFE 2T (Hadlock)                                  | [*DATA REMOVED*]                                                                                                                                                                                |
| Semanas gestación 3T                              | [*DATA REMOVED*]                                                                                                                                                                                |
| días 3T                                           | [*DATA REMOVED*]                                                                                                                                                                                |
| DBP 3T                                            | [*DATA REMOVED*]                                                                                                                                                                                |
| CC 3T                                             | [*DATA REMOVED*]                                                                                                                                                                                |
| AC 3T                                             | [*DATA REMOVED*]                                                                                                                                                                                |
| LF 3T                                             | [*DATA REMOVED*]                                                                                                                                                                                |
| PFE 3T (Hadlock)                                  | [*DATA REMOVED*]                                                                                                                                                                                |
| Semanas de gestación final                        | [*DATA REMOVED*]                                                                                                                                                                                |
| días gestación final                              | [*DATA REMOVED*]                                                                                                                                                                                |
| Localización placenta                             | <input type="radio"/> anterior<br><input type="radio"/> lateral derecha<br><input type="radio"/> lateral izquierda<br><input checked="" type="radio"/> posterior<br><input type="radio"/> fondo |
| Presentación longitudinal cefálica                | <input type="radio"/> no<br><input checked="" type="radio"/> si                                                                                                                                 |
| Dorso                                             | <input type="radio"/> izquierda anterior<br><input type="radio"/> izquierda posterior<br><input checked="" type="radio"/> derecha anterior<br><input type="radio"/> derecha posterior           |
| diámetro biparietal                               | [*DATA REMOVED*]                                                                                                                                                                                |
| Circunferencia craneal                            | [*DATA REMOVED*]                                                                                                                                                                                |
| Circunferencia abdominal                          | [*DATA REMOVED*]                                                                                                                                                                                |
| Longitud de femur                                 | [*DATA REMOVED*]                                                                                                                                                                                |
| tejido celular subcutáneo a nivel del muslo en mm | [*DATA REMOVED*]                                                                                                                                                                                |
| tejido celular subcutáneo en abdomen en mm        | [*DATA REMOVED*]                                                                                                                                                                                |
| Volumen del muslo en cm3                          | [*DATA REMOVED*]                                                                                                                                                                                |
| Peso fetal estimado según fórmula de Hadlock      | [*DATA REMOVED*]                                                                                                                                                                                |

|                                               |                                                                                                                                               |
|-----------------------------------------------|-----------------------------------------------------------------------------------------------------------------------------------------------|
| Percentil                                     | [*DATA REMOVED*]                                                                                                                              |
| Peso fetal estimado según fórmula de Scioscia | <hr/>                                                                                                                                         |
| Peso fetal estimado según fórmula de LEE      | <hr/>                                                                                                                                         |
| Tipo de parto                                 | <input type="radio"/> eutocico<br><input type="radio"/> instrumentado/ventosa<br><input checked="" type="radio"/> cesarea                     |
| fecha de nacimiento                           | [*DATA REMOVED*]                                                                                                                              |
| Días entre exploración y nacimiento           | [*DATA REMOVED*]                                                                                                                              |
| Peso RN en g                                  | [*DATA REMOVED*]                                                                                                                              |
| sexo                                          | <input checked="" type="radio"/> mujer<br><input type="radio"/> hombre                                                                        |
| Apgar 1 minuto                                | [*DATA REMOVED*]                                                                                                                              |
| Apgar 5 minutos                               | [*DATA REMOVED*]                                                                                                                              |
| Apgar 10 minutos                              | <hr/>                                                                                                                                         |
| antecedente Covid durante gestación           | <input type="radio"/> Yes<br><input checked="" type="radio"/> No                                                                              |
| Nivel de estudios                             | <input type="radio"/> ninguno<br><input type="radio"/> primarios<br><input type="radio"/> secundarios<br><input type="radio"/> universitarios |

# Base\_datos\_estimacion\_peso\_fetal

|                                       |                                                                                                                                                                                                                                                                                      |
|---------------------------------------|--------------------------------------------------------------------------------------------------------------------------------------------------------------------------------------------------------------------------------------------------------------------------------------|
| Número de identificación participante | 174                                                                                                                                                                                                                                                                                  |
| CODIGO PARTICIPANTE                   |                                                                                                                                                                                                                                                                                      |
| Edad                                  | [*DATA REMOVED*]                                                                                                                                                                                                                                                                     |
| Gestaciones                           | <input checked="" type="radio"/> 1<br><input type="radio"/> 2<br><input type="radio"/> 3<br><input type="radio"/> mas de 3                                                                                                                                                           |
| partos                                | <input checked="" type="radio"/> 0<br><input type="radio"/> 1<br><input type="radio"/> 2<br><input type="radio"/> 3<br><input type="radio"/> mas de 3                                                                                                                                |
| cesáreas                              | <input checked="" type="radio"/> 0<br><input type="radio"/> 1<br><input type="radio"/> 2<br><input type="radio"/> 3<br><input type="radio"/> mas de 3                                                                                                                                |
| Abortos                               | <input checked="" type="radio"/> 0<br><input type="radio"/> 1<br><input type="radio"/> 2<br><input type="radio"/> 3<br><input type="radio"/> mas de 3                                                                                                                                |
| Tipo de gestacion                     | <input checked="" type="radio"/> espontanea<br><input type="radio"/> IAC inseminación artificial conyuge<br><input type="radio"/> IAD inseminación artificial donante<br><input type="radio"/> FIV Fecundación in Vitro<br><input type="radio"/> Ovodon FIV con donación de ovocitos |
| peso previo a embarazo                | [*DATA REMOVED*]                                                                                                                                                                                                                                                                     |
| Ganancia ponderal embarazo            |                                                                                                                                                                                                                                                                                      |
| Talla madre                           | [*DATA REMOVED*]                                                                                                                                                                                                                                                                     |
| IMC previo embarazo                   | 24.218749999999996                                                                                                                                                                                                                                                                   |
| Patología obstétrica                  | <input type="radio"/> no<br><input checked="" type="radio"/> si                                                                                                                                                                                                                      |
| Diabetes pregestacional               | <input checked="" type="radio"/> no<br><input type="radio"/> si                                                                                                                                                                                                                      |
| Diabetes gestacional                  | <input type="radio"/> no<br><input checked="" type="radio"/> si                                                                                                                                                                                                                      |

|                                            |                                                                                                                                                                                      |
|--------------------------------------------|--------------------------------------------------------------------------------------------------------------------------------------------------------------------------------------|
| Diabetes gestacional con insulina          | <input checked="" type="radio"/> no<br><input type="radio"/> si                                                                                                                      |
| Diabetes gestacional con dieta y ejercicio | <input type="radio"/> no<br><input checked="" type="radio"/> si                                                                                                                      |
| Percentil fetos previos                    | <input checked="" type="radio"/> Nada<br><input type="radio"/> percentil menor de 10<br><input type="radio"/> percentil entre 10 y 90<br><input type="radio"/> percentil mayor de 90 |
| Exfumadora                                 | <input checked="" type="radio"/> Nada<br><input type="radio"/> menos de 5 años<br><input type="radio"/> 5 a 10 años<br><input type="radio"/> mayor o igual a 10 años                 |
| Hábito tabáquico                           | <input checked="" type="radio"/> no<br><input type="radio"/> si                                                                                                                      |
| fumadora                                   | [*DATA REMOVED*]                                                                                                                                                                     |
| Consumo otros tóxicos                      | <input checked="" type="radio"/> no<br><input type="radio"/> si                                                                                                                      |
| Hb 1T                                      | [*DATA REMOVED*]                                                                                                                                                                     |
| Htc 1T                                     | [*DATA REMOVED*]                                                                                                                                                                     |
| Hb 2T                                      | [*DATA REMOVED*]                                                                                                                                                                     |
| HTC 2T                                     | [*DATA REMOVED*]                                                                                                                                                                     |
| Hb 3T                                      | [*DATA REMOVED*]                                                                                                                                                                     |
| HTC 3T                                     | [*DATA REMOVED*]                                                                                                                                                                     |
| Suplemento FE oral                         | <input checked="" type="radio"/> si<br><input type="radio"/> no                                                                                                                      |
| Suplemento fe iv                           | <input type="radio"/> si<br><input checked="" type="radio"/> no                                                                                                                      |
| Transfusión                                | <input checked="" type="radio"/> no<br><input type="radio"/> si                                                                                                                      |
| Solicitada Vit D                           | <input checked="" type="radio"/> no<br><input type="radio"/> si                                                                                                                      |
| Deficit vit D                              | <input type="radio"/> no<br><input type="radio"/> si                                                                                                                                 |
| Suplemento vit D                           | <input type="radio"/> si<br><input type="radio"/> no                                                                                                                                 |

|                       |                                                                                                                                                                                                                                                                                                                                                                                                              |
|-----------------------|--------------------------------------------------------------------------------------------------------------------------------------------------------------------------------------------------------------------------------------------------------------------------------------------------------------------------------------------------------------------------------------------------------------|
| Dieta, cuestionario   | <input checked="" type="radio"/> sí<br><input type="radio"/> no                                                                                                                                                                                                                                                                                                                                              |
| Leche entera          | <input checked="" type="radio"/> Nunca o menos 1 vez al mes<br><input type="radio"/> 1 a 3 veces mes<br><input type="radio"/> 1 vez semana<br><input type="radio"/> 2 a 4 veces semana<br><input type="radio"/> 5 a 6 veces semana<br><input type="radio"/> 1 vez al día<br><input type="radio"/> 2 a 3 veces al día<br><input type="radio"/> 5 a 6 veces al día<br><input type="radio"/> más 6 veces al día |
| Leche semidesnatada   | <input type="radio"/> Nunca o menos 1 vez al mes<br><input type="radio"/> 1 a 3 veces mes<br><input type="radio"/> 1 vez semana<br><input type="radio"/> 2 a 4 veces semana<br><input type="radio"/> 5 a 6 veces semana<br><input type="radio"/> 1 vez al día<br><input checked="" type="radio"/> 2 a 3 veces al día<br><input type="radio"/> 5 a 6 veces al día<br><input type="radio"/> mas 6 veces al día |
| Leche desnatada       | <input checked="" type="radio"/> Nunca o menos 1 vez al mes<br><input type="radio"/> 1 a 3 veces mes<br><input type="radio"/> 1 vez semana<br><input type="radio"/> 2 a 4 veces semana<br><input type="radio"/> 5 a 6 veces semana<br><input type="radio"/> 1 vez al día<br><input type="radio"/> 2 a 3 veces al día<br><input type="radio"/> 5 a 6 veces al día<br><input type="radio"/> más 6 veces al día |
| Leche condensada      | <input checked="" type="radio"/> Nunca o menos 1 vez al mes<br><input type="radio"/> 1 a 3 veces mes<br><input type="radio"/> 1 vez semana<br><input type="radio"/> 2 a 4 veces semana<br><input type="radio"/> 5 a 6 veces semana<br><input type="radio"/> 1 vez al día<br><input type="radio"/> 2 a 3 veces al día<br><input type="radio"/> 5 a 6 veces al día<br><input type="radio"/> más 6 veces al día |
| nata o crema de leche | <input checked="" type="radio"/> Nunca o menos 1 vez al mes<br><input type="radio"/> 1 a 3 veces mes<br><input type="radio"/> 1 vez semana<br><input type="radio"/> 2 a 4 veces semana<br><input type="radio"/> 5 a 6 veces semana<br><input type="radio"/> 1 vez al día<br><input type="radio"/> 2 a 3 veces al día<br><input type="radio"/> 5 a 6 veces al día<br><input type="radio"/> más 6 veces al día |

---

Yogurt Entero

- ☐ Nunca o menos 1 vez al mes
- ☐ 1 a 3 veces mes
- ☐ 1 vez semana
- ☐ 2 a 4 veces semana
- ☐ 5 a 6 veces semana
- ☐ 1 vez al día
- ☒ 2 a 3 veces al día
- ☐ 5 a 6 veces al día
- ☐ más 6 veces al día

---

Yogurt desnatado

- ☒ Nunca o menos 1 vez al mes
- ☐ 1 a 3 veces mes
- ☐ 1 vez semana
- ☐ 2 a 4 veces semana
- ☐ 5 a 6 veces semana
- ☐ 1 vez al día
- ☐ 2 a 3 veces al día
- ☐ 5 a 6 veces al día
- ☐ más 6 veces al día

---

100g requesón o queso blando o queso fresco

- ☒ Nunca o menos 1 vez al mes
- ☐ 1 a 3 veces mes
- ☐ 1 vez semana
- ☐ 2 a 4 veces semana
- ☐ 5 a 6 veces semana
- ☐ 1 vez al día
- ☐ 2 a 3 veces al día
- ☐ 5 a 6 veces al día
- ☐ más 6 veces al día

---

queso curado o semicurado o cremoso

- ☐ Nunca o menos 1 vez al mes
- ☐ 1 a 3 veces mes
- ☐ 1 vez semana
- ☐ 2 a 4 veces semana
- ☐ 5 a 6 veces semana
- ☒ 1 vez al día
- ☐ 2 a 3 veces al día
- ☐ 5 a 6 veces al día
- ☐ más 6 veces al día

---

natillas flan pudding

- ☒ Nunca o menos 1 vez al mes
- ☐ 1 a 3 veces mes
- ☐ 1 vez semana
- ☐ 2 a 4 veces semana
- ☐ 5 a 6 veces semana
- ☐ 1 vez al día
- ☐ 2 a 3 veces al día
- ☐ 5 a 6 veces al día
- ☐ más 6 veces al día

---

Helado

- ☒ Nunca o menos 1 vez al mes
- ☐ 1 a 3 veces mes
- ☐ 1 vez semana
- ☐ 2 a 4 veces semana
- ☐ 5 a 6 veces semana
- ☐ 1 vez al día
- ☐ 2 a 3 veces al día
- ☐ 5 a 6 veces al día
- ☐ más 6 veces al día

|                                      |                                                                                                                                                                                                                                                                                                                                                                                                              |
|--------------------------------------|--------------------------------------------------------------------------------------------------------------------------------------------------------------------------------------------------------------------------------------------------------------------------------------------------------------------------------------------------------------------------------------------------------------|
| huevo                                | <input type="radio"/> Nunca o menos 1 vez al mes<br><input type="radio"/> 1 a 3 veces mes<br><input type="radio"/> 1 vez semana<br><input type="radio"/> 2 a 4 veces semana<br><input type="radio"/> 5 a 6 veces semana<br><input checked="" type="radio"/> 1 vez al día<br><input type="radio"/> 2 a 3 veces al día<br><input type="radio"/> 5 a 6 veces al día<br><input type="radio"/> más 6 veces al día |
| Pollo con piel                       | <input type="radio"/> Nunca o menos 1 vez al mes<br><input type="radio"/> 1 a 3 veces mes<br><input checked="" type="radio"/> 1 vez semana<br><input type="radio"/> 2 a 4 veces semana<br><input type="radio"/> 5 a 6 veces semana<br><input type="radio"/> 1 vez al día<br><input type="radio"/> 2 a 3 veces al día<br><input type="radio"/> 5 a 6 veces al día<br><input type="radio"/> más 6 veces al día |
| pollo sin piel                       | <input type="radio"/> Nunca o menos 1 vez al mes<br><input type="radio"/> 1 a 3 veces mes<br><input type="radio"/> 1 vez semana<br><input checked="" type="radio"/> 2 a 4 veces semana<br><input type="radio"/> 5 a 6 veces semana<br><input type="radio"/> 1 vez al día<br><input type="radio"/> 2 a 3 veces al día<br><input type="radio"/> 5 a 6 veces al día<br><input type="radio"/> más 6 veces al día |
| Ternera o cerdo o cordero            | <input type="radio"/> Nunca o menos 1 vez al mes<br><input checked="" type="radio"/> 1 a 3 veces mes<br><input type="radio"/> 1 vez semana<br><input type="radio"/> 2 a 4 veces semana<br><input type="radio"/> 5 a 6 veces semana<br><input type="radio"/> 1 vez al día<br><input type="radio"/> 2 a 3 veces al día<br><input type="radio"/> 5 a 6 veces al día<br><input type="radio"/> más 6 veces al día |
| carne caza: Conejo o codorniz o pato | <input checked="" type="radio"/> Nunca o menos 1 vez al mes<br><input type="radio"/> 1 a 3 veces mes<br><input type="radio"/> 1 vez semana<br><input type="radio"/> 2 a 4 veces semana<br><input type="radio"/> 5 a 6 veces semana<br><input type="radio"/> 1 vez al día<br><input type="radio"/> 2 a 3 veces al día<br><input type="radio"/> 5 a 6 veces al día<br><input type="radio"/> más 6 veces al día |
| Hígado de ternera o cerdo o pollo    | <input checked="" type="radio"/> Nunca o menos 1 vez al mes<br><input type="radio"/> 1 a 3 veces mes<br><input type="radio"/> 1 vez semana<br><input type="radio"/> 2 a 4 veces semana<br><input type="radio"/> 5 a 6 veces semana<br><input type="radio"/> 1 vez al día<br><input type="radio"/> 2 a 3 veces al día<br><input type="radio"/> 5 a 6 veces al día<br><input type="radio"/> más 6 veces al día |

---

Vísceras

- ☒ Nunca o menos 1 vez al mes  
☐ 1 a 3 veces mes  
☐ 1 vez semana  
☐ 2 a 4 veces semana  
☐ 5 a 6 veces semana  
☐ 1 vez al día  
☐ 2 a 3 veces al día  
☐ 5 a 6 veces al día  
☐ más 6 veces al día

---

Embutido

- ☒ Nunca o menos 1 vez al mes  
☐ 1 a 3 veces mes  
☐ 1 vez semana  
☐ 2 a 4 veces semana  
☐ 5 a 6 veces semana  
☐ 1 vez al día  
☐ 2 a 3 veces al día  
☐ 5 a 6 veces al día  
☐ más 6 veces al día

---

Salchicha o similar

- ☒ Nunca o menos 1 vez al mes  
☐ 1 a 3 veces mes  
☐ 1 vez semana  
☐ 2 a 4 veces semana  
☐ 5 a 6 veces semana  
☐ 1 vez al día  
☐ 2 a 3 veces al día  
☐ 5 a 6 veces al día  
☐ más 6 veces al día

---

Pate o foiegras

- ☒ Nunca o menos 1 vez al mes  
☐ 1 a 3 veces mes  
☐ 1 vez semana  
☐ 2 a 4 veces semana  
☐ 5 a 6 veces semana  
☐ 1 vez al día  
☐ 2 a 3 veces al día  
☐ 5 a 6 veces al día  
☐ más 6 veces al día

---

Hamburguesa

- ☐ Nunca o menos 1 vez al mes  
☐ 1 a 3 veces mes  
☒ 1 vez semana  
☐ 2 a 4 veces semana  
☐ 5 a 6 veces semana  
☐ 1 vez al día  
☐ 2 a 3 veces al día  
☐ 5 a 6 veces al día  
☐ más 6 veces al día

---

tocino o bacon

- ☒ Nunca o menos 1 vez al mes  
☐ 1 a 3 veces mes  
☐ 1 vez semana  
☐ 2 a 4 veces semana  
☐ 5 a 6 veces semana  
☐ 1 vez al día  
☐ 2 a 3 veces al día  
☐ 5 a 6 veces al día  
☐ más 6 veces al día



---

Pescado frito

- ☒ Nunca o menos 1 vez al mes  
☐ 1 a 3 veces mes  
☐ 1 vez semana  
☐ 2 a 4 veces semana  
☐ 5 a 6 veces semana  
☐ 1 vez al día  
☐ 2 a 3 veces al día  
☐ 5 a 6 veces al día  
☐ más 6 veces al día

---

pescado hervido blanco

- ☐ Nunca o menos 1 vez al mes  
☐ 1 a 3 veces mes  
☐ 1 vez semana  
☒ 2 a 4 veces semana  
☐ 5 a 6 veces semana  
☐ 1 vez al día  
☐ 2 a 3 veces al día  
☐ 5 a 6 veces al día  
☐ más 6 veces al día

---

pescado hervido azul

- ☐ Nunca o menos 1 vez al mes  
☐ 1 a 3 veces mes  
☐ 1 vez semana  
☒ 2 a 4 veces semana  
☐ 5 a 6 veces semana  
☐ 1 vez al día  
☐ 2 a 3 veces al día  
☐ 5 a 6 veces al día  
☐ más 6 veces al día

---

otros pescado azul

- ☐ Nunca o menos 1 vez al mes  
☐ 1 a 3 veces mes  
☐ 1 vez semana  
☒ 2 a 4 veces semana  
☐ 5 a 6 veces semana  
☐ 1 vez al día  
☐ 2 a 3 veces al día  
☐ 5 a 6 veces al día  
☐ más 6 veces al día

---

atun conserva

- ☐ Nunca o menos 1 vez al mes  
☐ 1 a 3 veces mes  
☐ 1 vez semana  
☒ 2 a 4 veces semana  
☐ 5 a 6 veces semana  
☐ 1 vez al día  
☐ 2 a 3 veces al día  
☐ 5 a 6 veces al día  
☐ más 6 veces al día

---

sardina conserva

- ☐ Nunca o menos 1 vez al mes  
☒ 1 a 3 veces mes  
☐ 1 vez semana  
☐ 2 a 4 veces semana  
☐ 5 a 6 veces semana  
☐ 1 vez al día  
☐ 2 a 3 veces al día  
☐ 5 a 6 veces al día  
☐ más 6 veces al día

|                                         |                                                                                                                                                                                                                                                                                                                                                                                                              |
|-----------------------------------------|--------------------------------------------------------------------------------------------------------------------------------------------------------------------------------------------------------------------------------------------------------------------------------------------------------------------------------------------------------------------------------------------------------------|
| pescado ahumado                         | <input checked="" type="radio"/> Nunca o menos 1 vez al mes<br><input type="radio"/> 1 a 3 veces mes<br><input type="radio"/> 1 vez semana<br><input type="radio"/> 2 a 4 veces semana<br><input type="radio"/> 5 a 6 veces semana<br><input type="radio"/> 1 vez al día<br><input type="radio"/> 2 a 3 veces al día<br><input type="radio"/> 5 a 6 veces al día<br><input type="radio"/> más 6 veces al día |
| almejas o mejillones o ostras unos 100g | <input type="radio"/> Nunca o menos 1 vez al mes<br><input type="radio"/> 1 a 3 veces mes<br><input checked="" type="radio"/> 1 vez semana<br><input type="radio"/> 2 a 4 veces semana<br><input type="radio"/> 5 a 6 veces semana<br><input type="radio"/> 1 vez al día<br><input type="radio"/> 2 a 3 veces al día<br><input type="radio"/> 5 a 6 veces al día<br><input type="radio"/> más 6 veces al día |
| calamar o chipiron o sepia unos 100g    | <input checked="" type="radio"/> Nunca o menos 1 vez al mes<br><input type="radio"/> 1 a 3 veces mes<br><input type="radio"/> 1 vez semana<br><input type="radio"/> 2 a 4 veces semana<br><input type="radio"/> 5 a 6 veces semana<br><input type="radio"/> 1 vez al día<br><input type="radio"/> 2 a 3 veces al día<br><input type="radio"/> 5 a 6 veces al día<br><input type="radio"/> más 6 veces al día |
| marisco unos 100g                       | <input type="radio"/> Nunca o menos 1 vez al mes<br><input checked="" type="radio"/> 1 a 3 veces mes<br><input type="radio"/> 1 vez semana<br><input type="radio"/> 2 a 4 veces semana<br><input type="radio"/> 5 a 6 veces semana<br><input type="radio"/> 1 vez al día<br><input type="radio"/> 2 a 3 veces al día<br><input type="radio"/> 5 a 6 veces al día<br><input type="radio"/> más 6 veces al día |
| Espinacas o acelgas cocinadas           | <input type="radio"/> Nunca o menos 1 vez al mes<br><input type="radio"/> 1 a 3 veces mes<br><input type="radio"/> 1 vez semana<br><input checked="" type="radio"/> 2 a 4 veces semana<br><input type="radio"/> 5 a 6 veces semana<br><input type="radio"/> 1 vez al día<br><input type="radio"/> 2 a 3 veces al día<br><input type="radio"/> 5 a 6 veces al día<br><input type="radio"/> más 6 veces al día |
| Col o coliflor o brocoli cocinado       | <input type="radio"/> Nunca o menos 1 vez al mes<br><input type="radio"/> 1 a 3 veces mes<br><input type="radio"/> 1 vez semana<br><input checked="" type="radio"/> 2 a 4 veces semana<br><input type="radio"/> 5 a 6 veces semana<br><input type="radio"/> 1 vez al día<br><input type="radio"/> 2 a 3 veces al día<br><input type="radio"/> 5 a 6 veces al día<br><input type="radio"/> más 6 veces al día |

---

Lechuga o endivia o escarola

- ☐ Nunca o menos 1 vez al mes  
☐ 1 a 3 veces mes  
☐ 1 vez semana  
☒ 2 a 4 veces semana  
☐ 5 a 6 veces semana  
☐ 1 vez al día  
☐ 2 a 3 veces al día  
☐ 5 a 6 veces al día  
☐ más 6 veces al día

---

tomate ensalada

- ☐ Nunca o menos 1 vez al mes  
☐ 1 a 3 veces mes  
☐ 1 vez semana  
☒ 2 a 4 veces semana  
☐ 5 a 6 veces semana  
☐ 1 vez al día  
☐ 2 a 3 veces al día  
☐ 5 a 6 veces al día  
☐ más 6 veces al día

---

cebolla

- ☐ Nunca o menos 1 vez al mes  
☐ 1 a 3 veces mes  
☐ 1 vez semana  
☒ 2 a 4 veces semana  
☐ 5 a 6 veces semana  
☐ 1 vez al día  
☐ 2 a 3 veces al día  
☐ 5 a 6 veces al día  
☐ más 6 veces al día

---

Zanahoria o calabaza

- ☐ Nunca o menos 1 vez al mes  
☐ 1 a 3 veces mes  
☐ 1 vez semana  
☐ 2 a 4 veces semana  
☒ 5 a 6 veces semana  
☐ 1 vez al día  
☐ 2 a 3 veces al día  
☐ 5 a 6 veces al día  
☐ más 6 veces al día

---

Judías verdes

- ☐ Nunca o menos 1 vez al mes  
☒ 1 a 3 veces mes  
☐ 1 vez semana  
☐ 2 a 4 veces semana  
☐ 5 a 6 veces semana  
☐ 1 vez al día  
☐ 2 a 3 veces al día  
☐ 5 a 6 veces al día  
☐ más 6 veces al día

---

Berenjena o calabacin o pepino

- ☐ Nunca o menos 1 vez al mes  
☐ 1 a 3 veces mes  
☒ 1 vez semana  
☐ 2 a 4 veces semana  
☐ 5 a 6 veces semana  
☐ 1 vez al día  
☐ 2 a 3 veces al día  
☐ 5 a 6 veces al día  
☐ más 6 veces al día

---

|          |                                                                                                                                                                                                                                                                                                                                                                                                              |
|----------|--------------------------------------------------------------------------------------------------------------------------------------------------------------------------------------------------------------------------------------------------------------------------------------------------------------------------------------------------------------------------------------------------------------|
| pimiento | <input type="radio"/> Nunca o menos 1 vez al mes<br><input type="radio"/> 1 a 3 veces mes<br><input checked="" type="radio"/> 1 vez semana<br><input type="radio"/> 2 a 4 veces semana<br><input type="radio"/> 5 a 6 veces semana<br><input type="radio"/> 1 vez al día<br><input type="radio"/> 2 a 3 veces al día<br><input type="radio"/> 5 a 6 veces al día<br><input type="radio"/> más 6 veces al día |
|----------|--------------------------------------------------------------------------------------------------------------------------------------------------------------------------------------------------------------------------------------------------------------------------------------------------------------------------------------------------------------------------------------------------------------|

---

|           |                                                                                                                                                                                                                                                                                                                                                                                                              |
|-----------|--------------------------------------------------------------------------------------------------------------------------------------------------------------------------------------------------------------------------------------------------------------------------------------------------------------------------------------------------------------------------------------------------------------|
| alcachofa | <input type="radio"/> Nunca o menos 1 vez al mes<br><input checked="" type="radio"/> 1 a 3 veces mes<br><input type="radio"/> 1 vez semana<br><input type="radio"/> 2 a 4 veces semana<br><input type="radio"/> 5 a 6 veces semana<br><input type="radio"/> 1 vez al día<br><input type="radio"/> 2 a 3 veces al día<br><input type="radio"/> 5 a 6 veces al día<br><input type="radio"/> más 6 veces al día |
|-----------|--------------------------------------------------------------------------------------------------------------------------------------------------------------------------------------------------------------------------------------------------------------------------------------------------------------------------------------------------------------------------------------------------------------|

---

|            |                                                                                                                                                                                                                                                                                                                                                                                                              |
|------------|--------------------------------------------------------------------------------------------------------------------------------------------------------------------------------------------------------------------------------------------------------------------------------------------------------------------------------------------------------------------------------------------------------------|
| espárragos | <input type="radio"/> Nunca o menos 1 vez al mes<br><input type="radio"/> 1 a 3 veces mes<br><input type="radio"/> 1 vez semana<br><input checked="" type="radio"/> 2 a 4 veces semana<br><input type="radio"/> 5 a 6 veces semana<br><input type="radio"/> 1 vez al día<br><input type="radio"/> 2 a 3 veces al día<br><input type="radio"/> 5 a 6 veces al día<br><input type="radio"/> más 6 veces al día |
|------------|--------------------------------------------------------------------------------------------------------------------------------------------------------------------------------------------------------------------------------------------------------------------------------------------------------------------------------------------------------------------------------------------------------------|

---

|              |                                                                                                                                                                                                                                                                                                                                                                                                              |
|--------------|--------------------------------------------------------------------------------------------------------------------------------------------------------------------------------------------------------------------------------------------------------------------------------------------------------------------------------------------------------------------------------------------------------------|
| maíz hervido | <input checked="" type="radio"/> Nunca o menos 1 vez al mes<br><input type="radio"/> 1 a 3 veces mes<br><input type="radio"/> 1 vez semana<br><input type="radio"/> 2 a 4 veces semana<br><input type="radio"/> 5 a 6 veces semana<br><input type="radio"/> 1 vez al día<br><input type="radio"/> 2 a 3 veces al día<br><input type="radio"/> 5 a 6 veces al día<br><input type="radio"/> más 6 veces al día |
|--------------|--------------------------------------------------------------------------------------------------------------------------------------------------------------------------------------------------------------------------------------------------------------------------------------------------------------------------------------------------------------------------------------------------------------|

---

|           |                                                                                                                                                                                                                                                                                                                                                                                                              |
|-----------|--------------------------------------------------------------------------------------------------------------------------------------------------------------------------------------------------------------------------------------------------------------------------------------------------------------------------------------------------------------------------------------------------------------|
| legumbres | <input type="radio"/> Nunca o menos 1 vez al mes<br><input type="radio"/> 1 a 3 veces mes<br><input checked="" type="radio"/> 1 vez semana<br><input type="radio"/> 2 a 4 veces semana<br><input type="radio"/> 5 a 6 veces semana<br><input type="radio"/> 1 vez al día<br><input type="radio"/> 2 a 3 veces al día<br><input type="radio"/> 5 a 6 veces al día<br><input type="radio"/> más 6 veces al día |
|-----------|--------------------------------------------------------------------------------------------------------------------------------------------------------------------------------------------------------------------------------------------------------------------------------------------------------------------------------------------------------------------------------------------------------------|

---

|                       |                                                                                                                                                                                                                                                                                                                                                                                                              |
|-----------------------|--------------------------------------------------------------------------------------------------------------------------------------------------------------------------------------------------------------------------------------------------------------------------------------------------------------------------------------------------------------------------------------------------------------|
| naranjas o mandarinas | <input type="radio"/> Nunca o menos 1 vez al mes<br><input type="radio"/> 1 a 3 veces mes<br><input type="radio"/> 1 vez semana<br><input type="radio"/> 2 a 4 veces semana<br><input type="radio"/> 5 a 6 veces semana<br><input type="radio"/> 1 vez al día<br><input checked="" type="radio"/> 2 a 3 veces al día<br><input type="radio"/> 5 a 6 veces al día<br><input type="radio"/> más 6 veces al día |
|-----------------------|--------------------------------------------------------------------------------------------------------------------------------------------------------------------------------------------------------------------------------------------------------------------------------------------------------------------------------------------------------------------------------------------------------------|

---

|                       |                                                                                                                                                                                                                                                                                                                                                                                                              |
|-----------------------|--------------------------------------------------------------------------------------------------------------------------------------------------------------------------------------------------------------------------------------------------------------------------------------------------------------------------------------------------------------------------------------------------------------|
| zum natural fruta     | <input checked="" type="radio"/> Nunca o menos 1 vez al mes<br><input type="radio"/> 1 a 3 veces mes<br><input type="radio"/> 1 vez semana<br><input type="radio"/> 2 a 4 veces semana<br><input type="radio"/> 5 a 6 veces semana<br><input type="radio"/> 1 vez al día<br><input type="radio"/> 2 a 3 veces al día<br><input type="radio"/> 5 a 6 veces al día<br><input type="radio"/> más 6 veces al día |
| platano               | <input checked="" type="radio"/> Nunca o menos 1 vez al mes<br><input type="radio"/> 1 a 3 veces mes<br><input type="radio"/> 1 vez semana<br><input type="radio"/> 2 a 4 veces semana<br><input type="radio"/> 5 a 6 veces semana<br><input type="radio"/> 1 vez al día<br><input type="radio"/> 2 a 3 veces al día<br><input type="radio"/> 5 a 6 veces al día<br><input type="radio"/> más 6 veces al día |
| manzana o pera        | <input type="radio"/> Nunca o menos 1 vez al mes<br><input type="radio"/> 1 a 3 veces mes<br><input type="radio"/> 1 vez semana<br><input checked="" type="radio"/> 2 a 4 veces semana<br><input type="radio"/> 5 a 6 veces semana<br><input type="radio"/> 1 vez al día<br><input type="radio"/> 2 a 3 veces al día<br><input type="radio"/> 5 a 6 veces al día<br><input type="radio"/> más 6 veces al día |
| melocotón o nectarina | <input type="radio"/> Nunca o menos 1 vez al mes<br><input checked="" type="radio"/> 1 a 3 veces mes<br><input type="radio"/> 1 vez semana<br><input type="radio"/> 2 a 4 veces semana<br><input type="radio"/> 5 a 6 veces semana<br><input type="radio"/> 1 vez al día<br><input type="radio"/> 2 a 3 veces al día<br><input type="radio"/> 5 a 6 veces al día<br><input type="radio"/> más 6 veces al día |
| sandia o melon        | <input type="radio"/> Nunca o menos 1 vez al mes<br><input checked="" type="radio"/> 1 a 3 veces mes<br><input type="radio"/> 1 vez semana<br><input type="radio"/> 2 a 4 veces semana<br><input type="radio"/> 5 a 6 veces semana<br><input type="radio"/> 1 vez al día<br><input type="radio"/> 2 a 3 veces al día<br><input type="radio"/> 5 a 6 veces al día<br><input type="radio"/> más 6 veces al día |
| uva                   | <input checked="" type="radio"/> Nunca o menos 1 vez al mes<br><input type="radio"/> 1 a 3 veces mes<br><input type="radio"/> 1 vez semana<br><input type="radio"/> 2 a 4 veces semana<br><input type="radio"/> 5 a 6 veces semana<br><input type="radio"/> 1 vez al día<br><input type="radio"/> 2 a 3 veces al día<br><input type="radio"/> 5 a 6 veces al día<br><input type="radio"/> más 6 veces al día |

---

bruna o ciruela

- ☐ Nunca o menos 1 vez al mes  
☐ 1 a 3 veces mes  
☒ 1 vez semana  
☐ 2 a 4 veces semana  
☐ 5 a 6 veces semana  
☐ 1 vez al día  
☐ 2 a 3 veces al día  
☐ 5 a 6 veces al día  
☐ más 6 veces al día

---

kiwi

- ☐ Nunca o menos 1 vez al mes  
☐ 1 a 3 veces mes  
☐ 1 vez semana  
☐ 2 a 4 veces semana  
☐ 5 a 6 veces semana  
☒ 1 vez al día  
☐ 2 a 3 veces al día  
☐ 5 a 6 veces al día  
☐ más 6 veces al día

---

aceituna

- ☐ Nunca o menos 1 vez al mes  
☐ 1 a 3 veces mes  
☒ 1 vez semana  
☐ 2 a 4 veces semana  
☐ 5 a 6 veces semana  
☐ 1 vez al día  
☐ 2 a 3 veces al día  
☐ 5 a 6 veces al día  
☐ más 6 veces al día

---

frutos secos

- ☐ Nunca o menos 1 vez al mes  
☐ 1 a 3 veces mes  
☐ 1 vez semana  
☐ 2 a 4 veces semana  
☐ 5 a 6 veces semana  
☒ 1 vez al día  
☐ 2 a 3 veces al día  
☐ 5 a 6 veces al día  
☐ más 6 veces al día

---

pan blanco

- ☐ Nunca o menos 1 vez al mes  
☐ 1 a 3 veces mes  
☒ 1 vez semana  
☐ 2 a 4 veces semana  
☐ 5 a 6 veces semana  
☐ 1 vez al día  
☐ 2 a 3 veces al día  
☐ 5 a 6 veces al día  
☐ más 6 veces al día

---

pan integral

- ☐ Nunca o menos 1 vez al mes  
☐ 1 a 3 veces mes  
☐ 1 vez semana  
☐ 2 a 4 veces semana  
☐ 5 a 6 veces semana  
☐ 1 vez al día  
☒ 2 a 3 veces al día  
☐ 5 a 6 veces al día  
☐ más 6 veces al día

---

cereales desayuno

- ☒ Nunca o menos 1 vez al mes  
☐ 1 a 3 veces mes  
☐ 1 vez semana  
☐ 2 a 4 veces semana  
☐ 5 a 6 veces semana  
☐ 1 vez al día  
☐ 2 a 3 veces al día  
☐ 5 a 6 veces al día  
☐ más 6 veces al día

---

patatas fritas

- ☐ Nunca o menos 1 vez al mes  
☒ 1 a 3 veces mes  
☐ 1 vez semana  
☐ 2 a 4 veces semana  
☐ 5 a 6 veces semana  
☐ 1 vez al día  
☐ 2 a 3 veces al día  
☐ 5 a 6 veces al día  
☐ más 6 veces al día

---

patatas cocidas o asadas

- ☐ Nunca o menos 1 vez al mes  
☒ 1 a 3 veces mes  
☐ 1 vez semana  
☐ 2 a 4 veces semana  
☐ 5 a 6 veces semana  
☐ 1 vez al día  
☐ 2 a 3 veces al día  
☐ 5 a 6 veces al día  
☐ más 6 veces al día

---

bolsa papas

- ☒ Nunca o menos 1 vez al mes  
☐ 1 a 3 veces mes  
☐ 1 vez semana  
☐ 2 a 4 veces semana  
☐ 5 a 6 veces semana  
☐ 1 vez al día  
☐ 2 a 3 veces al día  
☐ 5 a 6 veces al día  
☐ más 6 veces al día

---

arroz cocinado

- ☐ Nunca o menos 1 vez al mes  
☐ 1 a 3 veces mes  
☒ 1 vez semana  
☐ 2 a 4 veces semana  
☐ 5 a 6 veces semana  
☐ 1 vez al día  
☐ 2 a 3 veces al día  
☐ 5 a 6 veces al día  
☐ más 6 veces al día

---

pasta

- ☐ Nunca o menos 1 vez al mes  
☐ 1 a 3 veces mes  
☒ 1 vez semana  
☐ 2 a 4 veces semana  
☐ 5 a 6 veces semana  
☐ 1 vez al día  
☐ 2 a 3 veces al día  
☐ 5 a 6 veces al día  
☐ más 6 veces al día

|                     |                                                                                                                                                                                                                                                                                                                                                                                                              |
|---------------------|--------------------------------------------------------------------------------------------------------------------------------------------------------------------------------------------------------------------------------------------------------------------------------------------------------------------------------------------------------------------------------------------------------------|
| pizza               | <input checked="" type="radio"/> Nunca o menos 1 vez al mes<br><input type="radio"/> 1 a 3 veces mes<br><input type="radio"/> 1 vez semana<br><input type="radio"/> 2 a 4 veces semana<br><input type="radio"/> 5 a 6 veces semana<br><input type="radio"/> 1 vez al día<br><input type="radio"/> 2 a 3 veces al día<br><input type="radio"/> 5 a 6 veces al día<br><input type="radio"/> más 6 veces al día |
| aceite oliva        | <input type="radio"/> Nunca o menos 1 vez al mes<br><input type="radio"/> 1 a 3 veces mes<br><input type="radio"/> 1 vez semana<br><input type="radio"/> 2 a 4 veces semana<br><input type="radio"/> 5 a 6 veces semana<br><input type="radio"/> 1 vez al día<br><input type="radio"/> 2 a 3 veces al día<br><input checked="" type="radio"/> 5 a 6 veces al día<br><input type="radio"/> más 6 veces al día |
| otros aceites       | <input checked="" type="radio"/> Nunca o menos 1 vez al mes<br><input type="radio"/> 1 a 3 veces mes<br><input type="radio"/> 1 vez semana<br><input type="radio"/> 2 a 4 veces semana<br><input type="radio"/> 5 a 6 veces semana<br><input type="radio"/> 1 vez al día<br><input type="radio"/> 2 a 3 veces al día<br><input type="radio"/> 5 a 6 veces al día<br><input type="radio"/> más 6 veces al día |
| margarina           | <input checked="" type="radio"/> Nunca o menos 1 vez al mes<br><input type="radio"/> 1 a 3 veces mes<br><input type="radio"/> 1 vez semana<br><input type="radio"/> 2 a 4 veces semana<br><input type="radio"/> 5 a 6 veces semana<br><input type="radio"/> 1 vez al día<br><input type="radio"/> 2 a 3 veces al día<br><input type="radio"/> 5 a 6 veces al día<br><input type="radio"/> más 6 veces al día |
| mantequilla         | <input checked="" type="radio"/> Nunca o menos 1 vez al mes<br><input type="radio"/> 1 a 3 veces mes<br><input type="radio"/> 1 vez semana<br><input type="radio"/> 2 a 4 veces semana<br><input type="radio"/> 5 a 6 veces semana<br><input type="radio"/> 1 vez al día<br><input type="radio"/> 2 a 3 veces al día<br><input type="radio"/> 5 a 6 veces al día<br><input type="radio"/> más 6 veces al día |
| galletas tipo maria | <input checked="" type="radio"/> Nunca o menos 1 vez al mes<br><input type="radio"/> 1 a 3 veces mes<br><input type="radio"/> 1 vez semana<br><input type="radio"/> 2 a 4 veces semana<br><input type="radio"/> 5 a 6 veces semana<br><input type="radio"/> 1 vez al día<br><input type="radio"/> 2 a 3 veces al día<br><input type="radio"/> 5 a 6 veces al día<br><input type="radio"/> más 6 veces al día |



---

galletas chocolate

- ☒ Nunca o menos 1 vez al mes  
☐ 1 a 3 veces mes  
☐ 1 vez semana  
☐ 2 a 4 veces semana  
☐ 5 a 6 veces semana  
☐ 1 vez al día  
☐ 2 a 3 veces al día  
☐ 5 a 6 veces al día  
☐ más 6 veces al día

---

bolleria

- ☒ Nunca o menos 1 vez al mes  
☐ 1 a 3 veces mes  
☐ 1 vez semana  
☐ 2 a 4 veces semana  
☐ 5 a 6 veces semana  
☐ 1 vez al día  
☐ 2 a 3 veces al día  
☐ 5 a 6 veces al día  
☐ más 6 veces al día

---

chocolate o bombones

- ☐ Nunca o menos 1 vez al mes  
☐ 1 a 3 veces mes  
☐ 1 vez semana  
☒ 2 a 4 veces semana  
☐ 5 a 6 veces semana  
☐ 1 vez al día  
☐ 2 a 3 veces al día  
☐ 5 a 6 veces al día  
☐ más 6 veces al día

---

chocolate polvo o colacao

- ☒ Nunca o menos 1 vez al mes  
☐ 1 a 3 veces mes  
☐ 1 vez semana  
☐ 2 a 4 veces semana  
☐ 5 a 6 veces semana  
☐ 1 vez al día  
☐ 2 a 3 veces al día  
☐ 5 a 6 veces al día  
☐ más 6 veces al día

---

vino tinto

- ☒ Nunca o menos 1 vez al mes  
☐ 1 a 3 veces mes  
☐ 1 vez semana  
☐ 2 a 4 veces semana  
☐ 5 a 6 veces semana  
☐ 1 vez al día  
☐ 2 a 3 veces al día  
☐ 5 a 6 veces al día  
☐ más 6 veces al día

---

vino blanco

- ☒ Nunca o menos 1 vez al mes  
☐ 1 a 3 veces mes  
☐ 1 vez semana  
☐ 2 a 4 veces semana  
☐ 5 a 6 veces semana  
☐ 1 vez al día  
☐ 2 a 3 veces al día  
☐ 5 a 6 veces al día  
☐ más 6 veces al día

---

|                    |                                                                                                                                                                                                                                                                                                                                                                                                              |
|--------------------|--------------------------------------------------------------------------------------------------------------------------------------------------------------------------------------------------------------------------------------------------------------------------------------------------------------------------------------------------------------------------------------------------------------|
| vino seco o vermut | <input checked="" type="radio"/> Nunca o menos 1 vez al mes<br><input type="radio"/> 1 a 3 veces mes<br><input type="radio"/> 1 vez semana<br><input type="radio"/> 2 a 4 veces semana<br><input type="radio"/> 5 a 6 veces semana<br><input type="radio"/> 1 vez al día<br><input type="radio"/> 2 a 3 veces al día<br><input type="radio"/> 5 a 6 veces al día<br><input type="radio"/> más 6 veces al día |
|--------------------|--------------------------------------------------------------------------------------------------------------------------------------------------------------------------------------------------------------------------------------------------------------------------------------------------------------------------------------------------------------------------------------------------------------|

---

|         |                                                                                                                                                                                                                                                                                                                                                                                                              |
|---------|--------------------------------------------------------------------------------------------------------------------------------------------------------------------------------------------------------------------------------------------------------------------------------------------------------------------------------------------------------------------------------------------------------------|
| cerveza | <input checked="" type="radio"/> Nunca o menos 1 vez al mes<br><input type="radio"/> 1 a 3 veces mes<br><input type="radio"/> 1 vez semana<br><input type="radio"/> 2 a 4 veces semana<br><input type="radio"/> 5 a 6 veces semana<br><input type="radio"/> 1 vez al día<br><input type="radio"/> 2 a 3 veces al día<br><input type="radio"/> 5 a 6 veces al día<br><input type="radio"/> más 6 veces al día |
|---------|--------------------------------------------------------------------------------------------------------------------------------------------------------------------------------------------------------------------------------------------------------------------------------------------------------------------------------------------------------------------------------------------------------------|

---

|                     |                                                                                                                                                                                                                                                                                                                                                                                                              |
|---------------------|--------------------------------------------------------------------------------------------------------------------------------------------------------------------------------------------------------------------------------------------------------------------------------------------------------------------------------------------------------------------------------------------------------------|
| cerveza sin alcohol | <input type="radio"/> Nunca o menos 1 vez al mes<br><input type="radio"/> 1 a 3 veces mes<br><input type="radio"/> 1 vez semana<br><input checked="" type="radio"/> 2 a 4 veces semana<br><input type="radio"/> 5 a 6 veces semana<br><input type="radio"/> 1 vez al día<br><input type="radio"/> 2 a 3 veces al día<br><input type="radio"/> 5 a 6 veces al día<br><input type="radio"/> más 6 veces al día |
|---------------------|--------------------------------------------------------------------------------------------------------------------------------------------------------------------------------------------------------------------------------------------------------------------------------------------------------------------------------------------------------------------------------------------------------------|

---

|         |                                                                                                                                                                                                                                                                                                                                                                                                              |
|---------|--------------------------------------------------------------------------------------------------------------------------------------------------------------------------------------------------------------------------------------------------------------------------------------------------------------------------------------------------------------------------------------------------------------|
| licores | <input checked="" type="radio"/> Nunca o menos 1 vez al mes<br><input type="radio"/> 1 a 3 veces mes<br><input type="radio"/> 1 vez semana<br><input type="radio"/> 2 a 4 veces semana<br><input type="radio"/> 5 a 6 veces semana<br><input type="radio"/> 1 vez al día<br><input type="radio"/> 2 a 3 veces al día<br><input type="radio"/> 5 a 6 veces al día<br><input type="radio"/> más 6 veces al día |
|---------|--------------------------------------------------------------------------------------------------------------------------------------------------------------------------------------------------------------------------------------------------------------------------------------------------------------------------------------------------------------------------------------------------------------|

---

|                       |                                                                                                                                                                                                                                                                                                                                                                                                              |
|-----------------------|--------------------------------------------------------------------------------------------------------------------------------------------------------------------------------------------------------------------------------------------------------------------------------------------------------------------------------------------------------------------------------------------------------------|
| ginebra o ron o vodka | <input checked="" type="radio"/> Nunca o menos 1 vez al mes<br><input type="radio"/> 1 a 3 veces mes<br><input type="radio"/> 1 vez semana<br><input type="radio"/> 2 a 4 veces semana<br><input type="radio"/> 5 a 6 veces semana<br><input type="radio"/> 1 vez al día<br><input type="radio"/> 2 a 3 veces al día<br><input type="radio"/> 5 a 6 veces al día<br><input type="radio"/> más 6 veces al día |
|-----------------------|--------------------------------------------------------------------------------------------------------------------------------------------------------------------------------------------------------------------------------------------------------------------------------------------------------------------------------------------------------------------------------------------------------------|

---

|                 |                                                                                                                                                                                                                                                                                                                                                                                                              |
|-----------------|--------------------------------------------------------------------------------------------------------------------------------------------------------------------------------------------------------------------------------------------------------------------------------------------------------------------------------------------------------------------------------------------------------------|
| refresco normal | <input checked="" type="radio"/> Nunca o menos 1 vez al mes<br><input type="radio"/> 1 a 3 veces mes<br><input type="radio"/> 1 vez semana<br><input type="radio"/> 2 a 4 veces semana<br><input type="radio"/> 5 a 6 veces semana<br><input type="radio"/> 1 vez al día<br><input type="radio"/> 2 a 3 veces al día<br><input type="radio"/> 5 a 6 veces al día<br><input type="radio"/> más 6 veces al día |
|-----------------|--------------------------------------------------------------------------------------------------------------------------------------------------------------------------------------------------------------------------------------------------------------------------------------------------------------------------------------------------------------------------------------------------------------|

---

---

refresco sin azúcar

- ☐ Nunca o menos 1 vez al mes  
☒ 1 a 3 veces mes  
☐ 1 vez semana  
☐ 2 a 4 veces semana  
☐ 5 a 6 veces semana  
☐ 1 vez al día  
☐ 2 a 3 veces al día  
☐ 5 a 6 veces al día  
☐ más 6 veces al día

---

Agua del grifo

- ☒ Nunca o menos 1 vez al mes  
☐ 1 a 3 veces mes  
☐ 1 vez semana  
☐ 2 a 4 veces semana  
☐ 5 a 6 veces semana  
☐ 1 vez al día  
☐ 2 a 3 veces al día  
☐ 5 a 6 veces al día  
☐ más 6 veces al día

---

agua embotellada sin gas

- ☐ Nunca o menos 1 vez al mes  
☐ 1 a 3 veces mes  
☐ 1 vez semana  
☐ 2 a 4 veces semana  
☐ 5 a 6 veces semana  
☐ 1 vez al día  
☐ 2 a 3 veces al día  
☐ 5 a 6 veces al día  
☒ más 6 veces al día

---

agua embotellada con gas

- ☐ Nunca o menos 1 vez al mes  
☒ 1 a 3 veces mes  
☐ 1 vez semana  
☐ 2 a 4 veces semana  
☐ 5 a 6 veces semana  
☐ 1 vez al día  
☐ 2 a 3 veces al día  
☐ 5 a 6 veces al día  
☐ más 6 veces al día

---

zumو frutas embasado

- ☒ Nunca o menos 1 vez al mes  
☐ 1 a 3 veces mes  
☐ 1 vez semana  
☐ 2 a 4 veces semana  
☐ 5 a 6 veces semana  
☐ 1 vez al día  
☐ 2 a 3 veces al día  
☐ 5 a 6 veces al día  
☐ más 6 veces al día

---

cafe

- ☐ Nunca o menos 1 vez al mes  
☐ 1 a 3 veces mes  
☒ 1 vez semana  
☐ 2 a 4 veces semana  
☐ 5 a 6 veces semana  
☐ 1 vez al día  
☐ 2 a 3 veces al día  
☐ 5 a 6 veces al día  
☐ más 6 veces al día

---

cafe descafeinado

- ☐ Nunca o menos 1 vez al mes  
☐ 1 a 3 veces mes  
☒ 1 vez semana  
☐ 2 a 4 veces semana  
☐ 5 a 6 veces semana  
☐ 1 vez al día  
☐ 2 a 3 veces al día  
☐ 5 a 6 veces al día  
☐ más 6 veces al día

---

te o infusión

- ☐ Nunca o menos 1 vez al mes  
☐ 1 a 3 veces mes  
☒ 1 vez semana  
☐ 2 a 4 veces semana  
☐ 5 a 6 veces semana  
☐ 1 vez al día  
☐ 2 a 3 veces al día  
☐ 5 a 6 veces al día  
☐ más 6 veces al día

---

sopa o puré verduras

- ☐ Nunca o menos 1 vez al mes  
☐ 1 a 3 veces mes  
☐ 1 vez semana  
☐ 2 a 4 veces semana  
☐ 5 a 6 veces semana  
☒ 1 vez al día  
☐ 2 a 3 veces al día  
☐ 5 a 6 veces al día  
☐ más 6 veces al día

---

croquetas pollo jamón

- ☐ Nunca o menos 1 vez al mes  
☒ 1 a 3 veces mes  
☐ 1 vez semana  
☐ 2 a 4 veces semana  
☐ 5 a 6 veces semana  
☐ 1 vez al día  
☐ 2 a 3 veces al día  
☐ 5 a 6 veces al día  
☐ más 6 veces al día

---

croquetas pescado

- ☒ Nunca o menos 1 vez al mes  
☐ 1 a 3 veces mes  
☐ 1 vez semana  
☐ 2 a 4 veces semana  
☐ 5 a 6 veces semana  
☐ 1 vez al día  
☐ 2 a 3 veces al día  
☐ 5 a 6 veces al día  
☐ más 6 veces al día

---

mayonesa

- ☒ Nunca o menos 1 vez al mes  
☐ 1 a 3 veces mes  
☐ 1 vez semana  
☐ 2 a 4 veces semana  
☐ 5 a 6 veces semana  
☐ 1 vez al día  
☐ 2 a 3 veces al día  
☐ 5 a 6 veces al día  
☐ más 6 veces al día

|                  |                                                                                                                                                                                                                                                                                                                                                                                                              |
|------------------|--------------------------------------------------------------------------------------------------------------------------------------------------------------------------------------------------------------------------------------------------------------------------------------------------------------------------------------------------------------------------------------------------------------|
| salsa tomate     | <input checked="" type="radio"/> Nunca o menos 1 vez al mes<br><input type="radio"/> 1 a 3 veces mes<br><input type="radio"/> 1 vez semana<br><input type="radio"/> 2 a 4 veces semana<br><input type="radio"/> 5 a 6 veces semana<br><input type="radio"/> 1 vez al día<br><input type="radio"/> 2 a 3 veces al día<br><input type="radio"/> 5 a 6 veces al día<br><input type="radio"/> más 6 veces al día |
| ketchup          | <input checked="" type="radio"/> Nunca o menos 1 vez al mes<br><input type="radio"/> 1 a 3 veces mes<br><input type="radio"/> 1 vez semana<br><input type="radio"/> 2 a 4 veces semana<br><input type="radio"/> 5 a 6 veces semana<br><input type="radio"/> 1 vez al día<br><input type="radio"/> 2 a 3 veces al día<br><input type="radio"/> 5 a 6 veces al día<br><input type="radio"/> más 6 veces al día |
| sal              | <input type="radio"/> Nunca o menos 1 vez al mes<br><input type="radio"/> 1 a 3 veces mes<br><input type="radio"/> 1 vez semana<br><input type="radio"/> 2 a 4 veces semana<br><input type="radio"/> 5 a 6 veces semana<br><input type="radio"/> 1 vez al día<br><input checked="" type="radio"/> 2 a 3 veces al día<br><input type="radio"/> 5 a 6 veces al día<br><input type="radio"/> más 6 veces al día |
| ajo              | <input type="radio"/> Nunca o menos 1 vez al mes<br><input checked="" type="radio"/> 1 a 3 veces mes<br><input type="radio"/> 1 vez semana<br><input type="radio"/> 2 a 4 veces semana<br><input type="radio"/> 5 a 6 veces semana<br><input type="radio"/> 1 vez al día<br><input type="radio"/> 2 a 3 veces al día<br><input type="radio"/> 5 a 6 veces al día<br><input type="radio"/> más 6 veces al día |
| mermelada o miel | <input type="radio"/> Nunca o menos 1 vez al mes<br><input checked="" type="radio"/> 1 a 3 veces mes<br><input type="radio"/> 1 vez semana<br><input type="radio"/> 2 a 4 veces semana<br><input type="radio"/> 5 a 6 veces semana<br><input type="radio"/> 1 vez al día<br><input type="radio"/> 2 a 3 veces al día<br><input type="radio"/> 5 a 6 veces al día<br><input type="radio"/> más 6 veces al día |
| azúcar           | <input checked="" type="radio"/> Nunca o menos 1 vez al mes<br><input type="radio"/> 1 a 3 veces mes<br><input type="radio"/> 1 vez semana<br><input type="radio"/> 2 a 4 veces semana<br><input type="radio"/> 5 a 6 veces semana<br><input type="radio"/> 1 vez al día<br><input type="radio"/> 2 a 3 veces al día<br><input type="radio"/> 5 a 6 veces al día<br><input type="radio"/> más 6 veces al día |

|                                       |                                                                                                                                                                                                                                                                                                                                                                                                                                                                                                                               |
|---------------------------------------|-------------------------------------------------------------------------------------------------------------------------------------------------------------------------------------------------------------------------------------------------------------------------------------------------------------------------------------------------------------------------------------------------------------------------------------------------------------------------------------------------------------------------------|
| Otro alimento                         | <hr/>                                                                                                                                                                                                                                                                                                                                                                                                                                                                                                                         |
| suplementos vitamínicos               | <input type="radio"/> si<br><input checked="" type="radio"/> no                                                                                                                                                                                                                                                                                                                                                                                                                                                               |
| suplementos vitamínicos               | <hr/>                                                                                                                                                                                                                                                                                                                                                                                                                                                                                                                         |
| dieta previa                          | <input checked="" type="radio"/> si<br><input type="radio"/> no                                                                                                                                                                                                                                                                                                                                                                                                                                                               |
| motivo dieta                          | <input type="radio"/> no dieta<br><input type="radio"/> control peso<br><input type="radio"/> control colesterol<br><input checked="" type="radio"/> control diabetes<br><input type="radio"/> problemas estómago<br><input type="radio"/> problemas vesícula o hepáticos<br><input type="radio"/> HTA o cardiopatía<br><input type="radio"/> problemas renales<br><input type="radio"/> alergia alimentaria<br><input type="radio"/> ácido úrico elevado<br><input type="radio"/> vegetariana<br><input type="radio"/> otros |
| cambio alimentos año previo gestación | <input checked="" type="radio"/> si<br><input type="radio"/> no                                                                                                                                                                                                                                                                                                                                                                                                                                                               |
| cambio lácteos                        | <input type="radio"/> eliminado<br><input type="radio"/> disminuido<br><input type="radio"/> igual<br><input type="radio"/> aumentado<br><input type="radio"/> no sabe                                                                                                                                                                                                                                                                                                                                                        |
| cambio huevos                         | <input type="radio"/> eliminado<br><input type="radio"/> disminuido<br><input type="radio"/> igual<br><input type="radio"/> aumentado<br><input type="radio"/> no sabe                                                                                                                                                                                                                                                                                                                                                        |
| cambio carne                          | <input type="radio"/> eliminado<br><input type="radio"/> disminuido<br><input type="radio"/> igual<br><input type="radio"/> aumentado<br><input type="radio"/> no sabe                                                                                                                                                                                                                                                                                                                                                        |
| cambio pescado                        | <input type="radio"/> eliminado<br><input type="radio"/> disminuido<br><input type="radio"/> igual<br><input type="radio"/> aumentado<br><input type="radio"/> no sabe                                                                                                                                                                                                                                                                                                                                                        |
| cambio verduras                       | <input type="radio"/> eliminado<br><input type="radio"/> disminuido<br><input type="radio"/> igual<br><input type="radio"/> aumentado<br><input type="radio"/> no sabe                                                                                                                                                                                                                                                                                                                                                        |

|                            |                                                                                                                                                                                                                        |
|----------------------------|------------------------------------------------------------------------------------------------------------------------------------------------------------------------------------------------------------------------|
| cambio legumbres           | <input type="radio"/> eliminado<br><input type="radio"/> disminuido<br><input type="radio"/> igual<br><input type="radio"/> aumentado<br><input type="radio"/> no sabe                                                 |
| cambio fruta               | <input type="radio"/> eliminado<br><input type="radio"/> disminuido<br><input type="radio"/> igual<br><input type="radio"/> aumentado<br><input type="radio"/> no sabe                                                 |
| cambio pan                 | <input type="radio"/> eliminado<br><input type="radio"/> disminuido<br><input type="radio"/> igual<br><input type="radio"/> aumentado<br><input type="radio"/> no sabe                                                 |
| cambio aceite oliva        | <input type="radio"/> eliminado<br><input type="radio"/> disminuido<br><input type="radio"/> igual<br><input type="radio"/> aumentado<br><input type="radio"/> no sabe                                                 |
| cambio mante o margarina   | <input checked="" type="radio"/> eliminado<br><input type="radio"/> disminuido<br><input type="radio"/> igual<br><input type="radio"/> aumentado<br><input type="radio"/> no sabe                                      |
| cambio azúcar y dulces     | <input checked="" type="radio"/> eliminado<br><input type="radio"/> disminuido<br><input type="radio"/> igual<br><input type="radio"/> aumentado<br><input type="radio"/> no sabe                                      |
| cambio bebidas alcohólicas | <input checked="" type="radio"/> eliminado<br><input type="radio"/> disminuido<br><input type="radio"/> igual<br><input type="radio"/> aumentado<br><input type="radio"/> no sabe                                      |
| frecuencia comidas fritas  | <input type="radio"/> a diario<br><input type="radio"/> 5 a 6 veces semana<br><input type="radio"/> 2 a 4 veces semana<br><input type="radio"/> 1 vez semana<br><input checked="" type="radio"/> menos de 1 vez semana |
| carne                      | <input type="radio"/> no como<br><input type="radio"/> cruda<br><input type="radio"/> poco hecha<br><input type="radio"/> hecha<br><input checked="" type="radio"/> muy hecha                                          |
| grasa visible carne        | <input checked="" type="radio"/> quita toda<br><input type="radio"/> quita mayoría<br><input type="radio"/> quita un poco<br><input type="radio"/> no quita nada                                                       |

|                                |                                                                                                                                                                                                                                                          |
|--------------------------------|----------------------------------------------------------------------------------------------------------------------------------------------------------------------------------------------------------------------------------------------------------|
| cocina carne                   | <input checked="" type="radio"/> a la plancha<br><input type="radio"/> a la parrilla<br><input type="radio"/> asada<br><input type="radio"/> frita<br><input type="radio"/> guisada                                                                      |
| tostado quemado carne          | <input checked="" type="radio"/> nunca<br><input type="radio"/> 1 vez mes<br><input type="radio"/> 2 a 3 veces mes<br><input type="radio"/> 1 vez semana<br><input type="radio"/> 2 a 3 semanas                                                          |
| tostado quemado pescado        | <input checked="" type="radio"/> nunca<br><input type="radio"/> 1 vez mes<br><input type="radio"/> 2 a 3 veces mes<br><input type="radio"/> 1 vez semana<br><input type="radio"/> 2 a 3 semanas                                                          |
| socarrat paella                | <input checked="" type="radio"/> nunca<br><input type="radio"/> 1 vez mes<br><input type="radio"/> 2 a 3 veces mes<br><input type="radio"/> 1 vez semana<br><input type="radio"/> 2 a 3 semanas                                                          |
| grasa o aceite cocinar         | <input type="radio"/> mantequilla<br><input type="radio"/> margarina<br><input type="radio"/> aceite oliva<br><input checked="" type="radio"/> aceite oliva virgen extra<br><input type="radio"/> aceite vegetal<br><input type="radio"/> mezcla aceites |
| grasa aceite aliñar            | <input type="radio"/> mantequilla<br><input type="radio"/> margarina<br><input type="radio"/> aceite oliva<br><input checked="" type="radio"/> aceite oliva virgen extra<br><input type="radio"/> aceite vegetal<br><input type="radio"/> mezcla aceites |
| grasa aceite freir             | <input type="radio"/> mantequilla<br><input type="radio"/> margarina<br><input type="radio"/> aceite oliva<br><input checked="" type="radio"/> aceite oliva virgen extra<br><input type="radio"/> aceite vegetal<br><input type="radio"/> mezcla aceites |
| Ejercicio cuestionario         | <input checked="" type="radio"/> si<br><input type="radio"/> no                                                                                                                                                                                          |
| horas de sueño incluido siesta | [*DATA REMOVED*]                                                                                                                                                                                                                                         |
| minutos siesta                 | [*DATA REMOVED*]                                                                                                                                                                                                                                         |
| horas televisión semana        | [*DATA REMOVED*]                                                                                                                                                                                                                                         |



|                                        |                                                                                                                                                                                                                                                                                                                                                                           |
|----------------------------------------|---------------------------------------------------------------------------------------------------------------------------------------------------------------------------------------------------------------------------------------------------------------------------------------------------------------------------------------------------------------------------|
| actividad trabajo                      | <input checked="" type="radio"/> casi siempre sentado<br><input type="radio"/> sentado 50 por cien<br><input type="radio"/> casi siempre de pie, quieto<br><input type="radio"/> casi siempre levantado caminando y llevando pocas cosas<br><input type="radio"/> casi siempre levantado, caminando y llevado muchas cosas<br><input type="radio"/> trabajo manual pesado |
| tiempo caminar o bici al día           | <input type="radio"/> casi nunca<br><input type="radio"/> menos 20min día<br><input type="radio"/> 20 a 40 min día<br><input checked="" type="radio"/> 40 a 60 min día<br><input type="radio"/> 1h o 1h y media día<br><input type="radio"/> más de 1h y media al día                                                                                                     |
| tiempo tareas casa al día              | <input checked="" type="radio"/> menos de 1h día<br><input type="radio"/> 1 a 2h día<br><input type="radio"/> 3 a 4h día<br><input type="radio"/> 5 a 6h día<br><input type="radio"/> 7 a 8h día<br><input type="radio"/> más de 8h día                                                                                                                                   |
| tiempo libre televisión ordenador leer | <input type="radio"/> menos 1h día<br><input type="radio"/> 1h día<br><input type="radio"/> 2h día<br><input type="radio"/> 3h día<br><input type="radio"/> 4h día<br><input checked="" type="radio"/> 5 a 6h día<br><input type="radio"/> mas 6h día                                                                                                                     |
| tiempo libre ejercicio o deporte       | <input type="radio"/> menos 1h semana<br><input checked="" type="radio"/> 1h semana<br><input type="radio"/> 2h semana<br><input type="radio"/> 3h semana<br><input type="radio"/> 4 a 5h semana<br><input type="radio"/> mas 5h semana                                                                                                                                   |
| como se considera                      | <input type="radio"/> sedentaria<br><input type="radio"/> poco activa<br><input checked="" type="radio"/> moderadamente activa<br><input type="radio"/> bastante activa<br><input type="radio"/> muy activa<br><input type="radio"/> no sabe                                                                                                                              |
| FUR                                    | [*DATA REMOVED*]                                                                                                                                                                                                                                                                                                                                                          |
| Semanas gestación 2T                   | [*DATA REMOVED*]                                                                                                                                                                                                                                                                                                                                                          |
| Días gestación 2T                      | [*DATA REMOVED*]                                                                                                                                                                                                                                                                                                                                                          |
| DBP 2T                                 | [*DATA REMOVED*]                                                                                                                                                                                                                                                                                                                                                          |
| CC 2T                                  | [*DATA REMOVED*]                                                                                                                                                                                                                                                                                                                                                          |
| AC 2T                                  | [*DATA REMOVED*]                                                                                                                                                                                                                                                                                                                                                          |

|                                                   |                                                                                                                                                                                                 |
|---------------------------------------------------|-------------------------------------------------------------------------------------------------------------------------------------------------------------------------------------------------|
| LF 2T                                             | [*DATA REMOVED*]                                                                                                                                                                                |
| PFE 2T (Hadlock)                                  | [*DATA REMOVED*]                                                                                                                                                                                |
| Semanas gestación 3T                              | [*DATA REMOVED*]                                                                                                                                                                                |
| días 3T                                           | [*DATA REMOVED*]                                                                                                                                                                                |
| DBP 3T                                            | [*DATA REMOVED*]                                                                                                                                                                                |
| CC 3T                                             | [*DATA REMOVED*]                                                                                                                                                                                |
| AC 3T                                             | [*DATA REMOVED*]                                                                                                                                                                                |
| LF 3T                                             | [*DATA REMOVED*]                                                                                                                                                                                |
| PFE 3T (Hadlock)                                  | [*DATA REMOVED*]                                                                                                                                                                                |
| Semanas de gestación final                        | [*DATA REMOVED*]                                                                                                                                                                                |
| días gestación final                              | [*DATA REMOVED*]                                                                                                                                                                                |
| Localización placenta                             | <input checked="" type="radio"/> anterior<br><input type="radio"/> lateral derecha<br><input type="radio"/> lateral izquierda<br><input type="radio"/> posterior<br><input type="radio"/> fondo |
| Presentación longitudinal cefálica                | <input type="radio"/> no<br><input checked="" type="radio"/> si                                                                                                                                 |
| Dorso                                             | <input checked="" type="radio"/> izquierda anterior<br><input type="radio"/> izquierda posterior<br><input type="radio"/> derecha anterior<br><input type="radio"/> derecha posterior           |
| diámetro biparietal                               | [*DATA REMOVED*]                                                                                                                                                                                |
| Circunferencia craneal                            | [*DATA REMOVED*]                                                                                                                                                                                |
| Circunferencia abdominal                          | [*DATA REMOVED*]                                                                                                                                                                                |
| Longitud de femur                                 | [*DATA REMOVED*]                                                                                                                                                                                |
| tejido celular subcutáneo a nivel del muslo en mm | [*DATA REMOVED*]                                                                                                                                                                                |
| tejido celular subcutáneo en abdomen en mm        | [*DATA REMOVED*]                                                                                                                                                                                |
| Volumen del muslo en cm3                          | [*DATA REMOVED*]                                                                                                                                                                                |
| Peso fetal estimado según fórmula de Hadlock      | [*DATA REMOVED*]                                                                                                                                                                                |

|                                               |                                                                                                                                                          |
|-----------------------------------------------|----------------------------------------------------------------------------------------------------------------------------------------------------------|
| Percentil                                     | [*DATA REMOVED*]                                                                                                                                         |
| Peso fetal estimado según fórmula de Scioscia | <hr/>                                                                                                                                                    |
| Peso fetal estimado según fórmula de LEE      | <hr/>                                                                                                                                                    |
| Tipo de parto                                 | <input type="radio"/> eutocico<br><input checked="" type="radio"/> instrumentado/ventosa<br><input type="radio"/> cesarea                                |
| fecha de nacimiento                           | [*DATA REMOVED*]                                                                                                                                         |
| Días entre exploración y nacimiento           | [*DATA REMOVED*]                                                                                                                                         |
| Peso RN en g                                  | [*DATA REMOVED*]                                                                                                                                         |
| sexo                                          | <input type="radio"/> mujer<br><input checked="" type="radio"/> hombre                                                                                   |
| Apgar 1 minuto                                | [*DATA REMOVED*]                                                                                                                                         |
| Apgar 5 minutos                               | [*DATA REMOVED*]                                                                                                                                         |
| Apgar 10 minutos                              | <hr/>                                                                                                                                                    |
| antecedente Covid durante gestación           | <input type="radio"/> Yes<br><input checked="" type="radio"/> No                                                                                         |
| Nivel de estudios                             | <input type="radio"/> ninguno<br><input type="radio"/> primarios<br><input type="radio"/> secundarios<br><input checked="" type="radio"/> universitarios |

## Base\_datos\_estimacion\_peso\_fetal

|                                       |                                                                                                                                                                                                                                                                           |
|---------------------------------------|---------------------------------------------------------------------------------------------------------------------------------------------------------------------------------------------------------------------------------------------------------------------------|
| Número de identificación participante | 175                                                                                                                                                                                                                                                                       |
| CODIGO PARTICIPANTE                   |                                                                                                                                                                                                                                                                           |
| Edad                                  | [*DATA REMOVED*]                                                                                                                                                                                                                                                          |
| Gestaciones                           | <input type="radio"/> 1<br><input checked="" type="radio"/> 2<br><input type="radio"/> 3<br><input type="radio"/> mas de 3                                                                                                                                                |
| partos                                | <input checked="" type="radio"/> 0<br><input type="radio"/> 1<br><input type="radio"/> 2<br><input type="radio"/> 3<br><input type="radio"/> mas de 3                                                                                                                     |
| cesáreas                              | <input checked="" type="radio"/> 0<br><input type="radio"/> 1<br><input type="radio"/> 2<br><input type="radio"/> 3<br><input type="radio"/> mas de 3                                                                                                                     |
| Abortos                               | <input type="radio"/> 0<br><input checked="" type="radio"/> 1<br><input type="radio"/> 2<br><input type="radio"/> 3<br><input type="radio"/> mas de 3                                                                                                                     |
| Tipo de gestacion                     | <input type="radio"/> espontanea<br><input type="radio"/> IAC inseminación artificial conyuge<br><input type="radio"/> IAD inseminación artificial donante<br><input type="radio"/> FIV Fecundación in Vitro<br><input type="radio"/> Ovodon FIV con donación de ovocitos |
| peso previo a embarazo                | [*DATA REMOVED*]                                                                                                                                                                                                                                                          |
| Ganancia ponderal embarazo            |                                                                                                                                                                                                                                                                           |
| Talla madre                           | [*DATA REMOVED*]                                                                                                                                                                                                                                                          |
| IMC previo embarazo                   | 21.15529420201513                                                                                                                                                                                                                                                         |
| Patología obstétrica                  | <input checked="" type="radio"/> no<br><input type="radio"/> si                                                                                                                                                                                                           |
| Diabetes pregestacional               | <input checked="" type="radio"/> no<br><input type="radio"/> si                                                                                                                                                                                                           |
| Diabetes gestacional                  | <input checked="" type="radio"/> no<br><input type="radio"/> si                                                                                                                                                                                                           |

|                                            |                                                                                                                                                                                      |
|--------------------------------------------|--------------------------------------------------------------------------------------------------------------------------------------------------------------------------------------|
| Diabetes gestacional con insulina          | <input checked="" type="radio"/> no<br><input type="radio"/> si                                                                                                                      |
| Diabetes gestacional con dieta y ejercicio | <input checked="" type="radio"/> no<br><input type="radio"/> si                                                                                                                      |
| Percentil fetos previos                    | <input checked="" type="radio"/> Nada<br><input type="radio"/> percentil menor de 10<br><input type="radio"/> percentil entre 10 y 90<br><input type="radio"/> percentil mayor de 90 |
| Exfumadora                                 | <input checked="" type="radio"/> Nada<br><input type="radio"/> menos de 5 años<br><input type="radio"/> 5 a 10 años<br><input type="radio"/> mayor o igual a 10 años                 |
| Hábito tabáquico                           | <input checked="" type="radio"/> no<br><input type="radio"/> si                                                                                                                      |
| fumadora                                   | [*DATA REMOVED*]                                                                                                                                                                     |
| Consumo otros tóxicos                      | <input checked="" type="radio"/> no<br><input type="radio"/> si                                                                                                                      |
| Hb 1T                                      | [*DATA REMOVED*]                                                                                                                                                                     |
| Htc 1T                                     | [*DATA REMOVED*]                                                                                                                                                                     |
| Hb 2T                                      | [*DATA REMOVED*]                                                                                                                                                                     |
| HTC 2T                                     | [*DATA REMOVED*]                                                                                                                                                                     |
| Hb 3T                                      | [*DATA REMOVED*]                                                                                                                                                                     |
| HTC 3T                                     | [*DATA REMOVED*]                                                                                                                                                                     |
| Suplemento FE oral                         | <input checked="" type="radio"/> si<br><input type="radio"/> no                                                                                                                      |
| Suplemento fe iv                           | <input type="radio"/> si<br><input checked="" type="radio"/> no                                                                                                                      |
| Transfusión                                | <input checked="" type="radio"/> no<br><input type="radio"/> si                                                                                                                      |
| Solicitada Vit D                           | <input checked="" type="radio"/> no<br><input type="radio"/> si                                                                                                                      |
| Deficit vit D                              | <input type="radio"/> no<br><input type="radio"/> si                                                                                                                                 |
| Suplemento vit D                           | <input type="radio"/> si<br><input type="radio"/> no                                                                                                                                 |

---

Dieta, cuestionario

- ☐ sí  
☒ no
- 

Leche entera

- ☐ Nunca o menos 1 vez al mes  
☐ 1 a 3 veces mes  
☐ 1 vez semana  
☐ 2 a 4 veces semana  
☐ 5 a 6 veces semana  
☐ 1 vez al día  
☐ 2 a 3 veces al día  
☐ 5 a 6 veces al día  
☐ más 6 veces al día
- 

Leche semidesnatada

- ☐ Nunca o menos 1 vez al mes  
☐ 1 a 3 veces mes  
☐ 1 vez semana  
☐ 2 a 4 veces semana  
☐ 5 a 6 veces semana  
☐ 1 vez al día  
☐ 2 a 3 veces al día  
☐ 5 a 6 veces al día  
☐ mas 6 veces al día
- 

Leche desnatada

- ☐ Nunca o menos 1 vez al mes  
☐ 1 a 3 veces mes  
☐ 1 vez semana  
☐ 2 a 4 veces semana  
☐ 5 a 6 veces semana  
☐ 1 vez al día  
☐ 2 a 3 veces al día  
☐ 5 a 6 veces al día  
☐ más 6 veces al día
- 

Leche condensada

- ☐ Nunca o menos 1 vez al mes  
☐ 1 a 3 veces mes  
☐ 1 vez semana  
☐ 2 a 4 veces semana  
☐ 5 a 6 veces semana  
☐ 1 vez al día  
☐ 2 a 3 veces al día  
☐ 5 a 6 veces al día  
☐ más 6 veces al día
- 

nata o crema de leche

- ☐ Nunca o menos 1 vez al mes  
☐ 1 a 3 veces mes  
☐ 1 vez semana  
☐ 2 a 4 veces semana  
☐ 5 a 6 veces semana  
☐ 1 vez al día  
☐ 2 a 3 veces al día  
☐ 5 a 6 veces al día  
☐ más 6 veces al día

---

Yogurt Entero

- ☐ Nunca o menos 1 vez al mes
- ☐ 1 a 3 veces mes
- ☐ 1 vez semana
- ☐ 2 a 4 veces semana
- ☐ 5 a 6 veces semana
- ☐ 1 vez al día
- ☐ 2 a 3 veces al día
- ☐ 5 a 6 veces al día
- ☐ más 6 veces al día

---

Yogurt desnatado

- ☐ Nunca o menos 1 vez al mes
- ☐ 1 a 3 veces mes
- ☐ 1 vez semana
- ☐ 2 a 4 veces semana
- ☐ 5 a 6 veces semana
- ☐ 1 vez al día
- ☐ 2 a 3 veces al día
- ☐ 5 a 6 veces al día
- ☐ más 6 veces al día

---

100g requesón o queso blando o queso fresco

- ☐ Nunca o menos 1 vez al mes
- ☐ 1 a 3 veces mes
- ☐ 1 vez semana
- ☐ 2 a 4 veces semana
- ☐ 5 a 6 veces semana
- ☐ 1 vez al día
- ☐ 2 a 3 veces al día
- ☐ 5 a 6 veces al día
- ☐ más 6 veces al día

---

queso curado o semicurado o cremoso

- ☐ Nunca o menos 1 vez al mes
- ☐ 1 a 3 veces mes
- ☐ 1 vez semana
- ☐ 2 a 4 veces semana
- ☐ 5 a 6 veces semana
- ☐ 1 vez al día
- ☐ 2 a 3 veces al día
- ☐ 5 a 6 veces al día
- ☐ más 6 veces al día

---

natillas flan pudding

- ☐ Nunca o menos 1 vez al mes
- ☐ 1 a 3 veces mes
- ☐ 1 vez semana
- ☐ 2 a 4 veces semana
- ☐ 5 a 6 veces semana
- ☐ 1 vez al día
- ☐ 2 a 3 veces al día
- ☐ 5 a 6 veces al día
- ☐ más 6 veces al día

---

Helado

- ☐ Nunca o menos 1 vez al mes
- ☐ 1 a 3 veces mes
- ☐ 1 vez semana
- ☐ 2 a 4 veces semana
- ☐ 5 a 6 veces semana
- ☐ 1 vez al día
- ☐ 2 a 3 veces al día
- ☐ 5 a 6 veces al día
- ☐ más 6 veces al día

|                                      |                                                                                                                                                                                                                                                                                                                                                                                                   |
|--------------------------------------|---------------------------------------------------------------------------------------------------------------------------------------------------------------------------------------------------------------------------------------------------------------------------------------------------------------------------------------------------------------------------------------------------|
| huevo                                | <input type="radio"/> Nunca o menos 1 vez al mes<br><input type="radio"/> 1 a 3 veces mes<br><input type="radio"/> 1 vez semana<br><input type="radio"/> 2 a 4 veces semana<br><input type="radio"/> 5 a 6 veces semana<br><input type="radio"/> 1 vez al día<br><input type="radio"/> 2 a 3 veces al día<br><input type="radio"/> 5 a 6 veces al día<br><input type="radio"/> más 6 veces al día |
| Pollo con piel                       | <input type="radio"/> Nunca o menos 1 vez al mes<br><input type="radio"/> 1 a 3 veces mes<br><input type="radio"/> 1 vez semana<br><input type="radio"/> 2 a 4 veces semana<br><input type="radio"/> 5 a 6 veces semana<br><input type="radio"/> 1 vez al día<br><input type="radio"/> 2 a 3 veces al día<br><input type="radio"/> 5 a 6 veces al día<br><input type="radio"/> más 6 veces al día |
| pollo sin piel                       | <input type="radio"/> Nunca o menos 1 vez al mes<br><input type="radio"/> 1 a 3 veces mes<br><input type="radio"/> 1 vez semana<br><input type="radio"/> 2 a 4 veces semana<br><input type="radio"/> 5 a 6 veces semana<br><input type="radio"/> 1 vez al día<br><input type="radio"/> 2 a 3 veces al día<br><input type="radio"/> 5 a 6 veces al día<br><input type="radio"/> más 6 veces al día |
| Ternera o cerdo o cordero            | <input type="radio"/> Nunca o menos 1 vez al mes<br><input type="radio"/> 1 a 3 veces mes<br><input type="radio"/> 1 vez semana<br><input type="radio"/> 2 a 4 veces semana<br><input type="radio"/> 5 a 6 veces semana<br><input type="radio"/> 1 vez al día<br><input type="radio"/> 2 a 3 veces al día<br><input type="radio"/> 5 a 6 veces al día<br><input type="radio"/> más 6 veces al día |
| carne caza: Conejo o codorniz o pato | <input type="radio"/> Nunca o menos 1 vez al mes<br><input type="radio"/> 1 a 3 veces mes<br><input type="radio"/> 1 vez semana<br><input type="radio"/> 2 a 4 veces semana<br><input type="radio"/> 5 a 6 veces semana<br><input type="radio"/> 1 vez al día<br><input type="radio"/> 2 a 3 veces al día<br><input type="radio"/> 5 a 6 veces al día<br><input type="radio"/> más 6 veces al día |
| Hígado de ternera o cerdo o pollo    | <input type="radio"/> Nunca o menos 1 vez al mes<br><input type="radio"/> 1 a 3 veces mes<br><input type="radio"/> 1 vez semana<br><input type="radio"/> 2 a 4 veces semana<br><input type="radio"/> 5 a 6 veces semana<br><input type="radio"/> 1 vez al día<br><input type="radio"/> 2 a 3 veces al día<br><input type="radio"/> 5 a 6 veces al día<br><input type="radio"/> más 6 veces al día |



|                     |                                                                                                                                                                                                                                                                                                                                                                                                   |
|---------------------|---------------------------------------------------------------------------------------------------------------------------------------------------------------------------------------------------------------------------------------------------------------------------------------------------------------------------------------------------------------------------------------------------|
| Vísceras            | <input type="radio"/> Nunca o menos 1 vez al mes<br><input type="radio"/> 1 a 3 veces mes<br><input type="radio"/> 1 vez semana<br><input type="radio"/> 2 a 4 veces semana<br><input type="radio"/> 5 a 6 veces semana<br><input type="radio"/> 1 vez al día<br><input type="radio"/> 2 a 3 veces al día<br><input type="radio"/> 5 a 6 veces al día<br><input type="radio"/> más 6 veces al día |
| Embutido            | <input type="radio"/> Nunca o menos 1 vez al mes<br><input type="radio"/> 1 a 3 veces mes<br><input type="radio"/> 1 vez semana<br><input type="radio"/> 2 a 4 veces semana<br><input type="radio"/> 5 a 6 veces semana<br><input type="radio"/> 1 vez al día<br><input type="radio"/> 2 a 3 veces al día<br><input type="radio"/> 5 a 6 veces al día<br><input type="radio"/> más 6 veces al día |
| Salchicha o similar | <input type="radio"/> Nunca o menos 1 vez al mes<br><input type="radio"/> 1 a 3 veces mes<br><input type="radio"/> 1 vez semana<br><input type="radio"/> 2 a 4 veces semana<br><input type="radio"/> 5 a 6 veces semana<br><input type="radio"/> 1 vez al día<br><input type="radio"/> 2 a 3 veces al día<br><input type="radio"/> 5 a 6 veces al día<br><input type="radio"/> más 6 veces al día |
| Pate o foiegras     | <input type="radio"/> Nunca o menos 1 vez al mes<br><input type="radio"/> 1 a 3 veces mes<br><input type="radio"/> 1 vez semana<br><input type="radio"/> 2 a 4 veces semana<br><input type="radio"/> 5 a 6 veces semana<br><input type="radio"/> 1 vez al día<br><input type="radio"/> 2 a 3 veces al día<br><input type="radio"/> 5 a 6 veces al día<br><input type="radio"/> más 6 veces al día |
| Hamburguesa         | <input type="radio"/> Nunca o menos 1 vez al mes<br><input type="radio"/> 1 a 3 veces mes<br><input type="radio"/> 1 vez semana<br><input type="radio"/> 2 a 4 veces semana<br><input type="radio"/> 5 a 6 veces semana<br><input type="radio"/> 1 vez al día<br><input type="radio"/> 2 a 3 veces al día<br><input type="radio"/> 5 a 6 veces al día<br><input type="radio"/> más 6 veces al día |
| tocino o bacon      | <input type="radio"/> Nunca o menos 1 vez al mes<br><input type="radio"/> 1 a 3 veces mes<br><input type="radio"/> 1 vez semana<br><input type="radio"/> 2 a 4 veces semana<br><input type="radio"/> 5 a 6 veces semana<br><input type="radio"/> 1 vez al día<br><input type="radio"/> 2 a 3 veces al día<br><input type="radio"/> 5 a 6 veces al día<br><input type="radio"/> más 6 veces al día |

---

|               |                                                                                                                                                                                                                                                                                                                                                                                                   |
|---------------|---------------------------------------------------------------------------------------------------------------------------------------------------------------------------------------------------------------------------------------------------------------------------------------------------------------------------------------------------------------------------------------------------|
| Pescado frito | <input type="radio"/> Nunca o menos 1 vez al mes<br><input type="radio"/> 1 a 3 veces mes<br><input type="radio"/> 1 vez semana<br><input type="radio"/> 2 a 4 veces semana<br><input type="radio"/> 5 a 6 veces semana<br><input type="radio"/> 1 vez al día<br><input type="radio"/> 2 a 3 veces al día<br><input type="radio"/> 5 a 6 veces al día<br><input type="radio"/> más 6 veces al día |
|---------------|---------------------------------------------------------------------------------------------------------------------------------------------------------------------------------------------------------------------------------------------------------------------------------------------------------------------------------------------------------------------------------------------------|

---

|                        |                                                                                                                                                                                                                                                                                                                                                                                                   |
|------------------------|---------------------------------------------------------------------------------------------------------------------------------------------------------------------------------------------------------------------------------------------------------------------------------------------------------------------------------------------------------------------------------------------------|
| pescado hervido blanco | <input type="radio"/> Nunca o menos 1 vez al mes<br><input type="radio"/> 1 a 3 veces mes<br><input type="radio"/> 1 vez semana<br><input type="radio"/> 2 a 4 veces semana<br><input type="radio"/> 5 a 6 veces semana<br><input type="radio"/> 1 vez al día<br><input type="radio"/> 2 a 3 veces al día<br><input type="radio"/> 5 a 6 veces al día<br><input type="radio"/> más 6 veces al día |
|------------------------|---------------------------------------------------------------------------------------------------------------------------------------------------------------------------------------------------------------------------------------------------------------------------------------------------------------------------------------------------------------------------------------------------|

---

|                      |                                                                                                                                                                                                                                                                                                                                                                                                   |
|----------------------|---------------------------------------------------------------------------------------------------------------------------------------------------------------------------------------------------------------------------------------------------------------------------------------------------------------------------------------------------------------------------------------------------|
| pescado hervido azul | <input type="radio"/> Nunca o menos 1 vez al mes<br><input type="radio"/> 1 a 3 veces mes<br><input type="radio"/> 1 vez semana<br><input type="radio"/> 2 a 4 veces semana<br><input type="radio"/> 5 a 6 veces semana<br><input type="radio"/> 1 vez al día<br><input type="radio"/> 2 a 3 veces al día<br><input type="radio"/> 5 a 6 veces al día<br><input type="radio"/> más 6 veces al día |
|----------------------|---------------------------------------------------------------------------------------------------------------------------------------------------------------------------------------------------------------------------------------------------------------------------------------------------------------------------------------------------------------------------------------------------|

---

|                    |                                                                                                                                                                                                                                                                                                                                                                                                   |
|--------------------|---------------------------------------------------------------------------------------------------------------------------------------------------------------------------------------------------------------------------------------------------------------------------------------------------------------------------------------------------------------------------------------------------|
| otros pescado azul | <input type="radio"/> Nunca o menos 1 vez al mes<br><input type="radio"/> 1 a 3 veces mes<br><input type="radio"/> 1 vez semana<br><input type="radio"/> 2 a 4 veces semana<br><input type="radio"/> 5 a 6 veces semana<br><input type="radio"/> 1 vez al día<br><input type="radio"/> 2 a 3 veces al día<br><input type="radio"/> 5 a 6 veces al día<br><input type="radio"/> más 6 veces al día |
|--------------------|---------------------------------------------------------------------------------------------------------------------------------------------------------------------------------------------------------------------------------------------------------------------------------------------------------------------------------------------------------------------------------------------------|

---

|               |                                                                                                                                                                                                                                                                                                                                                                                                   |
|---------------|---------------------------------------------------------------------------------------------------------------------------------------------------------------------------------------------------------------------------------------------------------------------------------------------------------------------------------------------------------------------------------------------------|
| atun conserva | <input type="radio"/> Nunca o menos 1 vez al mes<br><input type="radio"/> 1 a 3 veces mes<br><input type="radio"/> 1 vez semana<br><input type="radio"/> 2 a 4 veces semana<br><input type="radio"/> 5 a 6 veces semana<br><input type="radio"/> 1 vez al día<br><input type="radio"/> 2 a 3 veces al día<br><input type="radio"/> 5 a 6 veces al día<br><input type="radio"/> más 6 veces al día |
|---------------|---------------------------------------------------------------------------------------------------------------------------------------------------------------------------------------------------------------------------------------------------------------------------------------------------------------------------------------------------------------------------------------------------|

---

|                  |                                                                                                                                                                                                                                                                                                                                                                                                   |
|------------------|---------------------------------------------------------------------------------------------------------------------------------------------------------------------------------------------------------------------------------------------------------------------------------------------------------------------------------------------------------------------------------------------------|
| sardina conserva | <input type="radio"/> Nunca o menos 1 vez al mes<br><input type="radio"/> 1 a 3 veces mes<br><input type="radio"/> 1 vez semana<br><input type="radio"/> 2 a 4 veces semana<br><input type="radio"/> 5 a 6 veces semana<br><input type="radio"/> 1 vez al día<br><input type="radio"/> 2 a 3 veces al día<br><input type="radio"/> 5 a 6 veces al día<br><input type="radio"/> más 6 veces al día |
|------------------|---------------------------------------------------------------------------------------------------------------------------------------------------------------------------------------------------------------------------------------------------------------------------------------------------------------------------------------------------------------------------------------------------|

---

|                                         |                                                                                                                                                                                                                                                                                                                                                                                                   |
|-----------------------------------------|---------------------------------------------------------------------------------------------------------------------------------------------------------------------------------------------------------------------------------------------------------------------------------------------------------------------------------------------------------------------------------------------------|
| pescado ahumado                         | <input type="radio"/> Nunca o menos 1 vez al mes<br><input type="radio"/> 1 a 3 veces mes<br><input type="radio"/> 1 vez semana<br><input type="radio"/> 2 a 4 veces semana<br><input type="radio"/> 5 a 6 veces semana<br><input type="radio"/> 1 vez al día<br><input type="radio"/> 2 a 3 veces al día<br><input type="radio"/> 5 a 6 veces al día<br><input type="radio"/> más 6 veces al día |
| almejas o mejillones o ostras unos 100g | <input type="radio"/> Nunca o menos 1 vez al mes<br><input type="radio"/> 1 a 3 veces mes<br><input type="radio"/> 1 vez semana<br><input type="radio"/> 2 a 4 veces semana<br><input type="radio"/> 5 a 6 veces semana<br><input type="radio"/> 1 vez al día<br><input type="radio"/> 2 a 3 veces al día<br><input type="radio"/> 5 a 6 veces al día<br><input type="radio"/> más 6 veces al día |
| calamar o chipiron o sepia unos 100g    | <input type="radio"/> Nunca o menos 1 vez al mes<br><input type="radio"/> 1 a 3 veces mes<br><input type="radio"/> 1 vez semana<br><input type="radio"/> 2 a 4 veces semana<br><input type="radio"/> 5 a 6 veces semana<br><input type="radio"/> 1 vez al día<br><input type="radio"/> 2 a 3 veces al día<br><input type="radio"/> 5 a 6 veces al día<br><input type="radio"/> más 6 veces al día |
| marisco unos 100g                       | <input type="radio"/> Nunca o menos 1 vez al mes<br><input type="radio"/> 1 a 3 veces mes<br><input type="radio"/> 1 vez semana<br><input type="radio"/> 2 a 4 veces semana<br><input type="radio"/> 5 a 6 veces semana<br><input type="radio"/> 1 vez al día<br><input type="radio"/> 2 a 3 veces al día<br><input type="radio"/> 5 a 6 veces al día<br><input type="radio"/> más 6 veces al día |
| Espinacas o acelgas cocinadas           | <input type="radio"/> Nunca o menos 1 vez al mes<br><input type="radio"/> 1 a 3 veces mes<br><input type="radio"/> 1 vez semana<br><input type="radio"/> 2 a 4 veces semana<br><input type="radio"/> 5 a 6 veces semana<br><input type="radio"/> 1 vez al día<br><input type="radio"/> 2 a 3 veces al día<br><input type="radio"/> 5 a 6 veces al día<br><input type="radio"/> más 6 veces al día |
| Col o coliflor o brocoli cocinado       | <input type="radio"/> Nunca o menos 1 vez al mes<br><input type="radio"/> 1 a 3 veces mes<br><input type="radio"/> 1 vez semana<br><input type="radio"/> 2 a 4 veces semana<br><input type="radio"/> 5 a 6 veces semana<br><input type="radio"/> 1 vez al día<br><input type="radio"/> 2 a 3 veces al día<br><input type="radio"/> 5 a 6 veces al día<br><input type="radio"/> más 6 veces al día |

---

Lechuga o endivia o escarola

- ☐ Nunca o menos 1 vez al mes
- ☐ 1 a 3 veces mes
- ☐ 1 vez semana
- ☐ 2 a 4 veces semana
- ☐ 5 a 6 veces semana
- ☐ 1 vez al día
- ☐ 2 a 3 veces al día
- ☐ 5 a 6 veces al día
- ☐ más 6 veces al día

---

tomate ensalada

- ☐ Nunca o menos 1 vez al mes
- ☐ 1 a 3 veces mes
- ☐ 1 vez semana
- ☐ 2 a 4 veces semana
- ☐ 5 a 6 veces semana
- ☐ 1 vez al día
- ☐ 2 a 3 veces al día
- ☐ 5 a 6 veces al día
- ☐ más 6 veces al día

---

cebolla

- ☐ Nunca o menos 1 vez al mes
- ☐ 1 a 3 veces mes
- ☐ 1 vez semana
- ☐ 2 a 4 veces semana
- ☐ 5 a 6 veces semana
- ☐ 1 vez al día
- ☐ 2 a 3 veces al día
- ☐ 5 a 6 veces al día
- ☐ más 6 veces al día

---

Zanahoria o calabaza

- ☐ Nunca o menos 1 vez al mes
- ☐ 1 a 3 veces mes
- ☐ 1 vez semana
- ☐ 2 a 4 veces semana
- ☐ 5 a 6 veces semana
- ☐ 1 vez al día
- ☐ 2 a 3 veces al día
- ☐ 5 a 6 veces al día
- ☐ más 6 veces al día

---

Judías verdes

- ☐ Nunca o menos 1 vez al mes
- ☐ 1 a 3 veces mes
- ☐ 1 vez semana
- ☐ 2 a 4 veces semana
- ☐ 5 a 6 veces semana
- ☐ 1 vez al día
- ☐ 2 a 3 veces al día
- ☐ 5 a 6 veces al día
- ☐ más 6 veces al día

---

Berenjena o calabacin o pepino

- ☐ Nunca o menos 1 vez al mes
- ☐ 1 a 3 veces mes
- ☐ 1 vez semana
- ☐ 2 a 4 veces semana
- ☐ 5 a 6 veces semana
- ☐ 1 vez al día
- ☐ 2 a 3 veces al día
- ☐ 5 a 6 veces al día
- ☐ más 6 veces al día

---

|          |                                                                                                                                                                                                                                                                                                                                                                                                   |
|----------|---------------------------------------------------------------------------------------------------------------------------------------------------------------------------------------------------------------------------------------------------------------------------------------------------------------------------------------------------------------------------------------------------|
| pimiento | <input type="radio"/> Nunca o menos 1 vez al mes<br><input type="radio"/> 1 a 3 veces mes<br><input type="radio"/> 1 vez semana<br><input type="radio"/> 2 a 4 veces semana<br><input type="radio"/> 5 a 6 veces semana<br><input type="radio"/> 1 vez al día<br><input type="radio"/> 2 a 3 veces al día<br><input type="radio"/> 5 a 6 veces al día<br><input type="radio"/> más 6 veces al día |
|----------|---------------------------------------------------------------------------------------------------------------------------------------------------------------------------------------------------------------------------------------------------------------------------------------------------------------------------------------------------------------------------------------------------|

---

|           |                                                                                                                                                                                                                                                                                                                                                                                                   |
|-----------|---------------------------------------------------------------------------------------------------------------------------------------------------------------------------------------------------------------------------------------------------------------------------------------------------------------------------------------------------------------------------------------------------|
| alcachofa | <input type="radio"/> Nunca o menos 1 vez al mes<br><input type="radio"/> 1 a 3 veces mes<br><input type="radio"/> 1 vez semana<br><input type="radio"/> 2 a 4 veces semana<br><input type="radio"/> 5 a 6 veces semana<br><input type="radio"/> 1 vez al día<br><input type="radio"/> 2 a 3 veces al día<br><input type="radio"/> 5 a 6 veces al día<br><input type="radio"/> más 6 veces al día |
|-----------|---------------------------------------------------------------------------------------------------------------------------------------------------------------------------------------------------------------------------------------------------------------------------------------------------------------------------------------------------------------------------------------------------|

---

|            |                                                                                                                                                                                                                                                                                                                                                                                                   |
|------------|---------------------------------------------------------------------------------------------------------------------------------------------------------------------------------------------------------------------------------------------------------------------------------------------------------------------------------------------------------------------------------------------------|
| espárragos | <input type="radio"/> Nunca o menos 1 vez al mes<br><input type="radio"/> 1 a 3 veces mes<br><input type="radio"/> 1 vez semana<br><input type="radio"/> 2 a 4 veces semana<br><input type="radio"/> 5 a 6 veces semana<br><input type="radio"/> 1 vez al día<br><input type="radio"/> 2 a 3 veces al día<br><input type="radio"/> 5 a 6 veces al día<br><input type="radio"/> más 6 veces al día |
|------------|---------------------------------------------------------------------------------------------------------------------------------------------------------------------------------------------------------------------------------------------------------------------------------------------------------------------------------------------------------------------------------------------------|

---

|              |                                                                                                                                                                                                                                                                                                                                                                                                   |
|--------------|---------------------------------------------------------------------------------------------------------------------------------------------------------------------------------------------------------------------------------------------------------------------------------------------------------------------------------------------------------------------------------------------------|
| maíz hervido | <input type="radio"/> Nunca o menos 1 vez al mes<br><input type="radio"/> 1 a 3 veces mes<br><input type="radio"/> 1 vez semana<br><input type="radio"/> 2 a 4 veces semana<br><input type="radio"/> 5 a 6 veces semana<br><input type="radio"/> 1 vez al día<br><input type="radio"/> 2 a 3 veces al día<br><input type="radio"/> 5 a 6 veces al día<br><input type="radio"/> más 6 veces al día |
|--------------|---------------------------------------------------------------------------------------------------------------------------------------------------------------------------------------------------------------------------------------------------------------------------------------------------------------------------------------------------------------------------------------------------|

---

|           |                                                                                                                                                                                                                                                                                                                                                                                                   |
|-----------|---------------------------------------------------------------------------------------------------------------------------------------------------------------------------------------------------------------------------------------------------------------------------------------------------------------------------------------------------------------------------------------------------|
| legumbres | <input type="radio"/> Nunca o menos 1 vez al mes<br><input type="radio"/> 1 a 3 veces mes<br><input type="radio"/> 1 vez semana<br><input type="radio"/> 2 a 4 veces semana<br><input type="radio"/> 5 a 6 veces semana<br><input type="radio"/> 1 vez al día<br><input type="radio"/> 2 a 3 veces al día<br><input type="radio"/> 5 a 6 veces al día<br><input type="radio"/> más 6 veces al día |
|-----------|---------------------------------------------------------------------------------------------------------------------------------------------------------------------------------------------------------------------------------------------------------------------------------------------------------------------------------------------------------------------------------------------------|

---

|                       |                                                                                                                                                                                                                                                                                                                                                                                                   |
|-----------------------|---------------------------------------------------------------------------------------------------------------------------------------------------------------------------------------------------------------------------------------------------------------------------------------------------------------------------------------------------------------------------------------------------|
| naranjas o mandarinas | <input type="radio"/> Nunca o menos 1 vez al mes<br><input type="radio"/> 1 a 3 veces mes<br><input type="radio"/> 1 vez semana<br><input type="radio"/> 2 a 4 veces semana<br><input type="radio"/> 5 a 6 veces semana<br><input type="radio"/> 1 vez al día<br><input type="radio"/> 2 a 3 veces al día<br><input type="radio"/> 5 a 6 veces al día<br><input type="radio"/> más 6 veces al día |
|-----------------------|---------------------------------------------------------------------------------------------------------------------------------------------------------------------------------------------------------------------------------------------------------------------------------------------------------------------------------------------------------------------------------------------------|

---

---

zum natural fruta

- ☐ Nunca o menos 1 vez al mes  
☐ 1 a 3 veces mes  
☐ 1 vez semana  
☐ 2 a 4 veces semana  
☐ 5 a 6 veces semana  
☐ 1 vez al día  
☐ 2 a 3 veces al día  
☐ 5 a 6 veces al día  
☐ más 6 veces al día

---

platano

- ☐ Nunca o menos 1 vez al mes  
☐ 1 a 3 veces mes  
☐ 1 vez semana  
☐ 2 a 4 veces semana  
☐ 5 a 6 veces semana  
☐ 1 vez al día  
☐ 2 a 3 veces al día  
☐ 5 a 6 veces al día  
☐ más 6 veces al día

---

manzana o pera

- ☐ Nunca o menos 1 vez al mes  
☐ 1 a 3 veces mes  
☐ 1 vez semana  
☐ 2 a 4 veces semana  
☐ 5 a 6 veces semana  
☐ 1 vez al día  
☐ 2 a 3 veces al día  
☐ 5 a 6 veces al día  
☐ más 6 veces al día

---

melocotón o nectarina

- ☐ Nunca o menos 1 vez al mes  
☐ 1 a 3 veces mes  
☐ 1 vez semana  
☐ 2 a 4 veces semana  
☐ 5 a 6 veces semana  
☐ 1 vez al día  
☐ 2 a 3 veces al día  
☐ 5 a 6 veces al día  
☐ más 6 veces al día

---

sandia o melon

- ☐ Nunca o menos 1 vez al mes  
☐ 1 a 3 veces mes  
☐ 1 vez semana  
☐ 2 a 4 veces semana  
☐ 5 a 6 veces semana  
☐ 1 vez al día  
☐ 2 a 3 veces al día  
☐ 5 a 6 veces al día  
☐ más 6 veces al día

---

uva

- ☐ Nunca o menos 1 vez al mes  
☐ 1 a 3 veces mes  
☐ 1 vez semana  
☐ 2 a 4 veces semana  
☐ 5 a 6 veces semana  
☐ 1 vez al día  
☐ 2 a 3 veces al día  
☐ 5 a 6 veces al día  
☐ más 6 veces al día

---

bruna o ciruela

- ☐ Nunca o menos 1 vez al mes
- ☐ 1 a 3 veces mes
- ☐ 1 vez semana
- ☐ 2 a 4 veces semana
- ☐ 5 a 6 veces semana
- ☐ 1 vez al día
- ☐ 2 a 3 veces al día
- ☐ 5 a 6 veces al día
- ☐ más 6 veces al día

---

kiwi

- ☐ Nunca o menos 1 vez al mes
- ☐ 1 a 3 veces mes
- ☐ 1 vez semana
- ☐ 2 a 4 veces semana
- ☐ 5 a 6 veces semana
- ☐ 1 vez al día
- ☐ 2 a 3 veces al día
- ☐ 5 a 6 veces al día
- ☐ más 6 veces al día

---

aceituna

- ☐ Nunca o menos 1 vez al mes
- ☐ 1 a 3 veces mes
- ☐ 1 vez semana
- ☐ 2 a 4 veces semana
- ☐ 5 a 6 veces semana
- ☐ 1 vez al día
- ☐ 2 a 3 veces al día
- ☐ 5 a 6 veces al día
- ☐ más 6 veces al día

---

frutos secos

- ☐ Nunca o menos 1 vez al mes
- ☐ 1 a 3 veces mes
- ☐ 1 vez semana
- ☐ 2 a 4 veces semana
- ☐ 5 a 6 veces semana
- ☐ 1 vez al día
- ☐ 2 a 3 veces al día
- ☐ 5 a 6 veces al día
- ☐ más 6 veces al día

---

pan blanco

- ☐ Nunca o menos 1 vez al mes
- ☐ 1 a 3 veces mes
- ☐ 1 vez semana
- ☐ 2 a 4 veces semana
- ☐ 5 a 6 veces semana
- ☐ 1 vez al día
- ☐ 2 a 3 veces al día
- ☐ 5 a 6 veces al día
- ☐ más 6 veces al día

---

pan integral

- ☐ Nunca o menos 1 vez al mes
- ☐ 1 a 3 veces mes
- ☐ 1 vez semana
- ☐ 2 a 4 veces semana
- ☐ 5 a 6 veces semana
- ☐ 1 vez al día
- ☐ 2 a 3 veces al día
- ☐ 5 a 6 veces al día
- ☐ más 6 veces al día

---

cereales desayuno

- ☐ Nunca o menos 1 vez al mes
- ☐ 1 a 3 veces mes
- ☐ 1 vez semana
- ☐ 2 a 4 veces semana
- ☐ 5 a 6 veces semana
- ☐ 1 vez al día
- ☐ 2 a 3 veces al día
- ☐ 5 a 6 veces al día
- ☐ más 6 veces al día

---

patatas fritas

- ☐ Nunca o menos 1 vez al mes
- ☐ 1 a 3 veces mes
- ☐ 1 vez semana
- ☐ 2 a 4 veces semana
- ☐ 5 a 6 veces semana
- ☐ 1 vez al día
- ☐ 2 a 3 veces al día
- ☐ 5 a 6 veces al día
- ☐ más 6 veces al día

---

patatas cocidas o asadas

- ☐ Nunca o menos 1 vez al mes
- ☐ 1 a 3 veces mes
- ☐ 1 vez semana
- ☐ 2 a 4 veces semana
- ☐ 5 a 6 veces semana
- ☐ 1 vez al día
- ☐ 2 a 3 veces al día
- ☐ 5 a 6 veces al día
- ☐ más 6 veces al día

---

bolsa papas

- ☐ Nunca o menos 1 vez al mes
- ☐ 1 a 3 veces mes
- ☐ 1 vez semana
- ☐ 2 a 4 veces semana
- ☐ 5 a 6 veces semana
- ☐ 1 vez al día
- ☐ 2 a 3 veces al día
- ☐ 5 a 6 veces al día
- ☐ más 6 veces al día

---

arroz cocinado

- ☐ Nunca o menos 1 vez al mes
- ☐ 1 a 3 veces mes
- ☐ 1 vez semana
- ☐ 2 a 4 veces semana
- ☐ 5 a 6 veces semana
- ☐ 1 vez al día
- ☐ 2 a 3 veces al día
- ☐ 5 a 6 veces al día
- ☐ más 6 veces al día

---

pasta

- ☐ Nunca o menos 1 vez al mes
- ☐ 1 a 3 veces mes
- ☐ 1 vez semana
- ☐ 2 a 4 veces semana
- ☐ 5 a 6 veces semana
- ☐ 1 vez al día
- ☐ 2 a 3 veces al día
- ☐ 5 a 6 veces al día
- ☐ más 6 veces al día



|                     |                                                                                                                                                                                                                                                                                                                                                                                                   |
|---------------------|---------------------------------------------------------------------------------------------------------------------------------------------------------------------------------------------------------------------------------------------------------------------------------------------------------------------------------------------------------------------------------------------------|
| pizza               | <input type="radio"/> Nunca o menos 1 vez al mes<br><input type="radio"/> 1 a 3 veces mes<br><input type="radio"/> 1 vez semana<br><input type="radio"/> 2 a 4 veces semana<br><input type="radio"/> 5 a 6 veces semana<br><input type="radio"/> 1 vez al día<br><input type="radio"/> 2 a 3 veces al día<br><input type="radio"/> 5 a 6 veces al día<br><input type="radio"/> más 6 veces al día |
| aceite oliva        | <input type="radio"/> Nunca o menos 1 vez al mes<br><input type="radio"/> 1 a 3 veces mes<br><input type="radio"/> 1 vez semana<br><input type="radio"/> 2 a 4 veces semana<br><input type="radio"/> 5 a 6 veces semana<br><input type="radio"/> 1 vez al día<br><input type="radio"/> 2 a 3 veces al día<br><input type="radio"/> 5 a 6 veces al día<br><input type="radio"/> más 6 veces al día |
| otros aceites       | <input type="radio"/> Nunca o menos 1 vez al mes<br><input type="radio"/> 1 a 3 veces mes<br><input type="radio"/> 1 vez semana<br><input type="radio"/> 2 a 4 veces semana<br><input type="radio"/> 5 a 6 veces semana<br><input type="radio"/> 1 vez al día<br><input type="radio"/> 2 a 3 veces al día<br><input type="radio"/> 5 a 6 veces al día<br><input type="radio"/> más 6 veces al día |
| margarina           | <input type="radio"/> Nunca o menos 1 vez al mes<br><input type="radio"/> 1 a 3 veces mes<br><input type="radio"/> 1 vez semana<br><input type="radio"/> 2 a 4 veces semana<br><input type="radio"/> 5 a 6 veces semana<br><input type="radio"/> 1 vez al día<br><input type="radio"/> 2 a 3 veces al día<br><input type="radio"/> 5 a 6 veces al día<br><input type="radio"/> más 6 veces al día |
| mantequilla         | <input type="radio"/> Nunca o menos 1 vez al mes<br><input type="radio"/> 1 a 3 veces mes<br><input type="radio"/> 1 vez semana<br><input type="radio"/> 2 a 4 veces semana<br><input type="radio"/> 5 a 6 veces semana<br><input type="radio"/> 1 vez al día<br><input type="radio"/> 2 a 3 veces al día<br><input type="radio"/> 5 a 6 veces al día<br><input type="radio"/> más 6 veces al día |
| galletas tipo maria | <input type="radio"/> Nunca o menos 1 vez al mes<br><input type="radio"/> 1 a 3 veces mes<br><input type="radio"/> 1 vez semana<br><input type="radio"/> 2 a 4 veces semana<br><input type="radio"/> 5 a 6 veces semana<br><input type="radio"/> 1 vez al día<br><input type="radio"/> 2 a 3 veces al día<br><input type="radio"/> 5 a 6 veces al día<br><input type="radio"/> más 6 veces al día |

---

galletas chocolate

- ☐ Nunca o menos 1 vez al mes
- ☐ 1 a 3 veces mes
- ☐ 1 vez semana
- ☐ 2 a 4 veces semana
- ☐ 5 a 6 veces semana
- ☐ 1 vez al día
- ☐ 2 a 3 veces al día
- ☐ 5 a 6 veces al día
- ☐ más 6 veces al día

---

bolleria

- ☐ Nunca o menos 1 vez al mes
- ☐ 1 a 3 veces mes
- ☐ 1 vez semana
- ☐ 2 a 4 veces semana
- ☐ 5 a 6 veces semana
- ☐ 1 vez al día
- ☐ 2 a 3 veces al día
- ☐ 5 a 6 veces al día
- ☐ más 6 veces al día

---

chocolate o bombones

- ☐ Nunca o menos 1 vez al mes
- ☐ 1 a 3 veces mes
- ☐ 1 vez semana
- ☐ 2 a 4 veces semana
- ☐ 5 a 6 veces semana
- ☐ 1 vez al día
- ☐ 2 a 3 veces al día
- ☐ 5 a 6 veces al día
- ☐ más 6 veces al día

---

chocolate polvo o colacao

- ☐ Nunca o menos 1 vez al mes
- ☐ 1 a 3 veces mes
- ☐ 1 vez semana
- ☐ 2 a 4 veces semana
- ☐ 5 a 6 veces semana
- ☐ 1 vez al día
- ☐ 2 a 3 veces al día
- ☐ 5 a 6 veces al día
- ☐ más 6 veces al día

---

vino tinto

- ☐ Nunca o menos 1 vez al mes
- ☐ 1 a 3 veces mes
- ☐ 1 vez semana
- ☐ 2 a 4 veces semana
- ☐ 5 a 6 veces semana
- ☐ 1 vez al día
- ☐ 2 a 3 veces al día
- ☐ 5 a 6 veces al día
- ☐ más 6 veces al día

---

vino blanco

- ☐ Nunca o menos 1 vez al mes
- ☐ 1 a 3 veces mes
- ☐ 1 vez semana
- ☐ 2 a 4 veces semana
- ☐ 5 a 6 veces semana
- ☐ 1 vez al día
- ☐ 2 a 3 veces al día
- ☐ 5 a 6 veces al día
- ☐ más 6 veces al día

---

|                    |                                                                                                                                                                                                                                                                                                                                                                                                   |
|--------------------|---------------------------------------------------------------------------------------------------------------------------------------------------------------------------------------------------------------------------------------------------------------------------------------------------------------------------------------------------------------------------------------------------|
| vino seco o vermut | <input type="radio"/> Nunca o menos 1 vez al mes<br><input type="radio"/> 1 a 3 veces mes<br><input type="radio"/> 1 vez semana<br><input type="radio"/> 2 a 4 veces semana<br><input type="radio"/> 5 a 6 veces semana<br><input type="radio"/> 1 vez al día<br><input type="radio"/> 2 a 3 veces al día<br><input type="radio"/> 5 a 6 veces al día<br><input type="radio"/> más 6 veces al día |
|--------------------|---------------------------------------------------------------------------------------------------------------------------------------------------------------------------------------------------------------------------------------------------------------------------------------------------------------------------------------------------------------------------------------------------|

---

|         |                                                                                                                                                                                                                                                                                                                                                                                                   |
|---------|---------------------------------------------------------------------------------------------------------------------------------------------------------------------------------------------------------------------------------------------------------------------------------------------------------------------------------------------------------------------------------------------------|
| cerveza | <input type="radio"/> Nunca o menos 1 vez al mes<br><input type="radio"/> 1 a 3 veces mes<br><input type="radio"/> 1 vez semana<br><input type="radio"/> 2 a 4 veces semana<br><input type="radio"/> 5 a 6 veces semana<br><input type="radio"/> 1 vez al día<br><input type="radio"/> 2 a 3 veces al día<br><input type="radio"/> 5 a 6 veces al día<br><input type="radio"/> más 6 veces al día |
|---------|---------------------------------------------------------------------------------------------------------------------------------------------------------------------------------------------------------------------------------------------------------------------------------------------------------------------------------------------------------------------------------------------------|

---

|                     |                                                                                                                                                                                                                                                                                                                                                                                                   |
|---------------------|---------------------------------------------------------------------------------------------------------------------------------------------------------------------------------------------------------------------------------------------------------------------------------------------------------------------------------------------------------------------------------------------------|
| cerveza sin alcohol | <input type="radio"/> Nunca o menos 1 vez al mes<br><input type="radio"/> 1 a 3 veces mes<br><input type="radio"/> 1 vez semana<br><input type="radio"/> 2 a 4 veces semana<br><input type="radio"/> 5 a 6 veces semana<br><input type="radio"/> 1 vez al día<br><input type="radio"/> 2 a 3 veces al día<br><input type="radio"/> 5 a 6 veces al día<br><input type="radio"/> más 6 veces al día |
|---------------------|---------------------------------------------------------------------------------------------------------------------------------------------------------------------------------------------------------------------------------------------------------------------------------------------------------------------------------------------------------------------------------------------------|

---

|         |                                                                                                                                                                                                                                                                                                                                                                                                   |
|---------|---------------------------------------------------------------------------------------------------------------------------------------------------------------------------------------------------------------------------------------------------------------------------------------------------------------------------------------------------------------------------------------------------|
| licores | <input type="radio"/> Nunca o menos 1 vez al mes<br><input type="radio"/> 1 a 3 veces mes<br><input type="radio"/> 1 vez semana<br><input type="radio"/> 2 a 4 veces semana<br><input type="radio"/> 5 a 6 veces semana<br><input type="radio"/> 1 vez al día<br><input type="radio"/> 2 a 3 veces al día<br><input type="radio"/> 5 a 6 veces al día<br><input type="radio"/> más 6 veces al día |
|---------|---------------------------------------------------------------------------------------------------------------------------------------------------------------------------------------------------------------------------------------------------------------------------------------------------------------------------------------------------------------------------------------------------|

---

|                       |                                                                                                                                                                                                                                                                                                                                                                                                   |
|-----------------------|---------------------------------------------------------------------------------------------------------------------------------------------------------------------------------------------------------------------------------------------------------------------------------------------------------------------------------------------------------------------------------------------------|
| ginebra o ron o vodka | <input type="radio"/> Nunca o menos 1 vez al mes<br><input type="radio"/> 1 a 3 veces mes<br><input type="radio"/> 1 vez semana<br><input type="radio"/> 2 a 4 veces semana<br><input type="radio"/> 5 a 6 veces semana<br><input type="radio"/> 1 vez al día<br><input type="radio"/> 2 a 3 veces al día<br><input type="radio"/> 5 a 6 veces al día<br><input type="radio"/> más 6 veces al día |
|-----------------------|---------------------------------------------------------------------------------------------------------------------------------------------------------------------------------------------------------------------------------------------------------------------------------------------------------------------------------------------------------------------------------------------------|

---

|                 |                                                                                                                                                                                                                                                                                                                                                                                                   |
|-----------------|---------------------------------------------------------------------------------------------------------------------------------------------------------------------------------------------------------------------------------------------------------------------------------------------------------------------------------------------------------------------------------------------------|
| refresco normal | <input type="radio"/> Nunca o menos 1 vez al mes<br><input type="radio"/> 1 a 3 veces mes<br><input type="radio"/> 1 vez semana<br><input type="radio"/> 2 a 4 veces semana<br><input type="radio"/> 5 a 6 veces semana<br><input type="radio"/> 1 vez al día<br><input type="radio"/> 2 a 3 veces al día<br><input type="radio"/> 5 a 6 veces al día<br><input type="radio"/> más 6 veces al día |
|-----------------|---------------------------------------------------------------------------------------------------------------------------------------------------------------------------------------------------------------------------------------------------------------------------------------------------------------------------------------------------------------------------------------------------|

---

---

refresco sin azúcar

- ☐ Nunca o menos 1 vez al mes
- ☐ 1 a 3 veces mes
- ☐ 1 vez semana
- ☐ 2 a 4 veces semana
- ☐ 5 a 6 veces semana
- ☐ 1 vez al día
- ☐ 2 a 3 veces al día
- ☐ 5 a 6 veces al día
- ☐ más 6 veces al día

---

Agua del grifo

- ☐ Nunca o menos 1 vez al mes
- ☐ 1 a 3 veces mes
- ☐ 1 vez semana
- ☐ 2 a 4 veces semana
- ☐ 5 a 6 veces semana
- ☐ 1 vez al día
- ☐ 2 a 3 veces al día
- ☐ 5 a 6 veces al día
- ☐ más 6 veces al día

---

agua embotellada sin gas

- ☐ Nunca o menos 1 vez al mes
- ☐ 1 a 3 veces mes
- ☐ 1 vez semana
- ☐ 2 a 4 veces semana
- ☐ 5 a 6 veces semana
- ☐ 1 vez al día
- ☐ 2 a 3 veces al día
- ☐ 5 a 6 veces al día
- ☐ más 6 veces al día

---

agua embotellada con gas

- ☐ Nunca o menos 1 vez al mes
- ☐ 1 a 3 veces mes
- ☐ 1 vez semana
- ☐ 2 a 4 veces semana
- ☐ 5 a 6 veces semana
- ☐ 1 vez al día
- ☐ 2 a 3 veces al día
- ☐ 5 a 6 veces al día
- ☐ más 6 veces al día

---

zumو frutas embasado

- ☐ Nunca o menos 1 vez al mes
- ☐ 1 a 3 veces mes
- ☐ 1 vez semana
- ☐ 2 a 4 veces semana
- ☐ 5 a 6 veces semana
- ☐ 1 vez al día
- ☐ 2 a 3 veces al día
- ☐ 5 a 6 veces al día
- ☐ más 6 veces al día

---

cafe

- ☐ Nunca o menos 1 vez al mes
- ☐ 1 a 3 veces mes
- ☐ 1 vez semana
- ☐ 2 a 4 veces semana
- ☐ 5 a 6 veces semana
- ☐ 1 vez al día
- ☐ 2 a 3 veces al día
- ☐ 5 a 6 veces al día
- ☐ más 6 veces al día

---

cafe descafeinado

- ☐ Nunca o menos 1 vez al mes
- ☐ 1 a 3 veces mes
- ☐ 1 vez semana
- ☐ 2 a 4 veces semana
- ☐ 5 a 6 veces semana
- ☐ 1 vez al día
- ☐ 2 a 3 veces al día
- ☐ 5 a 6 veces al día
- ☐ más 6 veces al día

---

te o infusión

- ☐ Nunca o menos 1 vez al mes
- ☐ 1 a 3 veces mes
- ☐ 1 vez semana
- ☐ 2 a 4 veces semana
- ☐ 5 a 6 veces semana
- ☐ 1 vez al día
- ☐ 2 a 3 veces al día
- ☐ 5 a 6 veces al día
- ☐ más 6 veces al día

---

sopa o puré verduras

- ☐ Nunca o menos 1 vez al mes
- ☐ 1 a 3 veces mes
- ☐ 1 vez semana
- ☐ 2 a 4 veces semana
- ☐ 5 a 6 veces semana
- ☐ 1 vez al día
- ☐ 2 a 3 veces al día
- ☐ 5 a 6 veces al día
- ☐ más 6 veces al día

---

croquetas pollo jamón

- ☐ Nunca o menos 1 vez al mes
- ☐ 1 a 3 veces mes
- ☐ 1 vez semana
- ☐ 2 a 4 veces semana
- ☐ 5 a 6 veces semana
- ☐ 1 vez al día
- ☐ 2 a 3 veces al día
- ☐ 5 a 6 veces al día
- ☐ más 6 veces al día

---

croquetas pescado

- ☐ Nunca o menos 1 vez al mes
- ☐ 1 a 3 veces mes
- ☐ 1 vez semana
- ☐ 2 a 4 veces semana
- ☐ 5 a 6 veces semana
- ☐ 1 vez al día
- ☐ 2 a 3 veces al día
- ☐ 5 a 6 veces al día
- ☐ más 6 veces al día

---

mayonesa

- ☐ Nunca o menos 1 vez al mes
- ☐ 1 a 3 veces mes
- ☐ 1 vez semana
- ☐ 2 a 4 veces semana
- ☐ 5 a 6 veces semana
- ☐ 1 vez al día
- ☐ 2 a 3 veces al día
- ☐ 5 a 6 veces al día
- ☐ más 6 veces al día

---

salsa tomate

- ☐ Nunca o menos 1 vez al mes
- ☐ 1 a 3 veces mes
- ☐ 1 vez semana
- ☐ 2 a 4 veces semana
- ☐ 5 a 6 veces semana
- ☐ 1 vez al día
- ☐ 2 a 3 veces al día
- ☐ 5 a 6 veces al día
- ☐ más 6 veces al día

---

ketchup

- ☐ Nunca o menos 1 vez al mes
- ☐ 1 a 3 veces mes
- ☐ 1 vez semana
- ☐ 2 a 4 veces semana
- ☐ 5 a 6 veces semana
- ☐ 1 vez al día
- ☐ 2 a 3 veces al día
- ☐ 5 a 6 veces al día
- ☐ más 6 veces al día

---

sal

- ☐ Nunca o menos 1 vez al mes
- ☐ 1 a 3 veces mes
- ☐ 1 vez semana
- ☐ 2 a 4 veces semana
- ☐ 5 a 6 veces semana
- ☐ 1 vez al día
- ☐ 2 a 3 veces al día
- ☐ 5 a 6 veces al día
- ☐ más 6 veces al día

---

ajo

- ☐ Nunca o menos 1 vez al mes
- ☐ 1 a 3 veces mes
- ☐ 1 vez semana
- ☐ 2 a 4 veces semana
- ☐ 5 a 6 veces semana
- ☐ 1 vez al día
- ☐ 2 a 3 veces al día
- ☐ 5 a 6 veces al día
- ☐ más 6 veces al día

---

mermelada o miel

- ☐ Nunca o menos 1 vez al mes
- ☐ 1 a 3 veces mes
- ☐ 1 vez semana
- ☐ 2 a 4 veces semana
- ☐ 5 a 6 veces semana
- ☐ 1 vez al día
- ☐ 2 a 3 veces al día
- ☐ 5 a 6 veces al día
- ☐ más 6 veces al día

---

azúcar

- ☐ Nunca o menos 1 vez al mes
- ☐ 1 a 3 veces mes
- ☐ 1 vez semana
- ☐ 2 a 4 veces semana
- ☐ 5 a 6 veces semana
- ☐ 1 vez al día
- ☐ 2 a 3 veces al día
- ☐ 5 a 6 veces al día
- ☐ más 6 veces al día

---

Otro alimento

---

suplementos vitamínicos

- ☐ si  
☐ no

---

suplementos vitamínicos

---

dieta previa

- ☐ si  
☐ no

motivo dieta

- ☐ no dieta  
☐ control peso  
☐ control colesterol  
☐ control diabetes  
☐ problemas estómago  
☐ problemas vesícula o hepáticos  
☐ HTA o cardiopatía  
☐ problemas renales  
☐ alergia alimentaria  
☐ ácido úrico elevado  
☐ vegetariana  
☐ otros

---

cambio alimentos año previo gestación

- ☐ si  
☐ no

---

cambio lácteos

- ☐ eliminado  
☐ disminuido  
☐ igual  
☐ aumentado  
☐ no sabe

---

cambio huevos

- ☐ eliminado  
☐ disminuido  
☐ igual  
☐ aumentado  
☐ no sabe

---

cambio carne

- ☐ eliminado  
☐ disminuido  
☐ igual  
☐ aumentado  
☐ no sabe

---

cambio pescado

- ☐ eliminado  
☐ disminuido  
☐ igual  
☐ aumentado  
☐ no sabe

---

cambio verduras

- ☐ eliminado  
☐ disminuido  
☐ igual  
☐ aumentado  
☐ no sabe

|                            |                                                                                                                                                                                                             |
|----------------------------|-------------------------------------------------------------------------------------------------------------------------------------------------------------------------------------------------------------|
| cambio legumbres           | <input type="radio"/> eliminado<br><input type="radio"/> disminuido<br><input type="radio"/> igual<br><input type="radio"/> aumentado<br><input type="radio"/> no sabe                                      |
| cambio fruta               | <input type="radio"/> eliminado<br><input type="radio"/> disminuido<br><input type="radio"/> igual<br><input type="radio"/> aumentado<br><input type="radio"/> no sabe                                      |
| cambio pan                 | <input type="radio"/> eliminado<br><input type="radio"/> disminuido<br><input type="radio"/> igual<br><input type="radio"/> aumentado<br><input type="radio"/> no sabe                                      |
| cambio aceite oliva        | <input type="radio"/> eliminado<br><input type="radio"/> disminuido<br><input type="radio"/> igual<br><input type="radio"/> aumentado<br><input type="radio"/> no sabe                                      |
| cambio mante o margarina   | <input type="radio"/> eliminado<br><input type="radio"/> disminuido<br><input type="radio"/> igual<br><input type="radio"/> aumentado<br><input type="radio"/> no sabe                                      |
| cambio azúcar y dulces     | <input type="radio"/> eliminado<br><input type="radio"/> disminuido<br><input type="radio"/> igual<br><input type="radio"/> aumentado<br><input type="radio"/> no sabe                                      |
| cambio bebidas alcohólicas | <input type="radio"/> eliminado<br><input type="radio"/> disminuido<br><input type="radio"/> igual<br><input type="radio"/> aumentado<br><input type="radio"/> no sabe                                      |
| frecuencia comidas fritas  | <input type="radio"/> a diario<br><input type="radio"/> 5 a 6 veces semana<br><input type="radio"/> 2 a 4 veces semana<br><input type="radio"/> 1 vez semana<br><input type="radio"/> menos de 1 vez semana |
| carne                      | <input type="radio"/> no como<br><input type="radio"/> cruda<br><input type="radio"/> poco hecha<br><input type="radio"/> hecha<br><input type="radio"/> muy hecha                                          |
| grasa visible carne        | <input type="radio"/> quita toda<br><input type="radio"/> quita mayoría<br><input type="radio"/> quita un poco<br><input type="radio"/> no quita nada                                                       |



|                                |                                                                                                                                                                                                                                               |
|--------------------------------|-----------------------------------------------------------------------------------------------------------------------------------------------------------------------------------------------------------------------------------------------|
| cocina carne                   | <input type="radio"/> a la plancha<br><input type="radio"/> a la parrilla<br><input type="radio"/> asada<br><input type="radio"/> frita<br><input type="radio"/> guisada                                                                      |
| tostado quemado carne          | <input type="radio"/> nunca<br><input type="radio"/> 1 vez mes<br><input type="radio"/> 2 a 3 veces mes<br><input type="radio"/> 1 vez semana<br><input type="radio"/> 2 a 3 semanas                                                          |
| tostado quemado pescado        | <input type="radio"/> nunca<br><input type="radio"/> 1 vez mes<br><input type="radio"/> 2 a 3 veces mes<br><input type="radio"/> 1 vez semana<br><input type="radio"/> 2 a 3 semanas                                                          |
| socarrat paella                | <input type="radio"/> nunca<br><input type="radio"/> 1 vez mes<br><input type="radio"/> 2 a 3 veces mes<br><input type="radio"/> 1 vez semana<br><input type="radio"/> 2 a 3 semanas                                                          |
| grasa o aceite cocinar         | <input type="radio"/> mantequilla<br><input type="radio"/> margarina<br><input type="radio"/> aceite oliva<br><input type="radio"/> aceite oliva virgen extra<br><input type="radio"/> aceite vegetal<br><input type="radio"/> mezcla aceites |
| grasa aceite aliñar            | <input type="radio"/> mantequilla<br><input type="radio"/> margarina<br><input type="radio"/> aceite oliva<br><input type="radio"/> aceite oliva virgen extra<br><input type="radio"/> aceite vegetal<br><input type="radio"/> mezcla aceites |
| grasa aceite freir             | <input type="radio"/> mantequilla<br><input type="radio"/> margarina<br><input type="radio"/> aceite oliva<br><input type="radio"/> aceite oliva virgen extra<br><input type="radio"/> aceite vegetal<br><input type="radio"/> mezcla aceites |
| Ejercicio cuestionario         | <input type="radio"/> si<br><input checked="" type="radio"/> no                                                                                                                                                                               |
| horas de sueño incluido siesta | <hr/>                                                                                                                                                                                                                                         |
| minutos siesta                 | <hr/>                                                                                                                                                                                                                                         |
| horas televisión semana        | <hr/>                                                                                                                                                                                                                                         |

|                                        |                                                                                                                                                                                                                                                                                                                                                                |
|----------------------------------------|----------------------------------------------------------------------------------------------------------------------------------------------------------------------------------------------------------------------------------------------------------------------------------------------------------------------------------------------------------------|
| actividad trabajo                      | <input type="radio"/> casi siempre sentado<br><input type="radio"/> sentado 50 por cien<br><input type="radio"/> casi siempre de pie, quieto<br><input type="radio"/> casi siempre levantado caminando y llevando pocas cosas<br><input type="radio"/> casi siempre levantado, caminando y llevado muchas cosas<br><input type="radio"/> trabajo manual pesado |
| tiempo caminar o bici al día           | <input type="radio"/> casi nunca<br><input type="radio"/> menos 20min día<br><input type="radio"/> 20 a 40 min día<br><input type="radio"/> 40 a 60 min día<br><input type="radio"/> 1h o 1h y media día<br><input type="radio"/> más de 1h y media al día                                                                                                     |
| tiempo tareas casa al día              | <input type="radio"/> menos de 1h día<br><input type="radio"/> 1 a 2h día<br><input type="radio"/> 3 a 4h día<br><input type="radio"/> 5 a 6h día<br><input type="radio"/> 7 a 8h día<br><input type="radio"/> más de 8h día                                                                                                                                   |
| tiempo libre televisión ordenador leer | <input type="radio"/> menos 1h día<br><input type="radio"/> 1h día<br><input type="radio"/> 2h día<br><input type="radio"/> 3h día<br><input type="radio"/> 4h día<br><input type="radio"/> 5 a 6h día<br><input type="radio"/> mas 6h día                                                                                                                     |
| tiempo libre ejercicio o deporte       | <input type="radio"/> menos 1h semana<br><input type="radio"/> 1h semana<br><input type="radio"/> 2h semana<br><input type="radio"/> 3h semana<br><input type="radio"/> 4 a 5h semana<br><input type="radio"/> mas 5h semana                                                                                                                                   |
| como se considera                      | <input type="radio"/> sedentaria<br><input type="radio"/> poco activa<br><input type="radio"/> moderadamente activa<br><input type="radio"/> bastante activa<br><input type="radio"/> muy activa<br><input type="radio"/> no sabe                                                                                                                              |
| FUR                                    | [*DATA REMOVED*]                                                                                                                                                                                                                                                                                                                                               |
| Semanas gestación 2T                   | [*DATA REMOVED*]                                                                                                                                                                                                                                                                                                                                               |
| Días gestación 2T                      | [*DATA REMOVED*]                                                                                                                                                                                                                                                                                                                                               |
| DBP 2T                                 | [*DATA REMOVED*]                                                                                                                                                                                                                                                                                                                                               |
| CC 2T                                  | [*DATA REMOVED*]                                                                                                                                                                                                                                                                                                                                               |
| AC 2T                                  | [*DATA REMOVED*]                                                                                                                                                                                                                                                                                                                                               |

|                                                   |                                                                                                                                                                                                 |
|---------------------------------------------------|-------------------------------------------------------------------------------------------------------------------------------------------------------------------------------------------------|
| LF 2T                                             | [*DATA REMOVED*]                                                                                                                                                                                |
| PFE 2T (Hadlock)                                  | [*DATA REMOVED*]                                                                                                                                                                                |
| Semanas gestación 3T                              | [*DATA REMOVED*]                                                                                                                                                                                |
| días 3T                                           | [*DATA REMOVED*]                                                                                                                                                                                |
| DBP 3T                                            | [*DATA REMOVED*]                                                                                                                                                                                |
| CC 3T                                             | [*DATA REMOVED*]                                                                                                                                                                                |
| AC 3T                                             | [*DATA REMOVED*]                                                                                                                                                                                |
| LF 3T                                             | [*DATA REMOVED*]                                                                                                                                                                                |
| PFE 3T (Hadlock)                                  | [*DATA REMOVED*]                                                                                                                                                                                |
| Semanas de gestación final                        | [*DATA REMOVED*]                                                                                                                                                                                |
| días gestación final                              | [*DATA REMOVED*]                                                                                                                                                                                |
| Localización placenta                             | <input type="radio"/> anterior<br><input type="radio"/> lateral derecha<br><input type="radio"/> lateral izquierda<br><input checked="" type="radio"/> posterior<br><input type="radio"/> fondo |
| Presentación longitudinal cefálica                | <input type="radio"/> no<br><input checked="" type="radio"/> si                                                                                                                                 |
| Dorso                                             | <input type="radio"/> izquierda anterior<br><input type="radio"/> izquierda posterior<br><input checked="" type="radio"/> derecha anterior<br><input type="radio"/> derecha posterior           |
| diámetro biparietal                               | [*DATA REMOVED*]                                                                                                                                                                                |
| Circunferencia craneal                            | [*DATA REMOVED*]                                                                                                                                                                                |
| Circunferencia abdominal                          | [*DATA REMOVED*]                                                                                                                                                                                |
| Longitud de femur                                 | [*DATA REMOVED*]                                                                                                                                                                                |
| tejido celular subcutáneo a nivel del muslo en mm | [*DATA REMOVED*]                                                                                                                                                                                |
| tejido celular subcutáneo en abdomen en mm        | [*DATA REMOVED*]                                                                                                                                                                                |
| Volumen del muslo en cm3                          | [*DATA REMOVED*]                                                                                                                                                                                |
| Peso fetal estimado según fórmula de Hadlock      | [*DATA REMOVED*]                                                                                                                                                                                |

|                                               |                                                                                                                                                          |
|-----------------------------------------------|----------------------------------------------------------------------------------------------------------------------------------------------------------|
| Percentil                                     | [*DATA REMOVED*]                                                                                                                                         |
| Peso fetal estimado según fórmula de Scioscia | <hr/>                                                                                                                                                    |
| Peso fetal estimado según fórmula de LEE      | <hr/>                                                                                                                                                    |
| Tipo de parto                                 | <input checked="" type="radio"/> eutocico<br><input type="radio"/> instrumentado/ventosa<br><input type="radio"/> cesarea                                |
| fecha de nacimiento                           | [*DATA REMOVED*]                                                                                                                                         |
| Días entre exploración y nacimiento           | [*DATA REMOVED*]                                                                                                                                         |
| Peso RN en g                                  | [*DATA REMOVED*]                                                                                                                                         |
| sexo                                          | <input checked="" type="radio"/> mujer<br><input type="radio"/> hombre                                                                                   |
| Apgar 1 minuto                                | [*DATA REMOVED*]                                                                                                                                         |
| Apgar 5 minutos                               | [*DATA REMOVED*]                                                                                                                                         |
| Apgar 10 minutos                              | <hr/>                                                                                                                                                    |
| antecedente Covid durante gestación           | <input type="radio"/> Yes<br><input checked="" type="radio"/> No                                                                                         |
| Nivel de estudios                             | <input type="radio"/> ninguno<br><input type="radio"/> primarios<br><input type="radio"/> secundarios<br><input checked="" type="radio"/> universitarios |

## Base\_datos\_estimacion\_peso\_fetal

|                                       |                                                                                                                                                                                                                                                                                      |
|---------------------------------------|--------------------------------------------------------------------------------------------------------------------------------------------------------------------------------------------------------------------------------------------------------------------------------------|
| Número de identificación participante | 176                                                                                                                                                                                                                                                                                  |
| CODIGO PARTICIPANTE                   |                                                                                                                                                                                                                                                                                      |
| Edad                                  | [*DATA REMOVED*]                                                                                                                                                                                                                                                                     |
| Gestaciones                           | <input type="radio"/> 1<br><input type="radio"/> 2<br><input checked="" type="radio"/> 3<br><input type="radio"/> mas de 3                                                                                                                                                           |
| partos                                | <input type="radio"/> 0<br><input type="radio"/> 1<br><input type="radio"/> 2<br><input type="radio"/> 3<br><input type="radio"/> mas de 3                                                                                                                                           |
| cesáreas                              | <input type="radio"/> 0<br><input checked="" type="radio"/> 1<br><input type="radio"/> 2<br><input type="radio"/> 3<br><input type="radio"/> mas de 3                                                                                                                                |
| Abortos                               | <input type="radio"/> 0<br><input checked="" type="radio"/> 1<br><input type="radio"/> 2<br><input type="radio"/> 3<br><input type="radio"/> mas de 3                                                                                                                                |
| Tipo de gestacion                     | <input checked="" type="radio"/> espontanea<br><input type="radio"/> IAC inseminación artificial conyuge<br><input type="radio"/> IAD inseminación artificial donante<br><input type="radio"/> FIV Fecundación in Vitro<br><input type="radio"/> Ovodon FIV con donación de ovocitos |
| peso previo a embarazo                | [*DATA REMOVED*]                                                                                                                                                                                                                                                                     |
| Ganancia ponderal embarazo            |                                                                                                                                                                                                                                                                                      |
| Talla madre                           | [*DATA REMOVED*]                                                                                                                                                                                                                                                                     |
| IMC previo embarazo                   | 23.433927754915405                                                                                                                                                                                                                                                                   |
| Patología obstétrica                  | <input checked="" type="radio"/> no<br><input type="radio"/> si                                                                                                                                                                                                                      |
| Diabetes pregestacional               | <input checked="" type="radio"/> no<br><input type="radio"/> si                                                                                                                                                                                                                      |
| Diabetes gestacional                  | <input checked="" type="radio"/> no<br><input type="radio"/> si                                                                                                                                                                                                                      |

|                                            |                                                                                                                                                                                      |
|--------------------------------------------|--------------------------------------------------------------------------------------------------------------------------------------------------------------------------------------|
| Diabetes gestacional con insulina          | <input checked="" type="radio"/> no<br><input type="radio"/> si                                                                                                                      |
| Diabetes gestacional con dieta y ejercicio | <input checked="" type="radio"/> no<br><input type="radio"/> si                                                                                                                      |
| Percentil fetos previos                    | <input type="radio"/> Nada<br><input type="radio"/> percentil menor de 10<br><input type="radio"/> percentil entre 10 y 90<br><input checked="" type="radio"/> percentil mayor de 90 |
| Exfumadora                                 | <input checked="" type="radio"/> Nada<br><input type="radio"/> menos de 5 años<br><input type="radio"/> 5 a 10 años<br><input type="radio"/> mayor o igual a 10 años                 |
| Hábito tabáquico                           | <input checked="" type="radio"/> no<br><input type="radio"/> si                                                                                                                      |
| fumadora                                   | [*DATA REMOVED*]                                                                                                                                                                     |
| Consumo otros tóxicos                      | <input checked="" type="radio"/> no<br><input type="radio"/> si                                                                                                                      |
| Hb 1T                                      | _____                                                                                                                                                                                |
| Htc 1T                                     | _____                                                                                                                                                                                |
| Hb 2T                                      | _____                                                                                                                                                                                |
| HTC 2T                                     | _____                                                                                                                                                                                |
| Hb 3T                                      | _____                                                                                                                                                                                |
| HTC 3T                                     | _____                                                                                                                                                                                |
| Suplemento FE oral                         | <input type="radio"/> si<br><input checked="" type="radio"/> no                                                                                                                      |
| Suplemento fe iv                           | <input type="radio"/> si<br><input checked="" type="radio"/> no                                                                                                                      |
| Transfusión                                | <input checked="" type="radio"/> no<br><input type="radio"/> si                                                                                                                      |
| Solicitada Vit D                           | <input checked="" type="radio"/> no<br><input type="radio"/> si                                                                                                                      |

|                       |                                                                                                                                                                                                                                                                                                                                                                                                              |
|-----------------------|--------------------------------------------------------------------------------------------------------------------------------------------------------------------------------------------------------------------------------------------------------------------------------------------------------------------------------------------------------------------------------------------------------------|
| Deficit vit D         | <input type="radio"/> no<br><input type="radio"/> si                                                                                                                                                                                                                                                                                                                                                         |
| Suplemento vit D      | <input type="radio"/> si<br><input type="radio"/> no                                                                                                                                                                                                                                                                                                                                                         |
| Dieta, cuestionario   | <input checked="" type="radio"/> si<br><input type="radio"/> no                                                                                                                                                                                                                                                                                                                                              |
| Leche entera          | <input type="radio"/> Nunca o menos 1 vez al mes<br><input type="radio"/> 1 a 3 veces mes<br><input type="radio"/> 1 vez semana<br><input type="radio"/> 2 a 4 veces semana<br><input type="radio"/> 5 a 6 veces semana<br><input checked="" type="radio"/> 1 vez al día<br><input type="radio"/> 2 a 3 veces al día<br><input type="radio"/> 5 a 6 veces al día<br><input type="radio"/> más 6 veces al día |
| Leche semidesnatada   | <input type="radio"/> Nunca o menos 1 vez al mes<br><input type="radio"/> 1 a 3 veces mes<br><input type="radio"/> 1 vez semana<br><input type="radio"/> 2 a 4 veces semana<br><input type="radio"/> 5 a 6 veces semana<br><input type="radio"/> 1 vez al día<br><input checked="" type="radio"/> 2 a 3 veces al día<br><input type="radio"/> 5 a 6 veces al día<br><input type="radio"/> mas 6 veces al día |
| Leche desnatada       | <input checked="" type="radio"/> Nunca o menos 1 vez al mes<br><input type="radio"/> 1 a 3 veces mes<br><input type="radio"/> 1 vez semana<br><input type="radio"/> 2 a 4 veces semana<br><input type="radio"/> 5 a 6 veces semana<br><input type="radio"/> 1 vez al día<br><input type="radio"/> 2 a 3 veces al día<br><input type="radio"/> 5 a 6 veces al día<br><input type="radio"/> más 6 veces al día |
| Leche condensada      | <input checked="" type="radio"/> Nunca o menos 1 vez al mes<br><input type="radio"/> 1 a 3 veces mes<br><input type="radio"/> 1 vez semana<br><input type="radio"/> 2 a 4 veces semana<br><input type="radio"/> 5 a 6 veces semana<br><input type="radio"/> 1 vez al día<br><input type="radio"/> 2 a 3 veces al día<br><input type="radio"/> 5 a 6 veces al día<br><input type="radio"/> más 6 veces al día |
| nata o crema de leche | <input checked="" type="radio"/> Nunca o menos 1 vez al mes<br><input type="radio"/> 1 a 3 veces mes<br><input type="radio"/> 1 vez semana<br><input type="radio"/> 2 a 4 veces semana<br><input type="radio"/> 5 a 6 veces semana<br><input type="radio"/> 1 vez al día<br><input type="radio"/> 2 a 3 veces al día<br><input type="radio"/> 5 a 6 veces al día<br><input type="radio"/> más 6 veces al día |

---

Yogurt Entero

- ☐ Nunca o menos 1 vez al mes  
☐ 1 a 3 veces mes  
☐ 1 vez semana  
☐ 2 a 4 veces semana  
☐ 5 a 6 veces semana  
☒ 1 vez al día  
☐ 2 a 3 veces al día  
☐ 5 a 6 veces al día  
☐ más 6 veces al día

---

Yogurt desnatado

- ☒ Nunca o menos 1 vez al mes  
☐ 1 a 3 veces mes  
☐ 1 vez semana  
☐ 2 a 4 veces semana  
☐ 5 a 6 veces semana  
☐ 1 vez al día  
☐ 2 a 3 veces al día  
☐ 5 a 6 veces al día  
☐ más 6 veces al día

---

100g requesón o queso blando o queso fresco

- ☐ Nunca o menos 1 vez al mes  
☐ 1 a 3 veces mes  
☒ 1 vez semana  
☐ 2 a 4 veces semana  
☐ 5 a 6 veces semana  
☐ 1 vez al día  
☐ 2 a 3 veces al día  
☐ 5 a 6 veces al día  
☐ más 6 veces al día

---

queso curado o semicurado o cremoso

- ☐ Nunca o menos 1 vez al mes  
☒ 1 a 3 veces mes  
☐ 1 vez semana  
☐ 2 a 4 veces semana  
☐ 5 a 6 veces semana  
☐ 1 vez al día  
☐ 2 a 3 veces al día  
☐ 5 a 6 veces al día  
☐ más 6 veces al día

---

natillas flan pudding

- ☒ Nunca o menos 1 vez al mes  
☐ 1 a 3 veces mes  
☐ 1 vez semana  
☐ 2 a 4 veces semana  
☐ 5 a 6 veces semana  
☐ 1 vez al día  
☐ 2 a 3 veces al día  
☐ 5 a 6 veces al día  
☐ más 6 veces al día

---

Helado

- ☒ Nunca o menos 1 vez al mes  
☐ 1 a 3 veces mes  
☐ 1 vez semana  
☐ 2 a 4 veces semana  
☐ 5 a 6 veces semana  
☐ 1 vez al día  
☐ 2 a 3 veces al día  
☐ 5 a 6 veces al día  
☐ más 6 veces al día



|                                      |                                                                                                                                                                                                                                                                                                                                                                                                              |
|--------------------------------------|--------------------------------------------------------------------------------------------------------------------------------------------------------------------------------------------------------------------------------------------------------------------------------------------------------------------------------------------------------------------------------------------------------------|
| huevo                                | <input type="radio"/> Nunca o menos 1 vez al mes<br><input type="radio"/> 1 a 3 veces mes<br><input type="radio"/> 1 vez semana<br><input type="radio"/> 2 a 4 veces semana<br><input type="radio"/> 5 a 6 veces semana<br><input checked="" type="radio"/> 1 vez al día<br><input type="radio"/> 2 a 3 veces al día<br><input type="radio"/> 5 a 6 veces al día<br><input type="radio"/> más 6 veces al día |
| Pollo con piel                       | <input checked="" type="radio"/> Nunca o menos 1 vez al mes<br><input type="radio"/> 1 a 3 veces mes<br><input type="radio"/> 1 vez semana<br><input type="radio"/> 2 a 4 veces semana<br><input type="radio"/> 5 a 6 veces semana<br><input type="radio"/> 1 vez al día<br><input type="radio"/> 2 a 3 veces al día<br><input type="radio"/> 5 a 6 veces al día<br><input type="radio"/> más 6 veces al día |
| pollo sin piel                       | <input type="radio"/> Nunca o menos 1 vez al mes<br><input type="radio"/> 1 a 3 veces mes<br><input checked="" type="radio"/> 1 vez semana<br><input type="radio"/> 2 a 4 veces semana<br><input type="radio"/> 5 a 6 veces semana<br><input type="radio"/> 1 vez al día<br><input type="radio"/> 2 a 3 veces al día<br><input type="radio"/> 5 a 6 veces al día<br><input type="radio"/> más 6 veces al día |
| Ternera o cerdo o cordero            | <input checked="" type="radio"/> Nunca o menos 1 vez al mes<br><input type="radio"/> 1 a 3 veces mes<br><input type="radio"/> 1 vez semana<br><input type="radio"/> 2 a 4 veces semana<br><input type="radio"/> 5 a 6 veces semana<br><input type="radio"/> 1 vez al día<br><input type="radio"/> 2 a 3 veces al día<br><input type="radio"/> 5 a 6 veces al día<br><input type="radio"/> más 6 veces al día |
| carne caza: Conejo o codorniz o pato | <input checked="" type="radio"/> Nunca o menos 1 vez al mes<br><input type="radio"/> 1 a 3 veces mes<br><input type="radio"/> 1 vez semana<br><input type="radio"/> 2 a 4 veces semana<br><input type="radio"/> 5 a 6 veces semana<br><input type="radio"/> 1 vez al día<br><input type="radio"/> 2 a 3 veces al día<br><input type="radio"/> 5 a 6 veces al día<br><input type="radio"/> más 6 veces al día |
| Hígado de ternera o cerdo o pollo    | <input checked="" type="radio"/> Nunca o menos 1 vez al mes<br><input type="radio"/> 1 a 3 veces mes<br><input type="radio"/> 1 vez semana<br><input type="radio"/> 2 a 4 veces semana<br><input type="radio"/> 5 a 6 veces semana<br><input type="radio"/> 1 vez al día<br><input type="radio"/> 2 a 3 veces al día<br><input type="radio"/> 5 a 6 veces al día<br><input type="radio"/> más 6 veces al día |

---

Vísceras

- ☒ Nunca o menos 1 vez al mes  
☐ 1 a 3 veces mes  
☐ 1 vez semana  
☐ 2 a 4 veces semana  
☐ 5 a 6 veces semana  
☐ 1 vez al día  
☐ 2 a 3 veces al día  
☐ 5 a 6 veces al día  
☐ más 6 veces al día

---

Embutido

- ☒ Nunca o menos 1 vez al mes  
☐ 1 a 3 veces mes  
☐ 1 vez semana  
☐ 2 a 4 veces semana  
☐ 5 a 6 veces semana  
☐ 1 vez al día  
☐ 2 a 3 veces al día  
☐ 5 a 6 veces al día  
☐ más 6 veces al día

---

Salchicha o similar

- ☐ Nunca o menos 1 vez al mes  
☐ 1 a 3 veces mes  
☒ 1 vez semana  
☐ 2 a 4 veces semana  
☐ 5 a 6 veces semana  
☐ 1 vez al día  
☐ 2 a 3 veces al día  
☐ 5 a 6 veces al día  
☐ más 6 veces al día

---

Pate o foiegras

- ☐ Nunca o menos 1 vez al mes  
☐ 1 a 3 veces mes  
☒ 1 vez semana  
☐ 2 a 4 veces semana  
☐ 5 a 6 veces semana  
☐ 1 vez al día  
☐ 2 a 3 veces al día  
☐ 5 a 6 veces al día  
☐ más 6 veces al día

---

Hamburguesa

- ☐ Nunca o menos 1 vez al mes  
☐ 1 a 3 veces mes  
☒ 1 vez semana  
☐ 2 a 4 veces semana  
☐ 5 a 6 veces semana  
☐ 1 vez al día  
☐ 2 a 3 veces al día  
☐ 5 a 6 veces al día  
☐ más 6 veces al día

---

tocino o bacon

- ☒ Nunca o menos 1 vez al mes  
☐ 1 a 3 veces mes  
☐ 1 vez semana  
☐ 2 a 4 veces semana  
☐ 5 a 6 veces semana  
☐ 1 vez al día  
☐ 2 a 3 veces al día  
☐ 5 a 6 veces al día  
☐ más 6 veces al día

---

Pescado frito

- ☒ Nunca o menos 1 vez al mes  
☐ 1 a 3 veces mes  
☐ 1 vez semana  
☐ 2 a 4 veces semana  
☐ 5 a 6 veces semana  
☐ 1 vez al día  
☐ 2 a 3 veces al día  
☐ 5 a 6 veces al día  
☐ más 6 veces al día

---

pescado hervido blanco

- ☒ Nunca o menos 1 vez al mes  
☐ 1 a 3 veces mes  
☐ 1 vez semana  
☐ 2 a 4 veces semana  
☐ 5 a 6 veces semana  
☐ 1 vez al día  
☐ 2 a 3 veces al día  
☐ 5 a 6 veces al día  
☐ más 6 veces al día

---

pescado hervido azul

- ☐ Nunca o menos 1 vez al mes  
☐ 1 a 3 veces mes  
☒ 1 vez semana  
☐ 2 a 4 veces semana  
☐ 5 a 6 veces semana  
☐ 1 vez al día  
☐ 2 a 3 veces al día  
☐ 5 a 6 veces al día  
☐ más 6 veces al día

---

otros pescado azul

- ☐ Nunca o menos 1 vez al mes  
☒ 1 a 3 veces mes  
☐ 1 vez semana  
☐ 2 a 4 veces semana  
☐ 5 a 6 veces semana  
☐ 1 vez al día  
☐ 2 a 3 veces al día  
☐ 5 a 6 veces al día  
☐ más 6 veces al día

---

atun conserva

- ☐ Nunca o menos 1 vez al mes  
☐ 1 a 3 veces mes  
☒ 1 vez semana  
☐ 2 a 4 veces semana  
☐ 5 a 6 veces semana  
☐ 1 vez al día  
☐ 2 a 3 veces al día  
☐ 5 a 6 veces al día  
☐ más 6 veces al día

---

sardina conserva

- ☒ Nunca o menos 1 vez al mes  
☐ 1 a 3 veces mes  
☐ 1 vez semana  
☐ 2 a 4 veces semana  
☐ 5 a 6 veces semana  
☐ 1 vez al día  
☐ 2 a 3 veces al día  
☐ 5 a 6 veces al día  
☐ más 6 veces al día

|                                         |                                                                                                                                                                                                                                                                                                                                                                                                              |
|-----------------------------------------|--------------------------------------------------------------------------------------------------------------------------------------------------------------------------------------------------------------------------------------------------------------------------------------------------------------------------------------------------------------------------------------------------------------|
| pescado ahumado                         | <input checked="" type="radio"/> Nunca o menos 1 vez al mes<br><input type="radio"/> 1 a 3 veces mes<br><input type="radio"/> 1 vez semana<br><input type="radio"/> 2 a 4 veces semana<br><input type="radio"/> 5 a 6 veces semana<br><input type="radio"/> 1 vez al día<br><input type="radio"/> 2 a 3 veces al día<br><input type="radio"/> 5 a 6 veces al día<br><input type="radio"/> más 6 veces al día |
| almejas o mejillones o ostras unos 100g | <input type="radio"/> Nunca o menos 1 vez al mes<br><input checked="" type="radio"/> 1 a 3 veces mes<br><input type="radio"/> 1 vez semana<br><input type="radio"/> 2 a 4 veces semana<br><input type="radio"/> 5 a 6 veces semana<br><input type="radio"/> 1 vez al día<br><input type="radio"/> 2 a 3 veces al día<br><input type="radio"/> 5 a 6 veces al día<br><input type="radio"/> más 6 veces al día |
| calamar o chipiron o sepia unos 100g    | <input type="radio"/> Nunca o menos 1 vez al mes<br><input checked="" type="radio"/> 1 a 3 veces mes<br><input type="radio"/> 1 vez semana<br><input type="radio"/> 2 a 4 veces semana<br><input type="radio"/> 5 a 6 veces semana<br><input type="radio"/> 1 vez al día<br><input type="radio"/> 2 a 3 veces al día<br><input type="radio"/> 5 a 6 veces al día<br><input type="radio"/> más 6 veces al día |
| marisco unos 100g                       | <input type="radio"/> Nunca o menos 1 vez al mes<br><input checked="" type="radio"/> 1 a 3 veces mes<br><input type="radio"/> 1 vez semana<br><input type="radio"/> 2 a 4 veces semana<br><input type="radio"/> 5 a 6 veces semana<br><input type="radio"/> 1 vez al día<br><input type="radio"/> 2 a 3 veces al día<br><input type="radio"/> 5 a 6 veces al día<br><input type="radio"/> más 6 veces al día |
| Espinacas o acelgas cocinadas           | <input type="radio"/> Nunca o menos 1 vez al mes<br><input type="radio"/> 1 a 3 veces mes<br><input type="radio"/> 1 vez semana<br><input checked="" type="radio"/> 2 a 4 veces semana<br><input type="radio"/> 5 a 6 veces semana<br><input type="radio"/> 1 vez al día<br><input type="radio"/> 2 a 3 veces al día<br><input type="radio"/> 5 a 6 veces al día<br><input type="radio"/> más 6 veces al día |
| Col o coliflor o brocoli cocinado       | <input checked="" type="radio"/> Nunca o menos 1 vez al mes<br><input type="radio"/> 1 a 3 veces mes<br><input type="radio"/> 1 vez semana<br><input type="radio"/> 2 a 4 veces semana<br><input type="radio"/> 5 a 6 veces semana<br><input type="radio"/> 1 vez al día<br><input type="radio"/> 2 a 3 veces al día<br><input type="radio"/> 5 a 6 veces al día<br><input type="radio"/> más 6 veces al día |

---

|                              |                                                                                                                                                                                                                                                                                                                                                                                                              |
|------------------------------|--------------------------------------------------------------------------------------------------------------------------------------------------------------------------------------------------------------------------------------------------------------------------------------------------------------------------------------------------------------------------------------------------------------|
| Lechuga o endivia o escarola | <input checked="" type="radio"/> Nunca o menos 1 vez al mes<br><input type="radio"/> 1 a 3 veces mes<br><input type="radio"/> 1 vez semana<br><input type="radio"/> 2 a 4 veces semana<br><input type="radio"/> 5 a 6 veces semana<br><input type="radio"/> 1 vez al día<br><input type="radio"/> 2 a 3 veces al día<br><input type="radio"/> 5 a 6 veces al día<br><input type="radio"/> más 6 veces al día |
|------------------------------|--------------------------------------------------------------------------------------------------------------------------------------------------------------------------------------------------------------------------------------------------------------------------------------------------------------------------------------------------------------------------------------------------------------|

---

|                 |                                                                                                                                                                                                                                                                                                                                                                                                              |
|-----------------|--------------------------------------------------------------------------------------------------------------------------------------------------------------------------------------------------------------------------------------------------------------------------------------------------------------------------------------------------------------------------------------------------------------|
| tomate ensalada | <input type="radio"/> Nunca o menos 1 vez al mes<br><input type="radio"/> 1 a 3 veces mes<br><input type="radio"/> 1 vez semana<br><input checked="" type="radio"/> 2 a 4 veces semana<br><input type="radio"/> 5 a 6 veces semana<br><input type="radio"/> 1 vez al día<br><input type="radio"/> 2 a 3 veces al día<br><input type="radio"/> 5 a 6 veces al día<br><input type="radio"/> más 6 veces al día |
|-----------------|--------------------------------------------------------------------------------------------------------------------------------------------------------------------------------------------------------------------------------------------------------------------------------------------------------------------------------------------------------------------------------------------------------------|

---

|         |                                                                                                                                                                                                                                                                                                                                                                                                              |
|---------|--------------------------------------------------------------------------------------------------------------------------------------------------------------------------------------------------------------------------------------------------------------------------------------------------------------------------------------------------------------------------------------------------------------|
| cebolla | <input type="radio"/> Nunca o menos 1 vez al mes<br><input type="radio"/> 1 a 3 veces mes<br><input type="radio"/> 1 vez semana<br><input checked="" type="radio"/> 2 a 4 veces semana<br><input type="radio"/> 5 a 6 veces semana<br><input type="radio"/> 1 vez al día<br><input type="radio"/> 2 a 3 veces al día<br><input type="radio"/> 5 a 6 veces al día<br><input type="radio"/> más 6 veces al día |
|---------|--------------------------------------------------------------------------------------------------------------------------------------------------------------------------------------------------------------------------------------------------------------------------------------------------------------------------------------------------------------------------------------------------------------|

---

|                      |                                                                                                                                                                                                                                                                                                                                                                                                              |
|----------------------|--------------------------------------------------------------------------------------------------------------------------------------------------------------------------------------------------------------------------------------------------------------------------------------------------------------------------------------------------------------------------------------------------------------|
| Zanahoria o calabaza | <input type="radio"/> Nunca o menos 1 vez al mes<br><input type="radio"/> 1 a 3 veces mes<br><input type="radio"/> 1 vez semana<br><input checked="" type="radio"/> 2 a 4 veces semana<br><input type="radio"/> 5 a 6 veces semana<br><input type="radio"/> 1 vez al día<br><input type="radio"/> 2 a 3 veces al día<br><input type="radio"/> 5 a 6 veces al día<br><input type="radio"/> más 6 veces al día |
|----------------------|--------------------------------------------------------------------------------------------------------------------------------------------------------------------------------------------------------------------------------------------------------------------------------------------------------------------------------------------------------------------------------------------------------------|

---

|               |                                                                                                                                                                                                                                                                                                                                                                                                              |
|---------------|--------------------------------------------------------------------------------------------------------------------------------------------------------------------------------------------------------------------------------------------------------------------------------------------------------------------------------------------------------------------------------------------------------------|
| Judías verdes | <input type="radio"/> Nunca o menos 1 vez al mes<br><input type="radio"/> 1 a 3 veces mes<br><input type="radio"/> 1 vez semana<br><input checked="" type="radio"/> 2 a 4 veces semana<br><input type="radio"/> 5 a 6 veces semana<br><input type="radio"/> 1 vez al día<br><input type="radio"/> 2 a 3 veces al día<br><input type="radio"/> 5 a 6 veces al día<br><input type="radio"/> más 6 veces al día |
|---------------|--------------------------------------------------------------------------------------------------------------------------------------------------------------------------------------------------------------------------------------------------------------------------------------------------------------------------------------------------------------------------------------------------------------|

---

|                                |                                                                                                                                                                                                                                                                                                                                                                                                              |
|--------------------------------|--------------------------------------------------------------------------------------------------------------------------------------------------------------------------------------------------------------------------------------------------------------------------------------------------------------------------------------------------------------------------------------------------------------|
| Berenjena o calabacin o pepino | <input type="radio"/> Nunca o menos 1 vez al mes<br><input type="radio"/> 1 a 3 veces mes<br><input type="radio"/> 1 vez semana<br><input checked="" type="radio"/> 2 a 4 veces semana<br><input type="radio"/> 5 a 6 veces semana<br><input type="radio"/> 1 vez al día<br><input type="radio"/> 2 a 3 veces al día<br><input type="radio"/> 5 a 6 veces al día<br><input type="radio"/> más 6 veces al día |
|--------------------------------|--------------------------------------------------------------------------------------------------------------------------------------------------------------------------------------------------------------------------------------------------------------------------------------------------------------------------------------------------------------------------------------------------------------|

---

---

|          |                                                                                                                                                                                                                                                                                                                                                                                                              |
|----------|--------------------------------------------------------------------------------------------------------------------------------------------------------------------------------------------------------------------------------------------------------------------------------------------------------------------------------------------------------------------------------------------------------------|
| pimiento | <input type="radio"/> Nunca o menos 1 vez al mes<br><input type="radio"/> 1 a 3 veces mes<br><input checked="" type="radio"/> 1 vez semana<br><input type="radio"/> 2 a 4 veces semana<br><input type="radio"/> 5 a 6 veces semana<br><input type="radio"/> 1 vez al día<br><input type="radio"/> 2 a 3 veces al día<br><input type="radio"/> 5 a 6 veces al día<br><input type="radio"/> más 6 veces al día |
|----------|--------------------------------------------------------------------------------------------------------------------------------------------------------------------------------------------------------------------------------------------------------------------------------------------------------------------------------------------------------------------------------------------------------------|

---

|           |                                                                                                                                                                                                                                                                                                                                                                                                              |
|-----------|--------------------------------------------------------------------------------------------------------------------------------------------------------------------------------------------------------------------------------------------------------------------------------------------------------------------------------------------------------------------------------------------------------------|
| alcachofa | <input type="radio"/> Nunca o menos 1 vez al mes<br><input checked="" type="radio"/> 1 a 3 veces mes<br><input type="radio"/> 1 vez semana<br><input type="radio"/> 2 a 4 veces semana<br><input type="radio"/> 5 a 6 veces semana<br><input type="radio"/> 1 vez al día<br><input type="radio"/> 2 a 3 veces al día<br><input type="radio"/> 5 a 6 veces al día<br><input type="radio"/> más 6 veces al día |
|-----------|--------------------------------------------------------------------------------------------------------------------------------------------------------------------------------------------------------------------------------------------------------------------------------------------------------------------------------------------------------------------------------------------------------------|

---

|            |                                                                                                                                                                                                                                                                                                                                                                                                              |
|------------|--------------------------------------------------------------------------------------------------------------------------------------------------------------------------------------------------------------------------------------------------------------------------------------------------------------------------------------------------------------------------------------------------------------|
| espárragos | <input type="radio"/> Nunca o menos 1 vez al mes<br><input type="radio"/> 1 a 3 veces mes<br><input checked="" type="radio"/> 1 vez semana<br><input type="radio"/> 2 a 4 veces semana<br><input type="radio"/> 5 a 6 veces semana<br><input type="radio"/> 1 vez al día<br><input type="radio"/> 2 a 3 veces al día<br><input type="radio"/> 5 a 6 veces al día<br><input type="radio"/> más 6 veces al día |
|------------|--------------------------------------------------------------------------------------------------------------------------------------------------------------------------------------------------------------------------------------------------------------------------------------------------------------------------------------------------------------------------------------------------------------|

---

|              |                                                                                                                                                                                                                                                                                                                                                                                                              |
|--------------|--------------------------------------------------------------------------------------------------------------------------------------------------------------------------------------------------------------------------------------------------------------------------------------------------------------------------------------------------------------------------------------------------------------|
| maíz hervido | <input type="radio"/> Nunca o menos 1 vez al mes<br><input checked="" type="radio"/> 1 a 3 veces mes<br><input type="radio"/> 1 vez semana<br><input type="radio"/> 2 a 4 veces semana<br><input type="radio"/> 5 a 6 veces semana<br><input type="radio"/> 1 vez al día<br><input type="radio"/> 2 a 3 veces al día<br><input type="radio"/> 5 a 6 veces al día<br><input type="radio"/> más 6 veces al día |
|--------------|--------------------------------------------------------------------------------------------------------------------------------------------------------------------------------------------------------------------------------------------------------------------------------------------------------------------------------------------------------------------------------------------------------------|

---

|           |                                                                                                                                                                                                                                                                                                                                                                                                              |
|-----------|--------------------------------------------------------------------------------------------------------------------------------------------------------------------------------------------------------------------------------------------------------------------------------------------------------------------------------------------------------------------------------------------------------------|
| legumbres | <input type="radio"/> Nunca o menos 1 vez al mes<br><input type="radio"/> 1 a 3 veces mes<br><input checked="" type="radio"/> 1 vez semana<br><input type="radio"/> 2 a 4 veces semana<br><input type="radio"/> 5 a 6 veces semana<br><input type="radio"/> 1 vez al día<br><input type="radio"/> 2 a 3 veces al día<br><input type="radio"/> 5 a 6 veces al día<br><input type="radio"/> más 6 veces al día |
|-----------|--------------------------------------------------------------------------------------------------------------------------------------------------------------------------------------------------------------------------------------------------------------------------------------------------------------------------------------------------------------------------------------------------------------|

---

|                       |                                                                                                                                                                                                                                                                                                                                                                                                              |
|-----------------------|--------------------------------------------------------------------------------------------------------------------------------------------------------------------------------------------------------------------------------------------------------------------------------------------------------------------------------------------------------------------------------------------------------------|
| naranjas o mandarinas | <input type="radio"/> Nunca o menos 1 vez al mes<br><input type="radio"/> 1 a 3 veces mes<br><input type="radio"/> 1 vez semana<br><input type="radio"/> 2 a 4 veces semana<br><input checked="" type="radio"/> 5 a 6 veces semana<br><input type="radio"/> 1 vez al día<br><input type="radio"/> 2 a 3 veces al día<br><input type="radio"/> 5 a 6 veces al día<br><input type="radio"/> más 6 veces al día |
|-----------------------|--------------------------------------------------------------------------------------------------------------------------------------------------------------------------------------------------------------------------------------------------------------------------------------------------------------------------------------------------------------------------------------------------------------|

---

|                       |                                                                                                                                                                                                                                                                                                                                                                                                              |
|-----------------------|--------------------------------------------------------------------------------------------------------------------------------------------------------------------------------------------------------------------------------------------------------------------------------------------------------------------------------------------------------------------------------------------------------------|
| zum natural fruta     | <input type="radio"/> Nunca o menos 1 vez al mes<br><input type="radio"/> 1 a 3 veces mes<br><input type="radio"/> 1 vez semana<br><input checked="" type="radio"/> 2 a 4 veces semana<br><input type="radio"/> 5 a 6 veces semana<br><input type="radio"/> 1 vez al día<br><input type="radio"/> 2 a 3 veces al día<br><input type="radio"/> 5 a 6 veces al día<br><input type="radio"/> más 6 veces al día |
| platano               | <input type="radio"/> Nunca o menos 1 vez al mes<br><input type="radio"/> 1 a 3 veces mes<br><input type="radio"/> 1 vez semana<br><input type="radio"/> 2 a 4 veces semana<br><input type="radio"/> 5 a 6 veces semana<br><input checked="" type="radio"/> 1 vez al día<br><input type="radio"/> 2 a 3 veces al día<br><input type="radio"/> 5 a 6 veces al día<br><input type="radio"/> más 6 veces al día |
| manzana o pera        | <input type="radio"/> Nunca o menos 1 vez al mes<br><input checked="" type="radio"/> 1 a 3 veces mes<br><input type="radio"/> 1 vez semana<br><input type="radio"/> 2 a 4 veces semana<br><input type="radio"/> 5 a 6 veces semana<br><input type="radio"/> 1 vez al día<br><input type="radio"/> 2 a 3 veces al día<br><input type="radio"/> 5 a 6 veces al día<br><input type="radio"/> más 6 veces al día |
| melocotón o nectarina | <input type="radio"/> Nunca o menos 1 vez al mes<br><input checked="" type="radio"/> 1 a 3 veces mes<br><input type="radio"/> 1 vez semana<br><input type="radio"/> 2 a 4 veces semana<br><input type="radio"/> 5 a 6 veces semana<br><input type="radio"/> 1 vez al día<br><input type="radio"/> 2 a 3 veces al día<br><input type="radio"/> 5 a 6 veces al día<br><input type="radio"/> más 6 veces al día |
| sandia o melon        | <input checked="" type="radio"/> Nunca o menos 1 vez al mes<br><input type="radio"/> 1 a 3 veces mes<br><input type="radio"/> 1 vez semana<br><input type="radio"/> 2 a 4 veces semana<br><input type="radio"/> 5 a 6 veces semana<br><input type="radio"/> 1 vez al día<br><input type="radio"/> 2 a 3 veces al día<br><input type="radio"/> 5 a 6 veces al día<br><input type="radio"/> más 6 veces al día |
| uva                   | <input checked="" type="radio"/> Nunca o menos 1 vez al mes<br><input type="radio"/> 1 a 3 veces mes<br><input type="radio"/> 1 vez semana<br><input type="radio"/> 2 a 4 veces semana<br><input type="radio"/> 5 a 6 veces semana<br><input type="radio"/> 1 vez al día<br><input type="radio"/> 2 a 3 veces al día<br><input type="radio"/> 5 a 6 veces al día<br><input type="radio"/> más 6 veces al día |

---

bruna o ciruela

- ☒ Nunca o menos 1 vez al mes  
☐ 1 a 3 veces mes  
☐ 1 vez semana  
☐ 2 a 4 veces semana  
☐ 5 a 6 veces semana  
☐ 1 vez al día  
☐ 2 a 3 veces al día  
☐ 5 a 6 veces al día  
☐ más 6 veces al día

---

kiwi

- ☐ Nunca o menos 1 vez al mes  
☐ 1 a 3 veces mes  
☐ 1 vez semana  
☐ 2 a 4 veces semana  
☐ 5 a 6 veces semana  
☒ 1 vez al día  
☐ 2 a 3 veces al día  
☐ 5 a 6 veces al día  
☐ más 6 veces al día

---

aceituna

- ☐ Nunca o menos 1 vez al mes  
☐ 1 a 3 veces mes  
☒ 1 vez semana  
☐ 2 a 4 veces semana  
☐ 5 a 6 veces semana  
☐ 1 vez al día  
☐ 2 a 3 veces al día  
☐ 5 a 6 veces al día  
☐ más 6 veces al día

---

frutos secos

- ☐ Nunca o menos 1 vez al mes  
☐ 1 a 3 veces mes  
☐ 1 vez semana  
☐ 2 a 4 veces semana  
☒ 5 a 6 veces semana  
☐ 1 vez al día  
☐ 2 a 3 veces al día  
☐ 5 a 6 veces al día  
☐ más 6 veces al día

---

pan blanco

- ☐ Nunca o menos 1 vez al mes  
☐ 1 a 3 veces mes  
☐ 1 vez semana  
☐ 2 a 4 veces semana  
☐ 5 a 6 veces semana  
☒ 1 vez al día  
☐ 2 a 3 veces al día  
☐ 5 a 6 veces al día  
☐ más 6 veces al día

---

pan integral

- ☐ Nunca o menos 1 vez al mes  
☐ 1 a 3 veces mes  
☐ 1 vez semana  
☐ 2 a 4 veces semana  
☐ 5 a 6 veces semana  
☒ 1 vez al día  
☐ 2 a 3 veces al día  
☐ 5 a 6 veces al día  
☐ más 6 veces al día



---

cereales desayuno

- ☒ Nunca o menos 1 vez al mes  
☐ 1 a 3 veces mes  
☐ 1 vez semana  
☐ 2 a 4 veces semana  
☐ 5 a 6 veces semana  
☐ 1 vez al día  
☐ 2 a 3 veces al día  
☐ 5 a 6 veces al día  
☐ más 6 veces al día

---

patatas fritas

- ☐ Nunca o menos 1 vez al mes  
☐ 1 a 3 veces mes  
☒ 1 vez semana  
☐ 2 a 4 veces semana  
☐ 5 a 6 veces semana  
☐ 1 vez al día  
☐ 2 a 3 veces al día  
☐ 5 a 6 veces al día  
☐ más 6 veces al día

---

patatas cocidas o asadas

- ☐ Nunca o menos 1 vez al mes  
☐ 1 a 3 veces mes  
☒ 1 vez semana  
☐ 2 a 4 veces semana  
☐ 5 a 6 veces semana  
☐ 1 vez al día  
☐ 2 a 3 veces al día  
☐ 5 a 6 veces al día  
☐ más 6 veces al día

---

bolsa papas

- ☐ Nunca o menos 1 vez al mes  
☒ 1 a 3 veces mes  
☐ 1 vez semana  
☐ 2 a 4 veces semana  
☐ 5 a 6 veces semana  
☐ 1 vez al día  
☐ 2 a 3 veces al día  
☐ 5 a 6 veces al día  
☐ más 6 veces al día

---

arroz cocinado

- ☐ Nunca o menos 1 vez al mes  
☐ 1 a 3 veces mes  
☐ 1 vez semana  
☒ 2 a 4 veces semana  
☐ 5 a 6 veces semana  
☐ 1 vez al día  
☐ 2 a 3 veces al día  
☐ 5 a 6 veces al día  
☐ más 6 veces al día

---

pasta

- ☐ Nunca o menos 1 vez al mes  
☐ 1 a 3 veces mes  
☒ 1 vez semana  
☐ 2 a 4 veces semana  
☐ 5 a 6 veces semana  
☐ 1 vez al día  
☐ 2 a 3 veces al día  
☐ 5 a 6 veces al día  
☐ más 6 veces al día

|                     |                                                                                                                                                                                                                                                                                                                                                                                                              |
|---------------------|--------------------------------------------------------------------------------------------------------------------------------------------------------------------------------------------------------------------------------------------------------------------------------------------------------------------------------------------------------------------------------------------------------------|
| pizza               | <input type="radio"/> Nunca o menos 1 vez al mes<br><input checked="" type="radio"/> 1 a 3 veces mes<br><input type="radio"/> 1 vez semana<br><input type="radio"/> 2 a 4 veces semana<br><input type="radio"/> 5 a 6 veces semana<br><input type="radio"/> 1 vez al día<br><input type="radio"/> 2 a 3 veces al día<br><input type="radio"/> 5 a 6 veces al día<br><input type="radio"/> más 6 veces al día |
| aceite oliva        | <input type="radio"/> Nunca o menos 1 vez al mes<br><input type="radio"/> 1 a 3 veces mes<br><input type="radio"/> 1 vez semana<br><input type="radio"/> 2 a 4 veces semana<br><input type="radio"/> 5 a 6 veces semana<br><input checked="" type="radio"/> 1 vez al día<br><input type="radio"/> 2 a 3 veces al día<br><input type="radio"/> 5 a 6 veces al día<br><input type="radio"/> más 6 veces al día |
| otros aceites       | <input type="radio"/> Nunca o menos 1 vez al mes<br><input checked="" type="radio"/> 1 a 3 veces mes<br><input type="radio"/> 1 vez semana<br><input type="radio"/> 2 a 4 veces semana<br><input type="radio"/> 5 a 6 veces semana<br><input type="radio"/> 1 vez al día<br><input type="radio"/> 2 a 3 veces al día<br><input type="radio"/> 5 a 6 veces al día<br><input type="radio"/> más 6 veces al día |
| margarina           | <input type="radio"/> Nunca o menos 1 vez al mes<br><input type="radio"/> 1 a 3 veces mes<br><input type="radio"/> 1 vez semana<br><input checked="" type="radio"/> 2 a 4 veces semana<br><input type="radio"/> 5 a 6 veces semana<br><input type="radio"/> 1 vez al día<br><input type="radio"/> 2 a 3 veces al día<br><input type="radio"/> 5 a 6 veces al día<br><input type="radio"/> más 6 veces al día |
| mantequilla         | <input type="radio"/> Nunca o menos 1 vez al mes<br><input type="radio"/> 1 a 3 veces mes<br><input type="radio"/> 1 vez semana<br><input checked="" type="radio"/> 2 a 4 veces semana<br><input type="radio"/> 5 a 6 veces semana<br><input type="radio"/> 1 vez al día<br><input type="radio"/> 2 a 3 veces al día<br><input type="radio"/> 5 a 6 veces al día<br><input type="radio"/> más 6 veces al día |
| galletas tipo maria | <input checked="" type="radio"/> Nunca o menos 1 vez al mes<br><input type="radio"/> 1 a 3 veces mes<br><input type="radio"/> 1 vez semana<br><input type="radio"/> 2 a 4 veces semana<br><input type="radio"/> 5 a 6 veces semana<br><input type="radio"/> 1 vez al día<br><input type="radio"/> 2 a 3 veces al día<br><input type="radio"/> 5 a 6 veces al día<br><input type="radio"/> más 6 veces al día |

---

galletas chocolate

- ☐ Nunca o menos 1 vez al mes  
☒ 1 a 3 veces mes  
☐ 1 vez semana  
☐ 2 a 4 veces semana  
☐ 5 a 6 veces semana  
☐ 1 vez al día  
☐ 2 a 3 veces al día  
☐ 5 a 6 veces al día  
☐ más 6 veces al día

---

bolleria

- ☒ Nunca o menos 1 vez al mes  
☐ 1 a 3 veces mes  
☐ 1 vez semana  
☐ 2 a 4 veces semana  
☐ 5 a 6 veces semana  
☐ 1 vez al día  
☐ 2 a 3 veces al día  
☐ 5 a 6 veces al día  
☐ más 6 veces al día

---

chocolate o bombones

- ☐ Nunca o menos 1 vez al mes  
☐ 1 a 3 veces mes  
☐ 1 vez semana  
☐ 2 a 4 veces semana  
☐ 5 a 6 veces semana  
☒ 1 vez al día  
☐ 2 a 3 veces al día  
☐ 5 a 6 veces al día  
☐ más 6 veces al día

---

chocolate polvo o colacao

- ☐ Nunca o menos 1 vez al mes  
☐ 1 a 3 veces mes  
☐ 1 vez semana  
☒ 2 a 4 veces semana  
☐ 5 a 6 veces semana  
☐ 1 vez al día  
☐ 2 a 3 veces al día  
☐ 5 a 6 veces al día  
☐ más 6 veces al día

---

vino tinto

- ☒ Nunca o menos 1 vez al mes  
☐ 1 a 3 veces mes  
☐ 1 vez semana  
☐ 2 a 4 veces semana  
☐ 5 a 6 veces semana  
☐ 1 vez al día  
☐ 2 a 3 veces al día  
☐ 5 a 6 veces al día  
☐ más 6 veces al día

---

vino blanco

- ☒ Nunca o menos 1 vez al mes  
☐ 1 a 3 veces mes  
☐ 1 vez semana  
☐ 2 a 4 veces semana  
☐ 5 a 6 veces semana  
☐ 1 vez al día  
☐ 2 a 3 veces al día  
☐ 5 a 6 veces al día  
☐ más 6 veces al día

---

|                    |                                                                                                                                                                                                                                                                                                                                                                                                              |
|--------------------|--------------------------------------------------------------------------------------------------------------------------------------------------------------------------------------------------------------------------------------------------------------------------------------------------------------------------------------------------------------------------------------------------------------|
| vino seco o vermut | <input checked="" type="radio"/> Nunca o menos 1 vez al mes<br><input type="radio"/> 1 a 3 veces mes<br><input type="radio"/> 1 vez semana<br><input type="radio"/> 2 a 4 veces semana<br><input type="radio"/> 5 a 6 veces semana<br><input type="radio"/> 1 vez al día<br><input type="radio"/> 2 a 3 veces al día<br><input type="radio"/> 5 a 6 veces al día<br><input type="radio"/> más 6 veces al día |
|--------------------|--------------------------------------------------------------------------------------------------------------------------------------------------------------------------------------------------------------------------------------------------------------------------------------------------------------------------------------------------------------------------------------------------------------|

---

|         |                                                                                                                                                                                                                                                                                                                                                                                                              |
|---------|--------------------------------------------------------------------------------------------------------------------------------------------------------------------------------------------------------------------------------------------------------------------------------------------------------------------------------------------------------------------------------------------------------------|
| cerveza | <input checked="" type="radio"/> Nunca o menos 1 vez al mes<br><input type="radio"/> 1 a 3 veces mes<br><input type="radio"/> 1 vez semana<br><input type="radio"/> 2 a 4 veces semana<br><input type="radio"/> 5 a 6 veces semana<br><input type="radio"/> 1 vez al día<br><input type="radio"/> 2 a 3 veces al día<br><input type="radio"/> 5 a 6 veces al día<br><input type="radio"/> más 6 veces al día |
|---------|--------------------------------------------------------------------------------------------------------------------------------------------------------------------------------------------------------------------------------------------------------------------------------------------------------------------------------------------------------------------------------------------------------------|

---

|                     |                                                                                                                                                                                                                                                                                                                                                                                                              |
|---------------------|--------------------------------------------------------------------------------------------------------------------------------------------------------------------------------------------------------------------------------------------------------------------------------------------------------------------------------------------------------------------------------------------------------------|
| cerveza sin alcohol | <input type="radio"/> Nunca o menos 1 vez al mes<br><input type="radio"/> 1 a 3 veces mes<br><input type="radio"/> 1 vez semana<br><input checked="" type="radio"/> 2 a 4 veces semana<br><input type="radio"/> 5 a 6 veces semana<br><input type="radio"/> 1 vez al día<br><input type="radio"/> 2 a 3 veces al día<br><input type="radio"/> 5 a 6 veces al día<br><input type="radio"/> más 6 veces al día |
|---------------------|--------------------------------------------------------------------------------------------------------------------------------------------------------------------------------------------------------------------------------------------------------------------------------------------------------------------------------------------------------------------------------------------------------------|

---

|         |                                                                                                                                                                                                                                                                                                                                                                                                              |
|---------|--------------------------------------------------------------------------------------------------------------------------------------------------------------------------------------------------------------------------------------------------------------------------------------------------------------------------------------------------------------------------------------------------------------|
| licores | <input checked="" type="radio"/> Nunca o menos 1 vez al mes<br><input type="radio"/> 1 a 3 veces mes<br><input type="radio"/> 1 vez semana<br><input type="radio"/> 2 a 4 veces semana<br><input type="radio"/> 5 a 6 veces semana<br><input type="radio"/> 1 vez al día<br><input type="radio"/> 2 a 3 veces al día<br><input type="radio"/> 5 a 6 veces al día<br><input type="radio"/> más 6 veces al día |
|---------|--------------------------------------------------------------------------------------------------------------------------------------------------------------------------------------------------------------------------------------------------------------------------------------------------------------------------------------------------------------------------------------------------------------|

---

|                       |                                                                                                                                                                                                                                                                                                                                                                                                              |
|-----------------------|--------------------------------------------------------------------------------------------------------------------------------------------------------------------------------------------------------------------------------------------------------------------------------------------------------------------------------------------------------------------------------------------------------------|
| ginebra o ron o vodka | <input checked="" type="radio"/> Nunca o menos 1 vez al mes<br><input type="radio"/> 1 a 3 veces mes<br><input type="radio"/> 1 vez semana<br><input type="radio"/> 2 a 4 veces semana<br><input type="radio"/> 5 a 6 veces semana<br><input type="radio"/> 1 vez al día<br><input type="radio"/> 2 a 3 veces al día<br><input type="radio"/> 5 a 6 veces al día<br><input type="radio"/> más 6 veces al día |
|-----------------------|--------------------------------------------------------------------------------------------------------------------------------------------------------------------------------------------------------------------------------------------------------------------------------------------------------------------------------------------------------------------------------------------------------------|

---

|                 |                                                                                                                                                                                                                                                                                                                                                                                                              |
|-----------------|--------------------------------------------------------------------------------------------------------------------------------------------------------------------------------------------------------------------------------------------------------------------------------------------------------------------------------------------------------------------------------------------------------------|
| refresco normal | <input checked="" type="radio"/> Nunca o menos 1 vez al mes<br><input type="radio"/> 1 a 3 veces mes<br><input type="radio"/> 1 vez semana<br><input type="radio"/> 2 a 4 veces semana<br><input type="radio"/> 5 a 6 veces semana<br><input type="radio"/> 1 vez al día<br><input type="radio"/> 2 a 3 veces al día<br><input type="radio"/> 5 a 6 veces al día<br><input type="radio"/> más 6 veces al día |
|-----------------|--------------------------------------------------------------------------------------------------------------------------------------------------------------------------------------------------------------------------------------------------------------------------------------------------------------------------------------------------------------------------------------------------------------|

---

|                          |                                                                                                                                                                                                                                                                                                                                                                                                              |
|--------------------------|--------------------------------------------------------------------------------------------------------------------------------------------------------------------------------------------------------------------------------------------------------------------------------------------------------------------------------------------------------------------------------------------------------------|
| refresco sin azúcar      | <input checked="" type="radio"/> Nunca o menos 1 vez al mes<br><input type="radio"/> 1 a 3 veces mes<br><input type="radio"/> 1 vez semana<br><input type="radio"/> 2 a 4 veces semana<br><input type="radio"/> 5 a 6 veces semana<br><input type="radio"/> 1 vez al día<br><input type="radio"/> 2 a 3 veces al día<br><input type="radio"/> 5 a 6 veces al día<br><input type="radio"/> más 6 veces al día |
| Agua del grifo           | <input checked="" type="radio"/> Nunca o menos 1 vez al mes<br><input type="radio"/> 1 a 3 veces mes<br><input type="radio"/> 1 vez semana<br><input type="radio"/> 2 a 4 veces semana<br><input type="radio"/> 5 a 6 veces semana<br><input type="radio"/> 1 vez al día<br><input type="radio"/> 2 a 3 veces al día<br><input type="radio"/> 5 a 6 veces al día<br><input type="radio"/> más 6 veces al día |
| agua embotellada sin gas | <input type="radio"/> Nunca o menos 1 vez al mes<br><input type="radio"/> 1 a 3 veces mes<br><input type="radio"/> 1 vez semana<br><input type="radio"/> 2 a 4 veces semana<br><input type="radio"/> 5 a 6 veces semana<br><input type="radio"/> 1 vez al día<br><input type="radio"/> 2 a 3 veces al día<br><input type="radio"/> 5 a 6 veces al día<br><input checked="" type="radio"/> más 6 veces al día |
| agua embotellada con gas | <input checked="" type="radio"/> Nunca o menos 1 vez al mes<br><input type="radio"/> 1 a 3 veces mes<br><input type="radio"/> 1 vez semana<br><input type="radio"/> 2 a 4 veces semana<br><input type="radio"/> 5 a 6 veces semana<br><input type="radio"/> 1 vez al día<br><input type="radio"/> 2 a 3 veces al día<br><input type="radio"/> 5 a 6 veces al día<br><input type="radio"/> más 6 veces al día |
| zumو frutas embasado     | <input checked="" type="radio"/> Nunca o menos 1 vez al mes<br><input type="radio"/> 1 a 3 veces mes<br><input type="radio"/> 1 vez semana<br><input type="radio"/> 2 a 4 veces semana<br><input type="radio"/> 5 a 6 veces semana<br><input type="radio"/> 1 vez al día<br><input type="radio"/> 2 a 3 veces al día<br><input type="radio"/> 5 a 6 veces al día<br><input type="radio"/> más 6 veces al día |
| cafe                     | <input type="radio"/> Nunca o menos 1 vez al mes<br><input type="radio"/> 1 a 3 veces mes<br><input type="radio"/> 1 vez semana<br><input type="radio"/> 2 a 4 veces semana<br><input type="radio"/> 5 a 6 veces semana<br><input checked="" type="radio"/> 1 vez al día<br><input type="radio"/> 2 a 3 veces al día<br><input type="radio"/> 5 a 6 veces al día<br><input type="radio"/> más 6 veces al día |

|                       |                                                                                                                                                                                                                                                                                                                                                                                                              |
|-----------------------|--------------------------------------------------------------------------------------------------------------------------------------------------------------------------------------------------------------------------------------------------------------------------------------------------------------------------------------------------------------------------------------------------------------|
| cafe descafeinado     | <input type="radio"/> Nunca o menos 1 vez al mes<br><input type="radio"/> 1 a 3 veces mes<br><input type="radio"/> 1 vez semana<br><input type="radio"/> 2 a 4 veces semana<br><input type="radio"/> 5 a 6 veces semana<br><input checked="" type="radio"/> 1 vez al día<br><input type="radio"/> 2 a 3 veces al día<br><input type="radio"/> 5 a 6 veces al día<br><input type="radio"/> más 6 veces al día |
| te o infusión         | <input type="radio"/> Nunca o menos 1 vez al mes<br><input type="radio"/> 1 a 3 veces mes<br><input type="radio"/> 1 vez semana<br><input type="radio"/> 2 a 4 veces semana<br><input type="radio"/> 5 a 6 veces semana<br><input checked="" type="radio"/> 1 vez al día<br><input type="radio"/> 2 a 3 veces al día<br><input type="radio"/> 5 a 6 veces al día<br><input type="radio"/> más 6 veces al día |
| sopa o puré verduras  | <input type="radio"/> Nunca o menos 1 vez al mes<br><input type="radio"/> 1 a 3 veces mes<br><input checked="" type="radio"/> 1 vez semana<br><input type="radio"/> 2 a 4 veces semana<br><input type="radio"/> 5 a 6 veces semana<br><input type="radio"/> 1 vez al día<br><input type="radio"/> 2 a 3 veces al día<br><input type="radio"/> 5 a 6 veces al día<br><input type="radio"/> más 6 veces al día |
| croquetas pollo jamón | <input checked="" type="radio"/> Nunca o menos 1 vez al mes<br><input type="radio"/> 1 a 3 veces mes<br><input type="radio"/> 1 vez semana<br><input type="radio"/> 2 a 4 veces semana<br><input type="radio"/> 5 a 6 veces semana<br><input type="radio"/> 1 vez al día<br><input type="radio"/> 2 a 3 veces al día<br><input type="radio"/> 5 a 6 veces al día<br><input type="radio"/> más 6 veces al día |
| croquetas pescado     | <input checked="" type="radio"/> Nunca o menos 1 vez al mes<br><input type="radio"/> 1 a 3 veces mes<br><input type="radio"/> 1 vez semana<br><input type="radio"/> 2 a 4 veces semana<br><input type="radio"/> 5 a 6 veces semana<br><input type="radio"/> 1 vez al día<br><input type="radio"/> 2 a 3 veces al día<br><input type="radio"/> 5 a 6 veces al día<br><input type="radio"/> más 6 veces al día |
| mayonesa              | <input checked="" type="radio"/> Nunca o menos 1 vez al mes<br><input type="radio"/> 1 a 3 veces mes<br><input type="radio"/> 1 vez semana<br><input type="radio"/> 2 a 4 veces semana<br><input type="radio"/> 5 a 6 veces semana<br><input type="radio"/> 1 vez al día<br><input type="radio"/> 2 a 3 veces al día<br><input type="radio"/> 5 a 6 veces al día<br><input type="radio"/> más 6 veces al día |

|                  |                                                                                                                                                                                                                                                                                                                                                                                                              |
|------------------|--------------------------------------------------------------------------------------------------------------------------------------------------------------------------------------------------------------------------------------------------------------------------------------------------------------------------------------------------------------------------------------------------------------|
| salsa tomate     | <input checked="" type="radio"/> Nunca o menos 1 vez al mes<br><input type="radio"/> 1 a 3 veces mes<br><input type="radio"/> 1 vez semana<br><input type="radio"/> 2 a 4 veces semana<br><input type="radio"/> 5 a 6 veces semana<br><input type="radio"/> 1 vez al día<br><input type="radio"/> 2 a 3 veces al día<br><input type="radio"/> 5 a 6 veces al día<br><input type="radio"/> más 6 veces al día |
| ketchup          | <input type="radio"/> Nunca o menos 1 vez al mes<br><input type="radio"/> 1 a 3 veces mes<br><input type="radio"/> 1 vez semana<br><input type="radio"/> 2 a 4 veces semana<br><input type="radio"/> 5 a 6 veces semana<br><input checked="" type="radio"/> 1 vez al día<br><input type="radio"/> 2 a 3 veces al día<br><input type="radio"/> 5 a 6 veces al día<br><input type="radio"/> más 6 veces al día |
| sal              | <input type="radio"/> Nunca o menos 1 vez al mes<br><input type="radio"/> 1 a 3 veces mes<br><input type="radio"/> 1 vez semana<br><input type="radio"/> 2 a 4 veces semana<br><input type="radio"/> 5 a 6 veces semana<br><input checked="" type="radio"/> 1 vez al día<br><input type="radio"/> 2 a 3 veces al día<br><input type="radio"/> 5 a 6 veces al día<br><input type="radio"/> más 6 veces al día |
| ajo              | <input type="radio"/> Nunca o menos 1 vez al mes<br><input type="radio"/> 1 a 3 veces mes<br><input type="radio"/> 1 vez semana<br><input type="radio"/> 2 a 4 veces semana<br><input type="radio"/> 5 a 6 veces semana<br><input checked="" type="radio"/> 1 vez al día<br><input type="radio"/> 2 a 3 veces al día<br><input type="radio"/> 5 a 6 veces al día<br><input type="radio"/> más 6 veces al día |
| mermelada o miel | <input type="radio"/> Nunca o menos 1 vez al mes<br><input type="radio"/> 1 a 3 veces mes<br><input type="radio"/> 1 vez semana<br><input type="radio"/> 2 a 4 veces semana<br><input type="radio"/> 5 a 6 veces semana<br><input checked="" type="radio"/> 1 vez al día<br><input type="radio"/> 2 a 3 veces al día<br><input type="radio"/> 5 a 6 veces al día<br><input type="radio"/> más 6 veces al día |
| azúcar           | <input checked="" type="radio"/> Nunca o menos 1 vez al mes<br><input type="radio"/> 1 a 3 veces mes<br><input type="radio"/> 1 vez semana<br><input type="radio"/> 2 a 4 veces semana<br><input type="radio"/> 5 a 6 veces semana<br><input type="radio"/> 1 vez al día<br><input type="radio"/> 2 a 3 veces al día<br><input type="radio"/> 5 a 6 veces al día<br><input type="radio"/> más 6 veces al día |

|                                       |                                                                                                                                                                                                                                                                                                                                                                                                                                                                                                                               |
|---------------------------------------|-------------------------------------------------------------------------------------------------------------------------------------------------------------------------------------------------------------------------------------------------------------------------------------------------------------------------------------------------------------------------------------------------------------------------------------------------------------------------------------------------------------------------------|
| Otro alimento                         | <hr/>                                                                                                                                                                                                                                                                                                                                                                                                                                                                                                                         |
| suplementos vitamínicos               | <input type="radio"/> si<br><input checked="" type="radio"/> no                                                                                                                                                                                                                                                                                                                                                                                                                                                               |
| suplementos vitamínicos               | <hr/>                                                                                                                                                                                                                                                                                                                                                                                                                                                                                                                         |
| dieta previa                          | <input type="radio"/> si<br><input checked="" type="radio"/> no                                                                                                                                                                                                                                                                                                                                                                                                                                                               |
| motivo dieta                          | <input checked="" type="radio"/> no dieta<br><input type="radio"/> control peso<br><input type="radio"/> control colesterol<br><input type="radio"/> control diabetes<br><input type="radio"/> problemas estómago<br><input type="radio"/> problemas vesícula o hepáticos<br><input type="radio"/> HTA o cardiopatía<br><input type="radio"/> problemas renales<br><input type="radio"/> alergia alimentaria<br><input type="radio"/> ácido úrico elevado<br><input type="radio"/> vegetariana<br><input type="radio"/> otros |
| cambio alimentos año previo gestación | <input checked="" type="radio"/> si<br><input type="radio"/> no                                                                                                                                                                                                                                                                                                                                                                                                                                                               |
| cambio lácteos                        | <input type="radio"/> eliminado<br><input type="radio"/> disminuido<br><input checked="" type="radio"/> igual<br><input type="radio"/> aumentado<br><input type="radio"/> no sabe                                                                                                                                                                                                                                                                                                                                             |
| cambio huevos                         | <input type="radio"/> eliminado<br><input type="radio"/> disminuido<br><input checked="" type="radio"/> igual<br><input type="radio"/> aumentado<br><input type="radio"/> no sabe                                                                                                                                                                                                                                                                                                                                             |
| cambio carne                          | <input type="radio"/> eliminado<br><input type="radio"/> disminuido<br><input checked="" type="radio"/> igual<br><input type="radio"/> aumentado<br><input type="radio"/> no sabe                                                                                                                                                                                                                                                                                                                                             |
| cambio pescado                        | <input type="radio"/> eliminado<br><input type="radio"/> disminuido<br><input checked="" type="radio"/> igual<br><input type="radio"/> aumentado<br><input type="radio"/> no sabe                                                                                                                                                                                                                                                                                                                                             |
| cambio verduras                       | <input type="radio"/> eliminado<br><input type="radio"/> disminuido<br><input checked="" type="radio"/> igual<br><input type="radio"/> aumentado<br><input type="radio"/> no sabe                                                                                                                                                                                                                                                                                                                                             |



|                            |                                                                                                                                                                                                                        |
|----------------------------|------------------------------------------------------------------------------------------------------------------------------------------------------------------------------------------------------------------------|
| cambio legumbres           | <input type="radio"/> eliminado<br><input type="radio"/> disminuido<br><input checked="" type="radio"/> igual<br><input type="radio"/> aumentado<br><input type="radio"/> no sabe                                      |
| cambio fruta               | <input type="radio"/> eliminado<br><input type="radio"/> disminuido<br><input checked="" type="radio"/> igual<br><input type="radio"/> aumentado<br><input type="radio"/> no sabe                                      |
| cambio pan                 | <input type="radio"/> eliminado<br><input type="radio"/> disminuido<br><input checked="" type="radio"/> igual<br><input type="radio"/> aumentado<br><input type="radio"/> no sabe                                      |
| cambio aceite oliva        | <input type="radio"/> eliminado<br><input type="radio"/> disminuido<br><input checked="" type="radio"/> igual<br><input type="radio"/> aumentado<br><input type="radio"/> no sabe                                      |
| cambio mante o margarina   | <input type="radio"/> eliminado<br><input type="radio"/> disminuido<br><input checked="" type="radio"/> igual<br><input type="radio"/> aumentado<br><input type="radio"/> no sabe                                      |
| cambio azúcar y dulces     | <input type="radio"/> eliminado<br><input type="radio"/> disminuido<br><input checked="" type="radio"/> igual<br><input type="radio"/> aumentado<br><input type="radio"/> no sabe                                      |
| cambio bebidas alcohólicas | <input checked="" type="radio"/> eliminado<br><input type="radio"/> disminuido<br><input type="radio"/> igual<br><input type="radio"/> aumentado<br><input type="radio"/> no sabe                                      |
| frecuencia comidas fritas  | <input type="radio"/> a diario<br><input type="radio"/> 5 a 6 veces semana<br><input type="radio"/> 2 a 4 veces semana<br><input checked="" type="radio"/> 1 vez semana<br><input type="radio"/> menos de 1 vez semana |
| carne                      | <input type="radio"/> no como<br><input type="radio"/> cruda<br><input type="radio"/> poco hecha<br><input type="radio"/> hecha<br><input checked="" type="radio"/> muy hecha                                          |
| grasa visible carne        | <input checked="" type="radio"/> quita toda<br><input type="radio"/> quita mayoría<br><input type="radio"/> quita un poco<br><input type="radio"/> no quita nada                                                       |

|                                |                                                                                                                                                                                                                                                          |
|--------------------------------|----------------------------------------------------------------------------------------------------------------------------------------------------------------------------------------------------------------------------------------------------------|
| cocina carne                   | <input checked="" type="radio"/> a la plancha<br><input type="radio"/> a la parrilla<br><input type="radio"/> asada<br><input type="radio"/> frita<br><input type="radio"/> guisada                                                                      |
| tostado quemado carne          | <input type="radio"/> nunca<br><input type="radio"/> 1 vez mes<br><input type="radio"/> 2 a 3 veces mes<br><input checked="" type="radio"/> 1 vez semana<br><input type="radio"/> 2 a 3 semanas                                                          |
| tostado quemado pescado        | <input type="radio"/> nunca<br><input type="radio"/> 1 vez mes<br><input type="radio"/> 2 a 3 veces mes<br><input checked="" type="radio"/> 1 vez semana<br><input type="radio"/> 2 a 3 semanas                                                          |
| socarrat paella                | <input type="radio"/> nunca<br><input checked="" type="radio"/> 1 vez mes<br><input type="radio"/> 2 a 3 veces mes<br><input type="radio"/> 1 vez semana<br><input type="radio"/> 2 a 3 semanas                                                          |
| grasa o aceite cocinar         | <input type="radio"/> mantequilla<br><input type="radio"/> margarina<br><input checked="" type="radio"/> aceite oliva<br><input type="radio"/> aceite oliva virgen extra<br><input type="radio"/> aceite vegetal<br><input type="radio"/> mezcla aceites |
| grasa aceite aliñar            | <input type="radio"/> mantequilla<br><input type="radio"/> margarina<br><input type="radio"/> aceite oliva<br><input checked="" type="radio"/> aceite oliva virgen extra<br><input type="radio"/> aceite vegetal<br><input type="radio"/> mezcla aceites |
| grasa aceite freir             | <input type="radio"/> mantequilla<br><input type="radio"/> margarina<br><input type="radio"/> aceite oliva<br><input type="radio"/> aceite oliva virgen extra<br><input checked="" type="radio"/> aceite vegetal<br><input type="radio"/> mezcla aceites |
| Ejercicio cuestionario         | <input checked="" type="radio"/> si<br><input type="radio"/> no                                                                                                                                                                                          |
| horas de sueño incluido siesta | [*DATA REMOVED*]                                                                                                                                                                                                                                         |
| minutos siesta                 | [*DATA REMOVED*]                                                                                                                                                                                                                                         |
| horas televisión semana        | [*DATA REMOVED*]                                                                                                                                                                                                                                         |

|                                        |                                                                                                                                                                                                                                                                                                                                                                           |
|----------------------------------------|---------------------------------------------------------------------------------------------------------------------------------------------------------------------------------------------------------------------------------------------------------------------------------------------------------------------------------------------------------------------------|
| actividad trabajo                      | <input type="radio"/> casi siempre sentado<br><input type="radio"/> sentado 50 por cien<br><input type="radio"/> casi siempre de pie, quieto<br><input checked="" type="radio"/> casi siempre levantado caminando y llevando pocas cosas<br><input type="radio"/> casi siempre levantado, caminando y llevado muchas cosas<br><input type="radio"/> trabajo manual pesado |
| tiempo caminar o bici al día           | <input type="radio"/> casi nunca<br><input type="radio"/> menos 20min día<br><input type="radio"/> 20 a 40 min día<br><input checked="" type="radio"/> 40 a 60 min día<br><input type="radio"/> 1h o 1h y media día<br><input type="radio"/> más de 1h y media al día                                                                                                     |
| tiempo tareas casa al día              | <input type="radio"/> menos de 1h día<br><input checked="" type="radio"/> 1 a 2h día<br><input type="radio"/> 3 a 4h día<br><input type="radio"/> 5 a 6h día<br><input type="radio"/> 7 a 8h día<br><input type="radio"/> más de 8h día                                                                                                                                   |
| tiempo libre televisión ordenador leer | <input type="radio"/> menos 1h día<br><input checked="" type="radio"/> 1h día<br><input type="radio"/> 2h día<br><input type="radio"/> 3h día<br><input type="radio"/> 4h día<br><input type="radio"/> 5 a 6h día<br><input type="radio"/> mas 6h día                                                                                                                     |
| tiempo libre ejercicio o deporte       | <input type="radio"/> menos 1h semana<br><input type="radio"/> 1h semana<br><input type="radio"/> 2h semana<br><input type="radio"/> 3h semana<br><input type="radio"/> 4 a 5h semana<br><input checked="" type="radio"/> mas 5h semana                                                                                                                                   |
| como se considera                      | <input type="radio"/> sedentaria<br><input type="radio"/> poco activa<br><input type="radio"/> moderadamente activa<br><input checked="" type="radio"/> bastante activa<br><input type="radio"/> muy activa<br><input type="radio"/> no sabe                                                                                                                              |
| FUR                                    | [*DATA REMOVED*]                                                                                                                                                                                                                                                                                                                                                          |
| Semanas gestación 2T                   | _____                                                                                                                                                                                                                                                                                                                                                                     |
| Días gestación 2T                      | [*DATA REMOVED*]                                                                                                                                                                                                                                                                                                                                                          |
| DBP 2T                                 | _____                                                                                                                                                                                                                                                                                                                                                                     |
| CC 2T                                  | _____                                                                                                                                                                                                                                                                                                                                                                     |

|                                    |                                                                                                                                                                                       |
|------------------------------------|---------------------------------------------------------------------------------------------------------------------------------------------------------------------------------------|
| AC 2T                              | <hr/>                                                                                                                                                                                 |
| LF 2T                              | <hr/>                                                                                                                                                                                 |
| PFE 2T (Hadlock)                   | <hr/>                                                                                                                                                                                 |
| Semanas gestación 3T               | <hr/>                                                                                                                                                                                 |
| días 3T                            | <hr/>                                                                                                                                                                                 |
| DBP 3T                             | <hr/>                                                                                                                                                                                 |
| CC 3T                              | <hr/>                                                                                                                                                                                 |
| AC 3T                              | <hr/>                                                                                                                                                                                 |
| LF 3T                              | <hr/>                                                                                                                                                                                 |
| PFE 3T (Hadlock)                   | <hr/>                                                                                                                                                                                 |
| Semanas de gestación final         | [*DATA REMOVED*]                                                                                                                                                                      |
| días gestación final               | [*DATA REMOVED*]                                                                                                                                                                      |
| Localización placenta              | <input type="radio"/> anterior<br><input type="radio"/> lateral derecha<br><input type="radio"/> lateral izquierda<br><input type="radio"/> posterior<br><input type="radio"/> fondo  |
| Presentación longitudinal cefálica | <input type="radio"/> no<br><input checked="" type="radio"/> si                                                                                                                       |
| Dorso                              | <input type="radio"/> izquierda anterior<br><input type="radio"/> izquierda posterior<br><input checked="" type="radio"/> derecha anterior<br><input type="radio"/> derecha posterior |
| diámetro biparietal                | [*DATA REMOVED*]                                                                                                                                                                      |
| Circunferencia craneal             | [*DATA REMOVED*]                                                                                                                                                                      |
| Circunferencia abdominal           | [*DATA REMOVED*]                                                                                                                                                                      |

|                                                   |                                                                                                                                               |
|---------------------------------------------------|-----------------------------------------------------------------------------------------------------------------------------------------------|
| Longitud de femur                                 | [*DATA REMOVED*]                                                                                                                              |
| tejido celular subcutáneo a nivel del muslo en mm | [*DATA REMOVED*]                                                                                                                              |
| tejido celular subcutáneo en abdomen en mm        | [*DATA REMOVED*]                                                                                                                              |
| Volumen del muslo en cm3                          | [*DATA REMOVED*]                                                                                                                              |
| Peso fetal estimado según fórmula de Hadlock      | [*DATA REMOVED*]                                                                                                                              |
| Percentil                                         | [*DATA REMOVED*]                                                                                                                              |
| Peso fetal estimado según fórmula de Scioscia     | <hr/>                                                                                                                                         |
| Peso fetal estimado según fórmula de LEE          | <hr/>                                                                                                                                         |
| Tipo de parto                                     | <input checked="" type="radio"/> eutocico<br><input type="radio"/> instrumentado/ventosa<br><input type="radio"/> cesarea                     |
| fecha de nacimiento                               | [*DATA REMOVED*]                                                                                                                              |
| Días entre exploración y nacimiento               | [*DATA REMOVED*]                                                                                                                              |
| Peso RN en g                                      | [*DATA REMOVED*]                                                                                                                              |
| sexo                                              | <input type="radio"/> mujer<br><input checked="" type="radio"/> hombre                                                                        |
| Apgar 1 minuto                                    | [*DATA REMOVED*]                                                                                                                              |
| Apgar 5 minutos                                   | [*DATA REMOVED*]                                                                                                                              |
| Apgar 10 minutos                                  | <hr/>                                                                                                                                         |
| antecedente Covid durante gestación               | <input type="radio"/> Yes<br><input checked="" type="radio"/> No                                                                              |
| Nivel de estudios                                 | <input type="radio"/> ninguno<br><input type="radio"/> primarios<br><input type="radio"/> secundarios<br><input type="radio"/> universitarios |

# Base\_datos\_estimacion\_peso\_fetal

|                                       |                                                                                                                                                                                                                                                                                      |
|---------------------------------------|--------------------------------------------------------------------------------------------------------------------------------------------------------------------------------------------------------------------------------------------------------------------------------------|
| Número de identificación participante | 177                                                                                                                                                                                                                                                                                  |
| CODIGO PARTICIPANTE                   |                                                                                                                                                                                                                                                                                      |
| Edad                                  | [*DATA REMOVED*]                                                                                                                                                                                                                                                                     |
| Gestaciones                           | <input checked="" type="radio"/> 1<br><input type="radio"/> 2<br><input type="radio"/> 3<br><input type="radio"/> mas de 3                                                                                                                                                           |
| partos                                | <input checked="" type="radio"/> 0<br><input type="radio"/> 1<br><input type="radio"/> 2<br><input type="radio"/> 3<br><input type="radio"/> mas de 3                                                                                                                                |
| cesáreas                              | <input checked="" type="radio"/> 0<br><input type="radio"/> 1<br><input type="radio"/> 2<br><input type="radio"/> 3<br><input type="radio"/> mas de 3                                                                                                                                |
| Abortos                               | <input checked="" type="radio"/> 0<br><input type="radio"/> 1<br><input type="radio"/> 2<br><input type="radio"/> 3<br><input type="radio"/> mas de 3                                                                                                                                |
| Tipo de gestacion                     | <input type="radio"/> espontanea<br><input type="radio"/> IAC inseminación artificial conyuge<br><input checked="" type="radio"/> IAD inseminación artificial donante<br><input type="radio"/> FIV Fecundación in Vitro<br><input type="radio"/> Ovodon FIV con donación de ovocitos |
| peso previo a embarazo                | [*DATA REMOVED*]                                                                                                                                                                                                                                                                     |
| Ganancia ponderal embarazo            |                                                                                                                                                                                                                                                                                      |
| Talla madre                           | [*DATA REMOVED*]                                                                                                                                                                                                                                                                     |
| IMC previo embarazo                   | 25.461980633463213                                                                                                                                                                                                                                                                   |
| Patología obstétrica                  | <input checked="" type="radio"/> no<br><input type="radio"/> si                                                                                                                                                                                                                      |
| Diabetes pregestacional               | <input checked="" type="radio"/> no<br><input type="radio"/> si                                                                                                                                                                                                                      |
| Diabetes gestacional                  | <input checked="" type="radio"/> no<br><input type="radio"/> si                                                                                                                                                                                                                      |

|                                            |                                                                                                                                                                                      |
|--------------------------------------------|--------------------------------------------------------------------------------------------------------------------------------------------------------------------------------------|
| Diabetes gestacional con insulina          | <input checked="" type="radio"/> no<br><input type="radio"/> si                                                                                                                      |
| Diabetes gestacional con dieta y ejercicio | <input checked="" type="radio"/> no<br><input type="radio"/> si                                                                                                                      |
| Percentil fetos previos                    | <input checked="" type="radio"/> Nada<br><input type="radio"/> percentil menor de 10<br><input type="radio"/> percentil entre 10 y 90<br><input type="radio"/> percentil mayor de 90 |
| Exfumadora                                 | <input checked="" type="radio"/> Nada<br><input type="radio"/> menos de 5 años<br><input type="radio"/> 5 a 10 años<br><input type="radio"/> mayor o igual a 10 años                 |
| Hábito tabáquico                           | <input checked="" type="radio"/> no<br><input type="radio"/> si                                                                                                                      |
| fumadora                                   | [*DATA REMOVED*]                                                                                                                                                                     |
| Consumo otros tóxicos                      | <input checked="" type="radio"/> no<br><input type="radio"/> si                                                                                                                      |
| Hb 1T                                      | _____                                                                                                                                                                                |
| Htc 1T                                     | _____                                                                                                                                                                                |
| Hb 2T                                      | _____                                                                                                                                                                                |
| HTC 2T                                     | _____                                                                                                                                                                                |
| Hb 3T                                      | _____                                                                                                                                                                                |
| HTC 3T                                     | _____                                                                                                                                                                                |
| Suplemento FE oral                         | <input type="radio"/> si<br><input checked="" type="radio"/> no                                                                                                                      |
| Suplemento fe iv                           | <input type="radio"/> si<br><input checked="" type="radio"/> no                                                                                                                      |
| Transfusión                                | <input checked="" type="radio"/> no<br><input type="radio"/> si                                                                                                                      |
| Solicitada Vit D                           | <input checked="" type="radio"/> no<br><input type="radio"/> si                                                                                                                      |

|                       |                                                                                                                                                                                                                                                                                                                                                                                                              |
|-----------------------|--------------------------------------------------------------------------------------------------------------------------------------------------------------------------------------------------------------------------------------------------------------------------------------------------------------------------------------------------------------------------------------------------------------|
| Deficit vit D         | <input type="radio"/> no<br><input type="radio"/> si                                                                                                                                                                                                                                                                                                                                                         |
| Suplemento vit D      | <input type="radio"/> si<br><input type="radio"/> no                                                                                                                                                                                                                                                                                                                                                         |
| Dieta, cuestionario   | <input checked="" type="radio"/> si<br><input type="radio"/> no                                                                                                                                                                                                                                                                                                                                              |
| Leche entera          | <input type="radio"/> Nunca o menos 1 vez al mes<br><input type="radio"/> 1 a 3 veces mes<br><input checked="" type="radio"/> 1 vez semana<br><input type="radio"/> 2 a 4 veces semana<br><input type="radio"/> 5 a 6 veces semana<br><input type="radio"/> 1 vez al día<br><input type="radio"/> 2 a 3 veces al día<br><input type="radio"/> 5 a 6 veces al día<br><input type="radio"/> más 6 veces al día |
| Leche semidesnatada   | <input checked="" type="radio"/> Nunca o menos 1 vez al mes<br><input type="radio"/> 1 a 3 veces mes<br><input type="radio"/> 1 vez semana<br><input type="radio"/> 2 a 4 veces semana<br><input type="radio"/> 5 a 6 veces semana<br><input type="radio"/> 1 vez al día<br><input type="radio"/> 2 a 3 veces al día<br><input type="radio"/> 5 a 6 veces al día<br><input type="radio"/> mas 6 veces al día |
| Leche desnatada       | <input checked="" type="radio"/> Nunca o menos 1 vez al mes<br><input type="radio"/> 1 a 3 veces mes<br><input type="radio"/> 1 vez semana<br><input type="radio"/> 2 a 4 veces semana<br><input type="radio"/> 5 a 6 veces semana<br><input type="radio"/> 1 vez al día<br><input type="radio"/> 2 a 3 veces al día<br><input type="radio"/> 5 a 6 veces al día<br><input type="radio"/> más 6 veces al día |
| Leche condensada      | <input checked="" type="radio"/> Nunca o menos 1 vez al mes<br><input type="radio"/> 1 a 3 veces mes<br><input type="radio"/> 1 vez semana<br><input type="radio"/> 2 a 4 veces semana<br><input type="radio"/> 5 a 6 veces semana<br><input type="radio"/> 1 vez al día<br><input type="radio"/> 2 a 3 veces al día<br><input type="radio"/> 5 a 6 veces al día<br><input type="radio"/> más 6 veces al día |
| nata o crema de leche | <input checked="" type="radio"/> Nunca o menos 1 vez al mes<br><input type="radio"/> 1 a 3 veces mes<br><input type="radio"/> 1 vez semana<br><input type="radio"/> 2 a 4 veces semana<br><input type="radio"/> 5 a 6 veces semana<br><input type="radio"/> 1 vez al día<br><input type="radio"/> 2 a 3 veces al día<br><input type="radio"/> 5 a 6 veces al día<br><input type="radio"/> más 6 veces al día |



---

Yogurt Entero

- ☐ Nunca o menos 1 vez al mes  
☐ 1 a 3 veces mes  
☐ 1 vez semana  
☒ 2 a 4 veces semana  
☐ 5 a 6 veces semana  
☐ 1 vez al día  
☐ 2 a 3 veces al día  
☐ 5 a 6 veces al día  
☐ más 6 veces al día

---

Yogurt desnatado

- ☒ Nunca o menos 1 vez al mes  
☐ 1 a 3 veces mes  
☐ 1 vez semana  
☐ 2 a 4 veces semana  
☐ 5 a 6 veces semana  
☐ 1 vez al día  
☐ 2 a 3 veces al día  
☐ 5 a 6 veces al día  
☐ más 6 veces al día

---

100g requesón o queso blando o queso fresco

- ☐ Nunca o menos 1 vez al mes  
☐ 1 a 3 veces mes  
☒ 1 vez semana  
☐ 2 a 4 veces semana  
☐ 5 a 6 veces semana  
☐ 1 vez al día  
☐ 2 a 3 veces al día  
☐ 5 a 6 veces al día  
☐ más 6 veces al día

---

queso curado o semicurado o cremoso

- ☐ Nunca o menos 1 vez al mes  
☐ 1 a 3 veces mes  
☐ 1 vez semana  
☒ 2 a 4 veces semana  
☐ 5 a 6 veces semana  
☐ 1 vez al día  
☐ 2 a 3 veces al día  
☐ 5 a 6 veces al día  
☐ más 6 veces al día

---

natillas flan pudding

- ☒ Nunca o menos 1 vez al mes  
☐ 1 a 3 veces mes  
☐ 1 vez semana  
☐ 2 a 4 veces semana  
☐ 5 a 6 veces semana  
☐ 1 vez al día  
☐ 2 a 3 veces al día  
☐ 5 a 6 veces al día  
☐ más 6 veces al día

---

Helado

- ☒ Nunca o menos 1 vez al mes  
☐ 1 a 3 veces mes  
☐ 1 vez semana  
☐ 2 a 4 veces semana  
☐ 5 a 6 veces semana  
☐ 1 vez al día  
☐ 2 a 3 veces al día  
☐ 5 a 6 veces al día  
☐ más 6 veces al día

|                                      |                                                                                                                                                                                                                                                                                                                                                                                                              |
|--------------------------------------|--------------------------------------------------------------------------------------------------------------------------------------------------------------------------------------------------------------------------------------------------------------------------------------------------------------------------------------------------------------------------------------------------------------|
| huevo                                | <input type="radio"/> Nunca o menos 1 vez al mes<br><input type="radio"/> 1 a 3 veces mes<br><input type="radio"/> 1 vez semana<br><input checked="" type="radio"/> 2 a 4 veces semana<br><input type="radio"/> 5 a 6 veces semana<br><input type="radio"/> 1 vez al día<br><input type="radio"/> 2 a 3 veces al día<br><input type="radio"/> 5 a 6 veces al día<br><input type="radio"/> más 6 veces al día |
| Pollo con piel                       | <input checked="" type="radio"/> Nunca o menos 1 vez al mes<br><input type="radio"/> 1 a 3 veces mes<br><input type="radio"/> 1 vez semana<br><input type="radio"/> 2 a 4 veces semana<br><input type="radio"/> 5 a 6 veces semana<br><input type="radio"/> 1 vez al día<br><input type="radio"/> 2 a 3 veces al día<br><input type="radio"/> 5 a 6 veces al día<br><input type="radio"/> más 6 veces al día |
| pollo sin piel                       | <input type="radio"/> Nunca o menos 1 vez al mes<br><input type="radio"/> 1 a 3 veces mes<br><input checked="" type="radio"/> 1 vez semana<br><input type="radio"/> 2 a 4 veces semana<br><input type="radio"/> 5 a 6 veces semana<br><input type="radio"/> 1 vez al día<br><input type="radio"/> 2 a 3 veces al día<br><input type="radio"/> 5 a 6 veces al día<br><input type="radio"/> más 6 veces al día |
| Ternera o cerdo o cordero            | <input checked="" type="radio"/> Nunca o menos 1 vez al mes<br><input type="radio"/> 1 a 3 veces mes<br><input type="radio"/> 1 vez semana<br><input type="radio"/> 2 a 4 veces semana<br><input type="radio"/> 5 a 6 veces semana<br><input type="radio"/> 1 vez al día<br><input type="radio"/> 2 a 3 veces al día<br><input type="radio"/> 5 a 6 veces al día<br><input type="radio"/> más 6 veces al día |
| carne caza: Conejo o codorniz o pato | <input checked="" type="radio"/> Nunca o menos 1 vez al mes<br><input type="radio"/> 1 a 3 veces mes<br><input type="radio"/> 1 vez semana<br><input type="radio"/> 2 a 4 veces semana<br><input type="radio"/> 5 a 6 veces semana<br><input type="radio"/> 1 vez al día<br><input type="radio"/> 2 a 3 veces al día<br><input type="radio"/> 5 a 6 veces al día<br><input type="radio"/> más 6 veces al día |
| Hígado de ternera o cerdo o pollo    | <input checked="" type="radio"/> Nunca o menos 1 vez al mes<br><input type="radio"/> 1 a 3 veces mes<br><input type="radio"/> 1 vez semana<br><input type="radio"/> 2 a 4 veces semana<br><input type="radio"/> 5 a 6 veces semana<br><input type="radio"/> 1 vez al día<br><input type="radio"/> 2 a 3 veces al día<br><input type="radio"/> 5 a 6 veces al día<br><input type="radio"/> más 6 veces al día |

|                     |                                                                                                                                                                                                                                                                                                                                                                                                              |
|---------------------|--------------------------------------------------------------------------------------------------------------------------------------------------------------------------------------------------------------------------------------------------------------------------------------------------------------------------------------------------------------------------------------------------------------|
| Vísceras            | <input checked="" type="radio"/> Nunca o menos 1 vez al mes<br><input type="radio"/> 1 a 3 veces mes<br><input type="radio"/> 1 vez semana<br><input type="radio"/> 2 a 4 veces semana<br><input type="radio"/> 5 a 6 veces semana<br><input type="radio"/> 1 vez al día<br><input type="radio"/> 2 a 3 veces al día<br><input type="radio"/> 5 a 6 veces al día<br><input type="radio"/> más 6 veces al día |
| Embutido            | <input checked="" type="radio"/> Nunca o menos 1 vez al mes<br><input type="radio"/> 1 a 3 veces mes<br><input type="radio"/> 1 vez semana<br><input type="radio"/> 2 a 4 veces semana<br><input type="radio"/> 5 a 6 veces semana<br><input type="radio"/> 1 vez al día<br><input type="radio"/> 2 a 3 veces al día<br><input type="radio"/> 5 a 6 veces al día<br><input type="radio"/> más 6 veces al día |
| Salchicha o similar | <input checked="" type="radio"/> Nunca o menos 1 vez al mes<br><input type="radio"/> 1 a 3 veces mes<br><input type="radio"/> 1 vez semana<br><input type="radio"/> 2 a 4 veces semana<br><input type="radio"/> 5 a 6 veces semana<br><input type="radio"/> 1 vez al día<br><input type="radio"/> 2 a 3 veces al día<br><input type="radio"/> 5 a 6 veces al día<br><input type="radio"/> más 6 veces al día |
| Pate o foiegras     | <input checked="" type="radio"/> Nunca o menos 1 vez al mes<br><input type="radio"/> 1 a 3 veces mes<br><input type="radio"/> 1 vez semana<br><input type="radio"/> 2 a 4 veces semana<br><input type="radio"/> 5 a 6 veces semana<br><input type="radio"/> 1 vez al día<br><input type="radio"/> 2 a 3 veces al día<br><input type="radio"/> 5 a 6 veces al día<br><input type="radio"/> más 6 veces al día |
| Hamburguesa         | <input type="radio"/> Nunca o menos 1 vez al mes<br><input checked="" type="radio"/> 1 a 3 veces mes<br><input type="radio"/> 1 vez semana<br><input type="radio"/> 2 a 4 veces semana<br><input type="radio"/> 5 a 6 veces semana<br><input type="radio"/> 1 vez al día<br><input type="radio"/> 2 a 3 veces al día<br><input type="radio"/> 5 a 6 veces al día<br><input type="radio"/> más 6 veces al día |
| tocino o bacon      | <input checked="" type="radio"/> Nunca o menos 1 vez al mes<br><input type="radio"/> 1 a 3 veces mes<br><input type="radio"/> 1 vez semana<br><input type="radio"/> 2 a 4 veces semana<br><input type="radio"/> 5 a 6 veces semana<br><input type="radio"/> 1 vez al día<br><input type="radio"/> 2 a 3 veces al día<br><input type="radio"/> 5 a 6 veces al día<br><input type="radio"/> más 6 veces al día |

---

Pescado frito

- ☒ Nunca o menos 1 vez al mes  
☐ 1 a 3 veces mes  
☐ 1 vez semana  
☐ 2 a 4 veces semana  
☐ 5 a 6 veces semana  
☐ 1 vez al día  
☐ 2 a 3 veces al día  
☐ 5 a 6 veces al día  
☐ más 6 veces al día

---

pescado hervido blanco

- ☐ Nunca o menos 1 vez al mes  
☒ 1 a 3 veces mes  
☐ 1 vez semana  
☐ 2 a 4 veces semana  
☐ 5 a 6 veces semana  
☐ 1 vez al día  
☐ 2 a 3 veces al día  
☐ 5 a 6 veces al día  
☐ más 6 veces al día

---

pescado hervido azul

- ☐ Nunca o menos 1 vez al mes  
☒ 1 a 3 veces mes  
☐ 1 vez semana  
☐ 2 a 4 veces semana  
☐ 5 a 6 veces semana  
☐ 1 vez al día  
☐ 2 a 3 veces al día  
☐ 5 a 6 veces al día  
☐ más 6 veces al día

---

otros pescado azul

- ☒ Nunca o menos 1 vez al mes  
☐ 1 a 3 veces mes  
☐ 1 vez semana  
☐ 2 a 4 veces semana  
☐ 5 a 6 veces semana  
☐ 1 vez al día  
☐ 2 a 3 veces al día  
☐ 5 a 6 veces al día  
☐ más 6 veces al día

---

atun conserva

- ☐ Nunca o menos 1 vez al mes  
☐ 1 a 3 veces mes  
☐ 1 vez semana  
☒ 2 a 4 veces semana  
☐ 5 a 6 veces semana  
☐ 1 vez al día  
☐ 2 a 3 veces al día  
☐ 5 a 6 veces al día  
☐ más 6 veces al día

---

sardina conserva

- ☒ Nunca o menos 1 vez al mes  
☐ 1 a 3 veces mes  
☐ 1 vez semana  
☐ 2 a 4 veces semana  
☐ 5 a 6 veces semana  
☐ 1 vez al día  
☐ 2 a 3 veces al día  
☐ 5 a 6 veces al día  
☐ más 6 veces al día

|                                         |                                                                                                                                                                                                                                                                                                                                                                                                              |
|-----------------------------------------|--------------------------------------------------------------------------------------------------------------------------------------------------------------------------------------------------------------------------------------------------------------------------------------------------------------------------------------------------------------------------------------------------------------|
| pescado ahumado                         | <input checked="" type="radio"/> Nunca o menos 1 vez al mes<br><input type="radio"/> 1 a 3 veces mes<br><input type="radio"/> 1 vez semana<br><input type="radio"/> 2 a 4 veces semana<br><input type="radio"/> 5 a 6 veces semana<br><input type="radio"/> 1 vez al día<br><input type="radio"/> 2 a 3 veces al día<br><input type="radio"/> 5 a 6 veces al día<br><input type="radio"/> más 6 veces al día |
| almejas o mejillones o ostras unos 100g | <input checked="" type="radio"/> Nunca o menos 1 vez al mes<br><input type="radio"/> 1 a 3 veces mes<br><input type="radio"/> 1 vez semana<br><input type="radio"/> 2 a 4 veces semana<br><input type="radio"/> 5 a 6 veces semana<br><input type="radio"/> 1 vez al día<br><input type="radio"/> 2 a 3 veces al día<br><input type="radio"/> 5 a 6 veces al día<br><input type="radio"/> más 6 veces al día |
| calamar o chipiron o sepia unos 100g    | <input checked="" type="radio"/> Nunca o menos 1 vez al mes<br><input type="radio"/> 1 a 3 veces mes<br><input type="radio"/> 1 vez semana<br><input type="radio"/> 2 a 4 veces semana<br><input type="radio"/> 5 a 6 veces semana<br><input type="radio"/> 1 vez al día<br><input type="radio"/> 2 a 3 veces al día<br><input type="radio"/> 5 a 6 veces al día<br><input type="radio"/> más 6 veces al día |
| marisco unos 100g                       | <input type="radio"/> Nunca o menos 1 vez al mes<br><input checked="" type="radio"/> 1 a 3 veces mes<br><input type="radio"/> 1 vez semana<br><input type="radio"/> 2 a 4 veces semana<br><input type="radio"/> 5 a 6 veces semana<br><input type="radio"/> 1 vez al día<br><input type="radio"/> 2 a 3 veces al día<br><input type="radio"/> 5 a 6 veces al día<br><input type="radio"/> más 6 veces al día |
| Espinacas o acelgas cocinadas           | <input checked="" type="radio"/> Nunca o menos 1 vez al mes<br><input type="radio"/> 1 a 3 veces mes<br><input type="radio"/> 1 vez semana<br><input type="radio"/> 2 a 4 veces semana<br><input type="radio"/> 5 a 6 veces semana<br><input type="radio"/> 1 vez al día<br><input type="radio"/> 2 a 3 veces al día<br><input type="radio"/> 5 a 6 veces al día<br><input type="radio"/> más 6 veces al día |
| Col o coliflor o brocoli cocinado       | <input checked="" type="radio"/> Nunca o menos 1 vez al mes<br><input type="radio"/> 1 a 3 veces mes<br><input type="radio"/> 1 vez semana<br><input type="radio"/> 2 a 4 veces semana<br><input type="radio"/> 5 a 6 veces semana<br><input type="radio"/> 1 vez al día<br><input type="radio"/> 2 a 3 veces al día<br><input type="radio"/> 5 a 6 veces al día<br><input type="radio"/> más 6 veces al día |

---

Lechuga o endivia o escarola

- ☐ Nunca o menos 1 vez al mes  
☐ 1 a 3 veces mes  
☐ 1 vez semana  
☐ 2 a 4 veces semana  
☐ 5 a 6 veces semana  
☒ 1 vez al día  
☐ 2 a 3 veces al día  
☐ 5 a 6 veces al día  
☐ más 6 veces al día

---

tomate ensalada

- ☐ Nunca o menos 1 vez al mes  
☐ 1 a 3 veces mes  
☐ 1 vez semana  
☒ 2 a 4 veces semana  
☐ 5 a 6 veces semana  
☐ 1 vez al día  
☐ 2 a 3 veces al día  
☐ 5 a 6 veces al día  
☐ más 6 veces al día

---

cebolla

- ☐ Nunca o menos 1 vez al mes  
☐ 1 a 3 veces mes  
☐ 1 vez semana  
☒ 2 a 4 veces semana  
☐ 5 a 6 veces semana  
☐ 1 vez al día  
☐ 2 a 3 veces al día  
☐ 5 a 6 veces al día  
☐ más 6 veces al día

---

Zanahoria o calabaza

- ☐ Nunca o menos 1 vez al mes  
☐ 1 a 3 veces mes  
☐ 1 vez semana  
☒ 2 a 4 veces semana  
☐ 5 a 6 veces semana  
☐ 1 vez al día  
☐ 2 a 3 veces al día  
☐ 5 a 6 veces al día  
☐ más 6 veces al día

---

Judías verdes

- ☐ Nunca o menos 1 vez al mes  
☐ 1 a 3 veces mes  
☐ 1 vez semana  
☒ 2 a 4 veces semana  
☐ 5 a 6 veces semana  
☐ 1 vez al día  
☐ 2 a 3 veces al día  
☐ 5 a 6 veces al día  
☐ más 6 veces al día

---

Berenjena o calabacin o pepino

- ☐ Nunca o menos 1 vez al mes  
☐ 1 a 3 veces mes  
☐ 1 vez semana  
☒ 2 a 4 veces semana  
☐ 5 a 6 veces semana  
☐ 1 vez al día  
☐ 2 a 3 veces al día  
☐ 5 a 6 veces al día  
☐ más 6 veces al día

---

|          |                                                                                                                                                                                                                                                                                                                                                                                                              |
|----------|--------------------------------------------------------------------------------------------------------------------------------------------------------------------------------------------------------------------------------------------------------------------------------------------------------------------------------------------------------------------------------------------------------------|
| pimiento | <input type="radio"/> Nunca o menos 1 vez al mes<br><input type="radio"/> 1 a 3 veces mes<br><input checked="" type="radio"/> 1 vez semana<br><input type="radio"/> 2 a 4 veces semana<br><input type="radio"/> 5 a 6 veces semana<br><input type="radio"/> 1 vez al día<br><input type="radio"/> 2 a 3 veces al día<br><input type="radio"/> 5 a 6 veces al día<br><input type="radio"/> más 6 veces al día |
|----------|--------------------------------------------------------------------------------------------------------------------------------------------------------------------------------------------------------------------------------------------------------------------------------------------------------------------------------------------------------------------------------------------------------------|

---

|           |                                                                                                                                                                                                                                                                                                                                                                                                              |
|-----------|--------------------------------------------------------------------------------------------------------------------------------------------------------------------------------------------------------------------------------------------------------------------------------------------------------------------------------------------------------------------------------------------------------------|
| alcachofa | <input checked="" type="radio"/> Nunca o menos 1 vez al mes<br><input type="radio"/> 1 a 3 veces mes<br><input type="radio"/> 1 vez semana<br><input type="radio"/> 2 a 4 veces semana<br><input type="radio"/> 5 a 6 veces semana<br><input type="radio"/> 1 vez al día<br><input type="radio"/> 2 a 3 veces al día<br><input type="radio"/> 5 a 6 veces al día<br><input type="radio"/> más 6 veces al día |
|-----------|--------------------------------------------------------------------------------------------------------------------------------------------------------------------------------------------------------------------------------------------------------------------------------------------------------------------------------------------------------------------------------------------------------------|

---

|            |                                                                                                                                                                                                                                                                                                                                                                                                              |
|------------|--------------------------------------------------------------------------------------------------------------------------------------------------------------------------------------------------------------------------------------------------------------------------------------------------------------------------------------------------------------------------------------------------------------|
| espárragos | <input checked="" type="radio"/> Nunca o menos 1 vez al mes<br><input type="radio"/> 1 a 3 veces mes<br><input type="radio"/> 1 vez semana<br><input type="radio"/> 2 a 4 veces semana<br><input type="radio"/> 5 a 6 veces semana<br><input type="radio"/> 1 vez al día<br><input type="radio"/> 2 a 3 veces al día<br><input type="radio"/> 5 a 6 veces al día<br><input type="radio"/> más 6 veces al día |
|------------|--------------------------------------------------------------------------------------------------------------------------------------------------------------------------------------------------------------------------------------------------------------------------------------------------------------------------------------------------------------------------------------------------------------|

---

|              |                                                                                                                                                                                                                                                                                                                                                                                                              |
|--------------|--------------------------------------------------------------------------------------------------------------------------------------------------------------------------------------------------------------------------------------------------------------------------------------------------------------------------------------------------------------------------------------------------------------|
| maíz hervido | <input checked="" type="radio"/> Nunca o menos 1 vez al mes<br><input type="radio"/> 1 a 3 veces mes<br><input type="radio"/> 1 vez semana<br><input type="radio"/> 2 a 4 veces semana<br><input type="radio"/> 5 a 6 veces semana<br><input type="radio"/> 1 vez al día<br><input type="radio"/> 2 a 3 veces al día<br><input type="radio"/> 5 a 6 veces al día<br><input type="radio"/> más 6 veces al día |
|--------------|--------------------------------------------------------------------------------------------------------------------------------------------------------------------------------------------------------------------------------------------------------------------------------------------------------------------------------------------------------------------------------------------------------------|

---

|           |                                                                                                                                                                                                                                                                                                                                                                                                              |
|-----------|--------------------------------------------------------------------------------------------------------------------------------------------------------------------------------------------------------------------------------------------------------------------------------------------------------------------------------------------------------------------------------------------------------------|
| legumbres | <input type="radio"/> Nunca o menos 1 vez al mes<br><input type="radio"/> 1 a 3 veces mes<br><input type="radio"/> 1 vez semana<br><input checked="" type="radio"/> 2 a 4 veces semana<br><input type="radio"/> 5 a 6 veces semana<br><input type="radio"/> 1 vez al día<br><input type="radio"/> 2 a 3 veces al día<br><input type="radio"/> 5 a 6 veces al día<br><input type="radio"/> más 6 veces al día |
|-----------|--------------------------------------------------------------------------------------------------------------------------------------------------------------------------------------------------------------------------------------------------------------------------------------------------------------------------------------------------------------------------------------------------------------|

---

|                       |                                                                                                                                                                                                                                                                                                                                                                                                              |
|-----------------------|--------------------------------------------------------------------------------------------------------------------------------------------------------------------------------------------------------------------------------------------------------------------------------------------------------------------------------------------------------------------------------------------------------------|
| naranjas o mandarinas | <input checked="" type="radio"/> Nunca o menos 1 vez al mes<br><input type="radio"/> 1 a 3 veces mes<br><input type="radio"/> 1 vez semana<br><input type="radio"/> 2 a 4 veces semana<br><input type="radio"/> 5 a 6 veces semana<br><input type="radio"/> 1 vez al día<br><input type="radio"/> 2 a 3 veces al día<br><input type="radio"/> 5 a 6 veces al día<br><input type="radio"/> más 6 veces al día |
|-----------------------|--------------------------------------------------------------------------------------------------------------------------------------------------------------------------------------------------------------------------------------------------------------------------------------------------------------------------------------------------------------------------------------------------------------|

---

|                       |                                                                                                                                                                                                                                                                                                                                                                                                              |
|-----------------------|--------------------------------------------------------------------------------------------------------------------------------------------------------------------------------------------------------------------------------------------------------------------------------------------------------------------------------------------------------------------------------------------------------------|
| zum natural fruta     | <input checked="" type="radio"/> Nunca o menos 1 vez al mes<br><input type="radio"/> 1 a 3 veces mes<br><input type="radio"/> 1 vez semana<br><input type="radio"/> 2 a 4 veces semana<br><input type="radio"/> 5 a 6 veces semana<br><input type="radio"/> 1 vez al día<br><input type="radio"/> 2 a 3 veces al día<br><input type="radio"/> 5 a 6 veces al día<br><input type="radio"/> más 6 veces al día |
| platano               | <input type="radio"/> Nunca o menos 1 vez al mes<br><input checked="" type="radio"/> 1 a 3 veces mes<br><input type="radio"/> 1 vez semana<br><input type="radio"/> 2 a 4 veces semana<br><input type="radio"/> 5 a 6 veces semana<br><input type="radio"/> 1 vez al día<br><input type="radio"/> 2 a 3 veces al día<br><input type="radio"/> 5 a 6 veces al día<br><input type="radio"/> más 6 veces al día |
| manzana o pera        | <input type="radio"/> Nunca o menos 1 vez al mes<br><input type="radio"/> 1 a 3 veces mes<br><input checked="" type="radio"/> 1 vez semana<br><input type="radio"/> 2 a 4 veces semana<br><input type="radio"/> 5 a 6 veces semana<br><input type="radio"/> 1 vez al día<br><input type="radio"/> 2 a 3 veces al día<br><input type="radio"/> 5 a 6 veces al día<br><input type="radio"/> más 6 veces al día |
| melocotón o nectarina | <input checked="" type="radio"/> Nunca o menos 1 vez al mes<br><input type="radio"/> 1 a 3 veces mes<br><input type="radio"/> 1 vez semana<br><input type="radio"/> 2 a 4 veces semana<br><input type="radio"/> 5 a 6 veces semana<br><input type="radio"/> 1 vez al día<br><input type="radio"/> 2 a 3 veces al día<br><input type="radio"/> 5 a 6 veces al día<br><input type="radio"/> más 6 veces al día |
| sandia o melon        | <input type="radio"/> Nunca o menos 1 vez al mes<br><input checked="" type="radio"/> 1 a 3 veces mes<br><input type="radio"/> 1 vez semana<br><input type="radio"/> 2 a 4 veces semana<br><input type="radio"/> 5 a 6 veces semana<br><input type="radio"/> 1 vez al día<br><input type="radio"/> 2 a 3 veces al día<br><input type="radio"/> 5 a 6 veces al día<br><input type="radio"/> más 6 veces al día |
| uva                   | <input type="radio"/> Nunca o menos 1 vez al mes<br><input checked="" type="radio"/> 1 a 3 veces mes<br><input type="radio"/> 1 vez semana<br><input type="radio"/> 2 a 4 veces semana<br><input type="radio"/> 5 a 6 veces semana<br><input type="radio"/> 1 vez al día<br><input type="radio"/> 2 a 3 veces al día<br><input type="radio"/> 5 a 6 veces al día<br><input type="radio"/> más 6 veces al día |



---

bruna o ciruela

- ☒ Nunca o menos 1 vez al mes  
☐ 1 a 3 veces mes  
☐ 1 vez semana  
☐ 2 a 4 veces semana  
☐ 5 a 6 veces semana  
☐ 1 vez al día  
☐ 2 a 3 veces al día  
☐ 5 a 6 veces al día  
☐ más 6 veces al día

---

kiwi

- ☐ Nunca o menos 1 vez al mes  
☐ 1 a 3 veces mes  
☒ 1 vez semana  
☐ 2 a 4 veces semana  
☐ 5 a 6 veces semana  
☐ 1 vez al día  
☐ 2 a 3 veces al día  
☐ 5 a 6 veces al día  
☐ más 6 veces al día

---

aceituna

- ☒ Nunca o menos 1 vez al mes  
☐ 1 a 3 veces mes  
☐ 1 vez semana  
☐ 2 a 4 veces semana  
☐ 5 a 6 veces semana  
☐ 1 vez al día  
☐ 2 a 3 veces al día  
☐ 5 a 6 veces al día  
☐ más 6 veces al día

---

frutos secos

- ☐ Nunca o menos 1 vez al mes  
☐ 1 a 3 veces mes  
☐ 1 vez semana  
☒ 2 a 4 veces semana  
☐ 5 a 6 veces semana  
☐ 1 vez al día  
☐ 2 a 3 veces al día  
☐ 5 a 6 veces al día  
☐ más 6 veces al día

---

pan blanco

- ☐ Nunca o menos 1 vez al mes  
☐ 1 a 3 veces mes  
☐ 1 vez semana  
☐ 2 a 4 veces semana  
☐ 5 a 6 veces semana  
☒ 1 vez al día  
☐ 2 a 3 veces al día  
☐ 5 a 6 veces al día  
☐ más 6 veces al día

---

pan integral

- ☒ Nunca o menos 1 vez al mes  
☐ 1 a 3 veces mes  
☐ 1 vez semana  
☐ 2 a 4 veces semana  
☐ 5 a 6 veces semana  
☐ 1 vez al día  
☐ 2 a 3 veces al día  
☐ 5 a 6 veces al día  
☐ más 6 veces al día

---

cereales desayuno

- ☐ Nunca o menos 1 vez al mes  
☐ 1 a 3 veces mes  
☐ 1 vez semana  
☒ 2 a 4 veces semana  
☐ 5 a 6 veces semana  
☐ 1 vez al día  
☐ 2 a 3 veces al día  
☐ 5 a 6 veces al día  
☐ más 6 veces al día

---

patatas fritas

- ☐ Nunca o menos 1 vez al mes  
☒ 1 a 3 veces mes  
☐ 1 vez semana  
☐ 2 a 4 veces semana  
☐ 5 a 6 veces semana  
☐ 1 vez al día  
☐ 2 a 3 veces al día  
☐ 5 a 6 veces al día  
☐ más 6 veces al día

---

patatas cocidas o asadas

- ☐ Nunca o menos 1 vez al mes  
☐ 1 a 3 veces mes  
☒ 1 vez semana  
☐ 2 a 4 veces semana  
☐ 5 a 6 veces semana  
☐ 1 vez al día  
☐ 2 a 3 veces al día  
☐ 5 a 6 veces al día  
☐ más 6 veces al día

---

bolsa papas

- ☒ Nunca o menos 1 vez al mes  
☐ 1 a 3 veces mes  
☐ 1 vez semana  
☐ 2 a 4 veces semana  
☐ 5 a 6 veces semana  
☐ 1 vez al día  
☐ 2 a 3 veces al día  
☐ 5 a 6 veces al día  
☐ más 6 veces al día

---

arroz cocinado

- ☐ Nunca o menos 1 vez al mes  
☐ 1 a 3 veces mes  
☒ 1 vez semana  
☐ 2 a 4 veces semana  
☐ 5 a 6 veces semana  
☐ 1 vez al día  
☐ 2 a 3 veces al día  
☐ 5 a 6 veces al día  
☐ más 6 veces al día

---

pasta

- ☐ Nunca o menos 1 vez al mes  
☐ 1 a 3 veces mes  
☒ 1 vez semana  
☐ 2 a 4 veces semana  
☐ 5 a 6 veces semana  
☐ 1 vez al día  
☐ 2 a 3 veces al día  
☐ 5 a 6 veces al día  
☐ más 6 veces al día

|                     |                                                                                                                                                                                                                                                                                                                                                                                                              |
|---------------------|--------------------------------------------------------------------------------------------------------------------------------------------------------------------------------------------------------------------------------------------------------------------------------------------------------------------------------------------------------------------------------------------------------------|
| pizza               | <input type="radio"/> Nunca o menos 1 vez al mes<br><input checked="" type="radio"/> 1 a 3 veces mes<br><input type="radio"/> 1 vez semana<br><input type="radio"/> 2 a 4 veces semana<br><input type="radio"/> 5 a 6 veces semana<br><input type="radio"/> 1 vez al día<br><input type="radio"/> 2 a 3 veces al día<br><input type="radio"/> 5 a 6 veces al día<br><input type="radio"/> más 6 veces al día |
| aceite oliva        | <input type="radio"/> Nunca o menos 1 vez al mes<br><input type="radio"/> 1 a 3 veces mes<br><input type="radio"/> 1 vez semana<br><input type="radio"/> 2 a 4 veces semana<br><input type="radio"/> 5 a 6 veces semana<br><input checked="" type="radio"/> 1 vez al día<br><input type="radio"/> 2 a 3 veces al día<br><input type="radio"/> 5 a 6 veces al día<br><input type="radio"/> más 6 veces al día |
| otros aceites       | <input checked="" type="radio"/> Nunca o menos 1 vez al mes<br><input type="radio"/> 1 a 3 veces mes<br><input type="radio"/> 1 vez semana<br><input type="radio"/> 2 a 4 veces semana<br><input type="radio"/> 5 a 6 veces semana<br><input type="radio"/> 1 vez al día<br><input type="radio"/> 2 a 3 veces al día<br><input type="radio"/> 5 a 6 veces al día<br><input type="radio"/> más 6 veces al día |
| margarina           | <input type="radio"/> Nunca o menos 1 vez al mes<br><input checked="" type="radio"/> 1 a 3 veces mes<br><input type="radio"/> 1 vez semana<br><input type="radio"/> 2 a 4 veces semana<br><input type="radio"/> 5 a 6 veces semana<br><input type="radio"/> 1 vez al día<br><input type="radio"/> 2 a 3 veces al día<br><input type="radio"/> 5 a 6 veces al día<br><input type="radio"/> más 6 veces al día |
| mantequilla         | <input type="radio"/> Nunca o menos 1 vez al mes<br><input checked="" type="radio"/> 1 a 3 veces mes<br><input type="radio"/> 1 vez semana<br><input type="radio"/> 2 a 4 veces semana<br><input type="radio"/> 5 a 6 veces semana<br><input type="radio"/> 1 vez al día<br><input type="radio"/> 2 a 3 veces al día<br><input type="radio"/> 5 a 6 veces al día<br><input type="radio"/> más 6 veces al día |
| galletas tipo maria | <input type="radio"/> Nunca o menos 1 vez al mes<br><input checked="" type="radio"/> 1 a 3 veces mes<br><input type="radio"/> 1 vez semana<br><input type="radio"/> 2 a 4 veces semana<br><input type="radio"/> 5 a 6 veces semana<br><input type="radio"/> 1 vez al día<br><input type="radio"/> 2 a 3 veces al día<br><input type="radio"/> 5 a 6 veces al día<br><input type="radio"/> más 6 veces al día |

---

galletas chocolate

- ☐ Nunca o menos 1 vez al mes  
☒ 1 a 3 veces mes  
☐ 1 vez semana  
☐ 2 a 4 veces semana  
☐ 5 a 6 veces semana  
☐ 1 vez al día  
☐ 2 a 3 veces al día  
☐ 5 a 6 veces al día  
☐ más 6 veces al día

---

bolleria

- ☐ Nunca o menos 1 vez al mes  
☒ 1 a 3 veces mes  
☐ 1 vez semana  
☐ 2 a 4 veces semana  
☐ 5 a 6 veces semana  
☐ 1 vez al día  
☐ 2 a 3 veces al día  
☐ 5 a 6 veces al día  
☐ más 6 veces al día

---

chocolate o bombones

- ☐ Nunca o menos 1 vez al mes  
☒ 1 a 3 veces mes  
☐ 1 vez semana  
☐ 2 a 4 veces semana  
☐ 5 a 6 veces semana  
☐ 1 vez al día  
☐ 2 a 3 veces al día  
☐ 5 a 6 veces al día  
☐ más 6 veces al día

---

chocolate polvo o colacao

- ☒ Nunca o menos 1 vez al mes  
☐ 1 a 3 veces mes  
☐ 1 vez semana  
☐ 2 a 4 veces semana  
☐ 5 a 6 veces semana  
☐ 1 vez al día  
☐ 2 a 3 veces al día  
☐ 5 a 6 veces al día  
☐ más 6 veces al día

---

vino tinto

- ☒ Nunca o menos 1 vez al mes  
☐ 1 a 3 veces mes  
☐ 1 vez semana  
☐ 2 a 4 veces semana  
☐ 5 a 6 veces semana  
☐ 1 vez al día  
☐ 2 a 3 veces al día  
☐ 5 a 6 veces al día  
☐ más 6 veces al día

---

vino blanco

- ☒ Nunca o menos 1 vez al mes  
☐ 1 a 3 veces mes  
☐ 1 vez semana  
☐ 2 a 4 veces semana  
☐ 5 a 6 veces semana  
☐ 1 vez al día  
☐ 2 a 3 veces al día  
☐ 5 a 6 veces al día  
☐ más 6 veces al día

|                       |                                                                                                                                                                                                                                                                                                                                                                                                              |
|-----------------------|--------------------------------------------------------------------------------------------------------------------------------------------------------------------------------------------------------------------------------------------------------------------------------------------------------------------------------------------------------------------------------------------------------------|
| vino seco o vermut    | <input checked="" type="radio"/> Nunca o menos 1 vez al mes<br><input type="radio"/> 1 a 3 veces mes<br><input type="radio"/> 1 vez semana<br><input type="radio"/> 2 a 4 veces semana<br><input type="radio"/> 5 a 6 veces semana<br><input type="radio"/> 1 vez al día<br><input type="radio"/> 2 a 3 veces al día<br><input type="radio"/> 5 a 6 veces al día<br><input type="radio"/> más 6 veces al día |
| cerveza               | <input checked="" type="radio"/> Nunca o menos 1 vez al mes<br><input type="radio"/> 1 a 3 veces mes<br><input type="radio"/> 1 vez semana<br><input type="radio"/> 2 a 4 veces semana<br><input type="radio"/> 5 a 6 veces semana<br><input type="radio"/> 1 vez al día<br><input type="radio"/> 2 a 3 veces al día<br><input type="radio"/> 5 a 6 veces al día<br><input type="radio"/> más 6 veces al día |
| cerveza sin alcohol   | <input checked="" type="radio"/> Nunca o menos 1 vez al mes<br><input type="radio"/> 1 a 3 veces mes<br><input type="radio"/> 1 vez semana<br><input type="radio"/> 2 a 4 veces semana<br><input type="radio"/> 5 a 6 veces semana<br><input type="radio"/> 1 vez al día<br><input type="radio"/> 2 a 3 veces al día<br><input type="radio"/> 5 a 6 veces al día<br><input type="radio"/> más 6 veces al día |
| licores               | <input checked="" type="radio"/> Nunca o menos 1 vez al mes<br><input type="radio"/> 1 a 3 veces mes<br><input type="radio"/> 1 vez semana<br><input type="radio"/> 2 a 4 veces semana<br><input type="radio"/> 5 a 6 veces semana<br><input type="radio"/> 1 vez al día<br><input type="radio"/> 2 a 3 veces al día<br><input type="radio"/> 5 a 6 veces al día<br><input type="radio"/> más 6 veces al día |
| ginebra o ron o vodka | <input checked="" type="radio"/> Nunca o menos 1 vez al mes<br><input type="radio"/> 1 a 3 veces mes<br><input type="radio"/> 1 vez semana<br><input type="radio"/> 2 a 4 veces semana<br><input type="radio"/> 5 a 6 veces semana<br><input type="radio"/> 1 vez al día<br><input type="radio"/> 2 a 3 veces al día<br><input type="radio"/> 5 a 6 veces al día<br><input type="radio"/> más 6 veces al día |
| refresco normal       | <input checked="" type="radio"/> Nunca o menos 1 vez al mes<br><input type="radio"/> 1 a 3 veces mes<br><input type="radio"/> 1 vez semana<br><input type="radio"/> 2 a 4 veces semana<br><input type="radio"/> 5 a 6 veces semana<br><input type="radio"/> 1 vez al día<br><input type="radio"/> 2 a 3 veces al día<br><input type="radio"/> 5 a 6 veces al día<br><input type="radio"/> más 6 veces al día |

|                          |                                                                                                                                                                                                                                                                                                                                                                                                              |
|--------------------------|--------------------------------------------------------------------------------------------------------------------------------------------------------------------------------------------------------------------------------------------------------------------------------------------------------------------------------------------------------------------------------------------------------------|
| refresco sin azúcar      | <input type="radio"/> Nunca o menos 1 vez al mes<br><input type="radio"/> 1 a 3 veces mes<br><input checked="" type="radio"/> 1 vez semana<br><input type="radio"/> 2 a 4 veces semana<br><input type="radio"/> 5 a 6 veces semana<br><input type="radio"/> 1 vez al día<br><input type="radio"/> 2 a 3 veces al día<br><input type="radio"/> 5 a 6 veces al día<br><input type="radio"/> más 6 veces al día |
| Agua del grifo           | <input checked="" type="radio"/> Nunca o menos 1 vez al mes<br><input type="radio"/> 1 a 3 veces mes<br><input type="radio"/> 1 vez semana<br><input type="radio"/> 2 a 4 veces semana<br><input type="radio"/> 5 a 6 veces semana<br><input type="radio"/> 1 vez al día<br><input type="radio"/> 2 a 3 veces al día<br><input type="radio"/> 5 a 6 veces al día<br><input type="radio"/> más 6 veces al día |
| agua embotellada sin gas | <input type="radio"/> Nunca o menos 1 vez al mes<br><input type="radio"/> 1 a 3 veces mes<br><input type="radio"/> 1 vez semana<br><input type="radio"/> 2 a 4 veces semana<br><input type="radio"/> 5 a 6 veces semana<br><input type="radio"/> 1 vez al día<br><input type="radio"/> 2 a 3 veces al día<br><input checked="" type="radio"/> 5 a 6 veces al día<br><input type="radio"/> más 6 veces al día |
| agua embotellada con gas | <input checked="" type="radio"/> Nunca o menos 1 vez al mes<br><input type="radio"/> 1 a 3 veces mes<br><input type="radio"/> 1 vez semana<br><input type="radio"/> 2 a 4 veces semana<br><input type="radio"/> 5 a 6 veces semana<br><input type="radio"/> 1 vez al día<br><input type="radio"/> 2 a 3 veces al día<br><input type="radio"/> 5 a 6 veces al día<br><input type="radio"/> más 6 veces al día |
| zumو frutas embasado     | <input checked="" type="radio"/> Nunca o menos 1 vez al mes<br><input type="radio"/> 1 a 3 veces mes<br><input type="radio"/> 1 vez semana<br><input type="radio"/> 2 a 4 veces semana<br><input type="radio"/> 5 a 6 veces semana<br><input type="radio"/> 1 vez al día<br><input type="radio"/> 2 a 3 veces al día<br><input type="radio"/> 5 a 6 veces al día<br><input type="radio"/> más 6 veces al día |
| cafe                     | <input checked="" type="radio"/> Nunca o menos 1 vez al mes<br><input type="radio"/> 1 a 3 veces mes<br><input type="radio"/> 1 vez semana<br><input type="radio"/> 2 a 4 veces semana<br><input type="radio"/> 5 a 6 veces semana<br><input type="radio"/> 1 vez al día<br><input type="radio"/> 2 a 3 veces al día<br><input type="radio"/> 5 a 6 veces al día<br><input type="radio"/> más 6 veces al día |

|                       |                                                                                                                                                                                                                                                                                                                                                                                                              |
|-----------------------|--------------------------------------------------------------------------------------------------------------------------------------------------------------------------------------------------------------------------------------------------------------------------------------------------------------------------------------------------------------------------------------------------------------|
| cafe descafeinado     | <input type="radio"/> Nunca o menos 1 vez al mes<br><input type="radio"/> 1 a 3 veces mes<br><input type="radio"/> 1 vez semana<br><input type="radio"/> 2 a 4 veces semana<br><input type="radio"/> 5 a 6 veces semana<br><input checked="" type="radio"/> 1 vez al día<br><input type="radio"/> 2 a 3 veces al día<br><input type="radio"/> 5 a 6 veces al día<br><input type="radio"/> más 6 veces al día |
| te o infusión         | <input type="radio"/> Nunca o menos 1 vez al mes<br><input checked="" type="radio"/> 1 a 3 veces mes<br><input type="radio"/> 1 vez semana<br><input type="radio"/> 2 a 4 veces semana<br><input type="radio"/> 5 a 6 veces semana<br><input type="radio"/> 1 vez al día<br><input type="radio"/> 2 a 3 veces al día<br><input type="radio"/> 5 a 6 veces al día<br><input type="radio"/> más 6 veces al día |
| sopa o puré verduras  | <input type="radio"/> Nunca o menos 1 vez al mes<br><input type="radio"/> 1 a 3 veces mes<br><input type="radio"/> 1 vez semana<br><input checked="" type="radio"/> 2 a 4 veces semana<br><input type="radio"/> 5 a 6 veces semana<br><input type="radio"/> 1 vez al día<br><input type="radio"/> 2 a 3 veces al día<br><input type="radio"/> 5 a 6 veces al día<br><input type="radio"/> más 6 veces al día |
| croquetas pollo jamón | <input checked="" type="radio"/> Nunca o menos 1 vez al mes<br><input type="radio"/> 1 a 3 veces mes<br><input type="radio"/> 1 vez semana<br><input type="radio"/> 2 a 4 veces semana<br><input type="radio"/> 5 a 6 veces semana<br><input type="radio"/> 1 vez al día<br><input type="radio"/> 2 a 3 veces al día<br><input type="radio"/> 5 a 6 veces al día<br><input type="radio"/> más 6 veces al día |
| croquetas pescado     | <input checked="" type="radio"/> Nunca o menos 1 vez al mes<br><input type="radio"/> 1 a 3 veces mes<br><input type="radio"/> 1 vez semana<br><input type="radio"/> 2 a 4 veces semana<br><input type="radio"/> 5 a 6 veces semana<br><input type="radio"/> 1 vez al día<br><input type="radio"/> 2 a 3 veces al día<br><input type="radio"/> 5 a 6 veces al día<br><input type="radio"/> más 6 veces al día |
| mayonesa              | <input checked="" type="radio"/> Nunca o menos 1 vez al mes<br><input type="radio"/> 1 a 3 veces mes<br><input type="radio"/> 1 vez semana<br><input type="radio"/> 2 a 4 veces semana<br><input type="radio"/> 5 a 6 veces semana<br><input type="radio"/> 1 vez al día<br><input type="radio"/> 2 a 3 veces al día<br><input type="radio"/> 5 a 6 veces al día<br><input type="radio"/> más 6 veces al día |

---

salsa tomate

- ☐ Nunca o menos 1 vez al mes  
☒ 1 a 3 veces mes  
☐ 1 vez semana  
☐ 2 a 4 veces semana  
☐ 5 a 6 veces semana  
☐ 1 vez al día  
☐ 2 a 3 veces al día  
☐ 5 a 6 veces al día  
☐ más 6 veces al día

---

ketchup

- ☒ Nunca o menos 1 vez al mes  
☐ 1 a 3 veces mes  
☐ 1 vez semana  
☐ 2 a 4 veces semana  
☐ 5 a 6 veces semana  
☐ 1 vez al día  
☐ 2 a 3 veces al día  
☐ 5 a 6 veces al día  
☐ más 6 veces al día

---

sal

- ☐ Nunca o menos 1 vez al mes  
☐ 1 a 3 veces mes  
☐ 1 vez semana  
☐ 2 a 4 veces semana  
☐ 5 a 6 veces semana  
☐ 1 vez al día  
☒ 2 a 3 veces al día  
☐ 5 a 6 veces al día  
☐ más 6 veces al día

---

ajo

- ☒ Nunca o menos 1 vez al mes  
☐ 1 a 3 veces mes  
☐ 1 vez semana  
☐ 2 a 4 veces semana  
☐ 5 a 6 veces semana  
☐ 1 vez al día  
☐ 2 a 3 veces al día  
☐ 5 a 6 veces al día  
☐ más 6 veces al día

---

mermelada o miel

- ☐ Nunca o menos 1 vez al mes  
☐ 1 a 3 veces mes  
☐ 1 vez semana  
☒ 2 a 4 veces semana  
☐ 5 a 6 veces semana  
☐ 1 vez al día  
☐ 2 a 3 veces al día  
☐ 5 a 6 veces al día  
☐ más 6 veces al día

---

azúcar

- ☐ Nunca o menos 1 vez al mes  
☐ 1 a 3 veces mes  
☒ 1 vez semana  
☐ 2 a 4 veces semana  
☐ 5 a 6 veces semana  
☐ 1 vez al día  
☐ 2 a 3 veces al día  
☐ 5 a 6 veces al día  
☐ más 6 veces al día



---

Otro alimento

---

suplementos vitamínicos

- ☐ si  
☒ no

---

suplementos vitamínicos

---

dieta previa

- ☐ si  
☒ no

motivo dieta

- ☒ no dieta  
☐ control peso  
☐ control colesterol  
☐ control diabetes  
☐ problemas estómago  
☐ problemas vesícula o hepáticos  
☐ HTA o cardiopatía  
☐ problemas renales  
☐ alergia alimentaria  
☐ ácido úrico elevado  
☐ vegetariana  
☐ otros

---

cambio alimentos año previo gestación

---

- ☒ si  
☐ no

cambio lácteos

- ☐ eliminado  
☐ disminuido  
☒ igual  
☐ aumentado  
☐ no sabe

---

cambio huevos

---

- ☐ eliminado  
☐ disminuido  
☒ igual  
☐ aumentado  
☐ no sabe

cambio carne

- ☐ eliminado  
☐ disminuido  
☒ igual  
☐ aumentado  
☐ no sabe

---

cambio pescado

---

- ☐ eliminado  
☐ disminuido  
☒ igual  
☐ aumentado  
☐ no sabe

cambio verduras

- ☐ eliminado  
☐ disminuido  
☒ igual  
☐ aumentado  
☐ no sabe

|                            |                                                                                                                                                                                                                        |
|----------------------------|------------------------------------------------------------------------------------------------------------------------------------------------------------------------------------------------------------------------|
| cambio legumbres           | <input type="radio"/> eliminado<br><input type="radio"/> disminuido<br><input checked="" type="radio"/> igual<br><input type="radio"/> aumentado<br><input type="radio"/> no sabe                                      |
| cambio fruta               | <input type="radio"/> eliminado<br><input type="radio"/> disminuido<br><input checked="" type="radio"/> igual<br><input type="radio"/> aumentado<br><input type="radio"/> no sabe                                      |
| cambio pan                 | <input type="radio"/> eliminado<br><input type="radio"/> disminuido<br><input checked="" type="radio"/> igual<br><input type="radio"/> aumentado<br><input type="radio"/> no sabe                                      |
| cambio aceite oliva        | <input type="radio"/> eliminado<br><input type="radio"/> disminuido<br><input checked="" type="radio"/> igual<br><input type="radio"/> aumentado<br><input type="radio"/> no sabe                                      |
| cambio mante o margarina   | <input type="radio"/> eliminado<br><input type="radio"/> disminuido<br><input checked="" type="radio"/> igual<br><input type="radio"/> aumentado<br><input type="radio"/> no sabe                                      |
| cambio azúcar y dulces     | <input type="radio"/> eliminado<br><input type="radio"/> disminuido<br><input checked="" type="radio"/> igual<br><input type="radio"/> aumentado<br><input type="radio"/> no sabe                                      |
| cambio bebidas alcohólicas | <input checked="" type="radio"/> eliminado<br><input type="radio"/> disminuido<br><input type="radio"/> igual<br><input type="radio"/> aumentado<br><input type="radio"/> no sabe                                      |
| frecuencia comidas fritas  | <input type="radio"/> a diario<br><input type="radio"/> 5 a 6 veces semana<br><input type="radio"/> 2 a 4 veces semana<br><input checked="" type="radio"/> 1 vez semana<br><input type="radio"/> menos de 1 vez semana |
| carne                      | <input type="radio"/> no como<br><input type="radio"/> cruda<br><input type="radio"/> poco hecha<br><input type="radio"/> hecha<br><input checked="" type="radio"/> muy hecha                                          |
| grasa visible carne        | <input type="radio"/> quita toda<br><input type="radio"/> quita mayoría<br><input checked="" type="radio"/> quita un poco<br><input type="radio"/> no quita nada                                                       |

|                                |                                                                                                                                                                                                                                                          |
|--------------------------------|----------------------------------------------------------------------------------------------------------------------------------------------------------------------------------------------------------------------------------------------------------|
| cocina carne                   | <input type="radio"/> a la plancha<br><input checked="" type="radio"/> a la parrilla<br><input type="radio"/> asada<br><input type="radio"/> frita<br><input type="radio"/> guisada                                                                      |
| tostado quemado carne          | <input checked="" type="radio"/> nunca<br><input type="radio"/> 1 vez mes<br><input type="radio"/> 2 a 3 veces mes<br><input type="radio"/> 1 vez semana<br><input type="radio"/> 2 a 3 semanas                                                          |
| tostado quemado pescado        | <input checked="" type="radio"/> nunca<br><input type="radio"/> 1 vez mes<br><input type="radio"/> 2 a 3 veces mes<br><input type="radio"/> 1 vez semana<br><input type="radio"/> 2 a 3 semanas                                                          |
| socarrat paella                | <input checked="" type="radio"/> nunca<br><input type="radio"/> 1 vez mes<br><input type="radio"/> 2 a 3 veces mes<br><input type="radio"/> 1 vez semana<br><input type="radio"/> 2 a 3 semanas                                                          |
| grasa o aceite cocinar         | <input type="radio"/> mantequilla<br><input type="radio"/> margarina<br><input type="radio"/> aceite oliva<br><input checked="" type="radio"/> aceite oliva virgen extra<br><input type="radio"/> aceite vegetal<br><input type="radio"/> mezcla aceites |
| grasa aceite aliñar            | <input type="radio"/> mantequilla<br><input type="radio"/> margarina<br><input type="radio"/> aceite oliva<br><input checked="" type="radio"/> aceite oliva virgen extra<br><input type="radio"/> aceite vegetal<br><input type="radio"/> mezcla aceites |
| grasa aceite freir             | <input type="radio"/> mantequilla<br><input type="radio"/> margarina<br><input checked="" type="radio"/> aceite oliva<br><input type="radio"/> aceite oliva virgen extra<br><input type="radio"/> aceite vegetal<br><input type="radio"/> mezcla aceites |
| Ejercicio cuestionario         | <input checked="" type="radio"/> si<br><input type="radio"/> no                                                                                                                                                                                          |
| horas de sueño incluido siesta | [*DATA REMOVED*]                                                                                                                                                                                                                                         |
| minutos siesta                 | [*DATA REMOVED*]                                                                                                                                                                                                                                         |
| horas televisión semana        | [*DATA REMOVED*]                                                                                                                                                                                                                                         |

|                                        |                                                                                                                                                                                                                                                                                                                                                                           |
|----------------------------------------|---------------------------------------------------------------------------------------------------------------------------------------------------------------------------------------------------------------------------------------------------------------------------------------------------------------------------------------------------------------------------|
| actividad trabajo                      | <input type="radio"/> casi siempre sentado<br><input type="radio"/> sentado 50 por cien<br><input type="radio"/> casi siempre de pie, quieto<br><input checked="" type="radio"/> casi siempre levantado caminando y llevando pocas cosas<br><input type="radio"/> casi siempre levantado, caminando y llevado muchas cosas<br><input type="radio"/> trabajo manual pesado |
| tiempo caminar o bici al día           | <input type="radio"/> casi nunca<br><input type="radio"/> menos 20min día<br><input checked="" type="radio"/> 20 a 40 min día<br><input type="radio"/> 40 a 60 min día<br><input type="radio"/> 1h o 1h y media día<br><input type="radio"/> más de 1h y media al día                                                                                                     |
| tiempo tareas casa al día              | <input type="radio"/> menos de 1h día<br><input checked="" type="radio"/> 1 a 2h día<br><input type="radio"/> 3 a 4h día<br><input type="radio"/> 5 a 6h día<br><input type="radio"/> 7 a 8h día<br><input type="radio"/> más de 8h día                                                                                                                                   |
| tiempo libre televisión ordenador leer | <input type="radio"/> menos 1h día<br><input type="radio"/> 1h día<br><input type="radio"/> 2h día<br><input checked="" type="radio"/> 3h día<br><input type="radio"/> 4h día<br><input type="radio"/> 5 a 6h día<br><input type="radio"/> mas 6h día                                                                                                                     |
| tiempo libre ejercicio o deporte       | <input type="radio"/> menos 1h semana<br><input type="radio"/> 1h semana<br><input type="radio"/> 2h semana<br><input checked="" type="radio"/> 3h semana<br><input type="radio"/> 4 a 5h semana<br><input type="radio"/> mas 5h semana                                                                                                                                   |
| como se considera                      | <input type="radio"/> sedentaria<br><input type="radio"/> poco activa<br><input checked="" type="radio"/> moderadamente activa<br><input type="radio"/> bastante activa<br><input type="radio"/> muy activa<br><input type="radio"/> no sabe                                                                                                                              |
| FUR                                    | [*DATA REMOVED*]                                                                                                                                                                                                                                                                                                                                                          |
| Semanas gestación 2T                   | _____                                                                                                                                                                                                                                                                                                                                                                     |
| Días gestación 2T                      | _____                                                                                                                                                                                                                                                                                                                                                                     |
| DBP 2T                                 | _____                                                                                                                                                                                                                                                                                                                                                                     |
| CC 2T                                  | _____                                                                                                                                                                                                                                                                                                                                                                     |

|                                                   |                                                                                                                                                                                                 |
|---------------------------------------------------|-------------------------------------------------------------------------------------------------------------------------------------------------------------------------------------------------|
| AC 2T                                             |                                                                                                                                                                                                 |
| LF 2T                                             |                                                                                                                                                                                                 |
| PFE 2T (Hadlock)                                  |                                                                                                                                                                                                 |
| Semanas gestación 3T                              | [*DATA REMOVED*]                                                                                                                                                                                |
| días 3T                                           | [*DATA REMOVED*]                                                                                                                                                                                |
| DBP 3T                                            | [*DATA REMOVED*]                                                                                                                                                                                |
| CC 3T                                             | [*DATA REMOVED*]                                                                                                                                                                                |
| AC 3T                                             | [*DATA REMOVED*]                                                                                                                                                                                |
| LF 3T                                             | [*DATA REMOVED*]                                                                                                                                                                                |
| PFE 3T (Hadlock)                                  | [*DATA REMOVED*]                                                                                                                                                                                |
| Semanas de gestación final                        | [*DATA REMOVED*]                                                                                                                                                                                |
| días gestación final                              | [*DATA REMOVED*]                                                                                                                                                                                |
| Localización placenta                             | <input type="radio"/> anterior<br><input type="radio"/> lateral derecha<br><input type="radio"/> lateral izquierda<br><input type="radio"/> posterior<br><input checked="" type="radio"/> fondo |
| Presentación longitudinal cefálica                | <input type="radio"/> no<br><input checked="" type="radio"/> si                                                                                                                                 |
| Dorso                                             | <input type="radio"/> izquierda anterior<br><input type="radio"/> izquierda posterior<br><input checked="" type="radio"/> derecha anterior<br><input type="radio"/> derecha posterior           |
| diámetro biparietal                               | [*DATA REMOVED*]                                                                                                                                                                                |
| Circunferencia craneal                            | [*DATA REMOVED*]                                                                                                                                                                                |
| Circunferencia abdominal                          | [*DATA REMOVED*]                                                                                                                                                                                |
| Longitud de femur                                 | [*DATA REMOVED*]                                                                                                                                                                                |
| tejido celular subcutáneo a nivel del muslo en mm | [*DATA REMOVED*]                                                                                                                                                                                |
| tejido celular subcutáneo en abdomen en mm        | [*DATA REMOVED*]                                                                                                                                                                                |

|                                               |                                                                                                                                                          |
|-----------------------------------------------|----------------------------------------------------------------------------------------------------------------------------------------------------------|
| Volumen del muslo en cm3                      | [*DATA REMOVED*]                                                                                                                                         |
| Peso fetal estimado según fórmula de Hadlock  | [*DATA REMOVED*]                                                                                                                                         |
| Percentil                                     | [*DATA REMOVED*]                                                                                                                                         |
| Peso fetal estimado según fórmula de Scioscia | _____                                                                                                                                                    |
| Peso fetal estimado según fórmula de LEE      | _____                                                                                                                                                    |
| Tipo de parto                                 | <input checked="" type="radio"/> eutocico<br><input type="radio"/> instrumentado/ventosa<br><input type="radio"/> cesarea                                |
| fecha de nacimiento                           | [*DATA REMOVED*]                                                                                                                                         |
| Días entre exploración y nacimiento           | [*DATA REMOVED*]                                                                                                                                         |
| Peso RN en g                                  | [*DATA REMOVED*]                                                                                                                                         |
| sexo                                          | <input type="radio"/> mujer<br><input checked="" type="radio"/> hombre                                                                                   |
| Apgar 1 minuto                                | [*DATA REMOVED*]                                                                                                                                         |
| Apgar 5 minutos                               | [*DATA REMOVED*]                                                                                                                                         |
| Apgar 10 minutos                              | _____                                                                                                                                                    |
| antecedente Covid durante gestación           | <input type="radio"/> Yes<br><input checked="" type="radio"/> No                                                                                         |
| Nivel de estudios                             | <input type="radio"/> ninguno<br><input type="radio"/> primarios<br><input checked="" type="radio"/> secundarios<br><input type="radio"/> universitarios |

# Base\_datos\_estimacion\_peso\_fetal

|                                       |                                                                                                                                                                                                                                                                                      |
|---------------------------------------|--------------------------------------------------------------------------------------------------------------------------------------------------------------------------------------------------------------------------------------------------------------------------------------|
| Número de identificación participante | 178                                                                                                                                                                                                                                                                                  |
| CODIGO PARTICIPANTE                   |                                                                                                                                                                                                                                                                                      |
| Edad                                  | [*DATA REMOVED*]                                                                                                                                                                                                                                                                     |
| Gestaciones                           | <input type="radio"/> 1<br><input checked="" type="radio"/> 2<br><input type="radio"/> 3<br><input type="radio"/> mas de 3                                                                                                                                                           |
| partos                                | <input checked="" type="radio"/> 0<br><input type="radio"/> 1<br><input type="radio"/> 2<br><input type="radio"/> 3<br><input type="radio"/> mas de 3                                                                                                                                |
| cesáreas                              | <input type="radio"/> 0<br><input checked="" type="radio"/> 1<br><input type="radio"/> 2<br><input type="radio"/> 3<br><input type="radio"/> mas de 3                                                                                                                                |
| Abortos                               | <input type="radio"/> 0<br><input type="radio"/> 1<br><input type="radio"/> 2<br><input type="radio"/> 3<br><input type="radio"/> mas de 3                                                                                                                                           |
| Tipo de gestacion                     | <input checked="" type="radio"/> espontanea<br><input type="radio"/> IAC inseminación artificial conyuge<br><input type="radio"/> IAD inseminación artificial donante<br><input type="radio"/> FIV Fecundación in Vitro<br><input type="radio"/> Ovodon FIV con donación de ovocitos |
| peso previo a embarazo                | [*DATA REMOVED*]                                                                                                                                                                                                                                                                     |
| Ganancia ponderal embarazo            | [*DATA REMOVED*]                                                                                                                                                                                                                                                                     |
| Talla madre                           | [*DATA REMOVED*]                                                                                                                                                                                                                                                                     |
| IMC previo embarazo                   | 27.343749999999996                                                                                                                                                                                                                                                                   |
| Patología obstétrica                  | <input checked="" type="radio"/> no<br><input type="radio"/> si                                                                                                                                                                                                                      |
| Diabetes pregestacional               | <input checked="" type="radio"/> no<br><input type="radio"/> si                                                                                                                                                                                                                      |
| Diabetes gestacional                  | <input checked="" type="radio"/> no<br><input type="radio"/> si                                                                                                                                                                                                                      |

|                                            |                                                                                                                                                                                      |
|--------------------------------------------|--------------------------------------------------------------------------------------------------------------------------------------------------------------------------------------|
| Diabetes gestacional con insulina          | <input checked="" type="radio"/> no<br><input type="radio"/> si                                                                                                                      |
| Diabetes gestacional con dieta y ejercicio | <input checked="" type="radio"/> no<br><input type="radio"/> si                                                                                                                      |
| Percentil fetos previos                    | <input type="radio"/> Nada<br><input checked="" type="radio"/> percentil menor de 10<br><input type="radio"/> percentil entre 10 y 90<br><input type="radio"/> percentil mayor de 90 |
| Exfumadora                                 | <input checked="" type="radio"/> Nada<br><input type="radio"/> menos de 5 años<br><input type="radio"/> 5 a 10 años<br><input type="radio"/> mayor o igual a 10 años                 |
| Hábito tabáquico                           | <input checked="" type="radio"/> no<br><input type="radio"/> si                                                                                                                      |
| fumadora                                   | [*DATA REMOVED*]                                                                                                                                                                     |
| Consumo otros tóxicos                      | <input checked="" type="radio"/> no<br><input type="radio"/> si                                                                                                                      |
| Hb 1T                                      | [*DATA REMOVED*]                                                                                                                                                                     |
| Htc 1T                                     | [*DATA REMOVED*]                                                                                                                                                                     |
| Hb 2T                                      | [*DATA REMOVED*]                                                                                                                                                                     |
| HTC 2T                                     | [*DATA REMOVED*]                                                                                                                                                                     |
| Hb 3T                                      | [*DATA REMOVED*]                                                                                                                                                                     |
| HTC 3T                                     | [*DATA REMOVED*]                                                                                                                                                                     |
| Suplemento FE oral                         | <input checked="" type="radio"/> si<br><input type="radio"/> no                                                                                                                      |
| Suplemento fe iv                           | <input type="radio"/> si<br><input checked="" type="radio"/> no                                                                                                                      |
| Transfusión                                | <input checked="" type="radio"/> no<br><input type="radio"/> si                                                                                                                      |
| Solicitada Vit D                           | <input type="radio"/> no<br><input checked="" type="radio"/> si                                                                                                                      |
| Deficit vit D                              | <input checked="" type="radio"/> no<br><input type="radio"/> si                                                                                                                      |
| Suplemento vit D                           | <input type="radio"/> si<br><input checked="" type="radio"/> no                                                                                                                      |



|                       |                                                                                                                                                                                                                                                                                                                                                                                                              |
|-----------------------|--------------------------------------------------------------------------------------------------------------------------------------------------------------------------------------------------------------------------------------------------------------------------------------------------------------------------------------------------------------------------------------------------------------|
| Dieta, cuestionario   | <input type="radio"/> si<br><input type="radio"/> no                                                                                                                                                                                                                                                                                                                                                         |
| Leche entera          | <input checked="" type="radio"/> Nunca o menos 1 vez al mes<br><input type="radio"/> 1 a 3 veces mes<br><input type="radio"/> 1 vez semana<br><input type="radio"/> 2 a 4 veces semana<br><input type="radio"/> 5 a 6 veces semana<br><input type="radio"/> 1 vez al día<br><input type="radio"/> 2 a 3 veces al día<br><input type="radio"/> 5 a 6 veces al día<br><input type="radio"/> más 6 veces al día |
| Leche semidesnatada   | <input type="radio"/> Nunca o menos 1 vez al mes<br><input type="radio"/> 1 a 3 veces mes<br><input type="radio"/> 1 vez semana<br><input type="radio"/> 2 a 4 veces semana<br><input type="radio"/> 5 a 6 veces semana<br><input checked="" type="radio"/> 1 vez al día<br><input type="radio"/> 2 a 3 veces al día<br><input type="radio"/> 5 a 6 veces al día<br><input type="radio"/> mas 6 veces al día |
| Leche desnatada       | <input checked="" type="radio"/> Nunca o menos 1 vez al mes<br><input type="radio"/> 1 a 3 veces mes<br><input type="radio"/> 1 vez semana<br><input type="radio"/> 2 a 4 veces semana<br><input type="radio"/> 5 a 6 veces semana<br><input type="radio"/> 1 vez al día<br><input type="radio"/> 2 a 3 veces al día<br><input type="radio"/> 5 a 6 veces al día<br><input type="radio"/> más 6 veces al día |
| Leche condensada      | <input checked="" type="radio"/> Nunca o menos 1 vez al mes<br><input type="radio"/> 1 a 3 veces mes<br><input type="radio"/> 1 vez semana<br><input type="radio"/> 2 a 4 veces semana<br><input type="radio"/> 5 a 6 veces semana<br><input type="radio"/> 1 vez al día<br><input type="radio"/> 2 a 3 veces al día<br><input type="radio"/> 5 a 6 veces al día<br><input type="radio"/> más 6 veces al día |
| nata o crema de leche | <input checked="" type="radio"/> Nunca o menos 1 vez al mes<br><input type="radio"/> 1 a 3 veces mes<br><input type="radio"/> 1 vez semana<br><input type="radio"/> 2 a 4 veces semana<br><input type="radio"/> 5 a 6 veces semana<br><input type="radio"/> 1 vez al día<br><input type="radio"/> 2 a 3 veces al día<br><input type="radio"/> 5 a 6 veces al día<br><input type="radio"/> más 6 veces al día |

---

Yogurt Entero

- ☒ Nunca o menos 1 vez al mes  
☐ 1 a 3 veces mes  
☐ 1 vez semana  
☐ 2 a 4 veces semana  
☐ 5 a 6 veces semana  
☐ 1 vez al día  
☐ 2 a 3 veces al día  
☐ 5 a 6 veces al día  
☐ más 6 veces al día

---

Yogurt desnatado

- ☒ Nunca o menos 1 vez al mes  
☐ 1 a 3 veces mes  
☐ 1 vez semana  
☐ 2 a 4 veces semana  
☐ 5 a 6 veces semana  
☐ 1 vez al día  
☐ 2 a 3 veces al día  
☐ 5 a 6 veces al día  
☐ más 6 veces al día

---

100g requesón o queso blando o queso fresco

- ☐ Nunca o menos 1 vez al mes  
☐ 1 a 3 veces mes  
☐ 1 vez semana  
☒ 2 a 4 veces semana  
☐ 5 a 6 veces semana  
☐ 1 vez al día  
☐ 2 a 3 veces al día  
☐ 5 a 6 veces al día  
☐ más 6 veces al día

---

queso curado o semicurado o cremoso

- ☐ Nunca o menos 1 vez al mes  
☐ 1 a 3 veces mes  
☐ 1 vez semana  
☒ 2 a 4 veces semana  
☐ 5 a 6 veces semana  
☐ 1 vez al día  
☐ 2 a 3 veces al día  
☐ 5 a 6 veces al día  
☐ más 6 veces al día

---

natillas flan pudding

- ☐ Nunca o menos 1 vez al mes  
☐ 1 a 3 veces mes  
☐ 1 vez semana  
☒ 2 a 4 veces semana  
☐ 5 a 6 veces semana  
☐ 1 vez al día  
☐ 2 a 3 veces al día  
☐ 5 a 6 veces al día  
☐ más 6 veces al día

---

Helado

- ☐ Nunca o menos 1 vez al mes  
☐ 1 a 3 veces mes  
☐ 1 vez semana  
☒ 2 a 4 veces semana  
☐ 5 a 6 veces semana  
☐ 1 vez al día  
☐ 2 a 3 veces al día  
☐ 5 a 6 veces al día  
☐ más 6 veces al día

|                                      |                                                                                                                                                                                                                                                                                                                                                                                                              |
|--------------------------------------|--------------------------------------------------------------------------------------------------------------------------------------------------------------------------------------------------------------------------------------------------------------------------------------------------------------------------------------------------------------------------------------------------------------|
| huevo                                | <input type="radio"/> Nunca o menos 1 vez al mes<br><input type="radio"/> 1 a 3 veces mes<br><input type="radio"/> 1 vez semana<br><input checked="" type="radio"/> 2 a 4 veces semana<br><input type="radio"/> 5 a 6 veces semana<br><input type="radio"/> 1 vez al día<br><input type="radio"/> 2 a 3 veces al día<br><input type="radio"/> 5 a 6 veces al día<br><input type="radio"/> más 6 veces al día |
| Pollo con piel                       | <input checked="" type="radio"/> Nunca o menos 1 vez al mes<br><input type="radio"/> 1 a 3 veces mes<br><input type="radio"/> 1 vez semana<br><input type="radio"/> 2 a 4 veces semana<br><input type="radio"/> 5 a 6 veces semana<br><input type="radio"/> 1 vez al día<br><input type="radio"/> 2 a 3 veces al día<br><input type="radio"/> 5 a 6 veces al día<br><input type="radio"/> más 6 veces al día |
| pollo sin piel                       | <input type="radio"/> Nunca o menos 1 vez al mes<br><input type="radio"/> 1 a 3 veces mes<br><input type="radio"/> 1 vez semana<br><input checked="" type="radio"/> 2 a 4 veces semana<br><input type="radio"/> 5 a 6 veces semana<br><input type="radio"/> 1 vez al día<br><input type="radio"/> 2 a 3 veces al día<br><input type="radio"/> 5 a 6 veces al día<br><input type="radio"/> más 6 veces al día |
| Ternera o cerdo o cordero            | <input checked="" type="radio"/> Nunca o menos 1 vez al mes<br><input type="radio"/> 1 a 3 veces mes<br><input type="radio"/> 1 vez semana<br><input type="radio"/> 2 a 4 veces semana<br><input type="radio"/> 5 a 6 veces semana<br><input type="radio"/> 1 vez al día<br><input type="radio"/> 2 a 3 veces al día<br><input type="radio"/> 5 a 6 veces al día<br><input type="radio"/> más 6 veces al día |
| carne caza: Conejo o codorniz o pato | <input checked="" type="radio"/> Nunca o menos 1 vez al mes<br><input type="radio"/> 1 a 3 veces mes<br><input type="radio"/> 1 vez semana<br><input type="radio"/> 2 a 4 veces semana<br><input type="radio"/> 5 a 6 veces semana<br><input type="radio"/> 1 vez al día<br><input type="radio"/> 2 a 3 veces al día<br><input type="radio"/> 5 a 6 veces al día<br><input type="radio"/> más 6 veces al día |
| Hígado de ternera o cerdo o pollo    | <input checked="" type="radio"/> Nunca o menos 1 vez al mes<br><input type="radio"/> 1 a 3 veces mes<br><input type="radio"/> 1 vez semana<br><input type="radio"/> 2 a 4 veces semana<br><input type="radio"/> 5 a 6 veces semana<br><input type="radio"/> 1 vez al día<br><input type="radio"/> 2 a 3 veces al día<br><input type="radio"/> 5 a 6 veces al día<br><input type="radio"/> más 6 veces al día |

---

Vísceras

- ☒ Nunca o menos 1 vez al mes  
☐ 1 a 3 veces mes  
☐ 1 vez semana  
☐ 2 a 4 veces semana  
☐ 5 a 6 veces semana  
☐ 1 vez al día  
☐ 2 a 3 veces al día  
☐ 5 a 6 veces al día  
☐ más 6 veces al día

---

Embutido

- ☒ Nunca o menos 1 vez al mes  
☐ 1 a 3 veces mes  
☐ 1 vez semana  
☐ 2 a 4 veces semana  
☐ 5 a 6 veces semana  
☐ 1 vez al día  
☐ 2 a 3 veces al día  
☐ 5 a 6 veces al día  
☐ más 6 veces al día

---

Salchicha o similar

- ☒ Nunca o menos 1 vez al mes  
☐ 1 a 3 veces mes  
☐ 1 vez semana  
☐ 2 a 4 veces semana  
☐ 5 a 6 veces semana  
☐ 1 vez al día  
☐ 2 a 3 veces al día  
☐ 5 a 6 veces al día  
☐ más 6 veces al día

---

Pate o foiegras

- ☒ Nunca o menos 1 vez al mes  
☐ 1 a 3 veces mes  
☐ 1 vez semana  
☐ 2 a 4 veces semana  
☐ 5 a 6 veces semana  
☐ 1 vez al día  
☐ 2 a 3 veces al día  
☐ 5 a 6 veces al día  
☐ más 6 veces al día

---

Hamburguesa

- ☐ Nunca o menos 1 vez al mes  
☐ 1 a 3 veces mes  
☒ 1 vez semana  
☐ 2 a 4 veces semana  
☐ 5 a 6 veces semana  
☐ 1 vez al día  
☐ 2 a 3 veces al día  
☐ 5 a 6 veces al día  
☐ más 6 veces al día

---

tocino o bacon

- ☒ Nunca o menos 1 vez al mes  
☐ 1 a 3 veces mes  
☐ 1 vez semana  
☐ 2 a 4 veces semana  
☐ 5 a 6 veces semana  
☐ 1 vez al día  
☐ 2 a 3 veces al día  
☐ 5 a 6 veces al día  
☐ más 6 veces al día

---

|               |                                                                                                                                                                                                                                                                                                                                                                                                              |
|---------------|--------------------------------------------------------------------------------------------------------------------------------------------------------------------------------------------------------------------------------------------------------------------------------------------------------------------------------------------------------------------------------------------------------------|
| Pescado frito | <input checked="" type="radio"/> Nunca o menos 1 vez al mes<br><input type="radio"/> 1 a 3 veces mes<br><input type="radio"/> 1 vez semana<br><input type="radio"/> 2 a 4 veces semana<br><input type="radio"/> 5 a 6 veces semana<br><input type="radio"/> 1 vez al día<br><input type="radio"/> 2 a 3 veces al día<br><input type="radio"/> 5 a 6 veces al día<br><input type="radio"/> más 6 veces al día |
|---------------|--------------------------------------------------------------------------------------------------------------------------------------------------------------------------------------------------------------------------------------------------------------------------------------------------------------------------------------------------------------------------------------------------------------|

---

|                        |                                                                                                                                                                                                                                                                                                                                                                                                              |
|------------------------|--------------------------------------------------------------------------------------------------------------------------------------------------------------------------------------------------------------------------------------------------------------------------------------------------------------------------------------------------------------------------------------------------------------|
| pescado hervido blanco | <input checked="" type="radio"/> Nunca o menos 1 vez al mes<br><input type="radio"/> 1 a 3 veces mes<br><input type="radio"/> 1 vez semana<br><input type="radio"/> 2 a 4 veces semana<br><input type="radio"/> 5 a 6 veces semana<br><input type="radio"/> 1 vez al día<br><input type="radio"/> 2 a 3 veces al día<br><input type="radio"/> 5 a 6 veces al día<br><input type="radio"/> más 6 veces al día |
|------------------------|--------------------------------------------------------------------------------------------------------------------------------------------------------------------------------------------------------------------------------------------------------------------------------------------------------------------------------------------------------------------------------------------------------------|

---

|                      |                                                                                                                                                                                                                                                                                                                                                                                                              |
|----------------------|--------------------------------------------------------------------------------------------------------------------------------------------------------------------------------------------------------------------------------------------------------------------------------------------------------------------------------------------------------------------------------------------------------------|
| pescado hervido azul | <input checked="" type="radio"/> Nunca o menos 1 vez al mes<br><input type="radio"/> 1 a 3 veces mes<br><input type="radio"/> 1 vez semana<br><input type="radio"/> 2 a 4 veces semana<br><input type="radio"/> 5 a 6 veces semana<br><input type="radio"/> 1 vez al día<br><input type="radio"/> 2 a 3 veces al día<br><input type="radio"/> 5 a 6 veces al día<br><input type="radio"/> más 6 veces al día |
|----------------------|--------------------------------------------------------------------------------------------------------------------------------------------------------------------------------------------------------------------------------------------------------------------------------------------------------------------------------------------------------------------------------------------------------------|

---

|                    |                                                                                                                                                                                                                                                                                                                                                                                                              |
|--------------------|--------------------------------------------------------------------------------------------------------------------------------------------------------------------------------------------------------------------------------------------------------------------------------------------------------------------------------------------------------------------------------------------------------------|
| otros pescado azul | <input type="radio"/> Nunca o menos 1 vez al mes<br><input type="radio"/> 1 a 3 veces mes<br><input checked="" type="radio"/> 1 vez semana<br><input type="radio"/> 2 a 4 veces semana<br><input type="radio"/> 5 a 6 veces semana<br><input type="radio"/> 1 vez al día<br><input type="radio"/> 2 a 3 veces al día<br><input type="radio"/> 5 a 6 veces al día<br><input type="radio"/> más 6 veces al día |
|--------------------|--------------------------------------------------------------------------------------------------------------------------------------------------------------------------------------------------------------------------------------------------------------------------------------------------------------------------------------------------------------------------------------------------------------|

---

|               |                                                                                                                                                                                                                                                                                                                                                                                                              |
|---------------|--------------------------------------------------------------------------------------------------------------------------------------------------------------------------------------------------------------------------------------------------------------------------------------------------------------------------------------------------------------------------------------------------------------|
| atun conserva | <input type="radio"/> Nunca o menos 1 vez al mes<br><input type="radio"/> 1 a 3 veces mes<br><input checked="" type="radio"/> 1 vez semana<br><input type="radio"/> 2 a 4 veces semana<br><input type="radio"/> 5 a 6 veces semana<br><input type="radio"/> 1 vez al día<br><input type="radio"/> 2 a 3 veces al día<br><input type="radio"/> 5 a 6 veces al día<br><input type="radio"/> más 6 veces al día |
|---------------|--------------------------------------------------------------------------------------------------------------------------------------------------------------------------------------------------------------------------------------------------------------------------------------------------------------------------------------------------------------------------------------------------------------|

---

|                  |                                                                                                                                                                                                                                                                                                                                                                                                              |
|------------------|--------------------------------------------------------------------------------------------------------------------------------------------------------------------------------------------------------------------------------------------------------------------------------------------------------------------------------------------------------------------------------------------------------------|
| sardina conserva | <input type="radio"/> Nunca o menos 1 vez al mes<br><input type="radio"/> 1 a 3 veces mes<br><input checked="" type="radio"/> 1 vez semana<br><input type="radio"/> 2 a 4 veces semana<br><input type="radio"/> 5 a 6 veces semana<br><input type="radio"/> 1 vez al día<br><input type="radio"/> 2 a 3 veces al día<br><input type="radio"/> 5 a 6 veces al día<br><input type="radio"/> más 6 veces al día |
|------------------|--------------------------------------------------------------------------------------------------------------------------------------------------------------------------------------------------------------------------------------------------------------------------------------------------------------------------------------------------------------------------------------------------------------|

---

|                                         |                                                                                                                                                                                                                                                                                                                                                                                                              |
|-----------------------------------------|--------------------------------------------------------------------------------------------------------------------------------------------------------------------------------------------------------------------------------------------------------------------------------------------------------------------------------------------------------------------------------------------------------------|
| pescado ahumado                         | <input checked="" type="radio"/> Nunca o menos 1 vez al mes<br><input type="radio"/> 1 a 3 veces mes<br><input type="radio"/> 1 vez semana<br><input type="radio"/> 2 a 4 veces semana<br><input type="radio"/> 5 a 6 veces semana<br><input type="radio"/> 1 vez al día<br><input type="radio"/> 2 a 3 veces al día<br><input type="radio"/> 5 a 6 veces al día<br><input type="radio"/> más 6 veces al día |
| almejas o mejillones o ostras unos 100g | <input checked="" type="radio"/> Nunca o menos 1 vez al mes<br><input type="radio"/> 1 a 3 veces mes<br><input type="radio"/> 1 vez semana<br><input type="radio"/> 2 a 4 veces semana<br><input type="radio"/> 5 a 6 veces semana<br><input type="radio"/> 1 vez al día<br><input type="radio"/> 2 a 3 veces al día<br><input type="radio"/> 5 a 6 veces al día<br><input type="radio"/> más 6 veces al día |
| calamar o chipiron o sepia unos 100g    | <input type="radio"/> Nunca o menos 1 vez al mes<br><input type="radio"/> 1 a 3 veces mes<br><input checked="" type="radio"/> 1 vez semana<br><input type="radio"/> 2 a 4 veces semana<br><input type="radio"/> 5 a 6 veces semana<br><input type="radio"/> 1 vez al día<br><input type="radio"/> 2 a 3 veces al día<br><input type="radio"/> 5 a 6 veces al día<br><input type="radio"/> más 6 veces al día |
| marisco unos 100g                       | <input checked="" type="radio"/> Nunca o menos 1 vez al mes<br><input type="radio"/> 1 a 3 veces mes<br><input type="radio"/> 1 vez semana<br><input type="radio"/> 2 a 4 veces semana<br><input type="radio"/> 5 a 6 veces semana<br><input type="radio"/> 1 vez al día<br><input type="radio"/> 2 a 3 veces al día<br><input type="radio"/> 5 a 6 veces al día<br><input type="radio"/> más 6 veces al día |
| Espinacas o acelgas cocinadas           | <input checked="" type="radio"/> Nunca o menos 1 vez al mes<br><input type="radio"/> 1 a 3 veces mes<br><input type="radio"/> 1 vez semana<br><input type="radio"/> 2 a 4 veces semana<br><input type="radio"/> 5 a 6 veces semana<br><input type="radio"/> 1 vez al día<br><input type="radio"/> 2 a 3 veces al día<br><input type="radio"/> 5 a 6 veces al día<br><input type="radio"/> más 6 veces al día |
| Col o coliflor o brocoli cocinado       | <input type="radio"/> Nunca o menos 1 vez al mes<br><input type="radio"/> 1 a 3 veces mes<br><input type="radio"/> 1 vez semana<br><input type="radio"/> 2 a 4 veces semana<br><input type="radio"/> 5 a 6 veces semana<br><input checked="" type="radio"/> 1 vez al día<br><input type="radio"/> 2 a 3 veces al día<br><input type="radio"/> 5 a 6 veces al día<br><input type="radio"/> más 6 veces al día |

---

|                              |                                                                                                                                                                                                                                                                                                                                                                                                              |
|------------------------------|--------------------------------------------------------------------------------------------------------------------------------------------------------------------------------------------------------------------------------------------------------------------------------------------------------------------------------------------------------------------------------------------------------------|
| Lechuga o endivia o escarola | <input checked="" type="radio"/> Nunca o menos 1 vez al mes<br><input type="radio"/> 1 a 3 veces mes<br><input type="radio"/> 1 vez semana<br><input type="radio"/> 2 a 4 veces semana<br><input type="radio"/> 5 a 6 veces semana<br><input type="radio"/> 1 vez al día<br><input type="radio"/> 2 a 3 veces al día<br><input type="radio"/> 5 a 6 veces al día<br><input type="radio"/> más 6 veces al día |
|------------------------------|--------------------------------------------------------------------------------------------------------------------------------------------------------------------------------------------------------------------------------------------------------------------------------------------------------------------------------------------------------------------------------------------------------------|

---

|                 |                                                                                                                                                                                                                                                                                                                                                                                                              |
|-----------------|--------------------------------------------------------------------------------------------------------------------------------------------------------------------------------------------------------------------------------------------------------------------------------------------------------------------------------------------------------------------------------------------------------------|
| tomate ensalada | <input type="radio"/> Nunca o menos 1 vez al mes<br><input type="radio"/> 1 a 3 veces mes<br><input type="radio"/> 1 vez semana<br><input type="radio"/> 2 a 4 veces semana<br><input type="radio"/> 5 a 6 veces semana<br><input checked="" type="radio"/> 1 vez al día<br><input type="radio"/> 2 a 3 veces al día<br><input type="radio"/> 5 a 6 veces al día<br><input type="radio"/> más 6 veces al día |
|-----------------|--------------------------------------------------------------------------------------------------------------------------------------------------------------------------------------------------------------------------------------------------------------------------------------------------------------------------------------------------------------------------------------------------------------|

---

|         |                                                                                                                                                                                                                                                                                                                                                                                                              |
|---------|--------------------------------------------------------------------------------------------------------------------------------------------------------------------------------------------------------------------------------------------------------------------------------------------------------------------------------------------------------------------------------------------------------------|
| cebolla | <input type="radio"/> Nunca o menos 1 vez al mes<br><input type="radio"/> 1 a 3 veces mes<br><input type="radio"/> 1 vez semana<br><input type="radio"/> 2 a 4 veces semana<br><input type="radio"/> 5 a 6 veces semana<br><input checked="" type="radio"/> 1 vez al día<br><input type="radio"/> 2 a 3 veces al día<br><input type="radio"/> 5 a 6 veces al día<br><input type="radio"/> más 6 veces al día |
|---------|--------------------------------------------------------------------------------------------------------------------------------------------------------------------------------------------------------------------------------------------------------------------------------------------------------------------------------------------------------------------------------------------------------------|

---

|                      |                                                                                                                                                                                                                                                                                                                                                                                                              |
|----------------------|--------------------------------------------------------------------------------------------------------------------------------------------------------------------------------------------------------------------------------------------------------------------------------------------------------------------------------------------------------------------------------------------------------------|
| Zanahoria o calabaza | <input type="radio"/> Nunca o menos 1 vez al mes<br><input type="radio"/> 1 a 3 veces mes<br><input type="radio"/> 1 vez semana<br><input type="radio"/> 2 a 4 veces semana<br><input type="radio"/> 5 a 6 veces semana<br><input checked="" type="radio"/> 1 vez al día<br><input type="radio"/> 2 a 3 veces al día<br><input type="radio"/> 5 a 6 veces al día<br><input type="radio"/> más 6 veces al día |
|----------------------|--------------------------------------------------------------------------------------------------------------------------------------------------------------------------------------------------------------------------------------------------------------------------------------------------------------------------------------------------------------------------------------------------------------|

---

|               |                                                                                                                                                                                                                                                                                                                                                                                                              |
|---------------|--------------------------------------------------------------------------------------------------------------------------------------------------------------------------------------------------------------------------------------------------------------------------------------------------------------------------------------------------------------------------------------------------------------|
| Judías verdes | <input type="radio"/> Nunca o menos 1 vez al mes<br><input type="radio"/> 1 a 3 veces mes<br><input type="radio"/> 1 vez semana<br><input type="radio"/> 2 a 4 veces semana<br><input type="radio"/> 5 a 6 veces semana<br><input checked="" type="radio"/> 1 vez al día<br><input type="radio"/> 2 a 3 veces al día<br><input type="radio"/> 5 a 6 veces al día<br><input type="radio"/> más 6 veces al día |
|---------------|--------------------------------------------------------------------------------------------------------------------------------------------------------------------------------------------------------------------------------------------------------------------------------------------------------------------------------------------------------------------------------------------------------------|

---

|                                |                                                                                                                                                                                                                                                                                                                                                                                                              |
|--------------------------------|--------------------------------------------------------------------------------------------------------------------------------------------------------------------------------------------------------------------------------------------------------------------------------------------------------------------------------------------------------------------------------------------------------------|
| Berenjena o calabacin o pepino | <input type="radio"/> Nunca o menos 1 vez al mes<br><input type="radio"/> 1 a 3 veces mes<br><input type="radio"/> 1 vez semana<br><input type="radio"/> 2 a 4 veces semana<br><input type="radio"/> 5 a 6 veces semana<br><input checked="" type="radio"/> 1 vez al día<br><input type="radio"/> 2 a 3 veces al día<br><input type="radio"/> 5 a 6 veces al día<br><input type="radio"/> más 6 veces al día |
|--------------------------------|--------------------------------------------------------------------------------------------------------------------------------------------------------------------------------------------------------------------------------------------------------------------------------------------------------------------------------------------------------------------------------------------------------------|

---

---

|          |                                                                                                                                                                                                                                                                                                                                                                                                              |
|----------|--------------------------------------------------------------------------------------------------------------------------------------------------------------------------------------------------------------------------------------------------------------------------------------------------------------------------------------------------------------------------------------------------------------|
| pimiento | <input type="radio"/> Nunca o menos 1 vez al mes<br><input type="radio"/> 1 a 3 veces mes<br><input type="radio"/> 1 vez semana<br><input type="radio"/> 2 a 4 veces semana<br><input type="radio"/> 5 a 6 veces semana<br><input checked="" type="radio"/> 1 vez al día<br><input type="radio"/> 2 a 3 veces al día<br><input type="radio"/> 5 a 6 veces al día<br><input type="radio"/> más 6 veces al día |
|----------|--------------------------------------------------------------------------------------------------------------------------------------------------------------------------------------------------------------------------------------------------------------------------------------------------------------------------------------------------------------------------------------------------------------|

---

|           |                                                                                                                                                                                                                                                                                                                                                                                                              |
|-----------|--------------------------------------------------------------------------------------------------------------------------------------------------------------------------------------------------------------------------------------------------------------------------------------------------------------------------------------------------------------------------------------------------------------|
| alcachofa | <input type="radio"/> Nunca o menos 1 vez al mes<br><input type="radio"/> 1 a 3 veces mes<br><input type="radio"/> 1 vez semana<br><input type="radio"/> 2 a 4 veces semana<br><input type="radio"/> 5 a 6 veces semana<br><input checked="" type="radio"/> 1 vez al día<br><input type="radio"/> 2 a 3 veces al día<br><input type="radio"/> 5 a 6 veces al día<br><input type="radio"/> más 6 veces al día |
|-----------|--------------------------------------------------------------------------------------------------------------------------------------------------------------------------------------------------------------------------------------------------------------------------------------------------------------------------------------------------------------------------------------------------------------|

---

|            |                                                                                                                                                                                                                                                                                                                                                                                                              |
|------------|--------------------------------------------------------------------------------------------------------------------------------------------------------------------------------------------------------------------------------------------------------------------------------------------------------------------------------------------------------------------------------------------------------------|
| espárragos | <input type="radio"/> Nunca o menos 1 vez al mes<br><input type="radio"/> 1 a 3 veces mes<br><input type="radio"/> 1 vez semana<br><input type="radio"/> 2 a 4 veces semana<br><input type="radio"/> 5 a 6 veces semana<br><input checked="" type="radio"/> 1 vez al día<br><input type="radio"/> 2 a 3 veces al día<br><input type="radio"/> 5 a 6 veces al día<br><input type="radio"/> más 6 veces al día |
|------------|--------------------------------------------------------------------------------------------------------------------------------------------------------------------------------------------------------------------------------------------------------------------------------------------------------------------------------------------------------------------------------------------------------------|

---

|              |                                                                                                                                                                                                                                                                                                                                                                                                              |
|--------------|--------------------------------------------------------------------------------------------------------------------------------------------------------------------------------------------------------------------------------------------------------------------------------------------------------------------------------------------------------------------------------------------------------------|
| maíz hervido | <input type="radio"/> Nunca o menos 1 vez al mes<br><input type="radio"/> 1 a 3 veces mes<br><input type="radio"/> 1 vez semana<br><input type="radio"/> 2 a 4 veces semana<br><input type="radio"/> 5 a 6 veces semana<br><input checked="" type="radio"/> 1 vez al día<br><input type="radio"/> 2 a 3 veces al día<br><input type="radio"/> 5 a 6 veces al día<br><input type="radio"/> más 6 veces al día |
|--------------|--------------------------------------------------------------------------------------------------------------------------------------------------------------------------------------------------------------------------------------------------------------------------------------------------------------------------------------------------------------------------------------------------------------|

---

|           |                                                                                                                                                                                                                                                                                                                                                                                                              |
|-----------|--------------------------------------------------------------------------------------------------------------------------------------------------------------------------------------------------------------------------------------------------------------------------------------------------------------------------------------------------------------------------------------------------------------|
| legumbres | <input type="radio"/> Nunca o menos 1 vez al mes<br><input type="radio"/> 1 a 3 veces mes<br><input type="radio"/> 1 vez semana<br><input type="radio"/> 2 a 4 veces semana<br><input type="radio"/> 5 a 6 veces semana<br><input checked="" type="radio"/> 1 vez al día<br><input type="radio"/> 2 a 3 veces al día<br><input type="radio"/> 5 a 6 veces al día<br><input type="radio"/> más 6 veces al día |
|-----------|--------------------------------------------------------------------------------------------------------------------------------------------------------------------------------------------------------------------------------------------------------------------------------------------------------------------------------------------------------------------------------------------------------------|

---

|                       |                                                                                                                                                                                                                                                                                                                                                                                                              |
|-----------------------|--------------------------------------------------------------------------------------------------------------------------------------------------------------------------------------------------------------------------------------------------------------------------------------------------------------------------------------------------------------------------------------------------------------|
| naranjas o mandarinas | <input checked="" type="radio"/> Nunca o menos 1 vez al mes<br><input type="radio"/> 1 a 3 veces mes<br><input type="radio"/> 1 vez semana<br><input type="radio"/> 2 a 4 veces semana<br><input type="radio"/> 5 a 6 veces semana<br><input type="radio"/> 1 vez al día<br><input type="radio"/> 2 a 3 veces al día<br><input type="radio"/> 5 a 6 veces al día<br><input type="radio"/> más 6 veces al día |
|-----------------------|--------------------------------------------------------------------------------------------------------------------------------------------------------------------------------------------------------------------------------------------------------------------------------------------------------------------------------------------------------------------------------------------------------------|

---



---

|                    |                                                                                                                                                                                                                                                                                                                                                                                                              |
|--------------------|--------------------------------------------------------------------------------------------------------------------------------------------------------------------------------------------------------------------------------------------------------------------------------------------------------------------------------------------------------------------------------------------------------------|
| zumو natural fruta | <input checked="" type="radio"/> Nunca o menos 1 vez al mes<br><input type="radio"/> 1 a 3 veces mes<br><input type="radio"/> 1 vez semana<br><input type="radio"/> 2 a 4 veces semana<br><input type="radio"/> 5 a 6 veces semana<br><input type="radio"/> 1 vez al día<br><input type="radio"/> 2 a 3 veces al día<br><input type="radio"/> 5 a 6 veces al día<br><input type="radio"/> más 6 veces al día |
|--------------------|--------------------------------------------------------------------------------------------------------------------------------------------------------------------------------------------------------------------------------------------------------------------------------------------------------------------------------------------------------------------------------------------------------------|

---

|         |                                                                                                                                                                                                                                                                                                                                                                                                              |
|---------|--------------------------------------------------------------------------------------------------------------------------------------------------------------------------------------------------------------------------------------------------------------------------------------------------------------------------------------------------------------------------------------------------------------|
| platano | <input checked="" type="radio"/> Nunca o menos 1 vez al mes<br><input type="radio"/> 1 a 3 veces mes<br><input type="radio"/> 1 vez semana<br><input type="radio"/> 2 a 4 veces semana<br><input type="radio"/> 5 a 6 veces semana<br><input type="radio"/> 1 vez al día<br><input type="radio"/> 2 a 3 veces al día<br><input type="radio"/> 5 a 6 veces al día<br><input type="radio"/> más 6 veces al día |
|---------|--------------------------------------------------------------------------------------------------------------------------------------------------------------------------------------------------------------------------------------------------------------------------------------------------------------------------------------------------------------------------------------------------------------|

---

|                |                                                                                                                                                                                                                                                                                                                                                                                                              |
|----------------|--------------------------------------------------------------------------------------------------------------------------------------------------------------------------------------------------------------------------------------------------------------------------------------------------------------------------------------------------------------------------------------------------------------|
| manzana o pera | <input checked="" type="radio"/> Nunca o menos 1 vez al mes<br><input type="radio"/> 1 a 3 veces mes<br><input type="radio"/> 1 vez semana<br><input type="radio"/> 2 a 4 veces semana<br><input type="radio"/> 5 a 6 veces semana<br><input type="radio"/> 1 vez al día<br><input type="radio"/> 2 a 3 veces al día<br><input type="radio"/> 5 a 6 veces al día<br><input type="radio"/> más 6 veces al día |
|----------------|--------------------------------------------------------------------------------------------------------------------------------------------------------------------------------------------------------------------------------------------------------------------------------------------------------------------------------------------------------------------------------------------------------------|

---

|                       |                                                                                                                                                                                                                                                                                                                                                                                                              |
|-----------------------|--------------------------------------------------------------------------------------------------------------------------------------------------------------------------------------------------------------------------------------------------------------------------------------------------------------------------------------------------------------------------------------------------------------|
| melocotón o nectarina | <input checked="" type="radio"/> Nunca o menos 1 vez al mes<br><input type="radio"/> 1 a 3 veces mes<br><input type="radio"/> 1 vez semana<br><input type="radio"/> 2 a 4 veces semana<br><input type="radio"/> 5 a 6 veces semana<br><input type="radio"/> 1 vez al día<br><input type="radio"/> 2 a 3 veces al día<br><input type="radio"/> 5 a 6 veces al día<br><input type="radio"/> más 6 veces al día |
|-----------------------|--------------------------------------------------------------------------------------------------------------------------------------------------------------------------------------------------------------------------------------------------------------------------------------------------------------------------------------------------------------------------------------------------------------|

---

|                |                                                                                                                                                                                                                                                                                                                                                                                                              |
|----------------|--------------------------------------------------------------------------------------------------------------------------------------------------------------------------------------------------------------------------------------------------------------------------------------------------------------------------------------------------------------------------------------------------------------|
| sandia o melon | <input checked="" type="radio"/> Nunca o menos 1 vez al mes<br><input type="radio"/> 1 a 3 veces mes<br><input type="radio"/> 1 vez semana<br><input type="radio"/> 2 a 4 veces semana<br><input type="radio"/> 5 a 6 veces semana<br><input type="radio"/> 1 vez al día<br><input type="radio"/> 2 a 3 veces al día<br><input type="radio"/> 5 a 6 veces al día<br><input type="radio"/> más 6 veces al día |
|----------------|--------------------------------------------------------------------------------------------------------------------------------------------------------------------------------------------------------------------------------------------------------------------------------------------------------------------------------------------------------------------------------------------------------------|

---

|     |                                                                                                                                                                                                                                                                                                                                                                                                              |
|-----|--------------------------------------------------------------------------------------------------------------------------------------------------------------------------------------------------------------------------------------------------------------------------------------------------------------------------------------------------------------------------------------------------------------|
| uva | <input checked="" type="radio"/> Nunca o menos 1 vez al mes<br><input type="radio"/> 1 a 3 veces mes<br><input type="radio"/> 1 vez semana<br><input type="radio"/> 2 a 4 veces semana<br><input type="radio"/> 5 a 6 veces semana<br><input type="radio"/> 1 vez al día<br><input type="radio"/> 2 a 3 veces al día<br><input type="radio"/> 5 a 6 veces al día<br><input type="radio"/> más 6 veces al día |
|-----|--------------------------------------------------------------------------------------------------------------------------------------------------------------------------------------------------------------------------------------------------------------------------------------------------------------------------------------------------------------------------------------------------------------|

---

---

bruna o ciruela

- ☒ Nunca o menos 1 vez al mes  
☐ 1 a 3 veces mes  
☐ 1 vez semana  
☐ 2 a 4 veces semana  
☐ 5 a 6 veces semana  
☐ 1 vez al día  
☐ 2 a 3 veces al día  
☐ 5 a 6 veces al día  
☐ más 6 veces al día

---

kiwi

- ☒ Nunca o menos 1 vez al mes  
☐ 1 a 3 veces mes  
☐ 1 vez semana  
☐ 2 a 4 veces semana  
☐ 5 a 6 veces semana  
☐ 1 vez al día  
☐ 2 a 3 veces al día  
☐ 5 a 6 veces al día  
☐ más 6 veces al día

---

aceituna

- ☒ Nunca o menos 1 vez al mes  
☐ 1 a 3 veces mes  
☐ 1 vez semana  
☐ 2 a 4 veces semana  
☐ 5 a 6 veces semana  
☐ 1 vez al día  
☐ 2 a 3 veces al día  
☐ 5 a 6 veces al día  
☐ más 6 veces al día

---

frutos secos

- ☐ Nunca o menos 1 vez al mes  
☐ 1 a 3 veces mes  
☐ 1 vez semana  
☐ 2 a 4 veces semana  
☐ 5 a 6 veces semana  
☒ 1 vez al día  
☐ 2 a 3 veces al día  
☐ 5 a 6 veces al día  
☐ más 6 veces al día

---

pan blanco

- ☒ Nunca o menos 1 vez al mes  
☐ 1 a 3 veces mes  
☐ 1 vez semana  
☐ 2 a 4 veces semana  
☐ 5 a 6 veces semana  
☐ 1 vez al día  
☐ 2 a 3 veces al día  
☐ 5 a 6 veces al día  
☐ más 6 veces al día

---

pan integral

- ☒ Nunca o menos 1 vez al mes  
☐ 1 a 3 veces mes  
☐ 1 vez semana  
☐ 2 a 4 veces semana  
☐ 5 a 6 veces semana  
☐ 1 vez al día  
☐ 2 a 3 veces al día  
☐ 5 a 6 veces al día  
☐ más 6 veces al día

---

cereales desayuno

- ☒ Nunca o menos 1 vez al mes  
☐ 1 a 3 veces mes  
☐ 1 vez semana  
☐ 2 a 4 veces semana  
☐ 5 a 6 veces semana  
☐ 1 vez al día  
☐ 2 a 3 veces al día  
☐ 5 a 6 veces al día  
☐ más 6 veces al día

---

patatas fritas

- ☒ Nunca o menos 1 vez al mes  
☐ 1 a 3 veces mes  
☐ 1 vez semana  
☐ 2 a 4 veces semana  
☐ 5 a 6 veces semana  
☐ 1 vez al día  
☐ 2 a 3 veces al día  
☐ 5 a 6 veces al día  
☐ más 6 veces al día

---

patatas cocidas o asadas

- ☐ Nunca o menos 1 vez al mes  
☐ 1 a 3 veces mes  
☐ 1 vez semana  
☐ 2 a 4 veces semana  
☒ 5 a 6 veces semana  
☐ 1 vez al día  
☐ 2 a 3 veces al día  
☐ 5 a 6 veces al día  
☐ más 6 veces al día

---

bolsa papas

- ☒ Nunca o menos 1 vez al mes  
☐ 1 a 3 veces mes  
☐ 1 vez semana  
☐ 2 a 4 veces semana  
☐ 5 a 6 veces semana  
☐ 1 vez al día  
☐ 2 a 3 veces al día  
☐ 5 a 6 veces al día  
☐ más 6 veces al día

---

arroz cocinado

- ☐ Nunca o menos 1 vez al mes  
☐ 1 a 3 veces mes  
☐ 1 vez semana  
☐ 2 a 4 veces semana  
☒ 5 a 6 veces semana  
☐ 1 vez al día  
☐ 2 a 3 veces al día  
☐ 5 a 6 veces al día  
☐ más 6 veces al día

---

pasta

- ☐ Nunca o menos 1 vez al mes  
☐ 1 a 3 veces mes  
☐ 1 vez semana  
☐ 2 a 4 veces semana  
☒ 5 a 6 veces semana  
☐ 1 vez al día  
☐ 2 a 3 veces al día  
☐ 5 a 6 veces al día  
☐ más 6 veces al día

|                     |                                                                                                                                                                                                                                                                                                                                                                                                              |
|---------------------|--------------------------------------------------------------------------------------------------------------------------------------------------------------------------------------------------------------------------------------------------------------------------------------------------------------------------------------------------------------------------------------------------------------|
| pizza               | <input type="radio"/> Nunca o menos 1 vez al mes<br><input type="radio"/> 1 a 3 veces mes<br><input type="radio"/> 1 vez semana<br><input checked="" type="radio"/> 2 a 4 veces semana<br><input type="radio"/> 5 a 6 veces semana<br><input type="radio"/> 1 vez al día<br><input type="radio"/> 2 a 3 veces al día<br><input type="radio"/> 5 a 6 veces al día<br><input type="radio"/> más 6 veces al día |
| aceite oliva        | <input type="radio"/> Nunca o menos 1 vez al mes<br><input type="radio"/> 1 a 3 veces mes<br><input type="radio"/> 1 vez semana<br><input type="radio"/> 2 a 4 veces semana<br><input type="radio"/> 5 a 6 veces semana<br><input checked="" type="radio"/> 1 vez al día<br><input type="radio"/> 2 a 3 veces al día<br><input type="radio"/> 5 a 6 veces al día<br><input type="radio"/> más 6 veces al día |
| otros aceites       | <input checked="" type="radio"/> Nunca o menos 1 vez al mes<br><input type="radio"/> 1 a 3 veces mes<br><input type="radio"/> 1 vez semana<br><input type="radio"/> 2 a 4 veces semana<br><input type="radio"/> 5 a 6 veces semana<br><input type="radio"/> 1 vez al día<br><input type="radio"/> 2 a 3 veces al día<br><input type="radio"/> 5 a 6 veces al día<br><input type="radio"/> más 6 veces al día |
| margarina           | <input checked="" type="radio"/> Nunca o menos 1 vez al mes<br><input type="radio"/> 1 a 3 veces mes<br><input type="radio"/> 1 vez semana<br><input type="radio"/> 2 a 4 veces semana<br><input type="radio"/> 5 a 6 veces semana<br><input type="radio"/> 1 vez al día<br><input type="radio"/> 2 a 3 veces al día<br><input type="radio"/> 5 a 6 veces al día<br><input type="radio"/> más 6 veces al día |
| mantequilla         | <input checked="" type="radio"/> Nunca o menos 1 vez al mes<br><input type="radio"/> 1 a 3 veces mes<br><input type="radio"/> 1 vez semana<br><input type="radio"/> 2 a 4 veces semana<br><input type="radio"/> 5 a 6 veces semana<br><input type="radio"/> 1 vez al día<br><input type="radio"/> 2 a 3 veces al día<br><input type="radio"/> 5 a 6 veces al día<br><input type="radio"/> más 6 veces al día |
| galletas tipo maria | <input checked="" type="radio"/> Nunca o menos 1 vez al mes<br><input type="radio"/> 1 a 3 veces mes<br><input type="radio"/> 1 vez semana<br><input type="radio"/> 2 a 4 veces semana<br><input type="radio"/> 5 a 6 veces semana<br><input type="radio"/> 1 vez al día<br><input type="radio"/> 2 a 3 veces al día<br><input type="radio"/> 5 a 6 veces al día<br><input type="radio"/> más 6 veces al día |

---

galletas chocolate

- ☒ Nunca o menos 1 vez al mes  
☐ 1 a 3 veces mes  
☐ 1 vez semana  
☐ 2 a 4 veces semana  
☐ 5 a 6 veces semana  
☐ 1 vez al día  
☐ 2 a 3 veces al día  
☐ 5 a 6 veces al día  
☐ más 6 veces al día

---

bolleria

- ☐ Nunca o menos 1 vez al mes  
☐ 1 a 3 veces mes  
☐ 1 vez semana  
☐ 2 a 4 veces semana  
☐ 5 a 6 veces semana  
☒ 1 vez al día  
☐ 2 a 3 veces al día  
☐ 5 a 6 veces al día  
☐ más 6 veces al día

---

chocolate o bombones

- ☐ Nunca o menos 1 vez al mes  
☐ 1 a 3 veces mes  
☐ 1 vez semana  
☐ 2 a 4 veces semana  
☒ 5 a 6 veces semana  
☐ 1 vez al día  
☐ 2 a 3 veces al día  
☐ 5 a 6 veces al día  
☐ más 6 veces al día

---

chocolate polvo o colacao

- ☐ Nunca o menos 1 vez al mes  
☐ 1 a 3 veces mes  
☐ 1 vez semana  
☐ 2 a 4 veces semana  
☐ 5 a 6 veces semana  
☒ 1 vez al día  
☐ 2 a 3 veces al día  
☐ 5 a 6 veces al día  
☐ más 6 veces al día

---

vino tinto

- ☒ Nunca o menos 1 vez al mes  
☐ 1 a 3 veces mes  
☐ 1 vez semana  
☐ 2 a 4 veces semana  
☐ 5 a 6 veces semana  
☐ 1 vez al día  
☐ 2 a 3 veces al día  
☐ 5 a 6 veces al día  
☐ más 6 veces al día

---

vino blanco

- ☒ Nunca o menos 1 vez al mes  
☐ 1 a 3 veces mes  
☐ 1 vez semana  
☐ 2 a 4 veces semana  
☐ 5 a 6 veces semana  
☐ 1 vez al día  
☐ 2 a 3 veces al día  
☐ 5 a 6 veces al día  
☐ más 6 veces al día

---

|                    |                                                                                                                                                                                                                                                                                                                                                                                                              |
|--------------------|--------------------------------------------------------------------------------------------------------------------------------------------------------------------------------------------------------------------------------------------------------------------------------------------------------------------------------------------------------------------------------------------------------------|
| vino seco o vermut | <input checked="" type="radio"/> Nunca o menos 1 vez al mes<br><input type="radio"/> 1 a 3 veces mes<br><input type="radio"/> 1 vez semana<br><input type="radio"/> 2 a 4 veces semana<br><input type="radio"/> 5 a 6 veces semana<br><input type="radio"/> 1 vez al día<br><input type="radio"/> 2 a 3 veces al día<br><input type="radio"/> 5 a 6 veces al día<br><input type="radio"/> más 6 veces al día |
|--------------------|--------------------------------------------------------------------------------------------------------------------------------------------------------------------------------------------------------------------------------------------------------------------------------------------------------------------------------------------------------------------------------------------------------------|

---

|         |                                                                                                                                                                                                                                                                                                                                                                                                              |
|---------|--------------------------------------------------------------------------------------------------------------------------------------------------------------------------------------------------------------------------------------------------------------------------------------------------------------------------------------------------------------------------------------------------------------|
| cerveza | <input checked="" type="radio"/> Nunca o menos 1 vez al mes<br><input type="radio"/> 1 a 3 veces mes<br><input type="radio"/> 1 vez semana<br><input type="radio"/> 2 a 4 veces semana<br><input type="radio"/> 5 a 6 veces semana<br><input type="radio"/> 1 vez al día<br><input type="radio"/> 2 a 3 veces al día<br><input type="radio"/> 5 a 6 veces al día<br><input type="radio"/> más 6 veces al día |
|---------|--------------------------------------------------------------------------------------------------------------------------------------------------------------------------------------------------------------------------------------------------------------------------------------------------------------------------------------------------------------------------------------------------------------|

---

|                     |                                                                                                                                                                                                                                                                                                                                                                                                              |
|---------------------|--------------------------------------------------------------------------------------------------------------------------------------------------------------------------------------------------------------------------------------------------------------------------------------------------------------------------------------------------------------------------------------------------------------|
| cerveza sin alcohol | <input checked="" type="radio"/> Nunca o menos 1 vez al mes<br><input type="radio"/> 1 a 3 veces mes<br><input type="radio"/> 1 vez semana<br><input type="radio"/> 2 a 4 veces semana<br><input type="radio"/> 5 a 6 veces semana<br><input type="radio"/> 1 vez al día<br><input type="radio"/> 2 a 3 veces al día<br><input type="radio"/> 5 a 6 veces al día<br><input type="radio"/> más 6 veces al día |
|---------------------|--------------------------------------------------------------------------------------------------------------------------------------------------------------------------------------------------------------------------------------------------------------------------------------------------------------------------------------------------------------------------------------------------------------|

---

|         |                                                                                                                                                                                                                                                                                                                                                                                                              |
|---------|--------------------------------------------------------------------------------------------------------------------------------------------------------------------------------------------------------------------------------------------------------------------------------------------------------------------------------------------------------------------------------------------------------------|
| licores | <input checked="" type="radio"/> Nunca o menos 1 vez al mes<br><input type="radio"/> 1 a 3 veces mes<br><input type="radio"/> 1 vez semana<br><input type="radio"/> 2 a 4 veces semana<br><input type="radio"/> 5 a 6 veces semana<br><input type="radio"/> 1 vez al día<br><input type="radio"/> 2 a 3 veces al día<br><input type="radio"/> 5 a 6 veces al día<br><input type="radio"/> más 6 veces al día |
|---------|--------------------------------------------------------------------------------------------------------------------------------------------------------------------------------------------------------------------------------------------------------------------------------------------------------------------------------------------------------------------------------------------------------------|

---

|                       |                                                                                                                                                                                                                                                                                                                                                                                                              |
|-----------------------|--------------------------------------------------------------------------------------------------------------------------------------------------------------------------------------------------------------------------------------------------------------------------------------------------------------------------------------------------------------------------------------------------------------|
| ginebra o ron o vodka | <input checked="" type="radio"/> Nunca o menos 1 vez al mes<br><input type="radio"/> 1 a 3 veces mes<br><input type="radio"/> 1 vez semana<br><input type="radio"/> 2 a 4 veces semana<br><input type="radio"/> 5 a 6 veces semana<br><input type="radio"/> 1 vez al día<br><input type="radio"/> 2 a 3 veces al día<br><input type="radio"/> 5 a 6 veces al día<br><input type="radio"/> más 6 veces al día |
|-----------------------|--------------------------------------------------------------------------------------------------------------------------------------------------------------------------------------------------------------------------------------------------------------------------------------------------------------------------------------------------------------------------------------------------------------|

---

|                 |                                                                                                                                                                                                                                                                                                                                                                                                              |
|-----------------|--------------------------------------------------------------------------------------------------------------------------------------------------------------------------------------------------------------------------------------------------------------------------------------------------------------------------------------------------------------------------------------------------------------|
| refresco normal | <input type="radio"/> Nunca o menos 1 vez al mes<br><input type="radio"/> 1 a 3 veces mes<br><input checked="" type="radio"/> 1 vez semana<br><input type="radio"/> 2 a 4 veces semana<br><input type="radio"/> 5 a 6 veces semana<br><input type="radio"/> 1 vez al día<br><input type="radio"/> 2 a 3 veces al día<br><input type="radio"/> 5 a 6 veces al día<br><input type="radio"/> más 6 veces al día |
|-----------------|--------------------------------------------------------------------------------------------------------------------------------------------------------------------------------------------------------------------------------------------------------------------------------------------------------------------------------------------------------------------------------------------------------------|

---

---

refresco sin azúcar

- ☐ Nunca o menos 1 vez al mes  
☐ 1 a 3 veces mes  
☒ 1 vez semana  
☐ 2 a 4 veces semana  
☐ 5 a 6 veces semana  
☐ 1 vez al día  
☐ 2 a 3 veces al día  
☐ 5 a 6 veces al día  
☐ más 6 veces al día

---

Agua del grifo

- ☒ Nunca o menos 1 vez al mes  
☐ 1 a 3 veces mes  
☐ 1 vez semana  
☐ 2 a 4 veces semana  
☐ 5 a 6 veces semana  
☐ 1 vez al día  
☐ 2 a 3 veces al día  
☐ 5 a 6 veces al día  
☐ más 6 veces al día

---

agua embotellada sin gas

- ☐ Nunca o menos 1 vez al mes  
☐ 1 a 3 veces mes  
☐ 1 vez semana  
☐ 2 a 4 veces semana  
☐ 5 a 6 veces semana  
☐ 1 vez al día  
☐ 2 a 3 veces al día  
☐ 5 a 6 veces al día  
☒ más 6 veces al día

---

agua embotellada con gas

- ☒ Nunca o menos 1 vez al mes  
☐ 1 a 3 veces mes  
☐ 1 vez semana  
☐ 2 a 4 veces semana  
☐ 5 a 6 veces semana  
☐ 1 vez al día  
☐ 2 a 3 veces al día  
☐ 5 a 6 veces al día  
☐ más 6 veces al día

---

zumو frutas embasado

- ☒ Nunca o menos 1 vez al mes  
☐ 1 a 3 veces mes  
☐ 1 vez semana  
☐ 2 a 4 veces semana  
☐ 5 a 6 veces semana  
☐ 1 vez al día  
☐ 2 a 3 veces al día  
☐ 5 a 6 veces al día  
☐ más 6 veces al día

---

cafe

- ☒ Nunca o menos 1 vez al mes  
☐ 1 a 3 veces mes  
☐ 1 vez semana  
☐ 2 a 4 veces semana  
☐ 5 a 6 veces semana  
☐ 1 vez al día  
☐ 2 a 3 veces al día  
☐ 5 a 6 veces al día  
☐ más 6 veces al día

---

|                   |                                                                                                                                                                                                                                                                                                                                                                                                              |
|-------------------|--------------------------------------------------------------------------------------------------------------------------------------------------------------------------------------------------------------------------------------------------------------------------------------------------------------------------------------------------------------------------------------------------------------|
| cafe descafeinado | <input checked="" type="radio"/> Nunca o menos 1 vez al mes<br><input type="radio"/> 1 a 3 veces mes<br><input type="radio"/> 1 vez semana<br><input type="radio"/> 2 a 4 veces semana<br><input type="radio"/> 5 a 6 veces semana<br><input type="radio"/> 1 vez al día<br><input type="radio"/> 2 a 3 veces al día<br><input type="radio"/> 5 a 6 veces al día<br><input type="radio"/> más 6 veces al día |
|-------------------|--------------------------------------------------------------------------------------------------------------------------------------------------------------------------------------------------------------------------------------------------------------------------------------------------------------------------------------------------------------------------------------------------------------|

---

|               |                                                                                                                                                                                                                                                                                                                                                                                                              |
|---------------|--------------------------------------------------------------------------------------------------------------------------------------------------------------------------------------------------------------------------------------------------------------------------------------------------------------------------------------------------------------------------------------------------------------|
| te o infusión | <input checked="" type="radio"/> Nunca o menos 1 vez al mes<br><input type="radio"/> 1 a 3 veces mes<br><input type="radio"/> 1 vez semana<br><input type="radio"/> 2 a 4 veces semana<br><input type="radio"/> 5 a 6 veces semana<br><input type="radio"/> 1 vez al día<br><input type="radio"/> 2 a 3 veces al día<br><input type="radio"/> 5 a 6 veces al día<br><input type="radio"/> más 6 veces al día |
|---------------|--------------------------------------------------------------------------------------------------------------------------------------------------------------------------------------------------------------------------------------------------------------------------------------------------------------------------------------------------------------------------------------------------------------|

---

|                      |                                                                                                                                                                                                                                                                                                                                                                                                              |
|----------------------|--------------------------------------------------------------------------------------------------------------------------------------------------------------------------------------------------------------------------------------------------------------------------------------------------------------------------------------------------------------------------------------------------------------|
| sopa o puré verduras | <input type="radio"/> Nunca o menos 1 vez al mes<br><input type="radio"/> 1 a 3 veces mes<br><input type="radio"/> 1 vez semana<br><input type="radio"/> 2 a 4 veces semana<br><input type="radio"/> 5 a 6 veces semana<br><input checked="" type="radio"/> 1 vez al día<br><input type="radio"/> 2 a 3 veces al día<br><input type="radio"/> 5 a 6 veces al día<br><input type="radio"/> más 6 veces al día |
|----------------------|--------------------------------------------------------------------------------------------------------------------------------------------------------------------------------------------------------------------------------------------------------------------------------------------------------------------------------------------------------------------------------------------------------------|

---

|                       |                                                                                                                                                                                                                                                                                                                                                                                                              |
|-----------------------|--------------------------------------------------------------------------------------------------------------------------------------------------------------------------------------------------------------------------------------------------------------------------------------------------------------------------------------------------------------------------------------------------------------|
| croquetas pollo jamón | <input checked="" type="radio"/> Nunca o menos 1 vez al mes<br><input type="radio"/> 1 a 3 veces mes<br><input type="radio"/> 1 vez semana<br><input type="radio"/> 2 a 4 veces semana<br><input type="radio"/> 5 a 6 veces semana<br><input type="radio"/> 1 vez al día<br><input type="radio"/> 2 a 3 veces al día<br><input type="radio"/> 5 a 6 veces al día<br><input type="radio"/> más 6 veces al día |
|-----------------------|--------------------------------------------------------------------------------------------------------------------------------------------------------------------------------------------------------------------------------------------------------------------------------------------------------------------------------------------------------------------------------------------------------------|

---

|                   |                                                                                                                                                                                                                                                                                                                                                                                                              |
|-------------------|--------------------------------------------------------------------------------------------------------------------------------------------------------------------------------------------------------------------------------------------------------------------------------------------------------------------------------------------------------------------------------------------------------------|
| croquetas pescado | <input checked="" type="radio"/> Nunca o menos 1 vez al mes<br><input type="radio"/> 1 a 3 veces mes<br><input type="radio"/> 1 vez semana<br><input type="radio"/> 2 a 4 veces semana<br><input type="radio"/> 5 a 6 veces semana<br><input type="radio"/> 1 vez al día<br><input type="radio"/> 2 a 3 veces al día<br><input type="radio"/> 5 a 6 veces al día<br><input type="radio"/> más 6 veces al día |
|-------------------|--------------------------------------------------------------------------------------------------------------------------------------------------------------------------------------------------------------------------------------------------------------------------------------------------------------------------------------------------------------------------------------------------------------|

---

|          |                                                                                                                                                                                                                                                                                                                                                                                                              |
|----------|--------------------------------------------------------------------------------------------------------------------------------------------------------------------------------------------------------------------------------------------------------------------------------------------------------------------------------------------------------------------------------------------------------------|
| mayonesa | <input checked="" type="radio"/> Nunca o menos 1 vez al mes<br><input type="radio"/> 1 a 3 veces mes<br><input type="radio"/> 1 vez semana<br><input type="radio"/> 2 a 4 veces semana<br><input type="radio"/> 5 a 6 veces semana<br><input type="radio"/> 1 vez al día<br><input type="radio"/> 2 a 3 veces al día<br><input type="radio"/> 5 a 6 veces al día<br><input type="radio"/> más 6 veces al día |
|----------|--------------------------------------------------------------------------------------------------------------------------------------------------------------------------------------------------------------------------------------------------------------------------------------------------------------------------------------------------------------------------------------------------------------|

---



---

salsa tomate

- ☐ Nunca o menos 1 vez al mes  
☐ 1 a 3 veces mes  
☒ 1 vez semana  
☐ 2 a 4 veces semana  
☐ 5 a 6 veces semana  
☐ 1 vez al día  
☐ 2 a 3 veces al día  
☐ 5 a 6 veces al día  
☐ más 6 veces al día

---

ketchup

- ☒ Nunca o menos 1 vez al mes  
☐ 1 a 3 veces mes  
☐ 1 vez semana  
☐ 2 a 4 veces semana  
☐ 5 a 6 veces semana  
☐ 1 vez al día  
☐ 2 a 3 veces al día  
☐ 5 a 6 veces al día  
☐ más 6 veces al día

---

sal

- ☒ Nunca o menos 1 vez al mes  
☐ 1 a 3 veces mes  
☐ 1 vez semana  
☐ 2 a 4 veces semana  
☐ 5 a 6 veces semana  
☐ 1 vez al día  
☐ 2 a 3 veces al día  
☐ 5 a 6 veces al día  
☐ más 6 veces al día

---

ajo

- ☒ Nunca o menos 1 vez al mes  
☐ 1 a 3 veces mes  
☐ 1 vez semana  
☐ 2 a 4 veces semana  
☐ 5 a 6 veces semana  
☐ 1 vez al día  
☐ 2 a 3 veces al día  
☐ 5 a 6 veces al día  
☐ más 6 veces al día

---

mermelada o miel

- ☐ Nunca o menos 1 vez al mes  
☐ 1 a 3 veces mes  
☒ 1 vez semana  
☐ 2 a 4 veces semana  
☐ 5 a 6 veces semana  
☐ 1 vez al día  
☐ 2 a 3 veces al día  
☐ 5 a 6 veces al día  
☐ más 6 veces al día

---

azúcar

- ☐ Nunca o menos 1 vez al mes  
☐ 1 a 3 veces mes  
☒ 1 vez semana  
☐ 2 a 4 veces semana  
☐ 5 a 6 veces semana  
☐ 1 vez al día  
☐ 2 a 3 veces al día  
☐ 5 a 6 veces al día  
☐ más 6 veces al día

|                                       |                                                                                                                                                                                                                                                                                                                                                                                                                                                                                                                               |
|---------------------------------------|-------------------------------------------------------------------------------------------------------------------------------------------------------------------------------------------------------------------------------------------------------------------------------------------------------------------------------------------------------------------------------------------------------------------------------------------------------------------------------------------------------------------------------|
| Otro alimento                         |                                                                                                                                                                                                                                                                                                                                                                                                                                                                                                                               |
| suplementos vitamínicos               | <input type="radio"/> si<br><input checked="" type="radio"/> no                                                                                                                                                                                                                                                                                                                                                                                                                                                               |
| suplementos vitamínicos               |                                                                                                                                                                                                                                                                                                                                                                                                                                                                                                                               |
| dieta previa                          | <input type="radio"/> si<br><input checked="" type="radio"/> no                                                                                                                                                                                                                                                                                                                                                                                                                                                               |
| motivo dieta                          | <input checked="" type="radio"/> no dieta<br><input type="radio"/> control peso<br><input type="radio"/> control colesterol<br><input type="radio"/> control diabetes<br><input type="radio"/> problemas estómago<br><input type="radio"/> problemas vesícula o hepáticos<br><input type="radio"/> HTA o cardiopatía<br><input type="radio"/> problemas renales<br><input type="radio"/> alergia alimentaria<br><input type="radio"/> ácido úrico elevado<br><input type="radio"/> vegetariana<br><input type="radio"/> otros |
| cambio alimentos año previo gestación | <input type="radio"/> si<br><input checked="" type="radio"/> no                                                                                                                                                                                                                                                                                                                                                                                                                                                               |
| cambio lácteos                        | <input type="radio"/> eliminado<br><input type="radio"/> disminuido<br><input type="radio"/> igual<br><input type="radio"/> aumentado<br><input type="radio"/> no sabe                                                                                                                                                                                                                                                                                                                                                        |
| cambio huevos                         | <input type="radio"/> eliminado<br><input type="radio"/> disminuido<br><input type="radio"/> igual<br><input type="radio"/> aumentado<br><input type="radio"/> no sabe                                                                                                                                                                                                                                                                                                                                                        |
| cambio carne                          | <input type="radio"/> eliminado<br><input type="radio"/> disminuido<br><input type="radio"/> igual<br><input type="radio"/> aumentado<br><input type="radio"/> no sabe                                                                                                                                                                                                                                                                                                                                                        |
| cambio pescado                        | <input type="radio"/> eliminado<br><input type="radio"/> disminuido<br><input type="radio"/> igual<br><input type="radio"/> aumentado<br><input type="radio"/> no sabe                                                                                                                                                                                                                                                                                                                                                        |
| cambio verduras                       | <input type="radio"/> eliminado<br><input type="radio"/> disminuido<br><input type="radio"/> igual<br><input type="radio"/> aumentado<br><input type="radio"/> no sabe                                                                                                                                                                                                                                                                                                                                                        |

|                            |                                                                                                                                                                                                                        |
|----------------------------|------------------------------------------------------------------------------------------------------------------------------------------------------------------------------------------------------------------------|
| cambio legumbres           | <input type="radio"/> eliminado<br><input type="radio"/> disminuido<br><input type="radio"/> igual<br><input type="radio"/> aumentado<br><input type="radio"/> no sabe                                                 |
| cambio fruta               | <input type="radio"/> eliminado<br><input type="radio"/> disminuido<br><input type="radio"/> igual<br><input type="radio"/> aumentado<br><input type="radio"/> no sabe                                                 |
| cambio pan                 | <input type="radio"/> eliminado<br><input type="radio"/> disminuido<br><input type="radio"/> igual<br><input type="radio"/> aumentado<br><input type="radio"/> no sabe                                                 |
| cambio aceite oliva        | <input type="radio"/> eliminado<br><input type="radio"/> disminuido<br><input type="radio"/> igual<br><input type="radio"/> aumentado<br><input type="radio"/> no sabe                                                 |
| cambio mante o margarina   | <input type="radio"/> eliminado<br><input type="radio"/> disminuido<br><input type="radio"/> igual<br><input type="radio"/> aumentado<br><input type="radio"/> no sabe                                                 |
| cambio azúcar y dulces     | <input type="radio"/> eliminado<br><input type="radio"/> disminuido<br><input type="radio"/> igual<br><input type="radio"/> aumentado<br><input type="radio"/> no sabe                                                 |
| cambio bebidas alcohólicas | <input type="radio"/> eliminado<br><input type="radio"/> disminuido<br><input type="radio"/> igual<br><input type="radio"/> aumentado<br><input type="radio"/> no sabe                                                 |
| frecuencia comidas fritas  | <input type="radio"/> a diario<br><input type="radio"/> 5 a 6 veces semana<br><input type="radio"/> 2 a 4 veces semana<br><input type="radio"/> 1 vez semana<br><input checked="" type="radio"/> menos de 1 vez semana |
| carne                      | <input type="radio"/> no como<br><input type="radio"/> cruda<br><input type="radio"/> poco hecha<br><input checked="" type="radio"/> hecha<br><input type="radio"/> muy hecha                                          |
| grasa visible carne        | <input checked="" type="radio"/> quita toda<br><input type="radio"/> quita mayoría<br><input type="radio"/> quita un poco<br><input type="radio"/> no quita nada                                                       |

|                                |                                                                                                                                                                                                                                                          |
|--------------------------------|----------------------------------------------------------------------------------------------------------------------------------------------------------------------------------------------------------------------------------------------------------|
| cocina carne                   | <input checked="" type="radio"/> a la plancha<br><input type="radio"/> a la parrilla<br><input type="radio"/> asada<br><input type="radio"/> frita<br><input type="radio"/> guisada                                                                      |
| tostado quemado carne          | <input checked="" type="radio"/> nunca<br><input type="radio"/> 1 vez mes<br><input type="radio"/> 2 a 3 veces mes<br><input type="radio"/> 1 vez semana<br><input type="radio"/> 2 a 3 semanas                                                          |
| tostado quemado pescado        | <input checked="" type="radio"/> nunca<br><input type="radio"/> 1 vez mes<br><input type="radio"/> 2 a 3 veces mes<br><input type="radio"/> 1 vez semana<br><input type="radio"/> 2 a 3 semanas                                                          |
| socarrat paella                | <input checked="" type="radio"/> nunca<br><input type="radio"/> 1 vez mes<br><input type="radio"/> 2 a 3 veces mes<br><input type="radio"/> 1 vez semana<br><input type="radio"/> 2 a 3 semanas                                                          |
| grasa o aceite cocinar         | <input type="radio"/> mantequilla<br><input type="radio"/> margarina<br><input type="radio"/> aceite oliva<br><input checked="" type="radio"/> aceite oliva virgen extra<br><input type="radio"/> aceite vegetal<br><input type="radio"/> mezcla aceites |
| grasa aceite aliñar            | <input type="radio"/> mantequilla<br><input type="radio"/> margarina<br><input type="radio"/> aceite oliva<br><input checked="" type="radio"/> aceite oliva virgen extra<br><input type="radio"/> aceite vegetal<br><input type="radio"/> mezcla aceites |
| grasa aceite freir             | <input type="radio"/> mantequilla<br><input type="radio"/> margarina<br><input type="radio"/> aceite oliva<br><input checked="" type="radio"/> aceite oliva virgen extra<br><input type="radio"/> aceite vegetal<br><input type="radio"/> mezcla aceites |
| Ejercicio cuestionario         | <input checked="" type="radio"/> si<br><input type="radio"/> no                                                                                                                                                                                          |
| horas de sueño incluido siesta | [*DATA REMOVED*]                                                                                                                                                                                                                                         |
| minutos siesta                 | [*DATA REMOVED*]                                                                                                                                                                                                                                         |
| horas televisión semana        |                                                                                                                                                                                                                                                          |

|                                        |                                                                                                                                                                                                                                                                                                                                                                           |
|----------------------------------------|---------------------------------------------------------------------------------------------------------------------------------------------------------------------------------------------------------------------------------------------------------------------------------------------------------------------------------------------------------------------------|
| actividad trabajo                      | <input type="radio"/> casi siempre sentado<br><input type="radio"/> sentado 50 por cien<br><input type="radio"/> casi siempre de pie, quieto<br><input checked="" type="radio"/> casi siempre levantado caminando y llevando pocas cosas<br><input type="radio"/> casi siempre levantado, caminando y llevado muchas cosas<br><input type="radio"/> trabajo manual pesado |
| tiempo caminar o bici al día           | <input type="radio"/> casi nunca<br><input type="radio"/> menos 20min día<br><input type="radio"/> 20 a 40 min día<br><input type="radio"/> 40 a 60 min día<br><input type="radio"/> 1h o 1h y media día<br><input checked="" type="radio"/> más de 1h y media al día                                                                                                     |
| tiempo tareas casa al día              | <input type="radio"/> menos de 1h día<br><input type="radio"/> 1 a 2h día<br><input checked="" type="radio"/> 3 a 4h día<br><input type="radio"/> 5 a 6h día<br><input type="radio"/> 7 a 8h día<br><input type="radio"/> más de 8h día                                                                                                                                   |
| tiempo libre televisión ordenador leer | <input checked="" type="radio"/> menos 1h día<br><input type="radio"/> 1h día<br><input type="radio"/> 2h día<br><input type="radio"/> 3h día<br><input type="radio"/> 4h día<br><input type="radio"/> 5 a 6h día<br><input type="radio"/> mas 6h día                                                                                                                     |
| tiempo libre ejercicio o deporte       | <input checked="" type="radio"/> menos 1h semana<br><input type="radio"/> 1h semana<br><input type="radio"/> 2h semana<br><input type="radio"/> 3h semana<br><input type="radio"/> 4 a 5h semana<br><input type="radio"/> mas 5h semana                                                                                                                                   |
| como se considera                      | <input type="radio"/> sedentaria<br><input type="radio"/> poco activa<br><input type="radio"/> moderadamente activa<br><input checked="" type="radio"/> bastante activa<br><input type="radio"/> muy activa<br><input type="radio"/> no sabe                                                                                                                              |
| FUR                                    | [*DATA REMOVED*]                                                                                                                                                                                                                                                                                                                                                          |
| Semanas gestación 2T                   | [*DATA REMOVED*]                                                                                                                                                                                                                                                                                                                                                          |
| Días gestación 2T                      | [*DATA REMOVED*]                                                                                                                                                                                                                                                                                                                                                          |
| DBP 2T                                 | [*DATA REMOVED*]                                                                                                                                                                                                                                                                                                                                                          |
| CC 2T                                  | [*DATA REMOVED*]                                                                                                                                                                                                                                                                                                                                                          |
| AC 2T                                  | [*DATA REMOVED*]                                                                                                                                                                                                                                                                                                                                                          |

|                                                   |                                                                                                                                                                                                 |
|---------------------------------------------------|-------------------------------------------------------------------------------------------------------------------------------------------------------------------------------------------------|
| LF 2T                                             | [*DATA REMOVED*]                                                                                                                                                                                |
| PFE 2T (Hadlock)                                  | [*DATA REMOVED*]                                                                                                                                                                                |
| Semanas gestación 3T                              | [*DATA REMOVED*]                                                                                                                                                                                |
| días 3T                                           | [*DATA REMOVED*]                                                                                                                                                                                |
| DBP 3T                                            | [*DATA REMOVED*]                                                                                                                                                                                |
| CC 3T                                             | [*DATA REMOVED*]                                                                                                                                                                                |
| AC 3T                                             | [*DATA REMOVED*]                                                                                                                                                                                |
| LF 3T                                             | [*DATA REMOVED*]                                                                                                                                                                                |
| PFE 3T (Hadlock)                                  | [*DATA REMOVED*]                                                                                                                                                                                |
| Semanas de gestación final                        | [*DATA REMOVED*]                                                                                                                                                                                |
| días gestación final                              | [*DATA REMOVED*]                                                                                                                                                                                |
| Localización placenta                             | <input checked="" type="radio"/> anterior<br><input type="radio"/> lateral derecha<br><input type="radio"/> lateral izquierda<br><input type="radio"/> posterior<br><input type="radio"/> fondo |
| Presentación longitudinal cefálica                | <input type="radio"/> no<br><input checked="" type="radio"/> si                                                                                                                                 |
| Dorso                                             | <input checked="" type="radio"/> izquierda anterior<br><input type="radio"/> izquierda posterior<br><input type="radio"/> derecha anterior<br><input type="radio"/> derecha posterior           |
| diámetro biparietal                               | [*DATA REMOVED*]                                                                                                                                                                                |
| Circunferencia craneal                            | [*DATA REMOVED*]                                                                                                                                                                                |
| Circunferencia abdominal                          | [*DATA REMOVED*]                                                                                                                                                                                |
| Longitud de femur                                 | [*DATA REMOVED*]                                                                                                                                                                                |
| tejido celular subcutáneo a nivel del muslo en mm | [*DATA REMOVED*]                                                                                                                                                                                |
| tejido celular subcutáneo en abdomen en mm        | [*DATA REMOVED*]                                                                                                                                                                                |
| Volumen del muslo en cm3                          | [*DATA REMOVED*]                                                                                                                                                                                |
| Peso fetal estimado según fórmula de Hadlock      | [*DATA REMOVED*]                                                                                                                                                                                |

|                                               |                                                                                                                                               |
|-----------------------------------------------|-----------------------------------------------------------------------------------------------------------------------------------------------|
| Percentil                                     | [*DATA REMOVED*]                                                                                                                              |
| Peso fetal estimado según fórmula de Scioscia | <hr/>                                                                                                                                         |
| Peso fetal estimado según fórmula de LEE      | <hr/>                                                                                                                                         |
| Tipo de parto                                 | <input type="radio"/> eutocico<br><input checked="" type="radio"/> instrumentado/ventosa<br><input type="radio"/> cesarea                     |
| fecha de nacimiento                           | [*DATA REMOVED*]                                                                                                                              |
| Días entre exploración y nacimiento           | [*DATA REMOVED*]                                                                                                                              |
| Peso RN en g                                  | [*DATA REMOVED*]                                                                                                                              |
| sexo                                          | <input checked="" type="radio"/> mujer<br><input type="radio"/> hombre                                                                        |
| Apgar 1 minuto                                | [*DATA REMOVED*]                                                                                                                              |
| Apgar 5 minutos                               | [*DATA REMOVED*]                                                                                                                              |
| Apgar 10 minutos                              | <hr/>                                                                                                                                         |
| antecedente Covid durante gestación           | <input type="radio"/> Yes<br><input checked="" type="radio"/> No                                                                              |
| Nivel de estudios                             | <input type="radio"/> ninguno<br><input type="radio"/> primarios<br><input type="radio"/> secundarios<br><input type="radio"/> universitarios |

# Base\_datos\_estimacion\_peso\_fetal

|                                       |                                                                                                                                                                                                                                                                                      |
|---------------------------------------|--------------------------------------------------------------------------------------------------------------------------------------------------------------------------------------------------------------------------------------------------------------------------------------|
| Número de identificación participante | 179                                                                                                                                                                                                                                                                                  |
| CODIGO PARTICIPANTE                   |                                                                                                                                                                                                                                                                                      |
| Edad                                  | [*DATA REMOVED*]                                                                                                                                                                                                                                                                     |
| Gestaciones                           | <input type="radio"/> 1<br><input checked="" type="radio"/> 2<br><input type="radio"/> 3<br><input type="radio"/> mas de 3                                                                                                                                                           |
| partos                                | <input type="radio"/> 0<br><input checked="" type="radio"/> 1<br><input type="radio"/> 2<br><input type="radio"/> 3<br><input type="radio"/> mas de 3                                                                                                                                |
| cesáreas                              | <input checked="" type="radio"/> 0<br><input type="radio"/> 1<br><input type="radio"/> 2<br><input type="radio"/> 3<br><input type="radio"/> mas de 3                                                                                                                                |
| Abortos                               | <input checked="" type="radio"/> 0<br><input type="radio"/> 1<br><input type="radio"/> 2<br><input type="radio"/> 3<br><input type="radio"/> mas de 3                                                                                                                                |
| Tipo de gestacion                     | <input checked="" type="radio"/> espontanea<br><input type="radio"/> IAC inseminación artificial conyuge<br><input type="radio"/> IAD inseminación artificial donante<br><input type="radio"/> FIV Fecundación in Vitro<br><input type="radio"/> Ovodon FIV con donación de ovocitos |
| peso previo a embarazo                | [*DATA REMOVED*]                                                                                                                                                                                                                                                                     |
| Ganancia ponderal embarazo            | [*DATA REMOVED*]                                                                                                                                                                                                                                                                     |
| Talla madre                           | [*DATA REMOVED*]                                                                                                                                                                                                                                                                     |
| IMC previo embarazo                   | 25.076193048107708                                                                                                                                                                                                                                                                   |
| Patología obstétrica                  | <input checked="" type="radio"/> no<br><input type="radio"/> si                                                                                                                                                                                                                      |
| Diabetes pregestacional               | <input checked="" type="radio"/> no<br><input type="radio"/> si                                                                                                                                                                                                                      |
| Diabetes gestacional                  | <input checked="" type="radio"/> no<br><input type="radio"/> si                                                                                                                                                                                                                      |



|                                            |                                                                                                                                                                                      |
|--------------------------------------------|--------------------------------------------------------------------------------------------------------------------------------------------------------------------------------------|
| Diabetes gestacional con insulina          | <input checked="" type="radio"/> no<br><input type="radio"/> si                                                                                                                      |
| Diabetes gestacional con dieta y ejercicio | <input checked="" type="radio"/> no<br><input type="radio"/> si                                                                                                                      |
| Percentil fetos previos                    | <input type="radio"/> Nada<br><input type="radio"/> percentil menor de 10<br><input checked="" type="radio"/> percentil entre 10 y 90<br><input type="radio"/> percentil mayor de 90 |
| Exfumadora                                 | <input type="radio"/> Nada<br><input checked="" type="radio"/> menos de 5 años<br><input type="radio"/> 5 a 10 años<br><input type="radio"/> mayor o igual a 10 años                 |
| Hábito tabáquico                           | <input checked="" type="radio"/> no<br><input type="radio"/> si                                                                                                                      |
| fumadora                                   | [*DATA REMOVED*]                                                                                                                                                                     |
| Consumo otros tóxicos                      | <input checked="" type="radio"/> no<br><input type="radio"/> si                                                                                                                      |
| Hb 1T                                      | [*DATA REMOVED*]                                                                                                                                                                     |
| Htc 1T                                     | [*DATA REMOVED*]                                                                                                                                                                     |
| Hb 2T                                      | [*DATA REMOVED*]                                                                                                                                                                     |
| HTC 2T                                     | [*DATA REMOVED*]                                                                                                                                                                     |
| Hb 3T                                      | [*DATA REMOVED*]                                                                                                                                                                     |
| HTC 3T                                     | [*DATA REMOVED*]                                                                                                                                                                     |
| Suplemento FE oral                         | <input checked="" type="radio"/> si<br><input type="radio"/> no                                                                                                                      |
| Suplemento fe iv                           | <input type="radio"/> si<br><input checked="" type="radio"/> no                                                                                                                      |
| Transfusión                                | <input checked="" type="radio"/> no<br><input type="radio"/> si                                                                                                                      |
| Solicitada Vit D                           | <input type="radio"/> no<br><input checked="" type="radio"/> si                                                                                                                      |
| Deficit vit D                              | <input checked="" type="radio"/> no<br><input type="radio"/> si                                                                                                                      |
| Suplemento vit D                           | <input type="radio"/> si<br><input checked="" type="radio"/> no                                                                                                                      |

|                       |                                                                                                                                                                                                                                                                                                                                                                                                              |
|-----------------------|--------------------------------------------------------------------------------------------------------------------------------------------------------------------------------------------------------------------------------------------------------------------------------------------------------------------------------------------------------------------------------------------------------------|
| Dieta, cuestionario   | <input checked="" type="radio"/> sí<br><input type="radio"/> no                                                                                                                                                                                                                                                                                                                                              |
| Leche entera          | <input checked="" type="radio"/> Nunca o menos 1 vez al mes<br><input type="radio"/> 1 a 3 veces mes<br><input type="radio"/> 1 vez semana<br><input type="radio"/> 2 a 4 veces semana<br><input type="radio"/> 5 a 6 veces semana<br><input type="radio"/> 1 vez al día<br><input type="radio"/> 2 a 3 veces al día<br><input type="radio"/> 5 a 6 veces al día<br><input type="radio"/> más 6 veces al día |
| Leche semidesnatada   | <input checked="" type="radio"/> Nunca o menos 1 vez al mes<br><input type="radio"/> 1 a 3 veces mes<br><input type="radio"/> 1 vez semana<br><input type="radio"/> 2 a 4 veces semana<br><input type="radio"/> 5 a 6 veces semana<br><input type="radio"/> 1 vez al día<br><input type="radio"/> 2 a 3 veces al día<br><input type="radio"/> 5 a 6 veces al día<br><input type="radio"/> mas 6 veces al día |
| Leche desnatada       | <input checked="" type="radio"/> Nunca o menos 1 vez al mes<br><input type="radio"/> 1 a 3 veces mes<br><input type="radio"/> 1 vez semana<br><input type="radio"/> 2 a 4 veces semana<br><input type="radio"/> 5 a 6 veces semana<br><input type="radio"/> 1 vez al día<br><input type="radio"/> 2 a 3 veces al día<br><input type="radio"/> 5 a 6 veces al día<br><input type="radio"/> más 6 veces al día |
| Leche condensada      | <input checked="" type="radio"/> Nunca o menos 1 vez al mes<br><input type="radio"/> 1 a 3 veces mes<br><input type="radio"/> 1 vez semana<br><input type="radio"/> 2 a 4 veces semana<br><input type="radio"/> 5 a 6 veces semana<br><input type="radio"/> 1 vez al día<br><input type="radio"/> 2 a 3 veces al día<br><input type="radio"/> 5 a 6 veces al día<br><input type="radio"/> más 6 veces al día |
| nata o crema de leche | <input checked="" type="radio"/> Nunca o menos 1 vez al mes<br><input type="radio"/> 1 a 3 veces mes<br><input type="radio"/> 1 vez semana<br><input type="radio"/> 2 a 4 veces semana<br><input type="radio"/> 5 a 6 veces semana<br><input type="radio"/> 1 vez al día<br><input type="radio"/> 2 a 3 veces al día<br><input type="radio"/> 5 a 6 veces al día<br><input type="radio"/> más 6 veces al día |

|                                             |                                                                                                                                                                                                                                                                                                                                                                                                              |
|---------------------------------------------|--------------------------------------------------------------------------------------------------------------------------------------------------------------------------------------------------------------------------------------------------------------------------------------------------------------------------------------------------------------------------------------------------------------|
| Yogurt Entero                               | <input checked="" type="radio"/> Nunca o menos 1 vez al mes<br><input type="radio"/> 1 a 3 veces mes<br><input type="radio"/> 1 vez semana<br><input type="radio"/> 2 a 4 veces semana<br><input type="radio"/> 5 a 6 veces semana<br><input type="radio"/> 1 vez al día<br><input type="radio"/> 2 a 3 veces al día<br><input type="radio"/> 5 a 6 veces al día<br><input type="radio"/> más 6 veces al día |
| Yogurt desnatado                            | <input checked="" type="radio"/> Nunca o menos 1 vez al mes<br><input type="radio"/> 1 a 3 veces mes<br><input type="radio"/> 1 vez semana<br><input type="radio"/> 2 a 4 veces semana<br><input type="radio"/> 5 a 6 veces semana<br><input type="radio"/> 1 vez al día<br><input type="radio"/> 2 a 3 veces al día<br><input type="radio"/> 5 a 6 veces al día<br><input type="radio"/> más 6 veces al día |
| 100g requesón o queso blando o queso fresco | <input checked="" type="radio"/> Nunca o menos 1 vez al mes<br><input type="radio"/> 1 a 3 veces mes<br><input type="radio"/> 1 vez semana<br><input type="radio"/> 2 a 4 veces semana<br><input type="radio"/> 5 a 6 veces semana<br><input type="radio"/> 1 vez al día<br><input type="radio"/> 2 a 3 veces al día<br><input type="radio"/> 5 a 6 veces al día<br><input type="radio"/> más 6 veces al día |
| queso curado o semicurado o cremoso         | <input type="radio"/> Nunca o menos 1 vez al mes<br><input type="radio"/> 1 a 3 veces mes<br><input checked="" type="radio"/> 1 vez semana<br><input type="radio"/> 2 a 4 veces semana<br><input type="radio"/> 5 a 6 veces semana<br><input type="radio"/> 1 vez al día<br><input type="radio"/> 2 a 3 veces al día<br><input type="radio"/> 5 a 6 veces al día<br><input type="radio"/> más 6 veces al día |
| natillas flan pudding                       | <input checked="" type="radio"/> Nunca o menos 1 vez al mes<br><input type="radio"/> 1 a 3 veces mes<br><input type="radio"/> 1 vez semana<br><input type="radio"/> 2 a 4 veces semana<br><input type="radio"/> 5 a 6 veces semana<br><input type="radio"/> 1 vez al día<br><input type="radio"/> 2 a 3 veces al día<br><input type="radio"/> 5 a 6 veces al día<br><input type="radio"/> más 6 veces al día |
| Helado                                      | <input type="radio"/> Nunca o menos 1 vez al mes<br><input type="radio"/> 1 a 3 veces mes<br><input type="radio"/> 1 vez semana<br><input checked="" type="radio"/> 2 a 4 veces semana<br><input type="radio"/> 5 a 6 veces semana<br><input type="radio"/> 1 vez al día<br><input type="radio"/> 2 a 3 veces al día<br><input type="radio"/> 5 a 6 veces al día<br><input type="radio"/> más 6 veces al día |

|                                      |                                                                                                                                                                                                                                                                                                                                                                                                              |
|--------------------------------------|--------------------------------------------------------------------------------------------------------------------------------------------------------------------------------------------------------------------------------------------------------------------------------------------------------------------------------------------------------------------------------------------------------------|
| huevo                                | <input type="radio"/> Nunca o menos 1 vez al mes<br><input type="radio"/> 1 a 3 veces mes<br><input type="radio"/> 1 vez semana<br><input checked="" type="radio"/> 2 a 4 veces semana<br><input type="radio"/> 5 a 6 veces semana<br><input type="radio"/> 1 vez al día<br><input type="radio"/> 2 a 3 veces al día<br><input type="radio"/> 5 a 6 veces al día<br><input type="radio"/> más 6 veces al día |
| Pollo con piel                       | <input checked="" type="radio"/> Nunca o menos 1 vez al mes<br><input type="radio"/> 1 a 3 veces mes<br><input type="radio"/> 1 vez semana<br><input type="radio"/> 2 a 4 veces semana<br><input type="radio"/> 5 a 6 veces semana<br><input type="radio"/> 1 vez al día<br><input type="radio"/> 2 a 3 veces al día<br><input type="radio"/> 5 a 6 veces al día<br><input type="radio"/> más 6 veces al día |
| pollo sin piel                       | <input type="radio"/> Nunca o menos 1 vez al mes<br><input type="radio"/> 1 a 3 veces mes<br><input type="radio"/> 1 vez semana<br><input checked="" type="radio"/> 2 a 4 veces semana<br><input type="radio"/> 5 a 6 veces semana<br><input type="radio"/> 1 vez al día<br><input type="radio"/> 2 a 3 veces al día<br><input type="radio"/> 5 a 6 veces al día<br><input type="radio"/> más 6 veces al día |
| Ternera o cerdo o cordero            | <input type="radio"/> Nunca o menos 1 vez al mes<br><input type="radio"/> 1 a 3 veces mes<br><input type="radio"/> 1 vez semana<br><input checked="" type="radio"/> 2 a 4 veces semana<br><input type="radio"/> 5 a 6 veces semana<br><input type="radio"/> 1 vez al día<br><input type="radio"/> 2 a 3 veces al día<br><input type="radio"/> 5 a 6 veces al día<br><input type="radio"/> más 6 veces al día |
| carne caza: Conejo o codorniz o pato | <input checked="" type="radio"/> Nunca o menos 1 vez al mes<br><input type="radio"/> 1 a 3 veces mes<br><input type="radio"/> 1 vez semana<br><input type="radio"/> 2 a 4 veces semana<br><input type="radio"/> 5 a 6 veces semana<br><input type="radio"/> 1 vez al día<br><input type="radio"/> 2 a 3 veces al día<br><input type="radio"/> 5 a 6 veces al día<br><input type="radio"/> más 6 veces al día |
| Hígado de ternera o cerdo o pollo    | <input checked="" type="radio"/> Nunca o menos 1 vez al mes<br><input type="radio"/> 1 a 3 veces mes<br><input type="radio"/> 1 vez semana<br><input type="radio"/> 2 a 4 veces semana<br><input type="radio"/> 5 a 6 veces semana<br><input type="radio"/> 1 vez al día<br><input type="radio"/> 2 a 3 veces al día<br><input type="radio"/> 5 a 6 veces al día<br><input type="radio"/> más 6 veces al día |

---

Vísceras

- ☒ Nunca o menos 1 vez al mes  
☐ 1 a 3 veces mes  
☐ 1 vez semana  
☐ 2 a 4 veces semana  
☐ 5 a 6 veces semana  
☐ 1 vez al día  
☐ 2 a 3 veces al día  
☐ 5 a 6 veces al día  
☐ más 6 veces al día

---

Embutido

- ☒ Nunca o menos 1 vez al mes  
☐ 1 a 3 veces mes  
☐ 1 vez semana  
☐ 2 a 4 veces semana  
☐ 5 a 6 veces semana  
☐ 1 vez al día  
☐ 2 a 3 veces al día  
☐ 5 a 6 veces al día  
☐ más 6 veces al día

---

Salchicha o similar

- ☒ Nunca o menos 1 vez al mes  
☐ 1 a 3 veces mes  
☐ 1 vez semana  
☐ 2 a 4 veces semana  
☐ 5 a 6 veces semana  
☐ 1 vez al día  
☐ 2 a 3 veces al día  
☐ 5 a 6 veces al día  
☐ más 6 veces al día

---

Pate o foiegras

- ☒ Nunca o menos 1 vez al mes  
☐ 1 a 3 veces mes  
☐ 1 vez semana  
☐ 2 a 4 veces semana  
☐ 5 a 6 veces semana  
☐ 1 vez al día  
☐ 2 a 3 veces al día  
☐ 5 a 6 veces al día  
☐ más 6 veces al día

---

Hamburguesa

- ☐ Nunca o menos 1 vez al mes  
☐ 1 a 3 veces mes  
☒ 1 vez semana  
☐ 2 a 4 veces semana  
☐ 5 a 6 veces semana  
☐ 1 vez al día  
☐ 2 a 3 veces al día  
☐ 5 a 6 veces al día  
☐ más 6 veces al día

---

tocino o bacon

- ☒ Nunca o menos 1 vez al mes  
☐ 1 a 3 veces mes  
☐ 1 vez semana  
☐ 2 a 4 veces semana  
☐ 5 a 6 veces semana  
☐ 1 vez al día  
☐ 2 a 3 veces al día  
☐ 5 a 6 veces al día  
☐ más 6 veces al día

---

Pescado frito

- ☐ Nunca o menos 1 vez al mes  
☐ 1 a 3 veces mes  
☒ 1 vez semana  
☐ 2 a 4 veces semana  
☐ 5 a 6 veces semana  
☐ 1 vez al día  
☐ 2 a 3 veces al día  
☐ 5 a 6 veces al día  
☐ más 6 veces al día

---

pescado hervido blanco

- ☐ Nunca o menos 1 vez al mes  
☒ 1 a 3 veces mes  
☐ 1 vez semana  
☐ 2 a 4 veces semana  
☐ 5 a 6 veces semana  
☐ 1 vez al día  
☐ 2 a 3 veces al día  
☐ 5 a 6 veces al día  
☐ más 6 veces al día

---

pescado hervido azul

- ☒ Nunca o menos 1 vez al mes  
☐ 1 a 3 veces mes  
☐ 1 vez semana  
☐ 2 a 4 veces semana  
☐ 5 a 6 veces semana  
☐ 1 vez al día  
☐ 2 a 3 veces al día  
☐ 5 a 6 veces al día  
☐ más 6 veces al día

---

otros pescado azul

- ☒ Nunca o menos 1 vez al mes  
☐ 1 a 3 veces mes  
☐ 1 vez semana  
☐ 2 a 4 veces semana  
☐ 5 a 6 veces semana  
☐ 1 vez al día  
☐ 2 a 3 veces al día  
☐ 5 a 6 veces al día  
☐ más 6 veces al día

---

atun conserva

- ☐ Nunca o menos 1 vez al mes  
☒ 1 a 3 veces mes  
☐ 1 vez semana  
☐ 2 a 4 veces semana  
☐ 5 a 6 veces semana  
☐ 1 vez al día  
☐ 2 a 3 veces al día  
☐ 5 a 6 veces al día  
☐ más 6 veces al día

---

sardina conserva

- ☒ Nunca o menos 1 vez al mes  
☐ 1 a 3 veces mes  
☐ 1 vez semana  
☐ 2 a 4 veces semana  
☐ 5 a 6 veces semana  
☐ 1 vez al día  
☐ 2 a 3 veces al día  
☐ 5 a 6 veces al día  
☐ más 6 veces al día

|                                         |                                                                                                                                                                                                                                                                                                                                                                                                              |
|-----------------------------------------|--------------------------------------------------------------------------------------------------------------------------------------------------------------------------------------------------------------------------------------------------------------------------------------------------------------------------------------------------------------------------------------------------------------|
| pescado ahumado                         | <input type="radio"/> Nunca o menos 1 vez al mes<br><input type="radio"/> 1 a 3 veces mes<br><input checked="" type="radio"/> 1 vez semana<br><input type="radio"/> 2 a 4 veces semana<br><input type="radio"/> 5 a 6 veces semana<br><input type="radio"/> 1 vez al día<br><input type="radio"/> 2 a 3 veces al día<br><input type="radio"/> 5 a 6 veces al día<br><input type="radio"/> más 6 veces al día |
| almejas o mejillones o ostras unos 100g | <input type="radio"/> Nunca o menos 1 vez al mes<br><input checked="" type="radio"/> 1 a 3 veces mes<br><input type="radio"/> 1 vez semana<br><input type="radio"/> 2 a 4 veces semana<br><input type="radio"/> 5 a 6 veces semana<br><input type="radio"/> 1 vez al día<br><input type="radio"/> 2 a 3 veces al día<br><input type="radio"/> 5 a 6 veces al día<br><input type="radio"/> más 6 veces al día |
| calamar o chipiron o sepia unos 100g    | <input type="radio"/> Nunca o menos 1 vez al mes<br><input checked="" type="radio"/> 1 a 3 veces mes<br><input type="radio"/> 1 vez semana<br><input type="radio"/> 2 a 4 veces semana<br><input type="radio"/> 5 a 6 veces semana<br><input type="radio"/> 1 vez al día<br><input type="radio"/> 2 a 3 veces al día<br><input type="radio"/> 5 a 6 veces al día<br><input type="radio"/> más 6 veces al día |
| marisco unos 100g                       | <input type="radio"/> Nunca o menos 1 vez al mes<br><input checked="" type="radio"/> 1 a 3 veces mes<br><input type="radio"/> 1 vez semana<br><input type="radio"/> 2 a 4 veces semana<br><input type="radio"/> 5 a 6 veces semana<br><input type="radio"/> 1 vez al día<br><input type="radio"/> 2 a 3 veces al día<br><input type="radio"/> 5 a 6 veces al día<br><input type="radio"/> más 6 veces al día |
| Espinacas o acelgas cocinadas           | <input checked="" type="radio"/> Nunca o menos 1 vez al mes<br><input type="radio"/> 1 a 3 veces mes<br><input type="radio"/> 1 vez semana<br><input type="radio"/> 2 a 4 veces semana<br><input type="radio"/> 5 a 6 veces semana<br><input type="radio"/> 1 vez al día<br><input type="radio"/> 2 a 3 veces al día<br><input type="radio"/> 5 a 6 veces al día<br><input type="radio"/> más 6 veces al día |
| Col o coliflor o brocoli cocinado       | <input type="radio"/> Nunca o menos 1 vez al mes<br><input type="radio"/> 1 a 3 veces mes<br><input checked="" type="radio"/> 1 vez semana<br><input type="radio"/> 2 a 4 veces semana<br><input type="radio"/> 5 a 6 veces semana<br><input type="radio"/> 1 vez al día<br><input type="radio"/> 2 a 3 veces al día<br><input type="radio"/> 5 a 6 veces al día<br><input type="radio"/> más 6 veces al día |

---

Lechuga o endivia o escarola

- ☐ Nunca o menos 1 vez al mes  
☐ 1 a 3 veces mes  
☐ 1 vez semana  
☒ 2 a 4 veces semana  
☐ 5 a 6 veces semana  
☐ 1 vez al día  
☐ 2 a 3 veces al día  
☐ 5 a 6 veces al día  
☐ más 6 veces al día

---

tomate ensalada

- ☐ Nunca o menos 1 vez al mes  
☐ 1 a 3 veces mes  
☐ 1 vez semana  
☒ 2 a 4 veces semana  
☐ 5 a 6 veces semana  
☐ 1 vez al día  
☐ 2 a 3 veces al día  
☐ 5 a 6 veces al día  
☐ más 6 veces al día

---

cebolla

- ☐ Nunca o menos 1 vez al mes  
☐ 1 a 3 veces mes  
☐ 1 vez semana  
☒ 2 a 4 veces semana  
☐ 5 a 6 veces semana  
☐ 1 vez al día  
☐ 2 a 3 veces al día  
☐ 5 a 6 veces al día  
☐ más 6 veces al día

---

Zanahoria o calabaza

- ☐ Nunca o menos 1 vez al mes  
☐ 1 a 3 veces mes  
☐ 1 vez semana  
☒ 2 a 4 veces semana  
☐ 5 a 6 veces semana  
☐ 1 vez al día  
☐ 2 a 3 veces al día  
☐ 5 a 6 veces al día  
☐ más 6 veces al día

---

Judías verdes

- ☐ Nunca o menos 1 vez al mes  
☐ 1 a 3 veces mes  
☐ 1 vez semana  
☒ 2 a 4 veces semana  
☐ 5 a 6 veces semana  
☐ 1 vez al día  
☐ 2 a 3 veces al día  
☐ 5 a 6 veces al día  
☐ más 6 veces al día

---

Berenjena o calabacin o pepino

- ☐ Nunca o menos 1 vez al mes  
☐ 1 a 3 veces mes  
☐ 1 vez semana  
☒ 2 a 4 veces semana  
☐ 5 a 6 veces semana  
☐ 1 vez al día  
☐ 2 a 3 veces al día  
☐ 5 a 6 veces al día  
☐ más 6 veces al día



|                       |                                                                                                                                                                                                                                                                                                                                                                                                              |
|-----------------------|--------------------------------------------------------------------------------------------------------------------------------------------------------------------------------------------------------------------------------------------------------------------------------------------------------------------------------------------------------------------------------------------------------------|
| pimiento              | <input checked="" type="radio"/> Nunca o menos 1 vez al mes<br><input type="radio"/> 1 a 3 veces mes<br><input type="radio"/> 1 vez semana<br><input type="radio"/> 2 a 4 veces semana<br><input type="radio"/> 5 a 6 veces semana<br><input type="radio"/> 1 vez al día<br><input type="radio"/> 2 a 3 veces al día<br><input type="radio"/> 5 a 6 veces al día<br><input type="radio"/> más 6 veces al día |
| alcachofa             | <input type="radio"/> Nunca o menos 1 vez al mes<br><input type="radio"/> 1 a 3 veces mes<br><input type="radio"/> 1 vez semana<br><input checked="" type="radio"/> 2 a 4 veces semana<br><input type="radio"/> 5 a 6 veces semana<br><input type="radio"/> 1 vez al día<br><input type="radio"/> 2 a 3 veces al día<br><input type="radio"/> 5 a 6 veces al día<br><input type="radio"/> más 6 veces al día |
| espárragos            | <input checked="" type="radio"/> Nunca o menos 1 vez al mes<br><input type="radio"/> 1 a 3 veces mes<br><input type="radio"/> 1 vez semana<br><input type="radio"/> 2 a 4 veces semana<br><input type="radio"/> 5 a 6 veces semana<br><input type="radio"/> 1 vez al día<br><input type="radio"/> 2 a 3 veces al día<br><input type="radio"/> 5 a 6 veces al día<br><input type="radio"/> más 6 veces al día |
| maíz hervido          | <input checked="" type="radio"/> Nunca o menos 1 vez al mes<br><input type="radio"/> 1 a 3 veces mes<br><input type="radio"/> 1 vez semana<br><input type="radio"/> 2 a 4 veces semana<br><input type="radio"/> 5 a 6 veces semana<br><input type="radio"/> 1 vez al día<br><input type="radio"/> 2 a 3 veces al día<br><input type="radio"/> 5 a 6 veces al día<br><input type="radio"/> más 6 veces al día |
| legumbres             | <input type="radio"/> Nunca o menos 1 vez al mes<br><input type="radio"/> 1 a 3 veces mes<br><input checked="" type="radio"/> 1 vez semana<br><input type="radio"/> 2 a 4 veces semana<br><input type="radio"/> 5 a 6 veces semana<br><input type="radio"/> 1 vez al día<br><input type="radio"/> 2 a 3 veces al día<br><input type="radio"/> 5 a 6 veces al día<br><input type="radio"/> más 6 veces al día |
| naranjas o mandarinas | <input type="radio"/> Nunca o menos 1 vez al mes<br><input type="radio"/> 1 a 3 veces mes<br><input checked="" type="radio"/> 1 vez semana<br><input type="radio"/> 2 a 4 veces semana<br><input type="radio"/> 5 a 6 veces semana<br><input type="radio"/> 1 vez al día<br><input type="radio"/> 2 a 3 veces al día<br><input type="radio"/> 5 a 6 veces al día<br><input type="radio"/> más 6 veces al día |

|                       |                                                                                                                                                                                                                                                                                                                                                                                                              |
|-----------------------|--------------------------------------------------------------------------------------------------------------------------------------------------------------------------------------------------------------------------------------------------------------------------------------------------------------------------------------------------------------------------------------------------------------|
| zum natural fruta     | <input type="radio"/> Nunca o menos 1 vez al mes<br><input checked="" type="radio"/> 1 a 3 veces mes<br><input type="radio"/> 1 vez semana<br><input type="radio"/> 2 a 4 veces semana<br><input type="radio"/> 5 a 6 veces semana<br><input type="radio"/> 1 vez al día<br><input type="radio"/> 2 a 3 veces al día<br><input type="radio"/> 5 a 6 veces al día<br><input type="radio"/> más 6 veces al día |
| platano               | <input type="radio"/> Nunca o menos 1 vez al mes<br><input type="radio"/> 1 a 3 veces mes<br><input checked="" type="radio"/> 1 vez semana<br><input type="radio"/> 2 a 4 veces semana<br><input type="radio"/> 5 a 6 veces semana<br><input type="radio"/> 1 vez al día<br><input type="radio"/> 2 a 3 veces al día<br><input type="radio"/> 5 a 6 veces al día<br><input type="radio"/> más 6 veces al día |
| manzana o pera        | <input type="radio"/> Nunca o menos 1 vez al mes<br><input type="radio"/> 1 a 3 veces mes<br><input checked="" type="radio"/> 1 vez semana<br><input type="radio"/> 2 a 4 veces semana<br><input type="radio"/> 5 a 6 veces semana<br><input type="radio"/> 1 vez al día<br><input type="radio"/> 2 a 3 veces al día<br><input type="radio"/> 5 a 6 veces al día<br><input type="radio"/> más 6 veces al día |
| melocotón o nectarina | <input type="radio"/> Nunca o menos 1 vez al mes<br><input checked="" type="radio"/> 1 a 3 veces mes<br><input type="radio"/> 1 vez semana<br><input type="radio"/> 2 a 4 veces semana<br><input type="radio"/> 5 a 6 veces semana<br><input type="radio"/> 1 vez al día<br><input type="radio"/> 2 a 3 veces al día<br><input type="radio"/> 5 a 6 veces al día<br><input type="radio"/> más 6 veces al día |
| sandia o melon        | <input type="radio"/> Nunca o menos 1 vez al mes<br><input type="radio"/> 1 a 3 veces mes<br><input checked="" type="radio"/> 1 vez semana<br><input type="radio"/> 2 a 4 veces semana<br><input type="radio"/> 5 a 6 veces semana<br><input type="radio"/> 1 vez al día<br><input type="radio"/> 2 a 3 veces al día<br><input type="radio"/> 5 a 6 veces al día<br><input type="radio"/> más 6 veces al día |
| uva                   | <input type="radio"/> Nunca o menos 1 vez al mes<br><input type="radio"/> 1 a 3 veces mes<br><input checked="" type="radio"/> 1 vez semana<br><input type="radio"/> 2 a 4 veces semana<br><input type="radio"/> 5 a 6 veces semana<br><input type="radio"/> 1 vez al día<br><input type="radio"/> 2 a 3 veces al día<br><input type="radio"/> 5 a 6 veces al día<br><input type="radio"/> más 6 veces al día |

---

bruna o ciruela

- ☒ Nunca o menos 1 vez al mes  
☐ 1 a 3 veces mes  
☐ 1 vez semana  
☐ 2 a 4 veces semana  
☐ 5 a 6 veces semana  
☐ 1 vez al día  
☐ 2 a 3 veces al día  
☐ 5 a 6 veces al día  
☐ más 6 veces al día

---

kiwi

- ☒ Nunca o menos 1 vez al mes  
☐ 1 a 3 veces mes  
☐ 1 vez semana  
☐ 2 a 4 veces semana  
☐ 5 a 6 veces semana  
☐ 1 vez al día  
☐ 2 a 3 veces al día  
☐ 5 a 6 veces al día  
☐ más 6 veces al día

---

aceituna

- ☐ Nunca o menos 1 vez al mes  
☐ 1 a 3 veces mes  
☒ 1 vez semana  
☐ 2 a 4 veces semana  
☐ 5 a 6 veces semana  
☐ 1 vez al día  
☐ 2 a 3 veces al día  
☐ 5 a 6 veces al día  
☐ más 6 veces al día

---

frutos secos

- ☐ Nunca o menos 1 vez al mes  
☐ 1 a 3 veces mes  
☒ 1 vez semana  
☐ 2 a 4 veces semana  
☐ 5 a 6 veces semana  
☐ 1 vez al día  
☐ 2 a 3 veces al día  
☐ 5 a 6 veces al día  
☐ más 6 veces al día

---

pan blanco

- ☐ Nunca o menos 1 vez al mes  
☐ 1 a 3 veces mes  
☐ 1 vez semana  
☐ 2 a 4 veces semana  
☐ 5 a 6 veces semana  
☒ 1 vez al día  
☐ 2 a 3 veces al día  
☐ 5 a 6 veces al día  
☐ más 6 veces al día

---

pan integral

- ☒ Nunca o menos 1 vez al mes  
☐ 1 a 3 veces mes  
☐ 1 vez semana  
☐ 2 a 4 veces semana  
☐ 5 a 6 veces semana  
☐ 1 vez al día  
☐ 2 a 3 veces al día  
☐ 5 a 6 veces al día  
☐ más 6 veces al día

---

cereales desayuno

- ☒ Nunca o menos 1 vez al mes  
☐ 1 a 3 veces mes  
☐ 1 vez semana  
☐ 2 a 4 veces semana  
☐ 5 a 6 veces semana  
☐ 1 vez al día  
☐ 2 a 3 veces al día  
☐ 5 a 6 veces al día  
☐ más 6 veces al día

---

patatas fritas

- ☐ Nunca o menos 1 vez al mes  
☐ 1 a 3 veces mes  
☒ 1 vez semana  
☐ 2 a 4 veces semana  
☐ 5 a 6 veces semana  
☐ 1 vez al día  
☐ 2 a 3 veces al día  
☐ 5 a 6 veces al día  
☐ más 6 veces al día

---

patatas cocidas o asadas

- ☐ Nunca o menos 1 vez al mes  
☐ 1 a 3 veces mes  
☒ 1 vez semana  
☐ 2 a 4 veces semana  
☐ 5 a 6 veces semana  
☐ 1 vez al día  
☐ 2 a 3 veces al día  
☐ 5 a 6 veces al día  
☐ más 6 veces al día

---

bolsa papas

- ☒ Nunca o menos 1 vez al mes  
☐ 1 a 3 veces mes  
☐ 1 vez semana  
☐ 2 a 4 veces semana  
☐ 5 a 6 veces semana  
☐ 1 vez al día  
☐ 2 a 3 veces al día  
☐ 5 a 6 veces al día  
☐ más 6 veces al día

---

arroz cocinado

- ☐ Nunca o menos 1 vez al mes  
☐ 1 a 3 veces mes  
☐ 1 vez semana  
☒ 2 a 4 veces semana  
☐ 5 a 6 veces semana  
☐ 1 vez al día  
☐ 2 a 3 veces al día  
☐ 5 a 6 veces al día  
☐ más 6 veces al día

---

pasta

- ☐ Nunca o menos 1 vez al mes  
☐ 1 a 3 veces mes  
☐ 1 vez semana  
☒ 2 a 4 veces semana  
☐ 5 a 6 veces semana  
☐ 1 vez al día  
☐ 2 a 3 veces al día  
☐ 5 a 6 veces al día  
☐ más 6 veces al día

|                     |                                                                                                                                                                                                                                                                                                                                                                                                              |
|---------------------|--------------------------------------------------------------------------------------------------------------------------------------------------------------------------------------------------------------------------------------------------------------------------------------------------------------------------------------------------------------------------------------------------------------|
| pizza               | <input type="radio"/> Nunca o menos 1 vez al mes<br><input type="radio"/> 1 a 3 veces mes<br><input checked="" type="radio"/> 1 vez semana<br><input type="radio"/> 2 a 4 veces semana<br><input type="radio"/> 5 a 6 veces semana<br><input type="radio"/> 1 vez al día<br><input type="radio"/> 2 a 3 veces al día<br><input type="radio"/> 5 a 6 veces al día<br><input type="radio"/> más 6 veces al día |
| aceite oliva        | <input type="radio"/> Nunca o menos 1 vez al mes<br><input type="radio"/> 1 a 3 veces mes<br><input type="radio"/> 1 vez semana<br><input type="radio"/> 2 a 4 veces semana<br><input type="radio"/> 5 a 6 veces semana<br><input checked="" type="radio"/> 1 vez al día<br><input type="radio"/> 2 a 3 veces al día<br><input type="radio"/> 5 a 6 veces al día<br><input type="radio"/> más 6 veces al día |
| otros aceites       | <input checked="" type="radio"/> Nunca o menos 1 vez al mes<br><input type="radio"/> 1 a 3 veces mes<br><input type="radio"/> 1 vez semana<br><input type="radio"/> 2 a 4 veces semana<br><input type="radio"/> 5 a 6 veces semana<br><input type="radio"/> 1 vez al día<br><input type="radio"/> 2 a 3 veces al día<br><input type="radio"/> 5 a 6 veces al día<br><input type="radio"/> más 6 veces al día |
| margarina           | <input checked="" type="radio"/> Nunca o menos 1 vez al mes<br><input type="radio"/> 1 a 3 veces mes<br><input type="radio"/> 1 vez semana<br><input type="radio"/> 2 a 4 veces semana<br><input type="radio"/> 5 a 6 veces semana<br><input type="radio"/> 1 vez al día<br><input type="radio"/> 2 a 3 veces al día<br><input type="radio"/> 5 a 6 veces al día<br><input type="radio"/> más 6 veces al día |
| mantequilla         | <input checked="" type="radio"/> Nunca o menos 1 vez al mes<br><input type="radio"/> 1 a 3 veces mes<br><input type="radio"/> 1 vez semana<br><input type="radio"/> 2 a 4 veces semana<br><input type="radio"/> 5 a 6 veces semana<br><input type="radio"/> 1 vez al día<br><input type="radio"/> 2 a 3 veces al día<br><input type="radio"/> 5 a 6 veces al día<br><input type="radio"/> más 6 veces al día |
| galletas tipo maria | <input checked="" type="radio"/> Nunca o menos 1 vez al mes<br><input type="radio"/> 1 a 3 veces mes<br><input type="radio"/> 1 vez semana<br><input type="radio"/> 2 a 4 veces semana<br><input type="radio"/> 5 a 6 veces semana<br><input type="radio"/> 1 vez al día<br><input type="radio"/> 2 a 3 veces al día<br><input type="radio"/> 5 a 6 veces al día<br><input type="radio"/> más 6 veces al día |

---

galletas chocolate

- ☐ Nunca o menos 1 vez al mes  
☐ 1 a 3 veces mes  
☒ 1 vez semana  
☐ 2 a 4 veces semana  
☐ 5 a 6 veces semana  
☐ 1 vez al día  
☐ 2 a 3 veces al día  
☐ 5 a 6 veces al día  
☐ más 6 veces al día

---

bolleria

- ☐ Nunca o menos 1 vez al mes  
☐ 1 a 3 veces mes  
☒ 1 vez semana  
☐ 2 a 4 veces semana  
☐ 5 a 6 veces semana  
☐ 1 vez al día  
☐ 2 a 3 veces al día  
☐ 5 a 6 veces al día  
☐ más 6 veces al día

---

chocolate o bombones

- ☒ Nunca o menos 1 vez al mes  
☐ 1 a 3 veces mes  
☐ 1 vez semana  
☐ 2 a 4 veces semana  
☐ 5 a 6 veces semana  
☐ 1 vez al día  
☐ 2 a 3 veces al día  
☐ 5 a 6 veces al día  
☐ más 6 veces al día

---

chocolate polvo o colacao

- ☐ Nunca o menos 1 vez al mes  
☐ 1 a 3 veces mes  
☐ 1 vez semana  
☐ 2 a 4 veces semana  
☐ 5 a 6 veces semana  
☒ 1 vez al día  
☐ 2 a 3 veces al día  
☐ 5 a 6 veces al día  
☐ más 6 veces al día

---

vino tinto

- ☒ Nunca o menos 1 vez al mes  
☐ 1 a 3 veces mes  
☐ 1 vez semana  
☐ 2 a 4 veces semana  
☐ 5 a 6 veces semana  
☐ 1 vez al día  
☐ 2 a 3 veces al día  
☐ 5 a 6 veces al día  
☐ más 6 veces al día

---

vino blanco

- ☒ Nunca o menos 1 vez al mes  
☐ 1 a 3 veces mes  
☐ 1 vez semana  
☐ 2 a 4 veces semana  
☐ 5 a 6 veces semana  
☐ 1 vez al día  
☐ 2 a 3 veces al día  
☐ 5 a 6 veces al día  
☐ más 6 veces al día

---

|                    |                                                                                                                                                                                                                                                                                                                                                                                                              |
|--------------------|--------------------------------------------------------------------------------------------------------------------------------------------------------------------------------------------------------------------------------------------------------------------------------------------------------------------------------------------------------------------------------------------------------------|
| vino seco o vermut | <input checked="" type="radio"/> Nunca o menos 1 vez al mes<br><input type="radio"/> 1 a 3 veces mes<br><input type="radio"/> 1 vez semana<br><input type="radio"/> 2 a 4 veces semana<br><input type="radio"/> 5 a 6 veces semana<br><input type="radio"/> 1 vez al día<br><input type="radio"/> 2 a 3 veces al día<br><input type="radio"/> 5 a 6 veces al día<br><input type="radio"/> más 6 veces al día |
|--------------------|--------------------------------------------------------------------------------------------------------------------------------------------------------------------------------------------------------------------------------------------------------------------------------------------------------------------------------------------------------------------------------------------------------------|

---

|         |                                                                                                                                                                                                                                                                                                                                                                                                              |
|---------|--------------------------------------------------------------------------------------------------------------------------------------------------------------------------------------------------------------------------------------------------------------------------------------------------------------------------------------------------------------------------------------------------------------|
| cerveza | <input checked="" type="radio"/> Nunca o menos 1 vez al mes<br><input type="radio"/> 1 a 3 veces mes<br><input type="radio"/> 1 vez semana<br><input type="radio"/> 2 a 4 veces semana<br><input type="radio"/> 5 a 6 veces semana<br><input type="radio"/> 1 vez al día<br><input type="radio"/> 2 a 3 veces al día<br><input type="radio"/> 5 a 6 veces al día<br><input type="radio"/> más 6 veces al día |
|---------|--------------------------------------------------------------------------------------------------------------------------------------------------------------------------------------------------------------------------------------------------------------------------------------------------------------------------------------------------------------------------------------------------------------|

---

|                     |                                                                                                                                                                                                                                                                                                                                                                                                              |
|---------------------|--------------------------------------------------------------------------------------------------------------------------------------------------------------------------------------------------------------------------------------------------------------------------------------------------------------------------------------------------------------------------------------------------------------|
| cerveza sin alcohol | <input checked="" type="radio"/> Nunca o menos 1 vez al mes<br><input type="radio"/> 1 a 3 veces mes<br><input type="radio"/> 1 vez semana<br><input type="radio"/> 2 a 4 veces semana<br><input type="radio"/> 5 a 6 veces semana<br><input type="radio"/> 1 vez al día<br><input type="radio"/> 2 a 3 veces al día<br><input type="radio"/> 5 a 6 veces al día<br><input type="radio"/> más 6 veces al día |
|---------------------|--------------------------------------------------------------------------------------------------------------------------------------------------------------------------------------------------------------------------------------------------------------------------------------------------------------------------------------------------------------------------------------------------------------|

---

|         |                                                                                                                                                                                                                                                                                                                                                                                                              |
|---------|--------------------------------------------------------------------------------------------------------------------------------------------------------------------------------------------------------------------------------------------------------------------------------------------------------------------------------------------------------------------------------------------------------------|
| licores | <input checked="" type="radio"/> Nunca o menos 1 vez al mes<br><input type="radio"/> 1 a 3 veces mes<br><input type="radio"/> 1 vez semana<br><input type="radio"/> 2 a 4 veces semana<br><input type="radio"/> 5 a 6 veces semana<br><input type="radio"/> 1 vez al día<br><input type="radio"/> 2 a 3 veces al día<br><input type="radio"/> 5 a 6 veces al día<br><input type="radio"/> más 6 veces al día |
|---------|--------------------------------------------------------------------------------------------------------------------------------------------------------------------------------------------------------------------------------------------------------------------------------------------------------------------------------------------------------------------------------------------------------------|

---

|                       |                                                                                                                                                                                                                                                                                                                                                                                                              |
|-----------------------|--------------------------------------------------------------------------------------------------------------------------------------------------------------------------------------------------------------------------------------------------------------------------------------------------------------------------------------------------------------------------------------------------------------|
| ginebra o ron o vodka | <input checked="" type="radio"/> Nunca o menos 1 vez al mes<br><input type="radio"/> 1 a 3 veces mes<br><input type="radio"/> 1 vez semana<br><input type="radio"/> 2 a 4 veces semana<br><input type="radio"/> 5 a 6 veces semana<br><input type="radio"/> 1 vez al día<br><input type="radio"/> 2 a 3 veces al día<br><input type="radio"/> 5 a 6 veces al día<br><input type="radio"/> más 6 veces al día |
|-----------------------|--------------------------------------------------------------------------------------------------------------------------------------------------------------------------------------------------------------------------------------------------------------------------------------------------------------------------------------------------------------------------------------------------------------|

---

|                 |                                                                                                                                                                                                                                                                                                                                                                                                              |
|-----------------|--------------------------------------------------------------------------------------------------------------------------------------------------------------------------------------------------------------------------------------------------------------------------------------------------------------------------------------------------------------------------------------------------------------|
| refresco normal | <input type="radio"/> Nunca o menos 1 vez al mes<br><input checked="" type="radio"/> 1 a 3 veces mes<br><input type="radio"/> 1 vez semana<br><input type="radio"/> 2 a 4 veces semana<br><input type="radio"/> 5 a 6 veces semana<br><input type="radio"/> 1 vez al día<br><input type="radio"/> 2 a 3 veces al día<br><input type="radio"/> 5 a 6 veces al día<br><input type="radio"/> más 6 veces al día |
|-----------------|--------------------------------------------------------------------------------------------------------------------------------------------------------------------------------------------------------------------------------------------------------------------------------------------------------------------------------------------------------------------------------------------------------------|

---

|                          |                                                                                                                                                                                                                                                                                                                                                                                                              |
|--------------------------|--------------------------------------------------------------------------------------------------------------------------------------------------------------------------------------------------------------------------------------------------------------------------------------------------------------------------------------------------------------------------------------------------------------|
| refresco sin azúcar      | <input checked="" type="radio"/> Nunca o menos 1 vez al mes<br><input type="radio"/> 1 a 3 veces mes<br><input type="radio"/> 1 vez semana<br><input type="radio"/> 2 a 4 veces semana<br><input type="radio"/> 5 a 6 veces semana<br><input type="radio"/> 1 vez al día<br><input type="radio"/> 2 a 3 veces al día<br><input type="radio"/> 5 a 6 veces al día<br><input type="radio"/> más 6 veces al día |
| Agua del grifo           | <input checked="" type="radio"/> Nunca o menos 1 vez al mes<br><input type="radio"/> 1 a 3 veces mes<br><input type="radio"/> 1 vez semana<br><input type="radio"/> 2 a 4 veces semana<br><input type="radio"/> 5 a 6 veces semana<br><input type="radio"/> 1 vez al día<br><input type="radio"/> 2 a 3 veces al día<br><input type="radio"/> 5 a 6 veces al día<br><input type="radio"/> más 6 veces al día |
| agua embotellada sin gas | <input type="radio"/> Nunca o menos 1 vez al mes<br><input type="radio"/> 1 a 3 veces mes<br><input type="radio"/> 1 vez semana<br><input type="radio"/> 2 a 4 veces semana<br><input type="radio"/> 5 a 6 veces semana<br><input type="radio"/> 1 vez al día<br><input type="radio"/> 2 a 3 veces al día<br><input checked="" type="radio"/> 5 a 6 veces al día<br><input type="radio"/> más 6 veces al día |
| agua embotellada con gas | <input checked="" type="radio"/> Nunca o menos 1 vez al mes<br><input type="radio"/> 1 a 3 veces mes<br><input type="radio"/> 1 vez semana<br><input type="radio"/> 2 a 4 veces semana<br><input type="radio"/> 5 a 6 veces semana<br><input type="radio"/> 1 vez al día<br><input type="radio"/> 2 a 3 veces al día<br><input type="radio"/> 5 a 6 veces al día<br><input type="radio"/> más 6 veces al día |
| zumو frutas embasado     | <input checked="" type="radio"/> Nunca o menos 1 vez al mes<br><input type="radio"/> 1 a 3 veces mes<br><input type="radio"/> 1 vez semana<br><input type="radio"/> 2 a 4 veces semana<br><input type="radio"/> 5 a 6 veces semana<br><input type="radio"/> 1 vez al día<br><input type="radio"/> 2 a 3 veces al día<br><input type="radio"/> 5 a 6 veces al día<br><input type="radio"/> más 6 veces al día |
| cafe                     | <input checked="" type="radio"/> Nunca o menos 1 vez al mes<br><input type="radio"/> 1 a 3 veces mes<br><input type="radio"/> 1 vez semana<br><input type="radio"/> 2 a 4 veces semana<br><input type="radio"/> 5 a 6 veces semana<br><input type="radio"/> 1 vez al día<br><input type="radio"/> 2 a 3 veces al día<br><input type="radio"/> 5 a 6 veces al día<br><input type="radio"/> más 6 veces al día |



---

cafe descafeinado

- ☐ Nunca o menos 1 vez al mes  
☒ 1 a 3 veces mes  
☐ 1 vez semana  
☐ 2 a 4 veces semana  
☐ 5 a 6 veces semana  
☐ 1 vez al día  
☐ 2 a 3 veces al día  
☐ 5 a 6 veces al día  
☐ más 6 veces al día

---

te o infusión

- ☒ Nunca o menos 1 vez al mes  
☐ 1 a 3 veces mes  
☐ 1 vez semana  
☐ 2 a 4 veces semana  
☐ 5 a 6 veces semana  
☐ 1 vez al día  
☐ 2 a 3 veces al día  
☐ 5 a 6 veces al día  
☐ más 6 veces al día

---

sopa o puré verduras

- ☐ Nunca o menos 1 vez al mes  
☐ 1 a 3 veces mes  
☐ 1 vez semana  
☒ 2 a 4 veces semana  
☐ 5 a 6 veces semana  
☐ 1 vez al día  
☐ 2 a 3 veces al día  
☐ 5 a 6 veces al día  
☐ más 6 veces al día

---

croquetas pollo jamón

- ☐ Nunca o menos 1 vez al mes  
☒ 1 a 3 veces mes  
☐ 1 vez semana  
☐ 2 a 4 veces semana  
☐ 5 a 6 veces semana  
☐ 1 vez al día  
☐ 2 a 3 veces al día  
☐ 5 a 6 veces al día  
☐ más 6 veces al día

---

croquetas pescado

- ☒ Nunca o menos 1 vez al mes  
☐ 1 a 3 veces mes  
☐ 1 vez semana  
☐ 2 a 4 veces semana  
☐ 5 a 6 veces semana  
☐ 1 vez al día  
☐ 2 a 3 veces al día  
☐ 5 a 6 veces al día  
☐ más 6 veces al día

---

mayonesa

- ☒ Nunca o menos 1 vez al mes  
☐ 1 a 3 veces mes  
☐ 1 vez semana  
☐ 2 a 4 veces semana  
☐ 5 a 6 veces semana  
☐ 1 vez al día  
☐ 2 a 3 veces al día  
☐ 5 a 6 veces al día  
☐ más 6 veces al día

---

salsa tomate

- ☐ Nunca o menos 1 vez al mes  
☐ 1 a 3 veces mes  
☐ 1 vez semana  
☒ 2 a 4 veces semana  
☐ 5 a 6 veces semana  
☐ 1 vez al día  
☐ 2 a 3 veces al día  
☐ 5 a 6 veces al día  
☐ más 6 veces al día

---

ketchup

- ☒ Nunca o menos 1 vez al mes  
☐ 1 a 3 veces mes  
☐ 1 vez semana  
☐ 2 a 4 veces semana  
☐ 5 a 6 veces semana  
☐ 1 vez al día  
☐ 2 a 3 veces al día  
☐ 5 a 6 veces al día  
☐ más 6 veces al día

---

sal

- ☐ Nunca o menos 1 vez al mes  
☐ 1 a 3 veces mes  
☐ 1 vez semana  
☐ 2 a 4 veces semana  
☐ 5 a 6 veces semana  
☐ 1 vez al día  
☒ 2 a 3 veces al día  
☐ 5 a 6 veces al día  
☐ más 6 veces al día

---

ajo

- ☐ Nunca o menos 1 vez al mes  
☐ 1 a 3 veces mes  
☐ 1 vez semana  
☐ 2 a 4 veces semana  
☐ 5 a 6 veces semana  
☒ 1 vez al día  
☐ 2 a 3 veces al día  
☐ 5 a 6 veces al día  
☐ más 6 veces al día

---

mermelada o miel

- ☒ Nunca o menos 1 vez al mes  
☐ 1 a 3 veces mes  
☐ 1 vez semana  
☐ 2 a 4 veces semana  
☐ 5 a 6 veces semana  
☐ 1 vez al día  
☐ 2 a 3 veces al día  
☐ 5 a 6 veces al día  
☐ más 6 veces al día

---

azúcar

- ☐ Nunca o menos 1 vez al mes  
☒ 1 a 3 veces mes  
☐ 1 vez semana  
☐ 2 a 4 veces semana  
☐ 5 a 6 veces semana  
☐ 1 vez al día  
☐ 2 a 3 veces al día  
☐ 5 a 6 veces al día  
☐ más 6 veces al día

|                                       |                                                                                                                                                                                                                                                                                                                                                                                                                                                                                                                               |
|---------------------------------------|-------------------------------------------------------------------------------------------------------------------------------------------------------------------------------------------------------------------------------------------------------------------------------------------------------------------------------------------------------------------------------------------------------------------------------------------------------------------------------------------------------------------------------|
| Otro alimento                         | [*DATA REMOVED*]                                                                                                                                                                                                                                                                                                                                                                                                                                                                                                              |
| suplementos vitamínicos               | <input type="radio"/> si<br><input checked="" type="radio"/> no                                                                                                                                                                                                                                                                                                                                                                                                                                                               |
| suplementos vitamínicos               |                                                                                                                                                                                                                                                                                                                                                                                                                                                                                                                               |
| dieta previa                          | <input type="radio"/> si<br><input checked="" type="radio"/> no                                                                                                                                                                                                                                                                                                                                                                                                                                                               |
| motivo dieta                          | <input checked="" type="radio"/> no dieta<br><input type="radio"/> control peso<br><input type="radio"/> control colesterol<br><input type="radio"/> control diabetes<br><input type="radio"/> problemas estómago<br><input type="radio"/> problemas vesícula o hepáticos<br><input type="radio"/> HTA o cardiopatía<br><input type="radio"/> problemas renales<br><input type="radio"/> alergia alimentaria<br><input type="radio"/> ácido úrico elevado<br><input type="radio"/> vegetariana<br><input type="radio"/> otros |
| cambio alimentos año previo gestación | <input checked="" type="radio"/> si<br><input type="radio"/> no                                                                                                                                                                                                                                                                                                                                                                                                                                                               |
| cambio lácteos                        | <input type="radio"/> eliminado<br><input type="radio"/> disminuido<br><input checked="" type="radio"/> igual<br><input type="radio"/> aumentado<br><input type="radio"/> no sabe                                                                                                                                                                                                                                                                                                                                             |
| cambio huevos                         | <input type="radio"/> eliminado<br><input type="radio"/> disminuido<br><input checked="" type="radio"/> igual<br><input type="radio"/> aumentado<br><input type="radio"/> no sabe                                                                                                                                                                                                                                                                                                                                             |
| cambio carne                          | <input type="radio"/> eliminado<br><input type="radio"/> disminuido<br><input checked="" type="radio"/> igual<br><input type="radio"/> aumentado<br><input type="radio"/> no sabe                                                                                                                                                                                                                                                                                                                                             |
| cambio pescado                        | <input type="radio"/> eliminado<br><input type="radio"/> disminuido<br><input checked="" type="radio"/> igual<br><input type="radio"/> aumentado<br><input type="radio"/> no sabe                                                                                                                                                                                                                                                                                                                                             |
| cambio verduras                       | <input type="radio"/> eliminado<br><input type="radio"/> disminuido<br><input checked="" type="radio"/> igual<br><input type="radio"/> aumentado<br><input type="radio"/> no sabe                                                                                                                                                                                                                                                                                                                                             |

|                            |                                                                                                                                                                                                                        |
|----------------------------|------------------------------------------------------------------------------------------------------------------------------------------------------------------------------------------------------------------------|
| cambio legumbres           | <input type="radio"/> eliminado<br><input type="radio"/> disminuido<br><input checked="" type="radio"/> igual<br><input type="radio"/> aumentado<br><input type="radio"/> no sabe                                      |
| cambio fruta               | <input type="radio"/> eliminado<br><input type="radio"/> disminuido<br><input checked="" type="radio"/> igual<br><input type="radio"/> aumentado<br><input type="radio"/> no sabe                                      |
| cambio pan                 | <input type="radio"/> eliminado<br><input type="radio"/> disminuido<br><input checked="" type="radio"/> igual<br><input type="radio"/> aumentado<br><input type="radio"/> no sabe                                      |
| cambio aceite oliva        | <input type="radio"/> eliminado<br><input checked="" type="radio"/> disminuido<br><input type="radio"/> igual<br><input type="radio"/> aumentado<br><input type="radio"/> no sabe                                      |
| cambio mante o margarina   | <input type="radio"/> eliminado<br><input type="radio"/> disminuido<br><input checked="" type="radio"/> igual<br><input type="radio"/> aumentado<br><input type="radio"/> no sabe                                      |
| cambio azúcar y dulces     | <input type="radio"/> eliminado<br><input type="radio"/> disminuido<br><input type="radio"/> igual<br><input checked="" type="radio"/> aumentado<br><input type="radio"/> no sabe                                      |
| cambio bebidas alcohólicas | <input checked="" type="radio"/> eliminado<br><input type="radio"/> disminuido<br><input type="radio"/> igual<br><input type="radio"/> aumentado<br><input type="radio"/> no sabe                                      |
| frecuencia comidas fritas  | <input type="radio"/> a diario<br><input type="radio"/> 5 a 6 veces semana<br><input type="radio"/> 2 a 4 veces semana<br><input type="radio"/> 1 vez semana<br><input checked="" type="radio"/> menos de 1 vez semana |
| carne                      | <input type="radio"/> no como<br><input type="radio"/> cruda<br><input checked="" type="radio"/> poco hecha<br><input type="radio"/> hecha<br><input type="radio"/> muy hecha                                          |
| grasa visible carne        | <input type="radio"/> quita toda<br><input checked="" type="radio"/> quita mayoría<br><input type="radio"/> quita un poco<br><input type="radio"/> no quita nada                                                       |

|                                |                                                                                                                                                                                                                                                          |
|--------------------------------|----------------------------------------------------------------------------------------------------------------------------------------------------------------------------------------------------------------------------------------------------------|
| cocina carne                   | <input checked="" type="radio"/> a la plancha<br><input type="radio"/> a la parrilla<br><input type="radio"/> asada<br><input type="radio"/> frita<br><input type="radio"/> guisada                                                                      |
| tostado quemado carne          | <input checked="" type="radio"/> nunca<br><input type="radio"/> 1 vez mes<br><input type="radio"/> 2 a 3 veces mes<br><input type="radio"/> 1 vez semana<br><input type="radio"/> 2 a 3 semanas                                                          |
| tostado quemado pescado        | <input checked="" type="radio"/> nunca<br><input type="radio"/> 1 vez mes<br><input type="radio"/> 2 a 3 veces mes<br><input type="radio"/> 1 vez semana<br><input type="radio"/> 2 a 3 semanas                                                          |
| socarrat paella                | <input checked="" type="radio"/> nunca<br><input type="radio"/> 1 vez mes<br><input type="radio"/> 2 a 3 veces mes<br><input type="radio"/> 1 vez semana<br><input type="radio"/> 2 a 3 semanas                                                          |
| grasa o aceite cocinar         | <input type="radio"/> mantequilla<br><input type="radio"/> margarina<br><input type="radio"/> aceite oliva<br><input checked="" type="radio"/> aceite oliva virgen extra<br><input type="radio"/> aceite vegetal<br><input type="radio"/> mezcla aceites |
| grasa aceite aliñar            | <input type="radio"/> mantequilla<br><input type="radio"/> margarina<br><input type="radio"/> aceite oliva<br><input checked="" type="radio"/> aceite oliva virgen extra<br><input type="radio"/> aceite vegetal<br><input type="radio"/> mezcla aceites |
| grasa aceite freir             | <input type="radio"/> mantequilla<br><input type="radio"/> margarina<br><input type="radio"/> aceite oliva<br><input checked="" type="radio"/> aceite oliva virgen extra<br><input type="radio"/> aceite vegetal<br><input type="radio"/> mezcla aceites |
| Ejercicio cuestionario         | <input checked="" type="radio"/> si<br><input type="radio"/> no                                                                                                                                                                                          |
| horas de sueño incluido siesta | [*DATA REMOVED*]                                                                                                                                                                                                                                         |
| minutos siesta                 | [*DATA REMOVED*]                                                                                                                                                                                                                                         |
| horas televisión semana        | [*DATA REMOVED*]                                                                                                                                                                                                                                         |

|                                        |                                                                                                                                                                                                                                                                                                                                                                           |
|----------------------------------------|---------------------------------------------------------------------------------------------------------------------------------------------------------------------------------------------------------------------------------------------------------------------------------------------------------------------------------------------------------------------------|
| actividad trabajo                      | <input type="radio"/> casi siempre sentado<br><input checked="" type="radio"/> sentado 50 por cien<br><input type="radio"/> casi siempre de pie, quieto<br><input type="radio"/> casi siempre levantado caminando y llevando pocas cosas<br><input type="radio"/> casi siempre levantado, caminando y llevado muchas cosas<br><input type="radio"/> trabajo manual pesado |
| tiempo caminar o bici al día           | <input type="radio"/> casi nunca<br><input type="radio"/> menos 20min día<br><input type="radio"/> 20 a 40 min día<br><input checked="" type="radio"/> 40 a 60 min día<br><input type="radio"/> 1h o 1h y media día<br><input type="radio"/> más de 1h y media al día                                                                                                     |
| tiempo tareas casa al día              | <input type="radio"/> menos de 1h día<br><input type="radio"/> 1 a 2h día<br><input checked="" type="radio"/> 3 a 4h día<br><input type="radio"/> 5 a 6h día<br><input type="radio"/> 7 a 8h día<br><input type="radio"/> más de 8h día                                                                                                                                   |
| tiempo libre televisión ordenador leer | <input type="radio"/> menos 1h día<br><input type="radio"/> 1h día<br><input type="radio"/> 2h día<br><input type="radio"/> 3h día<br><input checked="" type="radio"/> 4h día<br><input type="radio"/> 5 a 6h día<br><input type="radio"/> mas 6h día                                                                                                                     |
| tiempo libre ejercicio o deporte       | <input checked="" type="radio"/> menos 1h semana<br><input type="radio"/> 1h semana<br><input type="radio"/> 2h semana<br><input type="radio"/> 3h semana<br><input type="radio"/> 4 a 5h semana<br><input type="radio"/> mas 5h semana                                                                                                                                   |
| como se considera                      | <input type="radio"/> sedentaria<br><input checked="" type="radio"/> poco activa<br><input type="radio"/> moderadamente activa<br><input type="radio"/> bastante activa<br><input type="radio"/> muy activa<br><input type="radio"/> no sabe                                                                                                                              |
| FUR                                    | [*DATA REMOVED*]                                                                                                                                                                                                                                                                                                                                                          |
| Semanas gestación 2T                   | [*DATA REMOVED*]                                                                                                                                                                                                                                                                                                                                                          |
| Días gestación 2T                      | [*DATA REMOVED*]                                                                                                                                                                                                                                                                                                                                                          |
| DBP 2T                                 | [*DATA REMOVED*]                                                                                                                                                                                                                                                                                                                                                          |
| CC 2T                                  | [*DATA REMOVED*]                                                                                                                                                                                                                                                                                                                                                          |
| AC 2T                                  | [*DATA REMOVED*]                                                                                                                                                                                                                                                                                                                                                          |

|                                                   |                                                                                                                                                                                                 |
|---------------------------------------------------|-------------------------------------------------------------------------------------------------------------------------------------------------------------------------------------------------|
| LF 2T                                             | [*DATA REMOVED*]                                                                                                                                                                                |
| PFE 2T (Hadlock)                                  | [*DATA REMOVED*]                                                                                                                                                                                |
| Semanas gestación 3T                              | [*DATA REMOVED*]                                                                                                                                                                                |
| días 3T                                           | [*DATA REMOVED*]                                                                                                                                                                                |
| DBP 3T                                            | [*DATA REMOVED*]                                                                                                                                                                                |
| CC 3T                                             | [*DATA REMOVED*]                                                                                                                                                                                |
| AC 3T                                             | [*DATA REMOVED*]                                                                                                                                                                                |
| LF 3T                                             | [*DATA REMOVED*]                                                                                                                                                                                |
| PFE 3T (Hadlock)                                  | [*DATA REMOVED*]                                                                                                                                                                                |
| Semanas de gestación final                        | [*DATA REMOVED*]                                                                                                                                                                                |
| días gestación final                              | [*DATA REMOVED*]                                                                                                                                                                                |
| Localización placenta                             | <input type="radio"/> anterior<br><input type="radio"/> lateral derecha<br><input type="radio"/> lateral izquierda<br><input checked="" type="radio"/> posterior<br><input type="radio"/> fondo |
| Presentación longitudinal cefálica                | <input type="radio"/> no<br><input checked="" type="radio"/> si                                                                                                                                 |
| Dorso                                             | <input type="radio"/> izquierda anterior<br><input checked="" type="radio"/> izquierda posterior<br><input type="radio"/> derecha anterior<br><input type="radio"/> derecha posterior           |
| diámetro biparietal                               | [*DATA REMOVED*]                                                                                                                                                                                |
| Circunferencia craneal                            | [*DATA REMOVED*]                                                                                                                                                                                |
| Circunferencia abdominal                          | [*DATA REMOVED*]                                                                                                                                                                                |
| Longitud de femur                                 | [*DATA REMOVED*]                                                                                                                                                                                |
| tejido celular subcutáneo a nivel del muslo en mm | [*DATA REMOVED*]                                                                                                                                                                                |
| tejido celular subcutáneo en abdomen en mm        | [*DATA REMOVED*]                                                                                                                                                                                |
| Volumen del muslo en cm3                          | [*DATA REMOVED*]                                                                                                                                                                                |
| Peso fetal estimado según fórmula de Hadlock      | [*DATA REMOVED*]                                                                                                                                                                                |

|                                               |                                                                                                                                                          |
|-----------------------------------------------|----------------------------------------------------------------------------------------------------------------------------------------------------------|
| Percentil                                     | [*DATA REMOVED*]                                                                                                                                         |
| Peso fetal estimado según fórmula de Scioscia | <hr/>                                                                                                                                                    |
| Peso fetal estimado según fórmula de LEE      | <hr/>                                                                                                                                                    |
| Tipo de parto                                 | <input type="radio"/> eutocico<br><input checked="" type="radio"/> instrumentado/ventosa<br><input type="radio"/> cesarea                                |
| fecha de nacimiento                           | [*DATA REMOVED*]                                                                                                                                         |
| Días entre exploración y nacimiento           | [*DATA REMOVED*]                                                                                                                                         |
| Peso RN en g                                  | [*DATA REMOVED*]                                                                                                                                         |
| sexo                                          | <input type="radio"/> mujer<br><input checked="" type="radio"/> hombre                                                                                   |
| Apgar 1 minuto                                | [*DATA REMOVED*]                                                                                                                                         |
| Apgar 5 minutos                               | [*DATA REMOVED*]                                                                                                                                         |
| Apgar 10 minutos                              | <hr/>                                                                                                                                                    |
| antecedente Covid durante gestación           | <input type="radio"/> Yes<br><input checked="" type="radio"/> No                                                                                         |
| Nivel de estudios                             | <input type="radio"/> ninguno<br><input type="radio"/> primarios<br><input checked="" type="radio"/> secundarios<br><input type="radio"/> universitarios |



# Base\_datos\_estimacion\_peso\_fetal

|                                       |                                                                                                                                                                                                                                                                                      |
|---------------------------------------|--------------------------------------------------------------------------------------------------------------------------------------------------------------------------------------------------------------------------------------------------------------------------------------|
| Número de identificación participante | 180                                                                                                                                                                                                                                                                                  |
| CODIGO PARTICIPANTE                   |                                                                                                                                                                                                                                                                                      |
| Edad                                  | [*DATA REMOVED*]                                                                                                                                                                                                                                                                     |
| Gestaciones                           | <input type="radio"/> 1<br><input checked="" type="radio"/> 2<br><input type="radio"/> 3<br><input type="radio"/> mas de 3                                                                                                                                                           |
| partos                                | <input type="radio"/> 0<br><input checked="" type="radio"/> 1<br><input type="radio"/> 2<br><input type="radio"/> 3<br><input type="radio"/> mas de 3                                                                                                                                |
| cesáreas                              | <input checked="" type="radio"/> 0<br><input type="radio"/> 1<br><input type="radio"/> 2<br><input type="radio"/> 3<br><input type="radio"/> mas de 3                                                                                                                                |
| Abortos                               | <input checked="" type="radio"/> 0<br><input type="radio"/> 1<br><input type="radio"/> 2<br><input type="radio"/> 3<br><input type="radio"/> mas de 3                                                                                                                                |
| Tipo de gestacion                     | <input checked="" type="radio"/> espontanea<br><input type="radio"/> IAC inseminación artificial conyuge<br><input type="radio"/> IAD inseminación artificial donante<br><input type="radio"/> FIV Fecundación in Vitro<br><input type="radio"/> Ovodon FIV con donación de ovocitos |
| peso previo a embarazo                | [*DATA REMOVED*]                                                                                                                                                                                                                                                                     |
| Ganancia ponderal embarazo            | [*DATA REMOVED*]                                                                                                                                                                                                                                                                     |
| Talla madre                           | [*DATA REMOVED*]                                                                                                                                                                                                                                                                     |
| IMC previo embarazo                   | 17.99307958477509                                                                                                                                                                                                                                                                    |
| Patología obstétrica                  | <input checked="" type="radio"/> no<br><input type="radio"/> si                                                                                                                                                                                                                      |
| Diabetes pregestacional               | <input checked="" type="radio"/> no<br><input type="radio"/> si                                                                                                                                                                                                                      |
| Diabetes gestacional                  | <input checked="" type="radio"/> no<br><input type="radio"/> si                                                                                                                                                                                                                      |

|                                            |                                                                                                                                                                                      |
|--------------------------------------------|--------------------------------------------------------------------------------------------------------------------------------------------------------------------------------------|
| Diabetes gestacional con insulina          | <input checked="" type="radio"/> no<br><input type="radio"/> si                                                                                                                      |
| Diabetes gestacional con dieta y ejercicio | <input checked="" type="radio"/> no<br><input type="radio"/> si                                                                                                                      |
| Percentil fetos previos                    | <input type="radio"/> Nada<br><input type="radio"/> percentil menor de 10<br><input checked="" type="radio"/> percentil entre 10 y 90<br><input type="radio"/> percentil mayor de 90 |
| Exfumadora                                 | <input checked="" type="radio"/> Nada<br><input type="radio"/> menos de 5 años<br><input type="radio"/> 5 a 10 años<br><input type="radio"/> mayor o igual a 10 años                 |
| Hábito tabáquico                           | <input checked="" type="radio"/> no<br><input type="radio"/> si                                                                                                                      |
| fumadora                                   | [*DATA REMOVED*]                                                                                                                                                                     |
| Consumo otros tóxicos                      | <input checked="" type="radio"/> no<br><input type="radio"/> si                                                                                                                      |
| Hb 1T                                      | [*DATA REMOVED*]                                                                                                                                                                     |
| Htc 1T                                     | [*DATA REMOVED*]                                                                                                                                                                     |
| Hb 2T                                      | _____                                                                                                                                                                                |
| HTC 2T                                     | _____                                                                                                                                                                                |
| Hb 3T                                      | _____                                                                                                                                                                                |
| HTC 3T                                     | _____                                                                                                                                                                                |
| Suplemento FE oral                         | <input checked="" type="radio"/> si<br><input type="radio"/> no                                                                                                                      |
| Suplemento fe iv                           | <input type="radio"/> si<br><input checked="" type="radio"/> no                                                                                                                      |
| Transfusión                                | <input checked="" type="radio"/> no<br><input type="radio"/> si                                                                                                                      |
| Solicitada Vit D                           | <input checked="" type="radio"/> no<br><input type="radio"/> si                                                                                                                      |
| Deficit vit D                              | <input type="radio"/> no<br><input type="radio"/> si                                                                                                                                 |

|                       |                                                                                                                                                                                                                                                                                                                                                                                                              |
|-----------------------|--------------------------------------------------------------------------------------------------------------------------------------------------------------------------------------------------------------------------------------------------------------------------------------------------------------------------------------------------------------------------------------------------------------|
| Suplemento vit D      | <input type="radio"/> si<br><input type="radio"/> no                                                                                                                                                                                                                                                                                                                                                         |
| Dieta, cuestionario   | <input checked="" type="radio"/> si<br><input type="radio"/> no                                                                                                                                                                                                                                                                                                                                              |
| Leche entera          | <input checked="" type="radio"/> Nunca o menos 1 vez al mes<br><input type="radio"/> 1 a 3 veces mes<br><input type="radio"/> 1 vez semana<br><input type="radio"/> 2 a 4 veces semana<br><input type="radio"/> 5 a 6 veces semana<br><input type="radio"/> 1 vez al día<br><input type="radio"/> 2 a 3 veces al día<br><input type="radio"/> 5 a 6 veces al día<br><input type="radio"/> más 6 veces al día |
| Leche semidesnatada   | <input checked="" type="radio"/> Nunca o menos 1 vez al mes<br><input type="radio"/> 1 a 3 veces mes<br><input type="radio"/> 1 vez semana<br><input type="radio"/> 2 a 4 veces semana<br><input type="radio"/> 5 a 6 veces semana<br><input type="radio"/> 1 vez al día<br><input type="radio"/> 2 a 3 veces al día<br><input type="radio"/> 5 a 6 veces al día<br><input type="radio"/> mas 6 veces al día |
| Leche desnatada       | <input type="radio"/> Nunca o menos 1 vez al mes<br><input type="radio"/> 1 a 3 veces mes<br><input type="radio"/> 1 vez semana<br><input checked="" type="radio"/> 2 a 4 veces semana<br><input type="radio"/> 5 a 6 veces semana<br><input type="radio"/> 1 vez al día<br><input type="radio"/> 2 a 3 veces al día<br><input type="radio"/> 5 a 6 veces al día<br><input type="radio"/> más 6 veces al día |
| Leche condensada      | <input checked="" type="radio"/> Nunca o menos 1 vez al mes<br><input type="radio"/> 1 a 3 veces mes<br><input type="radio"/> 1 vez semana<br><input type="radio"/> 2 a 4 veces semana<br><input type="radio"/> 5 a 6 veces semana<br><input type="radio"/> 1 vez al día<br><input type="radio"/> 2 a 3 veces al día<br><input type="radio"/> 5 a 6 veces al día<br><input type="radio"/> más 6 veces al día |
| nata o crema de leche | <input checked="" type="radio"/> Nunca o menos 1 vez al mes<br><input type="radio"/> 1 a 3 veces mes<br><input type="radio"/> 1 vez semana<br><input type="radio"/> 2 a 4 veces semana<br><input type="radio"/> 5 a 6 veces semana<br><input type="radio"/> 1 vez al día<br><input type="radio"/> 2 a 3 veces al día<br><input type="radio"/> 5 a 6 veces al día<br><input type="radio"/> más 6 veces al día |

---

Yogurt Entero

- ☒ Nunca o menos 1 vez al mes  
☐ 1 a 3 veces mes  
☐ 1 vez semana  
☐ 2 a 4 veces semana  
☐ 5 a 6 veces semana  
☐ 1 vez al día  
☐ 2 a 3 veces al día  
☐ 5 a 6 veces al día  
☐ más 6 veces al día

---

Yogurt desnatado

- ☐ Nunca o menos 1 vez al mes  
☒ 1 a 3 veces mes  
☐ 1 vez semana  
☐ 2 a 4 veces semana  
☐ 5 a 6 veces semana  
☐ 1 vez al día  
☐ 2 a 3 veces al día  
☐ 5 a 6 veces al día  
☐ más 6 veces al día

---

100g requesón o queso blando o queso fresco

- ☐ Nunca o menos 1 vez al mes  
☐ 1 a 3 veces mes  
☒ 1 vez semana  
☐ 2 a 4 veces semana  
☐ 5 a 6 veces semana  
☐ 1 vez al día  
☐ 2 a 3 veces al día  
☐ 5 a 6 veces al día  
☐ más 6 veces al día

---

queso curado o semicurado o cremoso

- ☐ Nunca o menos 1 vez al mes  
☐ 1 a 3 veces mes  
☐ 1 vez semana  
☒ 2 a 4 veces semana  
☐ 5 a 6 veces semana  
☐ 1 vez al día  
☐ 2 a 3 veces al día  
☐ 5 a 6 veces al día  
☐ más 6 veces al día

---

natillas flan pudding

- ☒ Nunca o menos 1 vez al mes  
☐ 1 a 3 veces mes  
☐ 1 vez semana  
☐ 2 a 4 veces semana  
☐ 5 a 6 veces semana  
☐ 1 vez al día  
☐ 2 a 3 veces al día  
☐ 5 a 6 veces al día  
☐ más 6 veces al día

---

Helado

- ☐ Nunca o menos 1 vez al mes  
☒ 1 a 3 veces mes  
☐ 1 vez semana  
☐ 2 a 4 veces semana  
☐ 5 a 6 veces semana  
☐ 1 vez al día  
☐ 2 a 3 veces al día  
☐ 5 a 6 veces al día  
☐ más 6 veces al día

|                                      |                                                                                                                                                                                                                                                                                                                                                                                                              |
|--------------------------------------|--------------------------------------------------------------------------------------------------------------------------------------------------------------------------------------------------------------------------------------------------------------------------------------------------------------------------------------------------------------------------------------------------------------|
| huevo                                | <input type="radio"/> Nunca o menos 1 vez al mes<br><input type="radio"/> 1 a 3 veces mes<br><input checked="" type="radio"/> 1 vez semana<br><input type="radio"/> 2 a 4 veces semana<br><input type="radio"/> 5 a 6 veces semana<br><input type="radio"/> 1 vez al día<br><input type="radio"/> 2 a 3 veces al día<br><input type="radio"/> 5 a 6 veces al día<br><input type="radio"/> más 6 veces al día |
| Pollo con piel                       | <input type="radio"/> Nunca o menos 1 vez al mes<br><input type="radio"/> 1 a 3 veces mes<br><input checked="" type="radio"/> 1 vez semana<br><input type="radio"/> 2 a 4 veces semana<br><input type="radio"/> 5 a 6 veces semana<br><input type="radio"/> 1 vez al día<br><input type="radio"/> 2 a 3 veces al día<br><input type="radio"/> 5 a 6 veces al día<br><input type="radio"/> más 6 veces al día |
| pollo sin piel                       | <input type="radio"/> Nunca o menos 1 vez al mes<br><input type="radio"/> 1 a 3 veces mes<br><input type="radio"/> 1 vez semana<br><input type="radio"/> 2 a 4 veces semana<br><input type="radio"/> 5 a 6 veces semana<br><input type="radio"/> 1 vez al día<br><input type="radio"/> 2 a 3 veces al día<br><input type="radio"/> 5 a 6 veces al día<br><input type="radio"/> más 6 veces al día            |
| Ternera o cerdo o cordero            | <input type="radio"/> Nunca o menos 1 vez al mes<br><input type="radio"/> 1 a 3 veces mes<br><input type="radio"/> 1 vez semana<br><input checked="" type="radio"/> 2 a 4 veces semana<br><input type="radio"/> 5 a 6 veces semana<br><input type="radio"/> 1 vez al día<br><input type="radio"/> 2 a 3 veces al día<br><input type="radio"/> 5 a 6 veces al día<br><input type="radio"/> más 6 veces al día |
| carne caza: Conejo o codorniz o pato | <input checked="" type="radio"/> Nunca o menos 1 vez al mes<br><input type="radio"/> 1 a 3 veces mes<br><input type="radio"/> 1 vez semana<br><input type="radio"/> 2 a 4 veces semana<br><input type="radio"/> 5 a 6 veces semana<br><input type="radio"/> 1 vez al día<br><input type="radio"/> 2 a 3 veces al día<br><input type="radio"/> 5 a 6 veces al día<br><input type="radio"/> más 6 veces al día |
| Hígado de ternera o cerdo o pollo    | <input checked="" type="radio"/> Nunca o menos 1 vez al mes<br><input type="radio"/> 1 a 3 veces mes<br><input type="radio"/> 1 vez semana<br><input type="radio"/> 2 a 4 veces semana<br><input type="radio"/> 5 a 6 veces semana<br><input type="radio"/> 1 vez al día<br><input type="radio"/> 2 a 3 veces al día<br><input type="radio"/> 5 a 6 veces al día<br><input type="radio"/> más 6 veces al día |

---

Vísceras

- ☒ Nunca o menos 1 vez al mes  
☐ 1 a 3 veces mes  
☐ 1 vez semana  
☐ 2 a 4 veces semana  
☐ 5 a 6 veces semana  
☐ 1 vez al día  
☐ 2 a 3 veces al día  
☐ 5 a 6 veces al día  
☐ más 6 veces al día

---

Embutido

- ☒ Nunca o menos 1 vez al mes  
☐ 1 a 3 veces mes  
☐ 1 vez semana  
☐ 2 a 4 veces semana  
☐ 5 a 6 veces semana  
☐ 1 vez al día  
☐ 2 a 3 veces al día  
☐ 5 a 6 veces al día  
☐ más 6 veces al día

---

Salchicha o similar

- ☒ Nunca o menos 1 vez al mes  
☐ 1 a 3 veces mes  
☐ 1 vez semana  
☐ 2 a 4 veces semana  
☐ 5 a 6 veces semana  
☐ 1 vez al día  
☐ 2 a 3 veces al día  
☐ 5 a 6 veces al día  
☐ más 6 veces al día

---

Pate o foiegras

- ☒ Nunca o menos 1 vez al mes  
☐ 1 a 3 veces mes  
☐ 1 vez semana  
☐ 2 a 4 veces semana  
☐ 5 a 6 veces semana  
☐ 1 vez al día  
☐ 2 a 3 veces al día  
☐ 5 a 6 veces al día  
☐ más 6 veces al día

---

Hamburguesa

- ☐ Nunca o menos 1 vez al mes  
☐ 1 a 3 veces mes  
☒ 1 vez semana  
☐ 2 a 4 veces semana  
☐ 5 a 6 veces semana  
☐ 1 vez al día  
☐ 2 a 3 veces al día  
☐ 5 a 6 veces al día  
☐ más 6 veces al día

---

tocino o bacon

- ☐ Nunca o menos 1 vez al mes  
☒ 1 a 3 veces mes  
☐ 1 vez semana  
☐ 2 a 4 veces semana  
☐ 5 a 6 veces semana  
☐ 1 vez al día  
☐ 2 a 3 veces al día  
☐ 5 a 6 veces al día  
☐ más 6 veces al día

---

|               |                                                                                                                                                                                                                                                                                                                                                                                                              |
|---------------|--------------------------------------------------------------------------------------------------------------------------------------------------------------------------------------------------------------------------------------------------------------------------------------------------------------------------------------------------------------------------------------------------------------|
| Pescado frito | <input type="radio"/> Nunca o menos 1 vez al mes<br><input checked="" type="radio"/> 1 a 3 veces mes<br><input type="radio"/> 1 vez semana<br><input type="radio"/> 2 a 4 veces semana<br><input type="radio"/> 5 a 6 veces semana<br><input type="radio"/> 1 vez al día<br><input type="radio"/> 2 a 3 veces al día<br><input type="radio"/> 5 a 6 veces al día<br><input type="radio"/> más 6 veces al día |
|---------------|--------------------------------------------------------------------------------------------------------------------------------------------------------------------------------------------------------------------------------------------------------------------------------------------------------------------------------------------------------------------------------------------------------------|

---

|                        |                                                                                                                                                                                                                                                                                                                                                                                                              |
|------------------------|--------------------------------------------------------------------------------------------------------------------------------------------------------------------------------------------------------------------------------------------------------------------------------------------------------------------------------------------------------------------------------------------------------------|
| pescado hervido blanco | <input type="radio"/> Nunca o menos 1 vez al mes<br><input type="radio"/> 1 a 3 veces mes<br><input type="radio"/> 1 vez semana<br><input checked="" type="radio"/> 2 a 4 veces semana<br><input type="radio"/> 5 a 6 veces semana<br><input type="radio"/> 1 vez al día<br><input type="radio"/> 2 a 3 veces al día<br><input type="radio"/> 5 a 6 veces al día<br><input type="radio"/> más 6 veces al día |
|------------------------|--------------------------------------------------------------------------------------------------------------------------------------------------------------------------------------------------------------------------------------------------------------------------------------------------------------------------------------------------------------------------------------------------------------|

---

|                      |                                                                                                                                                                                                                                                                                                                                                                                                              |
|----------------------|--------------------------------------------------------------------------------------------------------------------------------------------------------------------------------------------------------------------------------------------------------------------------------------------------------------------------------------------------------------------------------------------------------------|
| pescado hervido azul | <input checked="" type="radio"/> Nunca o menos 1 vez al mes<br><input type="radio"/> 1 a 3 veces mes<br><input type="radio"/> 1 vez semana<br><input type="radio"/> 2 a 4 veces semana<br><input type="radio"/> 5 a 6 veces semana<br><input type="radio"/> 1 vez al día<br><input type="radio"/> 2 a 3 veces al día<br><input type="radio"/> 5 a 6 veces al día<br><input type="radio"/> más 6 veces al día |
|----------------------|--------------------------------------------------------------------------------------------------------------------------------------------------------------------------------------------------------------------------------------------------------------------------------------------------------------------------------------------------------------------------------------------------------------|

---

|                    |                                                                                                                                                                                                                                                                                                                                                                                                              |
|--------------------|--------------------------------------------------------------------------------------------------------------------------------------------------------------------------------------------------------------------------------------------------------------------------------------------------------------------------------------------------------------------------------------------------------------|
| otros pescado azul | <input type="radio"/> Nunca o menos 1 vez al mes<br><input type="radio"/> 1 a 3 veces mes<br><input type="radio"/> 1 vez semana<br><input checked="" type="radio"/> 2 a 4 veces semana<br><input type="radio"/> 5 a 6 veces semana<br><input type="radio"/> 1 vez al día<br><input type="radio"/> 2 a 3 veces al día<br><input type="radio"/> 5 a 6 veces al día<br><input type="radio"/> más 6 veces al día |
|--------------------|--------------------------------------------------------------------------------------------------------------------------------------------------------------------------------------------------------------------------------------------------------------------------------------------------------------------------------------------------------------------------------------------------------------|

---

|               |                                                                                                                                                                                                                                                                                                                                                                                                              |
|---------------|--------------------------------------------------------------------------------------------------------------------------------------------------------------------------------------------------------------------------------------------------------------------------------------------------------------------------------------------------------------------------------------------------------------|
| atun conserva | <input type="radio"/> Nunca o menos 1 vez al mes<br><input type="radio"/> 1 a 3 veces mes<br><input checked="" type="radio"/> 1 vez semana<br><input type="radio"/> 2 a 4 veces semana<br><input type="radio"/> 5 a 6 veces semana<br><input type="radio"/> 1 vez al día<br><input type="radio"/> 2 a 3 veces al día<br><input type="radio"/> 5 a 6 veces al día<br><input type="radio"/> más 6 veces al día |
|---------------|--------------------------------------------------------------------------------------------------------------------------------------------------------------------------------------------------------------------------------------------------------------------------------------------------------------------------------------------------------------------------------------------------------------|

---

|                  |                                                                                                                                                                                                                                                                                                                                                                                                              |
|------------------|--------------------------------------------------------------------------------------------------------------------------------------------------------------------------------------------------------------------------------------------------------------------------------------------------------------------------------------------------------------------------------------------------------------|
| sardina conserva | <input type="radio"/> Nunca o menos 1 vez al mes<br><input type="radio"/> 1 a 3 veces mes<br><input checked="" type="radio"/> 1 vez semana<br><input type="radio"/> 2 a 4 veces semana<br><input type="radio"/> 5 a 6 veces semana<br><input type="radio"/> 1 vez al día<br><input type="radio"/> 2 a 3 veces al día<br><input type="radio"/> 5 a 6 veces al día<br><input type="radio"/> más 6 veces al día |
|------------------|--------------------------------------------------------------------------------------------------------------------------------------------------------------------------------------------------------------------------------------------------------------------------------------------------------------------------------------------------------------------------------------------------------------|

---

|                                         |                                                                                                                                                                                                                                                                                                                                                                                                              |
|-----------------------------------------|--------------------------------------------------------------------------------------------------------------------------------------------------------------------------------------------------------------------------------------------------------------------------------------------------------------------------------------------------------------------------------------------------------------|
| pescado ahumado                         | <input checked="" type="radio"/> Nunca o menos 1 vez al mes<br><input type="radio"/> 1 a 3 veces mes<br><input type="radio"/> 1 vez semana<br><input type="radio"/> 2 a 4 veces semana<br><input type="radio"/> 5 a 6 veces semana<br><input type="radio"/> 1 vez al día<br><input type="radio"/> 2 a 3 veces al día<br><input type="radio"/> 5 a 6 veces al día<br><input type="radio"/> más 6 veces al día |
| almejas o mejillones o ostras unos 100g | <input type="radio"/> Nunca o menos 1 vez al mes<br><input type="radio"/> 1 a 3 veces mes<br><input checked="" type="radio"/> 1 vez semana<br><input type="radio"/> 2 a 4 veces semana<br><input type="radio"/> 5 a 6 veces semana<br><input type="radio"/> 1 vez al día<br><input type="radio"/> 2 a 3 veces al día<br><input type="radio"/> 5 a 6 veces al día<br><input type="radio"/> más 6 veces al día |
| calamar o chipiron o sepia unos 100g    | <input type="radio"/> Nunca o menos 1 vez al mes<br><input type="radio"/> 1 a 3 veces mes<br><input checked="" type="radio"/> 1 vez semana<br><input type="radio"/> 2 a 4 veces semana<br><input type="radio"/> 5 a 6 veces semana<br><input type="radio"/> 1 vez al día<br><input type="radio"/> 2 a 3 veces al día<br><input type="radio"/> 5 a 6 veces al día<br><input type="radio"/> más 6 veces al día |
| marisco unos 100g                       | <input type="radio"/> Nunca o menos 1 vez al mes<br><input checked="" type="radio"/> 1 a 3 veces mes<br><input type="radio"/> 1 vez semana<br><input type="radio"/> 2 a 4 veces semana<br><input type="radio"/> 5 a 6 veces semana<br><input type="radio"/> 1 vez al día<br><input type="radio"/> 2 a 3 veces al día<br><input type="radio"/> 5 a 6 veces al día<br><input type="radio"/> más 6 veces al día |
| Espinacas o acelgas cocinadas           | <input checked="" type="radio"/> Nunca o menos 1 vez al mes<br><input type="radio"/> 1 a 3 veces mes<br><input type="radio"/> 1 vez semana<br><input type="radio"/> 2 a 4 veces semana<br><input type="radio"/> 5 a 6 veces semana<br><input type="radio"/> 1 vez al día<br><input type="radio"/> 2 a 3 veces al día<br><input type="radio"/> 5 a 6 veces al día<br><input type="radio"/> más 6 veces al día |
| Col o coliflor o brocoli cocinado       | <input type="radio"/> Nunca o menos 1 vez al mes<br><input type="radio"/> 1 a 3 veces mes<br><input checked="" type="radio"/> 1 vez semana<br><input type="radio"/> 2 a 4 veces semana<br><input type="radio"/> 5 a 6 veces semana<br><input type="radio"/> 1 vez al día<br><input type="radio"/> 2 a 3 veces al día<br><input type="radio"/> 5 a 6 veces al día<br><input type="radio"/> más 6 veces al día |



---

Lechuga o endivia o escarola

- ☐ Nunca o menos 1 vez al mes  
☐ 1 a 3 veces mes  
☒ 1 vez semana  
☐ 2 a 4 veces semana  
☐ 5 a 6 veces semana  
☐ 1 vez al día  
☐ 2 a 3 veces al día  
☐ 5 a 6 veces al día  
☐ más 6 veces al día

---

tomate ensalada

- ☐ Nunca o menos 1 vez al mes  
☐ 1 a 3 veces mes  
☐ 1 vez semana  
☒ 2 a 4 veces semana  
☐ 5 a 6 veces semana  
☐ 1 vez al día  
☐ 2 a 3 veces al día  
☐ 5 a 6 veces al día  
☐ más 6 veces al día

---

cebolla

- ☐ Nunca o menos 1 vez al mes  
☐ 1 a 3 veces mes  
☒ 1 vez semana  
☐ 2 a 4 veces semana  
☐ 5 a 6 veces semana  
☐ 1 vez al día  
☐ 2 a 3 veces al día  
☐ 5 a 6 veces al día  
☐ más 6 veces al día

---

Zanahoria o calabaza

- ☐ Nunca o menos 1 vez al mes  
☐ 1 a 3 veces mes  
☐ 1 vez semana  
☒ 2 a 4 veces semana  
☐ 5 a 6 veces semana  
☐ 1 vez al día  
☐ 2 a 3 veces al día  
☐ 5 a 6 veces al día  
☐ más 6 veces al día

---

Judías verdes

- ☐ Nunca o menos 1 vez al mes  
☐ 1 a 3 veces mes  
☒ 1 vez semana  
☐ 2 a 4 veces semana  
☐ 5 a 6 veces semana  
☐ 1 vez al día  
☐ 2 a 3 veces al día  
☐ 5 a 6 veces al día  
☐ más 6 veces al día

---

Berenjena o calabacin o pepino

- ☐ Nunca o menos 1 vez al mes  
☐ 1 a 3 veces mes  
☐ 1 vez semana  
☒ 2 a 4 veces semana  
☐ 5 a 6 veces semana  
☐ 1 vez al día  
☐ 2 a 3 veces al día  
☐ 5 a 6 veces al día  
☐ más 6 veces al día

---

pimiento

- ☐ Nunca o menos 1 vez al mes  
☐ 1 a 3 veces mes  
☒ 1 vez semana  
☐ 2 a 4 veces semana  
☐ 5 a 6 veces semana  
☐ 1 vez al día  
☐ 2 a 3 veces al día  
☐ 5 a 6 veces al día  
☐ más 6 veces al día

---

alcachofa

- ☐ Nunca o menos 1 vez al mes  
☐ 1 a 3 veces mes  
☒ 1 vez semana  
☐ 2 a 4 veces semana  
☐ 5 a 6 veces semana  
☐ 1 vez al día  
☐ 2 a 3 veces al día  
☐ 5 a 6 veces al día  
☐ más 6 veces al día

---

espárragos

- ☐ Nunca o menos 1 vez al mes  
☐ 1 a 3 veces mes  
☒ 1 vez semana  
☐ 2 a 4 veces semana  
☐ 5 a 6 veces semana  
☐ 1 vez al día  
☐ 2 a 3 veces al día  
☐ 5 a 6 veces al día  
☐ más 6 veces al día

---

maíz hervido

- ☐ Nunca o menos 1 vez al mes  
☐ 1 a 3 veces mes  
☒ 1 vez semana  
☐ 2 a 4 veces semana  
☐ 5 a 6 veces semana  
☐ 1 vez al día  
☐ 2 a 3 veces al día  
☐ 5 a 6 veces al día  
☐ más 6 veces al día

---

legumbres

- ☐ Nunca o menos 1 vez al mes  
☐ 1 a 3 veces mes  
☐ 1 vez semana  
☐ 2 a 4 veces semana  
☐ 5 a 6 veces semana  
☐ 1 vez al día  
☐ 2 a 3 veces al día  
☐ 5 a 6 veces al día  
☐ más 6 veces al día

---

naranjas o mandarinas

- ☐ Nunca o menos 1 vez al mes  
☐ 1 a 3 veces mes  
☒ 1 vez semana  
☐ 2 a 4 veces semana  
☐ 5 a 6 veces semana  
☐ 1 vez al día  
☐ 2 a 3 veces al día  
☐ 5 a 6 veces al día  
☐ más 6 veces al día

|                       |                                                                                                                                                                                                                                                                                                                                                                                                              |
|-----------------------|--------------------------------------------------------------------------------------------------------------------------------------------------------------------------------------------------------------------------------------------------------------------------------------------------------------------------------------------------------------------------------------------------------------|
| zum natural fruta     | <input type="radio"/> Nunca o menos 1 vez al mes<br><input type="radio"/> 1 a 3 veces mes<br><input checked="" type="radio"/> 1 vez semana<br><input type="radio"/> 2 a 4 veces semana<br><input type="radio"/> 5 a 6 veces semana<br><input type="radio"/> 1 vez al día<br><input type="radio"/> 2 a 3 veces al día<br><input type="radio"/> 5 a 6 veces al día<br><input type="radio"/> más 6 veces al día |
| platano               | <input checked="" type="radio"/> Nunca o menos 1 vez al mes<br><input type="radio"/> 1 a 3 veces mes<br><input type="radio"/> 1 vez semana<br><input type="radio"/> 2 a 4 veces semana<br><input type="radio"/> 5 a 6 veces semana<br><input type="radio"/> 1 vez al día<br><input type="radio"/> 2 a 3 veces al día<br><input type="radio"/> 5 a 6 veces al día<br><input type="radio"/> más 6 veces al día |
| manzana o pera        | <input type="radio"/> Nunca o menos 1 vez al mes<br><input type="radio"/> 1 a 3 veces mes<br><input type="radio"/> 1 vez semana<br><input checked="" type="radio"/> 2 a 4 veces semana<br><input type="radio"/> 5 a 6 veces semana<br><input type="radio"/> 1 vez al día<br><input type="radio"/> 2 a 3 veces al día<br><input type="radio"/> 5 a 6 veces al día<br><input type="radio"/> más 6 veces al día |
| melocotón o nectarina | <input type="radio"/> Nunca o menos 1 vez al mes<br><input type="radio"/> 1 a 3 veces mes<br><input checked="" type="radio"/> 1 vez semana<br><input type="radio"/> 2 a 4 veces semana<br><input type="radio"/> 5 a 6 veces semana<br><input type="radio"/> 1 vez al día<br><input type="radio"/> 2 a 3 veces al día<br><input type="radio"/> 5 a 6 veces al día<br><input type="radio"/> más 6 veces al día |
| sandia o melon        | <input type="radio"/> Nunca o menos 1 vez al mes<br><input type="radio"/> 1 a 3 veces mes<br><input type="radio"/> 1 vez semana<br><input checked="" type="radio"/> 2 a 4 veces semana<br><input type="radio"/> 5 a 6 veces semana<br><input type="radio"/> 1 vez al día<br><input type="radio"/> 2 a 3 veces al día<br><input type="radio"/> 5 a 6 veces al día<br><input type="radio"/> más 6 veces al día |
| uva                   | <input type="radio"/> Nunca o menos 1 vez al mes<br><input type="radio"/> 1 a 3 veces mes<br><input checked="" type="radio"/> 1 vez semana<br><input type="radio"/> 2 a 4 veces semana<br><input type="radio"/> 5 a 6 veces semana<br><input type="radio"/> 1 vez al día<br><input type="radio"/> 2 a 3 veces al día<br><input type="radio"/> 5 a 6 veces al día<br><input type="radio"/> más 6 veces al día |

---

bruna o ciruela

- ☐ Nunca o menos 1 vez al mes  
☐ 1 a 3 veces mes  
☒ 1 vez semana  
☐ 2 a 4 veces semana  
☐ 5 a 6 veces semana  
☐ 1 vez al día  
☐ 2 a 3 veces al día  
☐ 5 a 6 veces al día  
☐ más 6 veces al día

---

kiwi

- ☐ Nunca o menos 1 vez al mes  
☐ 1 a 3 veces mes  
☒ 1 vez semana  
☐ 2 a 4 veces semana  
☐ 5 a 6 veces semana  
☐ 1 vez al día  
☐ 2 a 3 veces al día  
☐ 5 a 6 veces al día  
☐ más 6 veces al día

---

aceituna

- ☐ Nunca o menos 1 vez al mes  
☐ 1 a 3 veces mes  
☐ 1 vez semana  
☒ 2 a 4 veces semana  
☐ 5 a 6 veces semana  
☐ 1 vez al día  
☐ 2 a 3 veces al día  
☐ 5 a 6 veces al día  
☐ más 6 veces al día

---

frutos secos

- ☐ Nunca o menos 1 vez al mes  
☐ 1 a 3 veces mes  
☒ 1 vez semana  
☐ 2 a 4 veces semana  
☐ 5 a 6 veces semana  
☐ 1 vez al día  
☐ 2 a 3 veces al día  
☐ 5 a 6 veces al día  
☐ más 6 veces al día

---

pan blanco

- ☐ Nunca o menos 1 vez al mes  
☐ 1 a 3 veces mes  
☐ 1 vez semana  
☒ 2 a 4 veces semana  
☐ 5 a 6 veces semana  
☐ 1 vez al día  
☐ 2 a 3 veces al día  
☐ 5 a 6 veces al día  
☐ más 6 veces al día

---

pan integral

- ☐ Nunca o menos 1 vez al mes  
☒ 1 a 3 veces mes  
☐ 1 vez semana  
☐ 2 a 4 veces semana  
☐ 5 a 6 veces semana  
☐ 1 vez al día  
☐ 2 a 3 veces al día  
☐ 5 a 6 veces al día  
☐ más 6 veces al día

---

cereales desayuno

- ☐ Nunca o menos 1 vez al mes  
☐ 1 a 3 veces mes  
☐ 1 vez semana  
☒ 2 a 4 veces semana  
☐ 5 a 6 veces semana  
☐ 1 vez al día  
☐ 2 a 3 veces al día  
☐ 5 a 6 veces al día  
☐ más 6 veces al día

---

patatas fritas

- ☒ Nunca o menos 1 vez al mes  
☐ 1 a 3 veces mes  
☐ 1 vez semana  
☐ 2 a 4 veces semana  
☐ 5 a 6 veces semana  
☐ 1 vez al día  
☐ 2 a 3 veces al día  
☐ 5 a 6 veces al día  
☐ más 6 veces al día

---

patatas cocidas o asadas

- ☐ Nunca o menos 1 vez al mes  
☐ 1 a 3 veces mes  
☒ 1 vez semana  
☐ 2 a 4 veces semana  
☐ 5 a 6 veces semana  
☐ 1 vez al día  
☐ 2 a 3 veces al día  
☐ 5 a 6 veces al día  
☐ más 6 veces al día

---

bolsa papas

- ☐ Nunca o menos 1 vez al mes  
☐ 1 a 3 veces mes  
☒ 1 vez semana  
☐ 2 a 4 veces semana  
☐ 5 a 6 veces semana  
☐ 1 vez al día  
☐ 2 a 3 veces al día  
☐ 5 a 6 veces al día  
☐ más 6 veces al día

---

arroz cocinado

- ☐ Nunca o menos 1 vez al mes  
☐ 1 a 3 veces mes  
☒ 1 vez semana  
☐ 2 a 4 veces semana  
☐ 5 a 6 veces semana  
☐ 1 vez al día  
☐ 2 a 3 veces al día  
☐ 5 a 6 veces al día  
☐ más 6 veces al día

---

pasta

- ☐ Nunca o menos 1 vez al mes  
☐ 1 a 3 veces mes  
☒ 1 vez semana  
☐ 2 a 4 veces semana  
☐ 5 a 6 veces semana  
☐ 1 vez al día  
☐ 2 a 3 veces al día  
☐ 5 a 6 veces al día  
☐ más 6 veces al día

|                     |                                                                                                                                                                                                                                                                                                                                                                                                              |
|---------------------|--------------------------------------------------------------------------------------------------------------------------------------------------------------------------------------------------------------------------------------------------------------------------------------------------------------------------------------------------------------------------------------------------------------|
| pizza               | <input type="radio"/> Nunca o menos 1 vez al mes<br><input type="radio"/> 1 a 3 veces mes<br><input checked="" type="radio"/> 1 vez semana<br><input type="radio"/> 2 a 4 veces semana<br><input type="radio"/> 5 a 6 veces semana<br><input type="radio"/> 1 vez al día<br><input type="radio"/> 2 a 3 veces al día<br><input type="radio"/> 5 a 6 veces al día<br><input type="radio"/> más 6 veces al día |
| aceite oliva        | <input type="radio"/> Nunca o menos 1 vez al mes<br><input type="radio"/> 1 a 3 veces mes<br><input checked="" type="radio"/> 1 vez semana<br><input type="radio"/> 2 a 4 veces semana<br><input type="radio"/> 5 a 6 veces semana<br><input type="radio"/> 1 vez al día<br><input type="radio"/> 2 a 3 veces al día<br><input type="radio"/> 5 a 6 veces al día<br><input type="radio"/> más 6 veces al día |
| otros aceites       | <input type="radio"/> Nunca o menos 1 vez al mes<br><input type="radio"/> 1 a 3 veces mes<br><input type="radio"/> 1 vez semana<br><input checked="" type="radio"/> 2 a 4 veces semana<br><input type="radio"/> 5 a 6 veces semana<br><input type="radio"/> 1 vez al día<br><input type="radio"/> 2 a 3 veces al día<br><input type="radio"/> 5 a 6 veces al día<br><input type="radio"/> más 6 veces al día |
| margarina           | <input checked="" type="radio"/> Nunca o menos 1 vez al mes<br><input type="radio"/> 1 a 3 veces mes<br><input type="radio"/> 1 vez semana<br><input type="radio"/> 2 a 4 veces semana<br><input type="radio"/> 5 a 6 veces semana<br><input type="radio"/> 1 vez al día<br><input type="radio"/> 2 a 3 veces al día<br><input type="radio"/> 5 a 6 veces al día<br><input type="radio"/> más 6 veces al día |
| mantequilla         | <input checked="" type="radio"/> Nunca o menos 1 vez al mes<br><input type="radio"/> 1 a 3 veces mes<br><input type="radio"/> 1 vez semana<br><input type="radio"/> 2 a 4 veces semana<br><input type="radio"/> 5 a 6 veces semana<br><input type="radio"/> 1 vez al día<br><input type="radio"/> 2 a 3 veces al día<br><input type="radio"/> 5 a 6 veces al día<br><input type="radio"/> más 6 veces al día |
| galletas tipo maria | <input checked="" type="radio"/> Nunca o menos 1 vez al mes<br><input type="radio"/> 1 a 3 veces mes<br><input type="radio"/> 1 vez semana<br><input type="radio"/> 2 a 4 veces semana<br><input type="radio"/> 5 a 6 veces semana<br><input type="radio"/> 1 vez al día<br><input type="radio"/> 2 a 3 veces al día<br><input type="radio"/> 5 a 6 veces al día<br><input type="radio"/> más 6 veces al día |

|                           |                                                                                                                                                                                                                                                                                                                                                                                                              |
|---------------------------|--------------------------------------------------------------------------------------------------------------------------------------------------------------------------------------------------------------------------------------------------------------------------------------------------------------------------------------------------------------------------------------------------------------|
| galletas chocolate        | <input checked="" type="radio"/> Nunca o menos 1 vez al mes<br><input type="radio"/> 1 a 3 veces mes<br><input type="radio"/> 1 vez semana<br><input type="radio"/> 2 a 4 veces semana<br><input type="radio"/> 5 a 6 veces semana<br><input type="radio"/> 1 vez al día<br><input type="radio"/> 2 a 3 veces al día<br><input type="radio"/> 5 a 6 veces al día<br><input type="radio"/> más 6 veces al día |
| bollieria                 | <input type="radio"/> Nunca o menos 1 vez al mes<br><input checked="" type="radio"/> 1 a 3 veces mes<br><input type="radio"/> 1 vez semana<br><input type="radio"/> 2 a 4 veces semana<br><input type="radio"/> 5 a 6 veces semana<br><input type="radio"/> 1 vez al día<br><input type="radio"/> 2 a 3 veces al día<br><input type="radio"/> 5 a 6 veces al día<br><input type="radio"/> más 6 veces al día |
| chocolate o bombones      | <input type="radio"/> Nunca o menos 1 vez al mes<br><input type="radio"/> 1 a 3 veces mes<br><input checked="" type="radio"/> 1 vez semana<br><input type="radio"/> 2 a 4 veces semana<br><input type="radio"/> 5 a 6 veces semana<br><input type="radio"/> 1 vez al día<br><input type="radio"/> 2 a 3 veces al día<br><input type="radio"/> 5 a 6 veces al día<br><input type="radio"/> más 6 veces al día |
| chocolate polvo o colacao | <input type="radio"/> Nunca o menos 1 vez al mes<br><input type="radio"/> 1 a 3 veces mes<br><input checked="" type="radio"/> 1 vez semana<br><input type="radio"/> 2 a 4 veces semana<br><input type="radio"/> 5 a 6 veces semana<br><input type="radio"/> 1 vez al día<br><input type="radio"/> 2 a 3 veces al día<br><input type="radio"/> 5 a 6 veces al día<br><input type="radio"/> más 6 veces al día |
| vino tinto                | <input checked="" type="radio"/> Nunca o menos 1 vez al mes<br><input type="radio"/> 1 a 3 veces mes<br><input type="radio"/> 1 vez semana<br><input type="radio"/> 2 a 4 veces semana<br><input type="radio"/> 5 a 6 veces semana<br><input type="radio"/> 1 vez al día<br><input type="radio"/> 2 a 3 veces al día<br><input type="radio"/> 5 a 6 veces al día<br><input type="radio"/> más 6 veces al día |
| vino blanco               | <input checked="" type="radio"/> Nunca o menos 1 vez al mes<br><input type="radio"/> 1 a 3 veces mes<br><input type="radio"/> 1 vez semana<br><input type="radio"/> 2 a 4 veces semana<br><input type="radio"/> 5 a 6 veces semana<br><input type="radio"/> 1 vez al día<br><input type="radio"/> 2 a 3 veces al día<br><input type="radio"/> 5 a 6 veces al día<br><input type="radio"/> más 6 veces al día |

|                       |                                                                                                                                                                                                                                                                                                                                                                                                              |
|-----------------------|--------------------------------------------------------------------------------------------------------------------------------------------------------------------------------------------------------------------------------------------------------------------------------------------------------------------------------------------------------------------------------------------------------------|
| vino seco o vermut    | <input checked="" type="radio"/> Nunca o menos 1 vez al mes<br><input type="radio"/> 1 a 3 veces mes<br><input type="radio"/> 1 vez semana<br><input type="radio"/> 2 a 4 veces semana<br><input type="radio"/> 5 a 6 veces semana<br><input type="radio"/> 1 vez al día<br><input type="radio"/> 2 a 3 veces al día<br><input type="radio"/> 5 a 6 veces al día<br><input type="radio"/> más 6 veces al día |
| cerveza               | <input checked="" type="radio"/> Nunca o menos 1 vez al mes<br><input type="radio"/> 1 a 3 veces mes<br><input type="radio"/> 1 vez semana<br><input type="radio"/> 2 a 4 veces semana<br><input type="radio"/> 5 a 6 veces semana<br><input type="radio"/> 1 vez al día<br><input type="radio"/> 2 a 3 veces al día<br><input type="radio"/> 5 a 6 veces al día<br><input type="radio"/> más 6 veces al día |
| cerveza sin alcohol   | <input type="radio"/> Nunca o menos 1 vez al mes<br><input checked="" type="radio"/> 1 a 3 veces mes<br><input type="radio"/> 1 vez semana<br><input type="radio"/> 2 a 4 veces semana<br><input type="radio"/> 5 a 6 veces semana<br><input type="radio"/> 1 vez al día<br><input type="radio"/> 2 a 3 veces al día<br><input type="radio"/> 5 a 6 veces al día<br><input type="radio"/> más 6 veces al día |
| licores               | <input checked="" type="radio"/> Nunca o menos 1 vez al mes<br><input type="radio"/> 1 a 3 veces mes<br><input type="radio"/> 1 vez semana<br><input type="radio"/> 2 a 4 veces semana<br><input type="radio"/> 5 a 6 veces semana<br><input type="radio"/> 1 vez al día<br><input type="radio"/> 2 a 3 veces al día<br><input type="radio"/> 5 a 6 veces al día<br><input type="radio"/> más 6 veces al día |
| ginebra o ron o vodka | <input checked="" type="radio"/> Nunca o menos 1 vez al mes<br><input type="radio"/> 1 a 3 veces mes<br><input type="radio"/> 1 vez semana<br><input type="radio"/> 2 a 4 veces semana<br><input type="radio"/> 5 a 6 veces semana<br><input type="radio"/> 1 vez al día<br><input type="radio"/> 2 a 3 veces al día<br><input type="radio"/> 5 a 6 veces al día<br><input type="radio"/> más 6 veces al día |
| refresco normal       | <input type="radio"/> Nunca o menos 1 vez al mes<br><input checked="" type="radio"/> 1 a 3 veces mes<br><input type="radio"/> 1 vez semana<br><input type="radio"/> 2 a 4 veces semana<br><input type="radio"/> 5 a 6 veces semana<br><input type="radio"/> 1 vez al día<br><input type="radio"/> 2 a 3 veces al día<br><input type="radio"/> 5 a 6 veces al día<br><input type="radio"/> más 6 veces al día |



|                          |                                                                                                                                                                                                                                                                                                                                                                                                              |
|--------------------------|--------------------------------------------------------------------------------------------------------------------------------------------------------------------------------------------------------------------------------------------------------------------------------------------------------------------------------------------------------------------------------------------------------------|
| refresco sin azúcar      | <input checked="" type="radio"/> Nunca o menos 1 vez al mes<br><input type="radio"/> 1 a 3 veces mes<br><input type="radio"/> 1 vez semana<br><input type="radio"/> 2 a 4 veces semana<br><input type="radio"/> 5 a 6 veces semana<br><input type="radio"/> 1 vez al día<br><input type="radio"/> 2 a 3 veces al día<br><input type="radio"/> 5 a 6 veces al día<br><input type="radio"/> más 6 veces al día |
| Agua del grifo           | <input checked="" type="radio"/> Nunca o menos 1 vez al mes<br><input type="radio"/> 1 a 3 veces mes<br><input type="radio"/> 1 vez semana<br><input type="radio"/> 2 a 4 veces semana<br><input type="radio"/> 5 a 6 veces semana<br><input type="radio"/> 1 vez al día<br><input type="radio"/> 2 a 3 veces al día<br><input type="radio"/> 5 a 6 veces al día<br><input type="radio"/> más 6 veces al día |
| agua embotellada sin gas | <input type="radio"/> Nunca o menos 1 vez al mes<br><input type="radio"/> 1 a 3 veces mes<br><input type="radio"/> 1 vez semana<br><input type="radio"/> 2 a 4 veces semana<br><input type="radio"/> 5 a 6 veces semana<br><input type="radio"/> 1 vez al día<br><input type="radio"/> 2 a 3 veces al día<br><input type="radio"/> 5 a 6 veces al día<br><input checked="" type="radio"/> más 6 veces al día |
| agua embotellada con gas | <input checked="" type="radio"/> Nunca o menos 1 vez al mes<br><input type="radio"/> 1 a 3 veces mes<br><input type="radio"/> 1 vez semana<br><input type="radio"/> 2 a 4 veces semana<br><input type="radio"/> 5 a 6 veces semana<br><input type="radio"/> 1 vez al día<br><input type="radio"/> 2 a 3 veces al día<br><input type="radio"/> 5 a 6 veces al día<br><input type="radio"/> más 6 veces al día |
| zumو frutas embasado     | <input checked="" type="radio"/> Nunca o menos 1 vez al mes<br><input type="radio"/> 1 a 3 veces mes<br><input type="radio"/> 1 vez semana<br><input type="radio"/> 2 a 4 veces semana<br><input type="radio"/> 5 a 6 veces semana<br><input type="radio"/> 1 vez al día<br><input type="radio"/> 2 a 3 veces al día<br><input type="radio"/> 5 a 6 veces al día<br><input type="radio"/> más 6 veces al día |
| cafe                     | <input type="radio"/> Nunca o menos 1 vez al mes<br><input type="radio"/> 1 a 3 veces mes<br><input type="radio"/> 1 vez semana<br><input type="radio"/> 2 a 4 veces semana<br><input checked="" type="radio"/> 5 a 6 veces semana<br><input type="radio"/> 1 vez al día<br><input type="radio"/> 2 a 3 veces al día<br><input type="radio"/> 5 a 6 veces al día<br><input type="radio"/> más 6 veces al día |

---

cafe descafeinado

- ☐ Nunca o menos 1 vez al mes  
☐ 1 a 3 veces mes  
☐ 1 vez semana  
☒ 2 a 4 veces semana  
☐ 5 a 6 veces semana  
☐ 1 vez al día  
☐ 2 a 3 veces al día  
☐ 5 a 6 veces al día  
☐ más 6 veces al día

---

te o infusión

- ☒ Nunca o menos 1 vez al mes  
☐ 1 a 3 veces mes  
☐ 1 vez semana  
☐ 2 a 4 veces semana  
☐ 5 a 6 veces semana  
☐ 1 vez al día  
☐ 2 a 3 veces al día  
☐ 5 a 6 veces al día  
☐ más 6 veces al día

---

sopa o puré verduras

- ☐ Nunca o menos 1 vez al mes  
☐ 1 a 3 veces mes  
☐ 1 vez semana  
☒ 2 a 4 veces semana  
☐ 5 a 6 veces semana  
☐ 1 vez al día  
☐ 2 a 3 veces al día  
☐ 5 a 6 veces al día  
☐ más 6 veces al día

---

croquetas pollo jamón

- ☐ Nunca o menos 1 vez al mes  
☐ 1 a 3 veces mes  
☒ 1 vez semana  
☐ 2 a 4 veces semana  
☐ 5 a 6 veces semana  
☐ 1 vez al día  
☐ 2 a 3 veces al día  
☐ 5 a 6 veces al día  
☐ más 6 veces al día

---

croquetas pescado

- ☒ Nunca o menos 1 vez al mes  
☐ 1 a 3 veces mes  
☐ 1 vez semana  
☐ 2 a 4 veces semana  
☐ 5 a 6 veces semana  
☐ 1 vez al día  
☐ 2 a 3 veces al día  
☐ 5 a 6 veces al día  
☐ más 6 veces al día

---

mayonesa

- ☐ Nunca o menos 1 vez al mes  
☒ 1 a 3 veces mes  
☐ 1 vez semana  
☐ 2 a 4 veces semana  
☐ 5 a 6 veces semana  
☐ 1 vez al día  
☐ 2 a 3 veces al día  
☐ 5 a 6 veces al día  
☐ más 6 veces al día

|                  |                                                                                                                                                                                                                                                                                                                                                                                                              |
|------------------|--------------------------------------------------------------------------------------------------------------------------------------------------------------------------------------------------------------------------------------------------------------------------------------------------------------------------------------------------------------------------------------------------------------|
| salsa tomate     | <input type="radio"/> Nunca o menos 1 vez al mes<br><input type="radio"/> 1 a 3 veces mes<br><input checked="" type="radio"/> 1 vez semana<br><input type="radio"/> 2 a 4 veces semana<br><input type="radio"/> 5 a 6 veces semana<br><input type="radio"/> 1 vez al día<br><input type="radio"/> 2 a 3 veces al día<br><input type="radio"/> 5 a 6 veces al día<br><input type="radio"/> más 6 veces al día |
| ketchup          | <input type="radio"/> Nunca o menos 1 vez al mes<br><input type="radio"/> 1 a 3 veces mes<br><input checked="" type="radio"/> 1 vez semana<br><input type="radio"/> 2 a 4 veces semana<br><input type="radio"/> 5 a 6 veces semana<br><input type="radio"/> 1 vez al día<br><input type="radio"/> 2 a 3 veces al día<br><input type="radio"/> 5 a 6 veces al día<br><input type="radio"/> más 6 veces al día |
| sal              | <input type="radio"/> Nunca o menos 1 vez al mes<br><input checked="" type="radio"/> 1 a 3 veces mes<br><input type="radio"/> 1 vez semana<br><input type="radio"/> 2 a 4 veces semana<br><input type="radio"/> 5 a 6 veces semana<br><input type="radio"/> 1 vez al día<br><input type="radio"/> 2 a 3 veces al día<br><input type="radio"/> 5 a 6 veces al día<br><input type="radio"/> más 6 veces al día |
| ajo              | <input type="radio"/> Nunca o menos 1 vez al mes<br><input checked="" type="radio"/> 1 a 3 veces mes<br><input type="radio"/> 1 vez semana<br><input type="radio"/> 2 a 4 veces semana<br><input type="radio"/> 5 a 6 veces semana<br><input type="radio"/> 1 vez al día<br><input type="radio"/> 2 a 3 veces al día<br><input type="radio"/> 5 a 6 veces al día<br><input type="radio"/> más 6 veces al día |
| mermelada o miel | <input checked="" type="radio"/> Nunca o menos 1 vez al mes<br><input type="radio"/> 1 a 3 veces mes<br><input type="radio"/> 1 vez semana<br><input type="radio"/> 2 a 4 veces semana<br><input type="radio"/> 5 a 6 veces semana<br><input type="radio"/> 1 vez al día<br><input type="radio"/> 2 a 3 veces al día<br><input type="radio"/> 5 a 6 veces al día<br><input type="radio"/> más 6 veces al día |
| azúcar           | <input checked="" type="radio"/> Nunca o menos 1 vez al mes<br><input type="radio"/> 1 a 3 veces mes<br><input type="radio"/> 1 vez semana<br><input type="radio"/> 2 a 4 veces semana<br><input type="radio"/> 5 a 6 veces semana<br><input type="radio"/> 1 vez al día<br><input type="radio"/> 2 a 3 veces al día<br><input type="radio"/> 5 a 6 veces al día<br><input type="radio"/> más 6 veces al día |

|                                       |                                                                                                                                                                                                                                                                                                                                                                                                                                                                                                                               |
|---------------------------------------|-------------------------------------------------------------------------------------------------------------------------------------------------------------------------------------------------------------------------------------------------------------------------------------------------------------------------------------------------------------------------------------------------------------------------------------------------------------------------------------------------------------------------------|
| Otro alimento                         |                                                                                                                                                                                                                                                                                                                                                                                                                                                                                                                               |
| suplementos vitamínicos               | <input checked="" type="radio"/> si<br><input type="radio"/> no                                                                                                                                                                                                                                                                                                                                                                                                                                                               |
| suplementos vitamínicos               | [*DATA REMOVED*]                                                                                                                                                                                                                                                                                                                                                                                                                                                                                                              |
| dieta previa                          | <input type="radio"/> si<br><input checked="" type="radio"/> no                                                                                                                                                                                                                                                                                                                                                                                                                                                               |
| motivo dieta                          | <input checked="" type="radio"/> no dieta<br><input type="radio"/> control peso<br><input type="radio"/> control colesterol<br><input type="radio"/> control diabetes<br><input type="radio"/> problemas estómago<br><input type="radio"/> problemas vesícula o hepáticos<br><input type="radio"/> HTA o cardiopatía<br><input type="radio"/> problemas renales<br><input type="radio"/> alergia alimentaria<br><input type="radio"/> ácido úrico elevado<br><input type="radio"/> vegetariana<br><input type="radio"/> otros |
| cambio alimentos año previo gestación | <input checked="" type="radio"/> si<br><input type="radio"/> no                                                                                                                                                                                                                                                                                                                                                                                                                                                               |
| cambio lácteos                        | <input type="radio"/> eliminado<br><input type="radio"/> disminuido<br><input checked="" type="radio"/> igual<br><input type="radio"/> aumentado<br><input type="radio"/> no sabe                                                                                                                                                                                                                                                                                                                                             |
| cambio huevos                         | <input type="radio"/> eliminado<br><input type="radio"/> disminuido<br><input checked="" type="radio"/> igual<br><input type="radio"/> aumentado<br><input type="radio"/> no sabe                                                                                                                                                                                                                                                                                                                                             |
| cambio carne                          | <input type="radio"/> eliminado<br><input type="radio"/> disminuido<br><input checked="" type="radio"/> igual<br><input type="radio"/> aumentado<br><input type="radio"/> no sabe                                                                                                                                                                                                                                                                                                                                             |
| cambio pescado                        | <input type="radio"/> eliminado<br><input type="radio"/> disminuido<br><input checked="" type="radio"/> igual<br><input type="radio"/> aumentado<br><input type="radio"/> no sabe                                                                                                                                                                                                                                                                                                                                             |
| cambio verduras                       | <input type="radio"/> eliminado<br><input type="radio"/> disminuido<br><input checked="" type="radio"/> igual<br><input type="radio"/> aumentado<br><input type="radio"/> no sabe                                                                                                                                                                                                                                                                                                                                             |

|                            |                                                                                                                                                                                                                        |
|----------------------------|------------------------------------------------------------------------------------------------------------------------------------------------------------------------------------------------------------------------|
| cambio legumbres           | <input type="radio"/> eliminado<br><input type="radio"/> disminuido<br><input checked="" type="radio"/> igual<br><input type="radio"/> aumentado<br><input type="radio"/> no sabe                                      |
| cambio fruta               | <input type="radio"/> eliminado<br><input type="radio"/> disminuido<br><input checked="" type="radio"/> igual<br><input type="radio"/> aumentado<br><input type="radio"/> no sabe                                      |
| cambio pan                 | <input type="radio"/> eliminado<br><input type="radio"/> disminuido<br><input checked="" type="radio"/> igual<br><input type="radio"/> aumentado<br><input type="radio"/> no sabe                                      |
| cambio aceite oliva        | <input type="radio"/> eliminado<br><input type="radio"/> disminuido<br><input checked="" type="radio"/> igual<br><input type="radio"/> aumentado<br><input type="radio"/> no sabe                                      |
| cambio mante o margarina   | <input type="radio"/> eliminado<br><input type="radio"/> disminuido<br><input checked="" type="radio"/> igual<br><input type="radio"/> aumentado<br><input type="radio"/> no sabe                                      |
| cambio azúcar y dulces     | <input type="radio"/> eliminado<br><input type="radio"/> disminuido<br><input checked="" type="radio"/> igual<br><input type="radio"/> aumentado<br><input type="radio"/> no sabe                                      |
| cambio bebidas alcohólicas | <input checked="" type="radio"/> eliminado<br><input type="radio"/> disminuido<br><input type="radio"/> igual<br><input type="radio"/> aumentado<br><input type="radio"/> no sabe                                      |
| frecuencia comidas fritas  | <input type="radio"/> a diario<br><input type="radio"/> 5 a 6 veces semana<br><input checked="" type="radio"/> 2 a 4 veces semana<br><input type="radio"/> 1 vez semana<br><input type="radio"/> menos de 1 vez semana |
| carne                      | <input type="radio"/> no como<br><input type="radio"/> cruda<br><input type="radio"/> poco hecha<br><input type="radio"/> hecha<br><input checked="" type="radio"/> muy hecha                                          |
| grasa visible carne        | <input type="radio"/> quita toda<br><input checked="" type="radio"/> quita mayoría<br><input type="radio"/> quita un poco<br><input type="radio"/> no quita nada                                                       |

|                                |                                                                                                                                                                                                                                                          |
|--------------------------------|----------------------------------------------------------------------------------------------------------------------------------------------------------------------------------------------------------------------------------------------------------|
| cocina carne                   | <input checked="" type="radio"/> a la plancha<br><input type="radio"/> a la parrilla<br><input type="radio"/> asada<br><input type="radio"/> frita<br><input type="radio"/> guisada                                                                      |
| tostado quemado carne          | <input checked="" type="radio"/> nunca<br><input type="radio"/> 1 vez mes<br><input type="radio"/> 2 a 3 veces mes<br><input type="radio"/> 1 vez semana<br><input type="radio"/> 2 a 3 semanas                                                          |
| tostado quemado pescado        | <input checked="" type="radio"/> nunca<br><input type="radio"/> 1 vez mes<br><input type="radio"/> 2 a 3 veces mes<br><input type="radio"/> 1 vez semana<br><input type="radio"/> 2 a 3 semanas                                                          |
| socarrat paella                | <input type="radio"/> nunca<br><input type="radio"/> 1 vez mes<br><input checked="" type="radio"/> 2 a 3 veces mes<br><input type="radio"/> 1 vez semana<br><input type="radio"/> 2 a 3 semanas                                                          |
| grasa o aceite cocinar         | <input type="radio"/> mantequilla<br><input type="radio"/> margarina<br><input type="radio"/> aceite oliva<br><input checked="" type="radio"/> aceite oliva virgen extra<br><input type="radio"/> aceite vegetal<br><input type="radio"/> mezcla aceites |
| grasa aceite aliñar            | <input type="radio"/> mantequilla<br><input type="radio"/> margarina<br><input type="radio"/> aceite oliva<br><input checked="" type="radio"/> aceite oliva virgen extra<br><input type="radio"/> aceite vegetal<br><input type="radio"/> mezcla aceites |
| grasa aceite freir             | <input type="radio"/> mantequilla<br><input type="radio"/> margarina<br><input type="radio"/> aceite oliva<br><input checked="" type="radio"/> aceite oliva virgen extra<br><input type="radio"/> aceite vegetal<br><input type="radio"/> mezcla aceites |
| Ejercicio cuestionario         | <input checked="" type="radio"/> si<br><input type="radio"/> no                                                                                                                                                                                          |
| horas de sueño incluido siesta | [*DATA REMOVED*]                                                                                                                                                                                                                                         |
| minutos siesta                 | [*DATA REMOVED*]                                                                                                                                                                                                                                         |
| horas televisión semana        | [*DATA REMOVED*]                                                                                                                                                                                                                                         |

|                                        |                                                                                                                                                                                                                                                                                                                                                                           |
|----------------------------------------|---------------------------------------------------------------------------------------------------------------------------------------------------------------------------------------------------------------------------------------------------------------------------------------------------------------------------------------------------------------------------|
| actividad trabajo                      | <input type="radio"/> casi siempre sentado<br><input checked="" type="radio"/> sentado 50 por cien<br><input type="radio"/> casi siempre de pie, quieto<br><input type="radio"/> casi siempre levantado caminando y llevando pocas cosas<br><input type="radio"/> casi siempre levantado, caminando y llevado muchas cosas<br><input type="radio"/> trabajo manual pesado |
| tiempo caminar o bici al día           | <input type="radio"/> casi nunca<br><input type="radio"/> menos 20min día<br><input checked="" type="radio"/> 20 a 40 min día<br><input type="radio"/> 40 a 60 min día<br><input type="radio"/> 1h o 1h y media día<br><input type="radio"/> más de 1h y media al día                                                                                                     |
| tiempo tareas casa al día              | <input checked="" type="radio"/> menos de 1h día<br><input type="radio"/> 1 a 2h día<br><input type="radio"/> 3 a 4h día<br><input type="radio"/> 5 a 6h día<br><input type="radio"/> 7 a 8h día<br><input type="radio"/> más de 8h día                                                                                                                                   |
| tiempo libre televisión ordenador leer | <input checked="" type="radio"/> menos 1h día<br><input type="radio"/> 1h día<br><input type="radio"/> 2h día<br><input type="radio"/> 3h día<br><input type="radio"/> 4h día<br><input type="radio"/> 5 a 6h día<br><input type="radio"/> mas 6h día                                                                                                                     |
| tiempo libre ejercicio o deporte       | <input type="radio"/> menos 1h semana<br><input type="radio"/> 1h semana<br><input type="radio"/> 2h semana<br><input checked="" type="radio"/> 3h semana<br><input type="radio"/> 4 a 5h semana<br><input type="radio"/> mas 5h semana                                                                                                                                   |
| como se considera                      | <input type="radio"/> sedentaria<br><input type="radio"/> poco activa<br><input checked="" type="radio"/> moderadamente activa<br><input type="radio"/> bastante activa<br><input type="radio"/> muy activa<br><input type="radio"/> no sabe                                                                                                                              |
| FUR                                    | [*DATA REMOVED*]                                                                                                                                                                                                                                                                                                                                                          |
| Semanas gestación 2T                   | [*DATA REMOVED*]                                                                                                                                                                                                                                                                                                                                                          |
| Días gestación 2T                      | [*DATA REMOVED*]                                                                                                                                                                                                                                                                                                                                                          |
| DBP 2T                                 | [*DATA REMOVED*]                                                                                                                                                                                                                                                                                                                                                          |
| CC 2T                                  | [*DATA REMOVED*]                                                                                                                                                                                                                                                                                                                                                          |
| AC 2T                                  | [*DATA REMOVED*]                                                                                                                                                                                                                                                                                                                                                          |

|                                                   |                                                                                                                                                                                                 |
|---------------------------------------------------|-------------------------------------------------------------------------------------------------------------------------------------------------------------------------------------------------|
| LF 2T                                             | [*DATA REMOVED*]                                                                                                                                                                                |
| PFE 2T (Hadlock)                                  | [*DATA REMOVED*]                                                                                                                                                                                |
| Semanas gestación 3T                              | [*DATA REMOVED*]                                                                                                                                                                                |
| días 3T                                           | [*DATA REMOVED*]                                                                                                                                                                                |
| DBP 3T                                            | [*DATA REMOVED*]                                                                                                                                                                                |
| CC 3T                                             | [*DATA REMOVED*]                                                                                                                                                                                |
| AC 3T                                             | [*DATA REMOVED*]                                                                                                                                                                                |
| LF 3T                                             | [*DATA REMOVED*]                                                                                                                                                                                |
| PFE 3T (Hadlock)                                  | [*DATA REMOVED*]                                                                                                                                                                                |
| Semanas de gestación final                        | [*DATA REMOVED*]                                                                                                                                                                                |
| días gestación final                              | [*DATA REMOVED*]                                                                                                                                                                                |
| Localización placenta                             | <input type="radio"/> anterior<br><input type="radio"/> lateral derecha<br><input type="radio"/> lateral izquierda<br><input type="radio"/> posterior<br><input checked="" type="radio"/> fondo |
| Presentación longitudinal cefálica                | <input type="radio"/> no<br><input checked="" type="radio"/> si                                                                                                                                 |
| Dorso                                             | <input checked="" type="radio"/> izquierda anterior<br><input type="radio"/> izquierda posterior<br><input type="radio"/> derecha anterior<br><input type="radio"/> derecha posterior           |
| diámetro biparietal                               | [*DATA REMOVED*]                                                                                                                                                                                |
| Circunferencia craneal                            | [*DATA REMOVED*]                                                                                                                                                                                |
| Circunferencia abdominal                          | [*DATA REMOVED*]                                                                                                                                                                                |
| Longitud de femur                                 | [*DATA REMOVED*]                                                                                                                                                                                |
| tejido celular subcutáneo a nivel del muslo en mm | [*DATA REMOVED*]                                                                                                                                                                                |
| tejido celular subcutáneo en abdomen en mm        | [*DATA REMOVED*]                                                                                                                                                                                |
| Volumen del muslo en cm3                          | [*DATA REMOVED*]                                                                                                                                                                                |
| Peso fetal estimado según fórmula de Hadlock      | [*DATA REMOVED*]                                                                                                                                                                                |



|                                               |                                                                                                                                                          |
|-----------------------------------------------|----------------------------------------------------------------------------------------------------------------------------------------------------------|
| Percentil                                     | [*DATA REMOVED*]                                                                                                                                         |
| Peso fetal estimado según fórmula de Scioscia | <hr/>                                                                                                                                                    |
| Peso fetal estimado según fórmula de LEE      | <hr/>                                                                                                                                                    |
| Tipo de parto                                 | <input checked="" type="radio"/> eutocico<br><input type="radio"/> instrumentado/ventosa<br><input type="radio"/> cesarea                                |
| fecha de nacimiento                           | [*DATA REMOVED*]                                                                                                                                         |
| Días entre exploración y nacimiento           | [*DATA REMOVED*]                                                                                                                                         |
| Peso RN en g                                  | [*DATA REMOVED*]                                                                                                                                         |
| sexo                                          | <input checked="" type="radio"/> mujer<br><input type="radio"/> hombre                                                                                   |
| Apgar 1 minuto                                | [*DATA REMOVED*]                                                                                                                                         |
| Apgar 5 minutos                               | [*DATA REMOVED*]                                                                                                                                         |
| Apgar 10 minutos                              | <hr/>                                                                                                                                                    |
| antecedente Covid durante gestación           | <input type="radio"/> Yes<br><input checked="" type="radio"/> No                                                                                         |
| Nivel de estudios                             | <input type="radio"/> ninguno<br><input type="radio"/> primarios<br><input type="radio"/> secundarios<br><input checked="" type="radio"/> universitarios |

# Base\_datos\_estimacion\_peso\_fetal

|                                       |                                                                                                                                                                                                                                                                                      |
|---------------------------------------|--------------------------------------------------------------------------------------------------------------------------------------------------------------------------------------------------------------------------------------------------------------------------------------|
| Número de identificación participante | 181                                                                                                                                                                                                                                                                                  |
| CODIGO PARTICIPANTE                   |                                                                                                                                                                                                                                                                                      |
| Edad                                  | [*DATA REMOVED*]                                                                                                                                                                                                                                                                     |
| Gestaciones                           | <input type="radio"/> 1<br><input type="radio"/> 2<br><input checked="" type="radio"/> 3<br><input type="radio"/> mas de 3                                                                                                                                                           |
| partos                                | <input checked="" type="radio"/> 0<br><input type="radio"/> 1<br><input type="radio"/> 2<br><input type="radio"/> 3<br><input type="radio"/> mas de 3                                                                                                                                |
| cesáreas                              | <input checked="" type="radio"/> 0<br><input type="radio"/> 1<br><input type="radio"/> 2<br><input type="radio"/> 3<br><input type="radio"/> mas de 3                                                                                                                                |
| Abortos                               | <input type="radio"/> 0<br><input type="radio"/> 1<br><input checked="" type="radio"/> 2<br><input type="radio"/> 3<br><input type="radio"/> mas de 3                                                                                                                                |
| Tipo de gestacion                     | <input type="radio"/> espontanea<br><input type="radio"/> IAC inseminación artificial conyuge<br><input type="radio"/> IAD inseminación artificial donante<br><input type="radio"/> FIV Fecundación in Vitro<br><input checked="" type="radio"/> Ovodon FIV con donación de ovocitos |
| peso previo a embarazo                | [*DATA REMOVED*]                                                                                                                                                                                                                                                                     |
| Ganancia ponderal embarazo            |                                                                                                                                                                                                                                                                                      |
| Talla madre                           | [*DATA REMOVED*]                                                                                                                                                                                                                                                                     |
| IMC previo embarazo                   | 20.569329660238754                                                                                                                                                                                                                                                                   |
| Patología obstétrica                  | <input type="radio"/> no<br><input checked="" type="radio"/> si                                                                                                                                                                                                                      |
| Diabetes pregestacional               | <input checked="" type="radio"/> no<br><input type="radio"/> si                                                                                                                                                                                                                      |
| Diabetes gestacional                  | <input type="radio"/> no<br><input checked="" type="radio"/> si                                                                                                                                                                                                                      |

|                                            |                                                                                                                                                                                      |
|--------------------------------------------|--------------------------------------------------------------------------------------------------------------------------------------------------------------------------------------|
| Diabetes gestacional con insulina          | <input checked="" type="radio"/> no<br><input type="radio"/> si                                                                                                                      |
| Diabetes gestacional con dieta y ejercicio | <input type="radio"/> no<br><input checked="" type="radio"/> si                                                                                                                      |
| Percentil fetos previos                    | <input checked="" type="radio"/> Nada<br><input type="radio"/> percentil menor de 10<br><input type="radio"/> percentil entre 10 y 90<br><input type="radio"/> percentil mayor de 90 |
| Exfumadora                                 | <input checked="" type="radio"/> Nada<br><input type="radio"/> menos de 5 años<br><input type="radio"/> 5 a 10 años<br><input type="radio"/> mayor o igual a 10 años                 |
| Hábito tabáquico                           | <input checked="" type="radio"/> no<br><input type="radio"/> si                                                                                                                      |
| fumadora                                   | [*DATA REMOVED*]                                                                                                                                                                     |
| Consumo otros tóxicos                      | <input checked="" type="radio"/> no<br><input type="radio"/> si                                                                                                                      |
| Hb 1T                                      | [*DATA REMOVED*]                                                                                                                                                                     |
| Htc 1T                                     | [*DATA REMOVED*]                                                                                                                                                                     |
| Hb 2T                                      | [*DATA REMOVED*]                                                                                                                                                                     |
| HTC 2T                                     | [*DATA REMOVED*]                                                                                                                                                                     |
| Hb 3T                                      | [*DATA REMOVED*]                                                                                                                                                                     |
| HTC 3T                                     | [*DATA REMOVED*]                                                                                                                                                                     |
| Suplemento FE oral                         | <input type="radio"/> si<br><input checked="" type="radio"/> no                                                                                                                      |
| Suplemento fe iv                           | <input type="radio"/> si<br><input type="radio"/> no                                                                                                                                 |
| Transfusión                                | <input type="radio"/> no<br><input type="radio"/> si                                                                                                                                 |
| Solicitada Vit D                           | <input checked="" type="radio"/> no<br><input type="radio"/> si                                                                                                                      |
| Deficit vit D                              | <input checked="" type="radio"/> no<br><input type="radio"/> si                                                                                                                      |
| Suplemento vit D                           | <input type="radio"/> si<br><input checked="" type="radio"/> no                                                                                                                      |

|                       |                                                                                                                                                                                                                                                                                                                                                                                                   |
|-----------------------|---------------------------------------------------------------------------------------------------------------------------------------------------------------------------------------------------------------------------------------------------------------------------------------------------------------------------------------------------------------------------------------------------|
| Dieta, cuestionario   | <input checked="" type="radio"/> si<br><input type="radio"/> no                                                                                                                                                                                                                                                                                                                                   |
| Leche entera          | <input type="radio"/> Nunca o menos 1 vez al mes<br><input type="radio"/> 1 a 3 veces mes<br><input type="radio"/> 1 vez semana<br><input type="radio"/> 2 a 4 veces semana<br><input type="radio"/> 5 a 6 veces semana<br><input type="radio"/> 1 vez al día<br><input type="radio"/> 2 a 3 veces al día<br><input type="radio"/> 5 a 6 veces al día<br><input type="radio"/> más 6 veces al día |
| Leche semidesnatada   | <input type="radio"/> Nunca o menos 1 vez al mes<br><input type="radio"/> 1 a 3 veces mes<br><input type="radio"/> 1 vez semana<br><input type="radio"/> 2 a 4 veces semana<br><input type="radio"/> 5 a 6 veces semana<br><input type="radio"/> 1 vez al día<br><input type="radio"/> 2 a 3 veces al día<br><input type="radio"/> 5 a 6 veces al día<br><input type="radio"/> mas 6 veces al día |
| Leche desnatada       | <input type="radio"/> Nunca o menos 1 vez al mes<br><input type="radio"/> 1 a 3 veces mes<br><input type="radio"/> 1 vez semana<br><input type="radio"/> 2 a 4 veces semana<br><input type="radio"/> 5 a 6 veces semana<br><input type="radio"/> 1 vez al día<br><input type="radio"/> 2 a 3 veces al día<br><input type="radio"/> 5 a 6 veces al día<br><input type="radio"/> más 6 veces al día |
| Leche condensada      | <input type="radio"/> Nunca o menos 1 vez al mes<br><input type="radio"/> 1 a 3 veces mes<br><input type="radio"/> 1 vez semana<br><input type="radio"/> 2 a 4 veces semana<br><input type="radio"/> 5 a 6 veces semana<br><input type="radio"/> 1 vez al día<br><input type="radio"/> 2 a 3 veces al día<br><input type="radio"/> 5 a 6 veces al día<br><input type="radio"/> más 6 veces al día |
| nata o crema de leche | <input type="radio"/> Nunca o menos 1 vez al mes<br><input type="radio"/> 1 a 3 veces mes<br><input type="radio"/> 1 vez semana<br><input type="radio"/> 2 a 4 veces semana<br><input type="radio"/> 5 a 6 veces semana<br><input type="radio"/> 1 vez al día<br><input type="radio"/> 2 a 3 veces al día<br><input type="radio"/> 5 a 6 veces al día<br><input type="radio"/> más 6 veces al día |

|                                             |                                                                                                                                                                                                                                                                                                                                                                                                              |
|---------------------------------------------|--------------------------------------------------------------------------------------------------------------------------------------------------------------------------------------------------------------------------------------------------------------------------------------------------------------------------------------------------------------------------------------------------------------|
| Yogurt Entero                               | <input type="radio"/> Nunca o menos 1 vez al mes<br><input type="radio"/> 1 a 3 veces mes<br><input type="radio"/> 1 vez semana<br><input type="radio"/> 2 a 4 veces semana<br><input type="radio"/> 5 a 6 veces semana<br><input checked="" type="radio"/> 1 vez al día<br><input type="radio"/> 2 a 3 veces al día<br><input type="radio"/> 5 a 6 veces al día<br><input type="radio"/> más 6 veces al día |
| Yogurt desnatado                            | <input type="radio"/> Nunca o menos 1 vez al mes<br><input type="radio"/> 1 a 3 veces mes<br><input type="radio"/> 1 vez semana<br><input type="radio"/> 2 a 4 veces semana<br><input type="radio"/> 5 a 6 veces semana<br><input type="radio"/> 1 vez al día<br><input type="radio"/> 2 a 3 veces al día<br><input type="radio"/> 5 a 6 veces al día<br><input type="radio"/> más 6 veces al día            |
| 100g requesón o queso blando o queso fresco | <input type="radio"/> Nunca o menos 1 vez al mes<br><input type="radio"/> 1 a 3 veces mes<br><input type="radio"/> 1 vez semana<br><input type="radio"/> 2 a 4 veces semana<br><input type="radio"/> 5 a 6 veces semana<br><input type="radio"/> 1 vez al día<br><input type="radio"/> 2 a 3 veces al día<br><input type="radio"/> 5 a 6 veces al día<br><input type="radio"/> más 6 veces al día            |
| queso curado o semicurado o cremoso         | <input type="radio"/> Nunca o menos 1 vez al mes<br><input type="radio"/> 1 a 3 veces mes<br><input type="radio"/> 1 vez semana<br><input type="radio"/> 2 a 4 veces semana<br><input type="radio"/> 5 a 6 veces semana<br><input checked="" type="radio"/> 1 vez al día<br><input type="radio"/> 2 a 3 veces al día<br><input type="radio"/> 5 a 6 veces al día<br><input type="radio"/> más 6 veces al día |
| natillas flan pudding                       | <input type="radio"/> Nunca o menos 1 vez al mes<br><input type="radio"/> 1 a 3 veces mes<br><input type="radio"/> 1 vez semana<br><input type="radio"/> 2 a 4 veces semana<br><input type="radio"/> 5 a 6 veces semana<br><input type="radio"/> 1 vez al día<br><input type="radio"/> 2 a 3 veces al día<br><input type="radio"/> 5 a 6 veces al día<br><input type="radio"/> más 6 veces al día            |
| Helado                                      | <input type="radio"/> Nunca o menos 1 vez al mes<br><input type="radio"/> 1 a 3 veces mes<br><input type="radio"/> 1 vez semana<br><input type="radio"/> 2 a 4 veces semana<br><input type="radio"/> 5 a 6 veces semana<br><input type="radio"/> 1 vez al día<br><input type="radio"/> 2 a 3 veces al día<br><input type="radio"/> 5 a 6 veces al día<br><input type="radio"/> más 6 veces al día            |

|                                      |                                                                                                                                                                                                                                                                                                                                                                                                              |
|--------------------------------------|--------------------------------------------------------------------------------------------------------------------------------------------------------------------------------------------------------------------------------------------------------------------------------------------------------------------------------------------------------------------------------------------------------------|
| huevo                                | <input type="radio"/> Nunca o menos 1 vez al mes<br><input type="radio"/> 1 a 3 veces mes<br><input type="radio"/> 1 vez semana<br><input checked="" type="radio"/> 2 a 4 veces semana<br><input type="radio"/> 5 a 6 veces semana<br><input type="radio"/> 1 vez al día<br><input type="radio"/> 2 a 3 veces al día<br><input type="radio"/> 5 a 6 veces al día<br><input type="radio"/> más 6 veces al día |
| Pollo con piel                       | <input type="radio"/> Nunca o menos 1 vez al mes<br><input type="radio"/> 1 a 3 veces mes<br><input type="radio"/> 1 vez semana<br><input type="radio"/> 2 a 4 veces semana<br><input type="radio"/> 5 a 6 veces semana<br><input type="radio"/> 1 vez al día<br><input type="radio"/> 2 a 3 veces al día<br><input type="radio"/> 5 a 6 veces al día<br><input type="radio"/> más 6 veces al día            |
| pollo sin piel                       | <input type="radio"/> Nunca o menos 1 vez al mes<br><input type="radio"/> 1 a 3 veces mes<br><input checked="" type="radio"/> 1 vez semana<br><input type="radio"/> 2 a 4 veces semana<br><input type="radio"/> 5 a 6 veces semana<br><input type="radio"/> 1 vez al día<br><input type="radio"/> 2 a 3 veces al día<br><input type="radio"/> 5 a 6 veces al día<br><input type="radio"/> más 6 veces al día |
| Ternera o cerdo o cordero            | <input type="radio"/> Nunca o menos 1 vez al mes<br><input type="radio"/> 1 a 3 veces mes<br><input checked="" type="radio"/> 1 vez semana<br><input type="radio"/> 2 a 4 veces semana<br><input type="radio"/> 5 a 6 veces semana<br><input type="radio"/> 1 vez al día<br><input type="radio"/> 2 a 3 veces al día<br><input type="radio"/> 5 a 6 veces al día<br><input type="radio"/> más 6 veces al día |
| carne caza: Conejo o codorniz o pato | <input type="radio"/> Nunca o menos 1 vez al mes<br><input type="radio"/> 1 a 3 veces mes<br><input type="radio"/> 1 vez semana<br><input type="radio"/> 2 a 4 veces semana<br><input type="radio"/> 5 a 6 veces semana<br><input type="radio"/> 1 vez al día<br><input type="radio"/> 2 a 3 veces al día<br><input type="radio"/> 5 a 6 veces al día<br><input type="radio"/> más 6 veces al día            |
| Hígado de ternera o cerdo o pollo    | <input type="radio"/> Nunca o menos 1 vez al mes<br><input type="radio"/> 1 a 3 veces mes<br><input type="radio"/> 1 vez semana<br><input type="radio"/> 2 a 4 veces semana<br><input type="radio"/> 5 a 6 veces semana<br><input type="radio"/> 1 vez al día<br><input type="radio"/> 2 a 3 veces al día<br><input type="radio"/> 5 a 6 veces al día<br><input type="radio"/> más 6 veces al día            |

---

Vísceras

- ☐ Nunca o menos 1 vez al mes
- ☐ 1 a 3 veces mes
- ☐ 1 vez semana
- ☐ 2 a 4 veces semana
- ☐ 5 a 6 veces semana
- ☐ 1 vez al día
- ☐ 2 a 3 veces al día
- ☐ 5 a 6 veces al día
- ☐ más 6 veces al día

---

Embutido

- ☐ Nunca o menos 1 vez al mes
- ☐ 1 a 3 veces mes
- ☐ 1 vez semana
- ☐ 2 a 4 veces semana
- ☐ 5 a 6 veces semana
- ☐ 1 vez al día
- ☐ 2 a 3 veces al día
- ☐ 5 a 6 veces al día
- ☐ más 6 veces al día

---

Salchicha o similar

- ☐ Nunca o menos 1 vez al mes
- ☐ 1 a 3 veces mes
- ☐ 1 vez semana
- ☐ 2 a 4 veces semana
- ☐ 5 a 6 veces semana
- ☐ 1 vez al día
- ☐ 2 a 3 veces al día
- ☐ 5 a 6 veces al día
- ☐ más 6 veces al día

---

Pate o foiegras

- ☐ Nunca o menos 1 vez al mes
- ☐ 1 a 3 veces mes
- ☐ 1 vez semana
- ☐ 2 a 4 veces semana
- ☐ 5 a 6 veces semana
- ☐ 1 vez al día
- ☐ 2 a 3 veces al día
- ☐ 5 a 6 veces al día
- ☐ más 6 veces al día

---

Hamburguesa

- ☐ Nunca o menos 1 vez al mes
- ☐ 1 a 3 veces mes
- ☐ 1 vez semana
- ☐ 2 a 4 veces semana
- ☐ 5 a 6 veces semana
- ☐ 1 vez al día
- ☐ 2 a 3 veces al día
- ☐ 5 a 6 veces al día
- ☐ más 6 veces al día

---

tocino o bacon

- ☐ Nunca o menos 1 vez al mes
- ☐ 1 a 3 veces mes
- ☐ 1 vez semana
- ☐ 2 a 4 veces semana
- ☐ 5 a 6 veces semana
- ☐ 1 vez al día
- ☐ 2 a 3 veces al día
- ☐ 5 a 6 veces al día
- ☐ más 6 veces al día

|                        |                                                                                                                                                                                                                                                                                                                                                                                                              |
|------------------------|--------------------------------------------------------------------------------------------------------------------------------------------------------------------------------------------------------------------------------------------------------------------------------------------------------------------------------------------------------------------------------------------------------------|
| Pescado frito          | <input checked="" type="radio"/> Nunca o menos 1 vez al mes<br><input type="radio"/> 1 a 3 veces mes<br><input type="radio"/> 1 vez semana<br><input type="radio"/> 2 a 4 veces semana<br><input type="radio"/> 5 a 6 veces semana<br><input type="radio"/> 1 vez al día<br><input type="radio"/> 2 a 3 veces al día<br><input type="radio"/> 5 a 6 veces al día<br><input type="radio"/> más 6 veces al día |
| pescado hervido blanco | <input type="radio"/> Nunca o menos 1 vez al mes<br><input checked="" type="radio"/> 1 a 3 veces mes<br><input type="radio"/> 1 vez semana<br><input type="radio"/> 2 a 4 veces semana<br><input type="radio"/> 5 a 6 veces semana<br><input type="radio"/> 1 vez al día<br><input type="radio"/> 2 a 3 veces al día<br><input type="radio"/> 5 a 6 veces al día<br><input type="radio"/> más 6 veces al día |
| pescado hervido azul   | <input type="radio"/> Nunca o menos 1 vez al mes<br><input type="radio"/> 1 a 3 veces mes<br><input type="radio"/> 1 vez semana<br><input type="radio"/> 2 a 4 veces semana<br><input type="radio"/> 5 a 6 veces semana<br><input type="radio"/> 1 vez al día<br><input type="radio"/> 2 a 3 veces al día<br><input type="radio"/> 5 a 6 veces al día<br><input type="radio"/> más 6 veces al día            |
| otros pescado azul     | <input type="radio"/> Nunca o menos 1 vez al mes<br><input type="radio"/> 1 a 3 veces mes<br><input type="radio"/> 1 vez semana<br><input type="radio"/> 2 a 4 veces semana<br><input type="radio"/> 5 a 6 veces semana<br><input type="radio"/> 1 vez al día<br><input type="radio"/> 2 a 3 veces al día<br><input type="radio"/> 5 a 6 veces al día<br><input type="radio"/> más 6 veces al día            |
| atun conserva          | <input type="radio"/> Nunca o menos 1 vez al mes<br><input type="radio"/> 1 a 3 veces mes<br><input type="radio"/> 1 vez semana<br><input checked="" type="radio"/> 2 a 4 veces semana<br><input type="radio"/> 5 a 6 veces semana<br><input type="radio"/> 1 vez al día<br><input type="radio"/> 2 a 3 veces al día<br><input type="radio"/> 5 a 6 veces al día<br><input type="radio"/> más 6 veces al día |
| sardina conserva       | <input type="radio"/> Nunca o menos 1 vez al mes<br><input type="radio"/> 1 a 3 veces mes<br><input type="radio"/> 1 vez semana<br><input type="radio"/> 2 a 4 veces semana<br><input type="radio"/> 5 a 6 veces semana<br><input type="radio"/> 1 vez al día<br><input type="radio"/> 2 a 3 veces al día<br><input type="radio"/> 5 a 6 veces al día<br><input type="radio"/> más 6 veces al día            |



---

pescado ahumado

- ☐ Nunca o menos 1 vez al mes
- ☐ 1 a 3 veces mes
- ☐ 1 vez semana
- ☐ 2 a 4 veces semana
- ☐ 5 a 6 veces semana
- ☐ 1 vez al día
- ☐ 2 a 3 veces al día
- ☐ 5 a 6 veces al día
- ☐ más 6 veces al día

---

almejas o mejillones o ostras unos 100g

- ☐ Nunca o menos 1 vez al mes
- ☐ 1 a 3 veces mes
- ☐ 1 vez semana
- ☐ 2 a 4 veces semana
- ☐ 5 a 6 veces semana
- ☐ 1 vez al día
- ☐ 2 a 3 veces al día
- ☐ 5 a 6 veces al día
- ☐ más 6 veces al día

---

calamar o chipiron o sepia unos 100g

- ☐ Nunca o menos 1 vez al mes
- ☐ 1 a 3 veces mes
- ☐ 1 vez semana
- ☐ 2 a 4 veces semana
- ☐ 5 a 6 veces semana
- ☐ 1 vez al día
- ☐ 2 a 3 veces al día
- ☐ 5 a 6 veces al día
- ☐ más 6 veces al día

---

marisco unos 100g

- ☐ Nunca o menos 1 vez al mes
- ☐ 1 a 3 veces mes
- ☐ 1 vez semana
- ☐ 2 a 4 veces semana
- ☐ 5 a 6 veces semana
- ☐ 1 vez al día
- ☐ 2 a 3 veces al día
- ☐ 5 a 6 veces al día
- ☐ más 6 veces al día

---

Espinacas o acelgas cocinadas

- ☐ Nunca o menos 1 vez al mes
- ☐ 1 a 3 veces mes
- ☐ 1 vez semana
- ☐ 2 a 4 veces semana
- ☐ 5 a 6 veces semana
- ☒ 1 vez al día
- ☐ 2 a 3 veces al día
- ☐ 5 a 6 veces al día
- ☐ más 6 veces al día

---

Col o coliflor o brocoli cocinado

- ☐ Nunca o menos 1 vez al mes
- ☐ 1 a 3 veces mes
- ☐ 1 vez semana
- ☐ 2 a 4 veces semana
- ☐ 5 a 6 veces semana
- ☒ 1 vez al día
- ☐ 2 a 3 veces al día
- ☐ 5 a 6 veces al día
- ☐ más 6 veces al día

---

Lechuga o endivia o escarola

- ☐ Nunca o menos 1 vez al mes  
☐ 1 a 3 veces mes  
☐ 1 vez semana  
☐ 2 a 4 veces semana  
☐ 5 a 6 veces semana  
☒ 1 vez al día  
☐ 2 a 3 veces al día  
☐ 5 a 6 veces al día  
☐ más 6 veces al día

---

tomate ensalada

- ☐ Nunca o menos 1 vez al mes  
☐ 1 a 3 veces mes  
☐ 1 vez semana  
☐ 2 a 4 veces semana  
☐ 5 a 6 veces semana  
☐ 1 vez al día  
☐ 2 a 3 veces al día  
☐ 5 a 6 veces al día  
☐ más 6 veces al día

---

cebolla

- ☐ Nunca o menos 1 vez al mes  
☐ 1 a 3 veces mes  
☐ 1 vez semana  
☐ 2 a 4 veces semana  
☐ 5 a 6 veces semana  
☒ 1 vez al día  
☐ 2 a 3 veces al día  
☐ 5 a 6 veces al día  
☐ más 6 veces al día

---

Zanahoria o calabaza

- ☐ Nunca o menos 1 vez al mes  
☐ 1 a 3 veces mes  
☐ 1 vez semana  
☐ 2 a 4 veces semana  
☐ 5 a 6 veces semana  
☒ 1 vez al día  
☐ 2 a 3 veces al día  
☐ 5 a 6 veces al día  
☐ más 6 veces al día

---

Judías verdes

- ☐ Nunca o menos 1 vez al mes  
☐ 1 a 3 veces mes  
☐ 1 vez semana  
☐ 2 a 4 veces semana  
☐ 5 a 6 veces semana  
☒ 1 vez al día  
☐ 2 a 3 veces al día  
☐ 5 a 6 veces al día  
☐ más 6 veces al día

---

Berenjena o calabacin o pepino

- ☐ Nunca o menos 1 vez al mes  
☐ 1 a 3 veces mes  
☐ 1 vez semana  
☐ 2 a 4 veces semana  
☐ 5 a 6 veces semana  
☐ 1 vez al día  
☐ 2 a 3 veces al día  
☐ 5 a 6 veces al día  
☐ más 6 veces al día

|                       |                                                                                                                                                                                                                                                                                                                                                                                                              |
|-----------------------|--------------------------------------------------------------------------------------------------------------------------------------------------------------------------------------------------------------------------------------------------------------------------------------------------------------------------------------------------------------------------------------------------------------|
| pimiento              | <input type="radio"/> Nunca o menos 1 vez al mes<br><input type="radio"/> 1 a 3 veces mes<br><input type="radio"/> 1 vez semana<br><input type="radio"/> 2 a 4 veces semana<br><input type="radio"/> 5 a 6 veces semana<br><input type="radio"/> 1 vez al día<br><input type="radio"/> 2 a 3 veces al día<br><input type="radio"/> 5 a 6 veces al día<br><input type="radio"/> más 6 veces al día            |
| alcachofa             | <input type="radio"/> Nunca o menos 1 vez al mes<br><input type="radio"/> 1 a 3 veces mes<br><input type="radio"/> 1 vez semana<br><input type="radio"/> 2 a 4 veces semana<br><input type="radio"/> 5 a 6 veces semana<br><input checked="" type="radio"/> 1 vez al día<br><input type="radio"/> 2 a 3 veces al día<br><input type="radio"/> 5 a 6 veces al día<br><input type="radio"/> más 6 veces al día |
| espárragos            | <input type="radio"/> Nunca o menos 1 vez al mes<br><input type="radio"/> 1 a 3 veces mes<br><input type="radio"/> 1 vez semana<br><input type="radio"/> 2 a 4 veces semana<br><input type="radio"/> 5 a 6 veces semana<br><input type="radio"/> 1 vez al día<br><input type="radio"/> 2 a 3 veces al día<br><input type="radio"/> 5 a 6 veces al día<br><input type="radio"/> más 6 veces al día            |
| maíz hervido          | <input type="radio"/> Nunca o menos 1 vez al mes<br><input type="radio"/> 1 a 3 veces mes<br><input type="radio"/> 1 vez semana<br><input type="radio"/> 2 a 4 veces semana<br><input type="radio"/> 5 a 6 veces semana<br><input type="radio"/> 1 vez al día<br><input type="radio"/> 2 a 3 veces al día<br><input type="radio"/> 5 a 6 veces al día<br><input type="radio"/> más 6 veces al día            |
| legumbres             | <input type="radio"/> Nunca o menos 1 vez al mes<br><input type="radio"/> 1 a 3 veces mes<br><input checked="" type="radio"/> 1 vez semana<br><input type="radio"/> 2 a 4 veces semana<br><input type="radio"/> 5 a 6 veces semana<br><input type="radio"/> 1 vez al día<br><input type="radio"/> 2 a 3 veces al día<br><input type="radio"/> 5 a 6 veces al día<br><input type="radio"/> más 6 veces al día |
| naranjas o mandarinas | <input type="radio"/> Nunca o menos 1 vez al mes<br><input type="radio"/> 1 a 3 veces mes<br><input type="radio"/> 1 vez semana<br><input type="radio"/> 2 a 4 veces semana<br><input type="radio"/> 5 a 6 veces semana<br><input type="radio"/> 1 vez al día<br><input type="radio"/> 2 a 3 veces al día<br><input type="radio"/> 5 a 6 veces al día<br><input type="radio"/> más 6 veces al día            |

---

zum natural fruta

- ☐ Nunca o menos 1 vez al mes  
☐ 1 a 3 veces mes  
☐ 1 vez semana  
☐ 2 a 4 veces semana  
☐ 5 a 6 veces semana  
☐ 1 vez al día  
☐ 2 a 3 veces al día  
☐ 5 a 6 veces al día  
☐ más 6 veces al día

---

platano

- ☐ Nunca o menos 1 vez al mes  
☐ 1 a 3 veces mes  
☐ 1 vez semana  
☒ 2 a 4 veces semana  
☐ 5 a 6 veces semana  
☐ 1 vez al día  
☐ 2 a 3 veces al día  
☐ 5 a 6 veces al día  
☐ más 6 veces al día

---

manzana o pera

- ☐ Nunca o menos 1 vez al mes  
☐ 1 a 3 veces mes  
☒ 1 vez semana  
☐ 2 a 4 veces semana  
☐ 5 a 6 veces semana  
☐ 1 vez al día  
☐ 2 a 3 veces al día  
☐ 5 a 6 veces al día  
☐ más 6 veces al día

---

melocotón o nectarina

- ☐ Nunca o menos 1 vez al mes  
☐ 1 a 3 veces mes  
☐ 1 vez semana  
☐ 2 a 4 veces semana  
☐ 5 a 6 veces semana  
☐ 1 vez al día  
☐ 2 a 3 veces al día  
☐ 5 a 6 veces al día  
☐ más 6 veces al día

---

sandia o melon

- ☐ Nunca o menos 1 vez al mes  
☐ 1 a 3 veces mes  
☐ 1 vez semana  
☐ 2 a 4 veces semana  
☐ 5 a 6 veces semana  
☐ 1 vez al día  
☐ 2 a 3 veces al día  
☐ 5 a 6 veces al día  
☐ más 6 veces al día

---

uva

- ☐ Nunca o menos 1 vez al mes  
☐ 1 a 3 veces mes  
☐ 1 vez semana  
☐ 2 a 4 veces semana  
☐ 5 a 6 veces semana  
☐ 1 vez al día  
☐ 2 a 3 veces al día  
☐ 5 a 6 veces al día  
☐ más 6 veces al día

|                 |                                                                                                                                                                                                                                                                                                                                                                                                              |
|-----------------|--------------------------------------------------------------------------------------------------------------------------------------------------------------------------------------------------------------------------------------------------------------------------------------------------------------------------------------------------------------------------------------------------------------|
| bruna o ciruela | <input type="radio"/> Nunca o menos 1 vez al mes<br><input type="radio"/> 1 a 3 veces mes<br><input type="radio"/> 1 vez semana<br><input type="radio"/> 2 a 4 veces semana<br><input type="radio"/> 5 a 6 veces semana<br><input type="radio"/> 1 vez al día<br><input type="radio"/> 2 a 3 veces al día<br><input type="radio"/> 5 a 6 veces al día<br><input type="radio"/> más 6 veces al día            |
| kiwi            | <input type="radio"/> Nunca o menos 1 vez al mes<br><input type="radio"/> 1 a 3 veces mes<br><input type="radio"/> 1 vez semana<br><input type="radio"/> 2 a 4 veces semana<br><input type="radio"/> 5 a 6 veces semana<br><input type="radio"/> 1 vez al día<br><input type="radio"/> 2 a 3 veces al día<br><input type="radio"/> 5 a 6 veces al día<br><input type="radio"/> más 6 veces al día            |
| aceituna        | <input type="radio"/> Nunca o menos 1 vez al mes<br><input type="radio"/> 1 a 3 veces mes<br><input type="radio"/> 1 vez semana<br><input checked="" type="radio"/> 2 a 4 veces semana<br><input type="radio"/> 5 a 6 veces semana<br><input type="radio"/> 1 vez al día<br><input type="radio"/> 2 a 3 veces al día<br><input type="radio"/> 5 a 6 veces al día<br><input type="radio"/> más 6 veces al día |
| frutos secos    | <input type="radio"/> Nunca o menos 1 vez al mes<br><input type="radio"/> 1 a 3 veces mes<br><input type="radio"/> 1 vez semana<br><input type="radio"/> 2 a 4 veces semana<br><input type="radio"/> 5 a 6 veces semana<br><input checked="" type="radio"/> 1 vez al día<br><input type="radio"/> 2 a 3 veces al día<br><input type="radio"/> 5 a 6 veces al día<br><input type="radio"/> más 6 veces al día |
| pan blanco      | <input type="radio"/> Nunca o menos 1 vez al mes<br><input type="radio"/> 1 a 3 veces mes<br><input type="radio"/> 1 vez semana<br><input type="radio"/> 2 a 4 veces semana<br><input type="radio"/> 5 a 6 veces semana<br><input type="radio"/> 1 vez al día<br><input type="radio"/> 2 a 3 veces al día<br><input type="radio"/> 5 a 6 veces al día<br><input type="radio"/> más 6 veces al día            |
| pan integral    | <input type="radio"/> Nunca o menos 1 vez al mes<br><input type="radio"/> 1 a 3 veces mes<br><input type="radio"/> 1 vez semana<br><input type="radio"/> 2 a 4 veces semana<br><input type="radio"/> 5 a 6 veces semana<br><input type="radio"/> 1 vez al día<br><input type="radio"/> 2 a 3 veces al día<br><input type="radio"/> 5 a 6 veces al día<br><input type="radio"/> más 6 veces al día            |

---

cereales desayuno

- ☐ Nunca o menos 1 vez al mes
- ☐ 1 a 3 veces mes
- ☐ 1 vez semana
- ☐ 2 a 4 veces semana
- ☐ 5 a 6 veces semana
- ☐ 1 vez al día
- ☐ 2 a 3 veces al día
- ☐ 5 a 6 veces al día
- ☐ más 6 veces al día

---

patatas fritas

- ☐ Nunca o menos 1 vez al mes
- ☐ 1 a 3 veces mes
- ☐ 1 vez semana
- ☐ 2 a 4 veces semana
- ☐ 5 a 6 veces semana
- ☐ 1 vez al día
- ☐ 2 a 3 veces al día
- ☐ 5 a 6 veces al día
- ☐ más 6 veces al día

---

patatas cocidas o asadas

- ☐ Nunca o menos 1 vez al mes
- ☐ 1 a 3 veces mes
- ☐ 1 vez semana
- ☐ 2 a 4 veces semana
- ☐ 5 a 6 veces semana
- ☐ 1 vez al día
- ☐ 2 a 3 veces al día
- ☐ 5 a 6 veces al día
- ☐ más 6 veces al día

---

bolsa papas

- ☐ Nunca o menos 1 vez al mes
- ☐ 1 a 3 veces mes
- ☐ 1 vez semana
- ☐ 2 a 4 veces semana
- ☐ 5 a 6 veces semana
- ☐ 1 vez al día
- ☐ 2 a 3 veces al día
- ☐ 5 a 6 veces al día
- ☐ más 6 veces al día

---

arroz cocinado

- ☐ Nunca o menos 1 vez al mes
- ☐ 1 a 3 veces mes
- ☐ 1 vez semana
- ☐ 2 a 4 veces semana
- ☐ 5 a 6 veces semana
- ☐ 1 vez al día
- ☐ 2 a 3 veces al día
- ☐ 5 a 6 veces al día
- ☐ más 6 veces al día

---

pasta

- ☐ Nunca o menos 1 vez al mes
- ☐ 1 a 3 veces mes
- ☐ 1 vez semana
- ☐ 2 a 4 veces semana
- ☐ 5 a 6 veces semana
- ☐ 1 vez al día
- ☐ 2 a 3 veces al día
- ☐ 5 a 6 veces al día
- ☐ más 6 veces al día

|                     |                                                                                                                                                                                                                                                                                                                                                                                                              |
|---------------------|--------------------------------------------------------------------------------------------------------------------------------------------------------------------------------------------------------------------------------------------------------------------------------------------------------------------------------------------------------------------------------------------------------------|
| pizza               | <input type="radio"/> Nunca o menos 1 vez al mes<br><input type="radio"/> 1 a 3 veces mes<br><input type="radio"/> 1 vez semana<br><input type="radio"/> 2 a 4 veces semana<br><input type="radio"/> 5 a 6 veces semana<br><input type="radio"/> 1 vez al día<br><input type="radio"/> 2 a 3 veces al día<br><input type="radio"/> 5 a 6 veces al día<br><input type="radio"/> más 6 veces al día            |
| aceite oliva        | <input type="radio"/> Nunca o menos 1 vez al mes<br><input type="radio"/> 1 a 3 veces mes<br><input type="radio"/> 1 vez semana<br><input type="radio"/> 2 a 4 veces semana<br><input type="radio"/> 5 a 6 veces semana<br><input checked="" type="radio"/> 1 vez al día<br><input type="radio"/> 2 a 3 veces al día<br><input type="radio"/> 5 a 6 veces al día<br><input type="radio"/> más 6 veces al día |
| otros aceites       | <input type="radio"/> Nunca o menos 1 vez al mes<br><input type="radio"/> 1 a 3 veces mes<br><input type="radio"/> 1 vez semana<br><input type="radio"/> 2 a 4 veces semana<br><input type="radio"/> 5 a 6 veces semana<br><input type="radio"/> 1 vez al día<br><input type="radio"/> 2 a 3 veces al día<br><input type="radio"/> 5 a 6 veces al día<br><input type="radio"/> más 6 veces al día            |
| margarina           | <input type="radio"/> Nunca o menos 1 vez al mes<br><input type="radio"/> 1 a 3 veces mes<br><input type="radio"/> 1 vez semana<br><input type="radio"/> 2 a 4 veces semana<br><input type="radio"/> 5 a 6 veces semana<br><input type="radio"/> 1 vez al día<br><input type="radio"/> 2 a 3 veces al día<br><input type="radio"/> 5 a 6 veces al día<br><input type="radio"/> más 6 veces al día            |
| mantequilla         | <input type="radio"/> Nunca o menos 1 vez al mes<br><input type="radio"/> 1 a 3 veces mes<br><input type="radio"/> 1 vez semana<br><input type="radio"/> 2 a 4 veces semana<br><input type="radio"/> 5 a 6 veces semana<br><input type="radio"/> 1 vez al día<br><input type="radio"/> 2 a 3 veces al día<br><input type="radio"/> 5 a 6 veces al día<br><input type="radio"/> más 6 veces al día            |
| galletas tipo maria | <input type="radio"/> Nunca o menos 1 vez al mes<br><input type="radio"/> 1 a 3 veces mes<br><input checked="" type="radio"/> 1 vez semana<br><input type="radio"/> 2 a 4 veces semana<br><input type="radio"/> 5 a 6 veces semana<br><input type="radio"/> 1 vez al día<br><input type="radio"/> 2 a 3 veces al día<br><input type="radio"/> 5 a 6 veces al día<br><input type="radio"/> más 6 veces al día |

|                           |                                                                                                                                                                                                                                                                                                                                                                                                              |
|---------------------------|--------------------------------------------------------------------------------------------------------------------------------------------------------------------------------------------------------------------------------------------------------------------------------------------------------------------------------------------------------------------------------------------------------------|
| galletas chocolate        | <input type="radio"/> Nunca o menos 1 vez al mes<br><input type="radio"/> 1 a 3 veces mes<br><input type="radio"/> 1 vez semana<br><input type="radio"/> 2 a 4 veces semana<br><input type="radio"/> 5 a 6 veces semana<br><input type="radio"/> 1 vez al día<br><input type="radio"/> 2 a 3 veces al día<br><input type="radio"/> 5 a 6 veces al día<br><input type="radio"/> más 6 veces al día            |
| bollieria                 | <input type="radio"/> Nunca o menos 1 vez al mes<br><input type="radio"/> 1 a 3 veces mes<br><input type="radio"/> 1 vez semana<br><input type="radio"/> 2 a 4 veces semana<br><input type="radio"/> 5 a 6 veces semana<br><input type="radio"/> 1 vez al día<br><input type="radio"/> 2 a 3 veces al día<br><input type="radio"/> 5 a 6 veces al día<br><input type="radio"/> más 6 veces al día            |
| chocolate o bombones      | <input type="radio"/> Nunca o menos 1 vez al mes<br><input type="radio"/> 1 a 3 veces mes<br><input type="radio"/> 1 vez semana<br><input checked="" type="radio"/> 2 a 4 veces semana<br><input type="radio"/> 5 a 6 veces semana<br><input type="radio"/> 1 vez al día<br><input type="radio"/> 2 a 3 veces al día<br><input type="radio"/> 5 a 6 veces al día<br><input type="radio"/> más 6 veces al día |
| chocolate polvo o colacao | <input type="radio"/> Nunca o menos 1 vez al mes<br><input type="radio"/> 1 a 3 veces mes<br><input type="radio"/> 1 vez semana<br><input type="radio"/> 2 a 4 veces semana<br><input type="radio"/> 5 a 6 veces semana<br><input type="radio"/> 1 vez al día<br><input type="radio"/> 2 a 3 veces al día<br><input type="radio"/> 5 a 6 veces al día<br><input type="radio"/> más 6 veces al día            |
| vino tinto                | <input type="radio"/> Nunca o menos 1 vez al mes<br><input type="radio"/> 1 a 3 veces mes<br><input type="radio"/> 1 vez semana<br><input type="radio"/> 2 a 4 veces semana<br><input type="radio"/> 5 a 6 veces semana<br><input type="radio"/> 1 vez al día<br><input type="radio"/> 2 a 3 veces al día<br><input type="radio"/> 5 a 6 veces al día<br><input type="radio"/> más 6 veces al día            |
| vino blanco               | <input type="radio"/> Nunca o menos 1 vez al mes<br><input type="radio"/> 1 a 3 veces mes<br><input type="radio"/> 1 vez semana<br><input type="radio"/> 2 a 4 veces semana<br><input type="radio"/> 5 a 6 veces semana<br><input type="radio"/> 1 vez al día<br><input type="radio"/> 2 a 3 veces al día<br><input type="radio"/> 5 a 6 veces al día<br><input type="radio"/> más 6 veces al día            |



---

|                    |                                                                                                                                                                                                                                                                                                                                                                                                   |
|--------------------|---------------------------------------------------------------------------------------------------------------------------------------------------------------------------------------------------------------------------------------------------------------------------------------------------------------------------------------------------------------------------------------------------|
| vino seco o vermut | <input type="radio"/> Nunca o menos 1 vez al mes<br><input type="radio"/> 1 a 3 veces mes<br><input type="radio"/> 1 vez semana<br><input type="radio"/> 2 a 4 veces semana<br><input type="radio"/> 5 a 6 veces semana<br><input type="radio"/> 1 vez al día<br><input type="radio"/> 2 a 3 veces al día<br><input type="radio"/> 5 a 6 veces al día<br><input type="radio"/> más 6 veces al día |
|--------------------|---------------------------------------------------------------------------------------------------------------------------------------------------------------------------------------------------------------------------------------------------------------------------------------------------------------------------------------------------------------------------------------------------|

---

|         |                                                                                                                                                                                                                                                                                                                                                                                                   |
|---------|---------------------------------------------------------------------------------------------------------------------------------------------------------------------------------------------------------------------------------------------------------------------------------------------------------------------------------------------------------------------------------------------------|
| cerveza | <input type="radio"/> Nunca o menos 1 vez al mes<br><input type="radio"/> 1 a 3 veces mes<br><input type="radio"/> 1 vez semana<br><input type="radio"/> 2 a 4 veces semana<br><input type="radio"/> 5 a 6 veces semana<br><input type="radio"/> 1 vez al día<br><input type="radio"/> 2 a 3 veces al día<br><input type="radio"/> 5 a 6 veces al día<br><input type="radio"/> más 6 veces al día |
|---------|---------------------------------------------------------------------------------------------------------------------------------------------------------------------------------------------------------------------------------------------------------------------------------------------------------------------------------------------------------------------------------------------------|

---

|                     |                                                                                                                                                                                                                                                                                                                                                                                                              |
|---------------------|--------------------------------------------------------------------------------------------------------------------------------------------------------------------------------------------------------------------------------------------------------------------------------------------------------------------------------------------------------------------------------------------------------------|
| cerveza sin alcohol | <input type="radio"/> Nunca o menos 1 vez al mes<br><input checked="" type="radio"/> 1 a 3 veces mes<br><input type="radio"/> 1 vez semana<br><input type="radio"/> 2 a 4 veces semana<br><input type="radio"/> 5 a 6 veces semana<br><input type="radio"/> 1 vez al día<br><input type="radio"/> 2 a 3 veces al día<br><input type="radio"/> 5 a 6 veces al día<br><input type="radio"/> más 6 veces al día |
|---------------------|--------------------------------------------------------------------------------------------------------------------------------------------------------------------------------------------------------------------------------------------------------------------------------------------------------------------------------------------------------------------------------------------------------------|

---

|         |                                                                                                                                                                                                                                                                                                                                                                                                   |
|---------|---------------------------------------------------------------------------------------------------------------------------------------------------------------------------------------------------------------------------------------------------------------------------------------------------------------------------------------------------------------------------------------------------|
| licores | <input type="radio"/> Nunca o menos 1 vez al mes<br><input type="radio"/> 1 a 3 veces mes<br><input type="radio"/> 1 vez semana<br><input type="radio"/> 2 a 4 veces semana<br><input type="radio"/> 5 a 6 veces semana<br><input type="radio"/> 1 vez al día<br><input type="radio"/> 2 a 3 veces al día<br><input type="radio"/> 5 a 6 veces al día<br><input type="radio"/> más 6 veces al día |
|---------|---------------------------------------------------------------------------------------------------------------------------------------------------------------------------------------------------------------------------------------------------------------------------------------------------------------------------------------------------------------------------------------------------|

---

|                       |                                                                                                                                                                                                                                                                                                                                                                                                   |
|-----------------------|---------------------------------------------------------------------------------------------------------------------------------------------------------------------------------------------------------------------------------------------------------------------------------------------------------------------------------------------------------------------------------------------------|
| ginebra o ron o vodka | <input type="radio"/> Nunca o menos 1 vez al mes<br><input type="radio"/> 1 a 3 veces mes<br><input type="radio"/> 1 vez semana<br><input type="radio"/> 2 a 4 veces semana<br><input type="radio"/> 5 a 6 veces semana<br><input type="radio"/> 1 vez al día<br><input type="radio"/> 2 a 3 veces al día<br><input type="radio"/> 5 a 6 veces al día<br><input type="radio"/> más 6 veces al día |
|-----------------------|---------------------------------------------------------------------------------------------------------------------------------------------------------------------------------------------------------------------------------------------------------------------------------------------------------------------------------------------------------------------------------------------------|

---

|                 |                                                                                                                                                                                                                                                                                                                                                                                                   |
|-----------------|---------------------------------------------------------------------------------------------------------------------------------------------------------------------------------------------------------------------------------------------------------------------------------------------------------------------------------------------------------------------------------------------------|
| refresco normal | <input type="radio"/> Nunca o menos 1 vez al mes<br><input type="radio"/> 1 a 3 veces mes<br><input type="radio"/> 1 vez semana<br><input type="radio"/> 2 a 4 veces semana<br><input type="radio"/> 5 a 6 veces semana<br><input type="radio"/> 1 vez al día<br><input type="radio"/> 2 a 3 veces al día<br><input type="radio"/> 5 a 6 veces al día<br><input type="radio"/> más 6 veces al día |
|-----------------|---------------------------------------------------------------------------------------------------------------------------------------------------------------------------------------------------------------------------------------------------------------------------------------------------------------------------------------------------------------------------------------------------|

---

---

refresco sin azúcar

- ☐ Nunca o menos 1 vez al mes
- ☐ 1 a 3 veces mes
- ☐ 1 vez semana
- ☐ 2 a 4 veces semana
- ☐ 5 a 6 veces semana
- ☐ 1 vez al día
- ☐ 2 a 3 veces al día
- ☐ 5 a 6 veces al día
- ☐ más 6 veces al día

---

Agua del grifo

- ☐ Nunca o menos 1 vez al mes
- ☐ 1 a 3 veces mes
- ☐ 1 vez semana
- ☐ 2 a 4 veces semana
- ☐ 5 a 6 veces semana
- ☐ 1 vez al día
- ☐ 2 a 3 veces al día
- ☐ 5 a 6 veces al día
- ☐ más 6 veces al día

---

agua embotellada sin gas

- ☐ Nunca o menos 1 vez al mes
- ☐ 1 a 3 veces mes
- ☐ 1 vez semana
- ☐ 2 a 4 veces semana
- ☐ 5 a 6 veces semana
- ☐ 1 vez al día
- ☐ 2 a 3 veces al día
- ☐ 5 a 6 veces al día
- ☐ más 6 veces al día

---

agua embotellada con gas

- ☐ Nunca o menos 1 vez al mes
- ☐ 1 a 3 veces mes
- ☐ 1 vez semana
- ☐ 2 a 4 veces semana
- ☐ 5 a 6 veces semana
- ☐ 1 vez al día
- ☐ 2 a 3 veces al día
- ☐ 5 a 6 veces al día
- ☐ más 6 veces al día

---

zumو frutas embasado

- ☐ Nunca o menos 1 vez al mes
- ☐ 1 a 3 veces mes
- ☐ 1 vez semana
- ☐ 2 a 4 veces semana
- ☐ 5 a 6 veces semana
- ☐ 1 vez al día
- ☐ 2 a 3 veces al día
- ☐ 5 a 6 veces al día
- ☐ más 6 veces al día

---

cafe

- ☐ Nunca o menos 1 vez al mes
- ☐ 1 a 3 veces mes
- ☐ 1 vez semana
- ☐ 2 a 4 veces semana
- ☐ 5 a 6 veces semana
- ☐ 1 vez al día
- ☐ 2 a 3 veces al día
- ☐ 5 a 6 veces al día
- ☐ más 6 veces al día

|                       |                                                                                                                                                                                                                                                                                                                                                                                                              |
|-----------------------|--------------------------------------------------------------------------------------------------------------------------------------------------------------------------------------------------------------------------------------------------------------------------------------------------------------------------------------------------------------------------------------------------------------|
| cafe descafeinado     | <input type="radio"/> Nunca o menos 1 vez al mes<br><input type="radio"/> 1 a 3 veces mes<br><input type="radio"/> 1 vez semana<br><input checked="" type="radio"/> 2 a 4 veces semana<br><input type="radio"/> 5 a 6 veces semana<br><input type="radio"/> 1 vez al día<br><input type="radio"/> 2 a 3 veces al día<br><input type="radio"/> 5 a 6 veces al día<br><input type="radio"/> más 6 veces al día |
| te o infusión         | <input type="radio"/> Nunca o menos 1 vez al mes<br><input type="radio"/> 1 a 3 veces mes<br><input type="radio"/> 1 vez semana<br><input type="radio"/> 2 a 4 veces semana<br><input type="radio"/> 5 a 6 veces semana<br><input type="radio"/> 1 vez al día<br><input type="radio"/> 2 a 3 veces al día<br><input type="radio"/> 5 a 6 veces al día<br><input type="radio"/> más 6 veces al día            |
| sopa o puré verduras  | <input type="radio"/> Nunca o menos 1 vez al mes<br><input type="radio"/> 1 a 3 veces mes<br><input type="radio"/> 1 vez semana<br><input type="radio"/> 2 a 4 veces semana<br><input type="radio"/> 5 a 6 veces semana<br><input type="radio"/> 1 vez al día<br><input type="radio"/> 2 a 3 veces al día<br><input type="radio"/> 5 a 6 veces al día<br><input type="radio"/> más 6 veces al día            |
| croquetas pollo jamón | <input type="radio"/> Nunca o menos 1 vez al mes<br><input checked="" type="radio"/> 1 a 3 veces mes<br><input type="radio"/> 1 vez semana<br><input type="radio"/> 2 a 4 veces semana<br><input type="radio"/> 5 a 6 veces semana<br><input type="radio"/> 1 vez al día<br><input type="radio"/> 2 a 3 veces al día<br><input type="radio"/> 5 a 6 veces al día<br><input type="radio"/> más 6 veces al día |
| croquetas pescado     | <input type="radio"/> Nunca o menos 1 vez al mes<br><input type="radio"/> 1 a 3 veces mes<br><input type="radio"/> 1 vez semana<br><input type="radio"/> 2 a 4 veces semana<br><input type="radio"/> 5 a 6 veces semana<br><input type="radio"/> 1 vez al día<br><input type="radio"/> 2 a 3 veces al día<br><input type="radio"/> 5 a 6 veces al día<br><input type="radio"/> más 6 veces al día            |
| mayonesa              | <input checked="" type="radio"/> Nunca o menos 1 vez al mes<br><input type="radio"/> 1 a 3 veces mes<br><input type="radio"/> 1 vez semana<br><input type="radio"/> 2 a 4 veces semana<br><input type="radio"/> 5 a 6 veces semana<br><input type="radio"/> 1 vez al día<br><input type="radio"/> 2 a 3 veces al día<br><input type="radio"/> 5 a 6 veces al día<br><input type="radio"/> más 6 veces al día |

|                  |                                                                                                                                                                                                                                                                                                                                                                                                              |
|------------------|--------------------------------------------------------------------------------------------------------------------------------------------------------------------------------------------------------------------------------------------------------------------------------------------------------------------------------------------------------------------------------------------------------------|
| salsa tomate     | <input type="radio"/> Nunca o menos 1 vez al mes<br><input type="radio"/> 1 a 3 veces mes<br><input type="radio"/> 1 vez semana<br><input type="radio"/> 2 a 4 veces semana<br><input type="radio"/> 5 a 6 veces semana<br><input type="radio"/> 1 vez al día<br><input type="radio"/> 2 a 3 veces al día<br><input type="radio"/> 5 a 6 veces al día<br><input type="radio"/> más 6 veces al día            |
| ketchup          | <input type="radio"/> Nunca o menos 1 vez al mes<br><input type="radio"/> 1 a 3 veces mes<br><input type="radio"/> 1 vez semana<br><input type="radio"/> 2 a 4 veces semana<br><input type="radio"/> 5 a 6 veces semana<br><input type="radio"/> 1 vez al día<br><input type="radio"/> 2 a 3 veces al día<br><input type="radio"/> 5 a 6 veces al día<br><input type="radio"/> más 6 veces al día            |
| sal              | <input type="radio"/> Nunca o menos 1 vez al mes<br><input type="radio"/> 1 a 3 veces mes<br><input type="radio"/> 1 vez semana<br><input type="radio"/> 2 a 4 veces semana<br><input type="radio"/> 5 a 6 veces semana<br><input checked="" type="radio"/> 1 vez al día<br><input type="radio"/> 2 a 3 veces al día<br><input type="radio"/> 5 a 6 veces al día<br><input type="radio"/> más 6 veces al día |
| ajo              | <input type="radio"/> Nunca o menos 1 vez al mes<br><input type="radio"/> 1 a 3 veces mes<br><input type="radio"/> 1 vez semana<br><input type="radio"/> 2 a 4 veces semana<br><input type="radio"/> 5 a 6 veces semana<br><input type="radio"/> 1 vez al día<br><input type="radio"/> 2 a 3 veces al día<br><input type="radio"/> 5 a 6 veces al día<br><input type="radio"/> más 6 veces al día            |
| mermelada o miel | <input type="radio"/> Nunca o menos 1 vez al mes<br><input type="radio"/> 1 a 3 veces mes<br><input type="radio"/> 1 vez semana<br><input type="radio"/> 2 a 4 veces semana<br><input type="radio"/> 5 a 6 veces semana<br><input type="radio"/> 1 vez al día<br><input type="radio"/> 2 a 3 veces al día<br><input type="radio"/> 5 a 6 veces al día<br><input type="radio"/> más 6 veces al día            |
| azúcar           | <input type="radio"/> Nunca o menos 1 vez al mes<br><input type="radio"/> 1 a 3 veces mes<br><input type="radio"/> 1 vez semana<br><input type="radio"/> 2 a 4 veces semana<br><input type="radio"/> 5 a 6 veces semana<br><input type="radio"/> 1 vez al día<br><input type="radio"/> 2 a 3 veces al día<br><input type="radio"/> 5 a 6 veces al día<br><input type="radio"/> más 6 veces al día            |

---

Otro alimento

---

suplementos vitamínicos

- ☐ si  
☒ no

suplementos vitamínicos

---

dieta previa

- ☐ si  
☒ no

motivo dieta

- ☒ no dieta  
☐ control peso  
☐ control colesterol  
☐ control diabetes  
☐ problemas estómago  
☐ problemas vesícula o hepáticos  
☐ HTA o cardiopatía  
☐ problemas renales  
☐ alergia alimentaria  
☐ ácido úrico elevado  
☐ vegetariana  
☐ otros

cambio alimentos año previo gestación

- ☒ si  
☐ no

cambio lácteos

- ☐ eliminado  
☐ disminuido  
☒ igual  
☐ aumentado  
☐ no sabe

cambio huevos

- ☐ eliminado  
☐ disminuido  
☒ igual  
☐ aumentado  
☐ no sabe

cambio carne

- ☐ eliminado  
☐ disminuido  
☒ igual  
☐ aumentado  
☐ no sabe

cambio pescado

- ☐ eliminado  
☐ disminuido  
☒ igual  
☐ aumentado  
☐ no sabe

cambio verduras

- ☐ eliminado  
☐ disminuido  
☒ igual  
☐ aumentado  
☐ no sabe

|                            |                                                                                                                                                                                                                        |
|----------------------------|------------------------------------------------------------------------------------------------------------------------------------------------------------------------------------------------------------------------|
| cambio legumbres           | <input type="radio"/> eliminado<br><input type="radio"/> disminuido<br><input checked="" type="radio"/> igual<br><input type="radio"/> aumentado<br><input type="radio"/> no sabe                                      |
| cambio fruta               | <input type="radio"/> eliminado<br><input type="radio"/> disminuido<br><input checked="" type="radio"/> igual<br><input type="radio"/> aumentado<br><input type="radio"/> no sabe                                      |
| cambio pan                 | <input type="radio"/> eliminado<br><input type="radio"/> disminuido<br><input checked="" type="radio"/> igual<br><input type="radio"/> aumentado<br><input type="radio"/> no sabe                                      |
| cambio aceite oliva        | <input type="radio"/> eliminado<br><input type="radio"/> disminuido<br><input checked="" type="radio"/> igual<br><input type="radio"/> aumentado<br><input type="radio"/> no sabe                                      |
| cambio mante o margarina   | <input checked="" type="radio"/> eliminado<br><input type="radio"/> disminuido<br><input type="radio"/> igual<br><input type="radio"/> aumentado<br><input type="radio"/> no sabe                                      |
| cambio azúcar y dulces     | <input checked="" type="radio"/> eliminado<br><input type="radio"/> disminuido<br><input type="radio"/> igual<br><input type="radio"/> aumentado<br><input type="radio"/> no sabe                                      |
| cambio bebidas alcohólicas | <input checked="" type="radio"/> eliminado<br><input type="radio"/> disminuido<br><input type="radio"/> igual<br><input type="radio"/> aumentado<br><input type="radio"/> no sabe                                      |
| frecuencia comidas fritas  | <input type="radio"/> a diario<br><input type="radio"/> 5 a 6 veces semana<br><input type="radio"/> 2 a 4 veces semana<br><input type="radio"/> 1 vez semana<br><input checked="" type="radio"/> menos de 1 vez semana |
| carne                      | <input type="radio"/> no como<br><input type="radio"/> cruda<br><input type="radio"/> poco hecha<br><input type="radio"/> hecha<br><input checked="" type="radio"/> muy hecha                                          |
| grasa visible carne        | <input type="radio"/> quita toda<br><input type="radio"/> quita mayoría<br><input checked="" type="radio"/> quita un poco<br><input type="radio"/> no quita nada                                                       |

|                                |                                                                                                                                                                                                                                                          |
|--------------------------------|----------------------------------------------------------------------------------------------------------------------------------------------------------------------------------------------------------------------------------------------------------|
| cocina carne                   | <input checked="" type="radio"/> a la plancha<br><input type="radio"/> a la parrilla<br><input type="radio"/> asada<br><input type="radio"/> frita<br><input type="radio"/> guisada                                                                      |
| tostado quemado carne          | <input checked="" type="radio"/> nunca<br><input type="radio"/> 1 vez mes<br><input type="radio"/> 2 a 3 veces mes<br><input type="radio"/> 1 vez semana<br><input type="radio"/> 2 a 3 semanas                                                          |
| tostado quemado pescado        | <input checked="" type="radio"/> nunca<br><input type="radio"/> 1 vez mes<br><input type="radio"/> 2 a 3 veces mes<br><input type="radio"/> 1 vez semana<br><input type="radio"/> 2 a 3 semanas                                                          |
| socarrat paella                | <input checked="" type="radio"/> nunca<br><input type="radio"/> 1 vez mes<br><input type="radio"/> 2 a 3 veces mes<br><input type="radio"/> 1 vez semana<br><input type="radio"/> 2 a 3 semanas                                                          |
| grasa o aceite cocinar         | <input type="radio"/> mantequilla<br><input type="radio"/> margarina<br><input type="radio"/> aceite oliva<br><input checked="" type="radio"/> aceite oliva virgen extra<br><input type="radio"/> aceite vegetal<br><input type="radio"/> mezcla aceites |
| grasa aceite aliñar            | <input type="radio"/> mantequilla<br><input type="radio"/> margarina<br><input type="radio"/> aceite oliva<br><input checked="" type="radio"/> aceite oliva virgen extra<br><input type="radio"/> aceite vegetal<br><input type="radio"/> mezcla aceites |
| grasa aceite freir             | <input type="radio"/> mantequilla<br><input type="radio"/> margarina<br><input type="radio"/> aceite oliva<br><input checked="" type="radio"/> aceite oliva virgen extra<br><input type="radio"/> aceite vegetal<br><input type="radio"/> mezcla aceites |
| Ejercicio cuestionario         | <input checked="" type="radio"/> si<br><input type="radio"/> no                                                                                                                                                                                          |
| horas de sueño incluido siesta | [*DATA REMOVED*]                                                                                                                                                                                                                                         |
| minutos siesta                 | [*DATA REMOVED*]                                                                                                                                                                                                                                         |
| horas televisión semana        |                                                                                                                                                                                                                                                          |

|                                        |                                                                                                                                                                                                                                                                                                                                                                           |
|----------------------------------------|---------------------------------------------------------------------------------------------------------------------------------------------------------------------------------------------------------------------------------------------------------------------------------------------------------------------------------------------------------------------------|
| actividad trabajo                      | <input type="radio"/> casi siempre sentado<br><input checked="" type="radio"/> sentado 50 por cien<br><input type="radio"/> casi siempre de pie, quieto<br><input type="radio"/> casi siempre levantado caminando y llevando pocas cosas<br><input type="radio"/> casi siempre levantado, caminando y llevado muchas cosas<br><input type="radio"/> trabajo manual pesado |
| tiempo caminar o bici al día           | <input type="radio"/> casi nunca<br><input type="radio"/> menos 20min día<br><input checked="" type="radio"/> 20 a 40 min día<br><input type="radio"/> 40 a 60 min día<br><input type="radio"/> 1h o 1h y media día<br><input type="radio"/> más de 1h y media al día                                                                                                     |
| tiempo tareas casa al día              | <input type="radio"/> menos de 1h día<br><input checked="" type="radio"/> 1 a 2h día<br><input type="radio"/> 3 a 4h día<br><input type="radio"/> 5 a 6h día<br><input type="radio"/> 7 a 8h día<br><input type="radio"/> más de 8h día                                                                                                                                   |
| tiempo libre televisión ordenador leer | <input type="radio"/> menos 1h día<br><input type="radio"/> 1h día<br><input checked="" type="radio"/> 2h día<br><input type="radio"/> 3h día<br><input type="radio"/> 4h día<br><input type="radio"/> 5 a 6h día<br><input type="radio"/> mas 6h día                                                                                                                     |
| tiempo libre ejercicio o deporte       | <input type="radio"/> menos 1h semana<br><input type="radio"/> 1h semana<br><input type="radio"/> 2h semana<br><input checked="" type="radio"/> 3h semana<br><input type="radio"/> 4 a 5h semana<br><input type="radio"/> mas 5h semana                                                                                                                                   |
| como se considera                      | <input type="radio"/> sedentaria<br><input checked="" type="radio"/> poco activa<br><input type="radio"/> moderadamente activa<br><input type="radio"/> bastante activa<br><input type="radio"/> muy activa<br><input type="radio"/> no sabe                                                                                                                              |
| FUR                                    | [*DATA REMOVED*]                                                                                                                                                                                                                                                                                                                                                          |
| Semanas gestación 2T                   | [*DATA REMOVED*]                                                                                                                                                                                                                                                                                                                                                          |
| Días gestación 2T                      | [*DATA REMOVED*]                                                                                                                                                                                                                                                                                                                                                          |
| DBP 2T                                 | [*DATA REMOVED*]                                                                                                                                                                                                                                                                                                                                                          |
| CC 2T                                  | [*DATA REMOVED*]                                                                                                                                                                                                                                                                                                                                                          |
| AC 2T                                  | [*DATA REMOVED*]                                                                                                                                                                                                                                                                                                                                                          |



|                                                   |                                                                                                                                                                                                 |
|---------------------------------------------------|-------------------------------------------------------------------------------------------------------------------------------------------------------------------------------------------------|
| LF 2T                                             | [*DATA REMOVED*]                                                                                                                                                                                |
| PFE 2T (Hadlock)                                  | [*DATA REMOVED*]                                                                                                                                                                                |
| Semanas gestación 3T                              | [*DATA REMOVED*]                                                                                                                                                                                |
| días 3T                                           | [*DATA REMOVED*]                                                                                                                                                                                |
| DBP 3T                                            | [*DATA REMOVED*]                                                                                                                                                                                |
| CC 3T                                             | [*DATA REMOVED*]                                                                                                                                                                                |
| AC 3T                                             | [*DATA REMOVED*]                                                                                                                                                                                |
| LF 3T                                             | [*DATA REMOVED*]                                                                                                                                                                                |
| PFE 3T (Hadlock)                                  | [*DATA REMOVED*]                                                                                                                                                                                |
| Semanas de gestación final                        | [*DATA REMOVED*]                                                                                                                                                                                |
| días gestación final                              | [*DATA REMOVED*]                                                                                                                                                                                |
| Localización placenta                             | <input checked="" type="radio"/> anterior<br><input type="radio"/> lateral derecha<br><input type="radio"/> lateral izquierda<br><input type="radio"/> posterior<br><input type="radio"/> fondo |
| Presentación longitudinal cefálica                | <input type="radio"/> no<br><input checked="" type="radio"/> si                                                                                                                                 |
| Dorso                                             | <input type="radio"/> izquierda anterior<br><input type="radio"/> izquierda posterior<br><input type="radio"/> derecha anterior<br><input checked="" type="radio"/> derecha posterior           |
| diámetro biparietal                               | [*DATA REMOVED*]                                                                                                                                                                                |
| Circunferencia craneal                            | [*DATA REMOVED*]                                                                                                                                                                                |
| Circunferencia abdominal                          | [*DATA REMOVED*]                                                                                                                                                                                |
| Longitud de femur                                 | [*DATA REMOVED*]                                                                                                                                                                                |
| tejido celular subcutáneo a nivel del muslo en mm | [*DATA REMOVED*]                                                                                                                                                                                |
| tejido celular subcutáneo en abdomen en mm        | [*DATA REMOVED*]                                                                                                                                                                                |
| Volumen del muslo en cm3                          | [*DATA REMOVED*]                                                                                                                                                                                |
| Peso fetal estimado según fórmula de Hadlock      | [*DATA REMOVED*]                                                                                                                                                                                |

|                                               |                                                                                                                                                          |
|-----------------------------------------------|----------------------------------------------------------------------------------------------------------------------------------------------------------|
| Percentil                                     | [*DATA REMOVED*]                                                                                                                                         |
| Peso fetal estimado según fórmula de Scioscia | <hr/>                                                                                                                                                    |
| Peso fetal estimado según fórmula de LEE      | <hr/>                                                                                                                                                    |
| Tipo de parto                                 | <input type="radio"/> eutocico<br><input type="radio"/> instrumentado/ventosa<br><input checked="" type="radio"/> cesarea                                |
| fecha de nacimiento                           | [*DATA REMOVED*]                                                                                                                                         |
| Días entre exploración y nacimiento           | [*DATA REMOVED*]                                                                                                                                         |
| Peso RN en g                                  | [*DATA REMOVED*]                                                                                                                                         |
| sexo                                          | <input type="radio"/> mujer<br><input checked="" type="radio"/> hombre                                                                                   |
| Apgar 1 minuto                                | [*DATA REMOVED*]                                                                                                                                         |
| Apgar 5 minutos                               | [*DATA REMOVED*]                                                                                                                                         |
| Apgar 10 minutos                              | <hr/>                                                                                                                                                    |
| antecedente Covid durante gestación           | <input type="radio"/> Yes<br><input checked="" type="radio"/> No                                                                                         |
| Nivel de estudios                             | <input type="radio"/> ninguno<br><input type="radio"/> primarios<br><input type="radio"/> secundarios<br><input checked="" type="radio"/> universitarios |

# Base\_datos\_estimacion\_peso\_fetal

|                                       |                                                                                                                                                                                                                                                                                      |
|---------------------------------------|--------------------------------------------------------------------------------------------------------------------------------------------------------------------------------------------------------------------------------------------------------------------------------------|
| Número de identificación participante | 182                                                                                                                                                                                                                                                                                  |
| CODIGO PARTICIPANTE                   |                                                                                                                                                                                                                                                                                      |
| Edad                                  | [*DATA REMOVED*]                                                                                                                                                                                                                                                                     |
| Gestaciones                           | <input type="radio"/> 1<br><input checked="" type="radio"/> 2<br><input type="radio"/> 3<br><input type="radio"/> mas de 3                                                                                                                                                           |
| partos                                | <input type="radio"/> 0<br><input checked="" type="radio"/> 1<br><input type="radio"/> 2<br><input type="radio"/> 3<br><input type="radio"/> mas de 3                                                                                                                                |
| cesáreas                              | <input checked="" type="radio"/> 0<br><input type="radio"/> 1<br><input type="radio"/> 2<br><input type="radio"/> 3<br><input type="radio"/> mas de 3                                                                                                                                |
| Abortos                               | <input checked="" type="radio"/> 0<br><input type="radio"/> 1<br><input type="radio"/> 2<br><input type="radio"/> 3<br><input type="radio"/> mas de 3                                                                                                                                |
| Tipo de gestacion                     | <input checked="" type="radio"/> espontanea<br><input type="radio"/> IAC inseminación artificial conyuge<br><input type="radio"/> IAD inseminación artificial donante<br><input type="radio"/> FIV Fecundación in Vitro<br><input type="radio"/> Ovodon FIV con donación de ovocitos |
| peso previo a embarazo                | [*DATA REMOVED*]                                                                                                                                                                                                                                                                     |
| Ganancia ponderal embarazo            | [*DATA REMOVED*]                                                                                                                                                                                                                                                                     |
| Talla madre                           | [*DATA REMOVED*]                                                                                                                                                                                                                                                                     |
| IMC previo embarazo                   | 23.80869017191275                                                                                                                                                                                                                                                                    |
| Patología obstétrica                  | <input checked="" type="radio"/> no<br><input type="radio"/> si                                                                                                                                                                                                                      |
| Diabetes pregestacional               | <input checked="" type="radio"/> no<br><input type="radio"/> si                                                                                                                                                                                                                      |
| Diabetes gestacional                  | <input checked="" type="radio"/> no<br><input type="radio"/> si                                                                                                                                                                                                                      |

|                                            |                                                                                                                                                                                      |
|--------------------------------------------|--------------------------------------------------------------------------------------------------------------------------------------------------------------------------------------|
| Diabetes gestacional con insulina          | <input checked="" type="radio"/> no<br><input type="radio"/> si                                                                                                                      |
| Diabetes gestacional con dieta y ejercicio | <input checked="" type="radio"/> no<br><input type="radio"/> si                                                                                                                      |
| Percentil fetos previos                    | <input type="radio"/> Nada<br><input type="radio"/> percentil menor de 10<br><input checked="" type="radio"/> percentil entre 10 y 90<br><input type="radio"/> percentil mayor de 90 |
| Exfumadora                                 | <input checked="" type="radio"/> Nada<br><input type="radio"/> menos de 5 años<br><input type="radio"/> 5 a 10 años<br><input type="radio"/> mayor o igual a 10 años                 |
| Hábito tabáquico                           | <input checked="" type="radio"/> no<br><input type="radio"/> si                                                                                                                      |
| fumadora                                   | [*DATA REMOVED*]                                                                                                                                                                     |
| Consumo otros tóxicos                      | <input checked="" type="radio"/> no<br><input type="radio"/> si                                                                                                                      |
| Hb 1T                                      | [*DATA REMOVED*]                                                                                                                                                                     |
| Htc 1T                                     | [*DATA REMOVED*]                                                                                                                                                                     |
| Hb 2T                                      | [*DATA REMOVED*]                                                                                                                                                                     |
| HTC 2T                                     | [*DATA REMOVED*]                                                                                                                                                                     |
| Hb 3T                                      | [*DATA REMOVED*]                                                                                                                                                                     |
| HTC 3T                                     | [*DATA REMOVED*]                                                                                                                                                                     |
| Suplemento FE oral                         | <input checked="" type="radio"/> si<br><input type="radio"/> no                                                                                                                      |
| Suplemento fe iv                           | <input type="radio"/> si<br><input checked="" type="radio"/> no                                                                                                                      |
| Transfusión                                | <input checked="" type="radio"/> no<br><input type="radio"/> si                                                                                                                      |
| Solicitada Vit D                           | <input checked="" type="radio"/> no<br><input type="radio"/> si                                                                                                                      |
| Deficit vit D                              | <input type="radio"/> no<br><input type="radio"/> si                                                                                                                                 |
| Suplemento vit D                           | <input type="radio"/> si<br><input type="radio"/> no                                                                                                                                 |

|                       |                                                                                                                                                                                                                                                                                                                                                                                                              |
|-----------------------|--------------------------------------------------------------------------------------------------------------------------------------------------------------------------------------------------------------------------------------------------------------------------------------------------------------------------------------------------------------------------------------------------------------|
| Dieta, cuestionario   | <input checked="" type="radio"/> sí<br><input type="radio"/> no                                                                                                                                                                                                                                                                                                                                              |
| Leche entera          | <input checked="" type="radio"/> Nunca o menos 1 vez al mes<br><input type="radio"/> 1 a 3 veces mes<br><input type="radio"/> 1 vez semana<br><input type="radio"/> 2 a 4 veces semana<br><input type="radio"/> 5 a 6 veces semana<br><input type="radio"/> 1 vez al día<br><input type="radio"/> 2 a 3 veces al día<br><input type="radio"/> 5 a 6 veces al día<br><input type="radio"/> más 6 veces al día |
| Leche semidesnatada   | <input type="radio"/> Nunca o menos 1 vez al mes<br><input type="radio"/> 1 a 3 veces mes<br><input type="radio"/> 1 vez semana<br><input type="radio"/> 2 a 4 veces semana<br><input type="radio"/> 5 a 6 veces semana<br><input checked="" type="radio"/> 1 vez al día<br><input type="radio"/> 2 a 3 veces al día<br><input type="radio"/> 5 a 6 veces al día<br><input type="radio"/> mas 6 veces al día |
| Leche desnatada       | <input checked="" type="radio"/> Nunca o menos 1 vez al mes<br><input type="radio"/> 1 a 3 veces mes<br><input type="radio"/> 1 vez semana<br><input type="radio"/> 2 a 4 veces semana<br><input type="radio"/> 5 a 6 veces semana<br><input type="radio"/> 1 vez al día<br><input type="radio"/> 2 a 3 veces al día<br><input type="radio"/> 5 a 6 veces al día<br><input type="radio"/> más 6 veces al día |
| Leche condensada      | <input checked="" type="radio"/> Nunca o menos 1 vez al mes<br><input type="radio"/> 1 a 3 veces mes<br><input type="radio"/> 1 vez semana<br><input type="radio"/> 2 a 4 veces semana<br><input type="radio"/> 5 a 6 veces semana<br><input type="radio"/> 1 vez al día<br><input type="radio"/> 2 a 3 veces al día<br><input type="radio"/> 5 a 6 veces al día<br><input type="radio"/> más 6 veces al día |
| nata o crema de leche | <input checked="" type="radio"/> Nunca o menos 1 vez al mes<br><input type="radio"/> 1 a 3 veces mes<br><input type="radio"/> 1 vez semana<br><input type="radio"/> 2 a 4 veces semana<br><input type="radio"/> 5 a 6 veces semana<br><input type="radio"/> 1 vez al día<br><input type="radio"/> 2 a 3 veces al día<br><input type="radio"/> 5 a 6 veces al día<br><input type="radio"/> más 6 veces al día |

|                                             |                                                                                                                                                                                                                                                                                                                                                                                                              |
|---------------------------------------------|--------------------------------------------------------------------------------------------------------------------------------------------------------------------------------------------------------------------------------------------------------------------------------------------------------------------------------------------------------------------------------------------------------------|
| Yogurt Entero                               | <input checked="" type="radio"/> Nunca o menos 1 vez al mes<br><input type="radio"/> 1 a 3 veces mes<br><input type="radio"/> 1 vez semana<br><input type="radio"/> 2 a 4 veces semana<br><input type="radio"/> 5 a 6 veces semana<br><input type="radio"/> 1 vez al día<br><input type="radio"/> 2 a 3 veces al día<br><input type="radio"/> 5 a 6 veces al día<br><input type="radio"/> más 6 veces al día |
| Yogurt desnatado                            | <input type="radio"/> Nunca o menos 1 vez al mes<br><input type="radio"/> 1 a 3 veces mes<br><input checked="" type="radio"/> 1 vez semana<br><input type="radio"/> 2 a 4 veces semana<br><input type="radio"/> 5 a 6 veces semana<br><input type="radio"/> 1 vez al día<br><input type="radio"/> 2 a 3 veces al día<br><input type="radio"/> 5 a 6 veces al día<br><input type="radio"/> más 6 veces al día |
| 100g requesón o queso blando o queso fresco | <input type="radio"/> Nunca o menos 1 vez al mes<br><input type="radio"/> 1 a 3 veces mes<br><input type="radio"/> 1 vez semana<br><input checked="" type="radio"/> 2 a 4 veces semana<br><input type="radio"/> 5 a 6 veces semana<br><input type="radio"/> 1 vez al día<br><input type="radio"/> 2 a 3 veces al día<br><input type="radio"/> 5 a 6 veces al día<br><input type="radio"/> más 6 veces al día |
| queso curado o semicurado o cremoso         | <input type="radio"/> Nunca o menos 1 vez al mes<br><input type="radio"/> 1 a 3 veces mes<br><input checked="" type="radio"/> 1 vez semana<br><input type="radio"/> 2 a 4 veces semana<br><input type="radio"/> 5 a 6 veces semana<br><input type="radio"/> 1 vez al día<br><input type="radio"/> 2 a 3 veces al día<br><input type="radio"/> 5 a 6 veces al día<br><input type="radio"/> más 6 veces al día |
| natillas flan pudding                       | <input type="radio"/> Nunca o menos 1 vez al mes<br><input checked="" type="radio"/> 1 a 3 veces mes<br><input type="radio"/> 1 vez semana<br><input type="radio"/> 2 a 4 veces semana<br><input type="radio"/> 5 a 6 veces semana<br><input type="radio"/> 1 vez al día<br><input type="radio"/> 2 a 3 veces al día<br><input type="radio"/> 5 a 6 veces al día<br><input type="radio"/> más 6 veces al día |
| Helado                                      | <input checked="" type="radio"/> Nunca o menos 1 vez al mes<br><input type="radio"/> 1 a 3 veces mes<br><input type="radio"/> 1 vez semana<br><input type="radio"/> 2 a 4 veces semana<br><input type="radio"/> 5 a 6 veces semana<br><input type="radio"/> 1 vez al día<br><input type="radio"/> 2 a 3 veces al día<br><input type="radio"/> 5 a 6 veces al día<br><input type="radio"/> más 6 veces al día |

|                                      |                                                                                                                                                                                                                                                                                                                                                                                                              |
|--------------------------------------|--------------------------------------------------------------------------------------------------------------------------------------------------------------------------------------------------------------------------------------------------------------------------------------------------------------------------------------------------------------------------------------------------------------|
| huevo                                | <input type="radio"/> Nunca o menos 1 vez al mes<br><input type="radio"/> 1 a 3 veces mes<br><input type="radio"/> 1 vez semana<br><input checked="" type="radio"/> 2 a 4 veces semana<br><input type="radio"/> 5 a 6 veces semana<br><input type="radio"/> 1 vez al día<br><input type="radio"/> 2 a 3 veces al día<br><input type="radio"/> 5 a 6 veces al día<br><input type="radio"/> más 6 veces al día |
| Pollo con piel                       | <input type="radio"/> Nunca o menos 1 vez al mes<br><input type="radio"/> 1 a 3 veces mes<br><input checked="" type="radio"/> 1 vez semana<br><input type="radio"/> 2 a 4 veces semana<br><input type="radio"/> 5 a 6 veces semana<br><input type="radio"/> 1 vez al día<br><input type="radio"/> 2 a 3 veces al día<br><input type="radio"/> 5 a 6 veces al día<br><input type="radio"/> más 6 veces al día |
| pollo sin piel                       | <input type="radio"/> Nunca o menos 1 vez al mes<br><input checked="" type="radio"/> 1 a 3 veces mes<br><input type="radio"/> 1 vez semana<br><input type="radio"/> 2 a 4 veces semana<br><input type="radio"/> 5 a 6 veces semana<br><input type="radio"/> 1 vez al día<br><input type="radio"/> 2 a 3 veces al día<br><input type="radio"/> 5 a 6 veces al día<br><input type="radio"/> más 6 veces al día |
| Ternera o cerdo o cordero            | <input type="radio"/> Nunca o menos 1 vez al mes<br><input checked="" type="radio"/> 1 a 3 veces mes<br><input type="radio"/> 1 vez semana<br><input type="radio"/> 2 a 4 veces semana<br><input type="radio"/> 5 a 6 veces semana<br><input type="radio"/> 1 vez al día<br><input type="radio"/> 2 a 3 veces al día<br><input type="radio"/> 5 a 6 veces al día<br><input type="radio"/> más 6 veces al día |
| carne caza: Conejo o codorniz o pato | <input type="radio"/> Nunca o menos 1 vez al mes<br><input checked="" type="radio"/> 1 a 3 veces mes<br><input type="radio"/> 1 vez semana<br><input type="radio"/> 2 a 4 veces semana<br><input type="radio"/> 5 a 6 veces semana<br><input type="radio"/> 1 vez al día<br><input type="radio"/> 2 a 3 veces al día<br><input type="radio"/> 5 a 6 veces al día<br><input type="radio"/> más 6 veces al día |
| Hígado de ternera o cerdo o pollo    | <input checked="" type="radio"/> Nunca o menos 1 vez al mes<br><input type="radio"/> 1 a 3 veces mes<br><input type="radio"/> 1 vez semana<br><input type="radio"/> 2 a 4 veces semana<br><input type="radio"/> 5 a 6 veces semana<br><input type="radio"/> 1 vez al día<br><input type="radio"/> 2 a 3 veces al día<br><input type="radio"/> 5 a 6 veces al día<br><input type="radio"/> más 6 veces al día |

|                     |                                                                                                                                                                                                                                                                                                                                                                                                              |
|---------------------|--------------------------------------------------------------------------------------------------------------------------------------------------------------------------------------------------------------------------------------------------------------------------------------------------------------------------------------------------------------------------------------------------------------|
| Vísceras            | <input checked="" type="radio"/> Nunca o menos 1 vez al mes<br><input type="radio"/> 1 a 3 veces mes<br><input type="radio"/> 1 vez semana<br><input type="radio"/> 2 a 4 veces semana<br><input type="radio"/> 5 a 6 veces semana<br><input type="radio"/> 1 vez al día<br><input type="radio"/> 2 a 3 veces al día<br><input type="radio"/> 5 a 6 veces al día<br><input type="radio"/> más 6 veces al día |
| Embutido            | <input type="radio"/> Nunca o menos 1 vez al mes<br><input type="radio"/> 1 a 3 veces mes<br><input type="radio"/> 1 vez semana<br><input checked="" type="radio"/> 2 a 4 veces semana<br><input type="radio"/> 5 a 6 veces semana<br><input type="radio"/> 1 vez al día<br><input type="radio"/> 2 a 3 veces al día<br><input type="radio"/> 5 a 6 veces al día<br><input type="radio"/> más 6 veces al día |
| Salchicha o similar | <input type="radio"/> Nunca o menos 1 vez al mes<br><input type="radio"/> 1 a 3 veces mes<br><input checked="" type="radio"/> 1 vez semana<br><input type="radio"/> 2 a 4 veces semana<br><input type="radio"/> 5 a 6 veces semana<br><input type="radio"/> 1 vez al día<br><input type="radio"/> 2 a 3 veces al día<br><input type="radio"/> 5 a 6 veces al día<br><input type="radio"/> más 6 veces al día |
| Pate o foiegras     | <input checked="" type="radio"/> Nunca o menos 1 vez al mes<br><input type="radio"/> 1 a 3 veces mes<br><input type="radio"/> 1 vez semana<br><input type="radio"/> 2 a 4 veces semana<br><input type="radio"/> 5 a 6 veces semana<br><input type="radio"/> 1 vez al día<br><input type="radio"/> 2 a 3 veces al día<br><input type="radio"/> 5 a 6 veces al día<br><input type="radio"/> más 6 veces al día |
| Hamburguesa         | <input type="radio"/> Nunca o menos 1 vez al mes<br><input type="radio"/> 1 a 3 veces mes<br><input type="radio"/> 1 vez semana<br><input checked="" type="radio"/> 2 a 4 veces semana<br><input type="radio"/> 5 a 6 veces semana<br><input type="radio"/> 1 vez al día<br><input type="radio"/> 2 a 3 veces al día<br><input type="radio"/> 5 a 6 veces al día<br><input type="radio"/> más 6 veces al día |
| tocino o bacon      | <input checked="" type="radio"/> Nunca o menos 1 vez al mes<br><input type="radio"/> 1 a 3 veces mes<br><input type="radio"/> 1 vez semana<br><input type="radio"/> 2 a 4 veces semana<br><input type="radio"/> 5 a 6 veces semana<br><input type="radio"/> 1 vez al día<br><input type="radio"/> 2 a 3 veces al día<br><input type="radio"/> 5 a 6 veces al día<br><input type="radio"/> más 6 veces al día |



---

Pescado frito

- ☒ Nunca o menos 1 vez al mes  
☐ 1 a 3 veces mes  
☐ 1 vez semana  
☐ 2 a 4 veces semana  
☐ 5 a 6 veces semana  
☐ 1 vez al día  
☐ 2 a 3 veces al día  
☐ 5 a 6 veces al día  
☐ más 6 veces al día

---

pescado hervido blanco

- ☐ Nunca o menos 1 vez al mes  
☐ 1 a 3 veces mes  
☒ 1 vez semana  
☐ 2 a 4 veces semana  
☐ 5 a 6 veces semana  
☐ 1 vez al día  
☐ 2 a 3 veces al día  
☐ 5 a 6 veces al día  
☐ más 6 veces al día

---

pescado hervido azul

- ☒ Nunca o menos 1 vez al mes  
☐ 1 a 3 veces mes  
☐ 1 vez semana  
☐ 2 a 4 veces semana  
☐ 5 a 6 veces semana  
☐ 1 vez al día  
☐ 2 a 3 veces al día  
☐ 5 a 6 veces al día  
☐ más 6 veces al día

---

otros pescado azul

- ☒ Nunca o menos 1 vez al mes  
☐ 1 a 3 veces mes  
☐ 1 vez semana  
☐ 2 a 4 veces semana  
☐ 5 a 6 veces semana  
☐ 1 vez al día  
☐ 2 a 3 veces al día  
☐ 5 a 6 veces al día  
☐ más 6 veces al día

---

atun conserva

- ☐ Nunca o menos 1 vez al mes  
☐ 1 a 3 veces mes  
☒ 1 vez semana  
☐ 2 a 4 veces semana  
☐ 5 a 6 veces semana  
☐ 1 vez al día  
☐ 2 a 3 veces al día  
☐ 5 a 6 veces al día  
☐ más 6 veces al día

---

sardina conserva

- ☐ Nunca o menos 1 vez al mes  
☐ 1 a 3 veces mes  
☐ 1 vez semana  
☐ 2 a 4 veces semana  
☐ 5 a 6 veces semana  
☐ 1 vez al día  
☐ 2 a 3 veces al día  
☐ 5 a 6 veces al día  
☐ más 6 veces al día

|                                         |                                                                                                                                                                                                                                                                                                                                                                                                              |
|-----------------------------------------|--------------------------------------------------------------------------------------------------------------------------------------------------------------------------------------------------------------------------------------------------------------------------------------------------------------------------------------------------------------------------------------------------------------|
| pescado ahumado                         | <input checked="" type="radio"/> Nunca o menos 1 vez al mes<br><input type="radio"/> 1 a 3 veces mes<br><input type="radio"/> 1 vez semana<br><input type="radio"/> 2 a 4 veces semana<br><input type="radio"/> 5 a 6 veces semana<br><input type="radio"/> 1 vez al día<br><input type="radio"/> 2 a 3 veces al día<br><input type="radio"/> 5 a 6 veces al día<br><input type="radio"/> más 6 veces al día |
| almejas o mejillones o ostras unos 100g | <input type="radio"/> Nunca o menos 1 vez al mes<br><input type="radio"/> 1 a 3 veces mes<br><input checked="" type="radio"/> 1 vez semana<br><input type="radio"/> 2 a 4 veces semana<br><input type="radio"/> 5 a 6 veces semana<br><input type="radio"/> 1 vez al día<br><input type="radio"/> 2 a 3 veces al día<br><input type="radio"/> 5 a 6 veces al día<br><input type="radio"/> más 6 veces al día |
| calamar o chipiron o sepia unos 100g    | <input type="radio"/> Nunca o menos 1 vez al mes<br><input type="radio"/> 1 a 3 veces mes<br><input checked="" type="radio"/> 1 vez semana<br><input type="radio"/> 2 a 4 veces semana<br><input type="radio"/> 5 a 6 veces semana<br><input type="radio"/> 1 vez al día<br><input type="radio"/> 2 a 3 veces al día<br><input type="radio"/> 5 a 6 veces al día<br><input type="radio"/> más 6 veces al día |
| marisco unos 100g                       | <input checked="" type="radio"/> Nunca o menos 1 vez al mes<br><input type="radio"/> 1 a 3 veces mes<br><input type="radio"/> 1 vez semana<br><input type="radio"/> 2 a 4 veces semana<br><input type="radio"/> 5 a 6 veces semana<br><input type="radio"/> 1 vez al día<br><input type="radio"/> 2 a 3 veces al día<br><input type="radio"/> 5 a 6 veces al día<br><input type="radio"/> más 6 veces al día |
| Espinacas o acelgas cocinadas           | <input checked="" type="radio"/> Nunca o menos 1 vez al mes<br><input type="radio"/> 1 a 3 veces mes<br><input type="radio"/> 1 vez semana<br><input type="radio"/> 2 a 4 veces semana<br><input type="radio"/> 5 a 6 veces semana<br><input type="radio"/> 1 vez al día<br><input type="radio"/> 2 a 3 veces al día<br><input type="radio"/> 5 a 6 veces al día<br><input type="radio"/> más 6 veces al día |
| Col o coliflor o brocoli cocinado       | <input checked="" type="radio"/> Nunca o menos 1 vez al mes<br><input type="radio"/> 1 a 3 veces mes<br><input type="radio"/> 1 vez semana<br><input type="radio"/> 2 a 4 veces semana<br><input type="radio"/> 5 a 6 veces semana<br><input type="radio"/> 1 vez al día<br><input type="radio"/> 2 a 3 veces al día<br><input type="radio"/> 5 a 6 veces al día<br><input type="radio"/> más 6 veces al día |

---

Lechuga o endivia o escarola

- ☐ Nunca o menos 1 vez al mes  
☐ 1 a 3 veces mes  
☐ 1 vez semana  
☒ 2 a 4 veces semana  
☐ 5 a 6 veces semana  
☐ 1 vez al día  
☐ 2 a 3 veces al día  
☐ 5 a 6 veces al día  
☐ más 6 veces al día

---

tomate ensalada

- ☐ Nunca o menos 1 vez al mes  
☐ 1 a 3 veces mes  
☐ 1 vez semana  
☒ 2 a 4 veces semana  
☐ 5 a 6 veces semana  
☐ 1 vez al día  
☐ 2 a 3 veces al día  
☐ 5 a 6 veces al día  
☐ más 6 veces al día

---

cebolla

- ☒ Nunca o menos 1 vez al mes  
☐ 1 a 3 veces mes  
☐ 1 vez semana  
☐ 2 a 4 veces semana  
☐ 5 a 6 veces semana  
☐ 1 vez al día  
☐ 2 a 3 veces al día  
☐ 5 a 6 veces al día  
☐ más 6 veces al día

---

Zanahoria o calabaza

- ☐ Nunca o menos 1 vez al mes  
☐ 1 a 3 veces mes  
☐ 1 vez semana  
☒ 2 a 4 veces semana  
☐ 5 a 6 veces semana  
☐ 1 vez al día  
☐ 2 a 3 veces al día  
☐ 5 a 6 veces al día  
☐ más 6 veces al día

---

Judías verdes

- ☒ Nunca o menos 1 vez al mes  
☐ 1 a 3 veces mes  
☐ 1 vez semana  
☐ 2 a 4 veces semana  
☐ 5 a 6 veces semana  
☐ 1 vez al día  
☐ 2 a 3 veces al día  
☐ 5 a 6 veces al día  
☐ más 6 veces al día

---

Berenjena o calabacin o pepino

- ☐ Nunca o menos 1 vez al mes  
☐ 1 a 3 veces mes  
☐ 1 vez semana  
☒ 2 a 4 veces semana  
☐ 5 a 6 veces semana  
☐ 1 vez al día  
☐ 2 a 3 veces al día  
☐ 5 a 6 veces al día  
☐ más 6 veces al día

|                       |                                                                                                                                                                                                                                                                                                                                                                                                              |
|-----------------------|--------------------------------------------------------------------------------------------------------------------------------------------------------------------------------------------------------------------------------------------------------------------------------------------------------------------------------------------------------------------------------------------------------------|
| pimiento              | <input checked="" type="radio"/> Nunca o menos 1 vez al mes<br><input type="radio"/> 1 a 3 veces mes<br><input type="radio"/> 1 vez semana<br><input type="radio"/> 2 a 4 veces semana<br><input type="radio"/> 5 a 6 veces semana<br><input type="radio"/> 1 vez al día<br><input type="radio"/> 2 a 3 veces al día<br><input type="radio"/> 5 a 6 veces al día<br><input type="radio"/> más 6 veces al día |
| alcachofa             | <input checked="" type="radio"/> Nunca o menos 1 vez al mes<br><input type="radio"/> 1 a 3 veces mes<br><input type="radio"/> 1 vez semana<br><input type="radio"/> 2 a 4 veces semana<br><input type="radio"/> 5 a 6 veces semana<br><input type="radio"/> 1 vez al día<br><input type="radio"/> 2 a 3 veces al día<br><input type="radio"/> 5 a 6 veces al día<br><input type="radio"/> más 6 veces al día |
| espárragos            | <input checked="" type="radio"/> Nunca o menos 1 vez al mes<br><input type="radio"/> 1 a 3 veces mes<br><input type="radio"/> 1 vez semana<br><input type="radio"/> 2 a 4 veces semana<br><input type="radio"/> 5 a 6 veces semana<br><input type="radio"/> 1 vez al día<br><input type="radio"/> 2 a 3 veces al día<br><input type="radio"/> 5 a 6 veces al día<br><input type="radio"/> más 6 veces al día |
| maíz hervido          | <input checked="" type="radio"/> Nunca o menos 1 vez al mes<br><input type="radio"/> 1 a 3 veces mes<br><input type="radio"/> 1 vez semana<br><input type="radio"/> 2 a 4 veces semana<br><input type="radio"/> 5 a 6 veces semana<br><input type="radio"/> 1 vez al día<br><input type="radio"/> 2 a 3 veces al día<br><input type="radio"/> 5 a 6 veces al día<br><input type="radio"/> más 6 veces al día |
| legumbres             | <input type="radio"/> Nunca o menos 1 vez al mes<br><input type="radio"/> 1 a 3 veces mes<br><input type="radio"/> 1 vez semana<br><input checked="" type="radio"/> 2 a 4 veces semana<br><input type="radio"/> 5 a 6 veces semana<br><input type="radio"/> 1 vez al día<br><input type="radio"/> 2 a 3 veces al día<br><input type="radio"/> 5 a 6 veces al día<br><input type="radio"/> más 6 veces al día |
| naranjas o mandarinas | <input type="radio"/> Nunca o menos 1 vez al mes<br><input type="radio"/> 1 a 3 veces mes<br><input type="radio"/> 1 vez semana<br><input checked="" type="radio"/> 2 a 4 veces semana<br><input type="radio"/> 5 a 6 veces semana<br><input type="radio"/> 1 vez al día<br><input type="radio"/> 2 a 3 veces al día<br><input type="radio"/> 5 a 6 veces al día<br><input type="radio"/> más 6 veces al día |

---

zumو natural fruta

- ☒ Nunca o menos 1 vez al mes  
☐ 1 a 3 veces mes  
☐ 1 vez semana  
☐ 2 a 4 veces semana  
☐ 5 a 6 veces semana  
☐ 1 vez al día  
☐ 2 a 3 veces al día  
☐ 5 a 6 veces al día  
☐ más 6 veces al día

---

platano

- ☐ Nunca o menos 1 vez al mes  
☐ 1 a 3 veces mes  
☐ 1 vez semana  
☒ 2 a 4 veces semana  
☐ 5 a 6 veces semana  
☐ 1 vez al día  
☐ 2 a 3 veces al día  
☐ 5 a 6 veces al día  
☐ más 6 veces al día

---

manzana o pera

- ☐ Nunca o menos 1 vez al mes  
☐ 1 a 3 veces mes  
☒ 1 vez semana  
☐ 2 a 4 veces semana  
☐ 5 a 6 veces semana  
☐ 1 vez al día  
☐ 2 a 3 veces al día  
☐ 5 a 6 veces al día  
☐ más 6 veces al día

---

melocotón o nectarina

- ☒ Nunca o menos 1 vez al mes  
☐ 1 a 3 veces mes  
☐ 1 vez semana  
☐ 2 a 4 veces semana  
☐ 5 a 6 veces semana  
☐ 1 vez al día  
☐ 2 a 3 veces al día  
☐ 5 a 6 veces al día  
☐ más 6 veces al día

---

sandia o melon

- ☒ Nunca o menos 1 vez al mes  
☐ 1 a 3 veces mes  
☐ 1 vez semana  
☐ 2 a 4 veces semana  
☐ 5 a 6 veces semana  
☐ 1 vez al día  
☐ 2 a 3 veces al día  
☐ 5 a 6 veces al día  
☐ más 6 veces al día

---

uva

- ☒ Nunca o menos 1 vez al mes  
☐ 1 a 3 veces mes  
☐ 1 vez semana  
☐ 2 a 4 veces semana  
☐ 5 a 6 veces semana  
☐ 1 vez al día  
☐ 2 a 3 veces al día  
☐ 5 a 6 veces al día  
☐ más 6 veces al día

---

bruna o ciruela

- ☒ Nunca o menos 1 vez al mes  
☐ 1 a 3 veces mes  
☐ 1 vez semana  
☐ 2 a 4 veces semana  
☐ 5 a 6 veces semana  
☐ 1 vez al día  
☐ 2 a 3 veces al día  
☐ 5 a 6 veces al día  
☐ más 6 veces al día

---

kiwi

- ☒ Nunca o menos 1 vez al mes  
☐ 1 a 3 veces mes  
☐ 1 vez semana  
☐ 2 a 4 veces semana  
☐ 5 a 6 veces semana  
☐ 1 vez al día  
☐ 2 a 3 veces al día  
☐ 5 a 6 veces al día  
☐ más 6 veces al día

---

aceituna

- ☐ Nunca o menos 1 vez al mes  
☐ 1 a 3 veces mes  
☒ 1 vez semana  
☐ 2 a 4 veces semana  
☐ 5 a 6 veces semana  
☐ 1 vez al día  
☐ 2 a 3 veces al día  
☐ 5 a 6 veces al día  
☐ más 6 veces al día

---

frutos secos

- ☐ Nunca o menos 1 vez al mes  
☐ 1 a 3 veces mes  
☒ 1 vez semana  
☐ 2 a 4 veces semana  
☐ 5 a 6 veces semana  
☐ 1 vez al día  
☐ 2 a 3 veces al día  
☐ 5 a 6 veces al día  
☐ más 6 veces al día

---

pan blanco

- ☐ Nunca o menos 1 vez al mes  
☐ 1 a 3 veces mes  
☐ 1 vez semana  
☐ 2 a 4 veces semana  
☐ 5 a 6 veces semana  
☒ 1 vez al día  
☐ 2 a 3 veces al día  
☐ 5 a 6 veces al día  
☐ más 6 veces al día

---

pan integral

- ☒ Nunca o menos 1 vez al mes  
☐ 1 a 3 veces mes  
☐ 1 vez semana  
☐ 2 a 4 veces semana  
☐ 5 a 6 veces semana  
☐ 1 vez al día  
☐ 2 a 3 veces al día  
☐ 5 a 6 veces al día  
☐ más 6 veces al día

---

cereales desayuno

- ☒ Nunca o menos 1 vez al mes  
☐ 1 a 3 veces mes  
☐ 1 vez semana  
☐ 2 a 4 veces semana  
☐ 5 a 6 veces semana  
☐ 1 vez al día  
☐ 2 a 3 veces al día  
☐ 5 a 6 veces al día  
☐ más 6 veces al día

---

patatas fritas

- ☐ Nunca o menos 1 vez al mes  
☒ 1 a 3 veces mes  
☐ 1 vez semana  
☐ 2 a 4 veces semana  
☐ 5 a 6 veces semana  
☐ 1 vez al día  
☐ 2 a 3 veces al día  
☐ 5 a 6 veces al día  
☐ más 6 veces al día

---

patatas cocidas o asadas

- ☐ Nunca o menos 1 vez al mes  
☐ 1 a 3 veces mes  
☒ 1 vez semana  
☐ 2 a 4 veces semana  
☐ 5 a 6 veces semana  
☐ 1 vez al día  
☐ 2 a 3 veces al día  
☐ 5 a 6 veces al día  
☐ más 6 veces al día

---

bolsa papas

- ☐ Nunca o menos 1 vez al mes  
☐ 1 a 3 veces mes  
☒ 1 vez semana  
☐ 2 a 4 veces semana  
☐ 5 a 6 veces semana  
☐ 1 vez al día  
☐ 2 a 3 veces al día  
☐ 5 a 6 veces al día  
☐ más 6 veces al día

---

arroz cocinado

- ☐ Nunca o menos 1 vez al mes  
☐ 1 a 3 veces mes  
☐ 1 vez semana  
☒ 2 a 4 veces semana  
☐ 5 a 6 veces semana  
☐ 1 vez al día  
☐ 2 a 3 veces al día  
☐ 5 a 6 veces al día  
☐ más 6 veces al día

---

pasta

- ☐ Nunca o menos 1 vez al mes  
☐ 1 a 3 veces mes  
☐ 1 vez semana  
☒ 2 a 4 veces semana  
☐ 5 a 6 veces semana  
☐ 1 vez al día  
☐ 2 a 3 veces al día  
☐ 5 a 6 veces al día  
☐ más 6 veces al día

|                     |                                                                                                                                                                                                                                                                                                                                                                                                              |
|---------------------|--------------------------------------------------------------------------------------------------------------------------------------------------------------------------------------------------------------------------------------------------------------------------------------------------------------------------------------------------------------------------------------------------------------|
| pizza               | <input type="radio"/> Nunca o menos 1 vez al mes<br><input type="radio"/> 1 a 3 veces mes<br><input checked="" type="radio"/> 1 vez semana<br><input type="radio"/> 2 a 4 veces semana<br><input type="radio"/> 5 a 6 veces semana<br><input type="radio"/> 1 vez al día<br><input type="radio"/> 2 a 3 veces al día<br><input type="radio"/> 5 a 6 veces al día<br><input type="radio"/> más 6 veces al día |
| aceite oliva        | <input type="radio"/> Nunca o menos 1 vez al mes<br><input type="radio"/> 1 a 3 veces mes<br><input type="radio"/> 1 vez semana<br><input type="radio"/> 2 a 4 veces semana<br><input type="radio"/> 5 a 6 veces semana<br><input type="radio"/> 1 vez al día<br><input checked="" type="radio"/> 2 a 3 veces al día<br><input type="radio"/> 5 a 6 veces al día<br><input type="radio"/> más 6 veces al día |
| otros aceites       | <input checked="" type="radio"/> Nunca o menos 1 vez al mes<br><input type="radio"/> 1 a 3 veces mes<br><input type="radio"/> 1 vez semana<br><input type="radio"/> 2 a 4 veces semana<br><input type="radio"/> 5 a 6 veces semana<br><input type="radio"/> 1 vez al día<br><input type="radio"/> 2 a 3 veces al día<br><input type="radio"/> 5 a 6 veces al día<br><input type="radio"/> más 6 veces al día |
| margarina           | <input checked="" type="radio"/> Nunca o menos 1 vez al mes<br><input type="radio"/> 1 a 3 veces mes<br><input type="radio"/> 1 vez semana<br><input type="radio"/> 2 a 4 veces semana<br><input type="radio"/> 5 a 6 veces semana<br><input type="radio"/> 1 vez al día<br><input type="radio"/> 2 a 3 veces al día<br><input type="radio"/> 5 a 6 veces al día<br><input type="radio"/> más 6 veces al día |
| mantequilla         | <input checked="" type="radio"/> Nunca o menos 1 vez al mes<br><input type="radio"/> 1 a 3 veces mes<br><input type="radio"/> 1 vez semana<br><input type="radio"/> 2 a 4 veces semana<br><input type="radio"/> 5 a 6 veces semana<br><input type="radio"/> 1 vez al día<br><input type="radio"/> 2 a 3 veces al día<br><input type="radio"/> 5 a 6 veces al día<br><input type="radio"/> más 6 veces al día |
| galletas tipo maria | <input checked="" type="radio"/> Nunca o menos 1 vez al mes<br><input type="radio"/> 1 a 3 veces mes<br><input type="radio"/> 1 vez semana<br><input type="radio"/> 2 a 4 veces semana<br><input type="radio"/> 5 a 6 veces semana<br><input type="radio"/> 1 vez al día<br><input type="radio"/> 2 a 3 veces al día<br><input type="radio"/> 5 a 6 veces al día<br><input type="radio"/> más 6 veces al día |



---

galletas chocolate

- ☐ Nunca o menos 1 vez al mes  
☐ 1 a 3 veces mes  
☒ 1 vez semana  
☐ 2 a 4 veces semana  
☐ 5 a 6 veces semana  
☐ 1 vez al día  
☐ 2 a 3 veces al día  
☐ 5 a 6 veces al día  
☐ más 6 veces al día

---

bolleria

- ☐ Nunca o menos 1 vez al mes  
☐ 1 a 3 veces mes  
☒ 1 vez semana  
☐ 2 a 4 veces semana  
☐ 5 a 6 veces semana  
☐ 1 vez al día  
☐ 2 a 3 veces al día  
☐ 5 a 6 veces al día  
☐ más 6 veces al día

---

chocolate o bombones

- ☒ Nunca o menos 1 vez al mes  
☐ 1 a 3 veces mes  
☐ 1 vez semana  
☐ 2 a 4 veces semana  
☐ 5 a 6 veces semana  
☐ 1 vez al día  
☐ 2 a 3 veces al día  
☐ 5 a 6 veces al día  
☐ más 6 veces al día

---

chocolate polvo o colacao

- ☐ Nunca o menos 1 vez al mes  
☐ 1 a 3 veces mes  
☒ 1 vez semana  
☐ 2 a 4 veces semana  
☐ 5 a 6 veces semana  
☐ 1 vez al día  
☐ 2 a 3 veces al día  
☐ 5 a 6 veces al día  
☐ más 6 veces al día

---

vino tinto

- ☒ Nunca o menos 1 vez al mes  
☐ 1 a 3 veces mes  
☐ 1 vez semana  
☐ 2 a 4 veces semana  
☐ 5 a 6 veces semana  
☐ 1 vez al día  
☐ 2 a 3 veces al día  
☐ 5 a 6 veces al día  
☐ más 6 veces al día

---

vino blanco

- ☒ Nunca o menos 1 vez al mes  
☐ 1 a 3 veces mes  
☐ 1 vez semana  
☐ 2 a 4 veces semana  
☐ 5 a 6 veces semana  
☐ 1 vez al día  
☐ 2 a 3 veces al día  
☐ 5 a 6 veces al día  
☐ más 6 veces al día

---

|                    |                                                                                                                                                                                                                                                                                                                                                                                                              |
|--------------------|--------------------------------------------------------------------------------------------------------------------------------------------------------------------------------------------------------------------------------------------------------------------------------------------------------------------------------------------------------------------------------------------------------------|
| vino seco o vermut | <input checked="" type="radio"/> Nunca o menos 1 vez al mes<br><input type="radio"/> 1 a 3 veces mes<br><input type="radio"/> 1 vez semana<br><input type="radio"/> 2 a 4 veces semana<br><input type="radio"/> 5 a 6 veces semana<br><input type="radio"/> 1 vez al día<br><input type="radio"/> 2 a 3 veces al día<br><input type="radio"/> 5 a 6 veces al día<br><input type="radio"/> más 6 veces al día |
|--------------------|--------------------------------------------------------------------------------------------------------------------------------------------------------------------------------------------------------------------------------------------------------------------------------------------------------------------------------------------------------------------------------------------------------------|

---

|         |                                                                                                                                                                                                                                                                                                                                                                                                              |
|---------|--------------------------------------------------------------------------------------------------------------------------------------------------------------------------------------------------------------------------------------------------------------------------------------------------------------------------------------------------------------------------------------------------------------|
| cerveza | <input checked="" type="radio"/> Nunca o menos 1 vez al mes<br><input type="radio"/> 1 a 3 veces mes<br><input type="radio"/> 1 vez semana<br><input type="radio"/> 2 a 4 veces semana<br><input type="radio"/> 5 a 6 veces semana<br><input type="radio"/> 1 vez al día<br><input type="radio"/> 2 a 3 veces al día<br><input type="radio"/> 5 a 6 veces al día<br><input type="radio"/> más 6 veces al día |
|---------|--------------------------------------------------------------------------------------------------------------------------------------------------------------------------------------------------------------------------------------------------------------------------------------------------------------------------------------------------------------------------------------------------------------|

---

|                     |                                                                                                                                                                                                                                                                                                                                                                                                              |
|---------------------|--------------------------------------------------------------------------------------------------------------------------------------------------------------------------------------------------------------------------------------------------------------------------------------------------------------------------------------------------------------------------------------------------------------|
| cerveza sin alcohol | <input checked="" type="radio"/> Nunca o menos 1 vez al mes<br><input type="radio"/> 1 a 3 veces mes<br><input type="radio"/> 1 vez semana<br><input type="radio"/> 2 a 4 veces semana<br><input type="radio"/> 5 a 6 veces semana<br><input type="radio"/> 1 vez al día<br><input type="radio"/> 2 a 3 veces al día<br><input type="radio"/> 5 a 6 veces al día<br><input type="radio"/> más 6 veces al día |
|---------------------|--------------------------------------------------------------------------------------------------------------------------------------------------------------------------------------------------------------------------------------------------------------------------------------------------------------------------------------------------------------------------------------------------------------|

---

|         |                                                                                                                                                                                                                                                                                                                                                                                                              |
|---------|--------------------------------------------------------------------------------------------------------------------------------------------------------------------------------------------------------------------------------------------------------------------------------------------------------------------------------------------------------------------------------------------------------------|
| licores | <input checked="" type="radio"/> Nunca o menos 1 vez al mes<br><input type="radio"/> 1 a 3 veces mes<br><input type="radio"/> 1 vez semana<br><input type="radio"/> 2 a 4 veces semana<br><input type="radio"/> 5 a 6 veces semana<br><input type="radio"/> 1 vez al día<br><input type="radio"/> 2 a 3 veces al día<br><input type="radio"/> 5 a 6 veces al día<br><input type="radio"/> más 6 veces al día |
|---------|--------------------------------------------------------------------------------------------------------------------------------------------------------------------------------------------------------------------------------------------------------------------------------------------------------------------------------------------------------------------------------------------------------------|

---

|                       |                                                                                                                                                                                                                                                                                                                                                                                                              |
|-----------------------|--------------------------------------------------------------------------------------------------------------------------------------------------------------------------------------------------------------------------------------------------------------------------------------------------------------------------------------------------------------------------------------------------------------|
| ginebra o ron o vodka | <input checked="" type="radio"/> Nunca o menos 1 vez al mes<br><input type="radio"/> 1 a 3 veces mes<br><input type="radio"/> 1 vez semana<br><input type="radio"/> 2 a 4 veces semana<br><input type="radio"/> 5 a 6 veces semana<br><input type="radio"/> 1 vez al día<br><input type="radio"/> 2 a 3 veces al día<br><input type="radio"/> 5 a 6 veces al día<br><input type="radio"/> más 6 veces al día |
|-----------------------|--------------------------------------------------------------------------------------------------------------------------------------------------------------------------------------------------------------------------------------------------------------------------------------------------------------------------------------------------------------------------------------------------------------|

---

|                 |                                                                                                                                                                                                                                                                                                                                                                                                              |
|-----------------|--------------------------------------------------------------------------------------------------------------------------------------------------------------------------------------------------------------------------------------------------------------------------------------------------------------------------------------------------------------------------------------------------------------|
| refresco normal | <input checked="" type="radio"/> Nunca o menos 1 vez al mes<br><input type="radio"/> 1 a 3 veces mes<br><input type="radio"/> 1 vez semana<br><input type="radio"/> 2 a 4 veces semana<br><input type="radio"/> 5 a 6 veces semana<br><input type="radio"/> 1 vez al día<br><input type="radio"/> 2 a 3 veces al día<br><input type="radio"/> 5 a 6 veces al día<br><input type="radio"/> más 6 veces al día |
|-----------------|--------------------------------------------------------------------------------------------------------------------------------------------------------------------------------------------------------------------------------------------------------------------------------------------------------------------------------------------------------------------------------------------------------------|

---

---

refresco sin azúcar

- ☒ Nunca o menos 1 vez al mes  
☐ 1 a 3 veces mes  
☐ 1 vez semana  
☐ 2 a 4 veces semana  
☐ 5 a 6 veces semana  
☐ 1 vez al día  
☐ 2 a 3 veces al día  
☐ 5 a 6 veces al día  
☐ más 6 veces al día

---

Agua del grifo

- ☒ Nunca o menos 1 vez al mes  
☐ 1 a 3 veces mes  
☐ 1 vez semana  
☐ 2 a 4 veces semana  
☐ 5 a 6 veces semana  
☐ 1 vez al día  
☐ 2 a 3 veces al día  
☐ 5 a 6 veces al día  
☐ más 6 veces al día

---

agua embotellada sin gas

- ☐ Nunca o menos 1 vez al mes  
☐ 1 a 3 veces mes  
☐ 1 vez semana  
☐ 2 a 4 veces semana  
☐ 5 a 6 veces semana  
☐ 1 vez al día  
☐ 2 a 3 veces al día  
☐ 5 a 6 veces al día  
☒ más 6 veces al día

---

agua embotellada con gas

- ☒ Nunca o menos 1 vez al mes  
☐ 1 a 3 veces mes  
☐ 1 vez semana  
☐ 2 a 4 veces semana  
☐ 5 a 6 veces semana  
☐ 1 vez al día  
☐ 2 a 3 veces al día  
☐ 5 a 6 veces al día  
☐ más 6 veces al día

---

zumو frutas embasado

- ☒ Nunca o menos 1 vez al mes  
☐ 1 a 3 veces mes  
☐ 1 vez semana  
☐ 2 a 4 veces semana  
☐ 5 a 6 veces semana  
☐ 1 vez al día  
☐ 2 a 3 veces al día  
☐ 5 a 6 veces al día  
☐ más 6 veces al día

---

cafe

- ☐ Nunca o menos 1 vez al mes  
☐ 1 a 3 veces mes  
☐ 1 vez semana  
☐ 2 a 4 veces semana  
☐ 5 a 6 veces semana  
☒ 1 vez al día  
☐ 2 a 3 veces al día  
☐ 5 a 6 veces al día  
☐ más 6 veces al día

---

cafe descafeinado

- ☐ Nunca o menos 1 vez al mes  
☐ 1 a 3 veces mes  
☒ 1 vez semana  
☐ 2 a 4 veces semana  
☐ 5 a 6 veces semana  
☐ 1 vez al día  
☐ 2 a 3 veces al día  
☐ 5 a 6 veces al día  
☐ más 6 veces al día

---

te o infusión

- ☒ Nunca o menos 1 vez al mes  
☐ 1 a 3 veces mes  
☐ 1 vez semana  
☐ 2 a 4 veces semana  
☐ 5 a 6 veces semana  
☐ 1 vez al día  
☐ 2 a 3 veces al día  
☐ 5 a 6 veces al día  
☐ más 6 veces al día

---

sopa o puré verduras

- ☐ Nunca o menos 1 vez al mes  
☐ 1 a 3 veces mes  
☐ 1 vez semana  
☐ 2 a 4 veces semana  
☐ 5 a 6 veces semana  
☐ 1 vez al día  
☐ 2 a 3 veces al día  
☐ 5 a 6 veces al día  
☐ más 6 veces al día

---

croquetas pollo jamón

- ☐ Nunca o menos 1 vez al mes  
☐ 1 a 3 veces mes  
☐ 1 vez semana  
☒ 2 a 4 veces semana  
☐ 5 a 6 veces semana  
☐ 1 vez al día  
☐ 2 a 3 veces al día  
☐ 5 a 6 veces al día  
☐ más 6 veces al día

---

croquetas pescado

- ☐ Nunca o menos 1 vez al mes  
☐ 1 a 3 veces mes  
☒ 1 vez semana  
☐ 2 a 4 veces semana  
☐ 5 a 6 veces semana  
☐ 1 vez al día  
☐ 2 a 3 veces al día  
☐ 5 a 6 veces al día  
☐ más 6 veces al día

---

mayonesa

- ☐ Nunca o menos 1 vez al mes  
☒ 1 a 3 veces mes  
☐ 1 vez semana  
☐ 2 a 4 veces semana  
☐ 5 a 6 veces semana  
☐ 1 vez al día  
☐ 2 a 3 veces al día  
☐ 5 a 6 veces al día  
☐ más 6 veces al día

|                  |                                                                                                                                                                                                                                                                                                                                                                                                              |
|------------------|--------------------------------------------------------------------------------------------------------------------------------------------------------------------------------------------------------------------------------------------------------------------------------------------------------------------------------------------------------------------------------------------------------------|
| salsa tomate     | <input type="radio"/> Nunca o menos 1 vez al mes<br><input type="radio"/> 1 a 3 veces mes<br><input type="radio"/> 1 vez semana<br><input checked="" type="radio"/> 2 a 4 veces semana<br><input type="radio"/> 5 a 6 veces semana<br><input type="radio"/> 1 vez al día<br><input type="radio"/> 2 a 3 veces al día<br><input type="radio"/> 5 a 6 veces al día<br><input type="radio"/> más 6 veces al día |
| ketchup          | <input type="radio"/> Nunca o menos 1 vez al mes<br><input type="radio"/> 1 a 3 veces mes<br><input checked="" type="radio"/> 1 vez semana<br><input type="radio"/> 2 a 4 veces semana<br><input type="radio"/> 5 a 6 veces semana<br><input type="radio"/> 1 vez al día<br><input type="radio"/> 2 a 3 veces al día<br><input type="radio"/> 5 a 6 veces al día<br><input type="radio"/> más 6 veces al día |
| sal              | <input type="radio"/> Nunca o menos 1 vez al mes<br><input type="radio"/> 1 a 3 veces mes<br><input type="radio"/> 1 vez semana<br><input type="radio"/> 2 a 4 veces semana<br><input type="radio"/> 5 a 6 veces semana<br><input type="radio"/> 1 vez al día<br><input checked="" type="radio"/> 2 a 3 veces al día<br><input type="radio"/> 5 a 6 veces al día<br><input type="radio"/> más 6 veces al día |
| ajo              | <input checked="" type="radio"/> Nunca o menos 1 vez al mes<br><input type="radio"/> 1 a 3 veces mes<br><input type="radio"/> 1 vez semana<br><input type="radio"/> 2 a 4 veces semana<br><input type="radio"/> 5 a 6 veces semana<br><input type="radio"/> 1 vez al día<br><input type="radio"/> 2 a 3 veces al día<br><input type="radio"/> 5 a 6 veces al día<br><input type="radio"/> más 6 veces al día |
| mermelada o miel | <input checked="" type="radio"/> Nunca o menos 1 vez al mes<br><input type="radio"/> 1 a 3 veces mes<br><input type="radio"/> 1 vez semana<br><input type="radio"/> 2 a 4 veces semana<br><input type="radio"/> 5 a 6 veces semana<br><input type="radio"/> 1 vez al día<br><input type="radio"/> 2 a 3 veces al día<br><input type="radio"/> 5 a 6 veces al día<br><input type="radio"/> más 6 veces al día |
| azúcar           | <input type="radio"/> Nunca o menos 1 vez al mes<br><input type="radio"/> 1 a 3 veces mes<br><input type="radio"/> 1 vez semana<br><input type="radio"/> 2 a 4 veces semana<br><input type="radio"/> 5 a 6 veces semana<br><input checked="" type="radio"/> 1 vez al día<br><input type="radio"/> 2 a 3 veces al día<br><input type="radio"/> 5 a 6 veces al día<br><input type="radio"/> más 6 veces al día |

|                                       |                                                                                                                                                                                                                                                                                                                                                                                                                                                                                                                               |
|---------------------------------------|-------------------------------------------------------------------------------------------------------------------------------------------------------------------------------------------------------------------------------------------------------------------------------------------------------------------------------------------------------------------------------------------------------------------------------------------------------------------------------------------------------------------------------|
| Otro alimento                         |                                                                                                                                                                                                                                                                                                                                                                                                                                                                                                                               |
| suplementos vitamínicos               | <input checked="" type="radio"/> si<br><input type="radio"/> no                                                                                                                                                                                                                                                                                                                                                                                                                                                               |
| suplementos vitamínicos               | [*DATA REMOVED*]                                                                                                                                                                                                                                                                                                                                                                                                                                                                                                              |
| dieta previa                          | <input type="radio"/> si<br><input checked="" type="radio"/> no                                                                                                                                                                                                                                                                                                                                                                                                                                                               |
| motivo dieta                          | <input checked="" type="radio"/> no dieta<br><input type="radio"/> control peso<br><input type="radio"/> control colesterol<br><input type="radio"/> control diabetes<br><input type="radio"/> problemas estómago<br><input type="radio"/> problemas vesícula o hepáticos<br><input type="radio"/> HTA o cardiopatía<br><input type="radio"/> problemas renales<br><input type="radio"/> alergia alimentaria<br><input type="radio"/> ácido úrico elevado<br><input type="radio"/> vegetariana<br><input type="radio"/> otros |
| cambio alimentos año previo gestación | <input type="radio"/> si<br><input checked="" type="radio"/> no                                                                                                                                                                                                                                                                                                                                                                                                                                                               |
| cambio lácteos                        | <input type="radio"/> eliminado<br><input type="radio"/> disminuido<br><input type="radio"/> igual<br><input type="radio"/> aumentado<br><input type="radio"/> no sabe                                                                                                                                                                                                                                                                                                                                                        |
| cambio huevos                         | <input type="radio"/> eliminado<br><input type="radio"/> disminuido<br><input type="radio"/> igual<br><input type="radio"/> aumentado<br><input type="radio"/> no sabe                                                                                                                                                                                                                                                                                                                                                        |
| cambio carne                          | <input type="radio"/> eliminado<br><input type="radio"/> disminuido<br><input type="radio"/> igual<br><input type="radio"/> aumentado<br><input type="radio"/> no sabe                                                                                                                                                                                                                                                                                                                                                        |
| cambio pescado                        | <input type="radio"/> eliminado<br><input type="radio"/> disminuido<br><input type="radio"/> igual<br><input type="radio"/> aumentado<br><input type="radio"/> no sabe                                                                                                                                                                                                                                                                                                                                                        |
| cambio verduras                       | <input type="radio"/> eliminado<br><input type="radio"/> disminuido<br><input type="radio"/> igual<br><input type="radio"/> aumentado<br><input type="radio"/> no sabe                                                                                                                                                                                                                                                                                                                                                        |

|                            |                                                                                                                                                                                                                        |
|----------------------------|------------------------------------------------------------------------------------------------------------------------------------------------------------------------------------------------------------------------|
| cambio legumbres           | <input type="radio"/> eliminado<br><input type="radio"/> disminuido<br><input type="radio"/> igual<br><input type="radio"/> aumentado<br><input type="radio"/> no sabe                                                 |
| cambio fruta               | <input type="radio"/> eliminado<br><input type="radio"/> disminuido<br><input type="radio"/> igual<br><input type="radio"/> aumentado<br><input type="radio"/> no sabe                                                 |
| cambio pan                 | <input type="radio"/> eliminado<br><input type="radio"/> disminuido<br><input type="radio"/> igual<br><input type="radio"/> aumentado<br><input type="radio"/> no sabe                                                 |
| cambio aceite oliva        | <input type="radio"/> eliminado<br><input type="radio"/> disminuido<br><input type="radio"/> igual<br><input type="radio"/> aumentado<br><input type="radio"/> no sabe                                                 |
| cambio mante o margarina   | <input type="radio"/> eliminado<br><input type="radio"/> disminuido<br><input type="radio"/> igual<br><input type="radio"/> aumentado<br><input type="radio"/> no sabe                                                 |
| cambio azúcar y dulces     | <input type="radio"/> eliminado<br><input type="radio"/> disminuido<br><input type="radio"/> igual<br><input type="radio"/> aumentado<br><input type="radio"/> no sabe                                                 |
| cambio bebidas alcohólicas | <input type="radio"/> eliminado<br><input type="radio"/> disminuido<br><input type="radio"/> igual<br><input type="radio"/> aumentado<br><input type="radio"/> no sabe                                                 |
| frecuencia comidas fritas  | <input type="radio"/> a diario<br><input type="radio"/> 5 a 6 veces semana<br><input type="radio"/> 2 a 4 veces semana<br><input checked="" type="radio"/> 1 vez semana<br><input type="radio"/> menos de 1 vez semana |
| carne                      | <input type="radio"/> no como<br><input type="radio"/> cruda<br><input checked="" type="radio"/> poco hecha<br><input type="radio"/> hecha<br><input type="radio"/> muy hecha                                          |
| grasa visible carne        | <input checked="" type="radio"/> quita toda<br><input type="radio"/> quita mayoría<br><input type="radio"/> quita un poco<br><input type="radio"/> no quita nada                                                       |

|                                |                                                                                                                                                                                                                                                          |
|--------------------------------|----------------------------------------------------------------------------------------------------------------------------------------------------------------------------------------------------------------------------------------------------------|
| cocina carne                   | <input checked="" type="radio"/> a la plancha<br><input type="radio"/> a la parrilla<br><input type="radio"/> asada<br><input type="radio"/> frita<br><input type="radio"/> guisada                                                                      |
| tostado quemado carne          | <input checked="" type="radio"/> nunca<br><input type="radio"/> 1 vez mes<br><input type="radio"/> 2 a 3 veces mes<br><input type="radio"/> 1 vez semana<br><input type="radio"/> 2 a 3 semanas                                                          |
| tostado quemado pescado        | <input checked="" type="radio"/> nunca<br><input type="radio"/> 1 vez mes<br><input type="radio"/> 2 a 3 veces mes<br><input type="radio"/> 1 vez semana<br><input type="radio"/> 2 a 3 semanas                                                          |
| socarrat paella                | <input checked="" type="radio"/> nunca<br><input type="radio"/> 1 vez mes<br><input type="radio"/> 2 a 3 veces mes<br><input type="radio"/> 1 vez semana<br><input type="radio"/> 2 a 3 semanas                                                          |
| grasa o aceite cocinar         | <input type="radio"/> mantequilla<br><input type="radio"/> margarina<br><input type="radio"/> aceite oliva<br><input checked="" type="radio"/> aceite oliva virgen extra<br><input type="radio"/> aceite vegetal<br><input type="radio"/> mezcla aceites |
| grasa aceite aliñar            | <input type="radio"/> mantequilla<br><input type="radio"/> margarina<br><input type="radio"/> aceite oliva<br><input checked="" type="radio"/> aceite oliva virgen extra<br><input type="radio"/> aceite vegetal<br><input type="radio"/> mezcla aceites |
| grasa aceite freir             | <input type="radio"/> mantequilla<br><input type="radio"/> margarina<br><input type="radio"/> aceite oliva<br><input checked="" type="radio"/> aceite oliva virgen extra<br><input type="radio"/> aceite vegetal<br><input type="radio"/> mezcla aceites |
| Ejercicio cuestionario         | <input checked="" type="radio"/> si<br><input type="radio"/> no                                                                                                                                                                                          |
| horas de sueño incluido siesta | [*DATA REMOVED*]                                                                                                                                                                                                                                         |
| minutos siesta                 | [*DATA REMOVED*]                                                                                                                                                                                                                                         |
| horas televisión semana        | [*DATA REMOVED*]                                                                                                                                                                                                                                         |



|                                        |                                                                                                                                                                                                                                                                                                                                                                           |
|----------------------------------------|---------------------------------------------------------------------------------------------------------------------------------------------------------------------------------------------------------------------------------------------------------------------------------------------------------------------------------------------------------------------------|
| actividad trabajo                      | <input checked="" type="radio"/> casi siempre sentado<br><input type="radio"/> sentado 50 por cien<br><input type="radio"/> casi siempre de pie, quieto<br><input type="radio"/> casi siempre levantado caminando y llevando pocas cosas<br><input type="radio"/> casi siempre levantado, caminando y llevado muchas cosas<br><input type="radio"/> trabajo manual pesado |
| tiempo caminar o bici al día           | <input type="radio"/> casi nunca<br><input checked="" type="radio"/> menos 20min día<br><input type="radio"/> 20 a 40 min día<br><input type="radio"/> 40 a 60 min día<br><input type="radio"/> 1h o 1h y media día<br><input type="radio"/> más de 1h y media al día                                                                                                     |
| tiempo tareas casa al día              | <input type="radio"/> menos de 1h día<br><input checked="" type="radio"/> 1 a 2h día<br><input type="radio"/> 3 a 4h día<br><input type="radio"/> 5 a 6h día<br><input type="radio"/> 7 a 8h día<br><input type="radio"/> más de 8h día                                                                                                                                   |
| tiempo libre televisión ordenador leer | <input type="radio"/> menos 1h día<br><input type="radio"/> 1h día<br><input checked="" type="radio"/> 2h día<br><input type="radio"/> 3h día<br><input type="radio"/> 4h día<br><input type="radio"/> 5 a 6h día<br><input type="radio"/> mas 6h día                                                                                                                     |
| tiempo libre ejercicio o deporte       | <input type="radio"/> menos 1h semana<br><input type="radio"/> 1h semana<br><input type="radio"/> 2h semana<br><input checked="" type="radio"/> 3h semana<br><input type="radio"/> 4 a 5h semana<br><input type="radio"/> mas 5h semana                                                                                                                                   |
| como se considera                      | <input type="radio"/> sedentaria<br><input checked="" type="radio"/> poco activa<br><input type="radio"/> moderadamente activa<br><input type="radio"/> bastante activa<br><input type="radio"/> muy activa<br><input type="radio"/> no sabe                                                                                                                              |
| FUR                                    | [*DATA REMOVED*]                                                                                                                                                                                                                                                                                                                                                          |
| Semanas gestación 2T                   | [*DATA REMOVED*]                                                                                                                                                                                                                                                                                                                                                          |
| Días gestación 2T                      | [*DATA REMOVED*]                                                                                                                                                                                                                                                                                                                                                          |
| DBP 2T                                 | [*DATA REMOVED*]                                                                                                                                                                                                                                                                                                                                                          |
| CC 2T                                  | [*DATA REMOVED*]                                                                                                                                                                                                                                                                                                                                                          |
| AC 2T                                  | [*DATA REMOVED*]                                                                                                                                                                                                                                                                                                                                                          |

|                                                   |                                                                                                                                                                                                 |
|---------------------------------------------------|-------------------------------------------------------------------------------------------------------------------------------------------------------------------------------------------------|
| LF 2T                                             | [*DATA REMOVED*]                                                                                                                                                                                |
| PFE 2T (Hadlock)                                  | [*DATA REMOVED*]                                                                                                                                                                                |
| Semanas gestación 3T                              | [*DATA REMOVED*]                                                                                                                                                                                |
| días 3T                                           | [*DATA REMOVED*]                                                                                                                                                                                |
| DBP 3T                                            | [*DATA REMOVED*]                                                                                                                                                                                |
| CC 3T                                             | [*DATA REMOVED*]                                                                                                                                                                                |
| AC 3T                                             | [*DATA REMOVED*]                                                                                                                                                                                |
| LF 3T                                             | [*DATA REMOVED*]                                                                                                                                                                                |
| PFE 3T (Hadlock)                                  | [*DATA REMOVED*]                                                                                                                                                                                |
| Semanas de gestación final                        | [*DATA REMOVED*]                                                                                                                                                                                |
| días gestación final                              | [*DATA REMOVED*]                                                                                                                                                                                |
| Localización placenta                             | <input type="radio"/> anterior<br><input type="radio"/> lateral derecha<br><input type="radio"/> lateral izquierda<br><input type="radio"/> posterior<br><input checked="" type="radio"/> fondo |
| Presentación longitudinal cefálica                | <input type="radio"/> no<br><input checked="" type="radio"/> si                                                                                                                                 |
| Dorso                                             | <input checked="" type="radio"/> izquierda anterior<br><input type="radio"/> izquierda posterior<br><input type="radio"/> derecha anterior<br><input type="radio"/> derecha posterior           |
| diámetro biparietal                               | [*DATA REMOVED*]                                                                                                                                                                                |
| Circunferencia craneal                            | [*DATA REMOVED*]                                                                                                                                                                                |
| Circunferencia abdominal                          | [*DATA REMOVED*]                                                                                                                                                                                |
| Longitud de femur                                 | [*DATA REMOVED*]                                                                                                                                                                                |
| tejido celular subcutáneo a nivel del muslo en mm | [*DATA REMOVED*]                                                                                                                                                                                |
| tejido celular subcutáneo en abdomen en mm        | [*DATA REMOVED*]                                                                                                                                                                                |
| Volumen del muslo en cm3                          | [*DATA REMOVED*]                                                                                                                                                                                |
| Peso fetal estimado según fórmula de Hadlock      | [*DATA REMOVED*]                                                                                                                                                                                |

|                                               |                                                                                                                                                          |
|-----------------------------------------------|----------------------------------------------------------------------------------------------------------------------------------------------------------|
| Percentil                                     | [*DATA REMOVED*]                                                                                                                                         |
| Peso fetal estimado según fórmula de Scioscia | <hr/>                                                                                                                                                    |
| Peso fetal estimado según fórmula de LEE      | <hr/>                                                                                                                                                    |
| Tipo de parto                                 | <input checked="" type="radio"/> eutocico<br><input type="radio"/> instrumentado/ventosa<br><input type="radio"/> cesarea                                |
| fecha de nacimiento                           | [*DATA REMOVED*]                                                                                                                                         |
| Días entre exploración y nacimiento           | [*DATA REMOVED*]                                                                                                                                         |
| Peso RN en g                                  | [*DATA REMOVED*]                                                                                                                                         |
| sexo                                          | <input type="radio"/> mujer<br><input checked="" type="radio"/> hombre                                                                                   |
| Apgar 1 minuto                                | [*DATA REMOVED*]                                                                                                                                         |
| Apgar 5 minutos                               | [*DATA REMOVED*]                                                                                                                                         |
| Apgar 10 minutos                              | <hr/>                                                                                                                                                    |
| antecedente Covid durante gestación           | <input type="radio"/> Yes<br><input checked="" type="radio"/> No                                                                                         |
| Nivel de estudios                             | <input type="radio"/> ninguno<br><input type="radio"/> primarios<br><input type="radio"/> secundarios<br><input checked="" type="radio"/> universitarios |

# Base\_datos\_estimacion\_peso\_fetal

|                                       |                                                                                                                                                                                                                                                                                      |
|---------------------------------------|--------------------------------------------------------------------------------------------------------------------------------------------------------------------------------------------------------------------------------------------------------------------------------------|
| Número de identificación participante | 183                                                                                                                                                                                                                                                                                  |
| CODIGO PARTICIPANTE                   |                                                                                                                                                                                                                                                                                      |
| Edad                                  | [*DATA REMOVED*]                                                                                                                                                                                                                                                                     |
| Gestaciones                           | <input checked="" type="radio"/> 1<br><input type="radio"/> 2<br><input type="radio"/> 3<br><input type="radio"/> mas de 3                                                                                                                                                           |
| partos                                | <input checked="" type="radio"/> 0<br><input type="radio"/> 1<br><input type="radio"/> 2<br><input type="radio"/> 3<br><input type="radio"/> mas de 3                                                                                                                                |
| cesáreas                              | <input checked="" type="radio"/> 0<br><input type="radio"/> 1<br><input type="radio"/> 2<br><input type="radio"/> 3<br><input type="radio"/> mas de 3                                                                                                                                |
| Abortos                               | <input checked="" type="radio"/> 0<br><input type="radio"/> 1<br><input type="radio"/> 2<br><input type="radio"/> 3<br><input type="radio"/> mas de 3                                                                                                                                |
| Tipo de gestacion                     | <input checked="" type="radio"/> espontanea<br><input type="radio"/> IAC inseminación artificial conyuge<br><input type="radio"/> IAD inseminación artificial donante<br><input type="radio"/> FIV Fecundación in Vitro<br><input type="radio"/> Ovodon FIV con donación de ovocitos |
| peso previo a embarazo                | [*DATA REMOVED*]                                                                                                                                                                                                                                                                     |
| Ganancia ponderal embarazo            |                                                                                                                                                                                                                                                                                      |
| Talla madre                           | [*DATA REMOVED*]                                                                                                                                                                                                                                                                     |
| IMC previo embarazo                   | 24.38652644413961                                                                                                                                                                                                                                                                    |
| Patología obstétrica                  | <input type="radio"/> no<br><input type="radio"/> si                                                                                                                                                                                                                                 |
| Diabetes pregestacional               | <input type="radio"/> no<br><input type="radio"/> si                                                                                                                                                                                                                                 |
| Diabetes gestacional                  | <input type="radio"/> no<br><input type="radio"/> si                                                                                                                                                                                                                                 |

|                                            |                                                                                                                                                                                      |
|--------------------------------------------|--------------------------------------------------------------------------------------------------------------------------------------------------------------------------------------|
| Diabetes gestacional con insulina          | <input type="radio"/> no<br><input type="radio"/> si                                                                                                                                 |
| Diabetes gestacional con dieta y ejercicio | <input type="radio"/> no<br><input type="radio"/> si                                                                                                                                 |
| Percentil fetos previos                    | <input checked="" type="radio"/> Nada<br><input type="radio"/> percentil menor de 10<br><input type="radio"/> percentil entre 10 y 90<br><input type="radio"/> percentil mayor de 90 |
| Exfumadora                                 | <input checked="" type="radio"/> Nada<br><input type="radio"/> menos de 5 años<br><input type="radio"/> 5 a 10 años<br><input type="radio"/> mayor o igual a 10 años                 |
| Hábito tabáquico                           | <input checked="" type="radio"/> no<br><input type="radio"/> si                                                                                                                      |
| fumadora                                   | [*DATA REMOVED*]                                                                                                                                                                     |
| Consumo otros tóxicos                      | <input checked="" type="radio"/> no<br><input type="radio"/> si                                                                                                                      |
| Hb 1T                                      | [*DATA REMOVED*]                                                                                                                                                                     |
| Htc 1T                                     | [*DATA REMOVED*]                                                                                                                                                                     |
| Hb 2T                                      | [*DATA REMOVED*]                                                                                                                                                                     |
| HTC 2T                                     | [*DATA REMOVED*]                                                                                                                                                                     |
| Hb 3T                                      | [*DATA REMOVED*]                                                                                                                                                                     |
| HTC 3T                                     | [*DATA REMOVED*]                                                                                                                                                                     |
| Suplemento FE oral                         | <input type="radio"/> si<br><input checked="" type="radio"/> no                                                                                                                      |
| Suplemento fe iv                           | <input type="radio"/> si<br><input checked="" type="radio"/> no                                                                                                                      |
| Transfusión                                | <input checked="" type="radio"/> no<br><input type="radio"/> si                                                                                                                      |
| Solicitada Vit D                           | <input type="radio"/> no<br><input checked="" type="radio"/> si                                                                                                                      |
| Deficit vit D                              | <input checked="" type="radio"/> no<br><input type="radio"/> si                                                                                                                      |
| Suplemento vit D                           | <input type="radio"/> si<br><input checked="" type="radio"/> no                                                                                                                      |

|                       |                                                                                                                                                                                                                                                                                                                                                                                                              |
|-----------------------|--------------------------------------------------------------------------------------------------------------------------------------------------------------------------------------------------------------------------------------------------------------------------------------------------------------------------------------------------------------------------------------------------------------|
| Dieta, cuestionario   | <input checked="" type="radio"/> sí<br><input type="radio"/> no                                                                                                                                                                                                                                                                                                                                              |
| Leche entera          | <input type="radio"/> Nunca o menos 1 vez al mes<br><input type="radio"/> 1 a 3 veces mes<br><input type="radio"/> 1 vez semana<br><input type="radio"/> 2 a 4 veces semana<br><input type="radio"/> 5 a 6 veces semana<br><input type="radio"/> 1 vez al día<br><input checked="" type="radio"/> 2 a 3 veces al día<br><input type="radio"/> 5 a 6 veces al día<br><input type="radio"/> más 6 veces al día |
| Leche semidesnatada   | <input type="radio"/> Nunca o menos 1 vez al mes<br><input type="radio"/> 1 a 3 veces mes<br><input checked="" type="radio"/> 1 vez semana<br><input type="radio"/> 2 a 4 veces semana<br><input type="radio"/> 5 a 6 veces semana<br><input type="radio"/> 1 vez al día<br><input type="radio"/> 2 a 3 veces al día<br><input type="radio"/> 5 a 6 veces al día<br><input type="radio"/> mas 6 veces al día |
| Leche desnatada       | <input checked="" type="radio"/> Nunca o menos 1 vez al mes<br><input type="radio"/> 1 a 3 veces mes<br><input type="radio"/> 1 vez semana<br><input type="radio"/> 2 a 4 veces semana<br><input type="radio"/> 5 a 6 veces semana<br><input type="radio"/> 1 vez al día<br><input type="radio"/> 2 a 3 veces al día<br><input type="radio"/> 5 a 6 veces al día<br><input type="radio"/> más 6 veces al día |
| Leche condensada      | <input type="radio"/> Nunca o menos 1 vez al mes<br><input type="radio"/> 1 a 3 veces mes<br><input type="radio"/> 1 vez semana<br><input type="radio"/> 2 a 4 veces semana<br><input checked="" type="radio"/> 5 a 6 veces semana<br><input type="radio"/> 1 vez al día<br><input type="radio"/> 2 a 3 veces al día<br><input type="radio"/> 5 a 6 veces al día<br><input type="radio"/> más 6 veces al día |
| nata o crema de leche | <input type="radio"/> Nunca o menos 1 vez al mes<br><input type="radio"/> 1 a 3 veces mes<br><input checked="" type="radio"/> 1 vez semana<br><input type="radio"/> 2 a 4 veces semana<br><input type="radio"/> 5 a 6 veces semana<br><input type="radio"/> 1 vez al día<br><input type="radio"/> 2 a 3 veces al día<br><input type="radio"/> 5 a 6 veces al día<br><input type="radio"/> más 6 veces al día |

---

Yogurt Entero

- ☒ Nunca o menos 1 vez al mes  
☐ 1 a 3 veces mes  
☐ 1 vez semana  
☐ 2 a 4 veces semana  
☐ 5 a 6 veces semana  
☐ 1 vez al día  
☐ 2 a 3 veces al día  
☐ 5 a 6 veces al día  
☐ más 6 veces al día

---

Yogurt desnatado

- ☒ Nunca o menos 1 vez al mes  
☐ 1 a 3 veces mes  
☐ 1 vez semana  
☐ 2 a 4 veces semana  
☐ 5 a 6 veces semana  
☐ 1 vez al día  
☐ 2 a 3 veces al día  
☐ 5 a 6 veces al día  
☐ más 6 veces al día

---

100g requesón o queso blando o queso fresco

- ☐ Nunca o menos 1 vez al mes  
☐ 1 a 3 veces mes  
☐ 1 vez semana  
☐ 2 a 4 veces semana  
☐ 5 a 6 veces semana  
☒ 1 vez al día  
☐ 2 a 3 veces al día  
☐ 5 a 6 veces al día  
☐ más 6 veces al día

---

queso curado o semicurado o cremoso

- ☐ Nunca o menos 1 vez al mes  
☐ 1 a 3 veces mes  
☒ 1 vez semana  
☐ 2 a 4 veces semana  
☐ 5 a 6 veces semana  
☐ 1 vez al día  
☐ 2 a 3 veces al día  
☐ 5 a 6 veces al día  
☐ más 6 veces al día

---

natillas flan pudding

- ☒ Nunca o menos 1 vez al mes  
☐ 1 a 3 veces mes  
☐ 1 vez semana  
☐ 2 a 4 veces semana  
☐ 5 a 6 veces semana  
☐ 1 vez al día  
☐ 2 a 3 veces al día  
☐ 5 a 6 veces al día  
☐ más 6 veces al día

---

Helado

- ☐ Nunca o menos 1 vez al mes  
☐ 1 a 3 veces mes  
☒ 1 vez semana  
☐ 2 a 4 veces semana  
☐ 5 a 6 veces semana  
☐ 1 vez al día  
☐ 2 a 3 veces al día  
☐ 5 a 6 veces al día  
☐ más 6 veces al día

|                                      |                                                                                                                                                                                                                                                                                                                                                                                                              |
|--------------------------------------|--------------------------------------------------------------------------------------------------------------------------------------------------------------------------------------------------------------------------------------------------------------------------------------------------------------------------------------------------------------------------------------------------------------|
| huevo                                | <input type="radio"/> Nunca o menos 1 vez al mes<br><input type="radio"/> 1 a 3 veces mes<br><input type="radio"/> 1 vez semana<br><input type="radio"/> 2 a 4 veces semana<br><input type="radio"/> 5 a 6 veces semana<br><input type="radio"/> 1 vez al día<br><input type="radio"/> 2 a 3 veces al día<br><input type="radio"/> 5 a 6 veces al día<br><input checked="" type="radio"/> más 6 veces al día |
| Pollo con piel                       | <input type="radio"/> Nunca o menos 1 vez al mes<br><input type="radio"/> 1 a 3 veces mes<br><input type="radio"/> 1 vez semana<br><input type="radio"/> 2 a 4 veces semana<br><input type="radio"/> 5 a 6 veces semana<br><input type="radio"/> 1 vez al día<br><input checked="" type="radio"/> 2 a 3 veces al día<br><input type="radio"/> 5 a 6 veces al día<br><input type="radio"/> más 6 veces al día |
| pollo sin piel                       | <input type="radio"/> Nunca o menos 1 vez al mes<br><input type="radio"/> 1 a 3 veces mes<br><input type="radio"/> 1 vez semana<br><input type="radio"/> 2 a 4 veces semana<br><input type="radio"/> 5 a 6 veces semana<br><input type="radio"/> 1 vez al día<br><input checked="" type="radio"/> 2 a 3 veces al día<br><input type="radio"/> 5 a 6 veces al día<br><input type="radio"/> más 6 veces al día |
| Ternera o cerdo o cordero            | <input type="radio"/> Nunca o menos 1 vez al mes<br><input type="radio"/> 1 a 3 veces mes<br><input type="radio"/> 1 vez semana<br><input type="radio"/> 2 a 4 veces semana<br><input type="radio"/> 5 a 6 veces semana<br><input type="radio"/> 1 vez al día<br><input checked="" type="radio"/> 2 a 3 veces al día<br><input type="radio"/> 5 a 6 veces al día<br><input type="radio"/> más 6 veces al día |
| carne caza: Conejo o codorniz o pato | <input type="radio"/> Nunca o menos 1 vez al mes<br><input type="radio"/> 1 a 3 veces mes<br><input checked="" type="radio"/> 1 vez semana<br><input type="radio"/> 2 a 4 veces semana<br><input type="radio"/> 5 a 6 veces semana<br><input type="radio"/> 1 vez al día<br><input type="radio"/> 2 a 3 veces al día<br><input type="radio"/> 5 a 6 veces al día<br><input type="radio"/> más 6 veces al día |
| Hígado de ternera o cerdo o pollo    | <input type="radio"/> Nunca o menos 1 vez al mes<br><input type="radio"/> 1 a 3 veces mes<br><input checked="" type="radio"/> 1 vez semana<br><input type="radio"/> 2 a 4 veces semana<br><input type="radio"/> 5 a 6 veces semana<br><input type="radio"/> 1 vez al día<br><input type="radio"/> 2 a 3 veces al día<br><input type="radio"/> 5 a 6 veces al día<br><input type="radio"/> más 6 veces al día |



---

Vísceras

- ☒ Nunca o menos 1 vez al mes  
☐ 1 a 3 veces mes  
☐ 1 vez semana  
☐ 2 a 4 veces semana  
☐ 5 a 6 veces semana  
☐ 1 vez al día  
☐ 2 a 3 veces al día  
☐ 5 a 6 veces al día  
☐ más 6 veces al día

---

Embutido

- ☒ Nunca o menos 1 vez al mes  
☐ 1 a 3 veces mes  
☐ 1 vez semana  
☐ 2 a 4 veces semana  
☐ 5 a 6 veces semana  
☐ 1 vez al día  
☐ 2 a 3 veces al día  
☐ 5 a 6 veces al día  
☐ más 6 veces al día

---

Salchicha o similar

- ☒ Nunca o menos 1 vez al mes  
☐ 1 a 3 veces mes  
☐ 1 vez semana  
☐ 2 a 4 veces semana  
☐ 5 a 6 veces semana  
☐ 1 vez al día  
☐ 2 a 3 veces al día  
☐ 5 a 6 veces al día  
☐ más 6 veces al día

---

Pate o foiegras

- ☒ Nunca o menos 1 vez al mes  
☐ 1 a 3 veces mes  
☐ 1 vez semana  
☐ 2 a 4 veces semana  
☐ 5 a 6 veces semana  
☐ 1 vez al día  
☐ 2 a 3 veces al día  
☐ 5 a 6 veces al día  
☐ más 6 veces al día

---

Hamburguesa

- ☐ Nunca o menos 1 vez al mes  
☐ 1 a 3 veces mes  
☐ 1 vez semana  
☒ 2 a 4 veces semana  
☐ 5 a 6 veces semana  
☐ 1 vez al día  
☐ 2 a 3 veces al día  
☐ 5 a 6 veces al día  
☐ más 6 veces al día

---

tocino o bacon

- ☐ Nunca o menos 1 vez al mes  
☐ 1 a 3 veces mes  
☐ 1 vez semana  
☒ 2 a 4 veces semana  
☐ 5 a 6 veces semana  
☐ 1 vez al día  
☐ 2 a 3 veces al día  
☐ 5 a 6 veces al día  
☐ más 6 veces al día

|                        |                                                                                                                                                                                                                                                                                                                                                                                                              |
|------------------------|--------------------------------------------------------------------------------------------------------------------------------------------------------------------------------------------------------------------------------------------------------------------------------------------------------------------------------------------------------------------------------------------------------------|
| Pescado frito          | <input checked="" type="radio"/> Nunca o menos 1 vez al mes<br><input type="radio"/> 1 a 3 veces mes<br><input type="radio"/> 1 vez semana<br><input type="radio"/> 2 a 4 veces semana<br><input type="radio"/> 5 a 6 veces semana<br><input type="radio"/> 1 vez al día<br><input type="radio"/> 2 a 3 veces al día<br><input type="radio"/> 5 a 6 veces al día<br><input type="radio"/> más 6 veces al día |
| pescado hervido blanco | <input type="radio"/> Nunca o menos 1 vez al mes<br><input type="radio"/> 1 a 3 veces mes<br><input type="radio"/> 1 vez semana<br><input checked="" type="radio"/> 2 a 4 veces semana<br><input type="radio"/> 5 a 6 veces semana<br><input type="radio"/> 1 vez al día<br><input type="radio"/> 2 a 3 veces al día<br><input type="radio"/> 5 a 6 veces al día<br><input type="radio"/> más 6 veces al día |
| pescado hervido azul   | <input type="radio"/> Nunca o menos 1 vez al mes<br><input type="radio"/> 1 a 3 veces mes<br><input type="radio"/> 1 vez semana<br><input checked="" type="radio"/> 2 a 4 veces semana<br><input type="radio"/> 5 a 6 veces semana<br><input type="radio"/> 1 vez al día<br><input type="radio"/> 2 a 3 veces al día<br><input type="radio"/> 5 a 6 veces al día<br><input type="radio"/> más 6 veces al día |
| otros pescado azul     | <input type="radio"/> Nunca o menos 1 vez al mes<br><input type="radio"/> 1 a 3 veces mes<br><input type="radio"/> 1 vez semana<br><input checked="" type="radio"/> 2 a 4 veces semana<br><input type="radio"/> 5 a 6 veces semana<br><input type="radio"/> 1 vez al día<br><input type="radio"/> 2 a 3 veces al día<br><input type="radio"/> 5 a 6 veces al día<br><input type="radio"/> más 6 veces al día |
| atun conserva          | <input checked="" type="radio"/> Nunca o menos 1 vez al mes<br><input type="radio"/> 1 a 3 veces mes<br><input type="radio"/> 1 vez semana<br><input type="radio"/> 2 a 4 veces semana<br><input type="radio"/> 5 a 6 veces semana<br><input type="radio"/> 1 vez al día<br><input type="radio"/> 2 a 3 veces al día<br><input type="radio"/> 5 a 6 veces al día<br><input type="radio"/> más 6 veces al día |
| sardina conserva       | <input checked="" type="radio"/> Nunca o menos 1 vez al mes<br><input type="radio"/> 1 a 3 veces mes<br><input type="radio"/> 1 vez semana<br><input type="radio"/> 2 a 4 veces semana<br><input type="radio"/> 5 a 6 veces semana<br><input type="radio"/> 1 vez al día<br><input type="radio"/> 2 a 3 veces al día<br><input type="radio"/> 5 a 6 veces al día<br><input type="radio"/> más 6 veces al día |

|                                         |                                                                                                                                                                                                                                                                                                                                                                                                              |
|-----------------------------------------|--------------------------------------------------------------------------------------------------------------------------------------------------------------------------------------------------------------------------------------------------------------------------------------------------------------------------------------------------------------------------------------------------------------|
| pescado ahumado                         | <input checked="" type="radio"/> Nunca o menos 1 vez al mes<br><input type="radio"/> 1 a 3 veces mes<br><input type="radio"/> 1 vez semana<br><input type="radio"/> 2 a 4 veces semana<br><input type="radio"/> 5 a 6 veces semana<br><input type="radio"/> 1 vez al día<br><input type="radio"/> 2 a 3 veces al día<br><input type="radio"/> 5 a 6 veces al día<br><input type="radio"/> más 6 veces al día |
| almejas o mejillones o ostras unos 100g | <input type="radio"/> Nunca o menos 1 vez al mes<br><input type="radio"/> 1 a 3 veces mes<br><input type="radio"/> 1 vez semana<br><input checked="" type="radio"/> 2 a 4 veces semana<br><input type="radio"/> 5 a 6 veces semana<br><input type="radio"/> 1 vez al día<br><input type="radio"/> 2 a 3 veces al día<br><input type="radio"/> 5 a 6 veces al día<br><input type="radio"/> más 6 veces al día |
| calamar o chipiron o sepia unos 100g    | <input type="radio"/> Nunca o menos 1 vez al mes<br><input type="radio"/> 1 a 3 veces mes<br><input checked="" type="radio"/> 1 vez semana<br><input type="radio"/> 2 a 4 veces semana<br><input type="radio"/> 5 a 6 veces semana<br><input type="radio"/> 1 vez al día<br><input type="radio"/> 2 a 3 veces al día<br><input type="radio"/> 5 a 6 veces al día<br><input type="radio"/> más 6 veces al día |
| marisco unos 100g                       | <input type="radio"/> Nunca o menos 1 vez al mes<br><input type="radio"/> 1 a 3 veces mes<br><input checked="" type="radio"/> 1 vez semana<br><input type="radio"/> 2 a 4 veces semana<br><input type="radio"/> 5 a 6 veces semana<br><input type="radio"/> 1 vez al día<br><input type="radio"/> 2 a 3 veces al día<br><input type="radio"/> 5 a 6 veces al día<br><input type="radio"/> más 6 veces al día |
| Espinacas o acelgas cocinadas           | <input checked="" type="radio"/> Nunca o menos 1 vez al mes<br><input type="radio"/> 1 a 3 veces mes<br><input type="radio"/> 1 vez semana<br><input type="radio"/> 2 a 4 veces semana<br><input type="radio"/> 5 a 6 veces semana<br><input type="radio"/> 1 vez al día<br><input type="radio"/> 2 a 3 veces al día<br><input type="radio"/> 5 a 6 veces al día<br><input type="radio"/> más 6 veces al día |
| Col o coliflor o brocoli cocinado       | <input checked="" type="radio"/> Nunca o menos 1 vez al mes<br><input type="radio"/> 1 a 3 veces mes<br><input type="radio"/> 1 vez semana<br><input type="radio"/> 2 a 4 veces semana<br><input type="radio"/> 5 a 6 veces semana<br><input type="radio"/> 1 vez al día<br><input type="radio"/> 2 a 3 veces al día<br><input type="radio"/> 5 a 6 veces al día<br><input type="radio"/> más 6 veces al día |

---

Lechuga o endivia o escarola

- ☐ Nunca o menos 1 vez al mes  
☐ 1 a 3 veces mes  
☐ 1 vez semana  
☐ 2 a 4 veces semana  
☐ 5 a 6 veces semana  
☐ 1 vez al día  
☐ 2 a 3 veces al día  
☐ 5 a 6 veces al día  
☒ más 6 veces al día

---

tomate ensalada

- ☐ Nunca o menos 1 vez al mes  
☐ 1 a 3 veces mes  
☐ 1 vez semana  
☐ 2 a 4 veces semana  
☐ 5 a 6 veces semana  
☐ 1 vez al día  
☐ 2 a 3 veces al día  
☐ 5 a 6 veces al día  
☒ más 6 veces al día

---

cebolla

- ☐ Nunca o menos 1 vez al mes  
☐ 1 a 3 veces mes  
☐ 1 vez semana  
☐ 2 a 4 veces semana  
☐ 5 a 6 veces semana  
☐ 1 vez al día  
☐ 2 a 3 veces al día  
☐ 5 a 6 veces al día  
☒ más 6 veces al día

---

Zanahoria o calabaza

- ☐ Nunca o menos 1 vez al mes  
☐ 1 a 3 veces mes  
☐ 1 vez semana  
☐ 2 a 4 veces semana  
☐ 5 a 6 veces semana  
☐ 1 vez al día  
☐ 2 a 3 veces al día  
☐ 5 a 6 veces al día  
☒ más 6 veces al día

---

Judías verdes

- ☐ Nunca o menos 1 vez al mes  
☐ 1 a 3 veces mes  
☐ 1 vez semana  
☐ 2 a 4 veces semana  
☐ 5 a 6 veces semana  
☐ 1 vez al día  
☐ 2 a 3 veces al día  
☐ 5 a 6 veces al día  
☒ más 6 veces al día

---

Berenjena o calabacin o pepino

- ☐ Nunca o menos 1 vez al mes  
☐ 1 a 3 veces mes  
☐ 1 vez semana  
☐ 2 a 4 veces semana  
☒ 5 a 6 veces semana  
☐ 1 vez al día  
☐ 2 a 3 veces al día  
☐ 5 a 6 veces al día  
☐ más 6 veces al día

---

|          |                                                                                                                                                                                                                                                                                                                                                                                                              |
|----------|--------------------------------------------------------------------------------------------------------------------------------------------------------------------------------------------------------------------------------------------------------------------------------------------------------------------------------------------------------------------------------------------------------------|
| pimiento | <input type="radio"/> Nunca o menos 1 vez al mes<br><input type="radio"/> 1 a 3 veces mes<br><input type="radio"/> 1 vez semana<br><input type="radio"/> 2 a 4 veces semana<br><input checked="" type="radio"/> 5 a 6 veces semana<br><input type="radio"/> 1 vez al día<br><input type="radio"/> 2 a 3 veces al día<br><input type="radio"/> 5 a 6 veces al día<br><input type="radio"/> más 6 veces al día |
|----------|--------------------------------------------------------------------------------------------------------------------------------------------------------------------------------------------------------------------------------------------------------------------------------------------------------------------------------------------------------------------------------------------------------------|

---

|           |                                                                                                                                                                                                                                                                                                                                                                                                              |
|-----------|--------------------------------------------------------------------------------------------------------------------------------------------------------------------------------------------------------------------------------------------------------------------------------------------------------------------------------------------------------------------------------------------------------------|
| alcachofa | <input type="radio"/> Nunca o menos 1 vez al mes<br><input type="radio"/> 1 a 3 veces mes<br><input type="radio"/> 1 vez semana<br><input type="radio"/> 2 a 4 veces semana<br><input checked="" type="radio"/> 5 a 6 veces semana<br><input type="radio"/> 1 vez al día<br><input type="radio"/> 2 a 3 veces al día<br><input type="radio"/> 5 a 6 veces al día<br><input type="radio"/> más 6 veces al día |
|-----------|--------------------------------------------------------------------------------------------------------------------------------------------------------------------------------------------------------------------------------------------------------------------------------------------------------------------------------------------------------------------------------------------------------------|

---

|            |                                                                                                                                                                                                                                                                                                                                                                                                              |
|------------|--------------------------------------------------------------------------------------------------------------------------------------------------------------------------------------------------------------------------------------------------------------------------------------------------------------------------------------------------------------------------------------------------------------|
| espárragos | <input type="radio"/> Nunca o menos 1 vez al mes<br><input type="radio"/> 1 a 3 veces mes<br><input type="radio"/> 1 vez semana<br><input type="radio"/> 2 a 4 veces semana<br><input checked="" type="radio"/> 5 a 6 veces semana<br><input type="radio"/> 1 vez al día<br><input type="radio"/> 2 a 3 veces al día<br><input type="radio"/> 5 a 6 veces al día<br><input type="radio"/> más 6 veces al día |
|------------|--------------------------------------------------------------------------------------------------------------------------------------------------------------------------------------------------------------------------------------------------------------------------------------------------------------------------------------------------------------------------------------------------------------|

---

|              |                                                                                                                                                                                                                                                                                                                                                                                                              |
|--------------|--------------------------------------------------------------------------------------------------------------------------------------------------------------------------------------------------------------------------------------------------------------------------------------------------------------------------------------------------------------------------------------------------------------|
| maíz hervido | <input type="radio"/> Nunca o menos 1 vez al mes<br><input type="radio"/> 1 a 3 veces mes<br><input type="radio"/> 1 vez semana<br><input type="radio"/> 2 a 4 veces semana<br><input type="radio"/> 5 a 6 veces semana<br><input type="radio"/> 1 vez al día<br><input type="radio"/> 2 a 3 veces al día<br><input type="radio"/> 5 a 6 veces al día<br><input checked="" type="radio"/> más 6 veces al día |
|--------------|--------------------------------------------------------------------------------------------------------------------------------------------------------------------------------------------------------------------------------------------------------------------------------------------------------------------------------------------------------------------------------------------------------------|

---

|           |                                                                                                                                                                                                                                                                                                                                                                                                              |
|-----------|--------------------------------------------------------------------------------------------------------------------------------------------------------------------------------------------------------------------------------------------------------------------------------------------------------------------------------------------------------------------------------------------------------------|
| legumbres | <input type="radio"/> Nunca o menos 1 vez al mes<br><input type="radio"/> 1 a 3 veces mes<br><input type="radio"/> 1 vez semana<br><input type="radio"/> 2 a 4 veces semana<br><input type="radio"/> 5 a 6 veces semana<br><input type="radio"/> 1 vez al día<br><input type="radio"/> 2 a 3 veces al día<br><input type="radio"/> 5 a 6 veces al día<br><input checked="" type="radio"/> más 6 veces al día |
|-----------|--------------------------------------------------------------------------------------------------------------------------------------------------------------------------------------------------------------------------------------------------------------------------------------------------------------------------------------------------------------------------------------------------------------|

---

|                       |                                                                                                                                                                                                                                                                                                                                                                                                              |
|-----------------------|--------------------------------------------------------------------------------------------------------------------------------------------------------------------------------------------------------------------------------------------------------------------------------------------------------------------------------------------------------------------------------------------------------------|
| naranjas o mandarinas | <input type="radio"/> Nunca o menos 1 vez al mes<br><input type="radio"/> 1 a 3 veces mes<br><input type="radio"/> 1 vez semana<br><input type="radio"/> 2 a 4 veces semana<br><input type="radio"/> 5 a 6 veces semana<br><input type="radio"/> 1 vez al día<br><input type="radio"/> 2 a 3 veces al día<br><input type="radio"/> 5 a 6 veces al día<br><input checked="" type="radio"/> más 6 veces al día |
|-----------------------|--------------------------------------------------------------------------------------------------------------------------------------------------------------------------------------------------------------------------------------------------------------------------------------------------------------------------------------------------------------------------------------------------------------|

---

---

zum natural fruta

- ☐ Nunca o menos 1 vez al mes  
☐ 1 a 3 veces mes  
☐ 1 vez semana  
☐ 2 a 4 veces semana  
☐ 5 a 6 veces semana  
☐ 1 vez al día  
☐ 2 a 3 veces al día  
☐ 5 a 6 veces al día  
☒ más 6 veces al día

---

platano

- ☐ Nunca o menos 1 vez al mes  
☐ 1 a 3 veces mes  
☐ 1 vez semana  
☐ 2 a 4 veces semana  
☐ 5 a 6 veces semana  
☐ 1 vez al día  
☐ 2 a 3 veces al día  
☐ 5 a 6 veces al día  
☒ más 6 veces al día

---

manzana o pera

- ☐ Nunca o menos 1 vez al mes  
☐ 1 a 3 veces mes  
☐ 1 vez semana  
☐ 2 a 4 veces semana  
☐ 5 a 6 veces semana  
☐ 1 vez al día  
☐ 2 a 3 veces al día  
☐ 5 a 6 veces al día  
☒ más 6 veces al día

---

melocotón o nectarina

- ☒ Nunca o menos 1 vez al mes  
☐ 1 a 3 veces mes  
☐ 1 vez semana  
☐ 2 a 4 veces semana  
☐ 5 a 6 veces semana  
☐ 1 vez al día  
☐ 2 a 3 veces al día  
☐ 5 a 6 veces al día  
☐ más 6 veces al día

---

sandia o melon

- ☒ Nunca o menos 1 vez al mes  
☐ 1 a 3 veces mes  
☐ 1 vez semana  
☐ 2 a 4 veces semana  
☐ 5 a 6 veces semana  
☐ 1 vez al día  
☐ 2 a 3 veces al día  
☐ 5 a 6 veces al día  
☐ más 6 veces al día

---

uva

- ☐ Nunca o menos 1 vez al mes  
☐ 1 a 3 veces mes  
☐ 1 vez semana  
☐ 2 a 4 veces semana  
☐ 5 a 6 veces semana  
☐ 1 vez al día  
☐ 2 a 3 veces al día  
☐ 5 a 6 veces al día  
☒ más 6 veces al día

---

bruna o ciruela

- ☒ Nunca o menos 1 vez al mes  
☐ 1 a 3 veces mes  
☐ 1 vez semana  
☐ 2 a 4 veces semana  
☐ 5 a 6 veces semana  
☐ 1 vez al día  
☐ 2 a 3 veces al día  
☐ 5 a 6 veces al día  
☐ más 6 veces al día

---

kiwi

- ☒ Nunca o menos 1 vez al mes  
☐ 1 a 3 veces mes  
☐ 1 vez semana  
☐ 2 a 4 veces semana  
☐ 5 a 6 veces semana  
☐ 1 vez al día  
☐ 2 a 3 veces al día  
☐ 5 a 6 veces al día  
☐ más 6 veces al día

---

aceituna

- ☒ Nunca o menos 1 vez al mes  
☐ 1 a 3 veces mes  
☐ 1 vez semana  
☐ 2 a 4 veces semana  
☐ 5 a 6 veces semana  
☐ 1 vez al día  
☐ 2 a 3 veces al día  
☐ 5 a 6 veces al día  
☐ más 6 veces al día

---

frutos secos

- ☐ Nunca o menos 1 vez al mes  
☐ 1 a 3 veces mes  
☒ 1 vez semana  
☐ 2 a 4 veces semana  
☐ 5 a 6 veces semana  
☐ 1 vez al día  
☐ 2 a 3 veces al día  
☐ 5 a 6 veces al día  
☐ más 6 veces al día

---

pan blanco

- ☐ Nunca o menos 1 vez al mes  
☐ 1 a 3 veces mes  
☐ 1 vez semana  
☐ 2 a 4 veces semana  
☐ 5 a 6 veces semana  
☒ 1 vez al día  
☐ 2 a 3 veces al día  
☐ 5 a 6 veces al día  
☐ más 6 veces al día

---

pan integral

- ☒ Nunca o menos 1 vez al mes  
☐ 1 a 3 veces mes  
☐ 1 vez semana  
☐ 2 a 4 veces semana  
☐ 5 a 6 veces semana  
☐ 1 vez al día  
☐ 2 a 3 veces al día  
☐ 5 a 6 veces al día  
☐ más 6 veces al día

---

cereales desayuno

- ☐ Nunca o menos 1 vez al mes  
☐ 1 a 3 veces mes  
☐ 1 vez semana  
☐ 2 a 4 veces semana  
☐ 5 a 6 veces semana  
☒ 1 vez al día  
☐ 2 a 3 veces al día  
☐ 5 a 6 veces al día  
☐ más 6 veces al día

---

patatas fritas

- ☐ Nunca o menos 1 vez al mes  
☐ 1 a 3 veces mes  
☒ 1 vez semana  
☐ 2 a 4 veces semana  
☐ 5 a 6 veces semana  
☐ 1 vez al día  
☐ 2 a 3 veces al día  
☐ 5 a 6 veces al día  
☐ más 6 veces al día

---

patatas cocidas o asadas

- ☒ Nunca o menos 1 vez al mes  
☐ 1 a 3 veces mes  
☐ 1 vez semana  
☐ 2 a 4 veces semana  
☐ 5 a 6 veces semana  
☐ 1 vez al día  
☐ 2 a 3 veces al día  
☐ 5 a 6 veces al día  
☐ más 6 veces al día

---

bolsa papas

- ☒ Nunca o menos 1 vez al mes  
☐ 1 a 3 veces mes  
☐ 1 vez semana  
☐ 2 a 4 veces semana  
☐ 5 a 6 veces semana  
☐ 1 vez al día  
☐ 2 a 3 veces al día  
☐ 5 a 6 veces al día  
☐ más 6 veces al día

---

arroz cocinado

- ☐ Nunca o menos 1 vez al mes  
☐ 1 a 3 veces mes  
☐ 1 vez semana  
☐ 2 a 4 veces semana  
☐ 5 a 6 veces semana  
☐ 1 vez al día  
☐ 2 a 3 veces al día  
☐ 5 a 6 veces al día  
☒ más 6 veces al día

---

pasta

- ☐ Nunca o menos 1 vez al mes  
☐ 1 a 3 veces mes  
☐ 1 vez semana  
☒ 2 a 4 veces semana  
☐ 5 a 6 veces semana  
☐ 1 vez al día  
☐ 2 a 3 veces al día  
☐ 5 a 6 veces al día  
☐ más 6 veces al día



|                     |                                                                                                                                                                                                                                                                                                                                                                                                              |
|---------------------|--------------------------------------------------------------------------------------------------------------------------------------------------------------------------------------------------------------------------------------------------------------------------------------------------------------------------------------------------------------------------------------------------------------|
| pizza               | <input type="radio"/> Nunca o menos 1 vez al mes<br><input type="radio"/> 1 a 3 veces mes<br><input type="radio"/> 1 vez semana<br><input checked="" type="radio"/> 2 a 4 veces semana<br><input type="radio"/> 5 a 6 veces semana<br><input type="radio"/> 1 vez al día<br><input type="radio"/> 2 a 3 veces al día<br><input type="radio"/> 5 a 6 veces al día<br><input type="radio"/> más 6 veces al día |
| aceite oliva        | <input type="radio"/> Nunca o menos 1 vez al mes<br><input type="radio"/> 1 a 3 veces mes<br><input type="radio"/> 1 vez semana<br><input type="radio"/> 2 a 4 veces semana<br><input type="radio"/> 5 a 6 veces semana<br><input type="radio"/> 1 vez al día<br><input type="radio"/> 2 a 3 veces al día<br><input type="radio"/> 5 a 6 veces al día<br><input checked="" type="radio"/> más 6 veces al día |
| otros aceites       | <input checked="" type="radio"/> Nunca o menos 1 vez al mes<br><input type="radio"/> 1 a 3 veces mes<br><input type="radio"/> 1 vez semana<br><input type="radio"/> 2 a 4 veces semana<br><input type="radio"/> 5 a 6 veces semana<br><input type="radio"/> 1 vez al día<br><input type="radio"/> 2 a 3 veces al día<br><input type="radio"/> 5 a 6 veces al día<br><input type="radio"/> más 6 veces al día |
| margarina           | <input type="radio"/> Nunca o menos 1 vez al mes<br><input type="radio"/> 1 a 3 veces mes<br><input type="radio"/> 1 vez semana<br><input type="radio"/> 2 a 4 veces semana<br><input type="radio"/> 5 a 6 veces semana<br><input type="radio"/> 1 vez al día<br><input type="radio"/> 2 a 3 veces al día<br><input type="radio"/> 5 a 6 veces al día<br><input checked="" type="radio"/> más 6 veces al día |
| mantequilla         | <input type="radio"/> Nunca o menos 1 vez al mes<br><input type="radio"/> 1 a 3 veces mes<br><input type="radio"/> 1 vez semana<br><input type="radio"/> 2 a 4 veces semana<br><input type="radio"/> 5 a 6 veces semana<br><input type="radio"/> 1 vez al día<br><input type="radio"/> 2 a 3 veces al día<br><input type="radio"/> 5 a 6 veces al día<br><input checked="" type="radio"/> más 6 veces al día |
| galletas tipo maria | <input type="radio"/> Nunca o menos 1 vez al mes<br><input type="radio"/> 1 a 3 veces mes<br><input checked="" type="radio"/> 1 vez semana<br><input type="radio"/> 2 a 4 veces semana<br><input type="radio"/> 5 a 6 veces semana<br><input type="radio"/> 1 vez al día<br><input type="radio"/> 2 a 3 veces al día<br><input type="radio"/> 5 a 6 veces al día<br><input type="radio"/> más 6 veces al día |

---

galletas chocolate

- ☒ Nunca o menos 1 vez al mes  
☐ 1 a 3 veces mes  
☐ 1 vez semana  
☐ 2 a 4 veces semana  
☐ 5 a 6 veces semana  
☐ 1 vez al día  
☐ 2 a 3 veces al día  
☐ 5 a 6 veces al día  
☐ más 6 veces al día

---

bolleria

- ☐ Nunca o menos 1 vez al mes  
☐ 1 a 3 veces mes  
☒ 1 vez semana  
☐ 2 a 4 veces semana  
☐ 5 a 6 veces semana  
☐ 1 vez al día  
☐ 2 a 3 veces al día  
☐ 5 a 6 veces al día  
☐ más 6 veces al día

---

chocolate o bombones

- ☐ Nunca o menos 1 vez al mes  
☐ 1 a 3 veces mes  
☒ 1 vez semana  
☐ 2 a 4 veces semana  
☐ 5 a 6 veces semana  
☐ 1 vez al día  
☐ 2 a 3 veces al día  
☐ 5 a 6 veces al día  
☐ más 6 veces al día

---

chocolate polvo o colacao

- ☐ Nunca o menos 1 vez al mes  
☐ 1 a 3 veces mes  
☐ 1 vez semana  
☒ 2 a 4 veces semana  
☐ 5 a 6 veces semana  
☐ 1 vez al día  
☐ 2 a 3 veces al día  
☐ 5 a 6 veces al día  
☐ más 6 veces al día

---

vino tinto

- ☒ Nunca o menos 1 vez al mes  
☐ 1 a 3 veces mes  
☐ 1 vez semana  
☐ 2 a 4 veces semana  
☐ 5 a 6 veces semana  
☐ 1 vez al día  
☐ 2 a 3 veces al día  
☐ 5 a 6 veces al día  
☐ más 6 veces al día

---

vino blanco

- ☒ Nunca o menos 1 vez al mes  
☐ 1 a 3 veces mes  
☐ 1 vez semana  
☐ 2 a 4 veces semana  
☐ 5 a 6 veces semana  
☐ 1 vez al día  
☐ 2 a 3 veces al día  
☐ 5 a 6 veces al día  
☐ más 6 veces al día

---

|                    |                                                                                                                                                                                                                                                                                                                                                                                                              |
|--------------------|--------------------------------------------------------------------------------------------------------------------------------------------------------------------------------------------------------------------------------------------------------------------------------------------------------------------------------------------------------------------------------------------------------------|
| vino seco o vermut | <input checked="" type="radio"/> Nunca o menos 1 vez al mes<br><input type="radio"/> 1 a 3 veces mes<br><input type="radio"/> 1 vez semana<br><input type="radio"/> 2 a 4 veces semana<br><input type="radio"/> 5 a 6 veces semana<br><input type="radio"/> 1 vez al día<br><input type="radio"/> 2 a 3 veces al día<br><input type="radio"/> 5 a 6 veces al día<br><input type="radio"/> más 6 veces al día |
|--------------------|--------------------------------------------------------------------------------------------------------------------------------------------------------------------------------------------------------------------------------------------------------------------------------------------------------------------------------------------------------------------------------------------------------------|

---

|         |                                                                                                                                                                                                                                                                                                                                                                                                              |
|---------|--------------------------------------------------------------------------------------------------------------------------------------------------------------------------------------------------------------------------------------------------------------------------------------------------------------------------------------------------------------------------------------------------------------|
| cerveza | <input checked="" type="radio"/> Nunca o menos 1 vez al mes<br><input type="radio"/> 1 a 3 veces mes<br><input type="radio"/> 1 vez semana<br><input type="radio"/> 2 a 4 veces semana<br><input type="radio"/> 5 a 6 veces semana<br><input type="radio"/> 1 vez al día<br><input type="radio"/> 2 a 3 veces al día<br><input type="radio"/> 5 a 6 veces al día<br><input type="radio"/> más 6 veces al día |
|---------|--------------------------------------------------------------------------------------------------------------------------------------------------------------------------------------------------------------------------------------------------------------------------------------------------------------------------------------------------------------------------------------------------------------|

---

|                     |                                                                                                                                                                                                                                                                                                                                                                                                              |
|---------------------|--------------------------------------------------------------------------------------------------------------------------------------------------------------------------------------------------------------------------------------------------------------------------------------------------------------------------------------------------------------------------------------------------------------|
| cerveza sin alcohol | <input checked="" type="radio"/> Nunca o menos 1 vez al mes<br><input type="radio"/> 1 a 3 veces mes<br><input type="radio"/> 1 vez semana<br><input type="radio"/> 2 a 4 veces semana<br><input type="radio"/> 5 a 6 veces semana<br><input type="radio"/> 1 vez al día<br><input type="radio"/> 2 a 3 veces al día<br><input type="radio"/> 5 a 6 veces al día<br><input type="radio"/> más 6 veces al día |
|---------------------|--------------------------------------------------------------------------------------------------------------------------------------------------------------------------------------------------------------------------------------------------------------------------------------------------------------------------------------------------------------------------------------------------------------|

---

|         |                                                                                                                                                                                                                                                                                                                                                                                                              |
|---------|--------------------------------------------------------------------------------------------------------------------------------------------------------------------------------------------------------------------------------------------------------------------------------------------------------------------------------------------------------------------------------------------------------------|
| licores | <input type="radio"/> Nunca o menos 1 vez al mes<br><input checked="" type="radio"/> 1 a 3 veces mes<br><input type="radio"/> 1 vez semana<br><input type="radio"/> 2 a 4 veces semana<br><input type="radio"/> 5 a 6 veces semana<br><input type="radio"/> 1 vez al día<br><input type="radio"/> 2 a 3 veces al día<br><input type="radio"/> 5 a 6 veces al día<br><input type="radio"/> más 6 veces al día |
|---------|--------------------------------------------------------------------------------------------------------------------------------------------------------------------------------------------------------------------------------------------------------------------------------------------------------------------------------------------------------------------------------------------------------------|

---

|                       |                                                                                                                                                                                                                                                                                                                                                                                                              |
|-----------------------|--------------------------------------------------------------------------------------------------------------------------------------------------------------------------------------------------------------------------------------------------------------------------------------------------------------------------------------------------------------------------------------------------------------|
| ginebra o ron o vodka | <input checked="" type="radio"/> Nunca o menos 1 vez al mes<br><input type="radio"/> 1 a 3 veces mes<br><input type="radio"/> 1 vez semana<br><input type="radio"/> 2 a 4 veces semana<br><input type="radio"/> 5 a 6 veces semana<br><input type="radio"/> 1 vez al día<br><input type="radio"/> 2 a 3 veces al día<br><input type="radio"/> 5 a 6 veces al día<br><input type="radio"/> más 6 veces al día |
|-----------------------|--------------------------------------------------------------------------------------------------------------------------------------------------------------------------------------------------------------------------------------------------------------------------------------------------------------------------------------------------------------------------------------------------------------|

---

|                 |                                                                                                                                                                                                                                                                                                                                                                                                              |
|-----------------|--------------------------------------------------------------------------------------------------------------------------------------------------------------------------------------------------------------------------------------------------------------------------------------------------------------------------------------------------------------------------------------------------------------|
| refresco normal | <input type="radio"/> Nunca o menos 1 vez al mes<br><input type="radio"/> 1 a 3 veces mes<br><input type="radio"/> 1 vez semana<br><input type="radio"/> 2 a 4 veces semana<br><input type="radio"/> 5 a 6 veces semana<br><input type="radio"/> 1 vez al día<br><input checked="" type="radio"/> 2 a 3 veces al día<br><input type="radio"/> 5 a 6 veces al día<br><input type="radio"/> más 6 veces al día |
|-----------------|--------------------------------------------------------------------------------------------------------------------------------------------------------------------------------------------------------------------------------------------------------------------------------------------------------------------------------------------------------------------------------------------------------------|

---

---

refresco sin azúcar

- ☐ Nunca o menos 1 vez al mes  
☐ 1 a 3 veces mes  
☐ 1 vez semana  
☐ 2 a 4 veces semana  
☐ 5 a 6 veces semana  
☐ 1 vez al día  
☒ 2 a 3 veces al día  
☐ 5 a 6 veces al día  
☐ más 6 veces al día

---

Agua del grifo

- ☒ Nunca o menos 1 vez al mes  
☐ 1 a 3 veces mes  
☐ 1 vez semana  
☐ 2 a 4 veces semana  
☐ 5 a 6 veces semana  
☐ 1 vez al día  
☐ 2 a 3 veces al día  
☐ 5 a 6 veces al día  
☐ más 6 veces al día

---

agua embotellada sin gas

- ☐ Nunca o menos 1 vez al mes  
☐ 1 a 3 veces mes  
☐ 1 vez semana  
☐ 2 a 4 veces semana  
☐ 5 a 6 veces semana  
☐ 1 vez al día  
☐ 2 a 3 veces al día  
☐ 5 a 6 veces al día  
☒ más 6 veces al día

---

agua embotellada con gas

- ☒ Nunca o menos 1 vez al mes  
☐ 1 a 3 veces mes  
☐ 1 vez semana  
☐ 2 a 4 veces semana  
☐ 5 a 6 veces semana  
☐ 1 vez al día  
☐ 2 a 3 veces al día  
☐ 5 a 6 veces al día  
☐ más 6 veces al día

---

zumو frutas embasado

- ☐ Nunca o menos 1 vez al mes  
☐ 1 a 3 veces mes  
☐ 1 vez semana  
☐ 2 a 4 veces semana  
☐ 5 a 6 veces semana  
☐ 1 vez al día  
☒ 2 a 3 veces al día  
☐ 5 a 6 veces al día  
☐ más 6 veces al día

---

cafe

- ☐ Nunca o menos 1 vez al mes  
☐ 1 a 3 veces mes  
☐ 1 vez semana  
☐ 2 a 4 veces semana  
☐ 5 a 6 veces semana  
☒ 1 vez al día  
☐ 2 a 3 veces al día  
☐ 5 a 6 veces al día  
☐ más 6 veces al día

---

cafe descafeinado

- ☐ Nunca o menos 1 vez al mes  
☐ 1 a 3 veces mes  
☐ 1 vez semana  
☐ 2 a 4 veces semana  
☐ 5 a 6 veces semana  
☒ 1 vez al día  
☐ 2 a 3 veces al día  
☐ 5 a 6 veces al día  
☐ más 6 veces al día

---

te o infusión

- ☐ Nunca o menos 1 vez al mes  
☐ 1 a 3 veces mes  
☐ 1 vez semana  
☐ 2 a 4 veces semana  
☐ 5 a 6 veces semana  
☐ 1 vez al día  
☐ 2 a 3 veces al día  
☐ 5 a 6 veces al día  
☐ más 6 veces al día

---

sopa o puré verduras

- ☒ Nunca o menos 1 vez al mes  
☐ 1 a 3 veces mes  
☐ 1 vez semana  
☐ 2 a 4 veces semana  
☐ 5 a 6 veces semana  
☐ 1 vez al día  
☐ 2 a 3 veces al día  
☐ 5 a 6 veces al día  
☐ más 6 veces al día

---

croquetas pollo jamón

- ☐ Nunca o menos 1 vez al mes  
☐ 1 a 3 veces mes  
☒ 1 vez semana  
☐ 2 a 4 veces semana  
☐ 5 a 6 veces semana  
☐ 1 vez al día  
☐ 2 a 3 veces al día  
☐ 5 a 6 veces al día  
☐ más 6 veces al día

---

croquetas pescado

- ☒ Nunca o menos 1 vez al mes  
☐ 1 a 3 veces mes  
☐ 1 vez semana  
☐ 2 a 4 veces semana  
☐ 5 a 6 veces semana  
☐ 1 vez al día  
☐ 2 a 3 veces al día  
☐ 5 a 6 veces al día  
☐ más 6 veces al día

---

mayonesa

- ☒ Nunca o menos 1 vez al mes  
☐ 1 a 3 veces mes  
☐ 1 vez semana  
☐ 2 a 4 veces semana  
☐ 5 a 6 veces semana  
☐ 1 vez al día  
☐ 2 a 3 veces al día  
☐ 5 a 6 veces al día  
☐ más 6 veces al día

|                  |                                                                                                                                                                                                                                                                                                                                                                                                              |
|------------------|--------------------------------------------------------------------------------------------------------------------------------------------------------------------------------------------------------------------------------------------------------------------------------------------------------------------------------------------------------------------------------------------------------------|
| salsa tomate     | <input checked="" type="radio"/> Nunca o menos 1 vez al mes<br><input type="radio"/> 1 a 3 veces mes<br><input type="radio"/> 1 vez semana<br><input type="radio"/> 2 a 4 veces semana<br><input type="radio"/> 5 a 6 veces semana<br><input type="radio"/> 1 vez al día<br><input type="radio"/> 2 a 3 veces al día<br><input type="radio"/> 5 a 6 veces al día<br><input type="radio"/> más 6 veces al día |
| ketchup          | <input type="radio"/> Nunca o menos 1 vez al mes<br><input type="radio"/> 1 a 3 veces mes<br><input type="radio"/> 1 vez semana<br><input type="radio"/> 2 a 4 veces semana<br><input type="radio"/> 5 a 6 veces semana<br><input type="radio"/> 1 vez al día<br><input checked="" type="radio"/> 2 a 3 veces al día<br><input type="radio"/> 5 a 6 veces al día<br><input type="radio"/> más 6 veces al día |
| sal              | <input type="radio"/> Nunca o menos 1 vez al mes<br><input type="radio"/> 1 a 3 veces mes<br><input type="radio"/> 1 vez semana<br><input type="radio"/> 2 a 4 veces semana<br><input type="radio"/> 5 a 6 veces semana<br><input type="radio"/> 1 vez al día<br><input checked="" type="radio"/> 2 a 3 veces al día<br><input type="radio"/> 5 a 6 veces al día<br><input type="radio"/> más 6 veces al día |
| ajo              | <input type="radio"/> Nunca o menos 1 vez al mes<br><input type="radio"/> 1 a 3 veces mes<br><input type="radio"/> 1 vez semana<br><input checked="" type="radio"/> 2 a 4 veces semana<br><input type="radio"/> 5 a 6 veces semana<br><input type="radio"/> 1 vez al día<br><input type="radio"/> 2 a 3 veces al día<br><input type="radio"/> 5 a 6 veces al día<br><input type="radio"/> más 6 veces al día |
| mermelada o miel | <input checked="" type="radio"/> Nunca o menos 1 vez al mes<br><input type="radio"/> 1 a 3 veces mes<br><input type="radio"/> 1 vez semana<br><input type="radio"/> 2 a 4 veces semana<br><input type="radio"/> 5 a 6 veces semana<br><input type="radio"/> 1 vez al día<br><input type="radio"/> 2 a 3 veces al día<br><input type="radio"/> 5 a 6 veces al día<br><input type="radio"/> más 6 veces al día |
| azúcar           | <input type="radio"/> Nunca o menos 1 vez al mes<br><input type="radio"/> 1 a 3 veces mes<br><input type="radio"/> 1 vez semana<br><input type="radio"/> 2 a 4 veces semana<br><input type="radio"/> 5 a 6 veces semana<br><input type="radio"/> 1 vez al día<br><input type="radio"/> 2 a 3 veces al día<br><input type="radio"/> 5 a 6 veces al día<br><input checked="" type="radio"/> más 6 veces al día |

|                                       |                                                                                                                                                                                                                                                                                                                                                                                                                                                                                                                               |
|---------------------------------------|-------------------------------------------------------------------------------------------------------------------------------------------------------------------------------------------------------------------------------------------------------------------------------------------------------------------------------------------------------------------------------------------------------------------------------------------------------------------------------------------------------------------------------|
| Otro alimento                         | <hr/>                                                                                                                                                                                                                                                                                                                                                                                                                                                                                                                         |
| suplementos vitamínicos               | <input type="radio"/> si<br><input checked="" type="radio"/> no                                                                                                                                                                                                                                                                                                                                                                                                                                                               |
| suplementos vitamínicos               | <hr/>                                                                                                                                                                                                                                                                                                                                                                                                                                                                                                                         |
| dieta previa                          | <input type="radio"/> si<br><input checked="" type="radio"/> no                                                                                                                                                                                                                                                                                                                                                                                                                                                               |
| motivo dieta                          | <input checked="" type="radio"/> no dieta<br><input type="radio"/> control peso<br><input type="radio"/> control colesterol<br><input type="radio"/> control diabetes<br><input type="radio"/> problemas estómago<br><input type="radio"/> problemas vesícula o hepáticos<br><input type="radio"/> HTA o cardiopatía<br><input type="radio"/> problemas renales<br><input type="radio"/> alergia alimentaria<br><input type="radio"/> ácido úrico elevado<br><input type="radio"/> vegetariana<br><input type="radio"/> otros |
| cambio alimentos año previo gestación | <input type="radio"/> si<br><input checked="" type="radio"/> no                                                                                                                                                                                                                                                                                                                                                                                                                                                               |
| cambio lácteos                        | <input type="radio"/> eliminado<br><input type="radio"/> disminuido<br><input checked="" type="radio"/> igual<br><input type="radio"/> aumentado<br><input type="radio"/> no sabe                                                                                                                                                                                                                                                                                                                                             |
| cambio huevos                         | <input type="radio"/> eliminado<br><input type="radio"/> disminuido<br><input checked="" type="radio"/> igual<br><input type="radio"/> aumentado<br><input type="radio"/> no sabe                                                                                                                                                                                                                                                                                                                                             |
| cambio carne                          | <input type="radio"/> eliminado<br><input type="radio"/> disminuido<br><input checked="" type="radio"/> igual<br><input type="radio"/> aumentado<br><input type="radio"/> no sabe                                                                                                                                                                                                                                                                                                                                             |
| cambio pescado                        | <input type="radio"/> eliminado<br><input type="radio"/> disminuido<br><input checked="" type="radio"/> igual<br><input type="radio"/> aumentado<br><input type="radio"/> no sabe                                                                                                                                                                                                                                                                                                                                             |
| cambio verduras                       | <input type="radio"/> eliminado<br><input type="radio"/> disminuido<br><input checked="" type="radio"/> igual<br><input type="radio"/> aumentado<br><input type="radio"/> no sabe                                                                                                                                                                                                                                                                                                                                             |

|                            |                                                                                                                                                                                                                        |
|----------------------------|------------------------------------------------------------------------------------------------------------------------------------------------------------------------------------------------------------------------|
| cambio legumbres           | <input type="radio"/> eliminado<br><input type="radio"/> disminuido<br><input checked="" type="radio"/> igual<br><input type="radio"/> aumentado<br><input type="radio"/> no sabe                                      |
| cambio fruta               | <input type="radio"/> eliminado<br><input type="radio"/> disminuido<br><input checked="" type="radio"/> igual<br><input type="radio"/> aumentado<br><input type="radio"/> no sabe                                      |
| cambio pan                 | <input type="radio"/> eliminado<br><input type="radio"/> disminuido<br><input checked="" type="radio"/> igual<br><input type="radio"/> aumentado<br><input type="radio"/> no sabe                                      |
| cambio aceite oliva        | <input type="radio"/> eliminado<br><input type="radio"/> disminuido<br><input checked="" type="radio"/> igual<br><input type="radio"/> aumentado<br><input type="radio"/> no sabe                                      |
| cambio mante o margarina   | <input type="radio"/> eliminado<br><input type="radio"/> disminuido<br><input checked="" type="radio"/> igual<br><input type="radio"/> aumentado<br><input type="radio"/> no sabe                                      |
| cambio azúcar y dulces     | <input type="radio"/> eliminado<br><input type="radio"/> disminuido<br><input checked="" type="radio"/> igual<br><input type="radio"/> aumentado<br><input type="radio"/> no sabe                                      |
| cambio bebidas alcohólicas | <input type="radio"/> eliminado<br><input type="radio"/> disminuido<br><input checked="" type="radio"/> igual<br><input type="radio"/> aumentado<br><input type="radio"/> no sabe                                      |
| frecuencia comidas fritas  | <input type="radio"/> a diario<br><input type="radio"/> 5 a 6 veces semana<br><input type="radio"/> 2 a 4 veces semana<br><input checked="" type="radio"/> 1 vez semana<br><input type="radio"/> menos de 1 vez semana |
| carne                      | <input type="radio"/> no como<br><input type="radio"/> cruda<br><input type="radio"/> poco hecha<br><input type="radio"/> hecha<br><input checked="" type="radio"/> muy hecha                                          |
| grasa visible carne        | <input type="radio"/> quita toda<br><input type="radio"/> quita mayoría<br><input type="radio"/> quita un poco<br><input checked="" type="radio"/> no quita nada                                                       |



|                                |                                                                                                                                                                                                                                                          |
|--------------------------------|----------------------------------------------------------------------------------------------------------------------------------------------------------------------------------------------------------------------------------------------------------|
| cocina carne                   | <input checked="" type="radio"/> a la plancha<br><input type="radio"/> a la parrilla<br><input type="radio"/> asada<br><input type="radio"/> frita<br><input type="radio"/> guisada                                                                      |
| tostado quemado carne          | <input checked="" type="radio"/> nunca<br><input type="radio"/> 1 vez mes<br><input type="radio"/> 2 a 3 veces mes<br><input type="radio"/> 1 vez semana<br><input type="radio"/> 2 a 3 semanas                                                          |
| tostado quemado pescado        | <input checked="" type="radio"/> nunca<br><input type="radio"/> 1 vez mes<br><input type="radio"/> 2 a 3 veces mes<br><input type="radio"/> 1 vez semana<br><input type="radio"/> 2 a 3 semanas                                                          |
| socarrat paella                | <input checked="" type="radio"/> nunca<br><input type="radio"/> 1 vez mes<br><input type="radio"/> 2 a 3 veces mes<br><input type="radio"/> 1 vez semana<br><input type="radio"/> 2 a 3 semanas                                                          |
| grasa o aceite cocinar         | <input type="radio"/> mantequilla<br><input type="radio"/> margarina<br><input type="radio"/> aceite oliva<br><input checked="" type="radio"/> aceite oliva virgen extra<br><input type="radio"/> aceite vegetal<br><input type="radio"/> mezcla aceites |
| grasa aceite aliñar            | <input type="radio"/> mantequilla<br><input type="radio"/> margarina<br><input checked="" type="radio"/> aceite oliva<br><input type="radio"/> aceite oliva virgen extra<br><input type="radio"/> aceite vegetal<br><input type="radio"/> mezcla aceites |
| grasa aceite freir             | <input type="radio"/> mantequilla<br><input type="radio"/> margarina<br><input checked="" type="radio"/> aceite oliva<br><input type="radio"/> aceite oliva virgen extra<br><input type="radio"/> aceite vegetal<br><input type="radio"/> mezcla aceites |
| Ejercicio cuestionario         | <input checked="" type="radio"/> si<br><input type="radio"/> no                                                                                                                                                                                          |
| horas de sueño incluido siesta | [*DATA REMOVED*]                                                                                                                                                                                                                                         |
| minutos siesta                 | [*DATA REMOVED*]                                                                                                                                                                                                                                         |
| horas televisión semana        | [*DATA REMOVED*]                                                                                                                                                                                                                                         |

|                                        |                                                                                                                                                                                                                                                                                                                                                                |
|----------------------------------------|----------------------------------------------------------------------------------------------------------------------------------------------------------------------------------------------------------------------------------------------------------------------------------------------------------------------------------------------------------------|
| actividad trabajo                      | <input type="radio"/> casi siempre sentado<br><input type="radio"/> sentado 50 por cien<br><input type="radio"/> casi siempre de pie, quieto<br><input type="radio"/> casi siempre levantado caminando y llevando pocas cosas<br><input type="radio"/> casi siempre levantado, caminando y llevado muchas cosas<br><input type="radio"/> trabajo manual pesado |
| tiempo caminar o bici al día           | <input type="radio"/> casi nunca<br><input type="radio"/> menos 20min día<br><input type="radio"/> 20 a 40 min día<br><input type="radio"/> 40 a 60 min día<br><input type="radio"/> 1h o 1h y media día<br><input type="radio"/> más de 1h y media al día                                                                                                     |
| tiempo tareas casa al día              | <input type="radio"/> menos de 1h día<br><input type="radio"/> 1 a 2h día<br><input checked="" type="radio"/> 3 a 4h día<br><input type="radio"/> 5 a 6h día<br><input type="radio"/> 7 a 8h día<br><input type="radio"/> más de 8h día                                                                                                                        |
| tiempo libre televisión ordenador leer | <input type="radio"/> menos 1h día<br><input type="radio"/> 1h día<br><input checked="" type="radio"/> 2h día<br><input type="radio"/> 3h día<br><input type="radio"/> 4h día<br><input type="radio"/> 5 a 6h día<br><input type="radio"/> mas 6h día                                                                                                          |
| tiempo libre ejercicio o deporte       | <input type="radio"/> menos 1h semana<br><input type="radio"/> 1h semana<br><input type="radio"/> 2h semana<br><input type="radio"/> 3h semana<br><input type="radio"/> 4 a 5h semana<br><input checked="" type="radio"/> mas 5h semana                                                                                                                        |
| como se considera                      | <input type="radio"/> sedentaria<br><input checked="" type="radio"/> poco activa<br><input type="radio"/> moderadamente activa<br><input type="radio"/> bastante activa<br><input type="radio"/> muy activa<br><input type="radio"/> no sabe                                                                                                                   |
| FUR                                    | [*DATA REMOVED*]                                                                                                                                                                                                                                                                                                                                               |
| Semanas gestación 2T                   | [*DATA REMOVED*]                                                                                                                                                                                                                                                                                                                                               |
| Días gestación 2T                      | [*DATA REMOVED*]                                                                                                                                                                                                                                                                                                                                               |
| DBP 2T                                 | [*DATA REMOVED*]                                                                                                                                                                                                                                                                                                                                               |
| CC 2T                                  | [*DATA REMOVED*]                                                                                                                                                                                                                                                                                                                                               |
| AC 2T                                  | [*DATA REMOVED*]                                                                                                                                                                                                                                                                                                                                               |

|                                                   |                                                                                                                                                                                      |
|---------------------------------------------------|--------------------------------------------------------------------------------------------------------------------------------------------------------------------------------------|
| LF 2T                                             | [*DATA REMOVED*]                                                                                                                                                                     |
| PFE 2T (Hadlock)                                  | [*DATA REMOVED*]                                                                                                                                                                     |
| Semanas gestación 3T                              | [*DATA REMOVED*]                                                                                                                                                                     |
| días 3T                                           | [*DATA REMOVED*]                                                                                                                                                                     |
| DBP 3T                                            | [*DATA REMOVED*]                                                                                                                                                                     |
| CC 3T                                             | [*DATA REMOVED*]                                                                                                                                                                     |
| AC 3T                                             | [*DATA REMOVED*]                                                                                                                                                                     |
| LF 3T                                             | [*DATA REMOVED*]                                                                                                                                                                     |
| PFE 3T (Hadlock)                                  | [*DATA REMOVED*]                                                                                                                                                                     |
| Semanas de gestación final                        | [*DATA REMOVED*]                                                                                                                                                                     |
| días gestación final                              | [*DATA REMOVED*]                                                                                                                                                                     |
| Localización placenta                             | <input type="radio"/> anterior<br><input type="radio"/> lateral derecha<br><input type="radio"/> lateral izquierda<br><input type="radio"/> posterior<br><input type="radio"/> fondo |
| Presentación longitudinal cefálica                | <input type="radio"/> no<br><input checked="" type="radio"/> si                                                                                                                      |
| Dorso                                             | <input type="radio"/> izquierda anterior<br><input type="radio"/> izquierda posterior<br><input type="radio"/> derecha anterior<br><input type="radio"/> derecha posterior           |
| diámetro biparietal                               | [*DATA REMOVED*]                                                                                                                                                                     |
| Circunferencia craneal                            | [*DATA REMOVED*]                                                                                                                                                                     |
| Circunferencia abdominal                          | [*DATA REMOVED*]                                                                                                                                                                     |
| Longitud de femur                                 | [*DATA REMOVED*]                                                                                                                                                                     |
| tejido celular subcutáneo a nivel del muslo en mm | [*DATA REMOVED*]                                                                                                                                                                     |
| tejido celular subcutáneo en abdomen en mm        | [*DATA REMOVED*]                                                                                                                                                                     |
| Volumen del muslo en cm3                          | [*DATA REMOVED*]                                                                                                                                                                     |
| Peso fetal estimado según fórmula de Hadlock      | [*DATA REMOVED*]                                                                                                                                                                     |

|                                               |                                                                                                                                               |
|-----------------------------------------------|-----------------------------------------------------------------------------------------------------------------------------------------------|
| Percentil                                     | [*DATA REMOVED*]                                                                                                                              |
| Peso fetal estimado según fórmula de Scioscia | <hr/>                                                                                                                                         |
| Peso fetal estimado según fórmula de LEE      | <hr/>                                                                                                                                         |
| Tipo de parto                                 | <input checked="" type="radio"/> eutocico<br><input type="radio"/> instrumentado/ventosa<br><input type="radio"/> cesarea                     |
| fecha de nacimiento                           | [*DATA REMOVED*]                                                                                                                              |
| Días entre exploración y nacimiento           | [*DATA REMOVED*]                                                                                                                              |
| Peso RN en g                                  | [*DATA REMOVED*]                                                                                                                              |
| sexo                                          | <input checked="" type="radio"/> mujer<br><input type="radio"/> hombre                                                                        |
| Apgar 1 minuto                                | [*DATA REMOVED*]                                                                                                                              |
| Apgar 5 minutos                               | [*DATA REMOVED*]                                                                                                                              |
| Apgar 10 minutos                              | <hr/>                                                                                                                                         |
| antecedente Covid durante gestación           | <input type="radio"/> Yes<br><input checked="" type="radio"/> No                                                                              |
| Nivel de estudios                             | <input type="radio"/> ninguno<br><input type="radio"/> primarios<br><input type="radio"/> secundarios<br><input type="radio"/> universitarios |

# Base\_datos\_estimacion\_peso\_fetal

|                                       |                                                                                                                                                                                                                                                                                      |
|---------------------------------------|--------------------------------------------------------------------------------------------------------------------------------------------------------------------------------------------------------------------------------------------------------------------------------------|
| Número de identificación participante | 184                                                                                                                                                                                                                                                                                  |
| CODIGO PARTICIPANTE                   |                                                                                                                                                                                                                                                                                      |
| Edad                                  | [*DATA REMOVED*]                                                                                                                                                                                                                                                                     |
| Gestaciones                           | <input checked="" type="radio"/> 1<br><input type="radio"/> 2<br><input type="radio"/> 3<br><input type="radio"/> mas de 3                                                                                                                                                           |
| partos                                | <input checked="" type="radio"/> 0<br><input type="radio"/> 1<br><input type="radio"/> 2<br><input type="radio"/> 3<br><input type="radio"/> mas de 3                                                                                                                                |
| cesáreas                              | <input checked="" type="radio"/> 0<br><input type="radio"/> 1<br><input type="radio"/> 2<br><input type="radio"/> 3<br><input type="radio"/> mas de 3                                                                                                                                |
| Abortos                               | <input checked="" type="radio"/> 0<br><input type="radio"/> 1<br><input type="radio"/> 2<br><input type="radio"/> 3<br><input type="radio"/> mas de 3                                                                                                                                |
| Tipo de gestacion                     | <input checked="" type="radio"/> espontanea<br><input type="radio"/> IAC inseminación artificial conyuge<br><input type="radio"/> IAD inseminación artificial donante<br><input type="radio"/> FIV Fecundación in Vitro<br><input type="radio"/> Ovodon FIV con donación de ovocitos |
| peso previo a embarazo                | [*DATA REMOVED*]                                                                                                                                                                                                                                                                     |
| Ganancia ponderal embarazo            |                                                                                                                                                                                                                                                                                      |
| Talla madre                           | [*DATA REMOVED*]                                                                                                                                                                                                                                                                     |
| IMC previo embarazo                   | 18.818924310286427                                                                                                                                                                                                                                                                   |
| Patología obstétrica                  | <input checked="" type="radio"/> no<br><input type="radio"/> si                                                                                                                                                                                                                      |
| Diabetes pregestacional               | <input checked="" type="radio"/> no<br><input type="radio"/> si                                                                                                                                                                                                                      |
| Diabetes gestacional                  | <input checked="" type="radio"/> no<br><input type="radio"/> si                                                                                                                                                                                                                      |

|                                            |                                                                                                                                                                                      |
|--------------------------------------------|--------------------------------------------------------------------------------------------------------------------------------------------------------------------------------------|
| Diabetes gestacional con insulina          | <input checked="" type="radio"/> no<br><input type="radio"/> si                                                                                                                      |
| Diabetes gestacional con dieta y ejercicio | <input checked="" type="radio"/> no<br><input type="radio"/> si                                                                                                                      |
| Percentil fetos previos                    | <input checked="" type="radio"/> Nada<br><input type="radio"/> percentil menor de 10<br><input type="radio"/> percentil entre 10 y 90<br><input type="radio"/> percentil mayor de 90 |
| Exfumadora                                 | <input checked="" type="radio"/> Nada<br><input type="radio"/> menos de 5 años<br><input type="radio"/> 5 a 10 años<br><input type="radio"/> mayor o igual a 10 años                 |
| Hábito tabáquico                           | <input checked="" type="radio"/> no<br><input type="radio"/> si                                                                                                                      |
| fumadora                                   | [*DATA REMOVED*]                                                                                                                                                                     |
| Consumo otros tóxicos                      | <input checked="" type="radio"/> no<br><input type="radio"/> si                                                                                                                      |
| Hb 1T                                      | _____                                                                                                                                                                                |
| Htc 1T                                     | _____                                                                                                                                                                                |
| Hb 2T                                      | _____                                                                                                                                                                                |
| HTC 2T                                     | _____                                                                                                                                                                                |
| Hb 3T                                      | _____                                                                                                                                                                                |
| HTC 3T                                     | _____                                                                                                                                                                                |
| Suplemento FE oral                         | <input type="radio"/> si<br><input checked="" type="radio"/> no                                                                                                                      |
| Suplemento fe iv                           | <input type="radio"/> si<br><input checked="" type="radio"/> no                                                                                                                      |
| Transfusión                                | <input checked="" type="radio"/> no<br><input type="radio"/> si                                                                                                                      |
| Solicitada Vit D                           | <input checked="" type="radio"/> no<br><input type="radio"/> si                                                                                                                      |

|                       |                                                                                                                                                                                                                                                                                                                                                                                                              |
|-----------------------|--------------------------------------------------------------------------------------------------------------------------------------------------------------------------------------------------------------------------------------------------------------------------------------------------------------------------------------------------------------------------------------------------------------|
| Deficit vit D         | <input type="radio"/> no<br><input type="radio"/> si                                                                                                                                                                                                                                                                                                                                                         |
| Suplemento vit D      | <input type="radio"/> si<br><input type="radio"/> no                                                                                                                                                                                                                                                                                                                                                         |
| Dieta, cuestionario   | <input checked="" type="radio"/> si<br><input type="radio"/> no                                                                                                                                                                                                                                                                                                                                              |
| Leche entera          | <input checked="" type="radio"/> Nunca o menos 1 vez al mes<br><input type="radio"/> 1 a 3 veces mes<br><input type="radio"/> 1 vez semana<br><input type="radio"/> 2 a 4 veces semana<br><input type="radio"/> 5 a 6 veces semana<br><input type="radio"/> 1 vez al día<br><input type="radio"/> 2 a 3 veces al día<br><input type="radio"/> 5 a 6 veces al día<br><input type="radio"/> más 6 veces al día |
| Leche semidesnatada   | <input type="radio"/> Nunca o menos 1 vez al mes<br><input type="radio"/> 1 a 3 veces mes<br><input type="radio"/> 1 vez semana<br><input type="radio"/> 2 a 4 veces semana<br><input type="radio"/> 5 a 6 veces semana<br><input checked="" type="radio"/> 1 vez al día<br><input type="radio"/> 2 a 3 veces al día<br><input type="radio"/> 5 a 6 veces al día<br><input type="radio"/> mas 6 veces al día |
| Leche desnatada       | <input checked="" type="radio"/> Nunca o menos 1 vez al mes<br><input type="radio"/> 1 a 3 veces mes<br><input type="radio"/> 1 vez semana<br><input type="radio"/> 2 a 4 veces semana<br><input type="radio"/> 5 a 6 veces semana<br><input type="radio"/> 1 vez al día<br><input type="radio"/> 2 a 3 veces al día<br><input type="radio"/> 5 a 6 veces al día<br><input type="radio"/> más 6 veces al día |
| Leche condensada      | <input checked="" type="radio"/> Nunca o menos 1 vez al mes<br><input type="radio"/> 1 a 3 veces mes<br><input type="radio"/> 1 vez semana<br><input type="radio"/> 2 a 4 veces semana<br><input type="radio"/> 5 a 6 veces semana<br><input type="radio"/> 1 vez al día<br><input type="radio"/> 2 a 3 veces al día<br><input type="radio"/> 5 a 6 veces al día<br><input type="radio"/> más 6 veces al día |
| nata o crema de leche | <input checked="" type="radio"/> Nunca o menos 1 vez al mes<br><input type="radio"/> 1 a 3 veces mes<br><input type="radio"/> 1 vez semana<br><input type="radio"/> 2 a 4 veces semana<br><input type="radio"/> 5 a 6 veces semana<br><input type="radio"/> 1 vez al día<br><input type="radio"/> 2 a 3 veces al día<br><input type="radio"/> 5 a 6 veces al día<br><input type="radio"/> más 6 veces al día |

---

Yogurt Entero

- ☐ Nunca o menos 1 vez al mes  
☐ 1 a 3 veces mes  
☐ 1 vez semana  
☒ 2 a 4 veces semana  
☐ 5 a 6 veces semana  
☐ 1 vez al día  
☐ 2 a 3 veces al día  
☐ 5 a 6 veces al día  
☐ más 6 veces al día

---

Yogurt desnatado

- ☐ Nunca o menos 1 vez al mes  
☐ 1 a 3 veces mes  
☒ 1 vez semana  
☐ 2 a 4 veces semana  
☐ 5 a 6 veces semana  
☐ 1 vez al día  
☐ 2 a 3 veces al día  
☐ 5 a 6 veces al día  
☐ más 6 veces al día

---

100g requesón o queso blando o queso fresco

- ☐ Nunca o menos 1 vez al mes  
☐ 1 a 3 veces mes  
☐ 1 vez semana  
☒ 2 a 4 veces semana  
☐ 5 a 6 veces semana  
☐ 1 vez al día  
☐ 2 a 3 veces al día  
☐ 5 a 6 veces al día  
☐ más 6 veces al día

---

queso curado o semicurado o cremoso

- ☐ Nunca o menos 1 vez al mes  
☐ 1 a 3 veces mes  
☐ 1 vez semana  
☒ 2 a 4 veces semana  
☐ 5 a 6 veces semana  
☐ 1 vez al día  
☐ 2 a 3 veces al día  
☐ 5 a 6 veces al día  
☐ más 6 veces al día

---

natillas flan pudding

- ☒ Nunca o menos 1 vez al mes  
☐ 1 a 3 veces mes  
☐ 1 vez semana  
☐ 2 a 4 veces semana  
☐ 5 a 6 veces semana  
☐ 1 vez al día  
☐ 2 a 3 veces al día  
☐ 5 a 6 veces al día  
☐ más 6 veces al día

---

Helado

- ☒ Nunca o menos 1 vez al mes  
☐ 1 a 3 veces mes  
☐ 1 vez semana  
☐ 2 a 4 veces semana  
☐ 5 a 6 veces semana  
☐ 1 vez al día  
☐ 2 a 3 veces al día  
☐ 5 a 6 veces al día  
☐ más 6 veces al día



|                                      |                                                                                                                                                                                                                                                                                                                                                                                                              |
|--------------------------------------|--------------------------------------------------------------------------------------------------------------------------------------------------------------------------------------------------------------------------------------------------------------------------------------------------------------------------------------------------------------------------------------------------------------|
| huevo                                | <input type="radio"/> Nunca o menos 1 vez al mes<br><input type="radio"/> 1 a 3 veces mes<br><input type="radio"/> 1 vez semana<br><input checked="" type="radio"/> 2 a 4 veces semana<br><input type="radio"/> 5 a 6 veces semana<br><input type="radio"/> 1 vez al día<br><input type="radio"/> 2 a 3 veces al día<br><input type="radio"/> 5 a 6 veces al día<br><input type="radio"/> más 6 veces al día |
| Pollo con piel                       | <input checked="" type="radio"/> Nunca o menos 1 vez al mes<br><input type="radio"/> 1 a 3 veces mes<br><input type="radio"/> 1 vez semana<br><input type="radio"/> 2 a 4 veces semana<br><input type="radio"/> 5 a 6 veces semana<br><input type="radio"/> 1 vez al día<br><input type="radio"/> 2 a 3 veces al día<br><input type="radio"/> 5 a 6 veces al día<br><input type="radio"/> más 6 veces al día |
| pollo sin piel                       | <input type="radio"/> Nunca o menos 1 vez al mes<br><input type="radio"/> 1 a 3 veces mes<br><input type="radio"/> 1 vez semana<br><input checked="" type="radio"/> 2 a 4 veces semana<br><input type="radio"/> 5 a 6 veces semana<br><input type="radio"/> 1 vez al día<br><input type="radio"/> 2 a 3 veces al día<br><input type="radio"/> 5 a 6 veces al día<br><input type="radio"/> más 6 veces al día |
| Ternera o cerdo o cordero            | <input type="radio"/> Nunca o menos 1 vez al mes<br><input type="radio"/> 1 a 3 veces mes<br><input checked="" type="radio"/> 1 vez semana<br><input type="radio"/> 2 a 4 veces semana<br><input type="radio"/> 5 a 6 veces semana<br><input type="radio"/> 1 vez al día<br><input type="radio"/> 2 a 3 veces al día<br><input type="radio"/> 5 a 6 veces al día<br><input type="radio"/> más 6 veces al día |
| carne caza: Conejo o codorniz o pato | <input checked="" type="radio"/> Nunca o menos 1 vez al mes<br><input type="radio"/> 1 a 3 veces mes<br><input type="radio"/> 1 vez semana<br><input type="radio"/> 2 a 4 veces semana<br><input type="radio"/> 5 a 6 veces semana<br><input type="radio"/> 1 vez al día<br><input type="radio"/> 2 a 3 veces al día<br><input type="radio"/> 5 a 6 veces al día<br><input type="radio"/> más 6 veces al día |
| Hígado de ternera o cerdo o pollo    | <input checked="" type="radio"/> Nunca o menos 1 vez al mes<br><input type="radio"/> 1 a 3 veces mes<br><input type="radio"/> 1 vez semana<br><input type="radio"/> 2 a 4 veces semana<br><input type="radio"/> 5 a 6 veces semana<br><input type="radio"/> 1 vez al día<br><input type="radio"/> 2 a 3 veces al día<br><input type="radio"/> 5 a 6 veces al día<br><input type="radio"/> más 6 veces al día |

|                     |                                                                                                                                                                                                                                                                                                                                                                                                              |
|---------------------|--------------------------------------------------------------------------------------------------------------------------------------------------------------------------------------------------------------------------------------------------------------------------------------------------------------------------------------------------------------------------------------------------------------|
| Vísceras            | <input checked="" type="radio"/> Nunca o menos 1 vez al mes<br><input type="radio"/> 1 a 3 veces mes<br><input type="radio"/> 1 vez semana<br><input type="radio"/> 2 a 4 veces semana<br><input type="radio"/> 5 a 6 veces semana<br><input type="radio"/> 1 vez al día<br><input type="radio"/> 2 a 3 veces al día<br><input type="radio"/> 5 a 6 veces al día<br><input type="radio"/> más 6 veces al día |
| Embutido            | <input checked="" type="radio"/> Nunca o menos 1 vez al mes<br><input type="radio"/> 1 a 3 veces mes<br><input type="radio"/> 1 vez semana<br><input type="radio"/> 2 a 4 veces semana<br><input type="radio"/> 5 a 6 veces semana<br><input type="radio"/> 1 vez al día<br><input type="radio"/> 2 a 3 veces al día<br><input type="radio"/> 5 a 6 veces al día<br><input type="radio"/> más 6 veces al día |
| Salchicha o similar | <input checked="" type="radio"/> Nunca o menos 1 vez al mes<br><input type="radio"/> 1 a 3 veces mes<br><input type="radio"/> 1 vez semana<br><input type="radio"/> 2 a 4 veces semana<br><input type="radio"/> 5 a 6 veces semana<br><input type="radio"/> 1 vez al día<br><input type="radio"/> 2 a 3 veces al día<br><input type="radio"/> 5 a 6 veces al día<br><input type="radio"/> más 6 veces al día |
| Pate o foiegras     | <input checked="" type="radio"/> Nunca o menos 1 vez al mes<br><input type="radio"/> 1 a 3 veces mes<br><input type="radio"/> 1 vez semana<br><input type="radio"/> 2 a 4 veces semana<br><input type="radio"/> 5 a 6 veces semana<br><input type="radio"/> 1 vez al día<br><input type="radio"/> 2 a 3 veces al día<br><input type="radio"/> 5 a 6 veces al día<br><input type="radio"/> más 6 veces al día |
| Hamburguesa         | <input checked="" type="radio"/> Nunca o menos 1 vez al mes<br><input type="radio"/> 1 a 3 veces mes<br><input type="radio"/> 1 vez semana<br><input type="radio"/> 2 a 4 veces semana<br><input type="radio"/> 5 a 6 veces semana<br><input type="radio"/> 1 vez al día<br><input type="radio"/> 2 a 3 veces al día<br><input type="radio"/> 5 a 6 veces al día<br><input type="radio"/> más 6 veces al día |
| tocino o bacon      | <input checked="" type="radio"/> Nunca o menos 1 vez al mes<br><input type="radio"/> 1 a 3 veces mes<br><input type="radio"/> 1 vez semana<br><input type="radio"/> 2 a 4 veces semana<br><input type="radio"/> 5 a 6 veces semana<br><input type="radio"/> 1 vez al día<br><input type="radio"/> 2 a 3 veces al día<br><input type="radio"/> 5 a 6 veces al día<br><input type="radio"/> más 6 veces al día |

---

Pescado frito

- ☐ Nunca o menos 1 vez al mes  
☒ 1 a 3 veces mes  
☐ 1 vez semana  
☐ 2 a 4 veces semana  
☐ 5 a 6 veces semana  
☐ 1 vez al día  
☐ 2 a 3 veces al día  
☐ 5 a 6 veces al día  
☐ más 6 veces al día

---

pescado hervido blanco

- ☐ Nunca o menos 1 vez al mes  
☐ 1 a 3 veces mes  
☒ 1 vez semana  
☐ 2 a 4 veces semana  
☐ 5 a 6 veces semana  
☐ 1 vez al día  
☐ 2 a 3 veces al día  
☐ 5 a 6 veces al día  
☐ más 6 veces al día

---

pescado hervido azul

- ☐ Nunca o menos 1 vez al mes  
☐ 1 a 3 veces mes  
☒ 1 vez semana  
☐ 2 a 4 veces semana  
☐ 5 a 6 veces semana  
☐ 1 vez al día  
☐ 2 a 3 veces al día  
☐ 5 a 6 veces al día  
☐ más 6 veces al día

---

otros pescado azul

- ☐ Nunca o menos 1 vez al mes  
☒ 1 a 3 veces mes  
☐ 1 vez semana  
☐ 2 a 4 veces semana  
☐ 5 a 6 veces semana  
☐ 1 vez al día  
☐ 2 a 3 veces al día  
☐ 5 a 6 veces al día  
☐ más 6 veces al día

---

atun conserva

- ☐ Nunca o menos 1 vez al mes  
☐ 1 a 3 veces mes  
☒ 1 vez semana  
☐ 2 a 4 veces semana  
☐ 5 a 6 veces semana  
☐ 1 vez al día  
☐ 2 a 3 veces al día  
☐ 5 a 6 veces al día  
☐ más 6 veces al día

---

sardina conserva

- ☒ Nunca o menos 1 vez al mes  
☐ 1 a 3 veces mes  
☐ 1 vez semana  
☐ 2 a 4 veces semana  
☐ 5 a 6 veces semana  
☐ 1 vez al día  
☐ 2 a 3 veces al día  
☐ 5 a 6 veces al día  
☐ más 6 veces al día

|                                         |                                                                                                                                                                                                                                                                                                                                                                                                              |
|-----------------------------------------|--------------------------------------------------------------------------------------------------------------------------------------------------------------------------------------------------------------------------------------------------------------------------------------------------------------------------------------------------------------------------------------------------------------|
| pescado ahumado                         | <input checked="" type="radio"/> Nunca o menos 1 vez al mes<br><input type="radio"/> 1 a 3 veces mes<br><input type="radio"/> 1 vez semana<br><input type="radio"/> 2 a 4 veces semana<br><input type="radio"/> 5 a 6 veces semana<br><input type="radio"/> 1 vez al día<br><input type="radio"/> 2 a 3 veces al día<br><input type="radio"/> 5 a 6 veces al día<br><input type="radio"/> más 6 veces al día |
| almejas o mejillones o ostras unos 100g | <input type="radio"/> Nunca o menos 1 vez al mes<br><input checked="" type="radio"/> 1 a 3 veces mes<br><input type="radio"/> 1 vez semana<br><input type="radio"/> 2 a 4 veces semana<br><input type="radio"/> 5 a 6 veces semana<br><input type="radio"/> 1 vez al día<br><input type="radio"/> 2 a 3 veces al día<br><input type="radio"/> 5 a 6 veces al día<br><input type="radio"/> más 6 veces al día |
| calamar o chipiron o sepia unos 100g    | <input checked="" type="radio"/> Nunca o menos 1 vez al mes<br><input type="radio"/> 1 a 3 veces mes<br><input type="radio"/> 1 vez semana<br><input type="radio"/> 2 a 4 veces semana<br><input type="radio"/> 5 a 6 veces semana<br><input type="radio"/> 1 vez al día<br><input type="radio"/> 2 a 3 veces al día<br><input type="radio"/> 5 a 6 veces al día<br><input type="radio"/> más 6 veces al día |
| marisco unos 100g                       | <input checked="" type="radio"/> Nunca o menos 1 vez al mes<br><input type="radio"/> 1 a 3 veces mes<br><input type="radio"/> 1 vez semana<br><input type="radio"/> 2 a 4 veces semana<br><input type="radio"/> 5 a 6 veces semana<br><input type="radio"/> 1 vez al día<br><input type="radio"/> 2 a 3 veces al día<br><input type="radio"/> 5 a 6 veces al día<br><input type="radio"/> más 6 veces al día |
| Espinacas o acelgas cocinadas           | <input checked="" type="radio"/> Nunca o menos 1 vez al mes<br><input type="radio"/> 1 a 3 veces mes<br><input type="radio"/> 1 vez semana<br><input type="radio"/> 2 a 4 veces semana<br><input type="radio"/> 5 a 6 veces semana<br><input type="radio"/> 1 vez al día<br><input type="radio"/> 2 a 3 veces al día<br><input type="radio"/> 5 a 6 veces al día<br><input type="radio"/> más 6 veces al día |
| Col o coliflor o brocoli cocinado       | <input type="radio"/> Nunca o menos 1 vez al mes<br><input checked="" type="radio"/> 1 a 3 veces mes<br><input type="radio"/> 1 vez semana<br><input type="radio"/> 2 a 4 veces semana<br><input type="radio"/> 5 a 6 veces semana<br><input type="radio"/> 1 vez al día<br><input type="radio"/> 2 a 3 veces al día<br><input type="radio"/> 5 a 6 veces al día<br><input type="radio"/> más 6 veces al día |

---

Lechuga o endivia o escarola

- ☐ Nunca o menos 1 vez al mes  
☐ 1 a 3 veces mes  
☐ 1 vez semana  
☐ 2 a 4 veces semana  
☐ 5 a 6 veces semana  
☒ 1 vez al día  
☐ 2 a 3 veces al día  
☐ 5 a 6 veces al día  
☐ más 6 veces al día

---

tomate ensalada

- ☐ Nunca o menos 1 vez al mes  
☐ 1 a 3 veces mes  
☐ 1 vez semana  
☐ 2 a 4 veces semana  
☐ 5 a 6 veces semana  
☒ 1 vez al día  
☐ 2 a 3 veces al día  
☐ 5 a 6 veces al día  
☐ más 6 veces al día

---

cebolla

- ☐ Nunca o menos 1 vez al mes  
☐ 1 a 3 veces mes  
☐ 1 vez semana  
☒ 2 a 4 veces semana  
☐ 5 a 6 veces semana  
☐ 1 vez al día  
☐ 2 a 3 veces al día  
☐ 5 a 6 veces al día  
☐ más 6 veces al día

---

Zanahoria o calabaza

- ☐ Nunca o menos 1 vez al mes  
☒ 1 a 3 veces mes  
☐ 1 vez semana  
☐ 2 a 4 veces semana  
☐ 5 a 6 veces semana  
☐ 1 vez al día  
☐ 2 a 3 veces al día  
☐ 5 a 6 veces al día  
☐ más 6 veces al día

---

Judías verdes

- ☒ Nunca o menos 1 vez al mes  
☐ 1 a 3 veces mes  
☐ 1 vez semana  
☐ 2 a 4 veces semana  
☐ 5 a 6 veces semana  
☐ 1 vez al día  
☐ 2 a 3 veces al día  
☐ 5 a 6 veces al día  
☐ más 6 veces al día

---

Berenjena o calabacin o pepino

- ☐ Nunca o menos 1 vez al mes  
☐ 1 a 3 veces mes  
☒ 1 vez semana  
☐ 2 a 4 veces semana  
☐ 5 a 6 veces semana  
☐ 1 vez al día  
☐ 2 a 3 veces al día  
☐ 5 a 6 veces al día  
☐ más 6 veces al día

|                       |                                                                                                                                                                                                                                                                                                                                                                                                              |
|-----------------------|--------------------------------------------------------------------------------------------------------------------------------------------------------------------------------------------------------------------------------------------------------------------------------------------------------------------------------------------------------------------------------------------------------------|
| pimiento              | <input type="radio"/> Nunca o menos 1 vez al mes<br><input checked="" type="radio"/> 1 a 3 veces mes<br><input type="radio"/> 1 vez semana<br><input type="radio"/> 2 a 4 veces semana<br><input type="radio"/> 5 a 6 veces semana<br><input type="radio"/> 1 vez al día<br><input type="radio"/> 2 a 3 veces al día<br><input type="radio"/> 5 a 6 veces al día<br><input type="radio"/> más 6 veces al día |
| alcachofa             | <input type="radio"/> Nunca o menos 1 vez al mes<br><input checked="" type="radio"/> 1 a 3 veces mes<br><input type="radio"/> 1 vez semana<br><input type="radio"/> 2 a 4 veces semana<br><input type="radio"/> 5 a 6 veces semana<br><input type="radio"/> 1 vez al día<br><input type="radio"/> 2 a 3 veces al día<br><input type="radio"/> 5 a 6 veces al día<br><input type="radio"/> más 6 veces al día |
| espárragos            | <input checked="" type="radio"/> Nunca o menos 1 vez al mes<br><input type="radio"/> 1 a 3 veces mes<br><input type="radio"/> 1 vez semana<br><input type="radio"/> 2 a 4 veces semana<br><input type="radio"/> 5 a 6 veces semana<br><input type="radio"/> 1 vez al día<br><input type="radio"/> 2 a 3 veces al día<br><input type="radio"/> 5 a 6 veces al día<br><input type="radio"/> más 6 veces al día |
| maíz hervido          | <input type="radio"/> Nunca o menos 1 vez al mes<br><input type="radio"/> 1 a 3 veces mes<br><input checked="" type="radio"/> 1 vez semana<br><input type="radio"/> 2 a 4 veces semana<br><input type="radio"/> 5 a 6 veces semana<br><input type="radio"/> 1 vez al día<br><input type="radio"/> 2 a 3 veces al día<br><input type="radio"/> 5 a 6 veces al día<br><input type="radio"/> más 6 veces al día |
| legumbres             | <input type="radio"/> Nunca o menos 1 vez al mes<br><input type="radio"/> 1 a 3 veces mes<br><input checked="" type="radio"/> 1 vez semana<br><input type="radio"/> 2 a 4 veces semana<br><input type="radio"/> 5 a 6 veces semana<br><input type="radio"/> 1 vez al día<br><input type="radio"/> 2 a 3 veces al día<br><input type="radio"/> 5 a 6 veces al día<br><input type="radio"/> más 6 veces al día |
| naranjas o mandarinas | <input type="radio"/> Nunca o menos 1 vez al mes<br><input type="radio"/> 1 a 3 veces mes<br><input type="radio"/> 1 vez semana<br><input checked="" type="radio"/> 2 a 4 veces semana<br><input type="radio"/> 5 a 6 veces semana<br><input type="radio"/> 1 vez al día<br><input type="radio"/> 2 a 3 veces al día<br><input type="radio"/> 5 a 6 veces al día<br><input type="radio"/> más 6 veces al día |

|                       |                                                                                                                                                                                                                                                                                                                                                                                                              |
|-----------------------|--------------------------------------------------------------------------------------------------------------------------------------------------------------------------------------------------------------------------------------------------------------------------------------------------------------------------------------------------------------------------------------------------------------|
| zum natural fruta     | <input type="radio"/> Nunca o menos 1 vez al mes<br><input type="radio"/> 1 a 3 veces mes<br><input type="radio"/> 1 vez semana<br><input checked="" type="radio"/> 2 a 4 veces semana<br><input type="radio"/> 5 a 6 veces semana<br><input type="radio"/> 1 vez al día<br><input type="radio"/> 2 a 3 veces al día<br><input type="radio"/> 5 a 6 veces al día<br><input type="radio"/> más 6 veces al día |
| platano               | <input type="radio"/> Nunca o menos 1 vez al mes<br><input type="radio"/> 1 a 3 veces mes<br><input type="radio"/> 1 vez semana<br><input checked="" type="radio"/> 2 a 4 veces semana<br><input type="radio"/> 5 a 6 veces semana<br><input type="radio"/> 1 vez al día<br><input type="radio"/> 2 a 3 veces al día<br><input type="radio"/> 5 a 6 veces al día<br><input type="radio"/> más 6 veces al día |
| manzana o pera        | <input type="radio"/> Nunca o menos 1 vez al mes<br><input type="radio"/> 1 a 3 veces mes<br><input type="radio"/> 1 vez semana<br><input checked="" type="radio"/> 2 a 4 veces semana<br><input type="radio"/> 5 a 6 veces semana<br><input type="radio"/> 1 vez al día<br><input type="radio"/> 2 a 3 veces al día<br><input type="radio"/> 5 a 6 veces al día<br><input type="radio"/> más 6 veces al día |
| melocotón o nectarina | <input checked="" type="radio"/> Nunca o menos 1 vez al mes<br><input type="radio"/> 1 a 3 veces mes<br><input type="radio"/> 1 vez semana<br><input type="radio"/> 2 a 4 veces semana<br><input type="radio"/> 5 a 6 veces semana<br><input type="radio"/> 1 vez al día<br><input type="radio"/> 2 a 3 veces al día<br><input type="radio"/> 5 a 6 veces al día<br><input type="radio"/> más 6 veces al día |
| sandia o melon        | <input checked="" type="radio"/> Nunca o menos 1 vez al mes<br><input type="radio"/> 1 a 3 veces mes<br><input type="radio"/> 1 vez semana<br><input type="radio"/> 2 a 4 veces semana<br><input type="radio"/> 5 a 6 veces semana<br><input type="radio"/> 1 vez al día<br><input type="radio"/> 2 a 3 veces al día<br><input type="radio"/> 5 a 6 veces al día<br><input type="radio"/> más 6 veces al día |
| uva                   | <input checked="" type="radio"/> Nunca o menos 1 vez al mes<br><input type="radio"/> 1 a 3 veces mes<br><input type="radio"/> 1 vez semana<br><input type="radio"/> 2 a 4 veces semana<br><input type="radio"/> 5 a 6 veces semana<br><input type="radio"/> 1 vez al día<br><input type="radio"/> 2 a 3 veces al día<br><input type="radio"/> 5 a 6 veces al día<br><input type="radio"/> más 6 veces al día |

|                 |                                                                                                                                                                                                                                                                                                                                                                                                              |
|-----------------|--------------------------------------------------------------------------------------------------------------------------------------------------------------------------------------------------------------------------------------------------------------------------------------------------------------------------------------------------------------------------------------------------------------|
| bruna o ciruela | <input checked="" type="radio"/> Nunca o menos 1 vez al mes<br><input type="radio"/> 1 a 3 veces mes<br><input type="radio"/> 1 vez semana<br><input type="radio"/> 2 a 4 veces semana<br><input type="radio"/> 5 a 6 veces semana<br><input type="radio"/> 1 vez al día<br><input type="radio"/> 2 a 3 veces al día<br><input type="radio"/> 5 a 6 veces al día<br><input type="radio"/> más 6 veces al día |
| kiwi            | <input type="radio"/> Nunca o menos 1 vez al mes<br><input type="radio"/> 1 a 3 veces mes<br><input type="radio"/> 1 vez semana<br><input checked="" type="radio"/> 2 a 4 veces semana<br><input type="radio"/> 5 a 6 veces semana<br><input type="radio"/> 1 vez al día<br><input type="radio"/> 2 a 3 veces al día<br><input type="radio"/> 5 a 6 veces al día<br><input type="radio"/> más 6 veces al día |
| aceituna        | <input checked="" type="radio"/> Nunca o menos 1 vez al mes<br><input type="radio"/> 1 a 3 veces mes<br><input type="radio"/> 1 vez semana<br><input type="radio"/> 2 a 4 veces semana<br><input type="radio"/> 5 a 6 veces semana<br><input type="radio"/> 1 vez al día<br><input type="radio"/> 2 a 3 veces al día<br><input type="radio"/> 5 a 6 veces al día<br><input type="radio"/> más 6 veces al día |
| frutos secos    | <input type="radio"/> Nunca o menos 1 vez al mes<br><input type="radio"/> 1 a 3 veces mes<br><input type="radio"/> 1 vez semana<br><input checked="" type="radio"/> 2 a 4 veces semana<br><input type="radio"/> 5 a 6 veces semana<br><input type="radio"/> 1 vez al día<br><input type="radio"/> 2 a 3 veces al día<br><input type="radio"/> 5 a 6 veces al día<br><input type="radio"/> más 6 veces al día |
| pan blanco      | <input checked="" type="radio"/> Nunca o menos 1 vez al mes<br><input type="radio"/> 1 a 3 veces mes<br><input type="radio"/> 1 vez semana<br><input type="radio"/> 2 a 4 veces semana<br><input type="radio"/> 5 a 6 veces semana<br><input type="radio"/> 1 vez al día<br><input type="radio"/> 2 a 3 veces al día<br><input type="radio"/> 5 a 6 veces al día<br><input type="radio"/> más 6 veces al día |
| pan integral    | <input type="radio"/> Nunca o menos 1 vez al mes<br><input type="radio"/> 1 a 3 veces mes<br><input type="radio"/> 1 vez semana<br><input type="radio"/> 2 a 4 veces semana<br><input type="radio"/> 5 a 6 veces semana<br><input checked="" type="radio"/> 1 vez al día<br><input type="radio"/> 2 a 3 veces al día<br><input type="radio"/> 5 a 6 veces al día<br><input type="radio"/> más 6 veces al día |



---

cereales desayuno

- ☐ Nunca o menos 1 vez al mes  
☐ 1 a 3 veces mes  
☐ 1 vez semana  
☒ 2 a 4 veces semana  
☐ 5 a 6 veces semana  
☐ 1 vez al día  
☐ 2 a 3 veces al día  
☐ 5 a 6 veces al día  
☐ más 6 veces al día

---

patatas fritas

- ☒ Nunca o menos 1 vez al mes  
☐ 1 a 3 veces mes  
☐ 1 vez semana  
☐ 2 a 4 veces semana  
☐ 5 a 6 veces semana  
☐ 1 vez al día  
☐ 2 a 3 veces al día  
☐ 5 a 6 veces al día  
☐ más 6 veces al día

---

patatas cocidas o asadas

- ☐ Nunca o menos 1 vez al mes  
☒ 1 a 3 veces mes  
☐ 1 vez semana  
☐ 2 a 4 veces semana  
☐ 5 a 6 veces semana  
☐ 1 vez al día  
☐ 2 a 3 veces al día  
☐ 5 a 6 veces al día  
☐ más 6 veces al día

---

bolsa papas

- ☐ Nunca o menos 1 vez al mes  
☐ 1 a 3 veces mes  
☐ 1 vez semana  
☒ 2 a 4 veces semana  
☐ 5 a 6 veces semana  
☐ 1 vez al día  
☐ 2 a 3 veces al día  
☐ 5 a 6 veces al día  
☐ más 6 veces al día

---

arroz cocinado

- ☐ Nunca o menos 1 vez al mes  
☐ 1 a 3 veces mes  
☐ 1 vez semana  
☒ 2 a 4 veces semana  
☐ 5 a 6 veces semana  
☐ 1 vez al día  
☐ 2 a 3 veces al día  
☐ 5 a 6 veces al día  
☐ más 6 veces al día

---

pasta

- ☐ Nunca o menos 1 vez al mes  
☐ 1 a 3 veces mes  
☐ 1 vez semana  
☒ 2 a 4 veces semana  
☐ 5 a 6 veces semana  
☐ 1 vez al día  
☐ 2 a 3 veces al día  
☐ 5 a 6 veces al día  
☐ más 6 veces al día

|                     |                                                                                                                                                                                                                                                                                                                                                                                                              |
|---------------------|--------------------------------------------------------------------------------------------------------------------------------------------------------------------------------------------------------------------------------------------------------------------------------------------------------------------------------------------------------------------------------------------------------------|
| pizza               | <input type="radio"/> Nunca o menos 1 vez al mes<br><input type="radio"/> 1 a 3 veces mes<br><input checked="" type="radio"/> 1 vez semana<br><input type="radio"/> 2 a 4 veces semana<br><input type="radio"/> 5 a 6 veces semana<br><input type="radio"/> 1 vez al día<br><input type="radio"/> 2 a 3 veces al día<br><input type="radio"/> 5 a 6 veces al día<br><input type="radio"/> más 6 veces al día |
| aceite oliva        | <input type="radio"/> Nunca o menos 1 vez al mes<br><input type="radio"/> 1 a 3 veces mes<br><input type="radio"/> 1 vez semana<br><input type="radio"/> 2 a 4 veces semana<br><input type="radio"/> 5 a 6 veces semana<br><input type="radio"/> 1 vez al día<br><input checked="" type="radio"/> 2 a 3 veces al día<br><input type="radio"/> 5 a 6 veces al día<br><input type="radio"/> más 6 veces al día |
| otros aceites       | <input checked="" type="radio"/> Nunca o menos 1 vez al mes<br><input type="radio"/> 1 a 3 veces mes<br><input type="radio"/> 1 vez semana<br><input type="radio"/> 2 a 4 veces semana<br><input type="radio"/> 5 a 6 veces semana<br><input type="radio"/> 1 vez al día<br><input type="radio"/> 2 a 3 veces al día<br><input type="radio"/> 5 a 6 veces al día<br><input type="radio"/> más 6 veces al día |
| margarina           | <input checked="" type="radio"/> Nunca o menos 1 vez al mes<br><input type="radio"/> 1 a 3 veces mes<br><input type="radio"/> 1 vez semana<br><input type="radio"/> 2 a 4 veces semana<br><input type="radio"/> 5 a 6 veces semana<br><input type="radio"/> 1 vez al día<br><input type="radio"/> 2 a 3 veces al día<br><input type="radio"/> 5 a 6 veces al día<br><input type="radio"/> más 6 veces al día |
| mantequilla         | <input checked="" type="radio"/> Nunca o menos 1 vez al mes<br><input type="radio"/> 1 a 3 veces mes<br><input type="radio"/> 1 vez semana<br><input type="radio"/> 2 a 4 veces semana<br><input type="radio"/> 5 a 6 veces semana<br><input type="radio"/> 1 vez al día<br><input type="radio"/> 2 a 3 veces al día<br><input type="radio"/> 5 a 6 veces al día<br><input type="radio"/> más 6 veces al día |
| galletas tipo maria | <input checked="" type="radio"/> Nunca o menos 1 vez al mes<br><input type="radio"/> 1 a 3 veces mes<br><input type="radio"/> 1 vez semana<br><input type="radio"/> 2 a 4 veces semana<br><input type="radio"/> 5 a 6 veces semana<br><input type="radio"/> 1 vez al día<br><input type="radio"/> 2 a 3 veces al día<br><input type="radio"/> 5 a 6 veces al día<br><input type="radio"/> más 6 veces al día |

---

galletas chocolate

- ☐ Nunca o menos 1 vez al mes  
☒ 1 a 3 veces mes  
☐ 1 vez semana  
☐ 2 a 4 veces semana  
☐ 5 a 6 veces semana  
☐ 1 vez al día  
☐ 2 a 3 veces al día  
☐ 5 a 6 veces al día  
☐ más 6 veces al día

---

bolleria

- ☐ Nunca o menos 1 vez al mes  
☐ 1 a 3 veces mes  
☒ 1 vez semana  
☐ 2 a 4 veces semana  
☐ 5 a 6 veces semana  
☐ 1 vez al día  
☐ 2 a 3 veces al día  
☐ 5 a 6 veces al día  
☐ más 6 veces al día

---

chocolate o bombones

- ☐ Nunca o menos 1 vez al mes  
☐ 1 a 3 veces mes  
☐ 1 vez semana  
☐ 2 a 4 veces semana  
☐ 5 a 6 veces semana  
☒ 1 vez al día  
☐ 2 a 3 veces al día  
☐ 5 a 6 veces al día  
☐ más 6 veces al día

---

chocolate polvo o colacao

- ☒ Nunca o menos 1 vez al mes  
☐ 1 a 3 veces mes  
☐ 1 vez semana  
☐ 2 a 4 veces semana  
☐ 5 a 6 veces semana  
☐ 1 vez al día  
☐ 2 a 3 veces al día  
☐ 5 a 6 veces al día  
☐ más 6 veces al día

---

vino tinto

- ☒ Nunca o menos 1 vez al mes  
☐ 1 a 3 veces mes  
☐ 1 vez semana  
☐ 2 a 4 veces semana  
☐ 5 a 6 veces semana  
☐ 1 vez al día  
☐ 2 a 3 veces al día  
☐ 5 a 6 veces al día  
☐ más 6 veces al día

---

vino blanco

- ☒ Nunca o menos 1 vez al mes  
☐ 1 a 3 veces mes  
☐ 1 vez semana  
☐ 2 a 4 veces semana  
☐ 5 a 6 veces semana  
☐ 1 vez al día  
☐ 2 a 3 veces al día  
☐ 5 a 6 veces al día  
☐ más 6 veces al día

---

|                    |                                                                                                                                                                                                                                                                                                                                                                                                              |
|--------------------|--------------------------------------------------------------------------------------------------------------------------------------------------------------------------------------------------------------------------------------------------------------------------------------------------------------------------------------------------------------------------------------------------------------|
| vino seco o vermut | <input checked="" type="radio"/> Nunca o menos 1 vez al mes<br><input type="radio"/> 1 a 3 veces mes<br><input type="radio"/> 1 vez semana<br><input type="radio"/> 2 a 4 veces semana<br><input type="radio"/> 5 a 6 veces semana<br><input type="radio"/> 1 vez al día<br><input type="radio"/> 2 a 3 veces al día<br><input type="radio"/> 5 a 6 veces al día<br><input type="radio"/> más 6 veces al día |
|--------------------|--------------------------------------------------------------------------------------------------------------------------------------------------------------------------------------------------------------------------------------------------------------------------------------------------------------------------------------------------------------------------------------------------------------|

---

|         |                                                                                                                                                                                                                                                                                                                                                                                                              |
|---------|--------------------------------------------------------------------------------------------------------------------------------------------------------------------------------------------------------------------------------------------------------------------------------------------------------------------------------------------------------------------------------------------------------------|
| cerveza | <input checked="" type="radio"/> Nunca o menos 1 vez al mes<br><input type="radio"/> 1 a 3 veces mes<br><input type="radio"/> 1 vez semana<br><input type="radio"/> 2 a 4 veces semana<br><input type="radio"/> 5 a 6 veces semana<br><input type="radio"/> 1 vez al día<br><input type="radio"/> 2 a 3 veces al día<br><input type="radio"/> 5 a 6 veces al día<br><input type="radio"/> más 6 veces al día |
|---------|--------------------------------------------------------------------------------------------------------------------------------------------------------------------------------------------------------------------------------------------------------------------------------------------------------------------------------------------------------------------------------------------------------------|

---

|                     |                                                                                                                                                                                                                                                                                                                                                                                                              |
|---------------------|--------------------------------------------------------------------------------------------------------------------------------------------------------------------------------------------------------------------------------------------------------------------------------------------------------------------------------------------------------------------------------------------------------------|
| cerveza sin alcohol | <input checked="" type="radio"/> Nunca o menos 1 vez al mes<br><input type="radio"/> 1 a 3 veces mes<br><input type="radio"/> 1 vez semana<br><input type="radio"/> 2 a 4 veces semana<br><input type="radio"/> 5 a 6 veces semana<br><input type="radio"/> 1 vez al día<br><input type="radio"/> 2 a 3 veces al día<br><input type="radio"/> 5 a 6 veces al día<br><input type="radio"/> más 6 veces al día |
|---------------------|--------------------------------------------------------------------------------------------------------------------------------------------------------------------------------------------------------------------------------------------------------------------------------------------------------------------------------------------------------------------------------------------------------------|

---

|         |                                                                                                                                                                                                                                                                                                                                                                                                              |
|---------|--------------------------------------------------------------------------------------------------------------------------------------------------------------------------------------------------------------------------------------------------------------------------------------------------------------------------------------------------------------------------------------------------------------|
| licores | <input checked="" type="radio"/> Nunca o menos 1 vez al mes<br><input type="radio"/> 1 a 3 veces mes<br><input type="radio"/> 1 vez semana<br><input type="radio"/> 2 a 4 veces semana<br><input type="radio"/> 5 a 6 veces semana<br><input type="radio"/> 1 vez al día<br><input type="radio"/> 2 a 3 veces al día<br><input type="radio"/> 5 a 6 veces al día<br><input type="radio"/> más 6 veces al día |
|---------|--------------------------------------------------------------------------------------------------------------------------------------------------------------------------------------------------------------------------------------------------------------------------------------------------------------------------------------------------------------------------------------------------------------|

---

|                       |                                                                                                                                                                                                                                                                                                                                                                                                              |
|-----------------------|--------------------------------------------------------------------------------------------------------------------------------------------------------------------------------------------------------------------------------------------------------------------------------------------------------------------------------------------------------------------------------------------------------------|
| ginebra o ron o vodka | <input checked="" type="radio"/> Nunca o menos 1 vez al mes<br><input type="radio"/> 1 a 3 veces mes<br><input type="radio"/> 1 vez semana<br><input type="radio"/> 2 a 4 veces semana<br><input type="radio"/> 5 a 6 veces semana<br><input type="radio"/> 1 vez al día<br><input type="radio"/> 2 a 3 veces al día<br><input type="radio"/> 5 a 6 veces al día<br><input type="radio"/> más 6 veces al día |
|-----------------------|--------------------------------------------------------------------------------------------------------------------------------------------------------------------------------------------------------------------------------------------------------------------------------------------------------------------------------------------------------------------------------------------------------------|

---

|                 |                                                                                                                                                                                                                                                                                                                                                                                                              |
|-----------------|--------------------------------------------------------------------------------------------------------------------------------------------------------------------------------------------------------------------------------------------------------------------------------------------------------------------------------------------------------------------------------------------------------------|
| refresco normal | <input checked="" type="radio"/> Nunca o menos 1 vez al mes<br><input type="radio"/> 1 a 3 veces mes<br><input type="radio"/> 1 vez semana<br><input type="radio"/> 2 a 4 veces semana<br><input type="radio"/> 5 a 6 veces semana<br><input type="radio"/> 1 vez al día<br><input type="radio"/> 2 a 3 veces al día<br><input type="radio"/> 5 a 6 veces al día<br><input type="radio"/> más 6 veces al día |
|-----------------|--------------------------------------------------------------------------------------------------------------------------------------------------------------------------------------------------------------------------------------------------------------------------------------------------------------------------------------------------------------------------------------------------------------|

---

---

refresco sin azúcar

- ☒ Nunca o menos 1 vez al mes  
☐ 1 a 3 veces mes  
☐ 1 vez semana  
☐ 2 a 4 veces semana  
☐ 5 a 6 veces semana  
☐ 1 vez al día  
☐ 2 a 3 veces al día  
☐ 5 a 6 veces al día  
☐ más 6 veces al día

---

Agua del grifo

- ☒ Nunca o menos 1 vez al mes  
☐ 1 a 3 veces mes  
☐ 1 vez semana  
☐ 2 a 4 veces semana  
☐ 5 a 6 veces semana  
☐ 1 vez al día  
☐ 2 a 3 veces al día  
☐ 5 a 6 veces al día  
☐ más 6 veces al día

---

agua embotellada sin gas

- ☐ Nunca o menos 1 vez al mes  
☐ 1 a 3 veces mes  
☐ 1 vez semana  
☐ 2 a 4 veces semana  
☐ 5 a 6 veces semana  
☐ 1 vez al día  
☐ 2 a 3 veces al día  
☒ 5 a 6 veces al día  
☐ más 6 veces al día

---

agua embotellada con gas

- ☒ Nunca o menos 1 vez al mes  
☐ 1 a 3 veces mes  
☐ 1 vez semana  
☐ 2 a 4 veces semana  
☐ 5 a 6 veces semana  
☐ 1 vez al día  
☐ 2 a 3 veces al día  
☐ 5 a 6 veces al día  
☐ más 6 veces al día

---

zumو frutas embasado

- ☒ Nunca o menos 1 vez al mes  
☐ 1 a 3 veces mes  
☐ 1 vez semana  
☐ 2 a 4 veces semana  
☐ 5 a 6 veces semana  
☐ 1 vez al día  
☐ 2 a 3 veces al día  
☐ 5 a 6 veces al día  
☐ más 6 veces al día

---

cafe

- ☒ Nunca o menos 1 vez al mes  
☐ 1 a 3 veces mes  
☐ 1 vez semana  
☐ 2 a 4 veces semana  
☐ 5 a 6 veces semana  
☐ 1 vez al día  
☐ 2 a 3 veces al día  
☐ 5 a 6 veces al día  
☐ más 6 veces al día

---

cafe descafeinado

- ☒ Nunca o menos 1 vez al mes  
☐ 1 a 3 veces mes  
☐ 1 vez semana  
☐ 2 a 4 veces semana  
☐ 5 a 6 veces semana  
☐ 1 vez al día  
☐ 2 a 3 veces al día  
☐ 5 a 6 veces al día  
☐ más 6 veces al día

---

te o infusión

- ☐ Nunca o menos 1 vez al mes  
☐ 1 a 3 veces mes  
☐ 1 vez semana  
☐ 2 a 4 veces semana  
☐ 5 a 6 veces semana  
☐ 1 vez al día  
☒ 2 a 3 veces al día  
☐ 5 a 6 veces al día  
☐ más 6 veces al día

---

sopa o puré verduras

- ☒ Nunca o menos 1 vez al mes  
☐ 1 a 3 veces mes  
☐ 1 vez semana  
☐ 2 a 4 veces semana  
☐ 5 a 6 veces semana  
☐ 1 vez al día  
☐ 2 a 3 veces al día  
☐ 5 a 6 veces al día  
☐ más 6 veces al día

---

croquetas pollo jamón

- ☒ Nunca o menos 1 vez al mes  
☐ 1 a 3 veces mes  
☐ 1 vez semana  
☐ 2 a 4 veces semana  
☐ 5 a 6 veces semana  
☐ 1 vez al día  
☐ 2 a 3 veces al día  
☐ 5 a 6 veces al día  
☐ más 6 veces al día

---

croquetas pescado

- ☒ Nunca o menos 1 vez al mes  
☐ 1 a 3 veces mes  
☐ 1 vez semana  
☐ 2 a 4 veces semana  
☐ 5 a 6 veces semana  
☐ 1 vez al día  
☐ 2 a 3 veces al día  
☐ 5 a 6 veces al día  
☐ más 6 veces al día

---

mayonesa

- ☒ Nunca o menos 1 vez al mes  
☐ 1 a 3 veces mes  
☐ 1 vez semana  
☐ 2 a 4 veces semana  
☐ 5 a 6 veces semana  
☐ 1 vez al día  
☐ 2 a 3 veces al día  
☐ 5 a 6 veces al día  
☐ más 6 veces al día

---

salsa tomate

- ☐ Nunca o menos 1 vez al mes  
☐ 1 a 3 veces mes  
☐ 1 vez semana  
☒ 2 a 4 veces semana  
☐ 5 a 6 veces semana  
☐ 1 vez al día  
☐ 2 a 3 veces al día  
☐ 5 a 6 veces al día  
☐ más 6 veces al día

---

ketchup

- ☐ Nunca o menos 1 vez al mes  
☐ 1 a 3 veces mes  
☐ 1 vez semana  
☒ 2 a 4 veces semana  
☐ 5 a 6 veces semana  
☐ 1 vez al día  
☐ 2 a 3 veces al día  
☐ 5 a 6 veces al día  
☐ más 6 veces al día

---

sal

- ☐ Nunca o menos 1 vez al mes  
☐ 1 a 3 veces mes  
☐ 1 vez semana  
☐ 2 a 4 veces semana  
☐ 5 a 6 veces semana  
☒ 1 vez al día  
☐ 2 a 3 veces al día  
☐ 5 a 6 veces al día  
☐ más 6 veces al día

---

ajo

- ☐ Nunca o menos 1 vez al mes  
☐ 1 a 3 veces mes  
☐ 1 vez semana  
☒ 2 a 4 veces semana  
☐ 5 a 6 veces semana  
☐ 1 vez al día  
☐ 2 a 3 veces al día  
☐ 5 a 6 veces al día  
☐ más 6 veces al día

---

mermelada o miel

- ☐ Nunca o menos 1 vez al mes  
☐ 1 a 3 veces mes  
☐ 1 vez semana  
☐ 2 a 4 veces semana  
☐ 5 a 6 veces semana  
☐ 1 vez al día  
☒ 2 a 3 veces al día  
☐ 5 a 6 veces al día  
☐ más 6 veces al día

---

azúcar

- ☒ Nunca o menos 1 vez al mes  
☐ 1 a 3 veces mes  
☐ 1 vez semana  
☐ 2 a 4 veces semana  
☐ 5 a 6 veces semana  
☐ 1 vez al día  
☐ 2 a 3 veces al día  
☐ 5 a 6 veces al día  
☐ más 6 veces al día

|                                       |                                                                                                                                                                                                                                                                                                                                                                                                                                                                                                                               |
|---------------------------------------|-------------------------------------------------------------------------------------------------------------------------------------------------------------------------------------------------------------------------------------------------------------------------------------------------------------------------------------------------------------------------------------------------------------------------------------------------------------------------------------------------------------------------------|
| Otro alimento                         |                                                                                                                                                                                                                                                                                                                                                                                                                                                                                                                               |
| suplementos vitamínicos               | <input checked="" type="radio"/> si<br><input type="radio"/> no                                                                                                                                                                                                                                                                                                                                                                                                                                                               |
| suplementos vitamínicos               | [*DATA REMOVED*]                                                                                                                                                                                                                                                                                                                                                                                                                                                                                                              |
| dieta previa                          | <input type="radio"/> si<br><input checked="" type="radio"/> no                                                                                                                                                                                                                                                                                                                                                                                                                                                               |
| motivo dieta                          | <input checked="" type="radio"/> no dieta<br><input type="radio"/> control peso<br><input type="radio"/> control colesterol<br><input type="radio"/> control diabetes<br><input type="radio"/> problemas estómago<br><input type="radio"/> problemas vesícula o hepáticos<br><input type="radio"/> HTA o cardiopatía<br><input type="radio"/> problemas renales<br><input type="radio"/> alergia alimentaria<br><input type="radio"/> ácido úrico elevado<br><input type="radio"/> vegetariana<br><input type="radio"/> otros |
| cambio alimentos año previo gestación | <input checked="" type="radio"/> si<br><input type="radio"/> no                                                                                                                                                                                                                                                                                                                                                                                                                                                               |
| cambio lácteos                        | <input type="radio"/> eliminado<br><input type="radio"/> disminuido<br><input type="radio"/> igual<br><input checked="" type="radio"/> aumentado<br><input type="radio"/> no sabe                                                                                                                                                                                                                                                                                                                                             |
| cambio huevos                         | <input type="radio"/> eliminado<br><input type="radio"/> disminuido<br><input checked="" type="radio"/> igual<br><input type="radio"/> aumentado<br><input type="radio"/> no sabe                                                                                                                                                                                                                                                                                                                                             |
| cambio carne                          | <input type="radio"/> eliminado<br><input type="radio"/> disminuido<br><input type="radio"/> igual<br><input checked="" type="radio"/> aumentado<br><input type="radio"/> no sabe                                                                                                                                                                                                                                                                                                                                             |
| cambio pescado                        | <input type="radio"/> eliminado<br><input type="radio"/> disminuido<br><input checked="" type="radio"/> igual<br><input type="radio"/> aumentado<br><input type="radio"/> no sabe                                                                                                                                                                                                                                                                                                                                             |
| cambio verduras                       | <input type="radio"/> eliminado<br><input type="radio"/> disminuido<br><input checked="" type="radio"/> igual<br><input type="radio"/> aumentado<br><input type="radio"/> no sabe                                                                                                                                                                                                                                                                                                                                             |



|                            |                                                                                                                                                                                                                        |
|----------------------------|------------------------------------------------------------------------------------------------------------------------------------------------------------------------------------------------------------------------|
| cambio legumbres           | <input type="radio"/> eliminado<br><input type="radio"/> disminuido<br><input checked="" type="radio"/> igual<br><input type="radio"/> aumentado<br><input type="radio"/> no sabe                                      |
| cambio fruta               | <input type="radio"/> eliminado<br><input type="radio"/> disminuido<br><input type="radio"/> igual<br><input checked="" type="radio"/> aumentado<br><input type="radio"/> no sabe                                      |
| cambio pan                 | <input type="radio"/> eliminado<br><input type="radio"/> disminuido<br><input checked="" type="radio"/> igual<br><input type="radio"/> aumentado<br><input type="radio"/> no sabe                                      |
| cambio aceite oliva        | <input type="radio"/> eliminado<br><input type="radio"/> disminuido<br><input checked="" type="radio"/> igual<br><input type="radio"/> aumentado<br><input type="radio"/> no sabe                                      |
| cambio mante o margarina   | <input checked="" type="radio"/> eliminado<br><input type="radio"/> disminuido<br><input type="radio"/> igual<br><input type="radio"/> aumentado<br><input type="radio"/> no sabe                                      |
| cambio azúcar y dulces     | <input type="radio"/> eliminado<br><input type="radio"/> disminuido<br><input type="radio"/> igual<br><input checked="" type="radio"/> aumentado<br><input type="radio"/> no sabe                                      |
| cambio bebidas alcohólicas | <input checked="" type="radio"/> eliminado<br><input type="radio"/> disminuido<br><input type="radio"/> igual<br><input type="radio"/> aumentado<br><input type="radio"/> no sabe                                      |
| frecuencia comidas fritas  | <input type="radio"/> a diario<br><input type="radio"/> 5 a 6 veces semana<br><input type="radio"/> 2 a 4 veces semana<br><input type="radio"/> 1 vez semana<br><input checked="" type="radio"/> menos de 1 vez semana |
| carne                      | <input type="radio"/> no como<br><input type="radio"/> cruda<br><input checked="" type="radio"/> poco hecha<br><input type="radio"/> hecha<br><input type="radio"/> muy hecha                                          |
| grasa visible carne        | <input checked="" type="radio"/> quita toda<br><input type="radio"/> quita mayoría<br><input type="radio"/> quita un poco<br><input type="radio"/> no quita nada                                                       |

|                                |                                                                                                                                                                                                                                                          |
|--------------------------------|----------------------------------------------------------------------------------------------------------------------------------------------------------------------------------------------------------------------------------------------------------|
| cocina carne                   | <input checked="" type="radio"/> a la plancha<br><input type="radio"/> a la parrilla<br><input type="radio"/> asada<br><input type="radio"/> frita<br><input type="radio"/> guisada                                                                      |
| tostado quemado carne          | <input checked="" type="radio"/> nunca<br><input type="radio"/> 1 vez mes<br><input type="radio"/> 2 a 3 veces mes<br><input type="radio"/> 1 vez semana<br><input type="radio"/> 2 a 3 semanas                                                          |
| tostado quemado pescado        | <input checked="" type="radio"/> nunca<br><input type="radio"/> 1 vez mes<br><input type="radio"/> 2 a 3 veces mes<br><input type="radio"/> 1 vez semana<br><input type="radio"/> 2 a 3 semanas                                                          |
| socarrat paella                | <input type="radio"/> nunca<br><input type="radio"/> 1 vez mes<br><input type="radio"/> 2 a 3 veces mes<br><input checked="" type="radio"/> 1 vez semana<br><input type="radio"/> 2 a 3 semanas                                                          |
| grasa o aceite cocinar         | <input type="radio"/> mantequilla<br><input type="radio"/> margarina<br><input type="radio"/> aceite oliva<br><input checked="" type="radio"/> aceite oliva virgen extra<br><input type="radio"/> aceite vegetal<br><input type="radio"/> mezcla aceites |
| grasa aceite aliñar            | <input type="radio"/> mantequilla<br><input type="radio"/> margarina<br><input type="radio"/> aceite oliva<br><input checked="" type="radio"/> aceite oliva virgen extra<br><input type="radio"/> aceite vegetal<br><input type="radio"/> mezcla aceites |
| grasa aceite freir             | <input type="radio"/> mantequilla<br><input type="radio"/> margarina<br><input type="radio"/> aceite oliva<br><input checked="" type="radio"/> aceite oliva virgen extra<br><input type="radio"/> aceite vegetal<br><input type="radio"/> mezcla aceites |
| Ejercicio cuestionario         | <input checked="" type="radio"/> si<br><input type="radio"/> no                                                                                                                                                                                          |
| horas de sueño incluido siesta | [*DATA REMOVED*]                                                                                                                                                                                                                                         |
| minutos siesta                 | [*DATA REMOVED*]                                                                                                                                                                                                                                         |
| horas televisión semana        | [*DATA REMOVED*]                                                                                                                                                                                                                                         |

|                                        |                                                                                                                                                                                                                                                                                                                                                                           |
|----------------------------------------|---------------------------------------------------------------------------------------------------------------------------------------------------------------------------------------------------------------------------------------------------------------------------------------------------------------------------------------------------------------------------|
| actividad trabajo                      | <input checked="" type="radio"/> casi siempre sentado<br><input type="radio"/> sentado 50 por cien<br><input type="radio"/> casi siempre de pie, quieto<br><input type="radio"/> casi siempre levantado caminando y llevando pocas cosas<br><input type="radio"/> casi siempre levantado, caminando y llevado muchas cosas<br><input type="radio"/> trabajo manual pesado |
| tiempo caminar o bici al día           | <input type="radio"/> casi nunca<br><input type="radio"/> menos 20min día<br><input type="radio"/> 20 a 40 min día<br><input checked="" type="radio"/> 40 a 60 min día<br><input type="radio"/> 1h o 1h y media día<br><input type="radio"/> más de 1h y media al día                                                                                                     |
| tiempo tareas casa al día              | <input type="radio"/> menos de 1h día<br><input checked="" type="radio"/> 1 a 2h día<br><input type="radio"/> 3 a 4h día<br><input type="radio"/> 5 a 6h día<br><input type="radio"/> 7 a 8h día<br><input type="radio"/> más de 8h día                                                                                                                                   |
| tiempo libre televisión ordenador leer | <input type="radio"/> menos 1h día<br><input type="radio"/> 1h día<br><input checked="" type="radio"/> 2h día<br><input type="radio"/> 3h día<br><input type="radio"/> 4h día<br><input type="radio"/> 5 a 6h día<br><input type="radio"/> mas 6h día                                                                                                                     |
| tiempo libre ejercicio o deporte       | <input type="radio"/> menos 1h semana<br><input type="radio"/> 1h semana<br><input type="radio"/> 2h semana<br><input checked="" type="radio"/> 3h semana<br><input type="radio"/> 4 a 5h semana<br><input type="radio"/> mas 5h semana                                                                                                                                   |
| como se considera                      | <input type="radio"/> sedentaria<br><input type="radio"/> poco activa<br><input checked="" type="radio"/> moderadamente activa<br><input type="radio"/> bastante activa<br><input type="radio"/> muy activa<br><input type="radio"/> no sabe                                                                                                                              |
| FUR                                    | [*DATA REMOVED*]                                                                                                                                                                                                                                                                                                                                                          |
| Semanas gestación 2T                   | _____                                                                                                                                                                                                                                                                                                                                                                     |
| Días gestación 2T                      | _____                                                                                                                                                                                                                                                                                                                                                                     |
| DBP 2T                                 | _____                                                                                                                                                                                                                                                                                                                                                                     |
| CC 2T                                  | _____                                                                                                                                                                                                                                                                                                                                                                     |

|                                                   |                                                                                                                                                                                                 |
|---------------------------------------------------|-------------------------------------------------------------------------------------------------------------------------------------------------------------------------------------------------|
| AC 2T                                             |                                                                                                                                                                                                 |
| LF 2T                                             |                                                                                                                                                                                                 |
| PFE 2T (Hadlock)                                  |                                                                                                                                                                                                 |
| Semanas gestación 3T                              | [*DATA REMOVED*]                                                                                                                                                                                |
| días 3T                                           | [*DATA REMOVED*]                                                                                                                                                                                |
| DBP 3T                                            | [*DATA REMOVED*]                                                                                                                                                                                |
| CC 3T                                             | [*DATA REMOVED*]                                                                                                                                                                                |
| AC 3T                                             | [*DATA REMOVED*]                                                                                                                                                                                |
| LF 3T                                             | [*DATA REMOVED*]                                                                                                                                                                                |
| PFE 3T (Hadlock)                                  | [*DATA REMOVED*]                                                                                                                                                                                |
| Semanas de gestación final                        | [*DATA REMOVED*]                                                                                                                                                                                |
| días gestación final                              | [*DATA REMOVED*]                                                                                                                                                                                |
| Localización placenta                             | <input type="radio"/> anterior<br><input type="radio"/> lateral derecha<br><input type="radio"/> lateral izquierda<br><input type="radio"/> posterior<br><input checked="" type="radio"/> fondo |
| Presentación longitudinal cefálica                | <input type="radio"/> no<br><input checked="" type="radio"/> si                                                                                                                                 |
| Dorso                                             | <input type="radio"/> izquierda anterior<br><input type="radio"/> izquierda posterior<br><input type="radio"/> derecha anterior<br><input checked="" type="radio"/> derecha posterior           |
| diámetro biparietal                               | [*DATA REMOVED*]                                                                                                                                                                                |
| Circunferencia craneal                            | [*DATA REMOVED*]                                                                                                                                                                                |
| Circunferencia abdominal                          | [*DATA REMOVED*]                                                                                                                                                                                |
| Longitud de femur                                 | [*DATA REMOVED*]                                                                                                                                                                                |
| tejido celular subcutáneo a nivel del muslo en mm | [*DATA REMOVED*]                                                                                                                                                                                |
| tejido celular subcutáneo en abdomen en mm        | [*DATA REMOVED*]                                                                                                                                                                                |

|                                               |                                                                                                                                                          |
|-----------------------------------------------|----------------------------------------------------------------------------------------------------------------------------------------------------------|
| Volumen del muslo en cm3                      | [*DATA REMOVED*]                                                                                                                                         |
| Peso fetal estimado según fórmula de Hadlock  | [*DATA REMOVED*]                                                                                                                                         |
| Percentil                                     | [*DATA REMOVED*]                                                                                                                                         |
| Peso fetal estimado según fórmula de Scioscia | _____                                                                                                                                                    |
| Peso fetal estimado según fórmula de LEE      | _____                                                                                                                                                    |
| Tipo de parto                                 | <input checked="" type="radio"/> eutocico<br><input type="radio"/> instrumentado/ventosa<br><input type="radio"/> cesarea                                |
| fecha de nacimiento                           | [*DATA REMOVED*]                                                                                                                                         |
| Días entre exploración y nacimiento           | [*DATA REMOVED*]                                                                                                                                         |
| Peso RN en g                                  | [*DATA REMOVED*]                                                                                                                                         |
| sexo                                          | <input type="radio"/> mujer<br><input checked="" type="radio"/> hombre                                                                                   |
| Apgar 1 minuto                                | [*DATA REMOVED*]                                                                                                                                         |
| Apgar 5 minutos                               | [*DATA REMOVED*]                                                                                                                                         |
| Apgar 10 minutos                              | _____                                                                                                                                                    |
| antecedente Covid durante gestación           | <input type="radio"/> Yes<br><input checked="" type="radio"/> No                                                                                         |
| Nivel de estudios                             | <input type="radio"/> ninguno<br><input type="radio"/> primarios<br><input type="radio"/> secundarios<br><input checked="" type="radio"/> universitarios |

# Base\_datos\_estimacion\_peso\_fetal

|                                       |                                                                                                                                                                                                                                                                                      |
|---------------------------------------|--------------------------------------------------------------------------------------------------------------------------------------------------------------------------------------------------------------------------------------------------------------------------------------|
| Número de identificación participante | 185                                                                                                                                                                                                                                                                                  |
| CODIGO PARTICIPANTE                   |                                                                                                                                                                                                                                                                                      |
| Edad                                  | [*DATA REMOVED*]                                                                                                                                                                                                                                                                     |
| Gestaciones                           | <input type="radio"/> 1<br><input type="radio"/> 2<br><input type="radio"/> 3<br><input checked="" type="radio"/> mas de 3                                                                                                                                                           |
| partos                                | <input type="radio"/> 0<br><input type="radio"/> 1<br><input type="radio"/> 2<br><input checked="" type="radio"/> 3<br><input type="radio"/> mas de 3                                                                                                                                |
| cesáreas                              | <input checked="" type="radio"/> 0<br><input type="radio"/> 1<br><input type="radio"/> 2<br><input type="radio"/> 3<br><input type="radio"/> mas de 3                                                                                                                                |
| Abortos                               | <input checked="" type="radio"/> 0<br><input type="radio"/> 1<br><input type="radio"/> 2<br><input type="radio"/> 3<br><input type="radio"/> mas de 3                                                                                                                                |
| Tipo de gestacion                     | <input checked="" type="radio"/> espontanea<br><input type="radio"/> IAC inseminación artificial conyuge<br><input type="radio"/> IAD inseminación artificial donante<br><input type="radio"/> FIV Fecundación in Vitro<br><input type="radio"/> Ovodon FIV con donación de ovocitos |
| peso previo a embarazo                | [*DATA REMOVED*]                                                                                                                                                                                                                                                                     |
| Ganancia ponderal embarazo            |                                                                                                                                                                                                                                                                                      |
| Talla madre                           | [*DATA REMOVED*]                                                                                                                                                                                                                                                                     |
| IMC previo embarazo                   | 23.337684427040067                                                                                                                                                                                                                                                                   |
| Patología obstétrica                  | <input checked="" type="radio"/> no<br><input type="radio"/> si                                                                                                                                                                                                                      |
| Diabetes pregestacional               | <input checked="" type="radio"/> no<br><input type="radio"/> si                                                                                                                                                                                                                      |
| Diabetes gestacional                  | <input checked="" type="radio"/> no<br><input type="radio"/> si                                                                                                                                                                                                                      |

|                                            |                                                                                                                                                                                      |
|--------------------------------------------|--------------------------------------------------------------------------------------------------------------------------------------------------------------------------------------|
| Diabetes gestacional con insulina          | <input checked="" type="radio"/> no<br><input type="radio"/> si                                                                                                                      |
| Diabetes gestacional con dieta y ejercicio | <input checked="" type="radio"/> no<br><input type="radio"/> si                                                                                                                      |
| Percentil fetos previos                    | <input type="radio"/> Nada<br><input type="radio"/> percentil menor de 10<br><input checked="" type="radio"/> percentil entre 10 y 90<br><input type="radio"/> percentil mayor de 90 |
| Exfumadora                                 | <input checked="" type="radio"/> Nada<br><input type="radio"/> menos de 5 años<br><input type="radio"/> 5 a 10 años<br><input type="radio"/> mayor o igual a 10 años                 |
| Hábito tabáquico                           | <input type="radio"/> no<br><input checked="" type="radio"/> si                                                                                                                      |
| fumadora                                   | [*DATA REMOVED*]                                                                                                                                                                     |
| Consumo otros tóxicos                      | <input checked="" type="radio"/> no<br><input type="radio"/> si                                                                                                                      |
| Hb 1T                                      | [*DATA REMOVED*]                                                                                                                                                                     |
| Htc 1T                                     | [*DATA REMOVED*]                                                                                                                                                                     |
| Hb 2T                                      | [*DATA REMOVED*]                                                                                                                                                                     |
| HTC 2T                                     | [*DATA REMOVED*]                                                                                                                                                                     |
| Hb 3T                                      | [*DATA REMOVED*]                                                                                                                                                                     |
| HTC 3T                                     | [*DATA REMOVED*]                                                                                                                                                                     |
| Suplemento FE oral                         | <input checked="" type="radio"/> si<br><input type="radio"/> no                                                                                                                      |
| Suplemento fe iv                           | <input type="radio"/> si<br><input checked="" type="radio"/> no                                                                                                                      |
| Transfusión                                | <input checked="" type="radio"/> no<br><input type="radio"/> si                                                                                                                      |
| Solicitada Vit D                           | <input checked="" type="radio"/> no<br><input type="radio"/> si                                                                                                                      |
| Deficit vit D                              | <input type="radio"/> no<br><input type="radio"/> si                                                                                                                                 |
| Suplemento vit D                           | <input type="radio"/> si<br><input type="radio"/> no                                                                                                                                 |

|                       |                                                                                                                                                                                                                                                                                                                                                                                                              |
|-----------------------|--------------------------------------------------------------------------------------------------------------------------------------------------------------------------------------------------------------------------------------------------------------------------------------------------------------------------------------------------------------------------------------------------------------|
| Dieta, cuestionario   | <input checked="" type="radio"/> sí<br><input type="radio"/> no                                                                                                                                                                                                                                                                                                                                              |
| Leche entera          | <input type="radio"/> Nunca o menos 1 vez al mes<br><input type="radio"/> 1 a 3 veces mes<br><input type="radio"/> 1 vez semana<br><input type="radio"/> 2 a 4 veces semana<br><input type="radio"/> 5 a 6 veces semana<br><input checked="" type="radio"/> 1 vez al día<br><input type="radio"/> 2 a 3 veces al día<br><input type="radio"/> 5 a 6 veces al día<br><input type="radio"/> más 6 veces al día |
| Leche semidesnatada   | <input type="radio"/> Nunca o menos 1 vez al mes<br><input checked="" type="radio"/> 1 a 3 veces mes<br><input type="radio"/> 1 vez semana<br><input type="radio"/> 2 a 4 veces semana<br><input type="radio"/> 5 a 6 veces semana<br><input type="radio"/> 1 vez al día<br><input type="radio"/> 2 a 3 veces al día<br><input type="radio"/> 5 a 6 veces al día<br><input type="radio"/> mas 6 veces al día |
| Leche desnatada       | <input type="radio"/> Nunca o menos 1 vez al mes<br><input type="radio"/> 1 a 3 veces mes<br><input type="radio"/> 1 vez semana<br><input type="radio"/> 2 a 4 veces semana<br><input type="radio"/> 5 a 6 veces semana<br><input checked="" type="radio"/> 1 vez al día<br><input type="radio"/> 2 a 3 veces al día<br><input type="radio"/> 5 a 6 veces al día<br><input type="radio"/> más 6 veces al día |
| Leche condensada      | <input checked="" type="radio"/> Nunca o menos 1 vez al mes<br><input type="radio"/> 1 a 3 veces mes<br><input type="radio"/> 1 vez semana<br><input type="radio"/> 2 a 4 veces semana<br><input type="radio"/> 5 a 6 veces semana<br><input type="radio"/> 1 vez al día<br><input type="radio"/> 2 a 3 veces al día<br><input type="radio"/> 5 a 6 veces al día<br><input type="radio"/> más 6 veces al día |
| nata o crema de leche | <input checked="" type="radio"/> Nunca o menos 1 vez al mes<br><input type="radio"/> 1 a 3 veces mes<br><input type="radio"/> 1 vez semana<br><input type="radio"/> 2 a 4 veces semana<br><input type="radio"/> 5 a 6 veces semana<br><input type="radio"/> 1 vez al día<br><input type="radio"/> 2 a 3 veces al día<br><input type="radio"/> 5 a 6 veces al día<br><input type="radio"/> más 6 veces al día |



---

Yogurt Entero

- ☐ Nunca o menos 1 vez al mes  
☒ 1 a 3 veces mes  
☐ 1 vez semana  
☐ 2 a 4 veces semana  
☐ 5 a 6 veces semana  
☐ 1 vez al día  
☐ 2 a 3 veces al día  
☐ 5 a 6 veces al día  
☐ más 6 veces al día

---

Yogurt desnatado

- ☒ Nunca o menos 1 vez al mes  
☐ 1 a 3 veces mes  
☐ 1 vez semana  
☐ 2 a 4 veces semana  
☐ 5 a 6 veces semana  
☐ 1 vez al día  
☐ 2 a 3 veces al día  
☐ 5 a 6 veces al día  
☐ más 6 veces al día

---

100g requesón o queso blando o queso fresco

- ☒ Nunca o menos 1 vez al mes  
☐ 1 a 3 veces mes  
☐ 1 vez semana  
☐ 2 a 4 veces semana  
☐ 5 a 6 veces semana  
☐ 1 vez al día  
☐ 2 a 3 veces al día  
☐ 5 a 6 veces al día  
☐ más 6 veces al día

---

queso curado o semicurado o cremoso

- ☐ Nunca o menos 1 vez al mes  
☒ 1 a 3 veces mes  
☐ 1 vez semana  
☐ 2 a 4 veces semana  
☐ 5 a 6 veces semana  
☐ 1 vez al día  
☐ 2 a 3 veces al día  
☐ 5 a 6 veces al día  
☐ más 6 veces al día

---

natillas flan pudding

- ☐ Nunca o menos 1 vez al mes  
☒ 1 a 3 veces mes  
☐ 1 vez semana  
☐ 2 a 4 veces semana  
☐ 5 a 6 veces semana  
☐ 1 vez al día  
☐ 2 a 3 veces al día  
☐ 5 a 6 veces al día  
☐ más 6 veces al día

---

Helado

- ☒ Nunca o menos 1 vez al mes  
☐ 1 a 3 veces mes  
☐ 1 vez semana  
☐ 2 a 4 veces semana  
☐ 5 a 6 veces semana  
☐ 1 vez al día  
☐ 2 a 3 veces al día  
☐ 5 a 6 veces al día  
☐ más 6 veces al día

|                                      |                                                                                                                                                                                                                                                                                                                                                                                                              |
|--------------------------------------|--------------------------------------------------------------------------------------------------------------------------------------------------------------------------------------------------------------------------------------------------------------------------------------------------------------------------------------------------------------------------------------------------------------|
| huevo                                | <input type="radio"/> Nunca o menos 1 vez al mes<br><input type="radio"/> 1 a 3 veces mes<br><input type="radio"/> 1 vez semana<br><input checked="" type="radio"/> 2 a 4 veces semana<br><input type="radio"/> 5 a 6 veces semana<br><input type="radio"/> 1 vez al día<br><input type="radio"/> 2 a 3 veces al día<br><input type="radio"/> 5 a 6 veces al día<br><input type="radio"/> más 6 veces al día |
| Pollo con piel                       | <input checked="" type="radio"/> Nunca o menos 1 vez al mes<br><input type="radio"/> 1 a 3 veces mes<br><input type="radio"/> 1 vez semana<br><input type="radio"/> 2 a 4 veces semana<br><input type="radio"/> 5 a 6 veces semana<br><input type="radio"/> 1 vez al día<br><input type="radio"/> 2 a 3 veces al día<br><input type="radio"/> 5 a 6 veces al día<br><input type="radio"/> más 6 veces al día |
| pollo sin piel                       | <input checked="" type="radio"/> Nunca o menos 1 vez al mes<br><input type="radio"/> 1 a 3 veces mes<br><input type="radio"/> 1 vez semana<br><input type="radio"/> 2 a 4 veces semana<br><input type="radio"/> 5 a 6 veces semana<br><input type="radio"/> 1 vez al día<br><input type="radio"/> 2 a 3 veces al día<br><input type="radio"/> 5 a 6 veces al día<br><input type="radio"/> más 6 veces al día |
| Ternera o cerdo o cordero            | <input type="radio"/> Nunca o menos 1 vez al mes<br><input checked="" type="radio"/> 1 a 3 veces mes<br><input type="radio"/> 1 vez semana<br><input type="radio"/> 2 a 4 veces semana<br><input type="radio"/> 5 a 6 veces semana<br><input type="radio"/> 1 vez al día<br><input type="radio"/> 2 a 3 veces al día<br><input type="radio"/> 5 a 6 veces al día<br><input type="radio"/> más 6 veces al día |
| carne caza: Conejo o codorniz o pato | <input type="radio"/> Nunca o menos 1 vez al mes<br><input checked="" type="radio"/> 1 a 3 veces mes<br><input type="radio"/> 1 vez semana<br><input type="radio"/> 2 a 4 veces semana<br><input type="radio"/> 5 a 6 veces semana<br><input type="radio"/> 1 vez al día<br><input type="radio"/> 2 a 3 veces al día<br><input type="radio"/> 5 a 6 veces al día<br><input type="radio"/> más 6 veces al día |
| Hígado de ternera o cerdo o pollo    | <input type="radio"/> Nunca o menos 1 vez al mes<br><input type="radio"/> 1 a 3 veces mes<br><input checked="" type="radio"/> 1 vez semana<br><input type="radio"/> 2 a 4 veces semana<br><input type="radio"/> 5 a 6 veces semana<br><input type="radio"/> 1 vez al día<br><input type="radio"/> 2 a 3 veces al día<br><input type="radio"/> 5 a 6 veces al día<br><input type="radio"/> más 6 veces al día |

---

Vísceras

- ☒ Nunca o menos 1 vez al mes  
☐ 1 a 3 veces mes  
☐ 1 vez semana  
☐ 2 a 4 veces semana  
☐ 5 a 6 veces semana  
☐ 1 vez al día  
☐ 2 a 3 veces al día  
☐ 5 a 6 veces al día  
☐ más 6 veces al día

---

Embutido

- ☐ Nunca o menos 1 vez al mes  
☐ 1 a 3 veces mes  
☒ 1 vez semana  
☐ 2 a 4 veces semana  
☐ 5 a 6 veces semana  
☐ 1 vez al día  
☐ 2 a 3 veces al día  
☐ 5 a 6 veces al día  
☐ más 6 veces al día

---

Salchicha o similar

- ☐ Nunca o menos 1 vez al mes  
☐ 1 a 3 veces mes  
☒ 1 vez semana  
☐ 2 a 4 veces semana  
☐ 5 a 6 veces semana  
☐ 1 vez al día  
☐ 2 a 3 veces al día  
☐ 5 a 6 veces al día  
☐ más 6 veces al día

---

Pate o foiegras

- ☐ Nunca o menos 1 vez al mes  
☐ 1 a 3 veces mes  
☒ 1 vez semana  
☐ 2 a 4 veces semana  
☐ 5 a 6 veces semana  
☐ 1 vez al día  
☐ 2 a 3 veces al día  
☐ 5 a 6 veces al día  
☐ más 6 veces al día

---

Hamburguesa

- ☐ Nunca o menos 1 vez al mes  
☒ 1 a 3 veces mes  
☐ 1 vez semana  
☐ 2 a 4 veces semana  
☐ 5 a 6 veces semana  
☐ 1 vez al día  
☐ 2 a 3 veces al día  
☐ 5 a 6 veces al día  
☐ más 6 veces al día

---

tocino o bacon

- ☐ Nunca o menos 1 vez al mes  
☒ 1 a 3 veces mes  
☐ 1 vez semana  
☐ 2 a 4 veces semana  
☐ 5 a 6 veces semana  
☐ 1 vez al día  
☐ 2 a 3 veces al día  
☐ 5 a 6 veces al día  
☐ más 6 veces al día

|                        |                                                                                                                                                                                                                                                                                                                                                                                                              |
|------------------------|--------------------------------------------------------------------------------------------------------------------------------------------------------------------------------------------------------------------------------------------------------------------------------------------------------------------------------------------------------------------------------------------------------------|
| Pescado frito          | <input type="radio"/> Nunca o menos 1 vez al mes<br><input type="radio"/> 1 a 3 veces mes<br><input checked="" type="radio"/> 1 vez semana<br><input type="radio"/> 2 a 4 veces semana<br><input type="radio"/> 5 a 6 veces semana<br><input type="radio"/> 1 vez al día<br><input type="radio"/> 2 a 3 veces al día<br><input type="radio"/> 5 a 6 veces al día<br><input type="radio"/> más 6 veces al día |
| pescado hervido blanco | <input checked="" type="radio"/> Nunca o menos 1 vez al mes<br><input type="radio"/> 1 a 3 veces mes<br><input type="radio"/> 1 vez semana<br><input type="radio"/> 2 a 4 veces semana<br><input type="radio"/> 5 a 6 veces semana<br><input type="radio"/> 1 vez al día<br><input type="radio"/> 2 a 3 veces al día<br><input type="radio"/> 5 a 6 veces al día<br><input type="radio"/> más 6 veces al día |
| pescado hervido azul   | <input type="radio"/> Nunca o menos 1 vez al mes<br><input type="radio"/> 1 a 3 veces mes<br><input checked="" type="radio"/> 1 vez semana<br><input type="radio"/> 2 a 4 veces semana<br><input type="radio"/> 5 a 6 veces semana<br><input type="radio"/> 1 vez al día<br><input type="radio"/> 2 a 3 veces al día<br><input type="radio"/> 5 a 6 veces al día<br><input type="radio"/> más 6 veces al día |
| otros pescado azul     | <input checked="" type="radio"/> Nunca o menos 1 vez al mes<br><input type="radio"/> 1 a 3 veces mes<br><input type="radio"/> 1 vez semana<br><input type="radio"/> 2 a 4 veces semana<br><input type="radio"/> 5 a 6 veces semana<br><input type="radio"/> 1 vez al día<br><input type="radio"/> 2 a 3 veces al día<br><input type="radio"/> 5 a 6 veces al día<br><input type="radio"/> más 6 veces al día |
| atun conserva          | <input type="radio"/> Nunca o menos 1 vez al mes<br><input type="radio"/> 1 a 3 veces mes<br><input checked="" type="radio"/> 1 vez semana<br><input type="radio"/> 2 a 4 veces semana<br><input type="radio"/> 5 a 6 veces semana<br><input type="radio"/> 1 vez al día<br><input type="radio"/> 2 a 3 veces al día<br><input type="radio"/> 5 a 6 veces al día<br><input type="radio"/> más 6 veces al día |
| sardina conserva       | <input checked="" type="radio"/> Nunca o menos 1 vez al mes<br><input type="radio"/> 1 a 3 veces mes<br><input type="radio"/> 1 vez semana<br><input type="radio"/> 2 a 4 veces semana<br><input type="radio"/> 5 a 6 veces semana<br><input type="radio"/> 1 vez al día<br><input type="radio"/> 2 a 3 veces al día<br><input type="radio"/> 5 a 6 veces al día<br><input type="radio"/> más 6 veces al día |

|                                         |                                                                                                                                                                                                                                                                                                                                                                                                              |
|-----------------------------------------|--------------------------------------------------------------------------------------------------------------------------------------------------------------------------------------------------------------------------------------------------------------------------------------------------------------------------------------------------------------------------------------------------------------|
| pescado ahumado                         | <input checked="" type="radio"/> Nunca o menos 1 vez al mes<br><input type="radio"/> 1 a 3 veces mes<br><input type="radio"/> 1 vez semana<br><input type="radio"/> 2 a 4 veces semana<br><input type="radio"/> 5 a 6 veces semana<br><input type="radio"/> 1 vez al día<br><input type="radio"/> 2 a 3 veces al día<br><input type="radio"/> 5 a 6 veces al día<br><input type="radio"/> más 6 veces al día |
| almejas o mejillones o ostras unos 100g | <input checked="" type="radio"/> Nunca o menos 1 vez al mes<br><input type="radio"/> 1 a 3 veces mes<br><input type="radio"/> 1 vez semana<br><input type="radio"/> 2 a 4 veces semana<br><input type="radio"/> 5 a 6 veces semana<br><input type="radio"/> 1 vez al día<br><input type="radio"/> 2 a 3 veces al día<br><input type="radio"/> 5 a 6 veces al día<br><input type="radio"/> más 6 veces al día |
| calamar o chipiron o sepia unos 100g    | <input checked="" type="radio"/> Nunca o menos 1 vez al mes<br><input type="radio"/> 1 a 3 veces mes<br><input type="radio"/> 1 vez semana<br><input type="radio"/> 2 a 4 veces semana<br><input type="radio"/> 5 a 6 veces semana<br><input type="radio"/> 1 vez al día<br><input type="radio"/> 2 a 3 veces al día<br><input type="radio"/> 5 a 6 veces al día<br><input type="radio"/> más 6 veces al día |
| marisco unos 100g                       | <input checked="" type="radio"/> Nunca o menos 1 vez al mes<br><input type="radio"/> 1 a 3 veces mes<br><input type="radio"/> 1 vez semana<br><input type="radio"/> 2 a 4 veces semana<br><input type="radio"/> 5 a 6 veces semana<br><input type="radio"/> 1 vez al día<br><input type="radio"/> 2 a 3 veces al día<br><input type="radio"/> 5 a 6 veces al día<br><input type="radio"/> más 6 veces al día |
| Espinacas o acelgas cocinadas           | <input checked="" type="radio"/> Nunca o menos 1 vez al mes<br><input type="radio"/> 1 a 3 veces mes<br><input type="radio"/> 1 vez semana<br><input type="radio"/> 2 a 4 veces semana<br><input type="radio"/> 5 a 6 veces semana<br><input type="radio"/> 1 vez al día<br><input type="radio"/> 2 a 3 veces al día<br><input type="radio"/> 5 a 6 veces al día<br><input type="radio"/> más 6 veces al día |
| Col o coliflor o brocoli cocinado       | <input checked="" type="radio"/> Nunca o menos 1 vez al mes<br><input type="radio"/> 1 a 3 veces mes<br><input type="radio"/> 1 vez semana<br><input type="radio"/> 2 a 4 veces semana<br><input type="radio"/> 5 a 6 veces semana<br><input type="radio"/> 1 vez al día<br><input type="radio"/> 2 a 3 veces al día<br><input type="radio"/> 5 a 6 veces al día<br><input type="radio"/> más 6 veces al día |

---

Lechuga o endivia o escarola

- ☐ Nunca o menos 1 vez al mes  
☒ 1 a 3 veces mes  
☐ 1 vez semana  
☐ 2 a 4 veces semana  
☐ 5 a 6 veces semana  
☐ 1 vez al día  
☐ 2 a 3 veces al día  
☐ 5 a 6 veces al día  
☐ más 6 veces al día

---

tomate ensalada

- ☐ Nunca o menos 1 vez al mes  
☐ 1 a 3 veces mes  
☐ 1 vez semana  
☒ 2 a 4 veces semana  
☐ 5 a 6 veces semana  
☐ 1 vez al día  
☐ 2 a 3 veces al día  
☐ 5 a 6 veces al día  
☐ más 6 veces al día

---

cebolla

- ☐ Nunca o menos 1 vez al mes  
☐ 1 a 3 veces mes  
☒ 1 vez semana  
☐ 2 a 4 veces semana  
☐ 5 a 6 veces semana  
☐ 1 vez al día  
☐ 2 a 3 veces al día  
☐ 5 a 6 veces al día  
☐ más 6 veces al día

---

Zanahoria o calabaza

- ☐ Nunca o menos 1 vez al mes  
☐ 1 a 3 veces mes  
☒ 1 vez semana  
☐ 2 a 4 veces semana  
☐ 5 a 6 veces semana  
☐ 1 vez al día  
☐ 2 a 3 veces al día  
☐ 5 a 6 veces al día  
☐ más 6 veces al día

---

Judías verdes

- ☒ Nunca o menos 1 vez al mes  
☐ 1 a 3 veces mes  
☐ 1 vez semana  
☐ 2 a 4 veces semana  
☐ 5 a 6 veces semana  
☐ 1 vez al día  
☐ 2 a 3 veces al día  
☐ 5 a 6 veces al día  
☐ más 6 veces al día

---

Berenjena o calabacin o pepino

- ☐ Nunca o menos 1 vez al mes  
☒ 1 a 3 veces mes  
☐ 1 vez semana  
☐ 2 a 4 veces semana  
☐ 5 a 6 veces semana  
☐ 1 vez al día  
☐ 2 a 3 veces al día  
☐ 5 a 6 veces al día  
☐ más 6 veces al día

---

|          |                                                                                                                                                                                                                                                                                                                                                                                                              |
|----------|--------------------------------------------------------------------------------------------------------------------------------------------------------------------------------------------------------------------------------------------------------------------------------------------------------------------------------------------------------------------------------------------------------------|
| pimiento | <input type="radio"/> Nunca o menos 1 vez al mes<br><input checked="" type="radio"/> 1 a 3 veces mes<br><input type="radio"/> 1 vez semana<br><input type="radio"/> 2 a 4 veces semana<br><input type="radio"/> 5 a 6 veces semana<br><input type="radio"/> 1 vez al día<br><input type="radio"/> 2 a 3 veces al día<br><input type="radio"/> 5 a 6 veces al día<br><input type="radio"/> más 6 veces al día |
|----------|--------------------------------------------------------------------------------------------------------------------------------------------------------------------------------------------------------------------------------------------------------------------------------------------------------------------------------------------------------------------------------------------------------------|

---

|           |                                                                                                                                                                                                                                                                                                                                                                                                              |
|-----------|--------------------------------------------------------------------------------------------------------------------------------------------------------------------------------------------------------------------------------------------------------------------------------------------------------------------------------------------------------------------------------------------------------------|
| alcachofa | <input type="radio"/> Nunca o menos 1 vez al mes<br><input checked="" type="radio"/> 1 a 3 veces mes<br><input type="radio"/> 1 vez semana<br><input type="radio"/> 2 a 4 veces semana<br><input type="radio"/> 5 a 6 veces semana<br><input type="radio"/> 1 vez al día<br><input type="radio"/> 2 a 3 veces al día<br><input type="radio"/> 5 a 6 veces al día<br><input type="radio"/> más 6 veces al día |
|-----------|--------------------------------------------------------------------------------------------------------------------------------------------------------------------------------------------------------------------------------------------------------------------------------------------------------------------------------------------------------------------------------------------------------------|

---

|            |                                                                                                                                                                                                                                                                                                                                                                                                              |
|------------|--------------------------------------------------------------------------------------------------------------------------------------------------------------------------------------------------------------------------------------------------------------------------------------------------------------------------------------------------------------------------------------------------------------|
| espárragos | <input checked="" type="radio"/> Nunca o menos 1 vez al mes<br><input type="radio"/> 1 a 3 veces mes<br><input type="radio"/> 1 vez semana<br><input type="radio"/> 2 a 4 veces semana<br><input type="radio"/> 5 a 6 veces semana<br><input type="radio"/> 1 vez al día<br><input type="radio"/> 2 a 3 veces al día<br><input type="radio"/> 5 a 6 veces al día<br><input type="radio"/> más 6 veces al día |
|------------|--------------------------------------------------------------------------------------------------------------------------------------------------------------------------------------------------------------------------------------------------------------------------------------------------------------------------------------------------------------------------------------------------------------|

---

|              |                                                                                                                                                                                                                                                                                                                                                                                                              |
|--------------|--------------------------------------------------------------------------------------------------------------------------------------------------------------------------------------------------------------------------------------------------------------------------------------------------------------------------------------------------------------------------------------------------------------|
| maíz hervido | <input checked="" type="radio"/> Nunca o menos 1 vez al mes<br><input type="radio"/> 1 a 3 veces mes<br><input type="radio"/> 1 vez semana<br><input type="radio"/> 2 a 4 veces semana<br><input type="radio"/> 5 a 6 veces semana<br><input type="radio"/> 1 vez al día<br><input type="radio"/> 2 a 3 veces al día<br><input type="radio"/> 5 a 6 veces al día<br><input type="radio"/> más 6 veces al día |
|--------------|--------------------------------------------------------------------------------------------------------------------------------------------------------------------------------------------------------------------------------------------------------------------------------------------------------------------------------------------------------------------------------------------------------------|

---

|           |                                                                                                                                                                                                                                                                                                                                                                                                              |
|-----------|--------------------------------------------------------------------------------------------------------------------------------------------------------------------------------------------------------------------------------------------------------------------------------------------------------------------------------------------------------------------------------------------------------------|
| legumbres | <input type="radio"/> Nunca o menos 1 vez al mes<br><input type="radio"/> 1 a 3 veces mes<br><input checked="" type="radio"/> 1 vez semana<br><input type="radio"/> 2 a 4 veces semana<br><input type="radio"/> 5 a 6 veces semana<br><input type="radio"/> 1 vez al día<br><input type="radio"/> 2 a 3 veces al día<br><input type="radio"/> 5 a 6 veces al día<br><input type="radio"/> más 6 veces al día |
|-----------|--------------------------------------------------------------------------------------------------------------------------------------------------------------------------------------------------------------------------------------------------------------------------------------------------------------------------------------------------------------------------------------------------------------|

---

|                       |                                                                                                                                                                                                                                                                                                                                                                                                              |
|-----------------------|--------------------------------------------------------------------------------------------------------------------------------------------------------------------------------------------------------------------------------------------------------------------------------------------------------------------------------------------------------------------------------------------------------------|
| naranjas o mandarinas | <input type="radio"/> Nunca o menos 1 vez al mes<br><input checked="" type="radio"/> 1 a 3 veces mes<br><input type="radio"/> 1 vez semana<br><input type="radio"/> 2 a 4 veces semana<br><input type="radio"/> 5 a 6 veces semana<br><input type="radio"/> 1 vez al día<br><input type="radio"/> 2 a 3 veces al día<br><input type="radio"/> 5 a 6 veces al día<br><input type="radio"/> más 6 veces al día |
|-----------------------|--------------------------------------------------------------------------------------------------------------------------------------------------------------------------------------------------------------------------------------------------------------------------------------------------------------------------------------------------------------------------------------------------------------|

---

---

zum natural fruta

- ☐ Nunca o menos 1 vez al mes  
☒ 1 a 3 veces mes  
☐ 1 vez semana  
☐ 2 a 4 veces semana  
☐ 5 a 6 veces semana  
☐ 1 vez al día  
☐ 2 a 3 veces al día  
☐ 5 a 6 veces al día  
☐ más 6 veces al día

---

platano

- ☐ Nunca o menos 1 vez al mes  
☐ 1 a 3 veces mes  
☒ 1 vez semana  
☐ 2 a 4 veces semana  
☐ 5 a 6 veces semana  
☐ 1 vez al día  
☐ 2 a 3 veces al día  
☐ 5 a 6 veces al día  
☐ más 6 veces al día

---

manzana o pera

- ☐ Nunca o menos 1 vez al mes  
☐ 1 a 3 veces mes  
☒ 1 vez semana  
☐ 2 a 4 veces semana  
☐ 5 a 6 veces semana  
☐ 1 vez al día  
☐ 2 a 3 veces al día  
☐ 5 a 6 veces al día  
☐ más 6 veces al día

---

melocotón o nectarina

- ☐ Nunca o menos 1 vez al mes  
☒ 1 a 3 veces mes  
☐ 1 vez semana  
☐ 2 a 4 veces semana  
☐ 5 a 6 veces semana  
☐ 1 vez al día  
☐ 2 a 3 veces al día  
☐ 5 a 6 veces al día  
☐ más 6 veces al día

---

sandia o melon

- ☐ Nunca o menos 1 vez al mes  
☒ 1 a 3 veces mes  
☐ 1 vez semana  
☐ 2 a 4 veces semana  
☐ 5 a 6 veces semana  
☐ 1 vez al día  
☐ 2 a 3 veces al día  
☐ 5 a 6 veces al día  
☐ más 6 veces al día

---

uva

- ☐ Nunca o menos 1 vez al mes  
☒ 1 a 3 veces mes  
☐ 1 vez semana  
☐ 2 a 4 veces semana  
☐ 5 a 6 veces semana  
☐ 1 vez al día  
☐ 2 a 3 veces al día  
☐ 5 a 6 veces al día  
☐ más 6 veces al día



---

bruna o ciruela

- ☐ Nunca o menos 1 vez al mes  
☒ 1 a 3 veces mes  
☐ 1 vez semana  
☐ 2 a 4 veces semana  
☐ 5 a 6 veces semana  
☐ 1 vez al día  
☐ 2 a 3 veces al día  
☐ 5 a 6 veces al día  
☐ más 6 veces al día

---

kiwi

- ☐ Nunca o menos 1 vez al mes  
☐ 1 a 3 veces mes  
☒ 1 vez semana  
☐ 2 a 4 veces semana  
☐ 5 a 6 veces semana  
☐ 1 vez al día  
☐ 2 a 3 veces al día  
☐ 5 a 6 veces al día  
☐ más 6 veces al día

---

aceituna

- ☐ Nunca o menos 1 vez al mes  
☐ 1 a 3 veces mes  
☐ 1 vez semana  
☒ 2 a 4 veces semana  
☐ 5 a 6 veces semana  
☐ 1 vez al día  
☐ 2 a 3 veces al día  
☐ 5 a 6 veces al día  
☐ más 6 veces al día

---

frutos secos

- ☐ Nunca o menos 1 vez al mes  
☐ 1 a 3 veces mes  
☐ 1 vez semana  
☒ 2 a 4 veces semana  
☐ 5 a 6 veces semana  
☐ 1 vez al día  
☐ 2 a 3 veces al día  
☐ 5 a 6 veces al día  
☐ más 6 veces al día

---

pan blanco

- ☐ Nunca o menos 1 vez al mes  
☒ 1 a 3 veces mes  
☐ 1 vez semana  
☐ 2 a 4 veces semana  
☐ 5 a 6 veces semana  
☐ 1 vez al día  
☐ 2 a 3 veces al día  
☐ 5 a 6 veces al día  
☐ más 6 veces al día

---

pan integral

- ☐ Nunca o menos 1 vez al mes  
☐ 1 a 3 veces mes  
☐ 1 vez semana  
☒ 2 a 4 veces semana  
☐ 5 a 6 veces semana  
☐ 1 vez al día  
☐ 2 a 3 veces al día  
☐ 5 a 6 veces al día  
☐ más 6 veces al día

---

cereales desayuno

- ☒ Nunca o menos 1 vez al mes  
☐ 1 a 3 veces mes  
☐ 1 vez semana  
☐ 2 a 4 veces semana  
☐ 5 a 6 veces semana  
☐ 1 vez al día  
☐ 2 a 3 veces al día  
☐ 5 a 6 veces al día  
☐ más 6 veces al día

---

patatas fritas

- ☐ Nunca o menos 1 vez al mes  
☐ 1 a 3 veces mes  
☒ 1 vez semana  
☐ 2 a 4 veces semana  
☐ 5 a 6 veces semana  
☐ 1 vez al día  
☐ 2 a 3 veces al día  
☐ 5 a 6 veces al día  
☐ más 6 veces al día

---

patatas cocidas o asadas

- ☐ Nunca o menos 1 vez al mes  
☒ 1 a 3 veces mes  
☐ 1 vez semana  
☐ 2 a 4 veces semana  
☐ 5 a 6 veces semana  
☐ 1 vez al día  
☐ 2 a 3 veces al día  
☐ 5 a 6 veces al día  
☐ más 6 veces al día

---

bolsa papas

- ☐ Nunca o menos 1 vez al mes  
☒ 1 a 3 veces mes  
☐ 1 vez semana  
☐ 2 a 4 veces semana  
☐ 5 a 6 veces semana  
☐ 1 vez al día  
☐ 2 a 3 veces al día  
☐ 5 a 6 veces al día  
☐ más 6 veces al día

---

arroz cocinado

- ☐ Nunca o menos 1 vez al mes  
☐ 1 a 3 veces mes  
☒ 1 vez semana  
☐ 2 a 4 veces semana  
☐ 5 a 6 veces semana  
☐ 1 vez al día  
☐ 2 a 3 veces al día  
☐ 5 a 6 veces al día  
☐ más 6 veces al día

---

pasta

- ☐ Nunca o menos 1 vez al mes  
☐ 1 a 3 veces mes  
☒ 1 vez semana  
☐ 2 a 4 veces semana  
☐ 5 a 6 veces semana  
☐ 1 vez al día  
☐ 2 a 3 veces al día  
☐ 5 a 6 veces al día  
☐ más 6 veces al día

|                     |                                                                                                                                                                                                                                                                                                                                                                                                              |
|---------------------|--------------------------------------------------------------------------------------------------------------------------------------------------------------------------------------------------------------------------------------------------------------------------------------------------------------------------------------------------------------------------------------------------------------|
| pizza               | <input checked="" type="radio"/> Nunca o menos 1 vez al mes<br><input type="radio"/> 1 a 3 veces mes<br><input type="radio"/> 1 vez semana<br><input type="radio"/> 2 a 4 veces semana<br><input type="radio"/> 5 a 6 veces semana<br><input type="radio"/> 1 vez al día<br><input type="radio"/> 2 a 3 veces al día<br><input type="radio"/> 5 a 6 veces al día<br><input type="radio"/> más 6 veces al día |
| aceite oliva        | <input type="radio"/> Nunca o menos 1 vez al mes<br><input type="radio"/> 1 a 3 veces mes<br><input checked="" type="radio"/> 1 vez semana<br><input type="radio"/> 2 a 4 veces semana<br><input type="radio"/> 5 a 6 veces semana<br><input type="radio"/> 1 vez al día<br><input type="radio"/> 2 a 3 veces al día<br><input type="radio"/> 5 a 6 veces al día<br><input type="radio"/> más 6 veces al día |
| otros aceites       | <input type="radio"/> Nunca o menos 1 vez al mes<br><input type="radio"/> 1 a 3 veces mes<br><input type="radio"/> 1 vez semana<br><input checked="" type="radio"/> 2 a 4 veces semana<br><input type="radio"/> 5 a 6 veces semana<br><input type="radio"/> 1 vez al día<br><input type="radio"/> 2 a 3 veces al día<br><input type="radio"/> 5 a 6 veces al día<br><input type="radio"/> más 6 veces al día |
| margarina           | <input checked="" type="radio"/> Nunca o menos 1 vez al mes<br><input type="radio"/> 1 a 3 veces mes<br><input type="radio"/> 1 vez semana<br><input type="radio"/> 2 a 4 veces semana<br><input type="radio"/> 5 a 6 veces semana<br><input type="radio"/> 1 vez al día<br><input type="radio"/> 2 a 3 veces al día<br><input type="radio"/> 5 a 6 veces al día<br><input type="radio"/> más 6 veces al día |
| mantequilla         | <input type="radio"/> Nunca o menos 1 vez al mes<br><input type="radio"/> 1 a 3 veces mes<br><input type="radio"/> 1 vez semana<br><input checked="" type="radio"/> 2 a 4 veces semana<br><input type="radio"/> 5 a 6 veces semana<br><input type="radio"/> 1 vez al día<br><input type="radio"/> 2 a 3 veces al día<br><input type="radio"/> 5 a 6 veces al día<br><input type="radio"/> más 6 veces al día |
| galletas tipo maria | <input type="radio"/> Nunca o menos 1 vez al mes<br><input type="radio"/> 1 a 3 veces mes<br><input type="radio"/> 1 vez semana<br><input checked="" type="radio"/> 2 a 4 veces semana<br><input type="radio"/> 5 a 6 veces semana<br><input type="radio"/> 1 vez al día<br><input type="radio"/> 2 a 3 veces al día<br><input type="radio"/> 5 a 6 veces al día<br><input type="radio"/> más 6 veces al día |

---

galletas chocolate

- ☒ Nunca o menos 1 vez al mes  
☐ 1 a 3 veces mes  
☐ 1 vez semana  
☐ 2 a 4 veces semana  
☐ 5 a 6 veces semana  
☐ 1 vez al día  
☐ 2 a 3 veces al día  
☐ 5 a 6 veces al día  
☐ más 6 veces al día

---

bolleria

- ☐ Nunca o menos 1 vez al mes  
☒ 1 a 3 veces mes  
☐ 1 vez semana  
☐ 2 a 4 veces semana  
☐ 5 a 6 veces semana  
☐ 1 vez al día  
☐ 2 a 3 veces al día  
☐ 5 a 6 veces al día  
☐ más 6 veces al día

---

chocolate o bombones

- ☐ Nunca o menos 1 vez al mes  
☒ 1 a 3 veces mes  
☐ 1 vez semana  
☐ 2 a 4 veces semana  
☐ 5 a 6 veces semana  
☐ 1 vez al día  
☐ 2 a 3 veces al día  
☐ 5 a 6 veces al día  
☐ más 6 veces al día

---

chocolate polvo o colacao

- ☐ Nunca o menos 1 vez al mes  
☐ 1 a 3 veces mes  
☐ 1 vez semana  
☒ 2 a 4 veces semana  
☐ 5 a 6 veces semana  
☐ 1 vez al día  
☐ 2 a 3 veces al día  
☐ 5 a 6 veces al día  
☐ más 6 veces al día

---

vino tinto

- ☒ Nunca o menos 1 vez al mes  
☐ 1 a 3 veces mes  
☐ 1 vez semana  
☐ 2 a 4 veces semana  
☐ 5 a 6 veces semana  
☐ 1 vez al día  
☐ 2 a 3 veces al día  
☐ 5 a 6 veces al día  
☐ más 6 veces al día

---

vino blanco

- ☒ Nunca o menos 1 vez al mes  
☐ 1 a 3 veces mes  
☐ 1 vez semana  
☐ 2 a 4 veces semana  
☐ 5 a 6 veces semana  
☐ 1 vez al día  
☐ 2 a 3 veces al día  
☐ 5 a 6 veces al día  
☐ más 6 veces al día

---

|                    |                                                                                                                                                                                                                                                                                                                                                                                                              |
|--------------------|--------------------------------------------------------------------------------------------------------------------------------------------------------------------------------------------------------------------------------------------------------------------------------------------------------------------------------------------------------------------------------------------------------------|
| vino seco o vermut | <input checked="" type="radio"/> Nunca o menos 1 vez al mes<br><input type="radio"/> 1 a 3 veces mes<br><input type="radio"/> 1 vez semana<br><input type="radio"/> 2 a 4 veces semana<br><input type="radio"/> 5 a 6 veces semana<br><input type="radio"/> 1 vez al día<br><input type="radio"/> 2 a 3 veces al día<br><input type="radio"/> 5 a 6 veces al día<br><input type="radio"/> más 6 veces al día |
|--------------------|--------------------------------------------------------------------------------------------------------------------------------------------------------------------------------------------------------------------------------------------------------------------------------------------------------------------------------------------------------------------------------------------------------------|

---

|         |                                                                                                                                                                                                                                                                                                                                                                                                              |
|---------|--------------------------------------------------------------------------------------------------------------------------------------------------------------------------------------------------------------------------------------------------------------------------------------------------------------------------------------------------------------------------------------------------------------|
| cerveza | <input checked="" type="radio"/> Nunca o menos 1 vez al mes<br><input type="radio"/> 1 a 3 veces mes<br><input type="radio"/> 1 vez semana<br><input type="radio"/> 2 a 4 veces semana<br><input type="radio"/> 5 a 6 veces semana<br><input type="radio"/> 1 vez al día<br><input type="radio"/> 2 a 3 veces al día<br><input type="radio"/> 5 a 6 veces al día<br><input type="radio"/> más 6 veces al día |
|---------|--------------------------------------------------------------------------------------------------------------------------------------------------------------------------------------------------------------------------------------------------------------------------------------------------------------------------------------------------------------------------------------------------------------|

---

|                     |                                                                                                                                                                                                                                                                                                                                                                                                              |
|---------------------|--------------------------------------------------------------------------------------------------------------------------------------------------------------------------------------------------------------------------------------------------------------------------------------------------------------------------------------------------------------------------------------------------------------|
| cerveza sin alcohol | <input checked="" type="radio"/> Nunca o menos 1 vez al mes<br><input type="radio"/> 1 a 3 veces mes<br><input type="radio"/> 1 vez semana<br><input type="radio"/> 2 a 4 veces semana<br><input type="radio"/> 5 a 6 veces semana<br><input type="radio"/> 1 vez al día<br><input type="radio"/> 2 a 3 veces al día<br><input type="radio"/> 5 a 6 veces al día<br><input type="radio"/> más 6 veces al día |
|---------------------|--------------------------------------------------------------------------------------------------------------------------------------------------------------------------------------------------------------------------------------------------------------------------------------------------------------------------------------------------------------------------------------------------------------|

---

|         |                                                                                                                                                                                                                                                                                                                                                                                                              |
|---------|--------------------------------------------------------------------------------------------------------------------------------------------------------------------------------------------------------------------------------------------------------------------------------------------------------------------------------------------------------------------------------------------------------------|
| licores | <input checked="" type="radio"/> Nunca o menos 1 vez al mes<br><input type="radio"/> 1 a 3 veces mes<br><input type="radio"/> 1 vez semana<br><input type="radio"/> 2 a 4 veces semana<br><input type="radio"/> 5 a 6 veces semana<br><input type="radio"/> 1 vez al día<br><input type="radio"/> 2 a 3 veces al día<br><input type="radio"/> 5 a 6 veces al día<br><input type="radio"/> más 6 veces al día |
|---------|--------------------------------------------------------------------------------------------------------------------------------------------------------------------------------------------------------------------------------------------------------------------------------------------------------------------------------------------------------------------------------------------------------------|

---

|                       |                                                                                                                                                                                                                                                                                                                                                                                                              |
|-----------------------|--------------------------------------------------------------------------------------------------------------------------------------------------------------------------------------------------------------------------------------------------------------------------------------------------------------------------------------------------------------------------------------------------------------|
| ginebra o ron o vodka | <input checked="" type="radio"/> Nunca o menos 1 vez al mes<br><input type="radio"/> 1 a 3 veces mes<br><input type="radio"/> 1 vez semana<br><input type="radio"/> 2 a 4 veces semana<br><input type="radio"/> 5 a 6 veces semana<br><input type="radio"/> 1 vez al día<br><input type="radio"/> 2 a 3 veces al día<br><input type="radio"/> 5 a 6 veces al día<br><input type="radio"/> más 6 veces al día |
|-----------------------|--------------------------------------------------------------------------------------------------------------------------------------------------------------------------------------------------------------------------------------------------------------------------------------------------------------------------------------------------------------------------------------------------------------|

---

|                 |                                                                                                                                                                                                                                                                                                                                                                                                              |
|-----------------|--------------------------------------------------------------------------------------------------------------------------------------------------------------------------------------------------------------------------------------------------------------------------------------------------------------------------------------------------------------------------------------------------------------|
| refresco normal | <input type="radio"/> Nunca o menos 1 vez al mes<br><input type="radio"/> 1 a 3 veces mes<br><input checked="" type="radio"/> 1 vez semana<br><input type="radio"/> 2 a 4 veces semana<br><input type="radio"/> 5 a 6 veces semana<br><input type="radio"/> 1 vez al día<br><input type="radio"/> 2 a 3 veces al día<br><input type="radio"/> 5 a 6 veces al día<br><input type="radio"/> más 6 veces al día |
|-----------------|--------------------------------------------------------------------------------------------------------------------------------------------------------------------------------------------------------------------------------------------------------------------------------------------------------------------------------------------------------------------------------------------------------------|

---

---

refresco sin azúcar

- ☐ Nunca o menos 1 vez al mes
- ☐ 1 a 3 veces mes
- ☒ 1 vez semana
- ☐ 2 a 4 veces semana
- ☐ 5 a 6 veces semana
- ☐ 1 vez al día
- ☐ 2 a 3 veces al día
- ☐ 5 a 6 veces al día
- ☐ más 6 veces al día

---

Agua del grifo

- ☐ Nunca o menos 1 vez al mes
- ☐ 1 a 3 veces mes
- ☒ 1 vez semana
- ☐ 2 a 4 veces semana
- ☐ 5 a 6 veces semana
- ☐ 1 vez al día
- ☐ 2 a 3 veces al día
- ☐ 5 a 6 veces al día
- ☐ más 6 veces al día

---

agua embotellada sin gas

- ☐ Nunca o menos 1 vez al mes
- ☐ 1 a 3 veces mes
- ☐ 1 vez semana
- ☐ 2 a 4 veces semana
- ☐ 5 a 6 veces semana
- ☒ 1 vez al día
- ☐ 2 a 3 veces al día
- ☐ 5 a 6 veces al día
- ☐ más 6 veces al día

---

agua embotellada con gas

- ☒ Nunca o menos 1 vez al mes
- ☐ 1 a 3 veces mes
- ☐ 1 vez semana
- ☐ 2 a 4 veces semana
- ☐ 5 a 6 veces semana
- ☐ 1 vez al día
- ☐ 2 a 3 veces al día
- ☐ 5 a 6 veces al día
- ☐ más 6 veces al día

---

zumو frutas embasado

- ☐ Nunca o menos 1 vez al mes
- ☐ 1 a 3 veces mes
- ☐ 1 vez semana
- ☒ 2 a 4 veces semana
- ☐ 5 a 6 veces semana
- ☐ 1 vez al día
- ☐ 2 a 3 veces al día
- ☐ 5 a 6 veces al día
- ☐ más 6 veces al día

---

cafe

- ☐ Nunca o menos 1 vez al mes
- ☐ 1 a 3 veces mes
- ☐ 1 vez semana
- ☐ 2 a 4 veces semana
- ☐ 5 a 6 veces semana
- ☐ 1 vez al día
- ☒ 2 a 3 veces al día
- ☐ 5 a 6 veces al día
- ☐ más 6 veces al día

---

cafe descafeinado

- ☐ Nunca o menos 1 vez al mes  
☒ 1 a 3 veces mes  
☐ 1 vez semana  
☐ 2 a 4 veces semana  
☐ 5 a 6 veces semana  
☐ 1 vez al día  
☐ 2 a 3 veces al día  
☐ 5 a 6 veces al día  
☐ más 6 veces al día

---

te o infusión

- ☐ Nunca o menos 1 vez al mes  
☒ 1 a 3 veces mes  
☐ 1 vez semana  
☐ 2 a 4 veces semana  
☐ 5 a 6 veces semana  
☐ 1 vez al día  
☐ 2 a 3 veces al día  
☐ 5 a 6 veces al día  
☐ más 6 veces al día

---

sopa o puré verduras

- ☐ Nunca o menos 1 vez al mes  
☒ 1 a 3 veces mes  
☐ 1 vez semana  
☐ 2 a 4 veces semana  
☐ 5 a 6 veces semana  
☐ 1 vez al día  
☐ 2 a 3 veces al día  
☐ 5 a 6 veces al día  
☐ más 6 veces al día

---

croquetas pollo jamón

- ☒ Nunca o menos 1 vez al mes  
☐ 1 a 3 veces mes  
☐ 1 vez semana  
☐ 2 a 4 veces semana  
☐ 5 a 6 veces semana  
☐ 1 vez al día  
☐ 2 a 3 veces al día  
☐ 5 a 6 veces al día  
☐ más 6 veces al día

---

croquetas pescado

- ☒ Nunca o menos 1 vez al mes  
☐ 1 a 3 veces mes  
☐ 1 vez semana  
☐ 2 a 4 veces semana  
☐ 5 a 6 veces semana  
☐ 1 vez al día  
☐ 2 a 3 veces al día  
☐ 5 a 6 veces al día  
☐ más 6 veces al día

---

mayonesa

- ☐ Nunca o menos 1 vez al mes  
☐ 1 a 3 veces mes  
☒ 1 vez semana  
☐ 2 a 4 veces semana  
☐ 5 a 6 veces semana  
☐ 1 vez al día  
☐ 2 a 3 veces al día  
☐ 5 a 6 veces al día  
☐ más 6 veces al día

|                  |                                                                                                                                                                                                                                                                                                                                                                                                              |
|------------------|--------------------------------------------------------------------------------------------------------------------------------------------------------------------------------------------------------------------------------------------------------------------------------------------------------------------------------------------------------------------------------------------------------------|
| salsa tomate     | <input type="radio"/> Nunca o menos 1 vez al mes<br><input type="radio"/> 1 a 3 veces mes<br><input checked="" type="radio"/> 1 vez semana<br><input type="radio"/> 2 a 4 veces semana<br><input type="radio"/> 5 a 6 veces semana<br><input type="radio"/> 1 vez al día<br><input type="radio"/> 2 a 3 veces al día<br><input type="radio"/> 5 a 6 veces al día<br><input type="radio"/> más 6 veces al día |
| ketchup          | <input type="radio"/> Nunca o menos 1 vez al mes<br><input type="radio"/> 1 a 3 veces mes<br><input type="radio"/> 1 vez semana<br><input type="radio"/> 2 a 4 veces semana<br><input type="radio"/> 5 a 6 veces semana<br><input type="radio"/> 1 vez al día<br><input checked="" type="radio"/> 2 a 3 veces al día<br><input type="radio"/> 5 a 6 veces al día<br><input type="radio"/> más 6 veces al día |
| sal              | <input type="radio"/> Nunca o menos 1 vez al mes<br><input checked="" type="radio"/> 1 a 3 veces mes<br><input type="radio"/> 1 vez semana<br><input type="radio"/> 2 a 4 veces semana<br><input type="radio"/> 5 a 6 veces semana<br><input type="radio"/> 1 vez al día<br><input type="radio"/> 2 a 3 veces al día<br><input type="radio"/> 5 a 6 veces al día<br><input type="radio"/> más 6 veces al día |
| ajo              | <input type="radio"/> Nunca o menos 1 vez al mes<br><input checked="" type="radio"/> 1 a 3 veces mes<br><input type="radio"/> 1 vez semana<br><input type="radio"/> 2 a 4 veces semana<br><input type="radio"/> 5 a 6 veces semana<br><input type="radio"/> 1 vez al día<br><input type="radio"/> 2 a 3 veces al día<br><input type="radio"/> 5 a 6 veces al día<br><input type="radio"/> más 6 veces al día |
| mermelada o miel | <input checked="" type="radio"/> Nunca o menos 1 vez al mes<br><input type="radio"/> 1 a 3 veces mes<br><input type="radio"/> 1 vez semana<br><input type="radio"/> 2 a 4 veces semana<br><input type="radio"/> 5 a 6 veces semana<br><input type="radio"/> 1 vez al día<br><input type="radio"/> 2 a 3 veces al día<br><input type="radio"/> 5 a 6 veces al día<br><input type="radio"/> más 6 veces al día |
| azúcar           | <input type="radio"/> Nunca o menos 1 vez al mes<br><input type="radio"/> 1 a 3 veces mes<br><input type="radio"/> 1 vez semana<br><input type="radio"/> 2 a 4 veces semana<br><input type="radio"/> 5 a 6 veces semana<br><input type="radio"/> 1 vez al día<br><input type="radio"/> 2 a 3 veces al día<br><input type="radio"/> 5 a 6 veces al día<br><input checked="" type="radio"/> más 6 veces al día |



---

Otro alimento

---

suplementos vitamínicos

- ☐ si  
☒ no

---

suplementos vitamínicos

---

dieta previa

- ☐ si  
☐ no

motivo dieta

- ☐ no dieta  
☐ control peso  
☐ control colesterol  
☐ control diabetes  
☐ problemas estómago  
☐ problemas vesícula o hepáticos  
☐ HTA o cardiopatía  
☐ problemas renales  
☐ alergia alimentaria  
☐ ácido úrico elevado  
☐ vegetariana  
☐ otros

---

cambio alimentos año previo gestación

---

- ☐ si  
☐ no

cambio lácteos

- ☐ eliminado  
☐ disminuido  
☐ igual  
☐ aumentado  
☐ no sabe

---

cambio huevos

---

- ☐ eliminado  
☐ disminuido  
☐ igual  
☐ aumentado  
☐ no sabe

---

cambio carne

---

- ☐ eliminado  
☐ disminuido  
☐ igual  
☐ aumentado  
☐ no sabe

---

cambio pescado

---

- ☐ eliminado  
☐ disminuido  
☐ igual  
☐ aumentado  
☐ no sabe

---

cambio verduras

---

- ☐ eliminado  
☐ disminuido  
☐ igual  
☐ aumentado  
☐ no sabe

|                            |                                                                                                                                                                                                             |
|----------------------------|-------------------------------------------------------------------------------------------------------------------------------------------------------------------------------------------------------------|
| cambio legumbres           | <input type="radio"/> eliminado<br><input type="radio"/> disminuido<br><input type="radio"/> igual<br><input type="radio"/> aumentado<br><input type="radio"/> no sabe                                      |
| cambio fruta               | <input type="radio"/> eliminado<br><input type="radio"/> disminuido<br><input type="radio"/> igual<br><input type="radio"/> aumentado<br><input type="radio"/> no sabe                                      |
| cambio pan                 | <input type="radio"/> eliminado<br><input type="radio"/> disminuido<br><input type="radio"/> igual<br><input type="radio"/> aumentado<br><input type="radio"/> no sabe                                      |
| cambio aceite oliva        | <input type="radio"/> eliminado<br><input type="radio"/> disminuido<br><input type="radio"/> igual<br><input type="radio"/> aumentado<br><input type="radio"/> no sabe                                      |
| cambio mante o margarina   | <input type="radio"/> eliminado<br><input type="radio"/> disminuido<br><input type="radio"/> igual<br><input type="radio"/> aumentado<br><input type="radio"/> no sabe                                      |
| cambio azúcar y dulces     | <input type="radio"/> eliminado<br><input type="radio"/> disminuido<br><input type="radio"/> igual<br><input type="radio"/> aumentado<br><input type="radio"/> no sabe                                      |
| cambio bebidas alcohólicas | <input type="radio"/> eliminado<br><input type="radio"/> disminuido<br><input type="radio"/> igual<br><input type="radio"/> aumentado<br><input type="radio"/> no sabe                                      |
| frecuencia comidas fritas  | <input type="radio"/> a diario<br><input type="radio"/> 5 a 6 veces semana<br><input type="radio"/> 2 a 4 veces semana<br><input type="radio"/> 1 vez semana<br><input type="radio"/> menos de 1 vez semana |
| carne                      | <input type="radio"/> no como<br><input type="radio"/> cruda<br><input type="radio"/> poco hecha<br><input type="radio"/> hecha<br><input type="radio"/> muy hecha                                          |
| grasa visible carne        | <input type="radio"/> quita toda<br><input type="radio"/> quita mayoría<br><input type="radio"/> quita un poco<br><input type="radio"/> no quita nada                                                       |

|                                |                                                                                                                                                                                                                                               |
|--------------------------------|-----------------------------------------------------------------------------------------------------------------------------------------------------------------------------------------------------------------------------------------------|
| cocina carne                   | <input type="radio"/> a la plancha<br><input type="radio"/> a la parrilla<br><input type="radio"/> asada<br><input type="radio"/> frita<br><input type="radio"/> guisada                                                                      |
| tostado quemado carne          | <input type="radio"/> nunca<br><input type="radio"/> 1 vez mes<br><input type="radio"/> 2 a 3 veces mes<br><input type="radio"/> 1 vez semana<br><input type="radio"/> 2 a 3 semanas                                                          |
| tostado quemado pescado        | <input type="radio"/> nunca<br><input type="radio"/> 1 vez mes<br><input type="radio"/> 2 a 3 veces mes<br><input type="radio"/> 1 vez semana<br><input type="radio"/> 2 a 3 semanas                                                          |
| socarrat paella                | <input type="radio"/> nunca<br><input type="radio"/> 1 vez mes<br><input type="radio"/> 2 a 3 veces mes<br><input type="radio"/> 1 vez semana<br><input type="radio"/> 2 a 3 semanas                                                          |
| grasa o aceite cocinar         | <input type="radio"/> mantequilla<br><input type="radio"/> margarina<br><input type="radio"/> aceite oliva<br><input type="radio"/> aceite oliva virgen extra<br><input type="radio"/> aceite vegetal<br><input type="radio"/> mezcla aceites |
| grasa aceite aliñar            | <input type="radio"/> mantequilla<br><input type="radio"/> margarina<br><input type="radio"/> aceite oliva<br><input type="radio"/> aceite oliva virgen extra<br><input type="radio"/> aceite vegetal<br><input type="radio"/> mezcla aceites |
| grasa aceite freir             | <input type="radio"/> mantequilla<br><input type="radio"/> margarina<br><input type="radio"/> aceite oliva<br><input type="radio"/> aceite oliva virgen extra<br><input type="radio"/> aceite vegetal<br><input type="radio"/> mezcla aceites |
| Ejercicio cuestionario         | <input type="radio"/> si<br><input checked="" type="radio"/> no                                                                                                                                                                               |
| horas de sueño incluido siesta | _____                                                                                                                                                                                                                                         |
| minutos siesta                 | _____                                                                                                                                                                                                                                         |
| horas televisión semana        | _____                                                                                                                                                                                                                                         |

|                                        |                                                                                                                                                                                                                                                                                                                                                                |
|----------------------------------------|----------------------------------------------------------------------------------------------------------------------------------------------------------------------------------------------------------------------------------------------------------------------------------------------------------------------------------------------------------------|
| actividad trabajo                      | <input type="radio"/> casi siempre sentado<br><input type="radio"/> sentado 50 por cien<br><input type="radio"/> casi siempre de pie, quieto<br><input type="radio"/> casi siempre levantado caminando y llevando pocas cosas<br><input type="radio"/> casi siempre levantado, caminando y llevado muchas cosas<br><input type="radio"/> trabajo manual pesado |
| tiempo caminar o bici al día           | <input type="radio"/> casi nunca<br><input type="radio"/> menos 20min día<br><input type="radio"/> 20 a 40 min día<br><input type="radio"/> 40 a 60 min día<br><input type="radio"/> 1h o 1h y media día<br><input type="radio"/> más de 1h y media al día                                                                                                     |
| tiempo tareas casa al día              | <input type="radio"/> menos de 1h día<br><input type="radio"/> 1 a 2h día<br><input type="radio"/> 3 a 4h día<br><input type="radio"/> 5 a 6h día<br><input type="radio"/> 7 a 8h día<br><input type="radio"/> más de 8h día                                                                                                                                   |
| tiempo libre televisión ordenador leer | <input type="radio"/> menos 1h día<br><input type="radio"/> 1h día<br><input type="radio"/> 2h día<br><input type="radio"/> 3h día<br><input type="radio"/> 4h día<br><input type="radio"/> 5 a 6h día<br><input type="radio"/> mas 6h día                                                                                                                     |
| tiempo libre ejercicio o deporte       | <input type="radio"/> menos 1h semana<br><input type="radio"/> 1h semana<br><input type="radio"/> 2h semana<br><input type="radio"/> 3h semana<br><input type="radio"/> 4 a 5h semana<br><input type="radio"/> mas 5h semana                                                                                                                                   |
| como se considera                      | <input type="radio"/> sedentaria<br><input type="radio"/> poco activa<br><input type="radio"/> moderadamente activa<br><input type="radio"/> bastante activa<br><input type="radio"/> muy activa<br><input type="radio"/> no sabe                                                                                                                              |
| FUR                                    | [*DATA REMOVED*]                                                                                                                                                                                                                                                                                                                                               |
| Semanas gestación 2T                   | [*DATA REMOVED*]                                                                                                                                                                                                                                                                                                                                               |
| Días gestación 2T                      | [*DATA REMOVED*]                                                                                                                                                                                                                                                                                                                                               |
| DBP 2T                                 | [*DATA REMOVED*]                                                                                                                                                                                                                                                                                                                                               |
| CC 2T                                  | [*DATA REMOVED*]                                                                                                                                                                                                                                                                                                                                               |
| AC 2T                                  | [*DATA REMOVED*]                                                                                                                                                                                                                                                                                                                                               |

|                                                   |                                                                                                                                                                                                 |
|---------------------------------------------------|-------------------------------------------------------------------------------------------------------------------------------------------------------------------------------------------------|
| LF 2T                                             | [*DATA REMOVED*]                                                                                                                                                                                |
| PFE 2T (Hadlock)                                  | [*DATA REMOVED*]                                                                                                                                                                                |
| Semanas gestación 3T                              | [*DATA REMOVED*]                                                                                                                                                                                |
| días 3T                                           | [*DATA REMOVED*]                                                                                                                                                                                |
| DBP 3T                                            | [*DATA REMOVED*]                                                                                                                                                                                |
| CC 3T                                             | [*DATA REMOVED*]                                                                                                                                                                                |
| AC 3T                                             | [*DATA REMOVED*]                                                                                                                                                                                |
| LF 3T                                             | [*DATA REMOVED*]                                                                                                                                                                                |
| PFE 3T (Hadlock)                                  | [*DATA REMOVED*]                                                                                                                                                                                |
| Semanas de gestación final                        | [*DATA REMOVED*]                                                                                                                                                                                |
| días gestación final                              | [*DATA REMOVED*]                                                                                                                                                                                |
| Localización placenta                             | <input checked="" type="radio"/> anterior<br><input type="radio"/> lateral derecha<br><input type="radio"/> lateral izquierda<br><input type="radio"/> posterior<br><input type="radio"/> fondo |
| Presentación longitudinal cefálica                | <input type="radio"/> no<br><input checked="" type="radio"/> si                                                                                                                                 |
| Dorso                                             | <input type="radio"/> izquierda anterior<br><input type="radio"/> izquierda posterior<br><input type="radio"/> derecha anterior<br><input checked="" type="radio"/> derecha posterior           |
| diámetro biparietal                               | [*DATA REMOVED*]                                                                                                                                                                                |
| Circunferencia craneal                            | [*DATA REMOVED*]                                                                                                                                                                                |
| Circunferencia abdominal                          | [*DATA REMOVED*]                                                                                                                                                                                |
| Longitud de femur                                 | [*DATA REMOVED*]                                                                                                                                                                                |
| tejido celular subcutáneo a nivel del muslo en mm | [*DATA REMOVED*]                                                                                                                                                                                |
| tejido celular subcutáneo en abdomen en mm        | [*DATA REMOVED*]                                                                                                                                                                                |
| Volumen del muslo en cm3                          | [*DATA REMOVED*]                                                                                                                                                                                |
| Peso fetal estimado según fórmula de Hadlock      | [*DATA REMOVED*]                                                                                                                                                                                |

|                                               |                                                                                                                                                          |
|-----------------------------------------------|----------------------------------------------------------------------------------------------------------------------------------------------------------|
| Percentil                                     | [*DATA REMOVED*]                                                                                                                                         |
| Peso fetal estimado según fórmula de Scioscia | <hr/>                                                                                                                                                    |
| Peso fetal estimado según fórmula de LEE      | <hr/>                                                                                                                                                    |
| Tipo de parto                                 | <input type="radio"/> eutocico<br><input checked="" type="radio"/> instrumentado/ventosa<br><input type="radio"/> cesarea                                |
| fecha de nacimiento                           | [*DATA REMOVED*]                                                                                                                                         |
| Días entre exploración y nacimiento           | [*DATA REMOVED*]                                                                                                                                         |
| Peso RN en g                                  | [*DATA REMOVED*]                                                                                                                                         |
| sexo                                          | <input type="radio"/> mujer<br><input checked="" type="radio"/> hombre                                                                                   |
| Apgar 1 minuto                                | [*DATA REMOVED*]                                                                                                                                         |
| Apgar 5 minutos                               | [*DATA REMOVED*]                                                                                                                                         |
| Apgar 10 minutos                              | <hr/>                                                                                                                                                    |
| antecedente Covid durante gestación           | <input type="radio"/> Yes<br><input checked="" type="radio"/> No                                                                                         |
| Nivel de estudios                             | <input type="radio"/> ninguno<br><input checked="" type="radio"/> primarios<br><input type="radio"/> secundarios<br><input type="radio"/> universitarios |

# Base\_datos\_estimacion\_peso\_fetal

|                                       |                                                                                                                                                                                                                                                                                      |
|---------------------------------------|--------------------------------------------------------------------------------------------------------------------------------------------------------------------------------------------------------------------------------------------------------------------------------------|
| Número de identificación participante | 186                                                                                                                                                                                                                                                                                  |
| CODIGO PARTICIPANTE                   |                                                                                                                                                                                                                                                                                      |
| Edad                                  | [*DATA REMOVED*]                                                                                                                                                                                                                                                                     |
| Gestaciones                           | <input checked="" type="radio"/> 1<br><input type="radio"/> 2<br><input type="radio"/> 3<br><input type="radio"/> mas de 3                                                                                                                                                           |
| partos                                | <input checked="" type="radio"/> 0<br><input type="radio"/> 1<br><input type="radio"/> 2<br><input type="radio"/> 3<br><input type="radio"/> mas de 3                                                                                                                                |
| cesáreas                              | <input checked="" type="radio"/> 0<br><input type="radio"/> 1<br><input type="radio"/> 2<br><input type="radio"/> 3<br><input type="radio"/> mas de 3                                                                                                                                |
| Abortos                               | <input checked="" type="radio"/> 0<br><input type="radio"/> 1<br><input type="radio"/> 2<br><input type="radio"/> 3<br><input type="radio"/> mas de 3                                                                                                                                |
| Tipo de gestacion                     | <input checked="" type="radio"/> espontanea<br><input type="radio"/> IAC inseminación artificial conyuge<br><input type="radio"/> IAD inseminación artificial donante<br><input type="radio"/> FIV Fecundación in Vitro<br><input type="radio"/> Ovodon FIV con donación de ovocitos |
| peso previo a embarazo                | [*DATA REMOVED*]                                                                                                                                                                                                                                                                     |
| Ganancia ponderal embarazo            |                                                                                                                                                                                                                                                                                      |
| Talla madre                           | [*DATA REMOVED*]                                                                                                                                                                                                                                                                     |
| IMC previo embarazo                   | 24.023808670084982                                                                                                                                                                                                                                                                   |
| Patología obstétrica                  | <input checked="" type="radio"/> no<br><input type="radio"/> si                                                                                                                                                                                                                      |
| Diabetes pregestacional               | <input checked="" type="radio"/> no<br><input type="radio"/> si                                                                                                                                                                                                                      |
| Diabetes gestacional                  | <input checked="" type="radio"/> no<br><input type="radio"/> si                                                                                                                                                                                                                      |

|                                            |                                                                                                                                                                                      |
|--------------------------------------------|--------------------------------------------------------------------------------------------------------------------------------------------------------------------------------------|
| Diabetes gestacional con insulina          | <input checked="" type="radio"/> no<br><input type="radio"/> si                                                                                                                      |
| Diabetes gestacional con dieta y ejercicio | <input checked="" type="radio"/> no<br><input type="radio"/> si                                                                                                                      |
| Percentil fetos previos                    | <input checked="" type="radio"/> Nada<br><input type="radio"/> percentil menor de 10<br><input type="radio"/> percentil entre 10 y 90<br><input type="radio"/> percentil mayor de 90 |
| Exfumadora                                 | <input checked="" type="radio"/> Nada<br><input type="radio"/> menos de 5 años<br><input type="radio"/> 5 a 10 años<br><input type="radio"/> mayor o igual a 10 años                 |
| Hábito tabáquico                           | <input checked="" type="radio"/> no<br><input type="radio"/> si                                                                                                                      |
| fumadora                                   | [*DATA REMOVED*]                                                                                                                                                                     |
| Consumo otros tóxicos                      | <input checked="" type="radio"/> no<br><input type="radio"/> si                                                                                                                      |
| Hb 1T                                      | _____                                                                                                                                                                                |
| Htc 1T                                     | _____                                                                                                                                                                                |
| Hb 2T                                      | [*DATA REMOVED*]                                                                                                                                                                     |
| HTC 2T                                     | [*DATA REMOVED*]                                                                                                                                                                     |
| Hb 3T                                      | [*DATA REMOVED*]                                                                                                                                                                     |
| HTC 3T                                     | [*DATA REMOVED*]                                                                                                                                                                     |
| Suplemento FE oral                         | <input type="radio"/> si<br><input checked="" type="radio"/> no                                                                                                                      |
| Suplemento fe iv                           | <input type="radio"/> si<br><input checked="" type="radio"/> no                                                                                                                      |
| Transfusión                                | <input checked="" type="radio"/> no<br><input type="radio"/> si                                                                                                                      |
| Solicitada Vit D                           | <input checked="" type="radio"/> no<br><input type="radio"/> si                                                                                                                      |
| Deficit vit D                              | <input type="radio"/> no<br><input type="radio"/> si                                                                                                                                 |



|                       |                                                                                                                                                                                                                                                                                                                                                                                                              |
|-----------------------|--------------------------------------------------------------------------------------------------------------------------------------------------------------------------------------------------------------------------------------------------------------------------------------------------------------------------------------------------------------------------------------------------------------|
| Suplemento vit D      | <input type="radio"/> si<br><input type="radio"/> no                                                                                                                                                                                                                                                                                                                                                         |
| Dieta, cuestionario   | <input checked="" type="radio"/> si<br><input type="radio"/> no                                                                                                                                                                                                                                                                                                                                              |
| Leche entera          | <input checked="" type="radio"/> Nunca o menos 1 vez al mes<br><input type="radio"/> 1 a 3 veces mes<br><input type="radio"/> 1 vez semana<br><input type="radio"/> 2 a 4 veces semana<br><input type="radio"/> 5 a 6 veces semana<br><input type="radio"/> 1 vez al día<br><input type="radio"/> 2 a 3 veces al día<br><input type="radio"/> 5 a 6 veces al día<br><input type="radio"/> más 6 veces al día |
| Leche semidesnatada   | <input checked="" type="radio"/> Nunca o menos 1 vez al mes<br><input type="radio"/> 1 a 3 veces mes<br><input type="radio"/> 1 vez semana<br><input type="radio"/> 2 a 4 veces semana<br><input type="radio"/> 5 a 6 veces semana<br><input type="radio"/> 1 vez al día<br><input type="radio"/> 2 a 3 veces al día<br><input type="radio"/> 5 a 6 veces al día<br><input type="radio"/> mas 6 veces al día |
| Leche desnatada       | <input checked="" type="radio"/> Nunca o menos 1 vez al mes<br><input type="radio"/> 1 a 3 veces mes<br><input type="radio"/> 1 vez semana<br><input type="radio"/> 2 a 4 veces semana<br><input type="radio"/> 5 a 6 veces semana<br><input type="radio"/> 1 vez al día<br><input type="radio"/> 2 a 3 veces al día<br><input type="radio"/> 5 a 6 veces al día<br><input type="radio"/> más 6 veces al día |
| Leche condensada      | <input checked="" type="radio"/> Nunca o menos 1 vez al mes<br><input type="radio"/> 1 a 3 veces mes<br><input type="radio"/> 1 vez semana<br><input type="radio"/> 2 a 4 veces semana<br><input type="radio"/> 5 a 6 veces semana<br><input type="radio"/> 1 vez al día<br><input type="radio"/> 2 a 3 veces al día<br><input type="radio"/> 5 a 6 veces al día<br><input type="radio"/> más 6 veces al día |
| nata o crema de leche | <input type="radio"/> Nunca o menos 1 vez al mes<br><input checked="" type="radio"/> 1 a 3 veces mes<br><input type="radio"/> 1 vez semana<br><input type="radio"/> 2 a 4 veces semana<br><input type="radio"/> 5 a 6 veces semana<br><input type="radio"/> 1 vez al día<br><input type="radio"/> 2 a 3 veces al día<br><input type="radio"/> 5 a 6 veces al día<br><input type="radio"/> más 6 veces al día |

---

Yogurt Entero

- ☒ Nunca o menos 1 vez al mes  
☐ 1 a 3 veces mes  
☐ 1 vez semana  
☐ 2 a 4 veces semana  
☐ 5 a 6 veces semana  
☐ 1 vez al día  
☐ 2 a 3 veces al día  
☐ 5 a 6 veces al día  
☐ más 6 veces al día

---

Yogurt desnatado

- ☒ Nunca o menos 1 vez al mes  
☐ 1 a 3 veces mes  
☐ 1 vez semana  
☐ 2 a 4 veces semana  
☐ 5 a 6 veces semana  
☐ 1 vez al día  
☐ 2 a 3 veces al día  
☐ 5 a 6 veces al día  
☐ más 6 veces al día

---

100g requesón o queso blando o queso fresco

- ☒ Nunca o menos 1 vez al mes  
☐ 1 a 3 veces mes  
☐ 1 vez semana  
☐ 2 a 4 veces semana  
☐ 5 a 6 veces semana  
☐ 1 vez al día  
☐ 2 a 3 veces al día  
☐ 5 a 6 veces al día  
☐ más 6 veces al día

---

queso curado o semicurado o cremoso

- ☒ Nunca o menos 1 vez al mes  
☐ 1 a 3 veces mes  
☐ 1 vez semana  
☐ 2 a 4 veces semana  
☐ 5 a 6 veces semana  
☐ 1 vez al día  
☐ 2 a 3 veces al día  
☐ 5 a 6 veces al día  
☐ más 6 veces al día

---

natillas flan pudding

- ☒ Nunca o menos 1 vez al mes  
☐ 1 a 3 veces mes  
☐ 1 vez semana  
☐ 2 a 4 veces semana  
☐ 5 a 6 veces semana  
☐ 1 vez al día  
☐ 2 a 3 veces al día  
☐ 5 a 6 veces al día  
☐ más 6 veces al día

---

Helado

- ☒ Nunca o menos 1 vez al mes  
☐ 1 a 3 veces mes  
☐ 1 vez semana  
☐ 2 a 4 veces semana  
☐ 5 a 6 veces semana  
☐ 1 vez al día  
☐ 2 a 3 veces al día  
☐ 5 a 6 veces al día  
☐ más 6 veces al día

|                                      |                                                                                                                                                                                                                                                                                                                                                                                                              |
|--------------------------------------|--------------------------------------------------------------------------------------------------------------------------------------------------------------------------------------------------------------------------------------------------------------------------------------------------------------------------------------------------------------------------------------------------------------|
| huevo                                | <input type="radio"/> Nunca o menos 1 vez al mes<br><input checked="" type="radio"/> 1 a 3 veces mes<br><input type="radio"/> 1 vez semana<br><input type="radio"/> 2 a 4 veces semana<br><input type="radio"/> 5 a 6 veces semana<br><input type="radio"/> 1 vez al día<br><input type="radio"/> 2 a 3 veces al día<br><input type="radio"/> 5 a 6 veces al día<br><input type="radio"/> más 6 veces al día |
| Pollo con piel                       | <input checked="" type="radio"/> Nunca o menos 1 vez al mes<br><input type="radio"/> 1 a 3 veces mes<br><input type="radio"/> 1 vez semana<br><input type="radio"/> 2 a 4 veces semana<br><input type="radio"/> 5 a 6 veces semana<br><input type="radio"/> 1 vez al día<br><input type="radio"/> 2 a 3 veces al día<br><input type="radio"/> 5 a 6 veces al día<br><input type="radio"/> más 6 veces al día |
| pollo sin piel                       | <input type="radio"/> Nunca o menos 1 vez al mes<br><input checked="" type="radio"/> 1 a 3 veces mes<br><input type="radio"/> 1 vez semana<br><input type="radio"/> 2 a 4 veces semana<br><input type="radio"/> 5 a 6 veces semana<br><input type="radio"/> 1 vez al día<br><input type="radio"/> 2 a 3 veces al día<br><input type="radio"/> 5 a 6 veces al día<br><input type="radio"/> más 6 veces al día |
| Ternera o cerdo o cordero            | <input type="radio"/> Nunca o menos 1 vez al mes<br><input checked="" type="radio"/> 1 a 3 veces mes<br><input type="radio"/> 1 vez semana<br><input type="radio"/> 2 a 4 veces semana<br><input type="radio"/> 5 a 6 veces semana<br><input type="radio"/> 1 vez al día<br><input type="radio"/> 2 a 3 veces al día<br><input type="radio"/> 5 a 6 veces al día<br><input type="radio"/> más 6 veces al día |
| carne caza: Conejo o codorniz o pato | <input checked="" type="radio"/> Nunca o menos 1 vez al mes<br><input type="radio"/> 1 a 3 veces mes<br><input type="radio"/> 1 vez semana<br><input type="radio"/> 2 a 4 veces semana<br><input type="radio"/> 5 a 6 veces semana<br><input type="radio"/> 1 vez al día<br><input type="radio"/> 2 a 3 veces al día<br><input type="radio"/> 5 a 6 veces al día<br><input type="radio"/> más 6 veces al día |
| Hígado de ternera o cerdo o pollo    | <input checked="" type="radio"/> Nunca o menos 1 vez al mes<br><input type="radio"/> 1 a 3 veces mes<br><input type="radio"/> 1 vez semana<br><input type="radio"/> 2 a 4 veces semana<br><input type="radio"/> 5 a 6 veces semana<br><input type="radio"/> 1 vez al día<br><input type="radio"/> 2 a 3 veces al día<br><input type="radio"/> 5 a 6 veces al día<br><input type="radio"/> más 6 veces al día |

|                     |                                                                                                                                                                                                                                                                                                                                                                                                              |
|---------------------|--------------------------------------------------------------------------------------------------------------------------------------------------------------------------------------------------------------------------------------------------------------------------------------------------------------------------------------------------------------------------------------------------------------|
| Vísceras            | <input checked="" type="radio"/> Nunca o menos 1 vez al mes<br><input type="radio"/> 1 a 3 veces mes<br><input type="radio"/> 1 vez semana<br><input type="radio"/> 2 a 4 veces semana<br><input type="radio"/> 5 a 6 veces semana<br><input type="radio"/> 1 vez al día<br><input type="radio"/> 2 a 3 veces al día<br><input type="radio"/> 5 a 6 veces al día<br><input type="radio"/> más 6 veces al día |
| Embutido            | <input checked="" type="radio"/> Nunca o menos 1 vez al mes<br><input type="radio"/> 1 a 3 veces mes<br><input type="radio"/> 1 vez semana<br><input type="radio"/> 2 a 4 veces semana<br><input type="radio"/> 5 a 6 veces semana<br><input type="radio"/> 1 vez al día<br><input type="radio"/> 2 a 3 veces al día<br><input type="radio"/> 5 a 6 veces al día<br><input type="radio"/> más 6 veces al día |
| Salchicha o similar | <input checked="" type="radio"/> Nunca o menos 1 vez al mes<br><input type="radio"/> 1 a 3 veces mes<br><input type="radio"/> 1 vez semana<br><input type="radio"/> 2 a 4 veces semana<br><input type="radio"/> 5 a 6 veces semana<br><input type="radio"/> 1 vez al día<br><input type="radio"/> 2 a 3 veces al día<br><input type="radio"/> 5 a 6 veces al día<br><input type="radio"/> más 6 veces al día |
| Pate o foiegras     | <input checked="" type="radio"/> Nunca o menos 1 vez al mes<br><input type="radio"/> 1 a 3 veces mes<br><input type="radio"/> 1 vez semana<br><input type="radio"/> 2 a 4 veces semana<br><input type="radio"/> 5 a 6 veces semana<br><input type="radio"/> 1 vez al día<br><input type="radio"/> 2 a 3 veces al día<br><input type="radio"/> 5 a 6 veces al día<br><input type="radio"/> más 6 veces al día |
| Hamburguesa         | <input type="radio"/> Nunca o menos 1 vez al mes<br><input checked="" type="radio"/> 1 a 3 veces mes<br><input type="radio"/> 1 vez semana<br><input type="radio"/> 2 a 4 veces semana<br><input type="radio"/> 5 a 6 veces semana<br><input type="radio"/> 1 vez al día<br><input type="radio"/> 2 a 3 veces al día<br><input type="radio"/> 5 a 6 veces al día<br><input type="radio"/> más 6 veces al día |
| tocino o bacon      | <input type="radio"/> Nunca o menos 1 vez al mes<br><input checked="" type="radio"/> 1 a 3 veces mes<br><input type="radio"/> 1 vez semana<br><input type="radio"/> 2 a 4 veces semana<br><input type="radio"/> 5 a 6 veces semana<br><input type="radio"/> 1 vez al día<br><input type="radio"/> 2 a 3 veces al día<br><input type="radio"/> 5 a 6 veces al día<br><input type="radio"/> más 6 veces al día |

---

Pescado frito

- ☒ Nunca o menos 1 vez al mes  
☐ 1 a 3 veces mes  
☐ 1 vez semana  
☐ 2 a 4 veces semana  
☐ 5 a 6 veces semana  
☐ 1 vez al día  
☐ 2 a 3 veces al día  
☐ 5 a 6 veces al día  
☐ más 6 veces al día

---

pescado hervido blanco

- ☐ Nunca o menos 1 vez al mes  
☒ 1 a 3 veces mes  
☐ 1 vez semana  
☐ 2 a 4 veces semana  
☐ 5 a 6 veces semana  
☐ 1 vez al día  
☐ 2 a 3 veces al día  
☐ 5 a 6 veces al día  
☐ más 6 veces al día

---

pescado hervido azul

- ☐ Nunca o menos 1 vez al mes  
☒ 1 a 3 veces mes  
☐ 1 vez semana  
☐ 2 a 4 veces semana  
☐ 5 a 6 veces semana  
☐ 1 vez al día  
☐ 2 a 3 veces al día  
☐ 5 a 6 veces al día  
☐ más 6 veces al día

---

otros pescado azul

- ☐ Nunca o menos 1 vez al mes  
☒ 1 a 3 veces mes  
☐ 1 vez semana  
☐ 2 a 4 veces semana  
☐ 5 a 6 veces semana  
☐ 1 vez al día  
☐ 2 a 3 veces al día  
☐ 5 a 6 veces al día  
☐ más 6 veces al día

---

atun conserva

- ☐ Nunca o menos 1 vez al mes  
☐ 1 a 3 veces mes  
☒ 1 vez semana  
☐ 2 a 4 veces semana  
☐ 5 a 6 veces semana  
☐ 1 vez al día  
☐ 2 a 3 veces al día  
☐ 5 a 6 veces al día  
☐ más 6 veces al día

---

sardina conserva

- ☒ Nunca o menos 1 vez al mes  
☐ 1 a 3 veces mes  
☐ 1 vez semana  
☐ 2 a 4 veces semana  
☐ 5 a 6 veces semana  
☐ 1 vez al día  
☐ 2 a 3 veces al día  
☐ 5 a 6 veces al día  
☐ más 6 veces al día

|                                         |                                                                                                                                                                                                                                                                                                                                                                                                              |
|-----------------------------------------|--------------------------------------------------------------------------------------------------------------------------------------------------------------------------------------------------------------------------------------------------------------------------------------------------------------------------------------------------------------------------------------------------------------|
| pescado ahumado                         | <input checked="" type="radio"/> Nunca o menos 1 vez al mes<br><input type="radio"/> 1 a 3 veces mes<br><input type="radio"/> 1 vez semana<br><input type="radio"/> 2 a 4 veces semana<br><input type="radio"/> 5 a 6 veces semana<br><input type="radio"/> 1 vez al día<br><input type="radio"/> 2 a 3 veces al día<br><input type="radio"/> 5 a 6 veces al día<br><input type="radio"/> más 6 veces al día |
| almejas o mejillones o ostras unos 100g | <input checked="" type="radio"/> Nunca o menos 1 vez al mes<br><input type="radio"/> 1 a 3 veces mes<br><input type="radio"/> 1 vez semana<br><input type="radio"/> 2 a 4 veces semana<br><input type="radio"/> 5 a 6 veces semana<br><input type="radio"/> 1 vez al día<br><input type="radio"/> 2 a 3 veces al día<br><input type="radio"/> 5 a 6 veces al día<br><input type="radio"/> más 6 veces al día |
| calamar o chipiron o sepia unos 100g    | <input type="radio"/> Nunca o menos 1 vez al mes<br><input checked="" type="radio"/> 1 a 3 veces mes<br><input type="radio"/> 1 vez semana<br><input type="radio"/> 2 a 4 veces semana<br><input type="radio"/> 5 a 6 veces semana<br><input type="radio"/> 1 vez al día<br><input type="radio"/> 2 a 3 veces al día<br><input type="radio"/> 5 a 6 veces al día<br><input type="radio"/> más 6 veces al día |
| marisco unos 100g                       | <input checked="" type="radio"/> Nunca o menos 1 vez al mes<br><input type="radio"/> 1 a 3 veces mes<br><input type="radio"/> 1 vez semana<br><input type="radio"/> 2 a 4 veces semana<br><input type="radio"/> 5 a 6 veces semana<br><input type="radio"/> 1 vez al día<br><input type="radio"/> 2 a 3 veces al día<br><input type="radio"/> 5 a 6 veces al día<br><input type="radio"/> más 6 veces al día |
| Espinacas o acelgas cocinadas           | <input checked="" type="radio"/> Nunca o menos 1 vez al mes<br><input type="radio"/> 1 a 3 veces mes<br><input type="radio"/> 1 vez semana<br><input type="radio"/> 2 a 4 veces semana<br><input type="radio"/> 5 a 6 veces semana<br><input type="radio"/> 1 vez al día<br><input type="radio"/> 2 a 3 veces al día<br><input type="radio"/> 5 a 6 veces al día<br><input type="radio"/> más 6 veces al día |
| Col o coliflor o brocoli cocinado       | <input checked="" type="radio"/> Nunca o menos 1 vez al mes<br><input type="radio"/> 1 a 3 veces mes<br><input type="radio"/> 1 vez semana<br><input type="radio"/> 2 a 4 veces semana<br><input type="radio"/> 5 a 6 veces semana<br><input type="radio"/> 1 vez al día<br><input type="radio"/> 2 a 3 veces al día<br><input type="radio"/> 5 a 6 veces al día<br><input type="radio"/> más 6 veces al día |

---

|                              |                                                                                                                                                                                                                                                                                                                                                                                                              |
|------------------------------|--------------------------------------------------------------------------------------------------------------------------------------------------------------------------------------------------------------------------------------------------------------------------------------------------------------------------------------------------------------------------------------------------------------|
| Lechuga o endivia o escarola | <input type="radio"/> Nunca o menos 1 vez al mes<br><input checked="" type="radio"/> 1 a 3 veces mes<br><input type="radio"/> 1 vez semana<br><input type="radio"/> 2 a 4 veces semana<br><input type="radio"/> 5 a 6 veces semana<br><input type="radio"/> 1 vez al día<br><input type="radio"/> 2 a 3 veces al día<br><input type="radio"/> 5 a 6 veces al día<br><input type="radio"/> más 6 veces al día |
|------------------------------|--------------------------------------------------------------------------------------------------------------------------------------------------------------------------------------------------------------------------------------------------------------------------------------------------------------------------------------------------------------------------------------------------------------|

---

|                 |                                                                                                                                                                                                                                                                                                                                                                                                              |
|-----------------|--------------------------------------------------------------------------------------------------------------------------------------------------------------------------------------------------------------------------------------------------------------------------------------------------------------------------------------------------------------------------------------------------------------|
| tomate ensalada | <input checked="" type="radio"/> Nunca o menos 1 vez al mes<br><input type="radio"/> 1 a 3 veces mes<br><input type="radio"/> 1 vez semana<br><input type="radio"/> 2 a 4 veces semana<br><input type="radio"/> 5 a 6 veces semana<br><input type="radio"/> 1 vez al día<br><input type="radio"/> 2 a 3 veces al día<br><input type="radio"/> 5 a 6 veces al día<br><input type="radio"/> más 6 veces al día |
|-----------------|--------------------------------------------------------------------------------------------------------------------------------------------------------------------------------------------------------------------------------------------------------------------------------------------------------------------------------------------------------------------------------------------------------------|

---

|         |                                                                                                                                                                                                                                                                                                                                                                                                              |
|---------|--------------------------------------------------------------------------------------------------------------------------------------------------------------------------------------------------------------------------------------------------------------------------------------------------------------------------------------------------------------------------------------------------------------|
| cebolla | <input checked="" type="radio"/> Nunca o menos 1 vez al mes<br><input type="radio"/> 1 a 3 veces mes<br><input type="radio"/> 1 vez semana<br><input type="radio"/> 2 a 4 veces semana<br><input type="radio"/> 5 a 6 veces semana<br><input type="radio"/> 1 vez al día<br><input type="radio"/> 2 a 3 veces al día<br><input type="radio"/> 5 a 6 veces al día<br><input type="radio"/> más 6 veces al día |
|---------|--------------------------------------------------------------------------------------------------------------------------------------------------------------------------------------------------------------------------------------------------------------------------------------------------------------------------------------------------------------------------------------------------------------|

---

|                      |                                                                                                                                                                                                                                                                                                                                                                                                              |
|----------------------|--------------------------------------------------------------------------------------------------------------------------------------------------------------------------------------------------------------------------------------------------------------------------------------------------------------------------------------------------------------------------------------------------------------|
| Zanahoria o calabaza | <input type="radio"/> Nunca o menos 1 vez al mes<br><input checked="" type="radio"/> 1 a 3 veces mes<br><input type="radio"/> 1 vez semana<br><input type="radio"/> 2 a 4 veces semana<br><input type="radio"/> 5 a 6 veces semana<br><input type="radio"/> 1 vez al día<br><input type="radio"/> 2 a 3 veces al día<br><input type="radio"/> 5 a 6 veces al día<br><input type="radio"/> más 6 veces al día |
|----------------------|--------------------------------------------------------------------------------------------------------------------------------------------------------------------------------------------------------------------------------------------------------------------------------------------------------------------------------------------------------------------------------------------------------------|

---

|               |                                                                                                                                                                                                                                                                                                                                                                                                              |
|---------------|--------------------------------------------------------------------------------------------------------------------------------------------------------------------------------------------------------------------------------------------------------------------------------------------------------------------------------------------------------------------------------------------------------------|
| Judías verdes | <input type="radio"/> Nunca o menos 1 vez al mes<br><input type="radio"/> 1 a 3 veces mes<br><input checked="" type="radio"/> 1 vez semana<br><input type="radio"/> 2 a 4 veces semana<br><input type="radio"/> 5 a 6 veces semana<br><input type="radio"/> 1 vez al día<br><input type="radio"/> 2 a 3 veces al día<br><input type="radio"/> 5 a 6 veces al día<br><input type="radio"/> más 6 veces al día |
|---------------|--------------------------------------------------------------------------------------------------------------------------------------------------------------------------------------------------------------------------------------------------------------------------------------------------------------------------------------------------------------------------------------------------------------|

---

|                                |                                                                                                                                                                                                                                                                                                                                                                                                              |
|--------------------------------|--------------------------------------------------------------------------------------------------------------------------------------------------------------------------------------------------------------------------------------------------------------------------------------------------------------------------------------------------------------------------------------------------------------|
| Berenjena o calabacin o pepino | <input type="radio"/> Nunca o menos 1 vez al mes<br><input checked="" type="radio"/> 1 a 3 veces mes<br><input type="radio"/> 1 vez semana<br><input type="radio"/> 2 a 4 veces semana<br><input type="radio"/> 5 a 6 veces semana<br><input type="radio"/> 1 vez al día<br><input type="radio"/> 2 a 3 veces al día<br><input type="radio"/> 5 a 6 veces al día<br><input type="radio"/> más 6 veces al día |
|--------------------------------|--------------------------------------------------------------------------------------------------------------------------------------------------------------------------------------------------------------------------------------------------------------------------------------------------------------------------------------------------------------------------------------------------------------|

---

|                       |                                                                                                                                                                                                                                                                                                                                                                                                              |
|-----------------------|--------------------------------------------------------------------------------------------------------------------------------------------------------------------------------------------------------------------------------------------------------------------------------------------------------------------------------------------------------------------------------------------------------------|
| pimiento              | <input type="radio"/> Nunca o menos 1 vez al mes<br><input checked="" type="radio"/> 1 a 3 veces mes<br><input type="radio"/> 1 vez semana<br><input type="radio"/> 2 a 4 veces semana<br><input type="radio"/> 5 a 6 veces semana<br><input type="radio"/> 1 vez al día<br><input type="radio"/> 2 a 3 veces al día<br><input type="radio"/> 5 a 6 veces al día<br><input type="radio"/> más 6 veces al día |
| alcachofa             | <input type="radio"/> Nunca o menos 1 vez al mes<br><input checked="" type="radio"/> 1 a 3 veces mes<br><input type="radio"/> 1 vez semana<br><input type="radio"/> 2 a 4 veces semana<br><input type="radio"/> 5 a 6 veces semana<br><input type="radio"/> 1 vez al día<br><input type="radio"/> 2 a 3 veces al día<br><input type="radio"/> 5 a 6 veces al día<br><input type="radio"/> más 6 veces al día |
| espárragos            | <input checked="" type="radio"/> Nunca o menos 1 vez al mes<br><input type="radio"/> 1 a 3 veces mes<br><input type="radio"/> 1 vez semana<br><input type="radio"/> 2 a 4 veces semana<br><input type="radio"/> 5 a 6 veces semana<br><input type="radio"/> 1 vez al día<br><input type="radio"/> 2 a 3 veces al día<br><input type="radio"/> 5 a 6 veces al día<br><input type="radio"/> más 6 veces al día |
| maíz hervido          | <input checked="" type="radio"/> Nunca o menos 1 vez al mes<br><input type="radio"/> 1 a 3 veces mes<br><input type="radio"/> 1 vez semana<br><input type="radio"/> 2 a 4 veces semana<br><input type="radio"/> 5 a 6 veces semana<br><input type="radio"/> 1 vez al día<br><input type="radio"/> 2 a 3 veces al día<br><input type="radio"/> 5 a 6 veces al día<br><input type="radio"/> más 6 veces al día |
| legumbres             | <input type="radio"/> Nunca o menos 1 vez al mes<br><input type="radio"/> 1 a 3 veces mes<br><input checked="" type="radio"/> 1 vez semana<br><input type="radio"/> 2 a 4 veces semana<br><input type="radio"/> 5 a 6 veces semana<br><input type="radio"/> 1 vez al día<br><input type="radio"/> 2 a 3 veces al día<br><input type="radio"/> 5 a 6 veces al día<br><input type="radio"/> más 6 veces al día |
| naranjas o mandarinas | <input type="radio"/> Nunca o menos 1 vez al mes<br><input checked="" type="radio"/> 1 a 3 veces mes<br><input type="radio"/> 1 vez semana<br><input type="radio"/> 2 a 4 veces semana<br><input type="radio"/> 5 a 6 veces semana<br><input type="radio"/> 1 vez al día<br><input type="radio"/> 2 a 3 veces al día<br><input type="radio"/> 5 a 6 veces al día<br><input type="radio"/> más 6 veces al día |



---

zumو natural fruta

- ☐ Nunca o menos 1 vez al mes  
☒ 1 a 3 veces mes  
☐ 1 vez semana  
☐ 2 a 4 veces semana  
☐ 5 a 6 veces semana  
☐ 1 vez al día  
☐ 2 a 3 veces al día  
☐ 5 a 6 veces al día  
☐ más 6 veces al día

---

platano

- ☐ Nunca o menos 1 vez al mes  
☒ 1 a 3 veces mes  
☐ 1 vez semana  
☐ 2 a 4 veces semana  
☐ 5 a 6 veces semana  
☐ 1 vez al día  
☐ 2 a 3 veces al día  
☐ 5 a 6 veces al día  
☐ más 6 veces al día

---

manzana o pera

- ☒ Nunca o menos 1 vez al mes  
☐ 1 a 3 veces mes  
☐ 1 vez semana  
☐ 2 a 4 veces semana  
☐ 5 a 6 veces semana  
☐ 1 vez al día  
☐ 2 a 3 veces al día  
☐ 5 a 6 veces al día  
☐ más 6 veces al día

---

melocotón o nectarina

- ☒ Nunca o menos 1 vez al mes  
☐ 1 a 3 veces mes  
☐ 1 vez semana  
☐ 2 a 4 veces semana  
☐ 5 a 6 veces semana  
☐ 1 vez al día  
☐ 2 a 3 veces al día  
☐ 5 a 6 veces al día  
☐ más 6 veces al día

---

sandia o melon

- ☒ Nunca o menos 1 vez al mes  
☐ 1 a 3 veces mes  
☐ 1 vez semana  
☐ 2 a 4 veces semana  
☐ 5 a 6 veces semana  
☐ 1 vez al día  
☐ 2 a 3 veces al día  
☐ 5 a 6 veces al día  
☐ más 6 veces al día

---

uva

- ☒ Nunca o menos 1 vez al mes  
☐ 1 a 3 veces mes  
☐ 1 vez semana  
☐ 2 a 4 veces semana  
☐ 5 a 6 veces semana  
☐ 1 vez al día  
☐ 2 a 3 veces al día  
☐ 5 a 6 veces al día  
☐ más 6 veces al día

---

bruna o ciruela

- ☒ Nunca o menos 1 vez al mes  
☐ 1 a 3 veces mes  
☐ 1 vez semana  
☐ 2 a 4 veces semana  
☐ 5 a 6 veces semana  
☐ 1 vez al día  
☐ 2 a 3 veces al día  
☐ 5 a 6 veces al día  
☐ más 6 veces al día

---

kiwi

- ☒ Nunca o menos 1 vez al mes  
☐ 1 a 3 veces mes  
☐ 1 vez semana  
☐ 2 a 4 veces semana  
☐ 5 a 6 veces semana  
☐ 1 vez al día  
☐ 2 a 3 veces al día  
☐ 5 a 6 veces al día  
☐ más 6 veces al día

---

aceituna

- ☐ Nunca o menos 1 vez al mes  
☒ 1 a 3 veces mes  
☐ 1 vez semana  
☐ 2 a 4 veces semana  
☐ 5 a 6 veces semana  
☐ 1 vez al día  
☐ 2 a 3 veces al día  
☐ 5 a 6 veces al día  
☐ más 6 veces al día

---

frutos secos

- ☐ Nunca o menos 1 vez al mes  
☒ 1 a 3 veces mes  
☐ 1 vez semana  
☐ 2 a 4 veces semana  
☐ 5 a 6 veces semana  
☐ 1 vez al día  
☐ 2 a 3 veces al día  
☐ 5 a 6 veces al día  
☐ más 6 veces al día

---

pan blanco

- ☒ Nunca o menos 1 vez al mes  
☐ 1 a 3 veces mes  
☐ 1 vez semana  
☐ 2 a 4 veces semana  
☐ 5 a 6 veces semana  
☐ 1 vez al día  
☐ 2 a 3 veces al día  
☐ 5 a 6 veces al día  
☐ más 6 veces al día

---

pan integral

- ☐ Nunca o menos 1 vez al mes  
☐ 1 a 3 veces mes  
☒ 1 vez semana  
☐ 2 a 4 veces semana  
☐ 5 a 6 veces semana  
☐ 1 vez al día  
☐ 2 a 3 veces al día  
☐ 5 a 6 veces al día  
☐ más 6 veces al día

|                          |                                                                                                                                                                                                                                                                                                                                                                                                              |
|--------------------------|--------------------------------------------------------------------------------------------------------------------------------------------------------------------------------------------------------------------------------------------------------------------------------------------------------------------------------------------------------------------------------------------------------------|
| cereales desayuno        | <input type="radio"/> Nunca o menos 1 vez al mes<br><input type="radio"/> 1 a 3 veces mes<br><input type="radio"/> 1 vez semana<br><input type="radio"/> 2 a 4 veces semana<br><input type="radio"/> 5 a 6 veces semana<br><input checked="" type="radio"/> 1 vez al día<br><input type="radio"/> 2 a 3 veces al día<br><input type="radio"/> 5 a 6 veces al día<br><input type="radio"/> más 6 veces al día |
| patatas fritas           | <input type="radio"/> Nunca o menos 1 vez al mes<br><input type="radio"/> 1 a 3 veces mes<br><input checked="" type="radio"/> 1 vez semana<br><input type="radio"/> 2 a 4 veces semana<br><input type="radio"/> 5 a 6 veces semana<br><input type="radio"/> 1 vez al día<br><input type="radio"/> 2 a 3 veces al día<br><input type="radio"/> 5 a 6 veces al día<br><input type="radio"/> más 6 veces al día |
| patatas cocidas o asadas | <input type="radio"/> Nunca o menos 1 vez al mes<br><input type="radio"/> 1 a 3 veces mes<br><input checked="" type="radio"/> 1 vez semana<br><input type="radio"/> 2 a 4 veces semana<br><input type="radio"/> 5 a 6 veces semana<br><input type="radio"/> 1 vez al día<br><input type="radio"/> 2 a 3 veces al día<br><input type="radio"/> 5 a 6 veces al día<br><input type="radio"/> más 6 veces al día |
| bolsa papas              | <input checked="" type="radio"/> Nunca o menos 1 vez al mes<br><input type="radio"/> 1 a 3 veces mes<br><input type="radio"/> 1 vez semana<br><input type="radio"/> 2 a 4 veces semana<br><input type="radio"/> 5 a 6 veces semana<br><input type="radio"/> 1 vez al día<br><input type="radio"/> 2 a 3 veces al día<br><input type="radio"/> 5 a 6 veces al día<br><input type="radio"/> más 6 veces al día |
| arroz cocinado           | <input type="radio"/> Nunca o menos 1 vez al mes<br><input type="radio"/> 1 a 3 veces mes<br><input checked="" type="radio"/> 1 vez semana<br><input type="radio"/> 2 a 4 veces semana<br><input type="radio"/> 5 a 6 veces semana<br><input type="radio"/> 1 vez al día<br><input type="radio"/> 2 a 3 veces al día<br><input type="radio"/> 5 a 6 veces al día<br><input type="radio"/> más 6 veces al día |
| pasta                    | <input type="radio"/> Nunca o menos 1 vez al mes<br><input type="radio"/> 1 a 3 veces mes<br><input type="radio"/> 1 vez semana<br><input checked="" type="radio"/> 2 a 4 veces semana<br><input type="radio"/> 5 a 6 veces semana<br><input type="radio"/> 1 vez al día<br><input type="radio"/> 2 a 3 veces al día<br><input type="radio"/> 5 a 6 veces al día<br><input type="radio"/> más 6 veces al día |

|                     |                                                                                                                                                                                                                                                                                                                                                                                                              |
|---------------------|--------------------------------------------------------------------------------------------------------------------------------------------------------------------------------------------------------------------------------------------------------------------------------------------------------------------------------------------------------------------------------------------------------------|
| pizza               | <input type="radio"/> Nunca o menos 1 vez al mes<br><input type="radio"/> 1 a 3 veces mes<br><input checked="" type="radio"/> 1 vez semana<br><input type="radio"/> 2 a 4 veces semana<br><input type="radio"/> 5 a 6 veces semana<br><input type="radio"/> 1 vez al día<br><input type="radio"/> 2 a 3 veces al día<br><input type="radio"/> 5 a 6 veces al día<br><input type="radio"/> más 6 veces al día |
| aceite oliva        | <input type="radio"/> Nunca o menos 1 vez al mes<br><input type="radio"/> 1 a 3 veces mes<br><input checked="" type="radio"/> 1 vez semana<br><input type="radio"/> 2 a 4 veces semana<br><input type="radio"/> 5 a 6 veces semana<br><input type="radio"/> 1 vez al día<br><input type="radio"/> 2 a 3 veces al día<br><input type="radio"/> 5 a 6 veces al día<br><input type="radio"/> más 6 veces al día |
| otros aceites       | <input type="radio"/> Nunca o menos 1 vez al mes<br><input type="radio"/> 1 a 3 veces mes<br><input checked="" type="radio"/> 1 vez semana<br><input type="radio"/> 2 a 4 veces semana<br><input type="radio"/> 5 a 6 veces semana<br><input type="radio"/> 1 vez al día<br><input type="radio"/> 2 a 3 veces al día<br><input type="radio"/> 5 a 6 veces al día<br><input type="radio"/> más 6 veces al día |
| margarina           | <input type="radio"/> Nunca o menos 1 vez al mes<br><input type="radio"/> 1 a 3 veces mes<br><input checked="" type="radio"/> 1 vez semana<br><input type="radio"/> 2 a 4 veces semana<br><input type="radio"/> 5 a 6 veces semana<br><input type="radio"/> 1 vez al día<br><input type="radio"/> 2 a 3 veces al día<br><input type="radio"/> 5 a 6 veces al día<br><input type="radio"/> más 6 veces al día |
| mantequilla         | <input checked="" type="radio"/> Nunca o menos 1 vez al mes<br><input type="radio"/> 1 a 3 veces mes<br><input type="radio"/> 1 vez semana<br><input type="radio"/> 2 a 4 veces semana<br><input type="radio"/> 5 a 6 veces semana<br><input type="radio"/> 1 vez al día<br><input type="radio"/> 2 a 3 veces al día<br><input type="radio"/> 5 a 6 veces al día<br><input type="radio"/> más 6 veces al día |
| galletas tipo maria | <input checked="" type="radio"/> Nunca o menos 1 vez al mes<br><input type="radio"/> 1 a 3 veces mes<br><input type="radio"/> 1 vez semana<br><input type="radio"/> 2 a 4 veces semana<br><input type="radio"/> 5 a 6 veces semana<br><input type="radio"/> 1 vez al día<br><input type="radio"/> 2 a 3 veces al día<br><input type="radio"/> 5 a 6 veces al día<br><input type="radio"/> más 6 veces al día |

|                           |                                                                                                                                                                                                                                                                                                                                                                                                              |
|---------------------------|--------------------------------------------------------------------------------------------------------------------------------------------------------------------------------------------------------------------------------------------------------------------------------------------------------------------------------------------------------------------------------------------------------------|
| galletas chocolate        | <input type="radio"/> Nunca o menos 1 vez al mes<br><input type="radio"/> 1 a 3 veces mes<br><input checked="" type="radio"/> 1 vez semana<br><input type="radio"/> 2 a 4 veces semana<br><input type="radio"/> 5 a 6 veces semana<br><input type="radio"/> 1 vez al día<br><input type="radio"/> 2 a 3 veces al día<br><input type="radio"/> 5 a 6 veces al día<br><input type="radio"/> más 6 veces al día |
| bollieria                 | <input type="radio"/> Nunca o menos 1 vez al mes<br><input type="radio"/> 1 a 3 veces mes<br><input type="radio"/> 1 vez semana<br><input checked="" type="radio"/> 2 a 4 veces semana<br><input type="radio"/> 5 a 6 veces semana<br><input type="radio"/> 1 vez al día<br><input type="radio"/> 2 a 3 veces al día<br><input type="radio"/> 5 a 6 veces al día<br><input type="radio"/> más 6 veces al día |
| chocolate o bombones      | <input type="radio"/> Nunca o menos 1 vez al mes<br><input type="radio"/> 1 a 3 veces mes<br><input checked="" type="radio"/> 1 vez semana<br><input type="radio"/> 2 a 4 veces semana<br><input type="radio"/> 5 a 6 veces semana<br><input type="radio"/> 1 vez al día<br><input type="radio"/> 2 a 3 veces al día<br><input type="radio"/> 5 a 6 veces al día<br><input type="radio"/> más 6 veces al día |
| chocolate polvo o colacao | <input type="radio"/> Nunca o menos 1 vez al mes<br><input type="radio"/> 1 a 3 veces mes<br><input type="radio"/> 1 vez semana<br><input type="radio"/> 2 a 4 veces semana<br><input type="radio"/> 5 a 6 veces semana<br><input checked="" type="radio"/> 1 vez al día<br><input type="radio"/> 2 a 3 veces al día<br><input type="radio"/> 5 a 6 veces al día<br><input type="radio"/> más 6 veces al día |
| vino tinto                | <input checked="" type="radio"/> Nunca o menos 1 vez al mes<br><input type="radio"/> 1 a 3 veces mes<br><input type="radio"/> 1 vez semana<br><input type="radio"/> 2 a 4 veces semana<br><input type="radio"/> 5 a 6 veces semana<br><input type="radio"/> 1 vez al día<br><input type="radio"/> 2 a 3 veces al día<br><input type="radio"/> 5 a 6 veces al día<br><input type="radio"/> más 6 veces al día |
| vino blanco               | <input checked="" type="radio"/> Nunca o menos 1 vez al mes<br><input type="radio"/> 1 a 3 veces mes<br><input type="radio"/> 1 vez semana<br><input type="radio"/> 2 a 4 veces semana<br><input type="radio"/> 5 a 6 veces semana<br><input type="radio"/> 1 vez al día<br><input type="radio"/> 2 a 3 veces al día<br><input type="radio"/> 5 a 6 veces al día<br><input type="radio"/> más 6 veces al día |

---

|                    |                                                                                                                                                                                                                                                                                                                                                                                                              |
|--------------------|--------------------------------------------------------------------------------------------------------------------------------------------------------------------------------------------------------------------------------------------------------------------------------------------------------------------------------------------------------------------------------------------------------------|
| vino seco o vermut | <input checked="" type="radio"/> Nunca o menos 1 vez al mes<br><input type="radio"/> 1 a 3 veces mes<br><input type="radio"/> 1 vez semana<br><input type="radio"/> 2 a 4 veces semana<br><input type="radio"/> 5 a 6 veces semana<br><input type="radio"/> 1 vez al día<br><input type="radio"/> 2 a 3 veces al día<br><input type="radio"/> 5 a 6 veces al día<br><input type="radio"/> más 6 veces al día |
|--------------------|--------------------------------------------------------------------------------------------------------------------------------------------------------------------------------------------------------------------------------------------------------------------------------------------------------------------------------------------------------------------------------------------------------------|

---

|         |                                                                                                                                                                                                                                                                                                                                                                                                              |
|---------|--------------------------------------------------------------------------------------------------------------------------------------------------------------------------------------------------------------------------------------------------------------------------------------------------------------------------------------------------------------------------------------------------------------|
| cerveza | <input checked="" type="radio"/> Nunca o menos 1 vez al mes<br><input type="radio"/> 1 a 3 veces mes<br><input type="radio"/> 1 vez semana<br><input type="radio"/> 2 a 4 veces semana<br><input type="radio"/> 5 a 6 veces semana<br><input type="radio"/> 1 vez al día<br><input type="radio"/> 2 a 3 veces al día<br><input type="radio"/> 5 a 6 veces al día<br><input type="radio"/> más 6 veces al día |
|---------|--------------------------------------------------------------------------------------------------------------------------------------------------------------------------------------------------------------------------------------------------------------------------------------------------------------------------------------------------------------------------------------------------------------|

---

|                     |                                                                                                                                                                                                                                                                                                                                                                                                              |
|---------------------|--------------------------------------------------------------------------------------------------------------------------------------------------------------------------------------------------------------------------------------------------------------------------------------------------------------------------------------------------------------------------------------------------------------|
| cerveza sin alcohol | <input checked="" type="radio"/> Nunca o menos 1 vez al mes<br><input type="radio"/> 1 a 3 veces mes<br><input type="radio"/> 1 vez semana<br><input type="radio"/> 2 a 4 veces semana<br><input type="radio"/> 5 a 6 veces semana<br><input type="radio"/> 1 vez al día<br><input type="radio"/> 2 a 3 veces al día<br><input type="radio"/> 5 a 6 veces al día<br><input type="radio"/> más 6 veces al día |
|---------------------|--------------------------------------------------------------------------------------------------------------------------------------------------------------------------------------------------------------------------------------------------------------------------------------------------------------------------------------------------------------------------------------------------------------|

---

|         |                                                                                                                                                                                                                                                                                                                                                                                                              |
|---------|--------------------------------------------------------------------------------------------------------------------------------------------------------------------------------------------------------------------------------------------------------------------------------------------------------------------------------------------------------------------------------------------------------------|
| licores | <input checked="" type="radio"/> Nunca o menos 1 vez al mes<br><input type="radio"/> 1 a 3 veces mes<br><input type="radio"/> 1 vez semana<br><input type="radio"/> 2 a 4 veces semana<br><input type="radio"/> 5 a 6 veces semana<br><input type="radio"/> 1 vez al día<br><input type="radio"/> 2 a 3 veces al día<br><input type="radio"/> 5 a 6 veces al día<br><input type="radio"/> más 6 veces al día |
|---------|--------------------------------------------------------------------------------------------------------------------------------------------------------------------------------------------------------------------------------------------------------------------------------------------------------------------------------------------------------------------------------------------------------------|

---

|                       |                                                                                                                                                                                                                                                                                                                                                                                                              |
|-----------------------|--------------------------------------------------------------------------------------------------------------------------------------------------------------------------------------------------------------------------------------------------------------------------------------------------------------------------------------------------------------------------------------------------------------|
| ginebra o ron o vodka | <input checked="" type="radio"/> Nunca o menos 1 vez al mes<br><input type="radio"/> 1 a 3 veces mes<br><input type="radio"/> 1 vez semana<br><input type="radio"/> 2 a 4 veces semana<br><input type="radio"/> 5 a 6 veces semana<br><input type="radio"/> 1 vez al día<br><input type="radio"/> 2 a 3 veces al día<br><input type="radio"/> 5 a 6 veces al día<br><input type="radio"/> más 6 veces al día |
|-----------------------|--------------------------------------------------------------------------------------------------------------------------------------------------------------------------------------------------------------------------------------------------------------------------------------------------------------------------------------------------------------------------------------------------------------|

---

|                 |                                                                                                                                                                                                                                                                                                                                                                                                              |
|-----------------|--------------------------------------------------------------------------------------------------------------------------------------------------------------------------------------------------------------------------------------------------------------------------------------------------------------------------------------------------------------------------------------------------------------|
| refresco normal | <input type="radio"/> Nunca o menos 1 vez al mes<br><input type="radio"/> 1 a 3 veces mes<br><input checked="" type="radio"/> 1 vez semana<br><input type="radio"/> 2 a 4 veces semana<br><input type="radio"/> 5 a 6 veces semana<br><input type="radio"/> 1 vez al día<br><input type="radio"/> 2 a 3 veces al día<br><input type="radio"/> 5 a 6 veces al día<br><input type="radio"/> más 6 veces al día |
|-----------------|--------------------------------------------------------------------------------------------------------------------------------------------------------------------------------------------------------------------------------------------------------------------------------------------------------------------------------------------------------------------------------------------------------------|

---

|                          |                                                                                                                                                                                                                                                                                                                                                                                                              |
|--------------------------|--------------------------------------------------------------------------------------------------------------------------------------------------------------------------------------------------------------------------------------------------------------------------------------------------------------------------------------------------------------------------------------------------------------|
| refresco sin azúcar      | <input checked="" type="radio"/> Nunca o menos 1 vez al mes<br><input type="radio"/> 1 a 3 veces mes<br><input type="radio"/> 1 vez semana<br><input type="radio"/> 2 a 4 veces semana<br><input type="radio"/> 5 a 6 veces semana<br><input type="radio"/> 1 vez al día<br><input type="radio"/> 2 a 3 veces al día<br><input type="radio"/> 5 a 6 veces al día<br><input type="radio"/> más 6 veces al día |
| Agua del grifo           | <input checked="" type="radio"/> Nunca o menos 1 vez al mes<br><input type="radio"/> 1 a 3 veces mes<br><input type="radio"/> 1 vez semana<br><input type="radio"/> 2 a 4 veces semana<br><input type="radio"/> 5 a 6 veces semana<br><input type="radio"/> 1 vez al día<br><input type="radio"/> 2 a 3 veces al día<br><input type="radio"/> 5 a 6 veces al día<br><input type="radio"/> más 6 veces al día |
| agua embotellada sin gas | <input type="radio"/> Nunca o menos 1 vez al mes<br><input type="radio"/> 1 a 3 veces mes<br><input type="radio"/> 1 vez semana<br><input type="radio"/> 2 a 4 veces semana<br><input type="radio"/> 5 a 6 veces semana<br><input type="radio"/> 1 vez al día<br><input type="radio"/> 2 a 3 veces al día<br><input type="radio"/> 5 a 6 veces al día<br><input checked="" type="radio"/> más 6 veces al día |
| agua embotellada con gas | <input checked="" type="radio"/> Nunca o menos 1 vez al mes<br><input type="radio"/> 1 a 3 veces mes<br><input type="radio"/> 1 vez semana<br><input type="radio"/> 2 a 4 veces semana<br><input type="radio"/> 5 a 6 veces semana<br><input type="radio"/> 1 vez al día<br><input type="radio"/> 2 a 3 veces al día<br><input type="radio"/> 5 a 6 veces al día<br><input type="radio"/> más 6 veces al día |
| zumو frutas embasado     | <input type="radio"/> Nunca o menos 1 vez al mes<br><input checked="" type="radio"/> 1 a 3 veces mes<br><input type="radio"/> 1 vez semana<br><input type="radio"/> 2 a 4 veces semana<br><input type="radio"/> 5 a 6 veces semana<br><input type="radio"/> 1 vez al día<br><input type="radio"/> 2 a 3 veces al día<br><input type="radio"/> 5 a 6 veces al día<br><input type="radio"/> más 6 veces al día |
| cafe                     | <input type="radio"/> Nunca o menos 1 vez al mes<br><input checked="" type="radio"/> 1 a 3 veces mes<br><input type="radio"/> 1 vez semana<br><input type="radio"/> 2 a 4 veces semana<br><input type="radio"/> 5 a 6 veces semana<br><input type="radio"/> 1 vez al día<br><input type="radio"/> 2 a 3 veces al día<br><input type="radio"/> 5 a 6 veces al día<br><input type="radio"/> más 6 veces al día |

---

cafe descafeinado

- ☐ Nunca o menos 1 vez al mes  
☒ 1 a 3 veces mes  
☐ 1 vez semana  
☐ 2 a 4 veces semana  
☐ 5 a 6 veces semana  
☐ 1 vez al día  
☐ 2 a 3 veces al día  
☐ 5 a 6 veces al día  
☐ más 6 veces al día

---

te o infusión

- ☒ Nunca o menos 1 vez al mes  
☐ 1 a 3 veces mes  
☐ 1 vez semana  
☐ 2 a 4 veces semana  
☐ 5 a 6 veces semana  
☐ 1 vez al día  
☐ 2 a 3 veces al día  
☐ 5 a 6 veces al día  
☐ más 6 veces al día

---

sopa o puré verduras

- ☐ Nunca o menos 1 vez al mes  
☐ 1 a 3 veces mes  
☒ 1 vez semana  
☐ 2 a 4 veces semana  
☐ 5 a 6 veces semana  
☐ 1 vez al día  
☐ 2 a 3 veces al día  
☐ 5 a 6 veces al día  
☐ más 6 veces al día

---

croquetas pollo jamón

- ☐ Nunca o menos 1 vez al mes  
☒ 1 a 3 veces mes  
☐ 1 vez semana  
☐ 2 a 4 veces semana  
☐ 5 a 6 veces semana  
☐ 1 vez al día  
☐ 2 a 3 veces al día  
☐ 5 a 6 veces al día  
☐ más 6 veces al día

---

croquetas pescado

- ☐ Nunca o menos 1 vez al mes  
☒ 1 a 3 veces mes  
☐ 1 vez semana  
☐ 2 a 4 veces semana  
☐ 5 a 6 veces semana  
☐ 1 vez al día  
☐ 2 a 3 veces al día  
☐ 5 a 6 veces al día  
☐ más 6 veces al día

---

mayonesa

- ☐ Nunca o menos 1 vez al mes  
☒ 1 a 3 veces mes  
☐ 1 vez semana  
☐ 2 a 4 veces semana  
☐ 5 a 6 veces semana  
☐ 1 vez al día  
☐ 2 a 3 veces al día  
☐ 5 a 6 veces al día  
☐ más 6 veces al día



---

salsa tomate

- ☐ Nunca o menos 1 vez al mes  
☒ 1 a 3 veces mes  
☐ 1 vez semana  
☐ 2 a 4 veces semana  
☐ 5 a 6 veces semana  
☐ 1 vez al día  
☐ 2 a 3 veces al día  
☐ 5 a 6 veces al día  
☐ más 6 veces al día

---

ketchup

- ☒ Nunca o menos 1 vez al mes  
☐ 1 a 3 veces mes  
☐ 1 vez semana  
☐ 2 a 4 veces semana  
☐ 5 a 6 veces semana  
☐ 1 vez al día  
☐ 2 a 3 veces al día  
☐ 5 a 6 veces al día  
☐ más 6 veces al día

---

sal

- ☒ Nunca o menos 1 vez al mes  
☐ 1 a 3 veces mes  
☐ 1 vez semana  
☐ 2 a 4 veces semana  
☐ 5 a 6 veces semana  
☐ 1 vez al día  
☐ 2 a 3 veces al día  
☐ 5 a 6 veces al día  
☐ más 6 veces al día

---

ajo

- ☐ Nunca o menos 1 vez al mes  
☒ 1 a 3 veces mes  
☐ 1 vez semana  
☐ 2 a 4 veces semana  
☐ 5 a 6 veces semana  
☐ 1 vez al día  
☐ 2 a 3 veces al día  
☐ 5 a 6 veces al día  
☐ más 6 veces al día

---

mermelada o miel

- ☐ Nunca o menos 1 vez al mes  
☒ 1 a 3 veces mes  
☐ 1 vez semana  
☐ 2 a 4 veces semana  
☐ 5 a 6 veces semana  
☐ 1 vez al día  
☐ 2 a 3 veces al día  
☐ 5 a 6 veces al día  
☐ más 6 veces al día

---

azúcar

- ☐ Nunca o menos 1 vez al mes  
☒ 1 a 3 veces mes  
☐ 1 vez semana  
☐ 2 a 4 veces semana  
☐ 5 a 6 veces semana  
☐ 1 vez al día  
☐ 2 a 3 veces al día  
☐ 5 a 6 veces al día  
☐ más 6 veces al día

|                                       |                                                                                                                                                                                                                                                                                                                                                                                                                                                                                                                               |
|---------------------------------------|-------------------------------------------------------------------------------------------------------------------------------------------------------------------------------------------------------------------------------------------------------------------------------------------------------------------------------------------------------------------------------------------------------------------------------------------------------------------------------------------------------------------------------|
| Otro alimento                         |                                                                                                                                                                                                                                                                                                                                                                                                                                                                                                                               |
| suplementos vitamínicos               | <input checked="" type="radio"/> si<br><input type="radio"/> no                                                                                                                                                                                                                                                                                                                                                                                                                                                               |
| suplementos vitamínicos               | [*DATA REMOVED*]                                                                                                                                                                                                                                                                                                                                                                                                                                                                                                              |
| dieta previa                          | <input type="radio"/> si<br><input checked="" type="radio"/> no                                                                                                                                                                                                                                                                                                                                                                                                                                                               |
| motivo dieta                          | <input checked="" type="radio"/> no dieta<br><input type="radio"/> control peso<br><input type="radio"/> control colesterol<br><input type="radio"/> control diabetes<br><input type="radio"/> problemas estómago<br><input type="radio"/> problemas vesícula o hepáticos<br><input type="radio"/> HTA o cardiopatía<br><input type="radio"/> problemas renales<br><input type="radio"/> alergia alimentaria<br><input type="radio"/> ácido úrico elevado<br><input type="radio"/> vegetariana<br><input type="radio"/> otros |
| cambio alimentos año previo gestación | <input type="radio"/> si<br><input checked="" type="radio"/> no                                                                                                                                                                                                                                                                                                                                                                                                                                                               |
| cambio lácteos                        | <input type="radio"/> eliminado<br><input type="radio"/> disminuido<br><input checked="" type="radio"/> igual<br><input type="radio"/> aumentado<br><input type="radio"/> no sabe                                                                                                                                                                                                                                                                                                                                             |
| cambio huevos                         | <input type="radio"/> eliminado<br><input type="radio"/> disminuido<br><input checked="" type="radio"/> igual<br><input type="radio"/> aumentado<br><input type="radio"/> no sabe                                                                                                                                                                                                                                                                                                                                             |
| cambio carne                          | <input type="radio"/> eliminado<br><input type="radio"/> disminuido<br><input checked="" type="radio"/> igual<br><input type="radio"/> aumentado<br><input type="radio"/> no sabe                                                                                                                                                                                                                                                                                                                                             |
| cambio pescado                        | <input type="radio"/> eliminado<br><input type="radio"/> disminuido<br><input checked="" type="radio"/> igual<br><input type="radio"/> aumentado<br><input type="radio"/> no sabe                                                                                                                                                                                                                                                                                                                                             |
| cambio verduras                       | <input type="radio"/> eliminado<br><input type="radio"/> disminuido<br><input checked="" type="radio"/> igual<br><input type="radio"/> aumentado<br><input type="radio"/> no sabe                                                                                                                                                                                                                                                                                                                                             |

|                            |                                                                                                                                                                                                                        |
|----------------------------|------------------------------------------------------------------------------------------------------------------------------------------------------------------------------------------------------------------------|
| cambio legumbres           | <input type="radio"/> eliminado<br><input type="radio"/> disminuido<br><input checked="" type="radio"/> igual<br><input type="radio"/> aumentado<br><input type="radio"/> no sabe                                      |
| cambio fruta               | <input type="radio"/> eliminado<br><input type="radio"/> disminuido<br><input checked="" type="radio"/> igual<br><input type="radio"/> aumentado<br><input type="radio"/> no sabe                                      |
| cambio pan                 | <input type="radio"/> eliminado<br><input type="radio"/> disminuido<br><input checked="" type="radio"/> igual<br><input type="radio"/> aumentado<br><input type="radio"/> no sabe                                      |
| cambio aceite oliva        | <input type="radio"/> eliminado<br><input type="radio"/> disminuido<br><input checked="" type="radio"/> igual<br><input type="radio"/> aumentado<br><input type="radio"/> no sabe                                      |
| cambio mante o margarina   | <input type="radio"/> eliminado<br><input type="radio"/> disminuido<br><input checked="" type="radio"/> igual<br><input type="radio"/> aumentado<br><input type="radio"/> no sabe                                      |
| cambio azúcar y dulces     | <input type="radio"/> eliminado<br><input type="radio"/> disminuido<br><input checked="" type="radio"/> igual<br><input type="radio"/> aumentado<br><input type="radio"/> no sabe                                      |
| cambio bebidas alcohólicas | <input type="radio"/> eliminado<br><input type="radio"/> disminuido<br><input checked="" type="radio"/> igual<br><input type="radio"/> aumentado<br><input type="radio"/> no sabe                                      |
| frecuencia comidas fritas  | <input type="radio"/> a diario<br><input type="radio"/> 5 a 6 veces semana<br><input type="radio"/> 2 a 4 veces semana<br><input type="radio"/> 1 vez semana<br><input checked="" type="radio"/> menos de 1 vez semana |
| carne                      | <input type="radio"/> no como<br><input type="radio"/> cruda<br><input type="radio"/> poco hecha<br><input checked="" type="radio"/> hecha<br><input type="radio"/> muy hecha                                          |
| grasa visible carne        | <input checked="" type="radio"/> quita toda<br><input type="radio"/> quita mayoría<br><input type="radio"/> quita un poco<br><input type="radio"/> no quita nada                                                       |

|                                |                                                                                                                                                                                                                                                          |
|--------------------------------|----------------------------------------------------------------------------------------------------------------------------------------------------------------------------------------------------------------------------------------------------------|
| cocina carne                   | <input checked="" type="radio"/> a la plancha<br><input type="radio"/> a la parrilla<br><input type="radio"/> asada<br><input type="radio"/> frita<br><input type="radio"/> guisada                                                                      |
| tostado quemado carne          | <input checked="" type="radio"/> nunca<br><input type="radio"/> 1 vez mes<br><input type="radio"/> 2 a 3 veces mes<br><input type="radio"/> 1 vez semana<br><input type="radio"/> 2 a 3 semanas                                                          |
| tostado quemado pescado        | <input checked="" type="radio"/> nunca<br><input type="radio"/> 1 vez mes<br><input type="radio"/> 2 a 3 veces mes<br><input type="radio"/> 1 vez semana<br><input type="radio"/> 2 a 3 semanas                                                          |
| socarrat paella                | <input checked="" type="radio"/> nunca<br><input type="radio"/> 1 vez mes<br><input type="radio"/> 2 a 3 veces mes<br><input type="radio"/> 1 vez semana<br><input type="radio"/> 2 a 3 semanas                                                          |
| grasa o aceite cocinar         | <input type="radio"/> mantequilla<br><input type="radio"/> margarina<br><input type="radio"/> aceite oliva<br><input checked="" type="radio"/> aceite oliva virgen extra<br><input type="radio"/> aceite vegetal<br><input type="radio"/> mezcla aceites |
| grasa aceite aliñar            | <input type="radio"/> mantequilla<br><input type="radio"/> margarina<br><input type="radio"/> aceite oliva<br><input checked="" type="radio"/> aceite oliva virgen extra<br><input type="radio"/> aceite vegetal<br><input type="radio"/> mezcla aceites |
| grasa aceite freir             | <input type="radio"/> mantequilla<br><input type="radio"/> margarina<br><input type="radio"/> aceite oliva<br><input type="radio"/> aceite oliva virgen extra<br><input checked="" type="radio"/> aceite vegetal<br><input type="radio"/> mezcla aceites |
| Ejercicio cuestionario         | <input checked="" type="radio"/> si<br><input type="radio"/> no                                                                                                                                                                                          |
| horas de sueño incluido siesta | [*DATA REMOVED*]                                                                                                                                                                                                                                         |
| minutos siesta                 | _____                                                                                                                                                                                                                                                    |
| horas televisión semana        | _____                                                                                                                                                                                                                                                    |

|                                        |                                                                                                                                                                                                                                                                                                                                                                           |
|----------------------------------------|---------------------------------------------------------------------------------------------------------------------------------------------------------------------------------------------------------------------------------------------------------------------------------------------------------------------------------------------------------------------------|
| actividad trabajo                      | <input type="radio"/> casi siempre sentado<br><input type="radio"/> sentado 50 por cien<br><input checked="" type="radio"/> casi siempre de pie, quieto<br><input type="radio"/> casi siempre levantado caminando y llevando pocas cosas<br><input type="radio"/> casi siempre levantado, caminando y llevado muchas cosas<br><input type="radio"/> trabajo manual pesado |
| tiempo caminar o bici al día           | <input type="radio"/> casi nunca<br><input type="radio"/> menos 20min día<br><input checked="" type="radio"/> 20 a 40 min día<br><input type="radio"/> 40 a 60 min día<br><input type="radio"/> 1h o 1h y media día<br><input type="radio"/> más de 1h y media al día                                                                                                     |
| tiempo tareas casa al día              | <input type="radio"/> menos de 1h día<br><input type="radio"/> 1 a 2h día<br><input checked="" type="radio"/> 3 a 4h día<br><input type="radio"/> 5 a 6h día<br><input type="radio"/> 7 a 8h día<br><input type="radio"/> más de 8h día                                                                                                                                   |
| tiempo libre televisión ordenador leer | <input type="radio"/> menos 1h día<br><input type="radio"/> 1h día<br><input type="radio"/> 2h día<br><input type="radio"/> 3h día<br><input type="radio"/> 4h día<br><input checked="" type="radio"/> 5 a 6h día<br><input type="radio"/> mas 6h día                                                                                                                     |
| tiempo libre ejercicio o deporte       | <input type="radio"/> menos 1h semana<br><input checked="" type="radio"/> 1h semana<br><input type="radio"/> 2h semana<br><input type="radio"/> 3h semana<br><input type="radio"/> 4 a 5h semana<br><input type="radio"/> mas 5h semana                                                                                                                                   |
| como se considera                      | <input type="radio"/> sedentaria<br><input checked="" type="radio"/> poco activa<br><input type="radio"/> moderadamente activa<br><input type="radio"/> bastante activa<br><input type="radio"/> muy activa<br><input type="radio"/> no sabe                                                                                                                              |
| FUR                                    | [*DATA REMOVED*]                                                                                                                                                                                                                                                                                                                                                          |
| Semanas gestación 2T                   | _____                                                                                                                                                                                                                                                                                                                                                                     |
| Días gestación 2T                      | _____                                                                                                                                                                                                                                                                                                                                                                     |
| DBP 2T                                 | _____                                                                                                                                                                                                                                                                                                                                                                     |
| CC 2T                                  | _____                                                                                                                                                                                                                                                                                                                                                                     |

|                                                   |                                                                                                                                                                                                 |
|---------------------------------------------------|-------------------------------------------------------------------------------------------------------------------------------------------------------------------------------------------------|
| AC 2T                                             |                                                                                                                                                                                                 |
| LF 2T                                             |                                                                                                                                                                                                 |
| PFE 2T (Hadlock)                                  |                                                                                                                                                                                                 |
| Semanas gestación 3T                              | [*DATA REMOVED*]                                                                                                                                                                                |
| días 3T                                           | [*DATA REMOVED*]                                                                                                                                                                                |
| DBP 3T                                            | [*DATA REMOVED*]                                                                                                                                                                                |
| CC 3T                                             | [*DATA REMOVED*]                                                                                                                                                                                |
| AC 3T                                             | [*DATA REMOVED*]                                                                                                                                                                                |
| LF 3T                                             | [*DATA REMOVED*]                                                                                                                                                                                |
| PFE 3T (Hadlock)                                  | [*DATA REMOVED*]                                                                                                                                                                                |
| Semanas de gestación final                        | [*DATA REMOVED*]                                                                                                                                                                                |
| días gestación final                              | [*DATA REMOVED*]                                                                                                                                                                                |
| Localización placenta                             | <input type="radio"/> anterior<br><input type="radio"/> lateral derecha<br><input type="radio"/> lateral izquierda<br><input checked="" type="radio"/> posterior<br><input type="radio"/> fondo |
| Presentación longitudinal cefálica                | <input type="radio"/> no<br><input checked="" type="radio"/> si                                                                                                                                 |
| Dorso                                             | <input type="radio"/> izquierda anterior<br><input checked="" type="radio"/> izquierda posterior<br><input type="radio"/> derecha anterior<br><input type="radio"/> derecha posterior           |
| diámetro biparietal                               | [*DATA REMOVED*]                                                                                                                                                                                |
| Circunferencia craneal                            | [*DATA REMOVED*]                                                                                                                                                                                |
| Circunferencia abdominal                          | [*DATA REMOVED*]                                                                                                                                                                                |
| Longitud de femur                                 | [*DATA REMOVED*]                                                                                                                                                                                |
| tejido celular subcutáneo a nivel del muslo en mm | [*DATA REMOVED*]                                                                                                                                                                                |
| tejido celular subcutáneo en abdomen en mm        | [*DATA REMOVED*]                                                                                                                                                                                |

|                                               |                                                                                                                                               |
|-----------------------------------------------|-----------------------------------------------------------------------------------------------------------------------------------------------|
| Volumen del muslo en cm3                      | [*DATA REMOVED*]                                                                                                                              |
| Peso fetal estimado según fórmula de Hadlock  | [*DATA REMOVED*]                                                                                                                              |
| Percentil                                     | [*DATA REMOVED*]                                                                                                                              |
| Peso fetal estimado según fórmula de Scioscia | _____                                                                                                                                         |
| Peso fetal estimado según fórmula de LEE      | _____                                                                                                                                         |
| Tipo de parto                                 | <input type="radio"/> eutocico<br><input type="radio"/> instrumentado/ventosa<br><input checked="" type="radio"/> cesarea                     |
| fecha de nacimiento                           | [*DATA REMOVED*]                                                                                                                              |
| Días entre exploración y nacimiento           | [*DATA REMOVED*]                                                                                                                              |
| Peso RN en g                                  | [*DATA REMOVED*]                                                                                                                              |
| sexo                                          | <input type="radio"/> mujer<br><input checked="" type="radio"/> hombre                                                                        |
| Apgar 1 minuto                                | [*DATA REMOVED*]                                                                                                                              |
| Apgar 5 minutos                               | [*DATA REMOVED*]                                                                                                                              |
| Apgar 10 minutos                              | _____                                                                                                                                         |
| antecedente Covid durante gestación           | <input type="radio"/> Yes<br><input checked="" type="radio"/> No                                                                              |
| Nivel de estudios                             | <input type="radio"/> ninguno<br><input type="radio"/> primarios<br><input type="radio"/> secundarios<br><input type="radio"/> universitarios |

# Base\_datos\_estimacion\_peso\_fetal

|                                       |                                                                                                                                                                                                                                                                                      |
|---------------------------------------|--------------------------------------------------------------------------------------------------------------------------------------------------------------------------------------------------------------------------------------------------------------------------------------|
| Número de identificación participante | 187                                                                                                                                                                                                                                                                                  |
| CODIGO PARTICIPANTE                   |                                                                                                                                                                                                                                                                                      |
| Edad                                  | [*DATA REMOVED*]                                                                                                                                                                                                                                                                     |
| Gestaciones                           | <input type="radio"/> 1<br><input type="radio"/> 2<br><input checked="" type="radio"/> 3<br><input type="radio"/> mas de 3                                                                                                                                                           |
| partos                                | <input type="radio"/> 0<br><input checked="" type="radio"/> 1<br><input type="radio"/> 2<br><input type="radio"/> 3<br><input type="radio"/> mas de 3                                                                                                                                |
| cesáreas                              | <input type="radio"/> 0<br><input checked="" type="radio"/> 1<br><input type="radio"/> 2<br><input type="radio"/> 3<br><input type="radio"/> mas de 3                                                                                                                                |
| Abortos                               | <input checked="" type="radio"/> 0<br><input type="radio"/> 1<br><input type="radio"/> 2<br><input type="radio"/> 3<br><input type="radio"/> mas de 3                                                                                                                                |
| Tipo de gestacion                     | <input checked="" type="radio"/> espontanea<br><input type="radio"/> IAC inseminación artificial conyuge<br><input type="radio"/> IAD inseminación artificial donante<br><input type="radio"/> FIV Fecundación in Vitro<br><input type="radio"/> Ovodon FIV con donación de ovocitos |
| peso previo a embarazo                | [*DATA REMOVED*]                                                                                                                                                                                                                                                                     |
| Ganancia ponderal embarazo            |                                                                                                                                                                                                                                                                                      |
| Talla madre                           | [*DATA REMOVED*]                                                                                                                                                                                                                                                                     |
| IMC previo embarazo                   | 20.312499999999996                                                                                                                                                                                                                                                                   |
| Patología obstétrica                  | <input checked="" type="radio"/> no<br><input type="radio"/> si                                                                                                                                                                                                                      |
| Diabetes pregestacional               | <input checked="" type="radio"/> no<br><input type="radio"/> si                                                                                                                                                                                                                      |
| Diabetes gestacional                  | <input checked="" type="radio"/> no<br><input type="radio"/> si                                                                                                                                                                                                                      |



|                                            |                                                                                                                                                                                      |
|--------------------------------------------|--------------------------------------------------------------------------------------------------------------------------------------------------------------------------------------|
| Diabetes gestacional con insulina          | <input checked="" type="radio"/> no<br><input type="radio"/> si                                                                                                                      |
| Diabetes gestacional con dieta y ejercicio | <input checked="" type="radio"/> no<br><input type="radio"/> si                                                                                                                      |
| Percentil fetos previos                    | <input type="radio"/> Nada<br><input type="radio"/> percentil menor de 10<br><input type="radio"/> percentil entre 10 y 90<br><input checked="" type="radio"/> percentil mayor de 90 |
| Exfumadora                                 | <input checked="" type="radio"/> Nada<br><input type="radio"/> menos de 5 años<br><input type="radio"/> 5 a 10 años<br><input type="radio"/> mayor o igual a 10 años                 |
| Hábito tabáquico                           | <input checked="" type="radio"/> no<br><input type="radio"/> si                                                                                                                      |
| fumadora                                   | [*DATA REMOVED*]                                                                                                                                                                     |
| Consumo otros tóxicos                      | <input checked="" type="radio"/> no<br><input type="radio"/> si                                                                                                                      |
| Hb 1T                                      | _____                                                                                                                                                                                |
| Htc 1T                                     | _____                                                                                                                                                                                |
| Hb 2T                                      | _____                                                                                                                                                                                |
| HTC 2T                                     | _____                                                                                                                                                                                |
| Hb 3T                                      | [*DATA REMOVED*]                                                                                                                                                                     |
| HTC 3T                                     | [*DATA REMOVED*]                                                                                                                                                                     |
| Suplemento FE oral                         | <input type="radio"/> si<br><input checked="" type="radio"/> no                                                                                                                      |
| Suplemento fe iv                           | <input type="radio"/> si<br><input checked="" type="radio"/> no                                                                                                                      |
| Transfusión                                | <input checked="" type="radio"/> no<br><input type="radio"/> si                                                                                                                      |
| Solicitada Vit D                           | <input checked="" type="radio"/> no<br><input type="radio"/> si                                                                                                                      |
| Deficit vit D                              | <input type="radio"/> no<br><input type="radio"/> si                                                                                                                                 |

|                       |                                                                                                                                                                                                                                                                                                                                                                                                   |
|-----------------------|---------------------------------------------------------------------------------------------------------------------------------------------------------------------------------------------------------------------------------------------------------------------------------------------------------------------------------------------------------------------------------------------------|
| Suplemento vit D      | <input type="radio"/> si<br><input type="radio"/> no                                                                                                                                                                                                                                                                                                                                              |
| Dieta, cuestionario   | <input type="radio"/> si<br><input checked="" type="radio"/> no                                                                                                                                                                                                                                                                                                                                   |
| Leche entera          | <input type="radio"/> Nunca o menos 1 vez al mes<br><input type="radio"/> 1 a 3 veces mes<br><input type="radio"/> 1 vez semana<br><input type="radio"/> 2 a 4 veces semana<br><input type="radio"/> 5 a 6 veces semana<br><input type="radio"/> 1 vez al día<br><input type="radio"/> 2 a 3 veces al día<br><input type="radio"/> 5 a 6 veces al día<br><input type="radio"/> más 6 veces al día |
| Leche semidesnatada   | <input type="radio"/> Nunca o menos 1 vez al mes<br><input type="radio"/> 1 a 3 veces mes<br><input type="radio"/> 1 vez semana<br><input type="radio"/> 2 a 4 veces semana<br><input type="radio"/> 5 a 6 veces semana<br><input type="radio"/> 1 vez al día<br><input type="radio"/> 2 a 3 veces al día<br><input type="radio"/> 5 a 6 veces al día<br><input type="radio"/> mas 6 veces al día |
| Leche desnatada       | <input type="radio"/> Nunca o menos 1 vez al mes<br><input type="radio"/> 1 a 3 veces mes<br><input type="radio"/> 1 vez semana<br><input type="radio"/> 2 a 4 veces semana<br><input type="radio"/> 5 a 6 veces semana<br><input type="radio"/> 1 vez al día<br><input type="radio"/> 2 a 3 veces al día<br><input type="radio"/> 5 a 6 veces al día<br><input type="radio"/> más 6 veces al día |
| Leche condensada      | <input type="radio"/> Nunca o menos 1 vez al mes<br><input type="radio"/> 1 a 3 veces mes<br><input type="radio"/> 1 vez semana<br><input type="radio"/> 2 a 4 veces semana<br><input type="radio"/> 5 a 6 veces semana<br><input type="radio"/> 1 vez al día<br><input type="radio"/> 2 a 3 veces al día<br><input type="radio"/> 5 a 6 veces al día<br><input type="radio"/> más 6 veces al día |
| nata o crema de leche | <input type="radio"/> Nunca o menos 1 vez al mes<br><input type="radio"/> 1 a 3 veces mes<br><input type="radio"/> 1 vez semana<br><input type="radio"/> 2 a 4 veces semana<br><input type="radio"/> 5 a 6 veces semana<br><input type="radio"/> 1 vez al día<br><input type="radio"/> 2 a 3 veces al día<br><input type="radio"/> 5 a 6 veces al día<br><input type="radio"/> más 6 veces al día |

---

Yogurt Entero

- ☐ Nunca o menos 1 vez al mes
- ☐ 1 a 3 veces mes
- ☐ 1 vez semana
- ☐ 2 a 4 veces semana
- ☐ 5 a 6 veces semana
- ☐ 1 vez al día
- ☐ 2 a 3 veces al día
- ☐ 5 a 6 veces al día
- ☐ más 6 veces al día

---

Yogurt desnatado

- ☐ Nunca o menos 1 vez al mes
- ☐ 1 a 3 veces mes
- ☐ 1 vez semana
- ☐ 2 a 4 veces semana
- ☐ 5 a 6 veces semana
- ☐ 1 vez al día
- ☐ 2 a 3 veces al día
- ☐ 5 a 6 veces al día
- ☐ más 6 veces al día

---

100g requesón o queso blando o queso fresco

- ☐ Nunca o menos 1 vez al mes
- ☐ 1 a 3 veces mes
- ☐ 1 vez semana
- ☐ 2 a 4 veces semana
- ☐ 5 a 6 veces semana
- ☐ 1 vez al día
- ☐ 2 a 3 veces al día
- ☐ 5 a 6 veces al día
- ☐ más 6 veces al día

---

queso curado o semicurado o cremoso

- ☐ Nunca o menos 1 vez al mes
- ☐ 1 a 3 veces mes
- ☐ 1 vez semana
- ☐ 2 a 4 veces semana
- ☐ 5 a 6 veces semana
- ☐ 1 vez al día
- ☐ 2 a 3 veces al día
- ☐ 5 a 6 veces al día
- ☐ más 6 veces al día

---

natillas flan pudding

- ☐ Nunca o menos 1 vez al mes
- ☐ 1 a 3 veces mes
- ☐ 1 vez semana
- ☐ 2 a 4 veces semana
- ☐ 5 a 6 veces semana
- ☐ 1 vez al día
- ☐ 2 a 3 veces al día
- ☐ 5 a 6 veces al día
- ☐ más 6 veces al día

---

Helado

- ☐ Nunca o menos 1 vez al mes
- ☐ 1 a 3 veces mes
- ☐ 1 vez semana
- ☐ 2 a 4 veces semana
- ☐ 5 a 6 veces semana
- ☐ 1 vez al día
- ☐ 2 a 3 veces al día
- ☐ 5 a 6 veces al día
- ☐ más 6 veces al día

|                                      |                                                                                                                                                                                                                                                                                                                                                                                                   |
|--------------------------------------|---------------------------------------------------------------------------------------------------------------------------------------------------------------------------------------------------------------------------------------------------------------------------------------------------------------------------------------------------------------------------------------------------|
| huevo                                | <input type="radio"/> Nunca o menos 1 vez al mes<br><input type="radio"/> 1 a 3 veces mes<br><input type="radio"/> 1 vez semana<br><input type="radio"/> 2 a 4 veces semana<br><input type="radio"/> 5 a 6 veces semana<br><input type="radio"/> 1 vez al día<br><input type="radio"/> 2 a 3 veces al día<br><input type="radio"/> 5 a 6 veces al día<br><input type="radio"/> más 6 veces al día |
| Pollo con piel                       | <input type="radio"/> Nunca o menos 1 vez al mes<br><input type="radio"/> 1 a 3 veces mes<br><input type="radio"/> 1 vez semana<br><input type="radio"/> 2 a 4 veces semana<br><input type="radio"/> 5 a 6 veces semana<br><input type="radio"/> 1 vez al día<br><input type="radio"/> 2 a 3 veces al día<br><input type="radio"/> 5 a 6 veces al día<br><input type="radio"/> más 6 veces al día |
| pollo sin piel                       | <input type="radio"/> Nunca o menos 1 vez al mes<br><input type="radio"/> 1 a 3 veces mes<br><input type="radio"/> 1 vez semana<br><input type="radio"/> 2 a 4 veces semana<br><input type="radio"/> 5 a 6 veces semana<br><input type="radio"/> 1 vez al día<br><input type="radio"/> 2 a 3 veces al día<br><input type="radio"/> 5 a 6 veces al día<br><input type="radio"/> más 6 veces al día |
| Ternera o cerdo o cordero            | <input type="radio"/> Nunca o menos 1 vez al mes<br><input type="radio"/> 1 a 3 veces mes<br><input type="radio"/> 1 vez semana<br><input type="radio"/> 2 a 4 veces semana<br><input type="radio"/> 5 a 6 veces semana<br><input type="radio"/> 1 vez al día<br><input type="radio"/> 2 a 3 veces al día<br><input type="radio"/> 5 a 6 veces al día<br><input type="radio"/> más 6 veces al día |
| carne caza: Conejo o codorniz o pato | <input type="radio"/> Nunca o menos 1 vez al mes<br><input type="radio"/> 1 a 3 veces mes<br><input type="radio"/> 1 vez semana<br><input type="radio"/> 2 a 4 veces semana<br><input type="radio"/> 5 a 6 veces semana<br><input type="radio"/> 1 vez al día<br><input type="radio"/> 2 a 3 veces al día<br><input type="radio"/> 5 a 6 veces al día<br><input type="radio"/> más 6 veces al día |
| Hígado de ternera o cerdo o pollo    | <input type="radio"/> Nunca o menos 1 vez al mes<br><input type="radio"/> 1 a 3 veces mes<br><input type="radio"/> 1 vez semana<br><input type="radio"/> 2 a 4 veces semana<br><input type="radio"/> 5 a 6 veces semana<br><input type="radio"/> 1 vez al día<br><input type="radio"/> 2 a 3 veces al día<br><input type="radio"/> 5 a 6 veces al día<br><input type="radio"/> más 6 veces al día |

---

Vísceras

- ☐ Nunca o menos 1 vez al mes
- ☐ 1 a 3 veces mes
- ☐ 1 vez semana
- ☐ 2 a 4 veces semana
- ☐ 5 a 6 veces semana
- ☐ 1 vez al día
- ☐ 2 a 3 veces al día
- ☐ 5 a 6 veces al día
- ☐ más 6 veces al día

---

Embutido

- ☐ Nunca o menos 1 vez al mes
- ☐ 1 a 3 veces mes
- ☐ 1 vez semana
- ☐ 2 a 4 veces semana
- ☐ 5 a 6 veces semana
- ☐ 1 vez al día
- ☐ 2 a 3 veces al día
- ☐ 5 a 6 veces al día
- ☐ más 6 veces al día

---

Salchicha o similar

- ☐ Nunca o menos 1 vez al mes
- ☐ 1 a 3 veces mes
- ☐ 1 vez semana
- ☐ 2 a 4 veces semana
- ☐ 5 a 6 veces semana
- ☐ 1 vez al día
- ☐ 2 a 3 veces al día
- ☐ 5 a 6 veces al día
- ☐ más 6 veces al día

---

Pate o foiegras

- ☐ Nunca o menos 1 vez al mes
- ☐ 1 a 3 veces mes
- ☐ 1 vez semana
- ☐ 2 a 4 veces semana
- ☐ 5 a 6 veces semana
- ☐ 1 vez al día
- ☐ 2 a 3 veces al día
- ☐ 5 a 6 veces al día
- ☐ más 6 veces al día

---

Hamburguesa

- ☐ Nunca o menos 1 vez al mes
- ☐ 1 a 3 veces mes
- ☐ 1 vez semana
- ☐ 2 a 4 veces semana
- ☐ 5 a 6 veces semana
- ☐ 1 vez al día
- ☐ 2 a 3 veces al día
- ☐ 5 a 6 veces al día
- ☐ más 6 veces al día

---

tocino o bacon

- ☐ Nunca o menos 1 vez al mes
- ☐ 1 a 3 veces mes
- ☐ 1 vez semana
- ☐ 2 a 4 veces semana
- ☐ 5 a 6 veces semana
- ☐ 1 vez al día
- ☐ 2 a 3 veces al día
- ☐ 5 a 6 veces al día
- ☐ más 6 veces al día

---

Pescado frito

- ☐ Nunca o menos 1 vez al mes
- ☐ 1 a 3 veces mes
- ☐ 1 vez semana
- ☐ 2 a 4 veces semana
- ☐ 5 a 6 veces semana
- ☐ 1 vez al día
- ☐ 2 a 3 veces al día
- ☐ 5 a 6 veces al día
- ☐ más 6 veces al día

---

pescado hervido blanco

- ☐ Nunca o menos 1 vez al mes
- ☐ 1 a 3 veces mes
- ☐ 1 vez semana
- ☐ 2 a 4 veces semana
- ☐ 5 a 6 veces semana
- ☐ 1 vez al día
- ☐ 2 a 3 veces al día
- ☐ 5 a 6 veces al día
- ☐ más 6 veces al día

---

pescado hervido azul

- ☐ Nunca o menos 1 vez al mes
- ☐ 1 a 3 veces mes
- ☐ 1 vez semana
- ☐ 2 a 4 veces semana
- ☐ 5 a 6 veces semana
- ☐ 1 vez al día
- ☐ 2 a 3 veces al día
- ☐ 5 a 6 veces al día
- ☐ más 6 veces al día

---

otros pescado azul

- ☐ Nunca o menos 1 vez al mes
- ☐ 1 a 3 veces mes
- ☐ 1 vez semana
- ☐ 2 a 4 veces semana
- ☐ 5 a 6 veces semana
- ☐ 1 vez al día
- ☐ 2 a 3 veces al día
- ☐ 5 a 6 veces al día
- ☐ más 6 veces al día

---

atun conserva

- ☐ Nunca o menos 1 vez al mes
- ☐ 1 a 3 veces mes
- ☐ 1 vez semana
- ☐ 2 a 4 veces semana
- ☐ 5 a 6 veces semana
- ☐ 1 vez al día
- ☐ 2 a 3 veces al día
- ☐ 5 a 6 veces al día
- ☐ más 6 veces al día

---

sardina conserva

- ☐ Nunca o menos 1 vez al mes
- ☐ 1 a 3 veces mes
- ☐ 1 vez semana
- ☐ 2 a 4 veces semana
- ☐ 5 a 6 veces semana
- ☐ 1 vez al día
- ☐ 2 a 3 veces al día
- ☐ 5 a 6 veces al día
- ☐ más 6 veces al día

|                                         |                                                                                                                                                                                                                                                                                                                                                                                                   |
|-----------------------------------------|---------------------------------------------------------------------------------------------------------------------------------------------------------------------------------------------------------------------------------------------------------------------------------------------------------------------------------------------------------------------------------------------------|
| pescado ahumado                         | <input type="radio"/> Nunca o menos 1 vez al mes<br><input type="radio"/> 1 a 3 veces mes<br><input type="radio"/> 1 vez semana<br><input type="radio"/> 2 a 4 veces semana<br><input type="radio"/> 5 a 6 veces semana<br><input type="radio"/> 1 vez al día<br><input type="radio"/> 2 a 3 veces al día<br><input type="radio"/> 5 a 6 veces al día<br><input type="radio"/> más 6 veces al día |
| almejas o mejillones o ostras unos 100g | <input type="radio"/> Nunca o menos 1 vez al mes<br><input type="radio"/> 1 a 3 veces mes<br><input type="radio"/> 1 vez semana<br><input type="radio"/> 2 a 4 veces semana<br><input type="radio"/> 5 a 6 veces semana<br><input type="radio"/> 1 vez al día<br><input type="radio"/> 2 a 3 veces al día<br><input type="radio"/> 5 a 6 veces al día<br><input type="radio"/> más 6 veces al día |
| calamar o chipiron o sepia unos 100g    | <input type="radio"/> Nunca o menos 1 vez al mes<br><input type="radio"/> 1 a 3 veces mes<br><input type="radio"/> 1 vez semana<br><input type="radio"/> 2 a 4 veces semana<br><input type="radio"/> 5 a 6 veces semana<br><input type="radio"/> 1 vez al día<br><input type="radio"/> 2 a 3 veces al día<br><input type="radio"/> 5 a 6 veces al día<br><input type="radio"/> más 6 veces al día |
| marisco unos 100g                       | <input type="radio"/> Nunca o menos 1 vez al mes<br><input type="radio"/> 1 a 3 veces mes<br><input type="radio"/> 1 vez semana<br><input type="radio"/> 2 a 4 veces semana<br><input type="radio"/> 5 a 6 veces semana<br><input type="radio"/> 1 vez al día<br><input type="radio"/> 2 a 3 veces al día<br><input type="radio"/> 5 a 6 veces al día<br><input type="radio"/> más 6 veces al día |
| Espinacas o acelgas cocinadas           | <input type="radio"/> Nunca o menos 1 vez al mes<br><input type="radio"/> 1 a 3 veces mes<br><input type="radio"/> 1 vez semana<br><input type="radio"/> 2 a 4 veces semana<br><input type="radio"/> 5 a 6 veces semana<br><input type="radio"/> 1 vez al día<br><input type="radio"/> 2 a 3 veces al día<br><input type="radio"/> 5 a 6 veces al día<br><input type="radio"/> más 6 veces al día |
| Col o coliflor o brocoli cocinado       | <input type="radio"/> Nunca o menos 1 vez al mes<br><input type="radio"/> 1 a 3 veces mes<br><input type="radio"/> 1 vez semana<br><input type="radio"/> 2 a 4 veces semana<br><input type="radio"/> 5 a 6 veces semana<br><input type="radio"/> 1 vez al día<br><input type="radio"/> 2 a 3 veces al día<br><input type="radio"/> 5 a 6 veces al día<br><input type="radio"/> más 6 veces al día |

---

Lechuga o endivia o escarola

- ☐ Nunca o menos 1 vez al mes
- ☐ 1 a 3 veces mes
- ☐ 1 vez semana
- ☐ 2 a 4 veces semana
- ☐ 5 a 6 veces semana
- ☐ 1 vez al día
- ☐ 2 a 3 veces al día
- ☐ 5 a 6 veces al día
- ☐ más 6 veces al día

---

tomate ensalada

- ☐ Nunca o menos 1 vez al mes
- ☐ 1 a 3 veces mes
- ☐ 1 vez semana
- ☐ 2 a 4 veces semana
- ☐ 5 a 6 veces semana
- ☐ 1 vez al día
- ☐ 2 a 3 veces al día
- ☐ 5 a 6 veces al día
- ☐ más 6 veces al día

---

cebolla

- ☐ Nunca o menos 1 vez al mes
- ☐ 1 a 3 veces mes
- ☐ 1 vez semana
- ☐ 2 a 4 veces semana
- ☐ 5 a 6 veces semana
- ☐ 1 vez al día
- ☐ 2 a 3 veces al día
- ☐ 5 a 6 veces al día
- ☐ más 6 veces al día

---

Zanahoria o calabaza

- ☐ Nunca o menos 1 vez al mes
- ☐ 1 a 3 veces mes
- ☐ 1 vez semana
- ☐ 2 a 4 veces semana
- ☐ 5 a 6 veces semana
- ☐ 1 vez al día
- ☐ 2 a 3 veces al día
- ☐ 5 a 6 veces al día
- ☐ más 6 veces al día

---

Judías verdes

- ☐ Nunca o menos 1 vez al mes
- ☐ 1 a 3 veces mes
- ☐ 1 vez semana
- ☐ 2 a 4 veces semana
- ☐ 5 a 6 veces semana
- ☐ 1 vez al día
- ☐ 2 a 3 veces al día
- ☐ 5 a 6 veces al día
- ☐ más 6 veces al día

---

Berenjena o calabacin o pepino

- ☐ Nunca o menos 1 vez al mes
- ☐ 1 a 3 veces mes
- ☐ 1 vez semana
- ☐ 2 a 4 veces semana
- ☐ 5 a 6 veces semana
- ☐ 1 vez al día
- ☐ 2 a 3 veces al día
- ☐ 5 a 6 veces al día
- ☐ más 6 veces al día



---

|          |                                                                                                                                                                                                                                                                                                                                                                                                   |
|----------|---------------------------------------------------------------------------------------------------------------------------------------------------------------------------------------------------------------------------------------------------------------------------------------------------------------------------------------------------------------------------------------------------|
| pimiento | <input type="radio"/> Nunca o menos 1 vez al mes<br><input type="radio"/> 1 a 3 veces mes<br><input type="radio"/> 1 vez semana<br><input type="radio"/> 2 a 4 veces semana<br><input type="radio"/> 5 a 6 veces semana<br><input type="radio"/> 1 vez al día<br><input type="radio"/> 2 a 3 veces al día<br><input type="radio"/> 5 a 6 veces al día<br><input type="radio"/> más 6 veces al día |
|----------|---------------------------------------------------------------------------------------------------------------------------------------------------------------------------------------------------------------------------------------------------------------------------------------------------------------------------------------------------------------------------------------------------|

---

|           |                                                                                                                                                                                                                                                                                                                                                                                                   |
|-----------|---------------------------------------------------------------------------------------------------------------------------------------------------------------------------------------------------------------------------------------------------------------------------------------------------------------------------------------------------------------------------------------------------|
| alcachofa | <input type="radio"/> Nunca o menos 1 vez al mes<br><input type="radio"/> 1 a 3 veces mes<br><input type="radio"/> 1 vez semana<br><input type="radio"/> 2 a 4 veces semana<br><input type="radio"/> 5 a 6 veces semana<br><input type="radio"/> 1 vez al día<br><input type="radio"/> 2 a 3 veces al día<br><input type="radio"/> 5 a 6 veces al día<br><input type="radio"/> más 6 veces al día |
|-----------|---------------------------------------------------------------------------------------------------------------------------------------------------------------------------------------------------------------------------------------------------------------------------------------------------------------------------------------------------------------------------------------------------|

---

|            |                                                                                                                                                                                                                                                                                                                                                                                                   |
|------------|---------------------------------------------------------------------------------------------------------------------------------------------------------------------------------------------------------------------------------------------------------------------------------------------------------------------------------------------------------------------------------------------------|
| espárragos | <input type="radio"/> Nunca o menos 1 vez al mes<br><input type="radio"/> 1 a 3 veces mes<br><input type="radio"/> 1 vez semana<br><input type="radio"/> 2 a 4 veces semana<br><input type="radio"/> 5 a 6 veces semana<br><input type="radio"/> 1 vez al día<br><input type="radio"/> 2 a 3 veces al día<br><input type="radio"/> 5 a 6 veces al día<br><input type="radio"/> más 6 veces al día |
|------------|---------------------------------------------------------------------------------------------------------------------------------------------------------------------------------------------------------------------------------------------------------------------------------------------------------------------------------------------------------------------------------------------------|

---

|              |                                                                                                                                                                                                                                                                                                                                                                                                   |
|--------------|---------------------------------------------------------------------------------------------------------------------------------------------------------------------------------------------------------------------------------------------------------------------------------------------------------------------------------------------------------------------------------------------------|
| maíz hervido | <input type="radio"/> Nunca o menos 1 vez al mes<br><input type="radio"/> 1 a 3 veces mes<br><input type="radio"/> 1 vez semana<br><input type="radio"/> 2 a 4 veces semana<br><input type="radio"/> 5 a 6 veces semana<br><input type="radio"/> 1 vez al día<br><input type="radio"/> 2 a 3 veces al día<br><input type="radio"/> 5 a 6 veces al día<br><input type="radio"/> más 6 veces al día |
|--------------|---------------------------------------------------------------------------------------------------------------------------------------------------------------------------------------------------------------------------------------------------------------------------------------------------------------------------------------------------------------------------------------------------|

---

|           |                                                                                                                                                                                                                                                                                                                                                                                                   |
|-----------|---------------------------------------------------------------------------------------------------------------------------------------------------------------------------------------------------------------------------------------------------------------------------------------------------------------------------------------------------------------------------------------------------|
| legumbres | <input type="radio"/> Nunca o menos 1 vez al mes<br><input type="radio"/> 1 a 3 veces mes<br><input type="radio"/> 1 vez semana<br><input type="radio"/> 2 a 4 veces semana<br><input type="radio"/> 5 a 6 veces semana<br><input type="radio"/> 1 vez al día<br><input type="radio"/> 2 a 3 veces al día<br><input type="radio"/> 5 a 6 veces al día<br><input type="radio"/> más 6 veces al día |
|-----------|---------------------------------------------------------------------------------------------------------------------------------------------------------------------------------------------------------------------------------------------------------------------------------------------------------------------------------------------------------------------------------------------------|

---

|                       |                                                                                                                                                                                                                                                                                                                                                                                                   |
|-----------------------|---------------------------------------------------------------------------------------------------------------------------------------------------------------------------------------------------------------------------------------------------------------------------------------------------------------------------------------------------------------------------------------------------|
| naranjas o mandarinas | <input type="radio"/> Nunca o menos 1 vez al mes<br><input type="radio"/> 1 a 3 veces mes<br><input type="radio"/> 1 vez semana<br><input type="radio"/> 2 a 4 veces semana<br><input type="radio"/> 5 a 6 veces semana<br><input type="radio"/> 1 vez al día<br><input type="radio"/> 2 a 3 veces al día<br><input type="radio"/> 5 a 6 veces al día<br><input type="radio"/> más 6 veces al día |
|-----------------------|---------------------------------------------------------------------------------------------------------------------------------------------------------------------------------------------------------------------------------------------------------------------------------------------------------------------------------------------------------------------------------------------------|

---

---

zumو natural fruta

- ☐ Nunca o menos 1 vez al mes
- ☐ 1 a 3 veces mes
- ☐ 1 vez semana
- ☐ 2 a 4 veces semana
- ☐ 5 a 6 veces semana
- ☐ 1 vez al día
- ☐ 2 a 3 veces al día
- ☐ 5 a 6 veces al día
- ☐ más 6 veces al día

---

platano

- ☐ Nunca o menos 1 vez al mes
- ☐ 1 a 3 veces mes
- ☐ 1 vez semana
- ☐ 2 a 4 veces semana
- ☐ 5 a 6 veces semana
- ☐ 1 vez al día
- ☐ 2 a 3 veces al día
- ☐ 5 a 6 veces al día
- ☐ más 6 veces al día

---

manzana o pera

- ☐ Nunca o menos 1 vez al mes
- ☐ 1 a 3 veces mes
- ☐ 1 vez semana
- ☐ 2 a 4 veces semana
- ☐ 5 a 6 veces semana
- ☐ 1 vez al día
- ☐ 2 a 3 veces al día
- ☐ 5 a 6 veces al día
- ☐ más 6 veces al día

---

melocotón o nectarina

- ☐ Nunca o menos 1 vez al mes
- ☐ 1 a 3 veces mes
- ☐ 1 vez semana
- ☐ 2 a 4 veces semana
- ☐ 5 a 6 veces semana
- ☐ 1 vez al día
- ☐ 2 a 3 veces al día
- ☐ 5 a 6 veces al día
- ☐ más 6 veces al día

---

sandia o melon

- ☐ Nunca o menos 1 vez al mes
- ☐ 1 a 3 veces mes
- ☐ 1 vez semana
- ☐ 2 a 4 veces semana
- ☐ 5 a 6 veces semana
- ☐ 1 vez al día
- ☐ 2 a 3 veces al día
- ☐ 5 a 6 veces al día
- ☐ más 6 veces al día

---

uva

- ☐ Nunca o menos 1 vez al mes
- ☐ 1 a 3 veces mes
- ☐ 1 vez semana
- ☐ 2 a 4 veces semana
- ☐ 5 a 6 veces semana
- ☐ 1 vez al día
- ☐ 2 a 3 veces al día
- ☐ 5 a 6 veces al día
- ☐ más 6 veces al día

---

bruna o ciruela

- ☐ Nunca o menos 1 vez al mes
- ☐ 1 a 3 veces mes
- ☐ 1 vez semana
- ☐ 2 a 4 veces semana
- ☐ 5 a 6 veces semana
- ☐ 1 vez al día
- ☐ 2 a 3 veces al día
- ☐ 5 a 6 veces al día
- ☐ más 6 veces al día

---

kiwi

- ☐ Nunca o menos 1 vez al mes
- ☐ 1 a 3 veces mes
- ☐ 1 vez semana
- ☐ 2 a 4 veces semana
- ☐ 5 a 6 veces semana
- ☐ 1 vez al día
- ☐ 2 a 3 veces al día
- ☐ 5 a 6 veces al día
- ☐ más 6 veces al día

---

aceituna

- ☐ Nunca o menos 1 vez al mes
- ☐ 1 a 3 veces mes
- ☐ 1 vez semana
- ☐ 2 a 4 veces semana
- ☐ 5 a 6 veces semana
- ☐ 1 vez al día
- ☐ 2 a 3 veces al día
- ☐ 5 a 6 veces al día
- ☐ más 6 veces al día

---

frutos secos

- ☐ Nunca o menos 1 vez al mes
- ☐ 1 a 3 veces mes
- ☐ 1 vez semana
- ☐ 2 a 4 veces semana
- ☐ 5 a 6 veces semana
- ☐ 1 vez al día
- ☐ 2 a 3 veces al día
- ☐ 5 a 6 veces al día
- ☐ más 6 veces al día

---

pan blanco

- ☐ Nunca o menos 1 vez al mes
- ☐ 1 a 3 veces mes
- ☐ 1 vez semana
- ☐ 2 a 4 veces semana
- ☐ 5 a 6 veces semana
- ☐ 1 vez al día
- ☐ 2 a 3 veces al día
- ☐ 5 a 6 veces al día
- ☐ más 6 veces al día

---

pan integral

- ☐ Nunca o menos 1 vez al mes
- ☐ 1 a 3 veces mes
- ☐ 1 vez semana
- ☐ 2 a 4 veces semana
- ☐ 5 a 6 veces semana
- ☐ 1 vez al día
- ☐ 2 a 3 veces al día
- ☐ 5 a 6 veces al día
- ☐ más 6 veces al día

---

cereales desayuno

- ☐ Nunca o menos 1 vez al mes
- ☐ 1 a 3 veces mes
- ☐ 1 vez semana
- ☐ 2 a 4 veces semana
- ☐ 5 a 6 veces semana
- ☐ 1 vez al día
- ☐ 2 a 3 veces al día
- ☐ 5 a 6 veces al día
- ☐ más 6 veces al día

---

patatas fritas

- ☐ Nunca o menos 1 vez al mes
- ☐ 1 a 3 veces mes
- ☐ 1 vez semana
- ☐ 2 a 4 veces semana
- ☐ 5 a 6 veces semana
- ☐ 1 vez al día
- ☐ 2 a 3 veces al día
- ☐ 5 a 6 veces al día
- ☐ más 6 veces al día

---

patatas cocidas o asadas

- ☐ Nunca o menos 1 vez al mes
- ☐ 1 a 3 veces mes
- ☐ 1 vez semana
- ☐ 2 a 4 veces semana
- ☐ 5 a 6 veces semana
- ☐ 1 vez al día
- ☐ 2 a 3 veces al día
- ☐ 5 a 6 veces al día
- ☐ más 6 veces al día

---

bolsa papas

- ☐ Nunca o menos 1 vez al mes
- ☐ 1 a 3 veces mes
- ☐ 1 vez semana
- ☐ 2 a 4 veces semana
- ☐ 5 a 6 veces semana
- ☐ 1 vez al día
- ☐ 2 a 3 veces al día
- ☐ 5 a 6 veces al día
- ☐ más 6 veces al día

---

arroz cocinado

- ☐ Nunca o menos 1 vez al mes
- ☐ 1 a 3 veces mes
- ☐ 1 vez semana
- ☐ 2 a 4 veces semana
- ☐ 5 a 6 veces semana
- ☐ 1 vez al día
- ☐ 2 a 3 veces al día
- ☐ 5 a 6 veces al día
- ☐ más 6 veces al día

---

pasta

- ☐ Nunca o menos 1 vez al mes
- ☐ 1 a 3 veces mes
- ☐ 1 vez semana
- ☐ 2 a 4 veces semana
- ☐ 5 a 6 veces semana
- ☐ 1 vez al día
- ☐ 2 a 3 veces al día
- ☐ 5 a 6 veces al día
- ☐ más 6 veces al día

|                     |                                                                                                                                                                                                                                                                                                                                                                                                   |
|---------------------|---------------------------------------------------------------------------------------------------------------------------------------------------------------------------------------------------------------------------------------------------------------------------------------------------------------------------------------------------------------------------------------------------|
| pizza               | <input type="radio"/> Nunca o menos 1 vez al mes<br><input type="radio"/> 1 a 3 veces mes<br><input type="radio"/> 1 vez semana<br><input type="radio"/> 2 a 4 veces semana<br><input type="radio"/> 5 a 6 veces semana<br><input type="radio"/> 1 vez al día<br><input type="radio"/> 2 a 3 veces al día<br><input type="radio"/> 5 a 6 veces al día<br><input type="radio"/> más 6 veces al día |
| aceite oliva        | <input type="radio"/> Nunca o menos 1 vez al mes<br><input type="radio"/> 1 a 3 veces mes<br><input type="radio"/> 1 vez semana<br><input type="radio"/> 2 a 4 veces semana<br><input type="radio"/> 5 a 6 veces semana<br><input type="radio"/> 1 vez al día<br><input type="radio"/> 2 a 3 veces al día<br><input type="radio"/> 5 a 6 veces al día<br><input type="radio"/> más 6 veces al día |
| otros aceites       | <input type="radio"/> Nunca o menos 1 vez al mes<br><input type="radio"/> 1 a 3 veces mes<br><input type="radio"/> 1 vez semana<br><input type="radio"/> 2 a 4 veces semana<br><input type="radio"/> 5 a 6 veces semana<br><input type="radio"/> 1 vez al día<br><input type="radio"/> 2 a 3 veces al día<br><input type="radio"/> 5 a 6 veces al día<br><input type="radio"/> más 6 veces al día |
| margarina           | <input type="radio"/> Nunca o menos 1 vez al mes<br><input type="radio"/> 1 a 3 veces mes<br><input type="radio"/> 1 vez semana<br><input type="radio"/> 2 a 4 veces semana<br><input type="radio"/> 5 a 6 veces semana<br><input type="radio"/> 1 vez al día<br><input type="radio"/> 2 a 3 veces al día<br><input type="radio"/> 5 a 6 veces al día<br><input type="radio"/> más 6 veces al día |
| mantequilla         | <input type="radio"/> Nunca o menos 1 vez al mes<br><input type="radio"/> 1 a 3 veces mes<br><input type="radio"/> 1 vez semana<br><input type="radio"/> 2 a 4 veces semana<br><input type="radio"/> 5 a 6 veces semana<br><input type="radio"/> 1 vez al día<br><input type="radio"/> 2 a 3 veces al día<br><input type="radio"/> 5 a 6 veces al día<br><input type="radio"/> más 6 veces al día |
| galletas tipo maria | <input type="radio"/> Nunca o menos 1 vez al mes<br><input type="radio"/> 1 a 3 veces mes<br><input type="radio"/> 1 vez semana<br><input type="radio"/> 2 a 4 veces semana<br><input type="radio"/> 5 a 6 veces semana<br><input type="radio"/> 1 vez al día<br><input type="radio"/> 2 a 3 veces al día<br><input type="radio"/> 5 a 6 veces al día<br><input type="radio"/> más 6 veces al día |

---

galletas chocolate

- ☐ Nunca o menos 1 vez al mes
- ☐ 1 a 3 veces mes
- ☐ 1 vez semana
- ☐ 2 a 4 veces semana
- ☐ 5 a 6 veces semana
- ☐ 1 vez al día
- ☐ 2 a 3 veces al día
- ☐ 5 a 6 veces al día
- ☐ más 6 veces al día

---

bolleria

- ☐ Nunca o menos 1 vez al mes
- ☐ 1 a 3 veces mes
- ☐ 1 vez semana
- ☐ 2 a 4 veces semana
- ☐ 5 a 6 veces semana
- ☐ 1 vez al día
- ☐ 2 a 3 veces al día
- ☐ 5 a 6 veces al día
- ☐ más 6 veces al día

---

chocolate o bombones

- ☐ Nunca o menos 1 vez al mes
- ☐ 1 a 3 veces mes
- ☐ 1 vez semana
- ☐ 2 a 4 veces semana
- ☐ 5 a 6 veces semana
- ☐ 1 vez al día
- ☐ 2 a 3 veces al día
- ☐ 5 a 6 veces al día
- ☐ más 6 veces al día

---

chocolate polvo o colacao

- ☐ Nunca o menos 1 vez al mes
- ☐ 1 a 3 veces mes
- ☐ 1 vez semana
- ☐ 2 a 4 veces semana
- ☐ 5 a 6 veces semana
- ☐ 1 vez al día
- ☐ 2 a 3 veces al día
- ☐ 5 a 6 veces al día
- ☐ más 6 veces al día

---

vino tinto

- ☐ Nunca o menos 1 vez al mes
- ☐ 1 a 3 veces mes
- ☐ 1 vez semana
- ☐ 2 a 4 veces semana
- ☐ 5 a 6 veces semana
- ☐ 1 vez al día
- ☐ 2 a 3 veces al día
- ☐ 5 a 6 veces al día
- ☐ más 6 veces al día

---

vino blanco

- ☐ Nunca o menos 1 vez al mes
- ☐ 1 a 3 veces mes
- ☐ 1 vez semana
- ☐ 2 a 4 veces semana
- ☐ 5 a 6 veces semana
- ☐ 1 vez al día
- ☐ 2 a 3 veces al día
- ☐ 5 a 6 veces al día
- ☐ más 6 veces al día

---

|                    |                                                                                                                                                                                                                                                                                                                                                                                                   |
|--------------------|---------------------------------------------------------------------------------------------------------------------------------------------------------------------------------------------------------------------------------------------------------------------------------------------------------------------------------------------------------------------------------------------------|
| vino seco o vermut | <input type="radio"/> Nunca o menos 1 vez al mes<br><input type="radio"/> 1 a 3 veces mes<br><input type="radio"/> 1 vez semana<br><input type="radio"/> 2 a 4 veces semana<br><input type="radio"/> 5 a 6 veces semana<br><input type="radio"/> 1 vez al día<br><input type="radio"/> 2 a 3 veces al día<br><input type="radio"/> 5 a 6 veces al día<br><input type="radio"/> más 6 veces al día |
|--------------------|---------------------------------------------------------------------------------------------------------------------------------------------------------------------------------------------------------------------------------------------------------------------------------------------------------------------------------------------------------------------------------------------------|

---

|         |                                                                                                                                                                                                                                                                                                                                                                                                   |
|---------|---------------------------------------------------------------------------------------------------------------------------------------------------------------------------------------------------------------------------------------------------------------------------------------------------------------------------------------------------------------------------------------------------|
| cerveza | <input type="radio"/> Nunca o menos 1 vez al mes<br><input type="radio"/> 1 a 3 veces mes<br><input type="radio"/> 1 vez semana<br><input type="radio"/> 2 a 4 veces semana<br><input type="radio"/> 5 a 6 veces semana<br><input type="radio"/> 1 vez al día<br><input type="radio"/> 2 a 3 veces al día<br><input type="radio"/> 5 a 6 veces al día<br><input type="radio"/> más 6 veces al día |
|---------|---------------------------------------------------------------------------------------------------------------------------------------------------------------------------------------------------------------------------------------------------------------------------------------------------------------------------------------------------------------------------------------------------|

---

|                     |                                                                                                                                                                                                                                                                                                                                                                                                   |
|---------------------|---------------------------------------------------------------------------------------------------------------------------------------------------------------------------------------------------------------------------------------------------------------------------------------------------------------------------------------------------------------------------------------------------|
| cerveza sin alcohol | <input type="radio"/> Nunca o menos 1 vez al mes<br><input type="radio"/> 1 a 3 veces mes<br><input type="radio"/> 1 vez semana<br><input type="radio"/> 2 a 4 veces semana<br><input type="radio"/> 5 a 6 veces semana<br><input type="radio"/> 1 vez al día<br><input type="radio"/> 2 a 3 veces al día<br><input type="radio"/> 5 a 6 veces al día<br><input type="radio"/> más 6 veces al día |
|---------------------|---------------------------------------------------------------------------------------------------------------------------------------------------------------------------------------------------------------------------------------------------------------------------------------------------------------------------------------------------------------------------------------------------|

---

|         |                                                                                                                                                                                                                                                                                                                                                                                                   |
|---------|---------------------------------------------------------------------------------------------------------------------------------------------------------------------------------------------------------------------------------------------------------------------------------------------------------------------------------------------------------------------------------------------------|
| licores | <input type="radio"/> Nunca o menos 1 vez al mes<br><input type="radio"/> 1 a 3 veces mes<br><input type="radio"/> 1 vez semana<br><input type="radio"/> 2 a 4 veces semana<br><input type="radio"/> 5 a 6 veces semana<br><input type="radio"/> 1 vez al día<br><input type="radio"/> 2 a 3 veces al día<br><input type="radio"/> 5 a 6 veces al día<br><input type="radio"/> más 6 veces al día |
|---------|---------------------------------------------------------------------------------------------------------------------------------------------------------------------------------------------------------------------------------------------------------------------------------------------------------------------------------------------------------------------------------------------------|

---

|                       |                                                                                                                                                                                                                                                                                                                                                                                                   |
|-----------------------|---------------------------------------------------------------------------------------------------------------------------------------------------------------------------------------------------------------------------------------------------------------------------------------------------------------------------------------------------------------------------------------------------|
| ginebra o ron o vodka | <input type="radio"/> Nunca o menos 1 vez al mes<br><input type="radio"/> 1 a 3 veces mes<br><input type="radio"/> 1 vez semana<br><input type="radio"/> 2 a 4 veces semana<br><input type="radio"/> 5 a 6 veces semana<br><input type="radio"/> 1 vez al día<br><input type="radio"/> 2 a 3 veces al día<br><input type="radio"/> 5 a 6 veces al día<br><input type="radio"/> más 6 veces al día |
|-----------------------|---------------------------------------------------------------------------------------------------------------------------------------------------------------------------------------------------------------------------------------------------------------------------------------------------------------------------------------------------------------------------------------------------|

---

|                 |                                                                                                                                                                                                                                                                                                                                                                                                   |
|-----------------|---------------------------------------------------------------------------------------------------------------------------------------------------------------------------------------------------------------------------------------------------------------------------------------------------------------------------------------------------------------------------------------------------|
| refresco normal | <input type="radio"/> Nunca o menos 1 vez al mes<br><input type="radio"/> 1 a 3 veces mes<br><input type="radio"/> 1 vez semana<br><input type="radio"/> 2 a 4 veces semana<br><input type="radio"/> 5 a 6 veces semana<br><input type="radio"/> 1 vez al día<br><input type="radio"/> 2 a 3 veces al día<br><input type="radio"/> 5 a 6 veces al día<br><input type="radio"/> más 6 veces al día |
|-----------------|---------------------------------------------------------------------------------------------------------------------------------------------------------------------------------------------------------------------------------------------------------------------------------------------------------------------------------------------------------------------------------------------------|

---

---

|                     |                                                  |
|---------------------|--------------------------------------------------|
| refresco sin azúcar | <input type="radio"/> Nunca o menos 1 vez al mes |
|                     | <input type="radio"/> 1 a 3 veces mes            |
|                     | <input type="radio"/> 1 vez semana               |
|                     | <input type="radio"/> 2 a 4 veces semana         |
|                     | <input type="radio"/> 5 a 6 veces semana         |
|                     | <input type="radio"/> 1 vez al día               |
|                     | <input type="radio"/> 2 a 3 veces al día         |
|                     | <input type="radio"/> 5 a 6 veces al día         |
|                     | <input type="radio"/> más 6 veces al día         |

---

|                |                                                  |
|----------------|--------------------------------------------------|
| Agua del grifo | <input type="radio"/> Nunca o menos 1 vez al mes |
|                | <input type="radio"/> 1 a 3 veces mes            |
|                | <input type="radio"/> 1 vez semana               |
|                | <input type="radio"/> 2 a 4 veces semana         |
|                | <input type="radio"/> 5 a 6 veces semana         |
|                | <input type="radio"/> 1 vez al día               |
|                | <input type="radio"/> 2 a 3 veces al día         |
|                | <input type="radio"/> 5 a 6 veces al día         |
|                | <input type="radio"/> más 6 veces al día         |

---

|                          |                                                  |
|--------------------------|--------------------------------------------------|
| agua embotellada sin gas | <input type="radio"/> Nunca o menos 1 vez al mes |
|                          | <input type="radio"/> 1 a 3 veces mes            |
|                          | <input type="radio"/> 1 vez semana               |
|                          | <input type="radio"/> 2 a 4 veces semana         |
|                          | <input type="radio"/> 5 a 6 veces semana         |
|                          | <input type="radio"/> 1 vez al día               |
|                          | <input type="radio"/> 2 a 3 veces al día         |
|                          | <input type="radio"/> 5 a 6 veces al día         |
|                          | <input type="radio"/> más 6 veces al día         |

---

|                          |                                                  |
|--------------------------|--------------------------------------------------|
| agua embotellada con gas | <input type="radio"/> Nunca o menos 1 vez al mes |
|                          | <input type="radio"/> 1 a 3 veces mes            |
|                          | <input type="radio"/> 1 vez semana               |
|                          | <input type="radio"/> 2 a 4 veces semana         |
|                          | <input type="radio"/> 5 a 6 veces semana         |
|                          | <input type="radio"/> 1 vez al día               |
|                          | <input type="radio"/> 2 a 3 veces al día         |
|                          | <input type="radio"/> 5 a 6 veces al día         |
|                          | <input type="radio"/> más 6 veces al día         |

---

|                      |                                                  |
|----------------------|--------------------------------------------------|
| zumو frutas embasado | <input type="radio"/> Nunca o menos 1 vez al mes |
|                      | <input type="radio"/> 1 a 3 veces mes            |
|                      | <input type="radio"/> 1 vez semana               |
|                      | <input type="radio"/> 2 a 4 veces semana         |
|                      | <input type="radio"/> 5 a 6 veces semana         |
|                      | <input type="radio"/> 1 vez al día               |
|                      | <input type="radio"/> 2 a 3 veces al día         |
|                      | <input type="radio"/> 5 a 6 veces al día         |
|                      | <input type="radio"/> más 6 veces al día         |

---

|      |                                                  |
|------|--------------------------------------------------|
| cafe | <input type="radio"/> Nunca o menos 1 vez al mes |
|      | <input type="radio"/> 1 a 3 veces mes            |
|      | <input type="radio"/> 1 vez semana               |
|      | <input type="radio"/> 2 a 4 veces semana         |
|      | <input type="radio"/> 5 a 6 veces semana         |
|      | <input type="radio"/> 1 vez al día               |
|      | <input type="radio"/> 2 a 3 veces al día         |
|      | <input type="radio"/> 5 a 6 veces al día         |
|      | <input type="radio"/> más 6 veces al día         |



---

cafe descafeinado

- ☐ Nunca o menos 1 vez al mes
- ☐ 1 a 3 veces mes
- ☐ 1 vez semana
- ☐ 2 a 4 veces semana
- ☐ 5 a 6 veces semana
- ☐ 1 vez al día
- ☐ 2 a 3 veces al día
- ☐ 5 a 6 veces al día
- ☐ más 6 veces al día

---

te o infusión

- ☐ Nunca o menos 1 vez al mes
- ☐ 1 a 3 veces mes
- ☐ 1 vez semana
- ☐ 2 a 4 veces semana
- ☐ 5 a 6 veces semana
- ☐ 1 vez al día
- ☐ 2 a 3 veces al día
- ☐ 5 a 6 veces al día
- ☐ más 6 veces al día

---

sopa o puré verduras

- ☐ Nunca o menos 1 vez al mes
- ☐ 1 a 3 veces mes
- ☐ 1 vez semana
- ☐ 2 a 4 veces semana
- ☐ 5 a 6 veces semana
- ☐ 1 vez al día
- ☐ 2 a 3 veces al día
- ☐ 5 a 6 veces al día
- ☐ más 6 veces al día

---

croquetas pollo jamón

- ☐ Nunca o menos 1 vez al mes
- ☐ 1 a 3 veces mes
- ☐ 1 vez semana
- ☐ 2 a 4 veces semana
- ☐ 5 a 6 veces semana
- ☐ 1 vez al día
- ☐ 2 a 3 veces al día
- ☐ 5 a 6 veces al día
- ☐ más 6 veces al día

---

croquetas pescado

- ☐ Nunca o menos 1 vez al mes
- ☐ 1 a 3 veces mes
- ☐ 1 vez semana
- ☐ 2 a 4 veces semana
- ☐ 5 a 6 veces semana
- ☐ 1 vez al día
- ☐ 2 a 3 veces al día
- ☐ 5 a 6 veces al día
- ☐ más 6 veces al día

---

mayonesa

- ☐ Nunca o menos 1 vez al mes
- ☐ 1 a 3 veces mes
- ☐ 1 vez semana
- ☐ 2 a 4 veces semana
- ☐ 5 a 6 veces semana
- ☐ 1 vez al día
- ☐ 2 a 3 veces al día
- ☐ 5 a 6 veces al día
- ☐ más 6 veces al día

---

salsa tomate

- ☐ Nunca o menos 1 vez al mes
- ☐ 1 a 3 veces mes
- ☐ 1 vez semana
- ☐ 2 a 4 veces semana
- ☐ 5 a 6 veces semana
- ☐ 1 vez al día
- ☐ 2 a 3 veces al día
- ☐ 5 a 6 veces al día
- ☐ más 6 veces al día

---

ketchup

- ☐ Nunca o menos 1 vez al mes
- ☐ 1 a 3 veces mes
- ☐ 1 vez semana
- ☐ 2 a 4 veces semana
- ☐ 5 a 6 veces semana
- ☐ 1 vez al día
- ☐ 2 a 3 veces al día
- ☐ 5 a 6 veces al día
- ☐ más 6 veces al día

---

sal

- ☐ Nunca o menos 1 vez al mes
- ☐ 1 a 3 veces mes
- ☐ 1 vez semana
- ☐ 2 a 4 veces semana
- ☐ 5 a 6 veces semana
- ☐ 1 vez al día
- ☐ 2 a 3 veces al día
- ☐ 5 a 6 veces al día
- ☐ más 6 veces al día

---

ajo

- ☐ Nunca o menos 1 vez al mes
- ☐ 1 a 3 veces mes
- ☐ 1 vez semana
- ☐ 2 a 4 veces semana
- ☐ 5 a 6 veces semana
- ☐ 1 vez al día
- ☐ 2 a 3 veces al día
- ☐ 5 a 6 veces al día
- ☐ más 6 veces al día

---

mermelada o miel

- ☐ Nunca o menos 1 vez al mes
- ☐ 1 a 3 veces mes
- ☐ 1 vez semana
- ☐ 2 a 4 veces semana
- ☐ 5 a 6 veces semana
- ☐ 1 vez al día
- ☐ 2 a 3 veces al día
- ☐ 5 a 6 veces al día
- ☐ más 6 veces al día

---

azúcar

- ☐ Nunca o menos 1 vez al mes
- ☐ 1 a 3 veces mes
- ☐ 1 vez semana
- ☐ 2 a 4 veces semana
- ☐ 5 a 6 veces semana
- ☐ 1 vez al día
- ☐ 2 a 3 veces al día
- ☐ 5 a 6 veces al día
- ☐ más 6 veces al día

|                                       |                                                                                                                                                                                                                                                                                                                                                                                                                                                                                                                    |
|---------------------------------------|--------------------------------------------------------------------------------------------------------------------------------------------------------------------------------------------------------------------------------------------------------------------------------------------------------------------------------------------------------------------------------------------------------------------------------------------------------------------------------------------------------------------|
| Otro alimento                         | <hr/>                                                                                                                                                                                                                                                                                                                                                                                                                                                                                                              |
| suplementos vitamínicos               | <input type="radio"/> si<br><input type="radio"/> no                                                                                                                                                                                                                                                                                                                                                                                                                                                               |
| suplementos vitamínicos               | <hr/>                                                                                                                                                                                                                                                                                                                                                                                                                                                                                                              |
| dieta previa                          | <input type="radio"/> si<br><input type="radio"/> no                                                                                                                                                                                                                                                                                                                                                                                                                                                               |
| motivo dieta                          | <input type="radio"/> no dieta<br><input type="radio"/> control peso<br><input type="radio"/> control colesterol<br><input type="radio"/> control diabetes<br><input type="radio"/> problemas estómago<br><input type="radio"/> problemas vesícula o hepáticos<br><input type="radio"/> HTA o cardiopatía<br><input type="radio"/> problemas renales<br><input type="radio"/> alergia alimentaria<br><input type="radio"/> ácido úrico elevado<br><input type="radio"/> vegetariana<br><input type="radio"/> otros |
| cambio alimentos año previo gestación | <input type="radio"/> si<br><input type="radio"/> no                                                                                                                                                                                                                                                                                                                                                                                                                                                               |
| cambio lácteos                        | <input type="radio"/> eliminado<br><input type="radio"/> disminuido<br><input type="radio"/> igual<br><input type="radio"/> aumentado<br><input type="radio"/> no sabe                                                                                                                                                                                                                                                                                                                                             |
| cambio huevos                         | <input type="radio"/> eliminado<br><input type="radio"/> disminuido<br><input type="radio"/> igual<br><input type="radio"/> aumentado<br><input type="radio"/> no sabe                                                                                                                                                                                                                                                                                                                                             |
| cambio carne                          | <input type="radio"/> eliminado<br><input type="radio"/> disminuido<br><input type="radio"/> igual<br><input type="radio"/> aumentado<br><input type="radio"/> no sabe                                                                                                                                                                                                                                                                                                                                             |
| cambio pescado                        | <input type="radio"/> eliminado<br><input type="radio"/> disminuido<br><input type="radio"/> igual<br><input type="radio"/> aumentado<br><input type="radio"/> no sabe                                                                                                                                                                                                                                                                                                                                             |
| cambio verduras                       | <input type="radio"/> eliminado<br><input type="radio"/> disminuido<br><input type="radio"/> igual<br><input type="radio"/> aumentado<br><input type="radio"/> no sabe                                                                                                                                                                                                                                                                                                                                             |

|                            |                                                                                                                                                                                                             |
|----------------------------|-------------------------------------------------------------------------------------------------------------------------------------------------------------------------------------------------------------|
| cambio legumbres           | <input type="radio"/> eliminado<br><input type="radio"/> disminuido<br><input type="radio"/> igual<br><input type="radio"/> aumentado<br><input type="radio"/> no sabe                                      |
| cambio fruta               | <input type="radio"/> eliminado<br><input type="radio"/> disminuido<br><input type="radio"/> igual<br><input type="radio"/> aumentado<br><input type="radio"/> no sabe                                      |
| cambio pan                 | <input type="radio"/> eliminado<br><input type="radio"/> disminuido<br><input type="radio"/> igual<br><input type="radio"/> aumentado<br><input type="radio"/> no sabe                                      |
| cambio aceite oliva        | <input type="radio"/> eliminado<br><input type="radio"/> disminuido<br><input type="radio"/> igual<br><input type="radio"/> aumentado<br><input type="radio"/> no sabe                                      |
| cambio mante o margarina   | <input type="radio"/> eliminado<br><input type="radio"/> disminuido<br><input type="radio"/> igual<br><input type="radio"/> aumentado<br><input type="radio"/> no sabe                                      |
| cambio azúcar y dulces     | <input type="radio"/> eliminado<br><input type="radio"/> disminuido<br><input type="radio"/> igual<br><input type="radio"/> aumentado<br><input type="radio"/> no sabe                                      |
| cambio bebidas alcohólicas | <input type="radio"/> eliminado<br><input type="radio"/> disminuido<br><input type="radio"/> igual<br><input type="radio"/> aumentado<br><input type="radio"/> no sabe                                      |
| frecuencia comidas fritas  | <input type="radio"/> a diario<br><input type="radio"/> 5 a 6 veces semana<br><input type="radio"/> 2 a 4 veces semana<br><input type="radio"/> 1 vez semana<br><input type="radio"/> menos de 1 vez semana |
| carne                      | <input type="radio"/> no como<br><input type="radio"/> cruda<br><input type="radio"/> poco hecha<br><input type="radio"/> hecha<br><input type="radio"/> muy hecha                                          |
| grasa visible carne        | <input type="radio"/> quita toda<br><input type="radio"/> quita mayoría<br><input type="radio"/> quita un poco<br><input type="radio"/> no quita nada                                                       |

---

cocina carne

- ☐ a la plancha
- ☐ a la parrilla
- ☐ asada
- ☐ frita
- ☐ guisada

---

tostado quemado carne

- ☐ nunca
- ☐ 1 vez mes
- ☐ 2 a 3 veces mes
- ☐ 1 vez semana
- ☐ 2 a 3 semanas

---

tostado quemado pescado

- ☐ nunca
- ☐ 1 vez mes
- ☐ 2 a 3 veces mes
- ☐ 1 vez semana
- ☐ 2 a 3 semanas

---

socarrat paella

- ☐ nunca
- ☐ 1 vez mes
- ☐ 2 a 3 veces mes
- ☐ 1 vez semana
- ☐ 2 a 3 semanas

---

grasa o aceite cocinar

- ☐ mantequilla
- ☐ margarina
- ☐ aceite oliva
- ☐ aceite oliva virgen extra
- ☐ aceite vegetal
- ☐ mezcla aceites

---

grasa aceite aliñar

- ☐ mantequilla
- ☐ margarina
- ☐ aceite oliva
- ☐ aceite oliva virgen extra
- ☐ aceite vegetal
- ☐ mezcla aceites

---

grasa aceite freir

- ☐ mantequilla
- ☐ margarina
- ☐ aceite oliva
- ☐ aceite oliva virgen extra
- ☐ aceite vegetal
- ☐ mezcla aceites

---

Ejercicio cuestionario

- ☐ si
- ☐ no

---

horas de sueño incluido siesta

---

---

minutos siesta

---

---

horas televisión semana

---

|                                        |                                                                                                                                                                                                                                                                                                                                                                |
|----------------------------------------|----------------------------------------------------------------------------------------------------------------------------------------------------------------------------------------------------------------------------------------------------------------------------------------------------------------------------------------------------------------|
| actividad trabajo                      | <input type="radio"/> casi siempre sentado<br><input type="radio"/> sentado 50 por cien<br><input type="radio"/> casi siempre de pie, quieto<br><input type="radio"/> casi siempre levantado caminando y llevando pocas cosas<br><input type="radio"/> casi siempre levantado, caminando y llevado muchas cosas<br><input type="radio"/> trabajo manual pesado |
| tiempo caminar o bici al día           | <input type="radio"/> casi nunca<br><input type="radio"/> menos 20min día<br><input type="radio"/> 20 a 40 min día<br><input type="radio"/> 40 a 60 min día<br><input type="radio"/> 1h o 1h y media día<br><input type="radio"/> más de 1h y media al día                                                                                                     |
| tiempo tareas casa al día              | <input type="radio"/> menos de 1h día<br><input type="radio"/> 1 a 2h día<br><input type="radio"/> 3 a 4h día<br><input type="radio"/> 5 a 6h día<br><input type="radio"/> 7 a 8h día<br><input type="radio"/> más de 8h día                                                                                                                                   |
| tiempo libre televisión ordenador leer | <input type="radio"/> menos 1h día<br><input type="radio"/> 1h día<br><input type="radio"/> 2h día<br><input type="radio"/> 3h día<br><input type="radio"/> 4h día<br><input type="radio"/> 5 a 6h día<br><input type="radio"/> mas 6h día                                                                                                                     |
| tiempo libre ejercicio o deporte       | <input type="radio"/> menos 1h semana<br><input type="radio"/> 1h semana<br><input type="radio"/> 2h semana<br><input type="radio"/> 3h semana<br><input type="radio"/> 4 a 5h semana<br><input type="radio"/> mas 5h semana                                                                                                                                   |
| como se considera                      | <input type="radio"/> sedentaria<br><input type="radio"/> poco activa<br><input type="radio"/> moderadamente activa<br><input type="radio"/> bastante activa<br><input type="radio"/> muy activa<br><input type="radio"/> no sabe                                                                                                                              |
| FUR                                    | [*DATA REMOVED*]                                                                                                                                                                                                                                                                                                                                               |
| Semanas gestación 2T                   | _____                                                                                                                                                                                                                                                                                                                                                          |
| Días gestación 2T                      | _____                                                                                                                                                                                                                                                                                                                                                          |
| DBP 2T                                 | _____                                                                                                                                                                                                                                                                                                                                                          |
| CC 2T                                  | _____                                                                                                                                                                                                                                                                                                                                                          |

|                                                   |                                                                                                                                                                                      |
|---------------------------------------------------|--------------------------------------------------------------------------------------------------------------------------------------------------------------------------------------|
| AC 2T                                             |                                                                                                                                                                                      |
| LF 2T                                             |                                                                                                                                                                                      |
| PFE 2T (Hadlock)                                  |                                                                                                                                                                                      |
| Semanas gestación 3T                              | [*DATA REMOVED*]                                                                                                                                                                     |
| días 3T                                           | [*DATA REMOVED*]                                                                                                                                                                     |
| DBP 3T                                            | [*DATA REMOVED*]                                                                                                                                                                     |
| CC 3T                                             | [*DATA REMOVED*]                                                                                                                                                                     |
| AC 3T                                             | [*DATA REMOVED*]                                                                                                                                                                     |
| LF 3T                                             | [*DATA REMOVED*]                                                                                                                                                                     |
| PFE 3T (Hadlock)                                  | [*DATA REMOVED*]                                                                                                                                                                     |
| Semanas de gestación final                        | [*DATA REMOVED*]                                                                                                                                                                     |
| días gestación final                              | [*DATA REMOVED*]                                                                                                                                                                     |
| Localización placenta                             | <input type="radio"/> anterior<br><input type="radio"/> lateral derecha<br><input type="radio"/> lateral izquierda<br><input type="radio"/> posterior<br><input type="radio"/> fondo |
| Presentación longitudinal cefálica                | <input type="radio"/> no<br><input checked="" type="radio"/> si                                                                                                                      |
| Dorso                                             | <input type="radio"/> izquierda anterior<br><input type="radio"/> izquierda posterior<br><input type="radio"/> derecha anterior<br><input type="radio"/> derecha posterior           |
| diámetro biparietal                               | [*DATA REMOVED*]                                                                                                                                                                     |
| Circunferencia craneal                            | [*DATA REMOVED*]                                                                                                                                                                     |
| Circunferencia abdominal                          | [*DATA REMOVED*]                                                                                                                                                                     |
| Longitud de femur                                 | [*DATA REMOVED*]                                                                                                                                                                     |
| tejido celular subcutáneo a nivel del muslo en mm | [*DATA REMOVED*]                                                                                                                                                                     |
| tejido celular subcutáneo en abdomen en mm        | [*DATA REMOVED*]                                                                                                                                                                     |

|                                               |                                                                                                                                                          |
|-----------------------------------------------|----------------------------------------------------------------------------------------------------------------------------------------------------------|
| Volumen del muslo en cm3                      | [*DATA REMOVED*]                                                                                                                                         |
| Peso fetal estimado según fórmula de Hadlock  | [*DATA REMOVED*]                                                                                                                                         |
| Percentil                                     | [*DATA REMOVED*]                                                                                                                                         |
| Peso fetal estimado según fórmula de Scioscia | _____                                                                                                                                                    |
| Peso fetal estimado según fórmula de LEE      | _____                                                                                                                                                    |
| Tipo de parto                                 | <input checked="" type="radio"/> eutocico<br><input type="radio"/> instrumentado/ventosa<br><input type="radio"/> cesarea                                |
| fecha de nacimiento                           | [*DATA REMOVED*]                                                                                                                                         |
| Días entre exploración y nacimiento           | [*DATA REMOVED*]                                                                                                                                         |
| Peso RN en g                                  | [*DATA REMOVED*]                                                                                                                                         |
| sexo                                          | <input checked="" type="radio"/> mujer<br><input type="radio"/> hombre                                                                                   |
| Apgar 1 minuto                                | [*DATA REMOVED*]                                                                                                                                         |
| Apgar 5 minutos                               | [*DATA REMOVED*]                                                                                                                                         |
| Apgar 10 minutos                              | _____                                                                                                                                                    |
| antecedente Covid durante gestación           | <input type="radio"/> Yes<br><input checked="" type="radio"/> No                                                                                         |
| Nivel de estudios                             | <input type="radio"/> ninguno<br><input type="radio"/> primarios<br><input type="radio"/> secundarios<br><input checked="" type="radio"/> universitarios |



# Base\_datos\_estimacion\_peso\_fetal

|                                       |                                                                                                                                                                                                                                                                           |
|---------------------------------------|---------------------------------------------------------------------------------------------------------------------------------------------------------------------------------------------------------------------------------------------------------------------------|
| Número de identificación participante | 188                                                                                                                                                                                                                                                                       |
| CODIGO PARTICIPANTE                   |                                                                                                                                                                                                                                                                           |
| Edad                                  | [*DATA REMOVED*]                                                                                                                                                                                                                                                          |
| Gestaciones                           | <input checked="" type="radio"/> 1<br><input type="radio"/> 2<br><input type="radio"/> 3<br><input type="radio"/> mas de 3                                                                                                                                                |
| partos                                | <input checked="" type="radio"/> 0<br><input type="radio"/> 1<br><input type="radio"/> 2<br><input type="radio"/> 3<br><input type="radio"/> mas de 3                                                                                                                     |
| cesáreas                              | <input checked="" type="radio"/> 0<br><input type="radio"/> 1<br><input type="radio"/> 2<br><input type="radio"/> 3<br><input type="radio"/> mas de 3                                                                                                                     |
| Abortos                               | <input checked="" type="radio"/> 0<br><input type="radio"/> 1<br><input type="radio"/> 2<br><input type="radio"/> 3<br><input type="radio"/> mas de 3                                                                                                                     |
| Tipo de gestacion                     | <input type="radio"/> espontanea<br><input type="radio"/> IAC inseminación artificial conyuge<br><input type="radio"/> IAD inseminación artificial donante<br><input type="radio"/> FIV Fecundación in Vitro<br><input type="radio"/> Ovodon FIV con donación de ovocitos |
| peso previo a embarazo                | [*DATA REMOVED*]                                                                                                                                                                                                                                                          |
| Ganancia ponderal embarazo            |                                                                                                                                                                                                                                                                           |
| Talla madre                           | [*DATA REMOVED*]                                                                                                                                                                                                                                                          |
| IMC previo embarazo                   | 18.125235115078144                                                                                                                                                                                                                                                        |
| Patología obstétrica                  | <input checked="" type="radio"/> no<br><input type="radio"/> si                                                                                                                                                                                                           |
| Diabetes pregestacional               | <input checked="" type="radio"/> no<br><input type="radio"/> si                                                                                                                                                                                                           |
| Diabetes gestacional                  | <input checked="" type="radio"/> no<br><input type="radio"/> si                                                                                                                                                                                                           |

|                                            |                                                                                                                                                                                      |
|--------------------------------------------|--------------------------------------------------------------------------------------------------------------------------------------------------------------------------------------|
| Diabetes gestacional con insulina          | <input checked="" type="radio"/> no<br><input type="radio"/> si                                                                                                                      |
| Diabetes gestacional con dieta y ejercicio | <input checked="" type="radio"/> no<br><input type="radio"/> si                                                                                                                      |
| Percentil fetos previos                    | <input checked="" type="radio"/> Nada<br><input type="radio"/> percentil menor de 10<br><input type="radio"/> percentil entre 10 y 90<br><input type="radio"/> percentil mayor de 90 |
| Exfumadora                                 | <input checked="" type="radio"/> Nada<br><input type="radio"/> menos de 5 años<br><input type="radio"/> 5 a 10 años<br><input type="radio"/> mayor o igual a 10 años                 |
| Hábito tabáquico                           | <input checked="" type="radio"/> no<br><input type="radio"/> si                                                                                                                      |
| fumadora                                   | [*DATA REMOVED*]                                                                                                                                                                     |
| Consumo otros tóxicos                      | <input checked="" type="radio"/> no<br><input type="radio"/> si                                                                                                                      |
| Hb 1T                                      | [*DATA REMOVED*]                                                                                                                                                                     |
| Htc 1T                                     | [*DATA REMOVED*]                                                                                                                                                                     |
| Hb 2T                                      | [*DATA REMOVED*]                                                                                                                                                                     |
| HTC 2T                                     | [*DATA REMOVED*]                                                                                                                                                                     |
| Hb 3T                                      | [*DATA REMOVED*]                                                                                                                                                                     |
| HTC 3T                                     | [*DATA REMOVED*]                                                                                                                                                                     |
| Suplemento FE oral                         | <input type="radio"/> si<br><input checked="" type="radio"/> no                                                                                                                      |
| Suplemento fe iv                           | <input type="radio"/> si<br><input type="radio"/> no                                                                                                                                 |
| Transfusión                                | <input checked="" type="radio"/> no<br><input type="radio"/> si                                                                                                                      |
| Solicitada Vit D                           | <input checked="" type="radio"/> no<br><input type="radio"/> si                                                                                                                      |
| Deficit vit D                              | <input type="radio"/> no<br><input type="radio"/> si                                                                                                                                 |
| Suplemento vit D                           | <input type="radio"/> si<br><input type="radio"/> no                                                                                                                                 |

|                       |                                                                                                                                                                                                                                                                                                                                                                                                              |
|-----------------------|--------------------------------------------------------------------------------------------------------------------------------------------------------------------------------------------------------------------------------------------------------------------------------------------------------------------------------------------------------------------------------------------------------------|
| Dieta, cuestionario   | <input checked="" type="radio"/> sí<br><input type="radio"/> no                                                                                                                                                                                                                                                                                                                                              |
| Leche entera          | <input checked="" type="radio"/> Nunca o menos 1 vez al mes<br><input type="radio"/> 1 a 3 veces mes<br><input type="radio"/> 1 vez semana<br><input type="radio"/> 2 a 4 veces semana<br><input type="radio"/> 5 a 6 veces semana<br><input type="radio"/> 1 vez al día<br><input type="radio"/> 2 a 3 veces al día<br><input type="radio"/> 5 a 6 veces al día<br><input type="radio"/> más 6 veces al día |
| Leche semidesnatada   | <input type="radio"/> Nunca o menos 1 vez al mes<br><input type="radio"/> 1 a 3 veces mes<br><input type="radio"/> 1 vez semana<br><input type="radio"/> 2 a 4 veces semana<br><input type="radio"/> 5 a 6 veces semana<br><input type="radio"/> 1 vez al día<br><input checked="" type="radio"/> 2 a 3 veces al día<br><input type="radio"/> 5 a 6 veces al día<br><input type="radio"/> mas 6 veces al día |
| Leche desnatada       | <input checked="" type="radio"/> Nunca o menos 1 vez al mes<br><input type="radio"/> 1 a 3 veces mes<br><input type="radio"/> 1 vez semana<br><input type="radio"/> 2 a 4 veces semana<br><input type="radio"/> 5 a 6 veces semana<br><input type="radio"/> 1 vez al día<br><input type="radio"/> 2 a 3 veces al día<br><input type="radio"/> 5 a 6 veces al día<br><input type="radio"/> más 6 veces al día |
| Leche condensada      | <input type="radio"/> Nunca o menos 1 vez al mes<br><input checked="" type="radio"/> 1 a 3 veces mes<br><input type="radio"/> 1 vez semana<br><input type="radio"/> 2 a 4 veces semana<br><input type="radio"/> 5 a 6 veces semana<br><input type="radio"/> 1 vez al día<br><input type="radio"/> 2 a 3 veces al día<br><input type="radio"/> 5 a 6 veces al día<br><input type="radio"/> más 6 veces al día |
| nata o crema de leche | <input checked="" type="radio"/> Nunca o menos 1 vez al mes<br><input type="radio"/> 1 a 3 veces mes<br><input type="radio"/> 1 vez semana<br><input type="radio"/> 2 a 4 veces semana<br><input type="radio"/> 5 a 6 veces semana<br><input type="radio"/> 1 vez al día<br><input type="radio"/> 2 a 3 veces al día<br><input type="radio"/> 5 a 6 veces al día<br><input type="radio"/> más 6 veces al día |

---

Yogurt Entero

- ☐ Nunca o menos 1 vez al mes  
☐ 1 a 3 veces mes  
☐ 1 vez semana  
☐ 2 a 4 veces semana  
☐ 5 a 6 veces semana  
☐ 1 vez al día  
☒ 2 a 3 veces al día  
☐ 5 a 6 veces al día  
☐ más 6 veces al día

---

Yogurt desnatado

- ☒ Nunca o menos 1 vez al mes  
☐ 1 a 3 veces mes  
☐ 1 vez semana  
☐ 2 a 4 veces semana  
☐ 5 a 6 veces semana  
☐ 1 vez al día  
☐ 2 a 3 veces al día  
☐ 5 a 6 veces al día  
☐ más 6 veces al día

---

100g requesón o queso blando o queso fresco

- ☐ Nunca o menos 1 vez al mes  
☒ 1 a 3 veces mes  
☐ 1 vez semana  
☐ 2 a 4 veces semana  
☐ 5 a 6 veces semana  
☐ 1 vez al día  
☐ 2 a 3 veces al día  
☐ 5 a 6 veces al día  
☐ más 6 veces al día

---

queso curado o semicurado o cremoso

- ☐ Nunca o menos 1 vez al mes  
☐ 1 a 3 veces mes  
☒ 1 vez semana  
☐ 2 a 4 veces semana  
☐ 5 a 6 veces semana  
☐ 1 vez al día  
☐ 2 a 3 veces al día  
☐ 5 a 6 veces al día  
☐ más 6 veces al día

---

natillas flan pudding

- ☒ Nunca o menos 1 vez al mes  
☐ 1 a 3 veces mes  
☐ 1 vez semana  
☐ 2 a 4 veces semana  
☐ 5 a 6 veces semana  
☐ 1 vez al día  
☐ 2 a 3 veces al día  
☐ 5 a 6 veces al día  
☐ más 6 veces al día

---

Helado

- ☐ Nunca o menos 1 vez al mes  
☒ 1 a 3 veces mes  
☐ 1 vez semana  
☐ 2 a 4 veces semana  
☐ 5 a 6 veces semana  
☐ 1 vez al día  
☐ 2 a 3 veces al día  
☐ 5 a 6 veces al día  
☐ más 6 veces al día

|                                      |                                                                                                                                                                                                                                                                                                                                                                                                              |
|--------------------------------------|--------------------------------------------------------------------------------------------------------------------------------------------------------------------------------------------------------------------------------------------------------------------------------------------------------------------------------------------------------------------------------------------------------------|
| huevo                                | <input type="radio"/> Nunca o menos 1 vez al mes<br><input type="radio"/> 1 a 3 veces mes<br><input checked="" type="radio"/> 1 vez semana<br><input type="radio"/> 2 a 4 veces semana<br><input type="radio"/> 5 a 6 veces semana<br><input type="radio"/> 1 vez al día<br><input type="radio"/> 2 a 3 veces al día<br><input type="radio"/> 5 a 6 veces al día<br><input type="radio"/> más 6 veces al día |
| Pollo con piel                       | <input type="radio"/> Nunca o menos 1 vez al mes<br><input checked="" type="radio"/> 1 a 3 veces mes<br><input type="radio"/> 1 vez semana<br><input type="radio"/> 2 a 4 veces semana<br><input type="radio"/> 5 a 6 veces semana<br><input type="radio"/> 1 vez al día<br><input type="radio"/> 2 a 3 veces al día<br><input type="radio"/> 5 a 6 veces al día<br><input type="radio"/> más 6 veces al día |
| pollo sin piel                       | <input type="radio"/> Nunca o menos 1 vez al mes<br><input type="radio"/> 1 a 3 veces mes<br><input type="radio"/> 1 vez semana<br><input checked="" type="radio"/> 2 a 4 veces semana<br><input type="radio"/> 5 a 6 veces semana<br><input type="radio"/> 1 vez al día<br><input type="radio"/> 2 a 3 veces al día<br><input type="radio"/> 5 a 6 veces al día<br><input type="radio"/> más 6 veces al día |
| Ternera o cerdo o cordero            | <input type="radio"/> Nunca o menos 1 vez al mes<br><input type="radio"/> 1 a 3 veces mes<br><input type="radio"/> 1 vez semana<br><input checked="" type="radio"/> 2 a 4 veces semana<br><input type="radio"/> 5 a 6 veces semana<br><input type="radio"/> 1 vez al día<br><input type="radio"/> 2 a 3 veces al día<br><input type="radio"/> 5 a 6 veces al día<br><input type="radio"/> más 6 veces al día |
| carne caza: Conejo o codorniz o pato | <input checked="" type="radio"/> Nunca o menos 1 vez al mes<br><input type="radio"/> 1 a 3 veces mes<br><input type="radio"/> 1 vez semana<br><input type="radio"/> 2 a 4 veces semana<br><input type="radio"/> 5 a 6 veces semana<br><input type="radio"/> 1 vez al día<br><input type="radio"/> 2 a 3 veces al día<br><input type="radio"/> 5 a 6 veces al día<br><input type="radio"/> más 6 veces al día |
| Hígado de ternera o cerdo o pollo    | <input checked="" type="radio"/> Nunca o menos 1 vez al mes<br><input type="radio"/> 1 a 3 veces mes<br><input type="radio"/> 1 vez semana<br><input type="radio"/> 2 a 4 veces semana<br><input type="radio"/> 5 a 6 veces semana<br><input type="radio"/> 1 vez al día<br><input type="radio"/> 2 a 3 veces al día<br><input type="radio"/> 5 a 6 veces al día<br><input type="radio"/> más 6 veces al día |

|                     |                                                                                                                                                                                                                                                                                                                                                                                                              |
|---------------------|--------------------------------------------------------------------------------------------------------------------------------------------------------------------------------------------------------------------------------------------------------------------------------------------------------------------------------------------------------------------------------------------------------------|
| Vísceras            | <input checked="" type="radio"/> Nunca o menos 1 vez al mes<br><input type="radio"/> 1 a 3 veces mes<br><input type="radio"/> 1 vez semana<br><input type="radio"/> 2 a 4 veces semana<br><input type="radio"/> 5 a 6 veces semana<br><input type="radio"/> 1 vez al día<br><input type="radio"/> 2 a 3 veces al día<br><input type="radio"/> 5 a 6 veces al día<br><input type="radio"/> más 6 veces al día |
| Embutido            | <input type="radio"/> Nunca o menos 1 vez al mes<br><input type="radio"/> 1 a 3 veces mes<br><input checked="" type="radio"/> 1 vez semana<br><input type="radio"/> 2 a 4 veces semana<br><input type="radio"/> 5 a 6 veces semana<br><input type="radio"/> 1 vez al día<br><input type="radio"/> 2 a 3 veces al día<br><input type="radio"/> 5 a 6 veces al día<br><input type="radio"/> más 6 veces al día |
| Salchicha o similar | <input type="radio"/> Nunca o menos 1 vez al mes<br><input type="radio"/> 1 a 3 veces mes<br><input type="radio"/> 1 vez semana<br><input checked="" type="radio"/> 2 a 4 veces semana<br><input type="radio"/> 5 a 6 veces semana<br><input type="radio"/> 1 vez al día<br><input type="radio"/> 2 a 3 veces al día<br><input type="radio"/> 5 a 6 veces al día<br><input type="radio"/> más 6 veces al día |
| Pate o foiegras     | <input checked="" type="radio"/> Nunca o menos 1 vez al mes<br><input type="radio"/> 1 a 3 veces mes<br><input type="radio"/> 1 vez semana<br><input type="radio"/> 2 a 4 veces semana<br><input type="radio"/> 5 a 6 veces semana<br><input type="radio"/> 1 vez al día<br><input type="radio"/> 2 a 3 veces al día<br><input type="radio"/> 5 a 6 veces al día<br><input type="radio"/> más 6 veces al día |
| Hamburguesa         | <input type="radio"/> Nunca o menos 1 vez al mes<br><input type="radio"/> 1 a 3 veces mes<br><input type="radio"/> 1 vez semana<br><input checked="" type="radio"/> 2 a 4 veces semana<br><input type="radio"/> 5 a 6 veces semana<br><input type="radio"/> 1 vez al día<br><input type="radio"/> 2 a 3 veces al día<br><input type="radio"/> 5 a 6 veces al día<br><input type="radio"/> más 6 veces al día |
| tocino o bacon      | <input type="radio"/> Nunca o menos 1 vez al mes<br><input checked="" type="radio"/> 1 a 3 veces mes<br><input type="radio"/> 1 vez semana<br><input type="radio"/> 2 a 4 veces semana<br><input type="radio"/> 5 a 6 veces semana<br><input type="radio"/> 1 vez al día<br><input type="radio"/> 2 a 3 veces al día<br><input type="radio"/> 5 a 6 veces al día<br><input type="radio"/> más 6 veces al día |

---

Pescado frito

- ☒ Nunca o menos 1 vez al mes  
☐ 1 a 3 veces mes  
☐ 1 vez semana  
☐ 2 a 4 veces semana  
☐ 5 a 6 veces semana  
☐ 1 vez al día  
☐ 2 a 3 veces al día  
☐ 5 a 6 veces al día  
☐ más 6 veces al día

---

pescado hervido blanco

- ☐ Nunca o menos 1 vez al mes  
☐ 1 a 3 veces mes  
☐ 1 vez semana  
☒ 2 a 4 veces semana  
☐ 5 a 6 veces semana  
☐ 1 vez al día  
☐ 2 a 3 veces al día  
☐ 5 a 6 veces al día  
☐ más 6 veces al día

---

pescado hervido azul

- ☐ Nunca o menos 1 vez al mes  
☒ 1 a 3 veces mes  
☐ 1 vez semana  
☐ 2 a 4 veces semana  
☐ 5 a 6 veces semana  
☐ 1 vez al día  
☐ 2 a 3 veces al día  
☐ 5 a 6 veces al día  
☐ más 6 veces al día

---

otros pescado azul

- ☐ Nunca o menos 1 vez al mes  
☐ 1 a 3 veces mes  
☐ 1 vez semana  
☒ 2 a 4 veces semana  
☐ 5 a 6 veces semana  
☐ 1 vez al día  
☐ 2 a 3 veces al día  
☐ 5 a 6 veces al día  
☐ más 6 veces al día

---

atun conserva

- ☐ Nunca o menos 1 vez al mes  
☐ 1 a 3 veces mes  
☒ 1 vez semana  
☐ 2 a 4 veces semana  
☐ 5 a 6 veces semana  
☐ 1 vez al día  
☐ 2 a 3 veces al día  
☐ 5 a 6 veces al día  
☐ más 6 veces al día

---

sardina conserva

- ☒ Nunca o menos 1 vez al mes  
☐ 1 a 3 veces mes  
☐ 1 vez semana  
☐ 2 a 4 veces semana  
☐ 5 a 6 veces semana  
☐ 1 vez al día  
☐ 2 a 3 veces al día  
☐ 5 a 6 veces al día  
☐ más 6 veces al día

|                                         |                                                                                                                                                                                                                                                                                                                                                                                                              |
|-----------------------------------------|--------------------------------------------------------------------------------------------------------------------------------------------------------------------------------------------------------------------------------------------------------------------------------------------------------------------------------------------------------------------------------------------------------------|
| pescado ahumado                         | <input checked="" type="radio"/> Nunca o menos 1 vez al mes<br><input type="radio"/> 1 a 3 veces mes<br><input type="radio"/> 1 vez semana<br><input type="radio"/> 2 a 4 veces semana<br><input type="radio"/> 5 a 6 veces semana<br><input type="radio"/> 1 vez al día<br><input type="radio"/> 2 a 3 veces al día<br><input type="radio"/> 5 a 6 veces al día<br><input type="radio"/> más 6 veces al día |
| almejas o mejillones o ostras unos 100g | <input type="radio"/> Nunca o menos 1 vez al mes<br><input type="radio"/> 1 a 3 veces mes<br><input checked="" type="radio"/> 1 vez semana<br><input type="radio"/> 2 a 4 veces semana<br><input type="radio"/> 5 a 6 veces semana<br><input type="radio"/> 1 vez al día<br><input type="radio"/> 2 a 3 veces al día<br><input type="radio"/> 5 a 6 veces al día<br><input type="radio"/> más 6 veces al día |
| calamar o chipiron o sepia unos 100g    | <input type="radio"/> Nunca o menos 1 vez al mes<br><input type="radio"/> 1 a 3 veces mes<br><input checked="" type="radio"/> 1 vez semana<br><input type="radio"/> 2 a 4 veces semana<br><input type="radio"/> 5 a 6 veces semana<br><input type="radio"/> 1 vez al día<br><input type="radio"/> 2 a 3 veces al día<br><input type="radio"/> 5 a 6 veces al día<br><input type="radio"/> más 6 veces al día |
| marisco unos 100g                       | <input type="radio"/> Nunca o menos 1 vez al mes<br><input type="radio"/> 1 a 3 veces mes<br><input checked="" type="radio"/> 1 vez semana<br><input type="radio"/> 2 a 4 veces semana<br><input type="radio"/> 5 a 6 veces semana<br><input type="radio"/> 1 vez al día<br><input type="radio"/> 2 a 3 veces al día<br><input type="radio"/> 5 a 6 veces al día<br><input type="radio"/> más 6 veces al día |
| Espinacas o acelgas cocinadas           | <input type="radio"/> Nunca o menos 1 vez al mes<br><input type="radio"/> 1 a 3 veces mes<br><input type="radio"/> 1 vez semana<br><input checked="" type="radio"/> 2 a 4 veces semana<br><input type="radio"/> 5 a 6 veces semana<br><input type="radio"/> 1 vez al día<br><input type="radio"/> 2 a 3 veces al día<br><input type="radio"/> 5 a 6 veces al día<br><input type="radio"/> más 6 veces al día |
| Col o coliflor o brocoli cocinado       | <input type="radio"/> Nunca o menos 1 vez al mes<br><input type="radio"/> 1 a 3 veces mes<br><input type="radio"/> 1 vez semana<br><input checked="" type="radio"/> 2 a 4 veces semana<br><input type="radio"/> 5 a 6 veces semana<br><input type="radio"/> 1 vez al día<br><input type="radio"/> 2 a 3 veces al día<br><input type="radio"/> 5 a 6 veces al día<br><input type="radio"/> más 6 veces al día |



---

Lechuga o endivia o escarola

- ☐ Nunca o menos 1 vez al mes  
☐ 1 a 3 veces mes  
☐ 1 vez semana  
☒ 2 a 4 veces semana  
☐ 5 a 6 veces semana  
☐ 1 vez al día  
☐ 2 a 3 veces al día  
☐ 5 a 6 veces al día  
☐ más 6 veces al día

---

tomate ensalada

- ☐ Nunca o menos 1 vez al mes  
☐ 1 a 3 veces mes  
☐ 1 vez semana  
☒ 2 a 4 veces semana  
☐ 5 a 6 veces semana  
☐ 1 vez al día  
☐ 2 a 3 veces al día  
☐ 5 a 6 veces al día  
☐ más 6 veces al día

---

cebolla

- ☐ Nunca o menos 1 vez al mes  
☐ 1 a 3 veces mes  
☒ 1 vez semana  
☐ 2 a 4 veces semana  
☐ 5 a 6 veces semana  
☐ 1 vez al día  
☐ 2 a 3 veces al día  
☐ 5 a 6 veces al día  
☐ más 6 veces al día

---

Zanahoria o calabaza

- ☐ Nunca o menos 1 vez al mes  
☐ 1 a 3 veces mes  
☐ 1 vez semana  
☒ 2 a 4 veces semana  
☐ 5 a 6 veces semana  
☐ 1 vez al día  
☐ 2 a 3 veces al día  
☐ 5 a 6 veces al día  
☐ más 6 veces al día

---

Judías verdes

- ☐ Nunca o menos 1 vez al mes  
☐ 1 a 3 veces mes  
☒ 1 vez semana  
☐ 2 a 4 veces semana  
☐ 5 a 6 veces semana  
☐ 1 vez al día  
☐ 2 a 3 veces al día  
☐ 5 a 6 veces al día  
☐ más 6 veces al día

---

Berenjena o calabacin o pepino

- ☐ Nunca o menos 1 vez al mes  
☐ 1 a 3 veces mes  
☐ 1 vez semana  
☒ 2 a 4 veces semana  
☐ 5 a 6 veces semana  
☐ 1 vez al día  
☐ 2 a 3 veces al día  
☐ 5 a 6 veces al día  
☐ más 6 veces al día

---

|          |                                                                                                                                                                                                                                                                                                                                                                                                              |
|----------|--------------------------------------------------------------------------------------------------------------------------------------------------------------------------------------------------------------------------------------------------------------------------------------------------------------------------------------------------------------------------------------------------------------|
| pimiento | <input type="radio"/> Nunca o menos 1 vez al mes<br><input type="radio"/> 1 a 3 veces mes<br><input type="radio"/> 1 vez semana<br><input checked="" type="radio"/> 2 a 4 veces semana<br><input type="radio"/> 5 a 6 veces semana<br><input type="radio"/> 1 vez al día<br><input type="radio"/> 2 a 3 veces al día<br><input type="radio"/> 5 a 6 veces al día<br><input type="radio"/> más 6 veces al día |
|----------|--------------------------------------------------------------------------------------------------------------------------------------------------------------------------------------------------------------------------------------------------------------------------------------------------------------------------------------------------------------------------------------------------------------|

---

|           |                                                                                                                                                                                                                                                                                                                                                                                                              |
|-----------|--------------------------------------------------------------------------------------------------------------------------------------------------------------------------------------------------------------------------------------------------------------------------------------------------------------------------------------------------------------------------------------------------------------|
| alcachofa | <input type="radio"/> Nunca o menos 1 vez al mes<br><input type="radio"/> 1 a 3 veces mes<br><input checked="" type="radio"/> 1 vez semana<br><input type="radio"/> 2 a 4 veces semana<br><input type="radio"/> 5 a 6 veces semana<br><input type="radio"/> 1 vez al día<br><input type="radio"/> 2 a 3 veces al día<br><input type="radio"/> 5 a 6 veces al día<br><input type="radio"/> más 6 veces al día |
|-----------|--------------------------------------------------------------------------------------------------------------------------------------------------------------------------------------------------------------------------------------------------------------------------------------------------------------------------------------------------------------------------------------------------------------|

---

|            |                                                                                                                                                                                                                                                                                                                                                                                                              |
|------------|--------------------------------------------------------------------------------------------------------------------------------------------------------------------------------------------------------------------------------------------------------------------------------------------------------------------------------------------------------------------------------------------------------------|
| espárragos | <input type="radio"/> Nunca o menos 1 vez al mes<br><input checked="" type="radio"/> 1 a 3 veces mes<br><input type="radio"/> 1 vez semana<br><input type="radio"/> 2 a 4 veces semana<br><input type="radio"/> 5 a 6 veces semana<br><input type="radio"/> 1 vez al día<br><input type="radio"/> 2 a 3 veces al día<br><input type="radio"/> 5 a 6 veces al día<br><input type="radio"/> más 6 veces al día |
|------------|--------------------------------------------------------------------------------------------------------------------------------------------------------------------------------------------------------------------------------------------------------------------------------------------------------------------------------------------------------------------------------------------------------------|

---

|              |                                                                                                                                                                                                                                                                                                                                                                                                              |
|--------------|--------------------------------------------------------------------------------------------------------------------------------------------------------------------------------------------------------------------------------------------------------------------------------------------------------------------------------------------------------------------------------------------------------------|
| maíz hervido | <input type="radio"/> Nunca o menos 1 vez al mes<br><input checked="" type="radio"/> 1 a 3 veces mes<br><input type="radio"/> 1 vez semana<br><input type="radio"/> 2 a 4 veces semana<br><input type="radio"/> 5 a 6 veces semana<br><input type="radio"/> 1 vez al día<br><input type="radio"/> 2 a 3 veces al día<br><input type="radio"/> 5 a 6 veces al día<br><input type="radio"/> más 6 veces al día |
|--------------|--------------------------------------------------------------------------------------------------------------------------------------------------------------------------------------------------------------------------------------------------------------------------------------------------------------------------------------------------------------------------------------------------------------|

---

|           |                                                                                                                                                                                                                                                                                                                                                                                                              |
|-----------|--------------------------------------------------------------------------------------------------------------------------------------------------------------------------------------------------------------------------------------------------------------------------------------------------------------------------------------------------------------------------------------------------------------|
| legumbres | <input type="radio"/> Nunca o menos 1 vez al mes<br><input type="radio"/> 1 a 3 veces mes<br><input checked="" type="radio"/> 1 vez semana<br><input type="radio"/> 2 a 4 veces semana<br><input type="radio"/> 5 a 6 veces semana<br><input type="radio"/> 1 vez al día<br><input type="radio"/> 2 a 3 veces al día<br><input type="radio"/> 5 a 6 veces al día<br><input type="radio"/> más 6 veces al día |
|-----------|--------------------------------------------------------------------------------------------------------------------------------------------------------------------------------------------------------------------------------------------------------------------------------------------------------------------------------------------------------------------------------------------------------------|

---

|                       |                                                                                                                                                                                                                                                                                                                                                                                                              |
|-----------------------|--------------------------------------------------------------------------------------------------------------------------------------------------------------------------------------------------------------------------------------------------------------------------------------------------------------------------------------------------------------------------------------------------------------|
| naranjas o mandarinas | <input type="radio"/> Nunca o menos 1 vez al mes<br><input type="radio"/> 1 a 3 veces mes<br><input type="radio"/> 1 vez semana<br><input type="radio"/> 2 a 4 veces semana<br><input type="radio"/> 5 a 6 veces semana<br><input type="radio"/> 1 vez al día<br><input type="radio"/> 2 a 3 veces al día<br><input checked="" type="radio"/> 5 a 6 veces al día<br><input type="radio"/> más 6 veces al día |
|-----------------------|--------------------------------------------------------------------------------------------------------------------------------------------------------------------------------------------------------------------------------------------------------------------------------------------------------------------------------------------------------------------------------------------------------------|

---

|                       |                                                                                                                                                                                                                                                                                                                                                                                                              |
|-----------------------|--------------------------------------------------------------------------------------------------------------------------------------------------------------------------------------------------------------------------------------------------------------------------------------------------------------------------------------------------------------------------------------------------------------|
| zum natural fruta     | <input checked="" type="radio"/> Nunca o menos 1 vez al mes<br><input type="radio"/> 1 a 3 veces mes<br><input type="radio"/> 1 vez semana<br><input type="radio"/> 2 a 4 veces semana<br><input type="radio"/> 5 a 6 veces semana<br><input type="radio"/> 1 vez al día<br><input type="radio"/> 2 a 3 veces al día<br><input type="radio"/> 5 a 6 veces al día<br><input type="radio"/> más 6 veces al día |
| platano               | <input type="radio"/> Nunca o menos 1 vez al mes<br><input type="radio"/> 1 a 3 veces mes<br><input type="radio"/> 1 vez semana<br><input type="radio"/> 2 a 4 veces semana<br><input type="radio"/> 5 a 6 veces semana<br><input checked="" type="radio"/> 1 vez al día<br><input type="radio"/> 2 a 3 veces al día<br><input type="radio"/> 5 a 6 veces al día<br><input type="radio"/> más 6 veces al día |
| manzana o pera        | <input type="radio"/> Nunca o menos 1 vez al mes<br><input type="radio"/> 1 a 3 veces mes<br><input type="radio"/> 1 vez semana<br><input checked="" type="radio"/> 2 a 4 veces semana<br><input type="radio"/> 5 a 6 veces semana<br><input type="radio"/> 1 vez al día<br><input type="radio"/> 2 a 3 veces al día<br><input type="radio"/> 5 a 6 veces al día<br><input type="radio"/> más 6 veces al día |
| melocotón o nectarina | <input checked="" type="radio"/> Nunca o menos 1 vez al mes<br><input type="radio"/> 1 a 3 veces mes<br><input type="radio"/> 1 vez semana<br><input type="radio"/> 2 a 4 veces semana<br><input type="radio"/> 5 a 6 veces semana<br><input type="radio"/> 1 vez al día<br><input type="radio"/> 2 a 3 veces al día<br><input type="radio"/> 5 a 6 veces al día<br><input type="radio"/> más 6 veces al día |
| sandia o melon        | <input type="radio"/> Nunca o menos 1 vez al mes<br><input type="radio"/> 1 a 3 veces mes<br><input type="radio"/> 1 vez semana<br><input type="radio"/> 2 a 4 veces semana<br><input type="radio"/> 5 a 6 veces semana<br><input type="radio"/> 1 vez al día<br><input type="radio"/> 2 a 3 veces al día<br><input type="radio"/> 5 a 6 veces al día<br><input type="radio"/> más 6 veces al día            |
| uva                   | <input checked="" type="radio"/> Nunca o menos 1 vez al mes<br><input type="radio"/> 1 a 3 veces mes<br><input type="radio"/> 1 vez semana<br><input type="radio"/> 2 a 4 veces semana<br><input type="radio"/> 5 a 6 veces semana<br><input type="radio"/> 1 vez al día<br><input type="radio"/> 2 a 3 veces al día<br><input type="radio"/> 5 a 6 veces al día<br><input type="radio"/> más 6 veces al día |

---

bruna o ciruela

- ☒ Nunca o menos 1 vez al mes  
☐ 1 a 3 veces mes  
☐ 1 vez semana  
☐ 2 a 4 veces semana  
☐ 5 a 6 veces semana  
☐ 1 vez al día  
☐ 2 a 3 veces al día  
☐ 5 a 6 veces al día  
☐ más 6 veces al día

---

kiwi

- ☒ Nunca o menos 1 vez al mes  
☐ 1 a 3 veces mes  
☐ 1 vez semana  
☐ 2 a 4 veces semana  
☐ 5 a 6 veces semana  
☐ 1 vez al día  
☐ 2 a 3 veces al día  
☐ 5 a 6 veces al día  
☐ más 6 veces al día

---

aceituna

- ☐ Nunca o menos 1 vez al mes  
☒ 1 a 3 veces mes  
☐ 1 vez semana  
☐ 2 a 4 veces semana  
☐ 5 a 6 veces semana  
☐ 1 vez al día  
☐ 2 a 3 veces al día  
☐ 5 a 6 veces al día  
☐ más 6 veces al día

---

frutos secos

- ☒ Nunca o menos 1 vez al mes  
☐ 1 a 3 veces mes  
☐ 1 vez semana  
☐ 2 a 4 veces semana  
☐ 5 a 6 veces semana  
☐ 1 vez al día  
☐ 2 a 3 veces al día  
☐ 5 a 6 veces al día  
☐ más 6 veces al día

---

pan blanco

- ☐ Nunca o menos 1 vez al mes  
☐ 1 a 3 veces mes  
☐ 1 vez semana  
☒ 2 a 4 veces semana  
☐ 5 a 6 veces semana  
☐ 1 vez al día  
☐ 2 a 3 veces al día  
☐ 5 a 6 veces al día  
☐ más 6 veces al día

---

pan integral

- ☐ Nunca o menos 1 vez al mes  
☒ 1 a 3 veces mes  
☐ 1 vez semana  
☐ 2 a 4 veces semana  
☐ 5 a 6 veces semana  
☐ 1 vez al día  
☐ 2 a 3 veces al día  
☐ 5 a 6 veces al día  
☐ más 6 veces al día

---

cereales desayuno

- ☒ Nunca o menos 1 vez al mes  
☐ 1 a 3 veces mes  
☐ 1 vez semana  
☐ 2 a 4 veces semana  
☐ 5 a 6 veces semana  
☐ 1 vez al día  
☐ 2 a 3 veces al día  
☐ 5 a 6 veces al día  
☐ más 6 veces al día

---

patatas fritas

- ☐ Nunca o menos 1 vez al mes  
☒ 1 a 3 veces mes  
☐ 1 vez semana  
☐ 2 a 4 veces semana  
☐ 5 a 6 veces semana  
☐ 1 vez al día  
☐ 2 a 3 veces al día  
☐ 5 a 6 veces al día  
☐ más 6 veces al día

---

patatas cocidas o asadas

- ☐ Nunca o menos 1 vez al mes  
☐ 1 a 3 veces mes  
☒ 1 vez semana  
☐ 2 a 4 veces semana  
☐ 5 a 6 veces semana  
☐ 1 vez al día  
☐ 2 a 3 veces al día  
☐ 5 a 6 veces al día  
☐ más 6 veces al día

---

bolsa papas

- ☐ Nunca o menos 1 vez al mes  
☒ 1 a 3 veces mes  
☐ 1 vez semana  
☐ 2 a 4 veces semana  
☐ 5 a 6 veces semana  
☐ 1 vez al día  
☐ 2 a 3 veces al día  
☐ 5 a 6 veces al día  
☐ más 6 veces al día

---

arroz cocinado

- ☐ Nunca o menos 1 vez al mes  
☐ 1 a 3 veces mes  
☐ 1 vez semana  
☒ 2 a 4 veces semana  
☐ 5 a 6 veces semana  
☐ 1 vez al día  
☐ 2 a 3 veces al día  
☐ 5 a 6 veces al día  
☐ más 6 veces al día

---

pasta

- ☐ Nunca o menos 1 vez al mes  
☐ 1 a 3 veces mes  
☐ 1 vez semana  
☒ 2 a 4 veces semana  
☐ 5 a 6 veces semana  
☐ 1 vez al día  
☐ 2 a 3 veces al día  
☐ 5 a 6 veces al día  
☐ más 6 veces al día

|                     |                                                                                                                                                                                                                                                                                                                                                                                                              |
|---------------------|--------------------------------------------------------------------------------------------------------------------------------------------------------------------------------------------------------------------------------------------------------------------------------------------------------------------------------------------------------------------------------------------------------------|
| pizza               | <input type="radio"/> Nunca o menos 1 vez al mes<br><input type="radio"/> 1 a 3 veces mes<br><input checked="" type="radio"/> 1 vez semana<br><input type="radio"/> 2 a 4 veces semana<br><input type="radio"/> 5 a 6 veces semana<br><input type="radio"/> 1 vez al día<br><input type="radio"/> 2 a 3 veces al día<br><input type="radio"/> 5 a 6 veces al día<br><input type="radio"/> más 6 veces al día |
| aceite oliva        | <input type="radio"/> Nunca o menos 1 vez al mes<br><input type="radio"/> 1 a 3 veces mes<br><input type="radio"/> 1 vez semana<br><input type="radio"/> 2 a 4 veces semana<br><input type="radio"/> 5 a 6 veces semana<br><input type="radio"/> 1 vez al día<br><input checked="" type="radio"/> 2 a 3 veces al día<br><input type="radio"/> 5 a 6 veces al día<br><input type="radio"/> más 6 veces al día |
| otros aceites       | <input checked="" type="radio"/> Nunca o menos 1 vez al mes<br><input type="radio"/> 1 a 3 veces mes<br><input type="radio"/> 1 vez semana<br><input type="radio"/> 2 a 4 veces semana<br><input type="radio"/> 5 a 6 veces semana<br><input type="radio"/> 1 vez al día<br><input type="radio"/> 2 a 3 veces al día<br><input type="radio"/> 5 a 6 veces al día<br><input type="radio"/> más 6 veces al día |
| margarina           | <input type="radio"/> Nunca o menos 1 vez al mes<br><input type="radio"/> 1 a 3 veces mes<br><input checked="" type="radio"/> 1 vez semana<br><input type="radio"/> 2 a 4 veces semana<br><input type="radio"/> 5 a 6 veces semana<br><input type="radio"/> 1 vez al día<br><input type="radio"/> 2 a 3 veces al día<br><input type="radio"/> 5 a 6 veces al día<br><input type="radio"/> más 6 veces al día |
| mantequilla         | <input type="radio"/> Nunca o menos 1 vez al mes<br><input type="radio"/> 1 a 3 veces mes<br><input checked="" type="radio"/> 1 vez semana<br><input type="radio"/> 2 a 4 veces semana<br><input type="radio"/> 5 a 6 veces semana<br><input type="radio"/> 1 vez al día<br><input type="radio"/> 2 a 3 veces al día<br><input type="radio"/> 5 a 6 veces al día<br><input type="radio"/> más 6 veces al día |
| galletas tipo maria | <input type="radio"/> Nunca o menos 1 vez al mes<br><input type="radio"/> 1 a 3 veces mes<br><input type="radio"/> 1 vez semana<br><input type="radio"/> 2 a 4 veces semana<br><input type="radio"/> 5 a 6 veces semana<br><input checked="" type="radio"/> 1 vez al día<br><input type="radio"/> 2 a 3 veces al día<br><input type="radio"/> 5 a 6 veces al día<br><input type="radio"/> más 6 veces al día |

---

galletas chocolate

- ☐ Nunca o menos 1 vez al mes  
☐ 1 a 3 veces mes  
☐ 1 vez semana  
☐ 2 a 4 veces semana  
☐ 5 a 6 veces semana  
☒ 1 vez al día  
☐ 2 a 3 veces al día  
☐ 5 a 6 veces al día  
☐ más 6 veces al día

---

bolleria

- ☐ Nunca o menos 1 vez al mes  
☐ 1 a 3 veces mes  
☐ 1 vez semana  
☐ 2 a 4 veces semana  
☐ 5 a 6 veces semana  
☒ 1 vez al día  
☐ 2 a 3 veces al día  
☐ 5 a 6 veces al día  
☐ más 6 veces al día

---

chocolate o bombones

- ☒ Nunca o menos 1 vez al mes  
☐ 1 a 3 veces mes  
☐ 1 vez semana  
☐ 2 a 4 veces semana  
☐ 5 a 6 veces semana  
☐ 1 vez al día  
☐ 2 a 3 veces al día  
☐ 5 a 6 veces al día  
☐ más 6 veces al día

---

chocolate polvo o colacao

- ☒ Nunca o menos 1 vez al mes  
☐ 1 a 3 veces mes  
☐ 1 vez semana  
☐ 2 a 4 veces semana  
☐ 5 a 6 veces semana  
☐ 1 vez al día  
☐ 2 a 3 veces al día  
☐ 5 a 6 veces al día  
☐ más 6 veces al día

---

vino tinto

- ☒ Nunca o menos 1 vez al mes  
☐ 1 a 3 veces mes  
☐ 1 vez semana  
☐ 2 a 4 veces semana  
☐ 5 a 6 veces semana  
☐ 1 vez al día  
☐ 2 a 3 veces al día  
☐ 5 a 6 veces al día  
☐ más 6 veces al día

---

vino blanco

- ☒ Nunca o menos 1 vez al mes  
☐ 1 a 3 veces mes  
☐ 1 vez semana  
☐ 2 a 4 veces semana  
☐ 5 a 6 veces semana  
☐ 1 vez al día  
☐ 2 a 3 veces al día  
☐ 5 a 6 veces al día  
☐ más 6 veces al día

|                       |                                                                                                                                                                                                                                                                                                                                                                                                              |
|-----------------------|--------------------------------------------------------------------------------------------------------------------------------------------------------------------------------------------------------------------------------------------------------------------------------------------------------------------------------------------------------------------------------------------------------------|
| vino seco o vermut    | <input checked="" type="radio"/> Nunca o menos 1 vez al mes<br><input type="radio"/> 1 a 3 veces mes<br><input type="radio"/> 1 vez semana<br><input type="radio"/> 2 a 4 veces semana<br><input type="radio"/> 5 a 6 veces semana<br><input type="radio"/> 1 vez al día<br><input type="radio"/> 2 a 3 veces al día<br><input type="radio"/> 5 a 6 veces al día<br><input type="radio"/> más 6 veces al día |
| cerveza               | <input type="radio"/> Nunca o menos 1 vez al mes<br><input checked="" type="radio"/> 1 a 3 veces mes<br><input type="radio"/> 1 vez semana<br><input type="radio"/> 2 a 4 veces semana<br><input type="radio"/> 5 a 6 veces semana<br><input type="radio"/> 1 vez al día<br><input type="radio"/> 2 a 3 veces al día<br><input type="radio"/> 5 a 6 veces al día<br><input type="radio"/> más 6 veces al día |
| cerveza sin alcohol   | <input type="radio"/> Nunca o menos 1 vez al mes<br><input type="radio"/> 1 a 3 veces mes<br><input type="radio"/> 1 vez semana<br><input checked="" type="radio"/> 2 a 4 veces semana<br><input type="radio"/> 5 a 6 veces semana<br><input type="radio"/> 1 vez al día<br><input type="radio"/> 2 a 3 veces al día<br><input type="radio"/> 5 a 6 veces al día<br><input type="radio"/> más 6 veces al día |
| licores               | <input checked="" type="radio"/> Nunca o menos 1 vez al mes<br><input type="radio"/> 1 a 3 veces mes<br><input type="radio"/> 1 vez semana<br><input type="radio"/> 2 a 4 veces semana<br><input type="radio"/> 5 a 6 veces semana<br><input type="radio"/> 1 vez al día<br><input type="radio"/> 2 a 3 veces al día<br><input type="radio"/> 5 a 6 veces al día<br><input type="radio"/> más 6 veces al día |
| ginebra o ron o vodka | <input checked="" type="radio"/> Nunca o menos 1 vez al mes<br><input type="radio"/> 1 a 3 veces mes<br><input type="radio"/> 1 vez semana<br><input type="radio"/> 2 a 4 veces semana<br><input type="radio"/> 5 a 6 veces semana<br><input type="radio"/> 1 vez al día<br><input type="radio"/> 2 a 3 veces al día<br><input type="radio"/> 5 a 6 veces al día<br><input type="radio"/> más 6 veces al día |
| refresco normal       | <input checked="" type="radio"/> Nunca o menos 1 vez al mes<br><input type="radio"/> 1 a 3 veces mes<br><input type="radio"/> 1 vez semana<br><input type="radio"/> 2 a 4 veces semana<br><input type="radio"/> 5 a 6 veces semana<br><input type="radio"/> 1 vez al día<br><input type="radio"/> 2 a 3 veces al día<br><input type="radio"/> 5 a 6 veces al día<br><input type="radio"/> más 6 veces al día |



---

refresco sin azúcar

- ☐ Nunca o menos 1 vez al mes  
☐ 1 a 3 veces mes  
☐ 1 vez semana  
☒ 2 a 4 veces semana  
☐ 5 a 6 veces semana  
☐ 1 vez al día  
☐ 2 a 3 veces al día  
☐ 5 a 6 veces al día  
☐ más 6 veces al día

---

Agua del grifo

- ☒ Nunca o menos 1 vez al mes  
☐ 1 a 3 veces mes  
☐ 1 vez semana  
☐ 2 a 4 veces semana  
☐ 5 a 6 veces semana  
☐ 1 vez al día  
☐ 2 a 3 veces al día  
☐ 5 a 6 veces al día  
☐ más 6 veces al día

---

agua embotellada sin gas

- ☐ Nunca o menos 1 vez al mes  
☐ 1 a 3 veces mes  
☐ 1 vez semana  
☐ 2 a 4 veces semana  
☐ 5 a 6 veces semana  
☐ 1 vez al día  
☐ 2 a 3 veces al día  
☐ 5 a 6 veces al día  
☒ más 6 veces al día

---

agua embotellada con gas

- ☒ Nunca o menos 1 vez al mes  
☐ 1 a 3 veces mes  
☐ 1 vez semana  
☐ 2 a 4 veces semana  
☐ 5 a 6 veces semana  
☐ 1 vez al día  
☐ 2 a 3 veces al día  
☐ 5 a 6 veces al día  
☐ más 6 veces al día

---

zumو frutas embasado

- ☒ Nunca o menos 1 vez al mes  
☐ 1 a 3 veces mes  
☐ 1 vez semana  
☐ 2 a 4 veces semana  
☐ 5 a 6 veces semana  
☐ 1 vez al día  
☐ 2 a 3 veces al día  
☐ 5 a 6 veces al día  
☐ más 6 veces al día

---

cafe

- ☒ Nunca o menos 1 vez al mes  
☐ 1 a 3 veces mes  
☐ 1 vez semana  
☐ 2 a 4 veces semana  
☐ 5 a 6 veces semana  
☐ 1 vez al día  
☐ 2 a 3 veces al día  
☐ 5 a 6 veces al día  
☐ más 6 veces al día

|                       |                                                                                                                                                                                                                                                                                                                                                                                                              |
|-----------------------|--------------------------------------------------------------------------------------------------------------------------------------------------------------------------------------------------------------------------------------------------------------------------------------------------------------------------------------------------------------------------------------------------------------|
| cafe descafeinado     | <input type="radio"/> Nunca o menos 1 vez al mes<br><input type="radio"/> 1 a 3 veces mes<br><input type="radio"/> 1 vez semana<br><input type="radio"/> 2 a 4 veces semana<br><input type="radio"/> 5 a 6 veces semana<br><input type="radio"/> 1 vez al día<br><input checked="" type="radio"/> 2 a 3 veces al día<br><input type="radio"/> 5 a 6 veces al día<br><input type="radio"/> más 6 veces al día |
| te o infusión         | <input type="radio"/> Nunca o menos 1 vez al mes<br><input checked="" type="radio"/> 1 a 3 veces mes<br><input type="radio"/> 1 vez semana<br><input type="radio"/> 2 a 4 veces semana<br><input type="radio"/> 5 a 6 veces semana<br><input type="radio"/> 1 vez al día<br><input type="radio"/> 2 a 3 veces al día<br><input type="radio"/> 5 a 6 veces al día<br><input type="radio"/> más 6 veces al día |
| sopa o puré verduras  | <input type="radio"/> Nunca o menos 1 vez al mes<br><input type="radio"/> 1 a 3 veces mes<br><input type="radio"/> 1 vez semana<br><input checked="" type="radio"/> 2 a 4 veces semana<br><input type="radio"/> 5 a 6 veces semana<br><input type="radio"/> 1 vez al día<br><input type="radio"/> 2 a 3 veces al día<br><input type="radio"/> 5 a 6 veces al día<br><input type="radio"/> más 6 veces al día |
| croquetas pollo jamón | <input type="radio"/> Nunca o menos 1 vez al mes<br><input checked="" type="radio"/> 1 a 3 veces mes<br><input type="radio"/> 1 vez semana<br><input type="radio"/> 2 a 4 veces semana<br><input type="radio"/> 5 a 6 veces semana<br><input type="radio"/> 1 vez al día<br><input type="radio"/> 2 a 3 veces al día<br><input type="radio"/> 5 a 6 veces al día<br><input type="radio"/> más 6 veces al día |
| croquetas pescado     | <input checked="" type="radio"/> Nunca o menos 1 vez al mes<br><input type="radio"/> 1 a 3 veces mes<br><input type="radio"/> 1 vez semana<br><input type="radio"/> 2 a 4 veces semana<br><input type="radio"/> 5 a 6 veces semana<br><input type="radio"/> 1 vez al día<br><input type="radio"/> 2 a 3 veces al día<br><input type="radio"/> 5 a 6 veces al día<br><input type="radio"/> más 6 veces al día |
| mayonesa              | <input checked="" type="radio"/> Nunca o menos 1 vez al mes<br><input type="radio"/> 1 a 3 veces mes<br><input type="radio"/> 1 vez semana<br><input type="radio"/> 2 a 4 veces semana<br><input type="radio"/> 5 a 6 veces semana<br><input type="radio"/> 1 vez al día<br><input type="radio"/> 2 a 3 veces al día<br><input type="radio"/> 5 a 6 veces al día<br><input type="radio"/> más 6 veces al día |

---

salsa tomate

- ☐ Nunca o menos 1 vez al mes  
☐ 1 a 3 veces mes  
☐ 1 vez semana  
☒ 2 a 4 veces semana  
☐ 5 a 6 veces semana  
☐ 1 vez al día  
☐ 2 a 3 veces al día  
☐ 5 a 6 veces al día  
☐ más 6 veces al día

---

ketchup

- ☒ Nunca o menos 1 vez al mes  
☐ 1 a 3 veces mes  
☐ 1 vez semana  
☐ 2 a 4 veces semana  
☐ 5 a 6 veces semana  
☐ 1 vez al día  
☐ 2 a 3 veces al día  
☐ 5 a 6 veces al día  
☐ más 6 veces al día

---

sal

- ☐ Nunca o menos 1 vez al mes  
☐ 1 a 3 veces mes  
☐ 1 vez semana  
☐ 2 a 4 veces semana  
☐ 5 a 6 veces semana  
☐ 1 vez al día  
☒ 2 a 3 veces al día  
☐ 5 a 6 veces al día  
☐ más 6 veces al día

---

ajo

- ☐ Nunca o menos 1 vez al mes  
☐ 1 a 3 veces mes  
☒ 1 vez semana  
☐ 2 a 4 veces semana  
☐ 5 a 6 veces semana  
☐ 1 vez al día  
☐ 2 a 3 veces al día  
☐ 5 a 6 veces al día  
☐ más 6 veces al día

---

mermelada o miel

- ☐ Nunca o menos 1 vez al mes  
☐ 1 a 3 veces mes  
☐ 1 vez semana  
☐ 2 a 4 veces semana  
☐ 5 a 6 veces semana  
☒ 1 vez al día  
☐ 2 a 3 veces al día  
☐ 5 a 6 veces al día  
☐ más 6 veces al día

---

azúcar

- ☒ Nunca o menos 1 vez al mes  
☐ 1 a 3 veces mes  
☐ 1 vez semana  
☐ 2 a 4 veces semana  
☐ 5 a 6 veces semana  
☐ 1 vez al día  
☐ 2 a 3 veces al día  
☐ 5 a 6 veces al día  
☐ más 6 veces al día

|                                       |                                                                                                                                                                                                                                                                                                                                                                                                                                                                                                                               |
|---------------------------------------|-------------------------------------------------------------------------------------------------------------------------------------------------------------------------------------------------------------------------------------------------------------------------------------------------------------------------------------------------------------------------------------------------------------------------------------------------------------------------------------------------------------------------------|
| Otro alimento                         |                                                                                                                                                                                                                                                                                                                                                                                                                                                                                                                               |
| suplementos vitamínicos               | <input checked="" type="radio"/> si<br><input type="radio"/> no                                                                                                                                                                                                                                                                                                                                                                                                                                                               |
| suplementos vitamínicos               | [*DATA REMOVED*]                                                                                                                                                                                                                                                                                                                                                                                                                                                                                                              |
| dieta previa                          | <input type="radio"/> si<br><input checked="" type="radio"/> no                                                                                                                                                                                                                                                                                                                                                                                                                                                               |
| motivo dieta                          | <input checked="" type="radio"/> no dieta<br><input type="radio"/> control peso<br><input type="radio"/> control colesterol<br><input type="radio"/> control diabetes<br><input type="radio"/> problemas estómago<br><input type="radio"/> problemas vesícula o hepáticos<br><input type="radio"/> HTA o cardiopatía<br><input type="radio"/> problemas renales<br><input type="radio"/> alergia alimentaria<br><input type="radio"/> ácido úrico elevado<br><input type="radio"/> vegetariana<br><input type="radio"/> otros |
| cambio alimentos año previo gestación | <input type="radio"/> si<br><input checked="" type="radio"/> no                                                                                                                                                                                                                                                                                                                                                                                                                                                               |
| cambio lácteos                        | <input type="radio"/> eliminado<br><input type="radio"/> disminuido<br><input checked="" type="radio"/> igual<br><input type="radio"/> aumentado<br><input type="radio"/> no sabe                                                                                                                                                                                                                                                                                                                                             |
| cambio huevos                         | <input type="radio"/> eliminado<br><input type="radio"/> disminuido<br><input checked="" type="radio"/> igual<br><input type="radio"/> aumentado<br><input type="radio"/> no sabe                                                                                                                                                                                                                                                                                                                                             |
| cambio carne                          | <input type="radio"/> eliminado<br><input type="radio"/> disminuido<br><input checked="" type="radio"/> igual<br><input type="radio"/> aumentado<br><input type="radio"/> no sabe                                                                                                                                                                                                                                                                                                                                             |
| cambio pescado                        | <input type="radio"/> eliminado<br><input type="radio"/> disminuido<br><input checked="" type="radio"/> igual<br><input type="radio"/> aumentado<br><input type="radio"/> no sabe                                                                                                                                                                                                                                                                                                                                             |
| cambio verduras                       | <input type="radio"/> eliminado<br><input type="radio"/> disminuido<br><input checked="" type="radio"/> igual<br><input type="radio"/> aumentado<br><input type="radio"/> no sabe                                                                                                                                                                                                                                                                                                                                             |

|                            |                                                                                                                                                                                                                        |
|----------------------------|------------------------------------------------------------------------------------------------------------------------------------------------------------------------------------------------------------------------|
| cambio legumbres           | <input type="radio"/> eliminado<br><input type="radio"/> disminuido<br><input checked="" type="radio"/> igual<br><input type="radio"/> aumentado<br><input type="radio"/> no sabe                                      |
| cambio fruta               | <input type="radio"/> eliminado<br><input type="radio"/> disminuido<br><input checked="" type="radio"/> igual<br><input type="radio"/> aumentado<br><input type="radio"/> no sabe                                      |
| cambio pan                 | <input type="radio"/> eliminado<br><input type="radio"/> disminuido<br><input checked="" type="radio"/> igual<br><input type="radio"/> aumentado<br><input type="radio"/> no sabe                                      |
| cambio aceite oliva        | <input type="radio"/> eliminado<br><input type="radio"/> disminuido<br><input checked="" type="radio"/> igual<br><input type="radio"/> aumentado<br><input type="radio"/> no sabe                                      |
| cambio mante o margarina   | <input type="radio"/> eliminado<br><input type="radio"/> disminuido<br><input checked="" type="radio"/> igual<br><input type="radio"/> aumentado<br><input type="radio"/> no sabe                                      |
| cambio azúcar y dulces     | <input type="radio"/> eliminado<br><input type="radio"/> disminuido<br><input checked="" type="radio"/> igual<br><input type="radio"/> aumentado<br><input type="radio"/> no sabe                                      |
| cambio bebidas alcohólicas | <input type="radio"/> eliminado<br><input type="radio"/> disminuido<br><input checked="" type="radio"/> igual<br><input type="radio"/> aumentado<br><input type="radio"/> no sabe                                      |
| frecuencia comidas fritas  | <input type="radio"/> a diario<br><input type="radio"/> 5 a 6 veces semana<br><input type="radio"/> 2 a 4 veces semana<br><input type="radio"/> 1 vez semana<br><input checked="" type="radio"/> menos de 1 vez semana |
| carne                      | <input type="radio"/> no como<br><input type="radio"/> cruda<br><input type="radio"/> poco hecha<br><input checked="" type="radio"/> hecha<br><input type="radio"/> muy hecha                                          |
| grasa visible carne        | <input type="radio"/> quita toda<br><input checked="" type="radio"/> quita mayoría<br><input type="radio"/> quita un poco<br><input type="radio"/> no quita nada                                                       |

|                                |                                                                                                                                                                                                                                                          |
|--------------------------------|----------------------------------------------------------------------------------------------------------------------------------------------------------------------------------------------------------------------------------------------------------|
| cocina carne                   | <input checked="" type="radio"/> a la plancha<br><input type="radio"/> a la parrilla<br><input type="radio"/> asada<br><input type="radio"/> frita<br><input type="radio"/> guisada                                                                      |
| tostado quemado carne          | <input checked="" type="radio"/> nunca<br><input type="radio"/> 1 vez mes<br><input type="radio"/> 2 a 3 veces mes<br><input type="radio"/> 1 vez semana<br><input type="radio"/> 2 a 3 semanas                                                          |
| tostado quemado pescado        | <input checked="" type="radio"/> nunca<br><input type="radio"/> 1 vez mes<br><input type="radio"/> 2 a 3 veces mes<br><input type="radio"/> 1 vez semana<br><input type="radio"/> 2 a 3 semanas                                                          |
| socarrat paella                | <input checked="" type="radio"/> nunca<br><input type="radio"/> 1 vez mes<br><input type="radio"/> 2 a 3 veces mes<br><input type="radio"/> 1 vez semana<br><input type="radio"/> 2 a 3 semanas                                                          |
| grasa o aceite cocinar         | <input type="radio"/> mantequilla<br><input type="radio"/> margarina<br><input type="radio"/> aceite oliva<br><input checked="" type="radio"/> aceite oliva virgen extra<br><input type="radio"/> aceite vegetal<br><input type="radio"/> mezcla aceites |
| grasa aceite aliñar            | <input type="radio"/> mantequilla<br><input type="radio"/> margarina<br><input type="radio"/> aceite oliva<br><input checked="" type="radio"/> aceite oliva virgen extra<br><input type="radio"/> aceite vegetal<br><input type="radio"/> mezcla aceites |
| grasa aceite freir             | <input type="radio"/> mantequilla<br><input type="radio"/> margarina<br><input type="radio"/> aceite oliva<br><input type="radio"/> aceite oliva virgen extra<br><input checked="" type="radio"/> aceite vegetal<br><input type="radio"/> mezcla aceites |
| Ejercicio cuestionario         | <input checked="" type="radio"/> si<br><input type="radio"/> no                                                                                                                                                                                          |
| horas de sueño incluido siesta | [*DATA REMOVED*]                                                                                                                                                                                                                                         |
| minutos siesta                 | [*DATA REMOVED*]                                                                                                                                                                                                                                         |
| horas televisión semana        | [*DATA REMOVED*]                                                                                                                                                                                                                                         |

|                                        |                                                                                                                                                                                                                                                                                                                                                                           |
|----------------------------------------|---------------------------------------------------------------------------------------------------------------------------------------------------------------------------------------------------------------------------------------------------------------------------------------------------------------------------------------------------------------------------|
| actividad trabajo                      | <input type="radio"/> casi siempre sentado<br><input type="radio"/> sentado 50 por cien<br><input type="radio"/> casi siempre de pie, quieto<br><input type="radio"/> casi siempre levantado caminando y llevando pocas cosas<br><input checked="" type="radio"/> casi siempre levantado, caminando y llevado muchas cosas<br><input type="radio"/> trabajo manual pesado |
| tiempo caminar o bici al día           | <input type="radio"/> casi nunca<br><input type="radio"/> menos 20min día<br><input type="radio"/> 20 a 40 min día<br><input type="radio"/> 40 a 60 min día<br><input type="radio"/> 1h o 1h y media día<br><input checked="" type="radio"/> más de 1h y media al día                                                                                                     |
| tiempo tareas casa al día              | <input checked="" type="radio"/> menos de 1h día<br><input type="radio"/> 1 a 2h día<br><input type="radio"/> 3 a 4h día<br><input type="radio"/> 5 a 6h día<br><input type="radio"/> 7 a 8h día<br><input type="radio"/> más de 8h día                                                                                                                                   |
| tiempo libre televisión ordenador leer | <input type="radio"/> menos 1h día<br><input type="radio"/> 1h día<br><input type="radio"/> 2h día<br><input type="radio"/> 3h día<br><input type="radio"/> 4h día<br><input type="radio"/> 5 a 6h día<br><input checked="" type="radio"/> mas 6h día                                                                                                                     |
| tiempo libre ejercicio o deporte       | <input checked="" type="radio"/> menos 1h semana<br><input type="radio"/> 1h semana<br><input type="radio"/> 2h semana<br><input type="radio"/> 3h semana<br><input type="radio"/> 4 a 5h semana<br><input type="radio"/> mas 5h semana                                                                                                                                   |
| como se considera                      | <input type="radio"/> sedentaria<br><input checked="" type="radio"/> poco activa<br><input type="radio"/> moderadamente activa<br><input type="radio"/> bastante activa<br><input type="radio"/> muy activa<br><input type="radio"/> no sabe                                                                                                                              |
| FUR                                    | [*DATA REMOVED*]                                                                                                                                                                                                                                                                                                                                                          |
| Semanas gestación 2T                   | [*DATA REMOVED*]                                                                                                                                                                                                                                                                                                                                                          |
| Días gestación 2T                      | [*DATA REMOVED*]                                                                                                                                                                                                                                                                                                                                                          |
| DBP 2T                                 | [*DATA REMOVED*]                                                                                                                                                                                                                                                                                                                                                          |
| CC 2T                                  | [*DATA REMOVED*]                                                                                                                                                                                                                                                                                                                                                          |
| AC 2T                                  | [*DATA REMOVED*]                                                                                                                                                                                                                                                                                                                                                          |

|                                                   |                                                                                                                                                                                                 |
|---------------------------------------------------|-------------------------------------------------------------------------------------------------------------------------------------------------------------------------------------------------|
| LF 2T                                             | [*DATA REMOVED*]                                                                                                                                                                                |
| PFE 2T (Hadlock)                                  | [*DATA REMOVED*]                                                                                                                                                                                |
| Semanas gestación 3T                              | [*DATA REMOVED*]                                                                                                                                                                                |
| días 3T                                           | [*DATA REMOVED*]                                                                                                                                                                                |
| DBP 3T                                            | [*DATA REMOVED*]                                                                                                                                                                                |
| CC 3T                                             | [*DATA REMOVED*]                                                                                                                                                                                |
| AC 3T                                             | [*DATA REMOVED*]                                                                                                                                                                                |
| LF 3T                                             | [*DATA REMOVED*]                                                                                                                                                                                |
| PFE 3T (Hadlock)                                  | [*DATA REMOVED*]                                                                                                                                                                                |
| Semanas de gestación final                        | [*DATA REMOVED*]                                                                                                                                                                                |
| días gestación final                              | [*DATA REMOVED*]                                                                                                                                                                                |
| Localización placenta                             | <input checked="" type="radio"/> anterior<br><input type="radio"/> lateral derecha<br><input type="radio"/> lateral izquierda<br><input type="radio"/> posterior<br><input type="radio"/> fondo |
| Presentación longitudinal cefálica                | <input type="radio"/> no<br><input checked="" type="radio"/> si                                                                                                                                 |
| Dorso                                             | <input type="radio"/> izquierda anterior<br><input type="radio"/> izquierda posterior<br><input checked="" type="radio"/> derecha anterior<br><input type="radio"/> derecha posterior           |
| diámetro biparietal                               | [*DATA REMOVED*]                                                                                                                                                                                |
| Circunferencia craneal                            | [*DATA REMOVED*]                                                                                                                                                                                |
| Circunferencia abdominal                          | [*DATA REMOVED*]                                                                                                                                                                                |
| Longitud de femur                                 | [*DATA REMOVED*]                                                                                                                                                                                |
| tejido celular subcutáneo a nivel del muslo en mm | [*DATA REMOVED*]                                                                                                                                                                                |
| tejido celular subcutáneo en abdomen en mm        | [*DATA REMOVED*]                                                                                                                                                                                |
| Volumen del muslo en cm3                          | [*DATA REMOVED*]                                                                                                                                                                                |
| Peso fetal estimado según fórmula de Hadlock      | [*DATA REMOVED*]                                                                                                                                                                                |



|                                               |                                                                                                                                                          |
|-----------------------------------------------|----------------------------------------------------------------------------------------------------------------------------------------------------------|
| Percentil                                     | [*DATA REMOVED*]                                                                                                                                         |
| Peso fetal estimado según fórmula de Scioscia | <hr/>                                                                                                                                                    |
| Peso fetal estimado según fórmula de LEE      | <hr/>                                                                                                                                                    |
| Tipo de parto                                 | <input type="radio"/> eutocico<br><input checked="" type="radio"/> instrumentado/ventosa<br><input type="radio"/> cesarea                                |
| fecha de nacimiento                           | [*DATA REMOVED*]                                                                                                                                         |
| Días entre exploración y nacimiento           | [*DATA REMOVED*]                                                                                                                                         |
| Peso RN en g                                  | [*DATA REMOVED*]                                                                                                                                         |
| sexo                                          | <input checked="" type="radio"/> mujer<br><input type="radio"/> hombre                                                                                   |
| Apgar 1 minuto                                | [*DATA REMOVED*]                                                                                                                                         |
| Apgar 5 minutos                               | [*DATA REMOVED*]                                                                                                                                         |
| Apgar 10 minutos                              | [*DATA REMOVED*]                                                                                                                                         |
| antecedente Covid durante gestación           | <input type="radio"/> Yes<br><input checked="" type="radio"/> No                                                                                         |
| Nivel de estudios                             | <input type="radio"/> ninguno<br><input checked="" type="radio"/> primarios<br><input type="radio"/> secundarios<br><input type="radio"/> universitarios |

# Base\_datos\_estimacion\_peso\_fetal

|                                       |                                                                                                                                                                                                                                                                                      |
|---------------------------------------|--------------------------------------------------------------------------------------------------------------------------------------------------------------------------------------------------------------------------------------------------------------------------------------|
| Número de identificación participante | 189                                                                                                                                                                                                                                                                                  |
| CODIGO PARTICIPANTE                   |                                                                                                                                                                                                                                                                                      |
| Edad                                  | [*DATA REMOVED*]                                                                                                                                                                                                                                                                     |
| Gestaciones                           | <input checked="" type="radio"/> 1<br><input type="radio"/> 2<br><input type="radio"/> 3<br><input type="radio"/> mas de 3                                                                                                                                                           |
| partos                                | <input checked="" type="radio"/> 0<br><input type="radio"/> 1<br><input type="radio"/> 2<br><input type="radio"/> 3<br><input type="radio"/> mas de 3                                                                                                                                |
| cesáreas                              | <input checked="" type="radio"/> 0<br><input type="radio"/> 1<br><input type="radio"/> 2<br><input type="radio"/> 3<br><input type="radio"/> mas de 3                                                                                                                                |
| Abortos                               | <input checked="" type="radio"/> 0<br><input type="radio"/> 1<br><input type="radio"/> 2<br><input type="radio"/> 3<br><input type="radio"/> mas de 3                                                                                                                                |
| Tipo de gestacion                     | <input checked="" type="radio"/> espontanea<br><input type="radio"/> IAC inseminación artificial conyuge<br><input type="radio"/> IAD inseminación artificial donante<br><input type="radio"/> FIV Fecundación in Vitro<br><input type="radio"/> Ovodon FIV con donación de ovocitos |
| peso previo a embarazo                | [*DATA REMOVED*]                                                                                                                                                                                                                                                                     |
| Ganancia ponderal embarazo            | [*DATA REMOVED*]                                                                                                                                                                                                                                                                     |
| Talla madre                           | [*DATA REMOVED*]                                                                                                                                                                                                                                                                     |
| IMC previo embarazo                   | 20.576131687242793                                                                                                                                                                                                                                                                   |
| Patología obstétrica                  | <input checked="" type="radio"/> no<br><input type="radio"/> si                                                                                                                                                                                                                      |
| Diabetes pregestacional               | <input checked="" type="radio"/> no<br><input type="radio"/> si                                                                                                                                                                                                                      |
| Diabetes gestacional                  | <input checked="" type="radio"/> no<br><input type="radio"/> si                                                                                                                                                                                                                      |

|                                            |                                                                                                                                                                                      |
|--------------------------------------------|--------------------------------------------------------------------------------------------------------------------------------------------------------------------------------------|
| Diabetes gestacional con insulina          | <input checked="" type="radio"/> no<br><input type="radio"/> si                                                                                                                      |
| Diabetes gestacional con dieta y ejercicio | <input checked="" type="radio"/> no<br><input type="radio"/> si                                                                                                                      |
| Percentil fetos previos                    | <input checked="" type="radio"/> Nada<br><input type="radio"/> percentil menor de 10<br><input type="radio"/> percentil entre 10 y 90<br><input type="radio"/> percentil mayor de 90 |
| Exfumadora                                 | <input type="radio"/> Nada<br><input checked="" type="radio"/> menos de 5 años<br><input type="radio"/> 5 a 10 años<br><input type="radio"/> mayor o igual a 10 años                 |
| Hábito tabáquico                           | <input checked="" type="radio"/> no<br><input type="radio"/> si                                                                                                                      |
| fumadora                                   | [*DATA REMOVED*]                                                                                                                                                                     |
| Consumo otros tóxicos                      | <input checked="" type="radio"/> no<br><input type="radio"/> si                                                                                                                      |
| Hb 1T                                      | _____                                                                                                                                                                                |
| Htc 1T                                     | _____                                                                                                                                                                                |
| Hb 2T                                      | _____                                                                                                                                                                                |
| HTC 2T                                     | _____                                                                                                                                                                                |
| Hb 3T                                      | _____                                                                                                                                                                                |
| HTC 3T                                     | _____                                                                                                                                                                                |
| Suplemento FE oral                         | <input checked="" type="radio"/> si<br><input type="radio"/> no                                                                                                                      |
| Suplemento fe iv                           | <input type="radio"/> si<br><input checked="" type="radio"/> no                                                                                                                      |
| Transfusión                                | <input checked="" type="radio"/> no<br><input type="radio"/> si                                                                                                                      |
| Solicitada Vit D                           | <input checked="" type="radio"/> no<br><input type="radio"/> si                                                                                                                      |

|                       |                                                                                                                                                                                                                                                                                                                                                                                                              |
|-----------------------|--------------------------------------------------------------------------------------------------------------------------------------------------------------------------------------------------------------------------------------------------------------------------------------------------------------------------------------------------------------------------------------------------------------|
| Deficit vit D         | <input type="radio"/> no<br><input type="radio"/> si                                                                                                                                                                                                                                                                                                                                                         |
| Suplemento vit D      | <input type="radio"/> si<br><input checked="" type="radio"/> no                                                                                                                                                                                                                                                                                                                                              |
| Dieta, cuestionario   | <input checked="" type="radio"/> si<br><input type="radio"/> no                                                                                                                                                                                                                                                                                                                                              |
| Leche entera          | <input checked="" type="radio"/> Nunca o menos 1 vez al mes<br><input type="radio"/> 1 a 3 veces mes<br><input type="radio"/> 1 vez semana<br><input type="radio"/> 2 a 4 veces semana<br><input type="radio"/> 5 a 6 veces semana<br><input type="radio"/> 1 vez al día<br><input type="radio"/> 2 a 3 veces al día<br><input type="radio"/> 5 a 6 veces al día<br><input type="radio"/> más 6 veces al día |
| Leche semidesnatada   | <input checked="" type="radio"/> Nunca o menos 1 vez al mes<br><input type="radio"/> 1 a 3 veces mes<br><input type="radio"/> 1 vez semana<br><input type="radio"/> 2 a 4 veces semana<br><input type="radio"/> 5 a 6 veces semana<br><input type="radio"/> 1 vez al día<br><input type="radio"/> 2 a 3 veces al día<br><input type="radio"/> 5 a 6 veces al día<br><input type="radio"/> mas 6 veces al día |
| Leche desnatada       | <input type="radio"/> Nunca o menos 1 vez al mes<br><input type="radio"/> 1 a 3 veces mes<br><input type="radio"/> 1 vez semana<br><input checked="" type="radio"/> 2 a 4 veces semana<br><input type="radio"/> 5 a 6 veces semana<br><input type="radio"/> 1 vez al día<br><input type="radio"/> 2 a 3 veces al día<br><input type="radio"/> 5 a 6 veces al día<br><input type="radio"/> más 6 veces al día |
| Leche condensada      | <input checked="" type="radio"/> Nunca o menos 1 vez al mes<br><input type="radio"/> 1 a 3 veces mes<br><input type="radio"/> 1 vez semana<br><input type="radio"/> 2 a 4 veces semana<br><input type="radio"/> 5 a 6 veces semana<br><input type="radio"/> 1 vez al día<br><input type="radio"/> 2 a 3 veces al día<br><input type="radio"/> 5 a 6 veces al día<br><input type="radio"/> más 6 veces al día |
| nata o crema de leche | <input checked="" type="radio"/> Nunca o menos 1 vez al mes<br><input type="radio"/> 1 a 3 veces mes<br><input type="radio"/> 1 vez semana<br><input type="radio"/> 2 a 4 veces semana<br><input type="radio"/> 5 a 6 veces semana<br><input type="radio"/> 1 vez al día<br><input type="radio"/> 2 a 3 veces al día<br><input type="radio"/> 5 a 6 veces al día<br><input type="radio"/> más 6 veces al día |

|                                             |                                                                                                                                                                                                                                                                                                                                                                                                              |
|---------------------------------------------|--------------------------------------------------------------------------------------------------------------------------------------------------------------------------------------------------------------------------------------------------------------------------------------------------------------------------------------------------------------------------------------------------------------|
| Yogurt Entero                               | <input type="radio"/> Nunca o menos 1 vez al mes<br><input type="radio"/> 1 a 3 veces mes<br><input checked="" type="radio"/> 1 vez semana<br><input type="radio"/> 2 a 4 veces semana<br><input type="radio"/> 5 a 6 veces semana<br><input type="radio"/> 1 vez al día<br><input type="radio"/> 2 a 3 veces al día<br><input type="radio"/> 5 a 6 veces al día<br><input type="radio"/> más 6 veces al día |
| Yogurt desnatado                            | <input checked="" type="radio"/> Nunca o menos 1 vez al mes<br><input type="radio"/> 1 a 3 veces mes<br><input type="radio"/> 1 vez semana<br><input type="radio"/> 2 a 4 veces semana<br><input type="radio"/> 5 a 6 veces semana<br><input type="radio"/> 1 vez al día<br><input type="radio"/> 2 a 3 veces al día<br><input type="radio"/> 5 a 6 veces al día<br><input type="radio"/> más 6 veces al día |
| 100g requesón o queso blando o queso fresco | <input type="radio"/> Nunca o menos 1 vez al mes<br><input type="radio"/> 1 a 3 veces mes<br><input type="radio"/> 1 vez semana<br><input checked="" type="radio"/> 2 a 4 veces semana<br><input type="radio"/> 5 a 6 veces semana<br><input type="radio"/> 1 vez al día<br><input type="radio"/> 2 a 3 veces al día<br><input type="radio"/> 5 a 6 veces al día<br><input type="radio"/> más 6 veces al día |
| queso curado o semicurado o cremoso         | <input type="radio"/> Nunca o menos 1 vez al mes<br><input type="radio"/> 1 a 3 veces mes<br><input checked="" type="radio"/> 1 vez semana<br><input type="radio"/> 2 a 4 veces semana<br><input type="radio"/> 5 a 6 veces semana<br><input type="radio"/> 1 vez al día<br><input type="radio"/> 2 a 3 veces al día<br><input type="radio"/> 5 a 6 veces al día<br><input type="radio"/> más 6 veces al día |
| natillas flan pudding                       | <input checked="" type="radio"/> Nunca o menos 1 vez al mes<br><input type="radio"/> 1 a 3 veces mes<br><input type="radio"/> 1 vez semana<br><input type="radio"/> 2 a 4 veces semana<br><input type="radio"/> 5 a 6 veces semana<br><input type="radio"/> 1 vez al día<br><input type="radio"/> 2 a 3 veces al día<br><input type="radio"/> 5 a 6 veces al día<br><input type="radio"/> más 6 veces al día |
| Helado                                      | <input type="radio"/> Nunca o menos 1 vez al mes<br><input type="radio"/> 1 a 3 veces mes<br><input type="radio"/> 1 vez semana<br><input checked="" type="radio"/> 2 a 4 veces semana<br><input type="radio"/> 5 a 6 veces semana<br><input type="radio"/> 1 vez al día<br><input type="radio"/> 2 a 3 veces al día<br><input type="radio"/> 5 a 6 veces al día<br><input type="radio"/> más 6 veces al día |

|                                      |                                                                                                                                                                                                                                                                                                                                                                                                              |
|--------------------------------------|--------------------------------------------------------------------------------------------------------------------------------------------------------------------------------------------------------------------------------------------------------------------------------------------------------------------------------------------------------------------------------------------------------------|
| huevo                                | <input type="radio"/> Nunca o menos 1 vez al mes<br><input type="radio"/> 1 a 3 veces mes<br><input type="radio"/> 1 vez semana<br><input checked="" type="radio"/> 2 a 4 veces semana<br><input type="radio"/> 5 a 6 veces semana<br><input type="radio"/> 1 vez al día<br><input type="radio"/> 2 a 3 veces al día<br><input type="radio"/> 5 a 6 veces al día<br><input type="radio"/> más 6 veces al día |
| Pollo con piel                       | <input checked="" type="radio"/> Nunca o menos 1 vez al mes<br><input type="radio"/> 1 a 3 veces mes<br><input type="radio"/> 1 vez semana<br><input type="radio"/> 2 a 4 veces semana<br><input type="radio"/> 5 a 6 veces semana<br><input type="radio"/> 1 vez al día<br><input type="radio"/> 2 a 3 veces al día<br><input type="radio"/> 5 a 6 veces al día<br><input type="radio"/> más 6 veces al día |
| pollo sin piel                       | <input type="radio"/> Nunca o menos 1 vez al mes<br><input type="radio"/> 1 a 3 veces mes<br><input checked="" type="radio"/> 1 vez semana<br><input type="radio"/> 2 a 4 veces semana<br><input type="radio"/> 5 a 6 veces semana<br><input type="radio"/> 1 vez al día<br><input type="radio"/> 2 a 3 veces al día<br><input type="radio"/> 5 a 6 veces al día<br><input type="radio"/> más 6 veces al día |
| Ternera o cerdo o cordero            | <input type="radio"/> Nunca o menos 1 vez al mes<br><input checked="" type="radio"/> 1 a 3 veces mes<br><input type="radio"/> 1 vez semana<br><input type="radio"/> 2 a 4 veces semana<br><input type="radio"/> 5 a 6 veces semana<br><input type="radio"/> 1 vez al día<br><input type="radio"/> 2 a 3 veces al día<br><input type="radio"/> 5 a 6 veces al día<br><input type="radio"/> más 6 veces al día |
| carne caza: Conejo o codorniz o pato | <input checked="" type="radio"/> Nunca o menos 1 vez al mes<br><input type="radio"/> 1 a 3 veces mes<br><input type="radio"/> 1 vez semana<br><input type="radio"/> 2 a 4 veces semana<br><input type="radio"/> 5 a 6 veces semana<br><input type="radio"/> 1 vez al día<br><input type="radio"/> 2 a 3 veces al día<br><input type="radio"/> 5 a 6 veces al día<br><input type="radio"/> más 6 veces al día |
| Hígado de ternera o cerdo o pollo    | <input checked="" type="radio"/> Nunca o menos 1 vez al mes<br><input type="radio"/> 1 a 3 veces mes<br><input type="radio"/> 1 vez semana<br><input type="radio"/> 2 a 4 veces semana<br><input type="radio"/> 5 a 6 veces semana<br><input type="radio"/> 1 vez al día<br><input type="radio"/> 2 a 3 veces al día<br><input type="radio"/> 5 a 6 veces al día<br><input type="radio"/> más 6 veces al día |

---

Vísceras

- ☒ Nunca o menos 1 vez al mes  
☐ 1 a 3 veces mes  
☐ 1 vez semana  
☐ 2 a 4 veces semana  
☐ 5 a 6 veces semana  
☐ 1 vez al día  
☐ 2 a 3 veces al día  
☐ 5 a 6 veces al día  
☐ más 6 veces al día

---

Embutido

- ☒ Nunca o menos 1 vez al mes  
☐ 1 a 3 veces mes  
☐ 1 vez semana  
☐ 2 a 4 veces semana  
☐ 5 a 6 veces semana  
☐ 1 vez al día  
☐ 2 a 3 veces al día  
☐ 5 a 6 veces al día  
☐ más 6 veces al día

---

Salchicha o similar

- ☒ Nunca o menos 1 vez al mes  
☐ 1 a 3 veces mes  
☐ 1 vez semana  
☐ 2 a 4 veces semana  
☐ 5 a 6 veces semana  
☐ 1 vez al día  
☐ 2 a 3 veces al día  
☐ 5 a 6 veces al día  
☐ más 6 veces al día

---

Pate o foiegras

- ☒ Nunca o menos 1 vez al mes  
☐ 1 a 3 veces mes  
☐ 1 vez semana  
☐ 2 a 4 veces semana  
☐ 5 a 6 veces semana  
☐ 1 vez al día  
☐ 2 a 3 veces al día  
☐ 5 a 6 veces al día  
☐ más 6 veces al día

---

Hamburguesa

- ☐ Nunca o menos 1 vez al mes  
☒ 1 a 3 veces mes  
☐ 1 vez semana  
☐ 2 a 4 veces semana  
☐ 5 a 6 veces semana  
☐ 1 vez al día  
☐ 2 a 3 veces al día  
☐ 5 a 6 veces al día  
☐ más 6 veces al día

---

tocino o bacon

- ☐ Nunca o menos 1 vez al mes  
☒ 1 a 3 veces mes  
☐ 1 vez semana  
☐ 2 a 4 veces semana  
☐ 5 a 6 veces semana  
☐ 1 vez al día  
☐ 2 a 3 veces al día  
☐ 5 a 6 veces al día  
☐ más 6 veces al día

---

Pescado frito

- ☒ Nunca o menos 1 vez al mes  
☐ 1 a 3 veces mes  
☐ 1 vez semana  
☐ 2 a 4 veces semana  
☐ 5 a 6 veces semana  
☐ 1 vez al día  
☐ 2 a 3 veces al día  
☐ 5 a 6 veces al día  
☐ más 6 veces al día

---

pescado hervido blanco

- ☐ Nunca o menos 1 vez al mes  
☒ 1 a 3 veces mes  
☐ 1 vez semana  
☐ 2 a 4 veces semana  
☐ 5 a 6 veces semana  
☐ 1 vez al día  
☐ 2 a 3 veces al día  
☐ 5 a 6 veces al día  
☐ más 6 veces al día

---

pescado hervido azul

- ☒ Nunca o menos 1 vez al mes  
☐ 1 a 3 veces mes  
☐ 1 vez semana  
☐ 2 a 4 veces semana  
☐ 5 a 6 veces semana  
☐ 1 vez al día  
☐ 2 a 3 veces al día  
☐ 5 a 6 veces al día  
☐ más 6 veces al día

---

otros pescado azul

- ☒ Nunca o menos 1 vez al mes  
☐ 1 a 3 veces mes  
☐ 1 vez semana  
☐ 2 a 4 veces semana  
☐ 5 a 6 veces semana  
☐ 1 vez al día  
☐ 2 a 3 veces al día  
☐ 5 a 6 veces al día  
☐ más 6 veces al día

---

atun conserva

- ☐ Nunca o menos 1 vez al mes  
☐ 1 a 3 veces mes  
☐ 1 vez semana  
☒ 2 a 4 veces semana  
☐ 5 a 6 veces semana  
☐ 1 vez al día  
☐ 2 a 3 veces al día  
☐ 5 a 6 veces al día  
☐ más 6 veces al día

---

sardina conserva

- ☒ Nunca o menos 1 vez al mes  
☐ 1 a 3 veces mes  
☐ 1 vez semana  
☐ 2 a 4 veces semana  
☐ 5 a 6 veces semana  
☐ 1 vez al día  
☐ 2 a 3 veces al día  
☐ 5 a 6 veces al día  
☐ más 6 veces al día



|                                         |                                                                                                                                                                                                                                                                                                                                                                                                              |
|-----------------------------------------|--------------------------------------------------------------------------------------------------------------------------------------------------------------------------------------------------------------------------------------------------------------------------------------------------------------------------------------------------------------------------------------------------------------|
| pescado ahumado                         | <input checked="" type="radio"/> Nunca o menos 1 vez al mes<br><input type="radio"/> 1 a 3 veces mes<br><input type="radio"/> 1 vez semana<br><input type="radio"/> 2 a 4 veces semana<br><input type="radio"/> 5 a 6 veces semana<br><input type="radio"/> 1 vez al día<br><input type="radio"/> 2 a 3 veces al día<br><input type="radio"/> 5 a 6 veces al día<br><input type="radio"/> más 6 veces al día |
| almejas o mejillones o ostras unos 100g | <input checked="" type="radio"/> Nunca o menos 1 vez al mes<br><input type="radio"/> 1 a 3 veces mes<br><input type="radio"/> 1 vez semana<br><input type="radio"/> 2 a 4 veces semana<br><input type="radio"/> 5 a 6 veces semana<br><input type="radio"/> 1 vez al día<br><input type="radio"/> 2 a 3 veces al día<br><input type="radio"/> 5 a 6 veces al día<br><input type="radio"/> más 6 veces al día |
| calamar o chipiron o sepia unos 100g    | <input checked="" type="radio"/> Nunca o menos 1 vez al mes<br><input type="radio"/> 1 a 3 veces mes<br><input type="radio"/> 1 vez semana<br><input type="radio"/> 2 a 4 veces semana<br><input type="radio"/> 5 a 6 veces semana<br><input type="radio"/> 1 vez al día<br><input type="radio"/> 2 a 3 veces al día<br><input type="radio"/> 5 a 6 veces al día<br><input type="radio"/> más 6 veces al día |
| marisco unos 100g                       | <input checked="" type="radio"/> Nunca o menos 1 vez al mes<br><input type="radio"/> 1 a 3 veces mes<br><input type="radio"/> 1 vez semana<br><input type="radio"/> 2 a 4 veces semana<br><input type="radio"/> 5 a 6 veces semana<br><input type="radio"/> 1 vez al día<br><input type="radio"/> 2 a 3 veces al día<br><input type="radio"/> 5 a 6 veces al día<br><input type="radio"/> más 6 veces al día |
| Espinacas o acelgas cocinadas           | <input type="radio"/> Nunca o menos 1 vez al mes<br><input checked="" type="radio"/> 1 a 3 veces mes<br><input type="radio"/> 1 vez semana<br><input type="radio"/> 2 a 4 veces semana<br><input type="radio"/> 5 a 6 veces semana<br><input type="radio"/> 1 vez al día<br><input type="radio"/> 2 a 3 veces al día<br><input type="radio"/> 5 a 6 veces al día<br><input type="radio"/> más 6 veces al día |
| Col o coliflor o brocoli cocinado       | <input type="radio"/> Nunca o menos 1 vez al mes<br><input checked="" type="radio"/> 1 a 3 veces mes<br><input type="radio"/> 1 vez semana<br><input type="radio"/> 2 a 4 veces semana<br><input type="radio"/> 5 a 6 veces semana<br><input type="radio"/> 1 vez al día<br><input type="radio"/> 2 a 3 veces al día<br><input type="radio"/> 5 a 6 veces al día<br><input type="radio"/> más 6 veces al día |

---

Lechuga o endivia o escarola

- ☒ Nunca o menos 1 vez al mes  
☐ 1 a 3 veces mes  
☐ 1 vez semana  
☐ 2 a 4 veces semana  
☐ 5 a 6 veces semana  
☐ 1 vez al día  
☐ 2 a 3 veces al día  
☐ 5 a 6 veces al día  
☐ más 6 veces al día

---

tomate ensalada

- ☐ Nunca o menos 1 vez al mes  
☐ 1 a 3 veces mes  
☒ 1 vez semana  
☐ 2 a 4 veces semana  
☐ 5 a 6 veces semana  
☐ 1 vez al día  
☐ 2 a 3 veces al día  
☐ 5 a 6 veces al día  
☐ más 6 veces al día

---

cebolla

- ☐ Nunca o menos 1 vez al mes  
☐ 1 a 3 veces mes  
☒ 1 vez semana  
☐ 2 a 4 veces semana  
☐ 5 a 6 veces semana  
☐ 1 vez al día  
☐ 2 a 3 veces al día  
☐ 5 a 6 veces al día  
☐ más 6 veces al día

---

Zanahoria o calabaza

- ☐ Nunca o menos 1 vez al mes  
☐ 1 a 3 veces mes  
☐ 1 vez semana  
☒ 2 a 4 veces semana  
☐ 5 a 6 veces semana  
☐ 1 vez al día  
☐ 2 a 3 veces al día  
☐ 5 a 6 veces al día  
☐ más 6 veces al día

---

Judías verdes

- ☐ Nunca o menos 1 vez al mes  
☐ 1 a 3 veces mes  
☒ 1 vez semana  
☐ 2 a 4 veces semana  
☐ 5 a 6 veces semana  
☐ 1 vez al día  
☐ 2 a 3 veces al día  
☐ 5 a 6 veces al día  
☐ más 6 veces al día

---

Berenjena o calabacin o pepino

- ☐ Nunca o menos 1 vez al mes  
☐ 1 a 3 veces mes  
☐ 1 vez semana  
☒ 2 a 4 veces semana  
☐ 5 a 6 veces semana  
☐ 1 vez al día  
☐ 2 a 3 veces al día  
☐ 5 a 6 veces al día  
☐ más 6 veces al día

|                       |                                                                                                                                                                                                                                                                                                                                                                                                              |
|-----------------------|--------------------------------------------------------------------------------------------------------------------------------------------------------------------------------------------------------------------------------------------------------------------------------------------------------------------------------------------------------------------------------------------------------------|
| pimiento              | <input type="radio"/> Nunca o menos 1 vez al mes<br><input type="radio"/> 1 a 3 veces mes<br><input type="radio"/> 1 vez semana<br><input checked="" type="radio"/> 2 a 4 veces semana<br><input type="radio"/> 5 a 6 veces semana<br><input type="radio"/> 1 vez al día<br><input type="radio"/> 2 a 3 veces al día<br><input type="radio"/> 5 a 6 veces al día<br><input type="radio"/> más 6 veces al día |
| alcachofa             | <input checked="" type="radio"/> Nunca o menos 1 vez al mes<br><input type="radio"/> 1 a 3 veces mes<br><input type="radio"/> 1 vez semana<br><input type="radio"/> 2 a 4 veces semana<br><input type="radio"/> 5 a 6 veces semana<br><input type="radio"/> 1 vez al día<br><input type="radio"/> 2 a 3 veces al día<br><input type="radio"/> 5 a 6 veces al día<br><input type="radio"/> más 6 veces al día |
| espárragos            | <input checked="" type="radio"/> Nunca o menos 1 vez al mes<br><input type="radio"/> 1 a 3 veces mes<br><input type="radio"/> 1 vez semana<br><input type="radio"/> 2 a 4 veces semana<br><input type="radio"/> 5 a 6 veces semana<br><input type="radio"/> 1 vez al día<br><input type="radio"/> 2 a 3 veces al día<br><input type="radio"/> 5 a 6 veces al día<br><input type="radio"/> más 6 veces al día |
| maíz hervido          | <input type="radio"/> Nunca o menos 1 vez al mes<br><input checked="" type="radio"/> 1 a 3 veces mes<br><input type="radio"/> 1 vez semana<br><input type="radio"/> 2 a 4 veces semana<br><input type="radio"/> 5 a 6 veces semana<br><input type="radio"/> 1 vez al día<br><input type="radio"/> 2 a 3 veces al día<br><input type="radio"/> 5 a 6 veces al día<br><input type="radio"/> más 6 veces al día |
| legumbres             | <input type="radio"/> Nunca o menos 1 vez al mes<br><input checked="" type="radio"/> 1 a 3 veces mes<br><input type="radio"/> 1 vez semana<br><input type="radio"/> 2 a 4 veces semana<br><input type="radio"/> 5 a 6 veces semana<br><input type="radio"/> 1 vez al día<br><input type="radio"/> 2 a 3 veces al día<br><input type="radio"/> 5 a 6 veces al día<br><input type="radio"/> más 6 veces al día |
| naranjas o mandarinas | <input checked="" type="radio"/> Nunca o menos 1 vez al mes<br><input type="radio"/> 1 a 3 veces mes<br><input type="radio"/> 1 vez semana<br><input type="radio"/> 2 a 4 veces semana<br><input type="radio"/> 5 a 6 veces semana<br><input type="radio"/> 1 vez al día<br><input type="radio"/> 2 a 3 veces al día<br><input type="radio"/> 5 a 6 veces al día<br><input type="radio"/> más 6 veces al día |

---

zumو natural fruta

- ☒ Nunca o menos 1 vez al mes  
☐ 1 a 3 veces mes  
☐ 1 vez semana  
☐ 2 a 4 veces semana  
☐ 5 a 6 veces semana  
☐ 1 vez al día  
☐ 2 a 3 veces al día  
☐ 5 a 6 veces al día  
☐ más 6 veces al día

---

platano

- ☐ Nunca o menos 1 vez al mes  
☒ 1 a 3 veces mes  
☐ 1 vez semana  
☐ 2 a 4 veces semana  
☐ 5 a 6 veces semana  
☐ 1 vez al día  
☐ 2 a 3 veces al día  
☐ 5 a 6 veces al día  
☐ más 6 veces al día

---

manzana o pera

- ☒ Nunca o menos 1 vez al mes  
☐ 1 a 3 veces mes  
☐ 1 vez semana  
☐ 2 a 4 veces semana  
☐ 5 a 6 veces semana  
☐ 1 vez al día  
☐ 2 a 3 veces al día  
☐ 5 a 6 veces al día  
☐ más 6 veces al día

---

melocotón o nectarina

- ☐ Nunca o menos 1 vez al mes  
☐ 1 a 3 veces mes  
☐ 1 vez semana  
☒ 2 a 4 veces semana  
☐ 5 a 6 veces semana  
☐ 1 vez al día  
☐ 2 a 3 veces al día  
☐ 5 a 6 veces al día  
☐ más 6 veces al día

---

sandia o melon

- ☐ Nunca o menos 1 vez al mes  
☐ 1 a 3 veces mes  
☐ 1 vez semana  
☒ 2 a 4 veces semana  
☐ 5 a 6 veces semana  
☐ 1 vez al día  
☐ 2 a 3 veces al día  
☐ 5 a 6 veces al día  
☐ más 6 veces al día

---

uva

- ☐ Nunca o menos 1 vez al mes  
☐ 1 a 3 veces mes  
☒ 1 vez semana  
☐ 2 a 4 veces semana  
☐ 5 a 6 veces semana  
☐ 1 vez al día  
☐ 2 a 3 veces al día  
☐ 5 a 6 veces al día  
☐ más 6 veces al día

|                 |                                                                                                                                                                                                                                                                                                                                                                                                              |
|-----------------|--------------------------------------------------------------------------------------------------------------------------------------------------------------------------------------------------------------------------------------------------------------------------------------------------------------------------------------------------------------------------------------------------------------|
| bruna o ciruela | <input type="radio"/> Nunca o menos 1 vez al mes<br><input type="radio"/> 1 a 3 veces mes<br><input type="radio"/> 1 vez semana<br><input checked="" type="radio"/> 2 a 4 veces semana<br><input type="radio"/> 5 a 6 veces semana<br><input type="radio"/> 1 vez al día<br><input type="radio"/> 2 a 3 veces al día<br><input type="radio"/> 5 a 6 veces al día<br><input type="radio"/> más 6 veces al día |
| kiwi            | <input type="radio"/> Nunca o menos 1 vez al mes<br><input type="radio"/> 1 a 3 veces mes<br><input type="radio"/> 1 vez semana<br><input type="radio"/> 2 a 4 veces semana<br><input type="radio"/> 5 a 6 veces semana<br><input checked="" type="radio"/> 1 vez al día<br><input type="radio"/> 2 a 3 veces al día<br><input type="radio"/> 5 a 6 veces al día<br><input type="radio"/> más 6 veces al día |
| aceituna        | <input type="radio"/> Nunca o menos 1 vez al mes<br><input checked="" type="radio"/> 1 a 3 veces mes<br><input type="radio"/> 1 vez semana<br><input type="radio"/> 2 a 4 veces semana<br><input type="radio"/> 5 a 6 veces semana<br><input type="radio"/> 1 vez al día<br><input type="radio"/> 2 a 3 veces al día<br><input type="radio"/> 5 a 6 veces al día<br><input type="radio"/> más 6 veces al día |
| frutos secos    | <input type="radio"/> Nunca o menos 1 vez al mes<br><input checked="" type="radio"/> 1 a 3 veces mes<br><input type="radio"/> 1 vez semana<br><input type="radio"/> 2 a 4 veces semana<br><input type="radio"/> 5 a 6 veces semana<br><input type="radio"/> 1 vez al día<br><input type="radio"/> 2 a 3 veces al día<br><input type="radio"/> 5 a 6 veces al día<br><input type="radio"/> más 6 veces al día |
| pan blanco      | <input type="radio"/> Nunca o menos 1 vez al mes<br><input type="radio"/> 1 a 3 veces mes<br><input type="radio"/> 1 vez semana<br><input type="radio"/> 2 a 4 veces semana<br><input type="radio"/> 5 a 6 veces semana<br><input checked="" type="radio"/> 1 vez al día<br><input type="radio"/> 2 a 3 veces al día<br><input type="radio"/> 5 a 6 veces al día<br><input type="radio"/> más 6 veces al día |
| pan integral    | <input type="radio"/> Nunca o menos 1 vez al mes<br><input type="radio"/> 1 a 3 veces mes<br><input type="radio"/> 1 vez semana<br><input checked="" type="radio"/> 2 a 4 veces semana<br><input type="radio"/> 5 a 6 veces semana<br><input type="radio"/> 1 vez al día<br><input type="radio"/> 2 a 3 veces al día<br><input type="radio"/> 5 a 6 veces al día<br><input type="radio"/> más 6 veces al día |

---

cereales desayuno

- ☒ Nunca o menos 1 vez al mes  
☐ 1 a 3 veces mes  
☐ 1 vez semana  
☐ 2 a 4 veces semana  
☐ 5 a 6 veces semana  
☐ 1 vez al día  
☐ 2 a 3 veces al día  
☐ 5 a 6 veces al día  
☐ más 6 veces al día

---

patatas fritas

- ☐ Nunca o menos 1 vez al mes  
☒ 1 a 3 veces mes  
☐ 1 vez semana  
☐ 2 a 4 veces semana  
☐ 5 a 6 veces semana  
☐ 1 vez al día  
☐ 2 a 3 veces al día  
☐ 5 a 6 veces al día  
☐ más 6 veces al día

---

patatas cocidas o asadas

- ☐ Nunca o menos 1 vez al mes  
☒ 1 a 3 veces mes  
☐ 1 vez semana  
☐ 2 a 4 veces semana  
☐ 5 a 6 veces semana  
☐ 1 vez al día  
☐ 2 a 3 veces al día  
☐ 5 a 6 veces al día  
☐ más 6 veces al día

---

bolsa papas

- ☐ Nunca o menos 1 vez al mes  
☒ 1 a 3 veces mes  
☐ 1 vez semana  
☐ 2 a 4 veces semana  
☐ 5 a 6 veces semana  
☐ 1 vez al día  
☐ 2 a 3 veces al día  
☐ 5 a 6 veces al día  
☐ más 6 veces al día

---

arroz cocinado

- ☐ Nunca o menos 1 vez al mes  
☐ 1 a 3 veces mes  
☒ 1 vez semana  
☐ 2 a 4 veces semana  
☐ 5 a 6 veces semana  
☐ 1 vez al día  
☐ 2 a 3 veces al día  
☐ 5 a 6 veces al día  
☐ más 6 veces al día

---

pasta

- ☐ Nunca o menos 1 vez al mes  
☐ 1 a 3 veces mes  
☐ 1 vez semana  
☒ 2 a 4 veces semana  
☐ 5 a 6 veces semana  
☐ 1 vez al día  
☐ 2 a 3 veces al día  
☐ 5 a 6 veces al día  
☐ más 6 veces al día

|                     |                                                                                                                                                                                                                                                                                                                                                                                                              |
|---------------------|--------------------------------------------------------------------------------------------------------------------------------------------------------------------------------------------------------------------------------------------------------------------------------------------------------------------------------------------------------------------------------------------------------------|
| pizza               | <input type="radio"/> Nunca o menos 1 vez al mes<br><input checked="" type="radio"/> 1 a 3 veces mes<br><input type="radio"/> 1 vez semana<br><input type="radio"/> 2 a 4 veces semana<br><input type="radio"/> 5 a 6 veces semana<br><input type="radio"/> 1 vez al día<br><input type="radio"/> 2 a 3 veces al día<br><input type="radio"/> 5 a 6 veces al día<br><input type="radio"/> más 6 veces al día |
| aceite oliva        | <input type="radio"/> Nunca o menos 1 vez al mes<br><input type="radio"/> 1 a 3 veces mes<br><input type="radio"/> 1 vez semana<br><input type="radio"/> 2 a 4 veces semana<br><input type="radio"/> 5 a 6 veces semana<br><input type="radio"/> 1 vez al día<br><input checked="" type="radio"/> 2 a 3 veces al día<br><input type="radio"/> 5 a 6 veces al día<br><input type="radio"/> más 6 veces al día |
| otros aceites       | <input checked="" type="radio"/> Nunca o menos 1 vez al mes<br><input type="radio"/> 1 a 3 veces mes<br><input type="radio"/> 1 vez semana<br><input type="radio"/> 2 a 4 veces semana<br><input type="radio"/> 5 a 6 veces semana<br><input type="radio"/> 1 vez al día<br><input type="radio"/> 2 a 3 veces al día<br><input type="radio"/> 5 a 6 veces al día<br><input type="radio"/> más 6 veces al día |
| margarina           | <input type="radio"/> Nunca o menos 1 vez al mes<br><input type="radio"/> 1 a 3 veces mes<br><input type="radio"/> 1 vez semana<br><input type="radio"/> 2 a 4 veces semana<br><input type="radio"/> 5 a 6 veces semana<br><input checked="" type="radio"/> 1 vez al día<br><input type="radio"/> 2 a 3 veces al día<br><input type="radio"/> 5 a 6 veces al día<br><input type="radio"/> más 6 veces al día |
| mantequilla         | <input type="radio"/> Nunca o menos 1 vez al mes<br><input type="radio"/> 1 a 3 veces mes<br><input type="radio"/> 1 vez semana<br><input type="radio"/> 2 a 4 veces semana<br><input type="radio"/> 5 a 6 veces semana<br><input checked="" type="radio"/> 1 vez al día<br><input type="radio"/> 2 a 3 veces al día<br><input type="radio"/> 5 a 6 veces al día<br><input type="radio"/> más 6 veces al día |
| galletas tipo maria | <input type="radio"/> Nunca o menos 1 vez al mes<br><input type="radio"/> 1 a 3 veces mes<br><input type="radio"/> 1 vez semana<br><input type="radio"/> 2 a 4 veces semana<br><input type="radio"/> 5 a 6 veces semana<br><input type="radio"/> 1 vez al día<br><input checked="" type="radio"/> 2 a 3 veces al día<br><input type="radio"/> 5 a 6 veces al día<br><input type="radio"/> más 6 veces al día |

---

galletas chocolate

- ☐ Nunca o menos 1 vez al mes  
☐ 1 a 3 veces mes  
☐ 1 vez semana  
☒ 2 a 4 veces semana  
☐ 5 a 6 veces semana  
☐ 1 vez al día  
☐ 2 a 3 veces al día  
☐ 5 a 6 veces al día  
☐ más 6 veces al día

---

bolleria

- ☐ Nunca o menos 1 vez al mes  
☐ 1 a 3 veces mes  
☐ 1 vez semana  
☐ 2 a 4 veces semana  
☐ 5 a 6 veces semana  
☒ 1 vez al día  
☐ 2 a 3 veces al día  
☐ 5 a 6 veces al día  
☐ más 6 veces al día

---

chocolate o bombones

- ☐ Nunca o menos 1 vez al mes  
☐ 1 a 3 veces mes  
☐ 1 vez semana  
☒ 2 a 4 veces semana  
☐ 5 a 6 veces semana  
☐ 1 vez al día  
☐ 2 a 3 veces al día  
☐ 5 a 6 veces al día  
☐ más 6 veces al día

---

chocolate polvo o colacao

- ☐ Nunca o menos 1 vez al mes  
☐ 1 a 3 veces mes  
☐ 1 vez semana  
☐ 2 a 4 veces semana  
☐ 5 a 6 veces semana  
☒ 1 vez al día  
☐ 2 a 3 veces al día  
☐ 5 a 6 veces al día  
☐ más 6 veces al día

---

vino tinto

- ☒ Nunca o menos 1 vez al mes  
☐ 1 a 3 veces mes  
☐ 1 vez semana  
☐ 2 a 4 veces semana  
☐ 5 a 6 veces semana  
☐ 1 vez al día  
☐ 2 a 3 veces al día  
☐ 5 a 6 veces al día  
☐ más 6 veces al día

---

vino blanco

- ☒ Nunca o menos 1 vez al mes  
☐ 1 a 3 veces mes  
☐ 1 vez semana  
☐ 2 a 4 veces semana  
☐ 5 a 6 veces semana  
☐ 1 vez al día  
☐ 2 a 3 veces al día  
☐ 5 a 6 veces al día  
☐ más 6 veces al día



|                       |                                                                                                                                                                                                                                                                                                                                                                                                              |
|-----------------------|--------------------------------------------------------------------------------------------------------------------------------------------------------------------------------------------------------------------------------------------------------------------------------------------------------------------------------------------------------------------------------------------------------------|
| vino seco o vermut    | <input checked="" type="radio"/> Nunca o menos 1 vez al mes<br><input type="radio"/> 1 a 3 veces mes<br><input type="radio"/> 1 vez semana<br><input type="radio"/> 2 a 4 veces semana<br><input type="radio"/> 5 a 6 veces semana<br><input type="radio"/> 1 vez al día<br><input type="radio"/> 2 a 3 veces al día<br><input type="radio"/> 5 a 6 veces al día<br><input type="radio"/> más 6 veces al día |
| cerveza               | <input checked="" type="radio"/> Nunca o menos 1 vez al mes<br><input type="radio"/> 1 a 3 veces mes<br><input type="radio"/> 1 vez semana<br><input type="radio"/> 2 a 4 veces semana<br><input type="radio"/> 5 a 6 veces semana<br><input type="radio"/> 1 vez al día<br><input type="radio"/> 2 a 3 veces al día<br><input type="radio"/> 5 a 6 veces al día<br><input type="radio"/> más 6 veces al día |
| cerveza sin alcohol   | <input checked="" type="radio"/> Nunca o menos 1 vez al mes<br><input type="radio"/> 1 a 3 veces mes<br><input type="radio"/> 1 vez semana<br><input type="radio"/> 2 a 4 veces semana<br><input type="radio"/> 5 a 6 veces semana<br><input type="radio"/> 1 vez al día<br><input type="radio"/> 2 a 3 veces al día<br><input type="radio"/> 5 a 6 veces al día<br><input type="radio"/> más 6 veces al día |
| licores               | <input checked="" type="radio"/> Nunca o menos 1 vez al mes<br><input type="radio"/> 1 a 3 veces mes<br><input type="radio"/> 1 vez semana<br><input type="radio"/> 2 a 4 veces semana<br><input type="radio"/> 5 a 6 veces semana<br><input type="radio"/> 1 vez al día<br><input type="radio"/> 2 a 3 veces al día<br><input type="radio"/> 5 a 6 veces al día<br><input type="radio"/> más 6 veces al día |
| ginebra o ron o vodka | <input checked="" type="radio"/> Nunca o menos 1 vez al mes<br><input type="radio"/> 1 a 3 veces mes<br><input type="radio"/> 1 vez semana<br><input type="radio"/> 2 a 4 veces semana<br><input type="radio"/> 5 a 6 veces semana<br><input type="radio"/> 1 vez al día<br><input type="radio"/> 2 a 3 veces al día<br><input type="radio"/> 5 a 6 veces al día<br><input type="radio"/> más 6 veces al día |
| refresco normal       | <input type="radio"/> Nunca o menos 1 vez al mes<br><input checked="" type="radio"/> 1 a 3 veces mes<br><input type="radio"/> 1 vez semana<br><input type="radio"/> 2 a 4 veces semana<br><input type="radio"/> 5 a 6 veces semana<br><input type="radio"/> 1 vez al día<br><input type="radio"/> 2 a 3 veces al día<br><input type="radio"/> 5 a 6 veces al día<br><input type="radio"/> más 6 veces al día |

|                          |                                                                                                                                                                                                                                                                                                                                                                                                              |
|--------------------------|--------------------------------------------------------------------------------------------------------------------------------------------------------------------------------------------------------------------------------------------------------------------------------------------------------------------------------------------------------------------------------------------------------------|
| refresco sin azúcar      | <input checked="" type="radio"/> Nunca o menos 1 vez al mes<br><input type="radio"/> 1 a 3 veces mes<br><input type="radio"/> 1 vez semana<br><input type="radio"/> 2 a 4 veces semana<br><input type="radio"/> 5 a 6 veces semana<br><input type="radio"/> 1 vez al día<br><input type="radio"/> 2 a 3 veces al día<br><input type="radio"/> 5 a 6 veces al día<br><input type="radio"/> más 6 veces al día |
| Agua del grifo           | <input checked="" type="radio"/> Nunca o menos 1 vez al mes<br><input type="radio"/> 1 a 3 veces mes<br><input type="radio"/> 1 vez semana<br><input type="radio"/> 2 a 4 veces semana<br><input type="radio"/> 5 a 6 veces semana<br><input type="radio"/> 1 vez al día<br><input type="radio"/> 2 a 3 veces al día<br><input type="radio"/> 5 a 6 veces al día<br><input type="radio"/> más 6 veces al día |
| agua embotellada sin gas | <input type="radio"/> Nunca o menos 1 vez al mes<br><input type="radio"/> 1 a 3 veces mes<br><input type="radio"/> 1 vez semana<br><input type="radio"/> 2 a 4 veces semana<br><input type="radio"/> 5 a 6 veces semana<br><input type="radio"/> 1 vez al día<br><input type="radio"/> 2 a 3 veces al día<br><input type="radio"/> 5 a 6 veces al día<br><input checked="" type="radio"/> más 6 veces al día |
| agua embotellada con gas | <input checked="" type="radio"/> Nunca o menos 1 vez al mes<br><input type="radio"/> 1 a 3 veces mes<br><input type="radio"/> 1 vez semana<br><input type="radio"/> 2 a 4 veces semana<br><input type="radio"/> 5 a 6 veces semana<br><input type="radio"/> 1 vez al día<br><input type="radio"/> 2 a 3 veces al día<br><input type="radio"/> 5 a 6 veces al día<br><input type="radio"/> más 6 veces al día |
| zumو frutas embasado     | <input type="radio"/> Nunca o menos 1 vez al mes<br><input checked="" type="radio"/> 1 a 3 veces mes<br><input type="radio"/> 1 vez semana<br><input type="radio"/> 2 a 4 veces semana<br><input type="radio"/> 5 a 6 veces semana<br><input type="radio"/> 1 vez al día<br><input type="radio"/> 2 a 3 veces al día<br><input type="radio"/> 5 a 6 veces al día<br><input type="radio"/> más 6 veces al día |
| cafe                     | <input checked="" type="radio"/> Nunca o menos 1 vez al mes<br><input type="radio"/> 1 a 3 veces mes<br><input type="radio"/> 1 vez semana<br><input type="radio"/> 2 a 4 veces semana<br><input type="radio"/> 5 a 6 veces semana<br><input type="radio"/> 1 vez al día<br><input type="radio"/> 2 a 3 veces al día<br><input type="radio"/> 5 a 6 veces al día<br><input type="radio"/> más 6 veces al día |

---

cafe descafeinado

- ☐ Nunca o menos 1 vez al mes  
☐ 1 a 3 veces mes  
☐ 1 vez semana  
☐ 2 a 4 veces semana  
☐ 5 a 6 veces semana  
☒ 1 vez al día  
☐ 2 a 3 veces al día  
☐ 5 a 6 veces al día  
☐ más 6 veces al día

---

te o infusión

- ☐ Nunca o menos 1 vez al mes  
☐ 1 a 3 veces mes  
☒ 1 vez semana  
☐ 2 a 4 veces semana  
☐ 5 a 6 veces semana  
☐ 1 vez al día  
☐ 2 a 3 veces al día  
☐ 5 a 6 veces al día  
☐ más 6 veces al día

---

sopa o puré verduras

- ☐ Nunca o menos 1 vez al mes  
☒ 1 a 3 veces mes  
☐ 1 vez semana  
☐ 2 a 4 veces semana  
☐ 5 a 6 veces semana  
☐ 1 vez al día  
☐ 2 a 3 veces al día  
☐ 5 a 6 veces al día  
☐ más 6 veces al día

---

croquetas pollo jamón

- ☒ Nunca o menos 1 vez al mes  
☐ 1 a 3 veces mes  
☐ 1 vez semana  
☐ 2 a 4 veces semana  
☐ 5 a 6 veces semana  
☐ 1 vez al día  
☐ 2 a 3 veces al día  
☐ 5 a 6 veces al día  
☐ más 6 veces al día

---

croquetas pescado

- ☒ Nunca o menos 1 vez al mes  
☐ 1 a 3 veces mes  
☐ 1 vez semana  
☐ 2 a 4 veces semana  
☐ 5 a 6 veces semana  
☐ 1 vez al día  
☐ 2 a 3 veces al día  
☐ 5 a 6 veces al día  
☐ más 6 veces al día

---

mayonesa

- ☒ Nunca o menos 1 vez al mes  
☐ 1 a 3 veces mes  
☐ 1 vez semana  
☐ 2 a 4 veces semana  
☐ 5 a 6 veces semana  
☐ 1 vez al día  
☐ 2 a 3 veces al día  
☐ 5 a 6 veces al día  
☐ más 6 veces al día

---

salsa tomate

- ☐ Nunca o menos 1 vez al mes  
☐ 1 a 3 veces mes  
☒ 1 vez semana  
☐ 2 a 4 veces semana  
☐ 5 a 6 veces semana  
☐ 1 vez al día  
☐ 2 a 3 veces al día  
☐ 5 a 6 veces al día  
☐ más 6 veces al día

---

ketchup

- ☒ Nunca o menos 1 vez al mes  
☐ 1 a 3 veces mes  
☐ 1 vez semana  
☐ 2 a 4 veces semana  
☐ 5 a 6 veces semana  
☐ 1 vez al día  
☐ 2 a 3 veces al día  
☐ 5 a 6 veces al día  
☐ más 6 veces al día

---

sal

- ☐ Nunca o menos 1 vez al mes  
☐ 1 a 3 veces mes  
☐ 1 vez semana  
☐ 2 a 4 veces semana  
☐ 5 a 6 veces semana  
☐ 1 vez al día  
☒ 2 a 3 veces al día  
☐ 5 a 6 veces al día  
☐ más 6 veces al día

---

ajo

- ☒ Nunca o menos 1 vez al mes  
☐ 1 a 3 veces mes  
☐ 1 vez semana  
☐ 2 a 4 veces semana  
☐ 5 a 6 veces semana  
☐ 1 vez al día  
☐ 2 a 3 veces al día  
☐ 5 a 6 veces al día  
☐ más 6 veces al día

---

mermelada o miel

- ☐ Nunca o menos 1 vez al mes  
☐ 1 a 3 veces mes  
☐ 1 vez semana  
☐ 2 a 4 veces semana  
☒ 5 a 6 veces semana  
☐ 1 vez al día  
☐ 2 a 3 veces al día  
☐ 5 a 6 veces al día  
☐ más 6 veces al día

---

azúcar

- ☒ Nunca o menos 1 vez al mes  
☐ 1 a 3 veces mes  
☐ 1 vez semana  
☐ 2 a 4 veces semana  
☐ 5 a 6 veces semana  
☐ 1 vez al día  
☐ 2 a 3 veces al día  
☐ 5 a 6 veces al día  
☐ más 6 veces al día

|                                       |                                                                                                                                                                                                                                                                                                                                                                                                                                                                                                                               |
|---------------------------------------|-------------------------------------------------------------------------------------------------------------------------------------------------------------------------------------------------------------------------------------------------------------------------------------------------------------------------------------------------------------------------------------------------------------------------------------------------------------------------------------------------------------------------------|
| Otro alimento                         |                                                                                                                                                                                                                                                                                                                                                                                                                                                                                                                               |
| suplementos vitamínicos               | <input checked="" type="radio"/> si<br><input type="radio"/> no                                                                                                                                                                                                                                                                                                                                                                                                                                                               |
| suplementos vitamínicos               | [*DATA REMOVED*]                                                                                                                                                                                                                                                                                                                                                                                                                                                                                                              |
| dieta previa                          | <input type="radio"/> si<br><input checked="" type="radio"/> no                                                                                                                                                                                                                                                                                                                                                                                                                                                               |
| motivo dieta                          | <input checked="" type="radio"/> no dieta<br><input type="radio"/> control peso<br><input type="radio"/> control colesterol<br><input type="radio"/> control diabetes<br><input type="radio"/> problemas estómago<br><input type="radio"/> problemas vesícula o hepáticos<br><input type="radio"/> HTA o cardiopatía<br><input type="radio"/> problemas renales<br><input type="radio"/> alergia alimentaria<br><input type="radio"/> ácido úrico elevado<br><input type="radio"/> vegetariana<br><input type="radio"/> otros |
| cambio alimentos año previo gestación | <input checked="" type="radio"/> si<br><input type="radio"/> no                                                                                                                                                                                                                                                                                                                                                                                                                                                               |
| cambio lácteos                        | <input type="radio"/> eliminado<br><input checked="" type="radio"/> disminuido<br><input type="radio"/> igual<br><input type="radio"/> aumentado<br><input type="radio"/> no sabe                                                                                                                                                                                                                                                                                                                                             |
| cambio huevos                         | <input type="radio"/> eliminado<br><input type="radio"/> disminuido<br><input checked="" type="radio"/> igual<br><input type="radio"/> aumentado<br><input type="radio"/> no sabe                                                                                                                                                                                                                                                                                                                                             |
| cambio carne                          | <input type="radio"/> eliminado<br><input checked="" type="radio"/> disminuido<br><input type="radio"/> igual<br><input type="radio"/> aumentado<br><input type="radio"/> no sabe                                                                                                                                                                                                                                                                                                                                             |
| cambio pescado                        | <input type="radio"/> eliminado<br><input checked="" type="radio"/> disminuido<br><input type="radio"/> igual<br><input type="radio"/> aumentado<br><input type="radio"/> no sabe                                                                                                                                                                                                                                                                                                                                             |
| cambio verduras                       | <input type="radio"/> eliminado<br><input type="radio"/> disminuido<br><input checked="" type="radio"/> igual<br><input type="radio"/> aumentado<br><input type="radio"/> no sabe                                                                                                                                                                                                                                                                                                                                             |

|                            |                                                                                                                                                                                                                        |
|----------------------------|------------------------------------------------------------------------------------------------------------------------------------------------------------------------------------------------------------------------|
| cambio legumbres           | <input type="radio"/> eliminado<br><input type="radio"/> disminuido<br><input checked="" type="radio"/> igual<br><input type="radio"/> aumentado<br><input type="radio"/> no sabe                                      |
| cambio fruta               | <input type="radio"/> eliminado<br><input type="radio"/> disminuido<br><input checked="" type="radio"/> igual<br><input type="radio"/> aumentado<br><input type="radio"/> no sabe                                      |
| cambio pan                 | <input type="radio"/> eliminado<br><input type="radio"/> disminuido<br><input type="radio"/> igual<br><input checked="" type="radio"/> aumentado<br><input type="radio"/> no sabe                                      |
| cambio aceite oliva        | <input type="radio"/> eliminado<br><input type="radio"/> disminuido<br><input checked="" type="radio"/> igual<br><input type="radio"/> aumentado<br><input type="radio"/> no sabe                                      |
| cambio mante o margarina   | <input type="radio"/> eliminado<br><input type="radio"/> disminuido<br><input type="radio"/> igual<br><input checked="" type="radio"/> aumentado<br><input type="radio"/> no sabe                                      |
| cambio azúcar y dulces     | <input type="radio"/> eliminado<br><input type="radio"/> disminuido<br><input type="radio"/> igual<br><input checked="" type="radio"/> aumentado<br><input type="radio"/> no sabe                                      |
| cambio bebidas alcohólicas | <input checked="" type="radio"/> eliminado<br><input type="radio"/> disminuido<br><input type="radio"/> igual<br><input type="radio"/> aumentado<br><input type="radio"/> no sabe                                      |
| frecuencia comidas fritas  | <input type="radio"/> a diario<br><input type="radio"/> 5 a 6 veces semana<br><input type="radio"/> 2 a 4 veces semana<br><input checked="" type="radio"/> 1 vez semana<br><input type="radio"/> menos de 1 vez semana |
| carne                      | <input type="radio"/> no como<br><input type="radio"/> cruda<br><input checked="" type="radio"/> poco hecha<br><input type="radio"/> hecha<br><input type="radio"/> muy hecha                                          |
| grasa visible carne        | <input type="radio"/> quita toda<br><input checked="" type="radio"/> quita mayoría<br><input type="radio"/> quita un poco<br><input type="radio"/> no quita nada                                                       |

|                                |                                                                                                                                                                                                                                                          |
|--------------------------------|----------------------------------------------------------------------------------------------------------------------------------------------------------------------------------------------------------------------------------------------------------|
| cocina carne                   | <input checked="" type="radio"/> a la plancha<br><input type="radio"/> a la parrilla<br><input type="radio"/> asada<br><input type="radio"/> frita<br><input type="radio"/> guisada                                                                      |
| tostado quemado carne          | <input checked="" type="radio"/> nunca<br><input type="radio"/> 1 vez mes<br><input type="radio"/> 2 a 3 veces mes<br><input type="radio"/> 1 vez semana<br><input type="radio"/> 2 a 3 semanas                                                          |
| tostado quemado pescado        | <input checked="" type="radio"/> nunca<br><input type="radio"/> 1 vez mes<br><input type="radio"/> 2 a 3 veces mes<br><input type="radio"/> 1 vez semana<br><input type="radio"/> 2 a 3 semanas                                                          |
| socarrat paella                | <input checked="" type="radio"/> nunca<br><input type="radio"/> 1 vez mes<br><input type="radio"/> 2 a 3 veces mes<br><input type="radio"/> 1 vez semana<br><input type="radio"/> 2 a 3 semanas                                                          |
| grasa o aceite cocinar         | <input type="radio"/> mantequilla<br><input type="radio"/> margarina<br><input type="radio"/> aceite oliva<br><input checked="" type="radio"/> aceite oliva virgen extra<br><input type="radio"/> aceite vegetal<br><input type="radio"/> mezcla aceites |
| grasa aceite aliñar            | <input type="radio"/> mantequilla<br><input type="radio"/> margarina<br><input type="radio"/> aceite oliva<br><input checked="" type="radio"/> aceite oliva virgen extra<br><input type="radio"/> aceite vegetal<br><input type="radio"/> mezcla aceites |
| grasa aceite freir             | <input type="radio"/> mantequilla<br><input type="radio"/> margarina<br><input type="radio"/> aceite oliva<br><input checked="" type="radio"/> aceite oliva virgen extra<br><input type="radio"/> aceite vegetal<br><input type="radio"/> mezcla aceites |
| Ejercicio cuestionario         | <input checked="" type="radio"/> si<br><input type="radio"/> no                                                                                                                                                                                          |
| horas de sueño incluido siesta | [*DATA REMOVED*]                                                                                                                                                                                                                                         |
| minutos siesta                 | [*DATA REMOVED*]                                                                                                                                                                                                                                         |
| horas televisión semana        | [*DATA REMOVED*]                                                                                                                                                                                                                                         |

|                                        |                                                                                                                                                                                                                                                                                                                                                                           |
|----------------------------------------|---------------------------------------------------------------------------------------------------------------------------------------------------------------------------------------------------------------------------------------------------------------------------------------------------------------------------------------------------------------------------|
| actividad trabajo                      | <input checked="" type="radio"/> casi siempre sentado<br><input type="radio"/> sentado 50 por cien<br><input type="radio"/> casi siempre de pie, quieto<br><input type="radio"/> casi siempre levantado caminando y llevando pocas cosas<br><input type="radio"/> casi siempre levantado, caminando y llevado muchas cosas<br><input type="radio"/> trabajo manual pesado |
| tiempo caminar o bici al día           | <input type="radio"/> casi nunca<br><input checked="" type="radio"/> menos 20min día<br><input type="radio"/> 20 a 40 min día<br><input type="radio"/> 40 a 60 min día<br><input type="radio"/> 1h o 1h y media día<br><input type="radio"/> más de 1h y media al día                                                                                                     |
| tiempo tareas casa al día              | <input type="radio"/> menos de 1h día<br><input type="radio"/> 1 a 2h día<br><input checked="" type="radio"/> 3 a 4h día<br><input type="radio"/> 5 a 6h día<br><input type="radio"/> 7 a 8h día<br><input type="radio"/> más de 8h día                                                                                                                                   |
| tiempo libre televisión ordenador leer | <input type="radio"/> menos 1h día<br><input type="radio"/> 1h día<br><input type="radio"/> 2h día<br><input type="radio"/> 3h día<br><input type="radio"/> 4h día<br><input checked="" type="radio"/> 5 a 6h día<br><input type="radio"/> mas 6h día                                                                                                                     |
| tiempo libre ejercicio o deporte       | <input type="radio"/> menos 1h semana<br><input type="radio"/> 1h semana<br><input checked="" type="radio"/> 2h semana<br><input type="radio"/> 3h semana<br><input type="radio"/> 4 a 5h semana<br><input type="radio"/> mas 5h semana                                                                                                                                   |
| como se considera                      | <input type="radio"/> sedentaria<br><input checked="" type="radio"/> poco activa<br><input type="radio"/> moderadamente activa<br><input type="radio"/> bastante activa<br><input type="radio"/> muy activa<br><input type="radio"/> no sabe                                                                                                                              |
| FUR                                    | [*DATA REMOVED*]                                                                                                                                                                                                                                                                                                                                                          |
| Semanas gestación 2T                   | _____                                                                                                                                                                                                                                                                                                                                                                     |
| Días gestación 2T                      | _____                                                                                                                                                                                                                                                                                                                                                                     |
| DBP 2T                                 | _____                                                                                                                                                                                                                                                                                                                                                                     |
| CC 2T                                  | _____                                                                                                                                                                                                                                                                                                                                                                     |



|                                                   |                                                                                                                                                                                                 |
|---------------------------------------------------|-------------------------------------------------------------------------------------------------------------------------------------------------------------------------------------------------|
| AC 2T                                             |                                                                                                                                                                                                 |
| LF 2T                                             |                                                                                                                                                                                                 |
| PFE 2T (Hadlock)                                  |                                                                                                                                                                                                 |
| Semanas gestación 3T                              | [*DATA REMOVED*]                                                                                                                                                                                |
| días 3T                                           | [*DATA REMOVED*]                                                                                                                                                                                |
| DBP 3T                                            | [*DATA REMOVED*]                                                                                                                                                                                |
| CC 3T                                             | [*DATA REMOVED*]                                                                                                                                                                                |
| AC 3T                                             | [*DATA REMOVED*]                                                                                                                                                                                |
| LF 3T                                             | [*DATA REMOVED*]                                                                                                                                                                                |
| PFE 3T (Hadlock)                                  | [*DATA REMOVED*]                                                                                                                                                                                |
| Semanas de gestación final                        | [*DATA REMOVED*]                                                                                                                                                                                |
| días gestación final                              | [*DATA REMOVED*]                                                                                                                                                                                |
| Localización placenta                             | <input type="radio"/> anterior<br><input type="radio"/> lateral derecha<br><input type="radio"/> lateral izquierda<br><input checked="" type="radio"/> posterior<br><input type="radio"/> fondo |
| Presentación longitudinal cefálica                | <input type="radio"/> no<br><input checked="" type="radio"/> si                                                                                                                                 |
| Dorso                                             | <input checked="" type="radio"/> izquierda anterior<br><input type="radio"/> izquierda posterior<br><input type="radio"/> derecha anterior<br><input type="radio"/> derecha posterior           |
| diámetro biparietal                               | [*DATA REMOVED*]                                                                                                                                                                                |
| Circunferencia craneal                            | [*DATA REMOVED*]                                                                                                                                                                                |
| Circunferencia abdominal                          | [*DATA REMOVED*]                                                                                                                                                                                |
| Longitud de femur                                 | [*DATA REMOVED*]                                                                                                                                                                                |
| tejido celular subcutáneo a nivel del muslo en mm | [*DATA REMOVED*]                                                                                                                                                                                |
| tejido celular subcutáneo en abdomen en mm        | [*DATA REMOVED*]                                                                                                                                                                                |

|                                               |                                                                                                                                                          |
|-----------------------------------------------|----------------------------------------------------------------------------------------------------------------------------------------------------------|
| Volumen del muslo en cm3                      | [*DATA REMOVED*]                                                                                                                                         |
| Peso fetal estimado según fórmula de Hadlock  | [*DATA REMOVED*]                                                                                                                                         |
| Percentil                                     | [*DATA REMOVED*]                                                                                                                                         |
| Peso fetal estimado según fórmula de Scioscia | _____                                                                                                                                                    |
| Peso fetal estimado según fórmula de LEE      | _____                                                                                                                                                    |
| Tipo de parto                                 | <input checked="" type="radio"/> eutocico<br><input type="radio"/> instrumentado/ventosa<br><input type="radio"/> cesarea                                |
| fecha de nacimiento                           | [*DATA REMOVED*]                                                                                                                                         |
| Días entre exploración y nacimiento           | [*DATA REMOVED*]                                                                                                                                         |
| Peso RN en g                                  | [*DATA REMOVED*]                                                                                                                                         |
| sexo                                          | <input checked="" type="radio"/> mujer<br><input type="radio"/> hombre                                                                                   |
| Apgar 1 minuto                                | [*DATA REMOVED*]                                                                                                                                         |
| Apgar 5 minutos                               | [*DATA REMOVED*]                                                                                                                                         |
| Apgar 10 minutos                              | _____                                                                                                                                                    |
| antecedente Covid durante gestación           | <input type="radio"/> Yes<br><input checked="" type="radio"/> No                                                                                         |
| Nivel de estudios                             | <input type="radio"/> ninguno<br><input type="radio"/> primarios<br><input checked="" type="radio"/> secundarios<br><input type="radio"/> universitarios |

# Base\_datos\_estimacion\_peso\_fetal

|                                       |                                                                                                                                                                                                                                                                                      |
|---------------------------------------|--------------------------------------------------------------------------------------------------------------------------------------------------------------------------------------------------------------------------------------------------------------------------------------|
| Número de identificación participante | 190                                                                                                                                                                                                                                                                                  |
| CODIGO PARTICIPANTE                   |                                                                                                                                                                                                                                                                                      |
| Edad                                  | [*DATA REMOVED*]                                                                                                                                                                                                                                                                     |
| Gestaciones                           | <input type="radio"/> 1<br><input checked="" type="radio"/> 2<br><input type="radio"/> 3<br><input type="radio"/> mas de 3                                                                                                                                                           |
| partos                                | <input checked="" type="radio"/> 0<br><input type="radio"/> 1<br><input type="radio"/> 2<br><input type="radio"/> 3<br><input type="radio"/> mas de 3                                                                                                                                |
| cesáreas                              | <input type="radio"/> 0<br><input checked="" type="radio"/> 1<br><input type="radio"/> 2<br><input type="radio"/> 3<br><input type="radio"/> mas de 3                                                                                                                                |
| Abortos                               | <input checked="" type="radio"/> 0<br><input type="radio"/> 1<br><input type="radio"/> 2<br><input type="radio"/> 3<br><input type="radio"/> mas de 3                                                                                                                                |
| Tipo de gestacion                     | <input checked="" type="radio"/> espontanea<br><input type="radio"/> IAC inseminación artificial conyuge<br><input type="radio"/> IAD inseminación artificial donante<br><input type="radio"/> FIV Fecundación in Vitro<br><input type="radio"/> Ovodon FIV con donación de ovocitos |
| peso previo a embarazo                | [*DATA REMOVED*]                                                                                                                                                                                                                                                                     |
| Ganancia ponderal embarazo            | [*DATA REMOVED*]                                                                                                                                                                                                                                                                     |
| Talla madre                           | [*DATA REMOVED*]                                                                                                                                                                                                                                                                     |
| IMC previo embarazo                   | 21.11678004535148                                                                                                                                                                                                                                                                    |
| Patología obstétrica                  | <input checked="" type="radio"/> no<br><input type="radio"/> si                                                                                                                                                                                                                      |
| Diabetes pregestacional               | <input checked="" type="radio"/> no<br><input type="radio"/> si                                                                                                                                                                                                                      |
| Diabetes gestacional                  | <input checked="" type="radio"/> no<br><input type="radio"/> si                                                                                                                                                                                                                      |

|                                            |                                                                                                                                                                                      |
|--------------------------------------------|--------------------------------------------------------------------------------------------------------------------------------------------------------------------------------------|
| Diabetes gestacional con insulina          | <input checked="" type="radio"/> no<br><input type="radio"/> si                                                                                                                      |
| Diabetes gestacional con dieta y ejercicio | <input checked="" type="radio"/> no<br><input type="radio"/> si                                                                                                                      |
| Percentil fetos previos                    | <input type="radio"/> Nada<br><input type="radio"/> percentil menor de 10<br><input checked="" type="radio"/> percentil entre 10 y 90<br><input type="radio"/> percentil mayor de 90 |
| Exfumadora                                 | <input checked="" type="radio"/> Nada<br><input type="radio"/> menos de 5 años<br><input type="radio"/> 5 a 10 años<br><input type="radio"/> mayor o igual a 10 años                 |
| Hábito tabáquico                           | <input checked="" type="radio"/> no<br><input type="radio"/> si                                                                                                                      |
| fumadora                                   | [*DATA REMOVED*]                                                                                                                                                                     |
| Consumo otros tóxicos                      | <input checked="" type="radio"/> no<br><input type="radio"/> si                                                                                                                      |
| Hb 1T                                      | _____                                                                                                                                                                                |
| Htc 1T                                     | _____                                                                                                                                                                                |
| Hb 2T                                      | _____                                                                                                                                                                                |
| HTC 2T                                     | _____                                                                                                                                                                                |
| Hb 3T                                      | _____                                                                                                                                                                                |
| HTC 3T                                     | _____                                                                                                                                                                                |
| Suplemento FE oral                         | <input checked="" type="radio"/> si<br><input type="radio"/> no                                                                                                                      |
| Suplemento fe iv                           | <input type="radio"/> si<br><input checked="" type="radio"/> no                                                                                                                      |
| Transfusión                                | <input checked="" type="radio"/> no<br><input type="radio"/> si                                                                                                                      |
| Solicitada Vit D                           | <input checked="" type="radio"/> no<br><input type="radio"/> si                                                                                                                      |

|                       |                                                                                                                                                                                                                                                                                                                                                                                                              |
|-----------------------|--------------------------------------------------------------------------------------------------------------------------------------------------------------------------------------------------------------------------------------------------------------------------------------------------------------------------------------------------------------------------------------------------------------|
| Deficit vit D         | <input type="radio"/> no<br><input type="radio"/> si                                                                                                                                                                                                                                                                                                                                                         |
| Suplemento vit D      | <input type="radio"/> si<br><input checked="" type="radio"/> no                                                                                                                                                                                                                                                                                                                                              |
| Dieta, cuestionario   | <input checked="" type="radio"/> si<br><input type="radio"/> no                                                                                                                                                                                                                                                                                                                                              |
| Leche entera          | <input checked="" type="radio"/> Nunca o menos 1 vez al mes<br><input type="radio"/> 1 a 3 veces mes<br><input type="radio"/> 1 vez semana<br><input type="radio"/> 2 a 4 veces semana<br><input type="radio"/> 5 a 6 veces semana<br><input type="radio"/> 1 vez al día<br><input type="radio"/> 2 a 3 veces al día<br><input type="radio"/> 5 a 6 veces al día<br><input type="radio"/> más 6 veces al día |
| Leche semidesnatada   | <input type="radio"/> Nunca o menos 1 vez al mes<br><input type="radio"/> 1 a 3 veces mes<br><input checked="" type="radio"/> 1 vez semana<br><input type="radio"/> 2 a 4 veces semana<br><input type="radio"/> 5 a 6 veces semana<br><input type="radio"/> 1 vez al día<br><input type="radio"/> 2 a 3 veces al día<br><input type="radio"/> 5 a 6 veces al día<br><input type="radio"/> mas 6 veces al día |
| Leche desnatada       | <input checked="" type="radio"/> Nunca o menos 1 vez al mes<br><input type="radio"/> 1 a 3 veces mes<br><input type="radio"/> 1 vez semana<br><input type="radio"/> 2 a 4 veces semana<br><input type="radio"/> 5 a 6 veces semana<br><input type="radio"/> 1 vez al día<br><input type="radio"/> 2 a 3 veces al día<br><input type="radio"/> 5 a 6 veces al día<br><input type="radio"/> más 6 veces al día |
| Leche condensada      | <input checked="" type="radio"/> Nunca o menos 1 vez al mes<br><input type="radio"/> 1 a 3 veces mes<br><input type="radio"/> 1 vez semana<br><input type="radio"/> 2 a 4 veces semana<br><input type="radio"/> 5 a 6 veces semana<br><input type="radio"/> 1 vez al día<br><input type="radio"/> 2 a 3 veces al día<br><input type="radio"/> 5 a 6 veces al día<br><input type="radio"/> más 6 veces al día |
| nata o crema de leche | <input checked="" type="radio"/> Nunca o menos 1 vez al mes<br><input type="radio"/> 1 a 3 veces mes<br><input type="radio"/> 1 vez semana<br><input type="radio"/> 2 a 4 veces semana<br><input type="radio"/> 5 a 6 veces semana<br><input type="radio"/> 1 vez al día<br><input type="radio"/> 2 a 3 veces al día<br><input type="radio"/> 5 a 6 veces al día<br><input type="radio"/> más 6 veces al día |

---

Yogurt Entero

- ☐ Nunca o menos 1 vez al mes  
☐ 1 a 3 veces mes  
☐ 1 vez semana  
☒ 2 a 4 veces semana  
☐ 5 a 6 veces semana  
☐ 1 vez al día  
☐ 2 a 3 veces al día  
☐ 5 a 6 veces al día  
☐ más 6 veces al día

---

Yogurt desnatado

- ☐ Nunca o menos 1 vez al mes  
☒ 1 a 3 veces mes  
☐ 1 vez semana  
☐ 2 a 4 veces semana  
☐ 5 a 6 veces semana  
☐ 1 vez al día  
☐ 2 a 3 veces al día  
☐ 5 a 6 veces al día  
☐ más 6 veces al día

---

100g requesón o queso blando o queso fresco

- ☐ Nunca o menos 1 vez al mes  
☐ 1 a 3 veces mes  
☐ 1 vez semana  
☐ 2 a 4 veces semana  
☐ 5 a 6 veces semana  
☒ 1 vez al día  
☐ 2 a 3 veces al día  
☐ 5 a 6 veces al día  
☐ más 6 veces al día

---

queso curado o semicurado o cremoso

- ☐ Nunca o menos 1 vez al mes  
☐ 1 a 3 veces mes  
☐ 1 vez semana  
☐ 2 a 4 veces semana  
☒ 5 a 6 veces semana  
☐ 1 vez al día  
☐ 2 a 3 veces al día  
☐ 5 a 6 veces al día  
☐ más 6 veces al día

---

natillas flan pudding

- ☐ Nunca o menos 1 vez al mes  
☒ 1 a 3 veces mes  
☐ 1 vez semana  
☐ 2 a 4 veces semana  
☐ 5 a 6 veces semana  
☐ 1 vez al día  
☐ 2 a 3 veces al día  
☐ 5 a 6 veces al día  
☐ más 6 veces al día

---

Helado

- ☐ Nunca o menos 1 vez al mes  
☐ 1 a 3 veces mes  
☐ 1 vez semana  
☒ 2 a 4 veces semana  
☐ 5 a 6 veces semana  
☐ 1 vez al día  
☐ 2 a 3 veces al día  
☐ 5 a 6 veces al día  
☐ más 6 veces al día

|                                      |                                                                                                                                                                                                                                                                                                                                                                                                              |
|--------------------------------------|--------------------------------------------------------------------------------------------------------------------------------------------------------------------------------------------------------------------------------------------------------------------------------------------------------------------------------------------------------------------------------------------------------------|
| huevo                                | <input type="radio"/> Nunca o menos 1 vez al mes<br><input type="radio"/> 1 a 3 veces mes<br><input type="radio"/> 1 vez semana<br><input checked="" type="radio"/> 2 a 4 veces semana<br><input type="radio"/> 5 a 6 veces semana<br><input type="radio"/> 1 vez al día<br><input type="radio"/> 2 a 3 veces al día<br><input type="radio"/> 5 a 6 veces al día<br><input type="radio"/> más 6 veces al día |
| Pollo con piel                       | <input checked="" type="radio"/> Nunca o menos 1 vez al mes<br><input type="radio"/> 1 a 3 veces mes<br><input type="radio"/> 1 vez semana<br><input type="radio"/> 2 a 4 veces semana<br><input type="radio"/> 5 a 6 veces semana<br><input type="radio"/> 1 vez al día<br><input type="radio"/> 2 a 3 veces al día<br><input type="radio"/> 5 a 6 veces al día<br><input type="radio"/> más 6 veces al día |
| pollo sin piel                       | <input type="radio"/> Nunca o menos 1 vez al mes<br><input checked="" type="radio"/> 1 a 3 veces mes<br><input type="radio"/> 1 vez semana<br><input type="radio"/> 2 a 4 veces semana<br><input type="radio"/> 5 a 6 veces semana<br><input type="radio"/> 1 vez al día<br><input type="radio"/> 2 a 3 veces al día<br><input type="radio"/> 5 a 6 veces al día<br><input type="radio"/> más 6 veces al día |
| Ternera o cerdo o cordero            | <input type="radio"/> Nunca o menos 1 vez al mes<br><input checked="" type="radio"/> 1 a 3 veces mes<br><input type="radio"/> 1 vez semana<br><input type="radio"/> 2 a 4 veces semana<br><input type="radio"/> 5 a 6 veces semana<br><input type="radio"/> 1 vez al día<br><input type="radio"/> 2 a 3 veces al día<br><input type="radio"/> 5 a 6 veces al día<br><input type="radio"/> más 6 veces al día |
| carne caza: Conejo o codorniz o pato | <input checked="" type="radio"/> Nunca o menos 1 vez al mes<br><input type="radio"/> 1 a 3 veces mes<br><input type="radio"/> 1 vez semana<br><input type="radio"/> 2 a 4 veces semana<br><input type="radio"/> 5 a 6 veces semana<br><input type="radio"/> 1 vez al día<br><input type="radio"/> 2 a 3 veces al día<br><input type="radio"/> 5 a 6 veces al día<br><input type="radio"/> más 6 veces al día |
| Hígado de ternera o cerdo o pollo    | <input checked="" type="radio"/> Nunca o menos 1 vez al mes<br><input type="radio"/> 1 a 3 veces mes<br><input type="radio"/> 1 vez semana<br><input type="radio"/> 2 a 4 veces semana<br><input type="radio"/> 5 a 6 veces semana<br><input type="radio"/> 1 vez al día<br><input type="radio"/> 2 a 3 veces al día<br><input type="radio"/> 5 a 6 veces al día<br><input type="radio"/> más 6 veces al día |

---

Vísceras

- ☐ Nunca o menos 1 vez al mes  
☒ 1 a 3 veces mes  
☐ 1 vez semana  
☐ 2 a 4 veces semana  
☐ 5 a 6 veces semana  
☐ 1 vez al día  
☐ 2 a 3 veces al día  
☐ 5 a 6 veces al día  
☐ más 6 veces al día

---

Embutido

- ☒ Nunca o menos 1 vez al mes  
☐ 1 a 3 veces mes  
☐ 1 vez semana  
☐ 2 a 4 veces semana  
☐ 5 a 6 veces semana  
☐ 1 vez al día  
☐ 2 a 3 veces al día  
☐ 5 a 6 veces al día  
☐ más 6 veces al día

---

Salchicha o similar

- ☒ Nunca o menos 1 vez al mes  
☐ 1 a 3 veces mes  
☐ 1 vez semana  
☐ 2 a 4 veces semana  
☐ 5 a 6 veces semana  
☐ 1 vez al día  
☐ 2 a 3 veces al día  
☐ 5 a 6 veces al día  
☐ más 6 veces al día

---

Pate o foiegras

- ☒ Nunca o menos 1 vez al mes  
☐ 1 a 3 veces mes  
☐ 1 vez semana  
☐ 2 a 4 veces semana  
☐ 5 a 6 veces semana  
☐ 1 vez al día  
☐ 2 a 3 veces al día  
☐ 5 a 6 veces al día  
☐ más 6 veces al día

---

Hamburguesa

- ☒ Nunca o menos 1 vez al mes  
☐ 1 a 3 veces mes  
☐ 1 vez semana  
☐ 2 a 4 veces semana  
☐ 5 a 6 veces semana  
☐ 1 vez al día  
☐ 2 a 3 veces al día  
☐ 5 a 6 veces al día  
☐ más 6 veces al día

---

tocino o bacon

- ☒ Nunca o menos 1 vez al mes  
☐ 1 a 3 veces mes  
☐ 1 vez semana  
☐ 2 a 4 veces semana  
☐ 5 a 6 veces semana  
☐ 1 vez al día  
☐ 2 a 3 veces al día  
☐ 5 a 6 veces al día  
☐ más 6 veces al día



---

Pescado frito

- ☐ Nunca o menos 1 vez al mes  
☐ 1 a 3 veces mes  
☒ 1 vez semana  
☐ 2 a 4 veces semana  
☐ 5 a 6 veces semana  
☐ 1 vez al día  
☐ 2 a 3 veces al día  
☐ 5 a 6 veces al día  
☐ más 6 veces al día

---

pescado hervido blanco

- ☐ Nunca o menos 1 vez al mes  
☐ 1 a 3 veces mes  
☐ 1 vez semana  
☒ 2 a 4 veces semana  
☐ 5 a 6 veces semana  
☐ 1 vez al día  
☐ 2 a 3 veces al día  
☐ 5 a 6 veces al día  
☐ más 6 veces al día

---

pescado hervido azul

- ☐ Nunca o menos 1 vez al mes  
☐ 1 a 3 veces mes  
☐ 1 vez semana  
☒ 2 a 4 veces semana  
☐ 5 a 6 veces semana  
☐ 1 vez al día  
☐ 2 a 3 veces al día  
☐ 5 a 6 veces al día  
☐ más 6 veces al día

---

otros pescado azul

- ☐ Nunca o menos 1 vez al mes  
☐ 1 a 3 veces mes  
☒ 1 vez semana  
☐ 2 a 4 veces semana  
☐ 5 a 6 veces semana  
☐ 1 vez al día  
☐ 2 a 3 veces al día  
☐ 5 a 6 veces al día  
☐ más 6 veces al día

---

atun conserva

- ☐ Nunca o menos 1 vez al mes  
☐ 1 a 3 veces mes  
☒ 1 vez semana  
☐ 2 a 4 veces semana  
☐ 5 a 6 veces semana  
☐ 1 vez al día  
☐ 2 a 3 veces al día  
☐ 5 a 6 veces al día  
☐ más 6 veces al día

---

sardina conserva

- ☐ Nunca o menos 1 vez al mes  
☒ 1 a 3 veces mes  
☐ 1 vez semana  
☐ 2 a 4 veces semana  
☐ 5 a 6 veces semana  
☐ 1 vez al día  
☐ 2 a 3 veces al día  
☐ 5 a 6 veces al día  
☐ más 6 veces al día

---

pescado ahumado

- ☐ Nunca o menos 1 vez al mes  
☐ 1 a 3 veces mes  
☒ 1 vez semana  
☐ 2 a 4 veces semana  
☐ 5 a 6 veces semana  
☐ 1 vez al día  
☐ 2 a 3 veces al día  
☐ 5 a 6 veces al día  
☐ más 6 veces al día

---

almejas o mejillones o ostras unos 100g

- ☐ Nunca o menos 1 vez al mes  
☐ 1 a 3 veces mes  
☒ 1 vez semana  
☐ 2 a 4 veces semana  
☐ 5 a 6 veces semana  
☐ 1 vez al día  
☐ 2 a 3 veces al día  
☐ 5 a 6 veces al día  
☐ más 6 veces al día

---

calamar o chipiron o sepia unos 100g

- ☐ Nunca o menos 1 vez al mes  
☐ 1 a 3 veces mes  
☒ 1 vez semana  
☐ 2 a 4 veces semana  
☐ 5 a 6 veces semana  
☐ 1 vez al día  
☐ 2 a 3 veces al día  
☐ 5 a 6 veces al día  
☐ más 6 veces al día

---

marisco unos 100g

- ☐ Nunca o menos 1 vez al mes  
☒ 1 a 3 veces mes  
☐ 1 vez semana  
☐ 2 a 4 veces semana  
☐ 5 a 6 veces semana  
☐ 1 vez al día  
☐ 2 a 3 veces al día  
☐ 5 a 6 veces al día  
☐ más 6 veces al día

---

Espinacas o acelgas cocinadas

- ☐ Nunca o menos 1 vez al mes  
☐ 1 a 3 veces mes  
☒ 1 vez semana  
☐ 2 a 4 veces semana  
☐ 5 a 6 veces semana  
☐ 1 vez al día  
☐ 2 a 3 veces al día  
☐ 5 a 6 veces al día  
☐ más 6 veces al día

---

Col o coliflor o brocoli cocinado

- ☐ Nunca o menos 1 vez al mes  
☐ 1 a 3 veces mes  
☐ 1 vez semana  
☒ 2 a 4 veces semana  
☐ 5 a 6 veces semana  
☐ 1 vez al día  
☐ 2 a 3 veces al día  
☐ 5 a 6 veces al día  
☐ más 6 veces al día

---

Lechuga o endivia o escarola

- ☐ Nunca o menos 1 vez al mes  
☐ 1 a 3 veces mes  
☐ 1 vez semana  
☒ 2 a 4 veces semana  
☐ 5 a 6 veces semana  
☐ 1 vez al día  
☐ 2 a 3 veces al día  
☐ 5 a 6 veces al día  
☐ más 6 veces al día

---

tomate ensalada

- ☐ Nunca o menos 1 vez al mes  
☐ 1 a 3 veces mes  
☐ 1 vez semana  
☐ 2 a 4 veces semana  
☒ 5 a 6 veces semana  
☐ 1 vez al día  
☐ 2 a 3 veces al día  
☐ 5 a 6 veces al día  
☐ más 6 veces al día

---

cebolla

- ☐ Nunca o menos 1 vez al mes  
☐ 1 a 3 veces mes  
☐ 1 vez semana  
☐ 2 a 4 veces semana  
☐ 5 a 6 veces semana  
☒ 1 vez al día  
☐ 2 a 3 veces al día  
☐ 5 a 6 veces al día  
☐ más 6 veces al día

---

Zanahoria o calabaza

- ☐ Nunca o menos 1 vez al mes  
☐ 1 a 3 veces mes  
☐ 1 vez semana  
☐ 2 a 4 veces semana  
☐ 5 a 6 veces semana  
☒ 1 vez al día  
☐ 2 a 3 veces al día  
☐ 5 a 6 veces al día  
☐ más 6 veces al día

---

Judías verdes

- ☐ Nunca o menos 1 vez al mes  
☐ 1 a 3 veces mes  
☒ 1 vez semana  
☐ 2 a 4 veces semana  
☐ 5 a 6 veces semana  
☐ 1 vez al día  
☐ 2 a 3 veces al día  
☐ 5 a 6 veces al día  
☐ más 6 veces al día

---

Berenjena o calabacin o pepino

- ☐ Nunca o menos 1 vez al mes  
☐ 1 a 3 veces mes  
☐ 1 vez semana  
☐ 2 a 4 veces semana  
☐ 5 a 6 veces semana  
☒ 1 vez al día  
☐ 2 a 3 veces al día  
☐ 5 a 6 veces al día  
☐ más 6 veces al día

---

|          |                                                                                                                                                                                                                                                                                                                                                                                                              |
|----------|--------------------------------------------------------------------------------------------------------------------------------------------------------------------------------------------------------------------------------------------------------------------------------------------------------------------------------------------------------------------------------------------------------------|
| pimiento | <input type="radio"/> Nunca o menos 1 vez al mes<br><input type="radio"/> 1 a 3 veces mes<br><input type="radio"/> 1 vez semana<br><input type="radio"/> 2 a 4 veces semana<br><input checked="" type="radio"/> 5 a 6 veces semana<br><input type="radio"/> 1 vez al día<br><input type="radio"/> 2 a 3 veces al día<br><input type="radio"/> 5 a 6 veces al día<br><input type="radio"/> más 6 veces al día |
|----------|--------------------------------------------------------------------------------------------------------------------------------------------------------------------------------------------------------------------------------------------------------------------------------------------------------------------------------------------------------------------------------------------------------------|

---

|           |                                                                                                                                                                                                                                                                                                                                                                                                              |
|-----------|--------------------------------------------------------------------------------------------------------------------------------------------------------------------------------------------------------------------------------------------------------------------------------------------------------------------------------------------------------------------------------------------------------------|
| alcachofa | <input type="radio"/> Nunca o menos 1 vez al mes<br><input type="radio"/> 1 a 3 veces mes<br><input type="radio"/> 1 vez semana<br><input type="radio"/> 2 a 4 veces semana<br><input checked="" type="radio"/> 5 a 6 veces semana<br><input type="radio"/> 1 vez al día<br><input type="radio"/> 2 a 3 veces al día<br><input type="radio"/> 5 a 6 veces al día<br><input type="radio"/> más 6 veces al día |
|-----------|--------------------------------------------------------------------------------------------------------------------------------------------------------------------------------------------------------------------------------------------------------------------------------------------------------------------------------------------------------------------------------------------------------------|

---

|            |                                                                                                                                                                                                                                                                                                                                                                                                              |
|------------|--------------------------------------------------------------------------------------------------------------------------------------------------------------------------------------------------------------------------------------------------------------------------------------------------------------------------------------------------------------------------------------------------------------|
| espárragos | <input type="radio"/> Nunca o menos 1 vez al mes<br><input type="radio"/> 1 a 3 veces mes<br><input checked="" type="radio"/> 1 vez semana<br><input type="radio"/> 2 a 4 veces semana<br><input type="radio"/> 5 a 6 veces semana<br><input type="radio"/> 1 vez al día<br><input type="radio"/> 2 a 3 veces al día<br><input type="radio"/> 5 a 6 veces al día<br><input type="radio"/> más 6 veces al día |
|------------|--------------------------------------------------------------------------------------------------------------------------------------------------------------------------------------------------------------------------------------------------------------------------------------------------------------------------------------------------------------------------------------------------------------|

---

|              |                                                                                                                                                                                                                                                                                                                                                                                                              |
|--------------|--------------------------------------------------------------------------------------------------------------------------------------------------------------------------------------------------------------------------------------------------------------------------------------------------------------------------------------------------------------------------------------------------------------|
| maíz hervido | <input type="radio"/> Nunca o menos 1 vez al mes<br><input checked="" type="radio"/> 1 a 3 veces mes<br><input type="radio"/> 1 vez semana<br><input type="radio"/> 2 a 4 veces semana<br><input type="radio"/> 5 a 6 veces semana<br><input type="radio"/> 1 vez al día<br><input type="radio"/> 2 a 3 veces al día<br><input type="radio"/> 5 a 6 veces al día<br><input type="radio"/> más 6 veces al día |
|--------------|--------------------------------------------------------------------------------------------------------------------------------------------------------------------------------------------------------------------------------------------------------------------------------------------------------------------------------------------------------------------------------------------------------------|

---

|           |                                                                                                                                                                                                                                                                                                                                                                                                              |
|-----------|--------------------------------------------------------------------------------------------------------------------------------------------------------------------------------------------------------------------------------------------------------------------------------------------------------------------------------------------------------------------------------------------------------------|
| legumbres | <input type="radio"/> Nunca o menos 1 vez al mes<br><input type="radio"/> 1 a 3 veces mes<br><input type="radio"/> 1 vez semana<br><input checked="" type="radio"/> 2 a 4 veces semana<br><input type="radio"/> 5 a 6 veces semana<br><input type="radio"/> 1 vez al día<br><input type="radio"/> 2 a 3 veces al día<br><input type="radio"/> 5 a 6 veces al día<br><input type="radio"/> más 6 veces al día |
|-----------|--------------------------------------------------------------------------------------------------------------------------------------------------------------------------------------------------------------------------------------------------------------------------------------------------------------------------------------------------------------------------------------------------------------|

---

|                       |                                                                                                                                                                                                                                                                                                                                                                                                              |
|-----------------------|--------------------------------------------------------------------------------------------------------------------------------------------------------------------------------------------------------------------------------------------------------------------------------------------------------------------------------------------------------------------------------------------------------------|
| naranjas o mandarinas | <input type="radio"/> Nunca o menos 1 vez al mes<br><input type="radio"/> 1 a 3 veces mes<br><input type="radio"/> 1 vez semana<br><input type="radio"/> 2 a 4 veces semana<br><input type="radio"/> 5 a 6 veces semana<br><input checked="" type="radio"/> 1 vez al día<br><input type="radio"/> 2 a 3 veces al día<br><input type="radio"/> 5 a 6 veces al día<br><input type="radio"/> más 6 veces al día |
|-----------------------|--------------------------------------------------------------------------------------------------------------------------------------------------------------------------------------------------------------------------------------------------------------------------------------------------------------------------------------------------------------------------------------------------------------|

---

---

zumو natural fruta

- ☐ Nunca o menos 1 vez al mes  
☐ 1 a 3 veces mes  
☐ 1 vez semana  
☒ 2 a 4 veces semana  
☐ 5 a 6 veces semana  
☐ 1 vez al día  
☐ 2 a 3 veces al día  
☐ 5 a 6 veces al día  
☐ más 6 veces al día

---

platano

- ☐ Nunca o menos 1 vez al mes  
☐ 1 a 3 veces mes  
☐ 1 vez semana  
☐ 2 a 4 veces semana  
☒ 5 a 6 veces semana  
☐ 1 vez al día  
☐ 2 a 3 veces al día  
☐ 5 a 6 veces al día  
☐ más 6 veces al día

---

manzana o pera

- ☐ Nunca o menos 1 vez al mes  
☐ 1 a 3 veces mes  
☐ 1 vez semana  
☐ 2 a 4 veces semana  
☒ 5 a 6 veces semana  
☐ 1 vez al día  
☐ 2 a 3 veces al día  
☐ 5 a 6 veces al día  
☐ más 6 veces al día

---

melocotón o nectarina

- ☐ Nunca o menos 1 vez al mes  
☐ 1 a 3 veces mes  
☐ 1 vez semana  
☒ 2 a 4 veces semana  
☐ 5 a 6 veces semana  
☐ 1 vez al día  
☐ 2 a 3 veces al día  
☐ 5 a 6 veces al día  
☐ más 6 veces al día

---

sandia o melon

- ☐ Nunca o menos 1 vez al mes  
☐ 1 a 3 veces mes  
☐ 1 vez semana  
☒ 2 a 4 veces semana  
☐ 5 a 6 veces semana  
☐ 1 vez al día  
☐ 2 a 3 veces al día  
☐ 5 a 6 veces al día  
☐ más 6 veces al día

---

uva

- ☐ Nunca o menos 1 vez al mes  
☐ 1 a 3 veces mes  
☐ 1 vez semana  
☒ 2 a 4 veces semana  
☐ 5 a 6 veces semana  
☐ 1 vez al día  
☐ 2 a 3 veces al día  
☐ 5 a 6 veces al día  
☐ más 6 veces al día

---

bruna o ciruela

- ☐ Nunca o menos 1 vez al mes  
☐ 1 a 3 veces mes  
☐ 1 vez semana  
☒ 2 a 4 veces semana  
☐ 5 a 6 veces semana  
☐ 1 vez al día  
☐ 2 a 3 veces al día  
☐ 5 a 6 veces al día  
☐ más 6 veces al día

---

kiwi

- ☐ Nunca o menos 1 vez al mes  
☐ 1 a 3 veces mes  
☒ 1 vez semana  
☐ 2 a 4 veces semana  
☐ 5 a 6 veces semana  
☐ 1 vez al día  
☐ 2 a 3 veces al día  
☐ 5 a 6 veces al día  
☐ más 6 veces al día

---

aceituna

- ☐ Nunca o menos 1 vez al mes  
☐ 1 a 3 veces mes  
☐ 1 vez semana  
☐ 2 a 4 veces semana  
☐ 5 a 6 veces semana  
☒ 1 vez al día  
☐ 2 a 3 veces al día  
☐ 5 a 6 veces al día  
☐ más 6 veces al día

---

frutos secos

- ☐ Nunca o menos 1 vez al mes  
☐ 1 a 3 veces mes  
☐ 1 vez semana  
☐ 2 a 4 veces semana  
☐ 5 a 6 veces semana  
☐ 1 vez al día  
☒ 2 a 3 veces al día  
☐ 5 a 6 veces al día  
☐ más 6 veces al día

---

pan blanco

- ☐ Nunca o menos 1 vez al mes  
☐ 1 a 3 veces mes  
☐ 1 vez semana  
☐ 2 a 4 veces semana  
☐ 5 a 6 veces semana  
☒ 1 vez al día  
☐ 2 a 3 veces al día  
☐ 5 a 6 veces al día  
☐ más 6 veces al día

---

pan integral

- ☐ Nunca o menos 1 vez al mes  
☐ 1 a 3 veces mes  
☐ 1 vez semana  
☐ 2 a 4 veces semana  
☐ 5 a 6 veces semana  
☒ 1 vez al día  
☐ 2 a 3 veces al día  
☐ 5 a 6 veces al día  
☐ más 6 veces al día

---

cereales desayuno

- ☐ Nunca o menos 1 vez al mes  
☐ 1 a 3 veces mes  
☐ 1 vez semana  
☒ 2 a 4 veces semana  
☐ 5 a 6 veces semana  
☐ 1 vez al día  
☐ 2 a 3 veces al día  
☐ 5 a 6 veces al día  
☐ más 6 veces al día

---

patatas fritas

- ☐ Nunca o menos 1 vez al mes  
☐ 1 a 3 veces mes  
☒ 1 vez semana  
☐ 2 a 4 veces semana  
☐ 5 a 6 veces semana  
☐ 1 vez al día  
☐ 2 a 3 veces al día  
☐ 5 a 6 veces al día  
☐ más 6 veces al día

---

patatas cocidas o asadas

- ☐ Nunca o menos 1 vez al mes  
☐ 1 a 3 veces mes  
☐ 1 vez semana  
☒ 2 a 4 veces semana  
☐ 5 a 6 veces semana  
☐ 1 vez al día  
☐ 2 a 3 veces al día  
☐ 5 a 6 veces al día  
☐ más 6 veces al día

---

bolsa papas

- ☐ Nunca o menos 1 vez al mes  
☒ 1 a 3 veces mes  
☐ 1 vez semana  
☐ 2 a 4 veces semana  
☐ 5 a 6 veces semana  
☐ 1 vez al día  
☐ 2 a 3 veces al día  
☐ 5 a 6 veces al día  
☐ más 6 veces al día

---

arroz cocinado

- ☐ Nunca o menos 1 vez al mes  
☐ 1 a 3 veces mes  
☐ 1 vez semana  
☒ 2 a 4 veces semana  
☐ 5 a 6 veces semana  
☐ 1 vez al día  
☐ 2 a 3 veces al día  
☐ 5 a 6 veces al día  
☐ más 6 veces al día

---

pasta

- ☐ Nunca o menos 1 vez al mes  
☐ 1 a 3 veces mes  
☐ 1 vez semana  
☒ 2 a 4 veces semana  
☐ 5 a 6 veces semana  
☐ 1 vez al día  
☐ 2 a 3 veces al día  
☐ 5 a 6 veces al día  
☐ más 6 veces al día

|                     |                                                                                                                                                                                                                                                                                                                                                                                                              |
|---------------------|--------------------------------------------------------------------------------------------------------------------------------------------------------------------------------------------------------------------------------------------------------------------------------------------------------------------------------------------------------------------------------------------------------------|
| pizza               | <input type="radio"/> Nunca o menos 1 vez al mes<br><input type="radio"/> 1 a 3 veces mes<br><input checked="" type="radio"/> 1 vez semana<br><input type="radio"/> 2 a 4 veces semana<br><input type="radio"/> 5 a 6 veces semana<br><input type="radio"/> 1 vez al día<br><input type="radio"/> 2 a 3 veces al día<br><input type="radio"/> 5 a 6 veces al día<br><input type="radio"/> más 6 veces al día |
| aceite oliva        | <input type="radio"/> Nunca o menos 1 vez al mes<br><input type="radio"/> 1 a 3 veces mes<br><input type="radio"/> 1 vez semana<br><input type="radio"/> 2 a 4 veces semana<br><input type="radio"/> 5 a 6 veces semana<br><input type="radio"/> 1 vez al día<br><input checked="" type="radio"/> 2 a 3 veces al día<br><input type="radio"/> 5 a 6 veces al día<br><input type="radio"/> más 6 veces al día |
| otros aceites       | <input checked="" type="radio"/> Nunca o menos 1 vez al mes<br><input type="radio"/> 1 a 3 veces mes<br><input type="radio"/> 1 vez semana<br><input type="radio"/> 2 a 4 veces semana<br><input type="radio"/> 5 a 6 veces semana<br><input type="radio"/> 1 vez al día<br><input type="radio"/> 2 a 3 veces al día<br><input type="radio"/> 5 a 6 veces al día<br><input type="radio"/> más 6 veces al día |
| margarina           | <input checked="" type="radio"/> Nunca o menos 1 vez al mes<br><input type="radio"/> 1 a 3 veces mes<br><input type="radio"/> 1 vez semana<br><input type="radio"/> 2 a 4 veces semana<br><input type="radio"/> 5 a 6 veces semana<br><input type="radio"/> 1 vez al día<br><input type="radio"/> 2 a 3 veces al día<br><input type="radio"/> 5 a 6 veces al día<br><input type="radio"/> más 6 veces al día |
| mantequilla         | <input checked="" type="radio"/> Nunca o menos 1 vez al mes<br><input type="radio"/> 1 a 3 veces mes<br><input type="radio"/> 1 vez semana<br><input type="radio"/> 2 a 4 veces semana<br><input type="radio"/> 5 a 6 veces semana<br><input type="radio"/> 1 vez al día<br><input type="radio"/> 2 a 3 veces al día<br><input type="radio"/> 5 a 6 veces al día<br><input type="radio"/> más 6 veces al día |
| galletas tipo maria | <input type="radio"/> Nunca o menos 1 vez al mes<br><input checked="" type="radio"/> 1 a 3 veces mes<br><input type="radio"/> 1 vez semana<br><input type="radio"/> 2 a 4 veces semana<br><input type="radio"/> 5 a 6 veces semana<br><input type="radio"/> 1 vez al día<br><input type="radio"/> 2 a 3 veces al día<br><input type="radio"/> 5 a 6 veces al día<br><input type="radio"/> más 6 veces al día |



---

galletas chocolate

- ☐ Nunca o menos 1 vez al mes  
☒ 1 a 3 veces mes  
☐ 1 vez semana  
☐ 2 a 4 veces semana  
☐ 5 a 6 veces semana  
☐ 1 vez al día  
☐ 2 a 3 veces al día  
☐ 5 a 6 veces al día  
☐ más 6 veces al día

---

bolleria

- ☐ Nunca o menos 1 vez al mes  
☒ 1 a 3 veces mes  
☐ 1 vez semana  
☐ 2 a 4 veces semana  
☐ 5 a 6 veces semana  
☐ 1 vez al día  
☐ 2 a 3 veces al día  
☐ 5 a 6 veces al día  
☐ más 6 veces al día

---

chocolate o bombones

- ☐ Nunca o menos 1 vez al mes  
☐ 1 a 3 veces mes  
☐ 1 vez semana  
☐ 2 a 4 veces semana  
☐ 5 a 6 veces semana  
☒ 1 vez al día  
☐ 2 a 3 veces al día  
☐ 5 a 6 veces al día  
☐ más 6 veces al día

---

chocolate polvo o colacao

- ☐ Nunca o menos 1 vez al mes  
☐ 1 a 3 veces mes  
☒ 1 vez semana  
☐ 2 a 4 veces semana  
☐ 5 a 6 veces semana  
☐ 1 vez al día  
☐ 2 a 3 veces al día  
☐ 5 a 6 veces al día  
☐ más 6 veces al día

---

vino tinto

- ☒ Nunca o menos 1 vez al mes  
☐ 1 a 3 veces mes  
☐ 1 vez semana  
☐ 2 a 4 veces semana  
☐ 5 a 6 veces semana  
☐ 1 vez al día  
☐ 2 a 3 veces al día  
☐ 5 a 6 veces al día  
☐ más 6 veces al día

---

vino blanco

- ☒ Nunca o menos 1 vez al mes  
☐ 1 a 3 veces mes  
☐ 1 vez semana  
☐ 2 a 4 veces semana  
☐ 5 a 6 veces semana  
☐ 1 vez al día  
☐ 2 a 3 veces al día  
☐ 5 a 6 veces al día  
☐ más 6 veces al día

|                       |                                                                                                                                                                                                                                                                                                                                                                                                              |
|-----------------------|--------------------------------------------------------------------------------------------------------------------------------------------------------------------------------------------------------------------------------------------------------------------------------------------------------------------------------------------------------------------------------------------------------------|
| vino seco o vermut    | <input checked="" type="radio"/> Nunca o menos 1 vez al mes<br><input type="radio"/> 1 a 3 veces mes<br><input type="radio"/> 1 vez semana<br><input type="radio"/> 2 a 4 veces semana<br><input type="radio"/> 5 a 6 veces semana<br><input type="radio"/> 1 vez al día<br><input type="radio"/> 2 a 3 veces al día<br><input type="radio"/> 5 a 6 veces al día<br><input type="radio"/> más 6 veces al día |
| cerveza               | <input type="radio"/> Nunca o menos 1 vez al mes<br><input type="radio"/> 1 a 3 veces mes<br><input checked="" type="radio"/> 1 vez semana<br><input type="radio"/> 2 a 4 veces semana<br><input type="radio"/> 5 a 6 veces semana<br><input type="radio"/> 1 vez al día<br><input type="radio"/> 2 a 3 veces al día<br><input type="radio"/> 5 a 6 veces al día<br><input type="radio"/> más 6 veces al día |
| cerveza sin alcohol   | <input type="radio"/> Nunca o menos 1 vez al mes<br><input type="radio"/> 1 a 3 veces mes<br><input checked="" type="radio"/> 1 vez semana<br><input type="radio"/> 2 a 4 veces semana<br><input type="radio"/> 5 a 6 veces semana<br><input type="radio"/> 1 vez al día<br><input type="radio"/> 2 a 3 veces al día<br><input type="radio"/> 5 a 6 veces al día<br><input type="radio"/> más 6 veces al día |
| licores               | <input checked="" type="radio"/> Nunca o menos 1 vez al mes<br><input type="radio"/> 1 a 3 veces mes<br><input type="radio"/> 1 vez semana<br><input type="radio"/> 2 a 4 veces semana<br><input type="radio"/> 5 a 6 veces semana<br><input type="radio"/> 1 vez al día<br><input type="radio"/> 2 a 3 veces al día<br><input type="radio"/> 5 a 6 veces al día<br><input type="radio"/> más 6 veces al día |
| ginebra o ron o vodka | <input checked="" type="radio"/> Nunca o menos 1 vez al mes<br><input type="radio"/> 1 a 3 veces mes<br><input type="radio"/> 1 vez semana<br><input type="radio"/> 2 a 4 veces semana<br><input type="radio"/> 5 a 6 veces semana<br><input type="radio"/> 1 vez al día<br><input type="radio"/> 2 a 3 veces al día<br><input type="radio"/> 5 a 6 veces al día<br><input type="radio"/> más 6 veces al día |
| refresco normal       | <input type="radio"/> Nunca o menos 1 vez al mes<br><input type="radio"/> 1 a 3 veces mes<br><input checked="" type="radio"/> 1 vez semana<br><input type="radio"/> 2 a 4 veces semana<br><input type="radio"/> 5 a 6 veces semana<br><input type="radio"/> 1 vez al día<br><input type="radio"/> 2 a 3 veces al día<br><input type="radio"/> 5 a 6 veces al día<br><input type="radio"/> más 6 veces al día |

|                          |                                                                                                                                                                                                                                                                                                                                                                                                              |
|--------------------------|--------------------------------------------------------------------------------------------------------------------------------------------------------------------------------------------------------------------------------------------------------------------------------------------------------------------------------------------------------------------------------------------------------------|
| refresco sin azúcar      | <input type="radio"/> Nunca o menos 1 vez al mes<br><input type="radio"/> 1 a 3 veces mes<br><input checked="" type="radio"/> 1 vez semana<br><input type="radio"/> 2 a 4 veces semana<br><input type="radio"/> 5 a 6 veces semana<br><input type="radio"/> 1 vez al día<br><input type="radio"/> 2 a 3 veces al día<br><input type="radio"/> 5 a 6 veces al día<br><input type="radio"/> más 6 veces al día |
| Agua del grifo           | <input checked="" type="radio"/> Nunca o menos 1 vez al mes<br><input type="radio"/> 1 a 3 veces mes<br><input type="radio"/> 1 vez semana<br><input type="radio"/> 2 a 4 veces semana<br><input type="radio"/> 5 a 6 veces semana<br><input type="radio"/> 1 vez al día<br><input type="radio"/> 2 a 3 veces al día<br><input type="radio"/> 5 a 6 veces al día<br><input type="radio"/> más 6 veces al día |
| agua embotellada sin gas | <input type="radio"/> Nunca o menos 1 vez al mes<br><input type="radio"/> 1 a 3 veces mes<br><input checked="" type="radio"/> 1 vez semana<br><input type="radio"/> 2 a 4 veces semana<br><input type="radio"/> 5 a 6 veces semana<br><input type="radio"/> 1 vez al día<br><input type="radio"/> 2 a 3 veces al día<br><input type="radio"/> 5 a 6 veces al día<br><input type="radio"/> más 6 veces al día |
| agua embotellada con gas | <input type="radio"/> Nunca o menos 1 vez al mes<br><input type="radio"/> 1 a 3 veces mes<br><input type="radio"/> 1 vez semana<br><input checked="" type="radio"/> 2 a 4 veces semana<br><input type="radio"/> 5 a 6 veces semana<br><input type="radio"/> 1 vez al día<br><input type="radio"/> 2 a 3 veces al día<br><input type="radio"/> 5 a 6 veces al día<br><input type="radio"/> más 6 veces al día |
| zumو frutas embasado     | <input type="radio"/> Nunca o menos 1 vez al mes<br><input type="radio"/> 1 a 3 veces mes<br><input type="radio"/> 1 vez semana<br><input type="radio"/> 2 a 4 veces semana<br><input type="radio"/> 5 a 6 veces semana<br><input checked="" type="radio"/> 1 vez al día<br><input type="radio"/> 2 a 3 veces al día<br><input type="radio"/> 5 a 6 veces al día<br><input type="radio"/> más 6 veces al día |
| cafe                     | <input type="radio"/> Nunca o menos 1 vez al mes<br><input type="radio"/> 1 a 3 veces mes<br><input type="radio"/> 1 vez semana<br><input type="radio"/> 2 a 4 veces semana<br><input type="radio"/> 5 a 6 veces semana<br><input checked="" type="radio"/> 1 vez al día<br><input type="radio"/> 2 a 3 veces al día<br><input type="radio"/> 5 a 6 veces al día<br><input type="radio"/> más 6 veces al día |

---

cafe descafeinado

- ☐ Nunca o menos 1 vez al mes  
☐ 1 a 3 veces mes  
☐ 1 vez semana  
☐ 2 a 4 veces semana  
☐ 5 a 6 veces semana  
☒ 1 vez al día  
☐ 2 a 3 veces al día  
☐ 5 a 6 veces al día  
☐ más 6 veces al día

---

te o infusión

- ☐ Nunca o menos 1 vez al mes  
☐ 1 a 3 veces mes  
☐ 1 vez semana  
☐ 2 a 4 veces semana  
☐ 5 a 6 veces semana  
☒ 1 vez al día  
☐ 2 a 3 veces al día  
☐ 5 a 6 veces al día  
☐ más 6 veces al día

---

sopa o puré verduras

- ☐ Nunca o menos 1 vez al mes  
☒ 1 a 3 veces mes  
☐ 1 vez semana  
☐ 2 a 4 veces semana  
☐ 5 a 6 veces semana  
☐ 1 vez al día  
☐ 2 a 3 veces al día  
☐ 5 a 6 veces al día  
☐ más 6 veces al día

---

croquetas pollo jamón

- ☐ Nunca o menos 1 vez al mes  
☒ 1 a 3 veces mes  
☐ 1 vez semana  
☐ 2 a 4 veces semana  
☐ 5 a 6 veces semana  
☐ 1 vez al día  
☐ 2 a 3 veces al día  
☐ 5 a 6 veces al día  
☐ más 6 veces al día

---

croquetas pescado

- ☐ Nunca o menos 1 vez al mes  
☒ 1 a 3 veces mes  
☐ 1 vez semana  
☐ 2 a 4 veces semana  
☐ 5 a 6 veces semana  
☐ 1 vez al día  
☐ 2 a 3 veces al día  
☐ 5 a 6 veces al día  
☐ más 6 veces al día

---

mayonesa

- ☐ Nunca o menos 1 vez al mes  
☒ 1 a 3 veces mes  
☐ 1 vez semana  
☐ 2 a 4 veces semana  
☐ 5 a 6 veces semana  
☐ 1 vez al día  
☐ 2 a 3 veces al día  
☐ 5 a 6 veces al día  
☐ más 6 veces al día

---

salsa tomate

- ☒ Nunca o menos 1 vez al mes  
☐ 1 a 3 veces mes  
☐ 1 vez semana  
☐ 2 a 4 veces semana  
☐ 5 a 6 veces semana  
☐ 1 vez al día  
☐ 2 a 3 veces al día  
☐ 5 a 6 veces al día  
☐ más 6 veces al día

---

ketchup

- ☐ Nunca o menos 1 vez al mes  
☐ 1 a 3 veces mes  
☐ 1 vez semana  
☐ 2 a 4 veces semana  
☐ 5 a 6 veces semana  
☐ 1 vez al día  
☒ 2 a 3 veces al día  
☐ 5 a 6 veces al día  
☐ más 6 veces al día

---

sal

- ☐ Nunca o menos 1 vez al mes  
☐ 1 a 3 veces mes  
☐ 1 vez semana  
☐ 2 a 4 veces semana  
☐ 5 a 6 veces semana  
☐ 1 vez al día  
☒ 2 a 3 veces al día  
☐ 5 a 6 veces al día  
☐ más 6 veces al día

---

ajo

- ☐ Nunca o menos 1 vez al mes  
☐ 1 a 3 veces mes  
☐ 1 vez semana  
☐ 2 a 4 veces semana  
☐ 5 a 6 veces semana  
☒ 1 vez al día  
☐ 2 a 3 veces al día  
☐ 5 a 6 veces al día  
☐ más 6 veces al día

---

mermelada o miel

- ☐ Nunca o menos 1 vez al mes  
☐ 1 a 3 veces mes  
☐ 1 vez semana  
☐ 2 a 4 veces semana  
☐ 5 a 6 veces semana  
☐ 1 vez al día  
☒ 2 a 3 veces al día  
☐ 5 a 6 veces al día  
☐ más 6 veces al día

---

azúcar

- ☐ Nunca o menos 1 vez al mes  
☐ 1 a 3 veces mes  
☐ 1 vez semana  
☐ 2 a 4 veces semana  
☐ 5 a 6 veces semana  
☐ 1 vez al día  
☐ 2 a 3 veces al día  
☐ 5 a 6 veces al día  
☐ más 6 veces al día

|                                       |                                                                                                                                                                                                                                                                                                                                                                                                                                                                                                                               |
|---------------------------------------|-------------------------------------------------------------------------------------------------------------------------------------------------------------------------------------------------------------------------------------------------------------------------------------------------------------------------------------------------------------------------------------------------------------------------------------------------------------------------------------------------------------------------------|
| Otro alimento                         |                                                                                                                                                                                                                                                                                                                                                                                                                                                                                                                               |
| suplementos vitamínicos               | <input checked="" type="radio"/> si<br><input type="radio"/> no                                                                                                                                                                                                                                                                                                                                                                                                                                                               |
| suplementos vitamínicos               | [*DATA REMOVED*]                                                                                                                                                                                                                                                                                                                                                                                                                                                                                                              |
| dieta previa                          | <input type="radio"/> si<br><input checked="" type="radio"/> no                                                                                                                                                                                                                                                                                                                                                                                                                                                               |
| motivo dieta                          | <input checked="" type="radio"/> no dieta<br><input type="radio"/> control peso<br><input type="radio"/> control colesterol<br><input type="radio"/> control diabetes<br><input type="radio"/> problemas estómago<br><input type="radio"/> problemas vesícula o hepáticos<br><input type="radio"/> HTA o cardiopatía<br><input type="radio"/> problemas renales<br><input type="radio"/> alergia alimentaria<br><input type="radio"/> ácido úrico elevado<br><input type="radio"/> vegetariana<br><input type="radio"/> otros |
| cambio alimentos año previo gestación | <input checked="" type="radio"/> si<br><input type="radio"/> no                                                                                                                                                                                                                                                                                                                                                                                                                                                               |
| cambio lácteos                        | <input type="radio"/> eliminado<br><input type="radio"/> disminuido<br><input checked="" type="radio"/> igual<br><input type="radio"/> aumentado<br><input type="radio"/> no sabe                                                                                                                                                                                                                                                                                                                                             |
| cambio huevos                         | <input type="radio"/> eliminado<br><input type="radio"/> disminuido<br><input checked="" type="radio"/> igual<br><input type="radio"/> aumentado<br><input type="radio"/> no sabe                                                                                                                                                                                                                                                                                                                                             |
| cambio carne                          | <input type="radio"/> eliminado<br><input type="radio"/> disminuido<br><input type="radio"/> igual<br><input checked="" type="radio"/> aumentado<br><input type="radio"/> no sabe                                                                                                                                                                                                                                                                                                                                             |
| cambio pescado                        | <input type="radio"/> eliminado<br><input type="radio"/> disminuido<br><input checked="" type="radio"/> igual<br><input type="radio"/> aumentado<br><input type="radio"/> no sabe                                                                                                                                                                                                                                                                                                                                             |
| cambio verduras                       | <input type="radio"/> eliminado<br><input type="radio"/> disminuido<br><input checked="" type="radio"/> igual<br><input type="radio"/> aumentado<br><input type="radio"/> no sabe                                                                                                                                                                                                                                                                                                                                             |

|                            |                                                                                                                                                                                                                        |
|----------------------------|------------------------------------------------------------------------------------------------------------------------------------------------------------------------------------------------------------------------|
| cambio legumbres           | <input type="radio"/> eliminado<br><input type="radio"/> disminuido<br><input checked="" type="radio"/> igual<br><input type="radio"/> aumentado<br><input type="radio"/> no sabe                                      |
| cambio fruta               | <input type="radio"/> eliminado<br><input type="radio"/> disminuido<br><input checked="" type="radio"/> igual<br><input type="radio"/> aumentado<br><input type="radio"/> no sabe                                      |
| cambio pan                 | <input type="radio"/> eliminado<br><input type="radio"/> disminuido<br><input checked="" type="radio"/> igual<br><input type="radio"/> aumentado<br><input type="radio"/> no sabe                                      |
| cambio aceite oliva        | <input type="radio"/> eliminado<br><input type="radio"/> disminuido<br><input checked="" type="radio"/> igual<br><input type="radio"/> aumentado<br><input type="radio"/> no sabe                                      |
| cambio mante o margarina   | <input checked="" type="radio"/> eliminado<br><input type="radio"/> disminuido<br><input type="radio"/> igual<br><input type="radio"/> aumentado<br><input type="radio"/> no sabe                                      |
| cambio azúcar y dulces     | <input type="radio"/> eliminado<br><input type="radio"/> disminuido<br><input checked="" type="radio"/> igual<br><input type="radio"/> aumentado<br><input type="radio"/> no sabe                                      |
| cambio bebidas alcohólicas | <input checked="" type="radio"/> eliminado<br><input type="radio"/> disminuido<br><input type="radio"/> igual<br><input type="radio"/> aumentado<br><input type="radio"/> no sabe                                      |
| frecuencia comidas fritas  | <input type="radio"/> a diario<br><input type="radio"/> 5 a 6 veces semana<br><input type="radio"/> 2 a 4 veces semana<br><input checked="" type="radio"/> 1 vez semana<br><input type="radio"/> menos de 1 vez semana |
| carne                      | <input checked="" type="radio"/> no como<br><input type="radio"/> cruda<br><input type="radio"/> poco hecha<br><input type="radio"/> hecha<br><input type="radio"/> muy hecha                                          |
| grasa visible carne        | <input checked="" type="radio"/> quita toda<br><input type="radio"/> quita mayoría<br><input type="radio"/> quita un poco<br><input type="radio"/> no quita nada                                                       |

|                                |                                                                                                                                                                                                                                                          |
|--------------------------------|----------------------------------------------------------------------------------------------------------------------------------------------------------------------------------------------------------------------------------------------------------|
| cocina carne                   | <input checked="" type="radio"/> a la plancha<br><input type="radio"/> a la parrilla<br><input type="radio"/> asada<br><input type="radio"/> frita<br><input type="radio"/> guisada                                                                      |
| tostado quemado carne          | <input checked="" type="radio"/> nunca<br><input type="radio"/> 1 vez mes<br><input type="radio"/> 2 a 3 veces mes<br><input type="radio"/> 1 vez semana<br><input type="radio"/> 2 a 3 semanas                                                          |
| tostado quemado pescado        | <input type="radio"/> nunca<br><input type="radio"/> 1 vez mes<br><input type="radio"/> 2 a 3 veces mes<br><input checked="" type="radio"/> 1 vez semana<br><input type="radio"/> 2 a 3 semanas                                                          |
| socarrat paella                | <input type="radio"/> nunca<br><input checked="" type="radio"/> 1 vez mes<br><input type="radio"/> 2 a 3 veces mes<br><input type="radio"/> 1 vez semana<br><input type="radio"/> 2 a 3 semanas                                                          |
| grasa o aceite cocinar         | <input type="radio"/> mantequilla<br><input type="radio"/> margarina<br><input checked="" type="radio"/> aceite oliva<br><input type="radio"/> aceite oliva virgen extra<br><input type="radio"/> aceite vegetal<br><input type="radio"/> mezcla aceites |
| grasa aceite aliñar            | <input type="radio"/> mantequilla<br><input type="radio"/> margarina<br><input checked="" type="radio"/> aceite oliva<br><input type="radio"/> aceite oliva virgen extra<br><input type="radio"/> aceite vegetal<br><input type="radio"/> mezcla aceites |
| grasa aceite freir             | <input type="radio"/> mantequilla<br><input type="radio"/> margarina<br><input checked="" type="radio"/> aceite oliva<br><input type="radio"/> aceite oliva virgen extra<br><input type="radio"/> aceite vegetal<br><input type="radio"/> mezcla aceites |
| Ejercicio cuestionario         | <input checked="" type="radio"/> si<br><input type="radio"/> no                                                                                                                                                                                          |
| horas de sueño incluido siesta | [*DATA REMOVED*]                                                                                                                                                                                                                                         |
| minutos siesta                 | [*DATA REMOVED*]                                                                                                                                                                                                                                         |
| horas televisión semana        | [*DATA REMOVED*]                                                                                                                                                                                                                                         |



|                                        |                                                                                                                                                                                                                                                                                                                                                                           |
|----------------------------------------|---------------------------------------------------------------------------------------------------------------------------------------------------------------------------------------------------------------------------------------------------------------------------------------------------------------------------------------------------------------------------|
| actividad trabajo                      | <input type="radio"/> casi siempre sentado<br><input type="radio"/> sentado 50 por cien<br><input type="radio"/> casi siempre de pie, quieto<br><input checked="" type="radio"/> casi siempre levantado caminando y llevando pocas cosas<br><input type="radio"/> casi siempre levantado, caminando y llevado muchas cosas<br><input type="radio"/> trabajo manual pesado |
| tiempo caminar o bici al día           | <input type="radio"/> casi nunca<br><input type="radio"/> menos 20min día<br><input type="radio"/> 20 a 40 min día<br><input type="radio"/> 40 a 60 min día<br><input checked="" type="radio"/> 1h o 1h y media día<br><input type="radio"/> más de 1h y media al día                                                                                                     |
| tiempo tareas casa al día              | <input type="radio"/> menos de 1h día<br><input checked="" type="radio"/> 1 a 2h día<br><input type="radio"/> 3 a 4h día<br><input type="radio"/> 5 a 6h día<br><input type="radio"/> 7 a 8h día<br><input type="radio"/> más de 8h día                                                                                                                                   |
| tiempo libre televisión ordenador leer | <input type="radio"/> menos 1h día<br><input checked="" type="radio"/> 1h día<br><input type="radio"/> 2h día<br><input type="radio"/> 3h día<br><input type="radio"/> 4h día<br><input type="radio"/> 5 a 6h día<br><input type="radio"/> mas 6h día                                                                                                                     |
| tiempo libre ejercicio o deporte       | <input type="radio"/> menos 1h semana<br><input type="radio"/> 1h semana<br><input type="radio"/> 2h semana<br><input type="radio"/> 3h semana<br><input type="radio"/> 4 a 5h semana<br><input checked="" type="radio"/> mas 5h semana                                                                                                                                   |
| como se considera                      | <input type="radio"/> sedentaria<br><input type="radio"/> poco activa<br><input type="radio"/> moderadamente activa<br><input type="radio"/> bastante activa<br><input checked="" type="radio"/> muy activa<br><input type="radio"/> no sabe                                                                                                                              |
| FUR                                    | [*DATA REMOVED*]                                                                                                                                                                                                                                                                                                                                                          |
| Semanas gestación 2T                   | _____                                                                                                                                                                                                                                                                                                                                                                     |
| Días gestación 2T                      | _____                                                                                                                                                                                                                                                                                                                                                                     |
| DBP 2T                                 | _____                                                                                                                                                                                                                                                                                                                                                                     |
| CC 2T                                  | _____                                                                                                                                                                                                                                                                                                                                                                     |

|                                                   |                                                                                                                                                                                                 |
|---------------------------------------------------|-------------------------------------------------------------------------------------------------------------------------------------------------------------------------------------------------|
| AC 2T                                             |                                                                                                                                                                                                 |
| LF 2T                                             |                                                                                                                                                                                                 |
| PFE 2T (Hadlock)                                  |                                                                                                                                                                                                 |
| Semanas gestación 3T                              | [*DATA REMOVED*]                                                                                                                                                                                |
| días 3T                                           | [*DATA REMOVED*]                                                                                                                                                                                |
| DBP 3T                                            | [*DATA REMOVED*]                                                                                                                                                                                |
| CC 3T                                             | [*DATA REMOVED*]                                                                                                                                                                                |
| AC 3T                                             | [*DATA REMOVED*]                                                                                                                                                                                |
| LF 3T                                             | [*DATA REMOVED*]                                                                                                                                                                                |
| PFE 3T (Hadlock)                                  | [*DATA REMOVED*]                                                                                                                                                                                |
| Semanas de gestación final                        | [*DATA REMOVED*]                                                                                                                                                                                |
| días gestación final                              | [*DATA REMOVED*]                                                                                                                                                                                |
| Localización placenta                             | <input type="radio"/> anterior<br><input type="radio"/> lateral derecha<br><input type="radio"/> lateral izquierda<br><input type="radio"/> posterior<br><input checked="" type="radio"/> fondo |
| Presentación longitudinal cefálica                | <input type="radio"/> no<br><input checked="" type="radio"/> si                                                                                                                                 |
| Dorso                                             | <input checked="" type="radio"/> izquierda anterior<br><input type="radio"/> izquierda posterior<br><input type="radio"/> derecha anterior<br><input type="radio"/> derecha posterior           |
| diámetro biparietal                               | [*DATA REMOVED*]                                                                                                                                                                                |
| Circunferencia craneal                            | [*DATA REMOVED*]                                                                                                                                                                                |
| Circunferencia abdominal                          | [*DATA REMOVED*]                                                                                                                                                                                |
| Longitud de femur                                 | [*DATA REMOVED*]                                                                                                                                                                                |
| tejido celular subcutáneo a nivel del muslo en mm | [*DATA REMOVED*]                                                                                                                                                                                |
| tejido celular subcutáneo en abdomen en mm        | [*DATA REMOVED*]                                                                                                                                                                                |

|                                               |                                                                                                                                                          |
|-----------------------------------------------|----------------------------------------------------------------------------------------------------------------------------------------------------------|
| Volumen del muslo en cm3                      | [*DATA REMOVED*]                                                                                                                                         |
| Peso fetal estimado según fórmula de Hadlock  | [*DATA REMOVED*]                                                                                                                                         |
| Percentil                                     | [*DATA REMOVED*]                                                                                                                                         |
| Peso fetal estimado según fórmula de Scioscia | _____                                                                                                                                                    |
| Peso fetal estimado según fórmula de LEE      | _____                                                                                                                                                    |
| Tipo de parto                                 | <input checked="" type="radio"/> eutocico<br><input type="radio"/> instrumentado/ventosa<br><input type="radio"/> cesarea                                |
| fecha de nacimiento                           | [*DATA REMOVED*]                                                                                                                                         |
| Días entre exploración y nacimiento           | [*DATA REMOVED*]                                                                                                                                         |
| Peso RN en g                                  | [*DATA REMOVED*]                                                                                                                                         |
| sexo                                          | <input checked="" type="radio"/> mujer<br><input type="radio"/> hombre                                                                                   |
| Apgar 1 minuto                                | [*DATA REMOVED*]                                                                                                                                         |
| Apgar 5 minutos                               | [*DATA REMOVED*]                                                                                                                                         |
| Apgar 10 minutos                              | _____                                                                                                                                                    |
| antecedente Covid durante gestación           | <input type="radio"/> Yes<br><input checked="" type="radio"/> No                                                                                         |
| Nivel de estudios                             | <input type="radio"/> ninguno<br><input type="radio"/> primarios<br><input checked="" type="radio"/> secundarios<br><input type="radio"/> universitarios |

# Base\_datos\_estimacion\_peso\_fetal

|                                       |                                                                                                                                                                                                                                                                                      |
|---------------------------------------|--------------------------------------------------------------------------------------------------------------------------------------------------------------------------------------------------------------------------------------------------------------------------------------|
| Número de identificación participante | 191                                                                                                                                                                                                                                                                                  |
| CODIGO PARTICIPANTE                   |                                                                                                                                                                                                                                                                                      |
| Edad                                  | [*DATA REMOVED*]                                                                                                                                                                                                                                                                     |
| Gestaciones                           | <input type="radio"/> 1<br><input checked="" type="radio"/> 2<br><input type="radio"/> 3<br><input type="radio"/> mas de 3                                                                                                                                                           |
| partos                                | <input type="radio"/> 0<br><input checked="" type="radio"/> 1<br><input type="radio"/> 2<br><input type="radio"/> 3<br><input type="radio"/> mas de 3                                                                                                                                |
| cesáreas                              | <input checked="" type="radio"/> 0<br><input type="radio"/> 1<br><input type="radio"/> 2<br><input type="radio"/> 3<br><input type="radio"/> mas de 3                                                                                                                                |
| Abortos                               | <input checked="" type="radio"/> 0<br><input type="radio"/> 1<br><input type="radio"/> 2<br><input type="radio"/> 3<br><input type="radio"/> mas de 3                                                                                                                                |
| Tipo de gestacion                     | <input checked="" type="radio"/> espontanea<br><input type="radio"/> IAC inseminación artificial conyuge<br><input type="radio"/> IAD inseminación artificial donante<br><input type="radio"/> FIV Fecundación in Vitro<br><input type="radio"/> Ovodon FIV con donación de ovocitos |
| peso previo a embarazo                | [*DATA REMOVED*]                                                                                                                                                                                                                                                                     |
| Ganancia ponderal embarazo            |                                                                                                                                                                                                                                                                                      |
| Talla madre                           | [*DATA REMOVED*]                                                                                                                                                                                                                                                                     |
| IMC previo embarazo                   | 23.111111111111111                                                                                                                                                                                                                                                                   |
| Patología obstétrica                  | <input checked="" type="radio"/> no<br><input type="radio"/> si                                                                                                                                                                                                                      |
| Diabetes pregestacional               | <input checked="" type="radio"/> no<br><input type="radio"/> si                                                                                                                                                                                                                      |
| Diabetes gestacional                  | <input checked="" type="radio"/> no<br><input type="radio"/> si                                                                                                                                                                                                                      |

|                                            |                                                                                                                                                                                      |
|--------------------------------------------|--------------------------------------------------------------------------------------------------------------------------------------------------------------------------------------|
| Diabetes gestacional con insulina          | <input checked="" type="radio"/> no<br><input type="radio"/> si                                                                                                                      |
| Diabetes gestacional con dieta y ejercicio | <input checked="" type="radio"/> no<br><input type="radio"/> si                                                                                                                      |
| Percentil fetos previos                    | <input type="radio"/> Nada<br><input type="radio"/> percentil menor de 10<br><input checked="" type="radio"/> percentil entre 10 y 90<br><input type="radio"/> percentil mayor de 90 |
| Exfumadora                                 | <input checked="" type="radio"/> Nada<br><input type="radio"/> menos de 5 años<br><input type="radio"/> 5 a 10 años<br><input type="radio"/> mayor o igual a 10 años                 |
| Hábito tabáquico                           | <input checked="" type="radio"/> no<br><input type="radio"/> si                                                                                                                      |
| fumadora                                   | [*DATA REMOVED*]                                                                                                                                                                     |
| Consumo otros tóxicos                      | <input checked="" type="radio"/> no<br><input type="radio"/> si                                                                                                                      |
| Hb 1T                                      | [*DATA REMOVED*]                                                                                                                                                                     |
| Htc 1T                                     | [*DATA REMOVED*]                                                                                                                                                                     |
| Hb 2T                                      | [*DATA REMOVED*]                                                                                                                                                                     |
| HTC 2T                                     | [*DATA REMOVED*]                                                                                                                                                                     |
| Hb 3T                                      | [*DATA REMOVED*]                                                                                                                                                                     |
| HTC 3T                                     | [*DATA REMOVED*]                                                                                                                                                                     |
| Suplemento FE oral                         | <input type="radio"/> si<br><input checked="" type="radio"/> no                                                                                                                      |
| Suplemento fe iv                           | <input type="radio"/> si<br><input type="radio"/> no                                                                                                                                 |
| Transfusión                                | <input type="radio"/> no<br><input type="radio"/> si                                                                                                                                 |
| Solicitada Vit D                           | <input type="radio"/> no<br><input type="radio"/> si                                                                                                                                 |
| Deficit vit D                              | <input type="radio"/> no<br><input type="radio"/> si                                                                                                                                 |
| Suplemento vit D                           | <input type="radio"/> si<br><input type="radio"/> no                                                                                                                                 |

---

Dieta, cuestionario

- ☐ si  
☒ no
- 

Leche entera

- ☒ Nunca o menos 1 vez al mes  
☐ 1 a 3 veces mes  
☐ 1 vez semana  
☐ 2 a 4 veces semana  
☐ 5 a 6 veces semana  
☐ 1 vez al día  
☐ 2 a 3 veces al día  
☐ 5 a 6 veces al día  
☐ más 6 veces al día
- 

Leche semidesnatada

- ☒ Nunca o menos 1 vez al mes  
☐ 1 a 3 veces mes  
☐ 1 vez semana  
☐ 2 a 4 veces semana  
☐ 5 a 6 veces semana  
☐ 1 vez al día  
☐ 2 a 3 veces al día  
☐ 5 a 6 veces al día  
☐ mas 6 veces al día
- 

Leche desnatada

- ☐ Nunca o menos 1 vez al mes  
☐ 1 a 3 veces mes  
☐ 1 vez semana  
☐ 2 a 4 veces semana  
☐ 5 a 6 veces semana  
☒ 1 vez al día  
☐ 2 a 3 veces al día  
☐ 5 a 6 veces al día  
☐ más 6 veces al día
- 

Leche condensada

- ☒ Nunca o menos 1 vez al mes  
☐ 1 a 3 veces mes  
☐ 1 vez semana  
☐ 2 a 4 veces semana  
☐ 5 a 6 veces semana  
☐ 1 vez al día  
☐ 2 a 3 veces al día  
☐ 5 a 6 veces al día  
☐ más 6 veces al día
- 

nata o crema de leche

- ☒ Nunca o menos 1 vez al mes  
☐ 1 a 3 veces mes  
☐ 1 vez semana  
☐ 2 a 4 veces semana  
☐ 5 a 6 veces semana  
☐ 1 vez al día  
☐ 2 a 3 veces al día  
☐ 5 a 6 veces al día  
☐ más 6 veces al día

|                                             |                                                                                                                                                                                                                                                                                                                                                                                                              |
|---------------------------------------------|--------------------------------------------------------------------------------------------------------------------------------------------------------------------------------------------------------------------------------------------------------------------------------------------------------------------------------------------------------------------------------------------------------------|
| Yogurt Entero                               | <input checked="" type="radio"/> Nunca o menos 1 vez al mes<br><input type="radio"/> 1 a 3 veces mes<br><input type="radio"/> 1 vez semana<br><input type="radio"/> 2 a 4 veces semana<br><input type="radio"/> 5 a 6 veces semana<br><input type="radio"/> 1 vez al día<br><input type="radio"/> 2 a 3 veces al día<br><input type="radio"/> 5 a 6 veces al día<br><input type="radio"/> más 6 veces al día |
| Yogurt desnatado                            | <input checked="" type="radio"/> Nunca o menos 1 vez al mes<br><input type="radio"/> 1 a 3 veces mes<br><input type="radio"/> 1 vez semana<br><input type="radio"/> 2 a 4 veces semana<br><input type="radio"/> 5 a 6 veces semana<br><input type="radio"/> 1 vez al día<br><input type="radio"/> 2 a 3 veces al día<br><input type="radio"/> 5 a 6 veces al día<br><input type="radio"/> más 6 veces al día |
| 100g requesón o queso blando o queso fresco | <input type="radio"/> Nunca o menos 1 vez al mes<br><input type="radio"/> 1 a 3 veces mes<br><input type="radio"/> 1 vez semana<br><input type="radio"/> 2 a 4 veces semana<br><input type="radio"/> 5 a 6 veces semana<br><input type="radio"/> 1 vez al día<br><input checked="" type="radio"/> 2 a 3 veces al día<br><input type="radio"/> 5 a 6 veces al día<br><input type="radio"/> más 6 veces al día |
| queso curado o semicurado o cremoso         | <input type="radio"/> Nunca o menos 1 vez al mes<br><input type="radio"/> 1 a 3 veces mes<br><input type="radio"/> 1 vez semana<br><input type="radio"/> 2 a 4 veces semana<br><input type="radio"/> 5 a 6 veces semana<br><input checked="" type="radio"/> 1 vez al día<br><input type="radio"/> 2 a 3 veces al día<br><input type="radio"/> 5 a 6 veces al día<br><input type="radio"/> más 6 veces al día |
| natillas flan pudding                       | <input checked="" type="radio"/> Nunca o menos 1 vez al mes<br><input type="radio"/> 1 a 3 veces mes<br><input type="radio"/> 1 vez semana<br><input type="radio"/> 2 a 4 veces semana<br><input type="radio"/> 5 a 6 veces semana<br><input type="radio"/> 1 vez al día<br><input type="radio"/> 2 a 3 veces al día<br><input type="radio"/> 5 a 6 veces al día<br><input type="radio"/> más 6 veces al día |
| Helado                                      | <input checked="" type="radio"/> Nunca o menos 1 vez al mes<br><input type="radio"/> 1 a 3 veces mes<br><input type="radio"/> 1 vez semana<br><input type="radio"/> 2 a 4 veces semana<br><input type="radio"/> 5 a 6 veces semana<br><input type="radio"/> 1 vez al día<br><input type="radio"/> 2 a 3 veces al día<br><input type="radio"/> 5 a 6 veces al día<br><input type="radio"/> más 6 veces al día |

|                                      |                                                                                                                                                                                                                                                                                                                                                                                                              |
|--------------------------------------|--------------------------------------------------------------------------------------------------------------------------------------------------------------------------------------------------------------------------------------------------------------------------------------------------------------------------------------------------------------------------------------------------------------|
| huevo                                | <input type="radio"/> Nunca o menos 1 vez al mes<br><input type="radio"/> 1 a 3 veces mes<br><input type="radio"/> 1 vez semana<br><input checked="" type="radio"/> 2 a 4 veces semana<br><input type="radio"/> 5 a 6 veces semana<br><input type="radio"/> 1 vez al día<br><input type="radio"/> 2 a 3 veces al día<br><input type="radio"/> 5 a 6 veces al día<br><input type="radio"/> más 6 veces al día |
| Pollo con piel                       | <input type="radio"/> Nunca o menos 1 vez al mes<br><input checked="" type="radio"/> 1 a 3 veces mes<br><input type="radio"/> 1 vez semana<br><input type="radio"/> 2 a 4 veces semana<br><input type="radio"/> 5 a 6 veces semana<br><input type="radio"/> 1 vez al día<br><input type="radio"/> 2 a 3 veces al día<br><input type="radio"/> 5 a 6 veces al día<br><input type="radio"/> más 6 veces al día |
| pollo sin piel                       | <input type="radio"/> Nunca o menos 1 vez al mes<br><input checked="" type="radio"/> 1 a 3 veces mes<br><input type="radio"/> 1 vez semana<br><input type="radio"/> 2 a 4 veces semana<br><input type="radio"/> 5 a 6 veces semana<br><input type="radio"/> 1 vez al día<br><input type="radio"/> 2 a 3 veces al día<br><input type="radio"/> 5 a 6 veces al día<br><input type="radio"/> más 6 veces al día |
| Ternera o cerdo o cordero            | <input type="radio"/> Nunca o menos 1 vez al mes<br><input type="radio"/> 1 a 3 veces mes<br><input type="radio"/> 1 vez semana<br><input checked="" type="radio"/> 2 a 4 veces semana<br><input type="radio"/> 5 a 6 veces semana<br><input type="radio"/> 1 vez al día<br><input type="radio"/> 2 a 3 veces al día<br><input type="radio"/> 5 a 6 veces al día<br><input type="radio"/> más 6 veces al día |
| carne caza: Conejo o codorniz o pato | <input checked="" type="radio"/> Nunca o menos 1 vez al mes<br><input type="radio"/> 1 a 3 veces mes<br><input type="radio"/> 1 vez semana<br><input type="radio"/> 2 a 4 veces semana<br><input type="radio"/> 5 a 6 veces semana<br><input type="radio"/> 1 vez al día<br><input type="radio"/> 2 a 3 veces al día<br><input type="radio"/> 5 a 6 veces al día<br><input type="radio"/> más 6 veces al día |
| Hígado de ternera o cerdo o pollo    | <input checked="" type="radio"/> Nunca o menos 1 vez al mes<br><input type="radio"/> 1 a 3 veces mes<br><input type="radio"/> 1 vez semana<br><input type="radio"/> 2 a 4 veces semana<br><input type="radio"/> 5 a 6 veces semana<br><input type="radio"/> 1 vez al día<br><input type="radio"/> 2 a 3 veces al día<br><input type="radio"/> 5 a 6 veces al día<br><input type="radio"/> más 6 veces al día |



---

Vísceras

- ☒ Nunca o menos 1 vez al mes  
☐ 1 a 3 veces mes  
☐ 1 vez semana  
☐ 2 a 4 veces semana  
☐ 5 a 6 veces semana  
☐ 1 vez al día  
☐ 2 a 3 veces al día  
☐ 5 a 6 veces al día  
☐ más 6 veces al día

---

Embutido

- ☐ Nunca o menos 1 vez al mes  
☐ 1 a 3 veces mes  
☐ 1 vez semana  
☐ 2 a 4 veces semana  
☐ 5 a 6 veces semana  
☒ 1 vez al día  
☐ 2 a 3 veces al día  
☐ 5 a 6 veces al día  
☐ más 6 veces al día

---

Salchicha o similar

- ☐ Nunca o menos 1 vez al mes  
☐ 1 a 3 veces mes  
☐ 1 vez semana  
☐ 2 a 4 veces semana  
☐ 5 a 6 veces semana  
☒ 1 vez al día  
☐ 2 a 3 veces al día  
☐ 5 a 6 veces al día  
☐ más 6 veces al día

---

Pate o foiegras

- ☐ Nunca o menos 1 vez al mes  
☒ 1 a 3 veces mes  
☐ 1 vez semana  
☐ 2 a 4 veces semana  
☐ 5 a 6 veces semana  
☐ 1 vez al día  
☐ 2 a 3 veces al día  
☐ 5 a 6 veces al día  
☐ más 6 veces al día

---

Hamburguesa

- ☐ Nunca o menos 1 vez al mes  
☐ 1 a 3 veces mes  
☐ 1 vez semana  
☒ 2 a 4 veces semana  
☐ 5 a 6 veces semana  
☐ 1 vez al día  
☐ 2 a 3 veces al día  
☐ 5 a 6 veces al día  
☐ más 6 veces al día

---

tocino o bacon

- ☐ Nunca o menos 1 vez al mes  
☐ 1 a 3 veces mes  
☒ 1 vez semana  
☐ 2 a 4 veces semana  
☐ 5 a 6 veces semana  
☐ 1 vez al día  
☐ 2 a 3 veces al día  
☐ 5 a 6 veces al día  
☐ más 6 veces al día

---

|               |                                                                                                                                                                                                                                                                                                                                                                                                              |
|---------------|--------------------------------------------------------------------------------------------------------------------------------------------------------------------------------------------------------------------------------------------------------------------------------------------------------------------------------------------------------------------------------------------------------------|
| Pescado frito | <input checked="" type="radio"/> Nunca o menos 1 vez al mes<br><input type="radio"/> 1 a 3 veces mes<br><input type="radio"/> 1 vez semana<br><input type="radio"/> 2 a 4 veces semana<br><input type="radio"/> 5 a 6 veces semana<br><input type="radio"/> 1 vez al día<br><input type="radio"/> 2 a 3 veces al día<br><input type="radio"/> 5 a 6 veces al día<br><input type="radio"/> más 6 veces al día |
|---------------|--------------------------------------------------------------------------------------------------------------------------------------------------------------------------------------------------------------------------------------------------------------------------------------------------------------------------------------------------------------------------------------------------------------|

---

|                        |                                                                                                                                                                                                                                                                                                                                                                                                              |
|------------------------|--------------------------------------------------------------------------------------------------------------------------------------------------------------------------------------------------------------------------------------------------------------------------------------------------------------------------------------------------------------------------------------------------------------|
| pescado hervido blanco | <input type="radio"/> Nunca o menos 1 vez al mes<br><input type="radio"/> 1 a 3 veces mes<br><input checked="" type="radio"/> 1 vez semana<br><input type="radio"/> 2 a 4 veces semana<br><input type="radio"/> 5 a 6 veces semana<br><input type="radio"/> 1 vez al día<br><input type="radio"/> 2 a 3 veces al día<br><input type="radio"/> 5 a 6 veces al día<br><input type="radio"/> más 6 veces al día |
|------------------------|--------------------------------------------------------------------------------------------------------------------------------------------------------------------------------------------------------------------------------------------------------------------------------------------------------------------------------------------------------------------------------------------------------------|

---

|                      |                                                                                                                                                                                                                                                                                                                                                                                                              |
|----------------------|--------------------------------------------------------------------------------------------------------------------------------------------------------------------------------------------------------------------------------------------------------------------------------------------------------------------------------------------------------------------------------------------------------------|
| pescado hervido azul | <input type="radio"/> Nunca o menos 1 vez al mes<br><input checked="" type="radio"/> 1 a 3 veces mes<br><input type="radio"/> 1 vez semana<br><input type="radio"/> 2 a 4 veces semana<br><input type="radio"/> 5 a 6 veces semana<br><input type="radio"/> 1 vez al día<br><input type="radio"/> 2 a 3 veces al día<br><input type="radio"/> 5 a 6 veces al día<br><input type="radio"/> más 6 veces al día |
|----------------------|--------------------------------------------------------------------------------------------------------------------------------------------------------------------------------------------------------------------------------------------------------------------------------------------------------------------------------------------------------------------------------------------------------------|

---

|                    |                                                                                                                                                                                                                                                                                                                                                                                                              |
|--------------------|--------------------------------------------------------------------------------------------------------------------------------------------------------------------------------------------------------------------------------------------------------------------------------------------------------------------------------------------------------------------------------------------------------------|
| otros pescado azul | <input checked="" type="radio"/> Nunca o menos 1 vez al mes<br><input type="radio"/> 1 a 3 veces mes<br><input type="radio"/> 1 vez semana<br><input type="radio"/> 2 a 4 veces semana<br><input type="radio"/> 5 a 6 veces semana<br><input type="radio"/> 1 vez al día<br><input type="radio"/> 2 a 3 veces al día<br><input type="radio"/> 5 a 6 veces al día<br><input type="radio"/> más 6 veces al día |
|--------------------|--------------------------------------------------------------------------------------------------------------------------------------------------------------------------------------------------------------------------------------------------------------------------------------------------------------------------------------------------------------------------------------------------------------|

---

|               |                                                                                                                                                                                                                                                                                                                                                                                                              |
|---------------|--------------------------------------------------------------------------------------------------------------------------------------------------------------------------------------------------------------------------------------------------------------------------------------------------------------------------------------------------------------------------------------------------------------|
| atun conserva | <input type="radio"/> Nunca o menos 1 vez al mes<br><input checked="" type="radio"/> 1 a 3 veces mes<br><input type="radio"/> 1 vez semana<br><input type="radio"/> 2 a 4 veces semana<br><input type="radio"/> 5 a 6 veces semana<br><input type="radio"/> 1 vez al día<br><input type="radio"/> 2 a 3 veces al día<br><input type="radio"/> 5 a 6 veces al día<br><input type="radio"/> más 6 veces al día |
|---------------|--------------------------------------------------------------------------------------------------------------------------------------------------------------------------------------------------------------------------------------------------------------------------------------------------------------------------------------------------------------------------------------------------------------|

---

|                  |                                                                                                                                                                                                                                                                                                                                                                                                              |
|------------------|--------------------------------------------------------------------------------------------------------------------------------------------------------------------------------------------------------------------------------------------------------------------------------------------------------------------------------------------------------------------------------------------------------------|
| sardina conserva | <input checked="" type="radio"/> Nunca o menos 1 vez al mes<br><input type="radio"/> 1 a 3 veces mes<br><input type="radio"/> 1 vez semana<br><input type="radio"/> 2 a 4 veces semana<br><input type="radio"/> 5 a 6 veces semana<br><input type="radio"/> 1 vez al día<br><input type="radio"/> 2 a 3 veces al día<br><input type="radio"/> 5 a 6 veces al día<br><input type="radio"/> más 6 veces al día |
|------------------|--------------------------------------------------------------------------------------------------------------------------------------------------------------------------------------------------------------------------------------------------------------------------------------------------------------------------------------------------------------------------------------------------------------|

---

|                                         |                                                                                                                                                                                                                                                                                                                                                                                                              |
|-----------------------------------------|--------------------------------------------------------------------------------------------------------------------------------------------------------------------------------------------------------------------------------------------------------------------------------------------------------------------------------------------------------------------------------------------------------------|
| pescado ahumado                         | <input checked="" type="radio"/> Nunca o menos 1 vez al mes<br><input type="radio"/> 1 a 3 veces mes<br><input type="radio"/> 1 vez semana<br><input type="radio"/> 2 a 4 veces semana<br><input type="radio"/> 5 a 6 veces semana<br><input type="radio"/> 1 vez al día<br><input type="radio"/> 2 a 3 veces al día<br><input type="radio"/> 5 a 6 veces al día<br><input type="radio"/> más 6 veces al día |
| almejas o mejillones o ostras unos 100g | <input type="radio"/> Nunca o menos 1 vez al mes<br><input type="radio"/> 1 a 3 veces mes<br><input checked="" type="radio"/> 1 vez semana<br><input type="radio"/> 2 a 4 veces semana<br><input type="radio"/> 5 a 6 veces semana<br><input type="radio"/> 1 vez al día<br><input type="radio"/> 2 a 3 veces al día<br><input type="radio"/> 5 a 6 veces al día<br><input type="radio"/> más 6 veces al día |
| calamar o chipiron o sepia unos 100g    | <input type="radio"/> Nunca o menos 1 vez al mes<br><input type="radio"/> 1 a 3 veces mes<br><input type="radio"/> 1 vez semana<br><input checked="" type="radio"/> 2 a 4 veces semana<br><input type="radio"/> 5 a 6 veces semana<br><input type="radio"/> 1 vez al día<br><input type="radio"/> 2 a 3 veces al día<br><input type="radio"/> 5 a 6 veces al día<br><input type="radio"/> más 6 veces al día |
| marisco unos 100g                       | <input type="radio"/> Nunca o menos 1 vez al mes<br><input type="radio"/> 1 a 3 veces mes<br><input type="radio"/> 1 vez semana<br><input checked="" type="radio"/> 2 a 4 veces semana<br><input type="radio"/> 5 a 6 veces semana<br><input type="radio"/> 1 vez al día<br><input type="radio"/> 2 a 3 veces al día<br><input type="radio"/> 5 a 6 veces al día<br><input type="radio"/> más 6 veces al día |
| Espinacas o acelgas cocinadas           | <input checked="" type="radio"/> Nunca o menos 1 vez al mes<br><input type="radio"/> 1 a 3 veces mes<br><input type="radio"/> 1 vez semana<br><input type="radio"/> 2 a 4 veces semana<br><input type="radio"/> 5 a 6 veces semana<br><input type="radio"/> 1 vez al día<br><input type="radio"/> 2 a 3 veces al día<br><input type="radio"/> 5 a 6 veces al día<br><input type="radio"/> más 6 veces al día |
| Col o coliflor o brocoli cocinado       | <input type="radio"/> Nunca o menos 1 vez al mes<br><input type="radio"/> 1 a 3 veces mes<br><input checked="" type="radio"/> 1 vez semana<br><input type="radio"/> 2 a 4 veces semana<br><input type="radio"/> 5 a 6 veces semana<br><input type="radio"/> 1 vez al día<br><input type="radio"/> 2 a 3 veces al día<br><input type="radio"/> 5 a 6 veces al día<br><input type="radio"/> más 6 veces al día |

---

Lechuga o endivia o escarola

- ☒ Nunca o menos 1 vez al mes  
☐ 1 a 3 veces mes  
☐ 1 vez semana  
☐ 2 a 4 veces semana  
☐ 5 a 6 veces semana  
☐ 1 vez al día  
☐ 2 a 3 veces al día  
☐ 5 a 6 veces al día  
☐ más 6 veces al día

---

tomate ensalada

- ☐ Nunca o menos 1 vez al mes  
☒ 1 a 3 veces mes  
☐ 1 vez semana  
☐ 2 a 4 veces semana  
☐ 5 a 6 veces semana  
☐ 1 vez al día  
☐ 2 a 3 veces al día  
☐ 5 a 6 veces al día  
☐ más 6 veces al día

---

cebolla

- ☒ Nunca o menos 1 vez al mes  
☐ 1 a 3 veces mes  
☐ 1 vez semana  
☐ 2 a 4 veces semana  
☐ 5 a 6 veces semana  
☐ 1 vez al día  
☐ 2 a 3 veces al día  
☐ 5 a 6 veces al día  
☐ más 6 veces al día

---

Zanahoria o calabaza

- ☐ Nunca o menos 1 vez al mes  
☐ 1 a 3 veces mes  
☐ 1 vez semana  
☒ 2 a 4 veces semana  
☐ 5 a 6 veces semana  
☐ 1 vez al día  
☐ 2 a 3 veces al día  
☐ 5 a 6 veces al día  
☐ más 6 veces al día

---

Judías verdes

- ☐ Nunca o menos 1 vez al mes  
☐ 1 a 3 veces mes  
☐ 1 vez semana  
☒ 2 a 4 veces semana  
☐ 5 a 6 veces semana  
☐ 1 vez al día  
☐ 2 a 3 veces al día  
☐ 5 a 6 veces al día  
☐ más 6 veces al día

---

Berenjena o calabacin o pepino

- ☐ Nunca o menos 1 vez al mes  
☒ 1 a 3 veces mes  
☐ 1 vez semana  
☐ 2 a 4 veces semana  
☐ 5 a 6 veces semana  
☐ 1 vez al día  
☐ 2 a 3 veces al día  
☐ 5 a 6 veces al día  
☐ más 6 veces al día

---

|          |                                                                                                                                                                                                                                                                                                                                                                                                              |
|----------|--------------------------------------------------------------------------------------------------------------------------------------------------------------------------------------------------------------------------------------------------------------------------------------------------------------------------------------------------------------------------------------------------------------|
| pimiento | <input checked="" type="radio"/> Nunca o menos 1 vez al mes<br><input type="radio"/> 1 a 3 veces mes<br><input type="radio"/> 1 vez semana<br><input type="radio"/> 2 a 4 veces semana<br><input type="radio"/> 5 a 6 veces semana<br><input type="radio"/> 1 vez al día<br><input type="radio"/> 2 a 3 veces al día<br><input type="radio"/> 5 a 6 veces al día<br><input type="radio"/> más 6 veces al día |
|----------|--------------------------------------------------------------------------------------------------------------------------------------------------------------------------------------------------------------------------------------------------------------------------------------------------------------------------------------------------------------------------------------------------------------|

---

|           |                                                                                                                                                                                                                                                                                                                                                                                                              |
|-----------|--------------------------------------------------------------------------------------------------------------------------------------------------------------------------------------------------------------------------------------------------------------------------------------------------------------------------------------------------------------------------------------------------------------|
| alcachofa | <input checked="" type="radio"/> Nunca o menos 1 vez al mes<br><input type="radio"/> 1 a 3 veces mes<br><input type="radio"/> 1 vez semana<br><input type="radio"/> 2 a 4 veces semana<br><input type="radio"/> 5 a 6 veces semana<br><input type="radio"/> 1 vez al día<br><input type="radio"/> 2 a 3 veces al día<br><input type="radio"/> 5 a 6 veces al día<br><input type="radio"/> más 6 veces al día |
|-----------|--------------------------------------------------------------------------------------------------------------------------------------------------------------------------------------------------------------------------------------------------------------------------------------------------------------------------------------------------------------------------------------------------------------|

---

|            |                                                                                                                                                                                                                                                                                                                                                                                                              |
|------------|--------------------------------------------------------------------------------------------------------------------------------------------------------------------------------------------------------------------------------------------------------------------------------------------------------------------------------------------------------------------------------------------------------------|
| espárragos | <input checked="" type="radio"/> Nunca o menos 1 vez al mes<br><input type="radio"/> 1 a 3 veces mes<br><input type="radio"/> 1 vez semana<br><input type="radio"/> 2 a 4 veces semana<br><input type="radio"/> 5 a 6 veces semana<br><input type="radio"/> 1 vez al día<br><input type="radio"/> 2 a 3 veces al día<br><input type="radio"/> 5 a 6 veces al día<br><input type="radio"/> más 6 veces al día |
|------------|--------------------------------------------------------------------------------------------------------------------------------------------------------------------------------------------------------------------------------------------------------------------------------------------------------------------------------------------------------------------------------------------------------------|

---

|              |                                                                                                                                                                                                                                                                                                                                                                                                              |
|--------------|--------------------------------------------------------------------------------------------------------------------------------------------------------------------------------------------------------------------------------------------------------------------------------------------------------------------------------------------------------------------------------------------------------------|
| maíz hervido | <input type="radio"/> Nunca o menos 1 vez al mes<br><input type="radio"/> 1 a 3 veces mes<br><input checked="" type="radio"/> 1 vez semana<br><input type="radio"/> 2 a 4 veces semana<br><input type="radio"/> 5 a 6 veces semana<br><input type="radio"/> 1 vez al día<br><input type="radio"/> 2 a 3 veces al día<br><input type="radio"/> 5 a 6 veces al día<br><input type="radio"/> más 6 veces al día |
|--------------|--------------------------------------------------------------------------------------------------------------------------------------------------------------------------------------------------------------------------------------------------------------------------------------------------------------------------------------------------------------------------------------------------------------|

---

|           |                                                                                                                                                                                                                                                                                                                                                                                                              |
|-----------|--------------------------------------------------------------------------------------------------------------------------------------------------------------------------------------------------------------------------------------------------------------------------------------------------------------------------------------------------------------------------------------------------------------|
| legumbres | <input type="radio"/> Nunca o menos 1 vez al mes<br><input type="radio"/> 1 a 3 veces mes<br><input checked="" type="radio"/> 1 vez semana<br><input type="radio"/> 2 a 4 veces semana<br><input type="radio"/> 5 a 6 veces semana<br><input type="radio"/> 1 vez al día<br><input type="radio"/> 2 a 3 veces al día<br><input type="radio"/> 5 a 6 veces al día<br><input type="radio"/> más 6 veces al día |
|-----------|--------------------------------------------------------------------------------------------------------------------------------------------------------------------------------------------------------------------------------------------------------------------------------------------------------------------------------------------------------------------------------------------------------------|

---

|                       |                                                                                                                                                                                                                                                                                                                                                                                                              |
|-----------------------|--------------------------------------------------------------------------------------------------------------------------------------------------------------------------------------------------------------------------------------------------------------------------------------------------------------------------------------------------------------------------------------------------------------|
| naranjas o mandarinas | <input type="radio"/> Nunca o menos 1 vez al mes<br><input checked="" type="radio"/> 1 a 3 veces mes<br><input type="radio"/> 1 vez semana<br><input type="radio"/> 2 a 4 veces semana<br><input type="radio"/> 5 a 6 veces semana<br><input type="radio"/> 1 vez al día<br><input type="radio"/> 2 a 3 veces al día<br><input type="radio"/> 5 a 6 veces al día<br><input type="radio"/> más 6 veces al día |
|-----------------------|--------------------------------------------------------------------------------------------------------------------------------------------------------------------------------------------------------------------------------------------------------------------------------------------------------------------------------------------------------------------------------------------------------------|

|                       |                                                                                                                                                                                                                                                                                                                                                                                                              |
|-----------------------|--------------------------------------------------------------------------------------------------------------------------------------------------------------------------------------------------------------------------------------------------------------------------------------------------------------------------------------------------------------------------------------------------------------|
| zum natural fruta     | <input type="radio"/> Nunca o menos 1 vez al mes<br><input type="radio"/> 1 a 3 veces mes<br><input type="radio"/> 1 vez semana<br><input type="radio"/> 2 a 4 veces semana<br><input type="radio"/> 5 a 6 veces semana<br><input checked="" type="radio"/> 1 vez al día<br><input type="radio"/> 2 a 3 veces al día<br><input type="radio"/> 5 a 6 veces al día<br><input type="radio"/> más 6 veces al día |
| platano               | <input type="radio"/> Nunca o menos 1 vez al mes<br><input type="radio"/> 1 a 3 veces mes<br><input checked="" type="radio"/> 1 vez semana<br><input type="radio"/> 2 a 4 veces semana<br><input type="radio"/> 5 a 6 veces semana<br><input type="radio"/> 1 vez al día<br><input type="radio"/> 2 a 3 veces al día<br><input type="radio"/> 5 a 6 veces al día<br><input type="radio"/> más 6 veces al día |
| manzana o pera        | <input type="radio"/> Nunca o menos 1 vez al mes<br><input type="radio"/> 1 a 3 veces mes<br><input checked="" type="radio"/> 1 vez semana<br><input type="radio"/> 2 a 4 veces semana<br><input type="radio"/> 5 a 6 veces semana<br><input type="radio"/> 1 vez al día<br><input type="radio"/> 2 a 3 veces al día<br><input type="radio"/> 5 a 6 veces al día<br><input type="radio"/> más 6 veces al día |
| melocotón o nectarina | <input checked="" type="radio"/> Nunca o menos 1 vez al mes<br><input type="radio"/> 1 a 3 veces mes<br><input type="radio"/> 1 vez semana<br><input type="radio"/> 2 a 4 veces semana<br><input type="radio"/> 5 a 6 veces semana<br><input type="radio"/> 1 vez al día<br><input type="radio"/> 2 a 3 veces al día<br><input type="radio"/> 5 a 6 veces al día<br><input type="radio"/> más 6 veces al día |
| sandia o melon        | <input type="radio"/> Nunca o menos 1 vez al mes<br><input checked="" type="radio"/> 1 a 3 veces mes<br><input type="radio"/> 1 vez semana<br><input type="radio"/> 2 a 4 veces semana<br><input type="radio"/> 5 a 6 veces semana<br><input type="radio"/> 1 vez al día<br><input type="radio"/> 2 a 3 veces al día<br><input type="radio"/> 5 a 6 veces al día<br><input type="radio"/> más 6 veces al día |
| uva                   | <input checked="" type="radio"/> Nunca o menos 1 vez al mes<br><input type="radio"/> 1 a 3 veces mes<br><input type="radio"/> 1 vez semana<br><input type="radio"/> 2 a 4 veces semana<br><input type="radio"/> 5 a 6 veces semana<br><input type="radio"/> 1 vez al día<br><input type="radio"/> 2 a 3 veces al día<br><input type="radio"/> 5 a 6 veces al día<br><input type="radio"/> más 6 veces al día |

|                 |                                                                                                                                                                                                                                                                                                                                                                                                              |
|-----------------|--------------------------------------------------------------------------------------------------------------------------------------------------------------------------------------------------------------------------------------------------------------------------------------------------------------------------------------------------------------------------------------------------------------|
| bruna o ciruela | <input checked="" type="radio"/> Nunca o menos 1 vez al mes<br><input type="radio"/> 1 a 3 veces mes<br><input type="radio"/> 1 vez semana<br><input type="radio"/> 2 a 4 veces semana<br><input type="radio"/> 5 a 6 veces semana<br><input type="radio"/> 1 vez al día<br><input type="radio"/> 2 a 3 veces al día<br><input type="radio"/> 5 a 6 veces al día<br><input type="radio"/> más 6 veces al día |
| kiwi            | <input type="radio"/> Nunca o menos 1 vez al mes<br><input type="radio"/> 1 a 3 veces mes<br><input type="radio"/> 1 vez semana<br><input checked="" type="radio"/> 2 a 4 veces semana<br><input type="radio"/> 5 a 6 veces semana<br><input type="radio"/> 1 vez al día<br><input type="radio"/> 2 a 3 veces al día<br><input type="radio"/> 5 a 6 veces al día<br><input type="radio"/> más 6 veces al día |
| aceituna        | <input type="radio"/> Nunca o menos 1 vez al mes<br><input type="radio"/> 1 a 3 veces mes<br><input checked="" type="radio"/> 1 vez semana<br><input type="radio"/> 2 a 4 veces semana<br><input type="radio"/> 5 a 6 veces semana<br><input type="radio"/> 1 vez al día<br><input type="radio"/> 2 a 3 veces al día<br><input type="radio"/> 5 a 6 veces al día<br><input type="radio"/> más 6 veces al día |
| frutos secos    | <input type="radio"/> Nunca o menos 1 vez al mes<br><input type="radio"/> 1 a 3 veces mes<br><input type="radio"/> 1 vez semana<br><input checked="" type="radio"/> 2 a 4 veces semana<br><input type="radio"/> 5 a 6 veces semana<br><input type="radio"/> 1 vez al día<br><input type="radio"/> 2 a 3 veces al día<br><input type="radio"/> 5 a 6 veces al día<br><input type="radio"/> más 6 veces al día |
| pan blanco      | <input type="radio"/> Nunca o menos 1 vez al mes<br><input type="radio"/> 1 a 3 veces mes<br><input type="radio"/> 1 vez semana<br><input type="radio"/> 2 a 4 veces semana<br><input type="radio"/> 5 a 6 veces semana<br><input type="radio"/> 1 vez al día<br><input type="radio"/> 2 a 3 veces al día<br><input checked="" type="radio"/> 5 a 6 veces al día<br><input type="radio"/> más 6 veces al día |
| pan integral    | <input checked="" type="radio"/> Nunca o menos 1 vez al mes<br><input type="radio"/> 1 a 3 veces mes<br><input type="radio"/> 1 vez semana<br><input type="radio"/> 2 a 4 veces semana<br><input type="radio"/> 5 a 6 veces semana<br><input type="radio"/> 1 vez al día<br><input type="radio"/> 2 a 3 veces al día<br><input type="radio"/> 5 a 6 veces al día<br><input type="radio"/> más 6 veces al día |

---

cereales desayuno

- ☒ Nunca o menos 1 vez al mes  
☐ 1 a 3 veces mes  
☐ 1 vez semana  
☐ 2 a 4 veces semana  
☐ 5 a 6 veces semana  
☐ 1 vez al día  
☐ 2 a 3 veces al día  
☐ 5 a 6 veces al día  
☐ más 6 veces al día

---

patatas fritas

- ☒ Nunca o menos 1 vez al mes  
☐ 1 a 3 veces mes  
☐ 1 vez semana  
☐ 2 a 4 veces semana  
☐ 5 a 6 veces semana  
☐ 1 vez al día  
☐ 2 a 3 veces al día  
☐ 5 a 6 veces al día  
☐ más 6 veces al día

---

patatas cocidas o asadas

- ☐ Nunca o menos 1 vez al mes  
☐ 1 a 3 veces mes  
☒ 1 vez semana  
☐ 2 a 4 veces semana  
☐ 5 a 6 veces semana  
☐ 1 vez al día  
☐ 2 a 3 veces al día  
☐ 5 a 6 veces al día  
☐ más 6 veces al día

---

bolsa papas

- ☐ Nunca o menos 1 vez al mes  
☐ 1 a 3 veces mes  
☐ 1 vez semana  
☒ 2 a 4 veces semana  
☐ 5 a 6 veces semana  
☐ 1 vez al día  
☐ 2 a 3 veces al día  
☐ 5 a 6 veces al día  
☐ más 6 veces al día

---

arroz cocinado

- ☐ Nunca o menos 1 vez al mes  
☐ 1 a 3 veces mes  
☒ 1 vez semana  
☐ 2 a 4 veces semana  
☐ 5 a 6 veces semana  
☐ 1 vez al día  
☐ 2 a 3 veces al día  
☐ 5 a 6 veces al día  
☐ más 6 veces al día

---

pasta

- ☐ Nunca o menos 1 vez al mes  
☐ 1 a 3 veces mes  
☐ 1 vez semana  
☐ 2 a 4 veces semana  
☐ 5 a 6 veces semana  
☐ 1 vez al día  
☐ 2 a 3 veces al día  
☒ 5 a 6 veces al día  
☐ más 6 veces al día



|                     |                                                                                                                                                                                                                                                                                                                                                                                                              |
|---------------------|--------------------------------------------------------------------------------------------------------------------------------------------------------------------------------------------------------------------------------------------------------------------------------------------------------------------------------------------------------------------------------------------------------------|
| pizza               | <input checked="" type="radio"/> Nunca o menos 1 vez al mes<br><input type="radio"/> 1 a 3 veces mes<br><input type="radio"/> 1 vez semana<br><input type="radio"/> 2 a 4 veces semana<br><input type="radio"/> 5 a 6 veces semana<br><input type="radio"/> 1 vez al día<br><input type="radio"/> 2 a 3 veces al día<br><input type="radio"/> 5 a 6 veces al día<br><input type="radio"/> más 6 veces al día |
| aceite oliva        | <input type="radio"/> Nunca o menos 1 vez al mes<br><input checked="" type="radio"/> 1 a 3 veces mes<br><input type="radio"/> 1 vez semana<br><input type="radio"/> 2 a 4 veces semana<br><input type="radio"/> 5 a 6 veces semana<br><input type="radio"/> 1 vez al día<br><input type="radio"/> 2 a 3 veces al día<br><input type="radio"/> 5 a 6 veces al día<br><input type="radio"/> más 6 veces al día |
| otros aceites       | <input checked="" type="radio"/> Nunca o menos 1 vez al mes<br><input type="radio"/> 1 a 3 veces mes<br><input type="radio"/> 1 vez semana<br><input type="radio"/> 2 a 4 veces semana<br><input type="radio"/> 5 a 6 veces semana<br><input type="radio"/> 1 vez al día<br><input type="radio"/> 2 a 3 veces al día<br><input type="radio"/> 5 a 6 veces al día<br><input type="radio"/> más 6 veces al día |
| margarina           | <input checked="" type="radio"/> Nunca o menos 1 vez al mes<br><input type="radio"/> 1 a 3 veces mes<br><input type="radio"/> 1 vez semana<br><input type="radio"/> 2 a 4 veces semana<br><input type="radio"/> 5 a 6 veces semana<br><input type="radio"/> 1 vez al día<br><input type="radio"/> 2 a 3 veces al día<br><input type="radio"/> 5 a 6 veces al día<br><input type="radio"/> más 6 veces al día |
| mantequilla         | <input checked="" type="radio"/> Nunca o menos 1 vez al mes<br><input type="radio"/> 1 a 3 veces mes<br><input type="radio"/> 1 vez semana<br><input type="radio"/> 2 a 4 veces semana<br><input type="radio"/> 5 a 6 veces semana<br><input type="radio"/> 1 vez al día<br><input type="radio"/> 2 a 3 veces al día<br><input type="radio"/> 5 a 6 veces al día<br><input type="radio"/> más 6 veces al día |
| galletas tipo maria | <input type="radio"/> Nunca o menos 1 vez al mes<br><input type="radio"/> 1 a 3 veces mes<br><input type="radio"/> 1 vez semana<br><input checked="" type="radio"/> 2 a 4 veces semana<br><input type="radio"/> 5 a 6 veces semana<br><input type="radio"/> 1 vez al día<br><input type="radio"/> 2 a 3 veces al día<br><input type="radio"/> 5 a 6 veces al día<br><input type="radio"/> más 6 veces al día |

|                           |                                                                                                                                                                                                                                                                                                                                                                                                              |
|---------------------------|--------------------------------------------------------------------------------------------------------------------------------------------------------------------------------------------------------------------------------------------------------------------------------------------------------------------------------------------------------------------------------------------------------------|
| galletas chocolate        | <input type="radio"/> Nunca o menos 1 vez al mes<br><input checked="" type="radio"/> 1 a 3 veces mes<br><input type="radio"/> 1 vez semana<br><input type="radio"/> 2 a 4 veces semana<br><input type="radio"/> 5 a 6 veces semana<br><input type="radio"/> 1 vez al día<br><input type="radio"/> 2 a 3 veces al día<br><input type="radio"/> 5 a 6 veces al día<br><input type="radio"/> más 6 veces al día |
| bollieria                 | <input type="radio"/> Nunca o menos 1 vez al mes<br><input type="radio"/> 1 a 3 veces mes<br><input type="radio"/> 1 vez semana<br><input checked="" type="radio"/> 2 a 4 veces semana<br><input type="radio"/> 5 a 6 veces semana<br><input type="radio"/> 1 vez al día<br><input type="radio"/> 2 a 3 veces al día<br><input type="radio"/> 5 a 6 veces al día<br><input type="radio"/> más 6 veces al día |
| chocolate o bombones      | <input type="radio"/> Nunca o menos 1 vez al mes<br><input checked="" type="radio"/> 1 a 3 veces mes<br><input type="radio"/> 1 vez semana<br><input type="radio"/> 2 a 4 veces semana<br><input type="radio"/> 5 a 6 veces semana<br><input type="radio"/> 1 vez al día<br><input type="radio"/> 2 a 3 veces al día<br><input type="radio"/> 5 a 6 veces al día<br><input type="radio"/> más 6 veces al día |
| chocolate polvo o colacao | <input checked="" type="radio"/> Nunca o menos 1 vez al mes<br><input type="radio"/> 1 a 3 veces mes<br><input type="radio"/> 1 vez semana<br><input type="radio"/> 2 a 4 veces semana<br><input type="radio"/> 5 a 6 veces semana<br><input type="radio"/> 1 vez al día<br><input type="radio"/> 2 a 3 veces al día<br><input type="radio"/> 5 a 6 veces al día<br><input type="radio"/> más 6 veces al día |
| vino tinto                | <input checked="" type="radio"/> Nunca o menos 1 vez al mes<br><input type="radio"/> 1 a 3 veces mes<br><input type="radio"/> 1 vez semana<br><input type="radio"/> 2 a 4 veces semana<br><input type="radio"/> 5 a 6 veces semana<br><input type="radio"/> 1 vez al día<br><input type="radio"/> 2 a 3 veces al día<br><input type="radio"/> 5 a 6 veces al día<br><input type="radio"/> más 6 veces al día |
| vino blanco               | <input checked="" type="radio"/> Nunca o menos 1 vez al mes<br><input type="radio"/> 1 a 3 veces mes<br><input type="radio"/> 1 vez semana<br><input type="radio"/> 2 a 4 veces semana<br><input type="radio"/> 5 a 6 veces semana<br><input type="radio"/> 1 vez al día<br><input type="radio"/> 2 a 3 veces al día<br><input type="radio"/> 5 a 6 veces al día<br><input type="radio"/> más 6 veces al día |

---

|                    |                                                                                                                                                                                                                                                                                                                                                                                                              |
|--------------------|--------------------------------------------------------------------------------------------------------------------------------------------------------------------------------------------------------------------------------------------------------------------------------------------------------------------------------------------------------------------------------------------------------------|
| vino seco o vermut | <input checked="" type="radio"/> Nunca o menos 1 vez al mes<br><input type="radio"/> 1 a 3 veces mes<br><input type="radio"/> 1 vez semana<br><input type="radio"/> 2 a 4 veces semana<br><input type="radio"/> 5 a 6 veces semana<br><input type="radio"/> 1 vez al día<br><input type="radio"/> 2 a 3 veces al día<br><input type="radio"/> 5 a 6 veces al día<br><input type="radio"/> más 6 veces al día |
|--------------------|--------------------------------------------------------------------------------------------------------------------------------------------------------------------------------------------------------------------------------------------------------------------------------------------------------------------------------------------------------------------------------------------------------------|

---

|         |                                                                                                                                                                                                                                                                                                                                                                                                              |
|---------|--------------------------------------------------------------------------------------------------------------------------------------------------------------------------------------------------------------------------------------------------------------------------------------------------------------------------------------------------------------------------------------------------------------|
| cerveza | <input checked="" type="radio"/> Nunca o menos 1 vez al mes<br><input type="radio"/> 1 a 3 veces mes<br><input type="radio"/> 1 vez semana<br><input type="radio"/> 2 a 4 veces semana<br><input type="radio"/> 5 a 6 veces semana<br><input type="radio"/> 1 vez al día<br><input type="radio"/> 2 a 3 veces al día<br><input type="radio"/> 5 a 6 veces al día<br><input type="radio"/> más 6 veces al día |
|---------|--------------------------------------------------------------------------------------------------------------------------------------------------------------------------------------------------------------------------------------------------------------------------------------------------------------------------------------------------------------------------------------------------------------|

---

|                     |                                                                                                                                                                                                                                                                                                                                                                                                              |
|---------------------|--------------------------------------------------------------------------------------------------------------------------------------------------------------------------------------------------------------------------------------------------------------------------------------------------------------------------------------------------------------------------------------------------------------|
| cerveza sin alcohol | <input checked="" type="radio"/> Nunca o menos 1 vez al mes<br><input type="radio"/> 1 a 3 veces mes<br><input type="radio"/> 1 vez semana<br><input type="radio"/> 2 a 4 veces semana<br><input type="radio"/> 5 a 6 veces semana<br><input type="radio"/> 1 vez al día<br><input type="radio"/> 2 a 3 veces al día<br><input type="radio"/> 5 a 6 veces al día<br><input type="radio"/> más 6 veces al día |
|---------------------|--------------------------------------------------------------------------------------------------------------------------------------------------------------------------------------------------------------------------------------------------------------------------------------------------------------------------------------------------------------------------------------------------------------|

---

|         |                                                                                                                                                                                                                                                                                                                                                                                                              |
|---------|--------------------------------------------------------------------------------------------------------------------------------------------------------------------------------------------------------------------------------------------------------------------------------------------------------------------------------------------------------------------------------------------------------------|
| licores | <input checked="" type="radio"/> Nunca o menos 1 vez al mes<br><input type="radio"/> 1 a 3 veces mes<br><input type="radio"/> 1 vez semana<br><input type="radio"/> 2 a 4 veces semana<br><input type="radio"/> 5 a 6 veces semana<br><input type="radio"/> 1 vez al día<br><input type="radio"/> 2 a 3 veces al día<br><input type="radio"/> 5 a 6 veces al día<br><input type="radio"/> más 6 veces al día |
|---------|--------------------------------------------------------------------------------------------------------------------------------------------------------------------------------------------------------------------------------------------------------------------------------------------------------------------------------------------------------------------------------------------------------------|

---

|                       |                                                                                                                                                                                                                                                                                                                                                                                                              |
|-----------------------|--------------------------------------------------------------------------------------------------------------------------------------------------------------------------------------------------------------------------------------------------------------------------------------------------------------------------------------------------------------------------------------------------------------|
| ginebra o ron o vodka | <input checked="" type="radio"/> Nunca o menos 1 vez al mes<br><input type="radio"/> 1 a 3 veces mes<br><input type="radio"/> 1 vez semana<br><input type="radio"/> 2 a 4 veces semana<br><input type="radio"/> 5 a 6 veces semana<br><input type="radio"/> 1 vez al día<br><input type="radio"/> 2 a 3 veces al día<br><input type="radio"/> 5 a 6 veces al día<br><input type="radio"/> más 6 veces al día |
|-----------------------|--------------------------------------------------------------------------------------------------------------------------------------------------------------------------------------------------------------------------------------------------------------------------------------------------------------------------------------------------------------------------------------------------------------|

---

|                 |                                                                                                                                                                                                                                                                                                                                                                                                              |
|-----------------|--------------------------------------------------------------------------------------------------------------------------------------------------------------------------------------------------------------------------------------------------------------------------------------------------------------------------------------------------------------------------------------------------------------|
| refresco normal | <input checked="" type="radio"/> Nunca o menos 1 vez al mes<br><input type="radio"/> 1 a 3 veces mes<br><input type="radio"/> 1 vez semana<br><input type="radio"/> 2 a 4 veces semana<br><input type="radio"/> 5 a 6 veces semana<br><input type="radio"/> 1 vez al día<br><input type="radio"/> 2 a 3 veces al día<br><input type="radio"/> 5 a 6 veces al día<br><input type="radio"/> más 6 veces al día |
|-----------------|--------------------------------------------------------------------------------------------------------------------------------------------------------------------------------------------------------------------------------------------------------------------------------------------------------------------------------------------------------------------------------------------------------------|

---

|                          |                                                                                                                                                                                                                                                                                                                                                                                                              |
|--------------------------|--------------------------------------------------------------------------------------------------------------------------------------------------------------------------------------------------------------------------------------------------------------------------------------------------------------------------------------------------------------------------------------------------------------|
| refresco sin azúcar      | <input checked="" type="radio"/> Nunca o menos 1 vez al mes<br><input type="radio"/> 1 a 3 veces mes<br><input type="radio"/> 1 vez semana<br><input type="radio"/> 2 a 4 veces semana<br><input type="radio"/> 5 a 6 veces semana<br><input type="radio"/> 1 vez al día<br><input type="radio"/> 2 a 3 veces al día<br><input type="radio"/> 5 a 6 veces al día<br><input type="radio"/> más 6 veces al día |
| Agua del grifo           | <input checked="" type="radio"/> Nunca o menos 1 vez al mes<br><input type="radio"/> 1 a 3 veces mes<br><input type="radio"/> 1 vez semana<br><input type="radio"/> 2 a 4 veces semana<br><input type="radio"/> 5 a 6 veces semana<br><input type="radio"/> 1 vez al día<br><input type="radio"/> 2 a 3 veces al día<br><input type="radio"/> 5 a 6 veces al día<br><input type="radio"/> más 6 veces al día |
| agua embotellada sin gas | <input type="radio"/> Nunca o menos 1 vez al mes<br><input type="radio"/> 1 a 3 veces mes<br><input type="radio"/> 1 vez semana<br><input type="radio"/> 2 a 4 veces semana<br><input type="radio"/> 5 a 6 veces semana<br><input type="radio"/> 1 vez al día<br><input type="radio"/> 2 a 3 veces al día<br><input type="radio"/> 5 a 6 veces al día<br><input checked="" type="radio"/> más 6 veces al día |
| agua embotellada con gas | <input checked="" type="radio"/> Nunca o menos 1 vez al mes<br><input type="radio"/> 1 a 3 veces mes<br><input type="radio"/> 1 vez semana<br><input type="radio"/> 2 a 4 veces semana<br><input type="radio"/> 5 a 6 veces semana<br><input type="radio"/> 1 vez al día<br><input type="radio"/> 2 a 3 veces al día<br><input type="radio"/> 5 a 6 veces al día<br><input type="radio"/> más 6 veces al día |
| zumو frutas embasado     | <input type="radio"/> Nunca o menos 1 vez al mes<br><input checked="" type="radio"/> 1 a 3 veces mes<br><input type="radio"/> 1 vez semana<br><input type="radio"/> 2 a 4 veces semana<br><input type="radio"/> 5 a 6 veces semana<br><input type="radio"/> 1 vez al día<br><input type="radio"/> 2 a 3 veces al día<br><input type="radio"/> 5 a 6 veces al día<br><input type="radio"/> más 6 veces al día |
| cafe                     | <input type="radio"/> Nunca o menos 1 vez al mes<br><input checked="" type="radio"/> 1 a 3 veces mes<br><input type="radio"/> 1 vez semana<br><input type="radio"/> 2 a 4 veces semana<br><input type="radio"/> 5 a 6 veces semana<br><input type="radio"/> 1 vez al día<br><input type="radio"/> 2 a 3 veces al día<br><input type="radio"/> 5 a 6 veces al día<br><input type="radio"/> más 6 veces al día |

---

cafe descafeinado

- ☒ Nunca o menos 1 vez al mes  
☐ 1 a 3 veces mes  
☐ 1 vez semana  
☐ 2 a 4 veces semana  
☐ 5 a 6 veces semana  
☐ 1 vez al día  
☐ 2 a 3 veces al día  
☐ 5 a 6 veces al día  
☐ más 6 veces al día

---

te o infusión

- ☐ Nunca o menos 1 vez al mes  
☒ 1 a 3 veces mes  
☐ 1 vez semana  
☐ 2 a 4 veces semana  
☐ 5 a 6 veces semana  
☐ 1 vez al día  
☐ 2 a 3 veces al día  
☐ 5 a 6 veces al día  
☐ más 6 veces al día

---

sopa o puré verduras

- ☐ Nunca o menos 1 vez al mes  
☐ 1 a 3 veces mes  
☐ 1 vez semana  
☐ 2 a 4 veces semana  
☐ 5 a 6 veces semana  
☐ 1 vez al día  
☒ 2 a 3 veces al día  
☐ 5 a 6 veces al día  
☐ más 6 veces al día

---

croquetas pollo jamón

- ☐ Nunca o menos 1 vez al mes  
☒ 1 a 3 veces mes  
☐ 1 vez semana  
☐ 2 a 4 veces semana  
☐ 5 a 6 veces semana  
☐ 1 vez al día  
☐ 2 a 3 veces al día  
☐ 5 a 6 veces al día  
☐ más 6 veces al día

---

croquetas pescado

- ☐ Nunca o menos 1 vez al mes  
☒ 1 a 3 veces mes  
☐ 1 vez semana  
☐ 2 a 4 veces semana  
☐ 5 a 6 veces semana  
☐ 1 vez al día  
☐ 2 a 3 veces al día  
☐ 5 a 6 veces al día  
☐ más 6 veces al día

---

mayonesa

- ☐ Nunca o menos 1 vez al mes  
☐ 1 a 3 veces mes  
☐ 1 vez semana  
☐ 2 a 4 veces semana  
☐ 5 a 6 veces semana  
☒ 1 vez al día  
☐ 2 a 3 veces al día  
☐ 5 a 6 veces al día  
☐ más 6 veces al día

---

salsa tomate

- ☒ Nunca o menos 1 vez al mes  
☐ 1 a 3 veces mes  
☐ 1 vez semana  
☐ 2 a 4 veces semana  
☐ 5 a 6 veces semana  
☐ 1 vez al día  
☐ 2 a 3 veces al día  
☐ 5 a 6 veces al día  
☐ más 6 veces al día

---

ketchup

- ☒ Nunca o menos 1 vez al mes  
☐ 1 a 3 veces mes  
☐ 1 vez semana  
☐ 2 a 4 veces semana  
☐ 5 a 6 veces semana  
☐ 1 vez al día  
☐ 2 a 3 veces al día  
☐ 5 a 6 veces al día  
☐ más 6 veces al día

---

sal

- ☐ Nunca o menos 1 vez al mes  
☐ 1 a 3 veces mes  
☐ 1 vez semana  
☐ 2 a 4 veces semana  
☐ 5 a 6 veces semana  
☒ 1 vez al día  
☐ 2 a 3 veces al día  
☐ 5 a 6 veces al día  
☐ más 6 veces al día

---

ajo

- ☒ Nunca o menos 1 vez al mes  
☐ 1 a 3 veces mes  
☐ 1 vez semana  
☐ 2 a 4 veces semana  
☐ 5 a 6 veces semana  
☐ 1 vez al día  
☐ 2 a 3 veces al día  
☐ 5 a 6 veces al día  
☐ más 6 veces al día

---

mermelada o miel

- ☒ Nunca o menos 1 vez al mes  
☐ 1 a 3 veces mes  
☐ 1 vez semana  
☐ 2 a 4 veces semana  
☐ 5 a 6 veces semana  
☐ 1 vez al día  
☐ 2 a 3 veces al día  
☐ 5 a 6 veces al día  
☐ más 6 veces al día

---

azúcar

- ☐ Nunca o menos 1 vez al mes  
☐ 1 a 3 veces mes  
☐ 1 vez semana  
☐ 2 a 4 veces semana  
☐ 5 a 6 veces semana  
☐ 1 vez al día  
☒ 2 a 3 veces al día  
☐ 5 a 6 veces al día  
☐ más 6 veces al día

|                                       |                                                                                                                                                                                                                                                                                                                                                                                                                                                                                                                               |
|---------------------------------------|-------------------------------------------------------------------------------------------------------------------------------------------------------------------------------------------------------------------------------------------------------------------------------------------------------------------------------------------------------------------------------------------------------------------------------------------------------------------------------------------------------------------------------|
| Otro alimento                         |                                                                                                                                                                                                                                                                                                                                                                                                                                                                                                                               |
| suplementos vitamínicos               | <input type="radio"/> si<br><input checked="" type="radio"/> no                                                                                                                                                                                                                                                                                                                                                                                                                                                               |
| suplementos vitamínicos               |                                                                                                                                                                                                                                                                                                                                                                                                                                                                                                                               |
| dieta previa                          | <input type="radio"/> si<br><input checked="" type="radio"/> no                                                                                                                                                                                                                                                                                                                                                                                                                                                               |
| motivo dieta                          | <input checked="" type="radio"/> no dieta<br><input type="radio"/> control peso<br><input type="radio"/> control colesterol<br><input type="radio"/> control diabetes<br><input type="radio"/> problemas estómago<br><input type="radio"/> problemas vesícula o hepáticos<br><input type="radio"/> HTA o cardiopatía<br><input type="radio"/> problemas renales<br><input type="radio"/> alergia alimentaria<br><input type="radio"/> ácido úrico elevado<br><input type="radio"/> vegetariana<br><input type="radio"/> otros |
| cambio alimentos año previo gestación | <input checked="" type="radio"/> si<br><input type="radio"/> no                                                                                                                                                                                                                                                                                                                                                                                                                                                               |
| cambio lácteos                        | <input checked="" type="radio"/> eliminado<br><input type="radio"/> disminuido<br><input type="radio"/> igual<br><input type="radio"/> aumentado<br><input type="radio"/> no sabe                                                                                                                                                                                                                                                                                                                                             |
| cambio huevos                         | <input type="radio"/> eliminado<br><input type="radio"/> disminuido<br><input checked="" type="radio"/> igual<br><input type="radio"/> aumentado<br><input type="radio"/> no sabe                                                                                                                                                                                                                                                                                                                                             |
| cambio carne                          | <input type="radio"/> eliminado<br><input type="radio"/> disminuido<br><input checked="" type="radio"/> igual<br><input type="radio"/> aumentado<br><input type="radio"/> no sabe                                                                                                                                                                                                                                                                                                                                             |
| cambio pescado                        | <input type="radio"/> eliminado<br><input type="radio"/> disminuido<br><input checked="" type="radio"/> igual<br><input type="radio"/> aumentado<br><input type="radio"/> no sabe                                                                                                                                                                                                                                                                                                                                             |
| cambio verduras                       | <input type="radio"/> eliminado<br><input type="radio"/> disminuido<br><input checked="" type="radio"/> igual<br><input type="radio"/> aumentado<br><input type="radio"/> no sabe                                                                                                                                                                                                                                                                                                                                             |

|                            |                                                                                                                                                                                                                        |
|----------------------------|------------------------------------------------------------------------------------------------------------------------------------------------------------------------------------------------------------------------|
| cambio legumbres           | <input type="radio"/> eliminado<br><input type="radio"/> disminuido<br><input checked="" type="radio"/> igual<br><input type="radio"/> aumentado<br><input type="radio"/> no sabe                                      |
| cambio fruta               | <input type="radio"/> eliminado<br><input type="radio"/> disminuido<br><input type="radio"/> igual<br><input checked="" type="radio"/> aumentado<br><input type="radio"/> no sabe                                      |
| cambio pan                 | <input type="radio"/> eliminado<br><input type="radio"/> disminuido<br><input checked="" type="radio"/> igual<br><input type="radio"/> aumentado<br><input type="radio"/> no sabe                                      |
| cambio aceite oliva        | <input type="radio"/> eliminado<br><input checked="" type="radio"/> disminuido<br><input type="radio"/> igual<br><input type="radio"/> aumentado<br><input type="radio"/> no sabe                                      |
| cambio mante o margarina   | <input checked="" type="radio"/> eliminado<br><input type="radio"/> disminuido<br><input type="radio"/> igual<br><input type="radio"/> aumentado<br><input type="radio"/> no sabe                                      |
| cambio azúcar y dulces     | <input type="radio"/> eliminado<br><input type="radio"/> disminuido<br><input type="radio"/> igual<br><input checked="" type="radio"/> aumentado<br><input type="radio"/> no sabe                                      |
| cambio bebidas alcohólicas | <input checked="" type="radio"/> eliminado<br><input type="radio"/> disminuido<br><input type="radio"/> igual<br><input type="radio"/> aumentado<br><input type="radio"/> no sabe                                      |
| frecuencia comidas fritas  | <input type="radio"/> a diario<br><input type="radio"/> 5 a 6 veces semana<br><input type="radio"/> 2 a 4 veces semana<br><input type="radio"/> 1 vez semana<br><input checked="" type="radio"/> menos de 1 vez semana |
| carne                      | <input type="radio"/> no como<br><input type="radio"/> cruda<br><input type="radio"/> poco hecha<br><input type="radio"/> hecha<br><input checked="" type="radio"/> muy hecha                                          |
| grasa visible carne        | <input type="radio"/> quita toda<br><input checked="" type="radio"/> quita mayoría<br><input type="radio"/> quita un poco<br><input type="radio"/> no quita nada                                                       |



|                                |                                                                                                                                                                                                                                                          |
|--------------------------------|----------------------------------------------------------------------------------------------------------------------------------------------------------------------------------------------------------------------------------------------------------|
| cocina carne                   | <input checked="" type="radio"/> a la plancha<br><input type="radio"/> a la parrilla<br><input type="radio"/> asada<br><input type="radio"/> frita<br><input type="radio"/> guisada                                                                      |
| tostado quemado carne          | <input checked="" type="radio"/> nunca<br><input type="radio"/> 1 vez mes<br><input type="radio"/> 2 a 3 veces mes<br><input type="radio"/> 1 vez semana<br><input type="radio"/> 2 a 3 semanas                                                          |
| tostado quemado pescado        | <input type="radio"/> nunca<br><input type="radio"/> 1 vez mes<br><input type="radio"/> 2 a 3 veces mes<br><input type="radio"/> 1 vez semana<br><input checked="" type="radio"/> 2 a 3 semanas                                                          |
| socarrat paella                | <input type="radio"/> nunca<br><input type="radio"/> 1 vez mes<br><input type="radio"/> 2 a 3 veces mes<br><input checked="" type="radio"/> 1 vez semana<br><input type="radio"/> 2 a 3 semanas                                                          |
| grasa o aceite cocinar         | <input type="radio"/> mantequilla<br><input type="radio"/> margarina<br><input checked="" type="radio"/> aceite oliva<br><input type="radio"/> aceite oliva virgen extra<br><input type="radio"/> aceite vegetal<br><input type="radio"/> mezcla aceites |
| grasa aceite aliñar            | <input type="radio"/> mantequilla<br><input type="radio"/> margarina<br><input checked="" type="radio"/> aceite oliva<br><input type="radio"/> aceite oliva virgen extra<br><input type="radio"/> aceite vegetal<br><input type="radio"/> mezcla aceites |
| grasa aceite freir             | <input type="radio"/> mantequilla<br><input type="radio"/> margarina<br><input type="radio"/> aceite oliva<br><input type="radio"/> aceite oliva virgen extra<br><input type="radio"/> aceite vegetal<br><input type="radio"/> mezcla aceites            |
| Ejercicio cuestionario         | <input checked="" type="radio"/> si<br><input type="radio"/> no                                                                                                                                                                                          |
| horas de sueño incluido siesta | [*DATA REMOVED*]                                                                                                                                                                                                                                         |
| minutos siesta                 | [*DATA REMOVED*]                                                                                                                                                                                                                                         |
| horas televisión semana        | [*DATA REMOVED*]                                                                                                                                                                                                                                         |

|                                        |                                                                                                                                                                                                                                                                                                                                                                |
|----------------------------------------|----------------------------------------------------------------------------------------------------------------------------------------------------------------------------------------------------------------------------------------------------------------------------------------------------------------------------------------------------------------|
| actividad trabajo                      | <input type="radio"/> casi siempre sentado<br><input type="radio"/> sentado 50 por cien<br><input type="radio"/> casi siempre de pie, quieto<br><input type="radio"/> casi siempre levantado caminando y llevando pocas cosas<br><input type="radio"/> casi siempre levantado, caminando y llevado muchas cosas<br><input type="radio"/> trabajo manual pesado |
| tiempo caminar o bici al día           | <input type="radio"/> casi nunca<br><input type="radio"/> menos 20min día<br><input checked="" type="radio"/> 20 a 40 min día<br><input type="radio"/> 40 a 60 min día<br><input type="radio"/> 1h o 1h y media día<br><input type="radio"/> más de 1h y media al día                                                                                          |
| tiempo tareas casa al día              | <input type="radio"/> menos de 1h día<br><input type="radio"/> 1 a 2h día<br><input type="radio"/> 3 a 4h día<br><input checked="" type="radio"/> 5 a 6h día<br><input type="radio"/> 7 a 8h día<br><input type="radio"/> más de 8h día                                                                                                                        |
| tiempo libre televisión ordenador leer | <input type="radio"/> menos 1h día<br><input type="radio"/> 1h día<br><input type="radio"/> 2h día<br><input checked="" type="radio"/> 3h día<br><input type="radio"/> 4h día<br><input type="radio"/> 5 a 6h día<br><input type="radio"/> mas 6h día                                                                                                          |
| tiempo libre ejercicio o deporte       | <input checked="" type="radio"/> menos 1h semana<br><input type="radio"/> 1h semana<br><input type="radio"/> 2h semana<br><input type="radio"/> 3h semana<br><input type="radio"/> 4 a 5h semana<br><input type="radio"/> mas 5h semana                                                                                                                        |
| como se considera                      | <input type="radio"/> sedentaria<br><input checked="" type="radio"/> poco activa<br><input type="radio"/> moderadamente activa<br><input type="radio"/> bastante activa<br><input type="radio"/> muy activa<br><input type="radio"/> no sabe                                                                                                                   |
| FUR                                    | [*DATA REMOVED*]                                                                                                                                                                                                                                                                                                                                               |
| Semanas gestación 2T                   | [*DATA REMOVED*]                                                                                                                                                                                                                                                                                                                                               |
| Días gestación 2T                      | [*DATA REMOVED*]                                                                                                                                                                                                                                                                                                                                               |
| DBP 2T                                 | [*DATA REMOVED*]                                                                                                                                                                                                                                                                                                                                               |
| CC 2T                                  | [*DATA REMOVED*]                                                                                                                                                                                                                                                                                                                                               |
| AC 2T                                  | [*DATA REMOVED*]                                                                                                                                                                                                                                                                                                                                               |

|                                                   |                                                                                                                                                                                                 |
|---------------------------------------------------|-------------------------------------------------------------------------------------------------------------------------------------------------------------------------------------------------|
| LF 2T                                             | [*DATA REMOVED*]                                                                                                                                                                                |
| PFE 2T (Hadlock)                                  | [*DATA REMOVED*]                                                                                                                                                                                |
| Semanas gestación 3T                              | [*DATA REMOVED*]                                                                                                                                                                                |
| días 3T                                           | [*DATA REMOVED*]                                                                                                                                                                                |
| DBP 3T                                            | [*DATA REMOVED*]                                                                                                                                                                                |
| CC 3T                                             | [*DATA REMOVED*]                                                                                                                                                                                |
| AC 3T                                             | [*DATA REMOVED*]                                                                                                                                                                                |
| LF 3T                                             | [*DATA REMOVED*]                                                                                                                                                                                |
| PFE 3T (Hadlock)                                  | [*DATA REMOVED*]                                                                                                                                                                                |
| Semanas de gestación final                        | [*DATA REMOVED*]                                                                                                                                                                                |
| días gestación final                              | [*DATA REMOVED*]                                                                                                                                                                                |
| Localización placenta                             | <input checked="" type="radio"/> anterior<br><input type="radio"/> lateral derecha<br><input type="radio"/> lateral izquierda<br><input type="radio"/> posterior<br><input type="radio"/> fondo |
| Presentación longitudinal cefálica                | <input type="radio"/> no<br><input checked="" type="radio"/> si                                                                                                                                 |
| Dorso                                             | <input checked="" type="radio"/> izquierda anterior<br><input type="radio"/> izquierda posterior<br><input type="radio"/> derecha anterior<br><input type="radio"/> derecha posterior           |
| diámetro biparietal                               | [*DATA REMOVED*]                                                                                                                                                                                |
| Circunferencia craneal                            | [*DATA REMOVED*]                                                                                                                                                                                |
| Circunferencia abdominal                          | [*DATA REMOVED*]                                                                                                                                                                                |
| Longitud de femur                                 | [*DATA REMOVED*]                                                                                                                                                                                |
| tejido celular subcutáneo a nivel del muslo en mm | [*DATA REMOVED*]                                                                                                                                                                                |
| tejido celular subcutáneo en abdomen en mm        | [*DATA REMOVED*]                                                                                                                                                                                |
| Volumen del muslo en cm3                          | [*DATA REMOVED*]                                                                                                                                                                                |
| Peso fetal estimado según fórmula de Hadlock      | [*DATA REMOVED*]                                                                                                                                                                                |

|                                               |                                                                                                                                               |
|-----------------------------------------------|-----------------------------------------------------------------------------------------------------------------------------------------------|
| Percentil                                     | [*DATA REMOVED*]                                                                                                                              |
| Peso fetal estimado según fórmula de Scioscia | <hr/>                                                                                                                                         |
| Peso fetal estimado según fórmula de LEE      | <hr/>                                                                                                                                         |
| Tipo de parto                                 | <input checked="" type="radio"/> eutocico<br><input type="radio"/> instrumentado/ventosa<br><input type="radio"/> cesarea                     |
| fecha de nacimiento                           | [*DATA REMOVED*]                                                                                                                              |
| Días entre exploración y nacimiento           | [*DATA REMOVED*]                                                                                                                              |
| Peso RN en g                                  | [*DATA REMOVED*]                                                                                                                              |
| sexo                                          | <input type="radio"/> mujer<br><input checked="" type="radio"/> hombre                                                                        |
| Apgar 1 minuto                                | [*DATA REMOVED*]                                                                                                                              |
| Apgar 5 minutos                               | [*DATA REMOVED*]                                                                                                                              |
| Apgar 10 minutos                              | <hr/>                                                                                                                                         |
| antecedente Covid durante gestación           | <input checked="" type="radio"/> Yes<br><input type="radio"/> No                                                                              |
| Nivel de estudios                             | <input type="radio"/> ninguno<br><input type="radio"/> primarios<br><input type="radio"/> secundarios<br><input type="radio"/> universitarios |

# Base\_datos\_estimacion\_peso\_fetal

|                                       |                                                                                                                                                                                                                                                                                      |
|---------------------------------------|--------------------------------------------------------------------------------------------------------------------------------------------------------------------------------------------------------------------------------------------------------------------------------------|
| Número de identificación participante | 192                                                                                                                                                                                                                                                                                  |
| CODIGO PARTICIPANTE                   |                                                                                                                                                                                                                                                                                      |
| Edad                                  | [*DATA REMOVED*]                                                                                                                                                                                                                                                                     |
| Gestaciones                           | <input checked="" type="radio"/> 1<br><input type="radio"/> 2<br><input type="radio"/> 3<br><input type="radio"/> mas de 3                                                                                                                                                           |
| partos                                | <input checked="" type="radio"/> 0<br><input type="radio"/> 1<br><input type="radio"/> 2<br><input type="radio"/> 3<br><input type="radio"/> mas de 3                                                                                                                                |
| cesáreas                              | <input checked="" type="radio"/> 0<br><input type="radio"/> 1<br><input type="radio"/> 2<br><input type="radio"/> 3<br><input type="radio"/> mas de 3                                                                                                                                |
| Abortos                               | <input checked="" type="radio"/> 0<br><input type="radio"/> 1<br><input type="radio"/> 2<br><input type="radio"/> 3<br><input type="radio"/> mas de 3                                                                                                                                |
| Tipo de gestacion                     | <input checked="" type="radio"/> espontanea<br><input type="radio"/> IAC inseminación artificial conyuge<br><input type="radio"/> IAD inseminación artificial donante<br><input type="radio"/> FIV Fecundación in Vitro<br><input type="radio"/> Ovodon FIV con donación de ovocitos |
| peso previo a embarazo                | [*DATA REMOVED*]                                                                                                                                                                                                                                                                     |
| Ganancia ponderal embarazo            | [*DATA REMOVED*]                                                                                                                                                                                                                                                                     |
| Talla madre                           | [*DATA REMOVED*]                                                                                                                                                                                                                                                                     |
| IMC previo embarazo                   | 23.93606231490121                                                                                                                                                                                                                                                                    |
| Patología obstétrica                  | <input checked="" type="radio"/> no<br><input type="radio"/> si                                                                                                                                                                                                                      |
| Diabetes pregestacional               | <input checked="" type="radio"/> no<br><input type="radio"/> si                                                                                                                                                                                                                      |
| Diabetes gestacional                  | <input checked="" type="radio"/> no<br><input type="radio"/> si                                                                                                                                                                                                                      |

|                                            |                                                                                                                                                                                      |
|--------------------------------------------|--------------------------------------------------------------------------------------------------------------------------------------------------------------------------------------|
| Diabetes gestacional con insulina          | <input checked="" type="radio"/> no<br><input type="radio"/> si                                                                                                                      |
| Diabetes gestacional con dieta y ejercicio | <input checked="" type="radio"/> no<br><input type="radio"/> si                                                                                                                      |
| Percentil fetos previos                    | <input checked="" type="radio"/> Nada<br><input type="radio"/> percentil menor de 10<br><input type="radio"/> percentil entre 10 y 90<br><input type="radio"/> percentil mayor de 90 |
| Exfumadora                                 | <input checked="" type="radio"/> Nada<br><input type="radio"/> menos de 5 años<br><input type="radio"/> 5 a 10 años<br><input type="radio"/> mayor o igual a 10 años                 |
| Hábito tabáquico                           | <input type="radio"/> no<br><input checked="" type="radio"/> si                                                                                                                      |
| fumadora                                   | [*DATA REMOVED*]                                                                                                                                                                     |
| Consumo otros tóxicos                      | <input checked="" type="radio"/> no<br><input type="radio"/> si                                                                                                                      |
| Hb 1T                                      | [*DATA REMOVED*]                                                                                                                                                                     |
| Htc 1T                                     | [*DATA REMOVED*]                                                                                                                                                                     |
| Hb 2T                                      | [*DATA REMOVED*]                                                                                                                                                                     |
| HTC 2T                                     | [*DATA REMOVED*]                                                                                                                                                                     |
| Hb 3T                                      | [*DATA REMOVED*]                                                                                                                                                                     |
| HTC 3T                                     | [*DATA REMOVED*]                                                                                                                                                                     |
| Suplemento FE oral                         | <input type="radio"/> si<br><input checked="" type="radio"/> no                                                                                                                      |
| Suplemento fe iv                           | <input type="radio"/> si<br><input type="radio"/> no                                                                                                                                 |
| Transfusión                                | <input type="radio"/> no<br><input type="radio"/> si                                                                                                                                 |
| Solicitada Vit D                           | <input checked="" type="radio"/> no<br><input type="radio"/> si                                                                                                                      |
| Deficit vit D                              | <input type="radio"/> no<br><input type="radio"/> si                                                                                                                                 |
| Suplemento vit D                           | <input type="radio"/> si<br><input type="radio"/> no                                                                                                                                 |

|                       |                                                                                                                                                                                                                                                                                                                                                                                                              |
|-----------------------|--------------------------------------------------------------------------------------------------------------------------------------------------------------------------------------------------------------------------------------------------------------------------------------------------------------------------------------------------------------------------------------------------------------|
| Dieta, cuestionario   | <input checked="" type="radio"/> sí<br><input type="radio"/> no                                                                                                                                                                                                                                                                                                                                              |
| Leche entera          | <input checked="" type="radio"/> Nunca o menos 1 vez al mes<br><input type="radio"/> 1 a 3 veces mes<br><input type="radio"/> 1 vez semana<br><input type="radio"/> 2 a 4 veces semana<br><input type="radio"/> 5 a 6 veces semana<br><input type="radio"/> 1 vez al día<br><input type="radio"/> 2 a 3 veces al día<br><input type="radio"/> 5 a 6 veces al día<br><input type="radio"/> más 6 veces al día |
| Leche semidesnatada   | <input checked="" type="radio"/> Nunca o menos 1 vez al mes<br><input type="radio"/> 1 a 3 veces mes<br><input type="radio"/> 1 vez semana<br><input type="radio"/> 2 a 4 veces semana<br><input type="radio"/> 5 a 6 veces semana<br><input type="radio"/> 1 vez al día<br><input type="radio"/> 2 a 3 veces al día<br><input type="radio"/> 5 a 6 veces al día<br><input type="radio"/> mas 6 veces al día |
| Leche desnatada       | <input type="radio"/> Nunca o menos 1 vez al mes<br><input type="radio"/> 1 a 3 veces mes<br><input type="radio"/> 1 vez semana<br><input type="radio"/> 2 a 4 veces semana<br><input type="radio"/> 5 a 6 veces semana<br><input type="radio"/> 1 vez al día<br><input type="radio"/> 2 a 3 veces al día<br><input type="radio"/> 5 a 6 veces al día<br><input checked="" type="radio"/> más 6 veces al día |
| Leche condensada      | <input checked="" type="radio"/> Nunca o menos 1 vez al mes<br><input type="radio"/> 1 a 3 veces mes<br><input type="radio"/> 1 vez semana<br><input type="radio"/> 2 a 4 veces semana<br><input type="radio"/> 5 a 6 veces semana<br><input type="radio"/> 1 vez al día<br><input type="radio"/> 2 a 3 veces al día<br><input type="radio"/> 5 a 6 veces al día<br><input type="radio"/> más 6 veces al día |
| nata o crema de leche | <input type="radio"/> Nunca o menos 1 vez al mes<br><input checked="" type="radio"/> 1 a 3 veces mes<br><input type="radio"/> 1 vez semana<br><input type="radio"/> 2 a 4 veces semana<br><input type="radio"/> 5 a 6 veces semana<br><input type="radio"/> 1 vez al día<br><input type="radio"/> 2 a 3 veces al día<br><input type="radio"/> 5 a 6 veces al día<br><input type="radio"/> más 6 veces al día |

---

Yogurt Entero

- ☐ Nunca o menos 1 vez al mes  
☒ 1 a 3 veces mes  
☐ 1 vez semana  
☐ 2 a 4 veces semana  
☐ 5 a 6 veces semana  
☐ 1 vez al día  
☐ 2 a 3 veces al día  
☐ 5 a 6 veces al día  
☐ más 6 veces al día

---

Yogurt desnatado

- ☐ Nunca o menos 1 vez al mes  
☐ 1 a 3 veces mes  
☒ 1 vez semana  
☐ 2 a 4 veces semana  
☐ 5 a 6 veces semana  
☐ 1 vez al día  
☐ 2 a 3 veces al día  
☐ 5 a 6 veces al día  
☐ más 6 veces al día

---

100g requesón o queso blando o queso fresco

- ☐ Nunca o menos 1 vez al mes  
☒ 1 a 3 veces mes  
☐ 1 vez semana  
☐ 2 a 4 veces semana  
☐ 5 a 6 veces semana  
☐ 1 vez al día  
☐ 2 a 3 veces al día  
☐ 5 a 6 veces al día  
☐ más 6 veces al día

---

queso curado o semicurado o cremoso

- ☐ Nunca o menos 1 vez al mes  
☐ 1 a 3 veces mes  
☐ 1 vez semana  
☒ 2 a 4 veces semana  
☐ 5 a 6 veces semana  
☐ 1 vez al día  
☐ 2 a 3 veces al día  
☐ 5 a 6 veces al día  
☐ más 6 veces al día

---

natillas flan pudding

- ☐ Nunca o menos 1 vez al mes  
☒ 1 a 3 veces mes  
☐ 1 vez semana  
☐ 2 a 4 veces semana  
☐ 5 a 6 veces semana  
☐ 1 vez al día  
☐ 2 a 3 veces al día  
☐ 5 a 6 veces al día  
☐ más 6 veces al día

---

Helado

- ☐ Nunca o menos 1 vez al mes  
☒ 1 a 3 veces mes  
☐ 1 vez semana  
☐ 2 a 4 veces semana  
☐ 5 a 6 veces semana  
☐ 1 vez al día  
☐ 2 a 3 veces al día  
☐ 5 a 6 veces al día  
☐ más 6 veces al día



|                                      |                                                                                                                                                                                                                                                                                                                                                                                                              |
|--------------------------------------|--------------------------------------------------------------------------------------------------------------------------------------------------------------------------------------------------------------------------------------------------------------------------------------------------------------------------------------------------------------------------------------------------------------|
| huevo                                | <input type="radio"/> Nunca o menos 1 vez al mes<br><input type="radio"/> 1 a 3 veces mes<br><input checked="" type="radio"/> 1 vez semana<br><input type="radio"/> 2 a 4 veces semana<br><input type="radio"/> 5 a 6 veces semana<br><input type="radio"/> 1 vez al día<br><input type="radio"/> 2 a 3 veces al día<br><input type="radio"/> 5 a 6 veces al día<br><input type="radio"/> más 6 veces al día |
| Pollo con piel                       | <input checked="" type="radio"/> Nunca o menos 1 vez al mes<br><input type="radio"/> 1 a 3 veces mes<br><input type="radio"/> 1 vez semana<br><input type="radio"/> 2 a 4 veces semana<br><input type="radio"/> 5 a 6 veces semana<br><input type="radio"/> 1 vez al día<br><input type="radio"/> 2 a 3 veces al día<br><input type="radio"/> 5 a 6 veces al día<br><input type="radio"/> más 6 veces al día |
| pollo sin piel                       | <input type="radio"/> Nunca o menos 1 vez al mes<br><input type="radio"/> 1 a 3 veces mes<br><input checked="" type="radio"/> 1 vez semana<br><input type="radio"/> 2 a 4 veces semana<br><input type="radio"/> 5 a 6 veces semana<br><input type="radio"/> 1 vez al día<br><input type="radio"/> 2 a 3 veces al día<br><input type="radio"/> 5 a 6 veces al día<br><input type="radio"/> más 6 veces al día |
| Ternera o cerdo o cordero            | <input type="radio"/> Nunca o menos 1 vez al mes<br><input checked="" type="radio"/> 1 a 3 veces mes<br><input type="radio"/> 1 vez semana<br><input type="radio"/> 2 a 4 veces semana<br><input type="radio"/> 5 a 6 veces semana<br><input type="radio"/> 1 vez al día<br><input type="radio"/> 2 a 3 veces al día<br><input type="radio"/> 5 a 6 veces al día<br><input type="radio"/> más 6 veces al día |
| carne caza: Conejo o codorniz o pato | <input checked="" type="radio"/> Nunca o menos 1 vez al mes<br><input type="radio"/> 1 a 3 veces mes<br><input type="radio"/> 1 vez semana<br><input type="radio"/> 2 a 4 veces semana<br><input type="radio"/> 5 a 6 veces semana<br><input type="radio"/> 1 vez al día<br><input type="radio"/> 2 a 3 veces al día<br><input type="radio"/> 5 a 6 veces al día<br><input type="radio"/> más 6 veces al día |
| Hígado de ternera o cerdo o pollo    | <input type="radio"/> Nunca o menos 1 vez al mes<br><input checked="" type="radio"/> 1 a 3 veces mes<br><input type="radio"/> 1 vez semana<br><input type="radio"/> 2 a 4 veces semana<br><input type="radio"/> 5 a 6 veces semana<br><input type="radio"/> 1 vez al día<br><input type="radio"/> 2 a 3 veces al día<br><input type="radio"/> 5 a 6 veces al día<br><input type="radio"/> más 6 veces al día |

---

Vísceras

- ☒ Nunca o menos 1 vez al mes  
☐ 1 a 3 veces mes  
☐ 1 vez semana  
☐ 2 a 4 veces semana  
☐ 5 a 6 veces semana  
☐ 1 vez al día  
☐ 2 a 3 veces al día  
☐ 5 a 6 veces al día  
☐ más 6 veces al día

---

Embutido

- ☐ Nunca o menos 1 vez al mes  
☐ 1 a 3 veces mes  
☒ 1 vez semana  
☐ 2 a 4 veces semana  
☐ 5 a 6 veces semana  
☐ 1 vez al día  
☐ 2 a 3 veces al día  
☐ 5 a 6 veces al día  
☐ más 6 veces al día

---

Salchicha o similar

- ☐ Nunca o menos 1 vez al mes  
☒ 1 a 3 veces mes  
☐ 1 vez semana  
☐ 2 a 4 veces semana  
☐ 5 a 6 veces semana  
☐ 1 vez al día  
☐ 2 a 3 veces al día  
☐ 5 a 6 veces al día  
☐ más 6 veces al día

---

Pate o foiegras

- ☐ Nunca o menos 1 vez al mes  
☒ 1 a 3 veces mes  
☐ 1 vez semana  
☐ 2 a 4 veces semana  
☐ 5 a 6 veces semana  
☐ 1 vez al día  
☐ 2 a 3 veces al día  
☐ 5 a 6 veces al día  
☐ más 6 veces al día

---

Hamburguesa

- ☐ Nunca o menos 1 vez al mes  
☐ 1 a 3 veces mes  
☒ 1 vez semana  
☐ 2 a 4 veces semana  
☐ 5 a 6 veces semana  
☐ 1 vez al día  
☐ 2 a 3 veces al día  
☐ 5 a 6 veces al día  
☐ más 6 veces al día

---

tocino o bacon

- ☐ Nunca o menos 1 vez al mes  
☒ 1 a 3 veces mes  
☐ 1 vez semana  
☐ 2 a 4 veces semana  
☐ 5 a 6 veces semana  
☐ 1 vez al día  
☐ 2 a 3 veces al día  
☐ 5 a 6 veces al día  
☐ más 6 veces al día

|                        |                                                                                                                                                                                                                                                                                                                                                                                                              |
|------------------------|--------------------------------------------------------------------------------------------------------------------------------------------------------------------------------------------------------------------------------------------------------------------------------------------------------------------------------------------------------------------------------------------------------------|
| Pescado frito          | <input type="radio"/> Nunca o menos 1 vez al mes<br><input checked="" type="radio"/> 1 a 3 veces mes<br><input type="radio"/> 1 vez semana<br><input type="radio"/> 2 a 4 veces semana<br><input type="radio"/> 5 a 6 veces semana<br><input type="radio"/> 1 vez al día<br><input type="radio"/> 2 a 3 veces al día<br><input type="radio"/> 5 a 6 veces al día<br><input type="radio"/> más 6 veces al día |
| pescado hervido blanco | <input type="radio"/> Nunca o menos 1 vez al mes<br><input checked="" type="radio"/> 1 a 3 veces mes<br><input type="radio"/> 1 vez semana<br><input type="radio"/> 2 a 4 veces semana<br><input type="radio"/> 5 a 6 veces semana<br><input type="radio"/> 1 vez al día<br><input type="radio"/> 2 a 3 veces al día<br><input type="radio"/> 5 a 6 veces al día<br><input type="radio"/> más 6 veces al día |
| pescado hervido azul   | <input type="radio"/> Nunca o menos 1 vez al mes<br><input checked="" type="radio"/> 1 a 3 veces mes<br><input type="radio"/> 1 vez semana<br><input type="radio"/> 2 a 4 veces semana<br><input type="radio"/> 5 a 6 veces semana<br><input type="radio"/> 1 vez al día<br><input type="radio"/> 2 a 3 veces al día<br><input type="radio"/> 5 a 6 veces al día<br><input type="radio"/> más 6 veces al día |
| otros pescado azul     | <input checked="" type="radio"/> Nunca o menos 1 vez al mes<br><input type="radio"/> 1 a 3 veces mes<br><input type="radio"/> 1 vez semana<br><input type="radio"/> 2 a 4 veces semana<br><input type="radio"/> 5 a 6 veces semana<br><input type="radio"/> 1 vez al día<br><input type="radio"/> 2 a 3 veces al día<br><input type="radio"/> 5 a 6 veces al día<br><input type="radio"/> más 6 veces al día |
| atun conserva          | <input type="radio"/> Nunca o menos 1 vez al mes<br><input type="radio"/> 1 a 3 veces mes<br><input checked="" type="radio"/> 1 vez semana<br><input type="radio"/> 2 a 4 veces semana<br><input type="radio"/> 5 a 6 veces semana<br><input type="radio"/> 1 vez al día<br><input type="radio"/> 2 a 3 veces al día<br><input type="radio"/> 5 a 6 veces al día<br><input type="radio"/> más 6 veces al día |
| sardina conserva       | <input checked="" type="radio"/> Nunca o menos 1 vez al mes<br><input type="radio"/> 1 a 3 veces mes<br><input type="radio"/> 1 vez semana<br><input type="radio"/> 2 a 4 veces semana<br><input type="radio"/> 5 a 6 veces semana<br><input type="radio"/> 1 vez al día<br><input type="radio"/> 2 a 3 veces al día<br><input type="radio"/> 5 a 6 veces al día<br><input type="radio"/> más 6 veces al día |

|                                         |                                                                                                                                                                                                                                                                                                                                                                                                              |
|-----------------------------------------|--------------------------------------------------------------------------------------------------------------------------------------------------------------------------------------------------------------------------------------------------------------------------------------------------------------------------------------------------------------------------------------------------------------|
| pescado ahumado                         | <input checked="" type="radio"/> Nunca o menos 1 vez al mes<br><input type="radio"/> 1 a 3 veces mes<br><input type="radio"/> 1 vez semana<br><input type="radio"/> 2 a 4 veces semana<br><input type="radio"/> 5 a 6 veces semana<br><input type="radio"/> 1 vez al día<br><input type="radio"/> 2 a 3 veces al día<br><input type="radio"/> 5 a 6 veces al día<br><input type="radio"/> más 6 veces al día |
| almejas o mejillones o ostras unos 100g | <input type="radio"/> Nunca o menos 1 vez al mes<br><input checked="" type="radio"/> 1 a 3 veces mes<br><input type="radio"/> 1 vez semana<br><input type="radio"/> 2 a 4 veces semana<br><input type="radio"/> 5 a 6 veces semana<br><input type="radio"/> 1 vez al día<br><input type="radio"/> 2 a 3 veces al día<br><input type="radio"/> 5 a 6 veces al día<br><input type="radio"/> más 6 veces al día |
| calamar o chipiron o sepia unos 100g    | <input type="radio"/> Nunca o menos 1 vez al mes<br><input checked="" type="radio"/> 1 a 3 veces mes<br><input type="radio"/> 1 vez semana<br><input type="radio"/> 2 a 4 veces semana<br><input type="radio"/> 5 a 6 veces semana<br><input type="radio"/> 1 vez al día<br><input type="radio"/> 2 a 3 veces al día<br><input type="radio"/> 5 a 6 veces al día<br><input type="radio"/> más 6 veces al día |
| marisco unos 100g                       | <input type="radio"/> Nunca o menos 1 vez al mes<br><input checked="" type="radio"/> 1 a 3 veces mes<br><input type="radio"/> 1 vez semana<br><input type="radio"/> 2 a 4 veces semana<br><input type="radio"/> 5 a 6 veces semana<br><input type="radio"/> 1 vez al día<br><input type="radio"/> 2 a 3 veces al día<br><input type="radio"/> 5 a 6 veces al día<br><input type="radio"/> más 6 veces al día |
| Espinacas o acelgas cocinadas           | <input type="radio"/> Nunca o menos 1 vez al mes<br><input checked="" type="radio"/> 1 a 3 veces mes<br><input type="radio"/> 1 vez semana<br><input type="radio"/> 2 a 4 veces semana<br><input type="radio"/> 5 a 6 veces semana<br><input type="radio"/> 1 vez al día<br><input type="radio"/> 2 a 3 veces al día<br><input type="radio"/> 5 a 6 veces al día<br><input type="radio"/> más 6 veces al día |
| Col o coliflor o brocoli cocinado       | <input type="radio"/> Nunca o menos 1 vez al mes<br><input type="radio"/> 1 a 3 veces mes<br><input checked="" type="radio"/> 1 vez semana<br><input type="radio"/> 2 a 4 veces semana<br><input type="radio"/> 5 a 6 veces semana<br><input type="radio"/> 1 vez al día<br><input type="radio"/> 2 a 3 veces al día<br><input type="radio"/> 5 a 6 veces al día<br><input type="radio"/> más 6 veces al día |

---

Lechuga o endivia o escarola

- ☐ Nunca o menos 1 vez al mes  
☐ 1 a 3 veces mes  
☐ 1 vez semana  
☒ 2 a 4 veces semana  
☐ 5 a 6 veces semana  
☐ 1 vez al día  
☐ 2 a 3 veces al día  
☐ 5 a 6 veces al día  
☐ más 6 veces al día

---

tomate ensalada

- ☐ Nunca o menos 1 vez al mes  
☐ 1 a 3 veces mes  
☐ 1 vez semana  
☒ 2 a 4 veces semana  
☐ 5 a 6 veces semana  
☐ 1 vez al día  
☐ 2 a 3 veces al día  
☐ 5 a 6 veces al día  
☐ más 6 veces al día

---

cebolla

- ☐ Nunca o menos 1 vez al mes  
☐ 1 a 3 veces mes  
☒ 1 vez semana  
☐ 2 a 4 veces semana  
☐ 5 a 6 veces semana  
☐ 1 vez al día  
☐ 2 a 3 veces al día  
☐ 5 a 6 veces al día  
☐ más 6 veces al día

---

Zanahoria o calabaza

- ☐ Nunca o menos 1 vez al mes  
☐ 1 a 3 veces mes  
☒ 1 vez semana  
☐ 2 a 4 veces semana  
☐ 5 a 6 veces semana  
☐ 1 vez al día  
☐ 2 a 3 veces al día  
☐ 5 a 6 veces al día  
☐ más 6 veces al día

---

Judías verdes

- ☐ Nunca o menos 1 vez al mes  
☐ 1 a 3 veces mes  
☒ 1 vez semana  
☐ 2 a 4 veces semana  
☐ 5 a 6 veces semana  
☐ 1 vez al día  
☐ 2 a 3 veces al día  
☐ 5 a 6 veces al día  
☐ más 6 veces al día

---

Berenjena o calabacin o pepino

- ☐ Nunca o menos 1 vez al mes  
☐ 1 a 3 veces mes  
☒ 1 vez semana  
☐ 2 a 4 veces semana  
☐ 5 a 6 veces semana  
☐ 1 vez al día  
☐ 2 a 3 veces al día  
☐ 5 a 6 veces al día  
☐ más 6 veces al día

---

|          |                                                                                                                                                                                                                                                                                                                                                                                                              |
|----------|--------------------------------------------------------------------------------------------------------------------------------------------------------------------------------------------------------------------------------------------------------------------------------------------------------------------------------------------------------------------------------------------------------------|
| pimiento | <input type="radio"/> Nunca o menos 1 vez al mes<br><input checked="" type="radio"/> 1 a 3 veces mes<br><input type="radio"/> 1 vez semana<br><input type="radio"/> 2 a 4 veces semana<br><input type="radio"/> 5 a 6 veces semana<br><input type="radio"/> 1 vez al día<br><input type="radio"/> 2 a 3 veces al día<br><input type="radio"/> 5 a 6 veces al día<br><input type="radio"/> más 6 veces al día |
|----------|--------------------------------------------------------------------------------------------------------------------------------------------------------------------------------------------------------------------------------------------------------------------------------------------------------------------------------------------------------------------------------------------------------------|

---

|           |                                                                                                                                                                                                                                                                                                                                                                                                              |
|-----------|--------------------------------------------------------------------------------------------------------------------------------------------------------------------------------------------------------------------------------------------------------------------------------------------------------------------------------------------------------------------------------------------------------------|
| alcachofa | <input type="radio"/> Nunca o menos 1 vez al mes<br><input checked="" type="radio"/> 1 a 3 veces mes<br><input type="radio"/> 1 vez semana<br><input type="radio"/> 2 a 4 veces semana<br><input type="radio"/> 5 a 6 veces semana<br><input type="radio"/> 1 vez al día<br><input type="radio"/> 2 a 3 veces al día<br><input type="radio"/> 5 a 6 veces al día<br><input type="radio"/> más 6 veces al día |
|-----------|--------------------------------------------------------------------------------------------------------------------------------------------------------------------------------------------------------------------------------------------------------------------------------------------------------------------------------------------------------------------------------------------------------------|

---

|            |                                                                                                                                                                                                                                                                                                                                                                                                              |
|------------|--------------------------------------------------------------------------------------------------------------------------------------------------------------------------------------------------------------------------------------------------------------------------------------------------------------------------------------------------------------------------------------------------------------|
| espárragos | <input type="radio"/> Nunca o menos 1 vez al mes<br><input type="radio"/> 1 a 3 veces mes<br><input checked="" type="radio"/> 1 vez semana<br><input type="radio"/> 2 a 4 veces semana<br><input type="radio"/> 5 a 6 veces semana<br><input type="radio"/> 1 vez al día<br><input type="radio"/> 2 a 3 veces al día<br><input type="radio"/> 5 a 6 veces al día<br><input type="radio"/> más 6 veces al día |
|------------|--------------------------------------------------------------------------------------------------------------------------------------------------------------------------------------------------------------------------------------------------------------------------------------------------------------------------------------------------------------------------------------------------------------|

---

|              |                                                                                                                                                                                                                                                                                                                                                                                                              |
|--------------|--------------------------------------------------------------------------------------------------------------------------------------------------------------------------------------------------------------------------------------------------------------------------------------------------------------------------------------------------------------------------------------------------------------|
| maíz hervido | <input type="radio"/> Nunca o menos 1 vez al mes<br><input type="radio"/> 1 a 3 veces mes<br><input checked="" type="radio"/> 1 vez semana<br><input type="radio"/> 2 a 4 veces semana<br><input type="radio"/> 5 a 6 veces semana<br><input type="radio"/> 1 vez al día<br><input type="radio"/> 2 a 3 veces al día<br><input type="radio"/> 5 a 6 veces al día<br><input type="radio"/> más 6 veces al día |
|--------------|--------------------------------------------------------------------------------------------------------------------------------------------------------------------------------------------------------------------------------------------------------------------------------------------------------------------------------------------------------------------------------------------------------------|

---

|           |                                                                                                                                                                                                                                                                                                                                                                                                              |
|-----------|--------------------------------------------------------------------------------------------------------------------------------------------------------------------------------------------------------------------------------------------------------------------------------------------------------------------------------------------------------------------------------------------------------------|
| legumbres | <input type="radio"/> Nunca o menos 1 vez al mes<br><input type="radio"/> 1 a 3 veces mes<br><input checked="" type="radio"/> 1 vez semana<br><input type="radio"/> 2 a 4 veces semana<br><input type="radio"/> 5 a 6 veces semana<br><input type="radio"/> 1 vez al día<br><input type="radio"/> 2 a 3 veces al día<br><input type="radio"/> 5 a 6 veces al día<br><input type="radio"/> más 6 veces al día |
|-----------|--------------------------------------------------------------------------------------------------------------------------------------------------------------------------------------------------------------------------------------------------------------------------------------------------------------------------------------------------------------------------------------------------------------|

---

|                       |                                                                                                                                                                                                                                                                                                                                                                                                              |
|-----------------------|--------------------------------------------------------------------------------------------------------------------------------------------------------------------------------------------------------------------------------------------------------------------------------------------------------------------------------------------------------------------------------------------------------------|
| naranjas o mandarinas | <input type="radio"/> Nunca o menos 1 vez al mes<br><input checked="" type="radio"/> 1 a 3 veces mes<br><input type="radio"/> 1 vez semana<br><input type="radio"/> 2 a 4 veces semana<br><input type="radio"/> 5 a 6 veces semana<br><input type="radio"/> 1 vez al día<br><input type="radio"/> 2 a 3 veces al día<br><input type="radio"/> 5 a 6 veces al día<br><input type="radio"/> más 6 veces al día |
|-----------------------|--------------------------------------------------------------------------------------------------------------------------------------------------------------------------------------------------------------------------------------------------------------------------------------------------------------------------------------------------------------------------------------------------------------|

---

|                       |                                                                                                                                                                                                                                                                                                                                                                                                              |
|-----------------------|--------------------------------------------------------------------------------------------------------------------------------------------------------------------------------------------------------------------------------------------------------------------------------------------------------------------------------------------------------------------------------------------------------------|
| zum natural fruta     | <input checked="" type="radio"/> Nunca o menos 1 vez al mes<br><input type="radio"/> 1 a 3 veces mes<br><input type="radio"/> 1 vez semana<br><input type="radio"/> 2 a 4 veces semana<br><input type="radio"/> 5 a 6 veces semana<br><input type="radio"/> 1 vez al día<br><input type="radio"/> 2 a 3 veces al día<br><input type="radio"/> 5 a 6 veces al día<br><input type="radio"/> más 6 veces al día |
| platano               | <input type="radio"/> Nunca o menos 1 vez al mes<br><input checked="" type="radio"/> 1 a 3 veces mes<br><input type="radio"/> 1 vez semana<br><input type="radio"/> 2 a 4 veces semana<br><input type="radio"/> 5 a 6 veces semana<br><input type="radio"/> 1 vez al día<br><input type="radio"/> 2 a 3 veces al día<br><input type="radio"/> 5 a 6 veces al día<br><input type="radio"/> más 6 veces al día |
| manzana o pera        | <input type="radio"/> Nunca o menos 1 vez al mes<br><input type="radio"/> 1 a 3 veces mes<br><input type="radio"/> 1 vez semana<br><input type="radio"/> 2 a 4 veces semana<br><input type="radio"/> 5 a 6 veces semana<br><input checked="" type="radio"/> 1 vez al día<br><input type="radio"/> 2 a 3 veces al día<br><input type="radio"/> 5 a 6 veces al día<br><input type="radio"/> más 6 veces al día |
| melocotón o nectarina | <input type="radio"/> Nunca o menos 1 vez al mes<br><input checked="" type="radio"/> 1 a 3 veces mes<br><input type="radio"/> 1 vez semana<br><input type="radio"/> 2 a 4 veces semana<br><input type="radio"/> 5 a 6 veces semana<br><input type="radio"/> 1 vez al día<br><input type="radio"/> 2 a 3 veces al día<br><input type="radio"/> 5 a 6 veces al día<br><input type="radio"/> más 6 veces al día |
| sandia o melon        | <input type="radio"/> Nunca o menos 1 vez al mes<br><input checked="" type="radio"/> 1 a 3 veces mes<br><input type="radio"/> 1 vez semana<br><input type="radio"/> 2 a 4 veces semana<br><input type="radio"/> 5 a 6 veces semana<br><input type="radio"/> 1 vez al día<br><input type="radio"/> 2 a 3 veces al día<br><input type="radio"/> 5 a 6 veces al día<br><input type="radio"/> más 6 veces al día |
| uva                   | <input type="radio"/> Nunca o menos 1 vez al mes<br><input type="radio"/> 1 a 3 veces mes<br><input type="radio"/> 1 vez semana<br><input type="radio"/> 2 a 4 veces semana<br><input type="radio"/> 5 a 6 veces semana<br><input checked="" type="radio"/> 1 vez al día<br><input type="radio"/> 2 a 3 veces al día<br><input type="radio"/> 5 a 6 veces al día<br><input type="radio"/> más 6 veces al día |

---

bruna o ciruela

- ☐ Nunca o menos 1 vez al mes  
☒ 1 a 3 veces mes  
☐ 1 vez semana  
☐ 2 a 4 veces semana  
☐ 5 a 6 veces semana  
☐ 1 vez al día  
☐ 2 a 3 veces al día  
☐ 5 a 6 veces al día  
☐ más 6 veces al día

---

kiwi

- ☐ Nunca o menos 1 vez al mes  
☒ 1 a 3 veces mes  
☐ 1 vez semana  
☐ 2 a 4 veces semana  
☐ 5 a 6 veces semana  
☐ 1 vez al día  
☐ 2 a 3 veces al día  
☐ 5 a 6 veces al día  
☐ más 6 veces al día

---

aceituna

- ☐ Nunca o menos 1 vez al mes  
☒ 1 a 3 veces mes  
☐ 1 vez semana  
☐ 2 a 4 veces semana  
☐ 5 a 6 veces semana  
☐ 1 vez al día  
☐ 2 a 3 veces al día  
☐ 5 a 6 veces al día  
☐ más 6 veces al día

---

frutos secos

- ☐ Nunca o menos 1 vez al mes  
☐ 1 a 3 veces mes  
☒ 1 vez semana  
☐ 2 a 4 veces semana  
☐ 5 a 6 veces semana  
☐ 1 vez al día  
☐ 2 a 3 veces al día  
☐ 5 a 6 veces al día  
☐ más 6 veces al día

---

pan blanco

- ☐ Nunca o menos 1 vez al mes  
☐ 1 a 3 veces mes  
☐ 1 vez semana  
☐ 2 a 4 veces semana  
☐ 5 a 6 veces semana  
☒ 1 vez al día  
☐ 2 a 3 veces al día  
☐ 5 a 6 veces al día  
☐ más 6 veces al día

---

pan integral

- ☐ Nunca o menos 1 vez al mes  
☐ 1 a 3 veces mes  
☐ 1 vez semana  
☒ 2 a 4 veces semana  
☐ 5 a 6 veces semana  
☐ 1 vez al día  
☐ 2 a 3 veces al día  
☐ 5 a 6 veces al día  
☐ más 6 veces al día



---

|                   |                                                                                                                                                                                                                                                                                                                                                                                                              |
|-------------------|--------------------------------------------------------------------------------------------------------------------------------------------------------------------------------------------------------------------------------------------------------------------------------------------------------------------------------------------------------------------------------------------------------------|
| cereales desayuno | <input checked="" type="radio"/> Nunca o menos 1 vez al mes<br><input type="radio"/> 1 a 3 veces mes<br><input type="radio"/> 1 vez semana<br><input type="radio"/> 2 a 4 veces semana<br><input type="radio"/> 5 a 6 veces semana<br><input type="radio"/> 1 vez al día<br><input type="radio"/> 2 a 3 veces al día<br><input type="radio"/> 5 a 6 veces al día<br><input type="radio"/> más 6 veces al día |
|-------------------|--------------------------------------------------------------------------------------------------------------------------------------------------------------------------------------------------------------------------------------------------------------------------------------------------------------------------------------------------------------------------------------------------------------|

---

|                |                                                                                                                                                                                                                                                                                                                                                                                                              |
|----------------|--------------------------------------------------------------------------------------------------------------------------------------------------------------------------------------------------------------------------------------------------------------------------------------------------------------------------------------------------------------------------------------------------------------|
| patatas fritas | <input type="radio"/> Nunca o menos 1 vez al mes<br><input type="radio"/> 1 a 3 veces mes<br><input type="radio"/> 1 vez semana<br><input checked="" type="radio"/> 2 a 4 veces semana<br><input type="radio"/> 5 a 6 veces semana<br><input type="radio"/> 1 vez al día<br><input type="radio"/> 2 a 3 veces al día<br><input type="radio"/> 5 a 6 veces al día<br><input type="radio"/> más 6 veces al día |
|----------------|--------------------------------------------------------------------------------------------------------------------------------------------------------------------------------------------------------------------------------------------------------------------------------------------------------------------------------------------------------------------------------------------------------------|

---

|                          |                                                                                                                                                                                                                                                                                                                                                                                                              |
|--------------------------|--------------------------------------------------------------------------------------------------------------------------------------------------------------------------------------------------------------------------------------------------------------------------------------------------------------------------------------------------------------------------------------------------------------|
| patatas cocidas o asadas | <input type="radio"/> Nunca o menos 1 vez al mes<br><input type="radio"/> 1 a 3 veces mes<br><input type="radio"/> 1 vez semana<br><input checked="" type="radio"/> 2 a 4 veces semana<br><input type="radio"/> 5 a 6 veces semana<br><input type="radio"/> 1 vez al día<br><input type="radio"/> 2 a 3 veces al día<br><input type="radio"/> 5 a 6 veces al día<br><input type="radio"/> más 6 veces al día |
|--------------------------|--------------------------------------------------------------------------------------------------------------------------------------------------------------------------------------------------------------------------------------------------------------------------------------------------------------------------------------------------------------------------------------------------------------|

---

|             |                                                                                                                                                                                                                                                                                                                                                                                                              |
|-------------|--------------------------------------------------------------------------------------------------------------------------------------------------------------------------------------------------------------------------------------------------------------------------------------------------------------------------------------------------------------------------------------------------------------|
| bolsa papas | <input type="radio"/> Nunca o menos 1 vez al mes<br><input type="radio"/> 1 a 3 veces mes<br><input type="radio"/> 1 vez semana<br><input checked="" type="radio"/> 2 a 4 veces semana<br><input type="radio"/> 5 a 6 veces semana<br><input type="radio"/> 1 vez al día<br><input type="radio"/> 2 a 3 veces al día<br><input type="radio"/> 5 a 6 veces al día<br><input type="radio"/> más 6 veces al día |
|-------------|--------------------------------------------------------------------------------------------------------------------------------------------------------------------------------------------------------------------------------------------------------------------------------------------------------------------------------------------------------------------------------------------------------------|

---

|                |                                                                                                                                                                                                                                                                                                                                                                                                              |
|----------------|--------------------------------------------------------------------------------------------------------------------------------------------------------------------------------------------------------------------------------------------------------------------------------------------------------------------------------------------------------------------------------------------------------------|
| arroz cocinado | <input type="radio"/> Nunca o menos 1 vez al mes<br><input type="radio"/> 1 a 3 veces mes<br><input checked="" type="radio"/> 1 vez semana<br><input type="radio"/> 2 a 4 veces semana<br><input type="radio"/> 5 a 6 veces semana<br><input type="radio"/> 1 vez al día<br><input type="radio"/> 2 a 3 veces al día<br><input type="radio"/> 5 a 6 veces al día<br><input type="radio"/> más 6 veces al día |
|----------------|--------------------------------------------------------------------------------------------------------------------------------------------------------------------------------------------------------------------------------------------------------------------------------------------------------------------------------------------------------------------------------------------------------------|

---

|       |                                                                                                                                                                                                                                                                                                                                                                                                              |
|-------|--------------------------------------------------------------------------------------------------------------------------------------------------------------------------------------------------------------------------------------------------------------------------------------------------------------------------------------------------------------------------------------------------------------|
| pasta | <input type="radio"/> Nunca o menos 1 vez al mes<br><input type="radio"/> 1 a 3 veces mes<br><input checked="" type="radio"/> 1 vez semana<br><input type="radio"/> 2 a 4 veces semana<br><input type="radio"/> 5 a 6 veces semana<br><input type="radio"/> 1 vez al día<br><input type="radio"/> 2 a 3 veces al día<br><input type="radio"/> 5 a 6 veces al día<br><input type="radio"/> más 6 veces al día |
|-------|--------------------------------------------------------------------------------------------------------------------------------------------------------------------------------------------------------------------------------------------------------------------------------------------------------------------------------------------------------------------------------------------------------------|

---

|                     |                                                                                                                                                                                                                                                                                                                                                                                                              |
|---------------------|--------------------------------------------------------------------------------------------------------------------------------------------------------------------------------------------------------------------------------------------------------------------------------------------------------------------------------------------------------------------------------------------------------------|
| pizza               | <input type="radio"/> Nunca o menos 1 vez al mes<br><input type="radio"/> 1 a 3 veces mes<br><input checked="" type="radio"/> 1 vez semana<br><input type="radio"/> 2 a 4 veces semana<br><input type="radio"/> 5 a 6 veces semana<br><input type="radio"/> 1 vez al día<br><input type="radio"/> 2 a 3 veces al día<br><input type="radio"/> 5 a 6 veces al día<br><input type="radio"/> más 6 veces al día |
| aceite oliva        | <input type="radio"/> Nunca o menos 1 vez al mes<br><input type="radio"/> 1 a 3 veces mes<br><input type="radio"/> 1 vez semana<br><input type="radio"/> 2 a 4 veces semana<br><input type="radio"/> 5 a 6 veces semana<br><input type="radio"/> 1 vez al día<br><input checked="" type="radio"/> 2 a 3 veces al día<br><input type="radio"/> 5 a 6 veces al día<br><input type="radio"/> más 6 veces al día |
| otros aceites       | <input type="radio"/> Nunca o menos 1 vez al mes<br><input type="radio"/> 1 a 3 veces mes<br><input type="radio"/> 1 vez semana<br><input type="radio"/> 2 a 4 veces semana<br><input type="radio"/> 5 a 6 veces semana<br><input checked="" type="radio"/> 1 vez al día<br><input type="radio"/> 2 a 3 veces al día<br><input type="radio"/> 5 a 6 veces al día<br><input type="radio"/> más 6 veces al día |
| margarina           | <input type="radio"/> Nunca o menos 1 vez al mes<br><input type="radio"/> 1 a 3 veces mes<br><input type="radio"/> 1 vez semana<br><input type="radio"/> 2 a 4 veces semana<br><input type="radio"/> 5 a 6 veces semana<br><input checked="" type="radio"/> 1 vez al día<br><input type="radio"/> 2 a 3 veces al día<br><input type="radio"/> 5 a 6 veces al día<br><input type="radio"/> más 6 veces al día |
| mantequilla         | <input type="radio"/> Nunca o menos 1 vez al mes<br><input type="radio"/> 1 a 3 veces mes<br><input type="radio"/> 1 vez semana<br><input type="radio"/> 2 a 4 veces semana<br><input type="radio"/> 5 a 6 veces semana<br><input checked="" type="radio"/> 1 vez al día<br><input type="radio"/> 2 a 3 veces al día<br><input type="radio"/> 5 a 6 veces al día<br><input type="radio"/> más 6 veces al día |
| galletas tipo maria | <input type="radio"/> Nunca o menos 1 vez al mes<br><input type="radio"/> 1 a 3 veces mes<br><input type="radio"/> 1 vez semana<br><input type="radio"/> 2 a 4 veces semana<br><input type="radio"/> 5 a 6 veces semana<br><input checked="" type="radio"/> 1 vez al día<br><input type="radio"/> 2 a 3 veces al día<br><input type="radio"/> 5 a 6 veces al día<br><input type="radio"/> más 6 veces al día |

---

galletas chocolate

- ☐ Nunca o menos 1 vez al mes  
☒ 1 a 3 veces mes  
☐ 1 vez semana  
☐ 2 a 4 veces semana  
☐ 5 a 6 veces semana  
☐ 1 vez al día  
☐ 2 a 3 veces al día  
☐ 5 a 6 veces al día  
☐ más 6 veces al día

---

bolleria

- ☐ Nunca o menos 1 vez al mes  
☐ 1 a 3 veces mes  
☒ 1 vez semana  
☐ 2 a 4 veces semana  
☐ 5 a 6 veces semana  
☐ 1 vez al día  
☐ 2 a 3 veces al día  
☐ 5 a 6 veces al día  
☐ más 6 veces al día

---

chocolate o bombones

- ☐ Nunca o menos 1 vez al mes  
☐ 1 a 3 veces mes  
☒ 1 vez semana  
☐ 2 a 4 veces semana  
☐ 5 a 6 veces semana  
☐ 1 vez al día  
☐ 2 a 3 veces al día  
☐ 5 a 6 veces al día  
☐ más 6 veces al día

---

chocolate polvo o colacao

- ☒ Nunca o menos 1 vez al mes  
☐ 1 a 3 veces mes  
☐ 1 vez semana  
☐ 2 a 4 veces semana  
☐ 5 a 6 veces semana  
☐ 1 vez al día  
☐ 2 a 3 veces al día  
☐ 5 a 6 veces al día  
☐ más 6 veces al día

---

vino tinto

- ☒ Nunca o menos 1 vez al mes  
☐ 1 a 3 veces mes  
☐ 1 vez semana  
☐ 2 a 4 veces semana  
☐ 5 a 6 veces semana  
☐ 1 vez al día  
☐ 2 a 3 veces al día  
☐ 5 a 6 veces al día  
☐ más 6 veces al día

---

vino blanco

- ☒ Nunca o menos 1 vez al mes  
☐ 1 a 3 veces mes  
☐ 1 vez semana  
☐ 2 a 4 veces semana  
☐ 5 a 6 veces semana  
☐ 1 vez al día  
☐ 2 a 3 veces al día  
☐ 5 a 6 veces al día  
☐ más 6 veces al día

---

|                    |                                                                                                                                                                                                                                                                                                                                                                                                              |
|--------------------|--------------------------------------------------------------------------------------------------------------------------------------------------------------------------------------------------------------------------------------------------------------------------------------------------------------------------------------------------------------------------------------------------------------|
| vino seco o vermut | <input checked="" type="radio"/> Nunca o menos 1 vez al mes<br><input type="radio"/> 1 a 3 veces mes<br><input type="radio"/> 1 vez semana<br><input type="radio"/> 2 a 4 veces semana<br><input type="radio"/> 5 a 6 veces semana<br><input type="radio"/> 1 vez al día<br><input type="radio"/> 2 a 3 veces al día<br><input type="radio"/> 5 a 6 veces al día<br><input type="radio"/> más 6 veces al día |
|--------------------|--------------------------------------------------------------------------------------------------------------------------------------------------------------------------------------------------------------------------------------------------------------------------------------------------------------------------------------------------------------------------------------------------------------|

---

|         |                                                                                                                                                                                                                                                                                                                                                                                                              |
|---------|--------------------------------------------------------------------------------------------------------------------------------------------------------------------------------------------------------------------------------------------------------------------------------------------------------------------------------------------------------------------------------------------------------------|
| cerveza | <input checked="" type="radio"/> Nunca o menos 1 vez al mes<br><input type="radio"/> 1 a 3 veces mes<br><input type="radio"/> 1 vez semana<br><input type="radio"/> 2 a 4 veces semana<br><input type="radio"/> 5 a 6 veces semana<br><input type="radio"/> 1 vez al día<br><input type="radio"/> 2 a 3 veces al día<br><input type="radio"/> 5 a 6 veces al día<br><input type="radio"/> más 6 veces al día |
|---------|--------------------------------------------------------------------------------------------------------------------------------------------------------------------------------------------------------------------------------------------------------------------------------------------------------------------------------------------------------------------------------------------------------------|

---

|                     |                                                                                                                                                                                                                                                                                                                                                                                                              |
|---------------------|--------------------------------------------------------------------------------------------------------------------------------------------------------------------------------------------------------------------------------------------------------------------------------------------------------------------------------------------------------------------------------------------------------------|
| cerveza sin alcohol | <input checked="" type="radio"/> Nunca o menos 1 vez al mes<br><input type="radio"/> 1 a 3 veces mes<br><input type="radio"/> 1 vez semana<br><input type="radio"/> 2 a 4 veces semana<br><input type="radio"/> 5 a 6 veces semana<br><input type="radio"/> 1 vez al día<br><input type="radio"/> 2 a 3 veces al día<br><input type="radio"/> 5 a 6 veces al día<br><input type="radio"/> más 6 veces al día |
|---------------------|--------------------------------------------------------------------------------------------------------------------------------------------------------------------------------------------------------------------------------------------------------------------------------------------------------------------------------------------------------------------------------------------------------------|

---

|         |                                                                                                                                                                                                                                                                                                                                                                                                              |
|---------|--------------------------------------------------------------------------------------------------------------------------------------------------------------------------------------------------------------------------------------------------------------------------------------------------------------------------------------------------------------------------------------------------------------|
| licores | <input checked="" type="radio"/> Nunca o menos 1 vez al mes<br><input type="radio"/> 1 a 3 veces mes<br><input type="radio"/> 1 vez semana<br><input type="radio"/> 2 a 4 veces semana<br><input type="radio"/> 5 a 6 veces semana<br><input type="radio"/> 1 vez al día<br><input type="radio"/> 2 a 3 veces al día<br><input type="radio"/> 5 a 6 veces al día<br><input type="radio"/> más 6 veces al día |
|---------|--------------------------------------------------------------------------------------------------------------------------------------------------------------------------------------------------------------------------------------------------------------------------------------------------------------------------------------------------------------------------------------------------------------|

---

|                       |                                                                                                                                                                                                                                                                                                                                                                                                              |
|-----------------------|--------------------------------------------------------------------------------------------------------------------------------------------------------------------------------------------------------------------------------------------------------------------------------------------------------------------------------------------------------------------------------------------------------------|
| ginebra o ron o vodka | <input checked="" type="radio"/> Nunca o menos 1 vez al mes<br><input type="radio"/> 1 a 3 veces mes<br><input type="radio"/> 1 vez semana<br><input type="radio"/> 2 a 4 veces semana<br><input type="radio"/> 5 a 6 veces semana<br><input type="radio"/> 1 vez al día<br><input type="radio"/> 2 a 3 veces al día<br><input type="radio"/> 5 a 6 veces al día<br><input type="radio"/> más 6 veces al día |
|-----------------------|--------------------------------------------------------------------------------------------------------------------------------------------------------------------------------------------------------------------------------------------------------------------------------------------------------------------------------------------------------------------------------------------------------------|

---

|                 |                                                                                                                                                                                                                                                                                                                                                                                                              |
|-----------------|--------------------------------------------------------------------------------------------------------------------------------------------------------------------------------------------------------------------------------------------------------------------------------------------------------------------------------------------------------------------------------------------------------------|
| refresco normal | <input type="radio"/> Nunca o menos 1 vez al mes<br><input type="radio"/> 1 a 3 veces mes<br><input checked="" type="radio"/> 1 vez semana<br><input type="radio"/> 2 a 4 veces semana<br><input type="radio"/> 5 a 6 veces semana<br><input type="radio"/> 1 vez al día<br><input type="radio"/> 2 a 3 veces al día<br><input type="radio"/> 5 a 6 veces al día<br><input type="radio"/> más 6 veces al día |
|-----------------|--------------------------------------------------------------------------------------------------------------------------------------------------------------------------------------------------------------------------------------------------------------------------------------------------------------------------------------------------------------------------------------------------------------|

---

---

refresco sin azúcar

- ☐ Nunca o menos 1 vez al mes  
☐ 1 a 3 veces mes  
☒ 1 vez semana  
☐ 2 a 4 veces semana  
☐ 5 a 6 veces semana  
☐ 1 vez al día  
☐ 2 a 3 veces al día  
☐ 5 a 6 veces al día  
☐ más 6 veces al día

---

Agua del grifo

- ☒ Nunca o menos 1 vez al mes  
☐ 1 a 3 veces mes  
☐ 1 vez semana  
☐ 2 a 4 veces semana  
☐ 5 a 6 veces semana  
☐ 1 vez al día  
☐ 2 a 3 veces al día  
☐ 5 a 6 veces al día  
☐ más 6 veces al día

---

agua embotellada sin gas

- ☐ Nunca o menos 1 vez al mes  
☐ 1 a 3 veces mes  
☐ 1 vez semana  
☐ 2 a 4 veces semana  
☐ 5 a 6 veces semana  
☐ 1 vez al día  
☐ 2 a 3 veces al día  
☐ 5 a 6 veces al día  
☒ más 6 veces al día

---

agua embotellada con gas

- ☒ Nunca o menos 1 vez al mes  
☐ 1 a 3 veces mes  
☐ 1 vez semana  
☐ 2 a 4 veces semana  
☐ 5 a 6 veces semana  
☐ 1 vez al día  
☐ 2 a 3 veces al día  
☐ 5 a 6 veces al día  
☐ más 6 veces al día

---

zumو frutas embasado

- ☐ Nunca o menos 1 vez al mes  
☐ 1 a 3 veces mes  
☒ 1 vez semana  
☐ 2 a 4 veces semana  
☐ 5 a 6 veces semana  
☐ 1 vez al día  
☐ 2 a 3 veces al día  
☐ 5 a 6 veces al día  
☐ más 6 veces al día

---

cafe

- ☐ Nunca o menos 1 vez al mes  
☐ 1 a 3 veces mes  
☐ 1 vez semana  
☐ 2 a 4 veces semana  
☐ 5 a 6 veces semana  
☐ 1 vez al día  
☒ 2 a 3 veces al día  
☐ 5 a 6 veces al día  
☐ más 6 veces al día

|                       |                                                                                                                                                                                                                                                                                                                                                                                                              |
|-----------------------|--------------------------------------------------------------------------------------------------------------------------------------------------------------------------------------------------------------------------------------------------------------------------------------------------------------------------------------------------------------------------------------------------------------|
| cafe descafeinado     | <input checked="" type="radio"/> Nunca o menos 1 vez al mes<br><input type="radio"/> 1 a 3 veces mes<br><input type="radio"/> 1 vez semana<br><input type="radio"/> 2 a 4 veces semana<br><input type="radio"/> 5 a 6 veces semana<br><input type="radio"/> 1 vez al día<br><input type="radio"/> 2 a 3 veces al día<br><input type="radio"/> 5 a 6 veces al día<br><input type="radio"/> más 6 veces al día |
| te o infusión         | <input checked="" type="radio"/> Nunca o menos 1 vez al mes<br><input type="radio"/> 1 a 3 veces mes<br><input type="radio"/> 1 vez semana<br><input type="radio"/> 2 a 4 veces semana<br><input type="radio"/> 5 a 6 veces semana<br><input type="radio"/> 1 vez al día<br><input type="radio"/> 2 a 3 veces al día<br><input type="radio"/> 5 a 6 veces al día<br><input type="radio"/> más 6 veces al día |
| sopa o puré verduras  | <input type="radio"/> Nunca o menos 1 vez al mes<br><input type="radio"/> 1 a 3 veces mes<br><input type="radio"/> 1 vez semana<br><input checked="" type="radio"/> 2 a 4 veces semana<br><input type="radio"/> 5 a 6 veces semana<br><input type="radio"/> 1 vez al día<br><input type="radio"/> 2 a 3 veces al día<br><input type="radio"/> 5 a 6 veces al día<br><input type="radio"/> más 6 veces al día |
| croquetas pollo jamón | <input type="radio"/> Nunca o menos 1 vez al mes<br><input type="radio"/> 1 a 3 veces mes<br><input checked="" type="radio"/> 1 vez semana<br><input type="radio"/> 2 a 4 veces semana<br><input type="radio"/> 5 a 6 veces semana<br><input type="radio"/> 1 vez al día<br><input type="radio"/> 2 a 3 veces al día<br><input type="radio"/> 5 a 6 veces al día<br><input type="radio"/> más 6 veces al día |
| croquetas pescado     | <input type="radio"/> Nunca o menos 1 vez al mes<br><input type="radio"/> 1 a 3 veces mes<br><input checked="" type="radio"/> 1 vez semana<br><input type="radio"/> 2 a 4 veces semana<br><input type="radio"/> 5 a 6 veces semana<br><input type="radio"/> 1 vez al día<br><input type="radio"/> 2 a 3 veces al día<br><input type="radio"/> 5 a 6 veces al día<br><input type="radio"/> más 6 veces al día |
| mayonesa              | <input type="radio"/> Nunca o menos 1 vez al mes<br><input type="radio"/> 1 a 3 veces mes<br><input type="radio"/> 1 vez semana<br><input type="radio"/> 2 a 4 veces semana<br><input type="radio"/> 5 a 6 veces semana<br><input checked="" type="radio"/> 1 vez al día<br><input type="radio"/> 2 a 3 veces al día<br><input type="radio"/> 5 a 6 veces al día<br><input type="radio"/> más 6 veces al día |

|                  |                                                                                                                                                                                                                                                                                                                                                                                                              |
|------------------|--------------------------------------------------------------------------------------------------------------------------------------------------------------------------------------------------------------------------------------------------------------------------------------------------------------------------------------------------------------------------------------------------------------|
| salsa tomate     | <input type="radio"/> Nunca o menos 1 vez al mes<br><input type="radio"/> 1 a 3 veces mes<br><input checked="" type="radio"/> 1 vez semana<br><input type="radio"/> 2 a 4 veces semana<br><input type="radio"/> 5 a 6 veces semana<br><input type="radio"/> 1 vez al día<br><input type="radio"/> 2 a 3 veces al día<br><input type="radio"/> 5 a 6 veces al día<br><input type="radio"/> más 6 veces al día |
| ketchup          | <input type="radio"/> Nunca o menos 1 vez al mes<br><input type="radio"/> 1 a 3 veces mes<br><input type="radio"/> 1 vez semana<br><input type="radio"/> 2 a 4 veces semana<br><input type="radio"/> 5 a 6 veces semana<br><input checked="" type="radio"/> 1 vez al día<br><input type="radio"/> 2 a 3 veces al día<br><input type="radio"/> 5 a 6 veces al día<br><input type="radio"/> más 6 veces al día |
| sal              | <input type="radio"/> Nunca o menos 1 vez al mes<br><input type="radio"/> 1 a 3 veces mes<br><input type="radio"/> 1 vez semana<br><input type="radio"/> 2 a 4 veces semana<br><input type="radio"/> 5 a 6 veces semana<br><input type="radio"/> 1 vez al día<br><input checked="" type="radio"/> 2 a 3 veces al día<br><input type="radio"/> 5 a 6 veces al día<br><input type="radio"/> más 6 veces al día |
| ajo              | <input type="radio"/> Nunca o menos 1 vez al mes<br><input type="radio"/> 1 a 3 veces mes<br><input type="radio"/> 1 vez semana<br><input type="radio"/> 2 a 4 veces semana<br><input type="radio"/> 5 a 6 veces semana<br><input type="radio"/> 1 vez al día<br><input checked="" type="radio"/> 2 a 3 veces al día<br><input type="radio"/> 5 a 6 veces al día<br><input type="radio"/> más 6 veces al día |
| mermelada o miel | <input type="radio"/> Nunca o menos 1 vez al mes<br><input type="radio"/> 1 a 3 veces mes<br><input type="radio"/> 1 vez semana<br><input type="radio"/> 2 a 4 veces semana<br><input checked="" type="radio"/> 5 a 6 veces semana<br><input type="radio"/> 1 vez al día<br><input type="radio"/> 2 a 3 veces al día<br><input type="radio"/> 5 a 6 veces al día<br><input type="radio"/> más 6 veces al día |
| azúcar           | <input type="radio"/> Nunca o menos 1 vez al mes<br><input type="radio"/> 1 a 3 veces mes<br><input type="radio"/> 1 vez semana<br><input type="radio"/> 2 a 4 veces semana<br><input checked="" type="radio"/> 5 a 6 veces semana<br><input type="radio"/> 1 vez al día<br><input type="radio"/> 2 a 3 veces al día<br><input type="radio"/> 5 a 6 veces al día<br><input type="radio"/> más 6 veces al día |

---

Otro alimento

---

suplementos vitamínicos

- ☐ si  
☒ no

---

suplementos vitamínicos

---

dieta previa

- ☐ si  
☒ no

motivo dieta

- ☒ no dieta  
☐ control peso  
☐ control colesterol  
☐ control diabetes  
☐ problemas estómago  
☐ problemas vesícula o hepáticos  
☐ HTA o cardiopatía  
☐ problemas renales  
☐ alergia alimentaria  
☐ ácido úrico elevado  
☐ vegetariana  
☐ otros

---

cambio alimentos año previo gestación

---

- ☐ si  
☒ no

cambio lácteos

- ☐ eliminado  
☐ disminuido  
☐ igual  
☐ aumentado  
☐ no sabe

---

cambio huevos

---

- ☐ eliminado  
☐ disminuido  
☐ igual  
☐ aumentado  
☐ no sabe

cambio carne

- ☐ eliminado  
☐ disminuido  
☐ igual  
☐ aumentado  
☐ no sabe

---

cambio pescado

---

- ☐ eliminado  
☐ disminuido  
☐ igual  
☐ aumentado  
☐ no sabe

cambio verduras

- ☐ eliminado  
☐ disminuido  
☐ igual  
☐ aumentado  
☐ no sabe



|                            |                                                                                                                                                                                                                        |
|----------------------------|------------------------------------------------------------------------------------------------------------------------------------------------------------------------------------------------------------------------|
| cambio legumbres           | <input type="radio"/> eliminado<br><input type="radio"/> disminuido<br><input type="radio"/> igual<br><input type="radio"/> aumentado<br><input type="radio"/> no sabe                                                 |
| cambio fruta               | <input type="radio"/> eliminado<br><input type="radio"/> disminuido<br><input type="radio"/> igual<br><input type="radio"/> aumentado<br><input type="radio"/> no sabe                                                 |
| cambio pan                 | <input type="radio"/> eliminado<br><input type="radio"/> disminuido<br><input type="radio"/> igual<br><input type="radio"/> aumentado<br><input type="radio"/> no sabe                                                 |
| cambio aceite oliva        | <input type="radio"/> eliminado<br><input type="radio"/> disminuido<br><input type="radio"/> igual<br><input type="radio"/> aumentado<br><input type="radio"/> no sabe                                                 |
| cambio mante o margarina   | <input type="radio"/> eliminado<br><input type="radio"/> disminuido<br><input type="radio"/> igual<br><input type="radio"/> aumentado<br><input type="radio"/> no sabe                                                 |
| cambio azúcar y dulces     | <input type="radio"/> eliminado<br><input type="radio"/> disminuido<br><input type="radio"/> igual<br><input type="radio"/> aumentado<br><input type="radio"/> no sabe                                                 |
| cambio bebidas alcohólicas | <input type="radio"/> eliminado<br><input type="radio"/> disminuido<br><input type="radio"/> igual<br><input type="radio"/> aumentado<br><input type="radio"/> no sabe                                                 |
| frecuencia comidas fritas  | <input type="radio"/> a diario<br><input type="radio"/> 5 a 6 veces semana<br><input checked="" type="radio"/> 2 a 4 veces semana<br><input type="radio"/> 1 vez semana<br><input type="radio"/> menos de 1 vez semana |
| carne                      | <input type="radio"/> no como<br><input type="radio"/> cruda<br><input type="radio"/> poco hecha<br><input type="radio"/> hecha<br><input checked="" type="radio"/> muy hecha                                          |
| grasa visible carne        | <input type="radio"/> quita toda<br><input checked="" type="radio"/> quita mayoría<br><input type="radio"/> quita un poco<br><input type="radio"/> no quita nada                                                       |

|                                |                                                                                                                                                                                                                                                          |
|--------------------------------|----------------------------------------------------------------------------------------------------------------------------------------------------------------------------------------------------------------------------------------------------------|
| cocina carne                   | <input checked="" type="radio"/> a la plancha<br><input type="radio"/> a la parrilla<br><input type="radio"/> asada<br><input type="radio"/> frita<br><input type="radio"/> guisada                                                                      |
| tostado quemado carne          | <input checked="" type="radio"/> nunca<br><input type="radio"/> 1 vez mes<br><input type="radio"/> 2 a 3 veces mes<br><input type="radio"/> 1 vez semana<br><input type="radio"/> 2 a 3 semanas                                                          |
| tostado quemado pescado        | <input checked="" type="radio"/> nunca<br><input type="radio"/> 1 vez mes<br><input type="radio"/> 2 a 3 veces mes<br><input type="radio"/> 1 vez semana<br><input type="radio"/> 2 a 3 semanas                                                          |
| socarrat paella                | <input checked="" type="radio"/> nunca<br><input type="radio"/> 1 vez mes<br><input type="radio"/> 2 a 3 veces mes<br><input type="radio"/> 1 vez semana<br><input type="radio"/> 2 a 3 semanas                                                          |
| grasa o aceite cocinar         | <input type="radio"/> mantequilla<br><input type="radio"/> margarina<br><input type="radio"/> aceite oliva<br><input checked="" type="radio"/> aceite oliva virgen extra<br><input type="radio"/> aceite vegetal<br><input type="radio"/> mezcla aceites |
| grasa aceite aliñar            | <input type="radio"/> mantequilla<br><input type="radio"/> margarina<br><input type="radio"/> aceite oliva<br><input checked="" type="radio"/> aceite oliva virgen extra<br><input type="radio"/> aceite vegetal<br><input type="radio"/> mezcla aceites |
| grasa aceite freir             | <input type="radio"/> mantequilla<br><input type="radio"/> margarina<br><input type="radio"/> aceite oliva<br><input checked="" type="radio"/> aceite oliva virgen extra<br><input type="radio"/> aceite vegetal<br><input type="radio"/> mezcla aceites |
| Ejercicio cuestionario         | <input type="radio"/> si<br><input checked="" type="radio"/> no                                                                                                                                                                                          |
| horas de sueño incluido siesta | [*DATA REMOVED*]                                                                                                                                                                                                                                         |
| minutos siesta                 | [*DATA REMOVED*]                                                                                                                                                                                                                                         |
| horas televisión semana        | [*DATA REMOVED*]                                                                                                                                                                                                                                         |

|                                        |                                                                                                                                                                                                                                                                                                                                                                           |
|----------------------------------------|---------------------------------------------------------------------------------------------------------------------------------------------------------------------------------------------------------------------------------------------------------------------------------------------------------------------------------------------------------------------------|
| actividad trabajo                      | <input checked="" type="radio"/> casi siempre sentado<br><input type="radio"/> sentado 50 por cien<br><input type="radio"/> casi siempre de pie, quieto<br><input type="radio"/> casi siempre levantado caminando y llevando pocas cosas<br><input type="radio"/> casi siempre levantado, caminando y llevado muchas cosas<br><input type="radio"/> trabajo manual pesado |
| tiempo caminar o bici al día           | <input type="radio"/> casi nunca<br><input checked="" type="radio"/> menos 20min día<br><input type="radio"/> 20 a 40 min día<br><input type="radio"/> 40 a 60 min día<br><input type="radio"/> 1h o 1h y media día<br><input type="radio"/> más de 1h y media al día                                                                                                     |
| tiempo tareas casa al día              | <input type="radio"/> menos de 1h día<br><input checked="" type="radio"/> 1 a 2h día<br><input type="radio"/> 3 a 4h día<br><input type="radio"/> 5 a 6h día<br><input type="radio"/> 7 a 8h día<br><input type="radio"/> más de 8h día                                                                                                                                   |
| tiempo libre televisión ordenador leer | <input type="radio"/> menos 1h día<br><input checked="" type="radio"/> 1h día<br><input type="radio"/> 2h día<br><input type="radio"/> 3h día<br><input type="radio"/> 4h día<br><input type="radio"/> 5 a 6h día<br><input type="radio"/> mas 6h día                                                                                                                     |
| tiempo libre ejercicio o deporte       | <input type="radio"/> menos 1h semana<br><input checked="" type="radio"/> 1h semana<br><input type="radio"/> 2h semana<br><input type="radio"/> 3h semana<br><input type="radio"/> 4 a 5h semana<br><input type="radio"/> mas 5h semana                                                                                                                                   |
| como se considera                      | <input checked="" type="radio"/> sedentaria<br><input type="radio"/> poco activa<br><input type="radio"/> moderadamente activa<br><input type="radio"/> bastante activa<br><input type="radio"/> muy activa<br><input type="radio"/> no sabe                                                                                                                              |
| FUR                                    | [*DATA REMOVED*]                                                                                                                                                                                                                                                                                                                                                          |
| Semanas gestación 2T                   | [*DATA REMOVED*]                                                                                                                                                                                                                                                                                                                                                          |
| Días gestación 2T                      | [*DATA REMOVED*]                                                                                                                                                                                                                                                                                                                                                          |
| DBP 2T                                 | [*DATA REMOVED*]                                                                                                                                                                                                                                                                                                                                                          |
| CC 2T                                  | [*DATA REMOVED*]                                                                                                                                                                                                                                                                                                                                                          |
| AC 2T                                  | [*DATA REMOVED*]                                                                                                                                                                                                                                                                                                                                                          |

|                                                   |                                                                                                                                                                                                 |
|---------------------------------------------------|-------------------------------------------------------------------------------------------------------------------------------------------------------------------------------------------------|
| LF 2T                                             | [*DATA REMOVED*]                                                                                                                                                                                |
| PFE 2T (Hadlock)                                  | [*DATA REMOVED*]                                                                                                                                                                                |
| Semanas gestación 3T                              | _____                                                                                                                                                                                           |
| días 3T                                           | _____                                                                                                                                                                                           |
| DBP 3T                                            | _____                                                                                                                                                                                           |
| CC 3T                                             | _____                                                                                                                                                                                           |
| AC 3T                                             | _____                                                                                                                                                                                           |
| LF 3T                                             | _____                                                                                                                                                                                           |
| PFE 3T (Hadlock)                                  | _____                                                                                                                                                                                           |
| Semanas de gestación final                        | [*DATA REMOVED*]                                                                                                                                                                                |
| dias gestación final                              | [*DATA REMOVED*]                                                                                                                                                                                |
| Localización placenta                             | <input checked="" type="radio"/> anterior<br><input type="radio"/> lateral derecha<br><input type="radio"/> lateral izquierda<br><input type="radio"/> posterior<br><input type="radio"/> fondo |
| Presentación longitudinal cefálica                | <input type="radio"/> no<br><input checked="" type="radio"/> si                                                                                                                                 |
| Dorso                                             | <input checked="" type="radio"/> izquierda anterior<br><input type="radio"/> izquierda posterior<br><input type="radio"/> derecha anterior<br><input type="radio"/> derecha posterior           |
| diámetro biparietal                               | [*DATA REMOVED*]                                                                                                                                                                                |
| Circunferencia craneal                            | [*DATA REMOVED*]                                                                                                                                                                                |
| Circunferencia abdominal                          | [*DATA REMOVED*]                                                                                                                                                                                |
| Longitud de femur                                 | [*DATA REMOVED*]                                                                                                                                                                                |
| tejido celular subcutáneo a nivel del muslo en mm | [*DATA REMOVED*]                                                                                                                                                                                |
| tejido celular subcutáneo en abdomen en mm        | [*DATA REMOVED*]                                                                                                                                                                                |

|                                               |                                                                                                                                                          |
|-----------------------------------------------|----------------------------------------------------------------------------------------------------------------------------------------------------------|
| Volumen del muslo en cm3                      | [*DATA REMOVED*]                                                                                                                                         |
| Peso fetal estimado según fórmula de Hadlock  | [*DATA REMOVED*]                                                                                                                                         |
| Percentil                                     | [*DATA REMOVED*]                                                                                                                                         |
| Peso fetal estimado según fórmula de Scioscia | _____                                                                                                                                                    |
| Peso fetal estimado según fórmula de LEE      | _____                                                                                                                                                    |
| Tipo de parto                                 | <input checked="" type="radio"/> eutocico<br><input type="radio"/> instrumentado/ventosa<br><input type="radio"/> cesarea                                |
| fecha de nacimiento                           | [*DATA REMOVED*]                                                                                                                                         |
| Días entre exploración y nacimiento           | [*DATA REMOVED*]                                                                                                                                         |
| Peso RN en g                                  | [*DATA REMOVED*]                                                                                                                                         |
| sexo                                          | <input type="radio"/> mujer<br><input checked="" type="radio"/> hombre                                                                                   |
| Apgar 1 minuto                                | [*DATA REMOVED*]                                                                                                                                         |
| Apgar 5 minutos                               | [*DATA REMOVED*]                                                                                                                                         |
| Apgar 10 minutos                              | _____                                                                                                                                                    |
| antecedente Covid durante gestación           | <input type="radio"/> Yes<br><input checked="" type="radio"/> No                                                                                         |
| Nivel de estudios                             | <input type="radio"/> ninguno<br><input type="radio"/> primarios<br><input checked="" type="radio"/> secundarios<br><input type="radio"/> universitarios |

# Base\_datos\_estimacion\_peso\_fetal

|                                       |                                                                                                                                                                                                                                                                                      |
|---------------------------------------|--------------------------------------------------------------------------------------------------------------------------------------------------------------------------------------------------------------------------------------------------------------------------------------|
| Número de identificación participante | 193                                                                                                                                                                                                                                                                                  |
| CODIGO PARTICIPANTE                   |                                                                                                                                                                                                                                                                                      |
| Edad                                  | [*DATA REMOVED*]                                                                                                                                                                                                                                                                     |
| Gestaciones                           | <input type="radio"/> 1<br><input checked="" type="radio"/> 2<br><input type="radio"/> 3<br><input type="radio"/> mas de 3                                                                                                                                                           |
| partos                                | <input checked="" type="radio"/> 0<br><input type="radio"/> 1<br><input type="radio"/> 2<br><input type="radio"/> 3<br><input type="radio"/> mas de 3                                                                                                                                |
| cesáreas                              | <input checked="" type="radio"/> 0<br><input type="radio"/> 1<br><input type="radio"/> 2<br><input type="radio"/> 3<br><input type="radio"/> mas de 3                                                                                                                                |
| Abortos                               | <input type="radio"/> 0<br><input checked="" type="radio"/> 1<br><input type="radio"/> 2<br><input type="radio"/> 3<br><input type="radio"/> mas de 3                                                                                                                                |
| Tipo de gestacion                     | <input checked="" type="radio"/> espontanea<br><input type="radio"/> IAC inseminación artificial conyuge<br><input type="radio"/> IAD inseminación artificial donante<br><input type="radio"/> FIV Fecundación in Vitro<br><input type="radio"/> Ovodon FIV con donación de ovocitos |
| peso previo a embarazo                | [*DATA REMOVED*]                                                                                                                                                                                                                                                                     |
| Ganancia ponderal embarazo            | [*DATA REMOVED*]                                                                                                                                                                                                                                                                     |
| Talla madre                           | [*DATA REMOVED*]                                                                                                                                                                                                                                                                     |
| IMC previo embarazo                   | 32.987916382803256                                                                                                                                                                                                                                                                   |
| Patología obstétrica                  | <input type="radio"/> no<br><input checked="" type="radio"/> si                                                                                                                                                                                                                      |
| Diabetes pregestacional               | <input checked="" type="radio"/> no<br><input type="radio"/> si                                                                                                                                                                                                                      |
| Diabetes gestacional                  | <input type="radio"/> no<br><input checked="" type="radio"/> si                                                                                                                                                                                                                      |

|                                            |                                                                                                                                                                                      |
|--------------------------------------------|--------------------------------------------------------------------------------------------------------------------------------------------------------------------------------------|
| Diabetes gestacional con insulina          | <input checked="" type="radio"/> no<br><input type="radio"/> si                                                                                                                      |
| Diabetes gestacional con dieta y ejercicio | <input type="radio"/> no<br><input checked="" type="radio"/> si                                                                                                                      |
| Percentil fetos previos                    | <input checked="" type="radio"/> Nada<br><input type="radio"/> percentil menor de 10<br><input type="radio"/> percentil entre 10 y 90<br><input type="radio"/> percentil mayor de 90 |
| Exfumadora                                 | <input checked="" type="radio"/> Nada<br><input type="radio"/> menos de 5 años<br><input type="radio"/> 5 a 10 años<br><input type="radio"/> mayor o igual a 10 años                 |
| Hábito tabáquico                           | <input type="radio"/> no<br><input checked="" type="radio"/> si                                                                                                                      |
| fumadora                                   | [*DATA REMOVED*]                                                                                                                                                                     |
| Consumo otros tóxicos                      | <input checked="" type="radio"/> no<br><input type="radio"/> si                                                                                                                      |
| Hb 1T                                      | [*DATA REMOVED*]                                                                                                                                                                     |
| Htc 1T                                     | [*DATA REMOVED*]                                                                                                                                                                     |
| Hb 2T                                      | [*DATA REMOVED*]                                                                                                                                                                     |
| HTC 2T                                     | [*DATA REMOVED*]                                                                                                                                                                     |
| Hb 3T                                      | [*DATA REMOVED*]                                                                                                                                                                     |
| HTC 3T                                     | [*DATA REMOVED*]                                                                                                                                                                     |
| Suplemento FE oral                         | <input checked="" type="radio"/> si<br><input type="radio"/> no                                                                                                                      |
| Suplemento fe iv                           | <input type="radio"/> si<br><input checked="" type="radio"/> no                                                                                                                      |
| Transfusión                                | <input checked="" type="radio"/> no<br><input type="radio"/> si                                                                                                                      |
| Solicitada Vit D                           | <input type="radio"/> no<br><input checked="" type="radio"/> si                                                                                                                      |
| Deficit vit D                              | <input type="radio"/> no<br><input checked="" type="radio"/> si                                                                                                                      |
| Suplemento vit D                           | <input checked="" type="radio"/> si<br><input type="radio"/> no                                                                                                                      |

|                       |                                                                                                                                                                                                                                                                                                                                                                                                              |
|-----------------------|--------------------------------------------------------------------------------------------------------------------------------------------------------------------------------------------------------------------------------------------------------------------------------------------------------------------------------------------------------------------------------------------------------------|
| Dieta, cuestionario   | <input checked="" type="radio"/> sí<br><input type="radio"/> no                                                                                                                                                                                                                                                                                                                                              |
| Leche entera          | <input checked="" type="radio"/> Nunca o menos 1 vez al mes<br><input type="radio"/> 1 a 3 veces mes<br><input type="radio"/> 1 vez semana<br><input type="radio"/> 2 a 4 veces semana<br><input type="radio"/> 5 a 6 veces semana<br><input type="radio"/> 1 vez al día<br><input type="radio"/> 2 a 3 veces al día<br><input type="radio"/> 5 a 6 veces al día<br><input type="radio"/> más 6 veces al día |
| Leche semidesnatada   | <input type="radio"/> Nunca o menos 1 vez al mes<br><input type="radio"/> 1 a 3 veces mes<br><input type="radio"/> 1 vez semana<br><input type="radio"/> 2 a 4 veces semana<br><input type="radio"/> 5 a 6 veces semana<br><input checked="" type="radio"/> 1 vez al día<br><input type="radio"/> 2 a 3 veces al día<br><input type="radio"/> 5 a 6 veces al día<br><input type="radio"/> mas 6 veces al día |
| Leche desnatada       | <input checked="" type="radio"/> Nunca o menos 1 vez al mes<br><input type="radio"/> 1 a 3 veces mes<br><input type="radio"/> 1 vez semana<br><input type="radio"/> 2 a 4 veces semana<br><input type="radio"/> 5 a 6 veces semana<br><input type="radio"/> 1 vez al día<br><input type="radio"/> 2 a 3 veces al día<br><input type="radio"/> 5 a 6 veces al día<br><input type="radio"/> más 6 veces al día |
| Leche condensada      | <input checked="" type="radio"/> Nunca o menos 1 vez al mes<br><input type="radio"/> 1 a 3 veces mes<br><input type="radio"/> 1 vez semana<br><input type="radio"/> 2 a 4 veces semana<br><input type="radio"/> 5 a 6 veces semana<br><input type="radio"/> 1 vez al día<br><input type="radio"/> 2 a 3 veces al día<br><input type="radio"/> 5 a 6 veces al día<br><input type="radio"/> más 6 veces al día |
| nata o crema de leche | <input type="radio"/> Nunca o menos 1 vez al mes<br><input checked="" type="radio"/> 1 a 3 veces mes<br><input type="radio"/> 1 vez semana<br><input type="radio"/> 2 a 4 veces semana<br><input type="radio"/> 5 a 6 veces semana<br><input type="radio"/> 1 vez al día<br><input type="radio"/> 2 a 3 veces al día<br><input type="radio"/> 5 a 6 veces al día<br><input type="radio"/> más 6 veces al día |



|                                             |                                                                                                                                                                                                                                                                                                                                                                                                              |
|---------------------------------------------|--------------------------------------------------------------------------------------------------------------------------------------------------------------------------------------------------------------------------------------------------------------------------------------------------------------------------------------------------------------------------------------------------------------|
| Yogurt Entero                               | <input checked="" type="radio"/> Nunca o menos 1 vez al mes<br><input type="radio"/> 1 a 3 veces mes<br><input type="radio"/> 1 vez semana<br><input type="radio"/> 2 a 4 veces semana<br><input type="radio"/> 5 a 6 veces semana<br><input type="radio"/> 1 vez al día<br><input type="radio"/> 2 a 3 veces al día<br><input type="radio"/> 5 a 6 veces al día<br><input type="radio"/> más 6 veces al día |
| Yogurt desnatado                            | <input type="radio"/> Nunca o menos 1 vez al mes<br><input checked="" type="radio"/> 1 a 3 veces mes<br><input type="radio"/> 1 vez semana<br><input type="radio"/> 2 a 4 veces semana<br><input type="radio"/> 5 a 6 veces semana<br><input type="radio"/> 1 vez al día<br><input type="radio"/> 2 a 3 veces al día<br><input type="radio"/> 5 a 6 veces al día<br><input type="radio"/> más 6 veces al día |
| 100g requesón o queso blando o queso fresco | <input type="radio"/> Nunca o menos 1 vez al mes<br><input checked="" type="radio"/> 1 a 3 veces mes<br><input type="radio"/> 1 vez semana<br><input type="radio"/> 2 a 4 veces semana<br><input type="radio"/> 5 a 6 veces semana<br><input type="radio"/> 1 vez al día<br><input type="radio"/> 2 a 3 veces al día<br><input type="radio"/> 5 a 6 veces al día<br><input type="radio"/> más 6 veces al día |
| queso curado o semicurado o cremoso         | <input type="radio"/> Nunca o menos 1 vez al mes<br><input type="radio"/> 1 a 3 veces mes<br><input checked="" type="radio"/> 1 vez semana<br><input type="radio"/> 2 a 4 veces semana<br><input type="radio"/> 5 a 6 veces semana<br><input type="radio"/> 1 vez al día<br><input type="radio"/> 2 a 3 veces al día<br><input type="radio"/> 5 a 6 veces al día<br><input type="radio"/> más 6 veces al día |
| natillas flan pudding                       | <input type="radio"/> Nunca o menos 1 vez al mes<br><input type="radio"/> 1 a 3 veces mes<br><input checked="" type="radio"/> 1 vez semana<br><input type="radio"/> 2 a 4 veces semana<br><input type="radio"/> 5 a 6 veces semana<br><input type="radio"/> 1 vez al día<br><input type="radio"/> 2 a 3 veces al día<br><input type="radio"/> 5 a 6 veces al día<br><input type="radio"/> más 6 veces al día |
| Helado                                      | <input type="radio"/> Nunca o menos 1 vez al mes<br><input checked="" type="radio"/> 1 a 3 veces mes<br><input type="radio"/> 1 vez semana<br><input type="radio"/> 2 a 4 veces semana<br><input type="radio"/> 5 a 6 veces semana<br><input type="radio"/> 1 vez al día<br><input type="radio"/> 2 a 3 veces al día<br><input type="radio"/> 5 a 6 veces al día<br><input type="radio"/> más 6 veces al día |

|                                      |                                                                                                                                                                                                                                                                                                                                                                                                              |
|--------------------------------------|--------------------------------------------------------------------------------------------------------------------------------------------------------------------------------------------------------------------------------------------------------------------------------------------------------------------------------------------------------------------------------------------------------------|
| huevo                                | <input type="radio"/> Nunca o menos 1 vez al mes<br><input type="radio"/> 1 a 3 veces mes<br><input type="radio"/> 1 vez semana<br><input checked="" type="radio"/> 2 a 4 veces semana<br><input type="radio"/> 5 a 6 veces semana<br><input type="radio"/> 1 vez al día<br><input type="radio"/> 2 a 3 veces al día<br><input type="radio"/> 5 a 6 veces al día<br><input type="radio"/> más 6 veces al día |
| Pollo con piel                       | <input type="radio"/> Nunca o menos 1 vez al mes<br><input type="radio"/> 1 a 3 veces mes<br><input checked="" type="radio"/> 1 vez semana<br><input type="radio"/> 2 a 4 veces semana<br><input type="radio"/> 5 a 6 veces semana<br><input type="radio"/> 1 vez al día<br><input type="radio"/> 2 a 3 veces al día<br><input type="radio"/> 5 a 6 veces al día<br><input type="radio"/> más 6 veces al día |
| pollo sin piel                       | <input type="radio"/> Nunca o menos 1 vez al mes<br><input type="radio"/> 1 a 3 veces mes<br><input checked="" type="radio"/> 1 vez semana<br><input type="radio"/> 2 a 4 veces semana<br><input type="radio"/> 5 a 6 veces semana<br><input type="radio"/> 1 vez al día<br><input type="radio"/> 2 a 3 veces al día<br><input type="radio"/> 5 a 6 veces al día<br><input type="radio"/> más 6 veces al día |
| Ternera o cerdo o cordero            | <input type="radio"/> Nunca o menos 1 vez al mes<br><input type="radio"/> 1 a 3 veces mes<br><input type="radio"/> 1 vez semana<br><input checked="" type="radio"/> 2 a 4 veces semana<br><input type="radio"/> 5 a 6 veces semana<br><input type="radio"/> 1 vez al día<br><input type="radio"/> 2 a 3 veces al día<br><input type="radio"/> 5 a 6 veces al día<br><input type="radio"/> más 6 veces al día |
| carne caza: Conejo o codorniz o pato | <input type="radio"/> Nunca o menos 1 vez al mes<br><input checked="" type="radio"/> 1 a 3 veces mes<br><input type="radio"/> 1 vez semana<br><input type="radio"/> 2 a 4 veces semana<br><input type="radio"/> 5 a 6 veces semana<br><input type="radio"/> 1 vez al día<br><input type="radio"/> 2 a 3 veces al día<br><input type="radio"/> 5 a 6 veces al día<br><input type="radio"/> más 6 veces al día |
| Hígado de ternera o cerdo o pollo    | <input type="radio"/> Nunca o menos 1 vez al mes<br><input checked="" type="radio"/> 1 a 3 veces mes<br><input type="radio"/> 1 vez semana<br><input type="radio"/> 2 a 4 veces semana<br><input type="radio"/> 5 a 6 veces semana<br><input type="radio"/> 1 vez al día<br><input type="radio"/> 2 a 3 veces al día<br><input type="radio"/> 5 a 6 veces al día<br><input type="radio"/> más 6 veces al día |

---

Vísceras

- ☐ Nunca o menos 1 vez al mes  
☒ 1 a 3 veces mes  
☐ 1 vez semana  
☐ 2 a 4 veces semana  
☐ 5 a 6 veces semana  
☐ 1 vez al día  
☐ 2 a 3 veces al día  
☐ 5 a 6 veces al día  
☐ más 6 veces al día

---

Embutido

- ☒ Nunca o menos 1 vez al mes  
☐ 1 a 3 veces mes  
☐ 1 vez semana  
☐ 2 a 4 veces semana  
☐ 5 a 6 veces semana  
☐ 1 vez al día  
☐ 2 a 3 veces al día  
☐ 5 a 6 veces al día  
☐ más 6 veces al día

---

Salchicha o similar

- ☐ Nunca o menos 1 vez al mes  
☐ 1 a 3 veces mes  
☒ 1 vez semana  
☐ 2 a 4 veces semana  
☐ 5 a 6 veces semana  
☐ 1 vez al día  
☐ 2 a 3 veces al día  
☐ 5 a 6 veces al día  
☐ más 6 veces al día

---

Pate o foiegras

- ☒ Nunca o menos 1 vez al mes  
☐ 1 a 3 veces mes  
☐ 1 vez semana  
☐ 2 a 4 veces semana  
☐ 5 a 6 veces semana  
☐ 1 vez al día  
☐ 2 a 3 veces al día  
☐ 5 a 6 veces al día  
☐ más 6 veces al día

---

Hamburguesa

- ☐ Nunca o menos 1 vez al mes  
☐ 1 a 3 veces mes  
☒ 1 vez semana  
☐ 2 a 4 veces semana  
☐ 5 a 6 veces semana  
☐ 1 vez al día  
☐ 2 a 3 veces al día  
☐ 5 a 6 veces al día  
☐ más 6 veces al día

---

tocino o bacon

- ☐ Nunca o menos 1 vez al mes  
☐ 1 a 3 veces mes  
☒ 1 vez semana  
☐ 2 a 4 veces semana  
☐ 5 a 6 veces semana  
☐ 1 vez al día  
☐ 2 a 3 veces al día  
☐ 5 a 6 veces al día  
☐ más 6 veces al día

|                        |                                                                                                                                                                                                                                                                                                                                                                                                              |
|------------------------|--------------------------------------------------------------------------------------------------------------------------------------------------------------------------------------------------------------------------------------------------------------------------------------------------------------------------------------------------------------------------------------------------------------|
| Pescado frito          | <input type="radio"/> Nunca o menos 1 vez al mes<br><input checked="" type="radio"/> 1 a 3 veces mes<br><input type="radio"/> 1 vez semana<br><input type="radio"/> 2 a 4 veces semana<br><input type="radio"/> 5 a 6 veces semana<br><input type="radio"/> 1 vez al día<br><input type="radio"/> 2 a 3 veces al día<br><input type="radio"/> 5 a 6 veces al día<br><input type="radio"/> más 6 veces al día |
| pescado hervido blanco | <input type="radio"/> Nunca o menos 1 vez al mes<br><input checked="" type="radio"/> 1 a 3 veces mes<br><input type="radio"/> 1 vez semana<br><input type="radio"/> 2 a 4 veces semana<br><input type="radio"/> 5 a 6 veces semana<br><input type="radio"/> 1 vez al día<br><input type="radio"/> 2 a 3 veces al día<br><input type="radio"/> 5 a 6 veces al día<br><input type="radio"/> más 6 veces al día |
| pescado hervido azul   | <input type="radio"/> Nunca o menos 1 vez al mes<br><input checked="" type="radio"/> 1 a 3 veces mes<br><input type="radio"/> 1 vez semana<br><input type="radio"/> 2 a 4 veces semana<br><input type="radio"/> 5 a 6 veces semana<br><input type="radio"/> 1 vez al día<br><input type="radio"/> 2 a 3 veces al día<br><input type="radio"/> 5 a 6 veces al día<br><input type="radio"/> más 6 veces al día |
| otros pescado azul     | <input type="radio"/> Nunca o menos 1 vez al mes<br><input checked="" type="radio"/> 1 a 3 veces mes<br><input type="radio"/> 1 vez semana<br><input type="radio"/> 2 a 4 veces semana<br><input type="radio"/> 5 a 6 veces semana<br><input type="radio"/> 1 vez al día<br><input type="radio"/> 2 a 3 veces al día<br><input type="radio"/> 5 a 6 veces al día<br><input type="radio"/> más 6 veces al día |
| atun conserva          | <input type="radio"/> Nunca o menos 1 vez al mes<br><input type="radio"/> 1 a 3 veces mes<br><input checked="" type="radio"/> 1 vez semana<br><input type="radio"/> 2 a 4 veces semana<br><input type="radio"/> 5 a 6 veces semana<br><input type="radio"/> 1 vez al día<br><input type="radio"/> 2 a 3 veces al día<br><input type="radio"/> 5 a 6 veces al día<br><input type="radio"/> más 6 veces al día |
| sardina conserva       | <input checked="" type="radio"/> Nunca o menos 1 vez al mes<br><input type="radio"/> 1 a 3 veces mes<br><input type="radio"/> 1 vez semana<br><input type="radio"/> 2 a 4 veces semana<br><input type="radio"/> 5 a 6 veces semana<br><input type="radio"/> 1 vez al día<br><input type="radio"/> 2 a 3 veces al día<br><input type="radio"/> 5 a 6 veces al día<br><input type="radio"/> más 6 veces al día |

|                                         |                                                                                                                                                                                                                                                                                                                                                                                                              |
|-----------------------------------------|--------------------------------------------------------------------------------------------------------------------------------------------------------------------------------------------------------------------------------------------------------------------------------------------------------------------------------------------------------------------------------------------------------------|
| pescado ahumado                         | <input checked="" type="radio"/> Nunca o menos 1 vez al mes<br><input type="radio"/> 1 a 3 veces mes<br><input type="radio"/> 1 vez semana<br><input type="radio"/> 2 a 4 veces semana<br><input type="radio"/> 5 a 6 veces semana<br><input type="radio"/> 1 vez al día<br><input type="radio"/> 2 a 3 veces al día<br><input type="radio"/> 5 a 6 veces al día<br><input type="radio"/> más 6 veces al día |
| almejas o mejillones o ostras unos 100g | <input type="radio"/> Nunca o menos 1 vez al mes<br><input type="radio"/> 1 a 3 veces mes<br><input checked="" type="radio"/> 1 vez semana<br><input type="radio"/> 2 a 4 veces semana<br><input type="radio"/> 5 a 6 veces semana<br><input type="radio"/> 1 vez al día<br><input type="radio"/> 2 a 3 veces al día<br><input type="radio"/> 5 a 6 veces al día<br><input type="radio"/> más 6 veces al día |
| calamar o chipiron o sepia unos 100g    | <input type="radio"/> Nunca o menos 1 vez al mes<br><input type="radio"/> 1 a 3 veces mes<br><input checked="" type="radio"/> 1 vez semana<br><input type="radio"/> 2 a 4 veces semana<br><input type="radio"/> 5 a 6 veces semana<br><input type="radio"/> 1 vez al día<br><input type="radio"/> 2 a 3 veces al día<br><input type="radio"/> 5 a 6 veces al día<br><input type="radio"/> más 6 veces al día |
| marisco unos 100g                       | <input type="radio"/> Nunca o menos 1 vez al mes<br><input type="radio"/> 1 a 3 veces mes<br><input checked="" type="radio"/> 1 vez semana<br><input type="radio"/> 2 a 4 veces semana<br><input type="radio"/> 5 a 6 veces semana<br><input type="radio"/> 1 vez al día<br><input type="radio"/> 2 a 3 veces al día<br><input type="radio"/> 5 a 6 veces al día<br><input type="radio"/> más 6 veces al día |
| Espinacas o acelgas cocinadas           | <input type="radio"/> Nunca o menos 1 vez al mes<br><input type="radio"/> 1 a 3 veces mes<br><input type="radio"/> 1 vez semana<br><input checked="" type="radio"/> 2 a 4 veces semana<br><input type="radio"/> 5 a 6 veces semana<br><input type="radio"/> 1 vez al día<br><input type="radio"/> 2 a 3 veces al día<br><input type="radio"/> 5 a 6 veces al día<br><input type="radio"/> más 6 veces al día |
| Col o coliflor o brocoli cocinado       | <input type="radio"/> Nunca o menos 1 vez al mes<br><input type="radio"/> 1 a 3 veces mes<br><input checked="" type="radio"/> 1 vez semana<br><input type="radio"/> 2 a 4 veces semana<br><input type="radio"/> 5 a 6 veces semana<br><input type="radio"/> 1 vez al día<br><input type="radio"/> 2 a 3 veces al día<br><input type="radio"/> 5 a 6 veces al día<br><input type="radio"/> más 6 veces al día |

---

|                              |                                                                                                                                                                                                                                                                                                                                                                                                              |
|------------------------------|--------------------------------------------------------------------------------------------------------------------------------------------------------------------------------------------------------------------------------------------------------------------------------------------------------------------------------------------------------------------------------------------------------------|
| Lechuga o endivia o escarola | <input type="radio"/> Nunca o menos 1 vez al mes<br><input type="radio"/> 1 a 3 veces mes<br><input type="radio"/> 1 vez semana<br><input checked="" type="radio"/> 2 a 4 veces semana<br><input type="radio"/> 5 a 6 veces semana<br><input type="radio"/> 1 vez al día<br><input type="radio"/> 2 a 3 veces al día<br><input type="radio"/> 5 a 6 veces al día<br><input type="radio"/> más 6 veces al día |
|------------------------------|--------------------------------------------------------------------------------------------------------------------------------------------------------------------------------------------------------------------------------------------------------------------------------------------------------------------------------------------------------------------------------------------------------------|

---

|                 |                                                                                                                                                                                                                                                                                                                                                                                                              |
|-----------------|--------------------------------------------------------------------------------------------------------------------------------------------------------------------------------------------------------------------------------------------------------------------------------------------------------------------------------------------------------------------------------------------------------------|
| tomate ensalada | <input type="radio"/> Nunca o menos 1 vez al mes<br><input type="radio"/> 1 a 3 veces mes<br><input type="radio"/> 1 vez semana<br><input checked="" type="radio"/> 2 a 4 veces semana<br><input type="radio"/> 5 a 6 veces semana<br><input type="radio"/> 1 vez al día<br><input type="radio"/> 2 a 3 veces al día<br><input type="radio"/> 5 a 6 veces al día<br><input type="radio"/> más 6 veces al día |
|-----------------|--------------------------------------------------------------------------------------------------------------------------------------------------------------------------------------------------------------------------------------------------------------------------------------------------------------------------------------------------------------------------------------------------------------|

---

|         |                                                                                                                                                                                                                                                                                                                                                                                                              |
|---------|--------------------------------------------------------------------------------------------------------------------------------------------------------------------------------------------------------------------------------------------------------------------------------------------------------------------------------------------------------------------------------------------------------------|
| cebolla | <input type="radio"/> Nunca o menos 1 vez al mes<br><input type="radio"/> 1 a 3 veces mes<br><input checked="" type="radio"/> 1 vez semana<br><input type="radio"/> 2 a 4 veces semana<br><input type="radio"/> 5 a 6 veces semana<br><input type="radio"/> 1 vez al día<br><input type="radio"/> 2 a 3 veces al día<br><input type="radio"/> 5 a 6 veces al día<br><input type="radio"/> más 6 veces al día |
|---------|--------------------------------------------------------------------------------------------------------------------------------------------------------------------------------------------------------------------------------------------------------------------------------------------------------------------------------------------------------------------------------------------------------------|

---

|                      |                                                                                                                                                                                                                                                                                                                                                                                                              |
|----------------------|--------------------------------------------------------------------------------------------------------------------------------------------------------------------------------------------------------------------------------------------------------------------------------------------------------------------------------------------------------------------------------------------------------------|
| Zanahoria o calabaza | <input type="radio"/> Nunca o menos 1 vez al mes<br><input type="radio"/> 1 a 3 veces mes<br><input checked="" type="radio"/> 1 vez semana<br><input type="radio"/> 2 a 4 veces semana<br><input type="radio"/> 5 a 6 veces semana<br><input type="radio"/> 1 vez al día<br><input type="radio"/> 2 a 3 veces al día<br><input type="radio"/> 5 a 6 veces al día<br><input type="radio"/> más 6 veces al día |
|----------------------|--------------------------------------------------------------------------------------------------------------------------------------------------------------------------------------------------------------------------------------------------------------------------------------------------------------------------------------------------------------------------------------------------------------|

---

|               |                                                                                                                                                                                                                                                                                                                                                                                                              |
|---------------|--------------------------------------------------------------------------------------------------------------------------------------------------------------------------------------------------------------------------------------------------------------------------------------------------------------------------------------------------------------------------------------------------------------|
| Judías verdes | <input type="radio"/> Nunca o menos 1 vez al mes<br><input type="radio"/> 1 a 3 veces mes<br><input type="radio"/> 1 vez semana<br><input checked="" type="radio"/> 2 a 4 veces semana<br><input type="radio"/> 5 a 6 veces semana<br><input type="radio"/> 1 vez al día<br><input type="radio"/> 2 a 3 veces al día<br><input type="radio"/> 5 a 6 veces al día<br><input type="radio"/> más 6 veces al día |
|---------------|--------------------------------------------------------------------------------------------------------------------------------------------------------------------------------------------------------------------------------------------------------------------------------------------------------------------------------------------------------------------------------------------------------------|

---

|                                |                                                                                                                                                                                                                                                                                                                                                                                                              |
|--------------------------------|--------------------------------------------------------------------------------------------------------------------------------------------------------------------------------------------------------------------------------------------------------------------------------------------------------------------------------------------------------------------------------------------------------------|
| Berenjena o calabacin o pepino | <input type="radio"/> Nunca o menos 1 vez al mes<br><input type="radio"/> 1 a 3 veces mes<br><input type="radio"/> 1 vez semana<br><input checked="" type="radio"/> 2 a 4 veces semana<br><input type="radio"/> 5 a 6 veces semana<br><input type="radio"/> 1 vez al día<br><input type="radio"/> 2 a 3 veces al día<br><input type="radio"/> 5 a 6 veces al día<br><input type="radio"/> más 6 veces al día |
|--------------------------------|--------------------------------------------------------------------------------------------------------------------------------------------------------------------------------------------------------------------------------------------------------------------------------------------------------------------------------------------------------------------------------------------------------------|

---

|                       |                                                                                                                                                                                                                                                                                                                                                                                                              |
|-----------------------|--------------------------------------------------------------------------------------------------------------------------------------------------------------------------------------------------------------------------------------------------------------------------------------------------------------------------------------------------------------------------------------------------------------|
| pimiento              | <input type="radio"/> Nunca o menos 1 vez al mes<br><input type="radio"/> 1 a 3 veces mes<br><input type="radio"/> 1 vez semana<br><input checked="" type="radio"/> 2 a 4 veces semana<br><input type="radio"/> 5 a 6 veces semana<br><input type="radio"/> 1 vez al día<br><input type="radio"/> 2 a 3 veces al día<br><input type="radio"/> 5 a 6 veces al día<br><input type="radio"/> más 6 veces al día |
| alcachofa             | <input type="radio"/> Nunca o menos 1 vez al mes<br><input type="radio"/> 1 a 3 veces mes<br><input type="radio"/> 1 vez semana<br><input checked="" type="radio"/> 2 a 4 veces semana<br><input type="radio"/> 5 a 6 veces semana<br><input type="radio"/> 1 vez al día<br><input type="radio"/> 2 a 3 veces al día<br><input type="radio"/> 5 a 6 veces al día<br><input type="radio"/> más 6 veces al día |
| espárragos            | <input type="radio"/> Nunca o menos 1 vez al mes<br><input type="radio"/> 1 a 3 veces mes<br><input type="radio"/> 1 vez semana<br><input checked="" type="radio"/> 2 a 4 veces semana<br><input type="radio"/> 5 a 6 veces semana<br><input type="radio"/> 1 vez al día<br><input type="radio"/> 2 a 3 veces al día<br><input type="radio"/> 5 a 6 veces al día<br><input type="radio"/> más 6 veces al día |
| maíz hervido          | <input type="radio"/> Nunca o menos 1 vez al mes<br><input checked="" type="radio"/> 1 a 3 veces mes<br><input type="radio"/> 1 vez semana<br><input type="radio"/> 2 a 4 veces semana<br><input type="radio"/> 5 a 6 veces semana<br><input type="radio"/> 1 vez al día<br><input type="radio"/> 2 a 3 veces al día<br><input type="radio"/> 5 a 6 veces al día<br><input type="radio"/> más 6 veces al día |
| legumbres             | <input type="radio"/> Nunca o menos 1 vez al mes<br><input type="radio"/> 1 a 3 veces mes<br><input checked="" type="radio"/> 1 vez semana<br><input type="radio"/> 2 a 4 veces semana<br><input type="radio"/> 5 a 6 veces semana<br><input type="radio"/> 1 vez al día<br><input type="radio"/> 2 a 3 veces al día<br><input type="radio"/> 5 a 6 veces al día<br><input type="radio"/> más 6 veces al día |
| naranjas o mandarinas | <input type="radio"/> Nunca o menos 1 vez al mes<br><input type="radio"/> 1 a 3 veces mes<br><input checked="" type="radio"/> 1 vez semana<br><input type="radio"/> 2 a 4 veces semana<br><input type="radio"/> 5 a 6 veces semana<br><input type="radio"/> 1 vez al día<br><input type="radio"/> 2 a 3 veces al día<br><input type="radio"/> 5 a 6 veces al día<br><input type="radio"/> más 6 veces al día |

---

zum natural fruta

- ☒ Nunca o menos 1 vez al mes  
☐ 1 a 3 veces mes  
☐ 1 vez semana  
☐ 2 a 4 veces semana  
☐ 5 a 6 veces semana  
☐ 1 vez al día  
☐ 2 a 3 veces al día  
☐ 5 a 6 veces al día  
☐ más 6 veces al día

---

platano

- ☐ Nunca o menos 1 vez al mes  
☐ 1 a 3 veces mes  
☒ 1 vez semana  
☐ 2 a 4 veces semana  
☐ 5 a 6 veces semana  
☐ 1 vez al día  
☐ 2 a 3 veces al día  
☐ 5 a 6 veces al día  
☐ más 6 veces al día

---

manzana o pera

- ☐ Nunca o menos 1 vez al mes  
☐ 1 a 3 veces mes  
☐ 1 vez semana  
☒ 2 a 4 veces semana  
☐ 5 a 6 veces semana  
☐ 1 vez al día  
☐ 2 a 3 veces al día  
☐ 5 a 6 veces al día  
☐ más 6 veces al día

---

melocotón o nectarina

- ☐ Nunca o menos 1 vez al mes  
☐ 1 a 3 veces mes  
☐ 1 vez semana  
☒ 2 a 4 veces semana  
☐ 5 a 6 veces semana  
☐ 1 vez al día  
☐ 2 a 3 veces al día  
☐ 5 a 6 veces al día  
☐ más 6 veces al día

---

sandia o melon

- ☐ Nunca o menos 1 vez al mes  
☐ 1 a 3 veces mes  
☐ 1 vez semana  
☒ 2 a 4 veces semana  
☐ 5 a 6 veces semana  
☐ 1 vez al día  
☐ 2 a 3 veces al día  
☐ 5 a 6 veces al día  
☐ más 6 veces al día

---

uva

- ☐ Nunca o menos 1 vez al mes  
☐ 1 a 3 veces mes  
☒ 1 vez semana  
☐ 2 a 4 veces semana  
☐ 5 a 6 veces semana  
☐ 1 vez al día  
☐ 2 a 3 veces al día  
☐ 5 a 6 veces al día  
☐ más 6 veces al día



---

bruna o ciruela

- ☐ Nunca o menos 1 vez al mes  
☐ 1 a 3 veces mes  
☐ 1 vez semana  
☒ 2 a 4 veces semana  
☐ 5 a 6 veces semana  
☐ 1 vez al día  
☐ 2 a 3 veces al día  
☐ 5 a 6 veces al día  
☐ más 6 veces al día

---

kiwi

- ☐ Nunca o menos 1 vez al mes  
☐ 1 a 3 veces mes  
☐ 1 vez semana  
☒ 2 a 4 veces semana  
☐ 5 a 6 veces semana  
☐ 1 vez al día  
☐ 2 a 3 veces al día  
☐ 5 a 6 veces al día  
☐ más 6 veces al día

---

aceituna

- ☐ Nunca o menos 1 vez al mes  
☐ 1 a 3 veces mes  
☒ 1 vez semana  
☐ 2 a 4 veces semana  
☐ 5 a 6 veces semana  
☐ 1 vez al día  
☐ 2 a 3 veces al día  
☐ 5 a 6 veces al día  
☐ más 6 veces al día

---

frutos secos

- ☐ Nunca o menos 1 vez al mes  
☐ 1 a 3 veces mes  
☐ 1 vez semana  
☒ 2 a 4 veces semana  
☐ 5 a 6 veces semana  
☐ 1 vez al día  
☐ 2 a 3 veces al día  
☐ 5 a 6 veces al día  
☐ más 6 veces al día

---

pan blanco

- ☐ Nunca o menos 1 vez al mes  
☐ 1 a 3 veces mes  
☐ 1 vez semana  
☒ 2 a 4 veces semana  
☐ 5 a 6 veces semana  
☐ 1 vez al día  
☐ 2 a 3 veces al día  
☐ 5 a 6 veces al día  
☐ más 6 veces al día

---

pan integral

- ☐ Nunca o menos 1 vez al mes  
☐ 1 a 3 veces mes  
☐ 1 vez semana  
☒ 2 a 4 veces semana  
☐ 5 a 6 veces semana  
☐ 1 vez al día  
☐ 2 a 3 veces al día  
☐ 5 a 6 veces al día  
☐ más 6 veces al día

---

cereales desayuno

- ☐ Nunca o menos 1 vez al mes  
☐ 1 a 3 veces mes  
☐ 1 vez semana  
☒ 2 a 4 veces semana  
☐ 5 a 6 veces semana  
☐ 1 vez al día  
☐ 2 a 3 veces al día  
☐ 5 a 6 veces al día  
☐ más 6 veces al día

---

patatas fritas

- ☐ Nunca o menos 1 vez al mes  
☒ 1 a 3 veces mes  
☐ 1 vez semana  
☐ 2 a 4 veces semana  
☐ 5 a 6 veces semana  
☐ 1 vez al día  
☐ 2 a 3 veces al día  
☐ 5 a 6 veces al día  
☐ más 6 veces al día

---

patatas cocidas o asadas

- ☐ Nunca o menos 1 vez al mes  
☐ 1 a 3 veces mes  
☒ 1 vez semana  
☐ 2 a 4 veces semana  
☐ 5 a 6 veces semana  
☐ 1 vez al día  
☐ 2 a 3 veces al día  
☐ 5 a 6 veces al día  
☐ más 6 veces al día

---

bolsa papas

- ☐ Nunca o menos 1 vez al mes  
☒ 1 a 3 veces mes  
☐ 1 vez semana  
☐ 2 a 4 veces semana  
☐ 5 a 6 veces semana  
☐ 1 vez al día  
☐ 2 a 3 veces al día  
☐ 5 a 6 veces al día  
☐ más 6 veces al día

---

arroz cocinado

- ☐ Nunca o menos 1 vez al mes  
☐ 1 a 3 veces mes  
☒ 1 vez semana  
☐ 2 a 4 veces semana  
☐ 5 a 6 veces semana  
☐ 1 vez al día  
☐ 2 a 3 veces al día  
☐ 5 a 6 veces al día  
☐ más 6 veces al día

---

pasta

- ☐ Nunca o menos 1 vez al mes  
☐ 1 a 3 veces mes  
☐ 1 vez semana  
☒ 2 a 4 veces semana  
☐ 5 a 6 veces semana  
☐ 1 vez al día  
☐ 2 a 3 veces al día  
☐ 5 a 6 veces al día  
☐ más 6 veces al día

|                     |                                                                                                                                                                                                                                                                                                                                                                                                              |
|---------------------|--------------------------------------------------------------------------------------------------------------------------------------------------------------------------------------------------------------------------------------------------------------------------------------------------------------------------------------------------------------------------------------------------------------|
| pizza               | <input type="radio"/> Nunca o menos 1 vez al mes<br><input type="radio"/> 1 a 3 veces mes<br><input checked="" type="radio"/> 1 vez semana<br><input type="radio"/> 2 a 4 veces semana<br><input type="radio"/> 5 a 6 veces semana<br><input type="radio"/> 1 vez al día<br><input type="radio"/> 2 a 3 veces al día<br><input type="radio"/> 5 a 6 veces al día<br><input type="radio"/> más 6 veces al día |
| aceite oliva        | <input type="radio"/> Nunca o menos 1 vez al mes<br><input type="radio"/> 1 a 3 veces mes<br><input type="radio"/> 1 vez semana<br><input type="radio"/> 2 a 4 veces semana<br><input type="radio"/> 5 a 6 veces semana<br><input type="radio"/> 1 vez al día<br><input checked="" type="radio"/> 2 a 3 veces al día<br><input type="radio"/> 5 a 6 veces al día<br><input type="radio"/> más 6 veces al día |
| otros aceites       | <input type="radio"/> Nunca o menos 1 vez al mes<br><input checked="" type="radio"/> 1 a 3 veces mes<br><input type="radio"/> 1 vez semana<br><input type="radio"/> 2 a 4 veces semana<br><input type="radio"/> 5 a 6 veces semana<br><input type="radio"/> 1 vez al día<br><input type="radio"/> 2 a 3 veces al día<br><input type="radio"/> 5 a 6 veces al día<br><input type="radio"/> más 6 veces al día |
| margarina           | <input type="radio"/> Nunca o menos 1 vez al mes<br><input type="radio"/> 1 a 3 veces mes<br><input type="radio"/> 1 vez semana<br><input checked="" type="radio"/> 2 a 4 veces semana<br><input type="radio"/> 5 a 6 veces semana<br><input type="radio"/> 1 vez al día<br><input type="radio"/> 2 a 3 veces al día<br><input type="radio"/> 5 a 6 veces al día<br><input type="radio"/> más 6 veces al día |
| mantequilla         | <input type="radio"/> Nunca o menos 1 vez al mes<br><input type="radio"/> 1 a 3 veces mes<br><input type="radio"/> 1 vez semana<br><input checked="" type="radio"/> 2 a 4 veces semana<br><input type="radio"/> 5 a 6 veces semana<br><input type="radio"/> 1 vez al día<br><input type="radio"/> 2 a 3 veces al día<br><input type="radio"/> 5 a 6 veces al día<br><input type="radio"/> más 6 veces al día |
| galletas tipo maria | <input type="radio"/> Nunca o menos 1 vez al mes<br><input type="radio"/> 1 a 3 veces mes<br><input type="radio"/> 1 vez semana<br><input type="radio"/> 2 a 4 veces semana<br><input type="radio"/> 5 a 6 veces semana<br><input checked="" type="radio"/> 1 vez al día<br><input type="radio"/> 2 a 3 veces al día<br><input type="radio"/> 5 a 6 veces al día<br><input type="radio"/> más 6 veces al día |

---

galletas chocolate

- ☐ Nunca o menos 1 vez al mes  
☒ 1 a 3 veces mes  
☐ 1 vez semana  
☐ 2 a 4 veces semana  
☐ 5 a 6 veces semana  
☐ 1 vez al día  
☐ 2 a 3 veces al día  
☐ 5 a 6 veces al día  
☐ más 6 veces al día

---

bolleria

- ☐ Nunca o menos 1 vez al mes  
☒ 1 a 3 veces mes  
☐ 1 vez semana  
☐ 2 a 4 veces semana  
☐ 5 a 6 veces semana  
☐ 1 vez al día  
☐ 2 a 3 veces al día  
☐ 5 a 6 veces al día  
☐ más 6 veces al día

---

chocolate o bombones

- ☐ Nunca o menos 1 vez al mes  
☒ 1 a 3 veces mes  
☐ 1 vez semana  
☐ 2 a 4 veces semana  
☐ 5 a 6 veces semana  
☐ 1 vez al día  
☐ 2 a 3 veces al día  
☐ 5 a 6 veces al día  
☐ más 6 veces al día

---

chocolate polvo o colacao

- ☒ Nunca o menos 1 vez al mes  
☐ 1 a 3 veces mes  
☐ 1 vez semana  
☐ 2 a 4 veces semana  
☐ 5 a 6 veces semana  
☐ 1 vez al día  
☐ 2 a 3 veces al día  
☐ 5 a 6 veces al día  
☐ más 6 veces al día

---

vino tinto

- ☒ Nunca o menos 1 vez al mes  
☐ 1 a 3 veces mes  
☐ 1 vez semana  
☐ 2 a 4 veces semana  
☐ 5 a 6 veces semana  
☐ 1 vez al día  
☐ 2 a 3 veces al día  
☐ 5 a 6 veces al día  
☐ más 6 veces al día

---

vino blanco

- ☒ Nunca o menos 1 vez al mes  
☐ 1 a 3 veces mes  
☐ 1 vez semana  
☐ 2 a 4 veces semana  
☐ 5 a 6 veces semana  
☐ 1 vez al día  
☐ 2 a 3 veces al día  
☐ 5 a 6 veces al día  
☐ más 6 veces al día

---

|                    |                                                                                                                                                                                                                                                                                                                                                                                                              |
|--------------------|--------------------------------------------------------------------------------------------------------------------------------------------------------------------------------------------------------------------------------------------------------------------------------------------------------------------------------------------------------------------------------------------------------------|
| vino seco o vermut | <input checked="" type="radio"/> Nunca o menos 1 vez al mes<br><input type="radio"/> 1 a 3 veces mes<br><input type="radio"/> 1 vez semana<br><input type="radio"/> 2 a 4 veces semana<br><input type="radio"/> 5 a 6 veces semana<br><input type="radio"/> 1 vez al día<br><input type="radio"/> 2 a 3 veces al día<br><input type="radio"/> 5 a 6 veces al día<br><input type="radio"/> más 6 veces al día |
|--------------------|--------------------------------------------------------------------------------------------------------------------------------------------------------------------------------------------------------------------------------------------------------------------------------------------------------------------------------------------------------------------------------------------------------------|

---

|         |                                                                                                                                                                                                                                                                                                                                                                                                              |
|---------|--------------------------------------------------------------------------------------------------------------------------------------------------------------------------------------------------------------------------------------------------------------------------------------------------------------------------------------------------------------------------------------------------------------|
| cerveza | <input checked="" type="radio"/> Nunca o menos 1 vez al mes<br><input type="radio"/> 1 a 3 veces mes<br><input type="radio"/> 1 vez semana<br><input type="radio"/> 2 a 4 veces semana<br><input type="radio"/> 5 a 6 veces semana<br><input type="radio"/> 1 vez al día<br><input type="radio"/> 2 a 3 veces al día<br><input type="radio"/> 5 a 6 veces al día<br><input type="radio"/> más 6 veces al día |
|---------|--------------------------------------------------------------------------------------------------------------------------------------------------------------------------------------------------------------------------------------------------------------------------------------------------------------------------------------------------------------------------------------------------------------|

---

|                     |                                                                                                                                                                                                                                                                                                                                                                                                              |
|---------------------|--------------------------------------------------------------------------------------------------------------------------------------------------------------------------------------------------------------------------------------------------------------------------------------------------------------------------------------------------------------------------------------------------------------|
| cerveza sin alcohol | <input checked="" type="radio"/> Nunca o menos 1 vez al mes<br><input type="radio"/> 1 a 3 veces mes<br><input type="radio"/> 1 vez semana<br><input type="radio"/> 2 a 4 veces semana<br><input type="radio"/> 5 a 6 veces semana<br><input type="radio"/> 1 vez al día<br><input type="radio"/> 2 a 3 veces al día<br><input type="radio"/> 5 a 6 veces al día<br><input type="radio"/> más 6 veces al día |
|---------------------|--------------------------------------------------------------------------------------------------------------------------------------------------------------------------------------------------------------------------------------------------------------------------------------------------------------------------------------------------------------------------------------------------------------|

---

|         |                                                                                                                                                                                                                                                                                                                                                                                                              |
|---------|--------------------------------------------------------------------------------------------------------------------------------------------------------------------------------------------------------------------------------------------------------------------------------------------------------------------------------------------------------------------------------------------------------------|
| licores | <input checked="" type="radio"/> Nunca o menos 1 vez al mes<br><input type="radio"/> 1 a 3 veces mes<br><input type="radio"/> 1 vez semana<br><input type="radio"/> 2 a 4 veces semana<br><input type="radio"/> 5 a 6 veces semana<br><input type="radio"/> 1 vez al día<br><input type="radio"/> 2 a 3 veces al día<br><input type="radio"/> 5 a 6 veces al día<br><input type="radio"/> más 6 veces al día |
|---------|--------------------------------------------------------------------------------------------------------------------------------------------------------------------------------------------------------------------------------------------------------------------------------------------------------------------------------------------------------------------------------------------------------------|

---

|                       |                                                                                                                                                                                                                                                                                                                                                                                                              |
|-----------------------|--------------------------------------------------------------------------------------------------------------------------------------------------------------------------------------------------------------------------------------------------------------------------------------------------------------------------------------------------------------------------------------------------------------|
| ginebra o ron o vodka | <input checked="" type="radio"/> Nunca o menos 1 vez al mes<br><input type="radio"/> 1 a 3 veces mes<br><input type="radio"/> 1 vez semana<br><input type="radio"/> 2 a 4 veces semana<br><input type="radio"/> 5 a 6 veces semana<br><input type="radio"/> 1 vez al día<br><input type="radio"/> 2 a 3 veces al día<br><input type="radio"/> 5 a 6 veces al día<br><input type="radio"/> más 6 veces al día |
|-----------------------|--------------------------------------------------------------------------------------------------------------------------------------------------------------------------------------------------------------------------------------------------------------------------------------------------------------------------------------------------------------------------------------------------------------|

---

|                 |                                                                                                                                                                                                                                                                                                                                                                                                              |
|-----------------|--------------------------------------------------------------------------------------------------------------------------------------------------------------------------------------------------------------------------------------------------------------------------------------------------------------------------------------------------------------------------------------------------------------|
| refresco normal | <input type="radio"/> Nunca o menos 1 vez al mes<br><input checked="" type="radio"/> 1 a 3 veces mes<br><input type="radio"/> 1 vez semana<br><input type="radio"/> 2 a 4 veces semana<br><input type="radio"/> 5 a 6 veces semana<br><input type="radio"/> 1 vez al día<br><input type="radio"/> 2 a 3 veces al día<br><input type="radio"/> 5 a 6 veces al día<br><input type="radio"/> más 6 veces al día |
|-----------------|--------------------------------------------------------------------------------------------------------------------------------------------------------------------------------------------------------------------------------------------------------------------------------------------------------------------------------------------------------------------------------------------------------------|

---

|                          |                                                                                                                                                                                                                                                                                                                                                                                                              |
|--------------------------|--------------------------------------------------------------------------------------------------------------------------------------------------------------------------------------------------------------------------------------------------------------------------------------------------------------------------------------------------------------------------------------------------------------|
| refresco sin azúcar      | <input checked="" type="radio"/> Nunca o menos 1 vez al mes<br><input type="radio"/> 1 a 3 veces mes<br><input type="radio"/> 1 vez semana<br><input type="radio"/> 2 a 4 veces semana<br><input type="radio"/> 5 a 6 veces semana<br><input type="radio"/> 1 vez al día<br><input type="radio"/> 2 a 3 veces al día<br><input type="radio"/> 5 a 6 veces al día<br><input type="radio"/> más 6 veces al día |
| Agua del grifo           | <input checked="" type="radio"/> Nunca o menos 1 vez al mes<br><input type="radio"/> 1 a 3 veces mes<br><input type="radio"/> 1 vez semana<br><input type="radio"/> 2 a 4 veces semana<br><input type="radio"/> 5 a 6 veces semana<br><input type="radio"/> 1 vez al día<br><input type="radio"/> 2 a 3 veces al día<br><input type="radio"/> 5 a 6 veces al día<br><input type="radio"/> más 6 veces al día |
| agua embotellada sin gas | <input type="radio"/> Nunca o menos 1 vez al mes<br><input type="radio"/> 1 a 3 veces mes<br><input type="radio"/> 1 vez semana<br><input type="radio"/> 2 a 4 veces semana<br><input type="radio"/> 5 a 6 veces semana<br><input type="radio"/> 1 vez al día<br><input type="radio"/> 2 a 3 veces al día<br><input type="radio"/> 5 a 6 veces al día<br><input checked="" type="radio"/> más 6 veces al día |
| agua embotellada con gas | <input checked="" type="radio"/> Nunca o menos 1 vez al mes<br><input type="radio"/> 1 a 3 veces mes<br><input type="radio"/> 1 vez semana<br><input type="radio"/> 2 a 4 veces semana<br><input type="radio"/> 5 a 6 veces semana<br><input type="radio"/> 1 vez al día<br><input type="radio"/> 2 a 3 veces al día<br><input type="radio"/> 5 a 6 veces al día<br><input type="radio"/> más 6 veces al día |
| zumو frutas embasado     | <input checked="" type="radio"/> Nunca o menos 1 vez al mes<br><input type="radio"/> 1 a 3 veces mes<br><input type="radio"/> 1 vez semana<br><input type="radio"/> 2 a 4 veces semana<br><input type="radio"/> 5 a 6 veces semana<br><input type="radio"/> 1 vez al día<br><input type="radio"/> 2 a 3 veces al día<br><input type="radio"/> 5 a 6 veces al día<br><input type="radio"/> más 6 veces al día |
| cafe                     | <input type="radio"/> Nunca o menos 1 vez al mes<br><input type="radio"/> 1 a 3 veces mes<br><input type="radio"/> 1 vez semana<br><input type="radio"/> 2 a 4 veces semana<br><input type="radio"/> 5 a 6 veces semana<br><input checked="" type="radio"/> 1 vez al día<br><input type="radio"/> 2 a 3 veces al día<br><input type="radio"/> 5 a 6 veces al día<br><input type="radio"/> más 6 veces al día |

---

cafe descafeinado

- ☒ Nunca o menos 1 vez al mes  
☐ 1 a 3 veces mes  
☐ 1 vez semana  
☐ 2 a 4 veces semana  
☐ 5 a 6 veces semana  
☐ 1 vez al día  
☐ 2 a 3 veces al día  
☐ 5 a 6 veces al día  
☐ más 6 veces al día

---

te o infusión

- ☐ Nunca o menos 1 vez al mes  
☐ 1 a 3 veces mes  
☒ 1 vez semana  
☐ 2 a 4 veces semana  
☐ 5 a 6 veces semana  
☐ 1 vez al día  
☐ 2 a 3 veces al día  
☐ 5 a 6 veces al día  
☐ más 6 veces al día

---

sopa o puré verduras

- ☐ Nunca o menos 1 vez al mes  
☒ 1 a 3 veces mes  
☐ 1 vez semana  
☐ 2 a 4 veces semana  
☐ 5 a 6 veces semana  
☐ 1 vez al día  
☐ 2 a 3 veces al día  
☐ 5 a 6 veces al día  
☐ más 6 veces al día

---

croquetas pollo jamón

- ☐ Nunca o menos 1 vez al mes  
☒ 1 a 3 veces mes  
☐ 1 vez semana  
☐ 2 a 4 veces semana  
☐ 5 a 6 veces semana  
☐ 1 vez al día  
☐ 2 a 3 veces al día  
☐ 5 a 6 veces al día  
☐ más 6 veces al día

---

croquetas pescado

- ☐ Nunca o menos 1 vez al mes  
☒ 1 a 3 veces mes  
☐ 1 vez semana  
☐ 2 a 4 veces semana  
☐ 5 a 6 veces semana  
☐ 1 vez al día  
☐ 2 a 3 veces al día  
☐ 5 a 6 veces al día  
☐ más 6 veces al día

---

mayonesa

- ☐ Nunca o menos 1 vez al mes  
☒ 1 a 3 veces mes  
☐ 1 vez semana  
☐ 2 a 4 veces semana  
☐ 5 a 6 veces semana  
☐ 1 vez al día  
☐ 2 a 3 veces al día  
☐ 5 a 6 veces al día  
☐ más 6 veces al día

---

salsa tomate

- ☐ Nunca o menos 1 vez al mes  
☒ 1 a 3 veces mes  
☐ 1 vez semana  
☐ 2 a 4 veces semana  
☐ 5 a 6 veces semana  
☐ 1 vez al día  
☐ 2 a 3 veces al día  
☐ 5 a 6 veces al día  
☐ más 6 veces al día

---

ketchup

- ☐ Nunca o menos 1 vez al mes  
☒ 1 a 3 veces mes  
☐ 1 vez semana  
☐ 2 a 4 veces semana  
☐ 5 a 6 veces semana  
☐ 1 vez al día  
☐ 2 a 3 veces al día  
☐ 5 a 6 veces al día  
☐ más 6 veces al día

---

sal

- ☐ Nunca o menos 1 vez al mes  
☐ 1 a 3 veces mes  
☐ 1 vez semana  
☐ 2 a 4 veces semana  
☐ 5 a 6 veces semana  
☒ 1 vez al día  
☐ 2 a 3 veces al día  
☐ 5 a 6 veces al día  
☐ más 6 veces al día

---

ajo

- ☐ Nunca o menos 1 vez al mes  
☐ 1 a 3 veces mes  
☐ 1 vez semana  
☒ 2 a 4 veces semana  
☐ 5 a 6 veces semana  
☐ 1 vez al día  
☐ 2 a 3 veces al día  
☐ 5 a 6 veces al día  
☐ más 6 veces al día

---

mermelada o miel

- ☐ Nunca o menos 1 vez al mes  
☐ 1 a 3 veces mes  
☒ 1 vez semana  
☐ 2 a 4 veces semana  
☐ 5 a 6 veces semana  
☐ 1 vez al día  
☐ 2 a 3 veces al día  
☐ 5 a 6 veces al día  
☐ más 6 veces al día

---

azúcar

- ☒ Nunca o menos 1 vez al mes  
☐ 1 a 3 veces mes  
☐ 1 vez semana  
☐ 2 a 4 veces semana  
☐ 5 a 6 veces semana  
☐ 1 vez al día  
☐ 2 a 3 veces al día  
☐ 5 a 6 veces al día  
☐ más 6 veces al día



|                                       |                                                                                                                                                                                                                                                                                                                                                                                                                                                                                                                               |
|---------------------------------------|-------------------------------------------------------------------------------------------------------------------------------------------------------------------------------------------------------------------------------------------------------------------------------------------------------------------------------------------------------------------------------------------------------------------------------------------------------------------------------------------------------------------------------|
| Otro alimento                         |                                                                                                                                                                                                                                                                                                                                                                                                                                                                                                                               |
| suplementos vitamínicos               | <input checked="" type="radio"/> si<br><input type="radio"/> no                                                                                                                                                                                                                                                                                                                                                                                                                                                               |
| suplementos vitamínicos               | [*DATA REMOVED*]                                                                                                                                                                                                                                                                                                                                                                                                                                                                                                              |
| dieta previa                          | <input checked="" type="radio"/> si<br><input type="radio"/> no                                                                                                                                                                                                                                                                                                                                                                                                                                                               |
| motivo dieta                          | <input type="radio"/> no dieta<br><input type="radio"/> control peso<br><input type="radio"/> control colesterol<br><input checked="" type="radio"/> control diabetes<br><input type="radio"/> problemas estómago<br><input type="radio"/> problemas vesícula o hepáticos<br><input type="radio"/> HTA o cardiopatía<br><input type="radio"/> problemas renales<br><input type="radio"/> alergia alimentaria<br><input type="radio"/> ácido úrico elevado<br><input type="radio"/> vegetariana<br><input type="radio"/> otros |
| cambio alimentos año previo gestación | <input checked="" type="radio"/> si<br><input type="radio"/> no                                                                                                                                                                                                                                                                                                                                                                                                                                                               |
| cambio lácteos                        | <input type="radio"/> eliminado<br><input checked="" type="radio"/> disminuido<br><input type="radio"/> igual<br><input type="radio"/> aumentado<br><input type="radio"/> no sabe                                                                                                                                                                                                                                                                                                                                             |
| cambio huevos                         | <input type="radio"/> eliminado<br><input checked="" type="radio"/> disminuido<br><input type="radio"/> igual<br><input type="radio"/> aumentado<br><input type="radio"/> no sabe                                                                                                                                                                                                                                                                                                                                             |
| cambio carne                          | <input type="radio"/> eliminado<br><input type="radio"/> disminuido<br><input checked="" type="radio"/> igual<br><input type="radio"/> aumentado<br><input type="radio"/> no sabe                                                                                                                                                                                                                                                                                                                                             |
| cambio pescado                        | <input type="radio"/> eliminado<br><input type="radio"/> disminuido<br><input checked="" type="radio"/> igual<br><input type="radio"/> aumentado<br><input type="radio"/> no sabe                                                                                                                                                                                                                                                                                                                                             |
| cambio verduras                       | <input type="radio"/> eliminado<br><input type="radio"/> disminuido<br><input checked="" type="radio"/> igual<br><input type="radio"/> aumentado<br><input type="radio"/> no sabe                                                                                                                                                                                                                                                                                                                                             |

|                            |                                                                                                                                                                                                                        |
|----------------------------|------------------------------------------------------------------------------------------------------------------------------------------------------------------------------------------------------------------------|
| cambio legumbres           | <input type="radio"/> eliminado<br><input type="radio"/> disminuido<br><input checked="" type="radio"/> igual<br><input type="radio"/> aumentado<br><input type="radio"/> no sabe                                      |
| cambio fruta               | <input type="radio"/> eliminado<br><input type="radio"/> disminuido<br><input checked="" type="radio"/> igual<br><input type="radio"/> aumentado<br><input type="radio"/> no sabe                                      |
| cambio pan                 | <input type="radio"/> eliminado<br><input checked="" type="radio"/> disminuido<br><input type="radio"/> igual<br><input type="radio"/> aumentado<br><input type="radio"/> no sabe                                      |
| cambio aceite oliva        | <input type="radio"/> eliminado<br><input type="radio"/> disminuido<br><input checked="" type="radio"/> igual<br><input type="radio"/> aumentado<br><input type="radio"/> no sabe                                      |
| cambio mante o margarina   | <input type="radio"/> eliminado<br><input checked="" type="radio"/> disminuido<br><input type="radio"/> igual<br><input type="radio"/> aumentado<br><input type="radio"/> no sabe                                      |
| cambio azúcar y dulces     | <input checked="" type="radio"/> eliminado<br><input type="radio"/> disminuido<br><input type="radio"/> igual<br><input type="radio"/> aumentado<br><input type="radio"/> no sabe                                      |
| cambio bebidas alcohólicas | <input checked="" type="radio"/> eliminado<br><input type="radio"/> disminuido<br><input type="radio"/> igual<br><input type="radio"/> aumentado<br><input type="radio"/> no sabe                                      |
| frecuencia comidas fritas  | <input type="radio"/> a diario<br><input type="radio"/> 5 a 6 veces semana<br><input type="radio"/> 2 a 4 veces semana<br><input checked="" type="radio"/> 1 vez semana<br><input type="radio"/> menos de 1 vez semana |
| carne                      | <input type="radio"/> no como<br><input type="radio"/> cruda<br><input type="radio"/> poco hecha<br><input type="radio"/> hecha<br><input checked="" type="radio"/> muy hecha                                          |
| grasa visible carne        | <input type="radio"/> quita toda<br><input checked="" type="radio"/> quita mayoría<br><input type="radio"/> quita un poco<br><input type="radio"/> no quita nada                                                       |

|                                |                                                                                                                                                                                                                                                          |
|--------------------------------|----------------------------------------------------------------------------------------------------------------------------------------------------------------------------------------------------------------------------------------------------------|
| cocina carne                   | <input checked="" type="radio"/> a la plancha<br><input type="radio"/> a la parrilla<br><input type="radio"/> asada<br><input type="radio"/> frita<br><input type="radio"/> guisada                                                                      |
| tostado quemado carne          | <input type="radio"/> nunca<br><input type="radio"/> 1 vez mes<br><input type="radio"/> 2 a 3 veces mes<br><input checked="" type="radio"/> 1 vez semana<br><input type="radio"/> 2 a 3 semanas                                                          |
| tostado quemado pescado        | <input checked="" type="radio"/> nunca<br><input type="radio"/> 1 vez mes<br><input type="radio"/> 2 a 3 veces mes<br><input type="radio"/> 1 vez semana<br><input type="radio"/> 2 a 3 semanas                                                          |
| socarrat paella                | <input type="radio"/> nunca<br><input type="radio"/> 1 vez mes<br><input type="radio"/> 2 a 3 veces mes<br><input checked="" type="radio"/> 1 vez semana<br><input type="radio"/> 2 a 3 semanas                                                          |
| grasa o aceite cocinar         | <input type="radio"/> mantequilla<br><input type="radio"/> margarina<br><input type="radio"/> aceite oliva<br><input checked="" type="radio"/> aceite oliva virgen extra<br><input type="radio"/> aceite vegetal<br><input type="radio"/> mezcla aceites |
| grasa aceite aliñar            | <input type="radio"/> mantequilla<br><input type="radio"/> margarina<br><input type="radio"/> aceite oliva<br><input checked="" type="radio"/> aceite oliva virgen extra<br><input type="radio"/> aceite vegetal<br><input type="radio"/> mezcla aceites |
| grasa aceite freir             | <input type="radio"/> mantequilla<br><input type="radio"/> margarina<br><input type="radio"/> aceite oliva<br><input type="radio"/> aceite oliva virgen extra<br><input checked="" type="radio"/> aceite vegetal<br><input type="radio"/> mezcla aceites |
| Ejercicio cuestionario         | <input checked="" type="radio"/> si<br><input type="radio"/> no                                                                                                                                                                                          |
| horas de sueño incluido siesta | [*DATA REMOVED*]                                                                                                                                                                                                                                         |
| minutos siesta                 | [*DATA REMOVED*]                                                                                                                                                                                                                                         |
| horas televisión semana        | [*DATA REMOVED*]                                                                                                                                                                                                                                         |

|                                        |                                                                                                                                                                                                                                                                                                                                                                           |
|----------------------------------------|---------------------------------------------------------------------------------------------------------------------------------------------------------------------------------------------------------------------------------------------------------------------------------------------------------------------------------------------------------------------------|
| actividad trabajo                      | <input type="radio"/> casi siempre sentado<br><input type="radio"/> sentado 50 por cien<br><input type="radio"/> casi siempre de pie, quieto<br><input type="radio"/> casi siempre levantado caminando y llevando pocas cosas<br><input checked="" type="radio"/> casi siempre levantado, caminando y llevado muchas cosas<br><input type="radio"/> trabajo manual pesado |
| tiempo caminar o bici al día           | <input type="radio"/> casi nunca<br><input type="radio"/> menos 20min día<br><input checked="" type="radio"/> 20 a 40 min día<br><input type="radio"/> 40 a 60 min día<br><input type="radio"/> 1h o 1h y media día<br><input type="radio"/> más de 1h y media al día                                                                                                     |
| tiempo tareas casa al día              | <input type="radio"/> menos de 1h día<br><input type="radio"/> 1 a 2h día<br><input checked="" type="radio"/> 3 a 4h día<br><input type="radio"/> 5 a 6h día<br><input type="radio"/> 7 a 8h día<br><input type="radio"/> más de 8h día                                                                                                                                   |
| tiempo libre televisión ordenador leer | <input type="radio"/> menos 1h día<br><input type="radio"/> 1h día<br><input type="radio"/> 2h día<br><input checked="" type="radio"/> 3h día<br><input type="radio"/> 4h día<br><input type="radio"/> 5 a 6h día<br><input type="radio"/> mas 6h día                                                                                                                     |
| tiempo libre ejercicio o deporte       | <input type="radio"/> menos 1h semana<br><input type="radio"/> 1h semana<br><input type="radio"/> 2h semana<br><input type="radio"/> 3h semana<br><input checked="" type="radio"/> 4 a 5h semana<br><input type="radio"/> mas 5h semana                                                                                                                                   |
| como se considera                      | <input type="radio"/> sedentaria<br><input type="radio"/> poco activa<br><input checked="" type="radio"/> moderadamente activa<br><input type="radio"/> bastante activa<br><input type="radio"/> muy activa<br><input type="radio"/> no sabe                                                                                                                              |
| FUR                                    | [*DATA REMOVED*]                                                                                                                                                                                                                                                                                                                                                          |
| Semanas gestación 2T                   | [*DATA REMOVED*]                                                                                                                                                                                                                                                                                                                                                          |
| Días gestación 2T                      | [*DATA REMOVED*]                                                                                                                                                                                                                                                                                                                                                          |
| DBP 2T                                 | [*DATA REMOVED*]                                                                                                                                                                                                                                                                                                                                                          |
| CC 2T                                  | [*DATA REMOVED*]                                                                                                                                                                                                                                                                                                                                                          |
| AC 2T                                  | [*DATA REMOVED*]                                                                                                                                                                                                                                                                                                                                                          |

|                                                   |                                                                                                                                                                                      |
|---------------------------------------------------|--------------------------------------------------------------------------------------------------------------------------------------------------------------------------------------|
| LF 2T                                             | [*DATA REMOVED*]                                                                                                                                                                     |
| PFE 2T (Hadlock)                                  | [*DATA REMOVED*]                                                                                                                                                                     |
| Semanas gestación 3T                              | [*DATA REMOVED*]                                                                                                                                                                     |
| días 3T                                           | [*DATA REMOVED*]                                                                                                                                                                     |
| DBP 3T                                            | [*DATA REMOVED*]                                                                                                                                                                     |
| CC 3T                                             | [*DATA REMOVED*]                                                                                                                                                                     |
| AC 3T                                             | [*DATA REMOVED*]                                                                                                                                                                     |
| LF 3T                                             | [*DATA REMOVED*]                                                                                                                                                                     |
| PFE 3T (Hadlock)                                  | [*DATA REMOVED*]                                                                                                                                                                     |
| Semanas de gestación final                        | [*DATA REMOVED*]                                                                                                                                                                     |
| días gestación final                              | [*DATA REMOVED*]                                                                                                                                                                     |
| Localización placenta                             | <input type="radio"/> anterior<br><input type="radio"/> lateral derecha<br><input type="radio"/> lateral izquierda<br><input type="radio"/> posterior<br><input type="radio"/> fondo |
| Presentación longitudinal cefálica                | <input type="radio"/> no<br><input type="radio"/> si                                                                                                                                 |
| Dorso                                             | <input type="radio"/> izquierda anterior<br><input type="radio"/> izquierda posterior<br><input type="radio"/> derecha anterior<br><input type="radio"/> derecha posterior           |
| diámetro biparietal                               | [*DATA REMOVED*]                                                                                                                                                                     |
| Circunferencia craneal                            | [*DATA REMOVED*]                                                                                                                                                                     |
| Circunferencia abdominal                          | [*DATA REMOVED*]                                                                                                                                                                     |
| Longitud de femur                                 | [*DATA REMOVED*]                                                                                                                                                                     |
| tejido celular subcutáneo a nivel del muslo en mm | [*DATA REMOVED*]                                                                                                                                                                     |
| tejido celular subcutáneo en abdomen en mm        | [*DATA REMOVED*]                                                                                                                                                                     |
| Volumen del muslo en cm3                          | [*DATA REMOVED*]                                                                                                                                                                     |
| Peso fetal estimado según fórmula de Hadlock      | [*DATA REMOVED*]                                                                                                                                                                     |

|                                               |                                                                                                                                                          |
|-----------------------------------------------|----------------------------------------------------------------------------------------------------------------------------------------------------------|
| Percentil                                     | [*DATA REMOVED*]                                                                                                                                         |
| Peso fetal estimado según fórmula de Scioscia | <hr/>                                                                                                                                                    |
| Peso fetal estimado según fórmula de LEE      | <hr/>                                                                                                                                                    |
| Tipo de parto                                 | <input checked="" type="radio"/> eutocico<br><input type="radio"/> instrumentado/ventosa<br><input type="radio"/> cesarea                                |
| fecha de nacimiento                           | [*DATA REMOVED*]                                                                                                                                         |
| Días entre exploración y nacimiento           | [*DATA REMOVED*]                                                                                                                                         |
| Peso RN en g                                  | [*DATA REMOVED*]                                                                                                                                         |
| sexo                                          | <input checked="" type="radio"/> mujer<br><input type="radio"/> hombre                                                                                   |
| Apgar 1 minuto                                | [*DATA REMOVED*]                                                                                                                                         |
| Apgar 5 minutos                               | [*DATA REMOVED*]                                                                                                                                         |
| Apgar 10 minutos                              | <hr/>                                                                                                                                                    |
| antecedente Covid durante gestación           | <input checked="" type="radio"/> Yes<br><input type="radio"/> No                                                                                         |
| Nivel de estudios                             | <input type="radio"/> ninguno<br><input type="radio"/> primarios<br><input checked="" type="radio"/> secundarios<br><input type="radio"/> universitarios |

# Base\_datos\_estimacion\_peso\_fetal

|                                       |                                                                                                                                                                                                                                                                                      |
|---------------------------------------|--------------------------------------------------------------------------------------------------------------------------------------------------------------------------------------------------------------------------------------------------------------------------------------|
| Número de identificación participante | 194                                                                                                                                                                                                                                                                                  |
| CODIGO PARTICIPANTE                   |                                                                                                                                                                                                                                                                                      |
| Edad                                  | [*DATA REMOVED*]                                                                                                                                                                                                                                                                     |
| Gestaciones                           | <input checked="" type="radio"/> 1<br><input type="radio"/> 2<br><input type="radio"/> 3<br><input type="radio"/> mas de 3                                                                                                                                                           |
| partos                                | <input checked="" type="radio"/> 0<br><input type="radio"/> 1<br><input type="radio"/> 2<br><input type="radio"/> 3<br><input type="radio"/> mas de 3                                                                                                                                |
| cesáreas                              | <input checked="" type="radio"/> 0<br><input type="radio"/> 1<br><input type="radio"/> 2<br><input type="radio"/> 3<br><input type="radio"/> mas de 3                                                                                                                                |
| Abortos                               | <input checked="" type="radio"/> 0<br><input type="radio"/> 1<br><input type="radio"/> 2<br><input type="radio"/> 3<br><input type="radio"/> mas de 3                                                                                                                                |
| Tipo de gestacion                     | <input checked="" type="radio"/> espontanea<br><input type="radio"/> IAC inseminación artificial conyuge<br><input type="radio"/> IAD inseminación artificial donante<br><input type="radio"/> FIV Fecundación in Vitro<br><input type="radio"/> Ovodon FIV con donación de ovocitos |
| peso previo a embarazo                | [*DATA REMOVED*]                                                                                                                                                                                                                                                                     |
| Ganancia ponderal embarazo            | [*DATA REMOVED*]                                                                                                                                                                                                                                                                     |
| Talla madre                           | [*DATA REMOVED*]                                                                                                                                                                                                                                                                     |
| IMC previo embarazo                   | 24.212293388429753                                                                                                                                                                                                                                                                   |
| Patología obstétrica                  | <input checked="" type="radio"/> no<br><input type="radio"/> si                                                                                                                                                                                                                      |
| Diabetes pregestacional               | <input checked="" type="radio"/> no<br><input type="radio"/> si                                                                                                                                                                                                                      |
| Diabetes gestacional                  | <input checked="" type="radio"/> no<br><input type="radio"/> si                                                                                                                                                                                                                      |

|                                            |                                                                                                                                                                                      |
|--------------------------------------------|--------------------------------------------------------------------------------------------------------------------------------------------------------------------------------------|
| Diabetes gestacional con insulina          | <input checked="" type="radio"/> no<br><input type="radio"/> si                                                                                                                      |
| Diabetes gestacional con dieta y ejercicio | <input checked="" type="radio"/> no<br><input type="radio"/> si                                                                                                                      |
| Percentil fetos previos                    | <input checked="" type="radio"/> Nada<br><input type="radio"/> percentil menor de 10<br><input type="radio"/> percentil entre 10 y 90<br><input type="radio"/> percentil mayor de 90 |
| Exfumadora                                 | <input checked="" type="radio"/> Nada<br><input type="radio"/> menos de 5 años<br><input type="radio"/> 5 a 10 años<br><input type="radio"/> mayor o igual a 10 años                 |
| Hábito tabáquico                           | <input checked="" type="radio"/> no<br><input type="radio"/> si                                                                                                                      |
| fumadora                                   | [*DATA REMOVED*]                                                                                                                                                                     |
| Consumo otros tóxicos                      | <input checked="" type="radio"/> no<br><input type="radio"/> si                                                                                                                      |
| Hb 1T                                      | _____                                                                                                                                                                                |
| Htc 1T                                     | _____                                                                                                                                                                                |
| Hb 2T                                      | _____                                                                                                                                                                                |
| HTC 2T                                     | _____                                                                                                                                                                                |
| Hb 3T                                      | _____                                                                                                                                                                                |
| HTC 3T                                     | _____                                                                                                                                                                                |
| Suplemento FE oral                         | <input type="radio"/> si<br><input checked="" type="radio"/> no                                                                                                                      |
| Suplemento fe iv                           | <input type="radio"/> si<br><input checked="" type="radio"/> no                                                                                                                      |
| Transfusión                                | <input checked="" type="radio"/> no<br><input type="radio"/> si                                                                                                                      |
| Solicitada Vit D                           | <input checked="" type="radio"/> no<br><input type="radio"/> si                                                                                                                      |



|                       |                                                                                                                                                                                                                                                                                                                                                                                                              |
|-----------------------|--------------------------------------------------------------------------------------------------------------------------------------------------------------------------------------------------------------------------------------------------------------------------------------------------------------------------------------------------------------------------------------------------------------|
| Deficit vit D         | <input type="radio"/> no<br><input type="radio"/> si                                                                                                                                                                                                                                                                                                                                                         |
| Suplemento vit D      | <input type="radio"/> si<br><input type="radio"/> no                                                                                                                                                                                                                                                                                                                                                         |
| Dieta, cuestionario   | <input checked="" type="radio"/> si<br><input type="radio"/> no                                                                                                                                                                                                                                                                                                                                              |
| Leche entera          | <input type="radio"/> Nunca o menos 1 vez al mes<br><input checked="" type="radio"/> 1 a 3 veces mes<br><input type="radio"/> 1 vez semana<br><input type="radio"/> 2 a 4 veces semana<br><input type="radio"/> 5 a 6 veces semana<br><input type="radio"/> 1 vez al día<br><input type="radio"/> 2 a 3 veces al día<br><input type="radio"/> 5 a 6 veces al día<br><input type="radio"/> más 6 veces al día |
| Leche semidesnatada   | <input type="radio"/> Nunca o menos 1 vez al mes<br><input type="radio"/> 1 a 3 veces mes<br><input type="radio"/> 1 vez semana<br><input checked="" type="radio"/> 2 a 4 veces semana<br><input type="radio"/> 5 a 6 veces semana<br><input type="radio"/> 1 vez al día<br><input type="radio"/> 2 a 3 veces al día<br><input type="radio"/> 5 a 6 veces al día<br><input type="radio"/> mas 6 veces al día |
| Leche desnatada       | <input type="radio"/> Nunca o menos 1 vez al mes<br><input type="radio"/> 1 a 3 veces mes<br><input type="radio"/> 1 vez semana<br><input checked="" type="radio"/> 2 a 4 veces semana<br><input type="radio"/> 5 a 6 veces semana<br><input type="radio"/> 1 vez al día<br><input type="radio"/> 2 a 3 veces al día<br><input type="radio"/> 5 a 6 veces al día<br><input type="radio"/> más 6 veces al día |
| Leche condensada      | <input type="radio"/> Nunca o menos 1 vez al mes<br><input checked="" type="radio"/> 1 a 3 veces mes<br><input type="radio"/> 1 vez semana<br><input type="radio"/> 2 a 4 veces semana<br><input type="radio"/> 5 a 6 veces semana<br><input type="radio"/> 1 vez al día<br><input type="radio"/> 2 a 3 veces al día<br><input type="radio"/> 5 a 6 veces al día<br><input type="radio"/> más 6 veces al día |
| nata o crema de leche | <input checked="" type="radio"/> Nunca o menos 1 vez al mes<br><input type="radio"/> 1 a 3 veces mes<br><input type="radio"/> 1 vez semana<br><input type="radio"/> 2 a 4 veces semana<br><input type="radio"/> 5 a 6 veces semana<br><input type="radio"/> 1 vez al día<br><input type="radio"/> 2 a 3 veces al día<br><input type="radio"/> 5 a 6 veces al día<br><input type="radio"/> más 6 veces al día |

---

Yogurt Entero

- ☐ Nunca o menos 1 vez al mes
- ☐ 1 a 3 veces mes
- ☐ 1 vez semana
- ☐ 2 a 4 veces semana
- ☐ 5 a 6 veces semana
- ☒ 1 vez al día
- ☐ 2 a 3 veces al día
- ☐ 5 a 6 veces al día
- ☐ más 6 veces al día

---

Yogurt desnatado

- ☐ Nunca o menos 1 vez al mes
- ☐ 1 a 3 veces mes
- ☐ 1 vez semana
- ☒ 2 a 4 veces semana
- ☐ 5 a 6 veces semana
- ☐ 1 vez al día
- ☐ 2 a 3 veces al día
- ☐ 5 a 6 veces al día
- ☐ más 6 veces al día

---

100g requesón o queso blando o queso fresco

- ☐ Nunca o menos 1 vez al mes
- ☐ 1 a 3 veces mes
- ☐ 1 vez semana
- ☐ 2 a 4 veces semana
- ☐ 5 a 6 veces semana
- ☒ 1 vez al día
- ☐ 2 a 3 veces al día
- ☐ 5 a 6 veces al día
- ☐ más 6 veces al día

---

queso curado o semicurado o cremoso

- ☐ Nunca o menos 1 vez al mes
- ☒ 1 a 3 veces mes
- ☐ 1 vez semana
- ☐ 2 a 4 veces semana
- ☐ 5 a 6 veces semana
- ☐ 1 vez al día
- ☐ 2 a 3 veces al día
- ☐ 5 a 6 veces al día
- ☐ más 6 veces al día

---

natillas flan pudding

- ☐ Nunca o menos 1 vez al mes
- ☒ 1 a 3 veces mes
- ☐ 1 vez semana
- ☐ 2 a 4 veces semana
- ☐ 5 a 6 veces semana
- ☐ 1 vez al día
- ☐ 2 a 3 veces al día
- ☐ 5 a 6 veces al día
- ☐ más 6 veces al día

---

Helado

- ☐ Nunca o menos 1 vez al mes
- ☐ 1 a 3 veces mes
- ☒ 1 vez semana
- ☐ 2 a 4 veces semana
- ☐ 5 a 6 veces semana
- ☐ 1 vez al día
- ☐ 2 a 3 veces al día
- ☐ 5 a 6 veces al día
- ☐ más 6 veces al día

|                                      |                                                                                                                                                                                                                                                                                                                                                                                                              |
|--------------------------------------|--------------------------------------------------------------------------------------------------------------------------------------------------------------------------------------------------------------------------------------------------------------------------------------------------------------------------------------------------------------------------------------------------------------|
| huevo                                | <input type="radio"/> Nunca o menos 1 vez al mes<br><input type="radio"/> 1 a 3 veces mes<br><input type="radio"/> 1 vez semana<br><input checked="" type="radio"/> 2 a 4 veces semana<br><input type="radio"/> 5 a 6 veces semana<br><input type="radio"/> 1 vez al día<br><input type="radio"/> 2 a 3 veces al día<br><input type="radio"/> 5 a 6 veces al día<br><input type="radio"/> más 6 veces al día |
| Pollo con piel                       | <input type="radio"/> Nunca o menos 1 vez al mes<br><input checked="" type="radio"/> 1 a 3 veces mes<br><input type="radio"/> 1 vez semana<br><input type="radio"/> 2 a 4 veces semana<br><input type="radio"/> 5 a 6 veces semana<br><input type="radio"/> 1 vez al día<br><input type="radio"/> 2 a 3 veces al día<br><input type="radio"/> 5 a 6 veces al día<br><input type="radio"/> más 6 veces al día |
| pollo sin piel                       | <input type="radio"/> Nunca o menos 1 vez al mes<br><input type="radio"/> 1 a 3 veces mes<br><input type="radio"/> 1 vez semana<br><input checked="" type="radio"/> 2 a 4 veces semana<br><input type="radio"/> 5 a 6 veces semana<br><input type="radio"/> 1 vez al día<br><input type="radio"/> 2 a 3 veces al día<br><input type="radio"/> 5 a 6 veces al día<br><input type="radio"/> más 6 veces al día |
| Ternera o cerdo o cordero            | <input type="radio"/> Nunca o menos 1 vez al mes<br><input type="radio"/> 1 a 3 veces mes<br><input type="radio"/> 1 vez semana<br><input checked="" type="radio"/> 2 a 4 veces semana<br><input type="radio"/> 5 a 6 veces semana<br><input type="radio"/> 1 vez al día<br><input type="radio"/> 2 a 3 veces al día<br><input type="radio"/> 5 a 6 veces al día<br><input type="radio"/> más 6 veces al día |
| carne caza: Conejo o codorniz o pato | <input type="radio"/> Nunca o menos 1 vez al mes<br><input checked="" type="radio"/> 1 a 3 veces mes<br><input type="radio"/> 1 vez semana<br><input type="radio"/> 2 a 4 veces semana<br><input type="radio"/> 5 a 6 veces semana<br><input type="radio"/> 1 vez al día<br><input type="radio"/> 2 a 3 veces al día<br><input type="radio"/> 5 a 6 veces al día<br><input type="radio"/> más 6 veces al día |
| Hígado de ternera o cerdo o pollo    | <input checked="" type="radio"/> Nunca o menos 1 vez al mes<br><input type="radio"/> 1 a 3 veces mes<br><input type="radio"/> 1 vez semana<br><input type="radio"/> 2 a 4 veces semana<br><input type="radio"/> 5 a 6 veces semana<br><input type="radio"/> 1 vez al día<br><input type="radio"/> 2 a 3 veces al día<br><input type="radio"/> 5 a 6 veces al día<br><input type="radio"/> más 6 veces al día |

---

Vísceras

- ☒ Nunca o menos 1 vez al mes  
☐ 1 a 3 veces mes  
☐ 1 vez semana  
☐ 2 a 4 veces semana  
☐ 5 a 6 veces semana  
☐ 1 vez al día  
☐ 2 a 3 veces al día  
☐ 5 a 6 veces al día  
☐ más 6 veces al día

---

Embutido

- ☒ Nunca o menos 1 vez al mes  
☐ 1 a 3 veces mes  
☐ 1 vez semana  
☐ 2 a 4 veces semana  
☐ 5 a 6 veces semana  
☐ 1 vez al día  
☐ 2 a 3 veces al día  
☐ 5 a 6 veces al día  
☐ más 6 veces al día

---

Salchicha o similar

- ☐ Nunca o menos 1 vez al mes  
☒ 1 a 3 veces mes  
☐ 1 vez semana  
☐ 2 a 4 veces semana  
☐ 5 a 6 veces semana  
☐ 1 vez al día  
☐ 2 a 3 veces al día  
☐ 5 a 6 veces al día  
☐ más 6 veces al día

---

Pate o foiegras

- ☒ Nunca o menos 1 vez al mes  
☐ 1 a 3 veces mes  
☐ 1 vez semana  
☐ 2 a 4 veces semana  
☐ 5 a 6 veces semana  
☐ 1 vez al día  
☐ 2 a 3 veces al día  
☐ 5 a 6 veces al día  
☐ más 6 veces al día

---

Hamburguesa

- ☐ Nunca o menos 1 vez al mes  
☐ 1 a 3 veces mes  
☒ 1 vez semana  
☐ 2 a 4 veces semana  
☐ 5 a 6 veces semana  
☐ 1 vez al día  
☐ 2 a 3 veces al día  
☐ 5 a 6 veces al día  
☐ más 6 veces al día

---

tocino o bacon

- ☐ Nunca o menos 1 vez al mes  
☒ 1 a 3 veces mes  
☐ 1 vez semana  
☐ 2 a 4 veces semana  
☐ 5 a 6 veces semana  
☐ 1 vez al día  
☐ 2 a 3 veces al día  
☐ 5 a 6 veces al día  
☐ más 6 veces al día

---

Pescado frito

- ☐ Nunca o menos 1 vez al mes  
☒ 1 a 3 veces mes  
☐ 1 vez semana  
☐ 2 a 4 veces semana  
☐ 5 a 6 veces semana  
☐ 1 vez al día  
☐ 2 a 3 veces al día  
☐ 5 a 6 veces al día  
☐ más 6 veces al día

---

pescado hervido blanco

- ☐ Nunca o menos 1 vez al mes  
☐ 1 a 3 veces mes  
☒ 1 vez semana  
☐ 2 a 4 veces semana  
☐ 5 a 6 veces semana  
☐ 1 vez al día  
☐ 2 a 3 veces al día  
☐ 5 a 6 veces al día  
☐ más 6 veces al día

---

pescado hervido azul

- ☒ Nunca o menos 1 vez al mes  
☐ 1 a 3 veces mes  
☐ 1 vez semana  
☐ 2 a 4 veces semana  
☐ 5 a 6 veces semana  
☐ 1 vez al día  
☐ 2 a 3 veces al día  
☐ 5 a 6 veces al día  
☐ más 6 veces al día

---

otros pescado azul

- ☐ Nunca o menos 1 vez al mes  
☐ 1 a 3 veces mes  
☒ 1 vez semana  
☐ 2 a 4 veces semana  
☐ 5 a 6 veces semana  
☐ 1 vez al día  
☐ 2 a 3 veces al día  
☐ 5 a 6 veces al día  
☐ más 6 veces al día

---

atun conserva

- ☐ Nunca o menos 1 vez al mes  
☐ 1 a 3 veces mes  
☐ 1 vez semana  
☒ 2 a 4 veces semana  
☐ 5 a 6 veces semana  
☐ 1 vez al día  
☐ 2 a 3 veces al día  
☐ 5 a 6 veces al día  
☐ más 6 veces al día

---

sardina conserva

- ☐ Nunca o menos 1 vez al mes  
☒ 1 a 3 veces mes  
☐ 1 vez semana  
☐ 2 a 4 veces semana  
☐ 5 a 6 veces semana  
☐ 1 vez al día  
☐ 2 a 3 veces al día  
☐ 5 a 6 veces al día  
☐ más 6 veces al día

|                                         |                                                                                                                                                                                                                                                                                                                                                                                                              |
|-----------------------------------------|--------------------------------------------------------------------------------------------------------------------------------------------------------------------------------------------------------------------------------------------------------------------------------------------------------------------------------------------------------------------------------------------------------------|
| pescado ahumado                         | <input checked="" type="radio"/> Nunca o menos 1 vez al mes<br><input type="radio"/> 1 a 3 veces mes<br><input type="radio"/> 1 vez semana<br><input type="radio"/> 2 a 4 veces semana<br><input type="radio"/> 5 a 6 veces semana<br><input type="radio"/> 1 vez al día<br><input type="radio"/> 2 a 3 veces al día<br><input type="radio"/> 5 a 6 veces al día<br><input type="radio"/> más 6 veces al día |
| almejas o mejillones o ostras unos 100g | <input type="radio"/> Nunca o menos 1 vez al mes<br><input type="radio"/> 1 a 3 veces mes<br><input checked="" type="radio"/> 1 vez semana<br><input type="radio"/> 2 a 4 veces semana<br><input type="radio"/> 5 a 6 veces semana<br><input type="radio"/> 1 vez al día<br><input type="radio"/> 2 a 3 veces al día<br><input type="radio"/> 5 a 6 veces al día<br><input type="radio"/> más 6 veces al día |
| calamar o chipiron o sepia unos 100g    | <input type="radio"/> Nunca o menos 1 vez al mes<br><input type="radio"/> 1 a 3 veces mes<br><input checked="" type="radio"/> 1 vez semana<br><input type="radio"/> 2 a 4 veces semana<br><input type="radio"/> 5 a 6 veces semana<br><input type="radio"/> 1 vez al día<br><input type="radio"/> 2 a 3 veces al día<br><input type="radio"/> 5 a 6 veces al día<br><input type="radio"/> más 6 veces al día |
| marisco unos 100g                       | <input type="radio"/> Nunca o menos 1 vez al mes<br><input type="radio"/> 1 a 3 veces mes<br><input checked="" type="radio"/> 1 vez semana<br><input type="radio"/> 2 a 4 veces semana<br><input type="radio"/> 5 a 6 veces semana<br><input type="radio"/> 1 vez al día<br><input type="radio"/> 2 a 3 veces al día<br><input type="radio"/> 5 a 6 veces al día<br><input type="radio"/> más 6 veces al día |
| Espinacas o acelgas cocinadas           | <input type="radio"/> Nunca o menos 1 vez al mes<br><input checked="" type="radio"/> 1 a 3 veces mes<br><input type="radio"/> 1 vez semana<br><input type="radio"/> 2 a 4 veces semana<br><input type="radio"/> 5 a 6 veces semana<br><input type="radio"/> 1 vez al día<br><input type="radio"/> 2 a 3 veces al día<br><input type="radio"/> 5 a 6 veces al día<br><input type="radio"/> más 6 veces al día |
| Col o coliflor o brocoli cocinado       | <input type="radio"/> Nunca o menos 1 vez al mes<br><input type="radio"/> 1 a 3 veces mes<br><input type="radio"/> 1 vez semana<br><input checked="" type="radio"/> 2 a 4 veces semana<br><input type="radio"/> 5 a 6 veces semana<br><input type="radio"/> 1 vez al día<br><input type="radio"/> 2 a 3 veces al día<br><input type="radio"/> 5 a 6 veces al día<br><input type="radio"/> más 6 veces al día |

---

Lechuga o endivia o escarola

- ☐ Nunca o menos 1 vez al mes  
☐ 1 a 3 veces mes  
☐ 1 vez semana  
☒ 2 a 4 veces semana  
☐ 5 a 6 veces semana  
☐ 1 vez al día  
☐ 2 a 3 veces al día  
☐ 5 a 6 veces al día  
☐ más 6 veces al día

---

tomate ensalada

- ☐ Nunca o menos 1 vez al mes  
☐ 1 a 3 veces mes  
☐ 1 vez semana  
☒ 2 a 4 veces semana  
☐ 5 a 6 veces semana  
☐ 1 vez al día  
☐ 2 a 3 veces al día  
☐ 5 a 6 veces al día  
☐ más 6 veces al día

---

cebolla

- ☐ Nunca o menos 1 vez al mes  
☐ 1 a 3 veces mes  
☐ 1 vez semana  
☒ 2 a 4 veces semana  
☐ 5 a 6 veces semana  
☐ 1 vez al día  
☐ 2 a 3 veces al día  
☐ 5 a 6 veces al día  
☐ más 6 veces al día

---

Zanahoria o calabaza

- ☐ Nunca o menos 1 vez al mes  
☐ 1 a 3 veces mes  
☒ 1 vez semana  
☐ 2 a 4 veces semana  
☐ 5 a 6 veces semana  
☐ 1 vez al día  
☐ 2 a 3 veces al día  
☐ 5 a 6 veces al día  
☐ más 6 veces al día

---

Judías verdes

- ☐ Nunca o menos 1 vez al mes  
☐ 1 a 3 veces mes  
☒ 1 vez semana  
☐ 2 a 4 veces semana  
☐ 5 a 6 veces semana  
☐ 1 vez al día  
☐ 2 a 3 veces al día  
☐ 5 a 6 veces al día  
☐ más 6 veces al día

---

Berenjena o calabacin o pepino

- ☐ Nunca o menos 1 vez al mes  
☐ 1 a 3 veces mes  
☐ 1 vez semana  
☒ 2 a 4 veces semana  
☐ 5 a 6 veces semana  
☐ 1 vez al día  
☐ 2 a 3 veces al día  
☐ 5 a 6 veces al día  
☐ más 6 veces al día

---

|          |                                                                                                                                                                                                                                                                                                                                                                                                              |
|----------|--------------------------------------------------------------------------------------------------------------------------------------------------------------------------------------------------------------------------------------------------------------------------------------------------------------------------------------------------------------------------------------------------------------|
| pimiento | <input type="radio"/> Nunca o menos 1 vez al mes<br><input type="radio"/> 1 a 3 veces mes<br><input type="radio"/> 1 vez semana<br><input checked="" type="radio"/> 2 a 4 veces semana<br><input type="radio"/> 5 a 6 veces semana<br><input type="radio"/> 1 vez al día<br><input type="radio"/> 2 a 3 veces al día<br><input type="radio"/> 5 a 6 veces al día<br><input type="radio"/> más 6 veces al día |
|----------|--------------------------------------------------------------------------------------------------------------------------------------------------------------------------------------------------------------------------------------------------------------------------------------------------------------------------------------------------------------------------------------------------------------|

---

|           |                                                                                                                                                                                                                                                                                                                                                                                                              |
|-----------|--------------------------------------------------------------------------------------------------------------------------------------------------------------------------------------------------------------------------------------------------------------------------------------------------------------------------------------------------------------------------------------------------------------|
| alcachofa | <input type="radio"/> Nunca o menos 1 vez al mes<br><input checked="" type="radio"/> 1 a 3 veces mes<br><input type="radio"/> 1 vez semana<br><input type="radio"/> 2 a 4 veces semana<br><input type="radio"/> 5 a 6 veces semana<br><input type="radio"/> 1 vez al día<br><input type="radio"/> 2 a 3 veces al día<br><input type="radio"/> 5 a 6 veces al día<br><input type="radio"/> más 6 veces al día |
|-----------|--------------------------------------------------------------------------------------------------------------------------------------------------------------------------------------------------------------------------------------------------------------------------------------------------------------------------------------------------------------------------------------------------------------|

---

|            |                                                                                                                                                                                                                                                                                                                                                                                                              |
|------------|--------------------------------------------------------------------------------------------------------------------------------------------------------------------------------------------------------------------------------------------------------------------------------------------------------------------------------------------------------------------------------------------------------------|
| espárragos | <input type="radio"/> Nunca o menos 1 vez al mes<br><input type="radio"/> 1 a 3 veces mes<br><input type="radio"/> 1 vez semana<br><input checked="" type="radio"/> 2 a 4 veces semana<br><input type="radio"/> 5 a 6 veces semana<br><input type="radio"/> 1 vez al día<br><input type="radio"/> 2 a 3 veces al día<br><input type="radio"/> 5 a 6 veces al día<br><input type="radio"/> más 6 veces al día |
|------------|--------------------------------------------------------------------------------------------------------------------------------------------------------------------------------------------------------------------------------------------------------------------------------------------------------------------------------------------------------------------------------------------------------------|

---

|              |                                                                                                                                                                                                                                                                                                                                                                                                              |
|--------------|--------------------------------------------------------------------------------------------------------------------------------------------------------------------------------------------------------------------------------------------------------------------------------------------------------------------------------------------------------------------------------------------------------------|
| maíz hervido | <input type="radio"/> Nunca o menos 1 vez al mes<br><input checked="" type="radio"/> 1 a 3 veces mes<br><input type="radio"/> 1 vez semana<br><input type="radio"/> 2 a 4 veces semana<br><input type="radio"/> 5 a 6 veces semana<br><input type="radio"/> 1 vez al día<br><input type="radio"/> 2 a 3 veces al día<br><input type="radio"/> 5 a 6 veces al día<br><input type="radio"/> más 6 veces al día |
|--------------|--------------------------------------------------------------------------------------------------------------------------------------------------------------------------------------------------------------------------------------------------------------------------------------------------------------------------------------------------------------------------------------------------------------|

---

|           |                                                                                                                                                                                                                                                                                                                                                                                                              |
|-----------|--------------------------------------------------------------------------------------------------------------------------------------------------------------------------------------------------------------------------------------------------------------------------------------------------------------------------------------------------------------------------------------------------------------|
| legumbres | <input type="radio"/> Nunca o menos 1 vez al mes<br><input type="radio"/> 1 a 3 veces mes<br><input type="radio"/> 1 vez semana<br><input checked="" type="radio"/> 2 a 4 veces semana<br><input type="radio"/> 5 a 6 veces semana<br><input type="radio"/> 1 vez al día<br><input type="radio"/> 2 a 3 veces al día<br><input type="radio"/> 5 a 6 veces al día<br><input type="radio"/> más 6 veces al día |
|-----------|--------------------------------------------------------------------------------------------------------------------------------------------------------------------------------------------------------------------------------------------------------------------------------------------------------------------------------------------------------------------------------------------------------------|

---

|                       |                                                                                                                                                                                                                                                                                                                                                                                                              |
|-----------------------|--------------------------------------------------------------------------------------------------------------------------------------------------------------------------------------------------------------------------------------------------------------------------------------------------------------------------------------------------------------------------------------------------------------|
| naranjas o mandarinas | <input type="radio"/> Nunca o menos 1 vez al mes<br><input type="radio"/> 1 a 3 veces mes<br><input type="radio"/> 1 vez semana<br><input type="radio"/> 2 a 4 veces semana<br><input checked="" type="radio"/> 5 a 6 veces semana<br><input type="radio"/> 1 vez al día<br><input type="radio"/> 2 a 3 veces al día<br><input type="radio"/> 5 a 6 veces al día<br><input type="radio"/> más 6 veces al día |
|-----------------------|--------------------------------------------------------------------------------------------------------------------------------------------------------------------------------------------------------------------------------------------------------------------------------------------------------------------------------------------------------------------------------------------------------------|

---



---

zumo natural fruta

- ☐ Nunca o menos 1 vez al mes  
☐ 1 a 3 veces mes  
☐ 1 vez semana  
☒ 2 a 4 veces semana  
☐ 5 a 6 veces semana  
☐ 1 vez al día  
☐ 2 a 3 veces al día  
☐ 5 a 6 veces al día  
☐ más 6 veces al día

---

platano

- ☐ Nunca o menos 1 vez al mes  
☐ 1 a 3 veces mes  
☐ 1 vez semana  
☐ 2 a 4 veces semana  
☐ 5 a 6 veces semana  
☒ 1 vez al día  
☐ 2 a 3 veces al día  
☐ 5 a 6 veces al día  
☐ más 6 veces al día

---

manzana o pera

- ☐ Nunca o menos 1 vez al mes  
☐ 1 a 3 veces mes  
☐ 1 vez semana  
☐ 2 a 4 veces semana  
☐ 5 a 6 veces semana  
☒ 1 vez al día  
☐ 2 a 3 veces al día  
☐ 5 a 6 veces al día  
☐ más 6 veces al día

---

melocotón o nectarina

- ☐ Nunca o menos 1 vez al mes  
☐ 1 a 3 veces mes  
☐ 1 vez semana  
☒ 2 a 4 veces semana  
☐ 5 a 6 veces semana  
☐ 1 vez al día  
☐ 2 a 3 veces al día  
☐ 5 a 6 veces al día  
☐ más 6 veces al día

---

sandia o melon

- ☐ Nunca o menos 1 vez al mes  
☐ 1 a 3 veces mes  
☐ 1 vez semana  
☒ 2 a 4 veces semana  
☐ 5 a 6 veces semana  
☐ 1 vez al día  
☐ 2 a 3 veces al día  
☐ 5 a 6 veces al día  
☐ más 6 veces al día

---

uva

- ☐ Nunca o menos 1 vez al mes  
☐ 1 a 3 veces mes  
☐ 1 vez semana  
☒ 2 a 4 veces semana  
☐ 5 a 6 veces semana  
☐ 1 vez al día  
☐ 2 a 3 veces al día  
☐ 5 a 6 veces al día  
☐ más 6 veces al día

---

bruna o ciruela

- ☐ Nunca o menos 1 vez al mes  
☐ 1 a 3 veces mes  
☐ 1 vez semana  
☒ 2 a 4 veces semana  
☐ 5 a 6 veces semana  
☐ 1 vez al día  
☐ 2 a 3 veces al día  
☐ 5 a 6 veces al día  
☐ más 6 veces al día

---

kiwi

- ☐ Nunca o menos 1 vez al mes  
☐ 1 a 3 veces mes  
☐ 1 vez semana  
☐ 2 a 4 veces semana  
☒ 5 a 6 veces semana  
☐ 1 vez al día  
☐ 2 a 3 veces al día  
☐ 5 a 6 veces al día  
☐ más 6 veces al día

---

aceituna

- ☒ Nunca o menos 1 vez al mes  
☐ 1 a 3 veces mes  
☐ 1 vez semana  
☐ 2 a 4 veces semana  
☐ 5 a 6 veces semana  
☐ 1 vez al día  
☐ 2 a 3 veces al día  
☐ 5 a 6 veces al día  
☐ más 6 veces al día

---

frutos secos

- ☐ Nunca o menos 1 vez al mes  
☐ 1 a 3 veces mes  
☐ 1 vez semana  
☒ 2 a 4 veces semana  
☐ 5 a 6 veces semana  
☐ 1 vez al día  
☐ 2 a 3 veces al día  
☐ 5 a 6 veces al día  
☐ más 6 veces al día

---

pan blanco

- ☐ Nunca o menos 1 vez al mes  
☐ 1 a 3 veces mes  
☐ 1 vez semana  
☐ 2 a 4 veces semana  
☐ 5 a 6 veces semana  
☒ 1 vez al día  
☐ 2 a 3 veces al día  
☐ 5 a 6 veces al día  
☐ más 6 veces al día

---

pan integral

- ☐ Nunca o menos 1 vez al mes  
☐ 1 a 3 veces mes  
☐ 1 vez semana  
☒ 2 a 4 veces semana  
☐ 5 a 6 veces semana  
☐ 1 vez al día  
☐ 2 a 3 veces al día  
☐ 5 a 6 veces al día  
☐ más 6 veces al día

---

cereales desayuno

- ☐ Nunca o menos 1 vez al mes  
☐ 1 a 3 veces mes  
☐ 1 vez semana  
☒ 2 a 4 veces semana  
☐ 5 a 6 veces semana  
☐ 1 vez al día  
☐ 2 a 3 veces al día  
☐ 5 a 6 veces al día  
☐ más 6 veces al día

---

patatas fritas

- ☐ Nunca o menos 1 vez al mes  
☒ 1 a 3 veces mes  
☐ 1 vez semana  
☐ 2 a 4 veces semana  
☐ 5 a 6 veces semana  
☐ 1 vez al día  
☐ 2 a 3 veces al día  
☐ 5 a 6 veces al día  
☐ más 6 veces al día

---

patatas cocidas o asadas

- ☐ Nunca o menos 1 vez al mes  
☐ 1 a 3 veces mes  
☐ 1 vez semana  
☒ 2 a 4 veces semana  
☐ 5 a 6 veces semana  
☐ 1 vez al día  
☐ 2 a 3 veces al día  
☐ 5 a 6 veces al día  
☐ más 6 veces al día

---

bolsa papas

- ☐ Nunca o menos 1 vez al mes  
☒ 1 a 3 veces mes  
☐ 1 vez semana  
☐ 2 a 4 veces semana  
☐ 5 a 6 veces semana  
☐ 1 vez al día  
☐ 2 a 3 veces al día  
☐ 5 a 6 veces al día  
☐ más 6 veces al día

---

arroz cocinado

- ☐ Nunca o menos 1 vez al mes  
☐ 1 a 3 veces mes  
☒ 1 vez semana  
☐ 2 a 4 veces semana  
☐ 5 a 6 veces semana  
☐ 1 vez al día  
☐ 2 a 3 veces al día  
☐ 5 a 6 veces al día  
☐ más 6 veces al día

---

pasta

- ☐ Nunca o menos 1 vez al mes  
☐ 1 a 3 veces mes  
☐ 1 vez semana  
☒ 2 a 4 veces semana  
☐ 5 a 6 veces semana  
☐ 1 vez al día  
☐ 2 a 3 veces al día  
☐ 5 a 6 veces al día  
☐ más 6 veces al día

|                     |                                                                                                                                                                                                                                                                                                                                                                                                              |
|---------------------|--------------------------------------------------------------------------------------------------------------------------------------------------------------------------------------------------------------------------------------------------------------------------------------------------------------------------------------------------------------------------------------------------------------|
| pizza               | <input type="radio"/> Nunca o menos 1 vez al mes<br><input checked="" type="radio"/> 1 a 3 veces mes<br><input type="radio"/> 1 vez semana<br><input type="radio"/> 2 a 4 veces semana<br><input type="radio"/> 5 a 6 veces semana<br><input type="radio"/> 1 vez al día<br><input type="radio"/> 2 a 3 veces al día<br><input type="radio"/> 5 a 6 veces al día<br><input type="radio"/> más 6 veces al día |
| aceite oliva        | <input type="radio"/> Nunca o menos 1 vez al mes<br><input type="radio"/> 1 a 3 veces mes<br><input type="radio"/> 1 vez semana<br><input type="radio"/> 2 a 4 veces semana<br><input type="radio"/> 5 a 6 veces semana<br><input type="radio"/> 1 vez al día<br><input checked="" type="radio"/> 2 a 3 veces al día<br><input type="radio"/> 5 a 6 veces al día<br><input type="radio"/> más 6 veces al día |
| otros aceites       | <input checked="" type="radio"/> Nunca o menos 1 vez al mes<br><input type="radio"/> 1 a 3 veces mes<br><input type="radio"/> 1 vez semana<br><input type="radio"/> 2 a 4 veces semana<br><input type="radio"/> 5 a 6 veces semana<br><input type="radio"/> 1 vez al día<br><input type="radio"/> 2 a 3 veces al día<br><input type="radio"/> 5 a 6 veces al día<br><input type="radio"/> más 6 veces al día |
| margarina           | <input checked="" type="radio"/> Nunca o menos 1 vez al mes<br><input type="radio"/> 1 a 3 veces mes<br><input type="radio"/> 1 vez semana<br><input type="radio"/> 2 a 4 veces semana<br><input type="radio"/> 5 a 6 veces semana<br><input type="radio"/> 1 vez al día<br><input type="radio"/> 2 a 3 veces al día<br><input type="radio"/> 5 a 6 veces al día<br><input type="radio"/> más 6 veces al día |
| mantequilla         | <input type="radio"/> Nunca o menos 1 vez al mes<br><input type="radio"/> 1 a 3 veces mes<br><input checked="" type="radio"/> 1 vez semana<br><input type="radio"/> 2 a 4 veces semana<br><input type="radio"/> 5 a 6 veces semana<br><input type="radio"/> 1 vez al día<br><input type="radio"/> 2 a 3 veces al día<br><input type="radio"/> 5 a 6 veces al día<br><input type="radio"/> más 6 veces al día |
| galletas tipo maria | <input checked="" type="radio"/> Nunca o menos 1 vez al mes<br><input type="radio"/> 1 a 3 veces mes<br><input type="radio"/> 1 vez semana<br><input type="radio"/> 2 a 4 veces semana<br><input type="radio"/> 5 a 6 veces semana<br><input type="radio"/> 1 vez al día<br><input type="radio"/> 2 a 3 veces al día<br><input type="radio"/> 5 a 6 veces al día<br><input type="radio"/> más 6 veces al día |

---

galletas chocolate

- ☐ Nunca o menos 1 vez al mes  
☒ 1 a 3 veces mes  
☐ 1 vez semana  
☐ 2 a 4 veces semana  
☐ 5 a 6 veces semana  
☐ 1 vez al día  
☐ 2 a 3 veces al día  
☐ 5 a 6 veces al día  
☐ más 6 veces al día

---

bolleria

- ☐ Nunca o menos 1 vez al mes  
☐ 1 a 3 veces mes  
☒ 1 vez semana  
☐ 2 a 4 veces semana  
☐ 5 a 6 veces semana  
☐ 1 vez al día  
☐ 2 a 3 veces al día  
☐ 5 a 6 veces al día  
☐ más 6 veces al día

---

chocolate o bombones

- ☐ Nunca o menos 1 vez al mes  
☐ 1 a 3 veces mes  
☒ 1 vez semana  
☐ 2 a 4 veces semana  
☐ 5 a 6 veces semana  
☐ 1 vez al día  
☐ 2 a 3 veces al día  
☐ 5 a 6 veces al día  
☐ más 6 veces al día

---

chocolate polvo o colacao

- ☐ Nunca o menos 1 vez al mes  
☒ 1 a 3 veces mes  
☐ 1 vez semana  
☐ 2 a 4 veces semana  
☐ 5 a 6 veces semana  
☐ 1 vez al día  
☐ 2 a 3 veces al día  
☐ 5 a 6 veces al día  
☐ más 6 veces al día

---

vino tinto

- ☒ Nunca o menos 1 vez al mes  
☐ 1 a 3 veces mes  
☐ 1 vez semana  
☐ 2 a 4 veces semana  
☐ 5 a 6 veces semana  
☐ 1 vez al día  
☐ 2 a 3 veces al día  
☐ 5 a 6 veces al día  
☐ más 6 veces al día

---

vino blanco

- ☒ Nunca o menos 1 vez al mes  
☐ 1 a 3 veces mes  
☐ 1 vez semana  
☐ 2 a 4 veces semana  
☐ 5 a 6 veces semana  
☐ 1 vez al día  
☐ 2 a 3 veces al día  
☐ 5 a 6 veces al día  
☐ más 6 veces al día

|                       |                                                                                                                                                                                                                                                                                                                                                                                                              |
|-----------------------|--------------------------------------------------------------------------------------------------------------------------------------------------------------------------------------------------------------------------------------------------------------------------------------------------------------------------------------------------------------------------------------------------------------|
| vino seco o vermut    | <input checked="" type="radio"/> Nunca o menos 1 vez al mes<br><input type="radio"/> 1 a 3 veces mes<br><input type="radio"/> 1 vez semana<br><input type="radio"/> 2 a 4 veces semana<br><input type="radio"/> 5 a 6 veces semana<br><input type="radio"/> 1 vez al día<br><input type="radio"/> 2 a 3 veces al día<br><input type="radio"/> 5 a 6 veces al día<br><input type="radio"/> más 6 veces al día |
| cerveza               | <input checked="" type="radio"/> Nunca o menos 1 vez al mes<br><input type="radio"/> 1 a 3 veces mes<br><input type="radio"/> 1 vez semana<br><input type="radio"/> 2 a 4 veces semana<br><input type="radio"/> 5 a 6 veces semana<br><input type="radio"/> 1 vez al día<br><input type="radio"/> 2 a 3 veces al día<br><input type="radio"/> 5 a 6 veces al día<br><input type="radio"/> más 6 veces al día |
| cerveza sin alcohol   | <input type="radio"/> Nunca o menos 1 vez al mes<br><input checked="" type="radio"/> 1 a 3 veces mes<br><input type="radio"/> 1 vez semana<br><input type="radio"/> 2 a 4 veces semana<br><input type="radio"/> 5 a 6 veces semana<br><input type="radio"/> 1 vez al día<br><input type="radio"/> 2 a 3 veces al día<br><input type="radio"/> 5 a 6 veces al día<br><input type="radio"/> más 6 veces al día |
| licores               | <input checked="" type="radio"/> Nunca o menos 1 vez al mes<br><input type="radio"/> 1 a 3 veces mes<br><input type="radio"/> 1 vez semana<br><input type="radio"/> 2 a 4 veces semana<br><input type="radio"/> 5 a 6 veces semana<br><input type="radio"/> 1 vez al día<br><input type="radio"/> 2 a 3 veces al día<br><input type="radio"/> 5 a 6 veces al día<br><input type="radio"/> más 6 veces al día |
| ginebra o ron o vodka | <input checked="" type="radio"/> Nunca o menos 1 vez al mes<br><input type="radio"/> 1 a 3 veces mes<br><input type="radio"/> 1 vez semana<br><input type="radio"/> 2 a 4 veces semana<br><input type="radio"/> 5 a 6 veces semana<br><input type="radio"/> 1 vez al día<br><input type="radio"/> 2 a 3 veces al día<br><input type="radio"/> 5 a 6 veces al día<br><input type="radio"/> más 6 veces al día |
| refresco normal       | <input checked="" type="radio"/> Nunca o menos 1 vez al mes<br><input type="radio"/> 1 a 3 veces mes<br><input type="radio"/> 1 vez semana<br><input type="radio"/> 2 a 4 veces semana<br><input type="radio"/> 5 a 6 veces semana<br><input type="radio"/> 1 vez al día<br><input type="radio"/> 2 a 3 veces al día<br><input type="radio"/> 5 a 6 veces al día<br><input type="radio"/> más 6 veces al día |

---

refresco sin azúcar

- ☒ Nunca o menos 1 vez al mes  
☐ 1 a 3 veces mes  
☐ 1 vez semana  
☐ 2 a 4 veces semana  
☐ 5 a 6 veces semana  
☐ 1 vez al día  
☐ 2 a 3 veces al día  
☐ 5 a 6 veces al día  
☐ más 6 veces al día

---

Agua del grifo

- ☐ Nunca o menos 1 vez al mes  
☐ 1 a 3 veces mes  
☒ 1 vez semana  
☐ 2 a 4 veces semana  
☐ 5 a 6 veces semana  
☐ 1 vez al día  
☐ 2 a 3 veces al día  
☐ 5 a 6 veces al día  
☐ más 6 veces al día

---

agua embotellada sin gas

- ☐ Nunca o menos 1 vez al mes  
☐ 1 a 3 veces mes  
☐ 1 vez semana  
☐ 2 a 4 veces semana  
☐ 5 a 6 veces semana  
☐ 1 vez al día  
☐ 2 a 3 veces al día  
☒ 5 a 6 veces al día  
☐ más 6 veces al día

---

agua embotellada con gas

- ☒ Nunca o menos 1 vez al mes  
☐ 1 a 3 veces mes  
☐ 1 vez semana  
☐ 2 a 4 veces semana  
☐ 5 a 6 veces semana  
☐ 1 vez al día  
☐ 2 a 3 veces al día  
☐ 5 a 6 veces al día  
☐ más 6 veces al día

---

zumو frutas embasado

- ☒ Nunca o menos 1 vez al mes  
☐ 1 a 3 veces mes  
☐ 1 vez semana  
☐ 2 a 4 veces semana  
☐ 5 a 6 veces semana  
☐ 1 vez al día  
☐ 2 a 3 veces al día  
☐ 5 a 6 veces al día  
☐ más 6 veces al día

---

cafe

- ☐ Nunca o menos 1 vez al mes  
☐ 1 a 3 veces mes  
☐ 1 vez semana  
☐ 2 a 4 veces semana  
☐ 5 a 6 veces semana  
☒ 1 vez al día  
☐ 2 a 3 veces al día  
☐ 5 a 6 veces al día  
☐ más 6 veces al día

---

cafe descafeinado

- ☐ Nunca o menos 1 vez al mes  
☒ 1 a 3 veces mes  
☐ 1 vez semana  
☐ 2 a 4 veces semana  
☐ 5 a 6 veces semana  
☐ 1 vez al día  
☐ 2 a 3 veces al día  
☐ 5 a 6 veces al día  
☐ más 6 veces al día

---

te o infusión

- ☐ Nunca o menos 1 vez al mes  
☒ 1 a 3 veces mes  
☐ 1 vez semana  
☐ 2 a 4 veces semana  
☐ 5 a 6 veces semana  
☐ 1 vez al día  
☐ 2 a 3 veces al día  
☐ 5 a 6 veces al día  
☐ más 6 veces al día

---

sopa o puré verduras

- ☐ Nunca o menos 1 vez al mes  
☐ 1 a 3 veces mes  
☐ 1 vez semana  
☐ 2 a 4 veces semana  
☒ 5 a 6 veces semana  
☐ 1 vez al día  
☐ 2 a 3 veces al día  
☐ 5 a 6 veces al día  
☐ más 6 veces al día

---

croquetas pollo jamón

- ☒ Nunca o menos 1 vez al mes  
☐ 1 a 3 veces mes  
☐ 1 vez semana  
☐ 2 a 4 veces semana  
☐ 5 a 6 veces semana  
☐ 1 vez al día  
☐ 2 a 3 veces al día  
☐ 5 a 6 veces al día  
☐ más 6 veces al día

---

croquetas pescado

- ☐ Nunca o menos 1 vez al mes  
☒ 1 a 3 veces mes  
☐ 1 vez semana  
☐ 2 a 4 veces semana  
☐ 5 a 6 veces semana  
☐ 1 vez al día  
☐ 2 a 3 veces al día  
☐ 5 a 6 veces al día  
☐ más 6 veces al día

---

mayonesa

- ☐ Nunca o menos 1 vez al mes  
☐ 1 a 3 veces mes  
☐ 1 vez semana  
☒ 2 a 4 veces semana  
☐ 5 a 6 veces semana  
☐ 1 vez al día  
☐ 2 a 3 veces al día  
☐ 5 a 6 veces al día  
☐ más 6 veces al día



---

salsa tomate

- ☐ Nunca o menos 1 vez al mes  
☐ 1 a 3 veces mes  
☒ 1 vez semana  
☐ 2 a 4 veces semana  
☐ 5 a 6 veces semana  
☐ 1 vez al día  
☐ 2 a 3 veces al día  
☐ 5 a 6 veces al día  
☐ más 6 veces al día

---

ketchup

- ☐ Nunca o menos 1 vez al mes  
☒ 1 a 3 veces mes  
☐ 1 vez semana  
☐ 2 a 4 veces semana  
☐ 5 a 6 veces semana  
☐ 1 vez al día  
☐ 2 a 3 veces al día  
☐ 5 a 6 veces al día  
☐ más 6 veces al día

---

sal

- ☒ Nunca o menos 1 vez al mes  
☐ 1 a 3 veces mes  
☐ 1 vez semana  
☐ 2 a 4 veces semana  
☐ 5 a 6 veces semana  
☐ 1 vez al día  
☐ 2 a 3 veces al día  
☐ 5 a 6 veces al día  
☐ más 6 veces al día

---

ajo

- ☐ Nunca o menos 1 vez al mes  
☒ 1 a 3 veces mes  
☐ 1 vez semana  
☐ 2 a 4 veces semana  
☐ 5 a 6 veces semana  
☐ 1 vez al día  
☐ 2 a 3 veces al día  
☐ 5 a 6 veces al día  
☐ más 6 veces al día

---

mermelada o miel

- ☐ Nunca o menos 1 vez al mes  
☐ 1 a 3 veces mes  
☒ 1 vez semana  
☐ 2 a 4 veces semana  
☐ 5 a 6 veces semana  
☐ 1 vez al día  
☐ 2 a 3 veces al día  
☐ 5 a 6 veces al día  
☐ más 6 veces al día

---

azúcar

- ☒ Nunca o menos 1 vez al mes  
☐ 1 a 3 veces mes  
☐ 1 vez semana  
☐ 2 a 4 veces semana  
☐ 5 a 6 veces semana  
☐ 1 vez al día  
☐ 2 a 3 veces al día  
☐ 5 a 6 veces al día  
☐ más 6 veces al día

|                                       |                                                                                                                                                                                                                                                                                                                                                                                                                                                                                                                               |
|---------------------------------------|-------------------------------------------------------------------------------------------------------------------------------------------------------------------------------------------------------------------------------------------------------------------------------------------------------------------------------------------------------------------------------------------------------------------------------------------------------------------------------------------------------------------------------|
| Otro alimento                         |                                                                                                                                                                                                                                                                                                                                                                                                                                                                                                                               |
| suplementos vitamínicos               | <input checked="" type="radio"/> si<br><input type="radio"/> no                                                                                                                                                                                                                                                                                                                                                                                                                                                               |
| suplementos vitamínicos               | [*DATA REMOVED*]                                                                                                                                                                                                                                                                                                                                                                                                                                                                                                              |
| dieta previa                          | <input type="radio"/> si<br><input checked="" type="radio"/> no                                                                                                                                                                                                                                                                                                                                                                                                                                                               |
| motivo dieta                          | <input checked="" type="radio"/> no dieta<br><input type="radio"/> control peso<br><input type="radio"/> control colesterol<br><input type="radio"/> control diabetes<br><input type="radio"/> problemas estómago<br><input type="radio"/> problemas vesícula o hepáticos<br><input type="radio"/> HTA o cardiopatía<br><input type="radio"/> problemas renales<br><input type="radio"/> alergia alimentaria<br><input type="radio"/> ácido úrico elevado<br><input type="radio"/> vegetariana<br><input type="radio"/> otros |
| cambio alimentos año previo gestación | <input checked="" type="radio"/> si<br><input type="radio"/> no                                                                                                                                                                                                                                                                                                                                                                                                                                                               |
| cambio lácteos                        | <input type="radio"/> eliminado<br><input type="radio"/> disminuido<br><input type="radio"/> igual<br><input checked="" type="radio"/> aumentado<br><input type="radio"/> no sabe                                                                                                                                                                                                                                                                                                                                             |
| cambio huevos                         | <input type="radio"/> eliminado<br><input type="radio"/> disminuido<br><input type="radio"/> igual<br><input checked="" type="radio"/> aumentado<br><input type="radio"/> no sabe                                                                                                                                                                                                                                                                                                                                             |
| cambio carne                          | <input type="radio"/> eliminado<br><input type="radio"/> disminuido<br><input checked="" type="radio"/> igual<br><input type="radio"/> aumentado<br><input type="radio"/> no sabe                                                                                                                                                                                                                                                                                                                                             |
| cambio pescado                        | <input type="radio"/> eliminado<br><input checked="" type="radio"/> disminuido<br><input type="radio"/> igual<br><input type="radio"/> aumentado<br><input type="radio"/> no sabe                                                                                                                                                                                                                                                                                                                                             |
| cambio verduras                       | <input type="radio"/> eliminado<br><input type="radio"/> disminuido<br><input checked="" type="radio"/> igual<br><input type="radio"/> aumentado<br><input type="radio"/> no sabe                                                                                                                                                                                                                                                                                                                                             |

|                            |                                                                                                                                                                                                                        |
|----------------------------|------------------------------------------------------------------------------------------------------------------------------------------------------------------------------------------------------------------------|
| cambio legumbres           | <input type="radio"/> eliminado<br><input type="radio"/> disminuido<br><input checked="" type="radio"/> igual<br><input type="radio"/> aumentado<br><input type="radio"/> no sabe                                      |
| cambio fruta               | <input type="radio"/> eliminado<br><input type="radio"/> disminuido<br><input checked="" type="radio"/> igual<br><input type="radio"/> aumentado<br><input type="radio"/> no sabe                                      |
| cambio pan                 | <input type="radio"/> eliminado<br><input type="radio"/> disminuido<br><input checked="" type="radio"/> igual<br><input type="radio"/> aumentado<br><input type="radio"/> no sabe                                      |
| cambio aceite oliva        | <input type="radio"/> eliminado<br><input type="radio"/> disminuido<br><input checked="" type="radio"/> igual<br><input type="radio"/> aumentado<br><input type="radio"/> no sabe                                      |
| cambio mante o margarina   | <input type="radio"/> eliminado<br><input type="radio"/> disminuido<br><input checked="" type="radio"/> igual<br><input type="radio"/> aumentado<br><input type="radio"/> no sabe                                      |
| cambio azúcar y dulces     | <input type="radio"/> eliminado<br><input checked="" type="radio"/> disminuido<br><input type="radio"/> igual<br><input type="radio"/> aumentado<br><input type="radio"/> no sabe                                      |
| cambio bebidas alcohólicas | <input checked="" type="radio"/> eliminado<br><input type="radio"/> disminuido<br><input type="radio"/> igual<br><input type="radio"/> aumentado<br><input type="radio"/> no sabe                                      |
| frecuencia comidas fritas  | <input type="radio"/> a diario<br><input type="radio"/> 5 a 6 veces semana<br><input type="radio"/> 2 a 4 veces semana<br><input type="radio"/> 1 vez semana<br><input checked="" type="radio"/> menos de 1 vez semana |
| carne                      | <input type="radio"/> no como<br><input type="radio"/> cruda<br><input type="radio"/> poco hecha<br><input checked="" type="radio"/> hecha<br><input type="radio"/> muy hecha                                          |
| grasa visible carne        | <input checked="" type="radio"/> quita toda<br><input type="radio"/> quita mayoría<br><input type="radio"/> quita un poco<br><input type="radio"/> no quita nada                                                       |

|                                |                                                                                                                                                                                                                                                          |
|--------------------------------|----------------------------------------------------------------------------------------------------------------------------------------------------------------------------------------------------------------------------------------------------------|
| cocina carne                   | <input checked="" type="radio"/> a la plancha<br><input type="radio"/> a la parrilla<br><input type="radio"/> asada<br><input type="radio"/> frita<br><input type="radio"/> guisada                                                                      |
| tostado quemado carne          | <input type="radio"/> nunca<br><input checked="" type="radio"/> 1 vez mes<br><input type="radio"/> 2 a 3 veces mes<br><input type="radio"/> 1 vez semana<br><input type="radio"/> 2 a 3 semanas                                                          |
| tostado quemado pescado        | <input type="radio"/> nunca<br><input checked="" type="radio"/> 1 vez mes<br><input type="radio"/> 2 a 3 veces mes<br><input type="radio"/> 1 vez semana<br><input type="radio"/> 2 a 3 semanas                                                          |
| socarrat paella                | <input type="radio"/> nunca<br><input checked="" type="radio"/> 1 vez mes<br><input type="radio"/> 2 a 3 veces mes<br><input type="radio"/> 1 vez semana<br><input type="radio"/> 2 a 3 semanas                                                          |
| grasa o aceite cocinar         | <input type="radio"/> mantequilla<br><input type="radio"/> margarina<br><input type="radio"/> aceite oliva<br><input checked="" type="radio"/> aceite oliva virgen extra<br><input type="radio"/> aceite vegetal<br><input type="radio"/> mezcla aceites |
| grasa aceite aliñar            | <input type="radio"/> mantequilla<br><input type="radio"/> margarina<br><input type="radio"/> aceite oliva<br><input checked="" type="radio"/> aceite oliva virgen extra<br><input type="radio"/> aceite vegetal<br><input type="radio"/> mezcla aceites |
| grasa aceite freir             | <input type="radio"/> mantequilla<br><input type="radio"/> margarina<br><input type="radio"/> aceite oliva<br><input checked="" type="radio"/> aceite oliva virgen extra<br><input type="radio"/> aceite vegetal<br><input type="radio"/> mezcla aceites |
| Ejercicio cuestionario         | <input checked="" type="radio"/> si<br><input type="radio"/> no                                                                                                                                                                                          |
| horas de sueño incluido siesta | [*DATA REMOVED*]                                                                                                                                                                                                                                         |
| minutos siesta                 | [*DATA REMOVED*]                                                                                                                                                                                                                                         |
| horas televisión semana        | [*DATA REMOVED*]                                                                                                                                                                                                                                         |

|                                        |                                                                                                                                                                                                                                                                                                                                                                           |
|----------------------------------------|---------------------------------------------------------------------------------------------------------------------------------------------------------------------------------------------------------------------------------------------------------------------------------------------------------------------------------------------------------------------------|
| actividad trabajo                      | <input type="radio"/> casi siempre sentado<br><input checked="" type="radio"/> sentado 50 por cien<br><input type="radio"/> casi siempre de pie, quieto<br><input type="radio"/> casi siempre levantado caminando y llevando pocas cosas<br><input type="radio"/> casi siempre levantado, caminando y llevado muchas cosas<br><input type="radio"/> trabajo manual pesado |
| tiempo caminar o bici al día           | <input type="radio"/> casi nunca<br><input type="radio"/> menos 20min día<br><input type="radio"/> 20 a 40 min día<br><input type="radio"/> 40 a 60 min día<br><input type="radio"/> 1h o 1h y media día<br><input checked="" type="radio"/> más de 1h y media al día                                                                                                     |
| tiempo tareas casa al día              | <input type="radio"/> menos de 1h día<br><input checked="" type="radio"/> 1 a 2h día<br><input type="radio"/> 3 a 4h día<br><input type="radio"/> 5 a 6h día<br><input type="radio"/> 7 a 8h día<br><input type="radio"/> más de 8h día                                                                                                                                   |
| tiempo libre televisión ordenador leer | <input checked="" type="radio"/> menos 1h día<br><input type="radio"/> 1h día<br><input type="radio"/> 2h día<br><input type="radio"/> 3h día<br><input type="radio"/> 4h día<br><input type="radio"/> 5 a 6h día<br><input type="radio"/> mas 6h día                                                                                                                     |
| tiempo libre ejercicio o deporte       | <input type="radio"/> menos 1h semana<br><input type="radio"/> 1h semana<br><input type="radio"/> 2h semana<br><input type="radio"/> 3h semana<br><input type="radio"/> 4 a 5h semana<br><input checked="" type="radio"/> mas 5h semana                                                                                                                                   |
| como se considera                      | <input type="radio"/> sedentaria<br><input type="radio"/> poco activa<br><input type="radio"/> moderadamente activa<br><input checked="" type="radio"/> bastante activa<br><input type="radio"/> muy activa<br><input type="radio"/> no sabe                                                                                                                              |
| FUR                                    | [*DATA REMOVED*]                                                                                                                                                                                                                                                                                                                                                          |
| Semanas gestación 2T                   | _____                                                                                                                                                                                                                                                                                                                                                                     |
| Días gestación 2T                      | _____                                                                                                                                                                                                                                                                                                                                                                     |
| DBP 2T                                 | _____                                                                                                                                                                                                                                                                                                                                                                     |
| CC 2T                                  | _____                                                                                                                                                                                                                                                                                                                                                                     |

|                                                   |                                                                                                                                                                                                 |
|---------------------------------------------------|-------------------------------------------------------------------------------------------------------------------------------------------------------------------------------------------------|
| AC 2T                                             |                                                                                                                                                                                                 |
| LF 2T                                             |                                                                                                                                                                                                 |
| PFE 2T (Hadlock)                                  |                                                                                                                                                                                                 |
| Semanas gestación 3T                              | [*DATA REMOVED*]                                                                                                                                                                                |
| días 3T                                           | [*DATA REMOVED*]                                                                                                                                                                                |
| DBP 3T                                            | [*DATA REMOVED*]                                                                                                                                                                                |
| CC 3T                                             | [*DATA REMOVED*]                                                                                                                                                                                |
| AC 3T                                             | [*DATA REMOVED*]                                                                                                                                                                                |
| LF 3T                                             | [*DATA REMOVED*]                                                                                                                                                                                |
| PFE 3T (Hadlock)                                  | [*DATA REMOVED*]                                                                                                                                                                                |
| Semanas de gestación final                        | [*DATA REMOVED*]                                                                                                                                                                                |
| días gestación final                              | [*DATA REMOVED*]                                                                                                                                                                                |
| Localización placenta                             | <input checked="" type="radio"/> anterior<br><input type="radio"/> lateral derecha<br><input type="radio"/> lateral izquierda<br><input type="radio"/> posterior<br><input type="radio"/> fondo |
| Presentación longitudinal cefálica                | <input type="radio"/> no<br><input checked="" type="radio"/> si                                                                                                                                 |
| Dorso                                             | <input checked="" type="radio"/> izquierda anterior<br><input type="radio"/> izquierda posterior<br><input type="radio"/> derecha anterior<br><input type="radio"/> derecha posterior           |
| diámetro biparietal                               | [*DATA REMOVED*]                                                                                                                                                                                |
| Circunferencia craneal                            | [*DATA REMOVED*]                                                                                                                                                                                |
| Circunferencia abdominal                          | [*DATA REMOVED*]                                                                                                                                                                                |
| Longitud de femur                                 | [*DATA REMOVED*]                                                                                                                                                                                |
| tejido celular subcutáneo a nivel del muslo en mm | [*DATA REMOVED*]                                                                                                                                                                                |
| tejido celular subcutáneo en abdomen en mm        | [*DATA REMOVED*]                                                                                                                                                                                |

|                                               |                                                                                                                                                          |
|-----------------------------------------------|----------------------------------------------------------------------------------------------------------------------------------------------------------|
| Volumen del muslo en cm3                      | [*DATA REMOVED*]                                                                                                                                         |
| Peso fetal estimado según fórmula de Hadlock  | [*DATA REMOVED*]                                                                                                                                         |
| Percentil                                     | [*DATA REMOVED*]                                                                                                                                         |
| Peso fetal estimado según fórmula de Scioscia | _____                                                                                                                                                    |
| Peso fetal estimado según fórmula de LEE      | _____                                                                                                                                                    |
| Tipo de parto                                 | <input type="radio"/> eutocico<br><input type="radio"/> instrumentado/ventosa<br><input type="radio"/> cesarea                                           |
| fecha de nacimiento                           | [*DATA REMOVED*]                                                                                                                                         |
| Días entre exploración y nacimiento           | [*DATA REMOVED*]                                                                                                                                         |
| Peso RN en g                                  | [*DATA REMOVED*]                                                                                                                                         |
| sexo                                          | <input type="radio"/> mujer<br><input checked="" type="radio"/> hombre                                                                                   |
| Apgar 1 minuto                                | [*DATA REMOVED*]                                                                                                                                         |
| Apgar 5 minutos                               | [*DATA REMOVED*]                                                                                                                                         |
| Apgar 10 minutos                              | _____                                                                                                                                                    |
| antecedente Covid durante gestación           | <input type="radio"/> Yes<br><input checked="" type="radio"/> No                                                                                         |
| Nivel de estudios                             | <input type="radio"/> ninguno<br><input type="radio"/> primarios<br><input type="radio"/> secundarios<br><input checked="" type="radio"/> universitarios |

# Base\_datos\_estimacion\_peso\_fetal

|                                       |                                                                                                                                                                                                                                                                                      |
|---------------------------------------|--------------------------------------------------------------------------------------------------------------------------------------------------------------------------------------------------------------------------------------------------------------------------------------|
| Número de identificación participante | 195                                                                                                                                                                                                                                                                                  |
| CODIGO PARTICIPANTE                   |                                                                                                                                                                                                                                                                                      |
| Edad                                  | [*DATA REMOVED*]                                                                                                                                                                                                                                                                     |
| Gestaciones                           | <input type="radio"/> 1<br><input type="radio"/> 2<br><input checked="" type="radio"/> 3<br><input type="radio"/> mas de 3                                                                                                                                                           |
| partos                                | <input checked="" type="radio"/> 0<br><input type="radio"/> 1<br><input type="radio"/> 2<br><input type="radio"/> 3<br><input type="radio"/> mas de 3                                                                                                                                |
| cesáreas                              | <input type="radio"/> 0<br><input checked="" type="radio"/> 1<br><input type="radio"/> 2<br><input type="radio"/> 3<br><input type="radio"/> mas de 3                                                                                                                                |
| Abortos                               | <input type="radio"/> 0<br><input checked="" type="radio"/> 1<br><input type="radio"/> 2<br><input type="radio"/> 3<br><input type="radio"/> mas de 3                                                                                                                                |
| Tipo de gestacion                     | <input checked="" type="radio"/> espontanea<br><input type="radio"/> IAC inseminación artificial conyuge<br><input type="radio"/> IAD inseminación artificial donante<br><input type="radio"/> FIV Fecundación in Vitro<br><input type="radio"/> Ovodon FIV con donación de ovocitos |
| peso previo a embarazo                | [*DATA REMOVED*]                                                                                                                                                                                                                                                                     |
| Ganancia ponderal embarazo            | [*DATA REMOVED*]                                                                                                                                                                                                                                                                     |
| Talla madre                           | [*DATA REMOVED*]                                                                                                                                                                                                                                                                     |
| IMC previo embarazo                   | 33.17773234057328                                                                                                                                                                                                                                                                    |
| Patología obstétrica                  | <input checked="" type="radio"/> no<br><input type="radio"/> si                                                                                                                                                                                                                      |
| Diabetes pregestacional               | <input checked="" type="radio"/> no<br><input type="radio"/> si                                                                                                                                                                                                                      |
| Diabetes gestacional                  | <input checked="" type="radio"/> no<br><input type="radio"/> si                                                                                                                                                                                                                      |



|                                            |                                                                                                                                                                                      |
|--------------------------------------------|--------------------------------------------------------------------------------------------------------------------------------------------------------------------------------------|
| Diabetes gestacional con insulina          | <input checked="" type="radio"/> no<br><input type="radio"/> si                                                                                                                      |
| Diabetes gestacional con dieta y ejercicio | <input checked="" type="radio"/> no<br><input type="radio"/> si                                                                                                                      |
| Percentil fetos previos                    | <input type="radio"/> Nada<br><input type="radio"/> percentil menor de 10<br><input type="radio"/> percentil entre 10 y 90<br><input checked="" type="radio"/> percentil mayor de 90 |
| Exfumadora                                 | <input checked="" type="radio"/> Nada<br><input type="radio"/> menos de 5 años<br><input type="radio"/> 5 a 10 años<br><input type="radio"/> mayor o igual a 10 años                 |
| Hábito tabáquico                           | <input checked="" type="radio"/> no<br><input type="radio"/> si                                                                                                                      |
| fumadora                                   | [*DATA REMOVED*]                                                                                                                                                                     |
| Consumo otros tóxicos                      | <input checked="" type="radio"/> no<br><input type="radio"/> si                                                                                                                      |
| Hb 1T                                      | _____                                                                                                                                                                                |
| Htc 1T                                     | _____                                                                                                                                                                                |
| Hb 2T                                      | _____                                                                                                                                                                                |
| HTC 2T                                     | _____                                                                                                                                                                                |
| Hb 3T                                      | _____                                                                                                                                                                                |
| HTC 3T                                     | _____                                                                                                                                                                                |
| Suplemento FE oral                         | <input checked="" type="radio"/> si<br><input type="radio"/> no                                                                                                                      |
| Suplemento fe iv                           | <input type="radio"/> si<br><input checked="" type="radio"/> no                                                                                                                      |
| Transfusión                                | <input checked="" type="radio"/> no<br><input type="radio"/> si                                                                                                                      |
| Solicitada Vit D                           | <input type="radio"/> no<br><input checked="" type="radio"/> si                                                                                                                      |

|                       |                                                                                                                                                                                                                                                                                                                                                                                                              |
|-----------------------|--------------------------------------------------------------------------------------------------------------------------------------------------------------------------------------------------------------------------------------------------------------------------------------------------------------------------------------------------------------------------------------------------------------|
| Deficit vit D         | <input type="radio"/> no<br><input checked="" type="radio"/> si                                                                                                                                                                                                                                                                                                                                              |
| Suplemento vit D      | <input checked="" type="radio"/> si<br><input type="radio"/> no                                                                                                                                                                                                                                                                                                                                              |
| Dieta, cuestionario   | <input checked="" type="radio"/> si<br><input type="radio"/> no                                                                                                                                                                                                                                                                                                                                              |
| Leche entera          | <input checked="" type="radio"/> Nunca o menos 1 vez al mes<br><input type="radio"/> 1 a 3 veces mes<br><input type="radio"/> 1 vez semana<br><input type="radio"/> 2 a 4 veces semana<br><input type="radio"/> 5 a 6 veces semana<br><input type="radio"/> 1 vez al día<br><input type="radio"/> 2 a 3 veces al día<br><input type="radio"/> 5 a 6 veces al día<br><input type="radio"/> más 6 veces al día |
| Leche semidesnatada   | <input type="radio"/> Nunca o menos 1 vez al mes<br><input type="radio"/> 1 a 3 veces mes<br><input type="radio"/> 1 vez semana<br><input type="radio"/> 2 a 4 veces semana<br><input type="radio"/> 5 a 6 veces semana<br><input type="radio"/> 1 vez al día<br><input checked="" type="radio"/> 2 a 3 veces al día<br><input type="radio"/> 5 a 6 veces al día<br><input type="radio"/> mas 6 veces al día |
| Leche desnatada       | <input checked="" type="radio"/> Nunca o menos 1 vez al mes<br><input type="radio"/> 1 a 3 veces mes<br><input type="radio"/> 1 vez semana<br><input type="radio"/> 2 a 4 veces semana<br><input type="radio"/> 5 a 6 veces semana<br><input type="radio"/> 1 vez al día<br><input type="radio"/> 2 a 3 veces al día<br><input type="radio"/> 5 a 6 veces al día<br><input type="radio"/> más 6 veces al día |
| Leche condensada      | <input checked="" type="radio"/> Nunca o menos 1 vez al mes<br><input type="radio"/> 1 a 3 veces mes<br><input type="radio"/> 1 vez semana<br><input type="radio"/> 2 a 4 veces semana<br><input type="radio"/> 5 a 6 veces semana<br><input type="radio"/> 1 vez al día<br><input type="radio"/> 2 a 3 veces al día<br><input type="radio"/> 5 a 6 veces al día<br><input type="radio"/> más 6 veces al día |
| nata o crema de leche | <input checked="" type="radio"/> Nunca o menos 1 vez al mes<br><input type="radio"/> 1 a 3 veces mes<br><input type="radio"/> 1 vez semana<br><input type="radio"/> 2 a 4 veces semana<br><input type="radio"/> 5 a 6 veces semana<br><input type="radio"/> 1 vez al día<br><input type="radio"/> 2 a 3 veces al día<br><input type="radio"/> 5 a 6 veces al día<br><input type="radio"/> más 6 veces al día |

---

Yogurt Entero

- ☒ Nunca o menos 1 vez al mes  
☐ 1 a 3 veces mes  
☐ 1 vez semana  
☐ 2 a 4 veces semana  
☐ 5 a 6 veces semana  
☐ 1 vez al día  
☐ 2 a 3 veces al día  
☐ 5 a 6 veces al día  
☐ más 6 veces al día

---

Yogurt desnatado

- ☒ Nunca o menos 1 vez al mes  
☐ 1 a 3 veces mes  
☐ 1 vez semana  
☐ 2 a 4 veces semana  
☐ 5 a 6 veces semana  
☐ 1 vez al día  
☐ 2 a 3 veces al día  
☐ 5 a 6 veces al día  
☐ más 6 veces al día

---

100g requesón o queso blando o queso fresco

- ☒ Nunca o menos 1 vez al mes  
☐ 1 a 3 veces mes  
☐ 1 vez semana  
☐ 2 a 4 veces semana  
☐ 5 a 6 veces semana  
☐ 1 vez al día  
☐ 2 a 3 veces al día  
☐ 5 a 6 veces al día  
☐ más 6 veces al día

---

queso curado o semicurado o cremoso

- ☐ Nunca o menos 1 vez al mes  
☐ 1 a 3 veces mes  
☒ 1 vez semana  
☐ 2 a 4 veces semana  
☐ 5 a 6 veces semana  
☐ 1 vez al día  
☐ 2 a 3 veces al día  
☐ 5 a 6 veces al día  
☐ más 6 veces al día

---

natillas flan pudding

- ☒ Nunca o menos 1 vez al mes  
☐ 1 a 3 veces mes  
☐ 1 vez semana  
☐ 2 a 4 veces semana  
☐ 5 a 6 veces semana  
☐ 1 vez al día  
☐ 2 a 3 veces al día  
☐ 5 a 6 veces al día  
☐ más 6 veces al día

---

Helado

- ☒ Nunca o menos 1 vez al mes  
☐ 1 a 3 veces mes  
☐ 1 vez semana  
☐ 2 a 4 veces semana  
☐ 5 a 6 veces semana  
☐ 1 vez al día  
☐ 2 a 3 veces al día  
☐ 5 a 6 veces al día  
☐ más 6 veces al día

|                                      |                                                                                                                                                                                                                                                                                                                                                                                                              |
|--------------------------------------|--------------------------------------------------------------------------------------------------------------------------------------------------------------------------------------------------------------------------------------------------------------------------------------------------------------------------------------------------------------------------------------------------------------|
| huevo                                | <input type="radio"/> Nunca o menos 1 vez al mes<br><input checked="" type="radio"/> 1 a 3 veces mes<br><input type="radio"/> 1 vez semana<br><input type="radio"/> 2 a 4 veces semana<br><input type="radio"/> 5 a 6 veces semana<br><input type="radio"/> 1 vez al día<br><input type="radio"/> 2 a 3 veces al día<br><input type="radio"/> 5 a 6 veces al día<br><input type="radio"/> más 6 veces al día |
| Pollo con piel                       | <input checked="" type="radio"/> Nunca o menos 1 vez al mes<br><input type="radio"/> 1 a 3 veces mes<br><input type="radio"/> 1 vez semana<br><input type="radio"/> 2 a 4 veces semana<br><input type="radio"/> 5 a 6 veces semana<br><input type="radio"/> 1 vez al día<br><input type="radio"/> 2 a 3 veces al día<br><input type="radio"/> 5 a 6 veces al día<br><input type="radio"/> más 6 veces al día |
| pollo sin piel                       | <input type="radio"/> Nunca o menos 1 vez al mes<br><input type="radio"/> 1 a 3 veces mes<br><input checked="" type="radio"/> 1 vez semana<br><input type="radio"/> 2 a 4 veces semana<br><input type="radio"/> 5 a 6 veces semana<br><input type="radio"/> 1 vez al día<br><input type="radio"/> 2 a 3 veces al día<br><input type="radio"/> 5 a 6 veces al día<br><input type="radio"/> más 6 veces al día |
| Ternera o cerdo o cordero            | <input type="radio"/> Nunca o menos 1 vez al mes<br><input type="radio"/> 1 a 3 veces mes<br><input type="radio"/> 1 vez semana<br><input checked="" type="radio"/> 2 a 4 veces semana<br><input type="radio"/> 5 a 6 veces semana<br><input type="radio"/> 1 vez al día<br><input type="radio"/> 2 a 3 veces al día<br><input type="radio"/> 5 a 6 veces al día<br><input type="radio"/> más 6 veces al día |
| carne caza: Conejo o codorniz o pato | <input checked="" type="radio"/> Nunca o menos 1 vez al mes<br><input type="radio"/> 1 a 3 veces mes<br><input type="radio"/> 1 vez semana<br><input type="radio"/> 2 a 4 veces semana<br><input type="radio"/> 5 a 6 veces semana<br><input type="radio"/> 1 vez al día<br><input type="radio"/> 2 a 3 veces al día<br><input type="radio"/> 5 a 6 veces al día<br><input type="radio"/> más 6 veces al día |
| Hígado de ternera o cerdo o pollo    | <input checked="" type="radio"/> Nunca o menos 1 vez al mes<br><input type="radio"/> 1 a 3 veces mes<br><input type="radio"/> 1 vez semana<br><input type="radio"/> 2 a 4 veces semana<br><input type="radio"/> 5 a 6 veces semana<br><input type="radio"/> 1 vez al día<br><input type="radio"/> 2 a 3 veces al día<br><input type="radio"/> 5 a 6 veces al día<br><input type="radio"/> más 6 veces al día |

|                     |                                                                                                                                                                                                                                                                                                                                                                                                              |
|---------------------|--------------------------------------------------------------------------------------------------------------------------------------------------------------------------------------------------------------------------------------------------------------------------------------------------------------------------------------------------------------------------------------------------------------|
| Vísceras            | <input checked="" type="radio"/> Nunca o menos 1 vez al mes<br><input type="radio"/> 1 a 3 veces mes<br><input type="radio"/> 1 vez semana<br><input type="radio"/> 2 a 4 veces semana<br><input type="radio"/> 5 a 6 veces semana<br><input type="radio"/> 1 vez al día<br><input type="radio"/> 2 a 3 veces al día<br><input type="radio"/> 5 a 6 veces al día<br><input type="radio"/> más 6 veces al día |
| Embutido            | <input type="radio"/> Nunca o menos 1 vez al mes<br><input checked="" type="radio"/> 1 a 3 veces mes<br><input type="radio"/> 1 vez semana<br><input type="radio"/> 2 a 4 veces semana<br><input type="radio"/> 5 a 6 veces semana<br><input type="radio"/> 1 vez al día<br><input type="radio"/> 2 a 3 veces al día<br><input type="radio"/> 5 a 6 veces al día<br><input type="radio"/> más 6 veces al día |
| Salchicha o similar | <input type="radio"/> Nunca o menos 1 vez al mes<br><input checked="" type="radio"/> 1 a 3 veces mes<br><input type="radio"/> 1 vez semana<br><input type="radio"/> 2 a 4 veces semana<br><input type="radio"/> 5 a 6 veces semana<br><input type="radio"/> 1 vez al día<br><input type="radio"/> 2 a 3 veces al día<br><input type="radio"/> 5 a 6 veces al día<br><input type="radio"/> más 6 veces al día |
| Pate o foiegras     | <input checked="" type="radio"/> Nunca o menos 1 vez al mes<br><input type="radio"/> 1 a 3 veces mes<br><input type="radio"/> 1 vez semana<br><input type="radio"/> 2 a 4 veces semana<br><input type="radio"/> 5 a 6 veces semana<br><input type="radio"/> 1 vez al día<br><input type="radio"/> 2 a 3 veces al día<br><input type="radio"/> 5 a 6 veces al día<br><input type="radio"/> más 6 veces al día |
| Hamburguesa         | <input type="radio"/> Nunca o menos 1 vez al mes<br><input type="radio"/> 1 a 3 veces mes<br><input checked="" type="radio"/> 1 vez semana<br><input type="radio"/> 2 a 4 veces semana<br><input type="radio"/> 5 a 6 veces semana<br><input type="radio"/> 1 vez al día<br><input type="radio"/> 2 a 3 veces al día<br><input type="radio"/> 5 a 6 veces al día<br><input type="radio"/> más 6 veces al día |
| tocino o bacon      | <input type="radio"/> Nunca o menos 1 vez al mes<br><input checked="" type="radio"/> 1 a 3 veces mes<br><input type="radio"/> 1 vez semana<br><input type="radio"/> 2 a 4 veces semana<br><input type="radio"/> 5 a 6 veces semana<br><input type="radio"/> 1 vez al día<br><input type="radio"/> 2 a 3 veces al día<br><input type="radio"/> 5 a 6 veces al día<br><input type="radio"/> más 6 veces al día |

|                        |                                                                                                                                                                                                                                                                                                                                                                                                              |
|------------------------|--------------------------------------------------------------------------------------------------------------------------------------------------------------------------------------------------------------------------------------------------------------------------------------------------------------------------------------------------------------------------------------------------------------|
| Pescado frito          | <input checked="" type="radio"/> Nunca o menos 1 vez al mes<br><input type="radio"/> 1 a 3 veces mes<br><input type="radio"/> 1 vez semana<br><input type="radio"/> 2 a 4 veces semana<br><input type="radio"/> 5 a 6 veces semana<br><input type="radio"/> 1 vez al día<br><input type="radio"/> 2 a 3 veces al día<br><input type="radio"/> 5 a 6 veces al día<br><input type="radio"/> más 6 veces al día |
| pescado hervido blanco | <input type="radio"/> Nunca o menos 1 vez al mes<br><input type="radio"/> 1 a 3 veces mes<br><input type="radio"/> 1 vez semana<br><input checked="" type="radio"/> 2 a 4 veces semana<br><input type="radio"/> 5 a 6 veces semana<br><input type="radio"/> 1 vez al día<br><input type="radio"/> 2 a 3 veces al día<br><input type="radio"/> 5 a 6 veces al día<br><input type="radio"/> más 6 veces al día |
| pescado hervido azul   | <input checked="" type="radio"/> Nunca o menos 1 vez al mes<br><input type="radio"/> 1 a 3 veces mes<br><input type="radio"/> 1 vez semana<br><input type="radio"/> 2 a 4 veces semana<br><input type="radio"/> 5 a 6 veces semana<br><input type="radio"/> 1 vez al día<br><input type="radio"/> 2 a 3 veces al día<br><input type="radio"/> 5 a 6 veces al día<br><input type="radio"/> más 6 veces al día |
| otros pescado azul     | <input checked="" type="radio"/> Nunca o menos 1 vez al mes<br><input type="radio"/> 1 a 3 veces mes<br><input type="radio"/> 1 vez semana<br><input type="radio"/> 2 a 4 veces semana<br><input type="radio"/> 5 a 6 veces semana<br><input type="radio"/> 1 vez al día<br><input type="radio"/> 2 a 3 veces al día<br><input type="radio"/> 5 a 6 veces al día<br><input type="radio"/> más 6 veces al día |
| atun conserva          | <input type="radio"/> Nunca o menos 1 vez al mes<br><input type="radio"/> 1 a 3 veces mes<br><input type="radio"/> 1 vez semana<br><input checked="" type="radio"/> 2 a 4 veces semana<br><input type="radio"/> 5 a 6 veces semana<br><input type="radio"/> 1 vez al día<br><input type="radio"/> 2 a 3 veces al día<br><input type="radio"/> 5 a 6 veces al día<br><input type="radio"/> más 6 veces al día |
| sardina conserva       | <input type="radio"/> Nunca o menos 1 vez al mes<br><input type="radio"/> 1 a 3 veces mes<br><input checked="" type="radio"/> 1 vez semana<br><input type="radio"/> 2 a 4 veces semana<br><input type="radio"/> 5 a 6 veces semana<br><input type="radio"/> 1 vez al día<br><input type="radio"/> 2 a 3 veces al día<br><input type="radio"/> 5 a 6 veces al día<br><input type="radio"/> más 6 veces al día |

|                                         |                                                                                                                                                                                                                                                                                                                                                                                                              |
|-----------------------------------------|--------------------------------------------------------------------------------------------------------------------------------------------------------------------------------------------------------------------------------------------------------------------------------------------------------------------------------------------------------------------------------------------------------------|
| pescado ahumado                         | <input checked="" type="radio"/> Nunca o menos 1 vez al mes<br><input type="radio"/> 1 a 3 veces mes<br><input type="radio"/> 1 vez semana<br><input type="radio"/> 2 a 4 veces semana<br><input type="radio"/> 5 a 6 veces semana<br><input type="radio"/> 1 vez al día<br><input type="radio"/> 2 a 3 veces al día<br><input type="radio"/> 5 a 6 veces al día<br><input type="radio"/> más 6 veces al día |
| almejas o mejillones o ostras unos 100g | <input type="radio"/> Nunca o menos 1 vez al mes<br><input checked="" type="radio"/> 1 a 3 veces mes<br><input type="radio"/> 1 vez semana<br><input type="radio"/> 2 a 4 veces semana<br><input type="radio"/> 5 a 6 veces semana<br><input type="radio"/> 1 vez al día<br><input type="radio"/> 2 a 3 veces al día<br><input type="radio"/> 5 a 6 veces al día<br><input type="radio"/> más 6 veces al día |
| calamar o chipiron o sepia unos 100g    | <input type="radio"/> Nunca o menos 1 vez al mes<br><input checked="" type="radio"/> 1 a 3 veces mes<br><input type="radio"/> 1 vez semana<br><input type="radio"/> 2 a 4 veces semana<br><input type="radio"/> 5 a 6 veces semana<br><input type="radio"/> 1 vez al día<br><input type="radio"/> 2 a 3 veces al día<br><input type="radio"/> 5 a 6 veces al día<br><input type="radio"/> más 6 veces al día |
| marisco unos 100g                       | <input checked="" type="radio"/> Nunca o menos 1 vez al mes<br><input type="radio"/> 1 a 3 veces mes<br><input type="radio"/> 1 vez semana<br><input type="radio"/> 2 a 4 veces semana<br><input type="radio"/> 5 a 6 veces semana<br><input type="radio"/> 1 vez al día<br><input type="radio"/> 2 a 3 veces al día<br><input type="radio"/> 5 a 6 veces al día<br><input type="radio"/> más 6 veces al día |
| Espinacas o acelgas cocinadas           | <input checked="" type="radio"/> Nunca o menos 1 vez al mes<br><input type="radio"/> 1 a 3 veces mes<br><input type="radio"/> 1 vez semana<br><input type="radio"/> 2 a 4 veces semana<br><input type="radio"/> 5 a 6 veces semana<br><input type="radio"/> 1 vez al día<br><input type="radio"/> 2 a 3 veces al día<br><input type="radio"/> 5 a 6 veces al día<br><input type="radio"/> más 6 veces al día |
| Col o coliflor o brocoli cocinado       | <input type="radio"/> Nunca o menos 1 vez al mes<br><input checked="" type="radio"/> 1 a 3 veces mes<br><input type="radio"/> 1 vez semana<br><input type="radio"/> 2 a 4 veces semana<br><input type="radio"/> 5 a 6 veces semana<br><input type="radio"/> 1 vez al día<br><input type="radio"/> 2 a 3 veces al día<br><input type="radio"/> 5 a 6 veces al día<br><input type="radio"/> más 6 veces al día |

---

Lechuga o endivia o escarola

- ☐ Nunca o menos 1 vez al mes  
☐ 1 a 3 veces mes  
☒ 1 vez semana  
☐ 2 a 4 veces semana  
☐ 5 a 6 veces semana  
☐ 1 vez al día  
☐ 2 a 3 veces al día  
☐ 5 a 6 veces al día  
☐ más 6 veces al día

---

tomate ensalada

- ☐ Nunca o menos 1 vez al mes  
☐ 1 a 3 veces mes  
☐ 1 vez semana  
☒ 2 a 4 veces semana  
☐ 5 a 6 veces semana  
☐ 1 vez al día  
☐ 2 a 3 veces al día  
☐ 5 a 6 veces al día  
☐ más 6 veces al día

---

cebolla

- ☐ Nunca o menos 1 vez al mes  
☐ 1 a 3 veces mes  
☐ 1 vez semana  
☒ 2 a 4 veces semana  
☐ 5 a 6 veces semana  
☐ 1 vez al día  
☐ 2 a 3 veces al día  
☐ 5 a 6 veces al día  
☐ más 6 veces al día

---

Zanahoria o calabaza

- ☐ Nunca o menos 1 vez al mes  
☐ 1 a 3 veces mes  
☐ 1 vez semana  
☒ 2 a 4 veces semana  
☐ 5 a 6 veces semana  
☐ 1 vez al día  
☐ 2 a 3 veces al día  
☐ 5 a 6 veces al día  
☐ más 6 veces al día

---

Judías verdes

- ☐ Nunca o menos 1 vez al mes  
☐ 1 a 3 veces mes  
☐ 1 vez semana  
☒ 2 a 4 veces semana  
☐ 5 a 6 veces semana  
☐ 1 vez al día  
☐ 2 a 3 veces al día  
☐ 5 a 6 veces al día  
☐ más 6 veces al día

---

Berenjena o calabacin o pepino

- ☐ Nunca o menos 1 vez al mes  
☐ 1 a 3 veces mes  
☐ 1 vez semana  
☒ 2 a 4 veces semana  
☐ 5 a 6 veces semana  
☐ 1 vez al día  
☐ 2 a 3 veces al día  
☐ 5 a 6 veces al día  
☐ más 6 veces al día



---

|          |                                                                                                                                                                                                                                                                                                                                                                                                              |
|----------|--------------------------------------------------------------------------------------------------------------------------------------------------------------------------------------------------------------------------------------------------------------------------------------------------------------------------------------------------------------------------------------------------------------|
| pimiento | <input checked="" type="radio"/> Nunca o menos 1 vez al mes<br><input type="radio"/> 1 a 3 veces mes<br><input type="radio"/> 1 vez semana<br><input type="radio"/> 2 a 4 veces semana<br><input type="radio"/> 5 a 6 veces semana<br><input type="radio"/> 1 vez al día<br><input type="radio"/> 2 a 3 veces al día<br><input type="radio"/> 5 a 6 veces al día<br><input type="radio"/> más 6 veces al día |
|----------|--------------------------------------------------------------------------------------------------------------------------------------------------------------------------------------------------------------------------------------------------------------------------------------------------------------------------------------------------------------------------------------------------------------|

---

|           |                                                                                                                                                                                                                                                                                                                                                                                                              |
|-----------|--------------------------------------------------------------------------------------------------------------------------------------------------------------------------------------------------------------------------------------------------------------------------------------------------------------------------------------------------------------------------------------------------------------|
| alcachofa | <input type="radio"/> Nunca o menos 1 vez al mes<br><input type="radio"/> 1 a 3 veces mes<br><input type="radio"/> 1 vez semana<br><input checked="" type="radio"/> 2 a 4 veces semana<br><input type="radio"/> 5 a 6 veces semana<br><input type="radio"/> 1 vez al día<br><input type="radio"/> 2 a 3 veces al día<br><input type="radio"/> 5 a 6 veces al día<br><input type="radio"/> más 6 veces al día |
|-----------|--------------------------------------------------------------------------------------------------------------------------------------------------------------------------------------------------------------------------------------------------------------------------------------------------------------------------------------------------------------------------------------------------------------|

---

|            |                                                                                                                                                                                                                                                                                                                                                                                                              |
|------------|--------------------------------------------------------------------------------------------------------------------------------------------------------------------------------------------------------------------------------------------------------------------------------------------------------------------------------------------------------------------------------------------------------------|
| espárragos | <input type="radio"/> Nunca o menos 1 vez al mes<br><input type="radio"/> 1 a 3 veces mes<br><input type="radio"/> 1 vez semana<br><input checked="" type="radio"/> 2 a 4 veces semana<br><input type="radio"/> 5 a 6 veces semana<br><input type="radio"/> 1 vez al día<br><input type="radio"/> 2 a 3 veces al día<br><input type="radio"/> 5 a 6 veces al día<br><input type="radio"/> más 6 veces al día |
|------------|--------------------------------------------------------------------------------------------------------------------------------------------------------------------------------------------------------------------------------------------------------------------------------------------------------------------------------------------------------------------------------------------------------------|

---

|              |                                                                                                                                                                                                                                                                                                                                                                                                              |
|--------------|--------------------------------------------------------------------------------------------------------------------------------------------------------------------------------------------------------------------------------------------------------------------------------------------------------------------------------------------------------------------------------------------------------------|
| maíz hervido | <input checked="" type="radio"/> Nunca o menos 1 vez al mes<br><input type="radio"/> 1 a 3 veces mes<br><input type="radio"/> 1 vez semana<br><input type="radio"/> 2 a 4 veces semana<br><input type="radio"/> 5 a 6 veces semana<br><input type="radio"/> 1 vez al día<br><input type="radio"/> 2 a 3 veces al día<br><input type="radio"/> 5 a 6 veces al día<br><input type="radio"/> más 6 veces al día |
|--------------|--------------------------------------------------------------------------------------------------------------------------------------------------------------------------------------------------------------------------------------------------------------------------------------------------------------------------------------------------------------------------------------------------------------|

---

|           |                                                                                                                                                                                                                                                                                                                                                                                                              |
|-----------|--------------------------------------------------------------------------------------------------------------------------------------------------------------------------------------------------------------------------------------------------------------------------------------------------------------------------------------------------------------------------------------------------------------|
| legumbres | <input type="radio"/> Nunca o menos 1 vez al mes<br><input type="radio"/> 1 a 3 veces mes<br><input type="radio"/> 1 vez semana<br><input checked="" type="radio"/> 2 a 4 veces semana<br><input type="radio"/> 5 a 6 veces semana<br><input type="radio"/> 1 vez al día<br><input type="radio"/> 2 a 3 veces al día<br><input type="radio"/> 5 a 6 veces al día<br><input type="radio"/> más 6 veces al día |
|-----------|--------------------------------------------------------------------------------------------------------------------------------------------------------------------------------------------------------------------------------------------------------------------------------------------------------------------------------------------------------------------------------------------------------------|

---

|                       |                                                                                                                                                                                                                                                                                                                                                                                                              |
|-----------------------|--------------------------------------------------------------------------------------------------------------------------------------------------------------------------------------------------------------------------------------------------------------------------------------------------------------------------------------------------------------------------------------------------------------|
| naranjas o mandarinas | <input type="radio"/> Nunca o menos 1 vez al mes<br><input type="radio"/> 1 a 3 veces mes<br><input type="radio"/> 1 vez semana<br><input checked="" type="radio"/> 2 a 4 veces semana<br><input type="radio"/> 5 a 6 veces semana<br><input type="radio"/> 1 vez al día<br><input type="radio"/> 2 a 3 veces al día<br><input type="radio"/> 5 a 6 veces al día<br><input type="radio"/> más 6 veces al día |
|-----------------------|--------------------------------------------------------------------------------------------------------------------------------------------------------------------------------------------------------------------------------------------------------------------------------------------------------------------------------------------------------------------------------------------------------------|

---

---

zum natural fruta

- ☐ Nunca o menos 1 vez al mes  
☐ 1 a 3 veces mes  
☐ 1 vez semana  
☐ 2 a 4 veces semana  
☐ 5 a 6 veces semana  
☒ 1 vez al día  
☐ 2 a 3 veces al día  
☐ 5 a 6 veces al día  
☐ más 6 veces al día

---

platano

- ☐ Nunca o menos 1 vez al mes  
☐ 1 a 3 veces mes  
☒ 1 vez semana  
☐ 2 a 4 veces semana  
☐ 5 a 6 veces semana  
☐ 1 vez al día  
☐ 2 a 3 veces al día  
☐ 5 a 6 veces al día  
☐ más 6 veces al día

---

manzana o pera

- ☐ Nunca o menos 1 vez al mes  
☐ 1 a 3 veces mes  
☐ 1 vez semana  
☐ 2 a 4 veces semana  
☒ 5 a 6 veces semana  
☐ 1 vez al día  
☐ 2 a 3 veces al día  
☐ 5 a 6 veces al día  
☐ más 6 veces al día

---

melocotón o nectarina

- ☐ Nunca o menos 1 vez al mes  
☐ 1 a 3 veces mes  
☒ 1 vez semana  
☐ 2 a 4 veces semana  
☐ 5 a 6 veces semana  
☐ 1 vez al día  
☐ 2 a 3 veces al día  
☐ 5 a 6 veces al día  
☐ más 6 veces al día

---

sandia o melon

- ☐ Nunca o menos 1 vez al mes  
☐ 1 a 3 veces mes  
☐ 1 vez semana  
☒ 2 a 4 veces semana  
☐ 5 a 6 veces semana  
☐ 1 vez al día  
☐ 2 a 3 veces al día  
☐ 5 a 6 veces al día  
☐ más 6 veces al día

---

uva

- ☐ Nunca o menos 1 vez al mes  
☒ 1 a 3 veces mes  
☐ 1 vez semana  
☐ 2 a 4 veces semana  
☐ 5 a 6 veces semana  
☐ 1 vez al día  
☐ 2 a 3 veces al día  
☐ 5 a 6 veces al día  
☐ más 6 veces al día

---

bruna o ciruela

- ☒ Nunca o menos 1 vez al mes  
☐ 1 a 3 veces mes  
☐ 1 vez semana  
☐ 2 a 4 veces semana  
☐ 5 a 6 veces semana  
☐ 1 vez al día  
☐ 2 a 3 veces al día  
☐ 5 a 6 veces al día  
☐ más 6 veces al día

---

kiwi

- ☒ Nunca o menos 1 vez al mes  
☐ 1 a 3 veces mes  
☐ 1 vez semana  
☐ 2 a 4 veces semana  
☐ 5 a 6 veces semana  
☐ 1 vez al día  
☐ 2 a 3 veces al día  
☐ 5 a 6 veces al día  
☐ más 6 veces al día

---

aceituna

- ☐ Nunca o menos 1 vez al mes  
☐ 1 a 3 veces mes  
☐ 1 vez semana  
☒ 2 a 4 veces semana  
☐ 5 a 6 veces semana  
☐ 1 vez al día  
☐ 2 a 3 veces al día  
☐ 5 a 6 veces al día  
☐ más 6 veces al día

---

frutos secos

- ☐ Nunca o menos 1 vez al mes  
☐ 1 a 3 veces mes  
☐ 1 vez semana  
☐ 2 a 4 veces semana  
☒ 5 a 6 veces semana  
☐ 1 vez al día  
☐ 2 a 3 veces al día  
☐ 5 a 6 veces al día  
☐ más 6 veces al día

---

pan blanco

- ☐ Nunca o menos 1 vez al mes  
☐ 1 a 3 veces mes  
☐ 1 vez semana  
☒ 2 a 4 veces semana  
☐ 5 a 6 veces semana  
☐ 1 vez al día  
☐ 2 a 3 veces al día  
☐ 5 a 6 veces al día  
☐ más 6 veces al día

---

pan integral

- ☒ Nunca o menos 1 vez al mes  
☐ 1 a 3 veces mes  
☐ 1 vez semana  
☐ 2 a 4 veces semana  
☐ 5 a 6 veces semana  
☐ 1 vez al día  
☐ 2 a 3 veces al día  
☐ 5 a 6 veces al día  
☐ más 6 veces al día

---

cereales desayuno

- ☐ Nunca o menos 1 vez al mes  
☐ 1 a 3 veces mes  
☐ 1 vez semana  
☐ 2 a 4 veces semana  
☒ 5 a 6 veces semana  
☐ 1 vez al día  
☐ 2 a 3 veces al día  
☐ 5 a 6 veces al día  
☐ más 6 veces al día

---

patatas fritas

- ☐ Nunca o menos 1 vez al mes  
☐ 1 a 3 veces mes  
☐ 1 vez semana  
☒ 2 a 4 veces semana  
☐ 5 a 6 veces semana  
☐ 1 vez al día  
☐ 2 a 3 veces al día  
☐ 5 a 6 veces al día  
☐ más 6 veces al día

---

patatas cocidas o asadas

- ☐ Nunca o menos 1 vez al mes  
☐ 1 a 3 veces mes  
☒ 1 vez semana  
☐ 2 a 4 veces semana  
☐ 5 a 6 veces semana  
☐ 1 vez al día  
☐ 2 a 3 veces al día  
☐ 5 a 6 veces al día  
☐ más 6 veces al día

---

bolsa papas

- ☒ Nunca o menos 1 vez al mes  
☐ 1 a 3 veces mes  
☐ 1 vez semana  
☐ 2 a 4 veces semana  
☐ 5 a 6 veces semana  
☐ 1 vez al día  
☐ 2 a 3 veces al día  
☐ 5 a 6 veces al día  
☐ más 6 veces al día

---

arroz cocinado

- ☐ Nunca o menos 1 vez al mes  
☐ 1 a 3 veces mes  
☒ 1 vez semana  
☐ 2 a 4 veces semana  
☐ 5 a 6 veces semana  
☐ 1 vez al día  
☐ 2 a 3 veces al día  
☐ 5 a 6 veces al día  
☐ más 6 veces al día

---

pasta

- ☐ Nunca o menos 1 vez al mes  
☐ 1 a 3 veces mes  
☒ 1 vez semana  
☐ 2 a 4 veces semana  
☐ 5 a 6 veces semana  
☐ 1 vez al día  
☐ 2 a 3 veces al día  
☐ 5 a 6 veces al día  
☐ más 6 veces al día

|                     |                                                                                                                                                                                                                                                                                                                                                                                                              |
|---------------------|--------------------------------------------------------------------------------------------------------------------------------------------------------------------------------------------------------------------------------------------------------------------------------------------------------------------------------------------------------------------------------------------------------------|
| pizza               | <input checked="" type="radio"/> Nunca o menos 1 vez al mes<br><input type="radio"/> 1 a 3 veces mes<br><input type="radio"/> 1 vez semana<br><input type="radio"/> 2 a 4 veces semana<br><input type="radio"/> 5 a 6 veces semana<br><input type="radio"/> 1 vez al día<br><input type="radio"/> 2 a 3 veces al día<br><input type="radio"/> 5 a 6 veces al día<br><input type="radio"/> más 6 veces al día |
| aceite oliva        | <input checked="" type="radio"/> Nunca o menos 1 vez al mes<br><input type="radio"/> 1 a 3 veces mes<br><input type="radio"/> 1 vez semana<br><input type="radio"/> 2 a 4 veces semana<br><input type="radio"/> 5 a 6 veces semana<br><input type="radio"/> 1 vez al día<br><input type="radio"/> 2 a 3 veces al día<br><input type="radio"/> 5 a 6 veces al día<br><input type="radio"/> más 6 veces al día |
| otros aceites       | <input checked="" type="radio"/> Nunca o menos 1 vez al mes<br><input type="radio"/> 1 a 3 veces mes<br><input type="radio"/> 1 vez semana<br><input type="radio"/> 2 a 4 veces semana<br><input type="radio"/> 5 a 6 veces semana<br><input type="radio"/> 1 vez al día<br><input type="radio"/> 2 a 3 veces al día<br><input type="radio"/> 5 a 6 veces al día<br><input type="radio"/> más 6 veces al día |
| margarina           | <input checked="" type="radio"/> Nunca o menos 1 vez al mes<br><input type="radio"/> 1 a 3 veces mes<br><input type="radio"/> 1 vez semana<br><input type="radio"/> 2 a 4 veces semana<br><input type="radio"/> 5 a 6 veces semana<br><input type="radio"/> 1 vez al día<br><input type="radio"/> 2 a 3 veces al día<br><input type="radio"/> 5 a 6 veces al día<br><input type="radio"/> más 6 veces al día |
| mantequilla         | <input checked="" type="radio"/> Nunca o menos 1 vez al mes<br><input type="radio"/> 1 a 3 veces mes<br><input type="radio"/> 1 vez semana<br><input type="radio"/> 2 a 4 veces semana<br><input type="radio"/> 5 a 6 veces semana<br><input type="radio"/> 1 vez al día<br><input type="radio"/> 2 a 3 veces al día<br><input type="radio"/> 5 a 6 veces al día<br><input type="radio"/> más 6 veces al día |
| galletas tipo maria | <input type="radio"/> Nunca o menos 1 vez al mes<br><input checked="" type="radio"/> 1 a 3 veces mes<br><input type="radio"/> 1 vez semana<br><input type="radio"/> 2 a 4 veces semana<br><input type="radio"/> 5 a 6 veces semana<br><input type="radio"/> 1 vez al día<br><input type="radio"/> 2 a 3 veces al día<br><input type="radio"/> 5 a 6 veces al día<br><input type="radio"/> más 6 veces al día |

---

galletas chocolate

- ☒ Nunca o menos 1 vez al mes  
☐ 1 a 3 veces mes  
☐ 1 vez semana  
☐ 2 a 4 veces semana  
☐ 5 a 6 veces semana  
☐ 1 vez al día  
☐ 2 a 3 veces al día  
☐ 5 a 6 veces al día  
☐ más 6 veces al día

---

bolleria

- ☐ Nunca o menos 1 vez al mes  
☐ 1 a 3 veces mes  
☒ 1 vez semana  
☐ 2 a 4 veces semana  
☐ 5 a 6 veces semana  
☐ 1 vez al día  
☐ 2 a 3 veces al día  
☐ 5 a 6 veces al día  
☐ más 6 veces al día

---

chocolate o bombones

- ☐ Nunca o menos 1 vez al mes  
☐ 1 a 3 veces mes  
☒ 1 vez semana  
☐ 2 a 4 veces semana  
☐ 5 a 6 veces semana  
☐ 1 vez al día  
☐ 2 a 3 veces al día  
☐ 5 a 6 veces al día  
☐ más 6 veces al día

---

chocolate polvo o colacao

- ☐ Nunca o menos 1 vez al mes  
☐ 1 a 3 veces mes  
☐ 1 vez semana  
☐ 2 a 4 veces semana  
☐ 5 a 6 veces semana  
☒ 1 vez al día  
☐ 2 a 3 veces al día  
☐ 5 a 6 veces al día  
☐ más 6 veces al día

---

vino tinto

- ☒ Nunca o menos 1 vez al mes  
☐ 1 a 3 veces mes  
☐ 1 vez semana  
☐ 2 a 4 veces semana  
☐ 5 a 6 veces semana  
☐ 1 vez al día  
☐ 2 a 3 veces al día  
☐ 5 a 6 veces al día  
☐ más 6 veces al día

---

vino blanco

- ☒ Nunca o menos 1 vez al mes  
☐ 1 a 3 veces mes  
☐ 1 vez semana  
☐ 2 a 4 veces semana  
☐ 5 a 6 veces semana  
☐ 1 vez al día  
☐ 2 a 3 veces al día  
☐ 5 a 6 veces al día  
☐ más 6 veces al día

|                       |                                                                                                                                                                                                                                                                                                                                                                                                              |
|-----------------------|--------------------------------------------------------------------------------------------------------------------------------------------------------------------------------------------------------------------------------------------------------------------------------------------------------------------------------------------------------------------------------------------------------------|
| vino seco o vermut    | <input checked="" type="radio"/> Nunca o menos 1 vez al mes<br><input type="radio"/> 1 a 3 veces mes<br><input type="radio"/> 1 vez semana<br><input type="radio"/> 2 a 4 veces semana<br><input type="radio"/> 5 a 6 veces semana<br><input type="radio"/> 1 vez al día<br><input type="radio"/> 2 a 3 veces al día<br><input type="radio"/> 5 a 6 veces al día<br><input type="radio"/> más 6 veces al día |
| cerveza               | <input checked="" type="radio"/> Nunca o menos 1 vez al mes<br><input type="radio"/> 1 a 3 veces mes<br><input type="radio"/> 1 vez semana<br><input type="radio"/> 2 a 4 veces semana<br><input type="radio"/> 5 a 6 veces semana<br><input type="radio"/> 1 vez al día<br><input type="radio"/> 2 a 3 veces al día<br><input type="radio"/> 5 a 6 veces al día<br><input type="radio"/> más 6 veces al día |
| cerveza sin alcohol   | <input checked="" type="radio"/> Nunca o menos 1 vez al mes<br><input type="radio"/> 1 a 3 veces mes<br><input type="radio"/> 1 vez semana<br><input type="radio"/> 2 a 4 veces semana<br><input type="radio"/> 5 a 6 veces semana<br><input type="radio"/> 1 vez al día<br><input type="radio"/> 2 a 3 veces al día<br><input type="radio"/> 5 a 6 veces al día<br><input type="radio"/> más 6 veces al día |
| licores               | <input checked="" type="radio"/> Nunca o menos 1 vez al mes<br><input type="radio"/> 1 a 3 veces mes<br><input type="radio"/> 1 vez semana<br><input type="radio"/> 2 a 4 veces semana<br><input type="radio"/> 5 a 6 veces semana<br><input type="radio"/> 1 vez al día<br><input type="radio"/> 2 a 3 veces al día<br><input type="radio"/> 5 a 6 veces al día<br><input type="radio"/> más 6 veces al día |
| ginebra o ron o vodka | <input checked="" type="radio"/> Nunca o menos 1 vez al mes<br><input type="radio"/> 1 a 3 veces mes<br><input type="radio"/> 1 vez semana<br><input type="radio"/> 2 a 4 veces semana<br><input type="radio"/> 5 a 6 veces semana<br><input type="radio"/> 1 vez al día<br><input type="radio"/> 2 a 3 veces al día<br><input type="radio"/> 5 a 6 veces al día<br><input type="radio"/> más 6 veces al día |
| refresco normal       | <input checked="" type="radio"/> Nunca o menos 1 vez al mes<br><input type="radio"/> 1 a 3 veces mes<br><input type="radio"/> 1 vez semana<br><input type="radio"/> 2 a 4 veces semana<br><input type="radio"/> 5 a 6 veces semana<br><input type="radio"/> 1 vez al día<br><input type="radio"/> 2 a 3 veces al día<br><input type="radio"/> 5 a 6 veces al día<br><input type="radio"/> más 6 veces al día |

|                          |                                                                                                                                                                                                                                                                                                                                                                                                              |
|--------------------------|--------------------------------------------------------------------------------------------------------------------------------------------------------------------------------------------------------------------------------------------------------------------------------------------------------------------------------------------------------------------------------------------------------------|
| refresco sin azúcar      | <input checked="" type="radio"/> Nunca o menos 1 vez al mes<br><input type="radio"/> 1 a 3 veces mes<br><input type="radio"/> 1 vez semana<br><input type="radio"/> 2 a 4 veces semana<br><input type="radio"/> 5 a 6 veces semana<br><input type="radio"/> 1 vez al día<br><input type="radio"/> 2 a 3 veces al día<br><input type="radio"/> 5 a 6 veces al día<br><input type="radio"/> más 6 veces al día |
| Agua del grifo           | <input checked="" type="radio"/> Nunca o menos 1 vez al mes<br><input type="radio"/> 1 a 3 veces mes<br><input type="radio"/> 1 vez semana<br><input type="radio"/> 2 a 4 veces semana<br><input type="radio"/> 5 a 6 veces semana<br><input type="radio"/> 1 vez al día<br><input type="radio"/> 2 a 3 veces al día<br><input type="radio"/> 5 a 6 veces al día<br><input type="radio"/> más 6 veces al día |
| agua embotellada sin gas | <input type="radio"/> Nunca o menos 1 vez al mes<br><input type="radio"/> 1 a 3 veces mes<br><input type="radio"/> 1 vez semana<br><input type="radio"/> 2 a 4 veces semana<br><input type="radio"/> 5 a 6 veces semana<br><input type="radio"/> 1 vez al día<br><input type="radio"/> 2 a 3 veces al día<br><input type="radio"/> 5 a 6 veces al día<br><input checked="" type="radio"/> más 6 veces al día |
| agua embotellada con gas | <input checked="" type="radio"/> Nunca o menos 1 vez al mes<br><input type="radio"/> 1 a 3 veces mes<br><input type="radio"/> 1 vez semana<br><input type="radio"/> 2 a 4 veces semana<br><input type="radio"/> 5 a 6 veces semana<br><input type="radio"/> 1 vez al día<br><input type="radio"/> 2 a 3 veces al día<br><input type="radio"/> 5 a 6 veces al día<br><input type="radio"/> más 6 veces al día |
| zumو frutas embasado     | <input type="radio"/> Nunca o menos 1 vez al mes<br><input type="radio"/> 1 a 3 veces mes<br><input type="radio"/> 1 vez semana<br><input type="radio"/> 2 a 4 veces semana<br><input type="radio"/> 5 a 6 veces semana<br><input checked="" type="radio"/> 1 vez al día<br><input type="radio"/> 2 a 3 veces al día<br><input type="radio"/> 5 a 6 veces al día<br><input type="radio"/> más 6 veces al día |
| cafe                     | <input checked="" type="radio"/> Nunca o menos 1 vez al mes<br><input type="radio"/> 1 a 3 veces mes<br><input type="radio"/> 1 vez semana<br><input type="radio"/> 2 a 4 veces semana<br><input type="radio"/> 5 a 6 veces semana<br><input type="radio"/> 1 vez al día<br><input type="radio"/> 2 a 3 veces al día<br><input type="radio"/> 5 a 6 veces al día<br><input type="radio"/> más 6 veces al día |



---

cafe descafeinado

- ☒ Nunca o menos 1 vez al mes  
☐ 1 a 3 veces mes  
☐ 1 vez semana  
☐ 2 a 4 veces semana  
☐ 5 a 6 veces semana  
☐ 1 vez al día  
☐ 2 a 3 veces al día  
☐ 5 a 6 veces al día  
☐ más 6 veces al día

---

te o infusión

- ☒ Nunca o menos 1 vez al mes  
☐ 1 a 3 veces mes  
☐ 1 vez semana  
☐ 2 a 4 veces semana  
☐ 5 a 6 veces semana  
☐ 1 vez al día  
☐ 2 a 3 veces al día  
☐ 5 a 6 veces al día  
☐ más 6 veces al día

---

sopa o puré verduras

- ☐ Nunca o menos 1 vez al mes  
☐ 1 a 3 veces mes  
☐ 1 vez semana  
☐ 2 a 4 veces semana  
☒ 5 a 6 veces semana  
☐ 1 vez al día  
☐ 2 a 3 veces al día  
☐ 5 a 6 veces al día  
☐ más 6 veces al día

---

croquetas pollo jamón

- ☒ Nunca o menos 1 vez al mes  
☐ 1 a 3 veces mes  
☐ 1 vez semana  
☐ 2 a 4 veces semana  
☐ 5 a 6 veces semana  
☐ 1 vez al día  
☐ 2 a 3 veces al día  
☐ 5 a 6 veces al día  
☐ más 6 veces al día

---

croquetas pescado

- ☒ Nunca o menos 1 vez al mes  
☐ 1 a 3 veces mes  
☐ 1 vez semana  
☐ 2 a 4 veces semana  
☐ 5 a 6 veces semana  
☐ 1 vez al día  
☐ 2 a 3 veces al día  
☐ 5 a 6 veces al día  
☐ más 6 veces al día

---

mayonesa

- ☒ Nunca o menos 1 vez al mes  
☐ 1 a 3 veces mes  
☐ 1 vez semana  
☐ 2 a 4 veces semana  
☐ 5 a 6 veces semana  
☐ 1 vez al día  
☐ 2 a 3 veces al día  
☐ 5 a 6 veces al día  
☐ más 6 veces al día

---

salsa tomate

- ☐ Nunca o menos 1 vez al mes  
☒ 1 a 3 veces mes  
☐ 1 vez semana  
☐ 2 a 4 veces semana  
☐ 5 a 6 veces semana  
☐ 1 vez al día  
☐ 2 a 3 veces al día  
☐ 5 a 6 veces al día  
☐ más 6 veces al día

---

ketchup

- ☐ Nunca o menos 1 vez al mes  
☒ 1 a 3 veces mes  
☐ 1 vez semana  
☐ 2 a 4 veces semana  
☐ 5 a 6 veces semana  
☐ 1 vez al día  
☐ 2 a 3 veces al día  
☐ 5 a 6 veces al día  
☐ más 6 veces al día

---

sal

- ☒ Nunca o menos 1 vez al mes  
☐ 1 a 3 veces mes  
☐ 1 vez semana  
☐ 2 a 4 veces semana  
☐ 5 a 6 veces semana  
☐ 1 vez al día  
☐ 2 a 3 veces al día  
☐ 5 a 6 veces al día  
☐ más 6 veces al día

---

ajo

- ☐ Nunca o menos 1 vez al mes  
☐ 1 a 3 veces mes  
☐ 1 vez semana  
☐ 2 a 4 veces semana  
☒ 5 a 6 veces semana  
☐ 1 vez al día  
☐ 2 a 3 veces al día  
☐ 5 a 6 veces al día  
☐ más 6 veces al día

---

mermelada o miel

- ☐ Nunca o menos 1 vez al mes  
☒ 1 a 3 veces mes  
☐ 1 vez semana  
☐ 2 a 4 veces semana  
☐ 5 a 6 veces semana  
☐ 1 vez al día  
☐ 2 a 3 veces al día  
☐ 5 a 6 veces al día  
☐ más 6 veces al día

---

azúcar

- ☒ Nunca o menos 1 vez al mes  
☐ 1 a 3 veces mes  
☐ 1 vez semana  
☐ 2 a 4 veces semana  
☐ 5 a 6 veces semana  
☐ 1 vez al día  
☐ 2 a 3 veces al día  
☐ 5 a 6 veces al día  
☐ más 6 veces al día

---

Otro alimento

---

suplementos vitamínicos

- ☐ si  
☒ no

---

suplementos vitamínicos

---

dieta previa

- ☐ si  
☒ no

motivo dieta

- ☒ no dieta  
☐ control peso  
☐ control colesterol  
☐ control diabetes  
☐ problemas estómago  
☐ problemas vesícula o hepáticos  
☐ HTA o cardiopatía  
☐ problemas renales  
☐ alergia alimentaria  
☐ ácido úrico elevado  
☐ vegetariana  
☐ otros

---

cambio alimentos año previo gestación

- ☒ si  
☐ no

---

cambio lácteos

- ☐ eliminado  
☐ disminuido  
☒ igual  
☐ aumentado  
☐ no sabe

---

cambio huevos

- ☐ eliminado  
☒ disminuido  
☐ igual  
☐ aumentado  
☐ no sabe

---

cambio carne

- ☐ eliminado  
☒ disminuido  
☐ igual  
☐ aumentado  
☐ no sabe

---

cambio pescado

- ☐ eliminado  
☐ disminuido  
☒ igual  
☐ aumentado  
☐ no sabe

---

cambio verduras

- ☐ eliminado  
☐ disminuido  
☒ igual  
☐ aumentado  
☐ no sabe

|                            |                                                                                                                                                                                                                        |
|----------------------------|------------------------------------------------------------------------------------------------------------------------------------------------------------------------------------------------------------------------|
| cambio legumbres           | <input type="radio"/> eliminado<br><input type="radio"/> disminuido<br><input checked="" type="radio"/> igual<br><input type="radio"/> aumentado<br><input type="radio"/> no sabe                                      |
| cambio fruta               | <input type="radio"/> eliminado<br><input type="radio"/> disminuido<br><input checked="" type="radio"/> igual<br><input type="radio"/> aumentado<br><input type="radio"/> no sabe                                      |
| cambio pan                 | <input type="radio"/> eliminado<br><input type="radio"/> disminuido<br><input checked="" type="radio"/> igual<br><input type="radio"/> aumentado<br><input type="radio"/> no sabe                                      |
| cambio aceite oliva        | <input type="radio"/> eliminado<br><input type="radio"/> disminuido<br><input checked="" type="radio"/> igual<br><input type="radio"/> aumentado<br><input type="radio"/> no sabe                                      |
| cambio mante o margarina   | <input type="radio"/> eliminado<br><input type="radio"/> disminuido<br><input checked="" type="radio"/> igual<br><input type="radio"/> aumentado<br><input type="radio"/> no sabe                                      |
| cambio azúcar y dulces     | <input type="radio"/> eliminado<br><input checked="" type="radio"/> disminuido<br><input type="radio"/> igual<br><input type="radio"/> aumentado<br><input type="radio"/> no sabe                                      |
| cambio bebidas alcohólicas | <input type="radio"/> eliminado<br><input type="radio"/> disminuido<br><input checked="" type="radio"/> igual<br><input type="radio"/> aumentado<br><input type="radio"/> no sabe                                      |
| frecuencia comidas fritas  | <input type="radio"/> a diario<br><input type="radio"/> 5 a 6 veces semana<br><input type="radio"/> 2 a 4 veces semana<br><input type="radio"/> 1 vez semana<br><input checked="" type="radio"/> menos de 1 vez semana |
| carne                      | <input type="radio"/> no como<br><input type="radio"/> cruda<br><input type="radio"/> poco hecha<br><input checked="" type="radio"/> hecha<br><input type="radio"/> muy hecha                                          |
| grasa visible carne        | <input type="radio"/> quita toda<br><input checked="" type="radio"/> quita mayoría<br><input type="radio"/> quita un poco<br><input type="radio"/> no quita nada                                                       |

|                                |                                                                                                                                                                                                                                                          |
|--------------------------------|----------------------------------------------------------------------------------------------------------------------------------------------------------------------------------------------------------------------------------------------------------|
| cocina carne                   | <input checked="" type="radio"/> a la plancha<br><input type="radio"/> a la parrilla<br><input type="radio"/> asada<br><input type="radio"/> frita<br><input type="radio"/> guisada                                                                      |
| tostado quemado carne          | <input checked="" type="radio"/> nunca<br><input type="radio"/> 1 vez mes<br><input type="radio"/> 2 a 3 veces mes<br><input type="radio"/> 1 vez semana<br><input type="radio"/> 2 a 3 semanas                                                          |
| tostado quemado pescado        | <input checked="" type="radio"/> nunca<br><input type="radio"/> 1 vez mes<br><input type="radio"/> 2 a 3 veces mes<br><input type="radio"/> 1 vez semana<br><input type="radio"/> 2 a 3 semanas                                                          |
| socarrat paella                | <input checked="" type="radio"/> nunca<br><input type="radio"/> 1 vez mes<br><input type="radio"/> 2 a 3 veces mes<br><input type="radio"/> 1 vez semana<br><input type="radio"/> 2 a 3 semanas                                                          |
| grasa o aceite cocinar         | <input type="radio"/> mantequilla<br><input type="radio"/> margarina<br><input checked="" type="radio"/> aceite oliva<br><input type="radio"/> aceite oliva virgen extra<br><input type="radio"/> aceite vegetal<br><input type="radio"/> mezcla aceites |
| grasa aceite aliñar            | <input type="radio"/> mantequilla<br><input type="radio"/> margarina<br><input type="radio"/> aceite oliva<br><input checked="" type="radio"/> aceite oliva virgen extra<br><input type="radio"/> aceite vegetal<br><input type="radio"/> mezcla aceites |
| grasa aceite freir             | <input type="radio"/> mantequilla<br><input type="radio"/> margarina<br><input type="radio"/> aceite oliva<br><input type="radio"/> aceite oliva virgen extra<br><input type="radio"/> aceite vegetal<br><input type="radio"/> mezcla aceites            |
| Ejercicio cuestionario         | <input type="radio"/> si<br><input type="radio"/> no                                                                                                                                                                                                     |
| horas de sueño incluido siesta | [*DATA REMOVED*]                                                                                                                                                                                                                                         |
| minutos siesta                 | [*DATA REMOVED*]                                                                                                                                                                                                                                         |
| horas televisión semana        | [*DATA REMOVED*]                                                                                                                                                                                                                                         |

|                                        |                                                                                                                                                                                                                                                                                                                                                                           |
|----------------------------------------|---------------------------------------------------------------------------------------------------------------------------------------------------------------------------------------------------------------------------------------------------------------------------------------------------------------------------------------------------------------------------|
| actividad trabajo                      | <input type="radio"/> casi siempre sentado<br><input type="radio"/> sentado 50 por cien<br><input type="radio"/> casi siempre de pie, quieto<br><input checked="" type="radio"/> casi siempre levantado caminando y llevando pocas cosas<br><input type="radio"/> casi siempre levantado, caminando y llevado muchas cosas<br><input type="radio"/> trabajo manual pesado |
| tiempo caminar o bici al día           | <input type="radio"/> casi nunca<br><input type="radio"/> menos 20min día<br><input checked="" type="radio"/> 20 a 40 min día<br><input type="radio"/> 40 a 60 min día<br><input type="radio"/> 1h o 1h y media día<br><input type="radio"/> más de 1h y media al día                                                                                                     |
| tiempo tareas casa al día              | <input type="radio"/> menos de 1h día<br><input checked="" type="radio"/> 1 a 2h día<br><input type="radio"/> 3 a 4h día<br><input type="radio"/> 5 a 6h día<br><input type="radio"/> 7 a 8h día<br><input type="radio"/> más de 8h día                                                                                                                                   |
| tiempo libre televisión ordenador leer | <input type="radio"/> menos 1h día<br><input type="radio"/> 1h día<br><input type="radio"/> 2h día<br><input checked="" type="radio"/> 3h día<br><input type="radio"/> 4h día<br><input type="radio"/> 5 a 6h día<br><input type="radio"/> mas 6h día                                                                                                                     |
| tiempo libre ejercicio o deporte       | <input checked="" type="radio"/> menos 1h semana<br><input type="radio"/> 1h semana<br><input type="radio"/> 2h semana<br><input type="radio"/> 3h semana<br><input type="radio"/> 4 a 5h semana<br><input type="radio"/> mas 5h semana                                                                                                                                   |
| como se considera                      | <input type="radio"/> sedentaria<br><input type="radio"/> poco activa<br><input checked="" type="radio"/> moderadamente activa<br><input type="radio"/> bastante activa<br><input type="radio"/> muy activa<br><input type="radio"/> no sabe                                                                                                                              |
| FUR                                    | [*DATA REMOVED*]                                                                                                                                                                                                                                                                                                                                                          |
| Semanas gestación 2T                   | _____                                                                                                                                                                                                                                                                                                                                                                     |
| Días gestación 2T                      | _____                                                                                                                                                                                                                                                                                                                                                                     |
| DBP 2T                                 | _____                                                                                                                                                                                                                                                                                                                                                                     |
| CC 2T                                  | _____                                                                                                                                                                                                                                                                                                                                                                     |

|                                                   |                                                                                                                                                                                                 |
|---------------------------------------------------|-------------------------------------------------------------------------------------------------------------------------------------------------------------------------------------------------|
| AC 2T                                             |                                                                                                                                                                                                 |
| LF 2T                                             |                                                                                                                                                                                                 |
| PFE 2T (Hadlock)                                  |                                                                                                                                                                                                 |
| Semanas gestación 3T                              | [*DATA REMOVED*]                                                                                                                                                                                |
| días 3T                                           | [*DATA REMOVED*]                                                                                                                                                                                |
| DBP 3T                                            | [*DATA REMOVED*]                                                                                                                                                                                |
| CC 3T                                             | [*DATA REMOVED*]                                                                                                                                                                                |
| AC 3T                                             | [*DATA REMOVED*]                                                                                                                                                                                |
| LF 3T                                             | [*DATA REMOVED*]                                                                                                                                                                                |
| PFE 3T (Hadlock)                                  | [*DATA REMOVED*]                                                                                                                                                                                |
| Semanas de gestación final                        | [*DATA REMOVED*]                                                                                                                                                                                |
| días gestación final                              | [*DATA REMOVED*]                                                                                                                                                                                |
| Localización placenta                             | <input checked="" type="radio"/> anterior<br><input type="radio"/> lateral derecha<br><input type="radio"/> lateral izquierda<br><input type="radio"/> posterior<br><input type="radio"/> fondo |
| Presentación longitudinal cefálica                | <input type="radio"/> no<br><input checked="" type="radio"/> si                                                                                                                                 |
| Dorso                                             | <input checked="" type="radio"/> izquierda anterior<br><input type="radio"/> izquierda posterior<br><input type="radio"/> derecha anterior<br><input type="radio"/> derecha posterior           |
| diámetro biparietal                               | [*DATA REMOVED*]                                                                                                                                                                                |
| Circunferencia craneal                            | [*DATA REMOVED*]                                                                                                                                                                                |
| Circunferencia abdominal                          | [*DATA REMOVED*]                                                                                                                                                                                |
| Longitud de femur                                 | [*DATA REMOVED*]                                                                                                                                                                                |
| tejido celular subcutáneo a nivel del muslo en mm | [*DATA REMOVED*]                                                                                                                                                                                |
| tejido celular subcutáneo en abdomen en mm        | [*DATA REMOVED*]                                                                                                                                                                                |

|                                               |                                                                                                                                                          |
|-----------------------------------------------|----------------------------------------------------------------------------------------------------------------------------------------------------------|
| Volumen del muslo en cm3                      | [*DATA REMOVED*]                                                                                                                                         |
| Peso fetal estimado según fórmula de Hadlock  | [*DATA REMOVED*]                                                                                                                                         |
| Percentil                                     | [*DATA REMOVED*]                                                                                                                                         |
| Peso fetal estimado según fórmula de Scioscia | _____                                                                                                                                                    |
| Peso fetal estimado según fórmula de LEE      | _____                                                                                                                                                    |
| Tipo de parto                                 | <input type="radio"/> eutocico<br><input type="radio"/> instrumentado/ventosa<br><input checked="" type="radio"/> cesarea                                |
| fecha de nacimiento                           | [*DATA REMOVED*]                                                                                                                                         |
| Días entre exploración y nacimiento           | [*DATA REMOVED*]                                                                                                                                         |
| Peso RN en g                                  | [*DATA REMOVED*]                                                                                                                                         |
| sexo                                          | <input type="radio"/> mujer<br><input checked="" type="radio"/> hombre                                                                                   |
| Apgar 1 minuto                                | [*DATA REMOVED*]                                                                                                                                         |
| Apgar 5 minutos                               | [*DATA REMOVED*]                                                                                                                                         |
| Apgar 10 minutos                              | _____                                                                                                                                                    |
| antecedente Covid durante gestación           | <input type="radio"/> Yes<br><input checked="" type="radio"/> No                                                                                         |
| Nivel de estudios                             | <input type="radio"/> ninguno<br><input type="radio"/> primarios<br><input checked="" type="radio"/> secundarios<br><input type="radio"/> universitarios |



## Base\_datos\_estimacion\_peso\_fetal

|                                       |                                                                                                                                                                                                                                                                                      |
|---------------------------------------|--------------------------------------------------------------------------------------------------------------------------------------------------------------------------------------------------------------------------------------------------------------------------------------|
| Número de identificación participante | 196                                                                                                                                                                                                                                                                                  |
| CODIGO PARTICIPANTE                   |                                                                                                                                                                                                                                                                                      |
| Edad                                  | [*DATA REMOVED*]                                                                                                                                                                                                                                                                     |
| Gestaciones                           | <input type="radio"/> 1<br><input checked="" type="radio"/> 2<br><input type="radio"/> 3<br><input type="radio"/> mas de 3                                                                                                                                                           |
| partos                                | <input type="radio"/> 0<br><input checked="" type="radio"/> 1<br><input type="radio"/> 2<br><input type="radio"/> 3<br><input type="radio"/> mas de 3                                                                                                                                |
| cesáreas                              | <input checked="" type="radio"/> 0<br><input type="radio"/> 1<br><input type="radio"/> 2<br><input type="radio"/> 3<br><input type="radio"/> mas de 3                                                                                                                                |
| Abortos                               | <input checked="" type="radio"/> 0<br><input type="radio"/> 1<br><input type="radio"/> 2<br><input type="radio"/> 3<br><input type="radio"/> mas de 3                                                                                                                                |
| Tipo de gestacion                     | <input checked="" type="radio"/> espontanea<br><input type="radio"/> IAC inseminación artificial conyuge<br><input type="radio"/> IAD inseminación artificial donante<br><input type="radio"/> FIV Fecundación in Vitro<br><input type="radio"/> Ovodon FIV con donación de ovocitos |
| peso previo a embarazo                | [*DATA REMOVED*]                                                                                                                                                                                                                                                                     |
| Ganancia ponderal embarazo            | [*DATA REMOVED*]                                                                                                                                                                                                                                                                     |
| Talla madre                           | [*DATA REMOVED*]                                                                                                                                                                                                                                                                     |
| IMC previo embarazo                   | 29.1363163371488                                                                                                                                                                                                                                                                     |
| Patología obstétrica                  | <input checked="" type="radio"/> no<br><input type="radio"/> si                                                                                                                                                                                                                      |
| Diabetes pregestacional               | <input checked="" type="radio"/> no<br><input type="radio"/> si                                                                                                                                                                                                                      |
| Diabetes gestacional                  | <input checked="" type="radio"/> no<br><input type="radio"/> si                                                                                                                                                                                                                      |

|                                            |                                                                                                                                                                                      |
|--------------------------------------------|--------------------------------------------------------------------------------------------------------------------------------------------------------------------------------------|
| Diabetes gestacional con insulina          | <input checked="" type="radio"/> no<br><input type="radio"/> si                                                                                                                      |
| Diabetes gestacional con dieta y ejercicio | <input checked="" type="radio"/> no<br><input type="radio"/> si                                                                                                                      |
| Percentil fetos previos                    | <input type="radio"/> Nada<br><input type="radio"/> percentil menor de 10<br><input checked="" type="radio"/> percentil entre 10 y 90<br><input type="radio"/> percentil mayor de 90 |
| Exfumadora                                 | <input checked="" type="radio"/> Nada<br><input type="radio"/> menos de 5 años<br><input type="radio"/> 5 a 10 años<br><input type="radio"/> mayor o igual a 10 años                 |
| Hábito tabáquico                           | <input checked="" type="radio"/> no<br><input type="radio"/> si                                                                                                                      |
| fumadora                                   | [*DATA REMOVED*]                                                                                                                                                                     |
| Consumo otros tóxicos                      | <input checked="" type="radio"/> no<br><input type="radio"/> si                                                                                                                      |
| Hb 1T                                      | [*DATA REMOVED*]                                                                                                                                                                     |
| Htc 1T                                     | [*DATA REMOVED*]                                                                                                                                                                     |
| Hb 2T                                      | [*DATA REMOVED*]                                                                                                                                                                     |
| HTC 2T                                     | [*DATA REMOVED*]                                                                                                                                                                     |
| Hb 3T                                      | [*DATA REMOVED*]                                                                                                                                                                     |
| HTC 3T                                     | [*DATA REMOVED*]                                                                                                                                                                     |
| Suplemento FE oral                         | <input checked="" type="radio"/> si<br><input type="radio"/> no                                                                                                                      |
| Suplemento fe iv                           | <input type="radio"/> si<br><input checked="" type="radio"/> no                                                                                                                      |
| Transfusión                                | <input checked="" type="radio"/> no<br><input type="radio"/> si                                                                                                                      |
| Solicitada Vit D                           | <input checked="" type="radio"/> no<br><input type="radio"/> si                                                                                                                      |
| Deficit vit D                              | <input type="radio"/> no<br><input type="radio"/> si                                                                                                                                 |
| Suplemento vit D                           | <input type="radio"/> si<br><input checked="" type="radio"/> no                                                                                                                      |

|                       |                                                                                                                                                                                                                                                                                                                                                                                                              |
|-----------------------|--------------------------------------------------------------------------------------------------------------------------------------------------------------------------------------------------------------------------------------------------------------------------------------------------------------------------------------------------------------------------------------------------------------|
| Dieta, cuestionario   | <input checked="" type="radio"/> sí<br><input type="radio"/> no                                                                                                                                                                                                                                                                                                                                              |
| Leche entera          | <input checked="" type="radio"/> Nunca o menos 1 vez al mes<br><input type="radio"/> 1 a 3 veces mes<br><input type="radio"/> 1 vez semana<br><input type="radio"/> 2 a 4 veces semana<br><input type="radio"/> 5 a 6 veces semana<br><input type="radio"/> 1 vez al día<br><input type="radio"/> 2 a 3 veces al día<br><input type="radio"/> 5 a 6 veces al día<br><input type="radio"/> más 6 veces al día |
| Leche semidesnatada   | <input type="radio"/> Nunca o menos 1 vez al mes<br><input type="radio"/> 1 a 3 veces mes<br><input type="radio"/> 1 vez semana<br><input checked="" type="radio"/> 2 a 4 veces semana<br><input type="radio"/> 5 a 6 veces semana<br><input type="radio"/> 1 vez al día<br><input type="radio"/> 2 a 3 veces al día<br><input type="radio"/> 5 a 6 veces al día<br><input type="radio"/> mas 6 veces al día |
| Leche desnatada       | <input checked="" type="radio"/> Nunca o menos 1 vez al mes<br><input type="radio"/> 1 a 3 veces mes<br><input type="radio"/> 1 vez semana<br><input type="radio"/> 2 a 4 veces semana<br><input type="radio"/> 5 a 6 veces semana<br><input type="radio"/> 1 vez al día<br><input type="radio"/> 2 a 3 veces al día<br><input type="radio"/> 5 a 6 veces al día<br><input type="radio"/> más 6 veces al día |
| Leche condensada      | <input checked="" type="radio"/> Nunca o menos 1 vez al mes<br><input type="radio"/> 1 a 3 veces mes<br><input type="radio"/> 1 vez semana<br><input type="radio"/> 2 a 4 veces semana<br><input type="radio"/> 5 a 6 veces semana<br><input type="radio"/> 1 vez al día<br><input type="radio"/> 2 a 3 veces al día<br><input type="radio"/> 5 a 6 veces al día<br><input type="radio"/> más 6 veces al día |
| nata o crema de leche | <input checked="" type="radio"/> Nunca o menos 1 vez al mes<br><input type="radio"/> 1 a 3 veces mes<br><input type="radio"/> 1 vez semana<br><input type="radio"/> 2 a 4 veces semana<br><input type="radio"/> 5 a 6 veces semana<br><input type="radio"/> 1 vez al día<br><input type="radio"/> 2 a 3 veces al día<br><input type="radio"/> 5 a 6 veces al día<br><input type="radio"/> más 6 veces al día |

---

Yogurt Entero

- ☐ Nunca o menos 1 vez al mes  
☐ 1 a 3 veces mes  
☐ 1 vez semana  
☐ 2 a 4 veces semana  
☐ 5 a 6 veces semana  
☒ 1 vez al día  
☐ 2 a 3 veces al día  
☐ 5 a 6 veces al día  
☐ más 6 veces al día

---

Yogurt desnatado

- ☐ Nunca o menos 1 vez al mes  
☐ 1 a 3 veces mes  
☐ 1 vez semana  
☐ 2 a 4 veces semana  
☒ 5 a 6 veces semana  
☐ 1 vez al día  
☐ 2 a 3 veces al día  
☐ 5 a 6 veces al día  
☐ más 6 veces al día

---

100g requesón o queso blando o queso fresco

- ☐ Nunca o menos 1 vez al mes  
☒ 1 a 3 veces mes  
☐ 1 vez semana  
☐ 2 a 4 veces semana  
☐ 5 a 6 veces semana  
☐ 1 vez al día  
☐ 2 a 3 veces al día  
☐ 5 a 6 veces al día  
☐ más 6 veces al día

---

queso curado o semicurado o cremoso

- ☐ Nunca o menos 1 vez al mes  
☐ 1 a 3 veces mes  
☒ 1 vez semana  
☐ 2 a 4 veces semana  
☐ 5 a 6 veces semana  
☐ 1 vez al día  
☐ 2 a 3 veces al día  
☐ 5 a 6 veces al día  
☐ más 6 veces al día

---

natillas flan pudding

- ☐ Nunca o menos 1 vez al mes  
☒ 1 a 3 veces mes  
☐ 1 vez semana  
☐ 2 a 4 veces semana  
☐ 5 a 6 veces semana  
☐ 1 vez al día  
☐ 2 a 3 veces al día  
☐ 5 a 6 veces al día  
☐ más 6 veces al día

---

Helado

- ☐ Nunca o menos 1 vez al mes  
☒ 1 a 3 veces mes  
☐ 1 vez semana  
☐ 2 a 4 veces semana  
☐ 5 a 6 veces semana  
☐ 1 vez al día  
☐ 2 a 3 veces al día  
☐ 5 a 6 veces al día  
☐ más 6 veces al día

|                                      |                                                                                                                                                                                                                                                                                                                                                                                                              |
|--------------------------------------|--------------------------------------------------------------------------------------------------------------------------------------------------------------------------------------------------------------------------------------------------------------------------------------------------------------------------------------------------------------------------------------------------------------|
| huevo                                | <input type="radio"/> Nunca o menos 1 vez al mes<br><input type="radio"/> 1 a 3 veces mes<br><input type="radio"/> 1 vez semana<br><input checked="" type="radio"/> 2 a 4 veces semana<br><input type="radio"/> 5 a 6 veces semana<br><input type="radio"/> 1 vez al día<br><input type="radio"/> 2 a 3 veces al día<br><input type="radio"/> 5 a 6 veces al día<br><input type="radio"/> más 6 veces al día |
| Pollo con piel                       | <input checked="" type="radio"/> Nunca o menos 1 vez al mes<br><input type="radio"/> 1 a 3 veces mes<br><input type="radio"/> 1 vez semana<br><input type="radio"/> 2 a 4 veces semana<br><input type="radio"/> 5 a 6 veces semana<br><input type="radio"/> 1 vez al día<br><input type="radio"/> 2 a 3 veces al día<br><input type="radio"/> 5 a 6 veces al día<br><input type="radio"/> más 6 veces al día |
| pollo sin piel                       | <input type="radio"/> Nunca o menos 1 vez al mes<br><input checked="" type="radio"/> 1 a 3 veces mes<br><input type="radio"/> 1 vez semana<br><input type="radio"/> 2 a 4 veces semana<br><input type="radio"/> 5 a 6 veces semana<br><input type="radio"/> 1 vez al día<br><input type="radio"/> 2 a 3 veces al día<br><input type="radio"/> 5 a 6 veces al día<br><input type="radio"/> más 6 veces al día |
| Ternera o cerdo o cordero            | <input type="radio"/> Nunca o menos 1 vez al mes<br><input checked="" type="radio"/> 1 a 3 veces mes<br><input type="radio"/> 1 vez semana<br><input type="radio"/> 2 a 4 veces semana<br><input type="radio"/> 5 a 6 veces semana<br><input type="radio"/> 1 vez al día<br><input type="radio"/> 2 a 3 veces al día<br><input type="radio"/> 5 a 6 veces al día<br><input type="radio"/> más 6 veces al día |
| carne caza: Conejo o codorniz o pato | <input checked="" type="radio"/> Nunca o menos 1 vez al mes<br><input type="radio"/> 1 a 3 veces mes<br><input type="radio"/> 1 vez semana<br><input type="radio"/> 2 a 4 veces semana<br><input type="radio"/> 5 a 6 veces semana<br><input type="radio"/> 1 vez al día<br><input type="radio"/> 2 a 3 veces al día<br><input type="radio"/> 5 a 6 veces al día<br><input type="radio"/> más 6 veces al día |
| Hígado de ternera o cerdo o pollo    | <input checked="" type="radio"/> Nunca o menos 1 vez al mes<br><input type="radio"/> 1 a 3 veces mes<br><input type="radio"/> 1 vez semana<br><input type="radio"/> 2 a 4 veces semana<br><input type="radio"/> 5 a 6 veces semana<br><input type="radio"/> 1 vez al día<br><input type="radio"/> 2 a 3 veces al día<br><input type="radio"/> 5 a 6 veces al día<br><input type="radio"/> más 6 veces al día |

---

Vísceras

- ☒ Nunca o menos 1 vez al mes  
☐ 1 a 3 veces mes  
☐ 1 vez semana  
☐ 2 a 4 veces semana  
☐ 5 a 6 veces semana  
☐ 1 vez al día  
☐ 2 a 3 veces al día  
☐ 5 a 6 veces al día  
☐ más 6 veces al día

---

Embutido

- ☒ Nunca o menos 1 vez al mes  
☐ 1 a 3 veces mes  
☐ 1 vez semana  
☐ 2 a 4 veces semana  
☐ 5 a 6 veces semana  
☐ 1 vez al día  
☐ 2 a 3 veces al día  
☐ 5 a 6 veces al día  
☐ más 6 veces al día

---

Salchicha o similar

- ☒ Nunca o menos 1 vez al mes  
☐ 1 a 3 veces mes  
☐ 1 vez semana  
☐ 2 a 4 veces semana  
☐ 5 a 6 veces semana  
☐ 1 vez al día  
☐ 2 a 3 veces al día  
☐ 5 a 6 veces al día  
☐ más 6 veces al día

---

Pate o foiegras

- ☒ Nunca o menos 1 vez al mes  
☐ 1 a 3 veces mes  
☐ 1 vez semana  
☐ 2 a 4 veces semana  
☐ 5 a 6 veces semana  
☐ 1 vez al día  
☐ 2 a 3 veces al día  
☐ 5 a 6 veces al día  
☐ más 6 veces al día

---

Hamburguesa

- ☐ Nunca o menos 1 vez al mes  
☒ 1 a 3 veces mes  
☐ 1 vez semana  
☐ 2 a 4 veces semana  
☐ 5 a 6 veces semana  
☐ 1 vez al día  
☐ 2 a 3 veces al día  
☐ 5 a 6 veces al día  
☐ más 6 veces al día

---

tocino o bacon

- ☒ Nunca o menos 1 vez al mes  
☐ 1 a 3 veces mes  
☐ 1 vez semana  
☐ 2 a 4 veces semana  
☐ 5 a 6 veces semana  
☐ 1 vez al día  
☐ 2 a 3 veces al día  
☐ 5 a 6 veces al día  
☐ más 6 veces al día

|                        |                                                                                                                                                                                                                                                                                                                                                                                                              |
|------------------------|--------------------------------------------------------------------------------------------------------------------------------------------------------------------------------------------------------------------------------------------------------------------------------------------------------------------------------------------------------------------------------------------------------------|
| Pescado frito          | <input type="radio"/> Nunca o menos 1 vez al mes<br><input checked="" type="radio"/> 1 a 3 veces mes<br><input type="radio"/> 1 vez semana<br><input type="radio"/> 2 a 4 veces semana<br><input type="radio"/> 5 a 6 veces semana<br><input type="radio"/> 1 vez al día<br><input type="radio"/> 2 a 3 veces al día<br><input type="radio"/> 5 a 6 veces al día<br><input type="radio"/> más 6 veces al día |
| pescado hervido blanco | <input type="radio"/> Nunca o menos 1 vez al mes<br><input checked="" type="radio"/> 1 a 3 veces mes<br><input type="radio"/> 1 vez semana<br><input type="radio"/> 2 a 4 veces semana<br><input type="radio"/> 5 a 6 veces semana<br><input type="radio"/> 1 vez al día<br><input type="radio"/> 2 a 3 veces al día<br><input type="radio"/> 5 a 6 veces al día<br><input type="radio"/> más 6 veces al día |
| pescado hervido azul   | <input checked="" type="radio"/> Nunca o menos 1 vez al mes<br><input type="radio"/> 1 a 3 veces mes<br><input type="radio"/> 1 vez semana<br><input type="radio"/> 2 a 4 veces semana<br><input type="radio"/> 5 a 6 veces semana<br><input type="radio"/> 1 vez al día<br><input type="radio"/> 2 a 3 veces al día<br><input type="radio"/> 5 a 6 veces al día<br><input type="radio"/> más 6 veces al día |
| otros pescado azul     | <input checked="" type="radio"/> Nunca o menos 1 vez al mes<br><input type="radio"/> 1 a 3 veces mes<br><input type="radio"/> 1 vez semana<br><input type="radio"/> 2 a 4 veces semana<br><input type="radio"/> 5 a 6 veces semana<br><input type="radio"/> 1 vez al día<br><input type="radio"/> 2 a 3 veces al día<br><input type="radio"/> 5 a 6 veces al día<br><input type="radio"/> más 6 veces al día |
| atun conserva          | <input type="radio"/> Nunca o menos 1 vez al mes<br><input checked="" type="radio"/> 1 a 3 veces mes<br><input type="radio"/> 1 vez semana<br><input type="radio"/> 2 a 4 veces semana<br><input type="radio"/> 5 a 6 veces semana<br><input type="radio"/> 1 vez al día<br><input type="radio"/> 2 a 3 veces al día<br><input type="radio"/> 5 a 6 veces al día<br><input type="radio"/> más 6 veces al día |
| sardina conserva       | <input checked="" type="radio"/> Nunca o menos 1 vez al mes<br><input type="radio"/> 1 a 3 veces mes<br><input type="radio"/> 1 vez semana<br><input type="radio"/> 2 a 4 veces semana<br><input type="radio"/> 5 a 6 veces semana<br><input type="radio"/> 1 vez al día<br><input type="radio"/> 2 a 3 veces al día<br><input type="radio"/> 5 a 6 veces al día<br><input type="radio"/> más 6 veces al día |

|                                         |                                                                                                                                                                                                                                                                                                                                                                                                              |
|-----------------------------------------|--------------------------------------------------------------------------------------------------------------------------------------------------------------------------------------------------------------------------------------------------------------------------------------------------------------------------------------------------------------------------------------------------------------|
| pescado ahumado                         | <input checked="" type="radio"/> Nunca o menos 1 vez al mes<br><input type="radio"/> 1 a 3 veces mes<br><input type="radio"/> 1 vez semana<br><input type="radio"/> 2 a 4 veces semana<br><input type="radio"/> 5 a 6 veces semana<br><input type="radio"/> 1 vez al día<br><input type="radio"/> 2 a 3 veces al día<br><input type="radio"/> 5 a 6 veces al día<br><input type="radio"/> más 6 veces al día |
| almejas o mejillones o ostras unos 100g | <input type="radio"/> Nunca o menos 1 vez al mes<br><input checked="" type="radio"/> 1 a 3 veces mes<br><input type="radio"/> 1 vez semana<br><input type="radio"/> 2 a 4 veces semana<br><input type="radio"/> 5 a 6 veces semana<br><input type="radio"/> 1 vez al día<br><input type="radio"/> 2 a 3 veces al día<br><input type="radio"/> 5 a 6 veces al día<br><input type="radio"/> más 6 veces al día |
| calamar o chipiron o sepia unos 100g    | <input type="radio"/> Nunca o menos 1 vez al mes<br><input checked="" type="radio"/> 1 a 3 veces mes<br><input type="radio"/> 1 vez semana<br><input type="radio"/> 2 a 4 veces semana<br><input type="radio"/> 5 a 6 veces semana<br><input type="radio"/> 1 vez al día<br><input type="radio"/> 2 a 3 veces al día<br><input type="radio"/> 5 a 6 veces al día<br><input type="radio"/> más 6 veces al día |
| marisco unos 100g                       | <input type="radio"/> Nunca o menos 1 vez al mes<br><input checked="" type="radio"/> 1 a 3 veces mes<br><input type="radio"/> 1 vez semana<br><input type="radio"/> 2 a 4 veces semana<br><input type="radio"/> 5 a 6 veces semana<br><input type="radio"/> 1 vez al día<br><input type="radio"/> 2 a 3 veces al día<br><input type="radio"/> 5 a 6 veces al día<br><input type="radio"/> más 6 veces al día |
| Espinacas o acelgas cocinadas           | <input type="radio"/> Nunca o menos 1 vez al mes<br><input checked="" type="radio"/> 1 a 3 veces mes<br><input type="radio"/> 1 vez semana<br><input type="radio"/> 2 a 4 veces semana<br><input type="radio"/> 5 a 6 veces semana<br><input type="radio"/> 1 vez al día<br><input type="radio"/> 2 a 3 veces al día<br><input type="radio"/> 5 a 6 veces al día<br><input type="radio"/> más 6 veces al día |
| Col o coliflor o brocoli cocinado       | <input type="radio"/> Nunca o menos 1 vez al mes<br><input checked="" type="radio"/> 1 a 3 veces mes<br><input type="radio"/> 1 vez semana<br><input type="radio"/> 2 a 4 veces semana<br><input type="radio"/> 5 a 6 veces semana<br><input type="radio"/> 1 vez al día<br><input type="radio"/> 2 a 3 veces al día<br><input type="radio"/> 5 a 6 veces al día<br><input type="radio"/> más 6 veces al día |



---

Lechuga o endivia o escarola

- ☐ Nunca o menos 1 vez al mes  
☐ 1 a 3 veces mes  
☐ 1 vez semana  
☒ 2 a 4 veces semana  
☐ 5 a 6 veces semana  
☐ 1 vez al día  
☐ 2 a 3 veces al día  
☐ 5 a 6 veces al día  
☐ más 6 veces al día

---

tomate ensalada

- ☐ Nunca o menos 1 vez al mes  
☐ 1 a 3 veces mes  
☐ 1 vez semana  
☒ 2 a 4 veces semana  
☐ 5 a 6 veces semana  
☐ 1 vez al día  
☐ 2 a 3 veces al día  
☐ 5 a 6 veces al día  
☐ más 6 veces al día

---

cebolla

- ☐ Nunca o menos 1 vez al mes  
☐ 1 a 3 veces mes  
☒ 1 vez semana  
☐ 2 a 4 veces semana  
☐ 5 a 6 veces semana  
☐ 1 vez al día  
☐ 2 a 3 veces al día  
☐ 5 a 6 veces al día  
☐ más 6 veces al día

---

Zanahoria o calabaza

- ☐ Nunca o menos 1 vez al mes  
☒ 1 a 3 veces mes  
☐ 1 vez semana  
☐ 2 a 4 veces semana  
☐ 5 a 6 veces semana  
☐ 1 vez al día  
☐ 2 a 3 veces al día  
☐ 5 a 6 veces al día  
☐ más 6 veces al día

---

Judías verdes

- ☐ Nunca o menos 1 vez al mes  
☐ 1 a 3 veces mes  
☒ 1 vez semana  
☐ 2 a 4 veces semana  
☐ 5 a 6 veces semana  
☐ 1 vez al día  
☐ 2 a 3 veces al día  
☐ 5 a 6 veces al día  
☐ más 6 veces al día

---

Berenjena o calabacin o pepino

- ☐ Nunca o menos 1 vez al mes  
☐ 1 a 3 veces mes  
☒ 1 vez semana  
☐ 2 a 4 veces semana  
☐ 5 a 6 veces semana  
☐ 1 vez al día  
☐ 2 a 3 veces al día  
☐ 5 a 6 veces al día  
☐ más 6 veces al día

---

|          |                                                                                                                                                                                                                                                                                                                                                                                                              |
|----------|--------------------------------------------------------------------------------------------------------------------------------------------------------------------------------------------------------------------------------------------------------------------------------------------------------------------------------------------------------------------------------------------------------------|
| pimiento | <input type="radio"/> Nunca o menos 1 vez al mes<br><input type="radio"/> 1 a 3 veces mes<br><input checked="" type="radio"/> 1 vez semana<br><input type="radio"/> 2 a 4 veces semana<br><input type="radio"/> 5 a 6 veces semana<br><input type="radio"/> 1 vez al día<br><input type="radio"/> 2 a 3 veces al día<br><input type="radio"/> 5 a 6 veces al día<br><input type="radio"/> más 6 veces al día |
|----------|--------------------------------------------------------------------------------------------------------------------------------------------------------------------------------------------------------------------------------------------------------------------------------------------------------------------------------------------------------------------------------------------------------------|

---

|           |                                                                                                                                                                                                                                                                                                                                                                                                              |
|-----------|--------------------------------------------------------------------------------------------------------------------------------------------------------------------------------------------------------------------------------------------------------------------------------------------------------------------------------------------------------------------------------------------------------------|
| alcachofa | <input type="radio"/> Nunca o menos 1 vez al mes<br><input checked="" type="radio"/> 1 a 3 veces mes<br><input type="radio"/> 1 vez semana<br><input type="radio"/> 2 a 4 veces semana<br><input type="radio"/> 5 a 6 veces semana<br><input type="radio"/> 1 vez al día<br><input type="radio"/> 2 a 3 veces al día<br><input type="radio"/> 5 a 6 veces al día<br><input type="radio"/> más 6 veces al día |
|-----------|--------------------------------------------------------------------------------------------------------------------------------------------------------------------------------------------------------------------------------------------------------------------------------------------------------------------------------------------------------------------------------------------------------------|

---

|            |                                                                                                                                                                                                                                                                                                                                                                                                              |
|------------|--------------------------------------------------------------------------------------------------------------------------------------------------------------------------------------------------------------------------------------------------------------------------------------------------------------------------------------------------------------------------------------------------------------|
| espárragos | <input type="radio"/> Nunca o menos 1 vez al mes<br><input checked="" type="radio"/> 1 a 3 veces mes<br><input type="radio"/> 1 vez semana<br><input type="radio"/> 2 a 4 veces semana<br><input type="radio"/> 5 a 6 veces semana<br><input type="radio"/> 1 vez al día<br><input type="radio"/> 2 a 3 veces al día<br><input type="radio"/> 5 a 6 veces al día<br><input type="radio"/> más 6 veces al día |
|------------|--------------------------------------------------------------------------------------------------------------------------------------------------------------------------------------------------------------------------------------------------------------------------------------------------------------------------------------------------------------------------------------------------------------|

---

|              |                                                                                                                                                                                                                                                                                                                                                                                                              |
|--------------|--------------------------------------------------------------------------------------------------------------------------------------------------------------------------------------------------------------------------------------------------------------------------------------------------------------------------------------------------------------------------------------------------------------|
| maíz hervido | <input type="radio"/> Nunca o menos 1 vez al mes<br><input type="radio"/> 1 a 3 veces mes<br><input checked="" type="radio"/> 1 vez semana<br><input type="radio"/> 2 a 4 veces semana<br><input type="radio"/> 5 a 6 veces semana<br><input type="radio"/> 1 vez al día<br><input type="radio"/> 2 a 3 veces al día<br><input type="radio"/> 5 a 6 veces al día<br><input type="radio"/> más 6 veces al día |
|--------------|--------------------------------------------------------------------------------------------------------------------------------------------------------------------------------------------------------------------------------------------------------------------------------------------------------------------------------------------------------------------------------------------------------------|

---

|           |                                                                                                                                                                                                                                                                                                                                                                                                              |
|-----------|--------------------------------------------------------------------------------------------------------------------------------------------------------------------------------------------------------------------------------------------------------------------------------------------------------------------------------------------------------------------------------------------------------------|
| legumbres | <input type="radio"/> Nunca o menos 1 vez al mes<br><input type="radio"/> 1 a 3 veces mes<br><input type="radio"/> 1 vez semana<br><input checked="" type="radio"/> 2 a 4 veces semana<br><input type="radio"/> 5 a 6 veces semana<br><input type="radio"/> 1 vez al día<br><input type="radio"/> 2 a 3 veces al día<br><input type="radio"/> 5 a 6 veces al día<br><input type="radio"/> más 6 veces al día |
|-----------|--------------------------------------------------------------------------------------------------------------------------------------------------------------------------------------------------------------------------------------------------------------------------------------------------------------------------------------------------------------------------------------------------------------|

---

|                       |                                                                                                                                                                                                                                                                                                                                                                                                              |
|-----------------------|--------------------------------------------------------------------------------------------------------------------------------------------------------------------------------------------------------------------------------------------------------------------------------------------------------------------------------------------------------------------------------------------------------------|
| naranjas o mandarinas | <input type="radio"/> Nunca o menos 1 vez al mes<br><input type="radio"/> 1 a 3 veces mes<br><input type="radio"/> 1 vez semana<br><input checked="" type="radio"/> 2 a 4 veces semana<br><input type="radio"/> 5 a 6 veces semana<br><input type="radio"/> 1 vez al día<br><input type="radio"/> 2 a 3 veces al día<br><input type="radio"/> 5 a 6 veces al día<br><input type="radio"/> más 6 veces al día |
|-----------------------|--------------------------------------------------------------------------------------------------------------------------------------------------------------------------------------------------------------------------------------------------------------------------------------------------------------------------------------------------------------------------------------------------------------|

---

|                       |                                                                                                                                                                                                                                                                                                                                                                                                              |
|-----------------------|--------------------------------------------------------------------------------------------------------------------------------------------------------------------------------------------------------------------------------------------------------------------------------------------------------------------------------------------------------------------------------------------------------------|
| zum natural fruta     | <input type="radio"/> Nunca o menos 1 vez al mes<br><input type="radio"/> 1 a 3 veces mes<br><input checked="" type="radio"/> 1 vez semana<br><input type="radio"/> 2 a 4 veces semana<br><input type="radio"/> 5 a 6 veces semana<br><input type="radio"/> 1 vez al día<br><input type="radio"/> 2 a 3 veces al día<br><input type="radio"/> 5 a 6 veces al día<br><input type="radio"/> más 6 veces al día |
| platano               | <input type="radio"/> Nunca o menos 1 vez al mes<br><input type="radio"/> 1 a 3 veces mes<br><input type="radio"/> 1 vez semana<br><input checked="" type="radio"/> 2 a 4 veces semana<br><input type="radio"/> 5 a 6 veces semana<br><input type="radio"/> 1 vez al día<br><input type="radio"/> 2 a 3 veces al día<br><input type="radio"/> 5 a 6 veces al día<br><input type="radio"/> más 6 veces al día |
| manzana o pera        | <input type="radio"/> Nunca o menos 1 vez al mes<br><input type="radio"/> 1 a 3 veces mes<br><input type="radio"/> 1 vez semana<br><input checked="" type="radio"/> 2 a 4 veces semana<br><input type="radio"/> 5 a 6 veces semana<br><input type="radio"/> 1 vez al día<br><input type="radio"/> 2 a 3 veces al día<br><input type="radio"/> 5 a 6 veces al día<br><input type="radio"/> más 6 veces al día |
| melocotón o nectarina | <input type="radio"/> Nunca o menos 1 vez al mes<br><input checked="" type="radio"/> 1 a 3 veces mes<br><input type="radio"/> 1 vez semana<br><input type="radio"/> 2 a 4 veces semana<br><input type="radio"/> 5 a 6 veces semana<br><input type="radio"/> 1 vez al día<br><input type="radio"/> 2 a 3 veces al día<br><input type="radio"/> 5 a 6 veces al día<br><input type="radio"/> más 6 veces al día |
| sandia o melon        | <input type="radio"/> Nunca o menos 1 vez al mes<br><input type="radio"/> 1 a 3 veces mes<br><input type="radio"/> 1 vez semana<br><input checked="" type="radio"/> 2 a 4 veces semana<br><input type="radio"/> 5 a 6 veces semana<br><input type="radio"/> 1 vez al día<br><input type="radio"/> 2 a 3 veces al día<br><input type="radio"/> 5 a 6 veces al día<br><input type="radio"/> más 6 veces al día |
| uva                   | <input type="radio"/> Nunca o menos 1 vez al mes<br><input type="radio"/> 1 a 3 veces mes<br><input checked="" type="radio"/> 1 vez semana<br><input type="radio"/> 2 a 4 veces semana<br><input type="radio"/> 5 a 6 veces semana<br><input type="radio"/> 1 vez al día<br><input type="radio"/> 2 a 3 veces al día<br><input type="radio"/> 5 a 6 veces al día<br><input type="radio"/> más 6 veces al día |

---

bruna o ciruela

- ☐ Nunca o menos 1 vez al mes  
☐ 1 a 3 veces mes  
☒ 1 vez semana  
☐ 2 a 4 veces semana  
☐ 5 a 6 veces semana  
☐ 1 vez al día  
☐ 2 a 3 veces al día  
☐ 5 a 6 veces al día  
☐ más 6 veces al día

---

kiwi

- ☐ Nunca o menos 1 vez al mes  
☒ 1 a 3 veces mes  
☐ 1 vez semana  
☐ 2 a 4 veces semana  
☐ 5 a 6 veces semana  
☐ 1 vez al día  
☐ 2 a 3 veces al día  
☐ 5 a 6 veces al día  
☐ más 6 veces al día

---

aceituna

- ☐ Nunca o menos 1 vez al mes  
☒ 1 a 3 veces mes  
☐ 1 vez semana  
☐ 2 a 4 veces semana  
☐ 5 a 6 veces semana  
☐ 1 vez al día  
☐ 2 a 3 veces al día  
☐ 5 a 6 veces al día  
☐ más 6 veces al día

---

frutos secos

- ☐ Nunca o menos 1 vez al mes  
☒ 1 a 3 veces mes  
☐ 1 vez semana  
☐ 2 a 4 veces semana  
☐ 5 a 6 veces semana  
☐ 1 vez al día  
☐ 2 a 3 veces al día  
☐ 5 a 6 veces al día  
☐ más 6 veces al día

---

pan blanco

- ☐ Nunca o menos 1 vez al mes  
☐ 1 a 3 veces mes  
☒ 1 vez semana  
☐ 2 a 4 veces semana  
☐ 5 a 6 veces semana  
☐ 1 vez al día  
☐ 2 a 3 veces al día  
☐ 5 a 6 veces al día  
☐ más 6 veces al día

---

pan integral

- ☐ Nunca o menos 1 vez al mes  
☒ 1 a 3 veces mes  
☐ 1 vez semana  
☐ 2 a 4 veces semana  
☐ 5 a 6 veces semana  
☐ 1 vez al día  
☐ 2 a 3 veces al día  
☐ 5 a 6 veces al día  
☐ más 6 veces al día

|                          |                                                                                                                                                                                                                                                                                                                                                                                                              |
|--------------------------|--------------------------------------------------------------------------------------------------------------------------------------------------------------------------------------------------------------------------------------------------------------------------------------------------------------------------------------------------------------------------------------------------------------|
| cereales desayuno        | <input checked="" type="radio"/> Nunca o menos 1 vez al mes<br><input type="radio"/> 1 a 3 veces mes<br><input type="radio"/> 1 vez semana<br><input type="radio"/> 2 a 4 veces semana<br><input type="radio"/> 5 a 6 veces semana<br><input type="radio"/> 1 vez al día<br><input type="radio"/> 2 a 3 veces al día<br><input type="radio"/> 5 a 6 veces al día<br><input type="radio"/> más 6 veces al día |
| patatas fritas           | <input type="radio"/> Nunca o menos 1 vez al mes<br><input checked="" type="radio"/> 1 a 3 veces mes<br><input type="radio"/> 1 vez semana<br><input type="radio"/> 2 a 4 veces semana<br><input type="radio"/> 5 a 6 veces semana<br><input type="radio"/> 1 vez al día<br><input type="radio"/> 2 a 3 veces al día<br><input type="radio"/> 5 a 6 veces al día<br><input type="radio"/> más 6 veces al día |
| patatas cocidas o asadas | <input type="radio"/> Nunca o menos 1 vez al mes<br><input checked="" type="radio"/> 1 a 3 veces mes<br><input type="radio"/> 1 vez semana<br><input type="radio"/> 2 a 4 veces semana<br><input type="radio"/> 5 a 6 veces semana<br><input type="radio"/> 1 vez al día<br><input type="radio"/> 2 a 3 veces al día<br><input type="radio"/> 5 a 6 veces al día<br><input type="radio"/> más 6 veces al día |
| bolsa papas              | <input type="radio"/> Nunca o menos 1 vez al mes<br><input checked="" type="radio"/> 1 a 3 veces mes<br><input type="radio"/> 1 vez semana<br><input type="radio"/> 2 a 4 veces semana<br><input type="radio"/> 5 a 6 veces semana<br><input type="radio"/> 1 vez al día<br><input type="radio"/> 2 a 3 veces al día<br><input type="radio"/> 5 a 6 veces al día<br><input type="radio"/> más 6 veces al día |
| arroz cocinado           | <input type="radio"/> Nunca o menos 1 vez al mes<br><input type="radio"/> 1 a 3 veces mes<br><input checked="" type="radio"/> 1 vez semana<br><input type="radio"/> 2 a 4 veces semana<br><input type="radio"/> 5 a 6 veces semana<br><input type="radio"/> 1 vez al día<br><input type="radio"/> 2 a 3 veces al día<br><input type="radio"/> 5 a 6 veces al día<br><input type="radio"/> más 6 veces al día |
| pasta                    | <input type="radio"/> Nunca o menos 1 vez al mes<br><input type="radio"/> 1 a 3 veces mes<br><input checked="" type="radio"/> 1 vez semana<br><input type="radio"/> 2 a 4 veces semana<br><input type="radio"/> 5 a 6 veces semana<br><input type="radio"/> 1 vez al día<br><input type="radio"/> 2 a 3 veces al día<br><input type="radio"/> 5 a 6 veces al día<br><input type="radio"/> más 6 veces al día |

|                     |                                                                                                                                                                                                                                                                                                                                                                                                              |
|---------------------|--------------------------------------------------------------------------------------------------------------------------------------------------------------------------------------------------------------------------------------------------------------------------------------------------------------------------------------------------------------------------------------------------------------|
| pizza               | <input type="radio"/> Nunca o menos 1 vez al mes<br><input checked="" type="radio"/> 1 a 3 veces mes<br><input type="radio"/> 1 vez semana<br><input type="radio"/> 2 a 4 veces semana<br><input type="radio"/> 5 a 6 veces semana<br><input type="radio"/> 1 vez al día<br><input type="radio"/> 2 a 3 veces al día<br><input type="radio"/> 5 a 6 veces al día<br><input type="radio"/> más 6 veces al día |
| aceite oliva        | <input type="radio"/> Nunca o menos 1 vez al mes<br><input type="radio"/> 1 a 3 veces mes<br><input type="radio"/> 1 vez semana<br><input checked="" type="radio"/> 2 a 4 veces semana<br><input type="radio"/> 5 a 6 veces semana<br><input type="radio"/> 1 vez al día<br><input type="radio"/> 2 a 3 veces al día<br><input type="radio"/> 5 a 6 veces al día<br><input type="radio"/> más 6 veces al día |
| otros aceites       | <input checked="" type="radio"/> Nunca o menos 1 vez al mes<br><input type="radio"/> 1 a 3 veces mes<br><input type="radio"/> 1 vez semana<br><input type="radio"/> 2 a 4 veces semana<br><input type="radio"/> 5 a 6 veces semana<br><input type="radio"/> 1 vez al día<br><input type="radio"/> 2 a 3 veces al día<br><input type="radio"/> 5 a 6 veces al día<br><input type="radio"/> más 6 veces al día |
| margarina           | <input checked="" type="radio"/> Nunca o menos 1 vez al mes<br><input type="radio"/> 1 a 3 veces mes<br><input type="radio"/> 1 vez semana<br><input type="radio"/> 2 a 4 veces semana<br><input type="radio"/> 5 a 6 veces semana<br><input type="radio"/> 1 vez al día<br><input type="radio"/> 2 a 3 veces al día<br><input type="radio"/> 5 a 6 veces al día<br><input type="radio"/> más 6 veces al día |
| mantequilla         | <input checked="" type="radio"/> Nunca o menos 1 vez al mes<br><input type="radio"/> 1 a 3 veces mes<br><input type="radio"/> 1 vez semana<br><input type="radio"/> 2 a 4 veces semana<br><input type="radio"/> 5 a 6 veces semana<br><input type="radio"/> 1 vez al día<br><input type="radio"/> 2 a 3 veces al día<br><input type="radio"/> 5 a 6 veces al día<br><input type="radio"/> más 6 veces al día |
| galletas tipo maria | <input checked="" type="radio"/> Nunca o menos 1 vez al mes<br><input type="radio"/> 1 a 3 veces mes<br><input type="radio"/> 1 vez semana<br><input type="radio"/> 2 a 4 veces semana<br><input type="radio"/> 5 a 6 veces semana<br><input type="radio"/> 1 vez al día<br><input type="radio"/> 2 a 3 veces al día<br><input type="radio"/> 5 a 6 veces al día<br><input type="radio"/> más 6 veces al día |

|                           |                                                                                                                                                                                                                                                                                                                                                                                                              |
|---------------------------|--------------------------------------------------------------------------------------------------------------------------------------------------------------------------------------------------------------------------------------------------------------------------------------------------------------------------------------------------------------------------------------------------------------|
| galletas chocolate        | <input checked="" type="radio"/> Nunca o menos 1 vez al mes<br><input type="radio"/> 1 a 3 veces mes<br><input type="radio"/> 1 vez semana<br><input type="radio"/> 2 a 4 veces semana<br><input type="radio"/> 5 a 6 veces semana<br><input type="radio"/> 1 vez al día<br><input type="radio"/> 2 a 3 veces al día<br><input type="radio"/> 5 a 6 veces al día<br><input type="radio"/> más 6 veces al día |
| bollieria                 | <input checked="" type="radio"/> Nunca o menos 1 vez al mes<br><input type="radio"/> 1 a 3 veces mes<br><input type="radio"/> 1 vez semana<br><input type="radio"/> 2 a 4 veces semana<br><input type="radio"/> 5 a 6 veces semana<br><input type="radio"/> 1 vez al día<br><input type="radio"/> 2 a 3 veces al día<br><input type="radio"/> 5 a 6 veces al día<br><input type="radio"/> más 6 veces al día |
| chocolate o bombones      | <input checked="" type="radio"/> Nunca o menos 1 vez al mes<br><input type="radio"/> 1 a 3 veces mes<br><input type="radio"/> 1 vez semana<br><input type="radio"/> 2 a 4 veces semana<br><input type="radio"/> 5 a 6 veces semana<br><input type="radio"/> 1 vez al día<br><input type="radio"/> 2 a 3 veces al día<br><input type="radio"/> 5 a 6 veces al día<br><input type="radio"/> más 6 veces al día |
| chocolate polvo o colacao | <input type="radio"/> Nunca o menos 1 vez al mes<br><input checked="" type="radio"/> 1 a 3 veces mes<br><input type="radio"/> 1 vez semana<br><input type="radio"/> 2 a 4 veces semana<br><input type="radio"/> 5 a 6 veces semana<br><input type="radio"/> 1 vez al día<br><input type="radio"/> 2 a 3 veces al día<br><input type="radio"/> 5 a 6 veces al día<br><input type="radio"/> más 6 veces al día |
| vino tinto                | <input checked="" type="radio"/> Nunca o menos 1 vez al mes<br><input type="radio"/> 1 a 3 veces mes<br><input type="radio"/> 1 vez semana<br><input type="radio"/> 2 a 4 veces semana<br><input type="radio"/> 5 a 6 veces semana<br><input type="radio"/> 1 vez al día<br><input type="radio"/> 2 a 3 veces al día<br><input type="radio"/> 5 a 6 veces al día<br><input type="radio"/> más 6 veces al día |
| vino blanco               | <input checked="" type="radio"/> Nunca o menos 1 vez al mes<br><input type="radio"/> 1 a 3 veces mes<br><input type="radio"/> 1 vez semana<br><input type="radio"/> 2 a 4 veces semana<br><input type="radio"/> 5 a 6 veces semana<br><input type="radio"/> 1 vez al día<br><input type="radio"/> 2 a 3 veces al día<br><input type="radio"/> 5 a 6 veces al día<br><input type="radio"/> más 6 veces al día |

---

|                    |                                                                                                                                                                                                                                                                                                                                                                                                              |
|--------------------|--------------------------------------------------------------------------------------------------------------------------------------------------------------------------------------------------------------------------------------------------------------------------------------------------------------------------------------------------------------------------------------------------------------|
| vino seco o vermut | <input checked="" type="radio"/> Nunca o menos 1 vez al mes<br><input type="radio"/> 1 a 3 veces mes<br><input type="radio"/> 1 vez semana<br><input type="radio"/> 2 a 4 veces semana<br><input type="radio"/> 5 a 6 veces semana<br><input type="radio"/> 1 vez al día<br><input type="radio"/> 2 a 3 veces al día<br><input type="radio"/> 5 a 6 veces al día<br><input type="radio"/> más 6 veces al día |
|--------------------|--------------------------------------------------------------------------------------------------------------------------------------------------------------------------------------------------------------------------------------------------------------------------------------------------------------------------------------------------------------------------------------------------------------|

---

|         |                                                                                                                                                                                                                                                                                                                                                                                                              |
|---------|--------------------------------------------------------------------------------------------------------------------------------------------------------------------------------------------------------------------------------------------------------------------------------------------------------------------------------------------------------------------------------------------------------------|
| cerveza | <input checked="" type="radio"/> Nunca o menos 1 vez al mes<br><input type="radio"/> 1 a 3 veces mes<br><input type="radio"/> 1 vez semana<br><input type="radio"/> 2 a 4 veces semana<br><input type="radio"/> 5 a 6 veces semana<br><input type="radio"/> 1 vez al día<br><input type="radio"/> 2 a 3 veces al día<br><input type="radio"/> 5 a 6 veces al día<br><input type="radio"/> más 6 veces al día |
|---------|--------------------------------------------------------------------------------------------------------------------------------------------------------------------------------------------------------------------------------------------------------------------------------------------------------------------------------------------------------------------------------------------------------------|

---

|                     |                                                                                                                                                                                                                                                                                                                                                                                                              |
|---------------------|--------------------------------------------------------------------------------------------------------------------------------------------------------------------------------------------------------------------------------------------------------------------------------------------------------------------------------------------------------------------------------------------------------------|
| cerveza sin alcohol | <input type="radio"/> Nunca o menos 1 vez al mes<br><input checked="" type="radio"/> 1 a 3 veces mes<br><input type="radio"/> 1 vez semana<br><input type="radio"/> 2 a 4 veces semana<br><input type="radio"/> 5 a 6 veces semana<br><input type="radio"/> 1 vez al día<br><input type="radio"/> 2 a 3 veces al día<br><input type="radio"/> 5 a 6 veces al día<br><input type="radio"/> más 6 veces al día |
|---------------------|--------------------------------------------------------------------------------------------------------------------------------------------------------------------------------------------------------------------------------------------------------------------------------------------------------------------------------------------------------------------------------------------------------------|

---

|         |                                                                                                                                                                                                                                                                                                                                                                                                              |
|---------|--------------------------------------------------------------------------------------------------------------------------------------------------------------------------------------------------------------------------------------------------------------------------------------------------------------------------------------------------------------------------------------------------------------|
| licores | <input checked="" type="radio"/> Nunca o menos 1 vez al mes<br><input type="radio"/> 1 a 3 veces mes<br><input type="radio"/> 1 vez semana<br><input type="radio"/> 2 a 4 veces semana<br><input type="radio"/> 5 a 6 veces semana<br><input type="radio"/> 1 vez al día<br><input type="radio"/> 2 a 3 veces al día<br><input type="radio"/> 5 a 6 veces al día<br><input type="radio"/> más 6 veces al día |
|---------|--------------------------------------------------------------------------------------------------------------------------------------------------------------------------------------------------------------------------------------------------------------------------------------------------------------------------------------------------------------------------------------------------------------|

---

|                       |                                                                                                                                                                                                                                                                                                                                                                                                              |
|-----------------------|--------------------------------------------------------------------------------------------------------------------------------------------------------------------------------------------------------------------------------------------------------------------------------------------------------------------------------------------------------------------------------------------------------------|
| ginebra o ron o vodka | <input checked="" type="radio"/> Nunca o menos 1 vez al mes<br><input type="radio"/> 1 a 3 veces mes<br><input type="radio"/> 1 vez semana<br><input type="radio"/> 2 a 4 veces semana<br><input type="radio"/> 5 a 6 veces semana<br><input type="radio"/> 1 vez al día<br><input type="radio"/> 2 a 3 veces al día<br><input type="radio"/> 5 a 6 veces al día<br><input type="radio"/> más 6 veces al día |
|-----------------------|--------------------------------------------------------------------------------------------------------------------------------------------------------------------------------------------------------------------------------------------------------------------------------------------------------------------------------------------------------------------------------------------------------------|

---

|                 |                                                                                                                                                                                                                                                                                                                                                                                                              |
|-----------------|--------------------------------------------------------------------------------------------------------------------------------------------------------------------------------------------------------------------------------------------------------------------------------------------------------------------------------------------------------------------------------------------------------------|
| refresco normal | <input type="radio"/> Nunca o menos 1 vez al mes<br><input checked="" type="radio"/> 1 a 3 veces mes<br><input type="radio"/> 1 vez semana<br><input type="radio"/> 2 a 4 veces semana<br><input type="radio"/> 5 a 6 veces semana<br><input type="radio"/> 1 vez al día<br><input type="radio"/> 2 a 3 veces al día<br><input type="radio"/> 5 a 6 veces al día<br><input type="radio"/> más 6 veces al día |
|-----------------|--------------------------------------------------------------------------------------------------------------------------------------------------------------------------------------------------------------------------------------------------------------------------------------------------------------------------------------------------------------------------------------------------------------|

---



---

refresco sin azúcar

- ☐ Nunca o menos 1 vez al mes  
☒ 1 a 3 veces mes  
☐ 1 vez semana  
☐ 2 a 4 veces semana  
☐ 5 a 6 veces semana  
☐ 1 vez al día  
☐ 2 a 3 veces al día  
☐ 5 a 6 veces al día  
☐ más 6 veces al día

---

Agua del grifo

- ☒ Nunca o menos 1 vez al mes  
☐ 1 a 3 veces mes  
☐ 1 vez semana  
☐ 2 a 4 veces semana  
☐ 5 a 6 veces semana  
☐ 1 vez al día  
☐ 2 a 3 veces al día  
☐ 5 a 6 veces al día  
☐ más 6 veces al día

---

agua embotellada sin gas

- ☐ Nunca o menos 1 vez al mes  
☐ 1 a 3 veces mes  
☐ 1 vez semana  
☐ 2 a 4 veces semana  
☐ 5 a 6 veces semana  
☒ 1 vez al día  
☐ 2 a 3 veces al día  
☐ 5 a 6 veces al día  
☐ más 6 veces al día

---

agua embotellada con gas

- ☒ Nunca o menos 1 vez al mes  
☐ 1 a 3 veces mes  
☐ 1 vez semana  
☐ 2 a 4 veces semana  
☐ 5 a 6 veces semana  
☐ 1 vez al día  
☐ 2 a 3 veces al día  
☐ 5 a 6 veces al día  
☐ más 6 veces al día

---

zumو frutas embasado

- ☒ Nunca o menos 1 vez al mes  
☐ 1 a 3 veces mes  
☐ 1 vez semana  
☐ 2 a 4 veces semana  
☐ 5 a 6 veces semana  
☐ 1 vez al día  
☐ 2 a 3 veces al día  
☐ 5 a 6 veces al día  
☐ más 6 veces al día

---

cafe

- ☐ Nunca o menos 1 vez al mes  
☐ 1 a 3 veces mes  
☐ 1 vez semana  
☐ 2 a 4 veces semana  
☐ 5 a 6 veces semana  
☒ 1 vez al día  
☐ 2 a 3 veces al día  
☐ 5 a 6 veces al día  
☐ más 6 veces al día

|                       |                                                                                                                                                                                                                                                                                                                                                                                                              |
|-----------------------|--------------------------------------------------------------------------------------------------------------------------------------------------------------------------------------------------------------------------------------------------------------------------------------------------------------------------------------------------------------------------------------------------------------|
| cafe descafeinado     | <input checked="" type="radio"/> Nunca o menos 1 vez al mes<br><input type="radio"/> 1 a 3 veces mes<br><input type="radio"/> 1 vez semana<br><input type="radio"/> 2 a 4 veces semana<br><input type="radio"/> 5 a 6 veces semana<br><input type="radio"/> 1 vez al día<br><input type="radio"/> 2 a 3 veces al día<br><input type="radio"/> 5 a 6 veces al día<br><input type="radio"/> más 6 veces al día |
| te o infusión         | <input checked="" type="radio"/> Nunca o menos 1 vez al mes<br><input type="radio"/> 1 a 3 veces mes<br><input type="radio"/> 1 vez semana<br><input type="radio"/> 2 a 4 veces semana<br><input type="radio"/> 5 a 6 veces semana<br><input type="radio"/> 1 vez al día<br><input type="radio"/> 2 a 3 veces al día<br><input type="radio"/> 5 a 6 veces al día<br><input type="radio"/> más 6 veces al día |
| sopa o puré verduras  | <input type="radio"/> Nunca o menos 1 vez al mes<br><input type="radio"/> 1 a 3 veces mes<br><input type="radio"/> 1 vez semana<br><input checked="" type="radio"/> 2 a 4 veces semana<br><input type="radio"/> 5 a 6 veces semana<br><input type="radio"/> 1 vez al día<br><input type="radio"/> 2 a 3 veces al día<br><input type="radio"/> 5 a 6 veces al día<br><input type="radio"/> más 6 veces al día |
| croquetas pollo jamón | <input type="radio"/> Nunca o menos 1 vez al mes<br><input checked="" type="radio"/> 1 a 3 veces mes<br><input type="radio"/> 1 vez semana<br><input type="radio"/> 2 a 4 veces semana<br><input type="radio"/> 5 a 6 veces semana<br><input type="radio"/> 1 vez al día<br><input type="radio"/> 2 a 3 veces al día<br><input type="radio"/> 5 a 6 veces al día<br><input type="radio"/> más 6 veces al día |
| croquetas pescado     | <input type="radio"/> Nunca o menos 1 vez al mes<br><input checked="" type="radio"/> 1 a 3 veces mes<br><input type="radio"/> 1 vez semana<br><input type="radio"/> 2 a 4 veces semana<br><input type="radio"/> 5 a 6 veces semana<br><input type="radio"/> 1 vez al día<br><input type="radio"/> 2 a 3 veces al día<br><input type="radio"/> 5 a 6 veces al día<br><input type="radio"/> más 6 veces al día |
| mayonesa              | <input type="radio"/> Nunca o menos 1 vez al mes<br><input type="radio"/> 1 a 3 veces mes<br><input checked="" type="radio"/> 1 vez semana<br><input type="radio"/> 2 a 4 veces semana<br><input type="radio"/> 5 a 6 veces semana<br><input type="radio"/> 1 vez al día<br><input type="radio"/> 2 a 3 veces al día<br><input type="radio"/> 5 a 6 veces al día<br><input type="radio"/> más 6 veces al día |

---

salsa tomate

- ☐ Nunca o menos 1 vez al mes  
☐ 1 a 3 veces mes  
☒ 1 vez semana  
☐ 2 a 4 veces semana  
☐ 5 a 6 veces semana  
☐ 1 vez al día  
☐ 2 a 3 veces al día  
☐ 5 a 6 veces al día  
☐ más 6 veces al día

---

ketchup

- ☐ Nunca o menos 1 vez al mes  
☒ 1 a 3 veces mes  
☐ 1 vez semana  
☐ 2 a 4 veces semana  
☐ 5 a 6 veces semana  
☐ 1 vez al día  
☐ 2 a 3 veces al día  
☐ 5 a 6 veces al día  
☐ más 6 veces al día

---

sal

- ☐ Nunca o menos 1 vez al mes  
☒ 1 a 3 veces mes  
☐ 1 vez semana  
☐ 2 a 4 veces semana  
☐ 5 a 6 veces semana  
☐ 1 vez al día  
☐ 2 a 3 veces al día  
☐ 5 a 6 veces al día  
☐ más 6 veces al día

---

ajo

- ☒ Nunca o menos 1 vez al mes  
☐ 1 a 3 veces mes  
☐ 1 vez semana  
☐ 2 a 4 veces semana  
☐ 5 a 6 veces semana  
☐ 1 vez al día  
☐ 2 a 3 veces al día  
☐ 5 a 6 veces al día  
☐ más 6 veces al día

---

mermelada o miel

- ☒ Nunca o menos 1 vez al mes  
☐ 1 a 3 veces mes  
☐ 1 vez semana  
☐ 2 a 4 veces semana  
☐ 5 a 6 veces semana  
☐ 1 vez al día  
☐ 2 a 3 veces al día  
☐ 5 a 6 veces al día  
☐ más 6 veces al día

---

azúcar

- ☐ Nunca o menos 1 vez al mes  
☒ 1 a 3 veces mes  
☐ 1 vez semana  
☐ 2 a 4 veces semana  
☐ 5 a 6 veces semana  
☐ 1 vez al día  
☐ 2 a 3 veces al día  
☐ 5 a 6 veces al día  
☐ más 6 veces al día

---

Otro alimento

---

---

suplementos vitamínicos

- ☐ si  
☒ no
- 

---

suplementos vitamínicos

---

---

dieta previa

- ☐ si  
☒ no
- 

---

motivo dieta

- ☒ no dieta  
☐ control peso  
☐ control colesterol  
☐ control diabetes  
☐ problemas estómago  
☐ problemas vesícula o hepáticos  
☐ HTA o cardiopatía  
☐ problemas renales  
☐ alergia alimentaria  
☐ ácido úrico elevado  
☐ vegetariana  
☐ otros
- 

---

cambio alimentos año previo gestación

- ☒ si  
☐ no
- 

---

cambio lácteos

- ☐ eliminado  
☐ disminuido  
☒ igual  
☐ aumentado  
☐ no sabe
- 

---

cambio huevos

- ☐ eliminado  
☐ disminuido  
☒ igual  
☐ aumentado  
☐ no sabe
- 

---

cambio carne

- ☐ eliminado  
☐ disminuido  
☒ igual  
☐ aumentado  
☐ no sabe
- 

---

cambio pescado

- ☐ eliminado  
☐ disminuido  
☒ igual  
☐ aumentado  
☐ no sabe
- 

---

cambio verduras

- ☐ eliminado  
☐ disminuido  
☐ igual  
☒ aumentado  
☐ no sabe
-

|                            |                                                                                                                                                                                                                        |
|----------------------------|------------------------------------------------------------------------------------------------------------------------------------------------------------------------------------------------------------------------|
| cambio legumbres           | <input type="radio"/> eliminado<br><input type="radio"/> disminuido<br><input type="radio"/> igual<br><input checked="" type="radio"/> aumentado<br><input type="radio"/> no sabe                                      |
| cambio fruta               | <input type="radio"/> eliminado<br><input type="radio"/> disminuido<br><input type="radio"/> igual<br><input checked="" type="radio"/> aumentado<br><input type="radio"/> no sabe                                      |
| cambio pan                 | <input type="radio"/> eliminado<br><input type="radio"/> disminuido<br><input checked="" type="radio"/> igual<br><input type="radio"/> aumentado<br><input type="radio"/> no sabe                                      |
| cambio aceite oliva        | <input type="radio"/> eliminado<br><input type="radio"/> disminuido<br><input checked="" type="radio"/> igual<br><input type="radio"/> aumentado<br><input type="radio"/> no sabe                                      |
| cambio mante o margarina   | <input type="radio"/> eliminado<br><input checked="" type="radio"/> disminuido<br><input type="radio"/> igual<br><input type="radio"/> aumentado<br><input type="radio"/> no sabe                                      |
| cambio azúcar y dulces     | <input type="radio"/> eliminado<br><input checked="" type="radio"/> disminuido<br><input type="radio"/> igual<br><input type="radio"/> aumentado<br><input type="radio"/> no sabe                                      |
| cambio bebidas alcohólicas | <input type="radio"/> eliminado<br><input checked="" type="radio"/> disminuido<br><input type="radio"/> igual<br><input type="radio"/> aumentado<br><input type="radio"/> no sabe                                      |
| frecuencia comidas fritas  | <input type="radio"/> a diario<br><input type="radio"/> 5 a 6 veces semana<br><input type="radio"/> 2 a 4 veces semana<br><input type="radio"/> 1 vez semana<br><input checked="" type="radio"/> menos de 1 vez semana |
| carne                      | <input type="radio"/> no como<br><input type="radio"/> cruda<br><input type="radio"/> poco hecha<br><input checked="" type="radio"/> hecha<br><input type="radio"/> muy hecha                                          |
| grasa visible carne        | <input checked="" type="radio"/> quita toda<br><input type="radio"/> quita mayoría<br><input type="radio"/> quita un poco<br><input type="radio"/> no quita nada                                                       |

|                                |                                                                                                                                                                                                                                                          |
|--------------------------------|----------------------------------------------------------------------------------------------------------------------------------------------------------------------------------------------------------------------------------------------------------|
| cocina carne                   | <input checked="" type="radio"/> a la plancha<br><input type="radio"/> a la parrilla<br><input type="radio"/> asada<br><input type="radio"/> frita<br><input type="radio"/> guisada                                                                      |
| tostado quemado carne          | <input checked="" type="radio"/> nunca<br><input type="radio"/> 1 vez mes<br><input type="radio"/> 2 a 3 veces mes<br><input type="radio"/> 1 vez semana<br><input type="radio"/> 2 a 3 semanas                                                          |
| tostado quemado pescado        | <input checked="" type="radio"/> nunca<br><input type="radio"/> 1 vez mes<br><input type="radio"/> 2 a 3 veces mes<br><input type="radio"/> 1 vez semana<br><input type="radio"/> 2 a 3 semanas                                                          |
| socarrat paella                | <input checked="" type="radio"/> nunca<br><input type="radio"/> 1 vez mes<br><input type="radio"/> 2 a 3 veces mes<br><input type="radio"/> 1 vez semana<br><input type="radio"/> 2 a 3 semanas                                                          |
| grasa o aceite cocinar         | <input type="radio"/> mantequilla<br><input type="radio"/> margarina<br><input checked="" type="radio"/> aceite oliva<br><input type="radio"/> aceite oliva virgen extra<br><input type="radio"/> aceite vegetal<br><input type="radio"/> mezcla aceites |
| grasa aceite aliñar            | <input type="radio"/> mantequilla<br><input type="radio"/> margarina<br><input checked="" type="radio"/> aceite oliva<br><input type="radio"/> aceite oliva virgen extra<br><input type="radio"/> aceite vegetal<br><input type="radio"/> mezcla aceites |
| grasa aceite freir             | <input type="radio"/> mantequilla<br><input type="radio"/> margarina<br><input checked="" type="radio"/> aceite oliva<br><input type="radio"/> aceite oliva virgen extra<br><input type="radio"/> aceite vegetal<br><input type="radio"/> mezcla aceites |
| Ejercicio cuestionario         | <input checked="" type="radio"/> si<br><input type="radio"/> no                                                                                                                                                                                          |
| horas de sueño incluido siesta | [*DATA REMOVED*]                                                                                                                                                                                                                                         |
| minutos siesta                 | [*DATA REMOVED*]                                                                                                                                                                                                                                         |
| horas televisión semana        | [*DATA REMOVED*]                                                                                                                                                                                                                                         |

|                                        |                                                                                                                                                                                                                                                                                                                                                                           |
|----------------------------------------|---------------------------------------------------------------------------------------------------------------------------------------------------------------------------------------------------------------------------------------------------------------------------------------------------------------------------------------------------------------------------|
| actividad trabajo                      | <input checked="" type="radio"/> casi siempre sentado<br><input type="radio"/> sentado 50 por cien<br><input type="radio"/> casi siempre de pie, quieto<br><input type="radio"/> casi siempre levantado caminando y llevando pocas cosas<br><input type="radio"/> casi siempre levantado, caminando y llevado muchas cosas<br><input type="radio"/> trabajo manual pesado |
| tiempo caminar o bici al día           | <input type="radio"/> casi nunca<br><input checked="" type="radio"/> menos 20min día<br><input type="radio"/> 20 a 40 min día<br><input type="radio"/> 40 a 60 min día<br><input type="radio"/> 1h o 1h y media día<br><input type="radio"/> más de 1h y media al día                                                                                                     |
| tiempo tareas casa al día              | <input checked="" type="radio"/> menos de 1h día<br><input type="radio"/> 1 a 2h día<br><input type="radio"/> 3 a 4h día<br><input type="radio"/> 5 a 6h día<br><input type="radio"/> 7 a 8h día<br><input type="radio"/> más de 8h día                                                                                                                                   |
| tiempo libre televisión ordenador leer | <input type="radio"/> menos 1h día<br><input type="radio"/> 1h día<br><input checked="" type="radio"/> 2h día<br><input type="radio"/> 3h día<br><input type="radio"/> 4h día<br><input type="radio"/> 5 a 6h día<br><input type="radio"/> mas 6h día                                                                                                                     |
| tiempo libre ejercicio o deporte       | <input type="radio"/> menos 1h semana<br><input type="radio"/> 1h semana<br><input type="radio"/> 2h semana<br><input type="radio"/> 3h semana<br><input checked="" type="radio"/> 4 a 5h semana<br><input type="radio"/> mas 5h semana                                                                                                                                   |
| como se considera                      | <input type="radio"/> sedentaria<br><input type="radio"/> poco activa<br><input checked="" type="radio"/> moderadamente activa<br><input type="radio"/> bastante activa<br><input type="radio"/> muy activa<br><input type="radio"/> no sabe                                                                                                                              |
| FUR                                    | [*DATA REMOVED*]                                                                                                                                                                                                                                                                                                                                                          |
| Semanas gestación 2T                   | [*DATA REMOVED*]                                                                                                                                                                                                                                                                                                                                                          |
| Días gestación 2T                      | [*DATA REMOVED*]                                                                                                                                                                                                                                                                                                                                                          |
| DBP 2T                                 | [*DATA REMOVED*]                                                                                                                                                                                                                                                                                                                                                          |
| CC 2T                                  | [*DATA REMOVED*]                                                                                                                                                                                                                                                                                                                                                          |
| AC 2T                                  | [*DATA REMOVED*]                                                                                                                                                                                                                                                                                                                                                          |

|                                                   |                                                                                                                                                                                                 |
|---------------------------------------------------|-------------------------------------------------------------------------------------------------------------------------------------------------------------------------------------------------|
| LF 2T                                             | [*DATA REMOVED*]                                                                                                                                                                                |
| PFE 2T (Hadlock)                                  | [*DATA REMOVED*]                                                                                                                                                                                |
| Semanas gestación 3T                              | [*DATA REMOVED*]                                                                                                                                                                                |
| días 3T                                           | [*DATA REMOVED*]                                                                                                                                                                                |
| DBP 3T                                            | [*DATA REMOVED*]                                                                                                                                                                                |
| CC 3T                                             | [*DATA REMOVED*]                                                                                                                                                                                |
| AC 3T                                             | [*DATA REMOVED*]                                                                                                                                                                                |
| LF 3T                                             | [*DATA REMOVED*]                                                                                                                                                                                |
| PFE 3T (Hadlock)                                  | [*DATA REMOVED*]                                                                                                                                                                                |
| Semanas de gestación final                        | [*DATA REMOVED*]                                                                                                                                                                                |
| días gestación final                              | [*DATA REMOVED*]                                                                                                                                                                                |
| Localización placenta                             | <input type="radio"/> anterior<br><input type="radio"/> lateral derecha<br><input type="radio"/> lateral izquierda<br><input checked="" type="radio"/> posterior<br><input type="radio"/> fondo |
| Presentación longitudinal cefálica                | <input type="radio"/> no<br><input checked="" type="radio"/> si                                                                                                                                 |
| Dorso                                             | <input checked="" type="radio"/> izquierda anterior<br><input type="radio"/> izquierda posterior<br><input type="radio"/> derecha anterior<br><input type="radio"/> derecha posterior           |
| diámetro biparietal                               | [*DATA REMOVED*]                                                                                                                                                                                |
| Circunferencia craneal                            | [*DATA REMOVED*]                                                                                                                                                                                |
| Circunferencia abdominal                          | [*DATA REMOVED*]                                                                                                                                                                                |
| Longitud de femur                                 | [*DATA REMOVED*]                                                                                                                                                                                |
| tejido celular subcutáneo a nivel del muslo en mm | [*DATA REMOVED*]                                                                                                                                                                                |
| tejido celular subcutáneo en abdomen en mm        | [*DATA REMOVED*]                                                                                                                                                                                |
| Volumen del muslo en cm3                          | [*DATA REMOVED*]                                                                                                                                                                                |
| Peso fetal estimado según fórmula de Hadlock      | [*DATA REMOVED*]                                                                                                                                                                                |



|                                               |                                                                                                                                                          |
|-----------------------------------------------|----------------------------------------------------------------------------------------------------------------------------------------------------------|
| Percentil                                     | [*DATA REMOVED*]                                                                                                                                         |
| Peso fetal estimado según fórmula de Scioscia | <hr/>                                                                                                                                                    |
| Peso fetal estimado según fórmula de LEE      | <hr/>                                                                                                                                                    |
| Tipo de parto                                 | <input checked="" type="radio"/> eutocico<br><input type="radio"/> instrumentado/ventosa<br><input type="radio"/> cesarea                                |
| fecha de nacimiento                           | [*DATA REMOVED*]                                                                                                                                         |
| Días entre exploración y nacimiento           | [*DATA REMOVED*]                                                                                                                                         |
| Peso RN en g                                  | [*DATA REMOVED*]                                                                                                                                         |
| sexo                                          | <input type="radio"/> mujer<br><input checked="" type="radio"/> hombre                                                                                   |
| Apgar 1 minuto                                | [*DATA REMOVED*]                                                                                                                                         |
| Apgar 5 minutos                               | [*DATA REMOVED*]                                                                                                                                         |
| Apgar 10 minutos                              | <hr/>                                                                                                                                                    |
| antecedente Covid durante gestación           | <input type="radio"/> Yes<br><input checked="" type="radio"/> No                                                                                         |
| Nivel de estudios                             | <input type="radio"/> ninguno<br><input type="radio"/> primarios<br><input checked="" type="radio"/> secundarios<br><input type="radio"/> universitarios |

# Base\_datos\_estimacion\_peso\_fetal

|                                       |                                                                                                                                                                                                                                                                                      |
|---------------------------------------|--------------------------------------------------------------------------------------------------------------------------------------------------------------------------------------------------------------------------------------------------------------------------------------|
| Número de identificación participante | 197                                                                                                                                                                                                                                                                                  |
| CODIGO PARTICIPANTE                   |                                                                                                                                                                                                                                                                                      |
| Edad                                  | [*DATA REMOVED*]                                                                                                                                                                                                                                                                     |
| Gestaciones                           | <input type="radio"/> 1<br><input type="radio"/> 2<br><input type="radio"/> 3<br><input checked="" type="radio"/> mas de 3                                                                                                                                                           |
| partos                                | <input type="radio"/> 0<br><input type="radio"/> 1<br><input type="radio"/> 2<br><input type="radio"/> 3<br><input checked="" type="radio"/> mas de 3                                                                                                                                |
| cesáreas                              | <input type="radio"/> 0<br><input type="radio"/> 1<br><input type="radio"/> 2<br><input type="radio"/> 3<br><input type="radio"/> mas de 3                                                                                                                                           |
| Abortos                               | <input type="radio"/> 0<br><input checked="" type="radio"/> 1<br><input type="radio"/> 2<br><input type="radio"/> 3<br><input type="radio"/> mas de 3                                                                                                                                |
| Tipo de gestacion                     | <input checked="" type="radio"/> espontanea<br><input type="radio"/> IAC inseminación artificial conyuge<br><input type="radio"/> IAD inseminación artificial donante<br><input type="radio"/> FIV Fecundación in Vitro<br><input type="radio"/> Ovodon FIV con donación de ovocitos |
| peso previo a embarazo                | [*DATA REMOVED*]                                                                                                                                                                                                                                                                     |
| Ganancia ponderal embarazo            | [*DATA REMOVED*]                                                                                                                                                                                                                                                                     |
| Talla madre                           | [*DATA REMOVED*]                                                                                                                                                                                                                                                                     |
| IMC previo embarazo                   | 24.38652644413961                                                                                                                                                                                                                                                                    |
| Patología obstétrica                  | <input type="radio"/> no<br><input checked="" type="radio"/> si                                                                                                                                                                                                                      |
| Diabetes pregestacional               | <input checked="" type="radio"/> no<br><input type="radio"/> si                                                                                                                                                                                                                      |
| Diabetes gestacional                  | <input type="radio"/> no<br><input checked="" type="radio"/> si                                                                                                                                                                                                                      |

|                                            |                                                                                                                                                                                      |
|--------------------------------------------|--------------------------------------------------------------------------------------------------------------------------------------------------------------------------------------|
| Diabetes gestacional con insulina          | <input checked="" type="radio"/> no<br><input type="radio"/> si                                                                                                                      |
| Diabetes gestacional con dieta y ejercicio | <input type="radio"/> no<br><input checked="" type="radio"/> si                                                                                                                      |
| Percentil fetos previos                    | <input type="radio"/> Nada<br><input checked="" type="radio"/> percentil menor de 10<br><input type="radio"/> percentil entre 10 y 90<br><input type="radio"/> percentil mayor de 90 |
| Exfumadora                                 | <input checked="" type="radio"/> Nada<br><input type="radio"/> menos de 5 años<br><input type="radio"/> 5 a 10 años<br><input type="radio"/> mayor o igual a 10 años                 |
| Hábito tabáquico                           | <input checked="" type="radio"/> no<br><input type="radio"/> si                                                                                                                      |
| fumadora                                   | [*DATA REMOVED*]                                                                                                                                                                     |
| Consumo otros tóxicos                      | <input checked="" type="radio"/> no<br><input type="radio"/> si                                                                                                                      |
| Hb 1T                                      | [*DATA REMOVED*]                                                                                                                                                                     |
| Htc 1T                                     | [*DATA REMOVED*]                                                                                                                                                                     |
| Hb 2T                                      | [*DATA REMOVED*]                                                                                                                                                                     |
| HTC 2T                                     | [*DATA REMOVED*]                                                                                                                                                                     |
| Hb 3T                                      | [*DATA REMOVED*]                                                                                                                                                                     |
| HTC 3T                                     | [*DATA REMOVED*]                                                                                                                                                                     |
| Suplemento FE oral                         | <input checked="" type="radio"/> si<br><input type="radio"/> no                                                                                                                      |
| Suplemento fe iv                           | <input type="radio"/> si<br><input checked="" type="radio"/> no                                                                                                                      |
| Transfusión                                | <input checked="" type="radio"/> no<br><input type="radio"/> si                                                                                                                      |
| Solicitada Vit D                           | <input type="radio"/> no<br><input checked="" type="radio"/> si                                                                                                                      |
| Deficit vit D                              | <input type="radio"/> no<br><input type="radio"/> si                                                                                                                                 |
| Suplemento vit D                           | <input checked="" type="radio"/> si<br><input type="radio"/> no                                                                                                                      |

|                       |                                                                                                                                                                                                                                                                                                                                                                                                   |
|-----------------------|---------------------------------------------------------------------------------------------------------------------------------------------------------------------------------------------------------------------------------------------------------------------------------------------------------------------------------------------------------------------------------------------------|
| Dieta, cuestionario   | <input checked="" type="radio"/> sí<br><input type="radio"/> no                                                                                                                                                                                                                                                                                                                                   |
| Leche entera          | <input type="radio"/> Nunca o menos 1 vez al mes<br><input type="radio"/> 1 a 3 veces mes<br><input type="radio"/> 1 vez semana<br><input type="radio"/> 2 a 4 veces semana<br><input type="radio"/> 5 a 6 veces semana<br><input type="radio"/> 1 vez al día<br><input type="radio"/> 2 a 3 veces al día<br><input type="radio"/> 5 a 6 veces al día<br><input type="radio"/> más 6 veces al día |
| Leche semidesnatada   | <input type="radio"/> Nunca o menos 1 vez al mes<br><input type="radio"/> 1 a 3 veces mes<br><input type="radio"/> 1 vez semana<br><input type="radio"/> 2 a 4 veces semana<br><input type="radio"/> 5 a 6 veces semana<br><input type="radio"/> 1 vez al día<br><input type="radio"/> 2 a 3 veces al día<br><input type="radio"/> 5 a 6 veces al día<br><input type="radio"/> mas 6 veces al día |
| Leche desnatada       | <input type="radio"/> Nunca o menos 1 vez al mes<br><input type="radio"/> 1 a 3 veces mes<br><input type="radio"/> 1 vez semana<br><input type="radio"/> 2 a 4 veces semana<br><input type="radio"/> 5 a 6 veces semana<br><input type="radio"/> 1 vez al día<br><input type="radio"/> 2 a 3 veces al día<br><input type="radio"/> 5 a 6 veces al día<br><input type="radio"/> más 6 veces al día |
| Leche condensada      | <input type="radio"/> Nunca o menos 1 vez al mes<br><input type="radio"/> 1 a 3 veces mes<br><input type="radio"/> 1 vez semana<br><input type="radio"/> 2 a 4 veces semana<br><input type="radio"/> 5 a 6 veces semana<br><input type="radio"/> 1 vez al día<br><input type="radio"/> 2 a 3 veces al día<br><input type="radio"/> 5 a 6 veces al día<br><input type="radio"/> más 6 veces al día |
| nata o crema de leche | <input type="radio"/> Nunca o menos 1 vez al mes<br><input type="radio"/> 1 a 3 veces mes<br><input type="radio"/> 1 vez semana<br><input type="radio"/> 2 a 4 veces semana<br><input type="radio"/> 5 a 6 veces semana<br><input type="radio"/> 1 vez al día<br><input type="radio"/> 2 a 3 veces al día<br><input type="radio"/> 5 a 6 veces al día<br><input type="radio"/> más 6 veces al día |

|                                             |                                                                                                                                                                                                                                                                                                                                                                                                   |
|---------------------------------------------|---------------------------------------------------------------------------------------------------------------------------------------------------------------------------------------------------------------------------------------------------------------------------------------------------------------------------------------------------------------------------------------------------|
| Yogurt Entero                               | <input type="radio"/> Nunca o menos 1 vez al mes<br><input type="radio"/> 1 a 3 veces mes<br><input type="radio"/> 1 vez semana<br><input type="radio"/> 2 a 4 veces semana<br><input type="radio"/> 5 a 6 veces semana<br><input type="radio"/> 1 vez al día<br><input type="radio"/> 2 a 3 veces al día<br><input type="radio"/> 5 a 6 veces al día<br><input type="radio"/> más 6 veces al día |
| Yogurt desnatado                            | <input type="radio"/> Nunca o menos 1 vez al mes<br><input type="radio"/> 1 a 3 veces mes<br><input type="radio"/> 1 vez semana<br><input type="radio"/> 2 a 4 veces semana<br><input type="radio"/> 5 a 6 veces semana<br><input type="radio"/> 1 vez al día<br><input type="radio"/> 2 a 3 veces al día<br><input type="radio"/> 5 a 6 veces al día<br><input type="radio"/> más 6 veces al día |
| 100g requesón o queso blando o queso fresco | <input type="radio"/> Nunca o menos 1 vez al mes<br><input type="radio"/> 1 a 3 veces mes<br><input type="radio"/> 1 vez semana<br><input type="radio"/> 2 a 4 veces semana<br><input type="radio"/> 5 a 6 veces semana<br><input type="radio"/> 1 vez al día<br><input type="radio"/> 2 a 3 veces al día<br><input type="radio"/> 5 a 6 veces al día<br><input type="radio"/> más 6 veces al día |
| queso curado o semicurado o cremoso         | <input type="radio"/> Nunca o menos 1 vez al mes<br><input type="radio"/> 1 a 3 veces mes<br><input type="radio"/> 1 vez semana<br><input type="radio"/> 2 a 4 veces semana<br><input type="radio"/> 5 a 6 veces semana<br><input type="radio"/> 1 vez al día<br><input type="radio"/> 2 a 3 veces al día<br><input type="radio"/> 5 a 6 veces al día<br><input type="radio"/> más 6 veces al día |
| natillas flan pudding                       | <input type="radio"/> Nunca o menos 1 vez al mes<br><input type="radio"/> 1 a 3 veces mes<br><input type="radio"/> 1 vez semana<br><input type="radio"/> 2 a 4 veces semana<br><input type="radio"/> 5 a 6 veces semana<br><input type="radio"/> 1 vez al día<br><input type="radio"/> 2 a 3 veces al día<br><input type="radio"/> 5 a 6 veces al día<br><input type="radio"/> más 6 veces al día |
| Helado                                      | <input type="radio"/> Nunca o menos 1 vez al mes<br><input type="radio"/> 1 a 3 veces mes<br><input type="radio"/> 1 vez semana<br><input type="radio"/> 2 a 4 veces semana<br><input type="radio"/> 5 a 6 veces semana<br><input type="radio"/> 1 vez al día<br><input type="radio"/> 2 a 3 veces al día<br><input type="radio"/> 5 a 6 veces al día<br><input type="radio"/> más 6 veces al día |

|                                      |                                                                                                                                                                                                                                                                                                                                                                                                   |
|--------------------------------------|---------------------------------------------------------------------------------------------------------------------------------------------------------------------------------------------------------------------------------------------------------------------------------------------------------------------------------------------------------------------------------------------------|
| huevo                                | <input type="radio"/> Nunca o menos 1 vez al mes<br><input type="radio"/> 1 a 3 veces mes<br><input type="radio"/> 1 vez semana<br><input type="radio"/> 2 a 4 veces semana<br><input type="radio"/> 5 a 6 veces semana<br><input type="radio"/> 1 vez al día<br><input type="radio"/> 2 a 3 veces al día<br><input type="radio"/> 5 a 6 veces al día<br><input type="radio"/> más 6 veces al día |
| Pollo con piel                       | <input type="radio"/> Nunca o menos 1 vez al mes<br><input type="radio"/> 1 a 3 veces mes<br><input type="radio"/> 1 vez semana<br><input type="radio"/> 2 a 4 veces semana<br><input type="radio"/> 5 a 6 veces semana<br><input type="radio"/> 1 vez al día<br><input type="radio"/> 2 a 3 veces al día<br><input type="radio"/> 5 a 6 veces al día<br><input type="radio"/> más 6 veces al día |
| pollo sin piel                       | <input type="radio"/> Nunca o menos 1 vez al mes<br><input type="radio"/> 1 a 3 veces mes<br><input type="radio"/> 1 vez semana<br><input type="radio"/> 2 a 4 veces semana<br><input type="radio"/> 5 a 6 veces semana<br><input type="radio"/> 1 vez al día<br><input type="radio"/> 2 a 3 veces al día<br><input type="radio"/> 5 a 6 veces al día<br><input type="radio"/> más 6 veces al día |
| Ternera o cerdo o cordero            | <input type="radio"/> Nunca o menos 1 vez al mes<br><input type="radio"/> 1 a 3 veces mes<br><input type="radio"/> 1 vez semana<br><input type="radio"/> 2 a 4 veces semana<br><input type="radio"/> 5 a 6 veces semana<br><input type="radio"/> 1 vez al día<br><input type="radio"/> 2 a 3 veces al día<br><input type="radio"/> 5 a 6 veces al día<br><input type="radio"/> más 6 veces al día |
| carne caza: Conejo o codorniz o pato | <input type="radio"/> Nunca o menos 1 vez al mes<br><input type="radio"/> 1 a 3 veces mes<br><input type="radio"/> 1 vez semana<br><input type="radio"/> 2 a 4 veces semana<br><input type="radio"/> 5 a 6 veces semana<br><input type="radio"/> 1 vez al día<br><input type="radio"/> 2 a 3 veces al día<br><input type="radio"/> 5 a 6 veces al día<br><input type="radio"/> más 6 veces al día |
| Hígado de ternera o cerdo o pollo    | <input type="radio"/> Nunca o menos 1 vez al mes<br><input type="radio"/> 1 a 3 veces mes<br><input type="radio"/> 1 vez semana<br><input type="radio"/> 2 a 4 veces semana<br><input type="radio"/> 5 a 6 veces semana<br><input type="radio"/> 1 vez al día<br><input type="radio"/> 2 a 3 veces al día<br><input type="radio"/> 5 a 6 veces al día<br><input type="radio"/> más 6 veces al día |

---

Vísceras

- ☐ Nunca o menos 1 vez al mes
- ☐ 1 a 3 veces mes
- ☐ 1 vez semana
- ☐ 2 a 4 veces semana
- ☐ 5 a 6 veces semana
- ☐ 1 vez al día
- ☐ 2 a 3 veces al día
- ☐ 5 a 6 veces al día
- ☐ más 6 veces al día

---

Embutido

- ☐ Nunca o menos 1 vez al mes
- ☐ 1 a 3 veces mes
- ☐ 1 vez semana
- ☐ 2 a 4 veces semana
- ☐ 5 a 6 veces semana
- ☐ 1 vez al día
- ☐ 2 a 3 veces al día
- ☐ 5 a 6 veces al día
- ☐ más 6 veces al día

---

Salchicha o similar

- ☐ Nunca o menos 1 vez al mes
- ☐ 1 a 3 veces mes
- ☐ 1 vez semana
- ☐ 2 a 4 veces semana
- ☐ 5 a 6 veces semana
- ☐ 1 vez al día
- ☐ 2 a 3 veces al día
- ☐ 5 a 6 veces al día
- ☐ más 6 veces al día

---

Pate o foiegras

- ☐ Nunca o menos 1 vez al mes
- ☐ 1 a 3 veces mes
- ☐ 1 vez semana
- ☐ 2 a 4 veces semana
- ☐ 5 a 6 veces semana
- ☐ 1 vez al día
- ☐ 2 a 3 veces al día
- ☐ 5 a 6 veces al día
- ☐ más 6 veces al día

---

Hamburguesa

- ☐ Nunca o menos 1 vez al mes
- ☐ 1 a 3 veces mes
- ☐ 1 vez semana
- ☐ 2 a 4 veces semana
- ☐ 5 a 6 veces semana
- ☐ 1 vez al día
- ☐ 2 a 3 veces al día
- ☐ 5 a 6 veces al día
- ☐ más 6 veces al día

---

tocino o bacon

- ☐ Nunca o menos 1 vez al mes
- ☐ 1 a 3 veces mes
- ☐ 1 vez semana
- ☐ 2 a 4 veces semana
- ☐ 5 a 6 veces semana
- ☐ 1 vez al día
- ☐ 2 a 3 veces al día
- ☐ 5 a 6 veces al día
- ☐ más 6 veces al día

---

Pescado frito

- ☐ Nunca o menos 1 vez al mes
- ☐ 1 a 3 veces mes
- ☐ 1 vez semana
- ☐ 2 a 4 veces semana
- ☐ 5 a 6 veces semana
- ☐ 1 vez al día
- ☐ 2 a 3 veces al día
- ☐ 5 a 6 veces al día
- ☐ más 6 veces al día

---

pescado hervido blanco

- ☐ Nunca o menos 1 vez al mes
- ☐ 1 a 3 veces mes
- ☐ 1 vez semana
- ☐ 2 a 4 veces semana
- ☐ 5 a 6 veces semana
- ☐ 1 vez al día
- ☐ 2 a 3 veces al día
- ☐ 5 a 6 veces al día
- ☐ más 6 veces al día

---

pescado hervido azul

- ☐ Nunca o menos 1 vez al mes
- ☐ 1 a 3 veces mes
- ☐ 1 vez semana
- ☐ 2 a 4 veces semana
- ☐ 5 a 6 veces semana
- ☐ 1 vez al día
- ☐ 2 a 3 veces al día
- ☐ 5 a 6 veces al día
- ☐ más 6 veces al día

---

otros pescado azul

- ☐ Nunca o menos 1 vez al mes
- ☐ 1 a 3 veces mes
- ☐ 1 vez semana
- ☐ 2 a 4 veces semana
- ☐ 5 a 6 veces semana
- ☐ 1 vez al día
- ☐ 2 a 3 veces al día
- ☐ 5 a 6 veces al día
- ☐ más 6 veces al día

---

atun conserva

- ☐ Nunca o menos 1 vez al mes
- ☐ 1 a 3 veces mes
- ☐ 1 vez semana
- ☐ 2 a 4 veces semana
- ☐ 5 a 6 veces semana
- ☐ 1 vez al día
- ☐ 2 a 3 veces al día
- ☐ 5 a 6 veces al día
- ☐ más 6 veces al día

---

sardina conserva

- ☐ Nunca o menos 1 vez al mes
- ☐ 1 a 3 veces mes
- ☐ 1 vez semana
- ☐ 2 a 4 veces semana
- ☐ 5 a 6 veces semana
- ☐ 1 vez al día
- ☐ 2 a 3 veces al día
- ☐ 5 a 6 veces al día
- ☐ más 6 veces al día



|                                         |                                                                                                                                                                                                                                                                                                                                                                                                   |
|-----------------------------------------|---------------------------------------------------------------------------------------------------------------------------------------------------------------------------------------------------------------------------------------------------------------------------------------------------------------------------------------------------------------------------------------------------|
| pescado ahumado                         | <input type="radio"/> Nunca o menos 1 vez al mes<br><input type="radio"/> 1 a 3 veces mes<br><input type="radio"/> 1 vez semana<br><input type="radio"/> 2 a 4 veces semana<br><input type="radio"/> 5 a 6 veces semana<br><input type="radio"/> 1 vez al día<br><input type="radio"/> 2 a 3 veces al día<br><input type="radio"/> 5 a 6 veces al día<br><input type="radio"/> más 6 veces al día |
| almejas o mejillones o ostras unos 100g | <input type="radio"/> Nunca o menos 1 vez al mes<br><input type="radio"/> 1 a 3 veces mes<br><input type="radio"/> 1 vez semana<br><input type="radio"/> 2 a 4 veces semana<br><input type="radio"/> 5 a 6 veces semana<br><input type="radio"/> 1 vez al día<br><input type="radio"/> 2 a 3 veces al día<br><input type="radio"/> 5 a 6 veces al día<br><input type="radio"/> más 6 veces al día |
| calamar o chipiron o sepia unos 100g    | <input type="radio"/> Nunca o menos 1 vez al mes<br><input type="radio"/> 1 a 3 veces mes<br><input type="radio"/> 1 vez semana<br><input type="radio"/> 2 a 4 veces semana<br><input type="radio"/> 5 a 6 veces semana<br><input type="radio"/> 1 vez al día<br><input type="radio"/> 2 a 3 veces al día<br><input type="radio"/> 5 a 6 veces al día<br><input type="radio"/> más 6 veces al día |
| marisco unos 100g                       | <input type="radio"/> Nunca o menos 1 vez al mes<br><input type="radio"/> 1 a 3 veces mes<br><input type="radio"/> 1 vez semana<br><input type="radio"/> 2 a 4 veces semana<br><input type="radio"/> 5 a 6 veces semana<br><input type="radio"/> 1 vez al día<br><input type="radio"/> 2 a 3 veces al día<br><input type="radio"/> 5 a 6 veces al día<br><input type="radio"/> más 6 veces al día |
| Espinacas o acelgas cocinadas           | <input type="radio"/> Nunca o menos 1 vez al mes<br><input type="radio"/> 1 a 3 veces mes<br><input type="radio"/> 1 vez semana<br><input type="radio"/> 2 a 4 veces semana<br><input type="radio"/> 5 a 6 veces semana<br><input type="radio"/> 1 vez al día<br><input type="radio"/> 2 a 3 veces al día<br><input type="radio"/> 5 a 6 veces al día<br><input type="radio"/> más 6 veces al día |
| Col o coliflor o brocoli cocinado       | <input type="radio"/> Nunca o menos 1 vez al mes<br><input type="radio"/> 1 a 3 veces mes<br><input type="radio"/> 1 vez semana<br><input type="radio"/> 2 a 4 veces semana<br><input type="radio"/> 5 a 6 veces semana<br><input type="radio"/> 1 vez al día<br><input type="radio"/> 2 a 3 veces al día<br><input type="radio"/> 5 a 6 veces al día<br><input type="radio"/> más 6 veces al día |

---

Lechuga o endivia o escarola

- ☐ Nunca o menos 1 vez al mes
- ☐ 1 a 3 veces mes
- ☐ 1 vez semana
- ☐ 2 a 4 veces semana
- ☐ 5 a 6 veces semana
- ☐ 1 vez al día
- ☐ 2 a 3 veces al día
- ☐ 5 a 6 veces al día
- ☐ más 6 veces al día

---

tomate ensalada

- ☐ Nunca o menos 1 vez al mes
- ☐ 1 a 3 veces mes
- ☐ 1 vez semana
- ☐ 2 a 4 veces semana
- ☐ 5 a 6 veces semana
- ☐ 1 vez al día
- ☐ 2 a 3 veces al día
- ☐ 5 a 6 veces al día
- ☐ más 6 veces al día

---

cebolla

- ☐ Nunca o menos 1 vez al mes
- ☐ 1 a 3 veces mes
- ☐ 1 vez semana
- ☐ 2 a 4 veces semana
- ☐ 5 a 6 veces semana
- ☐ 1 vez al día
- ☐ 2 a 3 veces al día
- ☐ 5 a 6 veces al día
- ☐ más 6 veces al día

---

Zanahoria o calabaza

- ☐ Nunca o menos 1 vez al mes
- ☐ 1 a 3 veces mes
- ☐ 1 vez semana
- ☐ 2 a 4 veces semana
- ☐ 5 a 6 veces semana
- ☐ 1 vez al día
- ☐ 2 a 3 veces al día
- ☐ 5 a 6 veces al día
- ☐ más 6 veces al día

---

Judías verdes

- ☐ Nunca o menos 1 vez al mes
- ☐ 1 a 3 veces mes
- ☐ 1 vez semana
- ☐ 2 a 4 veces semana
- ☐ 5 a 6 veces semana
- ☐ 1 vez al día
- ☐ 2 a 3 veces al día
- ☐ 5 a 6 veces al día
- ☐ más 6 veces al día

---

Berenjena o calabacin o pepino

- ☐ Nunca o menos 1 vez al mes
- ☐ 1 a 3 veces mes
- ☐ 1 vez semana
- ☐ 2 a 4 veces semana
- ☐ 5 a 6 veces semana
- ☐ 1 vez al día
- ☐ 2 a 3 veces al día
- ☐ 5 a 6 veces al día
- ☐ más 6 veces al día

---

|          |                                                                                                                                                                                                                                                                                                                                                                                                   |
|----------|---------------------------------------------------------------------------------------------------------------------------------------------------------------------------------------------------------------------------------------------------------------------------------------------------------------------------------------------------------------------------------------------------|
| pimiento | <input type="radio"/> Nunca o menos 1 vez al mes<br><input type="radio"/> 1 a 3 veces mes<br><input type="radio"/> 1 vez semana<br><input type="radio"/> 2 a 4 veces semana<br><input type="radio"/> 5 a 6 veces semana<br><input type="radio"/> 1 vez al día<br><input type="radio"/> 2 a 3 veces al día<br><input type="radio"/> 5 a 6 veces al día<br><input type="radio"/> más 6 veces al día |
|----------|---------------------------------------------------------------------------------------------------------------------------------------------------------------------------------------------------------------------------------------------------------------------------------------------------------------------------------------------------------------------------------------------------|

---

|           |                                                                                                                                                                                                                                                                                                                                                                                                   |
|-----------|---------------------------------------------------------------------------------------------------------------------------------------------------------------------------------------------------------------------------------------------------------------------------------------------------------------------------------------------------------------------------------------------------|
| alcachofa | <input type="radio"/> Nunca o menos 1 vez al mes<br><input type="radio"/> 1 a 3 veces mes<br><input type="radio"/> 1 vez semana<br><input type="radio"/> 2 a 4 veces semana<br><input type="radio"/> 5 a 6 veces semana<br><input type="radio"/> 1 vez al día<br><input type="radio"/> 2 a 3 veces al día<br><input type="radio"/> 5 a 6 veces al día<br><input type="radio"/> más 6 veces al día |
|-----------|---------------------------------------------------------------------------------------------------------------------------------------------------------------------------------------------------------------------------------------------------------------------------------------------------------------------------------------------------------------------------------------------------|

---

|            |                                                                                                                                                                                                                                                                                                                                                                                                   |
|------------|---------------------------------------------------------------------------------------------------------------------------------------------------------------------------------------------------------------------------------------------------------------------------------------------------------------------------------------------------------------------------------------------------|
| espárragos | <input type="radio"/> Nunca o menos 1 vez al mes<br><input type="radio"/> 1 a 3 veces mes<br><input type="radio"/> 1 vez semana<br><input type="radio"/> 2 a 4 veces semana<br><input type="radio"/> 5 a 6 veces semana<br><input type="radio"/> 1 vez al día<br><input type="radio"/> 2 a 3 veces al día<br><input type="radio"/> 5 a 6 veces al día<br><input type="radio"/> más 6 veces al día |
|------------|---------------------------------------------------------------------------------------------------------------------------------------------------------------------------------------------------------------------------------------------------------------------------------------------------------------------------------------------------------------------------------------------------|

---

|              |                                                                                                                                                                                                                                                                                                                                                                                                   |
|--------------|---------------------------------------------------------------------------------------------------------------------------------------------------------------------------------------------------------------------------------------------------------------------------------------------------------------------------------------------------------------------------------------------------|
| maíz hervido | <input type="radio"/> Nunca o menos 1 vez al mes<br><input type="radio"/> 1 a 3 veces mes<br><input type="radio"/> 1 vez semana<br><input type="radio"/> 2 a 4 veces semana<br><input type="radio"/> 5 a 6 veces semana<br><input type="radio"/> 1 vez al día<br><input type="radio"/> 2 a 3 veces al día<br><input type="radio"/> 5 a 6 veces al día<br><input type="radio"/> más 6 veces al día |
|--------------|---------------------------------------------------------------------------------------------------------------------------------------------------------------------------------------------------------------------------------------------------------------------------------------------------------------------------------------------------------------------------------------------------|

---

|           |                                                                                                                                                                                                                                                                                                                                                                                                   |
|-----------|---------------------------------------------------------------------------------------------------------------------------------------------------------------------------------------------------------------------------------------------------------------------------------------------------------------------------------------------------------------------------------------------------|
| legumbres | <input type="radio"/> Nunca o menos 1 vez al mes<br><input type="radio"/> 1 a 3 veces mes<br><input type="radio"/> 1 vez semana<br><input type="radio"/> 2 a 4 veces semana<br><input type="radio"/> 5 a 6 veces semana<br><input type="radio"/> 1 vez al día<br><input type="radio"/> 2 a 3 veces al día<br><input type="radio"/> 5 a 6 veces al día<br><input type="radio"/> más 6 veces al día |
|-----------|---------------------------------------------------------------------------------------------------------------------------------------------------------------------------------------------------------------------------------------------------------------------------------------------------------------------------------------------------------------------------------------------------|

---

|                       |                                                                                                                                                                                                                                                                                                                                                                                                   |
|-----------------------|---------------------------------------------------------------------------------------------------------------------------------------------------------------------------------------------------------------------------------------------------------------------------------------------------------------------------------------------------------------------------------------------------|
| naranjas o mandarinas | <input type="radio"/> Nunca o menos 1 vez al mes<br><input type="radio"/> 1 a 3 veces mes<br><input type="radio"/> 1 vez semana<br><input type="radio"/> 2 a 4 veces semana<br><input type="radio"/> 5 a 6 veces semana<br><input type="radio"/> 1 vez al día<br><input type="radio"/> 2 a 3 veces al día<br><input type="radio"/> 5 a 6 veces al día<br><input type="radio"/> más 6 veces al día |
|-----------------------|---------------------------------------------------------------------------------------------------------------------------------------------------------------------------------------------------------------------------------------------------------------------------------------------------------------------------------------------------------------------------------------------------|

---

|                       |                                                                                                                                                                                                                                                                                                                                                                                                   |
|-----------------------|---------------------------------------------------------------------------------------------------------------------------------------------------------------------------------------------------------------------------------------------------------------------------------------------------------------------------------------------------------------------------------------------------|
| zum natural fruta     | <input type="radio"/> Nunca o menos 1 vez al mes<br><input type="radio"/> 1 a 3 veces mes<br><input type="radio"/> 1 vez semana<br><input type="radio"/> 2 a 4 veces semana<br><input type="radio"/> 5 a 6 veces semana<br><input type="radio"/> 1 vez al día<br><input type="radio"/> 2 a 3 veces al día<br><input type="radio"/> 5 a 6 veces al día<br><input type="radio"/> más 6 veces al día |
| platano               | <input type="radio"/> Nunca o menos 1 vez al mes<br><input type="radio"/> 1 a 3 veces mes<br><input type="radio"/> 1 vez semana<br><input type="radio"/> 2 a 4 veces semana<br><input type="radio"/> 5 a 6 veces semana<br><input type="radio"/> 1 vez al día<br><input type="radio"/> 2 a 3 veces al día<br><input type="radio"/> 5 a 6 veces al día<br><input type="radio"/> más 6 veces al día |
| manzana o pera        | <input type="radio"/> Nunca o menos 1 vez al mes<br><input type="radio"/> 1 a 3 veces mes<br><input type="radio"/> 1 vez semana<br><input type="radio"/> 2 a 4 veces semana<br><input type="radio"/> 5 a 6 veces semana<br><input type="radio"/> 1 vez al día<br><input type="radio"/> 2 a 3 veces al día<br><input type="radio"/> 5 a 6 veces al día<br><input type="radio"/> más 6 veces al día |
| melocotón o nectarina | <input type="radio"/> Nunca o menos 1 vez al mes<br><input type="radio"/> 1 a 3 veces mes<br><input type="radio"/> 1 vez semana<br><input type="radio"/> 2 a 4 veces semana<br><input type="radio"/> 5 a 6 veces semana<br><input type="radio"/> 1 vez al día<br><input type="radio"/> 2 a 3 veces al día<br><input type="radio"/> 5 a 6 veces al día<br><input type="radio"/> más 6 veces al día |
| sandia o melon        | <input type="radio"/> Nunca o menos 1 vez al mes<br><input type="radio"/> 1 a 3 veces mes<br><input type="radio"/> 1 vez semana<br><input type="radio"/> 2 a 4 veces semana<br><input type="radio"/> 5 a 6 veces semana<br><input type="radio"/> 1 vez al día<br><input type="radio"/> 2 a 3 veces al día<br><input type="radio"/> 5 a 6 veces al día<br><input type="radio"/> más 6 veces al día |
| uva                   | <input type="radio"/> Nunca o menos 1 vez al mes<br><input type="radio"/> 1 a 3 veces mes<br><input type="radio"/> 1 vez semana<br><input type="radio"/> 2 a 4 veces semana<br><input type="radio"/> 5 a 6 veces semana<br><input type="radio"/> 1 vez al día<br><input type="radio"/> 2 a 3 veces al día<br><input type="radio"/> 5 a 6 veces al día<br><input type="radio"/> más 6 veces al día |

---

bruna o ciruela

- ☐ Nunca o menos 1 vez al mes
- ☐ 1 a 3 veces mes
- ☐ 1 vez semana
- ☐ 2 a 4 veces semana
- ☐ 5 a 6 veces semana
- ☐ 1 vez al día
- ☐ 2 a 3 veces al día
- ☐ 5 a 6 veces al día
- ☐ más 6 veces al día

---

kiwi

- ☐ Nunca o menos 1 vez al mes
- ☐ 1 a 3 veces mes
- ☐ 1 vez semana
- ☐ 2 a 4 veces semana
- ☐ 5 a 6 veces semana
- ☐ 1 vez al día
- ☐ 2 a 3 veces al día
- ☐ 5 a 6 veces al día
- ☐ más 6 veces al día

---

aceituna

- ☐ Nunca o menos 1 vez al mes
- ☐ 1 a 3 veces mes
- ☐ 1 vez semana
- ☐ 2 a 4 veces semana
- ☐ 5 a 6 veces semana
- ☐ 1 vez al día
- ☐ 2 a 3 veces al día
- ☐ 5 a 6 veces al día
- ☐ más 6 veces al día

---

frutos secos

- ☐ Nunca o menos 1 vez al mes
- ☐ 1 a 3 veces mes
- ☐ 1 vez semana
- ☐ 2 a 4 veces semana
- ☐ 5 a 6 veces semana
- ☐ 1 vez al día
- ☐ 2 a 3 veces al día
- ☐ 5 a 6 veces al día
- ☐ más 6 veces al día

---

pan blanco

- ☐ Nunca o menos 1 vez al mes
- ☐ 1 a 3 veces mes
- ☐ 1 vez semana
- ☐ 2 a 4 veces semana
- ☐ 5 a 6 veces semana
- ☐ 1 vez al día
- ☐ 2 a 3 veces al día
- ☐ 5 a 6 veces al día
- ☐ más 6 veces al día

---

pan integral

- ☐ Nunca o menos 1 vez al mes
- ☐ 1 a 3 veces mes
- ☐ 1 vez semana
- ☐ 2 a 4 veces semana
- ☐ 5 a 6 veces semana
- ☐ 1 vez al día
- ☐ 2 a 3 veces al día
- ☐ 5 a 6 veces al día
- ☐ más 6 veces al día

---

cereales desayuno

- ☐ Nunca o menos 1 vez al mes
- ☐ 1 a 3 veces mes
- ☐ 1 vez semana
- ☐ 2 a 4 veces semana
- ☐ 5 a 6 veces semana
- ☐ 1 vez al día
- ☐ 2 a 3 veces al día
- ☐ 5 a 6 veces al día
- ☐ más 6 veces al día

---

patatas fritas

- ☐ Nunca o menos 1 vez al mes
- ☐ 1 a 3 veces mes
- ☐ 1 vez semana
- ☐ 2 a 4 veces semana
- ☐ 5 a 6 veces semana
- ☐ 1 vez al día
- ☐ 2 a 3 veces al día
- ☐ 5 a 6 veces al día
- ☐ más 6 veces al día

---

patatas cocidas o asadas

- ☐ Nunca o menos 1 vez al mes
- ☐ 1 a 3 veces mes
- ☐ 1 vez semana
- ☐ 2 a 4 veces semana
- ☐ 5 a 6 veces semana
- ☐ 1 vez al día
- ☐ 2 a 3 veces al día
- ☐ 5 a 6 veces al día
- ☐ más 6 veces al día

---

bolsa papas

- ☐ Nunca o menos 1 vez al mes
- ☐ 1 a 3 veces mes
- ☐ 1 vez semana
- ☐ 2 a 4 veces semana
- ☐ 5 a 6 veces semana
- ☐ 1 vez al día
- ☐ 2 a 3 veces al día
- ☐ 5 a 6 veces al día
- ☐ más 6 veces al día

---

arroz cocinado

- ☐ Nunca o menos 1 vez al mes
- ☐ 1 a 3 veces mes
- ☐ 1 vez semana
- ☐ 2 a 4 veces semana
- ☐ 5 a 6 veces semana
- ☐ 1 vez al día
- ☐ 2 a 3 veces al día
- ☐ 5 a 6 veces al día
- ☐ más 6 veces al día

---

pasta

- ☐ Nunca o menos 1 vez al mes
- ☐ 1 a 3 veces mes
- ☐ 1 vez semana
- ☐ 2 a 4 veces semana
- ☐ 5 a 6 veces semana
- ☐ 1 vez al día
- ☐ 2 a 3 veces al día
- ☐ 5 a 6 veces al día
- ☐ más 6 veces al día

|                     |                                                                                                                                                                                                                                                                                                                                                                                                   |
|---------------------|---------------------------------------------------------------------------------------------------------------------------------------------------------------------------------------------------------------------------------------------------------------------------------------------------------------------------------------------------------------------------------------------------|
| pizza               | <input type="radio"/> Nunca o menos 1 vez al mes<br><input type="radio"/> 1 a 3 veces mes<br><input type="radio"/> 1 vez semana<br><input type="radio"/> 2 a 4 veces semana<br><input type="radio"/> 5 a 6 veces semana<br><input type="radio"/> 1 vez al día<br><input type="radio"/> 2 a 3 veces al día<br><input type="radio"/> 5 a 6 veces al día<br><input type="radio"/> más 6 veces al día |
| aceite oliva        | <input type="radio"/> Nunca o menos 1 vez al mes<br><input type="radio"/> 1 a 3 veces mes<br><input type="radio"/> 1 vez semana<br><input type="radio"/> 2 a 4 veces semana<br><input type="radio"/> 5 a 6 veces semana<br><input type="radio"/> 1 vez al día<br><input type="radio"/> 2 a 3 veces al día<br><input type="radio"/> 5 a 6 veces al día<br><input type="radio"/> más 6 veces al día |
| otros aceites       | <input type="radio"/> Nunca o menos 1 vez al mes<br><input type="radio"/> 1 a 3 veces mes<br><input type="radio"/> 1 vez semana<br><input type="radio"/> 2 a 4 veces semana<br><input type="radio"/> 5 a 6 veces semana<br><input type="radio"/> 1 vez al día<br><input type="radio"/> 2 a 3 veces al día<br><input type="radio"/> 5 a 6 veces al día<br><input type="radio"/> más 6 veces al día |
| margarina           | <input type="radio"/> Nunca o menos 1 vez al mes<br><input type="radio"/> 1 a 3 veces mes<br><input type="radio"/> 1 vez semana<br><input type="radio"/> 2 a 4 veces semana<br><input type="radio"/> 5 a 6 veces semana<br><input type="radio"/> 1 vez al día<br><input type="radio"/> 2 a 3 veces al día<br><input type="radio"/> 5 a 6 veces al día<br><input type="radio"/> más 6 veces al día |
| mantequilla         | <input type="radio"/> Nunca o menos 1 vez al mes<br><input type="radio"/> 1 a 3 veces mes<br><input type="radio"/> 1 vez semana<br><input type="radio"/> 2 a 4 veces semana<br><input type="radio"/> 5 a 6 veces semana<br><input type="radio"/> 1 vez al día<br><input type="radio"/> 2 a 3 veces al día<br><input type="radio"/> 5 a 6 veces al día<br><input type="radio"/> más 6 veces al día |
| galletas tipo maria | <input type="radio"/> Nunca o menos 1 vez al mes<br><input type="radio"/> 1 a 3 veces mes<br><input type="radio"/> 1 vez semana<br><input type="radio"/> 2 a 4 veces semana<br><input type="radio"/> 5 a 6 veces semana<br><input type="radio"/> 1 vez al día<br><input type="radio"/> 2 a 3 veces al día<br><input type="radio"/> 5 a 6 veces al día<br><input type="radio"/> más 6 veces al día |

---

galletas chocolate

- ☐ Nunca o menos 1 vez al mes
- ☐ 1 a 3 veces mes
- ☐ 1 vez semana
- ☐ 2 a 4 veces semana
- ☐ 5 a 6 veces semana
- ☐ 1 vez al día
- ☐ 2 a 3 veces al día
- ☐ 5 a 6 veces al día
- ☐ más 6 veces al día

---

bolleria

- ☐ Nunca o menos 1 vez al mes
- ☐ 1 a 3 veces mes
- ☐ 1 vez semana
- ☐ 2 a 4 veces semana
- ☐ 5 a 6 veces semana
- ☐ 1 vez al día
- ☐ 2 a 3 veces al día
- ☐ 5 a 6 veces al día
- ☐ más 6 veces al día

---

chocolate o bombones

- ☐ Nunca o menos 1 vez al mes
- ☐ 1 a 3 veces mes
- ☐ 1 vez semana
- ☐ 2 a 4 veces semana
- ☐ 5 a 6 veces semana
- ☐ 1 vez al día
- ☐ 2 a 3 veces al día
- ☐ 5 a 6 veces al día
- ☐ más 6 veces al día

---

chocolate polvo o colacao

- ☐ Nunca o menos 1 vez al mes
- ☐ 1 a 3 veces mes
- ☐ 1 vez semana
- ☐ 2 a 4 veces semana
- ☐ 5 a 6 veces semana
- ☐ 1 vez al día
- ☐ 2 a 3 veces al día
- ☐ 5 a 6 veces al día
- ☐ más 6 veces al día

---

vino tinto

- ☐ Nunca o menos 1 vez al mes
- ☐ 1 a 3 veces mes
- ☐ 1 vez semana
- ☐ 2 a 4 veces semana
- ☐ 5 a 6 veces semana
- ☐ 1 vez al día
- ☐ 2 a 3 veces al día
- ☐ 5 a 6 veces al día
- ☐ más 6 veces al día

---

vino blanco

- ☐ Nunca o menos 1 vez al mes
- ☐ 1 a 3 veces mes
- ☐ 1 vez semana
- ☐ 2 a 4 veces semana
- ☐ 5 a 6 veces semana
- ☐ 1 vez al día
- ☐ 2 a 3 veces al día
- ☐ 5 a 6 veces al día
- ☐ más 6 veces al día



---

|                    |                                                                                                                                                                                                                                                                                                                                                                                                   |
|--------------------|---------------------------------------------------------------------------------------------------------------------------------------------------------------------------------------------------------------------------------------------------------------------------------------------------------------------------------------------------------------------------------------------------|
| vino seco o vermut | <input type="radio"/> Nunca o menos 1 vez al mes<br><input type="radio"/> 1 a 3 veces mes<br><input type="radio"/> 1 vez semana<br><input type="radio"/> 2 a 4 veces semana<br><input type="radio"/> 5 a 6 veces semana<br><input type="radio"/> 1 vez al día<br><input type="radio"/> 2 a 3 veces al día<br><input type="radio"/> 5 a 6 veces al día<br><input type="radio"/> más 6 veces al día |
|--------------------|---------------------------------------------------------------------------------------------------------------------------------------------------------------------------------------------------------------------------------------------------------------------------------------------------------------------------------------------------------------------------------------------------|

---

|         |                                                                                                                                                                                                                                                                                                                                                                                                   |
|---------|---------------------------------------------------------------------------------------------------------------------------------------------------------------------------------------------------------------------------------------------------------------------------------------------------------------------------------------------------------------------------------------------------|
| cerveza | <input type="radio"/> Nunca o menos 1 vez al mes<br><input type="radio"/> 1 a 3 veces mes<br><input type="radio"/> 1 vez semana<br><input type="radio"/> 2 a 4 veces semana<br><input type="radio"/> 5 a 6 veces semana<br><input type="radio"/> 1 vez al día<br><input type="radio"/> 2 a 3 veces al día<br><input type="radio"/> 5 a 6 veces al día<br><input type="radio"/> más 6 veces al día |
|---------|---------------------------------------------------------------------------------------------------------------------------------------------------------------------------------------------------------------------------------------------------------------------------------------------------------------------------------------------------------------------------------------------------|

---

|                     |                                                                                                                                                                                                                                                                                                                                                                                                   |
|---------------------|---------------------------------------------------------------------------------------------------------------------------------------------------------------------------------------------------------------------------------------------------------------------------------------------------------------------------------------------------------------------------------------------------|
| cerveza sin alcohol | <input type="radio"/> Nunca o menos 1 vez al mes<br><input type="radio"/> 1 a 3 veces mes<br><input type="radio"/> 1 vez semana<br><input type="radio"/> 2 a 4 veces semana<br><input type="radio"/> 5 a 6 veces semana<br><input type="radio"/> 1 vez al día<br><input type="radio"/> 2 a 3 veces al día<br><input type="radio"/> 5 a 6 veces al día<br><input type="radio"/> más 6 veces al día |
|---------------------|---------------------------------------------------------------------------------------------------------------------------------------------------------------------------------------------------------------------------------------------------------------------------------------------------------------------------------------------------------------------------------------------------|

---

|         |                                                                                                                                                                                                                                                                                                                                                                                                   |
|---------|---------------------------------------------------------------------------------------------------------------------------------------------------------------------------------------------------------------------------------------------------------------------------------------------------------------------------------------------------------------------------------------------------|
| licores | <input type="radio"/> Nunca o menos 1 vez al mes<br><input type="radio"/> 1 a 3 veces mes<br><input type="radio"/> 1 vez semana<br><input type="radio"/> 2 a 4 veces semana<br><input type="radio"/> 5 a 6 veces semana<br><input type="radio"/> 1 vez al día<br><input type="radio"/> 2 a 3 veces al día<br><input type="radio"/> 5 a 6 veces al día<br><input type="radio"/> más 6 veces al día |
|---------|---------------------------------------------------------------------------------------------------------------------------------------------------------------------------------------------------------------------------------------------------------------------------------------------------------------------------------------------------------------------------------------------------|

---

|                       |                                                                                                                                                                                                                                                                                                                                                                                                   |
|-----------------------|---------------------------------------------------------------------------------------------------------------------------------------------------------------------------------------------------------------------------------------------------------------------------------------------------------------------------------------------------------------------------------------------------|
| ginebra o ron o vodka | <input type="radio"/> Nunca o menos 1 vez al mes<br><input type="radio"/> 1 a 3 veces mes<br><input type="radio"/> 1 vez semana<br><input type="radio"/> 2 a 4 veces semana<br><input type="radio"/> 5 a 6 veces semana<br><input type="radio"/> 1 vez al día<br><input type="radio"/> 2 a 3 veces al día<br><input type="radio"/> 5 a 6 veces al día<br><input type="radio"/> más 6 veces al día |
|-----------------------|---------------------------------------------------------------------------------------------------------------------------------------------------------------------------------------------------------------------------------------------------------------------------------------------------------------------------------------------------------------------------------------------------|

---

|                 |                                                                                                                                                                                                                                                                                                                                                                                                   |
|-----------------|---------------------------------------------------------------------------------------------------------------------------------------------------------------------------------------------------------------------------------------------------------------------------------------------------------------------------------------------------------------------------------------------------|
| refresco normal | <input type="radio"/> Nunca o menos 1 vez al mes<br><input type="radio"/> 1 a 3 veces mes<br><input type="radio"/> 1 vez semana<br><input type="radio"/> 2 a 4 veces semana<br><input type="radio"/> 5 a 6 veces semana<br><input type="radio"/> 1 vez al día<br><input type="radio"/> 2 a 3 veces al día<br><input type="radio"/> 5 a 6 veces al día<br><input type="radio"/> más 6 veces al día |
|-----------------|---------------------------------------------------------------------------------------------------------------------------------------------------------------------------------------------------------------------------------------------------------------------------------------------------------------------------------------------------------------------------------------------------|

---

---

refresco sin azúcar

- ☐ Nunca o menos 1 vez al mes
- ☐ 1 a 3 veces mes
- ☐ 1 vez semana
- ☐ 2 a 4 veces semana
- ☐ 5 a 6 veces semana
- ☐ 1 vez al día
- ☐ 2 a 3 veces al día
- ☐ 5 a 6 veces al día
- ☐ más 6 veces al día

---

Agua del grifo

- ☐ Nunca o menos 1 vez al mes
- ☐ 1 a 3 veces mes
- ☐ 1 vez semana
- ☐ 2 a 4 veces semana
- ☐ 5 a 6 veces semana
- ☐ 1 vez al día
- ☐ 2 a 3 veces al día
- ☐ 5 a 6 veces al día
- ☐ más 6 veces al día

---

agua embotellada sin gas

- ☐ Nunca o menos 1 vez al mes
- ☐ 1 a 3 veces mes
- ☐ 1 vez semana
- ☐ 2 a 4 veces semana
- ☐ 5 a 6 veces semana
- ☐ 1 vez al día
- ☐ 2 a 3 veces al día
- ☐ 5 a 6 veces al día
- ☐ más 6 veces al día

---

agua embotellada con gas

- ☐ Nunca o menos 1 vez al mes
- ☐ 1 a 3 veces mes
- ☐ 1 vez semana
- ☐ 2 a 4 veces semana
- ☐ 5 a 6 veces semana
- ☐ 1 vez al día
- ☐ 2 a 3 veces al día
- ☐ 5 a 6 veces al día
- ☐ más 6 veces al día

---

zumو frutas embasado

- ☐ Nunca o menos 1 vez al mes
- ☐ 1 a 3 veces mes
- ☐ 1 vez semana
- ☐ 2 a 4 veces semana
- ☐ 5 a 6 veces semana
- ☐ 1 vez al día
- ☐ 2 a 3 veces al día
- ☐ 5 a 6 veces al día
- ☐ más 6 veces al día

---

cafe

- ☐ Nunca o menos 1 vez al mes
- ☐ 1 a 3 veces mes
- ☐ 1 vez semana
- ☐ 2 a 4 veces semana
- ☐ 5 a 6 veces semana
- ☐ 1 vez al día
- ☐ 2 a 3 veces al día
- ☐ 5 a 6 veces al día
- ☐ más 6 veces al día

---

cafe descafeinado

- ☐ Nunca o menos 1 vez al mes
- ☐ 1 a 3 veces mes
- ☐ 1 vez semana
- ☐ 2 a 4 veces semana
- ☐ 5 a 6 veces semana
- ☐ 1 vez al día
- ☐ 2 a 3 veces al día
- ☐ 5 a 6 veces al día
- ☐ más 6 veces al día

---

te o infusión

- ☐ Nunca o menos 1 vez al mes
- ☐ 1 a 3 veces mes
- ☐ 1 vez semana
- ☐ 2 a 4 veces semana
- ☐ 5 a 6 veces semana
- ☐ 1 vez al día
- ☐ 2 a 3 veces al día
- ☐ 5 a 6 veces al día
- ☐ más 6 veces al día

---

sopa o puré verduras

- ☐ Nunca o menos 1 vez al mes
- ☐ 1 a 3 veces mes
- ☐ 1 vez semana
- ☐ 2 a 4 veces semana
- ☐ 5 a 6 veces semana
- ☐ 1 vez al día
- ☐ 2 a 3 veces al día
- ☐ 5 a 6 veces al día
- ☐ más 6 veces al día

---

croquetas pollo jamón

- ☐ Nunca o menos 1 vez al mes
- ☐ 1 a 3 veces mes
- ☐ 1 vez semana
- ☐ 2 a 4 veces semana
- ☐ 5 a 6 veces semana
- ☐ 1 vez al día
- ☐ 2 a 3 veces al día
- ☐ 5 a 6 veces al día
- ☐ más 6 veces al día

---

croquetas pescado

- ☐ Nunca o menos 1 vez al mes
- ☐ 1 a 3 veces mes
- ☐ 1 vez semana
- ☐ 2 a 4 veces semana
- ☐ 5 a 6 veces semana
- ☐ 1 vez al día
- ☐ 2 a 3 veces al día
- ☐ 5 a 6 veces al día
- ☐ más 6 veces al día

---

mayonesa

- ☐ Nunca o menos 1 vez al mes
- ☐ 1 a 3 veces mes
- ☐ 1 vez semana
- ☐ 2 a 4 veces semana
- ☐ 5 a 6 veces semana
- ☐ 1 vez al día
- ☐ 2 a 3 veces al día
- ☐ 5 a 6 veces al día
- ☐ más 6 veces al día

|                  |                                                                                                                                                                                                                                                                                                                                                                                                   |
|------------------|---------------------------------------------------------------------------------------------------------------------------------------------------------------------------------------------------------------------------------------------------------------------------------------------------------------------------------------------------------------------------------------------------|
| salsa tomate     | <input type="radio"/> Nunca o menos 1 vez al mes<br><input type="radio"/> 1 a 3 veces mes<br><input type="radio"/> 1 vez semana<br><input type="radio"/> 2 a 4 veces semana<br><input type="radio"/> 5 a 6 veces semana<br><input type="radio"/> 1 vez al día<br><input type="radio"/> 2 a 3 veces al día<br><input type="radio"/> 5 a 6 veces al día<br><input type="radio"/> más 6 veces al día |
| ketchup          | <input type="radio"/> Nunca o menos 1 vez al mes<br><input type="radio"/> 1 a 3 veces mes<br><input type="radio"/> 1 vez semana<br><input type="radio"/> 2 a 4 veces semana<br><input type="radio"/> 5 a 6 veces semana<br><input type="radio"/> 1 vez al día<br><input type="radio"/> 2 a 3 veces al día<br><input type="radio"/> 5 a 6 veces al día<br><input type="radio"/> más 6 veces al día |
| sal              | <input type="radio"/> Nunca o menos 1 vez al mes<br><input type="radio"/> 1 a 3 veces mes<br><input type="radio"/> 1 vez semana<br><input type="radio"/> 2 a 4 veces semana<br><input type="radio"/> 5 a 6 veces semana<br><input type="radio"/> 1 vez al día<br><input type="radio"/> 2 a 3 veces al día<br><input type="radio"/> 5 a 6 veces al día<br><input type="radio"/> más 6 veces al día |
| ajo              | <input type="radio"/> Nunca o menos 1 vez al mes<br><input type="radio"/> 1 a 3 veces mes<br><input type="radio"/> 1 vez semana<br><input type="radio"/> 2 a 4 veces semana<br><input type="radio"/> 5 a 6 veces semana<br><input type="radio"/> 1 vez al día<br><input type="radio"/> 2 a 3 veces al día<br><input type="radio"/> 5 a 6 veces al día<br><input type="radio"/> más 6 veces al día |
| mermelada o miel | <input type="radio"/> Nunca o menos 1 vez al mes<br><input type="radio"/> 1 a 3 veces mes<br><input type="radio"/> 1 vez semana<br><input type="radio"/> 2 a 4 veces semana<br><input type="radio"/> 5 a 6 veces semana<br><input type="radio"/> 1 vez al día<br><input type="radio"/> 2 a 3 veces al día<br><input type="radio"/> 5 a 6 veces al día<br><input type="radio"/> más 6 veces al día |
| azúcar           | <input type="radio"/> Nunca o menos 1 vez al mes<br><input type="radio"/> 1 a 3 veces mes<br><input type="radio"/> 1 vez semana<br><input type="radio"/> 2 a 4 veces semana<br><input type="radio"/> 5 a 6 veces semana<br><input type="radio"/> 1 vez al día<br><input type="radio"/> 2 a 3 veces al día<br><input type="radio"/> 5 a 6 veces al día<br><input type="radio"/> más 6 veces al día |

|                                       |                                                                                                                                                                                                                                                                                                                                                                                                                                                                                                                    |
|---------------------------------------|--------------------------------------------------------------------------------------------------------------------------------------------------------------------------------------------------------------------------------------------------------------------------------------------------------------------------------------------------------------------------------------------------------------------------------------------------------------------------------------------------------------------|
| Otro alimento                         | <hr/>                                                                                                                                                                                                                                                                                                                                                                                                                                                                                                              |
| suplementos vitamínicos               | <input type="radio"/> si<br><input type="radio"/> no                                                                                                                                                                                                                                                                                                                                                                                                                                                               |
| suplementos vitamínicos               | <hr/>                                                                                                                                                                                                                                                                                                                                                                                                                                                                                                              |
| dieta previa                          | <input type="radio"/> si<br><input type="radio"/> no                                                                                                                                                                                                                                                                                                                                                                                                                                                               |
| motivo dieta                          | <input type="radio"/> no dieta<br><input type="radio"/> control peso<br><input type="radio"/> control colesterol<br><input type="radio"/> control diabetes<br><input type="radio"/> problemas estómago<br><input type="radio"/> problemas vesícula o hepáticos<br><input type="radio"/> HTA o cardiopatía<br><input type="radio"/> problemas renales<br><input type="radio"/> alergia alimentaria<br><input type="radio"/> ácido úrico elevado<br><input type="radio"/> vegetariana<br><input type="radio"/> otros |
| cambio alimentos año previo gestación | <input type="radio"/> si<br><input type="radio"/> no                                                                                                                                                                                                                                                                                                                                                                                                                                                               |
| cambio lácteos                        | <input type="radio"/> eliminado<br><input type="radio"/> disminuido<br><input type="radio"/> igual<br><input type="radio"/> aumentado<br><input type="radio"/> no sabe                                                                                                                                                                                                                                                                                                                                             |
| cambio huevos                         | <input type="radio"/> eliminado<br><input type="radio"/> disminuido<br><input type="radio"/> igual<br><input type="radio"/> aumentado<br><input type="radio"/> no sabe                                                                                                                                                                                                                                                                                                                                             |
| cambio carne                          | <input type="radio"/> eliminado<br><input type="radio"/> disminuido<br><input type="radio"/> igual<br><input type="radio"/> aumentado<br><input type="radio"/> no sabe                                                                                                                                                                                                                                                                                                                                             |
| cambio pescado                        | <input type="radio"/> eliminado<br><input type="radio"/> disminuido<br><input type="radio"/> igual<br><input type="radio"/> aumentado<br><input type="radio"/> no sabe                                                                                                                                                                                                                                                                                                                                             |
| cambio verduras                       | <input type="radio"/> eliminado<br><input type="radio"/> disminuido<br><input type="radio"/> igual<br><input type="radio"/> aumentado<br><input type="radio"/> no sabe                                                                                                                                                                                                                                                                                                                                             |

|                            |                                                                                                                                                                                                             |
|----------------------------|-------------------------------------------------------------------------------------------------------------------------------------------------------------------------------------------------------------|
| cambio legumbres           | <input type="radio"/> eliminado<br><input type="radio"/> disminuido<br><input type="radio"/> igual<br><input type="radio"/> aumentado<br><input type="radio"/> no sabe                                      |
| cambio fruta               | <input type="radio"/> eliminado<br><input type="radio"/> disminuido<br><input type="radio"/> igual<br><input type="radio"/> aumentado<br><input type="radio"/> no sabe                                      |
| cambio pan                 | <input type="radio"/> eliminado<br><input type="radio"/> disminuido<br><input type="radio"/> igual<br><input type="radio"/> aumentado<br><input type="radio"/> no sabe                                      |
| cambio aceite oliva        | <input type="radio"/> eliminado<br><input type="radio"/> disminuido<br><input type="radio"/> igual<br><input type="radio"/> aumentado<br><input type="radio"/> no sabe                                      |
| cambio mante o margarina   | <input type="radio"/> eliminado<br><input type="radio"/> disminuido<br><input type="radio"/> igual<br><input type="radio"/> aumentado<br><input type="radio"/> no sabe                                      |
| cambio azúcar y dulces     | <input type="radio"/> eliminado<br><input type="radio"/> disminuido<br><input type="radio"/> igual<br><input type="radio"/> aumentado<br><input type="radio"/> no sabe                                      |
| cambio bebidas alcohólicas | <input type="radio"/> eliminado<br><input type="radio"/> disminuido<br><input type="radio"/> igual<br><input type="radio"/> aumentado<br><input type="radio"/> no sabe                                      |
| frecuencia comidas fritas  | <input type="radio"/> a diario<br><input type="radio"/> 5 a 6 veces semana<br><input type="radio"/> 2 a 4 veces semana<br><input type="radio"/> 1 vez semana<br><input type="radio"/> menos de 1 vez semana |
| carne                      | <input type="radio"/> no como<br><input type="radio"/> cruda<br><input type="radio"/> poco hecha<br><input type="radio"/> hecha<br><input type="radio"/> muy hecha                                          |
| grasa visible carne        | <input type="radio"/> quita toda<br><input type="radio"/> quita mayoría<br><input type="radio"/> quita un poco<br><input type="radio"/> no quita nada                                                       |

|                                |                                                                                                                                                                                                                                               |
|--------------------------------|-----------------------------------------------------------------------------------------------------------------------------------------------------------------------------------------------------------------------------------------------|
| cocina carne                   | <input type="radio"/> a la plancha<br><input type="radio"/> a la parrilla<br><input type="radio"/> asada<br><input type="radio"/> frita<br><input type="radio"/> guisada                                                                      |
| tostado quemado carne          | <input type="radio"/> nunca<br><input type="radio"/> 1 vez mes<br><input type="radio"/> 2 a 3 veces mes<br><input type="radio"/> 1 vez semana<br><input type="radio"/> 2 a 3 semanas                                                          |
| tostado quemado pescado        | <input type="radio"/> nunca<br><input type="radio"/> 1 vez mes<br><input type="radio"/> 2 a 3 veces mes<br><input type="radio"/> 1 vez semana<br><input type="radio"/> 2 a 3 semanas                                                          |
| socarrat paella                | <input type="radio"/> nunca<br><input type="radio"/> 1 vez mes<br><input type="radio"/> 2 a 3 veces mes<br><input type="radio"/> 1 vez semana<br><input type="radio"/> 2 a 3 semanas                                                          |
| grasa o aceite cocinar         | <input type="radio"/> mantequilla<br><input type="radio"/> margarina<br><input type="radio"/> aceite oliva<br><input type="radio"/> aceite oliva virgen extra<br><input type="radio"/> aceite vegetal<br><input type="radio"/> mezcla aceites |
| grasa aceite aliñar            | <input type="radio"/> mantequilla<br><input type="radio"/> margarina<br><input type="radio"/> aceite oliva<br><input type="radio"/> aceite oliva virgen extra<br><input type="radio"/> aceite vegetal<br><input type="radio"/> mezcla aceites |
| grasa aceite freir             | <input type="radio"/> mantequilla<br><input type="radio"/> margarina<br><input type="radio"/> aceite oliva<br><input type="radio"/> aceite oliva virgen extra<br><input type="radio"/> aceite vegetal<br><input type="radio"/> mezcla aceites |
| Ejercicio cuestionario         | <input type="radio"/> si<br><input type="radio"/> no                                                                                                                                                                                          |
| horas de sueño incluido siesta | _____                                                                                                                                                                                                                                         |
| minutos siesta                 | _____                                                                                                                                                                                                                                         |
| horas televisión semana        | _____                                                                                                                                                                                                                                         |

|                                        |                                                                                                                                                                                                                                                                                                                                                                |
|----------------------------------------|----------------------------------------------------------------------------------------------------------------------------------------------------------------------------------------------------------------------------------------------------------------------------------------------------------------------------------------------------------------|
| actividad trabajo                      | <input type="radio"/> casi siempre sentado<br><input type="radio"/> sentado 50 por cien<br><input type="radio"/> casi siempre de pie, quieto<br><input type="radio"/> casi siempre levantado caminando y llevando pocas cosas<br><input type="radio"/> casi siempre levantado, caminando y llevado muchas cosas<br><input type="radio"/> trabajo manual pesado |
| tiempo caminar o bici al día           | <input type="radio"/> casi nunca<br><input type="radio"/> menos 20min día<br><input type="radio"/> 20 a 40 min día<br><input type="radio"/> 40 a 60 min día<br><input type="radio"/> 1h o 1h y media día<br><input type="radio"/> más de 1h y media al día                                                                                                     |
| tiempo tareas casa al día              | <input type="radio"/> menos de 1h día<br><input type="radio"/> 1 a 2h día<br><input type="radio"/> 3 a 4h día<br><input type="radio"/> 5 a 6h día<br><input type="radio"/> 7 a 8h día<br><input type="radio"/> más de 8h día                                                                                                                                   |
| tiempo libre televisión ordenador leer | <input type="radio"/> menos 1h día<br><input type="radio"/> 1h día<br><input type="radio"/> 2h día<br><input type="radio"/> 3h día<br><input type="radio"/> 4h día<br><input type="radio"/> 5 a 6h día<br><input type="radio"/> mas 6h día                                                                                                                     |
| tiempo libre ejercicio o deporte       | <input type="radio"/> menos 1h semana<br><input type="radio"/> 1h semana<br><input type="radio"/> 2h semana<br><input type="radio"/> 3h semana<br><input type="radio"/> 4 a 5h semana<br><input type="radio"/> mas 5h semana                                                                                                                                   |
| como se considera                      | <input type="radio"/> sedentaria<br><input type="radio"/> poco activa<br><input type="radio"/> moderadamente activa<br><input type="radio"/> bastante activa<br><input type="radio"/> muy activa<br><input type="radio"/> no sabe                                                                                                                              |
| FUR                                    | [*DATA REMOVED*]                                                                                                                                                                                                                                                                                                                                               |
| Semanas gestación 2T                   | [*DATA REMOVED*]                                                                                                                                                                                                                                                                                                                                               |
| Días gestación 2T                      | [*DATA REMOVED*]                                                                                                                                                                                                                                                                                                                                               |
| DBP 2T                                 | [*DATA REMOVED*]                                                                                                                                                                                                                                                                                                                                               |
| CC 2T                                  | [*DATA REMOVED*]                                                                                                                                                                                                                                                                                                                                               |
| AC 2T                                  | [*DATA REMOVED*]                                                                                                                                                                                                                                                                                                                                               |



|                                                   |                                                                                                                                                                                                 |
|---------------------------------------------------|-------------------------------------------------------------------------------------------------------------------------------------------------------------------------------------------------|
| LF 2T                                             | [*DATA REMOVED*]                                                                                                                                                                                |
| PFE 2T (Hadlock)                                  | [*DATA REMOVED*]                                                                                                                                                                                |
| Semanas gestación 3T                              | [*DATA REMOVED*]                                                                                                                                                                                |
| días 3T                                           | [*DATA REMOVED*]                                                                                                                                                                                |
| DBP 3T                                            | [*DATA REMOVED*]                                                                                                                                                                                |
| CC 3T                                             | [*DATA REMOVED*]                                                                                                                                                                                |
| AC 3T                                             | [*DATA REMOVED*]                                                                                                                                                                                |
| LF 3T                                             | [*DATA REMOVED*]                                                                                                                                                                                |
| PFE 3T (Hadlock)                                  | [*DATA REMOVED*]                                                                                                                                                                                |
| Semanas de gestación final                        | [*DATA REMOVED*]                                                                                                                                                                                |
| días gestación final                              | [*DATA REMOVED*]                                                                                                                                                                                |
| Localización placenta                             | <input type="radio"/> anterior<br><input type="radio"/> lateral derecha<br><input type="radio"/> lateral izquierda<br><input checked="" type="radio"/> posterior<br><input type="radio"/> fondo |
| Presentación longitudinal cefálica                | <input type="radio"/> no<br><input checked="" type="radio"/> si                                                                                                                                 |
| Dorso                                             | <input checked="" type="radio"/> izquierda anterior<br><input type="radio"/> izquierda posterior<br><input type="radio"/> derecha anterior<br><input type="radio"/> derecha posterior           |
| diámetro biparietal                               | [*DATA REMOVED*]                                                                                                                                                                                |
| Circunferencia craneal                            | [*DATA REMOVED*]                                                                                                                                                                                |
| Circunferencia abdominal                          | [*DATA REMOVED*]                                                                                                                                                                                |
| Longitud de femur                                 | [*DATA REMOVED*]                                                                                                                                                                                |
| tejido celular subcutáneo a nivel del muslo en mm | [*DATA REMOVED*]                                                                                                                                                                                |
| tejido celular subcutáneo en abdomen en mm        | [*DATA REMOVED*]                                                                                                                                                                                |
| Volumen del muslo en cm3                          | [*DATA REMOVED*]                                                                                                                                                                                |
| Peso fetal estimado según fórmula de Hadlock      | [*DATA REMOVED*]                                                                                                                                                                                |

|                                               |                                                                                                                                                          |
|-----------------------------------------------|----------------------------------------------------------------------------------------------------------------------------------------------------------|
| Percentil                                     | [*DATA REMOVED*]                                                                                                                                         |
| Peso fetal estimado según fórmula de Scioscia | <hr/>                                                                                                                                                    |
| Peso fetal estimado según fórmula de LEE      | <hr/>                                                                                                                                                    |
| Tipo de parto                                 | <input checked="" type="radio"/> eutocico<br><input type="radio"/> instrumentado/ventosa<br><input type="radio"/> cesarea                                |
| fecha de nacimiento                           | [*DATA REMOVED*]                                                                                                                                         |
| Días entre exploración y nacimiento           | [*DATA REMOVED*]                                                                                                                                         |
| Peso RN en g                                  | [*DATA REMOVED*]                                                                                                                                         |
| sexo                                          | <input checked="" type="radio"/> mujer<br><input type="radio"/> hombre                                                                                   |
| Apgar 1 minuto                                | [*DATA REMOVED*]                                                                                                                                         |
| Apgar 5 minutos                               | [*DATA REMOVED*]                                                                                                                                         |
| Apgar 10 minutos                              | <hr/>                                                                                                                                                    |
| antecedente Covid durante gestación           | <input type="radio"/> Yes<br><input checked="" type="radio"/> No                                                                                         |
| Nivel de estudios                             | <input type="radio"/> ninguno<br><input type="radio"/> primarios<br><input type="radio"/> secundarios<br><input checked="" type="radio"/> universitarios |

# Base\_datos\_estimacion\_peso\_fetal

|                                       |                                                                                                                                                                                                                                                                                      |
|---------------------------------------|--------------------------------------------------------------------------------------------------------------------------------------------------------------------------------------------------------------------------------------------------------------------------------------|
| Número de identificación participante | 198                                                                                                                                                                                                                                                                                  |
| CODIGO PARTICIPANTE                   |                                                                                                                                                                                                                                                                                      |
| Edad                                  | [*DATA REMOVED*]                                                                                                                                                                                                                                                                     |
| Gestaciones                           | <input checked="" type="radio"/> 1<br><input type="radio"/> 2<br><input type="radio"/> 3<br><input type="radio"/> mas de 3                                                                                                                                                           |
| partos                                | <input checked="" type="radio"/> 0<br><input type="radio"/> 1<br><input type="radio"/> 2<br><input type="radio"/> 3<br><input type="radio"/> mas de 3                                                                                                                                |
| cesáreas                              | <input checked="" type="radio"/> 0<br><input type="radio"/> 1<br><input type="radio"/> 2<br><input type="radio"/> 3<br><input type="radio"/> mas de 3                                                                                                                                |
| Abortos                               | <input checked="" type="radio"/> 0<br><input type="radio"/> 1<br><input type="radio"/> 2<br><input type="radio"/> 3<br><input type="radio"/> mas de 3                                                                                                                                |
| Tipo de gestacion                     | <input checked="" type="radio"/> espontanea<br><input type="radio"/> IAC inseminación artificial conyuge<br><input type="radio"/> IAD inseminación artificial donante<br><input type="radio"/> FIV Fecundación in Vitro<br><input type="radio"/> Ovodon FIV con donación de ovocitos |
| peso previo a embarazo                | [*DATA REMOVED*]                                                                                                                                                                                                                                                                     |
| Ganancia ponderal embarazo            | [*DATA REMOVED*]                                                                                                                                                                                                                                                                     |
| Talla madre                           | [*DATA REMOVED*]                                                                                                                                                                                                                                                                     |
| IMC previo embarazo                   | 25.536703601108034                                                                                                                                                                                                                                                                   |
| Patología obstétrica                  | <input checked="" type="radio"/> no<br><input type="radio"/> si                                                                                                                                                                                                                      |
| Diabetes pregestacional               | <input checked="" type="radio"/> no<br><input type="radio"/> si                                                                                                                                                                                                                      |
| Diabetes gestacional                  | <input checked="" type="radio"/> no<br><input type="radio"/> si                                                                                                                                                                                                                      |

|                                            |                                                                                                                                                                                      |
|--------------------------------------------|--------------------------------------------------------------------------------------------------------------------------------------------------------------------------------------|
| Diabetes gestacional con insulina          | <input checked="" type="radio"/> no<br><input type="radio"/> si                                                                                                                      |
| Diabetes gestacional con dieta y ejercicio | <input checked="" type="radio"/> no<br><input type="radio"/> si                                                                                                                      |
| Percentil fetos previos                    | <input checked="" type="radio"/> Nada<br><input type="radio"/> percentil menor de 10<br><input type="radio"/> percentil entre 10 y 90<br><input type="radio"/> percentil mayor de 90 |
| Exfumadora                                 | <input type="radio"/> Nada<br><input checked="" type="radio"/> menos de 5 años<br><input type="radio"/> 5 a 10 años<br><input type="radio"/> mayor o igual a 10 años                 |
| Hábito tabáquico                           | <input checked="" type="radio"/> no<br><input type="radio"/> si                                                                                                                      |
| fumadora                                   | [*DATA REMOVED*]                                                                                                                                                                     |
| Consumo otros tóxicos                      | <input checked="" type="radio"/> no<br><input type="radio"/> si                                                                                                                      |
| Hb 1T                                      | [*DATA REMOVED*]                                                                                                                                                                     |
| Htc 1T                                     | [*DATA REMOVED*]                                                                                                                                                                     |
| Hb 2T                                      | [*DATA REMOVED*]                                                                                                                                                                     |
| HTC 2T                                     | [*DATA REMOVED*]                                                                                                                                                                     |
| Hb 3T                                      | [*DATA REMOVED*]                                                                                                                                                                     |
| HTC 3T                                     | [*DATA REMOVED*]                                                                                                                                                                     |
| Suplemento FE oral                         | <input checked="" type="radio"/> si<br><input type="radio"/> no                                                                                                                      |
| Suplemento fe iv                           | <input type="radio"/> si<br><input checked="" type="radio"/> no                                                                                                                      |
| Transfusión                                | <input checked="" type="radio"/> no<br><input type="radio"/> si                                                                                                                      |
| Solicitada Vit D                           | <input checked="" type="radio"/> no<br><input type="radio"/> si                                                                                                                      |
| Deficit vit D                              | <input type="radio"/> no<br><input type="radio"/> si                                                                                                                                 |
| Suplemento vit D                           | <input type="radio"/> si<br><input checked="" type="radio"/> no                                                                                                                      |

---

Dieta, cuestionario

- ☒ sí  
☐ no
- 

Leche entera

- ☐ Nunca o menos 1 vez al mes  
☐ 1 a 3 veces mes  
☐ 1 vez semana  
☐ 2 a 4 veces semana  
☐ 5 a 6 veces semana  
☐ 1 vez al día  
☐ 2 a 3 veces al día  
☐ 5 a 6 veces al día  
☐ más 6 veces al día
- 

Leche semidesnatada

- ☐ Nunca o menos 1 vez al mes  
☐ 1 a 3 veces mes  
☐ 1 vez semana  
☐ 2 a 4 veces semana  
☐ 5 a 6 veces semana  
☐ 1 vez al día  
☐ 2 a 3 veces al día  
☐ 5 a 6 veces al día  
☐ mas 6 veces al día
- 

Leche desnatada

- ☐ Nunca o menos 1 vez al mes  
☐ 1 a 3 veces mes  
☐ 1 vez semana  
☐ 2 a 4 veces semana  
☐ 5 a 6 veces semana  
☐ 1 vez al día  
☐ 2 a 3 veces al día  
☐ 5 a 6 veces al día  
☐ más 6 veces al día
- 

Leche condensada

- ☐ Nunca o menos 1 vez al mes  
☐ 1 a 3 veces mes  
☐ 1 vez semana  
☐ 2 a 4 veces semana  
☐ 5 a 6 veces semana  
☐ 1 vez al día  
☐ 2 a 3 veces al día  
☐ 5 a 6 veces al día  
☐ más 6 veces al día
- 

nata o crema de leche

- ☐ Nunca o menos 1 vez al mes  
☐ 1 a 3 veces mes  
☐ 1 vez semana  
☐ 2 a 4 veces semana  
☐ 5 a 6 veces semana  
☐ 1 vez al día  
☐ 2 a 3 veces al día  
☐ 5 a 6 veces al día  
☐ más 6 veces al día

---

Yogurt Entero

- ☐ Nunca o menos 1 vez al mes
- ☐ 1 a 3 veces mes
- ☐ 1 vez semana
- ☐ 2 a 4 veces semana
- ☐ 5 a 6 veces semana
- ☐ 1 vez al día
- ☐ 2 a 3 veces al día
- ☐ 5 a 6 veces al día
- ☐ más 6 veces al día

---

Yogurt desnatado

- ☐ Nunca o menos 1 vez al mes
- ☐ 1 a 3 veces mes
- ☐ 1 vez semana
- ☐ 2 a 4 veces semana
- ☐ 5 a 6 veces semana
- ☐ 1 vez al día
- ☐ 2 a 3 veces al día
- ☐ 5 a 6 veces al día
- ☐ más 6 veces al día

---

100g requesón o queso blando o queso fresco

- ☐ Nunca o menos 1 vez al mes
- ☐ 1 a 3 veces mes
- ☐ 1 vez semana
- ☐ 2 a 4 veces semana
- ☐ 5 a 6 veces semana
- ☐ 1 vez al día
- ☐ 2 a 3 veces al día
- ☐ 5 a 6 veces al día
- ☐ más 6 veces al día

---

queso curado o semicurado o cremoso

- ☐ Nunca o menos 1 vez al mes
- ☐ 1 a 3 veces mes
- ☐ 1 vez semana
- ☐ 2 a 4 veces semana
- ☐ 5 a 6 veces semana
- ☐ 1 vez al día
- ☐ 2 a 3 veces al día
- ☐ 5 a 6 veces al día
- ☐ más 6 veces al día

---

natillas flan pudding

- ☐ Nunca o menos 1 vez al mes
- ☐ 1 a 3 veces mes
- ☐ 1 vez semana
- ☐ 2 a 4 veces semana
- ☐ 5 a 6 veces semana
- ☐ 1 vez al día
- ☐ 2 a 3 veces al día
- ☐ 5 a 6 veces al día
- ☐ más 6 veces al día

---

Helado

- ☐ Nunca o menos 1 vez al mes
- ☐ 1 a 3 veces mes
- ☐ 1 vez semana
- ☐ 2 a 4 veces semana
- ☐ 5 a 6 veces semana
- ☐ 1 vez al día
- ☐ 2 a 3 veces al día
- ☐ 5 a 6 veces al día
- ☐ más 6 veces al día

|                                      |                                                                                                                                                                                                                                                                                                                                                                                                   |
|--------------------------------------|---------------------------------------------------------------------------------------------------------------------------------------------------------------------------------------------------------------------------------------------------------------------------------------------------------------------------------------------------------------------------------------------------|
| huevo                                | <input type="radio"/> Nunca o menos 1 vez al mes<br><input type="radio"/> 1 a 3 veces mes<br><input type="radio"/> 1 vez semana<br><input type="radio"/> 2 a 4 veces semana<br><input type="radio"/> 5 a 6 veces semana<br><input type="radio"/> 1 vez al día<br><input type="radio"/> 2 a 3 veces al día<br><input type="radio"/> 5 a 6 veces al día<br><input type="radio"/> más 6 veces al día |
| Pollo con piel                       | <input type="radio"/> Nunca o menos 1 vez al mes<br><input type="radio"/> 1 a 3 veces mes<br><input type="radio"/> 1 vez semana<br><input type="radio"/> 2 a 4 veces semana<br><input type="radio"/> 5 a 6 veces semana<br><input type="radio"/> 1 vez al día<br><input type="radio"/> 2 a 3 veces al día<br><input type="radio"/> 5 a 6 veces al día<br><input type="radio"/> más 6 veces al día |
| pollo sin piel                       | <input type="radio"/> Nunca o menos 1 vez al mes<br><input type="radio"/> 1 a 3 veces mes<br><input type="radio"/> 1 vez semana<br><input type="radio"/> 2 a 4 veces semana<br><input type="radio"/> 5 a 6 veces semana<br><input type="radio"/> 1 vez al día<br><input type="radio"/> 2 a 3 veces al día<br><input type="radio"/> 5 a 6 veces al día<br><input type="radio"/> más 6 veces al día |
| Ternera o cerdo o cordero            | <input type="radio"/> Nunca o menos 1 vez al mes<br><input type="radio"/> 1 a 3 veces mes<br><input type="radio"/> 1 vez semana<br><input type="radio"/> 2 a 4 veces semana<br><input type="radio"/> 5 a 6 veces semana<br><input type="radio"/> 1 vez al día<br><input type="radio"/> 2 a 3 veces al día<br><input type="radio"/> 5 a 6 veces al día<br><input type="radio"/> más 6 veces al día |
| carne caza: Conejo o codorniz o pato | <input type="radio"/> Nunca o menos 1 vez al mes<br><input type="radio"/> 1 a 3 veces mes<br><input type="radio"/> 1 vez semana<br><input type="radio"/> 2 a 4 veces semana<br><input type="radio"/> 5 a 6 veces semana<br><input type="radio"/> 1 vez al día<br><input type="radio"/> 2 a 3 veces al día<br><input type="radio"/> 5 a 6 veces al día<br><input type="radio"/> más 6 veces al día |
| Hígado de ternera o cerdo o pollo    | <input type="radio"/> Nunca o menos 1 vez al mes<br><input type="radio"/> 1 a 3 veces mes<br><input type="radio"/> 1 vez semana<br><input type="radio"/> 2 a 4 veces semana<br><input type="radio"/> 5 a 6 veces semana<br><input type="radio"/> 1 vez al día<br><input type="radio"/> 2 a 3 veces al día<br><input type="radio"/> 5 a 6 veces al día<br><input type="radio"/> más 6 veces al día |

---

Vísceras

- ☐ Nunca o menos 1 vez al mes
- ☐ 1 a 3 veces mes
- ☐ 1 vez semana
- ☐ 2 a 4 veces semana
- ☐ 5 a 6 veces semana
- ☐ 1 vez al día
- ☐ 2 a 3 veces al día
- ☐ 5 a 6 veces al día
- ☐ más 6 veces al día

---

Embutido

- ☐ Nunca o menos 1 vez al mes
- ☐ 1 a 3 veces mes
- ☐ 1 vez semana
- ☐ 2 a 4 veces semana
- ☐ 5 a 6 veces semana
- ☐ 1 vez al día
- ☐ 2 a 3 veces al día
- ☐ 5 a 6 veces al día
- ☐ más 6 veces al día

---

Salchicha o similar

- ☐ Nunca o menos 1 vez al mes
- ☐ 1 a 3 veces mes
- ☐ 1 vez semana
- ☐ 2 a 4 veces semana
- ☐ 5 a 6 veces semana
- ☐ 1 vez al día
- ☐ 2 a 3 veces al día
- ☐ 5 a 6 veces al día
- ☐ más 6 veces al día

---

Pate o foiegras

- ☐ Nunca o menos 1 vez al mes
- ☐ 1 a 3 veces mes
- ☐ 1 vez semana
- ☐ 2 a 4 veces semana
- ☐ 5 a 6 veces semana
- ☐ 1 vez al día
- ☐ 2 a 3 veces al día
- ☐ 5 a 6 veces al día
- ☐ más 6 veces al día

---

Hamburguesa

- ☐ Nunca o menos 1 vez al mes
- ☐ 1 a 3 veces mes
- ☐ 1 vez semana
- ☐ 2 a 4 veces semana
- ☐ 5 a 6 veces semana
- ☐ 1 vez al día
- ☐ 2 a 3 veces al día
- ☐ 5 a 6 veces al día
- ☐ más 6 veces al día

---

tocino o bacon

- ☐ Nunca o menos 1 vez al mes
- ☐ 1 a 3 veces mes
- ☐ 1 vez semana
- ☐ 2 a 4 veces semana
- ☐ 5 a 6 veces semana
- ☐ 1 vez al día
- ☐ 2 a 3 veces al día
- ☐ 5 a 6 veces al día
- ☐ más 6 veces al día



---

Pescado frito

- ☐ Nunca o menos 1 vez al mes
- ☐ 1 a 3 veces mes
- ☐ 1 vez semana
- ☐ 2 a 4 veces semana
- ☐ 5 a 6 veces semana
- ☐ 1 vez al día
- ☐ 2 a 3 veces al día
- ☐ 5 a 6 veces al día
- ☐ más 6 veces al día

---

pescado hervido blanco

- ☐ Nunca o menos 1 vez al mes
- ☐ 1 a 3 veces mes
- ☐ 1 vez semana
- ☐ 2 a 4 veces semana
- ☐ 5 a 6 veces semana
- ☐ 1 vez al día
- ☐ 2 a 3 veces al día
- ☐ 5 a 6 veces al día
- ☐ más 6 veces al día

---

pescado hervido azul

- ☐ Nunca o menos 1 vez al mes
- ☐ 1 a 3 veces mes
- ☐ 1 vez semana
- ☐ 2 a 4 veces semana
- ☐ 5 a 6 veces semana
- ☐ 1 vez al día
- ☐ 2 a 3 veces al día
- ☐ 5 a 6 veces al día
- ☐ más 6 veces al día

---

otros pescado azul

- ☐ Nunca o menos 1 vez al mes
- ☐ 1 a 3 veces mes
- ☐ 1 vez semana
- ☐ 2 a 4 veces semana
- ☐ 5 a 6 veces semana
- ☐ 1 vez al día
- ☐ 2 a 3 veces al día
- ☐ 5 a 6 veces al día
- ☐ más 6 veces al día

---

atun conserva

- ☐ Nunca o menos 1 vez al mes
- ☐ 1 a 3 veces mes
- ☐ 1 vez semana
- ☐ 2 a 4 veces semana
- ☐ 5 a 6 veces semana
- ☐ 1 vez al día
- ☐ 2 a 3 veces al día
- ☐ 5 a 6 veces al día
- ☐ más 6 veces al día

---

sardina conserva

- ☐ Nunca o menos 1 vez al mes
- ☐ 1 a 3 veces mes
- ☐ 1 vez semana
- ☐ 2 a 4 veces semana
- ☐ 5 a 6 veces semana
- ☐ 1 vez al día
- ☐ 2 a 3 veces al día
- ☐ 5 a 6 veces al día
- ☐ más 6 veces al día

|                                         |                                                                                                                                                                                                                                                                                                                                                                                                   |
|-----------------------------------------|---------------------------------------------------------------------------------------------------------------------------------------------------------------------------------------------------------------------------------------------------------------------------------------------------------------------------------------------------------------------------------------------------|
| pescado ahumado                         | <input type="radio"/> Nunca o menos 1 vez al mes<br><input type="radio"/> 1 a 3 veces mes<br><input type="radio"/> 1 vez semana<br><input type="radio"/> 2 a 4 veces semana<br><input type="radio"/> 5 a 6 veces semana<br><input type="radio"/> 1 vez al día<br><input type="radio"/> 2 a 3 veces al día<br><input type="radio"/> 5 a 6 veces al día<br><input type="radio"/> más 6 veces al día |
| almejas o mejillones o ostras unos 100g | <input type="radio"/> Nunca o menos 1 vez al mes<br><input type="radio"/> 1 a 3 veces mes<br><input type="radio"/> 1 vez semana<br><input type="radio"/> 2 a 4 veces semana<br><input type="radio"/> 5 a 6 veces semana<br><input type="radio"/> 1 vez al día<br><input type="radio"/> 2 a 3 veces al día<br><input type="radio"/> 5 a 6 veces al día<br><input type="radio"/> más 6 veces al día |
| calamar o chipiron o sepia unos 100g    | <input type="radio"/> Nunca o menos 1 vez al mes<br><input type="radio"/> 1 a 3 veces mes<br><input type="radio"/> 1 vez semana<br><input type="radio"/> 2 a 4 veces semana<br><input type="radio"/> 5 a 6 veces semana<br><input type="radio"/> 1 vez al día<br><input type="radio"/> 2 a 3 veces al día<br><input type="radio"/> 5 a 6 veces al día<br><input type="radio"/> más 6 veces al día |
| marisco unos 100g                       | <input type="radio"/> Nunca o menos 1 vez al mes<br><input type="radio"/> 1 a 3 veces mes<br><input type="radio"/> 1 vez semana<br><input type="radio"/> 2 a 4 veces semana<br><input type="radio"/> 5 a 6 veces semana<br><input type="radio"/> 1 vez al día<br><input type="radio"/> 2 a 3 veces al día<br><input type="radio"/> 5 a 6 veces al día<br><input type="radio"/> más 6 veces al día |
| Espinacas o acelgas cocinadas           | <input type="radio"/> Nunca o menos 1 vez al mes<br><input type="radio"/> 1 a 3 veces mes<br><input type="radio"/> 1 vez semana<br><input type="radio"/> 2 a 4 veces semana<br><input type="radio"/> 5 a 6 veces semana<br><input type="radio"/> 1 vez al día<br><input type="radio"/> 2 a 3 veces al día<br><input type="radio"/> 5 a 6 veces al día<br><input type="radio"/> más 6 veces al día |
| Col o coliflor o brocoli cocinado       | <input type="radio"/> Nunca o menos 1 vez al mes<br><input type="radio"/> 1 a 3 veces mes<br><input type="radio"/> 1 vez semana<br><input type="radio"/> 2 a 4 veces semana<br><input type="radio"/> 5 a 6 veces semana<br><input type="radio"/> 1 vez al día<br><input type="radio"/> 2 a 3 veces al día<br><input type="radio"/> 5 a 6 veces al día<br><input type="radio"/> más 6 veces al día |

---

Lechuga o endivia o escarola

- ☐ Nunca o menos 1 vez al mes
- ☐ 1 a 3 veces mes
- ☐ 1 vez semana
- ☐ 2 a 4 veces semana
- ☐ 5 a 6 veces semana
- ☐ 1 vez al día
- ☐ 2 a 3 veces al día
- ☐ 5 a 6 veces al día
- ☐ más 6 veces al día

---

tomate ensalada

- ☐ Nunca o menos 1 vez al mes
- ☐ 1 a 3 veces mes
- ☐ 1 vez semana
- ☐ 2 a 4 veces semana
- ☐ 5 a 6 veces semana
- ☐ 1 vez al día
- ☐ 2 a 3 veces al día
- ☐ 5 a 6 veces al día
- ☐ más 6 veces al día

---

cebolla

- ☐ Nunca o menos 1 vez al mes
- ☐ 1 a 3 veces mes
- ☐ 1 vez semana
- ☐ 2 a 4 veces semana
- ☐ 5 a 6 veces semana
- ☐ 1 vez al día
- ☐ 2 a 3 veces al día
- ☐ 5 a 6 veces al día
- ☐ más 6 veces al día

---

Zanahoria o calabaza

- ☐ Nunca o menos 1 vez al mes
- ☐ 1 a 3 veces mes
- ☐ 1 vez semana
- ☐ 2 a 4 veces semana
- ☐ 5 a 6 veces semana
- ☐ 1 vez al día
- ☐ 2 a 3 veces al día
- ☐ 5 a 6 veces al día
- ☐ más 6 veces al día

---

Judías verdes

- ☐ Nunca o menos 1 vez al mes
- ☐ 1 a 3 veces mes
- ☐ 1 vez semana
- ☐ 2 a 4 veces semana
- ☐ 5 a 6 veces semana
- ☐ 1 vez al día
- ☐ 2 a 3 veces al día
- ☐ 5 a 6 veces al día
- ☐ más 6 veces al día

---

Berenjena o calabacin o pepino

- ☐ Nunca o menos 1 vez al mes
- ☐ 1 a 3 veces mes
- ☐ 1 vez semana
- ☐ 2 a 4 veces semana
- ☐ 5 a 6 veces semana
- ☐ 1 vez al día
- ☐ 2 a 3 veces al día
- ☐ 5 a 6 veces al día
- ☐ más 6 veces al día

---

pimiento

- ☐ Nunca o menos 1 vez al mes
- ☐ 1 a 3 veces mes
- ☐ 1 vez semana
- ☐ 2 a 4 veces semana
- ☐ 5 a 6 veces semana
- ☐ 1 vez al día
- ☐ 2 a 3 veces al día
- ☐ 5 a 6 veces al día
- ☐ más 6 veces al día

---

alcachofa

- ☐ Nunca o menos 1 vez al mes
- ☐ 1 a 3 veces mes
- ☐ 1 vez semana
- ☐ 2 a 4 veces semana
- ☐ 5 a 6 veces semana
- ☐ 1 vez al día
- ☐ 2 a 3 veces al día
- ☐ 5 a 6 veces al día
- ☐ más 6 veces al día

---

espárragos

- ☐ Nunca o menos 1 vez al mes
- ☐ 1 a 3 veces mes
- ☐ 1 vez semana
- ☐ 2 a 4 veces semana
- ☐ 5 a 6 veces semana
- ☐ 1 vez al día
- ☐ 2 a 3 veces al día
- ☐ 5 a 6 veces al día
- ☐ más 6 veces al día

---

maíz hervido

- ☐ Nunca o menos 1 vez al mes
- ☐ 1 a 3 veces mes
- ☐ 1 vez semana
- ☐ 2 a 4 veces semana
- ☐ 5 a 6 veces semana
- ☐ 1 vez al día
- ☐ 2 a 3 veces al día
- ☐ 5 a 6 veces al día
- ☐ más 6 veces al día

---

legumbres

- ☐ Nunca o menos 1 vez al mes
- ☐ 1 a 3 veces mes
- ☐ 1 vez semana
- ☐ 2 a 4 veces semana
- ☐ 5 a 6 veces semana
- ☐ 1 vez al día
- ☐ 2 a 3 veces al día
- ☐ 5 a 6 veces al día
- ☐ más 6 veces al día

---

naranjas o mandarinas

- ☐ Nunca o menos 1 vez al mes
- ☐ 1 a 3 veces mes
- ☐ 1 vez semana
- ☐ 2 a 4 veces semana
- ☐ 5 a 6 veces semana
- ☐ 1 vez al día
- ☐ 2 a 3 veces al día
- ☐ 5 a 6 veces al día
- ☐ más 6 veces al día

---

zumo natural fruta

- ☐ Nunca o menos 1 vez al mes
- ☐ 1 a 3 veces mes
- ☐ 1 vez semana
- ☐ 2 a 4 veces semana
- ☐ 5 a 6 veces semana
- ☐ 1 vez al día
- ☐ 2 a 3 veces al día
- ☐ 5 a 6 veces al día
- ☐ más 6 veces al día

---

platano

- ☐ Nunca o menos 1 vez al mes
- ☐ 1 a 3 veces mes
- ☐ 1 vez semana
- ☐ 2 a 4 veces semana
- ☐ 5 a 6 veces semana
- ☐ 1 vez al día
- ☐ 2 a 3 veces al día
- ☐ 5 a 6 veces al día
- ☐ más 6 veces al día

---

manzana o pera

- ☐ Nunca o menos 1 vez al mes
- ☐ 1 a 3 veces mes
- ☐ 1 vez semana
- ☐ 2 a 4 veces semana
- ☐ 5 a 6 veces semana
- ☐ 1 vez al día
- ☐ 2 a 3 veces al día
- ☐ 5 a 6 veces al día
- ☐ más 6 veces al día

---

melocotón o nectarina

- ☐ Nunca o menos 1 vez al mes
- ☐ 1 a 3 veces mes
- ☐ 1 vez semana
- ☐ 2 a 4 veces semana
- ☐ 5 a 6 veces semana
- ☐ 1 vez al día
- ☐ 2 a 3 veces al día
- ☐ 5 a 6 veces al día
- ☐ más 6 veces al día

---

sandia o melon

- ☐ Nunca o menos 1 vez al mes
- ☐ 1 a 3 veces mes
- ☐ 1 vez semana
- ☐ 2 a 4 veces semana
- ☐ 5 a 6 veces semana
- ☐ 1 vez al día
- ☐ 2 a 3 veces al día
- ☐ 5 a 6 veces al día
- ☐ más 6 veces al día

---

uva

- ☐ Nunca o menos 1 vez al mes
- ☐ 1 a 3 veces mes
- ☐ 1 vez semana
- ☐ 2 a 4 veces semana
- ☐ 5 a 6 veces semana
- ☐ 1 vez al día
- ☐ 2 a 3 veces al día
- ☐ 5 a 6 veces al día
- ☐ más 6 veces al día

---

bruna o ciruela

- ☐ Nunca o menos 1 vez al mes
- ☐ 1 a 3 veces mes
- ☐ 1 vez semana
- ☐ 2 a 4 veces semana
- ☐ 5 a 6 veces semana
- ☐ 1 vez al día
- ☐ 2 a 3 veces al día
- ☐ 5 a 6 veces al día
- ☐ más 6 veces al día

---

kiwi

- ☐ Nunca o menos 1 vez al mes
- ☐ 1 a 3 veces mes
- ☐ 1 vez semana
- ☐ 2 a 4 veces semana
- ☐ 5 a 6 veces semana
- ☐ 1 vez al día
- ☐ 2 a 3 veces al día
- ☐ 5 a 6 veces al día
- ☐ más 6 veces al día

---

aceituna

- ☐ Nunca o menos 1 vez al mes
- ☐ 1 a 3 veces mes
- ☐ 1 vez semana
- ☐ 2 a 4 veces semana
- ☐ 5 a 6 veces semana
- ☐ 1 vez al día
- ☐ 2 a 3 veces al día
- ☐ 5 a 6 veces al día
- ☐ más 6 veces al día

---

frutos secos

- ☐ Nunca o menos 1 vez al mes
- ☐ 1 a 3 veces mes
- ☐ 1 vez semana
- ☐ 2 a 4 veces semana
- ☐ 5 a 6 veces semana
- ☐ 1 vez al día
- ☐ 2 a 3 veces al día
- ☐ 5 a 6 veces al día
- ☐ más 6 veces al día

---

pan blanco

- ☐ Nunca o menos 1 vez al mes
- ☐ 1 a 3 veces mes
- ☐ 1 vez semana
- ☐ 2 a 4 veces semana
- ☐ 5 a 6 veces semana
- ☐ 1 vez al día
- ☐ 2 a 3 veces al día
- ☐ 5 a 6 veces al día
- ☐ más 6 veces al día

---

pan integral

- ☐ Nunca o menos 1 vez al mes
- ☐ 1 a 3 veces mes
- ☐ 1 vez semana
- ☐ 2 a 4 veces semana
- ☐ 5 a 6 veces semana
- ☐ 1 vez al día
- ☐ 2 a 3 veces al día
- ☐ 5 a 6 veces al día
- ☐ más 6 veces al día

---

cereales desayuno

- ☐ Nunca o menos 1 vez al mes
- ☐ 1 a 3 veces mes
- ☐ 1 vez semana
- ☐ 2 a 4 veces semana
- ☐ 5 a 6 veces semana
- ☐ 1 vez al día
- ☐ 2 a 3 veces al día
- ☐ 5 a 6 veces al día
- ☐ más 6 veces al día

---

patatas fritas

- ☐ Nunca o menos 1 vez al mes
- ☐ 1 a 3 veces mes
- ☐ 1 vez semana
- ☐ 2 a 4 veces semana
- ☐ 5 a 6 veces semana
- ☐ 1 vez al día
- ☐ 2 a 3 veces al día
- ☐ 5 a 6 veces al día
- ☐ más 6 veces al día

---

patatas cocidas o asadas

- ☐ Nunca o menos 1 vez al mes
- ☐ 1 a 3 veces mes
- ☐ 1 vez semana
- ☐ 2 a 4 veces semana
- ☐ 5 a 6 veces semana
- ☐ 1 vez al día
- ☐ 2 a 3 veces al día
- ☐ 5 a 6 veces al día
- ☐ más 6 veces al día

---

bolsa papas

- ☐ Nunca o menos 1 vez al mes
- ☐ 1 a 3 veces mes
- ☐ 1 vez semana
- ☐ 2 a 4 veces semana
- ☐ 5 a 6 veces semana
- ☐ 1 vez al día
- ☐ 2 a 3 veces al día
- ☐ 5 a 6 veces al día
- ☐ más 6 veces al día

---

arroz cocinado

- ☐ Nunca o menos 1 vez al mes
- ☐ 1 a 3 veces mes
- ☐ 1 vez semana
- ☐ 2 a 4 veces semana
- ☐ 5 a 6 veces semana
- ☐ 1 vez al día
- ☐ 2 a 3 veces al día
- ☐ 5 a 6 veces al día
- ☐ más 6 veces al día

---

pasta

- ☐ Nunca o menos 1 vez al mes
- ☐ 1 a 3 veces mes
- ☐ 1 vez semana
- ☐ 2 a 4 veces semana
- ☐ 5 a 6 veces semana
- ☐ 1 vez al día
- ☐ 2 a 3 veces al día
- ☐ 5 a 6 veces al día
- ☐ más 6 veces al día

|                     |                                                                                                                                                                                                                                                                                                                                                                                                   |
|---------------------|---------------------------------------------------------------------------------------------------------------------------------------------------------------------------------------------------------------------------------------------------------------------------------------------------------------------------------------------------------------------------------------------------|
| pizza               | <input type="radio"/> Nunca o menos 1 vez al mes<br><input type="radio"/> 1 a 3 veces mes<br><input type="radio"/> 1 vez semana<br><input type="radio"/> 2 a 4 veces semana<br><input type="radio"/> 5 a 6 veces semana<br><input type="radio"/> 1 vez al día<br><input type="radio"/> 2 a 3 veces al día<br><input type="radio"/> 5 a 6 veces al día<br><input type="radio"/> más 6 veces al día |
| aceite oliva        | <input type="radio"/> Nunca o menos 1 vez al mes<br><input type="radio"/> 1 a 3 veces mes<br><input type="radio"/> 1 vez semana<br><input type="radio"/> 2 a 4 veces semana<br><input type="radio"/> 5 a 6 veces semana<br><input type="radio"/> 1 vez al día<br><input type="radio"/> 2 a 3 veces al día<br><input type="radio"/> 5 a 6 veces al día<br><input type="radio"/> más 6 veces al día |
| otros aceites       | <input type="radio"/> Nunca o menos 1 vez al mes<br><input type="radio"/> 1 a 3 veces mes<br><input type="radio"/> 1 vez semana<br><input type="radio"/> 2 a 4 veces semana<br><input type="radio"/> 5 a 6 veces semana<br><input type="radio"/> 1 vez al día<br><input type="radio"/> 2 a 3 veces al día<br><input type="radio"/> 5 a 6 veces al día<br><input type="radio"/> más 6 veces al día |
| margarina           | <input type="radio"/> Nunca o menos 1 vez al mes<br><input type="radio"/> 1 a 3 veces mes<br><input type="radio"/> 1 vez semana<br><input type="radio"/> 2 a 4 veces semana<br><input type="radio"/> 5 a 6 veces semana<br><input type="radio"/> 1 vez al día<br><input type="radio"/> 2 a 3 veces al día<br><input type="radio"/> 5 a 6 veces al día<br><input type="radio"/> más 6 veces al día |
| mantequilla         | <input type="radio"/> Nunca o menos 1 vez al mes<br><input type="radio"/> 1 a 3 veces mes<br><input type="radio"/> 1 vez semana<br><input type="radio"/> 2 a 4 veces semana<br><input type="radio"/> 5 a 6 veces semana<br><input type="radio"/> 1 vez al día<br><input type="radio"/> 2 a 3 veces al día<br><input type="radio"/> 5 a 6 veces al día<br><input type="radio"/> más 6 veces al día |
| galletas tipo maria | <input type="radio"/> Nunca o menos 1 vez al mes<br><input type="radio"/> 1 a 3 veces mes<br><input type="radio"/> 1 vez semana<br><input type="radio"/> 2 a 4 veces semana<br><input type="radio"/> 5 a 6 veces semana<br><input type="radio"/> 1 vez al día<br><input type="radio"/> 2 a 3 veces al día<br><input type="radio"/> 5 a 6 veces al día<br><input type="radio"/> más 6 veces al día |



|                           |                                                                                                                                                                                                                                                                                                                                                                                                   |
|---------------------------|---------------------------------------------------------------------------------------------------------------------------------------------------------------------------------------------------------------------------------------------------------------------------------------------------------------------------------------------------------------------------------------------------|
| galletas chocolate        | <input type="radio"/> Nunca o menos 1 vez al mes<br><input type="radio"/> 1 a 3 veces mes<br><input type="radio"/> 1 vez semana<br><input type="radio"/> 2 a 4 veces semana<br><input type="radio"/> 5 a 6 veces semana<br><input type="radio"/> 1 vez al día<br><input type="radio"/> 2 a 3 veces al día<br><input type="radio"/> 5 a 6 veces al día<br><input type="radio"/> más 6 veces al día |
| bollieria                 | <input type="radio"/> Nunca o menos 1 vez al mes<br><input type="radio"/> 1 a 3 veces mes<br><input type="radio"/> 1 vez semana<br><input type="radio"/> 2 a 4 veces semana<br><input type="radio"/> 5 a 6 veces semana<br><input type="radio"/> 1 vez al día<br><input type="radio"/> 2 a 3 veces al día<br><input type="radio"/> 5 a 6 veces al día<br><input type="radio"/> más 6 veces al día |
| chocolate o bombones      | <input type="radio"/> Nunca o menos 1 vez al mes<br><input type="radio"/> 1 a 3 veces mes<br><input type="radio"/> 1 vez semana<br><input type="radio"/> 2 a 4 veces semana<br><input type="radio"/> 5 a 6 veces semana<br><input type="radio"/> 1 vez al día<br><input type="radio"/> 2 a 3 veces al día<br><input type="radio"/> 5 a 6 veces al día<br><input type="radio"/> más 6 veces al día |
| chocolate polvo o colacao | <input type="radio"/> Nunca o menos 1 vez al mes<br><input type="radio"/> 1 a 3 veces mes<br><input type="radio"/> 1 vez semana<br><input type="radio"/> 2 a 4 veces semana<br><input type="radio"/> 5 a 6 veces semana<br><input type="radio"/> 1 vez al día<br><input type="radio"/> 2 a 3 veces al día<br><input type="radio"/> 5 a 6 veces al día<br><input type="radio"/> más 6 veces al día |
| vino tinto                | <input type="radio"/> Nunca o menos 1 vez al mes<br><input type="radio"/> 1 a 3 veces mes<br><input type="radio"/> 1 vez semana<br><input type="radio"/> 2 a 4 veces semana<br><input type="radio"/> 5 a 6 veces semana<br><input type="radio"/> 1 vez al día<br><input type="radio"/> 2 a 3 veces al día<br><input type="radio"/> 5 a 6 veces al día<br><input type="radio"/> más 6 veces al día |
| vino blanco               | <input type="radio"/> Nunca o menos 1 vez al mes<br><input type="radio"/> 1 a 3 veces mes<br><input type="radio"/> 1 vez semana<br><input type="radio"/> 2 a 4 veces semana<br><input type="radio"/> 5 a 6 veces semana<br><input type="radio"/> 1 vez al día<br><input type="radio"/> 2 a 3 veces al día<br><input type="radio"/> 5 a 6 veces al día<br><input type="radio"/> más 6 veces al día |

---

|                    |                                                                                                                                                                                                                                                                                                                                                                                                   |
|--------------------|---------------------------------------------------------------------------------------------------------------------------------------------------------------------------------------------------------------------------------------------------------------------------------------------------------------------------------------------------------------------------------------------------|
| vino seco o vermut | <input type="radio"/> Nunca o menos 1 vez al mes<br><input type="radio"/> 1 a 3 veces mes<br><input type="radio"/> 1 vez semana<br><input type="radio"/> 2 a 4 veces semana<br><input type="radio"/> 5 a 6 veces semana<br><input type="radio"/> 1 vez al día<br><input type="radio"/> 2 a 3 veces al día<br><input type="radio"/> 5 a 6 veces al día<br><input type="radio"/> más 6 veces al día |
|--------------------|---------------------------------------------------------------------------------------------------------------------------------------------------------------------------------------------------------------------------------------------------------------------------------------------------------------------------------------------------------------------------------------------------|

---

|         |                                                                                                                                                                                                                                                                                                                                                                                                   |
|---------|---------------------------------------------------------------------------------------------------------------------------------------------------------------------------------------------------------------------------------------------------------------------------------------------------------------------------------------------------------------------------------------------------|
| cerveza | <input type="radio"/> Nunca o menos 1 vez al mes<br><input type="radio"/> 1 a 3 veces mes<br><input type="radio"/> 1 vez semana<br><input type="radio"/> 2 a 4 veces semana<br><input type="radio"/> 5 a 6 veces semana<br><input type="radio"/> 1 vez al día<br><input type="radio"/> 2 a 3 veces al día<br><input type="radio"/> 5 a 6 veces al día<br><input type="radio"/> más 6 veces al día |
|---------|---------------------------------------------------------------------------------------------------------------------------------------------------------------------------------------------------------------------------------------------------------------------------------------------------------------------------------------------------------------------------------------------------|

---

|                     |                                                                                                                                                                                                                                                                                                                                                                                                   |
|---------------------|---------------------------------------------------------------------------------------------------------------------------------------------------------------------------------------------------------------------------------------------------------------------------------------------------------------------------------------------------------------------------------------------------|
| cerveza sin alcohol | <input type="radio"/> Nunca o menos 1 vez al mes<br><input type="radio"/> 1 a 3 veces mes<br><input type="radio"/> 1 vez semana<br><input type="radio"/> 2 a 4 veces semana<br><input type="radio"/> 5 a 6 veces semana<br><input type="radio"/> 1 vez al día<br><input type="radio"/> 2 a 3 veces al día<br><input type="radio"/> 5 a 6 veces al día<br><input type="radio"/> más 6 veces al día |
|---------------------|---------------------------------------------------------------------------------------------------------------------------------------------------------------------------------------------------------------------------------------------------------------------------------------------------------------------------------------------------------------------------------------------------|

---

|         |                                                                                                                                                                                                                                                                                                                                                                                                   |
|---------|---------------------------------------------------------------------------------------------------------------------------------------------------------------------------------------------------------------------------------------------------------------------------------------------------------------------------------------------------------------------------------------------------|
| licores | <input type="radio"/> Nunca o menos 1 vez al mes<br><input type="radio"/> 1 a 3 veces mes<br><input type="radio"/> 1 vez semana<br><input type="radio"/> 2 a 4 veces semana<br><input type="radio"/> 5 a 6 veces semana<br><input type="radio"/> 1 vez al día<br><input type="radio"/> 2 a 3 veces al día<br><input type="radio"/> 5 a 6 veces al día<br><input type="radio"/> más 6 veces al día |
|---------|---------------------------------------------------------------------------------------------------------------------------------------------------------------------------------------------------------------------------------------------------------------------------------------------------------------------------------------------------------------------------------------------------|

---

|                       |                                                                                                                                                                                                                                                                                                                                                                                                   |
|-----------------------|---------------------------------------------------------------------------------------------------------------------------------------------------------------------------------------------------------------------------------------------------------------------------------------------------------------------------------------------------------------------------------------------------|
| ginebra o ron o vodka | <input type="radio"/> Nunca o menos 1 vez al mes<br><input type="radio"/> 1 a 3 veces mes<br><input type="radio"/> 1 vez semana<br><input type="radio"/> 2 a 4 veces semana<br><input type="radio"/> 5 a 6 veces semana<br><input type="radio"/> 1 vez al día<br><input type="radio"/> 2 a 3 veces al día<br><input type="radio"/> 5 a 6 veces al día<br><input type="radio"/> más 6 veces al día |
|-----------------------|---------------------------------------------------------------------------------------------------------------------------------------------------------------------------------------------------------------------------------------------------------------------------------------------------------------------------------------------------------------------------------------------------|

---

|                 |                                                                                                                                                                                                                                                                                                                                                                                                   |
|-----------------|---------------------------------------------------------------------------------------------------------------------------------------------------------------------------------------------------------------------------------------------------------------------------------------------------------------------------------------------------------------------------------------------------|
| refresco normal | <input type="radio"/> Nunca o menos 1 vez al mes<br><input type="radio"/> 1 a 3 veces mes<br><input type="radio"/> 1 vez semana<br><input type="radio"/> 2 a 4 veces semana<br><input type="radio"/> 5 a 6 veces semana<br><input type="radio"/> 1 vez al día<br><input type="radio"/> 2 a 3 veces al día<br><input type="radio"/> 5 a 6 veces al día<br><input type="radio"/> más 6 veces al día |
|-----------------|---------------------------------------------------------------------------------------------------------------------------------------------------------------------------------------------------------------------------------------------------------------------------------------------------------------------------------------------------------------------------------------------------|

---

---

refresco sin azúcar

- ☐ Nunca o menos 1 vez al mes
- ☐ 1 a 3 veces mes
- ☐ 1 vez semana
- ☐ 2 a 4 veces semana
- ☐ 5 a 6 veces semana
- ☐ 1 vez al día
- ☐ 2 a 3 veces al día
- ☐ 5 a 6 veces al día
- ☐ más 6 veces al día

---

Agua del grifo

- ☐ Nunca o menos 1 vez al mes
- ☐ 1 a 3 veces mes
- ☐ 1 vez semana
- ☐ 2 a 4 veces semana
- ☐ 5 a 6 veces semana
- ☐ 1 vez al día
- ☐ 2 a 3 veces al día
- ☐ 5 a 6 veces al día
- ☐ más 6 veces al día

---

agua embotellada sin gas

- ☐ Nunca o menos 1 vez al mes
- ☐ 1 a 3 veces mes
- ☐ 1 vez semana
- ☐ 2 a 4 veces semana
- ☐ 5 a 6 veces semana
- ☐ 1 vez al día
- ☐ 2 a 3 veces al día
- ☐ 5 a 6 veces al día
- ☐ más 6 veces al día

---

agua embotellada con gas

- ☐ Nunca o menos 1 vez al mes
- ☐ 1 a 3 veces mes
- ☐ 1 vez semana
- ☐ 2 a 4 veces semana
- ☐ 5 a 6 veces semana
- ☐ 1 vez al día
- ☐ 2 a 3 veces al día
- ☐ 5 a 6 veces al día
- ☐ más 6 veces al día

---

zumو frutas embasado

- ☐ Nunca o menos 1 vez al mes
- ☐ 1 a 3 veces mes
- ☐ 1 vez semana
- ☐ 2 a 4 veces semana
- ☐ 5 a 6 veces semana
- ☐ 1 vez al día
- ☐ 2 a 3 veces al día
- ☐ 5 a 6 veces al día
- ☐ más 6 veces al día

---

cafe

- ☐ Nunca o menos 1 vez al mes
- ☐ 1 a 3 veces mes
- ☐ 1 vez semana
- ☐ 2 a 4 veces semana
- ☐ 5 a 6 veces semana
- ☐ 1 vez al día
- ☐ 2 a 3 veces al día
- ☐ 5 a 6 veces al día
- ☐ más 6 veces al día

---

cafe descafeinado

- ☐ Nunca o menos 1 vez al mes
- ☐ 1 a 3 veces mes
- ☐ 1 vez semana
- ☐ 2 a 4 veces semana
- ☐ 5 a 6 veces semana
- ☐ 1 vez al día
- ☐ 2 a 3 veces al día
- ☐ 5 a 6 veces al día
- ☐ más 6 veces al día

---

te o infusión

- ☐ Nunca o menos 1 vez al mes
- ☐ 1 a 3 veces mes
- ☐ 1 vez semana
- ☐ 2 a 4 veces semana
- ☐ 5 a 6 veces semana
- ☐ 1 vez al día
- ☐ 2 a 3 veces al día
- ☐ 5 a 6 veces al día
- ☐ más 6 veces al día

---

sopa o puré verduras

- ☐ Nunca o menos 1 vez al mes
- ☐ 1 a 3 veces mes
- ☐ 1 vez semana
- ☐ 2 a 4 veces semana
- ☐ 5 a 6 veces semana
- ☐ 1 vez al día
- ☐ 2 a 3 veces al día
- ☐ 5 a 6 veces al día
- ☐ más 6 veces al día

---

croquetas pollo jamón

- ☐ Nunca o menos 1 vez al mes
- ☐ 1 a 3 veces mes
- ☐ 1 vez semana
- ☐ 2 a 4 veces semana
- ☐ 5 a 6 veces semana
- ☐ 1 vez al día
- ☐ 2 a 3 veces al día
- ☐ 5 a 6 veces al día
- ☐ más 6 veces al día

---

croquetas pescado

- ☐ Nunca o menos 1 vez al mes
- ☐ 1 a 3 veces mes
- ☐ 1 vez semana
- ☐ 2 a 4 veces semana
- ☐ 5 a 6 veces semana
- ☐ 1 vez al día
- ☐ 2 a 3 veces al día
- ☐ 5 a 6 veces al día
- ☐ más 6 veces al día

---

mayonesa

- ☐ Nunca o menos 1 vez al mes
- ☐ 1 a 3 veces mes
- ☐ 1 vez semana
- ☐ 2 a 4 veces semana
- ☐ 5 a 6 veces semana
- ☐ 1 vez al día
- ☐ 2 a 3 veces al día
- ☐ 5 a 6 veces al día
- ☐ más 6 veces al día

---

salsa tomate

- ☐ Nunca o menos 1 vez al mes
- ☐ 1 a 3 veces mes
- ☐ 1 vez semana
- ☐ 2 a 4 veces semana
- ☐ 5 a 6 veces semana
- ☐ 1 vez al día
- ☐ 2 a 3 veces al día
- ☐ 5 a 6 veces al día
- ☐ más 6 veces al día

---

ketchup

- ☐ Nunca o menos 1 vez al mes
- ☐ 1 a 3 veces mes
- ☐ 1 vez semana
- ☐ 2 a 4 veces semana
- ☐ 5 a 6 veces semana
- ☐ 1 vez al día
- ☐ 2 a 3 veces al día
- ☐ 5 a 6 veces al día
- ☐ más 6 veces al día

---

sal

- ☐ Nunca o menos 1 vez al mes
- ☐ 1 a 3 veces mes
- ☐ 1 vez semana
- ☐ 2 a 4 veces semana
- ☐ 5 a 6 veces semana
- ☐ 1 vez al día
- ☐ 2 a 3 veces al día
- ☐ 5 a 6 veces al día
- ☐ más 6 veces al día

---

ajo

- ☐ Nunca o menos 1 vez al mes
- ☐ 1 a 3 veces mes
- ☐ 1 vez semana
- ☐ 2 a 4 veces semana
- ☐ 5 a 6 veces semana
- ☐ 1 vez al día
- ☐ 2 a 3 veces al día
- ☐ 5 a 6 veces al día
- ☐ más 6 veces al día

---

mermelada o miel

- ☐ Nunca o menos 1 vez al mes
- ☐ 1 a 3 veces mes
- ☐ 1 vez semana
- ☐ 2 a 4 veces semana
- ☐ 5 a 6 veces semana
- ☐ 1 vez al día
- ☐ 2 a 3 veces al día
- ☐ 5 a 6 veces al día
- ☐ más 6 veces al día

---

azúcar

- ☐ Nunca o menos 1 vez al mes
- ☐ 1 a 3 veces mes
- ☐ 1 vez semana
- ☐ 2 a 4 veces semana
- ☐ 5 a 6 veces semana
- ☐ 1 vez al día
- ☐ 2 a 3 veces al día
- ☐ 5 a 6 veces al día
- ☐ más 6 veces al día

---

Otro alimento

---

suplementos vitamínicos

- ☐ si  
☐ no

---

suplementos vitamínicos

---

dieta previa

- ☐ si  
☐ no

motivo dieta

- ☐ no dieta  
☐ control peso  
☐ control colesterol  
☐ control diabetes  
☐ problemas estómago  
☐ problemas vesícula o hepáticos  
☐ HTA o cardiopatía  
☐ problemas renales  
☐ alergia alimentaria  
☐ ácido úrico elevado  
☐ vegetariana  
☐ otros

---

cambio alimentos año previo gestación

---

- ☐ si  
☐ no

cambio lácteos

- ☐ eliminado  
☐ disminuido  
☐ igual  
☐ aumentado  
☐ no sabe

---

cambio huevos

---

- ☐ eliminado  
☐ disminuido  
☐ igual  
☐ aumentado  
☐ no sabe

cambio carne

- ☐ eliminado  
☐ disminuido  
☐ igual  
☐ aumentado  
☐ no sabe

---

cambio pescado

---

- ☐ eliminado  
☐ disminuido  
☐ igual  
☐ aumentado  
☐ no sabe

cambio verduras

- ☐ eliminado  
☐ disminuido  
☐ igual  
☐ aumentado  
☐ no sabe

|                            |                                                                                                                                                                                                             |
|----------------------------|-------------------------------------------------------------------------------------------------------------------------------------------------------------------------------------------------------------|
| cambio legumbres           | <input type="radio"/> eliminado<br><input type="radio"/> disminuido<br><input type="radio"/> igual<br><input type="radio"/> aumentado<br><input type="radio"/> no sabe                                      |
| cambio fruta               | <input type="radio"/> eliminado<br><input type="radio"/> disminuido<br><input type="radio"/> igual<br><input type="radio"/> aumentado<br><input type="radio"/> no sabe                                      |
| cambio pan                 | <input type="radio"/> eliminado<br><input type="radio"/> disminuido<br><input type="radio"/> igual<br><input type="radio"/> aumentado<br><input type="radio"/> no sabe                                      |
| cambio aceite oliva        | <input type="radio"/> eliminado<br><input type="radio"/> disminuido<br><input type="radio"/> igual<br><input type="radio"/> aumentado<br><input type="radio"/> no sabe                                      |
| cambio mante o margarina   | <input type="radio"/> eliminado<br><input type="radio"/> disminuido<br><input type="radio"/> igual<br><input type="radio"/> aumentado<br><input type="radio"/> no sabe                                      |
| cambio azúcar y dulces     | <input type="radio"/> eliminado<br><input type="radio"/> disminuido<br><input type="radio"/> igual<br><input type="radio"/> aumentado<br><input type="radio"/> no sabe                                      |
| cambio bebidas alcohólicas | <input type="radio"/> eliminado<br><input type="radio"/> disminuido<br><input type="radio"/> igual<br><input type="radio"/> aumentado<br><input type="radio"/> no sabe                                      |
| frecuencia comidas fritas  | <input type="radio"/> a diario<br><input type="radio"/> 5 a 6 veces semana<br><input type="radio"/> 2 a 4 veces semana<br><input type="radio"/> 1 vez semana<br><input type="radio"/> menos de 1 vez semana |
| carne                      | <input type="radio"/> no como<br><input type="radio"/> cruda<br><input type="radio"/> poco hecha<br><input type="radio"/> hecha<br><input type="radio"/> muy hecha                                          |
| grasa visible carne        | <input type="radio"/> quita toda<br><input type="radio"/> quita mayoría<br><input type="radio"/> quita un poco<br><input type="radio"/> no quita nada                                                       |

|                                |                                                                                                                                                                                                                                               |
|--------------------------------|-----------------------------------------------------------------------------------------------------------------------------------------------------------------------------------------------------------------------------------------------|
| cocina carne                   | <input type="radio"/> a la plancha<br><input type="radio"/> a la parrilla<br><input type="radio"/> asada<br><input type="radio"/> frita<br><input type="radio"/> guisada                                                                      |
| tostado quemado carne          | <input type="radio"/> nunca<br><input type="radio"/> 1 vez mes<br><input type="radio"/> 2 a 3 veces mes<br><input type="radio"/> 1 vez semana<br><input type="radio"/> 2 a 3 semanas                                                          |
| tostado quemado pescado        | <input type="radio"/> nunca<br><input type="radio"/> 1 vez mes<br><input type="radio"/> 2 a 3 veces mes<br><input type="radio"/> 1 vez semana<br><input type="radio"/> 2 a 3 semanas                                                          |
| socarrat paella                | <input type="radio"/> nunca<br><input type="radio"/> 1 vez mes<br><input type="radio"/> 2 a 3 veces mes<br><input type="radio"/> 1 vez semana<br><input type="radio"/> 2 a 3 semanas                                                          |
| grasa o aceite cocinar         | <input type="radio"/> mantequilla<br><input type="radio"/> margarina<br><input type="radio"/> aceite oliva<br><input type="radio"/> aceite oliva virgen extra<br><input type="radio"/> aceite vegetal<br><input type="radio"/> mezcla aceites |
| grasa aceite aliñar            | <input type="radio"/> mantequilla<br><input type="radio"/> margarina<br><input type="radio"/> aceite oliva<br><input type="radio"/> aceite oliva virgen extra<br><input type="radio"/> aceite vegetal<br><input type="radio"/> mezcla aceites |
| grasa aceite freir             | <input type="radio"/> mantequilla<br><input type="radio"/> margarina<br><input type="radio"/> aceite oliva<br><input type="radio"/> aceite oliva virgen extra<br><input type="radio"/> aceite vegetal<br><input type="radio"/> mezcla aceites |
| Ejercicio cuestionario         | <input type="radio"/> si<br><input type="radio"/> no                                                                                                                                                                                          |
| horas de sueño incluido siesta | _____                                                                                                                                                                                                                                         |
| minutos siesta                 | _____                                                                                                                                                                                                                                         |
| horas televisión semana        | _____                                                                                                                                                                                                                                         |



|                                        |                                                                                                                                                                                                                                                                                                                                                                |
|----------------------------------------|----------------------------------------------------------------------------------------------------------------------------------------------------------------------------------------------------------------------------------------------------------------------------------------------------------------------------------------------------------------|
| actividad trabajo                      | <input type="radio"/> casi siempre sentado<br><input type="radio"/> sentado 50 por cien<br><input type="radio"/> casi siempre de pie, quieto<br><input type="radio"/> casi siempre levantado caminando y llevando pocas cosas<br><input type="radio"/> casi siempre levantado, caminando y llevado muchas cosas<br><input type="radio"/> trabajo manual pesado |
| tiempo caminar o bici al día           | <input type="radio"/> casi nunca<br><input type="radio"/> menos 20min día<br><input type="radio"/> 20 a 40 min día<br><input type="radio"/> 40 a 60 min día<br><input type="radio"/> 1h o 1h y media día<br><input type="radio"/> más de 1h y media al día                                                                                                     |
| tiempo tareas casa al día              | <input type="radio"/> menos de 1h día<br><input type="radio"/> 1 a 2h día<br><input type="radio"/> 3 a 4h día<br><input type="radio"/> 5 a 6h día<br><input type="radio"/> 7 a 8h día<br><input type="radio"/> más de 8h día                                                                                                                                   |
| tiempo libre televisión ordenador leer | <input type="radio"/> menos 1h día<br><input type="radio"/> 1h día<br><input type="radio"/> 2h día<br><input type="radio"/> 3h día<br><input type="radio"/> 4h día<br><input type="radio"/> 5 a 6h día<br><input type="radio"/> mas 6h día                                                                                                                     |
| tiempo libre ejercicio o deporte       | <input type="radio"/> menos 1h semana<br><input type="radio"/> 1h semana<br><input type="radio"/> 2h semana<br><input type="radio"/> 3h semana<br><input type="radio"/> 4 a 5h semana<br><input type="radio"/> mas 5h semana                                                                                                                                   |
| como se considera                      | <input type="radio"/> sedentaria<br><input type="radio"/> poco activa<br><input type="radio"/> moderadamente activa<br><input type="radio"/> bastante activa<br><input type="radio"/> muy activa<br><input type="radio"/> no sabe                                                                                                                              |
| FUR                                    | [*DATA REMOVED*]                                                                                                                                                                                                                                                                                                                                               |
| Semanas gestación 2T                   | [*DATA REMOVED*]                                                                                                                                                                                                                                                                                                                                               |
| Días gestación 2T                      | [*DATA REMOVED*]                                                                                                                                                                                                                                                                                                                                               |
| DBP 2T                                 | [*DATA REMOVED*]                                                                                                                                                                                                                                                                                                                                               |
| CC 2T                                  | [*DATA REMOVED*]                                                                                                                                                                                                                                                                                                                                               |
| AC 2T                                  | [*DATA REMOVED*]                                                                                                                                                                                                                                                                                                                                               |

|                                                   |                                                                                                                                                                                                 |
|---------------------------------------------------|-------------------------------------------------------------------------------------------------------------------------------------------------------------------------------------------------|
| LF 2T                                             | [*DATA REMOVED*]                                                                                                                                                                                |
| PFE 2T (Hadlock)                                  | [*DATA REMOVED*]                                                                                                                                                                                |
| Semanas gestación 3T                              | [*DATA REMOVED*]                                                                                                                                                                                |
| días 3T                                           | [*DATA REMOVED*]                                                                                                                                                                                |
| DBP 3T                                            | [*DATA REMOVED*]                                                                                                                                                                                |
| CC 3T                                             | [*DATA REMOVED*]                                                                                                                                                                                |
| AC 3T                                             | [*DATA REMOVED*]                                                                                                                                                                                |
| LF 3T                                             | [*DATA REMOVED*]                                                                                                                                                                                |
| PFE 3T (Hadlock)                                  | [*DATA REMOVED*]                                                                                                                                                                                |
| Semanas de gestación final                        | [*DATA REMOVED*]                                                                                                                                                                                |
| días gestación final                              | [*DATA REMOVED*]                                                                                                                                                                                |
| Localización placenta                             | <input type="radio"/> anterior<br><input type="radio"/> lateral derecha<br><input type="radio"/> lateral izquierda<br><input type="radio"/> posterior<br><input checked="" type="radio"/> fondo |
| Presentación longitudinal cefálica                | <input type="radio"/> no<br><input checked="" type="radio"/> si                                                                                                                                 |
| Dorso                                             | <input checked="" type="radio"/> izquierda anterior<br><input type="radio"/> izquierda posterior<br><input type="radio"/> derecha anterior<br><input type="radio"/> derecha posterior           |
| diámetro biparietal                               | [*DATA REMOVED*]                                                                                                                                                                                |
| Circunferencia craneal                            | [*DATA REMOVED*]                                                                                                                                                                                |
| Circunferencia abdominal                          | [*DATA REMOVED*]                                                                                                                                                                                |
| Longitud de femur                                 | [*DATA REMOVED*]                                                                                                                                                                                |
| tejido celular subcutáneo a nivel del muslo en mm | [*DATA REMOVED*]                                                                                                                                                                                |
| tejido celular subcutáneo en abdomen en mm        | [*DATA REMOVED*]                                                                                                                                                                                |
| Volumen del muslo en cm3                          | [*DATA REMOVED*]                                                                                                                                                                                |
| Peso fetal estimado según fórmula de Hadlock      | [*DATA REMOVED*]                                                                                                                                                                                |

|                                               |                                                                                                                                                          |
|-----------------------------------------------|----------------------------------------------------------------------------------------------------------------------------------------------------------|
| Percentil                                     | [*DATA REMOVED*]                                                                                                                                         |
| Peso fetal estimado según fórmula de Scioscia | <hr/>                                                                                                                                                    |
| Peso fetal estimado según fórmula de LEE      | <hr/>                                                                                                                                                    |
| Tipo de parto                                 | <input checked="" type="radio"/> eutocico<br><input type="radio"/> instrumentado/ventosa<br><input type="radio"/> cesarea                                |
| fecha de nacimiento                           | [*DATA REMOVED*]                                                                                                                                         |
| Días entre exploración y nacimiento           | [*DATA REMOVED*]                                                                                                                                         |
| Peso RN en g                                  | [*DATA REMOVED*]                                                                                                                                         |
| sexo                                          | <input type="radio"/> mujer<br><input checked="" type="radio"/> hombre                                                                                   |
| Apgar 1 minuto                                | [*DATA REMOVED*]                                                                                                                                         |
| Apgar 5 minutos                               | [*DATA REMOVED*]                                                                                                                                         |
| Apgar 10 minutos                              | <hr/>                                                                                                                                                    |
| antecedente Covid durante gestación           | <input type="radio"/> Yes<br><input checked="" type="radio"/> No                                                                                         |
| Nivel de estudios                             | <input type="radio"/> ninguno<br><input type="radio"/> primarios<br><input checked="" type="radio"/> secundarios<br><input type="radio"/> universitarios |

# Base\_datos\_estimacion\_peso\_fetal

|                                       |                                                                                                                                                                                                                                                                                      |
|---------------------------------------|--------------------------------------------------------------------------------------------------------------------------------------------------------------------------------------------------------------------------------------------------------------------------------------|
| Número de identificación participante | 199                                                                                                                                                                                                                                                                                  |
| CODIGO PARTICIPANTE                   |                                                                                                                                                                                                                                                                                      |
| Edad                                  | [*DATA REMOVED*]                                                                                                                                                                                                                                                                     |
| Gestaciones                           | <input checked="" type="radio"/> 1<br><input type="radio"/> 2<br><input type="radio"/> 3<br><input type="radio"/> mas de 3                                                                                                                                                           |
| partos                                | <input checked="" type="radio"/> 0<br><input type="radio"/> 1<br><input type="radio"/> 2<br><input type="radio"/> 3<br><input type="radio"/> mas de 3                                                                                                                                |
| cesáreas                              | <input checked="" type="radio"/> 0<br><input type="radio"/> 1<br><input type="radio"/> 2<br><input type="radio"/> 3<br><input type="radio"/> mas de 3                                                                                                                                |
| Abortos                               | <input checked="" type="radio"/> 0<br><input type="radio"/> 1<br><input type="radio"/> 2<br><input type="radio"/> 3<br><input type="radio"/> mas de 3                                                                                                                                |
| Tipo de gestacion                     | <input checked="" type="radio"/> espontanea<br><input type="radio"/> IAC inseminación artificial conyuge<br><input type="radio"/> IAD inseminación artificial donante<br><input type="radio"/> FIV Fecundación in Vitro<br><input type="radio"/> Ovodon FIV con donación de ovocitos |
| peso previo a embarazo                | [*DATA REMOVED*]                                                                                                                                                                                                                                                                     |
| Ganancia ponderal embarazo            | [*DATA REMOVED*]                                                                                                                                                                                                                                                                     |
| Talla madre                           | [*DATA REMOVED*]                                                                                                                                                                                                                                                                     |
| IMC previo embarazo                   | 22.229061933586404                                                                                                                                                                                                                                                                   |
| Patología obstétrica                  | <input checked="" type="radio"/> no<br><input type="radio"/> si                                                                                                                                                                                                                      |
| Diabetes pregestacional               | <input checked="" type="radio"/> no<br><input type="radio"/> si                                                                                                                                                                                                                      |
| Diabetes gestacional                  | <input checked="" type="radio"/> no<br><input type="radio"/> si                                                                                                                                                                                                                      |

|                                            |                                                                                                                                                                                      |
|--------------------------------------------|--------------------------------------------------------------------------------------------------------------------------------------------------------------------------------------|
| Diabetes gestacional con insulina          | <input checked="" type="radio"/> no<br><input type="radio"/> si                                                                                                                      |
| Diabetes gestacional con dieta y ejercicio | <input checked="" type="radio"/> no<br><input type="radio"/> si                                                                                                                      |
| Percentil fetos previos                    | <input checked="" type="radio"/> Nada<br><input type="radio"/> percentil menor de 10<br><input type="radio"/> percentil entre 10 y 90<br><input type="radio"/> percentil mayor de 90 |
| Exfumadora                                 | <input type="radio"/> Nada<br><input checked="" type="radio"/> menos de 5 años<br><input type="radio"/> 5 a 10 años<br><input type="radio"/> mayor o igual a 10 años                 |
| Hábito tabáquico                           | <input checked="" type="radio"/> no<br><input type="radio"/> si                                                                                                                      |
| fumadora                                   | [*DATA REMOVED*]                                                                                                                                                                     |
| Consumo otros tóxicos                      | <input checked="" type="radio"/> no<br><input type="radio"/> si                                                                                                                      |
| Hb 1T                                      | [*DATA REMOVED*]                                                                                                                                                                     |
| Htc 1T                                     | [*DATA REMOVED*]                                                                                                                                                                     |
| Hb 2T                                      | [*DATA REMOVED*]                                                                                                                                                                     |
| HTC 2T                                     | [*DATA REMOVED*]                                                                                                                                                                     |
| Hb 3T                                      | [*DATA REMOVED*]                                                                                                                                                                     |
| HTC 3T                                     | [*DATA REMOVED*]                                                                                                                                                                     |
| Suplemento FE oral                         | <input type="radio"/> si<br><input checked="" type="radio"/> no                                                                                                                      |
| Suplemento fe iv                           | <input type="radio"/> si<br><input checked="" type="radio"/> no                                                                                                                      |
| Transfusión                                | <input checked="" type="radio"/> no<br><input type="radio"/> si                                                                                                                      |
| Solicitada Vit D                           | <input checked="" type="radio"/> no<br><input type="radio"/> si                                                                                                                      |
| Deficit vit D                              | <input type="radio"/> no<br><input type="radio"/> si                                                                                                                                 |
| Suplemento vit D                           | <input type="radio"/> si<br><input checked="" type="radio"/> no                                                                                                                      |

---

Dieta, cuestionario

- ☒ sí  
☐ no
- 

Leche entera

- ☐ Nunca o menos 1 vez al mes  
☐ 1 a 3 veces mes  
☐ 1 vez semana  
☐ 2 a 4 veces semana  
☐ 5 a 6 veces semana  
☐ 1 vez al día  
☐ 2 a 3 veces al día  
☐ 5 a 6 veces al día  
☐ más 6 veces al día
- 

Leche semidesnatada

- ☐ Nunca o menos 1 vez al mes  
☐ 1 a 3 veces mes  
☐ 1 vez semana  
☐ 2 a 4 veces semana  
☐ 5 a 6 veces semana  
☐ 1 vez al día  
☐ 2 a 3 veces al día  
☐ 5 a 6 veces al día  
☐ mas 6 veces al día
- 

Leche desnatada

- ☐ Nunca o menos 1 vez al mes  
☐ 1 a 3 veces mes  
☐ 1 vez semana  
☐ 2 a 4 veces semana  
☐ 5 a 6 veces semana  
☐ 1 vez al día  
☐ 2 a 3 veces al día  
☐ 5 a 6 veces al día  
☐ más 6 veces al día
- 

Leche condensada

- ☐ Nunca o menos 1 vez al mes  
☐ 1 a 3 veces mes  
☐ 1 vez semana  
☐ 2 a 4 veces semana  
☐ 5 a 6 veces semana  
☐ 1 vez al día  
☐ 2 a 3 veces al día  
☐ 5 a 6 veces al día  
☐ más 6 veces al día
- 

nata o crema de leche

- ☐ Nunca o menos 1 vez al mes  
☐ 1 a 3 veces mes  
☐ 1 vez semana  
☐ 2 a 4 veces semana  
☐ 5 a 6 veces semana  
☐ 1 vez al día  
☐ 2 a 3 veces al día  
☐ 5 a 6 veces al día  
☐ más 6 veces al día

---

Yogurt Entero

- ☐ Nunca o menos 1 vez al mes
- ☐ 1 a 3 veces mes
- ☐ 1 vez semana
- ☐ 2 a 4 veces semana
- ☐ 5 a 6 veces semana
- ☐ 1 vez al día
- ☐ 2 a 3 veces al día
- ☐ 5 a 6 veces al día
- ☐ más 6 veces al día

---

Yogurt desnatado

- ☐ Nunca o menos 1 vez al mes
- ☐ 1 a 3 veces mes
- ☐ 1 vez semana
- ☐ 2 a 4 veces semana
- ☐ 5 a 6 veces semana
- ☐ 1 vez al día
- ☐ 2 a 3 veces al día
- ☐ 5 a 6 veces al día
- ☐ más 6 veces al día

---

100g requesón o queso blando o queso fresco

- ☐ Nunca o menos 1 vez al mes
- ☐ 1 a 3 veces mes
- ☐ 1 vez semana
- ☐ 2 a 4 veces semana
- ☐ 5 a 6 veces semana
- ☐ 1 vez al día
- ☐ 2 a 3 veces al día
- ☐ 5 a 6 veces al día
- ☐ más 6 veces al día

---

queso curado o semicurado o cremoso

- ☐ Nunca o menos 1 vez al mes
- ☐ 1 a 3 veces mes
- ☐ 1 vez semana
- ☐ 2 a 4 veces semana
- ☐ 5 a 6 veces semana
- ☐ 1 vez al día
- ☐ 2 a 3 veces al día
- ☐ 5 a 6 veces al día
- ☐ más 6 veces al día

---

natillas flan pudding

- ☐ Nunca o menos 1 vez al mes
- ☐ 1 a 3 veces mes
- ☐ 1 vez semana
- ☐ 2 a 4 veces semana
- ☐ 5 a 6 veces semana
- ☐ 1 vez al día
- ☐ 2 a 3 veces al día
- ☐ 5 a 6 veces al día
- ☐ más 6 veces al día

---

Helado

- ☐ Nunca o menos 1 vez al mes
- ☐ 1 a 3 veces mes
- ☐ 1 vez semana
- ☐ 2 a 4 veces semana
- ☐ 5 a 6 veces semana
- ☐ 1 vez al día
- ☐ 2 a 3 veces al día
- ☐ 5 a 6 veces al día
- ☐ más 6 veces al día

|                                      |                                                                                                                                                                                                                                                                                                                                                                                                   |
|--------------------------------------|---------------------------------------------------------------------------------------------------------------------------------------------------------------------------------------------------------------------------------------------------------------------------------------------------------------------------------------------------------------------------------------------------|
| huevo                                | <input type="radio"/> Nunca o menos 1 vez al mes<br><input type="radio"/> 1 a 3 veces mes<br><input type="radio"/> 1 vez semana<br><input type="radio"/> 2 a 4 veces semana<br><input type="radio"/> 5 a 6 veces semana<br><input type="radio"/> 1 vez al día<br><input type="radio"/> 2 a 3 veces al día<br><input type="radio"/> 5 a 6 veces al día<br><input type="radio"/> más 6 veces al día |
| Pollo con piel                       | <input type="radio"/> Nunca o menos 1 vez al mes<br><input type="radio"/> 1 a 3 veces mes<br><input type="radio"/> 1 vez semana<br><input type="radio"/> 2 a 4 veces semana<br><input type="radio"/> 5 a 6 veces semana<br><input type="radio"/> 1 vez al día<br><input type="radio"/> 2 a 3 veces al día<br><input type="radio"/> 5 a 6 veces al día<br><input type="radio"/> más 6 veces al día |
| pollo sin piel                       | <input type="radio"/> Nunca o menos 1 vez al mes<br><input type="radio"/> 1 a 3 veces mes<br><input type="radio"/> 1 vez semana<br><input type="radio"/> 2 a 4 veces semana<br><input type="radio"/> 5 a 6 veces semana<br><input type="radio"/> 1 vez al día<br><input type="radio"/> 2 a 3 veces al día<br><input type="radio"/> 5 a 6 veces al día<br><input type="radio"/> más 6 veces al día |
| Ternera o cerdo o cordero            | <input type="radio"/> Nunca o menos 1 vez al mes<br><input type="radio"/> 1 a 3 veces mes<br><input type="radio"/> 1 vez semana<br><input type="radio"/> 2 a 4 veces semana<br><input type="radio"/> 5 a 6 veces semana<br><input type="radio"/> 1 vez al día<br><input type="radio"/> 2 a 3 veces al día<br><input type="radio"/> 5 a 6 veces al día<br><input type="radio"/> más 6 veces al día |
| carne caza: Conejo o codorniz o pato | <input type="radio"/> Nunca o menos 1 vez al mes<br><input type="radio"/> 1 a 3 veces mes<br><input type="radio"/> 1 vez semana<br><input type="radio"/> 2 a 4 veces semana<br><input type="radio"/> 5 a 6 veces semana<br><input type="radio"/> 1 vez al día<br><input type="radio"/> 2 a 3 veces al día<br><input type="radio"/> 5 a 6 veces al día<br><input type="radio"/> más 6 veces al día |
| Hígado de ternera o cerdo o pollo    | <input type="radio"/> Nunca o menos 1 vez al mes<br><input type="radio"/> 1 a 3 veces mes<br><input type="radio"/> 1 vez semana<br><input type="radio"/> 2 a 4 veces semana<br><input type="radio"/> 5 a 6 veces semana<br><input type="radio"/> 1 vez al día<br><input type="radio"/> 2 a 3 veces al día<br><input type="radio"/> 5 a 6 veces al día<br><input type="radio"/> más 6 veces al día |



---

Vísceras

- ☐ Nunca o menos 1 vez al mes
- ☐ 1 a 3 veces mes
- ☐ 1 vez semana
- ☐ 2 a 4 veces semana
- ☐ 5 a 6 veces semana
- ☐ 1 vez al día
- ☐ 2 a 3 veces al día
- ☐ 5 a 6 veces al día
- ☐ más 6 veces al día

---

Embutido

- ☐ Nunca o menos 1 vez al mes
- ☐ 1 a 3 veces mes
- ☐ 1 vez semana
- ☐ 2 a 4 veces semana
- ☐ 5 a 6 veces semana
- ☐ 1 vez al día
- ☐ 2 a 3 veces al día
- ☐ 5 a 6 veces al día
- ☐ más 6 veces al día

---

Salchicha o similar

- ☐ Nunca o menos 1 vez al mes
- ☐ 1 a 3 veces mes
- ☐ 1 vez semana
- ☐ 2 a 4 veces semana
- ☐ 5 a 6 veces semana
- ☐ 1 vez al día
- ☐ 2 a 3 veces al día
- ☐ 5 a 6 veces al día
- ☐ más 6 veces al día

---

Pate o foiegras

- ☐ Nunca o menos 1 vez al mes
- ☐ 1 a 3 veces mes
- ☐ 1 vez semana
- ☐ 2 a 4 veces semana
- ☐ 5 a 6 veces semana
- ☐ 1 vez al día
- ☐ 2 a 3 veces al día
- ☐ 5 a 6 veces al día
- ☐ más 6 veces al día

---

Hamburguesa

- ☐ Nunca o menos 1 vez al mes
- ☐ 1 a 3 veces mes
- ☐ 1 vez semana
- ☐ 2 a 4 veces semana
- ☐ 5 a 6 veces semana
- ☐ 1 vez al día
- ☐ 2 a 3 veces al día
- ☐ 5 a 6 veces al día
- ☐ más 6 veces al día

---

tocino o bacon

- ☐ Nunca o menos 1 vez al mes
- ☐ 1 a 3 veces mes
- ☐ 1 vez semana
- ☐ 2 a 4 veces semana
- ☐ 5 a 6 veces semana
- ☐ 1 vez al día
- ☐ 2 a 3 veces al día
- ☐ 5 a 6 veces al día
- ☐ más 6 veces al día

---

Pescado frito

- ☐ Nunca o menos 1 vez al mes
- ☐ 1 a 3 veces mes
- ☐ 1 vez semana
- ☐ 2 a 4 veces semana
- ☐ 5 a 6 veces semana
- ☐ 1 vez al día
- ☐ 2 a 3 veces al día
- ☐ 5 a 6 veces al día
- ☐ más 6 veces al día

---

pescado hervido blanco

- ☐ Nunca o menos 1 vez al mes
- ☐ 1 a 3 veces mes
- ☐ 1 vez semana
- ☐ 2 a 4 veces semana
- ☐ 5 a 6 veces semana
- ☐ 1 vez al día
- ☐ 2 a 3 veces al día
- ☐ 5 a 6 veces al día
- ☐ más 6 veces al día

---

pescado hervido azul

- ☐ Nunca o menos 1 vez al mes
- ☐ 1 a 3 veces mes
- ☐ 1 vez semana
- ☐ 2 a 4 veces semana
- ☐ 5 a 6 veces semana
- ☐ 1 vez al día
- ☐ 2 a 3 veces al día
- ☐ 5 a 6 veces al día
- ☐ más 6 veces al día

---

otros pescado azul

- ☐ Nunca o menos 1 vez al mes
- ☐ 1 a 3 veces mes
- ☐ 1 vez semana
- ☐ 2 a 4 veces semana
- ☐ 5 a 6 veces semana
- ☐ 1 vez al día
- ☐ 2 a 3 veces al día
- ☐ 5 a 6 veces al día
- ☐ más 6 veces al día

---

atun conserva

- ☐ Nunca o menos 1 vez al mes
- ☐ 1 a 3 veces mes
- ☐ 1 vez semana
- ☐ 2 a 4 veces semana
- ☐ 5 a 6 veces semana
- ☐ 1 vez al día
- ☐ 2 a 3 veces al día
- ☐ 5 a 6 veces al día
- ☐ más 6 veces al día

---

sardina conserva

- ☐ Nunca o menos 1 vez al mes
- ☐ 1 a 3 veces mes
- ☐ 1 vez semana
- ☐ 2 a 4 veces semana
- ☐ 5 a 6 veces semana
- ☐ 1 vez al día
- ☐ 2 a 3 veces al día
- ☐ 5 a 6 veces al día
- ☐ más 6 veces al día

|                                         |                                                                                                                                                                                                                                                                                                                                                                                                   |
|-----------------------------------------|---------------------------------------------------------------------------------------------------------------------------------------------------------------------------------------------------------------------------------------------------------------------------------------------------------------------------------------------------------------------------------------------------|
| pescado ahumado                         | <input type="radio"/> Nunca o menos 1 vez al mes<br><input type="radio"/> 1 a 3 veces mes<br><input type="radio"/> 1 vez semana<br><input type="radio"/> 2 a 4 veces semana<br><input type="radio"/> 5 a 6 veces semana<br><input type="radio"/> 1 vez al día<br><input type="radio"/> 2 a 3 veces al día<br><input type="radio"/> 5 a 6 veces al día<br><input type="radio"/> más 6 veces al día |
| almejas o mejillones o ostras unos 100g | <input type="radio"/> Nunca o menos 1 vez al mes<br><input type="radio"/> 1 a 3 veces mes<br><input type="radio"/> 1 vez semana<br><input type="radio"/> 2 a 4 veces semana<br><input type="radio"/> 5 a 6 veces semana<br><input type="radio"/> 1 vez al día<br><input type="radio"/> 2 a 3 veces al día<br><input type="radio"/> 5 a 6 veces al día<br><input type="radio"/> más 6 veces al día |
| calamar o chipiron o sepia unos 100g    | <input type="radio"/> Nunca o menos 1 vez al mes<br><input type="radio"/> 1 a 3 veces mes<br><input type="radio"/> 1 vez semana<br><input type="radio"/> 2 a 4 veces semana<br><input type="radio"/> 5 a 6 veces semana<br><input type="radio"/> 1 vez al día<br><input type="radio"/> 2 a 3 veces al día<br><input type="radio"/> 5 a 6 veces al día<br><input type="radio"/> más 6 veces al día |
| marisco unos 100g                       | <input type="radio"/> Nunca o menos 1 vez al mes<br><input type="radio"/> 1 a 3 veces mes<br><input type="radio"/> 1 vez semana<br><input type="radio"/> 2 a 4 veces semana<br><input type="radio"/> 5 a 6 veces semana<br><input type="radio"/> 1 vez al día<br><input type="radio"/> 2 a 3 veces al día<br><input type="radio"/> 5 a 6 veces al día<br><input type="radio"/> más 6 veces al día |
| Espinacas o acelgas cocinadas           | <input type="radio"/> Nunca o menos 1 vez al mes<br><input type="radio"/> 1 a 3 veces mes<br><input type="radio"/> 1 vez semana<br><input type="radio"/> 2 a 4 veces semana<br><input type="radio"/> 5 a 6 veces semana<br><input type="radio"/> 1 vez al día<br><input type="radio"/> 2 a 3 veces al día<br><input type="radio"/> 5 a 6 veces al día<br><input type="radio"/> más 6 veces al día |
| Col o coliflor o brocoli cocinado       | <input type="radio"/> Nunca o menos 1 vez al mes<br><input type="radio"/> 1 a 3 veces mes<br><input type="radio"/> 1 vez semana<br><input type="radio"/> 2 a 4 veces semana<br><input type="radio"/> 5 a 6 veces semana<br><input type="radio"/> 1 vez al día<br><input type="radio"/> 2 a 3 veces al día<br><input type="radio"/> 5 a 6 veces al día<br><input type="radio"/> más 6 veces al día |

---

Lechuga o endivia o escarola

- ☐ Nunca o menos 1 vez al mes
- ☐ 1 a 3 veces mes
- ☐ 1 vez semana
- ☐ 2 a 4 veces semana
- ☐ 5 a 6 veces semana
- ☐ 1 vez al día
- ☐ 2 a 3 veces al día
- ☐ 5 a 6 veces al día
- ☐ más 6 veces al día

---

tomate ensalada

- ☐ Nunca o menos 1 vez al mes
- ☐ 1 a 3 veces mes
- ☐ 1 vez semana
- ☐ 2 a 4 veces semana
- ☐ 5 a 6 veces semana
- ☐ 1 vez al día
- ☐ 2 a 3 veces al día
- ☐ 5 a 6 veces al día
- ☐ más 6 veces al día

---

cebolla

- ☐ Nunca o menos 1 vez al mes
- ☐ 1 a 3 veces mes
- ☐ 1 vez semana
- ☐ 2 a 4 veces semana
- ☐ 5 a 6 veces semana
- ☐ 1 vez al día
- ☐ 2 a 3 veces al día
- ☐ 5 a 6 veces al día
- ☐ más 6 veces al día

---

Zanahoria o calabaza

- ☐ Nunca o menos 1 vez al mes
- ☐ 1 a 3 veces mes
- ☐ 1 vez semana
- ☐ 2 a 4 veces semana
- ☐ 5 a 6 veces semana
- ☐ 1 vez al día
- ☐ 2 a 3 veces al día
- ☐ 5 a 6 veces al día
- ☐ más 6 veces al día

---

Judías verdes

- ☐ Nunca o menos 1 vez al mes
- ☐ 1 a 3 veces mes
- ☐ 1 vez semana
- ☐ 2 a 4 veces semana
- ☐ 5 a 6 veces semana
- ☐ 1 vez al día
- ☐ 2 a 3 veces al día
- ☐ 5 a 6 veces al día
- ☐ más 6 veces al día

---

Berenjena o calabacin o pepino

- ☐ Nunca o menos 1 vez al mes
- ☐ 1 a 3 veces mes
- ☐ 1 vez semana
- ☐ 2 a 4 veces semana
- ☐ 5 a 6 veces semana
- ☐ 1 vez al día
- ☐ 2 a 3 veces al día
- ☐ 5 a 6 veces al día
- ☐ más 6 veces al día

---

pimiento

- ☐ Nunca o menos 1 vez al mes
- ☐ 1 a 3 veces mes
- ☐ 1 vez semana
- ☐ 2 a 4 veces semana
- ☐ 5 a 6 veces semana
- ☐ 1 vez al día
- ☐ 2 a 3 veces al día
- ☐ 5 a 6 veces al día
- ☐ más 6 veces al día

---

alcachofa

- ☐ Nunca o menos 1 vez al mes
- ☐ 1 a 3 veces mes
- ☐ 1 vez semana
- ☐ 2 a 4 veces semana
- ☐ 5 a 6 veces semana
- ☐ 1 vez al día
- ☐ 2 a 3 veces al día
- ☐ 5 a 6 veces al día
- ☐ más 6 veces al día

---

espárragos

- ☐ Nunca o menos 1 vez al mes
- ☐ 1 a 3 veces mes
- ☐ 1 vez semana
- ☐ 2 a 4 veces semana
- ☐ 5 a 6 veces semana
- ☐ 1 vez al día
- ☐ 2 a 3 veces al día
- ☐ 5 a 6 veces al día
- ☐ más 6 veces al día

---

maíz hervido

- ☐ Nunca o menos 1 vez al mes
- ☐ 1 a 3 veces mes
- ☐ 1 vez semana
- ☐ 2 a 4 veces semana
- ☐ 5 a 6 veces semana
- ☐ 1 vez al día
- ☐ 2 a 3 veces al día
- ☐ 5 a 6 veces al día
- ☐ más 6 veces al día

---

legumbres

- ☐ Nunca o menos 1 vez al mes
- ☐ 1 a 3 veces mes
- ☐ 1 vez semana
- ☐ 2 a 4 veces semana
- ☐ 5 a 6 veces semana
- ☐ 1 vez al día
- ☐ 2 a 3 veces al día
- ☐ 5 a 6 veces al día
- ☐ más 6 veces al día

---

naranjas o mandarinas

- ☐ Nunca o menos 1 vez al mes
- ☐ 1 a 3 veces mes
- ☐ 1 vez semana
- ☐ 2 a 4 veces semana
- ☐ 5 a 6 veces semana
- ☐ 1 vez al día
- ☐ 2 a 3 veces al día
- ☐ 5 a 6 veces al día
- ☐ más 6 veces al día

---

zumo natural fruta

- ☐ Nunca o menos 1 vez al mes
- ☐ 1 a 3 veces mes
- ☐ 1 vez semana
- ☐ 2 a 4 veces semana
- ☐ 5 a 6 veces semana
- ☐ 1 vez al día
- ☐ 2 a 3 veces al día
- ☐ 5 a 6 veces al día
- ☐ más 6 veces al día

---

platano

- ☐ Nunca o menos 1 vez al mes
- ☐ 1 a 3 veces mes
- ☐ 1 vez semana
- ☐ 2 a 4 veces semana
- ☐ 5 a 6 veces semana
- ☐ 1 vez al día
- ☐ 2 a 3 veces al día
- ☐ 5 a 6 veces al día
- ☐ más 6 veces al día

---

manzana o pera

- ☐ Nunca o menos 1 vez al mes
- ☐ 1 a 3 veces mes
- ☐ 1 vez semana
- ☐ 2 a 4 veces semana
- ☐ 5 a 6 veces semana
- ☐ 1 vez al día
- ☐ 2 a 3 veces al día
- ☐ 5 a 6 veces al día
- ☐ más 6 veces al día

---

melocotón o nectarina

- ☐ Nunca o menos 1 vez al mes
- ☐ 1 a 3 veces mes
- ☐ 1 vez semana
- ☐ 2 a 4 veces semana
- ☐ 5 a 6 veces semana
- ☐ 1 vez al día
- ☐ 2 a 3 veces al día
- ☐ 5 a 6 veces al día
- ☐ más 6 veces al día

---

sandia o melon

- ☐ Nunca o menos 1 vez al mes
- ☐ 1 a 3 veces mes
- ☐ 1 vez semana
- ☐ 2 a 4 veces semana
- ☐ 5 a 6 veces semana
- ☐ 1 vez al día
- ☐ 2 a 3 veces al día
- ☐ 5 a 6 veces al día
- ☐ más 6 veces al día

---

uva

- ☐ Nunca o menos 1 vez al mes
- ☐ 1 a 3 veces mes
- ☐ 1 vez semana
- ☐ 2 a 4 veces semana
- ☐ 5 a 6 veces semana
- ☐ 1 vez al día
- ☐ 2 a 3 veces al día
- ☐ 5 a 6 veces al día
- ☐ más 6 veces al día

---

bruna o ciruela

- ☐ Nunca o menos 1 vez al mes
- ☐ 1 a 3 veces mes
- ☐ 1 vez semana
- ☐ 2 a 4 veces semana
- ☐ 5 a 6 veces semana
- ☐ 1 vez al día
- ☐ 2 a 3 veces al día
- ☐ 5 a 6 veces al día
- ☐ más 6 veces al día

---

kiwi

- ☐ Nunca o menos 1 vez al mes
- ☐ 1 a 3 veces mes
- ☐ 1 vez semana
- ☐ 2 a 4 veces semana
- ☐ 5 a 6 veces semana
- ☐ 1 vez al día
- ☐ 2 a 3 veces al día
- ☐ 5 a 6 veces al día
- ☐ más 6 veces al día

---

aceituna

- ☐ Nunca o menos 1 vez al mes
- ☐ 1 a 3 veces mes
- ☐ 1 vez semana
- ☐ 2 a 4 veces semana
- ☐ 5 a 6 veces semana
- ☐ 1 vez al día
- ☐ 2 a 3 veces al día
- ☐ 5 a 6 veces al día
- ☐ más 6 veces al día

---

frutos secos

- ☐ Nunca o menos 1 vez al mes
- ☐ 1 a 3 veces mes
- ☐ 1 vez semana
- ☐ 2 a 4 veces semana
- ☐ 5 a 6 veces semana
- ☐ 1 vez al día
- ☐ 2 a 3 veces al día
- ☐ 5 a 6 veces al día
- ☐ más 6 veces al día

---

pan blanco

- ☐ Nunca o menos 1 vez al mes
- ☐ 1 a 3 veces mes
- ☐ 1 vez semana
- ☐ 2 a 4 veces semana
- ☐ 5 a 6 veces semana
- ☐ 1 vez al día
- ☐ 2 a 3 veces al día
- ☐ 5 a 6 veces al día
- ☐ más 6 veces al día

---

pan integral

- ☐ Nunca o menos 1 vez al mes
- ☐ 1 a 3 veces mes
- ☐ 1 vez semana
- ☐ 2 a 4 veces semana
- ☐ 5 a 6 veces semana
- ☐ 1 vez al día
- ☐ 2 a 3 veces al día
- ☐ 5 a 6 veces al día
- ☐ más 6 veces al día

---

cereales desayuno

- ☐ Nunca o menos 1 vez al mes
- ☐ 1 a 3 veces mes
- ☐ 1 vez semana
- ☐ 2 a 4 veces semana
- ☐ 5 a 6 veces semana
- ☐ 1 vez al día
- ☐ 2 a 3 veces al día
- ☐ 5 a 6 veces al día
- ☐ más 6 veces al día

---

patatas fritas

- ☐ Nunca o menos 1 vez al mes
- ☐ 1 a 3 veces mes
- ☐ 1 vez semana
- ☐ 2 a 4 veces semana
- ☐ 5 a 6 veces semana
- ☐ 1 vez al día
- ☐ 2 a 3 veces al día
- ☐ 5 a 6 veces al día
- ☐ más 6 veces al día

---

patatas cocidas o asadas

- ☐ Nunca o menos 1 vez al mes
- ☐ 1 a 3 veces mes
- ☐ 1 vez semana
- ☐ 2 a 4 veces semana
- ☐ 5 a 6 veces semana
- ☐ 1 vez al día
- ☐ 2 a 3 veces al día
- ☐ 5 a 6 veces al día
- ☐ más 6 veces al día

---

bolsa papas

- ☐ Nunca o menos 1 vez al mes
- ☐ 1 a 3 veces mes
- ☐ 1 vez semana
- ☐ 2 a 4 veces semana
- ☐ 5 a 6 veces semana
- ☐ 1 vez al día
- ☐ 2 a 3 veces al día
- ☐ 5 a 6 veces al día
- ☐ más 6 veces al día

---

arroz cocinado

- ☐ Nunca o menos 1 vez al mes
- ☐ 1 a 3 veces mes
- ☐ 1 vez semana
- ☐ 2 a 4 veces semana
- ☐ 5 a 6 veces semana
- ☐ 1 vez al día
- ☐ 2 a 3 veces al día
- ☐ 5 a 6 veces al día
- ☐ más 6 veces al día

---

pasta

- ☐ Nunca o menos 1 vez al mes
- ☐ 1 a 3 veces mes
- ☐ 1 vez semana
- ☐ 2 a 4 veces semana
- ☐ 5 a 6 veces semana
- ☐ 1 vez al día
- ☐ 2 a 3 veces al día
- ☐ 5 a 6 veces al día
- ☐ más 6 veces al día



|                     |                                                                                                                                                                                                                                                                                                                                                                                                   |
|---------------------|---------------------------------------------------------------------------------------------------------------------------------------------------------------------------------------------------------------------------------------------------------------------------------------------------------------------------------------------------------------------------------------------------|
| pizza               | <input type="radio"/> Nunca o menos 1 vez al mes<br><input type="radio"/> 1 a 3 veces mes<br><input type="radio"/> 1 vez semana<br><input type="radio"/> 2 a 4 veces semana<br><input type="radio"/> 5 a 6 veces semana<br><input type="radio"/> 1 vez al día<br><input type="radio"/> 2 a 3 veces al día<br><input type="radio"/> 5 a 6 veces al día<br><input type="radio"/> más 6 veces al día |
| aceite oliva        | <input type="radio"/> Nunca o menos 1 vez al mes<br><input type="radio"/> 1 a 3 veces mes<br><input type="radio"/> 1 vez semana<br><input type="radio"/> 2 a 4 veces semana<br><input type="radio"/> 5 a 6 veces semana<br><input type="radio"/> 1 vez al día<br><input type="radio"/> 2 a 3 veces al día<br><input type="radio"/> 5 a 6 veces al día<br><input type="radio"/> más 6 veces al día |
| otros aceites       | <input type="radio"/> Nunca o menos 1 vez al mes<br><input type="radio"/> 1 a 3 veces mes<br><input type="radio"/> 1 vez semana<br><input type="radio"/> 2 a 4 veces semana<br><input type="radio"/> 5 a 6 veces semana<br><input type="radio"/> 1 vez al día<br><input type="radio"/> 2 a 3 veces al día<br><input type="radio"/> 5 a 6 veces al día<br><input type="radio"/> más 6 veces al día |
| margarina           | <input type="radio"/> Nunca o menos 1 vez al mes<br><input type="radio"/> 1 a 3 veces mes<br><input type="radio"/> 1 vez semana<br><input type="radio"/> 2 a 4 veces semana<br><input type="radio"/> 5 a 6 veces semana<br><input type="radio"/> 1 vez al día<br><input type="radio"/> 2 a 3 veces al día<br><input type="radio"/> 5 a 6 veces al día<br><input type="radio"/> más 6 veces al día |
| mantequilla         | <input type="radio"/> Nunca o menos 1 vez al mes<br><input type="radio"/> 1 a 3 veces mes<br><input type="radio"/> 1 vez semana<br><input type="radio"/> 2 a 4 veces semana<br><input type="radio"/> 5 a 6 veces semana<br><input type="radio"/> 1 vez al día<br><input type="radio"/> 2 a 3 veces al día<br><input type="radio"/> 5 a 6 veces al día<br><input type="radio"/> más 6 veces al día |
| galletas tipo maria | <input type="radio"/> Nunca o menos 1 vez al mes<br><input type="radio"/> 1 a 3 veces mes<br><input type="radio"/> 1 vez semana<br><input type="radio"/> 2 a 4 veces semana<br><input type="radio"/> 5 a 6 veces semana<br><input type="radio"/> 1 vez al día<br><input type="radio"/> 2 a 3 veces al día<br><input type="radio"/> 5 a 6 veces al día<br><input type="radio"/> más 6 veces al día |

---

galletas chocolate

- ☐ Nunca o menos 1 vez al mes
- ☐ 1 a 3 veces mes
- ☐ 1 vez semana
- ☐ 2 a 4 veces semana
- ☐ 5 a 6 veces semana
- ☐ 1 vez al día
- ☐ 2 a 3 veces al día
- ☐ 5 a 6 veces al día
- ☐ más 6 veces al día

---

bolleria

- ☐ Nunca o menos 1 vez al mes
- ☐ 1 a 3 veces mes
- ☐ 1 vez semana
- ☐ 2 a 4 veces semana
- ☐ 5 a 6 veces semana
- ☐ 1 vez al día
- ☐ 2 a 3 veces al día
- ☐ 5 a 6 veces al día
- ☐ más 6 veces al día

---

chocolate o bombones

- ☐ Nunca o menos 1 vez al mes
- ☐ 1 a 3 veces mes
- ☐ 1 vez semana
- ☐ 2 a 4 veces semana
- ☐ 5 a 6 veces semana
- ☐ 1 vez al día
- ☐ 2 a 3 veces al día
- ☐ 5 a 6 veces al día
- ☐ más 6 veces al día

---

chocolate polvo o colacao

- ☐ Nunca o menos 1 vez al mes
- ☐ 1 a 3 veces mes
- ☐ 1 vez semana
- ☐ 2 a 4 veces semana
- ☐ 5 a 6 veces semana
- ☐ 1 vez al día
- ☐ 2 a 3 veces al día
- ☐ 5 a 6 veces al día
- ☐ más 6 veces al día

---

vino tinto

- ☐ Nunca o menos 1 vez al mes
- ☐ 1 a 3 veces mes
- ☐ 1 vez semana
- ☐ 2 a 4 veces semana
- ☐ 5 a 6 veces semana
- ☐ 1 vez al día
- ☐ 2 a 3 veces al día
- ☐ 5 a 6 veces al día
- ☐ más 6 veces al día

---

vino blanco

- ☐ Nunca o menos 1 vez al mes
- ☐ 1 a 3 veces mes
- ☐ 1 vez semana
- ☐ 2 a 4 veces semana
- ☐ 5 a 6 veces semana
- ☐ 1 vez al día
- ☐ 2 a 3 veces al día
- ☐ 5 a 6 veces al día
- ☐ más 6 veces al día

---

|                    |                                                                                                                                                                                                                                                                                                                                                                                                   |
|--------------------|---------------------------------------------------------------------------------------------------------------------------------------------------------------------------------------------------------------------------------------------------------------------------------------------------------------------------------------------------------------------------------------------------|
| vino seco o vermut | <input type="radio"/> Nunca o menos 1 vez al mes<br><input type="radio"/> 1 a 3 veces mes<br><input type="radio"/> 1 vez semana<br><input type="radio"/> 2 a 4 veces semana<br><input type="radio"/> 5 a 6 veces semana<br><input type="radio"/> 1 vez al día<br><input type="radio"/> 2 a 3 veces al día<br><input type="radio"/> 5 a 6 veces al día<br><input type="radio"/> más 6 veces al día |
|--------------------|---------------------------------------------------------------------------------------------------------------------------------------------------------------------------------------------------------------------------------------------------------------------------------------------------------------------------------------------------------------------------------------------------|

---

|         |                                                                                                                                                                                                                                                                                                                                                                                                   |
|---------|---------------------------------------------------------------------------------------------------------------------------------------------------------------------------------------------------------------------------------------------------------------------------------------------------------------------------------------------------------------------------------------------------|
| cerveza | <input type="radio"/> Nunca o menos 1 vez al mes<br><input type="radio"/> 1 a 3 veces mes<br><input type="radio"/> 1 vez semana<br><input type="radio"/> 2 a 4 veces semana<br><input type="radio"/> 5 a 6 veces semana<br><input type="radio"/> 1 vez al día<br><input type="radio"/> 2 a 3 veces al día<br><input type="radio"/> 5 a 6 veces al día<br><input type="radio"/> más 6 veces al día |
|---------|---------------------------------------------------------------------------------------------------------------------------------------------------------------------------------------------------------------------------------------------------------------------------------------------------------------------------------------------------------------------------------------------------|

---

|                     |                                                                                                                                                                                                                                                                                                                                                                                                   |
|---------------------|---------------------------------------------------------------------------------------------------------------------------------------------------------------------------------------------------------------------------------------------------------------------------------------------------------------------------------------------------------------------------------------------------|
| cerveza sin alcohol | <input type="radio"/> Nunca o menos 1 vez al mes<br><input type="radio"/> 1 a 3 veces mes<br><input type="radio"/> 1 vez semana<br><input type="radio"/> 2 a 4 veces semana<br><input type="radio"/> 5 a 6 veces semana<br><input type="radio"/> 1 vez al día<br><input type="radio"/> 2 a 3 veces al día<br><input type="radio"/> 5 a 6 veces al día<br><input type="radio"/> más 6 veces al día |
|---------------------|---------------------------------------------------------------------------------------------------------------------------------------------------------------------------------------------------------------------------------------------------------------------------------------------------------------------------------------------------------------------------------------------------|

---

|         |                                                                                                                                                                                                                                                                                                                                                                                                   |
|---------|---------------------------------------------------------------------------------------------------------------------------------------------------------------------------------------------------------------------------------------------------------------------------------------------------------------------------------------------------------------------------------------------------|
| licores | <input type="radio"/> Nunca o menos 1 vez al mes<br><input type="radio"/> 1 a 3 veces mes<br><input type="radio"/> 1 vez semana<br><input type="radio"/> 2 a 4 veces semana<br><input type="radio"/> 5 a 6 veces semana<br><input type="radio"/> 1 vez al día<br><input type="radio"/> 2 a 3 veces al día<br><input type="radio"/> 5 a 6 veces al día<br><input type="radio"/> más 6 veces al día |
|---------|---------------------------------------------------------------------------------------------------------------------------------------------------------------------------------------------------------------------------------------------------------------------------------------------------------------------------------------------------------------------------------------------------|

---

|                       |                                                                                                                                                                                                                                                                                                                                                                                                   |
|-----------------------|---------------------------------------------------------------------------------------------------------------------------------------------------------------------------------------------------------------------------------------------------------------------------------------------------------------------------------------------------------------------------------------------------|
| ginebra o ron o vodka | <input type="radio"/> Nunca o menos 1 vez al mes<br><input type="radio"/> 1 a 3 veces mes<br><input type="radio"/> 1 vez semana<br><input type="radio"/> 2 a 4 veces semana<br><input type="radio"/> 5 a 6 veces semana<br><input type="radio"/> 1 vez al día<br><input type="radio"/> 2 a 3 veces al día<br><input type="radio"/> 5 a 6 veces al día<br><input type="radio"/> más 6 veces al día |
|-----------------------|---------------------------------------------------------------------------------------------------------------------------------------------------------------------------------------------------------------------------------------------------------------------------------------------------------------------------------------------------------------------------------------------------|

---

|                 |                                                                                                                                                                                                                                                                                                                                                                                                   |
|-----------------|---------------------------------------------------------------------------------------------------------------------------------------------------------------------------------------------------------------------------------------------------------------------------------------------------------------------------------------------------------------------------------------------------|
| refresco normal | <input type="radio"/> Nunca o menos 1 vez al mes<br><input type="radio"/> 1 a 3 veces mes<br><input type="radio"/> 1 vez semana<br><input type="radio"/> 2 a 4 veces semana<br><input type="radio"/> 5 a 6 veces semana<br><input type="radio"/> 1 vez al día<br><input type="radio"/> 2 a 3 veces al día<br><input type="radio"/> 5 a 6 veces al día<br><input type="radio"/> más 6 veces al día |
|-----------------|---------------------------------------------------------------------------------------------------------------------------------------------------------------------------------------------------------------------------------------------------------------------------------------------------------------------------------------------------------------------------------------------------|

---

---

refresco sin azúcar

- ☐ Nunca o menos 1 vez al mes
- ☐ 1 a 3 veces mes
- ☐ 1 vez semana
- ☐ 2 a 4 veces semana
- ☐ 5 a 6 veces semana
- ☐ 1 vez al día
- ☐ 2 a 3 veces al día
- ☐ 5 a 6 veces al día
- ☐ más 6 veces al día

---

Agua del grifo

- ☐ Nunca o menos 1 vez al mes
- ☐ 1 a 3 veces mes
- ☐ 1 vez semana
- ☐ 2 a 4 veces semana
- ☐ 5 a 6 veces semana
- ☐ 1 vez al día
- ☐ 2 a 3 veces al día
- ☐ 5 a 6 veces al día
- ☐ más 6 veces al día

---

agua embotellada sin gas

- ☐ Nunca o menos 1 vez al mes
- ☐ 1 a 3 veces mes
- ☐ 1 vez semana
- ☐ 2 a 4 veces semana
- ☐ 5 a 6 veces semana
- ☐ 1 vez al día
- ☐ 2 a 3 veces al día
- ☐ 5 a 6 veces al día
- ☐ más 6 veces al día

---

agua embotellada con gas

- ☐ Nunca o menos 1 vez al mes
- ☐ 1 a 3 veces mes
- ☐ 1 vez semana
- ☐ 2 a 4 veces semana
- ☐ 5 a 6 veces semana
- ☐ 1 vez al día
- ☐ 2 a 3 veces al día
- ☐ 5 a 6 veces al día
- ☐ más 6 veces al día

---

zumو frutas embasado

- ☐ Nunca o menos 1 vez al mes
- ☐ 1 a 3 veces mes
- ☐ 1 vez semana
- ☐ 2 a 4 veces semana
- ☐ 5 a 6 veces semana
- ☐ 1 vez al día
- ☐ 2 a 3 veces al día
- ☐ 5 a 6 veces al día
- ☐ más 6 veces al día

---

cafe

- ☐ Nunca o menos 1 vez al mes
- ☐ 1 a 3 veces mes
- ☐ 1 vez semana
- ☐ 2 a 4 veces semana
- ☐ 5 a 6 veces semana
- ☐ 1 vez al día
- ☐ 2 a 3 veces al día
- ☐ 5 a 6 veces al día
- ☐ más 6 veces al día

---

cafe descafeinado

- ☐ Nunca o menos 1 vez al mes
- ☐ 1 a 3 veces mes
- ☐ 1 vez semana
- ☐ 2 a 4 veces semana
- ☐ 5 a 6 veces semana
- ☐ 1 vez al día
- ☐ 2 a 3 veces al día
- ☐ 5 a 6 veces al día
- ☐ más 6 veces al día

---

te o infusión

- ☐ Nunca o menos 1 vez al mes
- ☐ 1 a 3 veces mes
- ☐ 1 vez semana
- ☐ 2 a 4 veces semana
- ☐ 5 a 6 veces semana
- ☐ 1 vez al día
- ☐ 2 a 3 veces al día
- ☐ 5 a 6 veces al día
- ☐ más 6 veces al día

---

sopa o puré verduras

- ☐ Nunca o menos 1 vez al mes
- ☐ 1 a 3 veces mes
- ☐ 1 vez semana
- ☐ 2 a 4 veces semana
- ☐ 5 a 6 veces semana
- ☐ 1 vez al día
- ☐ 2 a 3 veces al día
- ☐ 5 a 6 veces al día
- ☐ más 6 veces al día

---

croquetas pollo jamón

- ☐ Nunca o menos 1 vez al mes
- ☐ 1 a 3 veces mes
- ☐ 1 vez semana
- ☐ 2 a 4 veces semana
- ☐ 5 a 6 veces semana
- ☐ 1 vez al día
- ☐ 2 a 3 veces al día
- ☐ 5 a 6 veces al día
- ☐ más 6 veces al día

---

croquetas pescado

- ☐ Nunca o menos 1 vez al mes
- ☐ 1 a 3 veces mes
- ☐ 1 vez semana
- ☐ 2 a 4 veces semana
- ☐ 5 a 6 veces semana
- ☐ 1 vez al día
- ☐ 2 a 3 veces al día
- ☐ 5 a 6 veces al día
- ☐ más 6 veces al día

---

mayonesa

- ☐ Nunca o menos 1 vez al mes
- ☐ 1 a 3 veces mes
- ☐ 1 vez semana
- ☐ 2 a 4 veces semana
- ☐ 5 a 6 veces semana
- ☐ 1 vez al día
- ☐ 2 a 3 veces al día
- ☐ 5 a 6 veces al día
- ☐ más 6 veces al día

---

salsa tomate

- ☐ Nunca o menos 1 vez al mes
- ☐ 1 a 3 veces mes
- ☐ 1 vez semana
- ☐ 2 a 4 veces semana
- ☐ 5 a 6 veces semana
- ☐ 1 vez al día
- ☐ 2 a 3 veces al día
- ☐ 5 a 6 veces al día
- ☐ más 6 veces al día

---

ketchup

- ☐ Nunca o menos 1 vez al mes
- ☐ 1 a 3 veces mes
- ☐ 1 vez semana
- ☐ 2 a 4 veces semana
- ☐ 5 a 6 veces semana
- ☐ 1 vez al día
- ☐ 2 a 3 veces al día
- ☐ 5 a 6 veces al día
- ☐ más 6 veces al día

---

sal

- ☐ Nunca o menos 1 vez al mes
- ☐ 1 a 3 veces mes
- ☐ 1 vez semana
- ☐ 2 a 4 veces semana
- ☐ 5 a 6 veces semana
- ☐ 1 vez al día
- ☐ 2 a 3 veces al día
- ☐ 5 a 6 veces al día
- ☐ más 6 veces al día

---

ajo

- ☐ Nunca o menos 1 vez al mes
- ☐ 1 a 3 veces mes
- ☐ 1 vez semana
- ☐ 2 a 4 veces semana
- ☐ 5 a 6 veces semana
- ☐ 1 vez al día
- ☐ 2 a 3 veces al día
- ☐ 5 a 6 veces al día
- ☐ más 6 veces al día

---

mermelada o miel

- ☐ Nunca o menos 1 vez al mes
- ☐ 1 a 3 veces mes
- ☐ 1 vez semana
- ☐ 2 a 4 veces semana
- ☐ 5 a 6 veces semana
- ☐ 1 vez al día
- ☐ 2 a 3 veces al día
- ☐ 5 a 6 veces al día
- ☐ más 6 veces al día

---

azúcar

- ☐ Nunca o menos 1 vez al mes
- ☐ 1 a 3 veces mes
- ☐ 1 vez semana
- ☐ 2 a 4 veces semana
- ☐ 5 a 6 veces semana
- ☐ 1 vez al día
- ☐ 2 a 3 veces al día
- ☐ 5 a 6 veces al día
- ☐ más 6 veces al día

---

Otro alimento

---

suplementos vitamínicos

- ☐ si  
☐ no

---

suplementos vitamínicos

---

dieta previa

- ☐ si  
☐ no

motivo dieta

- ☐ no dieta  
☐ control peso  
☐ control colesterol  
☐ control diabetes  
☐ problemas estómago  
☐ problemas vesícula o hepáticos  
☐ HTA o cardiopatía  
☐ problemas renales  
☐ alergia alimentaria  
☐ ácido úrico elevado  
☐ vegetariana  
☐ otros

---

cambio alimentos año previo gestación

---

- ☐ si  
☐ no

cambio lácteos

- ☐ eliminado  
☐ disminuido  
☐ igual  
☐ aumentado  
☐ no sabe

---

cambio huevos

---

- ☐ eliminado  
☐ disminuido  
☐ igual  
☐ aumentado  
☐ no sabe

cambio carne

- ☐ eliminado  
☐ disminuido  
☐ igual  
☐ aumentado  
☐ no sabe

---

cambio pescado

---

- ☐ eliminado  
☐ disminuido  
☐ igual  
☐ aumentado  
☐ no sabe

cambio verduras

- ☐ eliminado  
☐ disminuido  
☐ igual  
☐ aumentado  
☐ no sabe

|                            |                                                                                                                                                                                                             |
|----------------------------|-------------------------------------------------------------------------------------------------------------------------------------------------------------------------------------------------------------|
| cambio legumbres           | <input type="radio"/> eliminado<br><input type="radio"/> disminuido<br><input type="radio"/> igual<br><input type="radio"/> aumentado<br><input type="radio"/> no sabe                                      |
| cambio fruta               | <input type="radio"/> eliminado<br><input type="radio"/> disminuido<br><input type="radio"/> igual<br><input type="radio"/> aumentado<br><input type="radio"/> no sabe                                      |
| cambio pan                 | <input type="radio"/> eliminado<br><input type="radio"/> disminuido<br><input type="radio"/> igual<br><input type="radio"/> aumentado<br><input type="radio"/> no sabe                                      |
| cambio aceite oliva        | <input type="radio"/> eliminado<br><input type="radio"/> disminuido<br><input type="radio"/> igual<br><input type="radio"/> aumentado<br><input type="radio"/> no sabe                                      |
| cambio mante o margarina   | <input type="radio"/> eliminado<br><input type="radio"/> disminuido<br><input type="radio"/> igual<br><input type="radio"/> aumentado<br><input type="radio"/> no sabe                                      |
| cambio azúcar y dulces     | <input type="radio"/> eliminado<br><input type="radio"/> disminuido<br><input type="radio"/> igual<br><input type="radio"/> aumentado<br><input type="radio"/> no sabe                                      |
| cambio bebidas alcohólicas | <input type="radio"/> eliminado<br><input type="radio"/> disminuido<br><input type="radio"/> igual<br><input type="radio"/> aumentado<br><input type="radio"/> no sabe                                      |
| frecuencia comidas fritas  | <input type="radio"/> a diario<br><input type="radio"/> 5 a 6 veces semana<br><input type="radio"/> 2 a 4 veces semana<br><input type="radio"/> 1 vez semana<br><input type="radio"/> menos de 1 vez semana |
| carne                      | <input type="radio"/> no como<br><input type="radio"/> cruda<br><input type="radio"/> poco hecha<br><input type="radio"/> hecha<br><input type="radio"/> muy hecha                                          |
| grasa visible carne        | <input type="radio"/> quita toda<br><input type="radio"/> quita mayoría<br><input type="radio"/> quita un poco<br><input type="radio"/> no quita nada                                                       |



---

cocina carne

- ☐ a la plancha
  - ☐ a la parrilla
  - ☐ asada
  - ☐ frita
  - ☐ guisada
- 

tostado quemado carne

- ☐ nunca
  - ☐ 1 vez mes
  - ☐ 2 a 3 veces mes
  - ☐ 1 vez semana
  - ☐ 2 a 3 semanas
- 

tostado quemado pescado

- ☐ nunca
  - ☐ 1 vez mes
  - ☐ 2 a 3 veces mes
  - ☐ 1 vez semana
  - ☐ 2 a 3 semanas
- 

socarrat paella

- ☐ nunca
  - ☐ 1 vez mes
  - ☐ 2 a 3 veces mes
  - ☐ 1 vez semana
  - ☐ 2 a 3 semanas
- 

grasa o aceite cocinar

- ☐ mantequilla
  - ☐ margarina
  - ☐ aceite oliva
  - ☐ aceite oliva virgen extra
  - ☐ aceite vegetal
  - ☐ mezcla aceites
- 

grasa aceite aliñar

- ☐ mantequilla
  - ☐ margarina
  - ☐ aceite oliva
  - ☐ aceite oliva virgen extra
  - ☐ aceite vegetal
  - ☐ mezcla aceites
- 

grasa aceite freir

- ☐ mantequilla
  - ☐ margarina
  - ☐ aceite oliva
  - ☐ aceite oliva virgen extra
  - ☐ aceite vegetal
  - ☐ mezcla aceites
- 

Ejercicio cuestionario

- ☐ si
  - ☐ no
- 

horas de sueño incluido siesta

---

minutos siesta

---

horas televisión semana

---

|                                        |                                                                                                                                                                                                                                                                                                                                                                |
|----------------------------------------|----------------------------------------------------------------------------------------------------------------------------------------------------------------------------------------------------------------------------------------------------------------------------------------------------------------------------------------------------------------|
| actividad trabajo                      | <input type="radio"/> casi siempre sentado<br><input type="radio"/> sentado 50 por cien<br><input type="radio"/> casi siempre de pie, quieto<br><input type="radio"/> casi siempre levantado caminando y llevando pocas cosas<br><input type="radio"/> casi siempre levantado, caminando y llevado muchas cosas<br><input type="radio"/> trabajo manual pesado |
| tiempo caminar o bici al día           | <input type="radio"/> casi nunca<br><input type="radio"/> menos 20min día<br><input type="radio"/> 20 a 40 min día<br><input type="radio"/> 40 a 60 min día<br><input type="radio"/> 1h o 1h y media día<br><input type="radio"/> más de 1h y media al día                                                                                                     |
| tiempo tareas casa al día              | <input type="radio"/> menos de 1h día<br><input type="radio"/> 1 a 2h día<br><input type="radio"/> 3 a 4h día<br><input type="radio"/> 5 a 6h día<br><input type="radio"/> 7 a 8h día<br><input type="radio"/> más de 8h día                                                                                                                                   |
| tiempo libre televisión ordenador leer | <input type="radio"/> menos 1h día<br><input type="radio"/> 1h día<br><input type="radio"/> 2h día<br><input type="radio"/> 3h día<br><input type="radio"/> 4h día<br><input type="radio"/> 5 a 6h día<br><input type="radio"/> mas 6h día                                                                                                                     |
| tiempo libre ejercicio o deporte       | <input type="radio"/> menos 1h semana<br><input type="radio"/> 1h semana<br><input type="radio"/> 2h semana<br><input type="radio"/> 3h semana<br><input type="radio"/> 4 a 5h semana<br><input type="radio"/> mas 5h semana                                                                                                                                   |
| como se considera                      | <input type="radio"/> sedentaria<br><input type="radio"/> poco activa<br><input type="radio"/> moderadamente activa<br><input type="radio"/> bastante activa<br><input type="radio"/> muy activa<br><input type="radio"/> no sabe                                                                                                                              |
| FUR                                    | [*DATA REMOVED*]                                                                                                                                                                                                                                                                                                                                               |
| Semanas gestación 2T                   | [*DATA REMOVED*]                                                                                                                                                                                                                                                                                                                                               |
| Días gestación 2T                      | [*DATA REMOVED*]                                                                                                                                                                                                                                                                                                                                               |
| DBP 2T                                 | [*DATA REMOVED*]                                                                                                                                                                                                                                                                                                                                               |
| CC 2T                                  | [*DATA REMOVED*]                                                                                                                                                                                                                                                                                                                                               |
| AC 2T                                  | [*DATA REMOVED*]                                                                                                                                                                                                                                                                                                                                               |

|                                                   |                                                                                                                                                                                                 |
|---------------------------------------------------|-------------------------------------------------------------------------------------------------------------------------------------------------------------------------------------------------|
| LF 2T                                             | [*DATA REMOVED*]                                                                                                                                                                                |
| PFE 2T (Hadlock)                                  | [*DATA REMOVED*]                                                                                                                                                                                |
| Semanas gestación 3T                              | [*DATA REMOVED*]                                                                                                                                                                                |
| días 3T                                           | [*DATA REMOVED*]                                                                                                                                                                                |
| DBP 3T                                            | [*DATA REMOVED*]                                                                                                                                                                                |
| CC 3T                                             | [*DATA REMOVED*]                                                                                                                                                                                |
| AC 3T                                             | [*DATA REMOVED*]                                                                                                                                                                                |
| LF 3T                                             | [*DATA REMOVED*]                                                                                                                                                                                |
| PFE 3T (Hadlock)                                  | [*DATA REMOVED*]                                                                                                                                                                                |
| Semanas de gestación final                        | [*DATA REMOVED*]                                                                                                                                                                                |
| días gestación final                              | [*DATA REMOVED*]                                                                                                                                                                                |
| Localización placenta                             | <input checked="" type="radio"/> anterior<br><input type="radio"/> lateral derecha<br><input type="radio"/> lateral izquierda<br><input type="radio"/> posterior<br><input type="radio"/> fondo |
| Presentación longitudinal cefálica                | <input type="radio"/> no<br><input checked="" type="radio"/> si                                                                                                                                 |
| Dorso                                             | <input type="radio"/> izquierda anterior<br><input type="radio"/> izquierda posterior<br><input type="radio"/> derecha anterior<br><input checked="" type="radio"/> derecha posterior           |
| diámetro biparietal                               | [*DATA REMOVED*]                                                                                                                                                                                |
| Circunferencia craneal                            | [*DATA REMOVED*]                                                                                                                                                                                |
| Circunferencia abdominal                          | [*DATA REMOVED*]                                                                                                                                                                                |
| Longitud de femur                                 | [*DATA REMOVED*]                                                                                                                                                                                |
| tejido celular subcutáneo a nivel del muslo en mm | [*DATA REMOVED*]                                                                                                                                                                                |
| tejido celular subcutáneo en abdomen en mm        | [*DATA REMOVED*]                                                                                                                                                                                |
| Volumen del muslo en cm3                          | [*DATA REMOVED*]                                                                                                                                                                                |
| Peso fetal estimado según fórmula de Hadlock      | [*DATA REMOVED*]                                                                                                                                                                                |

|                                               |                                                                                                                                                          |
|-----------------------------------------------|----------------------------------------------------------------------------------------------------------------------------------------------------------|
| Percentil                                     | [*DATA REMOVED*]                                                                                                                                         |
| Peso fetal estimado según fórmula de Scioscia | <hr/>                                                                                                                                                    |
| Peso fetal estimado según fórmula de LEE      | <hr/>                                                                                                                                                    |
| Tipo de parto                                 | <input checked="" type="radio"/> eutocico<br><input type="radio"/> instrumentado/ventosa<br><input type="radio"/> cesarea                                |
| fecha de nacimiento                           | [*DATA REMOVED*]                                                                                                                                         |
| Días entre exploración y nacimiento           | [*DATA REMOVED*]                                                                                                                                         |
| Peso RN en g                                  | [*DATA REMOVED*]                                                                                                                                         |
| sexo                                          | <input checked="" type="radio"/> mujer<br><input type="radio"/> hombre                                                                                   |
| Apgar 1 minuto                                | [*DATA REMOVED*]                                                                                                                                         |
| Apgar 5 minutos                               | [*DATA REMOVED*]                                                                                                                                         |
| Apgar 10 minutos                              | <hr/>                                                                                                                                                    |
| antecedente Covid durante gestación           | <input type="radio"/> Yes<br><input checked="" type="radio"/> No                                                                                         |
| Nivel de estudios                             | <input type="radio"/> ninguno<br><input type="radio"/> primarios<br><input checked="" type="radio"/> secundarios<br><input type="radio"/> universitarios |
